# Supplementary material for: Dynamic Changes of Urine Proteome in Rat Models Inoculated with Two Different Hepatoma Cell Lines
Source: Hindawi journal article supplement (doi:10.1155/2021/8895330), 2021-01-07
Supplement: f1 [file 8895330.f1.zip]

Title: Dynamic changes of urine proteome in rat models inoculated with two different hepatoma cell lines. Full author: Yameng Zhang, Yufei Gao, Jing Wei & Youhe Gao\*.

Table S5 The details of 12155 random allocations in RH-35 model.

| Day 5             |                  |                           |                                          |                                                                                                                                                                                                                                                                                                                                                                                                                                                                               |
|-------------------|------------------|---------------------------|------------------------------------------|-------------------------------------------------------------------------------------------------------------------------------------------------------------------------------------------------------------------------------------------------------------------------------------------------------------------------------------------------------------------------------------------------------------------------------------------------------------------------------|
| Random allocation | Group1           | Group2                    | Numbers of differential urinary proteins | Differential protein ID                                                                                                                                                                                                                                                                                                                                                                                                                                                       |
| 1                 | 1,2,3,4,5,6,7,8  | 9,10,11,12,13,14,15,16,17 | 64                                       | D3ZHA0,O54858,O55004,O55006,O88267,P01041,P01681,P02631,P02761,P02764,P05371,P06761,P07171,P07647,P08649,P08723,P08932,P08937,P10536,P15399,P16086,P18418,P19629,P20646,P20760,P20761,P20762,P22282,P22283,P23593,P28648,P29975,P31044,P34901,P50280,P52590,P61206,P84079,P84082,P62815,P68370,P83748,P97571,P97580,P97615,Q08463,Q30KJ2,Q5GRG2,Q5M8C6,Q63317,Q63475,Q63617,Q63751,Q64361,Q6AYS7,Q6TMA8,Q8CJ52,Q8K1G0,Q8VD89,Q99041,Q9EQS0,Q9JI85,Q9QX79,Q9R0T3,Q9WTT6,Q9Z0V6 |
| 2                 | 1,2,3,4,5,6,7,9  | 8,10,11,12,13,14,15,16,17 | 29                                       | O55006,O88267,P01681,P02631,P05371,P08937,P15399,P16086,P18418,P20646,P20760,P20761,P20762,P23593,P28648,P34901,P52590,P61206,P84079,P84082,P83748,P97580,Q30KJ2,Q498R7,Q63317,Q63475,Q63751,Q63942,Q64361,Q9EQS0,Q9Z0V6                                                                                                                                                                                                                                                      |
| 3                 | 1,2,3,4,5,6,7,10 | 8,9,11,12,13,14,15,16,17  | 33                                       | O54858,O55006,O88267,P01681,P02631,P05371,P08937,P12020,P15399,P16086,P18418,P20646,P20760,P20761,P20762,P28648,P34901,P52590,P61206,P84079,P84082,P68370,P83748,P97571,P97580,P97615,Q30KJ2,Q4FZU2,Q63317,Q63475,Q63751,Q64361,Q7TP52,Q9EQS0,Q9Z0V6                                                                                                                                                                                                                          |
| 4                 | 1,2,3,4,5,6,7,11 | 8,9,10,12,13,14,15,16,17  | 36                                       | O54858,O55004,O88267,P01681,P01836,P02631,P05371,P08937,P15399,P16086,P18418,P20646,P20760,P20761,P20762,P28648,P34901,P52590,P55314,P61206,P84079,P84082,P68370,P83748,P97580,P97615,Q30KJ2,Q498R7,Q4FZU2,Q63317,Q63475,Q63751,Q64361,Q8VD89,Q9EQS0,Q9ESW0,Q9JI85,Q9Z0V6                                                                                                                                                                                                     |
| 5                 | 1,2,3,4,5,6,7,12 | 8,9,10,11,13,14,15,16,17  | 44                                       | O54858,O55004,O88267,P01041,P01681,P01836,P02631,P05371,P07647,P08723,P08937,P15399,P16086,P18418,P20760,P20761,P20762,P28648,P30120,P34901,P52590,P61206,P84079,P84082,P62815,P83748,P97580,P97615,Q10758,Q30KJ2,Q498R7,Q4FZU2,Q5M8C6,Q63317,Q63475,Q63751,Q64361,Q6AYS7,Q6IFW6,Q6IG02,Q6IMF3,Q6P6Q2,Q9EQS0,Q9ESW0,Q9JI85,Q9Z0V6                                                                                                                                             |
| 6                 | 1,2,3,4,5,6,7,13 | 8,9,10,11,12,14,15,16,17  | 31                                       | O88267,P01681,P01836,P02631,P05371,P05539,P06911,P07647,P08937,P12020,P15399,P16086,P18418,P20760,P20761,P20762,P28648,P34901,P52590,P61206,P84079,P84082,P62815,P83748,P97580,Q30KJ2,Q5GRG2,Q63317,Q63751,Q64361,Q8VD89,Q9JI85,Q9Z0V6                                                                                                                                                                                                                                        |
| 7                 | 1,2,3,4,5,6,7,14 | 8,9,10,11,12,13,15,16,17  | 28                                       | O88267,P01681,P02631,P05371,P08937,P12020,P15399,P16086,P18418,P20760,P20761,P20762,P28648,P34901,P52590,P61206,P84079,P84082,P83748,P97580,P97615,Q30KJ2,Q63317,Q63475,Q63532,Q63751,Q64361,Q6AYS7,Q9EQS0,Q9Z0V6                                                                                                                                                                                                                                                             |
| 8                 | 1,2,3,4,5,6,7,15 | 8,9,10,11,12,13,14,16,17  | 27                                       | O55004,O55006,O88267,P01681,P01836,P02631,P05371,P08937,P15399,P16086,P18418,P20760,P20761,P20762,P28648,P34901,P52590,P61206,P84079,P84082,P83748,P97580,P97615,Q30KJ2,Q63317,Q63475,Q63751,Q64361,Q9Z0V6                                                                                                                                                                                                                                                                    |
| 9                 | 1,2,3,4,5,6,7,16 | 8,9,10,11,12,13,14,15,17  | 26                                       | G3V686,O88267,P01681,P01836,P02631,P05371,P08937,P15399,P16086,P18418,P20760,P20761,P20762,P23593,P28648,P34901,P52590,P61206,P84079,P84082,P83748,P97580,Q30KJ2,Q63317,Q63751,Q64361,Q8VD89,Q9Z0V6                                                                                                                                                                                                                                                                           |
| 10                | 1,2,3,4,5,6,7,17 | 8,9,10,11,12,13,14,15,16  | 36                                       | O54858,O55004,O88267,P01041,P01681,P01946,P02091,P02631,P05371,P08937,P09605,P25809,P10536,P15399,P16086,P18418,P19223,P20646,P20760,P20761,P20762,P23593,P28648,P34901,P52590,P55091,P61206,P84079,P84082,P62815,P83748,P97580,P97615,Q30KJ2,Q63317,Q63751,Q64361,Q80WY6,Q9Z0V6                                                                                                                                                                                              |
| 11                | 1,2,3,4,5,6,8,9  | 7,10,11,12,13,14,15,16,17 | 25                                       | D3ZHA0,O55006,O88267,P01681,P02793,Q7TP54,P07647,P08649,P08937,P18418,P20646,P20761,P20762,P23593,P28648,P34901,Q5M8C6,Q63317,Q63751,Q63942,Q64361,Q6TMA8,Q9EQS0,Q9QX79,Q9WTT6,Q9Z0V6                                                                                                                                                                                                                                                                                         |

|    |                      |                                  |    |                                                                                                                                                                                                                                                                                                              |
|----|----------------------|----------------------------------|----|--------------------------------------------------------------------------------------------------------------------------------------------------------------------------------------------------------------------------------------------------------------------------------------------------------------|
| 12 | 1,2,3,4,5,6<br>,8,10 | 7,9,11,12,<br>13,14,15,1<br>6,17 | 27 | D3ZHA0,O54858,O55006,O88267,P01681,P02761,P07647,P08649,P08937,P18418,P20760,P20761,P20762,P23593,P28648,P34901,P97615,Q08463,Q4FZU2,Q5M8C6,Q63317,Q63751,Q64361,Q7TP52,Q9EQS0,Q9WTT6,Q9Z0V6                                                                                                                 |
| 13 | 1,2,3,4,5,6<br>,8,11 | 7,9,10,12,<br>13,14,15,1<br>6,17 | 38 | D3ZHA0,O54715,O54858,O88267,P01681,P02761,P02793;Q7TP54,P04041,P07150,P07171,P07647,P08649,P08937,P14668,P14669,P18418,P20760,P20761,P20762,P28648,P34901,P50280,P55314,Q30KJ2,Q4FZU2,Q5I0D1,Q5M8C6,Q5XI22,Q63317,Q63751,Q64361,Q6AYS4,Q6IFW6,Q6P6Q2,Q6TMA8,Q9EQS0,Q9ESW0,Q9Z0V6                             |
| 14 | 1,2,3,4,5,6<br>,8,12 | 7,9,10,11,<br>13,14,15,1<br>6,17 | 43 | D3ZHA0,O54858,O88267,P01681,P02780,P02782,P07647,P08723,P08937,P16636,P18418,P20760,P20761,P20762,P23593,P28648,P30120,P34901,P35053,P50280,Q08463,Q10758,Q4FZU2,Q5M8C6,Q63317,Q63475,Q63751,Q64361,Q6AYS7,Q6IFU8,Q6IFW6,Q6IG02,Q6IMF3,Q6P6Q2,Q6TMA8,Q8CJ52,Q8K1G0,Q9EQS0,Q9ESW0,Q9JHB9,Q9JJS8,Q9WTT6,Q9Z0V6 |
| 15 | 1,2,3,4,5,6<br>,8,13 | 7,9,10,11,<br>12,14,15,1<br>6,17 | 26 | D3ZHA0,O88267,P01681,P02764,P06911,P07647,P08937,P10536,P18418,P20760,P20761,P20762,P23593,P25236,P28648,P29975,P34901,Q5GRG2,Q5M8C6,Q63317,Q63751,Q64361,Q6PCU2,Q6TMA8,Q9WTT6,Q9Z0V6                                                                                                                        |
| 16 | 1,2,3,4,5,6<br>,8,14 | 7,9,10,11,<br>12,13,15,1<br>6,17 | 25 | D3ZHA0,O88267,P01681,P02793;Q7TP54,P07647,P08649,P08937,P10536,P18418,P20760,P20761,P20762,P28648,P29288,P34901,Q5M8C6,Q63317,Q63751,Q64361,Q6AYS7,Q6TMA8,Q923S2,Q9EQS0,Q9WTT6,Q9Z0V6                                                                                                                        |
| 17 | 1,2,3,4,5,6<br>,8,15 | 7,9,10,11,<br>12,13,14,1<br>6,17 | 24 | B0BNN3,D3ZHA0,O55006,P01681,P02631,P02761,P08649,P08937,P10536,P18418,P20760,P20761,P20762,P23593,P28648,P34901,Q5M8C6,Q62894,Q63317,Q63751,Q64361,Q6TMA8,Q9WTT6,Q9Z0V6                                                                                                                                      |
| 18 | 1,2,3,4,5,6<br>,8,16 | 7,9,10,11,<br>12,13,14,1<br>5,17 | 18 | D3ZHA0,O88267,P01681,P08649,P08937,P14668,P20760,P20762,P23593,P28648,P34901,Q5M8C6,Q63317,Q63751,Q64361,Q6PCU2,Q9WTT6,Q9Z0V6                                                                                                                                                                                |
| 19 | 1,2,3,4,5,6<br>,8,17 | 7,9,10,11,<br>12,13,14,1<br>5,16 | 41 | B0BNN3,D3ZHA0,O54858,O88267,P01681,P01946,P02761,P02770,P02793;Q7TP54,P06760,P07647,P08649,P08937,P10536,P16636,P17475,P18418,P19223,P20646,P20760,P20761,P20762,P23593,P23928,P28648,P34901,P50115,P52590,P62815,P97580,Q08463,Q30KJ2,Q4G075,Q5M8C6,Q63317,Q63751,Q64361,Q6PCU2,Q9QX79,Q9WTT6,Q9Z0V6        |
| 20 | 1,2,3,4,5,6<br>,9,10 | 7,8,11,12,<br>13,14,15,1<br>6,17 | 11 | O55006,P01681,P08649,P14173,P23593,P28648,P34901,Q4FZU2,Q63942,Q64361,Q7TP52                                                                                                                                                                                                                                 |
| 21 | 1,2,3,4,5,6<br>,9,11 | 7,8,10,12,<br>13,14,15,1<br>6,17 | 9  | P01681,P08649,P20762,P28648,P34901,P55314,Q30KJ2,Q4FZU2,Q63942                                                                                                                                                                                                                                               |
| 22 | 1,2,3,4,5,6<br>,9,12 | 7,8,10,11,<br>13,14,15,1<br>6,17 | 16 | P01681,P01835,P20762,P23593,P34901,Q10758,Q498R7,Q4FZU2,Q5M8C6,Q64361,Q6IFU8,Q6IFW6,Q6IG02,Q6IMF3,Q6P6Q2,Q9JJS8                                                                                                                                                                                              |
| 23 | 1,2,3,4,5,6<br>,9,13 | 7,8,10,11,<br>12,14,15,1<br>6,17 | 5  | P01681,P23593,P34901,Q63317,Q63942                                                                                                                                                                                                                                                                           |
| 24 | 1,2,3,4,5,6<br>,9,14 | 7,8,10,11,<br>12,13,15,1<br>6,17 | 5  | P01681,P20762,P34901,Q63317,Q63942                                                                                                                                                                                                                                                                           |
| 25 | 1,2,3,4,5,6<br>,9,15 | 7,8,10,11,<br>12,13,14,1<br>6,17 | 8  | O54728,O55006,P01681,P20762,P23593,P34901,Q63317,Q63942                                                                                                                                                                                                                                                      |
| 26 | 1,2,3,4,5,6<br>,9,16 | 7,8,10,11,<br>12,13,14,1<br>5,17 | 4  | P01681,P23593,P34901,Q63942                                                                                                                                                                                                                                                                                  |

|    |                       |                                  |    |                                                                                                                                                                                |
|----|-----------------------|----------------------------------|----|--------------------------------------------------------------------------------------------------------------------------------------------------------------------------------|
| 27 | 1,2,3,4,5,6<br>,9,17  | 7,8,10,11,<br>12,13,14,1<br>5,16 | 10 | P01681,P20760,P20761,P23593,P34901,P52590,Q30KJ2,Q63751,Q63942,Q9Z0V6                                                                                                          |
| 28 | 1,2,3,4,5,6<br>,10,11 | 7,8,9,12,1<br>3,14,15,16<br>,17  | 15 | O54858,P01681,P08649,P15399,P20762,P28648,P34901,P55314,P97580,Q30KJ2,Q4FZU2,Q64361,Q6IFW6,Q6P6Q2,Q7TP52                                                                       |
| 29 | 1,2,3,4,5,6<br>,10,12 | 7,8,9,11,1<br>3,14,15,16<br>,17  | 16 | P01681,P08937,P28648,P34901,Q08463,Q10758,Q4FZU2,Q5M8C6,Q64361,Q6IFU7,Q6IFU8,Q6IFW6,Q6IG02,Q6IMF3,Q6P6Q2,Q9JJS8                                                                |
| 30 | 1,2,3,4,5,6<br>,10,13 | 7,8,9,11,1<br>2,14,15,16<br>,17  | 5  | P01681,P28648,P34901,Q63317,Q64361                                                                                                                                             |
| 31 | 1,2,3,4,5,6<br>,10,14 | 7,8,9,11,1<br>2,13,15,16<br>,17  | 8  | P01681,P08649,P20762,P28648,P34901,P97615,Q4FZU2,Q64361                                                                                                                        |
| 32 | 1,2,3,4,5,6<br>,10,15 | 7,8,9,11,1<br>2,13,14,16<br>,17  | 8  | P01681,P08649,P20760,P28648,P34901,Q4FZU2,Q64361,Q7TP52                                                                                                                        |
| 33 | 1,2,3,4,5,6<br>,10,16 | 7,8,9,11,1<br>2,13,14,15<br>,17  | 9  | P01681,P08649,P08721,P23593,P28648,P34901,Q4FZU2,Q62997,Q7TP52                                                                                                                 |
| 34 | 1,2,3,4,5,6<br>,10,17 | 7,8,9,11,1<br>2,13,14,15<br>,16  | 19 | O54858,P01681,P08649,P08937,P20760,P20761,P23593,P28648,P34901,P52590,P97580,Q08463,Q30KJ2,Q4FZU2,Q63355,Q63751,Q64361,Q7TP52,Q9Z0V6                                           |
| 35 | 1,2,3,4,5,6<br>,11,12 | 7,8,9,10,1<br>3,14,15,16<br>,17  | 25 | P01681,P01836,P07647,P08937,P15399,P20762,P28648,P30120,P34901,P55314,Q10758,Q30KJ2,Q498R7,Q4FZU2,Q5M8C6,Q63751,Q64361,Q6IFU7,Q6IFU8,Q6IFW6,Q6IG02,Q6IMF3,Q6P6Q2,Q9ESW0,Q9JHB9 |
| 36 | 1,2,3,4,5,6<br>,11,13 | 7,8,9,10,1<br>2,14,15,16<br>,17  | 9  | P01681,P05539,P20762,P28648,P34901,P55314,Q30KJ2,Q4FZU2,Q63317                                                                                                                 |
| 37 | 1,2,3,4,5,6<br>,11,14 | 7,8,9,10,1<br>2,13,15,16<br>,17  | 10 | P01681,P02793;Q7TP54,P15399,P20762,P28648,P34901,P35434,P55314,Q30KJ2,Q4FZU2                                                                                                   |
| 38 | 1,2,3,4,5,6<br>,11,15 | 7,8,9,10,1<br>2,13,14,16<br>,17  | 9  | B0BNN3,P01681,P20762,P28648,P34901,P55314,Q30KJ2,Q4FZU2,Q5I0D1                                                                                                                 |
| 39 | 1,2,3,4,5,6<br>,11,16 | 7,8,9,10,1<br>2,13,14,15<br>,17  | 8  | G3V686,P01681,P14668,P28648,P34901,P55314,Q30KJ2,Q4FZU2                                                                                                                        |
| 40 | 1,2,3,4,5,6<br>,11,17 | 7,8,9,10,1<br>2,13,14,15<br>,16  | 17 | O54858,P01681,P01946,P08649,P08937,P15399,P20760,P20761,P20762,P28648,P34901,P55314,P97580,Q30KJ2,Q4FZU2,Q63751,Q9Z0V6                                                         |
| 41 | 1,2,3,4,5,6<br>,12,13 | 7,8,9,10,1<br>1,14,15,16<br>,17  | 17 | O88267,P01681,P01836,P07647,P08937,P25236,P30120,P34901,P82995,Q10758,Q4FZU2,Q5M8C6,Q63317,Q6IFW6,Q6IMF3,Q9JHB9,Q9JJS8                                                         |

|    |                       |                                   |    |                                                                                                                                                                                                                                        |
|----|-----------------------|-----------------------------------|----|----------------------------------------------------------------------------------------------------------------------------------------------------------------------------------------------------------------------------------------|
| 42 | 1,2,3,4,5,6<br>,12,14 | 7,8,9,10,1<br>1,13,15,16<br>,17   | 18 | O88267,P01681,P01835,P20762,P25236,P34901,Q10758,Q4FZU2,Q5M8C6,Q63317,Q64361,Q6IFU8,Q6IFW6,Q6IG02,Q6IMF3,Q6P6Q2,Q9JJS8,Q9Z0V6                                                                                                          |
| 43 | 1,2,3,4,5,6<br>,12,15 | 7,8,9,10,1<br>1,13,14,16<br>,17   | 10 | B0BNN3,P01681,P01836,P20762,P34901,Q10758,Q4FZU2,Q64361,Q6IFW6,Q6IMF3                                                                                                                                                                  |
| 44 | 1,2,3,4,5,6<br>,12,16 | 7,8,9,10,1<br>1,13,14,15<br>,17   | 14 | G3V686,O88267,P01681,P01836,P23593,P34901,Q10758,Q4FZU2,Q6IFU8,Q6IFW6,Q6IG02,Q6IMF3,Q6P6Q2,Q9JJS8                                                                                                                                      |
| 45 | 1,2,3,4,5,6<br>,12,17 | 7,8,9,10,1<br>1,13,14,15<br>,16   | 33 | B0BNN3,O54858,O88267,P01681,P01835,P01946,P08937,P13432,P16636,P19223,P20760,P20761,P20762,P23593,P34901,P55091,P62815,P97580,P98089,Q08463,Q10758,Q30KJ2,Q4FZU2,Q5M8C6,Q62635,Q63751,Q64361,Q6IFU8,Q6IFW6,Q6IG02,Q6IMF3,Q9JJS8,Q9Z0V6 |
| 46 | 1,2,3,4,5,6<br>,13,14 | 7,8,9,10,1<br>1,12,15,16<br>,17   | 6  | P01681,P06911,P20762,P25236,P34901,Q63317                                                                                                                                                                                              |
| 47 | 1,2,3,4,5,6<br>,13,15 | 7,8,9,10,1<br>1,12,14,16<br>,17   | 5  | P01681,P20760,P34901,P82995,Q63317                                                                                                                                                                                                     |
| 48 | 1,2,3,4,5,6<br>,13,16 | 7,8,9,10,1<br>1,12,14,15<br>,17   | 4  | G3V686,P01681,P23593,P34901                                                                                                                                                                                                            |
| 49 | 1,2,3,4,5,6<br>,13,17 | 7,8,9,10,1<br>1,12,14,15<br>,16   | 15 | O88267,P01681,P01946,P08937,P20760,P20761,P23593,P34901,P62815,Q30KJ2,Q63317,Q63355,Q63751,Q6PCU2,Q9Z0V6                                                                                                                               |
| 50 | 1,2,3,4,5,6<br>,14,15 | 7,8,9,10,1<br>1,12,13,16<br>,17   | 7  | B0BNN3,P01681,P10536,P20760,P20762,P34901,Q63317                                                                                                                                                                                       |
| 51 | 1,2,3,4,5,6<br>,14,16 | 7,8,9,10,1<br>1,12,13,15<br>,17   | 4  | P01681,P20762,P34901,Q6P767                                                                                                                                                                                                            |
| 52 | 1,2,3,4,5,6<br>,14,17 | 7,8,9,10,1<br>1,12,13,15<br>,16   | 14 | O88267,P01681,P01946,P02793,Q7TP54,P10536,P20760,P20761,P20762,P34901,P97580,Q30KJ2,Q63751,Q6PCU2,Q9Z0V6                                                                                                                               |
| 53 | 1,2,3,4,5,6<br>,15,16 | 7,8,9,10,1<br>1,12,13,14<br>,17   | 3  | P01681,P23593,P34901                                                                                                                                                                                                                   |
| 54 | 1,2,3,4,5,6<br>,15,17 | 7,8,9,10,1<br>1,12,13,14<br>,16   | 11 | B0BNN3,P01681,P10536,P20760,P20761,P20762,P23593,P34901,Q30KJ2,Q63751,Q9Z0V6                                                                                                                                                           |
| 55 | 1,2,3,4,5,6<br>,16,17 | 7,8,9,10,1<br>1,12,13,14<br>,15   | 11 | O88267,P01681,P20760,P20761,P23593,P34901,P97580,Q30KJ2,Q63751,Q6PCU2,Q9Z0V6                                                                                                                                                           |
| 56 | 1,2,3,4,5,7<br>,8,9   | 6,10,11,12<br>,13,14,15,<br>16,17 | 20 | D3ZHA0,O55006,O88267,P02761,P05371,P08937,P18418,P20762,P28648,P31044,P34901,P36970,P52590,P97571,Q63317,Q63475,Q63617,Q9EQS0,Q9QX79,Q9R0T3                                                                                            |

|    |                  |                          |    |                                                                                                                                                                                                                                                                                                |
|----|------------------|--------------------------|----|------------------------------------------------------------------------------------------------------------------------------------------------------------------------------------------------------------------------------------------------------------------------------------------------|
| 57 | 1,2,3,4,5,7,8,10 | 6,9,11,12,13,14,15,16,17 | 28 | D3ZHA0,O54858,O55006,O88267,P02761,P05371,P07171,P08649,P08937,P16391,P18418,P20762,P28648,P31044,P34901,P36970,P46844,P52590,P61206,P84079,P84082,P68370,P97571,P97615,Q63317,Q63475,Q64361,Q9EQS0,Q9QX79,Q9R0T3                                                                              |
| 58 | 1,2,3,4,5,7,8,11 | 6,9,10,12,13,14,15,16,17 | 33 | D3ZHA0,O54715,O54858,O55004,O88267,P01836,P02761,P05371,P07171,P08649,P08937,P10715,P14669,P18418,P19814,P20762,P28648,P31044,P34901,P52590,P55314,P61206,P84079,P84082,P68370,Q63317,Q63475,Q63751,Q64194,Q6AYS4,Q8VD89,Q9EQS0,Q9ESW0,Q9QX79,Q9R0T3                                           |
| 59 | 1,2,3,4,5,7,8,12 | 6,9,10,11,13,14,15,16,17 | 41 | D3ZHA0,O54858,O55004,O88267,P01041,P01681,P01836,P02761,P05371,P06761,P08937,P10715,P18418,P19223,P20762,P28648,P31044,P34901,P36970,P52590,P83748,P97571,Q498R7,Q5M8C6,Q62894,Q63317,Q63475,Q63751,Q64361,Q68FS4,Q6AYS7,Q6IFW6,Q6IG02,Q80WL1,Q8CJ52,Q8K1G0,Q99041,Q9EQS0,Q9ESW0,Q9QX79,Q9R0T3 |
| 60 | 1,2,3,4,5,7,8,13 | 6,9,10,11,12,14,15,16,17 | 19 | D3ZHA0,O88267,P01836,P05371,P08937,P18418,P20762,P28648,P31044,P34901,P36970,P52590,P97571,Q5GRG2,Q63317,Q63751,Q9EQS0,Q9QX79,Q9R0T3                                                                                                                                                           |
| 61 | 1,2,3,4,5,7,8,14 | 6,9,10,11,12,13,15,16,17 | 23 | D3ZHA0,O88267,P02761,P05371,P07171,P08937,P10536,P16086,P18418,P20762,P28648,P31044,P34901,P36970,P52590,P97571,P97615,Q63317,Q63475,Q6AYS7,Q9EQS0,Q9ESW0,Q9QX79                                                                                                                               |
| 62 | 1,2,3,4,5,7,8,15 | 6,9,10,11,12,13,14,16,17 | 26 | D3ZHA0,O54728,O88267,P01041,P01836,P02761,P05371,P07171,P08937,P10536,P18418,P20762,P28648,P31044,P34901,P36970,P52590,P97571,P97615,Q62894,Q63317,Q63475,Q63751,Q9EQS0,Q9ESW0,Q9QX79                                                                                                          |
| 63 | 1,2,3,4,5,7,8,16 | 6,9,10,11,12,13,14,15,17 | 21 | B4F795,D3ZHA0,O88267,P01836,P05371,P08721,P08937,P18418,P20762,P28648,P31044,P34901,P52590,P97571,Q62894,Q63317,Q63475,Q8VD89,Q9EQS0,Q9QX79,Q9R0T3                                                                                                                                             |
| 64 | 1,2,3,4,5,7,8,17 | 6,9,10,11,12,13,14,15,16 | 41 | D3ZHA0,O54858,O88267,P01041,P01681,P01946,P02091,P02761,P02770,P05371,P08937,P10536,P12346,P17475,P18418,P19223,P20760,P20761,P20762,P23928,P28648,P31044,P34901,P36970,P46844,P50115,P52590,P55091,P97571,Q4G075,Q62894,Q63317,Q63751,Q64361,Q6PCU2,Q99041,Q9EQS0,Q9ESW0,Q9QX79,Q9QZA6,Q9R0T3 |
| 65 | 1,2,3,4,5,7,9,10 | 6,8,11,12,13,14,15,16,17 | 7  | O55006,P18418,P28648,P34901,P52590,P97584,Q63475                                                                                                                                                                                                                                               |
| 66 | 1,2,3,4,5,7,9,11 | 6,8,10,12,13,14,15,16,17 | 10 | P01836,P05371,P08289,P28648,P34901,P52590,P55314,P61206,P84079,P84082,Q63475,Q9ESW0                                                                                                                                                                                                            |
| 67 | 1,2,3,4,5,7,9,12 | 6,8,10,11,13,14,15,16,17 | 8  | P01836,P18418,P34901,P52590,Q498R7,Q63475,Q9EQS0,Q9ESW0                                                                                                                                                                                                                                        |
| 68 | 1,2,3,4,5,7,9,13 | 6,8,10,11,12,14,15,16,17 | 5  | P01836,P05539,P34901,P52590,Q63317                                                                                                                                                                                                                                                             |
| 69 | 1,2,3,4,5,7,9,14 | 6,8,10,11,12,13,15,16,17 | 4  | P18418,P34901,P52590,Q63317                                                                                                                                                                                                                                                                    |
| 70 | 1,2,3,4,5,7,9,15 | 6,8,10,11,12,13,14,16,17 | 8  | O54728,P01836,P34901,P47727,P52590,P97584,Q63317,Q63475                                                                                                                                                                                                                                        |
| 71 | 1,2,3,4,5,7,9,16 | 6,8,10,11,12,13,14,15,17 | 8  | O54728,P01836,P08010,P23593,P34901,P47727,P52590,Q9QZK9                                                                                                                                                                                                                                        |

|    |                       |                                  |    |                                                                                                                                                                                |
|----|-----------------------|----------------------------------|----|--------------------------------------------------------------------------------------------------------------------------------------------------------------------------------|
| 72 | 1,2,3,4,5,7<br>,9,17  | 6,8,10,11,<br>12,13,14,1<br>5,16 | 7  | P01946,P02091,P19223,P23593,P34901,P47727,P52590                                                                                                                               |
| 73 | 1,2,3,4,5,7<br>,10,11 | 6,8,9,12,1<br>3,14,15,16<br>,17  | 14 | P01836,P05371,P05964,P18418,P28648,P34901,P52590,P55314,P61206;P84079;P84082,Q5FVI6,Q63475,Q7TP52,Q8VD89,Q9ESW0                                                                |
| 74 | 1,2,3,4,5,7<br>,10,12 | 6,8,9,11,1<br>3,14,15,16<br>,17  | 16 | O35783,P01041,P01836,P18418,P28648,P34901,P52590,Q10758,Q498R7,Q4FZU2,Q63475,Q6IFW6,Q6IG02,Q6IMF3,Q9EQS0,Q9ESW0                                                                |
| 75 | 1,2,3,4,5,7<br>,10,13 | 6,8,9,11,1<br>2,14,15,16<br>,17  | 6  | P01836,P18418,P28648,P34901,P52590,Q63317                                                                                                                                      |
| 76 | 1,2,3,4,5,7<br>,10,14 | 6,8,9,11,1<br>2,13,15,16<br>,17  | 8  | P18418,P28648,P34901,P36970,P52590,P97615,Q63317,Q63475                                                                                                                        |
| 77 | 1,2,3,4,5,7<br>,10,15 | 6,8,9,11,1<br>2,13,14,16<br>,17  | 8  | O54728,P01836,P18418,P28648,P34901,P52590,P97615,Q63475                                                                                                                        |
| 78 | 1,2,3,4,5,7<br>,10,16 | 6,8,9,11,1<br>2,13,14,15<br>,17  | 8  | P01836,P08721,P18418,P28648,P34901,P52590,P61206;P84079;P84082,Q62997                                                                                                          |
| 79 | 1,2,3,4,5,7<br>,10,17 | 6,8,9,11,1<br>2,13,14,15<br>,16  | 10 | O54858,P01946,P02091,P18418,P19223,P28648,P34901,P46844,P52590,P97615                                                                                                          |
| 80 | 1,2,3,4,5,7<br>,11,12 | 6,8,9,10,1<br>3,14,15,16<br>,17  | 23 | P01681,P01836,P05371,P05964,P08937,P18418,P28648,P34901,P52590,P55314,P61206;P84079;P84082,Q498R7,Q4FZU2,Q63475,Q63751,Q6IFU8,Q6IFW6,Q6IG02,Q6IMF3,Q6P6Q2,Q9EQS0,Q9ESW0,Q9R1T1 |
| 81 | 1,2,3,4,5,7<br>,11,13 | 6,8,9,10,1<br>2,14,15,16<br>,17  | 11 | P01836,P05371,P05539,P28648,P34901,P52590,P55314,P61206;P84079;P84082,Q63317,Q8VD89,Q9ESW0                                                                                     |
| 82 | 1,2,3,4,5,7<br>,11,14 | 6,8,9,10,1<br>2,13,15,16<br>,17  | 12 | P01836,P05371,P18418,P20762,P28648,P34901,P52590,P55314,P61206;P84079;P84082,Q63317,Q63475,Q9ESW0                                                                              |
| 83 | 1,2,3,4,5,7<br>,11,15 | 6,8,9,10,1<br>2,13,14,16<br>,17  | 12 | O54728,P01836,P05371,P28648,P34901,P52590,P55314,P61206;P84079;P84082,Q5I0D1,Q63475,Q8VD89,Q9ESW0                                                                              |
| 84 | 1,2,3,4,5,7<br>,11,16 | 6,8,9,10,1<br>2,13,14,15<br>,17  | 10 | P01836,P05371,P14408,P28648,P34901,P52590,P55314,P61206;P84079;P84082,Q8VD89,Q9ESW0                                                                                            |
| 85 | 1,2,3,4,5,7<br>,11,17 | 6,8,9,10,1<br>2,13,14,15<br>,16  | 14 | O54858,P01681,P01836,P01946,P02091,P05371,P08937,P28648,P34901,P52590,P55314,P61206;P84079;P84082,Q63751,Q9ESW0                                                                |
| 86 | 1,2,3,4,5,7<br>,12,13 | 6,8,9,10,1<br>1,14,15,16<br>,17  | 11 | O88267,P01836,P08937,P18418,P34901,P36970,P52590,P83748,Q498R7,Q63317,Q9ESW0                                                                                                   |

|     |                       |                                  |    |                                                                                                                        |
|-----|-----------------------|----------------------------------|----|------------------------------------------------------------------------------------------------------------------------|
| 87  | 1,2,3,4,5,7<br>,12,14 | 6,8,9,10,1<br>1,13,15,16<br>,17  | 12 | O88267,P01836,P11762,P18418,P34901,P36970,P52590,Q498R7,Q63317,Q63475,Q9EQS0,Q9ESW0                                    |
| 88  | 1,2,3,4,5,7<br>,12,15 | 6,8,9,10,1<br>1,13,14,16<br>,17  | 12 | P01041,P01836,P11762,P18418,P34901,P52590,P83748,Q498R7,Q4FZU2,Q63317,Q63475,Q9ESW0                                    |
| 89  | 1,2,3,4,5,7<br>,12,16 | 6,8,9,10,1<br>1,13,14,15<br>,17  | 10 | O88267,P01836,P08721,P34901,P52590,P83748,Q498R7,Q63475,Q6IFW6,Q9ESW0                                                  |
| 90  | 1,2,3,4,5,7<br>,12,17 | 6,8,9,10,1<br>1,13,14,15<br>,16  | 17 | O88267,P01041,P01681,P01836,P01946,P02091,P08937,P18418,P19223,P34901,P52590,P55091,P98089,Q10758,Q498R7,Q63751,Q9ESW0 |
| 91  | 1,2,3,4,5,7<br>,13,14 | 6,8,9,10,1<br>1,12,15,16<br>,17  | 6  | O88267,P01836,P34901,P36970,P52590,Q63317                                                                              |
| 92  | 1,2,3,4,5,7<br>,13,15 | 6,8,9,10,1<br>1,12,14,16<br>,17  | 7  | O54728,P01836,P05539,P34901,P52590,Q09030,Q63317                                                                       |
| 93  | 1,2,3,4,5,7<br>,13,16 | 6,8,9,10,1<br>1,12,14,15<br>,17  | 7  | O88267,P01836,P08010,P34901,P52590,Q63317,Q8VD89                                                                       |
| 94  | 1,2,3,4,5,7<br>,13,17 | 6,8,9,10,1<br>1,12,14,15<br>,16  | 11 | O88267,P01836,P01946,P02091,P08937,P34901,P52590,P55091,Q63317,Q63751,Q6PCU2                                           |
| 95  | 1,2,3,4,5,7<br>,14,15 | 6,8,9,10,1<br>1,12,13,16<br>,17  | 8  | O54728,P01836,P11762,P34901,P52590,Q63317,Q63475,Q6IE51                                                                |
| 96  | 1,2,3,4,5,7<br>,14,16 | 6,8,9,10,1<br>1,12,13,15<br>,17  | 7  | O88267,P01836,P05371,P08721,P34901,P52590,Q63532                                                                       |
| 97  | 1,2,3,4,5,7<br>,14,17 | 6,8,9,10,1<br>1,12,13,15<br>,16  | 8  | O88267,P01946,P02091,P10536,P34901,P52590,Q63317,Q6PCU2                                                                |
| 98  | 1,2,3,4,5,7<br>,15,16 | 6,8,9,10,1<br>1,12,13,14<br>,17  | 5  | O54728,P01836,P34901,P47727,P52590                                                                                     |
| 99  | 1,2,3,4,5,7<br>,15,17 | 6,8,9,10,1<br>1,12,13,14<br>,16  | 11 | P01041,P01836,P01946,P02091,P10536,P34901,P47727,P52590,Q63317,Q63751,Q9ESW0                                           |
| 100 | 1,2,3,4,5,7<br>,16,17 | 6,8,9,10,1<br>1,12,13,14<br>,15  | 9  | O88267,P01836,P01946,P02091,P23593,P34901,P47727,P52590,Q6PCU2                                                         |
| 101 | 1,2,3,4,5,8<br>,9,10  | 6,7,11,12,<br>13,14,15,1<br>6,17 | 8  | D3ZHA0,O55006,P02761,P08649,P23593,P28648,P34901,Q63942                                                                |

|     |                       |                                  |    |                                                                                                                                      |
|-----|-----------------------|----------------------------------|----|--------------------------------------------------------------------------------------------------------------------------------------|
| 102 | 1,2,3,4,5,8<br>,9,11  | 6,7,10,12,<br>13,14,15,1<br>6,17 | 9  | P02761,P08649,P14668,P28648,P34901,P55314,Q63942,Q6AYS4,Q6TMA8                                                                       |
| 103 | 1,2,3,4,5,8<br>,9,12  | 6,7,10,11,<br>13,14,15,1<br>6,17 | 12 | D3ZHA0,P01681,P23593,P34901,P36970,Q5M8C6,Q62894,Q6IFW6,Q6IG02,Q6TMA8,Q9EQS0,Q9JJS8                                                  |
| 104 | 1,2,3,4,5,8<br>,9,13  | 6,7,10,11,<br>12,14,15,1<br>6,17 | 6  | P20766,P34901,P36970,Q63317,Q63942,Q6TMA8                                                                                            |
| 105 | 1,2,3,4,5,8<br>,9,14  | 6,7,10,11,<br>12,13,15,1<br>6,17 | 7  | D3ZHA0,P34901,P36970,Q63317,Q63942,Q9QX79,Q9QZK9                                                                                     |
| 106 | 1,2,3,4,5,8<br>,9,15  | 6,7,10,11,<br>12,13,14,1<br>6,17 | 11 | D3ZHA0,O54728,P02761,P23593,P34901,Q5QE79,Q62894,Q63317,Q63942,Q9QX79,Q9QZK9                                                         |
| 107 | 1,2,3,4,5,8<br>,9,16  | 6,7,10,11,<br>12,13,14,1<br>5,17 | 5  | P23593,P34901,Q62894,Q63942,Q9QZK9                                                                                                   |
| 108 | 1,2,3,4,5,8<br>,9,17  | 6,7,10,11,<br>12,13,14,1<br>5,16 | 11 | P01681,P01946,P02761,P08649,P17475,P19223,P23593,P34901,P52590,Q63942,Q9QX79                                                         |
| 109 | 1,2,3,4,5,8<br>,10,11 | 6,7,9,12,1<br>3,14,15,16<br>,17  | 12 | D3ZHA0,O54858,P02761,P08649,P28648,P34901,P55314,Q5BJY9,Q63598,Q64194,Q6AYS4,Q9ESW0                                                  |
| 110 | 1,2,3,4,5,8<br>,10,12 | 6,7,9,11,1<br>3,14,15,16<br>,17  | 19 | D3ZHA0,P01681,P28648,P34901,P35053,P36970,Q10758,Q4FZU2,Q5M8C6,Q63475,Q64361,Q6IFW6,Q6IG02,Q6IMF3,Q6P6Q2,Q80WL1,Q9EQS0,Q9ESW0,Q9JJS8 |
| 111 | 1,2,3,4,5,8<br>,10,13 | 6,7,9,11,1<br>2,14,15,16<br>,17  | 5  | D3ZHA0,P28648,P34901,P36970,Q63317                                                                                                   |
| 112 | 1,2,3,4,5,8<br>,10,14 | 6,7,9,11,1<br>2,13,15,16<br>,17  | 7  | D3ZHA0,P02761,P08649,P28648,P29288,P34901,P36970                                                                                     |
| 113 | 1,2,3,4,5,8<br>,10,15 | 6,7,9,11,1<br>2,13,14,16<br>,17  | 5  | D3ZHA0,P02761,P08649,P28648,P34901                                                                                                   |
| 114 | 1,2,3,4,5,8<br>,10,16 | 6,7,9,11,1<br>2,13,14,15<br>,17  | 6  | D3ZHA0,P08649,P08721,P28648,P34901,Q62997                                                                                            |
| 115 | 1,2,3,4,5,8<br>,10,17 | 6,7,9,11,1<br>2,13,14,15<br>,16  | 14 | D3ZHA0,O54858,P01681,P01946,P02761,P08649,P10959,P17475,P19223,P28648,P34901,P46844,P52590,Q08463                                    |
| 116 | 1,2,3,4,5,8<br>,11,12 | 6,7,9,10,1<br>3,14,15,16<br>,17  | 18 | P01681,P01836,P28648,P34901,P35053,P55314,Q4FZU2,Q5M8C6,Q63475,Q6AYS4,Q6IFU8,Q6IFW6,Q6IG02,Q6IMF3,Q6P6Q2,Q80WL1,Q9EQS0,Q9ESW0        |



|     |                       |                                 |    |                                                                                                                                                                                       |
|-----|-----------------------|---------------------------------|----|---------------------------------------------------------------------------------------------------------------------------------------------------------------------------------------|
| 117 | 1,2,3,4,5,8<br>,11,13 | 6,7,9,10,1<br>2,14,15,16<br>,17 | 6  | P28648,P34901,P55314,Q63317,Q6AYS4,Q6TMA8                                                                                                                                             |
| 118 | 1,2,3,4,5,8<br>,11,14 | 6,7,9,10,1<br>2,13,15,16<br>,17 | 15 | P01681,P02793,Q7TP54,P08649,P14668,P19218,P20762,P28648,P34901,P55314,P97840,Q5I0D1,Q64194,Q6AYS4,Q9EQS0,Q9ESW0                                                                       |
| 119 | 1,2,3,4,5,8<br>,11,15 | 6,7,9,10,1<br>2,13,14,16<br>,17 | 13 | O54728,P02761,P08649,P14668,P34901,P52303,P55314,P97840,Q5I0D1,Q62894,Q64194,Q6AYS4,Q9ESW0                                                                                            |
| 120 | 1,2,3,4,5,8<br>,11,16 | 6,7,9,10,1<br>2,13,14,15<br>,17 | 8  | P01681,P08649,P14668,P34901,P55314,Q64194,Q6AYS4,Q9ESW0                                                                                                                               |
| 121 | 1,2,3,4,5,8<br>,11,17 | 6,7,9,10,1<br>2,13,14,15<br>,16 | 15 | O54858,P01681,P01946,P02761,P08649,P17475,P19223,P28648,P34901,P50115,P55314,P97840,Q63751,Q6AYS4,Q9ESW0                                                                              |
| 122 | 1,2,3,4,5,8<br>,12,13 | 6,7,9,10,1<br>1,14,15,16<br>,17 | 13 | O88267,P01681,P01836,P13265,P34901,P35053,P36970,Q5M8C6,Q62894,Q63317,Q6IG02,Q6TMA8,Q80WL1                                                                                            |
| 123 | 1,2,3,4,5,8<br>,12,14 | 6,7,9,10,1<br>1,13,15,16<br>,17 | 14 | D3ZHA0,O88267,P01681,P29288,P34901,P35053,P36970,Q5M8C6,Q63317,Q6IFW6,Q6IG02,Q9EQS0,Q9ESW0,Q9JJS8                                                                                     |
| 124 | 1,2,3,4,5,8<br>,12,15 | 6,7,9,10,1<br>1,13,14,16<br>,17 | 14 | B0BNN3,D3ZHA0,P01836,P02761,P34901,P35053,P36970,P83121,Q4FZU2,Q5M8C6,Q62894,Q63317,Q6IG02,Q9ESW0                                                                                     |
| 125 | 1,2,3,4,5,8<br>,12,16 | 6,7,9,10,1<br>1,13,14,15<br>,17 | 12 | O88267,P01681,P01836,P08721,P34901,P83121,Q4FZU2,Q5M8C6,Q62894,Q6IFW6,Q6IG02,Q9JJS8                                                                                                   |
| 126 | 1,2,3,4,5,8<br>,12,17 | 6,7,9,10,1<br>1,13,14,15<br>,16 | 26 | B0BNN3,O54858,O88267,P01681,P01946,P02761,P16636,P17475,P19223,P34901,P35053,P55091,P83121,P98089,Q10758,Q4G075,Q5M8C6,Q62894,Q63751,Q6IFW6,Q6IG02,Q6PCU2,Q80WL1,Q9ESW0,Q9JJS8,Q9QZA6 |
| 127 | 1,2,3,4,5,8<br>,13,14 | 6,7,9,10,1<br>1,12,15,16<br>,17 | 7  | P13265,P34901,P36970,Q63317,Q64093,Q6PCU2,Q6TMA8                                                                                                                                      |
| 128 | 1,2,3,4,5,8<br>,13,15 | 6,7,9,10,1<br>1,12,14,16<br>,17 | 5  | P34901,P36970,Q62894,Q63317,Q6TMA8                                                                                                                                                    |
| 129 | 1,2,3,4,5,8<br>,13,16 | 6,7,9,10,1<br>1,12,14,15<br>,17 | 4  | P34901,Q62894,Q63317,Q6PCU2                                                                                                                                                           |
| 130 | 1,2,3,4,5,8<br>,13,17 | 6,7,9,10,1<br>1,12,14,15<br>,16 | 9  | O88267,P01681,P01946,P10536,P17475,P34901,P36970,Q63317,Q6PCU2                                                                                                                        |
| 131 | 1,2,3,4,5,8<br>,14,15 | 6,7,9,10,1<br>1,12,13,16<br>,17 | 8  | B0BNN3,O54728,P02761,P10536,P34901,P36970,P97840,Q63317                                                                                                                               |

|     |                       |                                 |    |                                                                                                   |
|-----|-----------------------|---------------------------------|----|---------------------------------------------------------------------------------------------------|
| 132 | 1,2,3,4,5,8<br>,14,16 | 6,7,9,10,1<br>1,12,13,15<br>,17 | 7  | P08721,P29288,P34901,P36970,P97574,Q6PCU2,Q9QZK9                                                  |
| 133 | 1,2,3,4,5,8<br>,14,17 | 6,7,9,10,1<br>1,12,13,15<br>,16 | 13 | O88267,P01681,P01946,P02761,P02793,Q7TP54,P10536,P17475,P34901,P36970,P97840,Q63317,Q6PCU2,Q9QW07 |
| 134 | 1,2,3,4,5,8<br>,15,16 | 6,7,9,10,1<br>1,12,13,14<br>,17 | 6  | O54728,P34901,P47727,P83121,Q62894,Q9QZK9                                                         |
| 135 | 1,2,3,4,5,8<br>,15,17 | 6,7,9,10,1<br>1,12,13,14<br>,16 | 10 | B0BNN3,P02761,P10536,P17475,P23593,P34901,P83121,P97840,Q62894,Q6PCU2                             |
| 136 | 1,2,3,4,5,8<br>,16,17 | 6,7,9,10,1<br>1,12,13,14<br>,15 | 8  | P01681,P01946,P17475,P23593,P23928,P34901,Q62894,Q6PCU2                                           |
| 137 | 1,2,3,4,5,9<br>,10,11 | 6,7,8,12,1<br>3,14,15,16<br>,17 | 6  | P08649,P14173,P28648,P34901,P55314,Q63661                                                         |
| 138 | 1,2,3,4,5,9<br>,10,12 | 6,7,8,11,1<br>3,14,15,16<br>,17 | 7  | P34901,Q10758,Q4FZU2,Q6IFW6,Q6IG02,Q6IMF3,Q9JJS8                                                  |
| 139 | 1,2,3,4,5,9<br>,10,13 | 6,7,8,11,1<br>2,14,15,16<br>,17 | 1  | P34901                                                                                            |
| 140 | 1,2,3,4,5,9<br>,10,14 | 6,7,8,11,1<br>2,13,15,16<br>,17 | 2  | P34901,Q9QZK9                                                                                     |
| 141 | 1,2,3,4,5,9<br>,10,15 | 6,7,8,11,1<br>2,13,14,16<br>,17 | 4  | O54728,P34901,Q62902,Q9QZK9                                                                       |
| 142 | 1,2,3,4,5,9<br>,10,16 | 6,7,8,11,1<br>2,13,14,15<br>,17 | 5  | P11598,P23593,P34901,Q62997,Q9QZK9                                                                |
| 143 | 1,2,3,4,5,9<br>,10,17 | 6,7,8,11,1<br>2,13,14,15<br>,16 | 4  | P23593,P34901,P52590,Q62902                                                                       |
| 144 | 1,2,3,4,5,9<br>,11,12 | 6,7,8,10,1<br>3,14,15,16<br>,17 | 11 | P01681,P01836,P34901,P55314,Q4FZU2,Q6IFU8,Q6IFW6,Q6IG02,Q6IMF3,Q6P6Q2,Q9ESW0                      |
| 145 | 1,2,3,4,5,9<br>,11,13 | 6,7,8,10,1<br>2,14,15,16<br>,17 | 3  | P05539,P34901,P55314                                                                              |
| 146 | 1,2,3,4,5,9<br>,11,14 | 6,7,8,10,1<br>2,13,15,16<br>,17 | 3  | P34901,P55314,Q9QZK9                                                                              |

|     |                       |                                 |   |                                    |
|-----|-----------------------|---------------------------------|---|------------------------------------|
| 147 | 1,2,3,4,5,9<br>,11,15 | 6,7,8,10,1<br>2,13,14,16<br>,17 | 4 | O54728,P34901,P55314,Q9QZK9        |
| 148 | 1,2,3,4,5,9<br>,11,16 | 6,7,8,10,1<br>2,13,14,15<br>,17 | 4 | O54728,P34901,P55314,Q9QZK9        |
| 149 | 1,2,3,4,5,9<br>,11,17 | 6,7,8,10,1<br>2,13,14,15<br>,16 | 5 | P01681,P01946,P34901,P52590,P55314 |
| 150 | 1,2,3,4,5,9<br>,12,13 | 6,7,8,10,1<br>1,14,15,16<br>,17 | 2 | P01836,P34901                      |
| 151 | 1,2,3,4,5,9<br>,12,14 | 6,7,8,10,1<br>1,13,15,16<br>,17 | 2 | P34901,Q9JJS8                      |
| 152 | 1,2,3,4,5,9<br>,12,15 | 6,7,8,10,1<br>1,13,14,16<br>,17 | 3 | O54728,P01836,P34901               |
| 153 | 1,2,3,4,5,9<br>,12,16 | 6,7,8,10,1<br>1,13,14,15<br>,17 | 5 | P01836,P23593,P34901,Q6IFW6,Q9JJS8 |
| 154 | 1,2,3,4,5,9<br>,12,17 | 6,7,8,10,1<br>1,13,14,15<br>,16 | 5 | P01681,P19223,P23593,P34901,P52590 |
| 155 | 1,2,3,4,5,9<br>,13,14 | 6,7,8,10,1<br>1,12,15,16<br>,17 | 2 | P34901,Q63317                      |
| 156 | 1,2,3,4,5,9<br>,13,15 | 6,7,8,10,1<br>1,12,14,16<br>,17 | 2 | O54728,P34901                      |
| 157 | 1,2,3,4,5,9<br>,13,16 | 6,7,8,10,1<br>1,12,14,15<br>,17 | 4 | O54728,P08010,P34901,Q9QZK9        |
| 158 | 1,2,3,4,5,9<br>,13,17 | 6,7,8,10,1<br>1,12,14,15<br>,16 | 4 | P01946,P23593,P34901,P52590        |
| 159 | 1,2,3,4,5,9<br>,14,15 | 6,7,8,10,1<br>1,12,13,16<br>,17 | 3 | O54728,P34901,Q9QZK9               |
| 160 | 1,2,3,4,5,9<br>,14,16 | 6,7,8,10,1<br>1,12,13,15<br>,17 | 4 | O54728,P34901,Q63942,Q9QZK9        |
| 161 | 1,2,3,4,5,9<br>,14,17 | 6,7,8,10,1<br>1,12,13,15<br>,16 | 2 | P34901,P52590                      |

|     |                        |                                 |    |                                                                                                                        |
|-----|------------------------|---------------------------------|----|------------------------------------------------------------------------------------------------------------------------|
| 162 | 1,2,3,4,5,9<br>,15,16  | 6,7,8,10,1<br>1,12,13,14<br>,17 | 8  | O54728,P11598,P23593,P34901,P47727,Q62902,Q63942,Q9QZK9                                                                |
| 163 | 1,2,3,4,5,9<br>,15,17  | 6,7,8,10,1<br>1,12,13,14<br>,16 | 6  | O54728,P23593,P34901,P47727,P52590,Q62902                                                                              |
| 164 | 1,2,3,4,5,9<br>,16,17  | 6,7,8,10,1<br>1,12,13,14<br>,15 | 4  | P23593,P34901,P47727,P52590                                                                                            |
| 165 | 1,2,3,4,5,1<br>0,11,12 | 6,7,8,9,13,<br>14,15,16,1<br>7  | 17 | P01681,P01836,P05964,P28648,P34901,P55314,Q10758,Q4FZU2,Q62636,Q6IFU7,Q6IFU8,Q6IFW6,Q6IG02,Q6IMF3,Q6P6Q2,Q9ESW0,Q9JJS8 |
| 166 | 1,2,3,4,5,1<br>0,11,13 | 6,7,8,9,12,<br>14,15,16,1<br>7  | 3  | P28648,P34901,P55314                                                                                                   |
| 167 | 1,2,3,4,5,1<br>0,11,14 | 6,7,8,9,12,<br>13,15,16,1<br>7  | 5  | P08649,P28648,P34901,P55314,Q64194                                                                                     |
| 168 | 1,2,3,4,5,1<br>0,11,15 | 6,7,8,9,12,<br>13,14,16,1<br>7  | 5  | O54728,P08649,P34901,P55314,Q64194                                                                                     |
| 169 | 1,2,3,4,5,1<br>0,11,16 | 6,7,8,9,12,<br>13,14,15,1<br>7  | 4  | P08649,P28648,P34901,P55314                                                                                            |
| 170 | 1,2,3,4,5,1<br>0,11,17 | 6,7,8,9,12,<br>13,14,15,1<br>6  | 7  | P01681,P01946,P08649,P28648,P34901,P55314,Q7TP52                                                                       |
| 171 | 1,2,3,4,5,1<br>0,12,13 | 6,7,8,9,11,<br>14,15,16,1<br>7  | 6  | P01836,P34901,Q10758,Q4FZU2,Q6IFW6,Q9JJS8                                                                              |
| 172 | 1,2,3,4,5,1<br>0,12,14 | 6,7,8,9,11,<br>13,15,16,1<br>7  | 7  | P34901,Q10758,Q4FZU2,Q6IFW6,Q6IG02,Q6IMF3,Q9JJS8                                                                       |
| 173 | 1,2,3,4,5,1<br>0,12,15 | 6,7,8,9,11,<br>13,14,16,1<br>7  | 6  | P01836,P34901,Q10758,Q4FZU2,Q6IFW6,Q9JJS8                                                                              |
| 174 | 1,2,3,4,5,1<br>0,12,16 | 6,7,8,9,11,<br>13,14,15,1<br>7  | 11 | P01836,P08721,P34901,Q10758,Q4FZU2,Q62997,Q6IFW6,Q6IG02,Q6IMF3,Q6P6Q2,Q9JJS8                                           |
| 175 | 1,2,3,4,5,1<br>0,12,17 | 6,7,8,9,11,<br>13,14,15,1<br>6  | 10 | P01681,P01946,P19223,P34901,Q10758,Q4FZU2,Q6IFW6,Q6IG02,Q6IMF3,Q9JJS8                                                  |
| 176 | 1,2,3,4,5,1<br>0,13,14 | 6,7,8,9,11,<br>12,15,16,1<br>7  | 2  | P34901,P36970                                                                                                          |

|     |                        |                                |    |                                                                                                   |
|-----|------------------------|--------------------------------|----|---------------------------------------------------------------------------------------------------|
| 177 | 1,2,3,4,5,1<br>0,13,15 | 6,7,8,9,11,<br>12,14,16,1<br>7 | 1  | P34901                                                                                            |
| 178 | 1,2,3,4,5,1<br>0,13,16 | 6,7,8,9,11,<br>12,14,15,1<br>7 | 2  | P34901,Q62997                                                                                     |
| 179 | 1,2,3,4,5,1<br>0,13,17 | 6,7,8,9,11,<br>12,14,15,1<br>6 | 3  | P01946,P34901,Q63355                                                                              |
| 180 | 1,2,3,4,5,1<br>0,14,15 | 6,7,8,9,11,<br>12,13,16,1<br>7 | 2  | O54728,P34901                                                                                     |
| 181 | 1,2,3,4,5,1<br>0,14,16 | 6,7,8,9,11,<br>12,13,15,1<br>7 | 4  | P08721,P34901,Q62997,Q9QZK9                                                                       |
| 182 | 1,2,3,4,5,1<br>0,14,17 | 6,7,8,9,11,<br>12,13,15,1<br>6 | 2  | P01946,P34901                                                                                     |
| 183 | 1,2,3,4,5,1<br>0,15,16 | 6,7,8,9,11,<br>12,13,14,1<br>7 | 8  | O54728,P02782,P08721,P34901,P47727,Q62902,Q62997,Q9QZK9                                           |
| 184 | 1,2,3,4,5,1<br>0,15,17 | 6,7,8,9,11,<br>12,13,14,1<br>6 | 2  | P34901,Q62902                                                                                     |
| 185 | 1,2,3,4,5,1<br>0,16,17 | 6,7,8,9,11,<br>12,13,14,1<br>5 | 5  | P08721,P23593,P34901,Q62902,Q62997                                                                |
| 186 | 1,2,3,4,5,1<br>1,12,13 | 6,7,8,9,10,<br>14,15,16,1<br>7 | 10 | P01681,P01836,P34901,P55314,Q4FZU2,Q6IFU8,Q6IFW6,Q6IG02,Q6P6Q2,Q9ESW0                             |
| 187 | 1,2,3,4,5,1<br>1,12,14 | 6,7,8,9,10,<br>13,15,16,1<br>7 | 11 | P01681,P01836,P34901,P55314,Q4FZU2,Q6IFU8,Q6IFW6,Q6IG02,Q6IMF3,Q6P6Q2,Q9ESW0                      |
| 188 | 1,2,3,4,5,1<br>1,12,15 | 6,7,8,9,10,<br>13,14,16,1<br>7 | 11 | P01681,P01836,P34901,P51907,P55314,Q4FZU2,Q6IFU8,Q6IFW6,Q6IG02,Q6P6Q2,Q9ESW0                      |
| 189 | 1,2,3,4,5,1<br>1,12,16 | 6,7,8,9,10,<br>13,14,15,1<br>7 | 12 | P01681,P01836,P34901,P55314,Q4FZU2,Q6IFU8,Q6IFW6,Q6IG02,Q6IMF3,Q6P6Q2,Q9ESW0,Q9JJS8               |
| 190 | 1,2,3,4,5,1<br>1,12,17 | 6,7,8,9,10,<br>13,14,15,1<br>6 | 14 | P01681,P01836,P01946,P19223,P34901,P55314,Q10758,Q4FZU2,Q6IFU8,Q6IFW6,Q6IG02,Q6IMF3,Q6P6Q2,Q9ESW0 |
| 191 | 1,2,3,4,5,1<br>1,13,14 | 6,7,8,9,10,<br>12,15,16,1<br>7 | 2  | P34901,P55314                                                                                     |

|     |                        |                                |   |                                                         |
|-----|------------------------|--------------------------------|---|---------------------------------------------------------|
| 192 | 1,2,3,4,5,1<br>1,13,15 | 6,7,8,9,10,<br>12,14,16,1<br>7 | 4 | O54728,P01836,P34901,P55314                             |
| 193 | 1,2,3,4,5,1<br>1,13,16 | 6,7,8,9,10,<br>12,14,15,1<br>7 | 3 | P01836,P34901,P55314                                    |
| 194 | 1,2,3,4,5,1<br>1,13,17 | 6,7,8,9,10,<br>12,14,15,1<br>6 | 4 | P01681,P01946,P34901,P55314                             |
| 195 | 1,2,3,4,5,1<br>1,14,15 | 6,7,8,9,10,<br>12,13,16,1<br>7 | 7 | O54728,P19218,P34901,P55314,P97840,Q5I0D1,Q64194        |
| 196 | 1,2,3,4,5,1<br>1,14,16 | 6,7,8,9,10,<br>12,13,15,1<br>7 | 3 | P34901,P55314,Q9QZK9                                    |
| 197 | 1,2,3,4,5,1<br>1,14,17 | 6,7,8,9,10,<br>12,13,15,1<br>6 | 7 | P01681,P01946,P19218,P34901,P55314,P97840,Q9ESW0        |
| 198 | 1,2,3,4,5,1<br>1,15,16 | 6,7,8,9,10,<br>12,13,14,1<br>7 | 8 | O54728,P01836,P14408,P34901,P55314,Q5I0D1,Q6AYR8,Q9QZK9 |
| 199 | 1,2,3,4,5,1<br>1,15,17 | 6,7,8,9,10,<br>12,13,14,1<br>6 | 5 | B0BNN3,P34901,P55314,P97840,Q9ESW0                      |
| 200 | 1,2,3,4,5,1<br>1,16,17 | 6,7,8,9,10,<br>12,13,14,1<br>5 | 4 | P01681,P01946,P34901,P55314                             |
| 201 | 1,2,3,4,5,1<br>2,13,14 | 6,7,8,9,10,<br>11,15,16,1<br>7 | 4 | P01836,P34901,P36970,Q63317                             |
| 202 | 1,2,3,4,5,1<br>2,13,15 | 6,7,8,9,10,<br>11,14,16,1<br>7 | 3 | P01836,P34901,P83121                                    |
| 203 | 1,2,3,4,5,1<br>2,13,16 | 6,7,8,9,10,<br>11,14,15,1<br>7 | 3 | P01836,P34901,Q9JJS8                                    |
| 204 | 1,2,3,4,5,1<br>2,13,17 | 6,7,8,9,10,<br>11,14,15,1<br>6 | 5 | P01681,P01836,P01946,P19223,P34901                      |
| 205 | 1,2,3,4,5,1<br>2,14,15 | 6,7,8,9,10,<br>11,13,16,1<br>7 | 5 | A2RUV9,B0BNN3,P01836,P34901,Q4FZU2                      |
| 206 | 1,2,3,4,5,1<br>2,14,16 | 6,7,8,9,10,<br>11,13,15,1<br>7 | 4 | P01836,P34901,Q6IFW6,Q9JJS8                             |

|     |                        |                                   |    |                                                                                                                                                                                                                                               |
|-----|------------------------|-----------------------------------|----|-----------------------------------------------------------------------------------------------------------------------------------------------------------------------------------------------------------------------------------------------|
| 207 | 1,2,3,4,5,1<br>2,14,17 | 6,7,8,9,10,<br>11,13,15,1<br>6    | 8  | P01681,P01946,P19223,P31430,P34901,P98089,Q10758,Q9JJS8                                                                                                                                                                                       |
| 208 | 1,2,3,4,5,1<br>2,15,16 | 6,7,8,9,10,<br>11,13,14,1<br>7    | 6  | P01836,P34901,P47727,P83121,Q4FZU2,Q9JJS8                                                                                                                                                                                                     |
| 209 | 1,2,3,4,5,1<br>2,15,17 | 6,7,8,9,10,<br>11,13,14,1<br>6    | 7  | B0BNN3,P01681,P01836,P19223,P34901,P83121,Q9ESW0                                                                                                                                                                                              |
| 210 | 1,2,3,4,5,1<br>2,16,17 | 6,7,8,9,10,<br>11,13,14,1<br>5    | 9  | P01681,P01836,P01946,P19223,P23593,P34901,P83121,Q10758,Q9JJS8                                                                                                                                                                                |
| 211 | 1,2,3,4,5,1<br>3,14,15 | 6,7,8,9,10,<br>11,12,16,1<br>7    | 3  | O54728,P34901,Q63317                                                                                                                                                                                                                          |
| 212 | 1,2,3,4,5,1<br>3,14,16 | 6,7,8,9,10,<br>11,12,15,1<br>7    | 1  | P34901                                                                                                                                                                                                                                        |
| 213 | 1,2,3,4,5,1<br>3,14,17 | 6,7,8,9,10,<br>11,12,15,1<br>6    | 4  | P01946,P34901,Q6PCU2,Q9QW07                                                                                                                                                                                                                   |
| 214 | 1,2,3,4,5,1<br>3,15,16 | 6,7,8,9,10,<br>11,12,14,1<br>7    | 4  | O54728,P01836,P34901,P47727                                                                                                                                                                                                                   |
| 215 | 1,2,3,4,5,1<br>3,15,17 | 6,7,8,9,10,<br>11,12,14,1<br>6    | 2  | P01946,P34901                                                                                                                                                                                                                                 |
| 216 | 1,2,3,4,5,1<br>3,16,17 | 6,7,8,9,10,<br>11,12,14,1<br>5    | 4  | P01946,P08010,P34901,Q6PCU2                                                                                                                                                                                                                   |
| 217 | 1,2,3,4,5,1<br>4,15,16 | 6,7,8,9,10,<br>11,12,13,1<br>7    | 4  | O54728,P34901,P60905,Q9QZK9                                                                                                                                                                                                                   |
| 218 | 1,2,3,4,5,1<br>4,15,17 | 6,7,8,9,10,<br>11,12,13,1<br>6    | 6  | B0BNN3,P10536,P34901,P47967,P97840,Q9QW07                                                                                                                                                                                                     |
| 219 | 1,2,3,4,5,1<br>4,16,17 | 6,7,8,9,10,<br>11,12,13,1<br>5    | 4  | P01946,P34901,Q6PCU2,Q9QW07                                                                                                                                                                                                                   |
| 220 | 1,2,3,4,5,1<br>5,16,17 | 6,7,8,9,10,<br>11,12,13,1<br>4    | 6  | P23593,P34901,P47727,P83121,Q62902,Q6PCU2                                                                                                                                                                                                     |
| 221 | 1,2,3,4,6,7<br>,8,9    | 5,10,11,12<br>,13,14,15,<br>16,17 | 34 | D3ZHA0,O55004,O55006,O88267,P01041,P02631,P02761,P05371,P06761,P07647,P08723,P15399,P16086,P18418,P19629,P20761,P20762,P22282,P22283,P31044,P68370,P97580,Q06496,Q30KJ2,Q63317,Q63617,Q63751,Q64361,Q6TMA8,Q9EQS0,Q9JI85,Q9QX79,Q9R0T3,Q9Z0V6 |

|     |                  |                          |    |                                                                                                                                                                                                                                                                                                                                                                                                                                                                               |
|-----|------------------|--------------------------|----|-------------------------------------------------------------------------------------------------------------------------------------------------------------------------------------------------------------------------------------------------------------------------------------------------------------------------------------------------------------------------------------------------------------------------------------------------------------------------------|
| 222 | 1,2,3,4,6,7,8,10 | 5,9,11,12,13,14,15,16,17 | 41 | D3ZHA0,O55004,O55006,O88267,P01041,P02631,P02761,P05371,P06761,P07647,P08723,P08937,P12020,P15399,P16086,P18418,P19629,P20761,P20762,P22282,P22283,P31044,P35280,P46844,P50280,P68370,P97571,P97580,P97615,Q30KJ2,Q5BJY9,Q5GRG2,Q63317,Q63475,Q63617,Q63751,Q64361,Q9EQS0,Q9JI85,Q9R0T3,Q9Z0V6                                                                                                                                                                                |
| 223 | 1,2,3,4,6,7,8,11 | 5,9,10,12,13,14,15,16,17 | 52 | D3ZHA0,O54715,O55004,O88267,P01041,P01681,P01836,P02631,P02761,P05371,P05964,P06761,P07150,P07171,P07647,P08723,P08937,P10715,P14669,P15399,P16086,P18418,P19629,P20761,P20762,P22282,P22283,P31044,P35280,P50280,P55314,P61206,P84079,P84082,P68370,P97580,Q30KJ2,Q5GRG2,Q5XI22,Q63317,Q63475,Q63493,Q63617,Q63751,Q64361,Q6TMA8,Q8CJ52,Q8VD89,Q99041,Q9EQS0,Q9JI85,Q9QX79,Q9R0T3,Q9Z0V6                                                                                     |
| 224 | 1,2,3,4,6,7,8,12 | 5,9,10,11,13,14,15,16,17 | 66 | D3ZHA0,O08557,O55004,O88267,P01041,P01681,P01836,P02631,P02761,P02780,P02781,P02782,P05371,P06761,P07647,P08723,P08937,P0C0A9,P10715,P11598,P13432,P15399,P16086,P18418,P19223,P19629,P20761,P20762,P22282,P22283,P25236,P29975,P30120,P31044,P35280,P40241,P50280,P62815,P68370,P83748,P97580,Q06496,Q30KJ2,Q498R7,Q5GRG2,Q5M8C6,Q63317,Q63475,Q63493,Q63617,Q63751,Q64361,Q6AYR9,Q6AYS7,Q6IFW6,Q6TMA8,Q80WL1,Q8CJ52,Q8K1G0,Q923M1,Q99041,Q9EQS0,Q9JHB9,Q9JI85,Q9R0T3,Q9Z0V6 |
| 225 | 1,2,3,4,6,7,8,13 | 5,9,10,11,12,14,15,16,17 | 48 | D3ZHA0,O08557,O55004,O88267,P01041,P01836,P02631,P02761,P02780,P05371,P06761,P06911,P07647,P08723,P08937,P11598,P12020,P15399,P16086,P18418,P19629,P20761,P20762,P20766,P22282,P22283,P25236,P29975,P31044,P50280,P62815,P68370,P70545,P97580,Q06496,Q30KJ2,Q5GRG2,Q62902,Q63317,Q63617,Q63751,Q64361,Q6TMA8,Q8CJ52,Q9EQS0,Q9JI85,Q9R0T3,Q9Z0V6                                                                                                                               |
| 226 | 1,2,3,4,6,7,8,14 | 5,9,10,11,12,13,15,16,17 | 53 | D3ZHA0,O08557,O55004,O88267,P01041,P02631,P02761,P05371,P06761,P06911,P07171,P07647,P08723,P10536,P11598,P12020,P15399,P16086,P18418,P19629,P20761,P20762,P22282,P22283,P25236,P29975,P31044,P35280,P36970,P50280,P62815,P68370,P97580,P97615,Q30KJ2,Q5GRG2,Q63317,Q63475,Q63532,Q63617,Q63751,Q64361,Q6AYS7,Q6TMA8,Q8CJ52,Q923M1,Q923S2,Q9EQS0,Q9JI85,Q9QX79,Q9R0T3,Q9WTT6,Q9Z0V6                                                                                            |
| 227 | 1,2,3,4,6,7,8,15 | 5,9,10,11,12,13,14,16,17 | 46 | B0BNN3,D3ZHA0,O08557,O55004,O55006,O88267,P01041,P01836,P02631,P02761,P05371,P06761,P07171,P07647,P08723,P10536,P15399,P16086,P18418,P19629,P20761,P20762,P22282,P31044,P35280,P50280,P62815,P68370,P97571,P97580,P97615,Q30KJ2,Q5GRG2,Q5QE79,Q63317,Q63475,Q63617,Q63751,Q64361,Q6AYS7,Q6TMA8,Q9EQS0,Q9JI85,Q9QX79,Q9R0T3,Q9Z0V6                                                                                                                                             |
| 228 | 1,2,3,4,6,7,8,16 | 5,9,10,11,12,13,14,15,17 | 32 | D3ZHA0,O55004,O88267,P01041,P01836,P02631,P05371,P06761,P07647,P08721,P08723,P15399,P16086,P18418,P19629,P20761,P20762,P22282,P31044,P68370,P97580,Q30KJ2,Q63617,Q63751,Q64361,Q6AYS7,Q8CJ52,Q8VD89,Q9EQS0,Q9JI85,Q9R0T3,Q9Z0V6                                                                                                                                                                                                                                               |
| 229 | 1,2,3,4,6,7,8,17 | 5,9,10,11,12,13,14,15,16 | 61 | B0BNN3,D3ZHA0,O54858,O55004,O88267,P01041,P01681,P01946,P02091,P02631,P02761,P02770,P05371,P06761,P07647,P08723,P08937,P09605,P25809,P10536,P11598,P12346,P15399,P16086,P17475,P18418,P19223,P19629,P20760,P20761,P20762,P22282,P22283,P29975,P31044,P46844,P50115,P50280,P55091,P62815,P68370,P97571,P97580,P97615,Q30KJ2,Q4G075,Q63317,Q63617,Q63751,Q64361,Q6AYS7,Q6P6R2,Q6PCU2,Q99041,Q9EPB1,Q9EQS0,Q9EQV9,Q9JI85,Q9QX79,Q9QZA6,Q9R0T3,Q9Z0V6                             |
| 230 | 1,2,3,4,6,7,9,10 | 5,8,11,12,13,14,15,16,17 | 11 | O55006,P02631,P05371,P15399,P16086,P18418,P97580,Q30KJ2,Q5FVI6,Q91ZS3,Q9EQS0                                                                                                                                                                                                                                                                                                                                                                                                  |
| 231 | 1,2,3,4,6,7,9,11 | 5,8,10,12,13,14,15,16,17 | 15 | O55004,P01836,P02631,P05371,P15399,P16086,P18418,P20762,P55314,P97580,Q30KJ2,Q498R7,Q91ZS3,Q9EQS0,Q9JI85                                                                                                                                                                                                                                                                                                                                                                      |
| 232 | 1,2,3,4,6,7,9,12 | 5,8,10,11,13,14,15,16,17 | 23 | O35783,O55004,P01041,P01836,P02631,P05371,P07647,P08723,P15399,P16086,P18418,P19223,P20762,P25236,P30120,P34901,P83748,P97580,Q06496,Q30KJ2,Q498R7,Q9EQS0,Q9JI85                                                                                                                                                                                                                                                                                                              |
| 233 | 1,2,3,4,6,7,9,13 | 5,8,10,11,12,14,15,16,17 | 14 | P01836,P02631,P05371,P06911,P12020,P15399,P16086,P18418,P25236,P97580,Q30KJ2,Q5GRG2,Q63317,Q9JI85                                                                                                                                                                                                                                                                                                                                                                             |
| 234 | 1,2,3,4,6,7,9,14 | 5,8,10,11,12,13,15,16,17 | 13 | P02631,P05371,P12020,P15399,P16086,P18418,P20762,P25236,P34901,P97580,Q30KJ2,Q63532,Q9EQS0                                                                                                                                                                                                                                                                                                                                                                                    |



|     |                   |                          |    |                                                                                                                                                                                                                                                                    |
|-----|-------------------|--------------------------|----|--------------------------------------------------------------------------------------------------------------------------------------------------------------------------------------------------------------------------------------------------------------------|
| 235 | 1,2,3,4,6,7,9,15  | 5,8,10,11,12,13,14,16,17 | 12 | O55006,P01041,P01836,P02631,P05371,P15399,P16086,P18418,P20762,P97580,Q30KJ2,Q5QE79                                                                                                                                                                                |
| 236 | 1,2,3,4,6,7,9,16  | 5,8,10,11,12,13,14,15,17 | 8  | P01836,P02631,P05371,P15399,P16086,P18418,P97580,Q30KJ2                                                                                                                                                                                                            |
| 237 | 1,2,3,4,6,7,9,17  | 5,8,10,11,12,13,14,15,16 | 18 | O55004,P01041,P01946,P02091,P02631,P02770,P05371,P09605,P25809,P15399,P16086,P18418,P19223,P20761,P23593,P52590,P97580,Q30KJ2,Q63751                                                                                                                               |
| 238 | 1,2,3,4,6,7,10,11 | 5,8,9,12,13,14,15,16,17  | 25 | O55004,P01836,P02631,P05371,P05964,P12020,P15399,P16086,P18418,P20762,P34901,P35280,P55314,P61206,P84079,P84082,P68370,P97580,P97615,Q30KJ2,Q5BJY9,Q5FVI6,Q63475,Q7TP52,Q8VD89,Q9EQS0,Q9JI85                                                                       |
| 239 | 1,2,3,4,6,7,10,12 | 5,8,9,11,13,14,15,16,17  | 34 | O35783,O55004,P01041,P01836,P02631,P05371,P05964,P07647,P08723,P12020,P15399,P16086,P18418,P19223,P25236,P30120,P34901,P35280,P47967,P83748,P97580,P97615,P97840,Q10758,Q30KJ2,Q498R7,Q4FZU2,Q63475,Q64361,Q6IFW6,Q6IMF3,Q9EQS0,Q9JI85,Q9JJS8                      |
| 240 | 1,2,3,4,6,7,10,13 | 5,8,9,11,12,14,15,16,17  | 14 | P01836,P02631,P05371,P06911,P12020,P15399,P16086,P18418,P25236,P97580,Q30KJ2,Q5GRG2,Q63317,Q9JI85                                                                                                                                                                  |
| 241 | 1,2,3,4,6,7,10,14 | 5,8,9,11,12,13,15,16,17  | 16 | P02631,P05371,P12020,P15399,P16086,P18418,P20762,P25236,P34901,P35280,P97580,P97615,Q30KJ2,Q5GRG2,Q63532,Q9EQS0                                                                                                                                                    |
| 242 | 1,2,3,4,6,7,10,15 | 5,8,9,11,12,13,14,16,17  | 13 | P01041,P01836,P02631,P05371,P15399,P16086,P18418,P20761,P35280,P97580,P97615,Q30KJ2,Q5FVI6                                                                                                                                                                         |
| 243 | 1,2,3,4,6,7,10,16 | 5,8,9,11,12,13,14,15,17  | 14 | P01836,P02631,P05371,P08721,P15399,P16086,P18418,P34901,P47967,P97580,Q30KJ2,Q5FVI6,Q62997,Q63532                                                                                                                                                                  |
| 244 | 1,2,3,4,6,7,10,17 | 5,8,9,11,12,13,14,15,16  | 21 | O55004,P01041,P01946,P02091,P02631,P02770,P05371,P09605,P25809,P12020,P15399,P16086,P17475,P18418,P19223,P20761,P46844,P97580,P97615,Q30KJ2,Q63751,Q7TP52                                                                                                          |
| 245 | 1,2,3,4,6,7,11,12 | 5,8,9,10,13,14,15,16,17  | 35 | O35783,O54715,O55004,P01041,P01681,P01836,P02631,P05371,P05964,P07647,P08723,P15399,P16086,P18418,P20762,P25236,P30120,P34901,P35280,P55314,P61206,P84079,P84082,P97580,Q30KJ2,Q498R7,Q4FZU2,Q63475,Q63493,Q63751,Q6IFU8,Q6IFW6,Q6IMF3,Q6P6Q2,Q9EQS0,Q9JHB9,Q9JI85 |
| 246 | 1,2,3,4,6,7,11,13 | 5,8,9,10,12,14,15,16,17  | 21 | P01836,P02631,P05371,P05539,P06911,P07647,P12020,P15399,P16086,P18418,P20762,P25236,P55314,P97580,Q30KJ2,Q5GRG2,Q5XI22,Q63317,Q63751,Q8VD89,Q9JI85                                                                                                                 |
| 247 | 1,2,3,4,6,7,11,14 | 5,8,9,10,12,13,15,16,17  | 17 | P01836,P02631,P05371,P12020,P15399,P16086,P18418,P20762,P25236,P34901,P35280,P55314,P97580,Q30KJ2,Q63532,Q9EQS0,Q9JI85                                                                                                                                             |
| 248 | 1,2,3,4,6,7,11,15 | 5,8,9,10,12,13,14,16,17  | 19 | O55004,P01041,P01836,P02625,P02631,P05371,P15399,P16086,P18418,P20761,P20762,P22006,P35280,P55314,P97580,Q30KJ2,Q63751,Q8VD89,Q9JI85                                                                                                                               |
| 249 | 1,2,3,4,6,7,11,16 | 5,8,9,10,12,13,14,15,17  | 15 | G3V686,P01836,P02631,P05371,P15399,P16086,P18418,P55053,P55314,P61206,P84079,P84082,P97580,Q30KJ2,Q63532,Q8VD89,Q9JI85                                                                                                                                             |

|     |                       |                                 |    |                                                                                                                                                                                                                                                                                          |
|-----|-----------------------|---------------------------------|----|------------------------------------------------------------------------------------------------------------------------------------------------------------------------------------------------------------------------------------------------------------------------------------------|
| 250 | 1,2,3,4,6,7<br>,11,17 | 5,8,9,10,1<br>2,13,14,15<br>,16 | 24 | O55004,P01041,P01681,P01836,P01946,P02091,P02631,P02770,P05371,P05964,P09605;P25809,P15399,P16086,P17475,P18418,P19223<br>,P20761,P20762,P55091,P55314,P97580,Q30KJ2,Q63751,Q9JI85                                                                                                       |
| 251 | 1,2,3,4,6,7<br>,12,13 | 5,8,9,10,1<br>1,14,15,16<br>,17 | 31 | O88267,P01041,P01836,P02631,P05371,P06911,P07647,P08723,P12020,P15399,P16086,P18418,P20762,P22282,P25236,P29975,P30120<br>,P62815,P83748,P97580,Q30KJ2,Q498R7,Q5GRG2,Q62902,Q63317,Q63751,Q6AYR9,Q9EQS0,Q9JHB9,Q9JI85,Q9ROT3                                                             |
| 252 | 1,2,3,4,6,7<br>,12,14 | 5,8,9,10,1<br>1,13,15,16<br>,17 | 27 | A2RUV9,O88267,P01041,P01836,P02631,P05371,P07647,P08723,P12020,P15399,P16086,P18418,P20761,P20762,P25236,P29975,P3012<br>0,P34901,P83748,P97580,Q30KJ2,Q498R7,Q63475,Q63532,Q923M1,Q9EQS0,Q9JI85                                                                                         |
| 253 | 1,2,3,4,6,7<br>,12,15 | 5,8,9,10,1<br>1,13,14,16<br>,17 | 25 | B0BNN3,O55004,P01041,P01836,P02625,P02631,P05371,P08723,P15399,P16086,P18418,P20761,P20762,P25236,P34901,P35280,P8374<br>8,P97580,Q30KJ2,Q498R7,Q4FZU2,Q63475,Q63751,Q9EQS0,Q9JI85                                                                                                       |
| 254 | 1,2,3,4,6,7<br>,12,16 | 5,8,9,10,1<br>1,13,14,15<br>,17 | 23 | G3V686,O55004,O88267,P01041,P01836,P02631,P05371,P08723,P15399,P16086,P18418,P25236,P34901,P47967,P83748,P97580,Q30KJ<br>2,Q498R7,Q4FZU2,Q63532,Q9EQS0,Q9JI85,Q9JJS8                                                                                                                     |
| 255 | 1,2,3,4,6,7<br>,12,17 | 5,8,9,10,1<br>1,13,14,15<br>,16 | 38 | B0BNN3,O55004,O88267,P01041,P01681,P01836,P01946,P02091,P02631,P02770,P05371,P07647,P08723,P08937,P09605;P25809,P134<br>32,P15399,P16086,P17475,P18418,P19223,P20761,P20762,P22282,P34901,P55091,P62815,P83748,P97580,P98089,Q10758,Q30KJ2,Q49<br>8R7,Q62635,Q63751,Q9EQS0,Q9JI85,Q9QZK9 |
| 256 | 1,2,3,4,6,7<br>,13,14 | 5,8,9,10,1<br>1,12,15,16<br>,17 | 18 | O88267,P01836,P02631,P05371,P06911,P12020,P15399,P16086,P18418,P20762,P25236,P29975,P97580,Q30KJ2,Q5GRG2,Q63317,Q635<br>32,Q9JI85                                                                                                                                                        |
| 257 | 1,2,3,4,6,7<br>,13,15 | 5,8,9,10,1<br>1,12,14,16<br>,17 | 15 | P01836,P02631,P05371,P06911,P12020,P15399,P16086,P18418,P20761,P20762,P25236,P97580,Q30KJ2,Q5GRG2,Q63317                                                                                                                                                                                 |
| 258 | 1,2,3,4,6,7<br>,13,16 | 5,8,9,10,1<br>1,12,14,15<br>,17 | 15 | G3V686,O88267,P01836,P02631,P05371,P06911,P12020,P15399,P16086,P18418,P25236,P97580,Q30KJ2,Q5GRG2,Q8VD89                                                                                                                                                                                 |
| 259 | 1,2,3,4,6,7<br>,13,17 | 5,8,9,10,1<br>1,12,14,15<br>,16 | 27 | O88267,P01836,P01946,P02091,P02631,P02770,P05371,P06911,P09605;P25809,P12020,P15399,P16086,P17475,P18418,P19223,P20761<br>,P22282,P25236,P29975,P55091,P62815,P97580,Q30KJ2,Q5GRG2,Q63317,Q63751,Q9JI85                                                                                  |
| 260 | 1,2,3,4,6,7<br>,14,15 | 5,8,9,10,1<br>1,12,13,16<br>,17 | 21 | B0BNN3,P01041,P01836,P02631,P02803,P05371,P12020,P15399,P16086,P18418,P20761,P20762,P25236,P34901,P35280,P97580,Q30KJ<br>2,Q5GRG2,Q63317,Q63532,Q6IE51                                                                                                                                   |
| 261 | 1,2,3,4,6,7<br>,14,16 | 5,8,9,10,1<br>1,12,13,15<br>,17 | 14 | G3V686,P01836,P02631,P05371,P12020,P15399,P16086,P18418,P20762,P25236,P34901,P97580,Q30KJ2,Q63532                                                                                                                                                                                        |
| 262 | 1,2,3,4,6,7<br>,14,17 | 5,8,9,10,1<br>1,12,13,15<br>,16 | 22 | O88267,P01041,P01946,P02091,P02631,P05371,P09605;P25809,P12020,P15399,P16086,P17475,P18418,P19223,P20761,P20762,P34901<br>,P55091,P62815,P97580,Q30KJ2,Q63532,Q63751                                                                                                                     |
| 263 | 1,2,3,4,6,7<br>,15,16 | 5,8,9,10,1<br>1,12,13,14<br>,17 | 9  | P01041,P01836,P02631,P05371,P16086,P18418,P97580,Q30KJ2,Q63532                                                                                                                                                                                                                           |
| 264 | 1,2,3,4,6,7<br>,15,17 | 5,8,9,10,1<br>1,12,13,14<br>,16 | 22 | B0BNN3,O55004,P01041,P01836,P01946,P02091,P02631,P02761,P05371,P09605;P25809,P15399,P16086,P17475,P18418,P19223,P2076<br>0,P20761,P20762,P62815,P97580,Q30KJ2,Q63751                                                                                                                     |

|     |                       |                                  |    |                                                                                                                                                                                                                                 |
|-----|-----------------------|----------------------------------|----|---------------------------------------------------------------------------------------------------------------------------------------------------------------------------------------------------------------------------------|
| 265 | 1,2,3,4,6,7<br>,16,17 | 5,8,9,10,1<br>1,12,13,14<br>,15  | 18 | O88267,P01041,P01836,P01946,P02091,P02631,P05371,P09605,P25809,P14480,P15399,P16086,P18418,P19223,P20761,P97580,Q30KJ2,Q63751,Q6PCU2                                                                                            |
| 266 | 1,2,3,4,6,8<br>,9,10  | 5,7,11,12,<br>13,14,15,1<br>6,17 | 9  | D3ZHA0,O55006,P02761,P08649,P16636,Q63942,Q64361,Q6TMA8,Q9EQS0                                                                                                                                                                  |
| 267 | 1,2,3,4,6,8<br>,9,11  | 5,7,10,12,<br>13,14,15,1<br>6,17 | 15 | D3ZHA0,O54715,P01681,P02761,P07647,P08649,P14669,P16636,P20762,P55314,Q30KJ2,Q5XI22,Q63942,Q6TMA8,Q9EQS0                                                                                                                        |
| 268 | 1,2,3,4,6,8<br>,9,12  | 5,7,10,11,<br>13,14,15,1<br>6,17 | 20 | D3ZHA0,P01681,P02761,P02780,P02782,P07647,P08723,P0C0A9,P16636,P19223,P20762,P25236,P30120,Q06496,Q5M8C6,Q64361,Q6TMA8,Q9EQS0,Q9JJS8,Q9Z0V6                                                                                     |
| 269 | 1,2,3,4,6,8<br>,9,13  | 5,7,10,11,<br>12,14,15,1<br>6,17 | 9  | D3ZHA0,P06911,P07647,P20766,P25236,Q06496,Q63317,Q63942,Q6TMA8                                                                                                                                                                  |
| 270 | 1,2,3,4,6,8<br>,9,14  | 5,7,10,11,<br>12,13,15,1<br>6,17 | 8  | D3ZHA0,P02761,P20762,P25236,Q63942,Q6TMA8,Q9EQS0,Q9Z0V6                                                                                                                                                                         |
| 271 | 1,2,3,4,6,8<br>,9,15  | 5,7,10,11,<br>12,13,14,1<br>6,17 | 9  | B0BNN3,D3ZHA0,O55006,P02761,P20762,P23593,Q5QE79,Q63942,Q6TMA8                                                                                                                                                                  |
| 272 | 1,2,3,4,6,8<br>,9,16  | 5,7,10,11,<br>12,13,14,1<br>5,17 | 4  | D3ZHA0,P23593,Q63942,Q6TMA8                                                                                                                                                                                                     |
| 273 | 1,2,3,4,6,8<br>,9,17  | 5,7,10,11,<br>12,13,14,1<br>5,16 | 17 | B0BNN3,D3ZHA0,P01681,P02761,P02770,P16636,P17475,P19223,P20761,P23593,Q06496,Q30KJ2,Q4G075,Q63355,Q63942,Q6P6R2,Q9Z0V6                                                                                                          |
| 274 | 1,2,3,4,6,8<br>,10,11 | 5,7,9,12,1<br>3,14,15,16<br>,17  | 23 | D3ZHA0,O54715,P01681,P02761,P07150,P07647,P08649,P14669,P15399,P16636,P20762,P35280,P50280,P55314,P97580,Q30KJ2,Q5BJY9,Q5XI22,Q63598,Q64361,Q6TMA8,Q7TP52,Q9EQS0                                                                |
| 275 | 1,2,3,4,6,8<br>,10,12 | 5,7,9,11,1<br>3,14,15,16<br>,17  | 32 | B0BNN3,D3ZHA0,P01681,P02761,P02782,P07647,P08723,P0C0A9,P16636,P18418,P19223,P25236,P30120,P35280,P35281,P50280,Q08463,Q10758,Q4FZU2,Q5M8C6,Q64361,Q6AYR9,Q6IFW6,Q6IG02,Q6IMF3,Q6P6Q2,Q6TMA8,Q80WL1,Q8K1G0,Q9EQS0,Q9JJS8,Q9Z0V6 |
| 276 | 1,2,3,4,6,8<br>,10,13 | 5,7,9,11,1<br>2,14,15,16<br>,17  | 11 | D3ZHA0,P02761,P06911,P07647,P12020,P16636,P25236,Q5GRG2,Q63355,Q64361,Q6TMA8                                                                                                                                                    |
| 277 | 1,2,3,4,6,8<br>,10,14 | 5,7,9,11,1<br>2,13,15,16<br>,17  | 11 | D3ZHA0,P02761,P12020,P20762,P25236,P35280,Q64361,Q6TMA8,Q9EQS0,Q9WTT6,Q9Z0V6                                                                                                                                                    |
| 278 | 1,2,3,4,6,8<br>,10,15 | 5,7,9,11,1<br>2,13,14,16<br>,17  | 6  | B0BNN3,D3ZHA0,P02761,P35280,Q64361,Q9Z0V6                                                                                                                                                                                       |
| 279 | 1,2,3,4,6,8<br>,10,16 | 5,7,9,11,1<br>2,13,14,15<br>,17  | 4  | D3ZHA0,P08721,P16636,Q64361                                                                                                                                                                                                     |

|     |                       |                                 |    |                                                                                                                                                                                                                                                                                                                     |
|-----|-----------------------|---------------------------------|----|---------------------------------------------------------------------------------------------------------------------------------------------------------------------------------------------------------------------------------------------------------------------------------------------------------------------|
| 280 | 1,2,3,4,6,8<br>,10,17 | 5,7,9,11,1<br>2,13,14,15<br>,16 | 20 | B0BNN3,D3ZHA0,P01681,P02761,P02770,P08649,P12346,P16636,P17475,P19223,P20761,P46844,P97580,Q08463,Q30KJ2,Q4G075,Q63355,Q64361,Q6P6R2,Q9Z0V6                                                                                                                                                                         |
| 281 | 1,2,3,4,6,8<br>,11,12 | 5,7,9,10,1<br>3,14,15,16<br>,17 | 44 | B0BNN3,D3ZHA0,O35547,O54715,O55004,P01681,P01836,P02761,P02780,P02781,P02782,P04905,P07647,P08723,P0C0A9,P14669,P15399,P16636,P20762,P25236,P30120,P35280,P40241,P50280,P55314,Q30KJ2,Q4FZU2,Q5M8C6,Q5XI22,Q63751,Q64361,Q6AYR9,Q6IFU8,Q6IFW6,Q6IG02,Q6IMF3,Q6P6Q2,Q6TMA8,Q80WL1,Q8CJ52,Q9EQS0,Q9JHB9,Q9JI85,Q9Z0V6 |
| 282 | 1,2,3,4,6,8<br>,11,13 | 5,7,9,10,1<br>2,14,15,16<br>,17 | 18 | O54715,P01681,P02782,P06911,P07647,P08723,P14669,P16636,P20762,P20766,P25236,P50280,P55314,Q30KJ2,Q5GRG2,Q5XI22,Q6TMA8,Q9JI85                                                                                                                                                                                       |
| 283 | 1,2,3,4,6,8<br>,11,14 | 5,7,9,10,1<br>2,13,15,16<br>,17 | 18 | D3ZHA0,O54715,P01681,P02761,P07647,P14669,P15399,P19218,P20762,P25236,P35280,P35434,P50280,P55314,Q30KJ2,Q6TMA8,Q9EQS0,Q9Z0V6                                                                                                                                                                                       |
| 284 | 1,2,3,4,6,8<br>,11,15 | 5,7,9,10,1<br>2,13,14,16<br>,17 | 14 | B0BNN3,D3ZHA0,O54715,P02625,P02761,P14669,P20762,P35280,P50280,P55314,Q30KJ2,Q5QE79,Q5XI22,Q6TMA8                                                                                                                                                                                                                   |
| 285 | 1,2,3,4,6,8<br>,11,16 | 5,7,9,10,1<br>2,13,14,15<br>,17 | 10 | O54715,P01681,P07150,P14668,P14669,P16636,P55314,Q30KJ2,Q5XI22,Q6TMA8                                                                                                                                                                                                                                               |
| 286 | 1,2,3,4,6,8<br>,11,17 | 5,7,9,10,1<br>2,13,14,15<br>,16 | 23 | B0BNN3,O54715,P01681,P02761,P02770,P07150,P07647,P08649,P14669,P15399,P16636,P17475,P19223,P20761,P20762,P50280,P55314,P97580,Q30KJ2,Q4G075,Q5XI22,Q63751,Q9Z0V6                                                                                                                                                    |
| 287 | 1,2,3,4,6,8<br>,12,13 | 5,7,9,10,1<br>1,14,15,16<br>,17 | 34 | D3ZHA0,O08557,O88267,P01681,P01836,P02780,P02781,P02782,P06761,P06911,P07647,P08723,P0C0A9,P16636,P20762,P22282,P25236,P29975,P30120,P50280,Q06496,Q5GRG2,Q5M8C6,Q63317,Q64093,Q64361,Q6AYR9,Q6TMA8,Q80WL1,Q8CJ52,Q9EQS0,Q9JHB9,Q9JI85,Q9JJS8                                                                       |
| 288 | 1,2,3,4,6,8<br>,12,14 | 5,7,9,10,1<br>1,13,15,16<br>,17 | 32 | B0BNN3,D3ZHA0,O08557,O88267,P01681,P02780,P02782,P07647,P08723,P20762,P25236,P29975,P30120,P34901,P40241,P50280,Q10758,Q4FZU2,Q5M8C6,Q64093,Q64361,Q6AYR9,Q6AYS7,Q6IFW6,Q6Q0N1,Q6TMA8,Q923M1,Q9EQS0,Q9JHB9,Q9JJS8,Q9WTT6,Q9Z0V6                                                                                     |
| 289 | 1,2,3,4,6,8<br>,12,15 | 5,7,9,10,1<br>1,13,14,16<br>,17 | 22 | B0BNN3,D3ZHA0,O08557,P01681,P01836,P02761,P02782,P07647,P08723,P20761,P20762,P25236,P30120,P35280,P50280,Q4FZU2,Q5M8C6,Q5QE79,Q64361,Q6TMA8,Q9EQS0,Q9Z0V6                                                                                                                                                           |
| 290 | 1,2,3,4,6,8<br>,12,16 | 5,7,9,10,1<br>1,13,14,15<br>,17 | 17 | D3ZHA0,P01681,P01836,P02782,P07647,P08723,P16636,P25236,P30120,Q4FZU2,Q5M8C6,Q64361,Q6IFW6,Q6IMF3,Q9EQS0,Q9JJS8,Q9Z0V6                                                                                                                                                                                              |
| 291 | 1,2,3,4,6,8<br>,12,17 | 5,7,9,10,1<br>1,13,14,15<br>,16 | 41 | B0BNN3,D3ZHA0,O55004,O88267,P01681,P02761,P02770,P02782,P07647,P08723,P13432,P16636,P17475,P19223,P20761,P20762,P22282,P29975,P30120,P50280,P55091,P62815,P98089,Q06496,Q08463,Q10758,Q30KJ2,Q4G075,Q5M8C6,Q62635,Q63355,Q63751,Q64361,Q6AYR9,Q80WL1,Q8K1G0,Q9EQS0,Q9EQV9,Q9JJS8,Q9QZA6,Q9Z0V6                      |
| 292 | 1,2,3,4,6,8<br>,13,14 | 5,7,9,10,1<br>1,12,15,16<br>,17 | 16 | D3ZHA0,O08557,P06911,P07647,P12020,P20762,P20766,P25236,P29975,P36970,P50280,Q5GRG2,Q63317,Q64093,Q6TMA8,Q923M1                                                                                                                                                                                                     |
| 293 | 1,2,3,4,6,8<br>,13,15 | 5,7,9,10,1<br>1,12,14,16<br>,17 | 12 | B0BNN3,D3ZHA0,O08557,P02761,P06911,P20762,P25236,Q5GRG2,Q5QE79,Q63317,Q64093,Q6TMA8                                                                                                                                                                                                                                 |
| 294 | 1,2,3,4,6,8<br>,13,16 | 5,7,9,10,1<br>1,12,14,15<br>,17 | 4  | P06911,P25236,Q6PCU2,Q6TMA8                                                                                                                                                                                                                                                                                         |

|     |                       |                                 |    |                                                                                                                                                                                                                |
|-----|-----------------------|---------------------------------|----|----------------------------------------------------------------------------------------------------------------------------------------------------------------------------------------------------------------|
| 295 | 1,2,3,4,6,8<br>,13,17 | 5,7,9,10,1<br>1,12,14,15<br>,16 | 29 | B0BNN3,O88267,P01681,P02761,P02770,P06911,P07647,P10536,P16636,P17475,P19223,P20761,P20766,P22282,P25236,P29975,P5028<br>0,P51907,P62815,Q06496,Q30KJ2,Q4G075,Q63317,Q63355,Q63751,Q64093,Q6PCU2,Q6TMA8,Q9Z0V6 |
| 296 | 1,2,3,4,6,8<br>,14,15 | 5,7,9,10,1<br>1,12,13,16<br>,17 | 13 | B0BNN3,D3ZHA0,O08557,P02761,P10536,P20761,P20762,P25236,P35280,Q63317,Q64093,Q6TMA8,Q9Z0V6                                                                                                                     |
| 297 | 1,2,3,4,6,8<br>,14,16 | 5,7,9,10,1<br>1,12,13,15<br>,17 | 7  | D3ZHA0,P20762,P25236,P97574,Q6PCU2,Q6Q0N1,Q9Z0V6                                                                                                                                                               |
| 298 | 1,2,3,4,6,8<br>,14,17 | 5,7,9,10,1<br>1,12,13,15<br>,16 | 21 | B0BNN3,P01681,P02761,P02770,P02793,Q7TP54,P10536,P17475,P19223,P20761,P20762,P25236,P29975,P62815,P97580,Q30KJ2,Q4G0<br>75,Q64093,Q6PCU2,Q923M1,Q9WTT6,Q9Z0V6                                                  |
| 299 | 1,2,3,4,6,8<br>,15,16 | 5,7,9,10,1<br>1,12,13,14<br>,17 | 4  | B0BNN3,D3ZHA0,P02761,Q5QE79                                                                                                                                                                                    |
| 300 | 1,2,3,4,6,8<br>,15,17 | 5,7,9,10,1<br>1,12,13,14<br>,16 | 19 | B0BNN3,D3ZHA0,P01681,P02761,P02770,P10536,P17475,P19223,P20761,P20762,P23593,P62815,Q30KJ2,Q4G075,Q5QE79,Q63751,Q6<br>PCU2,Q9EQV9,Q9Z0V6                                                                       |
| 301 | 1,2,3,4,6,8<br>,16,17 | 5,7,9,10,1<br>1,12,13,14<br>,15 | 14 | B0BNN3,P01681,P02761,P02770,P16636,P17475,P19223,P20761,P23593,Q30KJ2,Q4G075,Q6P6R2,Q6PCU2,Q9Z0V6                                                                                                              |
| 302 | 1,2,3,4,6,9<br>,10,11 | 5,7,8,12,1<br>3,14,15,16<br>,17 | 8  | P14173,P15399,P34901,P55314,Q30KJ2,Q63661,Q7TP52,Q91ZS3                                                                                                                                                        |
| 303 | 1,2,3,4,6,9<br>,10,12 | 5,7,8,11,1<br>3,14,15,16<br>,17 | 8  | P14173,P16636,P34901,Q10758,Q4FZU2,Q6IFW6,Q6IMF3,Q9JJS8                                                                                                                                                        |
| 304 | 1,2,3,4,6,9<br>,10,13 | 5,7,8,11,1<br>2,14,15,16<br>,17 | 3  | P14173,P25236,Q63355                                                                                                                                                                                           |
| 305 | 1,2,3,4,6,9<br>,10,14 | 5,7,8,11,1<br>2,13,15,16<br>,17 | 3  | P14173,P25236,P34901                                                                                                                                                                                           |
| 306 | 1,2,3,4,6,9<br>,10,15 | 5,7,8,11,1<br>2,13,14,16<br>,17 | 0  |                                                                                                                                                                                                                |
| 307 | 1,2,3,4,6,9<br>,10,16 | 5,7,8,11,1<br>2,13,14,15<br>,17 | 2  | P14173,P23593                                                                                                                                                                                                  |
| 308 | 1,2,3,4,6,9<br>,10,17 | 5,7,8,11,1<br>2,13,14,15<br>,16 | 6  | P14173,P16636,P23593,P97580,Q30KJ2,Q63355                                                                                                                                                                      |
| 309 | 1,2,3,4,6,9<br>,11,12 | 5,7,8,10,1<br>3,14,15,16<br>,17 | 14 | P01681,P01835,P01836,P15399,P16636,P34901,P55314,Q498R7,Q4FZU2,Q6IFU7,Q6IFU8,Q6IFW6,Q6IMF3,Q6P6Q2                                                                                                              |

|     |                       |                                 |    |                                                                                                                 |
|-----|-----------------------|---------------------------------|----|-----------------------------------------------------------------------------------------------------------------|
| 310 | 1,2,3,4,6,9<br>,11,13 | 5,7,8,10,1<br>2,14,15,16<br>,17 | 2  | P25236,P55314                                                                                                   |
| 311 | 1,2,3,4,6,9<br>,11,14 | 5,7,8,10,1<br>2,13,15,16<br>,17 | 5  | P15399,P25236,P34901,P55314,Q30KJ2                                                                              |
| 312 | 1,2,3,4,6,9<br>,11,15 | 5,7,8,10,1<br>2,13,14,16<br>,17 | 3  | P02625,P55314,Q5QE79                                                                                            |
| 313 | 1,2,3,4,6,9<br>,11,16 | 5,7,8,10,1<br>2,13,14,15<br>,17 | 1  | P55314                                                                                                          |
| 314 | 1,2,3,4,6,9<br>,11,17 | 5,7,8,10,1<br>2,13,14,15<br>,16 | 7  | P01681,P09605,P25809,P15399,P16636,P55314,P97580,Q30KJ2                                                         |
| 315 | 1,2,3,4,6,9<br>,12,13 | 5,7,8,10,1<br>1,14,15,16<br>,17 | 3  | P01836,P25236,Q06496                                                                                            |
| 316 | 1,2,3,4,6,9<br>,12,14 | 5,7,8,10,1<br>1,13,15,16<br>,17 | 4  | P01835,P25236,P34901,Q9JJS8                                                                                     |
| 317 | 1,2,3,4,6,9<br>,12,15 | 5,7,8,10,1<br>1,13,14,16<br>,17 | 7  | B0BNN3,P01836,P02625,P25236,P34901,Q4FZU2,Q5QE79                                                                |
| 318 | 1,2,3,4,6,9<br>,12,16 | 5,7,8,10,1<br>1,13,14,15<br>,17 | 5  | P01836,P23593,P25236,P34901,Q9JJS8                                                                              |
| 319 | 1,2,3,4,6,9<br>,12,17 | 5,7,8,10,1<br>1,13,14,15<br>,16 | 15 | B0BNN3,P01681,P01835,P09605,P25809,P13432,P16636,P19223,P23593,P34901,P98089,Q06496,Q30KJ2,Q62635,Q63355,Q9JJS8 |
| 320 | 1,2,3,4,6,9<br>,13,14 | 5,7,8,10,1<br>1,12,15,16<br>,17 | 2  | P06911,P25236                                                                                                   |
| 321 | 1,2,3,4,6,9<br>,13,15 | 5,7,8,10,1<br>1,12,14,16<br>,17 | 2  | P25236,Q5QE79                                                                                                   |
| 322 | 1,2,3,4,6,9<br>,13,16 | 5,7,8,10,1<br>1,12,14,15<br>,17 | 1  | P25236                                                                                                          |
| 323 | 1,2,3,4,6,9<br>,13,17 | 5,7,8,10,1<br>1,12,14,15<br>,16 | 3  | P23593,Q30KJ2,Q63355                                                                                            |
| 324 | 1,2,3,4,6,9<br>,14,15 | 5,7,8,10,1<br>1,12,13,16<br>,17 | 4  | B0BNN3,P25236,P34901,Q5QE79                                                                                     |

|     |                        |                                 |    |                                                                                                                                                                  |
|-----|------------------------|---------------------------------|----|------------------------------------------------------------------------------------------------------------------------------------------------------------------|
| 325 | 1,2,3,4,6,9<br>,14,16  | 5,7,8,10,1<br>1,12,13,15<br>,17 | 3  | P25236,P34901,Q63942                                                                                                                                             |
| 326 | 1,2,3,4,6,9<br>,14,17  | 5,7,8,10,1<br>1,12,13,15<br>,16 | 3  | P34901,Q30KJ2,Q5HZV9                                                                                                                                             |
| 327 | 1,2,3,4,6,9<br>,15,16  | 5,7,8,10,1<br>1,12,13,14<br>,17 | 3  | P23593,Q5QE79,Q63942                                                                                                                                             |
| 328 | 1,2,3,4,6,9<br>,15,17  | 5,7,8,10,1<br>1,12,13,14<br>,16 | 4  | B0BNN3,P20761,P23593,Q5QE79                                                                                                                                      |
| 329 | 1,2,3,4,6,9<br>,16,17  | 5,7,8,10,1<br>1,12,13,14<br>,15 | 3  | P09605;P25809,P23593,Q30KJ2                                                                                                                                      |
| 330 | 1,2,3,4,6,1<br>0,11,12 | 5,7,8,9,13,<br>14,15,16,1<br>7  | 23 | P01681,P01836,P05964,P06757,P08723,P0C0A9,P15399,P16636,P30120,P34901,P35280,P55314,Q10758,Q30KJ2,Q4FZU2,Q6IFU7,Q6IFU8,Q6IFW6,Q6IG02,Q6IMF3,Q6P6Q2,Q7TP52,Q9JJS8 |
| 331 | 1,2,3,4,6,1<br>0,11,13 | 5,7,8,9,12,<br>14,15,16,1<br>7  | 4  | P15399,P25236,P55314,Q30KJ2                                                                                                                                      |
| 332 | 1,2,3,4,6,1<br>0,11,14 | 5,7,8,9,12,<br>13,15,16,1<br>7  | 8  | P15399,P25236,P34901,P35280,P55314,P97580,Q30KJ2,Q7TP52                                                                                                          |
| 333 | 1,2,3,4,6,1<br>0,11,15 | 5,7,8,9,12,<br>13,14,16,1<br>7  | 8  | B0BNN3,P15399,P34901,P35280,P55314,Q30KJ2,Q4FZU6,Q7TP52                                                                                                          |
| 334 | 1,2,3,4,6,1<br>0,11,16 | 5,7,8,9,12,<br>13,14,15,1<br>7  | 5  | P15399,P34901,P55314,Q30KJ2,Q7TP52                                                                                                                               |
| 335 | 1,2,3,4,6,1<br>0,11,17 | 5,7,8,9,12,<br>13,14,15,1<br>6  | 10 | P01681,P05964,P15399,P16636,P17475,P34901,P55314,P97580,Q30KJ2,Q7TP52                                                                                            |
| 336 | 1,2,3,4,6,1<br>0,12,13 | 5,7,8,9,11,<br>14,15,16,1<br>7  | 12 | P01836,P08723,P16636,P25236,P34901,P70709,Q10758,Q4FZU2,Q63355,Q6AYR9,Q6IMF3,Q9JJS8                                                                              |
| 337 | 1,2,3,4,6,1<br>0,12,14 | 5,7,8,9,11,<br>13,15,16,1<br>7  | 8  | P01681,P25236,P34901,Q10758,Q4FZU2,Q6IFW6,Q6IMF3,Q9JJS8                                                                                                          |
| 338 | 1,2,3,4,6,1<br>0,12,15 | 5,7,8,9,11,<br>13,14,16,1<br>7  | 8  | B0BNN3,P01836,P34901,P35280,Q10758,Q4FZU2,Q6IMF3,Q9JJS8                                                                                                          |
| 339 | 1,2,3,4,6,1<br>0,12,16 | 5,7,8,9,11,<br>13,14,15,1<br>7  | 10 | P01836,P08721,P16636,P34901,P47967,Q10758,Q4FZU2,Q6IFW6,Q6IMF3,Q9JJS8                                                                                            |

|     |                        |                                |    |                                                                                                                               |
|-----|------------------------|--------------------------------|----|-------------------------------------------------------------------------------------------------------------------------------|
| 340 | 1,2,3,4,6,1<br>0,12,17 | 5,7,8,9,11,<br>13,14,15,1<br>6 | 16 | B0BNN3,P01681,P16636,P17475,P19223,P34901,P97580,P98089,Q10758,Q30KJ2,Q4FZU2,Q62635,Q63355,Q6IFW6,Q6IMF3,Q9JJS8               |
| 341 | 1,2,3,4,6,1<br>0,13,14 | 5,7,8,9,11,<br>12,15,16,1<br>7 | 4  | P06911,P12020,P25236,Q5GRG2                                                                                                   |
| 342 | 1,2,3,4,6,1<br>0,13,15 | 5,7,8,9,11,<br>12,14,16,1<br>7 | 2  | P25236,Q4FZU6                                                                                                                 |
| 343 | 1,2,3,4,6,1<br>0,13,16 | 5,7,8,9,11,<br>12,14,15,1<br>7 | 2  | P25236,Q62997                                                                                                                 |
| 344 | 1,2,3,4,6,1<br>0,13,17 | 5,7,8,9,11,<br>12,14,15,1<br>6 | 5  | P16636,P17475,P97580,Q30KJ2,Q63355                                                                                            |
| 345 | 1,2,3,4,6,1<br>0,14,15 | 5,7,8,9,11,<br>12,13,16,1<br>7 | 4  | B0BNN3,P25236,P34901,P35280                                                                                                   |
| 346 | 1,2,3,4,6,1<br>0,14,16 | 5,7,8,9,11,<br>12,13,15,1<br>7 | 3  | P08721,P25236,P34901                                                                                                          |
| 347 | 1,2,3,4,6,1<br>0,14,17 | 5,7,8,9,11,<br>12,13,15,1<br>6 | 5  | P15399,P17475,P34901,P97580,Q30KJ2                                                                                            |
| 348 | 1,2,3,4,6,1<br>0,15,16 | 5,7,8,9,11,<br>12,13,14,1<br>7 | 1  | Q62997                                                                                                                        |
| 349 | 1,2,3,4,6,1<br>0,15,17 | 5,7,8,9,11,<br>12,13,14,1<br>6 | 6  | B0BNN3,P02761,P17475,P20761,P97580,Q30KJ2                                                                                     |
| 350 | 1,2,3,4,6,1<br>0,16,17 | 5,7,8,9,11,<br>12,13,14,1<br>5 | 7  | P16636,P23593,P97580,Q30KJ2,Q62997,Q63355,Q7TP52                                                                              |
| 351 | 1,2,3,4,6,1<br>1,12,13 | 5,7,8,9,10,<br>14,15,16,1<br>7 | 18 | P01681,P01836,P07647,P08723,P0C0A9,P15399,P16636,P25236,P30120,P34901,P55314,Q4FZU2,Q5XI22,Q6IFU8,Q6IFW6,Q6IMF3,Q6P6Q2,Q9JHB9 |
| 352 | 1,2,3,4,6,1<br>1,12,14 | 5,7,8,9,10,<br>13,15,16,1<br>7 | 18 | P01681,P01836,P04905,P08723,P15399,P25236,P30120,P34901,P55314,Q30KJ2,Q4FZU2,Q6IFU7,Q6IFU8,Q6IFW6,Q6IMF3,Q6P6Q2,Q9EQS0,Q9JHB9 |
| 353 | 1,2,3,4,6,1<br>1,12,15 | 5,7,8,9,10,<br>13,14,16,1<br>7 | 13 | B0BNN3,P01681,P01836,P02625,P34901,P35280,P55314,Q4FZU2,Q6IFU7,Q6IFU8,Q6IFW6,Q6IMF3,Q6P6Q2                                    |
| 354 | 1,2,3,4,6,1<br>1,12,16 | 5,7,8,9,10,<br>13,14,15,1<br>7 | 13 | G3V686,P01681,P01836,P16636,P34901,P55314,Q4FZU2,Q6IFU7,Q6IFU8,Q6IFW6,Q6IMF3,Q6P6Q2,Q9JJS8                                    |



|     |                        |                                |    |                                                                                                                                                                         |
|-----|------------------------|--------------------------------|----|-------------------------------------------------------------------------------------------------------------------------------------------------------------------------|
| 355 | 1,2,3,4,6,1<br>1,12,17 | 5,7,8,9,10,<br>13,14,15,1<br>6 | 23 | B0BNN3,P01681,P01836,P05964,P09605;P25809,P13432,P15399,P16636,P17475,P19223,P34901,P55314,P97580,P98089,Q10758,Q30KJ2,Q4FZU2,Q62635,Q63751,Q6IFU8,Q6IFW6,Q6IMF3,Q6P6Q2 |
| 356 | 1,2,3,4,6,1<br>1,13,14 | 5,7,8,9,10,<br>12,15,16,1<br>7 | 7  | P06911,P15399,P25236,P47727,P55314,Q30KJ2,Q64093                                                                                                                        |
| 357 | 1,2,3,4,6,1<br>1,13,15 | 5,7,8,9,10,<br>12,14,16,1<br>7 | 5  | P01836,P02625,P25236,P55314,Q5XI22                                                                                                                                      |
| 358 | 1,2,3,4,6,1<br>1,13,16 | 5,7,8,9,10,<br>12,14,15,1<br>7 | 4  | G3V686,P01836,P25236,P55314                                                                                                                                             |
| 359 | 1,2,3,4,6,1<br>1,13,17 | 5,7,8,9,10,<br>12,14,15,1<br>6 | 6  | P01681,P15399,P16636,P55314,P97580,Q30KJ2                                                                                                                               |
| 360 | 1,2,3,4,6,1<br>1,14,15 | 5,7,8,9,10,<br>12,13,16,1<br>7 | 9  | B0BNN3,P02625,P19218,P25236,P34901,P35280,P35434,P55314,Q30KJ2                                                                                                          |
| 361 | 1,2,3,4,6,1<br>1,14,16 | 5,7,8,9,10,<br>12,13,15,1<br>7 | 6  | G3V686,P15399,P25236,P34901,P55314,Q30KJ2                                                                                                                               |
| 362 | 1,2,3,4,6,1<br>1,14,17 | 5,7,8,9,10,<br>12,13,15,1<br>6 | 7  | P01681,P15399,P19218,P34901,P55314,P97580,Q30KJ2                                                                                                                        |
| 363 | 1,2,3,4,6,1<br>1,15,16 | 5,7,8,9,10,<br>12,13,14,1<br>7 | 2  | P01836,P55314                                                                                                                                                           |
| 364 | 1,2,3,4,6,1<br>1,15,17 | 5,7,8,9,10,<br>12,13,14,1<br>6 | 9  | B0BNN3,P01681,P02761,P15399,P17475,P20761,P55314,P97580,Q30KJ2                                                                                                          |
| 365 | 1,2,3,4,6,1<br>1,16,17 | 5,7,8,9,10,<br>12,13,14,1<br>5 | 7  | P01681,P09605;P25809,P15399,P16636,P55314,P97580,Q30KJ2                                                                                                                 |
| 366 | 1,2,3,4,6,1<br>2,13,14 | 5,7,8,9,10,<br>11,15,16,1<br>7 | 10 | P01836,P06911,P08723,P25236,P29975,P30120,P34901,Q64093,Q6AYR9,Q9JJS8                                                                                                   |
| 367 | 1,2,3,4,6,1<br>2,13,15 | 5,7,8,9,10,<br>11,14,16,1<br>7 | 5  | B0BNN3,P01836,P02625,P25236,P82995                                                                                                                                      |
| 368 | 1,2,3,4,6,1<br>2,13,16 | 5,7,8,9,10,<br>11,14,15,1<br>7 | 4  | G3V686,P01836,P25236,Q9JJS8                                                                                                                                             |
| 369 | 1,2,3,4,6,1<br>2,13,17 | 5,7,8,9,10,<br>11,14,15,1<br>6 | 15 | B0BNN3,P01681,P01836,P13432,P16636,P17475,P19223,P20761,P25236,P55091,P62815,P98089,Q62635,Q63355,Q9QZK9                                                                |

|     |                        |                                |    |                                                                                                                 |
|-----|------------------------|--------------------------------|----|-----------------------------------------------------------------------------------------------------------------|
| 370 | 1,2,3,4,6,1<br>2,14,15 | 5,7,8,9,10,<br>11,13,16,1<br>7 | 7  | A2RUV9,B0BNN3,P01836,P02625,P25236,P34901,Q4FZU2                                                                |
| 371 | 1,2,3,4,6,1<br>2,14,16 | 5,7,8,9,10,<br>11,13,15,1<br>7 | 11 | G3V686,P01681,P01836,P25236,P34901,Q10758,Q4FZU2,Q63532,Q6IFW6,Q6IMF3,Q9JJS8                                    |
| 372 | 1,2,3,4,6,1<br>2,14,17 | 5,7,8,9,10,<br>11,13,15,1<br>6 | 15 | B0BNN3,P01681,P01835,P13432,P19223,P20761,P25236,P31430,P34901,P98089,Q10758,Q30KJ2,Q62635,Q923M1,Q9JJS8        |
| 373 | 1,2,3,4,6,1<br>2,15,16 | 5,7,8,9,10,<br>11,13,14,1<br>7 | 6  | B0BNN3,P01836,P25236,P34901,Q4FZU2,Q9JJS8                                                                       |
| 374 | 1,2,3,4,6,1<br>2,15,17 | 5,7,8,9,10,<br>11,13,14,1<br>6 | 10 | B0BNN3,P01681,P01836,P17475,P19223,P20761,P34901,P98089,Q4FZU2,Q62635                                           |
| 375 | 1,2,3,4,6,1<br>2,16,17 | 5,7,8,9,10,<br>11,13,14,1<br>5 | 15 | B0BNN3,P01681,P01836,P09605,P25809,P13432,P14480,P16636,P19223,P23593,P34901,P98089,Q10758,Q30KJ2,Q62635,Q9JJS8 |
| 376 | 1,2,3,4,6,1<br>3,14,15 | 5,7,8,9,10,<br>11,12,16,1<br>7 | 6  | B0BNN3,P06911,P25236,Q5GRG2,Q63317,Q64093                                                                       |
| 377 | 1,2,3,4,6,1<br>3,14,16 | 5,7,8,9,10,<br>11,12,15,1<br>7 | 4  | G3V686,P06911,P25236,Q64093                                                                                     |
| 378 | 1,2,3,4,6,1<br>3,14,17 | 5,7,8,9,10,<br>11,12,15,1<br>6 | 6  | P06911,P25236,Q30KJ2,Q64093,Q6PCU2,Q9QW07                                                                       |
| 379 | 1,2,3,4,6,1<br>3,15,16 | 5,7,8,9,10,<br>11,12,14,1<br>7 | 2  | P01836,P25236                                                                                                   |
| 380 | 1,2,3,4,6,1<br>3,15,17 | 5,7,8,9,10,<br>11,12,14,1<br>6 | 4  | B0BNN3,P17475,P20761,P25236                                                                                     |
| 381 | 1,2,3,4,6,1<br>3,16,17 | 5,7,8,9,10,<br>11,12,14,1<br>5 | 4  | P14480,Q30KJ2,Q63355,Q6PCU2                                                                                     |
| 382 | 1,2,3,4,6,1<br>4,15,16 | 5,7,8,9,10,<br>11,12,13,1<br>7 | 3  | B0BNN3,P25236,P34901                                                                                            |
| 383 | 1,2,3,4,6,1<br>4,15,17 | 5,7,8,9,10,<br>11,12,13,1<br>6 | 8  | B0BNN3,P02803,P10536,P17475,P20761,P34901,Q30KJ2,Q5HZV9                                                         |
| 384 | 1,2,3,4,6,1<br>4,16,17 | 5,7,8,9,10,<br>11,12,13,1<br>5 | 4  | P34901,Q30KJ2,Q5HZV9,Q6PCU2                                                                                     |

|     |                        |                                  |    |                                                                                                                                             |
|-----|------------------------|----------------------------------|----|---------------------------------------------------------------------------------------------------------------------------------------------|
| 385 | 1,2,3,4,6,1<br>5,16,17 | 5,7,8,9,10,<br>11,12,13,1<br>4   | 3  | B0BNN3,P20761,P23593                                                                                                                        |
| 386 | 1,2,3,4,7,8<br>,9,10   | 5,6,11,12,<br>13,14,15,1<br>6,17 | 13 | D3ZHA0,O55006,P01041,P02761,P18418,P31044,P36970,P97571,Q63475,Q80WL1,Q9EQS0,Q9QX79,Q9R0T3                                                  |
| 387 | 1,2,3,4,7,8<br>,9,11   | 5,6,10,12,<br>13,14,15,1<br>6,17 | 15 | D3ZHA0,O54715,P01836,P02761,P05371,P10715,P18418,P31044,Q5XI22,Q63475,Q63617,Q6TMA8,Q9EQS0,Q9QX79,Q9R0T3                                    |
| 388 | 1,2,3,4,7,8<br>,9,12   | 5,6,10,11,<br>13,14,15,1<br>6,17 | 16 | D3ZHA0,O55004,P01041,P01836,P02761,P10715,P18418,P19223,P31044,P36970,Q498R7,Q63475,Q80WL1,Q8CJ52,Q9EQS0,Q9R0T3                             |
| 389 | 1,2,3,4,7,8<br>,9,13   | 5,6,10,11,<br>12,14,15,1<br>6,17 | 11 | D3ZHA0,P01836,P18418,P20766,P31044,P36970,Q63317,Q63617,Q6TMA8,Q9EQS0,Q9R0T3                                                                |
| 390 | 1,2,3,4,7,8<br>,9,14   | 5,6,10,11,<br>12,13,15,1<br>6,17 | 9  | D3ZHA0,P02761,P18418,P31044,P36970,Q63317,Q63617,Q9EQS0,Q9QX79                                                                              |
| 391 | 1,2,3,4,7,8<br>,9,15   | 5,6,10,11,<br>12,13,14,1<br>6,17 | 10 | D3ZHA0,P01041,P01836,P02761,P18418,P31044,Q5QE79,Q63317,Q9EQS0,Q9QX79                                                                       |
| 392 | 1,2,3,4,7,8<br>,9,16   | 5,6,10,11,<br>12,13,14,1<br>5,17 | 8  | B4F795,D3ZHA0,P01836,P18418,P31044,Q63617,Q9EQS0,Q9R0T3                                                                                     |
| 393 | 1,2,3,4,7,8<br>,9,17   | 5,6,10,11,<br>12,13,14,1<br>5,16 | 16 | D3ZHA0,P01041,P01946,P02091,P02761,P02770,P17475,P18418,P19223,P50115,P52590,P55091,Q63617,Q9EQS0,Q9QX79,Q9R0T3                             |
| 394 | 1,2,3,4,7,8<br>,10,11  | 5,6,9,12,1<br>3,14,15,16<br>,17  | 20 | D3ZHA0,O54715,P00714,P01041,P01836,P02761,P05371,P05964,P14669,P18418,P31044,P35280,P55314,P68370,Q5BJY9,Q5XI22,Q63475,Q80WL1,Q9EQS0,Q9R0T3 |
| 395 | 1,2,3,4,7,8<br>,10,12  | 5,6,9,11,1<br>3,14,15,16<br>,17  | 20 | D3ZHA0,O35783,P01041,P01836,P02761,P05964,P08723,P10715,P18418,P19223,P31044,P35280,P36970,P46844,Q63475,Q80WL1,Q8CJ52,Q8K1G0,Q9EQS0,Q9R0T3 |
| 396 | 1,2,3,4,7,8<br>,10,13  | 5,6,9,11,1<br>2,14,15,16<br>,17  | 15 | D3ZHA0,P01835,P01836,P02761,P06911,P18418,P20766,P31044,P36970,P46844,Q5GRG2,Q63317,Q80WL1,Q9EQS0,Q9R0T3                                    |
| 397 | 1,2,3,4,7,8<br>,10,14  | 5,6,9,11,1<br>2,13,15,16<br>,17  | 11 | D3ZHA0,P01041,P02761,P16086,P18418,P31044,P35280,P36970,P97615,Q63475,Q9EQS0                                                                |
| 398 | 1,2,3,4,7,8<br>,10,15  | 5,6,9,11,1<br>2,13,14,16<br>,17  | 13 | D3ZHA0,P01041,P01835,P01836,P02761,P18418,P31044,P35280,P36970,P97571,P97615,Q63475,Q9EQS0                                                  |
| 399 | 1,2,3,4,7,8<br>,10,16  | 5,6,9,11,1<br>2,13,14,15<br>,17  | 11 | D3ZHA0,P01041,P01835,P01836,P02761,P08721,P18418,P31044,Q62997,Q9EQS0,Q9R0T3                                                                |

|     |                       |                                 |    |                                                                                                                                                                                                                          |
|-----|-----------------------|---------------------------------|----|--------------------------------------------------------------------------------------------------------------------------------------------------------------------------------------------------------------------------|
| 400 | 1,2,3,4,7,8<br>,10,17 | 5,6,9,11,1<br>2,13,14,15<br>,16 | 18 | D3ZHA0,P01041,P01946,P02091,P02761,P02770,P12346,P17475,P18418,P19223,P20761,P31044,P46844,P55091,P97571,Q80WL1,Q9EQS0,Q9R0T3                                                                                            |
| 401 | 1,2,3,4,7,8<br>,11,12 | 5,6,9,10,1<br>3,14,15,16<br>,17 | 27 | D3ZHA0,O54715,O55004,P01041,P01836,P02761,P05371,P05964,P07647,P08723,P10715,P14669,P18418,P19223,P31044,P35280,Q498R7,Q5XI22,Q63475,Q63493,Q80WL1,Q8CJ52,Q9EQS0,Q9ESW0,Q9JI85,Q9R0T3,Q9R1T1                             |
| 402 | 1,2,3,4,7,8<br>,11,13 | 5,6,9,10,1<br>2,14,15,16<br>,17 | 16 | P01836,P02761,P16086,P18418,P20766,P31044,P36970,Q5GRG2,Q5XI22,Q63317,Q6TMA8,Q80WL1,Q8VD89,Q9EQS0,Q9JI85,Q9R0T3                                                                                                          |
| 403 | 1,2,3,4,7,8<br>,11,14 | 5,6,9,10,1<br>2,13,15,16<br>,17 | 15 | P01041,P01836,P02761,P05371,P16086,P18418,P19218,P19629,P20762,P31044,P35280,P36970,Q63475,Q63617,Q9EQS0                                                                                                                 |
| 404 | 1,2,3,4,7,8<br>,11,15 | 5,6,9,10,1<br>2,13,14,16<br>,17 | 15 | D3ZHA0,O55004,P01041,P01836,P02761,P05371,P10715,P14669,P18418,P22006,P31044,P35280,Q5XI22,Q63475,Q9EQS0                                                                                                                 |
| 405 | 1,2,3,4,7,8<br>,11,16 | 5,6,9,10,1<br>2,13,14,15<br>,17 | 13 | B4F795,P01041,P01836,P02761,P05371,P10715,P16086,P18418,P31044,P55314,Q8VD89,Q9EQS0,Q9R0T3                                                                                                                               |
| 406 | 1,2,3,4,7,8<br>,11,17 | 5,6,9,10,1<br>2,13,14,15<br>,16 | 24 | O55004,P01041,P01836,P01946,P02091,P02761,P02770,P05371,P10715,P12346,P14669,P16086,P17475,P18418,P19223,P20761,P31044,P50115,P55091,Q63751,Q80WL1,Q9EQS0,Q9QZA6,Q9R0T3                                                  |
| 407 | 1,2,3,4,7,8<br>,12,13 | 5,6,9,10,1<br>1,14,15,16<br>,17 | 25 | D3ZHA0,O08557,O88267,P01041,P01836,P06761,P07647,P08723,P10715,P18418,P19223,P20766,P22283,P29975,P31044,P36374,P36970,Q5GRG2,Q63317,Q6TMA8,Q80WL1,Q8CJ52,Q9EQS0,Q9JI85,Q9R0T3                                           |
| 408 | 1,2,3,4,7,8<br>,12,14 | 5,6,9,10,1<br>1,13,15,16<br>,17 | 25 | A2RUV9,D3ZHA0,O08557,O88267,P01041,P01836,P02761,P08723,P10715,P18418,P19223,P19629,P20762,P29975,P31044,P34901,P36970,Q63317,Q63475,Q6AYS7,Q80WL1,Q8CJ52,Q923M1,Q9EQS0,Q9R0T3                                           |
| 409 | 1,2,3,4,7,8<br>,12,15 | 5,6,9,10,1<br>1,13,14,16<br>,17 | 16 | B0BNN3,D3ZHA0,O08557,O55004,P01041,P01836,P02761,P10715,P18418,P19223,P35280,P36970,Q62894,Q63475,Q80WL1,Q9EQS0                                                                                                          |
| 410 | 1,2,3,4,7,8<br>,12,16 | 5,6,9,10,1<br>1,13,14,15<br>,17 | 13 | D3ZHA0,O88267,P01041,P01836,P08721,P10715,P18418,P19223,P36970,Q80WL1,Q8CJ52,Q9EQS0,Q9R0T3                                                                                                                               |
| 411 | 1,2,3,4,7,8<br>,12,17 | 5,6,9,10,1<br>1,13,14,15<br>,16 | 31 | D3ZHA0,O55004,O88267,P01041,P01836,P01946,P02091,P02761,P02770,P10715,P12346,P17475,P18418,P19223,P20761,P31430,P36970,P46844,P50115,P55091,P63029,P98089,Q4G075,Q63751,Q80WL1,Q8CJ52,Q99041,Q9EQS0,Q9EQV9,Q9QZA6,Q9R0T3 |
| 412 | 1,2,3,4,7,8<br>,13,14 | 5,6,9,10,1<br>1,12,15,16<br>,17 | 13 | P01836,P06911,P16086,P18418,P20766,P29975,P31044,P36970,Q5GRG2,Q63317,Q6TMA8,Q9EQS0,Q9R0T3                                                                                                                               |
| 413 | 1,2,3,4,7,8<br>,13,15 | 5,6,9,10,1<br>1,12,14,16<br>,17 | 12 | D3ZHA0,P01041,P01835,P01836,P02761,P18418,P20766,P31044,P36970,Q09030,Q5GRG2,Q63317                                                                                                                                      |
| 414 | 1,2,3,4,7,8<br>,13,16 | 5,6,9,10,1<br>1,12,14,15<br>,17 | 7  | P01835,P01836,P18418,P20766,P31044,P36970,Q9R0T3                                                                                                                                                                         |

|     |                       |                                 |    |                                                                                                                                                                      |
|-----|-----------------------|---------------------------------|----|----------------------------------------------------------------------------------------------------------------------------------------------------------------------|
| 415 | 1,2,3,4,7,8<br>,13,17 | 5,6,9,10,1<br>1,12,14,15<br>,16 | 23 | O88267,P01041,P01836,P01946,P02091,P02761,P02770,P17475,P18418,P19223,P20761,P20766,P29975,P31044,P36970,P46844,P55091<br>,P63029,Q63317,Q63751,Q6PCU2,Q80WL1,Q9R0T3 |
| 416 | 1,2,3,4,7,8<br>,14,15 | 5,6,9,10,1<br>1,12,13,16<br>,17 | 13 | D3ZHA0,P01041,P01836,P02761,P18418,P19629,P20762,P31044,P35280,P36970,Q63317,Q9EQS0,Q9QX79                                                                           |
| 417 | 1,2,3,4,7,8<br>,14,16 | 5,6,9,10,1<br>1,12,13,15<br>,17 | 13 | D3ZHA0,P01041,P01836,P08721,P16086,P18418,P31044,P36970,P97574,Q566E6,Q63532,Q9EQS0,Q9R0T3                                                                           |
| 418 | 1,2,3,4,7,8<br>,14,17 | 5,6,9,10,1<br>1,12,13,15<br>,16 | 20 | O88267,P01041,P01946,P02091,P02761,P02770,P10536,P12346,P16086,P17475,P18418,P19223,P20761,P36970,P55091,Q6PCU2,Q923<br>M1,Q9EQS0,Q9QX79,Q9QZA6                      |
| 419 | 1,2,3,4,7,8<br>,15,16 | 5,6,9,10,1<br>1,12,13,14<br>,17 | 10 | B4F795,D3ZHA0,P01041,P01835,P01836,P02761,P08721,P18418,P31044,Q62894                                                                                                |
| 420 | 1,2,3,4,7,8<br>,15,17 | 5,6,9,10,1<br>1,12,13,14<br>,16 | 18 | B0BNN3,P01041,P01836,P01946,P02091,P02761,P02770,P10536,P12346,P17475,P18418,P19223,P20761,P55091,Q62894,Q9EQV9,Q9Q<br>X79,Q9QZA6                                    |
| 421 | 1,2,3,4,7,8<br>,16,17 | 5,6,9,10,1<br>1,12,13,14<br>,15 | 15 | O88267,P01041,P01836,P01946,P02091,P02761,P02770,P08721,P17475,P18418,P19223,P55091,P63029,Q6PCU2,Q9R0T3                                                             |
| 422 | 1,2,3,4,7,9<br>,10,11 | 5,6,8,12,1<br>3,14,15,16<br>,17 | 5  | P01836,P05964,P55314,Q5FVI6,Q63661                                                                                                                                   |
| 423 | 1,2,3,4,7,9<br>,10,12 | 5,6,8,11,1<br>3,14,15,16<br>,17 | 8  | O35783,P01041,P01836,P34901,P97840,Q498R7,Q63475,Q9EQS0                                                                                                              |
| 424 | 1,2,3,4,7,9<br>,10,13 | 5,6,8,11,1<br>2,14,15,16<br>,17 | 1  | P01836                                                                                                                                                               |
| 425 | 1,2,3,4,7,9<br>,10,14 | 5,6,8,11,1<br>2,13,15,16<br>,17 | 1  | P34901                                                                                                                                                               |
| 426 | 1,2,3,4,7,9<br>,10,15 | 5,6,8,11,1<br>2,13,14,16<br>,17 | 1  | P01836                                                                                                                                                               |
| 427 | 1,2,3,4,7,9<br>,10,16 | 5,6,8,11,1<br>2,13,14,15<br>,17 | 2  | P01836,P08721                                                                                                                                                        |
| 428 | 1,2,3,4,7,9<br>,10,17 | 5,6,8,11,1<br>2,13,14,15<br>,16 | 4  | P01946,P02091,P19223,P52590                                                                                                                                          |
| 429 | 1,2,3,4,7,9<br>,11,12 | 5,6,8,10,1<br>3,14,15,16<br>,17 | 7  | O35783,P01836,P05964,P34901,Q498R7,Q63475,Q9EQS0                                                                                                                     |

|     |                       |                                 |    |                                                                              |
|-----|-----------------------|---------------------------------|----|------------------------------------------------------------------------------|
| 430 | 1,2,3,4,7,9<br>,11,13 | 5,6,8,10,1<br>2,14,15,16<br>,17 | 2  | P01836,P05539                                                                |
| 431 | 1,2,3,4,7,9<br>,11,14 | 5,6,8,10,1<br>2,13,15,16<br>,17 | 2  | P01836,P34901                                                                |
| 432 | 1,2,3,4,7,9<br>,11,15 | 5,6,8,10,1<br>2,13,14,16<br>,17 | 3  | O54728,P01836,P22006                                                         |
| 433 | 1,2,3,4,7,9<br>,11,16 | 5,6,8,10,1<br>2,13,14,15<br>,17 | 2  | P01836,P55314                                                                |
| 434 | 1,2,3,4,7,9<br>,11,17 | 5,6,8,10,1<br>2,13,14,15<br>,16 | 4  | P01836,P01946,P02091,P19223                                                  |
| 435 | 1,2,3,4,7,9<br>,12,13 | 5,6,8,10,1<br>1,14,15,16<br>,17 | 2  | P01836,Q498R7                                                                |
| 436 | 1,2,3,4,7,9<br>,12,14 | 5,6,8,10,1<br>1,13,15,16<br>,17 | 7  | A2RUV9,P01041,P01836,P34901,P36970,Q498R7,Q9EQS0                             |
| 437 | 1,2,3,4,7,9<br>,12,15 | 5,6,8,10,1<br>1,13,14,16<br>,17 | 4  | P01041,P01836,P34901,Q498R7                                                  |
| 438 | 1,2,3,4,7,9<br>,12,16 | 5,6,8,10,1<br>1,13,14,15<br>,17 | 3  | P01041,P01836,P34901                                                         |
| 439 | 1,2,3,4,7,9<br>,12,17 | 5,6,8,10,1<br>1,13,14,15<br>,16 | 10 | P01041,P01836,P01946,P02091,P09605,P25809,P19223,P34901,P55091,P98089,Q498R7 |
| 440 | 1,2,3,4,7,9<br>,13,14 | 5,6,8,10,1<br>1,12,15,16<br>,17 | 3  | P01836,P06760,P36970                                                         |
| 441 | 1,2,3,4,7,9<br>,13,15 | 5,6,8,10,1<br>1,12,14,16<br>,17 | 3  | O54728,P01836,P06760                                                         |
| 442 | 1,2,3,4,7,9<br>,13,16 | 5,6,8,10,1<br>1,12,14,15<br>,17 | 3  | P01836,P06760,P08010                                                         |
| 443 | 1,2,3,4,7,9<br>,13,17 | 5,6,8,10,1<br>1,12,14,15<br>,16 | 4  | P01836,P01946,P02091,P19223                                                  |
| 444 | 1,2,3,4,7,9<br>,14,15 | 5,6,8,10,1<br>1,12,13,16<br>,17 | 5  | O54728,P01836,P06760,P34901,Q9QZK9                                           |

|     |                        |                                 |    |                                                                                                   |
|-----|------------------------|---------------------------------|----|---------------------------------------------------------------------------------------------------|
| 445 | 1,2,3,4,7,9<br>,14,16  | 5,6,8,10,1<br>1,12,13,15<br>,17 | 6  | P01836,P06760,P08010,P34901,Q63532,Q9QZK9                                                         |
| 446 | 1,2,3,4,7,9<br>,14,17  | 5,6,8,10,1<br>1,12,13,15<br>,16 | 4  | P01946,P02091,P19223,P34901                                                                       |
| 447 | 1,2,3,4,7,9<br>,15,16  | 5,6,8,10,1<br>1,12,13,14<br>,17 | 5  | O54728,P01836,P06760,P47727,Q9QZK9                                                                |
| 448 | 1,2,3,4,7,9<br>,15,17  | 5,6,8,10,1<br>1,12,13,14<br>,16 | 6  | P01041,P01836,P01946,P02091,P19223,P47727                                                         |
| 449 | 1,2,3,4,7,9<br>,16,17  | 5,6,8,10,1<br>1,12,13,14<br>,15 | 6  | P01836,P01946,P02091,P08010,P19223,P47727                                                         |
| 450 | 1,2,3,4,7,1<br>0,11,12 | 5,6,8,9,13,<br>14,15,16,1<br>7  | 14 | O35783,P01041,P01836,P05964,P06757,P34901,P35280,P47967,P55314,Q498R7,Q5FVI6,Q62636,Q63475,Q9EQS0 |
| 451 | 1,2,3,4,7,1<br>0,11,13 | 5,6,8,9,12,<br>14,15,16,1<br>7  | 3  | P01836,P05964,P55314                                                                              |
| 452 | 1,2,3,4,7,1<br>0,11,14 | 5,6,8,9,12,<br>13,15,16,1<br>7  | 7  | P01836,P05964,P34901,P35280,P55314,Q63532,Q9EQS0                                                  |
| 453 | 1,2,3,4,7,1<br>0,11,15 | 5,6,8,9,12,<br>13,14,16,1<br>7  | 6  | P01836,P02761,P22006,P35280,P55314,Q5FVI6                                                         |
| 454 | 1,2,3,4,7,1<br>0,11,16 | 5,6,8,9,12,<br>13,14,15,1<br>7  | 5  | P01836,P08721,P55314,Q5FVI6,Q8VD89                                                                |
| 455 | 1,2,3,4,7,1<br>0,11,17 | 5,6,8,9,12,<br>13,14,15,1<br>6  | 7  | P01041,P01836,P01946,P02091,P05964,P19223,P55314                                                  |
| 456 | 1,2,3,4,7,1<br>0,12,13 | 5,6,8,9,11,<br>14,15,16,1<br>7  | 3  | O35783,P01836,P47967                                                                              |
| 457 | 1,2,3,4,7,1<br>0,12,14 | 5,6,8,9,11,<br>13,15,16,1<br>7  | 9  | A2RUV9,O35783,P01041,P01836,P34901,P36970,Q63475,Q63532,Q9EQS0                                    |
| 458 | 1,2,3,4,7,1<br>0,12,15 | 5,6,8,9,11,<br>13,14,16,1<br>7  | 5  | P01041,P01836,P34901,P35280,Q63475                                                                |
| 459 | 1,2,3,4,7,1<br>0,12,16 | 5,6,8,9,11,<br>13,14,15,1<br>7  | 8  | O35783,P01041,P01836,P08721,P34901,P47967,P97840,Q9JJS8                                           |

|     |                        |                                |    |                                                                              |
|-----|------------------------|--------------------------------|----|------------------------------------------------------------------------------|
| 460 | 1,2,3,4,7,1<br>0,12,17 | 5,6,8,9,11,<br>13,14,15,1<br>6 | 11 | O35783,P01041,P01836,P01946,P02091,P05964,P19223,P34901,P55091,P98089,Q10758 |
| 461 | 1,2,3,4,7,1<br>0,13,14 | 5,6,8,9,11,<br>12,15,16,1<br>7 | 5  | P01836,P06911,P12020,P36970,Q5GRG2                                           |
| 462 | 1,2,3,4,7,1<br>0,13,15 | 5,6,8,9,11,<br>12,14,16,1<br>7 | 3  | P01835,P01836,Q09030                                                         |
| 463 | 1,2,3,4,7,1<br>0,13,16 | 5,6,8,9,11,<br>12,14,15,1<br>7 | 3  | P01835,P01836,Q62997                                                         |
| 464 | 1,2,3,4,7,1<br>0,13,17 | 5,6,8,9,11,<br>12,14,15,1<br>6 | 3  | P01836,P01946,P02091                                                         |
| 465 | 1,2,3,4,7,1<br>0,14,15 | 5,6,8,9,11,<br>12,13,16,1<br>7 | 5  | A2RUV9,P01041,P01836,P34901,P35280                                           |
| 466 | 1,2,3,4,7,1<br>0,14,16 | 5,6,8,9,11,<br>12,13,15,1<br>7 | 5  | P01836,P08721,P34901,Q62997,Q63532                                           |
| 467 | 1,2,3,4,7,1<br>0,14,17 | 5,6,8,9,11,<br>12,13,15,1<br>6 | 4  | P01041,P01946,P02091,P34901                                                  |
| 468 | 1,2,3,4,7,1<br>0,15,16 | 5,6,8,9,11,<br>12,13,14,1<br>7 | 5  | P01041,P01835,P01836,P08721,Q62997                                           |
| 469 | 1,2,3,4,7,1<br>0,15,17 | 5,6,8,9,11,<br>12,13,14,1<br>6 | 6  | P01041,P01836,P01946,P02091,P02761,P17475                                    |
| 470 | 1,2,3,4,7,1<br>0,16,17 | 5,6,8,9,11,<br>12,13,14,1<br>5 | 6  | P01041,P01836,P01946,P02091,P08721,Q62997                                    |
| 471 | 1,2,3,4,7,1<br>1,12,13 | 5,6,8,9,10,<br>14,15,16,1<br>7 | 5  | P01836,P05964,P36374,Q498R7,Q9JI85                                           |
| 472 | 1,2,3,4,7,1<br>1,12,14 | 5,6,8,9,10,<br>13,15,16,1<br>7 | 9  | P01041,P01836,P05964,P34901,Q498R7,Q63475,Q63532,Q9EQS0,Q9ESW0               |
| 473 | 1,2,3,4,7,1<br>1,12,15 | 5,6,8,9,10,<br>13,14,16,1<br>7 | 9  | P01041,P01836,P22006,P34901,P35280,P51907,Q498R7,Q63475,Q9ESW0               |
| 474 | 1,2,3,4,7,1<br>1,12,16 | 5,6,8,9,10,<br>13,14,15,1<br>7 | 6  | P01041,P01836,P34901,P55314,Q498R7,Q9EQS0                                    |



|     |                        |                                |    |                                                                                     |
|-----|------------------------|--------------------------------|----|-------------------------------------------------------------------------------------|
| 475 | 1,2,3,4,7,1<br>1,12,17 | 5,6,8,9,10,<br>13,14,15,1<br>6 | 12 | P01041,P01836,P01946,P02091,P05964,P19223,P34901,P55091,P98089,Q498R7,Q6AYQ8,Q9ESW0 |
| 476 | 1,2,3,4,7,1<br>1,13,14 | 5,6,8,9,10,<br>12,15,16,1<br>7 | 2  | P01836,Q5GRG2                                                                       |
| 477 | 1,2,3,4,7,1<br>1,13,15 | 5,6,8,9,10,<br>12,14,16,1<br>7 | 4  | P01836,P05539,P22006,Q09030                                                         |
| 478 | 1,2,3,4,7,1<br>1,13,16 | 5,6,8,9,10,<br>12,14,15,1<br>7 | 3  | P01836,P55314,Q8VD89                                                                |
| 479 | 1,2,3,4,7,1<br>1,13,17 | 5,6,8,9,10,<br>12,14,15,1<br>6 | 3  | P01836,P01946,P02091                                                                |
| 480 | 1,2,3,4,7,1<br>1,14,15 | 5,6,8,9,10,<br>12,13,16,1<br>7 | 5  | P01836,P19218,P22006,P34901,P35280                                                  |
| 481 | 1,2,3,4,7,1<br>1,14,16 | 5,6,8,9,10,<br>12,13,15,1<br>7 | 4  | P01836,P34901,P55314,Q63532                                                         |
| 482 | 1,2,3,4,7,1<br>1,14,17 | 5,6,8,9,10,<br>12,13,15,1<br>6 | 5  | P01836,P01946,P02091,P19218,P34901                                                  |
| 483 | 1,2,3,4,7,1<br>1,15,16 | 5,6,8,9,10,<br>12,13,14,1<br>7 | 3  | P01836,P55314,Q8VD89                                                                |
| 484 | 1,2,3,4,7,1<br>1,15,17 | 5,6,8,9,10,<br>12,13,14,1<br>6 | 6  | P01041,P01836,P01946,P02091,P02761,P22006                                           |
| 485 | 1,2,3,4,7,1<br>1,16,17 | 5,6,8,9,10,<br>12,13,14,1<br>5 | 4  | P01836,P01946,P02091,P55314                                                         |
| 486 | 1,2,3,4,7,1<br>2,13,14 | 5,6,8,9,10,<br>11,15,16,1<br>7 | 7  | A2RUV9,P01836,P06911,P25236,P34901,P36970,Q5GRG2                                    |
| 487 | 1,2,3,4,7,1<br>2,13,15 | 5,6,8,9,10,<br>11,14,16,1<br>7 | 3  | P01041,P01836,Q09030                                                                |
| 488 | 1,2,3,4,7,1<br>2,13,16 | 5,6,8,9,10,<br>11,14,15,1<br>7 | 1  | P01836                                                                              |
| 489 | 1,2,3,4,7,1<br>2,13,17 | 5,6,8,9,10,<br>11,14,15,1<br>6 | 8  | P01041,P01836,P01946,P02091,P19223,P36374,P55091,P98089                             |

|     |                        |                                |    |                                                                       |
|-----|------------------------|--------------------------------|----|-----------------------------------------------------------------------|
| 490 | 1,2,3,4,7,1<br>2,14,15 | 5,6,8,9,10,<br>11,13,16,1<br>7 | 6  | A2RUV9,P01041,P01836,P34901,P36970,Q63532                             |
| 491 | 1,2,3,4,7,1<br>2,14,16 | 5,6,8,9,10,<br>11,13,15,1<br>7 | 6  | P01041,P01836,P08721,P34901,Q63532,Q9EQS0                             |
| 492 | 1,2,3,4,7,1<br>2,14,17 | 5,6,8,9,10,<br>11,13,15,1<br>6 | 10 | A2RUV9,P01041,P01836,P01946,P02091,P19223,P31430,P34901,P55091,P98089 |
| 493 | 1,2,3,4,7,1<br>2,15,16 | 5,6,8,9,10,<br>11,13,14,1<br>7 | 3  | P01041,P01836,P34901                                                  |
| 494 | 1,2,3,4,7,1<br>2,15,17 | 5,6,8,9,10,<br>11,13,14,1<br>6 | 10 | B0BNN3,P01041,P01836,P01946,P02091,P06866,P19223,P34901,P55091,P98089 |
| 495 | 1,2,3,4,7,1<br>2,16,17 | 5,6,8,9,10,<br>11,13,14,1<br>5 | 9  | P01041,P01836,P01946,P02091,P06866,P19223,P34901,P55091,P98089        |
| 496 | 1,2,3,4,7,1<br>3,14,15 | 5,6,8,9,10,<br>11,12,16,1<br>7 | 7  | A2RUV9,P01836,P06760,P36970,Q09030,Q5GRG2,Q63317                      |
| 497 | 1,2,3,4,7,1<br>3,14,16 | 5,6,8,9,10,<br>11,12,15,1<br>7 | 5  | P01836,P06760,P08010,Q566E6,Q63532                                    |
| 498 | 1,2,3,4,7,1<br>3,14,17 | 5,6,8,9,10,<br>11,12,15,1<br>6 | 5  | P01836,P01946,P02091,Q6PCU2,Q9QW07                                    |
| 499 | 1,2,3,4,7,1<br>3,15,16 | 5,6,8,9,10,<br>11,12,14,1<br>7 | 4  | P01835,P01836,P06760,Q09030                                           |
| 500 | 1,2,3,4,7,1<br>3,15,17 | 5,6,8,9,10,<br>11,12,14,1<br>6 | 4  | P01041,P01836,P01946,P02091                                           |
| 501 | 1,2,3,4,7,1<br>3,16,17 | 5,6,8,9,10,<br>11,12,14,1<br>5 | 5  | P01836,P01946,P02091,P08010,Q6PCU2                                    |
| 502 | 1,2,3,4,7,1<br>4,15,16 | 5,6,8,9,10,<br>11,12,13,1<br>7 | 5  | P01836,P06760,P34901,Q63532,Q9QZK9                                    |
| 503 | 1,2,3,4,7,1<br>4,15,17 | 5,6,8,9,10,<br>11,12,13,1<br>6 | 5  | B0BNN3,P01041,P01836,P01946,P02091                                    |
| 504 | 1,2,3,4,7,1<br>4,16,17 | 5,6,8,9,10,<br>11,12,13,1<br>5 | 6  | P01836,P01946,P02091,P34901,Q63532,Q6PCU2                             |

|     |                        |                                 |   |                                                  |
|-----|------------------------|---------------------------------|---|--------------------------------------------------|
| 505 | 1,2,3,4,7,1<br>5,16,17 | 5,6,8,9,10,<br>11,12,13,1<br>4  | 5 | P01041,P01836,P01946,P02091,P47727               |
| 506 | 1,2,3,4,8,9<br>,10,11  | 5,6,7,12,1<br>3,14,15,16<br>,17 | 3 | P02761,P08649,Q5XI22                             |
| 507 | 1,2,3,4,8,9<br>,10,12  | 5,6,7,11,1<br>3,14,15,16<br>,17 | 7 | D3ZHA0,P02761,P16636,P19223,Q80WL1,Q9EQS0,Q9JJS8 |
| 508 | 1,2,3,4,8,9<br>,10,13  | 5,6,7,11,1<br>2,14,15,16<br>,17 | 4 | D3ZHA0,P20766,P36970,Q6TMA8                      |
| 509 | 1,2,3,4,8,9<br>,10,14  | 5,6,7,11,1<br>2,13,15,16<br>,17 | 3 | D3ZHA0,P02761,P36970                             |
| 510 | 1,2,3,4,8,9<br>,10,15  | 5,6,7,11,1<br>2,13,14,16<br>,17 | 3 | D3ZHA0,P02761,Q5QE79                             |
| 511 | 1,2,3,4,8,9<br>,10,16  | 5,6,7,11,1<br>2,13,14,15<br>,17 | 3 | D3ZHA0,P08721,Q9WUW8                             |
| 512 | 1,2,3,4,8,9<br>,10,17  | 5,6,7,11,1<br>2,13,14,15<br>,16 | 6 | P02761,P02770,P16636,P17475,P19223,Q63355        |
| 513 | 1,2,3,4,8,9<br>,11,12  | 5,6,7,10,1<br>3,14,15,16<br>,17 | 7 | P01836,P02761,P16636,Q5XI22,Q6TMA8,Q80WL1,Q9EQS0 |
| 514 | 1,2,3,4,8,9<br>,11,13  | 5,6,7,10,1<br>2,14,15,16<br>,17 | 3 | P20766,Q5XI22,Q6TMA8                             |
| 515 | 1,2,3,4,8,9<br>,11,14  | 5,6,7,10,1<br>2,13,15,16<br>,17 | 4 | P02761,P19218,Q6TMA8,Q9EQS0                      |
| 516 | 1,2,3,4,8,9<br>,11,15  | 5,6,7,10,1<br>2,13,14,16<br>,17 | 4 | P02761,Q5QE79,Q5XI22,Q6TMA8                      |
| 517 | 1,2,3,4,8,9<br>,11,16  | 5,6,7,10,1<br>2,13,14,15<br>,17 | 3 | B4F795,P55314,Q9QZK9                             |
| 518 | 1,2,3,4,8,9<br>,11,17  | 5,6,7,10,1<br>2,13,14,15<br>,16 | 5 | P02761,P02770,P16636,P17475,P19223               |
| 519 | 1,2,3,4,8,9<br>,12,13  | 5,6,7,10,1<br>1,14,15,16<br>,17 | 5 | P01836,P20766,P36970,Q6TMA8,Q80WL1               |

|     |                        |                                 |    |                                                                                                                 |
|-----|------------------------|---------------------------------|----|-----------------------------------------------------------------------------------------------------------------|
| 520 | 1,2,3,4,8,9<br>,12,14  | 5,6,7,10,1<br>1,13,15,16<br>,17 | 6  | P34901,P36970,Q6TMA8,Q80WL1,Q9EQS0,Q9JJS8                                                                       |
| 521 | 1,2,3,4,8,9<br>,12,15  | 5,6,7,10,1<br>1,13,14,16<br>,17 | 7  | B0BNN3,D3ZHA0,P01836,P02761,Q5QE79,Q62894,Q6TMA8                                                                |
| 522 | 1,2,3,4,8,9<br>,12,16  | 5,6,7,10,1<br>1,13,14,15<br>,17 | 3  | P01836,Q80WL1,Q9JJS8                                                                                            |
| 523 | 1,2,3,4,8,9<br>,12,17  | 5,6,7,10,1<br>1,13,14,15<br>,16 | 8  | P02761,P02770,P16636,P17475,P19223,P55091,P98089,Q80WL1                                                         |
| 524 | 1,2,3,4,8,9<br>,13,14  | 5,6,7,10,1<br>1,12,15,16<br>,17 | 3  | P20766,P36970,Q6TMA8                                                                                            |
| 525 | 1,2,3,4,8,9<br>,13,15  | 5,6,7,10,1<br>1,12,14,16<br>,17 | 4  | P02761,P20766,Q5QE79,Q6TMA8                                                                                     |
| 526 | 1,2,3,4,8,9<br>,13,16  | 5,6,7,10,1<br>1,12,14,15<br>,17 | 1  | P20766                                                                                                          |
| 527 | 1,2,3,4,8,9<br>,13,17  | 5,6,7,10,1<br>1,12,14,15<br>,16 | 6  | P02761,P02770,P17475,P19223,P20766,Q63355                                                                       |
| 528 | 1,2,3,4,8,9<br>,14,15  | 5,6,7,10,1<br>1,12,13,16<br>,17 | 4  | P02761,P36970,Q5QE79,Q9QZK9                                                                                     |
| 529 | 1,2,3,4,8,9<br>,14,16  | 5,6,7,10,1<br>1,12,13,15<br>,17 | 2  | P97574,Q9QZK9                                                                                                   |
| 530 | 1,2,3,4,8,9<br>,14,17  | 5,6,7,10,1<br>1,12,13,15<br>,16 | 3  | P02761,P17475,P19223                                                                                            |
| 531 | 1,2,3,4,8,9<br>,15,16  | 5,6,7,10,1<br>1,12,13,14<br>,17 | 7  | B4F795,O54728,P02761,P47727,Q5QE79,Q62894,Q9QZK9                                                                |
| 532 | 1,2,3,4,8,9<br>,15,17  | 5,6,7,10,1<br>1,12,13,14<br>,16 | 7  | B0BNN3,P02761,P02770,P17475,P19223,Q5QE79,Q68FV8                                                                |
| 533 | 1,2,3,4,8,9<br>,16,17  | 5,6,7,10,1<br>1,12,13,14<br>,15 | 4  | P17475,P19223,P23593,Q68FV8                                                                                     |
| 534 | 1,2,3,4,8,1<br>0,11,12 | 5,6,7,9,13,<br>14,15,16,1<br>7  | 16 | D3ZHA0,P01836,P02761,P05964,P16636,P35280,P53792,Q5XI22,Q63598,Q6IFU8,Q6IFW6,Q6IG02,Q6P6Q2,Q80WL1,Q9EQS0,Q9JJS8 |

|     |                        |                                |    |                                                                                                   |
|-----|------------------------|--------------------------------|----|---------------------------------------------------------------------------------------------------|
| 535 | 1,2,3,4,8,1<br>0,11,13 | 5,6,7,9,12,<br>14,15,16,1<br>7 | 5  | P02761,P20766,Q5XI22,Q63598,Q6TMA8                                                                |
| 536 | 1,2,3,4,8,1<br>0,11,14 | 5,6,7,9,12,<br>13,15,16,1<br>7 | 6  | P02761,P19218,P35280,Q63598,Q64194,Q9EQS0                                                         |
| 537 | 1,2,3,4,8,1<br>0,11,15 | 5,6,7,9,12,<br>13,14,16,1<br>7 | 4  | P02761,P35280,Q5XI22,Q64194                                                                       |
| 538 | 1,2,3,4,8,1<br>0,11,16 | 5,6,7,9,12,<br>13,14,15,1<br>7 | 4  | P08649,P08721,P53792,P55314                                                                       |
| 539 | 1,2,3,4,8,1<br>0,11,17 | 5,6,7,9,12,<br>13,14,15,1<br>6 | 7  | P02761,P02770,P08649,P16636,P17475,P19223,Q63598                                                  |
| 540 | 1,2,3,4,8,1<br>0,12,13 | 5,6,7,9,11,<br>14,15,16,1<br>7 | 6  | D3ZHA0,P01836,P16636,P36970,Q80WL1,Q9JJS8                                                         |
| 541 | 1,2,3,4,8,1<br>0,12,14 | 5,6,7,9,11,<br>13,15,16,1<br>7 | 7  | D3ZHA0,P02761,P34901,P36970,Q80WL1,Q9EQS0,Q9JJS8                                                  |
| 542 | 1,2,3,4,8,1<br>0,12,15 | 5,6,7,9,11,<br>13,14,16,1<br>7 | 6  | B0BNN3,D3ZHA0,P01836,P02761,P35280,P36970                                                         |
| 543 | 1,2,3,4,8,1<br>0,12,16 | 5,6,7,9,11,<br>13,14,15,1<br>7 | 7  | D3ZHA0,P01836,P08721,P16636,Q80WL1,Q9JJS8,Q9WUW8                                                  |
| 544 | 1,2,3,4,8,1<br>0,12,17 | 5,6,7,9,11,<br>13,14,15,1<br>6 | 14 | B0BNN3,P02761,P02770,P16636,P17475,P19223,P55091,P98089,Q10758,Q4G075,Q63355,Q80WL1,Q9EQV9,Q9JJS8 |
| 545 | 1,2,3,4,8,1<br>0,13,14 | 5,6,7,9,11,<br>12,15,16,1<br>7 | 2  | P20766,P36970                                                                                     |
| 546 | 1,2,3,4,8,1<br>0,13,15 | 5,6,7,9,11,<br>12,14,16,1<br>7 | 3  | P01835,P02761,P36970                                                                              |
| 547 | 1,2,3,4,8,1<br>0,13,16 | 5,6,7,9,11,<br>12,14,15,1<br>7 | 2  | P01835,Q62997                                                                                     |
| 548 | 1,2,3,4,8,1<br>0,13,17 | 5,6,7,9,11,<br>12,14,15,1<br>6 | 8  | P02761,P02770,P16636,P17475,P19223,P20766,P46844,Q63355                                           |
| 549 | 1,2,3,4,8,1<br>0,14,15 | 5,6,7,9,11,<br>12,13,16,1<br>7 | 5  | B0BNN3,D3ZHA0,P02761,P35280,P36970                                                                |

|     |                        |                                |    |                                                                                                   |
|-----|------------------------|--------------------------------|----|---------------------------------------------------------------------------------------------------|
| 550 | 1,2,3,4,8,1<br>0,14,16 | 5,6,7,9,11,<br>12,13,15,1<br>7 | 4  | P08721,P36970,P97574,Q62997                                                                       |
| 551 | 1,2,3,4,8,1<br>0,14,17 | 5,6,7,9,11,<br>12,13,15,1<br>6 | 4  | P02761,P17475,P19223,P36970                                                                       |
| 552 | 1,2,3,4,8,1<br>0,15,16 | 5,6,7,9,11,<br>12,13,14,1<br>7 | 4  | P01835,P02761,P08721,Q62997                                                                       |
| 553 | 1,2,3,4,8,1<br>0,15,17 | 5,6,7,9,11,<br>12,13,14,1<br>6 | 7  | B0BNN3,P02761,P02770,P12346,P17475,P19223,Q9EQV9                                                  |
| 554 | 1,2,3,4,8,1<br>0,16,17 | 5,6,7,9,11,<br>12,13,14,1<br>5 | 6  | P02761,P08721,P16636,P17475,P19223,Q62997                                                         |
| 555 | 1,2,3,4,8,1<br>1,12,13 | 5,6,7,9,10,<br>14,15,16,1<br>7 | 7  | P01836,P16636,P36374,Q5XI22,Q6TMA8,Q80WL1,Q9EQS0                                                  |
| 556 | 1,2,3,4,8,1<br>1,12,14 | 5,6,7,9,10,<br>13,15,16,1<br>7 | 8  | P01836,P02761,P19218,P34901,P36970,Q6TMA8,Q80WL1,Q9EQS0                                           |
| 557 | 1,2,3,4,8,1<br>1,12,15 | 5,6,7,9,10,<br>13,14,16,1<br>7 | 6  | B0BNN3,P01836,P02761,P35280,Q5XI22,Q9EQS0                                                         |
| 558 | 1,2,3,4,8,1<br>1,12,16 | 5,6,7,9,10,<br>13,14,15,1<br>7 | 7  | P01836,P16636,P55314,Q6P6Q2,Q80WL1,Q9EQS0,Q9JJS8                                                  |
| 559 | 1,2,3,4,8,1<br>1,12,17 | 5,6,7,9,10,<br>13,14,15,1<br>6 | 14 | B0BNN3,P01836,P02761,P02770,P16636,P17475,P19223,P55091,P98089,Q4G075,Q6AYQ8,Q80WL1,Q9EQS0,Q9QZA6 |
| 560 | 1,2,3,4,8,1<br>1,13,14 | 5,6,7,9,10,<br>12,15,16,1<br>7 | 5  | P19218,P20766,P36970,Q64093,Q6TMA8                                                                |
| 561 | 1,2,3,4,8,1<br>1,13,15 | 5,6,7,9,10,<br>12,14,16,1<br>7 | 5  | P01836,P02761,P20766,Q5XI22,Q6TMA8                                                                |
| 562 | 1,2,3,4,8,1<br>1,13,16 | 5,6,7,9,10,<br>12,14,15,1<br>7 | 4  | P01836,P20766,P55314,Q5XI22                                                                       |
| 563 | 1,2,3,4,8,1<br>1,13,17 | 5,6,7,9,10,<br>12,14,15,1<br>6 | 6  | P02761,P02770,P16636,P17475,P20766,Q5XI22                                                         |
| 564 | 1,2,3,4,8,1<br>1,14,15 | 5,6,7,9,10,<br>12,13,16,1<br>7 | 6  | B0BNN3,P02761,P19218,P35280,P97840,Q64194                                                         |

|     |                        |                                |    |                                                                                                          |
|-----|------------------------|--------------------------------|----|----------------------------------------------------------------------------------------------------------|
| 565 | 1,2,3,4,8,1<br>1,14,16 | 5,6,7,9,10,<br>12,13,15,1<br>7 | 3  | P19218,P55314,P97574                                                                                     |
| 566 | 1,2,3,4,8,1<br>1,14,17 | 5,6,7,9,10,<br>12,13,15,1<br>6 | 4  | P02761,P17475,P19218,P97840                                                                              |
| 567 | 1,2,3,4,8,1<br>1,15,16 | 5,6,7,9,10,<br>12,13,14,1<br>7 | 4  | B4F795,P01836,P02761,P55314                                                                              |
| 568 | 1,2,3,4,8,1<br>1,15,17 | 5,6,7,9,10,<br>12,13,14,1<br>6 | 4  | B0BNN3,P02761,P17475,P97840                                                                              |
| 569 | 1,2,3,4,8,1<br>1,16,17 | 5,6,7,9,10,<br>12,13,14,1<br>5 | 4  | P02761,P16636,P17475,P55314                                                                              |
| 570 | 1,2,3,4,8,1<br>2,13,14 | 5,6,7,9,10,<br>11,15,16,1<br>7 | 12 | A2RUV9,O08557,P01836,P25236,P29975,P36970,Q64093,Q6TMA8,Q80WL1,Q923M1,Q9EQS0,Q9QUL6                      |
| 571 | 1,2,3,4,8,1<br>2,13,15 | 5,6,7,9,10,<br>11,14,16,1<br>7 | 8  | B0BNN3,P01836,P02761,P36970,Q62894,Q64093,Q6TMA8,Q9QUL6                                                  |
| 572 | 1,2,3,4,8,1<br>2,13,16 | 5,6,7,9,10,<br>11,14,15,1<br>7 | 5  | P01836,P36970,Q80WL1,Q9JJS8,Q9QUL6                                                                       |
| 573 | 1,2,3,4,8,1<br>2,13,17 | 5,6,7,9,10,<br>11,14,15,1<br>6 | 12 | P01836,P16636,P17475,P19223,P20766,P36970,P55091,P98089,Q62635,Q63355,Q6PCU2,Q80WL1                      |
| 574 | 1,2,3,4,8,1<br>2,14,15 | 5,6,7,9,10,<br>11,13,16,1<br>7 | 10 | A2RUV9,B0BNN3,O08557,P01836,P02761,P34901,P36970,Q64093,Q923M1,Q9EQS0                                    |
| 575 | 1,2,3,4,8,1<br>2,14,16 | 5,6,7,9,10,<br>11,13,15,1<br>7 | 9  | P01836,P08721,P34901,P36970,P97574,Q566E6,Q80WL1,Q9EQS0,Q9JJS8                                           |
| 576 | 1,2,3,4,8,1<br>2,14,17 | 5,6,7,9,10,<br>11,13,15,1<br>6 | 15 | B0BNN3,P02761,P17475,P19223,P31430,P34901,P36970,P55091,P98089,Q6PCU2,Q80WL1,Q923M1,Q9EQS0,Q9JJS8,Q9QZA6 |
| 577 | 1,2,3,4,8,1<br>2,15,16 | 5,6,7,9,10,<br>11,13,14,1<br>7 | 6  | B0BNN3,P01836,P83121,Q62894,Q9JJS8,Q9QUL6                                                                |
| 578 | 1,2,3,4,8,1<br>2,15,17 | 5,6,7,9,10,<br>11,13,14,1<br>6 | 12 | B0BNN3,P01836,P02761,P06866,P17475,P19223,P55091,P83121,P98089,Q62894,Q9EQV9,Q9QZA6                      |
| 579 | 1,2,3,4,8,1<br>2,16,17 | 5,6,7,9,10,<br>11,13,14,1<br>5 | 10 | P01836,P16636,P17475,P19223,P55091,P83121,P98089,Q6PCU2,Q80WL1,Q9JJS8                                    |

|     |                        |                                |   |                                                  |
|-----|------------------------|--------------------------------|---|--------------------------------------------------|
| 580 | 1,2,3,4,8,1<br>3,14,15 | 5,6,7,9,10,<br>11,12,16,1<br>7 | 6 | P02761,P20766,P36970,Q63317,Q64093,Q6TMA8        |
| 581 | 1,2,3,4,8,1<br>3,14,16 | 5,6,7,9,10,<br>11,12,15,1<br>7 | 5 | P36970,P97574,Q566E6,Q64093,Q6PCU2               |
| 582 | 1,2,3,4,8,1<br>3,14,17 | 5,6,7,9,10,<br>11,12,15,1<br>6 | 6 | P17475,P20766,P36970,Q64093,Q6PCU2,Q9QW07        |
| 583 | 1,2,3,4,8,1<br>3,15,16 | 5,6,7,9,10,<br>11,12,14,1<br>7 | 4 | P01835,P01836,Q62894,Q9QUL6                      |
| 584 | 1,2,3,4,8,1<br>3,15,17 | 5,6,7,9,10,<br>11,12,14,1<br>6 | 6 | B0BNN3,P02761,P17475,P20766,Q64093,Q6PCU2        |
| 585 | 1,2,3,4,8,1<br>3,16,17 | 5,6,7,9,10,<br>11,12,14,1<br>5 | 3 | P17475,P20766,Q6PCU2                             |
| 586 | 1,2,3,4,8,1<br>4,15,16 | 5,6,7,9,10,<br>11,12,13,1<br>7 | 2 | P97574,Q9QZK9                                    |
| 587 | 1,2,3,4,8,1<br>4,15,17 | 5,6,7,9,10,<br>11,12,13,1<br>6 | 7 | B0BNN3,P02761,P10536,P17475,P36970,P97840,Q6PCU2 |
| 588 | 1,2,3,4,8,1<br>4,16,17 | 5,6,7,9,10,<br>11,12,13,1<br>5 | 3 | P17475,Q566E6,Q6PCU2                             |
| 589 | 1,2,3,4,8,1<br>5,16,17 | 5,6,7,9,10,<br>11,12,13,1<br>4 | 7 | B0BNN3,P02761,P17475,P47727,P83121,Q62894,Q6PCU2 |
| 590 | 1,2,3,4,9,1<br>0,11,12 | 5,6,7,8,13,<br>14,15,16,1<br>7 | 7 | P01836,P05964,P14173,P34901,Q62636,Q63661,Q6IFU8 |
| 591 | 1,2,3,4,9,1<br>0,11,13 | 5,6,7,8,12,<br>14,15,16,1<br>7 | 3 | P12785,P14173,Q63661                             |
| 592 | 1,2,3,4,9,1<br>0,11,14 | 5,6,7,8,12,<br>13,15,16,1<br>7 | 4 | P14173,P19218,P34901,Q63661                      |
| 593 | 1,2,3,4,9,1<br>0,11,15 | 5,6,7,8,12,<br>13,14,16,1<br>7 | 2 | Q561R9,Q63661                                    |
| 594 | 1,2,3,4,9,1<br>0,11,16 | 5,6,7,8,12,<br>13,14,15,1<br>7 | 6 | P12785,P14173,P55314,Q63661,Q9QZK9,Q9WUW8        |



|     |                        |                                |   |                                           |
|-----|------------------------|--------------------------------|---|-------------------------------------------|
| 595 | 1,2,3,4,9,1<br>0,11,17 | 5,6,7,8,12,<br>13,14,15,1<br>6 | 2 | P12785,P16636                             |
| 596 | 1,2,3,4,9,1<br>0,12,13 | 5,6,7,8,11,<br>14,15,16,1<br>7 | 2 | P01836,Q9JJS8                             |
| 597 | 1,2,3,4,9,1<br>0,12,14 | 5,6,7,8,11,<br>13,15,16,1<br>7 | 2 | P34901,Q9JJS8                             |
| 598 | 1,2,3,4,9,1<br>0,12,15 | 5,6,7,8,11,<br>13,14,16,1<br>7 | 3 | P01836,P10758,P34901                      |
| 599 | 1,2,3,4,9,1<br>0,12,16 | 5,6,7,8,11,<br>13,14,15,1<br>7 | 4 | P01836,P34901,Q9JJS8,Q9WUW8               |
| 600 | 1,2,3,4,9,1<br>0,12,17 | 5,6,7,8,11,<br>13,14,15,1<br>6 | 6 | P06866,P16636,P19223,P34901,Q63355,Q9JJS8 |
| 601 | 1,2,3,4,9,1<br>0,13,14 | 5,6,7,8,11,<br>12,15,16,1<br>7 | 0 |                                           |
| 602 | 1,2,3,4,9,1<br>0,13,15 | 5,6,7,8,11,<br>12,14,16,1<br>7 | 0 |                                           |
| 603 | 1,2,3,4,9,1<br>0,13,16 | 5,6,7,8,11,<br>12,14,15,1<br>7 | 0 |                                           |
| 604 | 1,2,3,4,9,1<br>0,13,17 | 5,6,7,8,11,<br>12,14,15,1<br>6 | 1 | Q63355                                    |
| 605 | 1,2,3,4,9,1<br>0,14,15 | 5,6,7,8,11,<br>12,13,16,1<br>7 | 2 | P34901,Q9QZK9                             |
| 606 | 1,2,3,4,9,1<br>0,14,16 | 5,6,7,8,11,<br>12,13,15,1<br>7 | 2 | P34901,Q9QZK9                             |
| 607 | 1,2,3,4,9,1<br>0,14,17 | 5,6,7,8,11,<br>12,13,15,1<br>6 | 1 | P34901                                    |
| 608 | 1,2,3,4,9,1<br>0,15,16 | 5,6,7,8,11,<br>12,13,14,1<br>7 | 4 | O54728,P47727,Q62902,Q9QZK9               |
| 609 | 1,2,3,4,9,1<br>0,15,17 | 5,6,7,8,11,<br>12,13,14,1<br>6 | 1 | Q62902                                    |

|     |                        |                                |   |                                           |
|-----|------------------------|--------------------------------|---|-------------------------------------------|
| 610 | 1,2,3,4,9,1<br>0,16,17 | 5,6,7,8,11,<br>12,13,14,1<br>5 | 1 | Q62997                                    |
| 611 | 1,2,3,4,9,1<br>1,12,13 | 5,6,7,8,10,<br>14,15,16,1<br>7 | 1 | P01836                                    |
| 612 | 1,2,3,4,9,1<br>1,12,14 | 5,6,7,8,10,<br>13,15,16,1<br>7 | 3 | P01836,P34901,Q6IFU8                      |
| 613 | 1,2,3,4,9,1<br>1,12,15 | 5,6,7,8,10,<br>13,14,16,1<br>7 | 3 | P01836,P34901,P51907                      |
| 614 | 1,2,3,4,9,1<br>1,12,16 | 5,6,7,8,10,<br>13,14,15,1<br>7 | 3 | P01836,P34901,P55314                      |
| 615 | 1,2,3,4,9,1<br>1,12,17 | 5,6,7,8,10,<br>13,14,15,1<br>6 | 5 | P01836,P16636,P19223,P34901,P98089        |
| 616 | 1,2,3,4,9,1<br>1,13,14 | 5,6,7,8,10,<br>12,15,16,1<br>7 | 1 | P06760                                    |
| 617 | 1,2,3,4,9,1<br>1,13,15 | 5,6,7,8,10,<br>12,14,16,1<br>7 | 2 | P01836,P06760                             |
| 618 | 1,2,3,4,9,1<br>1,13,16 | 5,6,7,8,10,<br>12,14,15,1<br>7 | 3 | P01836,P06760,P55314                      |
| 619 | 1,2,3,4,9,1<br>1,13,17 | 5,6,7,8,10,<br>12,14,15,1<br>6 | 0 |                                           |
| 620 | 1,2,3,4,9,1<br>1,14,15 | 5,6,7,8,10,<br>12,13,16,1<br>7 | 5 | O54728,P06760,P19218,P34901,Q9QZK9        |
| 621 | 1,2,3,4,9,1<br>1,14,16 | 5,6,7,8,10,<br>12,13,15,1<br>7 | 6 | P06760,P19218,P34901,P55314,Q99MH3,Q9QZK9 |
| 622 | 1,2,3,4,9,1<br>1,14,17 | 5,6,7,8,10,<br>12,13,15,1<br>6 | 2 | P19218,P34901                             |
| 623 | 1,2,3,4,9,1<br>1,15,16 | 5,6,7,8,10,<br>12,13,14,1<br>7 | 5 | O54728,P01836,P06760,P55314,Q9QZK9        |
| 624 | 1,2,3,4,9,1<br>1,15,17 | 5,6,7,8,10,<br>12,13,14,1<br>6 | 0 |                                           |

|     |                        |                                |   |                                           |
|-----|------------------------|--------------------------------|---|-------------------------------------------|
| 625 | 1,2,3,4,9,1<br>1,16,17 | 5,6,7,8,10,<br>12,13,14,1<br>5 | 2 | P55314,Q498D9                             |
| 626 | 1,2,3,4,9,1<br>2,13,14 | 5,6,7,8,10,<br>11,15,16,1<br>7 | 5 | A2RUV9,P01836,P25236,P34901,P36970        |
| 627 | 1,2,3,4,9,1<br>2,13,15 | 5,6,7,8,10,<br>11,14,16,1<br>7 | 2 | P01836,P10758                             |
| 628 | 1,2,3,4,9,1<br>2,13,16 | 5,6,7,8,10,<br>11,14,15,1<br>7 | 2 | P01836,Q9JJS8                             |
| 629 | 1,2,3,4,9,1<br>2,13,17 | 5,6,7,8,10,<br>11,14,15,1<br>6 | 3 | P01836,P19223,Q63355                      |
| 630 | 1,2,3,4,9,1<br>2,14,15 | 5,6,7,8,10,<br>11,13,16,1<br>7 | 4 | A2RUV9,P01836,P10758,P34901               |
| 631 | 1,2,3,4,9,1<br>2,14,16 | 5,6,7,8,10,<br>11,13,15,1<br>7 | 3 | P01836,P34901,Q9JJS8                      |
| 632 | 1,2,3,4,9,1<br>2,14,17 | 5,6,7,8,10,<br>11,13,15,1<br>6 | 4 | P19223,P31430,P34901,P98089               |
| 633 | 1,2,3,4,9,1<br>2,15,16 | 5,6,7,8,10,<br>11,13,14,1<br>7 | 4 | P01836,P06760,P34901,P47727               |
| 634 | 1,2,3,4,9,1<br>2,15,17 | 5,6,7,8,10,<br>11,13,14,1<br>6 | 6 | B0BNN3,P01836,P06866,P19223,P34901,P98089 |
| 635 | 1,2,3,4,9,1<br>2,16,17 | 5,6,7,8,10,<br>11,13,14,1<br>5 | 6 | P01836,P06866,P19223,P34901,P98089,Q9JJS8 |
| 636 | 1,2,3,4,9,1<br>3,14,15 | 5,6,7,8,10,<br>11,12,16,1<br>7 | 2 | P06760,Q9QZK9                             |
| 637 | 1,2,3,4,9,1<br>3,14,16 | 5,6,7,8,10,<br>11,12,15,1<br>7 | 3 | P06760,P08010,Q9QZK9                      |
| 638 | 1,2,3,4,9,1<br>3,14,17 | 5,6,7,8,10,<br>11,12,15,1<br>6 | 1 | Q9QW07                                    |
| 639 | 1,2,3,4,9,1<br>3,15,16 | 5,6,7,8,10,<br>11,12,14,1<br>7 | 4 | O54728,P01836,P06760,Q9QZK9               |

|     |                         |                                |    |                                                                       |
|-----|-------------------------|--------------------------------|----|-----------------------------------------------------------------------|
| 640 | 1,2,3,4,9,1<br>3,15,17  | 5,6,7,8,10,<br>11,12,14,1<br>6 | 0  |                                                                       |
| 641 | 1,2,3,4,9,1<br>3,16,17  | 5,6,7,8,10,<br>11,12,14,1<br>5 | 1  | P08010                                                                |
| 642 | 1,2,3,4,9,1<br>4,15,16  | 5,6,7,8,10,<br>11,12,13,1<br>7 | 4  | O54728,P06760,P60905,Q9QZK9                                           |
| 643 | 1,2,3,4,9,1<br>4,15,17  | 5,6,7,8,10,<br>11,12,13,1<br>6 | 1  | B0BNN3                                                                |
| 644 | 1,2,3,4,9,1<br>4,16,17  | 5,6,7,8,10,<br>11,12,13,1<br>5 | 0  |                                                                       |
| 645 | 1,2,3,4,9,1<br>5,16,17  | 5,6,7,8,10,<br>11,12,13,1<br>4 | 3  | P47727,Q62902,Q68FV8                                                  |
| 646 | 1,2,3,4,10,<br>11,12,13 | 5,6,7,8,9,1<br>4,15,16,17      | 5  | P01836,P05964,P16636,P34901,Q62636                                    |
| 647 | 1,2,3,4,10,<br>11,12,14 | 5,6,7,8,9,1<br>3,15,16,17      | 6  | P01836,P05964,P34901,P53792,Q6IFU8,Q9JJS8                             |
| 648 | 1,2,3,4,10,<br>11,12,15 | 5,6,7,8,9,1<br>3,14,16,17      | 6  | P01836,P34901,P35280,P51907,P53792,Q4FZU2                             |
| 649 | 1,2,3,4,10,<br>11,12,16 | 5,6,7,8,9,1<br>3,14,15,17      | 10 | P01836,P06757,P34901,P53792,P55314,Q4FZU2,Q6IFU8,Q6P6Q2,Q9JJS8,Q9WUW8 |
| 650 | 1,2,3,4,10,<br>11,12,17 | 5,6,7,8,9,1<br>3,14,15,16      | 10 | P01836,P05964,P06757,P06866,P16636,P19223,P34901,P53792,Q10758,Q6IFU8 |
| 651 | 1,2,3,4,10,<br>11,13,14 | 5,6,7,8,9,1<br>2,15,16,17      | 0  |                                                                       |
| 652 | 1,2,3,4,10,<br>11,13,15 | 5,6,7,8,9,1<br>2,14,16,17      | 1  | P01836                                                                |
| 653 | 1,2,3,4,10,<br>11,13,16 | 5,6,7,8,9,1<br>2,14,15,17      | 2  | P01836,P55314                                                         |
| 654 | 1,2,3,4,10,<br>11,13,17 | 5,6,7,8,9,1<br>2,14,15,16      | 1  | P16636                                                                |
| 655 | 1,2,3,4,10,<br>11,14,15 | 5,6,7,8,9,1<br>2,13,16,17      | 3  | P19218,P34901,P35280                                                  |
| 656 | 1,2,3,4,10,<br>11,14,16 | 5,6,7,8,9,1<br>2,13,15,17      | 3  | P34901,P53792,P55314                                                  |
| 657 | 1,2,3,4,10,<br>11,14,17 | 5,6,7,8,9,1<br>2,13,15,16      | 2  | P19218,P34901                                                         |
| 658 | 1,2,3,4,10,<br>11,15,16 | 5,6,7,8,9,1<br>2,13,14,17      | 4  | P01836,P51907,P53792,P55314                                           |
| 659 | 1,2,3,4,10,<br>11,15,17 | 5,6,7,8,9,1<br>2,13,14,16      | 2  | B0BNN3,P02761                                                         |

|     |                                                |   |                                                         |
|-----|------------------------------------------------|---|---------------------------------------------------------|
| 660 | 1,2,3,4,10, 5,6,7,8,9,1<br>11,16,17 2,13,14,15 | 1 | P55314                                                  |
| 661 | 1,2,3,4,10, 5,6,7,8,9,1<br>12,13,14 1,15,16,17 | 6 | A2RUV9,P01836,P25236,P34901,P36970,Q9JJS8               |
| 662 | 1,2,3,4,10, 5,6,7,8,9,1<br>12,13,15 1,14,16,17 | 1 | P01836                                                  |
| 663 | 1,2,3,4,10, 5,6,7,8,9,1<br>12,13,16 1,14,15,17 | 2 | P01836,Q9JJS8                                           |
| 664 | 1,2,3,4,10, 5,6,7,8,9,1<br>12,13,17 1,14,15,16 | 4 | P01836,P16636,P19223,Q63355                             |
| 665 | 1,2,3,4,10, 5,6,7,8,9,1<br>12,14,15 1,13,16,17 | 5 | A2RUV9,B0BNN3,P01836,P34901,Q9JJS8                      |
| 666 | 1,2,3,4,10, 5,6,7,8,9,1<br>12,14,16 1,13,15,17 | 4 | P01836,P08721,P34901,Q9JJS8                             |
| 667 | 1,2,3,4,10, 5,6,7,8,9,1<br>12,14,17 1,13,15,16 | 6 | P19223,P31430,P34901,P98089,Q10758,Q9JJS8               |
| 668 | 1,2,3,4,10, 5,6,7,8,9,1<br>12,15,16 1,13,14,17 | 4 | P01836,P08721,P34901,Q9JJS8                             |
| 669 | 1,2,3,4,10, 5,6,7,8,9,1<br>12,15,17 1,13,14,16 | 6 | B0BNN3,P01836,P06866,P19223,P34901,P98089               |
| 670 | 1,2,3,4,10, 5,6,7,8,9,1<br>12,16,17 1,13,14,15 | 8 | P01836,P06866,P08721,P16636,P19223,P34901,Q10758,Q9JJS8 |
| 671 | 1,2,3,4,10, 5,6,7,8,9,1<br>13,14,15 1,12,16,17 | 1 | P50115                                                  |
| 672 | 1,2,3,4,10, 5,6,7,8,9,1<br>13,14,16 1,12,15,17 | 2 | P50115,Q62997                                           |
| 673 | 1,2,3,4,10, 5,6,7,8,9,1<br>13,14,17 1,12,15,16 | 1 | Q9QW07                                                  |
| 674 | 1,2,3,4,10, 5,6,7,8,9,1<br>13,15,16 1,12,14,17 | 4 | P01835,P01836,P50115,Q62997                             |
| 675 | 1,2,3,4,10, 5,6,7,8,9,1<br>13,15,17 1,12,14,16 | 0 |                                                         |
| 676 | 1,2,3,4,10, 5,6,7,8,9,1<br>13,16,17 1,12,14,15 | 2 | Q62997,Q63355                                           |
| 677 | 1,2,3,4,10, 5,6,7,8,9,1<br>14,15,16 1,12,13,17 | 5 | P08721,P34901,P50115,Q62997,Q9QZK9                      |
| 678 | 1,2,3,4,10, 5,6,7,8,9,1<br>14,15,17 1,12,13,16 | 2 | B0BNN3,P34901                                           |
| 679 | 1,2,3,4,10, 5,6,7,8,9,1<br>14,16,17 1,12,13,15 | 2 | P34901,Q62997                                           |
| 680 | 1,2,3,4,10, 5,6,7,8,9,1<br>15,16,17 1,12,13,14 | 3 | P47727,Q62902,Q62997                                    |
| 681 | 1,2,3,4,11, 5,6,7,8,9,1<br>12,13,14 0,15,16,17 | 4 | P01836,P25236,P34901,Q64093                             |
| 682 | 1,2,3,4,11, 5,6,7,8,9,1<br>12,13,15 0,14,16,17 | 1 | P01836                                                  |

|     |                                                |   |                                                         |
|-----|------------------------------------------------|---|---------------------------------------------------------|
| 683 | 1,2,3,4,11, 5,6,7,8,9,1<br>12,13,16 0,14,15,17 | 2 | P01836,P55314                                           |
| 684 | 1,2,3,4,11, 5,6,7,8,9,1<br>12,13,17 0,14,15,16 | 4 | P01836,P16636,P19223,P36374                             |
| 685 | 1,2,3,4,11, 5,6,7,8,9,1<br>12,14,15 0,13,16,17 | 5 | A2RUV9,B0BNN3,P01836,P34901,P51907                      |
| 686 | 1,2,3,4,11, 5,6,7,8,9,1<br>12,14,16 0,13,15,17 | 4 | P01836,P34901,P55314,Q9JJS8                             |
| 687 | 1,2,3,4,11, 5,6,7,8,9,1<br>12,14,17 0,13,15,16 | 7 | P01836,P19218,P19223,P31430,P34901,P98089,Q6AYQ8        |
| 688 | 1,2,3,4,11, 5,6,7,8,9,1<br>12,15,16 0,13,14,17 | 4 | P01836,P34901,P51907,P55314                             |
| 689 | 1,2,3,4,11, 5,6,7,8,9,1<br>12,15,17 0,13,14,16 | 6 | B0BNN3,P01836,P06866,P19223,P34901,P98089               |
| 690 | 1,2,3,4,11, 5,6,7,8,9,1<br>12,16,17 0,13,14,15 | 7 | P01836,P06866,P16636,P19223,P34901,P55314,P98089        |
| 691 | 1,2,3,4,11, 5,6,7,8,9,1<br>13,14,15 0,12,16,17 | 3 | P01836,P06760,Q64093                                    |
| 692 | 1,2,3,4,11, 5,6,7,8,9,1<br>13,14,16 0,12,15,17 | 3 | P01836,P06760,P55314                                    |
| 693 | 1,2,3,4,11, 5,6,7,8,9,1<br>13,14,17 0,12,15,16 | 3 | P19218,Q64093,Q9QW07                                    |
| 694 | 1,2,3,4,11, 5,6,7,8,9,1<br>13,15,16 0,12,14,17 | 3 | P01836,P06760,P55314                                    |
| 695 | 1,2,3,4,11, 5,6,7,8,9,1<br>13,15,17 0,12,14,16 | 1 | P01836                                                  |
| 696 | 1,2,3,4,11, 5,6,7,8,9,1<br>13,16,17 0,12,14,15 | 2 | P01836,P55314                                           |
| 697 | 1,2,3,4,11, 5,6,7,8,9,1<br>14,15,16 0,12,13,17 | 6 | P01836,P06760,P19218,P34901,P55314,Q9QZK9               |
| 698 | 1,2,3,4,11, 5,6,7,8,9,1<br>14,15,17 0,12,13,16 | 4 | B0BNN3,P19218,P34901,P97840                             |
| 699 | 1,2,3,4,11, 5,6,7,8,9,1<br>14,16,17 0,12,13,15 | 3 | P19218,P34901,P55314                                    |
| 700 | 1,2,3,4,11, 5,6,7,8,9,1<br>15,16,17 0,12,13,14 | 2 | P01836,P55314                                           |
| 701 | 1,2,3,4,12, 5,6,7,8,9,1<br>13,14,15 0,11,16,17 | 8 | A2RUV9,P01836,P10758,P25236,P34901,P36970,Q64093,Q9QUL6 |
| 702 | 1,2,3,4,12, 5,6,7,8,9,1<br>13,14,16 0,11,15,17 | 6 | P01836,P25236,P34901,Q566E6,Q9JJS8,Q9QUL6               |
| 703 | 1,2,3,4,12, 5,6,7,8,9,1<br>13,14,17 0,11,15,16 | 7 | A2RUV9,P01836,P31430,P34901,P98089,Q64093,Q9QW07        |
| 704 | 1,2,3,4,12, 5,6,7,8,9,1<br>13,15,16 0,11,14,17 | 3 | P01836,P83121,Q9QUL6                                    |
| 705 | 1,2,3,4,12, 5,6,7,8,9,1<br>13,15,17 0,11,14,16 | 3 | B0BNN3,P01836,P06866                                    |

|     |                         |                                   |    |                                                                                                                                                                                                                                 |
|-----|-------------------------|-----------------------------------|----|---------------------------------------------------------------------------------------------------------------------------------------------------------------------------------------------------------------------------------|
| 706 | 1,2,3,4,12,<br>13,16,17 | 5,6,7,8,9,1<br>0,11,14,15         | 2  | P01836,P06866                                                                                                                                                                                                                   |
| 707 | 1,2,3,4,12,<br>14,15,16 | 5,6,7,8,9,1<br>0,11,13,17         | 5  | A2RUV9,D3ZUC6,P01836,P34901,Q9JJS8                                                                                                                                                                                              |
| 708 | 1,2,3,4,12,<br>14,15,17 | 5,6,7,8,9,1<br>0,11,13,16         | 7  | A2RUV9,B0BNN3,P01836,P06866,P31430,P34901,P98089                                                                                                                                                                                |
| 709 | 1,2,3,4,12,<br>14,16,17 | 5,6,7,8,9,1<br>0,11,13,15         | 6  | P01836,P06866,P31430,P34901,P98089,Q9JJS8                                                                                                                                                                                       |
| 710 | 1,2,3,4,12,<br>15,16,17 | 5,6,7,8,9,1<br>0,11,13,14         | 7  | B0BNN3,P01836,P06866,P34901,P47727,P83121,P98089                                                                                                                                                                                |
| 711 | 1,2,3,4,13,<br>14,15,16 | 5,6,7,8,9,1<br>0,11,12,17         | 7  | P01836,P06760,P50115,P60905,Q566E6,Q64093,Q9QZK9                                                                                                                                                                                |
| 712 | 1,2,3,4,13,<br>14,15,17 | 5,6,7,8,9,1<br>0,11,12,16         | 3  | B0BNN3,Q64093,Q9QW07                                                                                                                                                                                                            |
| 713 | 1,2,3,4,13,<br>14,16,17 | 5,6,7,8,9,1<br>0,11,12,15         | 4  | P08010,Q566E6,Q6PCU2,Q9QW07                                                                                                                                                                                                     |
| 714 | 1,2,3,4,13,<br>15,16,17 | 5,6,7,8,9,1<br>0,11,12,14         | 3  | P01836,P47727,Q6PCU2                                                                                                                                                                                                            |
| 715 | 1,2,3,4,14,<br>15,16,17 | 5,6,7,8,9,1<br>0,11,12,13         | 2  | B0BNN3,P60905                                                                                                                                                                                                                   |
| 716 | 1,2,3,5,6,7,<br>8,9     | 4,10,11,12,<br>13,14,15,<br>16,17 | 21 | O55006,O88267,P02631,P02764,P05371,P08932,P08937,P10715,P16086,P19629,P20762,P23593,P27213,P31044,P52590,P53792,P68370,P83748,Q63942,Q9QX79,Q9Z1F2                                                                              |
| 717 | 1,2,3,5,6,7,<br>8,10    | 4,9,11,12,<br>13,14,15,1<br>6,17  | 23 | D3ZHA0,O54858,O55006,O88267,P02631,P05371,P08649,P08937,P12020,P16086,P19629,P27213,P28648,P31044,P52590,P68370,P83748,P97571,P97615,Q30KJ2,Q63751,Q64361,Q6AYS7                                                                |
| 718 | 1,2,3,5,6,7,<br>8,11    | 4,9,10,12,<br>13,14,15,1<br>6,17  | 32 | O54715,O54858,O88267,P02631,P04041,P05371,P07150,P08649,P08932,P08937,P10715,P14669,P15399,P16086,P19629,P20762,P27213,P28648,P31044,P52590,P55314,P68370,P97580,P97615,Q30KJ2,Q63493,Q63751,Q6IRE4,Q9EQS0,Q9JI85,Q9QUL6,Q9Z1F2 |
| 719 | 1,2,3,5,6,7,<br>8,12    | 4,9,10,11,<br>13,14,15,1<br>6,17  | 31 | O88267,P02631,P02782,P05371,P06761,P08723,P08937,P10715,P13432,P16086,P19629,P20762,P22283,P27213,P30120,P31044,P38918,P52590,P68370,P83748,P97615,Q561R9,Q5M8C6,Q63751,Q64361,Q6AYS7,Q8CJ52,Q9EQS0,Q9JHB9,Q9JI85,Q9Z1F2        |
| 720 | 1,2,3,5,6,7,<br>8,13    | 4,9,10,11,<br>12,14,15,1<br>6,17  | 26 | O88267,P02631,P02764,P05371,P06761,P06911,P08753,P08932,P08937,P12020,P16086,P19629,P20762,P29975,P31044,P51907,P52590,P53792,P68370,P70545,P83748,Q5GRG2,Q63317,Q63751,Q6AYS7,Q9Z1F2                                           |
| 721 | 1,2,3,5,6,7,<br>8,14    | 4,9,10,11,<br>12,13,15,1<br>6,17  | 22 | O88267,P02631,P05371,P08937,P10536,P12020,P16086,P19629,P20762,P27213,P31044,P38918,P52590,P68370,P83748,P97615,Q30KJ2,Q561R9,Q5GRG2,Q63317,Q6AYS7,Q9Z1F2                                                                       |
| 722 | 1,2,3,5,6,7,<br>8,15    | 4,9,10,11,<br>12,13,14,1<br>6,17  | 20 | O55006,O88267,P02631,P05371,P08932,P08937,P10536,P10715,P16086,P19629,P20762,P27213,P31044,P52590,P68370,P83748,P97615,Q63317,Q63751,Q6AYS7                                                                                     |
| 723 | 1,2,3,5,6,7,<br>8,16    | 4,9,10,11,<br>12,13,14,1<br>5,17  | 17 | O88267,P02631,P05371,P08937,P10715,P10758,P16086,P19629,P27213,P31044,P52590,P68370,P83748,Q561R9,Q63751,Q6AYS7,Q6IRE4                                                                                                          |

|     |                       |                                  |    |                                                                                                                                                                                                                                                                     |
|-----|-----------------------|----------------------------------|----|---------------------------------------------------------------------------------------------------------------------------------------------------------------------------------------------------------------------------------------------------------------------|
| 724 | 1,2,3,5,6,7<br>,8,17  | 4,9,10,11,<br>12,13,14,1<br>5,16 | 36 | O54858,O88267,P01946,P02091,P02631,P02770,P05371,P06760,P08937,P10536,P10715,P10758,P12346,P16086,P17475,P19629,P2076<br>2,P23593,P23928,P31044,P50115,P51907,P52590,P53792,P55091,P68370,P83748,P97580,P97615,Q30KJ2,Q4G075,Q561R9,Q63751,Q6<br>AYS7,Q6PCU2,Q9Z1F2 |
| 725 | 1,2,3,5,6,7<br>,9,10  | 4,8,11,12,<br>13,14,15,1<br>6,17 | 9  | O55006,P02631,P05371,P16086,P27213,P52590,P83748,Q63942,Q9QUL6                                                                                                                                                                                                      |
| 726 | 1,2,3,5,6,7<br>,9,11  | 4,8,10,12,<br>13,14,15,1<br>6,17 | 12 | P02631,P05371,P08937,P15399,P16086,P27213,P52590,P55314,Q30KJ2,Q6IRE4,Q91ZS3,Q9QUL6                                                                                                                                                                                 |
| 727 | 1,2,3,5,6,7<br>,9,12  | 4,8,10,11,<br>13,14,15,1<br>6,17 | 10 | O88267,P02631,P05371,P08937,P16086,P27213,P52590,P83748,Q498R7,Q9Z1F2                                                                                                                                                                                               |
| 728 | 1,2,3,5,6,7<br>,9,13  | 4,8,10,11,<br>12,14,15,1<br>6,17 | 9  | P02631,P08937,P16086,P52590,P53792,P83748,Q63942,Q6IRE4,Q9Z1F2                                                                                                                                                                                                      |
| 729 | 1,2,3,5,6,7<br>,9,14  | 4,8,10,11,<br>12,13,15,1<br>6,17 | 10 | P02631,P05371,P16086,P27213,P52590,P53792,P83748,Q63942,Q6IRE4,Q9QUL6                                                                                                                                                                                               |
| 730 | 1,2,3,5,6,7<br>,9,15  | 4,8,10,11,<br>12,13,14,1<br>6,17 | 9  | O55006,P02631,P05371,P16086,P27213,P52590,P53792,P83748,Q63942                                                                                                                                                                                                      |
| 731 | 1,2,3,5,6,7<br>,9,16  | 4,8,10,11,<br>12,13,14,1<br>5,17 | 9  | P02631,P05371,P16086,P23593,P27213,P52590,P83748,Q63942,Q6IRE4                                                                                                                                                                                                      |
| 732 | 1,2,3,5,6,7<br>,9,17  | 4,8,10,11,<br>12,13,14,1<br>5,16 | 15 | O88267,P01946,P02091,P02631,P05371,P08937,P09605,P25809,P16086,P23593,P52590,P53792,P97580,Q30KJ2,Q561R9,Q9QUL6                                                                                                                                                     |
| 733 | 1,2,3,5,6,7<br>,10,11 | 4,8,9,12,1<br>3,14,15,16<br>,17  | 15 | P02631,P05371,P08937,P15399,P16086,P27213,P28648,P52590,P55314,P61206,P84079,P84082,P68370,P97580,P97615,Q30KJ2,Q9QUL<br>6                                                                                                                                          |
| 734 | 1,2,3,5,6,7<br>,10,12 | 4,8,9,11,1<br>3,14,15,16<br>,17  | 13 | P05371,P08937,P16086,P27213,P34901,P52590,P83748,P97615,P97840,Q10758,Q4FZU2,Q6IFW6,Q6IMF3                                                                                                                                                                          |
| 735 | 1,2,3,5,6,7<br>,10,13 | 4,8,9,11,1<br>2,14,15,16<br>,17  | 7  | P08937,P12020,P16086,P52590,P83748,P97615,Q5GRG2                                                                                                                                                                                                                    |
| 736 | 1,2,3,5,6,7<br>,10,14 | 4,8,9,11,1<br>2,13,15,16<br>,17  | 10 | P02631,P05371,P08937,P12020,P16086,P27213,P52590,P83748,P97615,Q63532                                                                                                                                                                                               |
| 737 | 1,2,3,5,6,7<br>,10,15 | 4,8,9,11,1<br>2,13,14,16<br>,17  | 8  | P02631,P05371,P08937,P16086,P27213,P52590,P83748,P97615                                                                                                                                                                                                             |
| 738 | 1,2,3,5,6,7<br>,10,16 | 4,8,9,11,1<br>2,13,14,15<br>,17  | 7  | P05371,P16086,P27213,P52590,P83748,P97615,Q6IRE4                                                                                                                                                                                                                    |



|     |                       |                                 |    |                                                                                                                                                                  |
|-----|-----------------------|---------------------------------|----|------------------------------------------------------------------------------------------------------------------------------------------------------------------|
| 739 | 1,2,3,5,6,7<br>,10,17 | 4,8,9,11,1<br>2,13,14,15<br>,16 | 13 | P01946,P02091,P08937,P15399,P16086,P52590,P83748,P97580,P97615,Q30KJ2,Q561R9,Q63751,Q9QUL6                                                                       |
| 740 | 1,2,3,5,6,7<br>,11,12 | 4,8,9,10,1<br>3,14,15,16<br>,17 | 23 | O88267,P02631,P05371,P08937,P15399,P16086,P17046,P27213,P52590,P55314,P83748,P97580,Q30KJ2,Q498R7,Q4FZU2,Q63751,Q6IFU8,Q6IFW6,Q6IMF3,Q6IRE4,Q6P6Q2,Q9JHB9,Q9JI85 |
| 741 | 1,2,3,5,6,7<br>,11,13 | 4,8,9,10,1<br>2,14,15,16<br>,17 | 11 | P01048,P02631,P05371,P08937,P15399,P16086,P17046,P55314,Q30KJ2,Q6IRE4,Q9Z1F2                                                                                     |
| 742 | 1,2,3,5,6,7<br>,11,14 | 4,8,9,10,1<br>2,13,15,16<br>,17 | 11 | P02631,P05371,P08937,P15399,P16086,P27213,P55314,P97580,Q30KJ2,Q6IRE4,Q9QUL6                                                                                     |
| 743 | 1,2,3,5,6,7<br>,11,15 | 4,8,9,10,1<br>2,13,14,16<br>,17 | 12 | P02631,P05371,P08937,P15399,P16086,P27213,P52590,P55314,P83748,Q30KJ2,Q5I0D1,Q6IRE4                                                                              |
| 744 | 1,2,3,5,6,7<br>,11,16 | 4,8,9,10,1<br>2,13,14,15<br>,17 | 14 | P02631,P05371,P08937,P10758,P15399,P16086,P17046,P27213,P55314,P61206;P84079;P84082,P97580,Q30KJ2,Q6IRE4,Q8VD89                                                  |
| 745 | 1,2,3,5,6,7<br>,11,17 | 4,8,9,10,1<br>2,13,14,15<br>,16 | 14 | P01946,P02091,P02631,P05371,P08937,P10758,P15399,P16086,P52590,P55314,P97580,Q30KJ2,Q63751,Q9QUL6                                                                |
| 746 | 1,2,3,5,6,7<br>,12,13 | 4,8,9,10,1<br>1,14,15,16<br>,17 | 8  | O88267,P08937,P16086,P17046,P83748,Q561R9,Q9JHB9,Q9Z1F2                                                                                                          |
| 747 | 1,2,3,5,6,7<br>,12,14 | 4,8,9,10,1<br>1,13,15,16<br>,17 | 13 | O88267,P02631,P05371,P08937,P16086,P19629,P27213,P34901,P83748,Q561R9,Q63532,Q6AYS7,Q9Z1F2                                                                       |
| 748 | 1,2,3,5,6,7<br>,12,15 | 4,8,9,10,1<br>1,13,14,16<br>,17 | 7  | P02631,P05371,P08937,P16086,P27213,P52590,P83748                                                                                                                 |
| 749 | 1,2,3,5,6,7<br>,12,16 | 4,8,9,10,1<br>1,13,14,15<br>,17 | 9  | O88267,P02631,P05371,P08937,P16086,P17046,P83748,Q561R9,Q6IRE4                                                                                                   |
| 750 | 1,2,3,5,6,7<br>,12,17 | 4,8,9,10,1<br>1,13,14,15<br>,16 | 20 | O88267,P01681,P01946,P02091,P02631,P05371,P08937,P09605;P25809,P13432,P16086,P52590,P55091,P83748,P97580,Q10758,Q30KJ2,Q561R9,Q62635,Q63751,Q9Z1F2               |
| 751 | 1,2,3,5,6,7<br>,13,14 | 4,8,9,10,1<br>1,12,15,16<br>,17 | 11 | O88267,P02631,P06911,P08937,P12020,P16086,P53792,P83748,Q561R9,Q5GRG2,Q9Z1F2                                                                                     |
| 752 | 1,2,3,5,6,7<br>,13,15 | 4,8,9,10,1<br>1,12,14,16<br>,17 | 6  | P02631,P08937,P16086,P53792,P83748,Q5GRG2                                                                                                                        |
| 753 | 1,2,3,5,6,7<br>,13,16 | 4,8,9,10,1<br>1,12,14,15<br>,17 | 8  | O88267,P05371,P08937,P16086,P17046,P83748,Q561R9,Q6IRE4                                                                                                          |

|     |                       |                                  |    |                                                                                                          |
|-----|-----------------------|----------------------------------|----|----------------------------------------------------------------------------------------------------------|
| 754 | 1,2,3,5,6,7<br>,13,17 | 4,8,9,10,1<br>1,12,14,15<br>,16  | 14 | O88267,P01946,P02091,P08937,P16086,P51907,P52590,P53792,P83748,P97580,Q30KJ2,Q561R9,Q63751,Q9Z1F2        |
| 755 | 1,2,3,5,6,7<br>,14,15 | 4,8,9,10,1<br>1,12,13,16<br>,17  | 7  | P02631,P02803,P05371,P16086,P27213,P53792,P83748                                                         |
| 756 | 1,2,3,5,6,7<br>,14,16 | 4,8,9,10,1<br>1,12,13,15<br>,17  | 8  | O88267,P02631,P05371,P16086,P83748,Q561R9,Q63532,Q6IRE4                                                  |
| 757 | 1,2,3,5,6,7<br>,14,17 | 4,8,9,10,1<br>1,12,13,15<br>,16  | 13 | O88267,P01946,P02091,P02631,P05371,P08937,P10536,P16086,P52590,P53792,P97580,Q30KJ2,Q561R9               |
| 758 | 1,2,3,5,6,7<br>,15,16 | 4,8,9,10,1<br>1,12,13,14<br>,17  | 6  | P02631,P02803,P05371,P16086,P83748,Q6IRE4                                                                |
| 759 | 1,2,3,5,6,7<br>,15,17 | 4,8,9,10,1<br>1,12,13,14<br>,16  | 15 | P01946,P02091,P02631,P02803,P05371,P08937,P10536,P16086,P52590,P53792,P83748,P97580,Q30KJ2,Q561R9,Q63751 |
| 760 | 1,2,3,5,6,7<br>,16,17 | 4,8,9,10,1<br>1,12,13,14<br>,15  | 15 | O88267,P01946,P02091,P02631,P05371,P08937,P10758,P16086,P17046,P23593,P52590,P83748,P97580,Q30KJ2,Q561R9 |
| 761 | 1,2,3,5,6,8<br>,9,10  | 4,7,11,12,<br>13,14,15,1<br>6,17 | 6  | O55006,P08649,P23593,P27213,Q63942,Q9QUL6                                                                |
| 762 | 1,2,3,5,6,8<br>,9,11  | 4,7,10,12,<br>13,14,15,1<br>6,17 | 8  | P08649,P08932,P14669,P27213,P55314,Q63942,Q9QUL6,Q9Z1F2                                                  |
| 763 | 1,2,3,5,6,8<br>,9,12  | 4,7,10,11,<br>13,14,15,1<br>6,17 | 7  | P08937,P23593,P27213,Q5M8C6,Q63942,Q6IG02,Q9Z1F2                                                         |
| 764 | 1,2,3,5,6,8<br>,9,13  | 4,7,10,11,<br>12,14,15,1<br>6,17 | 6  | P08753,P23593,P51907,P53792,Q63942,Q9Z1F2                                                                |
| 765 | 1,2,3,5,6,8<br>,9,14  | 4,7,10,11,<br>12,13,15,1<br>6,17 | 4  | P02793,Q7TP54,P27213,Q63942,Q9Z1F2                                                                       |
| 766 | 1,2,3,5,6,8<br>,9,15  | 4,7,10,11,<br>12,13,14,1<br>6,17 | 5  | O55006,P23593,P27213,Q5QE79,Q63942                                                                       |
| 767 | 1,2,3,5,6,8<br>,9,16  | 4,7,10,11,<br>12,13,14,1<br>5,17 | 4  | P23593,P27213,Q63942,Q6IRE4                                                                              |
| 768 | 1,2,3,5,6,8<br>,9,17  | 4,7,10,11,<br>12,13,14,1<br>5,16 | 10 | P06760,P08649,P23593,P50115,P51907,P52590,P53792,Q561R9,Q63942,Q9Z1F2                                    |

|     |                       |                                 |    |                                                                                                                                      |
|-----|-----------------------|---------------------------------|----|--------------------------------------------------------------------------------------------------------------------------------------|
| 769 | 1,2,3,5,6,8<br>,10,11 | 4,7,9,12,1<br>3,14,15,16<br>,17 | 6  | P08649,P14669,P27213,P28648,P55314,Q9QUL6                                                                                            |
| 770 | 1,2,3,5,6,8<br>,10,12 | 4,7,9,11,1<br>3,14,15,16<br>,17 | 12 | P08937,P27213,Q08463,Q10758,Q4FZU2,Q5M8C6,Q64361,Q6IFW6,Q6IG02,Q6IMF3,Q6P6Q2,Q9Z1F2                                                  |
| 771 | 1,2,3,5,6,8<br>,10,13 | 4,7,9,11,1<br>2,14,15,16<br>,17 | 3  | P08753,P51907,Q9Z1F2                                                                                                                 |
| 772 | 1,2,3,5,6,8<br>,10,14 | 4,7,9,11,1<br>2,13,15,16<br>,17 | 4  | P08649,P27213,P97615,Q9Z1F2                                                                                                          |
| 773 | 1,2,3,5,6,8<br>,10,15 | 4,7,9,11,1<br>2,13,14,16<br>,17 | 3  | P08649,P27213,Q6IFV1                                                                                                                 |
| 774 | 1,2,3,5,6,8<br>,10,16 | 4,7,9,11,1<br>2,13,14,15<br>,17 | 1  | P08649                                                                                                                               |
| 775 | 1,2,3,5,6,8<br>,10,17 | 4,7,9,11,1<br>2,13,14,15<br>,16 | 11 | O54858,P01946,P06760,P08649,P08937,P17475,P23593,P50115,P51907,Q08463,Q561R9                                                         |
| 776 | 1,2,3,5,6,8<br>,11,12 | 4,7,9,10,1<br>3,14,15,16<br>,17 | 19 | O35547,O54715,P01681,P02782,P08937,P14669,P27213,P30120,P55314,P62804,Q4FZU2,Q5M8C6,Q6IFU8,Q6IFW6,Q6IG02,Q6IMF3,Q6P6Q2,Q9JHB9,Q9Z1F2 |
| 777 | 1,2,3,5,6,8<br>,11,13 | 4,7,9,10,1<br>2,14,15,16<br>,17 | 4  | P08937,P14669,P55314,Q9Z1F2                                                                                                          |
| 778 | 1,2,3,5,6,8<br>,11,14 | 4,7,9,10,1<br>2,13,15,16<br>,17 | 7  | P02793;Q7TP54,P08649,P14669,P27213,P55314,Q5I0D1,Q9Z1F2                                                                              |
| 779 | 1,2,3,5,6,8<br>,11,15 | 4,7,9,10,1<br>2,13,14,16<br>,17 | 5  | P08649,P14669,P27213,P55314,Q5I0D1                                                                                                   |
| 780 | 1,2,3,5,6,8<br>,11,16 | 4,7,9,10,1<br>2,13,14,15<br>,17 | 4  | P08649,P14668,P55314,Q6IRE4                                                                                                          |
| 781 | 1,2,3,5,6,8<br>,11,17 | 4,7,9,10,1<br>2,13,14,15<br>,16 | 12 | O54858,P01681,P01946,P06760,P08649,P08937,P14669,P17475,P50115,P55314,Q63751,Q9QUL6                                                  |
| 782 | 1,2,3,5,6,8<br>,12,13 | 4,7,9,10,1<br>1,14,15,16<br>,17 | 10 | O88267,P02782,P08937,P30120,P51907,P82995,Q561R9,Q5M8C6,Q9JHB9,Q9Z1F2                                                                |
| 783 | 1,2,3,5,6,8<br>,12,14 | 4,7,9,10,1<br>1,13,15,16<br>,17 | 10 | O88267,P02782,P02793;Q7TP54,P08937,Q561R9,Q5M8C6,Q6AYS7,Q6IFW6,Q6IG02,Q9Z1F2                                                         |

|     |                       |                                 |    |                                                                                                                                                           |
|-----|-----------------------|---------------------------------|----|-----------------------------------------------------------------------------------------------------------------------------------------------------------|
| 784 | 1,2,3,5,6,8<br>,12,15 | 4,7,9,10,1<br>1,13,14,16<br>,17 | 5  | P08937,P83121,Q5M8C6,Q6IFV1,Q9Z1F2                                                                                                                        |
| 785 | 1,2,3,5,6,8<br>,12,16 | 4,7,9,10,1<br>1,13,14,15<br>,17 | 7  | O88267,P08937,Q561R9,Q5M8C6,Q6IFW6,Q6IMF3,Q9Z1F2                                                                                                          |
| 786 | 1,2,3,5,6,8<br>,12,17 | 4,7,9,10,1<br>1,13,14,15<br>,16 | 22 | O88267,P01681,P01946,P06760,P08937,P13432,P16636,P17475,P23593,P50115,P51907,P55091,Q08463,Q10758,Q4G075,Q561R9,Q5M8C6,Q62635,Q63751,Q6IFV1,Q6IG02,Q9Z1F2 |
| 787 | 1,2,3,5,6,8<br>,13,14 | 4,7,9,10,1<br>1,12,15,16<br>,17 | 9  | O88267,P06911,P08753,P51907,Q561R9,Q5FVI6,Q5GRG2,Q64093,Q9Z1F2                                                                                            |
| 788 | 1,2,3,5,6,8<br>,13,15 | 4,7,9,10,1<br>1,12,14,16<br>,17 | 4  | P08753,P82995,Q6IFV1,Q9Z1F2                                                                                                                               |
| 789 | 1,2,3,5,6,8<br>,13,16 | 4,7,9,10,1<br>1,12,14,15<br>,17 | 4  | P08753,P51907,Q6PCU2,Q9Z1F2                                                                                                                               |
| 790 | 1,2,3,5,6,8<br>,13,17 | 4,7,9,10,1<br>1,12,14,15<br>,16 | 14 | O88267,P01946,P06760,P08753,P08937,P10536,P23593,P51907,P53792,Q561R9,Q5FVI6,Q6IFV1,Q6PCU2,Q9Z1F2                                                         |
| 791 | 1,2,3,5,6,8<br>,14,15 | 4,7,9,10,1<br>1,12,13,16<br>,17 | 3  | P08753,P10536,Q9Z1F2                                                                                                                                      |
| 792 | 1,2,3,5,6,8<br>,14,16 | 4,7,9,10,1<br>1,12,13,15<br>,17 | 3  | P08753,Q561R9,Q9Z1F2                                                                                                                                      |
| 793 | 1,2,3,5,6,8<br>,14,17 | 4,7,9,10,1<br>1,12,13,15<br>,16 | 13 | O88267,P01946,P02793,Q7TP54,P06760,P08753,P08937,P10536,P50115,P51907,Q561R9,Q5FVI6,Q6PCU2,Q9Z1F2                                                         |
| 794 | 1,2,3,5,6,8<br>,15,16 | 4,7,9,10,1<br>1,12,13,14<br>,17 | 1  | P23593                                                                                                                                                    |
| 795 | 1,2,3,5,6,8<br>,15,17 | 4,7,9,10,1<br>1,12,13,14<br>,16 | 8  | P06760,P08753,P08937,P10536,P17475,P23593,Q561R9,Q6IFV1                                                                                                   |
| 796 | 1,2,3,5,6,8<br>,16,17 | 4,7,9,10,1<br>1,12,13,14<br>,15 | 10 | O88267,P01946,P06760,P08753,P10758,P23593,P42854,P51907,Q561R9,Q6PCU2                                                                                     |
| 797 | 1,2,3,5,6,9<br>,10,11 | 4,7,8,12,1<br>3,14,15,16<br>,17 | 7  | P08649,P14173,P27213,P55314,Q63942,Q91ZS3,Q9QUL6                                                                                                          |
| 798 | 1,2,3,5,6,9<br>,10,12 | 4,7,8,11,1<br>3,14,15,16<br>,17 | 5  | P27213,Q10758,Q63942,Q6IFW6,Q6IMF3                                                                                                                        |

|     |                       |                                 |   |                                                                |
|-----|-----------------------|---------------------------------|---|----------------------------------------------------------------|
| 799 | 1,2,3,5,6,9<br>,10,13 | 4,7,8,11,1<br>2,14,15,16<br>,17 | 1 | Q63942                                                         |
| 800 | 1,2,3,5,6,9<br>,10,14 | 4,7,8,11,1<br>2,13,15,16<br>,17 | 3 | P27213,Q63942,Q9QUL6                                           |
| 801 | 1,2,3,5,6,9<br>,10,15 | 4,7,8,11,1<br>2,13,14,16<br>,17 | 3 | P27213,Q63942,Q9QUL6                                           |
| 802 | 1,2,3,5,6,9<br>,10,16 | 4,7,8,11,1<br>2,13,14,15<br>,17 | 5 | P23593,P27213,Q63942,Q6IRE4,Q9QUL6                             |
| 803 | 1,2,3,5,6,9<br>,10,17 | 4,7,8,11,1<br>2,13,14,15<br>,16 | 4 | P23593,P52590,Q63942,Q9QUL6                                    |
| 804 | 1,2,3,5,6,9<br>,11,12 | 4,7,8,10,1<br>3,14,15,16<br>,17 | 9 | P27213,P55314,Q4FZU2,Q6IFU7,Q6IFU8,Q6IFW6,Q6IG02,Q6IMF3,Q6P6Q2 |
| 805 | 1,2,3,5,6,9<br>,11,13 | 4,7,8,10,1<br>2,14,15,16<br>,17 | 3 | P55314,Q63942,Q6IRE4                                           |
| 806 | 1,2,3,5,6,9<br>,11,14 | 4,7,8,10,1<br>2,13,15,16<br>,17 | 5 | P27213,P55314,Q63942,Q6IRE4,Q9QUL6                             |
| 807 | 1,2,3,5,6,9<br>,11,15 | 4,7,8,10,1<br>2,13,14,16<br>,17 | 5 | P27213,P55314,Q63942,Q6IRE4,Q9QUL6                             |
| 808 | 1,2,3,5,6,9<br>,11,16 | 4,7,8,10,1<br>2,13,14,15<br>,17 | 5 | P27213,P55314,Q63942,Q6IRE4,Q9QUL6                             |
| 809 | 1,2,3,5,6,9<br>,11,17 | 4,7,8,10,1<br>2,13,14,15<br>,16 | 3 | P55314,Q63942,Q9QUL6                                           |
| 810 | 1,2,3,5,6,9<br>,12,13 | 4,7,8,10,1<br>1,14,15,16<br>,17 | 2 | P00714,Q9Z1F2                                                  |
| 811 | 1,2,3,5,6,9<br>,12,14 | 4,7,8,10,1<br>1,13,15,16<br>,17 | 5 | P01835,P34901,Q561R9,Q63942,Q9Z1F2                             |
| 812 | 1,2,3,5,6,9<br>,12,15 | 4,7,8,10,1<br>1,13,14,16<br>,17 | 2 | P27213,Q63942                                                  |
| 813 | 1,2,3,5,6,9<br>,12,16 | 4,7,8,10,1<br>1,13,14,15<br>,17 | 3 | P23593,Q63942,Q6IRE4                                           |

|     |                        |                                 |    |                                                                              |
|-----|------------------------|---------------------------------|----|------------------------------------------------------------------------------|
| 814 | 1,2,3,5,6,9<br>,12,17  | 4,7,8,10,1<br>1,13,14,15<br>,16 | 5  | P00714,P01681,P01835,P23593,Q561R9                                           |
| 815 | 1,2,3,5,6,9<br>,13,14  | 4,7,8,10,1<br>1,12,15,16<br>,17 | 4  | P00714,P53792,Q63942,Q9Z1F2                                                  |
| 816 | 1,2,3,5,6,9<br>,13,15  | 4,7,8,10,1<br>1,12,14,16<br>,17 | 3  | P00714,P53792,Q63942                                                         |
| 817 | 1,2,3,5,6,9<br>,13,16  | 4,7,8,10,1<br>1,12,14,15<br>,17 | 4  | P00714,P23593,Q63942,Q6IRE4                                                  |
| 818 | 1,2,3,5,6,9<br>,13,17  | 4,7,8,10,1<br>1,12,14,15<br>,16 | 9  | P00714,P01946,P08753,P23593,P51907,P53792,Q561R9,Q63942,Q9Z1F2               |
| 819 | 1,2,3,5,6,9<br>,14,15  | 4,7,8,10,1<br>1,12,13,16<br>,17 | 4  | P00714,P27213,P53792,Q63942                                                  |
| 820 | 1,2,3,5,6,9<br>,14,16  | 4,7,8,10,1<br>1,12,13,15<br>,17 | 3  | Q561R9,Q63942,Q6IRE4                                                         |
| 821 | 1,2,3,5,6,9<br>,14,17  | 4,7,8,10,1<br>1,12,13,15<br>,16 | 5  | P00714,P53792,Q561R9,Q63942,Q9QUL6                                           |
| 822 | 1,2,3,5,6,9<br>,15,16  | 4,7,8,10,1<br>1,12,13,14<br>,17 | 5  | O54728,P00714,P23593,Q63942,Q6IRE4                                           |
| 823 | 1,2,3,5,6,9<br>,15,17  | 4,7,8,10,1<br>1,12,13,14<br>,16 | 4  | P00714,P23593,P53792,Q63942                                                  |
| 824 | 1,2,3,5,6,9<br>,16,17  | 4,7,8,10,1<br>1,12,13,14<br>,15 | 4  | P00714,P23593,Q561R9,Q63942                                                  |
| 825 | 1,2,3,5,6,1<br>0,11,12 | 4,7,8,9,13,<br>14,15,16,1<br>7  | 11 | P27213,P34901,P55314,Q10758,Q4FZU2,Q6IFU7,Q6IFU8,Q6IFW6,Q6IG02,Q6IMF3,Q6P6Q2 |
| 826 | 1,2,3,5,6,1<br>0,11,13 | 4,7,8,9,12,<br>14,15,16,1<br>7  | 1  | P55314                                                                       |
| 827 | 1,2,3,5,6,1<br>0,11,14 | 4,7,8,9,12,<br>13,15,16,1<br>7  | 5  | P08649,P27213,P34901,P55314,Q9QUL6                                           |
| 828 | 1,2,3,5,6,1<br>0,11,15 | 4,7,8,9,12,<br>13,14,16,1<br>7  | 5  | P08649,P27213,P55314,Q4FZU6,Q9QUL6                                           |

|     |                        |                                |   |                                           |
|-----|------------------------|--------------------------------|---|-------------------------------------------|
| 829 | 1,2,3,5,6,1<br>0,11,16 | 4,7,8,9,12,<br>13,14,15,1<br>7 | 5 | P08649,P27213,P55314,Q6IRE4,Q9QUL6        |
| 830 | 1,2,3,5,6,1<br>0,11,17 | 4,7,8,9,12,<br>13,14,15,1<br>6 | 4 | P01946,P08649,P55314,Q9QUL6               |
| 831 | 1,2,3,5,6,1<br>0,12,13 | 4,7,8,9,11,<br>14,15,16,1<br>7 | 3 | Q10758,Q6IMF3,Q9Z1F2                      |
| 832 | 1,2,3,5,6,1<br>0,12,14 | 4,7,8,9,11,<br>13,15,16,1<br>7 | 6 | P34901,Q10758,Q4FZU2,Q561R9,Q6IFW6,Q6IMF3 |
| 833 | 1,2,3,5,6,1<br>0,12,15 | 4,7,8,9,11,<br>13,14,16,1<br>7 | 4 | P27213,Q10758,Q4FZU2,Q6IMF3               |
| 834 | 1,2,3,5,6,1<br>0,12,16 | 4,7,8,9,11,<br>13,14,15,1<br>7 | 6 | Q10758,Q4FZU2,Q6IFU7,Q6IFW6,Q6IMF3,Q6P6Q2 |
| 835 | 1,2,3,5,6,1<br>0,12,17 | 4,7,8,9,11,<br>13,14,15,1<br>6 | 5 | P01681,Q10758,Q561R9,Q6IMF3,Q99MH3        |
| 836 | 1,2,3,5,6,1<br>0,13,14 | 4,7,8,9,11,<br>12,15,16,1<br>7 | 1 | Q9Z1F2                                    |
| 837 | 1,2,3,5,6,1<br>0,13,15 | 4,7,8,9,11,<br>12,14,16,1<br>7 | 1 | P82995                                    |
| 838 | 1,2,3,5,6,1<br>0,13,16 | 4,7,8,9,11,<br>12,14,15,1<br>7 | 0 |                                           |
| 839 | 1,2,3,5,6,1<br>0,13,17 | 4,7,8,9,11,<br>12,14,15,1<br>6 | 5 | P01946,P08753,P51907,Q561R9,Q99MH3        |
| 840 | 1,2,3,5,6,1<br>0,14,15 | 4,7,8,9,11,<br>12,13,16,1<br>7 | 1 | P27213                                    |
| 841 | 1,2,3,5,6,1<br>0,14,16 | 4,7,8,9,11,<br>12,13,15,1<br>7 | 0 |                                           |
| 842 | 1,2,3,5,6,1<br>0,14,17 | 4,7,8,9,11,<br>12,13,15,1<br>6 | 1 | Q561R9                                    |
| 843 | 1,2,3,5,6,1<br>0,15,16 | 4,7,8,9,11,<br>12,13,14,1<br>7 | 0 |                                           |

|     |                        |                                |    |                                                                              |
|-----|------------------------|--------------------------------|----|------------------------------------------------------------------------------|
| 844 | 1,2,3,5,6,1<br>0,15,17 | 4,7,8,9,11,<br>12,13,14,1<br>6 | 0  |                                                                              |
| 845 | 1,2,3,5,6,1<br>0,16,17 | 4,7,8,9,11,<br>12,13,14,1<br>5 | 3  | P10758,P23593,Q561R9                                                         |
| 846 | 1,2,3,5,6,1<br>1,12,13 | 4,7,8,9,10,<br>14,15,16,1<br>7 | 8  | P55314,Q4FZU2,Q6IFU8,Q6IFW6,Q6IMF3,Q6P6Q2,Q9JHB9,Q9Z1F2                      |
| 847 | 1,2,3,5,6,1<br>1,12,14 | 4,7,8,9,10,<br>13,15,16,1<br>7 | 11 | P01681,P34901,P55314,Q4FZU2,Q6IFU7,Q6IFU8,Q6IFW6,Q6IG02,Q6IMF3,Q6P6Q2,Q9Z1F2 |
| 848 | 1,2,3,5,6,1<br>1,12,15 | 4,7,8,9,10,<br>13,14,16,1<br>7 | 8  | P27213,P55314,Q4FZU2,Q6IFU7,Q6IFU8,Q6IFW6,Q6IMF3,Q6P6Q2                      |
| 849 | 1,2,3,5,6,1<br>1,12,16 | 4,7,8,9,10,<br>13,14,15,1<br>7 | 9  | P17046,P55314,Q4FZU2,Q6IFU7,Q6IFU8,Q6IFW6,Q6IMF3,Q6IRE4,Q6P6Q2               |
| 850 | 1,2,3,5,6,1<br>1,12,17 | 4,7,8,9,10,<br>13,14,15,1<br>6 | 11 | P01681,P01946,P55314,Q10758,Q4FZU2,Q561R9,Q6IFU8,Q6IFW6,Q6IG02,Q6IMF3,Q6P6Q2 |
| 851 | 1,2,3,5,6,1<br>1,13,14 | 4,7,8,9,10,<br>12,15,16,1<br>7 | 2  | P55314,Q9Z1F2                                                                |
| 852 | 1,2,3,5,6,1<br>1,13,15 | 4,7,8,9,10,<br>12,14,16,1<br>7 | 1  | P55314                                                                       |
| 853 | 1,2,3,5,6,1<br>1,13,16 | 4,7,8,9,10,<br>12,14,15,1<br>7 | 3  | P17046,P55314,Q6IRE4                                                         |
| 854 | 1,2,3,5,6,1<br>1,13,17 | 4,7,8,9,10,<br>12,14,15,1<br>6 | 2  | P01946,P55314                                                                |
| 855 | 1,2,3,5,6,1<br>1,14,15 | 4,7,8,9,10,<br>12,13,16,1<br>7 | 3  | P27213,P55314,Q5I0D1                                                         |
| 856 | 1,2,3,5,6,1<br>1,14,16 | 4,7,8,9,10,<br>12,13,15,1<br>7 | 2  | P55314,Q6IRE4                                                                |
| 857 | 1,2,3,5,6,1<br>1,14,17 | 4,7,8,9,10,<br>12,13,15,1<br>6 | 4  | P01946,P55314,Q561R9,Q9QUL6                                                  |
| 858 | 1,2,3,5,6,1<br>1,15,16 | 4,7,8,9,10,<br>12,13,14,1<br>7 | 3  | P55314,Q5I0D1,Q6IRE4                                                         |



|     |                        |                                |    |                                                                       |
|-----|------------------------|--------------------------------|----|-----------------------------------------------------------------------|
| 859 | 1,2,3,5,6,1<br>1,15,17 | 4,7,8,9,10,<br>12,13,14,1<br>6 | 1  | P55314                                                                |
| 860 | 1,2,3,5,6,1<br>1,16,17 | 4,7,8,9,10,<br>12,13,14,1<br>5 | 4  | P01946,P10758,P17046,P55314                                           |
| 861 | 1,2,3,5,6,1<br>2,13,14 | 4,7,8,9,10,<br>11,15,16,1<br>7 | 3  | P00714,Q561R9,Q9Z1F2                                                  |
| 862 | 1,2,3,5,6,1<br>2,13,15 | 4,7,8,9,10,<br>11,14,16,1<br>7 | 3  | P00714,P82995,Q9Z1F2                                                  |
| 863 | 1,2,3,5,6,1<br>2,13,16 | 4,7,8,9,10,<br>11,14,15,1<br>7 | 4  | P00714,P17046,Q561R9,Q9Z1F2                                           |
| 864 | 1,2,3,5,6,1<br>2,13,17 | 4,7,8,9,10,<br>11,14,15,1<br>6 | 8  | P00714,P01681,P01946,P51907,Q561R9,Q62635,Q99MH3,Q9Z1F2               |
| 865 | 1,2,3,5,6,1<br>2,14,15 | 4,7,8,9,10,<br>11,13,16,1<br>7 | 2  | P00714,P34901                                                         |
| 866 | 1,2,3,5,6,1<br>2,14,16 | 4,7,8,9,10,<br>11,13,15,1<br>7 | 3  | P34901,Q561R9,Q6IMF3                                                  |
| 867 | 1,2,3,5,6,1<br>2,14,17 | 4,7,8,9,10,<br>11,13,15,1<br>6 | 8  | P00714,P01681,P01946,P31430,P34901,Q10758,Q561R9,Q9Z1F2               |
| 868 | 1,2,3,5,6,1<br>2,15,16 | 4,7,8,9,10,<br>11,13,14,1<br>7 | 2  | P00714,P83121                                                         |
| 869 | 1,2,3,5,6,1<br>2,15,17 | 4,7,8,9,10,<br>11,13,14,1<br>6 | 3  | P00714,P83121,Q561R9                                                  |
| 870 | 1,2,3,5,6,1<br>2,16,17 | 4,7,8,9,10,<br>11,13,14,1<br>5 | 7  | P00714,P01681,P01946,P17046,P23593,Q10758,Q561R9                      |
| 871 | 1,2,3,5,6,1<br>3,14,15 | 4,7,8,9,10,<br>11,12,16,1<br>7 | 5  | P00714,P08753,P53792,Q64093,Q9Z1F2                                    |
| 872 | 1,2,3,5,6,1<br>3,14,16 | 4,7,8,9,10,<br>11,12,15,1<br>7 | 5  | P00714,P08753,Q561R9,Q6IRE4,Q9Z1F2                                    |
| 873 | 1,2,3,5,6,1<br>3,14,17 | 4,7,8,9,10,<br>11,12,15,1<br>6 | 10 | P00714,P01946,P08753,P51907,P53792,Q561R9,Q5FVI6,Q6PCU2,Q9QW07,Q9Z1F2 |

|     |                        |                                  |   |                                                         |
|-----|------------------------|----------------------------------|---|---------------------------------------------------------|
| 874 | 1,2,3,5,6,1<br>3,15,16 | 4,7,8,9,10,<br>11,12,14,1<br>7   | 3 | P00714,P08753,P82995                                    |
| 875 | 1,2,3,5,6,1<br>3,15,17 | 4,7,8,9,10,<br>11,12,14,1<br>6   | 5 | P00714,P08753,P53792,Q561R9,Q6IFV1                      |
| 876 | 1,2,3,5,6,1<br>3,16,17 | 4,7,8,9,10,<br>11,12,14,1<br>5   | 8 | P00714,P01946,P08753,P10758,P23593,P51907,Q561R9,Q6PCU2 |
| 877 | 1,2,3,5,6,1<br>4,15,16 | 4,7,8,9,10,<br>11,12,13,1<br>7   | 4 | P00714,P02803,P36374,Q6IRE4                             |
| 878 | 1,2,3,5,6,1<br>4,15,17 | 4,7,8,9,10,<br>11,12,13,1<br>6   | 5 | P00714,P02803,P10536,P47967,Q561R9                      |
| 879 | 1,2,3,5,6,1<br>4,16,17 | 4,7,8,9,10,<br>11,12,13,1<br>5   | 6 | P00714,P01946,P10758,Q561R9,Q6PCU2,Q9QW07               |
| 880 | 1,2,3,5,6,1<br>5,16,17 | 4,7,8,9,10,<br>11,12,13,1<br>4   | 4 | P00714,P02803,P23593,Q561R9                             |
| 881 | 1,2,3,5,7,8<br>,9,10   | 4,6,11,12,<br>13,14,15,1<br>6,17 | 5 | O55006,P27213,P31044,P52590,Q63942                      |
| 882 | 1,2,3,5,7,8<br>,9,11   | 4,6,10,12,<br>13,14,15,1<br>6,17 | 6 | P10715,P27213,P52590,P55314,Q6IRE4,Q9QUL6               |
| 883 | 1,2,3,5,7,8<br>,9,12   | 4,6,10,11,<br>13,14,15,1<br>6,17 | 5 | P10715,P27213,P52590,Q9EQS0,Q9Z1F2                      |
| 884 | 1,2,3,5,7,8<br>,9,13   | 4,6,10,11,<br>12,14,15,1<br>6,17 | 4 | P20766,P52590,P53792,Q9Z1F2                             |
| 885 | 1,2,3,5,7,8<br>,9,14   | 4,6,10,11,<br>12,13,15,1<br>6,17 | 4 | P27213,P52590,Q63942,Q9QX79                             |
| 886 | 1,2,3,5,7,8<br>,9,15   | 4,6,10,11,<br>12,13,14,1<br>6,17 | 6 | O54728,P10715,P27213,P52590,Q5QE79,Q63942               |
| 887 | 1,2,3,5,7,8<br>,9,16   | 4,6,10,11,<br>12,13,14,1<br>5,17 | 5 | P10715,P27213,P52590,Q63942,Q6IRE4                      |
| 888 | 1,2,3,5,7,8<br>,9,17   | 4,6,10,11,<br>12,13,14,1<br>5,16 | 7 | P01946,P02091,P10715,P50115,P52590,P53792,Q9QX79        |

|     |                       |                                 |   |                                                                |
|-----|-----------------------|---------------------------------|---|----------------------------------------------------------------|
| 889 | 1,2,3,5,7,8<br>,10,11 | 4,6,9,12,1<br>3,14,15,16<br>,17 | 9 | P08649,P10715,P16391,P27213,P28648,P31044,P52590,P55314,P68370 |
| 890 | 1,2,3,5,7,8<br>,10,12 | 4,6,9,11,1<br>3,14,15,16<br>,17 | 7 | P00731,P08937,P10715,P16391,P27213,P52590,Q9EQS0               |
| 891 | 1,2,3,5,7,8<br>,10,13 | 4,6,9,11,1<br>2,14,15,16<br>,17 | 3 | P01835,P31044,P52590                                           |
| 892 | 1,2,3,5,7,8<br>,10,14 | 4,6,9,11,1<br>2,13,15,16<br>,17 | 5 | P27213,P31044,P36970,P52590,P97615                             |
| 893 | 1,2,3,5,7,8<br>,10,15 | 4,6,9,11,1<br>2,13,14,16<br>,17 | 6 | P00731,P01835,P27213,P31044,P52590,P97615                      |
| 894 | 1,2,3,5,7,8<br>,10,16 | 4,6,9,11,1<br>2,13,14,15<br>,17 | 4 | P01835,P08721,P27213,P52590                                    |
| 895 | 1,2,3,5,7,8<br>,10,17 | 4,6,9,11,1<br>2,13,14,15<br>,16 | 8 | P01946,P02091,P08937,P12346,P50115,P52590,P97571,P97615        |
| 896 | 1,2,3,5,7,8<br>,11,12 | 4,6,9,10,1<br>3,14,15,16<br>,17 | 8 | P08937,P10715,P27213,P52590,P55314,Q6IG02,Q8CJ52,Q9EQS0        |
| 897 | 1,2,3,5,7,8<br>,11,13 | 4,6,9,10,1<br>2,14,15,16<br>,17 | 2 | P10715,P55314                                                  |
| 898 | 1,2,3,5,7,8<br>,11,14 | 4,6,9,10,1<br>2,13,15,16<br>,17 | 5 | P10715,P19629,P27213,P52590,P55314                             |
| 899 | 1,2,3,5,7,8<br>,11,15 | 4,6,9,10,1<br>2,13,14,16<br>,17 | 5 | P10715,P27213,P52590,P55314,Q5I0D1                             |
| 900 | 1,2,3,5,7,8<br>,11,16 | 4,6,9,10,1<br>2,13,14,15<br>,17 | 5 | B4F795,P10715,P27213,P55314,Q6IRE4                             |
| 901 | 1,2,3,5,7,8<br>,11,17 | 4,6,9,10,1<br>2,13,14,15<br>,16 | 8 | P01946,P02091,P08937,P10715,P50115,P52590,P55314,Q63751        |
| 902 | 1,2,3,5,7,8<br>,12,13 | 4,6,9,10,1<br>1,14,15,16<br>,17 | 6 | O88267,P08937,P10715,P36970,Q8CJ52,Q9Z1F2                      |
| 903 | 1,2,3,5,7,8<br>,12,14 | 4,6,9,10,1<br>1,13,15,16<br>,17 | 9 | O88267,P08937,P10715,P19629,P36970,P52590,Q6AYS7,Q9EQS0,Q9Z1F2 |

|     |                       |                                 |    |                                                                                                   |
|-----|-----------------------|---------------------------------|----|---------------------------------------------------------------------------------------------------|
| 904 | 1,2,3,5,7,8<br>,12,15 | 4,6,9,10,1<br>1,13,14,16<br>,17 | 5  | P08937,P10715,P27213,P52590,P83121                                                                |
| 905 | 1,2,3,5,7,8<br>,12,16 | 4,6,9,10,1<br>1,13,14,15<br>,17 | 3  | O88267,P10715,P83121                                                                              |
| 906 | 1,2,3,5,7,8<br>,12,17 | 4,6,9,10,1<br>1,13,14,15<br>,16 | 14 | O88267,P01946,P02091,P08937,P10715,P19223,P23928,P50115,P52590,P55091,P83121,Q561R9,Q63751,Q9QZA6 |
| 907 | 1,2,3,5,7,8<br>,13,14 | 4,6,9,10,1<br>1,12,15,16<br>,17 | 8  | O88267,P00762,P08753,P36970,Q08849,Q5GRG2,Q63317,Q9Z1F2                                           |
| 908 | 1,2,3,5,7,8<br>,13,15 | 4,6,9,10,1<br>1,12,14,16<br>,17 | 6  | P00762,P01835,P08753,P52590,Q09030,Q63317                                                         |
| 909 | 1,2,3,5,7,8<br>,13,16 | 4,6,9,10,1<br>1,12,14,15<br>,17 | 4  | O88267,P00762,P01835,P08753                                                                       |
| 910 | 1,2,3,5,7,8<br>,13,17 | 4,6,9,10,1<br>1,12,14,15<br>,16 | 13 | O88267,P01946,P02091,P08753,P08937,P23928,P50115,P51907,P52590,P53792,P55091,Q6PCU2,Q9Z1F2        |
| 911 | 1,2,3,5,7,8<br>,14,15 | 4,6,9,10,1<br>1,12,13,16<br>,17 | 5  | P10536,P19629,P27213,P52590,Q08849                                                                |
| 912 | 1,2,3,5,7,8<br>,14,16 | 4,6,9,10,1<br>1,12,13,15<br>,17 | 2  | O88267,Q6IRE4                                                                                     |
| 913 | 1,2,3,5,7,8<br>,14,17 | 4,6,9,10,1<br>1,12,13,15<br>,16 | 9  | O88267,P01946,P02091,P10536,P19629,P50115,P52590,Q561R9,Q6PCU2                                    |
| 914 | 1,2,3,5,7,8<br>,15,16 | 4,6,9,10,1<br>1,12,13,14<br>,17 | 5  | B4F795,P00762,P01835,P10715,P83121                                                                |
| 915 | 1,2,3,5,7,8<br>,15,17 | 4,6,9,10,1<br>1,12,13,14<br>,16 | 7  | P01946,P02091,P10536,P12346,P50115,P52590,P83121                                                  |
| 916 | 1,2,3,5,7,8<br>,16,17 | 4,6,9,10,1<br>1,12,13,14<br>,15 | 10 | O88267,P01946,P02091,P10715,P10758,P23928,P50115,P50116,P52590,Q6PCU2                             |
| 917 | 1,2,3,5,7,9<br>,10,11 | 4,6,8,12,1<br>3,14,15,16<br>,17 | 5  | P27213,P52590,P55314,Q6IRE4,Q9QUL6                                                                |
| 918 | 1,2,3,5,7,9<br>,10,12 | 4,6,8,11,1<br>3,14,15,16<br>,17 | 3  | P27213,P52590,P97840                                                                              |

|     |                       |                                 |   |                                           |
|-----|-----------------------|---------------------------------|---|-------------------------------------------|
| 919 | 1,2,3,5,7,9<br>,10,13 | 4,6,8,11,1<br>2,14,15,16<br>,17 | 1 | P52590                                    |
| 920 | 1,2,3,5,7,9<br>,10,14 | 4,6,8,11,1<br>2,13,15,16<br>,17 | 3 | P27213,P52590,Q9QUL6                      |
| 921 | 1,2,3,5,7,9<br>,10,15 | 4,6,8,11,1<br>2,13,14,16<br>,17 | 3 | O54728,P27213,P52590                      |
| 922 | 1,2,3,5,7,9<br>,10,16 | 4,6,8,11,1<br>2,13,14,15<br>,17 | 3 | P27213,P52590,Q6IRE4                      |
| 923 | 1,2,3,5,7,9<br>,10,17 | 4,6,8,11,1<br>2,13,14,15<br>,16 | 4 | P01946,P02091,P52590,Q9QUL6               |
| 924 | 1,2,3,5,7,9<br>,11,12 | 4,6,8,10,1<br>3,14,15,16<br>,17 | 5 | P27213,P52590,P55314,Q498R7,Q6IRE4        |
| 925 | 1,2,3,5,7,9<br>,11,13 | 4,6,8,10,1<br>2,14,15,16<br>,17 | 3 | P52590,P55314,Q6IRE4                      |
| 926 | 1,2,3,5,7,9<br>,11,14 | 4,6,8,10,1<br>2,13,15,16<br>,17 | 5 | P27213,P52590,P55314,Q6IRE4,Q9QUL6        |
| 927 | 1,2,3,5,7,9<br>,11,15 | 4,6,8,10,1<br>2,13,14,16<br>,17 | 6 | O54728,P27213,P52590,P55314,Q6IRE4,Q9QUL6 |
| 928 | 1,2,3,5,7,9<br>,11,16 | 4,6,8,10,1<br>2,13,14,15<br>,17 | 5 | P27213,P52590,P55314,Q6IRE4,Q9QUL6        |
| 929 | 1,2,3,5,7,9<br>,11,17 | 4,6,8,10,1<br>2,13,14,15<br>,16 | 5 | P01946,P02091,P52590,P55314,Q9QUL6        |
| 930 | 1,2,3,5,7,9<br>,12,13 | 4,6,8,10,1<br>1,14,15,16<br>,17 | 2 | P52590,Q9Z1F2                             |
| 931 | 1,2,3,5,7,9<br>,12,14 | 4,6,8,10,1<br>1,13,15,16<br>,17 | 3 | P27213,P34901,P52590                      |
| 932 | 1,2,3,5,7,9<br>,12,15 | 4,6,8,10,1<br>1,13,14,16<br>,17 | 2 | P27213,P52590                             |
| 933 | 1,2,3,5,7,9<br>,12,16 | 4,6,8,10,1<br>1,13,14,15<br>,17 | 3 | P17046,P52590,Q6IRE4                      |

|     |                        |                                 |   |                                                         |
|-----|------------------------|---------------------------------|---|---------------------------------------------------------|
| 934 | 1,2,3,5,7,9<br>,12,17  | 4,6,8,10,1<br>1,13,14,15<br>,16 | 4 | P01946,P02091,P52590,P55091                             |
| 935 | 1,2,3,5,7,9<br>,13,14  | 4,6,8,10,1<br>1,12,15,16<br>,17 | 3 | P52590,P53792,Q6IRE4                                    |
| 936 | 1,2,3,5,7,9<br>,13,15  | 4,6,8,10,1<br>1,12,14,16<br>,17 | 3 | O54728,P52590,P53792                                    |
| 937 | 1,2,3,5,7,9<br>,13,16  | 4,6,8,10,1<br>1,12,14,15<br>,17 | 3 | P08010,P52590,Q6IRE4                                    |
| 938 | 1,2,3,5,7,9<br>,13,17  | 4,6,8,10,1<br>1,12,14,15<br>,16 | 4 | P01946,P02091,P52590,P53792                             |
| 939 | 1,2,3,5,7,9<br>,14,15  | 4,6,8,10,1<br>1,12,13,16<br>,17 | 7 | O54728,P0C0A9,P16636,P27213,P52590,P53792,Q9QZK9        |
| 940 | 1,2,3,5,7,9<br>,14,16  | 4,6,8,10,1<br>1,12,13,15<br>,17 | 4 | P0C0A9,P52590,Q6IRE4,Q9QZK9                             |
| 941 | 1,2,3,5,7,9<br>,14,17  | 4,6,8,10,1<br>1,12,13,15<br>,16 | 4 | P01946,P02091,P52590,P53792                             |
| 942 | 1,2,3,5,7,9<br>,15,16  | 4,6,8,10,1<br>1,12,13,14<br>,17 | 8 | O54728,P02782,P0C0A9,P47727,P52590,Q6AYR9,Q6IRE4,Q9QZK9 |
| 943 | 1,2,3,5,7,9<br>,15,17  | 4,6,8,10,1<br>1,12,13,14<br>,16 | 7 | O54728,P01946,P02091,P0C0A9,P47727,P52590,P53792        |
| 944 | 1,2,3,5,7,9<br>,16,17  | 4,6,8,10,1<br>1,12,13,14<br>,15 | 5 | P01946,P02091,P0C0A9,P47727,P52590                      |
| 945 | 1,2,3,5,7,1<br>0,11,12 | 4,6,8,9,13,<br>14,15,16,1<br>7  | 5 | P27213,P34901,P52590,P55314,Q6P6Q2                      |
| 946 | 1,2,3,5,7,1<br>0,11,13 | 4,6,8,9,12,<br>14,15,16,1<br>7  | 2 | P52590,P55314                                           |
| 947 | 1,2,3,5,7,1<br>0,11,14 | 4,6,8,9,12,<br>13,15,16,1<br>7  | 4 | P27213,P52590,P55314,Q9QUL6                             |
| 948 | 1,2,3,5,7,1<br>0,11,15 | 4,6,8,9,12,<br>13,14,16,1<br>7  | 3 | P27213,P52590,P55314                                    |

|     |                        |                                |   |                                    |
|-----|------------------------|--------------------------------|---|------------------------------------|
| 949 | 1,2,3,5,7,1<br>0,11,16 | 4,6,8,9,12,<br>13,14,15,1<br>7 | 4 | P17046,P27213,P55314,Q6IRE4        |
| 950 | 1,2,3,5,7,1<br>0,11,17 | 4,6,8,9,12,<br>13,14,15,1<br>6 | 5 | P01946,P02091,P52590,P55314,Q9QUL6 |
| 951 | 1,2,3,5,7,1<br>0,12,13 | 4,6,8,9,11,<br>14,15,16,1<br>7 | 1 | P52590                             |
| 952 | 1,2,3,5,7,1<br>0,12,14 | 4,6,8,9,11,<br>13,15,16,1<br>7 | 2 | P34901,P52590                      |
| 953 | 1,2,3,5,7,1<br>0,12,15 | 4,6,8,9,11,<br>13,14,16,1<br>7 | 3 | P00731,P27213,P52590               |
| 954 | 1,2,3,5,7,1<br>0,12,16 | 4,6,8,9,11,<br>13,14,15,1<br>7 | 3 | P08721,P17046,P97840               |
| 955 | 1,2,3,5,7,1<br>0,12,17 | 4,6,8,9,11,<br>13,14,15,1<br>6 | 5 | P01946,P02091,P52590,P55091,Q10758 |
| 956 | 1,2,3,5,7,1<br>0,13,14 | 4,6,8,9,11,<br>12,15,16,1<br>7 | 0 |                                    |
| 957 | 1,2,3,5,7,1<br>0,13,15 | 4,6,8,9,11,<br>12,14,16,1<br>7 | 3 | P01835,P52590,Q09030               |
| 958 | 1,2,3,5,7,1<br>0,13,16 | 4,6,8,9,11,<br>12,14,15,1<br>7 | 1 | P01835                             |
| 959 | 1,2,3,5,7,1<br>0,13,17 | 4,6,8,9,11,<br>12,14,15,1<br>6 | 3 | P01946,P02091,P52590               |
| 960 | 1,2,3,5,7,1<br>0,14,15 | 4,6,8,9,11,<br>12,13,16,1<br>7 | 2 | P27213,P52590                      |
| 961 | 1,2,3,5,7,1<br>0,14,16 | 4,6,8,9,11,<br>12,13,15,1<br>7 | 3 | P08721,Q63532,Q6IRE4               |
| 962 | 1,2,3,5,7,1<br>0,14,17 | 4,6,8,9,11,<br>12,13,15,1<br>6 | 3 | P01946,P02091,P52590               |
| 963 | 1,2,3,5,7,1<br>0,15,16 | 4,6,8,9,11,<br>12,13,14,1<br>7 | 4 | P01835,P02782,P0C0A9,P52590        |

|     |                        |                                |   |                                           |
|-----|------------------------|--------------------------------|---|-------------------------------------------|
| 964 | 1,2,3,5,7,1<br>0,15,17 | 4,6,8,9,11,<br>12,13,14,1<br>6 | 4 | P01946,P02091,P0C0A9,P52590               |
| 965 | 1,2,3,5,7,1<br>0,16,17 | 4,6,8,9,11,<br>12,13,14,1<br>5 | 5 | P01946,P02091,P0C0A9,P10758,P52590        |
| 966 | 1,2,3,5,7,1<br>1,12,13 | 4,6,8,9,10,<br>14,15,16,1<br>7 | 2 | P17046,P55314                             |
| 967 | 1,2,3,5,7,1<br>1,12,14 | 4,6,8,9,10,<br>13,15,16,1<br>7 | 4 | P17046,P27213,P34901,P55314               |
| 968 | 1,2,3,5,7,1<br>1,12,15 | 4,6,8,9,10,<br>13,14,16,1<br>7 | 3 | P17046,P27213,P55314                      |
| 969 | 1,2,3,5,7,1<br>1,12,16 | 4,6,8,9,10,<br>13,14,15,1<br>7 | 3 | P17046,P55314,Q6IRE4                      |
| 970 | 1,2,3,5,7,1<br>1,12,17 | 4,6,8,9,10,<br>13,14,15,1<br>6 | 6 | P01946,P02091,P17046,P52590,P55091,P55314 |
| 971 | 1,2,3,5,7,1<br>1,13,14 | 4,6,8,9,10,<br>12,15,16,1<br>7 | 2 | P55314,Q6IRE4                             |
| 972 | 1,2,3,5,7,1<br>1,13,15 | 4,6,8,9,10,<br>12,14,16,1<br>7 | 2 | P55314,Q09030                             |
| 973 | 1,2,3,5,7,1<br>1,13,16 | 4,6,8,9,10,<br>12,14,15,1<br>7 | 3 | P17046,P55314,Q6IRE4                      |
| 974 | 1,2,3,5,7,1<br>1,13,17 | 4,6,8,9,10,<br>12,14,15,1<br>6 | 5 | P01946,P02091,P17046,P52590,P55314        |
| 975 | 1,2,3,5,7,1<br>1,14,15 | 4,6,8,9,10,<br>12,13,16,1<br>7 | 4 | P16636,P27213,P55314,Q6IRE4               |
| 976 | 1,2,3,5,7,1<br>1,14,16 | 4,6,8,9,10,<br>12,13,15,1<br>7 | 4 | P17046,P55314,Q63532,Q6IRE4               |
| 977 | 1,2,3,5,7,1<br>1,14,17 | 4,6,8,9,10,<br>12,13,15,1<br>6 | 5 | P01946,P02091,P52590,P55314,Q9QUL6        |
| 978 | 1,2,3,5,7,1<br>1,15,16 | 4,6,8,9,10,<br>12,13,14,1<br>7 | 4 | O54728,P17046,P55314,Q6IRE4               |



|     |                        |                                |   |                                                                |
|-----|------------------------|--------------------------------|---|----------------------------------------------------------------|
| 979 | 1,2,3,5,7,1<br>1,15,17 | 4,6,8,9,10,<br>12,13,14,1<br>6 | 4 | P01946,P02091,P52590,P55314                                    |
| 980 | 1,2,3,5,7,1<br>1,16,17 | 4,6,8,9,10,<br>12,13,14,1<br>5 | 7 | P01946,P02091,P10758,P17046,P52590,P55314,Q6IRE4               |
| 981 | 1,2,3,5,7,1<br>2,13,14 | 4,6,8,9,10,<br>11,15,16,1<br>7 | 2 | A2RUV9,Q9Z1F2                                                  |
| 982 | 1,2,3,5,7,1<br>2,13,15 | 4,6,8,9,10,<br>11,14,16,1<br>7 | 2 | P83121,Q09030                                                  |
| 983 | 1,2,3,5,7,1<br>2,13,16 | 4,6,8,9,10,<br>11,14,15,1<br>7 | 2 | P17046,Q6IRE4                                                  |
| 984 | 1,2,3,5,7,1<br>2,13,17 | 4,6,8,9,10,<br>11,14,15,1<br>6 | 6 | P01946,P02091,P17046,P52590,P55091,Q561R9                      |
| 985 | 1,2,3,5,7,1<br>2,14,15 | 4,6,8,9,10,<br>11,13,16,1<br>7 | 3 | A2RUV9,P34901,Q8CJD3                                           |
| 986 | 1,2,3,5,7,1<br>2,14,16 | 4,6,8,9,10,<br>11,13,15,1<br>7 | 4 | P17046,P34901,Q63532,Q6IRE4                                    |
| 987 | 1,2,3,5,7,1<br>2,14,17 | 4,6,8,9,10,<br>11,13,15,1<br>6 | 7 | P01946,P02091,P31430,P34901,P52590,P55091,Q561R9               |
| 988 | 1,2,3,5,7,1<br>2,15,16 | 4,6,8,9,10,<br>11,13,14,1<br>7 | 2 | P17046,P83121                                                  |
| 989 | 1,2,3,5,7,1<br>2,15,17 | 4,6,8,9,10,<br>11,13,14,1<br>6 | 5 | P01946,P02091,P52590,P55091,P83121                             |
| 990 | 1,2,3,5,7,1<br>2,16,17 | 4,6,8,9,10,<br>11,13,14,1<br>5 | 7 | P01946,P02091,P17046,P52590,P55091,P83121,Q561R9               |
| 991 | 1,2,3,5,7,1<br>3,14,15 | 4,6,8,9,10,<br>11,12,16,1<br>7 | 4 | P00762,P16636,P53792,Q09030                                    |
| 992 | 1,2,3,5,7,1<br>3,14,16 | 4,6,8,9,10,<br>11,12,15,1<br>7 | 2 | P00762,Q6IRE4                                                  |
| 993 | 1,2,3,5,7,1<br>3,14,17 | 4,6,8,9,10,<br>11,12,15,1<br>6 | 9 | P00714,P01946,P02091,P08753,P52590,P53792,Q561R9,Q6PCU2,Q9QW07 |

|      |                        |                                 |   |                                                                |
|------|------------------------|---------------------------------|---|----------------------------------------------------------------|
| 994  | 1,2,3,5,7,1<br>3,15,16 | 4,6,8,9,10,<br>11,12,14,1<br>7  | 6 | O54728,P00762,P01835,P0C0A9,Q09030,Q6IRE4                      |
| 995  | 1,2,3,5,7,1<br>3,15,17 | 4,6,8,9,10,<br>11,12,14,1<br>6  | 7 | P00714,P01946,P02091,P0C0A9,P52590,P53792,Q09030               |
| 996  | 1,2,3,5,7,1<br>3,16,17 | 4,6,8,9,10,<br>11,12,14,1<br>5  | 9 | P00714,P01946,P02091,P0C0A9,P10758,P17046,P52590,Q561R9,Q6PCU2 |
| 997  | 1,2,3,5,7,1<br>4,15,16 | 4,6,8,9,10,<br>11,12,13,1<br>7  | 6 | O54728,P0C0A9,P16636,Q63532,Q6IRE4,Q9QZK9                      |
| 998  | 1,2,3,5,7,1<br>4,15,17 | 4,6,8,9,10,<br>11,12,13,1<br>6  | 5 | P01946,P02091,P02803,P0C0A9,P52590                             |
| 999  | 1,2,3,5,7,1<br>4,16,17 | 4,6,8,9,10,<br>11,12,13,1<br>5  | 8 | P01946,P02091,P0C0A9,P10758,P52590,Q561R9,Q6PCU2,Q9QW07        |
| 1000 | 1,2,3,5,7,1<br>5,16,17 | 4,6,8,9,10,<br>11,12,13,1<br>4  | 8 | P01946,P02091,P02780,P02782,P0C0A9,P47727,P52590,P83121        |
| 1001 | 1,2,3,5,8,9<br>,10,11  | 4,6,7,12,1<br>3,14,15,16<br>,17 | 5 | P08649,P27213,P55314,Q63942,Q9QUL6                             |
| 1002 | 1,2,3,5,8,9<br>,10,12  | 4,6,7,11,1<br>3,14,15,16<br>,17 | 2 | P27213,Q6IG02                                                  |
| 1003 | 1,2,3,5,8,9<br>,10,13  | 4,6,7,11,1<br>2,14,15,16<br>,17 | 1 | Q63942                                                         |
| 1004 | 1,2,3,5,8,9<br>,10,14  | 4,6,7,11,1<br>2,13,15,16<br>,17 | 2 | P27213,Q63942                                                  |
| 1005 | 1,2,3,5,8,9<br>,10,15  | 4,6,7,11,1<br>2,13,14,16<br>,17 | 3 | O54728,P27213,Q63942                                           |
| 1006 | 1,2,3,5,8,9<br>,10,16  | 4,6,7,11,1<br>2,13,14,15<br>,17 | 2 | Q63942,Q9QZK9                                                  |
| 1007 | 1,2,3,5,8,9<br>,10,17  | 4,6,7,11,1<br>2,13,14,15<br>,16 | 3 | P08649,P52590,Q63942                                           |
| 1008 | 1,2,3,5,8,9<br>,11,12  | 4,6,7,10,1<br>3,14,15,16<br>,17 | 2 | P27213,Q6IG02                                                  |

|      |                       |                                 |   |                                                         |
|------|-----------------------|---------------------------------|---|---------------------------------------------------------|
| 1009 | 1,2,3,5,8,9<br>,11,13 | 4,6,7,10,1<br>2,14,15,16<br>,17 | 2 | P20766,Q63942                                           |
| 1010 | 1,2,3,5,8,9<br>,11,14 | 4,6,7,10,1<br>2,13,15,16<br>,17 | 2 | P27213,Q63942                                           |
| 1011 | 1,2,3,5,8,9<br>,11,15 | 4,6,7,10,1<br>2,13,14,16<br>,17 | 4 | O54728,P27213,Q5QE79,Q63942                             |
| 1012 | 1,2,3,5,8,9<br>,11,16 | 4,6,7,10,1<br>2,13,14,15<br>,17 | 5 | P27213,P55314,Q63942,Q6IRE4,Q9QZK9                      |
| 1013 | 1,2,3,5,8,9<br>,11,17 | 4,6,7,10,1<br>2,13,14,15<br>,16 | 3 | P01946,P08649,Q9QUL6                                    |
| 1014 | 1,2,3,5,8,9<br>,12,13 | 4,6,7,10,1<br>1,14,15,16<br>,17 | 2 | Q5FVI6,Q9Z1F2                                           |
| 1015 | 1,2,3,5,8,9<br>,12,14 | 4,6,7,10,1<br>1,13,15,16<br>,17 | 3 | Q5FVI6,Q63942,Q9Z1F2                                    |
| 1016 | 1,2,3,5,8,9<br>,12,15 | 4,6,7,10,1<br>1,13,14,16<br>,17 | 4 | P27213,P83121,Q5QE79,Q63942                             |
| 1017 | 1,2,3,5,8,9<br>,12,16 | 4,6,7,10,1<br>1,13,14,15<br>,17 | 2 | P83121,Q63942                                           |
| 1018 | 1,2,3,5,8,9<br>,12,17 | 4,6,7,10,1<br>1,13,14,15<br>,16 | 2 | P01946,Q5FVI6                                           |
| 1019 | 1,2,3,5,8,9<br>,13,14 | 4,6,7,10,1<br>1,12,15,16<br>,17 | 5 | P08753,P20766,Q5FVI6,Q63942,Q9Z1F2                      |
| 1020 | 1,2,3,5,8,9<br>,13,15 | 4,6,7,10,1<br>1,12,14,16<br>,17 | 5 | O54728,P08753,Q5FVI6,Q5QE79,Q63942                      |
| 1021 | 1,2,3,5,8,9<br>,13,16 | 4,6,7,10,1<br>1,12,14,15<br>,17 | 2 | P08753,Q63942                                           |
| 1022 | 1,2,3,5,8,9<br>,13,17 | 4,6,7,10,1<br>1,12,14,15<br>,16 | 8 | P01946,P08753,P20766,P51907,P53792,Q5FVI6,Q63942,Q9Z1F2 |
| 1023 | 1,2,3,5,8,9<br>,14,15 | 4,6,7,10,1<br>1,12,13,16<br>,17 | 6 | O54728,P27213,Q5FVI6,Q5QE79,Q63942,Q9QZK9               |

|      |                        |                                 |   |                                                  |
|------|------------------------|---------------------------------|---|--------------------------------------------------|
| 1024 | 1,2,3,5,8,9<br>,14,16  | 4,6,7,10,1<br>1,12,13,15<br>,17 | 2 | Q63942,Q9QZK9                                    |
| 1025 | 1,2,3,5,8,9<br>,14,17  | 4,6,7,10,1<br>1,12,13,15<br>,16 | 5 | P01946,P08753,P47967,Q5FVI6,Q63942               |
| 1026 | 1,2,3,5,8,9<br>,15,16  | 4,6,7,10,1<br>1,12,13,14<br>,17 | 6 | O54728,P47727,P83121,Q5QE79,Q63942,Q9QZK9        |
| 1027 | 1,2,3,5,8,9<br>,15,17  | 4,6,7,10,1<br>1,12,13,14<br>,16 | 5 | P47727,P47967,Q5FVI6,Q5QE79,Q63942               |
| 1028 | 1,2,3,5,8,9<br>,16,17  | 4,6,7,10,1<br>1,12,13,14<br>,15 | 3 | P23593,P47727,Q63942                             |
| 1029 | 1,2,3,5,8,1<br>0,11,12 | 4,6,7,9,13,<br>14,15,16,1<br>7  | 7 | P00731,P27213,P55314,P62804,Q6IFU8,Q6IG02,Q6P6Q2 |
| 1030 | 1,2,3,5,8,1<br>0,11,13 | 4,6,7,9,12,<br>14,15,16,1<br>7  | 1 | P55314                                           |
| 1031 | 1,2,3,5,8,1<br>0,11,14 | 4,6,7,9,12,<br>13,15,16,1<br>7  | 3 | P08649,P27213,P55314                             |
| 1032 | 1,2,3,5,8,1<br>0,11,15 | 4,6,7,9,12,<br>13,14,16,1<br>7  | 4 | P00731,P08649,P27213,P55314                      |
| 1033 | 1,2,3,5,8,1<br>0,11,16 | 4,6,7,9,12,<br>13,14,15,1<br>7  | 2 | P08649,P55314                                    |
| 1034 | 1,2,3,5,8,1<br>0,11,17 | 4,6,7,9,12,<br>13,14,15,1<br>6  | 3 | P01946,P08649,P55314                             |
| 1035 | 1,2,3,5,8,1<br>0,12,13 | 4,6,7,9,11,<br>14,15,16,1<br>7  | 2 | P83121,Q9Z1F2                                    |
| 1036 | 1,2,3,5,8,1<br>0,12,14 | 4,6,7,9,11,<br>13,15,16,1<br>7  | 1 | Q6IG02                                           |
| 1037 | 1,2,3,5,8,1<br>0,12,15 | 4,6,7,9,11,<br>13,14,16,1<br>7  | 2 | P00731,P83121                                    |
| 1038 | 1,2,3,5,8,1<br>0,12,16 | 4,6,7,9,11,<br>13,14,15,1<br>7  | 3 | P08721,P83121,Q6IG02                             |

|      |                        |                                |   |                                    |
|------|------------------------|--------------------------------|---|------------------------------------|
| 1039 | 1,2,3,5,8,1<br>0,12,17 | 4,6,7,9,11,<br>13,14,15,1<br>6 | 4 | P01946,P83121,Q10758,Q6IG02        |
| 1040 | 1,2,3,5,8,1<br>0,13,14 | 4,6,7,9,11,<br>12,15,16,1<br>7 | 3 | P08753,P09605,P25809,P36970        |
| 1041 | 1,2,3,5,8,1<br>0,13,15 | 4,6,7,9,11,<br>12,14,16,1<br>7 | 4 | P01835,P08753,P09605,P25809,P83121 |
| 1042 | 1,2,3,5,8,1<br>0,13,16 | 4,6,7,9,11,<br>12,14,15,1<br>7 | 3 | P01835,P08753,P83121               |
| 1043 | 1,2,3,5,8,1<br>0,13,17 | 4,6,7,9,11,<br>12,14,15,1<br>6 | 4 | P01946,P08753,P51907,P83121        |
| 1044 | 1,2,3,5,8,1<br>0,14,15 | 4,6,7,9,11,<br>12,13,16,1<br>7 | 1 | P09605,P25809                      |
| 1045 | 1,2,3,5,8,1<br>0,14,16 | 4,6,7,9,11,<br>12,13,15,1<br>7 | 1 | P08721                             |
| 1046 | 1,2,3,5,8,1<br>0,14,17 | 4,6,7,9,11,<br>12,13,15,1<br>6 | 1 | P01946                             |
| 1047 | 1,2,3,5,8,1<br>0,15,16 | 4,6,7,9,11,<br>12,13,14,1<br>7 | 2 | P01835,P83121                      |
| 1048 | 1,2,3,5,8,1<br>0,15,17 | 4,6,7,9,11,<br>12,13,14,1<br>6 | 1 | P83121                             |
| 1049 | 1,2,3,5,8,1<br>0,16,17 | 4,6,7,9,11,<br>12,13,14,1<br>5 | 2 | P01946,P83121                      |
| 1050 | 1,2,3,5,8,1<br>1,12,13 | 4,6,7,9,10,<br>14,15,16,1<br>7 | 1 | Q9Z1F2                             |
| 1051 | 1,2,3,5,8,1<br>1,12,14 | 4,6,7,9,10,<br>13,15,16,1<br>7 | 4 | P62804,Q6IFU8,Q6IG02,Q6P6Q2        |
| 1052 | 1,2,3,5,8,1<br>1,12,15 | 4,6,7,9,10,<br>13,14,16,1<br>7 | 2 | P83121,Q5I0D1                      |
| 1053 | 1,2,3,5,8,1<br>1,12,16 | 4,6,7,9,10,<br>13,14,15,1<br>7 | 3 | P55314,Q6IG02,Q6P6Q2               |

|      |                        |                                |   |                                                                |
|------|------------------------|--------------------------------|---|----------------------------------------------------------------|
| 1054 | 1,2,3,5,8,1<br>1,12,17 | 4,6,7,9,10,<br>13,14,15,1<br>6 | 2 | P01946,Q6IG02                                                  |
| 1055 | 1,2,3,5,8,1<br>1,13,14 | 4,6,7,9,10,<br>12,15,16,1<br>7 | 1 | Q9Z1F2                                                         |
| 1056 | 1,2,3,5,8,1<br>1,13,15 | 4,6,7,9,10,<br>12,14,16,1<br>7 | 0 |                                                                |
| 1057 | 1,2,3,5,8,1<br>1,13,16 | 4,6,7,9,10,<br>12,14,15,1<br>7 | 2 | P55314,Q6IRE4                                                  |
| 1058 | 1,2,3,5,8,1<br>1,13,17 | 4,6,7,9,10,<br>12,14,15,1<br>6 | 1 | P01946                                                         |
| 1059 | 1,2,3,5,8,1<br>1,14,15 | 4,6,7,9,10,<br>12,13,16,1<br>7 | 3 | P97840,Q5I0D1,Q64194                                           |
| 1060 | 1,2,3,5,8,1<br>1,14,16 | 4,6,7,9,10,<br>12,13,15,1<br>7 | 3 | P55314,Q6IRE4,Q9QZK9                                           |
| 1061 | 1,2,3,5,8,1<br>1,14,17 | 4,6,7,9,10,<br>12,13,15,1<br>6 | 2 | P01946,P97840                                                  |
| 1062 | 1,2,3,5,8,1<br>1,15,16 | 4,6,7,9,10,<br>12,13,14,1<br>7 | 3 | P55314,Q5I0D1,Q9QZK9                                           |
| 1063 | 1,2,3,5,8,1<br>1,15,17 | 4,6,7,9,10,<br>12,13,14,1<br>6 | 2 | P01946,P97840                                                  |
| 1064 | 1,2,3,5,8,1<br>1,16,17 | 4,6,7,9,10,<br>12,13,14,1<br>5 | 2 | P01946,P55314                                                  |
| 1065 | 1,2,3,5,8,1<br>2,13,14 | 4,6,7,9,10,<br>11,15,16,1<br>7 | 4 | P36970,Q5FVI6,Q64093,Q9Z1F2                                    |
| 1066 | 1,2,3,5,8,1<br>2,13,15 | 4,6,7,9,10,<br>11,14,16,1<br>7 | 3 | P83121,Q5FVI6,Q9Z1F2                                           |
| 1067 | 1,2,3,5,8,1<br>2,13,16 | 4,6,7,9,10,<br>11,14,15,1<br>7 | 2 | P83121,Q9Z1F2                                                  |
| 1068 | 1,2,3,5,8,1<br>2,13,17 | 4,6,7,9,10,<br>11,14,15,1<br>6 | 9 | P01946,P08753,P51907,P55091,P83121,Q561R9,Q5FVI6,Q6PCU2,Q9Z1F2 |

|      |                        |                                |    |                                                                              |
|------|------------------------|--------------------------------|----|------------------------------------------------------------------------------|
| 1069 | 1,2,3,5,8,1<br>2,14,15 | 4,6,7,9,10,<br>11,13,16,1<br>7 | 2  | P83121,Q5FVI6                                                                |
| 1070 | 1,2,3,5,8,1<br>2,14,16 | 4,6,7,9,10,<br>11,13,15,1<br>7 | 1  | P83121                                                                       |
| 1071 | 1,2,3,5,8,1<br>2,14,17 | 4,6,7,9,10,<br>11,13,15,1<br>6 | 6  | P01946,P31430,P83121,Q561R9,Q5FVI6,Q9Z1F2                                    |
| 1072 | 1,2,3,5,8,1<br>2,15,16 | 4,6,7,9,10,<br>11,13,14,1<br>7 | 1  | P83121                                                                       |
| 1073 | 1,2,3,5,8,1<br>2,15,17 | 4,6,7,9,10,<br>11,13,14,1<br>6 | 2  | P83121,Q5FVI6                                                                |
| 1074 | 1,2,3,5,8,1<br>2,16,17 | 4,6,7,9,10,<br>11,13,14,1<br>5 | 5  | P01946,P83121,Q561R9,Q5XFX0,Q6PCU2                                           |
| 1075 | 1,2,3,5,8,1<br>3,14,15 | 4,6,7,9,10,<br>11,12,16,1<br>7 | 7  | P06757,P08753,P09605,P25809,Q08849,Q5FVI6,Q64093,Q9Z1F2                      |
| 1076 | 1,2,3,5,8,1<br>3,14,16 | 4,6,7,9,10,<br>11,12,15,1<br>7 | 4  | P08753,Q5FVI6,Q6PCU2,Q9Z1F2                                                  |
| 1077 | 1,2,3,5,8,1<br>3,14,17 | 4,6,7,9,10,<br>11,12,15,1<br>6 | 11 | P01946,P08753,P10536,P51907,Q08849,Q561R9,Q5FVI6,Q64093,Q6PCU2,Q9QW07,Q9Z1F2 |
| 1078 | 1,2,3,5,8,1<br>3,15,16 | 4,6,7,9,10,<br>11,12,14,1<br>7 | 3  | P01835,P08753,P83121                                                         |
| 1079 | 1,2,3,5,8,1<br>3,15,17 | 4,6,7,9,10,<br>11,12,14,1<br>6 | 7  | P00714,P01946,P08753,P10536,P83121,Q5FVI6,Q6PCU2                             |
| 1080 | 1,2,3,5,8,1<br>3,16,17 | 4,6,7,9,10,<br>11,12,14,1<br>5 | 6  | P01946,P08753,P51907,P83121,Q5FVI6,Q6PCU2                                    |
| 1081 | 1,2,3,5,8,1<br>4,15,16 | 4,6,7,9,10,<br>11,12,13,1<br>7 | 4  | P08753,P36374,P83121,Q9QZK9                                                  |
| 1082 | 1,2,3,5,8,1<br>4,15,17 | 4,6,7,9,10,<br>11,12,13,1<br>6 | 8  | P08753,P10536,P47967,P83121,P97840,Q08849,Q5FVI6,Q6PCU2                      |
| 1083 | 1,2,3,5,8,1<br>4,16,17 | 4,6,7,9,10,<br>11,12,13,1<br>5 | 6  | P01946,P08753,Q561R9,Q5FVI6,Q6PCU2,Q9QW07                                    |

|      |                        |                                |    |                                                                              |
|------|------------------------|--------------------------------|----|------------------------------------------------------------------------------|
| 1084 | 1,2,3,5,8,1<br>5,16,17 | 4,6,7,9,10,<br>11,12,13,1<br>4 | 6  | P08753,P0C0A9,P47727,P83121,Q5XFX0,Q6PCU2                                    |
| 1085 | 1,2,3,5,9,1<br>0,11,12 | 4,6,7,8,13,<br>14,15,16,1<br>7 | 7  | P11598,P27213,P55314,Q63661,Q6IFU8,Q6IG02,Q6P6Q2                             |
| 1086 | 1,2,3,5,9,1<br>0,11,13 | 4,6,7,8,12,<br>14,15,16,1<br>7 | 5  | P11598,P55314,Q4G075,Q63661,Q99041                                           |
| 1087 | 1,2,3,5,9,1<br>0,11,14 | 4,6,7,8,12,<br>13,15,16,1<br>7 | 7  | P11598,P27213,P55314,Q4G075,Q63661,Q99041,Q9QUL6                             |
| 1088 | 1,2,3,5,9,1<br>0,11,15 | 4,6,7,8,12,<br>13,14,16,1<br>7 | 11 | O54728,P06761,P11598,P22282,P27213,P55314,Q62902,Q63661,Q99041,Q9QUL6,Q9QZK9 |
| 1089 | 1,2,3,5,9,1<br>0,11,16 | 4,6,7,8,12,<br>13,14,15,1<br>7 | 10 | P06761,P11598,P22282,P27213,P55314,Q63661,Q6IRE4,Q99041,Q9QUL6,Q9QZK9        |
| 1090 | 1,2,3,5,9,1<br>0,11,17 | 4,6,7,8,12,<br>13,14,15,1<br>6 | 4  | P11598,P55314,Q62902,Q9QUL6                                                  |
| 1091 | 1,2,3,5,9,1<br>0,12,13 | 4,6,7,8,11,<br>14,15,16,1<br>7 | 1  | P07150                                                                       |
| 1092 | 1,2,3,5,9,1<br>0,12,14 | 4,6,7,8,11,<br>13,15,16,1<br>7 | 1  | P34901                                                                       |
| 1093 | 1,2,3,5,9,1<br>0,12,15 | 4,6,7,8,11,<br>13,14,16,1<br>7 | 3  | P07150,P11598,P27213                                                         |
| 1094 | 1,2,3,5,9,1<br>0,12,16 | 4,6,7,8,11,<br>13,14,15,1<br>7 | 2  | P11598,Q9WUW8                                                                |
| 1095 | 1,2,3,5,9,1<br>0,12,17 | 4,6,7,8,11,<br>13,14,15,1<br>6 | 0  |                                                                              |
| 1096 | 1,2,3,5,9,1<br>0,13,14 | 4,6,7,8,11,<br>12,15,16,1<br>7 | 2  | Q4G075,Q99041                                                                |
| 1097 | 1,2,3,5,9,1<br>0,13,15 | 4,6,7,8,11,<br>12,14,16,1<br>7 | 5  | O54728,P07150,P11598,Q4G075,Q99041                                           |
| 1098 | 1,2,3,5,9,1<br>0,13,16 | 4,6,7,8,11,<br>12,14,15,1<br>7 | 3  | P11598,Q4G075,Q99041                                                         |



|      |                        |                                |    |                                                                                                                                      |
|------|------------------------|--------------------------------|----|--------------------------------------------------------------------------------------------------------------------------------------|
| 1099 | 1,2,3,5,9,1<br>0,13,17 | 4,6,7,8,11,<br>12,14,15,1<br>6 | 1  | P01946                                                                                                                               |
| 1100 | 1,2,3,5,9,1<br>0,14,15 | 4,6,7,8,11,<br>12,13,16,1<br>7 | 11 | O54728,P0C0A9,P11598,P22282,P22283,P27213,Q4G075,Q62902,Q63942,Q99041,Q9QZK9                                                         |
| 1101 | 1,2,3,5,9,1<br>0,14,16 | 4,6,7,8,11,<br>12,13,15,1<br>7 | 8  | P06761,P11598,P22282,P22283,Q4G075,Q63942,Q99041,Q9QZK9                                                                              |
| 1102 | 1,2,3,5,9,1<br>0,14,17 | 4,6,7,8,11,<br>12,13,15,1<br>6 | 3  | Q62902,Q99041,Q9QUL6                                                                                                                 |
| 1103 | 1,2,3,5,9,1<br>0,15,16 | 4,6,7,8,11,<br>12,13,14,1<br>7 | 19 | O54728,P02780,P02782,P06761,P07647,P0C0A9,P11598,P22282,P22283,P30120,P36374,P47727,Q4G075,Q62902,Q63942,Q6AYR9,Q99041,Q9JHB9,Q9QZK9 |
| 1104 | 1,2,3,5,9,1<br>0,15,17 | 4,6,7,8,11,<br>12,13,14,1<br>6 | 9  | P02780,P06761,P0C0A9,P11598,P22282,P22283,P47727,Q62902,Q8CJ52                                                                       |
| 1105 | 1,2,3,5,9,1<br>0,16,17 | 4,6,7,8,11,<br>12,13,14,1<br>5 | 8  | P02780,P06761,P0C0A9,P11598,P22282,P22283,P47727,Q62902                                                                              |
| 1106 | 1,2,3,5,9,1<br>1,12,13 | 4,6,7,8,10,<br>14,15,16,1<br>7 | 0  |                                                                                                                                      |
| 1107 | 1,2,3,5,9,1<br>1,12,14 | 4,6,7,8,10,<br>13,15,16,1<br>7 | 3  | P27213,P34901,Q6IFU8                                                                                                                 |
| 1108 | 1,2,3,5,9,1<br>1,12,15 | 4,6,7,8,10,<br>13,14,16,1<br>7 | 3  | P11598,P12020,P27213                                                                                                                 |
| 1109 | 1,2,3,5,9,1<br>1,12,16 | 4,6,7,8,10,<br>13,14,15,1<br>7 | 4  | P11598,P12020,P55314,Q6IRE4                                                                                                          |
| 1110 | 1,2,3,5,9,1<br>1,12,17 | 4,6,7,8,10,<br>13,14,15,1<br>6 | 2  | P01946,P12020                                                                                                                        |
| 1111 | 1,2,3,5,9,1<br>1,13,14 | 4,6,7,8,10,<br>12,15,16,1<br>7 | 3  | Q4G075,Q6IRE4,Q99041                                                                                                                 |
| 1112 | 1,2,3,5,9,1<br>1,13,15 | 4,6,7,8,10,<br>12,14,16,1<br>7 | 4  | O54728,P11598,Q4G075,Q99041                                                                                                          |
| 1113 | 1,2,3,5,9,1<br>1,13,16 | 4,6,7,8,10,<br>12,14,15,1<br>7 | 6  | P11598,P55314,Q4G075,Q6IRE4,Q99041,Q9QZK9                                                                                            |

|      |                        |                                |    |                                                                                                          |
|------|------------------------|--------------------------------|----|----------------------------------------------------------------------------------------------------------|
| 1114 | 1,2,3,5,9,1<br>1,13,17 | 4,6,7,8,10,<br>12,14,15,1<br>6 | 1  | P01946                                                                                                   |
| 1115 | 1,2,3,5,9,1<br>1,14,15 | 4,6,7,8,10,<br>12,13,16,1<br>7 | 6  | O54728,P11598,P27213,Q4G075,Q99041,Q9QZK9                                                                |
| 1116 | 1,2,3,5,9,1<br>1,14,16 | 4,6,7,8,10,<br>12,13,15,1<br>7 | 8  | P06761,P11598,P55314,Q4G075,Q6IRE4,Q99041,Q99MH3,Q9QZK9                                                  |
| 1117 | 1,2,3,5,9,1<br>1,14,17 | 4,6,7,8,10,<br>12,13,15,1<br>6 | 2  | P01946,Q9QUL6                                                                                            |
| 1118 | 1,2,3,5,9,1<br>1,15,16 | 4,6,7,8,10,<br>12,13,14,1<br>7 | 15 | O54728,P02782,P06761,P06911,P11598,P12020,P22282,P22283,P55314,Q4G075,Q62902,Q6AYR9,Q6IRE4,Q99041,Q9QZK9 |
| 1119 | 1,2,3,5,9,1<br>1,15,17 | 4,6,7,8,10,<br>12,13,14,1<br>6 | 5  | P06911,P11598,P12020,Q62902,Q9QUL6                                                                       |
| 1120 | 1,2,3,5,9,1<br>1,16,17 | 4,6,7,8,10,<br>12,13,14,1<br>5 | 7  | P01946,P06761,P11598,P12020,P55314,Q6IRE4,Q9QUL6                                                         |
| 1121 | 1,2,3,5,9,1<br>2,13,14 | 4,6,7,8,10,<br>11,15,16,1<br>7 | 4  | P00714,P07150,Q5FVI6,Q9Z1F2                                                                              |
| 1122 | 1,2,3,5,9,1<br>2,13,15 | 4,6,7,8,10,<br>11,14,16,1<br>7 | 2  | P00714,P07150                                                                                            |
| 1123 | 1,2,3,5,9,1<br>2,13,16 | 4,6,7,8,10,<br>11,14,15,1<br>7 | 4  | P00714,P07150,P11598,P22006                                                                              |
| 1124 | 1,2,3,5,9,1<br>2,13,17 | 4,6,7,8,10,<br>11,14,15,1<br>6 | 4  | P00714,P01946,P35280,Q5FVI6                                                                              |
| 1125 | 1,2,3,5,9,1<br>2,14,15 | 4,6,7,8,10,<br>11,13,16,1<br>7 | 2  | P07150,P34901                                                                                            |
| 1126 | 1,2,3,5,9,1<br>2,14,16 | 4,6,7,8,10,<br>11,13,15,1<br>7 | 3  | P11598,P34901,Q6IRE4                                                                                     |
| 1127 | 1,2,3,5,9,1<br>2,14,17 | 4,6,7,8,10,<br>11,13,15,1<br>6 | 4  | P00714,P34901,Q561R9,Q5FVI6                                                                              |
| 1128 | 1,2,3,5,9,1<br>2,15,16 | 4,6,7,8,10,<br>11,13,14,1<br>7 | 9  | O54728,P00714,P07150,P11598,P12020,P22282,P22283,P47727,P83121                                           |

|      |                         |                                |    |                                                                                                                                                                  |
|------|-------------------------|--------------------------------|----|------------------------------------------------------------------------------------------------------------------------------------------------------------------|
| 1129 | 1,2,3,5,9,1<br>2,15,17  | 4,6,7,8,10,<br>11,13,14,1<br>6 | 5  | P00714,P12020,P47727,P83121,Q5FVI6                                                                                                                               |
| 1130 | 1,2,3,5,9,1<br>2,16,17  | 4,6,7,8,10,<br>11,13,14,1<br>5 | 6  | P00714,P11598,P12020,P22006,P35280,P47727                                                                                                                        |
| 1131 | 1,2,3,5,9,1<br>3,14,15  | 4,6,7,8,10,<br>11,12,16,1<br>7 | 10 | O54728,P00714,P07150,P0C0A9,P53792,P60905,Q4G075,Q5FVI6,Q99041,Q9QZK9                                                                                            |
| 1132 | 1,2,3,5,9,1<br>3,14,16  | 4,6,7,8,10,<br>11,12,15,1<br>7 | 10 | P00714,P07150,P11598,P14669,Q4G075,Q5FVI6,Q63942,Q6IRE4,Q99041,Q9QZK9                                                                                            |
| 1133 | 1,2,3,5,9,1<br>3,14,17  | 4,6,7,8,10,<br>11,12,15,1<br>6 | 7  | P00714,P01946,P08753,P35280,P53792,Q5FVI6,Q9QW07                                                                                                                 |
| 1134 | 1,2,3,5,9,1<br>3,15,16  | 4,6,7,8,10,<br>11,12,14,1<br>7 | 14 | O54728,P00714,P07150,P0C0A9,P11598,P22282,P22283,P47727,P60905,Q4G075,Q63942,Q6IRE4,Q99041,Q9QZK9                                                                |
| 1135 | 1,2,3,5,9,1<br>3,15,17  | 4,6,7,8,10,<br>11,12,14,1<br>6 | 6  | P00714,P08753,P0C0A9,P47727,P53792,Q5FVI6                                                                                                                        |
| 1136 | 1,2,3,5,9,1<br>3,16,17  | 4,6,7,8,10,<br>11,12,14,1<br>5 | 9  | P00714,P01946,P08753,P0C0A9,P11598,P22006,P35280,P47727,Q5FVI6                                                                                                   |
| 1137 | 1,2,3,5,9,1<br>4,15,16  | 4,6,7,8,10,<br>11,12,13,1<br>7 | 22 | O54728,P00714,P02780,P02781,P02782,P06761,P07150,P07647,P0C0A9,P11598,P22282,P22283,P36374,P60905,Q4G075,Q62902,Q63942,Q6AYR9,Q6IRE4,Q99041,Q9JHB9,Q9QZK9        |
| 1138 | 1,2,3,5,9,1<br>4,15,17  | 4,6,7,8,10,<br>11,12,13,1<br>6 | 9  | P00714,P02780,P0C0A9,P22283,P47967,P60905,Q5FVI6,Q62902,Q8CJ52                                                                                                   |
| 1139 | 1,2,3,5,9,1<br>4,16,17  | 4,6,7,8,10,<br>11,12,13,1<br>5 | 5  | P00714,P0C0A9,P11598,P22283,Q5FVI6                                                                                                                               |
| 1140 | 1,2,3,5,9,1<br>5,16,17  | 4,6,7,8,10,<br>11,12,13,1<br>4 | 23 | O54728,P00714,P02780,P02781,P02782,P04905,P06761,P06911,P07647,P0C0A9,P11598,P12020,P22282,P22283,P23593,P24368,P30120,P47727,P60905,Q62902,Q6AYR9,Q8CJ52,Q9JHB9 |
| 1141 | 1,2,3,5,10,<br>11,12,13 | 4,6,7,8,9,1<br>4,15,16,17      | 1  | P55314                                                                                                                                                           |
| 1142 | 1,2,3,5,10,<br>11,12,14 | 4,6,7,8,9,1<br>3,15,16,17      | 5  | P34901,P55314,Q6IFU8,Q6IG02,Q6P6Q2                                                                                                                               |
| 1143 | 1,2,3,5,10,<br>11,12,15 | 4,6,7,8,9,1<br>3,14,16,17      | 4  | P00731,P27213,P55314,Q63617                                                                                                                                      |
| 1144 | 1,2,3,5,10,<br>11,12,16 | 4,6,7,8,9,1<br>3,14,15,17      | 5  | P11598,P55314,Q6IFU8,Q6IG02,Q6P6Q2                                                                                                                               |
| 1145 | 1,2,3,5,10,<br>11,12,17 | 4,6,7,8,9,1<br>3,14,15,16      | 5  | P01946,P55314,Q10758,Q6IFU8,Q6IG02                                                                                                                               |

|      |                                                |    |                                                                              |
|------|------------------------------------------------|----|------------------------------------------------------------------------------|
| 1146 | 1,2,3,5,10, 4,6,7,8,9,1<br>11,13,14 2,15,16,17 | 3  | P09605;P25809,P55314,Q99041                                                  |
| 1147 | 1,2,3,5,10, 4,6,7,8,9,1<br>11,13,15 2,14,16,17 | 2  | P55314,Q99041                                                                |
| 1148 | 1,2,3,5,10, 4,6,7,8,9,1<br>11,13,16 2,14,15,17 | 4  | P11598,P55314,Q6IRE4,Q99041                                                  |
| 1149 | 1,2,3,5,10, 4,6,7,8,9,1<br>11,13,17 2,14,15,16 | 2  | P01946,P55314                                                                |
| 1150 | 1,2,3,5,10, 4,6,7,8,9,1<br>11,14,15 2,13,16,17 | 7  | P09605;P25809,P11598,P22282,P27213,P55314,Q62902,Q99041                      |
| 1151 | 1,2,3,5,10, 4,6,7,8,9,1<br>11,14,16 2,13,15,17 | 7  | P06761,P11598,P22282,P55314,Q6IRE4,Q99041,Q9QZK9                             |
| 1152 | 1,2,3,5,10, 4,6,7,8,9,1<br>11,14,17 2,13,15,16 | 3  | P01946,P55314,Q9QUL6                                                         |
| 1153 | 1,2,3,5,10, 4,6,7,8,9,1<br>11,15,16 2,13,14,17 | 11 | P02780,P02782,P06761,P11598,P22282,P22283,P55314,Q62902,Q6AYR9,Q99041,Q9QZK9 |
| 1154 | 1,2,3,5,10, 4,6,7,8,9,1<br>11,15,17 2,13,14,16 | 2  | P55314,Q62902                                                                |
| 1155 | 1,2,3,5,10, 4,6,7,8,9,1<br>11,16,17 2,13,14,15 | 5  | P01946,P06761,P11598,P55314,Q62902                                           |
| 1156 | 1,2,3,5,10, 4,6,7,8,9,1<br>12,13,14 1,15,16,17 | 0  |                                                                              |
| 1157 | 1,2,3,5,10, 4,6,7,8,9,1<br>12,13,15 1,14,16,17 | 2  | P83121,Q63617                                                                |
| 1158 | 1,2,3,5,10, 4,6,7,8,9,1<br>12,13,16 1,14,15,17 | 1  | P83121                                                                       |
| 1159 | 1,2,3,5,10, 4,6,7,8,9,1<br>12,13,17 1,14,15,16 | 2  | P01946,P83121                                                                |
| 1160 | 1,2,3,5,10, 4,6,7,8,9,1<br>12,14,15 1,13,16,17 | 2  | P34901,Q63617                                                                |
| 1161 | 1,2,3,5,10, 4,6,7,8,9,1<br>12,14,16 1,13,15,17 | 2  | P11598,P34901                                                                |
| 1162 | 1,2,3,5,10, 4,6,7,8,9,1<br>12,14,17 1,13,15,16 | 5  | P01946,P31430,P34901,Q10758,Q561R9                                           |
| 1163 | 1,2,3,5,10, 4,6,7,8,9,1<br>12,15,16 1,13,14,17 | 6  | P11598,P22282,P22283,P83121,Q62902,Q63617                                    |
| 1164 | 1,2,3,5,10, 4,6,7,8,9,1<br>12,15,17 1,13,14,16 | 3  | P83121,Q62902,Q63617                                                         |
| 1165 | 1,2,3,5,10, 4,6,7,8,9,1<br>12,16,17 1,13,14,15 | 4  | P01946,P83121,Q10758,Q63617                                                  |
| 1166 | 1,2,3,5,10, 4,6,7,8,9,1<br>13,14,15 1,12,16,17 | 2  | P09605;P25809,Q99041                                                         |
| 1167 | 1,2,3,5,10, 4,6,7,8,9,1<br>13,14,16 1,12,15,17 | 3  | P09605;P25809,Q4G075,Q99041                                                  |
| 1168 | 1,2,3,5,10, 4,6,7,8,9,1<br>13,14,17 1,12,15,16 | 3  | P01946,P08753,Q9QW07                                                         |

|      |                                                |    |                                                                                                                        |
|------|------------------------------------------------|----|------------------------------------------------------------------------------------------------------------------------|
| 1169 | 1,2,3,5,10, 4,6,7,8,9,1<br>13,15,16 1,12,14,17 | 9  | P01835,P02780,P0C0A9,P11598,P22282,P22283,P83121,Q63617,Q99041                                                         |
| 1170 | 1,2,3,5,10, 4,6,7,8,9,1<br>13,15,17 1,12,14,16 | 4  | P08753,P0C0A9,P83121,Q63617                                                                                            |
| 1171 | 1,2,3,5,10, 4,6,7,8,9,1<br>13,16,17 1,12,14,15 | 3  | P01946,P0C0A9,P83121                                                                                                   |
| 1172 | 1,2,3,5,10, 4,6,7,8,9,1<br>14,15,16 1,12,13,17 | 14 | P02780,P02782,P06761,P07647,P09605,P25809,P0C0A9,P11598,P22282,P22283,P36374,Q62902,Q99041,Q9JHB9,Q9QZK9               |
| 1173 | 1,2,3,5,10, 4,6,7,8,9,1<br>14,15,17 1,12,13,16 | 4  | P02780,P0C0A9,P22283,Q62902                                                                                            |
| 1174 | 1,2,3,5,10, 4,6,7,8,9,1<br>14,16,17 1,12,13,15 | 5  | P02780,P0C0A9,P11598,P22283,Q62902                                                                                     |
| 1175 | 1,2,3,5,10, 4,6,7,8,9,1<br>15,16,17 1,12,13,14 | 17 | P02780,P02781,P02782,P06761,P07647,P0C0A9,P11598,P22282,P22283,P24368,P30120,P47727,P83121,Q62902,Q63617,Q6AYR9,Q9JHB9 |
| 1176 | 1,2,3,5,11, 4,6,7,8,9,1<br>12,13,14 0,15,16,17 | 0  |                                                                                                                        |
| 1177 | 1,2,3,5,11, 4,6,7,8,9,1<br>12,13,15 0,14,16,17 | 1  | Q6P6R2                                                                                                                 |
| 1178 | 1,2,3,5,11, 4,6,7,8,9,1<br>12,13,16 0,14,15,17 | 3  | P17046,P55314,Q6IRE4                                                                                                   |
| 1179 | 1,2,3,5,11, 4,6,7,8,9,1<br>12,13,17 0,14,15,16 | 2  | P01946,P17046                                                                                                          |
| 1180 | 1,2,3,5,11, 4,6,7,8,9,1<br>12,14,15 0,13,16,17 | 1  | P34901                                                                                                                 |
| 1181 | 1,2,3,5,11, 4,6,7,8,9,1<br>12,14,16 0,13,15,17 | 6  | P11598,P17046,P34901,P55314,Q6IFU8,Q6IRE4                                                                              |
| 1182 | 1,2,3,5,11, 4,6,7,8,9,1<br>12,14,17 0,13,15,16 | 3  | P01946,P31430,P34901                                                                                                   |
| 1183 | 1,2,3,5,11, 4,6,7,8,9,1<br>12,15,16 0,13,14,17 | 5  | P11598,P12020,P17046,P55314,P83121                                                                                     |
| 1184 | 1,2,3,5,11, 4,6,7,8,9,1<br>12,15,17 0,13,14,16 | 3  | P01946,P12020,P83121                                                                                                   |
| 1185 | 1,2,3,5,11, 4,6,7,8,9,1<br>12,16,17 0,13,14,15 | 4  | P01946,P12020,P17046,P55314                                                                                            |
| 1186 | 1,2,3,5,11, 4,6,7,8,9,1<br>13,14,15 0,12,16,17 | 2  | Q6P6R2,Q99041                                                                                                          |
| 1187 | 1,2,3,5,11, 4,6,7,8,9,1<br>13,14,16 0,12,15,17 | 3  | P55314,Q6IRE4,Q99041                                                                                                   |
| 1188 | 1,2,3,5,11, 4,6,7,8,9,1<br>13,14,17 0,12,15,16 | 3  | P01946,Q5FVI6,Q9QW07                                                                                                   |
| 1189 | 1,2,3,5,11, 4,6,7,8,9,1<br>13,15,16 0,12,14,17 | 5  | O54728,P11598,P55314,Q6IRE4,Q99041                                                                                     |
| 1190 | 1,2,3,5,11, 4,6,7,8,9,1<br>13,15,17 0,12,14,16 | 2  | P00714,P01946                                                                                                          |
| 1191 | 1,2,3,5,11, 4,6,7,8,9,1<br>13,16,17 0,12,14,15 | 4  | P00714,P01946,P17046,P55314                                                                                            |

|      |                                                    |    |                                                                                                                                                                  |
|------|----------------------------------------------------|----|------------------------------------------------------------------------------------------------------------------------------------------------------------------|
| 1192 | 1,2,3,5,11, 4,6,7,8,9,1<br>14,15,16 0,12,13,17     | 11 | O54728,P06761,P0C0A9,P11598,P22282,P22283,P55314,Q6AYR9,Q6IRE4,Q99041,Q9QZK9                                                                                     |
| 1193 | 1,2,3,5,11, 4,6,7,8,9,1<br>14,15,17 0,12,13,16     | 2  | P47967,P97840                                                                                                                                                    |
| 1194 | 1,2,3,5,11, 4,6,7,8,9,1<br>14,16,17 0,12,13,15     | 3  | P01946,P11598,P55314                                                                                                                                             |
| 1195 | 1,2,3,5,11, 4,6,7,8,9,1<br>15,16,17 0,12,13,14     | 12 | P02780,P02782,P06761,P06911,P0C0A9,P11598,P12020,P22282,P22283,P55314,Q62902,Q6AYR9                                                                              |
| 1196 | 1,2,3,5,12, 4,6,7,8,9,1<br>13,14,15 0,11,16,17     | 5  | A2RUV9,P00714,P07150,P83121,Q5FVI6                                                                                                                               |
| 1197 | 1,2,3,5,12, 4,6,7,8,9,1<br>13,14,16 0,11,15,17     | 2  | P00714,Q5FVI6                                                                                                                                                    |
| 1198 | 1,2,3,5,12, 4,6,7,8,9,1<br>13,14,17 0,11,15,16     | 7  | P00714,P01946,P31430,Q561R9,Q5FVI6,Q9QW07,Q9Z1F2                                                                                                                 |
| 1199 | 1,2,3,5,12, 4,6,7,8,9,1<br>13,15,16 0,11,14,17     | 3  | P00714,P83121,Q63617                                                                                                                                             |
| 1200 | 1,2,3,5,12, 4,6,7,8,9,1<br>13,15,17 0,11,14,16     | 5  | P00714,P01946,P83121,Q5FVI6,Q63617                                                                                                                               |
| 1201 | 1,2,3,5,12, 4,6,7,8,9,1<br>13,16,17 0,11,14,15     | 8  | P00714,P01946,P17046,P22006,P35280,P83121,Q561R9,Q5FVI6                                                                                                          |
| 1202 | 1,2,3,5,12, 4,6,7,8,9,1<br>14,15,16 0,11,13,17     | 6  | P00714,P11598,P22282,P22283,P34901,P83121                                                                                                                        |
| 1203 | 1,2,3,5,12, 4,6,7,8,9,1<br>14,15,17 0,11,13,16     | 3  | P00714,P83121,Q5FVI6                                                                                                                                             |
| 1204 | 1,2,3,5,12, 4,6,7,8,9,1<br>14,16,17 0,11,13,15     | 8  | P00714,P01946,P31430,P34901,P83121,Q561R9,Q5FVI6,Q9QW07                                                                                                          |
| 1205 | 1,2,3,5,12, 4,6,7,8,9,1<br>15,16,17 0,11,13,14     | 6  | P00714,P12020,P47727,P83121,Q5XFX0,Q63617                                                                                                                        |
| 1206 | 1,2,3,5,13, 4,6,7,8,9,1<br>14,15,16 0,11,12,17     | 10 | O54728,P00714,P08753,P0C0A9,P22282,P22283,P60905,Q4G075,Q99041,Q9QZK9                                                                                            |
| 1207 | 1,2,3,5,13, 4,6,7,8,9,1<br>14,15,17 0,11,12,16     | 9  | P00714,P01946,P08753,P0C0A9,P47967,P60905,P63095,Q5FVI6,Q9QW07                                                                                                   |
| 1208 | 1,2,3,5,13, 4,6,7,8,9,1<br>14,16,17 0,11,12,15     | 9  | P00714,P01946,P08753,P0C0A9,P35280,Q561R9,Q5FVI6,Q6PCU2,Q9QW07                                                                                                   |
| 1209 | 1,2,3,5,13, 4,6,7,8,9,1<br>15,16,17 0,11,12,14     | 9  | P00714,P01946,P02780,P08753,P0C0A9,P22283,P47727,P60905,P83121                                                                                                   |
| 1210 | 1,2,3,5,14, 4,6,7,8,9,1<br>15,16,17 0,11,12,13     | 23 | P00714,P02780,P02781,P02782,P02803,P06761,P07647,P0C0A9,P11598,P22282,P22283,P24368,P30120,P36374,P47727,P60905,P83121,Q5FVI6,Q62902,Q6AYR9,Q8CFN2,Q9JHB9,Q9QW07 |
| 1211 | 1,2,3,6,7,8 4,5,11,12,<br>,9,10 13,14,15,1<br>6,17 | 10 | O55006,P02631,P16086,P19629,P27213,P31044,P35280,P68370,Q63942,Q91ZS3                                                                                            |
| 1212 | 1,2,3,6,7,8 4,5,10,12,<br>,9,11 13,14,15,1<br>6,17 | 16 | O54715,P02631,P05371,P10715,P14669,P15399,P16086,P19629,P27213,P31044,P35280,P68370,Q30KJ2,Q63493,Q91ZS3,Q9JI85                                                  |

|      |                       |                                  |    |                                                                                                                                                                                                                   |
|------|-----------------------|----------------------------------|----|-------------------------------------------------------------------------------------------------------------------------------------------------------------------------------------------------------------------|
| 1213 | 1,2,3,6,7,8<br>,9,12  | 4,5,10,11,<br>13,14,15,1<br>6,17 | 14 | P02631,P02782,P08723,P10715,P13432,P16086,P19629,P27213,P30120,P31044,P68370,Q9EQS0,Q9JI85,Q9Z1F2                                                                                                                 |
| 1214 | 1,2,3,6,7,8<br>,9,13  | 4,5,10,11,<br>12,14,15,1<br>6,17 | 13 | P02631,P06911,P12020,P16086,P19629,P20766,P29975,P31044,P51907,P53792,P68370,Q5GRG2,Q9Z1F2                                                                                                                        |
| 1215 | 1,2,3,6,7,8<br>,9,14  | 4,5,10,11,<br>12,13,15,1<br>6,17 | 10 | P02631,P05371,P12020,P16086,P19629,P27213,P31044,P68370,Q63942,Q9Z1F2                                                                                                                                             |
| 1216 | 1,2,3,6,7,8<br>,9,15  | 4,5,10,11,<br>12,13,14,1<br>6,17 | 11 | O55006,P02631,P10715,P16086,P19629,P27213,P31044,P35280,P68370,Q5QE79,Q63942                                                                                                                                      |
| 1217 | 1,2,3,6,7,8<br>,9,16  | 4,5,10,11,<br>12,13,14,1<br>5,17 | 8  | P02631,P05371,P10715,P16086,P19629,P31044,P68370,Q63942                                                                                                                                                           |
| 1218 | 1,2,3,6,7,8<br>,9,17  | 4,5,10,11,<br>12,13,14,1<br>5,16 | 17 | P01946,P02091,P02631,P02770,P09605,P25809,P10715,P12346,P16086,P17475,P19629,P31044,P50115,P51907,P55091,P97580,Q30KJ2,Q6P6R2                                                                                     |
| 1219 | 1,2,3,6,7,8<br>,10,11 | 4,5,9,12,1<br>3,14,15,16<br>,17  | 20 | O54715,P02631,P05371,P10715,P12020,P14669,P15399,P16086,P19629,P27213,P31044,P35280,P55314,P68370,P97580,P97615,Q30KJ2,Q63493,Q9EQS0,Q9JI85                                                                       |
| 1220 | 1,2,3,6,7,8<br>,10,12 | 4,5,9,11,1<br>3,14,15,16<br>,17  | 19 | O35783,P01041,P02631,P02782,P08723,P10715,P12020,P16086,P19629,P27213,P30120,P31044,P35280,P68370,P97615,P97840,Q8CJ52,Q9EQS0,Q9JI85                                                                              |
| 1221 | 1,2,3,6,7,8<br>,10,13 | 4,5,9,11,1<br>2,14,15,16<br>,17  | 10 | P02631,P06911,P12020,P16086,P19629,P31044,P51907,P68370,Q5GRG2,Q9Z1F2                                                                                                                                             |
| 1222 | 1,2,3,6,7,8<br>,10,14 | 4,5,9,11,1<br>2,13,15,16<br>,17  | 12 | P02631,P12020,P16086,P19629,P27213,P31044,P35280,P68370,P97615,Q30KJ2,Q5GRG2,Q9EQS0                                                                                                                               |
| 1223 | 1,2,3,6,7,8<br>,10,15 | 4,5,9,11,1<br>2,13,14,16<br>,17  | 8  | P02631,P16086,P19629,P27213,P31044,P35280,P68370,P97615                                                                                                                                                           |
| 1224 | 1,2,3,6,7,8<br>,10,16 | 4,5,9,11,1<br>2,13,14,15<br>,17  | 7  | P02631,P05371,P08721,P16086,P19629,P31044,P68370                                                                                                                                                                  |
| 1225 | 1,2,3,6,7,8<br>,10,17 | 4,5,9,11,1<br>2,13,14,15<br>,16  | 19 | P01946,P02091,P02631,P02770,P12020,P12346,P15399,P16086,P17475,P19629,P31044,P50115,P51907,P55091,P68370,P97580,P97615,Q30KJ2,Q6P6R2                                                                              |
| 1226 | 1,2,3,6,7,8<br>,11,12 | 4,5,9,10,1<br>3,14,15,16<br>,17  | 30 | O54715,P02631,P02781,P02782,P05371,P07647,P08723,P10715,P13432,P14669,P15399,P16086,P19629,P22282,P22283,P27213,P30120,P31044,P35280,P68370,P97580,Q30KJ2,Q498R7,Q63493,Q63751,Q8CJ52,Q9EQS0,Q9JHB9,Q9JI85,Q9Z1F2 |
| 1227 | 1,2,3,6,7,8<br>,11,13 | 4,5,9,10,1<br>2,14,15,16<br>,17  | 21 | P02631,P05371,P06911,P10715,P12020,P14669,P15399,P16086,P19629,P20766,P22282,P22283,P31044,P68370,Q30KJ2,Q5GRG2,Q5XI22,Q62902,Q63493,Q9JI85,Q9Z1F2                                                                |

|      |                       |                                 |    |                                                                                                                                                                                                                                                                    |
|------|-----------------------|---------------------------------|----|--------------------------------------------------------------------------------------------------------------------------------------------------------------------------------------------------------------------------------------------------------------------|
| 1228 | 1,2,3,6,7,8<br>,11,14 | 4,5,9,10,1<br>2,13,15,16<br>,17 | 19 | P02631,P05371,P10715,P12020,P14669,P15399,P16086,P19629,P27213,P31044,P35280,P47727,P68370,P97580,Q30KJ2,Q5GRG2,Q63493,Q9EQS0,Q9JI85                                                                                                                               |
| 1229 | 1,2,3,6,7,8<br>,11,15 | 4,5,9,10,1<br>2,13,14,16<br>,17 | 13 | P02631,P05371,P10715,P14669,P15399,P16086,P19629,P27213,P31044,P35280,P68370,Q30KJ2,Q9JI85                                                                                                                                                                         |
| 1230 | 1,2,3,6,7,8<br>,11,16 | 4,5,9,10,1<br>2,13,14,15<br>,17 | 14 | O54715,P02631,P05371,P10715,P14669,P15399,P16086,P19629,P31044,P55314,P68370,P97580,Q30KJ2,Q9JI85                                                                                                                                                                  |
| 1231 | 1,2,3,6,7,8<br>,11,17 | 4,5,9,10,1<br>2,13,14,15<br>,16 | 22 | P01946,P02091,P02631,P02770,P05371,P07150,P10715,P12346,P14669,P15399,P16086,P17475,P19629,P31044,P50115,P55091,P68370,P97580,Q30KJ2,Q63493,Q63751,Q9JI85                                                                                                          |
| 1232 | 1,2,3,6,7,8<br>,12,13 | 4,5,9,10,1<br>1,14,15,16<br>,17 | 28 | O08557,O88267,P02631,P02782,P06761,P06911,P07647,P08723,P08937,P10715,P12020,P13432,P16086,P19629,P22282,P22283,P29975,P30120,P31044,P68370,P70545,Q5GRG2,Q62902,Q6AYR9,Q8CJ52,Q9JHB9,Q9JI85,Q9Z1F2                                                                |
| 1233 | 1,2,3,6,7,8<br>,12,14 | 4,5,9,10,1<br>1,13,15,16<br>,17 | 24 | O08557,O88267,P02631,P02782,P05371,P08723,P10715,P12020,P13432,P16086,P19629,P29975,P30120,P31044,P68370,Q5GRG2,Q63532,Q6AYS7,Q8CJ52,Q923M1,Q9EQS0,Q9JHB9,Q9JI85,Q9Z1F2                                                                                            |
| 1234 | 1,2,3,6,7,8<br>,12,15 | 4,5,9,10,1<br>1,13,14,16<br>,17 | 11 | O08557,P01041,P02631,P08723,P10715,P16086,P19629,P31044,P35280,P68370,Q9JI85                                                                                                                                                                                       |
| 1235 | 1,2,3,6,7,8<br>,12,16 | 4,5,9,10,1<br>1,13,14,15<br>,17 | 13 | O88267,P01041,P02631,P05371,P08723,P10715,P16086,P19629,P31044,P68370,Q8CJ52,Q9EQS0,Q9JI85                                                                                                                                                                         |
| 1236 | 1,2,3,6,7,8<br>,12,17 | 4,5,9,10,1<br>1,13,14,15<br>,16 | 36 | O88267,P01041,P01946,P02091,P02631,P02770,P02782,P08723,P08937,P09605,P25809,P10715,P12346,P13432,P16086,P17475,P19223,P19629,P22282,P22283,P29975,P30120,P31044,P50115,P55091,P68370,P97580,P98089,Q30KJ2,Q4G075,Q561R9,Q62635,Q63751,Q8CJ52,Q9JI85,Q9QZK9,Q9Z1F2 |
| 1237 | 1,2,3,6,7,8<br>,13,14 | 4,5,9,10,1<br>1,12,15,16<br>,17 | 15 | O08557,O88267,P02631,P06911,P12020,P16086,P19629,P20766,P29975,P31044,P51907,P68370,Q5GRG2,Q62902,Q9Z1F2                                                                                                                                                           |
| 1238 | 1,2,3,6,7,8<br>,13,15 | 4,5,9,10,1<br>1,12,14,16<br>,17 | 10 | P02631,P06911,P12020,P15999,P16086,P19629,P31044,P68370,Q5GRG2,Q9Z1F2                                                                                                                                                                                              |
| 1239 | 1,2,3,6,7,8<br>,13,16 | 4,5,9,10,1<br>1,12,14,15<br>,17 | 11 | O88267,P02631,P06911,P12020,P16086,P19629,P31044,P51907,P68370,Q5GRG2,Q9Z1F2                                                                                                                                                                                       |
| 1240 | 1,2,3,6,7,8<br>,13,17 | 4,5,9,10,1<br>1,12,14,15<br>,16 | 26 | O88267,P01946,P02091,P02631,P02770,P06911,P12020,P12346,P16086,P17475,P19629,P20766,P22282,P29975,P31044,P50115,P51907,P55091,P68370,P70545,P97580,Q30KJ2,Q5GRG2,Q63751,Q6PCU2,Q9Z1F2                                                                              |
| 1241 | 1,2,3,6,7,8<br>,14,15 | 4,5,9,10,1<br>1,12,13,16<br>,17 | 10 | O08557,P02631,P05371,P12020,P16086,P19629,P31044,P35280,P68370,Q5GRG2                                                                                                                                                                                              |
| 1242 | 1,2,3,6,7,8<br>,14,16 | 4,5,9,10,1<br>1,12,13,15<br>,17 | 8  | P02631,P05371,P12020,P16086,P19629,P31044,P68370,Q63532                                                                                                                                                                                                            |



|      |                       |                                 |    |                                                                                                                                                                      |
|------|-----------------------|---------------------------------|----|----------------------------------------------------------------------------------------------------------------------------------------------------------------------|
| 1243 | 1,2,3,6,7,8<br>,14,17 | 4,5,9,10,1<br>1,12,13,15<br>,16 | 23 | O88267,P01946,P02091,P02631,P02770,P10536,P12020,P12346,P15399,P16086,P17475,P19629,P29975,P31044,P50115,P51907,P55091<br>,P68370,P97580,Q30KJ2,Q561R9,Q6PCU2,Q9Z1F2 |
| 1244 | 1,2,3,6,7,8<br>,15,16 | 4,5,9,10,1<br>1,12,13,14<br>,17 | 7  | P02631,P05371,P10715,P16086,P19629,P31044,P68370                                                                                                                     |
| 1245 | 1,2,3,6,7,8<br>,15,17 | 4,5,9,10,1<br>1,12,13,14<br>,16 | 17 | P01041,P01946,P02091,P02631,P02770,P10536,P10715,P12346,P16086,P17475,P19629,P31044,P50115,P55091,P97580,Q30KJ2,Q63751                                               |
| 1246 | 1,2,3,6,7,8<br>,16,17 | 4,5,9,10,1<br>1,12,13,14<br>,15 | 20 | O88267,P01946,P02091,P02631,P02770,P05371,P09605,P25809,P10715,P10758,P12346,P16086,P17475,P19629,P31044,P50115,P51907<br>,P97580,Q30KJ2,Q6P6R2,Q6PCU2               |
| 1247 | 1,2,3,6,7,9<br>,10,11 | 4,5,8,12,1<br>3,14,15,16<br>,17 | 9  | P15399,P16086,P27213,P35280,P55314,P97580,Q30KJ2,Q91ZS3,Q9QUL6                                                                                                       |
| 1248 | 1,2,3,6,7,9<br>,10,12 | 4,5,8,11,1<br>3,14,15,16<br>,17 | 6  | O35783,P16086,P27213,P47967,P97840,Q91ZS3                                                                                                                            |
| 1249 | 1,2,3,6,7,9<br>,10,13 | 4,5,8,11,1<br>2,14,15,16<br>,17 | 4  | P12020,P16086,P97840,Q91ZS3                                                                                                                                          |
| 1250 | 1,2,3,6,7,9<br>,10,14 | 4,5,8,11,1<br>2,13,15,16<br>,17 | 5  | P02631,P12020,P16086,P27213,Q91ZS3                                                                                                                                   |
| 1251 | 1,2,3,6,7,9<br>,10,15 | 4,5,8,11,1<br>2,13,14,16<br>,17 | 6  | P02631,P16086,P27213,P35280,P97840,Q91ZS3                                                                                                                            |
| 1252 | 1,2,3,6,7,9<br>,10,16 | 4,5,8,11,1<br>2,13,14,15<br>,17 | 3  | P16086,P97840,Q91ZS3                                                                                                                                                 |
| 1253 | 1,2,3,6,7,9<br>,10,17 | 4,5,8,11,1<br>2,13,14,15<br>,16 | 8  | P01946,P02091,P15399,P16086,P97580,Q30KJ2,Q91ZS3,Q9QUL6                                                                                                              |
| 1254 | 1,2,3,6,7,9<br>,11,12 | 4,5,8,10,1<br>3,14,15,16<br>,17 | 8  | P02631,P15399,P16086,P27213,Q30KJ2,Q498R7,Q91ZS3,Q9JI85                                                                                                              |
| 1255 | 1,2,3,6,7,9<br>,11,13 | 4,5,8,10,1<br>2,14,15,16<br>,17 | 5  | P02631,P15399,P16086,Q30KJ2,Q91ZS3                                                                                                                                   |
| 1256 | 1,2,3,6,7,9<br>,11,14 | 4,5,8,10,1<br>2,13,15,16<br>,17 | 8  | P02631,P05371,P15399,P16086,P27213,Q30KJ2,Q91ZS3,Q9QUL6                                                                                                              |
| 1257 | 1,2,3,6,7,9<br>,11,15 | 4,5,8,10,1<br>2,13,14,16<br>,17 | 7  | P02631,P15399,P16086,P27213,P35280,Q30KJ2,Q91ZS3                                                                                                                     |

|      |                       |                                 |    |                                                                              |
|------|-----------------------|---------------------------------|----|------------------------------------------------------------------------------|
| 1258 | 1,2,3,6,7,9<br>,11,16 | 4,5,8,10,1<br>2,13,14,15<br>,17 | 7  | P02631,P05371,P15399,P16086,P55314,Q30KJ2,Q91ZS3                             |
| 1259 | 1,2,3,6,7,9<br>,11,17 | 4,5,8,10,1<br>2,13,14,15<br>,16 | 10 | P01946,P02091,P02631,P09605,P25809,P15399,P16086,P97580,Q30KJ2,Q91ZS3,Q9QUL6 |
| 1260 | 1,2,3,6,7,9<br>,12,13 | 4,5,8,10,1<br>1,14,15,16<br>,17 | 3  | P16086,P97840,Q9Z1F2                                                         |
| 1261 | 1,2,3,6,7,9<br>,12,14 | 4,5,8,10,1<br>1,13,15,16<br>,17 | 3  | P02631,P16086,Q63532                                                         |
| 1262 | 1,2,3,6,7,9<br>,12,15 | 4,5,8,10,1<br>1,13,14,16<br>,17 | 2  | P02631,P16086                                                                |
| 1263 | 1,2,3,6,7,9<br>,12,16 | 4,5,8,10,1<br>1,13,14,15<br>,17 | 3  | P16086,P97840,Q6AYS4                                                         |
| 1264 | 1,2,3,6,7,9<br>,12,17 | 4,5,8,10,1<br>1,13,14,15<br>,16 | 8  | P01946,P02091,P09605,P25809,P13432,P16086,P55091,P97580,Q30KJ2               |
| 1265 | 1,2,3,6,7,9<br>,13,14 | 4,5,8,10,1<br>1,12,15,16<br>,17 | 7  | P02631,P06911,P12020,P16086,P53792,Q5GRG2,Q9Z1F2                             |
| 1266 | 1,2,3,6,7,9<br>,13,15 | 4,5,8,10,1<br>1,12,14,16<br>,17 | 4  | P02631,P16086,P53792,Q6AYS4                                                  |
| 1267 | 1,2,3,6,7,9<br>,13,16 | 4,5,8,10,1<br>1,12,14,15<br>,17 | 2  | P16086,Q6AYS4                                                                |
| 1268 | 1,2,3,6,7,9<br>,13,17 | 4,5,8,10,1<br>1,12,14,15<br>,16 | 7  | P01946,P02091,P09605,P25809,P16086,P51907,P53792,Q30KJ2                      |
| 1269 | 1,2,3,6,7,9<br>,14,15 | 4,5,8,10,1<br>1,12,13,16<br>,17 | 3  | P02631,P16086,Q6AYS4                                                         |
| 1270 | 1,2,3,6,7,9<br>,14,16 | 4,5,8,10,1<br>1,12,13,15<br>,17 | 4  | P02631,P16086,Q63532,Q6AYS4                                                  |
| 1271 | 1,2,3,6,7,9<br>,14,17 | 4,5,8,10,1<br>1,12,13,15<br>,16 | 8  | P01946,P02091,P02631,P15399,P16086,P53792,P97580,Q30KJ2                      |
| 1272 | 1,2,3,6,7,9<br>,15,16 | 4,5,8,10,1<br>1,12,13,14<br>,17 | 3  | P02631,P16086,Q6AYS4                                                         |

|      |                        |                                 |    |                                                                                                   |
|------|------------------------|---------------------------------|----|---------------------------------------------------------------------------------------------------|
| 1273 | 1,2,3,6,7,9<br>,15,17  | 4,5,8,10,1<br>1,12,13,14<br>,16 | 6  | P01946,P02091,P02631,P16086,P53792,Q30KJ2                                                         |
| 1274 | 1,2,3,6,7,9<br>,16,17  | 4,5,8,10,1<br>1,12,13,14<br>,15 | 6  | P01946,P02091,P09605,P25809,P16086,P97580,Q30KJ2                                                  |
| 1275 | 1,2,3,6,7,1<br>0,11,12 | 4,5,8,9,13,<br>14,15,16,1<br>7  | 13 | O35783,P05964,P15399,P16086,P27213,P35280,P47967,P55314,P97580,P97840,Q30KJ2,Q91ZS3,Q9JI85        |
| 1276 | 1,2,3,6,7,1<br>0,11,13 | 4,5,8,9,12,<br>14,15,16,1<br>7  | 8  | P12020,P15399,P16086,P55314,P97580,Q30KJ2,Q5GRG2,Q91ZS3                                           |
| 1277 | 1,2,3,6,7,1<br>0,11,14 | 4,5,8,9,12,<br>13,15,16,1<br>7  | 11 | P02631,P12020,P15399,P16086,P27213,P35280,P47727,P55314,P97580,Q30KJ2,Q63532                      |
| 1278 | 1,2,3,6,7,1<br>0,11,15 | 4,5,8,9,12,<br>13,14,16,1<br>7  | 9  | P02631,P15399,P16086,P27213,P35280,P55314,P97580,Q30KJ2,Q4FZU6                                    |
| 1279 | 1,2,3,6,7,1<br>0,11,16 | 4,5,8,9,12,<br>13,14,15,1<br>7  | 7  | P05371,P15399,P16086,P47967,P55314,P97580,Q30KJ2                                                  |
| 1280 | 1,2,3,6,7,1<br>0,11,17 | 4,5,8,9,12,<br>13,14,15,1<br>6  | 8  | P01946,P02091,P15399,P16086,P55314,P97580,Q30KJ2,Q9QUL6                                           |
| 1281 | 1,2,3,6,7,1<br>0,12,13 | 4,5,8,9,11,<br>14,15,16,1<br>7  | 7  | O35783,P06911,P12020,P16086,P47967,P97840,Q5GRG2                                                  |
| 1282 | 1,2,3,6,7,1<br>0,12,14 | 4,5,8,9,11,<br>13,15,16,1<br>7  | 6  | A2RUV9,P12020,P15399,P16086,P97840,Q63532                                                         |
| 1283 | 1,2,3,6,7,1<br>0,12,15 | 4,5,8,9,11,<br>13,14,16,1<br>7  | 4  | P02631,P16086,P35280,P97840                                                                       |
| 1284 | 1,2,3,6,7,1<br>0,12,16 | 4,5,8,9,11,<br>13,14,15,1<br>7  | 4  | P16086,P47967,P97840,Q63532                                                                       |
| 1285 | 1,2,3,6,7,1<br>0,12,17 | 4,5,8,9,11,<br>13,14,15,1<br>6  | 14 | P01041,P01946,P02091,P13432,P15399,P16086,P55091,P97580,P97840,Q10758,Q30KJ2,Q62635,Q99MH3,Q9QZK9 |
| 1286 | 1,2,3,6,7,1<br>0,13,14 | 4,5,8,9,11,<br>12,15,16,1<br>7  | 5  | P06911,P12020,P16086,Q5GRG2,Q63532                                                                |
| 1287 | 1,2,3,6,7,1<br>0,13,15 | 4,5,8,9,11,<br>12,14,16,1<br>7  | 4  | P12020,P16086,Q4FZU6,Q5GRG2                                                                       |

|      |                        |                                |    |                                                                                                          |
|------|------------------------|--------------------------------|----|----------------------------------------------------------------------------------------------------------|
| 1288 | 1,2,3,6,7,1<br>0,13,16 | 4,5,8,9,11,<br>12,14,15,1<br>7 | 5  | P12020,P16086,P47967,P97840,Q6AYS4                                                                       |
| 1289 | 1,2,3,6,7,1<br>0,13,17 | 4,5,8,9,11,<br>12,14,15,1<br>6 | 8  | P01946,P02091,P12020,P15399,P16086,P51907,P97580,Q30KJ2                                                  |
| 1290 | 1,2,3,6,7,1<br>0,14,15 | 4,5,8,9,11,<br>12,13,16,1<br>7 | 6  | P02631,P02803,P12020,P16086,P35280,Q63532                                                                |
| 1291 | 1,2,3,6,7,1<br>0,14,16 | 4,5,8,9,11,<br>12,13,15,1<br>7 | 4  | P12020,P16086,P97840,Q63532                                                                              |
| 1292 | 1,2,3,6,7,1<br>0,14,17 | 4,5,8,9,11,<br>12,13,15,1<br>6 | 7  | P01946,P02091,P12020,P15399,P16086,P97580,Q30KJ2                                                         |
| 1293 | 1,2,3,6,7,1<br>0,15,16 | 4,5,8,9,11,<br>12,13,14,1<br>7 | 3  | P16086,P97840,Q6AYS4                                                                                     |
| 1294 | 1,2,3,6,7,1<br>0,15,17 | 4,5,8,9,11,<br>12,13,14,1<br>6 | 6  | P01946,P02091,P02803,P16086,P97580,Q30KJ2                                                                |
| 1295 | 1,2,3,6,7,1<br>0,16,17 | 4,5,8,9,11,<br>12,13,14,1<br>5 | 6  | P01946,P02091,P10758,P16086,P97580,Q30KJ2                                                                |
| 1296 | 1,2,3,6,7,1<br>1,12,13 | 4,5,8,9,10,<br>14,15,16,1<br>7 | 7  | P15399,P16086,P30120,Q30KJ2,Q62902,Q9JHB9,Q9JI85                                                         |
| 1297 | 1,2,3,6,7,1<br>1,12,14 | 4,5,8,9,10,<br>13,15,16,1<br>7 | 10 | P02631,P05371,P15399,P16086,P19629,P47727,Q30KJ2,Q63532,Q9JHB9,Q9JI85                                    |
| 1298 | 1,2,3,6,7,1<br>1,12,15 | 4,5,8,9,10,<br>13,14,16,1<br>7 | 6  | P02631,P15399,P16086,P35280,Q30KJ2,Q9JI85                                                                |
| 1299 | 1,2,3,6,7,1<br>1,12,16 | 4,5,8,9,10,<br>13,14,15,1<br>7 | 6  | P05371,P15399,P16086,P17046,P55314,Q30KJ2                                                                |
| 1300 | 1,2,3,6,7,1<br>1,12,17 | 4,5,8,9,10,<br>13,14,15,1<br>6 | 14 | P01946,P02091,P02631,P09605,P25809,P13432,P15399,P16086,P55091,P97580,Q30KJ2,Q62635,Q63751,Q9JI85,Q9QZK9 |
| 1301 | 1,2,3,6,7,1<br>1,13,14 | 4,5,8,9,10,<br>12,15,16,1<br>7 | 9  | P02631,P06911,P12020,P15399,P16086,P47727,Q30KJ2,Q5GRG2,Q63532                                           |
| 1302 | 1,2,3,6,7,1<br>1,13,15 | 4,5,8,9,10,<br>12,14,16,1<br>7 | 5  | P02631,P15399,P16086,Q30KJ2,Q5GRG2                                                                       |

|      |                        |                                |    |                                                                                                   |
|------|------------------------|--------------------------------|----|---------------------------------------------------------------------------------------------------|
| 1303 | 1,2,3,6,7,1<br>1,13,16 | 4,5,8,9,10,<br>12,14,15,1<br>7 | 4  | P15399,P16086,P55314,Q30KJ2                                                                       |
| 1304 | 1,2,3,6,7,1<br>1,13,17 | 4,5,8,9,10,<br>12,14,15,1<br>6 | 6  | P01946,P02091,P15399,P16086,P97580,Q30KJ2                                                         |
| 1305 | 1,2,3,6,7,1<br>1,14,15 | 4,5,8,9,10,<br>12,13,16,1<br>7 | 8  | P02631,P05371,P15399,P16086,P19629,P35280,Q30KJ2,Q63532                                           |
| 1306 | 1,2,3,6,7,1<br>1,14,16 | 4,5,8,9,10,<br>12,13,15,1<br>7 | 7  | P02631,P05371,P15399,P16086,P55314,Q30KJ2,Q63532                                                  |
| 1307 | 1,2,3,6,7,1<br>1,14,17 | 4,5,8,9,10,<br>12,13,15,1<br>6 | 8  | P01946,P02091,P02631,P15399,P16086,P19629,P97580,Q30KJ2                                           |
| 1308 | 1,2,3,6,7,1<br>1,15,16 | 4,5,8,9,10,<br>12,13,14,1<br>7 | 5  | P02631,P05371,P16086,P55314,Q30KJ2                                                                |
| 1309 | 1,2,3,6,7,1<br>1,15,17 | 4,5,8,9,10,<br>12,13,14,1<br>6 | 7  | P01946,P02091,P02631,P15399,P16086,P97580,Q30KJ2                                                  |
| 1310 | 1,2,3,6,7,1<br>1,16,17 | 4,5,8,9,10,<br>12,13,14,1<br>5 | 10 | P01946,P02091,P05371,P09605,P25809,P10758,P15399,P16086,P55314,P97580,Q30KJ2                      |
| 1311 | 1,2,3,6,7,1<br>2,13,14 | 4,5,8,9,10,<br>11,15,16,1<br>7 | 8  | A2RUV9,P06911,P12020,P16086,P29975,Q5GRG2,Q63532,Q9Z1F2                                           |
| 1312 | 1,2,3,6,7,1<br>2,13,15 | 4,5,8,9,10,<br>11,14,16,1<br>7 | 4  | P02631,P16086,Q5GRG2,Q6AYS4                                                                       |
| 1313 | 1,2,3,6,7,1<br>2,13,16 | 4,5,8,9,10,<br>11,14,15,1<br>7 | 3  | P16086,P97840,Q6AYS4                                                                              |
| 1314 | 1,2,3,6,7,1<br>2,13,17 | 4,5,8,9,10,<br>11,14,15,1<br>6 | 11 | P01946,P02091,P09605,P25809,P13432,P16086,P55091,Q30KJ2,Q561R9,Q62635,Q9QZK9,Q9Z1F2               |
| 1315 | 1,2,3,6,7,1<br>2,14,15 | 4,5,8,9,10,<br>11,13,16,1<br>7 | 6  | A2RUV9,P02631,P16086,P19629,Q63532,Q6AYS4                                                         |
| 1316 | 1,2,3,6,7,1<br>2,14,16 | 4,5,8,9,10,<br>11,13,15,1<br>7 | 4  | P02631,P16086,Q63532,Q6AYS4                                                                       |
| 1317 | 1,2,3,6,7,1<br>2,14,17 | 4,5,8,9,10,<br>11,13,15,1<br>6 | 14 | P01946,P02091,P02631,P13432,P15399,P16086,P19629,P31430,P55091,P97580,P98089,Q30KJ2,Q561R9,Q62635 |

|      |                        |                                 |    |                                                                                            |
|------|------------------------|---------------------------------|----|--------------------------------------------------------------------------------------------|
| 1318 | 1,2,3,6,7,1<br>2,15,16 | 4,5,8,9,10,<br>11,13,14,1<br>7  | 3  | P02631,P16086,Q6AYS4                                                                       |
| 1319 | 1,2,3,6,7,1<br>2,15,17 | 4,5,8,9,10,<br>11,13,14,1<br>6  | 9  | P01041,P01946,P02091,P02631,P13432,P16086,P55091,Q30KJ2,Q62635                             |
| 1320 | 1,2,3,6,7,1<br>2,16,17 | 4,5,8,9,10,<br>11,13,14,1<br>5  | 9  | P01946,P02091,P09605,P25809,P13432,P16086,P55091,P97580,Q30KJ2,Q561R9                      |
| 1321 | 1,2,3,6,7,1<br>3,14,15 | 4,5,8,9,10,<br>11,12,16,1<br>7  | 7  | P02631,P06911,P12020,P16086,Q09030,Q5GRG2,Q6AYS4                                           |
| 1322 | 1,2,3,6,7,1<br>3,14,16 | 4,5,8,9,10,<br>11,12,15,1<br>7  | 6  | P06911,P12020,P16086,Q5GRG2,Q63532,Q6AYS4                                                  |
| 1323 | 1,2,3,6,7,1<br>3,14,17 | 4,5,8,9,10,<br>11,12,15,1<br>6  | 13 | P01946,P02091,P06911,P12020,P16086,P51907,P53792,P97580,Q30KJ2,Q561R9,Q5GRG2,Q9QW07,Q9Z1F2 |
| 1324 | 1,2,3,6,7,1<br>3,15,16 | 4,5,8,9,10,<br>11,12,14,1<br>7  | 2  | P16086,Q6AYS4                                                                              |
| 1325 | 1,2,3,6,7,1<br>3,15,17 | 4,5,8,9,10,<br>11,12,14,1<br>6  | 7  | P00714,P01946,P02091,P02631,P16086,P53792,Q30KJ2                                           |
| 1326 | 1,2,3,6,7,1<br>3,16,17 | 4,5,8,9,10,<br>11,12,14,1<br>5  | 7  | P01946,P02091,P10758,P16086,P51907,Q30KJ2,Q561R9                                           |
| 1327 | 1,2,3,6,7,1<br>4,15,16 | 4,5,8,9,10,<br>11,12,13,1<br>7  | 5  | P02631,P02803,P16086,Q63532,Q6AYS4                                                         |
| 1328 | 1,2,3,6,7,1<br>4,15,17 | 4,5,8,9,10,<br>11,12,13,1<br>6  | 8  | P01946,P02091,P02631,P02803,P16086,P19629,P97580,Q30KJ2                                    |
| 1329 | 1,2,3,6,7,1<br>4,16,17 | 4,5,8,9,10,<br>11,12,13,1<br>5  | 8  | P01946,P02091,P10758,P16086,P97580,Q30KJ2,Q561R9,Q63532                                    |
| 1330 | 1,2,3,6,7,1<br>5,16,17 | 4,5,8,9,10,<br>11,12,13,1<br>4  | 8  | P01946,P02091,P02631,P02803,P16086,P97580,Q30KJ2,Q6AYS4                                    |
| 1331 | 1,2,3,6,8,9<br>,10,11  | 4,5,7,12,1<br>3,14,15,16<br>,17 | 7  | P08649,P27213,P35280,P55314,Q63942,Q91ZS3,Q9QUL6                                           |
| 1332 | 1,2,3,6,8,9<br>,10,12  | 4,5,7,11,1<br>3,14,15,16<br>,17 | 3  | P02782,P16636,Q91ZS3                                                                       |

|      |                       |                                 |   |                                                         |
|------|-----------------------|---------------------------------|---|---------------------------------------------------------|
| 1333 | 1,2,3,6,8,9<br>,10,13 | 4,5,7,11,1<br>2,14,15,16<br>,17 | 4 | P20766,P51907,Q63942,Q91ZS3                             |
| 1334 | 1,2,3,6,8,9<br>,10,14 | 4,5,7,11,1<br>2,13,15,16<br>,17 | 2 | P14408,Q63942                                           |
| 1335 | 1,2,3,6,8,9<br>,10,15 | 4,5,7,11,1<br>2,13,14,16<br>,17 | 5 | P27213,P35280,Q4FZU6,Q5QE79,Q63942                      |
| 1336 | 1,2,3,6,8,9<br>,10,16 | 4,5,7,11,1<br>2,13,14,15<br>,17 | 1 | Q63942                                                  |
| 1337 | 1,2,3,6,8,9<br>,10,17 | 4,5,7,11,1<br>2,13,14,15<br>,16 | 7 | P02770,P16636,P17475,P51907,Q63355,Q63942,Q6P6R2        |
| 1338 | 1,2,3,6,8,9<br>,11,12 | 4,5,7,10,1<br>3,14,15,16<br>,17 | 8 | P02782,P08723,P16636,P27213,P30120,Q6IFU8,Q91ZS3,Q9JHB9 |
| 1339 | 1,2,3,6,8,9<br>,11,13 | 4,5,7,10,1<br>2,14,15,16<br>,17 | 4 | P20766,Q63942,Q91ZS3,Q9Z1F2                             |
| 1340 | 1,2,3,6,8,9<br>,11,14 | 4,5,7,10,1<br>2,13,15,16<br>,17 | 2 | P27213,Q63942                                           |
| 1341 | 1,2,3,6,8,9<br>,11,15 | 4,5,7,10,1<br>2,13,14,16<br>,17 | 4 | P27213,P35280,Q5QE79,Q63942                             |
| 1342 | 1,2,3,6,8,9<br>,11,16 | 4,5,7,10,1<br>2,13,14,15<br>,17 | 2 | P55314,Q63942                                           |
| 1343 | 1,2,3,6,8,9<br>,11,17 | 4,5,7,10,1<br>2,13,14,15<br>,16 | 2 | P16636,P17475                                           |
| 1344 | 1,2,3,6,8,9<br>,12,13 | 4,5,7,10,1<br>1,14,15,16<br>,17 | 7 | P02782,P08723,P20766,P30120,Q06496,Q9JHB9,Q9Z1F2        |
| 1345 | 1,2,3,6,8,9<br>,12,14 | 4,5,7,10,1<br>1,13,15,16<br>,17 | 4 | P02782,P08723,P14408,Q9Z1F2                             |
| 1346 | 1,2,3,6,8,9<br>,12,15 | 4,5,7,10,1<br>1,13,14,16<br>,17 | 1 | Q5QE79                                                  |
| 1347 | 1,2,3,6,8,9<br>,12,16 | 4,5,7,10,1<br>1,13,14,15<br>,17 | 1 | Q63942                                                  |

|      |                        |                                 |    |                                                                                                   |
|------|------------------------|---------------------------------|----|---------------------------------------------------------------------------------------------------|
| 1348 | 1,2,3,6,8,9<br>,12,17  | 4,5,7,10,1<br>1,13,14,15<br>,16 | 7  | P02782,P13432,P16636,P17475,P98089,Q62635,Q9Z1F2                                                  |
| 1349 | 1,2,3,6,8,9<br>,13,14  | 4,5,7,10,1<br>1,12,15,16<br>,17 | 6  | P06911,P20766,P51907,Q62687,Q63942,Q9Z1F2                                                         |
| 1350 | 1,2,3,6,8,9<br>,13,15  | 4,5,7,10,1<br>1,12,14,16<br>,17 | 4  | P15999,P20766,Q5QE79,Q63942                                                                       |
| 1351 | 1,2,3,6,8,9<br>,13,16  | 4,5,7,10,1<br>1,12,14,15<br>,17 | 4  | P20766,P51907,Q63942,Q9Z1F2                                                                       |
| 1352 | 1,2,3,6,8,9<br>,13,17  | 4,5,7,10,1<br>1,12,14,15<br>,16 | 6  | P17475,P20766,P51907,Q63355,Q63942,Q9Z1F2                                                         |
| 1353 | 1,2,3,6,8,9<br>,14,15  | 4,5,7,10,1<br>1,12,13,16<br>,17 | 2  | Q5QE79,Q63942                                                                                     |
| 1354 | 1,2,3,6,8,9<br>,14,16  | 4,5,7,10,1<br>1,12,13,15<br>,17 | 1  | Q63942                                                                                            |
| 1355 | 1,2,3,6,8,9<br>,14,17  | 4,5,7,10,1<br>1,12,13,15<br>,16 | 2  | P51907,Q63942                                                                                     |
| 1356 | 1,2,3,6,8,9<br>,15,16  | 4,5,7,10,1<br>1,12,13,14<br>,17 | 2  | Q5QE79,Q63942                                                                                     |
| 1357 | 1,2,3,6,8,9<br>,15,17  | 4,5,7,10,1<br>1,12,13,14<br>,16 | 3  | P17475,Q5QE79,Q63942                                                                              |
| 1358 | 1,2,3,6,8,9<br>,16,17  | 4,5,7,10,1<br>1,12,13,14<br>,15 | 4  | P23593,P51907,Q63942,Q6P6R2                                                                       |
| 1359 | 1,2,3,6,8,1<br>0,11,12 | 4,5,7,9,13,<br>14,15,16,1<br>7  | 14 | O35547,P02782,P08723,P16636,P30120,P35280,P55314,P62804,Q00715,Q6IFU8,Q6IG02,Q6IMF3,Q6P6Q2,Q9JHB9 |
| 1360 | 1,2,3,6,8,1<br>0,11,13 | 4,5,7,9,12,<br>14,15,16,1<br>7  | 3  | P47727,P55314,Q4FZU6                                                                              |
| 1361 | 1,2,3,6,8,1<br>0,11,14 | 4,5,7,9,12,<br>13,15,16,1<br>7  | 3  | P35280,P47727,P55314                                                                              |
| 1362 | 1,2,3,6,8,1<br>0,11,15 | 4,5,7,9,12,<br>13,14,16,1<br>7  | 4  | P27213,P35280,P55314,Q4FZU6                                                                       |



|      |                        |                                |   |                                                  |
|------|------------------------|--------------------------------|---|--------------------------------------------------|
| 1363 | 1,2,3,6,8,1<br>0,11,16 | 4,5,7,9,12,<br>13,14,15,1<br>7 | 2 | P08649,P55314                                    |
| 1364 | 1,2,3,6,8,1<br>0,11,17 | 4,5,7,9,12,<br>13,14,15,1<br>6 | 6 | P08649,P12346,P14669,P16636,P17475,P55314        |
| 1365 | 1,2,3,6,8,1<br>0,12,13 | 4,5,7,9,11,<br>14,15,16,1<br>7 | 7 | P02782,P08723,P16636,P30120,Q8K4G9,Q9JHB9,Q9Z1F2 |
| 1366 | 1,2,3,6,8,1<br>0,12,14 | 4,5,7,9,11,<br>13,15,16,1<br>7 | 4 | P02782,P08723,Q10758,Q9Z1F2                      |
| 1367 | 1,2,3,6,8,1<br>0,12,15 | 4,5,7,9,11,<br>13,14,16,1<br>7 | 2 | P35280,Q4FZU6                                    |
| 1368 | 1,2,3,6,8,1<br>0,12,16 | 4,5,7,9,11,<br>13,14,15,1<br>7 | 2 | P05539,P16636                                    |
| 1369 | 1,2,3,6,8,1<br>0,12,17 | 4,5,7,9,11,<br>13,14,15,1<br>6 | 6 | P02782,P13432,P16636,P17475,Q10758,Q62635        |
| 1370 | 1,2,3,6,8,1<br>0,13,14 | 4,5,7,9,11,<br>12,15,16,1<br>7 | 6 | P06911,P12020,P51907,Q5GRG2,Q64093,Q9Z1F2        |
| 1371 | 1,2,3,6,8,1<br>0,13,15 | 4,5,7,9,11,<br>12,14,16,1<br>7 | 4 | P15999,Q4FZU6,Q5GRG2,Q6IFV1                      |
| 1372 | 1,2,3,6,8,1<br>0,13,16 | 4,5,7,9,11,<br>12,14,15,1<br>7 | 1 | P51907                                           |
| 1373 | 1,2,3,6,8,1<br>0,13,17 | 4,5,7,9,11,<br>12,14,15,1<br>6 | 5 | P16636,P17475,P51907,Q63355,Q6IFV1               |
| 1374 | 1,2,3,6,8,1<br>0,14,15 | 4,5,7,9,11,<br>12,13,16,1<br>7 | 1 | P35280                                           |
| 1375 | 1,2,3,6,8,1<br>0,14,16 | 4,5,7,9,11,<br>12,13,15,1<br>7 | 1 | P05539                                           |
| 1376 | 1,2,3,6,8,1<br>0,14,17 | 4,5,7,9,11,<br>12,13,15,1<br>6 | 2 | P17475,P51907                                    |
| 1377 | 1,2,3,6,8,1<br>0,15,16 | 4,5,7,9,11,<br>12,13,14,1<br>7 | 0 |                                                  |

|      |                        |                                |    |                                                                              |
|------|------------------------|--------------------------------|----|------------------------------------------------------------------------------|
| 1378 | 1,2,3,6,8,1<br>0,15,17 | 4,5,7,9,11,<br>12,13,14,1<br>6 | 4  | P12346,P17475,Q4FZU6,Q6IFV1                                                  |
| 1379 | 1,2,3,6,8,1<br>0,16,17 | 4,5,7,9,11,<br>12,13,14,1<br>5 | 5  | P05539,P16636,P17475,P51907,Q6P6R2                                           |
| 1380 | 1,2,3,6,8,1<br>1,12,13 | 4,5,7,9,10,<br>14,15,16,1<br>7 | 9  | P02781,P02782,P08723,P16636,P30120,P47727,Q5XI22,Q9JHB9,Q9Z1F2               |
| 1381 | 1,2,3,6,8,1<br>1,12,14 | 4,5,7,9,10,<br>13,15,16,1<br>7 | 10 | O35547,P02782,P08723,P30120,P47727,P62804,Q00715,Q6IFU8,Q9JHB9,Q9Z1F2        |
| 1382 | 1,2,3,6,8,1<br>1,12,15 | 4,5,7,9,10,<br>13,14,16,1<br>7 | 3  | O35547,P02782,P35280                                                         |
| 1383 | 1,2,3,6,8,1<br>1,12,16 | 4,5,7,9,10,<br>13,14,15,1<br>7 | 6  | O35547,P02782,P16636,P55314,Q6IFU8,Q6P6Q2                                    |
| 1384 | 1,2,3,6,8,1<br>1,12,17 | 4,5,7,9,10,<br>13,14,15,1<br>6 | 11 | O35547,P02782,P08723,P13432,P16636,P17475,P55091,P62804,Q00715,Q62635,Q9JHB9 |
| 1385 | 1,2,3,6,8,1<br>1,13,14 | 4,5,7,9,10,<br>12,15,16,1<br>7 | 6  | P06911,P20766,P47727,Q5GRG2,Q64093,Q9Z1F2                                    |
| 1386 | 1,2,3,6,8,1<br>1,13,15 | 4,5,7,9,10,<br>12,14,16,1<br>7 | 2  | P15999,Q64093                                                                |
| 1387 | 1,2,3,6,8,1<br>1,13,16 | 4,5,7,9,10,<br>12,14,15,1<br>7 | 1  | P55314                                                                       |
| 1388 | 1,2,3,6,8,1<br>1,13,17 | 4,5,7,9,10,<br>12,14,15,1<br>6 | 4  | P16636,P17475,P20766,Q9Z1F2                                                  |
| 1389 | 1,2,3,6,8,1<br>1,14,15 | 4,5,7,9,10,<br>12,13,16,1<br>7 | 3  | P35280,P35434,Q64093                                                         |
| 1390 | 1,2,3,6,8,1<br>1,14,16 | 4,5,7,9,10,<br>12,13,15,1<br>7 | 1  | P55314                                                                       |
| 1391 | 1,2,3,6,8,1<br>1,14,17 | 4,5,7,9,10,<br>12,13,15,1<br>6 | 1  | P17475                                                                       |
| 1392 | 1,2,3,6,8,1<br>1,15,16 | 4,5,7,9,10,<br>12,13,14,1<br>7 | 1  | P55314                                                                       |

|      |                        |                                |    |                                                                                                          |
|------|------------------------|--------------------------------|----|----------------------------------------------------------------------------------------------------------|
| 1393 | 1,2,3,6,8,1<br>1,15,17 | 4,5,7,9,10,<br>12,13,14,1<br>6 | 1  | P17475                                                                                                   |
| 1394 | 1,2,3,6,8,1<br>1,16,17 | 4,5,7,9,10,<br>12,13,14,1<br>5 | 3  | P16636,P17475,P55314                                                                                     |
| 1395 | 1,2,3,6,8,1<br>2,13,14 | 4,5,7,9,10,<br>11,15,16,1<br>7 | 14 | O08557,P02782,P06911,P08723,P29975,P30120,P46720,P51907,Q5GRG2,Q62687,Q63424,Q64093,Q9JHB9,Q9Z1F2        |
| 1396 | 1,2,3,6,8,1<br>2,13,15 | 4,5,7,9,10,<br>11,14,16,1<br>7 | 6  | O08557,P02782,P15999,Q64093,Q6IFV1,Q9Z1F2                                                                |
| 1397 | 1,2,3,6,8,1<br>2,13,16 | 4,5,7,9,10,<br>11,14,15,1<br>7 | 2  | P02782,Q9Z1F2                                                                                            |
| 1398 | 1,2,3,6,8,1<br>2,13,17 | 4,5,7,9,10,<br>11,14,15,1<br>6 | 15 | P02782,P13432,P16636,P17475,P29975,P51907,P55091,Q561R9,Q62635,Q63355,Q64093,Q6IFV1,Q9JHB9,Q9QZK9,Q9Z1F2 |
| 1399 | 1,2,3,6,8,1<br>2,14,15 | 4,5,7,9,10,<br>11,13,16,1<br>7 | 3  | O08557,Q64093,Q9Z1F2                                                                                     |
| 1400 | 1,2,3,6,8,1<br>2,14,16 | 4,5,7,9,10,<br>11,13,15,1<br>7 | 1  | Q9Z1F2                                                                                                   |
| 1401 | 1,2,3,6,8,1<br>2,14,17 | 4,5,7,9,10,<br>11,13,15,1<br>6 | 12 | P02782,P13432,P17475,P31430,P51907,P55091,P98089,Q561R9,Q5FVI6,Q62635,Q64093,Q9Z1F2                      |
| 1402 | 1,2,3,6,8,1<br>2,15,16 | 4,5,7,9,10,<br>11,13,14,1<br>7 | 1  | P83121                                                                                                   |
| 1403 | 1,2,3,6,8,1<br>2,15,17 | 4,5,7,9,10,<br>11,13,14,1<br>6 | 6  | P13432,P17475,P83121,P98089,Q62635,Q6IFV1                                                                |
| 1404 | 1,2,3,6,8,1<br>2,16,17 | 4,5,7,9,10,<br>11,13,14,1<br>5 | 7  | P13432,P16636,P17475,P98089,Q561R9,Q5XFX0,Q62635                                                         |
| 1405 | 1,2,3,6,8,1<br>3,14,15 | 4,5,7,9,10,<br>11,12,16,1<br>7 | 8  | O08557,P06911,P15999,Q5GRG2,Q62687,Q63424,Q64093,Q9Z1F2                                                  |
| 1406 | 1,2,3,6,8,1<br>3,14,16 | 4,5,7,9,10,<br>11,12,15,1<br>7 | 4  | P06911,P51907,Q64093,Q9Z1F2                                                                              |
| 1407 | 1,2,3,6,8,1<br>3,14,17 | 4,5,7,9,10,<br>11,12,15,1<br>6 | 15 | P06911,P08753,P17475,P20766,P29975,P51907,P53790,Q561R9,Q5FVI6,Q62687,Q63424,Q64093,Q6PCU2,Q9QW07,Q9Z1F2 |

|      |                        |                                |   |                                                         |
|------|------------------------|--------------------------------|---|---------------------------------------------------------|
| 1408 | 1,2,3,6,8,1<br>3,15,16 | 4,5,7,9,10,<br>11,12,14,1<br>7 | 1 | P15999                                                  |
| 1409 | 1,2,3,6,8,1<br>3,15,17 | 4,5,7,9,10,<br>11,12,14,1<br>6 | 6 | P08753,P15999,P17475,P51907,Q64093,Q6IFV1               |
| 1410 | 1,2,3,6,8,1<br>3,16,17 | 4,5,7,9,10,<br>11,12,14,1<br>5 | 3 | P17475,P51907,Q6PCU2                                    |
| 1411 | 1,2,3,6,8,1<br>4,15,16 | 4,5,7,9,10,<br>11,12,13,1<br>7 | 0 |                                                         |
| 1412 | 1,2,3,6,8,1<br>4,15,17 | 4,5,7,9,10,<br>11,12,13,1<br>6 | 3 | P10536,P17475,Q64093                                    |
| 1413 | 1,2,3,6,8,1<br>4,16,17 | 4,5,7,9,10,<br>11,12,13,1<br>5 | 3 | P51907,Q561R9,Q6PCU2                                    |
| 1414 | 1,2,3,6,8,1<br>5,16,17 | 4,5,7,9,10,<br>11,12,13,1<br>4 | 3 | P17475,Q5XFX0,Q6PCU2                                    |
| 1415 | 1,2,3,6,9,1<br>0,11,12 | 4,5,7,8,13,<br>14,15,16,1<br>7 | 8 | P14173,P27213,P55314,Q4FZU6,Q63661,Q6IFU7,Q6IFU8,Q91ZS3 |
| 1416 | 1,2,3,6,9,1<br>0,11,13 | 4,5,7,8,12,<br>14,15,16,1<br>7 | 4 | P14173,P55314,Q4FZU6,Q91ZS3                             |
| 1417 | 1,2,3,6,9,1<br>0,11,14 | 4,5,7,8,12,<br>13,15,16,1<br>7 | 7 | P14173,P27213,P55314,Q63661,Q91ZS3,Q99041,Q9QUL6        |
| 1418 | 1,2,3,6,9,1<br>0,11,15 | 4,5,7,8,12,<br>13,14,16,1<br>7 | 6 | P27213,P35280,P55314,Q4FZU6,Q63661,Q91ZS3               |
| 1419 | 1,2,3,6,9,1<br>0,11,16 | 4,5,7,8,12,<br>13,14,15,1<br>7 | 3 | P14173,P55314,Q91ZS3                                    |
| 1420 | 1,2,3,6,9,1<br>0,11,17 | 4,5,7,8,12,<br>13,14,15,1<br>6 | 5 | P16636,P55314,Q4FZU6,Q91ZS3,Q9QUL6                      |
| 1421 | 1,2,3,6,9,1<br>0,12,13 | 4,5,7,8,11,<br>14,15,16,1<br>7 | 3 | P97840,Q6AYS4,Q91ZS3                                    |
| 1422 | 1,2,3,6,9,1<br>0,12,14 | 4,5,7,8,11,<br>13,15,16,1<br>7 | 0 |                                                         |

|      |                        |                                |   |                             |
|------|------------------------|--------------------------------|---|-----------------------------|
| 1423 | 1,2,3,6,9,1<br>0,12,15 | 4,5,7,8,11,<br>13,14,16,1<br>7 | 2 | Q4FZU6,Q6AYS4               |
| 1424 | 1,2,3,6,9,1<br>0,12,16 | 4,5,7,8,11,<br>13,14,15,1<br>7 | 3 | P97840,Q6AYS4,Q9WUW8        |
| 1425 | 1,2,3,6,9,1<br>0,12,17 | 4,5,7,8,11,<br>13,14,15,1<br>6 | 4 | P07171,P16636,Q10758,Q63355 |
| 1426 | 1,2,3,6,9,1<br>0,13,14 | 4,5,7,8,11,<br>12,15,16,1<br>7 | 2 | Q6AYS4,Q99041               |
| 1427 | 1,2,3,6,9,1<br>0,13,15 | 4,5,7,8,11,<br>12,14,16,1<br>7 | 3 | Q4FZU6,Q6AYS4,Q99041        |
| 1428 | 1,2,3,6,9,1<br>0,13,16 | 4,5,7,8,11,<br>12,14,15,1<br>7 | 2 | Q6AYS4,Q99041               |
| 1429 | 1,2,3,6,9,1<br>0,13,17 | 4,5,7,8,11,<br>12,14,15,1<br>6 | 2 | P51907,Q63355               |
| 1430 | 1,2,3,6,9,1<br>0,14,15 | 4,5,7,8,11,<br>12,13,16,1<br>7 | 3 | Q4FZU6,Q6AYS4,Q99041        |
| 1431 | 1,2,3,6,9,1<br>0,14,16 | 4,5,7,8,11,<br>12,13,15,1<br>7 | 3 | Q63942,Q6AYS4,Q99041        |
| 1432 | 1,2,3,6,9,1<br>0,14,17 | 4,5,7,8,11,<br>12,13,15,1<br>6 | 0 |                             |
| 1433 | 1,2,3,6,9,1<br>0,15,16 | 4,5,7,8,11,<br>12,13,14,1<br>7 | 4 | Q4FZU6,Q63942,Q6AYS4,Q99041 |
| 1434 | 1,2,3,6,9,1<br>0,15,17 | 4,5,7,8,11,<br>12,13,14,1<br>6 | 1 | Q4FZU6                      |
| 1435 | 1,2,3,6,9,1<br>0,16,17 | 4,5,7,8,11,<br>12,13,14,1<br>5 | 1 | Q6AYS4                      |
| 1436 | 1,2,3,6,9,1<br>1,12,13 | 4,5,7,8,10,<br>14,15,16,1<br>7 | 2 | Q91ZS3,Q9JHB9               |
| 1437 | 1,2,3,6,9,1<br>1,12,14 | 4,5,7,8,10,<br>13,15,16,1<br>7 | 2 | Q6IFU8,Q91ZS3               |

|      |                        |                                |   |                             |
|------|------------------------|--------------------------------|---|-----------------------------|
| 1438 | 1,2,3,6,9,1<br>1,12,15 | 4,5,7,8,10,<br>13,14,16,1<br>7 | 0 |                             |
| 1439 | 1,2,3,6,9,1<br>1,12,16 | 4,5,7,8,10,<br>13,14,15,1<br>7 | 4 | P55314,Q6IFU7,Q6IFU8,Q91ZS3 |
| 1440 | 1,2,3,6,9,1<br>1,12,17 | 4,5,7,8,10,<br>13,14,15,1<br>6 | 1 | P16636                      |
| 1441 | 1,2,3,6,9,1<br>1,13,14 | 4,5,7,8,10,<br>12,15,16,1<br>7 | 1 | Q91ZS3                      |
| 1442 | 1,2,3,6,9,1<br>1,13,15 | 4,5,7,8,10,<br>12,14,16,1<br>7 | 1 | Q4FZU6                      |
| 1443 | 1,2,3,6,9,1<br>1,13,16 | 4,5,7,8,10,<br>12,14,15,1<br>7 | 1 | P55314                      |
| 1444 | 1,2,3,6,9,1<br>1,13,17 | 4,5,7,8,10,<br>12,14,15,1<br>6 | 0 |                             |
| 1445 | 1,2,3,6,9,1<br>1,14,15 | 4,5,7,8,10,<br>12,13,16,1<br>7 | 0 |                             |
| 1446 | 1,2,3,6,9,1<br>1,14,16 | 4,5,7,8,10,<br>12,13,15,1<br>7 | 2 | P55314,Q99MH3               |
| 1447 | 1,2,3,6,9,1<br>1,14,17 | 4,5,7,8,10,<br>12,13,15,1<br>6 | 1 | Q9QUL6                      |
| 1448 | 1,2,3,6,9,1<br>1,15,16 | 4,5,7,8,10,<br>12,13,14,1<br>7 | 1 | P55314                      |
| 1449 | 1,2,3,6,9,1<br>1,15,17 | 4,5,7,8,10,<br>12,13,14,1<br>6 | 0 |                             |
| 1450 | 1,2,3,6,9,1<br>1,16,17 | 4,5,7,8,10,<br>12,13,14,1<br>5 | 1 | P55314                      |
| 1451 | 1,2,3,6,9,1<br>2,13,14 | 4,5,7,8,10,<br>11,15,16,1<br>7 | 3 | P00714,Q6AYS4,Q9Z1F2        |
| 1452 | 1,2,3,6,9,1<br>2,13,15 | 4,5,7,8,10,<br>11,14,16,1<br>7 | 2 | P00714,Q6AYS4               |

|      |                        |                                |   |                                           |
|------|------------------------|--------------------------------|---|-------------------------------------------|
| 1453 | 1,2,3,6,9,1<br>2,13,16 | 4,5,7,8,10,<br>11,14,15,1<br>7 | 2 | P00714,Q6AYS4                             |
| 1454 | 1,2,3,6,9,1<br>2,13,17 | 4,5,7,8,10,<br>11,14,15,1<br>6 | 6 | P00714,P07171,Q62635,Q63355,Q6AYS4,Q9Z1F2 |
| 1455 | 1,2,3,6,9,1<br>2,14,15 | 4,5,7,8,10,<br>11,13,16,1<br>7 | 1 | Q6AYS4                                    |
| 1456 | 1,2,3,6,9,1<br>2,14,16 | 4,5,7,8,10,<br>11,13,15,1<br>7 | 1 | Q6AYS4                                    |
| 1457 | 1,2,3,6,9,1<br>2,14,17 | 4,5,7,8,10,<br>11,13,15,1<br>6 | 3 | P00714,P01835,Q561R9                      |
| 1458 | 1,2,3,6,9,1<br>2,15,16 | 4,5,7,8,10,<br>11,13,14,1<br>7 | 1 | Q6AYS4                                    |
| 1459 | 1,2,3,6,9,1<br>2,15,17 | 4,5,7,8,10,<br>11,13,14,1<br>6 | 2 | P00714,Q6AYS4                             |
| 1460 | 1,2,3,6,9,1<br>2,16,17 | 4,5,7,8,10,<br>11,13,14,1<br>5 | 3 | P00714,P07171,Q6AYS4                      |
| 1461 | 1,2,3,6,9,1<br>3,14,15 | 4,5,7,8,10,<br>11,12,16,1<br>7 | 4 | P00714,P16391,Q6AYS4,Q99041               |
| 1462 | 1,2,3,6,9,1<br>3,14,16 | 4,5,7,8,10,<br>11,12,15,1<br>7 | 3 | P00714,Q6AYS4,Q99041                      |
| 1463 | 1,2,3,6,9,1<br>3,14,17 | 4,5,7,8,10,<br>11,12,15,1<br>6 | 6 | P00714,P51907,P53792,Q5FVI6,Q6AYS4,Q9QW07 |
| 1464 | 1,2,3,6,9,1<br>3,15,16 | 4,5,7,8,10,<br>11,12,14,1<br>7 | 2 | P00714,Q6AYS4                             |
| 1465 | 1,2,3,6,9,1<br>3,15,17 | 4,5,7,8,10,<br>11,12,14,1<br>6 | 3 | P00714,P53792,Q6AYS4                      |
| 1466 | 1,2,3,6,9,1<br>3,16,17 | 4,5,7,8,10,<br>11,12,14,1<br>5 | 4 | P00714,P07171,P51907,Q6AYS4               |
| 1467 | 1,2,3,6,9,1<br>4,15,16 | 4,5,7,8,10,<br>11,12,13,1<br>7 | 5 | P00714,Q63942,Q6AYS4,Q99041,Q9QZK9        |

|      |                         |                                |   |                                           |
|------|-------------------------|--------------------------------|---|-------------------------------------------|
| 1468 | 1,2,3,6,9,1<br>4,15,17  | 4,5,7,8,10,<br>11,12,13,1<br>6 | 2 | P00714,Q6AYS4                             |
| 1469 | 1,2,3,6,9,1<br>4,16,17  | 4,5,7,8,10,<br>11,12,13,1<br>5 | 2 | P00714,Q6AYS4                             |
| 1470 | 1,2,3,6,9,1<br>5,16,17  | 4,5,7,8,10,<br>11,12,13,1<br>4 | 3 | P00714,P23593,Q6AYS4                      |
| 1471 | 1,2,3,6,10,<br>11,12,13 | 4,5,7,8,9,1<br>4,15,16,17      | 4 | P47727,P55314,Q4FZU6,Q9JHB9               |
| 1472 | 1,2,3,6,10,<br>11,12,14 | 4,5,7,8,9,1<br>3,15,16,17      | 5 | P47727,P55314,P62804,Q6IFU7,Q6IFU8        |
| 1473 | 1,2,3,6,10,<br>11,12,15 | 4,5,7,8,9,1<br>3,14,16,17      | 4 | P35280,P55314,Q4FZU6,Q6IFU7               |
| 1474 | 1,2,3,6,10,<br>11,12,16 | 4,5,7,8,9,1<br>3,14,15,17      | 6 | P47967,P55314,Q6IFU7,Q6IFU8,Q6IMF3,Q6P6Q2 |
| 1475 | 1,2,3,6,10,<br>11,12,17 | 4,5,7,8,9,1<br>3,14,15,16      | 5 | P06757,P16636,P55314,Q10758,Q6IFU8        |
| 1476 | 1,2,3,6,10,<br>11,13,14 | 4,5,7,8,9,1<br>2,15,16,17      | 3 | P47727,P55314,Q4FZU6                      |
| 1477 | 1,2,3,6,10,<br>11,13,15 | 4,5,7,8,9,1<br>2,14,16,17      | 2 | P55314,Q4FZU6                             |
| 1478 | 1,2,3,6,10,<br>11,13,16 | 4,5,7,8,9,1<br>2,14,15,17      | 2 | P55314,Q4FZU6                             |
| 1479 | 1,2,3,6,10,<br>11,13,17 | 4,5,7,8,9,1<br>2,14,15,16      | 3 | P16636,P55314,Q4FZU6                      |
| 1480 | 1,2,3,6,10,<br>11,14,15 | 4,5,7,8,9,1<br>2,13,16,17      | 3 | P35280,P55314,Q4FZU6                      |
| 1481 | 1,2,3,6,10,<br>11,14,16 | 4,5,7,8,9,1<br>2,13,15,17      | 1 | P55314                                    |
| 1482 | 1,2,3,6,10,<br>11,14,17 | 4,5,7,8,9,1<br>2,13,15,16      | 2 | P15399,P55314                             |
| 1483 | 1,2,3,6,10,<br>11,15,16 | 4,5,7,8,9,1<br>2,13,14,17      | 2 | P55314,Q4FZU6                             |
| 1484 | 1,2,3,6,10,<br>11,15,17 | 4,5,7,8,9,1<br>2,13,14,16      | 2 | P55314,Q4FZU6                             |
| 1485 | 1,2,3,6,10,<br>11,16,17 | 4,5,7,8,9,1<br>2,13,14,15      | 1 | P55314                                    |
| 1486 | 1,2,3,6,10,<br>12,13,14 | 4,5,7,8,9,1<br>1,15,16,17      | 2 | Q05175,Q6AYS4                             |
| 1487 | 1,2,3,6,10,<br>12,13,15 | 4,5,7,8,9,1<br>1,14,16,17      | 2 | Q4FZU6,Q6AYS4                             |
| 1488 | 1,2,3,6,10,<br>12,13,16 | 4,5,7,8,9,1<br>1,14,15,17      | 2 | P97840,Q6AYS4                             |



|      |                                                |   |                                                         |
|------|------------------------------------------------|---|---------------------------------------------------------|
| 1489 | 1,2,3,6,10, 4,5,7,8,9,1<br>12,13,17 1,14,15,16 | 8 | P07171,P16636,Q05175,Q10758,Q62635,Q63355,Q99MH3,Q9QZK9 |
| 1490 | 1,2,3,6,10, 4,5,7,8,9,1<br>12,14,15 1,13,16,17 | 3 | A2RUV9,Q4FZU6,Q6AYS4                                    |
| 1491 | 1,2,3,6,10, 4,5,7,8,9,1<br>12,14,16 1,13,15,17 | 3 | P97840,Q10758,Q6AYS4                                    |
| 1492 | 1,2,3,6,10, 4,5,7,8,9,1<br>12,14,17 1,13,15,16 | 2 | Q10758,Q561R9                                           |
| 1493 | 1,2,3,6,10, 4,5,7,8,9,1<br>12,15,16 1,13,14,17 | 3 | P97840,Q4FZU6,Q6AYS4                                    |
| 1494 | 1,2,3,6,10, 4,5,7,8,9,1<br>12,15,17 1,13,14,16 | 3 | P06866,Q4FZU6,Q6AYS4                                    |
| 1495 | 1,2,3,6,10, 4,5,7,8,9,1<br>12,16,17 1,13,14,15 | 4 | P07171,P16636,Q10758,Q6AYS4                             |
| 1496 | 1,2,3,6,10, 4,5,7,8,9,1<br>13,14,15 1,12,16,17 | 3 | Q4FZU6,Q6AYS4,Q99041                                    |
| 1497 | 1,2,3,6,10, 4,5,7,8,9,1<br>13,14,16 1,12,15,17 | 2 | Q6AYS4,Q99041                                           |
| 1498 | 1,2,3,6,10, 4,5,7,8,9,1<br>13,14,17 1,12,15,16 | 2 | P51907,Q9QW07                                           |
| 1499 | 1,2,3,6,10, 4,5,7,8,9,1<br>13,15,16 1,12,14,17 | 2 | Q4FZU6,Q6AYS4                                           |
| 1500 | 1,2,3,6,10, 4,5,7,8,9,1<br>13,15,17 1,12,14,16 | 3 | Q4FZU6,Q6AYS4,Q6IFV1                                    |
| 1501 | 1,2,3,6,10, 4,5,7,8,9,1<br>13,16,17 1,12,14,15 | 2 | P51907,Q6AYS4                                           |
| 1502 | 1,2,3,6,10, 4,5,7,8,9,1<br>14,15,16 1,12,13,17 | 4 | P02803,P36374,Q6AYS4,Q99041                             |
| 1503 | 1,2,3,6,10, 4,5,7,8,9,1<br>14,15,17 1,12,13,16 | 3 | P02803,Q4FZU6,Q6AYS4                                    |
| 1504 | 1,2,3,6,10, 4,5,7,8,9,1<br>14,16,17 1,12,13,15 | 1 | Q6AYS4                                                  |
| 1505 | 1,2,3,6,10, 4,5,7,8,9,1<br>15,16,17 1,12,13,14 | 3 | P02803,Q4FZU6,Q6AYS4                                    |
| 1506 | 1,2,3,6,11, 4,5,7,8,9,1<br>12,13,14 0,15,16,17 | 4 | P47727,Q64093,Q9JHB9,Q9Z1F2                             |
| 1507 | 1,2,3,6,11, 4,5,7,8,9,1<br>12,13,15 0,14,16,17 | 0 |                                                         |
| 1508 | 1,2,3,6,11, 4,5,7,8,9,1<br>12,13,16 0,14,15,17 | 1 | P55314                                                  |
| 1509 | 1,2,3,6,11, 4,5,7,8,9,1<br>12,13,17 0,14,15,16 | 4 | P16636,Q62635,Q9JHB9,Q9QZK9                             |
| 1510 | 1,2,3,6,11, 4,5,7,8,9,1<br>12,14,15 0,13,16,17 | 0 |                                                         |
| 1511 | 1,2,3,6,11, 4,5,7,8,9,1<br>12,14,16 0,13,15,17 | 2 | P55314,Q6IFU8                                           |

|      |                                                |   |                                                                |
|------|------------------------------------------------|---|----------------------------------------------------------------|
| 1512 | 1,2,3,6,11, 4,5,7,8,9,1<br>12,14,17 0,13,15,16 | 2 | Q62635,Q6IFU8                                                  |
| 1513 | 1,2,3,6,11, 4,5,7,8,9,1<br>12,15,16 0,13,14,17 | 1 | P55314                                                         |
| 1514 | 1,2,3,6,11, 4,5,7,8,9,1<br>12,15,17 0,13,14,16 | 0 |                                                                |
| 1515 | 1,2,3,6,11, 4,5,7,8,9,1<br>12,16,17 0,13,14,15 | 2 | P16636,P55314                                                  |
| 1516 | 1,2,3,6,11, 4,5,7,8,9,1<br>13,14,15 0,12,16,17 | 1 | Q64093                                                         |
| 1517 | 1,2,3,6,11, 4,5,7,8,9,1<br>13,14,16 0,12,15,17 | 1 | P55314                                                         |
| 1518 | 1,2,3,6,11, 4,5,7,8,9,1<br>13,14,17 0,12,15,16 | 2 | Q64093,Q9QW07                                                  |
| 1519 | 1,2,3,6,11, 4,5,7,8,9,1<br>13,15,16 0,12,14,17 | 1 | P55314                                                         |
| 1520 | 1,2,3,6,11, 4,5,7,8,9,1<br>13,15,17 0,12,14,16 | 1 | P00714                                                         |
| 1521 | 1,2,3,6,11, 4,5,7,8,9,1<br>13,16,17 0,12,14,15 | 1 | P55314                                                         |
| 1522 | 1,2,3,6,11, 4,5,7,8,9,1<br>14,15,16 0,12,13,17 | 1 | P55314                                                         |
| 1523 | 1,2,3,6,11, 4,5,7,8,9,1<br>14,15,17 0,12,13,16 | 0 |                                                                |
| 1524 | 1,2,3,6,11, 4,5,7,8,9,1<br>14,16,17 0,12,13,15 | 1 | P55314                                                         |
| 1525 | 1,2,3,6,11, 4,5,7,8,9,1<br>15,16,17 0,12,13,14 | 1 | P55314                                                         |
| 1526 | 1,2,3,6,12, 4,5,7,8,9,1<br>13,14,15 0,11,16,17 | 5 | A2RUV9,P00714,Q64093,Q6AYS4,Q9Z1F2                             |
| 1527 | 1,2,3,6,12, 4,5,7,8,9,1<br>13,14,16 0,11,15,17 | 4 | P00714,Q64093,Q6AYS4,Q9Z1F2                                    |
| 1528 | 1,2,3,6,12, 4,5,7,8,9,1<br>13,14,17 0,11,15,16 | 9 | P00714,P51907,Q561R9,Q5FVI6,Q62635,Q64093,Q6AYS4,Q9QW07,Q9Z1F2 |
| 1529 | 1,2,3,6,12, 4,5,7,8,9,1<br>13,15,16 0,11,14,17 | 2 | P00714,Q6AYS4                                                  |
| 1530 | 1,2,3,6,12, 4,5,7,8,9,1<br>13,15,17 0,11,14,16 | 4 | P00714,Q62635,Q6AYS4,Q6IFV1                                    |
| 1531 | 1,2,3,6,12, 4,5,7,8,9,1<br>13,16,17 0,11,14,15 | 5 | P00714,P07171,Q561R9,Q62635,Q6AYS4                             |
| 1532 | 1,2,3,6,12, 4,5,7,8,9,1<br>14,15,16 0,11,13,17 | 2 | P00714,Q6AYS4                                                  |
| 1533 | 1,2,3,6,12, 4,5,7,8,9,1<br>14,15,17 0,11,13,16 | 2 | P00714,Q6AYS4                                                  |
| 1534 | 1,2,3,6,12, 4,5,7,8,9,1<br>14,16,17 0,11,13,15 | 3 | P00714,Q561R9,Q6AYS4                                           |

|      |                                                    |   |                                           |
|------|----------------------------------------------------|---|-------------------------------------------|
| 1535 | 1,2,3,6,12, 4,5,7,8,9,1<br>15,16,17 0,11,13,14     | 5 | P00714,P06866,P83121,Q5XFX0,Q6AYS4        |
| 1536 | 1,2,3,6,13, 4,5,7,8,9,1<br>14,15,16 0,11,12,17     | 4 | P00714,Q64093,Q6AYS4,Q99041               |
| 1537 | 1,2,3,6,13, 4,5,7,8,9,1<br>14,15,17 0,11,12,16     | 4 | P00714,Q64093,Q6AYS4,Q9QW07               |
| 1538 | 1,2,3,6,13, 4,5,7,8,9,1<br>14,16,17 0,11,12,15     | 6 | P00714,P51907,Q561R9,Q6AYS4,Q6PCU2,Q9QW07 |
| 1539 | 1,2,3,6,13, 4,5,7,8,9,1<br>15,16,17 0,11,12,14     | 2 | P00714,Q6AYS4                             |
| 1540 | 1,2,3,6,14, 4,5,7,8,9,1<br>15,16,17 0,11,12,13     | 3 | P00714,P02803,Q6AYS4                      |
| 1541 | 1,2,3,7,8,9 4,5,6,12,1<br>,10,11 3,14,15,16<br>,17 | 5 | P10715,P27213,P31044,P35280,Q91ZS3        |
| 1542 | 1,2,3,7,8,9 4,5,6,11,1<br>,10,12 3,14,15,16<br>,17 | 4 | P10715,P27213,P97840,Q9EQS0               |
| 1543 | 1,2,3,7,8,9 4,5,6,11,1<br>,10,13 2,14,15,16<br>,17 | 3 | P01835,P20766,P31044                      |
| 1544 | 1,2,3,7,8,9 4,5,6,11,1<br>,10,14 2,13,15,16<br>,17 | 2 | P27213,P31044                             |
| 1545 | 1,2,3,7,8,9 4,5,6,11,1<br>,10,15 2,13,14,16<br>,17 | 4 | P01835,P27213,P35280,Q5QE79               |
| 1546 | 1,2,3,7,8,9 4,5,6,11,1<br>,10,16 2,13,14,15<br>,17 | 1 | P01835                                    |
| 1547 | 1,2,3,7,8,9 4,5,6,11,1<br>,10,17 2,13,14,15<br>,16 | 4 | P01946,P02091,P02770,P12346               |
| 1548 | 1,2,3,7,8,9 4,5,6,10,1<br>,11,12 3,14,15,16<br>,17 | 3 | P10715,P27213,Q9EQS0                      |
| 1549 | 1,2,3,7,8,9 4,5,6,10,1<br>,11,13 2,14,15,16<br>,17 | 2 | P10715,P20766                             |
| 1550 | 1,2,3,7,8,9 4,5,6,10,1<br>,11,14 2,13,15,16<br>,17 | 3 | P10715,P19629,P27213                      |
| 1551 | 1,2,3,7,8,9 4,5,6,10,1<br>,11,15 2,13,14,16<br>,17 | 4 | P10715,P27213,P35280,Q5QE79               |

|      |                       |                                 |   |                                           |
|------|-----------------------|---------------------------------|---|-------------------------------------------|
| 1552 | 1,2,3,7,8,9<br>,11,16 | 4,5,6,10,1<br>2,13,14,15<br>,17 | 2 | B4F795,P10715                             |
| 1553 | 1,2,3,7,8,9<br>,11,17 | 4,5,6,10,1<br>2,13,14,15<br>,16 | 5 | P01946,P02091,P02770,P10715,P50115        |
| 1554 | 1,2,3,7,8,9<br>,12,13 | 4,5,6,10,1<br>1,14,15,16<br>,17 | 3 | P10715,P20766,Q9Z1F2                      |
| 1555 | 1,2,3,7,8,9<br>,12,14 | 4,5,6,10,1<br>1,13,15,16<br>,17 | 4 | P10715,P19629,P36970,Q9EQS0               |
| 1556 | 1,2,3,7,8,9<br>,12,15 | 4,5,6,10,1<br>1,13,14,16<br>,17 | 2 | P10715,Q5QE79                             |
| 1557 | 1,2,3,7,8,9<br>,12,16 | 4,5,6,10,1<br>1,13,14,15<br>,17 | 1 | P10715                                    |
| 1558 | 1,2,3,7,8,9<br>,12,17 | 4,5,6,10,1<br>1,13,14,15<br>,16 | 6 | P01946,P02091,P02770,P10715,P19223,P55091 |
| 1559 | 1,2,3,7,8,9<br>,13,14 | 4,5,6,10,1<br>1,12,15,16<br>,17 | 4 | P20766,P36970,Q08849,Q9Z1F2               |
| 1560 | 1,2,3,7,8,9<br>,13,15 | 4,5,6,10,1<br>1,12,14,16<br>,17 | 3 | P01835,P20766,Q5QE79                      |
| 1561 | 1,2,3,7,8,9<br>,13,16 | 4,5,6,10,1<br>1,12,14,15<br>,17 | 2 | P01835,P20766                             |
| 1562 | 1,2,3,7,8,9<br>,13,17 | 4,5,6,10,1<br>1,12,14,15<br>,16 | 6 | P01946,P02091,P02770,P20766,P51907,Q6IFU7 |
| 1563 | 1,2,3,7,8,9<br>,14,15 | 4,5,6,10,1<br>1,12,13,16<br>,17 | 3 | P19629,Q08849,Q5QE79                      |
| 1564 | 1,2,3,7,8,9<br>,14,16 | 4,5,6,10,1<br>1,12,13,15<br>,17 | 2 | Q08849,Q9QZK9                             |
| 1565 | 1,2,3,7,8,9<br>,14,17 | 4,5,6,10,1<br>1,12,13,15<br>,16 | 4 | P01946,P02091,P19629,Q08849               |
| 1566 | 1,2,3,7,8,9<br>,15,16 | 4,5,6,10,1<br>1,12,13,14<br>,17 | 5 | B4F795,P01835,P10715,Q5QE79,Q9QZK9        |

|      |                        |                                 |   |                                                                |
|------|------------------------|---------------------------------|---|----------------------------------------------------------------|
| 1567 | 1,2,3,7,8,9<br>,15,17  | 4,5,6,10,1<br>1,12,13,14<br>,16 | 3 | P01946,P02091,Q5QE79                                           |
| 1568 | 1,2,3,7,8,9<br>,16,17  | 4,5,6,10,1<br>1,12,13,14<br>,15 | 3 | P01946,P02091,P10715                                           |
| 1569 | 1,2,3,7,8,1<br>0,11,12 | 4,5,6,9,13,<br>14,15,16,1<br>7  | 7 | O35783,P00731,P05964,P10715,P27213,P35280,Q9EQS0               |
| 1570 | 1,2,3,7,8,1<br>0,11,13 | 4,5,6,9,12,<br>14,15,16,1<br>7  | 3 | P01835,P20766,P31044                                           |
| 1571 | 1,2,3,7,8,1<br>0,11,14 | 4,5,6,9,12,<br>13,15,16,1<br>7  | 3 | P27213,P31044,P35280                                           |
| 1572 | 1,2,3,7,8,1<br>0,11,15 | 4,5,6,9,12,<br>13,14,16,1<br>7  | 5 | P00731,P01835,P27213,P31044,P35280                             |
| 1573 | 1,2,3,7,8,1<br>0,11,16 | 4,5,6,9,12,<br>13,14,15,1<br>7  | 3 | P01835,P10715,P55314                                           |
| 1574 | 1,2,3,7,8,1<br>0,11,17 | 4,5,6,9,12,<br>13,14,15,1<br>6  | 6 | P01946,P02091,P02770,P10715,P12346,P17475                      |
| 1575 | 1,2,3,7,8,1<br>0,12,13 | 4,5,6,9,11,<br>14,15,16,1<br>7  | 0 |                                                                |
| 1576 | 1,2,3,7,8,1<br>0,12,14 | 4,5,6,9,11,<br>13,15,16,1<br>7  | 4 | A2RUV9,P19629,P36970,Q9EQS0                                    |
| 1577 | 1,2,3,7,8,1<br>0,12,15 | 4,5,6,9,11,<br>13,14,16,1<br>7  | 4 | P00731,P01041,P10715,P35280                                    |
| 1578 | 1,2,3,7,8,1<br>0,12,16 | 4,5,6,9,11,<br>13,14,15,1<br>7  | 4 | P08721,P10715,P47967,P97840                                    |
| 1579 | 1,2,3,7,8,1<br>0,12,17 | 4,5,6,9,11,<br>13,14,15,1<br>6  | 9 | P01041,P01946,P02091,P02770,P10715,P12346,P17475,P19223,P55091 |
| 1580 | 1,2,3,7,8,1<br>0,13,14 | 4,5,6,9,11,<br>12,15,16,1<br>7  | 8 | P01835,P06911,P12020,P20766,P31044,P36970,Q08849,Q5GRG2        |
| 1581 | 1,2,3,7,8,1<br>0,13,15 | 4,5,6,9,11,<br>12,14,16,1<br>7  | 4 | P01835,P15999,Q09030,Q5GRG2                                    |

|      |                        |                                |    |                                                                       |
|------|------------------------|--------------------------------|----|-----------------------------------------------------------------------|
| 1582 | 1,2,3,7,8,1<br>0,13,16 | 4,5,6,9,11,<br>12,14,15,1<br>7 | 1  | P01835                                                                |
| 1583 | 1,2,3,7,8,1<br>0,13,17 | 4,5,6,9,11,<br>12,14,15,1<br>6 | 8  | P01835,P01946,P02091,P02770,P12346,P17475,P20766,P51907               |
| 1584 | 1,2,3,7,8,1<br>0,14,15 | 4,5,6,9,11,<br>12,13,16,1<br>7 | 4  | P01835,P19629,P35280,Q08849                                           |
| 1585 | 1,2,3,7,8,1<br>0,14,16 | 4,5,6,9,11,<br>12,13,15,1<br>7 | 3  | P01835,P08721,Q63532                                                  |
| 1586 | 1,2,3,7,8,1<br>0,14,17 | 4,5,6,9,11,<br>12,13,15,1<br>6 | 5  | P01946,P02091,P12346,P17475,Q08849                                    |
| 1587 | 1,2,3,7,8,1<br>0,15,16 | 4,5,6,9,11,<br>12,13,14,1<br>7 | 2  | P01835,P08721                                                         |
| 1588 | 1,2,3,7,8,1<br>0,15,17 | 4,5,6,9,11,<br>12,13,14,1<br>6 | 5  | P01835,P01946,P02091,P12346,P17475                                    |
| 1589 | 1,2,3,7,8,1<br>0,16,17 | 4,5,6,9,11,<br>12,13,14,1<br>5 | 5  | P01835,P01946,P02091,P08721,P12346                                    |
| 1590 | 1,2,3,7,8,1<br>1,12,13 | 4,5,6,9,10,<br>14,15,16,1<br>7 | 2  | P10715,Q8CJ52                                                         |
| 1591 | 1,2,3,7,8,1<br>1,12,14 | 4,5,6,9,10,<br>13,15,16,1<br>7 | 3  | P10715,P19629,Q9EQS0                                                  |
| 1592 | 1,2,3,7,8,1<br>1,12,15 | 4,5,6,9,10,<br>13,14,16,1<br>7 | 4  | P01041,P10715,P19629,P35280                                           |
| 1593 | 1,2,3,7,8,1<br>1,12,16 | 4,5,6,9,10,<br>13,14,15,1<br>7 | 1  | P10715                                                                |
| 1594 | 1,2,3,7,8,1<br>1,12,17 | 4,5,6,9,10,<br>13,14,15,1<br>6 | 10 | P01041,P01946,P02091,P02770,P10715,P17475,P19223,P50115,P55091,Q9QZA6 |
| 1595 | 1,2,3,7,8,1<br>1,13,14 | 4,5,6,9,10,<br>12,15,16,1<br>7 | 4  | P19629,P20766,Q08849,Q5GRG2                                           |
| 1596 | 1,2,3,7,8,1<br>1,13,15 | 4,5,6,9,10,<br>12,14,16,1<br>7 | 3  | P01835,P20766,Q09030                                                  |

|      |                        |                                |   |                                                                |
|------|------------------------|--------------------------------|---|----------------------------------------------------------------|
| 1597 | 1,2,3,7,8,1<br>1,13,16 | 4,5,6,9,10,<br>12,14,15,1<br>7 | 2 | P01835,P10715                                                  |
| 1598 | 1,2,3,7,8,1<br>1,13,17 | 4,5,6,9,10,<br>12,14,15,1<br>6 | 4 | P01946,P02091,P10715,P20766                                    |
| 1599 | 1,2,3,7,8,1<br>1,14,15 | 4,5,6,9,10,<br>12,13,16,1<br>7 | 3 | P19629,P35280,Q08849                                           |
| 1600 | 1,2,3,7,8,1<br>1,14,16 | 4,5,6,9,10,<br>12,13,15,1<br>7 | 2 | P19629,Q63532                                                  |
| 1601 | 1,2,3,7,8,1<br>1,14,17 | 4,5,6,9,10,<br>12,13,15,1<br>6 | 3 | P01946,P02091,P19629                                           |
| 1602 | 1,2,3,7,8,1<br>1,15,16 | 4,5,6,9,10,<br>12,13,14,1<br>7 | 3 | B4F795,P01835,P10715                                           |
| 1603 | 1,2,3,7,8,1<br>1,15,17 | 4,5,6,9,10,<br>12,13,14,1<br>6 | 5 | P01946,P02091,P10715,P12346,P17475                             |
| 1604 | 1,2,3,7,8,1<br>1,16,17 | 4,5,6,9,10,<br>12,13,14,1<br>5 | 3 | P01946,P02091,P10715                                           |
| 1605 | 1,2,3,7,8,1<br>2,13,14 | 4,5,6,9,10,<br>11,15,16,1<br>7 | 7 | A2RUV9,P06911,P19629,P29975,P36970,Q5GRG2,Q9Z1F2               |
| 1606 | 1,2,3,7,8,1<br>2,13,15 | 4,5,6,9,10,<br>11,14,16,1<br>7 | 4 | P10715,P15999,P83121,Q09030                                    |
| 1607 | 1,2,3,7,8,1<br>2,13,16 | 4,5,6,9,10,<br>11,14,15,1<br>7 | 2 | P10715,P63029                                                  |
| 1608 | 1,2,3,7,8,1<br>2,13,17 | 4,5,6,9,10,<br>11,14,15,1<br>6 | 9 | P01946,P02091,P10715,P17475,P20766,P55091,P63029,Q62635,Q9Z1F2 |
| 1609 | 1,2,3,7,8,1<br>2,14,15 | 4,5,6,9,10,<br>11,13,16,1<br>7 | 5 | A2RUV9,P01041,P10715,P19629,P36970                             |
| 1610 | 1,2,3,7,8,1<br>2,14,16 | 4,5,6,9,10,<br>11,13,15,1<br>7 | 3 | P10715,P19629,Q63532                                           |
| 1611 | 1,2,3,7,8,1<br>2,14,17 | 4,5,6,9,10,<br>11,13,15,1<br>6 | 8 | P01041,P01946,P02091,P10715,P17475,P19629,P31430,P55091        |

|      |                        |                                |    |                                                                       |
|------|------------------------|--------------------------------|----|-----------------------------------------------------------------------|
| 1612 | 1,2,3,7,8,1<br>2,15,16 | 4,5,6,9,10,<br>11,13,14,1<br>7 | 3  | P01041,P10715,P83121                                                  |
| 1613 | 1,2,3,7,8,1<br>2,15,17 | 4,5,6,9,10,<br>11,13,14,1<br>6 | 10 | P01041,P01946,P02091,P10715,P12346,P17475,P19629,P55091,P83121,Q9QZA6 |
| 1614 | 1,2,3,7,8,1<br>2,16,17 | 4,5,6,9,10,<br>11,13,14,1<br>5 | 7  | P01041,P01946,P02091,P10715,P55091,P63029,P83121                      |
| 1615 | 1,2,3,7,8,1<br>3,14,15 | 4,5,6,9,10,<br>11,12,16,1<br>7 | 8  | A2RUV9,P01835,P15999,P19629,P36970,Q08849,Q09030,Q5GRG2               |
| 1616 | 1,2,3,7,8,1<br>3,14,16 | 4,5,6,9,10,<br>11,12,15,1<br>7 | 3  | P01835,Q08849,Q566E6                                                  |
| 1617 | 1,2,3,7,8,1<br>3,14,17 | 4,5,6,9,10,<br>11,12,15,1<br>6 | 9  | P01946,P02091,P19629,P20766,P51907,Q08849,Q6IFU7,Q6PCU2,Q9QW07        |
| 1618 | 1,2,3,7,8,1<br>3,15,16 | 4,5,6,9,10,<br>11,12,14,1<br>7 | 3  | P01835,Q08849,Q09030                                                  |
| 1619 | 1,2,3,7,8,1<br>3,15,17 | 4,5,6,9,10,<br>11,12,14,1<br>6 | 8  | P01835,P01946,P02091,P15999,P17475,P20766,Q08849,Q6IFU7               |
| 1620 | 1,2,3,7,8,1<br>3,16,17 | 4,5,6,9,10,<br>11,12,14,1<br>5 | 7  | P01835,P01946,P02091,P20766,P51907,P63029,Q6PCU2                      |
| 1621 | 1,2,3,7,8,1<br>4,15,16 | 4,5,6,9,10,<br>11,12,13,1<br>7 | 4  | P01835,P19629,Q08849,Q63532                                           |
| 1622 | 1,2,3,7,8,1<br>4,15,17 | 4,5,6,9,10,<br>11,12,13,1<br>6 | 8  | P01946,P02091,P10536,P12346,P17475,P19629,Q08849,Q6IFU7               |
| 1623 | 1,2,3,7,8,1<br>4,16,17 | 4,5,6,9,10,<br>11,12,13,1<br>5 | 5  | P01946,P02091,P19629,Q08849,Q6PCU2                                    |
| 1624 | 1,2,3,7,8,1<br>5,16,17 | 4,5,6,9,10,<br>11,12,13,1<br>4 | 5  | P01835,P01946,P02091,P0C0A9,P83121                                    |
| 1625 | 1,2,3,7,9,1<br>0,11,12 | 4,5,6,8,13,<br>14,15,16,1<br>7 | 5  | O35783,P27213,P97840,Q63661,Q91ZS3                                    |
| 1626 | 1,2,3,7,9,1<br>0,11,13 | 4,5,6,8,12,<br>14,15,16,1<br>7 | 3  | P06760,Q63661,Q91ZS3                                                  |



|      |                        |                                |   |                                    |
|------|------------------------|--------------------------------|---|------------------------------------|
| 1627 | 1,2,3,7,9,1<br>0,11,14 | 4,5,6,8,12,<br>13,15,16,1<br>7 | 5 | P06760,P27213,Q63661,Q91ZS3,Q9QUL6 |
| 1628 | 1,2,3,7,9,1<br>0,11,15 | 4,5,6,8,12,<br>13,14,16,1<br>7 | 4 | P06760,P27213,P35280,Q63661        |
| 1629 | 1,2,3,7,9,1<br>0,11,16 | 4,5,6,8,12,<br>13,14,15,1<br>7 | 3 | P06760,P55314,Q91ZS3               |
| 1630 | 1,2,3,7,9,1<br>0,11,17 | 4,5,6,8,12,<br>13,14,15,1<br>6 | 3 | P01946,P02091,Q9QUL6               |
| 1631 | 1,2,3,7,9,1<br>0,12,13 | 4,5,6,8,11,<br>14,15,16,1<br>7 | 3 | P06760,P14668,P97840               |
| 1632 | 1,2,3,7,9,1<br>0,12,14 | 4,5,6,8,11,<br>13,15,16,1<br>7 | 4 | A2RUV9,P06760,P14668,P97840        |
| 1633 | 1,2,3,7,9,1<br>0,12,15 | 4,5,6,8,11,<br>13,14,16,1<br>7 | 3 | P06760,P14668,P97840               |
| 1634 | 1,2,3,7,9,1<br>0,12,16 | 4,5,6,8,11,<br>13,14,15,1<br>7 | 3 | P06760,P47967,P97840               |
| 1635 | 1,2,3,7,9,1<br>0,12,17 | 4,5,6,8,11,<br>13,14,15,1<br>6 | 4 | P01946,P02091,P14668,P97840        |
| 1636 | 1,2,3,7,9,1<br>0,13,14 | 4,5,6,8,11,<br>12,15,16,1<br>7 | 3 | P06760,P14668,Q4G075               |
| 1637 | 1,2,3,7,9,1<br>0,13,15 | 4,5,6,8,11,<br>12,14,16,1<br>7 | 4 | P01835,P06760,P14668,Q4G075        |
| 1638 | 1,2,3,7,9,1<br>0,13,16 | 4,5,6,8,11,<br>12,14,15,1<br>7 | 4 | P01835,P06760,P97840,Q4G075        |
| 1639 | 1,2,3,7,9,1<br>0,13,17 | 4,5,6,8,11,<br>12,14,15,1<br>6 | 3 | P01946,P02091,P14668               |
| 1640 | 1,2,3,7,9,1<br>0,14,15 | 4,5,6,8,11,<br>12,13,16,1<br>7 | 3 | P06760,P14668,Q4G075               |
| 1641 | 1,2,3,7,9,1<br>0,14,16 | 4,5,6,8,11,<br>12,13,15,1<br>7 | 4 | P06760,Q4G075,Q63532,Q9QZK9        |

|      |                        |                                |   |                                           |
|------|------------------------|--------------------------------|---|-------------------------------------------|
| 1642 | 1,2,3,7,9,1<br>0,14,17 | 4,5,6,8,11,<br>12,13,15,1<br>6 | 3 | P01946,P02091,P14668                      |
| 1643 | 1,2,3,7,9,1<br>0,15,16 | 4,5,6,8,11,<br>12,13,14,1<br>7 | 6 | P01835,P02780,P02782,P06760,P0C0A9,Q9QZK9 |
| 1644 | 1,2,3,7,9,1<br>0,15,17 | 4,5,6,8,11,<br>12,13,14,1<br>6 | 4 | P01946,P02091,P0C0A9,P14668               |
| 1645 | 1,2,3,7,9,1<br>0,16,17 | 4,5,6,8,11,<br>12,13,14,1<br>5 | 4 | P01946,P02091,P0C0A9,P14668               |
| 1646 | 1,2,3,7,9,1<br>1,12,13 | 4,5,6,8,10,<br>14,15,16,1<br>7 | 1 | P06760                                    |
| 1647 | 1,2,3,7,9,1<br>1,12,14 | 4,5,6,8,10,<br>13,15,16,1<br>7 | 1 | P06760                                    |
| 1648 | 1,2,3,7,9,1<br>1,12,15 | 4,5,6,8,10,<br>13,14,16,1<br>7 | 1 | P06760                                    |
| 1649 | 1,2,3,7,9,1<br>1,12,16 | 4,5,6,8,10,<br>13,14,15,1<br>7 | 1 | P06760                                    |
| 1650 | 1,2,3,7,9,1<br>1,12,17 | 4,5,6,8,10,<br>13,14,15,1<br>6 | 2 | P01946,P02091                             |
| 1651 | 1,2,3,7,9,1<br>1,13,14 | 4,5,6,8,10,<br>12,15,16,1<br>7 | 2 | P06760,Q4G075                             |
| 1652 | 1,2,3,7,9,1<br>1,13,15 | 4,5,6,8,10,<br>12,14,16,1<br>7 | 1 | P06760                                    |
| 1653 | 1,2,3,7,9,1<br>1,13,16 | 4,5,6,8,10,<br>12,14,15,1<br>7 | 2 | P06760,Q4G075                             |
| 1654 | 1,2,3,7,9,1<br>1,13,17 | 4,5,6,8,10,<br>12,14,15,1<br>6 | 2 | P01946,P02091                             |
| 1655 | 1,2,3,7,9,1<br>1,14,15 | 4,5,6,8,10,<br>12,13,16,1<br>7 | 2 | P06760,Q4G075                             |
| 1656 | 1,2,3,7,9,1<br>1,14,16 | 4,5,6,8,10,<br>12,13,15,1<br>7 | 5 | P06760,Q4G075,Q63532,Q99MH3,Q9QZK9        |

|      |                        |                                |   |                                    |
|------|------------------------|--------------------------------|---|------------------------------------|
| 1657 | 1,2,3,7,9,1<br>1,14,17 | 4,5,6,8,10,<br>12,13,15,1<br>6 | 2 | P01946,P02091                      |
| 1658 | 1,2,3,7,9,1<br>1,15,16 | 4,5,6,8,10,<br>12,13,14,1<br>7 | 2 | P06760,Q9QZK9                      |
| 1659 | 1,2,3,7,9,1<br>1,15,17 | 4,5,6,8,10,<br>12,13,14,1<br>6 | 2 | P01946,P02091                      |
| 1660 | 1,2,3,7,9,1<br>1,16,17 | 4,5,6,8,10,<br>12,13,14,1<br>5 | 3 | P01946,P02091,Q498D9               |
| 1661 | 1,2,3,7,9,1<br>2,13,14 | 4,5,6,8,10,<br>11,15,16,1<br>7 | 3 | A2RUV9,P06760,P14668               |
| 1662 | 1,2,3,7,9,1<br>2,13,15 | 4,5,6,8,10,<br>11,14,16,1<br>7 | 2 | P06760,P14668                      |
| 1663 | 1,2,3,7,9,1<br>2,13,16 | 4,5,6,8,10,<br>11,14,15,1<br>7 | 1 | P06760                             |
| 1664 | 1,2,3,7,9,1<br>2,13,17 | 4,5,6,8,10,<br>11,14,15,1<br>6 | 4 | P01946,P02091,P14668,P55091        |
| 1665 | 1,2,3,7,9,1<br>2,14,15 | 4,5,6,8,10,<br>11,13,16,1<br>7 | 3 | A2RUV9,P06760,P14668               |
| 1666 | 1,2,3,7,9,1<br>2,14,16 | 4,5,6,8,10,<br>11,13,15,1<br>7 | 2 | P06760,Q63532                      |
| 1667 | 1,2,3,7,9,1<br>2,14,17 | 4,5,6,8,10,<br>11,13,15,1<br>6 | 5 | A2RUV9,P01946,P02091,P14668,P31430 |
| 1668 | 1,2,3,7,9,1<br>2,15,16 | 4,5,6,8,10,<br>11,13,14,1<br>7 | 2 | P06760,Q6AYS4                      |
| 1669 | 1,2,3,7,9,1<br>2,15,17 | 4,5,6,8,10,<br>11,13,14,1<br>6 | 3 | P01946,P02091,P14668               |
| 1670 | 1,2,3,7,9,1<br>2,16,17 | 4,5,6,8,10,<br>11,13,14,1<br>5 | 3 | P01946,P02091,P14668               |
| 1671 | 1,2,3,7,9,1<br>3,14,15 | 4,5,6,8,10,<br>11,12,16,1<br>7 | 5 | A2RUV9,P06760,P14668,Q08849,Q4G075 |

|      |                         |                                |   |                                                  |
|------|-------------------------|--------------------------------|---|--------------------------------------------------|
| 1672 | 1,2,3,7,9,1<br>3,14,16  | 4,5,6,8,10,<br>11,12,15,1<br>7 | 3 | P06760,P08010,Q4G075                             |
| 1673 | 1,2,3,7,9,1<br>3,14,17  | 4,5,6,8,10,<br>11,12,15,1<br>6 | 5 | P01946,P02091,P14668,P53792,Q9QW07               |
| 1674 | 1,2,3,7,9,1<br>3,15,16  | 4,5,6,8,10,<br>11,12,14,1<br>7 | 5 | P01835,P06760,P0C0A9,Q4G075,Q6AYS4               |
| 1675 | 1,2,3,7,9,1<br>3,15,17  | 4,5,6,8,10,<br>11,12,14,1<br>6 | 6 | P01946,P02091,P0C0A9,P14668,P53792,Q6IFU7        |
| 1676 | 1,2,3,7,9,1<br>3,16,17  | 4,5,6,8,10,<br>11,12,14,1<br>5 | 5 | P01946,P02091,P08010,P0C0A9,P14668               |
| 1677 | 1,2,3,7,9,1<br>4,15,16  | 4,5,6,8,10,<br>11,12,13,1<br>7 | 7 | P06760,P0C0A9,P16636,Q4G075,Q63532,Q6AYS4,Q9QZK9 |
| 1678 | 1,2,3,7,9,1<br>4,15,17  | 4,5,6,8,10,<br>11,12,13,1<br>6 | 4 | P01946,P02091,P0C0A9,P14668                      |
| 1679 | 1,2,3,7,9,1<br>4,16,17  | 4,5,6,8,10,<br>11,12,13,1<br>5 | 3 | P01946,P02091,P0C0A9                             |
| 1680 | 1,2,3,7,9,1<br>5,16,17  | 4,5,6,8,10,<br>11,12,13,1<br>4 | 6 | P01946,P02091,P02780,P02781,P0C0A9,P47727        |
| 1681 | 1,2,3,7,10,<br>11,12,13 | 4,5,6,8,9,1<br>4,15,16,17      | 1 | O35783                                           |
| 1682 | 1,2,3,7,10,<br>11,12,14 | 4,5,6,8,9,1<br>3,15,16,17      | 1 | O35783                                           |
| 1683 | 1,2,3,7,10,<br>11,12,15 | 4,5,6,8,9,1<br>3,14,16,17      | 2 | P00731,P35280                                    |
| 1684 | 1,2,3,7,10,<br>11,12,16 | 4,5,6,8,9,1<br>3,14,15,17      | 5 | P06757,P12368,P47967,P55314,P97840               |
| 1685 | 1,2,3,7,10,<br>11,12,17 | 4,5,6,8,9,1<br>3,14,15,16      | 4 | P01946,P02091,P05964,P06757                      |
| 1686 | 1,2,3,7,10,<br>11,13,14 | 4,5,6,8,9,1<br>2,15,16,17      | 1 | P06760                                           |
| 1687 | 1,2,3,7,10,<br>11,13,15 | 4,5,6,8,9,1<br>2,14,16,17      | 3 | P01835,P06760,Q09030                             |
| 1688 | 1,2,3,7,10,<br>11,13,16 | 4,5,6,8,9,1<br>2,14,15,17      | 3 | P01835,P06760,P55314                             |
| 1689 | 1,2,3,7,10,<br>11,13,17 | 4,5,6,8,9,1<br>2,14,15,16      | 2 | P01946,P02091                                    |

|      |                                                |   |                                    |
|------|------------------------------------------------|---|------------------------------------|
| 1690 | 1,2,3,7,10, 4,5,6,8,9,1<br>11,14,15 2,13,16,17 | 2 | P06760,P35280                      |
| 1691 | 1,2,3,7,10, 4,5,6,8,9,1<br>11,14,16 2,13,15,17 | 3 | P06760,P55314,Q63532               |
| 1692 | 1,2,3,7,10, 4,5,6,8,9,1<br>11,14,17 2,13,15,16 | 3 | P01946,P02091,Q8R431               |
| 1693 | 1,2,3,7,10, 4,5,6,8,9,1<br>11,15,16 2,13,14,17 | 3 | P01835,P06760,P55314               |
| 1694 | 1,2,3,7,10, 4,5,6,8,9,1<br>11,15,17 2,13,14,16 | 2 | P01946,P02091                      |
| 1695 | 1,2,3,7,10, 4,5,6,8,9,1<br>11,16,17 2,13,14,15 | 3 | P01946,P02091,P55314               |
| 1696 | 1,2,3,7,10, 4,5,6,8,9,1<br>12,13,14 1,15,16,17 | 3 | A2RUV9,P06760,P14668               |
| 1697 | 1,2,3,7,10, 4,5,6,8,9,1<br>12,13,15 1,14,16,17 | 3 | P06760,P14668,Q09030               |
| 1698 | 1,2,3,7,10, 4,5,6,8,9,1<br>12,13,16 1,14,15,17 | 4 | P06760,P14668,P47967,P97840        |
| 1699 | 1,2,3,7,10, 4,5,6,8,9,1<br>12,13,17 1,14,15,16 | 4 | P01946,P02091,P14668,P55091        |
| 1700 | 1,2,3,7,10, 4,5,6,8,9,1<br>12,14,15 1,13,16,17 | 3 | A2RUV9,P06760,P14668               |
| 1701 | 1,2,3,7,10, 4,5,6,8,9,1<br>12,14,16 1,13,15,17 | 4 | P06760,P08721,P97840,Q63532        |
| 1702 | 1,2,3,7,10, 4,5,6,8,9,1<br>12,14,17 1,13,15,16 | 5 | A2RUV9,P01946,P02091,P14668,P31430 |
| 1703 | 1,2,3,7,10, 4,5,6,8,9,1<br>12,15,16 1,13,14,17 | 2 | P06760,P97840                      |
| 1704 | 1,2,3,7,10, 4,5,6,8,9,1<br>12,15,17 1,13,14,16 | 5 | P01041,P01946,P02091,P06866,P14668 |
| 1705 | 1,2,3,7,10, 4,5,6,8,9,1<br>12,16,17 1,13,14,15 | 5 | P01946,P02091,P06866,P14668,P97840 |
| 1706 | 1,2,3,7,10, 4,5,6,8,9,1<br>13,14,15 1,12,16,17 | 5 | A2RUV9,P01835,P06760,P14668,Q09030 |
| 1707 | 1,2,3,7,10, 4,5,6,8,9,1<br>13,14,16 1,12,15,17 | 3 | P01835,P06760,Q63532               |
| 1708 | 1,2,3,7,10, 4,5,6,8,9,1<br>13,14,17 1,12,15,16 | 4 | P01946,P02091,P14668,Q9QW07        |
| 1709 | 1,2,3,7,10, 4,5,6,8,9,1<br>13,15,16 1,12,14,17 | 5 | P01835,P06760,P0C0A9,Q09030,Q6AYS4 |
| 1710 | 1,2,3,7,10, 4,5,6,8,9,1<br>13,15,17 1,12,14,16 | 5 | P01835,P01946,P02091,P0C0A9,P14668 |
| 1711 | 1,2,3,7,10, 4,5,6,8,9,1<br>13,16,17 1,12,14,15 | 4 | P01835,P01946,P02091,P14668        |
| 1712 | 1,2,3,7,10, 4,5,6,8,9,1<br>14,15,16 1,12,13,17 | 4 | P01835,P06760,P0C0A9,Q63532        |

|      |                                                |   |                                                  |
|------|------------------------------------------------|---|--------------------------------------------------|
| 1713 | 1,2,3,7,10, 4,5,6,8,9,1<br>14,15,17 1,12,13,16 | 4 | P01946,P02091,P0C0A9,P14668                      |
| 1714 | 1,2,3,7,10, 4,5,6,8,9,1<br>14,16,17 1,12,13,15 | 4 | P01946,P02091,P0C0A9,P14668                      |
| 1715 | 1,2,3,7,10, 4,5,6,8,9,1<br>15,16,17 1,12,13,14 | 7 | P01835,P01946,P02091,P02780,P02782,P0C0A9,P14668 |
| 1716 | 1,2,3,7,11, 4,5,6,8,9,1<br>12,13,14 0,15,16,17 | 2 | A2RUV9,P06760                                    |
| 1717 | 1,2,3,7,11, 4,5,6,8,9,1<br>12,13,15 0,14,16,17 | 3 | P01836,P06760,Q09030                             |
| 1718 | 1,2,3,7,11, 4,5,6,8,9,1<br>12,13,16 0,14,15,17 | 3 | P01836,P06760,P17046                             |
| 1719 | 1,2,3,7,11, 4,5,6,8,9,1<br>12,13,17 0,14,15,16 | 3 | P01946,P02091,P55091                             |
| 1720 | 1,2,3,7,11, 4,5,6,8,9,1<br>12,14,15 0,13,16,17 | 2 | A2RUV9,P06760                                    |
| 1721 | 1,2,3,7,11, 4,5,6,8,9,1<br>12,14,16 0,13,15,17 | 2 | P06760,Q63532                                    |
| 1722 | 1,2,3,7,11, 4,5,6,8,9,1<br>12,14,17 0,13,15,16 | 3 | P01946,P02091,P31430                             |
| 1723 | 1,2,3,7,11, 4,5,6,8,9,1<br>12,15,16 0,13,14,17 | 2 | P01836,P06760                                    |
| 1724 | 1,2,3,7,11, 4,5,6,8,9,1<br>12,15,17 0,13,14,16 | 3 | P01946,P02091,P06866                             |
| 1725 | 1,2,3,7,11, 4,5,6,8,9,1<br>12,16,17 0,13,14,15 | 3 | P01946,P02091,P17046                             |
| 1726 | 1,2,3,7,11, 4,5,6,8,9,1<br>13,14,15 0,12,16,17 | 2 | P06760,Q09030                                    |
| 1727 | 1,2,3,7,11, 4,5,6,8,9,1<br>13,14,16 0,12,15,17 | 2 | P06760,Q63532                                    |
| 1728 | 1,2,3,7,11, 4,5,6,8,9,1<br>13,14,17 0,12,15,16 | 3 | P01946,P02091,Q9QW07                             |
| 1729 | 1,2,3,7,11, 4,5,6,8,9,1<br>13,15,16 0,12,14,17 | 3 | P01835,P06760,Q09030                             |
| 1730 | 1,2,3,7,11, 4,5,6,8,9,1<br>13,15,17 0,12,14,16 | 2 | P01946,P02091                                    |
| 1731 | 1,2,3,7,11, 4,5,6,8,9,1<br>13,16,17 0,12,14,15 | 2 | P01946,P02091                                    |
| 1732 | 1,2,3,7,11, 4,5,6,8,9,1<br>14,15,16 0,12,13,17 | 3 | P06760,Q63532,Q9QZK9                             |
| 1733 | 1,2,3,7,11, 4,5,6,8,9,1<br>14,15,17 0,12,13,16 | 2 | P01946,P02091                                    |
| 1734 | 1,2,3,7,11, 4,5,6,8,9,1<br>14,16,17 0,12,13,15 | 2 | P01946,P02091                                    |
| 1735 | 1,2,3,7,11, 4,5,6,8,9,1<br>15,16,17 0,12,13,14 | 3 | P01946,P02091,P0C0A9                             |

|      |                         |                                |    |                                                                       |
|------|-------------------------|--------------------------------|----|-----------------------------------------------------------------------|
| 1736 | 1,2,3,7,12,<br>13,14,15 | 4,5,6,8,9,1<br>0,11,16,17      | 4  | A2RUV9,P06760,P14668,Q09030                                           |
| 1737 | 1,2,3,7,12,<br>13,14,16 | 4,5,6,8,9,1<br>0,11,15,17      | 5  | A2RUV9,P06760,Q566E6,Q63532,Q6AYS4                                    |
| 1738 | 1,2,3,7,12,<br>13,14,17 | 4,5,6,8,9,1<br>0,11,15,16      | 7  | A2RUV9,P01946,P02091,P14668,P31430,P55091,Q9QW07                      |
| 1739 | 1,2,3,7,12,<br>13,15,16 | 4,5,6,8,9,1<br>0,11,14,17      | 5  | P01836,P06760,P83121,Q09030,Q6AYS4                                    |
| 1740 | 1,2,3,7,12,<br>13,15,17 | 4,5,6,8,9,1<br>0,11,14,16      | 5  | P00714,P01946,P02091,P14668,P55091                                    |
| 1741 | 1,2,3,7,12,<br>13,16,17 | 4,5,6,8,9,1<br>0,11,14,15      | 3  | P01946,P02091,P14668                                                  |
| 1742 | 1,2,3,7,12,<br>14,15,16 | 4,5,6,8,9,1<br>0,11,13,17      | 4  | A2RUV9,P06760,Q63532,Q6AYS4                                           |
| 1743 | 1,2,3,7,12,<br>14,15,17 | 4,5,6,8,9,1<br>0,11,13,16      | 5  | A2RUV9,P01946,P02091,P14668,P31430                                    |
| 1744 | 1,2,3,7,12,<br>14,16,17 | 4,5,6,8,9,1<br>0,11,13,15      | 5  | P01946,P02091,P14668,P31430,Q63532                                    |
| 1745 | 1,2,3,7,12,<br>15,16,17 | 4,5,6,8,9,1<br>0,11,13,14      | 5  | P01946,P02091,P06866,P14668,P83121                                    |
| 1746 | 1,2,3,7,13,<br>14,15,16 | 4,5,6,8,9,1<br>0,11,12,17      | 8  | P01835,P06760,P0C0A9,P16636,Q08849,Q09030,Q63532,Q6AYS4               |
| 1747 | 1,2,3,7,13,<br>14,15,17 | 4,5,6,8,9,1<br>0,11,12,16      | 10 | A2RUV9,P00714,P01946,P02091,P0C0A9,P14668,Q08849,Q09030,Q6IFU7,Q9QW07 |
| 1748 | 1,2,3,7,13,<br>14,16,17 | 4,5,6,8,9,1<br>0,11,12,15      | 8  | P00714,P01946,P02091,P0C0A9,P14668,Q08849,Q6PCU2,Q9QW07               |
| 1749 | 1,2,3,7,13,<br>15,16,17 | 4,5,6,8,9,1<br>0,11,12,14      | 7  | P00714,P01835,P01946,P02091,P0C0A9,P14668,Q09030                      |
| 1750 | 1,2,3,7,14,<br>15,16,17 | 4,5,6,8,9,1<br>0,11,12,13      | 6  | P01946,P02091,P02780,P02803,P0C0A9,Q08849                             |
| 1751 | 1,2,3,8,9,1<br>0,11,12  | 4,5,6,7,13,<br>14,15,16,1<br>7 | 2  | P27213,Q63661                                                         |
| 1752 | 1,2,3,8,9,1<br>0,11,13  | 4,5,6,7,12,<br>14,15,16,1<br>7 | 2  | P20766,P35467                                                         |
| 1753 | 1,2,3,8,9,1<br>0,11,14  | 4,5,6,7,12,<br>13,15,16,1<br>7 | 1  | P27213                                                                |
| 1754 | 1,2,3,8,9,1<br>0,11,15  | 4,5,6,7,12,<br>13,14,16,1<br>7 | 3  | P27213,P35280,Q5QE79                                                  |
| 1755 | 1,2,3,8,9,1<br>0,11,16  | 4,5,6,7,12,<br>13,14,15,1<br>7 | 1  | Q9WUW8                                                                |

|      |                        |                                |   |                             |
|------|------------------------|--------------------------------|---|-----------------------------|
| 1756 | 1,2,3,8,9,1<br>0,11,17 | 4,5,6,7,12,<br>13,14,15,1<br>6 | 0 |                             |
| 1757 | 1,2,3,8,9,1<br>0,12,13 | 4,5,6,7,11,<br>14,15,16,1<br>7 | 1 | P20766                      |
| 1758 | 1,2,3,8,9,1<br>0,12,14 | 4,5,6,7,11,<br>13,15,16,1<br>7 | 0 |                             |
| 1759 | 1,2,3,8,9,1<br>0,12,15 | 4,5,6,7,11,<br>13,14,16,1<br>7 | 1 | Q5QE79                      |
| 1760 | 1,2,3,8,9,1<br>0,12,16 | 4,5,6,7,11,<br>13,14,15,1<br>7 | 2 | P05539,Q9WUW8               |
| 1761 | 1,2,3,8,9,1<br>0,12,17 | 4,5,6,7,11,<br>13,14,15,1<br>6 | 1 | P16636                      |
| 1762 | 1,2,3,8,9,1<br>0,13,14 | 4,5,6,7,11,<br>12,15,16,1<br>7 | 1 | P20766                      |
| 1763 | 1,2,3,8,9,1<br>0,13,15 | 4,5,6,7,11,<br>12,14,16,1<br>7 | 4 | P01835,P15999,P20766,Q5QE79 |
| 1764 | 1,2,3,8,9,1<br>0,13,16 | 4,5,6,7,11,<br>12,14,15,1<br>7 | 2 | P01835,P20766               |
| 1765 | 1,2,3,8,9,1<br>0,13,17 | 4,5,6,7,11,<br>12,14,15,1<br>6 | 2 | P20766,P51907               |
| 1766 | 1,2,3,8,9,1<br>0,14,15 | 4,5,6,7,11,<br>12,13,16,1<br>7 | 2 | Q5QE79,Q9QZK9               |
| 1767 | 1,2,3,8,9,1<br>0,14,16 | 4,5,6,7,11,<br>12,13,15,1<br>7 | 3 | P05539,Q63942,Q9QZK9        |
| 1768 | 1,2,3,8,9,1<br>0,14,17 | 4,5,6,7,11,<br>12,13,15,1<br>6 | 0 |                             |
| 1769 | 1,2,3,8,9,1<br>0,15,16 | 4,5,6,7,11,<br>12,13,14,1<br>7 | 4 | P01835,Q5QE79,Q63942,Q9QZK9 |
| 1770 | 1,2,3,8,9,1<br>0,15,17 | 4,5,6,7,11,<br>12,13,14,1<br>6 | 1 | Q5QE79                      |



|      |                        |                                |   |                      |
|------|------------------------|--------------------------------|---|----------------------|
| 1771 | 1,2,3,8,9,1<br>0,16,17 | 4,5,6,7,11,<br>12,13,14,1<br>5 | 2 | P05539,P25031        |
| 1772 | 1,2,3,8,9,1<br>1,12,13 | 4,5,6,7,10,<br>14,15,16,1<br>7 | 1 | P20766               |
| 1773 | 1,2,3,8,9,1<br>1,12,14 | 4,5,6,7,10,<br>13,15,16,1<br>7 | 0 |                      |
| 1774 | 1,2,3,8,9,1<br>1,12,15 | 4,5,6,7,10,<br>13,14,16,1<br>7 | 1 | Q5QE79               |
| 1775 | 1,2,3,8,9,1<br>1,12,16 | 4,5,6,7,10,<br>13,14,15,1<br>7 | 0 |                      |
| 1776 | 1,2,3,8,9,1<br>1,12,17 | 4,5,6,7,10,<br>13,14,15,1<br>6 | 1 | P16636               |
| 1777 | 1,2,3,8,9,1<br>1,13,14 | 4,5,6,7,10,<br>12,15,16,1<br>7 | 1 | P20766               |
| 1778 | 1,2,3,8,9,1<br>1,13,15 | 4,5,6,7,10,<br>12,14,16,1<br>7 | 2 | P20766,Q5QE79        |
| 1779 | 1,2,3,8,9,1<br>1,13,16 | 4,5,6,7,10,<br>12,14,15,1<br>7 | 1 | P20766               |
| 1780 | 1,2,3,8,9,1<br>1,13,17 | 4,5,6,7,10,<br>12,14,15,1<br>6 | 1 | P20766               |
| 1781 | 1,2,3,8,9,1<br>1,14,15 | 4,5,6,7,10,<br>12,13,16,1<br>7 | 3 | P19218,Q5QE79,Q9QZK9 |
| 1782 | 1,2,3,8,9,1<br>1,14,16 | 4,5,6,7,10,<br>12,13,15,1<br>7 | 2 | Q99MH3,Q9QZK9        |
| 1783 | 1,2,3,8,9,1<br>1,14,17 | 4,5,6,7,10,<br>12,13,15,1<br>6 | 1 | P19218               |
| 1784 | 1,2,3,8,9,1<br>1,15,16 | 4,5,6,7,10,<br>12,13,14,1<br>7 | 3 | B4F795,Q5QE79,Q9QZK9 |
| 1785 | 1,2,3,8,9,1<br>1,15,17 | 4,5,6,7,10,<br>12,13,14,1<br>6 | 1 | Q5QE79               |

|      |                        |                                |   |                                                                |
|------|------------------------|--------------------------------|---|----------------------------------------------------------------|
| 1786 | 1,2,3,8,9,1<br>1,16,17 | 4,5,6,7,10,<br>12,13,14,1<br>5 | 1 | Q498D9                                                         |
| 1787 | 1,2,3,8,9,1<br>2,13,14 | 4,5,6,7,10,<br>11,15,16,1<br>7 | 4 | P20766,P36970,Q5FVI6,Q9Z1F2                                    |
| 1788 | 1,2,3,8,9,1<br>2,13,15 | 4,5,6,7,10,<br>11,14,16,1<br>7 | 4 | P15999,P20766,P61206;P84079;P84082,Q5QE79                      |
| 1789 | 1,2,3,8,9,1<br>2,13,16 | 4,5,6,7,10,<br>11,14,15,1<br>7 | 0 |                                                                |
| 1790 | 1,2,3,8,9,1<br>2,13,17 | 4,5,6,7,10,<br>11,14,15,1<br>6 | 2 | P20766,Q5FVI6                                                  |
| 1791 | 1,2,3,8,9,1<br>2,14,15 | 4,5,6,7,10,<br>11,13,16,1<br>7 | 4 | A2RUV9,P61206;P84079;P84082,Q5FVI6,Q5QE79                      |
| 1792 | 1,2,3,8,9,1<br>2,14,16 | 4,5,6,7,10,<br>11,13,15,1<br>7 | 0 |                                                                |
| 1793 | 1,2,3,8,9,1<br>2,14,17 | 4,5,6,7,10,<br>11,13,15,1<br>6 | 3 | P31430,Q5FVI6,Q8VD89                                           |
| 1794 | 1,2,3,8,9,1<br>2,15,16 | 4,5,6,7,10,<br>11,13,14,1<br>7 | 2 | P83121,Q5QE79                                                  |
| 1795 | 1,2,3,8,9,1<br>2,15,17 | 4,5,6,7,10,<br>11,13,14,1<br>6 | 4 | P61206;P84079;P84082,P83121,Q5FVI6,Q5QE79                      |
| 1796 | 1,2,3,8,9,1<br>2,16,17 | 4,5,6,7,10,<br>11,13,14,1<br>5 | 0 |                                                                |
| 1797 | 1,2,3,8,9,1<br>3,14,15 | 4,5,6,7,10,<br>11,12,16,1<br>7 | 7 | P06757,P15999,P20766,P61206;P84079;P84082,Q08849,Q5FVI6,Q5QE79 |
| 1798 | 1,2,3,8,9,1<br>3,14,16 | 4,5,6,7,10,<br>11,12,15,1<br>7 | 4 | P20766,Q08849,Q5FVI6,Q9QZK9                                    |
| 1799 | 1,2,3,8,9,1<br>3,14,17 | 4,5,6,7,10,<br>11,12,15,1<br>6 | 6 | P20766,P51907,P61206;P84079;P84082,Q08849,Q5FVI6,Q9QW07        |
| 1800 | 1,2,3,8,9,1<br>3,15,16 | 4,5,6,7,10,<br>11,12,14,1<br>7 | 4 | P01835,P20766,Q5QE79,Q9QZK9                                    |

|      |                         |                                |   |                                                  |
|------|-------------------------|--------------------------------|---|--------------------------------------------------|
| 1801 | 1,2,3,8,9,1<br>3,15,17  | 4,5,6,7,10,<br>11,12,14,1<br>6 | 5 | P15999,P20766,P61206;P84079;P84082,Q5FVI6,Q5QE79 |
| 1802 | 1,2,3,8,9,1<br>3,16,17  | 4,5,6,7,10,<br>11,12,14,1<br>5 | 3 | P20766,P51907,Q5FVI6                             |
| 1803 | 1,2,3,8,9,1<br>4,15,16  | 4,5,6,7,10,<br>11,12,13,1<br>7 | 4 | Q08849,Q5QE79,Q63942,Q9QZK9                      |
| 1804 | 1,2,3,8,9,1<br>4,15,17  | 4,5,6,7,10,<br>11,12,13,1<br>6 | 4 | P61206;P84079;P84082,Q08849,Q5FVI6,Q5QE79        |
| 1805 | 1,2,3,8,9,1<br>4,16,17  | 4,5,6,7,10,<br>11,12,13,1<br>5 | 2 | Q08849,Q5FVI6                                    |
| 1806 | 1,2,3,8,9,1<br>5,16,17  | 4,5,6,7,10,<br>11,12,13,1<br>4 | 4 | P0C0A9,P47727,Q5QE79,Q68FV8                      |
| 1807 | 1,2,3,8,10,<br>11,12,13 | 4,5,6,7,9,1<br>4,15,16,17      | 0 |                                                  |
| 1808 | 1,2,3,8,10,<br>11,12,14 | 4,5,6,7,9,1<br>3,15,16,17      | 2 | P62804,Q00715                                    |
| 1809 | 1,2,3,8,10,<br>11,12,15 | 4,5,6,7,9,1<br>3,14,16,17      | 3 | P00731,P35280,P62804                             |
| 1810 | 1,2,3,8,10,<br>11,12,16 | 4,5,6,7,9,1<br>3,14,15,17      | 1 | Q9WUW8                                           |
| 1811 | 1,2,3,8,10,<br>11,12,17 | 4,5,6,7,9,1<br>3,14,15,16      | 4 | P16636,P17475,P62804,Q00715                      |
| 1812 | 1,2,3,8,10,<br>11,13,14 | 4,5,6,7,9,1<br>2,15,16,17      | 1 | P20766                                           |
| 1813 | 1,2,3,8,10,<br>11,13,15 | 4,5,6,7,9,1<br>2,14,16,17      | 2 | P01835,P15999                                    |
| 1814 | 1,2,3,8,10,<br>11,13,16 | 4,5,6,7,9,1<br>2,14,15,17      | 1 | P01835                                           |
| 1815 | 1,2,3,8,10,<br>11,13,17 | 4,5,6,7,9,1<br>2,14,15,16      | 2 | P16636,P20766                                    |
| 1816 | 1,2,3,8,10,<br>11,14,15 | 4,5,6,7,9,1<br>2,13,16,17      | 2 | P09605;P25809,P35280                             |
| 1817 | 1,2,3,8,10,<br>11,14,16 | 4,5,6,7,9,1<br>2,13,15,17      | 0 |                                                  |
| 1818 | 1,2,3,8,10,<br>11,14,17 | 4,5,6,7,9,1<br>2,13,15,16      | 1 | P19218                                           |
| 1819 | 1,2,3,8,10,<br>11,15,16 | 4,5,6,7,9,1<br>2,13,14,17      | 1 | P01835                                           |
| 1820 | 1,2,3,8,10,<br>11,15,17 | 4,5,6,7,9,1<br>2,13,14,16      | 1 | P17475                                           |

|      |                                                |   |                                           |
|------|------------------------------------------------|---|-------------------------------------------|
| 1821 | 1,2,3,8,10, 4,5,6,7,9,1<br>11,16,17 2,13,14,15 | 1 | P05539                                    |
| 1822 | 1,2,3,8,10, 4,5,6,7,9,1<br>12,13,14 1,15,16,17 | 2 | P36970,Q8K4G9                             |
| 1823 | 1,2,3,8,10, 4,5,6,7,9,1<br>12,13,15 1,14,16,17 | 2 | P15999,P83121                             |
| 1824 | 1,2,3,8,10, 4,5,6,7,9,1<br>12,13,16 1,14,15,17 | 1 | P83121                                    |
| 1825 | 1,2,3,8,10, 4,5,6,7,9,1<br>12,13,17 1,14,15,16 | 4 | P16636,P17475,P83121,Q8K4G9               |
| 1826 | 1,2,3,8,10, 4,5,6,7,9,1<br>12,14,15 1,13,16,17 | 1 | A2RUV9                                    |
| 1827 | 1,2,3,8,10, 4,5,6,7,9,1<br>12,14,16 1,13,15,17 | 2 | P05539,P08721                             |
| 1828 | 1,2,3,8,10, 4,5,6,7,9,1<br>12,14,17 1,13,15,16 | 2 | P05539,P31430                             |
| 1829 | 1,2,3,8,10, 4,5,6,7,9,1<br>12,15,16 1,13,14,17 | 2 | P05539,P83121                             |
| 1830 | 1,2,3,8,10, 4,5,6,7,9,1<br>12,15,17 1,13,14,16 | 4 | P05539,P06866,P17475,P83121               |
| 1831 | 1,2,3,8,10, 4,5,6,7,9,1<br>12,16,17 1,13,14,15 | 4 | P05539,P06866,P16636,P83121               |
| 1832 | 1,2,3,8,10, 4,5,6,7,9,1<br>13,14,15 1,12,16,17 | 5 | P01835,P09605,P25809,P15999,Q08849,Q64093 |
| 1833 | 1,2,3,8,10, 4,5,6,7,9,1<br>13,14,16 1,12,15,17 | 2 | P01835,Q08849                             |
| 1834 | 1,2,3,8,10, 4,5,6,7,9,1<br>13,14,17 1,12,15,16 | 4 | P20766,P51907,Q08849,Q9QW07               |
| 1835 | 1,2,3,8,10, 4,5,6,7,9,1<br>13,15,16 1,12,14,17 | 3 | P01835,P15999,P83121                      |
| 1836 | 1,2,3,8,10, 4,5,6,7,9,1<br>13,15,17 1,12,14,16 | 4 | P01835,P15999,P17475,P83121               |
| 1837 | 1,2,3,8,10, 4,5,6,7,9,1<br>13,16,17 1,12,14,15 | 3 | P01835,P51907,P83121                      |
| 1838 | 1,2,3,8,10, 4,5,6,7,9,1<br>14,15,16 1,12,13,17 | 5 | P01835,P05539,P09605,P25809,Q08849,Q9QZK9 |
| 1839 | 1,2,3,8,10, 4,5,6,7,9,1<br>14,15,17 1,12,13,16 | 2 | P17475,Q08849                             |
| 1840 | 1,2,3,8,10, 4,5,6,7,9,1<br>14,16,17 1,12,13,15 | 1 | P05539                                    |
| 1841 | 1,2,3,8,10, 4,5,6,7,9,1<br>15,16,17 1,12,13,14 | 4 | P01835,P05539,P0C0A9,P83121               |
| 1842 | 1,2,3,8,11, 4,5,6,7,9,1<br>12,13,14 0,15,16,17 | 2 | Q64093,Q9Z1F2                             |
| 1843 | 1,2,3,8,11, 4,5,6,7,9,1<br>12,13,15 0,14,16,17 | 1 | P15999                                    |

|      |                                                |    |                                                                                     |
|------|------------------------------------------------|----|-------------------------------------------------------------------------------------|
| 1844 | 1,2,3,8,11, 4,5,6,7,9,1<br>12,13,16 0,14,15,17 | 0  |                                                                                     |
| 1845 | 1,2,3,8,11, 4,5,6,7,9,1<br>12,13,17 0,14,15,16 | 2  | P16636,P20766                                                                       |
| 1846 | 1,2,3,8,11, 4,5,6,7,9,1<br>12,14,15 0,13,16,17 | 0  |                                                                                     |
| 1847 | 1,2,3,8,11, 4,5,6,7,9,1<br>12,14,16 0,13,15,17 | 0  |                                                                                     |
| 1848 | 1,2,3,8,11, 4,5,6,7,9,1<br>12,14,17 0,13,15,16 | 3  | P31430,P62804,Q00715                                                                |
| 1849 | 1,2,3,8,11, 4,5,6,7,9,1<br>12,15,16 0,13,14,17 | 1  | P83121                                                                              |
| 1850 | 1,2,3,8,11, 4,5,6,7,9,1<br>12,15,17 0,13,14,16 | 2  | P17475,P83121                                                                       |
| 1851 | 1,2,3,8,11, 4,5,6,7,9,1<br>12,16,17 0,13,14,15 | 1  | P16636                                                                              |
| 1852 | 1,2,3,8,11, 4,5,6,7,9,1<br>13,14,15 0,12,16,17 | 3  | P15999,Q08849,Q64093                                                                |
| 1853 | 1,2,3,8,11, 4,5,6,7,9,1<br>13,14,16 0,12,15,17 | 0  |                                                                                     |
| 1854 | 1,2,3,8,11, 4,5,6,7,9,1<br>13,14,17 0,12,15,16 | 5  | P20766,Q08849,Q5FVI6,Q64093,Q9QW07                                                  |
| 1855 | 1,2,3,8,11, 4,5,6,7,9,1<br>13,15,16 0,12,14,17 | 1  | P01835                                                                              |
| 1856 | 1,2,3,8,11, 4,5,6,7,9,1<br>13,15,17 0,12,14,16 | 3  | P15999,P17475,P20766                                                                |
| 1857 | 1,2,3,8,11, 4,5,6,7,9,1<br>13,16,17 0,12,14,15 | 1  | P20766                                                                              |
| 1858 | 1,2,3,8,11, 4,5,6,7,9,1<br>14,15,16 0,12,13,17 | 1  | Q9QZK9                                                                              |
| 1859 | 1,2,3,8,11, 4,5,6,7,9,1<br>14,15,17 0,12,13,16 | 3  | P19218,P97840,Q08849                                                                |
| 1860 | 1,2,3,8,11, 4,5,6,7,9,1<br>14,16,17 0,12,13,15 | 0  |                                                                                     |
| 1861 | 1,2,3,8,11, 4,5,6,7,9,1<br>15,16,17 0,12,13,14 | 0  |                                                                                     |
| 1862 | 1,2,3,8,12, 4,5,6,7,9,1<br>13,14,15 0,11,16,17 | 6  | A2RUV9,P15999,P36970,P61206;P84079;P84082,Q5FVI6,Q64093                             |
| 1863 | 1,2,3,8,12, 4,5,6,7,9,1<br>13,14,16 0,11,15,17 | 3  | Q566E6,Q5FVI6,Q64093                                                                |
| 1864 | 1,2,3,8,12, 4,5,6,7,9,1<br>13,14,17 0,11,15,16 | 10 | P31430,P51907,P61206;P84079;P84082,Q5FVI6,Q62635,Q64093,Q6PCU2,Q80W57,Q9QW07,Q9Z1F2 |
| 1865 | 1,2,3,8,12, 4,5,6,7,9,1<br>13,15,16 0,11,14,17 | 2  | P15999,P83121                                                                       |
| 1866 | 1,2,3,8,12, 4,5,6,7,9,1<br>13,15,17 0,11,14,16 | 7  | P15999,P17475,P61206;P84079;P84082,P83121,Q5FVI6,Q5XFX0,Q64093                      |

|      |                                                |    |                                                                                            |
|------|------------------------------------------------|----|--------------------------------------------------------------------------------------------|
| 1867 | 1,2,3,8,12, 4,5,6,7,9,1<br>13,16,17 0,11,14,15 | 5  | P63029,P83121,Q5FVI6,Q5XFX0,Q6PCU2                                                         |
| 1868 | 1,2,3,8,12, 4,5,6,7,9,1<br>14,15,16 0,11,13,17 | 1  | P83121                                                                                     |
| 1869 | 1,2,3,8,12, 4,5,6,7,9,1<br>14,15,17 0,11,13,16 | 6  | A2RUV9,P17475,P31430,P61206;P84079;P84082,P83121,Q5FVI6                                    |
| 1870 | 1,2,3,8,12, 4,5,6,7,9,1<br>14,16,17 0,11,13,15 | 5  | P05539,P31430,P83121,Q5FVI6,Q6PCU2                                                         |
| 1871 | 1,2,3,8,12, 4,5,6,7,9,1<br>15,16,17 0,11,13,14 | 4  | P05539,P06866,P83121,Q5XFX0                                                                |
| 1872 | 1,2,3,8,13, 4,5,6,7,9,1<br>14,15,16 0,11,12,17 | 6  | P01835,P15999,Q08849,Q566E6,Q64093,Q9QZK9                                                  |
| 1873 | 1,2,3,8,13, 4,5,6,7,9,1<br>14,15,17 0,11,12,16 | 11 | P05712,P08753,P15999,P20766,P61206;P84079;P84082,Q08849,Q5FVI6,Q62687,Q64093,Q6PCU2,Q9QW07 |
| 1874 | 1,2,3,8,13, 4,5,6,7,9,1<br>14,16,17 0,11,12,15 | 8  | P08753,P51907,Q08849,Q566E6,Q5FVI6,Q64093,Q6PCU2,Q9QW07                                    |
| 1875 | 1,2,3,8,13, 4,5,6,7,9,1<br>15,16,17 0,11,12,14 | 7  | P00714,P01835,P15999,P83121,Q08849,Q5XFX0,Q6PCU2                                           |
| 1876 | 1,2,3,8,14, 4,5,6,7,9,1<br>15,16,17 0,11,12,13 | 5  | P0C0A9,P83121,Q08849,Q5FVI6,Q6PCU2                                                         |
| 1877 | 1,2,3,9,10, 4,5,6,7,8,1<br>11,12,13 4,15,16,17 | 4  | P06760,P20760,Q63661,Q91ZS3                                                                |
| 1878 | 1,2,3,9,10, 4,5,6,7,8,1<br>11,12,14 3,15,16,17 | 4  | P06760,P20760,Q63661,Q99041                                                                |
| 1879 | 1,2,3,9,10, 4,5,6,7,8,1<br>11,12,15 3,14,16,17 | 3  | P06760,Q63661,Q99041                                                                       |
| 1880 | 1,2,3,9,10, 4,5,6,7,8,1<br>11,12,16 3,14,15,17 | 7  | P06760,P06761,P07171,P10536,P20760,Q63661,Q9WUW8                                           |
| 1881 | 1,2,3,9,10, 4,5,6,7,8,1<br>11,12,17 3,14,15,16 | 3  | P07171,P16636,Q63661                                                                       |
| 1882 | 1,2,3,9,10, 4,5,6,7,8,1<br>11,13,14 2,15,16,17 | 5  | P06760,P20760,Q4G075,Q63661,Q99041                                                         |
| 1883 | 1,2,3,9,10, 4,5,6,7,8,1<br>11,13,15 2,14,16,17 | 5  | P06760,P06761,Q4G075,Q63661,Q99041                                                         |
| 1884 | 1,2,3,9,10, 4,5,6,7,8,1<br>11,13,16 2,14,15,17 | 6  | P06760,P06761,P20760,Q4G075,Q63661,Q99041                                                  |
| 1885 | 1,2,3,9,10, 4,5,6,7,8,1<br>11,13,17 2,14,15,16 | 2  | P07171,Q99041                                                                              |
| 1886 | 1,2,3,9,10, 4,5,6,7,8,1<br>11,14,15 2,13,16,17 | 9  | P06760,P06761,P22282,P22283,P23928,Q4G075,Q63661,Q99041,Q9QZK9                             |
| 1887 | 1,2,3,9,10, 4,5,6,7,8,1<br>11,14,16 2,13,15,17 | 11 | P06760,P06761,P20760,P22282,P22283,Q4G075,Q63661,Q99041,Q99MH3,Q9QZK9,Q9WUW8               |
| 1888 | 1,2,3,9,10, 4,5,6,7,8,1<br>11,14,17 2,13,15,16 | 5  | P06761,Q63661,Q8R431,Q99041,Q9QUL6                                                         |
| 1889 | 1,2,3,9,10, 4,5,6,7,8,1<br>11,15,16 2,13,14,17 | 11 | P02780,P06760,P06761,P11598,P22282,P22283,Q4G075,Q62902,Q63661,Q99041,Q9QZK9               |

|      |                                                |    |                                                                                                                                             |
|------|------------------------------------------------|----|---------------------------------------------------------------------------------------------------------------------------------------------|
| 1890 | 1,2,3,9,10, 4,5,6,7,8,1<br>11,15,17 2,13,14,16 | 3  | P06761,Q62902,Q99041                                                                                                                        |
| 1891 | 1,2,3,9,10, 4,5,6,7,8,1<br>11,16,17 2,13,14,15 | 3  | P06761,P07171,Q99041                                                                                                                        |
| 1892 | 1,2,3,9,10, 4,5,6,7,8,1<br>12,13,14 1,15,16,17 | 7  | P06760,P07150,P07171,P14668,P20760,Q4G075,Q99041                                                                                            |
| 1893 | 1,2,3,9,10, 4,5,6,7,8,1<br>12,13,15 1,14,16,17 | 6  | P06760,P07150,P07171,P14668,Q6AYS4,Q99041                                                                                                   |
| 1894 | 1,2,3,9,10, 4,5,6,7,8,1<br>12,13,16 1,14,15,17 | 8  | P06760,P07150,P07171,P14669,P20760,P97840,Q6AYS4,Q99041                                                                                     |
| 1895 | 1,2,3,9,10, 4,5,6,7,8,1<br>12,13,17 1,14,15,16 | 3  | P07150,P07171,P14668                                                                                                                        |
| 1896 | 1,2,3,9,10, 4,5,6,7,8,1<br>12,14,15 1,13,16,17 | 5  | A2RUV9,P06760,P07150,P14668,Q99041                                                                                                          |
| 1897 | 1,2,3,9,10, 4,5,6,7,8,1<br>12,14,16 1,13,15,17 | 8  | P06760,P07150,P07171,P14669,P20760,Q6AYS4,Q99041,Q9WUW8                                                                                     |
| 1898 | 1,2,3,9,10, 4,5,6,7,8,1<br>12,14,17 1,13,15,16 | 3  | P07171,P14668,Q8VD89                                                                                                                        |
| 1899 | 1,2,3,9,10, 4,5,6,7,8,1<br>12,15,16 1,13,14,17 | 10 | P06760,P06761,P07150,P07171,P14669,P22282,P22283,Q6AYS4,Q99041,Q9WUW8                                                                       |
| 1900 | 1,2,3,9,10, 4,5,6,7,8,1<br>12,15,17 1,13,14,16 | 4  | P06866,P07150,P07171,P14668                                                                                                                 |
| 1901 | 1,2,3,9,10, 4,5,6,7,8,1<br>12,16,17 1,13,14,15 | 4  | P05539,P06866,P07171,P14668                                                                                                                 |
| 1902 | 1,2,3,9,10, 4,5,6,7,8,1<br>13,14,15 1,12,16,17 | 10 | P06760,P07150,P14668,P20646,P50115,Q07936,Q4G075,Q6AYS4,Q99041,Q9QZK9                                                                       |
| 1903 | 1,2,3,9,10, 4,5,6,7,8,1<br>13,14,16 1,12,15,17 | 9  | P06760,P07150,P14669,P20760,P50115,Q4G075,Q6AYS4,Q99041,Q9QZK9                                                                              |
| 1904 | 1,2,3,9,10, 4,5,6,7,8,1<br>13,14,17 1,12,15,16 | 5  | P07150,P07171,P14668,Q99041,Q9QW07                                                                                                          |
| 1905 | 1,2,3,9,10, 4,5,6,7,8,1<br>13,15,16 1,12,14,17 | 14 | P01835,P02780,P06760,P06761,P07150,P0C0A9,P14669,P22282,P22283,P50115,Q4G075,Q6AYS4,Q99041,Q9QZK9                                           |
| 1906 | 1,2,3,9,10, 4,5,6,7,8,1<br>13,15,17 1,12,14,16 | 7  | P07150,P07171,P0C0A9,P14668,Q07936,Q8CJ52,Q99041                                                                                            |
| 1907 | 1,2,3,9,10, 4,5,6,7,8,1<br>13,16,17 1,12,14,15 | 6  | P06761,P07171,P0C0A9,P14668,P14669,Q99041                                                                                                   |
| 1908 | 1,2,3,9,10, 4,5,6,7,8,1<br>14,15,16 1,12,13,17 | 20 | P02780,P02781,P06760,P06761,P07150,P07647,P0C0A9,P14669,P22282,P22283,P30120,P36374,P50115,Q4G075,Q62902,Q6AYS4,Q8CJ52,Q99041,Q9JHB9,Q9QZK9 |
| 1909 | 1,2,3,9,10, 4,5,6,7,8,1<br>14,15,17 1,12,13,16 | 11 | P02780,P06761,P07150,P0C0A9,P14668,P22282,P22283,Q62902,Q8CJ52,Q99041,Q9JHB9                                                                |
| 1910 | 1,2,3,9,10, 4,5,6,7,8,1<br>14,16,17 1,12,13,15 | 9  | P02780,P06761,P07171,P0C0A9,P14669,P22282,P22283,Q99041,Q9JHB9                                                                              |
| 1911 | 1,2,3,9,10, 4,5,6,7,8,1<br>15,16,17 1,12,13,14 | 16 | P02780,P02781,P02782,P06761,P07171,P07647,P0C0A9,P22282,P22283,P30120,P46462,P47727,Q62902,Q8CJ52,Q99041,Q9JHB9                             |
| 1912 | 1,2,3,9,11, 4,5,6,7,8,1<br>12,13,14 0,15,16,17 | 3  | P06760,P20760,Q99041                                                                                                                        |

|      |                                                |    |                                                                                                          |
|------|------------------------------------------------|----|----------------------------------------------------------------------------------------------------------|
| 1913 | 1,2,3,9,11, 4,5,6,7,8,1<br>12,13,15 0,14,16,17 | 1  | P06760                                                                                                   |
| 1914 | 1,2,3,9,11, 4,5,6,7,8,1<br>12,13,16 0,14,15,17 | 3  | P06760,P07171,P20760                                                                                     |
| 1915 | 1,2,3,9,11, 4,5,6,7,8,1<br>12,13,17 0,14,15,16 | 2  | P07171,P82471                                                                                            |
| 1916 | 1,2,3,9,11, 4,5,6,7,8,1<br>12,14,15 0,13,16,17 | 2  | P06760,Q99041                                                                                            |
| 1917 | 1,2,3,9,11, 4,5,6,7,8,1<br>12,14,16 0,13,15,17 | 4  | P06760,P20760,Q99041,Q99MH3                                                                              |
| 1918 | 1,2,3,9,11, 4,5,6,7,8,1<br>12,14,17 0,13,15,16 | 0  |                                                                                                          |
| 1919 | 1,2,3,9,11, 4,5,6,7,8,1<br>12,15,16 0,13,14,17 | 4  | P06760,P06761,P12020,P22282                                                                              |
| 1920 | 1,2,3,9,11, 4,5,6,7,8,1<br>12,15,17 0,13,14,16 | 2  | P06866,P12020                                                                                            |
| 1921 | 1,2,3,9,11, 4,5,6,7,8,1<br>12,16,17 0,13,14,15 | 3  | P06866,P07171,P12020                                                                                     |
| 1922 | 1,2,3,9,11, 4,5,6,7,8,1<br>13,14,15 0,12,16,17 | 6  | P06760,P20646,P82471,Q4G075,Q99041,Q9QZK9                                                                |
| 1923 | 1,2,3,9,11, 4,5,6,7,8,1<br>13,14,16 0,12,15,17 | 7  | P06760,P20760,Q4G075,Q7TPB1,Q99041,Q99MH3,Q9QZK9                                                         |
| 1924 | 1,2,3,9,11, 4,5,6,7,8,1<br>13,14,17 0,12,15,16 | 3  | P82471,Q99041,Q9QW07                                                                                     |
| 1925 | 1,2,3,9,11, 4,5,6,7,8,1<br>13,15,16 0,12,14,17 | 7  | P06760,P06761,P22282,P22283,Q4G075,Q99041,Q9QZK9                                                         |
| 1926 | 1,2,3,9,11, 4,5,6,7,8,1<br>13,15,17 0,12,14,16 | 1  | P82471                                                                                                   |
| 1927 | 1,2,3,9,11, 4,5,6,7,8,1<br>13,16,17 0,12,14,15 | 1  | P07171                                                                                                   |
| 1928 | 1,2,3,9,11, 4,5,6,7,8,1<br>14,15,16 0,12,13,17 | 10 | P02780,P06760,P06761,P22282,P22283,Q4G075,Q6AYR9,Q99041,Q99MH3,Q9QZK9                                    |
| 1929 | 1,2,3,9,11, 4,5,6,7,8,1<br>14,15,17 0,12,13,16 | 2  | P06761,Q99041                                                                                            |
| 1930 | 1,2,3,9,11, 4,5,6,7,8,1<br>14,16,17 0,12,13,15 | 2  | P06761,Q99041                                                                                            |
| 1931 | 1,2,3,9,11, 4,5,6,7,8,1<br>15,16,17 0,12,13,14 | 11 | P02780,P06761,P06911,P0C0A9,P12020,P22282,P22283,Q498D9,Q62902,Q6AYR9,Q99041                             |
| 1932 | 1,2,3,9,12, 4,5,6,7,8,1<br>13,14,15 0,11,16,17 | 13 | A2RUV9,P00714,P06760,P07150,P14668,P14669,P20646,P61206;P84079;P84082,P82471,Q4G075,Q5FVI6,Q6AYS4,Q99041 |
| 1933 | 1,2,3,9,12, 4,5,6,7,8,1<br>13,14,16 0,11,15,17 | 10 | P00714,P06760,P07150,P07171,P14669,P20760,P82471,Q4G075,Q6AYS4,Q99041                                    |
| 1934 | 1,2,3,9,12, 4,5,6,7,8,1<br>13,14,17 0,11,15,16 | 9  | P00714,P07150,P07171,P14668,P61206;P84079;P84082,P82471,Q5FVI6,Q8VD89,Q9QW07                             |
| 1935 | 1,2,3,9,12, 4,5,6,7,8,1<br>13,15,16 0,11,14,17 | 9  | P00714,P06760,P07150,P07171,P14669,P82471,Q4G075,Q6AYS4,Q99041                                           |



|      |                                                |    |                                                                                                                                                           |
|------|------------------------------------------------|----|-----------------------------------------------------------------------------------------------------------------------------------------------------------|
| 1936 | 1,2,3,9,12, 4,5,6,7,8,1<br>13,15,17 0,11,14,16 | 7  | P00714,P07150,P07171,P14668,P61206;P84079;P84082,P82471,Q5FVI6                                                                                            |
| 1937 | 1,2,3,9,12, 4,5,6,7,8,1<br>13,16,17 0,11,14,15 | 7  | P00714,P07150,P07171,P14668,P14669,P82471,Q6AYS4                                                                                                          |
| 1938 | 1,2,3,9,12, 4,5,6,7,8,1<br>14,15,16 0,11,13,17 | 9  | P06760,P06761,P07150,P14669,P22282,P22283,Q4G075,Q6AYS4,Q99041                                                                                            |
| 1939 | 1,2,3,9,12, 4,5,6,7,8,1<br>14,15,17 0,11,13,16 | 8  | A2RUV9,P00714,P07150,P14668,P61206;P84079;P84082,P82471,Q5FVI6,Q8VD89                                                                                     |
| 1940 | 1,2,3,9,12, 4,5,6,7,8,1<br>14,16,17 0,11,13,15 | 3  | P00714,P07171,P14669                                                                                                                                      |
| 1941 | 1,2,3,9,12, 4,5,6,7,8,1<br>15,16,17 0,11,13,14 | 12 | P00714,P06761,P06866,P06911,P07150,P07171,P12020,P14669,P22283,P47727,P83121,Q6AYS4                                                                       |
| 1942 | 1,2,3,9,13, 4,5,6,7,8,1<br>14,15,16 0,11,12,17 | 16 | P00714,P06760,P06761,P07150,P0C0A9,P14669,P20646,P22282,P22283,P50115,P60905,P82471,Q4G075,Q6AYS4,Q99041,Q9QZK9                                           |
| 1943 | 1,2,3,9,13, 4,5,6,7,8,1<br>14,15,17 0,11,12,16 | 14 | P00714,P07150,P0C0A9,P14668,P48199,P60905,P61206;P84079;P84082,P82471,Q07936,Q5FVI6,Q6AYS4,Q8CJ52,Q99041,Q9QW07                                           |
| 1944 | 1,2,3,9,13, 4,5,6,7,8,1<br>14,16,17 0,11,12,15 | 11 | P00714,P07150,P07171,P0C0A9,P14668,P14669,P82471,Q5FVI6,Q6AYS4,Q99041,Q9QW07                                                                              |
| 1945 | 1,2,3,9,13, 4,5,6,7,8,1<br>15,16,17 0,11,12,14 | 18 | P00714,P02780,P02781,P06761,P07150,P07171,P0C0A9,P14668,P14669,P22283,P30120,P47727,P60905,P61206;P84079;P84082,P82471,Q6AYS4,Q8CJ52,Q99041               |
| 1946 | 1,2,3,9,14, 4,5,6,7,8,1<br>15,16,17 0,11,12,13 | 20 | P00714,P02780,P02781,P06761,P07150,P07647,P0C0A9,P14669,P22282,P22283,P30120,P47727,P60905,P61206;P84079;P84082,P82471,Q62902,Q6AYS4,Q8CJ52,Q99041,Q9JHB9 |
| 1947 | 1,2,3,10,1 4,5,6,7,8,9<br>1,12,13,14 ,15,16,17 | 2  | P06760,Q99041                                                                                                                                             |
| 1948 | 1,2,3,10,1 4,5,6,7,8,9<br>1,12,13,15 ,14,16,17 | 2  | P06760,Q63617                                                                                                                                             |
| 1949 | 1,2,3,10,1 4,5,6,7,8,9<br>1,12,13,16 ,14,15,17 | 3  | P06760,P07171,P20760                                                                                                                                      |
| 1950 | 1,2,3,10,1 4,5,6,7,8,9<br>1,12,13,17 ,14,15,16 | 2  | P07171,P16636                                                                                                                                             |
| 1951 | 1,2,3,10,1 4,5,6,7,8,9<br>1,12,14,15 ,13,16,17 | 2  | P06760,Q99041                                                                                                                                             |
| 1952 | 1,2,3,10,1 4,5,6,7,8,9<br>1,12,14,16 ,13,15,17 | 4  | P06760,P20760,Q99041,Q9WUW8                                                                                                                               |
| 1953 | 1,2,3,10,1 4,5,6,7,8,9<br>1,12,14,17 ,13,15,16 | 0  |                                                                                                                                                           |
| 1954 | 1,2,3,10,1 4,5,6,7,8,9<br>1,12,15,16 ,13,14,17 | 4  | P06760,P06761,P22282,Q63617                                                                                                                               |
| 1955 | 1,2,3,10,1 4,5,6,7,8,9<br>1,12,15,17 ,13,14,16 | 2  | P06866,Q63617                                                                                                                                             |
| 1956 | 1,2,3,10,1 4,5,6,7,8,9<br>1,12,16,17 ,13,14,15 | 3  | P06757,P06866,P07171                                                                                                                                      |
| 1957 | 1,2,3,10,1 4,5,6,7,8,9<br>1,13,14,15 ,12,16,17 | 6  | P06760,P09605;P25809,P20646,P50115,Q4G075,Q99041                                                                                                          |
| 1958 | 1,2,3,10,1 4,5,6,7,8,9<br>1,13,14,16 ,12,15,17 | 6  | P06760,P20646,P50115,Q4G075,Q7TPB1,Q99041                                                                                                                 |

|      |                          |                          |    |                                                                                                                        |
|------|--------------------------|--------------------------|----|------------------------------------------------------------------------------------------------------------------------|
| 1959 | 1,2,3,10,1<br>1,13,14,17 | 4,5,6,7,8,9<br>,12,15,16 | 2  | Q99041,Q9QW07                                                                                                          |
| 1960 | 1,2,3,10,1<br>1,13,15,16 | 4,5,6,7,8,9<br>,12,14,17 | 8  | P01835,P06760,P06761,P22282,P22283,P50115,Q4G075,Q99041                                                                |
| 1961 | 1,2,3,10,1<br>1,13,15,17 | 4,5,6,7,8,9<br>,12,14,16 | 0  |                                                                                                                        |
| 1962 | 1,2,3,10,1<br>1,13,16,17 | 4,5,6,7,8,9<br>,12,14,15 | 1  | P07171                                                                                                                 |
| 1963 | 1,2,3,10,1<br>1,14,15,16 | 4,5,6,7,8,9<br>,12,13,17 | 9  | P02780,P06760,P06761,P22282,P22283,P50115,Q4G075,Q99041,Q9QZK9                                                         |
| 1964 | 1,2,3,10,1<br>1,14,15,17 | 4,5,6,7,8,9<br>,12,13,16 | 2  | P06761,Q99041                                                                                                          |
| 1965 | 1,2,3,10,1<br>1,14,16,17 | 4,5,6,7,8,9<br>,12,13,15 | 2  | P06761,Q99041                                                                                                          |
| 1966 | 1,2,3,10,1<br>1,15,16,17 | 4,5,6,7,8,9<br>,12,13,14 | 6  | P02780,P06761,P0C0A9,P22282,P22283,Q62902                                                                              |
| 1967 | 1,2,3,10,1<br>2,13,14,15 | 4,5,6,7,8,9<br>,11,16,17 | 9  | A2RUV9,P06760,P07150,P14668,P20646,P50115,Q63617,Q6AYS4,Q99041                                                         |
| 1968 | 1,2,3,10,1<br>2,13,14,16 | 4,5,6,7,8,9<br>,11,15,17 | 8  | P06760,P07150,P07171,P14669,P20646,P50115,Q6AYS4,Q99041                                                                |
| 1969 | 1,2,3,10,1<br>2,13,14,17 | 4,5,6,7,8,9<br>,11,15,16 | 4  | P07171,P14668,Q05175,Q9QW07                                                                                            |
| 1970 | 1,2,3,10,1<br>2,13,15,16 | 4,5,6,7,8,9<br>,11,14,17 | 9  | P06760,P07150,P07171,P14669,P50115,P83121,Q63617,Q6AYS4,Q99041                                                         |
| 1971 | 1,2,3,10,1<br>2,13,15,17 | 4,5,6,7,8,9<br>,11,14,16 | 5  | P06866,P07171,P14668,P83121,Q63617                                                                                     |
| 1972 | 1,2,3,10,1<br>2,13,16,17 | 4,5,6,7,8,9<br>,11,14,15 | 5  | P06866,P07171,P14668,P14669,P83121                                                                                     |
| 1973 | 1,2,3,10,1<br>2,14,15,16 | 4,5,6,7,8,9<br>,11,13,17 | 9  | P06760,P07150,P14669,P22282,P22283,P50115,Q63617,Q6AYS4,Q99041                                                         |
| 1974 | 1,2,3,10,1<br>2,14,15,17 | 4,5,6,7,8,9<br>,11,13,16 | 4  | A2RUV9,P06866,P14668,Q63617                                                                                            |
| 1975 | 1,2,3,10,1<br>2,14,16,17 | 4,5,6,7,8,9<br>,11,13,15 | 4  | P05539,P06866,P07171,P14668                                                                                            |
| 1976 | 1,2,3,10,1<br>2,15,16,17 | 4,5,6,7,8,9<br>,11,13,14 | 10 | P05539,P06761,P06866,P07171,P14668,P22282,P22283,P83121,Q63617,Q6AYS4                                                  |
| 1977 | 1,2,3,10,1<br>3,14,15,16 | 4,5,6,7,8,9<br>,11,12,17 | 16 | P01835,P02780,P06760,P06761,P07150,P09605,P25809,P0C0A9,P14669,P20646,P22282,P22283,P50115,Q4G075,Q6AYS4,Q99041,Q9QZK9 |
| 1978 | 1,2,3,10,1<br>3,14,15,17 | 4,5,6,7,8,9<br>,11,12,16 | 5  | P0C0A9,P14668,P61206,P84079,P84082,Q99041,Q9QW07                                                                       |
| 1979 | 1,2,3,10,1<br>3,14,16,17 | 4,5,6,7,8,9<br>,11,12,15 | 6  | P07171,P0C0A9,P14668,P14669,Q99041,Q9QW07                                                                              |
| 1980 | 1,2,3,10,1<br>3,15,16,17 | 4,5,6,7,8,9<br>,11,12,14 | 14 | P01835,P02780,P06761,P07171,P0C0A9,P14668,P14669,P22282,P22283,P30120,P83121,Q63617,Q6AYS4,Q99041                      |
| 1981 | 1,2,3,10,1<br>4,15,16,17 | 4,5,6,7,8,9<br>,11,12,13 | 14 | P02780,P02781,P05539,P06761,P07647,P0C0A9,P22282,P22283,P30120,Q62902,Q6AYS4,Q8CJ52,Q99041,Q9JHB9                      |

|      |                          |                                   |    |                                                                                                                                                                                                                                                                           |
|------|--------------------------|-----------------------------------|----|---------------------------------------------------------------------------------------------------------------------------------------------------------------------------------------------------------------------------------------------------------------------------|
| 1982 | 1,2,3,11,1<br>2,13,14,15 | 4,5,6,7,8,9<br>,10,16,17          | 4  | A2RUV9,P06760,P20646,Q64093                                                                                                                                                                                                                                               |
| 1983 | 1,2,3,11,1<br>2,13,14,16 | 4,5,6,7,8,9<br>,10,15,17          | 3  | P06760,P20646,P20760                                                                                                                                                                                                                                                      |
| 1984 | 1,2,3,11,1<br>2,13,14,17 | 4,5,6,7,8,9<br>,10,15,16          | 2  | Q64093,Q9QW07                                                                                                                                                                                                                                                             |
| 1985 | 1,2,3,11,1<br>2,13,15,16 | 4,5,6,7,8,9<br>,10,14,17          | 1  | P06760                                                                                                                                                                                                                                                                    |
| 1986 | 1,2,3,11,1<br>2,13,15,17 | 4,5,6,7,8,9<br>,10,14,16          | 2  | P06866,P82471                                                                                                                                                                                                                                                             |
| 1987 | 1,2,3,11,1<br>2,13,16,17 | 4,5,6,7,8,9<br>,10,14,15          | 1  | P07171                                                                                                                                                                                                                                                                    |
| 1988 | 1,2,3,11,1<br>2,14,15,16 | 4,5,6,7,8,9<br>,10,13,17          | 2  | P06760,Q99041                                                                                                                                                                                                                                                             |
| 1989 | 1,2,3,11,1<br>2,14,15,17 | 4,5,6,7,8,9<br>,10,13,16          | 1  | P06866                                                                                                                                                                                                                                                                    |
| 1990 | 1,2,3,11,1<br>2,14,16,17 | 4,5,6,7,8,9<br>,10,13,15          | 0  |                                                                                                                                                                                                                                                                           |
| 1991 | 1,2,3,11,1<br>2,15,16,17 | 4,5,6,7,8,9<br>,10,13,14          | 4  | P06761,P06866,P12020,P83121                                                                                                                                                                                                                                               |
| 1992 | 1,2,3,11,1<br>3,14,15,16 | 4,5,6,7,8,9<br>,10,12,17          | 8  | P06760,P06761,P20646,P22283,P50115,Q4G075,Q99041,Q9QZK9                                                                                                                                                                                                                   |
| 1993 | 1,2,3,11,1<br>3,14,15,17 | 4,5,6,7,8,9<br>,10,12,16          | 5  | P00714,P82471,Q64093,Q99041,Q9QW07                                                                                                                                                                                                                                        |
| 1994 | 1,2,3,11,1<br>3,14,16,17 | 4,5,6,7,8,9<br>,10,12,15          | 2  | Q99041,Q9QW07                                                                                                                                                                                                                                                             |
| 1995 | 1,2,3,11,1<br>3,15,16,17 | 4,5,6,7,8,9<br>,10,12,14          | 3  | P00714,P06761,P0C0A9                                                                                                                                                                                                                                                      |
| 1996 | 1,2,3,11,1<br>4,15,16,17 | 4,5,6,7,8,9<br>,10,12,13          | 6  | P02780,P06761,P0C0A9,P22282,P22283,Q99041                                                                                                                                                                                                                                 |
| 1997 | 1,2,3,12,1<br>3,14,15,16 | 4,5,6,7,8,9<br>,10,11,17          | 11 | A2RUV9,P00714,P06760,P07150,P14669,P20646,P50115,P83121,Q64093,Q6AYS4,Q99041                                                                                                                                                                                              |
| 1998 | 1,2,3,12,1<br>3,14,15,17 | 4,5,6,7,8,9<br>,10,11,16          | 10 | A2RUV9,P00714,P07150,P14668,P61206,P84079,P84082,P82471,Q5FVI6,Q64093,Q6AYS4,Q9QW07                                                                                                                                                                                       |
| 1999 | 1,2,3,12,1<br>3,14,16,17 | 4,5,6,7,8,9<br>,10,11,15          | 8  | P00714,P07171,P14668,P14669,P82471,Q5FVI6,Q6AYS4,Q9QW07                                                                                                                                                                                                                   |
| 2000 | 1,2,3,12,1<br>3,15,16,17 | 4,5,6,7,8,9<br>,10,11,14          | 11 | P00714,P06866,P07171,P14668,P14669,P61206,P84079,P84082,P82471,P83121,Q5XFX0,Q63617,Q6AYS4                                                                                                                                                                                |
| 2001 | 1,2,3,12,1<br>4,15,16,17 | 4,5,6,7,8,9<br>,10,11,13          | 7  | P00714,P06866,P14669,P22283,P61206,P84079,P84082,P83121,Q6AYS4                                                                                                                                                                                                            |
| 2002 | 1,2,3,13,1<br>4,15,16,17 | 4,5,6,7,8,9<br>,10,11,12          | 17 | P00714,P02780,P02781,P0C0A9,P14668,P14669,P20646,P22283,P48199,P60905,P61206,P84079,P84082,P82471,Q08849,Q5FVI6,Q6AYS4,Q99041,Q9QW07                                                                                                                                      |
| 2003 | 1,2,4,5,6,7<br>,8,9      | 3,10,11,12<br>,13,14,15,<br>16,17 | 36 | D3ZHA0,Q55004,Q55006,Q88267,P02631,P02764,P05371,P06761,P07171,P07647,P18418,P19629,P20646,P20760,P20762,P22282,P22283,P28648,P31044,P50280,P52590,P61206,P84079,P84082,P68370,P83748,P97571,Q30KJ2,Q63617,Q63942,Q64361,Q8CJ52,Q99041,Q9EQS0,Q9JI85,Q9ROT3,Q9WTT6,Q9ZOV6 |

|      |                  |                          |    |                                                                                                                                                                                                                                                                                                                                                                                                                                            |
|------|------------------|--------------------------|----|--------------------------------------------------------------------------------------------------------------------------------------------------------------------------------------------------------------------------------------------------------------------------------------------------------------------------------------------------------------------------------------------------------------------------------------------|
| 2004 | 1,2,4,5,6,7,8,10 | 3,9,11,12,13,14,15,16,17 | 47 | D3ZHA0,O54858,O55004,O55006,O88267,P02631,P02764,P05371,P06761,P07171,P07647,P08649,P08723,P12020,P15399,P18418,P19629,P20646,P20760,P20762,P22282,P22283,P28648,P31044,P50280,P52590,P55018,P61206,P84079,P84082,P68370,P82471,P83748,P97571,P97580,Q30KJ2,Q5BJY9,Q5GRG2,Q63475,Q63617,Q64361,Q7TP52,Q8CJ52,Q99041,Q9EQS0,Q9JI85,Q9R0T3,Q9WTT6,Q9Z0V6                                                                                     |
| 2005 | 1,2,4,5,6,7,8,11 | 3,9,10,12,13,14,15,16,17 | 51 | D3ZHA0,O54715,O54858,O55004,O88267,P02631,P02764,P02780,P05371,P06761,P07150,P07171,P07647,P08649,P08723,P10715,P14668,P14669,P15399,P18418,P19629,P20646,P20760,P20762,P22282,P22283,P28648,P31044,P50280,P52590,P61206,P84079,P84082,P68370,P83748,P97580,Q07936,Q30KJ2,Q5BJY9,Q5GRG2,Q63475,Q63493,Q63617,Q64361,Q6AYS4,Q8CJ52,Q8VD89,Q99041,Q9EQS0,Q9JHB9,Q9JI85,Q9R0T3,Q9Z0V6                                                         |
| 2006 | 1,2,4,5,6,7,8,12 | 3,9,10,11,13,14,15,16,17 | 59 | D3ZHA0,F1LM93,O54858,O55004,O88267,P02631,P02780,P02781,P02782,P05371,P06761,P07171,P07647,P08723,P0C0A9,P10715,P13432,P18418,P19223,P19629,P20646,P20760,P20761,P20762,P22282,P22283,P24368,P28648,P30120,P31044,P50280,P52590,P61206,P84079,P84082,P62815,P68370,P83748,P97571,Q10758,Q30KJ2,Q5GRG2,Q5M8C6,Q63475,Q63493,Q63617,Q64361,Q6AYR9,Q6AYS7,Q6IFW6,Q6IMF3,Q80WL1,Q8CJ52,Q99041,Q9EQS0,Q9JHB9,Q9JI85,Q9QZK8,Q9R0T3,Q9WTT6,Q9Z0V6 |
| 2007 | 1,2,4,5,6,7,8,13 | 3,9,10,11,12,14,15,16,17 | 40 | D3ZHA0,O55004,O88267,P02631,P02764,P02780,P05371,P06761,P06911,P07171,P07647,P08723,P12020,P18418,P19629,P20760,P20762,P22282,P22283,P25236,P28648,P31044,P50280,P52590,P61206,P84079,P84082,P68370,P83748,P97571,Q30KJ2,Q5GRG2,Q62902,Q63617,Q64361,Q8CJ52,Q99041,Q9JHB9,Q9JI85,Q9R0T3,Q9WTT6,Q9Z0V6                                                                                                                                      |
| 2008 | 1,2,4,5,6,7,8,14 | 3,9,10,11,12,13,15,16,17 | 41 | D3ZHA0,O55004,O88267,P02631,P05371,P06761,P06911,P07171,P07647,P08723,P10536,P12020,P15399,P18418,P19629,P20760,P20762,P22282,P22283,P25236,P28648,P31044,P50280,P52590,P61206,P84079,P84082,P68370,P83748,P97571,P97580,Q30KJ2,Q5GRG2,Q63532,Q63617,Q64361,Q6AYS7,Q8CJ52,Q9EQS0,Q9JI85,Q9R0T3,Q9WTT6,Q9Z0V6                                                                                                                               |
| 2009 | 1,2,4,5,6,7,8,15 | 3,9,10,11,12,13,14,16,17 | 37 | D3ZHA0,O55004,O55006,O88267,P02631,P02761,P05371,P06761,P07171,P07647,P10536,P18418,P19629,P20646,P20760,P20761,P20762,P22282,P22283,P28648,P31044,P50280,P52590,P61206,P84079,P84082,P68370,P83748,P97571,Q30KJ2,Q5GRG2,Q63617,Q64361,Q8CJ52,Q99041,Q9JI85,Q9R0T3,Q9WTT6,Q9Z0V6                                                                                                                                                           |
| 2010 | 1,2,4,5,6,7,8,16 | 3,9,10,11,12,13,14,15,17 | 33 | D3ZHA0,O55004,O88267,P02631,P05371,P06761,P07171,P07647,P18418,P19629,P20646,P20760,P20762,P22282,P22283,P28648,P31044,P50280,P52590,P61206,P84079,P84082,P68370,P83748,P97571,Q30KJ2,Q63617,Q64361,Q8CJ52,Q8VD89,Q99041,Q9JI85,Q9R0T3,Q9WTT6,Q9Z0V6                                                                                                                                                                                       |
| 2011 | 1,2,4,5,6,7,8,17 | 3,9,10,11,12,13,14,15,16 | 49 | D3ZHA0,O54858,O55004,O88267,P02631,P02761,P05371,P06760,P06761,P07171,P07647,P09605,P25809,P10536,P15399,P18418,P19223,P19629,P20646,P20760,P20761,P20762,P22282,P22283,P23928,P28648,P31044,P50115,P50280,P52590,P55091,P61206,P84079,P84082,P62815,P68370,P83748,P97571,P97580,Q30KJ2,Q4G075,Q63617,Q64361,Q6PCU2,Q8CJ52,Q99041,Q9EPB1,Q9JI85,Q9QZA6,Q9R0T3,Q9WTT6,Q9Z0V6                                                                |
| 2012 | 1,2,4,5,6,7,9,10 | 3,8,11,12,13,14,15,16,17 | 16 | O55006,P02631,P05371,P15399,P18418,P20646,P20760,P20762,P28648,P52590,P61206,P84079,P84082,P83748,P97580,Q30KJ2,Q63942,Q7TP52                                                                                                                                                                                                                                                                                                              |
| 2013 | 1,2,4,5,6,7,9,11 | 3,8,10,12,13,14,15,16,17 | 15 | O55004,P02631,P05371,P15399,P18418,P20646,P20762,P28648,P52590,P61206,P84079,P84082,P68370,P83748,P97580,Q30KJ2,Q9JI85                                                                                                                                                                                                                                                                                                                     |
| 2014 | 1,2,4,5,6,7,9,12 | 3,8,10,11,13,14,15,16,17 | 16 | O55004,O88267,P02631,P05371,P07647,P08723,P13432,P18418,P20762,P30120,P52590,P61206,P84079,P84082,P83748,Q30KJ2,Q9JHB9,Q9JI85                                                                                                                                                                                                                                                                                                              |
| 2015 | 1,2,4,5,6,7,9,13 | 3,8,10,11,12,14,15,16,17 | 13 | P02631,P05539,P06911,P07647,P12020,P18418,P20762,P52590,P61206,P84079,P84082,P83748,Q30KJ2,Q5GRG2,Q9JI85                                                                                                                                                                                                                                                                                                                                   |
| 2016 | 1,2,4,5,6,7,9,14 | 3,8,10,11,12,13,15,16,17 | 11 | P02631,P05371,P18418,P20760,P20762,P52590,P61206,P84079,P84082,P83748,Q30KJ2,Q63532,Q63942                                                                                                                                                                                                                                                                                                                                                 |
| 2017 | 1,2,4,5,6,7,9,15 | 3,8,10,11,12,13,14,16,17 | 10 | O55006,P02631,P05371,P18418,P20760,P20762,P52590,P83748,Q30KJ2,Q63942                                                                                                                                                                                                                                                                                                                                                                      |

|      |                   |                          |    |                                                                                                                                                                                                                                                                                                |
|------|-------------------|--------------------------|----|------------------------------------------------------------------------------------------------------------------------------------------------------------------------------------------------------------------------------------------------------------------------------------------------|
| 2018 | 1,2,4,5,6,7,9,16  | 3,8,10,11,12,13,14,15,17 | 9  | P02631,P05371,P18418,P23593,P52590,P61206;P84079;P84082,P83748,Q30KJ2,Q63942                                                                                                                                                                                                                   |
| 2019 | 1,2,4,5,6,7,9,17  | 3,8,10,11,12,13,14,15,16 | 18 | O55004,O88267,P02631,P05371,P09605;P25809,P15399,P18418,P19223,P20646,P20760,P20761,P20762,P23593,P52590,P61206;P84079;P84082,P83748,P97580,Q30KJ2                                                                                                                                             |
| 2020 | 1,2,4,5,6,7,10,11 | 3,8,9,12,13,14,15,16,17  | 21 | O54858,P02631,P05371,P05964,P15399,P18418,P20760,P20762,P28648,P52590,P55018,P61206;P84079;P84082,P68370,P83748,P97580,Q30KJ2,Q5BJY9,Q5FVI6,Q7TP52,Q8VD89,Q9JI85                                                                                                                               |
| 2021 | 1,2,4,5,6,7,10,12 | 3,8,9,11,13,14,15,16,17  | 32 | F1LM93,O55004,O88267,P02631,P04218,P05371,P07647,P08723,P12020,P15399,P17559,P18418,P20760,P20762,P28648,P30120,P52590,P61206;P84079;P84082,P68370,P83748,P97580,P97840,Q10758,Q30KJ2,Q63475,Q64361,Q6IFU7,Q6IFW6,Q6IMF3,Q7TP52,Q9JHB9,Q9JI85                                                  |
| 2022 | 1,2,4,5,6,7,10,13 | 3,8,9,11,12,14,15,16,17  | 18 | P02631,P06911,P07647,P12020,P15399,P18418,P20760,P20762,P28648,P52590,P61206;P84079;P84082,P68370,P83748,P97580,Q30KJ2,Q5GRG2,Q7TP52,Q9JI85                                                                                                                                                    |
| 2023 | 1,2,4,5,6,7,10,14 | 3,8,9,11,12,13,15,16,17  | 18 | P02631,P05371,P12020,P15399,P18418,P20760,P20762,P28648,P52590,P55018,P61206;P84079;P84082,P68370,P83748,P97580,Q30KJ2,Q5GRG2,Q63532,Q7TP52                                                                                                                                                    |
| 2024 | 1,2,4,5,6,7,10,15 | 3,8,9,11,12,13,14,16,17  | 14 | O55006,P02631,P05371,P18418,P20760,P20762,P28648,P52590,P55018,P61206;P84079;P84082,P83748,P97580,Q30KJ2,Q7TP52                                                                                                                                                                                |
| 2025 | 1,2,4,5,6,7,10,16 | 3,8,9,11,12,13,14,15,17  | 17 | P02631,P05371,P08721,P18418,P20760,P28648,P52590,P55018,P61206;P84079;P84082,P83748,P97580,P97840,Q30KJ2,Q5FVI6,Q62997,Q63532,Q7TP52                                                                                                                                                           |
| 2026 | 1,2,4,5,6,7,10,17 | 3,8,9,11,12,13,14,15,16  | 18 | O54858,O88267,P02631,P05371,P15399,P18418,P20646,P20760,P20761,P20762,P28648,P52590,P61206;P84079;P84082,P83748,P97580,Q30KJ2,Q64361,Q7TP52                                                                                                                                                    |
| 2027 | 1,2,4,5,6,7,11,12 | 3,8,9,10,13,14,15,16,17  | 39 | O55004,O88267,P02631,P04905,P05371,P07647,P08723,P0C0A9,P13432,P15399,P18418,P20760,P20762,P22282,P28648,P30120,P36374,P50280,P52590,P61206;P84079;P84082,P68370,P83748,P97580,Q10758,Q30KJ2,Q498R7,Q63357,Q63475,Q63493,Q6IFU7,Q6IFU8,Q6IFW6,Q6IMF3,Q6P6Q2,Q8CJ52,Q9EQS0,Q9ESW0,Q9JHB9,Q9JI85 |
| 2028 | 1,2,4,5,6,7,11,13 | 3,8,9,10,12,14,15,16,17  | 21 | P02631,P05371,P05539,P06911,P07647,P12020,P15399,P18418,P20760,P20762,P22282,P28648,P61206;P84079;P84082,P68370,P83748,P97580,Q30KJ2,Q5GRG2,Q8VD89,Q9JHB9,Q9JI85                                                                                                                               |
| 2029 | 1,2,4,5,6,7,11,14 | 3,8,9,10,12,13,15,16,17  | 16 | P02631,P05371,P12020,P15399,P18418,P20760,P20762,P28648,P52590,P61206;P84079;P84082,P68370,P83748,P97580,Q30KJ2,Q63532,Q9JI85                                                                                                                                                                  |
| 2030 | 1,2,4,5,6,7,11,15 | 3,8,9,10,12,13,14,16,17  | 17 | O55004,P02631,P05371,P14408,P15399,P18418,P20760,P20762,P28648,P52590,P61206;P84079;P84082,P68370,P83748,P97580,Q30KJ2,Q8VD89,Q9JI85                                                                                                                                                           |
| 2031 | 1,2,4,5,6,7,11,16 | 3,8,9,10,12,13,14,15,17  | 15 | G3V686,P02631,P05371,P14408,P15399,P18418,P20762,P28648,P61206;P84079;P84082,P68370,P83748,P97580,Q30KJ2,Q8VD89,Q9JI85                                                                                                                                                                         |
| 2032 | 1,2,4,5,6,7,11,17 | 3,8,9,10,12,13,14,15,16  | 22 | O54858,O55004,O88267,P02631,P05371,P09605;P25809,P15399,P18418,P20646,P20760,P20761,P20762,P28648,P52590,P55091,P61206;P84079;P84082,P83748,P97580,Q30KJ2,Q63493,Q7TP52,Q9JI85                                                                                                                 |

|      |                       |                                 |    |                                                                                                                                                                                                                                                                            |
|------|-----------------------|---------------------------------|----|----------------------------------------------------------------------------------------------------------------------------------------------------------------------------------------------------------------------------------------------------------------------------|
| 2033 | 1,2,4,5,6,7<br>,12,13 | 3,8,9,10,1<br>1,14,15,16<br>,17 | 22 | O88267,P02631,P05539,P06911,P07647,P08723,P12020,P18418,P20760,P20762,P22282,P25236,P30120,P36374,P61206;P84079;P84082<br>,P83748,Q30KJ2,Q5GRG2,Q6AYR9,Q8CJ52,Q9JHB9,Q9JI85                                                                                                |
| 2034 | 1,2,4,5,6,7<br>,12,14 | 3,8,9,10,1<br>1,13,15,16<br>,17 | 23 | O88267,P02631,P05371,P07647,P08723,P12020,P13432,P15399,P18418,P20760,P20762,P25236,P30120,P35467,P52590,P61206;P84079<br>;P84082,P83748,Q10758,Q30KJ2,Q63532,Q9EQS0,Q9JHB9,Q9JI85                                                                                         |
| 2035 | 1,2,4,5,6,7<br>,12,15 | 3,8,9,10,1<br>1,13,14,16<br>,17 | 14 | O55004,O88267,P02631,P05371,P07647,P18418,P20760,P20762,P35467,P52590,P61206;P84079;P84082,P83748,Q30KJ2,Q9JI85                                                                                                                                                            |
| 2036 | 1,2,4,5,6,7<br>,12,16 | 3,8,9,10,1<br>1,13,14,15<br>,17 | 17 | G3V686,O88267,P02631,P05371,P07647,P18418,P20760,P20762,P30120,P35467,P61206;P84079;P84082,P83748,Q10758,Q30KJ2,Q635<br>32,Q6IMF3,Q9JI85                                                                                                                                   |
| 2037 | 1,2,4,5,6,7<br>,12,17 | 3,8,9,10,1<br>1,13,14,15<br>,16 | 34 | O54858,O55004,O88267,P02631,P05371,P07647,P09605;P25809,P13432,P15399,P18418,P19223,P20646,P20760,P20761,P20762,P2228<br>2,P30120,P52590,P55091,P61206;P84079;P84082,P62815,P83748,P97580,P98089,Q10758,Q30KJ2,Q4G075,Q62635,Q64361,Q99041,Q9<br>JHB9,Q9JI85,Q9QZK9,Q9Z0V6 |
| 2038 | 1,2,4,5,6,7<br>,13,14 | 3,8,9,10,1<br>1,12,15,16<br>,17 | 17 | O88267,P02631,P05371,P05539,P06911,P07647,P12020,P18418,P20760,P20762,P25236,P61206;P84079;P84082,P83748,Q30KJ2,Q5GRG<br>2,Q63532,Q9JI85                                                                                                                                   |
| 2039 | 1,2,4,5,6,7<br>,13,15 | 3,8,9,10,1<br>1,12,14,16<br>,17 | 12 | P02631,P05539,P06911,P12020,P18418,P20760,P20762,P25236,P35467,P83748,Q30KJ2,Q5GRG2                                                                                                                                                                                        |
| 2040 | 1,2,4,5,6,7<br>,13,16 | 3,8,9,10,1<br>1,12,14,15<br>,17 | 13 | G3V686,O88267,P02631,P05371,P06911,P12020,P18418,P20760,P61206;P84079;P84082,P83748,Q30KJ2,Q5GRG2,Q8VD89                                                                                                                                                                   |
| 2041 | 1,2,4,5,6,7<br>,13,17 | 3,8,9,10,1<br>1,12,14,15<br>,16 | 21 | O88267,P02631,P05539,P06911,P07647,P09605;P25809,P12020,P15399,P18418,P20760,P20761,P20762,P22282,P52590,P55091,P62815<br>,P83748,P97580,Q30KJ2,Q5GRG2,Q9JI85                                                                                                              |
| 2042 | 1,2,4,5,6,7<br>,14,15 | 3,8,9,10,1<br>1,12,13,16<br>,17 | 13 | P02631,P05371,P16636,P18418,P20760,P20762,P35467,P52590,P83748,Q30KJ2,Q5GRG2,Q63532,Q6IE51                                                                                                                                                                                 |
| 2043 | 1,2,4,5,6,7<br>,14,16 | 3,8,9,10,1<br>1,12,13,15<br>,17 | 12 | G3V686,O88267,P02631,P05371,P18418,P20760,P20762,P35467,P61206;P84079;P84082,P83748,Q30KJ2,Q63532                                                                                                                                                                          |
| 2044 | 1,2,4,5,6,7<br>,14,17 | 3,8,9,10,1<br>1,12,13,15<br>,16 | 17 | O88267,P02631,P05371,P10536,P15399,P18418,P20760,P20761,P20762,P35467,P52590,P55091,P62815,P83748,P97580,Q30KJ2,Q9Z0V<br>6                                                                                                                                                 |
| 2045 | 1,2,4,5,6,7<br>,15,16 | 3,8,9,10,1<br>1,12,13,14<br>,17 | 9  | P02631,P05371,P18418,P20760,P20762,P35467,P61206;P84079;P84082,P83748,Q30KJ2                                                                                                                                                                                               |
| 2046 | 1,2,4,5,6,7<br>,15,17 | 3,8,9,10,1<br>1,12,13,14<br>,16 | 14 | O55004,P02631,P05371,P10536,P15399,P18418,P20760,P20761,P20762,P35467,P52590,P83748,P97580,Q30KJ2                                                                                                                                                                          |
| 2047 | 1,2,4,5,6,7<br>,16,17 | 3,8,9,10,1<br>1,12,13,14<br>,15 | 16 | O88267,P02631,P05371,P09605;P25809,P15399,P18418,P20646,P20760,P23593,P23928,P35467,P52590,P61206;P84079;P84082,P83748<br>,P97580,Q30KJ2                                                                                                                                   |

|      |                       |                                  |    |                                                                                                                                                                                                            |
|------|-----------------------|----------------------------------|----|------------------------------------------------------------------------------------------------------------------------------------------------------------------------------------------------------------|
| 2048 | 1,2,4,5,6,8<br>,9,10  | 3,7,11,12,<br>13,14,15,1<br>6,17 | 13 | D3ZHA0,O55006,P07647,P08649,P18418,P20762,P23593,P28648,Q5M8C6,Q63942,Q64361,Q9WTT6,Q9Z0V6                                                                                                                 |
| 2049 | 1,2,4,5,6,8<br>,9,11  | 3,7,10,12,<br>13,14,15,1<br>6,17 | 12 | A2RUV9,D3ZHA0,O54715,P07647,P08649,P14668,P14669,P20762,P28648,Q5M8C6,Q63942,Q9Z0V6                                                                                                                        |
| 2050 | 1,2,4,5,6,8<br>,9,12  | 3,7,10,11,<br>13,14,15,1<br>6,17 | 18 | D3ZHA0,P02780,P02782,P07647,P08723,P0C0A9,P13432,P20762,P23593,P30120,Q5M8C6,Q63942,Q64361,Q6IFW6,Q6IMF3,Q9JHB9,Q9WTT6,Q9Z0V6                                                                              |
| 2051 | 1,2,4,5,6,8<br>,9,13  | 3,7,10,11,<br>12,14,15,1<br>6,17 | 10 | D3ZHA0,P06911,P07647,P20762,P25236,Q5M8C6,Q63942,Q6TMA8,Q9WTT6,Q9Z0V6                                                                                                                                      |
| 2052 | 1,2,4,5,6,8<br>,9,14  | 3,7,10,11,<br>12,13,15,1<br>6,17 | 7  | D3ZHA0,P02793,Q7TP54,P20762,P25236,Q63942,Q9WTT6,Q9Z0V6                                                                                                                                                    |
| 2053 | 1,2,4,5,6,8<br>,9,15  | 3,7,10,11,<br>12,13,14,1<br>6,17 | 9  | D3ZHA0,O55006,P20760,P20762,P23593,Q5QE79,Q63942,Q9WTT6,Q9Z0V6                                                                                                                                             |
| 2054 | 1,2,4,5,6,8<br>,9,16  | 3,7,10,11,<br>12,13,14,1<br>5,17 | 7  | A2RUV9,D3ZHA0,P14668,P23593,Q63942,Q9WTT6,Q9Z0V6                                                                                                                                                           |
| 2055 | 1,2,4,5,6,8<br>,9,17  | 3,7,10,11,<br>12,13,14,1<br>5,16 | 15 | A2RUV9,P06760,P19223,P20646,P20760,P20762,P23593,P50115,P52590,Q4G075,Q5M8C6,Q63942,Q64361,Q9WTT6,Q9Z0V6                                                                                                   |
| 2056 | 1,2,4,5,6,8<br>,10,11 | 3,7,9,12,1<br>3,14,15,16<br>,17  | 22 | A2RUV9,D3ZHA0,O54715,O54858,P07150,P07647,P08649,P14668,P14669,P18418,P20762,P28648,P50280,P55018,P68370,Q5BJY9,Q5M8C6,Q63598,Q64361,Q6AYS4,Q7TP52,Q9Z0V6                                                  |
| 2057 | 1,2,4,5,6,8<br>,10,12 | 3,7,9,11,1<br>3,14,15,16<br>,17  | 29 | D3ZHA0,F1LM93,P02780,P02782,P06760,P07647,P08723,P0C0A9,P18418,P20762,P28648,P30120,P35281,P50280,P55018,Q10758,Q5M8C6,Q63598,Q64361,Q6AYR9,Q6IFU7,Q6IFW6,Q6IMF3,Q6P6Q2,Q8CJ52,Q9EQS0,Q9JHB9,Q9WTT6,Q9Z0V6 |
| 2058 | 1,2,4,5,6,8<br>,10,13 | 3,7,9,11,1<br>2,14,15,16<br>,17  | 14 | D3ZHA0,P06911,P07647,P12020,P18418,P20762,P28648,P50280,P55018,Q5GRG2,Q5M8C6,Q64361,Q9WTT6,Q9Z0V6                                                                                                          |
| 2059 | 1,2,4,5,6,8<br>,10,14 | 3,7,9,11,1<br>2,13,15,16<br>,17  | 11 | D3ZHA0,P02793,Q7TP54,P07647,P08649,P18418,P20762,P28648,P55018,Q64361,Q9WTT6,Q9Z0V6                                                                                                                        |
| 2060 | 1,2,4,5,6,8<br>,10,15 | 3,7,9,11,1<br>2,13,14,16<br>,17  | 10 | D3ZHA0,P02761,P08649,P18418,P20760,P20762,P55018,Q64361,Q9WTT6,Q9Z0V6                                                                                                                                      |
| 2061 | 1,2,4,5,6,8<br>,10,16 | 3,7,9,11,1<br>2,13,14,15<br>,17  | 11 | A2RUV9,D3ZHA0,P08649,P08721,P18418,P55018,Q62997,Q64361,Q7TP52,Q9WTT6,Q9Z0V6                                                                                                                               |
| 2062 | 1,2,4,5,6,8<br>,10,17 | 3,7,9,11,1<br>2,13,14,15<br>,16  | 21 | D3ZHA0,O54858,P02761,P06760,P07647,P08649,P18418,P19223,P20646,P20760,P20762,P23593,P28648,Q08463,Q4G075,Q5M8C6,Q64361,Q6P6R2,Q7TP52,Q9WTT6,Q9Z0V6                                                         |

|      |                       |                                 |    |                                                                                                                                                                                                                                                                                  |
|------|-----------------------|---------------------------------|----|----------------------------------------------------------------------------------------------------------------------------------------------------------------------------------------------------------------------------------------------------------------------------------|
| 2063 | 1,2,4,5,6,8<br>,11,12 | 3,7,9,10,1<br>3,14,15,16<br>,17 | 39 | D3ZHA0,O35547,O54715,O55004,P02780,P02781,P02782,P04905,P07150,P07647,P08723,P0C0A9,P13432,P14668,P14669,P20762,P22282,P24368,P28648,P30120,P35053,P50280,P62804,Q10758,Q5M8C6,Q63357,Q64361,Q6AYR9,Q6IFU7,Q6IFU8,Q6IFW6,Q6IMF3,Q6P6Q2,Q8CJ52,Q9EQS0,Q9ESW0,Q9JHB9,Q9JI85,Q9Z0V6 |
| 2064 | 1,2,4,5,6,8<br>,11,13 | 3,7,9,10,1<br>2,14,15,16<br>,17 | 17 | P02780,P06911,P07150,P07647,P14668,P14669,P20762,P22282,P25236,P28648,P50280,Q5GRG2,Q5M8C6,Q6TMA8,Q9JHB9,Q9JI85,Q9Z0V6                                                                                                                                                           |
| 2065 | 1,2,4,5,6,8<br>,11,14 | 3,7,9,10,1<br>2,13,15,16<br>,17 | 12 | P02793;Q7TP54,P07150,P07171,P07647,P08649,P14668,P14669,P20762,P47727,P50280,Q5M8C6,Q9Z0V6                                                                                                                                                                                       |
| 2066 | 1,2,4,5,6,8<br>,11,15 | 3,7,9,10,1<br>2,13,14,16<br>,17 | 12 | P02761,P07150,P07171,P08649,P14668,P14669,P20760,P20762,P50280,Q5I0D1,Q64361,Q9Z0V6                                                                                                                                                                                              |
| 2067 | 1,2,4,5,6,8<br>,11,16 | 3,7,9,10,1<br>2,13,14,15<br>,17 | 8  | A2RUV9,O54715,P07150,P08649,P14668,P14669,P20762,Q9Z0V6                                                                                                                                                                                                                          |
| 2068 | 1,2,4,5,6,8<br>,11,17 | 3,7,9,10,1<br>2,13,14,15<br>,16 | 21 | A2RUV9,O54858,P02761,P06760,P07150,P07647,P08649,P14668,P14669,P20646,P20760,P20762,P28648,P50115,P50280,Q30KJ2,Q4G075,Q5M8C6,Q64361,Q6AYS4,Q9Z0V6                                                                                                                               |
| 2069 | 1,2,4,5,6,8<br>,12,13 | 3,7,9,10,1<br>1,14,15,16<br>,17 | 27 | D3ZHA0,O88267,P02780,P02781,P02782,P06761,P06911,P07647,P08723,P0C0A9,P20762,P22282,P22283,P25236,P30120,P36374,P50280,Q5GRG2,Q5M8C6,Q64361,Q6AYR9,Q6TMA8,Q8CJ52,Q9JHB9,Q9JI85,Q9WTT6,Q9Z0V6                                                                                     |
| 2070 | 1,2,4,5,6,8<br>,12,14 | 3,7,9,10,1<br>1,13,15,16<br>,17 | 24 | D3ZHA0,O88267,P02780,P02782,P02793;Q7TP54,P06761,P07647,P08723,P0C0A9,P20762,P25236,P30120,P50280,Q10758,Q5M8C6,Q64361,Q6AYR9,Q6IFW6,Q6IMF3,Q8CJ52,Q9EQS0,Q9JHB9,Q9WTT6,Q9Z0V6                                                                                                   |
| 2071 | 1,2,4,5,6,8<br>,12,15 | 3,7,9,10,1<br>1,13,14,16<br>,17 | 14 | D3ZHA0,P07647,P08723,P20760,P20762,P30120,P35053,P50280,P83748,Q5M8C6,Q64361,Q9JHB9,Q9WTT6,Q9Z0V6                                                                                                                                                                                |
| 2072 | 1,2,4,5,6,8<br>,12,16 | 3,7,9,10,1<br>1,13,14,15<br>,17 | 16 | D3ZHA0,O88267,P07647,P08723,P20762,P30120,Q10758,Q5M8C6,Q64361,Q6IFU7,Q6IFW6,Q6IMF3,Q6P6Q2,Q8CJ52,Q9WTT6,Q9Z0V6                                                                                                                                                                  |
| 2073 | 1,2,4,5,6,8<br>,12,17 | 3,7,9,10,1<br>1,13,14,15<br>,16 | 37 | D3ZHA0,O54858,O88267,P01681,P02780,P02782,P06760,P07647,P08723,P10536,P13432,P19223,P20646,P20760,P20761,P20762,P22282,P23593,P23928,P30120,P50115,P50280,P55091,P62815,P98089,Q10758,Q4G075,Q5M8C6,Q62635,Q64361,Q6AYR9,Q6IMF3,Q8CJ52,Q9JHB9,Q9QZA6,Q9WTT6,Q9Z0V6               |
| 2074 | 1,2,4,5,6,8<br>,13,14 | 3,7,9,10,1<br>1,12,15,16<br>,17 | 12 | O88267,P02793;Q7TP54,P06911,P07647,P12020,P20762,P25236,P50280,Q5GRG2,Q5M8C6,Q9WTT6,Q9Z0V6                                                                                                                                                                                       |
| 2075 | 1,2,4,5,6,8<br>,13,15 | 3,7,9,10,1<br>1,12,14,16<br>,17 | 10 | P06911,P07647,P20760,P20762,P25236,P50280,Q5GRG2,Q6IFV1,Q9WTT6,Q9Z0V6                                                                                                                                                                                                            |
| 2076 | 1,2,4,5,6,8<br>,13,16 | 3,7,9,10,1<br>1,12,14,15<br>,17 | 7  | O88267,P06911,P07647,P25236,Q6PCU2,Q9WTT6,Q9Z0V6                                                                                                                                                                                                                                 |
| 2077 | 1,2,4,5,6,8<br>,13,17 | 3,7,9,10,1<br>1,12,14,15<br>,16 | 18 | O88267,P06760,P06911,P07647,P10536,P20760,P20762,P22282,P23928,P50280,P62815,Q4G075,Q5M8C6,Q63355,Q6IFV1,Q6PCU2,Q9WTT6,Q9Z0V6                                                                                                                                                    |



|      |                       |                                 |    |                                                                                                          |
|------|-----------------------|---------------------------------|----|----------------------------------------------------------------------------------------------------------|
| 2078 | 1,2,4,5,6,8<br>,14,15 | 3,7,9,10,1<br>1,12,13,16<br>,17 | 9  | D3ZHA0,P02793;Q7TP54,P07171,P10536,P20760,P20762,P25236,Q9WTT6,Q9Z0V6                                    |
| 2079 | 1,2,4,5,6,8<br>,14,16 | 3,7,9,10,1<br>1,12,13,15<br>,17 | 8  | O88267,P02793;Q7TP54,P14668,P20762,P25236,P97574,Q9WTT6,Q9Z0V6                                           |
| 2080 | 1,2,4,5,6,8<br>,14,17 | 3,7,9,10,1<br>1,12,13,15<br>,16 | 14 | O88267,P02793;Q7TP54,P06760,P10536,P20760,P20761,P20762,P50280,Q4G075,Q5M8C6,Q64361,Q6PCU2,Q9WTT6,Q9Z0V6 |
| 2081 | 1,2,4,5,6,8<br>,15,16 | 3,7,9,10,1<br>1,12,13,14<br>,17 | 4  | P14668,P20760,P20762,Q9Z0V6                                                                              |
| 2082 | 1,2,4,5,6,8<br>,15,17 | 3,7,9,10,1<br>1,12,13,14<br>,16 | 14 | B0BNN3,P02761,P06760,P10536,P20760,P20761,P20762,P23593,Q4G075,Q64361,Q6IFV1,Q9QZA6,Q9WTT6,Q9Z0V6        |
| 2083 | 1,2,4,5,6,8<br>,16,17 | 3,7,9,10,1<br>1,12,13,14<br>,15 | 11 | A2RUV9,O88267,P06760,P20760,P20762,P23593,P23928,Q4G075,Q6PCU2,Q9WTT6,Q9Z0V6                             |
| 2084 | 1,2,4,5,6,9<br>,10,11 | 3,7,8,12,1<br>3,14,15,16<br>,17 | 6  | A2RUV9,P08649,P28648,Q63942,Q6IFU7,Q7TP52                                                                |
| 2085 | 1,2,4,5,6,9<br>,10,12 | 3,7,8,11,1<br>3,14,15,16<br>,17 | 4  | Q10758,Q6IFU7,Q6IFW6,Q6IMF3                                                                              |
| 2086 | 1,2,4,5,6,9<br>,10,13 | 3,7,8,11,1<br>2,14,15,16<br>,17 | 1  | Q63942                                                                                                   |
| 2087 | 1,2,4,5,6,9<br>,10,14 | 3,7,8,11,1<br>2,13,15,16<br>,17 | 1  | Q63942                                                                                                   |
| 2088 | 1,2,4,5,6,9<br>,10,15 | 3,7,8,11,1<br>2,13,14,16<br>,17 | 2  | Q63942,Q7TP52                                                                                            |
| 2089 | 1,2,4,5,6,9<br>,10,16 | 3,7,8,11,1<br>2,13,14,15<br>,17 | 4  | A2RUV9,P23593,Q63942,Q7TP52                                                                              |
| 2090 | 1,2,4,5,6,9<br>,10,17 | 3,7,8,11,1<br>2,13,14,15<br>,16 | 5  | P23593,P52590,Q63942,Q64335,Q7TP52                                                                       |
| 2091 | 1,2,4,5,6,9<br>,11,12 | 3,7,8,10,1<br>3,14,15,16<br>,17 | 9  | P0C0A9,P30120,Q08849,Q6IFU7,Q6IFU8,Q6IFW6,Q6IMF3,Q6P6Q2,Q9JHB9                                           |
| 2092 | 1,2,4,5,6,9<br>,11,13 | 3,7,8,10,1<br>2,14,15,16<br>,17 | 2  | P05539,Q63942                                                                                            |

|      |                       |                                 |   |                                                  |
|------|-----------------------|---------------------------------|---|--------------------------------------------------|
| 2093 | 1,2,4,5,6,9<br>,11,14 | 3,7,8,10,1<br>2,13,15,16<br>,17 | 2 | P20762,Q63942                                    |
| 2094 | 1,2,4,5,6,9<br>,11,15 | 3,7,8,10,1<br>2,13,14,16<br>,17 | 1 | Q63942                                           |
| 2095 | 1,2,4,5,6,9<br>,11,16 | 3,7,8,10,1<br>2,13,14,15<br>,17 | 3 | A2RUV9,P14668,Q63942                             |
| 2096 | 1,2,4,5,6,9<br>,11,17 | 3,7,8,10,1<br>2,13,14,15<br>,16 | 2 | A2RUV9,Q63942                                    |
| 2097 | 1,2,4,5,6,9<br>,12,13 | 3,7,8,10,1<br>1,14,15,16<br>,17 | 5 | P02803,P07647,P25236,P30120,Q9JHB9               |
| 2098 | 1,2,4,5,6,9<br>,12,14 | 3,7,8,10,1<br>1,13,15,16<br>,17 | 5 | P01835,P25236,Q10758,Q63942,Q6IMF3               |
| 2099 | 1,2,4,5,6,9<br>,12,15 | 3,7,8,10,1<br>1,13,14,16<br>,17 | 1 | Q63942                                           |
| 2100 | 1,2,4,5,6,9<br>,12,16 | 3,7,8,10,1<br>1,13,14,15<br>,17 | 4 | P23593,Q63942,Q6IFU7,Q6IMF3                      |
| 2101 | 1,2,4,5,6,9<br>,12,17 | 3,7,8,10,1<br>1,13,14,15<br>,16 | 7 | P01835,P13432,P19223,P23593,P98089,Q10758,Q62635 |
| 2102 | 1,2,4,5,6,9<br>,13,14 | 3,7,8,10,1<br>1,12,15,16<br>,17 | 3 | P06911,P25236,Q63942                             |
| 2103 | 1,2,4,5,6,9<br>,13,15 | 3,7,8,10,1<br>1,12,14,16<br>,17 | 1 | Q63942                                           |
| 2104 | 1,2,4,5,6,9<br>,13,16 | 3,7,8,10,1<br>1,12,14,15<br>,17 | 1 | Q63942                                           |
| 2105 | 1,2,4,5,6,9<br>,13,17 | 3,7,8,10,1<br>1,12,14,15<br>,16 | 3 | P23593,Q63355,Q63942                             |
| 2106 | 1,2,4,5,6,9<br>,14,15 | 3,7,8,10,1<br>1,12,13,16<br>,17 | 1 | Q63942                                           |
| 2107 | 1,2,4,5,6,9<br>,14,16 | 3,7,8,10,1<br>1,12,13,15<br>,17 | 1 | Q63942                                           |

|      |                        |                                 |    |                                                                                                                        |
|------|------------------------|---------------------------------|----|------------------------------------------------------------------------------------------------------------------------|
| 2108 | 1,2,4,5,6,9<br>,14,17  | 3,7,8,10,1<br>1,12,13,15<br>,16 | 1  | Q63942                                                                                                                 |
| 2109 | 1,2,4,5,6,9<br>,15,16  | 3,7,8,10,1<br>1,12,13,14<br>,17 | 2  | P23593,Q63942                                                                                                          |
| 2110 | 1,2,4,5,6,9<br>,15,17  | 3,7,8,10,1<br>1,12,13,14<br>,16 | 3  | P20760,P23593,Q63942                                                                                                   |
| 2111 | 1,2,4,5,6,9<br>,16,17  | 3,7,8,10,1<br>1,12,13,14<br>,15 | 3  | A2RUV9,P23593,Q63942                                                                                                   |
| 2112 | 1,2,4,5,6,1<br>0,11,12 | 3,7,8,9,13,<br>14,15,16,1<br>7  | 17 | O35547,P06757,P07647,P0C0A9,P28648,P30120,Q08849,Q10758,Q63357,Q63598,Q6IFU7,Q6IFU8,Q6IFW6,Q6IMF3,Q6P6Q2,Q7TP52,Q9JHB9 |
| 2113 | 1,2,4,5,6,1<br>0,11,13 | 3,7,8,9,12,<br>14,15,16,1<br>7  | 2  | P28648,Q7TP52                                                                                                          |
| 2114 | 1,2,4,5,6,1<br>0,11,14 | 3,7,8,9,12,<br>13,15,16,1<br>7  | 3  | P08649,P55018,Q7TP52                                                                                                   |
| 2115 | 1,2,4,5,6,1<br>0,11,15 | 3,7,8,9,12,<br>13,14,16,1<br>7  | 3  | P08649,P55018,Q7TP52                                                                                                   |
| 2116 | 1,2,4,5,6,1<br>0,11,16 | 3,7,8,9,12,<br>13,14,15,1<br>7  | 6  | A2RUV9,P08649,P55018,P55314,Q6IFU7,Q7TP52                                                                              |
| 2117 | 1,2,4,5,6,1<br>0,11,17 | 3,7,8,9,12,<br>13,14,15,1<br>6  | 8  | A2RUV9,Q54858,P08649,P15399,P20760,P28648,P97580,Q7TP52                                                                |
| 2118 | 1,2,4,5,6,1<br>0,12,13 | 3,7,8,9,11,<br>14,15,16,1<br>7  | 9  | P07647,P25236,P30120,P70709,Q10758,Q6AYR9,Q6IFU7,Q6IMF3,Q9JHB9                                                         |
| 2119 | 1,2,4,5,6,1<br>0,12,14 | 3,7,8,9,11,<br>13,15,16,1<br>7  | 5  | P25236,Q10758,Q6IFU7,Q6IFW6,Q6IMF3                                                                                     |
| 2120 | 1,2,4,5,6,1<br>0,12,15 | 3,7,8,9,11,<br>13,14,16,1<br>7  | 4  | Q10758,Q6IFU7,Q6IFW6,Q6IMF3                                                                                            |
| 2121 | 1,2,4,5,6,1<br>0,12,16 | 3,7,8,9,11,<br>13,14,15,1<br>7  | 6  | Q10758,Q6IFU7,Q6IFW6,Q6IMF3,Q6P6Q2,Q7TP52                                                                              |
| 2122 | 1,2,4,5,6,1<br>0,12,17 | 3,7,8,9,11,<br>13,14,15,1<br>6  | 8  | P19223,P20760,P98089,Q10758,Q62635,Q6IFW6,Q6IMF3,Q7TP52                                                                |

|      |                        |                                |    |                                                                                                                 |
|------|------------------------|--------------------------------|----|-----------------------------------------------------------------------------------------------------------------|
| 2123 | 1,2,4,5,6,1<br>0,13,14 | 3,7,8,9,11,<br>12,15,16,1<br>7 | 4  | P06911,P12020,P25236,Q5GRG2                                                                                     |
| 2124 | 1,2,4,5,6,1<br>0,13,15 | 3,7,8,9,11,<br>12,14,16,1<br>7 | 0  |                                                                                                                 |
| 2125 | 1,2,4,5,6,1<br>0,13,16 | 3,7,8,9,11,<br>12,14,15,1<br>7 | 2  | Q62997,Q7TP52                                                                                                   |
| 2126 | 1,2,4,5,6,1<br>0,13,17 | 3,7,8,9,11,<br>12,14,15,1<br>6 | 3  | P20760,Q63355,Q7TP52                                                                                            |
| 2127 | 1,2,4,5,6,1<br>0,14,15 | 3,7,8,9,11,<br>12,13,16,1<br>7 | 1  | P55018                                                                                                          |
| 2128 | 1,2,4,5,6,1<br>0,14,16 | 3,7,8,9,11,<br>12,13,15,1<br>7 | 3  | P55018,Q62997,Q7TP52                                                                                            |
| 2129 | 1,2,4,5,6,1<br>0,14,17 | 3,7,8,9,11,<br>12,13,15,1<br>6 | 2  | P20760,Q7TP52                                                                                                   |
| 2130 | 1,2,4,5,6,1<br>0,15,16 | 3,7,8,9,11,<br>12,13,14,1<br>7 | 3  | P55018,Q62997,Q7TP52                                                                                            |
| 2131 | 1,2,4,5,6,1<br>0,15,17 | 3,7,8,9,11,<br>12,13,14,1<br>6 | 2  | P20760,Q7TP52                                                                                                   |
| 2132 | 1,2,4,5,6,1<br>0,16,17 | 3,7,8,9,11,<br>12,13,14,1<br>5 | 5  | A2RUV9,P20760,P23593,Q62997,Q7TP52                                                                              |
| 2133 | 1,2,4,5,6,1<br>1,12,13 | 3,7,8,9,10,<br>14,15,16,1<br>7 | 12 | P04905,P07647,P0C0A9,P25236,P30120,P36374,Q6IFU7,Q6IFU8,Q6IFW6,Q6IMF3,Q6P6Q2,Q9JHB9                             |
| 2134 | 1,2,4,5,6,1<br>1,12,14 | 3,7,8,9,10,<br>13,15,16,1<br>7 | 14 | O35547,P04905,P0C0A9,P20762,P25236,P30120,P47727,Q10758,Q6IFU7,Q6IFU8,Q6IFW6,Q6IMF3,Q6P6Q2,Q9JHB9               |
| 2135 | 1,2,4,5,6,1<br>1,12,15 | 3,7,8,9,10,<br>13,14,16,1<br>7 | 7  | P51907,Q6IFU7,Q6IFU8,Q6IFW6,Q6IMF3,Q6P6Q2,Q9JHB9                                                                |
| 2136 | 1,2,4,5,6,1<br>1,12,16 | 3,7,8,9,10,<br>13,14,15,1<br>7 | 8  | G3V686,O35547,Q10758,Q6IFU7,Q6IFU8,Q6IFW6,Q6IMF3,Q6P6Q2                                                         |
| 2137 | 1,2,4,5,6,1<br>1,12,17 | 3,7,8,9,10,<br>13,14,15,1<br>6 | 16 | O35547,P01681,P07647,P13432,P15399,P19223,P30120,P98089,Q10758,Q62635,Q6IFU7,Q6IFU8,Q6IFW6,Q6IMF3,Q6P6Q2,Q9JHB9 |

|      |                        |                                |    |                                                                              |
|------|------------------------|--------------------------------|----|------------------------------------------------------------------------------|
| 2138 | 1,2,4,5,6,1<br>1,13,14 | 3,7,8,9,10,<br>12,15,16,1<br>7 | 5  | P05539,P06911,P20762,P25236,P47727                                           |
| 2139 | 1,2,4,5,6,1<br>1,13,15 | 3,7,8,9,10,<br>12,14,16,1<br>7 | 1  | P05539                                                                       |
| 2140 | 1,2,4,5,6,1<br>1,13,16 | 3,7,8,9,10,<br>12,14,15,1<br>7 | 2  | A2RUV9,G3V686                                                                |
| 2141 | 1,2,4,5,6,1<br>1,13,17 | 3,7,8,9,10,<br>12,14,15,1<br>6 | 1  | P20760                                                                       |
| 2142 | 1,2,4,5,6,1<br>1,14,15 | 3,7,8,9,10,<br>12,13,16,1<br>7 | 1  | P20762                                                                       |
| 2143 | 1,2,4,5,6,1<br>1,14,16 | 3,7,8,9,10,<br>12,13,15,1<br>7 | 1  | P14668                                                                       |
| 2144 | 1,2,4,5,6,1<br>1,14,17 | 3,7,8,9,10,<br>12,13,15,1<br>6 | 3  | P15399,P20760,P20762                                                         |
| 2145 | 1,2,4,5,6,1<br>1,15,16 | 3,7,8,9,10,<br>12,13,14,1<br>7 | 2  | P14408,P14668                                                                |
| 2146 | 1,2,4,5,6,1<br>1,15,17 | 3,7,8,9,10,<br>12,13,14,1<br>6 | 1  | P20760                                                                       |
| 2147 | 1,2,4,5,6,1<br>1,16,17 | 3,7,8,9,10,<br>12,13,14,1<br>5 | 1  | A2RUV9                                                                       |
| 2148 | 1,2,4,5,6,1<br>2,13,14 | 3,7,8,9,10,<br>11,15,16,1<br>7 | 7  | P06911,P07647,P25236,P30120,Q10758,Q6AYR9,Q9JHB9                             |
| 2149 | 1,2,4,5,6,1<br>2,13,15 | 3,7,8,9,10,<br>11,14,16,1<br>7 | 2  | P25236,P83748                                                                |
| 2150 | 1,2,4,5,6,1<br>2,13,16 | 3,7,8,9,10,<br>11,14,15,1<br>7 | 3  | G3V686,P25236,Q6IFU7                                                         |
| 2151 | 1,2,4,5,6,1<br>2,13,17 | 3,7,8,9,10,<br>11,14,15,1<br>6 | 11 | P07647,P13432,P20760,P25236,P36374,P55091,P98089,Q10758,Q62635,Q63355,Q9JHB9 |
| 2152 | 1,2,4,5,6,1<br>2,14,15 | 3,7,8,9,10,<br>11,13,16,1<br>7 | 3  | P20762,P25236,P35467                                                         |

|      |                        |                                |   |                                                         |
|------|------------------------|--------------------------------|---|---------------------------------------------------------|
| 2153 | 1,2,4,5,6,1<br>2,14,16 | 3,7,8,9,10,<br>11,13,15,1<br>7 | 7 | G3V686,P25236,P35467,Q10758,Q6IFU7,Q6IFW6,Q6IMF3        |
| 2154 | 1,2,4,5,6,1<br>2,14,17 | 3,7,8,9,10,<br>11,13,15,1<br>6 | 8 | P01835,P13432,P20760,P25236,P31430,P98089,Q10758,Q62635 |
| 2155 | 1,2,4,5,6,1<br>2,15,16 | 3,7,8,9,10,<br>11,13,14,1<br>7 | 3 | P35467,P83748,Q6IFU7                                    |
| 2156 | 1,2,4,5,6,1<br>2,15,17 | 3,7,8,9,10,<br>11,13,14,1<br>6 | 6 | B0BNN3,P13432,P20760,P98089,Q10758,Q62635               |
| 2157 | 1,2,4,5,6,1<br>2,16,17 | 3,7,8,9,10,<br>11,13,14,1<br>5 | 6 | P13432,P23593,P98089,Q10758,Q62635,Q6IMF3               |
| 2158 | 1,2,4,5,6,1<br>3,14,15 | 3,7,8,9,10,<br>11,12,16,1<br>7 | 4 | P06911,P25236,P35467,Q5GRG2                             |
| 2159 | 1,2,4,5,6,1<br>3,14,16 | 3,7,8,9,10,<br>11,12,15,1<br>7 | 3 | G3V686,P06911,P25236                                    |
| 2160 | 1,2,4,5,6,1<br>3,14,17 | 3,7,8,9,10,<br>11,12,15,1<br>6 | 4 | P06911,P20760,P25236,Q6PCU2                             |
| 2161 | 1,2,4,5,6,1<br>3,15,16 | 3,7,8,9,10,<br>11,12,14,1<br>7 | 1 | P35467                                                  |
| 2162 | 1,2,4,5,6,1<br>3,15,17 | 3,7,8,9,10,<br>11,12,14,1<br>6 | 2 | P20760,Q6IFV1                                           |
| 2163 | 1,2,4,5,6,1<br>3,16,17 | 3,7,8,9,10,<br>11,12,14,1<br>5 | 2 | P20760,Q6PCU2                                           |
| 2164 | 1,2,4,5,6,1<br>4,15,16 | 3,7,8,9,10,<br>11,12,13,1<br>7 | 1 | P35467                                                  |
| 2165 | 1,2,4,5,6,1<br>4,15,17 | 3,7,8,9,10,<br>11,12,13,1<br>6 | 3 | P10536,P20760,P35467                                    |
| 2166 | 1,2,4,5,6,1<br>4,16,17 | 3,7,8,9,10,<br>11,12,13,1<br>5 | 3 | P20760,P35467,Q6PCU2                                    |
| 2167 | 1,2,4,5,6,1<br>5,16,17 | 3,7,8,9,10,<br>11,12,13,1<br>4 | 3 | P20760,P23593,P35467                                    |

|      |                       |                                  |    |                                                                                                                                                                         |
|------|-----------------------|----------------------------------|----|-------------------------------------------------------------------------------------------------------------------------------------------------------------------------|
| 2168 | 1,2,4,5,7,8<br>,9,10  | 3,6,11,12,<br>13,14,15,1<br>6,17 | 10 | D3ZHA0,O55006,P18418,P28648,P31044,P52590,P68370,P97571,Q63475,Q63942                                                                                                   |
| 2169 | 1,2,4,5,7,8<br>,9,11  | 3,6,10,12,<br>13,14,15,1<br>6,17 | 14 | P02803,P07171,P10715,P14669,P18418,P20762,P28648,P31044,P52590,P61206;P84079;P84082,P68370,Q63617,Q6AYS4,Q9EQS0                                                         |
| 2170 | 1,2,4,5,7,8<br>,9,12  | 3,6,10,11,<br>13,14,15,1<br>6,17 | 14 | D3ZHA0,O88267,P02803,P10715,P18418,P19223,P31044,P52590,P83748,Q63475,Q80WL1,Q8CJ52,Q9EQS0,Q9R0T3                                                                       |
| 2171 | 1,2,4,5,7,8<br>,9,13  | 3,6,10,11,<br>12,14,15,1<br>6,17 | 7  | D3ZHA0,P02803,P18418,P31044,P52590,Q63617,Q9R0T3                                                                                                                        |
| 2172 | 1,2,4,5,7,8<br>,9,14  | 3,6,10,11,<br>12,13,15,1<br>6,17 | 9  | D3ZHA0,P07171,P18418,P20762,P31044,P52590,Q63617,Q63942,Q9EQS0                                                                                                          |
| 2173 | 1,2,4,5,7,8<br>,9,15  | 3,6,10,11,<br>12,13,14,1<br>6,17 | 8  | D3ZHA0,P02761,P07171,P18418,P31044,P52590,Q5QE79,Q63942                                                                                                                 |
| 2174 | 1,2,4,5,7,8<br>,9,16  | 3,6,10,11,<br>12,13,14,1<br>5,17 | 7  | D3ZHA0,P18418,P31044,P52590,Q63617,Q63942,Q9R0T3                                                                                                                        |
| 2175 | 1,2,4,5,7,8<br>,9,17  | 3,6,10,11,<br>12,13,14,1<br>5,16 | 8  | O88267,P18418,P19223,P50115,P52590,P55091,Q63617,Q9QZA6                                                                                                                 |
| 2176 | 1,2,4,5,7,8<br>,10,11 | 3,6,9,12,1<br>3,14,15,16<br>,17  | 22 | D3ZHA0,O54858,P00714,P02761,P07171,P08649,P14669,P16391,P18418,P28648,P31044,P52590,P55018,P61206;P84079;P84082,P68370,Q5BJY9,Q63475,Q63598,Q6AYS4,Q8CJ52,Q9EQS0,Q9R0T3 |
| 2177 | 1,2,4,5,7,8<br>,10,12 | 3,6,9,11,1<br>3,14,15,16<br>,17  | 17 | D3ZHA0,P10715,P16391,P18418,P19223,P28648,P31044,P52590,P68370,P83748,P97571,Q10758,Q63475,Q80WL1,Q8CJ52,Q9EQS0,Q9R0T3                                                  |
| 2178 | 1,2,4,5,7,8<br>,10,13 | 3,6,9,11,1<br>2,14,15,16<br>,17  | 10 | D3ZHA0,P01835,P18418,P28648,P31044,P52590,P68370,P97571,Q5GRG2,Q9R0T3                                                                                                   |
| 2179 | 1,2,4,5,7,8<br>,10,14 | 3,6,9,11,1<br>2,13,15,16<br>,17  | 13 | D3ZHA0,P07171,P18418,P20762,P28648,P31044,P36970,P52590,P55018,P68370,P97571,Q63475,Q9EQS0                                                                              |
| 2180 | 1,2,4,5,7,8<br>,10,15 | 3,6,9,11,1<br>2,13,14,16<br>,17  | 12 | D3ZHA0,P01835,P02761,P07171,P18418,P28648,P31044,P52590,P55018,P68370,P97571,Q63475                                                                                     |
| 2181 | 1,2,4,5,7,8<br>,10,16 | 3,6,9,11,1<br>2,13,14,15<br>,17  | 13 | D3ZHA0,P01835,P08721,P18418,P28648,P31044,P52590,P55018,P61206;P84079;P84082,P68370,P97571,Q62997,Q9R0T3                                                                |
| 2182 | 1,2,4,5,7,8<br>,10,17 | 3,6,9,11,1<br>2,13,14,15<br>,16  | 16 | D3ZHA0,O54858,P02761,P16391,P18418,P19223,P28648,P31044,P46844,P50115,P52590,P55091,P97571,Q4G075,Q9QZA6,Q9R0T3                                                         |

|      |                       |                                 |    |                                                                                                                                                                                                                                               |
|------|-----------------------|---------------------------------|----|-----------------------------------------------------------------------------------------------------------------------------------------------------------------------------------------------------------------------------------------------|
| 2183 | 1,2,4,5,7,8<br>,11,12 | 3,6,9,10,1<br>3,14,15,16<br>,17 | 32 | D3ZHA0,O54715,O55004,P02780,P02781,P02803,P07171,P07647,P10715,P14669,P18418,P20762,P22283,P28648,P30120,P31044,P36374,P52590,P61206,P84079,P84082,P68370,Q63475,Q63493,Q68FS4,Q6AYS4,Q6P6Q2,Q80WL1,Q8CJ52,Q99041,Q9EQS0,Q9ESW0,Q9JI85,Q9ROT3 |
| 2184 | 1,2,4,5,7,8<br>,11,13 | 3,6,9,10,1<br>2,14,15,16<br>,17 | 17 | P02803,P05539,P07171,P14669,P18418,P28648,P31044,P52590,P61206,P84079,P84082,P68370,Q5GRG2,Q63617,Q6AYS4,Q8CJ52,Q8VD89,Q9JI85,Q9ROT3                                                                                                          |
| 2185 | 1,2,4,5,7,8<br>,11,14 | 3,6,9,10,1<br>2,13,15,16<br>,17 | 16 | P05371,P07171,P14669,P18418,P19814,P20762,P28648,P31044,P52590,P61206,P84079,P84082,P68370,Q63617,Q6AYS4,Q8CJ52,Q9EQS0,Q9ESW0                                                                                                                 |
| 2186 | 1,2,4,5,7,8<br>,11,15 | 3,6,9,10,1<br>2,13,14,16<br>,17 | 14 | P02761,P07171,P10715,P14408,P14669,P18418,P20762,P22006,P31044,P52590,P68370,Q63475,Q6AYS4,Q9ESW0                                                                                                                                             |
| 2187 | 1,2,4,5,7,8<br>,11,16 | 3,6,9,10,1<br>2,13,14,15<br>,17 | 14 | P05371,P07171,P10715,P14408,P14668,P18418,P31044,P61206,P84079,P84082,P68370,Q63617,Q6AYS4,Q8CJ52,Q8VD89,Q9ROT3                                                                                                                               |
| 2188 | 1,2,4,5,7,8<br>,11,17 | 3,6,9,10,1<br>2,13,14,15<br>,16 | 22 | O54858,O55004,P02761,P07171,P10715,P14669,P18418,P19223,P20762,P28648,P31044,P50115,P52590,P55091,P61206,P84079,P84082,Q4G075,Q63617,Q6AYS4,Q99041,Q9ESW0,Q9QZA6,Q9ROT3                                                                       |
| 2189 | 1,2,4,5,7,8<br>,12,13 | 3,6,9,10,1<br>1,14,15,16<br>,17 | 22 | D3ZHA0,O88267,P02780,P02803,P06761,P07647,P10715,P18418,P22282,P22283,P30120,P31044,P36374,P36970,P52590,P83748,Q5GRG2,Q80WL1,Q8CJ52,Q9EQS0,Q9JI85,Q9ROT3                                                                                     |
| 2190 | 1,2,4,5,7,8<br>,12,14 | 3,6,9,10,1<br>1,13,15,16<br>,17 | 18 | D3ZHA0,O88267,P06761,P07171,P10715,P18418,P19629,P20762,P31044,P36970,P52590,P83748,Q63475,Q68FS4,Q80WL1,Q8CJ52,Q9EQS0,Q9ROT3                                                                                                                 |
| 2191 | 1,2,4,5,7,8<br>,12,15 | 3,6,9,10,1<br>1,13,14,16<br>,17 | 13 | D3ZHA0,O55004,P07171,P10715,P18418,P20762,P52590,P83748,Q63475,Q8CJ52,Q9EQS0,Q9ESW0,Q9QZA6                                                                                                                                                    |
| 2192 | 1,2,4,5,7,8<br>,12,16 | 3,6,9,10,1<br>1,13,14,15<br>,17 | 10 | D3ZHA0,O88267,P08721,P10715,P18418,P83748,Q80WL1,Q8CJ52,Q9EQS0,Q9ROT3                                                                                                                                                                         |
| 2193 | 1,2,4,5,7,8<br>,12,17 | 3,6,9,10,1<br>1,13,14,15<br>,16 | 23 | O54858,O55004,O88267,P06761,P10715,P18418,P19223,P23928,P36374,P50115,P52590,P55091,P83748,P98089,Q4G075,Q62635,Q80WL1,Q8CJ52,Q99041,Q9EQS0,Q9ESW0,Q9QZA6,Q9ROT3                                                                              |
| 2194 | 1,2,4,5,7,8<br>,13,14 | 3,6,9,10,1<br>1,12,15,16<br>,17 | 10 | O88267,P06761,P06911,P07171,P18418,P20762,P31044,P36970,Q5GRG2,Q8CJ52                                                                                                                                                                         |
| 2195 | 1,2,4,5,7,8<br>,13,15 | 3,6,9,10,1<br>1,12,14,16<br>,17 | 7  | P01835,P07171,P18418,P31044,P52590,Q09030,Q5GRG2                                                                                                                                                                                              |
| 2196 | 1,2,4,5,7,8<br>,13,16 | 3,6,9,10,1<br>1,12,14,15<br>,17 | 6  | O88267,P01835,P18418,P31044,Q8CJ52,Q9ROT3                                                                                                                                                                                                     |
| 2197 | 1,2,4,5,7,8<br>,13,17 | 3,6,9,10,1<br>1,12,14,15<br>,16 | 11 | O88267,P06761,P10536,P18418,P19223,P23928,P50115,P52590,P55091,Q6PCU2,Q9ROT3                                                                                                                                                                  |



|      |                       |                                 |    |                                                                              |
|------|-----------------------|---------------------------------|----|------------------------------------------------------------------------------|
| 2198 | 1,2,4,5,7,8<br>,14,15 | 3,6,9,10,1<br>1,12,13,16<br>,17 | 8  | D3ZHA0,P07171,P10536,P16636,P18418,P20762,P31044,P52590                      |
| 2199 | 1,2,4,5,7,8<br>,14,16 | 3,6,9,10,1<br>1,12,13,15<br>,17 | 7  | O88267,P07171,P08721,P18418,P31044,P97574,Q63532                             |
| 2200 | 1,2,4,5,7,8<br>,14,17 | 3,6,9,10,1<br>1,12,13,15<br>,16 | 11 | O88267,P07171,P10536,P18418,P19223,P20762,P50115,P52590,P55091,Q6PCU2,Q9QZA6 |
| 2201 | 1,2,4,5,7,8<br>,15,16 | 3,6,9,10,1<br>1,12,13,14<br>,17 | 5  | P01835,P07171,P18418,P31044,P52590                                           |
| 2202 | 1,2,4,5,7,8<br>,15,17 | 3,6,9,10,1<br>1,12,13,14<br>,16 | 10 | P02761,P07171,P10536,P18418,P19223,P20760,P50115,P52590,P55091,Q9QZA6        |
| 2203 | 1,2,4,5,7,8<br>,16,17 | 3,6,9,10,1<br>1,12,13,14<br>,15 | 11 | O88267,P18418,P19223,P23928,P50115,P50116,P52590,P55091,Q6PCU2,Q9QZA6,Q9R0T3 |
| 2204 | 1,2,4,5,7,9<br>,10,11 | 3,6,8,12,1<br>3,14,15,16<br>,17 | 6  | P18418,P28648,P52590,P61206;P84079;P84082,Q64093,Q7TP52                      |
| 2205 | 1,2,4,5,7,9<br>,10,12 | 3,6,8,11,1<br>3,14,15,16<br>,17 | 4  | P18418,P52590,P97840,Q63475                                                  |
| 2206 | 1,2,4,5,7,9<br>,10,13 | 3,6,8,11,1<br>2,14,15,16<br>,17 | 1  | P52590                                                                       |
| 2207 | 1,2,4,5,7,9<br>,10,14 | 3,6,8,11,1<br>2,13,15,16<br>,17 | 2  | P18418,P52590                                                                |
| 2208 | 1,2,4,5,7,9<br>,10,15 | 3,6,8,11,1<br>2,13,14,16<br>,17 | 1  | P52590                                                                       |
| 2209 | 1,2,4,5,7,9<br>,10,16 | 3,6,8,11,1<br>2,13,14,15<br>,17 | 4  | P52590,P61206;P84079;P84082,Q62997,Q64093                                    |
| 2210 | 1,2,4,5,7,9<br>,10,17 | 3,6,8,11,1<br>2,13,14,15<br>,16 | 2  | P52590,Q64093                                                                |
| 2211 | 1,2,4,5,7,9<br>,11,12 | 3,6,8,10,1<br>3,14,15,16<br>,17 | 5  | P02803,P51907,P52590,P61206;P84079;P84082,Q9ESW0                             |
| 2212 | 1,2,4,5,7,9<br>,11,13 | 3,6,8,10,1<br>2,14,15,16<br>,17 | 4  | P02803,P05539,P52590,P61206;P84079;P84082                                    |

|      |                       |                                 |   |                                    |
|------|-----------------------|---------------------------------|---|------------------------------------|
| 2213 | 1,2,4,5,7,9<br>,11,14 | 3,6,8,10,1<br>2,13,15,16<br>,17 | 3 | P52590,P61206,P84079,P84082,Q99MH3 |
| 2214 | 1,2,4,5,7,9<br>,11,15 | 3,6,8,10,1<br>2,13,14,16<br>,17 | 3 | P14408,P51907,P52590               |
| 2215 | 1,2,4,5,7,9<br>,11,16 | 3,6,8,10,1<br>2,13,14,15<br>,17 | 3 | P14408,P52590,P61206,P84079,P84082 |
| 2216 | 1,2,4,5,7,9<br>,11,17 | 3,6,8,10,1<br>2,13,14,15<br>,16 | 1 | P52590                             |
| 2217 | 1,2,4,5,7,9<br>,12,13 | 3,6,8,10,1<br>1,14,15,16<br>,17 | 5 | P02803,P05539,P36374,P52590,P83748 |
| 2218 | 1,2,4,5,7,9<br>,12,14 | 3,6,8,10,1<br>1,13,15,16<br>,17 | 1 | P52590                             |
| 2219 | 1,2,4,5,7,9<br>,12,15 | 3,6,8,10,1<br>1,13,14,16<br>,17 | 2 | P52590,P83748                      |
| 2220 | 1,2,4,5,7,9<br>,12,16 | 3,6,8,10,1<br>1,13,14,15<br>,17 | 2 | P52590,P83748                      |
| 2221 | 1,2,4,5,7,9<br>,12,17 | 3,6,8,10,1<br>1,13,14,15<br>,16 | 4 | P19223,P52590,P55091,P98089        |
| 2222 | 1,2,4,5,7,9<br>,13,14 | 3,6,8,10,1<br>1,12,15,16<br>,17 | 2 | P05539,P52590                      |
| 2223 | 1,2,4,5,7,9<br>,13,15 | 3,6,8,10,1<br>1,12,14,16<br>,17 | 2 | P05539,P52590                      |
| 2224 | 1,2,4,5,7,9<br>,13,16 | 3,6,8,10,1<br>1,12,14,15<br>,17 | 1 | P52590                             |
| 2225 | 1,2,4,5,7,9<br>,13,17 | 3,6,8,10,1<br>1,12,14,15<br>,16 | 2 | P05539,P52590                      |
| 2226 | 1,2,4,5,7,9<br>,14,15 | 3,6,8,10,1<br>1,12,13,16<br>,17 | 3 | P16636,P52590,Q9QZK9               |
| 2227 | 1,2,4,5,7,9<br>,14,16 | 3,6,8,10,1<br>1,12,13,15<br>,17 | 4 | P52590,Q63532,Q99MH3,Q9QZK9        |

|      |                        |                                 |    |                                                                                            |
|------|------------------------|---------------------------------|----|--------------------------------------------------------------------------------------------|
| 2228 | 1,2,4,5,7,9<br>,14,17  | 3,6,8,10,1<br>1,12,13,15<br>,16 | 1  | P52590                                                                                     |
| 2229 | 1,2,4,5,7,9<br>,15,16  | 3,6,8,10,1<br>1,12,13,14<br>,17 | 3  | P47727,P52590,Q9QZK9                                                                       |
| 2230 | 1,2,4,5,7,9<br>,15,17  | 3,6,8,10,1<br>1,12,13,14<br>,16 | 2  | P47727,P52590                                                                              |
| 2231 | 1,2,4,5,7,9<br>,16,17  | 3,6,8,10,1<br>1,12,13,14<br>,15 | 2  | P47727,P52590                                                                              |
| 2232 | 1,2,4,5,7,1<br>0,11,12 | 3,6,8,9,13,<br>14,15,16,1<br>7  | 11 | P05964,P06757,P18418,P28648,P51907,P52590,P61206;P84079;P84082,Q62636,Q63475,Q6P6Q2,Q9ESW0 |
| 2233 | 1,2,4,5,7,1<br>0,11,13 | 3,6,8,9,12,<br>14,15,16,1<br>7  | 4  | P05539,P28648,P52590,P61206;P84079;P84082                                                  |
| 2234 | 1,2,4,5,7,1<br>0,11,14 | 3,6,8,9,12,<br>13,15,16,1<br>7  | 4  | P18418,P28648,P52590,P61206;P84079;P84082                                                  |
| 2235 | 1,2,4,5,7,1<br>0,11,15 | 3,6,8,9,12,<br>13,14,16,1<br>7  | 7  | P14408,P22006,P28648,P51907,P52590,P61206;P84079;P84082,Q5FVI6                             |
| 2236 | 1,2,4,5,7,1<br>0,11,16 | 3,6,8,9,12,<br>13,14,15,1<br>7  | 8  | P14408,P28648,P51907,P52590,P61206;P84079;P84082,Q5FVI6,Q7TP52,Q8VD89                      |
| 2237 | 1,2,4,5,7,1<br>0,11,17 | 3,6,8,9,12,<br>13,14,15,1<br>6  | 5  | P14408,P28648,P52590,P61206;P84079;P84082,Q7TP52                                           |
| 2238 | 1,2,4,5,7,1<br>0,12,13 | 3,6,8,9,11,<br>14,15,16,1<br>7  | 4  | P18418,P36374,P52590,P83748                                                                |
| 2239 | 1,2,4,5,7,1<br>0,12,14 | 3,6,8,9,11,<br>13,15,16,1<br>7  | 5  | P18418,P52590,Q10758,Q63475,Q63532                                                         |
| 2240 | 1,2,4,5,7,1<br>0,12,15 | 3,6,8,9,11,<br>13,14,16,1<br>7  | 4  | P18418,P52590,P83748,Q63475                                                                |
| 2241 | 1,2,4,5,7,1<br>0,12,16 | 3,6,8,9,11,<br>13,14,15,1<br>7  | 7  | P08721,P18418,P52590,P61206;P84079;P84082,P83748,P97840,Q10758                             |
| 2242 | 1,2,4,5,7,1<br>0,12,17 | 3,6,8,9,11,<br>13,14,15,1<br>6  | 6  | P18418,P19223,P52590,P55091,P98089,Q10758                                                  |

|      |                        |                                |   |                                                                       |
|------|------------------------|--------------------------------|---|-----------------------------------------------------------------------|
| 2243 | 1,2,4,5,7,1<br>0,13,14 | 3,6,8,9,11,<br>12,15,16,1<br>7 | 3 | P12020,P18418,Q5GRG2                                                  |
| 2244 | 1,2,4,5,7,1<br>0,13,15 | 3,6,8,9,11,<br>12,14,16,1<br>7 | 3 | P01835,P52590,Q09030                                                  |
| 2245 | 1,2,4,5,7,1<br>0,13,16 | 3,6,8,9,11,<br>12,14,15,1<br>7 | 2 | P01835,Q62997                                                         |
| 2246 | 1,2,4,5,7,1<br>0,13,17 | 3,6,8,9,11,<br>12,14,15,1<br>6 | 1 | P52590                                                                |
| 2247 | 1,2,4,5,7,1<br>0,14,15 | 3,6,8,9,11,<br>12,13,16,1<br>7 | 4 | P16636,P18418,P35467,P52590                                           |
| 2248 | 1,2,4,5,7,1<br>0,14,16 | 3,6,8,9,11,<br>12,13,15,1<br>7 | 3 | P08721,Q62997,Q63532                                                  |
| 2249 | 1,2,4,5,7,1<br>0,14,17 | 3,6,8,9,11,<br>12,13,15,1<br>6 | 2 | P18418,P52590                                                         |
| 2250 | 1,2,4,5,7,1<br>0,15,16 | 3,6,8,9,11,<br>12,13,14,1<br>7 | 6 | P01835,P08721,P14408,P35467,P52590,Q62997                             |
| 2251 | 1,2,4,5,7,1<br>0,15,17 | 3,6,8,9,11,<br>12,13,14,1<br>6 | 1 | P52590                                                                |
| 2252 | 1,2,4,5,7,1<br>0,16,17 | 3,6,8,9,11,<br>12,13,14,1<br>5 | 3 | P08721,P52590,Q62997                                                  |
| 2253 | 1,2,4,5,7,1<br>1,12,13 | 3,6,8,9,10,<br>14,15,16,1<br>7 | 8 | P01836,P02803,P05539,P14408,P36374,P61206;P84079;P84082,Q9ESW0,Q9JI85 |
| 2254 | 1,2,4,5,7,1<br>1,12,14 | 3,6,8,9,10,<br>13,15,16,1<br>7 | 3 | P51907,P61206;P84079;P84082,Q9ESW0                                    |
| 2255 | 1,2,4,5,7,1<br>1,12,15 | 3,6,8,9,10,<br>13,14,16,1<br>7 | 4 | P01836,P14408,P51907,Q9ESW0                                           |
| 2256 | 1,2,4,5,7,1<br>1,12,16 | 3,6,8,9,10,<br>13,14,15,1<br>7 | 5 | P01836,P14408,P51907,P61206;P84079;P84082,Q9ESW0                      |
| 2257 | 1,2,4,5,7,1<br>1,12,17 | 3,6,8,9,10,<br>13,14,15,1<br>6 | 7 | P14408,P19223,P36374,P52590,P55091,P98089,Q9ESW0                      |

|      |                        |                                |   |                                           |
|------|------------------------|--------------------------------|---|-------------------------------------------|
| 2258 | 1,2,4,5,7,1<br>1,13,14 | 3,6,8,9,10,<br>12,15,16,1<br>7 | 2 | P05539,Q5GRG2                             |
| 2259 | 1,2,4,5,7,1<br>1,13,15 | 3,6,8,9,10,<br>12,14,16,1<br>7 | 3 | P05539,P14408,Q09030                      |
| 2260 | 1,2,4,5,7,1<br>1,13,16 | 3,6,8,9,10,<br>12,14,15,1<br>7 | 3 | P14408,P61206;P84079;P84082,Q8VD89        |
| 2261 | 1,2,4,5,7,1<br>1,13,17 | 3,6,8,9,10,<br>12,14,15,1<br>6 | 3 | P05539,P14408,P52590                      |
| 2262 | 1,2,4,5,7,1<br>1,14,15 | 3,6,8,9,10,<br>12,13,16,1<br>7 | 4 | P14408,P16636,P22006,P51907               |
| 2263 | 1,2,4,5,7,1<br>1,14,16 | 3,6,8,9,10,<br>12,13,15,1<br>7 | 4 | P14408,P61206;P84079;P84082,Q63532,Q99MH3 |
| 2264 | 1,2,4,5,7,1<br>1,14,17 | 3,6,8,9,10,<br>12,13,15,1<br>6 | 1 | P52590                                    |
| 2265 | 1,2,4,5,7,1<br>1,15,16 | 3,6,8,9,10,<br>12,13,14,1<br>7 | 4 | P14408,P51907,P61206;P84079;P84082,Q8VD89 |
| 2266 | 1,2,4,5,7,1<br>1,15,17 | 3,6,8,9,10,<br>12,13,14,1<br>6 | 2 | P14408,P52590                             |
| 2267 | 1,2,4,5,7,1<br>1,16,17 | 3,6,8,9,10,<br>12,13,14,1<br>5 | 3 | P14408,P52590,P61206;P84079;P84082        |
| 2268 | 1,2,4,5,7,1<br>2,13,14 | 3,6,8,9,10,<br>11,15,16,1<br>7 | 1 | P83748                                    |
| 2269 | 1,2,4,5,7,1<br>2,13,15 | 3,6,8,9,10,<br>11,14,16,1<br>7 | 4 | P01836,P05539,P83748,Q09030               |
| 2270 | 1,2,4,5,7,1<br>2,13,16 | 3,6,8,9,10,<br>11,14,15,1<br>7 | 2 | P01836,P83748                             |
| 2271 | 1,2,4,5,7,1<br>2,13,17 | 3,6,8,9,10,<br>11,14,15,1<br>6 | 6 | O88267,P19223,P36374,P52590,P55091,P98089 |
| 2272 | 1,2,4,5,7,1<br>2,14,15 | 3,6,8,9,10,<br>11,13,16,1<br>7 | 3 | P16636,P35467,P83748                      |

|      |                        |                                |   |                                           |
|------|------------------------|--------------------------------|---|-------------------------------------------|
| 2273 | 1,2,4,5,7,1<br>2,14,16 | 3,6,8,9,10,<br>11,13,15,1<br>7 | 3 | P35467,P83748,Q63532                      |
| 2274 | 1,2,4,5,7,1<br>2,14,17 | 3,6,8,9,10,<br>11,13,15,1<br>6 | 6 | O88267,P19223,P31430,P52590,P55091,P98089 |
| 2275 | 1,2,4,5,7,1<br>2,15,16 | 3,6,8,9,10,<br>11,13,14,1<br>7 | 4 | P01836,P14408,P35467,P83748               |
| 2276 | 1,2,4,5,7,1<br>2,15,17 | 3,6,8,9,10,<br>11,13,14,1<br>6 | 5 | P19223,P52590,P55091,P83748,P98089        |
| 2277 | 1,2,4,5,7,1<br>2,16,17 | 3,6,8,9,10,<br>11,13,14,1<br>5 | 5 | P19223,P52590,P55091,P83748,P98089        |
| 2278 | 1,2,4,5,7,1<br>3,14,15 | 3,6,8,9,10,<br>11,12,16,1<br>7 | 5 | P05539,P16636,P35467,Q09030,Q5GRG2        |
| 2279 | 1,2,4,5,7,1<br>3,14,16 | 3,6,8,9,10,<br>11,12,15,1<br>7 | 2 | P35467,Q63532                             |
| 2280 | 1,2,4,5,7,1<br>3,14,17 | 3,6,8,9,10,<br>11,12,15,1<br>6 | 2 | P52590,Q6PCU2                             |
| 2281 | 1,2,4,5,7,1<br>3,15,16 | 3,6,8,9,10,<br>11,12,14,1<br>7 | 4 | P01835,P14408,P35467,Q09030               |
| 2282 | 1,2,4,5,7,1<br>3,15,17 | 3,6,8,9,10,<br>11,12,14,1<br>6 | 1 | P52590                                    |
| 2283 | 1,2,4,5,7,1<br>3,16,17 | 3,6,8,9,10,<br>11,12,14,1<br>5 | 2 | P52590,Q6PCU2                             |
| 2284 | 1,2,4,5,7,1<br>4,15,16 | 3,6,8,9,10,<br>11,12,13,1<br>7 | 4 | P16636,P35467,Q63532,Q9QZK9               |
| 2285 | 1,2,4,5,7,1<br>4,15,17 | 3,6,8,9,10,<br>11,12,13,1<br>6 | 4 | P10536,P16636,P35467,P52590               |
| 2286 | 1,2,4,5,7,1<br>4,16,17 | 3,6,8,9,10,<br>11,12,13,1<br>5 | 3 | P35467,P52590,Q6PCU2                      |
| 2287 | 1,2,4,5,7,1<br>5,16,17 | 3,6,8,9,10,<br>11,12,13,1<br>4 | 4 | P14408,P35467,P47727,P52590               |

|      |                       |                                 |   |                                           |
|------|-----------------------|---------------------------------|---|-------------------------------------------|
| 2288 | 1,2,4,5,8,9<br>,10,11 | 3,6,7,12,1<br>3,14,15,16<br>,17 | 6 | A2RUV9,P02803,P08649,Q63598,Q63942,Q6AYS4 |
| 2289 | 1,2,4,5,8,9<br>,10,12 | 3,6,7,11,1<br>3,14,15,16<br>,17 | 3 | D3ZHA0,P02803,Q80WL1                      |
| 2290 | 1,2,4,5,8,9<br>,10,13 | 3,6,7,11,1<br>2,14,15,16<br>,17 | 2 | P02803,Q63942                             |
| 2291 | 1,2,4,5,8,9<br>,10,14 | 3,6,7,11,1<br>2,13,15,16<br>,17 | 1 | Q63942                                    |
| 2292 | 1,2,4,5,8,9<br>,10,15 | 3,6,7,11,1<br>2,13,14,16<br>,17 | 3 | D3ZHA0,P02761,Q63942                      |
| 2293 | 1,2,4,5,8,9<br>,10,16 | 3,6,7,11,1<br>2,13,14,15<br>,17 | 4 | A2RUV9,Q62997,Q63942,Q9QZK9               |
| 2294 | 1,2,4,5,8,9<br>,10,17 | 3,6,7,11,1<br>2,13,14,15<br>,16 | 4 | P08649,P19223,P52590,Q63942               |
| 2295 | 1,2,4,5,8,9<br>,11,12 | 3,6,7,10,1<br>3,14,15,16<br>,17 | 5 | P02803,Q5M8C6,Q6AYS4,Q6P6Q2,Q80WL1        |
| 2296 | 1,2,4,5,8,9<br>,11,13 | 3,6,7,10,1<br>2,14,15,16<br>,17 | 2 | P02803,Q6AYS4                             |
| 2297 | 1,2,4,5,8,9<br>,11,14 | 3,6,7,10,1<br>2,13,15,16<br>,17 | 3 | Q63942,Q6AYS4,Q99MH3                      |
| 2298 | 1,2,4,5,8,9<br>,11,15 | 3,6,7,10,1<br>2,13,14,16<br>,17 | 3 | P02761,Q5QE79,Q63942                      |
| 2299 | 1,2,4,5,8,9<br>,11,16 | 3,6,7,10,1<br>2,13,14,15<br>,17 | 5 | A2RUV9,P02803,P14668,Q63942,Q9QZK9        |
| 2300 | 1,2,4,5,8,9<br>,11,17 | 3,6,7,10,1<br>2,13,14,15<br>,16 | 4 | A2RUV9,P02803,P08649,Q6AYS4               |
| 2301 | 1,2,4,5,8,9<br>,12,13 | 3,6,7,10,1<br>1,14,15,16<br>,17 | 4 | P02803,P36374,Q5M8C6,Q80WL1               |
| 2302 | 1,2,4,5,8,9<br>,12,14 | 3,6,7,10,1<br>1,13,15,16<br>,17 | 1 | P02803                                    |

|      |                        |                                 |    |                                                                              |
|------|------------------------|---------------------------------|----|------------------------------------------------------------------------------|
| 2303 | 1,2,4,5,8,9<br>,12,15  | 3,6,7,10,1<br>1,13,14,16<br>,17 | 1  | Q5QE79                                                                       |
| 2304 | 1,2,4,5,8,9<br>,12,16  | 3,6,7,10,1<br>1,13,14,15<br>,17 | 2  | P02803,Q63942                                                                |
| 2305 | 1,2,4,5,8,9<br>,12,17  | 3,6,7,10,1<br>1,13,14,15<br>,16 | 7  | P02803,P19223,P55091,P98089,Q5M8C6,Q80WL1,Q9QZA6                             |
| 2306 | 1,2,4,5,8,9<br>,13,14  | 3,6,7,10,1<br>1,12,15,16<br>,17 | 2  | P02803,Q63942                                                                |
| 2307 | 1,2,4,5,8,9<br>,13,15  | 3,6,7,10,1<br>1,12,14,16<br>,17 | 2  | Q5QE79,Q63942                                                                |
| 2308 | 1,2,4,5,8,9<br>,13,16  | 3,6,7,10,1<br>1,12,14,15<br>,17 | 2  | P02803,Q63942                                                                |
| 2309 | 1,2,4,5,8,9<br>,13,17  | 3,6,7,10,1<br>1,12,14,15<br>,16 | 1  | P02803                                                                       |
| 2310 | 1,2,4,5,8,9<br>,14,15  | 3,6,7,10,1<br>1,12,13,16<br>,17 | 3  | Q5QE79,Q63942,Q9QZK9                                                         |
| 2311 | 1,2,4,5,8,9<br>,14,16  | 3,6,7,10,1<br>1,12,13,15<br>,17 | 4  | P97574,Q63942,Q99MH3,Q9QZK9                                                  |
| 2312 | 1,2,4,5,8,9<br>,14,17  | 3,6,7,10,1<br>1,12,13,15<br>,16 | 1  | Q63942                                                                       |
| 2313 | 1,2,4,5,8,9<br>,15,16  | 3,6,7,10,1<br>1,12,13,14<br>,17 | 3  | Q5QE79,Q63942,Q9QZK9                                                         |
| 2314 | 1,2,4,5,8,9<br>,15,17  | 3,6,7,10,1<br>1,12,13,14<br>,16 | 4  | P02761,Q5QE79,Q63942,Q68FV8                                                  |
| 2315 | 1,2,4,5,8,9<br>,16,17  | 3,6,7,10,1<br>1,12,13,14<br>,15 | 4  | A2RUV9,P23593,Q63942,Q68FV8                                                  |
| 2316 | 1,2,4,5,8,1<br>0,11,12 | 3,6,7,9,13,<br>14,15,16,1<br>7  | 11 | P02803,P62804,Q10758,Q63598,Q6AYS4,Q6IFU7,Q6IFU8,Q6IFW6,Q6IMF3,Q6P6Q2,Q80WL1 |
| 2317 | 1,2,4,5,8,1<br>0,11,13 | 3,6,7,9,12,<br>14,15,16,1<br>7  | 3  | P02803,Q63598,Q6AYS4                                                         |



|      |                        |                                |   |                                                  |
|------|------------------------|--------------------------------|---|--------------------------------------------------|
| 2318 | 1,2,4,5,8,1<br>0,11,14 | 3,6,7,9,12,<br>13,15,16,1<br>7 | 3 | P08649,Q63598,Q6AYS4                             |
| 2319 | 1,2,4,5,8,1<br>0,11,15 | 3,6,7,9,12,<br>13,14,16,1<br>7 | 4 | P02761,P08649,Q63598,Q6AYS4                      |
| 2320 | 1,2,4,5,8,1<br>0,11,16 | 3,6,7,9,12,<br>13,14,15,1<br>7 | 5 | A2RUV9,P08649,P14668,P55018,Q63598               |
| 2321 | 1,2,4,5,8,1<br>0,11,17 | 3,6,7,9,12,<br>13,14,15,1<br>6 | 6 | A2RUV9,Q54858,P02761,P08649,Q63598,Q6AYS4        |
| 2322 | 1,2,4,5,8,1<br>0,12,13 | 3,6,7,9,11,<br>14,15,16,1<br>7 | 3 | P02803,Q5M8C6,Q80WL1                             |
| 2323 | 1,2,4,5,8,1<br>0,12,14 | 3,6,7,9,11,<br>13,15,16,1<br>7 | 2 | D3ZHA0,Q10758                                    |
| 2324 | 1,2,4,5,8,1<br>0,12,15 | 3,6,7,9,11,<br>13,14,16,1<br>7 | 1 | D3ZHA0                                           |
| 2325 | 1,2,4,5,8,1<br>0,12,16 | 3,6,7,9,11,<br>13,14,15,1<br>7 | 2 | P08721,Q10758                                    |
| 2326 | 1,2,4,5,8,1<br>0,12,17 | 3,6,7,9,11,<br>13,14,15,1<br>6 | 7 | P19223,P55091,P98089,Q10758,Q4G075,Q80WL1,Q9QZA6 |
| 2327 | 1,2,4,5,8,1<br>0,13,14 | 3,6,7,9,11,<br>12,15,16,1<br>7 | 1 | P36970                                           |
| 2328 | 1,2,4,5,8,1<br>0,13,15 | 3,6,7,9,11,<br>12,14,16,1<br>7 | 1 | P01835                                           |
| 2329 | 1,2,4,5,8,1<br>0,13,16 | 3,6,7,9,11,<br>12,14,15,1<br>7 | 2 | P01835,Q62997                                    |
| 2330 | 1,2,4,5,8,1<br>0,13,17 | 3,6,7,9,11,<br>12,14,15,1<br>6 | 0 |                                                  |
| 2331 | 1,2,4,5,8,1<br>0,14,15 | 3,6,7,9,11,<br>12,13,16,1<br>7 | 1 | P55018                                           |
| 2332 | 1,2,4,5,8,1<br>0,14,16 | 3,6,7,9,11,<br>12,13,15,1<br>7 | 4 | P08721,P55018,P97574,Q62997                      |

|      |                        |                                |    |                                                                                     |
|------|------------------------|--------------------------------|----|-------------------------------------------------------------------------------------|
| 2333 | 1,2,4,5,8,1<br>0,14,17 | 3,6,7,9,11,<br>12,13,15,1<br>6 | 0  |                                                                                     |
| 2334 | 1,2,4,5,8,1<br>0,15,16 | 3,6,7,9,11,<br>12,13,14,1<br>7 | 4  | P01835,P08721,P55018,Q62997                                                         |
| 2335 | 1,2,4,5,8,1<br>0,15,17 | 3,6,7,9,11,<br>12,13,14,1<br>6 | 1  | P02761                                                                              |
| 2336 | 1,2,4,5,8,1<br>0,16,17 | 3,6,7,9,11,<br>12,13,14,1<br>5 | 3  | A2RUV9,P08721,Q62997                                                                |
| 2337 | 1,2,4,5,8,1<br>1,12,13 | 3,6,7,9,10,<br>14,15,16,1<br>7 | 8  | P02780,P02803,P35053,P36374,Q5M8C6,Q80WL1,Q8CJ52,Q9JHB9                             |
| 2338 | 1,2,4,5,8,1<br>1,12,14 | 3,6,7,9,10,<br>13,15,16,1<br>7 | 6  | P35053,P62804,Q6AYS4,Q6IFU8,Q6P6Q2,Q9ESW0                                           |
| 2339 | 1,2,4,5,8,1<br>1,12,15 | 3,6,7,9,10,<br>13,14,16,1<br>7 | 3  | P35053,P51907,Q9ESW0                                                                |
| 2340 | 1,2,4,5,8,1<br>1,12,16 | 3,6,7,9,10,<br>13,14,15,1<br>7 | 5  | P02803,P14668,Q6IFU7,Q6P6Q2,Q8CJ52                                                  |
| 2341 | 1,2,4,5,8,1<br>1,12,17 | 3,6,7,9,10,<br>13,14,15,1<br>6 | 12 | P02803,P19223,P36374,P55091,P98089,Q4G075,Q5M8C6,Q6AYS4,Q6P6Q2,Q80WL1,Q9ESW0,Q9QZA6 |
| 2342 | 1,2,4,5,8,1<br>1,13,14 | 3,6,7,9,10,<br>12,15,16,1<br>7 | 0  |                                                                                     |
| 2343 | 1,2,4,5,8,1<br>1,13,15 | 3,6,7,9,10,<br>12,14,16,1<br>7 | 0  |                                                                                     |
| 2344 | 1,2,4,5,8,1<br>1,13,16 | 3,6,7,9,10,<br>12,14,15,1<br>7 | 2  | A2RUV9,P02803                                                                       |
| 2345 | 1,2,4,5,8,1<br>1,13,17 | 3,6,7,9,10,<br>12,14,15,1<br>6 | 2  | P02803,Q6AYS4                                                                       |
| 2346 | 1,2,4,5,8,1<br>1,14,15 | 3,6,7,9,10,<br>12,13,16,1<br>7 | 4  | P07171,P97840,Q5I0D1,Q64194                                                         |
| 2347 | 1,2,4,5,8,1<br>1,14,16 | 3,6,7,9,10,<br>12,13,15,1<br>7 | 3  | P14668,P97574,Q99MH3                                                                |

|      |                        |                                |   |                                                                |
|------|------------------------|--------------------------------|---|----------------------------------------------------------------|
| 2348 | 1,2,4,5,8,1<br>1,14,17 | 3,6,7,9,10,<br>12,13,15,1<br>6 | 2 | P97840,Q6AYS4                                                  |
| 2349 | 1,2,4,5,8,1<br>1,15,16 | 3,6,7,9,10,<br>12,13,14,1<br>7 | 2 | P14408,P14668                                                  |
| 2350 | 1,2,4,5,8,1<br>1,15,17 | 3,6,7,9,10,<br>12,13,14,1<br>6 | 4 | P02761,P97840,Q6AYS4,Q9QZA6                                    |
| 2351 | 1,2,4,5,8,1<br>1,16,17 | 3,6,7,9,10,<br>12,13,14,1<br>5 | 2 | A2RUV9,Q6AYS4                                                  |
| 2352 | 1,2,4,5,8,1<br>2,13,14 | 3,6,7,9,10,<br>11,15,16,1<br>7 | 3 | P02803,P25236,P36970                                           |
| 2353 | 1,2,4,5,8,1<br>2,13,15 | 3,6,7,9,10,<br>11,14,16,1<br>7 | 1 | P35053                                                         |
| 2354 | 1,2,4,5,8,1<br>2,13,16 | 3,6,7,9,10,<br>11,14,15,1<br>7 | 1 | P02803                                                         |
| 2355 | 1,2,4,5,8,1<br>2,13,17 | 3,6,7,9,10,<br>11,14,15,1<br>6 | 9 | P02803,P19223,P36374,P55091,P98089,Q5M8C6,Q62635,Q6PCU2,Q80WL1 |
| 2356 | 1,2,4,5,8,1<br>2,14,15 | 3,6,7,9,10,<br>11,13,16,1<br>7 | 1 | P35053                                                         |
| 2357 | 1,2,4,5,8,1<br>2,14,16 | 3,6,7,9,10,<br>11,13,15,1<br>7 | 0 |                                                                |
| 2358 | 1,2,4,5,8,1<br>2,14,17 | 3,6,7,9,10,<br>11,13,15,1<br>6 | 6 | P19223,P31430,P55091,P98089,Q6PCU2,Q9QZA6                      |
| 2359 | 1,2,4,5,8,1<br>2,15,16 | 3,6,7,9,10,<br>11,13,14,1<br>7 | 0 |                                                                |
| 2360 | 1,2,4,5,8,1<br>2,15,17 | 3,6,7,9,10,<br>11,13,14,1<br>6 | 6 | P02761,P19223,P55091,P98089,Q4G075,Q9QZA6                      |
| 2361 | 1,2,4,5,8,1<br>2,16,17 | 3,6,7,9,10,<br>11,13,14,1<br>5 | 7 | P19223,P23928,P55091,P98089,Q4G075,Q6PCU2,Q9QZA6               |
| 2362 | 1,2,4,5,8,1<br>3,14,15 | 3,6,7,9,10,<br>11,12,16,1<br>7 | 0 |                                                                |

|      |                        |                                |   |                                                  |
|------|------------------------|--------------------------------|---|--------------------------------------------------|
| 2363 | 1,2,4,5,8,1<br>3,14,16 | 3,6,7,9,10,<br>11,12,15,1<br>7 | 1 | Q6PCU2                                           |
| 2364 | 1,2,4,5,8,1<br>3,14,17 | 3,6,7,9,10,<br>11,12,15,1<br>6 | 2 | P10536,Q6PCU2                                    |
| 2365 | 1,2,4,5,8,1<br>3,15,16 | 3,6,7,9,10,<br>11,12,14,1<br>7 | 1 | P01835                                           |
| 2366 | 1,2,4,5,8,1<br>3,15,17 | 3,6,7,9,10,<br>11,12,14,1<br>6 | 2 | P10536,Q6PCU2                                    |
| 2367 | 1,2,4,5,8,1<br>3,16,17 | 3,6,7,9,10,<br>11,12,14,1<br>5 | 2 | P23928,Q6PCU2                                    |
| 2368 | 1,2,4,5,8,1<br>4,15,16 | 3,6,7,9,10,<br>11,12,13,1<br>7 | 2 | P97574,Q9QZK9                                    |
| 2369 | 1,2,4,5,8,1<br>4,15,17 | 3,6,7,9,10,<br>11,12,13,1<br>6 | 6 | P02761,P10536,P47967,P97840,Q6PCU2,Q9QZA6        |
| 2370 | 1,2,4,5,8,1<br>4,16,17 | 3,6,7,9,10,<br>11,12,13,1<br>5 | 1 | Q6PCU2                                           |
| 2371 | 1,2,4,5,8,1<br>5,16,17 | 3,6,7,9,10,<br>11,12,13,1<br>4 | 2 | P47727,Q6PCU2                                    |
| 2372 | 1,2,4,5,9,1<br>0,11,12 | 3,6,7,8,13,<br>14,15,16,1<br>7 | 7 | P02803,P51907,Q62636,Q63661,Q6IFU7,Q6IFU8,Q6P6Q2 |
| 2373 | 1,2,4,5,9,1<br>0,11,13 | 3,6,7,8,12,<br>14,15,16,1<br>7 | 1 | P02803                                           |
| 2374 | 1,2,4,5,9,1<br>0,11,14 | 3,6,7,8,12,<br>13,15,16,1<br>7 | 1 | Q63661                                           |
| 2375 | 1,2,4,5,9,1<br>0,11,15 | 3,6,7,8,12,<br>13,14,16,1<br>7 | 3 | P51907,Q561R9,Q63661                             |
| 2376 | 1,2,4,5,9,1<br>0,11,16 | 3,6,7,8,12,<br>13,14,15,1<br>7 | 4 | A2RUV9,P51907,Q9QZK9,Q9WUW8                      |
| 2377 | 1,2,4,5,9,1<br>0,11,17 | 3,6,7,8,12,<br>13,14,15,1<br>6 | 1 | Q7TP52                                           |

|      |                        |                                |   |                                    |
|------|------------------------|--------------------------------|---|------------------------------------|
| 2378 | 1,2,4,5,9,1<br>0,12,13 | 3,6,7,8,11,<br>14,15,16,1<br>7 | 1 | P02803                             |
| 2379 | 1,2,4,5,9,1<br>0,12,14 | 3,6,7,8,11,<br>13,15,16,1<br>7 | 0 |                                    |
| 2380 | 1,2,4,5,9,1<br>0,12,15 | 3,6,7,8,11,<br>13,14,16,1<br>7 | 0 |                                    |
| 2381 | 1,2,4,5,9,1<br>0,12,16 | 3,6,7,8,11,<br>13,14,15,1<br>7 | 1 | Q9WUW8                             |
| 2382 | 1,2,4,5,9,1<br>0,12,17 | 3,6,7,8,11,<br>13,14,15,1<br>6 | 2 | P19223,Q10758                      |
| 2383 | 1,2,4,5,9,1<br>0,13,14 | 3,6,7,8,11,<br>12,15,16,1<br>7 | 0 |                                    |
| 2384 | 1,2,4,5,9,1<br>0,13,15 | 3,6,7,8,11,<br>12,14,16,1<br>7 | 0 |                                    |
| 2385 | 1,2,4,5,9,1<br>0,13,16 | 3,6,7,8,11,<br>12,14,15,1<br>7 | 1 | Q62997                             |
| 2386 | 1,2,4,5,9,1<br>0,13,17 | 3,6,7,8,11,<br>12,14,15,1<br>6 | 0 |                                    |
| 2387 | 1,2,4,5,9,1<br>0,14,15 | 3,6,7,8,11,<br>12,13,16,1<br>7 | 1 | Q9QZK9                             |
| 2388 | 1,2,4,5,9,1<br>0,14,16 | 3,6,7,8,11,<br>12,13,15,1<br>7 | 2 | Q63942,Q9QZK9                      |
| 2389 | 1,2,4,5,9,1<br>0,14,17 | 3,6,7,8,11,<br>12,13,15,1<br>6 | 0 |                                    |
| 2390 | 1,2,4,5,9,1<br>0,15,16 | 3,6,7,8,11,<br>12,13,14,1<br>7 | 5 | P02782,Q62902,Q62997,Q63942,Q9QZK9 |
| 2391 | 1,2,4,5,9,1<br>0,15,17 | 3,6,7,8,11,<br>12,13,14,1<br>6 | 1 | Q62902                             |
| 2392 | 1,2,4,5,9,1<br>0,16,17 | 3,6,7,8,11,<br>12,13,14,1<br>5 | 2 | Q62902,Q62997                      |

|      |                        |                                |   |                             |
|------|------------------------|--------------------------------|---|-----------------------------|
| 2393 | 1,2,4,5,9,1<br>1,12,13 | 3,6,7,8,10,<br>14,15,16,1<br>7 | 2 | P02803,P36374               |
| 2394 | 1,2,4,5,9,1<br>1,12,14 | 3,6,7,8,10,<br>13,15,16,1<br>7 | 3 | P02803,P51907,Q6IFU8        |
| 2395 | 1,2,4,5,9,1<br>1,12,15 | 3,6,7,8,10,<br>13,14,16,1<br>7 | 1 | P51907                      |
| 2396 | 1,2,4,5,9,1<br>1,12,16 | 3,6,7,8,10,<br>13,14,15,1<br>7 | 3 | P02803,P51907,Q6IFU7        |
| 2397 | 1,2,4,5,9,1<br>1,12,17 | 3,6,7,8,10,<br>13,14,15,1<br>6 | 2 | P02803,P19223               |
| 2398 | 1,2,4,5,9,1<br>1,13,14 | 3,6,7,8,10,<br>12,15,16,1<br>7 | 2 | P02803,Q99MH3               |
| 2399 | 1,2,4,5,9,1<br>1,13,15 | 3,6,7,8,10,<br>12,14,16,1<br>7 | 1 | P05539                      |
| 2400 | 1,2,4,5,9,1<br>1,13,16 | 3,6,7,8,10,<br>12,14,15,1<br>7 | 2 | A2RUV9,P02803               |
| 2401 | 1,2,4,5,9,1<br>1,13,17 | 3,6,7,8,10,<br>12,14,15,1<br>6 | 1 | P02803                      |
| 2402 | 1,2,4,5,9,1<br>1,14,15 | 3,6,7,8,10,<br>12,13,16,1<br>7 | 4 | P51907,Q03191,Q99MH3,Q9QZK9 |
| 2403 | 1,2,4,5,9,1<br>1,14,16 | 3,6,7,8,10,<br>12,13,15,1<br>7 | 2 | Q99MH3,Q9QZK9               |
| 2404 | 1,2,4,5,9,1<br>1,14,17 | 3,6,7,8,10,<br>12,13,15,1<br>6 | 0 |                             |
| 2405 | 1,2,4,5,9,1<br>1,15,16 | 3,6,7,8,10,<br>12,13,14,1<br>7 | 3 | P14408,P51907,Q9QZK9        |
| 2406 | 1,2,4,5,9,1<br>1,15,17 | 3,6,7,8,10,<br>12,13,14,1<br>6 | 0 |                             |
| 2407 | 1,2,4,5,9,1<br>1,16,17 | 3,6,7,8,10,<br>12,13,14,1<br>5 | 1 | A2RUV9                      |

|      |                        |                                |   |               |
|------|------------------------|--------------------------------|---|---------------|
| 2408 | 1,2,4,5,9,1<br>2,13,14 | 3,6,7,8,10,<br>11,15,16,1<br>7 | 1 | P02803        |
| 2409 | 1,2,4,5,9,1<br>2,13,15 | 3,6,7,8,10,<br>11,14,16,1<br>7 | 0 |               |
| 2410 | 1,2,4,5,9,1<br>2,13,16 | 3,6,7,8,10,<br>11,14,15,1<br>7 | 1 | P02803        |
| 2411 | 1,2,4,5,9,1<br>2,13,17 | 3,6,7,8,10,<br>11,14,15,1<br>6 | 2 | P02803,P35280 |
| 2412 | 1,2,4,5,9,1<br>2,14,15 | 3,6,7,8,10,<br>11,13,16,1<br>7 | 0 |               |
| 2413 | 1,2,4,5,9,1<br>2,14,16 | 3,6,7,8,10,<br>11,13,15,1<br>7 | 0 |               |
| 2414 | 1,2,4,5,9,1<br>2,14,17 | 3,6,7,8,10,<br>11,13,15,1<br>6 | 1 | P31430        |
| 2415 | 1,2,4,5,9,1<br>2,15,16 | 3,6,7,8,10,<br>11,13,14,1<br>7 | 0 |               |
| 2416 | 1,2,4,5,9,1<br>2,15,17 | 3,6,7,8,10,<br>11,13,14,1<br>6 | 1 | P06866        |
| 2417 | 1,2,4,5,9,1<br>2,16,17 | 3,6,7,8,10,<br>11,13,14,1<br>5 | 0 |               |
| 2418 | 1,2,4,5,9,1<br>3,14,15 | 3,6,7,8,10,<br>11,12,16,1<br>7 | 1 | Q9QZK9        |
| 2419 | 1,2,4,5,9,1<br>3,14,16 | 3,6,7,8,10,<br>11,12,15,1<br>7 | 2 | Q99MH3,Q9QZK9 |
| 2420 | 1,2,4,5,9,1<br>3,14,17 | 3,6,7,8,10,<br>11,12,15,1<br>6 | 0 |               |
| 2421 | 1,2,4,5,9,1<br>3,15,16 | 3,6,7,8,10,<br>11,12,14,1<br>7 | 1 | Q9QZK9        |
| 2422 | 1,2,4,5,9,1<br>3,15,17 | 3,6,7,8,10,<br>11,12,14,1<br>6 | 0 |               |

|      |                         |                                |    |                                                                              |
|------|-------------------------|--------------------------------|----|------------------------------------------------------------------------------|
| 2423 | 1,2,4,5,9,1<br>3,16,17  | 3,6,7,8,10,<br>11,12,14,1<br>5 | 1  | P35280                                                                       |
| 2424 | 1,2,4,5,9,1<br>4,15,16  | 3,6,7,8,10,<br>11,12,13,1<br>7 | 3  | Q63942,Q99MH3,Q9QZK9                                                         |
| 2425 | 1,2,4,5,9,1<br>4,15,17  | 3,6,7,8,10,<br>11,12,13,1<br>6 | 1  | P47967                                                                       |
| 2426 | 1,2,4,5,9,1<br>4,16,17  | 3,6,7,8,10,<br>11,12,13,1<br>5 | 0  |                                                                              |
| 2427 | 1,2,4,5,9,1<br>5,16,17  | 3,6,7,8,10,<br>11,12,13,1<br>4 | 3  | P47727,Q62902,Q68FV8                                                         |
| 2428 | 1,2,4,5,10,<br>11,12,13 | 3,6,7,8,9,1<br>4,15,16,17      | 5  | P02803,P36374,Q62636,Q6IFU7,Q6P6Q2                                           |
| 2429 | 1,2,4,5,10,<br>11,12,14 | 3,6,7,8,9,1<br>3,15,16,17      | 5  | P51907,Q10758,Q6IFU7,Q6IFU8,Q6P6Q2                                           |
| 2430 | 1,2,4,5,10,<br>11,12,15 | 3,6,7,8,9,1<br>3,14,16,17      | 4  | P51907,Q62636,Q6IFU7,Q6P6Q2                                                  |
| 2431 | 1,2,4,5,10,<br>11,12,16 | 3,6,7,8,9,1<br>3,14,15,17      | 11 | P06757,P14408,P51907,P53792,Q10758,Q6IFU7,Q6IFU8,Q6IFW6,Q6IMF3,Q6P6Q2,Q9WUW8 |
| 2432 | 1,2,4,5,10,<br>11,12,17 | 3,6,7,8,9,1<br>3,14,15,16      | 7  | P06757,P06866,P19223,Q10758,Q62636,Q6IFU8,Q6P6Q2                             |
| 2433 | 1,2,4,5,10,<br>11,13,14 | 3,6,7,8,9,1<br>2,15,16,17      | 0  |                                                                              |
| 2434 | 1,2,4,5,10,<br>11,13,15 | 3,6,7,8,9,1<br>2,14,16,17      | 0  |                                                                              |
| 2435 | 1,2,4,5,10,<br>11,13,16 | 3,6,7,8,9,1<br>2,14,15,17      | 1  | P14408                                                                       |
| 2436 | 1,2,4,5,10,<br>11,13,17 | 3,6,7,8,9,1<br>2,14,15,16      | 0  |                                                                              |
| 2437 | 1,2,4,5,10,<br>11,14,15 | 3,6,7,8,9,1<br>2,13,16,17      | 1  | P51907                                                                       |
| 2438 | 1,2,4,5,10,<br>11,14,16 | 3,6,7,8,9,1<br>2,13,15,17      | 0  |                                                                              |
| 2439 | 1,2,4,5,10,<br>11,14,17 | 3,6,7,8,9,1<br>2,13,15,16      | 0  |                                                                              |
| 2440 | 1,2,4,5,10,<br>11,15,16 | 3,6,7,8,9,1<br>2,13,14,17      | 3  | P14408,P51907,Q9QZK9                                                         |
| 2441 | 1,2,4,5,10,<br>11,15,17 | 3,6,7,8,9,1<br>2,13,14,16      | 2  | Q62902,Q7TP52                                                                |
| 2442 | 1,2,4,5,10,<br>11,16,17 | 3,6,7,8,9,1<br>2,13,14,15      | 3  | A2RUV9,P14408,Q7TP52                                                         |



|      |                                                |   |                             |
|------|------------------------------------------------|---|-----------------------------|
| 2443 | 1,2,4,5,10, 3,6,7,8,9,1<br>12,13,14 1,15,16,17 | 0 |                             |
| 2444 | 1,2,4,5,10, 3,6,7,8,9,1<br>12,13,15 1,14,16,17 | 0 |                             |
| 2445 | 1,2,4,5,10, 3,6,7,8,9,1<br>12,13,16 1,14,15,17 | 1 | Q62997                      |
| 2446 | 1,2,4,5,10, 3,6,7,8,9,1<br>12,13,17 1,14,15,16 | 1 | Q10758                      |
| 2447 | 1,2,4,5,10, 3,6,7,8,9,1<br>12,14,15 1,13,16,17 | 0 |                             |
| 2448 | 1,2,4,5,10, 3,6,7,8,9,1<br>12,14,16 1,13,15,17 | 2 | P08721,Q10758               |
| 2449 | 1,2,4,5,10, 3,6,7,8,9,1<br>12,14,17 1,13,15,16 | 2 | P31430,Q10758               |
| 2450 | 1,2,4,5,10, 3,6,7,8,9,1<br>12,15,16 1,13,14,17 | 1 | Q62997                      |
| 2451 | 1,2,4,5,10, 3,6,7,8,9,1<br>12,15,17 1,13,14,16 | 2 | P06866,Q10758               |
| 2452 | 1,2,4,5,10, 3,6,7,8,9,1<br>12,16,17 1,13,14,15 | 3 | P06866,Q10758,Q62997        |
| 2453 | 1,2,4,5,10, 3,6,7,8,9,1<br>13,14,15 1,12,16,17 | 0 |                             |
| 2454 | 1,2,4,5,10, 3,6,7,8,9,1<br>13,14,16 1,12,15,17 | 1 | Q62997                      |
| 2455 | 1,2,4,5,10, 3,6,7,8,9,1<br>13,14,17 1,12,15,16 | 0 |                             |
| 2456 | 1,2,4,5,10, 3,6,7,8,9,1<br>13,15,16 1,12,14,17 | 2 | P01835,Q62997               |
| 2457 | 1,2,4,5,10, 3,6,7,8,9,1<br>13,15,17 1,12,14,16 | 0 |                             |
| 2458 | 1,2,4,5,10, 3,6,7,8,9,1<br>13,16,17 1,12,14,15 | 1 | Q62997                      |
| 2459 | 1,2,4,5,10, 3,6,7,8,9,1<br>14,15,16 1,12,13,17 | 2 | Q62997,Q9QZK9               |
| 2460 | 1,2,4,5,10, 3,6,7,8,9,1<br>14,15,17 1,12,13,16 | 1 | Q62902                      |
| 2461 | 1,2,4,5,10, 3,6,7,8,9,1<br>14,16,17 1,12,13,15 | 1 | Q62997                      |
| 2462 | 1,2,4,5,10, 3,6,7,8,9,1<br>15,16,17 1,12,13,14 | 4 | P02782,P47727,Q62902,Q62997 |
| 2463 | 1,2,4,5,11, 3,6,7,8,9,1<br>12,13,14 0,15,16,17 | 1 | P02803                      |
| 2464 | 1,2,4,5,11, 3,6,7,8,9,1<br>12,13,15 0,14,16,17 | 1 | P51907                      |
| 2465 | 1,2,4,5,11, 3,6,7,8,9,1<br>12,13,16 0,14,15,17 | 3 | P02803,P14408,Q6IFU7        |

|      |                                                |   |                             |
|------|------------------------------------------------|---|-----------------------------|
| 2466 | 1,2,4,5,11, 3,6,7,8,9,1<br>12,13,17 0,14,15,16 | 2 | P02803,P36374               |
| 2467 | 1,2,4,5,11, 3,6,7,8,9,1<br>12,14,15 0,13,16,17 | 1 | P51907                      |
| 2468 | 1,2,4,5,11, 3,6,7,8,9,1<br>12,14,16 0,13,15,17 | 3 | P51907,Q6IFU7,Q6IFU8        |
| 2469 | 1,2,4,5,11, 3,6,7,8,9,1<br>12,14,17 0,13,15,16 | 2 | P31430,Q6AYQ8               |
| 2470 | 1,2,4,5,11, 3,6,7,8,9,1<br>12,15,16 0,13,14,17 | 3 | P14408,P51907,Q6IFU7        |
| 2471 | 1,2,4,5,11, 3,6,7,8,9,1<br>12,15,17 0,13,14,16 | 3 | P06866,P51907,Q9ESW0        |
| 2472 | 1,2,4,5,11, 3,6,7,8,9,1<br>12,16,17 0,13,14,15 | 2 | P06866,P14408               |
| 2473 | 1,2,4,5,11, 3,6,7,8,9,1<br>13,14,15 0,12,16,17 | 0 |                             |
| 2474 | 1,2,4,5,11, 3,6,7,8,9,1<br>13,14,16 0,12,15,17 | 1 | P14408                      |
| 2475 | 1,2,4,5,11, 3,6,7,8,9,1<br>13,14,17 0,12,15,16 | 0 |                             |
| 2476 | 1,2,4,5,11, 3,6,7,8,9,1<br>13,15,16 0,12,14,17 | 1 | P14408                      |
| 2477 | 1,2,4,5,11, 3,6,7,8,9,1<br>13,15,17 0,12,14,16 | 0 |                             |
| 2478 | 1,2,4,5,11, 3,6,7,8,9,1<br>13,16,17 0,12,14,15 | 2 | A2RUV9,P14408               |
| 2479 | 1,2,4,5,11, 3,6,7,8,9,1<br>14,15,16 0,12,13,17 | 4 | P14408,P51907,Q99MH3,Q9QZK9 |
| 2480 | 1,2,4,5,11, 3,6,7,8,9,1<br>14,15,17 0,12,13,16 | 2 | P47967,P97840               |
| 2481 | 1,2,4,5,11, 3,6,7,8,9,1<br>14,16,17 0,12,13,15 | 1 | P14408                      |
| 2482 | 1,2,4,5,11, 3,6,7,8,9,1<br>15,16,17 0,12,13,14 | 1 | P14408                      |
| 2483 | 1,2,4,5,12, 3,6,7,8,9,1<br>13,14,15 0,11,16,17 | 0 |                             |
| 2484 | 1,2,4,5,12, 3,6,7,8,9,1<br>13,14,16 0,11,15,17 | 0 |                             |
| 2485 | 1,2,4,5,12, 3,6,7,8,9,1<br>13,14,17 0,11,15,16 | 1 | P31430                      |
| 2486 | 1,2,4,5,12, 3,6,7,8,9,1<br>13,15,16 0,11,14,17 | 0 |                             |
| 2487 | 1,2,4,5,12, 3,6,7,8,9,1<br>13,15,17 0,11,14,16 | 0 |                             |
| 2488 | 1,2,4,5,12, 3,6,7,8,9,1<br>13,16,17 0,11,14,15 | 1 | P35280                      |

|      |                                                    |    |                                                                                                                                                                                                                                                                                                                                                 |
|------|----------------------------------------------------|----|-------------------------------------------------------------------------------------------------------------------------------------------------------------------------------------------------------------------------------------------------------------------------------------------------------------------------------------------------|
| 2489 | 1,2,4,5,12, 3,6,7,8,9,1<br>14,15,16 0,11,13,17     | 1  | P35467                                                                                                                                                                                                                                                                                                                                          |
| 2490 | 1,2,4,5,12, 3,6,7,8,9,1<br>14,15,17 0,11,13,16     | 2  | P31430,P98089                                                                                                                                                                                                                                                                                                                                   |
| 2491 | 1,2,4,5,12, 3,6,7,8,9,1<br>14,16,17 0,11,13,15     | 1  | P31430                                                                                                                                                                                                                                                                                                                                          |
| 2492 | 1,2,4,5,12, 3,6,7,8,9,1<br>15,16,17 0,11,13,14     | 2  | P06866,P47727                                                                                                                                                                                                                                                                                                                                   |
| 2493 | 1,2,4,5,13, 3,6,7,8,9,1<br>14,15,16 0,11,12,17     | 2  | P35467,Q9QZK9                                                                                                                                                                                                                                                                                                                                   |
| 2494 | 1,2,4,5,13, 3,6,7,8,9,1<br>14,15,17 0,11,12,16     | 1  | P47967                                                                                                                                                                                                                                                                                                                                          |
| 2495 | 1,2,4,5,13, 3,6,7,8,9,1<br>14,16,17 0,11,12,15     | 1  | Q6PCU2                                                                                                                                                                                                                                                                                                                                          |
| 2496 | 1,2,4,5,13, 3,6,7,8,9,1<br>15,16,17 0,11,12,14     | 0  |                                                                                                                                                                                                                                                                                                                                                 |
| 2497 | 1,2,4,5,14, 3,6,7,8,9,1<br>15,16,17 0,11,12,13     | 1  | P35467                                                                                                                                                                                                                                                                                                                                          |
| 2498 | 1,2,4,6,7,8 3,5,11,12,<br>,9,10 13,14,15,1<br>6,17 | 27 | D3ZHA0,O55004,O55006,P02631,P02761,P06761,P07647,P08723,P12020,P15399,P18418,P20762,P22282,P22283,P31044,P35280,P50280,P68370,P97571,P97580,Q30KJ2,Q5GRG2,Q63617,Q6P6R2,Q9EQS0,Q9JI85,Q9ROT3                                                                                                                                                    |
| 2499 | 1,2,4,6,7,8 3,5,10,12,<br>,9,11 13,14,15,1<br>6,17 | 34 | D3ZHA0,O54715,O55004,P02631,P02761,P02780,P05371,P06761,P07150,P07171,P07647,P08723,P09456,P10715,P14669,P15399,P18418,P19629,P20762,P22282,P22283,P31044,P35280,P50280,P68370,P97580,Q30KJ2,Q63493,Q63617,Q8CJ52,Q9EQS0,Q9JHB9,Q9JI85,Q9ROT3                                                                                                   |
| 2500 | 1,2,4,6,7,8 3,5,10,11,<br>,9,12 13,14,15,1<br>6,17 | 40 | D3ZHA0,O55004,O88267,P02631,P02780,P02781,P02782,P05371,P06761,P07647,P08723,P09456,P0C0A9,P10715,P11598,P13432,P18418,P19223,P19629,P20762,P22282,P22283,P24368,P25236,P30120,P31044,P36374,P50280,P68370,P83748,Q30KJ2,Q63617,Q6AYR9,Q8OWL1,Q8CJ52,Q99041,Q9EQS0,Q9JHB9,Q9JI85,Q9ROT3                                                         |
| 2501 | 1,2,4,6,7,8 3,5,10,11,<br>,9,13 12,14,15,1<br>6,17 | 28 | D3ZHA0,O55004,P02631,P02780,P06761,P06911,P07647,P08723,P09456,P11598,P12020,P18418,P19629,P20762,P22282,P22283,P25236,P31044,P50280,P68370,Q30KJ2,Q5GRG2,Q62902,Q63617,Q6TMA8,Q8CJ52,Q9JI85,Q9ROT3                                                                                                                                             |
| 2502 | 1,2,4,6,7,8 3,5,10,11,<br>,9,14 12,13,15,1<br>6,17 | 28 | D3ZHA0,O55004,P02631,P05371,P06761,P06911,P07647,P08723,P11598,P12020,P15399,P18418,P19629,P20762,P22282,P22283,P25236,P31044,P50280,P68370,Q30KJ2,Q5GRG2,Q63617,Q63942,Q9EQS0,Q9JI85,Q9ROT3,Q9WTT6                                                                                                                                             |
| 2503 | 1,2,4,6,7,8 3,5,10,11,<br>,9,15 12,13,14,1<br>6,17 | 23 | D3ZHA0,O55004,O55006,P02631,P02761,P05371,P06761,P07647,P18418,P19629,P20762,P22282,P31044,P35280,P50280,P68370,Q30KJ2,Q5GRG2,Q5QE79,Q63617,Q63942,Q9JI85,Q9ROT3                                                                                                                                                                                |
| 2504 | 1,2,4,6,7,8 3,5,10,11,<br>,9,16 12,13,14,1<br>5,17 | 18 | D3ZHA0,O55004,P02631,P05371,P06761,P07647,P18418,P19629,P20762,P22282,P31044,P68370,Q30KJ2,Q63617,Q63942,Q6P6R2,Q9JI85,Q9ROT3                                                                                                                                                                                                                   |
| 2505 | 1,2,4,6,7,8 3,5,10,11,<br>,9,17 12,13,14,1<br>5,16 | 31 | D3ZHA0,O55004,P02631,P02761,P06761,P07647,P08723,P09605,P25809,P11598,P15399,P18418,P19223,P19629,P20761,P20762,P22282,P22283,P31044,P50115,P50280,P55091,P68370,P97580,Q30KJ2,Q4G075,Q63617,Q6P6R2,Q99041,Q9JI85,Q9QZA6,Q9ROT3                                                                                                                 |
| 2506 | 1,2,4,6,7,8 3,5,9,12,1<br>,10,11 3,14,15,16<br>,17 | 46 | D3ZHA0,O54715,O55004,P00714,P02631,P02761,P02780,P05371,P05964,P06761,P07150,P07171,P07647,P08723,P11598,P12020,P14669,P15399,P18418,P19629,P20762,P22282,P22283,P24368,P31044,P35280,P47727,P50280,P61206,P84079,P84082,P68370,P97580,Q30KJ2,Q5BJY9,Q5FVI6,Q5GRG2,Q63493,Q63598,Q63617,Q64361,Q6AYL6,Q7TP52,Q8CJ52,Q9EQS0,Q9JHB9,Q9JI85,Q9ROT3 |

|      |                       |                                 |    |                                                                                                                                                                                                                                                                                                                                                                                                                              |
|------|-----------------------|---------------------------------|----|------------------------------------------------------------------------------------------------------------------------------------------------------------------------------------------------------------------------------------------------------------------------------------------------------------------------------------------------------------------------------------------------------------------------------|
| 2507 | 1,2,4,6,7,8<br>,10,12 | 3,5,9,11,1<br>3,14,15,16<br>,17 | 55 | D3ZHA0,F1LM93,O55004,P01041,P02631,P02761,P02780,P02781,P02782,P05964,P06761,P07647,P08723,P09456,P0C0A9,P10715,P11598,P12020,P13432,P15399,P18418,P19223,P19629,P20762,P22282,P22283,P24368,P25236,P30120,P31044,P35280,P35281,P36374,P47967,P50280,P60905,P68370,P83748,P97580,P97840,Q10758,Q30KJ2,Q5GRG2,Q63475,Q63493,Q63617,Q64361,Q6AYR9,Q80WL1,Q8CJ52,Q99041,Q9EQS0,Q9JHB9,Q9JI85,Q9R0T3                             |
| 2508 | 1,2,4,6,7,8<br>,10,13 | 3,5,9,11,1<br>2,14,15,16<br>,17 | 26 | D3ZHA0,P02631,P02780,P06761,P06911,P07647,P08723,P11598,P12020,P15399,P18418,P20762,P22282,P22283,P25236,P31044,P50280,P68370,P97580,Q30KJ2,Q5GRG2,Q62902,Q63617,Q8CJ52,Q9JI85,Q9R0T3                                                                                                                                                                                                                                        |
| 2509 | 1,2,4,6,7,8<br>,10,14 | 3,5,9,11,1<br>2,13,15,16<br>,17 | 33 | D3ZHA0,P02631,P02761,P05371,P06761,P06911,P07171,P07647,P08723,P11598,P12020,P15399,P18418,P19629,P20762,P22282,P22283,P25236,P31044,P35280,P50280,P68370,P97580,Q30KJ2,Q5BJY9,Q5GRG2,Q63532,Q63617,Q8CJ52,Q9EQS0,Q9JI85,Q9R0T3,Q9WTT6                                                                                                                                                                                       |
| 2510 | 1,2,4,6,7,8<br>,10,15 | 3,5,9,11,1<br>2,13,14,16<br>,17 | 29 | D3ZHA0,O55004,P02631,P02761,P06761,P07171,P07647,P08723,P11598,P12020,P15399,P18418,P19629,P20762,P22006,P22282,P22283,P31044,P35280,P50280,P68370,P97571,P97580,Q30KJ2,Q5GRG2,Q63617,Q64361,Q9JI85,Q9R0T3                                                                                                                                                                                                                   |
| 2511 | 1,2,4,6,7,8<br>,10,16 | 3,5,9,11,1<br>2,13,14,15<br>,17 | 26 | D3ZHA0,O55004,P02631,P05371,P06761,P07647,P08721,P08723,P12020,P15399,P18418,P22282,P22283,P31044,P35280,P47967,P68370,P97580,Q30KJ2,Q5FV16,Q5GRG2,Q63617,Q6P6R2,Q8CJ52,Q9JI85,Q9R0T3                                                                                                                                                                                                                                        |
| 2512 | 1,2,4,6,7,8<br>,10,17 | 3,5,9,11,1<br>2,13,14,15<br>,16 | 37 | D3ZHA0,O55004,P02631,P02761,P06761,P07647,P08723,P11598,P12020,P15399,P18418,P19223,P19629,P20761,P20762,P22282,P22283,P31044,P46844,P50115,P50280,P55091,P68370,P97571,P97580,Q30KJ2,Q4G075,Q5GRG2,Q63617,Q64361,Q6P6R2,Q7TP52,Q99041,Q9JI85,Q9QZA6,Q9R0T3,Q9Z0V6                                                                                                                                                           |
| 2513 | 1,2,4,6,7,8<br>,11,12 | 3,5,9,10,1<br>3,14,15,16<br>,17 | 59 | D3ZHA0,O35547,O54715,O55004,P02631,P02780,P02781,P02782,P04905,P05371,P05964,P06761,P07150,P07647,P08723,P09456,P0C0A9,P10715,P11598,P13432,P14669,P15399,P18418,P19223,P19629,P20762,P22282,P22283,P24368,P25236,P30120,P31044,P35280,P36374,P40241,P46462,P47727,P50280,P60905,P68370,P97580,Q30KJ2,Q5GRG2,Q5M8C6,Q62902,Q63357,Q63493,Q63617,Q64361,Q6AYL6,Q6AYR9,Q6P6Q2,Q80WL1,Q8CJ52,Q99041,Q9EQS0,Q9JHB9,Q9JI85,Q9R0T3 |
| 2514 | 1,2,4,6,7,8<br>,11,13 | 3,5,9,10,1<br>2,14,15,16<br>,17 | 42 | D3ZHA0,O54715,O55004,P02631,P02780,P02781,P02782,P05371,P06761,P06911,P07150,P07171,P07647,P08723,P09456,P11598,P12020,P14669,P15399,P18418,P19629,P20762,P22282,P22283,P24368,P25236,P31044,P47727,P50280,P68370,P97580,Q30KJ2,Q5GRG2,Q62902,Q63493,Q63617,Q8CJ52,Q8VD89,Q9EQS0,Q9JHB9,Q9JI85,Q9R0T3                                                                                                                        |
| 2515 | 1,2,4,6,7,8<br>,11,14 | 3,5,9,10,1<br>2,13,15,16<br>,17 | 40 | D3ZHA0,O54715,O55004,P02631,P02761,P02780,P05371,P06761,P06911,P07150,P07171,P07647,P08723,P11598,P12020,P14669,P15399,P16086,P18418,P19629,P20762,P22282,P22283,P25236,P31044,P35280,P47727,P50280,P68370,P97580,Q30KJ2,Q5GRG2,Q63493,Q63532,Q63617,Q8CJ52,Q9EQS0,Q9JHB9,Q9JI85,Q9R0T3                                                                                                                                      |
| 2516 | 1,2,4,6,7,8<br>,11,15 | 3,5,9,10,1<br>2,13,14,16<br>,17 | 34 | D3ZHA0,O54715,O55004,P02631,P02761,P05371,P06761,P07150,P07171,P07647,P08723,P10715,P11598,P14669,P15399,P18418,P19629,P20762,P22006,P22282,P22283,P31044,P35280,P50280,P68370,P97580,Q30KJ2,Q5GRG2,Q63493,Q63617,Q6P9T8,Q8CJ52,Q9JI85,Q9R0T3                                                                                                                                                                                |
| 2517 | 1,2,4,6,7,8<br>,11,16 | 3,5,9,10,1<br>2,13,14,15<br>,17 | 34 | D3ZHA0,O54715,O55004,P02631,P05371,P06761,P07150,P07171,P07647,P08723,P10715,P14668,P14669,P15399,P18418,P19629,P20762,P22282,P22283,P31044,P35280,P50280,P61206,P84079,P84082,P68370,P97580,Q30KJ2,Q63493,Q63617,Q6AYL6,Q8CJ52,Q8VD89,Q9EQS0,Q9JI85,Q9R0T3                                                                                                                                                                  |
| 2518 | 1,2,4,6,7,8<br>,11,17 | 3,5,9,10,1<br>2,13,14,15<br>,16 | 38 | O54715,O55004,P02631,P02761,P05371,P06761,P07150,P07647,P08723,P09605,P25809,P10715,P11598,P14669,P15399,P18418,P19223,P19629,P20761,P20762,P22282,P22283,P31044,P50115,P50280,P55091,P68370,P97580,Q30KJ2,Q4G075,Q63493,Q63617,Q6P6R2,Q8CJ52,Q99041,Q9JI85,Q9QZA6,Q9R0T3,Q9Z0V6                                                                                                                                             |
| 2519 | 1,2,4,6,7,8<br>,12,13 | 3,5,9,10,1<br>1,14,15,16<br>,17 | 49 | D3ZHA0,O08557,O55004,O88267,P02631,P02780,P02781,P02782,P06761,P06911,P07647,P08723,P09456,P0C0A9,P10715,P11598,P12020,P13432,P18418,P19223,P19629,P20762,P22282,P22283,P24368,P25236,P29975,P30120,P31044,P36374,P50280,P62815,P68370,P83748,Q30KJ2,Q5GRG2,Q5M8C6,Q62635,Q62902,Q63493,Q63617,Q6AYR9,Q80WL1,Q8CJ52,Q99041,Q9EQS0,Q9JHB9,Q9JI85,Q9R0T3                                                                       |
| 2520 | 1,2,4,6,7,8<br>,12,14 | 3,5,9,10,1<br>1,13,15,16<br>,17 | 52 | D3ZHA0,O08557,O55004,O88267,P02631,P02780,P02781,P02782,P05371,P06761,P06911,P07647,P08723,P0C0A9,P10715,P11598,P12020,P13432,P15399,P18418,P19223,P19629,P20762,P22282,P22283,P24368,P25236,P29975,P30120,P31044,P35280,P40241,P50280,P68370,P83748,Q30KJ2,Q5GRG2,Q62902,Q63493,Q63532,Q63617,Q6AYR9,Q6AYS7,Q80WL1,Q8CJ52,Q923M1,Q99041,Q9EQS0,Q9JHB9,Q9JI85,Q9R0T3,Q9WTT6                                                  |

|      |                       |                                 |    |                                                                                                                                                                                                                                                                                                                                                                                                                       |
|------|-----------------------|---------------------------------|----|-----------------------------------------------------------------------------------------------------------------------------------------------------------------------------------------------------------------------------------------------------------------------------------------------------------------------------------------------------------------------------------------------------------------------|
| 2521 | 1,2,4,6,7,8<br>,12,15 | 3,5,9,10,1<br>1,13,14,16<br>,17 | 40 | D3ZHA0,O08557,O55004,P01015,P01041,P02631,P02761,P02780,P02782,P05371,P06761,P07647,P08723,P10715,P11598,P13432,P18418,P19223,P19629,P20762,P22282,P22283,P25236,P30120,P31044,P35280,P50280,P68370,P83748,Q30KJ2,Q5GRG2,Q63617,Q64361,Q6AYR9,Q8CJ52,Q99041,Q9EQS0,Q9JHB9,Q9JI85,Q9R0T3                                                                                                                               |
| 2522 | 1,2,4,6,7,8<br>,12,16 | 3,5,9,10,1<br>1,13,14,15<br>,17 | 37 | D3ZHA0,O55004,O88267,P02631,P02780,P02782,P05371,P06761,P07647,P08723,P0C0A9,P10715,P11598,P13432,P18418,P19223,P19629,P20762,P22282,P22283,P25236,P30120,P31044,P50280,P68370,P83748,Q30KJ2,Q63532,Q63617,Q6AYR9,Q80WL1,Q8CJ52,Q99041,Q9EQS0,Q9JHB9,Q9JI85,Q9R0T3                                                                                                                                                    |
| 2523 | 1,2,4,6,7,8<br>,12,17 | 3,5,9,10,1<br>1,13,14,15<br>,16 | 57 | D3ZHA0,O55004,O88267,P01041,P02631,P02761,P02780,P02782,P06761,P07647,P08723,P09605,P25809,P0C0A9,P10715,P11598,P13432,P15399,P18418,P19223,P19629,P20761,P20762,P22282,P22283,P25236,P30120,P31044,P36374,P50115,P50280,P55091,P62815,P63029,P68370,P83748,P97580,P98089,Q30KJ2,Q4G075,Q5M8C6,Q62635,Q63493,Q63617,Q64361,Q6AYR9,Q6P6R2,Q80WL1,Q8CJ52,Q99041,Q9EQS0,Q9EQV9,Q9JHB9,Q9JI85,Q9QZA6,Q9QZK9,Q9R0T3,Q9Z0V6 |
| 2524 | 1,2,4,6,7,8<br>,13,14 | 3,5,9,10,1<br>1,12,15,16<br>,17 | 32 | D3ZHA0,O08557,O88267,P02631,P02780,P02782,P06761,P06911,P07647,P08723,P11598,P12020,P15399,P18418,P19629,P20762,P22282,P22283,P25236,P29975,P31044,P50280,P68370,Q30KJ2,Q5GRG2,Q62902,Q63532,Q63617,Q8CJ52,Q9JHB9,Q9JI85,Q9R0T3                                                                                                                                                                                       |
| 2525 | 1,2,4,6,7,8<br>,13,15 | 3,5,9,10,1<br>1,12,14,16<br>,17 | 26 | D3ZHA0,O08557,O55004,P02631,P06761,P06911,P07647,P08723,P11598,P12020,P18418,P19629,P20762,P22282,P22283,P25236,P31044,P50280,P68370,P83748,Q30KJ2,Q5GRG2,Q63617,Q8CJ52,Q9JI85,Q9R0T3                                                                                                                                                                                                                                 |
| 2526 | 1,2,4,6,7,8<br>,13,16 | 3,5,9,10,1<br>1,12,14,15<br>,17 | 24 | D3ZHA0,O88267,P02631,P06761,P06911,P07647,P08723,P11598,P12020,P18418,P19629,P22282,P22283,P25236,P31044,P50280,P68370,Q30KJ2,Q5GRG2,Q62902,Q63617,Q8CJ52,Q9JI85,Q9R0T3                                                                                                                                                                                                                                               |
| 2527 | 1,2,4,6,7,8<br>,13,17 | 3,5,9,10,1<br>1,12,14,15<br>,16 | 40 | O55004,O88267,P02631,P02780,P02782,P06761,P06911,P07647,P08723,P09605,P25809,P11598,P12020,P15399,P18418,P19223,P19629,P20761,P20762,P22282,P22283,P25236,P31044,P50115,P50280,P55091,P62815,P63029,P68370,P70545,P97580,Q30KJ2,Q4G075,Q5GRG2,Q62902,Q63617,Q6PCU2,Q8CJ52,Q99041,Q9JI85,Q9R0T3                                                                                                                        |
| 2528 | 1,2,4,6,7,8<br>,14,15 | 3,5,9,10,1<br>1,12,13,16<br>,17 | 30 | D3ZHA0,O08557,O55004,P02631,P02761,P05371,P06761,P06911,P07171,P07647,P08723,P11598,P12020,P18418,P19629,P20762,P22006,P22282,P22283,P25236,P31044,P35280,P50280,P68370,Q30KJ2,Q5GRG2,Q63532,Q63617,Q9JI85,Q9R0T3                                                                                                                                                                                                     |
| 2529 | 1,2,4,6,7,8<br>,14,16 | 3,5,9,10,1<br>1,12,13,15<br>,17 | 28 | D3ZHA0,O88267,P02631,P05371,P06761,P06911,P07647,P08723,P11598,P12020,P18418,P19629,P20762,P22282,P22283,P25236,P31044,P50280,P68370,P97574,Q30KJ2,Q5GRG2,Q63532,Q63617,Q8CJ52,Q9EQS0,Q9JI85,Q9R0T3                                                                                                                                                                                                                   |
| 2530 | 1,2,4,6,7,8<br>,14,17 | 3,5,9,10,1<br>1,12,13,15<br>,16 | 43 | D3ZHA0,O55004,O88267,P02631,P02761,P05371,P06761,P06911,P07647,P08723,P09605,P25809,P10536,P11598,P12020,P15399,P18418,P19223,P19629,P20761,P20762,P22282,P22283,P25236,P31044,P50115,P50280,P55091,P62815,P68370,P97580,Q30KJ2,Q4G075,Q5GRG2,Q63617,Q6P6R2,Q6PCU2,Q8CJ52,Q99041,Q9JI85,Q9QZA6,Q9R0T3,Q9WTT6,Q9Z0V6                                                                                                   |
| 2531 | 1,2,4,6,7,8<br>,15,16 | 3,5,9,10,1<br>1,12,13,14<br>,17 | 17 | D3ZHA0,O55004,P02631,P05371,P06761,P18418,P19629,P20762,P31044,P35280,P68370,P83748,Q30KJ2,Q5GRG2,Q63617,Q9JI85,Q9R0T3                                                                                                                                                                                                                                                                                                |
| 2532 | 1,2,4,6,7,8<br>,15,17 | 3,5,9,10,1<br>1,12,13,14<br>,16 | 37 | B0BNN3,D3ZHA0,O55004,P01041,P02631,P02761,P06761,P07647,P09605,P25809,P10536,P11598,P15399,P18418,P19223,P19629,P20760,P20761,P20762,P22282,P22283,P31044,P50115,P50280,P55091,P62815,P68370,P97580,Q30KJ2,Q4G075,Q5GRG2,Q63617,Q99041,Q9EQV9,Q9JI85,Q9QZA6,Q9R0T3,Q9Z0V6                                                                                                                                             |
| 2533 | 1,2,4,6,7,8<br>,16,17 | 3,5,9,10,1<br>1,12,13,14<br>,15 | 33 | O55004,O88267,P02631,P05371,P06761,P07647,P09605,P25809,P11598,P15399,P18418,P19223,P19629,P20761,P20762,P22282,P22283,P23928,P31044,P50115,P50280,P55091,P63029,P68370,P97580,Q30KJ2,Q4G075,Q63617,Q6P6R2,Q6PCU2,Q8CJ52,Q99041,Q9JI85,Q9R0T3                                                                                                                                                                         |
| 2534 | 1,2,4,6,7,9<br>,10,11 | 3,5,8,12,1<br>3,14,15,16<br>,17 | 14 | O54861,P02631,P05964,P15399,P18418,P35280,P61206,P84079,P84082,P83121,P97580,Q30KJ2,Q5FVI6,Q7TP52,Q91ZS3,Q9JI85                                                                                                                                                                                                                                                                                                       |
| 2535 | 1,2,4,6,7,9<br>,10,12 | 3,5,8,11,1<br>3,14,15,16<br>,17 | 15 | O55004,P07647,P08723,P09456,P15399,P18418,P25236,P30120,P47967,P83748,P97840,Q30KJ2,Q6AYR9,Q91ZS3,Q9JI85                                                                                                                                                                                                                                                                                                              |

|      |                       |                                 |    |                                                                                                                                                                         |
|------|-----------------------|---------------------------------|----|-------------------------------------------------------------------------------------------------------------------------------------------------------------------------|
| 2536 | 1,2,4,6,7,9<br>,10,13 | 3,5,8,11,1<br>2,14,15,16<br>,17 | 9  | P06911,P12020,P15399,P18418,P25236,P97840,Q30KJ2,Q5GRG2,Q9JI85                                                                                                          |
| 2537 | 1,2,4,6,7,9<br>,10,14 | 3,5,8,11,1<br>2,13,15,16<br>,17 | 9  | P02631,P12020,P15399,P18418,P25236,P97580,Q30KJ2,Q5GRG2,Q63532                                                                                                          |
| 2538 | 1,2,4,6,7,9<br>,10,15 | 3,5,8,11,1<br>2,13,14,16<br>,17 | 5  | P02631,P18418,P35280,P97840,Q30KJ2                                                                                                                                      |
| 2539 | 1,2,4,6,7,9<br>,10,16 | 3,5,8,11,1<br>2,13,14,15<br>,17 | 5  | P18418,P47967,P97840,Q30KJ2,Q5FVI6                                                                                                                                      |
| 2540 | 1,2,4,6,7,9<br>,10,17 | 3,5,8,11,1<br>2,13,14,15<br>,16 | 8  | P09605,P25809,P15399,P18418,P19223,P97580,Q30KJ2,Q6P6R2,Q7TP52                                                                                                          |
| 2541 | 1,2,4,6,7,9<br>,11,12 | 3,5,8,10,1<br>3,14,15,16<br>,17 | 24 | O54861,O55004,P02631,P04905,P05371,P07647,P08723,P09456,P0C0A9,P13432,P15399,P18418,P25236,P30120,P36374,P97580,Q30KJ2,Q63357,Q6AYL6,Q6IFU7,Q91ZS3,Q9EQS0,Q9JHB9,Q9JI85 |
| 2542 | 1,2,4,6,7,9<br>,11,13 | 3,5,8,10,1<br>2,14,15,16<br>,17 | 12 | P02631,P05539,P06911,P07647,P09456,P15399,P25236,P97580,Q30KJ2,Q5GRG2,Q91ZS3,Q9JI85                                                                                     |
| 2543 | 1,2,4,6,7,9<br>,11,14 | 3,5,8,10,1<br>2,13,15,16<br>,17 | 11 | P02631,P05371,P15399,P18418,P20762,P25236,P83121,P97580,Q30KJ2,Q63532,Q9JI85                                                                                            |
| 2544 | 1,2,4,6,7,9<br>,11,15 | 3,5,8,10,1<br>2,13,14,16<br>,17 | 9  | O55004,P02631,P05371,P15399,P22006,P35280,P97580,Q30KJ2,Q9JI85                                                                                                          |
| 2545 | 1,2,4,6,7,9<br>,11,16 | 3,5,8,10,1<br>2,13,14,15<br>,17 | 7  | P02631,P05371,P15399,P61206,P84079,P84082,P97580,Q30KJ2,Q9JI85                                                                                                          |
| 2546 | 1,2,4,6,7,9<br>,11,17 | 3,5,8,10,1<br>2,13,14,15<br>,16 | 9  | O54861,O55004,P02631,P09605,P25809,P15399,P19223,P97580,Q30KJ2,Q9JI85                                                                                                   |
| 2547 | 1,2,4,6,7,9<br>,12,13 | 3,5,8,10,1<br>1,14,15,16<br>,17 | 19 | P02631,P06911,P07647,P08723,P09456,P12020,P18418,P22282,P25236,P30120,P36374,P83748,P97840,Q30KJ2,Q5GRG2,Q62902,Q6AYR9,Q9JHB9,Q9JI85                                    |
| 2548 | 1,2,4,6,7,9<br>,12,14 | 3,5,8,10,1<br>1,13,15,16<br>,17 | 16 | P02631,P07647,P08723,P13432,P15399,P18418,P20762,P25236,P30120,P83748,Q30KJ2,Q63532,Q6AYR9,Q9EQS0,Q9JHB9,Q9JI85                                                         |
| 2549 | 1,2,4,6,7,9<br>,12,15 | 3,5,8,10,1<br>1,13,14,16<br>,17 | 8  | O55004,P02631,P08723,P18418,P25236,P83748,Q30KJ2,Q9JI85                                                                                                                 |
| 2550 | 1,2,4,6,7,9<br>,12,16 | 3,5,8,10,1<br>1,13,14,15<br>,17 | 10 | G3V686,P02631,P08723,P25236,P47967,P83748,P97840,Q30KJ2,Q63532,Q9JI85                                                                                                   |

|      |                        |                                 |    |                                                                                                                                                                                                                                                                                  |
|------|------------------------|---------------------------------|----|----------------------------------------------------------------------------------------------------------------------------------------------------------------------------------------------------------------------------------------------------------------------------------|
| 2551 | 1,2,4,6,7,9<br>,12,17  | 3,5,8,10,1<br>1,13,14,15<br>,16 | 18 | O55004,P02631,P07647,P08723,P09605;P25809,P13432,P15399,P18418,P19223,P36374,P55091,P83748,P97580,P98089,Q30KJ2,Q62635,Q6AYR9,Q9JI85                                                                                                                                             |
| 2552 | 1,2,4,6,7,9<br>,13,14  | 3,5,8,10,1<br>1,12,15,16<br>,17 | 9  | P02631,P06911,P12020,P18418,P25236,Q30KJ2,Q5GRG2,Q63532,Q9JI85                                                                                                                                                                                                                   |
| 2553 | 1,2,4,6,7,9<br>,13,15  | 3,5,8,10,1<br>1,12,14,16<br>,17 | 7  | P02631,P05539,P06911,P25236,Q30KJ2,Q5GRG2,Q9JI85                                                                                                                                                                                                                                 |
| 2554 | 1,2,4,6,7,9<br>,13,16  | 3,5,8,10,1<br>1,12,14,15<br>,17 | 5  | G3V686,P06911,P25236,Q30KJ2,Q5GRG2                                                                                                                                                                                                                                               |
| 2555 | 1,2,4,6,7,9<br>,13,17  | 3,5,8,10,1<br>1,12,14,15<br>,16 | 8  | P06911,P09605;P25809,P15399,P25236,P97580,Q30KJ2,Q5GRG2,Q9JI85                                                                                                                                                                                                                   |
| 2556 | 1,2,4,6,7,9<br>,14,15  | 3,5,8,10,1<br>1,12,13,16<br>,17 | 5  | P02631,P25236,Q30KJ2,Q63532,Q6IE51                                                                                                                                                                                                                                               |
| 2557 | 1,2,4,6,7,9<br>,14,16  | 3,5,8,10,1<br>1,12,13,15<br>,17 | 4  | P02631,P25236,Q30KJ2,Q63532                                                                                                                                                                                                                                                      |
| 2558 | 1,2,4,6,7,9<br>,14,17  | 3,5,8,10,1<br>1,12,13,15<br>,16 | 6  | P02631,P09605;P25809,P15399,P25236,P97580,Q30KJ2                                                                                                                                                                                                                                 |
| 2559 | 1,2,4,6,7,9<br>,15,16  | 3,5,8,10,1<br>1,12,13,14<br>,17 | 2  | P02631,Q30KJ2                                                                                                                                                                                                                                                                    |
| 2560 | 1,2,4,6,7,9<br>,15,17  | 3,5,8,10,1<br>1,12,13,14<br>,16 | 6  | O55004,P02631,P09605;P25809,P15399,P97580,Q30KJ2                                                                                                                                                                                                                                 |
| 2561 | 1,2,4,6,7,9<br>,16,17  | 3,5,8,10,1<br>1,12,13,14<br>,15 | 7  | P02631,P09605;P25809,P14480,P15399,P97580,Q30KJ2,Q6P6R2                                                                                                                                                                                                                          |
| 2562 | 1,2,4,6,7,1<br>0,11,12 | 3,5,8,9,13,<br>14,15,16,1<br>7  | 37 | O54861,O55004,P02631,P04905,P05964,P06757,P07647,P08723,P09456,P0C0A9,P15399,P18418,P24368,P30120,P35280,P36374,P47727,P47967,P50280,P61206;P84079;P84082,P68370,P97580,P97840,Q10758,Q30KJ2,Q5FVI6,Q63357,Q63493,Q6AYL6,Q6AYR9,Q6IFU7,Q6IMF3,Q6P6Q2,Q7TP52,Q9EQS0,Q9JHB9,Q9JI85 |
| 2563 | 1,2,4,6,7,1<br>0,11,13 | 3,5,8,9,12,<br>14,15,16,1<br>7  | 14 | P06911,P07647,P12020,P15399,P18418,P25236,P47727,P61206;P84079;P84082,P97580,Q30KJ2,Q5FVI6,Q5GRG2,Q7TP52,Q9JI85                                                                                                                                                                  |
| 2564 | 1,2,4,6,7,1<br>0,11,14 | 3,5,8,9,12,<br>13,15,16,1<br>7  | 20 | P02631,P05371,P05964,P12020,P15399,P18418,P20762,P25236,P35280,P47727,P61206;P84079;P84082,P83121,P97580,Q30KJ2,Q5BJY9,Q5FVI6,Q5GRG2,Q63532,Q7TP52,Q9JI85                                                                                                                        |
| 2565 | 1,2,4,6,7,1<br>0,11,15 | 3,5,8,9,12,<br>13,14,16,1<br>7  | 13 | O54861,O55004,P02631,P15399,P18418,P22006,P35280,P61206;P84079;P84082,P97580,Q30KJ2,Q5FVI6,Q7TP52,Q9JI85                                                                                                                                                                         |

|      |                        |                                |    |                                                                                                                                                                         |
|------|------------------------|--------------------------------|----|-------------------------------------------------------------------------------------------------------------------------------------------------------------------------|
| 2566 | 1,2,4,6,7,1<br>0,11,16 | 3,5,8,9,12,<br>13,14,15,1<br>7 | 14 | P02631,P05371,P15399,P18418,P35280,P47967,P61206;P84079;P84082,P97580,Q30KJ2,Q5FVI6,Q63532,Q7TP52,Q8VD89,Q9JI85                                                         |
| 2567 | 1,2,4,6,7,1<br>0,11,17 | 3,5,8,9,12,<br>13,14,15,1<br>6 | 14 | O54861,O55004,P02631,P05964,P09605;P25809,P15399,P18418,P19223,P61206;P84079;P84082,P97580,Q30KJ2,Q5FVI6,Q7TP52,Q9JI85                                                  |
| 2568 | 1,2,4,6,7,1<br>0,12,13 | 3,5,8,9,11,<br>14,15,16,1<br>7 | 21 | P06911,P07647,P08723,P09456,P0C0A9,P12020,P15399,P18418,P22282,P25236,P30120,P36374,P47967,P70709,P83748,P97840,Q30KJ2,Q5GRG2,Q6AYR9,Q9JHB9,Q9JI85                      |
| 2569 | 1,2,4,6,7,1<br>0,12,14 | 3,5,8,9,11,<br>13,15,16,1<br>7 | 20 | P02631,P07647,P08723,P12020,P15399,P18418,P25236,P30120,P35280,P83748,P97580,P97840,Q10758,Q30KJ2,Q5GRG2,Q63532,Q6AYR9,Q9EQS0,Q9JHB9,Q9JI85                             |
| 2570 | 1,2,4,6,7,1<br>0,12,15 | 3,5,8,9,11,<br>13,14,16,1<br>7 | 11 | O55004,P02631,P08723,P15399,P18418,P25236,P35280,P83748,P97840,Q30KJ2,Q9JI85                                                                                            |
| 2571 | 1,2,4,6,7,1<br>0,12,16 | 3,5,8,9,11,<br>13,14,15,1<br>7 | 13 | P08721,P08723,P15399,P18418,P25236,P47967,P83748,P97840,Q10758,Q30KJ2,Q5FVI6,Q63532,Q9JI85                                                                              |
| 2572 | 1,2,4,6,7,1<br>0,12,17 | 3,5,8,9,11,<br>13,14,15,1<br>6 | 23 | O55004,P05964,P07647,P08723,P09605;P25809,P13432,P14480,P15399,P18418,P19223,P30120,P36374,P55091,P83748,P97580,P97840,P98089,Q10758,Q30KJ2,Q62635,Q6AYR9,Q9JI85,Q9QZK9 |
| 2573 | 1,2,4,6,7,1<br>0,13,14 | 3,5,8,9,11,<br>12,15,16,1<br>7 | 9  | P06911,P12020,P15399,P18418,P25236,Q30KJ2,Q5GRG2,Q63532,Q9JI85                                                                                                          |
| 2574 | 1,2,4,6,7,1<br>0,13,15 | 3,5,8,9,11,<br>12,14,16,1<br>7 | 7  | P02631,P06911,P12020,P18418,P25236,Q30KJ2,Q5GRG2                                                                                                                        |
| 2575 | 1,2,4,6,7,1<br>0,13,16 | 3,5,8,9,11,<br>12,14,15,1<br>7 | 9  | P06911,P12020,P18418,P25236,P47967,P97840,Q30KJ2,Q5GRG2,Q63532                                                                                                          |
| 2576 | 1,2,4,6,7,1<br>0,13,17 | 3,5,8,9,11,<br>12,14,15,1<br>6 | 9  | P06911,P12020,P14480,P15399,P18418,P97580,Q30KJ2,Q5GRG2,Q9JI85                                                                                                          |
| 2577 | 1,2,4,6,7,1<br>0,14,15 | 3,5,8,9,11,<br>12,13,16,1<br>7 | 11 | P02631,P12020,P15399,P18418,P22006,P25236,P35280,P35467,Q30KJ2,Q5GRG2,Q63532                                                                                            |
| 2578 | 1,2,4,6,7,1<br>0,14,16 | 3,5,8,9,11,<br>12,13,15,1<br>7 | 11 | P02631,P08721,P12020,P15399,P18418,P25236,P97580,P97840,Q30KJ2,Q5GRG2,Q63532                                                                                            |
| 2579 | 1,2,4,6,7,1<br>0,14,17 | 3,5,8,9,11,<br>12,13,15,1<br>6 | 7  | P02631,P12020,P15399,P18418,P97580,Q30KJ2,Q63532                                                                                                                        |
| 2580 | 1,2,4,6,7,1<br>0,15,16 | 3,5,8,9,11,<br>12,13,14,1<br>7 | 8  | P02631,P18418,P35280,P35467,P97840,Q30KJ2,Q5FVI6,Q63532                                                                                                                 |



|      |                        |                                |    |                                                                                                                                                                                                                                        |
|------|------------------------|--------------------------------|----|----------------------------------------------------------------------------------------------------------------------------------------------------------------------------------------------------------------------------------------|
| 2581 | 1,2,4,6,7,1<br>0,15,17 | 3,5,8,9,11,<br>12,13,14,1<br>6 | 6  | P02631,P15399,P18418,P97580,Q30KJ2,Q7TP52                                                                                                                                                                                              |
| 2582 | 1,2,4,6,7,1<br>0,16,17 | 3,5,8,9,11,<br>12,13,14,1<br>5 | 9  | P09605,P25809,P14480,P15399,P18418,P97580,Q30KJ2,Q62997,Q6P6R2,Q7TP52                                                                                                                                                                  |
| 2583 | 1,2,4,6,7,1<br>1,12,13 | 3,5,8,9,10,<br>14,15,16,1<br>7 | 33 | O55004,P01836,P02631,P02780,P02781,P04905,P05539,P06911,P07647,P08723,P09456,P0C0A9,P12020,P15399,P18418,P22282,P22283,P24368,P25236,P30120,P36374,P47727,P50280,P97580,Q30KJ2,Q5GRG2,Q62902,Q63357,Q63493,Q6AYR9,Q8CJ52,Q9JHB9,Q9JI85 |
| 2584 | 1,2,4,6,7,1<br>1,12,14 | 3,5,8,9,10,<br>13,15,16,1<br>7 | 29 | O55004,P02631,P04905,P05371,P07647,P08723,P09456,P0C0A9,P12020,P13432,P15399,P18418,P20762,P25236,P30120,P35280,P36374,P47727,P50280,P97580,Q30KJ2,Q63493,Q63532,Q6AYL6,Q6AYR9,Q8CJ52,Q9EQS0,Q9JHB9,Q9JI85                             |
| 2585 | 1,2,4,6,7,1<br>1,12,15 | 3,5,8,9,10,<br>13,14,16,1<br>7 | 22 | O54861,O55004,P01015,P01836,P02631,P05371,P07647,P08723,P15399,P18418,P20762,P22006,P25236,P30120,P35280,P50280,P51907,P83748,P97580,Q30KJ2,Q9JHB9,Q9JI85                                                                              |
| 2586 | 1,2,4,6,7,1<br>1,12,16 | 3,5,8,9,10,<br>13,14,15,1<br>7 | 21 | G3V686,O55004,P01836,P02631,P05371,P07647,P08723,P15399,P18418,P25236,P30120,P47967,P61206,P84079,P84082,P97580,Q30KJ2,Q63532,Q6AYL6,Q6IFU7,Q8CJ52,Q9JHB9,Q9JI85                                                                       |
| 2587 | 1,2,4,6,7,1<br>1,12,17 | 3,5,8,9,10,<br>13,14,15,1<br>6 | 29 | O54861,O55004,P01015,P02631,P05964,P07647,P08723,P09605,P25809,P0C0A9,P13432,P15399,P18418,P19223,P22282,P30120,P36374,P50280,P55091,P97580,P98089,Q30KJ2,Q62635,Q63493,Q6AYQ8,Q6AYR9,Q99041,Q9JHB9,Q9JI85,Q9QZK9                      |
| 2588 | 1,2,4,6,7,1<br>1,13,14 | 3,5,8,9,10,<br>12,15,16,1<br>7 | 18 | P02631,P05539,P06911,P07647,P12020,P15399,P18418,P20762,P25236,P47727,P50280,P97580,Q30KJ2,Q5GRG2,Q62902,Q63532,Q9JHB9,Q9JI85                                                                                                          |
| 2589 | 1,2,4,6,7,1<br>1,13,15 | 3,5,8,9,10,<br>12,14,16,1<br>7 | 11 | P01836,P02631,P05539,P06911,P15399,P22006,P25236,P97580,Q30KJ2,Q5GRG2,Q9JI85                                                                                                                                                           |
| 2590 | 1,2,4,6,7,1<br>1,13,16 | 3,5,8,9,10,<br>12,14,15,1<br>7 | 13 | G3V686,P01836,P02631,P06911,P15399,P25236,P61206,P84079,P84082,P97580,Q30KJ2,Q5GRG2,Q63532,Q8VD89,Q9JI85                                                                                                                               |
| 2591 | 1,2,4,6,7,1<br>1,13,17 | 3,5,8,9,10,<br>12,14,15,1<br>6 | 13 | P02631,P05539,P06911,P07647,P09605,P25809,P15399,P22282,P25236,P50280,P97580,Q30KJ2,Q5GRG2,Q9JI85                                                                                                                                      |
| 2592 | 1,2,4,6,7,1<br>1,14,15 | 3,5,8,9,10,<br>12,13,16,1<br>7 | 13 | P02631,P05371,P15399,P18418,P20762,P22006,P25236,P35280,P97580,Q30KJ2,Q5GRG2,Q63532,Q9JI85                                                                                                                                             |
| 2593 | 1,2,4,6,7,1<br>1,14,16 | 3,5,8,9,10,<br>12,13,15,1<br>7 | 10 | G3V686,P02631,P05371,P15399,P25236,P61206,P84079,P84082,P97580,Q30KJ2,Q63532,Q9JI85                                                                                                                                                    |
| 2594 | 1,2,4,6,7,1<br>1,14,17 | 3,5,8,9,10,<br>12,13,15,1<br>6 | 11 | P02631,P05371,P09605,P25809,P15399,P18418,P20762,P97580,Q30KJ2,Q63493,Q63532,Q9JI85                                                                                                                                                    |
| 2595 | 1,2,4,6,7,1<br>1,15,16 | 3,5,8,9,10,<br>12,13,14,1<br>7 | 10 | P01836,P02631,P05371,P15399,P35280,P97580,Q30KJ2,Q63532,Q8VD89,Q9JI85                                                                                                                                                                  |

|      |                        |                                |    |                                                                                                                                                                                                                                 |
|------|------------------------|--------------------------------|----|---------------------------------------------------------------------------------------------------------------------------------------------------------------------------------------------------------------------------------|
| 2596 | 1,2,4,6,7,1<br>1,15,17 | 3,5,8,9,10,<br>12,13,14,1<br>6 | 9  | O55004,P01015,P02631,P09605;P25809,P15399,P22006,P97580,Q30KJ2,Q9JI85                                                                                                                                                           |
| 2597 | 1,2,4,6,7,1<br>1,16,17 | 3,5,8,9,10,<br>12,13,14,1<br>5 | 9  | O55004,P02631,P05371,P09605;P25809,P14480,P15399,P97580,Q30KJ2,Q9JI85                                                                                                                                                           |
| 2598 | 1,2,4,6,7,1<br>2,13,14 | 3,5,8,9,10,<br>11,15,16,1<br>7 | 21 | P02631,P06911,P07647,P08723,P09456,P12020,P15399,P18418,P22282,P25236,P30120,P36374,P50280,P83748,Q30KJ2,Q5GRG2,Q62902,Q63532,Q6AYR9,Q9JHB9,Q9JI85                                                                              |
| 2599 | 1,2,4,6,7,1<br>2,13,15 | 3,5,8,9,10,<br>11,14,16,1<br>7 | 15 | P01836,P02631,P06911,P07647,P08723,P12020,P18418,P25236,P30120,P83748,Q30KJ2,Q5GRG2,Q6AYR9,Q9JHB9,Q9JI85                                                                                                                        |
| 2600 | 1,2,4,6,7,1<br>2,13,16 | 3,5,8,9,10,<br>11,14,15,1<br>7 | 19 | G3V686,P01836,P06911,P07647,P08723,P12020,P25236,P30120,P47967,P83748,P97840,Q30KJ2,Q5GRG2,Q62902,Q63532,Q6AYR9,Q9JHB9,Q9JI85,Q9ROT3                                                                                            |
| 2601 | 1,2,4,6,7,1<br>2,13,17 | 3,5,8,9,10,<br>11,14,15,1<br>6 | 31 | O55004,O88267,P06911,P07647,P08723,P09605;P25809,P12020,P13432,P14480,P15399,P18418,P19223,P22282,P22283,P25236,P30120,P36374,P50280,P55091,P62815,P80254,P83748,P97580,P98089,Q30KJ2,Q5GRG2,Q62635,Q6AYR9,Q9JHB9,Q9JI85,Q9QZK9 |
| 2602 | 1,2,4,6,7,1<br>2,14,15 | 3,5,8,9,10,<br>11,13,16,1<br>7 | 13 | P02631,P08723,P15399,P18418,P20762,P25236,P35280,P35467,P83748,Q30KJ2,Q5GRG2,Q63532,Q9JI85                                                                                                                                      |
| 2603 | 1,2,4,6,7,1<br>2,14,16 | 3,5,8,9,10,<br>11,13,15,1<br>7 | 13 | D3ZUC6,G3V686,P02631,P08723,P15399,P18418,P25236,P30120,P35467,P83748,Q30KJ2,Q63532,Q9JI85                                                                                                                                      |
| 2604 | 1,2,4,6,7,1<br>2,14,17 | 3,5,8,9,10,<br>11,13,15,1<br>6 | 28 | O55004,O88267,P02631,P07647,P08723,P09605;P25809,P12020,P13432,P15399,P18418,P19223,P20762,P22282,P25236,P30120,P31430,P55091,P62815,P80254,P83748,P97580,P98089,Q30KJ2,Q62635,Q63532,Q6AYQ8,Q6AYR9,Q9JI85                      |
| 2605 | 1,2,4,6,7,1<br>2,15,16 | 3,5,8,9,10,<br>11,13,14,1<br>7 | 8  | P01836,P02631,P25236,P35467,P83748,Q30KJ2,Q63532,Q9JI85                                                                                                                                                                         |
| 2606 | 1,2,4,6,7,1<br>2,15,17 | 3,5,8,9,10,<br>11,13,14,1<br>6 | 19 | O55004,P01015,P01041,P02631,P06866,P09605;P25809,P13432,P15399,P18418,P19223,P20761,P55091,P62815,P83748,P97580,P98089,Q30KJ2,Q62635,Q9JI85                                                                                     |
| 2607 | 1,2,4,6,7,1<br>2,16,17 | 3,5,8,9,10,<br>11,13,14,1<br>5 | 15 | O55004,P09605;P25809,P13432,P14480,P15399,P16573,P19223,P55091,P80254,P83748,P97580,P98089,Q30KJ2,Q62635,Q9JI85                                                                                                                 |
| 2608 | 1,2,4,6,7,1<br>3,14,15 | 3,5,8,9,10,<br>11,12,16,1<br>7 | 10 | P02631,P06911,P12020,P25236,P35467,Q30KJ2,Q5GRG2,Q63532,Q6IE51,Q9JI85                                                                                                                                                           |
| 2609 | 1,2,4,6,7,1<br>3,14,16 | 3,5,8,9,10,<br>11,12,15,1<br>7 | 9  | G3V686,P02631,P06911,P12020,P25236,P35467,Q30KJ2,Q5GRG2,Q63532                                                                                                                                                                  |
| 2610 | 1,2,4,6,7,1<br>3,14,17 | 3,5,8,9,10,<br>11,12,15,1<br>6 | 10 | P02631,P06911,P12020,P15399,P22282,P25236,P97580,Q30KJ2,Q5GRG2,Q9JI85                                                                                                                                                           |

|      |                        |                                 |    |                                                                                                                                                                                                                   |
|------|------------------------|---------------------------------|----|-------------------------------------------------------------------------------------------------------------------------------------------------------------------------------------------------------------------|
| 2611 | 1,2,4,6,7,1<br>3,15,16 | 3,5,8,9,10,<br>11,12,14,1<br>7  | 7  | P02631,P06911,P25236,P35467,P83748,Q30KJ2,Q5GRG2                                                                                                                                                                  |
| 2612 | 1,2,4,6,7,1<br>3,15,17 | 3,5,8,9,10,<br>11,12,14,1<br>6  | 7  | P02631,P06911,P15399,P25236,P97580,Q30KJ2,Q5GRG2                                                                                                                                                                  |
| 2613 | 1,2,4,6,7,1<br>3,16,17 | 3,5,8,9,10,<br>11,12,14,1<br>5  | 9  | P06911,P09605,P25809,P14480,P15399,P25236,P97580,Q30KJ2,Q5GRG2,Q6PCU2                                                                                                                                             |
| 2614 | 1,2,4,6,7,1<br>4,15,16 | 3,5,8,9,10,<br>11,12,13,1<br>7  | 6  | P02631,P25236,P35467,Q30KJ2,Q63532,Q6IE51                                                                                                                                                                         |
| 2615 | 1,2,4,6,7,1<br>4,15,17 | 3,5,8,9,10,<br>11,12,13,1<br>6  | 10 | P02631,P15399,P20761,P20762,P25236,P35467,P97580,Q30KJ2,Q63532,Q6IE51                                                                                                                                             |
| 2616 | 1,2,4,6,7,1<br>4,16,17 | 3,5,8,9,10,<br>11,12,13,1<br>5  | 9  | P02631,P09605,P25809,P14480,P15399,P25236,P35467,P97580,Q30KJ2,Q63532                                                                                                                                             |
| 2617 | 1,2,4,6,7,1<br>5,16,17 | 3,5,8,9,10,<br>11,12,13,1<br>4  | 5  | P02631,P09605,P25809,P35467,P97580,Q30KJ2                                                                                                                                                                         |
| 2618 | 1,2,4,6,8,9<br>,10,11  | 3,5,7,12,1<br>3,14,15,16<br>,17 | 12 | D3ZHA0,O54715,P02761,P07647,P08649,P14669,P35280,Q63598,Q63942,Q64335,Q7TP52,Q91ZS3                                                                                                                               |
| 2619 | 1,2,4,6,8,9<br>,10,12  | 3,5,7,11,1<br>3,14,15,16<br>,17 | 15 | D3ZHA0,P02780,P02782,P02803,P07647,P08723,P0C0A9,P25236,P30120,Q10758,Q5M8C6,Q6AYR9,Q80WL1,Q9EQS0,Q9JHB9                                                                                                          |
| 2620 | 1,2,4,6,8,9<br>,10,13  | 3,5,7,11,1<br>2,14,15,16<br>,17 | 8  | D3ZHA0,P02803,P06911,P07647,P25236,Q5GRG2,Q63942,Q8CJD3                                                                                                                                                           |
| 2621 | 1,2,4,6,8,9<br>,10,14  | 3,5,7,11,1<br>2,13,15,16<br>,17 | 5  | D3ZHA0,P17046,P25236,Q63942,Q9WTT6                                                                                                                                                                                |
| 2622 | 1,2,4,6,8,9<br>,10,15  | 3,5,7,11,1<br>2,13,14,16<br>,17 | 6  | D3ZHA0,P02761,P17046,P35280,Q5QE79,Q63942                                                                                                                                                                         |
| 2623 | 1,2,4,6,8,9<br>,10,16  | 3,5,7,11,1<br>2,13,14,15<br>,17 | 3  | D3ZHA0,Q63942,Q6P6R2                                                                                                                                                                                              |
| 2624 | 1,2,4,6,8,9<br>,10,17  | 3,5,7,11,1<br>2,13,14,15<br>,16 | 8  | D3ZHA0,P02761,P17046,P19223,Q63355,Q63942,Q64335,Q6P6R2                                                                                                                                                           |
| 2625 | 1,2,4,6,8,9<br>,11,12  | 3,5,7,10,1<br>3,14,15,16<br>,17 | 30 | O35547,O54715,O55004,P02780,P02781,P02782,P02803,P04905,P07647,P08723,P0C0A9,P13432,P14669,P24368,P25236,P30120,P36374,P50280,Q5M8C6,Q63357,Q6AYR9,Q6IFU7,Q6IFU8,Q6P6Q2,Q6TMA8,Q80WL1,Q8CJ52,Q9EQS0,Q9JHB9,Q9JI85 |

|      |                       |                                 |    |                                                                                                                                             |
|------|-----------------------|---------------------------------|----|---------------------------------------------------------------------------------------------------------------------------------------------|
| 2626 | 1,2,4,6,8,9<br>,11,13 | 3,5,7,10,1<br>2,14,15,16<br>,17 | 12 | P02780,P02782,P02803,P06911,P07647,P14669,P25236,P50280,Q6TMA8,Q8CJD3,Q9JHB9,Q9JI85                                                         |
| 2627 | 1,2,4,6,8,9<br>,11,14 | 3,5,7,10,1<br>2,13,15,16<br>,17 | 6  | P07647,P14669,P20762,P25236,P47727,Q63942                                                                                                   |
| 2628 | 1,2,4,6,8,9<br>,11,15 | 3,5,7,10,1<br>2,13,14,16<br>,17 | 5  | P02761,P14669,P35280,Q5QE79,Q63942                                                                                                          |
| 2629 | 1,2,4,6,8,9<br>,11,16 | 3,5,7,10,1<br>2,13,14,15<br>,17 | 4  | A2RUV9,P14668,P14669,Q63942                                                                                                                 |
| 2630 | 1,2,4,6,8,9<br>,11,17 | 3,5,7,10,1<br>2,13,14,15<br>,16 | 6  | A2RUV9,P02761,P07647,P14669,P19223,Q6P6R2                                                                                                   |
| 2631 | 1,2,4,6,8,9<br>,12,13 | 3,5,7,10,1<br>1,14,15,16<br>,17 | 18 | P02780,P02782,P02803,P06911,P07647,P08723,P0C0A9,P22282,P25236,P30120,P36374,P50280,Q5M8C6,Q6AYR9,Q6TMA8,Q80WL1,Q9JHB9,Q9JI85               |
| 2632 | 1,2,4,6,8,9<br>,12,14 | 3,5,7,10,1<br>1,13,15,16<br>,17 | 15 | D3ZHA0,P02780,P02782,P07647,P08723,P0C0A9,P13432,P20762,P25236,P30120,Q5M8C6,Q6AYR9,Q9EQS0,Q9JHB9,Q9WTT6                                    |
| 2633 | 1,2,4,6,8,9<br>,12,15 | 3,5,7,10,1<br>1,13,14,16<br>,17 | 8  | D3ZHA0,P02761,P02782,P07647,P08723,P25236,P30120,Q5QE79                                                                                     |
| 2634 | 1,2,4,6,8,9<br>,12,16 | 3,5,7,10,1<br>1,13,14,15<br>,17 | 6  | P02782,P07647,P08723,P25236,P30120,Q63942                                                                                                   |
| 2635 | 1,2,4,6,8,9<br>,12,17 | 3,5,7,10,1<br>1,13,14,15<br>,16 | 20 | P02782,P07647,P08723,P0C0A9,P13432,P16636,P19223,P30120,P50280,P55091,P98089,Q4G075,Q5M8C6,Q62635,Q63355,Q6AYR9,Q6P6R2,Q80WL1,Q9JHB9,Q9QZA6 |
| 2636 | 1,2,4,6,8,9<br>,13,14 | 3,5,7,10,1<br>1,12,15,16<br>,17 | 7  | P02782,P06911,P07647,P25236,Q5GRG2,Q63942,Q6TMA8                                                                                            |
| 2637 | 1,2,4,6,8,9<br>,13,15 | 3,5,7,10,1<br>1,12,14,16<br>,17 | 5  | P25236,Q5GRG2,Q5QE79,Q63942,Q6TMA8                                                                                                          |
| 2638 | 1,2,4,6,8,9<br>,13,16 | 3,5,7,10,1<br>1,12,14,15<br>,17 | 3  | P25236,Q63942,Q8CJD3                                                                                                                        |
| 2639 | 1,2,4,6,8,9<br>,13,17 | 3,5,7,10,1<br>1,12,14,15<br>,16 | 6  | P07647,P19223,P22282,P25236,Q63355,Q8CJD3                                                                                                   |
| 2640 | 1,2,4,6,8,9<br>,14,15 | 3,5,7,10,1<br>1,12,13,16<br>,17 | 5  | P02761,P17046,P25236,Q5QE79,Q63942                                                                                                          |

|      |                        |                                 |    |                                                                                                                                                                                                                                                                                         |
|------|------------------------|---------------------------------|----|-----------------------------------------------------------------------------------------------------------------------------------------------------------------------------------------------------------------------------------------------------------------------------------------|
| 2641 | 1,2,4,6,8,9<br>,14,16  | 3,5,7,10,1<br>1,12,13,15<br>,17 | 3  | P25236,P97574,Q63942                                                                                                                                                                                                                                                                    |
| 2642 | 1,2,4,6,8,9<br>,14,17  | 3,5,7,10,1<br>1,12,13,15<br>,16 | 5  | P19223,P25236,Q63942,Q6P6R2,Q9WTT6                                                                                                                                                                                                                                                      |
| 2643 | 1,2,4,6,8,9<br>,15,16  | 3,5,7,10,1<br>1,12,13,14<br>,17 | 2  | Q5QE79,Q63942                                                                                                                                                                                                                                                                           |
| 2644 | 1,2,4,6,8,9<br>,15,17  | 3,5,7,10,1<br>1,12,13,14<br>,16 | 5  | B0BNN3,P02761,P19223,Q5QE79,Q63942                                                                                                                                                                                                                                                      |
| 2645 | 1,2,4,6,8,9<br>,16,17  | 3,5,7,10,1<br>1,12,13,14<br>,15 | 5  | A2RUV9,P19223,P23593,Q63942,Q6P6R2                                                                                                                                                                                                                                                      |
| 2646 | 1,2,4,6,8,1<br>0,11,12 | 3,5,7,9,13,<br>14,15,16,1<br>7  | 40 | D3ZHA0,O35547,O54715,P02780,P02781,P02782,P04905,P05964,P07647,P08723,P0C0A9,P14669,P15399,P16636,P24368,P25236,P30120,P35280,P35281,P36374,P47727,P50280,P53792,P60905,P62804,Q00715,Q10758,Q5M8C6,Q63357,Q63598,Q6AYR9,Q6IFU7,Q6IFU8,Q6IMF3,Q6P6Q2,Q80WL1,Q8CJ52,Q9EQS0,Q9JHB9,Q9JI85 |
| 2647 | 1,2,4,6,8,1<br>0,11,13 | 3,5,7,9,12,<br>14,15,16,1<br>7  | 12 | P06911,P07647,P08723,P14669,P25236,P47727,P50280,Q5GRG2,Q63598,Q8CJD3,Q9JHB9,Q9JI85                                                                                                                                                                                                     |
| 2648 | 1,2,4,6,8,1<br>0,11,14 | 3,5,7,9,12,<br>13,15,16,1<br>7  | 11 | P02761,P07647,P14669,P15399,P20762,P25236,P35280,P47727,P50280,Q5BJY9,Q63598                                                                                                                                                                                                            |
| 2649 | 1,2,4,6,8,1<br>0,11,15 | 3,5,7,9,12,<br>13,14,16,1<br>7  | 7  | D3ZHA0,P02761,P14669,P35280,P50280,Q63598,Q7TP52                                                                                                                                                                                                                                        |
| 2650 | 1,2,4,6,8,1<br>0,11,16 | 3,5,7,9,12,<br>13,14,15,1<br>7  | 7  | A2RUV9,O54715,P07150,P14669,P35280,Q63598,Q7TP52                                                                                                                                                                                                                                        |
| 2651 | 1,2,4,6,8,1<br>0,11,17 | 3,5,7,9,12,<br>13,14,15,1<br>6  | 16 | P02761,P07150,P07647,P08649,P14669,P15399,P16636,P19223,P50280,P97580,Q30KJ2,Q4G075,Q63598,Q64335,Q6P6R2,Q7TP52                                                                                                                                                                         |
| 2652 | 1,2,4,6,8,1<br>0,12,13 | 3,5,7,9,11,<br>14,15,16,1<br>7  | 25 | D3ZHA0,P02780,P02781,P02782,P02803,P06911,P07647,P08723,P0C0A9,P12020,P22282,P22283,P25236,P30120,P36374,P50280,P70709,Q10758,Q5GRG2,Q5M8C6,Q6AYR9,Q80WL1,Q8CJ52,Q9JHB9,Q9JI85                                                                                                          |
| 2653 | 1,2,4,6,8,1<br>0,12,14 | 3,5,7,9,11,<br>13,15,16,1<br>7  | 15 | D3ZHA0,P02780,P02782,P07647,P08723,P0C0A9,P25236,P30120,P35280,P50280,Q10758,Q6AYR9,Q9EQS0,Q9JHB9,Q9WTT6                                                                                                                                                                                |
| 2654 | 1,2,4,6,8,1<br>0,12,15 | 3,5,7,9,11,<br>13,14,16,1<br>7  | 13 | D3ZHA0,P01015,P02761,P02782,P07647,P08723,P0C0A9,P25236,P30120,P35280,P35281,P50280,Q6AYR9                                                                                                                                                                                              |
| 2655 | 1,2,4,6,8,1<br>0,12,16 | 3,5,7,9,11,<br>13,14,15,1<br>7  | 13 | D3ZHA0,P02782,P07647,P08721,P08723,P0C0A9,P25236,P30120,P35281,P47967,Q10758,Q6AYR9,Q6IFU7                                                                                                                                                                                              |

|      |                        |                                |    |                                                                                                                                                                                                                   |
|------|------------------------|--------------------------------|----|-------------------------------------------------------------------------------------------------------------------------------------------------------------------------------------------------------------------|
| 2656 | 1,2,4,6,8,1<br>0,12,17 | 3,5,7,9,11,<br>13,14,15,1<br>6 | 27 | D3ZHA0,D4A5U3,P02761,P02782,P07647,P08723,P0C0A9,P13432,P16636,P19223,P30120,P50280,P55091,P98089,Q10758,Q4G075,Q5M8C6,Q62635,Q63355,Q64361,Q6AYR9,Q6P6R2,Q80WL1,Q9EQV9,Q9JHB9,Q9QZA6,Q9QZK9                      |
| 2657 | 1,2,4,6,8,1<br>0,13,14 | 3,5,7,9,11,<br>12,15,16,1<br>7 | 6  | P06911,P07647,P12020,P25236,P50280,Q5GRG2                                                                                                                                                                         |
| 2658 | 1,2,4,6,8,1<br>0,13,15 | 3,5,7,9,11,<br>12,14,16,1<br>7 | 7  | D3ZHA0,P06911,P15999,P25236,P50280,Q5GRG2,Q6IFV1                                                                                                                                                                  |
| 2659 | 1,2,4,6,8,1<br>0,13,16 | 3,5,7,9,11,<br>12,14,15,1<br>7 | 4  | P06911,P25236,Q5GRG2,Q8CJD3                                                                                                                                                                                       |
| 2660 | 1,2,4,6,8,1<br>0,13,17 | 3,5,7,9,11,<br>12,14,15,1<br>6 | 9  | P06911,P07647,P16636,P25236,P50280,Q4G075,Q5GRG2,Q63355,Q6IFV1                                                                                                                                                    |
| 2661 | 1,2,4,6,8,1<br>0,14,15 | 3,5,7,9,11,<br>12,13,16,1<br>7 | 6  | D3ZHA0,P02761,P17046,P25236,P35280,Q5GRG2                                                                                                                                                                         |
| 2662 | 1,2,4,6,8,1<br>0,14,16 | 3,5,7,9,11,<br>12,13,15,1<br>7 | 3  | P08721,P25236,P97574                                                                                                                                                                                              |
| 2663 | 1,2,4,6,8,1<br>0,14,17 | 3,5,7,9,11,<br>12,13,15,1<br>6 | 6  | P02761,P25236,P50280,Q4G075,Q6P6R2,Q9WTT6                                                                                                                                                                         |
| 2664 | 1,2,4,6,8,1<br>0,15,16 | 3,5,7,9,11,<br>12,13,14,1<br>7 | 2  | D3ZHA0,P35280                                                                                                                                                                                                     |
| 2665 | 1,2,4,6,8,1<br>0,15,17 | 3,5,7,9,11,<br>12,13,14,1<br>6 | 5  | B0BNN3,P02761,Q4G075,Q6IFV1,Q9EQV9                                                                                                                                                                                |
| 2666 | 1,2,4,6,8,1<br>0,16,17 | 3,5,7,9,11,<br>12,13,14,1<br>5 | 3  | Q4G075,Q62997,Q6P6R2                                                                                                                                                                                              |
| 2667 | 1,2,4,6,8,1<br>1,12,13 | 3,5,7,9,10,<br>14,15,16,1<br>7 | 30 | O35547,P02780,P02781,P02782,P02803,P04905,P06761,P06911,P07647,P08723,P0C0A9,P14669,P22282,P22283,P24368,P25236,P30120,P36374,P47727,P50280,Q5GRG2,Q5M8C6,Q62902,Q63357,Q6AYR9,Q6TMA8,Q80WL1,Q8CJ52,Q9JHB9,Q9JI85 |
| 2668 | 1,2,4,6,8,1<br>1,12,14 | 3,5,7,9,10,<br>13,15,16,1<br>7 | 28 | O35547,P02780,P02781,P02782,P04905,P07647,P08723,P0C0A9,P14669,P20762,P24368,P25236,P30120,P35280,P40241,P47727,P50280,P62804,Q00715,Q5M8C6,Q6AYR9,Q6IFU7,Q6IFU8,Q6P6Q2,Q8CJ52,Q9EQS0,Q9JHB9,Q9JI85               |
| 2669 | 1,2,4,6,8,1<br>1,12,15 | 3,5,7,9,10,<br>13,14,16,1<br>7 | 21 | B0BNN3,O35547,O54715,O55004,P01015,P02761,P02782,P07647,P08723,P0C0A9,P14669,P20762,P25236,P30120,P35280,P50280,Q00715,Q6IFU7,Q8CJ52,Q9JHB9,Q9JI85                                                                |
| 2670 | 1,2,4,6,8,1<br>1,12,16 | 3,5,7,9,10,<br>13,14,15,1<br>7 | 16 | O35547,O54715,P02782,P07647,P08723,P0C0A9,P14669,P25236,P30120,P50280,Q6IFU7,Q6IFU8,Q6P6Q2,Q8CJ52,Q9JHB9,Q9JI85                                                                                                   |

|      |                        |                                |    |                                                                                                                                                                                                                                                                                          |
|------|------------------------|--------------------------------|----|------------------------------------------------------------------------------------------------------------------------------------------------------------------------------------------------------------------------------------------------------------------------------------------|
| 2671 | 1,2,4,6,8,1<br>1,12,17 | 3,5,7,9,10,<br>13,14,15,1<br>6 | 39 | O35547,O54715,O55004,P01015,P02761,P02780,P02781,P02782,P04905,P07150,P07647,P08723,P0C0A9,P13432,P14669,P15399,P1663<br>6,P19223,P22282,P22283,P30120,P36374,P50280,P55091,P62804,P98089,Q00715,Q4G075,Q5M8C6,Q62635,Q63493,Q6AYQ8,Q6AYR9,<br>Q80WL1,Q8CJ52,Q9JHB9,Q9JI85,Q9QZA6,Q9QZK9 |
| 2672 | 1,2,4,6,8,1<br>1,13,14 | 3,5,7,9,10,<br>12,15,16,1<br>7 | 15 | P02780,P02782,P06911,P07647,P08723,P14669,P20762,P22282,P25236,P47727,P50280,Q5GRG2,Q6TMA8,Q9JHB9,Q9JI85                                                                                                                                                                                 |
| 2673 | 1,2,4,6,8,1<br>1,13,15 | 3,5,7,9,10,<br>12,14,16,1<br>7 | 6  | P07647,P14669,P25236,P50280,Q5GRG2,Q6TMA8                                                                                                                                                                                                                                                |
| 2674 | 1,2,4,6,8,1<br>1,13,16 | 3,5,7,9,10,<br>12,14,15,1<br>7 | 6  | P06911,P07647,P14669,P25236,P50280,Q8CJD3                                                                                                                                                                                                                                                |
| 2675 | 1,2,4,6,8,1<br>1,13,17 | 3,5,7,9,10,<br>12,14,15,1<br>6 | 12 | P02782,P06911,P07150,P07647,P14669,P22282,P25236,P50280,Q4G075,Q8CJD3,Q9JHB9,Q9JI85                                                                                                                                                                                                      |
| 2676 | 1,2,4,6,8,1<br>1,14,15 | 3,5,7,9,10,<br>12,13,16,1<br>7 | 6  | P02761,P14669,P20762,P25236,P35280,P50280                                                                                                                                                                                                                                                |
| 2677 | 1,2,4,6,8,1<br>1,14,16 | 3,5,7,9,10,<br>12,13,15,1<br>7 | 4  | P14668,P14669,P25236,P97574                                                                                                                                                                                                                                                              |
| 2678 | 1,2,4,6,8,1<br>1,14,17 | 3,5,7,9,10,<br>12,13,15,1<br>6 | 10 | P02761,P07150,P07647,P14669,P15399,P20762,P25236,P50280,Q30KJ2,Q4G075                                                                                                                                                                                                                    |
| 2679 | 1,2,4,6,8,1<br>1,15,16 | 3,5,7,9,10,<br>12,13,14,1<br>7 | 3  | P14668,P14669,P35280                                                                                                                                                                                                                                                                     |
| 2680 | 1,2,4,6,8,1<br>1,15,17 | 3,5,7,9,10,<br>12,13,14,1<br>6 | 8  | B0BNN3,P01015,P02761,P07150,P14669,P50280,Q4G075,Q9QZA6                                                                                                                                                                                                                                  |
| 2681 | 1,2,4,6,8,1<br>1,16,17 | 3,5,7,9,10,<br>12,13,14,1<br>5 | 5  | A2RUV9,P07150,P14669,Q4G075,Q6P6R2                                                                                                                                                                                                                                                       |
| 2682 | 1,2,4,6,8,1<br>2,13,14 | 3,5,7,9,10,<br>11,15,16,1<br>7 | 26 | O08557,P02780,P02782,P06761,P06911,P07647,P08723,P0C0A9,P12020,P22282,P22283,P25236,P29975,P30120,P36374,P50280,Q5GR<br>G2,Q5M8C6,Q62902,Q64093,Q6AYR9,Q6TMA8,Q8CJ52,Q923M1,Q9JHB9,Q9JI85                                                                                                |
| 2683 | 1,2,4,6,8,1<br>2,13,15 | 3,5,7,9,10,<br>11,14,16,1<br>7 | 14 | O08557,P02782,P06911,P07647,P08723,P0C0A9,P15999,P25236,P30120,P50280,Q5GRG2,Q6AYR9,Q6IFV1,Q9JHB9                                                                                                                                                                                        |
| 2684 | 1,2,4,6,8,1<br>2,13,16 | 3,5,7,9,10,<br>11,14,15,1<br>7 | 12 | P02780,P02782,P06911,P07647,P08723,P0C0A9,P25236,P30120,P50280,Q6AYR9,Q8CJ52,Q9JHB9                                                                                                                                                                                                      |
| 2685 | 1,2,4,6,8,1<br>2,13,17 | 3,5,7,9,10,<br>11,14,15,1<br>6 | 29 | P02780,P02782,P06761,P06911,P07647,P08723,P0C0A9,P13432,P16636,P19223,P22282,P22283,P25236,P30120,P36374,P50280,P55091<br>,P62815,P98089,Q4G075,Q5M8C6,Q62635,Q63355,Q6AYR9,Q6IFV1,Q80WL1,Q8CJ52,Q9JHB9,Q9QZK9                                                                           |

|      |                        |                                |    |                                                                                                                                                                             |
|------|------------------------|--------------------------------|----|-----------------------------------------------------------------------------------------------------------------------------------------------------------------------------|
| 2686 | 1,2,4,6,8,1<br>2,14,15 | 3,5,7,9,10,<br>11,13,16,1<br>7 | 11 | B0BNN3,O08557,P02782,P07647,P08723,P20762,P25236,P30120,P35280,P50280,Q6AYR9                                                                                                |
| 2687 | 1,2,4,6,8,1<br>2,14,16 | 3,5,7,9,10,<br>11,13,15,1<br>7 | 7  | P02782,P07647,P08723,P25236,P30120,Q6AYR9,Q8CJ52                                                                                                                            |
| 2688 | 1,2,4,6,8,1<br>2,14,17 | 3,5,7,9,10,<br>11,13,15,1<br>6 | 24 | P02782,P07647,P08723,P0C0A9,P13432,P19223,P20762,P22282,P25236,P30120,P31430,P50280,P55091,P98089,Q10758,Q4G075,Q5M8<br>C6,Q62635,Q6AYQ8,Q6AYR9,Q923M1,Q9JHB9,Q9QZA6,Q9WTT6 |
| 2689 | 1,2,4,6,8,1<br>2,15,16 | 3,5,7,9,10,<br>11,13,14,1<br>7 | 2  | P08723,P25236                                                                                                                                                               |
| 2690 | 1,2,4,6,8,1<br>2,15,17 | 3,5,7,9,10,<br>11,13,14,1<br>6 | 17 | B0BNN3,P01015,P02761,P02782,P06866,P07647,P08723,P13432,P19223,P50280,P55091,P98089,Q4G075,Q62635,Q6IFV1,Q9EQV9,Q9<br>QZA6                                                  |
| 2691 | 1,2,4,6,8,1<br>2,16,17 | 3,5,7,9,10,<br>11,13,14,1<br>5 | 14 | P02782,P07647,P08723,P13432,P14480,P16636,P19223,P30120,P55091,P98089,Q4G075,Q62635,Q6AYR9,Q6P6R2                                                                           |
| 2692 | 1,2,4,6,8,1<br>3,14,15 | 3,5,7,9,10,<br>11,12,16,1<br>7 | 7  | O08557,P06911,P15999,P25236,P50280,Q5GRG2,Q64093                                                                                                                            |
| 2693 | 1,2,4,6,8,1<br>3,14,16 | 3,5,7,9,10,<br>11,12,15,1<br>7 | 4  | P06911,P25236,Q5GRG2,Q6PCU2                                                                                                                                                 |
| 2694 | 1,2,4,6,8,1<br>3,14,17 | 3,5,7,9,10,<br>11,12,15,1<br>6 | 8  | P02782,P06911,P07647,P22282,P25236,P50280,Q5GRG2,Q6PCU2                                                                                                                     |
| 2695 | 1,2,4,6,8,1<br>3,15,16 | 3,5,7,9,10,<br>11,12,14,1<br>7 | 2  | P25236,Q5GRG2                                                                                                                                                               |
| 2696 | 1,2,4,6,8,1<br>3,15,17 | 3,5,7,9,10,<br>11,12,14,1<br>6 | 8  | B0BNN3,P02761,P15999,P25236,P50280,Q4G075,Q5GRG2,Q6IFV1                                                                                                                     |
| 2697 | 1,2,4,6,8,1<br>3,16,17 | 3,5,7,9,10,<br>11,12,14,1<br>5 | 4  | P25236,Q63355,Q6PCU2,Q8CJD3                                                                                                                                                 |
| 2698 | 1,2,4,6,8,1<br>4,15,16 | 3,5,7,9,10,<br>11,12,13,1<br>7 | 2  | P25236,P97574                                                                                                                                                               |
| 2699 | 1,2,4,6,8,1<br>4,15,17 | 3,5,7,9,10,<br>11,12,13,1<br>6 | 6  | B0BNN3,P02761,P10536,P20762,P25236,P50280                                                                                                                                   |
| 2700 | 1,2,4,6,8,1<br>4,16,17 | 3,5,7,9,10,<br>11,12,13,1<br>5 | 3  | P25236,Q6P6R2,Q6PCU2                                                                                                                                                        |



|      |                        |                                |    |                                                                                            |
|------|------------------------|--------------------------------|----|--------------------------------------------------------------------------------------------|
| 2701 | 1,2,4,6,8,1<br>5,16,17 | 3,5,7,9,10,<br>11,12,13,1<br>4 | 4  | B0BNN3,P02761,Q4G075,Q6PCU2                                                                |
| 2702 | 1,2,4,6,9,1<br>0,11,12 | 3,5,7,8,13,<br>14,15,16,1<br>7 | 13 | P02803,P06757,P0C0A9,P30120,Q63357,Q63661,Q6IFU7,Q6IFU8,Q6IMF3,Q6P6Q2,Q7TP52,Q91ZS3,Q9JHB9 |
| 2703 | 1,2,4,6,9,1<br>0,11,13 | 3,5,7,8,12,<br>14,15,16,1<br>7 | 4  | P02803,P25236,Q8CJD3,Q91ZS3                                                                |
| 2704 | 1,2,4,6,9,1<br>0,11,14 | 3,5,7,8,12,<br>13,15,16,1<br>7 | 7  | P15399,P25236,P47727,P83121,Q63661,Q7TP52,Q91ZS3                                           |
| 2705 | 1,2,4,6,9,1<br>0,11,15 | 3,5,7,8,12,<br>13,14,16,1<br>7 | 3  | P35280,Q561R9,Q7TP52                                                                       |
| 2706 | 1,2,4,6,9,1<br>0,11,16 | 3,5,7,8,12,<br>13,14,15,1<br>7 | 4  | A2RUV9,Q7TP52,Q91ZS3,Q9WUW8                                                                |
| 2707 | 1,2,4,6,9,1<br>0,11,17 | 3,5,7,8,12,<br>13,14,15,1<br>6 | 3  | P15399,Q64335,Q7TP52                                                                       |
| 2708 | 1,2,4,6,9,1<br>0,12,13 | 3,5,7,8,11,<br>14,15,16,1<br>7 | 8  | P02803,P25236,P30120,P36374,P70709,P97840,Q6AYR9,Q9JHB9                                    |
| 2709 | 1,2,4,6,9,1<br>0,12,14 | 3,5,7,8,11,<br>13,15,16,1<br>7 | 2  | P25236,Q10758                                                                              |
| 2710 | 1,2,4,6,9,1<br>0,12,15 | 3,5,7,8,11,<br>13,14,16,1<br>7 | 0  |                                                                                            |
| 2711 | 1,2,4,6,9,1<br>0,12,16 | 3,5,7,8,11,<br>13,14,15,1<br>7 | 5  | P47967,P97840,Q10758,Q6IFU7,Q9WUW8                                                         |
| 2712 | 1,2,4,6,9,1<br>0,12,17 | 3,5,7,8,11,<br>13,14,15,1<br>6 | 7  | P13432,P16636,P19223,P98089,Q10758,Q62635,Q63355                                           |
| 2713 | 1,2,4,6,9,1<br>0,13,14 | 3,5,7,8,11,<br>12,15,16,1<br>7 | 4  | P06911,P12020,P25236,Q5GRG2                                                                |
| 2714 | 1,2,4,6,9,1<br>0,13,15 | 3,5,7,8,11,<br>12,14,16,1<br>7 | 1  | P25236                                                                                     |
| 2715 | 1,2,4,6,9,1<br>0,13,16 | 3,5,7,8,11,<br>12,14,15,1<br>7 | 2  | P25236,Q8CJD3                                                                              |

|      |                        |                                |    |                                                                              |
|------|------------------------|--------------------------------|----|------------------------------------------------------------------------------|
| 2716 | 1,2,4,6,9,1<br>0,13,17 | 3,5,7,8,11,<br>12,14,15,1<br>6 | 2  | Q63355,Q8CJD3                                                                |
| 2717 | 1,2,4,6,9,1<br>0,14,15 | 3,5,7,8,11,<br>12,13,16,1<br>7 | 2  | P17046,P25236                                                                |
| 2718 | 1,2,4,6,9,1<br>0,14,16 | 3,5,7,8,11,<br>12,13,15,1<br>7 | 2  | P25236,Q63942                                                                |
| 2719 | 1,2,4,6,9,1<br>0,14,17 | 3,5,7,8,11,<br>12,13,15,1<br>6 | 0  |                                                                              |
| 2720 | 1,2,4,6,9,1<br>0,15,16 | 3,5,7,8,11,<br>12,13,14,1<br>7 | 1  | Q63942                                                                       |
| 2721 | 1,2,4,6,9,1<br>0,15,17 | 3,5,7,8,11,<br>12,13,14,1<br>6 | 0  |                                                                              |
| 2722 | 1,2,4,6,9,1<br>0,16,17 | 3,5,7,8,11,<br>12,13,14,1<br>5 | 3  | P14480,Q6P6R2,Q7TP52                                                         |
| 2723 | 1,2,4,6,9,1<br>1,12,13 | 3,5,7,8,10,<br>14,15,16,1<br>7 | 11 | P02803,P04905,P07647,P0C0A9,P25236,P30120,P36374,Q6AYR9,Q6IFU7,Q9JHB9,Q9JI85 |
| 2724 | 1,2,4,6,9,1<br>1,12,14 | 3,5,7,8,10,<br>13,15,16,1<br>7 | 8  | P04905,P0C0A9,P25236,P30120,P47727,Q6IFU7,Q6IFU8,Q9JHB9                      |
| 2725 | 1,2,4,6,9,1<br>1,12,15 | 3,5,7,8,10,<br>13,14,16,1<br>7 | 3  | P25236,P51907,Q6IFU7                                                         |
| 2726 | 1,2,4,6,9,1<br>1,12,16 | 3,5,7,8,10,<br>13,14,15,1<br>7 | 2  | Q6IFU7,Q6IFU8                                                                |
| 2727 | 1,2,4,6,9,1<br>1,12,17 | 3,5,7,8,10,<br>13,14,15,1<br>6 | 10 | P09605,P25809,P13432,P15399,P19223,P36374,P98089,Q62635,Q6AYQ8,Q6IFU7,Q9JHB9 |
| 2728 | 1,2,4,6,9,1<br>1,13,14 | 3,5,7,8,10,<br>12,15,16,1<br>7 | 4  | P06911,P25236,P47727,P83121                                                  |
| 2729 | 1,2,4,6,9,1<br>1,13,15 | 3,5,7,8,10,<br>12,14,16,1<br>7 | 1  | P25236                                                                       |
| 2730 | 1,2,4,6,9,1<br>1,13,16 | 3,5,7,8,10,<br>12,14,15,1<br>7 | 2  | P25236,Q8CJD3                                                                |

|      |                        |                                |   |                                                                |
|------|------------------------|--------------------------------|---|----------------------------------------------------------------|
| 2731 | 1,2,4,6,9,1<br>1,13,17 | 3,5,7,8,10,<br>12,14,15,1<br>6 | 1 | Q8CJD3                                                         |
| 2732 | 1,2,4,6,9,1<br>1,14,15 | 3,5,7,8,10,<br>12,13,16,1<br>7 | 1 | P25236                                                         |
| 2733 | 1,2,4,6,9,1<br>1,14,16 | 3,5,7,8,10,<br>12,13,15,1<br>7 | 2 | P25236,Q99MH3                                                  |
| 2734 | 1,2,4,6,9,1<br>1,14,17 | 3,5,7,8,10,<br>12,13,15,1<br>6 | 1 | P15399                                                         |
| 2735 | 1,2,4,6,9,1<br>1,15,16 | 3,5,7,8,10,<br>12,13,14,1<br>7 | 0 |                                                                |
| 2736 | 1,2,4,6,9,1<br>1,15,17 | 3,5,7,8,10,<br>12,13,14,1<br>6 | 0 |                                                                |
| 2737 | 1,2,4,6,9,1<br>1,16,17 | 3,5,7,8,10,<br>12,13,14,1<br>5 | 1 | A2RUV9                                                         |
| 2738 | 1,2,4,6,9,1<br>2,13,14 | 3,5,7,8,10,<br>11,15,16,1<br>7 | 5 | P06911,P25236,P30120,Q6AYR9,Q9JHB9                             |
| 2739 | 1,2,4,6,9,1<br>2,13,15 | 3,5,7,8,10,<br>11,14,16,1<br>7 | 1 | P25236                                                         |
| 2740 | 1,2,4,6,9,1<br>2,13,16 | 3,5,7,8,10,<br>11,14,15,1<br>7 | 2 | G3V686,P25236                                                  |
| 2741 | 1,2,4,6,9,1<br>2,13,17 | 3,5,7,8,10,<br>11,14,15,1<br>6 | 9 | P13432,P19223,P25236,P36374,P98089,Q62635,Q63355,Q6AYR9,Q9JHB9 |
| 2742 | 1,2,4,6,9,1<br>2,14,15 | 3,5,7,8,10,<br>11,13,16,1<br>7 | 1 | P25236                                                         |
| 2743 | 1,2,4,6,9,1<br>2,14,16 | 3,5,7,8,10,<br>11,13,15,1<br>7 | 1 | P25236                                                         |
| 2744 | 1,2,4,6,9,1<br>2,14,17 | 3,5,7,8,10,<br>11,13,15,1<br>6 | 9 | P01835,P13432,P19223,P25236,P31430,P98089,Q5HZV9,Q62635,Q6AYQ8 |
| 2745 | 1,2,4,6,9,1<br>2,15,16 | 3,5,7,8,10,<br>11,13,14,1<br>7 | 1 | P25236                                                         |

|      |                         |                                |    |                                                                                                                        |
|------|-------------------------|--------------------------------|----|------------------------------------------------------------------------------------------------------------------------|
| 2746 | 1,2,4,6,9,1<br>2,15,17  | 3,5,7,8,10,<br>11,13,14,1<br>6 | 6  | B0BNN3,P06866,P13432,P19223,P98089,Q62635                                                                              |
| 2747 | 1,2,4,6,9,1<br>2,16,17  | 3,5,7,8,10,<br>11,13,14,1<br>5 | 8  | P06866,P09605,P25809,P13432,P14480,P16573,P19223,P98089,Q62635                                                         |
| 2748 | 1,2,4,6,9,1<br>3,14,15  | 3,5,7,8,10,<br>11,12,16,1<br>7 | 2  | P16391,P25236                                                                                                          |
| 2749 | 1,2,4,6,9,1<br>3,14,16  | 3,5,7,8,10,<br>11,12,15,1<br>7 | 1  | P25236                                                                                                                 |
| 2750 | 1,2,4,6,9,1<br>3,14,17  | 3,5,7,8,10,<br>11,12,15,1<br>6 | 1  | P25236                                                                                                                 |
| 2751 | 1,2,4,6,9,1<br>3,15,16  | 3,5,7,8,10,<br>11,12,14,1<br>7 | 1  | P25236                                                                                                                 |
| 2752 | 1,2,4,6,9,1<br>3,15,17  | 3,5,7,8,10,<br>11,12,14,1<br>6 | 1  | P25236                                                                                                                 |
| 2753 | 1,2,4,6,9,1<br>3,16,17  | 3,5,7,8,10,<br>11,12,14,1<br>5 | 3  | P14480,Q63355,Q8CJD3                                                                                                   |
| 2754 | 1,2,4,6,9,1<br>4,15,16  | 3,5,7,8,10,<br>11,12,13,1<br>7 | 3  | P25236,Q63942,Q9QZK9                                                                                                   |
| 2755 | 1,2,4,6,9,1<br>4,15,17  | 3,5,7,8,10,<br>11,12,13,1<br>6 | 1  | Q5HZV9                                                                                                                 |
| 2756 | 1,2,4,6,9,1<br>4,16,17  | 3,5,7,8,10,<br>11,12,13,1<br>5 | 1  | Q5HZV9                                                                                                                 |
| 2757 | 1,2,4,6,9,1<br>5,16,17  | 3,5,7,8,10,<br>11,12,13,1<br>4 | 0  |                                                                                                                        |
| 2758 | 1,2,4,6,10,<br>11,12,13 | 3,5,7,8,9,1<br>4,15,16,17      | 13 | P02803,P04905,P07647,P08723,P0C0A9,P25236,P30120,P36374,P47727,P70709,Q6AYR9,Q6IFU7,Q9JHB9                             |
| 2759 | 1,2,4,6,10,<br>11,12,14 | 3,5,7,8,9,1<br>3,15,16,17      | 15 | P04905,P08723,P0C0A9,P15399,P25236,P30120,P35280,P47727,P62804,Q10758,Q6IFU7,Q6IFU8,Q6IMF3,Q6P6Q2,Q9JHB9               |
| 2760 | 1,2,4,6,10,<br>11,12,15 | 3,5,7,8,9,1<br>3,14,16,17      | 4  | P01015,P35280,P51907,Q6IFU7                                                                                            |
| 2761 | 1,2,4,6,10,<br>11,12,16 | 3,5,7,8,9,1<br>3,14,15,17      | 10 | P06757,P47967,P53792,Q10758,Q6IFU7,Q6IFU8,Q6IMF3,Q6P6Q2,Q7TP52,Q9WUW8                                                  |
| 2762 | 1,2,4,6,10,<br>11,12,17 | 3,5,7,8,9,1<br>3,14,15,16      | 17 | O08815,P05964,P06757,P06866,P0C0A9,P13432,P15399,P16636,P19223,P36374,P98089,Q10758,Q62635,Q6IFU7,Q6IFU8,Q7TP52,Q9JHB9 |

|      |                                                |    |                                                                                            |
|------|------------------------------------------------|----|--------------------------------------------------------------------------------------------|
| 2763 | 1,2,4,6,10, 3,5,7,8,9,1<br>11,13,14 2,15,16,17 | 5  | P06911,P12020,P25236,P47727,Q5GRG2                                                         |
| 2764 | 1,2,4,6,10, 3,5,7,8,9,1<br>11,13,15 2,14,16,17 | 1  | P25236                                                                                     |
| 2765 | 1,2,4,6,10, 3,5,7,8,9,1<br>11,13,16 2,14,15,17 | 3  | P25236,Q7TP52,Q8CJD3                                                                       |
| 2766 | 1,2,4,6,10, 3,5,7,8,9,1<br>11,13,17 2,14,15,16 | 3  | P15399,Q7TP52,Q8CJD3                                                                       |
| 2767 | 1,2,4,6,10, 3,5,7,8,9,1<br>11,14,15 2,13,16,17 | 2  | P25236,P35280                                                                              |
| 2768 | 1,2,4,6,10, 3,5,7,8,9,1<br>11,14,16 2,13,15,17 | 2  | P25236,Q7TP52                                                                              |
| 2769 | 1,2,4,6,10, 3,5,7,8,9,1<br>11,14,17 2,13,15,16 | 4  | P15399,P97580,Q30KJ2,Q7TP52                                                                |
| 2770 | 1,2,4,6,10, 3,5,7,8,9,1<br>11,15,16 2,13,14,17 | 3  | P35280,P51907,Q7TP52                                                                       |
| 2771 | 1,2,4,6,10, 3,5,7,8,9,1<br>11,15,17 2,13,14,16 | 2  | P15399,Q7TP52                                                                              |
| 2772 | 1,2,4,6,10, 3,5,7,8,9,1<br>11,16,17 2,13,14,15 | 4  | A2RUV9,P14480,P15399,Q7TP52                                                                |
| 2773 | 1,2,4,6,10, 3,5,7,8,9,1<br>12,13,14 1,15,16,17 | 10 | P06911,P08723,P12020,P25236,P30120,P70709,Q10758,Q5GRG2,Q6AYR9,Q9JHB9                      |
| 2774 | 1,2,4,6,10, 3,5,7,8,9,1<br>12,13,15 1,14,16,17 | 2  | P25236,P70709                                                                              |
| 2775 | 1,2,4,6,10, 3,5,7,8,9,1<br>12,13,16 1,14,15,17 | 6  | P25236,P47967,P70709,P97840,Q10758,Q6IFU7                                                  |
| 2776 | 1,2,4,6,10, 3,5,7,8,9,1<br>12,13,17 1,14,15,16 | 13 | P14480,P16636,P19223,P25236,P36374,P70709,P98089,Q10758,Q62635,Q63355,Q6AYR9,Q9JHB9,Q9QZK9 |
| 2777 | 1,2,4,6,10, 3,5,7,8,9,1<br>12,14,15 1,13,16,17 | 3  | P25236,P35280,Q10758                                                                       |
| 2778 | 1,2,4,6,10, 3,5,7,8,9,1<br>12,14,16 1,13,15,17 | 5  | P25236,P97840,Q10758,Q63532,Q6IFU7                                                         |
| 2779 | 1,2,4,6,10, 3,5,7,8,9,1<br>12,14,17 1,13,15,16 | 7  | P19223,P25236,P31430,P98089,Q10758,Q62635,Q6AYR9                                           |
| 2780 | 1,2,4,6,10, 3,5,7,8,9,1<br>12,15,16 1,13,14,17 | 3  | P25236,P97840,Q6IFU7                                                                       |
| 2781 | 1,2,4,6,10, 3,5,7,8,9,1<br>12,15,17 1,13,14,16 | 7  | B0BNN3,P01015,P06866,P19223,P98089,Q10758,Q62635                                           |
| 2782 | 1,2,4,6,10, 3,5,7,8,9,1<br>12,16,17 1,13,14,15 | 6  | P06866,P14480,P19223,P98089,Q10758,Q62635                                                  |
| 2783 | 1,2,4,6,10, 3,5,7,8,9,1<br>13,14,15 1,12,16,17 | 4  | P06911,P12020,P25236,Q5GRG2                                                                |
| 2784 | 1,2,4,6,10, 3,5,7,8,9,1<br>13,14,16 1,12,15,17 | 4  | P06911,P12020,P25236,Q5GRG2                                                                |
| 2785 | 1,2,4,6,10, 3,5,7,8,9,1<br>13,14,17 1,12,15,16 | 4  | P06911,P12020,P25236,Q5GRG2                                                                |

|      |                                                |    |                                                                                            |
|------|------------------------------------------------|----|--------------------------------------------------------------------------------------------|
| 2786 | 1,2,4,6,10, 3,5,7,8,9,1<br>13,15,16 1,12,14,17 | 2  | P25236,Q62997                                                                              |
| 2787 | 1,2,4,6,10, 3,5,7,8,9,1<br>13,15,17 1,12,14,16 | 1  | Q6IFV1                                                                                     |
| 2788 | 1,2,4,6,10, 3,5,7,8,9,1<br>13,16,17 1,12,14,15 | 4  | P14480,Q62997,Q63355,Q8CJD3                                                                |
| 2789 | 1,2,4,6,10, 3,5,7,8,9,1<br>14,15,16 1,12,13,17 | 1  | P25236                                                                                     |
| 2790 | 1,2,4,6,10, 3,5,7,8,9,1<br>14,15,17 1,12,13,16 | 0  |                                                                                            |
| 2791 | 1,2,4,6,10, 3,5,7,8,9,1<br>14,16,17 1,12,13,15 | 1  | P14480                                                                                     |
| 2792 | 1,2,4,6,10, 3,5,7,8,9,1<br>15,16,17 1,12,13,14 | 1  | Q62997                                                                                     |
| 2793 | 1,2,4,6,11, 3,5,7,8,9,1<br>12,13,14 0,15,16,17 | 13 | P04905,P06911,P07647,P08723,P0C0A9,P25236,P30120,P36374,P47727,Q6AYR9,Q6IFU7,Q9JHB9,Q9JI85 |
| 2794 | 1,2,4,6,11, 3,5,7,8,9,1<br>12,13,15 0,14,16,17 | 4  | P25236,P30120,Q6IFU7,Q9JHB9                                                                |
| 2795 | 1,2,4,6,11, 3,5,7,8,9,1<br>12,13,16 0,14,15,17 | 6  | G3V686,P0C0A9,P25236,P30120,Q6IFU7,Q9JHB9                                                  |
| 2796 | 1,2,4,6,11, 3,5,7,8,9,1<br>12,13,17 0,14,15,16 | 12 | P07647,P0C0A9,P13432,P15399,P25236,P30120,P36374,P98089,Q62635,Q6AYR9,Q9JHB9,Q9QZK9        |
| 2797 | 1,2,4,6,11, 3,5,7,8,9,1<br>12,14,15 0,13,16,17 | 4  | P25236,P35280,P51907,Q6IFU7                                                                |
| 2798 | 1,2,4,6,11, 3,5,7,8,9,1<br>12,14,16 0,13,15,17 | 5  | G3V686,P25236,Q63532,Q6IFU7,Q6IFU8                                                         |
| 2799 | 1,2,4,6,11, 3,5,7,8,9,1<br>12,14,17 0,13,15,16 | 13 | P13432,P15399,P25236,P30120,P31430,P47727,P98089,Q00715,Q10758,Q62635,Q6AYQ8,Q6IFU8,Q9JHB9 |
| 2800 | 1,2,4,6,11, 3,5,7,8,9,1<br>12,15,16 0,13,14,17 | 3  | P25236,P51907,Q6IFU7                                                                       |
| 2801 | 1,2,4,6,11, 3,5,7,8,9,1<br>12,15,17 0,13,14,16 | 8  | B0BNN3,P01015,P06866,P13432,P19223,P98089,Q62635,Q6AYQ8                                    |
| 2802 | 1,2,4,6,11, 3,5,7,8,9,1<br>12,16,17 0,13,14,15 | 6  | P06866,P13432,P14480,P98089,Q62635,Q6IFU7                                                  |
| 2803 | 1,2,4,6,11, 3,5,7,8,9,1<br>13,14,15 0,12,16,17 | 3  | P06911,P25236,Q5GRG2                                                                       |
| 2804 | 1,2,4,6,11, 3,5,7,8,9,1<br>13,14,16 0,12,15,17 | 3  | G3V686,P06911,P25236                                                                       |
| 2805 | 1,2,4,6,11, 3,5,7,8,9,1<br>13,14,17 0,12,15,16 | 4  | P06911,P15399,P25236,P47727                                                                |
| 2806 | 1,2,4,6,11, 3,5,7,8,9,1<br>13,15,16 0,12,14,17 | 1  | P25236                                                                                     |
| 2807 | 1,2,4,6,11, 3,5,7,8,9,1<br>13,15,17 0,12,14,16 | 0  |                                                                                            |
| 2808 | 1,2,4,6,11, 3,5,7,8,9,1<br>13,16,17 0,12,14,15 | 2  | P14480,Q8CJD3                                                                              |

|      |                                                    |    |                                                                                            |
|------|----------------------------------------------------|----|--------------------------------------------------------------------------------------------|
| 2809 | 1,2,4,6,11, 3,5,7,8,9,1<br>14,15,16 0,12,13,17     | 1  | P25236                                                                                     |
| 2810 | 1,2,4,6,11, 3,5,7,8,9,1<br>14,15,17 0,12,13,16     | 0  |                                                                                            |
| 2811 | 1,2,4,6,11, 3,5,7,8,9,1<br>14,16,17 0,12,13,15     | 0  |                                                                                            |
| 2812 | 1,2,4,6,11, 3,5,7,8,9,1<br>15,16,17 0,12,13,14     | 0  |                                                                                            |
| 2813 | 1,2,4,6,12, 3,5,7,8,9,1<br>13,14,15 0,11,16,17     | 3  | P06911,P25236,Q5GRG2                                                                       |
| 2814 | 1,2,4,6,12, 3,5,7,8,9,1<br>13,14,16 0,11,15,17     | 3  | G3V686,P06911,P25236                                                                       |
| 2815 | 1,2,4,6,12, 3,5,7,8,9,1<br>13,14,17 0,11,15,16     | 10 | P06911,P13432,P25236,P30120,P31430,P36374,P98089,Q62635,Q6AYR9,Q9JHB9                      |
| 2816 | 1,2,4,6,12, 3,5,7,8,9,1<br>13,15,16 0,11,14,17     | 1  | P25236                                                                                     |
| 2817 | 1,2,4,6,12, 3,5,7,8,9,1<br>13,15,17 0,11,14,16     | 8  | B0BNN3,P06866,P13432,P25236,P55016,P98089,Q62635,Q6IFV1                                    |
| 2818 | 1,2,4,6,12, 3,5,7,8,9,1<br>13,16,17 0,11,14,15     | 8  | P13432,P14480,P16573,P25236,P27213,P98089,Q62635,Q63355                                    |
| 2819 | 1,2,4,6,12, 3,5,7,8,9,1<br>14,15,16 0,11,13,17     | 4  | D3ZUC6,P25236,P35467,Q63532                                                                |
| 2820 | 1,2,4,6,12, 3,5,7,8,9,1<br>14,15,17 0,11,13,16     | 9  | B0BNN3,P06866,P13432,P25236,P31430,P98089,Q5HZV9,Q62635,Q6AYQ8                             |
| 2821 | 1,2,4,6,12, 3,5,7,8,9,1<br>14,16,17 0,11,13,15     | 8  | P13432,P14480,P25236,P31430,P98089,Q10758,Q5HZV9,Q62635                                    |
| 2822 | 1,2,4,6,12, 3,5,7,8,9,1<br>15,16,17 0,11,13,14     | 4  | P06866,P16573,P98089,Q62635                                                                |
| 2823 | 1,2,4,6,13, 3,5,7,8,9,1<br>14,15,16 0,11,12,17     | 2  | P25236,P35467                                                                              |
| 2824 | 1,2,4,6,13, 3,5,7,8,9,1<br>14,15,17 0,11,12,16     | 1  | P25236                                                                                     |
| 2825 | 1,2,4,6,13, 3,5,7,8,9,1<br>14,16,17 0,11,12,15     | 4  | P14480,P25236,P27213,Q6PCU2                                                                |
| 2826 | 1,2,4,6,13, 3,5,7,8,9,1<br>15,16,17 0,11,12,14     | 2  | P25236,P27213                                                                              |
| 2827 | 1,2,4,6,14, 3,5,7,8,9,1<br>15,16,17 0,11,12,13     | 2  | P35467,Q5HZV9                                                                              |
| 2828 | 1,2,4,7,8,9 3,5,6,12,1<br>,10,11 3,14,15,16<br>,17 | 13 | D3ZHA0,P00714,P02761,P02803,P18418,P30919,P31044,P35280,Q561R9,Q63617,Q80WL1,Q9EQS0,Q9R0T3 |
| 2829 | 1,2,4,7,8,9 3,5,6,11,1<br>,10,12 3,14,15,16<br>,17 | 12 | D3ZHA0,P02803,P10715,P18418,P19223,P31044,P36374,P97840,Q80WL1,Q8CJ52,Q9EQS0,Q9R0T3        |

|      |                       |                                 |    |                                                                                                                        |
|------|-----------------------|---------------------------------|----|------------------------------------------------------------------------------------------------------------------------|
| 2830 | 1,2,4,7,8,9<br>,10,13 | 3,5,6,11,1<br>2,14,15,16<br>,17 | 7  | D3ZHA0,P02803,P18418,P31044,Q5GRG2,Q80WL1,Q9ROT3                                                                       |
| 2831 | 1,2,4,7,8,9<br>,10,14 | 3,5,6,11,1<br>2,13,15,16<br>,17 | 5  | D3ZHA0,P18418,P31044,Q63617,Q9EQS0                                                                                     |
| 2832 | 1,2,4,7,8,9<br>,10,15 | 3,5,6,11,1<br>2,13,14,16<br>,17 | 7  | D3ZHA0,P02761,P18418,P31044,P35280,Q561R9,Q5QE79                                                                       |
| 2833 | 1,2,4,7,8,9<br>,10,16 | 3,5,6,11,1<br>2,13,14,15<br>,17 | 5  | D3ZHA0,P08721,P18418,P31044,Q9ROT3                                                                                     |
| 2834 | 1,2,4,7,8,9<br>,10,17 | 3,5,6,11,1<br>2,13,14,15<br>,16 | 7  | P02761,P18418,P19223,P31044,P52590,P55091,Q80WL1                                                                       |
| 2835 | 1,2,4,7,8,9<br>,11,12 | 3,5,6,10,1<br>3,14,15,16<br>,17 | 16 | O55004,P02780,P02803,P08723,P0C0A9,P10715,P18418,P19223,P31044,P36374,Q63617,Q80WL1,Q8CJ52,Q9EQS0,Q9JI85,Q9ROT3        |
| 2836 | 1,2,4,7,8,9<br>,11,13 | 3,5,6,10,1<br>2,14,15,16<br>,17 | 10 | P02803,P18418,P20766,P31044,Q561R9,Q5GRG2,Q63617,Q80WL1,Q9JI85,Q9ROT3                                                  |
| 2837 | 1,2,4,7,8,9<br>,11,14 | 3,5,6,10,1<br>2,13,15,16<br>,17 | 6  | P18418,P31044,Q63617,Q99MH3,Q9EQS0,Q9JI85                                                                              |
| 2838 | 1,2,4,7,8,9<br>,11,15 | 3,5,6,10,1<br>2,13,14,16<br>,17 | 9  | P02761,P10715,P18418,P22006,P31044,P35280,Q561R9,Q5QE79,Q63617                                                         |
| 2839 | 1,2,4,7,8,9<br>,11,16 | 3,5,6,10,1<br>2,13,14,15<br>,17 | 5  | P10715,P31044,Q63617,Q99MH3,Q9ROT3                                                                                     |
| 2840 | 1,2,4,7,8,9<br>,11,17 | 3,5,6,10,1<br>2,13,14,15<br>,16 | 9  | O55004,P02761,P10715,P18418,P19223,P55091,Q63617,Q80WL1,Q9QZA6                                                         |
| 2841 | 1,2,4,7,8,9<br>,12,13 | 3,5,6,10,1<br>1,14,15,16<br>,17 | 17 | P02780,P02803,P06761,P07647,P10715,P18418,P19223,P22283,P31044,P36374,Q5GRG2,Q6AYR9,Q80WL1,Q8CJ52,Q9EQS0,Q9JI85,Q9ROT3 |
| 2842 | 1,2,4,7,8,9<br>,12,14 | 3,5,6,10,1<br>1,13,15,16<br>,17 | 8  | P10715,P18418,P19223,P36970,Q63617,Q80WL1,Q8CJ52,Q9EQS0                                                                |
| 2843 | 1,2,4,7,8,9<br>,12,15 | 3,5,6,10,1<br>1,13,14,16<br>,17 | 8  | D3ZHA0,P02761,P10715,P18418,P19223,Q5QE79,Q80WL1,Q9EQS0                                                                |
| 2844 | 1,2,4,7,8,9<br>,12,16 | 3,5,6,10,1<br>1,13,14,15<br>,17 | 8  | P02803,P10715,P18418,P19223,Q80WL1,Q8CJ52,Q9EQS0,Q9ROT3                                                                |



|      |                        |                                 |    |                                                                                                                                                                                                                   |
|------|------------------------|---------------------------------|----|-------------------------------------------------------------------------------------------------------------------------------------------------------------------------------------------------------------------|
| 2845 | 1,2,4,7,8,9<br>,12,17  | 3,5,6,10,1<br>1,13,14,15<br>,16 | 14 | O55004,P02761,P10715,P18418,P19223,P36374,P55091,P98089,Q80WL1,Q8CJ52,Q99041,Q9EQS0,Q9QZA6,Q9R0T3                                                                                                                 |
| 2846 | 1,2,4,7,8,9<br>,13,14  | 3,5,6,10,1<br>1,12,15,16<br>,17 | 6  | P06911,P18418,P31044,P36970,Q5GRG2,Q63617                                                                                                                                                                         |
| 2847 | 1,2,4,7,8,9<br>,13,15  | 3,5,6,10,1<br>1,12,14,16<br>,17 | 3  | P31044,Q5GRG2,Q5QE79                                                                                                                                                                                              |
| 2848 | 1,2,4,7,8,9<br>,13,16  | 3,5,6,10,1<br>1,12,14,15<br>,17 | 4  | P02803,P31044,Q63617,Q9R0T3                                                                                                                                                                                       |
| 2849 | 1,2,4,7,8,9<br>,13,17  | 3,5,6,10,1<br>1,12,14,15<br>,16 | 6  | P19223,P20766,P55091,Q63617,Q80WL1,Q9R0T3                                                                                                                                                                         |
| 2850 | 1,2,4,7,8,9<br>,14,15  | 3,5,6,10,1<br>1,12,13,16<br>,17 | 4  | P02761,P18418,P31044,Q5QE79                                                                                                                                                                                       |
| 2851 | 1,2,4,7,8,9<br>,14,16  | 3,5,6,10,1<br>1,12,13,15<br>,17 | 6  | P31044,P97574,Q63532,Q63617,Q99MH3,Q9QZK9                                                                                                                                                                         |
| 2852 | 1,2,4,7,8,9<br>,14,17  | 3,5,6,10,1<br>1,12,13,15<br>,16 | 5  | P02761,P18418,P19223,P55091,Q63617                                                                                                                                                                                |
| 2853 | 1,2,4,7,8,9<br>,15,16  | 3,5,6,10,1<br>1,12,13,14<br>,17 | 2  | Q5QE79,Q9QZK9                                                                                                                                                                                                     |
| 2854 | 1,2,4,7,8,9<br>,15,17  | 3,5,6,10,1<br>1,12,13,14<br>,16 | 5  | P02761,P19223,P55091,Q5QE79,Q9QZA6                                                                                                                                                                                |
| 2855 | 1,2,4,7,8,9<br>,16,17  | 3,5,6,10,1<br>1,12,13,14<br>,15 | 3  | P19223,Q63617,Q9R0T3                                                                                                                                                                                              |
| 2856 | 1,2,4,7,8,1<br>0,11,12 | 3,5,6,9,13,<br>14,15,16,1<br>7  | 30 | D3ZHA0,O54715,O55004,P00714,P02761,P02781,P02803,P05964,P08723,P0C0A9,P10715,P18418,P19223,P24368,P31044,P35280,P36374,P53792,P68370,Q63357,Q63475,Q63493,Q63598,Q64057,Q6AYL6,Q80WL1,Q8CJ52,Q9EQS0,Q9JI85,Q9R0T3 |
| 2857 | 1,2,4,7,8,1<br>0,11,13 | 3,5,6,9,12,<br>14,15,16,1<br>7  | 12 | P00714,P01835,P02803,P18418,P31044,P68370,Q561R9,Q5GRG2,Q80WL1,Q8CJ52,Q9JI85,Q9R0T3                                                                                                                               |
| 2858 | 1,2,4,7,8,1<br>0,11,14 | 3,5,6,9,12,<br>13,15,16,1<br>7  | 9  | P00714,P02761,P18418,P31044,P35280,P68370,Q5BJY9,Q63598,Q9EQS0                                                                                                                                                    |
| 2859 | 1,2,4,7,8,1<br>0,11,15 | 3,5,6,9,12,<br>13,14,16,1<br>7  | 8  | P00714,P01835,P02761,P18418,P22006,P31044,P35280,Q561R9                                                                                                                                                           |

|      |                        |                                |    |                                                                                                                                                    |
|------|------------------------|--------------------------------|----|----------------------------------------------------------------------------------------------------------------------------------------------------|
| 2860 | 1,2,4,7,8,1<br>0,11,16 | 3,5,6,9,12,<br>13,14,15,1<br>7 | 9  | P00714,P01835,P08721,P18418,P31044,P35280,Q561R9,Q5FVI6,Q9R0T3                                                                                     |
| 2861 | 1,2,4,7,8,1<br>0,11,17 | 3,5,6,9,12,<br>13,14,15,1<br>6 | 12 | P00714,P02761,P05964,P14669,P18418,P19223,P31044,P55091,Q63598,Q80WL1,Q9QZA6,Q9R0T3                                                                |
| 2862 | 1,2,4,7,8,1<br>0,12,13 | 3,5,6,9,11,<br>14,15,16,1<br>7 | 17 | D3ZHA0,P02803,P06761,P07647,P08723,P11598,P18418,P22283,P31044,P36374,Q5GRG2,Q6AYR9,Q80WL1,Q8CJ52,Q9EQS0,Q9JI85,Q9R0T3                             |
| 2863 | 1,2,4,7,8,1<br>0,12,14 | 3,5,6,9,11,<br>13,15,16,1<br>7 | 12 | D3ZHA0,P08723,P18418,P31044,P35280,P36970,Q63532,Q6AYR9,Q80WL1,Q8CJ52,Q9EQS0,Q9R0T3                                                                |
| 2864 | 1,2,4,7,8,1<br>0,12,15 | 3,5,6,9,11,<br>13,14,16,1<br>7 | 11 | D3ZHA0,P01041,P02761,P10715,P18418,P19223,P31044,P35280,Q80WL1,Q8CJ52,Q9EQS0                                                                       |
| 2865 | 1,2,4,7,8,1<br>0,12,16 | 3,5,6,9,11,<br>13,14,15,1<br>7 | 11 | D3ZHA0,P08721,P10715,P18418,P31044,P47967,P97840,Q80WL1,Q8CJ52,Q9EQS0,Q9R0T3                                                                       |
| 2866 | 1,2,4,7,8,1<br>0,12,17 | 3,5,6,9,11,<br>13,14,15,1<br>6 | 21 | D3ZHA0,P01041,P02761,P06866,P10715,P18418,P19223,P31044,P36374,P55091,P98089,Q4G075,Q62635,Q6AYR9,Q80WL1,Q8CJ52,Q99041,Q9EQS0,Q9EQV9,Q9QZA6,Q9R0T3 |
| 2867 | 1,2,4,7,8,1<br>0,13,14 | 3,5,6,9,11,<br>12,15,16,1<br>7 | 8  | P01835,P06911,P12020,P18418,P31044,P36970,Q5GRG2,Q9R0T3                                                                                            |
| 2868 | 1,2,4,7,8,1<br>0,13,15 | 3,5,6,9,11,<br>12,14,16,1<br>7 | 6  | D3ZHA0,P01835,P02761,P18418,P31044,Q5GRG2                                                                                                          |
| 2869 | 1,2,4,7,8,1<br>0,13,16 | 3,5,6,9,11,<br>12,14,15,1<br>7 | 6  | P01835,P18418,P31044,Q5GRG2,Q62997,Q9R0T3                                                                                                          |
| 2870 | 1,2,4,7,8,1<br>0,13,17 | 3,5,6,9,11,<br>12,14,15,1<br>6 | 11 | P01835,P02761,P11598,P18418,P19223,P31044,P46844,P55091,Q5GRG2,Q80WL1,Q9R0T3                                                                       |
| 2871 | 1,2,4,7,8,1<br>0,14,15 | 3,5,6,9,11,<br>12,13,16,1<br>7 | 8  | D3ZHA0,P01835,P02761,P18418,P22006,P31044,P35280,Q5GRG2                                                                                            |
| 2872 | 1,2,4,7,8,1<br>0,14,16 | 3,5,6,9,11,<br>12,13,15,1<br>7 | 6  | P01835,P08721,P18418,P31044,P97574,Q63532                                                                                                          |
| 2873 | 1,2,4,7,8,1<br>0,14,17 | 3,5,6,9,11,<br>12,13,15,1<br>6 | 5  | P02761,P18418,P19223,P31044,P55091                                                                                                                 |
| 2874 | 1,2,4,7,8,1<br>0,15,16 | 3,5,6,9,11,<br>12,13,14,1<br>7 | 7  | D3ZHA0,P01835,P02761,P08721,P18418,P31044,P35280                                                                                                   |

|      |                        |                                |    |                                                                                                                                                                                              |
|------|------------------------|--------------------------------|----|----------------------------------------------------------------------------------------------------------------------------------------------------------------------------------------------|
| 2875 | 1,2,4,7,8,1<br>0,15,17 | 3,5,6,9,11,<br>12,13,14,1<br>6 | 8  | P01835,P02761,P18418,P19223,P31044,P55091,Q9EQV9,Q9QZA6                                                                                                                                      |
| 2876 | 1,2,4,7,8,1<br>0,16,17 | 3,5,6,9,11,<br>12,13,14,1<br>5 | 7  | P01835,P08721,P18418,P19223,P31044,Q62997,Q9R0T3                                                                                                                                             |
| 2877 | 1,2,4,7,8,1<br>1,12,13 | 3,5,6,9,10,<br>14,15,16,1<br>7 | 27 | P01836,P02780,P02781,P02803,P06761,P07647,P08723,P0C0A9,P10715,P11598,P18418,P22282,P22283,P24368,P30120,P31044,P36374,Q5GRG2,Q62902,Q63493,Q6AYR9,Q80WL1,Q8CJ52,Q9EQS0,Q9JHB9,Q9JI85,Q9R0T3 |
| 2878 | 1,2,4,7,8,1<br>1,12,14 | 3,5,6,9,10,<br>13,15,16,1<br>7 | 17 | P02780,P08723,P0C0A9,P10715,P18418,P19629,P24368,P30120,P31044,P35280,P36374,Q63493,Q80WL1,Q8CJ52,Q9EQS0,Q9JI85,Q9R0T3                                                                       |
| 2879 | 1,2,4,7,8,1<br>1,12,15 | 3,5,6,9,10,<br>13,14,16,1<br>7 | 15 | O55004,P01015,P01041,P01836,P02761,P10715,P18418,P22006,P35280,P51907,Q561R9,Q80WL1,Q8CJ52,Q9EQS0,Q9JI85                                                                                     |
| 2880 | 1,2,4,7,8,1<br>1,12,16 | 3,5,6,9,10,<br>13,14,15,1<br>7 | 8  | P01836,P10715,P18418,Q80WL1,Q8CJ52,Q9EQS0,Q9JI85,Q9R0T3                                                                                                                                      |
| 2881 | 1,2,4,7,8,1<br>1,12,17 | 3,5,6,9,10,<br>13,14,15,1<br>6 | 25 | O55004,P01015,P01041,P02761,P05964,P10715,P14669,P18418,P19223,P22283,P36374,P50115,P55091,P98089,Q4G075,Q62635,Q63493,Q6AYQ8,Q80WL1,Q8CJ52,Q99041,Q9EQS0,Q9JI85,Q9QZA6,Q9R0T3               |
| 2882 | 1,2,4,7,8,1<br>1,13,14 | 3,5,6,9,10,<br>12,15,16,1<br>7 | 7  | P06911,P18418,P31044,Q5GRG2,Q63617,Q8CJ52,Q9JI85                                                                                                                                             |
| 2883 | 1,2,4,7,8,1<br>1,13,15 | 3,5,6,9,10,<br>12,14,16,1<br>7 | 8  | P01835,P01836,P02761,P22006,P31044,Q561R9,Q5GRG2,Q9JI85                                                                                                                                      |
| 2884 | 1,2,4,7,8,1<br>1,13,16 | 3,5,6,9,10,<br>12,14,15,1<br>7 | 8  | P01835,P01836,P31044,Q5GRG2,Q63617,Q8CJ52,Q8VD89,Q9R0T3                                                                                                                                      |
| 2885 | 1,2,4,7,8,1<br>1,13,17 | 3,5,6,9,10,<br>12,14,15,1<br>6 | 8  | P11598,P19223,P55091,Q5GRG2,Q63617,Q80WL1,Q9JI85,Q9R0T3                                                                                                                                      |
| 2886 | 1,2,4,7,8,1<br>1,14,15 | 3,5,6,9,10,<br>12,13,16,1<br>7 | 7  | P02761,P07171,P18418,P19629,P22006,P31044,P35280                                                                                                                                             |
| 2887 | 1,2,4,7,8,1<br>1,14,16 | 3,5,6,9,10,<br>12,13,15,1<br>7 | 6  | P18418,P31044,P97574,Q63532,Q63617,Q99MH3                                                                                                                                                    |
| 2888 | 1,2,4,7,8,1<br>1,14,17 | 3,5,6,9,10,<br>12,13,15,1<br>6 | 6  | P02761,P18418,P19223,P55091,Q63617,Q9QZA6                                                                                                                                                    |
| 2889 | 1,2,4,7,8,1<br>1,15,16 | 3,5,6,9,10,<br>12,13,14,1<br>7 | 7  | P01835,P01836,P10715,P22006,P31044,P35280,Q561R9                                                                                                                                             |

|      |                        |                                |    |                                                                                                                                                           |
|------|------------------------|--------------------------------|----|-----------------------------------------------------------------------------------------------------------------------------------------------------------|
| 2890 | 1,2,4,7,8,1<br>1,15,17 | 3,5,6,9,10,<br>12,13,14,1<br>6 | 9  | O55004,P01015,P02761,P10715,P14669,P19223,P22006,P55091,Q9QZA6                                                                                            |
| 2891 | 1,2,4,7,8,1<br>1,16,17 | 3,5,6,9,10,<br>12,13,14,1<br>5 | 6  | P10715,P19223,P55091,Q63617,Q9QZA6,Q9ROT3                                                                                                                 |
| 2892 | 1,2,4,7,8,1<br>2,13,14 | 3,5,6,9,10,<br>11,15,16,1<br>7 | 22 | O08557,P02780,P06761,P06911,P07647,P08723,P11598,P18418,P22283,P25236,P30120,P31044,P36374,P36970,Q5GRG2,Q62902,Q6AYR9,Q80WL1,Q8CJ52,Q9EQS0,Q9JI85,Q9ROT3 |
| 2893 | 1,2,4,7,8,1<br>2,13,15 | 3,5,6,9,10,<br>11,14,16,1<br>7 | 9  | P01836,P10715,P11598,P18418,Q5GRG2,Q80WL1,Q8CJ52,Q9JI85,Q9ROT3                                                                                            |
| 2894 | 1,2,4,7,8,1<br>2,13,16 | 3,5,6,9,10,<br>11,14,15,1<br>7 | 9  | P01836,P02803,P10715,P18418,P63029,Q5GRG2,Q80WL1,Q8CJ52,Q9ROT3                                                                                            |
| 2895 | 1,2,4,7,8,1<br>2,13,17 | 3,5,6,9,10,<br>11,14,15,1<br>6 | 21 | P06761,P07647,P10715,P11598,P18418,P19223,P22282,P22283,P36374,P55091,P63029,P98089,Q4G075,Q62635,Q6AYR9,Q80WL1,Q8CJ52,Q99041,Q9JI85,Q9QZA6,Q9ROT3        |
| 2896 | 1,2,4,7,8,1<br>2,14,15 | 3,5,6,9,10,<br>11,13,16,1<br>7 | 11 | D3ZUC6,O08557,P01041,P02761,P18418,P19629,P35280,P36970,Q80WL1,Q8CJ52,Q9EQS0                                                                              |
| 2897 | 1,2,4,7,8,1<br>2,14,16 | 3,5,6,9,10,<br>11,13,15,1<br>7 | 10 | D3ZUC6,P08721,P10715,P18418,P97574,Q63532,Q80WL1,Q8CJ52,Q9EQS0,Q9ROT3                                                                                     |
| 2898 | 1,2,4,7,8,1<br>2,14,17 | 3,5,6,9,10,<br>11,13,15,1<br>6 | 18 | P01041,P11598,P18418,P19223,P19629,P31430,P36374,P55091,P98089,Q4G075,Q62635,Q6AYQ8,Q80WL1,Q8CJ52,Q99041,Q9EQS0,Q9QZA6,Q9ROT3                             |
| 2899 | 1,2,4,7,8,1<br>2,15,16 | 3,5,6,9,10,<br>11,13,14,1<br>7 | 5  | P01041,P01836,P10715,Q80WL1,Q8CJ52                                                                                                                        |
| 2900 | 1,2,4,7,8,1<br>2,15,17 | 3,5,6,9,10,<br>11,13,14,1<br>6 | 16 | O55004,P01015,P01041,P02761,P06866,P10715,P18418,P19223,P55091,P98089,Q4G075,Q62635,Q80WL1,Q99041,Q9EQV9,Q9QZA6                                           |
| 2901 | 1,2,4,7,8,1<br>2,16,17 | 3,5,6,9,10,<br>11,13,14,1<br>5 | 13 | P01041,P06866,P10715,P19223,P55091,P63029,P98089,Q4G075,Q80WL1,Q8CJ52,Q99041,Q9QZA6,Q9ROT3                                                                |
| 2902 | 1,2,4,7,8,1<br>3,14,15 | 3,5,6,9,10,<br>11,12,16,1<br>7 | 8  | P01835,P06911,P18418,P25236,P31044,P36970,Q09030,Q5GRG2                                                                                                   |
| 2903 | 1,2,4,7,8,1<br>3,14,16 | 3,5,6,9,10,<br>11,12,15,1<br>7 | 8  | P01835,P06911,P31044,P97574,Q5GRG2,Q63532,Q63617,Q9ROT3                                                                                                   |
| 2904 | 1,2,4,7,8,1<br>3,14,17 | 3,5,6,9,10,<br>11,12,15,1<br>6 | 7  | P06911,P11598,P18418,P19223,P55091,Q5GRG2,Q6PCU2                                                                                                          |

|      |                        |                                |    |                                                                                            |
|------|------------------------|--------------------------------|----|--------------------------------------------------------------------------------------------|
| 2905 | 1,2,4,7,8,1<br>3,15,16 | 3,5,6,9,10,<br>11,12,14,1<br>7 | 4  | P01835,P31044,Q09030,Q5GRG2                                                                |
| 2906 | 1,2,4,7,8,1<br>3,15,17 | 3,5,6,9,10,<br>11,12,14,1<br>6 | 7  | P01835,P02761,P11598,P19223,P55091,Q5GRG2,Q9QZA6                                           |
| 2907 | 1,2,4,7,8,1<br>3,16,17 | 3,5,6,9,10,<br>11,12,14,1<br>5 | 6  | P01835,P19223,P55091,P63029,Q6PCU2,Q9R0T3                                                  |
| 2908 | 1,2,4,7,8,1<br>4,15,16 | 3,5,6,9,10,<br>11,12,13,1<br>7 | 4  | P01835,P31044,P97574,Q63532                                                                |
| 2909 | 1,2,4,7,8,1<br>4,15,17 | 3,5,6,9,10,<br>11,12,13,1<br>6 | 6  | P02761,P10536,P19223,P19629,P55091,Q9QZA6                                                  |
| 2910 | 1,2,4,7,8,1<br>4,16,17 | 3,5,6,9,10,<br>11,12,13,1<br>5 | 3  | P55091,P97574,Q6PCU2                                                                       |
| 2911 | 1,2,4,7,8,1<br>5,16,17 | 3,5,6,9,10,<br>11,12,13,1<br>4 | 4  | P01835,P02761,P19223,Q9QZA6                                                                |
| 2912 | 1,2,4,7,9,1<br>0,11,12 | 3,5,6,8,13,<br>14,15,16,1<br>7 | 13 | O54861,P02803,P05964,P06757,P08753,P36374,P47967,P51907,P97840,Q561R9,Q5FVI6,Q62636,Q63661 |
| 2913 | 1,2,4,7,9,1<br>0,11,13 | 3,5,6,8,12,<br>14,15,16,1<br>7 | 2  | P02803,Q561R9                                                                              |
| 2914 | 1,2,4,7,9,1<br>0,11,14 | 3,5,6,8,12,<br>13,15,16,1<br>7 | 3  | Q561R9,Q63661,Q99MH3                                                                       |
| 2915 | 1,2,4,7,9,1<br>0,11,15 | 3,5,6,8,12,<br>13,14,16,1<br>7 | 7  | O70594,P22006,P35280,P51907,Q561R9,Q5FVI6,Q63661                                           |
| 2916 | 1,2,4,7,9,1<br>0,11,16 | 3,5,6,8,12,<br>13,14,15,1<br>7 | 7  | O70594,P47967,P51907,Q561R9,Q5FVI6,Q64093,Q9WUW8                                           |
| 2917 | 1,2,4,7,9,1<br>0,11,17 | 3,5,6,8,12,<br>13,14,15,1<br>6 | 1  | P19223                                                                                     |
| 2918 | 1,2,4,7,9,1<br>0,12,13 | 3,5,6,8,11,<br>14,15,16,1<br>7 | 4  | P02803,P36374,P47967,P97840                                                                |
| 2919 | 1,2,4,7,9,1<br>0,12,14 | 3,5,6,8,11,<br>13,15,16,1<br>7 | 2  | P97840,Q63532                                                                              |

|      |                        |                                |   |                                           |
|------|------------------------|--------------------------------|---|-------------------------------------------|
| 2920 | 1,2,4,7,9,1<br>0,12,15 | 3,5,6,8,11,<br>13,14,16,1<br>7 | 1 | P97840                                    |
| 2921 | 1,2,4,7,9,1<br>0,12,16 | 3,5,6,8,11,<br>13,14,15,1<br>7 | 3 | P47967,P97840,Q9WUW8                      |
| 2922 | 1,2,4,7,9,1<br>0,12,17 | 3,5,6,8,11,<br>13,14,15,1<br>6 | 6 | P06866,P19223,P36374,P55091,P97840,P98089 |
| 2923 | 1,2,4,7,9,1<br>0,13,14 | 3,5,6,8,11,<br>12,15,16,1<br>7 | 1 | Q5GRG2                                    |
| 2924 | 1,2,4,7,9,1<br>0,13,15 | 3,5,6,8,11,<br>12,14,16,1<br>7 | 1 | Q561R9                                    |
| 2925 | 1,2,4,7,9,1<br>0,13,16 | 3,5,6,8,11,<br>12,14,15,1<br>7 | 2 | P47967,P97840                             |
| 2926 | 1,2,4,7,9,1<br>0,13,17 | 3,5,6,8,11,<br>12,14,15,1<br>6 | 0 |                                           |
| 2927 | 1,2,4,7,9,1<br>0,14,15 | 3,5,6,8,11,<br>12,13,16,1<br>7 | 0 |                                           |
| 2928 | 1,2,4,7,9,1<br>0,14,16 | 3,5,6,8,11,<br>12,13,15,1<br>7 | 3 | Q63532,Q99MH3,Q9QZK9                      |
| 2929 | 1,2,4,7,9,1<br>0,14,17 | 3,5,6,8,11,<br>12,13,15,1<br>6 | 0 |                                           |
| 2930 | 1,2,4,7,9,1<br>0,15,16 | 3,5,6,8,11,<br>12,13,14,1<br>7 | 2 | Q561R9,Q9QZK9                             |
| 2931 | 1,2,4,7,9,1<br>0,15,17 | 3,5,6,8,11,<br>12,13,14,1<br>6 | 0 |                                           |
| 2932 | 1,2,4,7,9,1<br>0,16,17 | 3,5,6,8,11,<br>12,13,14,1<br>5 | 0 |                                           |
| 2933 | 1,2,4,7,9,1<br>1,12,13 | 3,5,6,8,10,<br>14,15,16,1<br>7 | 4 | P01836,P02803,P36374,Q9JI85               |
| 2934 | 1,2,4,7,9,1<br>1,12,14 | 3,5,6,8,10,<br>13,15,16,1<br>7 | 3 | D3ZUC6,P51907,Q99MH3                      |

|      |                        |                                |   |                                           |
|------|------------------------|--------------------------------|---|-------------------------------------------|
| 2935 | 1,2,4,7,9,1<br>1,12,15 | 3,5,6,8,10,<br>13,14,16,1<br>7 | 4 | P01836,P22006,P51907,Q561R9               |
| 2936 | 1,2,4,7,9,1<br>1,12,16 | 3,5,6,8,10,<br>13,14,15,1<br>7 | 3 | P01836,P02803,P51907                      |
| 2937 | 1,2,4,7,9,1<br>1,12,17 | 3,5,6,8,10,<br>13,14,15,1<br>6 | 6 | P06866,P19223,P36374,P55091,P98089,Q6AYQ8 |
| 2938 | 1,2,4,7,9,1<br>1,13,14 | 3,5,6,8,10,<br>12,15,16,1<br>7 | 2 | P05539,Q99MH3                             |
| 2939 | 1,2,4,7,9,1<br>1,13,15 | 3,5,6,8,10,<br>12,14,16,1<br>7 | 4 | P01836,P05539,P22006,Q561R9               |
| 2940 | 1,2,4,7,9,1<br>1,13,16 | 3,5,6,8,10,<br>12,14,15,1<br>7 | 2 | P01836,P02803                             |
| 2941 | 1,2,4,7,9,1<br>1,13,17 | 3,5,6,8,10,<br>12,14,15,1<br>6 | 0 |                                           |
| 2942 | 1,2,4,7,9,1<br>1,14,15 | 3,5,6,8,10,<br>12,13,16,1<br>7 | 5 | P06760,P22006,P51907,Q561R9,Q99MH3        |
| 2943 | 1,2,4,7,9,1<br>1,14,16 | 3,5,6,8,10,<br>12,13,15,1<br>7 | 4 | P06760,Q63532,Q99MH3,Q9QZK9               |
| 2944 | 1,2,4,7,9,1<br>1,14,17 | 3,5,6,8,10,<br>12,13,15,1<br>6 | 0 |                                           |
| 2945 | 1,2,4,7,9,1<br>1,15,16 | 3,5,6,8,10,<br>12,13,14,1<br>7 | 6 | P01836,P06760,P51907,Q561R9,Q99MH3,Q9QZK9 |
| 2946 | 1,2,4,7,9,1<br>1,15,17 | 3,5,6,8,10,<br>12,13,14,1<br>6 | 1 | P22006                                    |
| 2947 | 1,2,4,7,9,1<br>1,16,17 | 3,5,6,8,10,<br>12,13,14,1<br>5 | 0 |                                           |
| 2948 | 1,2,4,7,9,1<br>2,13,14 | 3,5,6,8,10,<br>11,15,16,1<br>7 | 4 | D3ZUC6,P02803,P25236,P36374               |
| 2949 | 1,2,4,7,9,1<br>2,13,15 | 3,5,6,8,10,<br>11,14,16,1<br>7 | 1 | P01836                                    |

|      |                        |                                |   |                                           |
|------|------------------------|--------------------------------|---|-------------------------------------------|
| 2950 | 1,2,4,7,9,1<br>2,13,16 | 3,5,6,8,10,<br>11,14,15,1<br>7 | 2 | P01836,P02803                             |
| 2951 | 1,2,4,7,9,1<br>2,13,17 | 3,5,6,8,10,<br>11,14,15,1<br>6 | 5 | P02803,P19223,P36374,P55091,P98089        |
| 2952 | 1,2,4,7,9,1<br>2,14,15 | 3,5,6,8,10,<br>11,13,16,1<br>7 | 1 | D3ZUC6                                    |
| 2953 | 1,2,4,7,9,1<br>2,14,16 | 3,5,6,8,10,<br>11,13,15,1<br>7 | 3 | D3ZUC6,Q63532,Q99MH3                      |
| 2954 | 1,2,4,7,9,1<br>2,14,17 | 3,5,6,8,10,<br>11,13,15,1<br>6 | 6 | D3ZUC6,P19223,P31430,P55091,P98089,Q6AYQ8 |
| 2955 | 1,2,4,7,9,1<br>2,15,16 | 3,5,6,8,10,<br>11,13,14,1<br>7 | 1 | P01836                                    |
| 2956 | 1,2,4,7,9,1<br>2,15,17 | 3,5,6,8,10,<br>11,13,14,1<br>6 | 4 | P06866,P19223,P55091,P98089               |
| 2957 | 1,2,4,7,9,1<br>2,16,17 | 3,5,6,8,10,<br>11,13,14,1<br>5 | 4 | P06866,P19223,P55091,P98089               |
| 2958 | 1,2,4,7,9,1<br>3,14,15 | 3,5,6,8,10,<br>11,12,16,1<br>7 | 3 | P06760,P16636,Q5GRG2                      |
| 2959 | 1,2,4,7,9,1<br>3,14,16 | 3,5,6,8,10,<br>11,12,15,1<br>7 | 3 | P06760,Q63532,Q99MH3                      |
| 2960 | 1,2,4,7,9,1<br>3,14,17 | 3,5,6,8,10,<br>11,12,15,1<br>6 | 0 |                                           |
| 2961 | 1,2,4,7,9,1<br>3,15,16 | 3,5,6,8,10,<br>11,12,14,1<br>7 | 1 | P06760                                    |
| 2962 | 1,2,4,7,9,1<br>3,15,17 | 3,5,6,8,10,<br>11,12,14,1<br>6 | 0 |                                           |
| 2963 | 1,2,4,7,9,1<br>3,16,17 | 3,5,6,8,10,<br>11,12,14,1<br>5 | 0 |                                           |
| 2964 | 1,2,4,7,9,1<br>4,15,16 | 3,5,6,8,10,<br>11,12,13,1<br>7 | 6 | D3ZUC6,P06760,P16636,Q63532,Q99MH3,Q9QZK9 |



|      |                         |                                |   |                                                                |
|------|-------------------------|--------------------------------|---|----------------------------------------------------------------|
| 2965 | 1,2,4,7,9,1<br>4,15,17  | 3,5,6,8,10,<br>11,12,13,1<br>6 | 0 |                                                                |
| 2966 | 1,2,4,7,9,1<br>4,16,17  | 3,5,6,8,10,<br>11,12,13,1<br>5 | 0 |                                                                |
| 2967 | 1,2,4,7,9,1<br>5,16,17  | 3,5,6,8,10,<br>11,12,13,1<br>4 | 1 | P47727                                                         |
| 2968 | 1,2,4,7,10,<br>11,12,13 | 3,5,6,8,9,1<br>4,15,16,17      | 7 | P01836,P02803,P05964,P36374,P47967,Q62636,Q9JI85               |
| 2969 | 1,2,4,7,10,<br>11,12,14 | 3,5,6,8,9,1<br>3,15,16,17      | 4 | P05964,P35280,P51907,Q63532                                    |
| 2970 | 1,2,4,7,10,<br>11,12,15 | 3,5,6,8,9,1<br>3,14,16,17      | 8 | P01836,P05964,P22006,P35280,P51907,Q561R9,Q5FVI6,Q62636        |
| 2971 | 1,2,4,7,10,<br>11,12,16 | 3,5,6,8,9,1<br>3,14,15,17      | 9 | P01836,P05964,P06757,P47967,P51907,P53792,P97840,Q5FVI6,Q9WUW8 |
| 2972 | 1,2,4,7,10,<br>11,12,17 | 3,5,6,8,9,1<br>3,14,15,16      | 9 | O54861,P05964,P06757,P06866,P19223,P36374,P55091,P98089,Q62636 |
| 2973 | 1,2,4,7,10,<br>11,13,14 | 3,5,6,8,9,1<br>2,15,16,17      | 1 | Q5GRG2                                                         |
| 2974 | 1,2,4,7,10,<br>11,13,15 | 3,5,6,8,9,1<br>2,14,16,17      | 4 | P01835,P01836,P22006,Q561R9                                    |
| 2975 | 1,2,4,7,10,<br>11,13,16 | 3,5,6,8,9,1<br>2,14,15,17      | 4 | P01835,P01836,P47967,Q5FVI6                                    |
| 2976 | 1,2,4,7,10,<br>11,13,17 | 3,5,6,8,9,1<br>2,14,15,16      | 0 |                                                                |
| 2977 | 1,2,4,7,10,<br>11,14,15 | 3,5,6,8,9,1<br>2,13,16,17      | 5 | P22006,P35280,P51907,Q561R9,Q63532                             |
| 2978 | 1,2,4,7,10,<br>11,14,16 | 3,5,6,8,9,1<br>2,13,15,17      | 3 | P51907,Q5FVI6,Q63532                                           |
| 2979 | 1,2,4,7,10,<br>11,14,17 | 3,5,6,8,9,1<br>2,13,15,16      | 0 |                                                                |
| 2980 | 1,2,4,7,10,<br>11,15,16 | 3,5,6,8,9,1<br>2,13,14,17      | 8 | P01835,P01836,P22006,P35280,P51907,Q561R9,Q5FVI6,Q9Z1F2        |
| 2981 | 1,2,4,7,10,<br>11,15,17 | 3,5,6,8,9,1<br>2,13,14,16      | 1 | P22006                                                         |
| 2982 | 1,2,4,7,10,<br>11,16,17 | 3,5,6,8,9,1<br>2,13,14,15      | 1 | Q5FVI6                                                         |
| 2983 | 1,2,4,7,10,<br>12,13,14 | 3,5,6,8,9,1<br>1,15,16,17      | 5 | P12020,P25236,P36374,Q5GRG2,Q63532                             |
| 2984 | 1,2,4,7,10,<br>12,13,15 | 3,5,6,8,9,1<br>1,14,16,17      | 1 | P01836                                                         |
| 2985 | 1,2,4,7,10,<br>12,13,16 | 3,5,6,8,9,1<br>1,14,15,17      | 3 | P01836,P47967,P97840                                           |

|      |                                                |   |                                                  |
|------|------------------------------------------------|---|--------------------------------------------------|
| 2986 | 1,2,4,7,10, 3,5,6,8,9,1<br>12,13,17 1,14,15,16 | 5 | P06866,P19223,P36374,P55091,P98089               |
| 2987 | 1,2,4,7,10, 3,5,6,8,9,1<br>12,14,15 1,13,16,17 | 3 | D3ZUC6,P35280,Q63532                             |
| 2988 | 1,2,4,7,10, 3,5,6,8,9,1<br>12,14,16 1,13,15,17 | 5 | D3ZUC6,P08721,P47967,P97840,Q63532               |
| 2989 | 1,2,4,7,10, 3,5,6,8,9,1<br>12,14,17 1,13,15,16 | 5 | P06866,P19223,P31430,P55091,P98089               |
| 2990 | 1,2,4,7,10, 3,5,6,8,9,1<br>12,15,16 1,13,14,17 | 5 | P01836,P08721,P47967,P51907,P97840               |
| 2991 | 1,2,4,7,10, 3,5,6,8,9,1<br>12,15,17 1,13,14,16 | 5 | P01041,P06866,P19223,P55091,P98089               |
| 2992 | 1,2,4,7,10, 3,5,6,8,9,1<br>12,16,17 1,13,14,15 | 7 | P06866,P08721,P14480,P19223,P55091,P97840,P98089 |
| 2993 | 1,2,4,7,10, 3,5,6,8,9,1<br>13,14,15 1,12,16,17 | 3 | P01835,Q09030,Q5GRG2                             |
| 2994 | 1,2,4,7,10, 3,5,6,8,9,1<br>13,14,16 1,12,15,17 | 3 | P01835,Q5GRG2,Q63532                             |
| 2995 | 1,2,4,7,10, 3,5,6,8,9,1<br>13,14,17 1,12,15,16 | 1 | Q5GRG2                                           |
| 2996 | 1,2,4,7,10, 3,5,6,8,9,1<br>13,15,16 1,12,14,17 | 4 | P01835,Q09030,Q62997,Q99PP0                      |
| 2997 | 1,2,4,7,10, 3,5,6,8,9,1<br>13,15,17 1,12,14,16 | 1 | P01835                                           |
| 2998 | 1,2,4,7,10, 3,5,6,8,9,1<br>13,16,17 1,12,14,15 | 3 | P01835,P14480,Q62997                             |
| 2999 | 1,2,4,7,10, 3,5,6,8,9,1<br>14,15,16 1,12,13,17 | 4 | P01835,P08721,P35467,Q63532                      |
| 3000 | 1,2,4,7,10, 3,5,6,8,9,1<br>14,15,17 1,12,13,16 | 0 |                                                  |
| 3001 | 1,2,4,7,10, 3,5,6,8,9,1<br>14,16,17 1,12,13,15 | 2 | Q62997,Q63532                                    |
| 3002 | 1,2,4,7,10, 3,5,6,8,9,1<br>15,16,17 1,12,13,14 | 2 | P01835,Q62997                                    |
| 3003 | 1,2,4,7,11, 3,5,6,8,9,1<br>12,13,14 0,15,16,17 | 7 | D3ZUC6,P01836,P25236,P36374,Q5GRG2,Q63532,Q9JI85 |
| 3004 | 1,2,4,7,11, 3,5,6,8,9,1<br>12,13,15 0,14,16,17 | 4 | P01836,P22006,P36374,P51907                      |
| 3005 | 1,2,4,7,11, 3,5,6,8,9,1<br>12,13,16 0,14,15,17 | 5 | G3V686,P01836,P02803,P36374,P47967               |
| 3006 | 1,2,4,7,11, 3,5,6,8,9,1<br>12,13,17 0,14,15,16 | 5 | P01836,P19223,P36374,P55091,P98089               |
| 3007 | 1,2,4,7,11, 3,5,6,8,9,1<br>12,14,15 0,13,16,17 | 6 | D3ZUC6,P01836,P22006,P35280,P51907,Q63532        |
| 3008 | 1,2,4,7,11, 3,5,6,8,9,1<br>12,14,16 0,13,15,17 | 4 | D3ZUC6,P01836,P51907,Q63532                      |

|      |                                                |   |                                                                |
|------|------------------------------------------------|---|----------------------------------------------------------------|
| 3009 | 1,2,4,7,11, 3,5,6,8,9,1<br>12,14,17 0,13,15,16 | 7 | D3ZUC6,P19223,P31430,P36374,P55091,P98089,Q6AYQ8               |
| 3010 | 1,2,4,7,11, 3,5,6,8,9,1<br>12,15,16 0,13,14,17 | 3 | P01836,P14408,P51907                                           |
| 3011 | 1,2,4,7,11, 3,5,6,8,9,1<br>12,15,17 0,13,14,16 | 9 | P01015,P01836,P06866,P19223,P22006,P51907,P55091,P98089,Q6AYQ8 |
| 3012 | 1,2,4,7,11, 3,5,6,8,9,1<br>12,16,17 0,13,14,15 | 5 | P01836,P06866,P19223,P55091,P98089                             |
| 3013 | 1,2,4,7,11, 3,5,6,8,9,1<br>13,14,15 0,12,16,17 | 4 | P01836,P22006,Q09030,Q5GRG2                                    |
| 3014 | 1,2,4,7,11, 3,5,6,8,9,1<br>13,14,16 0,12,15,17 | 3 | P01836,Q63532,Q99MH3                                           |
| 3015 | 1,2,4,7,11, 3,5,6,8,9,1<br>13,14,17 0,12,15,16 | 0 |                                                                |
| 3016 | 1,2,4,7,11, 3,5,6,8,9,1<br>13,15,16 0,12,14,17 | 6 | P01835,P01836,P14408,Q09030,Q561R9,Q99PP0                      |
| 3017 | 1,2,4,7,11, 3,5,6,8,9,1<br>13,15,17 0,12,14,16 | 1 | P22006                                                         |
| 3018 | 1,2,4,7,11, 3,5,6,8,9,1<br>13,16,17 0,12,14,15 | 0 |                                                                |
| 3019 | 1,2,4,7,11, 3,5,6,8,9,1<br>14,15,16 0,12,13,17 | 7 | D3ZUC6,P01836,P16636,P22006,P51907,Q63532,Q99MH3               |
| 3020 | 1,2,4,7,11, 3,5,6,8,9,1<br>14,15,17 0,12,13,16 | 1 | P22006                                                         |
| 3021 | 1,2,4,7,11, 3,5,6,8,9,1<br>14,16,17 0,12,13,15 | 2 | D3ZUC6,Q63532                                                  |
| 3022 | 1,2,4,7,11, 3,5,6,8,9,1<br>15,16,17 0,12,13,14 | 1 | P14408                                                         |
| 3023 | 1,2,4,7,12, 3,5,6,8,9,1<br>13,14,15 0,11,16,17 | 6 | D3ZUC6,P01836,P25236,Q09030,Q5GRG2,Q63532                      |
| 3024 | 1,2,4,7,12, 3,5,6,8,9,1<br>13,14,16 0,11,15,17 | 4 | D3ZUC6,P01836,P25236,Q63532                                    |
| 3025 | 1,2,4,7,12, 3,5,6,8,9,1<br>13,14,17 0,11,15,16 | 7 | D3ZUC6,P19223,P25236,P31430,P36374,P55091,P98089               |
| 3026 | 1,2,4,7,12, 3,5,6,8,9,1<br>13,15,16 0,11,14,17 | 2 | P01836,Q09030                                                  |
| 3027 | 1,2,4,7,12, 3,5,6,8,9,1<br>13,15,17 0,11,14,16 | 5 | P01836,P06866,P19223,P55091,P98089                             |
| 3028 | 1,2,4,7,12, 3,5,6,8,9,1<br>13,16,17 0,11,14,15 | 7 | P01836,P06866,P14480,P19223,P27213,P55091,P98089               |
| 3029 | 1,2,4,7,12, 3,5,6,8,9,1<br>14,15,16 0,11,13,17 | 4 | D3ZUC6,P01836,P35467,Q63532                                    |
| 3030 | 1,2,4,7,12, 3,5,6,8,9,1<br>14,15,17 0,11,13,16 | 8 | D3ZUC6,P06866,P19223,P31430,P35467,P55091,P98089,Q6AYQ8        |
| 3031 | 1,2,4,7,12, 3,5,6,8,9,1<br>14,16,17 0,11,13,15 | 8 | D3ZUC6,P06866,P14480,P19223,P31430,P55091,P98089,Q63532        |

|      |                         |                                |   |                                                         |
|------|-------------------------|--------------------------------|---|---------------------------------------------------------|
| 3032 | 1,2,4,7,12,<br>15,16,17 | 3,5,6,8,9,1<br>0,11,13,14      | 6 | P01836,P06866,P19223,P35467,P55091,P98089               |
| 3033 | 1,2,4,7,13,<br>14,15,16 | 3,5,6,8,9,1<br>0,11,12,17      | 8 | D3ZUC6,P01835,P06760,P16636,P35467,Q09030,Q5GRG2,Q63532 |
| 3034 | 1,2,4,7,13,<br>14,15,17 | 3,5,6,8,9,1<br>0,11,12,16      | 1 | Q5GRG2                                                  |
| 3035 | 1,2,4,7,13,<br>14,16,17 | 3,5,6,8,9,1<br>0,11,12,15      | 4 | P14480,P27213,Q63532,Q6PCU2                             |
| 3036 | 1,2,4,7,13,<br>15,16,17 | 3,5,6,8,9,1<br>0,11,12,14      | 1 | P01835                                                  |
| 3037 | 1,2,4,7,14,<br>15,16,17 | 3,5,6,8,9,1<br>0,11,12,13      | 3 | D3ZUC6,P35467,Q63532                                    |
| 3038 | 1,2,4,8,9,1<br>0,11,12  | 3,5,6,7,13,<br>14,15,16,1<br>7 | 8 | P00714,P02803,P0C0A9,P36374,P53792,Q561R9,Q63598,Q80WL1 |
| 3039 | 1,2,4,8,9,1<br>0,11,13  | 3,5,6,7,12,<br>14,15,16,1<br>7 | 3 | P02803,Q561R9,Q8CJD3                                    |
| 3040 | 1,2,4,8,9,1<br>0,11,14  | 3,5,6,7,12,<br>13,15,16,1<br>7 | 3 | P02803,Q561R9,Q99MH3                                    |
| 3041 | 1,2,4,8,9,1<br>0,11,15  | 3,5,6,7,12,<br>13,14,16,1<br>7 | 4 | P02761,P35280,Q561R9,Q5QE79                             |
| 3042 | 1,2,4,8,9,1<br>0,11,16  | 3,5,6,7,12,<br>13,14,15,1<br>7 | 4 | A2RUV9,P02803,Q561R9,Q9WUW8                             |
| 3043 | 1,2,4,8,9,1<br>0,11,17  | 3,5,6,7,12,<br>13,14,15,1<br>6 | 3 | P02761,P02803,P19223                                    |
| 3044 | 1,2,4,8,9,1<br>0,12,13  | 3,5,6,7,11,<br>14,15,16,1<br>7 | 3 | P02803,P36374,Q80WL1                                    |
| 3045 | 1,2,4,8,9,1<br>0,12,14  | 3,5,6,7,11,<br>13,15,16,1<br>7 | 2 | P02803,Q80WL1                                           |
| 3046 | 1,2,4,8,9,1<br>0,12,15  | 3,5,6,7,11,<br>13,14,16,1<br>7 | 4 | P02761,P10758,Q561R9,Q5QE79                             |
| 3047 | 1,2,4,8,9,1<br>0,12,16  | 3,5,6,7,11,<br>13,14,15,1<br>7 | 3 | P02803,Q80WL1,Q9WUW8                                    |
| 3048 | 1,2,4,8,9,1<br>0,12,17  | 3,5,6,7,11,<br>13,14,15,1<br>6 | 6 | P02761,P02803,P06866,P19223,P98089,Q80WL1               |

|      |                        |                                |   |                                                         |
|------|------------------------|--------------------------------|---|---------------------------------------------------------|
| 3049 | 1,2,4,8,9,1<br>0,13,14 | 3,5,6,7,11,<br>12,15,16,1<br>7 | 2 | P02803,P17046                                           |
| 3050 | 1,2,4,8,9,1<br>0,13,15 | 3,5,6,7,11,<br>12,14,16,1<br>7 | 3 | P17046,Q561R9,Q5QE79                                    |
| 3051 | 1,2,4,8,9,1<br>0,13,16 | 3,5,6,7,11,<br>12,14,15,1<br>7 | 2 | P02803,Q8CJD3                                           |
| 3052 | 1,2,4,8,9,1<br>0,13,17 | 3,5,6,7,11,<br>12,14,15,1<br>6 | 2 | P02803,Q63355                                           |
| 3053 | 1,2,4,8,9,1<br>0,14,15 | 3,5,6,7,11,<br>12,13,16,1<br>7 | 4 | P02761,P17046,Q5QE79,Q9QZK9                             |
| 3054 | 1,2,4,8,9,1<br>0,14,16 | 3,5,6,7,11,<br>12,13,15,1<br>7 | 4 | P97574,Q99MH3,Q9QZK9,Q9WUW8                             |
| 3055 | 1,2,4,8,9,1<br>0,14,17 | 3,5,6,7,11,<br>12,13,15,1<br>6 | 2 | P02761,P17046                                           |
| 3056 | 1,2,4,8,9,1<br>0,15,16 | 3,5,6,7,11,<br>12,13,14,1<br>7 | 3 | Q561R9,Q5QE79,Q9QZK9                                    |
| 3057 | 1,2,4,8,9,1<br>0,15,17 | 3,5,6,7,11,<br>12,13,14,1<br>6 | 4 | P02761,P17046,P80201,Q5QE79                             |
| 3058 | 1,2,4,8,9,1<br>0,16,17 | 3,5,6,7,11,<br>12,13,14,1<br>5 | 1 | P25031                                                  |
| 3059 | 1,2,4,8,9,1<br>1,12,13 | 3,5,6,7,10,<br>14,15,16,1<br>7 | 4 | P02803,P0C0A9,P36374,Q80WL1                             |
| 3060 | 1,2,4,8,9,1<br>1,12,14 | 3,5,6,7,10,<br>13,15,16,1<br>7 | 3 | P02803,Q80WL1,Q99MH3                                    |
| 3061 | 1,2,4,8,9,1<br>1,12,15 | 3,5,6,7,10,<br>13,14,16,1<br>7 | 5 | P02761,P10758,P51907,Q561R9,Q5QE79                      |
| 3062 | 1,2,4,8,9,1<br>1,12,16 | 3,5,6,7,10,<br>13,14,15,1<br>7 | 2 | P02803,Q80WL1                                           |
| 3063 | 1,2,4,8,9,1<br>1,12,17 | 3,5,6,7,10,<br>13,14,15,1<br>6 | 8 | P02803,P19223,P36374,P55091,P98089,Q6AYQ8,Q80WL1,Q9QZA6 |

|      |                        |                                |   |                                                         |
|------|------------------------|--------------------------------|---|---------------------------------------------------------|
| 3064 | 1,2,4,8,9,1<br>1,13,14 | 3,5,6,7,10,<br>12,15,16,1<br>7 | 2 | P02803,Q99MH3                                           |
| 3065 | 1,2,4,8,9,1<br>1,13,15 | 3,5,6,7,10,<br>12,14,16,1<br>7 | 2 | Q561R9,Q5QE79                                           |
| 3066 | 1,2,4,8,9,1<br>1,13,16 | 3,5,6,7,10,<br>12,14,15,1<br>7 | 3 | P02803,Q561R9,Q8CJD3                                    |
| 3067 | 1,2,4,8,9,1<br>1,13,17 | 3,5,6,7,10,<br>12,14,15,1<br>6 | 2 | P02803,P20766                                           |
| 3068 | 1,2,4,8,9,1<br>1,14,15 | 3,5,6,7,10,<br>12,13,16,1<br>7 | 6 | P02761,P19218,Q561R9,Q5QE79,Q99MH3,Q9QZK9               |
| 3069 | 1,2,4,8,9,1<br>1,14,16 | 3,5,6,7,10,<br>12,13,15,1<br>7 | 3 | P97574,Q99MH3,Q9QZK9                                    |
| 3070 | 1,2,4,8,9,1<br>1,14,17 | 3,5,6,7,10,<br>12,13,15,1<br>6 | 2 | P02761,P19218                                           |
| 3071 | 1,2,4,8,9,1<br>1,15,16 | 3,5,6,7,10,<br>12,13,14,1<br>7 | 4 | Q561R9,Q5QE79,Q99MH3,Q9QZK9                             |
| 3072 | 1,2,4,8,9,1<br>1,15,17 | 3,5,6,7,10,<br>12,13,14,1<br>6 | 3 | P02761,Q5QE79,Q68FV8                                    |
| 3073 | 1,2,4,8,9,1<br>1,16,17 | 3,5,6,7,10,<br>12,13,14,1<br>5 | 3 | A2RUV9,Q498D9,Q68FV8                                    |
| 3074 | 1,2,4,8,9,1<br>2,13,14 | 3,5,6,7,10,<br>11,15,16,1<br>7 | 4 | P02803,P25236,P36970,Q80WL1                             |
| 3075 | 1,2,4,8,9,1<br>2,13,15 | 3,5,6,7,10,<br>11,14,16,1<br>7 | 3 | P02803,P10758,Q5QE79                                    |
| 3076 | 1,2,4,8,9,1<br>2,13,16 | 3,5,6,7,10,<br>11,14,15,1<br>7 | 2 | P02803,Q80WL1                                           |
| 3077 | 1,2,4,8,9,1<br>2,13,17 | 3,5,6,7,10,<br>11,14,15,1<br>6 | 8 | P02803,P19223,P36374,P55091,P98089,Q62635,Q63355,Q80WL1 |
| 3078 | 1,2,4,8,9,1<br>2,14,15 | 3,5,6,7,10,<br>11,13,16,1<br>7 | 2 | P10758,Q5QE79                                           |

|      |                        |                                |   |                                                  |
|------|------------------------|--------------------------------|---|--------------------------------------------------|
| 3079 | 1,2,4,8,9,1<br>2,14,16 | 3,5,6,7,10,<br>11,13,15,1<br>7 | 2 | Q80WL1,Q99MH3                                    |
| 3080 | 1,2,4,8,9,1<br>2,14,17 | 3,5,6,7,10,<br>11,13,15,1<br>6 | 6 | P19223,P31430,P55091,P98089,Q6AYQ8,Q80WL1        |
| 3081 | 1,2,4,8,9,1<br>2,15,16 | 3,5,6,7,10,<br>11,13,14,1<br>7 | 1 | Q5QE79                                           |
| 3082 | 1,2,4,8,9,1<br>2,15,17 | 3,5,6,7,10,<br>11,13,14,1<br>6 | 7 | P02761,P06866,P19223,P98089,Q5QE79,Q68FV8,Q9QZA6 |
| 3083 | 1,2,4,8,9,1<br>2,16,17 | 3,5,6,7,10,<br>11,13,14,1<br>5 | 4 | P06866,P19223,P98089,Q80WL1                      |
| 3084 | 1,2,4,8,9,1<br>3,14,15 | 3,5,6,7,10,<br>11,12,16,1<br>7 | 2 | P17046,Q5QE79                                    |
| 3085 | 1,2,4,8,9,1<br>3,14,16 | 3,5,6,7,10,<br>11,12,15,1<br>7 | 2 | Q99MH3,Q9QZK9                                    |
| 3086 | 1,2,4,8,9,1<br>3,14,17 | 3,5,6,7,10,<br>11,12,15,1<br>6 | 0 |                                                  |
| 3087 | 1,2,4,8,9,1<br>3,15,16 | 3,5,6,7,10,<br>11,12,14,1<br>7 | 2 | Q5QE79,Q9QZK9                                    |
| 3088 | 1,2,4,8,9,1<br>3,15,17 | 3,5,6,7,10,<br>11,12,14,1<br>6 | 2 | P02761,Q5QE79                                    |
| 3089 | 1,2,4,8,9,1<br>3,16,17 | 3,5,6,7,10,<br>11,12,14,1<br>5 | 1 | Q8CJD3                                           |
| 3090 | 1,2,4,8,9,1<br>4,15,16 | 3,5,6,7,10,<br>11,12,13,1<br>7 | 5 | P97574,Q5QE79,Q63942,Q99MH3,Q9QZK9               |
| 3091 | 1,2,4,8,9,1<br>4,15,17 | 3,5,6,7,10,<br>11,12,13,1<br>6 | 3 | P02761,P17046,Q5QE79                             |
| 3092 | 1,2,4,8,9,1<br>4,16,17 | 3,5,6,7,10,<br>11,12,13,1<br>5 | 0 |                                                  |
| 3093 | 1,2,4,8,9,1<br>5,16,17 | 3,5,6,7,10,<br>11,12,13,1<br>4 | 3 | P47727,Q5QE79,Q68FV8                             |

|      |                                                |    |                                                                                                                 |
|------|------------------------------------------------|----|-----------------------------------------------------------------------------------------------------------------|
| 3094 | 1,2,4,8,10, 3,5,6,7,9,1<br>11,12,13 4,15,16,17 | 8  | P02803,P0C0A9,P36374,P53792,Q561R9,Q63598,Q6AYR9,Q80WL1                                                         |
| 3095 | 1,2,4,8,10, 3,5,6,7,9,1<br>11,12,14 3,15,16,17 | 9  | P02803,P0C0A9,P35280,P47727,P53792,P62804,Q00715,Q63598,Q80WL1                                                  |
| 3096 | 1,2,4,8,10, 3,5,6,7,9,1<br>11,12,15 3,14,16,17 | 6  | P01015,P02761,P35280,P51907,P53792,Q561R9                                                                       |
| 3097 | 1,2,4,8,10, 3,5,6,7,9,1<br>11,12,16 3,14,15,17 | 7  | P02803,P53792,Q63598,Q6IFU7,Q6P6Q2,Q80WL1,Q9WUW8                                                                |
| 3098 | 1,2,4,8,10, 3,5,6,7,9,1<br>11,12,17 3,14,15,16 | 16 | P02761,P02803,P05964,P06757,P06866,P16636,P19223,P36374,P53792,P55091,P62804,P98089,Q00715,Q63598,Q80WL1,Q9QZA6 |
| 3099 | 1,2,4,8,10, 3,5,6,7,9,1<br>11,13,14 2,15,16,17 | 3  | P02803,P47727,Q63598                                                                                            |
| 3100 | 1,2,4,8,10, 3,5,6,7,9,1<br>11,13,15 2,14,16,17 | 3  | P01835,P02761,Q561R9                                                                                            |
| 3101 | 1,2,4,8,10, 3,5,6,7,9,1<br>11,13,16 2,14,15,17 | 4  | P01835,P02803,Q561R9,Q8CJD3                                                                                     |
| 3102 | 1,2,4,8,10, 3,5,6,7,9,1<br>11,13,17 2,14,15,16 | 2  | P02803,Q63598                                                                                                   |
| 3103 | 1,2,4,8,10, 3,5,6,7,9,1<br>11,14,15 2,13,16,17 | 4  | P02761,P19218,P35280,Q561R9                                                                                     |
| 3104 | 1,2,4,8,10, 3,5,6,7,9,1<br>11,14,16 2,13,15,17 | 2  | P53792,P97574                                                                                                   |
| 3105 | 1,2,4,8,10, 3,5,6,7,9,1<br>11,14,17 2,13,15,16 | 3  | P02761,P19218,Q63598                                                                                            |
| 3106 | 1,2,4,8,10, 3,5,6,7,9,1<br>11,15,16 2,13,14,17 | 5  | P01835,P35280,P51907,P53792,Q561R9                                                                              |
| 3107 | 1,2,4,8,10, 3,5,6,7,9,1<br>11,15,17 2,13,14,16 | 2  | P02761,Q561R9                                                                                                   |
| 3108 | 1,2,4,8,10, 3,5,6,7,9,1<br>11,16,17 2,13,14,15 | 2  | A2RUV9,P53792                                                                                                   |
| 3109 | 1,2,4,8,10, 3,5,6,7,9,1<br>12,13,14 1,15,16,17 | 5  | P02803,P25236,P36970,Q6AYR9,Q80WL1                                                                              |
| 3110 | 1,2,4,8,10, 3,5,6,7,9,1<br>12,13,15 1,14,16,17 | 2  | P10758,P15999                                                                                                   |
| 3111 | 1,2,4,8,10, 3,5,6,7,9,1<br>12,13,16 1,14,15,17 | 2  | P02803,Q80WL1                                                                                                   |
| 3112 | 1,2,4,8,10, 3,5,6,7,9,1<br>12,13,17 1,14,15,16 | 10 | P02803,P16636,P19223,P36374,P55091,P98089,Q62635,Q63355,Q6AYR9,Q80WL1                                           |
| 3113 | 1,2,4,8,10, 3,5,6,7,9,1<br>12,14,15 1,13,16,17 | 2  | P02761,P35280                                                                                                   |
| 3114 | 1,2,4,8,10, 3,5,6,7,9,1<br>12,14,16 1,13,15,17 | 4  | P08721,P97574,Q80WL1,Q9WUW8                                                                                     |
| 3115 | 1,2,4,8,10, 3,5,6,7,9,1<br>12,14,17 1,13,15,16 | 8  | P06866,P19223,P31430,P55091,P98089,Q10758,Q62635,Q80WL1                                                         |
| 3116 | 1,2,4,8,10, 3,5,6,7,9,1<br>12,15,16 1,13,14,17 | 1  | P08721                                                                                                          |



|      |                                                |    |                                                                              |
|------|------------------------------------------------|----|------------------------------------------------------------------------------|
| 3117 | 1,2,4,8,10, 3,5,6,7,9,1<br>12,15,17 1,13,14,16 | 7  | P01015,P02761,P06866,P19223,P98089,Q9EQV9,Q9QZA6                             |
| 3118 | 1,2,4,8,10, 3,5,6,7,9,1<br>12,16,17 1,13,14,15 | 5  | P06866,P08721,P19223,P98089,Q80WL1                                           |
| 3119 | 1,2,4,8,10, 3,5,6,7,9,1<br>13,14,15 1,12,16,17 | 4  | P01835,P15999,P17046,Q5GRG2                                                  |
| 3120 | 1,2,4,8,10, 3,5,6,7,9,1<br>13,14,16 1,12,15,17 | 1  | P01835                                                                       |
| 3121 | 1,2,4,8,10, 3,5,6,7,9,1<br>13,14,17 1,12,15,16 | 0  |                                                                              |
| 3122 | 1,2,4,8,10, 3,5,6,7,9,1<br>13,15,16 1,12,14,17 | 2  | P01835,Q62997                                                                |
| 3123 | 1,2,4,8,10, 3,5,6,7,9,1<br>13,15,17 1,12,14,16 | 3  | P01835,P02761,P15999                                                         |
| 3124 | 1,2,4,8,10, 3,5,6,7,9,1<br>13,16,17 1,12,14,15 | 3  | P01835,Q62997,Q8CJD3                                                         |
| 3125 | 1,2,4,8,10, 3,5,6,7,9,1<br>14,15,16 1,12,13,17 | 4  | P01835,P08721,P97574,Q9QZK9                                                  |
| 3126 | 1,2,4,8,10, 3,5,6,7,9,1<br>14,15,17 1,12,13,16 | 2  | P02761,P17046                                                                |
| 3127 | 1,2,4,8,10, 3,5,6,7,9,1<br>14,16,17 1,12,13,15 | 1  | Q62997                                                                       |
| 3128 | 1,2,4,8,10, 3,5,6,7,9,1<br>15,16,17 1,12,13,14 | 3  | P01835,P02761,Q62997                                                         |
| 3129 | 1,2,4,8,11, 3,5,6,7,9,1<br>12,13,14 0,15,16,17 | 8  | P02803,P0C0A9,P25236,P36374,P47727,Q6AYR9,Q80WL1,Q9JHB9                      |
| 3130 | 1,2,4,8,11, 3,5,6,7,9,1<br>12,13,15 0,14,16,17 | 1  | Q561R9                                                                       |
| 3131 | 1,2,4,8,11, 3,5,6,7,9,1<br>12,13,16 0,14,15,17 | 3  | P02803,Q80WL1,Q8CJ52                                                         |
| 3132 | 1,2,4,8,11, 3,5,6,7,9,1<br>12,13,17 0,14,15,16 | 7  | P02803,P19223,P36374,P55091,P98089,Q62635,Q80WL1                             |
| 3133 | 1,2,4,8,11, 3,5,6,7,9,1<br>12,14,15 0,13,16,17 | 5  | D3ZUC6,P02761,P35280,P51907,Q00715                                           |
| 3134 | 1,2,4,8,11, 3,5,6,7,9,1<br>12,14,16 0,13,15,17 | 3  | D3ZUC6,Q80WL1,Q99MH3                                                         |
| 3135 | 1,2,4,8,11, 3,5,6,7,9,1<br>12,14,17 0,13,15,16 | 11 | P19223,P31430,P36374,P55091,P62804,P98089,Q00715,Q62635,Q6AYQ8,Q80WL1,Q9QZA6 |
| 3136 | 1,2,4,8,11, 3,5,6,7,9,1<br>12,15,16 0,13,14,17 | 2  | P51907,Q561R9                                                                |
| 3137 | 1,2,4,8,11, 3,5,6,7,9,1<br>12,15,17 0,13,14,16 | 10 | B0BNN3,P01015,P02761,P06866,P19223,P55091,P98089,Q00715,Q6AYQ8,Q9QZA6        |
| 3138 | 1,2,4,8,11, 3,5,6,7,9,1<br>12,16,17 0,13,14,15 | 5  | P06866,P19223,P98089,Q80WL1,Q9QZA6                                           |
| 3139 | 1,2,4,8,11, 3,5,6,7,9,1<br>13,14,15 0,12,16,17 | 0  |                                                                              |

|      |                                                |    |                                                                       |
|------|------------------------------------------------|----|-----------------------------------------------------------------------|
| 3140 | 1,2,4,8,11, 3,5,6,7,9,1<br>13,14,16 0,12,15,17 | 1  | Q99MH3                                                                |
| 3141 | 1,2,4,8,11, 3,5,6,7,9,1<br>13,14,17 0,12,15,16 | 0  |                                                                       |
| 3142 | 1,2,4,8,11, 3,5,6,7,9,1<br>13,15,16 0,12,14,17 | 2  | P01835,Q561R9                                                         |
| 3143 | 1,2,4,8,11, 3,5,6,7,9,1<br>13,15,17 0,12,14,16 | 1  | P02761                                                                |
| 3144 | 1,2,4,8,11, 3,5,6,7,9,1<br>13,16,17 0,12,14,15 | 1  | Q8CJD3                                                                |
| 3145 | 1,2,4,8,11, 3,5,6,7,9,1<br>14,15,16 0,12,13,17 | 3  | P97574,Q99MH3,Q9QZK9                                                  |
| 3146 | 1,2,4,8,11, 3,5,6,7,9,1<br>14,15,17 0,12,13,16 | 3  | P02761,P19218,P97840                                                  |
| 3147 | 1,2,4,8,11, 3,5,6,7,9,1<br>14,16,17 0,12,13,15 | 1  | P19218                                                                |
| 3148 | 1,2,4,8,11, 3,5,6,7,9,1<br>15,16,17 0,12,13,14 | 1  | P02761                                                                |
| 3149 | 1,2,4,8,12, 3,5,6,7,9,1<br>13,14,15 0,11,16,17 | 7  | O08557,P10758,P15999,P25236,P36970,Q64093,Q9QUL6                      |
| 3150 | 1,2,4,8,12, 3,5,6,7,9,1<br>13,14,16 0,11,15,17 | 3  | P25236,Q80WL1,Q9QUL6                                                  |
| 3151 | 1,2,4,8,12, 3,5,6,7,9,1<br>13,14,17 0,11,15,16 | 10 | P19223,P25236,P31430,P36374,P55091,P98089,Q62635,Q6AYR9,Q6PCU2,Q80WL1 |
| 3152 | 1,2,4,8,12, 3,5,6,7,9,1<br>13,15,16 0,11,14,17 | 1  | Q9QUL6                                                                |
| 3153 | 1,2,4,8,12, 3,5,6,7,9,1<br>13,15,17 0,11,14,16 | 7  | P06866,P15999,P19223,P55091,P98089,Q62635,Q9QZA6                      |
| 3154 | 1,2,4,8,12, 3,5,6,7,9,1<br>13,16,17 0,11,14,15 | 9  | P06866,P19223,P27213,P55091,P63029,P98089,Q62635,Q6PCU2,Q80WL1        |
| 3155 | 1,2,4,8,12, 3,5,6,7,9,1<br>14,15,16 0,11,13,17 | 2  | D3ZUC6,P97574                                                         |
| 3156 | 1,2,4,8,12, 3,5,6,7,9,1<br>14,15,17 0,11,13,16 | 9  | B0BNN3,P02761,P06866,P19223,P31430,P55091,P98089,Q6AYQ8,Q9QZA6        |
| 3157 | 1,2,4,8,12, 3,5,6,7,9,1<br>14,16,17 0,11,13,15 | 7  | D3ZUC6,P06866,P19223,P31430,P98089,Q6PCU2,Q80WL1                      |
| 3158 | 1,2,4,8,12, 3,5,6,7,9,1<br>15,16,17 0,11,13,14 | 4  | P06866,P19223,P98089,Q9QZA6                                           |
| 3159 | 1,2,4,8,13, 3,5,6,7,9,1<br>14,15,16 0,11,12,17 | 2  | P01835,P97574                                                         |
| 3160 | 1,2,4,8,13, 3,5,6,7,9,1<br>14,15,17 0,11,12,16 | 2  | P15999,Q6PCU2                                                         |
| 3161 | 1,2,4,8,13, 3,5,6,7,9,1<br>14,16,17 0,11,12,15 | 2  | P27213,Q6PCU2                                                         |
| 3162 | 1,2,4,8,13, 3,5,6,7,9,1<br>15,16,17 0,11,12,14 | 3  | P01835,P27213,Q6PCU2                                                  |

|      |                                                |    |                                                                       |
|------|------------------------------------------------|----|-----------------------------------------------------------------------|
| 3163 | 1,2,4,8,14, 3,5,6,7,9,1<br>15,16,17 0,11,12,13 | 1  | Q6PCU2                                                                |
| 3164 | 1,2,4,9,10, 3,5,6,7,8,1<br>11,12,13 4,15,16,17 | 5  | P02803,P36374,Q561R9,Q62636,Q63661                                    |
| 3165 | 1,2,4,9,10, 3,5,6,7,8,1<br>11,12,14 3,15,16,17 | 3  | P02803,P51907,Q63661                                                  |
| 3166 | 1,2,4,9,10, 3,5,6,7,8,1<br>11,12,15 3,14,16,17 | 5  | P10758,P51907,Q561R9,Q62636,Q63661                                    |
| 3167 | 1,2,4,9,10, 3,5,6,7,8,1<br>11,12,16 3,14,15,17 | 10 | P02803,P06757,P10536,P47967,P51907,P53792,Q561R9,Q63661,Q6IFU7,Q9WUW8 |
| 3168 | 1,2,4,9,10, 3,5,6,7,8,1<br>11,12,17 3,14,15,16 | 6  | P02803,P06757,P06866,P19223,Q62636,Q63661                             |
| 3169 | 1,2,4,9,10, 3,5,6,7,8,1<br>11,13,14 2,15,16,17 | 4  | P02803,P50115,Q561R9,Q63661                                           |
| 3170 | 1,2,4,9,10, 3,5,6,7,8,1<br>11,13,15 2,14,16,17 | 3  | P50115,Q561R9,Q63661                                                  |
| 3171 | 1,2,4,9,10, 3,5,6,7,8,1<br>11,13,16 2,14,15,17 | 5  | P02803,P50115,Q561R9,Q63661,Q8CJD3                                    |
| 3172 | 1,2,4,9,10, 3,5,6,7,8,1<br>11,13,17 2,14,15,16 | 1  | P02803                                                                |
| 3173 | 1,2,4,9,10, 3,5,6,7,8,1<br>11,14,15 2,13,16,17 | 7  | P08937,P50115,P51907,Q561R9,Q63661,Q99MH3,Q9QZK9                      |
| 3174 | 1,2,4,9,10, 3,5,6,7,8,1<br>11,14,16 2,13,15,17 | 8  | P08937,P50115,P51907,Q561R9,Q63661,Q99MH3,Q9QZK9,Q9WUW8               |
| 3175 | 1,2,4,9,10, 3,5,6,7,8,1<br>11,14,17 2,13,15,16 | 0  |                                                                       |
| 3176 | 1,2,4,9,10, 3,5,6,7,8,1<br>11,15,16 2,13,14,17 | 9  | O70594,P08937,P50115,P51907,Q561R9,Q63661,Q9QZK9,Q9WUW8,Q9Z1F2        |
| 3177 | 1,2,4,9,10, 3,5,6,7,8,1<br>11,15,17 2,13,14,16 | 1  | Q561R9                                                                |
| 3178 | 1,2,4,9,10, 3,5,6,7,8,1<br>11,16,17 2,13,14,15 | 1  | A2RUV9                                                                |
| 3179 | 1,2,4,9,10, 3,5,6,7,8,1<br>12,13,14 1,15,16,17 | 4  | P02803,P10758,P25236,P50115                                           |
| 3180 | 1,2,4,9,10, 3,5,6,7,8,1<br>12,13,15 1,14,16,17 | 3  | P10758,P50115,Q561R9                                                  |
| 3181 | 1,2,4,9,10, 3,5,6,7,8,1<br>12,13,16 1,14,15,17 | 5  | P02803,P47967,P50115,P97840,Q9WUW8                                    |
| 3182 | 1,2,4,9,10, 3,5,6,7,8,1<br>12,13,17 1,14,15,16 | 5  | P02803,P06866,P19223,P36374,Q63355                                    |
| 3183 | 1,2,4,9,10, 3,5,6,7,8,1<br>12,14,15 1,13,16,17 | 2  | P10758,P50115                                                         |
| 3184 | 1,2,4,9,10, 3,5,6,7,8,1<br>12,14,16 1,13,15,17 | 2  | P50115,Q9WUW8                                                         |
| 3185 | 1,2,4,9,10, 3,5,6,7,8,1<br>12,14,17 1,13,15,16 | 4  | P06866,P19223,P31430,P98089                                           |

|      |                                                |   |                                    |
|------|------------------------------------------------|---|------------------------------------|
| 3186 | 1,2,4,9,10, 3,5,6,7,8,1<br>12,15,16 1,13,14,17 | 3 | P50115,P51907,Q9WUW8               |
| 3187 | 1,2,4,9,10, 3,5,6,7,8,1<br>12,15,17 1,13,14,16 | 2 | P06866,P19223                      |
| 3188 | 1,2,4,9,10, 3,5,6,7,8,1<br>12,16,17 1,13,14,15 | 2 | P06866,P19223                      |
| 3189 | 1,2,4,9,10, 3,5,6,7,8,1<br>13,14,15 1,12,16,17 | 3 | P08937,P17046,P50115               |
| 3190 | 1,2,4,9,10, 3,5,6,7,8,1<br>13,14,16 1,12,15,17 | 3 | P08937,P50115,Q9QZK9               |
| 3191 | 1,2,4,9,10, 3,5,6,7,8,1<br>13,14,17 1,12,15,16 | 0 |                                    |
| 3192 | 1,2,4,9,10, 3,5,6,7,8,1<br>13,15,16 1,12,14,17 | 4 | P08937,P50115,Q561R9,Q9QZK9        |
| 3193 | 1,2,4,9,10, 3,5,6,7,8,1<br>13,15,17 1,12,14,16 | 0 |                                    |
| 3194 | 1,2,4,9,10, 3,5,6,7,8,1<br>13,16,17 1,12,14,15 | 1 | Q8CJD3                             |
| 3195 | 1,2,4,9,10, 3,5,6,7,8,1<br>14,15,16 1,12,13,17 | 4 | P08937,P50115,Q99MH3,Q9QZK9        |
| 3196 | 1,2,4,9,10, 3,5,6,7,8,1<br>14,15,17 1,12,13,16 | 1 | P17046                             |
| 3197 | 1,2,4,9,10, 3,5,6,7,8,1<br>14,16,17 1,12,13,15 | 0 |                                    |
| 3198 | 1,2,4,9,10, 3,5,6,7,8,1<br>15,16,17 1,12,13,14 | 3 | P47727,Q62902,Q9Z1F2               |
| 3199 | 1,2,4,9,11, 3,5,6,7,8,1<br>12,13,14 0,15,16,17 | 4 | D3ZUC6,P02803,P25236,P36374        |
| 3200 | 1,2,4,9,11, 3,5,6,7,8,1<br>12,13,15 0,14,16,17 | 4 | P02803,P10758,P51907,Q561R9        |
| 3201 | 1,2,4,9,11, 3,5,6,7,8,1<br>12,13,16 0,14,15,17 | 1 | P02803                             |
| 3202 | 1,2,4,9,11, 3,5,6,7,8,1<br>12,13,17 0,14,15,16 | 2 | P02803,P36374                      |
| 3203 | 1,2,4,9,11, 3,5,6,7,8,1<br>12,14,15 0,13,16,17 | 5 | D3ZUC6,P10758,P51907,Q561R9,Q99MH3 |
| 3204 | 1,2,4,9,11, 3,5,6,7,8,1<br>12,14,16 0,13,15,17 | 3 | D3ZUC6,P51907,Q99MH3               |
| 3205 | 1,2,4,9,11, 3,5,6,7,8,1<br>12,14,17 0,13,15,16 | 5 | D3ZUC6,P06866,P31430,P98089,Q6AYQ8 |
| 3206 | 1,2,4,9,11, 3,5,6,7,8,1<br>12,15,16 0,13,14,17 | 2 | P51907,Q561R9                      |
| 3207 | 1,2,4,9,11, 3,5,6,7,8,1<br>12,15,17 0,13,14,16 | 4 | P06866,P19223,P51907,Q6AYQ8        |
| 3208 | 1,2,4,9,11, 3,5,6,7,8,1<br>12,16,17 0,13,14,15 | 2 | P02803,P06866                      |

|      |                                                |   |                                                  |
|------|------------------------------------------------|---|--------------------------------------------------|
| 3209 | 1,2,4,9,11, 3,5,6,7,8,1<br>13,14,15 0,12,16,17 | 4 | P06760,P50115,Q561R9,Q99MH3                      |
| 3210 | 1,2,4,9,11, 3,5,6,7,8,1<br>13,14,16 0,12,15,17 | 6 | P06760,P08937,P50115,Q7TPB1,Q99MH3,Q9QZK9        |
| 3211 | 1,2,4,9,11, 3,5,6,7,8,1<br>13,14,17 0,12,15,16 | 0 |                                                  |
| 3212 | 1,2,4,9,11, 3,5,6,7,8,1<br>13,15,16 0,12,14,17 | 5 | P06760,P08937,P50115,Q561R9,Q9QZK9               |
| 3213 | 1,2,4,9,11, 3,5,6,7,8,1<br>13,15,17 0,12,14,16 | 0 |                                                  |
| 3214 | 1,2,4,9,11, 3,5,6,7,8,1<br>13,16,17 0,12,14,15 | 1 | Q8CJD3                                           |
| 3215 | 1,2,4,9,11, 3,5,6,7,8,1<br>14,15,16 0,12,13,17 | 7 | P06760,P08937,P50115,P51907,Q561R9,Q99MH3,Q9QZK9 |
| 3216 | 1,2,4,9,11, 3,5,6,7,8,1<br>14,15,17 0,12,13,16 | 0 |                                                  |
| 3217 | 1,2,4,9,11, 3,5,6,7,8,1<br>14,16,17 0,12,13,15 | 1 | Q99MH3                                           |
| 3218 | 1,2,4,9,11, 3,5,6,7,8,1<br>15,16,17 0,12,13,14 | 2 | Q498D9,Q68FV8                                    |
| 3219 | 1,2,4,9,12, 3,5,6,7,8,1<br>13,14,15 0,11,16,17 | 5 | D3ZUC6,P06760,P10758,P25236,P50115               |
| 3220 | 1,2,4,9,12, 3,5,6,7,8,1<br>13,14,16 0,11,15,17 | 5 | D3ZUC6,P02803,P06760,P25236,P50115               |
| 3221 | 1,2,4,9,12, 3,5,6,7,8,1<br>13,14,17 0,11,15,16 | 2 | D3ZUC6,P31430                                    |
| 3222 | 1,2,4,9,12, 3,5,6,7,8,1<br>13,15,16 0,11,14,17 | 2 | P06760,P50115                                    |
| 3223 | 1,2,4,9,12, 3,5,6,7,8,1<br>13,15,17 0,11,14,16 | 2 | P06866,P82471                                    |
| 3224 | 1,2,4,9,12, 3,5,6,7,8,1<br>13,16,17 0,11,14,15 | 3 | P02803,P06866,P27213                             |
| 3225 | 1,2,4,9,12, 3,5,6,7,8,1<br>14,15,16 0,11,13,17 | 5 | D3ZUC6,P06760,P08937,P50115,Q99MH3               |
| 3226 | 1,2,4,9,12, 3,5,6,7,8,1<br>14,15,17 0,11,13,16 | 5 | D3ZUC6,P06866,P31430,P98089,Q6AYQ8               |
| 3227 | 1,2,4,9,12, 3,5,6,7,8,1<br>14,16,17 0,11,13,15 | 4 | D3ZUC6,P06866,P31430,P98089                      |
| 3228 | 1,2,4,9,12, 3,5,6,7,8,1<br>15,16,17 0,11,13,14 | 2 | P06866,P98089                                    |
| 3229 | 1,2,4,9,13, 3,5,6,7,8,1<br>14,15,16 0,11,12,17 | 5 | P06760,P08937,P50115,Q99MH3,Q9QZK9               |
| 3230 | 1,2,4,9,13, 3,5,6,7,8,1<br>14,15,17 0,11,12,16 | 1 | P82471                                           |
| 3231 | 1,2,4,9,13, 3,5,6,7,8,1<br>14,16,17 0,11,12,15 | 1 | P27213                                           |

|      |                                                |   |                                                  |
|------|------------------------------------------------|---|--------------------------------------------------|
| 3232 | 1,2,4,9,13, 3,5,6,7,8,1<br>15,16,17 0,11,12,14 | 1 | P27213                                           |
| 3233 | 1,2,4,9,14, 3,5,6,7,8,1<br>15,16,17 0,11,12,13 | 1 | P08937                                           |
| 3234 | 1,2,4,10,1 3,5,6,7,8,9<br>1,12,13,14 ,15,16,17 | 4 | P02803,P25236,P36374,P47727                      |
| 3235 | 1,2,4,10,1 3,5,6,7,8,9<br>1,12,13,15 ,14,16,17 | 2 | P51907,Q561R9                                    |
| 3236 | 1,2,4,10,1 3,5,6,7,8,9<br>1,12,13,16 ,14,15,17 | 4 | P02803,P47967,P53792,Q6IFU7                      |
| 3237 | 1,2,4,10,1 3,5,6,7,8,9<br>1,12,13,17 ,14,15,16 | 4 | P02803,P06757,P06866,P36374                      |
| 3238 | 1,2,4,10,1 3,5,6,7,8,9<br>1,12,14,15 ,13,16,17 | 4 | P35280,P51907,P53792,Q561R9                      |
| 3239 | 1,2,4,10,1 3,5,6,7,8,9<br>1,12,14,16 ,13,15,17 | 5 | D3ZUC6,P51907,P53792,Q6IFU7,Q9WUW8               |
| 3240 | 1,2,4,10,1 3,5,6,7,8,9<br>1,12,14,17 ,13,15,16 | 4 | P06866,P31430,P98089,Q6AYQ8                      |
| 3241 | 1,2,4,10,1 3,5,6,7,8,9<br>1,12,15,16 ,13,14,17 | 5 | P51907,P53792,Q561R9,Q6IFU7,Q9WUW8               |
| 3242 | 1,2,4,10,1 3,5,6,7,8,9<br>1,12,15,17 ,13,14,16 | 5 | P01015,P06757,P06866,P51907,P53792               |
| 3243 | 1,2,4,10,1 3,5,6,7,8,9<br>1,12,16,17 ,13,14,15 | 3 | P06757,P06866,P53792                             |
| 3244 | 1,2,4,10,1 3,5,6,7,8,9<br>1,13,14,15 ,12,16,17 | 2 | P50115,Q561R9                                    |
| 3245 | 1,2,4,10,1 3,5,6,7,8,9<br>1,13,14,16 ,12,15,17 | 2 | P50115,Q7TPB1                                    |
| 3246 | 1,2,4,10,1 3,5,6,7,8,9<br>1,13,14,17 ,12,15,16 | 0 |                                                  |
| 3247 | 1,2,4,10,1 3,5,6,7,8,9<br>1,13,15,16 ,12,14,17 | 4 | P01835,P50115,P51907,Q561R9                      |
| 3248 | 1,2,4,10,1 3,5,6,7,8,9<br>1,13,15,17 ,12,14,16 | 0 |                                                  |
| 3249 | 1,2,4,10,1 3,5,6,7,8,9<br>1,13,16,17 ,12,14,15 | 1 | Q8CJD3                                           |
| 3250 | 1,2,4,10,1 3,5,6,7,8,9<br>1,14,15,16 ,12,13,17 | 7 | P08937,P50115,P51907,P53792,Q561R9,Q99MH3,Q9QZK9 |
| 3251 | 1,2,4,10,1 3,5,6,7,8,9<br>1,14,15,17 ,12,13,16 | 0 |                                                  |
| 3252 | 1,2,4,10,1 3,5,6,7,8,9<br>1,14,16,17 ,12,13,15 | 0 |                                                  |
| 3253 | 1,2,4,10,1 3,5,6,7,8,9<br>1,15,16,17 ,12,13,14 | 2 | P51907,Q9Z1F2                                    |
| 3254 | 1,2,4,10,1 3,5,6,7,8,9<br>2,13,14,15 ,11,16,17 | 3 | P10758,P25236,P50115                             |

|      |                          |                          |   |                                           |
|------|--------------------------|--------------------------|---|-------------------------------------------|
| 3255 | 1,2,4,10,1<br>2,13,14,16 | 3,5,6,7,8,9<br>,11,15,17 | 2 | P25236,P50115                             |
| 3256 | 1,2,4,10,1<br>2,13,14,17 | 3,5,6,7,8,9<br>,11,15,16 | 2 | P06866,P31430                             |
| 3257 | 1,2,4,10,1<br>2,13,15,16 | 3,5,6,7,8,9<br>,11,14,17 | 1 | P50115                                    |
| 3258 | 1,2,4,10,1<br>2,13,15,17 | 3,5,6,7,8,9<br>,11,14,16 | 1 | P06866                                    |
| 3259 | 1,2,4,10,1<br>2,13,16,17 | 3,5,6,7,8,9<br>,11,14,15 | 3 | P06866,P14480,P27213                      |
| 3260 | 1,2,4,10,1<br>2,14,15,16 | 3,5,6,7,8,9<br>,11,13,17 | 3 | D3ZUC6,P50115,P51907                      |
| 3261 | 1,2,4,10,1<br>2,14,15,17 | 3,5,6,7,8,9<br>,11,13,16 | 3 | P06866,P31430,P98089                      |
| 3262 | 1,2,4,10,1<br>2,14,16,17 | 3,5,6,7,8,9<br>,11,13,15 | 6 | D3ZUC6,P06866,P14480,P31430,P98089,Q10758 |
| 3263 | 1,2,4,10,1<br>2,15,16,17 | 3,5,6,7,8,9<br>,11,13,14 | 1 | P06866                                    |
| 3264 | 1,2,4,10,1<br>3,14,15,16 | 3,5,6,7,8,9<br>,11,12,17 | 5 | P01835,P08937,P50115,Q62997,Q9QZK9        |
| 3265 | 1,2,4,10,1<br>3,14,15,17 | 3,5,6,7,8,9<br>,11,12,16 | 0 |                                           |
| 3266 | 1,2,4,10,1<br>3,14,16,17 | 3,5,6,7,8,9<br>,11,12,15 | 2 | P27213,Q62997                             |
| 3267 | 1,2,4,10,1<br>3,15,16,17 | 3,5,6,7,8,9<br>,11,12,14 | 3 | P01835,P27213,Q62997                      |
| 3268 | 1,2,4,10,1<br>4,15,16,17 | 3,5,6,7,8,9<br>,11,12,13 | 1 | Q62997                                    |
| 3269 | 1,2,4,11,1<br>2,13,14,15 | 3,5,6,7,8,9<br>,10,16,17 | 4 | D3ZUC6,P10758,P25236,P51907               |
| 3270 | 1,2,4,11,1<br>2,13,14,16 | 3,5,6,7,8,9<br>,10,15,17 | 2 | D3ZUC6,P25236                             |
| 3271 | 1,2,4,11,1<br>2,13,14,17 | 3,5,6,7,8,9<br>,10,15,16 | 4 | D3ZUC6,P31430,P36374,Q6AYQ8               |
| 3272 | 1,2,4,11,1<br>2,13,15,16 | 3,5,6,7,8,9<br>,10,14,17 | 2 | P01836,P51907                             |
| 3273 | 1,2,4,11,1<br>2,13,15,17 | 3,5,6,7,8,9<br>,10,14,16 | 1 | P06866                                    |
| 3274 | 1,2,4,11,1<br>2,13,16,17 | 3,5,6,7,8,9<br>,10,14,15 | 3 | P02803,P06866,P27213                      |
| 3275 | 1,2,4,11,1<br>2,14,15,16 | 3,5,6,7,8,9<br>,10,13,17 | 4 | D3ZUC6,O89117,P51907,Q99MH3               |
| 3276 | 1,2,4,11,1<br>2,14,15,17 | 3,5,6,7,8,9<br>,10,13,16 | 6 | D3ZUC6,P06866,P31430,P51907,P98089,Q6AYQ8 |
| 3277 | 1,2,4,11,1<br>2,14,16,17 | 3,5,6,7,8,9<br>,10,13,15 | 5 | D3ZUC6,P06866,P31430,P98089,Q6AYQ8        |

|      |                          |                                  |    |                                                                                                                                      |
|------|--------------------------|----------------------------------|----|--------------------------------------------------------------------------------------------------------------------------------------|
| 3278 | 1,2,4,11,1<br>2,15,16,17 | 3,5,6,7,8,9<br>,10,13,14         | 2  | P06866,P51907                                                                                                                        |
| 3279 | 1,2,4,11,1<br>3,14,15,16 | 3,5,6,7,8,9<br>,10,12,17         | 4  | P06760,P50115,Q99MH3,Q9QZK9                                                                                                          |
| 3280 | 1,2,4,11,1<br>3,14,15,17 | 3,5,6,7,8,9<br>,10,12,16         | 0  |                                                                                                                                      |
| 3281 | 1,2,4,11,1<br>3,14,16,17 | 3,5,6,7,8,9<br>,10,12,15         | 1  | P27213                                                                                                                               |
| 3282 | 1,2,4,11,1<br>3,15,16,17 | 3,5,6,7,8,9<br>,10,12,14         | 1  | P27213                                                                                                                               |
| 3283 | 1,2,4,11,1<br>4,15,16,17 | 3,5,6,7,8,9<br>,10,12,13         | 1  | D3ZUC6                                                                                                                               |
| 3284 | 1,2,4,12,1<br>3,14,15,16 | 3,5,6,7,8,9<br>,10,11,17         | 5  | D3ZUC6,P06760,P25236,P50115,Q9QUL6                                                                                                   |
| 3285 | 1,2,4,12,1<br>3,14,15,17 | 3,5,6,7,8,9<br>,10,11,16         | 6  | D3ZUC6,P06866,P25236,P27213,P31430,P98089                                                                                            |
| 3286 | 1,2,4,12,1<br>3,14,16,17 | 3,5,6,7,8,9<br>,10,11,15         | 6  | D3ZUC6,P06866,P14480,P25236,P27213,P31430                                                                                            |
| 3287 | 1,2,4,12,1<br>3,15,16,17 | 3,5,6,7,8,9<br>,10,11,14         | 2  | P06866,P27213                                                                                                                        |
| 3288 | 1,2,4,12,1<br>4,15,16,17 | 3,5,6,7,8,9<br>,10,11,13         | 5  | D3ZUC6,P06866,P31430,P35467,P98089                                                                                                   |
| 3289 | 1,2,4,13,1<br>4,15,16,17 | 3,5,6,7,8,9<br>,10,11,12         | 1  | P27213                                                                                                                               |
| 3290 | 1,2,5,6,7,8<br>,9,10     | 3,4,11,12,<br>13,14,15,1<br>6,17 | 10 | O55006,P02631,P19629,P27213,P31044,P52590,P68370,P83748,Q63942,Q9QUL6                                                                |
| 3291 | 1,2,5,6,7,8<br>,9,11     | 3,4,10,12,<br>13,14,15,1<br>6,17 | 15 | O54715,P02631,P05371,P08932,P10715,P14669,P19629,P27213,P31044,P52590,P68370,Q63493,Q63942,Q9JI85,Q9QUL6                             |
| 3292 | 1,2,5,6,7,8<br>,9,12     | 3,4,10,11,<br>13,14,15,1<br>6,17 | 19 | O88267,P02631,P02782,P08723,P10715,P13432,P19629,P22283,P27213,P30120,P31044,P52590,P68370,P83748,Q63942,Q8CJ52,Q9JHB9,Q9JI85,Q9Z1F2 |
| 3293 | 1,2,5,6,7,8<br>,9,13     | 3,4,10,11,<br>12,14,15,1<br>6,17 | 13 | P02631,P02764,P06911,P12020,P19629,P31044,P52590,P53792,P68370,P83748,Q5GRG2,Q63942,Q9Z1F2                                           |
| 3294 | 1,2,5,6,7,8<br>,9,14     | 3,4,10,11,<br>12,13,15,1<br>6,17 | 11 | P02631,P19629,P27213,P31044,P52590,P53792,P68370,P83748,Q63942,Q9QUL6,Q9Z1F2                                                         |
| 3295 | 1,2,5,6,7,8<br>,9,15     | 3,4,10,11,<br>12,13,14,1<br>6,17 | 11 | O55006,P02631,P10715,P19629,P27213,P31044,P52590,P53792,P68370,P83748,Q63942                                                         |
| 3296 | 1,2,5,6,7,8<br>,9,16     | 3,4,10,11,<br>12,13,14,1<br>5,17 | 8  | P02631,P10715,P19629,P31044,P52590,P68370,P83748,Q63942                                                                              |



|      |                       |                                  |    |                                                                                                                                                                                                                   |
|------|-----------------------|----------------------------------|----|-------------------------------------------------------------------------------------------------------------------------------------------------------------------------------------------------------------------|
| 3297 | 1,2,5,6,7,8<br>,9,17  | 3,4,10,11,<br>12,13,14,1<br>5,16 | 14 | O88267,P02631,P06760,P10715,P19629,P31044,P50115,P52590,P53792,P55091,P68370,P83748,Q63942,Q9QUL6                                                                                                                 |
| 3298 | 1,2,5,6,7,8<br>,10,11 | 3,4,9,12,1<br>3,14,15,16<br>,17  | 18 | O54715,P02631,P05371,P07150,P08649,P10715,P14669,P15399,P19629,P27213,P28648,P31044,P52590,P61206,P84079,P84082,P68370,Q63493,Q9JI85,Q9QUL6                                                                       |
| 3299 | 1,2,5,6,7,8<br>,10,12 | 3,4,9,11,1<br>3,14,15,16<br>,17  | 20 | F1LM93,O88267,P02631,P02782,P08723,P10715,P12020,P19629,P22283,P27213,P30120,P31044,P52590,P68370,P83748,P97840,Q10758,Q8CJ52,Q9JHB9,Q9JI85                                                                       |
| 3300 | 1,2,5,6,7,8<br>,10,13 | 3,4,9,11,1<br>2,14,15,16<br>,17  | 10 | P02764,P06911,P12020,P19629,P31044,P52590,P68370,P83748,Q5GRG2,Q9Z1F2                                                                                                                                             |
| 3301 | 1,2,5,6,7,8<br>,10,14 | 3,4,9,11,1<br>2,13,15,16<br>,17  | 10 | P02631,P12020,P19629,P27213,P31044,P52590,P55018,P68370,P83748,Q5GRG2                                                                                                                                             |
| 3302 | 1,2,5,6,7,8<br>,10,15 | 3,4,9,11,1<br>2,13,14,16<br>,17  | 9  | O55006,P02631,P19629,P27213,P31044,P52590,P55018,P68370,P83748                                                                                                                                                    |
| 3303 | 1,2,5,6,7,8<br>,10,16 | 3,4,9,11,1<br>2,13,14,15<br>,17  | 6  | P19629,P31044,P52590,P55018,P68370,P83748                                                                                                                                                                         |
| 3304 | 1,2,5,6,7,8<br>,10,17 | 3,4,9,11,1<br>2,13,14,15<br>,16  | 13 | O54858,O88267,P02631,P06760,P19629,P31044,P50115,P52590,P55091,P68370,P83748,P97571,Q9QUL6                                                                                                                        |
| 3305 | 1,2,5,6,7,8<br>,11,12 | 3,4,9,10,1<br>3,14,15,16<br>,17  | 30 | O35547,O54715,O88267,P02631,P02781,P02782,P05371,P06761,P07647,P08723,P10715,P13432,P14669,P19629,P20762,P22282,P22283,P27213,P30120,P31044,P62804,P68370,P83748,Q63357,Q63493,Q6P6Q2,Q8CJ52,Q9JHB9,Q9JI85,Q9Z1F2 |
| 3306 | 1,2,5,6,7,8<br>,11,13 | 3,4,9,10,1<br>2,14,15,16<br>,17  | 21 | P01048,P02631,P02764,P05371,P06911,P10715,P12020,P14669,P19629,P22282,P22283,P31044,P68370,P83748,Q5GRG2,Q62902,Q63493,Q8CJ52,Q9JHB9,Q9JI85,Q9Z1F2                                                                |
| 3307 | 1,2,5,6,7,8<br>,11,14 | 3,4,9,10,1<br>2,13,15,16<br>,17  | 18 | P02631,P05371,P07171,P10715,P12020,P14669,P15399,P19629,P20762,P27213,P31044,P47727,P68370,Q5GRG2,Q63493,Q8CJ52,Q9JI85,Q9QUL6                                                                                     |
| 3308 | 1,2,5,6,7,8<br>,11,15 | 3,4,9,10,1<br>2,13,14,16<br>,17  | 11 | P02631,P05371,P07171,P10715,P14669,P19629,P27213,P31044,P68370,P83748,Q9JI85                                                                                                                                      |
| 3309 | 1,2,5,6,7,8<br>,11,16 | 3,4,9,10,1<br>2,13,14,15<br>,17  | 15 | A2RUV9,O54715,P02631,P05371,P07150,P10715,P14669,P19629,P31044,P61206,P84079,P84082,P68370,P83748,Q63493,Q8CJ52,Q9JI85                                                                                            |
| 3310 | 1,2,5,6,7,8<br>,11,17 | 3,4,9,10,1<br>2,13,14,15<br>,16  | 20 | O54858,O88267,P02631,P05371,P06760,P07150,P10715,P14669,P15399,P19629,P31044,P50115,P52590,P55091,P68370,P97580,Q30KJ2,Q63493,Q9JI85,Q9QUL6                                                                       |
| 3311 | 1,2,5,6,7,8<br>,12,13 | 3,4,9,10,1<br>1,14,15,16<br>,17  | 25 | O88267,P02631,P02781,P02782,P06761,P06911,P07647,P08723,P10715,P12020,P13432,P19629,P22282,P22283,P30120,P31044,P68370,P83748,Q5GRG2,Q62902,Q6AYR9,Q8CJ52,Q9JHB9,Q9JI85,Q9Z1F2                                    |

|      |                       |                                 |    |                                                                                                                                                                                                                                 |
|------|-----------------------|---------------------------------|----|---------------------------------------------------------------------------------------------------------------------------------------------------------------------------------------------------------------------------------|
| 3312 | 1,2,5,6,7,8<br>,12,14 | 3,4,9,10,1<br>1,13,15,16<br>,17 | 23 | O88267,P02631,P02782,P06761,P08723,P10715,P12020,P13432,P19629,P20762,P22282,P22283,P30120,P31044,P68370,P83748,Q5GRG2,Q63493,Q6AYS7,Q8CJ52,Q9JHB9,Q9JI85,Q9Z1F2                                                                |
| 3313 | 1,2,5,6,7,8<br>,12,15 | 3,4,9,10,1<br>1,13,14,16<br>,17 | 13 | O88267,P02631,P08723,P10715,P13432,P19629,P30120,P31044,P68370,P83748,Q8CJ52,Q9JHB9,Q9JI85                                                                                                                                      |
| 3314 | 1,2,5,6,7,8<br>,12,16 | 3,4,9,10,1<br>1,13,14,15<br>,17 | 14 | O88267,P02631,P08723,P10715,P13432,P19629,P30120,P31044,P68370,P83748,Q8CJ52,Q9JHB9,Q9JI85,Q9Z1F2                                                                                                                               |
| 3315 | 1,2,5,6,7,8<br>,12,17 | 3,4,9,10,1<br>1,13,14,15<br>,16 | 32 | F1LM93,O88267,P02631,P02782,P06760,P06761,P08723,P10715,P13432,P19629,P22282,P22283,P23928,P30120,P31044,P50115,P52590,P55091,P68370,P83748,P98089,Q4G075,Q561R9,Q62635,Q63493,Q8CJ52,Q99041,Q9JHB9,Q9JI85,Q9QZA6,Q9QZK9,Q9Z1F2 |
| 3316 | 1,2,5,6,7,8<br>,13,14 | 3,4,9,10,1<br>1,12,15,16<br>,17 | 15 | O88267,P02631,P06761,P06911,P12020,P19629,P22282,P31044,P53792,P68370,P83748,Q5GRG2,Q5RLM2,Q62902,Q9Z1F2                                                                                                                        |
| 3317 | 1,2,5,6,7,8<br>,13,15 | 3,4,9,10,1<br>1,12,14,16<br>,17 | 11 | P02631,P06911,P12020,P19629,P31044,P53792,P68370,P83748,Q5GRG2,Q6IFV1,Q9Z1F2                                                                                                                                                    |
| 3318 | 1,2,5,6,7,8<br>,13,16 | 3,4,9,10,1<br>1,12,14,15<br>,17 | 10 | O88267,P02631,P06911,P12020,P19629,P31044,P68370,P83748,Q5GRG2,Q9Z1F2                                                                                                                                                           |
| 3319 | 1,2,5,6,7,8<br>,13,17 | 3,4,9,10,1<br>1,12,14,15<br>,16 | 23 | O88267,P02631,P06760,P06761,P06911,P12020,P19629,P22282,P22283,P23928,P31044,P50115,P51907,P52590,P53792,P55091,P68370,P70545,P83748,Q5GRG2,Q6IFV1,Q6PCU2,Q9Z1F2                                                                |
| 3320 | 1,2,5,6,7,8<br>,14,15 | 3,4,9,10,1<br>1,12,13,16<br>,17 | 10 | P02631,P07171,P10536,P16636,P19629,P20762,P31044,P68370,P83748,Q5GRG2                                                                                                                                                           |
| 3321 | 1,2,5,6,7,8<br>,14,16 | 3,4,9,10,1<br>1,12,13,15<br>,17 | 7  | O88267,P02631,P19629,P31044,P68370,P83748,Q63532                                                                                                                                                                                |
| 3322 | 1,2,5,6,7,8<br>,14,17 | 3,4,9,10,1<br>1,12,13,15<br>,16 | 17 | O88267,P02631,P06760,P10536,P12020,P19629,P20762,P31044,P50115,P52590,P53792,P55091,P68370,P83748,Q561R9,Q6PCU2,Q9Z1F2                                                                                                          |
| 3323 | 1,2,5,6,7,8<br>,15,16 | 3,4,9,10,1<br>1,12,13,14<br>,17 | 6  | P02631,P10715,P19629,P31044,P68370,P83748                                                                                                                                                                                       |
| 3324 | 1,2,5,6,7,8<br>,15,17 | 3,4,9,10,1<br>1,12,13,14<br>,16 | 13 | P02631,P06760,P10536,P10715,P19629,P31044,P50115,P52590,P53792,P55091,P68370,P83748,Q6IFV1                                                                                                                                      |
| 3325 | 1,2,5,6,7,8<br>,16,17 | 3,4,9,10,1<br>1,12,13,14<br>,15 | 14 | O88267,P02631,P06760,P10715,P10758,P19629,P23928,P31044,P50115,P50116,P52590,P68370,P83748,Q6PCU2                                                                                                                               |
| 3326 | 1,2,5,6,7,9<br>,10,11 | 3,4,8,12,1<br>3,14,15,16<br>,17 | 7  | P15399,P27213,P52590,P61206,P84079,P84082,Q63942,Q91ZS3,Q9QUL6                                                                                                                                                                  |

|      |                       |                                 |   |                                                                |
|------|-----------------------|---------------------------------|---|----------------------------------------------------------------|
| 3327 | 1,2,5,6,7,9<br>,10,12 | 3,4,8,11,1<br>3,14,15,16<br>,17 | 5 | P27213,P52590,P83748,P97840,Q9QUL6                             |
| 3328 | 1,2,5,6,7,9<br>,10,13 | 3,4,8,11,1<br>2,14,15,16<br>,17 | 6 | P12020,P52590,P83748,P97840,Q63942,Q9QUL6                      |
| 3329 | 1,2,5,6,7,9<br>,10,14 | 3,4,8,11,1<br>2,13,15,16<br>,17 | 6 | P12020,P27213,P52590,P83748,Q63942,Q9QUL6                      |
| 3330 | 1,2,5,6,7,9<br>,10,15 | 3,4,8,11,1<br>2,13,14,16<br>,17 | 6 | P27213,P52590,P83748,P97840,Q63942,Q9QUL6                      |
| 3331 | 1,2,5,6,7,9<br>,10,16 | 3,4,8,11,1<br>2,13,14,15<br>,17 | 6 | P52590,P83748,P97840,Q63942,Q64093,Q9QUL6                      |
| 3332 | 1,2,5,6,7,9<br>,10,17 | 3,4,8,11,1<br>2,13,14,15<br>,16 | 4 | P52590,P83748,Q63942,Q9QUL6                                    |
| 3333 | 1,2,5,6,7,9<br>,11,12 | 3,4,8,10,1<br>3,14,15,16<br>,17 | 9 | P27213,P30120,P52590,P83748,Q61FU7,Q91ZS3,Q9JHB9,Q9JI85,Q9QUL6 |
| 3334 | 1,2,5,6,7,9<br>,11,13 | 3,4,8,10,1<br>2,14,15,16<br>,17 | 2 | Q91ZS3,Q9QUL6                                                  |
| 3335 | 1,2,5,6,7,9<br>,11,14 | 3,4,8,10,1<br>2,13,15,16<br>,17 | 5 | P02631,P27213,P52590,Q63942,Q9QUL6                             |
| 3336 | 1,2,5,6,7,9<br>,11,15 | 3,4,8,10,1<br>2,13,14,16<br>,17 | 6 | P02631,P27213,P52590,P83748,Q63942,Q9QUL6                      |
| 3337 | 1,2,5,6,7,9<br>,11,16 | 3,4,8,10,1<br>2,13,14,15<br>,17 | 5 | A2RUV9,P05712,P61206,P84079,P84082,Q63942,Q9QUL6               |
| 3338 | 1,2,5,6,7,9<br>,11,17 | 3,4,8,10,1<br>2,13,14,15<br>,16 | 3 | P15399,P52590,Q9QUL6                                           |
| 3339 | 1,2,5,6,7,9<br>,12,13 | 3,4,8,10,1<br>1,14,15,16<br>,17 | 5 | P19218,P83748,P97840,Q9JHB9,Q9Z1F2                             |
| 3340 | 1,2,5,6,7,9<br>,12,14 | 3,4,8,10,1<br>1,13,15,16<br>,17 | 4 | P02631,P52590,P83748,Q9Z1F2                                    |
| 3341 | 1,2,5,6,7,9<br>,12,15 | 3,4,8,10,1<br>1,13,14,16<br>,17 | 3 | P02631,P52590,P83748                                           |

|      |                        |                                 |    |                                                                                                                        |
|------|------------------------|---------------------------------|----|------------------------------------------------------------------------------------------------------------------------|
| 3342 | 1,2,5,6,7,9<br>,12,16  | 3,4,8,10,1<br>1,13,14,15<br>,17 | 4  | P19218,P83748,P97840,Q63942                                                                                            |
| 3343 | 1,2,5,6,7,9<br>,12,17  | 3,4,8,10,1<br>1,13,14,15<br>,16 | 5  | P13432,P52590,P55091,P83748,Q9QUL6                                                                                     |
| 3344 | 1,2,5,6,7,9<br>,13,14  | 3,4,8,10,1<br>1,12,15,16<br>,17 | 7  | P06911,P12020,P53792,P83748,Q5GRG2,Q63942,Q9Z1F2                                                                       |
| 3345 | 1,2,5,6,7,9<br>,13,15  | 3,4,8,10,1<br>1,12,14,16<br>,17 | 3  | P53792,P83748,Q63942                                                                                                   |
| 3346 | 1,2,5,6,7,9<br>,13,16  | 3,4,8,10,1<br>1,12,14,15<br>,17 | 5  | B0BNN3,P19218,P53792,P83748,Q63942                                                                                     |
| 3347 | 1,2,5,6,7,9<br>,13,17  | 3,4,8,10,1<br>1,12,14,15<br>,16 | 4  | P52590,P53792,P83748,Q9QUL6                                                                                            |
| 3348 | 1,2,5,6,7,9<br>,14,15  | 3,4,8,10,1<br>1,12,13,16<br>,17 | 8  | P02631,P16636,P35467,P52590,P53792,P83748,Q63942,Q9QUL6                                                                |
| 3349 | 1,2,5,6,7,9<br>,14,16  | 3,4,8,10,1<br>1,12,13,15<br>,17 | 4  | P83748,Q63532,Q63942,Q9QUL6                                                                                            |
| 3350 | 1,2,5,6,7,9<br>,14,17  | 3,4,8,10,1<br>1,12,13,15<br>,16 | 4  | P52590,P53792,Q63942,Q9QUL6                                                                                            |
| 3351 | 1,2,5,6,7,9<br>,15,16  | 3,4,8,10,1<br>1,12,13,14<br>,17 | 4  | P02631,P35467,P83748,Q63942                                                                                            |
| 3352 | 1,2,5,6,7,9<br>,15,17  | 3,4,8,10,1<br>1,12,13,14<br>,16 | 6  | P02631,P52590,P53792,P83748,Q63942,Q9QUL6                                                                              |
| 3353 | 1,2,5,6,7,9<br>,16,17  | 3,4,8,10,1<br>1,12,13,14<br>,15 | 5  | P10758,P52590,P83748,Q63942,Q9QUL6                                                                                     |
| 3354 | 1,2,5,6,7,1<br>0,11,12 | 3,4,8,9,13,<br>14,15,16,1<br>7  | 15 | P15399,P27213,P30120,P61206;P84079;P84082,P68370,P83748,P97840,Q10758,Q63357,Q6IFU7,Q6IMF3,Q6P6Q2,Q9JHB9,Q9JI85,Q9QUL6 |
| 3355 | 1,2,5,6,7,1<br>0,11,13 | 3,4,8,9,12,<br>14,15,16,1<br>7  | 6  | P12020,P15399,P61206;P84079;P84082,P68370,Q5GRG2,Q9QUL6                                                                |
| 3356 | 1,2,5,6,7,1<br>0,11,14 | 3,4,8,9,12,<br>13,15,16,1<br>7  | 8  | P12020,P15399,P27213,P47727,P61206;P84079;P84082,P68370,Q63532,Q9QUL6                                                  |

|      |                        |                                |   |                                                         |
|------|------------------------|--------------------------------|---|---------------------------------------------------------|
| 3357 | 1,2,5,6,7,1<br>0,11,15 | 3,4,8,9,12,<br>13,14,16,1<br>7 | 4 | P02631,P27213,P83748,Q9QUL6                             |
| 3358 | 1,2,5,6,7,1<br>0,11,16 | 3,4,8,9,12,<br>13,14,15,1<br>7 | 4 | A2RUV9,P05712,P61206;P84079;P84082,Q9QUL6               |
| 3359 | 1,2,5,6,7,1<br>0,11,17 | 3,4,8,9,12,<br>13,14,15,1<br>6 | 5 | P15399,P52590,P97580,Q30KJ2,Q9QUL6                      |
| 3360 | 1,2,5,6,7,1<br>0,12,13 | 3,4,8,9,11,<br>14,15,16,1<br>7 | 6 | P12020,P19218,P83748,P97840,Q5GRG2,Q9JHB9               |
| 3361 | 1,2,5,6,7,1<br>0,12,14 | 3,4,8,9,11,<br>13,15,16,1<br>7 | 5 | P12020,P83748,P97840,Q10758,Q63532                      |
| 3362 | 1,2,5,6,7,1<br>0,12,15 | 3,4,8,9,11,<br>13,14,16,1<br>7 | 2 | P83748,P97840                                           |
| 3363 | 1,2,5,6,7,1<br>0,12,16 | 3,4,8,9,11,<br>13,14,15,1<br>7 | 5 | P19218,P47967,P83748,P97840,Q10758                      |
| 3364 | 1,2,5,6,7,1<br>0,12,17 | 3,4,8,9,11,<br>13,14,15,1<br>6 | 8 | P13432,P52590,P55091,P83748,P97840,Q10758,Q62635,Q9QZK9 |
| 3365 | 1,2,5,6,7,1<br>0,13,14 | 3,4,8,9,11,<br>12,15,16,1<br>7 | 4 | P06911,P12020,P83748,Q5GRG2                             |
| 3366 | 1,2,5,6,7,1<br>0,13,15 | 3,4,8,9,11,<br>12,14,16,1<br>7 | 3 | P12020,P83748,Q5GRG2                                    |
| 3367 | 1,2,5,6,7,1<br>0,13,16 | 3,4,8,9,11,<br>12,14,15,1<br>7 | 4 | P12020,P19218,P83748,P97840                             |
| 3368 | 1,2,5,6,7,1<br>0,13,17 | 3,4,8,9,11,<br>12,14,15,1<br>6 | 3 | P12020,P52590,P83748                                    |
| 3369 | 1,2,5,6,7,1<br>0,14,15 | 3,4,8,9,11,<br>12,13,16,1<br>7 | 6 | P02631,P12020,P16636,P35467,P83748,Q63532               |
| 3370 | 1,2,5,6,7,1<br>0,14,16 | 3,4,8,9,11,<br>12,13,15,1<br>7 | 5 | P12020,P35467,P83748,P97840,Q63532                      |
| 3371 | 1,2,5,6,7,1<br>0,14,17 | 3,4,8,9,11,<br>12,13,15,1<br>6 | 4 | P12020,P52590,P83748,Q9QUL6                             |

|      |                        |                                |    |                                                                              |
|------|------------------------|--------------------------------|----|------------------------------------------------------------------------------|
| 3372 | 1,2,5,6,7,1<br>0,15,16 | 3,4,8,9,11,<br>12,13,14,1<br>7 | 3  | P35467,P83748,P97840                                                         |
| 3373 | 1,2,5,6,7,1<br>0,15,17 | 3,4,8,9,11,<br>12,13,14,1<br>6 | 3  | P52590,P83748,Q9QUL6                                                         |
| 3374 | 1,2,5,6,7,1<br>0,16,17 | 3,4,8,9,11,<br>12,13,14,1<br>5 | 4  | P10758,P52590,P83748,Q9QUL6                                                  |
| 3375 | 1,2,5,6,7,1<br>1,12,13 | 3,4,8,9,10,<br>14,15,16,1<br>7 | 5  | P30120,P83748,Q9JHB9,Q9JI85,Q9Z1F2                                           |
| 3376 | 1,2,5,6,7,1<br>1,12,14 | 3,4,8,9,10,<br>13,15,16,1<br>7 | 11 | P02631,P15399,P19629,P30120,P47727,P83748,Q63493,Q63532,Q6IFU7,Q9JHB9,Q9JI85 |
| 3377 | 1,2,5,6,7,1<br>1,12,15 | 3,4,8,9,10,<br>13,14,16,1<br>7 | 4  | P02631,P83748,Q9JHB9,Q9JI85                                                  |
| 3378 | 1,2,5,6,7,1<br>1,12,16 | 3,4,8,9,10,<br>13,14,15,1<br>7 | 4  | P17046,P61206,P84079,P84082,P83748,Q6IFU7                                    |
| 3379 | 1,2,5,6,7,1<br>1,12,17 | 3,4,8,9,10,<br>13,14,15,1<br>6 | 11 | P13432,P15399,P52590,P55091,P83748,Q62635,Q63493,Q9JHB9,Q9JI85,Q9QUL6,Q9QZK9 |
| 3380 | 1,2,5,6,7,1<br>1,13,14 | 3,4,8,9,10,<br>12,15,16,1<br>7 | 4  | P06911,P12020,P47727,Q5GRG2                                                  |
| 3381 | 1,2,5,6,7,1<br>1,13,15 | 3,4,8,9,10,<br>12,14,16,1<br>7 | 3  | P02631,P83748,Q5GRG2                                                         |
| 3382 | 1,2,5,6,7,1<br>1,13,16 | 3,4,8,9,10,<br>12,14,15,1<br>7 | 1  | P83748                                                                       |
| 3383 | 1,2,5,6,7,1<br>1,13,17 | 3,4,8,9,10,<br>12,14,15,1<br>6 | 3  | P15399,P52590,Q9QUL6                                                         |
| 3384 | 1,2,5,6,7,1<br>1,14,15 | 3,4,8,9,10,<br>12,13,16,1<br>7 | 4  | P02631,P16636,P83748,Q9QUL6                                                  |
| 3385 | 1,2,5,6,7,1<br>1,14,16 | 3,4,8,9,10,<br>12,13,15,1<br>7 | 3  | P02631,Q63532,Q9QUL6                                                         |
| 3386 | 1,2,5,6,7,1<br>1,14,17 | 3,4,8,9,10,<br>12,13,15,1<br>6 | 6  | P02631,P15399,P52590,P97580,Q30KJ2,Q9QUL6                                    |

|      |                        |                                |    |                                                                       |
|------|------------------------|--------------------------------|----|-----------------------------------------------------------------------|
| 3387 | 1,2,5,6,7,1<br>1,15,16 | 3,4,8,9,10,<br>12,13,14,1<br>7 | 2  | P02631,P83748                                                         |
| 3388 | 1,2,5,6,7,1<br>1,15,17 | 3,4,8,9,10,<br>12,13,14,1<br>6 | 4  | P02631,P15399,P52590,Q9QUL6                                           |
| 3389 | 1,2,5,6,7,1<br>1,16,17 | 3,4,8,9,10,<br>12,13,14,1<br>5 | 6  | A2RUV9,P10758,P15399,P52590,P97580,Q9QUL6                             |
| 3390 | 1,2,5,6,7,1<br>2,13,14 | 3,4,8,9,10,<br>11,15,16,1<br>7 | 9  | O88267,P06911,P12020,P30120,P83748,Q5GRG2,Q63532,Q9JHB9,Q9Z1F2        |
| 3391 | 1,2,5,6,7,1<br>2,13,15 | 3,4,8,9,10,<br>11,14,16,1<br>7 | 4  | P19218,P35467,P83748,Q5GRG2                                           |
| 3392 | 1,2,5,6,7,1<br>2,13,16 | 3,4,8,9,10,<br>11,14,15,1<br>7 | 3  | P19218,P83748,P97840                                                  |
| 3393 | 1,2,5,6,7,1<br>2,13,17 | 3,4,8,9,10,<br>11,14,15,1<br>6 | 10 | O88267,P13432,P52590,P55091,P83748,Q561R9,Q62635,Q9JHB9,Q9QZK9,Q9Z1F2 |
| 3394 | 1,2,5,6,7,1<br>2,14,15 | 3,4,8,9,10,<br>11,13,16,1<br>7 | 6  | P02631,P16636,P19629,P35467,P83748,Q63532                             |
| 3395 | 1,2,5,6,7,1<br>2,14,16 | 3,4,8,9,10,<br>11,13,15,1<br>7 | 3  | P35467,P83748,Q63532                                                  |
| 3396 | 1,2,5,6,7,1<br>2,14,17 | 3,4,8,9,10,<br>11,13,15,1<br>6 | 9  | O88267,P13432,P19629,P35467,P52590,P55091,P83748,Q561R9,Q62635        |
| 3397 | 1,2,5,6,7,1<br>2,15,16 | 3,4,8,9,10,<br>11,13,14,1<br>7 | 2  | P35467,P83748                                                         |
| 3398 | 1,2,5,6,7,1<br>2,15,17 | 3,4,8,9,10,<br>11,13,14,1<br>6 | 6  | P13432,P35467,P52590,P55091,P83748,Q62635                             |
| 3399 | 1,2,5,6,7,1<br>2,16,17 | 3,4,8,9,10,<br>11,13,14,1<br>5 | 7  | O88267,P13432,P35467,P52590,P55091,P83748,Q561R9                      |
| 3400 | 1,2,5,6,7,1<br>3,14,15 | 3,4,8,9,10,<br>11,12,16,1<br>7 | 8  | P02631,P06911,P12020,P16636,P35467,P53792,P83748,Q5GRG2               |
| 3401 | 1,2,5,6,7,1<br>3,14,16 | 3,4,8,9,10,<br>11,12,15,1<br>7 | 6  | P06911,P12020,P35467,P83748,Q5GRG2,Q63532                             |

|      |                        |                                 |   |                                                         |
|------|------------------------|---------------------------------|---|---------------------------------------------------------|
| 3402 | 1,2,5,6,7,1<br>3,14,17 | 3,4,8,9,10,<br>11,12,15,1<br>6  | 8 | P06911,P12020,P52590,P53792,P83748,Q561R9,Q5GRG2,Q9Z1F2 |
| 3403 | 1,2,5,6,7,1<br>3,15,16 | 3,4,8,9,10,<br>11,12,14,1<br>7  | 2 | P35467,P83748                                           |
| 3404 | 1,2,5,6,7,1<br>3,15,17 | 3,4,8,9,10,<br>11,12,14,1<br>6  | 7 | P00714,P35467,P52590,P53792,P83748,Q6IFV1,Q9WUW8        |
| 3405 | 1,2,5,6,7,1<br>3,16,17 | 3,4,8,9,10,<br>11,12,14,1<br>5  | 4 | P10758,P52590,P83748,Q561R9                             |
| 3406 | 1,2,5,6,7,1<br>4,15,16 | 3,4,8,9,10,<br>11,12,13,1<br>7  | 5 | P02631,P16636,P35467,P83748,Q63532                      |
| 3407 | 1,2,5,6,7,1<br>4,15,17 | 3,4,8,9,10,<br>11,12,13,1<br>6  | 6 | P02631,P16636,P35467,P52590,P53792,P83748               |
| 3408 | 1,2,5,6,7,1<br>4,16,17 | 3,4,8,9,10,<br>11,12,13,1<br>5  | 6 | P10758,P35467,P52590,P83748,Q561R9,Q63532               |
| 3409 | 1,2,5,6,7,1<br>5,16,17 | 3,4,8,9,10,<br>11,12,13,1<br>4  | 4 | P10758,P35467,P52590,P83748                             |
| 3410 | 1,2,5,6,8,9<br>,10,11  | 3,4,7,12,1<br>3,14,15,16<br>,17 | 7 | A2RUV9,P08649,P14669,P27213,Q63942,Q91ZS3,Q9QUL6        |
| 3411 | 1,2,5,6,8,9<br>,10,12  | 3,4,7,11,1<br>3,14,15,16<br>,17 | 2 | P27213,Q63942                                           |
| 3412 | 1,2,5,6,8,9<br>,10,13  | 3,4,7,11,1<br>2,14,15,16<br>,17 | 2 | Q63942,Q9Z1F2                                           |
| 3413 | 1,2,5,6,8,9<br>,10,14  | 3,4,7,11,1<br>2,13,15,16<br>,17 | 3 | P27213,Q63942,Q9QUL6                                    |
| 3414 | 1,2,5,6,8,9<br>,10,15  | 3,4,7,11,1<br>2,13,14,16<br>,17 | 3 | P27213,Q63942,Q9QUL6                                    |
| 3415 | 1,2,5,6,8,9<br>,10,16  | 3,4,7,11,1<br>2,13,14,15<br>,17 | 3 | A2RUV9,Q63942,Q9QUL6                                    |
| 3416 | 1,2,5,6,8,9<br>,10,17  | 3,4,7,11,1<br>2,13,14,15<br>,16 | 5 | A2RUV9,P06760,P08649,Q63942,Q9QUL6                      |



|      |                       |                                 |    |                                                                                     |
|------|-----------------------|---------------------------------|----|-------------------------------------------------------------------------------------|
| 3417 | 1,2,5,6,8,9<br>,11,12 | 3,4,7,10,1<br>3,14,15,16<br>,17 | 12 | O35547,P02782,P02803,P27213,P30120,Q5M8C6,Q63942,Q6IFU7,Q6IFU8,Q6P6Q2,Q9JHB9,Q9Z1F2 |
| 3418 | 1,2,5,6,8,9<br>,11,13 | 3,4,7,10,1<br>2,14,15,16<br>,17 | 4  | A2RUV9,P02803,Q63942,Q9Z1F2                                                         |
| 3419 | 1,2,5,6,8,9<br>,11,14 | 3,4,7,10,1<br>2,13,15,16<br>,17 | 3  | P27213,Q63942,Q9QUL6                                                                |
| 3420 | 1,2,5,6,8,9<br>,11,15 | 3,4,7,10,1<br>2,13,14,16<br>,17 | 3  | P27213,Q63942,Q9QUL6                                                                |
| 3421 | 1,2,5,6,8,9<br>,11,16 | 3,4,7,10,1<br>2,13,14,15<br>,17 | 3  | A2RUV9,Q63942,Q9QUL6                                                                |
| 3422 | 1,2,5,6,8,9<br>,11,17 | 3,4,7,10,1<br>2,13,14,15<br>,16 | 6  | A2RUV9,P06760,P08649,P14669,Q63942,Q9QUL6                                           |
| 3423 | 1,2,5,6,8,9<br>,12,13 | 3,4,7,10,1<br>1,14,15,16<br>,17 | 7  | P02782,P02803,P30120,Q5M8C6,Q63942,Q9JHB9,Q9Z1F2                                    |
| 3424 | 1,2,5,6,8,9<br>,12,14 | 3,4,7,10,1<br>1,13,15,16<br>,17 | 4  | P02782,P30120,Q63942,Q9Z1F2                                                         |
| 3425 | 1,2,5,6,8,9<br>,12,15 | 3,4,7,10,1<br>1,13,14,16<br>,17 | 1  | Q63942                                                                              |
| 3426 | 1,2,5,6,8,9<br>,12,16 | 3,4,7,10,1<br>1,13,14,15<br>,17 | 1  | Q63942                                                                              |
| 3427 | 1,2,5,6,8,9<br>,12,17 | 3,4,7,10,1<br>1,13,14,15<br>,16 | 7  | P02782,P06760,P13432,Q5M8C6,Q62635,Q63942,Q9Z1F2                                    |
| 3428 | 1,2,5,6,8,9<br>,13,14 | 3,4,7,10,1<br>1,12,15,16<br>,17 | 5  | P06911,P53792,Q5FVI6,Q63942,Q9Z1F2                                                  |
| 3429 | 1,2,5,6,8,9<br>,13,15 | 3,4,7,10,1<br>1,12,14,16<br>,17 | 4  | P53792,Q63942,Q6IFV1,Q9Z1F2                                                         |
| 3430 | 1,2,5,6,8,9<br>,13,16 | 3,4,7,10,1<br>1,12,14,15<br>,17 | 3  | A2RUV9,Q63942,Q9Z1F2                                                                |
| 3431 | 1,2,5,6,8,9<br>,13,17 | 3,4,7,10,1<br>1,12,14,15<br>,16 | 8  | P06760,P08753,P51907,P53792,Q5FVI6,Q63942,Q6IFV1,Q9Z1F2                             |

|      |                        |                                 |    |                                                                                                          |
|------|------------------------|---------------------------------|----|----------------------------------------------------------------------------------------------------------|
| 3432 | 1,2,5,6,8,9<br>,14,15  | 3,4,7,10,1<br>1,12,13,16<br>,17 | 1  | Q63942                                                                                                   |
| 3433 | 1,2,5,6,8,9<br>,14,16  | 3,4,7,10,1<br>1,12,13,15<br>,17 | 1  | Q63942                                                                                                   |
| 3434 | 1,2,5,6,8,9<br>,14,17  | 3,4,7,10,1<br>1,12,13,15<br>,16 | 6  | P06760,P53792,Q5FVI6,Q63942,Q9QUL6,Q9Z1F2                                                                |
| 3435 | 1,2,5,6,8,9<br>,15,16  | 3,4,7,10,1<br>1,12,13,14<br>,17 | 2  | Q5QE79,Q63942                                                                                            |
| 3436 | 1,2,5,6,8,9<br>,15,17  | 3,4,7,10,1<br>1,12,13,14<br>,16 | 4  | P06760,P53792,Q63942,Q6IFV1                                                                              |
| 3437 | 1,2,5,6,8,9<br>,16,17  | 3,4,7,10,1<br>1,12,13,14<br>,15 | 4  | A2RUV9,P06760,P23593,Q63942                                                                              |
| 3438 | 1,2,5,6,8,1<br>0,11,12 | 3,4,7,9,13,<br>14,15,16,1<br>7  | 15 | F1LM93,O35547,P02782,P14669,P27213,P30120,P47727,P62804,Q10758,Q63357,Q6IFU7,Q6IFU8,Q6IMF3,Q6P6Q2,Q9JHB9 |
| 3439 | 1,2,5,6,8,1<br>0,11,13 | 3,4,7,9,12,<br>14,15,16,1<br>7  | 3  | A2RUV9,P14669,P47727                                                                                     |
| 3440 | 1,2,5,6,8,1<br>0,11,14 | 3,4,7,9,12,<br>13,15,16,1<br>7  | 6  | P08649,P14669,P27213,P47727,P62804,Q9QUL6                                                                |
| 3441 | 1,2,5,6,8,1<br>0,11,15 | 3,4,7,9,12,<br>13,14,16,1<br>7  | 4  | P08649,P14669,P27213,Q9QUL6                                                                              |
| 3442 | 1,2,5,6,8,1<br>0,11,16 | 3,4,7,9,12,<br>13,14,15,1<br>7  | 3  | A2RUV9,P08649,Q9QUL6                                                                                     |
| 3443 | 1,2,5,6,8,1<br>0,11,17 | 3,4,7,9,12,<br>13,14,15,1<br>6  | 5  | A2RUV9,P06760,P08649,P14669,Q9QUL6                                                                       |
| 3444 | 1,2,5,6,8,1<br>0,12,13 | 3,4,7,9,11,<br>14,15,16,1<br>7  | 6  | P02782,P30120,Q5M8C6,Q6IFV1,Q9JHB9,Q9Z1F2                                                                |
| 3445 | 1,2,5,6,8,1<br>0,12,14 | 3,4,7,9,11,<br>13,15,16,1<br>7  | 5  | P02782,P30120,P62804,Q10758,Q9Z1F2                                                                       |
| 3446 | 1,2,5,6,8,1<br>0,12,15 | 3,4,7,9,11,<br>13,14,16,1<br>7  | 1  | Q6IFV1                                                                                                   |

|      |                        |                                |    |                                                                                     |
|------|------------------------|--------------------------------|----|-------------------------------------------------------------------------------------|
| 3447 | 1,2,5,6,8,1<br>0,12,16 | 3,4,7,9,11,<br>13,14,15,1<br>7 | 2  | Q10758,Q6IFU7                                                                       |
| 3448 | 1,2,5,6,8,1<br>0,12,17 | 3,4,7,9,11,<br>13,14,15,1<br>6 | 7  | F1LM93,P06760,P13432,Q10758,Q4G075,Q62635,Q6IFV1                                    |
| 3449 | 1,2,5,6,8,1<br>0,13,14 | 3,4,7,9,11,<br>12,15,16,1<br>7 | 4  | P06911,P12020,Q5GRG2,Q9Z1F2                                                         |
| 3450 | 1,2,5,6,8,1<br>0,13,15 | 3,4,7,9,11,<br>12,14,16,1<br>7 | 1  | Q6IFV1                                                                              |
| 3451 | 1,2,5,6,8,1<br>0,13,16 | 3,4,7,9,11,<br>12,14,15,1<br>7 | 1  | A2RUV9                                                                              |
| 3452 | 1,2,5,6,8,1<br>0,13,17 | 3,4,7,9,11,<br>12,14,15,1<br>6 | 3  | P06760,P51907,Q6IFV1                                                                |
| 3453 | 1,2,5,6,8,1<br>0,14,15 | 3,4,7,9,11,<br>12,13,16,1<br>7 | 0  |                                                                                     |
| 3454 | 1,2,5,6,8,1<br>0,14,16 | 3,4,7,9,11,<br>12,13,15,1<br>7 | 0  |                                                                                     |
| 3455 | 1,2,5,6,8,1<br>0,14,17 | 3,4,7,9,11,<br>12,13,15,1<br>6 | 1  | P06760                                                                              |
| 3456 | 1,2,5,6,8,1<br>0,15,16 | 3,4,7,9,11,<br>12,13,14,1<br>7 | 0  |                                                                                     |
| 3457 | 1,2,5,6,8,1<br>0,15,17 | 3,4,7,9,11,<br>12,13,14,1<br>6 | 2  | P06760,Q6IFV1                                                                       |
| 3458 | 1,2,5,6,8,1<br>0,16,17 | 3,4,7,9,11,<br>12,13,14,1<br>5 | 5  | A2RUV9,P02625,P06760,P10758,P42854                                                  |
| 3459 | 1,2,5,6,8,1<br>1,12,13 | 3,4,7,9,10,<br>14,15,16,1<br>7 | 12 | O35547,P02781,P02782,P02803,P07647,P30120,P47727,Q5M8C6,Q6IFU7,Q8CJ52,Q9JHB9,Q9Z1F2 |
| 3460 | 1,2,5,6,8,1<br>1,12,14 | 3,4,7,9,10,<br>13,15,16,1<br>7 | 11 | O35547,P02782,P30120,P47727,P62804,Q00715,Q6IFU7,Q6IFU8,Q6P6Q2,Q9JHB9,Q9Z1F2        |
| 3461 | 1,2,5,6,8,1<br>1,12,15 | 3,4,7,9,10,<br>13,14,16,1<br>7 | 5  | O35547,P14669,P62804,Q6IFU7,Q9JHB9                                                  |

|      |                        |                                |    |                                                                                                          |
|------|------------------------|--------------------------------|----|----------------------------------------------------------------------------------------------------------|
| 3462 | 1,2,5,6,8,1<br>1,12,16 | 3,4,7,9,10,<br>13,14,15,1<br>7 | 6  | O35547,P30120,Q6IFU7,Q6IFU8,Q6P6Q2,Q9JHB9                                                                |
| 3463 | 1,2,5,6,8,1<br>1,12,17 | 3,4,7,9,10,<br>13,14,15,1<br>6 | 15 | O35547,P02782,P06760,P13432,P14669,P30120,P50115,P55091,P62804,Q00715,Q4G075,Q5M8C6,Q62635,Q6P6Q2,Q9JHB9 |
| 3464 | 1,2,5,6,8,1<br>1,13,14 | 3,4,7,9,10,<br>12,15,16,1<br>7 | 4  | P06911,P47727,Q5GRG2,Q9Z1F2                                                                              |
| 3465 | 1,2,5,6,8,1<br>1,13,15 | 3,4,7,9,10,<br>12,14,16,1<br>7 | 1  | Q6IFV1                                                                                                   |
| 3466 | 1,2,5,6,8,1<br>1,13,16 | 3,4,7,9,10,<br>12,14,15,1<br>7 | 1  | A2RUV9                                                                                                   |
| 3467 | 1,2,5,6,8,1<br>1,13,17 | 3,4,7,9,10,<br>12,14,15,1<br>6 | 5  | A2RUV9,P06760,P14669,Q6IFV1,Q9Z1F2                                                                       |
| 3468 | 1,2,5,6,8,1<br>1,14,15 | 3,4,7,9,10,<br>12,13,16,1<br>7 | 1  | Q5I0D1                                                                                                   |
| 3469 | 1,2,5,6,8,1<br>1,14,16 | 3,4,7,9,10,<br>12,13,15,1<br>7 | 0  |                                                                                                          |
| 3470 | 1,2,5,6,8,1<br>1,14,17 | 3,4,7,9,10,<br>12,13,15,1<br>6 | 4  | P02793;Q7TP54,P06760,P14669,Q9QUL6                                                                       |
| 3471 | 1,2,5,6,8,1<br>1,15,16 | 3,4,7,9,10,<br>12,13,14,1<br>7 | 1  | A2RUV9                                                                                                   |
| 3472 | 1,2,5,6,8,1<br>1,15,17 | 3,4,7,9,10,<br>12,13,14,1<br>6 | 3  | P06760,P14669,Q6IFV1                                                                                     |
| 3473 | 1,2,5,6,8,1<br>1,16,17 | 3,4,7,9,10,<br>12,13,14,1<br>5 | 3  | A2RUV9,P06760,P10758                                                                                     |
| 3474 | 1,2,5,6,8,1<br>2,13,14 | 3,4,7,9,10,<br>11,15,16,1<br>7 | 7  | P02782,P06911,P30120,Q5FVI6,Q5GRG2,Q9JHB9,Q9Z1F2                                                         |
| 3475 | 1,2,5,6,8,1<br>2,13,15 | 3,4,7,9,10,<br>11,14,16,1<br>7 | 4  | P02782,Q6IFV1,Q9JHB9,Q9Z1F2                                                                              |
| 3476 | 1,2,5,6,8,1<br>2,13,16 | 3,4,7,9,10,<br>11,14,15,1<br>7 | 3  | P02782,Q9JHB9,Q9Z1F2                                                                                     |

|      |                        |                                |    |                                                                                                   |
|------|------------------------|--------------------------------|----|---------------------------------------------------------------------------------------------------|
| 3477 | 1,2,5,6,8,1<br>2,13,17 | 3,4,7,9,10,<br>11,14,15,1<br>6 | 14 | P02782,P06760,P13432,P30120,P51907,P55091,Q561R9,Q5FVI6,Q5M8C6,Q62635,Q6IFV1,Q9JHB9,Q9QZK9,Q9Z1F2 |
| 3478 | 1,2,5,6,8,1<br>2,14,15 | 3,4,7,9,10,<br>11,13,16,1<br>7 | 1  | Q9Z1F2                                                                                            |
| 3479 | 1,2,5,6,8,1<br>2,14,16 | 3,4,7,9,10,<br>11,13,15,1<br>7 | 1  | Q9Z1F2                                                                                            |
| 3480 | 1,2,5,6,8,1<br>2,14,17 | 3,4,7,9,10,<br>11,13,15,1<br>6 | 10 | P02782,P06760,P13432,P31430,P55091,Q10758,Q561R9,Q5FVI6,Q62635,Q9Z1F2                             |
| 3481 | 1,2,5,6,8,1<br>2,15,16 | 3,4,7,9,10,<br>11,13,14,1<br>7 | 0  |                                                                                                   |
| 3482 | 1,2,5,6,8,1<br>2,15,17 | 3,4,7,9,10,<br>11,13,14,1<br>6 | 4  | P06760,P13432,Q62635,Q6IFV1                                                                       |
| 3483 | 1,2,5,6,8,1<br>2,16,17 | 3,4,7,9,10,<br>11,13,14,1<br>5 | 4  | P06760,P13432,Q561R9,Q62635                                                                       |
| 3484 | 1,2,5,6,8,1<br>3,14,15 | 3,4,7,9,10,<br>11,12,16,1<br>7 | 6  | P06757,P06911,P08753,Q5FVI6,Q5GRG2,Q9Z1F2                                                         |
| 3485 | 1,2,5,6,8,1<br>3,14,16 | 3,4,7,9,10,<br>11,12,15,1<br>7 | 3  | P06911,P08753,Q9Z1F2                                                                              |
| 3486 | 1,2,5,6,8,1<br>3,14,17 | 3,4,7,9,10,<br>11,12,15,1<br>6 | 10 | P06760,P06911,P08753,P10536,P51907,P53792,Q561R9,Q5FVI6,Q6PCU2,Q9Z1F2                             |
| 3487 | 1,2,5,6,8,1<br>3,15,16 | 3,4,7,9,10,<br>11,12,14,1<br>7 | 2  | P08753,Q6IFV1                                                                                     |
| 3488 | 1,2,5,6,8,1<br>3,15,17 | 3,4,7,9,10,<br>11,12,14,1<br>6 | 7  | P06760,P08753,P10536,P53792,Q5FVI6,Q6IFV1,Q9Z1F2                                                  |
| 3489 | 1,2,5,6,8,1<br>3,16,17 | 3,4,7,9,10,<br>11,12,14,1<br>5 | 7  | A2RUV9,P06760,P08753,P51907,Q6IFV1,Q6PCU2,Q9Z1F2                                                  |
| 3490 | 1,2,5,6,8,1<br>4,15,16 | 3,4,7,9,10,<br>11,12,13,1<br>7 | 0  |                                                                                                   |
| 3491 | 1,2,5,6,8,1<br>4,15,17 | 3,4,7,9,10,<br>11,12,13,1<br>6 | 4  | P06760,P10536,P47967,Q5FVI6                                                                       |

|      |                        |                                |   |                                                         |
|------|------------------------|--------------------------------|---|---------------------------------------------------------|
| 3492 | 1,2,5,6,8,1<br>4,16,17 | 3,4,7,9,10,<br>11,12,13,1<br>5 | 4 | P06760,P42854,Q561R9,Q6PCU2                             |
| 3493 | 1,2,5,6,8,1<br>5,16,17 | 3,4,7,9,10,<br>11,12,13,1<br>4 | 2 | P06760,Q6IFV1                                           |
| 3494 | 1,2,5,6,9,1<br>0,11,12 | 3,4,7,8,13,<br>14,15,16,1<br>7 | 8 | P27213,Q566E6,Q6IFU7,Q6IFU8,Q6IMF3,Q6P6Q2,Q91ZS3,Q9QUL6 |
| 3495 | 1,2,5,6,9,1<br>0,11,13 | 3,4,7,8,12,<br>14,15,16,1<br>7 | 3 | Q63942,Q91ZS3,Q9QUL6                                    |
| 3496 | 1,2,5,6,9,1<br>0,11,14 | 3,4,7,8,12,<br>13,15,16,1<br>7 | 3 | P27213,Q63942,Q9QUL6                                    |
| 3497 | 1,2,5,6,9,1<br>0,11,15 | 3,4,7,8,12,<br>13,14,16,1<br>7 | 4 | P27213,Q566E6,Q63942,Q9QUL6                             |
| 3498 | 1,2,5,6,9,1<br>0,11,16 | 3,4,7,8,12,<br>13,14,15,1<br>7 | 3 | A2RUV9,Q63942,Q9QUL6                                    |
| 3499 | 1,2,5,6,9,1<br>0,11,17 | 3,4,7,8,12,<br>13,14,15,1<br>6 | 4 | A2RUV9,Q566E6,Q63942,Q9QUL6                             |
| 3500 | 1,2,5,6,9,1<br>0,12,13 | 3,4,7,8,11,<br>14,15,16,1<br>7 | 1 | P97840                                                  |
| 3501 | 1,2,5,6,9,1<br>0,12,14 | 3,4,7,8,11,<br>13,15,16,1<br>7 | 2 | Q10758,Q63942                                           |
| 3502 | 1,2,5,6,9,1<br>0,12,15 | 3,4,7,8,11,<br>13,14,16,1<br>7 | 1 | Q63942                                                  |
| 3503 | 1,2,5,6,9,1<br>0,12,16 | 3,4,7,8,11,<br>13,14,15,1<br>7 | 3 | P97840,Q63942,Q6IFU7                                    |
| 3504 | 1,2,5,6,9,1<br>0,12,17 | 3,4,7,8,11,<br>13,14,15,1<br>6 | 2 | Q10758,Q9QUL6                                           |
| 3505 | 1,2,5,6,9,1<br>0,13,14 | 3,4,7,8,11,<br>12,15,16,1<br>7 | 1 | Q63942                                                  |
| 3506 | 1,2,5,6,9,1<br>0,13,15 | 3,4,7,8,11,<br>12,14,16,1<br>7 | 1 | Q63942                                                  |

|      |                        |                                |   |                             |
|------|------------------------|--------------------------------|---|-----------------------------|
| 3507 | 1,2,5,6,9,1<br>0,13,16 | 3,4,7,8,11,<br>12,14,15,1<br>7 | 1 | Q63942                      |
| 3508 | 1,2,5,6,9,1<br>0,13,17 | 3,4,7,8,11,<br>12,14,15,1<br>6 | 2 | Q63942,Q9QUL6               |
| 3509 | 1,2,5,6,9,1<br>0,14,15 | 3,4,7,8,11,<br>12,13,16,1<br>7 | 2 | Q63942,Q9QUL6               |
| 3510 | 1,2,5,6,9,1<br>0,14,16 | 3,4,7,8,11,<br>12,13,15,1<br>7 | 2 | Q63942,Q9QUL6               |
| 3511 | 1,2,5,6,9,1<br>0,14,17 | 3,4,7,8,11,<br>12,13,15,1<br>6 | 2 | Q63942,Q9QUL6               |
| 3512 | 1,2,5,6,9,1<br>0,15,16 | 3,4,7,8,11,<br>12,13,14,1<br>7 | 1 | Q63942                      |
| 3513 | 1,2,5,6,9,1<br>0,15,17 | 3,4,7,8,11,<br>12,13,14,1<br>6 | 2 | Q63942,Q9QUL6               |
| 3514 | 1,2,5,6,9,1<br>0,16,17 | 3,4,7,8,11,<br>12,13,14,1<br>5 | 4 | A2RUV9,P23593,Q63942,Q9QUL6 |
| 3515 | 1,2,5,6,9,1<br>1,12,13 | 3,4,7,8,10,<br>14,15,16,1<br>7 | 4 | P02803,Q6IFU7,Q9JHB9,Q9Z1F2 |
| 3516 | 1,2,5,6,9,1<br>1,12,14 | 3,4,7,8,10,<br>13,15,16,1<br>7 | 3 | Q6IFU7,Q6IFU8,Q9QUL6        |
| 3517 | 1,2,5,6,9,1<br>1,12,15 | 3,4,7,8,10,<br>13,14,16,1<br>7 | 1 | Q6IFU7                      |
| 3518 | 1,2,5,6,9,1<br>1,12,16 | 3,4,7,8,10,<br>13,14,15,1<br>7 | 3 | Q63942,Q6IFU7,Q6IFU8        |
| 3519 | 1,2,5,6,9,1<br>1,12,17 | 3,4,7,8,10,<br>13,14,15,1<br>6 | 4 | P13432,Q6IFU7,Q6IFU8,Q9QUL6 |
| 3520 | 1,2,5,6,9,1<br>1,13,14 | 3,4,7,8,10,<br>12,15,16,1<br>7 | 2 | Q63942,Q9QUL6               |
| 3521 | 1,2,5,6,9,1<br>1,13,15 | 3,4,7,8,10,<br>12,14,16,1<br>7 | 1 | Q63942                      |

|      |                        |                                |   |                             |
|------|------------------------|--------------------------------|---|-----------------------------|
| 3522 | 1,2,5,6,9,1<br>1,13,16 | 3,4,7,8,10,<br>12,14,15,1<br>7 | 2 | A2RUV9,Q63942               |
| 3523 | 1,2,5,6,9,1<br>1,13,17 | 3,4,7,8,10,<br>12,14,15,1<br>6 | 3 | A2RUV9,Q63942,Q9QUL6        |
| 3524 | 1,2,5,6,9,1<br>1,14,15 | 3,4,7,8,10,<br>12,13,16,1<br>7 | 2 | Q63942,Q9QUL6               |
| 3525 | 1,2,5,6,9,1<br>1,14,16 | 3,4,7,8,10,<br>12,13,15,1<br>7 | 3 | Q63942,Q99MH3,Q9QUL6        |
| 3526 | 1,2,5,6,9,1<br>1,14,17 | 3,4,7,8,10,<br>12,13,15,1<br>6 | 2 | Q63942,Q9QUL6               |
| 3527 | 1,2,5,6,9,1<br>1,15,16 | 3,4,7,8,10,<br>12,13,14,1<br>7 | 3 | A2RUV9,Q63942,Q9QUL6        |
| 3528 | 1,2,5,6,9,1<br>1,15,17 | 3,4,7,8,10,<br>12,13,14,1<br>6 | 2 | Q63942,Q9QUL6               |
| 3529 | 1,2,5,6,9,1<br>1,16,17 | 3,4,7,8,10,<br>12,13,14,1<br>5 | 3 | A2RUV9,Q63942,Q9QUL6        |
| 3530 | 1,2,5,6,9,1<br>2,13,14 | 3,4,7,8,10,<br>11,15,16,1<br>7 | 3 | P00714,Q63942,Q9Z1F2        |
| 3531 | 1,2,5,6,9,1<br>2,13,15 | 3,4,7,8,10,<br>11,14,16,1<br>7 | 2 | P00714,Q63942               |
| 3532 | 1,2,5,6,9,1<br>2,13,16 | 3,4,7,8,10,<br>11,14,15,1<br>7 | 3 | P00714,P19218,Q63942        |
| 3533 | 1,2,5,6,9,1<br>2,13,17 | 3,4,7,8,10,<br>11,14,15,1<br>6 | 4 | P00714,P35280,Q62635,Q9Z1F2 |
| 3534 | 1,2,5,6,9,1<br>2,14,15 | 3,4,7,8,10,<br>11,13,16,1<br>7 | 1 | Q63942                      |
| 3535 | 1,2,5,6,9,1<br>2,14,16 | 3,4,7,8,10,<br>11,13,15,1<br>7 | 1 | Q63942                      |
| 3536 | 1,2,5,6,9,1<br>2,14,17 | 3,4,7,8,10,<br>11,13,15,1<br>6 | 4 | P13432,Q561R9,Q5FVI6,Q8VD89 |



|      |                         |                                |   |                                                         |
|------|-------------------------|--------------------------------|---|---------------------------------------------------------|
| 3537 | 1,2,5,6,9,1<br>2,15,16  | 3,4,7,8,10,<br>11,13,14,1<br>7 | 1 | Q63942                                                  |
| 3538 | 1,2,5,6,9,1<br>2,15,17  | 3,4,7,8,10,<br>11,13,14,1<br>6 | 1 | P00714                                                  |
| 3539 | 1,2,5,6,9,1<br>2,16,17  | 3,4,7,8,10,<br>11,13,14,1<br>5 | 2 | P23593,Q63942                                           |
| 3540 | 1,2,5,6,9,1<br>3,14,15  | 3,4,7,8,10,<br>11,12,16,1<br>7 | 3 | P00714,P53792,Q63942                                    |
| 3541 | 1,2,5,6,9,1<br>3,14,16  | 3,4,7,8,10,<br>11,12,15,1<br>7 | 2 | P00714,Q63942                                           |
| 3542 | 1,2,5,6,9,1<br>3,14,17  | 3,4,7,8,10,<br>11,12,15,1<br>6 | 5 | P00714,P53792,Q5FVI6,Q63942,Q9Z1F2                      |
| 3543 | 1,2,5,6,9,1<br>3,15,16  | 3,4,7,8,10,<br>11,12,14,1<br>7 | 2 | P00714,Q63942                                           |
| 3544 | 1,2,5,6,9,1<br>3,15,17  | 3,4,7,8,10,<br>11,12,14,1<br>6 | 4 | P00714,P53792,Q63942,Q6IFV1                             |
| 3545 | 1,2,5,6,9,1<br>3,16,17  | 3,4,7,8,10,<br>11,12,14,1<br>5 | 4 | A2RUV9,P00714,P35280,Q63942                             |
| 3546 | 1,2,5,6,9,1<br>4,15,16  | 3,4,7,8,10,<br>11,12,13,1<br>7 | 3 | P00714,Q63942,Q9QZK9                                    |
| 3547 | 1,2,5,6,9,1<br>4,15,17  | 3,4,7,8,10,<br>11,12,13,1<br>6 | 5 | P00714,P47967,P53792,Q63942,Q9QUL6                      |
| 3548 | 1,2,5,6,9,1<br>4,16,17  | 3,4,7,8,10,<br>11,12,13,1<br>5 | 3 | P00714,Q63942,Q9QUL6                                    |
| 3549 | 1,2,5,6,9,1<br>5,16,17  | 3,4,7,8,10,<br>11,12,13,1<br>4 | 3 | P00714,P23593,Q63942                                    |
| 3550 | 1,2,5,6,10,<br>11,12,13 | 3,4,7,8,9,1<br>4,15,16,17      | 4 | P47727,Q6IFU7,Q6P6Q2,Q9JHB9                             |
| 3551 | 1,2,5,6,10,<br>11,12,14 | 3,4,7,8,9,1<br>3,15,16,17      | 8 | O35547,P47727,P62804,Q10758,Q6IFU7,Q6IFU8,Q6IMF3,Q6P6Q2 |
| 3552 | 1,2,5,6,10,<br>11,12,15 | 3,4,7,8,9,1<br>3,14,16,17      | 2 | Q6IFU7,Q6P6Q2                                           |

|      |                                                |   |                                                         |
|------|------------------------------------------------|---|---------------------------------------------------------|
| 3553 | 1,2,5,6,10, 3,4,7,8,9,1<br>11,12,16 3,14,15,17 | 6 | O35547,Q10758,Q6IFU7,Q6IFU8,Q6IMF3,Q6P6Q2               |
| 3554 | 1,2,5,6,10, 3,4,7,8,9,1<br>11,12,17 3,14,15,16 | 8 | O35547,P06757,P62804,Q10758,Q6IFU7,Q6IFU8,Q6P6Q2,Q9QUL6 |
| 3555 | 1,2,5,6,10, 3,4,7,8,9,1<br>11,13,14 2,15,16,17 | 1 | P47727                                                  |
| 3556 | 1,2,5,6,10, 3,4,7,8,9,1<br>11,13,15 2,14,16,17 | 0 |                                                         |
| 3557 | 1,2,5,6,10, 3,4,7,8,9,1<br>11,13,16 2,14,15,17 | 1 | A2RUV9                                                  |
| 3558 | 1,2,5,6,10, 3,4,7,8,9,1<br>11,13,17 2,14,15,16 | 1 | Q9QUL6                                                  |
| 3559 | 1,2,5,6,10, 3,4,7,8,9,1<br>11,14,15 2,13,16,17 | 1 | Q9QUL6                                                  |
| 3560 | 1,2,5,6,10, 3,4,7,8,9,1<br>11,14,16 2,13,15,17 | 1 | Q9QUL6                                                  |
| 3561 | 1,2,5,6,10, 3,4,7,8,9,1<br>11,14,17 2,13,15,16 | 1 | Q9QUL6                                                  |
| 3562 | 1,2,5,6,10, 3,4,7,8,9,1<br>11,15,16 2,13,14,17 | 2 | A2RUV9,Q9QUL6                                           |
| 3563 | 1,2,5,6,10, 3,4,7,8,9,1<br>11,15,17 2,13,14,16 | 1 | Q9QUL6                                                  |
| 3564 | 1,2,5,6,10, 3,4,7,8,9,1<br>11,16,17 2,13,14,15 | 3 | A2RUV9,P10758,Q9QUL6                                    |
| 3565 | 1,2,5,6,10, 3,4,7,8,9,1<br>12,13,14 1,15,16,17 | 2 | Q10758,Q9Z1F2                                           |
| 3566 | 1,2,5,6,10, 3,4,7,8,9,1<br>12,13,15 1,14,16,17 | 1 | Q6IFV1                                                  |
| 3567 | 1,2,5,6,10, 3,4,7,8,9,1<br>12,13,16 1,14,15,17 | 3 | P19218,P97840,Q6IFU7                                    |
| 3568 | 1,2,5,6,10, 3,4,7,8,9,1<br>12,13,17 1,14,15,16 | 4 | Q10758,Q62635,Q6IFV1,Q9QZK9                             |
| 3569 | 1,2,5,6,10, 3,4,7,8,9,1<br>12,14,15 1,13,16,17 | 1 | Q10758                                                  |
| 3570 | 1,2,5,6,10, 3,4,7,8,9,1<br>12,14,16 1,13,15,17 | 3 | P97840,Q10758,Q6IFU7                                    |
| 3571 | 1,2,5,6,10, 3,4,7,8,9,1<br>12,14,17 1,13,15,16 | 3 | Q10758,Q561R9,Q62635                                    |
| 3572 | 1,2,5,6,10, 3,4,7,8,9,1<br>12,15,16 1,13,14,17 | 2 | P97840,Q6IFU7                                           |
| 3573 | 1,2,5,6,10, 3,4,7,8,9,1<br>12,15,17 1,13,14,16 | 2 | Q10758,Q6IFV1                                           |
| 3574 | 1,2,5,6,10, 3,4,7,8,9,1<br>12,16,17 1,13,14,15 | 1 | Q10758                                                  |
| 3575 | 1,2,5,6,10, 3,4,7,8,9,1<br>13,14,15 1,12,16,17 | 0 |                                                         |

|      |                                                |   |                                    |
|------|------------------------------------------------|---|------------------------------------|
| 3576 | 1,2,5,6,10, 3,4,7,8,9,1<br>13,14,16 1,12,15,17 | 0 |                                    |
| 3577 | 1,2,5,6,10, 3,4,7,8,9,1<br>13,14,17 1,12,15,16 | 0 |                                    |
| 3578 | 1,2,5,6,10, 3,4,7,8,9,1<br>13,15,16 1,12,14,17 | 0 |                                    |
| 3579 | 1,2,5,6,10, 3,4,7,8,9,1<br>13,15,17 1,12,14,16 | 1 | Q6IFV1                             |
| 3580 | 1,2,5,6,10, 3,4,7,8,9,1<br>13,16,17 1,12,14,15 | 0 |                                    |
| 3581 | 1,2,5,6,10, 3,4,7,8,9,1<br>14,15,16 1,12,13,17 | 1 | P35467                             |
| 3582 | 1,2,5,6,10, 3,4,7,8,9,1<br>14,15,17 1,12,13,16 | 0 |                                    |
| 3583 | 1,2,5,6,10, 3,4,7,8,9,1<br>14,16,17 1,12,13,15 | 0 |                                    |
| 3584 | 1,2,5,6,10, 3,4,7,8,9,1<br>15,16,17 1,12,13,14 | 0 |                                    |
| 3585 | 1,2,5,6,11, 3,4,7,8,9,1<br>12,13,14 0,15,16,17 | 5 | P30120,P47727,Q6IFU7,Q9JHB9,Q9Z1F2 |
| 3586 | 1,2,5,6,11, 3,4,7,8,9,1<br>12,13,15 0,14,16,17 | 2 | Q6IFU7,Q9JHB9                      |
| 3587 | 1,2,5,6,11, 3,4,7,8,9,1<br>12,13,16 0,14,15,17 | 2 | Q6IFU7,Q9JHB9                      |
| 3588 | 1,2,5,6,11, 3,4,7,8,9,1<br>12,13,17 0,14,15,16 | 3 | Q62635,Q9JHB9,Q9QZK9               |
| 3589 | 1,2,5,6,11, 3,4,7,8,9,1<br>12,14,15 0,13,16,17 | 1 | Q6IFU7                             |
| 3590 | 1,2,5,6,11, 3,4,7,8,9,1<br>12,14,16 0,13,15,17 | 2 | Q6IFU7,Q6IFU8                      |
| 3591 | 1,2,5,6,11, 3,4,7,8,9,1<br>12,14,17 0,13,15,16 | 4 | P13432,P62804,Q62635,Q6IFU8        |
| 3592 | 1,2,5,6,11, 3,4,7,8,9,1<br>12,15,16 0,13,14,17 | 1 | Q6IFU7                             |
| 3593 | 1,2,5,6,11, 3,4,7,8,9,1<br>12,15,17 0,13,14,16 | 0 |                                    |
| 3594 | 1,2,5,6,11, 3,4,7,8,9,1<br>12,16,17 0,13,14,15 | 1 | Q6IFU7                             |
| 3595 | 1,2,5,6,11, 3,4,7,8,9,1<br>13,14,15 0,12,16,17 | 0 |                                    |
| 3596 | 1,2,5,6,11, 3,4,7,8,9,1<br>13,14,16 0,12,15,17 | 0 |                                    |
| 3597 | 1,2,5,6,11, 3,4,7,8,9,1<br>13,14,17 0,12,15,16 | 0 |                                    |
| 3598 | 1,2,5,6,11, 3,4,7,8,9,1<br>13,15,16 0,12,14,17 | 0 |                                    |

|      |                                                    |   |                                           |
|------|----------------------------------------------------|---|-------------------------------------------|
| 3599 | 1,2,5,6,11, 3,4,7,8,9,1<br>13,15,17 0,12,14,16     | 1 | Q6IFV1                                    |
| 3600 | 1,2,5,6,11, 3,4,7,8,9,1<br>13,16,17 0,12,14,15     | 1 | A2RUV9                                    |
| 3601 | 1,2,5,6,11, 3,4,7,8,9,1<br>14,15,16 0,12,13,17     | 0 |                                           |
| 3602 | 1,2,5,6,11, 3,4,7,8,9,1<br>14,15,17 0,12,13,16     | 1 | Q9QUL6                                    |
| 3603 | 1,2,5,6,11, 3,4,7,8,9,1<br>14,16,17 0,12,13,15     | 1 | Q9QUL6                                    |
| 3604 | 1,2,5,6,11, 3,4,7,8,9,1<br>15,16,17 0,12,13,14     | 1 | A2RUV9                                    |
| 3605 | 1,2,5,6,12, 3,4,7,8,9,1<br>13,14,15 0,11,16,17     | 2 | P00714,Q9Z1F2                             |
| 3606 | 1,2,5,6,12, 3,4,7,8,9,1<br>13,14,16 0,11,15,17     | 2 | P00714,Q9Z1F2                             |
| 3607 | 1,2,5,6,12, 3,4,7,8,9,1<br>13,14,17 0,11,15,16     | 5 | P00714,Q561R9,Q5FVI6,Q62635,Q9Z1F2        |
| 3608 | 1,2,5,6,12, 3,4,7,8,9,1<br>13,15,16 0,11,14,17     | 1 | P00714                                    |
| 3609 | 1,2,5,6,12, 3,4,7,8,9,1<br>13,15,17 0,11,14,16     | 3 | P00714,Q62635,Q6IFV1                      |
| 3610 | 1,2,5,6,12, 3,4,7,8,9,1<br>13,16,17 0,11,14,15     | 4 | P00714,P35280,Q561R9,Q62635               |
| 3611 | 1,2,5,6,12, 3,4,7,8,9,1<br>14,15,16 0,11,13,17     | 2 | P00714,P35467                             |
| 3612 | 1,2,5,6,12, 3,4,7,8,9,1<br>14,15,17 0,11,13,16     | 3 | P00714,P35467,Q62635                      |
| 3613 | 1,2,5,6,12, 3,4,7,8,9,1<br>14,16,17 0,11,13,15     | 4 | P00714,P35467,Q10758,Q561R9               |
| 3614 | 1,2,5,6,12, 3,4,7,8,9,1<br>15,16,17 0,11,13,14     | 2 | P00714,P35467                             |
| 3615 | 1,2,5,6,13, 3,4,7,8,9,1<br>14,15,16 0,11,12,17     | 2 | P00714,P35467                             |
| 3616 | 1,2,5,6,13, 3,4,7,8,9,1<br>14,15,17 0,11,12,16     | 5 | P00714,P08753,P35467,P53792,Q5FVI6        |
| 3617 | 1,2,5,6,13, 3,4,7,8,9,1<br>14,16,17 0,11,12,15     | 4 | P00714,P08753,Q561R9,Q6PCU2               |
| 3618 | 1,2,5,6,13, 3,4,7,8,9,1<br>15,16,17 0,11,12,14     | 1 | P00714                                    |
| 3619 | 1,2,5,6,14, 3,4,7,8,9,1<br>15,16,17 0,11,12,13     | 2 | P00714,P35467                             |
| 3620 | 1,2,5,7,8,9 3,4,6,12,1<br>,10,11 3,14,15,16<br>,17 | 6 | P10715,P27213,P31044,P52590,P68370,Q9QUL6 |

|      |                       |                                 |   |                                           |
|------|-----------------------|---------------------------------|---|-------------------------------------------|
| 3621 | 1,2,5,7,8,9<br>,10,12 | 3,4,6,11,1<br>3,14,15,16<br>,17 | 5 | P02803,P10715,P27213,P52590,P97840        |
| 3622 | 1,2,5,7,8,9<br>,10,13 | 3,4,6,11,1<br>2,14,15,16<br>,17 | 4 | P01835,P02803,P31044,P52590               |
| 3623 | 1,2,5,7,8,9<br>,10,14 | 3,4,6,11,1<br>2,13,15,16<br>,17 | 5 | P27213,P31044,P52590,Q63942,Q9QUL6        |
| 3624 | 1,2,5,7,8,9<br>,10,15 | 3,4,6,11,1<br>2,13,14,16<br>,17 | 4 | P01835,P27213,P52590,Q63942               |
| 3625 | 1,2,5,7,8,9<br>,10,16 | 3,4,6,11,1<br>2,13,14,15<br>,17 | 6 | B0BNN3,P01835,P02625,P52590,Q63942,Q64093 |
| 3626 | 1,2,5,7,8,9<br>,10,17 | 3,4,6,11,1<br>2,13,14,15<br>,16 | 3 | P02625,P52590,Q9QUL6                      |
| 3627 | 1,2,5,7,8,9<br>,11,12 | 3,4,6,10,1<br>3,14,15,16<br>,17 | 5 | P02803,P10715,P27213,P52590,Q8CJ52        |
| 3628 | 1,2,5,7,8,9<br>,11,13 | 3,4,6,10,1<br>2,14,15,16<br>,17 | 3 | P02803,P10715,P52590                      |
| 3629 | 1,2,5,7,8,9<br>,11,14 | 3,4,6,10,1<br>2,13,15,16<br>,17 | 6 | P10715,P27213,P52590,Q63942,Q99MH3,Q9QUL6 |
| 3630 | 1,2,5,7,8,9<br>,11,15 | 3,4,6,10,1<br>2,13,14,16<br>,17 | 5 | P10715,P27213,P52590,Q63942,Q9QUL6        |
| 3631 | 1,2,5,7,8,9<br>,11,16 | 3,4,6,10,1<br>2,13,14,15<br>,17 | 4 | A2RUV9,P10715,Q63942,Q9QUL6               |
| 3632 | 1,2,5,7,8,9<br>,11,17 | 3,4,6,10,1<br>2,13,14,15<br>,16 | 4 | P10715,P50115,P52590,Q9QUL6               |
| 3633 | 1,2,5,7,8,9<br>,12,13 | 3,4,6,10,1<br>1,14,15,16<br>,17 | 4 | P02803,P10715,P52590,Q9Z1F2               |
| 3634 | 1,2,5,7,8,9<br>,12,14 | 3,4,6,10,1<br>1,13,15,16<br>,17 | 3 | P10715,P19629,P52590                      |
| 3635 | 1,2,5,7,8,9<br>,12,15 | 3,4,6,10,1<br>1,13,14,16<br>,17 | 2 | P10715,P52590                             |

|      |                        |                                 |   |                                                  |
|------|------------------------|---------------------------------|---|--------------------------------------------------|
| 3636 | 1,2,5,7,8,9<br>,12,16  | 3,4,6,10,1<br>1,13,14,15<br>,17 | 1 | P10715                                           |
| 3637 | 1,2,5,7,8,9<br>,12,17  | 3,4,6,10,1<br>1,13,14,15<br>,16 | 5 | P10715,P50115,P52590,P55091,Q9QZA6               |
| 3638 | 1,2,5,7,8,9<br>,13,14  | 3,4,6,10,1<br>1,12,15,16<br>,17 | 4 | P00762,P53792,Q63942,Q9Z1F2                      |
| 3639 | 1,2,5,7,8,9<br>,13,15  | 3,4,6,10,1<br>1,12,14,16<br>,17 | 5 | P00762,P01835,P52590,P53792,Q63942               |
| 3640 | 1,2,5,7,8,9<br>,13,16  | 3,4,6,10,1<br>1,12,14,15<br>,17 | 4 | B0BNN3,P00762,P01835,Q63942                      |
| 3641 | 1,2,5,7,8,9<br>,13,17  | 3,4,6,10,1<br>1,12,14,15<br>,16 | 3 | P00762,P52590,P53792                             |
| 3642 | 1,2,5,7,8,9<br>,14,15  | 3,4,6,10,1<br>1,12,13,16<br>,17 | 7 | P00762,P16636,P19629,P52590,Q03191,Q63942,Q9QZK9 |
| 3643 | 1,2,5,7,8,9<br>,14,16  | 3,4,6,10,1<br>1,12,13,15<br>,17 | 5 | P00762,P02625,Q63942,Q99MH3,Q9QZK9               |
| 3644 | 1,2,5,7,8,9<br>,14,17  | 3,4,6,10,1<br>1,12,13,15<br>,16 | 3 | P00762,P52590,P53792                             |
| 3645 | 1,2,5,7,8,9<br>,15,16  | 3,4,6,10,1<br>1,12,13,14<br>,17 | 6 | P00762,P01835,P10715,P52590,Q63942,Q9QZK9        |
| 3646 | 1,2,5,7,8,9<br>,15,17  | 3,4,6,10,1<br>1,12,13,14<br>,16 | 3 | P00762,P52590,P53792                             |
| 3647 | 1,2,5,7,8,9<br>,16,17  | 3,4,6,10,1<br>1,12,13,14<br>,15 | 5 | P00762,P02625,P10715,P52590,Q63942               |
| 3648 | 1,2,5,7,8,1<br>0,11,12 | 3,4,6,9,13,<br>14,15,16,1<br>7  | 6 | P10715,P16391,P27213,P62804,P68370,Q8CJ52        |
| 3649 | 1,2,5,7,8,1<br>0,11,13 | 3,4,6,9,12,<br>14,15,16,1<br>7  | 4 | P01835,P31044,P68370,Q5HZV9                      |
| 3650 | 1,2,5,7,8,1<br>0,11,14 | 3,4,6,9,12,<br>13,15,16,1<br>7  | 4 | P27213,P31044,P68370,Q9QUL6                      |

|      |                        |                                |   |                                           |
|------|------------------------|--------------------------------|---|-------------------------------------------|
| 3651 | 1,2,5,7,8,1<br>0,11,15 | 3,4,6,9,12,<br>13,14,16,1<br>7 | 2 | P01835,P27213                             |
| 3652 | 1,2,5,7,8,1<br>0,11,16 | 3,4,6,9,12,<br>13,14,15,1<br>7 | 4 | A2RUV9,P01835,P02625,P10715               |
| 3653 | 1,2,5,7,8,1<br>0,11,17 | 3,4,6,9,12,<br>13,14,15,1<br>6 | 5 | P10715,P16391,P50115,P52590,Q9QUL6        |
| 3654 | 1,2,5,7,8,1<br>0,12,13 | 3,4,6,9,11,<br>14,15,16,1<br>7 | 2 | P02803,Q8CJ52                             |
| 3655 | 1,2,5,7,8,1<br>0,12,14 | 3,4,6,9,11,<br>13,15,16,1<br>7 | 0 |                                           |
| 3656 | 1,2,5,7,8,1<br>0,12,15 | 3,4,6,9,11,<br>13,14,16,1<br>7 | 2 | P00731,P10715                             |
| 3657 | 1,2,5,7,8,1<br>0,12,16 | 3,4,6,9,11,<br>13,14,15,1<br>7 | 4 | P02625,P08721,P10715,P97840               |
| 3658 | 1,2,5,7,8,1<br>0,12,17 | 3,4,6,9,11,<br>13,14,15,1<br>6 | 6 | P10715,P16391,P50115,P52590,P55091,Q9QZA6 |
| 3659 | 1,2,5,7,8,1<br>0,13,14 | 3,4,6,9,11,<br>12,15,16,1<br>7 | 5 | P00762,P01835,P12020,P31044,Q5GRG2        |
| 3660 | 1,2,5,7,8,1<br>0,13,15 | 3,4,6,9,11,<br>12,14,16,1<br>7 | 3 | P00762,P01835,Q5GRG2                      |
| 3661 | 1,2,5,7,8,1<br>0,13,16 | 3,4,6,9,11,<br>12,14,15,1<br>7 | 4 | B0BNN3,P00762,P01835,P02625               |
| 3662 | 1,2,5,7,8,1<br>0,13,17 | 3,4,6,9,11,<br>12,14,15,1<br>6 | 3 | P01835,P02625,P52590                      |
| 3663 | 1,2,5,7,8,1<br>0,14,15 | 3,4,6,9,11,<br>12,13,16,1<br>7 | 3 | P00762,P01835,P16636                      |
| 3664 | 1,2,5,7,8,1<br>0,14,16 | 3,4,6,9,11,<br>12,13,15,1<br>7 | 4 | P00762,P01835,P02625,P08721               |
| 3665 | 1,2,5,7,8,1<br>0,14,17 | 3,4,6,9,11,<br>12,13,15,1<br>6 | 2 | P02625,P52590                             |

|      |                        |                                |   |                                                  |
|------|------------------------|--------------------------------|---|--------------------------------------------------|
| 3666 | 1,2,5,7,8,1<br>0,15,16 | 3,4,6,9,11,<br>12,13,14,1<br>7 | 2 | P00762,P01835                                    |
| 3667 | 1,2,5,7,8,1<br>0,15,17 | 3,4,6,9,11,<br>12,13,14,1<br>6 | 2 | P01835,P52590                                    |
| 3668 | 1,2,5,7,8,1<br>0,16,17 | 3,4,6,9,11,<br>12,13,14,1<br>5 | 4 | P01835,P02625,P10758,P52590                      |
| 3669 | 1,2,5,7,8,1<br>1,12,13 | 3,4,6,9,10,<br>14,15,16,1<br>7 | 5 | P02803,P10715,Q8CJ52,Q9JHB9,Q9Z1F2               |
| 3670 | 1,2,5,7,8,1<br>1,12,14 | 3,4,6,9,10,<br>13,15,16,1<br>7 | 5 | P10715,P19629,P62804,Q63493,Q8CJ52               |
| 3671 | 1,2,5,7,8,1<br>1,12,15 | 3,4,6,9,10,<br>13,14,16,1<br>7 | 2 | P10715,Q8CJ52                                    |
| 3672 | 1,2,5,7,8,1<br>1,12,16 | 3,4,6,9,10,<br>13,14,15,1<br>7 | 2 | P10715,Q8CJ52                                    |
| 3673 | 1,2,5,7,8,1<br>1,12,17 | 3,4,6,9,10,<br>13,14,15,1<br>6 | 7 | P10715,P50115,P52590,P55091,Q63493,Q8CJ52,Q9QZA6 |
| 3674 | 1,2,5,7,8,1<br>1,13,14 | 3,4,6,9,10,<br>12,15,16,1<br>7 | 1 | Q5GRG2                                           |
| 3675 | 1,2,5,7,8,1<br>1,13,15 | 3,4,6,9,10,<br>12,14,16,1<br>7 | 2 | P00762,P01835                                    |
| 3676 | 1,2,5,7,8,1<br>1,13,16 | 3,4,6,9,10,<br>12,14,15,1<br>7 | 2 | P01835,P10715                                    |
| 3677 | 1,2,5,7,8,1<br>1,13,17 | 3,4,6,9,10,<br>12,14,15,1<br>6 | 3 | P10715,P50115,P52590                             |
| 3678 | 1,2,5,7,8,1<br>1,14,15 | 3,4,6,9,10,<br>12,13,16,1<br>7 | 4 | P07171,P16636,P19629,Q03191                      |
| 3679 | 1,2,5,7,8,1<br>1,14,16 | 3,4,6,9,10,<br>12,13,15,1<br>7 | 1 | Q99MH3                                           |
| 3680 | 1,2,5,7,8,1<br>1,14,17 | 3,4,6,9,10,<br>12,13,15,1<br>6 | 4 | P19629,P50115,P52590,Q9QUL6                      |



|      |                        |                                |   |                                                                |
|------|------------------------|--------------------------------|---|----------------------------------------------------------------|
| 3681 | 1,2,5,7,8,1<br>1,15,16 | 3,4,6,9,10,<br>12,13,14,1<br>7 | 2 | P01835,P10715                                                  |
| 3682 | 1,2,5,7,8,1<br>1,15,17 | 3,4,6,9,10,<br>12,13,14,1<br>6 | 4 | P10715,P50115,P52590,Q9QZA6                                    |
| 3683 | 1,2,5,7,8,1<br>1,16,17 | 3,4,6,9,10,<br>12,13,14,1<br>5 | 6 | A2RUV9,P10715,P10758,P50115,P50116,P52590                      |
| 3684 | 1,2,5,7,8,1<br>2,13,14 | 3,4,6,9,10,<br>11,15,16,1<br>7 | 5 | P00762,P19629,Q5GRG2,Q8CJ52,Q9Z1F2                             |
| 3685 | 1,2,5,7,8,1<br>2,13,15 | 3,4,6,9,10,<br>11,14,16,1<br>7 | 2 | P00762,P10715                                                  |
| 3686 | 1,2,5,7,8,1<br>2,13,16 | 3,4,6,9,10,<br>11,14,15,1<br>7 | 3 | P00762,P10715,Q8CJ52                                           |
| 3687 | 1,2,5,7,8,1<br>2,13,17 | 3,4,6,9,10,<br>11,14,15,1<br>6 | 9 | O88267,P10715,P23928,P50115,P52590,P55091,Q62635,Q8CJ52,Q9Z1F2 |
| 3688 | 1,2,5,7,8,1<br>2,14,15 | 3,4,6,9,10,<br>11,13,16,1<br>7 | 5 | P00762,P10715,P16636,P19629,Q03191                             |
| 3689 | 1,2,5,7,8,1<br>2,14,16 | 3,4,6,9,10,<br>11,13,15,1<br>7 | 4 | P10715,P19629,Q63532,Q8CJ52                                    |
| 3690 | 1,2,5,7,8,1<br>2,14,17 | 3,4,6,9,10,<br>11,13,15,1<br>6 | 8 | O88267,P10715,P19629,P31430,P50115,P52590,P55091,Q9QZA6        |
| 3691 | 1,2,5,7,8,1<br>2,15,16 | 3,4,6,9,10,<br>11,13,14,1<br>7 | 3 | P00762,P10715,P83121                                           |
| 3692 | 1,2,5,7,8,1<br>2,15,17 | 3,4,6,9,10,<br>11,13,14,1<br>6 | 5 | P10715,P50115,P52590,P55091,Q9QZA6                             |
| 3693 | 1,2,5,7,8,1<br>2,16,17 | 3,4,6,9,10,<br>11,13,14,1<br>5 | 9 | P02625,P10715,P23928,P50115,P50116,P52590,P55091,P63029,Q9QZA6 |
| 3694 | 1,2,5,7,8,1<br>3,14,15 | 3,4,6,9,10,<br>11,12,16,1<br>7 | 7 | P00762,P01835,P06757,P16636,Q03191,Q09030,Q5GRG2               |
| 3695 | 1,2,5,7,8,1<br>3,14,16 | 3,4,6,9,10,<br>11,12,15,1<br>7 | 3 | P00762,P01835,P02625                                           |

|      |                        |                                |   |                                           |
|------|------------------------|--------------------------------|---|-------------------------------------------|
| 3696 | 1,2,5,7,8,1<br>3,14,17 | 3,4,6,9,10,<br>11,12,15,1<br>6 | 6 | P00762,P08753,P52590,P53792,Q6PCU2,Q9Z1F2 |
| 3697 | 1,2,5,7,8,1<br>3,15,16 | 3,4,6,9,10,<br>11,12,14,1<br>7 | 3 | P00762,P01835,Q09030                      |
| 3698 | 1,2,5,7,8,1<br>3,15,17 | 3,4,6,9,10,<br>11,12,14,1<br>6 | 4 | P00762,P01835,P52590,P53792               |
| 3699 | 1,2,5,7,8,1<br>3,16,17 | 3,4,6,9,10,<br>11,12,14,1<br>5 | 6 | P00762,P01835,P02625,P23928,P52590,Q6PCU2 |
| 3700 | 1,2,5,7,8,1<br>4,15,16 | 3,4,6,9,10,<br>11,12,13,1<br>7 | 5 | P00762,P01835,P16636,P19629,Q9QZK9        |
| 3701 | 1,2,5,7,8,1<br>4,15,17 | 3,4,6,9,10,<br>11,12,13,1<br>6 | 5 | P00762,P10536,P16636,P19629,P52590        |
| 3702 | 1,2,5,7,8,1<br>4,16,17 | 3,4,6,9,10,<br>11,12,13,1<br>5 | 4 | P00762,P02625,P52590,Q6PCU2               |
| 3703 | 1,2,5,7,8,1<br>5,16,17 | 3,4,6,9,10,<br>11,12,13,1<br>4 | 3 | P00762,P01835,P52590                      |
| 3704 | 1,2,5,7,9,1<br>0,11,12 | 3,4,6,8,13,<br>14,15,16,1<br>7 | 6 | P02803,P27213,P52590,P97840,Q64093,Q9QUL6 |
| 3705 | 1,2,5,7,9,1<br>0,11,13 | 3,4,6,8,12,<br>14,15,16,1<br>7 | 4 | B0BNN3,P02803,P52590,Q9QUL6               |
| 3706 | 1,2,5,7,9,1<br>0,11,14 | 3,4,6,8,12,<br>13,15,16,1<br>7 | 4 | B0BNN3,P27213,P52590,Q9QUL6               |
| 3707 | 1,2,5,7,9,1<br>0,11,15 | 3,4,6,8,12,<br>13,14,16,1<br>7 | 3 | P27213,P52590,Q9QUL6                      |
| 3708 | 1,2,5,7,9,1<br>0,11,16 | 3,4,6,8,12,<br>13,14,15,1<br>7 | 5 | B0BNN3,P52590,Q64093,Q80W57,Q9QUL6        |
| 3709 | 1,2,5,7,9,1<br>0,11,17 | 3,4,6,8,12,<br>13,14,15,1<br>6 | 3 | P52590,Q64093,Q9QUL6                      |
| 3710 | 1,2,5,7,9,1<br>0,12,13 | 3,4,6,8,11,<br>14,15,16,1<br>7 | 4 | B0BNN3,P02803,P52590,P97840               |

|      |                        |                                |   |                                    |
|------|------------------------|--------------------------------|---|------------------------------------|
| 3711 | 1,2,5,7,9,1<br>0,12,14 | 3,4,6,8,11,<br>13,15,16,1<br>7 | 2 | P52590,P97840                      |
| 3712 | 1,2,5,7,9,1<br>0,12,15 | 3,4,6,8,11,<br>13,14,16,1<br>7 | 2 | P52590,P97840                      |
| 3713 | 1,2,5,7,9,1<br>0,12,16 | 3,4,6,8,11,<br>13,14,15,1<br>7 | 4 | B0BNN3,P52590,P97840,Q64093        |
| 3714 | 1,2,5,7,9,1<br>0,12,17 | 3,4,6,8,11,<br>13,14,15,1<br>6 | 4 | P52590,P97840,Q64093,Q9QUL6        |
| 3715 | 1,2,5,7,9,1<br>0,13,14 | 3,4,6,8,11,<br>12,15,16,1<br>7 | 2 | B0BNN3,Q4G075                      |
| 3716 | 1,2,5,7,9,1<br>0,13,15 | 3,4,6,8,11,<br>12,14,16,1<br>7 | 2 | P01835,P52590                      |
| 3717 | 1,2,5,7,9,1<br>0,13,16 | 3,4,6,8,11,<br>12,14,15,1<br>7 | 4 | B0BNN3,P01835,P02625,P97840        |
| 3718 | 1,2,5,7,9,1<br>0,13,17 | 3,4,6,8,11,<br>12,14,15,1<br>6 | 4 | P02625,P14668,P52590,Q9QUL6        |
| 3719 | 1,2,5,7,9,1<br>0,14,15 | 3,4,6,8,11,<br>12,13,16,1<br>7 | 5 | P16636,P52590,Q03191,Q9QUL6,Q9QZK9 |
| 3720 | 1,2,5,7,9,1<br>0,14,16 | 3,4,6,8,11,<br>12,13,15,1<br>7 | 4 | B0BNN3,P02625,Q9QUL6,Q9QZK9        |
| 3721 | 1,2,5,7,9,1<br>0,14,17 | 3,4,6,8,11,<br>12,13,15,1<br>6 | 3 | P02625,P52590,Q9QUL6               |
| 3722 | 1,2,5,7,9,1<br>0,15,16 | 3,4,6,8,11,<br>12,13,14,1<br>7 | 5 | P01835,P02782,P52590,Q64093,Q9QZK9 |
| 3723 | 1,2,5,7,9,1<br>0,15,17 | 3,4,6,8,11,<br>12,13,14,1<br>6 | 2 | P52590,Q9QUL6                      |
| 3724 | 1,2,5,7,9,1<br>0,16,17 | 3,4,6,8,11,<br>12,13,14,1<br>5 | 4 | P02625,P52590,Q64093,Q9QUL6        |
| 3725 | 1,2,5,7,9,1<br>1,12,13 | 3,4,6,8,10,<br>14,15,16,1<br>7 | 1 | P02803                             |

|      |                        |                                |   |                                    |
|------|------------------------|--------------------------------|---|------------------------------------|
| 3726 | 1,2,5,7,9,1<br>1,12,14 | 3,4,6,8,10,<br>13,15,16,1<br>7 | 0 |                                    |
| 3727 | 1,2,5,7,9,1<br>1,12,15 | 3,4,6,8,10,<br>13,14,16,1<br>7 | 1 | P51907                             |
| 3728 | 1,2,5,7,9,1<br>1,12,16 | 3,4,6,8,10,<br>13,14,15,1<br>7 | 0 |                                    |
| 3729 | 1,2,5,7,9,1<br>1,12,17 | 3,4,6,8,10,<br>13,14,15,1<br>6 | 2 | P52590,Q9QUL6                      |
| 3730 | 1,2,5,7,9,1<br>1,13,14 | 3,4,6,8,10,<br>12,15,16,1<br>7 | 1 | B0BNN3                             |
| 3731 | 1,2,5,7,9,1<br>1,13,15 | 3,4,6,8,10,<br>12,14,16,1<br>7 | 0 |                                    |
| 3732 | 1,2,5,7,9,1<br>1,13,16 | 3,4,6,8,10,<br>12,14,15,1<br>7 | 1 | B0BNN3                             |
| 3733 | 1,2,5,7,9,1<br>1,13,17 | 3,4,6,8,10,<br>12,14,15,1<br>6 | 2 | P52590,Q9QUL6                      |
| 3734 | 1,2,5,7,9,1<br>1,14,15 | 3,4,6,8,10,<br>12,13,16,1<br>7 | 5 | P16636,Q03191,Q99MH3,Q9QUL6,Q9QZK9 |
| 3735 | 1,2,5,7,9,1<br>1,14,16 | 3,4,6,8,10,<br>12,13,15,1<br>7 | 4 | B0BNN3,Q99MH3,Q9QUL6,Q9QZK9        |
| 3736 | 1,2,5,7,9,1<br>1,14,17 | 3,4,6,8,10,<br>12,13,15,1<br>6 | 2 | P52590,Q9QUL6                      |
| 3737 | 1,2,5,7,9,1<br>1,15,16 | 3,4,6,8,10,<br>12,13,14,1<br>7 | 3 | P16636,Q9QUL6,Q9QZK9               |
| 3738 | 1,2,5,7,9,1<br>1,15,17 | 3,4,6,8,10,<br>12,13,14,1<br>6 | 2 | P52590,Q9QUL6                      |
| 3739 | 1,2,5,7,9,1<br>1,16,17 | 3,4,6,8,10,<br>12,13,14,1<br>5 | 3 | A2RUV9,P52590,Q9QUL6               |
| 3740 | 1,2,5,7,9,1<br>2,13,14 | 3,4,6,8,10,<br>11,15,16,1<br>7 | 0 |                                    |

|      |                        |                                |   |                                    |
|------|------------------------|--------------------------------|---|------------------------------------|
| 3741 | 1,2,5,7,9,1<br>2,13,15 | 3,4,6,8,10,<br>11,14,16,1<br>7 | 0 |                                    |
| 3742 | 1,2,5,7,9,1<br>2,13,16 | 3,4,6,8,10,<br>11,14,15,1<br>7 | 2 | B0BNN3,P19218                      |
| 3743 | 1,2,5,7,9,1<br>2,13,17 | 3,4,6,8,10,<br>11,14,15,1<br>6 | 4 | P14668,P35280,P52590,P55091        |
| 3744 | 1,2,5,7,9,1<br>2,14,15 | 3,4,6,8,10,<br>11,13,16,1<br>7 | 2 | P16636,Q03191                      |
| 3745 | 1,2,5,7,9,1<br>2,14,16 | 3,4,6,8,10,<br>11,13,15,1<br>7 | 1 | Q63532                             |
| 3746 | 1,2,5,7,9,1<br>2,14,17 | 3,4,6,8,10,<br>11,13,15,1<br>6 | 1 | P52590                             |
| 3747 | 1,2,5,7,9,1<br>2,15,16 | 3,4,6,8,10,<br>11,13,14,1<br>7 | 0 |                                    |
| 3748 | 1,2,5,7,9,1<br>2,15,17 | 3,4,6,8,10,<br>11,13,14,1<br>6 | 1 | P52590                             |
| 3749 | 1,2,5,7,9,1<br>2,16,17 | 3,4,6,8,10,<br>11,13,14,1<br>5 | 1 | P52590                             |
| 3750 | 1,2,5,7,9,1<br>3,14,15 | 3,4,6,8,10,<br>11,12,16,1<br>7 | 5 | P00762,P16636,P53792,Q03191,Q4G075 |
| 3751 | 1,2,5,7,9,1<br>3,14,16 | 3,4,6,8,10,<br>11,12,15,1<br>7 | 4 | B0BNN3,P00762,Q4G075,Q9QZK9        |
| 3752 | 1,2,5,7,9,1<br>3,14,17 | 3,4,6,8,10,<br>11,12,15,1<br>6 | 4 | P00762,P14668,P52590,P53792        |
| 3753 | 1,2,5,7,9,1<br>3,15,16 | 3,4,6,8,10,<br>11,12,14,1<br>7 | 5 | P00762,P01835,P16636,Q4G075,Q9QZK9 |
| 3754 | 1,2,5,7,9,1<br>3,15,17 | 3,4,6,8,10,<br>11,12,14,1<br>6 | 4 | P00762,P14668,P52590,P53792        |
| 3755 | 1,2,5,7,9,1<br>3,16,17 | 3,4,6,8,10,<br>11,12,14,1<br>5 | 5 | B0BNN3,P00762,P02625,P35280,P52590 |

|      |                         |                                |   |                                                         |
|------|-------------------------|--------------------------------|---|---------------------------------------------------------|
| 3756 | 1,2,5,7,9,1<br>4,15,16  | 3,4,6,8,10,<br>11,12,13,1<br>7 | 8 | P00762,P0C0A9,P16636,P35467,Q03191,Q4G075,Q99MH3,Q9QZK9 |
| 3757 | 1,2,5,7,9,1<br>4,15,17  | 3,4,6,8,10,<br>11,12,13,1<br>6 | 5 | P00762,P0C0A9,P16636,P52590,P53792                      |
| 3758 | 1,2,5,7,9,1<br>4,16,17  | 3,4,6,8,10,<br>11,12,13,1<br>5 | 3 | P00762,P02625,P52590                                    |
| 3759 | 1,2,5,7,9,1<br>5,16,17  | 3,4,6,8,10,<br>11,12,13,1<br>4 | 5 | P00762,P02782,P0C0A9,P47727,P52590                      |
| 3760 | 1,2,5,7,10,<br>11,12,13 | 3,4,6,8,9,1<br>4,15,16,17      | 1 | P02803                                                  |
| 3761 | 1,2,5,7,10,<br>11,12,14 | 3,4,6,8,9,1<br>3,15,16,17      | 1 | O70417                                                  |
| 3762 | 1,2,5,7,10,<br>11,12,15 | 3,4,6,8,9,1<br>3,14,16,17      | 1 | P51907                                                  |
| 3763 | 1,2,5,7,10,<br>11,12,16 | 3,4,6,8,9,1<br>3,14,15,17      | 2 | P12368,P97840                                           |
| 3764 | 1,2,5,7,10,<br>11,12,17 | 3,4,6,8,9,1<br>3,14,15,16      | 3 | P06757,P52590,Q9QUL6                                    |
| 3765 | 1,2,5,7,10,<br>11,13,14 | 3,4,6,8,9,1<br>2,15,16,17      | 2 | B0BNN3,O70417                                           |
| 3766 | 1,2,5,7,10,<br>11,13,15 | 3,4,6,8,9,1<br>2,14,16,17      | 1 | P01835                                                  |
| 3767 | 1,2,5,7,10,<br>11,13,16 | 3,4,6,8,9,1<br>2,14,15,17      | 2 | B0BNN3,P01835                                           |
| 3768 | 1,2,5,7,10,<br>11,13,17 | 3,4,6,8,9,1<br>2,14,15,16      | 2 | P52590,Q9QUL6                                           |
| 3769 | 1,2,5,7,10,<br>11,14,15 | 3,4,6,8,9,1<br>2,13,16,17      | 4 | O70417,P16636,Q03191,Q9QUL6                             |
| 3770 | 1,2,5,7,10,<br>11,14,16 | 3,4,6,8,9,1<br>2,13,15,17      | 3 | B0BNN3,Q63532,Q9QUL6                                    |
| 3771 | 1,2,5,7,10,<br>11,14,17 | 3,4,6,8,9,1<br>2,13,15,16      | 2 | P52590,Q9QUL6                                           |
| 3772 | 1,2,5,7,10,<br>11,15,16 | 3,4,6,8,9,1<br>2,13,14,17      | 2 | P01835,Q80W57                                           |
| 3773 | 1,2,5,7,10,<br>11,15,17 | 3,4,6,8,9,1<br>2,13,14,16      | 2 | P52590,Q9QUL6                                           |
| 3774 | 1,2,5,7,10,<br>11,16,17 | 3,4,6,8,9,1<br>2,13,14,15      | 4 | P02625,P10758,P52590,Q9QUL6                             |
| 3775 | 1,2,5,7,10,<br>12,13,14 | 3,4,6,8,9,1<br>1,15,16,17      | 0 |                                                         |
| 3776 | 1,2,5,7,10,<br>12,13,15 | 3,4,6,8,9,1<br>1,14,16,17      | 1 | P97840                                                  |

|      |                                                |   |                                                  |
|------|------------------------------------------------|---|--------------------------------------------------|
| 3777 | 1,2,5,7,10, 3,4,6,8,9,1<br>12,13,16 1,14,15,17 | 3 | B0BNN3,P19218,P97840                             |
| 3778 | 1,2,5,7,10, 3,4,6,8,9,1<br>12,13,17 1,14,15,16 | 3 | P14668,P52590,P55091                             |
| 3779 | 1,2,5,7,10, 3,4,6,8,9,1<br>12,14,15 1,13,16,17 | 1 | P16636                                           |
| 3780 | 1,2,5,7,10, 3,4,6,8,9,1<br>12,14,16 1,13,15,17 | 3 | P02625,P97840,Q63532                             |
| 3781 | 1,2,5,7,10, 3,4,6,8,9,1<br>12,14,17 1,13,15,16 | 1 | P52590                                           |
| 3782 | 1,2,5,7,10, 3,4,6,8,9,1<br>12,15,16 1,13,14,17 | 1 | P97840                                           |
| 3783 | 1,2,5,7,10, 3,4,6,8,9,1<br>12,15,17 1,13,14,16 | 2 | P06866,P52590                                    |
| 3784 | 1,2,5,7,10, 3,4,6,8,9,1<br>12,16,17 1,13,14,15 | 3 | P02625,P52590,P97840                             |
| 3785 | 1,2,5,7,10, 3,4,6,8,9,1<br>13,14,15 1,12,16,17 | 4 | P00762,P01835,P16636,Q09030                      |
| 3786 | 1,2,5,7,10, 3,4,6,8,9,1<br>13,14,16 1,12,15,17 | 5 | B0BNN3,P00762,P01835,P02625,Q63532               |
| 3787 | 1,2,5,7,10, 3,4,6,8,9,1<br>13,14,17 1,12,15,16 | 3 | P02625,P14668,P52590                             |
| 3788 | 1,2,5,7,10, 3,4,6,8,9,1<br>13,15,16 1,12,14,17 | 3 | P00762,P01835,Q09030                             |
| 3789 | 1,2,5,7,10, 3,4,6,8,9,1<br>13,15,17 1,12,14,16 | 3 | P01835,P14668,P52590                             |
| 3790 | 1,2,5,7,10, 3,4,6,8,9,1<br>13,16,17 1,12,14,15 | 3 | P01835,P02625,P52590                             |
| 3791 | 1,2,5,7,10, 3,4,6,8,9,1<br>14,15,16 1,12,13,17 | 7 | P00762,P01835,P02782,P16636,P35467,Q63532,Q9QZK9 |
| 3792 | 1,2,5,7,10, 3,4,6,8,9,1<br>14,15,17 1,12,13,16 | 3 | P16636,P35467,P52590                             |
| 3793 | 1,2,5,7,10, 3,4,6,8,9,1<br>14,16,17 1,12,13,15 | 2 | P02625,P52590                                    |
| 3794 | 1,2,5,7,10, 3,4,6,8,9,1<br>15,16,17 1,12,13,14 | 4 | P01835,P02782,P0C0A9,P52590                      |
| 3795 | 1,2,5,7,11, 3,4,6,8,9,1<br>12,13,14 0,15,16,17 | 1 | O70417                                           |
| 3796 | 1,2,5,7,11, 3,4,6,8,9,1<br>12,13,15 0,14,16,17 | 0 |                                                  |
| 3797 | 1,2,5,7,11, 3,4,6,8,9,1<br>12,13,16 0,14,15,17 | 1 | P17046                                           |
| 3798 | 1,2,5,7,11, 3,4,6,8,9,1<br>12,13,17 0,14,15,16 | 1 | P55091                                           |
| 3799 | 1,2,5,7,11, 3,4,6,8,9,1<br>12,14,15 0,13,16,17 | 2 | P16636,Q03191                                    |

|      |                                                |   |                                    |
|------|------------------------------------------------|---|------------------------------------|
| 3800 | 1,2,5,7,11, 3,4,6,8,9,1<br>12,14,16 0,13,15,17 | 1 | Q63532                             |
| 3801 | 1,2,5,7,11, 3,4,6,8,9,1<br>12,14,17 0,13,15,16 | 0 |                                    |
| 3802 | 1,2,5,7,11, 3,4,6,8,9,1<br>12,15,16 0,13,14,17 | 1 | P51907                             |
| 3803 | 1,2,5,7,11, 3,4,6,8,9,1<br>12,15,17 0,13,14,16 | 1 | P52590                             |
| 3804 | 1,2,5,7,11, 3,4,6,8,9,1<br>12,16,17 0,13,14,15 | 1 | P17046                             |
| 3805 | 1,2,5,7,11, 3,4,6,8,9,1<br>13,14,15 0,12,16,17 | 4 | O70417,P16636,Q03191,Q09030        |
| 3806 | 1,2,5,7,11, 3,4,6,8,9,1<br>13,14,16 0,12,15,17 | 2 | B0BNN3,Q7TPB1                      |
| 3807 | 1,2,5,7,11, 3,4,6,8,9,1<br>13,14,17 0,12,15,16 | 0 |                                    |
| 3808 | 1,2,5,7,11, 3,4,6,8,9,1<br>13,15,16 0,12,14,17 | 3 | P01835,P16636,Q09030               |
| 3809 | 1,2,5,7,11, 3,4,6,8,9,1<br>13,15,17 0,12,14,16 | 0 |                                    |
| 3810 | 1,2,5,7,11, 3,4,6,8,9,1<br>13,16,17 0,12,14,15 | 0 |                                    |
| 3811 | 1,2,5,7,11, 3,4,6,8,9,1<br>14,15,16 0,12,13,17 | 5 | P16636,Q03191,Q63532,Q99MH3,Q9QZK9 |
| 3812 | 1,2,5,7,11, 3,4,6,8,9,1<br>14,15,17 0,12,13,16 | 2 | P16636,P52590                      |
| 3813 | 1,2,5,7,11, 3,4,6,8,9,1<br>14,16,17 0,12,13,15 | 1 | P10758                             |
| 3814 | 1,2,5,7,11, 3,4,6,8,9,1<br>15,16,17 0,12,13,14 | 0 |                                    |
| 3815 | 1,2,5,7,12, 3,4,6,8,9,1<br>13,14,15 0,11,16,17 | 5 | P00762,P16636,P35467,Q03191,Q09030 |
| 3816 | 1,2,5,7,12, 3,4,6,8,9,1<br>13,14,16 0,11,15,17 | 2 | P00762,Q63532                      |
| 3817 | 1,2,5,7,12, 3,4,6,8,9,1<br>13,14,17 0,11,15,16 | 2 | P14668,P55091                      |
| 3818 | 1,2,5,7,12, 3,4,6,8,9,1<br>13,15,16 0,11,14,17 | 3 | P00762,P35467,Q09030               |
| 3819 | 1,2,5,7,12, 3,4,6,8,9,1<br>13,15,17 0,11,14,16 | 2 | P14668,P55091                      |
| 3820 | 1,2,5,7,12, 3,4,6,8,9,1<br>13,16,17 0,11,14,15 | 1 | P35280                             |
| 3821 | 1,2,5,7,12, 3,4,6,8,9,1<br>14,15,16 0,11,13,17 | 3 | P16636,P35467,Q63532               |
| 3822 | 1,2,5,7,12, 3,4,6,8,9,1<br>14,15,17 0,11,13,16 | 3 | P16636,P35467,P52590               |



|      |                                                    |   |                                           |
|------|----------------------------------------------------|---|-------------------------------------------|
| 3823 | 1,2,5,7,12, 3,4,6,8,9,1<br>14,16,17 0,11,13,15     | 1 | P35467                                    |
| 3824 | 1,2,5,7,12, 3,4,6,8,9,1<br>15,16,17 0,11,13,14     | 2 | P06866,P35467                             |
| 3825 | 1,2,5,7,13, 3,4,6,8,9,1<br>14,15,16 0,11,12,17     | 5 | P00762,P01835,P16636,P35467,Q09030        |
| 3826 | 1,2,5,7,13, 3,4,6,8,9,1<br>14,15,17 0,11,12,16     | 6 | P00714,P00762,P14668,P16636,P35467,P53792 |
| 3827 | 1,2,5,7,13, 3,4,6,8,9,1<br>14,16,17 0,11,12,15     | 4 | P00762,P02625,P35467,Q6PCU2               |
| 3828 | 1,2,5,7,13, 3,4,6,8,9,1<br>15,16,17 0,11,12,14     | 5 | P00714,P00762,P01835,P0C0A9,P35467        |
| 3829 | 1,2,5,7,14, 3,4,6,8,9,1<br>15,16,17 0,11,12,13     | 4 | P00762,P0C0A9,P16636,P35467               |
| 3830 | 1,2,5,8,9,1 3,4,6,7,13,<br>0,11,12 14,15,16,1<br>7 | 3 | P02803,P27213,P62804                      |
| 3831 | 1,2,5,8,9,1 3,4,6,7,12,<br>0,11,13 14,15,16,1<br>7 | 2 | P02803,Q63942                             |
| 3832 | 1,2,5,8,9,1 3,4,6,7,12,<br>0,11,14 13,15,16,1<br>7 | 3 | P27213,Q63942,Q9QUL6                      |
| 3833 | 1,2,5,8,9,1 3,4,6,7,12,<br>0,11,15 13,14,16,1<br>7 | 3 | P27213,Q63942,Q9QUL6                      |
| 3834 | 1,2,5,8,9,1 3,4,6,7,12,<br>0,11,16 13,14,15,1<br>7 | 5 | A2RUV9,Q63942,Q9QUL6,Q9QZK9,Q9WUW8        |
| 3835 | 1,2,5,8,9,1 3,4,6,7,12,<br>0,11,17 13,14,15,1<br>6 | 4 | A2RUV9,P08649,Q63942,Q9QUL6               |
| 3836 | 1,2,5,8,9,1 3,4,6,7,11,<br>0,12,13 14,15,16,1<br>7 | 1 | P02803                                    |
| 3837 | 1,2,5,8,9,1 3,4,6,7,11,<br>0,12,14 13,15,16,1<br>7 | 1 | Q63942                                    |
| 3838 | 1,2,5,8,9,1 3,4,6,7,11,<br>0,12,15 13,14,16,1<br>7 | 1 | Q63942                                    |
| 3839 | 1,2,5,8,9,1 3,4,6,7,11,<br>0,12,16 13,14,15,1<br>7 | 4 | P02625,P02803,Q63942,Q9WUW8               |

|      |                        |                                |   |                             |
|------|------------------------|--------------------------------|---|-----------------------------|
| 3840 | 1,2,5,8,9,1<br>0,12,17 | 3,4,6,7,11,<br>13,14,15,1<br>6 | 1 | P02803                      |
| 3841 | 1,2,5,8,9,1<br>0,13,14 | 3,4,6,7,11,<br>12,15,16,1<br>7 | 2 | P09605;P25809,Q63942        |
| 3842 | 1,2,5,8,9,1<br>0,13,15 | 3,4,6,7,11,<br>12,14,16,1<br>7 | 3 | P01835,P09605;P25809,Q63942 |
| 3843 | 1,2,5,8,9,1<br>0,13,16 | 3,4,6,7,11,<br>12,14,15,1<br>7 | 4 | P01835,P02625,P02803,Q63942 |
| 3844 | 1,2,5,8,9,1<br>0,13,17 | 3,4,6,7,11,<br>12,14,15,1<br>6 | 2 | P02625,Q63942               |
| 3845 | 1,2,5,8,9,1<br>0,14,15 | 3,4,6,7,11,<br>12,13,16,1<br>7 | 3 | P09605;P25809,Q63942,Q9QZK9 |
| 3846 | 1,2,5,8,9,1<br>0,14,16 | 3,4,6,7,11,<br>12,13,15,1<br>7 | 3 | P02625,Q63942,Q9QZK9        |
| 3847 | 1,2,5,8,9,1<br>0,14,17 | 3,4,6,7,11,<br>12,13,15,1<br>6 | 3 | P02625,Q63942,Q9QUL6        |
| 3848 | 1,2,5,8,9,1<br>0,15,16 | 3,4,6,7,11,<br>12,13,14,1<br>7 | 3 | P01835,Q63942,Q9QZK9        |
| 3849 | 1,2,5,8,9,1<br>0,15,17 | 3,4,6,7,11,<br>12,13,14,1<br>6 | 1 | Q63942                      |
| 3850 | 1,2,5,8,9,1<br>0,16,17 | 3,4,6,7,11,<br>12,13,14,1<br>5 | 4 | A2RUV9,P02625,P25031,Q63942 |
| 3851 | 1,2,5,8,9,1<br>1,12,13 | 3,4,6,7,10,<br>14,15,16,1<br>7 | 1 | P02803                      |
| 3852 | 1,2,5,8,9,1<br>1,12,14 | 3,4,6,7,10,<br>13,15,16,1<br>7 | 1 | P02803                      |
| 3853 | 1,2,5,8,9,1<br>1,12,15 | 3,4,6,7,10,<br>13,14,16,1<br>7 | 0 |                             |
| 3854 | 1,2,5,8,9,1<br>1,12,16 | 3,4,6,7,10,<br>13,14,15,1<br>7 | 2 | P02803,Q63942               |

|      |                        |                                |   |                             |
|------|------------------------|--------------------------------|---|-----------------------------|
| 3855 | 1,2,5,8,9,1<br>1,12,17 | 3,4,6,7,10,<br>13,14,15,1<br>6 | 1 | P02803                      |
| 3856 | 1,2,5,8,9,1<br>1,13,14 | 3,4,6,7,10,<br>12,15,16,1<br>7 | 2 | P02803,Q63942               |
| 3857 | 1,2,5,8,9,1<br>1,13,15 | 3,4,6,7,10,<br>12,14,16,1<br>7 | 1 | Q63942                      |
| 3858 | 1,2,5,8,9,1<br>1,13,16 | 3,4,6,7,10,<br>12,14,15,1<br>7 | 3 | A2RUV9,P02803,Q63942        |
| 3859 | 1,2,5,8,9,1<br>1,13,17 | 3,4,6,7,10,<br>12,14,15,1<br>6 | 3 | A2RUV9,P02803,Q5FVI6        |
| 3860 | 1,2,5,8,9,1<br>1,14,15 | 3,4,6,7,10,<br>12,13,16,1<br>7 | 4 | Q03191,Q63942,Q99MH3,Q9QZK9 |
| 3861 | 1,2,5,8,9,1<br>1,14,16 | 3,4,6,7,10,<br>12,13,15,1<br>7 | 3 | Q63942,Q99MH3,Q9QZK9        |
| 3862 | 1,2,5,8,9,1<br>1,14,17 | 3,4,6,7,10,<br>12,13,15,1<br>6 | 3 | Q5FVI6,Q63942,Q9QUL6        |
| 3863 | 1,2,5,8,9,1<br>1,15,16 | 3,4,6,7,10,<br>12,13,14,1<br>7 | 3 | A2RUV9,Q63942,Q9QZK9        |
| 3864 | 1,2,5,8,9,1<br>1,15,17 | 3,4,6,7,10,<br>12,13,14,1<br>6 | 2 | Q63942,Q9QUL6               |
| 3865 | 1,2,5,8,9,1<br>1,16,17 | 3,4,6,7,10,<br>12,13,14,1<br>5 | 3 | A2RUV9,Q63942,Q9QUL6        |
| 3866 | 1,2,5,8,9,1<br>2,13,14 | 3,4,6,7,10,<br>11,15,16,1<br>7 | 3 | P02803,Q5FVI6,Q9Z1F2        |
| 3867 | 1,2,5,8,9,1<br>2,13,15 | 3,4,6,7,10,<br>11,14,16,1<br>7 | 1 | Q5FVI6                      |
| 3868 | 1,2,5,8,9,1<br>2,13,16 | 3,4,6,7,10,<br>11,14,15,1<br>7 | 3 | P02803,Q5FVI6,Q63942        |
| 3869 | 1,2,5,8,9,1<br>2,13,17 | 3,4,6,7,10,<br>11,14,15,1<br>6 | 4 | P02803,P35280,Q5FVI6,Q9Z1F2 |

|      |                        |                                |   |                                                         |
|------|------------------------|--------------------------------|---|---------------------------------------------------------|
| 3870 | 1,2,5,8,9,1<br>2,14,15 | 3,4,6,7,10,<br>11,13,16,1<br>7 | 3 | Q03191,Q5FVI6,Q63942                                    |
| 3871 | 1,2,5,8,9,1<br>2,14,16 | 3,4,6,7,10,<br>11,13,15,1<br>7 | 2 | Q5FVI6,Q63942                                           |
| 3872 | 1,2,5,8,9,1<br>2,14,17 | 3,4,6,7,10,<br>11,13,15,1<br>6 | 2 | Q5FVI6,Q8VD89                                           |
| 3873 | 1,2,5,8,9,1<br>2,15,16 | 3,4,6,7,10,<br>11,13,14,1<br>7 | 1 | Q63942                                                  |
| 3874 | 1,2,5,8,9,1<br>2,15,17 | 3,4,6,7,10,<br>11,13,14,1<br>6 | 1 | Q5FVI6                                                  |
| 3875 | 1,2,5,8,9,1<br>2,16,17 | 3,4,6,7,10,<br>11,13,14,1<br>5 | 2 | Q5FVI6,Q63942                                           |
| 3876 | 1,2,5,8,9,1<br>3,14,15 | 3,4,6,7,10,<br>11,12,16,1<br>7 | 7 | P00762,P06757,P09605,P25809,Q03191,Q5FVI6,Q63942,Q9QZK9 |
| 3877 | 1,2,5,8,9,1<br>3,14,16 | 3,4,6,7,10,<br>11,12,15,1<br>7 | 4 | P00762,Q5FVI6,Q63942,Q9QZK9                             |
| 3878 | 1,2,5,8,9,1<br>3,14,17 | 3,4,6,7,10,<br>11,12,15,1<br>6 | 4 | P08753,P53792,Q5FVI6,Q63942                             |
| 3879 | 1,2,5,8,9,1<br>3,15,16 | 3,4,6,7,10,<br>11,12,14,1<br>7 | 4 | P00762,P01835,Q63942,Q9QZK9                             |
| 3880 | 1,2,5,8,9,1<br>3,15,17 | 3,4,6,7,10,<br>11,12,14,1<br>6 | 4 | P08753,P53792,Q5FVI6,Q63942                             |
| 3881 | 1,2,5,8,9,1<br>3,16,17 | 3,4,6,7,10,<br>11,12,14,1<br>5 | 6 | A2RUV9,P02625,P08753,P35280,Q5FVI6,Q63942               |
| 3882 | 1,2,5,8,9,1<br>4,15,16 | 3,4,6,7,10,<br>11,12,13,1<br>7 | 5 | P00762,Q03191,Q63942,Q99MH3,Q9QZK9                      |
| 3883 | 1,2,5,8,9,1<br>4,15,17 | 3,4,6,7,10,<br>11,12,13,1<br>6 | 3 | P47967,Q5FVI6,Q63942                                    |
| 3884 | 1,2,5,8,9,1<br>4,16,17 | 3,4,6,7,10,<br>11,12,13,1<br>5 | 3 | P02625,Q5FVI6,Q63942                                    |

|      |                         |                                |   |                             |
|------|-------------------------|--------------------------------|---|-----------------------------|
| 3885 | 1,2,5,8,9,1<br>5,16,17  | 3,4,6,7,10,<br>11,12,13,1<br>4 | 2 | P47727,Q63942               |
| 3886 | 1,2,5,8,10,<br>11,12,13 | 3,4,6,7,9,1<br>4,15,16,17      | 1 | P02803                      |
| 3887 | 1,2,5,8,10,<br>11,12,14 | 3,4,6,7,9,1<br>3,15,16,17      | 1 | P62804                      |
| 3888 | 1,2,5,8,10,<br>11,12,15 | 3,4,6,7,9,1<br>3,14,16,17      | 2 | P00731,P62804               |
| 3889 | 1,2,5,8,10,<br>11,12,16 | 3,4,6,7,9,1<br>3,14,15,17      | 4 | P02803,Q6IFU7,Q6P6Q2,Q9WUW8 |
| 3890 | 1,2,5,8,10,<br>11,12,17 | 3,4,6,7,9,1<br>3,14,15,16      | 1 | P62804                      |
| 3891 | 1,2,5,8,10,<br>11,13,14 | 3,4,6,7,9,1<br>2,15,16,17      | 1 | P09605;P25809               |
| 3892 | 1,2,5,8,10,<br>11,13,15 | 3,4,6,7,9,1<br>2,14,16,17      | 2 | P01835,P09605;P25809        |
| 3893 | 1,2,5,8,10,<br>11,13,16 | 3,4,6,7,9,1<br>2,14,15,17      | 2 | A2RUV9,P01835               |
| 3894 | 1,2,5,8,10,<br>11,13,17 | 3,4,6,7,9,1<br>2,14,15,16      | 0 |                             |
| 3895 | 1,2,5,8,10,<br>11,14,15 | 3,4,6,7,9,1<br>2,13,16,17      | 1 | P09605;P25809               |
| 3896 | 1,2,5,8,10,<br>11,14,16 | 3,4,6,7,9,1<br>2,13,15,17      | 2 | P02625,P09605;P25809        |
| 3897 | 1,2,5,8,10,<br>11,14,17 | 3,4,6,7,9,1<br>2,13,15,16      | 1 | Q9QUL6                      |
| 3898 | 1,2,5,8,10,<br>11,15,16 | 3,4,6,7,9,1<br>2,13,14,17      | 2 | P01835,P09605;P25809        |
| 3899 | 1,2,5,8,10,<br>11,15,17 | 3,4,6,7,9,1<br>2,13,14,16      | 0 |                             |
| 3900 | 1,2,5,8,10,<br>11,16,17 | 3,4,6,7,9,1<br>2,13,14,15      | 3 | A2RUV9,P02625,P08649        |
| 3901 | 1,2,5,8,10,<br>12,13,14 | 3,4,6,7,9,1<br>1,15,16,17      | 2 | P09605;P25809,Q9Z1F2        |
| 3902 | 1,2,5,8,10,<br>12,13,15 | 3,4,6,7,9,1<br>1,14,16,17      | 3 | P09605;P25809,P83121,Q6IFV1 |
| 3903 | 1,2,5,8,10,<br>12,13,16 | 3,4,6,7,9,1<br>1,14,15,17      | 2 | P02803,P83121               |
| 3904 | 1,2,5,8,10,<br>12,13,17 | 3,4,6,7,9,1<br>1,14,15,16      | 3 | P02803,P83121,Q6IFV1        |
| 3905 | 1,2,5,8,10,<br>12,14,15 | 3,4,6,7,9,1<br>1,13,16,17      | 1 | P09605;P25809               |
| 3906 | 1,2,5,8,10,<br>12,14,16 | 3,4,6,7,9,1<br>1,13,15,17      | 1 | P02625                      |

|      |                                                |   |                             |
|------|------------------------------------------------|---|-----------------------------|
| 3907 | 1,2,5,8,10, 3,4,6,7,9,1<br>12,14,17 1,13,15,16 | 2 | P31430,Q10758               |
| 3908 | 1,2,5,8,10, 3,4,6,7,9,1<br>12,15,16 1,13,14,17 | 1 | P83121                      |
| 3909 | 1,2,5,8,10, 3,4,6,7,9,1<br>12,15,17 1,13,14,16 | 2 | P83121,Q6IFV1               |
| 3910 | 1,2,5,8,10, 3,4,6,7,9,1<br>12,16,17 1,13,14,15 | 3 | P02625,P05539,P83121        |
| 3911 | 1,2,5,8,10, 3,4,6,7,9,1<br>13,14,15 1,12,16,17 | 2 | P01835,P09605,P25809        |
| 3912 | 1,2,5,8,10, 3,4,6,7,9,1<br>13,14,16 1,12,15,17 | 3 | P01835,P02625,P09605,P25809 |
| 3913 | 1,2,5,8,10, 3,4,6,7,9,1<br>13,14,17 1,12,15,16 | 2 | P02625,P08753               |
| 3914 | 1,2,5,8,10, 3,4,6,7,9,1<br>13,15,16 1,12,14,17 | 3 | P01835,P09605,P25809,P83121 |
| 3915 | 1,2,5,8,10, 3,4,6,7,9,1<br>13,15,17 1,12,14,16 | 3 | P01835,P83121,Q6IFV1        |
| 3916 | 1,2,5,8,10, 3,4,6,7,9,1<br>13,16,17 1,12,14,15 | 3 | P01835,P02625,P83121        |
| 3917 | 1,2,5,8,10, 3,4,6,7,9,1<br>14,15,16 1,12,13,17 | 3 | P01835,P09605,P25809,Q9QZK9 |
| 3918 | 1,2,5,8,10, 3,4,6,7,9,1<br>14,15,17 1,12,13,16 | 0 |                             |
| 3919 | 1,2,5,8,10, 3,4,6,7,9,1<br>14,16,17 1,12,13,15 | 2 | P02625,P05539               |
| 3920 | 1,2,5,8,10, 3,4,6,7,9,1<br>15,16,17 1,12,13,14 | 2 | P01835,P83121               |
| 3921 | 1,2,5,8,11, 3,4,6,7,9,1<br>12,13,14 0,15,16,17 | 3 | P02803,Q5FVI6,Q9Z1F2        |
| 3922 | 1,2,5,8,11, 3,4,6,7,9,1<br>12,13,15 0,14,16,17 | 0 |                             |
| 3923 | 1,2,5,8,11, 3,4,6,7,9,1<br>12,13,16 0,14,15,17 | 1 | P02803                      |
| 3924 | 1,2,5,8,11, 3,4,6,7,9,1<br>12,13,17 0,14,15,16 | 3 | P02803,Q5FVI6,Q62635        |
| 3925 | 1,2,5,8,11, 3,4,6,7,9,1<br>12,14,15 0,13,16,17 | 2 | P62804,Q03191               |
| 3926 | 1,2,5,8,11, 3,4,6,7,9,1<br>12,14,16 0,13,15,17 | 0 |                             |
| 3927 | 1,2,5,8,11, 3,4,6,7,9,1<br>12,14,17 0,13,15,16 | 4 | P31430,P62804,Q00715,Q5FVI6 |
| 3928 | 1,2,5,8,11, 3,4,6,7,9,1<br>12,15,16 0,13,14,17 | 0 |                             |
| 3929 | 1,2,5,8,11, 3,4,6,7,9,1<br>12,15,17 0,13,14,16 | 1 | Q9QZA6                      |

|      |                                                |   |                                                  |
|------|------------------------------------------------|---|--------------------------------------------------|
| 3930 | 1,2,5,8,11, 3,4,6,7,9,1<br>12,16,17 0,13,14,15 | 0 |                                                  |
| 3931 | 1,2,5,8,11, 3,4,6,7,9,1<br>13,14,15 0,12,16,17 | 2 | P09605;P25809,Q03191                             |
| 3932 | 1,2,5,8,11, 3,4,6,7,9,1<br>13,14,16 0,12,15,17 | 0 |                                                  |
| 3933 | 1,2,5,8,11, 3,4,6,7,9,1<br>13,14,17 0,12,15,16 | 1 | Q5FVI6                                           |
| 3934 | 1,2,5,8,11, 3,4,6,7,9,1<br>13,15,16 0,12,14,17 | 1 | P01835                                           |
| 3935 | 1,2,5,8,11, 3,4,6,7,9,1<br>13,15,17 0,12,14,16 | 0 |                                                  |
| 3936 | 1,2,5,8,11, 3,4,6,7,9,1<br>13,16,17 0,12,14,15 | 1 | A2RUV9                                           |
| 3937 | 1,2,5,8,11, 3,4,6,7,9,1<br>14,15,16 0,12,13,17 | 4 | P09605;P25809,Q03191,Q99MH3,Q9QZK9               |
| 3938 | 1,2,5,8,11, 3,4,6,7,9,1<br>14,15,17 0,12,13,16 | 2 | P47967,P97840                                    |
| 3939 | 1,2,5,8,11, 3,4,6,7,9,1<br>14,16,17 0,12,13,15 | 0 |                                                  |
| 3940 | 1,2,5,8,11, 3,4,6,7,9,1<br>15,16,17 0,12,13,14 | 2 | A2RUV9,P05369                                    |
| 3941 | 1,2,5,8,12, 3,4,6,7,9,1<br>13,14,15 0,11,16,17 | 4 | P09605;P25809,Q03191,Q5FVI6,Q9Z1F2               |
| 3942 | 1,2,5,8,12, 3,4,6,7,9,1<br>13,14,16 0,11,15,17 | 2 | Q5FVI6,Q9Z1F2                                    |
| 3943 | 1,2,5,8,12, 3,4,6,7,9,1<br>13,14,17 0,11,15,16 | 4 | P31430,Q5FVI6,Q62635,Q9Z1F2                      |
| 3944 | 1,2,5,8,12, 3,4,6,7,9,1<br>13,15,16 0,11,14,17 | 1 | P83121                                           |
| 3945 | 1,2,5,8,12, 3,4,6,7,9,1<br>13,15,17 0,11,14,16 | 3 | P83121,Q5FVI6,Q6IFV1                             |
| 3946 | 1,2,5,8,12, 3,4,6,7,9,1<br>13,16,17 0,11,14,15 | 4 | P35280,P83121,Q5FVI6,Q6PCU2                      |
| 3947 | 1,2,5,8,12, 3,4,6,7,9,1<br>14,15,16 0,11,13,17 | 0 |                                                  |
| 3948 | 1,2,5,8,12, 3,4,6,7,9,1<br>14,15,17 0,11,13,16 | 1 | Q5FVI6                                           |
| 3949 | 1,2,5,8,12, 3,4,6,7,9,1<br>14,16,17 0,11,13,15 | 3 | P31430,Q5FVI6,Q6PCU2                             |
| 3950 | 1,2,5,8,12, 3,4,6,7,9,1<br>15,16,17 0,11,13,14 | 4 | P06866,P83121,Q5FVI6,Q5XFX0                      |
| 3951 | 1,2,5,8,13, 3,4,6,7,9,1<br>14,15,16 0,11,12,17 | 6 | P00762,P01835,P08753,P09605;P25809,Q5FVI6,Q9QZK9 |
| 3952 | 1,2,5,8,13, 3,4,6,7,9,1<br>14,15,17 0,11,12,16 | 5 | P08753,P10536,P47967,Q5FVI6,Q6PCU2               |

|      |                                                |    |                                                                                            |
|------|------------------------------------------------|----|--------------------------------------------------------------------------------------------|
| 3953 | 1,2,5,8,13, 3,4,6,7,9,1<br>14,16,17 0,11,12,15 | 4  | P02625,P08753,Q5FVI6,Q6PCU2                                                                |
| 3954 | 1,2,5,8,13, 3,4,6,7,9,1<br>15,16,17 0,11,12,14 | 6  | P00762,P01835,P08753,P83121,Q5FVI6,Q6PCU2                                                  |
| 3955 | 1,2,5,8,14, 3,4,6,7,9,1<br>15,16,17 0,11,12,13 | 2  | Q5FVI6,Q6PCU2                                                                              |
| 3956 | 1,2,5,9,10, 3,4,6,7,8,1<br>11,12,13 4,15,16,17 | 3  | P02803,P20761,Q63661                                                                       |
| 3957 | 1,2,5,9,10, 3,4,6,7,8,1<br>11,12,14 3,15,16,17 | 3  | P20761,Q63661,Q9QUL6                                                                       |
| 3958 | 1,2,5,9,10, 3,4,6,7,8,1<br>11,12,15 3,14,16,17 | 2  | P51907,Q63661                                                                              |
| 3959 | 1,2,5,9,10, 3,4,6,7,8,1<br>11,12,16 3,14,15,17 | 7  | P02803,P11598,P12368,P20761,Q63661,Q6IFU7,Q9WUW8                                           |
| 3960 | 1,2,5,9,10, 3,4,6,7,8,1<br>11,12,17 3,14,15,16 | 2  | P02803,Q9QUL6                                                                              |
| 3961 | 1,2,5,9,10, 3,4,6,7,8,1<br>11,13,14 2,15,16,17 | 8  | B0BNN3,O70417,P09605,P25809,P20761,Q4G075,Q63661,Q99041,Q9QUL6                             |
| 3962 | 1,2,5,9,10, 3,4,6,7,8,1<br>11,13,15 2,14,16,17 | 4  | P09605,P25809,P20761,Q4G075,Q99041                                                         |
| 3963 | 1,2,5,9,10, 3,4,6,7,8,1<br>11,13,16 2,14,15,17 | 8  | A2RUV9,B0BNN3,P02803,P11598,P20761,P62815,Q4G075,Q99041                                    |
| 3964 | 1,2,5,9,10, 3,4,6,7,8,1<br>11,13,17 2,14,15,16 | 2  | P02803,Q9QUL6                                                                              |
| 3965 | 1,2,5,9,10, 3,4,6,7,8,1<br>11,14,15 2,13,16,17 | 9  | P06761,P09605,P25809,P22282,Q03191,Q4G075,Q63661,Q99041,Q9QUL6,Q9QZK9                      |
| 3966 | 1,2,5,9,10, 3,4,6,7,8,1<br>11,14,16 2,13,15,17 | 12 | B0BNN3,P06761,P11598,P20761,P22282,P62815,Q4G075,Q63661,Q99041,Q99MH3,Q9QUL6,Q9QZK9        |
| 3967 | 1,2,5,9,10, 3,4,6,7,8,1<br>11,14,17 2,13,15,16 | 1  | Q9QUL6                                                                                     |
| 3968 | 1,2,5,9,10, 3,4,6,7,8,1<br>11,15,16 2,13,14,17 | 13 | P02782,P06761,P06911,P11598,P20761,P22282,P22283,P62815,Q4G075,Q62902,Q99041,Q9QUL6,Q9QZK9 |
| 3969 | 1,2,5,9,10, 3,4,6,7,8,1<br>11,15,17 2,13,14,16 | 4  | P06761,P06911,Q62902,Q9QUL6                                                                |
| 3970 | 1,2,5,9,10, 3,4,6,7,8,1<br>11,16,17 2,13,14,15 | 8  | A2RUV9,O08557,P02625,P06761,P06911,P11598,Q62902,Q9QUL6                                    |
| 3971 | 1,2,5,9,10, 3,4,6,7,8,1<br>12,13,14 1,15,16,17 | 4  | P02803,P07150,P20761,Q99041                                                                |
| 3972 | 1,2,5,9,10, 3,4,6,7,8,1<br>12,13,15 1,14,16,17 | 1  | P07150                                                                                     |
| 3973 | 1,2,5,9,10, 3,4,6,7,8,1<br>12,13,16 1,14,15,17 | 6  | B0BNN3,P02803,P07150,P14669,P20761,P97840                                                  |
| 3974 | 1,2,5,9,10, 3,4,6,7,8,1<br>12,13,17 1,14,15,16 | 3  | P02803,P14668,P35280                                                                       |
| 3975 | 1,2,5,9,10, 3,4,6,7,8,1<br>12,14,15 1,13,16,17 | 4  | P07150,P09605,P25809,Q03191,Q99041                                                         |



|      |                                                |    |                                                                                                                                      |
|------|------------------------------------------------|----|--------------------------------------------------------------------------------------------------------------------------------------|
| 3976 | 1,2,5,9,10, 3,4,6,7,8,1<br>12,14,16 1,13,15,17 | 4  | P11598,P20761,Q99041,Q9WUW8                                                                                                          |
| 3977 | 1,2,5,9,10, 3,4,6,7,8,1<br>12,14,17 1,13,15,16 | 1  | Q8VD89                                                                                                                               |
| 3978 | 1,2,5,9,10, 3,4,6,7,8,1<br>12,15,16 1,13,14,17 | 5  | P07150,P11598,P20761,P22282,P22283                                                                                                   |
| 3979 | 1,2,5,9,10, 3,4,6,7,8,1<br>12,15,17 1,13,14,16 | 2  | P06866,Q62902                                                                                                                        |
| 3980 | 1,2,5,9,10, 3,4,6,7,8,1<br>12,16,17 1,13,14,15 | 1  | P02625                                                                                                                               |
| 3981 | 1,2,5,9,10, 3,4,6,7,8,1<br>13,14,15 1,12,16,17 | 7  | P07150,P09605,P25809,P50115,Q4G075,Q63751,Q99041,Q9QZK9                                                                              |
| 3982 | 1,2,5,9,10, 3,4,6,7,8,1<br>13,14,16 1,12,15,17 | 12 | B0BNN3,P02625,P07150,P09605,P25809,P14669,P20761,P50115,Q4G075,Q63751,Q63942,Q99041,Q9QZK9                                           |
| 3983 | 1,2,5,9,10, 3,4,6,7,8,1<br>13,14,17 1,12,15,16 | 2  | P14668,Q99041                                                                                                                        |
| 3984 | 1,2,5,9,10, 3,4,6,7,8,1<br>13,15,16 1,12,14,17 | 13 | P01835,P07150,P09605,P25809,P11598,P14669,P20761,P22282,P22283,P50115,Q4G075,Q63942,Q99041,Q9QZK9                                    |
| 3985 | 1,2,5,9,10, 3,4,6,7,8,1<br>13,15,17 1,12,14,16 | 2  | P14668,Q99041                                                                                                                        |
| 3986 | 1,2,5,9,10, 3,4,6,7,8,1<br>13,16,17 1,12,14,15 | 2  | P02625,P35280                                                                                                                        |
| 3987 | 1,2,5,9,10, 3,4,6,7,8,1<br>14,15,16 1,12,13,17 | 18 | P02780,P02782,P06761,P07150,P07647,P09605,P25809,P0C0A9,P11598,P20761,P22282,P22283,P50115,Q4G075,Q62902,Q63751,Q63942,Q99041,Q9QZK9 |
| 3988 | 1,2,5,9,10, 3,4,6,7,8,1<br>14,15,17 1,12,13,16 | 5  | P22282,P22283,Q62902,Q99041,Q9QUL6                                                                                                   |
| 3989 | 1,2,5,9,10, 3,4,6,7,8,1<br>14,16,17 1,12,13,15 | 8  | P02625,P06761,P11598,P22282,P22283,Q62902,Q99041,Q9QUL6                                                                              |
| 3990 | 1,2,5,9,10, 3,4,6,7,8,1<br>15,16,17 1,12,13,14 | 15 | P02780,P02781,P02782,P06761,P06911,P07647,P0C0A9,P11598,P22282,P22283,P30120,P47727,Q62902,Q99041,Q9JHB9                             |
| 3991 | 1,2,5,9,11, 3,4,6,7,8,1<br>12,13,14 0,15,16,17 | 2  | P02803,P20761                                                                                                                        |
| 3992 | 1,2,5,9,11, 3,4,6,7,8,1<br>12,13,15 0,14,16,17 | 0  |                                                                                                                                      |
| 3993 | 1,2,5,9,11, 3,4,6,7,8,1<br>12,13,16 0,14,15,17 | 2  | P02803,P20761                                                                                                                        |
| 3994 | 1,2,5,9,11, 3,4,6,7,8,1<br>12,13,17 0,14,15,16 | 2  | P02803,P35280                                                                                                                        |
| 3995 | 1,2,5,9,11, 3,4,6,7,8,1<br>12,14,15 0,13,16,17 | 1  | Q03191                                                                                                                               |
| 3996 | 1,2,5,9,11, 3,4,6,7,8,1<br>12,14,16 0,13,15,17 | 2  | P20761,Q99MH3                                                                                                                        |
| 3997 | 1,2,5,9,11, 3,4,6,7,8,1<br>12,14,17 0,13,15,16 | 0  |                                                                                                                                      |
| 3998 | 1,2,5,9,11, 3,4,6,7,8,1<br>12,15,16 0,13,14,17 | 4  | P06911,P11598,P12020,P51907                                                                                                          |

|      |                                                |    |                                                                                                                 |
|------|------------------------------------------------|----|-----------------------------------------------------------------------------------------------------------------|
| 3999 | 1,2,5,9,11, 3,4,6,7,8,1<br>12,15,17 0,13,14,16 | 2  | P06911,P12020                                                                                                   |
| 4000 | 1,2,5,9,11, 3,4,6,7,8,1<br>12,16,17 0,13,14,15 | 2  | P06911,P12020                                                                                                   |
| 4001 | 1,2,5,9,11, 3,4,6,7,8,1<br>13,14,15 0,12,16,17 | 4  | Q03191,Q4G075,Q99041,Q9QZK9                                                                                     |
| 4002 | 1,2,5,9,11, 3,4,6,7,8,1<br>13,14,16 0,12,15,17 | 7  | B0BNN3,P20761,Q4G075,Q7TPB1,Q99041,Q99MH3,Q9QZK9                                                                |
| 4003 | 1,2,5,9,11, 3,4,6,7,8,1<br>13,14,17 0,12,15,16 | 1  | Q5FVI6                                                                                                          |
| 4004 | 1,2,5,9,11, 3,4,6,7,8,1<br>13,15,16 0,12,14,17 | 5  | P11598,P20761,Q4G075,Q99041,Q9QZK9                                                                              |
| 4005 | 1,2,5,9,11, 3,4,6,7,8,1<br>13,15,17 0,12,14,16 | 0  |                                                                                                                 |
| 4006 | 1,2,5,9,11, 3,4,6,7,8,1<br>13,16,17 0,12,14,15 | 2  | A2RUV9,P35280                                                                                                   |
| 4007 | 1,2,5,9,11, 3,4,6,7,8,1<br>14,15,16 0,12,13,17 | 11 | P06761,P11598,P20761,P22282,P22283,Q03191,Q4G075,Q63942,Q99041,Q99MH3,Q9QZK9                                    |
| 4008 | 1,2,5,9,11, 3,4,6,7,8,1<br>14,15,17 0,12,13,16 | 3  | P47967,Q9QUL6,Q9ROT3                                                                                            |
| 4009 | 1,2,5,9,11, 3,4,6,7,8,1<br>14,16,17 0,12,13,15 | 2  | Q99MH3,Q9QUL6                                                                                                   |
| 4010 | 1,2,5,9,11, 3,4,6,7,8,1<br>15,16,17 0,12,13,14 | 11 | A2RUV9,P02780,P06761,P06911,P11598,P12020,P22282,P22283,Q62902,Q6AYR9,Q9QUL6                                    |
| 4011 | 1,2,5,9,12, 3,4,6,7,8,1<br>13,14,15 0,11,16,17 | 5  | P00714,P07150,Q03191,Q5FVI6,Q99041                                                                              |
| 4012 | 1,2,5,9,12, 3,4,6,7,8,1<br>13,14,16 0,11,15,17 | 7  | P00714,P07150,P14669,P20761,Q4G075,Q5FVI6,Q99041                                                                |
| 4013 | 1,2,5,9,12, 3,4,6,7,8,1<br>13,14,17 0,11,15,16 | 5  | P00714,P14668,P35280,Q5FVI6,Q8VD89                                                                              |
| 4014 | 1,2,5,9,12, 3,4,6,7,8,1<br>13,15,16 0,11,14,17 | 3  | P00714,P07150,P14669                                                                                            |
| 4015 | 1,2,5,9,12, 3,4,6,7,8,1<br>13,15,17 0,11,14,16 | 5  | P00714,P07150,P14668,P35280,Q5FVI6                                                                              |
| 4016 | 1,2,5,9,12, 3,4,6,7,8,1<br>13,16,17 0,11,14,15 | 5  | P00714,P07171,P22006,P35280,Q5FVI6                                                                              |
| 4017 | 1,2,5,9,12, 3,4,6,7,8,1<br>14,15,16 0,11,13,17 | 7  | P07150,P11598,P14669,P22282,P22283,Q03191,Q99041                                                                |
| 4018 | 1,2,5,9,12, 3,4,6,7,8,1<br>14,15,17 0,11,13,16 | 3  | P00714,Q5FVI6,Q8VD89                                                                                            |
| 4019 | 1,2,5,9,12, 3,4,6,7,8,1<br>14,16,17 0,11,13,15 | 3  | P00714,P35280,Q5FVI6                                                                                            |
| 4020 | 1,2,5,9,12, 3,4,6,7,8,1<br>15,16,17 0,11,13,14 | 5  | P00714,P06866,P06911,P12020,P47727                                                                              |
| 4021 | 1,2,5,9,13, 3,4,6,7,8,1<br>14,15,16 0,11,12,17 | 16 | P00714,P00762,P07150,P0C0A9,P14669,P20761,P22282,P22283,P50115,Q03191,Q4G075,Q5FVI6,Q63751,Q63942,Q99041,Q9QZK9 |

|      |                                                |    |                                                                                                          |
|------|------------------------------------------------|----|----------------------------------------------------------------------------------------------------------|
| 4022 | 1,2,5,9,13, 3,4,6,7,8,1<br>14,15,17 0,11,12,16 | 6  | P00714,P07150,P47967,P53792,Q5FVI6,Q99041                                                                |
| 4023 | 1,2,5,9,13, 3,4,6,7,8,1<br>14,16,17 0,11,12,15 | 6  | P00714,P02625,P14669,P35280,Q5FVI6,Q99041                                                                |
| 4024 | 1,2,5,9,13, 3,4,6,7,8,1<br>15,16,17 0,11,12,14 | 6  | P00714,P0C0A9,P22283,P35280,P47727,Q5FVI6                                                                |
| 4025 | 1,2,5,9,14, 3,4,6,7,8,1<br>15,16,17 0,11,12,13 | 15 | P00714,P02780,P02781,P06761,P07647,P0C0A9,P11598,P22282,P22283,P30120,Q5FVI6,Q62902,Q63942,Q99041,Q9JHB9 |
| 4026 | 1,2,5,10,1 3,4,6,7,8,9<br>1,12,13,14 ,15,16,17 | 3  | O70417,P09605;P25809,P20761                                                                              |
| 4027 | 1,2,5,10,1 3,4,6,7,8,9<br>1,12,13,15 ,14,16,17 | 1  | P09605;P25809                                                                                            |
| 4028 | 1,2,5,10,1 3,4,6,7,8,9<br>1,12,13,16 ,14,15,17 | 3  | P02803,P20761,Q6IFU7                                                                                     |
| 4029 | 1,2,5,10,1 3,4,6,7,8,9<br>1,12,13,17 ,14,15,16 | 1  | P02803                                                                                                   |
| 4030 | 1,2,5,10,1 3,4,6,7,8,9<br>1,12,14,15 ,13,16,17 | 4  | O70417,P09605;P25809,P51907,Q03191                                                                       |
| 4031 | 1,2,5,10,1 3,4,6,7,8,9<br>1,12,14,16 ,13,15,17 | 2  | P20761,Q6IFU7                                                                                            |
| 4032 | 1,2,5,10,1 3,4,6,7,8,9<br>1,12,14,17 ,13,15,16 | 1  | P62804                                                                                                   |
| 4033 | 1,2,5,10,1 3,4,6,7,8,9<br>1,12,15,16 ,13,14,17 | 4  | P11598,P22282,P51907,Q6IFU7                                                                              |
| 4034 | 1,2,5,10,1 3,4,6,7,8,9<br>1,12,15,17 ,13,14,16 | 1  | P06866                                                                                                   |
| 4035 | 1,2,5,10,1 3,4,6,7,8,9<br>1,12,16,17 ,13,14,15 | 3  | P05369,P06757,P06866                                                                                     |
| 4036 | 1,2,5,10,1 3,4,6,7,8,9<br>1,13,14,15 ,12,16,17 | 4  | O70417,P09605;P25809,Q4G075,Q99041                                                                       |
| 4037 | 1,2,5,10,1 3,4,6,7,8,9<br>1,13,14,16 ,12,15,17 | 7  | B0BNN3,O70417,P09605;P25809,P20761,Q4G075,Q7TPB1,Q99041                                                  |
| 4038 | 1,2,5,10,1 3,4,6,7,8,9<br>1,13,14,17 ,12,15,16 | 1  | O70417                                                                                                   |
| 4039 | 1,2,5,10,1 3,4,6,7,8,9<br>1,13,15,16 ,12,14,17 | 5  | P01835,P09605;P25809,P20761,P22282,Q99041                                                                |
| 4040 | 1,2,5,10,1 3,4,6,7,8,9<br>1,13,15,17 ,12,14,16 | 0  |                                                                                                          |
| 4041 | 1,2,5,10,1 3,4,6,7,8,9<br>1,13,16,17 ,12,14,15 | 2  | A2RUV9,P02625                                                                                            |
| 4042 | 1,2,5,10,1 3,4,6,7,8,9<br>1,14,15,16 ,12,13,17 | 8  | P06761,P09605;P25809,P11598,P20761,P22282,P22283,Q99041,Q9QZK9                                           |
| 4043 | 1,2,5,10,1 3,4,6,7,8,9<br>1,14,15,17 ,12,13,16 | 2  | Q62902,Q9QUL6                                                                                            |
| 4044 | 1,2,5,10,1 3,4,6,7,8,9<br>1,14,16,17 ,12,13,15 | 2  | P02625,Q9QUL6                                                                                            |

|      |                          |                          |    |                                                                              |
|------|--------------------------|--------------------------|----|------------------------------------------------------------------------------|
| 4045 | 1,2,5,10,1<br>1,15,16,17 | 3,4,6,7,8,9<br>,12,13,14 | 9  | P02780,P02782,P05369,P06761,P06911,P11598,P22282,P22283,Q62902               |
| 4046 | 1,2,5,10,1<br>2,13,14,15 | 3,4,6,7,8,9<br>,11,16,17 | 2  | P07150,P09605,P25809                                                         |
| 4047 | 1,2,5,10,1<br>2,13,14,16 | 3,4,6,7,8,9<br>,11,15,17 | 2  | P09605,P25809,P20761                                                         |
| 4048 | 1,2,5,10,1<br>2,13,14,17 | 3,4,6,7,8,9<br>,11,15,16 | 1  | P14668                                                                       |
| 4049 | 1,2,5,10,1<br>2,13,15,16 | 3,4,6,7,8,9<br>,11,14,17 | 3  | P09605,P25809,P83121,Q63617                                                  |
| 4050 | 1,2,5,10,1<br>2,13,15,17 | 3,4,6,7,8,9<br>,11,14,16 | 3  | P14668,P83121,Q63617                                                         |
| 4051 | 1,2,5,10,1<br>2,13,16,17 | 3,4,6,7,8,9<br>,11,14,15 | 3  | P02625,P35280,P83121                                                         |
| 4052 | 1,2,5,10,1<br>2,14,15,16 | 3,4,6,7,8,9<br>,11,13,17 | 5  | P09605,P25809,P22282,P22283,Q63617,Q99041                                    |
| 4053 | 1,2,5,10,1<br>2,14,15,17 | 3,4,6,7,8,9<br>,11,13,16 | 1  | Q63617                                                                       |
| 4054 | 1,2,5,10,1<br>2,14,16,17 | 3,4,6,7,8,9<br>,11,13,15 | 1  | P02625                                                                       |
| 4055 | 1,2,5,10,1<br>2,15,16,17 | 3,4,6,7,8,9<br>,11,13,14 | 4  | P06866,P83121,Q62902,Q63617                                                  |
| 4056 | 1,2,5,10,1<br>3,14,15,16 | 3,4,6,7,8,9<br>,11,12,17 | 10 | P01835,P09605,P25809,P19223,P20761,P22282,P22283,P50115,Q4G075,Q99041,Q9QZK9 |
| 4057 | 1,2,5,10,1<br>3,14,15,17 | 3,4,6,7,8,9<br>,11,12,16 | 2  | P14668,Q99041                                                                |
| 4058 | 1,2,5,10,1<br>3,14,16,17 | 3,4,6,7,8,9<br>,11,12,15 | 2  | P02625,Q99041                                                                |
| 4059 | 1,2,5,10,1<br>3,15,16,17 | 3,4,6,7,8,9<br>,11,12,14 | 5  | P01835,P02780,P0C0A9,P22283,P83121                                           |
| 4060 | 1,2,5,10,1<br>4,15,16,17 | 3,4,6,7,8,9<br>,11,12,13 | 11 | P02780,P02781,P02782,P06761,P07647,P0C0A9,P22282,P22283,P30120,Q62902,Q99041 |
| 4061 | 1,2,5,11,1<br>2,13,14,15 | 3,4,6,7,8,9<br>,10,16,17 | 3  | O70417,Q03191,Q6P6R2                                                         |
| 4062 | 1,2,5,11,1<br>2,13,14,16 | 3,4,6,7,8,9<br>,10,15,17 | 1  | P20761                                                                       |
| 4063 | 1,2,5,11,1<br>2,13,14,17 | 3,4,6,7,8,9<br>,10,15,16 | 1  | Q5FVI6                                                                       |
| 4064 | 1,2,5,11,1<br>2,13,15,16 | 3,4,6,7,8,9<br>,10,14,17 | 0  |                                                                              |
| 4065 | 1,2,5,11,1<br>2,13,15,17 | 3,4,6,7,8,9<br>,10,14,16 | 0  |                                                                              |
| 4066 | 1,2,5,11,1<br>2,13,16,17 | 3,4,6,7,8,9<br>,10,14,15 | 1  | P35280                                                                       |
| 4067 | 1,2,5,11,1<br>2,14,15,16 | 3,4,6,7,8,9<br>,10,13,17 | 2  | P51907,Q03191                                                                |

|      |                          |                                 |    |                                                                                                   |
|------|--------------------------|---------------------------------|----|---------------------------------------------------------------------------------------------------|
| 4068 | 1,2,5,11,1<br>2,14,15,17 | 3,4,6,7,8,9<br>,10,13,16        | 0  |                                                                                                   |
| 4069 | 1,2,5,11,1<br>2,14,16,17 | 3,4,6,7,8,9<br>,10,13,15        | 0  |                                                                                                   |
| 4070 | 1,2,5,11,1<br>2,15,16,17 | 3,4,6,7,8,9<br>,10,13,14        | 4  | P05369,P06866,P06911,P12020                                                                       |
| 4071 | 1,2,5,11,1<br>3,14,15,16 | 3,4,6,7,8,9<br>,10,12,17        | 6  | P09605,P25809,P19223,Q03191,Q4G075,Q99041,Q9QZK9                                                  |
| 4072 | 1,2,5,11,1<br>3,14,15,17 | 3,4,6,7,8,9<br>,10,12,16        | 3  | P00714,P47967,Q5FVI6                                                                              |
| 4073 | 1,2,5,11,1<br>3,14,16,17 | 3,4,6,7,8,9<br>,10,12,15        | 0  |                                                                                                   |
| 4074 | 1,2,5,11,1<br>3,15,16,17 | 3,4,6,7,8,9<br>,10,12,14        | 1  | P00714                                                                                            |
| 4075 | 1,2,5,11,1<br>4,15,16,17 | 3,4,6,7,8,9<br>,10,12,13        | 4  | P02780,P06761,P22282,P22283                                                                       |
| 4076 | 1,2,5,12,1<br>3,14,15,16 | 3,4,6,7,8,9<br>,10,11,17        | 5  | P00714,P07150,P14669,P35467,Q5FVI6                                                                |
| 4077 | 1,2,5,12,1<br>3,14,15,17 | 3,4,6,7,8,9<br>,10,11,16        | 3  | P00714,P14668,Q5FVI6                                                                              |
| 4078 | 1,2,5,12,1<br>3,14,16,17 | 3,4,6,7,8,9<br>,10,11,15        | 3  | P00714,P35280,Q5FVI6                                                                              |
| 4079 | 1,2,5,12,1<br>3,15,16,17 | 3,4,6,7,8,9<br>,10,11,14        | 5  | P00714,P06866,P35280,P83121,Q5FVI6                                                                |
| 4080 | 1,2,5,12,1<br>4,15,16,17 | 3,4,6,7,8,9<br>,10,11,13        | 4  | P00714,P06866,P35467,Q5FVI6                                                                       |
| 4081 | 1,2,5,13,1<br>4,15,16,17 | 3,4,6,7,8,9<br>,10,11,12        | 7  | P00714,P08753,P0C0A9,P22283,P23785,P35467,Q5FVI6                                                  |
| 4082 | 1,2,6,7,8,9<br>,10,11    | 3,4,5,12,1<br>3,14,15,16<br>,17 | 14 | P02631,P10715,P14669,P15399,P19629,P27213,P31044,P35280,P68370,Q63493,Q6AYL6,Q91ZS3,Q9JI85,Q9QUL6 |
| 4083 | 1,2,6,7,8,9<br>,10,12    | 3,4,5,11,1<br>3,14,15,16<br>,17 | 12 | P02782,P08723,P10715,P19629,P30120,P31044,P68370,P97840,Q8CJ52,Q91ZS3,Q9JHB9,Q9JI85               |
| 4084 | 1,2,6,7,8,9<br>,10,13    | 3,4,5,11,1<br>2,14,15,16<br>,17 | 7  | P06911,P12020,P31044,P68370,P97840,Q5GRG2,Q91ZS3                                                  |
| 4085 | 1,2,6,7,8,9<br>,10,14    | 3,4,5,11,1<br>2,13,15,16<br>,17 | 7  | P02631,P12020,P19629,P31044,P68370,Q5GRG2,Q63942                                                  |
| 4086 | 1,2,6,7,8,9<br>,10,15    | 3,4,5,11,1<br>2,13,14,16<br>,17 | 7  | P02631,P19629,P31044,P35280,P68370,P97840,Q63942                                                  |
| 4087 | 1,2,6,7,8,9<br>,10,16    | 3,4,5,11,1<br>2,13,14,15<br>,17 | 6  | P19629,P31044,P68370,P97840,Q63942,Q6P6R2                                                         |

|      |                       |                                 |    |                                                                                                                                                                         |
|------|-----------------------|---------------------------------|----|-------------------------------------------------------------------------------------------------------------------------------------------------------------------------|
| 4088 | 1,2,6,7,8,9<br>,10,17 | 3,4,5,11,1<br>2,13,14,15<br>,16 | 5  | P19629,P31044,P68370,Q6P6R2,Q9QUL6                                                                                                                                      |
| 4089 | 1,2,6,7,8,9<br>,11,12 | 3,4,5,10,1<br>3,14,15,16<br>,17 | 22 | O54715,P02631,P02781,P02782,P07647,P08723,P09456,P10715,P13432,P14669,P19629,P22283,P30120,P31044,P68370,Q63357,Q63493,Q6AYL6,Q8CJ52,Q91ZS3,Q9JHB9,Q9JI85               |
| 4090 | 1,2,6,7,8,9<br>,11,13 | 3,4,5,10,1<br>2,14,15,16<br>,17 | 13 | P02631,P06911,P10715,P14669,P19629,P22283,P31044,P68370,Q5GRG2,Q62902,Q91ZS3,Q9JHB9,Q9JI85                                                                              |
| 4091 | 1,2,6,7,8,9<br>,11,14 | 3,4,5,10,1<br>2,13,15,16<br>,17 | 12 | P02631,P10715,P14669,P15399,P19629,P31044,P47727,P68370,Q63493,Q91ZS3,Q9JI85,Q9QUL6                                                                                     |
| 4092 | 1,2,6,7,8,9<br>,11,15 | 3,4,5,10,1<br>2,13,14,16<br>,17 | 10 | P02631,P10715,P14669,P19629,P27213,P31044,P35280,P68370,Q5QE79,Q9JI85                                                                                                   |
| 4093 | 1,2,6,7,8,9<br>,11,16 | 3,4,5,10,1<br>2,13,14,15<br>,17 | 9  | A2RUV9,P02631,P10715,P19629,P31044,P68370,Q63942,Q91ZS3,Q9JI85                                                                                                          |
| 4094 | 1,2,6,7,8,9<br>,11,17 | 3,4,5,10,1<br>2,13,14,15<br>,16 | 12 | P02631,P10715,P14669,P15399,P19629,P31044,P50115,P68370,Q30KJ2,Q63493,Q9JI85,Q9QUL6                                                                                     |
| 4095 | 1,2,6,7,8,9<br>,12,13 | 3,4,5,10,1<br>1,14,15,16<br>,17 | 24 | P02782,P02803,P06761,P06911,P07647,P08723,P09456,P10715,P12020,P13432,P19629,P22282,P22283,P30120,P31044,P68370,P97840,Q5GRG2,Q62902,Q6AYR9,Q8CJ52,Q9JHB9,Q9JI85,Q9Z1F2 |
| 4096 | 1,2,6,7,8,9<br>,12,14 | 3,4,5,10,1<br>1,13,15,16<br>,17 | 13 | P02631,P02782,P08723,P10715,P13432,P19629,P30120,P31044,P68370,Q8CJ52,Q9JHB9,Q9JI85,Q9Z1F2                                                                              |
| 4097 | 1,2,6,7,8,9<br>,12,15 | 3,4,5,10,1<br>1,13,14,16<br>,17 | 9  | P02631,P08723,P10715,P13432,P19629,P31044,P68370,Q5QE79,Q9JI85                                                                                                          |
| 4098 | 1,2,6,7,8,9<br>,12,16 | 3,4,5,10,1<br>1,13,14,15<br>,17 | 9  | P08723,P10715,P13432,P19629,P31044,P68370,P97840,Q8CJ52,Q9JI85                                                                                                          |
| 4099 | 1,2,6,7,8,9<br>,12,17 | 3,4,5,10,1<br>1,13,14,15<br>,16 | 18 | P02782,P08723,P09605,P25809,P10715,P13432,P19223,P19629,P22282,P22283,P30120,P31044,P50115,P55091,P98089,Q62635,Q6P6R2,Q9JHB9,Q9JI85                                    |
| 4100 | 1,2,6,7,8,9<br>,13,14 | 3,4,5,10,1<br>1,12,15,16<br>,17 | 12 | P02631,P06911,P12020,P19629,P31044,P53792,P68370,Q5GRG2,Q62902,Q63942,Q9JI85,Q9Z1F2                                                                                     |
| 4101 | 1,2,6,7,8,9<br>,13,15 | 3,4,5,10,1<br>1,12,14,16<br>,17 | 10 | P02631,P06911,P15999,P19629,P31044,P53792,P68370,Q5GRG2,Q5QE79,Q63942                                                                                                   |
| 4102 | 1,2,6,7,8,9<br>,13,16 | 3,4,5,10,1<br>1,12,14,15<br>,17 | 6  | P06911,P19629,P31044,P68370,Q5GRG2,Q63942                                                                                                                               |

|      |                        |                                 |    |                                                                                                                                                                                                                          |
|------|------------------------|---------------------------------|----|--------------------------------------------------------------------------------------------------------------------------------------------------------------------------------------------------------------------------|
| 4103 | 1,2,6,7,8,9<br>,13,17  | 3,4,5,10,1<br>1,12,14,15<br>,16 | 8  | P06911,P19629,P22282,P31044,P51907,P53792,Q5GRG2,Q9Z1F2                                                                                                                                                                  |
| 4104 | 1,2,6,7,8,9<br>,14,15  | 3,4,5,10,1<br>1,12,13,16<br>,17 | 6  | P02631,P19629,P31044,P68370,Q5GRG2,Q63942                                                                                                                                                                                |
| 4105 | 1,2,6,7,8,9<br>,14,16  | 3,4,5,10,1<br>1,12,13,15<br>,17 | 6  | P02631,P19629,P31044,P68370,Q63532,Q63942                                                                                                                                                                                |
| 4106 | 1,2,6,7,8,9<br>,14,17  | 3,4,5,10,1<br>1,12,13,15<br>,16 | 5  | P02631,P19629,P31044,P53792,Q6P6R2                                                                                                                                                                                       |
| 4107 | 1,2,6,7,8,9<br>,15,16  | 3,4,5,10,1<br>1,12,13,14<br>,17 | 6  | P02631,P10715,P19629,P31044,Q5QE79,Q63942                                                                                                                                                                                |
| 4108 | 1,2,6,7,8,9<br>,15,17  | 3,4,5,10,1<br>1,12,13,14<br>,16 | 6  | P02631,P10715,P19629,P31044,P53792,Q5QE79                                                                                                                                                                                |
| 4109 | 1,2,6,7,8,9<br>,16,17  | 3,4,5,10,1<br>1,12,13,14<br>,15 | 5  | P10715,P19629,P31044,Q63942,Q6P6R2                                                                                                                                                                                       |
| 4110 | 1,2,6,7,8,1<br>0,11,12 | 3,4,5,9,13,<br>14,15,16,1<br>7  | 31 | O35547,O54715,P02781,P02782,P05964,P07647,P08723,P0C0A9,P10715,P12020,P14669,P15399,P19629,P22283,P24368,P30120,P31044,P35280,P47727,P47967,P60905,P62804,P68370,P97840,Q00715,Q63357,Q63493,Q6AYL6,Q8CJ52,Q9JHB9,Q9JI85 |
| 4111 | 1,2,6,7,8,1<br>0,11,13 | 3,4,5,9,12,<br>14,15,16,1<br>7  | 15 | P01835,P06911,P12020,P14669,P15399,P19629,P22283,P31044,P47727,P68370,Q5GRG2,Q62902,Q63493,Q9JHB9,Q9JI85                                                                                                                 |
| 4112 | 1,2,6,7,8,1<br>0,11,14 | 3,4,5,9,12,<br>13,15,16,1<br>7  | 14 | P02631,P12020,P14669,P15399,P19629,P31044,P35280,P47727,P68370,Q5GRG2,Q63493,Q63532,Q6AYL6,Q9JI85                                                                                                                        |
| 4113 | 1,2,6,7,8,1<br>0,11,15 | 3,4,5,9,12,<br>13,14,16,1<br>7  | 11 | P01835,P02631,P10715,P14669,P15399,P19629,P22006,P31044,P35280,P68370,Q9JI85                                                                                                                                             |
| 4114 | 1,2,6,7,8,1<br>0,11,16 | 3,4,5,9,12,<br>13,14,15,1<br>7  | 11 | P01835,P10715,P14669,P15399,P19629,P31044,P35280,P47967,P68370,Q6AYL6,Q9JI85                                                                                                                                             |
| 4115 | 1,2,6,7,8,1<br>0,11,17 | 3,4,5,9,12,<br>13,14,15,1<br>6  | 14 | P07150,P10715,P14669,P15399,P19629,P31044,P50115,P68370,P97580,Q30KJ2,Q63493,Q6P6R2,Q9JI85,Q9QUL6                                                                                                                        |
| 4116 | 1,2,6,7,8,1<br>0,12,13 | 3,4,5,9,11,<br>14,15,16,1<br>7  | 23 | P02782,P06761,P06911,P07647,P08723,P09456,P11598,P12020,P19629,P22282,P22283,P30120,P31044,P47967,P68370,P97840,Q5GRG2,Q62902,Q6AYR9,Q8CJ52,Q9JHB9,Q9JI85,Q9Z1F2                                                         |
| 4117 | 1,2,6,7,8,1<br>0,12,14 | 3,4,5,9,11,<br>13,15,16,1<br>7  | 16 | P02782,P08723,P12020,P19629,P22283,P30120,P31044,P35280,P68370,P97840,Q5GRG2,Q63532,Q6AYR9,Q8CJ52,Q9JHB9,Q9JI85                                                                                                          |

|      |                        |                                |    |                                                                                                                                                                                                                                        |
|------|------------------------|--------------------------------|----|----------------------------------------------------------------------------------------------------------------------------------------------------------------------------------------------------------------------------------------|
| 4118 | 1,2,6,7,8,1<br>0,12,15 | 3,4,5,9,11,<br>13,14,16,1<br>7 | 9  | P02631,P08723,P10715,P19629,P31044,P35280,P68370,P97840,Q9JI85                                                                                                                                                                         |
| 4119 | 1,2,6,7,8,1<br>0,12,16 | 3,4,5,9,11,<br>13,14,15,1<br>7 | 10 | P08723,P10715,P19629,P30120,P31044,P47967,P68370,P97840,Q8CJ52,Q9JI85                                                                                                                                                                  |
| 4120 | 1,2,6,7,8,1<br>0,12,17 | 3,4,5,9,11,<br>13,14,15,1<br>6 | 25 | O54728,P02782,P08723,P10715,P11598,P13432,P19223,P19629,P22282,P22283,P30120,P31044,P50115,P55091,P68370,P97840,P98089,Q4G075,Q62635,Q6AYR9,Q6P6R2,Q8CJ52,Q9JHB9,Q9JI85,Q9QZK9                                                         |
| 4121 | 1,2,6,7,8,1<br>0,13,14 | 3,4,5,9,11,<br>12,15,16,1<br>7 | 8  | P06911,P11598,P12020,P19629,P31044,P68370,Q5GRG2,Q62902                                                                                                                                                                                |
| 4122 | 1,2,6,7,8,1<br>0,13,15 | 3,4,5,9,11,<br>12,14,16,1<br>7 | 9  | P01835,P06911,P12020,P15999,P19629,P31044,P68370,Q5GRG2,Q6IFV1                                                                                                                                                                         |
| 4123 | 1,2,6,7,8,1<br>0,13,16 | 3,4,5,9,11,<br>12,14,15,1<br>7 | 7  | P01835,P06911,P12020,P31044,P68370,P97840,Q5GRG2                                                                                                                                                                                       |
| 4124 | 1,2,6,7,8,1<br>0,13,17 | 3,4,5,9,11,<br>12,14,15,1<br>6 | 11 | P06911,P11598,P12020,P19629,P22282,P22283,P31044,P51907,P68370,Q5GRG2,Q6IFV1                                                                                                                                                           |
| 4125 | 1,2,6,7,8,1<br>0,14,15 | 3,4,5,9,11,<br>12,13,16,1<br>7 | 8  | P02631,P12020,P19629,P31044,P35280,P68370,Q5GRG2,Q63532                                                                                                                                                                                |
| 4126 | 1,2,6,7,8,1<br>0,14,16 | 3,4,5,9,11,<br>12,13,15,1<br>7 | 7  | P12020,P19629,P31044,P68370,P97840,Q5GRG2,Q63532                                                                                                                                                                                       |
| 4127 | 1,2,6,7,8,1<br>0,14,17 | 3,4,5,9,11,<br>12,13,15,1<br>6 | 6  | P12020,P19629,P31044,P68370,Q5GRG2,Q6P6R2                                                                                                                                                                                              |
| 4128 | 1,2,6,7,8,1<br>0,15,16 | 3,4,5,9,11,<br>12,13,14,1<br>7 | 7  | P01835,P02631,P19629,P31044,P35280,P68370,P97840                                                                                                                                                                                       |
| 4129 | 1,2,6,7,8,1<br>0,15,17 | 3,4,5,9,11,<br>12,13,14,1<br>6 | 5  | P02631,P19629,P31044,P68370,Q6IFV1                                                                                                                                                                                                     |
| 4130 | 1,2,6,7,8,1<br>0,16,17 | 3,4,5,9,11,<br>12,13,14,1<br>5 | 5  | P10758,P19629,P31044,P68370,Q6P6R2                                                                                                                                                                                                     |
| 4131 | 1,2,6,7,8,1<br>1,12,13 | 3,4,5,9,10,<br>14,15,16,1<br>7 | 33 | P02780,P02781,P02782,P04905,P06761,P06911,P07647,P08723,P09456,P0C0A9,P10715,P11598,P12020,P13432,P14669,P19629,P22282,P22283,P24368,P30120,P31044,P36374,P47727,P68370,Q5GRG2,Q62902,Q63357,Q63493,Q6AYR9,Q8CJ52,Q9JHB9,Q9JI85,Q9Z1F2 |
| 4132 | 1,2,6,7,8,1<br>1,12,14 | 3,4,5,9,10,<br>13,15,16,1<br>7 | 30 | P02631,P02781,P02782,P04905,P07647,P08723,P10715,P12020,P13432,P14669,P15399,P19629,P22282,P22283,P30120,P31044,P35280,P47727,P62804,P68370,Q00715,Q5GRG2,Q62902,Q63493,Q63532,Q6AYL6,Q8CJ52,Q9EQS0,Q9JHB9,Q9JI85                      |



|      |                        |                                |    |                                                                                                                                                                                                                          |
|------|------------------------|--------------------------------|----|--------------------------------------------------------------------------------------------------------------------------------------------------------------------------------------------------------------------------|
| 4133 | 1,2,6,7,8,1<br>1,12,15 | 3,4,5,9,10,<br>13,14,16,1<br>7 | 16 | P02631,P02782,P08723,P10715,P13432,P14669,P19629,P30120,P31044,P35280,P68370,Q63493,Q6AYL6,Q8CJ52,Q9JHB9,Q9JI85                                                                                                          |
| 4134 | 1,2,6,7,8,1<br>1,12,16 | 3,4,5,9,10,<br>13,14,15,1<br>7 | 15 | O54715,P02631,P02782,P08723,P10715,P13432,P19629,P30120,P31044,P68370,Q63493,Q6AYL6,Q8CJ52,Q9JHB9,Q9JI85                                                                                                                 |
| 4135 | 1,2,6,7,8,1<br>1,12,17 | 3,4,5,9,10,<br>13,14,15,1<br>6 | 31 | O54728,P02631,P02782,P07647,P08723,P10715,P11598,P13432,P14669,P15399,P19629,P22282,P22283,P30120,P31044,P50115,P55091,P62804,P68370,P98089,Q00715,Q30KJ2,Q4G075,Q62635,Q63493,Q6AYL6,Q8CJ52,Q9JHB9,Q9JI85,Q9QZA6,Q9QZK9 |
| 4136 | 1,2,6,7,8,1<br>1,13,14 | 3,4,5,9,10,<br>12,15,16,1<br>7 | 20 | P02631,P02782,P06911,P11598,P12020,P14669,P15399,P19629,P22282,P22283,P31044,P47727,P68370,Q5GRG2,Q62902,Q63493,Q8CJ52,Q9JHB9,Q9JI85,Q9Z1F2                                                                              |
| 4137 | 1,2,6,7,8,1<br>1,13,15 | 3,4,5,9,10,<br>12,14,16,1<br>7 | 11 | P01835,P02631,P06911,P10715,P14669,P15999,P19629,P31044,P68370,Q5GRG2,Q9JI85                                                                                                                                             |
| 4138 | 1,2,6,7,8,1<br>1,13,16 | 3,4,5,9,10,<br>12,14,15,1<br>7 | 10 | P01835,P06911,P10715,P19629,P31044,P68370,Q5GRG2,Q62902,Q8CJ52,Q9JI85                                                                                                                                                    |
| 4139 | 1,2,6,7,8,1<br>1,13,17 | 3,4,5,9,10,<br>12,14,15,1<br>6 | 19 | P06911,P10715,P11598,P12020,P14669,P15399,P19629,P22282,P22283,P31044,P50115,P55091,P68370,Q30KJ2,Q5GRG2,Q62902,Q63493,Q9JHB9,Q9JI85                                                                                     |
| 4140 | 1,2,6,7,8,1<br>1,14,15 | 3,4,5,9,10,<br>12,13,16,1<br>7 | 10 | P02631,P14669,P19629,P22006,P31044,P35280,P47727,P68370,Q5GRG2,Q9JI85                                                                                                                                                    |
| 4141 | 1,2,6,7,8,1<br>1,14,16 | 3,4,5,9,10,<br>12,13,15,1<br>7 | 9  | P02631,P10715,P19629,P31044,P47727,P68370,Q63493,Q63532,Q9JI85                                                                                                                                                           |
| 4142 | 1,2,6,7,8,1<br>1,14,17 | 3,4,5,9,10,<br>12,13,15,1<br>6 | 12 | P02631,P14669,P15399,P19629,P31044,P47727,P50115,P68370,P97580,Q30KJ2,Q63493,Q9JI85                                                                                                                                      |
| 4143 | 1,2,6,7,8,1<br>1,15,16 | 3,4,5,9,10,<br>12,13,14,1<br>7 | 7  | P01835,P02631,P10715,P19629,P31044,P35280,P68370                                                                                                                                                                         |
| 4144 | 1,2,6,7,8,1<br>1,15,17 | 3,4,5,9,10,<br>12,13,14,1<br>6 | 10 | P02631,P10715,P14669,P15399,P19629,P31044,P50115,P68370,Q30KJ2,Q9JI85                                                                                                                                                    |
| 4145 | 1,2,6,7,8,1<br>1,16,17 | 3,4,5,9,10,<br>12,13,14,1<br>5 | 13 | A2RUV9,P02631,P07150,P10715,P10758,P14669,P15399,P19629,P31044,P50115,P68370,Q30KJ2,Q63493                                                                                                                               |
| 4146 | 1,2,6,7,8,1<br>2,13,14 | 3,4,5,9,10,<br>11,15,16,1<br>7 | 23 | O08557,P02782,P06761,P06911,P07647,P08723,P11598,P12020,P13432,P19629,P22282,P22283,P29975,P30120,P31044,P68370,Q5GRG2,Q62902,Q6AYR9,Q8CJ52,Q9JHB9,Q9JI85,Q9Z1F2                                                         |
| 4147 | 1,2,6,7,8,1<br>2,13,15 | 3,4,5,9,10,<br>11,14,16,1<br>7 | 20 | O08557,P02631,P02782,P06911,P08723,P10715,P11598,P12020,P15999,P19629,P30120,P31044,P68370,Q5GRG2,Q62902,Q6IFV1,Q8CJ52,Q9JHB9,Q9JI85,Q9Z1F2                                                                              |

|      |                        |                                |    |                                                                                                                                                                                                                                        |
|------|------------------------|--------------------------------|----|----------------------------------------------------------------------------------------------------------------------------------------------------------------------------------------------------------------------------------------|
| 4148 | 1,2,6,7,8,1<br>2,13,16 | 3,4,5,9,10,<br>11,14,15,1<br>7 | 17 | P02782,P06911,P08723,P10715,P12020,P13432,P19629,P30120,P31044,P68370,P97840,Q5GRG2,Q62902,Q8CJ52,Q9JHB9,Q9JI85,Q9Z1F2                                                                                                                 |
| 4149 | 1,2,6,7,8,1<br>2,13,17 | 3,4,5,9,10,<br>11,14,15,1<br>6 | 33 | O54728,O88267,P02782,P06761,P06911,P07647,P08723,P10715,P11598,P12020,P13432,P19629,P22282,P22283,P30120,P31044,P50115,P55091,P63029,P68370,P70545,P98089,Q4G075,Q5GRG2,Q62635,Q62902,Q6AYR9,Q6IFV1,Q8CJ52,Q9JHB9,Q9JI85,Q9QZK9,Q9Z1F2 |
| 4150 | 1,2,6,7,8,1<br>2,14,15 | 3,4,5,9,10,<br>11,13,16,1<br>7 | 15 | O08557,P02631,P02782,P08723,P10715,P13432,P19629,P30120,P31044,P35280,P68370,Q5GRG2,Q63532,Q8CJ52,Q9JI85                                                                                                                               |
| 4151 | 1,2,6,7,8,1<br>2,14,16 | 3,4,5,9,10,<br>11,13,15,1<br>7 | 13 | P02631,P02782,P08723,P10715,P12020,P13432,P19629,P30120,P31044,P68370,Q63532,Q8CJ52,Q9JI85                                                                                                                                             |
| 4152 | 1,2,6,7,8,1<br>2,14,17 | 3,4,5,9,10,<br>11,13,15,1<br>6 | 27 | O54728,O88267,P02631,P02782,P08723,P10715,P11598,P12020,P13432,P19629,P22282,P22283,P30120,P31044,P31430,P50115,P55091,P68370,P98089,Q62635,Q63493,Q6AYR9,Q8CJ52,Q9JHB9,Q9JI85,Q9QZA6,Q9Z1F2                                           |
| 4153 | 1,2,6,7,8,1<br>2,15,16 | 3,4,5,9,10,<br>11,13,14,1<br>7 | 6  | P02631,P10715,P19629,P31044,P68370,Q8CJ52                                                                                                                                                                                              |
| 4154 | 1,2,6,7,8,1<br>2,15,17 | 3,4,5,9,10,<br>11,13,14,1<br>6 | 15 | P02631,P08723,P10715,P11598,P13432,P19629,P31044,P50115,P55091,P98089,Q4G075,Q62635,Q6IFV1,Q9JI85,Q9QZA6                                                                                                                               |
| 4155 | 1,2,6,7,8,1<br>2,16,17 | 3,4,5,9,10,<br>11,13,14,1<br>5 | 13 | P08723,P10715,P13432,P19629,P31044,P50115,P55091,P63029,P98089,Q4G075,Q62635,Q6P6R2,Q8CJ52                                                                                                                                             |
| 4156 | 1,2,6,7,8,1<br>3,14,15 | 3,4,5,9,10,<br>11,12,16,1<br>7 | 10 | O08557,P02631,P06911,P11598,P12020,P15999,P19629,P31044,P68370,Q5GRG2                                                                                                                                                                  |
| 4157 | 1,2,6,7,8,1<br>3,14,16 | 3,4,5,9,10,<br>11,12,15,1<br>7 | 8  | P06911,P12020,P19629,P31044,P68370,Q5GRG2,Q62902,Q63532                                                                                                                                                                                |
| 4158 | 1,2,6,7,8,1<br>3,14,17 | 3,4,5,9,10,<br>11,12,15,1<br>6 | 14 | P06911,P11598,P12020,P19629,P22282,P22283,P31044,P51907,P55091,P68370,Q5GRG2,Q62902,Q6PCU2,Q9Z1F2                                                                                                                                      |
| 4159 | 1,2,6,7,8,1<br>3,15,16 | 3,4,5,9,10,<br>11,12,14,1<br>7 | 8  | P01835,P02631,P06911,P15999,P19629,P31044,P68370,Q5GRG2                                                                                                                                                                                |
| 4160 | 1,2,6,7,8,1<br>3,15,17 | 3,4,5,9,10,<br>11,12,14,1<br>6 | 8  | P02631,P06911,P11598,P15999,P19629,P31044,Q5GRG2,Q6IFV1                                                                                                                                                                                |
| 4161 | 1,2,6,7,8,1<br>3,16,17 | 3,4,5,9,10,<br>11,12,14,1<br>5 | 7  | P06911,P19629,P31044,P51907,P63029,Q5GRG2,Q6PCU2                                                                                                                                                                                       |
| 4162 | 1,2,6,7,8,1<br>4,15,16 | 3,4,5,9,10,<br>11,12,13,1<br>7 | 6  | P02631,P19629,P31044,P68370,Q5GRG2,Q63532                                                                                                                                                                                              |

|      |                        |                                |    |                                                                              |
|------|------------------------|--------------------------------|----|------------------------------------------------------------------------------|
| 4163 | 1,2,6,7,8,1<br>4,15,17 | 3,4,5,9,10,<br>11,12,13,1<br>6 | 5  | P02631,P10536,P19629,P31044,Q5GRG2                                           |
| 4164 | 1,2,6,7,8,1<br>4,16,17 | 3,4,5,9,10,<br>11,12,13,1<br>5 | 6  | P02631,P19629,P31044,Q63532,Q6P6R2,Q6PCU2                                    |
| 4165 | 1,2,6,7,8,1<br>5,16,17 | 3,4,5,9,10,<br>11,12,13,1<br>4 | 3  | P02631,P19629,P31044                                                         |
| 4166 | 1,2,6,7,9,1<br>0,11,12 | 3,4,5,8,13,<br>14,15,16,1<br>7 | 11 | O54861,P15399,P47967,P97840,Q63357,Q6AYL6,Q6IFU7,Q91ZS3,Q9JHB9,Q9JI85,Q9QUL6 |
| 4167 | 1,2,6,7,9,1<br>0,11,13 | 3,4,5,8,12,<br>14,15,16,1<br>7 | 5  | P12020,P15399,P97840,Q91ZS3,Q9QUL6                                           |
| 4168 | 1,2,6,7,9,1<br>0,11,14 | 3,4,5,8,12,<br>13,15,16,1<br>7 | 7  | P12020,P15399,P47727,P83121,Q63532,Q91ZS3,Q9QUL6                             |
| 4169 | 1,2,6,7,9,1<br>0,11,15 | 3,4,5,8,12,<br>13,14,16,1<br>7 | 6  | O54861,P27213,P35280,P97840,Q91ZS3,Q9QUL6                                    |
| 4170 | 1,2,6,7,9,1<br>0,11,16 | 3,4,5,8,12,<br>13,14,15,1<br>7 | 4  | P47967,P97840,Q91ZS3,Q9QUL6                                                  |
| 4171 | 1,2,6,7,9,1<br>0,11,17 | 3,4,5,8,12,<br>13,14,15,1<br>6 | 5  | O54861,P15399,P97580,Q91ZS3,Q9QUL6                                           |
| 4172 | 1,2,6,7,9,1<br>0,12,13 | 3,4,5,8,11,<br>14,15,16,1<br>7 | 7  | P09456,P12020,P19218,P47967,P97840,Q91ZS3,Q9JHB9                             |
| 4173 | 1,2,6,7,9,1<br>0,12,14 | 3,4,5,8,11,<br>13,15,16,1<br>7 | 4  | P12020,P97840,Q63532,Q91ZS3                                                  |
| 4174 | 1,2,6,7,9,1<br>0,12,15 | 3,4,5,8,11,<br>13,14,16,1<br>7 | 3  | P97840,Q6AYS4,Q91ZS3                                                         |
| 4175 | 1,2,6,7,9,1<br>0,12,16 | 3,4,5,8,11,<br>13,14,15,1<br>7 | 4  | P47967,P97840,Q6AYS4,Q91ZS3                                                  |
| 4176 | 1,2,6,7,9,1<br>0,12,17 | 3,4,5,8,11,<br>13,14,15,1<br>6 | 3  | P13432,P14668,P97840                                                         |
| 4177 | 1,2,6,7,9,1<br>0,13,14 | 3,4,5,8,11,<br>12,15,16,1<br>7 | 5  | P06911,P12020,P97840,Q5GRG2,Q91ZS3                                           |

|      |                        |                                |   |                                                                       |
|------|------------------------|--------------------------------|---|-----------------------------------------------------------------------|
| 4178 | 1,2,6,7,9,1<br>0,13,15 | 3,4,5,8,11,<br>12,14,16,1<br>7 | 4 | P12020,P97840,Q5GRG2,Q6AYS4                                           |
| 4179 | 1,2,6,7,9,1<br>0,13,16 | 3,4,5,8,11,<br>12,14,15,1<br>7 | 5 | P12020,P47967,P97840,Q6AYS4,Q91ZS3                                    |
| 4180 | 1,2,6,7,9,1<br>0,13,17 | 3,4,5,8,11,<br>12,14,15,1<br>6 | 3 | P12020,P14668,P97840                                                  |
| 4181 | 1,2,6,7,9,1<br>0,14,15 | 3,4,5,8,11,<br>12,13,16,1<br>7 | 3 | P97840,Q63532,Q6AYS4                                                  |
| 4182 | 1,2,6,7,9,1<br>0,14,16 | 3,4,5,8,11,<br>12,13,15,1<br>7 | 3 | P97840,Q63532,Q6AYS4                                                  |
| 4183 | 1,2,6,7,9,1<br>0,14,17 | 3,4,5,8,11,<br>12,13,15,1<br>6 | 1 | Q9QUL6                                                                |
| 4184 | 1,2,6,7,9,1<br>0,15,16 | 3,4,5,8,11,<br>12,13,14,1<br>7 | 2 | P97840,Q6AYS4                                                         |
| 4185 | 1,2,6,7,9,1<br>0,15,17 | 3,4,5,8,11,<br>12,13,14,1<br>6 | 2 | P97840,Q9QUL6                                                         |
| 4186 | 1,2,6,7,9,1<br>0,16,17 | 3,4,5,8,11,<br>12,13,14,1<br>5 | 3 | P97840,Q6P6R2,Q9QUL6                                                  |
| 4187 | 1,2,6,7,9,1<br>1,12,13 | 3,4,5,8,10,<br>14,15,16,1<br>7 | 8 | P02803,P09456,P30120,P97840,Q62902,Q91ZS3,Q9JHB9,Q9JI85               |
| 4188 | 1,2,6,7,9,1<br>1,12,14 | 3,4,5,8,10,<br>13,15,16,1<br>7 | 9 | P15399,P19629,P30120,P47727,Q63532,Q6AYL6,Q91ZS3,Q9JHB9,Q9JI85        |
| 4189 | 1,2,6,7,9,1<br>1,12,15 | 3,4,5,8,10,<br>13,14,16,1<br>7 | 4 | O54861,P02631,Q91ZS3,Q9JI85                                           |
| 4190 | 1,2,6,7,9,1<br>1,12,16 | 3,4,5,8,10,<br>13,14,15,1<br>7 | 6 | P12368,P47967,P97840,Q6AYL6,Q6IFU7,Q91ZS3                             |
| 4191 | 1,2,6,7,9,1<br>1,12,17 | 3,4,5,8,10,<br>13,14,15,1<br>6 | 9 | O54861,P09605;P25809,P13432,P15399,Q62635,Q91ZS3,Q9JHB9,Q9JI85,Q9QUL6 |
| 4192 | 1,2,6,7,9,1<br>1,13,14 | 3,4,5,8,10,<br>12,15,16,1<br>7 | 5 | P06911,P12020,P47727,Q5GRG2,Q91ZS3                                    |

|      |                        |                                |   |                                                                |
|------|------------------------|--------------------------------|---|----------------------------------------------------------------|
| 4193 | 1,2,6,7,9,1<br>1,13,15 | 3,4,5,8,10,<br>12,14,16,1<br>7 | 1 | Q91ZS3                                                         |
| 4194 | 1,2,6,7,9,1<br>1,13,16 | 3,4,5,8,10,<br>12,14,15,1<br>7 | 1 | Q91ZS3                                                         |
| 4195 | 1,2,6,7,9,1<br>1,13,17 | 3,4,5,8,10,<br>12,14,15,1<br>6 | 3 | P15399,Q91ZS3,Q9QUL6                                           |
| 4196 | 1,2,6,7,9,1<br>1,14,15 | 3,4,5,8,10,<br>12,13,16,1<br>7 | 2 | P02631,Q9QUL6                                                  |
| 4197 | 1,2,6,7,9,1<br>1,14,16 | 3,4,5,8,10,<br>12,13,15,1<br>7 | 3 | Q63532,Q99MH3,Q9QUL6                                           |
| 4198 | 1,2,6,7,9,1<br>1,14,17 | 3,4,5,8,10,<br>12,13,15,1<br>6 | 3 | P15399,Q30KJ2,Q9QUL6                                           |
| 4199 | 1,2,6,7,9,1<br>1,15,16 | 3,4,5,8,10,<br>12,13,14,1<br>7 | 0 |                                                                |
| 4200 | 1,2,6,7,9,1<br>1,15,17 | 3,4,5,8,10,<br>12,13,14,1<br>6 | 3 | P02631,P15399,Q9QUL6                                           |
| 4201 | 1,2,6,7,9,1<br>1,16,17 | 3,4,5,8,10,<br>12,13,14,1<br>5 | 3 | P09605;P25809,P15399,Q9QUL6                                    |
| 4202 | 1,2,6,7,9,1<br>2,13,14 | 3,4,5,8,10,<br>11,15,16,1<br>7 | 7 | P06911,P12020,P97840,Q5GRG2,Q6AYS4,Q9JHB9,Q9Z1F2               |
| 4203 | 1,2,6,7,9,1<br>2,13,15 | 3,4,5,8,10,<br>11,14,16,1<br>7 | 2 | P97840,Q6AYS4                                                  |
| 4204 | 1,2,6,7,9,1<br>2,13,16 | 3,4,5,8,10,<br>11,14,15,1<br>7 | 4 | P19218,P47967,P97840,Q6AYS4                                    |
| 4205 | 1,2,6,7,9,1<br>2,13,17 | 3,4,5,8,10,<br>11,14,15,1<br>6 | 8 | P09605;P25809,P13432,P14668,P55091,P97840,Q62635,Q64194,Q9JHB9 |
| 4206 | 1,2,6,7,9,1<br>2,14,15 | 3,4,5,8,10,<br>11,13,16,1<br>7 | 4 | P02631,P19629,Q63532,Q6AYS4                                    |
| 4207 | 1,2,6,7,9,1<br>2,14,16 | 3,4,5,8,10,<br>11,13,15,1<br>7 | 3 | P97840,Q63532,Q6AYS4                                           |

|      |                         |                                |    |                                                                                     |
|------|-------------------------|--------------------------------|----|-------------------------------------------------------------------------------------|
| 4208 | 1,2,6,7,9,1<br>2,14,17  | 3,4,5,8,10,<br>11,13,15,1<br>6 | 3  | P13432,P98089,Q62635                                                                |
| 4209 | 1,2,6,7,9,1<br>2,15,16  | 3,4,5,8,10,<br>11,13,14,1<br>7 | 2  | P97840,Q6AYS4                                                                       |
| 4210 | 1,2,6,7,9,1<br>2,15,17  | 3,4,5,8,10,<br>11,13,14,1<br>6 | 1  | P13432                                                                              |
| 4211 | 1,2,6,7,9,1<br>2,16,17  | 3,4,5,8,10,<br>11,13,14,1<br>5 | 4  | P09605,P25809,P13432,P97840,Q6AYS4                                                  |
| 4212 | 1,2,6,7,9,1<br>3,14,15  | 3,4,5,8,10,<br>11,12,16,1<br>7 | 6  | P06911,P12020,P16636,P53792,Q5GRG2,Q6AYS4                                           |
| 4213 | 1,2,6,7,9,1<br>3,14,16  | 3,4,5,8,10,<br>11,12,15,1<br>7 | 5  | P06911,P12020,Q5GRG2,Q63532,Q6AYS4                                                  |
| 4214 | 1,2,6,7,9,1<br>3,14,17  | 3,4,5,8,10,<br>11,12,15,1<br>6 | 5  | P06911,P12020,P14668,P53792,Q5GRG2                                                  |
| 4215 | 1,2,6,7,9,1<br>3,15,16  | 3,4,5,8,10,<br>11,12,14,1<br>7 | 1  | Q6AYS4                                                                              |
| 4216 | 1,2,6,7,9,1<br>3,15,17  | 3,4,5,8,10,<br>11,12,14,1<br>6 | 3  | P14668,P53792,Q6AYS4                                                                |
| 4217 | 1,2,6,7,9,1<br>3,16,17  | 3,4,5,8,10,<br>11,12,14,1<br>5 | 1  | Q6AYS4                                                                              |
| 4218 | 1,2,6,7,9,1<br>4,15,16  | 3,4,5,8,10,<br>11,12,13,1<br>7 | 5  | P02631,P16636,P35467,Q63532,Q6AYS4                                                  |
| 4219 | 1,2,6,7,9,1<br>4,15,17  | 3,4,5,8,10,<br>11,12,13,1<br>6 | 2  | P02631,P53792                                                                       |
| 4220 | 1,2,6,7,9,1<br>4,16,17  | 3,4,5,8,10,<br>11,12,13,1<br>5 | 2  | Q63532,Q6AYS4                                                                       |
| 4221 | 1,2,6,7,9,1<br>5,16,17  | 3,4,5,8,10,<br>11,12,13,1<br>4 | 1  | Q6AYS4                                                                              |
| 4222 | 1,2,6,7,10,<br>11,12,13 | 3,4,5,8,9,1<br>4,15,16,17      | 11 | P09456,P12020,P15399,P30120,P47727,P47967,P97840,Q5GRG2,Q91ZS3,Q9JHB9,Q9JI85        |
| 4223 | 1,2,6,7,10,<br>11,12,14 | 3,4,5,8,9,1<br>3,15,16,17      | 12 | P12020,P15399,P30120,P35280,P47727,P62804,P97840,Q63532,Q6AYL6,Q6IFU7,Q9JHB9,Q9JI85 |

|      |                                                |    |                                                                                                   |
|------|------------------------------------------------|----|---------------------------------------------------------------------------------------------------|
| 4224 | 1,2,6,7,10, 3,4,5,8,9,1<br>11,12,15 3,14,16,17 | 5  | O54861,P15399,P35280,P97840,Q9JI85                                                                |
| 4225 | 1,2,6,7,10, 3,4,5,8,9,1<br>11,12,16 3,14,15,17 | 9  | O54861,P06757,P12368,P15399,P47967,P97840,Q63532,Q6AYL6,Q6IFU7                                    |
| 4226 | 1,2,6,7,10, 3,4,5,8,9,1<br>11,12,17 3,14,15,16 | 14 | O54728,O54861,P05964,P06757,P13432,P15399,P55091,P97580,P97840,Q62635,Q63493,Q9JHB9,Q9JI85,Q9QZK9 |
| 4227 | 1,2,6,7,10, 3,4,5,8,9,1<br>11,13,14 2,15,16,17 | 6  | P06911,P12020,P15399,P47727,Q5GRG2,Q63532                                                         |
| 4228 | 1,2,6,7,10, 3,4,5,8,9,1<br>11,13,15 2,14,16,17 | 3  | P01835,P12020,Q5GRG2                                                                              |
| 4229 | 1,2,6,7,10, 3,4,5,8,9,1<br>11,13,16 2,14,15,17 | 4  | P01835,P12020,P47967,P97840                                                                       |
| 4230 | 1,2,6,7,10, 3,4,5,8,9,1<br>11,13,17 2,14,15,16 | 3  | P12020,P15399,P97580                                                                              |
| 4231 | 1,2,6,7,10, 3,4,5,8,9,1<br>11,14,15 2,13,16,17 | 5  | P02631,P12020,P15399,P35280,Q63532                                                                |
| 4232 | 1,2,6,7,10, 3,4,5,8,9,1<br>11,14,16 2,13,15,17 | 4  | P12020,P15399,P97840,Q63532                                                                       |
| 4233 | 1,2,6,7,10, 3,4,5,8,9,1<br>11,14,17 2,13,15,16 | 6  | P12020,P15399,P47727,P97580,Q30KJ2,Q9QUL6                                                         |
| 4234 | 1,2,6,7,10, 3,4,5,8,9,1<br>11,15,16 2,13,14,17 | 3  | P01835,P35280,P97840                                                                              |
| 4235 | 1,2,6,7,10, 3,4,5,8,9,1<br>11,15,17 2,13,14,16 | 4  | O54861,P15399,P97580,Q9QUL6                                                                       |
| 4236 | 1,2,6,7,10, 3,4,5,8,9,1<br>11,16,17 2,13,14,15 | 4  | P10758,P15399,P97580,Q9QUL6                                                                       |
| 4237 | 1,2,6,7,10, 3,4,5,8,9,1<br>12,13,14 1,15,16,17 | 8  | P06911,P12020,P30120,P97840,Q5GRG2,Q63532,Q6AYS4,Q9JHB9                                           |
| 4238 | 1,2,6,7,10, 3,4,5,8,9,1<br>12,13,15 1,14,16,17 | 4  | P12020,P97840,Q5GRG2,Q6AYS4                                                                       |
| 4239 | 1,2,6,7,10, 3,4,5,8,9,1<br>12,13,16 1,14,15,17 | 6  | P12020,P19218,P47967,P97840,Q63532,Q6AYS4                                                         |
| 4240 | 1,2,6,7,10, 3,4,5,8,9,1<br>12,13,17 1,14,15,16 | 9  | O54728,P12020,P13432,P14668,P55091,P97840,Q62635,Q9JHB9,Q9QZK9                                    |
| 4241 | 1,2,6,7,10, 3,4,5,8,9,1<br>12,14,15 1,13,16,17 | 5  | P12020,P35280,P97840,Q63532,Q6AYS4                                                                |
| 4242 | 1,2,6,7,10, 3,4,5,8,9,1<br>12,14,16 1,13,15,17 | 5  | P12020,P47967,P97840,Q63532,Q6AYS4                                                                |
| 4243 | 1,2,6,7,10, 3,4,5,8,9,1<br>12,14,17 1,13,15,16 | 9  | O54728,P12020,P13432,P14668,P15399,P55091,P97840,Q62635,Q63532                                    |
| 4244 | 1,2,6,7,10, 3,4,5,8,9,1<br>12,15,16 1,13,14,17 | 4  | P47967,P97840,Q63532,Q6AYS4                                                                       |
| 4245 | 1,2,6,7,10, 3,4,5,8,9,1<br>12,15,17 1,13,14,16 | 5  | P06866,P13432,P14668,P97840,Q62635                                                                |
| 4246 | 1,2,6,7,10, 3,4,5,8,9,1<br>12,16,17 1,13,14,15 | 3  | P06866,P13432,P97840                                                                              |

|      |                                                |    |                                                                       |
|------|------------------------------------------------|----|-----------------------------------------------------------------------|
| 4247 | 1,2,6,7,10, 3,4,5,8,9,1<br>13,14,15 1,12,16,17 | 5  | P06911,P12020,Q5GRG2,Q63532,Q6AYS4                                    |
| 4248 | 1,2,6,7,10, 3,4,5,8,9,1<br>13,14,16 1,12,15,17 | 6  | P06911,P12020,P97840,Q5GRG2,Q63532,Q6AYS4                             |
| 4249 | 1,2,6,7,10, 3,4,5,8,9,1<br>13,14,17 1,12,15,16 | 4  | P06911,P12020,P14668,Q5GRG2                                           |
| 4250 | 1,2,6,7,10, 3,4,5,8,9,1<br>13,15,16 1,12,14,17 | 5  | P01835,P12020,P97840,Q5GRG2,Q6AYS4                                    |
| 4251 | 1,2,6,7,10, 3,4,5,8,9,1<br>13,15,17 1,12,14,16 | 4  | P12020,P14668,Q5GRG2,Q6IFV1                                           |
| 4252 | 1,2,6,7,10, 3,4,5,8,9,1<br>13,16,17 1,12,14,15 | 3  | P12020,P97840,Q6AYS4                                                  |
| 4253 | 1,2,6,7,10, 3,4,5,8,9,1<br>14,15,16 1,12,13,17 | 4  | P35467,P97840,Q63532,Q6AYS4                                           |
| 4254 | 1,2,6,7,10, 3,4,5,8,9,1<br>14,15,17 1,12,13,16 | 1  | P35467                                                                |
| 4255 | 1,2,6,7,10, 3,4,5,8,9,1<br>14,16,17 1,12,13,15 | 3  | P12020,P97840,Q63532                                                  |
| 4256 | 1,2,6,7,10, 3,4,5,8,9,1<br>15,16,17 1,12,13,14 | 2  | P97840,Q6AYS4                                                         |
| 4257 | 1,2,6,7,11, 3,4,5,8,9,1<br>12,13,14 0,15,16,17 | 10 | P06911,P12020,P15399,P30120,P47727,Q5GRG2,Q62902,Q63532,Q9JHB9,Q9JI85 |
| 4258 | 1,2,6,7,11, 3,4,5,8,9,1<br>12,13,15 0,14,16,17 | 3  | Q5GRG2,Q9JHB9,Q9JI85                                                  |
| 4259 | 1,2,6,7,11, 3,4,5,8,9,1<br>12,13,16 0,14,15,17 | 5  | P47967,P97840,Q62902,Q9JHB9,Q9JI85                                    |
| 4260 | 1,2,6,7,11, 3,4,5,8,9,1<br>12,13,17 0,14,15,16 | 9  | P13432,P15399,P30120,P36374,P55091,Q62635,Q9JHB9,Q9JI85,Q9QZK9        |
| 4261 | 1,2,6,7,11, 3,4,5,8,9,1<br>12,14,15 0,13,16,17 | 7  | P02631,P19629,P25031,P35280,P47727,Q63532,Q9JI85                      |
| 4262 | 1,2,6,7,11, 3,4,5,8,9,1<br>12,14,16 0,13,15,17 | 5  | P15399,P19629,P47727,Q63532,Q6AYL6                                    |
| 4263 | 1,2,6,7,11, 3,4,5,8,9,1<br>12,14,17 0,13,15,16 | 9  | P13432,P15399,P19629,P47727,P55091,Q62635,Q63493,Q9JHB9,Q9JI85        |
| 4264 | 1,2,6,7,11, 3,4,5,8,9,1<br>12,15,16 0,13,14,17 | 0  |                                                                       |
| 4265 | 1,2,6,7,11, 3,4,5,8,9,1<br>12,15,17 0,13,14,16 | 5  | O54861,P06866,P13432,P15399,Q62635                                    |
| 4266 | 1,2,6,7,11, 3,4,5,8,9,1<br>12,16,17 0,13,14,15 | 4  | P09605,P25809,P13432,P15399,Q62635                                    |
| 4267 | 1,2,6,7,11, 3,4,5,8,9,1<br>13,14,15 0,12,16,17 | 6  | P02631,P06911,P12020,P47727,Q5GRG2,Q63532                             |
| 4268 | 1,2,6,7,11, 3,4,5,8,9,1<br>13,14,16 0,12,15,17 | 5  | P06911,P12020,P47727,Q5GRG2,Q63532                                    |
| 4269 | 1,2,6,7,11, 3,4,5,8,9,1<br>13,14,17 0,12,15,16 | 5  | P06911,P12020,P15399,P47727,Q5GRG2                                    |



|      |                                                |    |                                                                              |
|------|------------------------------------------------|----|------------------------------------------------------------------------------|
| 4270 | 1,2,6,7,11, 3,4,5,8,9,1<br>13,15,16 0,12,14,17 | 1  | P01835                                                                       |
| 4271 | 1,2,6,7,11, 3,4,5,8,9,1<br>13,15,17 0,12,14,16 | 1  | P15399                                                                       |
| 4272 | 1,2,6,7,11, 3,4,5,8,9,1<br>13,16,17 0,12,14,15 | 1  | P15399                                                                       |
| 4273 | 1,2,6,7,11, 3,4,5,8,9,1<br>14,15,16 0,12,13,17 | 3  | P02631,P16636,Q63532                                                         |
| 4274 | 1,2,6,7,11, 3,4,5,8,9,1<br>14,15,17 0,12,13,16 | 3  | P02631,P15399,P19629                                                         |
| 4275 | 1,2,6,7,11, 3,4,5,8,9,1<br>14,16,17 0,12,13,15 | 4  | P10758,P15399,Q30KJ2,Q63532                                                  |
| 4276 | 1,2,6,7,11, 3,4,5,8,9,1<br>15,16,17 0,12,13,14 | 0  |                                                                              |
| 4277 | 1,2,6,7,12, 3,4,5,8,9,1<br>13,14,15 0,11,16,17 | 7  | P06911,P12020,P19629,P35467,Q5GRG2,Q63532,Q6AYS4                             |
| 4278 | 1,2,6,7,12, 3,4,5,8,9,1<br>13,14,16 0,11,15,17 | 6  | P06911,P12020,P97840,Q5GRG2,Q63532,Q6AYS4                                    |
| 4279 | 1,2,6,7,12, 3,4,5,8,9,1<br>13,14,17 0,11,15,16 | 11 | P06911,P12020,P13432,P14668,P55091,P80254,Q5GRG2,Q62635,Q9JHB9,Q9QZK9,Q9Z1F2 |
| 4280 | 1,2,6,7,12, 3,4,5,8,9,1<br>13,15,16 0,11,14,17 | 3  | P35467,P97840,Q6AYS4                                                         |
| 4281 | 1,2,6,7,12, 3,4,5,8,9,1<br>13,15,17 0,11,14,16 | 8  | P13432,P14668,P55016,P55091,Q62635,Q6AYS4,Q6IFV1,Q9QZK9                      |
| 4282 | 1,2,6,7,12, 3,4,5,8,9,1<br>13,16,17 0,11,14,15 | 6  | P13432,P55091,P80254,P97840,Q62635,Q6AYS4                                    |
| 4283 | 1,2,6,7,12, 3,4,5,8,9,1<br>14,15,16 0,11,13,17 | 4  | P19629,P35467,Q63532,Q6AYS4                                                  |
| 4284 | 1,2,6,7,12, 3,4,5,8,9,1<br>14,15,17 0,11,13,16 | 7  | P13432,P19629,P35467,P55091,P98089,Q62635,Q6AYS4                             |
| 4285 | 1,2,6,7,12, 3,4,5,8,9,1<br>14,16,17 0,11,13,15 | 6  | P13432,P35467,P98089,Q62635,Q63532,Q6AYS4                                    |
| 4286 | 1,2,6,7,12, 3,4,5,8,9,1<br>15,16,17 0,11,13,14 | 4  | P06866,P13432,P35467,Q6AYS4                                                  |
| 4287 | 1,2,6,7,13, 3,4,5,8,9,1<br>14,15,16 0,11,12,17 | 7  | P06911,P12020,P16636,P35467,Q5GRG2,Q63532,Q6AYS4                             |
| 4288 | 1,2,6,7,13, 3,4,5,8,9,1<br>14,15,17 0,11,12,16 | 7  | P06911,P12020,P14668,P35467,P53792,Q5GRG2,Q6AYS4                             |
| 4289 | 1,2,6,7,13, 3,4,5,8,9,1<br>14,16,17 0,11,12,15 | 5  | P06911,P12020,Q5GRG2,Q63532,Q6AYS4                                           |
| 4290 | 1,2,6,7,13, 3,4,5,8,9,1<br>15,16,17 0,11,12,14 | 3  | P00714,P35467,Q6AYS4                                                         |
| 4291 | 1,2,6,7,14, 3,4,5,8,9,1<br>15,16,17 0,11,12,13 | 3  | P35467,Q63532,Q6AYS4                                                         |

|      |                        |                                |    |                                                                                     |
|------|------------------------|--------------------------------|----|-------------------------------------------------------------------------------------|
| 4292 | 1,2,6,8,9,1<br>0,11,12 | 3,4,5,7,13,<br>14,15,16,1<br>7 | 12 | O35547,P02782,P02803,P08723,P0C0A9,P30120,P47727,P62804,Q63357,Q6IFU7,Q91ZS3,Q9JHB9 |
| 4293 | 1,2,6,8,9,1<br>0,11,13 | 3,4,5,7,12,<br>14,15,16,1<br>7 | 5  | P02803,P47727,Q63942,Q8CJD3,Q91ZS3                                                  |
| 4294 | 1,2,6,8,9,1<br>0,11,14 | 3,4,5,7,12,<br>13,15,16,1<br>7 | 4  | P47727,Q63942,Q91ZS3,Q9QUL6                                                         |
| 4295 | 1,2,6,8,9,1<br>0,11,15 | 3,4,5,7,12,<br>13,14,16,1<br>7 | 5  | P35280,Q4FZU6,Q63942,Q91ZS3,Q9QUL6                                                  |
| 4296 | 1,2,6,8,9,1<br>0,11,16 | 3,4,5,7,12,<br>13,14,15,1<br>7 | 4  | A2RUV9,Q63942,Q91ZS3,Q9WUW8                                                         |
| 4297 | 1,2,6,8,9,1<br>0,11,17 | 3,4,5,7,12,<br>13,14,15,1<br>6 | 4  | A2RUV9,Q6P6R2,Q91ZS3,Q9QUL6                                                         |
| 4298 | 1,2,6,8,9,1<br>0,12,13 | 3,4,5,7,11,<br>14,15,16,1<br>7 | 8  | P02782,P02803,P08723,P30120,P97840,Q8K4G9,Q91ZS3,Q9JHB9                             |
| 4299 | 1,2,6,8,9,1<br>0,12,14 | 3,4,5,7,11,<br>13,15,16,1<br>7 | 3  | P02782,P08723,Q63942                                                                |
| 4300 | 1,2,6,8,9,1<br>0,12,15 | 3,4,5,7,11,<br>13,14,16,1<br>7 | 1  | Q63942                                                                              |
| 4301 | 1,2,6,8,9,1<br>0,12,16 | 3,4,5,7,11,<br>13,14,15,1<br>7 | 3  | P97840,Q63942,Q9WUW8                                                                |
| 4302 | 1,2,6,8,9,1<br>0,12,17 | 3,4,5,7,11,<br>13,14,15,1<br>6 | 4  | P02782,P13432,Q62635,Q6P6R2                                                         |
| 4303 | 1,2,6,8,9,1<br>0,13,14 | 3,4,5,7,11,<br>12,15,16,1<br>7 | 5  | P06911,P12020,Q5GRG2,Q63942,Q8K4G9                                                  |
| 4304 | 1,2,6,8,9,1<br>0,13,15 | 3,4,5,7,11,<br>12,14,16,1<br>7 | 3  | P15999,Q63942,Q6IFV1                                                                |
| 4305 | 1,2,6,8,9,1<br>0,13,16 | 3,4,5,7,11,<br>12,14,15,1<br>7 | 2  | Q63942,Q8CJD3                                                                       |
| 4306 | 1,2,6,8,9,1<br>0,13,17 | 3,4,5,7,11,<br>12,14,15,1<br>6 | 5  | P51907,Q63355,Q63942,Q6IFV1,Q8CJD3                                                  |

|      |                        |                                |   |                                                                |
|------|------------------------|--------------------------------|---|----------------------------------------------------------------|
| 4307 | 1,2,6,8,9,1<br>0,14,15 | 3,4,5,7,11,<br>12,13,16,1<br>7 | 2 | P17046,Q63942                                                  |
| 4308 | 1,2,6,8,9,1<br>0,14,16 | 3,4,5,7,11,<br>12,13,15,1<br>7 | 1 | Q63942                                                         |
| 4309 | 1,2,6,8,9,1<br>0,14,17 | 3,4,5,7,11,<br>12,13,15,1<br>6 | 2 | Q63942,Q6P6R2                                                  |
| 4310 | 1,2,6,8,9,1<br>0,15,16 | 3,4,5,7,11,<br>12,13,14,1<br>7 | 2 | Q5QE79,Q63942                                                  |
| 4311 | 1,2,6,8,9,1<br>0,15,17 | 3,4,5,7,11,<br>12,13,14,1<br>6 | 2 | Q63942,Q6IFV1                                                  |
| 4312 | 1,2,6,8,9,1<br>0,16,17 | 3,4,5,7,11,<br>12,13,14,1<br>5 | 3 | A2RUV9,Q63942,Q6P6R2                                           |
| 4313 | 1,2,6,8,9,1<br>1,12,13 | 3,4,5,7,10,<br>14,15,16,1<br>7 | 9 | P02782,P02803,P08723,P0C0A9,P30120,P47727,Q91ZS3,Q9JHB9,Q9Z1F2 |
| 4314 | 1,2,6,8,9,1<br>1,12,14 | 3,4,5,7,10,<br>13,15,16,1<br>7 | 7 | P02782,P08723,P30120,P47727,P62804,Q00715,Q9JHB9               |
| 4315 | 1,2,6,8,9,1<br>1,12,15 | 3,4,5,7,10,<br>13,14,16,1<br>7 | 3 | P02782,Q5QE79,Q9JHB9                                           |
| 4316 | 1,2,6,8,9,1<br>1,12,16 | 3,4,5,7,10,<br>13,14,15,1<br>7 | 3 | P02782,Q6IFU7,Q9JHB9                                           |
| 4317 | 1,2,6,8,9,1<br>1,12,17 | 3,4,5,7,10,<br>13,14,15,1<br>6 | 7 | P02782,P13432,P30120,P62804,Q00715,Q62635,Q9JHB9               |
| 4318 | 1,2,6,8,9,1<br>1,13,14 | 3,4,5,7,10,<br>12,15,16,1<br>7 | 5 | P02782,P06911,P47727,Q63942,Q9Z1F2                             |
| 4319 | 1,2,6,8,9,1<br>1,13,15 | 3,4,5,7,10,<br>12,14,16,1<br>7 | 2 | Q5QE79,Q63942                                                  |
| 4320 | 1,2,6,8,9,1<br>1,13,16 | 3,4,5,7,10,<br>12,14,15,1<br>7 | 3 | A2RUV9,Q63942,Q8CJD3                                           |
| 4321 | 1,2,6,8,9,1<br>1,13,17 | 3,4,5,7,10,<br>12,14,15,1<br>6 | 1 | Q8CJD3                                                         |

|      |                        |                                |   |                                                         |
|------|------------------------|--------------------------------|---|---------------------------------------------------------|
| 4322 | 1,2,6,8,9,1<br>1,14,15 | 3,4,5,7,10,<br>12,13,16,1<br>7 | 2 | Q5QE79,Q63942                                           |
| 4323 | 1,2,6,8,9,1<br>1,14,16 | 3,4,5,7,10,<br>12,13,15,1<br>7 | 2 | Q63942,Q99MH3                                           |
| 4324 | 1,2,6,8,9,1<br>1,14,17 | 3,4,5,7,10,<br>12,13,15,1<br>6 | 2 | Q63942,Q9QUL6                                           |
| 4325 | 1,2,6,8,9,1<br>1,15,16 | 3,4,5,7,10,<br>12,13,14,1<br>7 | 2 | Q5QE79,Q63942                                           |
| 4326 | 1,2,6,8,9,1<br>1,15,17 | 3,4,5,7,10,<br>12,13,14,1<br>6 | 2 | Q5QE79,Q63942                                           |
| 4327 | 1,2,6,8,9,1<br>1,16,17 | 3,4,5,7,10,<br>12,13,14,1<br>5 | 3 | A2RUV9,Q63942,Q6P6R2                                    |
| 4328 | 1,2,6,8,9,1<br>2,13,14 | 3,4,5,7,10,<br>11,15,16,1<br>7 | 8 | P02782,P06911,P08723,P30120,Q5FVI6,Q8K4G9,Q9JHB9,Q9Z1F2 |
| 4329 | 1,2,6,8,9,1<br>2,13,15 | 3,4,5,7,10,<br>11,14,16,1<br>7 | 6 | P02782,P15999,Q5QE79,Q6IFV1,Q9JHB9,Q9Z1F2               |
| 4330 | 1,2,6,8,9,1<br>2,13,16 | 3,4,5,7,10,<br>11,14,15,1<br>7 | 4 | P02782,P02803,Q63942,Q9Z1F2                             |
| 4331 | 1,2,6,8,9,1<br>2,13,17 | 3,4,5,7,10,<br>11,14,15,1<br>6 | 7 | P02782,P13432,Q5FVI6,Q62635,Q6IFV1,Q9JHB9,Q9Z1F2        |
| 4332 | 1,2,6,8,9,1<br>2,14,15 | 3,4,5,7,10,<br>11,13,16,1<br>7 | 2 | P02782,Q63942                                           |
| 4333 | 1,2,6,8,9,1<br>2,14,16 | 3,4,5,7,10,<br>11,13,15,1<br>7 | 2 | P02782,Q63942                                           |
| 4334 | 1,2,6,8,9,1<br>2,14,17 | 3,4,5,7,10,<br>11,13,15,1<br>6 | 7 | P02782,P13432,P98089,Q5FVI6,Q62635,Q8VD89,Q9Z1F2        |
| 4335 | 1,2,6,8,9,1<br>2,15,16 | 3,4,5,7,10,<br>11,13,14,1<br>7 | 2 | Q5QE79,Q63942                                           |
| 4336 | 1,2,6,8,9,1<br>2,15,17 | 3,4,5,7,10,<br>11,13,14,1<br>6 | 4 | P13432,Q5QE79,Q62635,Q6IFV1                             |

|      |                         |                                |    |                                                                                            |
|------|-------------------------|--------------------------------|----|--------------------------------------------------------------------------------------------|
| 4337 | 1,2,6,8,9,1<br>2,16,17  | 3,4,5,7,10,<br>11,13,14,1<br>5 | 3  | P13432,Q62635,Q6P6R2                                                                       |
| 4338 | 1,2,6,8,9,1<br>3,14,15  | 3,4,5,7,10,<br>11,12,16,1<br>7 | 4  | P15999,Q5GRG2,Q5QE79,Q63942                                                                |
| 4339 | 1,2,6,8,9,1<br>3,14,16  | 3,4,5,7,10,<br>11,12,15,1<br>7 | 1  | Q63942                                                                                     |
| 4340 | 1,2,6,8,9,1<br>3,14,17  | 3,4,5,7,10,<br>11,12,15,1<br>6 | 5  | P51907,P53792,Q5FVI6,Q63942,Q9Z1F2                                                         |
| 4341 | 1,2,6,8,9,1<br>3,15,16  | 3,4,5,7,10,<br>11,12,14,1<br>7 | 2  | Q5QE79,Q63942                                                                              |
| 4342 | 1,2,6,8,9,1<br>3,15,17  | 3,4,5,7,10,<br>11,12,14,1<br>6 | 5  | P15999,P53792,Q5QE79,Q63942,Q6IFV1                                                         |
| 4343 | 1,2,6,8,9,1<br>3,16,17  | 3,4,5,7,10,<br>11,12,14,1<br>5 | 3  | P51907,Q63942,Q8CJD3                                                                       |
| 4344 | 1,2,6,8,9,1<br>4,15,16  | 3,4,5,7,10,<br>11,12,13,1<br>7 | 3  | Q5QE79,Q63942,Q9QZK9                                                                       |
| 4345 | 1,2,6,8,9,1<br>4,15,17  | 3,4,5,7,10,<br>11,12,13,1<br>6 | 2  | Q5QE79,Q63942                                                                              |
| 4346 | 1,2,6,8,9,1<br>4,16,17  | 3,4,5,7,10,<br>11,12,13,1<br>5 | 2  | Q63942,Q6P6R2                                                                              |
| 4347 | 1,2,6,8,9,1<br>5,16,17  | 3,4,5,7,10,<br>11,12,13,1<br>4 | 2  | Q5QE79,Q63942                                                                              |
| 4348 | 1,2,6,8,10,<br>11,12,13 | 3,4,5,7,9,1<br>4,15,16,17      | 13 | O35547,P02781,P02782,P02803,P08723,P0C0A9,P30120,P47727,P62804,Q6AYR9,Q6IFU7,Q8K4G9,Q9JHB9 |
| 4349 | 1,2,6,8,10,<br>11,12,14 | 3,4,5,7,9,1<br>3,15,16,17      | 11 | O35547,P02782,P08723,P0C0A9,P30120,P35280,P47727,P62804,Q00715,Q6IFU7,Q9JHB9               |
| 4350 | 1,2,6,8,10,<br>11,12,15 | 3,4,5,7,9,1<br>3,14,16,17      | 7  | O35547,P08010,P35280,P62804,Q00715,Q6IFU7,Q9JHB9                                           |
| 4351 | 1,2,6,8,10,<br>11,12,16 | 3,4,5,7,9,1<br>3,14,15,17      | 6  | O35547,P62804,Q6IFU7,Q6P6Q2,Q9JHB9,Q9WUW8                                                  |
| 4352 | 1,2,6,8,10,<br>11,12,17 | 3,4,5,7,9,1<br>3,14,15,16      | 13 | O35547,O54728,P02782,P08723,P13432,P16636,P30120,P47727,P62804,Q00715,Q62635,Q9JHB9,Q9QZK9 |
| 4353 | 1,2,6,8,10,<br>11,13,14 | 3,4,5,7,9,1<br>2,15,16,17      | 5  | P06911,P12020,P47727,Q5GRG2,Q8K4G9                                                         |

|      |                                                |    |                                                                                     |
|------|------------------------------------------------|----|-------------------------------------------------------------------------------------|
| 4354 | 1,2,6,8,10, 3,4,5,7,9,1<br>11,13,15 2,14,16,17 | 5  | P01835,P15999,Q4FZU6,Q5GRG2,Q6IFV1                                                  |
| 4355 | 1,2,6,8,10, 3,4,5,7,9,1<br>11,13,16 2,14,15,17 | 3  | A2RUV9,P01835,Q8CJD3                                                                |
| 4356 | 1,2,6,8,10, 3,4,5,7,9,1<br>11,13,17 2,14,15,16 | 3  | P47727,Q6IFV1,Q8CJD3                                                                |
| 4357 | 1,2,6,8,10, 3,4,5,7,9,1<br>11,14,15 2,13,16,17 | 2  | P35280,P47727                                                                       |
| 4358 | 1,2,6,8,10, 3,4,5,7,9,1<br>11,14,16 2,13,15,17 | 1  | P47727                                                                              |
| 4359 | 1,2,6,8,10, 3,4,5,7,9,1<br>11,14,17 2,13,15,16 | 3  | P47727,P62804,Q00715                                                                |
| 4360 | 1,2,6,8,10, 3,4,5,7,9,1<br>11,15,16 2,13,14,17 | 2  | P01835,P35280                                                                       |
| 4361 | 1,2,6,8,10, 3,4,5,7,9,1<br>11,15,17 2,13,14,16 | 1  | Q6IFV1                                                                              |
| 4362 | 1,2,6,8,10, 3,4,5,7,9,1<br>11,16,17 2,13,14,15 | 2  | A2RUV9,Q6P6R2                                                                       |
| 4363 | 1,2,6,8,10, 3,4,5,7,9,1<br>12,13,14 1,15,16,17 | 11 | P02782,P06911,P08723,P12020,P30120,P47727,Q5GRG2,Q6AYR9,Q8K4G9,Q9JHB9,Q9Z1F2        |
| 4364 | 1,2,6,8,10, 3,4,5,7,9,1<br>12,13,15 1,14,16,17 | 5  | P02782,P15999,Q5GRG2,Q6IFV1,Q9JHB9                                                  |
| 4365 | 1,2,6,8,10, 3,4,5,7,9,1<br>12,13,16 1,14,15,17 | 3  | P02782,P97840,Q8K4G9                                                                |
| 4366 | 1,2,6,8,10, 3,4,5,7,9,1<br>12,13,17 1,14,15,16 | 12 | O54728,P02782,P13432,P16636,P30120,Q62635,Q63355,Q6AYR9,Q6IFV1,Q8K4G9,Q9JHB9,Q9QZK9 |
| 4367 | 1,2,6,8,10, 3,4,5,7,9,1<br>12,14,15 1,13,16,17 | 1  | P35280                                                                              |
| 4368 | 1,2,6,8,10, 3,4,5,7,9,1<br>12,14,16 1,13,15,17 | 3  | P05539,P97840,Q8K4G9                                                                |
| 4369 | 1,2,6,8,10, 3,4,5,7,9,1<br>12,14,17 1,13,15,16 | 8  | O54728,P02782,P13432,P62804,P98089,Q10758,Q62635,Q8K4G9                             |
| 4370 | 1,2,6,8,10, 3,4,5,7,9,1<br>12,15,16 1,13,14,17 | 2  | P05539,P97840                                                                       |
| 4371 | 1,2,6,8,10, 3,4,5,7,9,1<br>12,15,17 1,13,14,16 | 3  | P06866,Q62635,Q6IFV1                                                                |
| 4372 | 1,2,6,8,10, 3,4,5,7,9,1<br>12,16,17 1,13,14,15 | 7  | O54728,P05539,P13432,Q10758,Q62635,Q6P6R2,Q8K4G9                                    |
| 4373 | 1,2,6,8,10, 3,4,5,7,9,1<br>13,14,15 1,12,16,17 | 4  | P06911,P12020,P15999,Q5GRG2                                                         |
| 4374 | 1,2,6,8,10, 3,4,5,7,9,1<br>13,14,16 1,12,15,17 | 4  | P06911,P12020,Q5GRG2,Q8K4G9                                                         |
| 4375 | 1,2,6,8,10, 3,4,5,7,9,1<br>13,14,17 1,12,15,16 | 5  | P06911,P12020,P51907,Q5GRG2,Q8K4G9                                                  |
| 4376 | 1,2,6,8,10, 3,4,5,7,9,1<br>13,15,16 1,12,14,17 | 2  | P01835,P15999                                                                       |

|      |                                                |    |                                                                                                                 |
|------|------------------------------------------------|----|-----------------------------------------------------------------------------------------------------------------|
| 4377 | 1,2,6,8,10, 3,4,5,7,9,1<br>13,15,17 1,12,14,16 | 2  | P15999,Q6IFV1                                                                                                   |
| 4378 | 1,2,6,8,10, 3,4,5,7,9,1<br>13,16,17 1,12,14,15 | 3  | P51907,Q8CJD3,Q8K4G9                                                                                            |
| 4379 | 1,2,6,8,10, 3,4,5,7,9,1<br>14,15,16 1,12,13,17 | 0  |                                                                                                                 |
| 4380 | 1,2,6,8,10, 3,4,5,7,9,1<br>14,15,17 1,12,13,16 | 0  |                                                                                                                 |
| 4381 | 1,2,6,8,10, 3,4,5,7,9,1<br>14,16,17 1,12,13,15 | 2  | P05539,Q6P6R2                                                                                                   |
| 4382 | 1,2,6,8,10, 3,4,5,7,9,1<br>15,16,17 1,12,13,14 | 2  | P05539,Q6IFV1                                                                                                   |
| 4383 | 1,2,6,8,11, 3,4,5,7,9,1<br>12,13,14 0,15,16,17 | 16 | O35547,P02782,P04905,P06911,P08723,P0C0A9,P30120,P47727,P62804,Q00715,Q5GRG2,Q62902,Q6AYR9,Q8K4G9,Q9JHB9,Q9Z1F2 |
| 4384 | 1,2,6,8,11, 3,4,5,7,9,1<br>12,13,15 0,14,16,17 | 5  | P02782,P15999,P30120,Q6IFV1,Q9JHB9                                                                              |
| 4385 | 1,2,6,8,11, 3,4,5,7,9,1<br>12,13,16 0,14,15,17 | 3  | P02782,P30120,Q9JHB9                                                                                            |
| 4386 | 1,2,6,8,11, 3,4,5,7,9,1<br>12,13,17 0,14,15,16 | 13 | O35547,O54728,P02782,P08723,P13432,P30120,P47727,Q00715,Q62635,Q6IFV1,Q9JHB9,Q9QZK9,Q9Z1F2                      |
| 4387 | 1,2,6,8,11, 3,4,5,7,9,1<br>12,14,15 0,13,16,17 | 7  | O35547,P02782,P35280,P47727,P62804,Q00715,Q9JHB9                                                                |
| 4388 | 1,2,6,8,11, 3,4,5,7,9,1<br>12,14,16 0,13,15,17 | 7  | O35547,P02782,P30120,P47727,P62804,Q6IFU7,Q9JHB9                                                                |
| 4389 | 1,2,6,8,11, 3,4,5,7,9,1<br>12,14,17 0,13,15,16 | 12 | O35547,O54728,P02782,P08723,P13432,P30120,P47727,P62804,P98089,Q00715,Q62635,Q9JHB9                             |
| 4390 | 1,2,6,8,11, 3,4,5,7,9,1<br>12,15,16 0,13,14,17 | 2  | O35547,Q6IFU7                                                                                                   |
| 4391 | 1,2,6,8,11, 3,4,5,7,9,1<br>12,15,17 0,13,14,16 | 7  | O35547,P02782,P13432,P62804,Q00715,Q62635,Q6IFV1                                                                |
| 4392 | 1,2,6,8,11, 3,4,5,7,9,1<br>12,16,17 0,13,14,15 | 4  | O35547,P02782,P13432,Q62635                                                                                     |
| 4393 | 1,2,6,8,11, 3,4,5,7,9,1<br>13,14,15 0,12,16,17 | 5  | P06911,P15999,P47727,Q5GRG2,Q64093                                                                              |
| 4394 | 1,2,6,8,11, 3,4,5,7,9,1<br>13,14,16 0,12,15,17 | 2  | P06911,P47727                                                                                                   |
| 4395 | 1,2,6,8,11, 3,4,5,7,9,1<br>13,14,17 0,12,15,16 | 3  | P02782,P06911,P47727                                                                                            |
| 4396 | 1,2,6,8,11, 3,4,5,7,9,1<br>13,15,16 0,12,14,17 | 1  | P01835                                                                                                          |
| 4397 | 1,2,6,8,11, 3,4,5,7,9,1<br>13,15,17 0,12,14,16 | 2  | P15999,Q6IFV1                                                                                                   |
| 4398 | 1,2,6,8,11, 3,4,5,7,9,1<br>13,16,17 0,12,14,15 | 2  | A2RUV9,Q8CJD3                                                                                                   |
| 4399 | 1,2,6,8,11, 3,4,5,7,9,1<br>14,15,16 0,12,13,17 | 0  |                                                                                                                 |

|      |                                                |    |                                                                                     |
|------|------------------------------------------------|----|-------------------------------------------------------------------------------------|
| 4400 | 1,2,6,8,11, 3,4,5,7,9,1<br>14,15,17 0,12,13,16 | 0  |                                                                                     |
| 4401 | 1,2,6,8,11, 3,4,5,7,9,1<br>14,16,17 0,12,13,15 | 0  |                                                                                     |
| 4402 | 1,2,6,8,11, 3,4,5,7,9,1<br>15,16,17 0,12,13,14 | 0  |                                                                                     |
| 4403 | 1,2,6,8,12, 3,4,5,7,9,1<br>13,14,15 0,11,16,17 | 8  | O08557,P02782,P06911,P15999,Q5GRG2,Q64093,Q9JHB9,Q9Z1F2                             |
| 4404 | 1,2,6,8,12, 3,4,5,7,9,1<br>13,14,16 0,11,15,17 | 6  | P02782,P06911,P30120,Q8K4G9,Q9JHB9,Q9Z1F2                                           |
| 4405 | 1,2,6,8,12, 3,4,5,7,9,1<br>13,14,17 0,11,15,16 | 12 | O54728,P02782,P06911,P13432,P30120,P51907,Q5FVI6,Q62635,Q6AYR9,Q8K4G9,Q9JHB9,Q9Z1F2 |
| 4406 | 1,2,6,8,12, 3,4,5,7,9,1<br>13,15,16 0,11,14,17 | 1  | P15999                                                                              |
| 4407 | 1,2,6,8,12, 3,4,5,7,9,1<br>13,15,17 0,11,14,16 | 6  | P02782,P13432,P15999,P55016,Q62635,Q6IFV1                                           |
| 4408 | 1,2,6,8,12, 3,4,5,7,9,1<br>13,16,17 0,11,14,15 | 4  | P02782,P13432,Q62635,Q8K4G9                                                         |
| 4409 | 1,2,6,8,12, 3,4,5,7,9,1<br>14,15,16 0,11,13,17 | 0  |                                                                                     |
| 4410 | 1,2,6,8,12, 3,4,5,7,9,1<br>14,15,17 0,11,13,16 | 5  | P02782,P13432,P98089,Q5FVI6,Q62635                                                  |
| 4411 | 1,2,6,8,12, 3,4,5,7,9,1<br>14,16,17 0,11,13,15 | 4  | P02782,P13432,P98089,Q62635                                                         |
| 4412 | 1,2,6,8,12, 3,4,5,7,9,1<br>15,16,17 0,11,13,14 | 5  | P06866,P13432,Q5XFX0,Q62635,Q6IFV1                                                  |
| 4413 | 1,2,6,8,13, 3,4,5,7,9,1<br>14,15,16 0,11,12,17 | 2  | P15999,Q5GRG2                                                                       |
| 4414 | 1,2,6,8,13, 3,4,5,7,9,1<br>14,15,17 0,11,12,16 | 4  | P15999,Q5FVI6,Q5GRG2,Q64093                                                         |
| 4415 | 1,2,6,8,13, 3,4,5,7,9,1<br>14,16,17 0,11,12,15 | 4  | P51907,Q5FVI6,Q6PCU2,Q8K4G9                                                         |
| 4416 | 1,2,6,8,13, 3,4,5,7,9,1<br>15,16,17 0,11,12,14 | 3  | P15999,Q6IFV1,Q6PCU2                                                                |
| 4417 | 1,2,6,8,14, 3,4,5,7,9,1<br>15,16,17 0,11,12,13 | 0  |                                                                                     |
| 4418 | 1,2,6,9,10, 3,4,5,7,8,1<br>11,12,13 4,15,16,17 | 7  | P02803,P47727,P97840,Q63661,Q6IFU7,Q91ZS3,Q9JHB9                                    |
| 4419 | 1,2,6,9,10, 3,4,5,7,8,1<br>11,12,14 3,15,16,17 | 4  | P47727,Q63661,Q6IFU7,Q91ZS3                                                         |
| 4420 | 1,2,6,9,10, 3,4,5,7,8,1<br>11,12,15 3,14,16,17 | 4  | Q4FZU6,Q63661,Q6IFU7,Q91ZS3                                                         |
| 4421 | 1,2,6,9,10, 3,4,5,7,8,1<br>11,12,16 3,14,15,17 | 8  | P10536,P12368,P47967,P97840,Q63661,Q6IFU7,Q91ZS3,Q9WUW8                             |
| 4422 | 1,2,6,9,10, 3,4,5,7,8,1<br>11,12,17 3,14,15,16 | 4  | P06757,Q6IFU7,Q91ZS3,Q9QUL6                                                         |



|      |                                                |   |                                           |
|------|------------------------------------------------|---|-------------------------------------------|
| 4423 | 1,2,6,9,10, 3,4,5,7,8,1<br>11,13,14 2,15,16,17 | 3 | P47727,Q91ZS3,Q99041                      |
| 4424 | 1,2,6,9,10, 3,4,5,7,8,1<br>11,13,15 2,14,16,17 | 2 | Q4FZU6,Q91ZS3                             |
| 4425 | 1,2,6,9,10, 3,4,5,7,8,1<br>11,13,16 2,14,15,17 | 2 | Q8CJD3,Q91ZS3                             |
| 4426 | 1,2,6,9,10, 3,4,5,7,8,1<br>11,13,17 2,14,15,16 | 3 | Q8CJD3,Q91ZS3,Q9QUL6                      |
| 4427 | 1,2,6,9,10, 3,4,5,7,8,1<br>11,14,15 2,13,16,17 | 5 | Q4FZU6,Q63661,Q91ZS3,Q99041,Q9QUL6        |
| 4428 | 1,2,6,9,10, 3,4,5,7,8,1<br>11,14,16 2,13,15,17 | 4 | Q91ZS3,Q99041,Q99MH3,Q9QUL6               |
| 4429 | 1,2,6,9,10, 3,4,5,7,8,1<br>11,14,17 2,13,15,16 | 2 | Q91ZS3,Q9QUL6                             |
| 4430 | 1,2,6,9,10, 3,4,5,7,8,1<br>11,15,16 2,13,14,17 | 3 | Q4FZU6,Q91ZS3,Q99041                      |
| 4431 | 1,2,6,9,10, 3,4,5,7,8,1<br>11,15,17 2,13,14,16 | 2 | Q4FZU6,Q9QUL6                             |
| 4432 | 1,2,6,9,10, 3,4,5,7,8,1<br>11,16,17 2,13,14,15 | 4 | A2RUV9,P36970,Q91ZS3,Q9QUL6               |
| 4433 | 1,2,6,9,10, 3,4,5,7,8,1<br>12,13,14 1,15,16,17 | 2 | P97840,Q6AYS4                             |
| 4434 | 1,2,6,9,10, 3,4,5,7,8,1<br>12,13,15 1,14,16,17 | 3 | P97840,Q4FZU6,Q6AYS4                      |
| 4435 | 1,2,6,9,10, 3,4,5,7,8,1<br>12,13,16 1,14,15,17 | 4 | P07171,P47967,P97840,Q6AYS4               |
| 4436 | 1,2,6,9,10, 3,4,5,7,8,1<br>12,13,17 1,14,15,16 | 6 | P07171,P14668,P97840,Q62635,Q63355,Q6AYS4 |
| 4437 | 1,2,6,9,10, 3,4,5,7,8,1<br>12,14,15 1,13,16,17 | 2 | P97840,Q6AYS4                             |
| 4438 | 1,2,6,9,10, 3,4,5,7,8,1<br>12,14,16 1,13,15,17 | 3 | P97840,Q6AYS4,Q9WUW8                      |
| 4439 | 1,2,6,9,10, 3,4,5,7,8,1<br>12,14,17 1,13,15,16 | 1 | Q8VD89                                    |
| 4440 | 1,2,6,9,10, 3,4,5,7,8,1<br>12,15,16 1,13,14,17 | 2 | P97840,Q6AYS4                             |
| 4441 | 1,2,6,9,10, 3,4,5,7,8,1<br>12,15,17 1,13,14,16 | 2 | P06866,Q6AYS4                             |
| 4442 | 1,2,6,9,10, 3,4,5,7,8,1<br>12,16,17 1,13,14,15 | 4 | P06866,P07171,P97840,Q6AYS4               |
| 4443 | 1,2,6,9,10, 3,4,5,7,8,1<br>13,14,15 1,12,16,17 | 4 | P50115,Q6AYS4,Q99041,Q9ESW0               |
| 4444 | 1,2,6,9,10, 3,4,5,7,8,1<br>13,14,16 1,12,15,17 | 5 | P50115,Q63942,Q6AYS4,Q99041,Q9ESW0        |
| 4445 | 1,2,6,9,10, 3,4,5,7,8,1<br>13,14,17 1,12,15,16 | 2 | P14668,Q6AYS4                             |

|      |                                                |   |                                           |
|------|------------------------------------------------|---|-------------------------------------------|
| 4446 | 1,2,6,9,10, 3,4,5,7,8,1<br>13,15,16 1,12,14,17 | 6 | P50115,P97840,Q63942,Q6AYS4,Q99041,Q9ESW0 |
| 4447 | 1,2,6,9,10, 3,4,5,7,8,1<br>13,15,17 1,12,14,16 | 4 | P14668,Q4FZU6,Q6AYS4,Q6IFV1               |
| 4448 | 1,2,6,9,10, 3,4,5,7,8,1<br>13,16,17 1,12,14,15 | 4 | P07171,Q6AYS4,Q8CJD3,Q9ESW0               |
| 4449 | 1,2,6,9,10, 3,4,5,7,8,1<br>14,15,16 1,12,13,17 | 5 | P50115,Q63942,Q6AYS4,Q99041,Q9QZK9        |
| 4450 | 1,2,6,9,10, 3,4,5,7,8,1<br>14,15,17 1,12,13,16 | 1 | Q6AYS4                                    |
| 4451 | 1,2,6,9,10, 3,4,5,7,8,1<br>14,16,17 1,12,13,15 | 1 | Q6AYS4                                    |
| 4452 | 1,2,6,9,10, 3,4,5,7,8,1<br>15,16,17 1,12,13,14 | 1 | Q6AYS4                                    |
| 4453 | 1,2,6,9,11, 3,4,5,7,8,1<br>12,13,14 0,15,16,17 | 2 | P47727,Q9JHB9                             |
| 4454 | 1,2,6,9,11, 3,4,5,7,8,1<br>12,13,15 0,14,16,17 | 0 |                                           |
| 4455 | 1,2,6,9,11, 3,4,5,7,8,1<br>12,13,16 0,14,15,17 | 2 | P02803,Q6IFU7                             |
| 4456 | 1,2,6,9,11, 3,4,5,7,8,1<br>12,13,17 0,14,15,16 | 2 | Q62635,Q9JHB9                             |
| 4457 | 1,2,6,9,11, 3,4,5,7,8,1<br>12,14,15 0,13,16,17 | 0 |                                           |
| 4458 | 1,2,6,9,11, 3,4,5,7,8,1<br>12,14,16 0,13,15,17 | 2 | Q6IFU7,Q99MH3                             |
| 4459 | 1,2,6,9,11, 3,4,5,7,8,1<br>12,14,17 0,13,15,16 | 1 | P13432                                    |
| 4460 | 1,2,6,9,11, 3,4,5,7,8,1<br>12,15,16 0,13,14,17 | 1 | Q6IFU7                                    |
| 4461 | 1,2,6,9,11, 3,4,5,7,8,1<br>12,15,17 0,13,14,16 | 1 | P06866                                    |
| 4462 | 1,2,6,9,11, 3,4,5,7,8,1<br>12,16,17 0,13,14,15 | 0 |                                           |
| 4463 | 1,2,6,9,11, 3,4,5,7,8,1<br>13,14,15 0,12,16,17 | 1 | Q99041                                    |
| 4464 | 1,2,6,9,11, 3,4,5,7,8,1<br>13,14,16 0,12,15,17 | 3 | Q7TPB1,Q99041,Q99MH3                      |
| 4465 | 1,2,6,9,11, 3,4,5,7,8,1<br>13,14,17 0,12,15,16 | 0 |                                           |
| 4466 | 1,2,6,9,11, 3,4,5,7,8,1<br>13,15,16 0,12,14,17 | 0 |                                           |
| 4467 | 1,2,6,9,11, 3,4,5,7,8,1<br>13,15,17 0,12,14,16 | 0 |                                           |
| 4468 | 1,2,6,9,11, 3,4,5,7,8,1<br>13,16,17 0,12,14,15 | 2 | A2RUV9,Q8CJD3                             |

|      |                                                |   |                                                  |
|------|------------------------------------------------|---|--------------------------------------------------|
| 4469 | 1,2,6,9,11, 3,4,5,7,8,1<br>14,15,16 0,12,13,17 | 4 | Q63942,Q99041,Q99MH3,Q9QZK9                      |
| 4470 | 1,2,6,9,11, 3,4,5,7,8,1<br>14,15,17 0,12,13,16 | 1 | Q9QUL6                                           |
| 4471 | 1,2,6,9,11, 3,4,5,7,8,1<br>14,16,17 0,12,13,15 | 1 | Q9QUL6                                           |
| 4472 | 1,2,6,9,11, 3,4,5,7,8,1<br>15,16,17 0,12,13,14 | 1 | P36970                                           |
| 4473 | 1,2,6,9,12, 3,4,5,7,8,1<br>13,14,15 0,11,16,17 | 2 | P00714,Q6AYS4                                    |
| 4474 | 1,2,6,9,12, 3,4,5,7,8,1<br>13,14,16 0,11,15,17 | 2 | P00714,Q6AYS4                                    |
| 4475 | 1,2,6,9,12, 3,4,5,7,8,1<br>13,14,17 0,11,15,16 | 6 | P00714,P14668,Q5FVI6,Q62635,Q6AYS4,Q8VDB89       |
| 4476 | 1,2,6,9,12, 3,4,5,7,8,1<br>13,15,16 0,11,14,17 | 2 | P00714,Q6AYS4                                    |
| 4477 | 1,2,6,9,12, 3,4,5,7,8,1<br>13,15,17 0,11,14,16 | 5 | P00714,P14668,Q62635,Q6AYS4,Q6IFV1               |
| 4478 | 1,2,6,9,12, 3,4,5,7,8,1<br>13,16,17 0,11,14,15 | 5 | P00714,P07171,Q62635,Q64194,Q6AYS4               |
| 4479 | 1,2,6,9,12, 3,4,5,7,8,1<br>14,15,16 0,11,13,17 | 1 | Q6AYS4                                           |
| 4480 | 1,2,6,9,12, 3,4,5,7,8,1<br>14,15,17 0,11,13,16 | 3 | P00714,Q6AYS4,Q8VDB89                            |
| 4481 | 1,2,6,9,12, 3,4,5,7,8,1<br>14,16,17 0,11,13,15 | 1 | Q6AYS4                                           |
| 4482 | 1,2,6,9,12, 3,4,5,7,8,1<br>15,16,17 0,11,13,14 | 3 | P00714,P06866,Q6AYS4                             |
| 4483 | 1,2,6,9,13, 3,4,5,7,8,1<br>14,15,16 0,11,12,17 | 7 | P00714,P16391,P50115,Q63942,Q6AYS4,Q99041,Q9ESW0 |
| 4484 | 1,2,6,9,13, 3,4,5,7,8,1<br>14,15,17 0,11,12,16 | 6 | P00714,P14668,P16391,P53792,Q5FVI6,Q6AYS4        |
| 4485 | 1,2,6,9,13, 3,4,5,7,8,1<br>14,16,17 0,11,12,15 | 3 | P00714,Q6AYS4,Q9ESW0                             |
| 4486 | 1,2,6,9,13, 3,4,5,7,8,1<br>15,16,17 0,11,12,14 | 2 | P00714,Q6AYS4                                    |
| 4487 | 1,2,6,9,14, 3,4,5,7,8,1<br>15,16,17 0,11,12,13 | 3 | P00714,Q63942,Q6AYS4                             |
| 4488 | 1,2,6,10,1 3,4,5,7,8,9<br>1,12,13,14 ,15,16,17 | 3 | P47727,Q6IFU7,Q9JHB9                             |
| 4489 | 1,2,6,10,1 3,4,5,7,8,9<br>1,12,13,15 ,14,16,17 | 3 | Q4FZU6,Q6IFU7,Q9JHB9                             |
| 4490 | 1,2,6,10,1 3,4,5,7,8,9<br>1,12,13,16 ,14,15,17 | 3 | P47967,P97840,Q6IFU7                             |
| 4491 | 1,2,6,10,1 3,4,5,7,8,9<br>1,12,13,17 ,14,15,16 | 5 | O54728,P47727,Q62635,Q9JHB9,Q9QZK9               |

|      |                          |                          |   |                                           |
|------|--------------------------|--------------------------|---|-------------------------------------------|
| 4492 | 1,2,6,10,1<br>1,12,14,15 | 3,4,5,7,8,9<br>,13,16,17 | 4 | P35280,P47727,P62804,Q6IFU7               |
| 4493 | 1,2,6,10,1<br>1,12,14,16 | 3,4,5,7,8,9<br>,13,15,17 | 3 | P47727,P97840,Q6IFU7                      |
| 4494 | 1,2,6,10,1<br>1,12,14,17 | 3,4,5,7,8,9<br>,13,15,16 | 6 | O54728,P47727,P62804,Q00715,Q10758,Q62635 |
| 4495 | 1,2,6,10,1<br>1,12,15,16 | 3,4,5,7,8,9<br>,13,14,17 | 2 | P97840,Q6IFU7                             |
| 4496 | 1,2,6,10,1<br>1,12,15,17 | 3,4,5,7,8,9<br>,13,14,16 | 2 | P06866,Q4FZU6                             |
| 4497 | 1,2,6,10,1<br>1,12,16,17 | 3,4,5,7,8,9<br>,13,14,15 | 3 | P06757,P06866,Q6IFU7                      |
| 4498 | 1,2,6,10,1<br>1,13,14,15 | 3,4,5,7,8,9<br>,12,16,17 | 3 | P47727,Q4FZU6,Q99041                      |
| 4499 | 1,2,6,10,1<br>1,13,14,16 | 3,4,5,7,8,9<br>,12,15,17 | 3 | P47727,Q7TPB1,Q99041                      |
| 4500 | 1,2,6,10,1<br>1,13,14,17 | 3,4,5,7,8,9<br>,12,15,16 | 1 | P47727                                    |
| 4501 | 1,2,6,10,1<br>1,13,15,16 | 3,4,5,7,8,9<br>,12,14,17 | 2 | P01835,Q4FZU6                             |
| 4502 | 1,2,6,10,1<br>1,13,15,17 | 3,4,5,7,8,9<br>,12,14,16 | 1 | Q4FZU6                                    |
| 4503 | 1,2,6,10,1<br>1,13,16,17 | 3,4,5,7,8,9<br>,12,14,15 | 1 | Q8CJD3                                    |
| 4504 | 1,2,6,10,1<br>1,14,15,16 | 3,4,5,7,8,9<br>,12,13,17 | 1 | Q99041                                    |
| 4505 | 1,2,6,10,1<br>1,14,15,17 | 3,4,5,7,8,9<br>,12,13,16 | 0 |                                           |
| 4506 | 1,2,6,10,1<br>1,14,16,17 | 3,4,5,7,8,9<br>,12,13,15 | 0 |                                           |
| 4507 | 1,2,6,10,1<br>1,15,16,17 | 3,4,5,7,8,9<br>,12,13,14 | 0 |                                           |
| 4508 | 1,2,6,10,1<br>2,13,14,15 | 3,4,5,7,8,9<br>,11,16,17 | 1 | Q6AYS4                                    |
| 4509 | 1,2,6,10,1<br>2,13,14,16 | 3,4,5,7,8,9<br>,11,15,17 | 2 | P97840,Q6AYS4                             |
| 4510 | 1,2,6,10,1<br>2,13,14,17 | 3,4,5,7,8,9<br>,11,15,16 | 6 | O54728,P14668,Q05175,Q62635,Q6AYS4,Q8K4G9 |
| 4511 | 1,2,6,10,1<br>2,13,15,16 | 3,4,5,7,8,9<br>,11,14,17 | 2 | P97840,Q6AYS4                             |
| 4512 | 1,2,6,10,1<br>2,13,15,17 | 3,4,5,7,8,9<br>,11,14,16 | 6 | P06866,P14668,P55016,Q62635,Q6AYS4,Q6IFV1 |
| 4513 | 1,2,6,10,1<br>2,13,16,17 | 3,4,5,7,8,9<br>,11,14,15 | 4 | P07171,P97840,Q62635,Q6AYS4               |
| 4514 | 1,2,6,10,1<br>2,14,15,16 | 3,4,5,7,8,9<br>,11,13,17 | 2 | P97840,Q6AYS4                             |

|      |                          |                          |   |                             |
|------|--------------------------|--------------------------|---|-----------------------------|
| 4515 | 1,2,6,10,1<br>2,14,15,17 | 3,4,5,7,8,9<br>,11,13,16 | 3 | P06866,Q62635,Q6AYS4        |
| 4516 | 1,2,6,10,1<br>2,14,16,17 | 3,4,5,7,8,9<br>,11,13,15 | 4 | P05539,P97840,Q10758,Q6AYS4 |
| 4517 | 1,2,6,10,1<br>2,15,16,17 | 3,4,5,7,8,9<br>,11,13,14 | 3 | P06866,P97840,Q6AYS4        |
| 4518 | 1,2,6,10,1<br>3,14,15,16 | 3,4,5,7,8,9<br>,11,12,17 | 3 | P50115,Q6AYS4,Q99041        |
| 4519 | 1,2,6,10,1<br>3,14,15,17 | 3,4,5,7,8,9<br>,11,12,16 | 2 | P14668,Q6AYS4               |
| 4520 | 1,2,6,10,1<br>3,14,16,17 | 3,4,5,7,8,9<br>,11,12,15 | 1 | Q6AYS4                      |
| 4521 | 1,2,6,10,1<br>3,15,16,17 | 3,4,5,7,8,9<br>,11,12,14 | 1 | Q6AYS4                      |
| 4522 | 1,2,6,10,1<br>4,15,16,17 | 3,4,5,7,8,9<br>,11,12,13 | 1 | Q6AYS4                      |
| 4523 | 1,2,6,11,1<br>2,13,14,15 | 3,4,5,7,8,9<br>,10,16,17 | 2 | P47727,Q9JHB9               |
| 4524 | 1,2,6,11,1<br>2,13,14,16 | 3,4,5,7,8,9<br>,10,15,17 | 3 | P47727,Q6IFU7,Q9JHB9        |
| 4525 | 1,2,6,11,1<br>2,13,14,17 | 3,4,5,7,8,9<br>,10,15,16 | 3 | P47727,Q62635,Q9JHB9        |
| 4526 | 1,2,6,11,1<br>2,13,15,16 | 3,4,5,7,8,9<br>,10,14,17 | 2 | Q6AYS4,Q6IFU7               |
| 4527 | 1,2,6,11,1<br>2,13,15,17 | 3,4,5,7,8,9<br>,10,14,16 | 2 | Q62635,Q6IFV1               |
| 4528 | 1,2,6,11,1<br>2,13,16,17 | 3,4,5,7,8,9<br>,10,14,15 | 1 | Q62635                      |
| 4529 | 1,2,6,11,1<br>2,14,15,16 | 3,4,5,7,8,9<br>,10,13,17 | 1 | Q6IFU7                      |
| 4530 | 1,2,6,11,1<br>2,14,15,17 | 3,4,5,7,8,9<br>,10,13,16 | 2 | Q00715,Q62635               |
| 4531 | 1,2,6,11,1<br>2,14,16,17 | 3,4,5,7,8,9<br>,10,13,15 | 0 |                             |
| 4532 | 1,2,6,11,1<br>2,15,16,17 | 3,4,5,7,8,9<br>,10,13,14 | 1 | P06866                      |
| 4533 | 1,2,6,11,1<br>3,14,15,16 | 3,4,5,7,8,9<br>,10,12,17 | 1 | Q6AYS4                      |
| 4534 | 1,2,6,11,1<br>3,14,15,17 | 3,4,5,7,8,9<br>,10,12,16 | 0 |                             |
| 4535 | 1,2,6,11,1<br>3,14,16,17 | 3,4,5,7,8,9<br>,10,12,15 | 0 |                             |
| 4536 | 1,2,6,11,1<br>3,15,16,17 | 3,4,5,7,8,9<br>,10,12,14 | 0 |                             |
| 4537 | 1,2,6,11,1<br>4,15,16,17 | 3,4,5,7,8,9<br>,10,12,13 | 0 |                             |

|      |                          |                                |   |                                    |
|------|--------------------------|--------------------------------|---|------------------------------------|
| 4538 | 1,2,6,12,1<br>3,14,15,16 | 3,4,5,7,8,9<br>,10,11,17       | 3 | P00714,P35467,Q6AYS4               |
| 4539 | 1,2,6,12,1<br>3,14,15,17 | 3,4,5,7,8,9<br>,10,11,16       | 5 | P00714,P14668,Q5FVI6,Q62635,Q6AYS4 |
| 4540 | 1,2,6,12,1<br>3,14,16,17 | 3,4,5,7,8,9<br>,10,11,15       | 3 | P00714,Q62635,Q6AYS4               |
| 4541 | 1,2,6,12,1<br>3,15,16,17 | 3,4,5,7,8,9<br>,10,11,14       | 4 | P00714,P06866,Q62635,Q6AYS4        |
| 4542 | 1,2,6,12,1<br>4,15,16,17 | 3,4,5,7,8,9<br>,10,11,13       | 4 | P00714,P06866,P35467,Q6AYS4        |
| 4543 | 1,2,6,13,1<br>4,15,16,17 | 3,4,5,7,8,9<br>,10,11,12       | 3 | P00714,P35467,Q6AYS4               |
| 4544 | 1,2,7,8,9,1<br>0,11,12   | 3,4,5,6,13,<br>14,15,16,1<br>7 | 5 | P02803,P10715,P97840,Q6AYL6,Q91ZS3 |
| 4545 | 1,2,7,8,9,1<br>0,11,13   | 3,4,5,6,12,<br>14,15,16,1<br>7 | 4 | P01835,P02803,P31044,Q91ZS3        |
| 4546 | 1,2,7,8,9,1<br>0,11,14   | 3,4,5,6,12,<br>13,15,16,1<br>7 | 1 | Q9QUL6                             |
| 4547 | 1,2,7,8,9,1<br>0,11,15   | 3,4,5,6,12,<br>13,14,16,1<br>7 | 3 | P01835,P10715,P35280               |
| 4548 | 1,2,7,8,9,1<br>0,11,16   | 3,4,5,6,12,<br>13,14,15,1<br>7 | 3 | P01835,P10715,Q9WUW8               |
| 4549 | 1,2,7,8,9,1<br>0,11,17   | 3,4,5,6,12,<br>13,14,15,1<br>6 | 2 | P10715,Q9QUL6                      |
| 4550 | 1,2,7,8,9,1<br>0,12,13   | 3,4,5,6,11,<br>14,15,16,1<br>7 | 2 | P02803,P97840                      |
| 4551 | 1,2,7,8,9,1<br>0,12,14   | 3,4,5,6,11,<br>13,15,16,1<br>7 | 1 | P97840                             |
| 4552 | 1,2,7,8,9,1<br>0,12,15   | 3,4,5,6,11,<br>13,14,16,1<br>7 | 2 | P10715,P97840                      |
| 4553 | 1,2,7,8,9,1<br>0,12,16   | 3,4,5,6,11,<br>13,14,15,1<br>7 | 4 | P10715,P47967,P97840,Q9WUW8        |
| 4554 | 1,2,7,8,9,1<br>0,12,17   | 3,4,5,6,11,<br>13,14,15,1<br>6 | 4 | P10715,P19223,P55091,P97840        |

|      |                        |                                |   |                             |
|------|------------------------|--------------------------------|---|-----------------------------|
| 4555 | 1,2,7,8,9,1<br>0,13,14 | 3,4,5,6,11,<br>12,15,16,1<br>7 | 2 | P01835,Q5GRG2               |
| 4556 | 1,2,7,8,9,1<br>0,13,15 | 3,4,5,6,11,<br>12,14,16,1<br>7 | 2 | P01835,P15999               |
| 4557 | 1,2,7,8,9,1<br>0,13,16 | 3,4,5,6,11,<br>12,14,15,1<br>7 | 4 | B0BNN3,P01835,P02625,P97840 |
| 4558 | 1,2,7,8,9,1<br>0,13,17 | 3,4,5,6,11,<br>12,14,15,1<br>6 | 3 | P01835,P14668,Q4FZU2        |
| 4559 | 1,2,7,8,9,1<br>0,14,15 | 3,4,5,6,11,<br>12,13,16,1<br>7 | 1 | P01835                      |
| 4560 | 1,2,7,8,9,1<br>0,14,16 | 3,4,5,6,11,<br>12,13,15,1<br>7 | 2 | P01835,P02625               |
| 4561 | 1,2,7,8,9,1<br>0,14,17 | 3,4,5,6,11,<br>12,13,15,1<br>6 | 0 |                             |
| 4562 | 1,2,7,8,9,1<br>0,15,16 | 3,4,5,6,11,<br>12,13,14,1<br>7 | 1 | P01835                      |
| 4563 | 1,2,7,8,9,1<br>0,15,17 | 3,4,5,6,11,<br>12,13,14,1<br>6 | 1 | P01835                      |
| 4564 | 1,2,7,8,9,1<br>0,16,17 | 3,4,5,6,11,<br>12,13,14,1<br>5 | 2 | P01835,P02625               |
| 4565 | 1,2,7,8,9,1<br>1,12,13 | 3,4,5,6,10,<br>14,15,16,1<br>7 | 4 | P02803,P10715,P36374,Q8CJ52 |
| 4566 | 1,2,7,8,9,1<br>1,12,14 | 3,4,5,6,10,<br>13,15,16,1<br>7 | 3 | P02803,P10715,P19629        |
| 4567 | 1,2,7,8,9,1<br>1,12,15 | 3,4,5,6,10,<br>13,14,16,1<br>7 | 1 | P10715                      |
| 4568 | 1,2,7,8,9,1<br>1,12,16 | 3,4,5,6,10,<br>13,14,15,1<br>7 | 2 | P02803,P10715               |
| 4569 | 1,2,7,8,9,1<br>1,12,17 | 3,4,5,6,10,<br>13,14,15,1<br>6 | 4 | P02803,P10715,P55091,Q9QZA6 |

|      |                        |                                |   |                                    |
|------|------------------------|--------------------------------|---|------------------------------------|
| 4570 | 1,2,7,8,9,1<br>1,13,14 | 3,4,5,6,10,<br>12,15,16,1<br>7 | 2 | P02803,Q99MH3                      |
| 4571 | 1,2,7,8,9,1<br>1,13,15 | 3,4,5,6,10,<br>12,14,16,1<br>7 | 1 | P01835                             |
| 4572 | 1,2,7,8,9,1<br>1,13,16 | 3,4,5,6,10,<br>12,14,15,1<br>7 | 4 | B0BNN3,P01835,P02803,P10715        |
| 4573 | 1,2,7,8,9,1<br>1,13,17 | 3,4,5,6,10,<br>12,14,15,1<br>6 | 3 | P02803,P10715,P20766               |
| 4574 | 1,2,7,8,9,1<br>1,14,15 | 3,4,5,6,10,<br>12,13,16,1<br>7 | 3 | P16636,P19629,Q99MH3               |
| 4575 | 1,2,7,8,9,1<br>1,14,16 | 3,4,5,6,10,<br>12,13,15,1<br>7 | 1 | Q99MH3                             |
| 4576 | 1,2,7,8,9,1<br>1,14,17 | 3,4,5,6,10,<br>12,13,15,1<br>6 | 1 | P19629                             |
| 4577 | 1,2,7,8,9,1<br>1,15,16 | 3,4,5,6,10,<br>12,13,14,1<br>7 | 3 | P01835,P10715,Q99MH3               |
| 4578 | 1,2,7,8,9,1<br>1,15,17 | 3,4,5,6,10,<br>12,13,14,1<br>6 | 1 | P10715                             |
| 4579 | 1,2,7,8,9,1<br>1,16,17 | 3,4,5,6,10,<br>12,13,14,1<br>5 | 1 | P10715                             |
| 4580 | 1,2,7,8,9,1<br>2,13,14 | 3,4,5,6,10,<br>11,15,16,1<br>7 | 3 | P02803,P19629,Q9Z1F2               |
| 4581 | 1,2,7,8,9,1<br>2,13,15 | 3,4,5,6,10,<br>11,14,16,1<br>7 | 1 | P10715                             |
| 4582 | 1,2,7,8,9,1<br>2,13,16 | 3,4,5,6,10,<br>11,14,15,1<br>7 | 2 | P02803,P10715                      |
| 4583 | 1,2,7,8,9,1<br>2,13,17 | 3,4,5,6,10,<br>11,14,15,1<br>6 | 5 | P02803,P10715,P14668,P55091,Q62635 |
| 4584 | 1,2,7,8,9,1<br>2,14,15 | 3,4,5,6,10,<br>11,13,16,1<br>7 | 2 | P10715,P19629                      |



|      |                        |                                |   |                                                  |
|------|------------------------|--------------------------------|---|--------------------------------------------------|
| 4585 | 1,2,7,8,9,1<br>2,14,16 | 3,4,5,6,10,<br>11,13,15,1<br>7 | 3 | P10715,P19629,Q63532                             |
| 4586 | 1,2,7,8,9,1<br>2,14,17 | 3,4,5,6,10,<br>11,13,15,1<br>6 | 4 | P10715,P19629,P31430,P55091                      |
| 4587 | 1,2,7,8,9,1<br>2,15,16 | 3,4,5,6,10,<br>11,13,14,1<br>7 | 1 | P10715                                           |
| 4588 | 1,2,7,8,9,1<br>2,15,17 | 3,4,5,6,10,<br>11,13,14,1<br>6 | 3 | P10715,P55091,Q9QZA6                             |
| 4589 | 1,2,7,8,9,1<br>2,16,17 | 3,4,5,6,10,<br>11,13,14,1<br>5 | 2 | P10715,P55091                                    |
| 4590 | 1,2,7,8,9,1<br>3,14,15 | 3,4,5,6,10,<br>11,12,16,1<br>7 | 7 | P00762,P01835,P15999,P16636,Q4FZU2,Q5GRG2,Q6IFW6 |
| 4591 | 1,2,7,8,9,1<br>3,14,16 | 3,4,5,6,10,<br>11,12,15,1<br>7 | 4 | P00762,P01835,Q4FZU2,Q99MH3                      |
| 4592 | 1,2,7,8,9,1<br>3,14,17 | 3,4,5,6,10,<br>11,12,15,1<br>6 | 3 | P53792,Q4FZU2,Q6IFW6                             |
| 4593 | 1,2,7,8,9,1<br>3,15,16 | 3,4,5,6,10,<br>11,12,14,1<br>7 | 4 | P00762,P01835,Q4FZU2,Q6IFW6                      |
| 4594 | 1,2,7,8,9,1<br>3,15,17 | 3,4,5,6,10,<br>11,12,14,1<br>6 | 4 | P01835,P53792,Q4FZU2,Q6IFW6                      |
| 4595 | 1,2,7,8,9,1<br>3,16,17 | 3,4,5,6,10,<br>11,12,14,1<br>5 | 2 | P01835,Q4FZU2                                    |
| 4596 | 1,2,7,8,9,1<br>4,15,16 | 3,4,5,6,10,<br>11,12,13,1<br>7 | 4 | P01835,P16636,Q99MH3,Q9QZK9                      |
| 4597 | 1,2,7,8,9,1<br>4,15,17 | 3,4,5,6,10,<br>11,12,13,1<br>6 | 3 | P19629,Q4FZU2,Q6IFW6                             |
| 4598 | 1,2,7,8,9,1<br>4,16,17 | 3,4,5,6,10,<br>11,12,13,1<br>5 | 1 | Q4FZU2                                           |
| 4599 | 1,2,7,8,9,1<br>5,16,17 | 3,4,5,6,10,<br>11,12,13,1<br>4 | 2 | P01835,Q4FZU2                                    |

|      |                                                |   |                                                         |
|------|------------------------------------------------|---|---------------------------------------------------------|
| 4600 | 1,2,7,8,10, 3,4,5,6,9,1<br>11,12,13 4,15,16,17 | 6 | P01835,P02803,P10715,P36374,P47727,Q8CJ52               |
| 4601 | 1,2,7,8,10, 3,4,5,6,9,1<br>11,12,14 3,15,16,17 | 8 | P10715,P19629,P35280,P47727,P62804,Q00715,Q6AYL6,Q8CJ52 |
| 4602 | 1,2,7,8,10, 3,4,5,6,9,1<br>11,12,15 3,14,16,17 | 4 | P00731,P01835,P10715,P35280                             |
| 4603 | 1,2,7,8,10, 3,4,5,6,9,1<br>11,12,16 3,14,15,17 | 7 | P01835,P10715,P47967,P97840,Q6AYL6,Q8CJ52,Q9WUW8        |
| 4604 | 1,2,7,8,10, 3,4,5,6,9,1<br>11,12,17 3,14,15,16 | 5 | P10715,P55091,P62804,Q00715,Q9QZA6                      |
| 4605 | 1,2,7,8,10, 3,4,5,6,9,1<br>11,13,14 2,15,16,17 | 4 | P01835,P31044,P47727,Q5GRG2                             |
| 4606 | 1,2,7,8,10, 3,4,5,6,9,1<br>11,13,15 2,14,16,17 | 3 | P01835,P15999,Q5GRG2                                    |
| 4607 | 1,2,7,8,10, 3,4,5,6,9,1<br>11,13,16 2,14,15,17 | 1 | P01835                                                  |
| 4608 | 1,2,7,8,10, 3,4,5,6,9,1<br>11,13,17 2,14,15,16 | 1 | P01835                                                  |
| 4609 | 1,2,7,8,10, 3,4,5,6,9,1<br>11,14,15 2,13,16,17 | 4 | P01835,P19629,P22006,P35280                             |
| 4610 | 1,2,7,8,10, 3,4,5,6,9,1<br>11,14,16 2,13,15,17 | 2 | P01835,Q63532                                           |
| 4611 | 1,2,7,8,10, 3,4,5,6,9,1<br>11,14,17 2,13,15,16 | 0 |                                                         |
| 4612 | 1,2,7,8,10, 3,4,5,6,9,1<br>11,15,16 2,13,14,17 | 2 | P01835,P35280                                           |
| 4613 | 1,2,7,8,10, 3,4,5,6,9,1<br>11,15,17 2,13,14,16 | 1 | P01835                                                  |
| 4614 | 1,2,7,8,10, 3,4,5,6,9,1<br>11,16,17 2,13,14,15 | 2 | P01835,P02625                                           |
| 4615 | 1,2,7,8,10, 3,4,5,6,9,1<br>12,13,14 1,15,16,17 | 3 | P12020,Q5GRG2,Q8K4G9                                    |
| 4616 | 1,2,7,8,10, 3,4,5,6,9,1<br>12,13,15 1,14,16,17 | 3 | P01835,P15999,Q5GRG2                                    |
| 4617 | 1,2,7,8,10, 3,4,5,6,9,1<br>12,13,16 1,14,15,17 | 3 | P01835,P47967,P97840                                    |
| 4618 | 1,2,7,8,10, 3,4,5,6,9,1<br>12,13,17 1,14,15,16 | 3 | P14668,P55091,Q62635                                    |
| 4619 | 1,2,7,8,10, 3,4,5,6,9,1<br>12,14,15 1,13,16,17 | 2 | P19629,P35280                                           |
| 4620 | 1,2,7,8,10, 3,4,5,6,9,1<br>12,14,16 1,13,15,17 | 3 | P08721,P97840,Q63532                                    |
| 4621 | 1,2,7,8,10, 3,4,5,6,9,1<br>12,14,17 1,13,15,16 | 3 | P19629,P31430,P55091                                    |
| 4622 | 1,2,7,8,10, 3,4,5,6,9,1<br>12,15,16 1,13,14,17 | 4 | P01835,P08721,P10715,P97840                             |

|      |                                                |   |                                                         |
|------|------------------------------------------------|---|---------------------------------------------------------|
| 4623 | 1,2,7,8,10, 3,4,5,6,9,1<br>12,15,17 1,13,14,16 | 4 | P06866,P10715,P55091,Q9QZA6                             |
| 4624 | 1,2,7,8,10, 3,4,5,6,9,1<br>12,16,17 1,13,14,15 | 5 | P02625,P06866,P10715,P55091,P97840                      |
| 4625 | 1,2,7,8,10, 3,4,5,6,9,1<br>13,14,15 1,12,16,17 | 3 | P01835,P15999,Q5GRG2                                    |
| 4626 | 1,2,7,8,10, 3,4,5,6,9,1<br>13,14,16 1,12,15,17 | 4 | P01835,P02625,Q5GRG2,Q63532                             |
| 4627 | 1,2,7,8,10, 3,4,5,6,9,1<br>13,14,17 1,12,15,16 | 3 | P01835,P14668,Q5GRG2                                    |
| 4628 | 1,2,7,8,10, 3,4,5,6,9,1<br>13,15,16 1,12,14,17 | 2 | P01835,P15999                                           |
| 4629 | 1,2,7,8,10, 3,4,5,6,9,1<br>13,15,17 1,12,14,16 | 3 | P01835,P14668,P15999                                    |
| 4630 | 1,2,7,8,10, 3,4,5,6,9,1<br>13,16,17 1,12,14,15 | 2 | P01835,P02625                                           |
| 4631 | 1,2,7,8,10, 3,4,5,6,9,1<br>14,15,16 1,12,13,17 | 2 | P01835,Q63532                                           |
| 4632 | 1,2,7,8,10, 3,4,5,6,9,1<br>14,15,17 1,12,13,16 | 1 | P01835                                                  |
| 4633 | 1,2,7,8,10, 3,4,5,6,9,1<br>14,16,17 1,12,13,15 | 2 | P01835,P02625                                           |
| 4634 | 1,2,7,8,10, 3,4,5,6,9,1<br>15,16,17 1,12,13,14 | 1 | P01835                                                  |
| 4635 | 1,2,7,8,11, 3,4,5,6,9,1<br>12,13,14 0,15,16,17 | 8 | P02803,P10715,P19629,P47727,Q5GRG2,Q62902,Q8CJ52,Q9JHB9 |
| 4636 | 1,2,7,8,11, 3,4,5,6,9,1<br>12,13,15 0,14,16,17 | 4 | P01835,P10715,P15999,Q8CJ52                             |
| 4637 | 1,2,7,8,11, 3,4,5,6,9,1<br>12,13,16 0,14,15,17 | 4 | P01835,P02803,P10715,Q8CJ52                             |
| 4638 | 1,2,7,8,11, 3,4,5,6,9,1<br>12,13,17 0,14,15,16 | 6 | P02803,P10715,P36374,P55091,Q62635,Q8CJ52               |
| 4639 | 1,2,7,8,11, 3,4,5,6,9,1<br>12,14,15 0,13,16,17 | 3 | P10715,P19629,P35280                                    |
| 4640 | 1,2,7,8,11, 3,4,5,6,9,1<br>12,14,16 0,13,15,17 | 4 | P10715,P19629,Q63532,Q8CJ52                             |
| 4641 | 1,2,7,8,11, 3,4,5,6,9,1<br>12,14,17 0,13,15,16 | 8 | P10715,P19629,P31430,P55091,P62804,Q00715,Q63493,Q9QZA6 |
| 4642 | 1,2,7,8,11, 3,4,5,6,9,1<br>12,15,16 0,13,14,17 | 2 | P01835,P10715                                           |
| 4643 | 1,2,7,8,11, 3,4,5,6,9,1<br>12,15,17 0,13,14,16 | 5 | P06866,P10715,P19629,P55091,Q9QZA6                      |
| 4644 | 1,2,7,8,11, 3,4,5,6,9,1<br>12,16,17 0,13,14,15 | 4 | P06866,P10715,P55091,Q9QZA6                             |
| 4645 | 1,2,7,8,11, 3,4,5,6,9,1<br>13,14,15 0,12,16,17 | 5 | P01835,P15999,P19629,Q09030,Q5GRG2                      |

|      |                                                |   |                                                         |
|------|------------------------------------------------|---|---------------------------------------------------------|
| 4646 | 1,2,7,8,11, 3,4,5,6,9,1<br>13,14,16 0,12,15,17 | 3 | P01835,Q7TPB1,Q99MH3                                    |
| 4647 | 1,2,7,8,11, 3,4,5,6,9,1<br>13,14,17 0,12,15,16 | 1 | P19629                                                  |
| 4648 | 1,2,7,8,11, 3,4,5,6,9,1<br>13,15,16 0,12,14,17 | 1 | P01835                                                  |
| 4649 | 1,2,7,8,11, 3,4,5,6,9,1<br>13,15,17 0,12,14,16 | 2 | P01835,P15999                                           |
| 4650 | 1,2,7,8,11, 3,4,5,6,9,1<br>13,16,17 0,12,14,15 | 1 | P01835                                                  |
| 4651 | 1,2,7,8,11, 3,4,5,6,9,1<br>14,15,16 0,12,13,17 | 5 | P01835,P16636,P19629,Q63532,Q99MH3                      |
| 4652 | 1,2,7,8,11, 3,4,5,6,9,1<br>14,15,17 0,12,13,16 | 1 | P19629                                                  |
| 4653 | 1,2,7,8,11, 3,4,5,6,9,1<br>14,16,17 0,12,13,15 | 1 | P19629                                                  |
| 4654 | 1,2,7,8,11, 3,4,5,6,9,1<br>15,16,17 0,12,13,14 | 2 | P01835,P10715                                           |
| 4655 | 1,2,7,8,12, 3,4,5,6,9,1<br>13,14,15 0,11,16,17 | 3 | P15999,P19629,Q5GRG2                                    |
| 4656 | 1,2,7,8,12, 3,4,5,6,9,1<br>13,14,16 0,11,15,17 | 3 | P19629,Q63532,Q8CJ52                                    |
| 4657 | 1,2,7,8,12, 3,4,5,6,9,1<br>13,14,17 0,11,15,16 | 5 | P14668,P19629,P31430,P55091,Q62635                      |
| 4658 | 1,2,7,8,12, 3,4,5,6,9,1<br>13,15,16 0,11,14,17 | 2 | P01835,P10715                                           |
| 4659 | 1,2,7,8,12, 3,4,5,6,9,1<br>13,15,17 0,11,14,16 | 5 | P10715,P14668,P15999,P55091,Q62635                      |
| 4660 | 1,2,7,8,12, 3,4,5,6,9,1<br>13,16,17 0,11,14,15 | 4 | P10715,P55091,P63029,Q62635                             |
| 4661 | 1,2,7,8,12, 3,4,5,6,9,1<br>14,15,16 0,11,13,17 | 3 | P10715,P19629,Q63532                                    |
| 4662 | 1,2,7,8,12, 3,4,5,6,9,1<br>14,15,17 0,11,13,16 | 5 | P10715,P19629,P31430,P55091,Q9QZA6                      |
| 4663 | 1,2,7,8,12, 3,4,5,6,9,1<br>14,16,17 0,11,13,15 | 4 | P10715,P19629,P31430,P55091                             |
| 4664 | 1,2,7,8,12, 3,4,5,6,9,1<br>15,16,17 0,11,13,14 | 4 | P06866,P10715,P55091,Q9QZA6                             |
| 4665 | 1,2,7,8,13, 3,4,5,6,9,1<br>14,15,16 0,11,12,17 | 8 | P00762,P01835,P15999,P16636,Q08849,Q09030,Q4FZU2,Q5GRG2 |
| 4666 | 1,2,7,8,13, 3,4,5,6,9,1<br>14,15,17 0,11,12,16 | 7 | P01835,P15999,P19629,Q08849,Q4FZU2,Q5GRG2,Q6IFW6        |
| 4667 | 1,2,7,8,13, 3,4,5,6,9,1<br>14,16,17 0,11,12,15 | 4 | P01835,Q08849,Q4FZU2,Q6PCU2                             |
| 4668 | 1,2,7,8,13, 3,4,5,6,9,1<br>15,16,17 0,11,12,14 | 4 | P00762,P01835,Q4FZU2,Q6IFW6                             |

|      |                                                |   |                                                                |
|------|------------------------------------------------|---|----------------------------------------------------------------|
| 4669 | 1,2,7,8,14, 3,4,5,6,9,1<br>15,16,17 0,11,12,13 | 3 | P01835,P19629,Q08849                                           |
| 4670 | 1,2,7,9,10, 3,4,5,6,8,1<br>11,12,13 4,15,16,17 | 7 | P02803,P06760,P10536,P47967,P97840,Q63661,Q91ZS3               |
| 4671 | 1,2,7,9,10, 3,4,5,6,8,1<br>11,12,14 3,15,16,17 | 4 | P06760,P97840,Q63661,Q91ZS3                                    |
| 4672 | 1,2,7,9,10, 3,4,5,6,8,1<br>11,12,15 3,14,16,17 | 4 | P06760,P51907,P97840,Q63661                                    |
| 4673 | 1,2,7,9,10, 3,4,5,6,8,1<br>11,12,16 3,14,15,17 | 9 | P06760,P10536,P12368,P47967,P97840,Q63661,Q64093,Q91ZS3,Q9WUW8 |
| 4674 | 1,2,7,9,10, 3,4,5,6,8,1<br>11,12,17 3,14,15,16 | 5 | O54861,P06757,P06866,P97840,Q9QUL6                             |
| 4675 | 1,2,7,9,10, 3,4,5,6,8,1<br>11,13,14 2,15,16,17 | 4 | B0BNN3,P06760,Q4G075,Q91ZS3                                    |
| 4676 | 1,2,7,9,10, 3,4,5,6,8,1<br>11,13,15 2,14,16,17 | 4 | P01835,P06760,Q4G075,Q9Z0V6                                    |
| 4677 | 1,2,7,9,10, 3,4,5,6,8,1<br>11,13,16 2,14,15,17 | 8 | B0BNN3,P01835,P02793,Q7TP54,P06760,P10536,P97840,Q4G075,Q9Z0V6 |
| 4678 | 1,2,7,9,10, 3,4,5,6,8,1<br>11,13,17 2,14,15,16 | 2 | P14668,Q9QUL6                                                  |
| 4679 | 1,2,7,9,10, 3,4,5,6,8,1<br>11,14,15 2,13,16,17 | 4 | P06760,P16636,Q4G075,Q63661                                    |
| 4680 | 1,2,7,9,10, 3,4,5,6,8,1<br>11,14,16 2,13,15,17 | 5 | B0BNN3,P06760,Q4G075,Q63532,Q99MH3                             |
| 4681 | 1,2,7,9,10, 3,4,5,6,8,1<br>11,14,17 2,13,15,16 | 2 | P82995,Q9QUL6                                                  |
| 4682 | 1,2,7,9,10, 3,4,5,6,8,1<br>11,15,16 2,13,14,17 | 5 | P01835,P06760,P51907,Q4G075,Q9QZK9                             |
| 4683 | 1,2,7,9,10, 3,4,5,6,8,1<br>11,15,17 2,13,14,16 | 1 | Q9QUL6                                                         |
| 4684 | 1,2,7,9,10, 3,4,5,6,8,1<br>11,16,17 2,13,14,15 | 2 | Q64093,Q9QUL6                                                  |
| 4685 | 1,2,7,9,10, 3,4,5,6,8,1<br>12,13,14 1,15,16,17 | 3 | P06760,P14668,P97840                                           |
| 4686 | 1,2,7,9,10, 3,4,5,6,8,1<br>12,13,15 1,14,16,17 | 4 | P02793,Q7TP54,P06760,P14668,P97840                             |
| 4687 | 1,2,7,9,10, 3,4,5,6,8,1<br>12,13,16 1,14,15,17 | 7 | B0BNN3,P02793,Q7TP54,P02803,P06760,P14668,P47967,P97840        |
| 4688 | 1,2,7,9,10, 3,4,5,6,8,1<br>12,13,17 1,14,15,16 | 2 | P14668,P97840                                                  |
| 4689 | 1,2,7,9,10, 3,4,5,6,8,1<br>12,14,15 1,13,16,17 | 3 | P06760,P14668,P97840                                           |
| 4690 | 1,2,7,9,10, 3,4,5,6,8,1<br>12,14,16 1,13,15,17 | 4 | P06760,P14668,P97840,Q63532                                    |
| 4691 | 1,2,7,9,10, 3,4,5,6,8,1<br>12,14,17 1,13,15,16 | 2 | P14668,P97840                                                  |

|      |                                                |   |                                                                |
|------|------------------------------------------------|---|----------------------------------------------------------------|
| 4692 | 1,2,7,9,10, 3,4,5,6,8,1<br>12,15,16 1,13,14,17 | 5 | P02793;Q7TP54,P06760,P14668,P97840,Q6AYS4                      |
| 4693 | 1,2,7,9,10, 3,4,5,6,8,1<br>12,15,17 1,13,14,16 | 3 | P06866,P14668,P97840                                           |
| 4694 | 1,2,7,9,10, 3,4,5,6,8,1<br>12,16,17 1,13,14,15 | 3 | P06866,P14668,P97840                                           |
| 4695 | 1,2,7,9,10, 3,4,5,6,8,1<br>13,14,15 1,12,16,17 | 6 | P01835,P06760,P14668,P16636,Q4G075,Q6IFW6                      |
| 4696 | 1,2,7,9,10, 3,4,5,6,8,1<br>13,14,16 1,12,15,17 | 8 | B0BNN3,P01835,P06760,P14668,P97840,Q4G075,Q63532,Q63751        |
| 4697 | 1,2,7,9,10, 3,4,5,6,8,1<br>13,14,17 1,12,15,16 | 2 | P14668,Q4FZU2                                                  |
| 4698 | 1,2,7,9,10, 3,4,5,6,8,1<br>13,15,16 1,12,14,17 | 8 | P01835,P02793;Q7TP54,P06760,P14668,P97840,Q4G075,Q6AYS4,Q9Z0V6 |
| 4699 | 1,2,7,9,10, 3,4,5,6,8,1<br>13,15,17 1,12,14,16 | 3 | P01835,P14668,Q6IFW6                                           |
| 4700 | 1,2,7,9,10, 3,4,5,6,8,1<br>13,16,17 1,12,14,15 | 5 | P01835,P02625,P14668,P97840,Q4FZU2                             |
| 4701 | 1,2,7,9,10, 3,4,5,6,8,1<br>14,15,16 1,12,13,17 | 8 | P01835,P06760,P16636,Q4G075,Q63532,Q63751,Q6AYS4,Q9QZK9        |
| 4702 | 1,2,7,9,10, 3,4,5,6,8,1<br>14,15,17 1,12,13,16 | 1 | P14668                                                         |
| 4703 | 1,2,7,9,10, 3,4,5,6,8,1<br>14,16,17 1,12,13,15 | 2 | P02625,P14668                                                  |
| 4704 | 1,2,7,9,10, 3,4,5,6,8,1<br>15,16,17 1,12,13,14 | 4 | P01835,P02780,P0C0A9,P14668                                    |
| 4705 | 1,2,7,9,11, 3,4,5,6,8,1<br>12,13,14 0,15,16,17 | 2 | P02803,P06760                                                  |
| 4706 | 1,2,7,9,11, 3,4,5,6,8,1<br>12,13,15 0,14,16,17 | 1 | P06760                                                         |
| 4707 | 1,2,7,9,11, 3,4,5,6,8,1<br>12,13,16 0,14,15,17 | 4 | B0BNN3,P02803,P06760,Q9Z0V6                                    |
| 4708 | 1,2,7,9,11, 3,4,5,6,8,1<br>12,13,17 0,14,15,16 | 2 | P02803,P14668                                                  |
| 4709 | 1,2,7,9,11, 3,4,5,6,8,1<br>12,14,15 0,13,16,17 | 4 | D3ZUC6,P06760,P51907,Q99MH3                                    |
| 4710 | 1,2,7,9,11, 3,4,5,6,8,1<br>12,14,16 0,13,15,17 | 4 | D3ZUC6,P06760,Q63532,Q99MH3                                    |
| 4711 | 1,2,7,9,11, 3,4,5,6,8,1<br>12,14,17 0,13,15,16 | 1 | D3ZUC6                                                         |
| 4712 | 1,2,7,9,11, 3,4,5,6,8,1<br>12,15,16 0,13,14,17 | 2 | P06760,P51907                                                  |
| 4713 | 1,2,7,9,11, 3,4,5,6,8,1<br>12,15,17 0,13,14,16 | 1 | P06866                                                         |
| 4714 | 1,2,7,9,11, 3,4,5,6,8,1<br>12,16,17 0,13,14,15 | 1 | P06866                                                         |

|      |                                                |    |                                                                                            |
|------|------------------------------------------------|----|--------------------------------------------------------------------------------------------|
| 4715 | 1,2,7,9,11, 3,4,5,6,8,1<br>13,14,15 0,12,16,17 | 4  | P06760,P16636,Q4G075,Q99MH3                                                                |
| 4716 | 1,2,7,9,11, 3,4,5,6,8,1<br>13,14,16 0,12,15,17 | 6  | B0BNN3,P06760,Q4G075,Q7TPB1,Q99MH3,Q9Z0V6                                                  |
| 4717 | 1,2,7,9,11, 3,4,5,6,8,1<br>13,14,17 0,12,15,16 | 1  | P14668                                                                                     |
| 4718 | 1,2,7,9,11, 3,4,5,6,8,1<br>13,15,16 0,12,14,17 | 4  | P01835,P06760,Q4G075,Q9Z0V6                                                                |
| 4719 | 1,2,7,9,11, 3,4,5,6,8,1<br>13,15,17 0,12,14,16 | 1  | P14668                                                                                     |
| 4720 | 1,2,7,9,11, 3,4,5,6,8,1<br>13,16,17 0,12,14,15 | 0  |                                                                                            |
| 4721 | 1,2,7,9,11, 3,4,5,6,8,1<br>14,15,16 0,12,13,17 | 6  | P06760,P16636,Q4G075,Q63532,Q99MH3,Q9QZK9                                                  |
| 4722 | 1,2,7,9,11, 3,4,5,6,8,1<br>14,15,17 0,12,13,16 | 0  |                                                                                            |
| 4723 | 1,2,7,9,11, 3,4,5,6,8,1<br>14,16,17 0,12,13,15 | 2  | P82995,Q99MH3                                                                              |
| 4724 | 1,2,7,9,11, 3,4,5,6,8,1<br>15,16,17 0,12,13,14 | 0  |                                                                                            |
| 4725 | 1,2,7,9,12, 3,4,5,6,8,1<br>13,14,15 0,11,16,17 | 7  | D3ZUC6,P06760,P07150,P08649,P14668,P16636,Q6AYS4                                           |
| 4726 | 1,2,7,9,12, 3,4,5,6,8,1<br>13,14,16 0,11,15,17 | 6  | D3ZUC6,P06760,P08649,P14668,Q63532,Q6AYS4                                                  |
| 4727 | 1,2,7,9,12, 3,4,5,6,8,1<br>13,14,17 0,11,15,16 | 1  | P14668                                                                                     |
| 4728 | 1,2,7,9,12, 3,4,5,6,8,1<br>13,15,16 0,11,14,17 | 6  | P02793;Q7TP54,P06760,P08649,P14668,P97840,Q6AYS4                                           |
| 4729 | 1,2,7,9,12, 3,4,5,6,8,1<br>13,15,17 0,11,14,16 | 1  | P14668                                                                                     |
| 4730 | 1,2,7,9,12, 3,4,5,6,8,1<br>13,16,17 0,11,14,15 | 1  | P14668                                                                                     |
| 4731 | 1,2,7,9,12, 3,4,5,6,8,1<br>14,15,16 0,11,13,17 | 6  | D3ZUC6,P06760,P16636,Q63532,Q6AYS4,Q99MH3                                                  |
| 4732 | 1,2,7,9,12, 3,4,5,6,8,1<br>14,15,17 0,11,13,16 | 2  | D3ZUC6,P14668                                                                              |
| 4733 | 1,2,7,9,12, 3,4,5,6,8,1<br>14,16,17 0,11,13,15 | 2  | D3ZUC6,P14668                                                                              |
| 4734 | 1,2,7,9,12, 3,4,5,6,8,1<br>15,16,17 0,11,13,14 | 3  | P06866,P14668,Q6AYS4                                                                       |
| 4735 | 1,2,7,9,13, 3,4,5,6,8,1<br>14,15,16 0,11,12,17 | 13 | P00762,P01835,P06760,P14668,P16636,Q4FZU2,Q4G075,Q6AYS4,Q6IFW6,Q6IG02,Q99MH3,Q9QZK9,Q9Z0V6 |
| 4736 | 1,2,7,9,13, 3,4,5,6,8,1<br>14,15,17 0,11,12,16 | 8  | P14668,P16636,P53792,Q4FZU2,Q6IFW6,Q6IG02,Q6IMF3,Q6P6Q2                                    |
| 4737 | 1,2,7,9,13, 3,4,5,6,8,1<br>14,16,17 0,11,12,15 | 3  | P14668,Q4FZU2,Q6IFW6                                                                       |

|      |                                                |   |                                                  |
|------|------------------------------------------------|---|--------------------------------------------------|
| 4738 | 1,2,7,9,13, 3,4,5,6,8,1<br>15,16,17 0,11,12,14 | 7 | P01835,P0C0A9,P14668,Q4FZU2,Q6AYS4,Q6IFW6,Q6IG02 |
| 4739 | 1,2,7,9,14, 3,4,5,6,8,1<br>15,16,17 0,11,12,13 | 7 | P02781,P0C0A9,P14668,P16636,Q4FZU2,Q6AYS4,Q6IFW6 |
| 4740 | 1,2,7,10,1 3,4,5,6,8,9<br>1,12,13,14 ,15,16,17 | 2 | P23593,P47727                                    |
| 4741 | 1,2,7,10,1 3,4,5,6,8,9<br>1,12,13,15 ,14,16,17 | 2 | P01835,P02793;Q7TP54                             |
| 4742 | 1,2,7,10,1 3,4,5,6,8,9<br>1,12,13,16 ,14,15,17 | 5 | P01835,P02793;Q7TP54,P12368,P47967,P97840        |
| 4743 | 1,2,7,10,1 3,4,5,6,8,9<br>1,12,13,17 ,14,15,16 | 1 | P14668                                           |
| 4744 | 1,2,7,10,1 3,4,5,6,8,9<br>1,12,14,15 ,13,16,17 | 4 | P06760,P23593,P35280,P51907                      |
| 4745 | 1,2,7,10,1 3,4,5,6,8,9<br>1,12,14,16 ,13,15,17 | 4 | P06760,P47967,P97840,Q63532                      |
| 4746 | 1,2,7,10,1 3,4,5,6,8,9<br>1,12,14,17 ,13,15,16 | 0 |                                                  |
| 4747 | 1,2,7,10,1 3,4,5,6,8,9<br>1,12,15,16 ,13,14,17 | 6 | P01835,P02793;Q7TP54,P06760,P47967,P51907,P97840 |
| 4748 | 1,2,7,10,1 3,4,5,6,8,9<br>1,12,15,17 ,13,14,16 | 1 | P06866                                           |
| 4749 | 1,2,7,10,1 3,4,5,6,8,9<br>1,12,16,17 ,13,14,15 | 3 | P06757,P06866,P97840                             |
| 4750 | 1,2,7,10,1 3,4,5,6,8,9<br>1,13,14,15 ,12,16,17 | 5 | P01835,P06760,P16636,P23593,Q09030               |
| 4751 | 1,2,7,10,1 3,4,5,6,8,9<br>1,13,14,16 ,12,15,17 | 5 | B0BNN3,P01835,P06760,Q63532,Q7TPB1               |
| 4752 | 1,2,7,10,1 3,4,5,6,8,9<br>1,13,14,17 ,12,15,16 | 1 | P14668                                           |
| 4753 | 1,2,7,10,1 3,4,5,6,8,9<br>1,13,15,16 ,12,14,17 | 4 | P01835,P02793;Q7TP54,P06760,Q9Z0V6               |
| 4754 | 1,2,7,10,1 3,4,5,6,8,9<br>1,13,15,17 ,12,14,16 | 2 | P01835,P14668                                    |
| 4755 | 1,2,7,10,1 3,4,5,6,8,9<br>1,13,16,17 ,12,14,15 | 1 | P01835                                           |
| 4756 | 1,2,7,10,1 3,4,5,6,8,9<br>1,14,15,16 ,12,13,17 | 5 | P01835,P06760,P16636,P51907,Q63532               |
| 4757 | 1,2,7,10,1 3,4,5,6,8,9<br>1,14,15,17 ,12,13,16 | 0 |                                                  |
| 4758 | 1,2,7,10,1 3,4,5,6,8,9<br>1,14,16,17 ,12,13,15 | 1 | Q63532                                           |
| 4759 | 1,2,7,10,1 3,4,5,6,8,9<br>1,15,16,17 ,12,13,14 | 1 | P01835                                           |
| 4760 | 1,2,7,10,1 3,4,5,6,8,9<br>2,13,14,15 ,11,16,17 | 3 | P06760,P14668,P97840                             |



|      |                                                |   |                                                         |
|------|------------------------------------------------|---|---------------------------------------------------------|
| 4761 | 1,2,7,10,1 3,4,5,6,8,9<br>2,13,14,16 ,11,15,17 | 6 | P06760,P14668,P47967,P97840,Q63532,Q6AYS4               |
| 4762 | 1,2,7,10,1 3,4,5,6,8,9<br>2,13,14,17 ,11,15,16 | 1 | P14668                                                  |
| 4763 | 1,2,7,10,1 3,4,5,6,8,9<br>2,13,15,16 ,11,14,17 | 7 | P01835,P02793;Q7TP54,P06760,P14668,P47967,P97840,Q6AYS4 |
| 4764 | 1,2,7,10,1 3,4,5,6,8,9<br>2,13,15,17 ,11,14,16 | 3 | P02793;Q7TP54,P06866,P14668                             |
| 4765 | 1,2,7,10,1 3,4,5,6,8,9<br>2,13,16,17 ,11,14,15 | 4 | P02793;Q7TP54,P06866,P14668,P97840                      |
| 4766 | 1,2,7,10,1 3,4,5,6,8,9<br>2,14,15,16 ,11,13,17 | 6 | P06760,P14668,P35467,P97840,Q63532,Q6AYS4               |
| 4767 | 1,2,7,10,1 3,4,5,6,8,9<br>2,14,15,17 ,11,13,16 | 2 | P06866,P14668                                           |
| 4768 | 1,2,7,10,1 3,4,5,6,8,9<br>2,14,16,17 ,11,13,15 | 4 | P06866,P14668,P97840,Q63532                             |
| 4769 | 1,2,7,10,1 3,4,5,6,8,9<br>2,15,16,17 ,11,13,14 | 4 | P02793;Q7TP54,P06866,P14668,P97840                      |
| 4770 | 1,2,7,10,1 3,4,5,6,8,9<br>3,14,15,16 ,11,12,17 | 8 | P01835,P06760,P14668,P16636,Q09030,Q4G075,Q63532,Q6AYS4 |
| 4771 | 1,2,7,10,1 3,4,5,6,8,9<br>3,14,15,17 ,11,12,16 | 3 | P01835,P14668,Q6IFW6                                    |
| 4772 | 1,2,7,10,1 3,4,5,6,8,9<br>3,14,16,17 ,11,12,15 | 3 | P01835,P02625,P14668                                    |
| 4773 | 1,2,7,10,1 3,4,5,6,8,9<br>3,15,16,17 ,11,12,14 | 4 | P01835,P02793;Q7TP54,P0C0A9,P14668                      |
| 4774 | 1,2,7,10,1 3,4,5,6,8,9<br>4,15,16,17 ,11,12,13 | 6 | P01835,P02780,P0C0A9,P14668,P35467,Q63532               |
| 4775 | 1,2,7,11,1 3,4,5,6,8,9<br>2,13,14,15 ,10,16,17 | 5 | D3ZUC6,P06760,P23593,P25031,Q09030                      |
| 4776 | 1,2,7,11,1 3,4,5,6,8,9<br>2,13,14,16 ,10,15,17 | 4 | D3ZUC6,P06760,Q63532,Q7TPB1                             |
| 4777 | 1,2,7,11,1 3,4,5,6,8,9<br>2,13,14,17 ,10,15,16 | 2 | D3ZUC6,P14668                                           |
| 4778 | 1,2,7,11,1 3,4,5,6,8,9<br>2,13,15,16 ,10,14,17 | 3 | P01835,P02793;Q7TP54,P06760                             |
| 4779 | 1,2,7,11,1 3,4,5,6,8,9<br>2,13,15,17 ,10,14,16 | 2 | P06866,P14668                                           |
| 4780 | 1,2,7,11,1 3,4,5,6,8,9<br>2,13,16,17 ,10,14,15 | 1 | P06866                                                  |
| 4781 | 1,2,7,11,1 3,4,5,6,8,9<br>2,14,15,16 ,10,13,17 | 5 | D3ZUC6,P06760,P16636,P51907,Q63532                      |
| 4782 | 1,2,7,11,1 3,4,5,6,8,9<br>2,14,15,17 ,10,13,16 | 2 | D3ZUC6,P06866                                           |
| 4783 | 1,2,7,11,1 3,4,5,6,8,9<br>2,14,16,17 ,10,13,15 | 3 | D3ZUC6,P06866,Q63532                                    |

|      |                          |                           |    |                                                                       |
|------|--------------------------|---------------------------|----|-----------------------------------------------------------------------|
| 4784 | 1,2,7,11,1<br>2,15,16,17 | 3,4,5,6,8,9<br>,10,13,14  | 1  | P06866                                                                |
| 4785 | 1,2,7,11,1<br>3,14,15,16 | 3,4,5,6,8,9<br>,10,12,17  | 7  | P01835,P06760,P16636,Q09030,Q4G075,Q63532,Q99MH3                      |
| 4786 | 1,2,7,11,1<br>3,14,15,17 | 3,4,5,6,8,9<br>,10,12,16  | 1  | P14668                                                                |
| 4787 | 1,2,7,11,1<br>3,14,16,17 | 3,4,5,6,8,9<br>,10,12,15  | 0  |                                                                       |
| 4788 | 1,2,7,11,1<br>3,15,16,17 | 3,4,5,6,8,9<br>,10,12,14  | 1  | P01835                                                                |
| 4789 | 1,2,7,11,1<br>4,15,16,17 | 3,4,5,6,8,9<br>,10,12,13  | 1  | P16636                                                                |
| 4790 | 1,2,7,12,1<br>3,14,15,16 | 3,4,5,6,8,9<br>,10,11,17  | 9  | D3ZUC6,P06760,P08649,P14668,P16636,P35467,Q09030,Q63532,Q6AYS4        |
| 4791 | 1,2,7,12,1<br>3,14,15,17 | 3,4,5,6,8,9<br>,10,11,16  | 3  | D3ZUC6,P08649,P14668                                                  |
| 4792 | 1,2,7,12,1<br>3,14,16,17 | 3,4,5,6,8,9<br>,10,11,15  | 3  | D3ZUC6,P14668,Q6AYS4                                                  |
| 4793 | 1,2,7,12,1<br>3,15,16,17 | 3,4,5,6,8,9<br>,10,11,14  | 4  | P02793;Q7TP54,P06866,P14668,Q6AYS4                                    |
| 4794 | 1,2,7,12,1<br>4,15,16,17 | 3,4,5,6,8,9<br>,10,11,13  | 6  | D3ZUC6,P06866,P14668,P35467,Q63532,Q6AYS4                             |
| 4795 | 1,2,7,13,1<br>4,15,16,17 | 3,4,5,6,8,9<br>,10,11,12  | 10 | P00714,P01835,P0C0A9,P14668,P16636,P35467,Q4FZU2,Q6AYS4,Q6IFW6,Q6IG02 |
| 4796 | 1,2,8,9,10,<br>11,12,13  | 3,4,5,6,7,1<br>4,15,16,17 | 1  | P02803                                                                |
| 4797 | 1,2,8,9,10,<br>11,12,14  | 3,4,5,6,7,1<br>3,15,16,17 | 2  | P02803,P62804                                                         |
| 4798 | 1,2,8,9,10,<br>11,12,15  | 3,4,5,6,7,1<br>3,14,16,17 | 0  |                                                                       |
| 4799 | 1,2,8,9,10,<br>11,12,16  | 3,4,5,6,7,1<br>3,14,15,17 | 3  | P02803,P20760,Q9WUW8                                                  |
| 4800 | 1,2,8,9,10,<br>11,12,17  | 3,4,5,6,7,1<br>3,14,15,16 | 2  | P02803,P62804                                                         |
| 4801 | 1,2,8,9,10,<br>11,13,14  | 3,4,5,6,7,1<br>2,15,16,17 | 1  | P02803                                                                |
| 4802 | 1,2,8,9,10,<br>11,13,15  | 3,4,5,6,7,1<br>2,14,16,17 | 1  | P01835                                                                |
| 4803 | 1,2,8,9,10,<br>11,13,16  | 3,4,5,6,7,1<br>2,14,15,17 | 3  | P01835,P02803,Q8CJD3                                                  |
| 4804 | 1,2,8,9,10,<br>11,13,17  | 3,4,5,6,7,1<br>2,14,15,16 | 1  | P02803                                                                |
| 4805 | 1,2,8,9,10,<br>11,14,15  | 3,4,5,6,7,1<br>2,13,16,17 | 3  | P09605;P25809,Q99MH3,Q9QZK9                                           |
| 4806 | 1,2,8,9,10,<br>11,14,16  | 3,4,5,6,7,1<br>2,13,15,17 | 4  | P08937,Q99MH3,Q9QZK9,Q9WUW8                                           |

|      |                                                |   |                                                                       |
|------|------------------------------------------------|---|-----------------------------------------------------------------------|
| 4807 | 1,2,8,9,10, 3,4,5,6,7,1<br>11,14,17 2,13,15,16 | 1 | Q9QUL6                                                                |
| 4808 | 1,2,8,9,10, 3,4,5,6,7,1<br>11,15,16 2,13,14,17 | 3 | P01835,Q9QZK9,Q9WUW8                                                  |
| 4809 | 1,2,8,9,10, 3,4,5,6,7,1<br>11,15,17 2,13,14,16 | 0 |                                                                       |
| 4810 | 1,2,8,9,10, 3,4,5,6,7,1<br>11,16,17 2,13,14,15 | 1 | A2RUV9                                                                |
| 4811 | 1,2,8,9,10, 3,4,5,6,7,1<br>12,13,14 1,15,16,17 | 2 | P02803,Q8K4G9                                                         |
| 4812 | 1,2,8,9,10, 3,4,5,6,7,1<br>12,13,15 1,14,16,17 | 1 | P15999                                                                |
| 4813 | 1,2,8,9,10, 3,4,5,6,7,1<br>12,13,16 1,14,15,17 | 2 | P02803,P97840                                                         |
| 4814 | 1,2,8,9,10, 3,4,5,6,7,1<br>12,13,17 1,14,15,16 | 3 | P02803,P14668,Q8K4G9                                                  |
| 4815 | 1,2,8,9,10, 3,4,5,6,7,1<br>12,14,15 1,13,16,17 | 0 |                                                                       |
| 4816 | 1,2,8,9,10, 3,4,5,6,7,1<br>12,14,16 1,13,15,17 | 3 | P05539,Q63751,Q9WUW8                                                  |
| 4817 | 1,2,8,9,10, 3,4,5,6,7,1<br>12,14,17 1,13,15,16 | 3 | P05539,Q8K4G9,Q8VD89                                                  |
| 4818 | 1,2,8,9,10, 3,4,5,6,7,1<br>12,15,16 1,13,14,17 | 2 | P05539,Q9WUW8                                                         |
| 4819 | 1,2,8,9,10, 3,4,5,6,7,1<br>12,15,17 1,13,14,16 | 1 | P06866                                                                |
| 4820 | 1,2,8,9,10, 3,4,5,6,7,1<br>12,16,17 1,13,14,15 | 2 | P05539,P06866                                                         |
| 4821 | 1,2,8,9,10, 3,4,5,6,7,1<br>13,14,15 1,12,16,17 | 4 | P01835,P09605,P25809,P15999,Q63751                                    |
| 4822 | 1,2,8,9,10, 3,4,5,6,7,1<br>13,14,16 1,12,15,17 | 3 | P01835,Q63751,Q9QZK9                                                  |
| 4823 | 1,2,8,9,10, 3,4,5,6,7,1<br>13,14,17 1,12,15,16 | 2 | Q4FZU2,Q8K4G9                                                         |
| 4824 | 1,2,8,9,10, 3,4,5,6,7,1<br>13,15,16 1,12,14,17 | 3 | P01835,Q63751,Q9QZK9                                                  |
| 4825 | 1,2,8,9,10, 3,4,5,6,7,1<br>13,15,17 1,12,14,16 | 2 | P01835,P15999                                                         |
| 4826 | 1,2,8,9,10, 3,4,5,6,7,1<br>13,16,17 1,12,14,15 | 3 | P01835,P02625,Q8CJD3                                                  |
| 4827 | 1,2,8,9,10, 3,4,5,6,7,1<br>14,15,16 1,12,13,17 | 9 | P01835,P05539,P08937,P09605,P25809,Q63751,Q63942,Q99041,Q99MH3,Q9QZK9 |
| 4828 | 1,2,8,9,10, 3,4,5,6,7,1<br>14,15,17 1,12,13,16 | 1 | P17046                                                                |
| 4829 | 1,2,8,9,10, 3,4,5,6,7,1<br>14,16,17 1,12,13,15 | 2 | P02625,P05539                                                         |

|      |                                                |   |                                    |
|------|------------------------------------------------|---|------------------------------------|
| 4830 | 1,2,8,9,10, 3,4,5,6,7,1<br>15,16,17 1,12,13,14 | 2 | P01835,P05539                      |
| 4831 | 1,2,8,9,11, 3,4,5,6,7,1<br>12,13,14 0,15,16,17 | 1 | P02803                             |
| 4832 | 1,2,8,9,11, 3,4,5,6,7,1<br>12,13,15 0,14,16,17 | 1 | P02803                             |
| 4833 | 1,2,8,9,11, 3,4,5,6,7,1<br>12,13,16 0,14,15,17 | 2 | P02803,P20760                      |
| 4834 | 1,2,8,9,11, 3,4,5,6,7,1<br>12,13,17 0,14,15,16 | 1 | P02803                             |
| 4835 | 1,2,8,9,11, 3,4,5,6,7,1<br>12,14,15 0,13,16,17 | 1 | Q99MH3                             |
| 4836 | 1,2,8,9,11, 3,4,5,6,7,1<br>12,14,16 0,13,15,17 | 3 | P02803,P20760,Q99MH3               |
| 4837 | 1,2,8,9,11, 3,4,5,6,7,1<br>12,14,17 0,13,15,16 | 2 | P62804,Q00715                      |
| 4838 | 1,2,8,9,11, 3,4,5,6,7,1<br>12,15,16 0,13,14,17 | 0 |                                    |
| 4839 | 1,2,8,9,11, 3,4,5,6,7,1<br>12,15,17 0,13,14,16 | 1 | P06866                             |
| 4840 | 1,2,8,9,11, 3,4,5,6,7,1<br>12,16,17 0,13,14,15 | 2 | P02803,P06866                      |
| 4841 | 1,2,8,9,11, 3,4,5,6,7,1<br>13,14,15 0,12,16,17 | 1 | Q99MH3                             |
| 4842 | 1,2,8,9,11, 3,4,5,6,7,1<br>13,14,16 0,12,15,17 | 4 | P02803,Q7TPB1,Q99MH3,Q9QZK9        |
| 4843 | 1,2,8,9,11, 3,4,5,6,7,1<br>13,14,17 0,12,15,16 | 1 | Q5FVI6                             |
| 4844 | 1,2,8,9,11, 3,4,5,6,7,1<br>13,15,16 0,12,14,17 | 2 | P01835,Q9QZK9                      |
| 4845 | 1,2,8,9,11, 3,4,5,6,7,1<br>13,15,17 0,12,14,16 | 0 |                                    |
| 4846 | 1,2,8,9,11, 3,4,5,6,7,1<br>13,16,17 0,12,14,15 | 3 | A2RUV9,P02803,Q8CJD3               |
| 4847 | 1,2,8,9,11, 3,4,5,6,7,1<br>14,15,16 0,12,13,17 | 3 | P08937,Q99MH3,Q9QZK9               |
| 4848 | 1,2,8,9,11, 3,4,5,6,7,1<br>14,15,17 0,12,13,16 | 0 |                                    |
| 4849 | 1,2,8,9,11, 3,4,5,6,7,1<br>14,16,17 0,12,13,15 | 1 | Q99MH3                             |
| 4850 | 1,2,8,9,11, 3,4,5,6,7,1<br>15,16,17 0,12,13,14 | 1 | Q498D9                             |
| 4851 | 1,2,8,9,12, 3,4,5,6,7,1<br>13,14,15 0,11,16,17 | 3 | P15999,P61206;P84079;P84082,Q5FVI6 |
| 4852 | 1,2,8,9,12, 3,4,5,6,7,1<br>13,14,16 0,11,15,17 | 2 | P02803,Q5FVI6                      |

|      |                                                |   |                                                         |
|------|------------------------------------------------|---|---------------------------------------------------------|
| 4853 | 1,2,8,9,12, 3,4,5,6,7,1<br>13,14,17 0,11,15,16 | 5 | P02803,P61206;P84079;P84082,Q5FVI6,Q8K4G9,Q8VD89        |
| 4854 | 1,2,8,9,12, 3,4,5,6,7,1<br>13,15,16 0,11,14,17 | 0 |                                                         |
| 4855 | 1,2,8,9,12, 3,4,5,6,7,1<br>13,15,17 0,11,14,16 | 3 | P15999,P61206;P84079;P84082,Q5FVI6                      |
| 4856 | 1,2,8,9,12, 3,4,5,6,7,1<br>13,16,17 0,11,14,15 | 2 | P02803,Q5FVI6                                           |
| 4857 | 1,2,8,9,12, 3,4,5,6,7,1<br>14,15,16 0,11,13,17 | 1 | Q99MH3                                                  |
| 4858 | 1,2,8,9,12, 3,4,5,6,7,1<br>14,15,17 0,11,13,16 | 3 | P61206;P84079;P84082,Q5FVI6,Q8VD89                      |
| 4859 | 1,2,8,9,12, 3,4,5,6,7,1<br>14,16,17 0,11,13,15 | 3 | P05539,Q5FVI6,Q8VD89                                    |
| 4860 | 1,2,8,9,12, 3,4,5,6,7,1<br>15,16,17 0,11,13,14 | 1 | P06866                                                  |
| 4861 | 1,2,8,9,13, 3,4,5,6,7,1<br>14,15,16 0,11,12,17 | 8 | P01835,P08937,Q4FZU2,Q5FVI6,Q63751,Q63942,Q99MH3,Q9QZK9 |
| 4862 | 1,2,8,9,13, 3,4,5,6,7,1<br>14,15,17 0,11,12,16 | 5 | P15999,P61206;P84079;P84082,Q4FZU2,Q5FVI6,Q6IFW6        |
| 4863 | 1,2,8,9,13, 3,4,5,6,7,1<br>14,16,17 0,11,12,15 | 2 | Q4FZU2,Q5FVI6                                           |
| 4864 | 1,2,8,9,13, 3,4,5,6,7,1<br>15,16,17 0,11,12,14 | 5 | P01835,P61206;P84079;P84082,Q4FZU2,Q5FVI6,Q6IFW6        |
| 4865 | 1,2,8,9,14, 3,4,5,6,7,1<br>15,16,17 0,11,12,13 | 3 | P61206;P84079;P84082,Q4FZU2,Q5FVI6                      |
| 4866 | 1,2,8,10,1 3,4,5,6,7,9<br>1,12,13,14 ,15,16,17 | 4 | P02803,P47727,P62804,Q8K4G9                             |
| 4867 | 1,2,8,10,1 3,4,5,6,7,9<br>1,12,13,15 ,14,16,17 | 2 | P01835,P15999                                           |
| 4868 | 1,2,8,10,1 3,4,5,6,7,9<br>1,12,13,16 ,14,15,17 | 2 | P01835,P02803                                           |
| 4869 | 1,2,8,10,1 3,4,5,6,7,9<br>1,12,13,17 ,14,15,16 | 4 | P02803,P62804,Q62635,Q8K4G9                             |
| 4870 | 1,2,8,10,1 3,4,5,6,7,9<br>1,12,14,15 ,13,16,17 | 4 | P09605;P25809,P35280,P62804,Q00715                      |
| 4871 | 1,2,8,10,1 3,4,5,6,7,9<br>1,12,14,16 ,13,15,17 | 3 | P05539,P62804,Q9WUW8                                    |
| 4872 | 1,2,8,10,1 3,4,5,6,7,9<br>1,12,14,17 ,13,15,16 | 2 | P62804,Q00715                                           |
| 4873 | 1,2,8,10,1 3,4,5,6,7,9<br>1,12,15,16 ,13,14,17 | 2 | P01835,Q9WUW8                                           |
| 4874 | 1,2,8,10,1 3,4,5,6,7,9<br>1,12,15,17 ,13,14,16 | 3 | P06866,P62804,Q00715                                    |
| 4875 | 1,2,8,10,1 3,4,5,6,7,9<br>1,12,16,17 ,13,14,15 | 2 | P05539,P06866                                           |

|      |                          |                          |   |                                           |
|------|--------------------------|--------------------------|---|-------------------------------------------|
| 4876 | 1,2,8,10,1<br>1,13,14,15 | 3,4,5,6,7,9<br>,12,16,17 | 3 | P01835,P09605;P25809,P15999               |
| 4877 | 1,2,8,10,1<br>1,13,14,16 | 3,4,5,6,7,9<br>,12,15,17 | 3 | P01835,P09605;P25809,Q7TPB1               |
| 4878 | 1,2,8,10,1<br>1,13,14,17 | 3,4,5,6,7,9<br>,12,15,16 | 1 | Q8K4G9                                    |
| 4879 | 1,2,8,10,1<br>1,13,15,16 | 3,4,5,6,7,9<br>,12,14,17 | 2 | P01835,P09605;P25809                      |
| 4880 | 1,2,8,10,1<br>1,13,15,17 | 3,4,5,6,7,9<br>,12,14,16 | 2 | P01835,P15999                             |
| 4881 | 1,2,8,10,1<br>1,13,16,17 | 3,4,5,6,7,9<br>,12,14,15 | 2 | P01835,Q8CJD3                             |
| 4882 | 1,2,8,10,1<br>1,14,15,16 | 3,4,5,6,7,9<br>,12,13,17 | 3 | P01835,P09605;P25809,Q9QZK9               |
| 4883 | 1,2,8,10,1<br>1,14,15,17 | 3,4,5,6,7,9<br>,12,13,16 | 0 |                                           |
| 4884 | 1,2,8,10,1<br>1,14,16,17 | 3,4,5,6,7,9<br>,12,13,15 | 1 | P05539                                    |
| 4885 | 1,2,8,10,1<br>1,15,16,17 | 3,4,5,6,7,9<br>,12,13,14 | 1 | P01835                                    |
| 4886 | 1,2,8,10,1<br>2,13,14,15 | 3,4,5,6,7,9<br>,11,16,17 | 3 | P09605;P25809,P15999,Q8K4G9               |
| 4887 | 1,2,8,10,1<br>2,13,14,16 | 3,4,5,6,7,9<br>,11,15,17 | 1 | Q8K4G9                                    |
| 4888 | 1,2,8,10,1<br>2,13,14,17 | 3,4,5,6,7,9<br>,11,15,16 | 3 | P14668,Q62635,Q8K4G9                      |
| 4889 | 1,2,8,10,1<br>2,13,15,16 | 3,4,5,6,7,9<br>,11,14,17 | 3 | P01835,P15999,P83121                      |
| 4890 | 1,2,8,10,1<br>2,13,15,17 | 3,4,5,6,7,9<br>,11,14,16 | 6 | P06866,P14668,P15999,P83121,Q6IFV1,Q8K4G9 |
| 4891 | 1,2,8,10,1<br>2,13,16,17 | 3,4,5,6,7,9<br>,11,14,15 | 3 | P06866,P83121,Q8K4G9                      |
| 4892 | 1,2,8,10,1<br>2,14,15,16 | 3,4,5,6,7,9<br>,11,13,17 | 2 | P05539,P09605;P25809                      |
| 4893 | 1,2,8,10,1<br>2,14,15,17 | 3,4,5,6,7,9<br>,11,13,16 | 2 | P05539,P06866                             |
| 4894 | 1,2,8,10,1<br>2,14,16,17 | 3,4,5,6,7,9<br>,11,13,15 | 4 | P02625,P05539,P06866,Q8K4G9               |
| 4895 | 1,2,8,10,1<br>2,15,16,17 | 3,4,5,6,7,9<br>,11,13,14 | 3 | P05539,P06866,P83121                      |
| 4896 | 1,2,8,10,1<br>3,14,15,16 | 3,4,5,6,7,9<br>,11,12,17 | 4 | P01835,P09605;P25809,P15999,Q63751        |
| 4897 | 1,2,8,10,1<br>3,14,15,17 | 3,4,5,6,7,9<br>,11,12,16 | 3 | P01835,P15999,P61206;P84079;P84082        |
| 4898 | 1,2,8,10,1<br>3,14,16,17 | 3,4,5,6,7,9<br>,11,12,15 | 3 | P01835,P02625,Q8K4G9                      |

|      |                                                |   |                                                                       |
|------|------------------------------------------------|---|-----------------------------------------------------------------------|
| 4899 | 1,2,8,10,1 3,4,5,6,7,9<br>3,15,16,17 ,11,12,14 | 3 | P01835,P15999,P83121                                                  |
| 4900 | 1,2,8,10,1 3,4,5,6,7,9<br>4,15,16,17 ,11,12,13 | 2 | P01835,P05539                                                         |
| 4901 | 1,2,8,11,1 3,4,5,6,7,9<br>2,13,14,15 ,10,16,17 | 1 | P15999                                                                |
| 4902 | 1,2,8,11,1 3,4,5,6,7,9<br>2,13,14,16 ,10,15,17 | 1 | P02803                                                                |
| 4903 | 1,2,8,11,1 3,4,5,6,7,9<br>2,13,14,17 ,10,15,16 | 4 | Q00715,Q5FVI6,Q62635,Q8K4G9                                           |
| 4904 | 1,2,8,11,1 3,4,5,6,7,9<br>2,13,15,16 ,10,14,17 | 1 | P01835                                                                |
| 4905 | 1,2,8,11,1 3,4,5,6,7,9<br>2,13,15,17 ,10,14,16 | 3 | P06866,P15999,Q62635                                                  |
| 4906 | 1,2,8,11,1 3,4,5,6,7,9<br>2,13,16,17 ,10,14,15 | 1 | P02803                                                                |
| 4907 | 1,2,8,11,1 3,4,5,6,7,9<br>2,14,15,16 ,10,13,17 | 0 |                                                                       |
| 4908 | 1,2,8,11,1 3,4,5,6,7,9<br>2,14,15,17 ,10,13,16 | 3 | P06866,P62804,Q00715                                                  |
| 4909 | 1,2,8,11,1 3,4,5,6,7,9<br>2,14,16,17 ,10,13,15 | 0 |                                                                       |
| 4910 | 1,2,8,11,1 3,4,5,6,7,9<br>2,15,16,17 ,10,13,14 | 1 | P06866                                                                |
| 4911 | 1,2,8,11,1 3,4,5,6,7,9<br>3,14,15,16 ,10,12,17 | 3 | P01835,P15999,Q99MH3                                                  |
| 4912 | 1,2,8,11,1 3,4,5,6,7,9<br>3,14,15,17 ,10,12,16 | 2 | P15999,Q5FVI6                                                         |
| 4913 | 1,2,8,11,1 3,4,5,6,7,9<br>3,14,16,17 ,10,12,15 | 0 |                                                                       |
| 4914 | 1,2,8,11,1 3,4,5,6,7,9<br>3,15,16,17 ,10,12,14 | 1 | P01835                                                                |
| 4915 | 1,2,8,11,1 3,4,5,6,7,9<br>4,15,16,17 ,10,12,13 | 0 |                                                                       |
| 4916 | 1,2,8,12,1 3,4,5,6,7,9<br>3,14,15,16 ,10,11,17 | 2 | P15999,Q5FVI6                                                         |
| 4917 | 1,2,8,12,1 3,4,5,6,7,9<br>3,14,15,17 ,10,11,16 | 4 | P15999,P61206;P84079;P84082,Q5FVI6,Q62635                             |
| 4918 | 1,2,8,12,1 3,4,5,6,7,9<br>3,14,16,17 ,10,11,15 | 3 | Q5FVI6,Q6PCU2,Q8K4G9                                                  |
| 4919 | 1,2,8,12,1 3,4,5,6,7,9<br>3,15,16,17 ,10,11,14 | 6 | P06866,P15999,P61206;P84079;P84082,P83121,Q5FVI6,Q5XFX0               |
| 4920 | 1,2,8,12,1 3,4,5,6,7,9<br>4,15,16,17 ,10,11,13 | 4 | P05539,P06866,P61206;P84079;P84082,Q5FVI6                             |
| 4921 | 1,2,8,13,1 3,4,5,6,7,9<br>4,15,16,17 ,10,11,12 | 8 | P01835,P15999,P61206;P84079;P84082,Q08849,Q4FZU2,Q5FVI6,Q6IFW6,Q6PCU2 |

|      |                          |                          |    |                                                                                                                                      |
|------|--------------------------|--------------------------|----|--------------------------------------------------------------------------------------------------------------------------------------|
| 4922 | 1,2,9,10,1<br>1,12,13,14 | 3,4,5,6,7,8<br>,15,16,17 | 11 | P02803,P06760,P08937,P20760,P20761,P50115,Q4G075,Q63661,Q63751,Q99041,Q9Z0V6                                                         |
| 4923 | 1,2,9,10,1<br>1,12,13,15 | 3,4,5,6,7,8<br>,14,16,17 | 8  | P06760,P08937,P20760,P20761,P50115,Q63661,Q99041,Q9Z0V6                                                                              |
| 4924 | 1,2,9,10,1<br>1,12,13,16 | 3,4,5,6,7,8<br>,14,15,17 | 14 | P02803,P06760,P07171,P08937,P10536,P20760,P20761,P50115,P97840,Q63661,Q63751,Q99041,Q9WUW8,Q9Z0V6                                    |
| 4925 | 1,2,9,10,1<br>1,12,13,17 | 3,4,5,6,7,8<br>,14,15,16 | 3  | P02803,P07171,P14668                                                                                                                 |
| 4926 | 1,2,9,10,1<br>1,12,14,15 | 3,4,5,6,7,8<br>,13,16,17 | 11 | P06760,P08937,P20760,P20761,P23928,P50115,P51907,Q63661,Q63751,Q99041,Q9Z0V6                                                         |
| 4927 | 1,2,9,10,1<br>1,12,14,16 | 3,4,5,6,7,8<br>,13,15,17 | 14 | P06760,P08937,P10536,P20760,P20761,P50115,P62815,Q4G075,Q63661,Q63751,Q99041,Q99MH3,Q9WUW8,Q9Z0V6                                    |
| 4928 | 1,2,9,10,1<br>1,12,14,17 | 3,4,5,6,7,8<br>,13,15,16 | 3  | P06866,Q63661,Q8VD89                                                                                                                 |
| 4929 | 1,2,9,10,1<br>1,12,15,16 | 3,4,5,6,7,8<br>,13,14,17 | 15 | P06760,P06761,P08937,P10536,P20760,P20761,P22282,P50115,P51907,P62815,Q63661,Q63751,Q99041,Q9WUW8,Q9Z0V6                             |
| 4930 | 1,2,9,10,1<br>1,12,15,17 | 3,4,5,6,7,8<br>,13,14,16 | 2  | P06866,Q63661                                                                                                                        |
| 4931 | 1,2,9,10,1<br>1,12,16,17 | 3,4,5,6,7,8<br>,13,14,15 | 4  | P06757,P06761,P06866,P07171                                                                                                          |
| 4932 | 1,2,9,10,1<br>1,13,14,15 | 3,4,5,6,7,8<br>,12,16,17 | 12 | P06760,P08937,P09605,P25809,P20646,P20761,P23928,P50115,Q4G075,Q63661,Q63751,Q99041,Q9Z0V6                                           |
| 4933 | 1,2,9,10,1<br>1,13,14,16 | 3,4,5,6,7,8<br>,12,15,17 | 18 | B0BNN3,P06760,P06761,P08937,P10536,P20646,P20760,P20761,P50115,P62815,Q4G075,Q63661,Q63751,Q7TPB1,Q99041,Q99MH3,Q9QZK9,Q9Z0V6        |
| 4934 | 1,2,9,10,1<br>1,13,14,17 | 3,4,5,6,7,8<br>,12,15,16 | 3  | P08937,P14668,Q99041                                                                                                                 |
| 4935 | 1,2,9,10,1<br>1,13,15,16 | 3,4,5,6,7,8<br>,12,14,17 | 17 | P01835,P06760,P06761,P08937,P10536,P20760,P20761,P22282,P22283,P50115,P62815,Q4G075,Q63661,Q63751,Q99041,Q9QZK9,Q9Z0V6               |
| 4936 | 1,2,9,10,1<br>1,13,15,17 | 3,4,5,6,7,8<br>,12,14,16 | 4  | P08937,P14668,Q99041,Q9Z0V6                                                                                                          |
| 4937 | 1,2,9,10,1<br>1,13,16,17 | 3,4,5,6,7,8<br>,12,14,15 | 6  | P06761,P07171,P08937,Q8CJD3,Q99041,Q9Z0V6                                                                                            |
| 4938 | 1,2,9,10,1<br>1,14,15,16 | 3,4,5,6,7,8<br>,12,13,17 | 19 | P02780,P06760,P06761,P07647,P08937,P20760,P20761,P22282,P22283,P50115,P51907,P62815,Q4G075,Q63661,Q63751,Q99041,Q99MH3,Q9QZK9,Q9Z0V6 |
| 4939 | 1,2,9,10,1<br>1,14,15,17 | 3,4,5,6,7,8<br>,12,13,16 | 4  | P06761,P08937,Q99041,Q9QUL6                                                                                                          |
| 4940 | 1,2,9,10,1<br>1,14,16,17 | 3,4,5,6,7,8<br>,12,13,15 | 4  | P06761,P08937,Q99041,Q99MH3                                                                                                          |
| 4941 | 1,2,9,10,1<br>1,15,16,17 | 3,4,5,6,7,8<br>,12,13,14 | 8  | P02780,P06761,P06911,P08937,P22282,P22283,Q62902,Q99041                                                                              |
| 4942 | 1,2,9,10,1<br>2,13,14,15 | 3,4,5,6,7,8<br>,11,16,17 | 14 | P06760,P07150,P08937,P09605,P25809,P14668,P14669,P20646,P20761,P50115,Q4G075,Q63751,Q6AYS4,Q99041,Q9Z0V6                             |
| 4943 | 1,2,9,10,1<br>2,13,14,16 | 3,4,5,6,7,8<br>,11,15,17 | 16 | P06760,P07150,P07171,P08937,P14668,P14669,P20646,P20760,P20761,P50115,P97840,Q4G075,Q63751,Q6AYS4,Q99041,Q9Z0V6                      |
| 4944 | 1,2,9,10,1<br>2,13,14,17 | 3,4,5,6,7,8<br>,11,15,16 | 4  | P07150,P07171,P14668,Q8VD89                                                                                                          |



|      |                          |                          |    |                                                                                                                                                    |
|------|--------------------------|--------------------------|----|----------------------------------------------------------------------------------------------------------------------------------------------------|
| 4945 | 1,2,9,10,1<br>2,13,15,16 | 3,4,5,6,7,8<br>,11,14,17 | 16 | P02793;Q7TP54,P06760,P07150,P07171,P08937,P14668,P14669,P20760,P20761,P50115,P97840,Q4G075,Q63751,Q6AYS4,Q99041,Q9Z0V6                             |
| 4946 | 1,2,9,10,1<br>2,13,15,17 | 3,4,5,6,7,8<br>,11,14,16 | 5  | P06866,P07150,P07171,P14668,P61206;P84079;P84082                                                                                                   |
| 4947 | 1,2,9,10,1<br>2,13,16,17 | 3,4,5,6,7,8<br>,11,14,15 | 7  | P06866,P07150,P07171,P14668,P14669,P97840,Q6AYS4                                                                                                   |
| 4948 | 1,2,9,10,1<br>2,14,15,16 | 3,4,5,6,7,8<br>,11,13,17 | 16 | P06760,P06761,P07150,P08937,P14669,P20760,P20761,P22282,P22283,P50115,Q4G075,Q63751,Q6AYS4,Q99041,Q9WUW8,Q9Z0V6                                    |
| 4949 | 1,2,9,10,1<br>2,14,15,17 | 3,4,5,6,7,8<br>,11,13,16 | 7  | P06866,P07150,P07171,P08937,P14668,P61206;P84079;P84082,Q8VD89                                                                                     |
| 4950 | 1,2,9,10,1<br>2,14,16,17 | 3,4,5,6,7,8<br>,11,13,15 | 9  | P05539,P06866,P07171,P08937,P14668,P14669,Q63751,Q6AYS4,Q8VD89                                                                                     |
| 4951 | 1,2,9,10,1<br>2,15,16,17 | 3,4,5,6,7,8<br>,11,13,14 | 11 | P06761,P06866,P06911,P07150,P07171,P08937,P14668,P14669,P22282,P22283,Q6AYS4                                                                       |
| 4952 | 1,2,9,10,1<br>3,14,15,16 | 3,4,5,6,7,8<br>,11,12,17 | 20 | P01835,P06760,P06761,P07150,P08937,P09605;P25809,P14668,P14669,P20646,P20761,P22282,P22283,P50115,Q4G075,Q63751,Q6AYS4,Q99041,Q9ESW0,Q9QZK9,Q9Z0V6 |
| 4953 | 1,2,9,10,1<br>3,14,15,17 | 3,4,5,6,7,8<br>,11,12,16 | 8  | P07150,P08937,P14668,P61206;P84079;P84082,Q63751,Q6AYS4,Q6IFW6,Q99041                                                                              |
| 4954 | 1,2,9,10,1<br>3,14,16,17 | 3,4,5,6,7,8<br>,11,12,15 | 10 | P02625,P07150,P07171,P08937,P14668,P14669,Q63751,Q6AYS4,Q99041,Q9ESW0                                                                              |
| 4955 | 1,2,9,10,1<br>3,15,16,17 | 3,4,5,6,7,8<br>,11,12,14 | 16 | P01835,P02780,P02781,P06761,P07150,P07171,P08937,P0C0A9,P14668,P14669,P22282,P22283,Q63751,Q6AYS4,Q99041,Q9Z0V6                                    |
| 4956 | 1,2,9,10,1<br>4,15,16,17 | 3,4,5,6,7,8<br>,11,12,13 | 18 | P02780,P02781,P06761,P07150,P07647,P08937,P0C0A9,P14668,P14669,P22282,P22283,P30120,Q62902,Q63751,Q6AYS4,Q8CJ52,Q99041,Q9JHB9                      |
| 4957 | 1,2,9,11,1<br>2,13,14,15 | 3,4,5,6,7,8<br>,10,16,17 | 11 | P06760,P08937,P20646,P20760,P20761,P50115,P82471,Q4G075,Q63751,Q99041,Q9Z0V6                                                                       |
| 4958 | 1,2,9,11,1<br>2,13,14,16 | 3,4,5,6,7,8<br>,10,15,17 | 14 | D3ZUC6,P02803,P06760,P08937,P20646,P20760,P20761,P50115,Q4G075,Q63751,Q7TPB1,Q99041,Q99MH3,Q9Z0V6                                                  |
| 4959 | 1,2,9,11,1<br>2,13,14,17 | 3,4,5,6,7,8<br>,10,15,16 | 4  | P02803,P14668,P82471,Q5FVI6                                                                                                                        |
| 4960 | 1,2,9,11,1<br>2,13,15,16 | 3,4,5,6,7,8<br>,10,14,17 | 8  | P06760,P08937,P20760,P20761,P50115,Q4G075,Q99041,Q9Z0V6                                                                                            |
| 4961 | 1,2,9,11,1<br>2,13,15,17 | 3,4,5,6,7,8<br>,10,14,16 | 3  | P06866,P14668,P82471                                                                                                                               |
| 4962 | 1,2,9,11,1<br>2,13,16,17 | 3,4,5,6,7,8<br>,10,14,15 | 5  | P02803,P06866,P07171,P82471,Q9Z0V6                                                                                                                 |
| 4963 | 1,2,9,11,1<br>2,14,15,16 | 3,4,5,6,7,8<br>,10,13,17 | 14 | D3ZUC6,P06760,P06761,P08937,P20760,P20761,P22282,P50115,P51907,Q4G075,Q63751,Q99041,Q99MH3,Q9Z0V6                                                  |
| 4964 | 1,2,9,11,1<br>2,14,15,17 | 3,4,5,6,7,8<br>,10,13,16 | 4  | D3ZUC6,P06866,P82471,Q8VD89                                                                                                                        |
| 4965 | 1,2,9,11,1<br>2,14,16,17 | 3,4,5,6,7,8<br>,10,13,15 | 5  | D3ZUC6,P06866,P07171,P08937,Q99MH3                                                                                                                 |
| 4966 | 1,2,9,11,1<br>2,15,16,17 | 3,4,5,6,7,8<br>,10,13,14 | 6  | P06761,P06866,P06911,P07171,P08937,P12020                                                                                                          |
| 4967 | 1,2,9,11,1<br>3,14,15,16 | 3,4,5,6,7,8<br>,10,12,17 | 16 | P06760,P06761,P08937,P20646,P20760,P20761,P22282,P22283,P50115,Q4G075,Q63751,Q7TPB1,Q99041,Q99MH3,Q9QZK9,Q9Z0V6                                    |

|      |                               |                          |    |                                                                                                                                                                         |
|------|-------------------------------|--------------------------|----|-------------------------------------------------------------------------------------------------------------------------------------------------------------------------|
| 4968 | 1,2,9,11,1<br>3,14,15,17      | 3,4,5,6,7,8<br>,10,12,16 | 3  | P08937,P82471,Q99041                                                                                                                                                    |
| 4969 | 1,2,9,11,1<br>3,14,16,17      | 3,4,5,6,7,8<br>,10,12,15 | 6  | D3ZHA0,P08937,P82471,Q99041,Q99MH3,Q9Z0V6                                                                                                                               |
| 4970 | 1,2,9,11,1<br>3,15,16,17      | 3,4,5,6,7,8<br>,10,12,14 | 6  | D3ZHA0,P06761,P08937,P82471,Q99041,Q9Z0V6                                                                                                                               |
| 4971 | 1,2,9,11,1<br>4,15,16,17      | 3,4,5,6,7,8<br>,10,12,13 | 8  | P02780,P06761,P07647,P08937,P22282,P22283,Q99041,Q99MH3                                                                                                                 |
| 4972 | 1,2,9,12,1<br>3,14,15,16      | 3,4,5,6,7,8<br>,10,11,17 | 19 | D3ZUC6,P00714,P04041,P06760,P07150,P08937,P14668,P14669,P20646,P20760,P20761,P50115,P61206;P84079;P84082,P82471,Q4G075,Q63751,Q6AYS4,Q99041,Q9Z0V6                      |
| 4973 | 1,2,9,12,1<br>3,14,15,17      | 3,4,5,6,7,8<br>,10,11,16 | 10 | P00714,P07150,P07171,P14668,P14669,P61206;P84079;P84082,P82471,Q5FVI6,Q6AYS4,Q8VD89                                                                                     |
| 4974 | 1,2,9,12,1<br>3,14,16,17      | 3,4,5,6,7,8<br>,10,11,15 | 11 | P00714,P07150,P07171,P08937,P14668,P14669,P61206;P84079;P84082,P82471,Q5FVI6,Q6AYS4,Q8VD89                                                                              |
| 4975 | 1,2,9,12,1<br>3,15,16,17      | 3,4,5,6,7,8<br>,10,11,14 | 10 | P00714,P06866,P07150,P07171,P14668,P14669,P61206;P84079;P84082,P82471,Q5BJY9,Q6AYS4                                                                                     |
| 4976 | 1,2,9,12,1<br>4,15,16,17      | 3,4,5,6,7,8<br>,10,11,13 | 13 | D3ZUC6,P00714,P06866,P07150,P07171,P08937,P14668,P14669,P22283,P61206;P84079;P84082,P82471,Q6AYS4,Q8VD89                                                                |
| 4977 | 1,2,9,13,1<br>4,15,16,17      | 3,4,5,6,7,8<br>,10,11,12 | 22 | P00714,P02780,P02781,P04041,P06761,P07150,P08937,P0C0A9,P14668,P14669,P20646,P22283,P61206;P84079;P84082,P82471,Q4FZU2,Q5FVI6,Q63751,Q6AYS4,Q6IFW6,Q6IG02,Q99041,Q9Z0V6 |
| 4978 | 1,2,10,11,<br>12,13,14,1<br>5 | 3,4,5,6,7,8<br>,9,16,17  | 8  | P06760,P09605;P25809,P20646,P20761,P23593,P50115,Q99041,Q9Z0V6                                                                                                          |
| 4979 | 1,2,10,11,<br>12,13,14,1<br>6 | 3,4,5,6,7,8<br>,9,15,17  | 10 | P06760,P08937,P20646,P20760,P20761,P50115,Q63751,Q7TPB1,Q99041,Q9Z0V6                                                                                                   |
| 4980 | 1,2,10,11,<br>12,13,14,1<br>7 | 3,4,5,6,7,8<br>,9,15,16  | 1  | P14668                                                                                                                                                                  |
| 4981 | 1,2,10,11,<br>12,13,15,1<br>6 | 3,4,5,6,7,8<br>,9,14,17  | 7  | P01835,P06760,P08937,P20761,P50115,Q99041,Q9Z0V6                                                                                                                        |
| 4982 | 1,2,10,11,<br>12,13,15,1<br>7 | 3,4,5,6,7,8<br>,9,14,16  | 2  | P06866,P14668                                                                                                                                                           |
| 4983 | 1,2,10,11,<br>12,13,16,1<br>7 | 3,4,5,6,7,8<br>,9,14,15  | 2  | P06866,P07171                                                                                                                                                           |
| 4984 | 1,2,10,11,<br>12,14,15,1<br>6 | 3,4,5,6,7,8<br>,9,13,17  | 10 | P06760,P06761,P08937,P20761,P22282,P50115,P51907,Q63751,Q99041,Q9Z0V6                                                                                                   |
| 4985 | 1,2,10,11,<br>12,14,15,1<br>7 | 3,4,5,6,7,8<br>,9,13,16  | 1  | P06866                                                                                                                                                                  |

|      |                               |                         |    |                                                                                                                 |
|------|-------------------------------|-------------------------|----|-----------------------------------------------------------------------------------------------------------------|
| 4986 | 1,2,10,11,<br>12,14,16,1<br>7 | 3,4,5,6,7,8<br>,9,13,15 | 1  | P06866                                                                                                          |
| 4987 | 1,2,10,11,<br>12,15,16,1<br>7 | 3,4,5,6,7,8<br>,9,13,14 | 2  | P06761,P06866                                                                                                   |
| 4988 | 1,2,10,11,<br>13,14,15,1<br>6 | 3,4,5,6,7,8<br>,9,12,17 | 15 | P01835,P06760,P06761,P08937,P09605;P25809,P19223,P20646,P20761,P22282,P50115,Q4G075,Q63751,Q7TPB1,Q99041,Q9Z0V6 |
| 4989 | 1,2,10,11,<br>13,14,15,1<br>7 | 3,4,5,6,7,8<br>,9,12,16 | 2  | P14668,Q99041                                                                                                   |
| 4990 | 1,2,10,11,<br>13,14,16,1<br>7 | 3,4,5,6,7,8<br>,9,12,15 | 3  | P08937,Q7TPB1,Q99041                                                                                            |
| 4991 | 1,2,10,11,<br>13,15,16,1<br>7 | 3,4,5,6,7,8<br>,9,12,14 | 5  | P01835,P06761,P08937,Q99041,Q9Z0V6                                                                              |
| 4992 | 1,2,10,11,<br>14,15,16,1<br>7 | 3,4,5,6,7,8<br>,9,12,13 | 7  | P02780,P06761,P07647,P08937,P22282,P22283,Q99041                                                                |
| 4993 | 1,2,10,12,<br>13,14,15,1<br>6 | 3,4,5,6,7,8<br>,9,11,17 | 13 | P06760,P07150,P08937,P09605;P25809,P14668,P14669,P20646,P20761,P50115,Q63751,Q6AYS4,Q99041,Q9Z0V6               |
| 4994 | 1,2,10,12,<br>13,14,15,1<br>7 | 3,4,5,6,7,8<br>,9,11,16 | 5  | P06866,P07150,P14668,P61206;P84079;P84082,Q6AYS4                                                                |
| 4995 | 1,2,10,12,<br>13,14,16,1<br>7 | 3,4,5,6,7,8<br>,9,11,15 | 5  | P06866,P07171,P14668,P14669,Q6AYS4                                                                              |
| 4996 | 1,2,10,12,<br>13,15,16,1<br>7 | 3,4,5,6,7,8<br>,9,11,14 | 7  | P06866,P07171,P14668,P14669,P83121,Q63617,Q6AYS4                                                                |
| 4997 | 1,2,10,12,<br>14,15,16,1<br>7 | 3,4,5,6,7,8<br>,9,11,13 | 8  | P05539,P06866,P07171,P08937,P14668,P14669,Q63617,Q6AYS4                                                         |
| 4998 | 1,2,10,13,<br>14,15,16,1<br>7 | 3,4,5,6,7,8<br>,9,11,12 | 12 | P01835,P02780,P06761,P08937,P0C0A9,P14668,P14669,P20646,P22283,Q63751,Q6AYS4,Q99041                             |
| 4999 | 1,2,11,12,<br>13,14,15,1<br>6 | 3,4,5,6,7,8<br>,9,10,17 | 8  | D3ZUC6,P06760,P08937,P20646,P20761,P50115,Q99041,Q9Z0V6                                                         |
| 5000 | 1,2,11,12,<br>13,14,15,1<br>7 | 3,4,5,6,7,8<br>,9,10,16 | 4  | D3ZUC6,P06866,P14668,P82471                                                                                     |

|      |                               |                                   |    |                                                                                                                                                                                                                                                                                                                                                                             |
|------|-------------------------------|-----------------------------------|----|-----------------------------------------------------------------------------------------------------------------------------------------------------------------------------------------------------------------------------------------------------------------------------------------------------------------------------------------------------------------------------|
| 5001 | 1,2,11,12,<br>13,14,16,1<br>7 | 3,4,5,6,7,8<br>,9,10,15           | 5  | D3ZHA0,D3ZUC6,O55006,P06866,P07171                                                                                                                                                                                                                                                                                                                                          |
| 5002 | 1,2,11,12,<br>13,15,16,1<br>7 | 3,4,5,6,7,8<br>,9,10,14           | 2  | P06866,P82471                                                                                                                                                                                                                                                                                                                                                               |
| 5003 | 1,2,11,12,<br>14,15,16,1<br>7 | 3,4,5,6,7,8<br>,9,10,13           | 2  | D3ZUC6,P06866                                                                                                                                                                                                                                                                                                                                                               |
| 5004 | 1,2,11,13,<br>14,15,16,1<br>7 | 3,4,5,6,7,8<br>,9,10,12           | 6  | D3ZHA0,P00714,P08937,P20646,P82471,Q99041                                                                                                                                                                                                                                                                                                                                   |
| 5005 | 1,2,12,13,<br>14,15,16,1<br>7 | 3,4,5,6,7,8<br>,9,10,11           | 13 | D3ZUC6,P00714,P04041,P06866,P07150,P07171,P14668,P14669,P20646,P61206;P84079;P84082,P82471,Q5FVI6,Q6AYS4                                                                                                                                                                                                                                                                    |
| 5006 | 1,3,4,5,6,7<br>,8,9           | 2,10,11,12<br>,13,14,15,<br>16,17 | 29 | D3ZHA0,O55006,O88267,P01681,P06761,P06866,P07171,P07647,P08937,P16086,P18418,P20646,P20761,P22282,P22283,P23593,P31044,P52590,P61206;P84079;P84082,P97571,Q63617,Q63751,Q64361,Q99041,Q9JI85,Q9QX79,Q9ROT3,Q9WTT6,Q9ZOV6                                                                                                                                                    |
| 5007 | 1,3,4,5,6,7<br>,8,10          | 2,9,11,12,<br>13,14,15,1<br>6,17  | 39 | D3ZHA0,O55006,P01681,P04041,P06761,P07171,P07647,P08649,P08723,P08937,P12020,P16086,P18418,P20646,P20760,P20761,P22282,P22283,P28648,P31044,P61206;P84079;P84082,P68370,P82471,P97571,P97615,Q4FZU2,Q5BJY9,Q5FVI6,Q63617,Q63751,Q64361,Q8CJ52,Q8VD89,Q99041,Q99MH3,Q9QX79,Q9ROT3,Q9WTT6,Q9ZOV6                                                                              |
| 5008 | 1,3,4,5,6,7<br>,8,11          | 2,9,10,12,<br>13,14,15,1<br>6,17  | 44 | D3ZHA0,O88267,P01681,P04041,P05371,P06761,P07150,P07171,P07647,P08649,P08723,P08937,P10715,P14668,P14669,P15399,P16086,P18418,P19629,P20646,P20761,P22282,P22283,P28648,P31044,P55314,P61206;P84079;P84082,P68370,Q30KJ2,Q4FZU2,Q5I0D1,Q63493,Q63617,Q63751,Q64361,Q6AYS4,Q8CJ52,Q8VD89,Q99041,Q9ESW0,Q9JI85,Q9QX79,Q9ROT3,Q9ZOV6                                           |
| 5009 | 1,3,4,5,6,7<br>,8,12          | 2,9,10,11,<br>13,14,15,1<br>6,17  | 50 | D3ZHA0,F1LM93,O55006,O88267,P01681,P02780,P02781,P02782,P06761,P07171,P07647,P08723,P08937,P0C0A9,P10715,P13432,P16086,P18418,P19629,P20646,P20761,P22282,P22283,P30120,P31044,P61206;P84079;P84082,P62815,P83748,Q10758,Q4FZU2,Q5M8C6,Q63493,Q63617,Q63751,Q64361,Q6AYS7,Q6IFW6,Q6IG02,Q6IMF3,Q6P6Q2,Q8CJ52,Q99041,Q99MH3,Q9ESW0,Q9JHB9,Q9JI85,Q9QX79,Q9ROT3,Q9WTT6,Q9ZOV6 |
| 5010 | 1,3,4,5,6,7<br>,8,13          | 2,9,10,11,<br>12,14,15,1<br>6,17  | 32 | D3ZHA0,O88267,P01681,P02764,P05539,P06761,P06866,P06911,P07171,P07647,P08723,P08937,P12020,P16086,P18418,P20760,P20761,P22282,P22283,P31044,Q5GRG2,Q62902,Q63617,Q63751,Q8CJ52,Q8VD89,Q99041,Q99MH3,Q9JI85,Q9QX79,Q9ROT3,Q9ZOV6                                                                                                                                             |
| 5011 | 1,3,4,5,6,7<br>,8,14          | 2,9,10,11,<br>12,13,15,1<br>6,17  | 35 | D3ZHA0,O88267,P01681,P02793,Q7TP54,P05371,P06761,P06866,P06911,P07171,P07647,P08723,P08937,P10536,P12020,P16086,P18418,P19629,P20760,P20761,P22282,P22283,P31044,Q63617,Q63618,Q63751,Q64361,Q6AYS7,Q8CJ52,Q923S2,Q99041,Q9JI85,Q9QX79,Q9ROT3,Q9WTT6,Q9ZOV6                                                                                                                 |
| 5012 | 1,3,4,5,6,7<br>,8,15          | 2,9,10,11,<br>12,13,14,1<br>6,17  | 26 | B0BNN3,D3ZHA0,O54728,O55006,P01681,P02631,P06761,P07171,P08937,P10536,P16086,P18418,P19629,P20760,P20761,P22282,P22283,P31044,P97571,Q63617,Q63751,Q64361,Q8VD89,Q99041,Q9QX79,Q9ZOV6                                                                                                                                                                                       |
| 5013 | 1,3,4,5,6,7<br>,8,16          | 2,9,10,11,<br>12,13,14,1<br>5,17  | 26 | D3ZHA0,O88267,P01681,P05371,P06761,P07171,P08937,P14668,P16086,P18418,P20646,P20761,P22282,P22283,P23593,P31044,P61206;P84079;P84082,Q63617,Q63751,Q6IRE4,Q8CJ52,Q8VD89,Q99041,Q9QX79,Q9ROT3,Q9ZOV6                                                                                                                                                                         |
| 5014 | 1,3,4,5,6,7<br>,8,17          | 2,9,10,11,<br>12,13,14,1<br>5,16  | 39 | D3ZHA0,O54858,O88267,P01681,P01946,P02091,P06760,P06761,P07171,P07647,P08937,P10536,P16086,P18418,P20646,P20760,P20761,P22282,P22283,P23593,P23928,P31044,P50115,P52590,P62815,P62898,P97571,Q30KJ2,Q4G075,Q63617,Q63751,Q64361,Q99041,Q99MH3,Q9EPB1,Q9QX79,Q9ROT3,Q9WTT6,Q9ZOV6                                                                                            |
| 5015 | 1,3,4,5,6,7<br>,9,10          | 2,8,11,12,<br>13,14,15,1<br>6,17  | 8  | O55006,P01681,P08937,P18418,P23593,P52590,P61206;P84079;P84082,Q5FVI6                                                                                                                                                                                                                                                                                                       |

|      |                       |                                  |    |                                                                                                                                                                                |
|------|-----------------------|----------------------------------|----|--------------------------------------------------------------------------------------------------------------------------------------------------------------------------------|
| 5016 | 1,3,4,5,6,7<br>,9,11  | 2,8,10,12,<br>13,14,15,1<br>6,17 | 10 | P01681,P05539,P08937,P15399,P18418,P55314,P61206;P84079;P84082,Q4FZU2,Q63751,Q6IRE4                                                                                            |
| 5017 | 1,3,4,5,6,7<br>,9,12  | 2,8,10,11,<br>13,14,15,1<br>6,17 | 13 | O55006,P01681,P01835,P08937,P13432,P18418,P23593,P61206;P84079;P84082,Q4FZU2,Q63751,Q6IFW6,Q6IG02,Q6IMF3                                                                       |
| 5018 | 1,3,4,5,6,7<br>,9,13  | 2,8,10,11,<br>12,14,15,1<br>6,17 | 7  | P01681,P05539,P06866,P08937,P18418,P62804,Q6IRE4                                                                                                                               |
| 5019 | 1,3,4,5,6,7<br>,9,14  | 2,8,10,11,<br>12,13,15,1<br>6,17 | 5  | P01681,P06866,P08937,P18418,Q6IRE4                                                                                                                                             |
| 5020 | 1,3,4,5,6,7<br>,9,15  | 2,8,10,11,<br>12,13,14,1<br>6,17 | 7  | O54728,O55006,P01681,P08937,P18418,P23593,P62804                                                                                                                               |
| 5021 | 1,3,4,5,6,7<br>,9,16  | 2,8,10,11,<br>12,13,14,1<br>5,17 | 8  | O54728,P01681,P18418,P23593,P61206;P84079;P84082,P62804,Q00715,Q6IRE4                                                                                                          |
| 5022 | 1,3,4,5,6,7<br>,9,17  | 2,8,10,11,<br>12,13,14,1<br>5,16 | 12 | P01681,P01946,P02091,P08937,P09605,P25809,P18418,P20646,P20760,P20761,P23593,P52590,Q63751                                                                                     |
| 5023 | 1,3,4,5,6,7<br>,10,11 | 2,8,9,12,1<br>3,14,15,16<br>,17  | 15 | P01681,P08937,P15399,P18418,P28648,P55314,P61206;P84079;P84082,Q4FZU2,Q5BJY9,Q5FVI6,Q63751,Q6IFW6,Q6P6Q2,Q8VD89,Q9ESW0                                                         |
| 5024 | 1,3,4,5,6,7<br>,10,12 | 2,8,9,11,1<br>3,14,15,16<br>,17  | 17 | F1LM93,P01681,P08723,P08937,P18418,P61206;P84079;P84082,P83748,Q10758,Q4FZU2,Q5FVI6,Q63751,Q6IFW6,Q6IG02,Q6IMF3,Q6P6Q2,Q99MH3,Q9ESW0                                           |
| 5025 | 1,3,4,5,6,7<br>,10,13 | 2,8,9,11,1<br>2,14,15,16<br>,17  | 12 | P01681,P05539,P06911,P08937,P12020,P18418,P61206;P84079;P84082,Q5FVI6,Q5GRG2,Q63751,Q8VD89,Q99MH3                                                                              |
| 5026 | 1,3,4,5,6,7<br>,10,14 | 2,8,9,11,1<br>2,13,15,16<br>,17  | 5  | P01681,P08937,P12020,P18418,P61206;P84079;P84082                                                                                                                               |
| 5027 | 1,3,4,5,6,7<br>,10,15 | 2,8,9,11,1<br>2,13,14,16<br>,17  | 10 | O54728,O55006,P01681,P08937,P18418,P61206;P84079;P84082,Q4FZU2,Q5FVI6,Q8VD89,Q99MH3                                                                                            |
| 5028 | 1,3,4,5,6,7<br>,10,16 | 2,8,9,11,1<br>2,13,14,15<br>,17  | 9  | P01681,P08721,P08937,P18418,P61206;P84079;P84082,Q4FZU2,Q5FVI6,Q6IRE4,Q8VD89                                                                                                   |
| 5029 | 1,3,4,5,6,7<br>,10,17 | 2,8,9,11,1<br>2,13,14,15<br>,16  | 14 | P01681,P01946,P02091,P08937,P18418,P20646,P20760,P20761,P23593,P52590,P61206;P84079;P84082,P97580,Q63751,Q99MH3                                                                |
| 5030 | 1,3,4,5,6,7<br>,11,12 | 2,8,9,10,1<br>3,14,15,16<br>,17  | 23 | P01681,P04905,P07647,P08723,P08937,P15399,P17046,P18418,P30120,P55314,P61206;P84079;P84082,Q4FZU2,Q63493,Q63751,Q6IFU8,Q6IFW6,Q6IG02,Q6IMF3,Q6P6Q2,Q99041,Q9ESW0,Q9JHB9,Q9JI85 |

|      |                       |                                 |    |                                                                                                                                                                                       |
|------|-----------------------|---------------------------------|----|---------------------------------------------------------------------------------------------------------------------------------------------------------------------------------------|
| 5031 | 1,3,4,5,6,7<br>,11,13 | 2,8,9,10,1<br>2,14,15,16<br>,17 | 13 | P01681,P05539,P06911,P08937,P16086,P18418,P55314,P61206;P84079;P84082,Q4FZU2,Q63751,Q6IRE4,Q8VD89,Q9JI85                                                                              |
| 5032 | 1,3,4,5,6,7<br>,11,14 | 2,8,9,10,1<br>2,13,15,16<br>,17 | 12 | P01681,P05371,P08937,P15399,P16086,P18418,P55314,P61206;P84079;P84082,Q4FZU2,Q63751,Q6IRE4,Q9ESW0                                                                                     |
| 5033 | 1,3,4,5,6,7<br>,11,15 | 2,8,9,10,1<br>2,13,14,16<br>,17 | 14 | O54728,P01681,P05539,P08937,P18418,P22006,P55314,P61206;P84079;P84082,Q4FZU2,Q5I0D1,Q63751,Q6IRE4,Q8VD89,Q9ESW0                                                                       |
| 5034 | 1,3,4,5,6,7<br>,11,16 | 2,8,9,10,1<br>2,13,14,15<br>,17 | 13 | P01681,P05371,P08937,P14668,P17046,P18418,P55314,P61206;P84079;P84082,Q4FZU2,Q5FVI6,Q63751,Q6IRE4,Q8VD89                                                                              |
| 5035 | 1,3,4,5,6,7<br>,11,17 | 2,8,9,10,1<br>2,13,14,15<br>,16 | 18 | P01681,P01946,P02091,P08937,P09605;P25809,P15399,P18418,P20646,P20760,P20761,P52590,P55314,P61206;P84079;P84082,P97580,Q30KJ2,Q4FZU2,Q63751,Q9ESW0                                    |
| 5036 | 1,3,4,5,6,7<br>,12,13 | 2,8,9,10,1<br>1,14,15,16<br>,17 | 20 | O88267,P01681,P05539,P06911,P07647,P08723,P08937,P18418,P22282,P30120,P36374,P83748,Q4FZU2,Q63751,Q6IFW6,Q6IG02,Q6IMF3,Q99MH3,Q9JHB9,Q9JI85                                           |
| 5037 | 1,3,4,5,6,7<br>,12,14 | 2,8,9,10,1<br>1,13,15,16<br>,17 | 15 | O88267,P01681,P01835,P08723,P08937,P18418,P30120,P83748,Q10758,Q4FZU2,Q63751,Q6IFW6,Q6IG02,Q6IMF3,Q9ESW0                                                                              |
| 5038 | 1,3,4,5,6,7<br>,12,15 | 2,8,9,10,1<br>1,13,14,16<br>,17 | 11 | P01681,P08937,P18418,P83748,Q4FZU2,Q63751,Q6IFW6,Q6IG02,Q6IMF3,Q99MH3,Q9ESW0                                                                                                          |
| 5039 | 1,3,4,5,6,7<br>,12,16 | 2,8,9,10,1<br>1,13,14,15<br>,17 | 15 | O88267,P01681,P08937,P17046,P18418,P61206;P84079;P84082,P83748,Q10758,Q4FZU2,Q63751,Q6IFW6,Q6IG02,Q6IMF3,Q6IRE4,Q6P6Q2                                                                |
| 5040 | 1,3,4,5,6,7<br>,12,17 | 2,8,9,10,1<br>1,13,14,15<br>,16 | 25 | O88267,P01681,P01835,P01946,P02091,P08937,P09605;P25809,P13432,P18418,P20760,P20761,P22282,P23593,P52590,P62815,Q10758,Q4FZU2,Q63751,Q6IFW6,Q6IG02,Q6IMF3,Q99041,Q99MH3,Q9ESW0,Q9QZK9 |
| 5041 | 1,3,4,5,6,7<br>,13,14 | 2,8,9,10,1<br>1,12,15,16<br>,17 | 9  | P01681,P05539,P06866,P06911,P08937,P12020,P16086,P18418,Q5GRG2                                                                                                                        |
| 5042 | 1,3,4,5,6,7<br>,13,15 | 2,8,9,10,1<br>1,12,14,16<br>,17 | 9  | O54728,P01681,P05539,P08937,P18418,P62804,Q63751,Q8VD89,Q99MH3                                                                                                                        |
| 5043 | 1,3,4,5,6,7<br>,13,16 | 2,8,9,10,1<br>1,12,14,15<br>,17 | 10 | P01681,P05539,P08937,P17046,P61206;P84079;P84082,P62804,Q00715,Q63751,Q6IRE4,Q8VD89                                                                                                   |
| 5044 | 1,3,4,5,6,7<br>,13,17 | 2,8,9,10,1<br>1,12,14,15<br>,16 | 14 | O88267,P01681,P01946,P02091,P05539,P08937,P18418,P20760,P20761,P22282,P52590,P62815,Q63751,Q99MH3                                                                                     |
| 5045 | 1,3,4,5,6,7<br>,14,15 | 2,8,9,10,1<br>1,12,13,16<br>,17 | 5  | O54728,P01681,P02803,P08937,P18418                                                                                                                                                    |

|      |                       |                                  |    |                                                                                                                                                                         |
|------|-----------------------|----------------------------------|----|-------------------------------------------------------------------------------------------------------------------------------------------------------------------------|
| 5046 | 1,3,4,5,6,7<br>,14,16 | 2,8,9,10,1<br>1,12,13,15<br>,17  | 5  | P01681,P08937,P18418,P61206;P84079;P84082,Q6IRE4                                                                                                                        |
| 5047 | 1,3,4,5,6,7<br>,14,17 | 2,8,9,10,1<br>1,12,13,15<br>,16  | 13 | O88267,P01681,P01946,P02091,P08937,P10536,P18418,P20760,P20761,P52590,Q30KJ2,Q63751,Q9QW07                                                                              |
| 5048 | 1,3,4,5,6,7<br>,15,16 | 2,8,9,10,1<br>1,12,13,14<br>,17  | 8  | O54728,P01681,P02803,P08937,P61206;P84079;P84082,P62804,Q6IRE4,Q8VD89                                                                                                   |
| 5049 | 1,3,4,5,6,7<br>,15,17 | 2,8,9,10,1<br>1,12,13,14<br>,16  | 14 | B0BNN3,P01681,P01946,P02091,P02803,P08937,P10536,P18418,P20760,P20761,P23593,P52590,Q63751,Q99MH3                                                                       |
| 5050 | 1,3,4,5,6,7<br>,16,17 | 2,8,9,10,1<br>1,12,13,14<br>,15  | 12 | O88267,P01681,P01946,P02091,P08937,P09605;P25809,P20760,P20761,P23593,P52590,P61206;P84079;P84082,Q63751                                                                |
| 5051 | 1,3,4,5,6,8<br>,9,10  | 2,7,11,12,<br>13,14,15,1<br>6,17 | 9  | D3ZHA0,D3ZUC6,O55006,P01681,P08649,P23593,Q5M8C6,Q9WTT6,Q9Z0V6                                                                                                          |
| 5052 | 1,3,4,5,6,8<br>,9,11  | 2,7,10,12,<br>13,14,15,1<br>6,17 | 12 | P01681,P02793;Q7TP54,P04041,P08649,P14668,P14669,P55314,Q4FZU2,Q5I0D1,Q5M8C6,Q63751,Q9Z0V6                                                                              |
| 5053 | 1,3,4,5,6,8<br>,9,12  | 2,7,10,11,<br>13,14,15,1<br>6,17 | 18 | D3ZHA0,P01681,P01835,P02782,P07647,P08723,P08937,P23593,P30120,Q4FZU2,Q5M8C6,Q63751,Q6IFW6,Q6IG02,Q6IMF3,Q6P6Q2,Q9WTT6,Q9Z0V6                                           |
| 5054 | 1,3,4,5,6,8<br>,9,13  | 2,7,10,11,<br>12,14,15,1<br>6,17 | 5  | P01681,P06866,P23593,Q5M8C6,Q9Z0V6                                                                                                                                      |
| 5055 | 1,3,4,5,6,8<br>,9,14  | 2,7,10,11,<br>12,13,15,1<br>6,17 | 5  | P01681,P02793;Q7TP54,P06866,Q9WTT6,Q9Z0V6                                                                                                                               |
| 5056 | 1,3,4,5,6,8<br>,9,15  | 2,7,10,11,<br>12,13,14,1<br>6,17 | 7  | B0BNN3,O54728,O55006,P01681,P23593,Q5QE79,Q9Z0V6                                                                                                                        |
| 5057 | 1,3,4,5,6,8<br>,9,16  | 2,7,10,11,<br>12,13,14,1<br>5,17 | 5  | P01681,P14668,P23593,Q6IRE4,Q9Z0V6                                                                                                                                      |
| 5058 | 1,3,4,5,6,8<br>,9,17  | 2,7,10,11,<br>12,13,14,1<br>5,16 | 13 | P01681,P02793;Q7TP54,P06760,P08649,P08937,P16636,P20761,P23593,Q4G075,Q5M8C6,Q63751,Q9WTT6,Q9Z0V6                                                                       |
| 5059 | 1,3,4,5,6,8<br>,10,11 | 2,7,9,12,1<br>3,14,15,16<br>,17  | 18 | P01681,P04041,P07150,P08649,P08937,P14668,P14669,P16636,P55314,Q4FZU2,Q5BJY9,Q5I0D1,Q5M8C6,Q63751,Q64361,Q6IFW6,Q6P6Q2,Q9Z0V6                                           |
| 5060 | 1,3,4,5,6,8<br>,10,12 | 2,7,9,11,1<br>3,14,15,16<br>,17  | 24 | D3ZHA0,F1LM93,P01681,P02781,P07647,P08723,P08937,P0C0A9,P16636,P30120,P35281,Q08463,Q10758,Q4FZU2,Q5M8C6,Q63751,Q64361,Q6IFW6,Q6IG02,Q6IMF3,Q6P6Q2,Q99MH3,Q9WTT6,Q9Z0V6 |

|      |                       |                                 |    |                                                                                                                                                                                                                                        |
|------|-----------------------|---------------------------------|----|----------------------------------------------------------------------------------------------------------------------------------------------------------------------------------------------------------------------------------------|
| 5061 | 1,3,4,5,6,8<br>,10,13 | 2,7,9,11,1<br>2,14,15,16<br>,17 | 8  | D3ZUC6,P01681,P06911,P08937,P82995,Q5M8C6,Q99MH3,Q9Z0V6                                                                                                                                                                                |
| 5062 | 1,3,4,5,6,8<br>,10,14 | 2,7,9,11,1<br>2,13,15,16<br>,17 | 7  | D3ZHA0,P01681,P02793;Q7TP54,P08649,Q4FZU2,Q9WTT6,Q9Z0V6                                                                                                                                                                                |
| 5063 | 1,3,4,5,6,8<br>,10,15 | 2,7,9,11,1<br>2,13,14,16<br>,17 | 9  | B0BNN3,D3ZHA0,O55006,P01681,P08649,Q4FZU2,Q64361,Q99MH3,Q9Z0V6                                                                                                                                                                         |
| 5064 | 1,3,4,5,6,8<br>,10,16 | 2,7,9,11,1<br>2,13,14,15<br>,17 | 7  | P01681,P08649,P08721,P14668,P23593,Q4FZU2,Q9Z0V6                                                                                                                                                                                       |
| 5065 | 1,3,4,5,6,8<br>,10,17 | 2,7,9,11,1<br>2,13,14,15<br>,16 | 18 | O54858,P01681,P06760,P08649,P08937,P16636,P20760,P20761,P23593,Q08463,Q4FZU2,Q4G075,Q5M8C6,Q63751,Q64361,Q99MH3,Q9WTT6,Q9Z0V6                                                                                                          |
| 5066 | 1,3,4,5,6,8<br>,11,12 | 2,7,9,10,1<br>3,14,15,16<br>,17 | 33 | F1LM93,O35547,P01681,P02780,P02781,P02782,P04041,P04905,P07150,P07647,P08723,P08937,P0C0A9,P14668,P14669,P16636,P30120,P55314,Q10758,Q4FZU2,Q5I0D1,Q5M8C6,Q63751,Q6IFU7,Q6IFU8,Q6IFW6,Q6IG02,Q6IMF3,Q6P6Q2,Q8CJ52,Q9ESW0,Q9JHB9,Q9Z0V6 |
| 5067 | 1,3,4,5,6,8<br>,11,13 | 2,7,9,10,1<br>2,14,15,16<br>,17 | 11 | P01681,P07647,P08937,P14668,P14669,P55314,Q4FZU2,Q5M8C6,Q63751,Q8VD89,Q9Z0V6                                                                                                                                                           |
| 5068 | 1,3,4,5,6,8<br>,11,14 | 2,7,9,10,1<br>2,13,15,16<br>,17 | 16 | P01681,P02793;Q7TP54,P07150,P07171,P08649,P08937,P14668,P14669,P35434,P55314,P97840,Q4FZU2,Q5I0D1,Q63751,Q6P6Q2,Q9Z0V6                                                                                                                 |
| 5069 | 1,3,4,5,6,8<br>,11,15 | 2,7,9,10,1<br>2,13,14,16<br>,17 | 15 | B0BNN3,O54728,P01681,P07171,P08649,P08937,P14668,P14669,P55314,P97840,Q4FZU2,Q5I0D1,Q63751,Q9ESW0,Q9Z0V6                                                                                                                               |
| 5070 | 1,3,4,5,6,8<br>,11,16 | 2,7,9,10,1<br>2,13,14,15<br>,17 | 14 | P01681,P07150,P08649,P14668,P14669,P55314,Q4FZU2,Q5I0D1,Q63751,Q6IFW6,Q6IRE4,Q6P6Q2,Q8VD89,Q9Z0V6                                                                                                                                      |
| 5071 | 1,3,4,5,6,8<br>,11,17 | 2,7,9,10,1<br>2,13,14,15<br>,16 | 23 | O54858,P01681,P02793;Q7TP54,P04041,P06760,P07150,P08649,P08937,P14668,P14669,P16636,P20761,P50115,P55314,P97840,Q4FZU2,Q4G075,Q5I0D1,Q5M8C6,Q63751,Q6AYS4,Q9ESW0,Q9Z0V6                                                                |
| 5072 | 1,3,4,5,6,8<br>,12,13 | 2,7,9,10,1<br>1,14,15,16<br>,17 | 25 | P01681,P02780,P02781,P02782,P06761,P06911,P07647,P08723,P08937,P0C0A9,P22282,P22283,P30120,P82995,Q4FZU2,Q5M8C6,Q63751,Q6IFW6,Q6IG02,Q6IMF3,Q6P6Q2,Q8CJ52,Q99MH3,Q9JHB9,Q9Z0V6                                                         |
| 5073 | 1,3,4,5,6,8<br>,12,14 | 2,7,9,10,1<br>1,13,15,16<br>,17 | 17 | P01681,P01835,P02782,P02793;Q7TP54,P07647,P08723,P08937,P30120,Q10758,Q4FZU2,Q5M8C6,Q6IFW6,Q6IG02,Q6IMF3,Q6P6Q2,Q9WTT6,Q9Z0V6                                                                                                          |
| 5074 | 1,3,4,5,6,8<br>,12,15 | 2,7,9,10,1<br>1,13,14,16<br>,17 | 16 | B0BNN3,P01681,P08723,P08937,Q4FZU2,Q5M8C6,Q62894,Q63751,Q64361,Q6IFW6,Q6IG02,Q6IMF3,Q6P6Q2,Q99MH3,Q9ESW0,Q9Z0V6                                                                                                                        |
| 5075 | 1,3,4,5,6,8<br>,12,16 | 2,7,9,10,1<br>1,13,14,15<br>,17 | 14 | P01681,P08723,P08937,P14668,P23593,Q10758,Q4FZU2,Q5M8C6,Q63751,Q6IFW6,Q6IG02,Q6IMF3,Q6P6Q2,Q9Z0V6                                                                                                                                      |



|      |                       |                                 |    |                                                                                                                                                                                                                                                                    |
|------|-----------------------|---------------------------------|----|--------------------------------------------------------------------------------------------------------------------------------------------------------------------------------------------------------------------------------------------------------------------|
| 5076 | 1,3,4,5,6,8<br>,12,17 | 2,7,9,10,1<br>1,13,14,15<br>,16 | 37 | B0BNN3,F1LM93,O88267,P01681,P01835,P02782,P06760,P07647,P08723,P08937,P10536,P13432,P16636,P19223,P20761,P22282,P23593,P23928,P30120,P62815,Q08463,Q10758,Q4FZU2,Q4G075,Q5M8C6,Q63751,Q64361,Q6IFW6,Q6IG02,Q6IMF3,Q6P6Q2,Q99041,Q99MH3,Q9ESW0,Q9QZK9,Q9WTT6,Q9Z0V6 |
| 5077 | 1,3,4,5,6,8<br>,13,14 | 2,7,9,10,1<br>1,12,15,16<br>,17 | 10 | P01681,P02793;Q7TP54,P06866,P06911,P08937,P10536,P51907,Q64093,Q9WTT6,Q9Z0V6                                                                                                                                                                                       |
| 5078 | 1,3,4,5,6,8<br>,13,15 | 2,7,9,10,1<br>1,12,14,16<br>,17 | 6  | B0BNN3,P01681,P08937,P10536,P82995,Q9Z0V6                                                                                                                                                                                                                          |
| 5079 | 1,3,4,5,6,8<br>,13,16 | 2,7,9,10,1<br>1,12,14,15<br>,17 | 5  | P01681,P14668,P23593,P82995,Q9Z0V6                                                                                                                                                                                                                                 |
| 5080 | 1,3,4,5,6,8<br>,13,17 | 2,7,9,10,1<br>1,12,14,15<br>,16 | 16 | P01681,P06760,P08937,P10536,P16636,P20761,P22282,P23593,P23928,P51907,Q4G075,Q5M8C6,Q63751,Q6PCU2,Q99MH3,Q9Z0V6                                                                                                                                                    |
| 5081 | 1,3,4,5,6,8<br>,14,15 | 2,7,9,10,1<br>1,12,13,16<br>,17 | 7  | B0BNN3,O54728,P01681,P02793;Q7TP54,P10536,P97840,Q9Z0V6                                                                                                                                                                                                            |
| 5082 | 1,3,4,5,6,8<br>,14,16 | 2,7,9,10,1<br>1,12,13,15<br>,17 | 4  | P01681,P02793;Q7TP54,P14668,Q9Z0V6                                                                                                                                                                                                                                 |
| 5083 | 1,3,4,5,6,8<br>,14,17 | 2,7,9,10,1<br>1,12,13,15<br>,16 | 15 | B0BNN3,P01681,P02793;Q7TP54,P06760,P08937,P10536,P20760,P20761,P51907,P97840,Q4G075,Q63751,Q9QW07,Q9WTT6,Q9Z0V6                                                                                                                                                    |
| 5084 | 1,3,4,5,6,8<br>,15,16 | 2,7,9,10,1<br>1,12,13,14<br>,17 | 7  | B0BNN3,O54728,P01681,P14668,P23593,Q62894,Q9Z0V6                                                                                                                                                                                                                   |
| 5085 | 1,3,4,5,6,8<br>,15,17 | 2,7,9,10,1<br>1,12,13,14<br>,16 | 13 | B0BNN3,P01681,P06760,P08937,P10536,P20760,P20761,P23593,P97840,Q4G075,Q63751,Q99MH3,Q9Z0V6                                                                                                                                                                         |
| 5086 | 1,3,4,5,6,8<br>,16,17 | 2,7,9,10,1<br>1,12,13,14<br>,15 | 11 | P01681,P06760,P08937,P20761,P23593,P23928,P42854,Q4G075,Q63751,Q6PCU2,Q9Z0V6                                                                                                                                                                                       |
| 5087 | 1,3,4,5,6,9<br>,10,11 | 2,7,8,12,1<br>3,14,15,16<br>,17 | 5  | P01681,P08649,P55314,Q4FZU2,Q6P6Q2                                                                                                                                                                                                                                 |
| 5088 | 1,3,4,5,6,9<br>,10,12 | 2,7,8,11,1<br>3,14,15,16<br>,17 | 9  | P01681,P01835,P23593,Q10758,Q4FZU2,Q6IFW6,Q6IG02,Q6IMF3,Q6P6Q2                                                                                                                                                                                                     |
| 5089 | 1,3,4,5,6,9<br>,10,13 | 2,7,8,11,1<br>2,14,15,16<br>,17 | 1  | P01681                                                                                                                                                                                                                                                             |
| 5090 | 1,3,4,5,6,9<br>,10,14 | 2,7,8,11,1<br>2,13,15,16<br>,17 | 1  | P01681                                                                                                                                                                                                                                                             |

|      |                       |                                 |    |                                                                              |
|------|-----------------------|---------------------------------|----|------------------------------------------------------------------------------|
| 5091 | 1,3,4,5,6,9<br>,10,15 | 2,7,8,11,1<br>2,13,14,16<br>,17 | 5  | O54728,O55006,P01681,P23593,Q4FZU2                                           |
| 5092 | 1,3,4,5,6,9<br>,10,16 | 2,7,8,11,1<br>2,13,14,15<br>,17 | 3  | P01681,P23593,Q4FZU2                                                         |
| 5093 | 1,3,4,5,6,9<br>,10,17 | 2,7,8,11,1<br>2,13,14,15<br>,16 | 3  | P01681,P23593,Q99MH3                                                         |
| 5094 | 1,3,4,5,6,9<br>,11,12 | 2,7,8,10,1<br>3,14,15,16<br>,17 | 11 | P01681,P01835,P55314,Q4FZU2,Q6IFU7,Q6IFU8,Q6IFW6,Q6IG02,Q6IMF3,Q6P6Q2,Q9ESW0 |
| 5095 | 1,3,4,5,6,9<br>,11,13 | 2,7,8,10,1<br>2,14,15,16<br>,17 | 5  | P01681,P05539,P55314,Q4FZU2,Q6IRE4                                           |
| 5096 | 1,3,4,5,6,9<br>,11,14 | 2,7,8,10,1<br>2,13,15,16<br>,17 | 5  | P01681,P01835,P55314,Q4FZU2,Q6IRE4                                           |
| 5097 | 1,3,4,5,6,9<br>,11,15 | 2,7,8,10,1<br>2,13,14,16<br>,17 | 6  | O54728,P01681,P55314,Q4FZU2,Q5I0D1,Q6IRE4                                    |
| 5098 | 1,3,4,5,6,9<br>,11,16 | 2,7,8,10,1<br>2,13,14,15<br>,17 | 6  | O54728,P01681,P14668,P55314,Q4FZU2,Q6IRE4                                    |
| 5099 | 1,3,4,5,6,9<br>,11,17 | 2,7,8,10,1<br>2,13,14,15<br>,16 | 6  | P01681,P01835,P23593,P55314,Q4FZU2,Q63751                                    |
| 5100 | 1,3,4,5,6,9<br>,12,13 | 2,7,8,10,1<br>1,14,15,16<br>,17 | 7  | P01681,P01835,P82995,Q4FZU2,Q6IFW6,Q6IG02,Q6IMF3                             |
| 5101 | 1,3,4,5,6,9<br>,12,14 | 2,7,8,10,1<br>1,13,15,16<br>,17 | 6  | P01681,P01835,Q4FZU2,Q6IFW6,Q6IG02,Q6IMF3                                    |
| 5102 | 1,3,4,5,6,9<br>,12,15 | 2,7,8,10,1<br>1,13,14,16<br>,17 | 9  | B0BNN3,O54728,P01681,P01835,P23593,Q4FZU2,Q6IFW6,Q6IG02,Q6IMF3               |
| 5103 | 1,3,4,5,6,9<br>,12,16 | 2,7,8,10,1<br>1,13,14,15<br>,17 | 9  | P01681,P01835,P23593,Q4FZU2,Q6IFW6,Q6IG02,Q6IMF3,Q6IRE4,Q6P6Q2               |
| 5104 | 1,3,4,5,6,9<br>,12,17 | 2,7,8,10,1<br>1,13,14,15<br>,16 | 11 | P01681,P01835,P13432,P16636,P23593,Q10758,Q4FZU2,Q6IFW6,Q6IG02,Q6IMF3,Q99MH3 |
| 5105 | 1,3,4,5,6,9<br>,13,14 | 2,7,8,10,1<br>1,12,15,16<br>,17 | 2  | P01681,P06866                                                                |

|      |                        |                                 |    |                                                                                            |
|------|------------------------|---------------------------------|----|--------------------------------------------------------------------------------------------|
| 5106 | 1,3,4,5,6,9<br>,13,15  | 2,7,8,10,1<br>1,12,14,16<br>,17 | 6  | O54728,P01681,P05539,P23593,P62804,P82995                                                  |
| 5107 | 1,3,4,5,6,9<br>,13,16  | 2,7,8,10,1<br>1,12,14,15<br>,17 | 6  | O54728,P01681,P23593,P62804,Q00715,Q6IRE4                                                  |
| 5108 | 1,3,4,5,6,9<br>,13,17  | 2,7,8,10,1<br>1,12,14,15<br>,16 | 2  | P01681,P23593                                                                              |
| 5109 | 1,3,4,5,6,9<br>,14,15  | 2,7,8,10,1<br>1,12,13,16<br>,17 | 2  | O54728,P01681                                                                              |
| 5110 | 1,3,4,5,6,9<br>,14,16  | 2,7,8,10,1<br>1,12,13,15<br>,17 | 3  | O54728,P01681,Q6IRE4                                                                       |
| 5111 | 1,3,4,5,6,9<br>,14,17  | 2,7,8,10,1<br>1,12,13,15<br>,16 | 2  | P01681,P01835                                                                              |
| 5112 | 1,3,4,5,6,9<br>,15,16  | 2,7,8,10,1<br>1,12,13,14<br>,17 | 6  | O54728,P01681,P23593,P62804,Q00715,Q6IRE4                                                  |
| 5113 | 1,3,4,5,6,9<br>,15,17  | 2,7,8,10,1<br>1,12,13,14<br>,16 | 4  | B0BNN3,O54728,P01681,P23593                                                                |
| 5114 | 1,3,4,5,6,9<br>,16,17  | 2,7,8,10,1<br>1,12,13,14<br>,15 | 3  | P01681,P23593,P62804                                                                       |
| 5115 | 1,3,4,5,6,1<br>0,11,12 | 2,7,8,9,13,<br>14,15,16,1<br>7  | 13 | O35547,P01681,P16636,P55314,Q10758,Q4FZU2,Q6IFU7,Q6IFU8,Q6IFW6,Q6IG02,Q6IMF3,Q6P6Q2,Q9ESW0 |
| 5116 | 1,3,4,5,6,1<br>0,11,13 | 2,7,8,9,12,<br>14,15,16,1<br>7  | 3  | P01681,P55314,Q4FZU2                                                                       |
| 5117 | 1,3,4,5,6,1<br>0,11,14 | 2,7,8,9,12,<br>13,15,16,1<br>7  | 6  | P01681,P08649,P55314,Q4FZU2,Q6IFW6,Q6P6Q2                                                  |
| 5118 | 1,3,4,5,6,1<br>0,11,15 | 2,7,8,9,12,<br>13,14,16,1<br>7  | 6  | O54728,P01681,P08649,P55314,Q4FZU2,Q5I0D1                                                  |
| 5119 | 1,3,4,5,6,1<br>0,11,16 | 2,7,8,9,12,<br>13,14,15,1<br>7  | 10 | P01681,P08649,P14668,P55314,Q4FZU2,Q5FVI6,Q6IFW6,Q6IRE4,Q6P6Q2,Q8VD89                      |
| 5120 | 1,3,4,5,6,1<br>0,11,17 | 2,7,8,9,12,<br>13,14,15,1<br>6  | 7  | P01681,P08649,P16636,P55314,Q4FZU2,Q63751,Q99MH3                                           |

|      |                        |                                |    |                                                                                                   |
|------|------------------------|--------------------------------|----|---------------------------------------------------------------------------------------------------|
| 5121 | 1,3,4,5,6,1<br>0,12,13 | 2,7,8,9,11,<br>14,15,16,1<br>7 | 10 | P01681,P82995,Q10758,Q498D9,Q4FZU2,Q6IFW6,Q6IG02,Q6IMF3,Q6P6Q2,Q99MH3                             |
| 5122 | 1,3,4,5,6,1<br>0,12,14 | 2,7,8,9,11,<br>13,15,16,1<br>7 | 10 | P01681,P01835,P34901,Q10758,Q498D9,Q4FZU2,Q6IFW6,Q6IG02,Q6IMF3,Q6P6Q2                             |
| 5123 | 1,3,4,5,6,1<br>0,12,15 | 2,7,8,9,11,<br>13,14,16,1<br>7 | 10 | B0BNN3,P01681,P20766,Q10758,Q4FZU2,Q6IFW6,Q6IG02,Q6IMF3,Q6P6Q2,Q99MH3                             |
| 5124 | 1,3,4,5,6,1<br>0,12,16 | 2,7,8,9,11,<br>13,14,15,1<br>7 | 10 | P01681,P08721,P20766,Q10758,Q4FZU2,Q6IFU7,Q6IFW6,Q6IG02,Q6IMF3,Q6P6Q2                             |
| 5125 | 1,3,4,5,6,1<br>0,12,17 | 2,7,8,9,11,<br>13,14,15,1<br>6 | 14 | P01681,P01835,P08937,P16636,P23593,Q10758,Q4FZU2,Q63751,Q6IFW6,Q6IG02,Q6IMF3,Q6P6Q2,Q99MH3,Q9QZK9 |
| 5126 | 1,3,4,5,6,1<br>0,13,14 | 2,7,8,9,11,<br>12,15,16,1<br>7 | 3  | P01681,P06911,Q498D9                                                                              |
| 5127 | 1,3,4,5,6,1<br>0,13,15 | 2,7,8,9,11,<br>12,14,16,1<br>7 | 4  | P01681,P82995,Q4FZU2,Q99MH3                                                                       |
| 5128 | 1,3,4,5,6,1<br>0,13,16 | 2,7,8,9,11,<br>12,14,15,1<br>7 | 1  | P01681                                                                                            |
| 5129 | 1,3,4,5,6,1<br>0,13,17 | 2,7,8,9,11,<br>12,14,15,1<br>6 | 2  | P01681,Q99MH3                                                                                     |
| 5130 | 1,3,4,5,6,1<br>0,14,15 | 2,7,8,9,11,<br>12,13,16,1<br>7 | 2  | P01681,Q4FZU2                                                                                     |
| 5131 | 1,3,4,5,6,1<br>0,14,16 | 2,7,8,9,11,<br>12,13,15,1<br>7 | 2  | P01681,Q4FZU2                                                                                     |
| 5132 | 1,3,4,5,6,1<br>0,14,17 | 2,7,8,9,11,<br>12,13,15,1<br>6 | 1  | P01681                                                                                            |
| 5133 | 1,3,4,5,6,1<br>0,15,16 | 2,7,8,9,11,<br>12,13,14,1<br>7 | 5  | O54728,P01681,P20766,P23593,Q4FZU2                                                                |
| 5134 | 1,3,4,5,6,1<br>0,15,17 | 2,7,8,9,11,<br>12,13,14,1<br>6 | 5  | B0BNN3,P01681,P23593,Q4FZU2,Q99MH3                                                                |
| 5135 | 1,3,4,5,6,1<br>0,16,17 | 2,7,8,9,11,<br>12,13,14,1<br>5 | 4  | P01681,P23593,Q4FZU2,Q99MH3                                                                       |

|      |                        |                                |    |                                                                                                                        |
|------|------------------------|--------------------------------|----|------------------------------------------------------------------------------------------------------------------------|
| 5136 | 1,3,4,5,6,1<br>1,12,13 | 2,7,8,9,10,<br>14,15,16,1<br>7 | 15 | P01681,P04905,P05539,P0C0A9,P30120,P36374,P55314,Q4FZU2,Q6IFU7,Q6IFU8,Q6IFW6,Q6IG02,Q6IMF3,Q6P6Q2,Q9JHB9               |
| 5137 | 1,3,4,5,6,1<br>1,12,14 | 2,7,8,9,10,<br>13,15,16,1<br>7 | 14 | P01681,P01835,P04905,P34901,P55314,Q10758,Q4FZU2,Q6IFU7,Q6IFU8,Q6IFW6,Q6IG02,Q6IMF3,Q6P6Q2,Q9ESW0                      |
| 5138 | 1,3,4,5,6,1<br>1,12,15 | 2,7,8,9,10,<br>13,14,16,1<br>7 | 13 | B0BNN3,P01681,P02625,P55314,Q4FZU2,Q5I0D1,Q6IFU7,Q6IFU8,Q6IFW6,Q6IG02,Q6IMF3,Q6P6Q2,Q9ESW0                             |
| 5139 | 1,3,4,5,6,1<br>1,12,16 | 2,7,8,9,10,<br>13,14,15,1<br>7 | 14 | P01681,P14668,P17046,P55314,Q10758,Q4FZU2,Q6IFU7,Q6IFU8,Q6IFW6,Q6IG02,Q6IMF3,Q6IRE4,Q6P6Q2,Q9ESW0                      |
| 5140 | 1,3,4,5,6,1<br>1,12,17 | 2,7,8,9,10,<br>13,14,15,1<br>6 | 17 | P01681,P01835,P08937,P13432,P16636,P55314,Q10758,Q4FZU2,Q63751,Q6IFU8,Q6IFW6,Q6IG02,Q6IMF3,Q6P6Q2,Q99MH3,Q9ESW0,Q9QZK9 |
| 5141 | 1,3,4,5,6,1<br>1,13,14 | 2,7,8,9,10,<br>12,15,16,1<br>7 | 4  | P01681,P05539,P55314,Q4FZU2                                                                                            |
| 5142 | 1,3,4,5,6,1<br>1,13,15 | 2,7,8,9,10,<br>12,14,16,1<br>7 | 6  | O54728,P01681,P05539,P55314,P82995,Q4FZU2                                                                              |
| 5143 | 1,3,4,5,6,1<br>1,13,16 | 2,7,8,9,10,<br>12,14,15,1<br>7 | 5  | P01681,P55314,Q4FZU2,Q6IRE4,Q8VD89                                                                                     |
| 5144 | 1,3,4,5,6,1<br>1,13,17 | 2,7,8,9,10,<br>12,14,15,1<br>6 | 6  | P01681,P05539,P55314,Q4FZU2,Q63751,Q99MH3                                                                              |
| 5145 | 1,3,4,5,6,1<br>1,14,15 | 2,7,8,9,10,<br>12,13,16,1<br>7 | 6  | O54728,P01681,P55314,P97840,Q4FZU2,Q5I0D1                                                                              |
| 5146 | 1,3,4,5,6,1<br>1,14,16 | 2,7,8,9,10,<br>12,13,15,1<br>7 | 6  | P01681,P14668,P55314,Q4FZU2,Q5I0D1,Q6IRE4                                                                              |
| 5147 | 1,3,4,5,6,1<br>1,14,17 | 2,7,8,9,10,<br>12,13,15,1<br>6 | 7  | P01681,P01835,P02793,Q7TP54,P55314,P97840,Q4FZU2,Q63751                                                                |
| 5148 | 1,3,4,5,6,1<br>1,15,16 | 2,7,8,9,10,<br>12,13,14,1<br>7 | 8  | O54728,P01681,P14668,P55314,Q4FZU2,Q5I0D1,Q6IRE4,Q8VD89                                                                |
| 5149 | 1,3,4,5,6,1<br>1,15,17 | 2,7,8,9,10,<br>12,13,14,1<br>6 | 7  | B0BNN3,P01681,P55314,P97840,Q4FZU2,Q5I0D1,Q63751                                                                       |
| 5150 | 1,3,4,5,6,1<br>1,16,17 | 2,7,8,9,10,<br>12,13,14,1<br>5 | 4  | P01681,P55314,Q4FZU2,Q63751                                                                                            |

|      |                        |                                |    |                                                                                            |
|------|------------------------|--------------------------------|----|--------------------------------------------------------------------------------------------|
| 5151 | 1,3,4,5,6,1<br>2,13,14 | 2,7,8,9,10,<br>11,15,16,1<br>7 | 9  | P01681,P01835,P06911,P82995,Q498D9,Q4FZU2,Q6IFW6,Q6IG02,Q6IMF3                             |
| 5152 | 1,3,4,5,6,1<br>2,13,15 | 2,7,8,9,10,<br>11,14,16,1<br>7 | 8  | B0BNN3,P01681,P82995,Q4FZU2,Q6IFW6,Q6IG02,Q6IMF3,Q99MH3                                    |
| 5153 | 1,3,4,5,6,1<br>2,13,16 | 2,7,8,9,10,<br>11,14,15,1<br>7 | 8  | P01681,P17046,P82995,Q4FZU2,Q6IFW6,Q6IG02,Q6IMF3,Q6P6Q2                                    |
| 5154 | 1,3,4,5,6,1<br>2,13,17 | 2,7,8,9,10,<br>11,14,15,1<br>6 | 13 | P01681,P01835,P08937,P13432,P16636,Q10758,Q4FZU2,Q63751,Q6IFW6,Q6IG02,Q6IMF3,Q99MH3,Q9QZK9 |
| 5155 | 1,3,4,5,6,1<br>2,14,15 | 2,7,8,9,10,<br>11,13,16,1<br>7 | 7  | B0BNN3,P01681,P01835,Q4FZU2,Q6IFW6,Q6IG02,Q6IMF3                                           |
| 5156 | 1,3,4,5,6,1<br>2,14,16 | 2,7,8,9,10,<br>11,13,15,1<br>7 | 8  | P01681,P01835,Q10758,Q4FZU2,Q6IFW6,Q6IG02,Q6IMF3,Q6P6Q2                                    |
| 5157 | 1,3,4,5,6,1<br>2,14,17 | 2,7,8,9,10,<br>11,13,15,1<br>6 | 10 | B0BNN3,P01681,P01835,P13432,Q10758,Q4FZU2,Q6IFW6,Q6IG02,Q6IMF3,Q9QW07                      |
| 5158 | 1,3,4,5,6,1<br>2,15,16 | 2,7,8,9,10,<br>11,13,14,1<br>7 | 7  | P01681,P20766,P23593,Q4FZU2,Q6IFW6,Q6IG02,Q6IMF3                                           |
| 5159 | 1,3,4,5,6,1<br>2,15,17 | 2,7,8,9,10,<br>11,13,14,1<br>6 | 12 | B0BNN3,P01681,P01835,P13432,P23593,Q10758,Q4FZU2,Q63751,Q6IFW6,Q6IG02,Q6IMF3,Q99MH3        |
| 5160 | 1,3,4,5,6,1<br>2,16,17 | 2,7,8,9,10,<br>11,13,14,1<br>5 | 12 | P01681,P01835,P13432,P23593,Q10758,Q4FZU2,Q63751,Q6IFW6,Q6IG02,Q6IMF3,Q6P6Q2,Q99MH3        |
| 5161 | 1,3,4,5,6,1<br>3,14,15 | 2,7,8,9,10,<br>11,12,16,1<br>7 | 4  | O54728,P01681,P82995,Q64093                                                                |
| 5162 | 1,3,4,5,6,1<br>3,14,16 | 2,7,8,9,10,<br>11,12,15,1<br>7 | 2  | P01681,Q6IRE4                                                                              |
| 5163 | 1,3,4,5,6,1<br>3,14,17 | 2,7,8,9,10,<br>11,12,15,1<br>6 | 3  | P01681,P51907,Q9QW07                                                                       |
| 5164 | 1,3,4,5,6,1<br>3,15,16 | 2,7,8,9,10,<br>11,12,14,1<br>7 | 5  | O54728,P01681,P62804,P82995,Q00715                                                         |
| 5165 | 1,3,4,5,6,1<br>3,15,17 | 2,7,8,9,10,<br>11,12,14,1<br>6 | 4  | B0BNN3,P01681,P23593,Q99MH3                                                                |

|      |                        |                                  |    |                                                                                                                        |
|------|------------------------|----------------------------------|----|------------------------------------------------------------------------------------------------------------------------|
| 5166 | 1,3,4,5,6,1<br>3,16,17 | 2,7,8,9,10,<br>11,12,14,1<br>5   | 4  | P01681,P23593,P62804,Q99MH3                                                                                            |
| 5167 | 1,3,4,5,6,1<br>4,15,16 | 2,7,8,9,10,<br>11,12,13,1<br>7   | 3  | O54728,P01681,P02803                                                                                                   |
| 5168 | 1,3,4,5,6,1<br>4,15,17 | 2,7,8,9,10,<br>11,12,13,1<br>6   | 7  | B0BNN3,P01681,P02803,P10536,P47967,P97840,Q9QW07                                                                       |
| 5169 | 1,3,4,5,6,1<br>4,16,17 | 2,7,8,9,10,<br>11,12,13,1<br>5   | 2  | P01681,Q9QW07                                                                                                          |
| 5170 | 1,3,4,5,6,1<br>5,16,17 | 2,7,8,9,10,<br>11,12,13,1<br>4   | 4  | B0BNN3,P01681,P02803,P23593                                                                                            |
| 5171 | 1,3,4,5,7,8<br>,9,10   | 2,6,11,12,<br>13,14,15,1<br>6,17 | 7  | D3ZHA0,O54728,O55006,P18418,P52590,P97571,Q9QX79                                                                       |
| 5172 | 1,3,4,5,7,8<br>,9,11   | 2,6,10,12,<br>13,14,15,1<br>6,17 | 9  | O54728,P07171,P10715,P18418,Q63617,Q6AYS4,Q6IRE4,Q9ESW0,Q9QX79                                                         |
| 5173 | 1,3,4,5,7,8<br>,9,12   | 2,6,10,11,<br>13,14,15,1<br>6,17 | 10 | P01681,P08937,P10715,P18418,Q4FZU6,Q6IG02,Q8CJ52,Q99041,Q9ESW0,Q9QX79                                                  |
| 5174 | 1,3,4,5,7,8<br>,9,13   | 2,6,10,11,<br>12,14,15,1<br>6,17 | 6  | O54728,P05539,P18418,Q4FZU6,Q63617,Q9QX79                                                                              |
| 5175 | 1,3,4,5,7,8<br>,9,14   | 2,6,10,11,<br>12,13,15,1<br>6,17 | 5  | O54728,P18418,Q4FZU6,Q63617,Q9QX79                                                                                     |
| 5176 | 1,3,4,5,7,8<br>,9,15   | 2,6,10,11,<br>12,13,14,1<br>6,17 | 5  | O54728,O55006,P18418,Q62894,Q9QX79                                                                                     |
| 5177 | 1,3,4,5,7,8<br>,9,16   | 2,6,10,11,<br>12,13,14,1<br>5,17 | 8  | B4F795,O54728,P18418,P62804,Q4FZU6,Q63617,Q6IRE4,Q9QX79                                                                |
| 5178 | 1,3,4,5,7,8<br>,9,17   | 2,6,10,11,<br>12,13,14,1<br>5,16 | 13 | P01681,P01946,P02091,P08937,P18418,P23593,P50115,P52590,Q4FZU6,Q63617,Q63751,Q99041,Q9QX79                             |
| 5179 | 1,3,4,5,7,8<br>,10,11  | 2,6,9,12,1<br>3,14,15,16<br>,17  | 15 | P00714,P04041,P07171,P08649,P08937,P16391,P18418,P55314,P61206,P84079,P84082,Q5BJY9,Q5FVI6,Q6AYS4,Q8VD89,Q9ESW0,Q9QX79 |
| 5180 | 1,3,4,5,7,8<br>,10,12  | 2,6,9,11,1<br>3,14,15,16<br>,17  | 15 | D3ZHA0,F1LM93,P01681,P08937,P18418,Q10758,Q4FZU2,Q6IFW6,Q6IG02,Q6IMF3,Q6P6Q2,Q8CJ52,Q99041,Q99MH3,Q9ESW0               |

|      |                       |                                 |    |                                                                                                                                                           |
|------|-----------------------|---------------------------------|----|-----------------------------------------------------------------------------------------------------------------------------------------------------------|
| 5181 | 1,3,4,5,7,8<br>,10,13 | 2,6,9,11,1<br>2,14,15,16<br>,17 | 3  | P08937,P18418,Q8VD89                                                                                                                                      |
| 5182 | 1,3,4,5,7,8<br>,10,14 | 2,6,9,11,1<br>2,13,15,16<br>,17 | 5  | D3ZHA0,P07171,P18418,P36970,Q9QX79                                                                                                                        |
| 5183 | 1,3,4,5,7,8<br>,10,15 | 2,6,9,11,1<br>2,13,14,16<br>,17 | 7  | D3ZHA0,O54728,P07171,P18418,P97571,Q8VD89,Q9QX79                                                                                                          |
| 5184 | 1,3,4,5,7,8<br>,10,16 | 2,6,9,11,1<br>2,13,14,15<br>,17 | 3  | P08721,P18418,Q8VD89                                                                                                                                      |
| 5185 | 1,3,4,5,7,8<br>,10,17 | 2,6,9,11,1<br>2,13,14,15<br>,16 | 14 | P01681,P01946,P02091,P08937,P12346,P18418,P46844,P50115,P52590,P97571,Q63751,Q99041,Q99MH3,Q9QX79                                                         |
| 5186 | 1,3,4,5,7,8<br>,11,12 | 2,6,9,10,1<br>3,14,15,16<br>,17 | 20 | P01681,P02781,P08937,P10715,P18418,P22283,P36374,P61206;P84079;P84082,Q4FZU2,Q4FZU6,Q63493,Q63751,Q6AYS4,Q6IFW6,Q6IG02,Q6IMF3,Q6P6Q2,Q8CJ52,Q99041,Q9ESW0 |
| 5187 | 1,3,4,5,7,8<br>,11,13 | 2,6,9,10,1<br>2,14,15,16<br>,17 | 10 | P05539,P07171,P08937,P18418,Q63617,Q63751,Q6AYS4,Q8CJ52,Q8VD89,Q9ESW0                                                                                     |
| 5188 | 1,3,4,5,7,8<br>,11,14 | 2,6,9,10,1<br>2,13,15,16<br>,17 | 11 | P01681,P07171,P18418,P97840,Q4FZU6,Q5I0D1,Q63617,Q64194,Q6AYS4,Q9ESW0,Q9QX79                                                                              |
| 5189 | 1,3,4,5,7,8<br>,11,15 | 2,6,9,10,1<br>2,13,14,16<br>,17 | 12 | O54728,P07171,P10715,P18418,P22006,Q5I0D1,Q63751,Q64194,Q6AYS4,Q8VD89,Q9ESW0,Q9QX79                                                                       |
| 5190 | 1,3,4,5,7,8<br>,11,16 | 2,6,9,10,1<br>2,13,14,15<br>,17 | 13 | B4F795,P07171,P10715,P14668,P18418,P55314,P61206;P84079;P84082,Q4FZU6,Q63617,Q6AYS4,Q6IRE4,Q8VD89,Q9ESW0                                                  |
| 5191 | 1,3,4,5,7,8<br>,11,17 | 2,6,9,10,1<br>2,13,14,15<br>,16 | 18 | P01681,P01946,P02091,P04041,P08937,P10715,P14669,P18418,P50115,P52590,P97840,Q4FZU6,Q63617,Q63751,Q6AYS4,Q99041,Q9ESW0,Q9QX79                             |
| 5192 | 1,3,4,5,7,8<br>,12,13 | 2,6,9,10,1<br>1,14,15,16<br>,17 | 14 | O88267,P01681,P06761,P08937,P18418,P22283,P36374,P36970,Q4FZU6,Q63751,Q6IG02,Q8CJ52,Q99041,Q9ESW0                                                         |
| 5193 | 1,3,4,5,7,8<br>,12,14 | 2,6,9,10,1<br>1,13,15,16<br>,17 | 14 | P01681,P06761,P08937,P18418,P36970,Q4FZU6,Q68FS4,Q6IFW6,Q6IG02,Q8CJ52,Q8CJD3,Q99041,Q9ESW0,Q9QX79                                                         |
| 5194 | 1,3,4,5,7,8<br>,12,15 | 2,6,9,10,1<br>1,13,14,16<br>,17 | 11 | O54728,P08937,P10715,P18418,Q62894,Q63751,Q6IG02,Q8CJ52,Q99041,Q9ESW0,Q9QX79                                                                              |
| 5195 | 1,3,4,5,7,8<br>,12,16 | 2,6,9,10,1<br>1,13,14,15<br>,17 | 12 | P01681,P08721,P08937,P10715,P18418,Q4FZU6,Q62894,Q6IFW6,Q6IG02,Q8CJ52,Q99041,Q9ESW0                                                                       |



|      |                       |                                 |    |                                                                                                                                                           |
|------|-----------------------|---------------------------------|----|-----------------------------------------------------------------------------------------------------------------------------------------------------------|
| 5196 | 1,3,4,5,7,8<br>,12,17 | 2,6,9,10,1<br>1,13,14,15<br>,16 | 22 | O88267,P01681,P01946,P02091,P08937,P10715,P18418,P19223,P23928,P50115,P52590,P55091,Q4FZU6,Q4G075,Q63751,Q6IG02,Q8CJ52,Q99041,Q99MH3,Q9ESW0,Q9QX79,Q9QZA6 |
| 5197 | 1,3,4,5,7,8<br>,13,14 | 2,6,9,10,1<br>1,12,15,16<br>,17 | 7  | P06866,P06911,P18418,P36970,Q4FZU6,Q5GRG2,Q9QX79                                                                                                          |
| 5198 | 1,3,4,5,7,8<br>,13,15 | 2,6,9,10,1<br>1,12,14,16<br>,17 | 6  | O54728,P07171,P18418,Q62894,Q8VD89,Q9QX79                                                                                                                 |
| 5199 | 1,3,4,5,7,8<br>,13,16 | 2,6,9,10,1<br>1,12,14,15<br>,17 | 4  | P18418,P62804,Q4FZU6,Q8VD89                                                                                                                               |
| 5200 | 1,3,4,5,7,8<br>,13,17 | 2,6,9,10,1<br>1,12,14,15<br>,16 | 13 | P01681,P01946,P02091,P08937,P10536,P18418,P23928,P52590,Q4FZU6,Q63751,Q99041,Q99MH3,Q9QX79                                                                |
| 5201 | 1,3,4,5,7,8<br>,14,15 | 2,6,9,10,1<br>1,12,13,16<br>,17 | 6  | O54728,P07171,P10536,P18418,P36970,Q9QX79                                                                                                                 |
| 5202 | 1,3,4,5,7,8<br>,14,16 | 2,6,9,10,1<br>1,12,13,15<br>,17 | 6  | B4F795,P08721,P18418,Q4FZU6,Q6IRE4,Q9QX79                                                                                                                 |
| 5203 | 1,3,4,5,7,8<br>,14,17 | 2,6,9,10,1<br>1,12,13,15<br>,16 | 13 | P01681,P01946,P02091,P08937,P10536,P18418,P52590,P97840,Q4FZU6,Q63751,Q9ESW0,Q9QW07,Q9QX79                                                                |
| 5204 | 1,3,4,5,7,8<br>,15,16 | 2,6,9,10,1<br>1,12,13,14<br>,17 | 7  | B4F795,O54728,P08721,P18418,Q62894,Q8VD89,Q9QX79                                                                                                          |
| 5205 | 1,3,4,5,7,8<br>,15,17 | 2,6,9,10,1<br>1,12,13,14<br>,16 | 13 | B0BNN3,O54728,P01946,P02091,P08937,P10536,P18418,P52590,Q62894,Q63751,Q99041,Q9ESW0,Q9QX79                                                                |
| 5206 | 1,3,4,5,7,8<br>,16,17 | 2,6,9,10,1<br>1,12,13,14<br>,15 | 12 | B4F795,P01681,P01946,P02091,P08937,P18418,P23928,P52590,Q4FZU6,Q63751,Q99041,Q9QX79                                                                       |
| 5207 | 1,3,4,5,7,9<br>,10,11 | 2,6,8,12,1<br>3,14,15,16<br>,17 | 7  | O54728,P52590,P55314,P61206,P84079,P84082,Q5FVI6,Q62635,Q6IRE4                                                                                            |
| 5208 | 1,3,4,5,7,9<br>,10,12 | 2,6,8,11,1<br>3,14,15,16<br>,17 | 4  | P52590,Q4FZU2,Q6IFW6,Q6IG02                                                                                                                               |
| 5209 | 1,3,4,5,7,9<br>,10,13 | 2,6,8,11,1<br>2,14,15,16<br>,17 | 4  | O54728,P62804,Q00715,Q62635                                                                                                                               |
| 5210 | 1,3,4,5,7,9<br>,10,14 | 2,6,8,11,1<br>2,13,15,16<br>,17 | 2  | O54728,Q62635                                                                                                                                             |

|      |                       |                                 |   |                                                                       |
|------|-----------------------|---------------------------------|---|-----------------------------------------------------------------------|
| 5211 | 1,3,4,5,7,9<br>,10,15 | 2,6,8,11,1<br>2,13,14,16<br>,17 | 3 | O54728,P52590,Q62635                                                  |
| 5212 | 1,3,4,5,7,9<br>,10,16 | 2,6,8,11,1<br>2,13,14,15<br>,17 | 7 | O54728,P08721,P62804,Q00715,Q5FVI6,Q62635,Q6IRE4                      |
| 5213 | 1,3,4,5,7,9<br>,10,17 | 2,6,8,11,1<br>2,13,14,15<br>,16 | 3 | P01946,P02091,P52590                                                  |
| 5214 | 1,3,4,5,7,9<br>,11,12 | 2,6,8,10,1<br>3,14,15,16<br>,17 | 8 | O54728,P01681,Q4FZU2,Q6IFW6,Q6IG02,Q6IRE4,Q6P6Q2,Q9ESW0               |
| 5215 | 1,3,4,5,7,9<br>,11,13 | 2,6,8,10,1<br>2,14,15,16<br>,17 | 4 | O54728,P05539,Q62635,Q6IRE4                                           |
| 5216 | 1,3,4,5,7,9<br>,11,14 | 2,6,8,10,1<br>2,13,15,16<br>,17 | 3 | O54728,Q62635,Q6IRE4                                                  |
| 5217 | 1,3,4,5,7,9<br>,11,15 | 2,6,8,10,1<br>2,13,14,16<br>,17 | 5 | O54728,Q62635,Q6IRE4,Q8K4G9,Q9ESW0                                    |
| 5218 | 1,3,4,5,7,9<br>,11,16 | 2,6,8,10,1<br>2,13,14,15<br>,17 | 8 | B4F795,O54728,P15999,P55314,P61206;P84079;P84082,Q62635,Q6IRE4,Q8K4G9 |
| 5219 | 1,3,4,5,7,9<br>,11,17 | 2,6,8,10,1<br>2,13,14,15<br>,16 | 6 | O54728,P01681,P01946,P02091,P52590,Q9ESW0                             |
| 5220 | 1,3,4,5,7,9<br>,12,13 | 2,6,8,10,1<br>1,14,15,16<br>,17 | 1 | P05539                                                                |
| 5221 | 1,3,4,5,7,9<br>,12,14 | 2,6,8,10,1<br>1,13,15,16<br>,17 | 2 | Q4FZU6,Q6IG02                                                         |
| 5222 | 1,3,4,5,7,9<br>,12,15 | 2,6,8,10,1<br>1,13,14,16<br>,17 | 2 | O54728,Q9ESW0                                                         |
| 5223 | 1,3,4,5,7,9<br>,12,16 | 2,6,8,10,1<br>1,13,14,15<br>,17 | 4 | O54728,Q4FZU6,Q6IG02,Q6IRE4                                           |
| 5224 | 1,3,4,5,7,9<br>,12,17 | 2,6,8,10,1<br>1,13,14,15<br>,16 | 7 | P01681,P01946,P02091,P52590,Q4FZU6,Q6IG02,Q9ESW0                      |
| 5225 | 1,3,4,5,7,9<br>,13,14 | 2,6,8,10,1<br>1,12,15,16<br>,17 | 4 | O54728,P05539,P62804,Q4FZU6                                           |

|      |                        |                                 |    |                                                                                            |
|------|------------------------|---------------------------------|----|--------------------------------------------------------------------------------------------|
| 5226 | 1,3,4,5,7,9<br>,13,15  | 2,6,8,10,1<br>1,12,14,16<br>,17 | 5  | O54728,P05539,P62804,Q00715,Q62635                                                         |
| 5227 | 1,3,4,5,7,9<br>,13,16  | 2,6,8,10,1<br>1,12,14,15<br>,17 | 6  | O54728,P62804,Q00715,Q4FZU6,Q62635,Q6IRE4                                                  |
| 5228 | 1,3,4,5,7,9<br>,13,17  | 2,6,8,10,1<br>1,12,14,15<br>,16 | 6  | P01946,P02091,P05539,P52590,P62804,Q4FZU6                                                  |
| 5229 | 1,3,4,5,7,9<br>,14,15  | 2,6,8,10,1<br>1,12,13,16<br>,17 | 3  | O54728,P62804,Q62635                                                                       |
| 5230 | 1,3,4,5,7,9<br>,14,16  | 2,6,8,10,1<br>1,12,13,15<br>,17 | 7  | O54728,P62804,Q00715,Q4FZU6,Q62635,Q6IRE4,Q9QZK9                                           |
| 5231 | 1,3,4,5,7,9<br>,14,17  | 2,6,8,10,1<br>1,12,13,15<br>,16 | 5  | O54728,P01946,P02091,P52590,Q4FZU6                                                         |
| 5232 | 1,3,4,5,7,9<br>,15,16  | 2,6,8,10,1<br>1,12,13,14<br>,17 | 10 | B4F795,O54728,P02782,P47727,P62804,Q00715,Q62635,Q6IRE4,Q8K4G9,Q9QZK9                      |
| 5233 | 1,3,4,5,7,9<br>,15,17  | 2,6,8,10,1<br>1,12,13,14<br>,16 | 5  | O54728,P02091,P47727,P52590,P62804                                                         |
| 5234 | 1,3,4,5,7,9<br>,16,17  | 2,6,8,10,1<br>1,12,13,14<br>,15 | 9  | O54728,P01946,P02091,P23593,P47727,P52590,P62804,Q00715,Q4FZU6                             |
| 5235 | 1,3,4,5,7,1<br>0,11,12 | 2,6,8,9,13,<br>14,15,16,1<br>7  | 11 | P01681,P06757,P55314,P61206;P84079;P84082,Q4FZU2,Q5FVI6,Q6IFW6,Q6IG02,Q6IMF3,Q6P6Q2,Q9ESW0 |
| 5236 | 1,3,4,5,7,1<br>0,11,13 | 2,6,8,9,12,<br>14,15,16,1<br>7  | 5  | P05539,P55314,P61206;P84079;P84082,Q5FVI6,Q8VD89                                           |
| 5237 | 1,3,4,5,7,1<br>0,11,14 | 2,6,8,9,12,<br>13,15,16,1<br>7  | 5  | P55314,P61206;P84079;P84082,Q5FVI6,Q62635,Q9ESW0                                           |
| 5238 | 1,3,4,5,7,1<br>0,11,15 | 2,6,8,9,12,<br>13,14,16,1<br>7  | 8  | O54728,P22006,P55314,P61206;P84079;P84082,Q5FVI6,Q62635,Q8VD89,Q9ESW0                      |
| 5239 | 1,3,4,5,7,1<br>0,11,16 | 2,6,8,9,12,<br>13,14,15,1<br>7  | 7  | P08721,P55314,P61206;P84079;P84082,Q5FVI6,Q62635,Q6IRE4,Q8VD89                             |
| 5240 | 1,3,4,5,7,1<br>0,11,17 | 2,6,8,9,12,<br>13,14,15,1<br>6  | 8  | P01681,P01946,P02091,P52590,P55314,P61206;P84079;P84082,Q5FVI6,Q9ESW0                      |

|      |                        |                                |    |                                                                       |
|------|------------------------|--------------------------------|----|-----------------------------------------------------------------------|
| 5241 | 1,3,4,5,7,1<br>0,12,13 | 2,6,8,9,11,<br>14,15,16,1<br>7 | 3  | Q4FZU2,Q6IG02,Q99MH3                                                  |
| 5242 | 1,3,4,5,7,1<br>0,12,14 | 2,6,8,9,11,<br>13,15,16,1<br>7 | 5  | Q10758,Q4FZU2,Q6IFW6,Q6IG02,Q9ESW0                                    |
| 5243 | 1,3,4,5,7,1<br>0,12,15 | 2,6,8,9,11,<br>13,14,16,1<br>7 | 5  | O54728,Q4FZU2,Q6IG02,Q99MH3,Q9ESW0                                    |
| 5244 | 1,3,4,5,7,1<br>0,12,16 | 2,6,8,9,11,<br>13,14,15,1<br>7 | 6  | P08721,Q4FZU2,Q5FVI6,Q6IFW6,Q6IG02,Q6IMF3                             |
| 5245 | 1,3,4,5,7,1<br>0,12,17 | 2,6,8,9,11,<br>13,14,15,1<br>6 | 10 | P01681,P01946,P02091,P52590,Q10758,Q4FZU2,Q6IFW6,Q6IG02,Q99MH3,Q9ESW0 |
| 5246 | 1,3,4,5,7,1<br>0,13,14 | 2,6,8,9,11,<br>12,15,16,1<br>7 | 0  |                                                                       |
| 5247 | 1,3,4,5,7,1<br>0,13,15 | 2,6,8,9,11,<br>12,14,16,1<br>7 | 3  | O54728,P62804,Q8VD89                                                  |
| 5248 | 1,3,4,5,7,1<br>0,13,16 | 2,6,8,9,11,<br>12,14,15,1<br>7 | 4  | P62804,Q00715,Q62635,Q8VD89                                           |
| 5249 | 1,3,4,5,7,1<br>0,13,17 | 2,6,8,9,11,<br>12,14,15,1<br>6 | 4  | P01946,P02091,P52590,Q99MH3                                           |
| 5250 | 1,3,4,5,7,1<br>0,14,15 | 2,6,8,9,11,<br>12,13,16,1<br>7 | 2  | O54728,Q62635                                                         |
| 5251 | 1,3,4,5,7,1<br>0,14,16 | 2,6,8,9,11,<br>12,13,15,1<br>7 | 2  | P08721,Q62635                                                         |
| 5252 | 1,3,4,5,7,1<br>0,14,17 | 2,6,8,9,11,<br>12,13,15,1<br>6 | 4  | P01946,P02091,P18427,P52590                                           |
| 5253 | 1,3,4,5,7,1<br>0,15,16 | 2,6,8,9,11,<br>12,13,14,1<br>7 | 8  | O54728,P02782,P08721,P62804,Q00715,Q5FVI6,Q62635,Q8VD89               |
| 5254 | 1,3,4,5,7,1<br>0,15,17 | 2,6,8,9,11,<br>12,13,14,1<br>6 | 4  | O54728,P02091,P52590,Q99MH3                                           |
| 5255 | 1,3,4,5,7,1<br>0,16,17 | 2,6,8,9,11,<br>12,13,14,1<br>5 | 4  | P01946,P02091,P08721,P52590                                           |

|      |                        |                                |    |                                                                                                   |
|------|------------------------|--------------------------------|----|---------------------------------------------------------------------------------------------------|
| 5256 | 1,3,4,5,7,1<br>1,12,13 | 2,6,8,9,10,<br>14,15,16,1<br>7 | 9  | P01681,P05539,P17046,P36374,Q4FZU2,Q6IFW6,Q6IG02,Q6P6Q2,Q9ESW0                                    |
| 5257 | 1,3,4,5,7,1<br>1,12,14 | 2,6,8,9,10,<br>13,15,16,1<br>7 | 7  | P01681,Q4FZU2,Q4FZU6,Q6IFW6,Q6IG02,Q6P6Q2,Q9ESW0                                                  |
| 5258 | 1,3,4,5,7,1<br>1,12,15 | 2,6,8,9,10,<br>13,14,16,1<br>7 | 7  | O54728,Q4FZU2,Q5I0D1,Q6IFW6,Q6IG02,Q6P6Q2,Q9ESW0                                                  |
| 5259 | 1,3,4,5,7,1<br>1,12,16 | 2,6,8,9,10,<br>13,14,15,1<br>7 | 12 | P01681,P17046,P55314,P61206;P84079;P84082,Q4FZU2,Q4FZU6,Q6IFW6,Q6IG02,Q6IMF3,Q6IRE4,Q6P6Q2,Q9ESW0 |
| 5260 | 1,3,4,5,7,1<br>1,12,17 | 2,6,8,9,10,<br>13,14,15,1<br>6 | 11 | P01681,P01946,P02091,P08937,P17046,Q4FZU2,Q63751,Q6IFW6,Q6IG02,Q6P6Q2,Q9ESW0                      |
| 5261 | 1,3,4,5,7,1<br>1,13,14 | 2,6,8,9,10,<br>12,15,16,1<br>7 | 3  | P05539,Q6IRE4,Q6P6R2                                                                              |
| 5262 | 1,3,4,5,7,1<br>1,13,15 | 2,6,8,9,10,<br>12,14,16,1<br>7 | 5  | O54728,P05539,Q6P6R2,Q8VD89,Q9ESW0                                                                |
| 5263 | 1,3,4,5,7,1<br>1,13,16 | 2,6,8,9,10,<br>12,14,15,1<br>7 | 7  | O54728,P05539,P17046,P55314,P61206;P84079;P84082,Q6IRE4,Q8VD89                                    |
| 5264 | 1,3,4,5,7,1<br>1,13,17 | 2,6,8,9,10,<br>12,14,15,1<br>6 | 6  | P01681,P01946,P02091,P05539,Q63751,Q9ESW0                                                         |
| 5265 | 1,3,4,5,7,1<br>1,14,15 | 2,6,8,9,10,<br>12,13,16,1<br>7 | 7  | O54728,P22006,Q5I0D1,Q62635,Q6IRE4,Q6P6R2,Q9ESW0                                                  |
| 5266 | 1,3,4,5,7,1<br>1,14,16 | 2,6,8,9,10,<br>12,13,15,1<br>7 | 7  | O54728,P55314,P61206;P84079;P84082,Q4FZU6,Q62635,Q6IRE4,Q9ESW0                                    |
| 5267 | 1,3,4,5,7,1<br>1,14,17 | 2,6,8,9,10,<br>12,13,15,1<br>6 | 6  | P01681,P01946,P02091,P97840,Q4FZU6,Q9ESW0                                                         |
| 5268 | 1,3,4,5,7,1<br>1,15,16 | 2,6,8,9,10,<br>12,13,14,1<br>7 | 11 | B4F795,O54728,P14408,P17046,P55314,Q5I0D1,Q62635,Q6IRE4,Q8K4G9,Q8VD89,Q9ESW0                      |
| 5269 | 1,3,4,5,7,1<br>1,15,17 | 2,6,8,9,10,<br>12,13,14,1<br>6 | 5  | O54728,P01946,P02091,Q63751,Q9ESW0                                                                |
| 5270 | 1,3,4,5,7,1<br>1,16,17 | 2,6,8,9,10,<br>12,13,14,1<br>5 | 8  | P01681,P01946,P02091,P17046,P55314,Q4FZU6,Q6IRE4,Q9ESW0                                           |

|      |                        |                                |   |                                                                |
|------|------------------------|--------------------------------|---|----------------------------------------------------------------|
| 5271 | 1,3,4,5,7,1<br>2,13,14 | 2,6,8,9,10,<br>11,15,16,1<br>7 | 2 | A2RUV9,Q4FZU6                                                  |
| 5272 | 1,3,4,5,7,1<br>2,13,15 | 2,6,8,9,10,<br>11,14,16,1<br>7 | 4 | O54728,P05539,Q6P6R2,Q9ESW0                                    |
| 5273 | 1,3,4,5,7,1<br>2,13,16 | 2,6,8,9,10,<br>11,14,15,1<br>7 | 2 | P17046,Q4FZU6                                                  |
| 5274 | 1,3,4,5,7,1<br>2,13,17 | 2,6,8,9,10,<br>11,14,15,1<br>6 | 9 | P01681,P01946,P02091,P08937,P36374,Q4FZU6,Q63751,Q99MH3,Q9ESW0 |
| 5275 | 1,3,4,5,7,1<br>2,14,15 | 2,6,8,9,10,<br>11,13,16,1<br>7 | 4 | A2RUV9,O54728,Q8CJD3,Q9ESW0                                    |
| 5276 | 1,3,4,5,7,1<br>2,14,16 | 2,6,8,9,10,<br>11,13,15,1<br>7 | 6 | P08721,P17046,Q4FZU6,Q6IG02,Q6IRE4,Q9ESW0                      |
| 5277 | 1,3,4,5,7,1<br>2,14,17 | 2,6,8,9,10,<br>11,13,15,1<br>6 | 9 | P01681,P01946,P02091,P31430,Q4FZU6,Q6IG02,Q8CJD3,Q9ESW0,Q9QW07 |
| 5278 | 1,3,4,5,7,1<br>2,15,16 | 2,6,8,9,10,<br>11,13,14,1<br>7 | 3 | O54728,P17046,Q9ESW0                                           |
| 5279 | 1,3,4,5,7,1<br>2,15,17 | 2,6,8,9,10,<br>11,13,14,1<br>6 | 5 | P01681,P01946,P02091,Q99MH3,Q9ESW0                             |
| 5280 | 1,3,4,5,7,1<br>2,16,17 | 2,6,8,9,10,<br>11,13,14,1<br>5 | 7 | P01681,P01946,P02091,P17046,Q4FZU6,Q6IG02,Q9ESW0               |
| 5281 | 1,3,4,5,7,1<br>3,14,15 | 2,6,8,9,10,<br>11,12,16,1<br>7 | 5 | O54728,P05539,P62804,Q09030,Q6P6R2                             |
| 5282 | 1,3,4,5,7,1<br>3,14,16 | 2,6,8,9,10,<br>11,12,15,1<br>7 | 5 | O54728,P62804,Q00715,Q4FZU6,Q6IRE4                             |
| 5283 | 1,3,4,5,7,1<br>3,14,17 | 2,6,8,9,10,<br>11,12,15,1<br>6 | 4 | P01946,P02091,Q4FZU6,Q9QW07                                    |
| 5284 | 1,3,4,5,7,1<br>3,15,16 | 2,6,8,9,10,<br>11,12,14,1<br>7 | 7 | O54728,P62804,Q00715,Q09030,Q62635,Q6IRE4,Q8VD89               |
| 5285 | 1,3,4,5,7,1<br>3,15,17 | 2,6,8,9,10,<br>11,12,14,1<br>6 | 7 | O54728,P01946,P02091,P05539,P62804,Q99MH3,Q9WUW8               |

|      |                        |                                 |   |                                                                |
|------|------------------------|---------------------------------|---|----------------------------------------------------------------|
| 5286 | 1,3,4,5,7,1<br>3,16,17 | 2,6,8,9,10,<br>11,12,14,1<br>5  | 6 | P01946,P02091,P17046,P62804,Q00715,Q4FZU6                      |
| 5287 | 1,3,4,5,7,1<br>4,15,16 | 2,6,8,9,10,<br>11,12,13,1<br>7  | 4 | O54728,P62804,Q62635,Q6IRE4                                    |
| 5288 | 1,3,4,5,7,1<br>4,15,17 | 2,6,8,9,10,<br>11,12,13,1<br>6  | 7 | O54728,P01946,P02091,P02803,P10536,Q8CJD3,Q9QW07               |
| 5289 | 1,3,4,5,7,1<br>4,16,17 | 2,6,8,9,10,<br>11,12,13,1<br>5  | 4 | P01946,P02091,Q4FZU6,Q9QW07                                    |
| 5290 | 1,3,4,5,7,1<br>5,16,17 | 2,6,8,9,10,<br>11,12,13,1<br>4  | 6 | O54728,P01946,P02091,P02782,P47727,P62804                      |
| 5291 | 1,3,4,5,8,9<br>,10,11  | 2,6,7,12,1<br>3,14,15,16<br>,17 | 3 | O54728,P08649,Q6AYS4                                           |
| 5292 | 1,3,4,5,8,9<br>,10,12  | 2,6,7,11,1<br>3,14,15,16<br>,17 | 6 | P01681,Q4FZU2,Q6IFW6,Q6IG02,Q6IMF3,Q6P6Q2                      |
| 5293 | 1,3,4,5,8,9<br>,10,13  | 2,6,7,11,1<br>2,14,15,16<br>,17 | 1 | O54728                                                         |
| 5294 | 1,3,4,5,8,9<br>,10,14  | 2,6,7,11,1<br>2,13,15,16<br>,17 | 1 | O54728                                                         |
| 5295 | 1,3,4,5,8,9<br>,10,15  | 2,6,7,11,1<br>2,13,14,16<br>,17 | 2 | O54728,Q62635                                                  |
| 5296 | 1,3,4,5,8,9<br>,10,16  | 2,6,7,11,1<br>2,13,14,15<br>,17 | 4 | O54728,P08721,P23593,Q62635                                    |
| 5297 | 1,3,4,5,8,9<br>,10,17  | 2,6,7,11,1<br>2,13,14,15<br>,16 | 5 | P01681,P08649,P23593,P25031,Q63532                             |
| 5298 | 1,3,4,5,8,9<br>,11,12  | 2,6,7,10,1<br>3,14,15,16<br>,17 | 9 | P01681,Q4FZU2,Q6AYS4,Q6IFU8,Q6IFW6,Q6IG02,Q6IMF3,Q6P6Q2,Q9ESW0 |
| 5299 | 1,3,4,5,8,9<br>,11,13  | 2,6,7,10,1<br>2,14,15,16<br>,17 | 3 | O54728,P97840,Q6AYS4                                           |
| 5300 | 1,3,4,5,8,9<br>,11,14  | 2,6,7,10,1<br>2,13,15,16<br>,17 | 5 | O54728,P01681,P14668,P97840,Q6AYS4                             |

|      |                       |                                 |   |                                                  |
|------|-----------------------|---------------------------------|---|--------------------------------------------------|
| 5301 | 1,3,4,5,8,9<br>,11,15 | 2,6,7,10,1<br>2,13,14,16<br>,17 | 5 | O54728,P14480,P14668,P97840,Q5I0D1               |
| 5302 | 1,3,4,5,8,9<br>,11,16 | 2,6,7,10,1<br>2,13,14,15<br>,17 | 6 | B4F795,O54728,P14668,P55314,Q62635,Q6IRE4        |
| 5303 | 1,3,4,5,8,9<br>,11,17 | 2,6,7,10,1<br>2,13,14,15<br>,16 | 5 | P01681,P08649,P97840,Q63532,Q6AYS4               |
| 5304 | 1,3,4,5,8,9<br>,12,13 | 2,6,7,10,1<br>1,14,15,16<br>,17 | 3 | P01681,Q5M8C6,Q6IG02                             |
| 5305 | 1,3,4,5,8,9<br>,12,14 | 2,6,7,10,1<br>1,13,15,16<br>,17 | 4 | P01681,Q4FZU6,Q6IFW6,Q6IG02                      |
| 5306 | 1,3,4,5,8,9<br>,12,15 | 2,6,7,10,1<br>1,13,14,16<br>,17 | 3 | O54728,Q62894,Q6IG02                             |
| 5307 | 1,3,4,5,8,9<br>,12,16 | 2,6,7,10,1<br>1,13,14,15<br>,17 | 6 | P01681,P23593,Q4FZU6,Q62894,Q6IFW6,Q6IG02        |
| 5308 | 1,3,4,5,8,9<br>,12,17 | 2,6,7,10,1<br>1,13,14,15<br>,16 | 7 | P01681,P16636,P19223,P23593,Q5M8C6,Q63532,Q6IG02 |
| 5309 | 1,3,4,5,8,9<br>,13,14 | 2,6,7,10,1<br>1,12,15,16<br>,17 | 3 | O54728,P06866,P97840                             |
| 5310 | 1,3,4,5,8,9<br>,13,15 | 2,6,7,10,1<br>1,12,14,16<br>,17 | 3 | O54728,P97840,Q62894                             |
| 5311 | 1,3,4,5,8,9<br>,13,16 | 2,6,7,10,1<br>1,12,14,15<br>,17 | 3 | O54728,P62804,Q00715                             |
| 5312 | 1,3,4,5,8,9<br>,13,17 | 2,6,7,10,1<br>1,12,14,15<br>,16 | 4 | P01681,P23593,P97840,Q63532                      |
| 5313 | 1,3,4,5,8,9<br>,14,15 | 2,6,7,10,1<br>1,12,13,16<br>,17 | 4 | O54728,P47967,P97840,Q9QZK9                      |
| 5314 | 1,3,4,5,8,9<br>,14,16 | 2,6,7,10,1<br>1,12,13,15<br>,17 | 4 | O54728,Q4FZU6,Q62635,Q9QZK9                      |
| 5315 | 1,3,4,5,8,9<br>,14,17 | 2,6,7,10,1<br>1,12,13,15<br>,16 | 5 | P01681,P02793,Q7TP54,P47967,P97840,Q4FZU6        |



|      |                        |                                 |    |                                                                              |
|------|------------------------|---------------------------------|----|------------------------------------------------------------------------------|
| 5316 | 1,3,4,5,8,9<br>,15,16  | 2,6,7,10,1<br>1,12,13,14<br>,17 | 8  | B4F795,O54728,P23593,P47727,Q5QE79,Q62635,Q62894,Q9QZK9                      |
| 5317 | 1,3,4,5,8,9<br>,15,17  | 2,6,7,10,1<br>1,12,13,14<br>,16 | 9  | B0BNN3,O54728,P23593,P47727,P47967,P97840,Q5QE79,Q62894,Q63532               |
| 5318 | 1,3,4,5,8,9<br>,16,17  | 2,6,7,10,1<br>1,12,13,14<br>,15 | 5  | P01681,P23593,P25031,P47727,Q4FZU6                                           |
| 5319 | 1,3,4,5,8,1<br>0,11,12 | 2,6,7,9,13,<br>14,15,16,1<br>7  | 11 | P01681,P16636,Q10758,Q4FZU2,Q6AYS4,Q6IFU8,Q6IFW6,Q6IG02,Q6IMF3,Q6P6Q2,Q9ESW0 |
| 5320 | 1,3,4,5,8,1<br>0,11,13 | 2,6,7,9,12,<br>14,15,16,1<br>7  | 1  | Q6AYS4                                                                       |
| 5321 | 1,3,4,5,8,1<br>0,11,14 | 2,6,7,9,12,<br>13,15,16,1<br>7  | 4  | P01681,P08649,Q64194,Q6AYS4                                                  |
| 5322 | 1,3,4,5,8,1<br>0,11,15 | 2,6,7,9,12,<br>13,14,16,1<br>7  | 6  | O54728,P08649,Q5I0D1,Q64194,Q6AYS4,Q9ESW0                                    |
| 5323 | 1,3,4,5,8,1<br>0,11,16 | 2,6,7,9,12,<br>13,14,15,1<br>7  | 4  | P08649,P08721,P14668,P55314                                                  |
| 5324 | 1,3,4,5,8,1<br>0,11,17 | 2,6,7,9,12,<br>13,14,15,1<br>6  | 5  | P01681,P08649,P16636,Q6AYS4,Q9ESW0                                           |
| 5325 | 1,3,4,5,8,1<br>0,12,13 | 2,6,7,9,11,<br>14,15,16,1<br>7  | 5  | P01681,Q4FZU2,Q6IFW6,Q6IG02,Q99MH3                                           |
| 5326 | 1,3,4,5,8,1<br>0,12,14 | 2,6,7,9,11,<br>13,15,16,1<br>7  | 8  | P01681,P36970,Q10758,Q4FZU2,Q6IFW6,Q6IG02,Q6IMF3,Q6P6Q2                      |
| 5327 | 1,3,4,5,8,1<br>0,12,15 | 2,6,7,9,11,<br>13,14,16,1<br>7  | 5  | B0BNN3,Q4FZU2,Q6IFW6,Q6IG02,Q99MH3                                           |
| 5328 | 1,3,4,5,8,1<br>0,12,16 | 2,6,7,9,11,<br>13,14,15,1<br>7  | 8  | P01681,P08721,Q10758,Q4FZU2,Q6IFW6,Q6IG02,Q6IMF3,Q6P6Q2                      |
| 5329 | 1,3,4,5,8,1<br>0,12,17 | 2,6,7,9,11,<br>13,14,15,1<br>6  | 9  | P01681,P16636,Q10758,Q4FZU2,Q4G075,Q6IFW6,Q6IG02,Q99MH3,Q9ESW0               |
| 5330 | 1,3,4,5,8,1<br>0,13,14 | 2,6,7,9,11,<br>12,15,16,1<br>7  | 1  | P36970                                                                       |

|      |                        |                                |    |                                                                                            |
|------|------------------------|--------------------------------|----|--------------------------------------------------------------------------------------------|
| 5331 | 1,3,4,5,8,1<br>0,13,15 | 2,6,7,9,11,<br>12,14,16,1<br>7 | 1  | O54728                                                                                     |
| 5332 | 1,3,4,5,8,1<br>0,13,16 | 2,6,7,9,11,<br>12,14,15,1<br>7 | 0  |                                                                                            |
| 5333 | 1,3,4,5,8,1<br>0,13,17 | 2,6,7,9,11,<br>12,14,15,1<br>6 | 2  | P01681,Q99MH3                                                                              |
| 5334 | 1,3,4,5,8,1<br>0,14,15 | 2,6,7,9,11,<br>12,13,16,1<br>7 | 2  | O54728,P09605;P25809                                                                       |
| 5335 | 1,3,4,5,8,1<br>0,14,16 | 2,6,7,9,11,<br>12,13,15,1<br>7 | 1  | P08721                                                                                     |
| 5336 | 1,3,4,5,8,1<br>0,14,17 | 2,6,7,9,11,<br>12,13,15,1<br>6 | 1  | P01681                                                                                     |
| 5337 | 1,3,4,5,8,1<br>0,15,16 | 2,6,7,9,11,<br>12,13,14,1<br>7 | 3  | O54728,P08721,Q62635                                                                       |
| 5338 | 1,3,4,5,8,1<br>0,15,17 | 2,6,7,9,11,<br>12,13,14,1<br>6 | 2  | B0BNN3,Q99MH3                                                                              |
| 5339 | 1,3,4,5,8,1<br>0,16,17 | 2,6,7,9,11,<br>12,13,14,1<br>5 | 4  | P01681,P08721,P23593,P25031                                                                |
| 5340 | 1,3,4,5,8,1<br>1,12,13 | 2,6,7,9,10,<br>14,15,16,1<br>7 | 9  | P01681,P02781,P36374,Q4FZU2,Q5M8C6,Q6IFW6,Q6IG02,Q6P6Q2,Q9ESW0                             |
| 5341 | 1,3,4,5,8,1<br>1,12,14 | 2,6,7,9,10,<br>13,15,16,1<br>7 | 11 | P01681,P97840,Q4FZU2,Q5I0D1,Q64194,Q6IFU8,Q6IFW6,Q6IG02,Q6IMF3,Q6P6Q2,Q9ESW0               |
| 5342 | 1,3,4,5,8,1<br>1,12,15 | 2,6,7,9,10,<br>13,14,16,1<br>7 | 10 | B0BNN3,O54728,P01681,P35053,Q4FZU2,Q5I0D1,Q6IFW6,Q6IG02,Q6P6Q2,Q9ESW0                      |
| 5343 | 1,3,4,5,8,1<br>1,12,16 | 2,6,7,9,10,<br>13,14,15,1<br>7 | 10 | P01681,P14668,P55314,Q4FZU2,Q6IFU8,Q6IFW6,Q6IG02,Q6IMF3,Q6P6Q2,Q9ESW0                      |
| 5344 | 1,3,4,5,8,1<br>1,12,17 | 2,6,7,9,10,<br>13,14,15,1<br>6 | 13 | P01681,P16636,P97840,Q4FZU2,Q4G075,Q5M8C6,Q63751,Q6AYS4,Q6IFW6,Q6IG02,Q6IMF3,Q6P6Q2,Q9ESW0 |
| 5345 | 1,3,4,5,8,1<br>1,13,14 | 2,6,7,9,10,<br>12,15,16,1<br>7 | 1  | P97840                                                                                     |

|      |                        |                                |   |                                                                |
|------|------------------------|--------------------------------|---|----------------------------------------------------------------|
| 5346 | 1,3,4,5,8,1<br>1,13,15 | 2,6,7,9,10,<br>12,14,16,1<br>7 | 3 | O54728,P97840,Q5I0D1                                           |
| 5347 | 1,3,4,5,8,1<br>1,13,16 | 2,6,7,9,10,<br>12,14,15,1<br>7 | 5 | P14668,P55314,P97840,Q6IRE4,Q8VD89                             |
| 5348 | 1,3,4,5,8,1<br>1,13,17 | 2,6,7,9,10,<br>12,14,15,1<br>6 | 4 | P01681,P97840,Q63532,Q6AYS4                                    |
| 5349 | 1,3,4,5,8,1<br>1,14,15 | 2,6,7,9,10,<br>12,13,16,1<br>7 | 6 | O54728,P14668,P97840,Q5I0D1,Q64194,Q9ESW0                      |
| 5350 | 1,3,4,5,8,1<br>1,14,16 | 2,6,7,9,10,<br>12,13,15,1<br>7 | 7 | P01681,P14668,P55314,P97840,Q5I0D1,Q64194,Q6IRE4               |
| 5351 | 1,3,4,5,8,1<br>1,14,17 | 2,6,7,9,10,<br>12,13,15,1<br>6 | 6 | P01681,P02793;Q7TP54,P47967,P97840,Q6AYS4,Q9ESW0               |
| 5352 | 1,3,4,5,8,1<br>1,15,16 | 2,6,7,9,10,<br>12,13,14,1<br>7 | 9 | B4F795,O54728,P14668,P55314,P97840,Q5I0D1,Q62894,Q64194,Q8VD89 |
| 5353 | 1,3,4,5,8,1<br>1,15,17 | 2,6,7,9,10,<br>12,13,14,1<br>6 | 9 | B0BNN3,O54728,P01681,P47967,P97840,Q5I0D1,Q63532,Q6AYS4,Q9ESW0 |
| 5354 | 1,3,4,5,8,1<br>1,16,17 | 2,6,7,9,10,<br>12,13,14,1<br>5 | 5 | P01681,P14668,P55314,P97840,Q9ESW0                             |
| 5355 | 1,3,4,5,8,1<br>2,13,14 | 2,6,7,9,10,<br>11,15,16,1<br>7 | 5 | P01681,P36970,Q64093,Q6IG02,Q9QUL6                             |
| 5356 | 1,3,4,5,8,1<br>2,13,15 | 2,6,7,9,10,<br>11,14,16,1<br>7 | 4 | O54728,Q62894,Q6IG02,Q9QUL6                                    |
| 5357 | 1,3,4,5,8,1<br>2,13,16 | 2,6,7,9,10,<br>11,14,15,1<br>7 | 3 | P01681,Q6IG02,Q9QUL6                                           |
| 5358 | 1,3,4,5,8,1<br>2,13,17 | 2,6,7,9,10,<br>11,14,15,1<br>6 | 6 | P01681,P16636,P36374,Q5M8C6,Q6IG02,Q99MH3                      |
| 5359 | 1,3,4,5,8,1<br>2,14,15 | 2,6,7,9,10,<br>11,13,16,1<br>7 | 6 | B0BNN3,O54728,P01681,P36970,Q6IG02,Q9ESW0                      |
| 5360 | 1,3,4,5,8,1<br>2,14,16 | 2,6,7,9,10,<br>11,13,15,1<br>7 | 5 | P01681,P08721,Q4FZU6,Q6IFW6,Q6IG02                             |

|      |                        |                                |   |                                                         |
|------|------------------------|--------------------------------|---|---------------------------------------------------------|
| 5361 | 1,3,4,5,8,1<br>2,14,17 | 2,6,7,9,10,<br>11,13,15,1<br>6 | 8 | P01681,P10536,P31430,P97840,Q4FZU6,Q6IG02,Q9ESW0,Q9QW07 |
| 5362 | 1,3,4,5,8,1<br>2,15,16 | 2,6,7,9,10,<br>11,13,14,1<br>7 | 5 | O54728,Q4FZU2,Q62894,Q6IG02,Q9QUL6                      |
| 5363 | 1,3,4,5,8,1<br>2,15,17 | 2,6,7,9,10,<br>11,13,14,1<br>6 | 8 | B0BNN3,P01681,P10536,P97840,Q62894,Q6IG02,Q99MH3,Q9ESW0 |
| 5364 | 1,3,4,5,8,1<br>2,16,17 | 2,6,7,9,10,<br>11,13,14,1<br>5 | 7 | P01681,P23593,P23928,Q4FZU6,Q62894,Q6IFW6,Q6IG02        |
| 5365 | 1,3,4,5,8,1<br>3,14,15 | 2,6,7,9,10,<br>11,12,16,1<br>7 | 4 | O54728,P36970,P97840,Q64093                             |
| 5366 | 1,3,4,5,8,1<br>3,14,16 | 2,6,7,9,10,<br>11,12,15,1<br>7 | 1 | Q4FZU6                                                  |
| 5367 | 1,3,4,5,8,1<br>3,14,17 | 2,6,7,9,10,<br>11,12,15,1<br>6 | 7 | P01681,P10536,P47967,P51907,P97840,Q6PCU2,Q9QW07        |
| 5368 | 1,3,4,5,8,1<br>3,15,16 | 2,6,7,9,10,<br>11,12,14,1<br>7 | 4 | O54728,P62804,Q62894,Q9QUL6                             |
| 5369 | 1,3,4,5,8,1<br>3,15,17 | 2,6,7,9,10,<br>11,12,14,1<br>6 | 8 | B0BNN3,O54728,P10536,P47967,P97840,Q62894,Q63532,Q99MH3 |
| 5370 | 1,3,4,5,8,1<br>3,16,17 | 2,6,7,9,10,<br>11,12,14,1<br>5 | 4 | P01681,P23928,P97840,Q6PCU2                             |
| 5371 | 1,3,4,5,8,1<br>4,15,16 | 2,6,7,9,10,<br>11,12,13,1<br>7 | 3 | O54728,P97840,Q9QZK9                                    |
| 5372 | 1,3,4,5,8,1<br>4,15,17 | 2,6,7,9,10,<br>11,12,13,1<br>6 | 6 | B0BNN3,O54728,P10536,P47967,P97840,Q9QW07               |
| 5373 | 1,3,4,5,8,1<br>4,16,17 | 2,6,7,9,10,<br>11,12,13,1<br>5 | 5 | P01681,P97840,Q4FZU6,Q6PCU2,Q9QW07                      |
| 5374 | 1,3,4,5,8,1<br>5,16,17 | 2,6,7,9,10,<br>11,12,13,1<br>4 | 6 | B0BNN3,O54728,P23593,P47727,P97840,Q62894               |
| 5375 | 1,3,4,5,9,1<br>0,11,12 | 2,6,7,8,13,<br>14,15,16,1<br>7 | 7 | P01681,Q4FZU2,Q6IFU8,Q6IFW6,Q6IG02,Q6IMF3,Q6P6Q2        |

|      |                        |                                |   |                                    |
|------|------------------------|--------------------------------|---|------------------------------------|
| 5376 | 1,3,4,5,9,1<br>0,11,13 | 2,6,7,8,12,<br>14,15,16,1<br>7 | 3 | O54728,P12785,Q62635               |
| 5377 | 1,3,4,5,9,1<br>0,11,14 | 2,6,7,8,12,<br>13,15,16,1<br>7 | 2 | O54728,Q62635                      |
| 5378 | 1,3,4,5,9,1<br>0,11,15 | 2,6,7,8,12,<br>13,14,16,1<br>7 | 2 | O54728,Q62635                      |
| 5379 | 1,3,4,5,9,1<br>0,11,16 | 2,6,7,8,12,<br>13,14,15,1<br>7 | 5 | O54728,P11598,P55314,Q62635,Q6IRE4 |
| 5380 | 1,3,4,5,9,1<br>0,11,17 | 2,6,7,8,12,<br>13,14,15,1<br>6 | 3 | P01681,P12785,P18427               |
| 5381 | 1,3,4,5,9,1<br>0,12,13 | 2,6,7,8,11,<br>14,15,16,1<br>7 | 1 | Q6IG02                             |
| 5382 | 1,3,4,5,9,1<br>0,12,14 | 2,6,7,8,11,<br>13,15,16,1<br>7 | 3 | Q4FZU2,Q6IFW6,Q6IG02               |
| 5383 | 1,3,4,5,9,1<br>0,12,15 | 2,6,7,8,11,<br>13,14,16,1<br>7 | 4 | O54728,P10758,Q4FZU2,Q6IG02        |
| 5384 | 1,3,4,5,9,1<br>0,12,16 | 2,6,7,8,11,<br>13,14,15,1<br>7 | 4 | Q4FZU2,Q6IFW6,Q6IG02,Q6IMF3        |
| 5385 | 1,3,4,5,9,1<br>0,12,17 | 2,6,7,8,11,<br>13,14,15,1<br>6 | 4 | P01681,Q10758,Q4FZU2,Q6IG02        |
| 5386 | 1,3,4,5,9,1<br>0,13,14 | 2,6,7,8,11,<br>12,15,16,1<br>7 | 2 | O54728,Q62635                      |
| 5387 | 1,3,4,5,9,1<br>0,13,15 | 2,6,7,8,11,<br>12,14,16,1<br>7 | 3 | O54728,P62804,Q62635               |
| 5388 | 1,3,4,5,9,1<br>0,13,16 | 2,6,7,8,11,<br>12,14,15,1<br>7 | 4 | O54728,P62804,Q00715,Q62635        |
| 5389 | 1,3,4,5,9,1<br>0,13,17 | 2,6,7,8,11,<br>12,14,15,1<br>6 | 0 |                                    |
| 5390 | 1,3,4,5,9,1<br>0,14,15 | 2,6,7,8,11,<br>12,13,16,1<br>7 | 4 | O54728,Q62635,Q62902,Q9QZK9        |

|      |                        |                                |    |                                                                                     |
|------|------------------------|--------------------------------|----|-------------------------------------------------------------------------------------|
| 5391 | 1,3,4,5,9,1<br>0,14,16 | 2,6,7,8,11,<br>12,13,15,1<br>7 | 3  | O54728,Q62635,Q9QZK9                                                                |
| 5392 | 1,3,4,5,9,1<br>0,14,17 | 2,6,7,8,11,<br>12,13,15,1<br>6 | 1  | P18427                                                                              |
| 5393 | 1,3,4,5,9,1<br>0,15,16 | 2,6,7,8,11,<br>12,13,14,1<br>7 | 10 | O54728,P02782,P11598,P47727,P62804,Q00715,Q62635,Q62902,Q9JHB9,Q9QZK9               |
| 5394 | 1,3,4,5,9,1<br>0,15,17 | 2,6,7,8,11,<br>12,13,14,1<br>6 | 3  | O54728,P47727,Q62902                                                                |
| 5395 | 1,3,4,5,9,1<br>0,16,17 | 2,6,7,8,11,<br>12,13,14,1<br>5 | 3  | P23593,P47727,Q62902                                                                |
| 5396 | 1,3,4,5,9,1<br>1,12,13 | 2,6,7,8,10,<br>14,15,16,1<br>7 | 6  | P01681,P05539,Q4FZU2,Q6IFW6,Q6IG02,Q6P6Q2                                           |
| 5397 | 1,3,4,5,9,1<br>1,12,14 | 2,6,7,8,10,<br>13,15,16,1<br>7 | 9  | P01681,P01835,Q4FZU2,Q6IFU8,Q6IFW6,Q6IG02,Q6IMF3,Q6P6Q2,Q9ESW0                      |
| 5398 | 1,3,4,5,9,1<br>1,12,15 | 2,6,7,8,10,<br>13,14,16,1<br>7 | 7  | O54728,P12020,Q4FZU2,Q6IFW6,Q6IG02,Q6P6Q2,Q9ESW0                                    |
| 5399 | 1,3,4,5,9,1<br>1,12,16 | 2,6,7,8,10,<br>13,14,15,1<br>7 | 12 | O54728,P01681,P12020,P15999,P55314,Q4FZU2,Q6IFU8,Q6IFW6,Q6IG02,Q6IMF3,Q6IRE4,Q6P6Q2 |
| 5400 | 1,3,4,5,9,1<br>1,12,17 | 2,6,7,8,10,<br>13,14,15,1<br>6 | 8  | P01681,P01835,P12020,Q4FZU2,Q6IFW6,Q6IG02,Q6P6Q2,Q9ESW0                             |
| 5401 | 1,3,4,5,9,1<br>1,13,14 | 2,6,7,8,10,<br>12,15,16,1<br>7 | 5  | O54728,P05539,P97840,Q62635,Q6IRE4                                                  |
| 5402 | 1,3,4,5,9,1<br>1,13,15 | 2,6,7,8,10,<br>12,14,16,1<br>7 | 5  | O54728,P05539,P97840,Q62635,Q6P6R2                                                  |
| 5403 | 1,3,4,5,9,1<br>1,13,16 | 2,6,7,8,10,<br>12,14,15,1<br>7 | 4  | O54728,P55314,Q62635,Q6IRE4                                                         |
| 5404 | 1,3,4,5,9,1<br>1,13,17 | 2,6,7,8,10,<br>12,14,15,1<br>6 | 4  | P01681,P05539,P97840,Q63532                                                         |
| 5405 | 1,3,4,5,9,1<br>1,14,15 | 2,6,7,8,10,<br>12,13,16,1<br>7 | 4  | O54728,P97840,Q62635,Q9QZK9                                                         |

|      |                        |                                |   |                                                  |
|------|------------------------|--------------------------------|---|--------------------------------------------------|
| 5406 | 1,3,4,5,9,1<br>1,14,16 | 2,6,7,8,10,<br>12,13,15,1<br>7 | 5 | O54728,P55314,Q62635,Q6IRE4,Q9QZK9               |
| 5407 | 1,3,4,5,9,1<br>1,14,17 | 2,6,7,8,10,<br>12,13,15,1<br>6 | 2 | P01681,P97840                                    |
| 5408 | 1,3,4,5,9,1<br>1,15,16 | 2,6,7,8,10,<br>12,13,14,1<br>7 | 7 | O54728,P11598,P12020,P55314,Q62635,Q6IRE4,Q9QZK9 |
| 5409 | 1,3,4,5,9,1<br>1,15,17 | 2,6,7,8,10,<br>12,13,14,1<br>6 | 4 | O54728,P12020,P97840,Q63532                      |
| 5410 | 1,3,4,5,9,1<br>1,16,17 | 2,6,7,8,10,<br>12,13,14,1<br>5 | 5 | O54728,P01681,P12020,P15999,P55314               |
| 5411 | 1,3,4,5,9,1<br>2,13,14 | 2,6,7,8,10,<br>11,15,16,1<br>7 | 1 | Q6IG02                                           |
| 5412 | 1,3,4,5,9,1<br>2,13,15 | 2,6,7,8,10,<br>11,14,16,1<br>7 | 3 | O54728,P10758,Q6P6R2                             |
| 5413 | 1,3,4,5,9,1<br>2,13,16 | 2,6,7,8,10,<br>11,14,15,1<br>7 | 2 | O54728,P62804                                    |
| 5414 | 1,3,4,5,9,1<br>2,13,17 | 2,6,7,8,10,<br>11,14,15,1<br>6 | 2 | P01681,P35280                                    |
| 5415 | 1,3,4,5,9,1<br>2,14,15 | 2,6,7,8,10,<br>11,13,16,1<br>7 | 3 | O54728,P10758,Q6IG02                             |
| 5416 | 1,3,4,5,9,1<br>2,14,16 | 2,6,7,8,10,<br>11,13,15,1<br>7 | 3 | O54728,Q4FZU6,Q6IG02                             |
| 5417 | 1,3,4,5,9,1<br>2,14,17 | 2,6,7,8,10,<br>11,13,15,1<br>6 | 3 | P01681,P01835,Q6IG02                             |
| 5418 | 1,3,4,5,9,1<br>2,15,16 | 2,6,7,8,10,<br>11,13,14,1<br>7 | 4 | O54728,P12020,P47727,Q6IG02                      |
| 5419 | 1,3,4,5,9,1<br>2,15,17 | 2,6,7,8,10,<br>11,13,14,1<br>6 | 6 | B0BNN3,O54728,P01681,P12020,P47727,Q6IG02        |
| 5420 | 1,3,4,5,9,1<br>2,16,17 | 2,6,7,8,10,<br>11,13,14,1<br>5 | 6 | P01681,P12020,P23593,P35280,P47727,Q6IG02        |

|      |                         |                                |    |                                                                                            |
|------|-------------------------|--------------------------------|----|--------------------------------------------------------------------------------------------|
| 5421 | 1,3,4,5,9,1<br>3,14,15  | 2,6,7,8,10,<br>11,12,16,1<br>7 | 5  | O54728,P60905,P62804,Q62635,Q6P6R2                                                         |
| 5422 | 1,3,4,5,9,1<br>3,14,16  | 2,6,7,8,10,<br>11,12,15,1<br>7 | 6  | O54728,P62804,Q00715,Q62635,Q6IRE4,Q9QZK9                                                  |
| 5423 | 1,3,4,5,9,1<br>3,14,17  | 2,6,7,8,10,<br>11,12,15,1<br>6 | 3  | P35280,P97840,Q9QW07                                                                       |
| 5424 | 1,3,4,5,9,1<br>3,15,16  | 2,6,7,8,10,<br>11,12,14,1<br>7 | 8  | O54728,P47727,P60905,P62804,Q00715,Q62635,Q6IRE4,Q9QZK9                                    |
| 5425 | 1,3,4,5,9,1<br>3,15,17  | 2,6,7,8,10,<br>11,12,14,1<br>6 | 5  | O54728,P47727,P62804,P97840,Q63532                                                         |
| 5426 | 1,3,4,5,9,1<br>3,16,17  | 2,6,7,8,10,<br>11,12,14,1<br>5 | 6  | O54728,P23593,P35280,P47727,P62804,Q00715                                                  |
| 5427 | 1,3,4,5,9,1<br>4,15,16  | 2,6,7,8,10,<br>11,12,13,1<br>7 | 9  | O54728,P02782,P60905,P62804,Q00715,Q62635,Q6IRE4,Q9JHB9,Q9QZK9                             |
| 5428 | 1,3,4,5,9,1<br>4,15,17  | 2,6,7,8,10,<br>11,12,13,1<br>6 | 4  | O54728,P47967,P60905,P97840                                                                |
| 5429 | 1,3,4,5,9,1<br>4,16,17  | 2,6,7,8,10,<br>11,12,13,1<br>5 | 4  | O54728,P62804,Q4FZU6,Q9QW07                                                                |
| 5430 | 1,3,4,5,9,1<br>5,16,17  | 2,6,7,8,10,<br>11,12,13,1<br>4 | 10 | O54728,P02782,P12020,P23593,P47727,P60905,P62804,Q00715,Q62902,Q9JHB9                      |
| 5431 | 1,3,4,5,10,<br>11,12,13 | 2,6,7,8,9,1<br>4,15,16,17      | 6  | P01681,Q4FZU2,Q6IFW6,Q6IG02,Q6IMF3,Q6P6Q2                                                  |
| 5432 | 1,3,4,5,10,<br>11,12,14 | 2,6,7,8,9,1<br>3,15,16,17      | 10 | P01681,P34901,Q10758,Q4FZU2,Q6IFU8,Q6IFW6,Q6IG02,Q6IMF3,Q6P6Q2,Q9ESW0                      |
| 5433 | 1,3,4,5,10,<br>11,12,15 | 2,6,7,8,9,1<br>3,14,16,17      | 8  | O54728,P51907,Q4FZU2,Q6IFW6,Q6IG02,Q6IMF3,Q6P6Q2,Q9ESW0                                    |
| 5434 | 1,3,4,5,10,<br>11,12,16 | 2,6,7,8,9,1<br>3,14,15,17      | 13 | P01681,P06757,P53792,P55314,Q10758,Q4FZU2,Q6IFU7,Q6IFU8,Q6IFW6,Q6IG02,Q6IMF3,Q6P6Q2,Q9ESW0 |
| 5435 | 1,3,4,5,10,<br>11,12,17 | 2,6,7,8,9,1<br>3,14,15,16      | 12 | P01681,P06757,P16636,Q10758,Q4FZU2,Q6IFU8,Q6IFW6,Q6IG02,Q6IMF3,Q6P6Q2,Q99MH3,Q9ESW0        |
| 5436 | 1,3,4,5,10,<br>11,13,14 | 2,6,7,8,9,1<br>2,15,16,17      | 0  |                                                                                            |
| 5437 | 1,3,4,5,10,<br>11,13,15 | 2,6,7,8,9,1<br>2,14,16,17      | 3  | O54728,Q62635,Q6P6R2                                                                       |
| 5438 | 1,3,4,5,10,<br>11,13,16 | 2,6,7,8,9,1<br>2,14,15,17      | 2  | P55314,Q62635                                                                              |



|      |                                                |   |                                           |
|------|------------------------------------------------|---|-------------------------------------------|
| 5439 | 1,3,4,5,10, 2,6,7,8,9,1<br>11,13,17 2,14,15,16 | 1 | P01681                                    |
| 5440 | 1,3,4,5,10, 2,6,7,8,9,1<br>11,14,15 2,13,16,17 | 3 | O54728,Q62635,Q64194                      |
| 5441 | 1,3,4,5,10, 2,6,7,8,9,1<br>11,14,16 2,13,15,17 | 3 | P55314,Q62635,Q6IRE4                      |
| 5442 | 1,3,4,5,10, 2,6,7,8,9,1<br>11,14,17 2,13,15,16 | 2 | P01681,P18427                             |
| 5443 | 1,3,4,5,10, 2,6,7,8,9,1<br>11,15,16 2,13,14,17 | 4 | O54728,P02782,P55314,Q62635               |
| 5444 | 1,3,4,5,10, 2,6,7,8,9,1<br>11,15,17 2,13,14,16 | 2 | O54728,Q62902                             |
| 5445 | 1,3,4,5,10, 2,6,7,8,9,1<br>11,16,17 2,13,14,15 | 2 | P01681,P55314                             |
| 5446 | 1,3,4,5,10, 2,6,7,8,9,1<br>12,13,14 1,15,16,17 | 2 | Q4FZU2,Q6IG02                             |
| 5447 | 1,3,4,5,10, 2,6,7,8,9,1<br>12,13,15 1,14,16,17 | 3 | Q4FZU2,Q6IG02,Q99MH3                      |
| 5448 | 1,3,4,5,10, 2,6,7,8,9,1<br>12,13,16 1,14,15,17 | 3 | Q4FZU2,Q6IFW6,Q6IG02                      |
| 5449 | 1,3,4,5,10, 2,6,7,8,9,1<br>12,13,17 1,14,15,16 | 4 | P01681,Q10758,Q6IG02,Q99MH3               |
| 5450 | 1,3,4,5,10, 2,6,7,8,9,1<br>12,14,15 1,13,16,17 | 4 | A2RUV9,O54728,Q4FZU2,Q6IG02               |
| 5451 | 1,3,4,5,10, 2,6,7,8,9,1<br>12,14,16 1,13,15,17 | 6 | P08721,Q10758,Q4FZU2,Q6IFW6,Q6IG02,Q6IMF3 |
| 5452 | 1,3,4,5,10, 2,6,7,8,9,1<br>12,14,17 1,13,15,16 | 5 | P01681,Q10758,Q4FZU2,Q6IFW6,Q6IG02        |
| 5453 | 1,3,4,5,10, 2,6,7,8,9,1<br>12,15,16 1,13,14,17 | 6 | O54728,P08721,P20766,Q4FZU2,Q6IFW6,Q6IG02 |
| 5454 | 1,3,4,5,10, 2,6,7,8,9,1<br>12,15,17 1,13,14,16 | 6 | B0BNN3,P01681,Q10758,Q4FZU2,Q6IG02,Q99MH3 |
| 5455 | 1,3,4,5,10, 2,6,7,8,9,1<br>12,16,17 1,13,14,15 | 6 | P01681,Q10758,Q4FZU2,Q6IFW6,Q6IG02,Q99MH3 |
| 5456 | 1,3,4,5,10, 2,6,7,8,9,1<br>13,14,15 1,12,16,17 | 4 | O54728,P09605;P25809,Q62635,Q6P6R2        |
| 5457 | 1,3,4,5,10, 2,6,7,8,9,1<br>13,14,16 1,12,15,17 | 1 | Q62635                                    |
| 5458 | 1,3,4,5,10, 2,6,7,8,9,1<br>13,14,17 1,12,15,16 | 1 | Q9QW07                                    |
| 5459 | 1,3,4,5,10, 2,6,7,8,9,1<br>13,15,16 1,12,14,17 | 4 | O54728,P62804,Q00715,Q62635               |
| 5460 | 1,3,4,5,10, 2,6,7,8,9,1<br>13,15,17 1,12,14,16 | 1 | Q99MH3                                    |
| 5461 | 1,3,4,5,10, 2,6,7,8,9,1<br>13,16,17 1,12,14,15 | 2 | P62804,Q62997                             |

|      |                                                |    |                                                                       |
|------|------------------------------------------------|----|-----------------------------------------------------------------------|
| 5462 | 1,3,4,5,10, 2,6,7,8,9,1<br>14,15,16 1,12,13,17 | 7  | O54728,P02782,P08721,Q62635,Q62902,Q9JHB9,Q9QZK9                      |
| 5463 | 1,3,4,5,10, 2,6,7,8,9,1<br>14,15,17 1,12,13,16 | 2  | O54728,Q62902                                                         |
| 5464 | 1,3,4,5,10, 2,6,7,8,9,1<br>14,16,17 1,12,13,15 | 1  | Q9QW07                                                                |
| 5465 | 1,3,4,5,10, 2,6,7,8,9,1<br>15,16,17 1,12,13,14 | 6  | O54728,P02782,P47727,Q62902,Q62997,Q9JHB9                             |
| 5466 | 1,3,4,5,11, 2,6,7,8,9,1<br>12,13,14 0,15,16,17 | 7  | P01681,Q4FZU2,Q6IFW6,Q6IG02,Q6P6Q2,Q6P6R2,Q9ESW0                      |
| 5467 | 1,3,4,5,11, 2,6,7,8,9,1<br>12,13,15 0,14,16,17 | 6  | O54728,Q4FZU2,Q6IFW6,Q6IG02,Q6P6R2,Q9ESW0                             |
| 5468 | 1,3,4,5,11, 2,6,7,8,9,1<br>12,13,16 0,14,15,17 | 8  | P01681,P17046,P55314,Q4FZU2,Q6IFW6,Q6IG02,Q6IRE4,Q6P6Q2               |
| 5469 | 1,3,4,5,11, 2,6,7,8,9,1<br>12,13,17 0,14,15,16 | 6  | P01681,P36374,Q4FZU2,Q6IFW6,Q6IG02,Q9ESW0                             |
| 5470 | 1,3,4,5,11, 2,6,7,8,9,1<br>12,14,15 0,13,16,17 | 9  | O54728,P01681,Q4FZU2,Q5I0D1,Q6IFW6,Q6IG02,Q6P6Q2,Q6P6R2,Q9ESW0        |
| 5471 | 1,3,4,5,11, 2,6,7,8,9,1<br>12,14,16 0,13,15,17 | 10 | P01681,P55314,Q4FZU2,Q6IFU8,Q6IFW6,Q6IG02,Q6IMF3,Q6IRE4,Q6P6Q2,Q9ESW0 |
| 5472 | 1,3,4,5,11, 2,6,7,8,9,1<br>12,14,17 0,13,15,16 | 9  | P01681,P01835,P97840,Q4FZU2,Q6IFU8,Q6IFW6,Q6IG02,Q6P6Q2,Q9ESW0        |
| 5473 | 1,3,4,5,11, 2,6,7,8,9,1<br>12,15,16 0,13,14,17 | 10 | O54728,P12020,P51907,P55314,Q4FZU2,Q5I0D1,Q6IFW6,Q6IG02,Q6P6Q2,Q9ESW0 |
| 5474 | 1,3,4,5,11, 2,6,7,8,9,1<br>12,15,17 0,13,14,16 | 8  | B0BNN3,P01681,P12020,P97840,Q4FZU2,Q6IFW6,Q6IG02,Q9ESW0               |
| 5475 | 1,3,4,5,11, 2,6,7,8,9,1<br>12,16,17 0,13,14,15 | 10 | P01681,P12020,P17046,P55314,Q4FZU2,Q6IFW6,Q6IG02,Q6IMF3,Q6P6Q2,Q9ESW0 |
| 5476 | 1,3,4,5,11, 2,6,7,8,9,1<br>13,14,15 0,12,16,17 | 4  | O54728,P05539,P97840,Q6P6R2                                           |
| 5477 | 1,3,4,5,11, 2,6,7,8,9,1<br>13,14,16 0,12,15,17 | 4  | O54728,P55314,Q62635,Q6IRE4                                           |
| 5478 | 1,3,4,5,11, 2,6,7,8,9,1<br>13,14,17 0,12,15,16 | 3  | P01681,P97840,Q9QW07                                                  |
| 5479 | 1,3,4,5,11, 2,6,7,8,9,1<br>13,15,16 0,12,14,17 | 5  | O54728,P55314,Q62635,Q6IRE4,Q6P6R2                                    |
| 5480 | 1,3,4,5,11, 2,6,7,8,9,1<br>13,15,17 0,12,14,16 | 2  | O54728,P97840                                                         |
| 5481 | 1,3,4,5,11, 2,6,7,8,9,1<br>13,16,17 0,12,14,15 | 3  | P01681,P55314,P97840                                                  |
| 5482 | 1,3,4,5,11, 2,6,7,8,9,1<br>14,15,16 0,12,13,17 | 8  | O54728,P55314,P97840,Q5I0D1,Q62635,Q64194,Q6IRE4,Q9QZK9               |
| 5483 | 1,3,4,5,11, 2,6,7,8,9,1<br>14,15,17 0,12,13,16 | 4  | O54728,P01681,P47967,P97840                                           |
| 5484 | 1,3,4,5,11, 2,6,7,8,9,1<br>14,16,17 0,12,13,15 | 4  | P01681,P55314,P97840,Q9QW07                                           |

|      |                                                    |    |                                                                                                                                                                                                     |
|------|----------------------------------------------------|----|-----------------------------------------------------------------------------------------------------------------------------------------------------------------------------------------------------|
| 5485 | 1,3,4,5,11, 2,6,7,8,9,1<br>15,16,17 0,12,13,14     | 4  | O54728,P12020,P55314,P97840                                                                                                                                                                         |
| 5486 | 1,3,4,5,12, 2,6,7,8,9,1<br>13,14,15 0,11,16,17     | 5  | A2RUV9,O54728,P10758,Q6P6R2,Q9QUL6                                                                                                                                                                  |
| 5487 | 1,3,4,5,12, 2,6,7,8,9,1<br>13,14,16 0,11,15,17     | 1  | Q9QUL6                                                                                                                                                                                              |
| 5488 | 1,3,4,5,12, 2,6,7,8,9,1<br>13,14,17 0,11,15,16     | 2  | P01681,Q9QW07                                                                                                                                                                                       |
| 5489 | 1,3,4,5,12, 2,6,7,8,9,1<br>13,15,16 0,11,14,17     | 3  | O54728,Q6P6R2,Q9QUL6                                                                                                                                                                                |
| 5490 | 1,3,4,5,12, 2,6,7,8,9,1<br>13,15,17 0,11,14,16     | 3  | B0BNN3,P01681,Q99MH3                                                                                                                                                                                |
| 5491 | 1,3,4,5,12, 2,6,7,8,9,1<br>13,16,17 0,11,14,15     | 3  | P01681,P17046,P35280                                                                                                                                                                                |
| 5492 | 1,3,4,5,12, 2,6,7,8,9,1<br>14,15,16 0,11,13,17     | 3  | O54728,P20766,Q4FZU2                                                                                                                                                                                |
| 5493 | 1,3,4,5,12, 2,6,7,8,9,1<br>14,15,17 0,11,13,16     | 5  | B0BNN3,P01681,Q6IG02,Q8CJD3,Q9QW07                                                                                                                                                                  |
| 5494 | 1,3,4,5,12, 2,6,7,8,9,1<br>14,16,17 0,11,13,15     | 4  | P01681,Q4FZU6,Q6IG02,Q9QW07                                                                                                                                                                         |
| 5495 | 1,3,4,5,12, 2,6,7,8,9,1<br>15,16,17 0,11,13,14     | 4  | B0BNN3,P01681,P12020,P47727                                                                                                                                                                         |
| 5496 | 1,3,4,5,13, 2,6,7,8,9,1<br>14,15,16 0,11,12,17     | 6  | O54728,P60905,P62804,Q00715,Q62635,Q6P6R2                                                                                                                                                           |
| 5497 | 1,3,4,5,13, 2,6,7,8,9,1<br>14,15,17 0,11,12,16     | 5  | O54728,P47967,P60905,P97840,Q9QW07                                                                                                                                                                  |
| 5498 | 1,3,4,5,13, 2,6,7,8,9,1<br>14,16,17 0,11,12,15     | 4  | P35280,P62804,Q6PCU2,Q9QW07                                                                                                                                                                         |
| 5499 | 1,3,4,5,13, 2,6,7,8,9,1<br>15,16,17 0,11,12,14     | 5  | O54728,P47727,P60905,P62804,Q00715                                                                                                                                                                  |
| 5500 | 1,3,4,5,14, 2,6,7,8,9,1<br>15,16,17 0,11,12,13     | 7  | O54728,P02803,P47727,P60905,P97840,Q9JHB9,Q9QW07                                                                                                                                                    |
| 5501 | 1,3,4,6,7,8 2,5,11,12,<br>,9,10 13,14,15,1<br>6,17 | 14 | D3ZHA0,O55006,P06761,P08723,P16086,P18418,P22282,P22283,P31044,P35280,Q5FVI6,Q63617,Q9JI85,Q9R0T3                                                                                                   |
| 5502 | 1,3,4,6,7,8 2,5,10,12,<br>,9,11 13,14,15,1<br>6,17 | 19 | P06761,P07150,P07647,P08723,P10715,P14669,P15399,P16086,P18418,P22282,P22283,P31044,P35280,Q63493,Q63617,Q63751,Q99041,Q9JI85,Q9R0T3                                                                |
| 5503 | 1,3,4,6,7,8 2,5,10,11,<br>,9,12 13,14,15,1<br>6,17 | 28 | D3ZHA0,O55006,P01681,P02780,P02781,P02782,P06761,P07647,P08723,P0C0A9,P10715,P13432,P16086,P18418,P19629,P22282,P22283,P30120,P31044,Q63617,Q63751,Q6AYR9,Q6IG02,Q8CJ52,Q99041,Q9JHB9,Q9JI85,Q9R0T3 |
| 5504 | 1,3,4,6,7,8 2,5,10,11,<br>,9,13 12,14,15,1<br>6,17 | 16 | P06761,P06911,P07647,P08723,P11598,P12020,P16086,P18418,P22282,P22283,P31044,Q5GRG2,Q62902,Q63617,Q9JI85,Q9R0T3                                                                                     |

|      |                       |                                  |    |                                                                                                                                                                                                                                                                                                                                          |
|------|-----------------------|----------------------------------|----|------------------------------------------------------------------------------------------------------------------------------------------------------------------------------------------------------------------------------------------------------------------------------------------------------------------------------------------|
| 5505 | 1,3,4,6,7,8<br>,9,14  | 2,5,10,11,<br>12,13,15,1<br>6,17 | 12 | D3ZHA0,P06761,P06911,P08723,P16086,P18418,P19629,P22282,P22283,P31044,Q63617,Q9JI85                                                                                                                                                                                                                                                      |
| 5506 | 1,3,4,6,7,8<br>,9,15  | 2,5,10,11,<br>12,13,14,1<br>6,17 | 11 | D3ZHA0,O55006,P06761,P16086,P18418,P22006,P22282,P31044,P35280,Q5QE79,Q63617                                                                                                                                                                                                                                                             |
| 5507 | 1,3,4,6,7,8<br>,9,16  | 2,5,10,11,<br>12,13,14,1<br>5,17 | 7  | P06761,P16086,P18418,P22282,P31044,Q63617,Q9R0T3                                                                                                                                                                                                                                                                                         |
| 5508 | 1,3,4,6,7,8<br>,9,17  | 2,5,10,11,<br>12,13,14,1<br>5,16 | 19 | P01681,P02091,P02770,P06761,P09605,P25809,P16086,P18418,P19223,P20761,P22282,P22283,P23593,P31044,P50115,Q4G075,Q63617,Q63751,Q99041,Q9R0T3                                                                                                                                                                                              |
| 5509 | 1,3,4,6,7,8<br>,10,11 | 2,5,9,12,1<br>3,14,15,16<br>,17  | 27 | D3ZHA0,P00714,P01681,P06761,P07150,P07647,P08723,P14669,P15399,P16086,P18418,P22282,P22283,P31044,P35280,P61206,P84079,P84082,Q30KJ2,Q5BJY9,Q5FVI6,Q63493,Q63617,Q63751,Q8CJ52,Q8VD89,Q99041,Q9JI85,Q9R0T3                                                                                                                               |
| 5510 | 1,3,4,6,7,8<br>,10,12 | 2,5,9,11,1<br>3,14,15,16<br>,17  | 39 | D3ZHA0,F1LM93,P01681,P02780,P02781,P02782,P06761,P07647,P08723,P08937,P0C0A9,P11598,P12020,P13432,P16086,P18418,P22282,P22283,P30120,P31044,P35280,P35281,Q10758,Q4FZU2,Q5FVI6,Q63617,Q63751,Q64361,Q6AYR9,Q6IFW6,Q6IG02,Q6IMF3,Q812E4,Q8CJ52,Q99041,Q99MH3,Q9JHB9,Q9JI85,Q9R0T3                                                         |
| 5511 | 1,3,4,6,7,8<br>,10,13 | 2,5,9,11,1<br>2,14,15,16<br>,17  | 20 | D3ZHA0,P06761,P06911,P07647,P08723,P11598,P12020,P16086,P18418,P22282,P22283,P31044,Q5GRG2,Q62902,Q63617,Q8CJ52,Q8VD89,Q99MH3,Q9JI85,Q9R0T3                                                                                                                                                                                              |
| 5512 | 1,3,4,6,7,8<br>,10,14 | 2,5,9,11,1<br>2,13,15,16<br>,17  | 17 | D3ZHA0,P06761,P06911,P08723,P11598,P12020,P16086,P18418,P19629,P22282,P22283,P31044,P35280,Q5GRG2,Q63617,Q9JI85,Q9R0T3                                                                                                                                                                                                                   |
| 5513 | 1,3,4,6,7,8<br>,10,15 | 2,5,9,11,1<br>2,13,14,16<br>,17  | 15 | B0BNN3,D3ZHA0,O55006,P06761,P08723,P16086,P18418,P22006,P22282,P22283,P31044,P35280,Q5FVI6,Q63617,Q8VD89                                                                                                                                                                                                                                 |
| 5514 | 1,3,4,6,7,8<br>,10,16 | 2,5,9,11,1<br>2,13,14,15<br>,17  | 13 | D3ZHA0,P06761,P08721,P08723,P16086,P18418,P22282,P22283,P31044,Q5FVI6,Q63617,Q8VD89,Q9R0T3                                                                                                                                                                                                                                               |
| 5515 | 1,3,4,6,7,8<br>,10,17 | 2,5,9,11,1<br>2,13,14,15<br>,16  | 26 | D3ZHA0,P01681,P02091,P02770,P06761,P08723,P08937,P11598,P12346,P15399,P16086,P17475,P18418,P20761,P22282,P22283,P31044,P46844,P97580,Q30KJ2,Q4G075,Q63617,Q63751,Q99041,Q99MH3,Q9R0T3                                                                                                                                                    |
| 5516 | 1,3,4,6,7,8<br>,11,12 | 2,5,9,10,1<br>3,14,15,16<br>,17  | 47 | O55004,P01681,P02780,P02781,P02782,P04905,P06761,P07150,P07647,P08723,P08937,P0C0A9,P10715,P11598,P13432,P14669,P15399,P16086,P18418,P19629,P22282,P22283,P24368,P30120,P31044,P35280,P36374,P40241,P46462,Q4FZU2,Q62902,Q63357,Q63493,Q63617,Q63751,Q6AYR9,Q6IFW6,Q6IG02,Q6IMF3,Q6P6Q2,Q812E4,Q8CJ52,Q99041,Q9ESW0,Q9JHB9,Q9JI85,Q9R0T3 |
| 5517 | 1,3,4,6,7,8<br>,11,13 | 2,5,9,10,1<br>2,14,15,16<br>,17  | 29 | P02780,P02781,P05539,P06761,P06911,P07150,P07647,P08723,P11598,P12020,P14669,P15399,P16086,P18418,P22282,P22283,P31044,Q5GRG2,Q5XI22,Q62902,Q63493,Q63617,Q63751,Q8CJ52,Q8VD89,Q99041,Q9JHB9,Q9JI85,Q9R0T3                                                                                                                               |
| 5518 | 1,3,4,6,7,8<br>,11,14 | 2,5,9,10,1<br>2,13,15,16<br>,17  | 27 | P01681,P06761,P06911,P07150,P07171,P07647,P08723,P11598,P12020,P14669,P15399,P16086,P18418,P19629,P22282,P22283,P31044,P35280,P35434,P47727,Q30KJ2,Q63493,Q63617,Q63751,Q8CJ52,Q9JI85,Q9R0T3                                                                                                                                             |
| 5519 | 1,3,4,6,7,8<br>,11,15 | 2,5,9,10,1<br>2,13,14,16<br>,17  | 21 | B0BNN3,P02625,P06761,P07150,P07171,P08723,P10715,P14669,P16086,P18418,P19629,P22006,P22282,P22283,P31044,P35280,Q63617,Q63751,Q8VD89,Q99041,Q9JI85                                                                                                                                                                                       |

|      |                       |                                 |    |                                                                                                                                                                                                                                                                                                              |
|------|-----------------------|---------------------------------|----|--------------------------------------------------------------------------------------------------------------------------------------------------------------------------------------------------------------------------------------------------------------------------------------------------------------|
| 5520 | 1,3,4,6,7,8<br>,11,16 | 2,5,9,10,1<br>2,13,14,15<br>,17 | 23 | P01681,P06761,P07150,P08723,P10715,P14668,P14669,P16086,P18418,P22282,P22283,P31044,P55314,P61206,P84079,P84082,Q5FVI6,Q63493,Q63617,Q63751,Q8CJ52,Q8VD89,Q99041,Q9JI85,Q9ROT3                                                                                                                               |
| 5521 | 1,3,4,6,7,8<br>,11,17 | 2,5,9,10,1<br>2,13,14,15<br>,16 | 32 | P01681,P02091,P02770,P06761,P07150,P07647,P08723,P08937,P09605,P25809,P10715,P11598,P12346,P14669,P15399,P16086,P18418,P19629,P20761,P22282,P22283,P31044,P50115,P97580,Q30KJ2,Q4G075,Q63493,Q63617,Q63751,Q8CJ52,Q99041,Q9JI85,Q9ROT3                                                                       |
| 5522 | 1,3,4,6,7,8<br>,12,13 | 2,5,9,10,1<br>1,14,15,16<br>,17 | 38 | D3ZHA0,O08557,P01681,P02780,P02781,P02782,P06761,P06911,P07647,P08723,P08937,P09456,P0C0A9,P11598,P12020,P13432,P16086,P18418,P19629,P22282,P22283,P29975,P30120,P31044,P36374,P62815,Q5GRG2,Q62902,Q63617,Q63751,Q6AYR9,Q8CJ52,Q99041,Q99MH3,Q9JHB9,Q9JI85,Q9JJ50,Q9ROT3                                    |
| 5523 | 1,3,4,6,7,8<br>,12,14 | 2,5,9,10,1<br>1,13,15,16<br>,17 | 37 | D3ZHA0,O08557,P01681,P02780,P02781,P02782,P06761,P06911,P07647,P08723,P0C0A9,P11598,P12020,P13432,P16086,P18418,P19629,P22282,P22283,P29975,P30120,P31044,P40241,Q62902,Q63493,Q63617,Q63618,Q63751,Q6AYR9,Q6AYS7,Q6IG02,Q8CJ52,Q923M1,Q99041,Q9JHB9,Q9JI85,Q9ROT3                                           |
| 5524 | 1,3,4,6,7,8<br>,12,15 | 2,5,9,10,1<br>1,13,14,16<br>,17 | 27 | B0BNN3,D3ZHA0,O08557,P06761,P07647,P08723,P10715,P11598,P13432,P16086,P18418,P19629,P20761,P22006,P22282,P22283,P30120,P31044,P35280,Q4FZU2,Q63617,Q63751,Q812E4,Q8CJ52,Q99041,Q9JI85,Q9ROT3                                                                                                                 |
| 5525 | 1,3,4,6,7,8<br>,12,16 | 2,5,9,10,1<br>1,13,14,15<br>,17 | 23 | D3ZHA0,P01681,P06761,P07647,P08721,P08723,P10715,P13432,P16086,P18418,P19629,P22282,P22283,P30120,P31044,Q63617,Q63751,Q6IFW6,Q6IG02,Q8CJ52,Q99041,Q9JI85,Q9ROT3                                                                                                                                             |
| 5526 | 1,3,4,6,7,8<br>,12,17 | 2,5,9,10,1<br>1,13,14,15<br>,16 | 42 | B0BNN3,O88267,P01681,P02091,P02770,P02780,P02782,P06761,P07647,P08723,P08937,P09605,P25809,P10715,P11598,P13432,P16086,P17475,P18418,P19223,P19629,P20761,P22282,P22283,P30120,P36374,P50115,P55091,P62815,Q4G075,Q63493,Q63617,Q63751,Q6AYR9,Q6IG02,Q8CJ52,Q99041,Q99MH3,Q9JI85,Q9QZA6,Q9QZK9,Q9ROT3,Q9Z0V6 |
| 5527 | 1,3,4,6,7,8<br>,13,14 | 2,5,9,10,1<br>1,12,15,16<br>,17 | 20 | O08557,P06761,P06911,P07647,P08723,P11598,P12020,P16086,P18418,P19629,P22282,P22283,P29975,P31044,Q5GRG2,Q62902,Q63617,Q8CJ52,Q9JI85,Q9ROT3                                                                                                                                                                  |
| 5528 | 1,3,4,6,7,8<br>,13,15 | 2,5,9,10,1<br>1,12,14,16<br>,17 | 18 | O08557,P06761,P06911,P07647,P08723,P11598,P12020,P16086,P18418,P22282,P22283,P31044,Q5GRG2,Q63617,Q63751,Q8VD89,Q9JI85,Q9ROT3                                                                                                                                                                                |
| 5529 | 1,3,4,6,7,8<br>,13,16 | 2,5,9,10,1<br>1,12,14,15<br>,17 | 17 | P06761,P06911,P07647,P08723,P12020,P16086,P18418,P22282,P22283,P31044,Q5GRG2,Q62902,Q63617,Q8CJ52,Q8VD89,Q9JI85,Q9ROT3                                                                                                                                                                                       |
| 5530 | 1,3,4,6,7,8<br>,13,17 | 2,5,9,10,1<br>1,12,14,15<br>,16 | 28 | P01681,P02091,P02770,P06761,P06911,P07647,P08723,P08937,P11598,P12020,P16086,P18418,P20761,P22282,P22283,P29975,P31044,P51907,P62815,Q4G075,Q5GRG2,Q62902,Q63617,Q63751,Q99041,Q99MH3,Q9JI85,Q9ROT3                                                                                                          |
| 5531 | 1,3,4,6,7,8<br>,14,15 | 2,5,9,10,1<br>1,12,13,16<br>,17 | 19 | B0BNN3,O08557,P06761,P07171,P08723,P10536,P11598,P16086,P18418,P19629,P20761,P22006,P22282,P22283,P31044,P35280,Q5GRG2,Q63617,Q63618                                                                                                                                                                         |
| 5532 | 1,3,4,6,7,8<br>,14,16 | 2,5,9,10,1<br>1,12,13,15<br>,17 | 11 | P06761,P06911,P08723,P16086,P18418,P19629,P22282,P22283,P31044,Q63617,Q9ROT3                                                                                                                                                                                                                                 |
| 5533 | 1,3,4,6,7,8<br>,14,17 | 2,5,9,10,1<br>1,12,13,15<br>,16 | 23 | P01681,P02091,P02770,P06761,P08723,P10536,P11598,P12020,P16086,P18418,P19629,P20761,P22282,P22283,P31044,P62815,Q30KJ2,Q4G075,Q63617,Q63751,Q99041,Q9ROT3,Q9Z0V6                                                                                                                                             |
| 5534 | 1,3,4,6,7,8<br>,15,16 | 2,5,9,10,1<br>1,12,13,14<br>,17 | 5  | P16086,P18418,P31044,Q63617,Q8VD89                                                                                                                                                                                                                                                                           |

|      |                       |                                 |    |                                                                                                                                                    |
|------|-----------------------|---------------------------------|----|----------------------------------------------------------------------------------------------------------------------------------------------------|
| 5535 | 1,3,4,6,7,8<br>,15,17 | 2,5,9,10,1<br>1,12,13,14<br>,16 | 21 | B0BNN3,P02091,P02770,P06761,P10536,P11598,P12346,P16086,P17475,P18418,P19629,P20761,P22282,P22283,P31044,P62815,Q4G075,Q63617,Q63751,Q99041,Q99MH3 |
| 5536 | 1,3,4,6,7,8<br>,16,17 | 2,5,9,10,1<br>1,12,13,14<br>,15 | 17 | P01681,P02091,P02770,P06761,P09605,P25809,P16086,P18418,P20761,P22282,P22283,P23928,P31044,Q4G075,Q63617,Q63751,Q99041,Q9R0T3                      |
| 5537 | 1,3,4,6,7,9<br>,10,11 | 2,5,8,12,1<br>3,14,15,16<br>,17 | 5  | P15399,P35280,P61206,P84079,P84082,P83121,Q5FVI6                                                                                                   |
| 5538 | 1,3,4,6,7,9<br>,10,12 | 2,5,8,11,1<br>3,14,15,16<br>,17 | 6  | P08723,P18418,P97840,Q4FZU2,Q5FVI6,Q6IG02                                                                                                          |
| 5539 | 1,3,4,6,7,9<br>,10,13 | 2,5,8,11,1<br>2,14,15,16<br>,17 | 3  | P06911,P12020,Q5FVI6                                                                                                                               |
| 5540 | 1,3,4,6,7,9<br>,10,14 | 2,5,8,11,1<br>2,13,15,16<br>,17 | 2  | P12020,Q5FVI6                                                                                                                                      |
| 5541 | 1,3,4,6,7,9<br>,10,15 | 2,5,8,11,1<br>2,13,14,16<br>,17 | 3  | O55006,P35280,Q5FVI6                                                                                                                               |
| 5542 | 1,3,4,6,7,9<br>,10,16 | 2,5,8,11,1<br>2,13,14,15<br>,17 | 2  | P62804,Q5FVI6                                                                                                                                      |
| 5543 | 1,3,4,6,7,9<br>,10,17 | 2,5,8,11,1<br>2,13,14,15<br>,16 | 3  | P02091,P09605,P25809,Q5FVI6                                                                                                                        |
| 5544 | 1,3,4,6,7,9<br>,11,12 | 2,5,8,10,1<br>3,14,15,16<br>,17 | 16 | P01681,P01835,P04905,P08723,P0C0A9,P13432,P15399,P30120,P36374,Q4FZU2,Q6IFW6,Q6IG02,Q6IMF3,Q6P6Q2,Q9JHB9,Q9JI85                                    |
| 5545 | 1,3,4,6,7,9<br>,11,13 | 2,5,8,10,1<br>2,14,15,16<br>,17 | 4  | P05539,P15399,P16086,Q9JI85                                                                                                                        |
| 5546 | 1,3,4,6,7,9<br>,11,14 | 2,5,8,10,1<br>2,13,15,16<br>,17 | 3  | P15399,P16086,P83121                                                                                                                               |
| 5547 | 1,3,4,6,7,9<br>,11,15 | 2,5,8,10,1<br>2,13,14,16<br>,17 | 5  | O54728,P02625,P22006,P35280,Q5FVI6                                                                                                                 |
| 5548 | 1,3,4,6,7,9<br>,11,16 | 2,5,8,10,1<br>2,13,14,15<br>,17 | 2  | P55314,Q5FVI6                                                                                                                                      |
| 5549 | 1,3,4,6,7,9<br>,11,17 | 2,5,8,10,1<br>2,13,14,15<br>,16 | 7  | P01681,P02091,P09605,P25809,P15399,P97580,Q30KJ2,Q63751                                                                                            |

|      |                       |                                 |    |                                                                       |
|------|-----------------------|---------------------------------|----|-----------------------------------------------------------------------|
| 5550 | 1,3,4,6,7,9<br>,12,13 | 2,5,8,10,1<br>1,14,15,16<br>,17 | 10 | P05539,P06911,P07647,P08723,P09456,P22282,P30120,P36374,Q62902,Q9JI85 |
| 5551 | 1,3,4,6,7,9<br>,12,14 | 2,5,8,10,1<br>1,13,15,16<br>,17 | 2  | P01835,P08723                                                         |
| 5552 | 1,3,4,6,7,9<br>,12,15 | 2,5,8,10,1<br>1,13,14,16<br>,17 | 1  | P02625                                                                |
| 5553 | 1,3,4,6,7,9<br>,12,16 | 2,5,8,10,1<br>1,13,14,15<br>,17 | 0  |                                                                       |
| 5554 | 1,3,4,6,7,9<br>,12,17 | 2,5,8,10,1<br>1,13,14,15<br>,16 | 9  | P01681,P01835,P02091,P08723,P09605;P25809,P13432,P19223,P20761,Q63751 |
| 5555 | 1,3,4,6,7,9<br>,13,14 | 2,5,8,10,1<br>1,12,15,16<br>,17 | 5  | P05539,P06911,P12020,P16086,Q5GRG2                                    |
| 5556 | 1,3,4,6,7,9<br>,13,15 | 2,5,8,10,1<br>1,12,14,16<br>,17 | 3  | O54728,P05539,P62804                                                  |
| 5557 | 1,3,4,6,7,9<br>,13,16 | 2,5,8,10,1<br>1,12,14,15<br>,17 | 2  | P62804,Q00715                                                         |
| 5558 | 1,3,4,6,7,9<br>,13,17 | 2,5,8,10,1<br>1,12,14,15<br>,16 | 3  | P02091,P09605;P25809,P62804                                           |
| 5559 | 1,3,4,6,7,9<br>,14,15 | 2,5,8,10,1<br>1,12,13,16<br>,17 | 1  | O54728                                                                |
| 5560 | 1,3,4,6,7,9<br>,14,16 | 2,5,8,10,1<br>1,12,13,15<br>,17 | 1  | P62804                                                                |
| 5561 | 1,3,4,6,7,9<br>,14,17 | 2,5,8,10,1<br>1,12,13,15<br>,16 | 2  | P02091,P09605;P25809                                                  |
| 5562 | 1,3,4,6,7,9<br>,15,16 | 2,5,8,10,1<br>1,12,13,14<br>,17 | 2  | O54728,P62804                                                         |
| 5563 | 1,3,4,6,7,9<br>,15,17 | 2,5,8,10,1<br>1,12,13,14<br>,16 | 4  | B0BNN3,P02091,P09605;P25809,P20761                                    |
| 5564 | 1,3,4,6,7,9<br>,16,17 | 2,5,8,10,1<br>1,12,13,14<br>,15 | 4  | P02091,P09605;P25809,P23593,P62804                                    |

|      |                        |                                |    |                                                                                                                                                                                       |
|------|------------------------|--------------------------------|----|---------------------------------------------------------------------------------------------------------------------------------------------------------------------------------------|
| 5565 | 1,3,4,6,7,1<br>0,11,12 | 2,5,8,9,13,<br>14,15,16,1<br>7 | 24 | O35783,P01681,P04905,P06757,P08723,P0C0A9,P15399,P18418,P30120,P35280,P36374,P61206;P84079;P84082,Q10758,Q4FZU2,Q5FVI6,Q63357,Q6IFU8,Q6IFW6,Q6IG02,Q6IMF3,Q6P6Q2,Q812E4,Q9JHB9,Q9JI85 |
| 5566 | 1,3,4,6,7,1<br>0,11,13 | 2,5,8,9,12,<br>14,15,16,1<br>7 | 8  | P06911,P12020,P15399,P16086,Q5FVI6,Q5GRG2,Q8VD89,Q9JI85                                                                                                                               |
| 5567 | 1,3,4,6,7,1<br>0,11,14 | 2,5,8,9,12,<br>13,15,16,1<br>7 | 8  | P12020,P15399,P16086,P18418,P35280,P47727,Q30KJ2,Q5FVI6                                                                                                                               |
| 5568 | 1,3,4,6,7,1<br>0,11,15 | 2,5,8,9,12,<br>13,14,16,1<br>7 | 5  | P15399,P22006,P35280,Q5FVI6,Q8VD89                                                                                                                                                    |
| 5569 | 1,3,4,6,7,1<br>0,11,16 | 2,5,8,9,12,<br>13,14,15,1<br>7 | 5  | P15399,P55314,P61206;P84079;P84082,Q5FVI6,Q8VD89                                                                                                                                      |
| 5570 | 1,3,4,6,7,1<br>0,11,17 | 2,5,8,9,12,<br>13,14,15,1<br>6 | 8  | O08815,P01681,P02091,P15399,P97580,Q30KJ2,Q5FVI6,Q63751                                                                                                                               |
| 5571 | 1,3,4,6,7,1<br>0,12,13 | 2,5,8,9,11,<br>14,15,16,1<br>7 | 14 | P06911,P07647,P08723,P12020,P18418,P22282,P30120,P36374,Q4FZU2,Q5FVI6,Q5GRG2,Q6AYR9,Q99MH3,Q9JI85                                                                                     |
| 5572 | 1,3,4,6,7,1<br>0,12,14 | 2,5,8,9,11,<br>13,15,16,1<br>7 | 9  | A2RUV9,P08723,P12020,P18418,Q10758,Q4FZU2,Q5FVI6,Q6IFW6,Q6IMF3                                                                                                                        |
| 5573 | 1,3,4,6,7,1<br>0,12,15 | 2,5,8,9,11,<br>13,14,16,1<br>7 | 6  | B0BNN3,P08723,P35280,Q4FZU2,Q5FVI6,Q99MH3                                                                                                                                             |
| 5574 | 1,3,4,6,7,1<br>0,12,16 | 2,5,8,9,11,<br>13,14,15,1<br>7 | 9  | P08721,P08723,P47967,P97840,Q10758,Q4FZU2,Q5FVI6,Q6IFW6,Q6IMF3                                                                                                                        |
| 5575 | 1,3,4,6,7,1<br>0,12,17 | 2,5,8,9,11,<br>13,14,15,1<br>6 | 16 | O08815,P01681,P02091,P08723,P09605;P25809,P13432,P15399,P18418,P19223,P20761,Q10758,Q4FZU2,Q5FVI6,Q63751,Q99MH3,Q9QZK9                                                                |
| 5576 | 1,3,4,6,7,1<br>0,13,14 | 2,5,8,9,11,<br>12,15,16,1<br>7 | 4  | P06911,P12020,P16086,Q5GRG2                                                                                                                                                           |
| 5577 | 1,3,4,6,7,1<br>0,13,15 | 2,5,8,9,11,<br>12,14,16,1<br>7 | 6  | P06911,P12020,Q5FVI6,Q5GRG2,Q8VD89,Q99MH3                                                                                                                                             |
| 5578 | 1,3,4,6,7,1<br>0,13,16 | 2,5,8,9,11,<br>12,14,15,1<br>7 | 5  | P06911,P12020,P62804,Q5FVI6,Q8VD89                                                                                                                                                    |
| 5579 | 1,3,4,6,7,1<br>0,13,17 | 2,5,8,9,11,<br>12,14,15,1<br>6 | 4  | P02091,P06911,P12020,Q99MH3                                                                                                                                                           |



|      |                        |                                |    |                                                                                                                                                                  |
|------|------------------------|--------------------------------|----|------------------------------------------------------------------------------------------------------------------------------------------------------------------|
| 5580 | 1,3,4,6,7,1<br>0,14,15 | 2,5,8,9,11,<br>12,13,16,1<br>7 | 5  | P02803,P12020,P22006,P35280,Q5FVI6                                                                                                                               |
| 5581 | 1,3,4,6,7,1<br>0,14,16 | 2,5,8,9,11,<br>12,13,15,1<br>7 | 3  | P08721,P12020,Q5FVI6                                                                                                                                             |
| 5582 | 1,3,4,6,7,1<br>0,14,17 | 2,5,8,9,11,<br>12,13,15,1<br>6 | 4  | P02091,P12020,P15399,Q30KJ2                                                                                                                                      |
| 5583 | 1,3,4,6,7,1<br>0,15,16 | 2,5,8,9,11,<br>12,13,14,1<br>7 | 3  | P08721,Q5FVI6,Q8VD89                                                                                                                                             |
| 5584 | 1,3,4,6,7,1<br>0,15,17 | 2,5,8,9,11,<br>12,13,14,1<br>6 | 6  | B0BNN3,P02091,P02803,P20761,Q5FVI6,Q99MH3                                                                                                                        |
| 5585 | 1,3,4,6,7,1<br>0,16,17 | 2,5,8,9,11,<br>12,13,14,1<br>5 | 2  | P02091,Q5FVI6                                                                                                                                                    |
| 5586 | 1,3,4,6,7,1<br>1,12,13 | 2,5,8,9,10,<br>14,15,16,1<br>7 | 22 | P01681,P01836,P02781,P04905,P05539,P06911,P07647,P08723,P09456,P0C0A9,P15399,P22282,P22283,P30120,P36374,Q4FZU2,Q62902,Q63751,Q6AYR9,Q6IFW6,Q9JHB9,Q9JI85        |
| 5587 | 1,3,4,6,7,1<br>1,12,14 | 2,5,8,9,10,<br>13,15,16,1<br>7 | 16 | P01681,P04905,P08723,P0C0A9,P15399,P16086,P30120,P47727,Q4FZU2,Q63493,Q6IFW6,Q6IG02,Q6IMF3,Q6P6Q2,Q9JHB9,Q9JI85                                                  |
| 5588 | 1,3,4,6,7,1<br>1,12,15 | 2,5,8,9,10,<br>13,14,16,1<br>7 | 11 | B0BNN3,P01681,P01836,P02625,P08723,P15399,P22006,P35280,Q4FZU2,Q6IFW6,Q9JI85                                                                                     |
| 5589 | 1,3,4,6,7,1<br>1,12,16 | 2,5,8,9,10,<br>13,14,15,1<br>7 | 12 | P01681,P01836,P08723,P15399,P55314,Q4FZU2,Q5FVI6,Q6IFW6,Q6IG02,Q6IMF3,Q6P6Q2,Q9JI85                                                                              |
| 5590 | 1,3,4,6,7,1<br>1,12,17 | 2,5,8,9,10,<br>13,14,15,1<br>6 | 22 | P01681,P02091,P08723,P09605,P25809,P13432,P15399,P19223,P20761,P22282,P30120,P36374,P97580,Q30KJ2,Q4FZU2,Q63493,Q63751,Q6IFW6,Q6IG02,Q6IMF3,Q99041,Q9JI85,Q9QZK9 |
| 5591 | 1,3,4,6,7,1<br>1,13,14 | 2,5,8,9,10,<br>12,15,16,1<br>7 | 9  | P05539,P06911,P12020,P15399,P16086,P47727,Q5GRG2,Q62902,Q9JI85                                                                                                   |
| 5592 | 1,3,4,6,7,1<br>1,13,15 | 2,5,8,9,10,<br>12,14,16,1<br>7 | 7  | P02625,P05539,P16086,P22006,Q5GRG2,Q8VD89,Q9JI85                                                                                                                 |
| 5593 | 1,3,4,6,7,1<br>1,13,16 | 2,5,8,9,10,<br>12,14,15,1<br>7 | 3  | P16086,P55314,Q8VD89                                                                                                                                             |
| 5594 | 1,3,4,6,7,1<br>1,13,17 | 2,5,8,9,10,<br>12,14,15,1<br>6 | 11 | P01681,P02091,P05539,P09605,P25809,P15399,P16086,P22282,P97580,Q30KJ2,Q63751,Q9JI85                                                                              |

|      |                        |                                |    |                                                                                                                               |
|------|------------------------|--------------------------------|----|-------------------------------------------------------------------------------------------------------------------------------|
| 5595 | 1,3,4,6,7,1<br>1,14,15 | 2,5,8,9,10,<br>12,13,16,1<br>7 | 5  | P02625,P15399,P16086,P22006,P35280                                                                                            |
| 5596 | 1,3,4,6,7,1<br>1,14,16 | 2,5,8,9,10,<br>12,13,15,1<br>7 | 3  | P15399,P16086,P55314                                                                                                          |
| 5597 | 1,3,4,6,7,1<br>1,14,17 | 2,5,8,9,10,<br>12,13,15,1<br>6 | 8  | P01681,P02091,P15399,P16086,P20761,P97580,Q30KJ2,Q63751                                                                       |
| 5598 | 1,3,4,6,7,1<br>1,15,16 | 2,5,8,9,10,<br>12,13,14,1<br>7 | 4  | P22006,P55314,Q5FVI6,Q8VD89                                                                                                   |
| 5599 | 1,3,4,6,7,1<br>1,15,17 | 2,5,8,9,10,<br>12,13,14,1<br>6 | 9  | B0BNN3,P02091,P09605,P25809,P15399,P20761,P22006,P97580,Q30KJ2,Q63751                                                         |
| 5600 | 1,3,4,6,7,1<br>1,16,17 | 2,5,8,9,10,<br>12,13,14,1<br>5 | 8  | P01681,P02091,P09605,P25809,P15399,P55314,P97580,Q30KJ2,Q63751                                                                |
| 5601 | 1,3,4,6,7,1<br>2,13,14 | 2,5,8,9,10,<br>11,15,16,1<br>7 | 13 | A2RUV9,P06911,P07647,P08723,P12020,P16086,P22282,P30120,Q5GRG2,Q62902,Q6AYR9,Q9JHB9,Q9JI85                                    |
| 5602 | 1,3,4,6,7,1<br>2,13,15 | 2,5,8,9,10,<br>11,14,16,1<br>7 | 5  | P02625,P06911,P08723,Q5GRG2,Q99MH3                                                                                            |
| 5603 | 1,3,4,6,7,1<br>2,13,16 | 2,5,8,9,10,<br>11,14,15,1<br>7 | 3  | P06911,P08723,Q62902                                                                                                          |
| 5604 | 1,3,4,6,7,1<br>2,13,17 | 2,5,8,9,10,<br>11,14,15,1<br>6 | 17 | P01681,P02091,P06911,P07647,P08723,P09605,P25809,P13432,P20761,P22282,P36374,P62815,Q63751,Q6AYR9,Q99041,Q99MH3,Q9JI85,Q9QZK9 |
| 5605 | 1,3,4,6,7,1<br>2,14,15 | 2,5,8,9,10,<br>11,13,16,1<br>7 | 4  | A2RUV9,B0BNN3,P02625,P08723                                                                                                   |
| 5606 | 1,3,4,6,7,1<br>2,14,16 | 2,5,8,9,10,<br>11,13,15,1<br>7 | 1  | P08723                                                                                                                        |
| 5607 | 1,3,4,6,7,1<br>2,14,17 | 2,5,8,9,10,<br>11,13,15,1<br>6 | 12 | P01681,P01835,P02091,P08723,P09605,P25809,P13432,P15399,P20761,P31430,P62815,Q63751,Q9QZK9                                    |
| 5608 | 1,3,4,6,7,1<br>2,15,16 | 2,5,8,9,10,<br>11,13,14,1<br>7 | 1  | Q4FZU2                                                                                                                        |
| 5609 | 1,3,4,6,7,1<br>2,15,17 | 2,5,8,9,10,<br>11,13,14,1<br>6 | 11 | B0BNN3,P01681,P02091,P07151,P09605,P25809,P13432,P20761,Q63751,Q99041,Q99MH3,Q9QZK9                                           |

|      |                        |                                 |    |                                                                                                   |
|------|------------------------|---------------------------------|----|---------------------------------------------------------------------------------------------------|
| 5610 | 1,3,4,6,7,1<br>2,16,17 | 2,5,8,9,10,<br>11,13,14,1<br>5  | 6  | P01681,P02091,P09605;P25809,P13432,Q63751,Q99041                                                  |
| 5611 | 1,3,4,6,7,1<br>3,14,15 | 2,5,8,9,10,<br>11,12,16,1<br>7  | 5  | A2RUV9,P06911,P12020,P16086,Q5GRG2                                                                |
| 5612 | 1,3,4,6,7,1<br>3,14,16 | 2,5,8,9,10,<br>11,12,15,1<br>7  | 5  | P06911,P12020,P16086,P62804,Q5GRG2                                                                |
| 5613 | 1,3,4,6,7,1<br>3,14,17 | 2,5,8,9,10,<br>11,12,15,1<br>6  | 8  | P02091,P06911,P12020,P16086,P20761,P22282,Q5GRG2,Q9QW07                                           |
| 5614 | 1,3,4,6,7,1<br>3,15,16 | 2,5,8,9,10,<br>11,12,14,1<br>7  | 2  | P62804,Q8VD89                                                                                     |
| 5615 | 1,3,4,6,7,1<br>3,15,17 | 2,5,8,9,10,<br>11,12,14,1<br>6  | 5  | B0BNN3,P02091,P20761,Q63751,Q99MH3                                                                |
| 5616 | 1,3,4,6,7,1<br>3,16,17 | 2,5,8,9,10,<br>11,12,14,1<br>5  | 3  | P02091,P09605;P25809,P62804                                                                       |
| 5617 | 1,3,4,6,7,1<br>4,15,16 | 2,5,8,9,10,<br>11,12,13,1<br>7  | 1  | P02803                                                                                            |
| 5618 | 1,3,4,6,7,1<br>4,15,17 | 2,5,8,9,10,<br>11,12,13,1<br>6  | 4  | B0BNN3,P02091,P02803,P20761                                                                       |
| 5619 | 1,3,4,6,7,1<br>4,16,17 | 2,5,8,9,10,<br>11,12,13,1<br>5  | 3  | P02091,P09605;P25809,P16086                                                                       |
| 5620 | 1,3,4,6,7,1<br>5,16,17 | 2,5,8,9,10,<br>11,12,13,1<br>4  | 6  | B0BNN3,P02091,P02803,P09605;P25809,P20761,P62804                                                  |
| 5621 | 1,3,4,6,8,9<br>,10,11  | 2,5,7,12,1<br>3,14,15,16<br>,17 | 6  | P01681,P08649,P14669,P16636,P35280,P35467                                                         |
| 5622 | 1,3,4,6,8,9<br>,10,12  | 2,5,7,11,1<br>3,14,15,16<br>,17 | 14 | D3ZHA0,P01681,P02782,P07647,P08723,P0C0A9,P16636,P30120,P35281,Q4FZU2,Q5M8C6,Q6IFW6,Q6IG02,Q6IMF3 |
| 5623 | 1,3,4,6,8,9<br>,10,13  | 2,5,7,11,1<br>2,14,15,16<br>,17 | 2  | P06911,P16636                                                                                     |
| 5624 | 1,3,4,6,8,9<br>,10,14  | 2,5,7,11,1<br>2,13,15,16<br>,17 | 0  |                                                                                                   |

|      |                       |                                 |    |                                                                                                                                             |
|------|-----------------------|---------------------------------|----|---------------------------------------------------------------------------------------------------------------------------------------------|
| 5625 | 1,3,4,6,8,9<br>,10,15 | 2,5,7,11,1<br>2,13,14,16<br>,17 | 3  | B0BNN3,P35280,Q5QE79                                                                                                                        |
| 5626 | 1,3,4,6,8,9<br>,10,16 | 2,5,7,11,1<br>2,13,14,15<br>,17 | 2  | P16636,P23593                                                                                                                               |
| 5627 | 1,3,4,6,8,9<br>,10,17 | 2,5,7,11,1<br>2,13,14,15<br>,16 | 3  | P01681,P16636,P23593                                                                                                                        |
| 5628 | 1,3,4,6,8,9<br>,11,12 | 2,5,7,10,1<br>3,14,15,16<br>,17 | 20 | P01681,P01835,P02780,P02781,P02782,P04905,P07647,P08723,P0C0A9,P14669,P16636,P30120,Q4FZU2,Q5M8C6,Q6IFU8,Q6IFW6,Q6IG02,Q6IMF3,Q6P6Q2,Q9JHB9 |
| 5629 | 1,3,4,6,8,9<br>,11,13 | 2,5,7,10,1<br>2,14,15,16<br>,17 | 3  | P07647,P14669,P16636                                                                                                                        |
| 5630 | 1,3,4,6,8,9<br>,11,14 | 2,5,7,10,1<br>2,13,15,16<br>,17 | 2  | P01681,P14669                                                                                                                               |
| 5631 | 1,3,4,6,8,9<br>,11,15 | 2,5,7,10,1<br>2,13,14,16<br>,17 | 6  | B0BNN3,P02625,P14668,P14669,P35280,Q5QE79                                                                                                   |
| 5632 | 1,3,4,6,8,9<br>,11,16 | 2,5,7,10,1<br>2,13,14,15<br>,17 | 2  | P01681,P14668                                                                                                                               |
| 5633 | 1,3,4,6,8,9<br>,11,17 | 2,5,7,10,1<br>2,13,14,15<br>,16 | 3  | P01681,P14669,P16636                                                                                                                        |
| 5634 | 1,3,4,6,8,9<br>,12,13 | 2,5,7,10,1<br>1,14,15,16<br>,17 | 15 | P01681,P02780,P02782,P07647,P08723,P0C0A9,P16636,P22282,P30120,P36374,Q06496,Q5M8C6,Q6AYR9,Q6IG02,Q9JHB9                                    |
| 5635 | 1,3,4,6,8,9<br>,12,14 | 2,5,7,10,1<br>1,13,15,16<br>,17 | 7  | P01681,P01835,P02782,P08723,P0C0A9,P30120,Q6IG02                                                                                            |
| 5636 | 1,3,4,6,8,9<br>,12,15 | 2,5,7,10,1<br>1,13,14,16<br>,17 | 5  | B0BNN3,P02625,P08723,Q5QE79,Q6IG02                                                                                                          |
| 5637 | 1,3,4,6,8,9<br>,12,16 | 2,5,7,10,1<br>1,13,14,15<br>,17 | 5  | P01681,P08723,P16636,P23593,Q6IG02                                                                                                          |
| 5638 | 1,3,4,6,8,9<br>,12,17 | 2,5,7,10,1<br>1,13,14,15<br>,16 | 12 | B0BNN3,P01681,P01835,P02782,P08723,P13432,P16636,P19223,P23593,Q4G075,Q5M8C6,Q6IG02                                                         |
| 5639 | 1,3,4,6,8,9<br>,13,14 | 2,5,7,10,1<br>1,12,15,16<br>,17 | 1  | P06911                                                                                                                                      |

|      |                        |                                 |    |                                                                                                                                                                                                         |
|------|------------------------|---------------------------------|----|---------------------------------------------------------------------------------------------------------------------------------------------------------------------------------------------------------|
| 5640 | 1,3,4,6,8,9<br>,13,15  | 2,5,7,10,1<br>1,12,14,16<br>,17 | 1  | Q5QE79                                                                                                                                                                                                  |
| 5641 | 1,3,4,6,8,9<br>,13,16  | 2,5,7,10,1<br>1,12,14,15<br>,17 | 0  |                                                                                                                                                                                                         |
| 5642 | 1,3,4,6,8,9<br>,13,17  | 2,5,7,10,1<br>1,12,14,15<br>,16 | 4  | P01681,P16636,P23593,P51907                                                                                                                                                                             |
| 5643 | 1,3,4,6,8,9<br>,14,15  | 2,5,7,10,1<br>1,12,13,16<br>,17 | 2  | B0BNN3,Q5QE79                                                                                                                                                                                           |
| 5644 | 1,3,4,6,8,9<br>,14,16  | 2,5,7,10,1<br>1,12,13,15<br>,17 | 0  |                                                                                                                                                                                                         |
| 5645 | 1,3,4,6,8,9<br>,14,17  | 2,5,7,10,1<br>1,12,13,15<br>,16 | 1  | P01681                                                                                                                                                                                                  |
| 5646 | 1,3,4,6,8,9<br>,15,16  | 2,5,7,10,1<br>1,12,13,14<br>,17 | 3  | O54728,P23593,Q5QE79                                                                                                                                                                                    |
| 5647 | 1,3,4,6,8,9<br>,15,17  | 2,5,7,10,1<br>1,12,13,14<br>,16 | 4  | B0BNN3,P20761,P23593,Q5QE79                                                                                                                                                                             |
| 5648 | 1,3,4,6,8,9<br>,16,17  | 2,5,7,10,1<br>1,12,13,14<br>,15 | 4  | O70417,P01681,P16636,P23593                                                                                                                                                                             |
| 5649 | 1,3,4,6,8,1<br>0,11,12 | 2,5,7,9,13,<br>14,15,16,1<br>7  | 28 | O35547,P01681,P02780,P02781,P02782,P04905,P07647,P08723,P0C0A9,P14669,P16636,P30120,P35280,P35281,P47727,Q10758,Q4FZ<br>U2,Q5M8C6,Q63357,Q6IFU7,Q6IFU8,Q6IFW6,Q6IG02,Q6IMF3,Q6P6Q2,Q812E4,Q8CJ52,Q9JHB9 |
| 5650 | 1,3,4,6,8,1<br>0,11,13 | 2,5,7,9,12,<br>14,15,16,1<br>7  | 6  | P01681,P06911,P07647,P14669,P16636,P47727                                                                                                                                                               |
| 5651 | 1,3,4,6,8,1<br>0,11,14 | 2,5,7,9,12,<br>13,15,16,1<br>7  | 5  | P01681,P14669,P35280,P47727,Q5BJY9                                                                                                                                                                      |
| 5652 | 1,3,4,6,8,1<br>0,11,15 | 2,5,7,9,12,<br>13,14,16,1<br>7  | 4  | B0BNN3,P14669,P35280,P35281                                                                                                                                                                             |
| 5653 | 1,3,4,6,8,1<br>0,11,16 | 2,5,7,9,12,<br>13,14,15,1<br>7  | 7  | P01681,P14668,P14669,P16636,P55314,Q5FVI6,Q8VD89                                                                                                                                                        |
| 5654 | 1,3,4,6,8,1<br>0,11,17 | 2,5,7,9,12,<br>13,14,15,1<br>6  | 6  | P01681,P07150,P08649,P14669,P16636,Q4G075                                                                                                                                                               |

|      |                        |                                |    |                                                                                                                                                    |
|------|------------------------|--------------------------------|----|----------------------------------------------------------------------------------------------------------------------------------------------------|
| 5655 | 1,3,4,6,8,1<br>0,12,13 | 2,5,7,9,11,<br>14,15,16,1<br>7 | 21 | P01681,P02780,P02781,P02782,P06911,P07647,P08723,P0C0A9,P16636,P22282,P22283,P30120,P35281,P36374,Q4FZU2,Q5M8C6,Q6AYR9,Q6IFW6,Q6IG02,Q99MH3,Q9JHB9 |
| 5656 | 1,3,4,6,8,1<br>0,12,14 | 2,5,7,9,11,<br>13,15,16,1<br>7 | 13 | P01681,P02782,P07647,P08723,P0C0A9,P30120,Q10758,Q4FZU2,Q6AYR9,Q6IFW6,Q6IG02,Q6IMF3,Q6P6Q2                                                         |
| 5657 | 1,3,4,6,8,1<br>0,12,15 | 2,5,7,9,11,<br>13,14,16,1<br>7 | 12 | B0BNN3,D3ZHA0,P01681,P08723,P35280,P35281,Q4FZU2,Q6IFW6,Q6IG02,Q6IMF3,Q812E4,Q99MH3                                                                |
| 5658 | 1,3,4,6,8,1<br>0,12,16 | 2,5,7,9,11,<br>13,14,15,1<br>7 | 11 | P01681,P08721,P08723,P16636,P35281,Q10758,Q4FZU2,Q6IFW6,Q6IG02,Q6IMF3,Q6P6Q2                                                                       |
| 5659 | 1,3,4,6,8,1<br>0,12,17 | 2,5,7,9,11,<br>13,14,15,1<br>6 | 20 | B0BNN3,F1LM93,P01681,P02782,P07647,P08723,P13432,P16636,P17475,P19223,Q10758,Q4FZU2,Q4G075,Q5M8C6,Q6AYR9,Q6IFW6,Q6IG02,Q6IMF3,Q99MH3,Q9QZK9        |
| 5660 | 1,3,4,6,8,1<br>0,13,14 | 2,5,7,9,11,<br>12,15,16,1<br>7 | 4  | P06911,P12020,Q5GRG2,Q64093                                                                                                                        |
| 5661 | 1,3,4,6,8,1<br>0,13,15 | 2,5,7,9,11,<br>12,14,16,1<br>7 | 3  | B0BNN3,P82995,Q99MH3                                                                                                                               |
| 5662 | 1,3,4,6,8,1<br>0,13,16 | 2,5,7,9,11,<br>12,14,15,1<br>7 | 2  | P06911,P16636                                                                                                                                      |
| 5663 | 1,3,4,6,8,1<br>0,13,17 | 2,5,7,9,11,<br>12,14,15,1<br>6 | 7  | P01681,P06911,P16636,P51907,Q4G075,Q63355,Q99MH3                                                                                                   |
| 5664 | 1,3,4,6,8,1<br>0,14,15 | 2,5,7,9,11,<br>12,13,16,1<br>7 | 2  | B0BNN3,P35280                                                                                                                                      |
| 5665 | 1,3,4,6,8,1<br>0,14,16 | 2,5,7,9,11,<br>12,13,15,1<br>7 | 1  | P08721                                                                                                                                             |
| 5666 | 1,3,4,6,8,1<br>0,14,17 | 2,5,7,9,11,<br>12,13,15,1<br>6 | 2  | B0BNN3,P01681                                                                                                                                      |
| 5667 | 1,3,4,6,8,1<br>0,15,16 | 2,5,7,9,11,<br>12,13,14,1<br>7 | 2  | B0BNN3,P08721                                                                                                                                      |
| 5668 | 1,3,4,6,8,1<br>0,15,17 | 2,5,7,9,11,<br>12,13,14,1<br>6 | 5  | B0BNN3,P17475,P20761,Q4G075,Q99MH3                                                                                                                 |
| 5669 | 1,3,4,6,8,1<br>0,16,17 | 2,5,7,9,11,<br>12,13,14,1<br>5 | 5  | P01681,P16636,P23593,P25031,Q4G075                                                                                                                 |

|      |                        |                                |    |                                                                                                                                                                                                                   |
|------|------------------------|--------------------------------|----|-------------------------------------------------------------------------------------------------------------------------------------------------------------------------------------------------------------------|
| 5670 | 1,3,4,6,8,1<br>1,12,13 | 2,5,7,9,10,<br>14,15,16,1<br>7 | 30 | O35547,P01681,P02780,P02781,P02782,P04905,P06911,P07647,P08723,P0C0A9,P14669,P16636,P22282,P22283,P30120,P36374,P40241,P47727,Q4FZU2,Q5M8C6,Q5XI22,Q62902,Q6AYR9,Q6IFW6,Q6IG02,Q6IMF3,Q6P6Q2,Q8CJ52,Q9JHB9,Q9JI85 |
| 5671 | 1,3,4,6,8,1<br>1,12,14 | 2,5,7,9,10,<br>13,15,16,1<br>7 | 23 | B0BNN3,O35547,P01681,P02780,P02781,P02782,P04905,P07647,P08723,P0C0A9,P14669,P30120,P40241,P47727,Q4FZU2,Q5M8C6,Q6IFU8,Q6IFW6,Q6IG02,Q6IMF3,Q6P6Q2,Q8CJ52,Q9JHB9                                                  |
| 5672 | 1,3,4,6,8,1<br>1,12,15 | 2,5,7,9,10,<br>13,14,16,1<br>7 | 16 | B0BNN3,O35547,P01681,P02625,P02782,P08723,P0C0A9,P14669,P30120,P35280,Q4FZU2,Q6IFW6,Q6IG02,Q6IMF3,Q6P6Q2,Q812E4                                                                                                   |
| 5673 | 1,3,4,6,8,1<br>1,12,16 | 2,5,7,9,10,<br>13,14,15,1<br>7 | 16 | O35547,P01681,P02782,P08723,P0C0A9,P14668,P16636,P30120,Q4FZU2,Q6IFU7,Q6IFU8,Q6IFW6,Q6IG02,Q6IMF3,Q6P6Q2,Q8CJ52                                                                                                   |
| 5674 | 1,3,4,6,8,1<br>1,12,17 | 2,5,7,9,10,<br>13,14,15,1<br>6 | 29 | B0BNN3,O35547,P01681,P02781,P02782,P04905,P07150,P07647,P08723,P0C0A9,P13432,P14669,P16636,P19223,P22282,P22283,P30120,P36374,Q4FZU2,Q4G075,Q5M8C6,Q63751,Q6IFU8,Q6IFW6,Q6IG02,Q6IMF3,Q6P6Q2,Q9JHB9,Q9QZK9        |
| 5675 | 1,3,4,6,8,1<br>1,13,14 | 2,5,7,9,10,<br>12,15,16,1<br>7 | 8  | P01681,P02782,P06911,P07647,P14669,P47727,Q5GRG2,Q64093                                                                                                                                                           |
| 5676 | 1,3,4,6,8,1<br>1,13,15 | 2,5,7,9,10,<br>12,14,16,1<br>7 | 5  | B0BNN3,P02625,P14669,Q5XI22,Q64093                                                                                                                                                                                |
| 5677 | 1,3,4,6,8,1<br>1,13,16 | 2,5,7,9,10,<br>12,14,15,1<br>7 | 4  | P01681,P14668,P16636,Q8VD89                                                                                                                                                                                       |
| 5678 | 1,3,4,6,8,1<br>1,13,17 | 2,5,7,9,10,<br>12,14,15,1<br>6 | 7  | P01681,P07647,P14669,P16636,P22282,Q4G075,Q63751                                                                                                                                                                  |
| 5679 | 1,3,4,6,8,1<br>1,14,15 | 2,5,7,9,10,<br>12,13,16,1<br>7 | 6  | B0BNN3,P02625,P14669,P35280,P35434,P97840                                                                                                                                                                         |
| 5680 | 1,3,4,6,8,1<br>1,14,16 | 2,5,7,9,10,<br>12,13,15,1<br>7 | 2  | P01681,P14668                                                                                                                                                                                                     |
| 5681 | 1,3,4,6,8,1<br>1,14,17 | 2,5,7,9,10,<br>12,13,15,1<br>6 | 6  | B0BNN3,P01681,P07150,P14669,P97840,Q4G075                                                                                                                                                                         |
| 5682 | 1,3,4,6,8,1<br>1,15,16 | 2,5,7,9,10,<br>12,13,14,1<br>7 | 3  | B0BNN3,P14668,Q8VD89                                                                                                                                                                                              |
| 5683 | 1,3,4,6,8,1<br>1,15,17 | 2,5,7,9,10,<br>12,13,14,1<br>6 | 8  | B0BNN3,P01681,P14669,P17475,P20761,P97840,Q4G075,Q63751                                                                                                                                                           |
| 5684 | 1,3,4,6,8,1<br>1,16,17 | 2,5,7,9,10,<br>12,13,14,1<br>5 | 6  | P01681,P07150,P14668,P14669,P16636,Q4G075                                                                                                                                                                         |

|      |                        |                                |    |                                                                                                                                                                  |
|------|------------------------|--------------------------------|----|------------------------------------------------------------------------------------------------------------------------------------------------------------------|
| 5685 | 1,3,4,6,8,1<br>2,13,14 | 2,5,7,9,10,<br>11,15,16,1<br>7 | 23 | O08557,P01681,P02780,P02781,P02782,P06761,P06911,P07647,P08723,P0C0A9,P22282,P22283,P29975,P30120,Q5GRG2,Q5M8C6,Q62902,Q64093,Q6AYR9,Q80W57,Q923M1,Q9JHB9,Q9QUL6 |
| 5686 | 1,3,4,6,8,1<br>2,13,15 | 2,5,7,9,10,<br>11,14,16,1<br>7 | 11 | B0BNN3,O08557,P02625,P02782,P07647,P08723,P30120,P82995,Q64093,Q99MH3,Q9QUL6                                                                                     |
| 5687 | 1,3,4,6,8,1<br>2,13,16 | 2,5,7,9,10,<br>11,14,15,1<br>7 | 7  | P01681,P02782,P07647,P08723,P16636,P30120,Q9QUL6                                                                                                                 |
| 5688 | 1,3,4,6,8,1<br>2,13,17 | 2,5,7,9,10,<br>11,14,15,1<br>6 | 23 | B0BNN3,P01681,P02780,P02782,P07647,P08723,P13432,P16636,P22282,P22283,P30120,P36374,P51907,P62815,Q4G075,Q5M8C6,Q62635,Q63751,Q6AYR9,Q80W57,Q99MH3,Q9JHB9,Q9QZK9 |
| 5689 | 1,3,4,6,8,1<br>2,14,15 | 2,5,7,9,10,<br>11,13,16,1<br>7 | 9  | B0BNN3,O08557,P01681,P02625,P02782,P08723,Q4FZU2,Q64093,Q6IG02                                                                                                   |
| 5690 | 1,3,4,6,8,1<br>2,14,16 | 2,5,7,9,10,<br>11,13,15,1<br>7 | 6  | P01681,P02782,P08723,Q4FZU2,Q6IFW6,Q6IG02                                                                                                                        |
| 5691 | 1,3,4,6,8,1<br>2,14,17 | 2,5,7,9,10,<br>11,13,15,1<br>6 | 17 | B0BNN3,P01681,P01835,P02782,P08723,P13432,P16636,P20761,P22282,P30120,P31430,Q10758,Q4G075,Q5M8C6,Q6IG02,Q923M1,Q9QYU4                                           |
| 5692 | 1,3,4,6,8,1<br>2,15,16 | 2,5,7,9,10,<br>11,13,14,1<br>7 | 5  | B0BNN3,P01681,P08723,Q4FZU2,Q9QUL6                                                                                                                               |
| 5693 | 1,3,4,6,8,1<br>2,15,17 | 2,5,7,9,10,<br>11,13,14,1<br>6 | 10 | B0BNN3,P01681,P08723,P13432,P17475,P20761,Q4G075,Q63751,Q6IG02,Q99MH3                                                                                            |
| 5694 | 1,3,4,6,8,1<br>2,16,17 | 2,5,7,9,10,<br>11,13,14,1<br>5 | 8  | B0BNN3,P01681,P08723,P13432,P16636,P23593,Q4G075,Q6IG02                                                                                                          |
| 5695 | 1,3,4,6,8,1<br>3,14,15 | 2,5,7,9,10,<br>11,12,16,1<br>7 | 6  | B0BNN3,O08557,P06911,Q5GRG2,Q62687,Q64093                                                                                                                        |
| 5696 | 1,3,4,6,8,1<br>3,14,16 | 2,5,7,9,10,<br>11,12,15,1<br>7 | 2  | P06911,Q64093                                                                                                                                                    |
| 5697 | 1,3,4,6,8,1<br>3,14,17 | 2,5,7,9,10,<br>11,12,15,1<br>6 | 10 | P01681,P06911,P10536,P22282,P51907,Q62687,Q64093,Q6PCU2,Q80W57,Q9QW07                                                                                            |
| 5698 | 1,3,4,6,8,1<br>3,15,16 | 2,5,7,9,10,<br>11,12,14,1<br>7 | 2  | P82995,Q9QUL6                                                                                                                                                    |
| 5699 | 1,3,4,6,8,1<br>3,15,17 | 2,5,7,9,10,<br>11,12,14,1<br>6 | 5  | B0BNN3,P10536,P20761,Q64093,Q99MH3                                                                                                                               |



|      |                        |                                |    |                                                                                            |
|------|------------------------|--------------------------------|----|--------------------------------------------------------------------------------------------|
| 5700 | 1,3,4,6,8,1<br>3,16,17 | 2,5,7,9,10,<br>11,12,14,1<br>5 | 4  | P01681,P16636,P51907,Q6PCU2                                                                |
| 5701 | 1,3,4,6,8,1<br>4,15,16 | 2,5,7,9,10,<br>11,12,13,1<br>7 | 1  | B0BNN3                                                                                     |
| 5702 | 1,3,4,6,8,1<br>4,15,17 | 2,5,7,9,10,<br>11,12,13,1<br>6 | 6  | B0BNN3,P01681,P10536,P20761,P97840,Q64093                                                  |
| 5703 | 1,3,4,6,8,1<br>4,16,17 | 2,5,7,9,10,<br>11,12,13,1<br>5 | 2  | P01681,Q6PCU2                                                                              |
| 5704 | 1,3,4,6,8,1<br>5,16,17 | 2,5,7,9,10,<br>11,12,13,1<br>4 | 3  | B0BNN3,O70417,P23593                                                                       |
| 5705 | 1,3,4,6,9,1<br>0,11,12 | 2,5,7,8,13,<br>14,15,16,1<br>7 | 13 | P00762,P01681,P01835,P06757,P0C0A9,P16636,Q4FZU2,Q6IFU7,Q6IFU8,Q6IFW6,Q6IG02,Q6IMF3,Q6P6Q2 |
| 5706 | 1,3,4,6,9,1<br>0,11,13 | 2,5,7,8,12,<br>14,15,16,1<br>7 | 1  | P12785                                                                                     |
| 5707 | 1,3,4,6,9,1<br>0,11,14 | 2,5,7,8,12,<br>13,15,16,1<br>7 | 1  | P83121                                                                                     |
| 5708 | 1,3,4,6,9,1<br>0,11,15 | 2,5,7,8,12,<br>13,14,16,1<br>7 | 2  | P35280,Q5FVI6                                                                              |
| 5709 | 1,3,4,6,9,1<br>0,11,16 | 2,5,7,8,12,<br>13,14,15,1<br>7 | 2  | P55314,Q5FVI6                                                                              |
| 5710 | 1,3,4,6,9,1<br>0,11,17 | 2,5,7,8,12,<br>13,14,15,1<br>6 | 3  | P01681,P12785,P16636                                                                       |
| 5711 | 1,3,4,6,9,1<br>0,12,13 | 2,5,7,8,11,<br>14,15,16,1<br>7 | 2  | P16636,Q4FZU2                                                                              |
| 5712 | 1,3,4,6,9,1<br>0,12,14 | 2,5,7,8,11,<br>13,15,16,1<br>7 | 6  | P01835,Q10758,Q4FZU2,Q6IFW6,Q6IG02,Q6IMF3                                                  |
| 5713 | 1,3,4,6,9,1<br>0,12,15 | 2,5,7,8,11,<br>13,14,16,1<br>7 | 2  | B0BNN3,Q4FZU2                                                                              |
| 5714 | 1,3,4,6,9,1<br>0,12,16 | 2,5,7,8,11,<br>13,14,15,1<br>7 | 5  | P16636,Q4FZU2,Q6IFW6,Q6IG02,Q6IMF3                                                         |

|      |                        |                                |    |                                                                              |
|------|------------------------|--------------------------------|----|------------------------------------------------------------------------------|
| 5715 | 1,3,4,6,9,1<br>0,12,17 | 2,5,7,8,11,<br>13,14,15,1<br>6 | 8  | O08815,P01681,P01835,P16636,Q10758,Q4FZU2,Q6IG02,Q99MH3                      |
| 5716 | 1,3,4,6,9,1<br>0,13,14 | 2,5,7,8,11,<br>12,15,16,1<br>7 | 1  | P06911                                                                       |
| 5717 | 1,3,4,6,9,1<br>0,13,15 | 2,5,7,8,11,<br>12,14,16,1<br>7 | 0  |                                                                              |
| 5718 | 1,3,4,6,9,1<br>0,13,16 | 2,5,7,8,11,<br>12,14,15,1<br>7 | 1  | P62804                                                                       |
| 5719 | 1,3,4,6,9,1<br>0,13,17 | 2,5,7,8,11,<br>12,14,15,1<br>6 | 3  | P16636,Q63355,Q99MH3                                                         |
| 5720 | 1,3,4,6,9,1<br>0,14,15 | 2,5,7,8,11,<br>12,13,16,1<br>7 | 0  |                                                                              |
| 5721 | 1,3,4,6,9,1<br>0,14,16 | 2,5,7,8,11,<br>12,13,15,1<br>7 | 0  |                                                                              |
| 5722 | 1,3,4,6,9,1<br>0,14,17 | 2,5,7,8,11,<br>12,13,15,1<br>6 | 0  |                                                                              |
| 5723 | 1,3,4,6,9,1<br>0,15,16 | 2,5,7,8,11,<br>12,13,14,1<br>7 | 1  | O54728                                                                       |
| 5724 | 1,3,4,6,9,1<br>0,15,17 | 2,5,7,8,11,<br>12,13,14,1<br>6 | 1  | B0BNN3                                                                       |
| 5725 | 1,3,4,6,9,1<br>0,16,17 | 2,5,7,8,11,<br>12,13,14,1<br>5 | 2  | P16636,P23593                                                                |
| 5726 | 1,3,4,6,9,1<br>1,12,13 | 2,5,7,8,10,<br>14,15,16,1<br>7 | 11 | P01681,P01835,P04905,P0C0A9,P16636,P30120,P36374,Q4FZU2,Q6IFW6,Q6IG02,Q9JHB9 |
| 5727 | 1,3,4,6,9,1<br>1,12,14 | 2,5,7,8,10,<br>13,15,16,1<br>7 | 10 | P01681,P01835,P04905,P0C0A9,Q4FZU2,Q6IFU8,Q6IFW6,Q6IG02,Q6IMF3,Q6P6Q2        |
| 5728 | 1,3,4,6,9,1<br>1,12,15 | 2,5,7,8,10,<br>13,14,16,1<br>7 | 7  | B0BNN3,P01681,P01835,P02625,Q4FZU2,Q6IFW6,Q6IG02                             |
| 5729 | 1,3,4,6,9,1<br>1,12,16 | 2,5,7,8,10,<br>13,14,15,1<br>7 | 10 | P01681,P01835,P16636,Q4FZU2,Q6IFU7,Q6IFU8,Q6IFW6,Q6IG02,Q6IMF3,Q6P6Q2        |

|      |                        |                                |   |                                                                |
|------|------------------------|--------------------------------|---|----------------------------------------------------------------|
| 5730 | 1,3,4,6,9,1<br>1,12,17 | 2,5,7,8,10,<br>13,14,15,1<br>6 | 9 | P01681,P01835,P13432,P16636,Q4FZU2,Q6IFU8,Q6IFW6,Q6IG02,Q6IMF3 |
| 5731 | 1,3,4,6,9,1<br>1,13,14 | 2,5,7,8,10,<br>12,15,16,1<br>7 | 0 |                                                                |
| 5732 | 1,3,4,6,9,1<br>1,13,15 | 2,5,7,8,10,<br>12,14,16,1<br>7 | 2 | P02625,P05539                                                  |
| 5733 | 1,3,4,6,9,1<br>1,13,16 | 2,5,7,8,10,<br>12,14,15,1<br>7 | 0 |                                                                |
| 5734 | 1,3,4,6,9,1<br>1,13,17 | 2,5,7,8,10,<br>12,14,15,1<br>6 | 2 | P01681,P16636                                                  |
| 5735 | 1,3,4,6,9,1<br>1,14,15 | 2,5,7,8,10,<br>12,13,16,1<br>7 | 2 | O54728,P02625                                                  |
| 5736 | 1,3,4,6,9,1<br>1,14,16 | 2,5,7,8,10,<br>12,13,15,1<br>7 | 0 |                                                                |
| 5737 | 1,3,4,6,9,1<br>1,14,17 | 2,5,7,8,10,<br>12,13,15,1<br>6 | 2 | P01681,P01835                                                  |
| 5738 | 1,3,4,6,9,1<br>1,15,16 | 2,5,7,8,10,<br>12,13,14,1<br>7 | 1 | O54728                                                         |
| 5739 | 1,3,4,6,9,1<br>1,15,17 | 2,5,7,8,10,<br>12,13,14,1<br>6 | 2 | B0BNN3,P02625                                                  |
| 5740 | 1,3,4,6,9,1<br>1,16,17 | 2,5,7,8,10,<br>12,13,14,1<br>5 | 2 | P01681,P16636                                                  |
| 5741 | 1,3,4,6,9,1<br>2,13,14 | 2,5,7,8,10,<br>11,15,16,1<br>7 | 1 | P01835                                                         |
| 5742 | 1,3,4,6,9,1<br>2,13,15 | 2,5,7,8,10,<br>11,14,16,1<br>7 | 2 | P02625,P10758                                                  |
| 5743 | 1,3,4,6,9,1<br>2,13,16 | 2,5,7,8,10,<br>11,14,15,1<br>7 | 0 |                                                                |
| 5744 | 1,3,4,6,9,1<br>2,13,17 | 2,5,7,8,10,<br>11,14,15,1<br>6 | 6 | P01681,P01835,P13432,P16636,P36374,Q99MH3                      |

|      |                        |                                |   |                                    |
|------|------------------------|--------------------------------|---|------------------------------------|
| 5745 | 1,3,4,6,9,1<br>2,14,15 | 2,5,7,8,10,<br>11,13,16,1<br>7 | 5 | A2RUV9,B0BNN3,P01835,P02625,P10758 |
| 5746 | 1,3,4,6,9,1<br>2,14,16 | 2,5,7,8,10,<br>11,13,15,1<br>7 | 1 | P01835                             |
| 5747 | 1,3,4,6,9,1<br>2,14,17 | 2,5,7,8,10,<br>11,13,15,1<br>6 | 3 | P01681,P01835,P13432               |
| 5748 | 1,3,4,6,9,1<br>2,15,16 | 2,5,7,8,10,<br>11,13,14,1<br>7 | 0 |                                    |
| 5749 | 1,3,4,6,9,1<br>2,15,17 | 2,5,7,8,10,<br>11,13,14,1<br>6 | 4 | B0BNN3,P01681,P01835,P13432        |
| 5750 | 1,3,4,6,9,1<br>2,16,17 | 2,5,7,8,10,<br>11,13,14,1<br>5 | 5 | P01681,P01835,P13432,P16636,P23593 |
| 5751 | 1,3,4,6,9,1<br>3,14,15 | 2,5,7,8,10,<br>11,12,16,1<br>7 | 1 | P16391                             |
| 5752 | 1,3,4,6,9,1<br>3,14,16 | 2,5,7,8,10,<br>11,12,15,1<br>7 | 1 | P62804                             |
| 5753 | 1,3,4,6,9,1<br>3,14,17 | 2,5,7,8,10,<br>11,12,15,1<br>6 | 1 | Q9QW07                             |
| 5754 | 1,3,4,6,9,1<br>3,15,16 | 2,5,7,8,10,<br>11,12,14,1<br>7 | 3 | O54728,P62804,Q00715               |
| 5755 | 1,3,4,6,9,1<br>3,15,17 | 2,5,7,8,10,<br>11,12,14,1<br>6 | 2 | B0BNN3,P62804                      |
| 5756 | 1,3,4,6,9,1<br>3,16,17 | 2,5,7,8,10,<br>11,12,14,1<br>5 | 2 | P23593,P62804                      |
| 5757 | 1,3,4,6,9,1<br>4,15,16 | 2,5,7,8,10,<br>11,12,13,1<br>7 | 2 | O54728,P62804                      |
| 5758 | 1,3,4,6,9,1<br>4,15,17 | 2,5,7,8,10,<br>11,12,13,1<br>6 | 2 | B0BNN3,Q5HZV9                      |
| 5759 | 1,3,4,6,9,1<br>4,16,17 | 2,5,7,8,10,<br>11,12,13,1<br>5 | 0 |                                    |

|      |                         |                                |    |                                                                                                          |
|------|-------------------------|--------------------------------|----|----------------------------------------------------------------------------------------------------------|
| 5760 | 1,3,4,6,9,1<br>5,16,17  | 2,5,7,8,10,<br>11,12,13,1<br>4 | 3  | B0BNN3,P23593,P62804                                                                                     |
| 5761 | 1,3,4,6,10,<br>11,12,13 | 2,5,7,8,9,1<br>4,15,16,17      | 15 | P01681,P04905,P08723,P0C0A9,P16636,P30120,P36374,P47727,Q4FZU2,Q6IFU7,Q6IFW6,Q6IG02,Q6IMF3,Q6P6Q2,Q9JHB9 |
| 5762 | 1,3,4,6,10,<br>11,12,14 | 2,5,7,8,9,1<br>3,15,16,17      | 13 | P01681,P04905,P08723,P0C0A9,P47727,Q10758,Q4FZU2,Q6IFU7,Q6IFU8,Q6IFW6,Q6IG02,Q6IMF3,Q6P6Q2               |
| 5763 | 1,3,4,6,10,<br>11,12,15 | 2,5,7,8,9,1<br>3,14,16,17      | 11 | B0BNN3,P01681,P02625,P35280,Q4FZU2,Q5FVI6,Q6IFU7,Q6IFW6,Q6IG02,Q6IMF3,Q6P6Q2                             |
| 5764 | 1,3,4,6,10,<br>11,12,16 | 2,5,7,8,9,1<br>3,14,15,17      | 14 | P01681,P06757,P16636,P53792,P55314,Q10758,Q4FZU2,Q5FVI6,Q6IFU7,Q6IFU8,Q6IFW6,Q6IG02,Q6IMF3,Q6P6Q2        |
| 5765 | 1,3,4,6,10,<br>11,12,17 | 2,5,7,8,9,1<br>3,14,15,16      | 14 | O08815,P00762,P01681,P06757,P16636,Q10758,Q4FZU2,Q6IFU8,Q6IFW6,Q6IG02,Q6IMF3,Q6P6Q2,Q99MH3,Q9QZK9        |
| 5766 | 1,3,4,6,10,<br>11,13,14 | 2,5,7,8,9,1<br>2,15,16,17      | 2  | P06911,P47727                                                                                            |
| 5767 | 1,3,4,6,10,<br>11,13,15 | 2,5,7,8,9,1<br>2,14,16,17      | 0  |                                                                                                          |
| 5768 | 1,3,4,6,10,<br>11,13,16 | 2,5,7,8,9,1<br>2,14,15,17      | 2  | P55314,Q5FVI6                                                                                            |
| 5769 | 1,3,4,6,10,<br>11,13,17 | 2,5,7,8,9,1<br>2,14,15,16      | 3  | P01681,P16636,Q99MH3                                                                                     |
| 5770 | 1,3,4,6,10,<br>11,14,15 | 2,5,7,8,9,1<br>2,13,16,17      | 1  | P35280                                                                                                   |
| 5771 | 1,3,4,6,10,<br>11,14,16 | 2,5,7,8,9,1<br>2,13,15,17      | 1  | P55314                                                                                                   |
| 5772 | 1,3,4,6,10,<br>11,14,17 | 2,5,7,8,9,1<br>2,13,15,16      | 1  | P01681                                                                                                   |
| 5773 | 1,3,4,6,10,<br>11,15,16 | 2,5,7,8,9,1<br>2,13,14,17      | 2  | P55314,Q5FVI6                                                                                            |
| 5774 | 1,3,4,6,10,<br>11,15,17 | 2,5,7,8,9,1<br>2,13,14,16      | 2  | B0BNN3,P01681                                                                                            |
| 5775 | 1,3,4,6,10,<br>11,16,17 | 2,5,7,8,9,1<br>2,13,14,15      | 3  | P01681,P16636,P55314                                                                                     |
| 5776 | 1,3,4,6,10,<br>12,13,14 | 2,5,7,8,9,1<br>1,15,16,17      | 3  | P06911,Q10758,Q4FZU2                                                                                     |
| 5777 | 1,3,4,6,10,<br>12,13,15 | 2,5,7,8,9,1<br>1,14,16,17      | 4  | B0BNN3,P82995,Q4FZU2,Q99MH3                                                                              |
| 5778 | 1,3,4,6,10,<br>12,13,16 | 2,5,7,8,9,1<br>1,14,15,17      | 2  | P16636,Q4FZU2                                                                                            |
| 5779 | 1,3,4,6,10,<br>12,13,17 | 2,5,7,8,9,1<br>1,14,15,16      | 8  | P01681,P16636,P36374,Q10758,Q4FZU2,Q63355,Q99MH3,Q9QZK9                                                  |
| 5780 | 1,3,4,6,10,<br>12,14,15 | 2,5,7,8,9,1<br>1,13,16,17      | 3  | A2RUV9,B0BNN3,Q4FZU2                                                                                     |
| 5781 | 1,3,4,6,10,<br>12,14,16 | 2,5,7,8,9,1<br>1,13,15,17      | 5  | Q10758,Q4FZU2,Q6IFW6,Q6IG02,Q6IMF3                                                                       |

|      |                                                |    |                                                                              |
|------|------------------------------------------------|----|------------------------------------------------------------------------------|
| 5782 | 1,3,4,6,10, 2,5,7,8,9,1<br>12,14,17 1,13,15,16 | 8  | B0BNN3,P01681,P01835,Q10758,Q4FZU2,Q6IG02,Q6IMF3,Q99MH3                      |
| 5783 | 1,3,4,6,10, 2,5,7,8,9,1<br>12,15,16 1,13,14,17 | 3  | B0BNN3,Q4FZU2,Q6IMF3                                                         |
| 5784 | 1,3,4,6,10, 2,5,7,8,9,1<br>12,15,17 1,13,14,16 | 5  | B0BNN3,P01681,Q10758,Q4FZU2,Q99MH3                                           |
| 5785 | 1,3,4,6,10, 2,5,7,8,9,1<br>12,16,17 1,13,14,15 | 8  | P01681,P16636,Q10758,Q4FZU2,Q6IFW6,Q6IG02,Q6IMF3,Q99MH3                      |
| 5786 | 1,3,4,6,10, 2,5,7,8,9,1<br>13,14,15 1,12,16,17 | 2  | P06911,P50115                                                                |
| 5787 | 1,3,4,6,10, 2,5,7,8,9,1<br>13,14,16 1,12,15,17 | 2  | P06911,P50115                                                                |
| 5788 | 1,3,4,6,10, 2,5,7,8,9,1<br>13,14,17 1,12,15,16 | 2  | P06911,Q9QW07                                                                |
| 5789 | 1,3,4,6,10, 2,5,7,8,9,1<br>13,15,16 1,12,14,17 | 2  | P50115,P62804                                                                |
| 5790 | 1,3,4,6,10, 2,5,7,8,9,1<br>13,15,17 1,12,14,16 | 2  | B0BNN3,Q99MH3                                                                |
| 5791 | 1,3,4,6,10, 2,5,7,8,9,1<br>13,16,17 1,12,14,15 | 2  | P16636,Q99MH3                                                                |
| 5792 | 1,3,4,6,10, 2,5,7,8,9,1<br>14,15,16 1,12,13,17 | 2  | P02803,P50115                                                                |
| 5793 | 1,3,4,6,10, 2,5,7,8,9,1<br>14,15,17 1,12,13,16 | 2  | B0BNN3,P02803                                                                |
| 5794 | 1,3,4,6,10, 2,5,7,8,9,1<br>14,16,17 1,12,13,15 | 0  |                                                                              |
| 5795 | 1,3,4,6,10, 2,5,7,8,9,1<br>15,16,17 1,12,13,14 | 2  | B0BNN3,P02803                                                                |
| 5796 | 1,3,4,6,11, 2,5,7,8,9,1<br>12,13,14 0,15,16,17 | 11 | P01681,P04905,P06911,P08723,P0C0A9,P30120,P47727,Q4FZU2,Q64093,Q6IFW6,Q9JHB9 |
| 5797 | 1,3,4,6,11, 2,5,7,8,9,1<br>12,13,15 0,14,16,17 | 5  | B0BNN3,P01681,P02625,Q4FZU2,Q6IFW6                                           |
| 5798 | 1,3,4,6,11, 2,5,7,8,9,1<br>12,13,16 0,14,15,17 | 6  | P01681,P16636,Q4FZU2,Q6IFW6,Q6IMF3,Q6P6Q2                                    |
| 5799 | 1,3,4,6,11, 2,5,7,8,9,1<br>12,13,17 0,14,15,16 | 9  | P01681,P13432,P16636,P36374,Q4FZU2,Q6IFW6,Q99MH3,Q9JHB9,Q9QZK9               |
| 5800 | 1,3,4,6,11, 2,5,7,8,9,1<br>12,14,15 0,13,16,17 | 6  | B0BNN3,P01681,P02625,Q4FZU2,Q6IFW6,Q6IG02                                    |
| 5801 | 1,3,4,6,11, 2,5,7,8,9,1<br>12,14,16 0,13,15,17 | 8  | P01681,Q4FZU2,Q6IFU7,Q6IFU8,Q6IFW6,Q6IG02,Q6IMF3,Q6P6Q2                      |
| 5802 | 1,3,4,6,11, 2,5,7,8,9,1<br>12,14,17 0,13,15,16 | 10 | B0BNN3,P01681,P01835,P13432,Q4FZU2,Q6IFU8,Q6IFW6,Q6IG02,Q6IMF3,Q6P6Q2        |
| 5803 | 1,3,4,6,11, 2,5,7,8,9,1<br>12,15,16 0,13,14,17 | 8  | B0BNN3,P01681,P02625,Q4FZU2,Q6IFU7,Q6IFW6,Q6IMF3,Q6P6Q2                      |
| 5804 | 1,3,4,6,11, 2,5,7,8,9,1<br>12,15,17 0,13,14,16 | 7  | B0BNN3,P01681,P02625,P13432,Q4FZU2,Q6IFW6,Q6IG02                             |

|      |                                                |   |                                                                |
|------|------------------------------------------------|---|----------------------------------------------------------------|
| 5805 | 1,3,4,6,11, 2,5,7,8,9,1<br>12,16,17 0,13,14,15 | 9 | P01681,P13432,P16636,Q4FZU2,Q6IFU8,Q6IFW6,Q6IG02,Q6IMF3,Q6P6Q2 |
| 5806 | 1,3,4,6,11, 2,5,7,8,9,1<br>13,14,15 0,12,16,17 | 2 | P02625,Q64093                                                  |
| 5807 | 1,3,4,6,11, 2,5,7,8,9,1<br>13,14,16 0,12,15,17 | 0 |                                                                |
| 5808 | 1,3,4,6,11, 2,5,7,8,9,1<br>13,14,17 0,12,15,16 | 3 | P01681,Q64093,Q9QW07                                           |
| 5809 | 1,3,4,6,11, 2,5,7,8,9,1<br>13,15,16 0,12,14,17 | 0 |                                                                |
| 5810 | 1,3,4,6,11, 2,5,7,8,9,1<br>13,15,17 0,12,14,16 | 2 | B0BNN3,P02625                                                  |
| 5811 | 1,3,4,6,11, 2,5,7,8,9,1<br>13,16,17 0,12,14,15 | 2 | P01681,P16636                                                  |
| 5812 | 1,3,4,6,11, 2,5,7,8,9,1<br>14,15,16 0,12,13,17 | 0 |                                                                |
| 5813 | 1,3,4,6,11, 2,5,7,8,9,1<br>14,15,17 0,12,13,16 | 3 | B0BNN3,P01681,P97840                                           |
| 5814 | 1,3,4,6,11, 2,5,7,8,9,1<br>14,16,17 0,12,13,15 | 1 | P01681                                                         |
| 5815 | 1,3,4,6,11, 2,5,7,8,9,1<br>15,16,17 0,12,13,14 | 2 | B0BNN3,P01681                                                  |
| 5816 | 1,3,4,6,12, 2,5,7,8,9,1<br>13,14,15 0,11,16,17 | 5 | A2RUV9,B0BNN3,P02625,Q64093,Q9QUL6                             |
| 5817 | 1,3,4,6,12, 2,5,7,8,9,1<br>13,14,16 0,11,15,17 | 1 | Q9QUL6                                                         |
| 5818 | 1,3,4,6,12, 2,5,7,8,9,1<br>13,14,17 0,11,15,16 | 6 | P01681,P01835,P13432,Q64093,Q9QW07,Q9QZK9                      |
| 5819 | 1,3,4,6,12, 2,5,7,8,9,1<br>13,15,16 0,11,14,17 | 2 | P82995,Q9QUL6                                                  |
| 5820 | 1,3,4,6,12, 2,5,7,8,9,1<br>13,15,17 0,11,14,16 | 4 | B0BNN3,P01681,Q99MH3,Q9QZK9                                    |
| 5821 | 1,3,4,6,12, 2,5,7,8,9,1<br>13,16,17 0,11,14,15 | 5 | P01681,P13432,P16636,P27213,Q99MH3                             |
| 5822 | 1,3,4,6,12, 2,5,7,8,9,1<br>14,15,16 0,11,13,17 | 2 | B0BNN3,Q4FZU2                                                  |
| 5823 | 1,3,4,6,12, 2,5,7,8,9,1<br>14,15,17 0,11,13,16 | 5 | A2RUV9,B0BNN3,P01681,P01835,P13432                             |
| 5824 | 1,3,4,6,12, 2,5,7,8,9,1<br>14,16,17 0,11,13,15 | 4 | P01681,P01835,P13432,Q10758                                    |
| 5825 | 1,3,4,6,12, 2,5,7,8,9,1<br>15,16,17 0,11,13,14 | 3 | B0BNN3,P01681,Q4FZU2                                           |
| 5826 | 1,3,4,6,13, 2,5,7,8,9,1<br>14,15,16 0,11,12,17 | 4 | P16391,P50115,P62804,Q64093                                    |
| 5827 | 1,3,4,6,13, 2,5,7,8,9,1<br>14,15,17 0,11,12,16 | 3 | B0BNN3,Q64093,Q9QW07                                           |

|      |                         |                                 |   |                                                  |
|------|-------------------------|---------------------------------|---|--------------------------------------------------|
| 5828 | 1,3,4,6,13,<br>14,16,17 | 2,5,7,8,9,1<br>0,11,12,15       | 2 | P27213,Q9QW07                                    |
| 5829 | 1,3,4,6,13,<br>15,16,17 | 2,5,7,8,9,1<br>0,11,12,14       | 2 | B0BNN3,P62804                                    |
| 5830 | 1,3,4,6,14,<br>15,16,17 | 2,5,7,8,9,1<br>0,11,12,13       | 2 | B0BNN3,P02803                                    |
| 5831 | 1,3,4,7,8,9<br>,10,11   | 2,5,6,12,1<br>3,14,15,16<br>,17 | 6 | P00714,P18418,P35280,Q561R9,Q5FVI6,Q63617        |
| 5832 | 1,3,4,7,8,9<br>,10,12   | 2,5,6,11,1<br>3,14,15,16<br>,17 | 4 | D3ZHA0,P00714,P18418,Q6IG02                      |
| 5833 | 1,3,4,7,8,9<br>,10,13   | 2,5,6,11,1<br>2,14,15,16<br>,17 | 0 |                                                  |
| 5834 | 1,3,4,7,8,9<br>,10,14   | 2,5,6,11,1<br>2,13,15,16<br>,17 | 2 | P18418,Q63617                                    |
| 5835 | 1,3,4,7,8,9<br>,10,15   | 2,5,6,11,1<br>2,13,14,16<br>,17 | 3 | O54728,P22006,P35280                             |
| 5836 | 1,3,4,7,8,9<br>,10,16   | 2,5,6,11,1<br>2,13,14,15<br>,17 | 2 | P08721,Q5FVI6                                    |
| 5837 | 1,3,4,7,8,9<br>,10,17   | 2,5,6,11,1<br>2,13,14,15<br>,16 | 2 | P02091,P02770                                    |
| 5838 | 1,3,4,7,8,9<br>,11,12   | 2,5,6,10,1<br>3,14,15,16<br>,17 | 5 | P10715,P36374,Q63617,Q6IG02,Q8CJ52               |
| 5839 | 1,3,4,7,8,9<br>,11,13   | 2,5,6,10,1<br>2,14,15,16<br>,17 | 1 | Q63617                                           |
| 5840 | 1,3,4,7,8,9<br>,11,14   | 2,5,6,10,1<br>2,13,15,16<br>,17 | 1 | Q63617                                           |
| 5841 | 1,3,4,7,8,9<br>,11,15   | 2,5,6,10,1<br>2,13,14,16<br>,17 | 7 | O54728,P10715,P22006,P35280,Q561R9,Q5QE79,Q63617 |
| 5842 | 1,3,4,7,8,9<br>,11,16   | 2,5,6,10,1<br>2,13,14,15<br>,17 | 3 | B4F795,P10715,Q63617                             |
| 5843 | 1,3,4,7,8,9<br>,11,17   | 2,5,6,10,1<br>2,13,14,15<br>,16 | 3 | P02091,P10715,Q63617                             |



|      |                       |                                 |   |                                    |
|------|-----------------------|---------------------------------|---|------------------------------------|
| 5844 | 1,3,4,7,8,9<br>,12,13 | 2,5,6,10,1<br>1,14,15,16<br>,17 | 3 | P22283,P36374,Q8CJ52               |
| 5845 | 1,3,4,7,8,9<br>,12,14 | 2,5,6,10,1<br>1,13,15,16<br>,17 | 3 | A2RUV9,P36970,Q63617               |
| 5846 | 1,3,4,7,8,9<br>,12,15 | 2,5,6,10,1<br>1,13,14,16<br>,17 | 2 | P10715,Q5QE79                      |
| 5847 | 1,3,4,7,8,9<br>,12,16 | 2,5,6,10,1<br>1,13,14,15<br>,17 | 2 | P10715,Q4FZU6                      |
| 5848 | 1,3,4,7,8,9<br>,12,17 | 2,5,6,10,1<br>1,13,14,15<br>,16 | 5 | P02091,P10715,P19223,P36374,Q99041 |
| 5849 | 1,3,4,7,8,9<br>,13,14 | 2,5,6,10,1<br>1,12,15,16<br>,17 | 3 | P06911,P36970,Q63617               |
| 5850 | 1,3,4,7,8,9<br>,13,15 | 2,5,6,10,1<br>1,12,14,16<br>,17 | 3 | O54728,P62804,Q5QE79               |
| 5851 | 1,3,4,7,8,9<br>,13,16 | 2,5,6,10,1<br>1,12,14,15<br>,17 | 3 | B4F795,P62804,Q63617               |
| 5852 | 1,3,4,7,8,9<br>,13,17 | 2,5,6,10,1<br>1,12,14,15<br>,16 | 2 | P02091,Q63617                      |
| 5853 | 1,3,4,7,8,9<br>,14,15 | 2,5,6,10,1<br>1,12,13,16<br>,17 | 3 | O54728,P22006,Q5QE79               |
| 5854 | 1,3,4,7,8,9<br>,14,16 | 2,5,6,10,1<br>1,12,13,15<br>,17 | 3 | B4F795,Q4FZU6,Q63617               |
| 5855 | 1,3,4,7,8,9<br>,14,17 | 2,5,6,10,1<br>1,12,13,15<br>,16 | 2 | P02091,Q63617                      |
| 5856 | 1,3,4,7,8,9<br>,15,16 | 2,5,6,10,1<br>1,12,13,14<br>,17 | 4 | B4F795,O54728,P62804,Q5QE79        |
| 5857 | 1,3,4,7,8,9<br>,15,17 | 2,5,6,10,1<br>1,12,13,14<br>,16 | 2 | P02091,Q5QE79                      |
| 5858 | 1,3,4,7,8,9<br>,16,17 | 2,5,6,10,1<br>1,12,13,14<br>,15 | 4 | B4F795,P02091,Q4FZU6,Q63617        |

|      |                        |                                |    |                                                                                            |
|------|------------------------|--------------------------------|----|--------------------------------------------------------------------------------------------|
| 5859 | 1,3,4,7,8,1<br>0,11,12 | 2,5,6,9,13,<br>14,15,16,1<br>7 | 13 | P00714,P02781,P08723,P10715,P18418,P35280,P36374,Q5FVI6,Q63357,Q6IG02,Q6P6Q2,Q8CJ52,Q9ESW0 |
| 5860 | 1,3,4,7,8,1<br>0,11,13 | 2,5,6,9,12,<br>14,15,16,1<br>7 | 3  | P00714,Q5FVI6,Q8VD89                                                                       |
| 5861 | 1,3,4,7,8,1<br>0,11,14 | 2,5,6,9,12,<br>13,15,16,1<br>7 | 5  | P00714,P18418,P35280,Q5BJY9,Q5FVI6                                                         |
| 5862 | 1,3,4,7,8,1<br>0,11,15 | 2,5,6,9,12,<br>13,14,16,1<br>7 | 6  | P00714,P22006,P35280,Q561R9,Q5FVI6,Q8VD89                                                  |
| 5863 | 1,3,4,7,8,1<br>0,11,16 | 2,5,6,9,12,<br>13,14,15,1<br>7 | 4  | P00714,P08721,Q5FVI6,Q8VD89                                                                |
| 5864 | 1,3,4,7,8,1<br>0,11,17 | 2,5,6,9,12,<br>13,14,15,1<br>6 | 4  | P00714,P02091,P12346,Q5FVI6                                                                |
| 5865 | 1,3,4,7,8,1<br>0,12,13 | 2,5,6,9,11,<br>14,15,16,1<br>7 | 9  | P08723,P18418,P22283,P36374,P36970,Q8CJ52,Q99MH3,Q9QUL6,Q9R0T3                             |
| 5866 | 1,3,4,7,8,1<br>0,12,14 | 2,5,6,9,11,<br>13,15,16,1<br>7 | 6  | A2RUV9,P08723,P18418,P36970,Q6IG02,Q8CJ52                                                  |
| 5867 | 1,3,4,7,8,1<br>0,12,15 | 2,5,6,9,11,<br>13,14,16,1<br>7 | 3  | P18418,P22006,P35280                                                                       |
| 5868 | 1,3,4,7,8,1<br>0,12,16 | 2,5,6,9,11,<br>13,14,15,1<br>7 | 5  | P08721,P47967,Q5FVI6,Q6IG02,Q8CJ52                                                         |
| 5869 | 1,3,4,7,8,1<br>0,12,17 | 2,5,6,9,11,<br>13,14,15,1<br>6 | 10 | P02091,P12346,P18418,P19223,P36374,P46844,Q4G075,Q6IG02,Q99041,Q99MH3                      |
| 5870 | 1,3,4,7,8,1<br>0,13,14 | 2,5,6,9,11,<br>12,15,16,1<br>7 | 5  | P06911,P12020,P18418,P36970,Q5GRG2                                                         |
| 5871 | 1,3,4,7,8,1<br>0,13,15 | 2,5,6,9,11,<br>12,14,16,1<br>7 | 2  | P01835,P22006                                                                              |
| 5872 | 1,3,4,7,8,1<br>0,13,16 | 2,5,6,9,11,<br>12,14,15,1<br>7 | 3  | P01835,P08721,Q8VD89                                                                       |
| 5873 | 1,3,4,7,8,1<br>0,13,17 | 2,5,6,9,11,<br>12,14,15,1<br>6 | 3  | P02091,P46844,Q99MH3                                                                       |

|      |                        |                                |    |                                                                                            |
|------|------------------------|--------------------------------|----|--------------------------------------------------------------------------------------------|
| 5874 | 1,3,4,7,8,1<br>0,14,15 | 2,5,6,9,11,<br>12,13,16,1<br>7 | 2  | P22006,P35280                                                                              |
| 5875 | 1,3,4,7,8,1<br>0,14,16 | 2,5,6,9,11,<br>12,13,15,1<br>7 | 1  | P08721                                                                                     |
| 5876 | 1,3,4,7,8,1<br>0,14,17 | 2,5,6,9,11,<br>12,13,15,1<br>6 | 2  | P02091,P12346                                                                              |
| 5877 | 1,3,4,7,8,1<br>0,15,16 | 2,5,6,9,11,<br>12,13,14,1<br>7 | 4  | P01835,P08721,Q5FVI6,Q8VD89                                                                |
| 5878 | 1,3,4,7,8,1<br>0,15,17 | 2,5,6,9,11,<br>12,13,14,1<br>6 | 6  | B0BNN3,P02091,P02761,P12346,P22006,Q99MH3                                                  |
| 5879 | 1,3,4,7,8,1<br>0,16,17 | 2,5,6,9,11,<br>12,13,14,1<br>5 | 3  | P02091,P08721,P25031                                                                       |
| 5880 | 1,3,4,7,8,1<br>1,12,13 | 2,5,6,9,10,<br>14,15,16,1<br>7 | 13 | P01836,P02780,P02781,P08723,P10715,P22282,P22283,P36374,Q62902,Q6IG02,Q8CJ52,Q99041,Q9JI85 |
| 5881 | 1,3,4,7,8,1<br>1,12,14 | 2,5,6,9,10,<br>13,15,16,1<br>7 | 6  | P08723,P10715,Q63493,Q6IG02,Q8CJ52,Q9ESW0                                                  |
| 5882 | 1,3,4,7,8,1<br>1,12,15 | 2,5,6,9,10,<br>13,14,16,1<br>7 | 7  | P01836,P10715,P22006,P35280,Q6IG02,Q8CJ52,Q9ESW0                                           |
| 5883 | 1,3,4,7,8,1<br>1,12,16 | 2,5,6,9,10,<br>13,14,15,1<br>7 | 6  | P01836,P10715,Q6IG02,Q6P6Q2,Q8CJ52,Q9ESW0                                                  |
| 5884 | 1,3,4,7,8,1<br>1,12,17 | 2,5,6,9,10,<br>13,14,15,1<br>6 | 13 | P02091,P10715,P19223,P22283,P36374,Q4G075,Q63493,Q63751,Q6IG02,Q8CJ52,Q99041,Q9ESW0,Q9QZA6 |
| 5885 | 1,3,4,7,8,1<br>1,13,14 | 2,5,6,9,10,<br>12,15,16,1<br>7 | 3  | P06911,Q5GRG2,Q63617                                                                       |
| 5886 | 1,3,4,7,8,1<br>1,13,15 | 2,5,6,9,10,<br>12,14,16,1<br>7 | 2  | P22006,Q8VD89                                                                              |
| 5887 | 1,3,4,7,8,1<br>1,13,16 | 2,5,6,9,10,<br>12,14,15,1<br>7 | 3  | B4F795,Q63617,Q8VD89                                                                       |
| 5888 | 1,3,4,7,8,1<br>1,13,17 | 2,5,6,9,10,<br>12,14,15,1<br>6 | 3  | P01946,P02091,Q63617                                                                       |

|      |                        |                                |    |                                                                                                          |
|------|------------------------|--------------------------------|----|----------------------------------------------------------------------------------------------------------|
| 5889 | 1,3,4,7,8,1<br>1,14,15 | 2,5,6,9,10,<br>12,13,16,1<br>7 | 2  | P22006,P35280                                                                                            |
| 5890 | 1,3,4,7,8,1<br>1,14,16 | 2,5,6,9,10,<br>12,13,15,1<br>7 | 2  | B4F795,Q63617                                                                                            |
| 5891 | 1,3,4,7,8,1<br>1,14,17 | 2,5,6,9,10,<br>12,13,15,1<br>6 | 3  | P02091,P97840,Q63617                                                                                     |
| 5892 | 1,3,4,7,8,1<br>1,15,16 | 2,5,6,9,10,<br>12,13,14,1<br>7 | 4  | B4F795,O54728,P22006,Q8VD89                                                                              |
| 5893 | 1,3,4,7,8,1<br>1,15,17 | 2,5,6,9,10,<br>12,13,14,1<br>6 | 4  | B0BNN3,P02091,P02761,P22006                                                                              |
| 5894 | 1,3,4,7,8,1<br>1,16,17 | 2,5,6,9,10,<br>12,13,14,1<br>5 | 4  | B4F795,P02091,P10715,Q63617                                                                              |
| 5895 | 1,3,4,7,8,1<br>2,13,14 | 2,5,6,9,10,<br>11,15,16,1<br>7 | 12 | A2RUV9,O08557,P06761,P06911,P08723,P22283,P36374,P36970,Q5GRG2,Q62902,Q8CJ52,Q9QUL6                      |
| 5896 | 1,3,4,7,8,1<br>2,13,15 | 2,5,6,9,10,<br>11,14,16,1<br>7 | 3  | P36970,Q8CJ52,Q9QUL6                                                                                     |
| 5897 | 1,3,4,7,8,1<br>2,13,16 | 2,5,6,9,10,<br>11,14,15,1<br>7 | 3  | Q8CJ52,Q9QUL6,Q9R0T3                                                                                     |
| 5898 | 1,3,4,7,8,1<br>2,13,17 | 2,5,6,9,10,<br>11,14,15,1<br>6 | 15 | P01946,P02091,P06761,P11598,P19223,P22282,P22283,P36374,P55091,Q4G075,Q8CJ52,Q99041,Q99MH3,Q9QUL6,Q9QZK9 |
| 5899 | 1,3,4,7,8,1<br>2,14,15 | 2,5,6,9,10,<br>11,13,16,1<br>7 | 6  | A2RUV9,B0BNN3,O08557,P22006,P36970,Q9QUL6                                                                |
| 5900 | 1,3,4,7,8,1<br>2,14,16 | 2,5,6,9,10,<br>11,13,15,1<br>7 | 4  | P08721,Q4FZU6,Q8CJ52,Q9QUL6                                                                              |
| 5901 | 1,3,4,7,8,1<br>2,14,17 | 2,5,6,9,10,<br>11,13,15,1<br>6 | 10 | A2RUV9,P02091,P19223,P31430,P36970,Q4FZU6,Q4G075,Q8CJ52,Q99041,Q9QZA6                                    |
| 5902 | 1,3,4,7,8,1<br>2,15,16 | 2,5,6,9,10,<br>11,13,14,1<br>7 | 4  | P08721,P10715,Q62894,Q9QUL6                                                                              |
| 5903 | 1,3,4,7,8,1<br>2,15,17 | 2,5,6,9,10,<br>11,13,14,1<br>6 | 8  | B0BNN3,P02091,P10715,P19223,Q4G075,Q99041,Q99MH3,Q9QZA6                                                  |

|      |                        |                                |   |                                                  |
|------|------------------------|--------------------------------|---|--------------------------------------------------|
| 5904 | 1,3,4,7,8,1<br>2,16,17 | 2,5,6,9,10,<br>11,13,14,1<br>5 | 7 | P02091,P10715,P19223,Q4FZU6,Q4G075,Q8CJ52,Q99041 |
| 5905 | 1,3,4,7,8,1<br>3,14,15 | 2,5,6,9,10,<br>11,12,16,1<br>7 | 6 | A2RUV9,P06911,P22006,P36970,Q5GRG2,Q9QUL6        |
| 5906 | 1,3,4,7,8,1<br>3,14,16 | 2,5,6,9,10,<br>11,12,15,1<br>7 | 2 | P06911,Q9QUL6                                    |
| 5907 | 1,3,4,7,8,1<br>3,14,17 | 2,5,6,9,10,<br>11,12,15,1<br>6 | 6 | P01946,P02091,P06911,P36970,Q6IFU7,Q9QW07        |
| 5908 | 1,3,4,7,8,1<br>3,15,16 | 2,5,6,9,10,<br>11,12,14,1<br>7 | 6 | B4F795,O54728,P01835,P62804,Q8VD89,Q9QUL6        |
| 5909 | 1,3,4,7,8,1<br>3,15,17 | 2,5,6,9,10,<br>11,12,14,1<br>6 | 2 | P02091,Q6IFU7                                    |
| 5910 | 1,3,4,7,8,1<br>3,16,17 | 2,5,6,9,10,<br>11,12,14,1<br>5 | 3 | P02091,P62804,Q6PCU2                             |
| 5911 | 1,3,4,7,8,1<br>4,15,16 | 2,5,6,9,10,<br>11,12,13,1<br>7 | 4 | B4F795,O54728,P08721,P97574                      |
| 5912 | 1,3,4,7,8,1<br>4,15,17 | 2,5,6,9,10,<br>11,12,13,1<br>6 | 4 | B0BNN3,P02091,P10536,P22006                      |
| 5913 | 1,3,4,7,8,1<br>4,16,17 | 2,5,6,9,10,<br>11,12,13,1<br>5 | 2 | P02091,Q4FZU6                                    |
| 5914 | 1,3,4,7,8,1<br>5,16,17 | 2,5,6,9,10,<br>11,12,13,1<br>4 | 2 | B4F795,P02091                                    |
| 5915 | 1,3,4,7,9,1<br>0,11,12 | 2,5,6,8,13,<br>14,15,16,1<br>7 | 5 | P06757,P08753,P09527,Q5FVI6,Q6IG02               |
| 5916 | 1,3,4,7,9,1<br>0,11,13 | 2,5,6,8,12,<br>14,15,16,1<br>7 | 3 | P12785,Q5FVI6,Q62635                             |
| 5917 | 1,3,4,7,9,1<br>0,11,14 | 2,5,6,8,12,<br>13,15,16,1<br>7 | 2 | Q5FVI6,Q62635                                    |
| 5918 | 1,3,4,7,9,1<br>0,11,15 | 2,5,6,8,12,<br>13,14,16,1<br>7 | 6 | O54728,P22006,P35280,Q561R9,Q5FVI6,Q62635        |

|      |                        |                                |   |                                                         |
|------|------------------------|--------------------------------|---|---------------------------------------------------------|
| 5919 | 1,3,4,7,9,1<br>0,11,16 | 2,5,6,8,12,<br>13,14,15,1<br>7 | 2 | Q5FVI6,Q62635                                           |
| 5920 | 1,3,4,7,9,1<br>0,11,17 | 2,5,6,8,12,<br>13,14,15,1<br>6 | 3 | P02091,P12785,Q5FVI6                                    |
| 5921 | 1,3,4,7,9,1<br>0,12,13 | 2,5,6,8,11,<br>14,15,16,1<br>7 | 1 | P36374                                                  |
| 5922 | 1,3,4,7,9,1<br>0,12,14 | 2,5,6,8,11,<br>13,15,16,1<br>7 | 1 | A2RUV9                                                  |
| 5923 | 1,3,4,7,9,1<br>0,12,15 | 2,5,6,8,11,<br>13,14,16,1<br>7 | 1 | Q5FVI6                                                  |
| 5924 | 1,3,4,7,9,1<br>0,12,16 | 2,5,6,8,11,<br>13,14,15,1<br>7 | 3 | P08721,P47967,Q5FVI6                                    |
| 5925 | 1,3,4,7,9,1<br>0,12,17 | 2,5,6,8,11,<br>13,14,15,1<br>6 | 2 | P02091,P19223                                           |
| 5926 | 1,3,4,7,9,1<br>0,13,14 | 2,5,6,8,11,<br>12,15,16,1<br>7 | 1 | P06760                                                  |
| 5927 | 1,3,4,7,9,1<br>0,13,15 | 2,5,6,8,11,<br>12,14,16,1<br>7 | 5 | O54728,P06760,P62804,Q5U2V4,Q62635                      |
| 5928 | 1,3,4,7,9,1<br>0,13,16 | 2,5,6,8,11,<br>12,14,15,1<br>7 | 4 | P06760,P62804,Q00715,Q62635                             |
| 5929 | 1,3,4,7,9,1<br>0,13,17 | 2,5,6,8,11,<br>12,14,15,1<br>6 | 2 | P02091,P62804                                           |
| 5930 | 1,3,4,7,9,1<br>0,14,15 | 2,5,6,8,11,<br>12,13,16,1<br>7 | 4 | O54728,P06760,P22006,Q62635                             |
| 5931 | 1,3,4,7,9,1<br>0,14,16 | 2,5,6,8,11,<br>12,13,15,1<br>7 | 4 | P06760,P08721,P62804,Q62635                             |
| 5932 | 1,3,4,7,9,1<br>0,14,17 | 2,5,6,8,11,<br>12,13,15,1<br>6 | 1 | P02091                                                  |
| 5933 | 1,3,4,7,9,1<br>0,15,16 | 2,5,6,8,11,<br>12,13,14,1<br>7 | 8 | O54728,P02782,P06760,P62804,Q00715,Q5FVI6,Q62635,Q9Z1F2 |

|      |                        |                                |   |                                           |
|------|------------------------|--------------------------------|---|-------------------------------------------|
| 5934 | 1,3,4,7,9,1<br>0,15,17 | 2,5,6,8,11,<br>12,13,14,1<br>6 | 1 | P02091                                    |
| 5935 | 1,3,4,7,9,1<br>0,16,17 | 2,5,6,8,11,<br>12,13,14,1<br>5 | 2 | P02091,P62804                             |
| 5936 | 1,3,4,7,9,1<br>1,12,13 | 2,5,6,8,10,<br>14,15,16,1<br>7 | 3 | P01836,P05539,P36374                      |
| 5937 | 1,3,4,7,9,1<br>1,12,14 | 2,5,6,8,10,<br>13,15,16,1<br>7 | 0 |                                           |
| 5938 | 1,3,4,7,9,1<br>1,12,15 | 2,5,6,8,10,<br>13,14,16,1<br>7 | 4 | O54728,P01836,P22006,P51907               |
| 5939 | 1,3,4,7,9,1<br>1,12,16 | 2,5,6,8,10,<br>13,14,15,1<br>7 | 1 | P01836                                    |
| 5940 | 1,3,4,7,9,1<br>1,12,17 | 2,5,6,8,10,<br>13,14,15,1<br>6 | 3 | P02091,P19223,P36374                      |
| 5941 | 1,3,4,7,9,1<br>1,13,14 | 2,5,6,8,10,<br>12,15,16,1<br>7 | 2 | P05539,P06760                             |
| 5942 | 1,3,4,7,9,1<br>1,13,15 | 2,5,6,8,10,<br>12,14,16,1<br>7 | 6 | O54728,P05539,P06760,P22006,Q561R9,Q62635 |
| 5943 | 1,3,4,7,9,1<br>1,13,16 | 2,5,6,8,10,<br>12,14,15,1<br>7 | 3 | P06760,P62804,Q62635                      |
| 5944 | 1,3,4,7,9,1<br>1,13,17 | 2,5,6,8,10,<br>12,14,15,1<br>6 | 2 | P02091,P05539                             |
| 5945 | 1,3,4,7,9,1<br>1,14,15 | 2,5,6,8,10,<br>12,13,16,1<br>7 | 4 | O54728,P06760,P22006,Q62635               |
| 5946 | 1,3,4,7,9,1<br>1,14,16 | 2,5,6,8,10,<br>12,13,15,1<br>7 | 2 | P06760,Q62635                             |
| 5947 | 1,3,4,7,9,1<br>1,14,17 | 2,5,6,8,10,<br>12,13,15,1<br>6 | 1 | P02091                                    |
| 5948 | 1,3,4,7,9,1<br>1,15,16 | 2,5,6,8,10,<br>12,13,14,1<br>7 | 5 | B4F795,O54728,P06760,P22006,Q62635        |

|      |                        |                                |   |                             |
|------|------------------------|--------------------------------|---|-----------------------------|
| 5949 | 1,3,4,7,9,1<br>1,15,17 | 2,5,6,8,10,<br>12,13,14,1<br>6 | 3 | O54728,P02091,P22006        |
| 5950 | 1,3,4,7,9,1<br>1,16,17 | 2,5,6,8,10,<br>12,13,14,1<br>5 | 1 | P02091                      |
| 5951 | 1,3,4,7,9,1<br>2,13,14 | 2,5,6,8,10,<br>11,15,16,1<br>7 | 2 | A2RUV9,P06760               |
| 5952 | 1,3,4,7,9,1<br>2,13,15 | 2,5,6,8,10,<br>11,14,16,1<br>7 | 3 | O54728,P06760,P10758        |
| 5953 | 1,3,4,7,9,1<br>2,13,16 | 2,5,6,8,10,<br>11,14,15,1<br>7 | 2 | P06760,P62804               |
| 5954 | 1,3,4,7,9,1<br>2,13,17 | 2,5,6,8,10,<br>11,14,15,1<br>6 | 2 | P02091,P36374               |
| 5955 | 1,3,4,7,9,1<br>2,14,15 | 2,5,6,8,10,<br>11,13,16,1<br>7 | 4 | A2RUV9,O54728,P06760,P10758 |
| 5956 | 1,3,4,7,9,1<br>2,14,16 | 2,5,6,8,10,<br>11,13,15,1<br>7 | 2 | P06760,Q4FZU6               |
| 5957 | 1,3,4,7,9,1<br>2,14,17 | 2,5,6,8,10,<br>11,13,15,1<br>6 | 2 | A2RUV9,P02091               |
| 5958 | 1,3,4,7,9,1<br>2,15,16 | 2,5,6,8,10,<br>11,13,14,1<br>7 | 3 | O54728,P06760,P62804        |
| 5959 | 1,3,4,7,9,1<br>2,15,17 | 2,5,6,8,10,<br>11,13,14,1<br>6 | 1 | P02091                      |
| 5960 | 1,3,4,7,9,1<br>2,16,17 | 2,5,6,8,10,<br>11,13,14,1<br>5 | 1 | P02091                      |
| 5961 | 1,3,4,7,9,1<br>3,14,15 | 2,5,6,8,10,<br>11,12,16,1<br>7 | 4 | A2RUV9,O54728,P06760,P62804 |
| 5962 | 1,3,4,7,9,1<br>3,14,16 | 2,5,6,8,10,<br>11,12,15,1<br>7 | 4 | P06760,P62804,Q00715,Q62635 |
| 5963 | 1,3,4,7,9,1<br>3,14,17 | 2,5,6,8,10,<br>11,12,15,1<br>6 | 3 | P02091,P62804,Q9QW07        |



|      |                         |                                |   |                                                         |
|------|-------------------------|--------------------------------|---|---------------------------------------------------------|
| 5964 | 1,3,4,7,9,1<br>3,15,16  | 2,5,6,8,10,<br>11,12,14,1<br>7 | 5 | O54728,P06760,P62804,Q00715,Q62635                      |
| 5965 | 1,3,4,7,9,1<br>3,15,17  | 2,5,6,8,10,<br>11,12,14,1<br>6 | 3 | O54728,P02091,P62804                                    |
| 5966 | 1,3,4,7,9,1<br>3,16,17  | 2,5,6,8,10,<br>11,12,14,1<br>5 | 3 | P02091,P62804,Q00715                                    |
| 5967 | 1,3,4,7,9,1<br>4,15,16  | 2,5,6,8,10,<br>11,12,13,1<br>7 | 5 | O54728,P06760,P62804,Q62635,Q9QZK9                      |
| 5968 | 1,3,4,7,9,1<br>4,15,17  | 2,5,6,8,10,<br>11,12,13,1<br>6 | 2 | O54728,P02091                                           |
| 5969 | 1,3,4,7,9,1<br>4,16,17  | 2,5,6,8,10,<br>11,12,13,1<br>5 | 3 | P02091,P62804,Q4FZU6                                    |
| 5970 | 1,3,4,7,9,1<br>5,16,17  | 2,5,6,8,10,<br>11,12,13,1<br>4 | 4 | O54728,P02091,P47727,P62804                             |
| 5971 | 1,3,4,7,10,<br>11,12,13 | 2,5,6,8,9,1<br>4,15,16,17      | 4 | P01836,P36374,Q5FVI6,Q63942                             |
| 5972 | 1,3,4,7,10,<br>11,12,14 | 2,5,6,8,9,1<br>3,15,16,17      | 2 | Q5FVI6,Q6IG02                                           |
| 5973 | 1,3,4,7,10,<br>11,12,15 | 2,5,6,8,9,1<br>3,14,16,17      | 5 | P01836,P22006,P35280,P51907,Q5FVI6                      |
| 5974 | 1,3,4,7,10,<br>11,12,16 | 2,5,6,8,9,1<br>3,14,15,17      | 8 | P01836,P06757,P08721,P47967,P53792,Q5FVI6,Q6IG02,Q6P6Q2 |
| 5975 | 1,3,4,7,10,<br>11,12,17 | 2,5,6,8,9,1<br>3,14,15,16      | 7 | O08815,P02091,P06757,P36374,Q5FVI6,Q63942,Q6IG02        |
| 5976 | 1,3,4,7,10,<br>11,13,14 | 2,5,6,8,9,1<br>2,15,16,17      | 0 |                                                         |
| 5977 | 1,3,4,7,10,<br>11,13,15 | 2,5,6,8,9,1<br>2,14,16,17      | 4 | P22006,Q561R9,Q5FVI6,Q8VD89                             |
| 5978 | 1,3,4,7,10,<br>11,13,16 | 2,5,6,8,9,1<br>2,14,15,17      | 2 | Q5FVI6,Q8VD89                                           |
| 5979 | 1,3,4,7,10,<br>11,13,17 | 2,5,6,8,9,1<br>2,14,15,16      | 1 | P02091                                                  |
| 5980 | 1,3,4,7,10,<br>11,14,15 | 2,5,6,8,9,1<br>2,13,16,17      | 4 | P22006,P35280,Q5FVI6,Q62635                             |
| 5981 | 1,3,4,7,10,<br>11,14,16 | 2,5,6,8,9,1<br>2,13,15,17      | 2 | Q5FVI6,Q62635                                           |
| 5982 | 1,3,4,7,10,<br>11,14,17 | 2,5,6,8,9,1<br>2,13,15,16      | 1 | P02091                                                  |

|      |                                                |   |                                                  |
|------|------------------------------------------------|---|--------------------------------------------------|
| 5983 | 1,3,4,7,10, 2,5,6,8,9,1<br>11,15,16 2,13,14,17 | 7 | O54728,P22006,Q561R9,Q5FVI6,Q62635,Q8VD89,Q9Z1F2 |
| 5984 | 1,3,4,7,10, 2,5,6,8,9,1<br>11,15,17 2,13,14,16 | 5 | O35077,P02091,P22006,Q5FVI6,Q9Z1F2               |
| 5985 | 1,3,4,7,10, 2,5,6,8,9,1<br>11,16,17 2,13,14,15 | 3 | P02091,Q5FVI6,Q9Z1F2                             |
| 5986 | 1,3,4,7,10, 2,5,6,8,9,1<br>12,13,14 1,15,16,17 | 1 | A2RUV9                                           |
| 5987 | 1,3,4,7,10, 2,5,6,8,9,1<br>12,13,15 1,14,16,17 | 2 | Q99MH3,Q9QUL6                                    |
| 5988 | 1,3,4,7,10, 2,5,6,8,9,1<br>12,13,16 1,14,15,17 | 2 | P47967,Q9QUL6                                    |
| 5989 | 1,3,4,7,10, 2,5,6,8,9,1<br>12,13,17 1,14,15,16 | 5 | P02091,P36374,Q63942,Q99MH3,Q9QZK9               |
| 5990 | 1,3,4,7,10, 2,5,6,8,9,1<br>12,14,15 1,13,16,17 | 2 | A2RUV9,P22006                                    |
| 5991 | 1,3,4,7,10, 2,5,6,8,9,1<br>12,14,16 1,13,15,17 | 1 | P08721                                           |
| 5992 | 1,3,4,7,10, 2,5,6,8,9,1<br>12,14,17 1,13,15,16 | 3 | A2RUV9,P02091,P31430                             |
| 5993 | 1,3,4,7,10, 2,5,6,8,9,1<br>12,15,16 1,13,14,17 | 2 | P08721,Q5FVI6                                    |
| 5994 | 1,3,4,7,10, 2,5,6,8,9,1<br>12,15,17 1,13,14,16 | 3 | B0BNN3,P02091,Q99MH3                             |
| 5995 | 1,3,4,7,10, 2,5,6,8,9,1<br>12,16,17 1,13,14,15 | 2 | P02091,P08721                                    |
| 5996 | 1,3,4,7,10, 2,5,6,8,9,1<br>13,14,15 1,12,16,17 | 3 | A2RUV9,P06760,P22006                             |
| 5997 | 1,3,4,7,10, 2,5,6,8,9,1<br>13,14,16 1,12,15,17 | 2 | P06760,P62804                                    |
| 5998 | 1,3,4,7,10, 2,5,6,8,9,1<br>13,14,17 1,12,15,16 | 2 | P02091,Q9QW07                                    |
| 5999 | 1,3,4,7,10, 2,5,6,8,9,1<br>13,15,16 1,12,14,17 | 7 | O54728,P01835,P06760,P62804,Q5FVI6,Q62635,Q8VD89 |
| 6000 | 1,3,4,7,10, 2,5,6,8,9,1<br>13,15,17 1,12,14,16 | 2 | P02091,Q99MH3                                    |
| 6001 | 1,3,4,7,10, 2,5,6,8,9,1<br>13,16,17 1,12,14,15 | 2 | P02091,P62804                                    |
| 6002 | 1,3,4,7,10, 2,5,6,8,9,1<br>14,15,16 1,12,13,17 | 5 | O54728,P06760,P08721,Q5FVI6,Q62635               |
| 6003 | 1,3,4,7,10, 2,5,6,8,9,1<br>14,15,17 1,12,13,16 | 2 | P02091,P22006                                    |
| 6004 | 1,3,4,7,10, 2,5,6,8,9,1<br>14,16,17 1,12,13,15 | 2 | P02091,P08721                                    |
| 6005 | 1,3,4,7,10, 2,5,6,8,9,1<br>15,16,17 1,12,13,14 | 5 | P02091,P02782,P62804,Q5FVI6,Q9Z1F2               |

|      |                                                |   |                                           |
|------|------------------------------------------------|---|-------------------------------------------|
| 6006 | 1,3,4,7,11, 2,5,6,8,9,1<br>12,13,14 0,15,16,17 | 3 | A2RUV9,P01836,P36374                      |
| 6007 | 1,3,4,7,11, 2,5,6,8,9,1<br>12,13,15 0,14,16,17 | 4 | P01836,P05539,P22006,Q6P6R2               |
| 6008 | 1,3,4,7,11, 2,5,6,8,9,1<br>12,13,16 0,14,15,17 | 2 | P01836,P17046                             |
| 6009 | 1,3,4,7,11, 2,5,6,8,9,1<br>12,13,17 0,14,15,16 | 5 | P01946,P02091,P36374,Q63942,Q9QZK9        |
| 6010 | 1,3,4,7,11, 2,5,6,8,9,1<br>12,14,15 0,13,16,17 | 3 | A2RUV9,P01836,P22006                      |
| 6011 | 1,3,4,7,11, 2,5,6,8,9,1<br>12,14,16 0,13,15,17 | 1 | P01836                                    |
| 6012 | 1,3,4,7,11, 2,5,6,8,9,1<br>12,14,17 0,13,15,16 | 3 | P02091,Q63942,Q9ESW0                      |
| 6013 | 1,3,4,7,11, 2,5,6,8,9,1<br>12,15,16 0,13,14,17 | 3 | P01836,P22006,P51907                      |
| 6014 | 1,3,4,7,11, 2,5,6,8,9,1<br>12,15,17 0,13,14,16 | 5 | B0BNN3,P02091,P22006,Q63942,Q9ESW0        |
| 6015 | 1,3,4,7,11, 2,5,6,8,9,1<br>12,16,17 0,13,14,15 | 1 | P02091                                    |
| 6016 | 1,3,4,7,11, 2,5,6,8,9,1<br>13,14,15 0,12,16,17 | 6 | O54728,P05539,P06760,P22006,Q09030,Q6P6R2 |
| 6017 | 1,3,4,7,11, 2,5,6,8,9,1<br>13,14,16 0,12,15,17 | 1 | P06760                                    |
| 6018 | 1,3,4,7,11, 2,5,6,8,9,1<br>13,14,17 0,12,15,16 | 3 | P01946,P02091,Q9QW07                      |
| 6019 | 1,3,4,7,11, 2,5,6,8,9,1<br>13,15,16 0,12,14,17 | 5 | O54728,P01836,P06760,P62804,Q8VD89        |
| 6020 | 1,3,4,7,11, 2,5,6,8,9,1<br>13,15,17 0,12,14,16 | 3 | P02091,P05539,P22006                      |
| 6021 | 1,3,4,7,11, 2,5,6,8,9,1<br>13,16,17 0,12,14,15 | 2 | P01946,P02091                             |
| 6022 | 1,3,4,7,11, 2,5,6,8,9,1<br>14,15,16 0,12,13,17 | 5 | B4F795,O54728,P06760,P22006,Q62635        |
| 6023 | 1,3,4,7,11, 2,5,6,8,9,1<br>14,15,17 0,12,13,16 | 2 | P02091,P22006                             |
| 6024 | 1,3,4,7,11, 2,5,6,8,9,1<br>14,16,17 0,12,13,15 | 1 | P02091                                    |
| 6025 | 1,3,4,7,11, 2,5,6,8,9,1<br>15,16,17 0,12,13,14 | 1 | P02091                                    |
| 6026 | 1,3,4,7,12, 2,5,6,8,9,1<br>13,14,15 0,11,16,17 | 3 | A2RUV9,P06760,Q9QUL6                      |
| 6027 | 1,3,4,7,12, 2,5,6,8,9,1<br>13,14,16 0,11,15,17 | 3 | A2RUV9,P06760,Q9QUL6                      |
| 6028 | 1,3,4,7,12, 2,5,6,8,9,1<br>13,14,17 0,11,15,16 | 5 | A2RUV9,P02091,P31430,P36374,Q9QW07        |

|      |                                                    |   |                                    |
|------|----------------------------------------------------|---|------------------------------------|
| 6029 | 1,3,4,7,12, 2,5,6,8,9,1<br>13,15,16 0,11,14,17     | 4 | P01836,P06760,P62804,Q9QUL6        |
| 6030 | 1,3,4,7,12, 2,5,6,8,9,1<br>13,15,17 0,11,14,16     | 3 | P02091,Q99MH3,Q9QUL6               |
| 6031 | 1,3,4,7,12, 2,5,6,8,9,1<br>13,16,17 0,11,14,15     | 2 | P02091,Q9QUL6                      |
| 6032 | 1,3,4,7,12, 2,5,6,8,9,1<br>14,15,16 0,11,13,17     | 3 | A2RUV9,P06760,Q9QUL6               |
| 6033 | 1,3,4,7,12, 2,5,6,8,9,1<br>14,15,17 0,11,13,16     | 3 | A2RUV9,B0BNN3,P02091               |
| 6034 | 1,3,4,7,12, 2,5,6,8,9,1<br>14,16,17 0,11,13,15     | 3 | P02091,P31430,Q4FZU6               |
| 6035 | 1,3,4,7,12, 2,5,6,8,9,1<br>15,16,17 0,11,13,14     | 1 | P02091                             |
| 6036 | 1,3,4,7,13, 2,5,6,8,9,1<br>14,15,16 0,11,12,17     | 5 | O54728,P06760,P62804,Q09030,Q9QUL6 |
| 6037 | 1,3,4,7,13, 2,5,6,8,9,1<br>14,15,17 0,11,12,16     | 3 | A2RUV9,P02091,Q9QW07               |
| 6038 | 1,3,4,7,13, 2,5,6,8,9,1<br>14,16,17 0,11,12,15     | 3 | P02091,P62804,Q9QW07               |
| 6039 | 1,3,4,7,13, 2,5,6,8,9,1<br>15,16,17 0,11,12,14     | 2 | P02091,P62804                      |
| 6040 | 1,3,4,7,14, 2,5,6,8,9,1<br>15,16,17 0,11,12,13     | 3 | P02091,P02803,P62804               |
| 6041 | 1,3,4,8,9,1 2,5,6,7,13,<br>0,11,12 14,15,16,1<br>7 | 5 | P00714,P16636,P35467,Q6IG02,Q6P6Q2 |
| 6042 | 1,3,4,8,9,1 2,5,6,7,12,<br>0,11,13 14,15,16,1<br>7 | 3 | P35467,P83748,Q561R9               |
| 6043 | 1,3,4,8,9,1 2,5,6,7,12,<br>0,11,14 13,15,16,1<br>7 | 1 | P83748                             |
| 6044 | 1,3,4,8,9,1 2,5,6,7,12,<br>0,11,15 13,14,16,1<br>7 | 3 | O54728,P35280,Q561R9               |
| 6045 | 1,3,4,8,9,1 2,5,6,7,12,<br>0,11,16 13,14,15,1<br>7 | 3 | P83748,Q62635,Q9WUW8               |
| 6046 | 1,3,4,8,9,1 2,5,6,7,12,<br>0,11,17 13,14,15,1<br>6 | 3 | P16636,P35467,P83748               |
| 6047 | 1,3,4,8,9,1 2,5,6,7,11,<br>0,12,13 14,15,16,1<br>7 | 3 | P10758,P16636,Q6IG02               |

|      |                        |                                |   |                                    |
|------|------------------------|--------------------------------|---|------------------------------------|
| 6048 | 1,3,4,8,9,1<br>0,12,14 | 2,5,6,7,11,<br>13,15,16,1<br>7 | 2 | P10758,Q6IG02                      |
| 6049 | 1,3,4,8,9,1<br>0,12,15 | 2,5,6,7,11,<br>13,14,16,1<br>7 | 2 | P10758,Q6IG02                      |
| 6050 | 1,3,4,8,9,1<br>0,12,16 | 2,5,6,7,11,<br>13,14,15,1<br>7 | 4 | P08721,P16636,Q6IG02,Q9WUW8        |
| 6051 | 1,3,4,8,9,1<br>0,12,17 | 2,5,6,7,11,<br>13,14,15,1<br>6 | 3 | P16636,P19223,Q6IG02               |
| 6052 | 1,3,4,8,9,1<br>0,13,14 | 2,5,6,7,11,<br>12,15,16,1<br>7 | 0 |                                    |
| 6053 | 1,3,4,8,9,1<br>0,13,15 | 2,5,6,7,11,<br>12,14,16,1<br>7 | 1 | O54728                             |
| 6054 | 1,3,4,8,9,1<br>0,13,16 | 2,5,6,7,11,<br>12,14,15,1<br>7 | 0 |                                    |
| 6055 | 1,3,4,8,9,1<br>0,13,17 | 2,5,6,7,11,<br>12,14,15,1<br>6 | 2 | P16636,Q63532                      |
| 6056 | 1,3,4,8,9,1<br>0,14,15 | 2,5,6,7,11,<br>12,13,16,1<br>7 | 1 | O54728                             |
| 6057 | 1,3,4,8,9,1<br>0,14,16 | 2,5,6,7,11,<br>12,13,15,1<br>7 | 2 | P08721,Q62635                      |
| 6058 | 1,3,4,8,9,1<br>0,14,17 | 2,5,6,7,11,<br>12,13,15,1<br>6 | 0 |                                    |
| 6059 | 1,3,4,8,9,1<br>0,15,16 | 2,5,6,7,11,<br>12,13,14,1<br>7 | 4 | O54728,Q5QE79,Q62635,Q9QZK9        |
| 6060 | 1,3,4,8,9,1<br>0,15,17 | 2,5,6,7,11,<br>12,13,14,1<br>6 | 2 | B0BNN3,Q5QE79                      |
| 6061 | 1,3,4,8,9,1<br>0,16,17 | 2,5,6,7,11,<br>12,13,14,1<br>5 | 2 | P16636,P25031                      |
| 6062 | 1,3,4,8,9,1<br>1,12,13 | 2,5,6,7,10,<br>14,15,16,1<br>7 | 5 | P10758,P16636,P35467,P36374,Q6IG02 |

|      |                        |                                |   |                                           |
|------|------------------------|--------------------------------|---|-------------------------------------------|
| 6063 | 1,3,4,8,9,1<br>1,12,14 | 2,5,6,7,10,<br>13,15,16,1<br>7 | 2 | P10758,Q6IG02                             |
| 6064 | 1,3,4,8,9,1<br>1,12,15 | 2,5,6,7,10,<br>13,14,16,1<br>7 | 3 | P10758,Q5QE79,Q6IG02                      |
| 6065 | 1,3,4,8,9,1<br>1,12,16 | 2,5,6,7,10,<br>13,14,15,1<br>7 | 1 | Q6IG02                                    |
| 6066 | 1,3,4,8,9,1<br>1,12,17 | 2,5,6,7,10,<br>13,14,15,1<br>6 | 4 | P16636,P19223,P36374,Q6IG02               |
| 6067 | 1,3,4,8,9,1<br>1,13,14 | 2,5,6,7,10,<br>12,15,16,1<br>7 | 2 | P83748,P97840                             |
| 6068 | 1,3,4,8,9,1<br>1,13,15 | 2,5,6,7,10,<br>12,14,16,1<br>7 | 4 | O54728,P97840,Q561R9,Q5QE79               |
| 6069 | 1,3,4,8,9,1<br>1,13,16 | 2,5,6,7,10,<br>12,14,15,1<br>7 | 2 | B4F795,P83748                             |
| 6070 | 1,3,4,8,9,1<br>1,13,17 | 2,5,6,7,10,<br>12,14,15,1<br>6 | 5 | P16636,P35467,P83748,P97840,Q63532        |
| 6071 | 1,3,4,8,9,1<br>1,14,15 | 2,5,6,7,10,<br>12,13,16,1<br>7 | 3 | O54728,P97840,Q5QE79                      |
| 6072 | 1,3,4,8,9,1<br>1,14,16 | 2,5,6,7,10,<br>12,13,15,1<br>7 | 3 | B4F795,P83748,Q9QZK9                      |
| 6073 | 1,3,4,8,9,1<br>1,14,17 | 2,5,6,7,10,<br>12,13,15,1<br>6 | 3 | P19218,P83748,P97840                      |
| 6074 | 1,3,4,8,9,1<br>1,15,16 | 2,5,6,7,10,<br>12,13,14,1<br>7 | 6 | B4F795,O54728,Q561R9,Q5QE79,Q62635,Q9QZK9 |
| 6075 | 1,3,4,8,9,1<br>1,15,17 | 2,5,6,7,10,<br>12,13,14,1<br>6 | 5 | B0BNN3,P83748,P97840,Q5QE79,Q63532        |
| 6076 | 1,3,4,8,9,1<br>1,16,17 | 2,5,6,7,10,<br>12,13,14,1<br>5 | 3 | B4F795,P16636,P83748                      |
| 6077 | 1,3,4,8,9,1<br>2,13,14 | 2,5,6,7,10,<br>11,15,16,1<br>7 | 3 | P10758,P36970,Q9QUL6                      |

|      |                        |                                |   |                             |
|------|------------------------|--------------------------------|---|-----------------------------|
| 6078 | 1,3,4,8,9,1<br>2,13,15 | 2,5,6,7,10,<br>11,14,16,1<br>7 | 3 | P10758,Q5QE79,Q9QUL6        |
| 6079 | 1,3,4,8,9,1<br>2,13,16 | 2,5,6,7,10,<br>11,14,15,1<br>7 | 1 | Q9QUL6                      |
| 6080 | 1,3,4,8,9,1<br>2,13,17 | 2,5,6,7,10,<br>11,14,15,1<br>6 | 2 | P16636,P36374               |
| 6081 | 1,3,4,8,9,1<br>2,14,15 | 2,5,6,7,10,<br>11,13,16,1<br>7 | 4 | A2RUV9,B0BNN3,P10758,Q5QE79 |
| 6082 | 1,3,4,8,9,1<br>2,14,16 | 2,5,6,7,10,<br>11,13,15,1<br>7 | 0 |                             |
| 6083 | 1,3,4,8,9,1<br>2,14,17 | 2,5,6,7,10,<br>11,13,15,1<br>6 | 1 | P31430                      |
| 6084 | 1,3,4,8,9,1<br>2,15,16 | 2,5,6,7,10,<br>11,13,14,1<br>7 | 4 | O54728,Q5QE79,Q62894,Q9QUL6 |
| 6085 | 1,3,4,8,9,1<br>2,15,17 | 2,5,6,7,10,<br>11,13,14,1<br>6 | 2 | B0BNN3,Q5QE79               |
| 6086 | 1,3,4,8,9,1<br>2,16,17 | 2,5,6,7,10,<br>11,13,14,1<br>5 | 1 | P16636                      |
| 6087 | 1,3,4,8,9,1<br>3,14,15 | 2,5,6,7,10,<br>11,12,16,1<br>7 | 2 | O54728,Q5QE79               |
| 6088 | 1,3,4,8,9,1<br>3,14,16 | 2,5,6,7,10,<br>11,12,15,1<br>7 | 0 |                             |
| 6089 | 1,3,4,8,9,1<br>3,14,17 | 2,5,6,7,10,<br>11,12,15,1<br>6 | 2 | P97840,Q9QW07               |
| 6090 | 1,3,4,8,9,1<br>3,15,16 | 2,5,6,7,10,<br>11,12,14,1<br>7 | 4 | O54728,P62804,Q5QE79,Q9QUL6 |
| 6091 | 1,3,4,8,9,1<br>3,15,17 | 2,5,6,7,10,<br>11,12,14,1<br>6 | 3 | P97840,Q5QE79,Q63532        |
| 6092 | 1,3,4,8,9,1<br>3,16,17 | 2,5,6,7,10,<br>11,12,14,1<br>5 | 1 | P62804                      |

|      |                         |                                |   |                                                         |
|------|-------------------------|--------------------------------|---|---------------------------------------------------------|
| 6093 | 1,3,4,8,9,1<br>4,15,16  | 2,5,6,7,10,<br>11,12,13,1<br>7 | 5 | B4F795,O54728,Q5QE79,Q62635,Q9QZK9                      |
| 6094 | 1,3,4,8,9,1<br>4,15,17  | 2,5,6,7,10,<br>11,12,13,1<br>6 | 4 | B0BNN3,P47967,P97840,Q5QE79                             |
| 6095 | 1,3,4,8,9,1<br>4,16,17  | 2,5,6,7,10,<br>11,12,13,1<br>5 | 0 |                                                         |
| 6096 | 1,3,4,8,9,1<br>5,16,17  | 2,5,6,7,10,<br>11,12,13,1<br>4 | 4 | B4F795,O54728,P47727,Q5QE79                             |
| 6097 | 1,3,4,8,10,<br>11,12,13 | 2,5,6,7,9,1<br>4,15,16,17      | 4 | P16636,P36374,Q6IG02,Q6P6Q2                             |
| 6098 | 1,3,4,8,10,<br>11,12,14 | 2,5,6,7,9,1<br>3,15,16,17      | 3 | P53792,Q6IG02,Q6P6Q2                                    |
| 6099 | 1,3,4,8,10,<br>11,12,15 | 2,5,6,7,9,1<br>3,14,16,17      | 8 | B0BNN3,P10758,P35280,P53792,Q4FZU2,Q561R9,Q6IG02,Q6P6Q2 |
| 6100 | 1,3,4,8,10,<br>11,12,16 | 2,5,6,7,9,1<br>3,14,15,17      | 7 | P08721,P16636,P53792,Q6IFW6,Q6IG02,Q6P6Q2,Q9WUW8        |
| 6101 | 1,3,4,8,10,<br>11,12,17 | 2,5,6,7,9,1<br>3,14,15,16      | 7 | P06757,P16636,P19223,P36374,P53792,Q6IG02,Q6P6Q2        |
| 6102 | 1,3,4,8,10,<br>11,13,14 | 2,5,6,7,9,1<br>2,15,16,17      | 1 | P83748                                                  |
| 6103 | 1,3,4,8,10,<br>11,13,15 | 2,5,6,7,9,1<br>2,14,16,17      | 1 | Q561R9                                                  |
| 6104 | 1,3,4,8,10,<br>11,13,16 | 2,5,6,7,9,1<br>2,14,15,17      | 0 |                                                         |
| 6105 | 1,3,4,8,10,<br>11,13,17 | 2,5,6,7,9,1<br>2,14,15,16      | 2 | P16636,P83748                                           |
| 6106 | 1,3,4,8,10,<br>11,14,15 | 2,5,6,7,9,1<br>2,13,16,17      | 2 | P35280,Q64194                                           |
| 6107 | 1,3,4,8,10,<br>11,14,16 | 2,5,6,7,9,1<br>2,13,15,17      | 3 | P08721,P53792,P83748                                    |
| 6108 | 1,3,4,8,10,<br>11,14,17 | 2,5,6,7,9,1<br>2,13,15,16      | 2 | P19218,P83748                                           |
| 6109 | 1,3,4,8,10,<br>11,15,16 | 2,5,6,7,9,1<br>2,13,14,17      | 2 | P53792,Q561R9                                           |
| 6110 | 1,3,4,8,10,<br>11,15,17 | 2,5,6,7,9,1<br>2,13,14,16      | 3 | B0BNN3,P02761,P83748                                    |
| 6111 | 1,3,4,8,10,<br>11,16,17 | 2,5,6,7,9,1<br>2,13,14,15      | 2 | P16636,P83748                                           |
| 6112 | 1,3,4,8,10,<br>12,13,14 | 2,5,6,7,9,1<br>1,15,16,17      | 2 | P36970,Q9QUL6                                           |
| 6113 | 1,3,4,8,10,<br>12,13,15 | 2,5,6,7,9,1<br>1,14,16,17      | 3 | P10758,Q99MH3,Q9QUL6                                    |



|      |                                                |   |                                    |
|------|------------------------------------------------|---|------------------------------------|
| 6114 | 1,3,4,8,10, 2,5,6,7,9,1<br>12,13,16 1,14,15,17 | 2 | P16636,Q9QUL6                      |
| 6115 | 1,3,4,8,10, 2,5,6,7,9,1<br>12,13,17 1,14,15,16 | 4 | P16636,P36374,Q99MH3,Q9QUL6        |
| 6116 | 1,3,4,8,10, 2,5,6,7,9,1<br>12,14,15 1,13,16,17 | 5 | A2RUV9,B0BNN3,P10758,Q6IG02,Q9QUL6 |
| 6117 | 1,3,4,8,10, 2,5,6,7,9,1<br>12,14,16 1,13,15,17 | 3 | P08721,Q6IG02,Q9QUL6               |
| 6118 | 1,3,4,8,10, 2,5,6,7,9,1<br>12,14,17 1,13,15,16 | 2 | P31430,Q6IG02                      |
| 6119 | 1,3,4,8,10, 2,5,6,7,9,1<br>12,15,16 1,13,14,17 | 2 | P08721,Q9QUL6                      |
| 6120 | 1,3,4,8,10, 2,5,6,7,9,1<br>12,15,17 1,13,14,16 | 3 | B0BNN3,Q6IG02,Q99MH3               |
| 6121 | 1,3,4,8,10, 2,5,6,7,9,1<br>12,16,17 1,13,14,15 | 3 | P08721,P16636,Q6IG02               |
| 6122 | 1,3,4,8,10, 2,5,6,7,9,1<br>13,14,15 1,12,16,17 | 3 | P09605;P25809,Q64093,Q9QUL6        |
| 6123 | 1,3,4,8,10, 2,5,6,7,9,1<br>13,14,16 1,12,15,17 | 1 | Q9QUL6                             |
| 6124 | 1,3,4,8,10, 2,5,6,7,9,1<br>13,14,17 1,12,15,16 | 1 | Q9QW07                             |
| 6125 | 1,3,4,8,10, 2,5,6,7,9,1<br>13,15,16 1,12,14,17 | 2 | P01835,Q9QUL6                      |
| 6126 | 1,3,4,8,10, 2,5,6,7,9,1<br>13,15,17 1,12,14,16 | 2 | B0BNN3,Q99MH3                      |
| 6127 | 1,3,4,8,10, 2,5,6,7,9,1<br>13,16,17 1,12,14,15 | 2 | P16636,P25031                      |
| 6128 | 1,3,4,8,10, 2,5,6,7,9,1<br>14,15,16 1,12,13,17 | 1 | P08721                             |
| 6129 | 1,3,4,8,10, 2,5,6,7,9,1<br>14,15,17 1,12,13,16 | 1 | B0BNN3                             |
| 6130 | 1,3,4,8,10, 2,5,6,7,9,1<br>14,16,17 1,12,13,15 | 1 | P08721                             |
| 6131 | 1,3,4,8,10, 2,5,6,7,9,1<br>15,16,17 1,12,13,14 | 1 | B0BNN3                             |
| 6132 | 1,3,4,8,11, 2,5,6,7,9,1<br>12,13,14 0,15,16,17 | 4 | P36374,Q64093,Q6IG02,Q9QUL6        |
| 6133 | 1,3,4,8,11, 2,5,6,7,9,1<br>12,13,15 0,14,16,17 | 2 | P10758,Q9QUL6                      |
| 6134 | 1,3,4,8,11, 2,5,6,7,9,1<br>12,13,16 0,14,15,17 | 3 | P16636,Q6IG02,Q9QUL6               |
| 6135 | 1,3,4,8,11, 2,5,6,7,9,1<br>12,13,17 0,14,15,16 | 3 | P16636,P36374,Q6IG02               |
| 6136 | 1,3,4,8,11, 2,5,6,7,9,1<br>12,14,15 0,13,16,17 | 3 | B0BNN3,P10758,Q6IG02               |

|      |                                                |   |                                           |
|------|------------------------------------------------|---|-------------------------------------------|
| 6137 | 1,3,4,8,11, 2,5,6,7,9,1<br>12,14,16 0,13,15,17 | 2 | Q6IG02,Q6P6Q2                             |
| 6138 | 1,3,4,8,11, 2,5,6,7,9,1<br>12,14,17 0,13,15,16 | 4 | B0BNN3,P31430,P97840,Q6IG02               |
| 6139 | 1,3,4,8,11, 2,5,6,7,9,1<br>12,15,16 0,13,14,17 | 2 | Q6IG02,Q9QUL6                             |
| 6140 | 1,3,4,8,11, 2,5,6,7,9,1<br>12,15,17 0,13,14,16 | 3 | B0BNN3,P97840,Q6IG02                      |
| 6141 | 1,3,4,8,11, 2,5,6,7,9,1<br>12,16,17 0,13,14,15 | 2 | P16636,Q6IG02                             |
| 6142 | 1,3,4,8,11, 2,5,6,7,9,1<br>13,14,15 0,12,16,17 | 2 | P97840,Q64093                             |
| 6143 | 1,3,4,8,11, 2,5,6,7,9,1<br>13,14,16 0,12,15,17 | 0 |                                           |
| 6144 | 1,3,4,8,11, 2,5,6,7,9,1<br>13,14,17 0,12,15,16 | 4 | P83748,P97840,Q64093,Q9QW07               |
| 6145 | 1,3,4,8,11, 2,5,6,7,9,1<br>13,15,16 0,12,14,17 | 2 | B4F795,Q9QUL6                             |
| 6146 | 1,3,4,8,11, 2,5,6,7,9,1<br>13,15,17 0,12,14,16 | 2 | B0BNN3,P97840                             |
| 6147 | 1,3,4,8,11, 2,5,6,7,9,1<br>13,16,17 0,12,14,15 | 3 | P16636,P83748,P97840                      |
| 6148 | 1,3,4,8,11, 2,5,6,7,9,1<br>14,15,16 0,12,13,17 | 3 | B4F795,O54728,P97840                      |
| 6149 | 1,3,4,8,11, 2,5,6,7,9,1<br>14,15,17 0,12,13,16 | 4 | B0BNN3,P19218,P83748,P97840               |
| 6150 | 1,3,4,8,11, 2,5,6,7,9,1<br>14,16,17 0,12,13,15 | 2 | P83748,P97840                             |
| 6151 | 1,3,4,8,11, 2,5,6,7,9,1<br>15,16,17 0,12,13,14 | 3 | B0BNN3,B4F795,P97840                      |
| 6152 | 1,3,4,8,12, 2,5,6,7,9,1<br>13,14,15 0,11,16,17 | 6 | A2RUV9,B0BNN3,P10758,P36970,Q64093,Q9QUL6 |
| 6153 | 1,3,4,8,12, 2,5,6,7,9,1<br>13,14,16 0,11,15,17 | 2 | Q64093,Q9QUL6                             |
| 6154 | 1,3,4,8,12, 2,5,6,7,9,1<br>13,14,17 0,11,15,16 | 6 | P31430,P36970,Q64093,Q80W57,Q9QUL6,Q9QW07 |
| 6155 | 1,3,4,8,12, 2,5,6,7,9,1<br>13,15,16 0,11,14,17 | 1 | Q9QUL6                                    |
| 6156 | 1,3,4,8,12, 2,5,6,7,9,1<br>13,15,17 0,11,14,16 | 3 | B0BNN3,Q99MH3,Q9QUL6                      |
| 6157 | 1,3,4,8,12, 2,5,6,7,9,1<br>13,16,17 0,11,14,15 | 3 | P16636,P27213,Q9QUL6                      |
| 6158 | 1,3,4,8,12, 2,5,6,7,9,1<br>14,15,16 0,11,13,17 | 2 | B0BNN3,Q9QUL6                             |
| 6159 | 1,3,4,8,12, 2,5,6,7,9,1<br>14,15,17 0,11,13,16 | 4 | A2RUV9,B0BNN3,P31430,Q9QUL6               |

|      |                                                |   |                                                         |
|------|------------------------------------------------|---|---------------------------------------------------------|
| 6160 | 1,3,4,8,12, 2,5,6,7,9,1<br>14,16,17 0,11,13,15 | 2 | P31430,Q9QUL6                                           |
| 6161 | 1,3,4,8,12, 2,5,6,7,9,1<br>15,16,17 0,11,13,14 | 4 | B0BNN3,Q5XFX0,Q62894,Q9QUL6                             |
| 6162 | 1,3,4,8,13, 2,5,6,7,9,1<br>14,15,16 0,11,12,17 | 2 | Q64093,Q9QUL6                                           |
| 6163 | 1,3,4,8,13, 2,5,6,7,9,1<br>14,15,17 0,11,12,16 | 6 | B0BNN3,P05712,P97840,Q64093,Q9QUL6,Q9QW07               |
| 6164 | 1,3,4,8,13, 2,5,6,7,9,1<br>14,16,17 0,11,12,15 | 5 | P27213,Q64093,Q6PCU2,Q9QUL6,Q9QW07                      |
| 6165 | 1,3,4,8,13, 2,5,6,7,9,1<br>15,16,17 0,11,12,14 | 2 | P27213,Q9QUL6                                           |
| 6166 | 1,3,4,8,14, 2,5,6,7,9,1<br>15,16,17 0,11,12,13 | 2 | B0BNN3,P97840                                           |
| 6167 | 1,3,4,9,10, 2,5,6,7,8,1<br>11,12,13 4,15,16,17 | 3 | P10758,P36374,Q6IG02                                    |
| 6168 | 1,3,4,9,10, 2,5,6,7,8,1<br>11,12,14 3,15,16,17 | 2 | P10758,Q6IG02                                           |
| 6169 | 1,3,4,9,10, 2,5,6,7,8,1<br>11,12,15 3,14,16,17 | 4 | P10758,P51907,Q561R9,Q6IG02                             |
| 6170 | 1,3,4,9,10, 2,5,6,7,8,1<br>11,12,16 3,14,15,17 | 6 | P06757,P10536,P53792,Q6IG02,Q6P6Q2,Q9WUW8               |
| 6171 | 1,3,4,9,10, 2,5,6,7,8,1<br>11,12,17 3,14,15,16 | 3 | P06757,P16636,Q6IG02                                    |
| 6172 | 1,3,4,9,10, 2,5,6,7,8,1<br>11,13,14 2,15,16,17 | 4 | P12785,P50115,P83748,Q62635                             |
| 6173 | 1,3,4,9,10, 2,5,6,7,8,1<br>11,13,15 2,14,16,17 | 5 | O54728,P12785,P50115,Q561R9,Q62635                      |
| 6174 | 1,3,4,9,10, 2,5,6,7,8,1<br>11,13,16 2,14,15,17 | 4 | P12785,P50115,P83748,Q62635                             |
| 6175 | 1,3,4,9,10, 2,5,6,7,8,1<br>11,13,17 2,14,15,16 | 2 | P12785,P83748                                           |
| 6176 | 1,3,4,9,10, 2,5,6,7,8,1<br>11,14,15 2,13,16,17 | 6 | O54728,P50115,P55091,P83748,Q561R9,Q62635               |
| 6177 | 1,3,4,9,10, 2,5,6,7,8,1<br>11,14,16 2,13,15,17 | 6 | P12785,P50115,P55091,P83748,Q62635,Q9QZK9               |
| 6178 | 1,3,4,9,10, 2,5,6,7,8,1<br>11,14,17 2,13,15,16 | 2 | P12785,P83748                                           |
| 6179 | 1,3,4,9,10, 2,5,6,7,8,1<br>11,15,16 2,13,14,17 | 8 | O54728,P06760,P50115,P55091,Q561R9,Q62635,Q9QZK9,Q9Z1F2 |
| 6180 | 1,3,4,9,10, 2,5,6,7,8,1<br>11,15,17 2,13,14,16 | 2 | P83748,Q9Z1F2                                           |
| 6181 | 1,3,4,9,10, 2,5,6,7,8,1<br>11,16,17 2,13,14,15 | 3 | P12785,P83748,Q9Z1F2                                    |
| 6182 | 1,3,4,9,10, 2,5,6,7,8,1<br>12,13,14 1,15,16,17 | 3 | A2RUV9,P10758,P50115                                    |

|      |                                                |   |                                                  |
|------|------------------------------------------------|---|--------------------------------------------------|
| 6183 | 1,3,4,9,10, 2,5,6,7,8,1<br>12,13,15 1,14,16,17 | 2 | P10758,P50115                                    |
| 6184 | 1,3,4,9,10, 2,5,6,7,8,1<br>12,13,16 1,14,15,17 | 1 | P50115                                           |
| 6185 | 1,3,4,9,10, 2,5,6,7,8,1<br>12,13,17 1,14,15,16 | 1 | P16636                                           |
| 6186 | 1,3,4,9,10, 2,5,6,7,8,1<br>12,14,15 1,13,16,17 | 3 | A2RUV9,P10758,P50115                             |
| 6187 | 1,3,4,9,10, 2,5,6,7,8,1<br>12,14,16 1,13,15,17 | 2 | P50115,Q9WUW8                                    |
| 6188 | 1,3,4,9,10, 2,5,6,7,8,1<br>12,14,17 1,13,15,16 | 0 |                                                  |
| 6189 | 1,3,4,9,10, 2,5,6,7,8,1<br>12,15,16 1,13,14,17 | 2 | O54728,P50115                                    |
| 6190 | 1,3,4,9,10, 2,5,6,7,8,1<br>12,15,17 1,13,14,16 | 1 | B0BNN3                                           |
| 6191 | 1,3,4,9,10, 2,5,6,7,8,1<br>12,16,17 1,13,14,15 | 1 | P16636                                           |
| 6192 | 1,3,4,9,10, 2,5,6,7,8,1<br>13,14,15 1,12,16,17 | 4 | O54728,P06760,P50115,Q62635                      |
| 6193 | 1,3,4,9,10, 2,5,6,7,8,1<br>13,14,16 1,12,15,17 | 4 | P06760,P50115,P62804,Q62635                      |
| 6194 | 1,3,4,9,10, 2,5,6,7,8,1<br>13,14,17 1,12,15,16 | 2 | P83748,Q9QW07                                    |
| 6195 | 1,3,4,9,10, 2,5,6,7,8,1<br>13,15,16 1,12,14,17 | 7 | O54728,P06760,P50115,P55091,P62804,Q00715,Q62635 |
| 6196 | 1,3,4,9,10, 2,5,6,7,8,1<br>13,15,17 1,12,14,16 | 0 |                                                  |
| 6197 | 1,3,4,9,10, 2,5,6,7,8,1<br>13,16,17 1,12,14,15 | 1 | P62804                                           |
| 6198 | 1,3,4,9,10, 2,5,6,7,8,1<br>14,15,16 1,12,13,17 | 7 | O54728,P06760,P50115,P55091,Q62635,Q9JHB9,Q9QZK9 |
| 6199 | 1,3,4,9,10, 2,5,6,7,8,1<br>14,15,17 1,12,13,16 | 0 |                                                  |
| 6200 | 1,3,4,9,10, 2,5,6,7,8,1<br>14,16,17 1,12,13,15 | 1 | Q9JHB9                                           |
| 6201 | 1,3,4,9,10, 2,5,6,7,8,1<br>15,16,17 1,12,13,14 | 7 | O54728,P02782,P47727,P62804,Q62902,Q9JHB9,Q9Z1F2 |
| 6202 | 1,3,4,9,11, 2,5,6,7,8,1<br>12,13,14 0,15,16,17 | 1 | P10758                                           |
| 6203 | 1,3,4,9,11, 2,5,6,7,8,1<br>12,13,15 0,14,16,17 | 4 | O54728,P02625,P06760,P10758                      |
| 6204 | 1,3,4,9,11, 2,5,6,7,8,1<br>12,13,16 0,14,15,17 | 1 | P06760                                           |
| 6205 | 1,3,4,9,11, 2,5,6,7,8,1<br>12,13,17 0,14,15,16 | 2 | P16636,P36374                                    |

|      |                                                |   |                                           |
|------|------------------------------------------------|---|-------------------------------------------|
| 6206 | 1,3,4,9,11, 2,5,6,7,8,1<br>12,14,15 0,13,16,17 | 3 | O54728,P06760,P10758                      |
| 6207 | 1,3,4,9,11, 2,5,6,7,8,1<br>12,14,16 0,13,15,17 | 1 | P06760                                    |
| 6208 | 1,3,4,9,11, 2,5,6,7,8,1<br>12,14,17 0,13,15,16 | 1 | P01835                                    |
| 6209 | 1,3,4,9,11, 2,5,6,7,8,1<br>12,15,16 0,13,14,17 | 4 | O54728,P06760,P12020,P51907               |
| 6210 | 1,3,4,9,11, 2,5,6,7,8,1<br>12,15,17 0,13,14,16 | 2 | B0BNN3,P12020                             |
| 6211 | 1,3,4,9,11, 2,5,6,7,8,1<br>12,16,17 0,13,14,15 | 2 | P12020,P16636                             |
| 6212 | 1,3,4,9,11, 2,5,6,7,8,1<br>13,14,15 0,12,16,17 | 6 | O54728,P06760,P50115,P83748,Q62635,Q6P6R2 |
| 6213 | 1,3,4,9,11, 2,5,6,7,8,1<br>13,14,16 0,12,15,17 | 4 | P06760,P50115,P83748,Q62635               |
| 6214 | 1,3,4,9,11, 2,5,6,7,8,1<br>13,14,17 0,12,15,16 | 3 | P83748,P97840,Q9QW07                      |
| 6215 | 1,3,4,9,11, 2,5,6,7,8,1<br>13,15,16 0,12,14,17 | 6 | O54728,P06760,P50115,P62804,Q561R9,Q62635 |
| 6216 | 1,3,4,9,11, 2,5,6,7,8,1<br>13,15,17 0,12,14,16 | 3 | O54728,P83748,P97840                      |
| 6217 | 1,3,4,9,11, 2,5,6,7,8,1<br>13,16,17 0,12,14,15 | 1 | P83748                                    |
| 6218 | 1,3,4,9,11, 2,5,6,7,8,1<br>14,15,16 0,12,13,17 | 6 | O54728,P06760,P50115,P55091,Q62635,Q9QZK9 |
| 6219 | 1,3,4,9,11, 2,5,6,7,8,1<br>14,15,17 0,12,13,16 | 3 | O54728,P83748,P97840                      |
| 6220 | 1,3,4,9,11, 2,5,6,7,8,1<br>14,16,17 0,12,13,15 | 1 | P83748                                    |
| 6221 | 1,3,4,9,11, 2,5,6,7,8,1<br>15,16,17 0,12,13,14 | 4 | O54728,P12020,P83748,Q9Z1F2               |
| 6222 | 1,3,4,9,12, 2,5,6,7,8,1<br>13,14,15 0,11,16,17 | 6 | A2RUV9,P06760,P10758,P50115,P82471,Q9QUL6 |
| 6223 | 1,3,4,9,12, 2,5,6,7,8,1<br>13,14,16 0,11,15,17 | 3 | P06760,P50115,Q9QUL6                      |
| 6224 | 1,3,4,9,12, 2,5,6,7,8,1<br>13,14,17 0,11,15,16 | 2 | P82471,Q9QW07                             |
| 6225 | 1,3,4,9,12, 2,5,6,7,8,1<br>13,15,16 0,11,14,17 | 5 | O54728,P06760,P50115,P62804,Q9QUL6        |
| 6226 | 1,3,4,9,12, 2,5,6,7,8,1<br>13,15,17 0,11,14,16 | 1 | P82471                                    |
| 6227 | 1,3,4,9,12, 2,5,6,7,8,1<br>13,16,17 0,11,14,15 | 2 | P07171,P27213                             |
| 6228 | 1,3,4,9,12, 2,5,6,7,8,1<br>14,15,16 0,11,13,17 | 3 | O54728,P06760,P50115                      |

|      |                                                |   |                                                         |
|------|------------------------------------------------|---|---------------------------------------------------------|
| 6229 | 1,3,4,9,12, 2,5,6,7,8,1<br>14,15,17 0,11,13,16 | 2 | A2RUV9,B0BNN3                                           |
| 6230 | 1,3,4,9,12, 2,5,6,7,8,1<br>14,16,17 0,11,13,15 | 0 |                                                         |
| 6231 | 1,3,4,9,12, 2,5,6,7,8,1<br>15,16,17 0,11,13,14 | 3 | P06866,P12020,P47727                                    |
| 6232 | 1,3,4,9,13, 2,5,6,7,8,1<br>14,15,16 0,11,12,17 | 8 | O54728,P06760,P50115,P60905,P62804,Q00715,Q62635,Q9QZK9 |
| 6233 | 1,3,4,9,13, 2,5,6,7,8,1<br>14,15,17 0,11,12,16 | 6 | O54728,P48199,P60905,P62804,P82471,Q9QW07               |
| 6234 | 1,3,4,9,13, 2,5,6,7,8,1<br>14,16,17 0,11,12,15 | 3 | P27213,P62804,Q9QW07                                    |
| 6235 | 1,3,4,9,13, 2,5,6,7,8,1<br>15,16,17 0,11,12,14 | 6 | O54728,P47727,P60905,P62804,P82471,Q00715               |
| 6236 | 1,3,4,9,14, 2,5,6,7,8,1<br>15,16,17 0,11,12,13 | 4 | O54728,P60905,P62804,Q9JHB9                             |
| 6237 | 1,3,4,10,1 2,5,6,7,8,9<br>1,12,13,14 ,15,16,17 | 1 | P50115                                                  |
| 6238 | 1,3,4,10,1 2,5,6,7,8,9<br>1,12,13,15 ,14,16,17 | 2 | P10758,P50115                                           |
| 6239 | 1,3,4,10,1 2,5,6,7,8,9<br>1,12,13,16 ,14,15,17 | 2 | P50115,P53792                                           |
| 6240 | 1,3,4,10,1 2,5,6,7,8,9<br>1,12,13,17 ,14,15,16 | 4 | P06757,P16636,P36374,Q99MH3                             |
| 6241 | 1,3,4,10,1 2,5,6,7,8,9<br>1,12,14,15 ,13,16,17 | 4 | P10758,P50115,P51907,Q6IG02                             |
| 6242 | 1,3,4,10,1 2,5,6,7,8,9<br>1,12,14,16 ,13,15,17 | 4 | P50115,P53792,Q6IG02,Q6P6Q2                             |
| 6243 | 1,3,4,10,1 2,5,6,7,8,9<br>1,12,14,17 ,13,15,16 | 1 | Q6IG02                                                  |
| 6244 | 1,3,4,10,1 2,5,6,7,8,9<br>1,12,15,16 ,13,14,17 | 5 | P50115,P51907,P53792,Q4FZU2,Q9Z1F2                      |
| 6245 | 1,3,4,10,1 2,5,6,7,8,9<br>1,12,15,17 ,13,14,16 | 3 | B0BNN3,P06866,Q6IG02                                    |
| 6246 | 1,3,4,10,1 2,5,6,7,8,9<br>1,12,16,17 ,13,14,15 | 5 | P06757,P06866,P16636,P53792,Q6IG02                      |
| 6247 | 1,3,4,10,1 2,5,6,7,8,9<br>1,13,14,15 ,12,16,17 | 1 | P50115                                                  |
| 6248 | 1,3,4,10,1 2,5,6,7,8,9<br>1,13,14,16 ,12,15,17 | 3 | P50115,P83748,Q62635                                    |
| 6249 | 1,3,4,10,1 2,5,6,7,8,9<br>1,13,14,17 ,12,15,16 | 2 | P83748,Q9QW07                                           |
| 6250 | 1,3,4,10,1 2,5,6,7,8,9<br>1,13,15,16 ,12,14,17 | 3 | P50115,Q561R9,Q62635                                    |
| 6251 | 1,3,4,10,1 2,5,6,7,8,9<br>1,13,15,17 ,12,14,16 | 1 | P83748                                                  |

|      |                          |                          |   |                                                  |
|------|--------------------------|--------------------------|---|--------------------------------------------------|
| 6252 | 1,3,4,10,1<br>1,13,16,17 | 2,5,6,7,8,9<br>,12,14,15 | 2 | P12785,P83748                                    |
| 6253 | 1,3,4,10,1<br>1,14,15,16 | 2,5,6,7,8,9<br>,12,13,17 | 5 | O54728,P50115,P55091,Q62635,Q9Z1F2               |
| 6254 | 1,3,4,10,1<br>1,14,15,17 | 2,5,6,7,8,9<br>,12,13,16 | 1 | P83748                                           |
| 6255 | 1,3,4,10,1<br>1,14,16,17 | 2,5,6,7,8,9<br>,12,13,15 | 1 | P83748                                           |
| 6256 | 1,3,4,10,1<br>1,15,16,17 | 2,5,6,7,8,9<br>,12,13,14 | 2 | P83748,Q9Z1F2                                    |
| 6257 | 1,3,4,10,1<br>2,13,14,15 | 2,5,6,7,8,9<br>,11,16,17 | 4 | A2RUV9,P10758,P50115,Q9QUL6                      |
| 6258 | 1,3,4,10,1<br>2,13,14,16 | 2,5,6,7,8,9<br>,11,15,17 | 2 | P50115,Q9QUL6                                    |
| 6259 | 1,3,4,10,1<br>2,13,14,17 | 2,5,6,7,8,9<br>,11,15,16 | 2 | A2RUV9,Q9QW07                                    |
| 6260 | 1,3,4,10,1<br>2,13,15,16 | 2,5,6,7,8,9<br>,11,14,17 | 2 | P50115,Q9QUL6                                    |
| 6261 | 1,3,4,10,1<br>2,13,15,17 | 2,5,6,7,8,9<br>,11,14,16 | 3 | B0BNN3,Q99MH3,Q9QUL6                             |
| 6262 | 1,3,4,10,1<br>2,13,16,17 | 2,5,6,7,8,9<br>,11,14,15 | 4 | P16636,P27213,Q99MH3,Q9QUL6                      |
| 6263 | 1,3,4,10,1<br>2,14,15,16 | 2,5,6,7,8,9<br>,11,13,17 | 3 | P08721,P50115,Q9QUL6                             |
| 6264 | 1,3,4,10,1<br>2,14,15,17 | 2,5,6,7,8,9<br>,11,13,16 | 2 | A2RUV9,B0BNN3                                    |
| 6265 | 1,3,4,10,1<br>2,14,16,17 | 2,5,6,7,8,9<br>,11,13,15 | 0 |                                                  |
| 6266 | 1,3,4,10,1<br>2,15,16,17 | 2,5,6,7,8,9<br>,11,13,14 | 2 | B0BNN3,P06866                                    |
| 6267 | 1,3,4,10,1<br>3,14,15,16 | 2,5,6,7,8,9<br>,11,12,17 | 5 | P06760,P50115,P62804,Q62635,Q9QUL6               |
| 6268 | 1,3,4,10,1<br>3,14,15,17 | 2,5,6,7,8,9<br>,11,12,16 | 1 | Q9QW07                                           |
| 6269 | 1,3,4,10,1<br>3,14,16,17 | 2,5,6,7,8,9<br>,11,12,15 | 2 | P27213,Q9QW07                                    |
| 6270 | 1,3,4,10,1<br>3,15,16,17 | 2,5,6,7,8,9<br>,11,12,14 | 2 | P27213,P62804                                    |
| 6271 | 1,3,4,10,1<br>4,15,16,17 | 2,5,6,7,8,9<br>,11,12,13 | 1 | Q9JHB9                                           |
| 6272 | 1,3,4,11,1<br>2,13,14,15 | 2,5,6,7,8,9<br>,10,16,17 | 7 | A2RUV9,P02625,P10758,P50115,Q64093,Q6P6R2,Q9QUL6 |
| 6273 | 1,3,4,11,1<br>2,13,14,16 | 2,5,6,7,8,9<br>,10,15,17 | 2 | P50115,Q9QUL6                                    |
| 6274 | 1,3,4,11,1<br>2,13,14,17 | 2,5,6,7,8,9<br>,10,15,16 | 2 | P36374,Q9QW07                                    |

|      |                          |                                  |    |                                                                                     |
|------|--------------------------|----------------------------------|----|-------------------------------------------------------------------------------------|
| 6275 | 1,3,4,11,1<br>2,13,15,16 | 2,5,6,7,8,9<br>,10,14,17         | 4  | P01836,P06760,P50115,Q9QUL6                                                         |
| 6276 | 1,3,4,11,1<br>2,13,15,17 | 2,5,6,7,8,9<br>,10,14,16         | 1  | B0BNN3                                                                              |
| 6277 | 1,3,4,11,1<br>2,13,16,17 | 2,5,6,7,8,9<br>,10,14,15         | 2  | P16636,P27213                                                                       |
| 6278 | 1,3,4,11,1<br>2,14,15,16 | 2,5,6,7,8,9<br>,10,13,17         | 3  | P06760,P50115,P51907                                                                |
| 6279 | 1,3,4,11,1<br>2,14,15,17 | 2,5,6,7,8,9<br>,10,13,16         | 1  | B0BNN3                                                                              |
| 6280 | 1,3,4,11,1<br>2,14,16,17 | 2,5,6,7,8,9<br>,10,13,15         | 0  |                                                                                     |
| 6281 | 1,3,4,11,1<br>2,15,16,17 | 2,5,6,7,8,9<br>,10,13,14         | 3  | B0BNN3,P06866,P12020                                                                |
| 6282 | 1,3,4,11,1<br>3,14,15,16 | 2,5,6,7,8,9<br>,10,12,17         | 5  | O54728,P06760,P50115,Q62635,Q6P6R2                                                  |
| 6283 | 1,3,4,11,1<br>3,14,15,17 | 2,5,6,7,8,9<br>,10,12,16         | 4  | P83748,P97840,Q64093,Q9QW07                                                         |
| 6284 | 1,3,4,11,1<br>3,14,16,17 | 2,5,6,7,8,9<br>,10,12,15         | 3  | P27213,P83748,Q9QW07                                                                |
| 6285 | 1,3,4,11,1<br>3,15,16,17 | 2,5,6,7,8,9<br>,10,12,14         | 0  |                                                                                     |
| 6286 | 1,3,4,11,1<br>4,15,16,17 | 2,5,6,7,8,9<br>,10,12,13         | 2  | P83748,P97840                                                                       |
| 6287 | 1,3,4,12,1<br>3,14,15,16 | 2,5,6,7,8,9<br>,10,11,17         | 4  | A2RUV9,P06760,P50115,Q9QUL6                                                         |
| 6288 | 1,3,4,12,1<br>3,14,15,17 | 2,5,6,7,8,9<br>,10,11,16         | 7  | A2RUV9,B0BNN3,P27213,P82471,Q64093,Q9QUL6,Q9QW07                                    |
| 6289 | 1,3,4,12,1<br>3,14,16,17 | 2,5,6,7,8,9<br>,10,11,15         | 3  | P27213,Q9QUL6,Q9QW07                                                                |
| 6290 | 1,3,4,12,1<br>3,15,16,17 | 2,5,6,7,8,9<br>,10,11,14         | 2  | P27213,Q9QUL6                                                                       |
| 6291 | 1,3,4,12,1<br>4,15,16,17 | 2,5,6,7,8,9<br>,10,11,13         | 2  | B0BNN3,Q9QUL6                                                                       |
| 6292 | 1,3,4,13,1<br>4,15,16,17 | 2,5,6,7,8,9<br>,10,11,12         | 6  | P27213,P48199,P60905,P62804,Q9QUL6,Q9QW07                                           |
| 6293 | 1,3,5,6,7,8<br>,9,10     | 2,4,11,12,<br>13,14,15,1<br>6,17 | 7  | D3ZUC6,O55006,P06866,P08937,P27213,P31044,Q6IRE4                                    |
| 6294 | 1,3,5,6,7,8<br>,9,11     | 2,4,10,12,<br>13,14,15,1<br>6,17 | 12 | P01048,P04041,P06866,P08932,P08937,P10715,P14669,P19629,P27213,P31044,Q6IRE4,Q9QUL6 |
| 6295 | 1,3,5,6,7,8<br>,9,12     | 2,4,10,11,<br>13,14,15,1<br>6,17 | 12 | O55006,P08723,P08937,P10715,P13432,P19629,P27213,P30120,Q6IG02,Q6IRE4,Q8CJ52,Q9Z1F2 |



|      |                       |                                  |    |                                                                                                                                                                                                                   |
|------|-----------------------|----------------------------------|----|-------------------------------------------------------------------------------------------------------------------------------------------------------------------------------------------------------------------|
| 6296 | 1,3,5,6,7,8<br>,9,13  | 2,4,10,11,<br>12,14,15,1<br>6,17 | 8  | P01048,P06866,P08937,P31044,P51907,P53792,Q6IRE4,Q9Z1F2                                                                                                                                                           |
| 6297 | 1,3,5,6,7,8<br>,9,14  | 2,4,10,11,<br>12,13,15,1<br>6,17 | 8  | P06866,P08937,P19629,P27213,P51907,P53792,Q6IRE4,Q9Z1F2                                                                                                                                                           |
| 6298 | 1,3,5,6,7,8<br>,9,15  | 2,4,10,11,<br>12,13,14,1<br>6,17 | 7  | O54728,O55006,P08937,P19629,P27213,P53792,Q6IRE4                                                                                                                                                                  |
| 6299 | 1,3,5,6,7,8<br>,9,16  | 2,4,10,11,<br>12,13,14,1<br>5,17 | 4  | P06866,P08937,P23593,Q6IRE4                                                                                                                                                                                       |
| 6300 | 1,3,5,6,7,8<br>,9,17  | 2,4,10,11,<br>12,13,14,1<br>5,16 | 12 | P01946,P02091,P06760,P08937,P19629,P23593,P50115,P51907,P52590,P53792,Q63751,Q6IRE4                                                                                                                               |
| 6301 | 1,3,5,6,7,8<br>,10,11 | 2,4,9,12,1<br>3,14,15,16<br>,17  | 14 | D3ZUC6,P04041,P07150,P08649,P08937,P14669,P27213,P31044,P55314,P61206,P84079,P84082,P68370,Q63493,Q6IRE4,Q8VD89                                                                                                   |
| 6302 | 1,3,5,6,7,8<br>,10,12 | 2,4,9,11,1<br>3,14,15,16<br>,17  | 17 | F1LM93,P08723,P08937,P10715,P19629,P22283,P27213,P30120,P31044,Q10758,Q6IFW6,Q6IG02,Q6IMF3,Q6P6Q2,Q8CJ52,Q99MH3,Q9ET32                                                                                            |
| 6303 | 1,3,5,6,7,8<br>,10,13 | 2,4,9,11,1<br>2,14,15,16<br>,17  | 10 | D3ZUC6,P06866,P06911,P08937,P12020,P31044,P51907,Q5GRG2,Q6IRE4,Q99MH3                                                                                                                                             |
| 6304 | 1,3,5,6,7,8<br>,10,14 | 2,4,9,11,1<br>2,13,15,16<br>,17  | 7  | P06866,P08937,P12020,P19629,P27213,P31044,Q6IRE4                                                                                                                                                                  |
| 6305 | 1,3,5,6,7,8<br>,10,15 | 2,4,9,11,1<br>2,13,14,16<br>,17  | 6  | O55006,P08937,P19629,P27213,P31044,Q99MH3                                                                                                                                                                         |
| 6306 | 1,3,5,6,7,8<br>,10,16 | 2,4,9,11,1<br>2,13,14,15<br>,17  | 5  | P08721,P08937,P31044,Q6IRE4,Q8VD89                                                                                                                                                                                |
| 6307 | 1,3,5,6,7,8<br>,10,17 | 2,4,9,11,1<br>2,13,14,15<br>,16  | 12 | D3ZUC6,P01946,P02091,P06760,P08937,P12346,P31044,P50115,P51907,P52590,Q63751,Q99MH3                                                                                                                               |
| 6308 | 1,3,5,6,7,8<br>,11,12 | 2,4,9,10,1<br>3,14,15,16<br>,17  | 30 | F1LM93,O35547,P01681,P02781,P02782,P04041,P08723,P08937,P10715,P13432,P14669,P17046,P19629,P22282,P22283,P24388,P27213,P30120,Q4FZU2,Q63493,Q63751,Q6IFW6,Q6IG02,Q6IMF3,Q6IRE4,Q6P6Q2,Q8CJ52,Q9ET32,Q9JHB9,Q9JI85 |
| 6309 | 1,3,5,6,7,8<br>,11,13 | 2,4,9,10,1<br>2,14,15,16<br>,17  | 17 | P01048,P06866,P06911,P08932,P08937,P14669,P16086,P19629,P22282,P22283,P31044,Q62902,Q63493,Q63751,Q6IRE4,Q8VD89,Q9Z1F2                                                                                            |
| 6310 | 1,3,5,6,7,8<br>,11,14 | 2,4,9,10,1<br>2,13,15,16<br>,17  | 10 | P06866,P08937,P14669,P16086,P19629,P27213,P31044,Q5I0D1,Q63493,Q6IRE4                                                                                                                                             |

|      |                       |                                 |    |                                                                                                                                                                                |
|------|-----------------------|---------------------------------|----|--------------------------------------------------------------------------------------------------------------------------------------------------------------------------------|
| 6311 | 1,3,5,6,7,8<br>,11,15 | 2,4,9,10,1<br>2,13,14,16<br>,17 | 9  | P08937,P10715,P14669,P19629,P27213,Q5I0D1,Q63751,Q6IRE4,Q8VD89                                                                                                                 |
| 6312 | 1,3,5,6,7,8<br>,11,16 | 2,4,9,10,1<br>2,13,14,15<br>,17 | 7  | P08937,P10715,P17046,P19629,P55314,Q6IRE4,Q8VD89                                                                                                                               |
| 6313 | 1,3,5,6,7,8<br>,11,17 | 2,4,9,10,1<br>2,13,14,15<br>,16 | 14 | P01681,P01946,P02091,P04041,P06760,P07150,P08937,P10715,P14669,P19629,P50115,Q63493,Q63751,Q6IRE4                                                                              |
| 6314 | 1,3,5,6,7,8<br>,12,13 | 2,4,9,10,1<br>1,14,15,16<br>,17 | 23 | O88267,P02781,P02782,P06761,P06911,P08723,P08937,P10715,P13432,P19218,P19629,P22282,P22283,P30120,P51907,Q62902,Q63751,Q6IG02,Q6IRE4,Q8CJ52,Q99MH3,Q9JHB9,Q9Z1F2               |
| 6315 | 1,3,5,6,7,8<br>,12,14 | 2,4,9,10,1<br>1,13,15,16<br>,17 | 17 | O88267,P02782,P06761,P08723,P08937,P10715,P13432,P19629,P22283,P30120,Q561R9,Q6AYS7,Q6IG02,Q6IRE4,Q8CJ52,Q9ET32,Q9Z1F2                                                         |
| 6316 | 1,3,5,6,7,8<br>,12,15 | 2,4,9,10,1<br>1,13,14,16<br>,17 | 7  | P08937,P10715,P19629,Q63751,Q6IG02,Q6IRE4,Q99MH3                                                                                                                               |
| 6317 | 1,3,5,6,7,8<br>,12,16 | 2,4,9,10,1<br>1,13,14,15<br>,17 | 10 | O88267,P08937,P10715,P13432,P17046,P19629,Q6IG02,Q6IRE4,Q8CJ52,Q9ET32                                                                                                          |
| 6318 | 1,3,5,6,7,8<br>,12,17 | 2,4,9,10,1<br>1,13,14,15<br>,16 | 25 | F1LM93,O88267,P01681,P01946,P02091,P06760,P08723,P08937,P10715,P13432,P19629,P22282,P22283,P23928,P50115,P51907,Q4G075,Q561R9,Q63751,Q6IG02,Q8CJ52,Q99041,Q99MH3,Q9QZK9,Q9Z1F2 |
| 6319 | 1,3,5,6,7,8<br>,13,14 | 2,4,9,10,1<br>1,12,15,16<br>,17 | 13 | P06866,P06911,P08937,P12020,P16086,P19629,P31044,P51907,P53792,Q498D9,Q5GRG2,Q6IRE4,Q9Z1F2                                                                                     |
| 6320 | 1,3,5,6,7,8<br>,13,15 | 2,4,9,10,1<br>1,12,14,16<br>,17 | 8  | P06866,P08937,P19629,P51907,P53792,Q5GRG2,Q6IRE4,Q99MH3                                                                                                                        |
| 6321 | 1,3,5,6,7,8<br>,13,16 | 2,4,9,10,1<br>1,12,14,15<br>,17 | 6  | P06866,P08937,P17046,P51907,Q6IRE4,Q8VD89                                                                                                                                      |
| 6322 | 1,3,5,6,7,8<br>,13,17 | 2,4,9,10,1<br>1,12,14,15<br>,16 | 18 | O88267,P01946,P02091,P06760,P08937,P10536,P19629,P22282,P22283,P23928,P50115,P51907,P53792,Q561R9,Q63751,Q99MH3,Q9WUW8,Q9Z1F2                                                  |
| 6323 | 1,3,5,6,7,8<br>,14,15 | 2,4,9,10,1<br>1,12,13,16<br>,17 | 6  | P02803,P08937,P10536,P19629,P53792,Q6IRE4                                                                                                                                      |
| 6324 | 1,3,5,6,7,8<br>,14,16 | 2,4,9,10,1<br>1,12,13,15<br>,17 | 5  | P06866,P08937,P19629,Q561R9,Q6IRE4                                                                                                                                             |
| 6325 | 1,3,5,6,7,8<br>,14,17 | 2,4,9,10,1<br>1,12,13,15<br>,16 | 12 | O88267,P01946,P02091,P06760,P08937,P10536,P19629,P50115,P51907,P53792,Q561R9,Q63751                                                                                            |

|      |                       |                                 |    |                                                                                                          |
|------|-----------------------|---------------------------------|----|----------------------------------------------------------------------------------------------------------|
| 6326 | 1,3,5,6,7,8<br>,15,16 | 2,4,9,10,1<br>1,12,13,14<br>,17 | 4  | P08937,P19629,Q6IRE4,Q8VD89                                                                              |
| 6327 | 1,3,5,6,7,8<br>,15,17 | 2,4,9,10,1<br>1,12,13,14<br>,16 | 11 | P01946,P02091,P02803,P06760,P08937,P10536,P19629,P50115,P53792,Q63751,Q99MH3                             |
| 6328 | 1,3,5,6,7,8<br>,16,17 | 2,4,9,10,1<br>1,12,13,14<br>,15 | 15 | O88267,P01946,P02091,P06760,P08937,P10758,P17046,P19629,P23593,P23928,P50115,P51907,Q561R9,Q63751,Q6IRE4 |
| 6329 | 1,3,5,6,7,9<br>,10,11 | 2,4,8,12,1<br>3,14,15,16<br>,17 | 4  | P27213,P55314,Q6IRE4,Q9QUL6                                                                              |
| 6330 | 1,3,5,6,7,9<br>,10,12 | 2,4,8,11,1<br>3,14,15,16<br>,17 | 5  | P19218,P27213,P97840,Q6IG02,Q6IRE4                                                                       |
| 6331 | 1,3,5,6,7,9<br>,10,13 | 2,4,8,11,1<br>2,14,15,16<br>,17 | 4  | P06866,P19218,Q5U2V4,Q6IRE4                                                                              |
| 6332 | 1,3,5,6,7,9<br>,10,14 | 2,4,8,11,1<br>2,13,15,16<br>,17 | 4  | P06866,P27213,Q6IRE4,Q9QUL6                                                                              |
| 6333 | 1,3,5,6,7,9<br>,10,15 | 2,4,8,11,1<br>2,13,14,16<br>,17 | 5  | O54728,O55006,P27213,Q6IRE4,Q80WL1                                                                       |
| 6334 | 1,3,5,6,7,9<br>,10,16 | 2,4,8,11,1<br>2,13,14,15<br>,17 | 3  | P27213,Q00715,Q6IRE4                                                                                     |
| 6335 | 1,3,5,6,7,9<br>,10,17 | 2,4,8,11,1<br>2,13,14,15<br>,16 | 6  | P01946,P02091,P52590,Q6IRE4,Q99MH3,Q9QUL6                                                                |
| 6336 | 1,3,5,6,7,9<br>,11,12 | 2,4,8,10,1<br>3,14,15,16<br>,17 | 9  | P08937,P17046,P27213,Q4FZU2,Q6IFW6,Q6IG02,Q6IMF3,Q6IRE4,Q6P6Q2                                           |
| 6337 | 1,3,5,6,7,9<br>,11,13 | 2,4,8,10,1<br>2,14,15,16<br>,17 | 4  | P01048,P06866,P17046,Q6IRE4                                                                              |
| 6338 | 1,3,5,6,7,9<br>,11,14 | 2,4,8,10,1<br>2,13,15,16<br>,17 | 4  | P06866,P27213,Q6IRE4,Q9QUL6                                                                              |
| 6339 | 1,3,5,6,7,9<br>,11,15 | 2,4,8,10,1<br>2,13,14,16<br>,17 | 5  | O54728,P27213,Q6IRE4,Q80WL1,Q9QUL6                                                                       |
| 6340 | 1,3,5,6,7,9<br>,11,16 | 2,4,8,10,1<br>2,13,14,15<br>,17 | 5  | P17046,P27213,P55314,Q6IRE4,Q9QUL6                                                                       |

|      |                       |                                 |    |                                                                       |
|------|-----------------------|---------------------------------|----|-----------------------------------------------------------------------|
| 6341 | 1,3,5,6,7,9<br>,11,17 | 2,4,8,10,1<br>2,13,14,15<br>,16 | 6  | P01946,P02091,P08937,P52590,Q6IRE4,Q9QUL6                             |
| 6342 | 1,3,5,6,7,9<br>,12,13 | 2,4,8,10,1<br>1,14,15,16<br>,17 | 6  | P08937,P17046,P19218,P53792,Q6IRE4,Q9Z1F2                             |
| 6343 | 1,3,5,6,7,9<br>,12,14 | 2,4,8,10,1<br>1,13,15,16<br>,17 | 2  | P01835,Q6IRE4                                                         |
| 6344 | 1,3,5,6,7,9<br>,12,15 | 2,4,8,10,1<br>1,13,14,16<br>,17 | 2  | P27213,Q6IRE4                                                         |
| 6345 | 1,3,5,6,7,9<br>,12,16 | 2,4,8,10,1<br>1,13,14,15<br>,17 | 3  | P17046,P19218,Q6IRE4                                                  |
| 6346 | 1,3,5,6,7,9<br>,12,17 | 2,4,8,10,1<br>1,13,14,15<br>,16 | 10 | P01835,P01946,P02091,P08937,P13432,P52590,P53792,Q561R9,Q6IRE4,Q99MH3 |
| 6347 | 1,3,5,6,7,9<br>,13,14 | 2,4,8,10,1<br>1,12,15,16<br>,17 | 5  | P06866,P06911,P51907,P53792,Q6IRE4                                    |
| 6348 | 1,3,5,6,7,9<br>,13,15 | 2,4,8,10,1<br>1,12,14,16<br>,17 | 6  | O54728,P53792,P62804,Q5U2V4,Q6IRE4,Q80WL1                             |
| 6349 | 1,3,5,6,7,9<br>,13,16 | 2,4,8,10,1<br>1,12,14,15<br>,17 | 7  | P06866,P17046,P19218,P53792,P62804,Q00715,Q6IRE4                      |
| 6350 | 1,3,5,6,7,9<br>,13,17 | 2,4,8,10,1<br>1,12,14,15<br>,16 | 9  | P01946,P02091,P08937,P51907,P52590,P53792,Q561R9,Q6IRE4,Q99MH3        |
| 6351 | 1,3,5,6,7,9<br>,14,15 | 2,4,8,10,1<br>1,12,13,16<br>,17 | 5  | O54728,P27213,P53792,Q6IRE4,Q80WL1                                    |
| 6352 | 1,3,5,6,7,9<br>,14,16 | 2,4,8,10,1<br>1,12,13,15<br>,17 | 3  | P53792,Q6IRE4,Q80WL1                                                  |
| 6353 | 1,3,5,6,7,9<br>,14,17 | 2,4,8,10,1<br>1,12,13,15<br>,16 | 7  | P01946,P02091,P51907,P52590,P53792,Q561R9,Q6IRE4                      |
| 6354 | 1,3,5,6,7,9<br>,15,16 | 2,4,8,10,1<br>1,12,13,14<br>,17 | 5  | O54728,P62804,Q00715,Q6IRE4,Q80WL1                                    |
| 6355 | 1,3,5,6,7,9<br>,15,17 | 2,4,8,10,1<br>1,12,13,14<br>,16 | 7  | O54728,P02091,P23593,P52590,P53792,Q6IRE4,Q80WL1                      |

|      |                        |                                 |    |                                                                                                   |
|------|------------------------|---------------------------------|----|---------------------------------------------------------------------------------------------------|
| 6356 | 1,3,5,6,7,9<br>,16,17  | 2,4,8,10,1<br>1,12,13,14<br>,15 | 9  | P01946,P02091,P17046,P23593,P52590,P53792,P62804,Q561R9,Q6IRE4                                    |
| 6357 | 1,3,5,6,7,1<br>0,11,12 | 2,4,8,9,13,<br>14,15,16,1<br>7  | 14 | F1LM93,P08937,P17046,P27213,P55314,Q10758,Q4FZU2,Q6IFU8,Q6IFW6,Q6IG02,Q6IMF3,Q6IRE4,Q6P6Q2,Q99MH3 |
| 6358 | 1,3,5,6,7,1<br>0,11,13 | 2,4,8,9,12,<br>14,15,16,1<br>7  | 5  | P08937,P17046,P55314,Q6IRE4,Q8VD89                                                                |
| 6359 | 1,3,5,6,7,1<br>0,11,14 | 2,4,8,9,12,<br>13,15,16,1<br>7  | 4  | P27213,P55314,Q6IRE4,Q9QUL6                                                                       |
| 6360 | 1,3,5,6,7,1<br>0,11,15 | 2,4,8,9,12,<br>13,14,16,1<br>7  | 5  | P27213,P55314,Q6IRE4,Q80WL1,Q8VD89                                                                |
| 6361 | 1,3,5,6,7,1<br>0,11,16 | 2,4,8,9,12,<br>13,14,15,1<br>7  | 6  | P17046,P27213,P55314,P61206;P84079;P84082,Q6IRE4,Q8VD89                                           |
| 6362 | 1,3,5,6,7,1<br>0,11,17 | 2,4,8,9,12,<br>13,14,15,1<br>6  | 7  | P01946,P02091,P08937,P55314,Q6IRE4,Q99MH3,Q9QUL6                                                  |
| 6363 | 1,3,5,6,7,1<br>0,12,13 | 2,4,8,9,11,<br>14,15,16,1<br>7  | 7  | P08937,P17046,P19218,Q498D9,Q6IG02,Q6IRE4,Q99MH3                                                  |
| 6364 | 1,3,5,6,7,1<br>0,12,14 | 2,4,8,9,11,<br>13,15,16,1<br>7  | 7  | P08937,Q10758,Q498D9,Q6IG02,Q6IMF3,Q6IRE4,Q9ET32                                                  |
| 6365 | 1,3,5,6,7,1<br>0,12,15 | 2,4,8,9,11,<br>13,14,16,1<br>7  | 5  | P08937,P20766,Q4FZU2,Q6IG02,Q99MH3                                                                |
| 6366 | 1,3,5,6,7,1<br>0,12,16 | 2,4,8,9,11,<br>13,14,15,1<br>7  | 10 | P17046,P19218,P20766,P97840,Q10758,Q6IFW6,Q6IG02,Q6IMF3,Q6IRE4,Q99MH3                             |
| 6367 | 1,3,5,6,7,1<br>0,12,17 | 2,4,8,9,11,<br>13,14,15,1<br>6  | 10 | F1LM93,P01946,P02091,P08937,P13432,Q10758,Q561R9,Q6IG02,Q99MH3,Q9QZK9                             |
| 6368 | 1,3,5,6,7,1<br>0,13,14 | 2,4,8,9,11,<br>12,15,16,1<br>7  | 5  | P06866,P06911,P12020,Q498D9,Q6IRE4                                                                |
| 6369 | 1,3,5,6,7,1<br>0,13,15 | 2,4,8,9,11,<br>12,14,16,1<br>7  | 3  | Q6IRE4,Q80WL1,Q99MH3                                                                              |
| 6370 | 1,3,5,6,7,1<br>0,13,16 | 2,4,8,9,11,<br>12,14,15,1<br>7  | 5  | P17046,P19218,Q6AYQ8,Q6IRE4,Q8VD89                                                                |

|      |                        |                                |    |                                                                                                          |
|------|------------------------|--------------------------------|----|----------------------------------------------------------------------------------------------------------|
| 6371 | 1,3,5,6,7,1<br>0,13,17 | 2,4,8,9,11,<br>12,14,15,1<br>6 | 6  | P01946,P02091,P08937,P51907,Q561R9,Q99MH3                                                                |
| 6372 | 1,3,5,6,7,1<br>0,14,15 | 2,4,8,9,11,<br>12,13,16,1<br>7 | 3  | P02803,Q6IRE4,Q80WL1                                                                                     |
| 6373 | 1,3,5,6,7,1<br>0,14,16 | 2,4,8,9,11,<br>12,13,15,1<br>7 | 2  | Q6IRE4,Q80WL1                                                                                            |
| 6374 | 1,3,5,6,7,1<br>0,14,17 | 2,4,8,9,11,<br>12,13,15,1<br>6 | 6  | P01946,P02091,P08689,P08937,P18427,Q561R9                                                                |
| 6375 | 1,3,5,6,7,1<br>0,15,16 | 2,4,8,9,11,<br>12,13,14,1<br>7 | 4  | P02803,P20766,Q6IRE4,Q80WL1                                                                              |
| 6376 | 1,3,5,6,7,1<br>0,15,17 | 2,4,8,9,11,<br>12,13,14,1<br>6 | 5  | P02091,P02803,P08937,Q80WL1,Q99MH3                                                                       |
| 6377 | 1,3,5,6,7,1<br>0,16,17 | 2,4,8,9,11,<br>12,13,14,1<br>5 | 7  | P01946,P02091,P10758,P17046,Q561R9,Q6IRE4,Q99MH3                                                         |
| 6378 | 1,3,5,6,7,1<br>1,12,13 | 2,4,8,9,10,<br>14,15,16,1<br>7 | 9  | P08937,P17046,P30120,Q4FZU2,Q6IFW6,Q6IG02,Q6IRE4,Q6P6Q2,Q9JHB9                                           |
| 6379 | 1,3,5,6,7,1<br>1,12,14 | 2,4,8,9,10,<br>13,15,16,1<br>7 | 8  | P08937,P17046,Q4FZU2,Q6IFW6,Q6IG02,Q6IMF3,Q6IRE4,Q6P6Q2                                                  |
| 6380 | 1,3,5,6,7,1<br>1,12,15 | 2,4,8,9,10,<br>13,14,16,1<br>7 | 8  | P08937,P17046,P27213,Q4FZU2,Q6IFW6,Q6IG02,Q6IRE4,Q6P6Q2                                                  |
| 6381 | 1,3,5,6,7,1<br>1,12,16 | 2,4,8,9,10,<br>13,14,15,1<br>7 | 9  | P08937,P17046,P55314,Q4FZU2,Q6IFW6,Q6IG02,Q6IMF3,Q6IRE4,Q6P6Q2                                           |
| 6382 | 1,3,5,6,7,1<br>1,12,17 | 2,4,8,9,10,<br>13,14,15,1<br>6 | 15 | P01681,P01946,P02091,P08937,P13432,P17046,Q4FZU2,Q63751,Q6IFW6,Q6IG02,Q6IMF3,Q6IRE4,Q6P6Q2,Q99MH3,Q9QZK9 |
| 6383 | 1,3,5,6,7,1<br>1,13,14 | 2,4,8,9,10,<br>12,15,16,1<br>7 | 4  | P06866,P06911,P17046,Q6IRE4                                                                              |
| 6384 | 1,3,5,6,7,1<br>1,13,15 | 2,4,8,9,10,<br>12,14,16,1<br>7 | 4  | P17046,Q6IRE4,Q80WL1,Q8VD89                                                                              |
| 6385 | 1,3,5,6,7,1<br>1,13,16 | 2,4,8,9,10,<br>12,14,15,1<br>7 | 4  | P17046,P55314,Q6IRE4,Q8VD89                                                                              |

|      |                        |                                |    |                                                                                     |
|------|------------------------|--------------------------------|----|-------------------------------------------------------------------------------------|
| 6386 | 1,3,5,6,7,1<br>1,13,17 | 2,4,8,9,10,<br>12,14,15,1<br>6 | 7  | P01946,P02091,P08937,P17046,Q63751,Q6IRE4,Q99MH3                                    |
| 6387 | 1,3,5,6,7,1<br>1,14,15 | 2,4,8,9,10,<br>12,13,16,1<br>7 | 5  | P02803,P27213,Q5I0D1,Q6IRE4,Q80WL1                                                  |
| 6388 | 1,3,5,6,7,1<br>1,14,16 | 2,4,8,9,10,<br>12,13,15,1<br>7 | 4  | P17046,P55314,Q6IRE4,Q80WL1                                                         |
| 6389 | 1,3,5,6,7,1<br>1,14,17 | 2,4,8,9,10,<br>12,13,15,1<br>6 | 6  | P01946,P02091,P08937,P17046,Q561R9,Q6IRE4                                           |
| 6390 | 1,3,5,6,7,1<br>1,15,16 | 2,4,8,9,10,<br>12,13,14,1<br>7 | 7  | O54728,P17046,P55314,Q5I0D1,Q6IRE4,Q80WL1,Q8VD89                                    |
| 6391 | 1,3,5,6,7,1<br>1,15,17 | 2,4,8,9,10,<br>12,13,14,1<br>6 | 7  | P01946,P02091,P08937,P17046,Q63751,Q6IRE4,Q80WL1                                    |
| 6392 | 1,3,5,6,7,1<br>1,16,17 | 2,4,8,9,10,<br>12,13,14,1<br>5 | 7  | P01946,P02091,P08937,P10758,P17046,P55314,Q6IRE4                                    |
| 6393 | 1,3,5,6,7,1<br>2,13,14 | 2,4,8,9,10,<br>11,15,16,1<br>7 | 7  | P06911,P08937,P17046,Q498D9,Q561R9,Q6IRE4,Q9Z1F2                                    |
| 6394 | 1,3,5,6,7,1<br>2,13,15 | 2,4,8,9,10,<br>11,14,16,1<br>7 | 5  | P08937,P17046,P19218,Q6IRE4,Q99MH3                                                  |
| 6395 | 1,3,5,6,7,1<br>2,13,16 | 2,4,8,9,10,<br>11,14,15,1<br>7 | 5  | P08937,P17046,P19218,Q561R9,Q6IRE4                                                  |
| 6396 | 1,3,5,6,7,1<br>2,13,17 | 2,4,8,9,10,<br>11,14,15,1<br>6 | 12 | P01946,P02091,P08937,P13432,P17046,P19218,P51907,Q561R9,Q63751,Q99MH3,Q9QZK9,Q9Z1F2 |
| 6397 | 1,3,5,6,7,1<br>2,14,15 | 2,4,8,9,10,<br>11,13,16,1<br>7 | 3  | A2RUV9,Q6IRE4,Q8CJD3                                                                |
| 6398 | 1,3,5,6,7,1<br>2,14,16 | 2,4,8,9,10,<br>11,13,15,1<br>7 | 5  | P17046,P20766,Q561R9,Q6IRE4,Q9ET32                                                  |
| 6399 | 1,3,5,6,7,1<br>2,14,17 | 2,4,8,9,10,<br>11,13,15,1<br>6 | 7  | P01681,P01946,P02091,P08937,P13432,P17046,Q561R9                                    |
| 6400 | 1,3,5,6,7,1<br>2,15,16 | 2,4,8,9,10,<br>11,13,14,1<br>7 | 3  | P17046,P20766,Q6IRE4                                                                |

|      |                        |                                 |    |                                                                              |
|------|------------------------|---------------------------------|----|------------------------------------------------------------------------------|
| 6401 | 1,3,5,6,7,1<br>2,15,17 | 2,4,8,9,10,<br>11,13,14,1<br>6  | 8  | P01946,P02091,P08937,P13432,P17046,Q561R9,Q63751,Q99MH3                      |
| 6402 | 1,3,5,6,7,1<br>2,16,17 | 2,4,8,9,10,<br>11,13,14,1<br>5  | 8  | P01946,P02091,P08937,P13432,P17046,Q561R9,Q6IRE4,Q99MH3                      |
| 6403 | 1,3,5,6,7,1<br>3,14,15 | 2,4,8,9,10,<br>11,12,16,1<br>7  | 3  | P53792,Q6IRE4,Q80WL1                                                         |
| 6404 | 1,3,5,6,7,1<br>3,14,16 | 2,4,8,9,10,<br>11,12,15,1<br>7  | 6  | P06866,P06911,P17046,Q561R9,Q6IRE4,Q80WL1                                    |
| 6405 | 1,3,5,6,7,1<br>3,14,17 | 2,4,8,9,10,<br>11,12,15,1<br>6  | 9  | P01946,P02091,P08937,P51907,P53792,Q561R9,Q6IRE4,Q9QW07,Q9WUW8               |
| 6406 | 1,3,5,6,7,1<br>3,15,16 | 2,4,8,9,10,<br>11,12,14,1<br>7  | 7  | O54728,P17046,P62804,Q00715,Q6IRE4,Q80WL1,Q8VD89                             |
| 6407 | 1,3,5,6,7,1<br>3,15,17 | 2,4,8,9,10,<br>11,12,14,1<br>6  | 8  | P01946,P02091,P08937,P51907,P53792,Q80WL1,Q99MH3,Q9WUW8                      |
| 6408 | 1,3,5,6,7,1<br>3,16,17 | 2,4,8,9,10,<br>11,12,14,1<br>5  | 11 | P01946,P02091,P08937,P10758,P17046,P51907,P53792,P62804,Q561R9,Q6IRE4,Q99MH3 |
| 6409 | 1,3,5,6,7,1<br>4,15,16 | 2,4,8,9,10,<br>11,12,13,1<br>7  | 4  | O54728,P02803,Q6IRE4,Q80WL1                                                  |
| 6410 | 1,3,5,6,7,1<br>4,15,17 | 2,4,8,9,10,<br>11,12,13,1<br>6  | 8  | P01946,P02091,P02803,P10536,P53792,Q561R9,Q6IRE4,Q80WL1                      |
| 6411 | 1,3,5,6,7,1<br>4,16,17 | 2,4,8,9,10,<br>11,12,13,1<br>5  | 9  | P01946,P02091,P02803,P10758,P17046,Q561R9,Q6IRE4,Q80WL1,Q9QW07               |
| 6412 | 1,3,5,6,7,1<br>5,16,17 | 2,4,8,9,10,<br>11,12,13,1<br>4  | 6  | P02091,P02803,P17046,Q561R9,Q6IRE4,Q80WL1                                    |
| 6413 | 1,3,5,6,8,9<br>,10,11  | 2,4,7,12,1<br>3,14,15,16<br>,17 | 6  | D3ZUC6,P04041,P08649,P27213,Q6IRE4,Q9QUL6                                    |
| 6414 | 1,3,5,6,8,9<br>,10,12  | 2,4,7,11,1<br>3,14,15,16<br>,17 | 6  | F1LM93,P27213,Q6IFW6,Q6IG02,Q6IMF3,Q6P6Q2                                    |
| 6415 | 1,3,5,6,8,9<br>,10,13  | 2,4,7,11,1<br>2,14,15,16<br>,17 | 3  | D3ZUC6,P06866,P51907                                                         |



|      |                       |                                 |    |                                                                                     |
|------|-----------------------|---------------------------------|----|-------------------------------------------------------------------------------------|
| 6416 | 1,3,5,6,8,9<br>,10,14 | 2,4,7,11,1<br>2,13,15,16<br>,17 | 3  | P06866,P27213,Q6IRE4                                                                |
| 6417 | 1,3,5,6,8,9<br>,10,15 | 2,4,7,11,1<br>2,13,14,16<br>,17 | 4  | D3ZUC6,O54728,O55006,P27213                                                         |
| 6418 | 1,3,5,6,8,9<br>,10,16 | 2,4,7,11,1<br>2,13,14,15<br>,17 | 4  | D3ZUC6,P23593,Q63942,Q6IRE4                                                         |
| 6419 | 1,3,5,6,8,9<br>,10,17 | 2,4,7,11,1<br>2,13,14,15<br>,16 | 6  | D3ZUC6,P06760,P08649,P23593,P51907,Q99MH3                                           |
| 6420 | 1,3,5,6,8,9<br>,11,12 | 2,4,7,10,1<br>3,14,15,16<br>,17 | 11 | O35547,P01681,P27213,Q4FZU2,Q5M8C6,Q6IFU8,Q6IFW6,Q6IG02,Q6IMF3,Q6IRE4,Q6P6Q2        |
| 6421 | 1,3,5,6,8,9<br>,11,13 | 2,4,7,10,1<br>2,14,15,16<br>,17 | 4  | P01048,P06866,Q6IRE4,Q9Z1F2                                                         |
| 6422 | 1,3,5,6,8,9<br>,11,14 | 2,4,7,10,1<br>2,13,15,16<br>,17 | 4  | P02793,Q7TP54,P06866,P27213,Q6IRE4                                                  |
| 6423 | 1,3,5,6,8,9<br>,11,15 | 2,4,7,10,1<br>2,13,14,16<br>,17 | 5  | O54728,P14480,P27213,Q5I0D1,Q6IRE4                                                  |
| 6424 | 1,3,5,6,8,9<br>,11,16 | 2,4,7,10,1<br>2,13,14,15<br>,17 | 3  | P14668,P55314,Q6IRE4                                                                |
| 6425 | 1,3,5,6,8,9<br>,11,17 | 2,4,7,10,1<br>2,13,14,15<br>,16 | 6  | P01681,P06760,P08649,Q63532,Q6IRE4,Q9QUL6                                           |
| 6426 | 1,3,5,6,8,9<br>,12,13 | 2,4,7,10,1<br>1,14,15,16<br>,17 | 7  | P02782,P51907,P82995,Q5M8C6,Q6IG02,Q6IRE4,Q9Z1F2                                    |
| 6427 | 1,3,5,6,8,9<br>,12,14 | 2,4,7,10,1<br>1,13,15,16<br>,17 | 4  | P01835,Q6IG02,Q6IRE4,Q9Z1F2                                                         |
| 6428 | 1,3,5,6,8,9<br>,12,15 | 2,4,7,10,1<br>1,13,14,16<br>,17 | 1  | Q6IG02                                                                              |
| 6429 | 1,3,5,6,8,9<br>,12,16 | 2,4,7,10,1<br>1,13,14,15<br>,17 | 3  | P23593,Q6IG02,Q6IRE4                                                                |
| 6430 | 1,3,5,6,8,9<br>,12,17 | 2,4,7,10,1<br>1,13,14,15<br>,16 | 12 | P01681,P01835,P06760,P13432,P16636,P23593,P51907,Q561R9,Q5M8C6,Q6IG02,Q99MH3,Q9Z1F2 |

|      |                        |                                 |    |                                                                                                   |
|------|------------------------|---------------------------------|----|---------------------------------------------------------------------------------------------------|
| 6431 | 1,3,5,6,8,9<br>,13,14  | 2,4,7,10,1<br>1,12,15,16<br>,17 | 6  | P06866,P08753,P51907,P53792,Q6IRE4,Q9Z1F2                                                         |
| 6432 | 1,3,5,6,8,9<br>,13,15  | 2,4,7,10,1<br>1,12,14,16<br>,17 | 5  | O54728,P51907,P53792,P82995,Q6IRE4                                                                |
| 6433 | 1,3,5,6,8,9<br>,13,16  | 2,4,7,10,1<br>1,12,14,15<br>,17 | 4  | P06866,P23593,P51907,Q6IRE4                                                                       |
| 6434 | 1,3,5,6,8,9<br>,13,17  | 2,4,7,10,1<br>1,12,14,15<br>,16 | 7  | P06760,P08753,P23593,P51907,P53792,Q63532,Q9Z1F2                                                  |
| 6435 | 1,3,5,6,8,9<br>,14,15  | 2,4,7,10,1<br>1,12,13,16<br>,17 | 5  | O54728,P14480,P53792,Q63942,Q6IRE4                                                                |
| 6436 | 1,3,5,6,8,9<br>,14,16  | 2,4,7,10,1<br>1,12,13,15<br>,17 | 3  | P06866,Q63942,Q6IRE4                                                                              |
| 6437 | 1,3,5,6,8,9<br>,14,17  | 2,4,7,10,1<br>1,12,13,15<br>,16 | 6  | P02793,Q7TP54,P06760,P47967,P51907,P53792,Q561R9                                                  |
| 6438 | 1,3,5,6,8,9<br>,15,16  | 2,4,7,10,1<br>1,12,13,14<br>,17 | 4  | O54728,P23593,Q63942,Q6IRE4                                                                       |
| 6439 | 1,3,5,6,8,9<br>,15,17  | 2,4,7,10,1<br>1,12,13,14<br>,16 | 6  | P06760,P23593,P47967,P51907,P53792,Q63532                                                         |
| 6440 | 1,3,5,6,8,9<br>,16,17  | 2,4,7,10,1<br>1,12,13,14<br>,15 | 6  | P06760,P23593,P42854,P51907,Q561R9,Q6IRE4                                                         |
| 6441 | 1,3,5,6,8,1<br>0,11,12 | 2,4,7,9,13,<br>14,15,16,1<br>7  | 14 | F1LM93,O35547,P01681,P02781,P16636,P27213,Q10758,Q4FZU2,Q6IFU7,Q6IFU8,Q6IFW6,Q6IG02,Q6IMF3,Q6P6Q2 |
| 6442 | 1,3,5,6,8,1<br>0,11,13 | 2,4,7,9,12,<br>14,15,16,1<br>7  | 2  | D3ZUC6,Q6IRE4                                                                                     |
| 6443 | 1,3,5,6,8,1<br>0,11,14 | 2,4,7,9,12,<br>13,15,16,1<br>7  | 4  | P08649,P27213,P47727,Q6IRE4                                                                       |
| 6444 | 1,3,5,6,8,1<br>0,11,15 | 2,4,7,9,12,<br>13,14,16,1<br>7  | 5  | D3ZUC6,P08649,P27213,Q5I0D1,Q6IRE4                                                                |
| 6445 | 1,3,5,6,8,1<br>0,11,16 | 2,4,7,9,12,<br>13,14,15,1<br>7  | 3  | P08649,P55314,Q6IRE4                                                                              |

|      |                        |                                |    |                                                                                                          |
|------|------------------------|--------------------------------|----|----------------------------------------------------------------------------------------------------------|
| 6446 | 1,3,5,6,8,1<br>0,11,17 | 2,4,7,9,12,<br>13,14,15,1<br>6 | 7  | D3ZUC6,P01681,P04041,P06760,P08649,P16636,Q99MH3                                                         |
| 6447 | 1,3,5,6,8,1<br>0,12,13 | 2,4,7,9,11,<br>14,15,16,1<br>7 | 6  | P02782,P82995,Q498D9,Q6IG02,Q99MH3,Q9Z1F2                                                                |
| 6448 | 1,3,5,6,8,1<br>0,12,14 | 2,4,7,9,11,<br>13,15,16,1<br>7 | 6  | Q10758,Q498D9,Q6IFW6,Q6IG02,Q6IMF3,Q6P6Q2                                                                |
| 6449 | 1,3,5,6,8,1<br>0,12,15 | 2,4,7,9,11,<br>13,14,16,1<br>7 | 5  | Q4FZU2,Q6IFV1,Q6IG02,Q6IMF3,Q99MH3                                                                       |
| 6450 | 1,3,5,6,8,1<br>0,12,16 | 2,4,7,9,11,<br>13,14,15,1<br>7 | 7  | Q10758,Q4FZU2,Q6IFW6,Q6IG02,Q6IMF3,Q6IRE4,Q6P6Q2                                                         |
| 6451 | 1,3,5,6,8,1<br>0,12,17 | 2,4,7,9,11,<br>13,14,15,1<br>6 | 15 | F1LM93,P01681,P06760,P08937,P13432,P16636,Q08463,Q10758,Q561R9,Q6IFV1,Q6IFW6,Q6IG02,Q6IMF3,Q99MH3,Q9QZK9 |
| 6452 | 1,3,5,6,8,1<br>0,13,14 | 2,4,7,9,11,<br>12,15,16,1<br>7 | 5  | P06866,P06911,P51907,Q498D9,Q9Z1F2                                                                       |
| 6453 | 1,3,5,6,8,1<br>0,13,15 | 2,4,7,9,11,<br>12,14,16,1<br>7 | 4  | D3ZUC6,P82995,Q6IFV1,Q99MH3                                                                              |
| 6454 | 1,3,5,6,8,1<br>0,13,16 | 2,4,7,9,11,<br>12,14,15,1<br>7 | 4  | D3ZUC6,P51907,Q6AYQ8,Q6IRE4                                                                              |
| 6455 | 1,3,5,6,8,1<br>0,13,17 | 2,4,7,9,11,<br>12,14,15,1<br>6 | 6  | D3ZUC6,P06760,P08753,P51907,Q6IFV1,Q99MH3                                                                |
| 6456 | 1,3,5,6,8,1<br>0,14,15 | 2,4,7,9,11,<br>12,13,16,1<br>7 | 0  |                                                                                                          |
| 6457 | 1,3,5,6,8,1<br>0,14,16 | 2,4,7,9,11,<br>12,13,15,1<br>7 | 1  | Q6IRE4                                                                                                   |
| 6458 | 1,3,5,6,8,1<br>0,14,17 | 2,4,7,9,11,<br>12,13,15,1<br>6 | 3  | P06760,P51907,Q561R9                                                                                     |
| 6459 | 1,3,5,6,8,1<br>0,15,16 | 2,4,7,9,11,<br>12,13,14,1<br>7 | 1  | Q6IRE4                                                                                                   |
| 6460 | 1,3,5,6,8,1<br>0,15,17 | 2,4,7,9,11,<br>12,13,14,1<br>6 | 4  | D3ZUC6,P06760,Q6IFV1,Q99MH3                                                                              |

|      |                        |                                |    |                                                                                                                               |
|------|------------------------|--------------------------------|----|-------------------------------------------------------------------------------------------------------------------------------|
| 6461 | 1,3,5,6,8,1<br>0,16,17 | 2,4,7,9,11,<br>12,13,14,1<br>5 | 6  | P06760,P23593,P25031,P42854,P51907,Q99MH3                                                                                     |
| 6462 | 1,3,5,6,8,1<br>1,12,13 | 2,4,7,9,10,<br>14,15,16,1<br>7 | 15 | O35547,P01681,P02781,P02782,P08937,P30120,Q4FZU2,Q5M8C6,Q6IFW6,Q6IG02,Q6IMF3,Q6IRE4,Q6P6Q2,Q9JHB9,Q9Z1F2                      |
| 6463 | 1,3,5,6,8,1<br>1,12,14 | 2,4,7,9,10,<br>13,15,16,1<br>7 | 14 | O35547,P01681,P02782,P30120,P47727,Q4FZU2,Q5I0D1,Q6IFU8,Q6IFW6,Q6IG02,Q6IMF3,Q6IRE4,Q6P6Q2,Q9Z1F2                             |
| 6464 | 1,3,5,6,8,1<br>1,12,15 | 2,4,7,9,10,<br>13,14,16,1<br>7 | 9  | O35547,P01681,Q4FZU2,Q5I0D1,Q6IFW6,Q6IG02,Q6IMF3,Q6IRE4,Q6P6Q2                                                                |
| 6465 | 1,3,5,6,8,1<br>1,12,16 | 2,4,7,9,10,<br>13,14,15,1<br>7 | 12 | O35547,P01681,P17046,P55314,Q4FZU2,Q6IFU7,Q6IFU8,Q6IFW6,Q6IG02,Q6IMF3,Q6IRE4,Q6P6Q2                                           |
| 6466 | 1,3,5,6,8,1<br>1,12,17 | 2,4,7,9,10,<br>13,14,15,1<br>6 | 18 | O35547,P01681,P02782,P06760,P08937,P13432,P16636,Q4FZU2,Q4G075,Q5M8C6,Q63751,Q6IFU8,Q6IFW6,Q6IG02,Q6IMF3,Q6P6Q2,Q99MH3,Q9QZK9 |
| 6467 | 1,3,5,6,8,1<br>1,13,14 | 2,4,7,9,10,<br>12,15,16,1<br>7 | 5  | P06866,P47727,Q64093,Q6IRE4,Q9Z1F2                                                                                            |
| 6468 | 1,3,5,6,8,1<br>1,13,15 | 2,4,7,9,10,<br>12,14,16,1<br>7 | 3  | P82995,Q5I0D1,Q6IRE4                                                                                                          |
| 6469 | 1,3,5,6,8,1<br>1,13,16 | 2,4,7,9,10,<br>12,14,15,1<br>7 | 3  | P17046,P55314,Q6IRE4                                                                                                          |
| 6470 | 1,3,5,6,8,1<br>1,13,17 | 2,4,7,9,10,<br>12,14,15,1<br>6 | 5  | P01681,P06760,P08937,P51907,Q99MH3                                                                                            |
| 6471 | 1,3,5,6,8,1<br>1,14,15 | 2,4,7,9,10,<br>12,13,16,1<br>7 | 4  | P14480,P97840,Q5I0D1,Q6IRE4                                                                                                   |
| 6472 | 1,3,5,6,8,1<br>1,14,16 | 2,4,7,9,10,<br>12,13,15,1<br>7 | 4  | P14668,P55314,Q5I0D1,Q6IRE4                                                                                                   |
| 6473 | 1,3,5,6,8,1<br>1,14,17 | 2,4,7,9,10,<br>12,13,15,1<br>6 | 5  | P01681,P02793,Q7TP54,P06760,P47967,P97840                                                                                     |
| 6474 | 1,3,5,6,8,1<br>1,15,16 | 2,4,7,9,10,<br>12,13,14,1<br>7 | 4  | P14668,P55314,Q5I0D1,Q6IRE4                                                                                                   |
| 6475 | 1,3,5,6,8,1<br>1,15,17 | 2,4,7,9,10,<br>12,13,14,1<br>6 | 4  | P06760,P47967,P97840,Q5I0D1                                                                                                   |

|      |                        |                                |    |                                                                                                   |
|------|------------------------|--------------------------------|----|---------------------------------------------------------------------------------------------------|
| 6476 | 1,3,5,6,8,1<br>1,16,17 | 2,4,7,9,10,<br>12,13,14,1<br>5 | 4  | P01681,P06760,P55314,Q6IRE4                                                                       |
| 6477 | 1,3,5,6,8,1<br>2,13,14 | 2,4,7,9,10,<br>11,15,16,1<br>7 | 9  | P02782,P06911,P30120,P51907,Q498D9,Q561R9,Q64093,Q6IG02,Q9Z1F2                                    |
| 6478 | 1,3,5,6,8,1<br>2,13,15 | 2,4,7,9,10,<br>11,14,16,1<br>7 | 5  | P82995,Q6IFV1,Q6IG02,Q99MH3,Q9Z1F2                                                                |
| 6479 | 1,3,5,6,8,1<br>2,13,16 | 2,4,7,9,10,<br>11,14,15,1<br>7 | 6  | P17046,P51907,P82995,Q6IG02,Q6IRE4,Q9Z1F2                                                         |
| 6480 | 1,3,5,6,8,1<br>2,13,17 | 2,4,7,9,10,<br>11,14,15,1<br>6 | 14 | P01681,P02782,P06760,P08937,P13432,P16636,P51907,Q561R9,Q5M8C6,Q6IFV1,Q6IG02,Q99MH3,Q9QZK9,Q9Z1F2 |
| 6481 | 1,3,5,6,8,1<br>2,14,15 | 2,4,7,9,10,<br>11,13,16,1<br>7 | 1  | Q6IG02                                                                                            |
| 6482 | 1,3,5,6,8,1<br>2,14,16 | 2,4,7,9,10,<br>11,13,15,1<br>7 | 4  | Q561R9,Q6IFW6,Q6IG02,Q6IRE4                                                                       |
| 6483 | 1,3,5,6,8,1<br>2,14,17 | 2,4,7,9,10,<br>11,13,15,1<br>6 | 12 | O70594,P01681,P02793;Q7TP54,P06760,P08937,P13432,P51907,Q10758,Q561R9,Q6IG02,Q99PP0,Q9Z1F2        |
| 6484 | 1,3,5,6,8,1<br>2,15,16 | 2,4,7,9,10,<br>11,13,14,1<br>7 | 2  | Q6IG02,Q6IRE4                                                                                     |
| 6485 | 1,3,5,6,8,1<br>2,15,17 | 2,4,7,9,10,<br>11,13,14,1<br>6 | 7  | P01681,P06760,P08937,P13432,Q6IFV1,Q6IG02,Q99MH3                                                  |
| 6486 | 1,3,5,6,8,1<br>2,16,17 | 2,4,7,9,10,<br>11,13,14,1<br>5 | 9  | P01681,P06760,P13432,P23593,P51907,Q561R9,Q5XFX0,Q6IG02,Q99MH3                                    |
| 6487 | 1,3,5,6,8,1<br>3,14,15 | 2,4,7,9,10,<br>11,12,16,1<br>7 | 8  | P06757,P06866,P08753,P51907,P53792,P82995,Q64093,Q9Z1F2                                           |
| 6488 | 1,3,5,6,8,1<br>3,14,16 | 2,4,7,9,10,<br>11,12,15,1<br>7 | 6  | P06866,P08753,P51907,Q561R9,Q6IRE4,Q9Z1F2                                                         |
| 6489 | 1,3,5,6,8,1<br>3,14,17 | 2,4,7,9,10,<br>11,12,15,1<br>6 | 11 | O70594,P06760,P08753,P10536,P47967,P51907,P53792,Q561R9,Q64093,Q9QW07,Q9Z1F2                      |
| 6490 | 1,3,5,6,8,1<br>3,15,16 | 2,4,7,9,10,<br>11,12,14,1<br>7 | 3  | P08753,P82995,Q6IRE4                                                                              |

|      |                        |                                |   |                                                                       |
|------|------------------------|--------------------------------|---|-----------------------------------------------------------------------|
| 6491 | 1,3,5,6,8,1<br>3,15,17 | 2,4,7,9,10,<br>11,12,14,1<br>6 | 8 | P06760,P08753,P10536,P47967,P51907,P53792,Q6IFV1,Q99MH3               |
| 6492 | 1,3,5,6,8,1<br>3,16,17 | 2,4,7,9,10,<br>11,12,14,1<br>5 | 9 | P06760,P08753,P23593,P42854,P51907,Q561R9,Q6IRE4,Q6PCU2,Q99MH3        |
| 6493 | 1,3,5,6,8,1<br>4,15,16 | 2,4,7,9,10,<br>11,12,13,1<br>7 | 2 | P02803,Q6IRE4                                                         |
| 6494 | 1,3,5,6,8,1<br>4,15,17 | 2,4,7,9,10,<br>11,12,13,1<br>6 | 9 | P02793;Q7TP54,P02803,P06760,P10536,P47967,P51907,P97840,Q561R9,Q9QW07 |
| 6495 | 1,3,5,6,8,1<br>4,16,17 | 2,4,7,9,10,<br>11,12,13,1<br>5 | 6 | P06760,P42854,P51907,Q561R9,Q6IRE4,Q9QW07                             |
| 6496 | 1,3,5,6,8,1<br>5,16,17 | 2,4,7,9,10,<br>11,12,13,1<br>4 | 3 | P06760,P23593,Q5XFX0                                                  |
| 6497 | 1,3,5,6,9,1<br>0,11,12 | 2,4,7,8,13,<br>14,15,16,1<br>7 | 9 | P27213,Q4FZU2,Q6IFU7,Q6IFU8,Q6IFW6,Q6IG02,Q6IMF3,Q6IRE4,Q6P6Q2        |
| 6498 | 1,3,5,6,9,1<br>0,11,13 | 2,4,7,8,12,<br>14,15,16,1<br>7 | 2 | Q6IRE4,Q80WL1                                                         |
| 6499 | 1,3,5,6,9,1<br>0,11,14 | 2,4,7,8,12,<br>13,15,16,1<br>7 | 5 | P27213,P55091,Q6IRE4,Q80WL1,Q9QUL6                                    |
| 6500 | 1,3,5,6,9,1<br>0,11,15 | 2,4,7,8,12,<br>13,14,16,1<br>7 | 6 | O54728,P27213,P55091,Q6IRE4,Q80WL1,Q9QUL6                             |
| 6501 | 1,3,5,6,9,1<br>0,11,16 | 2,4,7,8,12,<br>13,14,15,1<br>7 | 6 | P55091,P55314,Q62635,Q6IRE4,Q80WL1,Q9QUL6                             |
| 6502 | 1,3,5,6,9,1<br>0,11,17 | 2,4,7,8,12,<br>13,14,15,1<br>6 | 4 | P18427,Q6IRE4,Q80WL1,Q9QUL6                                           |
| 6503 | 1,3,5,6,9,1<br>0,12,13 | 2,4,7,8,11,<br>14,15,16,1<br>7 | 4 | P19218,Q6IG02,Q6IRE4,Q99MH3                                           |
| 6504 | 1,3,5,6,9,1<br>0,12,14 | 2,4,7,8,11,<br>13,15,16,1<br>7 | 5 | P01835,Q10758,Q6IG02,Q6IMF3,Q6IRE4                                    |
| 6505 | 1,3,5,6,9,1<br>0,12,15 | 2,4,7,8,11,<br>13,14,16,1<br>7 | 1 | Q6IG02                                                                |

|      |                        |                                |   |                                                         |
|------|------------------------|--------------------------------|---|---------------------------------------------------------|
| 6506 | 1,3,5,6,9,1<br>0,12,16 | 2,4,7,8,11,<br>13,14,15,1<br>7 | 4 | Q6IFW6,Q6IG02,Q6IMF3,Q6IRE4                             |
| 6507 | 1,3,5,6,9,1<br>0,12,17 | 2,4,7,8,11,<br>13,14,15,1<br>6 | 5 | P01835,P23593,Q10758,Q6IG02,Q99MH3                      |
| 6508 | 1,3,5,6,9,1<br>0,13,14 | 2,4,7,8,11,<br>12,15,16,1<br>7 | 4 | P06866,P19223,Q6IRE4,Q80WL1                             |
| 6509 | 1,3,5,6,9,1<br>0,13,15 | 2,4,7,8,11,<br>12,14,16,1<br>7 | 4 | O54728,Q5U2V4,Q6IRE4,Q80WL1                             |
| 6510 | 1,3,5,6,9,1<br>0,13,16 | 2,4,7,8,11,<br>12,14,15,1<br>7 | 7 | P19223,P55091,Q00715,Q6AYQ8,Q6IRE4,Q80WL1,Q9QZA6        |
| 6511 | 1,3,5,6,9,1<br>0,13,17 | 2,4,7,8,11,<br>12,14,15,1<br>6 | 3 | P51907,Q80WL1,Q99MH3                                    |
| 6512 | 1,3,5,6,9,1<br>0,14,15 | 2,4,7,8,11,<br>12,13,16,1<br>7 | 4 | O54728,P55091,Q6IRE4,Q80WL1                             |
| 6513 | 1,3,5,6,9,1<br>0,14,16 | 2,4,7,8,11,<br>12,13,15,1<br>7 | 4 | P19223,P55091,Q6IRE4,Q80WL1                             |
| 6514 | 1,3,5,6,9,1<br>0,14,17 | 2,4,7,8,11,<br>12,13,15,1<br>6 | 4 | P08689,P18427,Q80WL1,Q9QUL6                             |
| 6515 | 1,3,5,6,9,1<br>0,15,16 | 2,4,7,8,11,<br>12,13,14,1<br>7 | 5 | O54728,P55091,Q62635,Q6IRE4,Q80WL1                      |
| 6516 | 1,3,5,6,9,1<br>0,15,17 | 2,4,7,8,11,<br>12,13,14,1<br>6 | 3 | P23593,Q80WL1,Q99MH3                                    |
| 6517 | 1,3,5,6,9,1<br>0,16,17 | 2,4,7,8,11,<br>12,13,14,1<br>5 | 3 | P23593,Q6IRE4,Q80WL1                                    |
| 6518 | 1,3,5,6,9,1<br>1,12,13 | 2,4,7,8,10,<br>14,15,16,1<br>7 | 4 | Q6IFW6,Q6IG02,Q6IRE4,Q6P6Q2                             |
| 6519 | 1,3,5,6,9,1<br>1,12,14 | 2,4,7,8,10,<br>13,15,16,1<br>7 | 8 | P01835,Q4FZU2,Q6IFU8,Q6IFW6,Q6IG02,Q6IMF3,Q6IRE4,Q6P6Q2 |
| 6520 | 1,3,5,6,9,1<br>1,12,15 | 2,4,7,8,10,<br>13,14,16,1<br>7 | 5 | P27213,Q4FZU2,Q6IFW6,Q6IG02,Q6IRE4                      |

|      |                        |                                |    |                                                                       |
|------|------------------------|--------------------------------|----|-----------------------------------------------------------------------|
| 6521 | 1,3,5,6,9,1<br>1,12,16 | 2,4,7,8,10,<br>13,14,15,1<br>7 | 10 | P17046,P55314,Q4FZU2,Q6IFU7,Q6IFU8,Q6IFW6,Q6IG02,Q6IMF3,Q6IRE4,Q6P6Q2 |
| 6522 | 1,3,5,6,9,1<br>1,12,17 | 2,4,7,8,10,<br>13,14,15,1<br>6 | 10 | P01681,P01835,P13432,Q4FZU2,Q6IFU8,Q6IFW6,Q6IG02,Q6IMF3,Q6IRE4,Q6P6Q2 |
| 6523 | 1,3,5,6,9,1<br>1,13,14 | 2,4,7,8,10,<br>12,15,16,1<br>7 | 4  | P06866,P19223,Q6IRE4,Q80WL1                                           |
| 6524 | 1,3,5,6,9,1<br>1,13,15 | 2,4,7,8,10,<br>12,14,16,1<br>7 | 4  | O54728,P19223,Q6IRE4,Q80WL1                                           |
| 6525 | 1,3,5,6,9,1<br>1,13,16 | 2,4,7,8,10,<br>12,14,15,1<br>7 | 6  | P17046,P19223,P55091,P55314,Q6IRE4,Q80WL1                             |
| 6526 | 1,3,5,6,9,1<br>1,13,17 | 2,4,7,8,10,<br>12,14,15,1<br>6 | 2  | Q6IRE4,Q80WL1                                                         |
| 6527 | 1,3,5,6,9,1<br>1,14,15 | 2,4,7,8,10,<br>12,13,16,1<br>7 | 7  | O54728,P14480,P19223,P27213,P55091,Q6IRE4,Q80WL1                      |
| 6528 | 1,3,5,6,9,1<br>1,14,16 | 2,4,7,8,10,<br>12,13,15,1<br>7 | 5  | P19223,P55091,P55314,Q6IRE4,Q80WL1                                    |
| 6529 | 1,3,5,6,9,1<br>1,14,17 | 2,4,7,8,10,<br>12,13,15,1<br>6 | 5  | P01835,P04218,Q6IRE4,Q80WL1,Q9QUL6                                    |
| 6530 | 1,3,5,6,9,1<br>1,15,16 | 2,4,7,8,10,<br>12,13,14,1<br>7 | 7  | O54728,P19223,P55091,P55314,Q62635,Q6IRE4,Q80WL1                      |
| 6531 | 1,3,5,6,9,1<br>1,15,17 | 2,4,7,8,10,<br>12,13,14,1<br>6 | 3  | Q6IRE4,Q80WL1,Q9QUL6                                                  |
| 6532 | 1,3,5,6,9,1<br>1,16,17 | 2,4,7,8,10,<br>12,13,14,1<br>5 | 5  | P04218,P55314,Q6IRE4,Q80WL1,Q9QUL6                                    |
| 6533 | 1,3,5,6,9,1<br>2,13,14 | 2,4,7,8,10,<br>11,15,16,1<br>7 | 3  | P01835,Q6IRE4,Q9Z1F2                                                  |
| 6534 | 1,3,5,6,9,1<br>2,13,15 | 2,4,7,8,10,<br>11,14,16,1<br>7 | 3  | P00714,P82995,Q6IRE4                                                  |
| 6535 | 1,3,5,6,9,1<br>2,13,16 | 2,4,7,8,10,<br>11,14,15,1<br>7 | 4  | P02761,P17046,P19218,Q6IRE4                                           |



|      |                        |                                |    |                                                                       |
|------|------------------------|--------------------------------|----|-----------------------------------------------------------------------|
| 6536 | 1,3,5,6,9,1<br>2,13,17 | 2,4,7,8,10,<br>11,14,15,1<br>6 | 7  | P00714,P01835,P35280,P51907,P53792,Q561R9,Q99MH3                      |
| 6537 | 1,3,5,6,9,1<br>2,14,15 | 2,4,7,8,10,<br>11,13,16,1<br>7 | 3  | P01835,Q6IRE4,Q80WL1                                                  |
| 6538 | 1,3,5,6,9,1<br>2,14,16 | 2,4,7,8,10,<br>11,13,15,1<br>7 | 2  | P01835,Q6IRE4                                                         |
| 6539 | 1,3,5,6,9,1<br>2,14,17 | 2,4,7,8,10,<br>11,13,15,1<br>6 | 4  | P01681,P01835,Q561R9,Q99PP0                                           |
| 6540 | 1,3,5,6,9,1<br>2,15,16 | 2,4,7,8,10,<br>11,13,14,1<br>7 | 3  | O54728,Q6IRE4,Q80WL1                                                  |
| 6541 | 1,3,5,6,9,1<br>2,15,17 | 2,4,7,8,10,<br>11,13,14,1<br>6 | 4  | P00714,P01835,P23593,Q99MH3                                           |
| 6542 | 1,3,5,6,9,1<br>2,16,17 | 2,4,7,8,10,<br>11,13,14,1<br>5 | 5  | P01835,P23593,P35280,Q561R9,Q6IRE4                                    |
| 6543 | 1,3,5,6,9,1<br>3,14,15 | 2,4,7,8,10,<br>11,12,16,1<br>7 | 6  | O54728,P00714,P19223,P53792,Q6IRE4,Q80WL1                             |
| 6544 | 1,3,5,6,9,1<br>3,14,16 | 2,4,7,8,10,<br>11,12,15,1<br>7 | 10 | P00714,P01015,P02761,P06866,P19223,P53792,P62804,Q00715,Q6IRE4,Q80WL1 |
| 6545 | 1,3,5,6,9,1<br>3,14,17 | 2,4,7,8,10,<br>11,12,15,1<br>6 | 8  | P00714,P35280,P51907,P53792,Q561R9,Q6IRE4,Q80WL1,Q9QW07               |
| 6546 | 1,3,5,6,9,1<br>3,15,16 | 2,4,7,8,10,<br>11,12,14,1<br>7 | 8  | O54728,P00714,P19223,P55091,P62804,Q00715,Q6IRE4,Q80WL1               |
| 6547 | 1,3,5,6,9,1<br>3,15,17 | 2,4,7,8,10,<br>11,12,14,1<br>6 | 4  | P00714,P51907,P53792,Q80WL1                                           |
| 6548 | 1,3,5,6,9,1<br>3,16,17 | 2,4,7,8,10,<br>11,12,14,1<br>5 | 10 | P00714,P23593,P35280,P51907,P53792,P62804,Q00715,Q561R9,Q6IRE4,Q80WL1 |
| 6549 | 1,3,5,6,9,1<br>4,15,16 | 2,4,7,8,10,<br>11,12,13,1<br>7 | 6  | O54728,P19223,P55091,Q62635,Q6IRE4,Q80WL1                             |
| 6550 | 1,3,5,6,9,1<br>4,15,17 | 2,4,7,8,10,<br>11,12,13,1<br>6 | 5  | P00714,P02803,P47967,P53792,Q80WL1                                    |

|      |                         |                                |    |                                                                                     |
|------|-------------------------|--------------------------------|----|-------------------------------------------------------------------------------------|
| 6551 | 1,3,5,6,9,1<br>4,16,17  | 2,4,7,8,10,<br>11,12,13,1<br>5 | 4  | P00714,Q561R9,Q6IRE4,Q80WL1                                                         |
| 6552 | 1,3,5,6,9,1<br>5,16,17  | 2,4,7,8,10,<br>11,12,13,1<br>4 | 6  | O54728,P00714,P23593,P47727,Q6IRE4,Q80WL1                                           |
| 6553 | 1,3,5,6,10,<br>11,12,13 | 2,4,7,8,9,1<br>4,15,16,17      | 8  | Q4FZU2,Q6IFU7,Q6IFW6,Q6IG02,Q6IMF3,Q6IRE4,Q6P6Q2,Q99MH3                             |
| 6554 | 1,3,5,6,10,<br>11,12,14 | 2,4,7,8,9,1<br>3,15,16,17      | 10 | P47727,Q10758,Q4FZU2,Q6IFU7,Q6IFU8,Q6IFW6,Q6IG02,Q6IMF3,Q6IRE4,Q6P6Q2               |
| 6555 | 1,3,5,6,10,<br>11,12,15 | 2,4,7,8,9,1<br>3,14,16,17      | 9  | P20766,Q4FZU2,Q6IFU7,Q6IFU8,Q6IFW6,Q6IG02,Q6IMF3,Q6IRE4,Q6P6Q2                      |
| 6556 | 1,3,5,6,10,<br>11,12,16 | 2,4,7,8,9,1<br>3,14,15,17      | 12 | P17046,P20766,P55314,Q10758,Q4FZU2,Q6IFU7,Q6IFU8,Q6IFW6,Q6IG02,Q6IMF3,Q6IRE4,Q6P6Q2 |
| 6557 | 1,3,5,6,10,<br>11,12,17 | 2,4,7,8,9,1<br>3,14,15,16      | 12 | O08815,P01681,P16636,Q10758,Q4FZU2,Q6IFU8,Q6IFW6,Q6IG02,Q6IMF3,Q6P6Q2,Q99MH3,Q9QZK9 |
| 6558 | 1,3,5,6,10,<br>11,13,14 | 2,4,7,8,9,1<br>2,15,16,17      | 4  | P19223,P47727,Q6IRE4,Q80WL1                                                         |
| 6559 | 1,3,5,6,10,<br>11,13,15 | 2,4,7,8,9,1<br>2,14,16,17      | 3  | P19223,Q6IRE4,Q80WL1                                                                |
| 6560 | 1,3,5,6,10,<br>11,13,16 | 2,4,7,8,9,1<br>2,14,15,17      | 5  | P17046,P19223,P55314,Q6IRE4,Q80WL1                                                  |
| 6561 | 1,3,5,6,10,<br>11,13,17 | 2,4,7,8,9,1<br>2,14,15,16      | 1  | Q99MH3                                                                              |
| 6562 | 1,3,5,6,10,<br>11,14,15 | 2,4,7,8,9,1<br>2,13,16,17      | 4  | P19223,P55091,Q6IRE4,Q80WL1                                                         |
| 6563 | 1,3,5,6,10,<br>11,14,16 | 2,4,7,8,9,1<br>2,13,15,17      | 5  | P19223,P55091,P55314,Q6IRE4,Q80WL1                                                  |
| 6564 | 1,3,5,6,10,<br>11,14,17 | 2,4,7,8,9,1<br>2,13,15,16      | 4  | P08689,P18427,Q80WL1,Q9QUL6                                                         |
| 6565 | 1,3,5,6,10,<br>11,15,16 | 2,4,7,8,9,1<br>2,13,14,17      | 6  | P19223,P20766,P55091,P55314,Q6IRE4,Q80WL1                                           |
| 6566 | 1,3,5,6,10,<br>11,15,17 | 2,4,7,8,9,1<br>2,13,14,16      | 2  | Q80WL1,Q99MH3                                                                       |
| 6567 | 1,3,5,6,10,<br>11,16,17 | 2,4,7,8,9,1<br>2,13,14,15      | 3  | P55314,Q6IRE4,Q80WL1                                                                |
| 6568 | 1,3,5,6,10,<br>12,13,14 | 2,4,7,8,9,1<br>1,15,16,17      | 4  | Q05175,Q10758,Q498D9,Q6IG02                                                         |
| 6569 | 1,3,5,6,10,<br>12,13,15 | 2,4,7,8,9,1<br>1,14,16,17      | 3  | P82995,Q498D9,Q99MH3                                                                |
| 6570 | 1,3,5,6,10,<br>12,13,16 | 2,4,7,8,9,1<br>1,14,15,17      | 6  | P17046,P19218,P82995,Q6IG02,Q6IRE4,Q99MH3                                           |
| 6571 | 1,3,5,6,10,<br>12,13,17 | 2,4,7,8,9,1<br>1,14,15,16      | 6  | Q05175,Q10758,Q561R9,Q6IG02,Q99MH3,Q9QZK9                                           |
| 6572 | 1,3,5,6,10,<br>12,14,15 | 2,4,7,8,9,1<br>1,13,16,17      | 4  | P20766,Q498D9,Q4FZU2,Q6IG02                                                         |

|      |                                                |    |                                                                                     |
|------|------------------------------------------------|----|-------------------------------------------------------------------------------------|
| 6573 | 1,3,5,6,10, 2,4,7,8,9,1<br>12,14,16 1,13,15,17 | 7  | P20766,Q10758,Q4FZU2,Q6IFW6,Q6IG02,Q6IMF3,Q6IRE4                                    |
| 6574 | 1,3,5,6,10, 2,4,7,8,9,1<br>12,14,17 1,13,15,16 | 7  | P01681,P08689,Q10758,Q561R9,Q6IG02,Q6IMF3,Q99MH3                                    |
| 6575 | 1,3,5,6,10, 2,4,7,8,9,1<br>12,15,16 1,13,14,17 | 6  | P20766,Q4FZU2,Q6IG02,Q6IMF3,Q6IRE4,Q80WL1                                           |
| 6576 | 1,3,5,6,10, 2,4,7,8,9,1<br>12,15,17 1,13,14,16 | 5  | P20766,Q10758,Q4FZU2,Q6IG02,Q99MH3                                                  |
| 6577 | 1,3,5,6,10, 2,4,7,8,9,1<br>12,16,17 1,13,14,15 | 6  | P20766,Q10758,Q561R9,Q6IG02,Q6IMF3,Q99MH3                                           |
| 6578 | 1,3,5,6,10, 2,4,7,8,9,1<br>13,14,15 1,12,16,17 | 3  | P19223,Q498D9,Q80WL1                                                                |
| 6579 | 1,3,5,6,10, 2,4,7,8,9,1<br>13,14,16 1,12,15,17 | 4  | P19223,Q6IRE4,Q80WL1,Q9QZA6                                                         |
| 6580 | 1,3,5,6,10, 2,4,7,8,9,1<br>13,14,17 1,12,15,16 | 5  | P51907,Q561R9,Q80WL1,Q99MH3,Q9QW07                                                  |
| 6581 | 1,3,5,6,10, 2,4,7,8,9,1<br>13,15,16 1,12,14,17 | 6  | P19223,P55091,P82995,Q6AYQ8,Q6IRE4,Q80WL1                                           |
| 6582 | 1,3,5,6,10, 2,4,7,8,9,1<br>13,15,17 1,12,14,16 | 3  | Q6IFV1,Q80WL1,Q99MH3                                                                |
| 6583 | 1,3,5,6,10, 2,4,7,8,9,1<br>13,16,17 1,12,14,15 | 4  | P51907,Q561R9,Q80WL1,Q99MH3                                                         |
| 6584 | 1,3,5,6,10, 2,4,7,8,9,1<br>14,15,16 1,12,13,17 | 6  | P02803,P19223,P20766,P55091,Q6IRE4,Q80WL1                                           |
| 6585 | 1,3,5,6,10, 2,4,7,8,9,1<br>14,15,17 1,12,13,16 | 2  | P02803,Q80WL1                                                                       |
| 6586 | 1,3,5,6,10, 2,4,7,8,9,1<br>14,16,17 1,12,13,15 | 3  | Q561R9,Q6IRE4,Q80WL1                                                                |
| 6587 | 1,3,5,6,10, 2,4,7,8,9,1<br>15,16,17 1,12,13,14 | 4  | P02803,P20766,Q80WL1,Q99MH3                                                         |
| 6588 | 1,3,5,6,11, 2,4,7,8,9,1<br>12,13,14 0,15,16,17 | 8  | P17046,P47727,Q4FZU2,Q6IFW6,Q6IG02,Q6IRE4,Q6P6Q2,Q9Z1F2                             |
| 6589 | 1,3,5,6,11, 2,4,7,8,9,1<br>12,13,15 0,14,16,17 | 6  | P17046,P82995,Q4FZU2,Q6IFW6,Q6IG02,Q6IRE4                                           |
| 6590 | 1,3,5,6,11, 2,4,7,8,9,1<br>12,13,16 0,14,15,17 | 9  | P17046,P55314,Q4FZU2,Q6IFU7,Q6IFW6,Q6IG02,Q6IMF3,Q6IRE4,Q6P6Q2                      |
| 6591 | 1,3,5,6,11, 2,4,7,8,9,1<br>12,13,17 0,14,15,16 | 7  | P01681,P17046,Q4FZU2,Q6IFW6,Q6IG02,Q99MH3,Q9QZK9                                    |
| 6592 | 1,3,5,6,11, 2,4,7,8,9,1<br>12,14,15 0,13,16,17 | 7  | Q4FZU2,Q5I0D1,Q6IFW6,Q6IG02,Q6IRE4,Q6P6Q2,Q80WL1                                    |
| 6593 | 1,3,5,6,11, 2,4,7,8,9,1<br>12,14,16 0,13,15,17 | 11 | P17046,P20766,P55314,Q4FZU2,Q6IFU7,Q6IFU8,Q6IFW6,Q6IG02,Q6IMF3,Q6IRE4,Q6P6Q2        |
| 6594 | 1,3,5,6,11, 2,4,7,8,9,1<br>12,14,17 0,13,15,16 | 10 | P01681,P01835,Q4FZU2,Q561R9,Q6IFU8,Q6IFW6,Q6IG02,Q6IMF3,Q6IRE4,Q6P6Q2               |
| 6595 | 1,3,5,6,11, 2,4,7,8,9,1<br>12,15,16 0,13,14,17 | 12 | P17046,P20766,P55314,Q4FZU2,Q5I0D1,Q6IFU7,Q6IFW6,Q6IG02,Q6IMF3,Q6IRE4,Q6P6Q2,Q80WL1 |

|      |                                                |    |                                                                       |
|------|------------------------------------------------|----|-----------------------------------------------------------------------|
| 6596 | 1,3,5,6,11, 2,4,7,8,9,1<br>12,15,17 0,13,14,16 | 5  | P01681,Q4FZU2,Q6IFW6,Q6IG02,Q99MH3                                    |
| 6597 | 1,3,5,6,11, 2,4,7,8,9,1<br>12,16,17 0,13,14,15 | 10 | P01681,P17046,P55314,Q4FZU2,Q6IFU8,Q6IFW6,Q6IG02,Q6IMF3,Q6IRE4,Q6P6Q2 |
| 6598 | 1,3,5,6,11, 2,4,7,8,9,1<br>13,14,15 0,12,16,17 | 3  | P19223,Q6IRE4,Q80WL1                                                  |
| 6599 | 1,3,5,6,11, 2,4,7,8,9,1<br>13,14,16 0,12,15,17 | 5  | P17046,P19223,P55314,Q6IRE4,Q80WL1                                    |
| 6600 | 1,3,5,6,11, 2,4,7,8,9,1<br>13,14,17 0,12,15,16 | 3  | Q6IRE4,Q80WL1,Q9QW07                                                  |
| 6601 | 1,3,5,6,11, 2,4,7,8,9,1<br>13,15,16 0,12,14,17 | 7  | O54728,P17046,P19223,P55091,P55314,Q6IRE4,Q80WL1                      |
| 6602 | 1,3,5,6,11, 2,4,7,8,9,1<br>13,15,17 0,12,14,16 | 3  | Q6IRE4,Q80WL1,Q99MH3                                                  |
| 6603 | 1,3,5,6,11, 2,4,7,8,9,1<br>13,16,17 0,12,14,15 | 4  | P17046,P55314,Q6IRE4,Q80WL1                                           |
| 6604 | 1,3,5,6,11, 2,4,7,8,9,1<br>14,15,16 0,12,13,17 | 8  | O54728,P02803,P19223,P55091,P55314,Q5I0D1,Q6IRE4,Q80WL1               |
| 6605 | 1,3,5,6,11, 2,4,7,8,9,1<br>14,15,17 0,12,13,16 | 5  | P02803,P47967,P97840,Q6IRE4,Q80WL1                                    |
| 6606 | 1,3,5,6,11, 2,4,7,8,9,1<br>14,16,17 0,12,13,15 | 5  | P17046,P55314,Q561R9,Q6IRE4,Q80WL1                                    |
| 6607 | 1,3,5,6,11, 2,4,7,8,9,1<br>15,16,17 0,12,13,14 | 4  | P17046,P55314,Q6IRE4,Q80WL1                                           |
| 6608 | 1,3,5,6,12, 2,4,7,8,9,1<br>13,14,15 0,11,16,17 | 6  | P00714,P82995,Q498D9,Q64093,Q6IRE4,Q80WL1                             |
| 6609 | 1,3,5,6,12, 2,4,7,8,9,1<br>13,14,16 0,11,15,17 | 5  | P00714,P02761,P17046,Q561R9,Q6IRE4                                    |
| 6610 | 1,3,5,6,12, 2,4,7,8,9,1<br>13,14,17 0,11,15,16 | 7  | P00714,P01681,P51907,Q561R9,Q99MH3,Q9QW07,Q9Z1F2                      |
| 6611 | 1,3,5,6,12, 2,4,7,8,9,1<br>13,15,16 0,11,14,17 | 6  | P00714,P17046,P19218,P82995,Q6IRE4,Q80WL1                             |
| 6612 | 1,3,5,6,12, 2,4,7,8,9,1<br>13,15,17 0,11,14,16 | 4  | P00714,Q561R9,Q6IFV1,Q99MH3                                           |
| 6613 | 1,3,5,6,12, 2,4,7,8,9,1<br>13,16,17 0,11,14,15 | 7  | P00714,P17046,P35280,P51907,Q561R9,Q6IRE4,Q99MH3                      |
| 6614 | 1,3,5,6,12, 2,4,7,8,9,1<br>14,15,16 0,11,13,17 | 3  | P20766,Q6IRE4,Q80WL1                                                  |
| 6615 | 1,3,5,6,12, 2,4,7,8,9,1<br>14,15,17 0,11,13,16 | 4  | P00714,P02803,Q561R9,Q9QW07                                           |
| 6616 | 1,3,5,6,12, 2,4,7,8,9,1<br>14,16,17 0,11,13,15 | 7  | P00714,P01681,P17046,Q10758,Q561R9,Q6IRE4,Q9QW07                      |
| 6617 | 1,3,5,6,12, 2,4,7,8,9,1<br>15,16,17 0,11,13,14 | 7  | P00714,P17046,P20766,Q561R9,Q5XFX0,Q80WL1,Q99MH3                      |
| 6618 | 1,3,5,6,13, 2,4,7,8,9,1<br>14,15,16 0,11,12,17 | 5  | O54728,P00714,P19223,Q6IRE4,Q80WL1                                    |

|      |                         |                                 |    |                                                                       |
|------|-------------------------|---------------------------------|----|-----------------------------------------------------------------------|
| 6619 | 1,3,5,6,13,<br>14,15,17 | 2,4,7,8,9,1<br>0,11,12,16       | 10 | P00714,P02803,P08753,P47967,P51907,P53792,Q561R9,Q80WL1,Q9QW07,Q9WUW8 |
| 6620 | 1,3,5,6,13,<br>14,16,17 | 2,4,7,8,9,1<br>0,11,12,15       | 8  | P00714,P08753,P35280,P51907,Q561R9,Q6IRE4,Q80WL1,Q9QW07               |
| 6621 | 1,3,5,6,13,<br>15,16,17 | 2,4,7,8,9,1<br>0,11,12,14       | 7  | P00714,P08753,P62804,Q6IRE4,Q80WL1,Q99MH3,Q9EQS0                      |
| 6622 | 1,3,5,6,14,<br>15,16,17 | 2,4,7,8,9,1<br>0,11,12,13       | 6  | P00714,P02803,Q561R9,Q6IRE4,Q80WL1,Q9QW07                             |
| 6623 | 1,3,5,7,8,9<br>,10,11   | 2,4,6,12,1<br>3,14,15,16<br>,17 | 6  | O54728,P14480,P25236,P27213,Q62635,Q6IRE4                             |
| 6624 | 1,3,5,7,8,9<br>,10,12   | 2,4,6,11,1<br>3,14,15,16<br>,17 | 3  | P10715,P27213,Q6IG02                                                  |
| 6625 | 1,3,5,7,8,9<br>,10,13   | 2,4,6,11,1<br>2,14,15,16<br>,17 | 1  | Q6IRE4                                                                |
| 6626 | 1,3,5,7,8,9<br>,10,14   | 2,4,6,11,1<br>2,13,15,16<br>,17 | 4  | O54728,P27213,Q62635,Q6IRE4                                           |
| 6627 | 1,3,5,7,8,9<br>,10,15   | 2,4,6,11,1<br>2,13,14,16<br>,17 | 6  | O54728,P14480,P25236,P27213,Q62635,Q6IRE4                             |
| 6628 | 1,3,5,7,8,9<br>,10,16   | 2,4,6,11,1<br>2,13,14,15<br>,17 | 4  | O54728,P25236,Q62635,Q6IRE4                                           |
| 6629 | 1,3,5,7,8,9<br>,10,17   | 2,4,6,11,1<br>2,13,14,15<br>,16 | 5  | P01946,P02091,P18427,P25236,P52590                                    |
| 6630 | 1,3,5,7,8,9<br>,11,12   | 2,4,6,10,1<br>3,14,15,16<br>,17 | 4  | P10715,P27213,Q6IG02,Q6IRE4                                           |
| 6631 | 1,3,5,7,8,9<br>,11,13   | 2,4,6,10,1<br>2,14,15,16<br>,17 | 5  | O54728,P01048,P06866,P14480,Q6IRE4                                    |
| 6632 | 1,3,5,7,8,9<br>,11,14   | 2,4,6,10,1<br>2,13,15,16<br>,17 | 6  | O54728,P06866,P14480,P27213,Q62635,Q6IRE4                             |
| 6633 | 1,3,5,7,8,9<br>,11,15   | 2,4,6,10,1<br>2,13,14,16<br>,17 | 7  | O54728,P10715,P14480,P25236,P27213,Q62635,Q6IRE4                      |
| 6634 | 1,3,5,7,8,9<br>,11,16   | 2,4,6,10,1<br>2,13,14,15<br>,17 | 7  | B4F795,O54728,P10715,P25236,P27213,Q62635,Q6IRE4                      |

|      |                       |                                 |   |                                                  |
|------|-----------------------|---------------------------------|---|--------------------------------------------------|
| 6635 | 1,3,5,7,8,9<br>,11,17 | 2,4,6,10,1<br>2,13,14,15<br>,16 | 7 | P01946,P02091,P10715,P25236,P50115,P52590,Q6IRE4 |
| 6636 | 1,3,5,7,8,9<br>,12,13 | 2,4,6,10,1<br>1,14,15,16<br>,17 | 3 | P10715,Q6IRE4,Q9Z1F2                             |
| 6637 | 1,3,5,7,8,9<br>,12,14 | 2,4,6,10,1<br>1,13,15,16<br>,17 | 4 | P10715,Q4FZU6,Q6IG02,Q6IRE4                      |
| 6638 | 1,3,5,7,8,9<br>,12,15 | 2,4,6,10,1<br>1,13,14,16<br>,17 | 4 | O54728,P10715,P14480,Q6IRE4                      |
| 6639 | 1,3,5,7,8,9<br>,12,16 | 2,4,6,10,1<br>1,13,14,15<br>,17 | 3 | P10715,Q4FZU6,Q6IRE4                             |
| 6640 | 1,3,5,7,8,9<br>,12,17 | 2,4,6,10,1<br>1,13,14,15<br>,16 | 6 | P01946,P02091,P10715,P50115,P52590,Q4FZU6        |
| 6641 | 1,3,5,7,8,9<br>,13,14 | 2,4,6,10,1<br>1,12,15,16<br>,17 | 5 | O54728,P06866,P51907,P53792,Q6IRE4               |
| 6642 | 1,3,5,7,8,9<br>,13,15 | 2,4,6,10,1<br>1,12,14,16<br>,17 | 4 | O54728,P14480,P53792,Q6IRE4                      |
| 6643 | 1,3,5,7,8,9<br>,13,16 | 2,4,6,10,1<br>1,12,14,15<br>,17 | 4 | O54728,P62804,Q00715,Q6IRE4                      |
| 6644 | 1,3,5,7,8,9<br>,13,17 | 2,4,6,10,1<br>1,12,14,15<br>,16 | 5 | P01946,P02091,P51907,P52590,P53792               |
| 6645 | 1,3,5,7,8,9<br>,14,15 | 2,4,6,10,1<br>1,12,13,16<br>,17 | 5 | O54728,P14480,P53792,Q62635,Q6IRE4               |
| 6646 | 1,3,5,7,8,9<br>,14,16 | 2,4,6,10,1<br>1,12,13,15<br>,17 | 5 | B4F795,O54728,Q4FZU6,Q62635,Q6IRE4               |
| 6647 | 1,3,5,7,8,9<br>,14,17 | 2,4,6,10,1<br>1,12,13,15<br>,16 | 6 | P01946,P02091,P51907,P52590,P53792,Q4FZU6        |
| 6648 | 1,3,5,7,8,9<br>,15,16 | 2,4,6,10,1<br>1,12,13,14<br>,17 | 7 | B4F795,O54728,P25236,P47727,P62804,Q62635,Q6IRE4 |
| 6649 | 1,3,5,7,8,9<br>,15,17 | 2,4,6,10,1<br>1,12,13,14<br>,16 | 7 | O54728,P01946,P02091,P25236,P47727,P52590,P53792 |

|      |                        |                                 |    |                                                                       |
|------|------------------------|---------------------------------|----|-----------------------------------------------------------------------|
| 6650 | 1,3,5,7,8,9<br>,16,17  | 2,4,6,10,1<br>1,12,13,14<br>,15 | 7  | P01946,P02091,P25236,P47727,P52590,Q4FZU6,Q6IRE4                      |
| 6651 | 1,3,5,7,8,1<br>0,11,12 | 2,4,6,9,13,<br>14,15,16,1<br>7  | 10 | F1LM93,P00731,P10715,P16391,P24388,P27213,Q6IG02,Q6IRE4,Q6P6Q2,Q8CJ52 |
| 6652 | 1,3,5,7,8,1<br>0,11,13 | 2,4,6,9,12,<br>14,15,16,1<br>7  | 3  | Q5HZV9,Q6IRE4,Q8VD89                                                  |
| 6653 | 1,3,5,7,8,1<br>0,11,14 | 2,4,6,9,12,<br>13,15,16,1<br>7  | 2  | P27213,Q6IRE4                                                         |
| 6654 | 1,3,5,7,8,1<br>0,11,15 | 2,4,6,9,12,<br>13,14,16,1<br>7  | 7  | O54728,P00731,P14480,P25236,P27213,Q62635,Q6IRE4                      |
| 6655 | 1,3,5,7,8,1<br>0,11,16 | 2,4,6,9,12,<br>13,14,15,1<br>7  | 5  | P25236,P55314,Q62635,Q6IRE4,Q8VD89                                    |
| 6656 | 1,3,5,7,8,1<br>0,11,17 | 2,4,6,9,12,<br>13,14,15,1<br>6  | 4  | P01946,P02091,P18427,P25236                                           |
| 6657 | 1,3,5,7,8,1<br>0,12,13 | 2,4,6,9,11,<br>14,15,16,1<br>7  | 2  | Q6IG02,Q99MH3                                                         |
| 6658 | 1,3,5,7,8,1<br>0,12,14 | 2,4,6,9,11,<br>13,15,16,1<br>7  | 2  | Q6IG02,Q9ET32                                                         |
| 6659 | 1,3,5,7,8,1<br>0,12,15 | 2,4,6,9,11,<br>13,14,16,1<br>7  | 4  | P00731,P10715,Q6IG02,Q99MH3                                           |
| 6660 | 1,3,5,7,8,1<br>0,12,16 | 2,4,6,9,11,<br>13,14,15,1<br>7  | 4  | P08721,P10715,Q6IG02,Q6IRE4                                           |
| 6661 | 1,3,5,7,8,1<br>0,12,17 | 2,4,6,9,11,<br>13,14,15,1<br>6  | 7  | F1LM93,P01946,P02091,P08937,P10715,Q6IG02,Q99MH3                      |
| 6662 | 1,3,5,7,8,1<br>0,13,14 | 2,4,6,9,11,<br>12,15,16,1<br>7  | 1  | P06866                                                                |
| 6663 | 1,3,5,7,8,1<br>0,13,15 | 2,4,6,9,11,<br>12,14,16,1<br>7  | 2  | O54728,P01835                                                         |
| 6664 | 1,3,5,7,8,1<br>0,13,16 | 2,4,6,9,11,<br>12,14,15,1<br>7  | 3  | P01835,Q6AYQ8,Q6IRE4                                                  |

|      |                        |                                |   |                                                         |
|------|------------------------|--------------------------------|---|---------------------------------------------------------|
| 6665 | 1,3,5,7,8,1<br>0,13,17 | 2,4,6,9,11,<br>12,14,15,1<br>6 | 4 | P01946,P02091,P51907,Q99MH3                             |
| 6666 | 1,3,5,7,8,1<br>0,14,15 | 2,4,6,9,11,<br>12,13,16,1<br>7 | 2 | O54728,P14480                                           |
| 6667 | 1,3,5,7,8,1<br>0,14,16 | 2,4,6,9,11,<br>12,13,15,1<br>7 | 3 | P08721,Q62635,Q6IRE4                                    |
| 6668 | 1,3,5,7,8,1<br>0,14,17 | 2,4,6,9,11,<br>12,13,15,1<br>6 | 3 | P01946,P02091,P18427                                    |
| 6669 | 1,3,5,7,8,1<br>0,15,16 | 2,4,6,9,11,<br>12,13,14,1<br>7 | 6 | O54728,P01835,P08721,P25236,Q62635,Q6IRE4               |
| 6670 | 1,3,5,7,8,1<br>0,15,17 | 2,4,6,9,11,<br>12,13,14,1<br>6 | 4 | P01946,P02091,P25236,Q99MH3                             |
| 6671 | 1,3,5,7,8,1<br>0,16,17 | 2,4,6,9,11,<br>12,13,14,1<br>5 | 4 | P01946,P02091,P25031,P25236                             |
| 6672 | 1,3,5,7,8,1<br>1,12,13 | 2,4,6,9,10,<br>14,15,16,1<br>7 | 5 | P10715,P17046,Q6IG02,Q6IRE4,Q8CJ52                      |
| 6673 | 1,3,5,7,8,1<br>1,12,14 | 2,4,6,9,10,<br>13,15,16,1<br>7 | 5 | P10715,Q6IG02,Q6IRE4,Q8CJ52,Q9ET32                      |
| 6674 | 1,3,5,7,8,1<br>1,12,15 | 2,4,6,9,10,<br>13,14,16,1<br>7 | 5 | P10715,P14480,Q5I0D1,Q6IG02,Q6IRE4                      |
| 6675 | 1,3,5,7,8,1<br>1,12,16 | 2,4,6,9,10,<br>13,14,15,1<br>7 | 7 | P10715,P17046,P24388,Q6IG02,Q6IRE4,Q6P6Q2,Q8CJ52        |
| 6676 | 1,3,5,7,8,1<br>1,12,17 | 2,4,6,9,10,<br>13,14,15,1<br>6 | 8 | P01946,P02091,P08937,P10715,P17046,P50115,Q63751,Q6IG02 |
| 6677 | 1,3,5,7,8,1<br>1,13,14 | 2,4,6,9,10,<br>12,15,16,1<br>7 | 2 | P06866,Q6IRE4                                           |
| 6678 | 1,3,5,7,8,1<br>1,13,15 | 2,4,6,9,10,<br>12,14,16,1<br>7 | 4 | O54728,P14480,Q6IRE4,Q8VD89                             |
| 6679 | 1,3,5,7,8,1<br>1,13,16 | 2,4,6,9,10,<br>12,14,15,1<br>7 | 3 | P17046,Q6IRE4,Q8VD89                                    |



|      |                        |                                |   |                                                                |
|------|------------------------|--------------------------------|---|----------------------------------------------------------------|
| 6680 | 1,3,5,7,8,1<br>1,13,17 | 2,4,6,9,10,<br>12,14,15,1<br>6 | 3 | P01946,P02091,Q6IRE4                                           |
| 6681 | 1,3,5,7,8,1<br>1,14,15 | 2,4,6,9,10,<br>12,13,16,1<br>7 | 5 | O54728,P14480,Q5I0D1,Q63355,Q6IRE4                             |
| 6682 | 1,3,5,7,8,1<br>1,14,16 | 2,4,6,9,10,<br>12,13,15,1<br>7 | 3 | B4F795,P17046,Q6IRE4                                           |
| 6683 | 1,3,5,7,8,1<br>1,14,17 | 2,4,6,9,10,<br>12,13,15,1<br>6 | 4 | P01946,P02091,P97840,Q6IRE4                                    |
| 6684 | 1,3,5,7,8,1<br>1,15,16 | 2,4,6,9,10,<br>12,13,14,1<br>7 | 9 | B4F795,O54728,P10715,P17046,P25236,Q5I0D1,Q62635,Q6IRE4,Q8VD89 |
| 6685 | 1,3,5,7,8,1<br>1,15,17 | 2,4,6,9,10,<br>12,13,14,1<br>6 | 4 | P01946,P02091,P10715,P25236                                    |
| 6686 | 1,3,5,7,8,1<br>1,16,17 | 2,4,6,9,10,<br>12,13,14,1<br>5 | 7 | B4F795,P01946,P02091,P10715,P17046,P25236,Q6IRE4               |
| 6687 | 1,3,5,7,8,1<br>2,13,14 | 2,4,6,9,10,<br>11,15,16,1<br>7 | 2 | Q6IRE4,Q9Z1F2                                                  |
| 6688 | 1,3,5,7,8,1<br>2,13,15 | 2,4,6,9,10,<br>11,14,16,1<br>7 | 1 | P10715                                                         |
| 6689 | 1,3,5,7,8,1<br>2,13,16 | 2,4,6,9,10,<br>11,14,15,1<br>7 | 4 | P10715,P17046,Q4FZU6,Q6IRE4                                    |
| 6690 | 1,3,5,7,8,1<br>2,13,17 | 2,4,6,9,10,<br>11,14,15,1<br>6 | 7 | P01946,P02091,P08937,P10715,P17046,P51907,Q99MH3               |
| 6691 | 1,3,5,7,8,1<br>2,14,15 | 2,4,6,9,10,<br>11,13,16,1<br>7 | 4 | A2RUV9,P10715,P19629,Q8CJD3                                    |
| 6692 | 1,3,5,7,8,1<br>2,14,16 | 2,4,6,9,10,<br>11,13,15,1<br>7 | 5 | P10715,P17046,Q4FZU6,Q6IRE4,Q9ET32                             |
| 6693 | 1,3,5,7,8,1<br>2,14,17 | 2,4,6,9,10,<br>11,13,15,1<br>6 | 6 | P01946,P02091,P10715,Q4FZU6,Q561R9,Q8CJD3                      |
| 6694 | 1,3,5,7,8,1<br>2,15,16 | 2,4,6,9,10,<br>11,13,14,1<br>7 | 4 | P10715,P17046,P83121,Q6IRE4                                    |

|      |                        |                                |   |                                                  |
|------|------------------------|--------------------------------|---|--------------------------------------------------|
| 6695 | 1,3,5,7,8,1<br>2,15,17 | 2,4,6,9,10,<br>11,13,14,1<br>6 | 4 | P01946,P02091,P10715,Q99MH3                      |
| 6696 | 1,3,5,7,8,1<br>2,16,17 | 2,4,6,9,10,<br>11,13,14,1<br>5 | 6 | P01946,P02091,P10715,P17046,P23928,Q4FZU6        |
| 6697 | 1,3,5,7,8,1<br>3,14,15 | 2,4,6,9,10,<br>11,12,16,1<br>7 | 7 | O54728,P00762,P06757,P53792,Q08849,Q09030,Q6IRE4 |
| 6698 | 1,3,5,7,8,1<br>3,14,16 | 2,4,6,9,10,<br>11,12,15,1<br>7 | 4 | P00762,Q08849,Q4FZU6,Q6IRE4                      |
| 6699 | 1,3,5,7,8,1<br>3,14,17 | 2,4,6,9,10,<br>11,12,15,1<br>6 | 7 | P01946,P02091,P08753,P51907,P53792,Q08849,Q9QW07 |
| 6700 | 1,3,5,7,8,1<br>3,15,16 | 2,4,6,9,10,<br>11,12,14,1<br>7 | 5 | O54728,P00762,P01835,P62804,Q6IRE4               |
| 6701 | 1,3,5,7,8,1<br>3,15,17 | 2,4,6,9,10,<br>11,12,14,1<br>6 | 7 | P01946,P02091,P51907,P53792,Q6IFU7,Q99MH3,Q9WUW8 |
| 6702 | 1,3,5,7,8,1<br>3,16,17 | 2,4,6,9,10,<br>11,12,14,1<br>5 | 7 | P01946,P02091,P17046,P23928,P51907,Q4FZU6,Q6IRE4 |
| 6703 | 1,3,5,7,8,1<br>4,15,16 | 2,4,6,9,10,<br>11,12,13,1<br>7 | 5 | B4F795,O54728,Q08849,Q62635,Q6IRE4               |
| 6704 | 1,3,5,7,8,1<br>4,15,17 | 2,4,6,9,10,<br>11,12,13,1<br>6 | 7 | P01946,P02091,P10536,P47967,Q08849,Q8CJD3,Q9QW07 |
| 6705 | 1,3,5,7,8,1<br>4,16,17 | 2,4,6,9,10,<br>11,12,13,1<br>5 | 6 | P01946,P02091,Q4FZU6,Q561R9,Q6IRE4,Q9QW07        |
| 6706 | 1,3,5,7,8,1<br>5,16,17 | 2,4,6,9,10,<br>11,12,13,1<br>4 | 7 | O54728,P01946,P02091,P0C0A9,P25236,P47727,Q6IRE4 |
| 6707 | 1,3,5,7,9,1<br>0,11,12 | 2,4,6,8,13,<br>14,15,16,1<br>7 | 3 | P27213,Q6IG02,Q6IRE4                             |
| 6708 | 1,3,5,7,9,1<br>0,11,13 | 2,4,6,8,12,<br>14,15,16,1<br>7 | 4 | O54728,P98089,Q62635,Q6IRE4                      |
| 6709 | 1,3,5,7,9,1<br>0,11,14 | 2,4,6,8,12,<br>13,15,16,1<br>7 | 6 | O54728,P18427,P27213,Q62635,Q6IRE4,Q9QUL6        |

|      |                        |                                |   |                                                                |
|------|------------------------|--------------------------------|---|----------------------------------------------------------------|
| 6710 | 1,3,5,7,9,1<br>0,11,15 | 2,4,6,8,12,<br>13,14,16,1<br>7 | 6 | O54728,P14480,P25236,P27213,Q62635,Q6IRE4                      |
| 6711 | 1,3,5,7,9,1<br>0,11,16 | 2,4,6,8,12,<br>13,14,15,1<br>7 | 7 | O54728,P25236,P27213,P55314,P98089,Q62635,Q6IRE4               |
| 6712 | 1,3,5,7,9,1<br>0,11,17 | 2,4,6,8,12,<br>13,14,15,1<br>6 | 8 | P01946,P02091,P08689,P18427,P25236,P52590,Q6IRE4,Q9QUL6        |
| 6713 | 1,3,5,7,9,1<br>0,12,13 | 2,4,6,8,11,<br>14,15,16,1<br>7 | 3 | P19218,Q5U2V4,Q6IRE4                                           |
| 6714 | 1,3,5,7,9,1<br>0,12,14 | 2,4,6,8,11,<br>13,15,16,1<br>7 | 1 | Q6IRE4                                                         |
| 6715 | 1,3,5,7,9,1<br>0,12,15 | 2,4,6,8,11,<br>13,14,16,1<br>7 | 3 | O54728,P27213,Q6IRE4                                           |
| 6716 | 1,3,5,7,9,1<br>0,12,16 | 2,4,6,8,11,<br>13,14,15,1<br>7 | 1 | Q6IRE4                                                         |
| 6717 | 1,3,5,7,9,1<br>0,12,17 | 2,4,6,8,11,<br>13,14,15,1<br>6 | 6 | P01946,P02091,P08689,P25236,P52590,Q99MH3                      |
| 6718 | 1,3,5,7,9,1<br>0,13,14 | 2,4,6,8,11,<br>12,15,16,1<br>7 | 5 | O54728,P98089,Q4G075,Q62635,Q6IRE4                             |
| 6719 | 1,3,5,7,9,1<br>0,13,15 | 2,4,6,8,11,<br>12,14,16,1<br>7 | 7 | O54728,P62804,P98089,Q00715,Q5U2V4,Q62635,Q6IRE4               |
| 6720 | 1,3,5,7,9,1<br>0,13,16 | 2,4,6,8,11,<br>12,14,15,1<br>7 | 9 | O54728,P01015,P62804,P98089,Q00715,Q4G075,Q62635,Q6AYQ8,Q6IRE4 |
| 6721 | 1,3,5,7,9,1<br>0,13,17 | 2,4,6,8,11,<br>12,14,15,1<br>6 | 3 | P01946,P02091,P52590                                           |
| 6722 | 1,3,5,7,9,1<br>0,14,15 | 2,4,6,8,11,<br>12,13,16,1<br>7 | 7 | O54728,P16636,P27213,Q4G075,Q62635,Q6IRE4,Q80WL1               |
| 6723 | 1,3,5,7,9,1<br>0,14,16 | 2,4,6,8,11,<br>12,13,15,1<br>7 | 6 | O54728,P01015,Q00715,Q4G075,Q62635,Q6IRE4                      |
| 6724 | 1,3,5,7,9,1<br>0,14,17 | 2,4,6,8,11,<br>12,13,15,1<br>6 | 5 | P01946,P02091,P08689,P18427,P52590                             |

|      |                        |                                |    |                                                                                            |
|------|------------------------|--------------------------------|----|--------------------------------------------------------------------------------------------|
| 6725 | 1,3,5,7,9,1<br>0,15,16 | 2,4,6,8,11,<br>12,13,14,1<br>7 | 13 | O54728,P02780,P02782,P0C0A9,P25236,P47727,P62804,Q00715,Q62635,Q6AYR9,Q6IRE4,Q80WL1,Q9JHB9 |
| 6726 | 1,3,5,7,9,1<br>0,15,17 | 2,4,6,8,11,<br>12,13,14,1<br>6 | 8  | O54728,P02091,P02782,P0C0A9,P18427,P25236,P47727,P52590                                    |
| 6727 | 1,3,5,7,9,1<br>0,16,17 | 2,4,6,8,11,<br>12,13,14,1<br>5 | 9  | P01946,P02091,P02782,P0C0A9,P25236,P47727,P52590,Q00715,Q6IRE4                             |
| 6728 | 1,3,5,7,9,1<br>1,12,13 | 2,4,6,8,10,<br>14,15,16,1<br>7 | 2  | P17046,Q6IRE4                                                                              |
| 6729 | 1,3,5,7,9,1<br>1,12,14 | 2,4,6,8,10,<br>13,15,16,1<br>7 | 2  | Q6IG02,Q6IRE4                                                                              |
| 6730 | 1,3,5,7,9,1<br>1,12,15 | 2,4,6,8,10,<br>13,14,16,1<br>7 | 4  | O54728,P14480,P27213,Q6IRE4                                                                |
| 6731 | 1,3,5,7,9,1<br>1,12,16 | 2,4,6,8,10,<br>13,14,15,1<br>7 | 2  | P17046,Q6IRE4                                                                              |
| 6732 | 1,3,5,7,9,1<br>1,12,17 | 2,4,6,8,10,<br>13,14,15,1<br>6 | 5  | P01946,P02091,P17046,P25236,Q6IRE4                                                         |
| 6733 | 1,3,5,7,9,1<br>1,13,14 | 2,4,6,8,10,<br>12,15,16,1<br>7 | 6  | O54728,P06866,Q4G075,Q62635,Q6IRE4,Q6P6R2                                                  |
| 6734 | 1,3,5,7,9,1<br>1,13,15 | 2,4,6,8,10,<br>12,14,16,1<br>7 | 6  | O54728,P14480,P98089,Q62635,Q6IRE4,Q6P6R2                                                  |
| 6735 | 1,3,5,7,9,1<br>1,13,16 | 2,4,6,8,10,<br>12,14,15,1<br>7 | 6  | O54728,P17046,P62804,P98089,Q62635,Q6IRE4                                                  |
| 6736 | 1,3,5,7,9,1<br>1,13,17 | 2,4,6,8,10,<br>12,14,15,1<br>6 | 4  | P01946,P02091,P17046,Q6IRE4                                                                |
| 6737 | 1,3,5,7,9,1<br>1,14,15 | 2,4,6,8,10,<br>12,13,16,1<br>7 | 9  | O54728,P14480,P16636,P27213,Q62635,Q63355,Q6IRE4,Q6P6R2,Q80WL1                             |
| 6738 | 1,3,5,7,9,1<br>1,14,16 | 2,4,6,8,10,<br>12,13,15,1<br>7 | 5  | O54728,P17046,Q4G075,Q62635,Q6IRE4                                                         |
| 6739 | 1,3,5,7,9,1<br>1,14,17 | 2,4,6,8,10,<br>12,13,15,1<br>6 | 4  | P01946,P02091,Q6IRE4,Q9QUL6                                                                |

|      |                        |                                |   |                                                                |
|------|------------------------|--------------------------------|---|----------------------------------------------------------------|
| 6740 | 1,3,5,7,9,1<br>1,15,16 | 2,4,6,8,10,<br>12,13,14,1<br>7 | 8 | O54728,P02782,P17046,P25236,Q62635,Q6AYR9,Q6IRE4,Q80WL1        |
| 6741 | 1,3,5,7,9,1<br>1,15,17 | 2,4,6,8,10,<br>12,13,14,1<br>6 | 5 | O54728,P01946,P02091,P25236,Q6IRE4                             |
| 6742 | 1,3,5,7,9,1<br>1,16,17 | 2,4,6,8,10,<br>12,13,14,1<br>5 | 5 | P01946,P02091,P17046,P25236,Q6IRE4                             |
| 6743 | 1,3,5,7,9,1<br>2,13,14 | 2,4,6,8,10,<br>11,15,16,1<br>7 | 2 | A2RUV9,Q6IRE4                                                  |
| 6744 | 1,3,5,7,9,1<br>2,13,15 | 2,4,6,8,10,<br>11,14,16,1<br>7 | 4 | O54728,Q5U2V4,Q6IRE4,Q6P6R2                                    |
| 6745 | 1,3,5,7,9,1<br>2,13,16 | 2,4,6,8,10,<br>11,14,15,1<br>7 | 6 | P02761,P17046,P19218,P62804,Q00715,Q6IRE4                      |
| 6746 | 1,3,5,7,9,1<br>2,13,17 | 2,4,6,8,10,<br>11,14,15,1<br>6 | 5 | P01946,P02091,P17046,P35280,P53792                             |
| 6747 | 1,3,5,7,9,1<br>2,14,15 | 2,4,6,8,10,<br>11,13,16,1<br>7 | 4 | A2RUV9,O54728,Q6IRE4,Q8CJD3                                    |
| 6748 | 1,3,5,7,9,1<br>2,14,16 | 2,4,6,8,10,<br>11,13,15,1<br>7 | 3 | P17046,Q4FZU6,Q6IRE4                                           |
| 6749 | 1,3,5,7,9,1<br>2,14,17 | 2,4,6,8,10,<br>11,13,15,1<br>6 | 4 | P01946,P02091,Q6IRE4,Q8CJD3                                    |
| 6750 | 1,3,5,7,9,1<br>2,15,16 | 2,4,6,8,10,<br>11,13,14,1<br>7 | 4 | O54728,P17046,P47727,Q6IRE4                                    |
| 6751 | 1,3,5,7,9,1<br>2,15,17 | 2,4,6,8,10,<br>11,13,14,1<br>6 | 3 | O54728,P02091,P47727                                           |
| 6752 | 1,3,5,7,9,1<br>2,16,17 | 2,4,6,8,10,<br>11,13,14,1<br>5 | 7 | P01946,P02091,P17046,P35280,P47727,Q4FZU6,Q6IRE4               |
| 6753 | 1,3,5,7,9,1<br>3,14,15 | 2,4,6,8,10,<br>11,12,16,1<br>7 | 9 | O54728,P16636,P53792,P62804,Q4G075,Q62635,Q6IRE4,Q6P6R2,Q80WL1 |
| 6754 | 1,3,5,7,9,1<br>3,14,16 | 2,4,6,8,10,<br>11,12,15,1<br>7 | 8 | O54728,P01015,P53792,P62804,Q00715,Q4G075,Q62635,Q6IRE4        |

|      |                         |                                |    |                                                                                                                 |
|------|-------------------------|--------------------------------|----|-----------------------------------------------------------------------------------------------------------------|
| 6755 | 1,3,5,7,9,1<br>3,14,17  | 2,4,6,8,10,<br>11,12,15,1<br>6 | 7  | P01946,P02091,P35280,P51907,P53792,Q6IRE4,Q9QW07                                                                |
| 6756 | 1,3,5,7,9,1<br>3,15,16  | 2,4,6,8,10,<br>11,12,14,1<br>7 | 11 | O54728,P0C0A9,P47727,P62804,P98089,Q00715,Q4G075,Q62635,Q63598,Q6IRE4,Q80WL1                                    |
| 6757 | 1,3,5,7,9,1<br>3,15,17  | 2,4,6,8,10,<br>11,12,14,1<br>6 | 8  | O54728,P01946,P02091,P0C0A9,P47727,P53792,P62804,Q6IRE4                                                         |
| 6758 | 1,3,5,7,9,1<br>3,16,17  | 2,4,6,8,10,<br>11,12,14,1<br>5 | 10 | P01946,P02091,P0C0A9,P17046,P35280,P47727,P53792,P62804,Q00715,Q6IRE4                                           |
| 6759 | 1,3,5,7,9,1<br>4,15,16  | 2,4,6,8,10,<br>11,12,13,1<br>7 | 13 | O54728,P02782,P0C0A9,P16636,P62804,Q00715,Q4G075,Q62635,Q6AYR9,Q6IRE4,Q80WL1,Q9JHB9,Q9QZK9                      |
| 6760 | 1,3,5,7,9,1<br>4,15,17  | 2,4,6,8,10,<br>11,12,13,1<br>6 | 8  | O54728,P02091,P0C0A9,P47967,P53792,Q6IRE4,Q80WL1,Q8CJD3                                                         |
| 6761 | 1,3,5,7,9,1<br>4,16,17  | 2,4,6,8,10,<br>11,12,13,1<br>5 | 6  | P01946,P02091,P0C0A9,P62804,Q4FZU6,Q6IRE4                                                                       |
| 6762 | 1,3,5,7,9,1<br>5,16,17  | 2,4,6,8,10,<br>11,12,13,1<br>4 | 16 | O54728,P02091,P02780,P02782,P0C0A9,P24368,P25236,P30120,P47727,P62804,Q00715,Q63598,Q6AYR9,Q6IRE4,Q80WL1,Q9JHB9 |
| 6763 | 1,3,5,7,10,<br>11,12,13 | 2,4,6,8,9,1<br>4,15,16,17      | 3  | P17046,Q6IG02,Q6IRE4                                                                                            |
| 6764 | 1,3,5,7,10,<br>11,12,14 | 2,4,6,8,9,1<br>3,15,16,17      | 2  | Q6IG02,Q6IRE4                                                                                                   |
| 6765 | 1,3,5,7,10,<br>11,12,15 | 2,4,6,8,9,1<br>3,14,16,17      | 4  | P00731,P27213,Q6IG02,Q6IRE4                                                                                     |
| 6766 | 1,3,5,7,10,<br>11,12,16 | 2,4,6,8,9,1<br>3,14,15,17      | 6  | P12368,P17046,P55314,Q6IG02,Q6IRE4,Q6P6Q2                                                                       |
| 6767 | 1,3,5,7,10,<br>11,12,17 | 2,4,6,8,9,1<br>3,14,15,16      | 8  | P01946,P02091,P06757,P08689,P17046,P25236,Q6IG02,Q99MH3                                                         |
| 6768 | 1,3,5,7,10,<br>11,13,14 | 2,4,6,8,9,1<br>2,15,16,17      | 4  | P98089,Q62635,Q6IRE4,Q6P6R2                                                                                     |
| 6769 | 1,3,5,7,10,<br>11,13,15 | 2,4,6,8,9,1<br>2,14,16,17      | 5  | O54728,P98089,Q62635,Q6IRE4,Q6P6R2                                                                              |
| 6770 | 1,3,5,7,10,<br>11,13,16 | 2,4,6,8,9,1<br>2,14,15,17      | 6  | P17046,P55314,P98089,Q62635,Q6IRE4,Q8VD89                                                                       |
| 6771 | 1,3,5,7,10,<br>11,13,17 | 2,4,6,8,9,1<br>2,14,15,16      | 4  | P01946,P02091,P17046,Q6IRE4                                                                                     |
| 6772 | 1,3,5,7,10,<br>11,14,15 | 2,4,6,8,9,1<br>2,13,16,17      | 4  | O54728,P27213,Q62635,Q6IRE4                                                                                     |
| 6773 | 1,3,5,7,10,<br>11,14,16 | 2,4,6,8,9,1<br>2,13,15,17      | 4  | P17046,P55314,Q62635,Q6IRE4                                                                                     |

|      |                                                |    |                                                                              |
|------|------------------------------------------------|----|------------------------------------------------------------------------------|
| 6774 | 1,3,5,7,10, 2,4,6,8,9,1<br>11,14,17 2,13,15,16 | 5  | P01946,P02091,P08689,P18427,Q6IRE4                                           |
| 6775 | 1,3,5,7,10, 2,4,6,8,9,1<br>11,15,16 2,13,14,17 | 11 | O54728,P02782,P17046,P25236,P32755,P55314,Q62635,Q6AYR9,Q6IRE4,Q80WL1,Q8VD89 |
| 6776 | 1,3,5,7,10, 2,4,6,8,9,1<br>11,15,17 2,13,14,16 | 4  | P01946,P02091,P18427,P25236                                                  |
| 6777 | 1,3,5,7,10, 2,4,6,8,9,1<br>11,16,17 2,13,14,15 | 6  | P01946,P02091,P17046,P25236,P55314,Q6IRE4                                    |
| 6778 | 1,3,5,7,10, 2,4,6,8,9,1<br>12,13,14 1,15,16,17 | 3  | A2RUV9,Q498D9,Q5QE79                                                         |
| 6779 | 1,3,5,7,10, 2,4,6,8,9,1<br>12,13,15 1,14,16,17 | 2  | Q6P6R2,Q99MH3                                                                |
| 6780 | 1,3,5,7,10, 2,4,6,8,9,1<br>12,13,16 1,14,15,17 | 3  | P17046,P19218,Q6IRE4                                                         |
| 6781 | 1,3,5,7,10, 2,4,6,8,9,1<br>12,13,17 1,14,15,16 | 5  | P01946,P02091,P14668,P17046,Q99MH3                                           |
| 6782 | 1,3,5,7,10, 2,4,6,8,9,1<br>12,14,15 1,13,16,17 | 2  | A2RUV9,Q8CJD3                                                                |
| 6783 | 1,3,5,7,10, 2,4,6,8,9,1<br>12,14,16 1,13,15,17 | 3  | P08721,P17046,Q6IRE4                                                         |
| 6784 | 1,3,5,7,10, 2,4,6,8,9,1<br>12,14,17 1,13,15,16 | 4  | P01946,P02091,P08689,Q8CJD3                                                  |
| 6785 | 1,3,5,7,10, 2,4,6,8,9,1<br>12,15,16 1,13,14,17 | 3  | P17046,P20766,Q6IRE4                                                         |
| 6786 | 1,3,5,7,10, 2,4,6,8,9,1<br>12,15,17 1,13,14,16 | 4  | P01946,P02091,P25236,Q99MH3                                                  |
| 6787 | 1,3,5,7,10, 2,4,6,8,9,1<br>12,16,17 1,13,14,15 | 6  | P01946,P02091,P17046,P25236,Q6TMA8,Q99MH3                                    |
| 6788 | 1,3,5,7,10, 2,4,6,8,9,1<br>13,14,15 1,12,16,17 | 5  | O54728,P16636,Q62635,Q6IRE4,Q6P6R2                                           |
| 6789 | 1,3,5,7,10, 2,4,6,8,9,1<br>13,14,16 1,12,15,17 | 6  | P01015,P19223,P98089,Q00715,Q62635,Q6IRE4                                    |
| 6790 | 1,3,5,7,10, 2,4,6,8,9,1<br>13,14,17 1,12,15,16 | 3  | P01946,P02091,Q9QW07                                                         |
| 6791 | 1,3,5,7,10, 2,4,6,8,9,1<br>13,15,16 1,12,14,17 | 11 | O54728,P01835,P02782,P0C0A9,P62804,P98089,Q00715,Q62635,Q6AYQ8,Q6IRE4,Q80WL1 |
| 6792 | 1,3,5,7,10, 2,4,6,8,9,1<br>13,15,17 1,12,14,16 | 4  | P01946,P02091,P0C0A9,Q99MH3                                                  |
| 6793 | 1,3,5,7,10, 2,4,6,8,9,1<br>13,16,17 1,12,14,15 | 6  | P01946,P02091,P0C0A9,P17046,P62804,Q6IRE4                                    |
| 6794 | 1,3,5,7,10, 2,4,6,8,9,1<br>14,15,16 1,12,13,17 | 11 | O54728,P02780,P02782,P02803,P0C0A9,P16636,P19223,Q62635,Q6IRE4,Q80WL1,Q9JHB9 |
| 6795 | 1,3,5,7,10, 2,4,6,8,9,1<br>14,15,17 1,12,13,16 | 7  | P01946,P02091,P02803,P08689,P0C0A9,P18427,Q8CJD3                             |
| 6796 | 1,3,5,7,10, 2,4,6,8,9,1<br>14,16,17 1,12,13,15 | 5  | P01946,P02091,P0C0A9,Q6IRE4,Q6TMA8                                           |

|      |                                                |    |                                                                              |
|------|------------------------------------------------|----|------------------------------------------------------------------------------|
| 6797 | 1,3,5,7,10, 2,4,6,8,9,1<br>15,16,17 1,12,13,14 | 11 | P02091,P02780,P02782,P0C0A9,P25236,P30120,P47727,Q6IRE4,Q6TMA8,Q80WL1,Q9JHB9 |
| 6798 | 1,3,5,7,11, 2,4,6,8,9,1<br>12,13,14 0,15,16,17 | 3  | P17046,Q6IRE4,Q6P6R2                                                         |
| 6799 | 1,3,5,7,11, 2,4,6,8,9,1<br>12,13,15 0,14,16,17 | 3  | P17046,Q6IRE4,Q6P6R2                                                         |
| 6800 | 1,3,5,7,11, 2,4,6,8,9,1<br>12,13,16 0,14,15,17 | 2  | P17046,Q6IRE4                                                                |
| 6801 | 1,3,5,7,11, 2,4,6,8,9,1<br>12,13,17 0,14,15,16 | 4  | P01946,P02091,P17046,Q6IRE4                                                  |
| 6802 | 1,3,5,7,11, 2,4,6,8,9,1<br>12,14,15 0,13,16,17 | 5  | P17046,Q63355,Q6IRE4,Q6P6R2,Q8CJD3                                           |
| 6803 | 1,3,5,7,11, 2,4,6,8,9,1<br>12,14,16 0,13,15,17 | 2  | P17046,Q6IRE4                                                                |
| 6804 | 1,3,5,7,11, 2,4,6,8,9,1<br>12,14,17 0,13,15,16 | 5  | P01946,P02091,P17046,Q6IRE4,Q8CJD3                                           |
| 6805 | 1,3,5,7,11, 2,4,6,8,9,1<br>12,15,16 0,13,14,17 | 3  | O54728,P17046,Q6IRE4                                                         |
| 6806 | 1,3,5,7,11, 2,4,6,8,9,1<br>12,15,17 0,13,14,16 | 3  | P01946,P02091,P17046                                                         |
| 6807 | 1,3,5,7,11, 2,4,6,8,9,1<br>12,16,17 0,13,14,15 | 5  | P01946,P02091,P17046,P25236,Q6IRE4                                           |
| 6808 | 1,3,5,7,11, 2,4,6,8,9,1<br>13,14,15 0,12,16,17 | 8  | O54728,P16636,P19223,Q09030,Q62635,Q6IRE4,Q6P6R2,Q80WL1                      |
| 6809 | 1,3,5,7,11, 2,4,6,8,9,1<br>13,14,16 0,12,15,17 | 5  | P17046,P19223,Q62635,Q6IRE4,Q6P6R2                                           |
| 6810 | 1,3,5,7,11, 2,4,6,8,9,1<br>13,14,17 0,12,15,16 | 5  | P01946,P02091,P17046,Q6IRE4,Q9QW07                                           |
| 6811 | 1,3,5,7,11, 2,4,6,8,9,1<br>13,15,16 0,12,14,17 | 10 | O54728,P17046,P19223,P98089,Q09030,Q62635,Q6IRE4,Q6P6R2,Q80WL1,Q8VD89        |
| 6812 | 1,3,5,7,11, 2,4,6,8,9,1<br>13,15,17 0,12,14,16 | 4  | P01946,P02091,P17046,Q6IRE4                                                  |
| 6813 | 1,3,5,7,11, 2,4,6,8,9,1<br>13,16,17 0,12,14,15 | 4  | P01946,P02091,P17046,Q6IRE4                                                  |
| 6814 | 1,3,5,7,11, 2,4,6,8,9,1<br>14,15,16 0,12,13,17 | 10 | O54728,P16636,P17046,P19223,Q62635,Q63355,Q6AYR9,Q6IRE4,Q6P6R2,Q80WL1        |
| 6815 | 1,3,5,7,11, 2,4,6,8,9,1<br>14,15,17 0,12,13,16 | 6  | O54728,P01946,P02091,Q6IRE4,Q80WL1,Q8CJD3                                    |
| 6816 | 1,3,5,7,11, 2,4,6,8,9,1<br>14,16,17 0,12,13,15 | 4  | P01946,P02091,P17046,Q6IRE4                                                  |
| 6817 | 1,3,5,7,11, 2,4,6,8,9,1<br>15,16,17 0,12,13,14 | 10 | O54728,P01946,P02091,P02782,P0C0A9,P17046,P25236,Q6AYR9,Q6IRE4,Q80WL1        |
| 6818 | 1,3,5,7,12, 2,4,6,8,9,1<br>13,14,15 0,11,16,17 | 3  | A2RUV9,Q6IRE4,Q6P6R2                                                         |
| 6819 | 1,3,5,7,12, 2,4,6,8,9,1<br>13,14,16 0,11,15,17 | 3  | P02761,P17046,Q6IRE4                                                         |



|      |                                                    |    |                                                                                            |
|------|----------------------------------------------------|----|--------------------------------------------------------------------------------------------|
| 6820 | 1,3,5,7,12, 2,4,6,8,9,1<br>13,14,17 0,11,15,16     | 5  | P01946,P02091,P17046,Q561R9,Q9QW07                                                         |
| 6821 | 1,3,5,7,12, 2,4,6,8,9,1<br>13,15,16 0,11,14,17     | 5  | O54728,P17046,P19218,Q6IRE4,Q6P6R2                                                         |
| 6822 | 1,3,5,7,12, 2,4,6,8,9,1<br>13,15,17 0,11,14,16     | 4  | P01946,P02091,P17046,Q99MH3                                                                |
| 6823 | 1,3,5,7,12, 2,4,6,8,9,1<br>13,16,17 0,11,14,15     | 5  | P01946,P02091,P17046,P35280,Q6IRE4                                                         |
| 6824 | 1,3,5,7,12, 2,4,6,8,9,1<br>14,15,16 0,11,13,17     | 5  | O54728,P17046,P20766,Q6IRE4,Q8CJD3                                                         |
| 6825 | 1,3,5,7,12, 2,4,6,8,9,1<br>14,15,17 0,11,13,16     | 4  | A2RUV9,P01946,P02091,Q8CJD3                                                                |
| 6826 | 1,3,5,7,12, 2,4,6,8,9,1<br>14,16,17 0,11,13,15     | 7  | P01946,P02091,P17046,Q4FZU6,Q561R9,Q6IRE4,Q9QW07                                           |
| 6827 | 1,3,5,7,12, 2,4,6,8,9,1<br>15,16,17 0,11,13,14     | 5  | P01946,P02091,P17046,P47727,Q6IRE4                                                         |
| 6828 | 1,3,5,7,13, 2,4,6,8,9,1<br>14,15,16 0,11,12,17     | 13 | O54728,P00762,P0C0A9,P16636,P17046,P19223,P62804,Q00715,Q09030,Q62635,Q6IRE4,Q6P6R2,Q80WL1 |
| 6829 | 1,3,5,7,13, 2,4,6,8,9,1<br>14,15,17 0,11,12,16     | 6  | P01946,P02091,P0C0A9,P53792,Q9QW07,Q9WUW8                                                  |
| 6830 | 1,3,5,7,13, 2,4,6,8,9,1<br>14,16,17 0,11,12,15     | 9  | P01946,P02091,P0C0A9,P17046,P35280,P62804,Q561R9,Q6IRE4,Q9QW07                             |
| 6831 | 1,3,5,7,13, 2,4,6,8,9,1<br>15,16,17 0,11,12,14     | 11 | O54728,P00714,P01946,P02091,P0C0A9,P17046,P47727,P62804,Q00715,Q6IRE4,Q80WL1               |
| 6832 | 1,3,5,7,14, 2,4,6,8,9,1<br>15,16,17 0,11,12,13     | 11 | O54728,P01946,P02091,P02780,P02782,P02803,P0C0A9,Q6IRE4,Q80WL1,Q9JHB9,Q9QW07               |
| 6833 | 1,3,5,8,9,1 2,4,6,7,13,<br>0,11,12 14,15,16,1<br>7 | 5  | P27213,P35467,Q6IG02,Q6IRE4,Q6P6Q2                                                         |
| 6834 | 1,3,5,8,9,1 2,4,6,7,12,<br>0,11,13 14,15,16,1<br>7 | 6  | P09605;P25809,P14480,P35467,P98089,Q63532,Q6IRE4                                           |
| 6835 | 1,3,5,8,9,1 2,4,6,7,12,<br>0,11,14 13,15,16,1<br>7 | 6  | P09605;P25809,P14480,P18427,P27213,Q62635,Q6IRE4                                           |
| 6836 | 1,3,5,8,9,1 2,4,6,7,12,<br>0,11,15 13,14,16,1<br>7 | 8  | O54728,P09605;P25809,P14480,P25236,P27213,Q62635,Q63532,Q6IRE4                             |
| 6837 | 1,3,5,8,9,1 2,4,6,7,12,<br>0,11,16 13,14,15,1<br>7 | 4  | O54728,P25236,Q62635,Q6IRE4                                                                |
| 6838 | 1,3,5,8,9,1 2,4,6,7,12,<br>0,11,17 13,14,15,1<br>6 | 5  | P08649,P18427,P25236,P35467,Q63532                                                         |

|      |                        |                                |   |                                                  |
|------|------------------------|--------------------------------|---|--------------------------------------------------|
| 6839 | 1,3,5,8,9,1<br>0,12,13 | 2,4,6,7,11,<br>14,15,16,1<br>7 | 1 | Q6IG02                                           |
| 6840 | 1,3,5,8,9,1<br>0,12,14 | 2,4,6,7,11,<br>13,15,16,1<br>7 | 2 | P09605;P25809,Q6IG02                             |
| 6841 | 1,3,5,8,9,1<br>0,12,15 | 2,4,6,7,11,<br>13,14,16,1<br>7 | 4 | O54728,P09605;P25809,P14480,Q6IG02               |
| 6842 | 1,3,5,8,9,1<br>0,12,16 | 2,4,6,7,11,<br>13,14,15,1<br>7 | 2 | Q6IG02,Q6IRE4                                    |
| 6843 | 1,3,5,8,9,1<br>0,12,17 | 2,4,6,7,11,<br>13,14,15,1<br>6 | 3 | P25236,Q63532,Q6IG02                             |
| 6844 | 1,3,5,8,9,1<br>0,13,14 | 2,4,6,7,11,<br>12,15,16,1<br>7 | 1 | P09605;P25809                                    |
| 6845 | 1,3,5,8,9,1<br>0,13,15 | 2,4,6,7,11,<br>12,14,16,1<br>7 | 5 | O54728,P09605;P25809,P14480,P98089,Q63532        |
| 6846 | 1,3,5,8,9,1<br>0,13,16 | 2,4,6,7,11,<br>12,14,15,1<br>7 | 6 | O54728,P09605;P25809,P98089,Q62635,Q6AYQ8,Q6IRE4 |
| 6847 | 1,3,5,8,9,1<br>0,13,17 | 2,4,6,7,11,<br>12,14,15,1<br>6 | 2 | P51907,Q63532                                    |
| 6848 | 1,3,5,8,9,1<br>0,14,15 | 2,4,6,7,11,<br>12,13,16,1<br>7 | 4 | O54728,P09605;P25809,P14480,Q62635               |
| 6849 | 1,3,5,8,9,1<br>0,14,16 | 2,4,6,7,11,<br>12,13,15,1<br>7 | 5 | O54728,P09605;P25809,Q62635,Q6IRE4,Q9QZK9        |
| 6850 | 1,3,5,8,9,1<br>0,14,17 | 2,4,6,7,11,<br>12,13,15,1<br>6 | 1 | P18427                                           |
| 6851 | 1,3,5,8,9,1<br>0,15,16 | 2,4,6,7,11,<br>12,13,14,1<br>7 | 6 | O54728,P09605;P25809,P25236,Q62635,Q6IRE4,Q9QZK9 |
| 6852 | 1,3,5,8,9,1<br>0,15,17 | 2,4,6,7,11,<br>12,13,14,1<br>6 | 5 | G3V686,O54728,P18427,P25236,Q63532               |
| 6853 | 1,3,5,8,9,1<br>0,16,17 | 2,4,6,7,11,<br>12,13,14,1<br>5 | 2 | P25031,P25236                                    |

|      |                        |                                |    |                                                                              |
|------|------------------------|--------------------------------|----|------------------------------------------------------------------------------|
| 6854 | 1,3,5,8,9,1<br>1,12,13 | 2,4,6,7,10,<br>14,15,16,1<br>7 | 3  | Q63532,Q6IG02,Q6IRE4                                                         |
| 6855 | 1,3,5,8,9,1<br>1,12,14 | 2,4,6,7,10,<br>13,15,16,1<br>7 | 3  | P14480,Q6IG02,Q6IRE4                                                         |
| 6856 | 1,3,5,8,9,1<br>1,12,15 | 2,4,6,7,10,<br>13,14,16,1<br>7 | 5  | O54728,P12020,P14480,Q6IG02,Q6IRE4                                           |
| 6857 | 1,3,5,8,9,1<br>1,12,16 | 2,4,6,7,10,<br>13,14,15,1<br>7 | 4  | P12020,Q6IG02,Q6IRE4,Q6P6Q2                                                  |
| 6858 | 1,3,5,8,9,1<br>1,12,17 | 2,4,6,7,10,<br>13,14,15,1<br>6 | 3  | P12020,Q63532,Q6IG02                                                         |
| 6859 | 1,3,5,8,9,1<br>1,13,14 | 2,4,6,7,10,<br>12,15,16,1<br>7 | 6  | O54728,P06866,P09605;P25809,P14480,P97840,Q6IRE4                             |
| 6860 | 1,3,5,8,9,1<br>1,13,15 | 2,4,6,7,10,<br>12,14,16,1<br>7 | 5  | O54728,P14480,P97840,Q63532,Q6IRE4                                           |
| 6861 | 1,3,5,8,9,1<br>1,13,16 | 2,4,6,7,10,<br>12,14,15,1<br>7 | 3  | O54728,P98089,Q6IRE4                                                         |
| 6862 | 1,3,5,8,9,1<br>1,13,17 | 2,4,6,7,10,<br>12,14,15,1<br>6 | 3  | P04218,P97840,Q63532                                                         |
| 6863 | 1,3,5,8,9,1<br>1,14,15 | 2,4,6,7,10,<br>12,13,16,1<br>7 | 10 | O54728,P04218,P09605;P25809,P14480,P47967,P97840,Q5I0D1,Q62635,Q6IRE4,Q9QZK9 |
| 6864 | 1,3,5,8,9,1<br>1,14,16 | 2,4,6,7,10,<br>12,13,15,1<br>7 | 5  | O54728,P04218,Q62635,Q6IRE4,Q9QZK9                                           |
| 6865 | 1,3,5,8,9,1<br>1,14,17 | 2,4,6,7,10,<br>12,13,15,1<br>6 | 4  | P04218,P47967,P97840,Q6IRE4                                                  |
| 6866 | 1,3,5,8,9,1<br>1,15,16 | 2,4,6,7,10,<br>12,13,14,1<br>7 | 10 | B4F795,O54728,P04218,P12020,P14480,P25236,Q62635,Q6AYR9,Q6IRE4,Q9QZK9        |
| 6867 | 1,3,5,8,9,1<br>1,15,17 | 2,4,6,7,10,<br>12,13,14,1<br>6 | 7  | O54728,P04218,P12020,P25236,P47967,P97840,Q63532                             |
| 6868 | 1,3,5,8,9,1<br>1,16,17 | 2,4,6,7,10,<br>12,13,14,1<br>5 | 4  | P04218,P12020,P25236,Q6IRE4                                                  |

|      |                        |                                |   |                                                                |
|------|------------------------|--------------------------------|---|----------------------------------------------------------------|
| 6869 | 1,3,5,8,9,1<br>2,13,14 | 2,4,6,7,10,<br>11,15,16,1<br>7 | 2 | Q5FVI6,Q9Z1F2                                                  |
| 6870 | 1,3,5,8,9,1<br>2,13,15 | 2,4,6,7,10,<br>11,14,16,1<br>7 | 3 | O54728,P14480,Q63532                                           |
| 6871 | 1,3,5,8,9,1<br>2,13,16 | 2,4,6,7,10,<br>11,14,15,1<br>7 | 1 | Q6IRE4                                                         |
| 6872 | 1,3,5,8,9,1<br>2,13,17 | 2,4,6,7,10,<br>11,14,15,1<br>6 | 4 | P35280,P51907,Q5FVI6,Q63532                                    |
| 6873 | 1,3,5,8,9,1<br>2,14,15 | 2,4,6,7,10,<br>11,13,16,1<br>7 | 2 | O54728,P14480                                                  |
| 6874 | 1,3,5,8,9,1<br>2,14,16 | 2,4,6,7,10,<br>11,13,15,1<br>7 | 2 | Q6IG02,Q6IRE4                                                  |
| 6875 | 1,3,5,8,9,1<br>2,14,17 | 2,4,6,7,10,<br>11,13,15,1<br>6 | 3 | Q5FVI6,Q6IG02,Q99PP0                                           |
| 6876 | 1,3,5,8,9,1<br>2,15,16 | 2,4,6,7,10,<br>11,13,14,1<br>7 | 3 | O54728,P12020,Q6IRE4                                           |
| 6877 | 1,3,5,8,9,1<br>2,15,17 | 2,4,6,7,10,<br>11,13,14,1<br>6 | 2 | P12020,Q63532                                                  |
| 6878 | 1,3,5,8,9,1<br>2,16,17 | 2,4,6,7,10,<br>11,13,14,1<br>5 | 3 | P12020,P35280,Q6IG02                                           |
| 6879 | 1,3,5,8,9,1<br>3,14,15 | 2,4,6,7,10,<br>11,12,16,1<br>7 | 8 | O54728,P06757,P08753,P09605,P25809,P14480,P47967,P53792,Q6IRE4 |
| 6880 | 1,3,5,8,9,1<br>3,14,16 | 2,4,6,7,10,<br>11,12,15,1<br>7 | 3 | O54728,P01015,Q6IRE4                                           |
| 6881 | 1,3,5,8,9,1<br>3,14,17 | 2,4,6,7,10,<br>11,12,15,1<br>6 | 8 | P08753,P35280,P47967,P51907,P53792,P97840,Q5FVI6,Q9QW07        |
| 6882 | 1,3,5,8,9,1<br>3,15,16 | 2,4,6,7,10,<br>11,12,14,1<br>7 | 5 | O54728,P62804,Q00715,Q62635,Q6IRE4                             |
| 6883 | 1,3,5,8,9,1<br>3,15,17 | 2,4,6,7,10,<br>11,12,14,1<br>6 | 8 | O54728,P08753,P47967,P51907,P53792,P97840,Q5FVI6,Q63532        |

|      |                         |                                |   |                                                                |
|------|-------------------------|--------------------------------|---|----------------------------------------------------------------|
| 6884 | 1,3,5,8,9,1<br>3,16,17  | 2,4,6,7,10,<br>11,12,14,1<br>5 | 4 | P08753,P35280,P51907,Q6IRE4                                    |
| 6885 | 1,3,5,8,9,1<br>4,15,16  | 2,4,6,7,10,<br>11,12,13,1<br>7 | 6 | O54728,P09605;P25809,P14480,Q62635,Q6IRE4,Q9QZK9               |
| 6886 | 1,3,5,8,9,1<br>4,15,17  | 2,4,6,7,10,<br>11,12,13,1<br>6 | 6 | O54728,P04218,P47967,P53792,P97840,Q5FVI6                      |
| 6887 | 1,3,5,8,9,1<br>4,16,17  | 2,4,6,7,10,<br>11,12,13,1<br>5 | 2 | P04218,Q6IRE4                                                  |
| 6888 | 1,3,5,8,9,1<br>5,16,17  | 2,4,6,7,10,<br>11,12,13,1<br>4 | 9 | O54728,P04218,P0C0A9,P12020,P23593,P25236,P47727,Q6IRE4,Q9JHB9 |
| 6889 | 1,3,5,8,10,<br>11,12,13 | 2,4,6,7,9,1<br>4,15,16,17      | 3 | P09605;P25809,Q6IG02,Q6P6Q2                                    |
| 6890 | 1,3,5,8,10,<br>11,12,14 | 2,4,6,7,9,1<br>3,15,16,17      | 3 | P09605;P25809,Q6IG02,Q6P6Q2                                    |
| 6891 | 1,3,5,8,10,<br>11,12,15 | 2,4,6,7,9,1<br>3,14,16,17      | 5 | P00731,P09605;P25809,P14480,Q6IG02,Q6P6Q2                      |
| 6892 | 1,3,5,8,10,<br>11,12,16 | 2,4,6,7,9,1<br>3,14,15,17      | 3 | Q6IG02,Q6IRE4,Q6P6Q2                                           |
| 6893 | 1,3,5,8,10,<br>11,12,17 | 2,4,6,7,9,1<br>3,14,15,16      | 5 | P16636,P25236,Q6IG02,Q6P6Q2,Q99MH3                             |
| 6894 | 1,3,5,8,10,<br>11,13,14 | 2,4,6,7,9,1<br>2,15,16,17      | 2 | P09605;P25809,Q6IRE4                                           |
| 6895 | 1,3,5,8,10,<br>11,13,15 | 2,4,6,7,9,1<br>2,14,16,17      | 4 | O54728,P09605;P25809,P14480,P98089                             |
| 6896 | 1,3,5,8,10,<br>11,13,16 | 2,4,6,7,9,1<br>2,14,15,17      | 3 | P09605;P25809,P98089,Q6IRE4                                    |
| 6897 | 1,3,5,8,10,<br>11,13,17 | 2,4,6,7,9,1<br>2,14,15,16      | 1 | Q63532                                                         |
| 6898 | 1,3,5,8,10,<br>11,14,15 | 2,4,6,7,9,1<br>2,13,16,17      | 4 | O54728,P09605;P25809,P14480,Q62635                             |
| 6899 | 1,3,5,8,10,<br>11,14,16 | 2,4,6,7,9,1<br>2,13,15,17      | 3 | P09605;P25809,Q62635,Q6IRE4                                    |
| 6900 | 1,3,5,8,10,<br>11,14,17 | 2,4,6,7,9,1<br>2,13,15,16      | 1 | P18427                                                         |
| 6901 | 1,3,5,8,10,<br>11,15,16 | 2,4,6,7,9,1<br>2,13,14,17      | 6 | O54728,P09605;P25809,P25236,P32755,Q62635,Q6IRE4               |
| 6902 | 1,3,5,8,10,<br>11,15,17 | 2,4,6,7,9,1<br>2,13,14,16      | 4 | G3V686,P18427,P25236,Q63532                                    |
| 6903 | 1,3,5,8,10,<br>11,16,17 | 2,4,6,7,9,1<br>2,13,14,15      | 2 | P08649,P25236                                                  |

|      |                                                |   |                                                  |
|------|------------------------------------------------|---|--------------------------------------------------|
| 6904 | 1,3,5,8,10, 2,4,6,7,9,1<br>12,13,14 1,15,16,17 | 2 | P09605;P25809,Q6IG02                             |
| 6905 | 1,3,5,8,10, 2,4,6,7,9,1<br>12,13,15 1,14,16,17 | 4 | P09605;P25809,P83121,Q6IG02,Q99MH3               |
| 6906 | 1,3,5,8,10, 2,4,6,7,9,1<br>12,13,16 1,14,15,17 | 3 | P09605;P25809,P83121,Q6IG02                      |
| 6907 | 1,3,5,8,10, 2,4,6,7,9,1<br>12,13,17 1,14,15,16 | 4 | P83121,Q63532,Q6IG02,Q99MH3                      |
| 6908 | 1,3,5,8,10, 2,4,6,7,9,1<br>12,14,15 1,13,16,17 | 2 | P09605;P25809,Q6IG02                             |
| 6909 | 1,3,5,8,10, 2,4,6,7,9,1<br>12,14,16 1,13,15,17 | 3 | P08721,P09605;P25809,Q6IG02                      |
| 6910 | 1,3,5,8,10, 2,4,6,7,9,1<br>12,14,17 1,13,15,16 | 2 | Q6IG02,Q99PP0                                    |
| 6911 | 1,3,5,8,10, 2,4,6,7,9,1<br>12,15,16 1,13,14,17 | 3 | P09605;P25809,P83121,Q6IG02                      |
| 6912 | 1,3,5,8,10, 2,4,6,7,9,1<br>12,15,17 1,13,14,16 | 4 | P83121,Q63532,Q6IG02,Q99MH3                      |
| 6913 | 1,3,5,8,10, 2,4,6,7,9,1<br>12,16,17 1,13,14,15 | 3 | P83121,Q6IG02,Q99MH3                             |
| 6914 | 1,3,5,8,10, 2,4,6,7,9,1<br>13,14,15 1,12,16,17 | 3 | O54728,P09605;P25809,P14480                      |
| 6915 | 1,3,5,8,10, 2,4,6,7,9,1<br>13,14,16 1,12,15,17 | 2 | P09605;P25809,Q6IRE4                             |
| 6916 | 1,3,5,8,10, 2,4,6,7,9,1<br>13,14,17 1,12,15,16 | 3 | P08753,P51907,Q9QW07                             |
| 6917 | 1,3,5,8,10, 2,4,6,7,9,1<br>13,15,16 1,12,14,17 | 6 | O54728,P01835,P09605;P25809,P83121,P98089,Q6AYQ8 |
| 6918 | 1,3,5,8,10, 2,4,6,7,9,1<br>13,15,17 1,12,14,16 | 4 | P08753,P83121,Q63532,Q99MH3                      |
| 6919 | 1,3,5,8,10, 2,4,6,7,9,1<br>13,16,17 1,12,14,15 | 4 | P08753,P25031,P51907,P83121                      |
| 6920 | 1,3,5,8,10, 2,4,6,7,9,1<br>14,15,16 1,12,13,17 | 5 | O54728,P09605;P25809,Q62635,Q6IRE4,Q9QZK9        |
| 6921 | 1,3,5,8,10, 2,4,6,7,9,1<br>14,15,17 1,12,13,16 | 3 | G3V686,P18427,P47967                             |
| 6922 | 1,3,5,8,10, 2,4,6,7,9,1<br>14,16,17 1,12,13,15 | 1 | Q9QW07                                           |
| 6923 | 1,3,5,8,10, 2,4,6,7,9,1<br>15,16,17 1,12,13,14 | 4 | P0C0A9,P25236,P83121,Q9JHB9                      |
| 6924 | 1,3,5,8,11, 2,4,6,7,9,1<br>12,13,14 0,15,16,17 | 3 | P09605;P25809,Q6IG02,Q6IRE4                      |
| 6925 | 1,3,5,8,11, 2,4,6,7,9,1<br>12,13,15 0,14,16,17 | 3 | P14480,Q6IG02,Q6P6R2                             |
| 6926 | 1,3,5,8,11, 2,4,6,7,9,1<br>12,13,16 0,14,15,17 | 3 | P17046,Q6IG02,Q6IRE4                             |

|      |                                                |   |                                                                       |
|------|------------------------------------------------|---|-----------------------------------------------------------------------|
| 6927 | 1,3,5,8,11, 2,4,6,7,9,1<br>12,13,17 0,14,15,16 | 2 | Q63532,Q6IG02                                                         |
| 6928 | 1,3,5,8,11, 2,4,6,7,9,1<br>12,14,15 0,13,16,17 | 5 | P09605;P25809,P14480,Q5I0D1,Q6IG02,Q6IRE4                             |
| 6929 | 1,3,5,8,11, 2,4,6,7,9,1<br>12,14,16 0,13,15,17 | 3 | Q6IG02,Q6IRE4,Q6P6Q2                                                  |
| 6930 | 1,3,5,8,11, 2,4,6,7,9,1<br>12,14,17 0,13,15,16 | 3 | P97840,Q6IG02,Q99PP0                                                  |
| 6931 | 1,3,5,8,11, 2,4,6,7,9,1<br>12,15,16 0,13,14,17 | 4 | P12020,Q5I0D1,Q6IG02,Q6IRE4                                           |
| 6932 | 1,3,5,8,11, 2,4,6,7,9,1<br>12,15,17 0,13,14,16 | 4 | P12020,P97840,Q63532,Q6IG02                                           |
| 6933 | 1,3,5,8,11, 2,4,6,7,9,1<br>12,16,17 0,13,14,15 | 5 | P12020,P17046,Q6IG02,Q6IRE4,Q6P6Q2                                    |
| 6934 | 1,3,5,8,11, 2,4,6,7,9,1<br>13,14,15 0,12,16,17 | 8 | O54728,P09605;P25809,P14480,P19223,P47967,P97840,Q6IRE4,Q6P6R2        |
| 6935 | 1,3,5,8,11, 2,4,6,7,9,1<br>13,14,16 0,12,15,17 | 3 | P09605;P25809,P19223,Q6IRE4                                           |
| 6936 | 1,3,5,8,11, 2,4,6,7,9,1<br>13,14,17 0,12,15,16 | 3 | P47967,P97840,Q9QW07                                                  |
| 6937 | 1,3,5,8,11, 2,4,6,7,9,1<br>13,15,16 0,12,14,17 | 4 | O54728,P09605;P25809,P19223,Q6IRE4                                    |
| 6938 | 1,3,5,8,11, 2,4,6,7,9,1<br>13,15,17 0,12,14,16 | 3 | P47967,P97840,Q63532                                                  |
| 6939 | 1,3,5,8,11, 2,4,6,7,9,1<br>13,16,17 0,12,14,15 | 3 | P17046,P97840,Q6IRE4                                                  |
| 6940 | 1,3,5,8,11, 2,4,6,7,9,1<br>14,15,16 0,12,13,17 | 9 | O54728,P09605;P25809,P14480,P19223,P97840,Q5I0D1,Q62635,Q6IRE4,Q9QZK9 |
| 6941 | 1,3,5,8,11, 2,4,6,7,9,1<br>14,15,17 0,12,13,16 | 4 | P04218,P47967,P97840,Q5I0D1                                           |
| 6942 | 1,3,5,8,11, 2,4,6,7,9,1<br>14,16,17 0,12,13,15 | 4 | P04218,P97840,Q6IRE4,Q9QW07                                           |
| 6943 | 1,3,5,8,11, 2,4,6,7,9,1<br>15,16,17 0,12,13,14 | 5 | P04218,P12020,P25236,P97840,Q6IRE4                                    |
| 6944 | 1,3,5,8,12, 2,4,6,7,9,1<br>13,14,15 0,11,16,17 | 4 | P09605;P25809,Q5FVI6,Q64093,Q6P6R2                                    |
| 6945 | 1,3,5,8,12, 2,4,6,7,9,1<br>13,14,16 0,11,15,17 | 1 | Q6IRE4                                                                |
| 6946 | 1,3,5,8,12, 2,4,6,7,9,1<br>13,14,17 0,11,15,16 | 6 | O70594,P51907,Q561R9,Q5FVI6,Q9QW07,Q9Z1F2                             |
| 6947 | 1,3,5,8,12, 2,4,6,7,9,1<br>13,15,16 0,11,14,17 | 2 | P83121,Q6IRE4                                                         |
| 6948 | 1,3,5,8,12, 2,4,6,7,9,1<br>13,15,17 0,11,14,16 | 5 | P83121,Q5FVI6,Q5XFX0,Q63532,Q99MH3                                    |
| 6949 | 1,3,5,8,12, 2,4,6,7,9,1<br>13,16,17 0,11,14,15 | 5 | P17046,P35280,P51907,P83121,Q5XFX0                                    |

|      |                                                |    |                                                                                                                                                                                |
|------|------------------------------------------------|----|--------------------------------------------------------------------------------------------------------------------------------------------------------------------------------|
| 6950 | 1,3,5,8,12, 2,4,6,7,9,1<br>14,15,16 0,11,13,17 | 2  | P09605;P25809,Q6IRE4                                                                                                                                                           |
| 6951 | 1,3,5,8,12, 2,4,6,7,9,1<br>14,15,17 0,11,13,16 | 4  | P47967,Q5FVI6,Q8CJD3,Q9QW07                                                                                                                                                    |
| 6952 | 1,3,5,8,12, 2,4,6,7,9,1<br>14,16,17 0,11,13,15 | 3  | Q561R9,Q6IG02,Q9QW07                                                                                                                                                           |
| 6953 | 1,3,5,8,12, 2,4,6,7,9,1<br>15,16,17 0,11,13,14 | 3  | P12020,P83121,Q5XFX0                                                                                                                                                           |
| 6954 | 1,3,5,8,13, 2,4,6,7,9,1<br>14,15,16 0,11,12,17 | 6  | O54728,P08753,P09605;P25809,P19223,Q08849,Q6IRE4                                                                                                                               |
| 6955 | 1,3,5,8,13, 2,4,6,7,9,1<br>14,15,17 0,11,12,16 | 9  | P08753,P10536,P47967,P51907,P97840,Q08849,Q5FVI6,Q64093,Q9QW07                                                                                                                 |
| 6956 | 1,3,5,8,13, 2,4,6,7,9,1<br>14,16,17 0,11,12,15 | 6  | P08753,P35280,P51907,Q5FVI6,Q6PCU2,Q9QW07                                                                                                                                      |
| 6957 | 1,3,5,8,13, 2,4,6,7,9,1<br>15,16,17 0,11,12,14 | 4  | P08753,P0C0A9,P83121,Q5XFX0                                                                                                                                                    |
| 6958 | 1,3,5,8,14, 2,4,6,7,9,1<br>15,16,17 0,11,12,13 | 4  | P0C0A9,P47967,P97840,Q9QW07                                                                                                                                                    |
| 6959 | 1,3,5,9,10, 2,4,6,7,8,1<br>11,12,13 4,15,16,17 | 2  | Q6IG02,Q6IRE4                                                                                                                                                                  |
| 6960 | 1,3,5,9,10, 2,4,6,7,8,1<br>11,12,14 3,15,16,17 | 2  | Q6IG02,Q6IRE4                                                                                                                                                                  |
| 6961 | 1,3,5,9,10, 2,4,6,7,8,1<br>11,12,15 3,14,16,17 | 6  | O54728,P06911,P11598,P14480,Q6IG02,Q6IRE4                                                                                                                                      |
| 6962 | 1,3,5,9,10, 2,4,6,7,8,1<br>11,12,16 3,14,15,17 | 9  | P06911,P11598,P12368,P20761,Q5GRG2,Q6IG02,Q6IRE4,Q6P6Q2,Q9WUW8                                                                                                                 |
| 6963 | 1,3,5,9,10, 2,4,6,7,8,1<br>11,12,17 3,14,15,16 | 5  | P06911,P08689,P25236,Q5GRG2,Q6IG02                                                                                                                                             |
| 6964 | 1,3,5,9,10, 2,4,6,7,8,1<br>11,13,14 2,15,16,17 | 10 | O54728,P09605;P25809,P19223,P20761,P55091,P98089,Q4G075,Q62635,Q6IRE4,Q99041                                                                                                   |
| 6965 | 1,3,5,9,10, 2,4,6,7,8,1<br>11,13,15 2,14,16,17 | 14 | O54728,P09605;P25809,P11598,P14480,P19223,P55091,P98089,Q4G075,Q62635,Q6IRE4,Q6P6R2,Q80WL1,Q99041,Q9R0T3                                                                       |
| 6966 | 1,3,5,9,10, 2,4,6,7,8,1<br>11,13,16 2,14,15,17 | 12 | O54728,P11598,P19223,P20761,P20762,P55091,P62815,P98089,Q4G075,Q62635,Q6IRE4,Q99041                                                                                            |
| 6967 | 1,3,5,9,10, 2,4,6,7,8,1<br>11,13,17 2,14,15,16 | 2  | Q63532,Q920P0                                                                                                                                                                  |
| 6968 | 1,3,5,9,10, 2,4,6,7,8,1<br>11,14,15 2,13,16,17 | 19 | O54728,P06761,P09605;P25809,P11598,P14480,P18427,P19223,P22282,P55091,P63029,P98089,Q4G075,Q62635,Q62902,Q6IRE4,Q80WL1,Q99041,Q9QZK9,Q9R0T3                                    |
| 6969 | 1,3,5,9,10, 2,4,6,7,8,1<br>11,14,16 2,13,15,17 | 15 | O54728,P06761,P11598,P19223,P20761,P22282,P55091,P62815,P98089,Q4G075,Q62635,Q6IRE4,Q80WL1,Q99041,Q9QZK9                                                                       |
| 6970 | 1,3,5,9,10, 2,4,6,7,8,1<br>11,14,17 2,13,15,16 | 6  | P08689,P18427,P25236,Q6IRE4,Q9QUL6,Q9R0T3                                                                                                                                      |
| 6971 | 1,3,5,9,10, 2,4,6,7,8,1<br>11,15,16 2,13,14,17 | 25 | O54728,P02780,P02782,P06761,P06911,P07647,P11598,P12020,P19223,P22282,P22283,P25236,P50280,P55091,P62815,P98089,Q4G075,Q62635,Q62902,Q6AYR9,Q6IRE4,Q80WL1,Q99041,Q9QZK9,Q9R0T3 |
| 6972 | 1,3,5,9,10, 2,4,6,7,8,1<br>11,15,17 2,13,14,16 | 12 | O54728,P06761,P06911,P11598,P12020,P18427,P25236,Q62902,Q63532,Q6AYR9,Q80WL1,Q9R0T3                                                                                            |



|      |                                                |    |                                                                                                                                                                                                                                        |
|------|------------------------------------------------|----|----------------------------------------------------------------------------------------------------------------------------------------------------------------------------------------------------------------------------------------|
| 6973 | 1,3,5,9,10, 2,4,6,7,8,1<br>11,16,17 2,13,14,15 | 10 | O08557,P06761,P06911,P11598,P12020,P25236,Q5GRG2,Q62902,Q6AYR9,Q6IRE4                                                                                                                                                                  |
| 6974 | 1,3,5,9,10, 2,4,6,7,8,1<br>12,13,14 1,15,16,17 | 3  | P07150,P09605,P25809,P14669                                                                                                                                                                                                            |
| 6975 | 1,3,5,9,10, 2,4,6,7,8,1<br>12,13,15 1,14,16,17 | 4  | O54728,P07150,P09605,P25809,Q6P6R2                                                                                                                                                                                                     |
| 6976 | 1,3,5,9,10, 2,4,6,7,8,1<br>12,13,16 1,14,15,17 | 9  | P02631,P02761,P07150,P07171,P11598,P14669,P20761,P20762,Q6IRE4                                                                                                                                                                         |
| 6977 | 1,3,5,9,10, 2,4,6,7,8,1<br>12,13,17 1,14,15,16 | 5  | P02631,P07171,P35280,Q63532,Q99MH3                                                                                                                                                                                                     |
| 6978 | 1,3,5,9,10, 2,4,6,7,8,1<br>12,14,15 1,13,16,17 | 5  | O54728,P07150,P09605,P25809,P11598,Q9ROT3                                                                                                                                                                                              |
| 6979 | 1,3,5,9,10, 2,4,6,7,8,1<br>12,14,16 1,13,15,17 | 4  | P07150,P11598,P14669,Q6IRE4                                                                                                                                                                                                            |
| 6980 | 1,3,5,9,10, 2,4,6,7,8,1<br>12,14,17 1,13,15,16 | 1  | P08689                                                                                                                                                                                                                                 |
| 6981 | 1,3,5,9,10, 2,4,6,7,8,1<br>12,15,16 1,13,14,17 | 12 | O54728,P06761,P06911,P07150,P11598,P12020,P14669,P22282,P22283,P50280,Q62902,Q6IRE4                                                                                                                                                    |
| 6982 | 1,3,5,9,10, 2,4,6,7,8,1<br>12,15,17 1,13,14,16 | 4  | P06911,P25236,Q62902,Q63532                                                                                                                                                                                                            |
| 6983 | 1,3,5,9,10, 2,4,6,7,8,1<br>12,16,17 1,13,14,15 | 9  | P02631,P06911,P07171,P11598,P14669,P20762,P25236,P35280,Q5GRG2                                                                                                                                                                         |
| 6984 | 1,3,5,9,10, 2,4,6,7,8,1<br>13,14,15 1,12,16,17 | 17 | O54728,O55004,P07150,P09605,P25809,P14669,P19223,P50115,P55091,P98089,Q07936,Q4G075,Q62635,Q6IRE4,Q6P6R2,Q80WL1,Q99041,Q9ROT3                                                                                                          |
| 6985 | 1,3,5,9,10, 2,4,6,7,8,1<br>13,14,16 1,12,15,17 | 20 | O54728,O55004,P01015,P07150,P09605,P25809,P11598,P14669,P19223,P20761,P50115,P50280,P55091,P98089,Q00715,Q4G075,Q62635,Q6IRE4,Q80WL1,Q99041,Q9QZA6                                                                                     |
| 6986 | 1,3,5,9,10, 2,4,6,7,8,1<br>13,14,17 1,12,15,16 | 2  | P35280,Q9QW07                                                                                                                                                                                                                          |
| 6987 | 1,3,5,9,10, 2,4,6,7,8,1<br>13,15,16 1,12,14,17 | 32 | O54728,O55004,P02780,P02782,P06761,P07150,P07647,P09605,P25809,P0C0A9,P11598,P14669,P19223,P20762,P22282,P22283,P30120,P50115,P50280,P55091,P62804,P98089,Q00715,Q4G075,Q62635,Q63493,Q6AYQ8,Q6AYR9,Q6IRE4,Q80WL1,Q99041,Q9EQS0,Q9QZK9 |
| 6988 | 1,3,5,9,10, 2,4,6,7,8,1<br>13,15,17 1,12,14,16 | 6  | O54728,P0C0A9,Q63532,Q80WL1,Q9EQS0,Q9ROT3                                                                                                                                                                                              |
| 6989 | 1,3,5,9,10, 2,4,6,7,8,1<br>13,16,17 1,12,14,15 | 12 | P02631,P07171,P0C0A9,P11598,P14669,P20762,P35280,P50280,P62804,Q00715,Q6IRE4,Q9EQS0                                                                                                                                                    |
| 6990 | 1,3,5,9,10, 2,4,6,7,8,1<br>14,15,16 1,12,13,17 | 30 | O54728,O55004,P02780,P02782,P06761,P07150,P07647,P09605,P25809,P0C0A9,P11598,P14669,P19223,P22282,P22283,P30120,P50115,P50280,P55091,P60905,P98089,Q4G075,Q62635,Q62902,Q6AYR9,Q6IRE4,Q80WL1,Q99041,Q9JHB9,Q9QZK9,Q9ROT3               |
| 6991 | 1,3,5,9,10, 2,4,6,7,8,1<br>14,15,17 1,12,13,16 | 18 | O54728,P02780,P02782,P06761,P07647,P08689,P0C0A9,P11598,P18427,P22282,P22283,P24368,P30120,Q62902,Q80WL1,Q8CJ52,Q9JHB9,Q9ROT3                                                                                                          |
| 6992 | 1,3,5,9,10, 2,4,6,7,8,1<br>14,16,17 1,12,13,15 | 15 | P02780,P02782,P06761,P07647,P0C0A9,P11598,P14669,P22282,P22283,P30120,P50280,Q62902,Q6IRE4,Q80WL1,Q9JHB9                                                                                                                               |
| 6993 | 1,3,5,9,10, 2,4,6,7,8,1<br>15,16,17 1,12,13,14 | 28 | O54728,P02780,P02781,P02782,P06761,P06911,P07647,P0C0A9,P11598,P12020,P14669,P20762,P22282,P22283,P24368,P25236,P30120,P47727,P50280,Q5GRG2,Q62902,Q6AYR9,Q80WL1,Q8CJ52,Q9EQS0,Q9JHB9,Q9J185,Q9ROT3                                    |
| 6994 | 1,3,5,9,11, 2,4,6,7,8,1<br>12,13,14 0,15,16,17 | 2  | Q6IRE4,Q6P6R2                                                                                                                                                                                                                          |

|      |                                                |    |                                                                                                                                                           |
|------|------------------------------------------------|----|-----------------------------------------------------------------------------------------------------------------------------------------------------------|
| 6995 | 1,3,5,9,11, 2,4,6,7,8,1<br>12,13,15 0,14,16,17 | 4  | O54728,P14480,Q6IRE4,Q6P6R2                                                                                                                               |
| 6996 | 1,3,5,9,11, 2,4,6,7,8,1<br>12,13,16 0,14,15,17 | 4  | P02761,P11598,P17046,Q6IRE4                                                                                                                               |
| 6997 | 1,3,5,9,11, 2,4,6,7,8,1<br>12,13,17 0,14,15,16 | 3  | P35280,Q63532,Q6IRE4                                                                                                                                      |
| 6998 | 1,3,5,9,11, 2,4,6,7,8,1<br>12,14,15 0,13,16,17 | 5  | O54728,P14480,Q6IRE4,Q6P6R2,Q9R0T3                                                                                                                        |
| 6999 | 1,3,5,9,11, 2,4,6,7,8,1<br>12,14,16 0,13,15,17 | 3  | P11598,Q6IG02,Q6IRE4                                                                                                                                      |
| 7000 | 1,3,5,9,11, 2,4,6,7,8,1<br>12,14,17 0,13,15,16 | 3  | P01835,Q6IG02,Q6IRE4                                                                                                                                      |
| 7001 | 1,3,5,9,11, 2,4,6,7,8,1<br>12,15,16 0,13,14,17 | 9  | O54728,P06761,P06911,P11598,P12020,P17046,P22282,Q5GRG2,Q6IRE4                                                                                            |
| 7002 | 1,3,5,9,11, 2,4,6,7,8,1<br>12,15,17 0,13,14,16 | 6  | P06911,P12020,P25236,Q5GRG2,Q63532,Q9R0T3                                                                                                                 |
| 7003 | 1,3,5,9,11, 2,4,6,7,8,1<br>12,16,17 0,13,14,15 | 9  | P06911,P11598,P12020,P17046,P25236,P35280,Q5GRG2,Q6IG02,Q6IRE4                                                                                            |
| 7004 | 1,3,5,9,11, 2,4,6,7,8,1<br>13,14,15 0,12,16,17 | 13 | O54728,P09605,P25809,P14480,P19223,P55091,P98089,Q4G075,Q62635,Q6IRE4,Q6P6R2,Q80WL1,Q99041,Q9R0T3                                                         |
| 7005 | 1,3,5,9,11, 2,4,6,7,8,1<br>13,14,16 0,12,15,17 | 17 | O54728,O55004,P01015,P02761,P04218,P11598,P19223,P20761,P55091,P98089,Q4G075,Q62635,Q6IRE4,Q6P6R2,Q80WL1,Q99041,Q9QZK9                                    |
| 7006 | 1,3,5,9,11, 2,4,6,7,8,1<br>13,14,17 0,12,15,16 | 7  | D3ZHA0,P04218,P35280,P47967,P97840,Q6IRE4,Q9QW07                                                                                                          |
| 7007 | 1,3,5,9,11, 2,4,6,7,8,1<br>13,15,16 0,12,14,17 | 17 | O54728,P06761,P11598,P12020,P19223,P22282,P55091,P98089,Q4G075,Q62635,Q6AYR9,Q6IRE4,Q6P6R2,Q80WL1,Q99041,Q9QZK9,Q9R0T3                                    |
| 7008 | 1,3,5,9,11, 2,4,6,7,8,1<br>13,15,17 0,12,14,16 | 9  | O54728,P04218,P47967,P97840,Q63532,Q6IRE4,Q80WL1,Q9EQS0,Q9R0T3                                                                                            |
| 7009 | 1,3,5,9,11, 2,4,6,7,8,1<br>13,16,17 0,12,14,15 | 6  | D3ZHA0,P04218,P11598,P17046,P35280,Q6IRE4                                                                                                                 |
| 7010 | 1,3,5,9,11, 2,4,6,7,8,1<br>14,15,16 0,12,13,17 | 21 | O54728,P02780,P02782,P04218,P06761,P07647,P11598,P12020,P19223,P22282,P22283,P55091,P98089,Q4G075,Q62635,Q6AYR9,Q6IRE4,Q80WL1,Q99041,Q9QZK9,Q9R0T3        |
| 7011 | 1,3,5,9,11, 2,4,6,7,8,1<br>14,15,17 0,12,13,16 | 10 | O54728,P04218,P06761,P12020,P47967,P97840,Q6AYR9,Q6IRE4,Q80WL1,Q9R0T3                                                                                     |
| 7012 | 1,3,5,9,11, 2,4,6,7,8,1<br>14,16,17 0,12,13,15 | 8  | D3ZHA0,P04218,P06761,P11598,P12020,Q6AYR9,Q6IRE4,Q80WL1                                                                                                   |
| 7013 | 1,3,5,9,11, 2,4,6,7,8,1<br>15,16,17 0,12,13,14 | 22 | O54728,P02780,P02782,P04218,P06761,P06911,P07647,POC0A9,P11598,P12020,P22282,P22283,P24368,P25236,P30120,Q5GRG2,Q62902,Q6AYR9,Q6IRE4,Q80WL1,Q9JHB9,Q9R0T3 |
| 7014 | 1,3,5,9,12, 2,4,6,7,8,1<br>13,14,15 0,11,16,17 | 10 | A2RUV9,O54728,P00714,P07150,P09605,P25809,P14669,Q4G075,Q6IRE4,Q6P6R2,Q9R0T3                                                                              |
| 7015 | 1,3,5,9,12, 2,4,6,7,8,1<br>13,14,16 0,11,15,17 | 6  | P00714,P02761,P07150,P14669,Q4G075,Q6IRE4                                                                                                                 |
| 7016 | 1,3,5,9,12, 2,4,6,7,8,1<br>13,14,17 0,11,15,16 | 6  | P00714,P07150,P14669,P35280,Q5FVI6,Q9QW07                                                                                                                 |
| 7017 | 1,3,5,9,12, 2,4,6,7,8,1<br>13,15,16 0,11,14,17 | 8  | O54728,P00714,P07150,P11598,P14669,P62804,Q6IRE4,Q6P6R2                                                                                                   |

|      |                                                |    |                                                                                                                                                                                                                   |
|------|------------------------------------------------|----|-------------------------------------------------------------------------------------------------------------------------------------------------------------------------------------------------------------------|
| 7018 | 1,3,5,9,12, 2,4,6,7,8,1<br>13,15,17 0,11,14,16 | 5  | P00714,P07150,P35280,Q5BJY9,Q63532                                                                                                                                                                                |
| 7019 | 1,3,5,9,12, 2,4,6,7,8,1<br>13,16,17 0,11,14,15 | 9  | P00714,P02631,P07171,P14669,P17046,P20762,P35280,Q5BJY9,Q6IRE4                                                                                                                                                    |
| 7020 | 1,3,5,9,12, 2,4,6,7,8,1<br>14,15,16 0,11,13,17 | 9  | O54728,P07150,P11598,P14669,P22282,P22283,Q4G075,Q6IRE4,Q9ROT3                                                                                                                                                    |
| 7021 | 1,3,5,9,12, 2,4,6,7,8,1<br>14,15,17 0,11,13,16 | 5  | P00714,P07150,P47967,Q8CJD3,Q9ROT3                                                                                                                                                                                |
| 7022 | 1,3,5,9,12, 2,4,6,7,8,1<br>14,16,17 0,11,13,15 | 3  | P14669,P35280,Q6IRE4                                                                                                                                                                                              |
| 7023 | 1,3,5,9,12, 2,4,6,7,8,1<br>15,16,17 0,11,13,14 | 11 | O54728,P00714,P06911,P11598,P12020,P14669,P25236,P35280,P47727,Q5GRG2,Q6IRE4                                                                                                                                      |
| 7024 | 1,3,5,9,13, 2,4,6,7,8,1<br>14,15,16 0,11,12,17 | 29 | O54728,O55004,P00714,P02780,P07150,P07647,P09605;P25809,P0C0A9,P11598,P14669,P19223,P22282,P22283,P50115,P50280,P55091,P60905,P62804,P98089,Q00715,Q4G075,Q62635,Q6AYR9,Q6IRE4,Q6P6R2,Q80WL1,Q99041,Q9QZK9,Q9ROT3 |
| 7025 | 1,3,5,9,13, 2,4,6,7,8,1<br>14,15,17 0,11,12,16 | 16 | O54728,P00714,P07150,P0C0A9,P14669,P35280,P47967,P53792,P60905,P82471,Q07936,Q5FVI6,Q80WL1,Q9EQS0,Q9QW07,Q9ROT3                                                                                                   |
| 7026 | 1,3,5,9,13, 2,4,6,7,8,1<br>14,16,17 0,11,12,15 | 13 | D3ZHA0,O55004,P00714,P01015,P0C0A9,P14669,P35280,P60905,P62804,Q00715,Q6IRE4,Q80WL1,Q9QW07                                                                                                                        |
| 7027 | 1,3,5,9,13, 2,4,6,7,8,1<br>15,16,17 0,11,12,14 | 24 | O54728,P00714,P02780,P07647,P0C0A9,P11598,P12020,P14669,P20762,P22283,P24368,P30120,P35280,P47727,P50280,P60905,P62804,Q00715,Q6AYR9,Q6IRE4,Q80WL1,Q9EQS0,Q9JHB9,Q9ROT3                                           |
| 7028 | 1,3,5,9,14, 2,4,6,7,8,1<br>15,16,17 0,11,12,13 | 29 | O54728,P00714,P02780,P02781,P02782,P04218,P06761,P07647,P0C0A9,P11598,P12020,P14669,P22282,P22283,P24368,P30120,P47727,P47967,P50280,P60905,P62804,Q62902,Q6AYR9,Q6IRE4,Q80WL1,Q8CJ52,Q9JHB9,Q9QW07,Q9ROT3        |
| 7029 | 1,3,5,10,1 2,4,6,7,8,9<br>1,12,13,14 ,15,16,17 | 4  | P09605;P25809,Q6IG02,Q6IRE4,Q6P6R2                                                                                                                                                                                |
| 7030 | 1,3,5,10,1 2,4,6,7,8,9<br>1,12,13,15 ,14,16,17 | 3  | P09605;P25809,Q6IG02,Q6P6R2                                                                                                                                                                                       |
| 7031 | 1,3,5,10,1 2,4,6,7,8,9<br>1,12,13,16 ,14,15,17 | 5  | P02631,P17046,Q6IG02,Q6IRE4,Q6P6Q2                                                                                                                                                                                |
| 7032 | 1,3,5,10,1 2,4,6,7,8,9<br>1,12,13,17 ,14,15,16 | 3  | P02631,Q6IG02,Q99MH3                                                                                                                                                                                              |
| 7033 | 1,3,5,10,1 2,4,6,7,8,9<br>1,12,14,15 ,13,16,17 | 4  | P09605;P25809,Q6IG02,Q6P6R2,Q9ROT3                                                                                                                                                                                |
| 7034 | 1,3,5,10,1 2,4,6,7,8,9<br>1,12,14,16 ,13,15,17 | 5  | P11598,P17046,Q6IG02,Q6IRE4,Q6P6Q2                                                                                                                                                                                |
| 7035 | 1,3,5,10,1 2,4,6,7,8,9<br>1,12,14,17 ,13,15,16 | 2  | P08689,Q6IG02                                                                                                                                                                                                     |
| 7036 | 1,3,5,10,1 2,4,6,7,8,9<br>1,12,15,16 ,13,14,17 | 7  | P06911,P11598,P17046,P20766,P22282,Q6IG02,Q6IRE4                                                                                                                                                                  |
| 7037 | 1,3,5,10,1 2,4,6,7,8,9<br>1,12,15,17 ,13,14,16 | 4  | P06911,P25236,Q6IG02,Q99MH3                                                                                                                                                                                       |
| 7038 | 1,3,5,10,1 2,4,6,7,8,9<br>1,12,16,17 ,13,14,15 | 8  | P06757,P06911,P17046,P25236,Q5GRG2,Q6IG02,Q6IRE4,Q6P6Q2                                                                                                                                                           |
| 7039 | 1,3,5,10,1 2,4,6,7,8,9<br>1,13,14,15 ,12,16,17 | 12 | O54728,P09605;P25809,P19223,P55091,P98089,Q4G075,Q62635,Q6IRE4,Q6P6R2,Q80WL1,Q99041,Q9ROT3                                                                                                                        |
| 7040 | 1,3,5,10,1 2,4,6,7,8,9<br>1,13,14,16 ,12,15,17 | 11 | O55004,P09605;P25809,P19223,P20761,P50115,P55091,P98089,Q4G075,Q62635,Q6IRE4,Q99041                                                                                                                               |

|      |                          |                          |    |                                                                                                                                                                         |
|------|--------------------------|--------------------------|----|-------------------------------------------------------------------------------------------------------------------------------------------------------------------------|
| 7041 | 1,3,5,10,1<br>1,13,14,17 | 2,4,6,7,8,9<br>,12,15,16 | 2  | P18427,Q9QW07                                                                                                                                                           |
| 7042 | 1,3,5,10,1<br>1,13,15,16 | 2,4,6,7,8,9<br>,12,14,17 | 15 | O54728,P06761,P09605;P25809,P11598,P19223,P22282,P50115,P55091,P98089,Q4G075,Q62635,Q6IRE4,Q6P6R2,Q80WL1,Q99041                                                         |
| 7043 | 1,3,5,10,1<br>1,13,15,17 | 2,4,6,7,8,9<br>,12,14,16 | 2  | Q63532,Q80WL1                                                                                                                                                           |
| 7044 | 1,3,5,10,1<br>1,13,16,17 | 2,4,6,7,8,9<br>,12,14,15 | 4  | P02631,P17046,P20762,Q6IRE4                                                                                                                                             |
| 7045 | 1,3,5,10,1<br>1,14,15,16 | 2,4,6,7,8,9<br>,12,13,17 | 22 | O54728,P02780,P02782,P06761,P07647,P09605;P25809,P11598,P19223,P22282,P22283,P50115,P55091,P98089,Q4G075,Q62635,Q62902,Q6AYR9,Q6IRE4,Q80WL1,Q99041,Q9QZK9,Q9ROT3        |
| 7046 | 1,3,5,10,1<br>1,14,15,17 | 2,4,6,7,8,9<br>,12,13,16 | 5  | P18427,P25236,Q62902,Q80WL1,Q9ROT3                                                                                                                                      |
| 7047 | 1,3,5,10,1<br>1,14,16,17 | 2,4,6,7,8,9<br>,12,13,15 | 5  | P06761,P11598,P18427,P25236,Q6IRE4                                                                                                                                      |
| 7048 | 1,3,5,10,1<br>1,15,16,17 | 2,4,6,7,8,9<br>,12,13,14 | 17 | P02780,P02782,P06761,P06911,P07647,P0C0A9,P11598,P12020,P22282,P22283,P25236,P30120,Q62902,Q6AYR9,Q6IRE4,Q80WL1,Q9JHB9                                                  |
| 7049 | 1,3,5,10,1<br>2,13,14,15 | 2,4,6,7,8,9<br>,11,16,17 | 5  | A2RUV9,P07150,P09605;P25809,P50115,Q6P6R2                                                                                                                               |
| 7050 | 1,3,5,10,1<br>2,13,14,16 | 2,4,6,7,8,9<br>,11,15,17 | 7  | O55004,P02631,P02761,P09605;P25809,P14669,P50115,Q6IRE4                                                                                                                 |
| 7051 | 1,3,5,10,1<br>2,13,14,17 | 2,4,6,7,8,9<br>,11,15,16 | 3  | P02631,Q99MH3,Q9QW07                                                                                                                                                    |
| 7052 | 1,3,5,10,1<br>2,13,15,16 | 2,4,6,7,8,9<br>,11,14,17 | 9  | P07150,P09605;P25809,P14669,P20762,P50115,P83121,Q63617,Q6IRE4,Q6P6R2                                                                                                   |
| 7053 | 1,3,5,10,1<br>2,13,15,17 | 2,4,6,7,8,9<br>,11,14,16 | 3  | P83121,Q63617,Q99MH3                                                                                                                                                    |
| 7054 | 1,3,5,10,1<br>2,13,16,17 | 2,4,6,7,8,9<br>,11,14,15 | 8  | P02631,P07171,P14669,P17046,P20762,P35280,P83121,Q99MH3                                                                                                                 |
| 7055 | 1,3,5,10,1<br>2,14,15,16 | 2,4,6,7,8,9<br>,11,13,17 | 9  | P09605;P25809,P11598,P14669,P20766,P22282,P22283,P50115,Q63617,Q6IRE4                                                                                                   |
| 7056 | 1,3,5,10,1<br>2,14,15,17 | 2,4,6,7,8,9<br>,11,13,16 | 4  | P08689,Q63617,Q8CJD3,Q9ROT3                                                                                                                                             |
| 7057 | 1,3,5,10,1<br>2,14,16,17 | 2,4,6,7,8,9<br>,11,13,15 | 1  | P14669                                                                                                                                                                  |
| 7058 | 1,3,5,10,1<br>2,15,16,17 | 2,4,6,7,8,9<br>,11,13,14 | 11 | P06911,P11598,P14669,P20766,P22282,P25236,P83121,Q62902,Q63617,Q6TMA8,Q99MH3                                                                                            |
| 7059 | 1,3,5,10,1<br>3,14,15,16 | 2,4,6,7,8,9<br>,11,12,17 | 23 | O54728,O55004,P02780,P07150,P07647,P09605;P25809,P0C0A9,P11598,P14669,P19223,P22282,P22283,P50115,P55091,P60905,P98089,Q4G075,Q62635,Q6IRE4,Q6P6R2,Q80WL1,Q99041,Q9ROT3 |
| 7060 | 1,3,5,10,1<br>3,14,15,17 | 2,4,6,7,8,9<br>,11,12,16 | 5  | P0C0A9,Q80WL1,Q9EQS0,Q9QW07,Q9ROT3                                                                                                                                      |
| 7061 | 1,3,5,10,1<br>3,14,16,17 | 2,4,6,7,8,9<br>,11,12,15 | 6  | O55004,P02631,P0C0A9,P14669,P35280,Q9QW07                                                                                                                               |
| 7062 | 1,3,5,10,1<br>3,15,16,17 | 2,4,6,7,8,9<br>,11,12,14 | 14 | P02780,P02782,P07647,P0C0A9,P14669,P20762,P22283,P24368,P30120,P62804,P83121,Q80WL1,Q9EQS0,Q9JHB9                                                                       |
| 7063 | 1,3,5,10,1<br>4,15,16,17 | 2,4,6,7,8,9<br>,11,12,13 | 22 | P02780,P02781,P02782,P02803,P06761,P07647,P0C0A9,P11598,P14669,P22282,P22283,P24368,P30120,P60905,Q62902,Q6AYR9,Q6TMA8,Q80WL1,Q9JHB9,Q9JH85,Q9QW07,Q9ROT3               |

|      |                          |                                 |    |                                                                                                                                                                  |
|------|--------------------------|---------------------------------|----|------------------------------------------------------------------------------------------------------------------------------------------------------------------|
| 7064 | 1,3,5,11,1<br>2,13,14,15 | 2,4,6,7,8,9<br>,10,16,17        | 3  | P09605;P25809,Q6IRE4,Q6P6R2                                                                                                                                      |
| 7065 | 1,3,5,11,1<br>2,13,14,16 | 2,4,6,7,8,9<br>,10,15,17        | 4  | P02761,P17046,Q6IRE4,Q6P6R2                                                                                                                                      |
| 7066 | 1,3,5,11,1<br>2,13,14,17 | 2,4,6,7,8,9<br>,10,15,16        | 2  | P17046,Q9QW07                                                                                                                                                    |
| 7067 | 1,3,5,11,1<br>2,13,15,16 | 2,4,6,7,8,9<br>,10,14,17        | 4  | O54728,P17046,Q6IRE4,Q6P6R2                                                                                                                                      |
| 7068 | 1,3,5,11,1<br>2,13,15,17 | 2,4,6,7,8,9<br>,10,14,16        | 2  | P17046,Q6P6R2                                                                                                                                                    |
| 7069 | 1,3,5,11,1<br>2,13,16,17 | 2,4,6,7,8,9<br>,10,14,15        | 4  | D3ZHA0,P17046,P35280,Q6IRE4                                                                                                                                      |
| 7070 | 1,3,5,11,1<br>2,14,15,16 | 2,4,6,7,8,9<br>,10,13,17        | 7  | O54728,P11598,P17046,P20766,Q6IRE4,Q6P6R2,Q9R0T3                                                                                                                 |
| 7071 | 1,3,5,11,1<br>2,14,15,17 | 2,4,6,7,8,9<br>,10,13,16        | 3  | P47967,Q8CJD3,Q9R0T3                                                                                                                                             |
| 7072 | 1,3,5,11,1<br>2,14,16,17 | 2,4,6,7,8,9<br>,10,13,15        | 3  | P17046,Q6IG02,Q6IRE4                                                                                                                                             |
| 7073 | 1,3,5,11,1<br>2,15,16,17 | 2,4,6,7,8,9<br>,10,13,14        | 6  | P06911,P12020,P17046,P25236,Q5GRG2,Q6IRE4                                                                                                                        |
| 7074 | 1,3,5,11,1<br>3,14,15,16 | 2,4,6,7,8,9<br>,10,12,17        | 15 | D3ZHA0,O54728,P09605;P25809,P19223,P50115,P55091,P60905,P98089,Q4G075,Q62635,Q6IRE4,Q6P6R2,Q80WL1,Q99041,Q9R0T3                                                  |
| 7075 | 1,3,5,11,1<br>3,14,15,17 | 2,4,6,7,8,9<br>,10,12,16        | 7  | D3ZHA0,P47967,P97840,Q6P6R2,Q80WL1,Q9QW07,Q9R0T3                                                                                                                 |
| 7076 | 1,3,5,11,1<br>3,14,16,17 | 2,4,6,7,8,9<br>,10,12,15        | 5  | D3ZHA0,P17046,P35280,Q6IRE4,Q9QW07                                                                                                                               |
| 7077 | 1,3,5,11,1<br>3,15,16,17 | 2,4,6,7,8,9<br>,10,12,14        | 9  | D3ZHA0,O54728,P00714,P0C0A9,P17046,Q6AYR9,Q6IRE4,Q80WL1,Q9EQS0                                                                                                   |
| 7078 | 1,3,5,11,1<br>4,15,16,17 | 2,4,6,7,8,9<br>,10,12,13        | 20 | D3ZHA0,O54728,P02780,P02782,P04218,P06761,P07647,P0C0A9,P11598,P12020,P22282,P22283,P47967,P97840,Q62902,Q6AYR9,Q6IRE4,Q80WL1,Q9QW07,Q9R0T3                      |
| 7079 | 1,3,5,12,1<br>3,14,15,16 | 2,4,6,7,8,9<br>,10,11,17        | 9  | O54728,P00714,P07150,P09605;P25809,P14669,P19223,P50115,Q6IRE4,Q6P6R2                                                                                            |
| 7080 | 1,3,5,12,1<br>3,14,15,17 | 2,4,6,7,8,9<br>,10,11,16        | 6  | A2RUV9,P00714,P47967,Q5FVI6,Q6P6R2,Q9QW07                                                                                                                        |
| 7081 | 1,3,5,12,1<br>3,14,16,17 | 2,4,6,7,8,9<br>,10,11,15        | 6  | P00714,P14669,P17046,P35280,Q561R9,Q9QW07                                                                                                                        |
| 7082 | 1,3,5,12,1<br>3,15,16,17 | 2,4,6,7,8,9<br>,10,11,14        | 6  | P00714,P14669,P17046,P35280,P83121,Q5XFX0                                                                                                                        |
| 7083 | 1,3,5,12,1<br>4,15,16,17 | 2,4,6,7,8,9<br>,10,11,13        | 4  | P00714,P14669,Q9QW07,Q9R0T3                                                                                                                                      |
| 7084 | 1,3,5,13,1<br>4,15,16,17 | 2,4,6,7,8,9<br>,10,11,12        | 23 | D3ZHA0,O54728,O55004,P00714,P02780,P07647,P08753,P0C0A9,P14669,P22283,P24368,P30120,P35280,P47967,P60905,P62804,Q6IRE4,Q6RUV5,Q80WL1,Q9EQS0,Q9JHB9,Q9QW07,Q9R0T3 |
| 7085 | 1,3,6,7,8,9<br>,10,11    | 2,4,5,12,1<br>3,14,15,16<br>,17 | 3  | P27213,P31044,P35280                                                                                                                                             |

|      |                       |                                 |    |                                                                                                          |
|------|-----------------------|---------------------------------|----|----------------------------------------------------------------------------------------------------------|
| 7086 | 1,3,6,7,8,9<br>,10,12 | 2,4,5,11,1<br>3,14,15,16<br>,17 | 5  | P08723,P10715,P19629,P31044,P97840                                                                       |
| 7087 | 1,3,6,7,8,9<br>,10,13 | 2,4,5,11,1<br>2,14,15,16<br>,17 | 5  | P06911,P12020,P31044,P51907,Q5GRG2                                                                       |
| 7088 | 1,3,6,7,8,9<br>,10,14 | 2,4,5,11,1<br>2,13,15,16<br>,17 | 3  | P12020,P19629,P31044                                                                                     |
| 7089 | 1,3,6,7,8,9<br>,10,15 | 2,4,5,11,1<br>2,13,14,16<br>,17 | 4  | O55006,P27213,P31044,P35280                                                                              |
| 7090 | 1,3,6,7,8,9<br>,10,16 | 2,4,5,11,1<br>2,13,14,15<br>,17 | 1  | P31044                                                                                                   |
| 7091 | 1,3,6,7,8,9<br>,10,17 | 2,4,5,11,1<br>2,13,14,15<br>,16 | 2  | P02091,P51907                                                                                            |
| 7092 | 1,3,6,7,8,9<br>,11,12 | 2,4,5,10,1<br>3,14,15,16<br>,17 | 15 | P02781,P02782,P08723,P10715,P13432,P19629,P22283,P27213,P30120,Q62997,Q63493,Q6IG02,Q8CJ52,Q9JHB9,Q9JI85 |
| 7093 | 1,3,6,7,8,9<br>,11,13 | 2,4,5,10,1<br>2,14,15,16<br>,17 | 4  | P16086,P22283,Q62902,Q9JI85                                                                              |
| 7094 | 1,3,6,7,8,9<br>,11,14 | 2,4,5,10,1<br>2,13,15,16<br>,17 | 3  | P16086,P19629,P27213                                                                                     |
| 7095 | 1,3,6,7,8,9<br>,11,15 | 2,4,5,10,1<br>2,13,14,16<br>,17 | 4  | P10715,P19629,P27213,P35280                                                                              |
| 7096 | 1,3,6,7,8,9<br>,11,16 | 2,4,5,10,1<br>2,13,14,15<br>,17 | 2  | P10715,P19629                                                                                            |
| 7097 | 1,3,6,7,8,9<br>,11,17 | 2,4,5,10,1<br>2,13,14,15<br>,16 | 4  | P02091,P10715,P19629,P50115                                                                              |
| 7098 | 1,3,6,7,8,9<br>,12,13 | 2,4,5,10,1<br>1,14,15,16<br>,17 | 14 | P02782,P06911,P08723,P10715,P13432,P19629,P22282,P22283,P30120,P51907,Q62902,Q8CJ52,Q9JHB9,Q9Z1F2        |
| 7099 | 1,3,6,7,8,9<br>,12,14 | 2,4,5,10,1<br>1,13,15,16<br>,17 | 6  | P02782,P08723,P10715,P13432,P19629,P30120                                                                |
| 7100 | 1,3,6,7,8,9<br>,12,15 | 2,4,5,10,1<br>1,13,14,16<br>,17 | 4  | P08723,P10715,P13432,P19629                                                                              |

|      |                        |                                 |    |                                                                                                                                                 |
|------|------------------------|---------------------------------|----|-------------------------------------------------------------------------------------------------------------------------------------------------|
| 7101 | 1,3,6,7,8,9<br>,12,16  | 2,4,5,10,1<br>1,13,14,15<br>,17 | 4  | P08723,P10715,P13432,P19629                                                                                                                     |
| 7102 | 1,3,6,7,8,9<br>,12,17  | 2,4,5,10,1<br>1,13,14,15<br>,16 | 10 | P02091,P02782,P08723,P10715,P13432,P19629,P22283,P50115,P51907,Q9QZK9                                                                           |
| 7103 | 1,3,6,7,8,9<br>,13,14  | 2,4,5,10,1<br>1,12,15,16<br>,17 | 10 | P06866,P06911,P12020,P16086,P19629,P51907,P53792,Q5GRG2,Q62902,Q9Z1F2                                                                           |
| 7104 | 1,3,6,7,8,9<br>,13,15  | 2,4,5,10,1<br>1,12,14,16<br>,17 | 2  | P19629,P53792                                                                                                                                   |
| 7105 | 1,3,6,7,8,9<br>,13,16  | 2,4,5,10,1<br>1,12,14,15<br>,17 | 1  | P51907                                                                                                                                          |
| 7106 | 1,3,6,7,8,9<br>,13,17  | 2,4,5,10,1<br>1,12,14,15<br>,16 | 4  | P02091,P22282,P51907,P53792                                                                                                                     |
| 7107 | 1,3,6,7,8,9<br>,14,15  | 2,4,5,10,1<br>1,12,13,16<br>,17 | 2  | P19629,P53792                                                                                                                                   |
| 7108 | 1,3,6,7,8,9<br>,14,16  | 2,4,5,10,1<br>1,12,13,15<br>,17 | 1  | P19629                                                                                                                                          |
| 7109 | 1,3,6,7,8,9<br>,14,17  | 2,4,5,10,1<br>1,12,13,15<br>,16 | 4  | P02091,P19629,P51907,P53792                                                                                                                     |
| 7110 | 1,3,6,7,8,9<br>,15,16  | 2,4,5,10,1<br>1,12,13,14<br>,17 | 2  | P19629,Q5QE79                                                                                                                                   |
| 7111 | 1,3,6,7,8,9<br>,15,17  | 2,4,5,10,1<br>1,12,13,14<br>,16 | 4  | P02091,P19629,P53792,Q5QE79                                                                                                                     |
| 7112 | 1,3,6,7,8,9<br>,16,17  | 2,4,5,10,1<br>1,12,13,14<br>,15 | 2  | P02091,P51907                                                                                                                                   |
| 7113 | 1,3,6,7,8,1<br>0,11,12 | 2,4,5,9,13,<br>14,15,16,1<br>7  | 20 | F1LM93,P02781,P02782,P08723,P10715,P14669,P19629,P22283,P30120,P31044,P35280,P47727,Q63357,Q63493,Q6AYL6,Q6IG02,Q6P6<br>Q2,Q8CJ52,Q9JHB9,Q9JI85 |
| 7114 | 1,3,6,7,8,1<br>0,11,13 | 2,4,5,9,12,<br>14,15,16,1<br>7  | 9  | P06911,P12020,P16086,P22283,P31044,P47727,Q5GRG2,Q62902,Q8VD89                                                                                  |
| 7115 | 1,3,6,7,8,1<br>0,11,14 | 2,4,5,9,12,<br>13,15,16,1<br>7  | 7  | P12020,P16086,P19629,P31044,P35280,P47727,Q63493                                                                                                |

|      |                        |                                |    |                                                                                                          |
|------|------------------------|--------------------------------|----|----------------------------------------------------------------------------------------------------------|
| 7116 | 1,3,6,7,8,1<br>0,11,15 | 2,4,5,9,12,<br>13,14,16,1<br>7 | 6  | P14669,P19629,P22006,P27213,P31044,P35280                                                                |
| 7117 | 1,3,6,7,8,1<br>0,11,16 | 2,4,5,9,12,<br>13,14,15,1<br>7 | 2  | P31044,Q8VD89                                                                                            |
| 7118 | 1,3,6,7,8,1<br>0,11,17 | 2,4,5,9,12,<br>13,14,15,1<br>6 | 8  | P02091,P07150,P12346,P14669,P15399,P19629,Q63493,Q99MH3                                                  |
| 7119 | 1,3,6,7,8,1<br>0,12,13 | 2,4,5,9,11,<br>14,15,16,1<br>7 | 15 | P02781,P02782,P06911,P08723,P12020,P19629,P22282,P22283,P30120,P31044,Q5GRG2,Q62902,Q8CJ52,Q99MH3,Q9JHB9 |
| 7120 | 1,3,6,7,8,1<br>0,12,14 | 2,4,5,9,11,<br>13,15,16,1<br>7 | 10 | P02782,P08723,P12020,P19629,P22283,P30120,P31044,P35280,Q8CJ52,Q9ET32                                    |
| 7121 | 1,3,6,7,8,1<br>0,12,15 | 2,4,5,9,11,<br>13,14,16,1<br>7 | 5  | P08723,P10715,P19629,P35280,Q99MH3                                                                       |
| 7122 | 1,3,6,7,8,1<br>0,12,16 | 2,4,5,9,11,<br>13,14,15,1<br>7 | 7  | P08721,P08723,P10715,P19629,P47967,P97840,Q8CJ52                                                         |
| 7123 | 1,3,6,7,8,1<br>0,12,17 | 2,4,5,9,11,<br>13,14,15,1<br>6 | 11 | F1LM93,P02091,P08723,P10715,P12346,P13432,P19629,P22283,Q4G075,Q99MH3,Q9QZK9                             |
| 7124 | 1,3,6,7,8,1<br>0,13,14 | 2,4,5,9,11,<br>12,15,16,1<br>7 | 7  | P06911,P12020,P16086,P19629,P31044,P51907,Q5GRG2                                                         |
| 7125 | 1,3,6,7,8,1<br>0,13,15 | 2,4,5,9,11,<br>12,14,16,1<br>7 | 6  | P06911,P12020,P15999,P31044,Q5GRG2,Q99MH3                                                                |
| 7126 | 1,3,6,7,8,1<br>0,13,16 | 2,4,5,9,11,<br>12,14,15,1<br>7 | 5  | P06911,P12020,P31044,P51907,Q5GRG2                                                                       |
| 7127 | 1,3,6,7,8,1<br>0,13,17 | 2,4,5,9,11,<br>12,14,15,1<br>6 | 6  | P02091,P06911,P12020,P22283,P51907,Q99MH3                                                                |
| 7128 | 1,3,6,7,8,1<br>0,14,15 | 2,4,5,9,11,<br>12,13,16,1<br>7 | 4  | P12020,P19629,P31044,P35280                                                                              |
| 7129 | 1,3,6,7,8,1<br>0,14,16 | 2,4,5,9,11,<br>12,13,15,1<br>7 | 3  | P12020,P19629,P31044                                                                                     |
| 7130 | 1,3,6,7,8,1<br>0,14,17 | 2,4,5,9,11,<br>12,13,15,1<br>6 | 6  | P02091,P08689,P12020,P12346,P19629,P51907                                                                |



|      |                        |                                |    |                                                                                                                                             |
|------|------------------------|--------------------------------|----|---------------------------------------------------------------------------------------------------------------------------------------------|
| 7131 | 1,3,6,7,8,1<br>0,15,16 | 2,4,5,9,11,<br>12,13,14,1<br>7 | 1  | P31044                                                                                                                                      |
| 7132 | 1,3,6,7,8,1<br>0,15,17 | 2,4,5,9,11,<br>12,13,14,1<br>6 | 4  | P02091,P12346,P19629,Q99MH3                                                                                                                 |
| 7133 | 1,3,6,7,8,1<br>0,16,17 | 2,4,5,9,11,<br>12,13,14,1<br>5 | 3  | P02091,P51907,Q99MH3                                                                                                                        |
| 7134 | 1,3,6,7,8,1<br>1,12,13 | 2,4,5,9,10,<br>14,15,16,1<br>7 | 19 | P02781,P02782,P04905,P06761,P06911,P08723,P10715,P13432,P19629,P22282,P22283,P30120,P47727,Q62902,Q63493,Q8CJ52,Q9JHB9,Q9JI85,Q9Z1F2        |
| 7135 | 1,3,6,7,8,1<br>1,12,14 | 2,4,5,9,10,<br>13,15,16,1<br>7 | 17 | P02781,P02782,P04905,P08723,P10715,P13432,P16086,P19629,P22282,P22283,P30120,P35280,P47727,Q63493,Q8CJ52,Q9JHB9,Q9JI85                      |
| 7136 | 1,3,6,7,8,1<br>1,12,15 | 2,4,5,9,10,<br>13,14,16,1<br>7 | 8  | P08723,P10715,P19629,P22006,P35280,Q63493,Q8CJ52,Q9JI85                                                                                     |
| 7137 | 1,3,6,7,8,1<br>1,12,16 | 2,4,5,9,10,<br>13,14,15,1<br>7 | 9  | P08723,P10715,P13432,P17046,P19629,P30120,Q63493,Q8CJ52,Q9JI85                                                                              |
| 7138 | 1,3,6,7,8,1<br>1,12,17 | 2,4,5,9,10,<br>13,14,15,1<br>6 | 20 | P02091,P02782,P08723,P10715,P13432,P14669,P19629,P22282,P22283,P30120,P50115,Q4G075,Q63493,Q63751,Q8CJ52,Q99041,Q99MH3,Q9JHB9,Q9JI85,Q9QZK9 |
| 7139 | 1,3,6,7,8,1<br>1,13,14 | 2,4,5,9,10,<br>12,15,16,1<br>7 | 12 | P06866,P06911,P12020,P16086,P19629,P22282,P22283,P47727,Q5GRG2,Q62902,Q63493,Q9JI85                                                         |
| 7140 | 1,3,6,7,8,1<br>1,13,15 | 2,4,5,9,10,<br>12,14,16,1<br>7 | 4  | P16086,P19629,Q5GRG2,Q8VD89                                                                                                                 |
| 7141 | 1,3,6,7,8,1<br>1,13,16 | 2,4,5,9,10,<br>12,14,15,1<br>7 | 3  | P16086,Q62902,Q8VD89                                                                                                                        |
| 7142 | 1,3,6,7,8,1<br>1,13,17 | 2,4,5,9,10,<br>12,14,15,1<br>6 | 10 | P01946,P02091,P16086,P19629,P22282,P22283,P51907,Q62902,Q63493,Q63751                                                                       |
| 7143 | 1,3,6,7,8,1<br>1,14,15 | 2,4,5,9,10,<br>12,13,16,1<br>7 | 4  | P16086,P19629,P22006,P35280                                                                                                                 |
| 7144 | 1,3,6,7,8,1<br>1,14,16 | 2,4,5,9,10,<br>12,13,15,1<br>7 | 2  | P16086,P19629                                                                                                                               |
| 7145 | 1,3,6,7,8,1<br>1,14,17 | 2,4,5,9,10,<br>12,13,15,1<br>6 | 5  | P02091,P14669,P16086,P19629,Q63493                                                                                                          |

|      |                        |                                |    |                                                                                                                                                        |
|------|------------------------|--------------------------------|----|--------------------------------------------------------------------------------------------------------------------------------------------------------|
| 7146 | 1,3,6,7,8,1<br>1,15,16 | 2,4,5,9,10,<br>12,13,14,1<br>7 | 3  | P10715,P19629,Q8VD89                                                                                                                                   |
| 7147 | 1,3,6,7,8,1<br>1,15,17 | 2,4,5,9,10,<br>12,13,14,1<br>6 | 5  | P02091,P10715,P14669,P19629,Q63751                                                                                                                     |
| 7148 | 1,3,6,7,8,1<br>1,16,17 | 2,4,5,9,10,<br>12,13,14,1<br>5 | 3  | P02091,P10715,P19629                                                                                                                                   |
| 7149 | 1,3,6,7,8,1<br>2,13,14 | 2,4,5,9,10,<br>11,15,16,1<br>7 | 21 | A2RUV9,O08557,P02782,P06761,P06911,P08723,P11598,P12020,P13432,P16086,P19629,P22282,P22283,P29975,P30120,P51907,Q5GR<br>G2,Q62902,Q8CJ52,Q9JHB9,Q9Z1F2 |
| 7150 | 1,3,6,7,8,1<br>2,13,15 | 2,4,5,9,10,<br>11,14,16,1<br>7 | 9  | P02782,P06911,P08723,P10715,P15999,P19629,Q5GRG2,Q62902,Q99MH3                                                                                         |
| 7151 | 1,3,6,7,8,1<br>2,13,16 | 2,4,5,9,10,<br>11,14,15,1<br>7 | 7  | P02782,P06911,P08723,P10715,P19629,Q62902,Q8CJ52                                                                                                       |
| 7152 | 1,3,6,7,8,1<br>2,13,17 | 2,4,5,9,10,<br>11,14,15,1<br>6 | 21 | P02091,P02782,P06761,P06911,P08723,P10715,P11598,P13432,P19629,P22282,P22283,P30120,P51907,Q62902,Q63751,Q8CJ52,Q9904<br>1,Q99MH3,Q9JHB9,Q9QZK9,Q9Z1F2 |
| 7153 | 1,3,6,7,8,1<br>2,14,15 | 2,4,5,9,10,<br>11,13,16,1<br>7 | 6  | A2RUV9,O08557,P08723,P10715,P19629,P35280                                                                                                              |
| 7154 | 1,3,6,7,8,1<br>2,14,16 | 2,4,5,9,10,<br>11,13,15,1<br>7 | 5  | P08723,P10715,P19629,Q8CJ52,Q9ET32                                                                                                                     |
| 7155 | 1,3,6,7,8,1<br>2,14,17 | 2,4,5,9,10,<br>11,13,15,1<br>6 | 12 | P02091,P02782,P08723,P10715,P13432,P19629,P22282,P22283,P51907,Q561R9,Q9QYU4,Q9QZK9                                                                    |
| 7156 | 1,3,6,7,8,1<br>2,15,16 | 2,4,5,9,10,<br>11,13,14,1<br>7 | 2  | P10715,P19629                                                                                                                                          |
| 7157 | 1,3,6,7,8,1<br>2,15,17 | 2,4,5,9,10,<br>11,13,14,1<br>6 | 8  | P02091,P08723,P10715,P13432,P19629,Q4G075,Q99MH3,Q9QZK9                                                                                                |
| 7158 | 1,3,6,7,8,1<br>2,16,17 | 2,4,5,9,10,<br>11,13,14,1<br>5 | 7  | P02091,P08723,P10715,P13432,P19629,Q99MH3,Q9QZK9                                                                                                       |
| 7159 | 1,3,6,7,8,1<br>3,14,15 | 2,4,5,9,10,<br>11,12,16,1<br>7 | 7  | P06911,P12020,P15999,P16086,P19629,Q5GRG2,Q62687                                                                                                       |
| 7160 | 1,3,6,7,8,1<br>3,14,16 | 2,4,5,9,10,<br>11,12,15,1<br>7 | 7  | P06911,P12020,P16086,P19629,P51907,Q5GRG2,Q62902                                                                                                       |

|      |                        |                                |    |                                                                                                                 |
|------|------------------------|--------------------------------|----|-----------------------------------------------------------------------------------------------------------------|
| 7161 | 1,3,6,7,8,1<br>3,14,17 | 2,4,5,9,10,<br>11,12,15,1<br>6 | 16 | P02091,P06911,P11598,P12020,P16086,P19629,P22282,P22283,P51907,P53790,P53792,Q5GRG2,Q62687,Q62902,Q9QW07,Q9Z1F2 |
| 7162 | 1,3,6,7,8,1<br>3,15,16 | 2,4,5,9,10,<br>11,12,14,1<br>7 | 1  | P19629                                                                                                          |
| 7163 | 1,3,6,7,8,1<br>3,15,17 | 2,4,5,9,10,<br>11,12,14,1<br>6 | 7  | P02091,P15999,P19629,P51907,P53792,Q99MH3,Q9WUW8                                                                |
| 7164 | 1,3,6,7,8,1<br>3,16,17 | 2,4,5,9,10,<br>11,12,14,1<br>5 | 2  | P02091,P51907                                                                                                   |
| 7165 | 1,3,6,7,8,1<br>4,15,16 | 2,4,5,9,10,<br>11,12,13,1<br>7 | 2  | P02803,P19629                                                                                                   |
| 7166 | 1,3,6,7,8,1<br>4,15,17 | 2,4,5,9,10,<br>11,12,13,1<br>6 | 4  | P02091,P02803,P10536,P19629                                                                                     |
| 7167 | 1,3,6,7,8,1<br>4,16,17 | 2,4,5,9,10,<br>11,12,13,1<br>5 | 5  | P02091,P16086,P19629,P51907,Q561R9                                                                              |
| 7168 | 1,3,6,7,8,1<br>5,16,17 | 2,4,5,9,10,<br>11,12,13,1<br>4 | 3  | P02091,P02803,P19629                                                                                            |
| 7169 | 1,3,6,7,9,1<br>0,11,12 | 2,4,5,8,13,<br>14,15,16,1<br>7 | 3  | P09527,P27213,P97840                                                                                            |
| 7170 | 1,3,6,7,9,1<br>0,11,13 | 2,4,5,8,12,<br>14,15,16,1<br>7 | 0  |                                                                                                                 |
| 7171 | 1,3,6,7,9,1<br>0,11,14 | 2,4,5,8,12,<br>13,15,16,1<br>7 | 2  | P27213,P83121                                                                                                   |
| 7172 | 1,3,6,7,9,1<br>0,11,15 | 2,4,5,8,12,<br>13,14,16,1<br>7 | 2  | P27213,P35280                                                                                                   |
| 7173 | 1,3,6,7,9,1<br>0,11,16 | 2,4,5,8,12,<br>13,14,15,1<br>7 | 0  |                                                                                                                 |
| 7174 | 1,3,6,7,9,1<br>0,11,17 | 2,4,5,8,12,<br>13,14,15,1<br>6 | 3  | P02091,P08689,Q9QUL6                                                                                            |
| 7175 | 1,3,6,7,9,1<br>0,12,13 | 2,4,5,8,11,<br>14,15,16,1<br>7 | 2  | P19218,P97840                                                                                                   |

|      |                        |                                |   |                                           |
|------|------------------------|--------------------------------|---|-------------------------------------------|
| 7176 | 1,3,6,7,9,1<br>0,12,14 | 2,4,5,8,11,<br>13,15,16,1<br>7 | 1 | P97840                                    |
| 7177 | 1,3,6,7,9,1<br>0,12,15 | 2,4,5,8,11,<br>13,14,16,1<br>7 | 2 | P97840,Q6AYS4                             |
| 7178 | 1,3,6,7,9,1<br>0,12,16 | 2,4,5,8,11,<br>13,14,15,1<br>7 | 3 | P47967,P97840,Q6AYS4                      |
| 7179 | 1,3,6,7,9,1<br>0,12,17 | 2,4,5,8,11,<br>13,14,15,1<br>6 | 6 | P02091,P08689,P13432,P97840,Q99MH3,Q9QZK9 |
| 7180 | 1,3,6,7,9,1<br>0,13,14 | 2,4,5,8,11,<br>12,15,16,1<br>7 | 2 | P06911,P12020                             |
| 7181 | 1,3,6,7,9,1<br>0,13,15 | 2,4,5,8,11,<br>12,14,16,1<br>7 | 2 | Q5U2V4,Q6AYS4                             |
| 7182 | 1,3,6,7,9,1<br>0,13,16 | 2,4,5,8,11,<br>12,14,15,1<br>7 | 4 | P62804,P97840,Q00715,Q6AYS4               |
| 7183 | 1,3,6,7,9,1<br>0,13,17 | 2,4,5,8,11,<br>12,14,15,1<br>6 | 3 | P02091,P51907,Q99MH3                      |
| 7184 | 1,3,6,7,9,1<br>0,14,15 | 2,4,5,8,11,<br>12,13,16,1<br>7 | 2 | Q6AYS4,Q80WL1                             |
| 7185 | 1,3,6,7,9,1<br>0,14,16 | 2,4,5,8,11,<br>12,13,15,1<br>7 | 1 | Q6AYS4                                    |
| 7186 | 1,3,6,7,9,1<br>0,14,17 | 2,4,5,8,11,<br>12,13,15,1<br>6 | 2 | P02091,P08689                             |
| 7187 | 1,3,6,7,9,1<br>0,15,16 | 2,4,5,8,11,<br>12,13,14,1<br>7 | 2 | Q6AYS4,Q80WL1                             |
| 7188 | 1,3,6,7,9,1<br>0,15,17 | 2,4,5,8,11,<br>12,13,14,1<br>6 | 2 | P02091,P08689                             |
| 7189 | 1,3,6,7,9,1<br>0,16,17 | 2,4,5,8,11,<br>12,13,14,1<br>5 | 1 | P02091                                    |
| 7190 | 1,3,6,7,9,1<br>1,12,13 | 2,4,5,8,10,<br>14,15,16,1<br>7 | 1 | Q9JHB9                                    |

|      |                        |                                |   |                                           |
|------|------------------------|--------------------------------|---|-------------------------------------------|
| 7191 | 1,3,6,7,9,1<br>1,12,14 | 2,4,5,8,10,<br>13,15,16,1<br>7 | 1 | Q62997                                    |
| 7192 | 1,3,6,7,9,1<br>1,12,15 | 2,4,5,8,10,<br>13,14,16,1<br>7 | 0 |                                           |
| 7193 | 1,3,6,7,9,1<br>1,12,16 | 2,4,5,8,10,<br>13,14,15,1<br>7 | 2 | P12368,P17046                             |
| 7194 | 1,3,6,7,9,1<br>1,12,17 | 2,4,5,8,10,<br>13,14,15,1<br>6 | 5 | P02091,P08689,P09605,P25809,P13432,Q9QZK9 |
| 7195 | 1,3,6,7,9,1<br>1,13,14 | 2,4,5,8,10,<br>12,15,16,1<br>7 | 0 |                                           |
| 7196 | 1,3,6,7,9,1<br>1,13,15 | 2,4,5,8,10,<br>12,14,16,1<br>7 | 0 |                                           |
| 7197 | 1,3,6,7,9,1<br>1,13,16 | 2,4,5,8,10,<br>12,14,15,1<br>7 | 0 |                                           |
| 7198 | 1,3,6,7,9,1<br>1,13,17 | 2,4,5,8,10,<br>12,14,15,1<br>6 | 1 | P02091                                    |
| 7199 | 1,3,6,7,9,1<br>1,14,15 | 2,4,5,8,10,<br>12,13,16,1<br>7 | 1 | Q80WL1                                    |
| 7200 | 1,3,6,7,9,1<br>1,14,16 | 2,4,5,8,10,<br>12,13,15,1<br>7 | 0 |                                           |
| 7201 | 1,3,6,7,9,1<br>1,14,17 | 2,4,5,8,10,<br>12,13,15,1<br>6 | 2 | P02091,P08689                             |
| 7202 | 1,3,6,7,9,1<br>1,15,16 | 2,4,5,8,10,<br>12,13,14,1<br>7 | 1 | Q80WL1                                    |
| 7203 | 1,3,6,7,9,1<br>1,15,17 | 2,4,5,8,10,<br>12,13,14,1<br>6 | 1 | P02091                                    |
| 7204 | 1,3,6,7,9,1<br>1,16,17 | 2,4,5,8,10,<br>12,13,14,1<br>5 | 1 | P02091                                    |
| 7205 | 1,3,6,7,9,1<br>2,13,14 | 2,4,5,8,10,<br>11,15,16,1<br>7 | 3 | A2RUV9,P06911,Q6AYS4                      |

|      |                        |                                |   |                                    |
|------|------------------------|--------------------------------|---|------------------------------------|
| 7206 | 1,3,6,7,9,1<br>2,13,15 | 2,4,5,8,10,<br>11,14,16,1<br>7 | 1 | Q6AYS4                             |
| 7207 | 1,3,6,7,9,1<br>2,13,16 | 2,4,5,8,10,<br>11,14,15,1<br>7 | 2 | P19218,Q6AYS4                      |
| 7208 | 1,3,6,7,9,1<br>2,13,17 | 2,4,5,8,10,<br>11,14,15,1<br>6 | 5 | P02091,P13432,P51907,Q99MH3,Q9QZK9 |
| 7209 | 1,3,6,7,9,1<br>2,14,15 | 2,4,5,8,10,<br>11,13,16,1<br>7 | 2 | A2RUV9,Q6AYS4                      |
| 7210 | 1,3,6,7,9,1<br>2,14,16 | 2,4,5,8,10,<br>11,13,15,1<br>7 | 1 | Q6AYS4                             |
| 7211 | 1,3,6,7,9,1<br>2,14,17 | 2,4,5,8,10,<br>11,13,15,1<br>6 | 4 | P01835,P02091,P08689,P13432        |
| 7212 | 1,3,6,7,9,1<br>2,15,16 | 2,4,5,8,10,<br>11,13,14,1<br>7 | 1 | Q6AYS4                             |
| 7213 | 1,3,6,7,9,1<br>2,15,17 | 2,4,5,8,10,<br>11,13,14,1<br>6 | 3 | P02091,P13432,Q6AYS4               |
| 7214 | 1,3,6,7,9,1<br>2,16,17 | 2,4,5,8,10,<br>11,13,14,1<br>5 | 4 | P02091,P09605,P25809,P13432,Q6AYS4 |
| 7215 | 1,3,6,7,9,1<br>3,14,15 | 2,4,5,8,10,<br>11,12,16,1<br>7 | 3 | P53792,Q6AYS4,Q80WL1               |
| 7216 | 1,3,6,7,9,1<br>3,14,16 | 2,4,5,8,10,<br>11,12,15,1<br>7 | 2 | P62804,Q6AYS4                      |
| 7217 | 1,3,6,7,9,1<br>3,14,17 | 2,4,5,8,10,<br>11,12,15,1<br>6 | 4 | P02091,P51907,P53792,Q9QW07        |
| 7218 | 1,3,6,7,9,1<br>3,15,16 | 2,4,5,8,10,<br>11,12,14,1<br>7 | 5 | P62804,Q00715,Q63598,Q6AYS4,Q80WL1 |
| 7219 | 1,3,6,7,9,1<br>3,15,17 | 2,4,5,8,10,<br>11,12,14,1<br>6 | 4 | P02091,P53792,P62804,Q6AYS4        |
| 7220 | 1,3,6,7,9,1<br>3,16,17 | 2,4,5,8,10,<br>11,12,14,1<br>5 | 5 | P02091,P51907,P53792,P62804,Q6AYS4 |

|      |                         |                                |   |                                                         |
|------|-------------------------|--------------------------------|---|---------------------------------------------------------|
| 7221 | 1,3,6,7,9,1<br>4,15,16  | 2,4,5,8,10,<br>11,12,13,1<br>7 | 4 | P02803,P62804,Q6AYS4,Q80WL1                             |
| 7222 | 1,3,6,7,9,1<br>4,15,17  | 2,4,5,8,10,<br>11,12,13,1<br>6 | 6 | P02091,P02803,P08689,P53792,Q6AYS4,Q80WL1               |
| 7223 | 1,3,6,7,9,1<br>4,16,17  | 2,4,5,8,10,<br>11,12,13,1<br>5 | 2 | P02091,Q6AYS4                                           |
| 7224 | 1,3,6,7,9,1<br>5,16,17  | 2,4,5,8,10,<br>11,12,13,1<br>4 | 6 | P02091,P02803,P62804,Q63598,Q6AYS4,Q80WL1               |
| 7225 | 1,3,6,7,10,<br>11,12,13 | 2,4,5,8,9,1<br>4,15,16,17      | 3 | P47727,Q99MH3,Q9JHB9                                    |
| 7226 | 1,3,6,7,10,<br>11,12,14 | 2,4,5,8,9,1<br>3,15,16,17      | 2 | P35280,P47727                                           |
| 7227 | 1,3,6,7,10,<br>11,12,15 | 2,4,5,8,9,1<br>3,14,16,17      | 1 | P35280                                                  |
| 7228 | 1,3,6,7,10,<br>11,12,16 | 2,4,5,8,9,1<br>3,14,15,17      | 6 | P06757,P12368,P17046,P47967,P97840,Q6P6Q2               |
| 7229 | 1,3,6,7,10,<br>11,12,17 | 2,4,5,8,9,1<br>3,14,15,16      | 8 | O08815,P02091,P06757,P08689,P13432,P15399,Q99MH3,Q9QZK9 |
| 7230 | 1,3,6,7,10,<br>11,13,14 | 2,4,5,8,9,1<br>2,15,16,17      | 4 | P06911,P12020,P47727,Q5GRG2                             |
| 7231 | 1,3,6,7,10,<br>11,13,15 | 2,4,5,8,9,1<br>2,14,16,17      | 0 |                                                         |
| 7232 | 1,3,6,7,10,<br>11,13,16 | 2,4,5,8,9,1<br>2,14,15,17      | 1 | Q8VD89                                                  |
| 7233 | 1,3,6,7,10,<br>11,13,17 | 2,4,5,8,9,1<br>2,14,15,16      | 2 | P02091,Q99MH3                                           |
| 7234 | 1,3,6,7,10,<br>11,14,15 | 2,4,5,8,9,1<br>2,13,16,17      | 3 | P22006,P35280,Q80WL1                                    |
| 7235 | 1,3,6,7,10,<br>11,14,16 | 2,4,5,8,9,1<br>2,13,15,17      | 0 |                                                         |
| 7236 | 1,3,6,7,10,<br>11,14,17 | 2,4,5,8,9,1<br>2,13,15,16      | 3 | P02091,P08689,P15399                                    |
| 7237 | 1,3,6,7,10,<br>11,15,16 | 2,4,5,8,9,1<br>2,13,14,17      | 2 | Q80WL1,Q8VD89                                           |
| 7238 | 1,3,6,7,10,<br>11,15,17 | 2,4,5,8,9,1<br>2,13,14,16      | 3 | P02091,P08689,Q99MH3                                    |
| 7239 | 1,3,6,7,10,<br>11,16,17 | 2,4,5,8,9,1<br>2,13,14,15      | 1 | P02091                                                  |
| 7240 | 1,3,6,7,10,<br>12,13,14 | 2,4,5,8,9,1<br>1,15,16,17      | 7 | A2RUV9,P06911,P12020,Q05175,Q498D9,Q5GRG2,Q6AYS4        |
| 7241 | 1,3,6,7,10,<br>12,13,15 | 2,4,5,8,9,1<br>1,14,16,17      | 3 | Q05175,Q6AYS4,Q99MH3                                    |

|      |                                                |   |                                                  |
|------|------------------------------------------------|---|--------------------------------------------------|
| 7242 | 1,3,6,7,10, 2,4,5,8,9,1<br>12,13,16 1,14,15,17 | 5 | P19218,P47967,P97840,Q6AYS4,Q99MH3               |
| 7243 | 1,3,6,7,10, 2,4,5,8,9,1<br>12,13,17 1,14,15,16 | 6 | P02091,P13432,P14668,Q05175,Q99MH3,Q9QZK9        |
| 7244 | 1,3,6,7,10, 2,4,5,8,9,1<br>12,14,15 1,13,16,17 | 3 | A2RUV9,P35280,Q6AYS4                             |
| 7245 | 1,3,6,7,10, 2,4,5,8,9,1<br>12,14,16 1,13,15,17 | 2 | P97840,Q6AYS4                                    |
| 7246 | 1,3,6,7,10, 2,4,5,8,9,1<br>12,14,17 1,13,15,16 | 5 | P02091,P08689,P13432,Q99MH3,Q9QZK9               |
| 7247 | 1,3,6,7,10, 2,4,5,8,9,1<br>12,15,16 1,13,14,17 | 2 | P97840,Q6AYS4                                    |
| 7248 | 1,3,6,7,10, 2,4,5,8,9,1<br>12,15,17 1,13,14,16 | 4 | P02091,P08689,Q99MH3,Q9QZK9                      |
| 7249 | 1,3,6,7,10, 2,4,5,8,9,1<br>12,16,17 1,13,14,15 | 5 | P02091,P13432,P97840,Q99MH3,Q9QZK9               |
| 7250 | 1,3,6,7,10, 2,4,5,8,9,1<br>13,14,15 1,12,16,17 | 4 | P06911,P12020,Q5GRG2,Q6AYS4                      |
| 7251 | 1,3,6,7,10, 2,4,5,8,9,1<br>13,14,16 1,12,15,17 | 3 | P06911,P12020,Q6AYS4                             |
| 7252 | 1,3,6,7,10, 2,4,5,8,9,1<br>13,14,17 1,12,15,16 | 6 | P02091,P06911,P12020,P51907,Q99MH3,Q9QW07        |
| 7253 | 1,3,6,7,10, 2,4,5,8,9,1<br>13,15,16 1,12,14,17 | 3 | P62804,Q6AYS4,Q80WL1                             |
| 7254 | 1,3,6,7,10, 2,4,5,8,9,1<br>13,15,17 1,12,14,16 | 2 | P02091,Q99MH3                                    |
| 7255 | 1,3,6,7,10, 2,4,5,8,9,1<br>13,16,17 1,12,14,15 | 4 | P02091,P51907,Q6AYS4,Q99MH3                      |
| 7256 | 1,3,6,7,10, 2,4,5,8,9,1<br>14,15,16 1,12,13,17 | 3 | P02803,Q6AYS4,Q80WL1                             |
| 7257 | 1,3,6,7,10, 2,4,5,8,9,1<br>14,15,17 1,12,13,16 | 3 | P02091,P02803,P08689                             |
| 7258 | 1,3,6,7,10, 2,4,5,8,9,1<br>14,16,17 1,12,13,15 | 2 | P02091,Q6AYS4                                    |
| 7259 | 1,3,6,7,10, 2,4,5,8,9,1<br>15,16,17 1,12,13,14 | 5 | P02091,P02803,Q6AYS4,Q80WL1,Q99MH3               |
| 7260 | 1,3,6,7,11, 2,4,5,8,9,1<br>12,13,14 0,15,16,17 | 5 | P06911,P30120,P47727,Q62902,Q9JHB9               |
| 7261 | 1,3,6,7,11, 2,4,5,8,9,1<br>12,13,15 0,14,16,17 | 0 |                                                  |
| 7262 | 1,3,6,7,11, 2,4,5,8,9,1<br>12,13,16 0,14,15,17 | 1 | P17046                                           |
| 7263 | 1,3,6,7,11, 2,4,5,8,9,1<br>12,13,17 0,14,15,16 | 7 | P01946,P02091,P13432,P17046,Q99MH3,Q9JHB9,Q9QZK9 |
| 7264 | 1,3,6,7,11, 2,4,5,8,9,1<br>12,14,15 0,13,16,17 | 2 | A2RUV9,P35280                                    |



|      |                                                |   |                                                                |
|------|------------------------------------------------|---|----------------------------------------------------------------|
| 7265 | 1,3,6,7,11, 2,4,5,8,9,1<br>12,14,16 0,13,15,17 | 1 | P17046                                                         |
| 7266 | 1,3,6,7,11, 2,4,5,8,9,1<br>12,14,17 0,13,15,16 | 4 | P02091,P08689,P13432,Q9QZK9                                    |
| 7267 | 1,3,6,7,11, 2,4,5,8,9,1<br>12,15,16 0,13,14,17 | 1 | P17046                                                         |
| 7268 | 1,3,6,7,11, 2,4,5,8,9,1<br>12,15,17 0,13,14,16 | 3 | P02091,P13432,Q9QZK9                                           |
| 7269 | 1,3,6,7,11, 2,4,5,8,9,1<br>12,16,17 0,13,14,15 | 3 | P02091,P13432,P17046                                           |
| 7270 | 1,3,6,7,11, 2,4,5,8,9,1<br>13,14,15 0,12,16,17 | 1 | Q80WL1                                                         |
| 7271 | 1,3,6,7,11, 2,4,5,8,9,1<br>13,14,16 0,12,15,17 | 0 |                                                                |
| 7272 | 1,3,6,7,11, 2,4,5,8,9,1<br>13,14,17 0,12,15,16 | 3 | P01946,P02091,Q9QW07                                           |
| 7273 | 1,3,6,7,11, 2,4,5,8,9,1<br>13,15,16 0,12,14,17 | 2 | Q80WL1,Q8VD89                                                  |
| 7274 | 1,3,6,7,11, 2,4,5,8,9,1<br>13,15,17 0,12,14,16 | 1 | P02091                                                         |
| 7275 | 1,3,6,7,11, 2,4,5,8,9,1<br>13,16,17 0,12,14,15 | 2 | P02091,P17046                                                  |
| 7276 | 1,3,6,7,11, 2,4,5,8,9,1<br>14,15,16 0,12,13,17 | 2 | P02803,Q80WL1                                                  |
| 7277 | 1,3,6,7,11, 2,4,5,8,9,1<br>14,15,17 0,12,13,16 | 3 | P02091,P02803,Q80WL1                                           |
| 7278 | 1,3,6,7,11, 2,4,5,8,9,1<br>14,16,17 0,12,13,15 | 1 | P02091                                                         |
| 7279 | 1,3,6,7,11, 2,4,5,8,9,1<br>15,16,17 0,12,13,14 | 3 | P02091,P02803,Q80WL1                                           |
| 7280 | 1,3,6,7,12, 2,4,5,8,9,1<br>13,14,15 0,11,16,17 | 3 | A2RUV9,P06911,Q6AYS4                                           |
| 7281 | 1,3,6,7,12, 2,4,5,8,9,1<br>13,14,16 0,11,15,17 | 2 | P06911,Q6AYS4                                                  |
| 7282 | 1,3,6,7,12, 2,4,5,8,9,1<br>13,14,17 0,11,15,16 | 9 | A2RUV9,P02091,P06911,P13432,P51907,Q561R9,Q6AYS4,Q9QW07,Q9QZK9 |
| 7283 | 1,3,6,7,12, 2,4,5,8,9,1<br>13,15,16 0,11,14,17 | 2 | P19218,Q6AYS4                                                  |
| 7284 | 1,3,6,7,12, 2,4,5,8,9,1<br>13,15,17 0,11,14,16 | 5 | P02091,P13432,Q6AYS4,Q99MH3,Q9QZK9                             |
| 7285 | 1,3,6,7,12, 2,4,5,8,9,1<br>13,16,17 0,11,14,15 | 6 | P02091,P13432,P17046,Q6AYS4,Q99MH3,Q9QZK9                      |
| 7286 | 1,3,6,7,12, 2,4,5,8,9,1<br>14,15,16 0,11,13,17 | 3 | A2RUV9,P02803,Q6AYS4                                           |
| 7287 | 1,3,6,7,12, 2,4,5,8,9,1<br>14,15,17 0,11,13,16 | 6 | A2RUV9,P02091,P02803,P08689,P13432,Q6AYS4                      |

|      |                                                    |   |                                                  |
|------|----------------------------------------------------|---|--------------------------------------------------|
| 7288 | 1,3,6,7,12, 2,4,5,8,9,1<br>14,16,17 0,11,13,15     | 4 | P02091,P13432,Q561R9,Q6AYS4                      |
| 7289 | 1,3,6,7,12, 2,4,5,8,9,1<br>15,16,17 0,11,13,14     | 4 | P02091,P02803,P13432,Q6AYS4                      |
| 7290 | 1,3,6,7,13, 2,4,5,8,9,1<br>14,15,16 0,11,12,17     | 5 | P02803,P19223,P62804,Q6AYS4,Q80WL1               |
| 7291 | 1,3,6,7,13, 2,4,5,8,9,1<br>14,15,17 0,11,12,16     | 7 | P02091,P02803,P53792,Q6AYS4,Q80WL1,Q9QW07,Q9WUW8 |
| 7292 | 1,3,6,7,13, 2,4,5,8,9,1<br>14,16,17 0,11,12,15     | 5 | P02091,P51907,Q561R9,Q6AYS4,Q9QW07               |
| 7293 | 1,3,6,7,13, 2,4,5,8,9,1<br>15,16,17 0,11,12,14     | 5 | P02091,P02803,P62804,Q6AYS4,Q80WL1               |
| 7294 | 1,3,6,7,14, 2,4,5,8,9,1<br>15,16,17 0,11,12,13     | 4 | P02091,P02803,Q6AYS4,Q80WL1                      |
| 7295 | 1,3,6,8,9,1 2,4,5,7,13,<br>0,11,12 14,15,16,1<br>7 | 6 | P02782,P08723,P16636,P35467,Q6IG02,Q6P6Q2        |
| 7296 | 1,3,6,8,9,1 2,4,5,7,12,<br>0,11,13 14,15,16,1<br>7 | 1 | P35467                                           |
| 7297 | 1,3,6,8,9,1 2,4,5,7,12,<br>0,11,14 13,15,16,1<br>7 | 1 | P47727                                           |
| 7298 | 1,3,6,8,9,1 2,4,5,7,12,<br>0,11,15 13,14,16,1<br>7 | 2 | P27213,P35280                                    |
| 7299 | 1,3,6,8,9,1 2,4,5,7,12,<br>0,11,16 13,14,15,1<br>7 | 0 |                                                  |
| 7300 | 1,3,6,8,9,1 2,4,5,7,12,<br>0,11,17 13,14,15,1<br>6 | 3 | P16636,P35467,Q09030                             |
| 7301 | 1,3,6,8,9,1 2,4,5,7,11,<br>0,12,13 14,15,16,1<br>7 | 3 | P02782,P14408,P16636                             |
| 7302 | 1,3,6,8,9,1 2,4,5,7,11,<br>0,12,14 13,15,16,1<br>7 | 2 | P02782,P14408                                    |
| 7303 | 1,3,6,8,9,1 2,4,5,7,11,<br>0,12,15 13,14,16,1<br>7 | 0 |                                                  |
| 7304 | 1,3,6,8,9,1 2,4,5,7,11,<br>0,12,16 13,14,15,1<br>7 | 1 | P16636                                           |

|      |                        |                                |   |                                    |
|------|------------------------|--------------------------------|---|------------------------------------|
| 7305 | 1,3,6,8,9,1<br>0,12,17 | 2,4,5,7,11,<br>13,14,15,1<br>6 | 5 | P13432,P14408,P16636,Q09030,Q99MH3 |
| 7306 | 1,3,6,8,9,1<br>0,13,14 | 2,4,5,7,11,<br>12,15,16,1<br>7 | 3 | P06911,P14408,P51907               |
| 7307 | 1,3,6,8,9,1<br>0,13,15 | 2,4,5,7,11,<br>12,14,16,1<br>7 | 1 | P15999                             |
| 7308 | 1,3,6,8,9,1<br>0,13,16 | 2,4,5,7,11,<br>12,14,15,1<br>7 | 1 | P51907                             |
| 7309 | 1,3,6,8,9,1<br>0,13,17 | 2,4,5,7,11,<br>12,14,15,1<br>6 | 4 | P14408,P16636,P51907,Q99MH3        |
| 7310 | 1,3,6,8,9,1<br>0,14,15 | 2,4,5,7,11,<br>12,13,16,1<br>7 | 1 | P14408                             |
| 7311 | 1,3,6,8,9,1<br>0,14,16 | 2,4,5,7,11,<br>12,13,15,1<br>7 | 0 |                                    |
| 7312 | 1,3,6,8,9,1<br>0,14,17 | 2,4,5,7,11,<br>12,13,15,1<br>6 | 3 | P08689,P14408,P51907               |
| 7313 | 1,3,6,8,9,1<br>0,15,16 | 2,4,5,7,11,<br>12,13,14,1<br>7 | 0 |                                    |
| 7314 | 1,3,6,8,9,1<br>0,15,17 | 2,4,5,7,11,<br>12,13,14,1<br>6 | 0 |                                    |
| 7315 | 1,3,6,8,9,1<br>0,16,17 | 2,4,5,7,11,<br>12,13,14,1<br>5 | 3 | P16636,P25031,P51907               |
| 7316 | 1,3,6,8,9,1<br>1,12,13 | 2,4,5,7,10,<br>14,15,16,1<br>7 | 5 | P02782,P08723,P16636,P30120,Q9JHB9 |
| 7317 | 1,3,6,8,9,1<br>1,12,14 | 2,4,5,7,10,<br>13,15,16,1<br>7 | 5 | P02782,P08723,P47727,Q62997,Q6IG02 |
| 7318 | 1,3,6,8,9,1<br>1,12,15 | 2,4,5,7,10,<br>13,14,16,1<br>7 | 0 |                                    |
| 7319 | 1,3,6,8,9,1<br>1,12,16 | 2,4,5,7,10,<br>13,14,15,1<br>7 | 1 | Q6IG02                             |

|      |                        |                                |   |                                                         |
|------|------------------------|--------------------------------|---|---------------------------------------------------------|
| 7320 | 1,3,6,8,9,1<br>1,12,17 | 2,4,5,7,10,<br>13,14,15,1<br>6 | 6 | P02782,P04218,P13432,P16636,Q09030,Q6IG02               |
| 7321 | 1,3,6,8,9,1<br>1,13,14 | 2,4,5,7,10,<br>12,15,16,1<br>7 | 2 | P04218,P47727                                           |
| 7322 | 1,3,6,8,9,1<br>1,13,15 | 2,4,5,7,10,<br>12,14,16,1<br>7 | 0 |                                                         |
| 7323 | 1,3,6,8,9,1<br>1,13,16 | 2,4,5,7,10,<br>12,14,15,1<br>7 | 1 | P04218                                                  |
| 7324 | 1,3,6,8,9,1<br>1,13,17 | 2,4,5,7,10,<br>12,14,15,1<br>6 | 3 | P04218,P16636,P51907                                    |
| 7325 | 1,3,6,8,9,1<br>1,14,15 | 2,4,5,7,10,<br>12,13,16,1<br>7 | 1 | P04218                                                  |
| 7326 | 1,3,6,8,9,1<br>1,14,16 | 2,4,5,7,10,<br>12,13,15,1<br>7 | 1 | P04218                                                  |
| 7327 | 1,3,6,8,9,1<br>1,14,17 | 2,4,5,7,10,<br>12,13,15,1<br>6 | 1 | P04218                                                  |
| 7328 | 1,3,6,8,9,1<br>1,15,16 | 2,4,5,7,10,<br>12,13,14,1<br>7 | 2 | P04218,Q5QE79                                           |
| 7329 | 1,3,6,8,9,1<br>1,15,17 | 2,4,5,7,10,<br>12,13,14,1<br>6 | 2 | P04218,Q5QE79                                           |
| 7330 | 1,3,6,8,9,1<br>1,16,17 | 2,4,5,7,10,<br>12,13,14,1<br>5 | 2 | P04218,P16636                                           |
| 7331 | 1,3,6,8,9,1<br>2,13,14 | 2,4,5,7,10,<br>11,15,16,1<br>7 | 5 | P02782,P14408,P51907,Q62687,Q9Z1F2                      |
| 7332 | 1,3,6,8,9,1<br>2,13,15 | 2,4,5,7,10,<br>11,14,16,1<br>7 | 1 | P02782                                                  |
| 7333 | 1,3,6,8,9,1<br>2,13,16 | 2,4,5,7,10,<br>11,14,15,1<br>7 | 1 | P02782                                                  |
| 7334 | 1,3,6,8,9,1<br>2,13,17 | 2,4,5,7,10,<br>11,14,15,1<br>6 | 8 | P02782,P13432,P14408,P16636,P51907,Q99MH3,Q9QZK9,Q9Z1F2 |

|      |                        |                                |   |                                           |
|------|------------------------|--------------------------------|---|-------------------------------------------|
| 7335 | 1,3,6,8,9,1<br>2,14,15 | 2,4,5,7,10,<br>11,13,16,1<br>7 | 1 | P14408                                    |
| 7336 | 1,3,6,8,9,1<br>2,14,16 | 2,4,5,7,10,<br>11,13,15,1<br>7 | 0 |                                           |
| 7337 | 1,3,6,8,9,1<br>2,14,17 | 2,4,5,7,10,<br>11,13,15,1<br>6 | 5 | P01835,P02782,P13432,P14408,P51907        |
| 7338 | 1,3,6,8,9,1<br>2,15,16 | 2,4,5,7,10,<br>11,13,14,1<br>7 | 1 | Q5QE79                                    |
| 7339 | 1,3,6,8,9,1<br>2,15,17 | 2,4,5,7,10,<br>11,13,14,1<br>6 | 1 | P13432                                    |
| 7340 | 1,3,6,8,9,1<br>2,16,17 | 2,4,5,7,10,<br>11,13,14,1<br>5 | 2 | P13432,P16636                             |
| 7341 | 1,3,6,8,9,1<br>3,14,15 | 2,4,5,7,10,<br>11,12,16,1<br>7 | 6 | P06757,P14408,P15999,P51907,P53792,Q62687 |
| 7342 | 1,3,6,8,9,1<br>3,14,16 | 2,4,5,7,10,<br>11,12,15,1<br>7 | 1 | P51907                                    |
| 7343 | 1,3,6,8,9,1<br>3,14,17 | 2,4,5,7,10,<br>11,12,15,1<br>6 | 6 | P04218,P14408,P51907,P53792,Q62687,Q9QW07 |
| 7344 | 1,3,6,8,9,1<br>3,15,16 | 2,4,5,7,10,<br>11,12,14,1<br>7 | 1 | Q5QE79                                    |
| 7345 | 1,3,6,8,9,1<br>3,15,17 | 2,4,5,7,10,<br>11,12,14,1<br>6 | 3 | P51907,P53792,Q5QE79                      |
| 7346 | 1,3,6,8,9,1<br>3,16,17 | 2,4,5,7,10,<br>11,12,14,1<br>5 | 2 | P04218,P51907                             |
| 7347 | 1,3,6,8,9,1<br>4,15,16 | 2,4,5,7,10,<br>11,12,13,1<br>7 | 2 | P04218,Q5QE79                             |
| 7348 | 1,3,6,8,9,1<br>4,15,17 | 2,4,5,7,10,<br>11,12,13,1<br>6 | 1 | P04218                                    |
| 7349 | 1,3,6,8,9,1<br>4,16,17 | 2,4,5,7,10,<br>11,12,13,1<br>5 | 2 | P04218,P51907                             |

|      |                         |                                |    |                                                                       |
|------|-------------------------|--------------------------------|----|-----------------------------------------------------------------------|
| 7350 | 1,3,6,8,9,1<br>5,16,17  | 2,4,5,7,10,<br>11,12,13,1<br>4 | 2  | P04218,Q5QE79                                                         |
| 7351 | 1,3,6,8,10,<br>11,12,13 | 2,4,5,7,9,1<br>4,15,16,17      | 10 | O35547,P02781,P02782,P08723,P16636,P30120,P47727,Q6IG02,Q6P6Q2,Q9JHB9 |
| 7352 | 1,3,6,8,10,<br>11,12,14 | 2,4,5,7,9,1<br>3,15,16,17      | 7  | O35547,P02782,P08723,P35280,P47727,Q6IG02,Q6P6Q2                      |
| 7353 | 1,3,6,8,10,<br>11,12,15 | 2,4,5,7,9,1<br>3,14,16,17      | 4  | O35547,P35280,Q6IG02,Q6P6Q2                                           |
| 7354 | 1,3,6,8,10,<br>11,12,16 | 2,4,5,7,9,1<br>3,14,15,17      | 6  | O35547,P16636,Q6IFU7,Q6IG02,Q6IMF3,Q6P6Q2                             |
| 7355 | 1,3,6,8,10,<br>11,12,17 | 2,4,5,7,9,1<br>3,14,15,16      | 9  | O08815,O35547,P02782,P13432,P16636,Q6IG02,Q6P6Q2,Q99MH3,Q9QZK9        |
| 7356 | 1,3,6,8,10,<br>11,13,14 | 2,4,5,7,9,1<br>2,15,16,17      | 2  | P06911,P47727                                                         |
| 7357 | 1,3,6,8,10,<br>11,13,15 | 2,4,5,7,9,1<br>2,14,16,17      | 1  | P15999                                                                |
| 7358 | 1,3,6,8,10,<br>11,13,16 | 2,4,5,7,9,1<br>2,14,15,17      | 0  |                                                                       |
| 7359 | 1,3,6,8,10,<br>11,13,17 | 2,4,5,7,9,1<br>2,14,15,16      | 2  | P16636,Q99MH3                                                         |
| 7360 | 1,3,6,8,10,<br>11,14,15 | 2,4,5,7,9,1<br>2,13,16,17      | 1  | P35280                                                                |
| 7361 | 1,3,6,8,10,<br>11,14,16 | 2,4,5,7,9,1<br>2,13,15,17      | 0  |                                                                       |
| 7362 | 1,3,6,8,10,<br>11,14,17 | 2,4,5,7,9,1<br>2,13,15,16      | 1  | P47727                                                                |
| 7363 | 1,3,6,8,10,<br>11,15,16 | 2,4,5,7,9,1<br>2,13,14,17      | 0  |                                                                       |
| 7364 | 1,3,6,8,10,<br>11,15,17 | 2,4,5,7,9,1<br>2,13,14,16      | 0  |                                                                       |
| 7365 | 1,3,6,8,10,<br>11,16,17 | 2,4,5,7,9,1<br>2,13,14,15      | 1  | P16636                                                                |
| 7366 | 1,3,6,8,10,<br>12,13,14 | 2,4,5,7,9,1<br>1,15,16,17      | 8  | P02782,P06911,P08723,P14408,Q05175,Q498D9,Q64093,Q9Z1F2               |
| 7367 | 1,3,6,8,10,<br>12,13,15 | 2,4,5,7,9,1<br>1,14,16,17      | 5  | P15999,P82995,Q05175,Q6IFV1,Q99MH3                                    |
| 7368 | 1,3,6,8,10,<br>12,13,16 | 2,4,5,7,9,1<br>1,14,15,17      | 1  | P16636                                                                |
| 7369 | 1,3,6,8,10,<br>12,13,17 | 2,4,5,7,9,1<br>1,14,15,16      | 8  | P02782,P13432,P16636,P51907,Q05175,Q6IFV1,Q99MH3,Q9QZK9               |
| 7370 | 1,3,6,8,10,<br>12,14,15 | 2,4,5,7,9,1<br>1,13,16,17      | 1  | P35280                                                                |
| 7371 | 1,3,6,8,10,<br>12,14,16 | 2,4,5,7,9,1<br>1,13,15,17      | 1  | P05539                                                                |

|      |                                                |    |                                                                              |
|------|------------------------------------------------|----|------------------------------------------------------------------------------|
| 7372 | 1,3,6,8,10, 2,4,5,7,9,1<br>12,14,17 1,13,15,16 | 6  | P02782,P08689,P13432,P14408,Q10758,Q99MH3                                    |
| 7373 | 1,3,6,8,10, 2,4,5,7,9,1<br>12,15,16 1,13,14,17 | 0  |                                                                              |
| 7374 | 1,3,6,8,10, 2,4,5,7,9,1<br>12,15,17 1,13,14,16 | 2  | Q6IFV1,Q99MH3                                                                |
| 7375 | 1,3,6,8,10, 2,4,5,7,9,1<br>12,16,17 1,13,14,15 | 3  | P05539,P16636,Q99MH3                                                         |
| 7376 | 1,3,6,8,10, 2,4,5,7,9,1<br>13,14,15 1,12,16,17 | 3  | P06911,P15999,Q64093                                                         |
| 7377 | 1,3,6,8,10, 2,4,5,7,9,1<br>13,14,16 1,12,15,17 | 2  | P06911,P51907                                                                |
| 7378 | 1,3,6,8,10, 2,4,5,7,9,1<br>13,14,17 1,12,15,16 | 4  | P06911,P14408,P51907,Q9QW07                                                  |
| 7379 | 1,3,6,8,10, 2,4,5,7,9,1<br>13,15,16 1,12,14,17 | 1  | P15999                                                                       |
| 7380 | 1,3,6,8,10, 2,4,5,7,9,1<br>13,15,17 1,12,14,16 | 4  | P15999,P51907,Q6IFV1,Q99MH3                                                  |
| 7381 | 1,3,6,8,10, 2,4,5,7,9,1<br>13,16,17 1,12,14,15 | 3  | P16636,P51907,Q99MH3                                                         |
| 7382 | 1,3,6,8,10, 2,4,5,7,9,1<br>14,15,16 1,12,13,17 | 0  |                                                                              |
| 7383 | 1,3,6,8,10, 2,4,5,7,9,1<br>14,15,17 1,12,13,16 | 1  | P02803                                                                       |
| 7384 | 1,3,6,8,10, 2,4,5,7,9,1<br>14,16,17 1,12,13,15 | 2  | P05539,P51907                                                                |
| 7385 | 1,3,6,8,10, 2,4,5,7,9,1<br>15,16,17 1,12,13,14 | 0  |                                                                              |
| 7386 | 1,3,6,8,11, 2,4,5,7,9,1<br>12,13,14 0,15,16,17 | 11 | P02781,P02782,P04905,P06911,P08723,P30120,P47727,Q62902,Q64093,Q9JHB9,Q9Z1F2 |
| 7387 | 1,3,6,8,11, 2,4,5,7,9,1<br>12,13,15 0,14,16,17 | 4  | P02782,P15999,Q64093,Q9JHB9                                                  |
| 7388 | 1,3,6,8,11, 2,4,5,7,9,1<br>12,13,16 0,14,15,17 | 3  | P02782,P16636,Q9JHB9                                                         |
| 7389 | 1,3,6,8,11, 2,4,5,7,9,1<br>12,13,17 0,14,15,16 | 7  | P02782,P13432,P16636,P30120,Q99MH3,Q9JHB9,Q9QZK9                             |
| 7390 | 1,3,6,8,11, 2,4,5,7,9,1<br>12,14,15 0,13,16,17 | 2  | P35280,Q64093                                                                |
| 7391 | 1,3,6,8,11, 2,4,5,7,9,1<br>12,14,16 0,13,15,17 | 3  | P02782,Q6IG02,Q6P6Q2                                                         |
| 7392 | 1,3,6,8,11, 2,4,5,7,9,1<br>12,14,17 0,13,15,16 | 4  | P02782,P13432,P47727,Q6IG02                                                  |
| 7393 | 1,3,6,8,11, 2,4,5,7,9,1<br>12,15,16 0,13,14,17 | 0  |                                                                              |
| 7394 | 1,3,6,8,11, 2,4,5,7,9,1<br>12,15,17 0,13,14,16 | 1  | P13432                                                                       |

|      |                                                |    |                                                                                                   |
|------|------------------------------------------------|----|---------------------------------------------------------------------------------------------------|
| 7395 | 1,3,6,8,11, 2,4,5,7,9,1<br>12,16,17 0,13,14,15 | 3  | P13432,P16636,Q6IG02                                                                              |
| 7396 | 1,3,6,8,11, 2,4,5,7,9,1<br>13,14,15 0,12,16,17 | 2  | P15999,Q64093                                                                                     |
| 7397 | 1,3,6,8,11, 2,4,5,7,9,1<br>13,14,16 0,12,15,17 | 1  | Q64093                                                                                            |
| 7398 | 1,3,6,8,11, 2,4,5,7,9,1<br>13,14,17 0,12,15,16 | 5  | P04218,P47727,P51907,Q64093,Q9QW07                                                                |
| 7399 | 1,3,6,8,11, 2,4,5,7,9,1<br>13,15,16 0,12,14,17 | 0  |                                                                                                   |
| 7400 | 1,3,6,8,11, 2,4,5,7,9,1<br>13,15,17 0,12,14,16 | 1  | P15999                                                                                            |
| 7401 | 1,3,6,8,11, 2,4,5,7,9,1<br>13,16,17 0,12,14,15 | 1  | P16636                                                                                            |
| 7402 | 1,3,6,8,11, 2,4,5,7,9,1<br>14,15,16 0,12,13,17 | 0  |                                                                                                   |
| 7403 | 1,3,6,8,11, 2,4,5,7,9,1<br>14,15,17 0,12,13,16 | 2  | P04218,P97840                                                                                     |
| 7404 | 1,3,6,8,11, 2,4,5,7,9,1<br>14,16,17 0,12,13,15 | 1  | P04218                                                                                            |
| 7405 | 1,3,6,8,11, 2,4,5,7,9,1<br>15,16,17 0,12,13,14 | 1  | P04218                                                                                            |
| 7406 | 1,3,6,8,12, 2,4,5,7,9,1<br>13,14,15 0,11,16,17 | 8  | A2RUV9,O08557,P02782,P15999,Q62687,Q63424,Q64093,Q9Z1F2                                           |
| 7407 | 1,3,6,8,12, 2,4,5,7,9,1<br>13,14,16 0,11,15,17 | 4  | P02782,P51907,Q64093,Q9Z1F2                                                                       |
| 7408 | 1,3,6,8,12, 2,4,5,7,9,1<br>13,14,17 0,11,15,16 | 14 | O70594,P02782,P13432,P14408,P46720,P51907,Q561R9,Q62687,Q63424,Q64093,Q80W57,Q9QW07,Q9QZK9,Q9Z1F2 |
| 7409 | 1,3,6,8,12, 2,4,5,7,9,1<br>13,15,16 0,11,14,17 | 1  | P82995                                                                                            |
| 7410 | 1,3,6,8,12, 2,4,5,7,9,1<br>13,15,17 0,11,14,16 | 9  | P02782,P13432,P15999,P51907,Q5XFX0,Q64093,Q6IFV1,Q99MH3,Q9QZK9                                    |
| 7411 | 1,3,6,8,12, 2,4,5,7,9,1<br>13,16,17 0,11,14,15 | 6  | P02782,P13432,P16636,P51907,Q5XFX0,Q99MH3                                                         |
| 7412 | 1,3,6,8,12, 2,4,5,7,9,1<br>14,15,16 0,11,13,17 | 0  |                                                                                                   |
| 7413 | 1,3,6,8,12, 2,4,5,7,9,1<br>14,15,17 0,11,13,16 | 2  | P13432,Q64093                                                                                     |
| 7414 | 1,3,6,8,12, 2,4,5,7,9,1<br>14,16,17 0,11,13,15 | 3  | P13432,P51907,Q561R9                                                                              |
| 7415 | 1,3,6,8,12, 2,4,5,7,9,1<br>15,16,17 0,11,13,14 | 2  | P13432,Q5XFX0                                                                                     |
| 7416 | 1,3,6,8,13, 2,4,5,7,9,1<br>14,15,16 0,11,12,17 | 2  | P15999,Q64093                                                                                     |
| 7417 | 1,3,6,8,13, 2,4,5,7,9,1<br>14,15,17 0,11,12,16 | 6  | P15999,P51907,Q62687,Q63424,Q64093,Q9QW07                                                         |



|      |                                                |   |                                    |
|------|------------------------------------------------|---|------------------------------------|
| 7418 | 1,3,6,8,13, 2,4,5,7,9,1<br>14,16,17 0,11,12,15 | 4 | P51907,Q64093,Q6PCU2,Q9QW07        |
| 7419 | 1,3,6,8,13, 2,4,5,7,9,1<br>15,16,17 0,11,12,14 | 2 | P51907,Q5XFX0                      |
| 7420 | 1,3,6,8,14, 2,4,5,7,9,1<br>15,16,17 0,11,12,13 | 1 | P02803                             |
| 7421 | 1,3,6,9,10, 2,4,5,7,8,1<br>11,12,13 4,15,16,17 | 0 |                                    |
| 7422 | 1,3,6,9,10, 2,4,5,7,8,1<br>11,12,14 3,15,16,17 | 1 | P47727                             |
| 7423 | 1,3,6,9,10, 2,4,5,7,8,1<br>11,12,15 3,14,16,17 | 1 | Q6PCU2                             |
| 7424 | 1,3,6,9,10, 2,4,5,7,8,1<br>11,12,16 3,14,15,17 | 5 | P10536,P12368,Q6IFU7,Q6P6Q2,Q9WUW8 |
| 7425 | 1,3,6,9,10, 2,4,5,7,8,1<br>11,12,17 3,14,15,16 | 5 | O08815,P06757,P08689,P16636,Q09030 |
| 7426 | 1,3,6,9,10, 2,4,5,7,8,1<br>11,13,14 2,15,16,17 | 2 | P47727,P55091                      |
| 7427 | 1,3,6,9,10, 2,4,5,7,8,1<br>11,13,15 2,14,16,17 | 2 | P55091,Q80WL1                      |
| 7428 | 1,3,6,9,10, 2,4,5,7,8,1<br>11,13,16 2,14,15,17 | 2 | P55091,Q9QZA6                      |
| 7429 | 1,3,6,9,10, 2,4,5,7,8,1<br>11,13,17 2,14,15,16 | 0 |                                    |
| 7430 | 1,3,6,9,10, 2,4,5,7,8,1<br>11,14,15 2,13,16,17 | 3 | P55091,P63029,Q80WL1               |
| 7431 | 1,3,6,9,10, 2,4,5,7,8,1<br>11,14,16 2,13,15,17 | 2 | P55091,Q80WL1                      |
| 7432 | 1,3,6,9,10, 2,4,5,7,8,1<br>11,14,17 2,13,15,16 | 1 | P08689                             |
| 7433 | 1,3,6,9,10, 2,4,5,7,8,1<br>11,15,16 2,13,14,17 | 3 | P55091,Q62635,Q80WL1               |
| 7434 | 1,3,6,9,10, 2,4,5,7,8,1<br>11,15,17 2,13,14,16 | 2 | P08689,Q80WL1                      |
| 7435 | 1,3,6,9,10, 2,4,5,7,8,1<br>11,16,17 2,13,14,15 | 0 |                                    |
| 7436 | 1,3,6,9,10, 2,4,5,7,8,1<br>12,13,14 1,15,16,17 | 3 | P14408,Q05175,Q6AYS4               |
| 7437 | 1,3,6,9,10, 2,4,5,7,8,1<br>12,13,15 1,14,16,17 | 1 | Q6AYS4                             |
| 7438 | 1,3,6,9,10, 2,4,5,7,8,1<br>12,13,16 1,14,15,17 | 3 | P07171,P97840,Q6AYS4               |
| 7439 | 1,3,6,9,10, 2,4,5,7,8,1<br>12,13,17 1,14,15,16 | 4 | P07171,P16636,Q6AYS4,Q99MH3        |
| 7440 | 1,3,6,9,10, 2,4,5,7,8,1<br>12,14,15 1,13,16,17 | 1 | Q6AYS4                             |

|      |                                                |   |                                                  |
|------|------------------------------------------------|---|--------------------------------------------------|
| 7441 | 1,3,6,9,10, 2,4,5,7,8,1<br>12,14,16 1,13,15,17 | 1 | Q6AYS4                                           |
| 7442 | 1,3,6,9,10, 2,4,5,7,8,1<br>12,14,17 1,13,15,16 | 4 | P01835,P07171,P08689,Q6AYS4                      |
| 7443 | 1,3,6,9,10, 2,4,5,7,8,1<br>12,15,16 1,13,14,17 | 1 | Q6AYS4                                           |
| 7444 | 1,3,6,9,10, 2,4,5,7,8,1<br>12,15,17 1,13,14,16 | 4 | P07171,P08689,Q6AYS4,Q99MH3                      |
| 7445 | 1,3,6,9,10, 2,4,5,7,8,1<br>12,16,17 1,13,14,15 | 3 | P07171,P16636,Q6AYS4                             |
| 7446 | 1,3,6,9,10, 2,4,5,7,8,1<br>13,14,15 1,12,16,17 | 6 | P19223,P50115,P55091,Q6AYS4,Q80WL1,Q99041        |
| 7447 | 1,3,6,9,10, 2,4,5,7,8,1<br>13,14,16 1,12,15,17 | 7 | P19223,P50115,P55091,Q6AYS4,Q80WL1,Q99041,Q9QZA6 |
| 7448 | 1,3,6,9,10, 2,4,5,7,8,1<br>13,14,17 1,12,15,16 | 3 | P51907,Q6AYS4,Q9QW07                             |
| 7449 | 1,3,6,9,10, 2,4,5,7,8,1<br>13,15,16 1,12,14,17 | 7 | P19223,P50115,P55091,P62804,Q6AYS4,Q80WL1,Q9QZA6 |
| 7450 | 1,3,6,9,10, 2,4,5,7,8,1<br>13,15,17 1,12,14,16 | 3 | Q6AYS4,Q80WL1,Q99MH3                             |
| 7451 | 1,3,6,9,10, 2,4,5,7,8,1<br>13,16,17 1,12,14,15 | 3 | P07171,P51907,Q6AYS4                             |
| 7452 | 1,3,6,9,10, 2,4,5,7,8,1<br>14,15,16 1,12,13,17 | 6 | P19223,P50115,P55091,Q6AYS4,Q80WL1,Q99041        |
| 7453 | 1,3,6,9,10, 2,4,5,7,8,1<br>14,15,17 1,12,13,16 | 3 | P08689,Q6AYS4,Q80WL1                             |
| 7454 | 1,3,6,9,10, 2,4,5,7,8,1<br>14,16,17 1,12,13,15 | 2 | Q6AYS4,Q80WL1                                    |
| 7455 | 1,3,6,9,10, 2,4,5,7,8,1<br>15,16,17 1,12,13,14 | 2 | Q6AYS4,Q80WL1                                    |
| 7456 | 1,3,6,9,11, 2,4,5,7,8,1<br>12,13,14 0,15,16,17 | 1 | P47727                                           |
| 7457 | 1,3,6,9,11, 2,4,5,7,8,1<br>12,13,15 0,14,16,17 | 0 |                                                  |
| 7458 | 1,3,6,9,11, 2,4,5,7,8,1<br>12,13,16 0,14,15,17 | 0 |                                                  |
| 7459 | 1,3,6,9,11, 2,4,5,7,8,1<br>12,13,17 0,14,15,16 | 1 | P16636                                           |
| 7460 | 1,3,6,9,11, 2,4,5,7,8,1<br>12,14,15 0,13,16,17 | 0 |                                                  |
| 7461 | 1,3,6,9,11, 2,4,5,7,8,1<br>12,14,16 0,13,15,17 | 0 |                                                  |
| 7462 | 1,3,6,9,11, 2,4,5,7,8,1<br>12,14,17 0,13,15,16 | 3 | P01835,P04218,P08689                             |
| 7463 | 1,3,6,9,11, 2,4,5,7,8,1<br>12,15,16 0,13,14,17 | 0 |                                                  |

|      |                                                |    |                                                                       |
|------|------------------------------------------------|----|-----------------------------------------------------------------------|
| 7464 | 1,3,6,9,11, 2,4,5,7,8,1<br>12,15,17 0,13,14,16 | 0  |                                                                       |
| 7465 | 1,3,6,9,11, 2,4,5,7,8,1<br>12,16,17 0,13,14,15 | 3  | P04218,P07171,P16636                                                  |
| 7466 | 1,3,6,9,11, 2,4,5,7,8,1<br>13,14,15 0,12,16,17 | 4  | P16391,P19223,P55091,Q80WL1                                           |
| 7467 | 1,3,6,9,11, 2,4,5,7,8,1<br>13,14,16 0,12,15,17 | 5  | P04218,P19223,P55091,Q80WL1,Q9QZA6                                    |
| 7468 | 1,3,6,9,11, 2,4,5,7,8,1<br>13,14,17 0,12,15,16 | 2  | P04218,Q9QW07                                                         |
| 7469 | 1,3,6,9,11, 2,4,5,7,8,1<br>13,15,16 0,12,14,17 | 3  | P19223,P55091,Q80WL1                                                  |
| 7470 | 1,3,6,9,11, 2,4,5,7,8,1<br>13,15,17 0,12,14,16 | 2  | P04218,Q80WL1                                                         |
| 7471 | 1,3,6,9,11, 2,4,5,7,8,1<br>13,16,17 0,12,14,15 | 1  | P04218                                                                |
| 7472 | 1,3,6,9,11, 2,4,5,7,8,1<br>14,15,16 0,12,13,17 | 4  | P04218,P19223,P55091,Q80WL1                                           |
| 7473 | 1,3,6,9,11, 2,4,5,7,8,1<br>14,15,17 0,12,13,16 | 2  | P04218,Q80WL1                                                         |
| 7474 | 1,3,6,9,11, 2,4,5,7,8,1<br>14,16,17 0,12,13,15 | 2  | P04218,Q80WL1                                                         |
| 7475 | 1,3,6,9,11, 2,4,5,7,8,1<br>15,16,17 0,12,13,14 | 2  | P04218,Q80WL1                                                         |
| 7476 | 1,3,6,9,12, 2,4,5,7,8,1<br>13,14,15 0,11,16,17 | 4  | A2RUV9,P00714,P16391,Q6AYS4                                           |
| 7477 | 1,3,6,9,12, 2,4,5,7,8,1<br>13,14,16 0,11,15,17 | 2  | P02761,Q6AYS4                                                         |
| 7478 | 1,3,6,9,12, 2,4,5,7,8,1<br>13,14,17 0,11,15,16 | 6  | P00714,P01835,P07171,P51907,Q6AYS4,Q9QW07                             |
| 7479 | 1,3,6,9,12, 2,4,5,7,8,1<br>13,15,16 0,11,14,17 | 2  | P00714,Q6AYS4                                                         |
| 7480 | 1,3,6,9,12, 2,4,5,7,8,1<br>13,15,17 0,11,14,16 | 4  | P00714,P07171,Q6AYS4,Q99MH3                                           |
| 7481 | 1,3,6,9,12, 2,4,5,7,8,1<br>13,16,17 0,11,14,15 | 3  | P00714,P07171,Q6AYS4                                                  |
| 7482 | 1,3,6,9,12, 2,4,5,7,8,1<br>14,15,16 0,11,13,17 | 1  | Q6AYS4                                                                |
| 7483 | 1,3,6,9,12, 2,4,5,7,8,1<br>14,15,17 0,11,13,16 | 3  | P01835,P08689,Q6AYS4                                                  |
| 7484 | 1,3,6,9,12, 2,4,5,7,8,1<br>14,16,17 0,11,13,15 | 3  | P01835,P07171,Q6AYS4                                                  |
| 7485 | 1,3,6,9,12, 2,4,5,7,8,1<br>15,16,17 0,11,13,14 | 3  | P00714,P07171,Q6AYS4                                                  |
| 7486 | 1,3,6,9,13, 2,4,5,7,8,1<br>14,15,16 0,11,12,17 | 10 | P00714,P16391,P19223,P50115,P55091,P62804,Q4G075,Q6AYS4,Q80WL1,Q99041 |

|      |                                                |   |                                                                |
|------|------------------------------------------------|---|----------------------------------------------------------------|
| 7487 | 1,3,6,9,13, 2,4,5,7,8,1<br>14,15,17 0,11,12,16 | 7 | P00714,P16391,P53792,P61206;P84079;P84082,Q6AYS4,Q80WL1,Q9QW07 |
| 7488 | 1,3,6,9,13, 2,4,5,7,8,1<br>14,16,17 0,11,12,15 | 7 | P00714,P04218,P07171,P51907,Q6AYS4,Q80WL1,Q9QW07               |
| 7489 | 1,3,6,9,13, 2,4,5,7,8,1<br>15,16,17 0,11,12,14 | 6 | P00714,P62804,Q63598,Q6AYS4,Q80WL1,Q9EQS0                      |
| 7490 | 1,3,6,9,14, 2,4,5,7,8,1<br>15,16,17 0,11,12,13 | 5 | P00714,P02803,P04218,Q6AYS4,Q80WL1                             |
| 7491 | 1,3,6,10,1 2,4,5,7,8,9<br>1,12,13,14 ,15,16,17 | 1 | P47727                                                         |
| 7492 | 1,3,6,10,1 2,4,5,7,8,9<br>1,12,13,15 ,14,16,17 | 0 |                                                                |
| 7493 | 1,3,6,10,1 2,4,5,7,8,9<br>1,12,13,16 ,14,15,17 | 1 | Q6IFU7                                                         |
| 7494 | 1,3,6,10,1 2,4,5,7,8,9<br>1,12,13,17 ,14,15,16 | 4 | O08815,P16636,Q99MH3,Q9QZK9                                    |
| 7495 | 1,3,6,10,1 2,4,5,7,8,9<br>1,12,14,15 ,13,16,17 | 1 | P35280                                                         |
| 7496 | 1,3,6,10,1 2,4,5,7,8,9<br>1,12,14,16 ,13,15,17 | 2 | Q6IFU7,Q6P6Q2                                                  |
| 7497 | 1,3,6,10,1 2,4,5,7,8,9<br>1,12,14,17 ,13,15,16 | 4 | O08815,P08689,P47727,Q10758                                    |
| 7498 | 1,3,6,10,1 2,4,5,7,8,9<br>1,12,15,16 ,13,14,17 | 1 | Q6IFU7                                                         |
| 7499 | 1,3,6,10,1 2,4,5,7,8,9<br>1,12,15,17 ,13,14,16 | 2 | P08689,Q99MH3                                                  |
| 7500 | 1,3,6,10,1 2,4,5,7,8,9<br>1,12,16,17 ,13,14,15 | 2 | P06757,P16636                                                  |
| 7501 | 1,3,6,10,1 2,4,5,7,8,9<br>1,13,14,15 ,12,16,17 | 4 | P19223,P50115,P55091,Q80WL1                                    |
| 7502 | 1,3,6,10,1 2,4,5,7,8,9<br>1,13,14,16 ,12,15,17 | 5 | P19223,P50115,P55091,Q80WL1,Q9QZA6                             |
| 7503 | 1,3,6,10,1 2,4,5,7,8,9<br>1,13,14,17 ,12,15,16 | 2 | P47727,Q9QW07                                                  |
| 7504 | 1,3,6,10,1 2,4,5,7,8,9<br>1,13,15,16 ,12,14,17 | 4 | P19223,P50115,P55091,Q80WL1                                    |
| 7505 | 1,3,6,10,1 2,4,5,7,8,9<br>1,13,15,17 ,12,14,16 | 2 | Q80WL1,Q99MH3                                                  |
| 7506 | 1,3,6,10,1 2,4,5,7,8,9<br>1,13,16,17 ,12,14,15 | 0 |                                                                |
| 7507 | 1,3,6,10,1 2,4,5,7,8,9<br>1,14,15,16 ,12,13,17 | 4 | P19223,P50115,P55091,Q80WL1                                    |
| 7508 | 1,3,6,10,1 2,4,5,7,8,9<br>1,14,15,17 ,12,13,16 | 2 | P08689,Q80WL1                                                  |
| 7509 | 1,3,6,10,1 2,4,5,7,8,9<br>1,14,16,17 ,12,13,15 | 0 |                                                                |

|      |                          |                          |   |                                           |
|------|--------------------------|--------------------------|---|-------------------------------------------|
| 7510 | 1,3,6,10,1<br>1,15,16,17 | 2,4,5,7,8,9<br>,12,13,14 | 1 | Q80WL1                                    |
| 7511 | 1,3,6,10,1<br>2,13,14,15 | 2,4,5,7,8,9<br>,11,16,17 | 4 | A2RUV9,P50115,Q05175,Q6AYS4               |
| 7512 | 1,3,6,10,1<br>2,13,14,16 | 2,4,5,7,8,9<br>,11,15,17 | 3 | P50115,Q05175,Q6AYS4                      |
| 7513 | 1,3,6,10,1<br>2,13,14,17 | 2,4,5,7,8,9<br>,11,15,16 | 6 | P07171,Q05175,Q6AYS4,Q99MH3,Q9QW07,Q9QZK9 |
| 7514 | 1,3,6,10,1<br>2,13,15,16 | 2,4,5,7,8,9<br>,11,14,17 | 2 | P50115,Q6AYS4                             |
| 7515 | 1,3,6,10,1<br>2,13,15,17 | 2,4,5,7,8,9<br>,11,14,16 | 6 | P07171,Q05175,Q6AYS4,Q6IFV1,Q99MH3,Q9QZK9 |
| 7516 | 1,3,6,10,1<br>2,13,16,17 | 2,4,5,7,8,9<br>,11,14,15 | 5 | P07171,P16636,Q05175,Q6AYS4,Q99MH3        |
| 7517 | 1,3,6,10,1<br>2,14,15,16 | 2,4,5,7,8,9<br>,11,13,17 | 3 | P20766,P50115,Q6AYS4                      |
| 7518 | 1,3,6,10,1<br>2,14,15,17 | 2,4,5,7,8,9<br>,11,13,16 | 3 | P08689,Q6AYS4,Q99MH3                      |
| 7519 | 1,3,6,10,1<br>2,14,16,17 | 2,4,5,7,8,9<br>,11,13,15 | 3 | P07171,Q10758,Q6AYS4                      |
| 7520 | 1,3,6,10,1<br>2,15,16,17 | 2,4,5,7,8,9<br>,11,13,14 | 3 | P07171,Q6AYS4,Q99MH3                      |
| 7521 | 1,3,6,10,1<br>3,14,15,16 | 2,4,5,7,8,9<br>,11,12,17 | 6 | P19223,P50115,P55091,Q6AYS4,Q80WL1,Q99041 |
| 7522 | 1,3,6,10,1<br>3,14,15,17 | 2,4,5,7,8,9<br>,11,12,16 | 3 | Q6AYS4,Q80WL1,Q9QW07                      |
| 7523 | 1,3,6,10,1<br>3,14,16,17 | 2,4,5,7,8,9<br>,11,12,15 | 3 | P51907,Q6AYS4,Q9QW07                      |
| 7524 | 1,3,6,10,1<br>3,15,16,17 | 2,4,5,7,8,9<br>,11,12,14 | 4 | Q6AYS4,Q80WL1,Q99MH3,Q9EQS0               |
| 7525 | 1,3,6,10,1<br>4,15,16,17 | 2,4,5,7,8,9<br>,11,12,13 | 3 | P02803,Q6AYS4,Q80WL1                      |
| 7526 | 1,3,6,11,1<br>2,13,14,15 | 2,4,5,7,8,9<br>,10,16,17 | 2 | P47727,Q64093                             |
| 7527 | 1,3,6,11,1<br>2,13,14,16 | 2,4,5,7,8,9<br>,10,15,17 | 1 | P47727                                    |
| 7528 | 1,3,6,11,1<br>2,13,14,17 | 2,4,5,7,8,9<br>,10,15,16 | 4 | P47727,Q64093,Q9QW07,Q9QZK9               |
| 7529 | 1,3,6,11,1<br>2,13,15,16 | 2,4,5,7,8,9<br>,10,14,17 | 1 | Q6AYS4                                    |
| 7530 | 1,3,6,11,1<br>2,13,15,17 | 2,4,5,7,8,9<br>,10,14,16 | 2 | Q99MH3,Q9QZK9                             |
| 7531 | 1,3,6,11,1<br>2,13,16,17 | 2,4,5,7,8,9<br>,10,14,15 | 3 | P07171,P16636,P17046                      |
| 7532 | 1,3,6,11,1<br>2,14,15,16 | 2,4,5,7,8,9<br>,10,13,17 | 1 | Q6AYS4                                    |

|      |                          |                                |   |                                                         |
|------|--------------------------|--------------------------------|---|---------------------------------------------------------|
| 7533 | 1,3,6,11,1<br>2,14,15,17 | 2,4,5,7,8,9<br>,10,13,16       | 0 |                                                         |
| 7534 | 1,3,6,11,1<br>2,14,16,17 | 2,4,5,7,8,9<br>,10,13,15       | 0 |                                                         |
| 7535 | 1,3,6,11,1<br>2,15,16,17 | 2,4,5,7,8,9<br>,10,13,14       | 0 |                                                         |
| 7536 | 1,3,6,11,1<br>3,14,15,16 | 2,4,5,7,8,9<br>,10,12,17       | 5 | P19223,P50115,P55091,Q6AYS4,Q80WL1                      |
| 7537 | 1,3,6,11,1<br>3,14,15,17 | 2,4,5,7,8,9<br>,10,12,16       | 3 | Q64093,Q80WL1,Q9QW07                                    |
| 7538 | 1,3,6,11,1<br>3,14,16,17 | 2,4,5,7,8,9<br>,10,12,15       | 4 | D3ZHA0,P04218,Q80WL1,Q9QW07                             |
| 7539 | 1,3,6,11,1<br>3,15,16,17 | 2,4,5,7,8,9<br>,10,12,14       | 2 | Q80WL1,Q9EQS0                                           |
| 7540 | 1,3,6,11,1<br>4,15,16,17 | 2,4,5,7,8,9<br>,10,12,13       | 3 | P02803,P04218,Q80WL1                                    |
| 7541 | 1,3,6,12,1<br>3,14,15,16 | 2,4,5,7,8,9<br>,10,11,17       | 4 | P00714,P50115,Q64093,Q6AYS4                             |
| 7542 | 1,3,6,12,1<br>3,14,15,17 | 2,4,5,7,8,9<br>,10,11,16       | 5 | A2RUV9,P00714,Q64093,Q6AYS4,Q9QW07                      |
| 7543 | 1,3,6,12,1<br>3,14,16,17 | 2,4,5,7,8,9<br>,10,11,15       | 6 | P00714,P07171,P51907,Q561R9,Q6AYS4,Q9QW07               |
| 7544 | 1,3,6,12,1<br>3,15,16,17 | 2,4,5,7,8,9<br>,10,11,14       | 5 | P00714,P07171,Q5XFX0,Q6AYS4,Q99MH3                      |
| 7545 | 1,3,6,12,1<br>4,15,16,17 | 2,4,5,7,8,9<br>,10,11,13       | 3 | P00714,P02803,Q6AYS4                                    |
| 7546 | 1,3,6,13,1<br>4,15,16,17 | 2,4,5,7,8,9<br>,10,11,12       | 8 | P00714,P02803,P16391,Q64093,Q6AYS4,Q80WL1,Q9EQS0,Q9QW07 |
| 7547 | 1,3,7,8,9,1<br>0,11,12   | 2,4,5,6,13,<br>14,15,16,1<br>7 | 2 | P10715,Q6IG02                                           |
| 7548 | 1,3,7,8,9,1<br>0,11,13   | 2,4,5,6,12,<br>14,15,16,1<br>7 | 1 | P35467                                                  |
| 7549 | 1,3,7,8,9,1<br>0,11,14   | 2,4,5,6,12,<br>13,15,16,1<br>7 | 1 | Q62635                                                  |
| 7550 | 1,3,7,8,9,1<br>0,11,15   | 2,4,5,6,12,<br>13,14,16,1<br>7 | 6 | O54728,P14480,P22006,P27213,P35280,Q62635               |
| 7551 | 1,3,7,8,9,1<br>0,11,16   | 2,4,5,6,12,<br>13,14,15,1<br>7 | 1 | Q62635                                                  |
| 7552 | 1,3,7,8,9,1<br>0,11,17   | 2,4,5,6,12,<br>13,14,15,1<br>6 | 2 | P02091,P25236                                           |

|      |                        |                                |   |                      |
|------|------------------------|--------------------------------|---|----------------------|
| 7553 | 1,3,7,8,9,1<br>0,12,13 | 2,4,5,6,11,<br>14,15,16,1<br>7 | 0 |                      |
| 7554 | 1,3,7,8,9,1<br>0,12,14 | 2,4,5,6,11,<br>13,15,16,1<br>7 | 0 |                      |
| 7555 | 1,3,7,8,9,1<br>0,12,15 | 2,4,5,6,11,<br>13,14,16,1<br>7 | 1 | P10715               |
| 7556 | 1,3,7,8,9,1<br>0,12,16 | 2,4,5,6,11,<br>13,14,15,1<br>7 | 1 | P10715               |
| 7557 | 1,3,7,8,9,1<br>0,12,17 | 2,4,5,6,11,<br>13,14,15,1<br>6 | 3 | P02091,P08689,P10715 |
| 7558 | 1,3,7,8,9,1<br>0,13,14 | 2,4,5,6,11,<br>12,15,16,1<br>7 | 0 |                      |
| 7559 | 1,3,7,8,9,1<br>0,13,15 | 2,4,5,6,11,<br>12,14,16,1<br>7 | 2 | O54728,P01835        |
| 7560 | 1,3,7,8,9,1<br>0,13,16 | 2,4,5,6,11,<br>12,14,15,1<br>7 | 1 | P01835               |
| 7561 | 1,3,7,8,9,1<br>0,13,17 | 2,4,5,6,11,<br>12,14,15,1<br>6 | 2 | P02091,P51907        |
| 7562 | 1,3,7,8,9,1<br>0,14,15 | 2,4,5,6,11,<br>12,13,16,1<br>7 | 2 | O54728,Q62635        |
| 7563 | 1,3,7,8,9,1<br>0,14,16 | 2,4,5,6,11,<br>12,13,15,1<br>7 | 1 | Q62635               |
| 7564 | 1,3,7,8,9,1<br>0,14,17 | 2,4,5,6,11,<br>12,13,15,1<br>6 | 2 | P02091,P08689        |
| 7565 | 1,3,7,8,9,1<br>0,15,16 | 2,4,5,6,11,<br>12,13,14,1<br>7 | 3 | O54728,P01835,Q62635 |
| 7566 | 1,3,7,8,9,1<br>0,15,17 | 2,4,5,6,11,<br>12,13,14,1<br>6 | 3 | G3V686,P02091,P25236 |
| 7567 | 1,3,7,8,9,1<br>0,16,17 | 2,4,5,6,11,<br>12,13,14,1<br>5 | 3 | P02091,P25031,P25236 |

|      |                        |                                |   |                                    |
|------|------------------------|--------------------------------|---|------------------------------------|
| 7568 | 1,3,7,8,9,1<br>1,12,13 | 2,4,5,6,10,<br>14,15,16,1<br>7 | 1 | P10715                             |
| 7569 | 1,3,7,8,9,1<br>1,12,14 | 2,4,5,6,10,<br>13,15,16,1<br>7 | 1 | P10715                             |
| 7570 | 1,3,7,8,9,1<br>1,12,15 | 2,4,5,6,10,<br>13,14,16,1<br>7 | 1 | P10715                             |
| 7571 | 1,3,7,8,9,1<br>1,12,16 | 2,4,5,6,10,<br>13,14,15,1<br>7 | 1 | P10715                             |
| 7572 | 1,3,7,8,9,1<br>1,12,17 | 2,4,5,6,10,<br>13,14,15,1<br>6 | 2 | P02091,P10715                      |
| 7573 | 1,3,7,8,9,1<br>1,13,14 | 2,4,5,6,10,<br>12,15,16,1<br>7 | 0 |                                    |
| 7574 | 1,3,7,8,9,1<br>1,13,15 | 2,4,5,6,10,<br>12,14,16,1<br>7 | 1 | O54728                             |
| 7575 | 1,3,7,8,9,1<br>1,13,16 | 2,4,5,6,10,<br>12,14,15,1<br>7 | 1 | B4F795                             |
| 7576 | 1,3,7,8,9,1<br>1,13,17 | 2,4,5,6,10,<br>12,14,15,1<br>6 | 1 | P02091                             |
| 7577 | 1,3,7,8,9,1<br>1,14,15 | 2,4,5,6,10,<br>12,13,16,1<br>7 | 4 | O54728,P14480,P22006,Q62635        |
| 7578 | 1,3,7,8,9,1<br>1,14,16 | 2,4,5,6,10,<br>12,13,15,1<br>7 | 3 | B4F795,P04218,Q62635               |
| 7579 | 1,3,7,8,9,1<br>1,14,17 | 2,4,5,6,10,<br>12,13,15,1<br>6 | 2 | P02091,P04218                      |
| 7580 | 1,3,7,8,9,1<br>1,15,16 | 2,4,5,6,10,<br>12,13,14,1<br>7 | 4 | B4F795,O54728,P10715,Q62635        |
| 7581 | 1,3,7,8,9,1<br>1,15,17 | 2,4,5,6,10,<br>12,13,14,1<br>6 | 4 | P02091,P04218,P10715,P25236        |
| 7582 | 1,3,7,8,9,1<br>1,16,17 | 2,4,5,6,10,<br>12,13,14,1<br>5 | 5 | B4F795,P02091,P04218,P10715,P25236 |



|      |                        |                                |   |                                           |
|------|------------------------|--------------------------------|---|-------------------------------------------|
| 7583 | 1,3,7,8,9,1<br>2,13,14 | 2,4,5,6,10,<br>11,15,16,1<br>7 | 1 | A2RUV9                                    |
| 7584 | 1,3,7,8,9,1<br>2,13,15 | 2,4,5,6,10,<br>11,14,16,1<br>7 | 1 | P10715                                    |
| 7585 | 1,3,7,8,9,1<br>2,13,16 | 2,4,5,6,10,<br>11,14,15,1<br>7 | 1 | P10715                                    |
| 7586 | 1,3,7,8,9,1<br>2,13,17 | 2,4,5,6,10,<br>11,14,15,1<br>6 | 3 | P02091,P10715,P51907                      |
| 7587 | 1,3,7,8,9,1<br>2,14,15 | 2,4,5,6,10,<br>11,13,16,1<br>7 | 2 | A2RUV9,P10715                             |
| 7588 | 1,3,7,8,9,1<br>2,14,16 | 2,4,5,6,10,<br>11,13,15,1<br>7 | 1 | P10715                                    |
| 7589 | 1,3,7,8,9,1<br>2,14,17 | 2,4,5,6,10,<br>11,13,15,1<br>6 | 2 | P02091,P10715                             |
| 7590 | 1,3,7,8,9,1<br>2,15,16 | 2,4,5,6,10,<br>11,13,14,1<br>7 | 1 | P10715                                    |
| 7591 | 1,3,7,8,9,1<br>2,15,17 | 2,4,5,6,10,<br>11,13,14,1<br>6 | 2 | P02091,P10715                             |
| 7592 | 1,3,7,8,9,1<br>2,16,17 | 2,4,5,6,10,<br>11,13,14,1<br>5 | 2 | P02091,P10715                             |
| 7593 | 1,3,7,8,9,1<br>3,14,15 | 2,4,5,6,10,<br>11,12,16,1<br>7 | 5 | O54728,P06757,P53792,Q08849,Q6IFU7        |
| 7594 | 1,3,7,8,9,1<br>3,14,16 | 2,4,5,6,10,<br>11,12,15,1<br>7 | 1 | Q08849                                    |
| 7595 | 1,3,7,8,9,1<br>3,14,17 | 2,4,5,6,10,<br>11,12,15,1<br>6 | 6 | P02091,P51907,P53792,Q08849,Q6IFU7,Q9QW07 |
| 7596 | 1,3,7,8,9,1<br>3,15,16 | 2,4,5,6,10,<br>11,12,14,1<br>7 | 4 | B4F795,O54728,P01835,P62804               |
| 7597 | 1,3,7,8,9,1<br>3,15,17 | 2,4,5,6,10,<br>11,12,14,1<br>6 | 3 | P02091,P53792,Q6IFU7                      |

|      |                         |                                |   |                                    |
|------|-------------------------|--------------------------------|---|------------------------------------|
| 7598 | 1,3,7,8,9,1<br>3,16,17  | 2,4,5,6,10,<br>11,12,14,1<br>5 | 4 | P02091,P51907,P62804,Q6IFU7        |
| 7599 | 1,3,7,8,9,1<br>4,15,16  | 2,4,5,6,10,<br>11,12,13,1<br>7 | 5 | B4F795,O54728,Q08849,Q62635,Q9QZK9 |
| 7600 | 1,3,7,8,9,1<br>4,15,17  | 2,4,5,6,10,<br>11,12,13,1<br>6 | 3 | P02091,Q08849,Q6IFU7               |
| 7601 | 1,3,7,8,9,1<br>4,16,17  | 2,4,5,6,10,<br>11,12,13,1<br>5 | 3 | P02091,P04218,Q08849               |
| 7602 | 1,3,7,8,9,1<br>5,16,17  | 2,4,5,6,10,<br>11,12,13,1<br>4 | 3 | B4F795,P02091,P47727               |
| 7603 | 1,3,7,8,10,<br>11,12,13 | 2,4,5,6,9,1<br>4,15,16,17      | 3 | P10715,Q5HZV9,Q8CJ52               |
| 7604 | 1,3,7,8,10,<br>11,12,14 | 2,4,5,6,9,1<br>3,15,16,17      | 3 | P10715,P35280,Q6IG02               |
| 7605 | 1,3,7,8,10,<br>11,12,15 | 2,4,5,6,9,1<br>3,14,16,17      | 4 | P00731,P10715,P22006,P35280        |
| 7606 | 1,3,7,8,10,<br>11,12,16 | 2,4,5,6,9,1<br>3,14,15,17      | 1 | P10715                             |
| 7607 | 1,3,7,8,10,<br>11,12,17 | 2,4,5,6,9,1<br>3,14,15,16      | 4 | P02091,P08689,P10715,Q9QZK9        |
| 7608 | 1,3,7,8,10,<br>11,13,14 | 2,4,5,6,9,1<br>2,15,16,17      | 1 | P47727                             |
| 7609 | 1,3,7,8,10,<br>11,13,15 | 2,4,5,6,9,1<br>2,14,16,17      | 2 | P01835,P22006                      |
| 7610 | 1,3,7,8,10,<br>11,13,16 | 2,4,5,6,9,1<br>2,14,15,17      | 2 | P01835,Q8VD89                      |
| 7611 | 1,3,7,8,10,<br>11,13,17 | 2,4,5,6,9,1<br>2,14,15,16      | 2 | P01946,P02091                      |
| 7612 | 1,3,7,8,10,<br>11,14,15 | 2,4,5,6,9,1<br>2,13,16,17      | 2 | P22006,P35280                      |
| 7613 | 1,3,7,8,10,<br>11,14,16 | 2,4,5,6,9,1<br>2,13,15,17      | 0 |                                    |
| 7614 | 1,3,7,8,10,<br>11,14,17 | 2,4,5,6,9,1<br>2,13,15,16      | 2 | P02091,P08689                      |
| 7615 | 1,3,7,8,10,<br>11,15,16 | 2,4,5,6,9,1<br>2,13,14,17      | 2 | P01835,Q62635                      |
| 7616 | 1,3,7,8,10,<br>11,15,17 | 2,4,5,6,9,1<br>2,13,14,16      | 4 | P02091,P12346,P22006,P25236        |
| 7617 | 1,3,7,8,10,<br>11,16,17 | 2,4,5,6,9,1<br>2,13,14,15      | 2 | P02091,P25236                      |

|      |                                                |   |                                    |
|------|------------------------------------------------|---|------------------------------------|
| 7618 | 1,3,7,8,10, 2,4,5,6,9,1<br>12,13,14 1,15,16,17 | 1 | A2RUV9                             |
| 7619 | 1,3,7,8,10, 2,4,5,6,9,1<br>12,13,15 1,14,16,17 | 2 | P15999,Q99MH3                      |
| 7620 | 1,3,7,8,10, 2,4,5,6,9,1<br>12,13,16 1,14,15,17 | 0 |                                    |
| 7621 | 1,3,7,8,10, 2,4,5,6,9,1<br>12,13,17 1,14,15,16 | 3 | P02091,Q99MH3,Q9QZK9               |
| 7622 | 1,3,7,8,10, 2,4,5,6,9,1<br>12,14,15 1,13,16,17 | 2 | A2RUV9,P35280                      |
| 7623 | 1,3,7,8,10, 2,4,5,6,9,1<br>12,14,16 1,13,15,17 | 1 | P08721                             |
| 7624 | 1,3,7,8,10, 2,4,5,6,9,1<br>12,14,17 1,13,15,16 | 2 | P02091,P08689                      |
| 7625 | 1,3,7,8,10, 2,4,5,6,9,1<br>12,15,16 1,13,14,17 | 2 | P08721,P10715                      |
| 7626 | 1,3,7,8,10, 2,4,5,6,9,1<br>12,15,17 1,13,14,16 | 3 | P02091,P10715,Q99MH3               |
| 7627 | 1,3,7,8,10, 2,4,5,6,9,1<br>12,16,17 1,13,14,15 | 3 | P02091,P08721,P10715               |
| 7628 | 1,3,7,8,10, 2,4,5,6,9,1<br>13,14,15 1,12,16,17 | 4 | A2RUV9,P01835,P15999,Q08849        |
| 7629 | 1,3,7,8,10, 2,4,5,6,9,1<br>13,14,16 1,12,15,17 | 2 | P01835,Q08849                      |
| 7630 | 1,3,7,8,10, 2,4,5,6,9,1<br>13,14,17 1,12,15,16 | 4 | P02091,P51907,Q08849,Q9QW07        |
| 7631 | 1,3,7,8,10, 2,4,5,6,9,1<br>13,15,16 1,12,14,17 | 1 | P01835                             |
| 7632 | 1,3,7,8,10, 2,4,5,6,9,1<br>13,15,17 1,12,14,16 | 5 | P01835,P02091,P15999,Q6IFU7,Q99MH3 |
| 7633 | 1,3,7,8,10, 2,4,5,6,9,1<br>13,16,17 1,12,14,15 | 3 | P01835,P02091,P51907               |
| 7634 | 1,3,7,8,10, 2,4,5,6,9,1<br>14,15,16 1,12,13,17 | 4 | P01835,P08721,Q08849,Q62635        |
| 7635 | 1,3,7,8,10, 2,4,5,6,9,1<br>14,15,17 1,12,13,16 | 2 | P02091,Q08849                      |
| 7636 | 1,3,7,8,10, 2,4,5,6,9,1<br>14,16,17 1,12,13,15 | 2 | P02091,Q08849                      |
| 7637 | 1,3,7,8,10, 2,4,5,6,9,1<br>15,16,17 1,12,13,14 | 3 | P01835,P02091,P25236               |
| 7638 | 1,3,7,8,11, 2,4,5,6,9,1<br>12,13,14 0,15,16,17 | 4 | P10715,P47727,Q62902,Q8CJ52        |
| 7639 | 1,3,7,8,11, 2,4,5,6,9,1<br>12,13,15 0,14,16,17 | 1 | P10715                             |
| 7640 | 1,3,7,8,11, 2,4,5,6,9,1<br>12,13,16 0,14,15,17 | 3 | P10715,P17046,Q8CJ52               |

|      |                                                |   |                                    |
|------|------------------------------------------------|---|------------------------------------|
| 7641 | 1,3,7,8,11, 2,4,5,6,9,1<br>12,13,17 0,14,15,16 | 5 | P01946,P02091,P10715,P36374,Q9QZK9 |
| 7642 | 1,3,7,8,11, 2,4,5,6,9,1<br>12,14,15 0,13,16,17 | 5 | A2RUV9,P10715,P19629,P22006,P35280 |
| 7643 | 1,3,7,8,11, 2,4,5,6,9,1<br>12,14,16 0,13,15,17 | 1 | P10715                             |
| 7644 | 1,3,7,8,11, 2,4,5,6,9,1<br>12,14,17 0,13,15,16 | 4 | P01946,P02091,P10715,P19629        |
| 7645 | 1,3,7,8,11, 2,4,5,6,9,1<br>12,15,16 0,13,14,17 | 1 | P10715                             |
| 7646 | 1,3,7,8,11, 2,4,5,6,9,1<br>12,15,17 0,13,14,16 | 2 | P02091,P10715                      |
| 7647 | 1,3,7,8,11, 2,4,5,6,9,1<br>12,16,17 0,13,14,15 | 3 | P02091,P10715,P17046               |
| 7648 | 1,3,7,8,11, 2,4,5,6,9,1<br>13,14,15 0,12,16,17 | 2 | P22006,Q08849                      |
| 7649 | 1,3,7,8,11, 2,4,5,6,9,1<br>13,14,16 0,12,15,17 | 1 | Q08849                             |
| 7650 | 1,3,7,8,11, 2,4,5,6,9,1<br>13,14,17 0,12,15,16 | 4 | P01946,P02091,Q08849,Q9QW07        |
| 7651 | 1,3,7,8,11, 2,4,5,6,9,1<br>13,15,16 0,12,14,17 | 3 | B4F795,P01835,Q8VD89               |
| 7652 | 1,3,7,8,11, 2,4,5,6,9,1<br>13,15,17 0,12,14,16 | 1 | P02091                             |
| 7653 | 1,3,7,8,11, 2,4,5,6,9,1<br>13,16,17 0,12,14,15 | 2 | P01946,P02091                      |
| 7654 | 1,3,7,8,11, 2,4,5,6,9,1<br>14,15,16 0,12,13,17 | 3 | B4F795,Q08849,Q63355               |
| 7655 | 1,3,7,8,11, 2,4,5,6,9,1<br>14,15,17 0,12,13,16 | 3 | P02091,P22006,Q08849               |
| 7656 | 1,3,7,8,11, 2,4,5,6,9,1<br>14,16,17 0,12,13,15 | 2 | P02091,P04218                      |
| 7657 | 1,3,7,8,11, 2,4,5,6,9,1<br>15,16,17 0,12,13,14 | 4 | B4F795,P02091,P10715,P25236        |
| 7658 | 1,3,7,8,12, 2,4,5,6,9,1<br>13,14,15 0,11,16,17 | 3 | A2RUV9,P15999,Q08849               |
| 7659 | 1,3,7,8,12, 2,4,5,6,9,1<br>13,14,16 0,11,15,17 | 0 |                                    |
| 7660 | 1,3,7,8,12, 2,4,5,6,9,1<br>13,14,17 0,11,15,16 | 5 | A2RUV9,P01946,P02091,P51907,Q9QW07 |
| 7661 | 1,3,7,8,12, 2,4,5,6,9,1<br>13,15,16 0,11,14,17 | 1 | P10715                             |
| 7662 | 1,3,7,8,12, 2,4,5,6,9,1<br>13,15,17 0,11,14,16 | 4 | P02091,P10715,P15999,Q99MH3        |
| 7663 | 1,3,7,8,12, 2,4,5,6,9,1<br>13,16,17 0,11,14,15 | 5 | P01946,P02091,P10715,P63029,Q5XFX0 |

|      |                                                |   |                                                  |
|------|------------------------------------------------|---|--------------------------------------------------|
| 7664 | 1,3,7,8,12, 2,4,5,6,9,1<br>14,15,16 0,11,13,17 | 1 | A2RUV9                                           |
| 7665 | 1,3,7,8,12, 2,4,5,6,9,1<br>14,15,17 0,11,13,16 | 3 | A2RUV9,P02091,P19629                             |
| 7666 | 1,3,7,8,12, 2,4,5,6,9,1<br>14,16,17 0,11,13,15 | 1 | P02091                                           |
| 7667 | 1,3,7,8,12, 2,4,5,6,9,1<br>15,16,17 0,11,13,14 | 3 | P02091,P10715,Q5XFX0                             |
| 7668 | 1,3,7,8,13, 2,4,5,6,9,1<br>14,15,16 0,11,12,17 | 3 | P01835,Q08849,Q09030                             |
| 7669 | 1,3,7,8,13, 2,4,5,6,9,1<br>14,15,17 0,11,12,16 | 5 | P02091,P15999,Q08849,Q6IFU7,Q9QW07               |
| 7670 | 1,3,7,8,13, 2,4,5,6,9,1<br>14,16,17 0,11,12,15 | 5 | P02091,P51907,Q08849,Q6IFU7,Q9QW07               |
| 7671 | 1,3,7,8,13, 2,4,5,6,9,1<br>15,16,17 0,11,12,14 | 5 | P01835,P02091,Q08849,Q5XFX0,Q6IFU7               |
| 7672 | 1,3,7,8,14, 2,4,5,6,9,1<br>15,16,17 0,11,12,13 | 3 | P02091,P02803,Q08849                             |
| 7673 | 1,3,7,9,10, 2,4,5,6,8,1<br>11,12,13 4,15,16,17 | 3 | P06760,P20760,Q9Z0V6                             |
| 7674 | 1,3,7,9,10, 2,4,5,6,8,1<br>11,12,14 3,15,16,17 | 3 | P06760,P08689,P20760                             |
| 7675 | 1,3,7,9,10, 2,4,5,6,8,1<br>11,12,15 3,14,16,17 | 2 | P06760,Q6PCU2                                    |
| 7676 | 1,3,7,9,10, 2,4,5,6,8,1<br>11,12,16 3,14,15,17 | 7 | P06760,P10536,P12368,P20760,P47967,Q9WUW8,Q9Z0V6 |
| 7677 | 1,3,7,9,10, 2,4,5,6,8,1<br>11,12,17 3,14,15,16 | 3 | P02091,P06757,P08689                             |
| 7678 | 1,3,7,9,10, 2,4,5,6,8,1<br>11,13,14 2,15,16,17 | 5 | P06760,P20760,Q4G075,Q62635,Q9Z0V6               |
| 7679 | 1,3,7,9,10, 2,4,5,6,8,1<br>11,13,15 2,14,16,17 | 5 | O54728,P06760,Q4G075,Q62635,Q9Z0V6               |
| 7680 | 1,3,7,9,10, 2,4,5,6,8,1<br>11,13,16 2,14,15,17 | 7 | P06760,P10536,P20760,P98089,Q4G075,Q62635,Q9Z0V6 |
| 7681 | 1,3,7,9,10, 2,4,5,6,8,1<br>11,13,17 2,14,15,16 | 1 | P02091                                           |
| 7682 | 1,3,7,9,10, 2,4,5,6,8,1<br>11,14,15 2,13,16,17 | 5 | O54728,P06760,P22006,Q4G075,Q62635               |
| 7683 | 1,3,7,9,10, 2,4,5,6,8,1<br>11,14,16 2,13,15,17 | 5 | P06760,P20760,Q4G075,Q62635,Q9Z0V6               |
| 7684 | 1,3,7,9,10, 2,4,5,6,8,1<br>11,14,17 2,13,15,16 | 3 | P02091,P08689,Q8R431                             |
| 7685 | 1,3,7,9,10, 2,4,5,6,8,1<br>11,15,16 2,13,14,17 | 7 | O54728,P02782,P06760,Q4G075,Q62635,Q9WTT6,Q9Z0V6 |
| 7686 | 1,3,7,9,10, 2,4,5,6,8,1<br>11,15,17 2,13,14,16 | 4 | O35077,P02091,P08689,P25236                      |

|      |                                                |    |                                                                                                          |
|------|------------------------------------------------|----|----------------------------------------------------------------------------------------------------------|
| 7687 | 1,3,7,9,10, 2,4,5,6,8,1<br>11,16,17 2,13,14,15 | 2  | P02091,P25236                                                                                            |
| 7688 | 1,3,7,9,10, 2,4,5,6,8,1<br>12,13,14 1,15,16,17 | 4  | A2RUV9,P06760,P14668,P20760                                                                              |
| 7689 | 1,3,7,9,10, 2,4,5,6,8,1<br>12,13,15 1,14,16,17 | 5  | P06760,P07150,P14668,Q5U2V4,Q9Z0V6                                                                       |
| 7690 | 1,3,7,9,10, 2,4,5,6,8,1<br>12,13,16 1,14,15,17 | 9  | P02793;Q7TP54,P06760,P14668,P14669,P20760,P20762,P47967,P97840,Q9Z0V6                                    |
| 7691 | 1,3,7,9,10, 2,4,5,6,8,1<br>12,13,17 1,14,15,16 | 3  | P02091,P14668,Q99MH3                                                                                     |
| 7692 | 1,3,7,9,10, 2,4,5,6,8,1<br>12,14,15 1,13,16,17 | 3  | A2RUV9,P06760,P14668                                                                                     |
| 7693 | 1,3,7,9,10, 2,4,5,6,8,1<br>12,14,16 1,13,15,17 | 3  | P06760,P14669,P20760                                                                                     |
| 7694 | 1,3,7,9,10, 2,4,5,6,8,1<br>12,14,17 1,13,15,16 | 4  | A2RUV9,P02091,P08689,P14668                                                                              |
| 7695 | 1,3,7,9,10, 2,4,5,6,8,1<br>12,15,16 1,13,14,17 | 3  | P06760,P97840,Q6AYS4                                                                                     |
| 7696 | 1,3,7,9,10, 2,4,5,6,8,1<br>12,15,17 1,13,14,16 | 3  | P02091,P08689,P14668                                                                                     |
| 7697 | 1,3,7,9,10, 2,4,5,6,8,1<br>12,16,17 1,13,14,15 | 4  | P02091,P07171,P14668,P20762                                                                              |
| 7698 | 1,3,7,9,10, 2,4,5,6,8,1<br>13,14,15 1,12,16,17 | 8  | A2RUV9,O54728,P06760,P14668,Q07936,Q4G075,Q62635,Q9Z0V6                                                  |
| 7699 | 1,3,7,9,10, 2,4,5,6,8,1<br>13,14,16 1,12,15,17 | 9  | P06760,P14669,P20760,P62804,Q00715,Q4G075,Q62635,Q6AYS4,Q9Z0V6                                           |
| 7700 | 1,3,7,9,10, 2,4,5,6,8,1<br>13,14,17 1,12,15,16 | 3  | P02091,P14668,Q9QW07                                                                                     |
| 7701 | 1,3,7,9,10, 2,4,5,6,8,1<br>13,15,16 1,12,14,17 | 14 | O54728,P01835,P02793;Q7TP54,P06760,P0C0A9,P14669,P20762,P62804,Q00715,Q4G075,Q5U2V4,Q62635,Q6AYS4,Q9Z0V6 |
| 7702 | 1,3,7,9,10, 2,4,5,6,8,1<br>13,15,17 1,12,14,16 | 3  | P02091,P14668,P62804                                                                                     |
| 7703 | 1,3,7,9,10, 2,4,5,6,8,1<br>13,16,17 1,12,14,15 | 5  | P02091,P14668,P20762,P62804,Q00715                                                                       |
| 7704 | 1,3,7,9,10, 2,4,5,6,8,1<br>14,15,16 1,12,13,17 | 12 | O54728,P02780,P02782,P06760,P07647,P0C0A9,P14669,Q4G075,Q62635,Q6AYS4,Q9JHB9,Q9QZK9                      |
| 7705 | 1,3,7,9,10, 2,4,5,6,8,1<br>14,15,17 1,12,13,16 | 4  | P02091,P08689,P0C0A9,P14668                                                                              |
| 7706 | 1,3,7,9,10, 2,4,5,6,8,1<br>14,16,17 1,12,13,15 | 4  | P02091,P08689,P0C0A9,P14668                                                                              |
| 7707 | 1,3,7,9,10, 2,4,5,6,8,1<br>15,16,17 1,12,13,14 | 12 | P02091,P02780,P02782,P07647,P0C0A9,P14668,P20762,P25236,P30120,P47727,P62804,Q9JHB9                      |
| 7708 | 1,3,7,9,11, 2,4,5,6,8,1<br>12,13,14 0,15,16,17 | 3  | P06760,P20760,Q9Z0V6                                                                                     |
| 7709 | 1,3,7,9,11, 2,4,5,6,8,1<br>12,13,15 0,14,16,17 | 3  | P06760,Q6P6R2,Q9Z0V6                                                                                     |

|      |                                                |   |                                                         |
|------|------------------------------------------------|---|---------------------------------------------------------|
| 7710 | 1,3,7,9,11, 2,4,5,6,8,1<br>12,13,16 0,14,15,17 | 4 | P06760,P17046,P20760,Q9Z0V6                             |
| 7711 | 1,3,7,9,11, 2,4,5,6,8,1<br>12,13,17 0,14,15,16 | 1 | P02091                                                  |
| 7712 | 1,3,7,9,11, 2,4,5,6,8,1<br>12,14,15 0,13,16,17 | 2 | A2RUV9,P06760                                           |
| 7713 | 1,3,7,9,11, 2,4,5,6,8,1<br>12,14,16 0,13,15,17 | 2 | P06760,P20760                                           |
| 7714 | 1,3,7,9,11, 2,4,5,6,8,1<br>12,14,17 0,13,15,16 | 2 | P02091,P08689                                           |
| 7715 | 1,3,7,9,11, 2,4,5,6,8,1<br>12,15,16 0,13,14,17 | 3 | P06760,Q9WTT6,Q9Z0V6                                    |
| 7716 | 1,3,7,9,11, 2,4,5,6,8,1<br>12,15,17 0,13,14,16 | 1 | P02091                                                  |
| 7717 | 1,3,7,9,11, 2,4,5,6,8,1<br>12,16,17 0,13,14,15 | 2 | P02091,P17046                                           |
| 7718 | 1,3,7,9,11, 2,4,5,6,8,1<br>13,14,15 0,12,16,17 | 7 | D4A5U3,O54728,P06760,Q4G075,Q62635,Q6P6R2,Q9Z0V6        |
| 7719 | 1,3,7,9,11, 2,4,5,6,8,1<br>13,14,16 0,12,15,17 | 5 | P06760,P20760,Q4G075,Q62635,Q9Z0V6                      |
| 7720 | 1,3,7,9,11, 2,4,5,6,8,1<br>13,14,17 0,12,15,16 | 3 | P02091,P04218,Q9QW07                                    |
| 7721 | 1,3,7,9,11, 2,4,5,6,8,1<br>13,15,16 0,12,14,17 | 7 | O54728,P06760,P62804,Q4G075,Q62635,Q9WTT6,Q9Z0V6        |
| 7722 | 1,3,7,9,11, 2,4,5,6,8,1<br>13,15,17 0,12,14,16 | 1 | P02091                                                  |
| 7723 | 1,3,7,9,11, 2,4,5,6,8,1<br>13,16,17 0,12,14,15 | 2 | P02091,P04218                                           |
| 7724 | 1,3,7,9,11, 2,4,5,6,8,1<br>14,15,16 0,12,13,17 | 7 | O54728,P06760,Q4G075,Q62635,Q63355,Q9QZK9,Q9Z0V6        |
| 7725 | 1,3,7,9,11, 2,4,5,6,8,1<br>14,15,17 0,12,13,16 | 3 | P02091,P04218,P08689                                    |
| 7726 | 1,3,7,9,11, 2,4,5,6,8,1<br>14,16,17 0,12,13,15 | 2 | P02091,P04218                                           |
| 7727 | 1,3,7,9,11, 2,4,5,6,8,1<br>15,16,17 0,12,13,14 | 5 | O54728,P02091,P04218,P0C0A9,P25236                      |
| 7728 | 1,3,7,9,12, 2,4,5,6,8,1<br>13,14,15 0,11,16,17 | 6 | A2RUV9,P06760,P07150,P08649,P14668,Q6AYS4               |
| 7729 | 1,3,7,9,12, 2,4,5,6,8,1<br>13,14,16 0,11,15,17 | 6 | P06760,P08649,P14669,P20760,Q6AYS4,Q9Z0V6               |
| 7730 | 1,3,7,9,12, 2,4,5,6,8,1<br>13,14,17 0,11,15,16 | 4 | A2RUV9,P02091,P14668,Q9QW07                             |
| 7731 | 1,3,7,9,12, 2,4,5,6,8,1<br>13,15,16 0,11,14,17 | 8 | P06760,P07150,P08649,P14669,P62804,Q63598,Q6AYS4,Q9Z0V6 |
| 7732 | 1,3,7,9,12, 2,4,5,6,8,1<br>13,15,17 0,11,14,16 | 3 | P02091,P14668,Q63598                                    |

|      |                                                |    |                                                                                                   |
|------|------------------------------------------------|----|---------------------------------------------------------------------------------------------------|
| 7733 | 1,3,7,9,12, 2,4,5,6,8,1<br>13,16,17 0,11,14,15 | 4  | P02091,P07171,P14668,P14669                                                                       |
| 7734 | 1,3,7,9,12, 2,4,5,6,8,1<br>14,15,16 0,11,13,17 | 5  | A2RUV9,P06760,P14669,Q63598,Q6AYS4                                                                |
| 7735 | 1,3,7,9,12, 2,4,5,6,8,1<br>14,15,17 0,11,13,16 | 4  | A2RUV9,P02091,P08689,P14668                                                                       |
| 7736 | 1,3,7,9,12, 2,4,5,6,8,1<br>14,16,17 0,11,13,15 | 3  | P02091,P14668,P14669                                                                              |
| 7737 | 1,3,7,9,12, 2,4,5,6,8,1<br>15,16,17 0,11,13,14 | 5  | P02091,P14668,P47727,Q63598,Q6AYS4                                                                |
| 7738 | 1,3,7,9,13, 2,4,5,6,8,1<br>14,15,16 0,11,12,17 | 14 | O54728,P06760,P07150,P0C0A9,P14669,P16636,P19223,P62804,Q00715,Q4G075,Q62635,Q63598,Q6AYS4,Q9Z0V6 |
| 7739 | 1,3,7,9,13, 2,4,5,6,8,1<br>14,15,17 0,11,12,16 | 9  | P02091,P0C0A9,P14668,P53792,P62804,Q08849,Q63598,Q6IFU7,Q9QW07                                    |
| 7740 | 1,3,7,9,13, 2,4,5,6,8,1<br>14,16,17 0,11,12,15 | 6  | P02091,P14668,P14669,P62804,Q63598,Q9QW07                                                         |
| 7741 | 1,3,7,9,13, 2,4,5,6,8,1<br>15,16,17 0,11,12,14 | 10 | P02091,P0C0A9,P14668,P14669,P20762,P47727,P62804,Q00715,Q63598,Q6AYS4                             |
| 7742 | 1,3,7,9,14, 2,4,5,6,8,1<br>15,16,17 0,11,12,13 | 12 | O54728,P02091,P02780,P02781,P07647,P0C0A9,P14669,P30120,P62804,Q63598,Q6AYS4,Q9JHB9               |
| 7743 | 1,3,7,10,1 2,4,5,6,8,9<br>1,12,13,14 ,15,16,17 | 4  | A2RUV9,P06760,P20760,P47727                                                                       |
| 7744 | 1,3,7,10,1 2,4,5,6,8,9<br>1,12,13,15 ,14,16,17 | 1  | P06760                                                                                            |
| 7745 | 1,3,7,10,1 2,4,5,6,8,9<br>1,12,13,16 ,14,15,17 | 6  | P06760,P12368,P17046,P20760,P47967,Q9Z0V6                                                         |
| 7746 | 1,3,7,10,1 2,4,5,6,8,9<br>1,12,13,17 ,14,15,16 | 5  | P01946,P02091,Q63942,Q99MH3,Q9QZK9                                                                |
| 7747 | 1,3,7,10,1 2,4,5,6,8,9<br>1,12,14,15 ,13,16,17 | 4  | A2RUV9,P06760,P22006,P35280                                                                       |
| 7748 | 1,3,7,10,1 2,4,5,6,8,9<br>1,12,14,16 ,13,15,17 | 2  | P06760,P20760                                                                                     |
| 7749 | 1,3,7,10,1 2,4,5,6,8,9<br>1,12,14,17 ,13,15,16 | 2  | P02091,P08689                                                                                     |
| 7750 | 1,3,7,10,1 2,4,5,6,8,9<br>1,12,15,16 ,13,14,17 | 1  | P06760                                                                                            |
| 7751 | 1,3,7,10,1 2,4,5,6,8,9<br>1,12,15,17 ,13,14,16 | 2  | P02091,P08689                                                                                     |
| 7752 | 1,3,7,10,1 2,4,5,6,8,9<br>1,12,16,17 ,13,14,15 | 3  | P02091,P06757,P17046                                                                              |
| 7753 | 1,3,7,10,1 2,4,5,6,8,9<br>1,13,14,15 ,12,16,17 | 5  | P06760,P22006,Q62635,Q6P6R2,Q9Z0V6                                                                |
| 7754 | 1,3,7,10,1 2,4,5,6,8,9<br>1,13,14,16 ,12,15,17 | 6  | P06760,P20760,Q4G075,Q62635,Q7TPB1,Q9Z0V6                                                         |
| 7755 | 1,3,7,10,1 2,4,5,6,8,9<br>1,13,14,17 ,12,15,16 | 2  | P02091,Q9QW07                                                                                     |



|      |                          |                          |    |                                                                              |
|------|--------------------------|--------------------------|----|------------------------------------------------------------------------------|
| 7756 | 1,3,7,10,1<br>1,13,15,16 | 2,4,5,6,8,9<br>,12,14,17 | 5  | P01835,P06760,Q62635,Q9WTT6,Q9Z0V6                                           |
| 7757 | 1,3,7,10,1<br>1,13,15,17 | 2,4,5,6,8,9<br>,12,14,16 | 1  | P02091                                                                       |
| 7758 | 1,3,7,10,1<br>1,13,16,17 | 2,4,5,6,8,9<br>,12,14,15 | 1  | P02091                                                                       |
| 7759 | 1,3,7,10,1<br>1,14,15,16 | 2,4,5,6,8,9<br>,12,13,17 | 2  | P06760,Q62635                                                                |
| 7760 | 1,3,7,10,1<br>1,14,15,17 | 2,4,5,6,8,9<br>,12,13,16 | 3  | P02091,P08689,P22006                                                         |
| 7761 | 1,3,7,10,1<br>1,14,16,17 | 2,4,5,6,8,9<br>,12,13,15 | 2  | P02091,P08689                                                                |
| 7762 | 1,3,7,10,1<br>1,15,16,17 | 2,4,5,6,8,9<br>,12,13,14 | 6  | O35077,P02091,P02780,P02782,P25236,Q6TMA8                                    |
| 7763 | 1,3,7,10,1<br>2,13,14,15 | 2,4,5,6,8,9<br>,11,16,17 | 4  | A2RUV9,P06760,P14668,Q6AYS4                                                  |
| 7764 | 1,3,7,10,1<br>2,13,14,16 | 2,4,5,6,8,9<br>,11,15,17 | 6  | A2RUV9,P06760,P14668,P14669,P20760,Q6AYS4                                    |
| 7765 | 1,3,7,10,1<br>2,13,14,17 | 2,4,5,6,8,9<br>,11,15,16 | 5  | A2RUV9,P02091,P14668,Q05175,Q9QW07                                           |
| 7766 | 1,3,7,10,1<br>2,13,15,16 | 2,4,5,6,8,9<br>,11,14,17 | 6  | P02793;Q7TP54,P06760,P14668,P14669,Q6AYS4,Q9Z0V6                             |
| 7767 | 1,3,7,10,1<br>2,13,15,17 | 2,4,5,6,8,9<br>,11,14,16 | 3  | P02091,P14668,Q99MH3                                                         |
| 7768 | 1,3,7,10,1<br>2,13,16,17 | 2,4,5,6,8,9<br>,11,14,15 | 5  | P02091,P07171,P14668,P20762,Q99MH3                                           |
| 7769 | 1,3,7,10,1<br>2,14,15,16 | 2,4,5,6,8,9<br>,11,13,17 | 3  | A2RUV9,P06760,Q6AYS4                                                         |
| 7770 | 1,3,7,10,1<br>2,14,15,17 | 2,4,5,6,8,9<br>,11,13,16 | 4  | A2RUV9,P02091,P08689,P14668                                                  |
| 7771 | 1,3,7,10,1<br>2,14,16,17 | 2,4,5,6,8,9<br>,11,13,15 | 4  | P02091,P08689,P14668,Q6TMA8                                                  |
| 7772 | 1,3,7,10,1<br>2,15,16,17 | 2,4,5,6,8,9<br>,11,13,14 | 4  | P02091,P06866,P14668,Q6TMA8                                                  |
| 7773 | 1,3,7,10,1<br>3,14,15,16 | 2,4,5,6,8,9<br>,11,12,17 | 11 | P01835,P06760,P0C0A9,P14669,P19223,P50115,P62804,Q4G075,Q62635,Q6AYS4,Q9Z0V6 |
| 7774 | 1,3,7,10,1<br>3,14,15,17 | 2,4,5,6,8,9<br>,11,12,16 | 4  | A2RUV9,P02091,P14668,Q9QW07                                                  |
| 7775 | 1,3,7,10,1<br>3,14,16,17 | 2,4,5,6,8,9<br>,11,12,15 | 3  | P02091,P14668,Q9QW07                                                         |
| 7776 | 1,3,7,10,1<br>3,15,16,17 | 2,4,5,6,8,9<br>,11,12,14 | 7  | P01835,P02091,P0C0A9,P14668,P20762,P62804,Q6AYS4                             |
| 7777 | 1,3,7,10,1<br>4,15,16,17 | 2,4,5,6,8,9<br>,11,12,13 | 10 | P02091,P02780,P02782,P02803,P07647,P0C0A9,P14668,P30120,Q6TMA8,Q9JHB9        |
| 7778 | 1,3,7,11,1<br>2,13,14,15 | 2,4,5,6,8,9<br>,10,16,17 | 3  | A2RUV9,P06760,Q6P6R2                                                         |

|      |                          |                           |    |                                                                       |
|------|--------------------------|---------------------------|----|-----------------------------------------------------------------------|
| 7779 | 1,3,7,11,1<br>2,13,14,16 | 2,4,5,6,8,9<br>,10,15,17  | 3  | P06760,P17046,P20760                                                  |
| 7780 | 1,3,7,11,1<br>2,13,14,17 | 2,4,5,6,8,9<br>,10,15,16  | 4  | P01946,P02091,Q63942,Q9QW07                                           |
| 7781 | 1,3,7,11,1<br>2,13,15,16 | 2,4,5,6,8,9<br>,10,14,17  | 5  | P06760,P17046,Q6P6R2,Q9WTT6,Q9Z0V6                                    |
| 7782 | 1,3,7,11,1<br>2,13,15,17 | 2,4,5,6,8,9<br>,10,14,16  | 2  | P02091,Q63942                                                         |
| 7783 | 1,3,7,11,1<br>2,13,16,17 | 2,4,5,6,8,9<br>,10,14,15  | 3  | P01946,P02091,P17046                                                  |
| 7784 | 1,3,7,11,1<br>2,14,15,16 | 2,4,5,6,8,9<br>,10,13,17  | 2  | P06760,Q63355                                                         |
| 7785 | 1,3,7,11,1<br>2,14,15,17 | 2,4,5,6,8,9<br>,10,13,16  | 3  | A2RUV9,P02091,P08689                                                  |
| 7786 | 1,3,7,11,1<br>2,14,16,17 | 2,4,5,6,8,9<br>,10,13,15  | 2  | P02091,P17046                                                         |
| 7787 | 1,3,7,11,1<br>2,15,16,17 | 2,4,5,6,8,9<br>,10,13,14  | 2  | P02091,P17046                                                         |
| 7788 | 1,3,7,11,1<br>3,14,15,16 | 2,4,5,6,8,9<br>,10,12,17  | 8  | P06760,P19223,Q09030,Q4G075,Q62635,Q6P6R2,Q9WTT6,Q9Z0V6               |
| 7789 | 1,3,7,11,1<br>3,14,15,17 | 2,4,5,6,8,9<br>,10,12,16  | 2  | P02091,Q9QW07                                                         |
| 7790 | 1,3,7,11,1<br>3,14,16,17 | 2,4,5,6,8,9<br>,10,12,15  | 4  | D3ZHA0,P01946,P02091,Q9QW07                                           |
| 7791 | 1,3,7,11,1<br>3,15,16,17 | 2,4,5,6,8,9<br>,10,12,14  | 2  | P02091,Q9WTT6                                                         |
| 7792 | 1,3,7,11,1<br>4,15,16,17 | 2,4,5,6,8,9<br>,10,12,13  | 3  | P02091,P02803,P0C0A9                                                  |
| 7793 | 1,3,7,12,1<br>3,14,15,16 | 2,4,5,6,8,9<br>,10,11,17  | 7  | A2RUV9,P06760,P08649,P14669,P20646,Q09030,Q6AYS4                      |
| 7794 | 1,3,7,12,1<br>3,14,15,17 | 2,4,5,6,8,9<br>,10,11,16  | 4  | A2RUV9,P02091,P14668,Q9QW07                                           |
| 7795 | 1,3,7,12,1<br>3,14,16,17 | 2,4,5,6,8,9<br>,10,11,15  | 5  | P02091,P14668,P14669,Q6AYS4,Q9QW07                                    |
| 7796 | 1,3,7,12,1<br>3,15,16,17 | 2,4,5,6,8,9<br>,10,11,14  | 5  | P02091,P14668,Q5XFX0,Q63598,Q6AYS4                                    |
| 7797 | 1,3,7,12,1<br>4,15,16,17 | 2,4,5,6,8,9<br>,10,11,13  | 4  | A2RUV9,P02091,P14668,Q6AYS4                                           |
| 7798 | 1,3,7,13,1<br>4,15,16,17 | 2,4,5,6,8,9<br>,10,11,12  | 10 | P00714,P02091,P0C0A9,P14668,P14669,P62804,Q08849,Q63598,Q6AYS4,Q9QW07 |
| 7799 | 1,3,8,9,10,<br>11,12,13  | 2,4,5,6,7,1<br>4,15,16,17 | 3  | P20760,P35467,P83748                                                  |
| 7800 | 1,3,8,9,10,<br>11,12,14  | 2,4,5,6,7,1<br>3,15,16,17 | 3  | P20760,P83748,Q6IG02                                                  |
| 7801 | 1,3,8,9,10,<br>11,12,15  | 2,4,5,6,7,1<br>3,14,16,17 | 2  | P20760,P83748                                                         |

|      |                                                |   |                                                                       |
|------|------------------------------------------------|---|-----------------------------------------------------------------------|
| 7802 | 1,3,8,9,10, 2,4,5,6,7,1<br>11,12,16 3,14,15,17 | 5 | P20760,P35467,P83748,Q6IG02,Q9WUW8                                    |
| 7803 | 1,3,8,9,10, 2,4,5,6,7,1<br>11,12,17 3,14,15,16 | 5 | P16636,P35467,P83748,Q63532,Q6IG02                                    |
| 7804 | 1,3,8,9,10, 2,4,5,6,7,1<br>11,13,14 2,15,16,17 | 4 | P09605;P25809,P20760,P35467,P83748                                    |
| 7805 | 1,3,8,9,10, 2,4,5,6,7,1<br>11,13,15 2,14,16,17 | 6 | O54728,P09605;P25809,P14480,P20760,P35467,P83748                      |
| 7806 | 1,3,8,9,10, 2,4,5,6,7,1<br>11,13,16 2,14,15,17 | 3 | P20760,P35467,P83748                                                  |
| 7807 | 1,3,8,9,10, 2,4,5,6,7,1<br>11,13,17 2,14,15,16 | 3 | P35467,P83748,Q63532                                                  |
| 7808 | 1,3,8,9,10, 2,4,5,6,7,1<br>11,14,15 2,13,16,17 | 6 | O54728,P09605;P25809,P14480,P20760,P83748,Q62635                      |
| 7809 | 1,3,8,9,10, 2,4,5,6,7,1<br>11,14,16 2,13,15,17 | 4 | P20760,P55091,P83748,Q62635                                           |
| 7810 | 1,3,8,9,10, 2,4,5,6,7,1<br>11,14,17 2,13,15,16 | 2 | P08689,P83748                                                         |
| 7811 | 1,3,8,9,10, 2,4,5,6,7,1<br>11,15,16 2,13,14,17 | 5 | O54728,P20760,P55091,P83748,Q62635                                    |
| 7812 | 1,3,8,9,10, 2,4,5,6,7,1<br>11,15,17 2,13,14,16 | 4 | G3V686,P25236,P83748,Q63532                                           |
| 7813 | 1,3,8,9,10, 2,4,5,6,7,1<br>11,16,17 2,13,14,15 | 2 | P25236,P83748                                                         |
| 7814 | 1,3,8,9,10, 2,4,5,6,7,1<br>12,13,14 1,15,16,17 | 3 | P09605;P25809,P14408,P20760                                           |
| 7815 | 1,3,8,9,10, 2,4,5,6,7,1<br>12,13,15 1,14,16,17 | 1 | P20760                                                                |
| 7816 | 1,3,8,9,10, 2,4,5,6,7,1<br>12,13,16 1,14,15,17 | 2 | P20760,P20762                                                         |
| 7817 | 1,3,8,9,10, 2,4,5,6,7,1<br>12,13,17 1,14,15,16 | 3 | P16636,P83748,Q63532                                                  |
| 7818 | 1,3,8,9,10, 2,4,5,6,7,1<br>12,14,15 1,13,16,17 | 2 | P09605;P25809,P20760                                                  |
| 7819 | 1,3,8,9,10, 2,4,5,6,7,1<br>12,14,16 1,13,15,17 | 2 | P05539,P20760                                                         |
| 7820 | 1,3,8,9,10, 2,4,5,6,7,1<br>12,14,17 1,13,15,16 | 3 | P08689,P14408,P83748                                                  |
| 7821 | 1,3,8,9,10, 2,4,5,6,7,1<br>12,15,16 1,13,14,17 | 1 | P20760                                                                |
| 7822 | 1,3,8,9,10, 2,4,5,6,7,1<br>12,15,17 1,13,14,16 | 3 | G3V686,P61206;P84079;P84082,Q63532                                    |
| 7823 | 1,3,8,9,10, 2,4,5,6,7,1<br>12,16,17 1,13,14,15 | 4 | P05539,P16636,P20762,P83748                                           |
| 7824 | 1,3,8,9,10, 2,4,5,6,7,1<br>13,14,15 1,12,16,17 | 7 | O54728,P09605;P25809,P15999,P20760,P61206;P84079;P84082,P83748,Q08849 |

|      |                                                |   |                                                                |
|------|------------------------------------------------|---|----------------------------------------------------------------|
| 7825 | 1,3,8,9,10, 2,4,5,6,7,1<br>13,14,16 1,12,15,17 | 3 | P09605;P25809,P20760,P83748                                    |
| 7826 | 1,3,8,9,10, 2,4,5,6,7,1<br>13,14,17 1,12,15,16 | 5 | P14408,P51907,P61206;P84079;P84082,P83748,Q9QW07               |
| 7827 | 1,3,8,9,10, 2,4,5,6,7,1<br>13,15,16 1,12,14,17 | 7 | O54728,P01835,P09605;P25809,P20760,P20762,P83748,Q62635        |
| 7828 | 1,3,8,9,10, 2,4,5,6,7,1<br>13,15,17 1,12,14,16 | 4 | G3V686,P61206;P84079;P84082,P83748,Q63532                      |
| 7829 | 1,3,8,9,10, 2,4,5,6,7,1<br>13,16,17 1,12,14,15 | 4 | P20762,P25031,P51907,P83748                                    |
| 7830 | 1,3,8,9,10, 2,4,5,6,7,1<br>14,15,16 1,12,13,17 | 8 | O54728,P09605;P25809,P20760,P55091,P83748,Q62635,Q9JHB9,Q9QZK9 |
| 7831 | 1,3,8,9,10, 2,4,5,6,7,1<br>14,15,17 1,12,13,16 | 3 | G3V686,P61206;P84079;P84082,P83748                             |
| 7832 | 1,3,8,9,10, 2,4,5,6,7,1<br>14,16,17 1,12,13,15 | 2 | P05539,P83748                                                  |
| 7833 | 1,3,8,9,10, 2,4,5,6,7,1<br>15,16,17 1,12,13,14 | 5 | P20762,P25031,P25236,P83748,Q9JHB9                             |
| 7834 | 1,3,8,9,11, 2,4,5,6,7,1<br>12,13,14 0,15,16,17 | 3 | P04218,P20760,P83748                                           |
| 7835 | 1,3,8,9,11, 2,4,5,6,7,1<br>12,13,15 0,14,16,17 | 2 | P20760,P83748                                                  |
| 7836 | 1,3,8,9,11, 2,4,5,6,7,1<br>12,13,16 0,14,15,17 | 3 | P04218,P20760,P83748                                           |
| 7837 | 1,3,8,9,11, 2,4,5,6,7,1<br>12,13,17 0,14,15,16 | 5 | P04218,P16636,P35467,P83748,Q63532                             |
| 7838 | 1,3,8,9,11, 2,4,5,6,7,1<br>12,14,15 0,13,16,17 | 4 | P04218,P14480,P20760,P83748                                    |
| 7839 | 1,3,8,9,11, 2,4,5,6,7,1<br>12,14,16 0,13,15,17 | 3 | P04218,P20760,P83748                                           |
| 7840 | 1,3,8,9,11, 2,4,5,6,7,1<br>12,14,17 0,13,15,16 | 2 | P04218,P83748                                                  |
| 7841 | 1,3,8,9,11, 2,4,5,6,7,1<br>12,15,16 0,13,14,17 | 4 | P04218,P12020,P20760,P83748                                    |
| 7842 | 1,3,8,9,11, 2,4,5,6,7,1<br>12,15,17 0,13,14,16 | 4 | P04218,P12020,P83748,Q63532                                    |
| 7843 | 1,3,8,9,11, 2,4,5,6,7,1<br>12,16,17 0,13,14,15 | 5 | P04218,P12020,P16636,P36376,P83748                             |
| 7844 | 1,3,8,9,11, 2,4,5,6,7,1<br>13,14,15 0,12,16,17 | 6 | O54728,P04218,P09605;P25809,P14480,P20760,P83748               |
| 7845 | 1,3,8,9,11, 2,4,5,6,7,1<br>13,14,16 0,12,15,17 | 3 | P04218,P20760,P83748                                           |
| 7846 | 1,3,8,9,11, 2,4,5,6,7,1<br>13,14,17 0,12,15,16 | 4 | P04218,P83748,P97840,Q9QW07                                    |
| 7847 | 1,3,8,9,11, 2,4,5,6,7,1<br>13,15,16 0,12,14,17 | 4 | O54728,P04218,P20760,P83748                                    |

|      |                                                |    |                                                                                     |
|------|------------------------------------------------|----|-------------------------------------------------------------------------------------|
| 7848 | 1,3,8,9,11, 2,4,5,6,7,1<br>13,15,17 0,12,14,16 | 4  | P04218,P83748,P97840,Q63532                                                         |
| 7849 | 1,3,8,9,11, 2,4,5,6,7,1<br>13,16,17 0,12,14,15 | 2  | P04218,P83748                                                                       |
| 7850 | 1,3,8,9,11, 2,4,5,6,7,1<br>14,15,16 0,12,13,17 | 8  | B4F795,O54728,P04218,P20760,P55091,P83748,Q62635,Q9QZK9                             |
| 7851 | 1,3,8,9,11, 2,4,5,6,7,1<br>14,15,17 0,12,13,16 | 4  | P04218,P47967,P83748,P97840                                                         |
| 7852 | 1,3,8,9,11, 2,4,5,6,7,1<br>14,16,17 0,12,13,15 | 2  | P04218,P83748                                                                       |
| 7853 | 1,3,8,9,11, 2,4,5,6,7,1<br>15,16,17 0,12,13,14 | 5  | B4F795,P04218,P12020,P25236,P83748                                                  |
| 7854 | 1,3,8,9,12, 2,4,5,6,7,1<br>13,14,15 0,11,16,17 | 4  | A2RUV9,P10758,P20760,P61206,P84079;P84082                                           |
| 7855 | 1,3,8,9,12, 2,4,5,6,7,1<br>13,14,16 0,11,15,17 | 1  | P20760                                                                              |
| 7856 | 1,3,8,9,12, 2,4,5,6,7,1<br>13,14,17 0,11,15,16 | 6  | P04218,P51907,P61206;P84079;P84082,P83748,Q5FVI6,Q9QW07                             |
| 7857 | 1,3,8,9,12, 2,4,5,6,7,1<br>13,15,16 0,11,14,17 | 2  | P20760,P61206;P84079;P84082                                                         |
| 7858 | 1,3,8,9,12, 2,4,5,6,7,1<br>13,15,17 0,11,14,16 | 2  | P61206;P84079;P84082,Q63532                                                         |
| 7859 | 1,3,8,9,12, 2,4,5,6,7,1<br>13,16,17 0,11,14,15 | 1  | P61206;P84079;P84082                                                                |
| 7860 | 1,3,8,9,12, 2,4,5,6,7,1<br>14,15,16 0,11,13,17 | 2  | P20760,P61206;P84079;P84082                                                         |
| 7861 | 1,3,8,9,12, 2,4,5,6,7,1<br>14,15,17 0,11,13,16 | 2  | P04218,P61206;P84079;P84082                                                         |
| 7862 | 1,3,8,9,12, 2,4,5,6,7,1<br>14,16,17 0,11,13,15 | 3  | P04218,P61206;P84079;P84082,P83748                                                  |
| 7863 | 1,3,8,9,12, 2,4,5,6,7,1<br>15,16,17 0,11,13,14 | 3  | P04218,P12020,P61206;P84079;P84082                                                  |
| 7864 | 1,3,8,9,13, 2,4,5,6,7,1<br>14,15,16 0,11,12,17 | 9  | O54728,P04218,P09605;P25809,P20646,P20760,P61206;P84079;P84082,P83748,Q08849,Q9QZK9 |
| 7865 | 1,3,8,9,13, 2,4,5,6,7,1<br>14,15,17 0,11,12,16 | 10 | P04218,P47967,P51907,P61206;P84079;P84082,P83748,Q08849,Q5FVI6,Q62687,Q6IFU7,Q9QW07 |
| 7866 | 1,3,8,9,13, 2,4,5,6,7,1<br>14,16,17 0,11,12,15 | 7  | P04218,P51907,P61206;P84079;P84082,P83748,Q08849,Q5FVI6,Q9QW07                      |
| 7867 | 1,3,8,9,13, 2,4,5,6,7,1<br>15,16,17 0,11,12,14 | 4  | P04218,P61206;P84079;P84082,P62804,P83748                                           |
| 7868 | 1,3,8,9,14, 2,4,5,6,7,1<br>15,16,17 0,11,12,13 | 6  | P04218,P0C0A9,P61206;P84079;P84082,P83748,Q08849,Q9JHB9                             |
| 7869 | 1,3,8,10,1 2,4,5,6,7,9<br>1,12,13,14 ,15,16,17 | 4  | P09605;P25809,P20760,P47727,P83748                                                  |
| 7870 | 1,3,8,10,1 2,4,5,6,7,9<br>1,12,13,15 ,14,16,17 | 4  | P09605;P25809,P15999,P20760,P83748                                                  |

|      |                          |                          |   |                                                         |
|------|--------------------------|--------------------------|---|---------------------------------------------------------|
| 7871 | 1,3,8,10,1<br>1,12,13,16 | 2,4,5,6,7,9<br>,14,15,17 | 2 | P20760,P83748                                           |
| 7872 | 1,3,8,10,1<br>1,12,13,17 | 2,4,5,6,7,9<br>,14,15,16 | 3 | P16636,P83748,Q99MH3                                    |
| 7873 | 1,3,8,10,1<br>1,12,14,15 | 2,4,5,6,7,9<br>,13,16,17 | 3 | P09605;P25809,P35280,P83748                             |
| 7874 | 1,3,8,10,1<br>1,12,14,16 | 2,4,5,6,7,9<br>,13,15,17 | 3 | P20760,P83748,Q6IG02                                    |
| 7875 | 1,3,8,10,1<br>1,12,14,17 | 2,4,5,6,7,9<br>,13,15,16 | 3 | P08689,P83748,Q6IG02                                    |
| 7876 | 1,3,8,10,1<br>1,12,15,16 | 2,4,5,6,7,9<br>,13,14,17 | 1 | P20760                                                  |
| 7877 | 1,3,8,10,1<br>1,12,15,17 | 2,4,5,6,7,9<br>,13,14,16 | 1 | P83748                                                  |
| 7878 | 1,3,8,10,1<br>1,12,16,17 | 2,4,5,6,7,9<br>,13,14,15 | 3 | P16636,P83748,Q6IG02                                    |
| 7879 | 1,3,8,10,1<br>1,13,14,15 | 2,4,5,6,7,9<br>,12,16,17 | 3 | P09605;P25809,P15999,P83748                             |
| 7880 | 1,3,8,10,1<br>1,13,14,16 | 2,4,5,6,7,9<br>,12,15,17 | 4 | P09605;P25809,P20760,P83748,Q7TPB1                      |
| 7881 | 1,3,8,10,1<br>1,13,14,17 | 2,4,5,6,7,9<br>,12,15,16 | 2 | P83748,Q9QW07                                           |
| 7882 | 1,3,8,10,1<br>1,13,15,16 | 2,4,5,6,7,9<br>,12,14,17 | 4 | P01835,P09605;P25809,P20760,P83748                      |
| 7883 | 1,3,8,10,1<br>1,13,15,17 | 2,4,5,6,7,9<br>,12,14,16 | 3 | P15999,P83748,Q63532                                    |
| 7884 | 1,3,8,10,1<br>1,13,16,17 | 2,4,5,6,7,9<br>,12,14,15 | 1 | P83748                                                  |
| 7885 | 1,3,8,10,1<br>1,14,15,16 | 2,4,5,6,7,9<br>,12,13,17 | 5 | P09605;P25809,P20760,P55091,P83748,Q62635               |
| 7886 | 1,3,8,10,1<br>1,14,15,17 | 2,4,5,6,7,9<br>,12,13,16 | 2 | G3V686,P83748                                           |
| 7887 | 1,3,8,10,1<br>1,14,16,17 | 2,4,5,6,7,9<br>,12,13,15 | 1 | P83748                                                  |
| 7888 | 1,3,8,10,1<br>1,15,16,17 | 2,4,5,6,7,9<br>,12,13,14 | 2 | P25236,P83748                                           |
| 7889 | 1,3,8,10,1<br>2,13,14,15 | 2,4,5,6,7,9<br>,11,16,17 | 5 | A2RUV9,P09605;P25809,P15999,P61206;P84079;P84082,Q64093 |
| 7890 | 1,3,8,10,1<br>2,13,14,16 | 2,4,5,6,7,9<br>,11,15,17 | 2 | P09605;P25809,P20760                                    |
| 7891 | 1,3,8,10,1<br>2,13,14,17 | 2,4,5,6,7,9<br>,11,15,16 | 4 | P61206;P84079;P84082,P83748,Q05175,Q9QW07               |
| 7892 | 1,3,8,10,1<br>2,13,15,16 | 2,4,5,6,7,9<br>,11,14,17 | 2 | P09605;P25809,P83121                                    |
| 7893 | 1,3,8,10,1<br>2,13,15,17 | 2,4,5,6,7,9<br>,11,14,16 | 4 | P15999,P61206;P84079;P84082,P83121,Q99MH3               |

|      |                          |                          |   |                                                                              |
|------|--------------------------|--------------------------|---|------------------------------------------------------------------------------|
| 7894 | 1,3,8,10,1<br>2,13,16,17 | 2,4,5,6,7,9<br>,11,14,15 | 5 | P02631,P16636,P20762,P83121,Q99MH3                                           |
| 7895 | 1,3,8,10,1<br>2,14,15,16 | 2,4,5,6,7,9<br>,11,13,17 | 2 | P05539,P09605,P25809                                                         |
| 7896 | 1,3,8,10,1<br>2,14,15,17 | 2,4,5,6,7,9<br>,11,13,16 | 1 | P61206,P84079,P84082                                                         |
| 7897 | 1,3,8,10,1<br>2,14,16,17 | 2,4,5,6,7,9<br>,11,13,15 | 2 | P05539,P83748                                                                |
| 7898 | 1,3,8,10,1<br>2,15,16,17 | 2,4,5,6,7,9<br>,11,13,14 | 2 | P05539,P83121                                                                |
| 7899 | 1,3,8,10,1<br>3,14,15,16 | 2,4,5,6,7,9<br>,11,12,17 | 7 | P01835,P09605,P25809,P15999,P19223,P20646,P83748,Q08849                      |
| 7900 | 1,3,8,10,1<br>3,14,15,17 | 2,4,5,6,7,9<br>,11,12,16 | 5 | P15999,P61206,P84079,P84082,P83748,Q08849,Q9QW07                             |
| 7901 | 1,3,8,10,1<br>3,14,16,17 | 2,4,5,6,7,9<br>,11,12,15 | 4 | P51907,P83748,Q08849,Q9QW07                                                  |
| 7902 | 1,3,8,10,1<br>3,15,16,17 | 2,4,5,6,7,9<br>,11,12,14 | 4 | P01835,P20762,P83121,P83748                                                  |
| 7903 | 1,3,8,10,1<br>4,15,16,17 | 2,4,5,6,7,9<br>,11,12,13 | 4 | P05539,P83748,Q08849,Q9JHB9                                                  |
| 7904 | 1,3,8,11,1<br>2,13,14,15 | 2,4,5,6,7,9<br>,10,16,17 | 6 | P09605,P25809,P15999,P20760,P83748,Q64093,Q6P6R2                             |
| 7905 | 1,3,8,11,1<br>2,13,14,16 | 2,4,5,6,7,9<br>,10,15,17 | 2 | P20760,P83748                                                                |
| 7906 | 1,3,8,11,1<br>2,13,14,17 | 2,4,5,6,7,9<br>,10,15,16 | 3 | P83748,Q64093,Q9QW07                                                         |
| 7907 | 1,3,8,11,1<br>2,13,15,16 | 2,4,5,6,7,9<br>,10,14,17 | 1 | P20760                                                                       |
| 7908 | 1,3,8,11,1<br>2,13,15,17 | 2,4,5,6,7,9<br>,10,14,16 | 2 | P83748,Q63532                                                                |
| 7909 | 1,3,8,11,1<br>2,13,16,17 | 2,4,5,6,7,9<br>,10,14,15 | 3 | P16636,P36376,P83748                                                         |
| 7910 | 1,3,8,11,1<br>2,14,15,16 | 2,4,5,6,7,9<br>,10,13,17 | 1 | P20760                                                                       |
| 7911 | 1,3,8,11,1<br>2,14,15,17 | 2,4,5,6,7,9<br>,10,13,16 | 2 | P04218,P83748                                                                |
| 7912 | 1,3,8,11,1<br>2,14,16,17 | 2,4,5,6,7,9<br>,10,13,15 | 2 | P04218,P83748                                                                |
| 7913 | 1,3,8,11,1<br>2,15,16,17 | 2,4,5,6,7,9<br>,10,13,14 | 3 | P04218,P12020,P83748                                                         |
| 7914 | 1,3,8,11,1<br>3,14,15,16 | 2,4,5,6,7,9<br>,10,12,17 | 8 | P04218,P09605,P25809,P19223,P20646,P20760,P83748,Q08849,Q64093               |
| 7915 | 1,3,8,11,1<br>3,14,15,17 | 2,4,5,6,7,9<br>,10,12,16 | 9 | P04218,P15999,P47967,P61206,P84079,P84082,P83748,P97840,Q08849,Q64093,Q9QW07 |
| 7916 | 1,3,8,11,1<br>3,14,16,17 | 2,4,5,6,7,9<br>,10,12,15 | 3 | P04218,P83748,Q9QW07                                                         |

|      |                          |                          |    |                                                                                                                                                                         |
|------|--------------------------|--------------------------|----|-------------------------------------------------------------------------------------------------------------------------------------------------------------------------|
| 7917 | 1,3,8,11,1<br>3,15,16,17 | 2,4,5,6,7,9<br>,10,12,14 | 2  | P04218,P83748                                                                                                                                                           |
| 7918 | 1,3,8,11,1<br>4,15,16,17 | 2,4,5,6,7,9<br>,10,12,13 | 3  | P04218,P83748,P97840                                                                                                                                                    |
| 7919 | 1,3,8,12,1<br>3,14,15,16 | 2,4,5,6,7,9<br>,10,11,17 | 4  | P09605;P25809,P20646,P61206;P84079;P84082,Q64093                                                                                                                        |
| 7920 | 1,3,8,12,1<br>3,14,15,17 | 2,4,5,6,7,9<br>,10,11,16 | 8  | A2RUV9,P05712,P15999,P61206;P84079;P84082,Q5FVI6,Q62687,Q64093,Q9QW07                                                                                                   |
| 7921 | 1,3,8,12,1<br>3,14,16,17 | 2,4,5,6,7,9<br>,10,11,15 | 5  | P51907,P61206;P84079;P84082,Q5FVI6,Q64093,Q9QW07                                                                                                                        |
| 7922 | 1,3,8,12,1<br>3,15,16,17 | 2,4,5,6,7,9<br>,10,11,14 | 3  | P61206;P84079;P84082,P83121,Q5XFX0                                                                                                                                      |
| 7923 | 1,3,8,12,1<br>4,15,16,17 | 2,4,5,6,7,9<br>,10,11,13 | 1  | P61206;P84079;P84082                                                                                                                                                    |
| 7924 | 1,3,8,13,1<br>4,15,16,17 | 2,4,5,6,7,9<br>,10,11,12 | 7  | P04218,P48199,P61206;P84079;P84082,P83748,Q08849,Q64093,Q9QW07                                                                                                          |
| 7925 | 1,3,9,10,1<br>1,12,13,14 | 2,4,5,6,7,8<br>,15,16,17 | 10 | P06760,P20646,P20760,P20761,P20762,P50115,P83748,Q4G075,Q99041,Q9Z0V6                                                                                                   |
| 7926 | 1,3,9,10,1<br>1,12,13,15 | 2,4,5,6,7,8<br>,14,16,17 | 9  | O88267,P06760,P20760,P20761,P20762,P50115,P83748,Q4G075,Q9Z0V6                                                                                                          |
| 7927 | 1,3,9,10,1<br>1,12,13,16 | 2,4,5,6,7,8<br>,14,15,17 | 11 | P02631,P06760,P07171,P10536,P20760,P20761,P20762,P50115,P83748,Q4G075,Q9Z0V6                                                                                            |
| 7928 | 1,3,9,10,1<br>1,12,13,17 | 2,4,5,6,7,8<br>,14,15,16 | 6  | P02631,P07171,P20760,P20762,P83748,Q9Z0V6                                                                                                                               |
| 7929 | 1,3,9,10,1<br>1,12,14,15 | 2,4,5,6,7,8<br>,13,16,17 | 10 | O88267,P06760,P20760,P23928,P50115,P83748,Q4G075,Q99041,Q9R0T3,Q9Z0V6                                                                                                   |
| 7930 | 1,3,9,10,1<br>1,12,14,16 | 2,4,5,6,7,8<br>,13,15,17 | 14 | P06760,P06761,P07171,P10536,P20760,P20761,P20762,P50115,P62815,P83748,Q4G075,Q99041,Q9WUW8,Q9Z0V6                                                                       |
| 7931 | 1,3,9,10,1<br>1,12,14,17 | 2,4,5,6,7,8<br>,13,15,16 | 4  | P07171,P08689,P20760,P83748                                                                                                                                             |
| 7932 | 1,3,9,10,1<br>1,12,15,16 | 2,4,5,6,7,8<br>,13,14,17 | 17 | O88267,P06760,P06761,P06911,P07171,P10536,P12020,P20760,P20761,P20762,P22282,P50115,P62815,P83748,Q9WTT6,Q9WUW8,Q9Z0V6                                                  |
| 7933 | 1,3,9,10,1<br>1,12,15,17 | 2,4,5,6,7,8<br>,13,14,16 | 7  | P06761,P06911,P07171,P08689,P12020,P20762,P83748                                                                                                                        |
| 7934 | 1,3,9,10,1<br>1,12,16,17 | 2,4,5,6,7,8<br>,13,14,15 | 11 | P02631,P06757,P06761,P06911,P07171,P12020,P20760,P20762,P83748,Q5GRG2,Q9Z0V6                                                                                            |
| 7935 | 1,3,9,10,1<br>1,13,14,15 | 2,4,5,6,7,8<br>,12,16,17 | 23 | O54728,O88267,P06760,P06761,P09605;P25809,P19223,P20646,P20760,P20761,P20762,P23928,P50115,P50116,P55091,P83748,P98089,Q4G075,Q62635,Q6P6R2,Q80WL1,Q99041,Q9R0T3,Q9Z0V6 |
| 7936 | 1,3,9,10,1<br>1,13,14,16 | 2,4,5,6,7,8<br>,12,15,17 | 20 | O55004,P02631,P06760,P06761,P19223,P20646,P20760,P20761,P20762,P50115,P55091,P62815,P83748,P98089,Q4G075,Q62635,Q7TPB1,Q99041,Q9QZA6,Q9Z0V6                             |
| 7937 | 1,3,9,10,1<br>1,13,14,17 | 2,4,5,6,7,8<br>,12,15,16 | 6  | P07171,P20760,P20762,P83748,Q99041,Q9Z0V6                                                                                                                               |
| 7938 | 1,3,9,10,1<br>1,13,15,16 | 2,4,5,6,7,8<br>,12,14,17 | 22 | O54728,O88267,P06760,P06761,P07647,P19223,P20760,P20761,P20762,P22282,P22283,P50115,P55091,P62815,P83748,P98089,Q4G075,Q62635,Q80WL1,Q99041,Q9WTT6,Q9Z0V6               |
| 7939 | 1,3,9,10,1<br>1,13,15,17 | 2,4,5,6,7,8<br>,12,14,16 | 9  | O88267,P06761,P07171,P20762,P83748,Q63532,Q9EQS0,Q9R0T3,Q9Z0V6                                                                                                          |



|      |                          |                          |    |                                                                                                                                                                                                                                                                           |
|------|--------------------------|--------------------------|----|---------------------------------------------------------------------------------------------------------------------------------------------------------------------------------------------------------------------------------------------------------------------------|
| 7940 | 1,3,9,10,1<br>1,13,16,17 | 2,4,5,6,7,8<br>,12,14,15 | 8  | D3ZHA0,P02631,P06761,P07171,P20760,P20762,P83748,Q9Z0V6                                                                                                                                                                                                                   |
| 7941 | 1,3,9,10,1<br>1,14,15,16 | 2,4,5,6,7,8<br>,12,13,17 | 29 | O54728,O88267,P02780,P06760,P06761,P07647,P09605;P25809,P11598,P19223,P20760,P20761,P20762,P22282,P22283,P50115,P55091,P62815,P70545,P83748,P98089,Q4G075,Q62635,Q6AYR9,Q80WL1,Q99041,Q9JHB9,Q9QZK9,Q9R0T3,Q9Z0V6                                                         |
| 7942 | 1,3,9,10,1<br>1,14,15,17 | 2,4,5,6,7,8<br>,12,13,16 | 11 | O88267,P02780,P06761,P07647,P08689,P22282,P83748,Q80WL1,Q8CJ52,Q99041,Q9R0T3                                                                                                                                                                                              |
| 7943 | 1,3,9,10,1<br>1,14,16,17 | 2,4,5,6,7,8<br>,12,13,15 | 11 | P06761,P07171,P07647,P08689,P20760,P20762,P22282,P83748,Q8R431,Q99041,Q9Z0V6                                                                                                                                                                                              |
| 7944 | 1,3,9,10,1<br>1,15,16,17 | 2,4,5,6,7,8<br>,12,13,14 | 23 | O88267,P02780,P02782,P06761,P06911,P07171,P07647,P12020,P20762,P22282,P22283,P25236,P30120,P83748,Q5GRG2,Q62902,Q6AYR9,Q80WL1,Q8CJ52,Q9JHB9,Q9R0T3,Q9WTT6,Q9Z0V6                                                                                                          |
| 7945 | 1,3,9,10,1<br>2,13,14,15 | 2,4,5,6,7,8<br>,11,16,17 | 20 | A2RUV9,P06760,P07150,P07171,P09605;P25809,P10758,P14668,P14669,P20646,P20760,P20762,P50115,P50116,P61206;P84079;P84082,Q07936,Q4G075,Q6AYS4,Q99041,Q9R0T3,Q9Z0V6                                                                                                          |
| 7946 | 1,3,9,10,1<br>2,13,14,16 | 2,4,5,6,7,8<br>,11,15,17 | 15 | O55004,P02631,P06760,P07150,P07171,P14669,P20646,P20760,P20761,P20762,P50115,Q4G075,Q6AYS4,Q99041,Q9Z0V6                                                                                                                                                                  |
| 7947 | 1,3,9,10,1<br>2,13,14,17 | 2,4,5,6,7,8<br>,11,15,16 | 11 | P02631,P07150,P07171,P14668,P14669,P20760,P20762,P61206;P84079;P84082,P83748,Q07936,Q9QW07                                                                                                                                                                                |
| 7948 | 1,3,9,10,1<br>2,13,15,16 | 2,4,5,6,7,8<br>,11,14,17 | 14 | P02631,P06760,P07150,P07171,P14669,P20760,P20761,P20762,P50115,Q07936,Q4G075,Q6AYS4,Q99041,Q9Z0V6                                                                                                                                                                         |
| 7949 | 1,3,9,10,1<br>2,13,15,17 | 2,4,5,6,7,8<br>,11,14,16 | 10 | P02631,P07150,P07171,P14668,P14669,P20762,P61206;P84079;P84082,Q07936,Q6AYS4,Q9Z0V6                                                                                                                                                                                       |
| 7950 | 1,3,9,10,1<br>2,13,16,17 | 2,4,5,6,7,8<br>,11,14,15 | 10 | P02631,P07150,P07171,P14668,P14669,P20760,P20762,P83748,Q6AYS4,Q9Z0V6                                                                                                                                                                                                     |
| 7951 | 1,3,9,10,1<br>2,14,15,16 | 2,4,5,6,7,8<br>,11,13,17 | 17 | P06760,P06761,P07150,P07171,P07647,P14669,P20760,P20761,P20762,P22282,P22283,P50115,Q4G075,Q6AYS4,Q99041,Q9R0T3,Q9Z0V6                                                                                                                                                    |
| 7952 | 1,3,9,10,1<br>2,14,15,17 | 2,4,5,6,7,8<br>,11,13,16 | 11 | A2RUV9,P07150,P07171,P08689,P14668,P14669,P20762,P61206;P84079;P84082,P83748,Q07936,Q9R0T3                                                                                                                                                                                |
| 7953 | 1,3,9,10,1<br>2,14,16,17 | 2,4,5,6,7,8<br>,11,13,15 | 10 | P02631,P07150,P07171,P08689,P14668,P14669,P20760,P20762,P83748,Q6AYS4                                                                                                                                                                                                     |
| 7954 | 1,3,9,10,1<br>2,15,16,17 | 2,4,5,6,7,8<br>,11,13,14 | 16 | P02631,P02780,P06761,P06866,P06911,P07150,P07171,P07647,P12020,P14668,P14669,P20762,P22282,P22283,Q5GRG2,Q6AYS4                                                                                                                                                           |
| 7955 | 1,3,9,10,1<br>3,14,15,16 | 2,4,5,6,7,8<br>,11,12,17 | 37 | O54728,O55004,P02780,P06760,P06761,P07150,P07647,P09605;P25809,P0C0A9,P14669,P19223,P20646,P20760,P20761,P20762,P22282,P22283,P30120,P50115,P50280,P55091,P60905,P62804,P83748,P98089,Q07936,Q4G075,Q62635,Q63493,Q6AYS4,Q80WL1,Q99041,Q9JHB9,Q9QZA6,Q9QZK9,Q9R0T3,Q9Z0V6 |
| 7956 | 1,3,9,10,1<br>3,14,15,17 | 2,4,5,6,7,8<br>,11,12,16 | 18 | P07150,P07171,P07647,P0C0A9,P14668,P14669,P20646,P20762,P61206;P84079;P84082,P83748,Q07936,Q6AYS4,Q8CJ52,Q99041,Q9EQS0,Q9QW07,Q9R0T3,Q9Z0V6                                                                                                                               |
| 7957 | 1,3,9,10,1<br>3,14,16,17 | 2,4,5,6,7,8<br>,11,12,15 | 16 | O55004,P02631,P06761,P07150,P07171,P07647,P14668,P14669,P20760,P20762,P83748,Q07936,Q6AYS4,Q99041,Q9QW07,Q9Z0V6                                                                                                                                                           |
| 7958 | 1,3,9,10,1<br>3,15,16,17 | 2,4,5,6,7,8<br>,11,12,14 | 27 | P02631,P02780,P06761,P07150,P07171,P07647,P0C0A9,P14668,P14669,P20762,P22282,P22283,P24368,P30120,P50280,P61206;P84079;P84082,P62804,P83748,Q07936,Q63493,Q6AYS4,Q80WL1,Q8CJ52,Q99041,Q9EQS0,Q9JHB9,Q9Z0V6                                                                |
| 7959 | 1,3,9,10,1<br>4,15,16,17 | 2,4,5,6,7,8<br>,11,12,13 | 26 | P02780,P02781,P02782,P06761,P07150,P07171,P07647,P0C0A9,P14669,P20762,P22282,P22283,P24368,P30120,P50280,P60905,P61206;P84079;P84082,P83748,Q62902,Q6AYR9,Q6AYS4,Q80WL1,Q8CJ52,Q99041,Q9JHB9,Q9R0T3                                                                       |
| 7960 | 1,3,9,11,1<br>2,13,14,15 | 2,4,5,6,7,8<br>,10,16,17 | 12 | A2RUV9,P06760,P20646,P20760,P50115,P82471,P83748,Q4G075,Q6P6R2,Q99041,Q9R0T3,Q9Z0V6                                                                                                                                                                                       |
| 7961 | 1,3,9,11,1<br>2,13,14,16 | 2,4,5,6,7,8<br>,10,15,17 | 12 | D3ZHA0,P04218,P06760,P07171,P20646,P20760,P20761,P20762,P50115,P83748,Q4G075,Q9Z0V6                                                                                                                                                                                       |

|      |                               |                          |    |                                                                                                                                                                                                                                                                           |
|------|-------------------------------|--------------------------|----|---------------------------------------------------------------------------------------------------------------------------------------------------------------------------------------------------------------------------------------------------------------------------|
| 7962 | 1,3,9,11,1<br>2,13,14,17      | 2,4,5,6,7,8<br>,10,15,16 | 8  | D3ZHA0,P04218,P07171,P20760,P82471,P83748,Q9QW07,Q9Z0V6                                                                                                                                                                                                                   |
| 7963 | 1,3,9,11,1<br>2,13,15,16      | 2,4,5,6,7,8<br>,10,14,17 | 11 | P06760,P07171,P20760,P20761,P20762,P50115,P82471,P83748,Q4G075,Q9WTT6,Q9Z0V6                                                                                                                                                                                              |
| 7964 | 1,3,9,11,1<br>2,13,15,17      | 2,4,5,6,7,8<br>,10,14,16 | 8  | D3ZHA0,P04218,P07171,P20762,P82471,P83748,Q63532,Q9Z0V6                                                                                                                                                                                                                   |
| 7965 | 1,3,9,11,1<br>2,13,16,17      | 2,4,5,6,7,8<br>,10,14,15 | 9  | D3ZHA0,P02631,P04218,P07171,P20760,P20762,P82471,P83748,Q9Z0V6                                                                                                                                                                                                            |
| 7966 | 1,3,9,11,1<br>2,14,15,16      | 2,4,5,6,7,8<br>,10,13,17 | 13 | P04218,P06760,P06761,P12020,P20760,P20761,P22282,P50115,P83748,Q4G075,Q99041,Q9R0T3,Q9Z0V6                                                                                                                                                                                |
| 7967 | 1,3,9,11,1<br>2,14,15,17      | 2,4,5,6,7,8<br>,10,13,16 | 6  | P04218,P08689,P12020,P82471,P83748,Q9R0T3                                                                                                                                                                                                                                 |
| 7968 | 1,3,9,11,1<br>2,14,16,17      | 2,4,5,6,7,8<br>,10,13,15 | 7  | D3ZHA0,P04218,P07171,P12020,P20760,P20762,P83748                                                                                                                                                                                                                          |
| 7969 | 1,3,9,11,1<br>2,15,16,17      | 2,4,5,6,7,8<br>,10,13,14 | 12 | D3ZHA0,P04218,P06761,P06911,P07171,P12020,P20760,P20762,P83748,Q5GRG2,Q9WTT6,Q9Z0V6                                                                                                                                                                                       |
| 7970 | 1,3,9,11,1<br>3,14,15,16      | 2,4,5,6,7,8<br>,10,12,17 | 28 | D3ZHA0,Q54728,P04218,P06760,P06761,P07647,P19223,P20646,P20760,P20761,P20762,P22282,P22283,P50115,P55091,P82471,P83748,P98089,Q4G075,Q62635,Q64361,Q6P6R2,Q80WL1,Q99041,Q9QZK9,Q9R0T3,Q9WTT6,Q9Z0V6                                                                       |
| 7971 | 1,3,9,11,1<br>3,14,15,17      | 2,4,5,6,7,8<br>,10,12,16 | 11 | D3ZHA0,P04218,P20646,P61206,P84079,P84082,P82471,P83748,Q80WL1,Q99041,Q9QW07,Q9R0T3,Q9Z0V6                                                                                                                                                                                |
| 7972 | 1,3,9,11,1<br>3,14,16,17      | 2,4,5,6,7,8<br>,10,12,15 | 12 | D3ZHA0,P04218,P06761,P07171,P20760,P20762,P82471,P83748,Q64361,Q99041,Q9QW07,Q9Z0V6                                                                                                                                                                                       |
| 7973 | 1,3,9,11,1<br>3,15,16,17      | 2,4,5,6,7,8<br>,10,12,14 | 14 | D3ZHA0,P02780,P04218,P06761,P07171,P07647,P12020,P20762,P82471,P83748,Q80WL1,Q9EQS0,Q9WTT6,Q9Z0V6                                                                                                                                                                         |
| 7974 | 1,3,9,11,1<br>4,15,16,17      | 2,4,5,6,7,8<br>,10,12,13 | 19 | D3ZHA0,P02780,P04218,P06761,P07647,P0C0A9,P12020,P20762,P22282,P22283,P30120,P82471,P83748,Q6AYR9,Q80WL1,Q99041,Q9JHB9,Q9R0T3,Q9Z0V6                                                                                                                                      |
| 7975 | 1,3,9,12,1<br>3,14,15,16      | 2,4,5,6,7,8<br>,10,11,17 | 20 | A2RUV9,P00714,P06760,P07150,P07171,P14669,P20646,P20760,P20761,P20762,P50115,P61206,P84079,P84082,P82471,Q07936,Q4G075,Q63598,Q6AYS4,Q99041,Q9R0T3,Q9Z0V6                                                                                                                 |
| 7976 | 1,3,9,12,1<br>3,14,15,17      | 2,4,5,6,7,8<br>,10,11,16 | 16 | A2RUV9,P00714,P07150,P07171,P14668,P14669,P20646,P20762,P61206,P84079,P84082,P82471,Q07936,Q5BJY9,Q5FVI6,Q6AYS4,Q9QW07,Q9R0T3                                                                                                                                             |
| 7977 | 1,3,9,12,1<br>3,14,16,17      | 2,4,5,6,7,8<br>,10,11,15 | 18 | D3ZHA0,P00714,P02631,P04218,P07150,P07171,P14668,P14669,P20646,P20760,P20762,P61206,P84079,P84082,P82471,P83748,Q5BJY9,Q6AYS4,Q9QW07,Q9Z0V6                                                                                                                               |
| 7978 | 1,3,9,12,1<br>3,15,16,17      | 2,4,5,6,7,8<br>,10,11,14 | 14 | D3ZHA0,P00714,P07150,P07171,P14668,P14669,P20762,P61206,P84079,P84082,P82471,Q5BJY9,Q63598,Q6AYS4,Q9EQS0,Q9Z0V6                                                                                                                                                           |
| 7979 | 1,3,9,12,1<br>4,15,16,17      | 2,4,5,6,7,8<br>,10,11,13 | 16 | P00714,P04218,P06761,P07150,P07171,P07647,P12020,P14669,P20762,P22282,P22283,P61206,P84079,P84082,P82471,Q63598,Q6AYS4,Q9R0T3                                                                                                                                             |
| 7980 | 1,3,9,13,1<br>4,15,16,17      | 2,4,5,6,7,8<br>,10,11,12 | 36 | D3ZHA0,Q55004,P00714,P02780,P02781,P04218,P06761,P07150,P07171,P07647,P0C0A9,P14668,P14669,P20646,P20762,P22283,P24368,P30120,P48199,P60905,P61206,P84079,P84082,P62804,P82471,P83748,Q07936,Q63598,Q64361,Q6AYS4,Q80WL1,Q8CJ52,Q99041,Q9EQS0,Q9JHB9,Q9QW07,Q9R0T3,Q9Z0V6 |
| 7981 | 1,3,10,11,<br>12,13,14,1<br>5 | 2,4,5,6,7,8<br>,9,16,17  | 9  | A2RUV9,P06760,P09605,P25809,P20646,P20760,P50115,P83748,Q6P6R2,Q9Z0V6                                                                                                                                                                                                     |
| 7982 | 1,3,10,11,<br>12,13,14,1<br>6 | 2,4,5,6,7,8<br>,9,15,17  | 11 | P02631,P06760,P07171,P20646,P20760,P20761,P20762,P50115,P83748,Q7TPB1,Q9Z0V6                                                                                                                                                                                              |

|      |                               |                         |    |                                                                                                                                                                         |
|------|-------------------------------|-------------------------|----|-------------------------------------------------------------------------------------------------------------------------------------------------------------------------|
| 7983 | 1,3,10,11,<br>12,13,14,1<br>7 | 2,4,5,6,7,8<br>,9,15,16 | 5  | P02631,P07171,P20760,P83748,Q9QW07                                                                                                                                      |
| 7984 | 1,3,10,11,<br>12,13,15,1<br>6 | 2,4,5,6,7,8<br>,9,14,17 | 11 | P02631,P06760,P07171,P20646,P20760,P20761,P20762,P50115,P83748,Q9WTT6,Q9Z0V6                                                                                            |
| 7985 | 1,3,10,11,<br>12,13,15,1<br>7 | 2,4,5,6,7,8<br>,9,14,16 | 5  | P07171,P20762,P83748,Q99MH3,Q9Z0V6                                                                                                                                      |
| 7986 | 1,3,10,11,<br>12,13,16,1<br>7 | 2,4,5,6,7,8<br>,9,14,15 | 6  | P02631,P07171,P20760,P20762,P83748,Q9Z0V6                                                                                                                               |
| 7987 | 1,3,10,11,<br>12,14,15,1<br>6 | 2,4,5,6,7,8<br>,9,13,17 | 10 | P06760,P06761,P09605,P25809,P20760,P20761,P20762,P22282,P50115,P83748,Q9Z0V6                                                                                            |
| 7988 | 1,3,10,11,<br>12,14,15,1<br>7 | 2,4,5,6,7,8<br>,9,13,16 | 3  | P08689,P83748,Q9R0T3                                                                                                                                                    |
| 7989 | 1,3,10,11,<br>12,14,16,1<br>7 | 2,4,5,6,7,8<br>,9,13,15 | 6  | P02631,P07171,P08689,P20760,P20762,P83748                                                                                                                               |
| 7990 | 1,3,10,11,<br>12,15,16,1<br>7 | 2,4,5,6,7,8<br>,9,13,14 | 7  | P06761,P06866,P06911,P07171,P12020,P20762,P83748                                                                                                                        |
| 7991 | 1,3,10,11,<br>13,14,15,1<br>6 | 2,4,5,6,7,8<br>,9,12,17 | 23 | O55004,P06760,P06761,P07647,P09605,P25809,P19223,P20646,P20760,P20761,P20762,P22282,P50115,P55091,P83748,P98089,Q4G075,Q62635,Q6P6R2,Q80WL1,Q99041,Q9R0T3,Q9WTT6,Q9Z0V6 |
| 7992 | 1,3,10,11,<br>13,14,15,1<br>7 | 2,4,5,6,7,8<br>,9,12,16 | 8  | D3ZHA0,P20646,P20762,P83748,Q99041,Q9QW07,Q9R0T3,Q9Z0V6                                                                                                                 |
| 7993 | 1,3,10,11,<br>13,14,16,1<br>7 | 2,4,5,6,7,8<br>,9,12,15 | 10 | D3ZHA0,P02631,P07171,P20646,P20760,P20762,P83748,Q99041,Q9QW07,Q9Z0V6                                                                                                   |
| 7994 | 1,3,10,11,<br>13,15,16,1<br>7 | 2,4,5,6,7,8<br>,9,12,14 | 11 | D3ZHA0,P02631,P02780,P06761,P07171,P07647,P20762,P83748,Q9EQS0,Q9WTT6,Q9Z0V6                                                                                            |
| 7995 | 1,3,10,11,<br>14,15,16,1<br>7 | 2,4,5,6,7,8<br>,9,12,13 | 15 | D3ZHA0,P02780,P06761,P07647,P0C0A9,P20762,P22282,P22283,P30120,P83748,Q62902,Q80WL1,Q99041,Q9JHB9,Q9R0T3                                                                |
| 7996 | 1,3,10,12,<br>13,14,15,1<br>6 | 2,4,5,6,7,8<br>,9,11,17 | 16 | A2RUV9,O55004,P06760,P07150,P07171,P09605,P25809,P14669,P20646,P20760,P20761,P20762,P50115,Q4G075,Q6AYS4,Q99041,Q9Z0V6                                                  |
| 7997 | 1,3,10,12,<br>13,14,15,1<br>7 | 2,4,5,6,7,8<br>,9,11,16 | 12 | A2RUV9,P07150,P07171,P14668,P14669,P20646,P20762,P61206,P84079,P84082,Q05175,Q07936,Q6AYS4,Q9QW07                                                                       |

|      |                               |                                  |    |                                                                                                                                                                                                                                        |
|------|-------------------------------|----------------------------------|----|----------------------------------------------------------------------------------------------------------------------------------------------------------------------------------------------------------------------------------------|
| 7998 | 1,3,10,12,<br>13,14,16,1<br>7 | 2,4,5,6,7,8<br>,9,11,15          | 10 | P02631,P07171,P14668,P14669,P20646,P20760,P20762,P83748,Q6AYS4,Q9QW07                                                                                                                                                                  |
| 7999 | 1,3,10,12,<br>13,15,16,1<br>7 | 2,4,5,6,7,8<br>,9,11,14          | 11 | P02631,P07150,P07171,P14668,P14669,P20762,P83121,Q63617,Q6AYS4,Q99MH3,Q9Z0V6                                                                                                                                                           |
| 8000 | 1,3,10,12,<br>14,15,16,1<br>7 | 2,4,5,6,7,8<br>,9,11,13          | 10 | P02780,P06761,P07171,P07647,P14668,P14669,P20762,P22282,Q63617,Q6AYS4                                                                                                                                                                  |
| 8001 | 1,3,10,13,<br>14,15,16,1<br>7 | 2,4,5,6,7,8<br>,9,11,12          | 27 | D3ZHA0,O55004,P02631,P02780,P06761,P07150,P07171,P07647,P0C0A9,P14668,P14669,P20646,P20762,P22282,P22283,P30120,P60905,P61206;P84079;P84082,P83748,Q6AYS4,Q80WL1,Q99041,Q9EQS0,Q9JHB9,Q9QW07,Q9R0T3,Q9Z0V6                             |
| 8002 | 1,3,11,12,<br>13,14,15,1<br>6 | 2,4,5,6,7,8<br>,9,10,17          | 12 | D3ZHA0,P06760,P19223,P20646,P20760,P20762,P50115,P52590,P83748,Q6P6R2,Q9WTT6,Q9Z0V6                                                                                                                                                    |
| 8003 | 1,3,11,12,<br>13,14,15,1<br>7 | 2,4,5,6,7,8<br>,9,10,16          | 9  | A2RUV9,D3ZHA0,P20646,P61206;P84079;P84082,P82471,P83748,Q64093,Q6P6R2,Q9QW07                                                                                                                                                           |
| 8004 | 1,3,11,12,<br>13,14,16,1<br>7 | 2,4,5,6,7,8<br>,9,10,15          | 10 | D3ZHA0,O55006,P07171,P20646,P20760,P20762,P82471,P83748,Q9QW07,Q9Z0V6                                                                                                                                                                  |
| 8005 | 1,3,11,12,<br>13,15,16,1<br>7 | 2,4,5,6,7,8<br>,9,10,14          | 7  | D3ZHA0,P07171,P20762,P82471,P83748,Q9WTT6,Q9Z0V6                                                                                                                                                                                       |
| 8006 | 1,3,11,12,<br>14,15,16,1<br>7 | 2,4,5,6,7,8<br>,9,10,13          | 6  | D3ZHA0,P04218,P06761,P12020,P83748,Q9R0T3                                                                                                                                                                                              |
| 8007 | 1,3,11,13,<br>14,15,16,1<br>7 | 2,4,5,6,7,8<br>,9,10,12          | 15 | D3ZHA0,P02780,P04218,P06761,P07647,P20646,P20762,P82471,P83748,Q80WL1,Q9EQS0,Q9QW07,Q9R0T3,Q9WTT6,Q9Z0V6                                                                                                                               |
| 8008 | 1,3,12,13,<br>14,15,16,1<br>7 | 2,4,5,6,7,8<br>,9,10,11          | 14 | A2RUV9,D3ZHA0,P00714,P07150,P07171,P14668,P14669,P20646,P20762,P48199,P61206;P84079;P84082,P82471,Q6AYS4,Q9QW07                                                                                                                        |
| 8009 | 1,4,5,6,7,8<br>,9,10          | 2,3,11,12,<br>13,14,15,1<br>6,17 | 19 | D3ZHA0,O55006,P00714,P06761,P07171,P07647,P18418,P20646,P22282,P22283,P31044,P52590,P61206;P84079;P84082,P97571,Q63617,Q99041,Q9JI85,Q9R0T3,Q9WTT6                                                                                     |
| 8010 | 1,4,5,6,7,8<br>,9,11          | 2,3,10,12,<br>13,14,15,1<br>6,17 | 24 | P02780,P04041,P06761,P07150,P07171,P07647,P10715,P14668,P14669,P18418,P20646,P22282,P22283,P31044,P61206;P84079;P84082,P68370,P83121,Q63493,Q63617,Q6AYS4,Q8CJ52,Q99041,Q9JI85,Q9R0T3                                                  |
| 8011 | 1,4,5,6,7,8<br>,9,12          | 2,3,10,11,<br>13,14,15,1<br>6,17 | 31 | D3ZHA0,F1LM93,O55006,P02780,P02781,P02782,P06761,P07647,P08723,P0C0A9,P10715,P13432,P18418,P20646,P22282,P22283,P30120,P31044,P36374,P61206;P84079;P84082,P83748,Q5M8C6,Q63617,Q6AYR9,Q8CJ52,Q99041,Q9JHB9,Q9JI85,Q9R0T3,Q9WTT6,Q9Z0V6 |
| 8012 | 1,4,5,6,7,8<br>,9,13          | 2,3,10,11,<br>12,14,15,1<br>6,17 | 19 | P02764,P02780,P05539,P06761,P06866,P06911,P07171,P07647,P18418,P22282,P22283,P31044,Q5GRG2,Q62902,Q63617,Q8CJ52,Q99041,Q9JI85,Q9R0T3                                                                                                   |

|      |                       |                                  |    |                                                                                                                                                                                                                                                                                                                                                 |
|------|-----------------------|----------------------------------|----|-------------------------------------------------------------------------------------------------------------------------------------------------------------------------------------------------------------------------------------------------------------------------------------------------------------------------------------------------|
| 8013 | 1,4,5,6,7,8<br>,9,14  | 2,3,10,11,<br>12,13,15,1<br>6,17 | 13 | P06761,P06866,P07171,P07647,P18418,P19629,P22282,P22283,P31044,Q63617,Q8CJ52,Q9JI85,Q9WTT6                                                                                                                                                                                                                                                      |
| 8014 | 1,4,5,6,7,8<br>,9,15  | 2,3,10,11,<br>12,13,14,1<br>6,17 | 9  | O55006,P06761,P07171,P18418,P22282,P22283,P31044,Q63617,Q99041                                                                                                                                                                                                                                                                                  |
| 8015 | 1,4,5,6,7,8<br>,9,16  | 2,3,10,11,<br>12,13,14,1<br>5,17 | 13 | P06761,P07171,P14668,P18418,P20646,P22282,P22283,P31044,P61206,P84079;P84082,Q63617,Q8CJ52,Q99041,Q9R0T3                                                                                                                                                                                                                                        |
| 8016 | 1,4,5,6,7,8<br>,9,17  | 2,3,10,11,<br>12,13,14,1<br>5,16 | 18 | P06760,P06761,P07647,P18418,P20646,P20760,P22282,P22283,P23593,P31044,P50115,P52590,Q4G075,Q63617,Q99041,Q9R0T3,Q9WTT6,Q9Z0V6                                                                                                                                                                                                                   |
| 8017 | 1,4,5,6,7,8<br>,10,11 | 2,3,9,12,1<br>3,14,15,16<br>,17  | 31 | D3ZHA0,P00714,P02781,P04041,P06761,P07150,P07171,P07647,P08649,P08723,P14668,P14669,P18418,P20646,P22282,P22283,P31044,P55018,P61206;P84079;P84082,P68370,P82471,Q5BJY9,Q5FVI6,Q63493,Q63617,Q6AYS4,Q8CJ52,Q8VD89,Q99041,Q9JI85,Q9R0T3                                                                                                          |
| 8018 | 1,4,5,6,7,8<br>,10,12 | 2,3,9,11,1<br>3,14,15,16<br>,17  | 41 | D3ZHA0,F1LM93,P02780,P02781,P02782,P06761,P07647,P08723,P0C0A9,P12020,P13432,P18418,P20646,P22282,P22283,P30120,P31044,P35281,P36374,P61206;P84079;P84082,P68370,P82471,P83748,Q10758,Q5M8C6,Q63493,Q63617,Q64361,Q6AYR9,Q6IFW6,Q6IG02,Q6IMF3,Q6P6Q2,Q8CJ52,Q99041,Q99MH3,Q9JHB9,Q9JI85,Q9R0T3,Q9WTT6,Q9Z0V6                                    |
| 8019 | 1,4,5,6,7,8<br>,10,13 | 2,3,9,11,1<br>2,14,15,16<br>,17  | 22 | D3ZHA0,P02780,P06761,P06911,P07171,P07647,P08723,P12020,P18418,P22282,P22283,P31044,P61206;P84079;P84082,P68370,Q498D9,Q5GRG2,Q63617,Q8CJ52,Q8VD89,Q99041,Q9JI85,Q9R0T3                                                                                                                                                                         |
| 8020 | 1,4,5,6,7,8<br>,10,14 | 2,3,9,11,1<br>2,13,15,16<br>,17  | 24 | D3ZHA0,P06761,P06911,P07171,P07647,P08723,P12020,P18418,P19629,P22282,P22283,P31044,P55018,P61206;P84079;P84082,P68370,Q498D9,Q5BJY9,Q5GRG2,Q63617,Q8CJ52,Q9JI85,Q9R0T3,Q9WTT6,Q9Z0V6                                                                                                                                                           |
| 8021 | 1,4,5,6,7,8<br>,10,15 | 2,3,9,11,1<br>2,13,14,16<br>,17  | 17 | D3ZHA0,O55006,P06761,P07171,P18418,P20760,P22282,P22283,P31044,P55018,P61206;P84079;P84082,P97571,Q5FVI6,Q63617,Q8VD89,Q99041,Q9Z0V6                                                                                                                                                                                                            |
| 8022 | 1,4,5,6,7,8<br>,10,16 | 2,3,9,11,1<br>2,13,14,15<br>,17  | 18 | D3ZHA0,P06761,P07171,P08721,P18418,P20646,P22282,P22283,P31044,P55018,P61206;P84079;P84082,P82471,Q5FVI6,Q63617,Q8CJ52,Q8VD89,Q99041,Q9R0T3                                                                                                                                                                                                     |
| 8023 | 1,4,5,6,7,8<br>,10,17 | 2,3,9,11,1<br>2,13,14,15<br>,16  | 23 | P06760,P06761,P07647,P18418,P20646,P20760,P20761,P22282,P22283,P23928,P31044,P50115,P52590,P61206;P84079;P84082,P97571,Q4G075,Q63617,Q8CJ52,Q99041,Q99MH3,Q9R0T3,Q9WTT6,Q9Z0V6                                                                                                                                                                  |
| 8024 | 1,4,5,6,7,8<br>,11,12 | 2,3,9,10,1<br>3,14,15,16<br>,17  | 46 | F1LM93,O35547,P02780,P02781,P02782,P04041,P04905,P06761,P07150,P07171,P07647,P08723,P0C0A9,P10715,P13432,P14668,P14669,P18418,P19629,P20646,P22282,P22283,P24368,P30120,P31044,P36374,P46462,P61206;P84079;P84082,P68370,Q5M8C6,Q63357,Q63493,Q63617,Q6AYR9,Q6IFU7,Q6IFW6,Q6IG02,Q6IMF3,Q6P6Q2,Q8CJ52,Q99041,Q9ESW0,Q9JHB9,Q9JI85,Q9R0T3,Q9Z0V6 |
| 8025 | 1,4,5,6,7,8<br>,11,13 | 2,3,9,10,1<br>2,14,15,16<br>,17  | 29 | P02780,P02781,P05539,P06761,P06911,P07150,P07171,P07647,P08723,P12020,P14668,P14669,P18418,P22282,P22283,P31044,P46462,P61206;P84079;P84082,P68370,Q5GRG2,Q62902,Q63493,Q63617,Q8CJ52,Q8VD89,Q99041,Q9JHB9,Q9JI85,Q9R0T3                                                                                                                        |
| 8026 | 1,4,5,6,7,8<br>,11,14 | 2,3,9,10,1<br>2,13,15,16<br>,17  | 23 | P02780,P06761,P07150,P07171,P07647,P08723,P14668,P14669,P18418,P19629,P22282,P22283,P31044,P46462,P47727,P61206;P84079;P84082,P68370,Q63493,Q63617,Q8CJ52,Q99041,Q9JI85,Q9Z0V6                                                                                                                                                                  |
| 8027 | 1,4,5,6,7,8<br>,11,15 | 2,3,9,10,1<br>2,13,14,16<br>,17  | 22 | P06761,P07150,P07171,P07647,P10715,P14668,P14669,P18418,P19629,P20760,P22006,P22282,P22283,P31044,P61206;P84079;P84082,Q5I0D1,Q63493,Q63617,Q8CJ52,Q8VD89,Q99041,Q9JI85                                                                                                                                                                         |

|      |                       |                                 |    |                                                                                                                                                                                                                                                                                                                     |
|------|-----------------------|---------------------------------|----|---------------------------------------------------------------------------------------------------------------------------------------------------------------------------------------------------------------------------------------------------------------------------------------------------------------------|
| 8028 | 1,4,5,6,7,8<br>,11,16 | 2,3,9,10,1<br>2,13,14,15<br>,17 | 21 | A2RUV9,P06761,P07150,P07171,P07647,P10715,P14668,P14669,P18418,P20646,P22282,P22283,P31044,P61206;P84079;P84082,Q63493,Q63617,Q8CJ52,Q8VD89,Q99041,Q9JI85,Q9R0T3                                                                                                                                                    |
| 8029 | 1,4,5,6,7,8<br>,11,17 | 2,3,9,10,1<br>2,13,14,15<br>,16 | 28 | P04041,P06760,P06761,P07150,P07171,P07647,P10715,P14668,P14669,P15399,P18418,P20646,P20760,P20761,P22282,P22283,P31044,P50115,P61206;P84079;P84082,Q4G075,Q63493,Q63617,Q6AYS4,Q8CJ52,Q99041,Q9JI85,Q9R0T3,Q9Z0V6                                                                                                   |
| 8030 | 1,4,5,6,7,8<br>,12,13 | 2,3,9,10,1<br>1,14,15,16<br>,17 | 33 | F1LM93,O88267,P02780,P02781,P02782,P06761,P06911,P07647,P08723,P09456,P0C0A9,P11598,P12020,P13432,P18418,P22282,P22283,P30120,P31044,P36374,P46462,P83748,Q498D9,Q5GRG2,Q5M8C6,Q62902,Q63617,Q6AYR9,Q8CJ52,Q99041,Q9JHB9,Q9JI85,Q9R0T3                                                                              |
| 8031 | 1,4,5,6,7,8<br>,12,14 | 2,3,9,10,1<br>1,13,15,16<br>,17 | 35 | F1LM93,O88267,P02780,P02781,P02782,P06761,P06911,P07171,P07647,P08723,P0C0A9,P11598,P12020,P13432,P18418,P19629,P22282,P22283,P30120,P31044,P36374,P83748,Q498D9,Q5M8C6,Q63493,Q63617,Q68FS4,Q6AYR9,Q8CJ52,Q99041,Q9JHB9,Q9JI85,Q9R0T3,Q9WTT6,Q9Z0V6                                                                |
| 8032 | 1,4,5,6,7,8<br>,12,15 | 2,3,9,10,1<br>1,13,14,16<br>,17 | 24 | D3ZHA0,F1LM93,P02780,P06761,P07171,P07647,P08723,P10715,P13432,P18418,P19629,P20760,P22282,P22283,P30120,P31044,P83748,Q63617,Q8CJ52,Q99041,Q9JHB9,Q9JI85,Q9R0T3,Q9Z0V6                                                                                                                                             |
| 8033 | 1,4,5,6,7,8<br>,12,16 | 2,3,9,10,1<br>1,13,14,15<br>,17 | 25 | F1LM93,O88267,P02780,P06761,P07647,P08723,P0C0A9,P10715,P13432,P18418,P22282,P22283,P30120,P31044,P61206;P84079;P84082,P83748,Q63617,Q6IFW6,Q6IMF3,Q8CJ52,Q99041,Q9JHB9,Q9JI85,Q9R0T3,Q9Z0V6                                                                                                                        |
| 8034 | 1,4,5,6,7,8<br>,12,17 | 2,3,9,10,1<br>1,13,14,15<br>,16 | 44 | F1LM93,O88267,P02780,P02781,P02782,P06760,P06761,P07647,P08723,P0C0A9,P10715,P11598,P13432,P18418,P19223,P19629,P20646,P20760,P20761,P22282,P22283,P23928,P30120,P36374,P50115,P55091,P62815,P83748,Q10758,Q4G075,Q5M8C6,Q63493,Q63617,Q6AYR9,Q8CJ52,Q99041,Q99MH3,Q9JHB9,Q9JI85,Q9QZA6,Q9QZK9,Q9R0T3,Q9WTT6,Q9Z0V6 |
| 8035 | 1,4,5,6,7,8<br>,13,14 | 2,3,9,10,1<br>1,12,15,16<br>,17 | 25 | O88267,P02780,P05539,P06761,P06866,P06911,P07171,P07647,P08723,P11598,P12020,P18418,P19629,P22282,P22283,P31044,Q498D9,Q5GRG2,Q62902,Q63617,Q8CJ52,Q99041,Q9JI85,Q9R0T3,Q9WTT6                                                                                                                                      |
| 8036 | 1,4,5,6,7,8<br>,13,15 | 2,3,9,10,1<br>1,12,14,16<br>,17 | 16 | P05539,P06761,P06911,P07171,P07647,P18418,P20760,P22282,P22283,P31044,Q5GRG2,Q63617,Q8CJ52,Q8VD89,Q99041,Q9JI85                                                                                                                                                                                                     |
| 8037 | 1,4,5,6,7,8<br>,13,16 | 2,3,9,10,1<br>1,12,14,15<br>,17 | 19 | O88267,P06761,P06911,P07171,P07647,P12020,P18418,P22282,P22283,P31044,P61206;P84079;P84082,Q5GRG2,Q62902,Q63617,Q8CJ52,Q8VD89,Q99041,Q9JI85,Q9R0T3                                                                                                                                                                  |
| 8038 | 1,4,5,6,7,8<br>,13,17 | 2,3,9,10,1<br>1,12,14,15<br>,16 | 26 | O88267,P06760,P06761,P06911,P07647,P10536,P11598,P12020,P18418,P20760,P20761,P22282,P22283,P23928,P31044,P50115,P62815,Q4G075,Q5GRG2,Q63617,Q8CJ52,Q99041,Q99MH3,Q9JI85,Q9R0T3,Q9Z0V6                                                                                                                               |
| 8039 | 1,4,5,6,7,8<br>,14,15 | 2,3,9,10,1<br>1,12,13,16<br>,17 | 13 | P06761,P07171,P10536,P18418,P19629,P20760,P22282,P22283,P31044,Q5GRG2,Q63617,Q99041,Q9Z0V6                                                                                                                                                                                                                          |
| 8040 | 1,4,5,6,7,8<br>,14,16 | 2,3,9,10,1<br>1,12,13,15<br>,17 | 13 | P06761,P07171,P18418,P19629,P22282,P22283,P31044,P61206;P84079;P84082,Q63617,Q8CJ52,Q99041,Q9R0T3,Q9Z0V6                                                                                                                                                                                                            |
| 8041 | 1,4,5,6,7,8<br>,14,17 | 2,3,9,10,1<br>1,12,13,15<br>,16 | 22 | O88267,P02793;Q7TP54,P06760,P06761,P07171,P07647,P10536,P11598,P18418,P19629,P20760,P20761,P22282,P22283,P31044,P50115,Q4G075,Q63617,Q8CJ52,Q99041,Q9WTT6,Q9Z0V6                                                                                                                                                    |
| 8042 | 1,4,5,6,7,8<br>,15,16 | 2,3,9,10,1<br>1,12,13,14<br>,17 | 11 | P06761,P07171,P14668,P18418,P20760,P31044,P61206;P84079;P84082,Q63617,Q8CJ52,Q8VD89,Q99041                                                                                                                                                                                                                          |

|      |                       |                                 |    |                                                                                                                                                 |
|------|-----------------------|---------------------------------|----|-------------------------------------------------------------------------------------------------------------------------------------------------|
| 8043 | 1,4,5,6,7,8<br>,15,17 | 2,3,9,10,1<br>1,12,13,14<br>,16 | 18 | P06760,P06761,P07171,P10536,P18418,P19629,P20646,P20760,P20761,P22282,P22283,P31044,P50115,Q4G075,Q63617,Q99041,Q9QZ<br>A6,Q9Z0V6               |
| 8044 | 1,4,5,6,7,8<br>,16,17 | 2,3,9,10,1<br>1,12,13,14<br>,15 | 18 | O88267,P06760,P06761,P18418,P20646,P20760,P22282,P22283,P23928,P31044,P50115,P61206;P84079;P84082,Q4G075,Q63617,Q8CJ<br>52,Q99041,Q9R0T3,Q9Z0V6 |
| 8045 | 1,4,5,6,7,9<br>,10,11 | 2,3,8,12,1<br>3,14,15,16<br>,17 | 6  | P18418,P61206;P84079;P84082,P83121,Q566E6,Q5FVI6,Q64093                                                                                         |
| 8046 | 1,4,5,6,7,9<br>,10,12 | 2,3,8,11,1<br>3,14,15,16<br>,17 | 11 | F1LM93,P08723,P18418,P20766,P36374,P61206;P84079;P84082,P83748,P97840,Q10758,Q5FVI6,Q6IMF3                                                      |
| 8047 | 1,4,5,6,7,9<br>,10,13 | 2,3,8,11,1<br>2,14,15,16<br>,17 | 4  | P05539,P12020,P18418,P61206;P84079;P84082                                                                                                       |
| 8048 | 1,4,5,6,7,9<br>,10,14 | 2,3,8,11,1<br>2,13,15,16<br>,17 | 4  | P12020,P18418,P61206;P84079;P84082,P83121                                                                                                       |
| 8049 | 1,4,5,6,7,9<br>,10,15 | 2,3,8,11,1<br>2,13,14,16<br>,17 | 5  | O55006,P18418,P20766,P61206;P84079;P84082,Q5FVI6                                                                                                |
| 8050 | 1,4,5,6,7,9<br>,10,16 | 2,3,8,11,1<br>2,13,14,15<br>,17 | 5  | P18418,P20766,P61206;P84079;P84082,Q5FVI6,Q64093                                                                                                |
| 8051 | 1,4,5,6,7,9<br>,10,17 | 2,3,8,11,1<br>2,13,14,15<br>,16 | 4  | P18418,P20646,P52590,P61206;P84079;P84082                                                                                                       |
| 8052 | 1,4,5,6,7,9<br>,11,12 | 2,3,8,10,1<br>3,14,15,16<br>,17 | 16 | P04905,P07647,P08723,P09456,P0C0A9,P13432,P30120,P36374,P61206;P84079;P84082,Q63357,Q6IFU7,Q6IFW6,Q6IMF3,Q6P6Q2,Q9J<br>HB9,Q9JI85               |
| 8053 | 1,4,5,6,7,9<br>,11,13 | 2,3,8,10,1<br>2,14,15,16<br>,17 | 4  | P05539,P61206;P84079;P84082,P83121,Q9JI85                                                                                                       |
| 8054 | 1,4,5,6,7,9<br>,11,14 | 2,3,8,10,1<br>2,13,15,16<br>,17 | 3  | P05539,P61206;P84079;P84082,P83121                                                                                                              |
| 8055 | 1,4,5,6,7,9<br>,11,15 | 2,3,8,10,1<br>2,13,14,16<br>,17 | 3  | P05539,P22006,P61206;P84079;P84082                                                                                                              |
| 8056 | 1,4,5,6,7,9<br>,11,16 | 2,3,8,10,1<br>2,13,14,15<br>,17 | 3  | A2RUV9,P15999,P61206;P84079;P84082                                                                                                              |
| 8057 | 1,4,5,6,7,9<br>,11,17 | 2,3,8,10,1<br>2,13,14,15<br>,16 | 6  | P09605;P25809,P15399,P20646,P52590,P61206;P84079;P84082,P83121                                                                                  |

|      |                       |                                 |    |                                                                                     |
|------|-----------------------|---------------------------------|----|-------------------------------------------------------------------------------------|
| 8058 | 1,4,5,6,7,9<br>,12,13 | 2,3,8,10,1<br>1,14,15,16<br>,17 | 12 | P05539,P07647,P08723,P09456,P13432,P19218,P22282,P30120,P36374,P83748,Q9JHB9,Q9JI85 |
| 8059 | 1,4,5,6,7,9<br>,12,14 | 2,3,8,10,1<br>1,13,15,16<br>,17 | 6  | P01835,P08723,P13432,P18418,P30120,P83748                                           |
| 8060 | 1,4,5,6,7,9<br>,12,15 | 2,3,8,10,1<br>1,13,14,16<br>,17 | 2  | P20766,P83748                                                                       |
| 8061 | 1,4,5,6,7,9<br>,12,16 | 2,3,8,10,1<br>1,13,14,15<br>,17 | 5  | P13432,P19218,P20766,P61206;P84079;P84082,P83748                                    |
| 8062 | 1,4,5,6,7,9<br>,12,17 | 2,3,8,10,1<br>1,13,14,15<br>,16 | 6  | P01835,P09605;P25809,P13432,P36374,P52590,Q99041                                    |
| 8063 | 1,4,5,6,7,9<br>,13,14 | 2,3,8,10,1<br>1,12,15,16<br>,17 | 5  | P05539,P06911,P12020,P83121,Q5GRG2                                                  |
| 8064 | 1,4,5,6,7,9<br>,13,15 | 2,3,8,10,1<br>1,12,14,16<br>,17 | 2  | P05539,P62804                                                                       |
| 8065 | 1,4,5,6,7,9<br>,13,16 | 2,3,8,10,1<br>1,12,14,15<br>,17 | 5  | P05539,P19218,P61206;P84079;P84082,P62804,Q00715                                    |
| 8066 | 1,4,5,6,7,9<br>,13,17 | 2,3,8,10,1<br>1,12,14,15<br>,16 | 3  | P05539,P22282,P52590                                                                |
| 8067 | 1,4,5,6,7,9<br>,14,15 | 2,3,8,10,1<br>1,12,13,16<br>,17 | 1  | P16636                                                                              |
| 8068 | 1,4,5,6,7,9<br>,14,16 | 2,3,8,10,1<br>1,12,13,15<br>,17 | 1  | P61206;P84079;P84082                                                                |
| 8069 | 1,4,5,6,7,9<br>,14,17 | 2,3,8,10,1<br>1,12,13,15<br>,16 | 1  | P52590                                                                              |
| 8070 | 1,4,5,6,7,9<br>,15,16 | 2,3,8,10,1<br>1,12,13,14<br>,17 | 3  | P20766,P62804,Q00715                                                                |
| 8071 | 1,4,5,6,7,9<br>,15,17 | 2,3,8,10,1<br>1,12,13,14<br>,16 | 2  | P20760,P52590                                                                       |
| 8072 | 1,4,5,6,7,9<br>,16,17 | 2,3,8,10,1<br>1,12,13,14<br>,15 | 4  | P09605;P25809,P23593,P52590,P62804                                                  |



|      |                        |                                |    |                                                                                                                                                                                                     |
|------|------------------------|--------------------------------|----|-----------------------------------------------------------------------------------------------------------------------------------------------------------------------------------------------------|
| 8073 | 1,4,5,6,7,1<br>0,11,12 | 2,3,8,9,13,<br>14,15,16,1<br>7 | 26 | F1LM93,P02781,P04905,P06757,P07647,P08723,P0C0A9,P15399,P18418,P20766,P30120,P36374,P61206;P84079;P84082,Q10758,Q5FVI6,Q63357,Q63493,Q6IFU7,Q6IFU8,Q6IFW6,Q6IG02,Q6IMF3,Q6P6Q2,Q8CJ52,Q9JHB9,Q9JI85 |
| 8074 | 1,4,5,6,7,1<br>0,11,13 | 2,3,8,9,12,<br>14,15,16,1<br>7 | 9  | P05539,P06911,P12020,P18418,P61206;P84079;P84082,Q5FVI6,Q5GRG2,Q8VD89,Q9JI85                                                                                                                        |
| 8075 | 1,4,5,6,7,1<br>0,11,14 | 2,3,8,9,12,<br>13,15,16,1<br>7 | 10 | P12020,P15399,P18418,P20766,P47727,P55018,P61206;P84079;P84082,P83121,Q5BJY9,Q5FVI6                                                                                                                 |
| 8076 | 1,4,5,6,7,1<br>0,11,15 | 2,3,8,9,12,<br>13,14,16,1<br>7 | 7  | P18418,P20766,P22006,P61206;P84079;P84082,Q566E6,Q5FVI6,Q8VD89                                                                                                                                      |
| 8077 | 1,4,5,6,7,1<br>0,11,16 | 2,3,8,9,12,<br>13,14,15,1<br>7 | 7  | A2RUV9,P18418,P20766,P55018,P61206;P84079;P84082,Q5FVI6,Q8VD89                                                                                                                                      |
| 8078 | 1,4,5,6,7,1<br>0,11,17 | 2,3,8,9,12,<br>13,14,15,1<br>6 | 6  | P15399,P18418,P20766,P61206;P84079;P84082,Q566E6,Q5FVI6                                                                                                                                             |
| 8079 | 1,4,5,6,7,1<br>0,12,13 | 2,3,8,9,11,<br>14,15,16,1<br>7 | 20 | F1LM93,P06911,P07647,P08723,P0C0A9,P12020,P18418,P19218,P22282,P30120,P36374,P61206;P84079;P84082,P83748,Q10758,Q498D9,Q5GRG2,Q6AYR9,Q99MH3,Q9JHB9,Q9JI85                                           |
| 8080 | 1,4,5,6,7,1<br>0,12,14 | 2,3,8,9,11,<br>13,15,16,1<br>7 | 12 | F1LM93,P08723,P12020,P18418,P20766,P30120,P61206;P84079;P84082,P83748,Q10758,Q498D9,Q6IFW6,Q6IMF3                                                                                                   |
| 8081 | 1,4,5,6,7,1<br>0,12,15 | 2,3,8,9,11,<br>13,14,16,1<br>7 | 9  | F1LM93,P18418,P20766,P61206;P84079;P84082,P83748,Q10758,Q5FVI6,Q6IMF3,Q99MH3                                                                                                                        |
| 8082 | 1,4,5,6,7,1<br>0,12,16 | 2,3,8,9,11,<br>13,14,15,1<br>7 | 13 | F1LM93,P08721,P18418,P19218,P20766,P61206;P84079;P84082,P83748,P97840,Q10758,Q5FVI6,Q6IFU7,Q6IFW6,Q6IMF3                                                                                            |
| 8083 | 1,4,5,6,7,1<br>0,12,17 | 2,3,8,9,11,<br>13,14,15,1<br>6 | 12 | F1LM93,P13432,P18418,P20760,P20766,P36374,P61206;P84079;P84082,Q10758,Q6IMF3,Q99041,Q99MH3,Q9QZK9                                                                                                   |
| 8084 | 1,4,5,6,7,1<br>0,13,14 | 2,3,8,9,11,<br>12,15,16,1<br>7 | 6  | P06911,P12020,P18418,P61206;P84079;P84082,Q498D9,Q5GRG2                                                                                                                                             |
| 8085 | 1,4,5,6,7,1<br>0,13,15 | 2,3,8,9,11,<br>12,14,16,1<br>7 | 7  | P05539,P12020,P18418,Q498D9,Q5FVI6,Q5GRG2,Q8VD89                                                                                                                                                    |
| 8086 | 1,4,5,6,7,1<br>0,13,16 | 2,3,8,9,11,<br>12,14,15,1<br>7 | 6  | P12020,P18418,P19218,P61206;P84079;P84082,Q5FVI6,Q8VD89                                                                                                                                             |
| 8087 | 1,4,5,6,7,1<br>0,13,17 | 2,3,8,9,11,<br>12,14,15,1<br>6 | 4  | P12020,P18418,P20760,Q99MH3                                                                                                                                                                         |

|      |                        |                                |    |                                                                                                                                                                                                         |
|------|------------------------|--------------------------------|----|---------------------------------------------------------------------------------------------------------------------------------------------------------------------------------------------------------|
| 8088 | 1,4,5,6,7,1<br>0,14,15 | 2,3,8,9,11,<br>12,13,16,1<br>7 | 5  | P12020,P18418,P20766,P55018,Q498D9                                                                                                                                                                      |
| 8089 | 1,4,5,6,7,1<br>0,14,16 | 2,3,8,9,11,<br>12,13,15,1<br>7 | 6  | P12020,P18418,P20766,P55018,P61206;P84079;P84082,Q5FVI6                                                                                                                                                 |
| 8090 | 1,4,5,6,7,1<br>0,14,17 | 2,3,8,9,11,<br>12,13,15,1<br>6 | 4  | P12020,P18418,P20760,P20766                                                                                                                                                                             |
| 8091 | 1,4,5,6,7,1<br>0,15,16 | 2,3,8,9,11,<br>12,13,14,1<br>7 | 5  | P20766,P55018,P61206;P84079;P84082,Q5FVI6,Q8VD89                                                                                                                                                        |
| 8092 | 1,4,5,6,7,1<br>0,15,17 | 2,3,8,9,11,<br>12,13,14,1<br>6 | 4  | P18418,P20760,P20766,Q99MH3                                                                                                                                                                             |
| 8093 | 1,4,5,6,7,1<br>0,16,17 | 2,3,8,9,11,<br>12,13,14,1<br>5 | 4  | P18418,P20766,P61206;P84079;P84082,Q5FVI6                                                                                                                                                               |
| 8094 | 1,4,5,6,7,1<br>1,12,13 | 2,3,8,9,10,<br>14,15,16,1<br>7 | 26 | P02780,P02781,P04905,P05539,P07647,P08723,P09456,P0C0A9,P13432,P14046,P22282,P22283,P30120,P36374,P46462,P61206;P84079<br>;P84082,Q62902,Q63493,Q6AYR9,Q6IFU7,Q6IFW6,Q6IMF3,Q6P6Q2,Q8CJ52,Q9JHB9,Q9JI85 |
| 8095 | 1,4,5,6,7,1<br>1,12,14 | 2,3,8,9,10,<br>13,15,16,1<br>7 | 21 | P04905,P07647,P08723,P0C0A9,P13432,P14046,P18418,P20766,P30120,P36374,P47727,P61206;P84079;P84082,Q63493,Q6IFU7,Q6IFW<br>6,Q6IMF3,Q6P6Q2,Q8CJ52,Q9ESW0,Q9JHB9,Q9JI85                                    |
| 8096 | 1,4,5,6,7,1<br>1,12,15 | 2,3,8,9,10,<br>13,14,16,1<br>7 | 11 | P20766,P22006,P30120,P61206;P84079;P84082,Q6IFU7,Q6IFW6,Q6IMF3,Q6P6Q2,Q9ESW0,Q9JHB9,Q9JI85                                                                                                              |
| 8097 | 1,4,5,6,7,1<br>1,12,16 | 2,3,8,9,10,<br>13,14,15,1<br>7 | 12 | P14408,P17046,P20766,P30120,P61206;P84079;P84082,Q6IFU7,Q6IFW6,Q6IMF3,Q6P6Q2,Q8CJ52,Q9JHB9,Q9JI85                                                                                                       |
| 8098 | 1,4,5,6,7,1<br>1,12,17 | 2,3,8,9,10,<br>13,14,15,1<br>6 | 24 | F1LM93,P01681,P07647,P08723,P09605;P25809,P0C0A9,P13432,P15399,P20766,P22282,P22283,P30120,P36374,P61206;P84079;P8408<br>2,Q10758,Q63493,Q6IFW6,Q6IMF3,Q6P6Q2,Q99041,Q9ESW0,Q9JHB9,Q9JI85,Q9QZK9        |
| 8099 | 1,4,5,6,7,1<br>1,13,14 | 2,3,8,9,10,<br>12,15,16,1<br>7 | 9  | P05539,P06911,P12020,P22282,P47727,P61206;P84079;P84082,P83121,Q5GRG2,Q9JI85                                                                                                                            |
| 8100 | 1,4,5,6,7,1<br>1,13,15 | 2,3,8,9,10,<br>12,14,16,1<br>7 | 6  | P05539,P22006,P61206;P84079;P84082,Q5GRG2,Q8VD89,Q9JI85                                                                                                                                                 |
| 8101 | 1,4,5,6,7,1<br>1,13,16 | 2,3,8,9,10,<br>12,14,15,1<br>7 | 4  | P05539,P14408,P61206;P84079;P84082,Q8VD89                                                                                                                                                               |
| 8102 | 1,4,5,6,7,1<br>1,13,17 | 2,3,8,9,10,<br>12,14,15,1<br>6 | 4  | P05539,P22282,P61206;P84079;P84082,Q9JI85                                                                                                                                                               |

|      |                        |                                |    |                                                                                                                 |
|------|------------------------|--------------------------------|----|-----------------------------------------------------------------------------------------------------------------|
| 8103 | 1,4,5,6,7,1<br>1,14,15 | 2,3,8,9,10,<br>12,13,16,1<br>7 | 3  | P20766,P22006,P61206;P84079;P84082                                                                              |
| 8104 | 1,4,5,6,7,1<br>1,14,16 | 2,3,8,9,10,<br>12,13,15,1<br>7 | 2  | P20766,P61206;P84079;P84082                                                                                     |
| 8105 | 1,4,5,6,7,1<br>1,14,17 | 2,3,8,9,10,<br>12,13,15,1<br>6 | 2  | P15399,P61206;P84079;P84082                                                                                     |
| 8106 | 1,4,5,6,7,1<br>1,15,16 | 2,3,8,9,10,<br>12,13,14,1<br>7 | 5  | P14408,P20766,P61206;P84079;P84082,Q5FVI6,Q8VD89                                                                |
| 8107 | 1,4,5,6,7,1<br>1,15,17 | 2,3,8,9,10,<br>12,13,14,1<br>6 | 4  | P20760,P20766,P22006,P61206;P84079;P84082                                                                       |
| 8108 | 1,4,5,6,7,1<br>1,16,17 | 2,3,8,9,10,<br>12,13,14,1<br>5 | 4  | A2RUV9,P14408,P20766,P61206;P84079;P84082                                                                       |
| 8109 | 1,4,5,6,7,1<br>2,13,14 | 2,3,8,9,10,<br>11,15,16,1<br>7 | 16 | P05539,P06911,P07647,P08723,P12020,P22282,P30120,P36374,P83748,Q498D9,Q5GRG2,Q62902,Q6AYR9,Q8CJ52,Q9JHB9,Q9JI85 |
| 8110 | 1,4,5,6,7,1<br>2,13,15 | 2,3,8,9,10,<br>11,14,16,1<br>7 | 7  | P05539,P19218,P30120,P83748,Q498D9,Q5GRG2,Q9JHB9                                                                |
| 8111 | 1,4,5,6,7,1<br>2,13,16 | 2,3,8,9,10,<br>11,14,15,1<br>7 | 5  | P19218,P30120,P61206;P84079;P84082,P83748,Q8CJ52                                                                |
| 8112 | 1,4,5,6,7,1<br>2,13,17 | 2,3,8,9,10,<br>11,14,15,1<br>6 | 15 | P05539,P07647,P13432,P19218,P22282,P22283,P30120,P36374,P83748,Q6AYR9,Q99041,Q99MH3,Q9JHB9,Q9JI85,Q9QZK9        |
| 8113 | 1,4,5,6,7,1<br>2,14,15 | 2,3,8,9,10,<br>11,13,16,1<br>7 | 4  | P20766,P35467,P83748,Q498D9                                                                                     |
| 8114 | 1,4,5,6,7,1<br>2,14,16 | 2,3,8,9,10,<br>11,13,15,1<br>7 | 3  | P20766,P61206;P84079;P84082,P83748                                                                              |
| 8115 | 1,4,5,6,7,1<br>2,14,17 | 2,3,8,9,10,<br>11,13,15,1<br>6 | 8  | P01835,P13432,P20760,P20766,P22282,Q10758,Q99041,Q9QZK9                                                         |
| 8116 | 1,4,5,6,7,1<br>2,15,16 | 2,3,8,9,10,<br>11,13,14,1<br>7 | 3  | P20766,P35467,P83748                                                                                            |
| 8117 | 1,4,5,6,7,1<br>2,15,17 | 2,3,8,9,10,<br>11,13,14,1<br>6 | 7  | P13432,P20760,P20766,P83748,Q99041,Q99MH3,Q9QZK9                                                                |

|      |                        |                                 |    |                                                                                     |
|------|------------------------|---------------------------------|----|-------------------------------------------------------------------------------------|
| 8118 | 1,4,5,6,7,1<br>2,16,17 | 2,3,8,9,10,<br>11,13,14,1<br>5  | 6  | P09605;P25809,P13432,P20766,P83748,Q10758,Q99041                                    |
| 8119 | 1,4,5,6,7,1<br>3,14,15 | 2,3,8,9,10,<br>11,12,16,1<br>7  | 6  | P05539,P06911,P12020,P16636,Q498D9,Q5GRG2                                           |
| 8120 | 1,4,5,6,7,1<br>3,14,16 | 2,3,8,9,10,<br>11,12,15,1<br>7  | 4  | P06911,P12020,P62804,Q5GRG2                                                         |
| 8121 | 1,4,5,6,7,1<br>3,14,17 | 2,3,8,9,10,<br>11,12,15,1<br>6  | 7  | P05539,P06911,P12020,P20760,P22282,Q5GRG2,Q9WUW8                                    |
| 8122 | 1,4,5,6,7,1<br>3,15,16 | 2,3,8,9,10,<br>11,12,14,1<br>7  | 4  | P05539,P62804,Q00715,Q8VD89                                                         |
| 8123 | 1,4,5,6,7,1<br>3,15,17 | 2,3,8,9,10,<br>11,12,14,1<br>6  | 4  | P05539,P20760,Q99MH3,Q9WUW8                                                         |
| 8124 | 1,4,5,6,7,1<br>3,16,17 | 2,3,8,9,10,<br>11,12,14,1<br>5  | 1  | P62804                                                                              |
| 8125 | 1,4,5,6,7,1<br>4,15,16 | 2,3,8,9,10,<br>11,12,13,1<br>7  | 3  | P16636,P20766,P35467                                                                |
| 8126 | 1,4,5,6,7,1<br>4,15,17 | 2,3,8,9,10,<br>11,12,13,1<br>6  | 4  | P10536,P20760,P20766,P35467                                                         |
| 8127 | 1,4,5,6,7,1<br>4,16,17 | 2,3,8,9,10,<br>11,12,13,1<br>5  | 2  | P20766,P35467                                                                       |
| 8128 | 1,4,5,6,7,1<br>5,16,17 | 2,3,8,9,10,<br>11,12,13,1<br>4  | 3  | P20760,P20766,P35467                                                                |
| 8129 | 1,4,5,6,8,9<br>,10,11  | 2,3,7,12,1<br>3,14,15,16<br>,17 | 6  | A2RUV9,P00714,P08649,P14668,P14669,Q566E6                                           |
| 8130 | 1,4,5,6,8,9<br>,10,12  | 2,3,7,11,1<br>3,14,15,16<br>,17 | 12 | F1LM93,P07647,P08723,P0C0A9,P30120,Q10758,Q5M8C6,Q6IFW6,Q6IG02,Q6IMF3,Q6P6Q2,Q9WTT6 |
| 8131 | 1,4,5,6,8,9<br>,10,13  | 2,3,7,11,1<br>2,14,15,16<br>,17 | 0  |                                                                                     |
| 8132 | 1,4,5,6,8,9<br>,10,14  | 2,3,7,11,1<br>2,13,15,16<br>,17 | 1  | Q9WTT6                                                                              |

|      |                       |                                 |    |                                                                                                                                                                         |
|------|-----------------------|---------------------------------|----|-------------------------------------------------------------------------------------------------------------------------------------------------------------------------|
| 8133 | 1,4,5,6,8,9<br>,10,15 | 2,3,7,11,1<br>2,13,14,16<br>,17 | 1  | O55006                                                                                                                                                                  |
| 8134 | 1,4,5,6,8,9<br>,10,16 | 2,3,7,11,1<br>2,13,14,15<br>,17 | 4  | A2RUV9,P14668,P23593,Q63942                                                                                                                                             |
| 8135 | 1,4,5,6,8,9<br>,10,17 | 2,3,7,11,1<br>2,13,14,15<br>,16 | 6  | A2RUV9,P06760,P08649,P23593,Q09030,Q9WTT6                                                                                                                               |
| 8136 | 1,4,5,6,8,9<br>,11,12 | 2,3,7,10,1<br>3,14,15,16<br>,17 | 24 | O35547,P02780,P02781,P02782,P02803,P04905,P07647,P08723,P0C0A9,P13432,P14668,P14669,P30120,P36374,Q5M8C6,Q63357,Q6IFU7,Q6IFU8,Q6IFW6,Q6IG02,Q6IMF3,Q6P6Q2,Q8CJ52,Q9JHB9 |
| 8137 | 1,4,5,6,8,9<br>,11,13 | 2,3,7,10,1<br>2,14,15,16<br>,17 | 6  | A2RUV9,P02803,P05539,P07647,P14668,P14669                                                                                                                               |
| 8138 | 1,4,5,6,8,9<br>,11,14 | 2,3,7,10,1<br>2,13,15,16<br>,17 | 4  | P02793;Q7TP54,P14668,P14669,P83121                                                                                                                                      |
| 8139 | 1,4,5,6,8,9<br>,11,15 | 2,3,7,10,1<br>2,13,14,16<br>,17 | 3  | P14668,P14669,Q5I0D1                                                                                                                                                    |
| 8140 | 1,4,5,6,8,9<br>,11,16 | 2,3,7,10,1<br>2,13,14,15<br>,17 | 3  | A2RUV9,P14668,P14669                                                                                                                                                    |
| 8141 | 1,4,5,6,8,9<br>,11,17 | 2,3,7,10,1<br>2,13,14,15<br>,16 | 7  | A2RUV9,P06760,P07150,P08649,P14668,P14669,Q09030                                                                                                                        |
| 8142 | 1,4,5,6,8,9<br>,12,13 | 2,3,7,10,1<br>1,14,15,16<br>,17 | 17 | P02780,P02781,P02782,P02803,P06761,P07647,P08723,P0C0A9,P13432,P22282,P22283,P30120,P36374,Q5M8C6,Q6AYR9,Q8CJ52,Q9JHB9                                                  |
| 8143 | 1,4,5,6,8,9<br>,12,14 | 2,3,7,10,1<br>1,13,15,16<br>,17 | 11 | P01835,P02780,P02782,P02793;Q7TP54,P07647,P08723,P0C0A9,P13432,P30120,Q5M8C6,Q9WTT6                                                                                     |
| 8144 | 1,4,5,6,8,9<br>,12,15 | 2,3,7,10,1<br>1,13,14,16<br>,17 | 1  | Q5M8C6                                                                                                                                                                  |
| 8145 | 1,4,5,6,8,9<br>,12,16 | 2,3,7,10,1<br>1,13,14,15<br>,17 | 6  | P14668,P23593,P30120,Q5M8C6,Q6IFW6,Q6IMF3                                                                                                                               |
| 8146 | 1,4,5,6,8,9<br>,12,17 | 2,3,7,10,1<br>1,13,14,15<br>,16 | 16 | F1LM93,P01835,P02782,P06760,P07647,P08723,P0C0A9,P13432,P23593,P30120,P36374,Q09030,Q4G075,Q5M8C6,Q9WTT6,Q9Z0V6                                                         |
| 8147 | 1,4,5,6,8,9<br>,13,14 | 2,3,7,10,1<br>1,12,15,16<br>,17 | 3  | P06866,P06911,Q9WTT6                                                                                                                                                    |

|      |                        |                                 |    |                                                                                                                                                                                                                   |
|------|------------------------|---------------------------------|----|-------------------------------------------------------------------------------------------------------------------------------------------------------------------------------------------------------------------|
| 8148 | 1,4,5,6,8,9<br>,13,15  | 2,3,7,10,1<br>1,12,14,16<br>,17 | 0  |                                                                                                                                                                                                                   |
| 8149 | 1,4,5,6,8,9<br>,13,16  | 2,3,7,10,1<br>1,12,14,15<br>,17 | 1  | A2RUV9                                                                                                                                                                                                            |
| 8150 | 1,4,5,6,8,9<br>,13,17  | 2,3,7,10,1<br>1,12,14,15<br>,16 | 3  | P06760,P22282,P23593                                                                                                                                                                                              |
| 8151 | 1,4,5,6,8,9<br>,14,15  | 2,3,7,10,1<br>1,12,13,16<br>,17 | 1  | P02793;Q7TP54                                                                                                                                                                                                     |
| 8152 | 1,4,5,6,8,9<br>,14,16  | 2,3,7,10,1<br>1,12,13,15<br>,17 | 3  | P02793;Q7TP54,P14668,Q63942                                                                                                                                                                                       |
| 8153 | 1,4,5,6,8,9<br>,14,17  | 2,3,7,10,1<br>1,12,13,15<br>,16 | 3  | P02793;Q7TP54,P06760,Q9WTT6                                                                                                                                                                                       |
| 8154 | 1,4,5,6,8,9<br>,15,16  | 2,3,7,10,1<br>1,12,13,14<br>,17 | 3  | P14668,P23593,Q63942                                                                                                                                                                                              |
| 8155 | 1,4,5,6,8,9<br>,15,17  | 2,3,7,10,1<br>1,12,13,14<br>,16 | 2  | P06760,P23593                                                                                                                                                                                                     |
| 8156 | 1,4,5,6,8,9<br>,16,17  | 2,3,7,10,1<br>1,12,13,14<br>,15 | 3  | A2RUV9,P06760,P23593                                                                                                                                                                                              |
| 8157 | 1,4,5,6,8,1<br>0,11,12 | 2,3,7,9,13,<br>14,15,16,1<br>7  | 30 | F1LM93,O35547,P00714,P02780,P02781,P02782,P04905,P06760,P07150,P07647,P08723,P0C0A9,P14668,P14669,P22283,P30120,P35281,P36374,P47727,Q10758,Q5M8C6,Q63357,Q6IFU7,Q6IFU8,Q6IFW6,Q6IG02,Q6IMF3,Q6P6Q2,Q8CJ52,Q9JHB9 |
| 8158 | 1,4,5,6,8,1<br>0,11,13 | 2,3,7,9,12,<br>14,15,16,1<br>7  | 4  | P07647,P14668,P14669,P47727                                                                                                                                                                                       |
| 8159 | 1,4,5,6,8,1<br>0,11,14 | 2,3,7,9,12,<br>13,15,16,1<br>7  | 8  | P02793;Q7TP54,P07150,P08649,P14668,P14669,P47727,P55018,Q5BJY9                                                                                                                                                    |
| 8160 | 1,4,5,6,8,1<br>0,11,15 | 2,3,7,9,12,<br>13,14,16,1<br>7  | 6  | P08649,P14668,P14669,P35281,P55018,Q5I0D1                                                                                                                                                                         |
| 8161 | 1,4,5,6,8,1<br>0,11,16 | 2,3,7,9,12,<br>13,14,15,1<br>7  | 7  | A2RUV9,P07150,P08649,P14668,P14669,P55018,Q6P6Q2                                                                                                                                                                  |
| 8162 | 1,4,5,6,8,1<br>0,11,17 | 2,3,7,9,12,<br>13,14,15,1<br>6  | 9  | A2RUV9,P04041,P06760,P07150,P08649,P14668,P14669,Q4G075,Q6AYS4                                                                                                                                                    |

|      |                        |                                |    |                                                                                                                                                                  |
|------|------------------------|--------------------------------|----|------------------------------------------------------------------------------------------------------------------------------------------------------------------|
| 8163 | 1,4,5,6,8,1<br>0,12,13 | 2,3,7,9,11,<br>14,15,16,1<br>7 | 23 | F1LM93,P02780,P02781,P02782,P06761,P06911,P07647,P08723,P0C0A9,P22282,P22283,P30120,P36374,Q10758,Q498D9,Q5M8C6,Q6AYR9,Q6IFW6,Q6IMF3,Q6P6Q2,Q8CJ52,Q99MH3,Q9JHB9 |
| 8164 | 1,4,5,6,8,1<br>0,12,14 | 2,3,7,9,11,<br>13,15,16,1<br>7 | 17 | F1LM93,P02780,P02782,P07647,P08723,P0C0A9,P30120,Q10758,Q498D9,Q5M8C6,Q6AYR9,Q6IFW6,Q6IG02,Q6IMF3,Q6P6Q2,Q8CJ52,Q9WTT6                                           |
| 8165 | 1,4,5,6,8,1<br>0,12,15 | 2,3,7,9,11,<br>13,14,16,1<br>7 | 10 | F1LM93,P08723,P35281,Q10758,Q5M8C6,Q6IFW6,Q6IG02,Q6IMF3,Q6P6Q2,Q99MH3                                                                                            |
| 8166 | 1,4,5,6,8,1<br>0,12,16 | 2,3,7,9,11,<br>13,14,15,1<br>7 | 13 | F1LM93,P08721,P08723,P0C0A9,P30120,P35281,Q10758,Q6IFU7,Q6IFW6,Q6IG02,Q6IMF3,Q6P6Q2,Q8CJ52                                                                       |
| 8167 | 1,4,5,6,8,1<br>0,12,17 | 2,3,7,9,11,<br>13,14,15,1<br>6 | 22 | F1LM93,P01681,P06760,P07647,P08723,P0C0A9,P13432,P16636,P30120,P36374,Q10758,Q4G075,Q5M8C6,Q6AYR9,Q6IFW6,Q6IG02,Q6IMF3,Q6P6Q2,Q99MH3,Q9QZK9,Q9WTT6,Q9Z0V6        |
| 8168 | 1,4,5,6,8,1<br>0,13,14 | 2,3,7,9,11,<br>12,15,16,1<br>7 | 5  | P06911,P12020,Q498D9,Q5GRG2,Q9WTT6                                                                                                                               |
| 8169 | 1,4,5,6,8,1<br>0,13,15 | 2,3,7,9,11,<br>12,14,16,1<br>7 | 1  | Q6IFV1                                                                                                                                                           |
| 8170 | 1,4,5,6,8,1<br>0,13,16 | 2,3,7,9,11,<br>12,14,15,1<br>7 | 0  |                                                                                                                                                                  |
| 8171 | 1,4,5,6,8,1<br>0,13,17 | 2,3,7,9,11,<br>12,14,15,1<br>6 | 4  | P06760,Q4G075,Q6IFV1,Q99MH3                                                                                                                                      |
| 8172 | 1,4,5,6,8,1<br>0,14,15 | 2,3,7,9,11,<br>12,13,16,1<br>7 | 1  | P55018                                                                                                                                                           |
| 8173 | 1,4,5,6,8,1<br>0,14,16 | 2,3,7,9,11,<br>12,13,15,1<br>7 | 1  | P55018                                                                                                                                                           |
| 8174 | 1,4,5,6,8,1<br>0,14,17 | 2,3,7,9,11,<br>12,13,15,1<br>6 | 5  | P02793;Q7TP54,P06760,Q4G075,Q9WTT6,Q9Z0V6                                                                                                                        |
| 8175 | 1,4,5,6,8,1<br>0,15,16 | 2,3,7,9,11,<br>12,13,14,1<br>7 | 1  | P55018                                                                                                                                                           |
| 8176 | 1,4,5,6,8,1<br>0,15,17 | 2,3,7,9,11,<br>12,13,14,1<br>6 | 5  | P06760,P20760,Q4G075,Q6IFV1,Q99MH3                                                                                                                               |
| 8177 | 1,4,5,6,8,1<br>0,16,17 | 2,3,7,9,11,<br>12,13,14,1<br>5 | 6  | A2RUV9,P06760,P23593,P25031,P42854,Q4G075                                                                                                                        |

|      |                        |                                |    |                                                                                                                                                                                                                                               |
|------|------------------------|--------------------------------|----|-----------------------------------------------------------------------------------------------------------------------------------------------------------------------------------------------------------------------------------------------|
| 8178 | 1,4,5,6,8,1<br>1,12,13 | 2,3,7,9,10,<br>14,15,16,1<br>7 | 27 | O35547,P02780,P02781,P02782,P02803,P04905,P06761,P07647,P08723,P0C0A9,P14668,P14669,P22282,P22283,P30120,P36374,P47727,Q5M8C6,Q6AYR9,Q6IFU7,Q6IFW6,Q6IG02,Q6IMF3,Q6P6Q2,Q8CJ52,Q9JHB9,Q9JI85                                                  |
| 8179 | 1,4,5,6,8,1<br>1,12,14 | 2,3,7,9,10,<br>13,15,16,1<br>7 | 26 | O35547,P02780,P02781,P02782,P02793;Q7TP54,P04905,P07647,P08723,P0C0A9,P13432,P14668,P14669,P22282,P22283,P30120,P36374,P47727,Q5M8C6,Q6IFU7,Q6IFU8,Q6IFW6,Q6IG02,Q6IMF3,Q6P6Q2,Q8CJ52,Q9JHB9                                                  |
| 8180 | 1,4,5,6,8,1<br>1,12,15 | 2,3,7,9,10,<br>13,14,16,1<br>7 | 17 | O35547,P02781,P07647,P08723,P0C0A9,P14668,P14669,P30120,Q5I0D1,Q5M8C6,Q6IFU7,Q6IFW6,Q6IG02,Q6IMF3,Q6P6Q2,Q8CJ52,Q9JHB9                                                                                                                        |
| 8181 | 1,4,5,6,8,1<br>1,12,16 | 2,3,7,9,10,<br>13,14,15,1<br>7 | 18 | O35547,P02781,P07150,P07647,P08723,P0C0A9,P14668,P14669,P30120,Q5M8C6,Q6IFU7,Q6IFU8,Q6IFW6,Q6IG02,Q6IMF3,Q6P6Q2,Q8CJ52,Q9JHB9                                                                                                                 |
| 8182 | 1,4,5,6,8,1<br>1,12,17 | 2,3,7,9,10,<br>13,14,15,1<br>6 | 34 | F1LM93,O35547,P01681,P02780,P02781,P02782,P04905,P06760,P07150,P07647,P08723,P0C0A9,P13432,P14668,P14669,P22282,P22283,P30120,P36374,Q10758,Q4G075,Q5M8C6,Q6IFU7,Q6IFU8,Q6IFW6,Q6IG02,Q6IMF3,Q6P6Q2,Q8CJ52,Q99041,Q9ESW0,Q9JHB9,Q9QZK9,Q9Z0V6 |
| 8183 | 1,4,5,6,8,1<br>1,13,14 | 2,3,7,9,10,<br>12,15,16,1<br>7 | 9  | P02780,P02793;Q7TP54,P06911,P07647,P14668,P14669,P22282,P47727,Q5GRG2                                                                                                                                                                         |
| 8184 | 1,4,5,6,8,1<br>1,13,15 | 2,3,7,9,10,<br>12,14,16,1<br>7 | 3  | P05539,P14668,P14669                                                                                                                                                                                                                          |
| 8185 | 1,4,5,6,8,1<br>1,13,16 | 2,3,7,9,10,<br>12,14,15,1<br>7 | 4  | A2RUV9,P14668,P14669,Q8VD89                                                                                                                                                                                                                   |
| 8186 | 1,4,5,6,8,1<br>1,13,17 | 2,3,7,9,10,<br>12,14,15,1<br>6 | 8  | A2RUV9,P06760,P07150,P07647,P14669,P22282,P22283,Q4G075                                                                                                                                                                                       |
| 8187 | 1,4,5,6,8,1<br>1,14,15 | 2,3,7,9,10,<br>12,13,16,1<br>7 | 6  | P02793;Q7TP54,P07171,P14668,P14669,P97840,Q5I0D1                                                                                                                                                                                              |
| 8188 | 1,4,5,6,8,1<br>1,14,16 | 2,3,7,9,10,<br>12,13,15,1<br>7 | 4  | P02793;Q7TP54,P07150,P14668,P14669                                                                                                                                                                                                            |
| 8189 | 1,4,5,6,8,1<br>1,14,17 | 2,3,7,9,10,<br>12,13,15,1<br>6 | 8  | P02793;Q7TP54,P06760,P07150,P14668,P14669,P97840,Q4G075,Q9Z0V6                                                                                                                                                                                |
| 8190 | 1,4,5,6,8,1<br>1,15,16 | 2,3,7,9,10,<br>12,13,14,1<br>7 | 4  | A2RUV9,P14668,P14669,Q5I0D1                                                                                                                                                                                                                   |
| 8191 | 1,4,5,6,8,1<br>1,15,17 | 2,3,7,9,10,<br>12,13,14,1<br>6 | 7  | P06760,P07150,P14668,P14669,P97840,Q4G075,Q5I0D1                                                                                                                                                                                              |
| 8192 | 1,4,5,6,8,1<br>1,16,17 | 2,3,7,9,10,<br>12,13,14,1<br>5 | 6  | A2RUV9,P06760,P07150,P14668,P14669,Q4G075                                                                                                                                                                                                     |



|      |                        |                                |    |                                                                                                                                                                  |
|------|------------------------|--------------------------------|----|------------------------------------------------------------------------------------------------------------------------------------------------------------------|
| 8193 | 1,4,5,6,8,1<br>2,13,14 | 2,3,7,9,10,<br>11,15,16,1<br>7 | 19 | P02780,P02781,P02782,P06761,P06911,P07647,P08723,P0C0A9,P22282,P22283,P30120,P36374,Q498D9,Q5GRG2,Q5M8C6,Q6AYR9,Q8CJ52,Q9JHB9,Q9WTT6                             |
| 8194 | 1,4,5,6,8,1<br>2,13,15 | 2,3,7,9,10,<br>11,14,16,1<br>7 | 10 | P02782,P06761,P07647,P08723,P0C0A9,P30120,Q5M8C6,Q6IFV1,Q8CJ52,Q9JHB9                                                                                            |
| 8195 | 1,4,5,6,8,1<br>2,13,16 | 2,3,7,9,10,<br>11,14,15,1<br>7 | 8  | P02782,P07647,P08723,P0C0A9,P30120,Q5M8C6,Q8CJ52,Q9JHB9                                                                                                          |
| 8196 | 1,4,5,6,8,1<br>2,13,17 | 2,3,7,9,10,<br>11,14,15,1<br>6 | 23 | P02780,P02782,P06760,P06761,P07647,P08723,P0C0A9,P13432,P22282,P22283,P23928,P30120,P36374,Q4G075,Q5M8C6,Q62635,Q6AYR9,Q6IFV1,Q8CJ52,Q99041,Q99MH3,Q9JHB9,Q9QZK9 |
| 8197 | 1,4,5,6,8,1<br>2,14,15 | 2,3,7,9,10,<br>11,13,16,1<br>7 | 2  | P08723,P30120                                                                                                                                                    |
| 8198 | 1,4,5,6,8,1<br>2,14,16 | 2,3,7,9,10,<br>11,13,15,1<br>7 | 5  | P08723,P30120,Q6IFW6,Q6IMF3,Q8CJ52                                                                                                                               |
| 8199 | 1,4,5,6,8,1<br>2,14,17 | 2,3,7,9,10,<br>11,13,15,1<br>6 | 17 | P01681,P01835,P02782,P02793;Q7TP54,P06760,P07647,P08723,P0C0A9,P10536,P13432,P22282,P30120,Q10758,Q4G075,Q5M8C6,Q9WTT6,Q9Z0V6                                    |
| 8200 | 1,4,5,6,8,1<br>2,15,16 | 2,3,7,9,10,<br>11,13,14,1<br>7 | 1  | P14668                                                                                                                                                           |
| 8201 | 1,4,5,6,8,1<br>2,15,17 | 2,3,7,9,10,<br>11,13,14,1<br>6 | 12 | B0BNN3,P06760,P10536,P13432,P20760,Q4G075,Q5M8C6,Q6IFV1,Q99041,Q99MH3,Q9QZA6,Q9Z0V6                                                                              |
| 8202 | 1,4,5,6,8,1<br>2,16,17 | 2,3,7,9,10,<br>11,13,14,1<br>5 | 12 | F1LM93,P01681,P06760,P13432,P23593,P23928,Q10758,Q4G075,Q5M8C6,Q6IMF3,Q99041,Q9Z0V6                                                                              |
| 8203 | 1,4,5,6,8,1<br>3,14,15 | 2,3,7,9,10,<br>11,12,16,1<br>7 | 4  | P06911,P10536,Q498D9,Q5GRG2                                                                                                                                      |
| 8204 | 1,4,5,6,8,1<br>3,14,16 | 2,3,7,9,10,<br>11,12,15,1<br>7 | 1  | P06911                                                                                                                                                           |
| 8205 | 1,4,5,6,8,1<br>3,14,17 | 2,3,7,9,10,<br>11,12,15,1<br>6 | 7  | P02793;Q7TP54,P06760,P06911,P10536,P22282,P51907,Q9WTT6                                                                                                          |
| 8206 | 1,4,5,6,8,1<br>3,15,16 | 2,3,7,9,10,<br>11,12,14,1<br>7 | 0  |                                                                                                                                                                  |
| 8207 | 1,4,5,6,8,1<br>3,15,17 | 2,3,7,9,10,<br>11,12,14,1<br>6 | 6  | P06760,P10536,P20760,Q4G075,Q6IFV1,Q99MH3                                                                                                                        |

|      |                        |                                |    |                                                                                     |
|------|------------------------|--------------------------------|----|-------------------------------------------------------------------------------------|
| 8208 | 1,4,5,6,8,1<br>3,16,17 | 2,3,7,9,10,<br>11,12,14,1<br>5 | 5  | A2RUV9,P06760,P23928,Q4G075,Q6PCU2                                                  |
| 8209 | 1,4,5,6,8,1<br>4,15,16 | 2,3,7,9,10,<br>11,12,13,1<br>7 | 1  | P14668                                                                              |
| 8210 | 1,4,5,6,8,1<br>4,15,17 | 2,3,7,9,10,<br>11,12,13,1<br>6 | 9  | B0BNN3,P02793;Q7TP54,P06760,P10536,P20760,P47967,P97840,Q4G075,Q9Z0V6               |
| 8211 | 1,4,5,6,8,1<br>4,16,17 | 2,3,7,9,10,<br>11,12,13,1<br>5 | 3  | P02793;Q7TP54,P06760,Q6PCU2                                                         |
| 8212 | 1,4,5,6,8,1<br>5,16,17 | 2,3,7,9,10,<br>11,12,13,1<br>4 | 3  | P06760,P23593,Q4G075                                                                |
| 8213 | 1,4,5,6,9,1<br>0,11,12 | 2,3,7,8,13,<br>14,15,16,1<br>7 | 12 | P0C0A9,P20766,Q08849,Q10758,Q566E6,Q63357,Q6IFU7,Q6IFU8,Q6IFW6,Q6IG02,Q6IMF3,Q6P6Q2 |
| 8214 | 1,4,5,6,9,1<br>0,11,13 | 2,3,7,8,12,<br>14,15,16,1<br>7 | 2  | P05539,Q566E6                                                                       |
| 8215 | 1,4,5,6,9,1<br>0,11,14 | 2,3,7,8,12,<br>13,15,16,1<br>7 | 1  | P83121                                                                              |
| 8216 | 1,4,5,6,9,1<br>0,11,15 | 2,3,7,8,12,<br>13,14,16,1<br>7 | 2  | P20766,Q566E6                                                                       |
| 8217 | 1,4,5,6,9,1<br>0,11,16 | 2,3,7,8,12,<br>13,14,15,1<br>7 | 4  | A2RUV9,P20766,Q5FVI6,Q6IFU7                                                         |
| 8218 | 1,4,5,6,9,1<br>0,11,17 | 2,3,7,8,12,<br>13,14,15,1<br>6 | 3  | A2RUV9,Q09030,Q566E6                                                                |
| 8219 | 1,4,5,6,9,1<br>0,12,13 | 2,3,7,8,11,<br>14,15,16,1<br>7 | 2  | P19218,P36374                                                                       |
| 8220 | 1,4,5,6,9,1<br>0,12,14 | 2,3,7,8,11,<br>13,15,16,1<br>7 | 6  | P01835,P20766,Q10758,Q6IFU7,Q6IFW6,Q6IMF3                                           |
| 8221 | 1,4,5,6,9,1<br>0,12,15 | 2,3,7,8,11,<br>13,14,16,1<br>7 | 2  | P20766,Q6IMF3                                                                       |
| 8222 | 1,4,5,6,9,1<br>0,12,16 | 2,3,7,8,11,<br>13,14,15,1<br>7 | 5  | P20766,Q10758,Q6IFU7,Q6IFW6,Q6IMF3                                                  |

|      |                        |                                |    |                                                                              |
|------|------------------------|--------------------------------|----|------------------------------------------------------------------------------|
| 8223 | 1,4,5,6,9,1<br>0,12,17 | 2,3,7,8,11,<br>13,14,15,1<br>6 | 6  | P01835,P13432,P20766,Q09030,Q10758,Q6IMF3                                    |
| 8224 | 1,4,5,6,9,1<br>0,13,14 | 2,3,7,8,11,<br>12,15,16,1<br>7 | 0  |                                                                              |
| 8225 | 1,4,5,6,9,1<br>0,13,15 | 2,3,7,8,11,<br>12,14,16,1<br>7 | 0  |                                                                              |
| 8226 | 1,4,5,6,9,1<br>0,13,16 | 2,3,7,8,11,<br>12,14,15,1<br>7 | 2  | P62804,Q00715                                                                |
| 8227 | 1,4,5,6,9,1<br>0,13,17 | 2,3,7,8,11,<br>12,14,15,1<br>6 | 0  |                                                                              |
| 8228 | 1,4,5,6,9,1<br>0,14,15 | 2,3,7,8,11,<br>12,13,16,1<br>7 | 1  | P20766                                                                       |
| 8229 | 1,4,5,6,9,1<br>0,14,16 | 2,3,7,8,11,<br>12,13,15,1<br>7 | 1  | P20766                                                                       |
| 8230 | 1,4,5,6,9,1<br>0,14,17 | 2,3,7,8,11,<br>12,13,15,1<br>6 | 0  |                                                                              |
| 8231 | 1,4,5,6,9,1<br>0,15,16 | 2,3,7,8,11,<br>12,13,14,1<br>7 | 1  | P20766                                                                       |
| 8232 | 1,4,5,6,9,1<br>0,15,17 | 2,3,7,8,11,<br>12,13,14,1<br>6 | 1  | P20766                                                                       |
| 8233 | 1,4,5,6,9,1<br>0,16,17 | 2,3,7,8,11,<br>12,13,14,1<br>5 | 3  | A2RUV9,P20766,P23593                                                         |
| 8234 | 1,4,5,6,9,1<br>1,12,13 | 2,3,7,8,10,<br>14,15,16,1<br>7 | 11 | P02803,P04905,P05539,P0C0A9,P30120,P36374,Q6IFU7,Q6IFW6,Q6IMF3,Q6P6Q2,Q9JHB9 |
| 8235 | 1,4,5,6,9,1<br>1,12,14 | 2,3,7,8,10,<br>13,15,16,1<br>7 | 9  | P01835,P04905,P0C0A9,P30120,Q6IFU7,Q6IFU8,Q6IFW6,Q6IMF3,Q6P6Q2               |
| 8236 | 1,4,5,6,9,1<br>1,12,15 | 2,3,7,8,10,<br>13,14,16,1<br>7 | 5  | P20766,Q6IFU7,Q6IFW6,Q6IMF3,Q6P6Q2                                           |
| 8237 | 1,4,5,6,9,1<br>1,12,16 | 2,3,7,8,10,<br>13,14,15,1<br>7 | 7  | P20766,Q08849,Q6IFU7,Q6IFU8,Q6IFW6,Q6IMF3,Q6P6Q2                             |

|      |                        |                                |    |                                                                       |
|------|------------------------|--------------------------------|----|-----------------------------------------------------------------------|
| 8238 | 1,4,5,6,9,1<br>1,12,17 | 2,3,7,8,10,<br>13,14,15,1<br>6 | 10 | P01681,P01835,P13432,P36374,Q09030,Q6IFU7,Q6IFU8,Q6IFW6,Q6IMF3,Q6P6Q2 |
| 8239 | 1,4,5,6,9,1<br>1,13,14 | 2,3,7,8,10,<br>12,15,16,1<br>7 | 2  | P05539,P83121                                                         |
| 8240 | 1,4,5,6,9,1<br>1,13,15 | 2,3,7,8,10,<br>12,14,16,1<br>7 | 1  | P05539                                                                |
| 8241 | 1,4,5,6,9,1<br>1,13,16 | 2,3,7,8,10,<br>12,14,15,1<br>7 | 2  | A2RUV9,P05539                                                         |
| 8242 | 1,4,5,6,9,1<br>1,13,17 | 2,3,7,8,10,<br>12,14,15,1<br>6 | 1  | P05539                                                                |
| 8243 | 1,4,5,6,9,1<br>1,14,15 | 2,3,7,8,10,<br>12,13,16,1<br>7 | 0  |                                                                       |
| 8244 | 1,4,5,6,9,1<br>1,14,16 | 2,3,7,8,10,<br>12,13,15,1<br>7 | 2  | P14668,P83121                                                         |
| 8245 | 1,4,5,6,9,1<br>1,14,17 | 2,3,7,8,10,<br>12,13,15,1<br>6 | 2  | P01835,P83121                                                         |
| 8246 | 1,4,5,6,9,1<br>1,15,16 | 2,3,7,8,10,<br>12,13,14,1<br>7 | 3  | A2RUV9,P14668,P20766                                                  |
| 8247 | 1,4,5,6,9,1<br>1,15,17 | 2,3,7,8,10,<br>12,13,14,1<br>6 | 0  |                                                                       |
| 8248 | 1,4,5,6,9,1<br>1,16,17 | 2,3,7,8,10,<br>12,13,14,1<br>5 | 1  | A2RUV9                                                                |
| 8249 | 1,4,5,6,9,1<br>2,13,14 | 2,3,7,8,10,<br>11,15,16,1<br>7 | 1  | P01835                                                                |
| 8250 | 1,4,5,6,9,1<br>2,13,15 | 2,3,7,8,10,<br>11,14,16,1<br>7 | 1  | P05539                                                                |
| 8251 | 1,4,5,6,9,1<br>2,13,16 | 2,3,7,8,10,<br>11,14,15,1<br>7 | 1  | P19218                                                                |
| 8252 | 1,4,5,6,9,1<br>2,13,17 | 2,3,7,8,10,<br>11,14,15,1<br>6 | 4  | P01835,P13432,P35280,P36374                                           |

|      |                        |                                |   |                             |
|------|------------------------|--------------------------------|---|-----------------------------|
| 8253 | 1,4,5,6,9,1<br>2,14,15 | 2,3,7,8,10,<br>11,13,16,1<br>7 | 2 | P01835,P20766               |
| 8254 | 1,4,5,6,9,1<br>2,14,16 | 2,3,7,8,10,<br>11,13,15,1<br>7 | 2 | P01835,P20766               |
| 8255 | 1,4,5,6,9,1<br>2,14,17 | 2,3,7,8,10,<br>11,13,15,1<br>6 | 3 | P01835,P13432,Q10758        |
| 8256 | 1,4,5,6,9,1<br>2,15,16 | 2,3,7,8,10,<br>11,13,14,1<br>7 | 1 | P20766                      |
| 8257 | 1,4,5,6,9,1<br>2,15,17 | 2,3,7,8,10,<br>11,13,14,1<br>6 | 3 | P01835,P13432,P20766        |
| 8258 | 1,4,5,6,9,1<br>2,16,17 | 2,3,7,8,10,<br>11,13,14,1<br>5 | 4 | P01835,P13432,P20766,P23593 |
| 8259 | 1,4,5,6,9,1<br>3,14,15 | 2,3,7,8,10,<br>11,12,16,1<br>7 | 1 | P05539                      |
| 8260 | 1,4,5,6,9,1<br>3,14,16 | 2,3,7,8,10,<br>11,12,15,1<br>7 | 1 | P62804                      |
| 8261 | 1,4,5,6,9,1<br>3,14,17 | 2,3,7,8,10,<br>11,12,15,1<br>6 | 0 |                             |
| 8262 | 1,4,5,6,9,1<br>3,15,16 | 2,3,7,8,10,<br>11,12,14,1<br>7 | 2 | P62804,Q00715               |
| 8263 | 1,4,5,6,9,1<br>3,15,17 | 2,3,7,8,10,<br>11,12,14,1<br>6 | 0 |                             |
| 8264 | 1,4,5,6,9,1<br>3,16,17 | 2,3,7,8,10,<br>11,12,14,1<br>5 | 3 | P23593,P35280,P62804        |
| 8265 | 1,4,5,6,9,1<br>4,15,16 | 2,3,7,8,10,<br>11,12,13,1<br>7 | 1 | P20766                      |
| 8266 | 1,4,5,6,9,1<br>4,15,17 | 2,3,7,8,10,<br>11,12,13,1<br>6 | 1 | P47967                      |
| 8267 | 1,4,5,6,9,1<br>4,16,17 | 2,3,7,8,10,<br>11,12,13,1<br>5 | 0 |                             |

|      |                         |                                |    |                                                                                                                                             |
|------|-------------------------|--------------------------------|----|---------------------------------------------------------------------------------------------------------------------------------------------|
| 8268 | 1,4,5,6,9,1<br>5,16,17  | 2,3,7,8,10,<br>11,12,13,1<br>4 | 3  | P20766,P23593,P62804                                                                                                                        |
| 8269 | 1,4,5,6,10,<br>11,12,13 | 2,3,7,8,9,1<br>4,15,16,17      | 12 | O35547,P04905,P0C0A9,P30120,P36374,P47727,Q10758,Q6IFU7,Q6IFW6,Q6IMF3,Q6P6Q2,Q9JHB9                                                         |
| 8270 | 1,4,5,6,10,<br>11,12,14 | 2,3,7,8,9,1<br>3,15,16,17      | 13 | O35547,P04905,P0C0A9,P20766,P30120,P47727,Q10758,Q6IFU7,Q6IFU8,Q6IFW6,Q6IG02,Q6IMF3,Q6P6Q2                                                  |
| 8271 | 1,4,5,6,10,<br>11,12,15 | 2,3,7,8,9,1<br>3,14,16,17      | 11 | O35547,P20766,P51907,Q10758,Q566E6,Q6IFU7,Q6IFU8,Q6IFW6,Q6IG02,Q6IMF3,Q6P6Q2                                                                |
| 8272 | 1,4,5,6,10,<br>11,12,16 | 2,3,7,8,9,1<br>3,14,15,17      | 12 | O35547,P06757,P20766,Q08849,Q10758,Q5FVI6,Q6IFU7,Q6IFU8,Q6IFW6,Q6IG02,Q6IMF3,Q6P6Q2                                                         |
| 8273 | 1,4,5,6,10,<br>11,12,17 | 2,3,7,8,9,1<br>3,14,15,16      | 20 | F1LM93,O08815,O35547,P01681,P06757,P0C0A9,P13432,P20766,P36374,Q08849,Q10758,Q566E6,Q6IFU7,Q6IFU8,Q6IFW6,Q6IG02,Q6IMF3,Q6P6Q2,Q99MH3,Q9QZK9 |
| 8274 | 1,4,5,6,10,<br>11,13,14 | 2,3,7,8,9,1<br>2,15,16,17      | 1  | P47727                                                                                                                                      |
| 8275 | 1,4,5,6,10,<br>11,13,15 | 2,3,7,8,9,1<br>2,14,16,17      | 0  |                                                                                                                                             |
| 8276 | 1,4,5,6,10,<br>11,13,16 | 2,3,7,8,9,1<br>2,14,15,17      | 1  | A2RUV9                                                                                                                                      |
| 8277 | 1,4,5,6,10,<br>11,13,17 | 2,3,7,8,9,1<br>2,14,15,16      | 0  |                                                                                                                                             |
| 8278 | 1,4,5,6,10,<br>11,14,15 | 2,3,7,8,9,1<br>2,13,16,17      | 1  | P20766                                                                                                                                      |
| 8279 | 1,4,5,6,10,<br>11,14,16 | 2,3,7,8,9,1<br>2,13,15,17      | 2  | P20766,Q6IFU7                                                                                                                               |
| 8280 | 1,4,5,6,10,<br>11,14,17 | 2,3,7,8,9,1<br>2,13,15,16      | 1  | P20766                                                                                                                                      |
| 8281 | 1,4,5,6,10,<br>11,15,16 | 2,3,7,8,9,1<br>2,13,14,17      | 2  | P20766,Q5FVI6                                                                                                                               |
| 8282 | 1,4,5,6,10,<br>11,15,17 | 2,3,7,8,9,1<br>2,13,14,16      | 2  | P20766,Q566E6                                                                                                                               |
| 8283 | 1,4,5,6,10,<br>11,16,17 | 2,3,7,8,9,1<br>2,13,14,15      | 2  | A2RUV9,P20766                                                                                                                               |
| 8284 | 1,4,5,6,10,<br>12,13,14 | 2,3,7,8,9,1<br>1,15,16,17      | 5  | P06911,P30120,Q10758,Q498D9,Q6IMF3                                                                                                          |
| 8285 | 1,4,5,6,10,<br>12,13,15 | 2,3,7,8,9,1<br>1,14,16,17      | 2  | Q498D9,Q99MH3                                                                                                                               |
| 8286 | 1,4,5,6,10,<br>12,13,16 | 2,3,7,8,9,1<br>1,14,15,17      | 4  | P19218,Q10758,Q6IFU7,Q6IMF3                                                                                                                 |
| 8287 | 1,4,5,6,10,<br>12,13,17 | 2,3,7,8,9,1<br>1,14,15,16      | 4  | P36374,Q10758,Q99MH3,Q9QZK9                                                                                                                 |
| 8288 | 1,4,5,6,10,<br>12,14,15 | 2,3,7,8,9,1<br>1,13,16,17      | 4  | P20766,Q10758,Q498D9,Q6IMF3                                                                                                                 |
| 8289 | 1,4,5,6,10,<br>12,14,16 | 2,3,7,8,9,1<br>1,13,15,17      | 6  | P20766,Q10758,Q6IFU7,Q6IFW6,Q6IMF3,Q6P6Q2                                                                                                   |

|      |                                                |    |                                                                              |
|------|------------------------------------------------|----|------------------------------------------------------------------------------|
| 8290 | 1,4,5,6,10, 2,3,7,8,9,1<br>12,14,17 1,13,15,16 | 6  | P01835,P13432,P20766,Q10758,Q6IFW6,Q6IMF3                                    |
| 8291 | 1,4,5,6,10, 2,3,7,8,9,1<br>12,15,16 1,13,14,17 | 5  | P20766,Q10758,Q6IFU7,Q6IFW6,Q6IMF3                                           |
| 8292 | 1,4,5,6,10, 2,3,7,8,9,1<br>12,15,17 1,13,14,16 | 3  | P20766,Q10758,Q99MH3                                                         |
| 8293 | 1,4,5,6,10, 2,3,7,8,9,1<br>12,16,17 1,13,14,15 | 6  | P20766,Q10758,Q6IFU7,Q6IFW6,Q6IMF3,Q99MH3                                    |
| 8294 | 1,4,5,6,10, 2,3,7,8,9,1<br>13,14,15 1,12,16,17 | 1  | Q498D9                                                                       |
| 8295 | 1,4,5,6,10, 2,3,7,8,9,1<br>13,14,16 1,12,15,17 | 0  |                                                                              |
| 8296 | 1,4,5,6,10, 2,3,7,8,9,1<br>13,14,17 1,12,15,16 | 0  |                                                                              |
| 8297 | 1,4,5,6,10, 2,3,7,8,9,1<br>13,15,16 1,12,14,17 | 0  |                                                                              |
| 8298 | 1,4,5,6,10, 2,3,7,8,9,1<br>13,15,17 1,12,14,16 | 2  | Q6IFV1,Q99MH3                                                                |
| 8299 | 1,4,5,6,10, 2,3,7,8,9,1<br>13,16,17 1,12,14,15 | 0  |                                                                              |
| 8300 | 1,4,5,6,10, 2,3,7,8,9,1<br>14,15,16 1,12,13,17 | 2  | P20766,P55018                                                                |
| 8301 | 1,4,5,6,10, 2,3,7,8,9,1<br>14,15,17 1,12,13,16 | 1  | P20766                                                                       |
| 8302 | 1,4,5,6,10, 2,3,7,8,9,1<br>14,16,17 1,12,13,15 | 1  | P20766                                                                       |
| 8303 | 1,4,5,6,10, 2,3,7,8,9,1<br>15,16,17 1,12,13,14 | 1  | P20766                                                                       |
| 8304 | 1,4,5,6,11, 2,3,7,8,9,1<br>12,13,14 0,15,16,17 | 11 | P04905,P05539,P0C0A9,P30120,P36374,P47727,Q6IFU7,Q6IFW6,Q6IMF3,Q6P6Q2,Q9JHB9 |
| 8305 | 1,4,5,6,11, 2,3,7,8,9,1<br>12,13,15 0,14,16,17 | 4  | P05539,Q6IFU7,Q6IFW6,Q9JHB9                                                  |
| 8306 | 1,4,5,6,11, 2,3,7,8,9,1<br>12,13,16 0,14,15,17 | 6  | P30120,Q6IFU7,Q6IFW6,Q6IMF3,Q6P6Q2,Q9JHB9                                    |
| 8307 | 1,4,5,6,11, 2,3,7,8,9,1<br>12,13,17 0,14,15,16 | 10 | P01681,P0C0A9,P13432,P30120,P36374,Q6IFW6,Q6IMF3,Q6P6Q2,Q9JHB9,Q9QZK9        |
| 8308 | 1,4,5,6,11, 2,3,7,8,9,1<br>12,14,15 0,13,16,17 | 5  | P20766,Q6IFU7,Q6IFW6,Q6IMF3,Q6P6Q2                                           |
| 8309 | 1,4,5,6,11, 2,3,7,8,9,1<br>12,14,16 0,13,15,17 | 6  | P20766,Q6IFU7,Q6IFU8,Q6IFW6,Q6IMF3,Q6P6Q2                                    |
| 8310 | 1,4,5,6,11, 2,3,7,8,9,1<br>12,14,17 0,13,15,16 | 11 | P01681,P01835,P04905,P13432,P20766,Q10758,Q6IFU7,Q6IFU8,Q6IFW6,Q6IMF3,Q6P6Q2 |
| 8311 | 1,4,5,6,11, 2,3,7,8,9,1<br>12,15,16 0,13,14,17 | 6  | P20766,P51907,Q6IFU7,Q6IFW6,Q6IMF3,Q6P6Q2                                    |
| 8312 | 1,4,5,6,11, 2,3,7,8,9,1<br>12,15,17 0,13,14,16 | 6  | P13432,P20766,Q6IFU7,Q6IFW6,Q6IMF3,Q6P6Q2                                    |

|      |                                                |   |                                                                |
|------|------------------------------------------------|---|----------------------------------------------------------------|
| 8313 | 1,4,5,6,11, 2,3,7,8,9,1<br>12,16,17 0,13,14,15 | 9 | P01681,P13432,P20766,Q10758,Q6IFU7,Q6IFU8,Q6IFW6,Q6IMF3,Q6P6Q2 |
| 8314 | 1,4,5,6,11, 2,3,7,8,9,1<br>13,14,15 0,12,16,17 | 1 | P05539                                                         |
| 8315 | 1,4,5,6,11, 2,3,7,8,9,1<br>13,14,16 0,12,15,17 | 0 |                                                                |
| 8316 | 1,4,5,6,11, 2,3,7,8,9,1<br>13,14,17 0,12,15,16 | 1 | P05539                                                         |
| 8317 | 1,4,5,6,11, 2,3,7,8,9,1<br>13,15,16 0,12,14,17 | 0 |                                                                |
| 8318 | 1,4,5,6,11, 2,3,7,8,9,1<br>13,15,17 0,12,14,16 | 1 | P05539                                                         |
| 8319 | 1,4,5,6,11, 2,3,7,8,9,1<br>13,16,17 0,12,14,15 | 1 | A2RUV9                                                         |
| 8320 | 1,4,5,6,11, 2,3,7,8,9,1<br>14,15,16 0,12,13,17 | 2 | P14668,P20766                                                  |
| 8321 | 1,4,5,6,11, 2,3,7,8,9,1<br>14,15,17 0,12,13,16 | 3 | P20766,P47967,P97840                                           |
| 8322 | 1,4,5,6,11, 2,3,7,8,9,1<br>14,16,17 0,12,13,15 | 1 | P20766                                                         |
| 8323 | 1,4,5,6,11, 2,3,7,8,9,1<br>15,16,17 0,12,13,14 | 2 | A2RUV9,P20766                                                  |
| 8324 | 1,4,5,6,12, 2,3,7,8,9,1<br>13,14,15 0,11,16,17 | 1 | Q498D9                                                         |
| 8325 | 1,4,5,6,12, 2,3,7,8,9,1<br>13,14,16 0,11,15,17 | 0 |                                                                |
| 8326 | 1,4,5,6,12, 2,3,7,8,9,1<br>13,14,17 0,11,15,16 | 4 | P01835,P13432,P36374,Q10758                                    |
| 8327 | 1,4,5,6,12, 2,3,7,8,9,1<br>13,15,16 0,11,14,17 | 0 |                                                                |
| 8328 | 1,4,5,6,12, 2,3,7,8,9,1<br>13,15,17 0,11,14,16 | 3 | P13432,Q6IFV1,Q99MH3                                           |
| 8329 | 1,4,5,6,12, 2,3,7,8,9,1<br>13,16,17 0,11,14,15 | 3 | P13432,P27213,P35280                                           |
| 8330 | 1,4,5,6,12, 2,3,7,8,9,1<br>14,15,16 0,11,13,17 | 2 | P20766,P35467                                                  |
| 8331 | 1,4,5,6,12, 2,3,7,8,9,1<br>14,15,17 0,11,13,16 | 4 | B0BNN3,P01835,P13432,P20766                                    |
| 8332 | 1,4,5,6,12, 2,3,7,8,9,1<br>14,16,17 0,11,13,15 | 4 | P01835,P13432,P20766,Q10758                                    |
| 8333 | 1,4,5,6,12, 2,3,7,8,9,1<br>15,16,17 0,11,13,14 | 2 | P13432,P20766                                                  |
| 8334 | 1,4,5,6,13, 2,3,7,8,9,1<br>14,15,16 0,11,12,17 | 0 |                                                                |
| 8335 | 1,4,5,6,13, 2,3,7,8,9,1<br>14,15,17 0,11,12,16 | 1 | P47967                                                         |



|      |                         |                                 |    |                                                                                                   |
|------|-------------------------|---------------------------------|----|---------------------------------------------------------------------------------------------------|
| 8336 | 1,4,5,6,13,<br>14,16,17 | 2,3,7,8,9,1<br>0,11,12,15       | 0  |                                                                                                   |
| 8337 | 1,4,5,6,13,<br>15,16,17 | 2,3,7,8,9,1<br>0,11,12,14       | 1  | P62804                                                                                            |
| 8338 | 1,4,5,6,14,<br>15,16,17 | 2,3,7,8,9,1<br>0,11,12,13       | 2  | P20766,P35467                                                                                     |
| 8339 | 1,4,5,7,8,9<br>,10,11   | 2,3,6,12,1<br>3,14,15,16<br>,17 | 8  | P00714,P07171,P18418,P61206;P84079;P84082,Q561R9,Q5FVI6,Q63617,Q6AYS4                             |
| 8340 | 1,4,5,7,8,9<br>,10,12   | 2,3,6,11,1<br>3,14,15,16<br>,17 | 7  | F1LM93,P00714,P02803,P18418,P36374,Q4FZU6,Q8CJ52                                                  |
| 8341 | 1,4,5,7,8,9<br>,10,13   | 2,3,6,11,1<br>2,14,15,16<br>,17 | 3  | P02803,P18418,Q63617                                                                              |
| 8342 | 1,4,5,7,8,9<br>,10,14   | 2,3,6,11,1<br>2,13,15,16<br>,17 | 3  | P18418,Q4FZU6,Q63617                                                                              |
| 8343 | 1,4,5,7,8,9<br>,10,15   | 2,3,6,11,1<br>2,13,14,16<br>,17 | 1  | P18418                                                                                            |
| 8344 | 1,4,5,7,8,9<br>,10,16   | 2,3,6,11,1<br>2,13,14,15<br>,17 | 5  | P08721,P18418,Q4FZU6,Q63617,Q64093                                                                |
| 8345 | 1,4,5,7,8,9<br>,10,17   | 2,3,6,11,1<br>2,13,14,15<br>,16 | 4  | P18418,P52590,Q4FZU6,Q63617                                                                       |
| 8346 | 1,4,5,7,8,9<br>,11,12   | 2,3,6,10,1<br>3,14,15,16<br>,17 | 14 | P02780,P02781,P02803,P0C0A9,P10715,P18418,P22283,P36374,Q4FZU6,Q63617,Q6AYS4,Q8CJ52,Q99041,Q9ESW0 |
| 8347 | 1,4,5,7,8,9<br>,11,13   | 2,3,6,10,1<br>2,14,15,16<br>,17 | 6  | P02803,P05539,Q4FZU6,Q63617,Q6AYS4,Q8CJ52                                                         |
| 8348 | 1,4,5,7,8,9<br>,11,14   | 2,3,6,10,1<br>2,13,15,16<br>,17 | 4  | P07171,Q4FZU6,Q63617,Q6AYS4                                                                       |
| 8349 | 1,4,5,7,8,9<br>,11,15   | 2,3,6,10,1<br>2,13,14,16<br>,17 | 6  | P07171,P10715,P22006,Q561R9,Q63617,Q6AYS4                                                         |
| 8350 | 1,4,5,7,8,9<br>,11,16   | 2,3,6,10,1<br>2,13,14,15<br>,17 | 6  | A2RUV9,P10715,P14668,P61206;P84079;P84082,Q4FZU6,Q63617                                           |
| 8351 | 1,4,5,7,8,9<br>,11,17   | 2,3,6,10,1<br>2,13,14,15<br>,16 | 6  | P10715,P52590,Q4FZU6,Q63617,Q6AYS4,Q99041                                                         |

|      |                       |                                 |   |                                                                |
|------|-----------------------|---------------------------------|---|----------------------------------------------------------------|
| 8352 | 1,4,5,7,8,9<br>,12,13 | 2,3,6,10,1<br>1,14,15,16<br>,17 | 8 | P02780,P02803,P06761,P22283,P36374,Q4FZU6,Q63617,Q8CJ52        |
| 8353 | 1,4,5,7,8,9<br>,12,14 | 2,3,6,10,1<br>1,13,15,16<br>,17 | 4 | P18418,Q4FZU6,Q63617,Q8CJ52                                    |
| 8354 | 1,4,5,7,8,9<br>,12,15 | 2,3,6,10,1<br>1,13,14,16<br>,17 | 2 | P10715,Q4FZU6                                                  |
| 8355 | 1,4,5,7,8,9<br>,12,16 | 2,3,6,10,1<br>1,13,14,15<br>,17 | 4 | P10715,Q4FZU6,Q63617,Q8CJ52                                    |
| 8356 | 1,4,5,7,8,9<br>,12,17 | 2,3,6,10,1<br>1,13,14,15<br>,16 | 9 | P10715,P19223,P36374,P52590,Q4FZU6,Q63617,Q8CJ52,Q99041,Q9QZA6 |
| 8357 | 1,4,5,7,8,9<br>,13,14 | 2,3,6,10,1<br>1,12,15,16<br>,17 | 2 | Q4FZU6,Q63617                                                  |
| 8358 | 1,4,5,7,8,9<br>,13,15 | 2,3,6,10,1<br>1,12,14,16<br>,17 | 2 | P05539,Q63617                                                  |
| 8359 | 1,4,5,7,8,9<br>,13,16 | 2,3,6,10,1<br>1,12,14,15<br>,17 | 4 | P62804,Q00715,Q4FZU6,Q63617                                    |
| 8360 | 1,4,5,7,8,9<br>,13,17 | 2,3,6,10,1<br>1,12,14,15<br>,16 | 3 | P52590,Q4FZU6,Q63617                                           |
| 8361 | 1,4,5,7,8,9<br>,14,15 | 2,3,6,10,1<br>1,12,13,16<br>,17 | 4 | P07171,P16636,Q4FZU6,Q63617                                    |
| 8362 | 1,4,5,7,8,9<br>,14,16 | 2,3,6,10,1<br>1,12,13,15<br>,17 | 2 | Q4FZU6,Q63617                                                  |
| 8363 | 1,4,5,7,8,9<br>,14,17 | 2,3,6,10,1<br>1,12,13,15<br>,16 | 3 | P52590,Q4FZU6,Q63617                                           |
| 8364 | 1,4,5,7,8,9<br>,15,16 | 2,3,6,10,1<br>1,12,13,14<br>,17 | 3 | O54728,P62804,Q4FZU6                                           |
| 8365 | 1,4,5,7,8,9<br>,15,17 | 2,3,6,10,1<br>1,12,13,14<br>,16 | 2 | P52590,Q4FZU6                                                  |
| 8366 | 1,4,5,7,8,9<br>,16,17 | 2,3,6,10,1<br>1,12,13,14<br>,15 | 3 | P52590,Q4FZU6,Q63617                                           |

|      |                        |                                |    |                                                                                                                                                           |
|------|------------------------|--------------------------------|----|-----------------------------------------------------------------------------------------------------------------------------------------------------------|
| 8367 | 1,4,5,7,8,1<br>0,11,12 | 2,3,6,9,13,<br>14,15,16,1<br>7 | 20 | F1LM93,P00714,P02781,P02803,P0C0A9,P10715,P16391,P18418,P22283,P36374,P61206;P84079;P84082,Q5FVI6,Q63357,Q63493,Q6AYS4,Q6IG02,Q6P6Q2,Q8CJ52,Q99041,Q9ESW0 |
| 8368 | 1,4,5,7,8,1<br>0,11,13 | 2,3,6,9,12,<br>14,15,16,1<br>7 | 7  | P00714,P07171,P18418,P61206;P84079;P84082,Q6AYS4,Q8CJ52,Q8VD89                                                                                            |
| 8369 | 1,4,5,7,8,1<br>0,11,14 | 2,3,6,9,12,<br>13,15,16,1<br>7 | 8  | P00714,P07171,P18418,P61206;P84079;P84082,Q5BJY9,Q63617,Q6AYS4,Q8CJ52                                                                                     |
| 8370 | 1,4,5,7,8,1<br>0,11,15 | 2,3,6,9,12,<br>13,14,16,1<br>7 | 9  | P00714,P07171,P18418,P22006,P61206;P84079;P84082,Q561R9,Q5FVI6,Q6AYS4,Q8VD89                                                                              |
| 8371 | 1,4,5,7,8,1<br>0,11,16 | 2,3,6,9,12,<br>13,14,15,1<br>7 | 9  | P00714,P08721,P18418,P55018,P61206;P84079;P84082,Q5FVI6,Q6AYS4,Q8CJ52,Q8VD89                                                                              |
| 8372 | 1,4,5,7,8,1<br>0,11,17 | 2,3,6,9,12,<br>13,14,15,1<br>6 | 6  | P00714,P16391,P18418,P61206;P84079;P84082,Q6AYS4,Q99041                                                                                                   |
| 8373 | 1,4,5,7,8,1<br>0,12,13 | 2,3,6,9,11,<br>14,15,16,1<br>7 | 7  | F1LM93,P02803,P06761,P18418,P22283,P36374,Q8CJ52                                                                                                          |
| 8374 | 1,4,5,7,8,1<br>0,12,14 | 2,3,6,9,11,<br>13,15,16,1<br>7 | 4  | F1LM93,P18418,Q4FZU6,Q8CJ52                                                                                                                               |
| 8375 | 1,4,5,7,8,1<br>0,12,15 | 2,3,6,9,11,<br>13,14,16,1<br>7 | 3  | F1LM93,P18418,Q8CJ52                                                                                                                                      |
| 8376 | 1,4,5,7,8,1<br>0,12,16 | 2,3,6,9,11,<br>13,14,15,1<br>7 | 5  | F1LM93,P08721,P18418,Q4FZU6,Q8CJ52                                                                                                                        |
| 8377 | 1,4,5,7,8,1<br>0,12,17 | 2,3,6,9,11,<br>13,14,15,1<br>6 | 11 | F1LM93,P18418,P19223,P36374,Q10758,Q4FZU6,Q4G075,Q8CJ52,Q99041,Q99MH3,Q9QZA6                                                                              |
| 8378 | 1,4,5,7,8,1<br>0,13,14 | 2,3,6,9,11,<br>12,15,16,1<br>7 | 4  | P06911,P12020,P18418,Q5GRG2                                                                                                                               |
| 8379 | 1,4,5,7,8,1<br>0,13,15 | 2,3,6,9,11,<br>12,14,16,1<br>7 | 2  | P01835,P18418                                                                                                                                             |
| 8380 | 1,4,5,7,8,1<br>0,13,16 | 2,3,6,9,11,<br>12,14,15,1<br>7 | 4  | P01835,P18418,Q4FZU6,Q8VD89                                                                                                                               |
| 8381 | 1,4,5,7,8,1<br>0,13,17 | 2,3,6,9,11,<br>12,14,15,1<br>6 | 2  | P18418,Q99MH3                                                                                                                                             |

|      |                        |                                |    |                                                                                                                                             |
|------|------------------------|--------------------------------|----|---------------------------------------------------------------------------------------------------------------------------------------------|
| 8382 | 1,4,5,7,8,1<br>0,14,15 | 2,3,6,9,11,<br>12,13,16,1<br>7 | 4  | P07171,P18418,P22006,P55018                                                                                                                 |
| 8383 | 1,4,5,7,8,1<br>0,14,16 | 2,3,6,9,11,<br>12,13,15,1<br>7 | 4  | P08721,P18418,P55018,Q4FZU6                                                                                                                 |
| 8384 | 1,4,5,7,8,1<br>0,14,17 | 2,3,6,9,11,<br>12,13,15,1<br>6 | 2  | P18418,Q4FZU6                                                                                                                               |
| 8385 | 1,4,5,7,8,1<br>0,15,16 | 2,3,6,9,11,<br>12,13,14,1<br>7 | 5  | P01835,P08721,P18418,P55018,Q8VD89                                                                                                          |
| 8386 | 1,4,5,7,8,1<br>0,15,17 | 2,3,6,9,11,<br>12,13,14,1<br>6 | 2  | P18418,P52590                                                                                                                               |
| 8387 | 1,4,5,7,8,1<br>0,16,17 | 2,3,6,9,11,<br>12,13,14,1<br>5 | 4  | P08721,P18418,P23928,Q4FZU6                                                                                                                 |
| 8388 | 1,4,5,7,8,1<br>1,12,13 | 2,3,6,9,10,<br>14,15,16,1<br>7 | 20 | P02780,P02781,P02803,P05539,P06761,P07647,P0C0A9,P10715,P18418,P22282,P22283,P30120,P36374,Q4FZU6,Q6AYS4,Q8CJ52,Q99041,Q9ESW0,Q9JHB9,Q9JI85 |
| 8389 | 1,4,5,7,8,1<br>1,12,14 | 2,3,6,9,10,<br>13,15,16,1<br>7 | 16 | P02780,P02781,P07171,P0C0A9,P10715,P18418,P22283,P36374,Q4FZU6,Q63493,Q63617,Q68FS4,Q6AYS4,Q8CJ52,Q99041,Q9ESW0                             |
| 8390 | 1,4,5,7,8,1<br>1,12,15 | 2,3,6,9,10,<br>13,14,16,1<br>7 | 6  | P07171,P10715,P22006,Q8CJ52,Q99041,Q9ESW0                                                                                                   |
| 8391 | 1,4,5,7,8,1<br>1,12,16 | 2,3,6,9,10,<br>13,14,15,1<br>7 | 7  | P10715,P61206,P84079,P84082,Q4FZU6,Q6P6Q2,Q8CJ52,Q99041,Q9ESW0                                                                              |
| 8392 | 1,4,5,7,8,1<br>1,12,17 | 2,3,6,9,10,<br>13,14,15,1<br>6 | 15 | F1LM93,P10715,P18418,P19223,P22283,P36374,P50115,Q4FZU6,Q4G075,Q63493,Q6AYS4,Q8CJ52,Q99041,Q9ESW0,Q9QZA6                                    |
| 8393 | 1,4,5,7,8,1<br>1,13,14 | 2,3,6,9,10,<br>12,15,16,1<br>7 | 8  | P05539,P06911,P07171,Q4FZU6,Q5GRG2,Q63617,Q6AYS4,Q8CJ52                                                                                     |
| 8394 | 1,4,5,7,8,1<br>1,13,15 | 2,3,6,9,10,<br>12,14,16,1<br>7 | 4  | P05539,P07171,P22006,Q8VD89                                                                                                                 |
| 8395 | 1,4,5,7,8,1<br>1,13,16 | 2,3,6,9,10,<br>12,14,15,1<br>7 | 5  | P61206,P84079,P84082,Q4FZU6,Q63617,Q8CJ52,Q8VD89                                                                                            |
| 8396 | 1,4,5,7,8,1<br>1,13,17 | 2,3,6,9,10,<br>12,14,15,1<br>6 | 8  | P05539,P22283,P36374,Q4FZU6,Q63617,Q6AYS4,Q8CJ52,Q99041                                                                                     |

|      |                        |                                |    |                                                                                     |
|------|------------------------|--------------------------------|----|-------------------------------------------------------------------------------------|
| 8397 | 1,4,5,7,8,1<br>1,14,15 | 2,3,6,9,10,<br>12,13,16,1<br>7 | 4  | P07171,P22006,Q4FZU6,Q5I0D1                                                         |
| 8398 | 1,4,5,7,8,1<br>1,14,16 | 2,3,6,9,10,<br>12,13,15,1<br>7 | 6  | P07171,P14668,P61206;P84079;P84082,Q4FZU6,Q63617,Q8CJ52                             |
| 8399 | 1,4,5,7,8,1<br>1,14,17 | 2,3,6,9,10,<br>12,13,15,1<br>6 | 6  | P07171,P97840,Q4FZU6,Q63617,Q6AYS4,Q99041                                           |
| 8400 | 1,4,5,7,8,1<br>1,15,16 | 2,3,6,9,10,<br>12,13,14,1<br>7 | 5  | P07171,P14408,P14668,Q4FZU6,Q8VD89                                                  |
| 8401 | 1,4,5,7,8,1<br>1,15,17 | 2,3,6,9,10,<br>12,13,14,1<br>6 | 6  | P07171,P22006,Q6AYS4,Q99041,Q9ESW0,Q9QZA6                                           |
| 8402 | 1,4,5,7,8,1<br>1,16,17 | 2,3,6,9,10,<br>12,13,14,1<br>5 | 6  | A2RUV9,P10715,Q4FZU6,Q63617,Q6AYS4,Q99041                                           |
| 8403 | 1,4,5,7,8,1<br>2,13,14 | 2,3,6,9,10,<br>11,15,16,1<br>7 | 10 | P02780,P06761,P06911,P18418,P22282,P22283,P36374,Q4FZU6,Q5GRG2,Q8CJ52               |
| 8404 | 1,4,5,7,8,1<br>2,13,15 | 2,3,6,9,10,<br>11,14,16,1<br>7 | 5  | P06761,P36374,Q4FZU6,Q8CJ52,Q99041                                                  |
| 8405 | 1,4,5,7,8,1<br>2,13,16 | 2,3,6,9,10,<br>11,14,15,1<br>7 | 4  | P36374,Q4FZU6,Q8CJ52,Q99041                                                         |
| 8406 | 1,4,5,7,8,1<br>2,13,17 | 2,3,6,9,10,<br>11,14,15,1<br>6 | 12 | P06761,P22282,P22283,P23928,P36374,P55091,Q4FZU6,Q4G075,Q8CJ52,Q99041,Q99MH3,Q9QZK9 |
| 8407 | 1,4,5,7,8,1<br>2,14,15 | 2,3,6,9,10,<br>11,13,16,1<br>7 | 4  | P07171,P18418,Q4FZU6,Q8CJ52                                                         |
| 8408 | 1,4,5,7,8,1<br>2,14,16 | 2,3,6,9,10,<br>11,13,15,1<br>7 | 4  | P08721,Q4FZU6,Q68FS4,Q8CJ52                                                         |
| 8409 | 1,4,5,7,8,1<br>2,14,17 | 2,3,6,9,10,<br>11,13,15,1<br>6 | 9  | P06761,P18418,P31430,P36374,Q4FZU6,Q4G075,Q8CJ52,Q99041,Q9QZA6                      |
| 8410 | 1,4,5,7,8,1<br>2,15,16 | 2,3,6,9,10,<br>11,13,14,1<br>7 | 4  | P10715,Q4FZU6,Q8CJ52,Q99041                                                         |
| 8411 | 1,4,5,7,8,1<br>2,15,17 | 2,3,6,9,10,<br>11,13,14,1<br>6 | 7  | P10715,Q4FZU6,Q4G075,Q8CJ52,Q99041,Q9ESW0,Q9QZA6                                    |

|      |                        |                                |   |                                                                |
|------|------------------------|--------------------------------|---|----------------------------------------------------------------|
| 8412 | 1,4,5,7,8,1<br>2,16,17 | 2,3,6,9,10,<br>11,13,14,1<br>5 | 7 | P10715,P23928,Q4FZU6,Q4G075,Q8CJ52,Q99041,Q9QZA6               |
| 8413 | 1,4,5,7,8,1<br>3,14,15 | 2,3,6,9,10,<br>11,12,16,1<br>7 | 4 | P07171,P16636,Q4FZU6,Q5GRG2                                    |
| 8414 | 1,4,5,7,8,1<br>3,14,16 | 2,3,6,9,10,<br>11,12,15,1<br>7 | 2 | Q4FZU6,Q63617                                                  |
| 8415 | 1,4,5,7,8,1<br>3,14,17 | 2,3,6,9,10,<br>11,12,15,1<br>6 | 3 | P10536,Q4FZU6,Q63617                                           |
| 8416 | 1,4,5,7,8,1<br>3,15,16 | 2,3,6,9,10,<br>11,12,14,1<br>7 | 4 | P01835,P62804,Q4FZU6,Q8VD89                                    |
| 8417 | 1,4,5,7,8,1<br>3,15,17 | 2,3,6,9,10,<br>11,12,14,1<br>6 | 2 | P10536,Q4FZU6                                                  |
| 8418 | 1,4,5,7,8,1<br>3,16,17 | 2,3,6,9,10,<br>11,12,14,1<br>5 | 3 | P23928,Q4FZU6,Q99041                                           |
| 8419 | 1,4,5,7,8,1<br>4,15,16 | 2,3,6,9,10,<br>11,12,13,1<br>7 | 3 | P07171,P16636,Q4FZU6                                           |
| 8420 | 1,4,5,7,8,1<br>4,15,17 | 2,3,6,9,10,<br>11,12,13,1<br>6 | 4 | P07171,P10536,Q4FZU6,Q9QZA6                                    |
| 8421 | 1,4,5,7,8,1<br>4,16,17 | 2,3,6,9,10,<br>11,12,13,1<br>5 | 3 | P23928,Q4FZU6,Q63617                                           |
| 8422 | 1,4,5,7,8,1<br>5,16,17 | 2,3,6,9,10,<br>11,12,13,1<br>4 | 1 | Q4FZU6                                                         |
| 8423 | 1,4,5,7,9,1<br>0,11,12 | 2,3,6,8,13,<br>14,15,16,1<br>7 | 7 | P02803,P36374,P51907,P61206;P84079;P84082,Q5FVI6,Q62636,Q64093 |
| 8424 | 1,4,5,7,9,1<br>0,11,13 | 2,3,6,8,12,<br>14,15,16,1<br>7 | 4 | P02803,P05539,P61206;P84079;P84082,Q5FVI6                      |
| 8425 | 1,4,5,7,9,1<br>0,11,14 | 2,3,6,8,12,<br>13,15,16,1<br>7 | 3 | P61206;P84079;P84082,P83121,Q62635                             |
| 8426 | 1,4,5,7,9,1<br>0,11,15 | 2,3,6,8,12,<br>13,14,16,1<br>7 | 6 | P22006,P51907,Q561R9,Q5FVI6,Q62635,Q64093                      |

|      |                        |                                |   |                                                                |
|------|------------------------|--------------------------------|---|----------------------------------------------------------------|
| 8427 | 1,4,5,7,9,1<br>0,11,16 | 2,3,6,8,12,<br>13,14,15,1<br>7 | 7 | P15999,P61206,P84079;P84082,Q5FVI6,Q62635,Q63424,Q64093,Q80W57 |
| 8428 | 1,4,5,7,9,1<br>0,11,17 | 2,3,6,8,12,<br>13,14,15,1<br>6 | 2 | P52590,Q64093                                                  |
| 8429 | 1,4,5,7,9,1<br>0,12,13 | 2,3,6,8,11,<br>14,15,16,1<br>7 | 3 | P02803,P19218,P36374                                           |
| 8430 | 1,4,5,7,9,1<br>0,12,14 | 2,3,6,8,11,<br>13,15,16,1<br>7 | 0 |                                                                |
| 8431 | 1,4,5,7,9,1<br>0,12,15 | 2,3,6,8,11,<br>13,14,16,1<br>7 | 1 | P20766                                                         |
| 8432 | 1,4,5,7,9,1<br>0,12,16 | 2,3,6,8,11,<br>13,14,15,1<br>7 | 3 | P20766,Q4FZU6,Q64093                                           |
| 8433 | 1,4,5,7,9,1<br>0,12,17 | 2,3,6,8,11,<br>13,14,15,1<br>6 | 3 | P36374,P52590,Q64093                                           |
| 8434 | 1,4,5,7,9,1<br>0,13,14 | 2,3,6,8,11,<br>12,15,16,1<br>7 | 0 |                                                                |
| 8435 | 1,4,5,7,9,1<br>0,13,15 | 2,3,6,8,11,<br>12,14,16,1<br>7 | 3 | P05539,P62804,Q62635                                           |
| 8436 | 1,4,5,7,9,1<br>0,13,16 | 2,3,6,8,11,<br>12,14,15,1<br>7 | 3 | P62804,Q00715,Q62635                                           |
| 8437 | 1,4,5,7,9,1<br>0,13,17 | 2,3,6,8,11,<br>12,14,15,1<br>6 | 1 | P52590                                                         |
| 8438 | 1,4,5,7,9,1<br>0,14,15 | 2,3,6,8,11,<br>12,13,16,1<br>7 | 2 | P16636,Q62635                                                  |
| 8439 | 1,4,5,7,9,1<br>0,14,16 | 2,3,6,8,11,<br>12,13,15,1<br>7 | 2 | Q4FZU6,Q62635                                                  |
| 8440 | 1,4,5,7,9,1<br>0,14,17 | 2,3,6,8,11,<br>12,13,15,1<br>6 | 1 | P52590                                                         |
| 8441 | 1,4,5,7,9,1<br>0,15,16 | 2,3,6,8,11,<br>12,13,14,1<br>7 | 8 | O54728,P02782,P20766,P62804,Q00715,Q5FVI6,Q62635,Q64093        |

|      |                        |                                |   |                                                         |
|------|------------------------|--------------------------------|---|---------------------------------------------------------|
| 8442 | 1,4,5,7,9,1<br>0,15,17 | 2,3,6,8,11,<br>12,13,14,1<br>6 | 1 | P52590                                                  |
| 8443 | 1,4,5,7,9,1<br>0,16,17 | 2,3,6,8,11,<br>12,13,14,1<br>5 | 4 | P52590,P62804,Q4FZU6,Q64093                             |
| 8444 | 1,4,5,7,9,1<br>1,12,13 | 2,3,6,8,10,<br>14,15,16,1<br>7 | 4 | P02803,P05539,P36374,Q4FZU6                             |
| 8445 | 1,4,5,7,9,1<br>1,12,14 | 2,3,6,8,10,<br>13,15,16,1<br>7 | 2 | P36374,Q4FZU6                                           |
| 8446 | 1,4,5,7,9,1<br>1,12,15 | 2,3,6,8,10,<br>13,14,16,1<br>7 | 2 | P51907,Q9ESW0                                           |
| 8447 | 1,4,5,7,9,1<br>1,12,16 | 2,3,6,8,10,<br>13,14,15,1<br>7 | 6 | P14408,P15999,P20766,P51907,P61206;P84079;P84082,Q4FZU6 |
| 8448 | 1,4,5,7,9,1<br>1,12,17 | 2,3,6,8,10,<br>13,14,15,1<br>6 | 3 | P36374,Q4FZU6,Q9ESW0                                    |
| 8449 | 1,4,5,7,9,1<br>1,13,14 | 2,3,6,8,10,<br>12,15,16,1<br>7 | 3 | P05539,P83121,Q4FZU6                                    |
| 8450 | 1,4,5,7,9,1<br>1,13,15 | 2,3,6,8,10,<br>12,14,16,1<br>7 | 4 | O54728,P05539,Q561R9,Q6P6R2                             |
| 8451 | 1,4,5,7,9,1<br>1,13,16 | 2,3,6,8,10,<br>12,14,15,1<br>7 | 5 | P05539,P14408,P62804,Q4FZU6,Q62635                      |
| 8452 | 1,4,5,7,9,1<br>1,13,17 | 2,3,6,8,10,<br>12,14,15,1<br>6 | 2 | P05539,Q4FZU6                                           |
| 8453 | 1,4,5,7,9,1<br>1,14,15 | 2,3,6,8,10,<br>12,13,16,1<br>7 | 5 | O54728,P16636,P22006,P51907,Q62635                      |
| 8454 | 1,4,5,7,9,1<br>1,14,16 | 2,3,6,8,10,<br>12,13,15,1<br>7 | 2 | Q4FZU6,Q62635                                           |
| 8455 | 1,4,5,7,9,1<br>1,14,17 | 2,3,6,8,10,<br>12,13,15,1<br>6 | 1 | Q4FZU6                                                  |
| 8456 | 1,4,5,7,9,1<br>1,15,16 | 2,3,6,8,10,<br>12,13,14,1<br>7 | 5 | O54728,P14408,P51907,Q62635,Q8K4G9                      |



|      |                        |                                |   |                             |
|------|------------------------|--------------------------------|---|-----------------------------|
| 8457 | 1,4,5,7,9,1<br>1,15,17 | 2,3,6,8,10,<br>12,13,14,1<br>6 | 0 |                             |
| 8458 | 1,4,5,7,9,1<br>1,16,17 | 2,3,6,8,10,<br>12,13,14,1<br>5 | 4 | P14408,P15999,Q4FZU6,Q64093 |
| 8459 | 1,4,5,7,9,1<br>2,13,14 | 2,3,6,8,10,<br>11,15,16,1<br>7 | 3 | P05539,P36374,Q4FZU6        |
| 8460 | 1,4,5,7,9,1<br>2,13,15 | 2,3,6,8,10,<br>11,14,16,1<br>7 | 1 | P05539                      |
| 8461 | 1,4,5,7,9,1<br>2,13,16 | 2,3,6,8,10,<br>11,14,15,1<br>7 | 3 | P19218,P62804,Q4FZU6        |
| 8462 | 1,4,5,7,9,1<br>2,13,17 | 2,3,6,8,10,<br>11,14,15,1<br>6 | 4 | P05539,P35280,P36374,Q4FZU6 |
| 8463 | 1,4,5,7,9,1<br>2,14,15 | 2,3,6,8,10,<br>11,13,16,1<br>7 | 3 | P16636,P20766,Q4FZU6        |
| 8464 | 1,4,5,7,9,1<br>2,14,16 | 2,3,6,8,10,<br>11,13,15,1<br>7 | 2 | P20766,Q4FZU6               |
| 8465 | 1,4,5,7,9,1<br>2,14,17 | 2,3,6,8,10,<br>11,13,15,1<br>6 | 1 | Q4FZU6                      |
| 8466 | 1,4,5,7,9,1<br>2,15,16 | 2,3,6,8,10,<br>11,13,14,1<br>7 | 2 | P20766,Q4FZU6               |
| 8467 | 1,4,5,7,9,1<br>2,15,17 | 2,3,6,8,10,<br>11,13,14,1<br>6 | 1 | Q4FZU6                      |
| 8468 | 1,4,5,7,9,1<br>2,16,17 | 2,3,6,8,10,<br>11,13,14,1<br>5 | 1 | Q4FZU6                      |
| 8469 | 1,4,5,7,9,1<br>3,14,15 | 2,3,6,8,10,<br>11,12,16,1<br>7 | 4 | O54728,P05539,P16636,P62804 |
| 8470 | 1,4,5,7,9,1<br>3,14,16 | 2,3,6,8,10,<br>11,12,15,1<br>7 | 4 | P62804,Q00715,Q4FZU6,Q62635 |
| 8471 | 1,4,5,7,9,1<br>3,14,17 | 2,3,6,8,10,<br>11,12,15,1<br>6 | 2 | P05539,Q4FZU6               |

|      |                         |                                |   |                                                                              |
|------|-------------------------|--------------------------------|---|------------------------------------------------------------------------------|
| 8472 | 1,4,5,7,9,1<br>3,15,16  | 2,3,6,8,10,<br>11,12,14,1<br>7 | 5 | O54728,P05539,P62804,Q00715,Q62635                                           |
| 8473 | 1,4,5,7,9,1<br>3,15,17  | 2,3,6,8,10,<br>11,12,14,1<br>6 | 2 | P05539,P62804                                                                |
| 8474 | 1,4,5,7,9,1<br>3,16,17  | 2,3,6,8,10,<br>11,12,14,1<br>5 | 4 | P35280,P62804,Q00715,Q4FZU6                                                  |
| 8475 | 1,4,5,7,9,1<br>4,15,16  | 2,3,6,8,10,<br>11,12,13,1<br>7 | 7 | O54728,P16636,P62804,Q00715,Q4FZU6,Q62635,Q9QZK9                             |
| 8476 | 1,4,5,7,9,1<br>4,15,17  | 2,3,6,8,10,<br>11,12,13,1<br>6 | 2 | P16636,Q4FZU6                                                                |
| 8477 | 1,4,5,7,9,1<br>4,16,17  | 2,3,6,8,10,<br>11,12,13,1<br>5 | 2 | P62804,Q4FZU6                                                                |
| 8478 | 1,4,5,7,9,1<br>5,16,17  | 2,3,6,8,10,<br>11,12,13,1<br>4 | 4 | P47727,P62804,Q00715,Q4FZU6                                                  |
| 8479 | 1,4,5,7,10,<br>11,12,13 | 2,3,6,8,9,1<br>4,15,16,17      | 6 | P02803,P05539,P36374,P61206;P84079;P84082,Q5FVI6,Q5QE79                      |
| 8480 | 1,4,5,7,10,<br>11,12,14 | 2,3,6,8,9,1<br>3,15,16,17      | 7 | P20766,P36374,P51907,P61206;P84079;P84082,Q5QE79,Q6P6Q2,Q9ESW0               |
| 8481 | 1,4,5,7,10,<br>11,12,15 | 2,3,6,8,9,1<br>3,14,16,17      | 5 | P20766,P22006,P51907,Q5FVI6,Q9ESW0                                           |
| 8482 | 1,4,5,7,10,<br>11,12,16 | 2,3,6,8,9,1<br>3,14,15,17      | 9 | P06757,P14408,P20766,P51907,P61206;P84079;P84082,Q5FVI6,Q63424,Q6IFU7,Q6P6Q2 |
| 8483 | 1,4,5,7,10,<br>11,12,17 | 2,3,6,8,9,1<br>3,14,15,16      | 5 | P06757,P20766,P36374,Q10758,Q9ESW0                                           |
| 8484 | 1,4,5,7,10,<br>11,13,14 | 2,3,6,8,9,1<br>2,15,16,17      | 2 | P05539,Q5QE79                                                                |
| 8485 | 1,4,5,7,10,<br>11,13,15 | 2,3,6,8,9,1<br>2,14,16,17      | 5 | P05539,P22006,Q561R9,Q5FVI6,Q8VD89                                           |
| 8486 | 1,4,5,7,10,<br>11,13,16 | 2,3,6,8,9,1<br>2,14,15,17      | 4 | P14408,P61206;P84079;P84082,Q5FVI6,Q8VD89                                    |
| 8487 | 1,4,5,7,10,<br>11,13,17 | 2,3,6,8,9,1<br>2,14,15,16      | 1 | P05539                                                                       |
| 8488 | 1,4,5,7,10,<br>11,14,15 | 2,3,6,8,9,1<br>2,13,16,17      | 6 | P16636,P20766,P22006,P51907,Q5FVI6,Q62635                                    |
| 8489 | 1,4,5,7,10,<br>11,14,16 | 2,3,6,8,9,1<br>2,13,15,17      | 5 | P14408,P20766,P61206;P84079;P84082,Q5FVI6,Q62635                             |
| 8490 | 1,4,5,7,10,<br>11,14,17 | 2,3,6,8,9,1<br>2,13,15,16      | 0 |                                                                              |

|      |                                                |   |                                                                              |
|------|------------------------------------------------|---|------------------------------------------------------------------------------|
| 8491 | 1,4,5,7,10, 2,3,6,8,9,1<br>11,15,16 2,13,14,17 | 9 | P14408,P20766,P51907,P61206;P84079;P84082,Q5FVI6,Q62635,Q63424,Q8VD89,Q9Z1F2 |
| 8492 | 1,4,5,7,10, 2,3,6,8,9,1<br>11,15,17 2,13,14,16 | 4 | P14408,P20766,P22006,Q5FVI6                                                  |
| 8493 | 1,4,5,7,10, 2,3,6,8,9,1<br>11,16,17 2,13,14,15 | 4 | P14408,P20766,P61206;P84079;P84082,Q5FVI6                                    |
| 8494 | 1,4,5,7,10, 2,3,6,8,9,1<br>12,13,14 1,15,16,17 | 3 | P36374,Q498D9,Q5QE79                                                         |
| 8495 | 1,4,5,7,10, 2,3,6,8,9,1<br>12,13,15 1,14,16,17 | 0 |                                                                              |
| 8496 | 1,4,5,7,10, 2,3,6,8,9,1<br>12,13,16 1,14,15,17 | 1 | P19218                                                                       |
| 8497 | 1,4,5,7,10, 2,3,6,8,9,1<br>12,13,17 1,14,15,16 | 3 | P36374,Q99MH3,Q9QZK9                                                         |
| 8498 | 1,4,5,7,10, 2,3,6,8,9,1<br>12,14,15 1,13,16,17 | 1 | P20766                                                                       |
| 8499 | 1,4,5,7,10, 2,3,6,8,9,1<br>12,14,16 1,13,15,17 | 3 | P08721,P20766,Q4FZU6                                                         |
| 8500 | 1,4,5,7,10, 2,3,6,8,9,1<br>12,14,17 1,13,15,16 | 3 | P20766,Q10758,Q4FZU6                                                         |
| 8501 | 1,4,5,7,10, 2,3,6,8,9,1<br>12,15,16 1,13,14,17 | 3 | P08721,P20766,Q5FVI6                                                         |
| 8502 | 1,4,5,7,10, 2,3,6,8,9,1<br>12,15,17 1,13,14,16 | 2 | P20766,Q99MH3                                                                |
| 8503 | 1,4,5,7,10, 2,3,6,8,9,1<br>12,16,17 1,13,14,15 | 4 | P08721,P20766,Q10758,Q4FZU6                                                  |
| 8504 | 1,4,5,7,10, 2,3,6,8,9,1<br>13,14,15 1,12,16,17 | 1 | P16636                                                                       |
| 8505 | 1,4,5,7,10, 2,3,6,8,9,1<br>13,14,16 1,12,15,17 | 0 |                                                                              |
| 8506 | 1,4,5,7,10, 2,3,6,8,9,1<br>13,14,17 1,12,15,16 | 0 |                                                                              |
| 8507 | 1,4,5,7,10, 2,3,6,8,9,1<br>13,15,16 1,12,14,17 | 4 | P01835,P62804,Q00715,Q8VD89                                                  |
| 8508 | 1,4,5,7,10, 2,3,6,8,9,1<br>13,15,17 1,12,14,16 | 1 | Q99MH3                                                                       |
| 8509 | 1,4,5,7,10, 2,3,6,8,9,1<br>13,16,17 1,12,14,15 | 1 | P62804                                                                       |
| 8510 | 1,4,5,7,10, 2,3,6,8,9,1<br>14,15,16 1,12,13,17 | 4 | P08721,P16636,P20766,Q62635                                                  |
| 8511 | 1,4,5,7,10, 2,3,6,8,9,1<br>14,15,17 1,12,13,16 | 1 | P20766                                                                       |
| 8512 | 1,4,5,7,10, 2,3,6,8,9,1<br>14,16,17 1,12,13,15 | 2 | P20766,Q4FZU6                                                                |
| 8513 | 1,4,5,7,10, 2,3,6,8,9,1<br>15,16,17 1,12,13,14 | 3 | P02782,P20766,Q9Z1F2                                                         |

|      |                                                |   |                                                  |
|------|------------------------------------------------|---|--------------------------------------------------|
| 8514 | 1,4,5,7,11, 2,3,6,8,9,1<br>12,13,14 0,15,16,17 | 5 | P05539,P14046,P36374,Q4FZU6,Q6P6R2               |
| 8515 | 1,4,5,7,11, 2,3,6,8,9,1<br>12,13,15 0,14,16,17 | 4 | P05539,P14408,P36374,Q6P6R2                      |
| 8516 | 1,4,5,7,11, 2,3,6,8,9,1<br>12,13,16 0,14,15,17 | 5 | P05539,P14408,P17046,P36374,Q4FZU6               |
| 8517 | 1,4,5,7,11, 2,3,6,8,9,1<br>12,13,17 0,14,15,16 | 4 | P05539,P36374,Q4FZU6,Q9ESW0                      |
| 8518 | 1,4,5,7,11, 2,3,6,8,9,1<br>12,14,15 0,13,16,17 | 5 | P20766,P22006,P51907,Q6P6R2,Q9ESW0               |
| 8519 | 1,4,5,7,11, 2,3,6,8,9,1<br>12,14,16 0,13,15,17 | 4 | P14408,P20766,P51907,Q4FZU6                      |
| 8520 | 1,4,5,7,11, 2,3,6,8,9,1<br>12,14,17 0,13,15,16 | 4 | P20766,P36374,Q4FZU6,Q9ESW0                      |
| 8521 | 1,4,5,7,11, 2,3,6,8,9,1<br>12,15,16 0,13,14,17 | 4 | P14408,P20766,P51907,Q9ESW0                      |
| 8522 | 1,4,5,7,11, 2,3,6,8,9,1<br>12,15,17 0,13,14,16 | 3 | P14408,P20766,Q9ESW0                             |
| 8523 | 1,4,5,7,11, 2,3,6,8,9,1<br>12,16,17 0,13,14,15 | 5 | P14408,P17046,P20766,Q4FZU6,Q9ESW0               |
| 8524 | 1,4,5,7,11, 2,3,6,8,9,1<br>13,14,15 0,12,16,17 | 4 | P05539,P16636,P22006,Q6P6R2                      |
| 8525 | 1,4,5,7,11, 2,3,6,8,9,1<br>13,14,16 0,12,15,17 | 3 | P05539,P14408,Q4FZU6                             |
| 8526 | 1,4,5,7,11, 2,3,6,8,9,1<br>13,14,17 0,12,15,16 | 2 | P05539,Q4FZU6                                    |
| 8527 | 1,4,5,7,11, 2,3,6,8,9,1<br>13,15,16 0,12,14,17 | 4 | P05539,P14408,Q6P6R2,Q8VD89                      |
| 8528 | 1,4,5,7,11, 2,3,6,8,9,1<br>13,15,17 0,12,14,16 | 2 | P05539,P14408                                    |
| 8529 | 1,4,5,7,11, 2,3,6,8,9,1<br>13,16,17 0,12,14,15 | 2 | P14408,Q4FZU6                                    |
| 8530 | 1,4,5,7,11, 2,3,6,8,9,1<br>14,15,16 0,12,13,17 | 7 | P14408,P16636,P20766,P51907,Q4FZU6,Q62635,Q63355 |
| 8531 | 1,4,5,7,11, 2,3,6,8,9,1<br>14,15,17 0,12,13,16 | 1 | P22006                                           |
| 8532 | 1,4,5,7,11, 2,3,6,8,9,1<br>14,16,17 0,12,13,15 | 3 | P14408,P20766,Q4FZU6                             |
| 8533 | 1,4,5,7,11, 2,3,6,8,9,1<br>15,16,17 0,12,13,14 | 2 | P14408,P20766                                    |
| 8534 | 1,4,5,7,12, 2,3,6,8,9,1<br>13,14,15 0,11,16,17 | 4 | P05539,P16636,Q4FZU6,Q6P6R2                      |
| 8535 | 1,4,5,7,12, 2,3,6,8,9,1<br>13,14,16 0,11,15,17 | 1 | Q4FZU6                                           |
| 8536 | 1,4,5,7,12, 2,3,6,8,9,1<br>13,14,17 0,11,15,16 | 2 | P36374,Q4FZU6                                    |

|      |                                                    |   |                                                  |
|------|----------------------------------------------------|---|--------------------------------------------------|
| 8537 | 1,4,5,7,12, 2,3,6,8,9,1<br>13,15,16 0,11,14,17     | 1 | Q4FZU6                                           |
| 8538 | 1,4,5,7,12, 2,3,6,8,9,1<br>13,15,17 0,11,14,16     | 3 | P05539,P36374,Q99MH3                             |
| 8539 | 1,4,5,7,12, 2,3,6,8,9,1<br>13,16,17 0,11,14,15     | 3 | P35280,P36374,Q4FZU6                             |
| 8540 | 1,4,5,7,12, 2,3,6,8,9,1<br>14,15,16 0,11,13,17     | 4 | P16636,P20766,P35467,Q4FZU6                      |
| 8541 | 1,4,5,7,12, 2,3,6,8,9,1<br>14,15,17 0,11,13,16     | 2 | P20766,Q4FZU6                                    |
| 8542 | 1,4,5,7,12, 2,3,6,8,9,1<br>14,16,17 0,11,13,15     | 2 | P20766,Q4FZU6                                    |
| 8543 | 1,4,5,7,12, 2,3,6,8,9,1<br>15,16,17 0,11,13,14     | 2 | P20766,Q4FZU6                                    |
| 8544 | 1,4,5,7,13, 2,3,6,8,9,1<br>14,15,16 0,11,12,17     | 5 | P16636,P35467,P62804,Q00715,Q4FZU6               |
| 8545 | 1,4,5,7,13, 2,3,6,8,9,1<br>14,15,17 0,11,12,16     | 5 | P05539,P11883,P16636,Q4FZU6,Q9WUW8               |
| 8546 | 1,4,5,7,13, 2,3,6,8,9,1<br>14,16,17 0,11,12,15     | 2 | P62804,Q4FZU6                                    |
| 8547 | 1,4,5,7,13, 2,3,6,8,9,1<br>15,16,17 0,11,12,14     | 4 | P11883,P62804,Q00715,Q4FZU6                      |
| 8548 | 1,4,5,7,14, 2,3,6,8,9,1<br>15,16,17 0,11,12,13     | 4 | P16636,P20766,P35467,Q4FZU6                      |
| 8549 | 1,4,5,8,9,1 2,3,6,7,13,<br>0,11,12 14,15,16,1<br>7 | 7 | P00714,P02803,P0C0A9,P36374,Q6AYS4,Q6IG02,Q6P6Q2 |
| 8550 | 1,4,5,8,9,1 2,3,6,7,12,<br>0,11,13 14,15,16,1<br>7 | 3 | P02803,Q561R9,Q6AYS4                             |
| 8551 | 1,4,5,8,9,1 2,3,6,7,12,<br>0,11,14 13,15,16,1<br>7 | 2 | P00714,Q6AYS4                                    |
| 8552 | 1,4,5,8,9,1 2,3,6,7,12,<br>0,11,15 13,14,16,1<br>7 | 1 | Q561R9                                           |
| 8553 | 1,4,5,8,9,1 2,3,6,7,12,<br>0,11,16 13,14,15,1<br>7 | 4 | A2RUV9,P02803,P14668,Q62635                      |
| 8554 | 1,4,5,8,9,1 2,3,6,7,12,<br>0,11,17 13,14,15,1<br>6 | 4 | A2RUV9,P08649,Q63532,Q6AYS4                      |
| 8555 | 1,4,5,8,9,1 2,3,6,7,11,<br>0,12,13 14,15,16,1<br>7 | 2 | P02803,P36374                                    |

|      |                        |                                |   |                      |
|------|------------------------|--------------------------------|---|----------------------|
| 8556 | 1,4,5,8,9,1<br>0,12,14 | 2,3,6,7,11,<br>13,15,16,1<br>7 | 0 |                      |
| 8557 | 1,4,5,8,9,1<br>0,12,15 | 2,3,6,7,11,<br>13,14,16,1<br>7 | 1 | P10758               |
| 8558 | 1,4,5,8,9,1<br>0,12,16 | 2,3,6,7,11,<br>13,14,15,1<br>7 | 2 | P02803,Q9WUW8        |
| 8559 | 1,4,5,8,9,1<br>0,12,17 | 2,3,6,7,11,<br>13,14,15,1<br>6 | 2 | P02803,P36374        |
| 8560 | 1,4,5,8,9,1<br>0,13,14 | 2,3,6,7,11,<br>12,15,16,1<br>7 | 1 | P09605;P25809        |
| 8561 | 1,4,5,8,9,1<br>0,13,15 | 2,3,6,7,11,<br>12,14,16,1<br>7 | 0 |                      |
| 8562 | 1,4,5,8,9,1<br>0,13,16 | 2,3,6,7,11,<br>12,14,15,1<br>7 | 1 | P02803               |
| 8563 | 1,4,5,8,9,1<br>0,13,17 | 2,3,6,7,11,<br>12,14,15,1<br>6 | 2 | P02803,Q63532        |
| 8564 | 1,4,5,8,9,1<br>0,14,15 | 2,3,6,7,11,<br>12,13,16,1<br>7 | 1 | P09605;P25809        |
| 8565 | 1,4,5,8,9,1<br>0,14,16 | 2,3,6,7,11,<br>12,13,15,1<br>7 | 1 | Q9QZK9               |
| 8566 | 1,4,5,8,9,1<br>0,14,17 | 2,3,6,7,11,<br>12,13,15,1<br>6 | 0 |                      |
| 8567 | 1,4,5,8,9,1<br>0,15,16 | 2,3,6,7,11,<br>12,13,14,1<br>7 | 2 | Q62635,Q9QZK9        |
| 8568 | 1,4,5,8,9,1<br>0,15,17 | 2,3,6,7,11,<br>12,13,14,1<br>6 | 1 | Q63532               |
| 8569 | 1,4,5,8,9,1<br>0,16,17 | 2,3,6,7,11,<br>12,13,14,1<br>5 | 2 | A2RUV9,P25031        |
| 8570 | 1,4,5,8,9,1<br>1,12,13 | 2,3,6,7,10,<br>14,15,16,1<br>7 | 3 | P02803,P0C0A9,P36374 |

|      |                        |                                |   |                                           |
|------|------------------------|--------------------------------|---|-------------------------------------------|
| 8571 | 1,4,5,8,9,1<br>1,12,14 | 2,3,6,7,10,<br>13,15,16,1<br>7 | 2 | P02803,Q4FZU6                             |
| 8572 | 1,4,5,8,9,1<br>1,12,15 | 2,3,6,7,10,<br>13,14,16,1<br>7 | 1 | P10758                                    |
| 8573 | 1,4,5,8,9,1<br>1,12,16 | 2,3,6,7,10,<br>13,14,15,1<br>7 | 4 | P02803,P14668,Q4FZU6,Q6P6Q2               |
| 8574 | 1,4,5,8,9,1<br>1,12,17 | 2,3,6,7,10,<br>13,14,15,1<br>6 | 4 | P02803,P36374,Q4FZU6,Q6AYS4               |
| 8575 | 1,4,5,8,9,1<br>1,13,14 | 2,3,6,7,10,<br>12,15,16,1<br>7 | 2 | P02803,P97840                             |
| 8576 | 1,4,5,8,9,1<br>1,13,15 | 2,3,6,7,10,<br>12,14,16,1<br>7 | 2 | P97840,Q561R9                             |
| 8577 | 1,4,5,8,9,1<br>1,13,16 | 2,3,6,7,10,<br>12,14,15,1<br>7 | 2 | A2RUV9,P02803                             |
| 8578 | 1,4,5,8,9,1<br>1,13,17 | 2,3,6,7,10,<br>12,14,15,1<br>6 | 4 | P02803,P97840,Q63532,Q6AYS4               |
| 8579 | 1,4,5,8,9,1<br>1,14,15 | 2,3,6,7,10,<br>12,13,16,1<br>7 | 1 | P97840                                    |
| 8580 | 1,4,5,8,9,1<br>1,14,16 | 2,3,6,7,10,<br>12,13,15,1<br>7 | 3 | P14668,Q4FZU6,Q9QZK9                      |
| 8581 | 1,4,5,8,9,1<br>1,14,17 | 2,3,6,7,10,<br>12,13,15,1<br>6 | 4 | P47967,P97840,Q4FZU6,Q6AYS4               |
| 8582 | 1,4,5,8,9,1<br>1,15,16 | 2,3,6,7,10,<br>12,13,14,1<br>7 | 6 | A2RUV9,O54728,P14668,Q561R9,Q62635,Q9QZK9 |
| 8583 | 1,4,5,8,9,1<br>1,15,17 | 2,3,6,7,10,<br>12,13,14,1<br>6 | 3 | P47967,P97840,Q63532                      |
| 8584 | 1,4,5,8,9,1<br>1,16,17 | 2,3,6,7,10,<br>12,13,14,1<br>5 | 2 | A2RUV9,Q4FZU6                             |
| 8585 | 1,4,5,8,9,1<br>2,13,14 | 2,3,6,7,10,<br>11,15,16,1<br>7 | 3 | P02803,P36374,Q4FZU6                      |

|      |                        |                                |   |                                    |
|------|------------------------|--------------------------------|---|------------------------------------|
| 8586 | 1,4,5,8,9,1<br>2,13,15 | 2,3,6,7,10,<br>11,14,16,1<br>7 | 1 | P10758                             |
| 8587 | 1,4,5,8,9,1<br>2,13,16 | 2,3,6,7,10,<br>11,14,15,1<br>7 | 2 | P02803,Q4FZU6                      |
| 8588 | 1,4,5,8,9,1<br>2,13,17 | 2,3,6,7,10,<br>11,14,15,1<br>6 | 5 | P02803,P35280,P36374,Q4FZU6,Q63532 |
| 8589 | 1,4,5,8,9,1<br>2,14,15 | 2,3,6,7,10,<br>11,13,16,1<br>7 | 1 | P10758                             |
| 8590 | 1,4,5,8,9,1<br>2,14,16 | 2,3,6,7,10,<br>11,13,15,1<br>7 | 1 | Q4FZU6                             |
| 8591 | 1,4,5,8,9,1<br>2,14,17 | 2,3,6,7,10,<br>11,13,15,1<br>6 | 1 | Q4FZU6                             |
| 8592 | 1,4,5,8,9,1<br>2,15,16 | 2,3,6,7,10,<br>11,13,14,1<br>7 | 0 |                                    |
| 8593 | 1,4,5,8,9,1<br>2,15,17 | 2,3,6,7,10,<br>11,13,14,1<br>6 | 1 | Q63532                             |
| 8594 | 1,4,5,8,9,1<br>2,16,17 | 2,3,6,7,10,<br>11,13,14,1<br>5 | 1 | Q4FZU6                             |
| 8595 | 1,4,5,8,9,1<br>3,14,15 | 2,3,6,7,10,<br>11,12,16,1<br>7 | 0 |                                    |
| 8596 | 1,4,5,8,9,1<br>3,14,16 | 2,3,6,7,10,<br>11,12,15,1<br>7 | 1 | Q4FZU6                             |
| 8597 | 1,4,5,8,9,1<br>3,14,17 | 2,3,6,7,10,<br>11,12,15,1<br>6 | 3 | P47967,P97840,Q4FZU6               |
| 8598 | 1,4,5,8,9,1<br>3,15,16 | 2,3,6,7,10,<br>11,12,14,1<br>7 | 2 | O54728,P62804                      |
| 8599 | 1,4,5,8,9,1<br>3,15,17 | 2,3,6,7,10,<br>11,12,14,1<br>6 | 3 | P47967,P97840,Q63532               |
| 8600 | 1,4,5,8,9,1<br>3,16,17 | 2,3,6,7,10,<br>11,12,14,1<br>5 | 2 | P35280,Q4FZU6                      |



|      |                         |                                |   |                                                  |
|------|-------------------------|--------------------------------|---|--------------------------------------------------|
| 8601 | 1,4,5,8,9,1<br>4,15,16  | 2,3,6,7,10,<br>11,12,13,1<br>7 | 3 | O54728,Q4FZU6,Q9QZK9                             |
| 8602 | 1,4,5,8,9,1<br>4,15,17  | 2,3,6,7,10,<br>11,12,13,1<br>6 | 2 | P47967,P97840                                    |
| 8603 | 1,4,5,8,9,1<br>4,16,17  | 2,3,6,7,10,<br>11,12,13,1<br>5 | 1 | Q4FZU6                                           |
| 8604 | 1,4,5,8,9,1<br>5,16,17  | 2,3,6,7,10,<br>11,12,13,1<br>4 | 1 | P47727                                           |
| 8605 | 1,4,5,8,10,<br>11,12,13 | 2,3,6,7,9,1<br>4,15,16,17      | 7 | P02781,P02803,P0C0A9,P36374,Q6IG02,Q6P6Q2,Q8CJ52 |
| 8606 | 1,4,5,8,10,<br>11,12,14 | 2,3,6,7,9,1<br>3,15,16,17      | 5 | P00714,P0C0A9,Q6IFW6,Q6IG02,Q6P6Q2               |
| 8607 | 1,4,5,8,10,<br>11,12,15 | 2,3,6,7,9,1<br>3,14,16,17      | 4 | P51907,Q561R9,Q6IG02,Q6P6Q2                      |
| 8608 | 1,4,5,8,10,<br>11,12,16 | 2,3,6,7,9,1<br>3,14,15,17      | 7 | P02803,P53792,Q6IFU7,Q6IFW6,Q6IG02,Q6IMF3,Q6P6Q2 |
| 8609 | 1,4,5,8,10,<br>11,12,17 | 2,3,6,7,9,1<br>3,14,15,16      | 7 | F1LM93,P36374,Q10758,Q4G075,Q6AYS4,Q6IG02,Q6P6Q2 |
| 8610 | 1,4,5,8,10,<br>11,13,14 | 2,3,6,7,9,1<br>2,15,16,17      | 1 | P09605;P25809                                    |
| 8611 | 1,4,5,8,10,<br>11,13,15 | 2,3,6,7,9,1<br>2,14,16,17      | 2 | P09605;P25809,Q561R9                             |
| 8612 | 1,4,5,8,10,<br>11,13,16 | 2,3,6,7,9,1<br>2,14,15,17      | 2 | A2RUV9,P02803                                    |
| 8613 | 1,4,5,8,10,<br>11,13,17 | 2,3,6,7,9,1<br>2,14,15,16      | 1 | Q6AYS4                                           |
| 8614 | 1,4,5,8,10,<br>11,14,15 | 2,3,6,7,9,1<br>2,13,16,17      | 1 | P09605;P25809                                    |
| 8615 | 1,4,5,8,10,<br>11,14,16 | 2,3,6,7,9,1<br>2,13,15,17      | 1 | P14668                                           |
| 8616 | 1,4,5,8,10,<br>11,14,17 | 2,3,6,7,9,1<br>2,13,15,16      | 1 | Q6AYS4                                           |
| 8617 | 1,4,5,8,10,<br>11,15,16 | 2,3,6,7,9,1<br>2,13,14,17      | 2 | P14668,Q561R9                                    |
| 8618 | 1,4,5,8,10,<br>11,15,17 | 2,3,6,7,9,1<br>2,13,14,16      | 1 | Q6AYS4                                           |
| 8619 | 1,4,5,8,10,<br>11,16,17 | 2,3,6,7,9,1<br>2,13,14,15      | 1 | A2RUV9                                           |
| 8620 | 1,4,5,8,10,<br>12,13,14 | 2,3,6,7,9,1<br>1,15,16,17      | 3 | P09605;P25809,P36374,Q498D9                      |
| 8621 | 1,4,5,8,10,<br>12,13,15 | 2,3,6,7,9,1<br>1,14,16,17      | 1 | P10758                                           |

|      |                                                |   |                                    |
|------|------------------------------------------------|---|------------------------------------|
| 8622 | 1,4,5,8,10, 2,3,6,7,9,1<br>12,13,16 1,14,15,17 | 1 | P02803                             |
| 8623 | 1,4,5,8,10, 2,3,6,7,9,1<br>12,13,17 1,14,15,16 | 3 | P02803,P36374,Q99MH3               |
| 8624 | 1,4,5,8,10, 2,3,6,7,9,1<br>12,14,15 1,13,16,17 | 1 | P09605;P25809                      |
| 8625 | 1,4,5,8,10, 2,3,6,7,9,1<br>12,14,16 1,13,15,17 | 1 | P08721                             |
| 8626 | 1,4,5,8,10, 2,3,6,7,9,1<br>12,14,17 1,13,15,16 | 1 | Q10758                             |
| 8627 | 1,4,5,8,10, 2,3,6,7,9,1<br>12,15,16 1,13,14,17 | 1 | P08721                             |
| 8628 | 1,4,5,8,10, 2,3,6,7,9,1<br>12,15,17 1,13,14,16 | 1 | Q99MH3                             |
| 8629 | 1,4,5,8,10, 2,3,6,7,9,1<br>12,16,17 1,13,14,15 | 2 | P08721,Q10758                      |
| 8630 | 1,4,5,8,10, 2,3,6,7,9,1<br>13,14,15 1,12,16,17 | 1 | P09605;P25809                      |
| 8631 | 1,4,5,8,10, 2,3,6,7,9,1<br>13,14,16 1,12,15,17 | 1 | P09605;P25809                      |
| 8632 | 1,4,5,8,10, 2,3,6,7,9,1<br>13,14,17 1,12,15,16 | 0 |                                    |
| 8633 | 1,4,5,8,10, 2,3,6,7,9,1<br>13,15,16 1,12,14,17 | 2 | P01835,P09605;P25809               |
| 8634 | 1,4,5,8,10, 2,3,6,7,9,1<br>13,15,17 1,12,14,16 | 0 |                                    |
| 8635 | 1,4,5,8,10, 2,3,6,7,9,1<br>13,16,17 1,12,14,15 | 1 | P25031                             |
| 8636 | 1,4,5,8,10, 2,3,6,7,9,1<br>14,15,16 1,12,13,17 | 3 | P08721,P09605;P25809,P55018        |
| 8637 | 1,4,5,8,10, 2,3,6,7,9,1<br>14,15,17 1,12,13,16 | 0 |                                    |
| 8638 | 1,4,5,8,10, 2,3,6,7,9,1<br>14,16,17 1,12,13,15 | 0 |                                    |
| 8639 | 1,4,5,8,10, 2,3,6,7,9,1<br>15,16,17 1,12,13,14 | 0 |                                    |
| 8640 | 1,4,5,8,11, 2,3,6,7,9,1<br>12,13,14 0,15,16,17 | 5 | P02803,P0C0A9,P36374,Q4FZU6,Q8CJ52 |
| 8641 | 1,4,5,8,11, 2,3,6,7,9,1<br>12,13,15 0,14,16,17 | 1 | P36374                             |
| 8642 | 1,4,5,8,11, 2,3,6,7,9,1<br>12,13,16 0,14,15,17 | 5 | P02803,P36374,Q4FZU6,Q6P6Q2,Q8CJ52 |
| 8643 | 1,4,5,8,11, 2,3,6,7,9,1<br>12,13,17 0,14,15,16 | 2 | P02803,P36374                      |
| 8644 | 1,4,5,8,11, 2,3,6,7,9,1<br>12,14,15 0,13,16,17 | 2 | Q5I0D1,Q9ESW0                      |

|      |                                                |   |                                    |
|------|------------------------------------------------|---|------------------------------------|
| 8645 | 1,4,5,8,11, 2,3,6,7,9,1<br>12,14,16 0,13,15,17 | 3 | P14668,Q4FZU6,Q6P6Q2               |
| 8646 | 1,4,5,8,11, 2,3,6,7,9,1<br>12,14,17 0,13,15,16 | 5 | P36374,P97840,Q4FZU6,Q6AYS4,Q9ESW0 |
| 8647 | 1,4,5,8,11, 2,3,6,7,9,1<br>12,15,16 0,13,14,17 | 3 | P14668,P51907,Q6P6Q2               |
| 8648 | 1,4,5,8,11, 2,3,6,7,9,1<br>12,15,17 0,13,14,16 | 2 | Q9ESW0,Q9QZA6                      |
| 8649 | 1,4,5,8,11, 2,3,6,7,9,1<br>12,16,17 0,13,14,15 | 2 | Q4FZU6,Q6P6Q2                      |
| 8650 | 1,4,5,8,11, 2,3,6,7,9,1<br>13,14,15 0,12,16,17 | 3 | P09605,P25809,P97840,Q6P6R2        |
| 8651 | 1,4,5,8,11, 2,3,6,7,9,1<br>13,14,16 0,12,15,17 | 1 | Q4FZU6                             |
| 8652 | 1,4,5,8,11, 2,3,6,7,9,1<br>13,14,17 0,12,15,16 | 2 | P97840,Q4FZU6                      |
| 8653 | 1,4,5,8,11, 2,3,6,7,9,1<br>13,15,16 0,12,14,17 | 0 |                                    |
| 8654 | 1,4,5,8,11, 2,3,6,7,9,1<br>13,15,17 0,12,14,16 | 2 | P97840,Q63532                      |
| 8655 | 1,4,5,8,11, 2,3,6,7,9,1<br>13,16,17 0,12,14,15 | 3 | A2RUV9,P97840,Q4FZU6               |
| 8656 | 1,4,5,8,11, 2,3,6,7,9,1<br>14,15,16 0,12,13,17 | 3 | P14668,P97840,Q5I0D1               |
| 8657 | 1,4,5,8,11, 2,3,6,7,9,1<br>14,15,17 0,12,13,16 | 2 | P47967,P97840                      |
| 8658 | 1,4,5,8,11, 2,3,6,7,9,1<br>14,16,17 0,12,13,15 | 2 | P97840,Q4FZU6                      |
| 8659 | 1,4,5,8,11, 2,3,6,7,9,1<br>15,16,17 0,12,13,14 | 2 | A2RUV9,P97840                      |
| 8660 | 1,4,5,8,12, 2,3,6,7,9,1<br>13,14,15 0,11,16,17 | 2 | P10758,Q9QUL6                      |
| 8661 | 1,4,5,8,12, 2,3,6,7,9,1<br>13,14,16 0,11,15,17 | 2 | Q4FZU6,Q9QUL6                      |
| 8662 | 1,4,5,8,12, 2,3,6,7,9,1<br>13,14,17 0,11,15,16 | 2 | P36374,Q4FZU6                      |
| 8663 | 1,4,5,8,12, 2,3,6,7,9,1<br>13,15,16 0,11,14,17 | 1 | Q9QUL6                             |
| 8664 | 1,4,5,8,12, 2,3,6,7,9,1<br>13,15,17 0,11,14,16 | 0 |                                    |
| 8665 | 1,4,5,8,12, 2,3,6,7,9,1<br>13,16,17 0,11,14,15 | 4 | P23928,P27213,P35280,Q4FZU6        |
| 8666 | 1,4,5,8,12, 2,3,6,7,9,1<br>14,15,16 0,11,13,17 | 1 | Q4FZU6                             |
| 8667 | 1,4,5,8,12, 2,3,6,7,9,1<br>14,15,17 0,11,13,16 | 1 | Q9QZA6                             |

|      |                                                |    |                                                                       |
|------|------------------------------------------------|----|-----------------------------------------------------------------------|
| 8668 | 1,4,5,8,12, 2,3,6,7,9,1<br>14,16,17 0,11,13,15 | 1  | Q4FZU6                                                                |
| 8669 | 1,4,5,8,12, 2,3,6,7,9,1<br>15,16,17 0,11,13,14 | 0  |                                                                       |
| 8670 | 1,4,5,8,13, 2,3,6,7,9,1<br>14,15,16 0,11,12,17 | 1  | P09605;P25809                                                         |
| 8671 | 1,4,5,8,13, 2,3,6,7,9,1<br>14,15,17 0,11,12,16 | 3  | P10536,P47967,P97840                                                  |
| 8672 | 1,4,5,8,13, 2,3,6,7,9,1<br>14,16,17 0,11,12,15 | 3  | P27213,Q4FZU6,Q6PCU2                                                  |
| 8673 | 1,4,5,8,13, 2,3,6,7,9,1<br>15,16,17 0,11,12,14 | 0  |                                                                       |
| 8674 | 1,4,5,8,14, 2,3,6,7,9,1<br>15,16,17 0,11,12,13 | 3  | P47967,P97840,Q4FZU6                                                  |
| 8675 | 1,4,5,9,10, 2,3,6,7,8,1<br>11,12,13 4,15,16,17 | 2  | P02803,P36374                                                         |
| 8676 | 1,4,5,9,10, 2,3,6,7,8,1<br>11,12,14 3,15,16,17 | 2  | P51907,Q6P6Q2                                                         |
| 8677 | 1,4,5,9,10, 2,3,6,7,8,1<br>11,12,15 3,14,16,17 | 4  | P10758,P20766,P51907,Q561R9                                           |
| 8678 | 1,4,5,9,10, 2,3,6,7,8,1<br>11,12,16 3,14,15,17 | 7  | P02803,P06757,P20766,P51907,Q6IFU7,Q6P6Q2,Q9WUW8                      |
| 8679 | 1,4,5,9,10, 2,3,6,7,8,1<br>11,12,17 3,14,15,16 | 3  | P02803,P06757,P36374                                                  |
| 8680 | 1,4,5,9,10, 2,3,6,7,8,1<br>11,13,14 2,15,16,17 | 1  | Q62635                                                                |
| 8681 | 1,4,5,9,10, 2,3,6,7,8,1<br>11,13,15 2,14,16,17 | 2  | Q561R9,Q62635                                                         |
| 8682 | 1,4,5,9,10, 2,3,6,7,8,1<br>11,13,16 2,14,15,17 | 3  | A2RUV9,P02803,Q62635                                                  |
| 8683 | 1,4,5,9,10, 2,3,6,7,8,1<br>11,13,17 2,14,15,16 | 1  | P02803                                                                |
| 8684 | 1,4,5,9,10, 2,3,6,7,8,1<br>11,14,15 2,13,16,17 | 5  | P51907,P55091,P63029,Q561R9,Q62635                                    |
| 8685 | 1,4,5,9,10, 2,3,6,7,8,1<br>11,14,16 2,13,15,17 | 3  | P55091,Q62635,Q9QZK9                                                  |
| 8686 | 1,4,5,9,10, 2,3,6,7,8,1<br>11,14,17 2,13,15,16 | 0  |                                                                       |
| 8687 | 1,4,5,9,10, 2,3,6,7,8,1<br>11,15,16 2,13,14,17 | 10 | O54728,P02782,P20766,P50115,P51907,P55091,Q561R9,Q62635,Q9QZK9,Q9Z1F2 |
| 8688 | 1,4,5,9,10, 2,3,6,7,8,1<br>11,15,17 2,13,14,16 | 2  | Q566E6,Q62902                                                         |
| 8689 | 1,4,5,9,10, 2,3,6,7,8,1<br>11,16,17 2,13,14,15 | 1  | A2RUV9                                                                |
| 8690 | 1,4,5,9,10, 2,3,6,7,8,1<br>12,13,14 1,15,16,17 | 1  | P02803                                                                |

|      |                                                |   |                                                  |
|------|------------------------------------------------|---|--------------------------------------------------|
| 8691 | 1,4,5,9,10, 2,3,6,7,8,1<br>12,13,15 1,14,16,17 | 3 | P10758,P16086,P50115                             |
| 8692 | 1,4,5,9,10, 2,3,6,7,8,1<br>12,13,16 1,14,15,17 | 3 | P02803,P16086,P50115                             |
| 8693 | 1,4,5,9,10, 2,3,6,7,8,1<br>12,13,17 1,14,15,16 | 4 | P02803,P16086,P35280,P36374                      |
| 8694 | 1,4,5,9,10, 2,3,6,7,8,1<br>12,14,15 1,13,16,17 | 3 | P10758,P20766,P50115                             |
| 8695 | 1,4,5,9,10, 2,3,6,7,8,1<br>12,14,16 1,13,15,17 | 2 | P20766,P50115                                    |
| 8696 | 1,4,5,9,10, 2,3,6,7,8,1<br>12,14,17 1,13,15,16 | 1 | Q10758                                           |
| 8697 | 1,4,5,9,10, 2,3,6,7,8,1<br>12,15,16 1,13,14,17 | 3 | P16086,P20766,P50115                             |
| 8698 | 1,4,5,9,10, 2,3,6,7,8,1<br>12,15,17 1,13,14,16 | 2 | P16086,P20766                                    |
| 8699 | 1,4,5,9,10, 2,3,6,7,8,1<br>12,16,17 1,13,14,15 | 2 | P16086,P20766                                    |
| 8700 | 1,4,5,9,10, 2,3,6,7,8,1<br>13,14,15 1,12,16,17 | 3 | P09605,P25809,P50115,Q62635                      |
| 8701 | 1,4,5,9,10, 2,3,6,7,8,1<br>13,14,16 1,12,15,17 | 4 | P50115,P62804,Q00715,Q62635                      |
| 8702 | 1,4,5,9,10, 2,3,6,7,8,1<br>13,14,17 1,12,15,16 | 0 |                                                  |
| 8703 | 1,4,5,9,10, 2,3,6,7,8,1<br>13,15,16 1,12,14,17 | 5 | P50115,P55091,P62804,Q00715,Q62635               |
| 8704 | 1,4,5,9,10, 2,3,6,7,8,1<br>13,15,17 1,12,14,16 | 0 |                                                  |
| 8705 | 1,4,5,9,10, 2,3,6,7,8,1<br>13,16,17 1,12,14,15 | 3 | P35280,P62804,Q00715                             |
| 8706 | 1,4,5,9,10, 2,3,6,7,8,1<br>14,15,16 1,12,13,17 | 7 | O54728,P02782,P20766,P50115,P55091,Q62635,Q9QZK9 |
| 8707 | 1,4,5,9,10, 2,3,6,7,8,1<br>14,15,17 1,12,13,16 | 1 | Q62902                                           |
| 8708 | 1,4,5,9,10, 2,3,6,7,8,1<br>14,16,17 1,12,13,15 | 0 |                                                  |
| 8709 | 1,4,5,9,10, 2,3,6,7,8,1<br>15,16,17 1,12,13,14 | 7 | P02782,P16086,P20766,P47727,Q62902,Q9JHB9,Q9Z1F2 |
| 8710 | 1,4,5,9,11, 2,3,6,7,8,1<br>12,13,14 0,15,16,17 | 3 | P02803,P36374,Q6P6R2                             |
| 8711 | 1,4,5,9,11, 2,3,6,7,8,1<br>12,13,15 0,14,16,17 | 3 | P05539,P10758,Q6P6R2                             |
| 8712 | 1,4,5,9,11, 2,3,6,7,8,1<br>12,13,16 0,14,15,17 | 1 | P02803                                           |
| 8713 | 1,4,5,9,11, 2,3,6,7,8,1<br>12,13,17 0,14,15,16 | 3 | P02803,P35280,P36374                             |

|      |                                                |   |                                                  |
|------|------------------------------------------------|---|--------------------------------------------------|
| 8714 | 1,4,5,9,11, 2,3,6,7,8,1<br>12,14,15 0,13,16,17 | 3 | P10758,P20766,P51907                             |
| 8715 | 1,4,5,9,11, 2,3,6,7,8,1<br>12,14,16 0,13,15,17 | 3 | P20766,P51907,Q4FZU6                             |
| 8716 | 1,4,5,9,11, 2,3,6,7,8,1<br>12,14,17 0,13,15,16 | 2 | P01835,Q4FZU6                                    |
| 8717 | 1,4,5,9,11, 2,3,6,7,8,1<br>12,15,16 0,13,14,17 | 3 | P12020,P20766,P51907                             |
| 8718 | 1,4,5,9,11, 2,3,6,7,8,1<br>12,15,17 0,13,14,16 | 1 | P12020                                           |
| 8719 | 1,4,5,9,11, 2,3,6,7,8,1<br>12,16,17 0,13,14,15 | 2 | P12020,Q4FZU6                                    |
| 8720 | 1,4,5,9,11, 2,3,6,7,8,1<br>13,14,15 0,12,16,17 | 4 | O54728,P05539,Q62635,Q6P6R2                      |
| 8721 | 1,4,5,9,11, 2,3,6,7,8,1<br>13,14,16 0,12,15,17 | 1 | Q62635                                           |
| 8722 | 1,4,5,9,11, 2,3,6,7,8,1<br>13,14,17 0,12,15,16 | 1 | P97840                                           |
| 8723 | 1,4,5,9,11, 2,3,6,7,8,1<br>13,15,16 0,12,14,17 | 3 | O54728,P50115,Q62635                             |
| 8724 | 1,4,5,9,11, 2,3,6,7,8,1<br>13,15,17 0,12,14,16 | 3 | P05539,P97840,Q63532                             |
| 8725 | 1,4,5,9,11, 2,3,6,7,8,1<br>13,16,17 0,12,14,15 | 2 | A2RUV9,P35280                                    |
| 8726 | 1,4,5,9,11, 2,3,6,7,8,1<br>14,15,16 0,12,13,17 | 7 | O54728,P20766,P50115,P51907,P55091,Q62635,Q9QZK9 |
| 8727 | 1,4,5,9,11, 2,3,6,7,8,1<br>14,15,17 0,12,13,16 | 2 | P47967,P97840                                    |
| 8728 | 1,4,5,9,11, 2,3,6,7,8,1<br>14,16,17 0,12,13,15 | 1 | Q4FZU6                                           |
| 8729 | 1,4,5,9,11, 2,3,6,7,8,1<br>15,16,17 0,12,13,14 | 2 | P06911,P12020                                    |
| 8730 | 1,4,5,9,12, 2,3,6,7,8,1<br>13,14,15 0,11,16,17 | 3 | P10758,P50115,Q6P6R2                             |
| 8731 | 1,4,5,9,12, 2,3,6,7,8,1<br>13,14,16 0,11,15,17 | 2 | P50115,Q4FZU6                                    |
| 8732 | 1,4,5,9,12, 2,3,6,7,8,1<br>13,14,17 0,11,15,16 | 3 | P35280,P36374,Q4FZU6                             |
| 8733 | 1,4,5,9,12, 2,3,6,7,8,1<br>13,15,16 0,11,14,17 | 3 | P16086,P50115,P62804                             |
| 8734 | 1,4,5,9,12, 2,3,6,7,8,1<br>13,15,17 0,11,14,16 | 2 | P16086,P35280                                    |
| 8735 | 1,4,5,9,12, 2,3,6,7,8,1<br>13,16,17 0,11,14,15 | 2 | P35280,Q4FZU6                                    |
| 8736 | 1,4,5,9,12, 2,3,6,7,8,1<br>14,15,16 0,11,13,17 | 2 | P20766,P50115                                    |

|      |                                                |   |                                                  |
|------|------------------------------------------------|---|--------------------------------------------------|
| 8737 | 1,4,5,9,12, 2,3,6,7,8,1<br>14,15,17 0,11,13,16 | 0 |                                                  |
| 8738 | 1,4,5,9,12, 2,3,6,7,8,1<br>14,16,17 0,11,13,15 | 3 | P20766,P35280,Q4FZU6                             |
| 8739 | 1,4,5,9,12, 2,3,6,7,8,1<br>15,16,17 0,11,13,14 | 4 | P12020,P16086,P20766,P47727                      |
| 8740 | 1,4,5,9,13, 2,3,6,7,8,1<br>14,15,16 0,11,12,17 | 7 | O54728,P11883,P50115,P62804,Q00715,Q62635,Q9QZK9 |
| 8741 | 1,4,5,9,13, 2,3,6,7,8,1<br>14,15,17 0,11,12,16 | 2 | P11883,P47967                                    |
| 8742 | 1,4,5,9,13, 2,3,6,7,8,1<br>14,16,17 0,11,12,15 | 3 | P35280,P62804,Q4FZU6                             |
| 8743 | 1,4,5,9,13, 2,3,6,7,8,1<br>15,16,17 0,11,12,14 | 6 | P11883,P35280,P47727,P62804,Q00715,Q9EQS0        |
| 8744 | 1,4,5,9,14, 2,3,6,7,8,1<br>15,16,17 0,11,12,13 | 2 | P11883,P62804                                    |
| 8745 | 1,4,5,10,1 2,3,6,7,8,9<br>1,12,13,14 ,15,16,17 | 2 | P36374,Q5QE79                                    |
| 8746 | 1,4,5,10,1 2,3,6,7,8,9<br>1,12,13,15 ,14,16,17 | 2 | P51907,Q6P6R2                                    |
| 8747 | 1,4,5,10,1 2,3,6,7,8,9<br>1,12,13,16 ,14,15,17 | 3 | P02803,Q6IFU7,Q6P6Q2                             |
| 8748 | 1,4,5,10,1 2,3,6,7,8,9<br>1,12,13,17 ,14,15,16 | 2 | P02803,P36374                                    |
| 8749 | 1,4,5,10,1 2,3,6,7,8,9<br>1,12,14,15 ,13,16,17 | 2 | P20766,P51907                                    |
| 8750 | 1,4,5,10,1 2,3,6,7,8,9<br>1,12,14,16 ,13,15,17 | 5 | P20766,P51907,P53792,Q6IFU7,Q6P6Q2               |
| 8751 | 1,4,5,10,1 2,3,6,7,8,9<br>1,12,14,17 ,13,15,16 | 2 | P20766,Q10758                                    |
| 8752 | 1,4,5,10,1 2,3,6,7,8,9<br>1,12,15,16 ,13,14,17 | 6 | P14408,P20766,P51907,P53792,Q6IFU7,Q6P6Q2        |
| 8753 | 1,4,5,10,1 2,3,6,7,8,9<br>1,12,15,17 ,13,14,16 | 2 | P20766,P51907                                    |
| 8754 | 1,4,5,10,1 2,3,6,7,8,9<br>1,12,16,17 ,13,14,15 | 5 | P06757,P20766,Q10758,Q6IFU7,Q6P6Q2               |
| 8755 | 1,4,5,10,1 2,3,6,7,8,9<br>1,13,14,15 ,12,16,17 | 3 | P09605,P25809,P50115,Q6P6R2                      |
| 8756 | 1,4,5,10,1 2,3,6,7,8,9<br>1,13,14,16 ,12,15,17 | 1 | P50115                                           |
| 8757 | 1,4,5,10,1 2,3,6,7,8,9<br>1,13,14,17 ,12,15,16 | 0 |                                                  |
| 8758 | 1,4,5,10,1 2,3,6,7,8,9<br>1,13,15,16 ,12,14,17 | 4 | P14408,P50115,Q561R9,Q62635                      |
| 8759 | 1,4,5,10,1 2,3,6,7,8,9<br>1,13,15,17 ,12,14,16 | 0 |                                                  |

|      |                          |                          |   |                                                                |
|------|--------------------------|--------------------------|---|----------------------------------------------------------------|
| 8760 | 1,4,5,10,1<br>1,13,16,17 | 2,3,6,7,8,9<br>,12,14,15 | 1 | A2RUV9                                                         |
| 8761 | 1,4,5,10,1<br>1,14,15,16 | 2,3,6,7,8,9<br>,12,13,17 | 8 | P09605;P25809,P20766,P50115,P51907,P55091,Q62635,Q9QZK9,Q9Z1F2 |
| 8762 | 1,4,5,10,1<br>1,14,15,17 | 2,3,6,7,8,9<br>,12,13,16 | 1 | P20766                                                         |
| 8763 | 1,4,5,10,1<br>1,14,16,17 | 2,3,6,7,8,9<br>,12,13,15 | 1 | P20766                                                         |
| 8764 | 1,4,5,10,1<br>1,15,16,17 | 2,3,6,7,8,9<br>,12,13,14 | 6 | P02782,P05369,P14408,P20766,Q62902,Q9Z1F2                      |
| 8765 | 1,4,5,10,1<br>2,13,14,15 | 2,3,6,7,8,9<br>,11,16,17 | 5 | P09605;P25809,P10758,P50115,Q498D9,Q6P6R2                      |
| 8766 | 1,4,5,10,1<br>2,13,14,16 | 2,3,6,7,8,9<br>,11,15,17 | 1 | P50115                                                         |
| 8767 | 1,4,5,10,1<br>2,13,14,17 | 2,3,6,7,8,9<br>,11,15,16 | 1 | P36374                                                         |
| 8768 | 1,4,5,10,1<br>2,13,15,16 | 2,3,6,7,8,9<br>,11,14,17 | 2 | P16086,P50115                                                  |
| 8769 | 1,4,5,10,1<br>2,13,15,17 | 2,3,6,7,8,9<br>,11,14,16 | 2 | P16086,Q99MH3                                                  |
| 8770 | 1,4,5,10,1<br>2,13,16,17 | 2,3,6,7,8,9<br>,11,14,15 | 3 | P02631,P27213,P35280                                           |
| 8771 | 1,4,5,10,1<br>2,14,15,16 | 2,3,6,7,8,9<br>,11,13,17 | 2 | P20766,P50115                                                  |
| 8772 | 1,4,5,10,1<br>2,14,15,17 | 2,3,6,7,8,9<br>,11,13,16 | 1 | P20766                                                         |
| 8773 | 1,4,5,10,1<br>2,14,16,17 | 2,3,6,7,8,9<br>,11,13,15 | 2 | P20766,Q10758                                                  |
| 8774 | 1,4,5,10,1<br>2,15,16,17 | 2,3,6,7,8,9<br>,11,13,14 | 3 | P06866,P16086,P20766                                           |
| 8775 | 1,4,5,10,1<br>3,14,15,16 | 2,3,6,7,8,9<br>,11,12,17 | 3 | P09605;P25809,P50115,Q62635                                    |
| 8776 | 1,4,5,10,1<br>3,14,15,17 | 2,3,6,7,8,9<br>,11,12,16 | 0 |                                                                |
| 8777 | 1,4,5,10,1<br>3,14,16,17 | 2,3,6,7,8,9<br>,11,12,15 | 1 | P27213                                                         |
| 8778 | 1,4,5,10,1<br>3,15,16,17 | 2,3,6,7,8,9<br>,11,12,14 | 2 | P62804,Q9EQS0                                                  |
| 8779 | 1,4,5,10,1<br>4,15,16,17 | 2,3,6,7,8,9<br>,11,12,13 | 3 | P02782,P20766,Q62902                                           |
| 8780 | 1,4,5,11,1<br>2,13,14,15 | 2,3,6,7,8,9<br>,10,16,17 | 2 | P10758,Q6P6R2                                                  |
| 8781 | 1,4,5,11,1<br>2,13,14,16 | 2,3,6,7,8,9<br>,10,15,17 | 2 | Q4FZU6,Q6P6R2                                                  |
| 8782 | 1,4,5,11,1<br>2,13,14,17 | 2,3,6,7,8,9<br>,10,15,16 | 1 | P36374                                                         |



|      |                          |                                 |    |                                                                                                                                                                                                                |
|------|--------------------------|---------------------------------|----|----------------------------------------------------------------------------------------------------------------------------------------------------------------------------------------------------------------|
| 8783 | 1,4,5,11,1<br>2,13,15,16 | 2,3,6,7,8,9<br>,10,14,17        | 3  | P14408,P51907,Q6P6R2                                                                                                                                                                                           |
| 8784 | 1,4,5,11,1<br>2,13,15,17 | 2,3,6,7,8,9<br>,10,14,16        | 1  | P36374                                                                                                                                                                                                         |
| 8785 | 1,4,5,11,1<br>2,13,16,17 | 2,3,6,7,8,9<br>,10,14,15        | 2  | P35280,P36374                                                                                                                                                                                                  |
| 8786 | 1,4,5,11,1<br>2,14,15,16 | 2,3,6,7,8,9<br>,10,13,17        | 2  | P20766,P51907                                                                                                                                                                                                  |
| 8787 | 1,4,5,11,1<br>2,14,15,17 | 2,3,6,7,8,9<br>,10,13,16        | 1  | P20766                                                                                                                                                                                                         |
| 8788 | 1,4,5,11,1<br>2,14,16,17 | 2,3,6,7,8,9<br>,10,13,15        | 2  | P20766,Q4FZU6                                                                                                                                                                                                  |
| 8789 | 1,4,5,11,1<br>2,15,16,17 | 2,3,6,7,8,9<br>,10,13,14        | 6  | P05369,P06866,P12020,P14408,P20766,P51907                                                                                                                                                                      |
| 8790 | 1,4,5,11,1<br>3,14,15,16 | 2,3,6,7,8,9<br>,10,12,17        | 2  | P50115,Q6P6R2                                                                                                                                                                                                  |
| 8791 | 1,4,5,11,1<br>3,14,15,17 | 2,3,6,7,8,9<br>,10,12,16        | 2  | P47967,P97840                                                                                                                                                                                                  |
| 8792 | 1,4,5,11,1<br>3,14,16,17 | 2,3,6,7,8,9<br>,10,12,15        | 1  | Q4FZU6                                                                                                                                                                                                         |
| 8793 | 1,4,5,11,1<br>3,15,16,17 | 2,3,6,7,8,9<br>,10,12,14        | 1  | P14408                                                                                                                                                                                                         |
| 8794 | 1,4,5,11,1<br>4,15,16,17 | 2,3,6,7,8,9<br>,10,12,13        | 3  | P14408,P20766,P97840                                                                                                                                                                                           |
| 8795 | 1,4,5,12,1<br>3,14,15,16 | 2,3,6,7,8,9<br>,10,11,17        | 3  | P50115,Q6P6R2,Q9QUL6                                                                                                                                                                                           |
| 8796 | 1,4,5,12,1<br>3,14,15,17 | 2,3,6,7,8,9<br>,10,11,16        | 2  | P11883,P27213                                                                                                                                                                                                  |
| 8797 | 1,4,5,12,1<br>3,14,16,17 | 2,3,6,7,8,9<br>,10,11,15        | 3  | P27213,P35280,Q4FZU6                                                                                                                                                                                           |
| 8798 | 1,4,5,12,1<br>3,15,16,17 | 2,3,6,7,8,9<br>,10,11,14        | 3  | P11883,P27213,P35280                                                                                                                                                                                           |
| 8799 | 1,4,5,12,1<br>4,15,16,17 | 2,3,6,7,8,9<br>,10,11,13        | 1  | P20766                                                                                                                                                                                                         |
| 8800 | 1,4,5,13,1<br>4,15,16,17 | 2,3,6,7,8,9<br>,10,11,12        | 3  | P11883,P27213,P62804                                                                                                                                                                                           |
| 8801 | 1,4,6,7,8,9<br>,10,11    | 2,3,5,12,1<br>3,14,15,16<br>,17 | 24 | P00714,P06761,P07150,P07647,P08723,P09456,P0C0A9,P14669,P15399,P18418,P22282,P22283,P31044,P35280,P61206,P84079,P84082<br>,P83121,Q561R9,Q5FVI6,Q63493,Q63617,Q6AYL6,Q8CJ52,Q9JI85,Q9R0T3                      |
| 8802 | 1,4,6,7,8,9<br>,10,12    | 2,3,5,11,1<br>3,14,15,16<br>,17 | 29 | D3ZHA0,F1LM93,P00714,P02780,P02781,P02782,P06761,P07647,P08723,P09456,P0C0A9,P11598,P13432,P18418,P22282,P22283,P301<br>20,P31044,P35281,P36374,P97840,Q5FVI6,Q63617,Q6AYR9,Q8CJ52,Q99041,Q9JHB9,Q9JI85,Q9R0T3 |
| 8803 | 1,4,6,7,8,9<br>,10,13    | 2,3,5,11,1<br>2,14,15,16<br>,17 | 16 | P06761,P06911,P07647,P08723,P09456,P11598,P12020,P18418,P22282,P22283,P31044,Q5GRG2,Q62902,Q63617,Q9JI85,Q9R0T3                                                                                                |

|      |                       |                                 |    |                                                                                                                                                                                                                                                      |
|------|-----------------------|---------------------------------|----|------------------------------------------------------------------------------------------------------------------------------------------------------------------------------------------------------------------------------------------------------|
| 8804 | 1,4,6,7,8,9<br>,10,14 | 2,3,5,11,1<br>2,13,15,16<br>,17 | 14 | P00714,P06761,P08723,P11598,P12020,P18418,P19629,P22282,P22283,P31044,P83121,Q5GRG2,Q63617,Q9JI85                                                                                                                                                    |
| 8805 | 1,4,6,7,8,9<br>,10,15 | 2,3,5,11,1<br>2,13,14,16<br>,17 | 10 | D3ZHA0,O55006,P06761,P18418,P22006,P22283,P31044,P35280,Q5FVI6,Q63617                                                                                                                                                                                |
| 8806 | 1,4,6,7,8,9<br>,10,16 | 2,3,5,11,1<br>2,13,14,15<br>,17 | 7  | P00714,P18418,P22283,P31044,Q5FVI6,Q63617,Q9R0T3                                                                                                                                                                                                     |
| 8807 | 1,4,6,7,8,9<br>,10,17 | 2,3,5,11,1<br>2,13,14,15<br>,16 | 11 | P06761,P08723,P11598,P18418,P22282,P22283,P31044,Q4G075,Q63617,Q99041,Q9R0T3                                                                                                                                                                         |
| 8808 | 1,4,6,7,8,9<br>,11,12 | 2,3,5,10,1<br>3,14,15,16<br>,17 | 35 | P00714,P02780,P02781,P02782,P04905,P06761,P07150,P07647,P08723,P09456,P0C0A9,P10715,P11598,P13432,P14669,P18418,P19629,P22282,P22283,P24368,P30120,P31044,P36374,P46462,Q62902,Q63357,Q63493,Q63617,Q6AYL6,Q6AYR9,Q8CJ52,Q99041,Q9JHB9,Q9JI85,Q9R0T3 |
| 8809 | 1,4,6,7,8,9<br>,11,13 | 2,3,5,10,1<br>2,14,15,16<br>,17 | 26 | P02780,P02781,P02782,P05539,P06761,P06911,P07647,P08723,P09456,P0C0A9,P11598,P14669,P18418,P22282,P22283,P31044,P36374,P83121,Q5GRG2,Q62902,Q63493,Q63617,Q8CJ52,Q9JHB9,Q9JI85,Q9R0T3                                                                |
| 8810 | 1,4,6,7,8,9<br>,11,14 | 2,3,5,10,1<br>2,13,15,16<br>,17 | 19 | P02780,P06761,P07150,P07171,P07647,P08723,P11598,P14669,P18418,P19629,P22282,P22283,P31044,P47727,P83121,Q63493,Q63617,Q8CJ52,Q9JI85                                                                                                                 |
| 8811 | 1,4,6,7,8,9<br>,11,15 | 2,3,5,10,1<br>2,13,14,16<br>,17 | 13 | P06761,P07171,P10715,P14669,P18418,P22006,P22282,P22283,P31044,P35280,Q561R9,Q63617,Q9JI85                                                                                                                                                           |
| 8812 | 1,4,6,7,8,9<br>,11,16 | 2,3,5,10,1<br>2,13,14,15<br>,17 | 15 | P06761,P07150,P10715,P14668,P14669,P18418,P22282,P22283,P31044,P83121,Q63617,Q6AYL6,Q8CJ52,Q9JI85,Q9R0T3                                                                                                                                             |
| 8813 | 1,4,6,7,8,9<br>,11,17 | 2,3,5,10,1<br>2,13,14,15<br>,16 | 20 | P06761,P07150,P07647,P08723,P09605,P25809,P10715,P11598,P14669,P15399,P18418,P22282,P22283,P31044,P83121,Q4G075,Q63493,Q63617,Q99041,Q9JI85,Q9R0T3                                                                                                   |
| 8814 | 1,4,6,7,8,9<br>,12,13 | 2,3,5,10,1<br>1,14,15,16<br>,17 | 28 | P02780,P02781,P02782,P02803,P06761,P06911,P07647,P08723,P09456,P0C0A9,P11598,P12020,P13432,P18418,P22282,P22283,P30120,P31044,P36374,Q5GRG2,Q62902,Q63617,Q6AYR9,Q8CJ52,Q99041,Q9JHB9,Q9JI85,Q9R0T3                                                  |
| 8815 | 1,4,6,7,8,9<br>,12,14 | 2,3,5,10,1<br>1,13,15,16<br>,17 | 25 | P02780,P02781,P02782,P06761,P07647,P08723,P09456,P0C0A9,P11598,P13432,P18418,P19629,P22282,P22283,P30120,P31044,P36374,Q62902,Q63617,Q6AYR9,Q8CJ52,Q99041,Q9JHB9,Q9JI85,Q9R0T3                                                                       |
| 8816 | 1,4,6,7,8,9<br>,12,15 | 2,3,5,10,1<br>1,13,14,16<br>,17 | 19 | P02782,P06761,P07647,P08723,P0C0A9,P10715,P11598,P13432,P18418,P19629,P22006,P22282,P22283,P30120,P31044,Q63617,Q8CJ52,Q99041,Q9JI85                                                                                                                 |
| 8817 | 1,4,6,7,8,9<br>,12,16 | 2,3,5,10,1<br>1,13,14,15<br>,17 | 18 | P02780,P02782,P06761,P07647,P08723,P0C0A9,P10715,P13432,P18418,P22282,P22283,P30120,P31044,Q63617,Q8CJ52,Q99041,Q9JI85,Q9R0T3                                                                                                                        |
| 8818 | 1,4,6,7,8,9<br>,12,17 | 2,3,5,10,1<br>1,13,14,15<br>,16 | 27 | P02780,P02782,P06761,P07647,P08723,P09605,P25809,P0C0A9,P10715,P11598,P13432,P18418,P19223,P19629,P22282,P22283,P30120,P36374,Q4G075,Q63617,Q6AYR9,Q8CJ52,Q99041,Q9JHB9,Q9JI85,Q9QZA6,Q9QZK9,Q9R0T3                                                  |

|      |                        |                                 |    |                                                                                                                                                                                                                                                                                                                                          |
|------|------------------------|---------------------------------|----|------------------------------------------------------------------------------------------------------------------------------------------------------------------------------------------------------------------------------------------------------------------------------------------------------------------------------------------|
| 8819 | 1,4,6,7,8,9<br>,13,14  | 2,3,5,10,1<br>1,12,15,16<br>,17 | 18 | P02780,P06761,P06911,P07647,P08723,P11598,P12020,P18418,P19629,P22282,P22283,P31044,P83121,Q5GRG2,Q62902,Q63617,Q8CJ52,Q9JI85                                                                                                                                                                                                            |
| 8820 | 1,4,6,7,8,9<br>,13,15  | 2,3,5,10,1<br>1,12,14,16<br>,17 | 11 | P06761,P06911,P11598,P18418,P22006,P22282,P22283,P31044,Q5GRG2,Q63617,Q9JI85                                                                                                                                                                                                                                                             |
| 8821 | 1,4,6,7,8,9<br>,13,16  | 2,3,5,10,1<br>1,12,14,15<br>,17 | 13 | P06761,P06911,P11598,P18418,P22282,P22283,P31044,Q5GRG2,Q62902,Q63617,Q8CJ52,Q9JI85,Q9R0T3                                                                                                                                                                                                                                               |
| 8822 | 1,4,6,7,8,9<br>,13,17  | 2,3,5,10,1<br>1,12,14,15<br>,16 | 15 | P06761,P06911,P07647,P08723,P11598,P18418,P22282,P22283,P31044,Q5GRG2,Q62902,Q63617,Q99041,Q9JI85,Q9R0T3                                                                                                                                                                                                                                 |
| 8823 | 1,4,6,7,8,9<br>,14,15  | 2,3,5,10,1<br>1,12,13,16<br>,17 | 10 | P06761,P11598,P18418,P19629,P22006,P22282,P22283,P31044,Q5GRG2,Q63617                                                                                                                                                                                                                                                                    |
| 8824 | 1,4,6,7,8,9<br>,14,16  | 2,3,5,10,1<br>1,12,13,15<br>,17 | 7  | P06761,P18418,P19629,P22282,P22283,P31044,Q63617                                                                                                                                                                                                                                                                                         |
| 8825 | 1,4,6,7,8,9<br>,14,17  | 2,3,5,10,1<br>1,12,13,15<br>,16 | 11 | P06761,P08723,P11598,P18418,P19629,P22282,P22283,P31044,Q63617,Q99041,Q9JI85                                                                                                                                                                                                                                                             |
| 8826 | 1,4,6,7,8,9<br>,15,16  | 2,3,5,10,1<br>1,12,13,14<br>,17 | 3  | P18418,P31044,Q63617                                                                                                                                                                                                                                                                                                                     |
| 8827 | 1,4,6,7,8,9<br>,15,17  | 2,3,5,10,1<br>1,12,13,14<br>,16 | 9  | P06761,P11598,P18418,P22006,P22282,P22283,P31044,Q63617,Q99041                                                                                                                                                                                                                                                                           |
| 8828 | 1,4,6,7,8,9<br>,16,17  | 2,3,5,10,1<br>1,12,13,14<br>,15 | 8  | P06761,P09605,P25809,P18418,P22282,P22283,Q63617,Q99041,Q9R0T3                                                                                                                                                                                                                                                                           |
| 8829 | 1,4,6,7,8,1<br>0,11,12 | 2,3,5,9,13,<br>14,15,16,1<br>7  | 45 | F1LM93,O35547,P00714,P02780,P02781,P02782,P04905,P06761,P07150,P07647,P08723,P09456,P0C0A9,P10715,P11598,P13432,P14669,P15399,P18418,P22282,P22283,P24368,P30120,P31044,P35280,P35281,P36374,P46462,P47727,P60905,P61206,P84079,P84082,Q5FVI6,Q63357,Q63493,Q63617,Q6AYL6,Q6AYR9,Q6IFU7,Q6P6Q2,Q812E4,Q8CJ52,Q99041,Q9JHB9,Q9JI85,Q9R0T3 |
| 8830 | 1,4,6,7,8,1<br>0,11,13 | 2,3,5,9,12,<br>14,15,16,1<br>7  | 29 | P00714,P02780,P02781,P06761,P06911,P07150,P07647,P08723,P09456,P0C0A9,P11598,P12020,P14669,P18418,P22282,P22283,P31044,P36374,P47727,Q5FVI6,Q5GRG2,Q62902,Q63493,Q63617,Q8CJ52,Q8VD89,Q9JHB9,Q9JI85,Q9R0T3                                                                                                                               |
| 8831 | 1,4,6,7,8,1<br>0,11,14 | 2,3,5,9,12,<br>13,15,16,1<br>7  | 28 | P00714,P06761,P06911,P07150,P07171,P07647,P08723,P11598,P12020,P14669,P15399,P18418,P19629,P22282,P22283,P31044,P35280,P47727,P83121,Q5BJY9,Q5FVI6,Q5GRG2,Q63493,Q63617,Q6AYL6,Q8CJ52,Q9JI85,Q9R0T3                                                                                                                                      |
| 8832 | 1,4,6,7,8,1<br>0,11,15 | 2,3,5,9,12,<br>13,14,16,1<br>7  | 21 | P00714,P06761,P07150,P07171,P08723,P11598,P14669,P18418,P22006,P22282,P22283,P31044,P35280,P35281,Q561R9,Q5BJY9,Q5FVI6,Q63617,Q8CJ52,Q8VD89,Q9JI85                                                                                                                                                                                       |
| 8833 | 1,4,6,7,8,1<br>0,11,16 | 2,3,5,9,12,<br>13,14,15,1<br>7  | 20 | P00714,P06761,P07150,P08723,P14669,P18418,P22282,P22283,P31044,P35280,P61206,P84079,P84082,Q5BJY9,Q5FVI6,Q63493,Q63617,Q6AYL6,Q8CJ52,Q8VD89,Q9JI85,Q9R0T3                                                                                                                                                                                |

|      |                        |                                |    |                                                                                                                                                                                                                                        |
|------|------------------------|--------------------------------|----|----------------------------------------------------------------------------------------------------------------------------------------------------------------------------------------------------------------------------------------|
| 8834 | 1,4,6,7,8,1<br>0,11,17 | 2,3,5,9,12,<br>13,14,15,1<br>6 | 20 | P00714,P06761,P07150,P07647,P08723,P11598,P14669,P15399,P18418,P22282,P22283,P31044,Q4G075,Q5FVI6,Q63493,Q63617,Q8CJ52,Q99041,Q9JI85,Q9R0T3                                                                                            |
| 8835 | 1,4,6,7,8,1<br>0,12,13 | 2,3,5,9,11,<br>14,15,16,1<br>7 | 32 | F1LM93,P02780,P02781,P02782,P04905,P06761,P06911,P07647,P08723,P09456,P0C0A9,P11598,P12020,P13432,P18418,P22282,P22283,P24368,P30120,P31044,P35281,P36374,Q5GRG2,Q62902,Q63617,Q6AYR9,Q8CJ52,Q99041,Q99MH3,Q9JHB9,Q9JI85,Q9R0T3        |
| 8836 | 1,4,6,7,8,1<br>0,12,14 | 2,3,5,9,11,<br>13,15,16,1<br>7 | 33 | D3ZHA0,F1LM93,P00714,P02780,P02781,P02782,P04905,P06761,P06911,P07647,P08723,P0C0A9,P11598,P12020,P13432,P18418,P19629,P22282,P22283,P24368,P30120,P31044,P35280,P36374,Q5GRG2,Q63493,Q63617,Q6AYR9,Q8CJ52,Q99041,Q9JHB9,Q9JI85,Q9R0T3 |
| 8837 | 1,4,6,7,8,1<br>0,12,15 | 2,3,5,9,11,<br>13,14,16,1<br>7 | 24 | D3ZHA0,F1LM93,P06761,P07647,P08723,P0C0A9,P11598,P13432,P18418,P19629,P22006,P22282,P22283,P30120,P31044,P35280,P35281,Q5FVI6,Q63617,Q6AYR9,Q8CJ52,Q99041,Q9JI85,Q9R0T3                                                                |
| 8838 | 1,4,6,7,8,1<br>0,12,16 | 2,3,5,9,11,<br>13,14,15,1<br>7 | 23 | F1LM93,P06761,P07647,P08721,P08723,P0C0A9,P11598,P13432,P18418,P22282,P22283,P30120,P31044,P35281,P47967,P97840,Q5FVI6,Q63617,Q6AYR9,Q8CJ52,Q99041,Q9JI85,Q9R0T3                                                                       |
| 8839 | 1,4,6,7,8,1<br>0,12,17 | 2,3,5,9,11,<br>13,14,15,1<br>6 | 30 | F1LM93,P02780,P02781,P02782,P06761,P07647,P08723,P0C0A9,P11598,P13432,P18418,P19223,P22282,P22283,P30120,P31044,P36374,Q10758,Q4G075,Q63493,Q63617,Q6AYR9,Q8CJ52,Q99041,Q99MH3,Q9JHB9,Q9JI85,Q9QZA6,Q9QZK9,Q9R0T3                      |
| 8840 | 1,4,6,7,8,1<br>0,13,14 | 2,3,5,9,11,<br>12,15,16,1<br>7 | 17 | P06761,P06911,P07647,P08723,P11598,P12020,P18418,P19629,P22282,P22283,P31044,Q5GRG2,Q62902,Q63617,Q8CJ52,Q9JI85,Q9R0T3                                                                                                                 |
| 8841 | 1,4,6,7,8,1<br>0,13,15 | 2,3,5,9,11,<br>12,14,16,1<br>7 | 14 | P06761,P06911,P07647,P08723,P11598,P12020,P18418,P22006,P22282,P22283,P31044,Q5GRG2,Q63617,Q9JI85                                                                                                                                      |
| 8842 | 1,4,6,7,8,1<br>0,13,16 | 2,3,5,9,11,<br>12,14,15,1<br>7 | 18 | P06761,P06911,P07647,P08723,P11598,P12020,P18418,P22282,P22283,P31044,Q5FVI6,Q5GRG2,Q62902,Q63617,Q8CJ52,Q8VD89,Q9JI85,Q9R0T3                                                                                                          |
| 8843 | 1,4,6,7,8,1<br>0,13,17 | 2,3,5,9,11,<br>12,14,15,1<br>6 | 18 | P06761,P06911,P07647,P08723,P11598,P12020,P18418,P22282,P22283,P31044,Q4G075,Q5GRG2,Q63617,Q8CJ52,Q99041,Q99MH3,Q9JI85,Q9R0T3                                                                                                          |
| 8844 | 1,4,6,7,8,1<br>0,14,15 | 2,3,5,9,11,<br>12,13,16,1<br>7 | 14 | P06761,P07171,P08723,P11598,P12020,P18418,P19629,P22006,P22282,P22283,P31044,P35280,Q5GRG2,Q63617                                                                                                                                      |
| 8845 | 1,4,6,7,8,1<br>0,14,16 | 2,3,5,9,11,<br>12,13,15,1<br>7 | 14 | P06761,P08721,P08723,P12020,P18418,P19629,P22282,P22283,P31044,Q5FVI6,Q5GRG2,Q63617,Q8CJ52,Q9R0T3                                                                                                                                      |
| 8846 | 1,4,6,7,8,1<br>0,14,17 | 2,3,5,9,11,<br>12,13,15,1<br>6 | 14 | P06761,P08723,P11598,P12020,P18418,P19629,P22282,P22283,P31044,Q4G075,Q5GRG2,Q63617,Q99041,Q9R0T3                                                                                                                                      |
| 8847 | 1,4,6,7,8,1<br>0,15,16 | 2,3,5,9,11,<br>12,13,14,1<br>7 | 7  | P08721,P18418,P31044,P35280,Q5FVI6,Q63617,Q8VD89                                                                                                                                                                                       |
| 8848 | 1,4,6,7,8,1<br>0,15,17 | 2,3,5,9,11,<br>12,13,14,1<br>6 | 11 | P06761,P11598,P18418,P22006,P22282,P22283,P31044,Q4G075,Q63617,Q99041,Q99MH3                                                                                                                                                           |

|      |                        |                                |    |                                                                                                                                                                                                                                                                                         |
|------|------------------------|--------------------------------|----|-----------------------------------------------------------------------------------------------------------------------------------------------------------------------------------------------------------------------------------------------------------------------------------------|
| 8849 | 1,4,6,7,8,1<br>0,16,17 | 2,3,5,9,11,<br>12,13,14,1<br>5 | 11 | P06761,P11598,P18418,P22282,P22283,P31044,Q4G075,Q5FVI6,Q63617,Q99041,Q9R0T3                                                                                                                                                                                                            |
| 8850 | 1,4,6,7,8,1<br>1,12,13 | 2,3,5,9,10,<br>14,15,16,1<br>7 | 37 | P02780,P02781,P02782,P04905,P06761,P06911,P07150,P07647,P08723,P09456,P0C0A9,P10715,P11598,P12020,P13432,P14669,P18418,P19629,P22282,P22283,P24368,P30120,P31044,P36374,P46462,P47727,Q5GRG2,Q62902,Q63357,Q63493,Q63617,Q6AYR9,Q8CJ52,Q9041,Q9JHB9,Q9JI85,Q9R0T3                       |
| 8851 | 1,4,6,7,8,1<br>1,12,14 | 2,3,5,9,10,<br>13,15,16,1<br>7 | 40 | P02780,P02781,P02782,P04905,P06761,P07150,P07647,P08723,P09456,P0C0A9,P10715,P11598,P12020,P13432,P14669,P15399,P18418,P19629,P22282,P22283,P24368,P30120,P31044,P35280,P36374,P40241,P46462,P47727,Q5GRG2,Q62902,Q63357,Q63493,Q63617,Q6AYL6,Q6AYR9,Q8CJ52,Q99041,Q9JHB9,Q9JI85,Q9R0T3 |
| 8852 | 1,4,6,7,8,1<br>1,12,15 | 2,3,5,9,10,<br>13,14,16,1<br>7 | 32 | P02780,P02781,P02782,P04905,P06761,P07150,P07647,P08723,P0C0A9,P10715,P11598,P13432,P14669,P18418,P19629,P22006,P22282,P22283,P30120,P31044,P35280,P36374,Q63357,Q63493,Q63617,Q6AYL6,Q6AYR9,Q8CJ52,Q99041,Q9JHB9,Q9JI85,Q9R0T3                                                         |
| 8853 | 1,4,6,7,8,1<br>1,12,16 | 2,3,5,9,10,<br>13,14,15,1<br>7 | 33 | P02780,P02781,P02782,P04905,P06761,P07150,P07647,P08723,P0C0A9,P10715,P11598,P13432,P14669,P18418,P19629,P22282,P22283,P24368,P30120,P31044,P36374,Q62902,Q63357,Q63493,Q63617,Q6AYL6,Q6AYR9,Q6P6Q2,Q8CJ52,Q99041,Q9JHB9,Q9JI85,Q9R0T3                                                  |
| 8854 | 1,4,6,7,8,1<br>1,12,17 | 2,3,5,9,10,<br>13,14,15,1<br>6 | 39 | F1LM93,O55004,P02780,P02781,P02782,P04905,P06761,P07150,P07647,P08723,P09605,P25809,P0C0A9,P10715,P11598,P13432,P14669,P15399,P18418,P19223,P19629,P22282,P22283,P30120,P36374,P46462,P50115,Q4G075,Q63357,Q63493,Q63617,Q6AYL6,Q6AYR9,Q8CJ52,Q99041,Q9JHB9,Q9JI85,Q9QZA6,Q9QZK9,Q9R0T3 |
| 8855 | 1,4,6,7,8,1<br>1,13,14 | 2,3,5,9,10,<br>12,15,16,1<br>7 | 30 | P02780,P02781,P02782,P04905,P06761,P06911,P07150,P07171,P07647,P08723,P0C0A9,P11598,P12020,P14669,P18418,P19629,P22282,P22283,P31044,P46462,P47727,P83121,Q5GRG2,Q62902,Q63493,Q63617,Q8CJ52,Q9JHB9,Q9JI85,Q9R0T3                                                                       |
| 8856 | 1,4,6,7,8,1<br>1,13,15 | 2,3,5,9,10,<br>12,14,16,1<br>7 | 21 | P05539,P06761,P06911,P07150,P07171,P07647,P08723,P11598,P14669,P18418,P22006,P22282,P22283,P31044,Q5GRG2,Q62902,Q63617,Q8CJ52,Q8VD89,Q99041,Q9JI85                                                                                                                                      |
| 8857 | 1,4,6,7,8,1<br>1,13,16 | 2,3,5,9,10,<br>12,14,15,1<br>7 | 19 | P06761,P06911,P07150,P07647,P08723,P11598,P14669,P18418,P22282,P22283,P31044,Q5GRG2,Q62902,Q63617,Q8CJ52,Q8VD89,Q99041,Q9JI85,Q9R0T3                                                                                                                                                    |
| 8858 | 1,4,6,7,8,1<br>1,13,17 | 2,3,5,9,10,<br>12,14,15,1<br>6 | 25 | P02780,P02782,P06761,P06911,P07150,P07647,P08723,P11598,P14669,P15399,P18418,P22282,P22283,P31044,P36374,Q4G075,Q5GRG2,Q62902,Q63493,Q63617,Q8CJ52,Q99041,Q9JHB9,Q9JI85,Q9R0T3                                                                                                          |
| 8859 | 1,4,6,7,8,1<br>1,14,15 | 2,3,5,9,10,<br>12,13,16,1<br>7 | 19 | P06761,P07150,P07171,P08723,P11598,P14669,P18418,P19629,P22006,P22282,P22283,P31044,P35280,P47727,Q5GRG2,Q63493,Q63617,Q8CJ52,Q9JI85                                                                                                                                                    |
| 8860 | 1,4,6,7,8,1<br>1,14,16 | 2,3,5,9,10,<br>12,13,15,1<br>7 | 17 | P06761,P07150,P08723,P11598,P14668,P14669,P18418,P19629,P22282,P22283,P31044,P47727,Q63493,Q63617,Q8CJ52,Q9JI85,Q9R0T3                                                                                                                                                                  |
| 8861 | 1,4,6,7,8,1<br>1,14,17 | 2,3,5,9,10,<br>12,13,15,1<br>6 | 19 | P06761,P07150,P07647,P08723,P11598,P14669,P15399,P18418,P19629,P22282,P22283,P31044,P47727,Q4G075,Q63493,Q63617,Q8CJ52,Q99041,Q9JI85                                                                                                                                                    |
| 8862 | 1,4,6,7,8,1<br>1,15,16 | 2,3,5,9,10,<br>12,13,14,1<br>7 | 14 | P07150,P07171,P10715,P14668,P14669,P18418,P19629,P22006,P31044,P35280,Q63617,Q8CJ52,Q8VD89,Q9JI85                                                                                                                                                                                       |
| 8863 | 1,4,6,7,8,1<br>1,15,17 | 2,3,5,9,10,<br>12,13,14,1<br>6 | 16 | P06761,P07150,P11598,P14669,P18418,P19629,P22006,P22282,P22283,P31044,Q4G075,Q63493,Q63617,Q99041,Q9JI85,Q9QZA6                                                                                                                                                                         |

|      |                        |                                |    |                                                                                                                                                                                                                                               |
|------|------------------------|--------------------------------|----|-----------------------------------------------------------------------------------------------------------------------------------------------------------------------------------------------------------------------------------------------|
| 8864 | 1,4,6,7,8,1<br>1,16,17 | 2,3,5,9,10,<br>12,13,14,1<br>5 | 17 | P06761,P07150,P09605;P25809,P10715,P11598,P14669,P18418,P22282,P22283,P31044,Q4G075,Q63493,Q63617,Q8CJ52,Q99041,Q9JI85,Q9R0T3                                                                                                                 |
| 8865 | 1,4,6,7,8,1<br>2,13,14 | 2,3,5,9,10,<br>11,15,16,1<br>7 | 33 | O08557,P02780,P02781,P02782,P04905,P06761,P06911,P07647,P08723,P09456,P0C0A9,P11598,P12020,P13432,P18418,P19629,P22282,P22283,P24368,P30120,P31044,P36374,P46462,Q498D9,Q5GRG2,Q62902,Q63617,Q6AYR9,Q8CJ52,Q99041,Q9JHB9,Q9JI85,Q9R0T3        |
| 8866 | 1,4,6,7,8,1<br>2,13,15 | 2,3,5,9,10,<br>11,14,16,1<br>7 | 29 | O08557,P02780,P02781,P02782,P06761,P06911,P07647,P08723,P0C0A9,P11598,P12020,P13432,P18418,P19629,P22006,P22282,P22283,P30120,P31044,P36374,Q5GRG2,Q62902,Q63617,Q6AYR9,Q8CJ52,Q99041,Q9JHB9,Q9JI85,Q9R0T3                                    |
| 8867 | 1,4,6,7,8,1<br>2,13,16 | 2,3,5,9,10,<br>11,14,15,1<br>7 | 26 | P02780,P02781,P02782,P06761,P06911,P07647,P08723,P0C0A9,P11598,P12020,P13432,P18418,P22282,P22283,P30120,P31044,P36374,Q5GRG2,Q62902,Q63617,Q6AYR9,Q8CJ52,Q99041,Q9JHB9,Q9JI85,Q9R0T3                                                         |
| 8868 | 1,4,6,7,8,1<br>2,13,17 | 2,3,5,9,10,<br>11,14,15,1<br>6 | 34 | P02780,P02781,P02782,P06761,P06911,P07647,P08723,P0C0A9,P11598,P12020,P13432,P18418,P19223,P19629,P22282,P22283,P30120,P36374,P55091,P62815,Q4G075,Q5GRG2,Q62635,Q62902,Q63493,Q63617,Q6AYR9,Q8CJ52,Q99041,Q99MH3,Q9JHB9,Q9JI85,Q9QZK9,Q9R0T3 |
| 8869 | 1,4,6,7,8,1<br>2,14,15 | 2,3,5,9,10,<br>11,13,16,1<br>7 | 23 | O08557,P02780,P02782,P06761,P07647,P08723,P0C0A9,P11598,P13432,P18418,P19629,P22006,P22282,P22283,P30120,P31044,P35280,Q5GRG2,Q63617,Q6AYR9,Q8CJ52,Q99041,Q9JI85                                                                              |
| 8870 | 1,4,6,7,8,1<br>2,14,16 | 2,3,5,9,10,<br>11,13,15,1<br>7 | 21 | P02780,P02782,P06761,P07647,P08723,P0C0A9,P11598,P13432,P18418,P19629,P22282,P22283,P30120,P31044,Q62902,Q63617,Q6AYR9,Q8CJ52,Q99041,Q9JI85,Q9R0T3                                                                                            |
| 8871 | 1,4,6,7,8,1<br>2,14,17 | 2,3,5,9,10,<br>11,13,15,1<br>6 | 30 | P02780,P02782,P06761,P07647,P08723,P0C0A9,P11598,P13432,P18418,P19223,P19629,P22282,P22283,P30120,P31430,P36374,P55091,P62815,Q4G075,Q62635,Q63493,Q63617,Q6AYR9,Q8CJ52,Q99041,Q9JHB9,Q9JI85,Q9QZA6,Q9QZK9,Q9R0T3                             |
| 8872 | 1,4,6,7,8,1<br>2,15,16 | 2,3,5,9,10,<br>11,13,14,1<br>7 | 15 | P06761,P08723,P10715,P11598,P13432,P18418,P19629,P22282,P22283,P30120,Q63617,Q8CJ52,Q99041,Q9JI85,Q9R0T3                                                                                                                                      |
| 8873 | 1,4,6,7,8,1<br>2,15,17 | 2,3,5,9,10,<br>11,13,14,1<br>6 | 27 | B0BNN3,P02782,P06761,P07647,P08723,P10715,P11598,P13432,P18418,P19223,P19629,P20761,P22006,P22282,P22283,P30120,P36374,Q4G075,Q63617,Q6AYR9,Q8CJ52,Q99041,Q99MH3,Q9JI85,Q9QZA6,Q9QZK9,Q9R0T3                                                  |
| 8874 | 1,4,6,7,8,1<br>2,16,17 | 2,3,5,9,10,<br>11,13,14,1<br>5 | 24 | P02782,P06761,P07647,P08723,P09605;P25809,P10715,P11598,P13432,P18418,P19223,P19629,P22282,P22283,P23928,P30120,P36374,Q4G075,Q63617,Q6AYR9,Q8CJ52,Q99041,Q9JI85,Q9QZK9,Q9R0T3                                                                |
| 8875 | 1,4,6,7,8,1<br>3,14,15 | 2,3,5,9,10,<br>11,12,16,1<br>7 | 16 | O08557,P06761,P06911,P08723,P11598,P12020,P18418,P19629,P22006,P22282,P22283,P31044,Q5GRG2,Q62902,Q63617,Q9JI85                                                                                                                               |
| 8876 | 1,4,6,7,8,1<br>3,14,16 | 2,3,5,9,10,<br>11,12,15,1<br>7 | 16 | P06761,P06911,P08723,P11598,P12020,P18418,P19629,P22282,P22283,P31044,Q5GRG2,Q62902,Q63617,Q8CJ52,Q9JI85,Q9R0T3                                                                                                                               |
| 8877 | 1,4,6,7,8,1<br>3,14,17 | 2,3,5,9,10,<br>11,12,15,1<br>6 | 19 | P06761,P06911,P07647,P08723,P11598,P12020,P18418,P19629,P22282,P22283,P31044,Q4G075,Q5GRG2,Q62902,Q63617,Q8CJ52,Q99041,Q9JI85,Q9R0T3                                                                                                          |
| 8878 | 1,4,6,7,8,1<br>3,15,16 | 2,3,5,9,10,<br>11,12,14,1<br>7 | 12 | P06761,P06911,P11598,P18418,P22282,P22283,P31044,Q5GRG2,Q63617,Q8CJ52,Q8VD89,Q9R0T3                                                                                                                                                           |

|      |                        |                                |    |                                                                                                                                      |
|------|------------------------|--------------------------------|----|--------------------------------------------------------------------------------------------------------------------------------------|
| 8879 | 1,4,6,7,8,1<br>3,15,17 | 2,3,5,9,10,<br>11,12,14,1<br>6 | 12 | P06761,P06911,P11598,P18418,P22282,P22283,P31044,Q4G075,Q5GRG2,Q63617,Q99041,Q9JI85                                                  |
| 8880 | 1,4,6,7,8,1<br>3,16,17 | 2,3,5,9,10,<br>11,12,14,1<br>5 | 15 | P06761,P06911,P11598,P18418,P22282,P22283,P23928,P31044,Q4G075,Q5GRG2,Q62902,Q63617,Q8CJ52,Q99041,Q9R0T3                             |
| 8881 | 1,4,6,7,8,1<br>4,15,16 | 2,3,5,9,10,<br>11,12,13,1<br>7 | 6  | P06761,P18418,P19629,P31044,Q5GRG2,Q63617                                                                                            |
| 8882 | 1,4,6,7,8,1<br>4,15,17 | 2,3,5,9,10,<br>11,12,13,1<br>6 | 12 | P06761,P10536,P11598,P18418,P19629,P22006,P22282,P22283,P31044,Q4G075,Q63617,Q99041                                                  |
| 8883 | 1,4,6,7,8,1<br>4,16,17 | 2,3,5,9,10,<br>11,12,13,1<br>5 | 10 | P06761,P11598,P18418,P19629,P22282,P22283,Q4G075,Q63617,Q99041,Q9R0T3                                                                |
| 8884 | 1,4,6,7,8,1<br>5,16,17 | 2,3,5,9,10,<br>11,12,13,1<br>4 | 6  | P06761,P11598,P22282,Q4G075,Q63617,Q99041                                                                                            |
| 8885 | 1,4,6,7,9,1<br>0,11,12 | 2,3,5,8,13,<br>14,15,16,1<br>7 | 19 | P00714,P04905,P06757,P08723,P08753,P09456,P0C0A9,P15399,P30120,P36374,P47967,P83121,P97840,Q5FVI6,Q63357,Q6AYL6,Q6IFU7,Q9JHB9,Q9JI85 |
| 8886 | 1,4,6,7,9,1<br>0,11,13 | 2,3,5,8,12,<br>14,15,16,1<br>7 | 6  | P05539,P09456,P12020,P83121,Q5FVI6,Q9JI85                                                                                            |
| 8887 | 1,4,6,7,9,1<br>0,11,14 | 2,3,5,8,12,<br>13,15,16,1<br>7 | 5  | P15399,P47727,P83121,Q5FVI6,Q9JI85                                                                                                   |
| 8888 | 1,4,6,7,9,1<br>0,11,15 | 2,3,5,8,12,<br>13,14,16,1<br>7 | 6  | P22006,P35280,P83121,Q561R9,Q566E6,Q5FVI6                                                                                            |
| 8889 | 1,4,6,7,9,1<br>0,11,16 | 2,3,5,8,12,<br>13,14,15,1<br>7 | 3  | P61206,P84079,P84082,P83121,Q5FVI6                                                                                                   |
| 8890 | 1,4,6,7,9,1<br>0,11,17 | 2,3,5,8,12,<br>13,14,15,1<br>6 | 4  | P15399,P83121,Q566E6,Q5FVI6                                                                                                          |
| 8891 | 1,4,6,7,9,1<br>0,12,13 | 2,3,5,8,11,<br>14,15,16,1<br>7 | 14 | P06911,P07647,P08723,P09456,P0C0A9,P12020,P19218,P30120,P36374,P97840,Q5FVI6,Q6AYR9,Q9JHB9,Q9JI85                                    |
| 8892 | 1,4,6,7,9,1<br>0,12,14 | 2,3,5,8,11,<br>13,15,16,1<br>7 | 7  | P08723,P0C0A9,P12020,P30120,P83121,P97840,Q6AYR9                                                                                     |
| 8893 | 1,4,6,7,9,1<br>0,12,15 | 2,3,5,8,11,<br>13,14,16,1<br>7 | 2  | P97840,Q5FVI6                                                                                                                        |

|      |                        |                                |    |                                                                                                                                      |
|------|------------------------|--------------------------------|----|--------------------------------------------------------------------------------------------------------------------------------------|
| 8894 | 1,4,6,7,9,1<br>0,12,16 | 2,3,5,8,11,<br>13,14,15,1<br>7 | 3  | P47967,P97840,Q5FVI6                                                                                                                 |
| 8895 | 1,4,6,7,9,1<br>0,12,17 | 2,3,5,8,11,<br>13,14,15,1<br>6 | 8  | O08815,P08723,P09605,P25809,P13432,P19223,P36374,P97840,Q9QZK9                                                                       |
| 8896 | 1,4,6,7,9,1<br>0,13,14 | 2,3,5,8,11,<br>12,15,16,1<br>7 | 4  | P06911,P12020,P83121,Q5GRG2                                                                                                          |
| 8897 | 1,4,6,7,9,1<br>0,13,15 | 2,3,5,8,11,<br>12,14,16,1<br>7 | 2  | Q5FVI6,Q5GRG2                                                                                                                        |
| 8898 | 1,4,6,7,9,1<br>0,13,16 | 2,3,5,8,11,<br>12,14,15,1<br>7 | 4  | P12020,P62804,P97840,Q5FVI6                                                                                                          |
| 8899 | 1,4,6,7,9,1<br>0,13,17 | 2,3,5,8,11,<br>12,14,15,1<br>6 | 1  | P12020                                                                                                                               |
| 8900 | 1,4,6,7,9,1<br>0,14,15 | 2,3,5,8,11,<br>12,13,16,1<br>7 | 3  | P22006,P83121,Q5FVI6                                                                                                                 |
| 8901 | 1,4,6,7,9,1<br>0,14,16 | 2,3,5,8,11,<br>12,13,15,1<br>7 | 2  | P83121,Q5FVI6                                                                                                                        |
| 8902 | 1,4,6,7,9,1<br>0,14,17 | 2,3,5,8,11,<br>12,13,15,1<br>6 | 1  | P83121                                                                                                                               |
| 8903 | 1,4,6,7,9,1<br>0,15,16 | 2,3,5,8,11,<br>12,13,14,1<br>7 | 1  | Q5FVI6                                                                                                                               |
| 8904 | 1,4,6,7,9,1<br>0,15,17 | 2,3,5,8,11,<br>12,13,14,1<br>6 | 1  | Q5FVI6                                                                                                                               |
| 8905 | 1,4,6,7,9,1<br>0,16,17 | 2,3,5,8,11,<br>12,13,14,1<br>5 | 1  | Q5FVI6                                                                                                                               |
| 8906 | 1,4,6,7,9,1<br>1,12,13 | 2,3,5,8,10,<br>14,15,16,1<br>7 | 19 | P02780,P02803,P04905,P05539,P07647,P08723,P09456,P0C0A9,P13432,P22282,P22283,P30120,P36374,P83121,Q62902,Q63357,Q6AYR9,Q9JHB9,Q9JI85 |
| 8907 | 1,4,6,7,9,1<br>1,12,14 | 2,3,5,8,10,<br>13,15,16,1<br>7 | 12 | P04905,P08723,P09456,P0C0A9,P13432,P30120,P36374,P47727,P83121,Q6AYL6,Q9JHB9,Q9JI85                                                  |
| 8908 | 1,4,6,7,9,1<br>1,12,15 | 2,3,5,8,10,<br>13,14,16,1<br>7 | 5  | P08723,P08753,P22006,P51907,Q9JI85                                                                                                   |



|      |                        |                                |    |                                                                                                   |
|------|------------------------|--------------------------------|----|---------------------------------------------------------------------------------------------------|
| 8909 | 1,4,6,7,9,1<br>1,12,16 | 2,3,5,8,10,<br>13,14,15,1<br>7 | 9  | P08723,P08753,P0C0A9,P13432,P30120,Q5FVI6,Q6AYL6,Q6IFU7,Q9JI85                                    |
| 8910 | 1,4,6,7,9,1<br>1,12,17 | 2,3,5,8,10,<br>13,14,15,1<br>6 | 12 | P08723,P09605,P25809,P0C0A9,P13432,P15399,P22282,P30120,P36374,Q99041,Q9JHB9,Q9JI85,Q9QZK9        |
| 8911 | 1,4,6,7,9,1<br>1,13,14 | 2,3,5,8,10,<br>12,15,16,1<br>7 | 9  | P05539,P06911,P09456,P12020,P47727,P83121,Q5GRG2,Q62902,Q9JI85                                    |
| 8912 | 1,4,6,7,9,1<br>1,13,15 | 2,3,5,8,10,<br>12,14,16,1<br>7 | 5  | P05539,P22006,P83121,Q561R9,Q9JI85                                                                |
| 8913 | 1,4,6,7,9,1<br>1,13,16 | 2,3,5,8,10,<br>12,14,15,1<br>7 | 2  | P05539,P83121                                                                                     |
| 8914 | 1,4,6,7,9,1<br>1,13,17 | 2,3,5,8,10,<br>12,14,15,1<br>6 | 7  | P05539,P09605,P25809,P15399,P22282,P36374,P83121,Q9JI85                                           |
| 8915 | 1,4,6,7,9,1<br>1,14,15 | 2,3,5,8,10,<br>12,13,16,1<br>7 | 2  | P22006,P83121                                                                                     |
| 8916 | 1,4,6,7,9,1<br>1,14,16 | 2,3,5,8,10,<br>12,13,15,1<br>7 | 1  | P83121                                                                                            |
| 8917 | 1,4,6,7,9,1<br>1,14,17 | 2,3,5,8,10,<br>12,13,15,1<br>6 | 2  | P15399,P83121                                                                                     |
| 8918 | 1,4,6,7,9,1<br>1,15,16 | 2,3,5,8,10,<br>12,13,14,1<br>7 | 2  | P22006,Q5FVI6                                                                                     |
| 8919 | 1,4,6,7,9,1<br>1,15,17 | 2,3,5,8,10,<br>12,13,14,1<br>6 | 2  | P09605,P25809,P22006                                                                              |
| 8920 | 1,4,6,7,9,1<br>1,16,17 | 2,3,5,8,10,<br>12,13,14,1<br>5 | 2  | P09605,P25809,P83121                                                                              |
| 8921 | 1,4,6,7,9,1<br>2,13,14 | 2,3,5,8,10,<br>11,15,16,1<br>7 | 14 | P06911,P08723,P09456,P0C0A9,P12020,P13432,P22282,P30120,P36374,Q5GRG2,Q62902,Q6AYR9,Q9JHB9,Q9JI85 |
| 8922 | 1,4,6,7,9,1<br>2,13,15 | 2,3,5,8,10,<br>11,14,16,1<br>7 | 3  | P05539,P36374,Q9JI85                                                                              |
| 8923 | 1,4,6,7,9,1<br>2,13,16 | 2,3,5,8,10,<br>11,14,15,1<br>7 | 3  | P19218,P36374,Q62902                                                                              |

|      |                        |                                |    |                                                                                     |
|------|------------------------|--------------------------------|----|-------------------------------------------------------------------------------------|
| 8924 | 1,4,6,7,9,1<br>2,13,17 | 2,3,5,8,10,<br>11,14,15,1<br>6 | 11 | P07647,P08723,P09605;P25809,P13432,P22282,P30120,P36374,Q6AYR9,Q9JHB9,Q9JI85,Q9QZK9 |
| 8925 | 1,4,6,7,9,1<br>2,14,15 | 2,3,5,8,10,<br>11,13,16,1<br>7 | 0  |                                                                                     |
| 8926 | 1,4,6,7,9,1<br>2,14,16 | 2,3,5,8,10,<br>11,13,15,1<br>7 | 0  |                                                                                     |
| 8927 | 1,4,6,7,9,1<br>2,14,17 | 2,3,5,8,10,<br>11,13,15,1<br>6 | 5  | P01835,P08723,P09605;P25809,P13432,P36374                                           |
| 8928 | 1,4,6,7,9,1<br>2,15,16 | 2,3,5,8,10,<br>11,13,14,1<br>7 | 1  | P20766                                                                              |
| 8929 | 1,4,6,7,9,1<br>2,15,17 | 2,3,5,8,10,<br>11,13,14,1<br>6 | 2  | P09605;P25809,P13432                                                                |
| 8930 | 1,4,6,7,9,1<br>2,16,17 | 2,3,5,8,10,<br>11,13,14,1<br>5 | 2  | P09605;P25809,P13432                                                                |
| 8931 | 1,4,6,7,9,1<br>3,14,15 | 2,3,5,8,10,<br>11,12,16,1<br>7 | 4  | P05539,P06911,P12020,Q5GRG2                                                         |
| 8932 | 1,4,6,7,9,1<br>3,14,16 | 2,3,5,8,10,<br>11,12,15,1<br>7 | 5  | P06911,P12020,P62804,P83121,Q5GRG2                                                  |
| 8933 | 1,4,6,7,9,1<br>3,14,17 | 2,3,5,8,10,<br>11,12,15,1<br>6 | 3  | P06911,P12020,P83121                                                                |
| 8934 | 1,4,6,7,9,1<br>3,15,16 | 2,3,5,8,10,<br>11,12,14,1<br>7 | 2  | P62804,Q00715                                                                       |
| 8935 | 1,4,6,7,9,1<br>3,15,17 | 2,3,5,8,10,<br>11,12,14,1<br>6 | 2  | P05539,P62804                                                                       |
| 8936 | 1,4,6,7,9,1<br>3,16,17 | 2,3,5,8,10,<br>11,12,14,1<br>5 | 2  | P09605;P25809,P62804                                                                |
| 8937 | 1,4,6,7,9,1<br>4,15,16 | 2,3,5,8,10,<br>11,12,13,1<br>7 | 1  | P62804                                                                              |
| 8938 | 1,4,6,7,9,1<br>4,15,17 | 2,3,5,8,10,<br>11,12,13,1<br>6 | 0  |                                                                                     |

|      |                         |                                |    |                                                                                                                                                                         |
|------|-------------------------|--------------------------------|----|-------------------------------------------------------------------------------------------------------------------------------------------------------------------------|
| 8939 | 1,4,6,7,9,1<br>4,16,17  | 2,3,5,8,10,<br>11,12,13,1<br>5 | 0  |                                                                                                                                                                         |
| 8940 | 1,4,6,7,9,1<br>5,16,17  | 2,3,5,8,10,<br>11,12,13,1<br>4 | 2  | P09605;P25809,P62804                                                                                                                                                    |
| 8941 | 1,4,6,7,10,<br>11,12,13 | 2,3,5,8,9,1<br>4,15,16,17      | 24 | P02781,P04905,P06911,P07647,P08723,P09456,P0C0A9,P12020,P15399,P22282,P22283,P30120,P36374,P47727,P47967,Q5FVI6,Q5GRG2,Q62902,Q63357,Q6AYR9,Q6IFU7,Q8CJ52,Q9JHB9,Q9JI85 |
| 8942 | 1,4,6,7,10,<br>11,12,14 | 2,3,5,8,9,1<br>3,15,16,17      | 21 | P04905,P08723,P08753,P09456,P0C0A9,P12020,P15399,P20766,P30120,P35280,P36374,P47727,P83121,Q5FVI6,Q63357,Q63493,Q6AYL6,Q6AYR9,Q6IFU7,Q9JHB9,Q9JI85                      |
| 8943 | 1,4,6,7,10,<br>11,12,15 | 2,3,5,8,9,1<br>3,14,16,17      | 11 | P08723,P08753,P0C0A9,P20766,P22006,P35280,P51907,Q5FVI6,Q63357,Q6IFU7,Q9JI85                                                                                            |
| 8944 | 1,4,6,7,10,<br>11,12,16 | 2,3,5,8,9,1<br>3,14,15,17      | 16 | P04905,P06757,P08723,P08753,P0C0A9,P20766,P30120,P47967,P61206;P84079;P84082,P97840,Q5FVI6,Q63357,Q6AYL6,Q6IFU7,Q6P6Q2,Q9JI85                                           |
| 8945 | 1,4,6,7,10,<br>11,12,17 | 2,3,5,8,9,1<br>3,14,15,16      | 18 | O08815,P04905,P06757,P08723,P0C0A9,P13432,P15399,P30120,P36374,Q10758,Q5FVI6,Q63357,Q63493,Q6AYR9,Q99041,Q9JHB9,Q9JI85,Q9QZK9                                           |
| 8946 | 1,4,6,7,10,<br>11,13,14 | 2,3,5,8,9,1<br>2,15,16,17      | 8  | P06911,P12020,P15399,P47727,P83121,Q5FVI6,Q5GRG2,Q9JI85                                                                                                                 |
| 8947 | 1,4,6,7,10,<br>11,13,15 | 2,3,5,8,9,1<br>2,14,16,17      | 8  | P05539,P12020,P22006,Q561R9,Q5FVI6,Q5GRG2,Q8VD89,Q9JI85                                                                                                                 |
| 8948 | 1,4,6,7,10,<br>11,13,16 | 2,3,5,8,9,1<br>2,14,15,17      | 5  | P12020,P47967,P61206;P84079;P84082,Q5FVI6,Q8VD89                                                                                                                        |
| 8949 | 1,4,6,7,10,<br>11,13,17 | 2,3,5,8,9,1<br>2,14,15,16      | 6  | P12020,P15399,P22282,P36374,Q5FVI6,Q9JI85                                                                                                                               |
| 8950 | 1,4,6,7,10,<br>11,14,15 | 2,3,5,8,9,1<br>2,13,16,17      | 6  | P15399,P22006,P35280,P47727,P83121,Q5FVI6                                                                                                                               |
| 8951 | 1,4,6,7,10,<br>11,14,16 | 2,3,5,8,9,1<br>2,13,15,17      | 6  | P15399,P20766,P47727,P61206;P84079;P84082,P83121,Q5FVI6                                                                                                                 |
| 8952 | 1,4,6,7,10,<br>11,14,17 | 2,3,5,8,9,1<br>2,13,15,16      | 5  | P12020,P15399,P47727,P83121,Q5FVI6                                                                                                                                      |
| 8953 | 1,4,6,7,10,<br>11,15,16 | 2,3,5,8,9,1<br>2,13,14,17      | 6  | P20766,P22006,P35280,Q561R9,Q5FVI6,Q8VD89                                                                                                                               |
| 8954 | 1,4,6,7,10,<br>11,15,17 | 2,3,5,8,9,1<br>2,13,14,16      | 3  | P15399,P22006,Q5FVI6                                                                                                                                                    |
| 8955 | 1,4,6,7,10,<br>11,16,17 | 2,3,5,8,9,1<br>2,13,14,15      | 2  | P15399,Q5FVI6                                                                                                                                                           |
| 8956 | 1,4,6,7,10,<br>12,13,14 | 2,3,5,8,9,1<br>1,15,16,17      | 16 | P04905,P06911,P07647,P08723,P09456,P0C0A9,P12020,P22282,P30120,P36374,Q498D9,Q5GRG2,Q62902,Q6AYR9,Q9JHB9,Q9JI85                                                         |
| 8957 | 1,4,6,7,10,<br>12,13,15 | 2,3,5,8,9,1<br>1,14,16,17      | 8  | P08723,P12020,P36374,P97840,Q5FVI6,Q5GRG2,Q6AYR9,Q99MH3                                                                                                                 |
| 8958 | 1,4,6,7,10,<br>12,13,16 | 2,3,5,8,9,1<br>1,14,15,17      | 9  | P06911,P08723,P12020,P19218,P36374,P47967,P97840,Q5FVI6,Q6AYR9                                                                                                          |
| 8959 | 1,4,6,7,10,<br>12,13,17 | 2,3,5,8,9,1<br>1,14,15,16      | 14 | P06911,P07647,P08723,P12020,P13432,P22282,P22283,P30120,P36374,Q6AYR9,Q99MH3,Q9JHB9,Q9JI85,Q9QZK9                                                                       |
| 8960 | 1,4,6,7,10,<br>12,14,15 | 2,3,5,8,9,1<br>1,13,16,17      | 6  | P08723,P12020,P20766,P22006,P35280,Q5FVI6                                                                                                                               |

|      |                                                |    |                                                                                                                                                           |
|------|------------------------------------------------|----|-----------------------------------------------------------------------------------------------------------------------------------------------------------|
| 8961 | 1,4,6,7,10, 2,3,5,8,9,1<br>12,14,16 1,13,15,17 | 6  | P08721,P08723,P12020,P20766,P97840,Q5FVI6                                                                                                                 |
| 8962 | 1,4,6,7,10, 2,3,5,8,9,1<br>12,14,17 1,13,15,16 | 8  | P08723,P12020,P13432,P20766,P36374,Q10758,Q6AYR9,Q9QZK9                                                                                                   |
| 8963 | 1,4,6,7,10, 2,3,5,8,9,1<br>12,15,16 1,13,14,17 | 3  | P20766,P97840,Q5FVI6                                                                                                                                      |
| 8964 | 1,4,6,7,10, 2,3,5,8,9,1<br>12,15,17 1,13,14,16 | 5  | P13432,P20766,Q5FVI6,Q99MH3,Q9QZK9                                                                                                                        |
| 8965 | 1,4,6,7,10, 2,3,5,8,9,1<br>12,16,17 1,13,14,15 | 6  | P13432,P20766,P97840,Q10758,Q5FVI6,Q9QZK9                                                                                                                 |
| 8966 | 1,4,6,7,10, 2,3,5,8,9,1<br>13,14,15 1,12,16,17 | 4  | P06911,P12020,P22006,Q5GRG2                                                                                                                               |
| 8967 | 1,4,6,7,10, 2,3,5,8,9,1<br>13,14,16 1,12,15,17 | 4  | P06911,P12020,Q5FVI6,Q5GRG2                                                                                                                               |
| 8968 | 1,4,6,7,10, 2,3,5,8,9,1<br>13,14,17 1,12,15,16 | 3  | P06911,P12020,Q5GRG2                                                                                                                                      |
| 8969 | 1,4,6,7,10, 2,3,5,8,9,1<br>13,15,16 1,12,14,17 | 4  | P62804,Q5FVI6,Q5GRG2,Q8VD89                                                                                                                               |
| 8970 | 1,4,6,7,10, 2,3,5,8,9,1<br>13,15,17 1,12,14,16 | 3  | P12020,Q5GRG2,Q99MH3                                                                                                                                      |
| 8971 | 1,4,6,7,10, 2,3,5,8,9,1<br>13,16,17 1,12,14,15 | 2  | P12020,Q5FVI6                                                                                                                                             |
| 8972 | 1,4,6,7,10, 2,3,5,8,9,1<br>14,15,16 1,12,13,17 | 2  | P20766,Q5FVI6                                                                                                                                             |
| 8973 | 1,4,6,7,10, 2,3,5,8,9,1<br>14,15,17 1,12,13,16 | 1  | P22006                                                                                                                                                    |
| 8974 | 1,4,6,7,10, 2,3,5,8,9,1<br>14,16,17 1,12,13,15 | 0  |                                                                                                                                                           |
| 8975 | 1,4,6,7,10, 2,3,5,8,9,1<br>15,16,17 1,12,13,14 | 2  | P20766,Q5FVI6                                                                                                                                             |
| 8976 | 1,4,6,7,11, 2,3,5,8,9,1<br>12,13,14 0,15,16,17 | 22 | P02780,P02781,P04905,P05539,P06911,P07647,P08723,P09456,P0C0A9,P12020,P22282,P22283,P30120,P36374,P47727,Q5GRG2,Q62902,Q63493,Q6AYR9,Q8CJ52,Q9JHB9,Q9JI85 |
| 8977 | 1,4,6,7,11, 2,3,5,8,9,1<br>12,13,15 0,14,16,17 | 11 | P04905,P05539,P08723,P0C0A9,P22006,P30120,P36374,Q5GRG2,Q62902,Q9JHB9,Q9JI85                                                                              |
| 8978 | 1,4,6,7,11, 2,3,5,8,9,1<br>12,13,16 0,14,15,17 | 9  | P04905,P08723,P0C0A9,P30120,P36374,Q62902,Q8CJ52,Q9JHB9,Q9JI85                                                                                            |
| 8979 | 1,4,6,7,11, 2,3,5,8,9,1<br>12,13,17 0,14,15,16 | 19 | P04905,P05539,P07647,P08723,P09605,P25809,P0C0A9,P13432,P15399,P22282,P22283,P30120,P36374,Q62902,Q63493,Q6AYR9,Q99041,Q9JHB9,Q9JI85,Q9QZK9               |
| 8980 | 1,4,6,7,11, 2,3,5,8,9,1<br>12,14,15 0,13,16,17 | 8  | P04905,P08723,P20766,P22006,P30120,P35280,P47727,Q9JI85                                                                                                   |
| 8981 | 1,4,6,7,11, 2,3,5,8,9,1<br>12,14,16 0,13,15,17 | 9  | P04905,P08723,P0C0A9,P20766,P30120,P47727,Q6AYL6,Q6IFU7,Q9JI85                                                                                            |
| 8982 | 1,4,6,7,11, 2,3,5,8,9,1<br>12,14,17 0,13,15,16 | 14 | P04905,P08723,P0C0A9,P13432,P15399,P22282,P30120,P36374,P47727,Q63493,Q6AYR9,Q9JHB9,Q9JI85,Q9QZK9                                                         |
| 8983 | 1,4,6,7,11, 2,3,5,8,9,1<br>12,15,16 0,13,14,17 | 6  | P20766,P22006,P51907,Q5FVI6,Q6IFU7,Q9JI85                                                                                                                 |

|      |                                                |    |                                                                                                   |
|------|------------------------------------------------|----|---------------------------------------------------------------------------------------------------|
| 8984 | 1,4,6,7,11, 2,3,5,8,9,1<br>12,15,17 0,13,14,16 | 8  | P09605;P25809,P13432,P15399,P22006,P36374,Q99041,Q9JI85,Q9QZK9                                    |
| 8985 | 1,4,6,7,11, 2,3,5,8,9,1<br>12,16,17 0,13,14,15 | 8  | P09605;P25809,P13432,P15399,P20766,P36374,Q99041,Q9JI85,Q9QZK9                                    |
| 8986 | 1,4,6,7,11, 2,3,5,8,9,1<br>13,14,15 0,12,16,17 | 8  | P05539,P06911,P12020,P22006,P47727,P83121,Q5GRG2,Q9JI85                                           |
| 8987 | 1,4,6,7,11, 2,3,5,8,9,1<br>13,14,16 0,12,15,17 | 6  | P06911,P12020,P47727,P83121,Q5GRG2,Q62902                                                         |
| 8988 | 1,4,6,7,11, 2,3,5,8,9,1<br>13,14,17 0,12,15,16 | 9  | P05539,P06911,P12020,P15399,P22282,P47727,P83121,Q5GRG2,Q9JI85                                    |
| 8989 | 1,4,6,7,11, 2,3,5,8,9,1<br>13,15,16 0,12,14,17 | 3  | P05539,P22006,Q8VD89                                                                              |
| 8990 | 1,4,6,7,11, 2,3,5,8,9,1<br>13,15,17 0,12,14,16 | 2  | P05539,P22006                                                                                     |
| 8991 | 1,4,6,7,11, 2,3,5,8,9,1<br>13,16,17 0,12,14,15 | 0  |                                                                                                   |
| 8992 | 1,4,6,7,11, 2,3,5,8,9,1<br>14,15,16 0,12,13,17 | 2  | P20766,P22006                                                                                     |
| 8993 | 1,4,6,7,11, 2,3,5,8,9,1<br>14,15,17 0,12,13,16 | 2  | P15399,P22006                                                                                     |
| 8994 | 1,4,6,7,11, 2,3,5,8,9,1<br>14,16,17 0,12,13,15 | 1  | P15399                                                                                            |
| 8995 | 1,4,6,7,11, 2,3,5,8,9,1<br>15,16,17 0,12,13,14 | 1  | P22006                                                                                            |
| 8996 | 1,4,6,7,12, 2,3,5,8,9,1<br>13,14,15 0,11,16,17 | 6  | P06911,P08723,P12020,P30120,Q5GRG2,Q9JI85                                                         |
| 8997 | 1,4,6,7,12, 2,3,5,8,9,1<br>13,14,16 0,11,15,17 | 7  | P06911,P08723,P12020,P30120,Q5GRG2,Q62902,Q6AYR9                                                  |
| 8998 | 1,4,6,7,12, 2,3,5,8,9,1<br>13,14,17 0,11,15,16 | 14 | P06911,P08723,P12020,P13432,P22282,P22283,P30120,P36374,Q5GRG2,Q62902,Q6AYR9,Q9JHB9,Q9JI85,Q9QZK9 |
| 8999 | 1,4,6,7,12, 2,3,5,8,9,1<br>13,15,16 0,11,14,17 | 1  | P19218                                                                                            |
| 9000 | 1,4,6,7,12, 2,3,5,8,9,1<br>13,15,17 0,11,14,16 | 5  | P13432,P22282,P36374,Q99MH3,Q9QZK9                                                                |
| 9001 | 1,4,6,7,12, 2,3,5,8,9,1<br>13,16,17 0,11,14,15 | 6  | P09605;P25809,P13432,P22282,P27213,P36374,Q9QZK9                                                  |
| 9002 | 1,4,6,7,12, 2,3,5,8,9,1<br>14,15,16 0,11,13,17 | 2  | P20766,P35467                                                                                     |
| 9003 | 1,4,6,7,12, 2,3,5,8,9,1<br>14,15,17 0,11,13,16 | 2  | P13432,P20766                                                                                     |
| 9004 | 1,4,6,7,12, 2,3,5,8,9,1<br>14,16,17 0,11,13,15 | 2  | P13432,P20766                                                                                     |
| 9005 | 1,4,6,7,12, 2,3,5,8,9,1<br>15,16,17 0,11,13,14 | 3  | P09605;P25809,P13432,P20766                                                                       |
| 9006 | 1,4,6,7,13, 2,3,5,8,9,1<br>14,15,16 0,11,12,17 | 5  | P06911,P12020,P35467,P62804,Q5GRG2                                                                |

|      |                         |                                |    |                                                                                                                                                                      |
|------|-------------------------|--------------------------------|----|----------------------------------------------------------------------------------------------------------------------------------------------------------------------|
| 9007 | 1,4,6,7,13,<br>14,15,17 | 2,3,5,8,9,1<br>0,11,12,16      | 4  | P06911,P12020,Q5GRG2,Q9WUW8                                                                                                                                          |
| 9008 | 1,4,6,7,13,<br>14,16,17 | 2,3,5,8,9,1<br>0,11,12,15      | 3  | P06911,P12020,P27213                                                                                                                                                 |
| 9009 | 1,4,6,7,13,<br>15,16,17 | 2,3,5,8,9,1<br>0,11,12,14      | 2  | P27213,P62804                                                                                                                                                        |
| 9010 | 1,4,6,7,14,<br>15,16,17 | 2,3,5,8,9,1<br>0,11,12,13      | 2  | P20766,P35467                                                                                                                                                        |
| 9011 | 1,4,6,8,9,1<br>0,11,12  | 2,3,5,7,13,<br>14,15,16,1<br>7 | 23 | O35547,P00714,P02780,P02781,P02782,P02803,P04905,P07647,P08723,P0C0A9,P14669,P16636,P30120,P35281,P36374,P47727,Q0903<br>0,Q63357,Q6AYR9,Q6IFU7,Q6IMF3,Q6P6Q2,Q9JHB9 |
| 9012 | 1,4,6,8,9,1<br>0,11,13  | 2,3,5,7,12,<br>14,15,16,1<br>7 | 6  | P02803,P0C0A9,P14669,P47727,Q561R9,Q8CJD3                                                                                                                            |
| 9013 | 1,4,6,8,9,1<br>0,11,14  | 2,3,5,7,12,<br>13,15,16,1<br>7 | 4  | P00714,P14669,P47727,P83121                                                                                                                                          |
| 9014 | 1,4,6,8,9,1<br>0,11,15  | 2,3,5,7,12,<br>13,14,16,1<br>7 | 4  | P14669,P35280,P80201,Q561R9                                                                                                                                          |
| 9015 | 1,4,6,8,9,1<br>0,11,16  | 2,3,5,7,12,<br>13,14,15,1<br>7 | 4  | A2RUV9,P00714,P14668,Q9WUW8                                                                                                                                          |
| 9016 | 1,4,6,8,9,1<br>0,11,17  | 2,3,5,7,12,<br>13,14,15,1<br>6 | 4  | A2RUV9,P14669,P16636,Q09030                                                                                                                                          |
| 9017 | 1,4,6,8,9,1<br>0,12,13  | 2,3,5,7,11,<br>14,15,16,1<br>7 | 13 | P02780,P02781,P02782,P02803,P07647,P08723,P0C0A9,P22282,P22283,P30120,P36374,Q6AYR9,Q9JHB9                                                                           |
| 9018 | 1,4,6,8,9,1<br>0,12,14  | 2,3,5,7,11,<br>13,15,16,1<br>7 | 5  | P02782,P08723,P0C0A9,P30120,Q6AYR9                                                                                                                                   |
| 9019 | 1,4,6,8,9,1<br>0,12,15  | 2,3,5,7,11,<br>13,14,16,1<br>7 | 5  | P08723,P0C0A9,P10758,P35281,P80201                                                                                                                                   |
| 9020 | 1,4,6,8,9,1<br>0,12,16  | 2,3,5,7,11,<br>13,14,15,1<br>7 | 3  | P08723,P0C0A9,Q9WUW8                                                                                                                                                 |
| 9021 | 1,4,6,8,9,1<br>0,12,17  | 2,3,5,7,11,<br>13,14,15,1<br>6 | 13 | P02782,P08644,P08723,P0C0A9,P13432,P16636,P19223,P30120,P36374,Q09030,Q10758,Q4G075,Q6AYR9                                                                           |
| 9022 | 1,4,6,8,9,1<br>0,13,14  | 2,3,5,7,11,<br>12,15,16,1<br>7 | 3  | P06911,P12020,Q5GRG2                                                                                                                                                 |

|      |                        |                                |    |                                                                                                                                      |
|------|------------------------|--------------------------------|----|--------------------------------------------------------------------------------------------------------------------------------------|
| 9023 | 1,4,6,8,9,1<br>0,13,15 | 2,3,5,7,11,<br>12,14,16,1<br>7 | 0  |                                                                                                                                      |
| 9024 | 1,4,6,8,9,1<br>0,13,16 | 2,3,5,7,11,<br>12,14,15,1<br>7 | 1  | Q8CJD3                                                                                                                               |
| 9025 | 1,4,6,8,9,1<br>0,13,17 | 2,3,5,7,11,<br>12,14,15,1<br>6 | 0  |                                                                                                                                      |
| 9026 | 1,4,6,8,9,1<br>0,14,15 | 2,3,5,7,11,<br>12,13,16,1<br>7 | 1  | P17046                                                                                                                               |
| 9027 | 1,4,6,8,9,1<br>0,14,16 | 2,3,5,7,11,<br>12,13,15,1<br>7 | 0  |                                                                                                                                      |
| 9028 | 1,4,6,8,9,1<br>0,14,17 | 2,3,5,7,11,<br>12,13,15,1<br>6 | 1  | Q09030                                                                                                                               |
| 9029 | 1,4,6,8,9,1<br>0,15,16 | 2,3,5,7,11,<br>12,13,14,1<br>7 | 0  |                                                                                                                                      |
| 9030 | 1,4,6,8,9,1<br>0,15,17 | 2,3,5,7,11,<br>12,13,14,1<br>6 | 1  | P80201                                                                                                                               |
| 9031 | 1,4,6,8,9,1<br>0,16,17 | 2,3,5,7,11,<br>12,13,14,1<br>5 | 4  | A2RUV9,P25031,Q09030,Q6P6R2                                                                                                          |
| 9032 | 1,4,6,8,9,1<br>1,12,13 | 2,3,5,7,10,<br>14,15,16,1<br>7 | 19 | P02780,P02781,P02782,P02803,P04905,P07647,P08723,P0C0A9,P13432,P22282,P22283,P30120,P36374,P47727,Q62902,Q6AYR9,Q8CJ52,Q9JHB9,Q9JI85 |
| 9033 | 1,4,6,8,9,1<br>1,12,14 | 2,3,5,7,10,<br>13,15,16,1<br>7 | 14 | P02780,P02781,P02782,P04905,P07647,P08723,P0C0A9,P13432,P14669,P30120,P36374,P47727,Q6AYR9,Q9JHB9                                    |
| 9034 | 1,4,6,8,9,1<br>1,12,15 | 2,3,5,7,10,<br>13,14,16,1<br>7 | 7  | P02782,P08723,P0C0A9,P10758,P14669,P30120,Q9JHB9                                                                                     |
| 9035 | 1,4,6,8,9,1<br>1,12,16 | 2,3,5,7,10,<br>13,14,15,1<br>7 | 9  | P02782,P08723,P0C0A9,P14668,P30120,Q6IFU7,Q6P6Q2,Q8CJ52,Q9JHB9                                                                       |
| 9036 | 1,4,6,8,9,1<br>1,12,17 | 2,3,5,7,10,<br>13,14,15,1<br>6 | 19 | P02780,P02781,P02782,P04905,P07647,P08723,P0C0A9,P13432,P14669,P16636,P19223,P22282,P22283,P30120,P36374,Q09030,Q4G075,Q6AYR9,Q9JHB9 |
| 9037 | 1,4,6,8,9,1<br>1,13,14 | 2,3,5,7,10,<br>12,15,16,1<br>7 | 4  | P02782,P06911,P47727,P83121                                                                                                          |

|      |                        |                                |    |                                                                                                                 |
|------|------------------------|--------------------------------|----|-----------------------------------------------------------------------------------------------------------------|
| 9038 | 1,4,6,8,9,1<br>1,13,15 | 2,3,5,7,10,<br>12,14,16,1<br>7 | 1  | Q561R9                                                                                                          |
| 9039 | 1,4,6,8,9,1<br>1,13,16 | 2,3,5,7,10,<br>12,14,15,1<br>7 | 2  | A2RUV9,Q8CJD3                                                                                                   |
| 9040 | 1,4,6,8,9,1<br>1,13,17 | 2,3,5,7,10,<br>12,14,15,1<br>6 | 2  | P14669,P22282                                                                                                   |
| 9041 | 1,4,6,8,9,1<br>1,14,15 | 2,3,5,7,10,<br>12,13,16,1<br>7 | 1  | P14669                                                                                                          |
| 9042 | 1,4,6,8,9,1<br>1,14,16 | 2,3,5,7,10,<br>12,13,15,1<br>7 | 2  | P14668,P83121                                                                                                   |
| 9043 | 1,4,6,8,9,1<br>1,14,17 | 2,3,5,7,10,<br>12,13,15,1<br>6 | 2  | P14669,P83121                                                                                                   |
| 9044 | 1,4,6,8,9,1<br>1,15,16 | 2,3,5,7,10,<br>12,13,14,1<br>7 | 3  | P14668,Q561R9,Q5QE79                                                                                            |
| 9045 | 1,4,6,8,9,1<br>1,15,17 | 2,3,5,7,10,<br>12,13,14,1<br>6 | 1  | P14669                                                                                                          |
| 9046 | 1,4,6,8,9,1<br>1,16,17 | 2,3,5,7,10,<br>12,13,14,1<br>5 | 2  | A2RUV9,Q09030                                                                                                   |
| 9047 | 1,4,6,8,9,1<br>2,13,14 | 2,3,5,7,10,<br>11,15,16,1<br>7 | 13 | P02780,P02782,P06911,P07647,P08723,P0C0A9,P22282,P22283,P30120,P36374,Q62902,Q6AYR9,Q9JHB9                      |
| 9048 | 1,4,6,8,9,1<br>2,13,15 | 2,3,5,7,10,<br>11,14,16,1<br>7 | 9  | P02782,P07647,P08723,P0C0A9,P10758,P30120,P36374,Q6AYR9,Q9JHB9                                                  |
| 9049 | 1,4,6,8,9,1<br>2,13,16 | 2,3,5,7,10,<br>11,14,15,1<br>7 | 9  | P02782,P02803,P07647,P08723,P0C0A9,P30120,P36374,Q6AYR9,Q9JHB9                                                  |
| 9050 | 1,4,6,8,9,1<br>2,13,17 | 2,3,5,7,10,<br>11,14,15,1<br>6 | 16 | P02780,P02782,P07647,P08723,P0C0A9,P13432,P16636,P22282,P22283,P30120,P36374,Q4G075,Q62635,Q6AYR9,Q9JHB9,Q9QZK9 |
| 9051 | 1,4,6,8,9,1<br>2,14,15 | 2,3,5,7,10,<br>11,13,16,1<br>7 | 3  | P02782,P08723,P10758                                                                                            |
| 9052 | 1,4,6,8,9,1<br>2,14,16 | 2,3,5,7,10,<br>11,13,15,1<br>7 | 4  | P02782,P08723,P0C0A9,P30120                                                                                     |



|      |                         |                                |    |                                                                                                                                                                                       |
|------|-------------------------|--------------------------------|----|---------------------------------------------------------------------------------------------------------------------------------------------------------------------------------------|
| 9053 | 1,4,6,8,9,1<br>2,14,17  | 2,3,5,7,10,<br>11,13,15,1<br>6 | 9  | P01835,P02782,P08723,P0C0A9,P13432,P30120,P36374,Q09030,Q6AYR9                                                                                                                        |
| 9054 | 1,4,6,8,9,1<br>2,15,16  | 2,3,5,7,10,<br>11,13,14,1<br>7 | 0  |                                                                                                                                                                                       |
| 9055 | 1,4,6,8,9,1<br>2,15,17  | 2,3,5,7,10,<br>11,13,14,1<br>6 | 4  | B0BNN3,P08723,P13432,Q4G075                                                                                                                                                           |
| 9056 | 1,4,6,8,9,1<br>2,16,17  | 2,3,5,7,10,<br>11,13,14,1<br>5 | 5  | P08723,P13432,P16636,Q09030,Q4G075                                                                                                                                                    |
| 9057 | 1,4,6,8,9,1<br>3,14,15  | 2,3,5,7,10,<br>11,12,16,1<br>7 | 2  | P06911,Q5GRG2                                                                                                                                                                         |
| 9058 | 1,4,6,8,9,1<br>3,14,16  | 2,3,5,7,10,<br>11,12,15,1<br>7 | 1  | P06911                                                                                                                                                                                |
| 9059 | 1,4,6,8,9,1<br>3,14,17  | 2,3,5,7,10,<br>11,12,15,1<br>6 | 1  | P06911                                                                                                                                                                                |
| 9060 | 1,4,6,8,9,1<br>3,15,16  | 2,3,5,7,10,<br>11,12,14,1<br>7 | 0  |                                                                                                                                                                                       |
| 9061 | 1,4,6,8,9,1<br>3,15,17  | 2,3,5,7,10,<br>11,12,14,1<br>6 | 0  |                                                                                                                                                                                       |
| 9062 | 1,4,6,8,9,1<br>3,16,17  | 2,3,5,7,10,<br>11,12,14,1<br>5 | 0  |                                                                                                                                                                                       |
| 9063 | 1,4,6,8,9,1<br>4,15,16  | 2,3,5,7,10,<br>11,12,13,1<br>7 | 0  |                                                                                                                                                                                       |
| 9064 | 1,4,6,8,9,1<br>4,15,17  | 2,3,5,7,10,<br>11,12,13,1<br>6 | 0  |                                                                                                                                                                                       |
| 9065 | 1,4,6,8,9,1<br>4,16,17  | 2,3,5,7,10,<br>11,12,13,1<br>5 | 0  |                                                                                                                                                                                       |
| 9066 | 1,4,6,8,9,1<br>5,16,17  | 2,3,5,7,10,<br>11,12,13,1<br>4 | 1  | Q5QE79                                                                                                                                                                                |
| 9067 | 1,4,6,8,10,<br>11,12,13 | 2,3,5,7,9,1<br>4,15,16,17      | 26 | O35547,P02780,P02781,P02782,P02803,P04905,P07647,P08723,P0C0A9,P14669,P16636,P22282,P22283,P24368,P30120,P35281,P36374,P47727,Q62975,Q63357,Q6AYR9,Q6IFU7,Q6P6Q2,Q8CJ52,Q9JHB9,Q9JI85 |
| 9068 | 1,4,6,8,10,<br>11,12,14 | 2,3,5,7,9,1<br>3,15,16,17      | 23 | O35547,P00714,P02780,P02781,P02782,P04905,P07647,P08723,P0C0A9,P14669,P24368,P30120,P35280,P35281,P36374,P47727,Q63357,Q6AYR9,Q6IFU7,Q6IMF3,Q6P6Q2,Q8CJ52,Q9JHB9                      |

|      |                                                |    |                                                                                                                                                                                                     |
|------|------------------------------------------------|----|-----------------------------------------------------------------------------------------------------------------------------------------------------------------------------------------------------|
| 9069 | 1,4,6,8,10, 2,3,5,7,9,1<br>11,12,15 3,14,16,17 | 15 | O35547,P02782,P04905,P08010,P08723,P0C0A9,P14669,P30120,P35280,P35281,Q561R9,Q63357,Q6IFU7,Q6P6Q2,Q9JHB9                                                                                            |
| 9070 | 1,4,6,8,10, 2,3,5,7,9,1<br>11,12,16 3,14,15,17 | 17 | O35547,P00714,P02782,P04905,P08723,P0C0A9,P16636,P30120,P35281,P53792,Q63357,Q6IFU7,Q6IMF3,Q6P6Q2,Q8CJ52,Q9JHB9,Q9WUW8                                                                              |
| 9071 | 1,4,6,8,10, 2,3,5,7,9,1<br>11,12,17 3,14,15,16 | 28 | F1LM93,O08815,O35547,P02780,P02781,P02782,P04905,P06757,P07150,P07647,P08723,P0C0A9,P13432,P14669,P16636,P22282,P22283,P30120,P36374,P47727,Q10758,Q4G075,Q63357,Q6AYR9,Q6P6Q2,Q8CJ52,Q9JHB9,Q9QZK9 |
| 9072 | 1,4,6,8,10, 2,3,5,7,9,1<br>11,13,14 2,15,16,17 | 6  | P06911,P0C0A9,P12020,P14669,P47727,Q5GRG2                                                                                                                                                           |
| 9073 | 1,4,6,8,10, 2,3,5,7,9,1<br>11,13,15 2,14,16,17 | 2  | P14669,Q561R9                                                                                                                                                                                       |
| 9074 | 1,4,6,8,10, 2,3,5,7,9,1<br>11,13,16 2,14,15,17 | 1  | Q8CJD3                                                                                                                                                                                              |
| 9075 | 1,4,6,8,10, 2,3,5,7,9,1<br>11,13,17 2,14,15,16 | 4  | P14669,P16636,P22282,P47727                                                                                                                                                                         |
| 9076 | 1,4,6,8,10, 2,3,5,7,9,1<br>11,14,15 2,13,16,17 | 3  | P14669,P35280,P47727                                                                                                                                                                                |
| 9077 | 1,4,6,8,10, 2,3,5,7,9,1<br>11,14,16 2,13,15,17 | 1  | P47727                                                                                                                                                                                              |
| 9078 | 1,4,6,8,10, 2,3,5,7,9,1<br>11,14,17 2,13,15,16 | 3  | P07150,P14669,P47727                                                                                                                                                                                |
| 9079 | 1,4,6,8,10, 2,3,5,7,9,1<br>11,15,16 2,13,14,17 | 5  | P14668,P35280,P35281,Q561R9,Q5FVI6                                                                                                                                                                  |
| 9080 | 1,4,6,8,10, 2,3,5,7,9,1<br>11,15,17 2,13,14,16 | 2  | P14669,Q4G075                                                                                                                                                                                       |
| 9081 | 1,4,6,8,10, 2,3,5,7,9,1<br>11,16,17 2,13,14,15 | 5  | A2RUV9,P07150,P14669,P16636,Q4G075                                                                                                                                                                  |
| 9082 | 1,4,6,8,10, 2,3,5,7,9,1<br>12,13,14 1,15,16,17 | 19 | P02780,P02781,P02782,P04905,P06911,P07647,P08723,P0C0A9,P12020,P22282,P22283,P30120,P36374,P47727,Q498D9,Q5GRG2,Q6AYR9,Q8CJ52,Q9JHB9                                                                |
| 9083 | 1,4,6,8,10, 2,3,5,7,9,1<br>12,13,15 1,14,16,17 | 11 | P02782,P07647,P08723,P0C0A9,P15999,P30120,P35281,Q6AYR9,Q6IFV1,Q99MH3,Q9JHB9                                                                                                                        |
| 9084 | 1,4,6,8,10, 2,3,5,7,9,1<br>12,13,16 1,14,15,17 | 8  | P02782,P07647,P08723,P0C0A9,P30120,Q6AYR9,Q8CJ52,Q9JHB9                                                                                                                                             |
| 9085 | 1,4,6,8,10, 2,3,5,7,9,1<br>12,13,17 1,14,15,16 | 19 | P02780,P02782,P07647,P08723,P0C0A9,P13432,P16636,P22282,P22283,P30120,P36374,Q10758,Q4G075,Q62635,Q6AYR9,Q6IFV1,Q99MH3,Q9JHB9,Q9QZK9                                                                |
| 9086 | 1,4,6,8,10, 2,3,5,7,9,1<br>12,14,15 1,13,16,17 | 3  | P08723,P0C0A9,P35280                                                                                                                                                                                |
| 9087 | 1,4,6,8,10, 2,3,5,7,9,1<br>12,14,16 1,13,15,17 | 5  | P08721,P08723,P0C0A9,P30120,Q10758                                                                                                                                                                  |
| 9088 | 1,4,6,8,10, 2,3,5,7,9,1<br>12,14,17 1,13,15,16 | 10 | P02782,P08723,P0C0A9,P13432,P30120,P36374,Q10758,Q4G075,Q6AYR9,Q9QZK9                                                                                                                               |
| 9089 | 1,4,6,8,10, 2,3,5,7,9,1<br>12,15,16 1,13,14,17 | 2  | P08723,P35281                                                                                                                                                                                       |
| 9090 | 1,4,6,8,10, 2,3,5,7,9,1<br>12,15,17 1,13,14,16 | 7  | B0BNN3,P08723,P13432,Q4G075,Q6IFV1,Q99MH3,Q9QZK9                                                                                                                                                    |
| 9091 | 1,4,6,8,10, 2,3,5,7,9,1<br>12,16,17 1,13,14,15 | 5  | P08723,P13432,P16636,Q10758,Q4G075                                                                                                                                                                  |

|      |                                                |    |                                                                                                                                                                         |
|------|------------------------------------------------|----|-------------------------------------------------------------------------------------------------------------------------------------------------------------------------|
| 9092 | 1,4,6,8,10, 2,3,5,7,9,1<br>13,14,15 1,12,16,17 | 4  | P06911,P12020,P15999,Q5GRG2                                                                                                                                             |
| 9093 | 1,4,6,8,10, 2,3,5,7,9,1<br>13,14,16 1,12,15,17 | 3  | P06911,P12020,Q5GRG2                                                                                                                                                    |
| 9094 | 1,4,6,8,10, 2,3,5,7,9,1<br>13,14,17 1,12,15,16 | 3  | P06911,P12020,Q5GRG2                                                                                                                                                    |
| 9095 | 1,4,6,8,10, 2,3,5,7,9,1<br>13,15,16 1,12,14,17 | 0  |                                                                                                                                                                         |
| 9096 | 1,4,6,8,10, 2,3,5,7,9,1<br>13,15,17 1,12,14,16 | 3  | P15999,Q6IFV1,Q99MH3                                                                                                                                                    |
| 9097 | 1,4,6,8,10, 2,3,5,7,9,1<br>13,16,17 1,12,14,15 | 0  |                                                                                                                                                                         |
| 9098 | 1,4,6,8,10, 2,3,5,7,9,1<br>14,15,16 1,12,13,17 | 0  |                                                                                                                                                                         |
| 9099 | 1,4,6,8,10, 2,3,5,7,9,1<br>14,15,17 1,12,13,16 | 1  | B0BNN3                                                                                                                                                                  |
| 9100 | 1,4,6,8,10, 2,3,5,7,9,1<br>14,16,17 1,12,13,15 | 0  |                                                                                                                                                                         |
| 9101 | 1,4,6,8,10, 2,3,5,7,9,1<br>15,16,17 1,12,13,14 | 0  |                                                                                                                                                                         |
| 9102 | 1,4,6,8,11, 2,3,5,7,9,1<br>12,13,14 0,15,16,17 | 21 | O35547,P02780,P02781,P02782,P04905,P06911,P07647,P08723,P0C0A9,P22282,P22283,P24368,P30120,P36374,P47727,Q5GRG2,Q62902,Q6AYR9,Q8CJ52,Q9JHB9,Q9JI85                      |
| 9103 | 1,4,6,8,11, 2,3,5,7,9,1<br>12,13,15 0,14,16,17 | 16 | O35547,P02780,P02781,P02782,P04905,P07647,P08723,P0C0A9,P14669,P30120,P36374,P47727,Q6AYR9,Q8CJ52,Q9JHB9,Q9JI85                                                         |
| 9104 | 1,4,6,8,11, 2,3,5,7,9,1<br>12,13,16 0,14,15,17 | 16 | O35547,P02780,P02781,P02782,P04905,P07647,P08723,P0C0A9,P30120,P36374,P47727,Q62902,Q6AYR9,Q6IFU7,Q8CJ52,Q9JHB9                                                         |
| 9105 | 1,4,6,8,11, 2,3,5,7,9,1<br>12,13,17 0,14,15,16 | 24 | O35547,P02780,P02781,P02782,P04905,P07647,P08723,P0C0A9,P13432,P14669,P16636,P22282,P22283,P30120,P36374,P47727,Q4G075,Q62635,Q62902,Q6AYR9,Q8CJ52,Q9JHB9,Q9JI85,Q9QZK9 |
| 9106 | 1,4,6,8,11, 2,3,5,7,9,1<br>12,14,15 0,13,16,17 | 10 | O35547,P02782,P04905,P08723,P0C0A9,P14669,P30120,P35280,P47727,Q9JHB9                                                                                                   |
| 9107 | 1,4,6,8,11, 2,3,5,7,9,1<br>12,14,16 0,13,15,17 | 12 | O35547,P02782,P04905,P08723,P0C0A9,P14668,P30120,P47727,Q6IFU7,Q6P6Q2,Q8CJ52,Q9JHB9                                                                                     |
| 9108 | 1,4,6,8,11, 2,3,5,7,9,1<br>12,14,17 0,13,15,16 | 19 | O35547,P02780,P02781,P02782,P04905,P07647,P08723,P0C0A9,P13432,P14669,P22282,P22283,P30120,P36374,P47727,Q4G075,Q6AYR9,Q8CJ52,Q9JHB9                                    |
| 9109 | 1,4,6,8,11, 2,3,5,7,9,1<br>12,15,16 0,13,14,17 | 5  | O35547,P08723,P0C0A9,P14668,Q6IFU7                                                                                                                                      |
| 9110 | 1,4,6,8,11, 2,3,5,7,9,1<br>12,15,17 0,13,14,16 | 11 | B0BNN3,O35547,P02782,P08723,P0C0A9,P13432,P14669,P30120,P36374,Q4G075,Q9QZA6                                                                                            |
| 9111 | 1,4,6,8,11, 2,3,5,7,9,1<br>12,16,17 0,13,14,15 | 12 | O35547,P02782,P07150,P08723,P0C0A9,P13432,P16636,P30120,P36374,Q4G075,Q6P6Q2,Q8CJ52                                                                                     |
| 9112 | 1,4,6,8,11, 2,3,5,7,9,1<br>13,14,15 0,12,16,17 | 3  | P06911,P47727,Q5GRG2                                                                                                                                                    |
| 9113 | 1,4,6,8,11, 2,3,5,7,9,1<br>13,14,16 0,12,15,17 | 2  | P06911,P47727                                                                                                                                                           |
| 9114 | 1,4,6,8,11, 2,3,5,7,9,1<br>13,14,17 0,12,15,16 | 5  | P02782,P06911,P14669,P22282,P47727                                                                                                                                      |

|      |                                                |    |                                                                                                                               |
|------|------------------------------------------------|----|-------------------------------------------------------------------------------------------------------------------------------|
| 9115 | 1,4,6,8,11, 2,3,5,7,9,1<br>13,15,16 0,12,14,17 | 0  |                                                                                                                               |
| 9116 | 1,4,6,8,11, 2,3,5,7,9,1<br>13,15,17 0,12,14,16 | 1  | P14669                                                                                                                        |
| 9117 | 1,4,6,8,11, 2,3,5,7,9,1<br>13,16,17 0,12,14,15 | 1  | A2RUV9                                                                                                                        |
| 9118 | 1,4,6,8,11, 2,3,5,7,9,1<br>14,15,16 0,12,13,17 | 1  | P14668                                                                                                                        |
| 9119 | 1,4,6,8,11, 2,3,5,7,9,1<br>14,15,17 0,12,13,16 | 3  | B0BNN3,P14669,P97840                                                                                                          |
| 9120 | 1,4,6,8,11, 2,3,5,7,9,1<br>14,16,17 0,12,13,15 | 1  | P07150                                                                                                                        |
| 9121 | 1,4,6,8,11, 2,3,5,7,9,1<br>15,16,17 0,12,13,14 | 0  |                                                                                                                               |
| 9122 | 1,4,6,8,12, 2,3,5,7,9,1<br>13,14,15 0,11,16,17 | 14 | O08557,P02782,P06911,P07647,P08723,P0C0A9,P10758,P15999,P30120,Q5GRG2,Q64093,Q6AYR9,Q9JHB9,Q9QUL6                             |
| 9123 | 1,4,6,8,12, 2,3,5,7,9,1<br>13,14,16 0,11,15,17 | 11 | P02782,P06911,P07647,P08723,P0C0A9,P30120,Q62902,Q6AYR9,Q8CJ52,Q9JHB9,Q9QUL6                                                  |
| 9124 | 1,4,6,8,12, 2,3,5,7,9,1<br>13,14,17 0,11,15,16 | 18 | P02780,P02782,P06761,P06911,P07647,P08723,P0C0A9,P13432,P22282,P22283,P27213,P30120,P36374,Q4G075,Q62635,Q6AYR9,Q9JHB9,Q9QZK9 |
| 9125 | 1,4,6,8,12, 2,3,5,7,9,1<br>13,15,16 0,11,14,17 | 3  | P02782,P08723,Q9QUL6                                                                                                          |
| 9126 | 1,4,6,8,12, 2,3,5,7,9,1<br>13,15,17 0,11,14,16 | 14 | B0BNN3,P02782,P07647,P08723,P13432,P22282,P30120,P36374,Q4G075,Q62635,Q6AYR9,Q6IFV1,Q99MH3,Q9QZK9                             |
| 9127 | 1,4,6,8,12, 2,3,5,7,9,1<br>13,16,17 0,11,14,15 | 13 | P02782,P07647,P08723,P13432,P16636,P22282,P27213,P30120,P36374,Q4G075,Q62635,Q6AYR9,Q9QZK9                                    |
| 9128 | 1,4,6,8,12, 2,3,5,7,9,1<br>14,15,16 0,11,13,17 | 1  | P08723                                                                                                                        |
| 9129 | 1,4,6,8,12, 2,3,5,7,9,1<br>14,15,17 0,11,13,16 | 5  | B0BNN3,P02782,P08723,P13432,Q4G075                                                                                            |
| 9130 | 1,4,6,8,12, 2,3,5,7,9,1<br>14,16,17 0,11,13,15 | 4  | P02782,P08723,P13432,Q4G075                                                                                                   |
| 9131 | 1,4,6,8,12, 2,3,5,7,9,1<br>15,16,17 0,11,13,14 | 3  | B0BNN3,P13432,Q4G075                                                                                                          |
| 9132 | 1,4,6,8,13, 2,3,5,7,9,1<br>14,15,16 0,11,12,17 | 2  | P06911,Q5GRG2                                                                                                                 |
| 9133 | 1,4,6,8,13, 2,3,5,7,9,1<br>14,15,17 0,11,12,16 | 4  | P06911,P15999,Q5GRG2,Q64093                                                                                                   |
| 9134 | 1,4,6,8,13, 2,3,5,7,9,1<br>14,16,17 0,11,12,15 | 3  | P06911,P27213,Q6PCU2                                                                                                          |
| 9135 | 1,4,6,8,13, 2,3,5,7,9,1<br>15,16,17 0,11,12,14 | 1  | P27213                                                                                                                        |
| 9136 | 1,4,6,8,14, 2,3,5,7,9,1<br>15,16,17 0,11,12,13 | 0  |                                                                                                                               |
| 9137 | 1,4,6,9,10, 2,3,5,7,8,1<br>11,12,13 4,15,16,17 | 8  | P02803,P04905,P0C0A9,P30120,P36374,P47727,Q6IFU7,Q9JHB9                                                                       |

|      |                                                |   |                                                                |
|------|------------------------------------------------|---|----------------------------------------------------------------|
| 9138 | 1,4,6,9,10, 2,3,5,7,8,1<br>11,12,14 3,15,16,17 | 5 | P04905,P0C0A9,P47727,P83121,Q6IFU7                             |
| 9139 | 1,4,6,9,10, 2,3,5,7,8,1<br>11,12,15 3,14,16,17 | 7 | P08753,P0C0A9,P10758,P51907,Q561R9,Q566E6,Q6IFU7               |
| 9140 | 1,4,6,9,10, 2,3,5,7,8,1<br>11,12,16 3,14,15,17 | 9 | P06757,P08753,P0C0A9,P10536,Q5FVI6,Q6IFU7,Q6IMF3,Q6P6Q2,Q9WUW8 |
| 9141 | 1,4,6,9,10, 2,3,5,7,8,1<br>11,12,17 3,14,15,16 | 9 | O08815,P06757,P0C0A9,P13432,P16636,P36374,Q09030,Q566E6,Q6IFU7 |
| 9142 | 1,4,6,9,10, 2,3,5,7,8,1<br>11,13,14 2,15,16,17 | 3 | P47727,P50115,P83121                                           |
| 9143 | 1,4,6,9,10, 2,3,5,7,8,1<br>11,13,15 2,14,16,17 | 2 | P50115,Q561R9                                                  |
| 9144 | 1,4,6,9,10, 2,3,5,7,8,1<br>11,13,16 2,14,15,17 | 2 | P50115,Q8CJD3                                                  |
| 9145 | 1,4,6,9,10, 2,3,5,7,8,1<br>11,13,17 2,14,15,16 | 0 |                                                                |
| 9146 | 1,4,6,9,10, 2,3,5,7,8,1<br>11,14,15 2,13,16,17 | 3 | P50115,P83121,Q561R9                                           |
| 9147 | 1,4,6,9,10, 2,3,5,7,8,1<br>11,14,16 2,13,15,17 | 3 | P50115,P55091,P83121                                           |
| 9148 | 1,4,6,9,10, 2,3,5,7,8,1<br>11,14,17 2,13,15,16 | 1 | P83121                                                         |
| 9149 | 1,4,6,9,10, 2,3,5,7,8,1<br>11,15,16 2,13,14,17 | 5 | P50115,P55091,Q561R9,Q5FVI6,Q9Z1F2                             |
| 9150 | 1,4,6,9,10, 2,3,5,7,8,1<br>11,15,17 2,13,14,16 | 1 | Q566E6                                                         |
| 9151 | 1,4,6,9,10, 2,3,5,7,8,1<br>11,16,17 2,13,14,15 | 2 | A2RUV9,Q09030                                                  |
| 9152 | 1,4,6,9,10, 2,3,5,7,8,1<br>12,13,14 1,15,16,17 | 4 | P0C0A9,P36374,P50115,Q6AYR9                                    |
| 9153 | 1,4,6,9,10, 2,3,5,7,8,1<br>12,13,15 1,14,16,17 | 2 | P10758,P50115                                                  |
| 9154 | 1,4,6,9,10, 2,3,5,7,8,1<br>12,13,16 1,14,15,17 | 2 | P50115,P97840                                                  |
| 9155 | 1,4,6,9,10, 2,3,5,7,8,1<br>12,13,17 1,14,15,16 | 3 | P36374,Q6AYR9,Q9QZK9                                           |
| 9156 | 1,4,6,9,10, 2,3,5,7,8,1<br>12,14,15 1,13,16,17 | 2 | P10758,P50115                                                  |
| 9157 | 1,4,6,9,10, 2,3,5,7,8,1<br>12,14,16 1,13,15,17 | 2 | P20766,P50115                                                  |
| 9158 | 1,4,6,9,10, 2,3,5,7,8,1<br>12,14,17 1,13,15,16 | 4 | P01835,P13432,Q09030,Q10758                                    |
| 9159 | 1,4,6,9,10, 2,3,5,7,8,1<br>12,15,16 1,13,14,17 | 2 | P20766,P50115                                                  |
| 9160 | 1,4,6,9,10, 2,3,5,7,8,1<br>12,15,17 1,13,14,16 | 0 |                                                                |

|      |                                                |   |                                                  |
|------|------------------------------------------------|---|--------------------------------------------------|
| 9161 | 1,4,6,9,10, 2,3,5,7,8,1<br>12,16,17 1,13,14,15 | 2 | Q09030,Q10758                                    |
| 9162 | 1,4,6,9,10, 2,3,5,7,8,1<br>13,14,15 1,12,16,17 | 1 | P50115                                           |
| 9163 | 1,4,6,9,10, 2,3,5,7,8,1<br>13,14,16 1,12,15,17 | 1 | P50115                                           |
| 9164 | 1,4,6,9,10, 2,3,5,7,8,1<br>13,14,17 1,12,15,16 | 0 |                                                  |
| 9165 | 1,4,6,9,10, 2,3,5,7,8,1<br>13,15,16 1,12,14,17 | 2 | P50115,P62804                                    |
| 9166 | 1,4,6,9,10, 2,3,5,7,8,1<br>13,15,17 1,12,14,16 | 0 |                                                  |
| 9167 | 1,4,6,9,10, 2,3,5,7,8,1<br>13,16,17 1,12,14,15 | 1 | Q8CJD3                                           |
| 9168 | 1,4,6,9,10, 2,3,5,7,8,1<br>14,15,16 1,12,13,17 | 2 | P50115,P55091                                    |
| 9169 | 1,4,6,9,10, 2,3,5,7,8,1<br>14,15,17 1,12,13,16 | 0 |                                                  |
| 9170 | 1,4,6,9,10, 2,3,5,7,8,1<br>14,16,17 1,12,13,15 | 0 |                                                  |
| 9171 | 1,4,6,9,10, 2,3,5,7,8,1<br>15,16,17 1,12,13,14 | 0 |                                                  |
| 9172 | 1,4,6,9,11, 2,3,5,7,8,1<br>12,13,14 0,15,16,17 | 7 | P04905,P0C0A9,P30120,P36374,P47727,P83121,Q9JHB9 |
| 9173 | 1,4,6,9,11, 2,3,5,7,8,1<br>12,13,15 0,14,16,17 | 4 | P0C0A9,P10758,P36374,Q9JHB9                      |
| 9174 | 1,4,6,9,11, 2,3,5,7,8,1<br>12,13,16 0,14,15,17 | 5 | P02803,P0C0A9,P36374,Q6IFU7,Q9JHB9               |
| 9175 | 1,4,6,9,11, 2,3,5,7,8,1<br>12,13,17 0,14,15,16 | 5 | P02803,P0C0A9,P13432,P36374,Q9JHB9               |
| 9176 | 1,4,6,9,11, 2,3,5,7,8,1<br>12,14,15 0,13,16,17 | 1 | P10758                                           |
| 9177 | 1,4,6,9,11, 2,3,5,7,8,1<br>12,14,16 0,13,15,17 | 1 | Q6IFU7                                           |
| 9178 | 1,4,6,9,11, 2,3,5,7,8,1<br>12,14,17 0,13,15,16 | 5 | P01835,P04905,P0C0A9,P13432,P36374               |
| 9179 | 1,4,6,9,11, 2,3,5,7,8,1<br>12,15,16 0,13,14,17 | 3 | P20766,P51907,Q6IFU7                             |
| 9180 | 1,4,6,9,11, 2,3,5,7,8,1<br>12,15,17 0,13,14,16 | 1 | P13432                                           |
| 9181 | 1,4,6,9,11, 2,3,5,7,8,1<br>12,16,17 0,13,14,15 | 3 | P13432,Q09030,Q6IFU7                             |
| 9182 | 1,4,6,9,11, 2,3,5,7,8,1<br>13,14,15 0,12,16,17 | 3 | P16391,P50115,P83121                             |
| 9183 | 1,4,6,9,11, 2,3,5,7,8,1<br>13,14,16 0,12,15,17 | 2 | P50115,P83121                                    |

|      |                                                |   |                      |
|------|------------------------------------------------|---|----------------------|
| 9184 | 1,4,6,9,11, 2,3,5,7,8,1<br>13,14,17 0,12,15,16 | 1 | P83121               |
| 9185 | 1,4,6,9,11, 2,3,5,7,8,1<br>13,15,16 0,12,14,17 | 2 | P50115,Q561R9        |
| 9186 | 1,4,6,9,11, 2,3,5,7,8,1<br>13,15,17 0,12,14,16 | 0 |                      |
| 9187 | 1,4,6,9,11, 2,3,5,7,8,1<br>13,16,17 0,12,14,15 | 2 | A2RUV9,Q8CJD3        |
| 9188 | 1,4,6,9,11, 2,3,5,7,8,1<br>14,15,16 0,12,13,17 | 2 | P50115,P55091        |
| 9189 | 1,4,6,9,11, 2,3,5,7,8,1<br>14,15,17 0,12,13,16 | 0 |                      |
| 9190 | 1,4,6,9,11, 2,3,5,7,8,1<br>14,16,17 0,12,13,15 | 1 | P83121               |
| 9191 | 1,4,6,9,11, 2,3,5,7,8,1<br>15,16,17 0,12,13,14 | 0 |                      |
| 9192 | 1,4,6,9,12, 2,3,5,7,8,1<br>13,14,15 0,11,16,17 | 3 | P10758,P16391,P50115 |
| 9193 | 1,4,6,9,12, 2,3,5,7,8,1<br>13,14,16 0,11,15,17 | 1 | P50115               |
| 9194 | 1,4,6,9,12, 2,3,5,7,8,1<br>13,14,17 0,11,15,16 | 3 | P01835,P13432,P36374 |
| 9195 | 1,4,6,9,12, 2,3,5,7,8,1<br>13,15,16 0,11,14,17 | 1 | P50115               |
| 9196 | 1,4,6,9,12, 2,3,5,7,8,1<br>13,15,17 0,11,14,16 | 1 | P13432               |
| 9197 | 1,4,6,9,12, 2,3,5,7,8,1<br>13,16,17 0,11,14,15 | 2 | P13432,P27213        |
| 9198 | 1,4,6,9,12, 2,3,5,7,8,1<br>14,15,16 0,11,13,17 | 2 | P20766,P50115        |
| 9199 | 1,4,6,9,12, 2,3,5,7,8,1<br>14,15,17 0,11,13,16 | 3 | P01835,P13432,Q5HZV9 |
| 9200 | 1,4,6,9,12, 2,3,5,7,8,1<br>14,16,17 0,11,13,15 | 3 | P01835,P13432,Q5HZV9 |
| 9201 | 1,4,6,9,12, 2,3,5,7,8,1<br>15,16,17 0,11,13,14 | 1 | P13432               |
| 9202 | 1,4,6,9,13, 2,3,5,7,8,1<br>14,15,16 0,11,12,17 | 3 | P16391,P50115,P62804 |
| 9203 | 1,4,6,9,13, 2,3,5,7,8,1<br>14,15,17 0,11,12,16 | 1 | P16391               |
| 9204 | 1,4,6,9,13, 2,3,5,7,8,1<br>14,16,17 0,11,12,15 | 2 | P00731,P27213        |
| 9205 | 1,4,6,9,13, 2,3,5,7,8,1<br>15,16,17 0,11,12,14 | 2 | P27213,P62804        |
| 9206 | 1,4,6,9,14, 2,3,5,7,8,1<br>15,16,17 0,11,12,13 | 1 | Q5HZV9               |

|      |                          |                          |    |                                                                                     |
|------|--------------------------|--------------------------|----|-------------------------------------------------------------------------------------|
| 9207 | 1,4,6,10,1<br>1,12,13,14 | 2,3,5,7,8,9<br>,15,16,17 | 10 | P04905,P06911,P08723,P0C0A9,P30120,P36374,P47727,Q6AYR9,Q6IFU7,Q9JHB9               |
| 9208 | 1,4,6,10,1<br>1,12,13,15 | 2,3,5,7,8,9<br>,14,16,17 | 5  | P0C0A9,P36374,P47727,Q6IFU7,Q9JHB9                                                  |
| 9209 | 1,4,6,10,1<br>1,12,13,16 | 2,3,5,7,8,9<br>,14,15,17 | 7  | P04905,P0C0A9,P36374,P47727,Q6IFU7,Q6P6Q2,Q9JHB9                                    |
| 9210 | 1,4,6,10,1<br>1,12,13,17 | 2,3,5,7,8,9<br>,14,15,16 | 12 | O08815,P04905,P06757,P0C0A9,P16636,P30120,P36374,P47727,Q6AYR9,Q99MH3,Q9JHB9,Q9QZK9 |
| 9211 | 1,4,6,10,1<br>1,12,14,15 | 2,3,5,7,8,9<br>,13,16,17 | 7  | P04905,P0C0A9,P20766,P35280,P47727,P51907,Q6IFU7                                    |
| 9212 | 1,4,6,10,1<br>1,12,14,16 | 2,3,5,7,8,9<br>,13,15,17 | 8  | P04905,P0C0A9,P20766,P47727,P53792,Q6IFU7,Q6IMF3,Q6P6Q2                             |
| 9213 | 1,4,6,10,1<br>1,12,14,17 | 2,3,5,7,8,9<br>,13,15,16 | 9  | O08815,P04905,P0C0A9,P13432,P20766,P36374,P47727,Q10758,Q6IFU7                      |
| 9214 | 1,4,6,10,1<br>1,12,15,16 | 2,3,5,7,8,9<br>,13,14,17 | 6  | P20766,P51907,P53792,Q5FVI6,Q6IFU7,Q6P6Q2                                           |
| 9215 | 1,4,6,10,1<br>1,12,15,17 | 2,3,5,7,8,9<br>,13,14,16 | 4  | P06757,P06866,P20766,Q6IFU7                                                         |
| 9216 | 1,4,6,10,1<br>1,12,16,17 | 2,3,5,7,8,9<br>,13,14,15 | 8  | O08815,P06757,P16636,P20766,P53792,Q10758,Q6IFU7,Q6P6Q2                             |
| 9217 | 1,4,6,10,1<br>1,13,14,15 | 2,3,5,7,8,9<br>,12,16,17 | 2  | P47727,P50115                                                                       |
| 9218 | 1,4,6,10,1<br>1,13,14,16 | 2,3,5,7,8,9<br>,12,15,17 | 2  | P47727,P50115                                                                       |
| 9219 | 1,4,6,10,1<br>1,13,14,17 | 2,3,5,7,8,9<br>,12,15,16 | 1  | P47727                                                                              |
| 9220 | 1,4,6,10,1<br>1,13,15,16 | 2,3,5,7,8,9<br>,12,14,17 | 3  | P50115,Q561R9,Q5FVI6                                                                |
| 9221 | 1,4,6,10,1<br>1,13,15,17 | 2,3,5,7,8,9<br>,12,14,16 | 0  |                                                                                     |
| 9222 | 1,4,6,10,1<br>1,13,16,17 | 2,3,5,7,8,9<br>,12,14,15 | 0  |                                                                                     |
| 9223 | 1,4,6,10,1<br>1,14,15,16 | 2,3,5,7,8,9<br>,12,13,17 | 2  | P20766,P50115                                                                       |
| 9224 | 1,4,6,10,1<br>1,14,15,17 | 2,3,5,7,8,9<br>,12,13,16 | 0  |                                                                                     |
| 9225 | 1,4,6,10,1<br>1,14,16,17 | 2,3,5,7,8,9<br>,12,13,15 | 1  | P20766                                                                              |
| 9226 | 1,4,6,10,1<br>1,15,16,17 | 2,3,5,7,8,9<br>,12,13,14 | 2  | P20766,Q9Z1F2                                                                       |
| 9227 | 1,4,6,10,1<br>2,13,14,15 | 2,3,5,7,8,9<br>,11,16,17 | 3  | P10758,P50115,Q498D9                                                                |
| 9228 | 1,4,6,10,1<br>2,13,14,16 | 2,3,5,7,8,9<br>,11,15,17 | 1  | P50115                                                                              |
| 9229 | 1,4,6,10,1<br>2,13,14,17 | 2,3,5,7,8,9<br>,11,15,16 | 5  | P27213,P36374,Q10758,Q6AYR9,Q9QZK9                                                  |



|      |                          |                          |   |                                                                |
|------|--------------------------|--------------------------|---|----------------------------------------------------------------|
| 9230 | 1,4,6,10,1<br>2,13,15,16 | 2,3,5,7,8,9<br>,11,14,17 | 1 | P50115                                                         |
| 9231 | 1,4,6,10,1<br>2,13,15,17 | 2,3,5,7,8,9<br>,11,14,16 | 3 | Q6IFV1,Q99MH3,Q9QZK9                                           |
| 9232 | 1,4,6,10,1<br>2,13,16,17 | 2,3,5,7,8,9<br>,11,14,15 | 3 | P27213,Q10758,Q99MH3                                           |
| 9233 | 1,4,6,10,1<br>2,14,15,16 | 2,3,5,7,8,9<br>,11,13,17 | 2 | P20766,P50115                                                  |
| 9234 | 1,4,6,10,1<br>2,14,15,17 | 2,3,5,7,8,9<br>,11,13,16 | 3 | B0BNN3,P20766,Q10758                                           |
| 9235 | 1,4,6,10,1<br>2,14,16,17 | 2,3,5,7,8,9<br>,11,13,15 | 2 | P20766,Q10758                                                  |
| 9236 | 1,4,6,10,1<br>2,15,16,17 | 2,3,5,7,8,9<br>,11,13,14 | 2 | P06866,P20766                                                  |
| 9237 | 1,4,6,10,1<br>3,14,15,16 | 2,3,5,7,8,9<br>,11,12,17 | 1 | P50115                                                         |
| 9238 | 1,4,6,10,1<br>3,14,15,17 | 2,3,5,7,8,9<br>,11,12,16 | 0 |                                                                |
| 9239 | 1,4,6,10,1<br>3,14,16,17 | 2,3,5,7,8,9<br>,11,12,15 | 1 | P27213                                                         |
| 9240 | 1,4,6,10,1<br>3,15,16,17 | 2,3,5,7,8,9<br>,11,12,14 | 1 | P27213                                                         |
| 9241 | 1,4,6,10,1<br>4,15,16,17 | 2,3,5,7,8,9<br>,11,12,13 | 1 | P20766                                                         |
| 9242 | 1,4,6,11,1<br>2,13,14,15 | 2,3,5,7,8,9<br>,10,16,17 | 5 | P04905,P0C0A9,P10758,P47727,Q9JHB9                             |
| 9243 | 1,4,6,11,1<br>2,13,14,16 | 2,3,5,7,8,9<br>,10,15,17 | 6 | P04905,P0C0A9,P30120,P47727,Q6IFU7,Q9JHB9                      |
| 9244 | 1,4,6,11,1<br>2,13,14,17 | 2,3,5,7,8,9<br>,10,15,16 | 9 | P04905,P0C0A9,P13432,P30120,P36374,P47727,Q6AYR9,Q9JHB9,Q9QZK9 |
| 9245 | 1,4,6,11,1<br>2,13,15,16 | 2,3,5,7,8,9<br>,10,14,17 | 1 | Q6IFU7                                                         |
| 9246 | 1,4,6,11,1<br>2,13,15,17 | 2,3,5,7,8,9<br>,10,14,16 | 3 | P13432,P36374,Q9QZK9                                           |
| 9247 | 1,4,6,11,1<br>2,13,16,17 | 2,3,5,7,8,9<br>,10,14,15 | 3 | P13432,P27213,P36374                                           |
| 9248 | 1,4,6,11,1<br>2,14,15,16 | 2,3,5,7,8,9<br>,10,13,17 | 3 | P20766,P51907,Q6IFU7                                           |
| 9249 | 1,4,6,11,1<br>2,14,15,17 | 2,3,5,7,8,9<br>,10,13,16 | 3 | B0BNN3,P13432,P20766                                           |
| 9250 | 1,4,6,11,1<br>2,14,16,17 | 2,3,5,7,8,9<br>,10,13,15 | 3 | P13432,P20766,Q6IFU7                                           |
| 9251 | 1,4,6,11,1<br>2,15,16,17 | 2,3,5,7,8,9<br>,10,13,14 | 4 | P06866,P13432,P20766,Q6IFU7                                    |
| 9252 | 1,4,6,11,1<br>3,14,15,16 | 2,3,5,7,8,9<br>,10,12,17 | 1 | P50115                                                         |

|      |                          |                                |    |                                                                                     |
|------|--------------------------|--------------------------------|----|-------------------------------------------------------------------------------------|
| 9253 | 1,4,6,11,1<br>3,14,15,17 | 2,3,5,7,8,9<br>,10,12,16       | 0  |                                                                                     |
| 9254 | 1,4,6,11,1<br>3,14,16,17 | 2,3,5,7,8,9<br>,10,12,15       | 1  | P27213                                                                              |
| 9255 | 1,4,6,11,1<br>3,15,16,17 | 2,3,5,7,8,9<br>,10,12,14       | 1  | P27213                                                                              |
| 9256 | 1,4,6,11,1<br>4,15,16,17 | 2,3,5,7,8,9<br>,10,12,13       | 1  | P20766                                                                              |
| 9257 | 1,4,6,12,1<br>3,14,15,16 | 2,3,5,7,8,9<br>,10,11,17       | 2  | P50115,Q9QUL6                                                                       |
| 9258 | 1,4,6,12,1<br>3,14,15,17 | 2,3,5,7,8,9<br>,10,11,16       | 2  | P13432,P27213                                                                       |
| 9259 | 1,4,6,12,1<br>3,14,16,17 | 2,3,5,7,8,9<br>,10,11,15       | 2  | P13432,P27213                                                                       |
| 9260 | 1,4,6,12,1<br>3,15,16,17 | 2,3,5,7,8,9<br>,10,11,14       | 1  | P27213                                                                              |
| 9261 | 1,4,6,12,1<br>4,15,16,17 | 2,3,5,7,8,9<br>,10,11,13       | 3  | P13432,P20766,Q5HZV9                                                                |
| 9262 | 1,4,6,13,1<br>4,15,16,17 | 2,3,5,7,8,9<br>,10,11,12       | 2  | P16391,P27213                                                                       |
| 9263 | 1,4,7,8,9,1<br>0,11,12   | 2,3,5,6,13,<br>14,15,16,1<br>7 | 12 | P00714,P02803,P08753,P0C0A9,P10715,P36374,Q561R9,Q5FVI6,Q63357,Q63617,Q6AYL6,Q8CJ52 |
| 9264 | 1,4,7,8,9,1<br>0,11,13   | 2,3,5,6,12,<br>14,15,16,1<br>7 | 6  | P00714,P02803,P36374,Q561R9,Q5FVI6,Q63617                                           |
| 9265 | 1,4,7,8,9,1<br>0,11,14   | 2,3,5,6,12,<br>13,15,16,1<br>7 | 4  | P00714,P83121,Q561R9,Q63617                                                         |
| 9266 | 1,4,7,8,9,1<br>0,11,15   | 2,3,5,6,12,<br>13,14,16,1<br>7 | 5  | P00714,P22006,P35280,Q561R9,Q5FVI6                                                  |
| 9267 | 1,4,7,8,9,1<br>0,11,16   | 2,3,5,6,12,<br>13,14,15,1<br>7 | 4  | P00714,Q561R9,Q5FVI6,Q63617                                                         |
| 9268 | 1,4,7,8,9,1<br>0,11,17   | 2,3,5,6,12,<br>13,14,15,1<br>6 | 3  | P00714,Q561R9,Q63617                                                                |
| 9269 | 1,4,7,8,9,1<br>0,12,13   | 2,3,5,6,11,<br>14,15,16,1<br>7 | 5  | P02803,P22283,P36374,Q6AYR9,Q8CJ52                                                  |
| 9270 | 1,4,7,8,9,1<br>0,12,14   | 2,3,5,6,11,<br>13,15,16,1<br>7 | 3  | P00714,P36374,Q8CJ52                                                                |

|      |                        |                                |    |                                                                                            |
|------|------------------------|--------------------------------|----|--------------------------------------------------------------------------------------------|
| 9271 | 1,4,7,8,9,1<br>0,12,15 | 2,3,5,6,11,<br>13,14,16,1<br>7 | 3  | P10758,P22006,Q561R9                                                                       |
| 9272 | 1,4,7,8,9,1<br>0,12,16 | 2,3,5,6,11,<br>13,14,15,1<br>7 | 5  | P00714,P08721,P47967,Q8CJ52,Q9WUW8                                                         |
| 9273 | 1,4,7,8,9,1<br>0,12,17 | 2,3,5,6,11,<br>13,14,15,1<br>6 | 3  | P19223,P36374,Q99041                                                                       |
| 9274 | 1,4,7,8,9,1<br>0,13,14 | 2,3,5,6,11,<br>12,15,16,1<br>7 | 3  | P06911,Q5GRG2,Q63617                                                                       |
| 9275 | 1,4,7,8,9,1<br>0,13,15 | 2,3,5,6,11,<br>12,14,16,1<br>7 | 2  | P22006,Q561R9                                                                              |
| 9276 | 1,4,7,8,9,1<br>0,13,16 | 2,3,5,6,11,<br>12,14,15,1<br>7 | 1  | Q63617                                                                                     |
| 9277 | 1,4,7,8,9,1<br>0,13,17 | 2,3,5,6,11,<br>12,14,15,1<br>6 | 1  | Q63617                                                                                     |
| 9278 | 1,4,7,8,9,1<br>0,14,15 | 2,3,5,6,11,<br>12,13,16,1<br>7 | 2  | P22006,Q561R9                                                                              |
| 9279 | 1,4,7,8,9,1<br>0,14,16 | 2,3,5,6,11,<br>12,13,15,1<br>7 | 2  | P08721,Q63617                                                                              |
| 9280 | 1,4,7,8,9,1<br>0,14,17 | 2,3,5,6,11,<br>12,13,15,1<br>6 | 1  | Q63617                                                                                     |
| 9281 | 1,4,7,8,9,1<br>0,15,16 | 2,3,5,6,11,<br>12,13,14,1<br>7 | 2  | Q561R9,Q5FVI6                                                                              |
| 9282 | 1,4,7,8,9,1<br>0,15,17 | 2,3,5,6,11,<br>12,13,14,1<br>6 | 1  | P22006                                                                                     |
| 9283 | 1,4,7,8,9,1<br>0,16,17 | 2,3,5,6,11,<br>12,13,14,1<br>5 | 2  | P25031,Q63617                                                                              |
| 9284 | 1,4,7,8,9,1<br>1,12,13 | 2,3,5,6,10,<br>14,15,16,1<br>7 | 13 | P02780,P02781,P02803,P0C0A9,P10715,P22283,P30120,P36374,Q561R9,Q62902,Q63617,Q8CJ52,Q9JI85 |
| 9285 | 1,4,7,8,9,1<br>1,12,14 | 2,3,5,6,10,<br>13,15,16,1<br>7 | 8  | P02803,P0C0A9,P10715,P36374,Q4FZU6,Q63617,Q8CJ52,Q9JI85                                    |

|      |                        |                                |    |                                                                       |
|------|------------------------|--------------------------------|----|-----------------------------------------------------------------------|
| 9286 | 1,4,7,8,9,1<br>1,12,15 | 2,3,5,6,10,<br>13,14,16,1<br>7 | 7  | P10715,P10758,P22006,P36374,P51907,Q561R9,Q8CJ52                      |
| 9287 | 1,4,7,8,9,1<br>1,12,16 | 2,3,5,6,10,<br>13,14,15,1<br>7 | 7  | P02803,P10715,P36374,Q4FZU6,Q561R9,Q63617,Q8CJ52                      |
| 9288 | 1,4,7,8,9,1<br>1,12,17 | 2,3,5,6,10,<br>13,14,15,1<br>6 | 10 | P02803,P10715,P19223,P22283,P36374,Q4FZU6,Q63617,Q8CJ52,Q99041,Q9QZA6 |
| 9289 | 1,4,7,8,9,1<br>1,13,14 | 2,3,5,6,10,<br>12,15,16,1<br>7 | 3  | P02803,P83121,Q63617                                                  |
| 9290 | 1,4,7,8,9,1<br>1,13,15 | 2,3,5,6,10,<br>12,14,16,1<br>7 | 4  | P05539,P22006,Q561R9,Q63617                                           |
| 9291 | 1,4,7,8,9,1<br>1,13,16 | 2,3,5,6,10,<br>12,14,15,1<br>7 | 3  | P02803,Q561R9,Q63617                                                  |
| 9292 | 1,4,7,8,9,1<br>1,13,17 | 2,3,5,6,10,<br>12,14,15,1<br>6 | 3  | P02803,P36374,Q63617                                                  |
| 9293 | 1,4,7,8,9,1<br>1,14,15 | 2,3,5,6,10,<br>12,13,16,1<br>7 | 3  | P22006,Q561R9,Q63617                                                  |
| 9294 | 1,4,7,8,9,1<br>1,14,16 | 2,3,5,6,10,<br>12,13,15,1<br>7 | 3  | Q4FZU6,Q63617,Q99MH3                                                  |
| 9295 | 1,4,7,8,9,1<br>1,14,17 | 2,3,5,6,10,<br>12,13,15,1<br>6 | 2  | Q4FZU6,Q63617                                                         |
| 9296 | 1,4,7,8,9,1<br>1,15,16 | 2,3,5,6,10,<br>12,13,14,1<br>7 | 4  | B4F795,P22006,Q561R9,Q63617                                           |
| 9297 | 1,4,7,8,9,1<br>1,15,17 | 2,3,5,6,10,<br>12,13,14,1<br>6 | 3  | P22006,Q561R9,Q63617                                                  |
| 9298 | 1,4,7,8,9,1<br>1,16,17 | 2,3,5,6,10,<br>12,13,14,1<br>5 | 3  | P10715,Q4FZU6,Q63617                                                  |
| 9299 | 1,4,7,8,9,1<br>2,13,14 | 2,3,5,6,10,<br>11,15,16,1<br>7 | 10 | P02780,P02803,P06911,P22283,P36374,Q4FZU6,Q62902,Q63617,Q6AYR9,Q8CJ52 |
| 9300 | 1,4,7,8,9,1<br>2,13,15 | 2,3,5,6,10,<br>11,14,16,1<br>7 | 2  | P10758,P36374                                                         |

|      |                        |                                |    |                                                                       |
|------|------------------------|--------------------------------|----|-----------------------------------------------------------------------|
| 9301 | 1,4,7,8,9,1<br>2,13,16 | 2,3,5,6,10,<br>11,14,15,1<br>7 | 5  | P02803,P36374,Q4FZU6,Q63617,Q8CJ52                                    |
| 9302 | 1,4,7,8,9,1<br>2,13,17 | 2,3,5,6,10,<br>11,14,15,1<br>6 | 10 | P02803,P11598,P19223,P22282,P22283,P36374,Q4FZU6,Q63617,Q8CJ52,Q99041 |
| 9303 | 1,4,7,8,9,1<br>2,14,15 | 2,3,5,6,10,<br>11,13,16,1<br>7 | 2  | P10758,P22006                                                         |
| 9304 | 1,4,7,8,9,1<br>2,14,16 | 2,3,5,6,10,<br>11,13,15,1<br>7 | 3  | Q4FZU6,Q63617,Q8CJ52                                                  |
| 9305 | 1,4,7,8,9,1<br>2,14,17 | 2,3,5,6,10,<br>11,13,15,1<br>6 | 5  | P19223,P36374,Q4FZU6,Q63617,Q99041                                    |
| 9306 | 1,4,7,8,9,1<br>2,15,16 | 2,3,5,6,10,<br>11,13,14,1<br>7 | 1  | P10715                                                                |
| 9307 | 1,4,7,8,9,1<br>2,15,17 | 2,3,5,6,10,<br>11,13,14,1<br>6 | 5  | P10715,P19223,P36374,Q99041,Q9QZA6                                    |
| 9308 | 1,4,7,8,9,1<br>2,16,17 | 2,3,5,6,10,<br>11,13,14,1<br>5 | 5  | P10715,P19223,Q4FZU6,Q63617,Q99041                                    |
| 9309 | 1,4,7,8,9,1<br>3,14,15 | 2,3,5,6,10,<br>11,12,16,1<br>7 | 3  | P22006,Q5GRG2,Q63617                                                  |
| 9310 | 1,4,7,8,9,1<br>3,14,16 | 2,3,5,6,10,<br>11,12,15,1<br>7 | 2  | Q4FZU6,Q63617                                                         |
| 9311 | 1,4,7,8,9,1<br>3,14,17 | 2,3,5,6,10,<br>11,12,15,1<br>6 | 2  | Q4FZU6,Q63617                                                         |
| 9312 | 1,4,7,8,9,1<br>3,15,16 | 2,3,5,6,10,<br>11,12,14,1<br>7 | 3  | P62804,Q561R9,Q63617                                                  |
| 9313 | 1,4,7,8,9,1<br>3,15,17 | 2,3,5,6,10,<br>11,12,14,1<br>6 | 1  | Q63617                                                                |
| 9314 | 1,4,7,8,9,1<br>3,16,17 | 2,3,5,6,10,<br>11,12,14,1<br>5 | 3  | P62804,Q4FZU6,Q63617                                                  |
| 9315 | 1,4,7,8,9,1<br>4,15,16 | 2,3,5,6,10,<br>11,12,13,1<br>7 | 2  | Q63617,Q9QZK9                                                         |

|      |                         |                                |    |                                                                                                                 |
|------|-------------------------|--------------------------------|----|-----------------------------------------------------------------------------------------------------------------|
| 9316 | 1,4,7,8,9,1<br>4,15,17  | 2,3,5,6,10,<br>11,12,13,1<br>6 | 2  | P22006,Q63617                                                                                                   |
| 9317 | 1,4,7,8,9,1<br>4,16,17  | 2,3,5,6,10,<br>11,12,13,1<br>5 | 2  | Q4FZU6,Q63617                                                                                                   |
| 9318 | 1,4,7,8,9,1<br>5,16,17  | 2,3,5,6,10,<br>11,12,13,1<br>4 | 0  |                                                                                                                 |
| 9319 | 1,4,7,8,10,<br>11,12,13 | 2,3,5,6,9,1<br>4,15,16,17      | 16 | P00714,P02780,P02781,P02803,P08723,P0C0A9,P22283,P30120,P36374,P47727,Q561R9,Q63357,Q6AYR9,Q8CJ52,Q9JHB9,Q9JI85 |
| 9320 | 1,4,7,8,10,<br>11,12,14 | 2,3,5,6,9,1<br>3,15,16,17      | 12 | P00714,P02781,P08723,P0C0A9,P22283,P35280,P36374,P47727,Q63357,Q63493,Q6AYL6,Q8CJ52                             |
| 9321 | 1,4,7,8,10,<br>11,12,15 | 2,3,5,6,9,1<br>3,14,16,17      | 10 | P00714,P10715,P22006,P35280,P36374,P51907,Q561R9,Q5FVI6,Q63357,Q8CJ52                                           |
| 9322 | 1,4,7,8,10,<br>11,12,16 | 2,3,5,6,9,1<br>3,14,15,17      | 12 | P00714,P06757,P08721,P10715,P36374,P47967,P53792,Q561R9,Q5FVI6,Q63357,Q6AYL6,Q8CJ52                             |
| 9323 | 1,4,7,8,10,<br>11,12,17 | 2,3,5,6,9,1<br>3,14,15,16      | 13 | P00714,P06757,P10715,P19223,P22283,P36374,Q4G075,Q63357,Q63493,Q8CJ52,Q99041,Q9QZA6,Q9QZK9                      |
| 9324 | 1,4,7,8,10,<br>11,13,14 | 2,3,5,6,9,1<br>2,15,16,17      | 7  | P00714,P06911,P47727,Q561R9,Q5GRG2,Q63617,Q8CJ52                                                                |
| 9325 | 1,4,7,8,10,<br>11,13,15 | 2,3,5,6,9,1<br>2,14,16,17      | 7  | P00714,P01835,P22006,Q561R9,Q5FVI6,Q5GRG2,Q8VD89                                                                |
| 9326 | 1,4,7,8,10,<br>11,13,16 | 2,3,5,6,9,1<br>2,14,15,17      | 6  | P00714,P01835,Q561R9,Q5FVI6,Q8CJ52,Q8VD89                                                                       |
| 9327 | 1,4,7,8,10,<br>11,13,17 | 2,3,5,6,9,1<br>2,14,15,16      | 3  | P00714,P22283,P36374                                                                                            |
| 9328 | 1,4,7,8,10,<br>11,14,15 | 2,3,5,6,9,1<br>2,13,16,17      | 5  | P00714,P22006,P35280,Q561R9,Q5FVI6                                                                              |
| 9329 | 1,4,7,8,10,<br>11,14,16 | 2,3,5,6,9,1<br>2,13,15,17      | 4  | P00714,P08721,Q5FVI6,Q63617                                                                                     |
| 9330 | 1,4,7,8,10,<br>11,14,17 | 2,3,5,6,9,1<br>2,13,15,16      | 2  | P00714,Q63617                                                                                                   |
| 9331 | 1,4,7,8,10,<br>11,15,16 | 2,3,5,6,9,1<br>2,13,14,17      | 8  | P00714,P01835,P22006,P35280,Q561R9,Q5FVI6,Q8VD89,Q9Z1F2                                                         |
| 9332 | 1,4,7,8,10,<br>11,15,17 | 2,3,5,6,9,1<br>2,13,14,16      | 4  | P00714,P22006,Q561R9,Q5FVI6                                                                                     |
| 9333 | 1,4,7,8,10,<br>11,16,17 | 2,3,5,6,9,1<br>2,13,14,15      | 2  | P00714,Q5FVI6                                                                                                   |
| 9334 | 1,4,7,8,10,<br>12,13,14 | 2,3,5,6,9,1<br>1,15,16,17      | 10 | P06761,P06911,P08723,P11598,P12020,P22283,P36374,Q5GRG2,Q6AYR9,Q8CJ52                                           |
| 9335 | 1,4,7,8,10,<br>12,13,15 | 2,3,5,6,9,1<br>1,14,16,17      | 4  | P22006,P36374,Q8CJ52,Q9QUL6                                                                                     |
| 9336 | 1,4,7,8,10,<br>12,13,16 | 2,3,5,6,9,1<br>1,14,15,17      | 5  | P36374,P47967,Q8CJ52,Q9QUL6,Q9R0T3                                                                              |

|      |                                                |    |                                                                                                                                                    |
|------|------------------------------------------------|----|----------------------------------------------------------------------------------------------------------------------------------------------------|
| 9337 | 1,4,7,8,10, 2,3,5,6,9,1<br>12,13,17 1,14,15,16 | 10 | P11598,P19223,P22282,P22283,P36374,Q6AYR9,Q8CJ52,Q99041,Q99MH3,Q9QZK9                                                                              |
| 9338 | 1,4,7,8,10, 2,3,5,6,9,1<br>12,14,15 1,13,16,17 | 2  | P22006,P35280                                                                                                                                      |
| 9339 | 1,4,7,8,10, 2,3,5,6,9,1<br>12,14,16 1,13,15,17 | 2  | P08721,Q8CJ52                                                                                                                                      |
| 9340 | 1,4,7,8,10, 2,3,5,6,9,1<br>12,14,17 1,13,15,16 | 6  | P11598,P19223,P31430,P36374,Q8CJ52,Q99041                                                                                                          |
| 9341 | 1,4,7,8,10, 2,3,5,6,9,1<br>12,15,16 1,13,14,17 | 3  | P08721,Q5FVI6,Q8CJ52                                                                                                                               |
| 9342 | 1,4,7,8,10, 2,3,5,6,9,1<br>12,15,17 1,13,14,16 | 5  | P19223,P22006,Q4G075,Q99041,Q9QZA6                                                                                                                 |
| 9343 | 1,4,7,8,10, 2,3,5,6,9,1<br>12,16,17 1,13,14,15 | 5  | P08721,P19223,Q4G075,Q8CJ52,Q99041                                                                                                                 |
| 9344 | 1,4,7,8,10, 2,3,5,6,9,1<br>13,14,15 1,12,16,17 | 4  | P01835,P06911,P22006,Q5GRG2                                                                                                                        |
| 9345 | 1,4,7,8,10, 2,3,5,6,9,1<br>13,14,16 1,12,15,17 | 3  | P01835,P06911,Q5GRG2                                                                                                                               |
| 9346 | 1,4,7,8,10, 2,3,5,6,9,1<br>13,14,17 1,12,15,16 | 3  | P06911,P11598,Q5GRG2                                                                                                                               |
| 9347 | 1,4,7,8,10, 2,3,5,6,9,1<br>13,15,16 1,12,14,17 | 2  | P01835,Q561R9                                                                                                                                      |
| 9348 | 1,4,7,8,10, 2,3,5,6,9,1<br>13,15,17 1,12,14,16 | 2  | P01835,P22006                                                                                                                                      |
| 9349 | 1,4,7,8,10, 2,3,5,6,9,1<br>13,16,17 1,12,14,15 | 1  | P01835                                                                                                                                             |
| 9350 | 1,4,7,8,10, 2,3,5,6,9,1<br>14,15,16 1,12,13,17 | 3  | P01835,P08721,P22006                                                                                                                               |
| 9351 | 1,4,7,8,10, 2,3,5,6,9,1<br>14,15,17 1,12,13,16 | 1  | P22006                                                                                                                                             |
| 9352 | 1,4,7,8,10, 2,3,5,6,9,1<br>14,16,17 1,12,13,15 | 1  | P08721                                                                                                                                             |
| 9353 | 1,4,7,8,10, 2,3,5,6,9,1<br>15,16,17 1,12,13,14 | 1  | P01835                                                                                                                                             |
| 9354 | 1,4,7,8,11, 2,3,5,6,9,1<br>12,13,14 0,15,16,17 | 21 | P02780,P02781,P02803,P04905,P06761,P06911,P08723,P0C0A9,P11598,P22282,P22283,P30120,P36374,P47727,Q5GRG2,Q62902,Q63617,Q6AYR9,Q8CJ52,Q9JHB9,Q9JI85 |
| 9355 | 1,4,7,8,11, 2,3,5,6,9,1<br>12,13,15 0,14,16,17 | 6  | P10715,P22006,P36374,Q561R9,Q8CJ52,Q9JI85                                                                                                          |
| 9356 | 1,4,7,8,11, 2,3,5,6,9,1<br>12,13,16 0,14,15,17 | 7  | P02803,P10715,P36374,Q4FZU6,Q62902,Q8CJ52,Q9R0T3                                                                                                   |
| 9357 | 1,4,7,8,11, 2,3,5,6,9,1<br>12,13,17 0,14,15,16 | 14 | P02780,P02781,P02803,P10715,P11598,P19223,P22282,P22283,P36374,Q6AYR9,Q8CJ52,Q99041,Q9JI85,Q9QZK9                                                  |
| 9358 | 1,4,7,8,11, 2,3,5,6,9,1<br>12,14,15 0,13,16,17 | 4  | P10715,P22006,P35280,Q8CJ52                                                                                                                        |
| 9359 | 1,4,7,8,11, 2,3,5,6,9,1<br>12,14,16 0,13,15,17 | 4  | P10715,Q4FZU6,Q63617,Q8CJ52                                                                                                                        |

|      |                                                |    |                                                                              |
|------|------------------------------------------------|----|------------------------------------------------------------------------------|
| 9360 | 1,4,7,8,11, 2,3,5,6,9,1<br>12,14,17 0,13,15,16 | 11 | P10715,P11598,P19223,P22283,P36374,Q4FZU6,Q63493,Q63617,Q8CJ52,Q99041,Q9QZA6 |
| 9361 | 1,4,7,8,11, 2,3,5,6,9,1<br>12,15,16 0,13,14,17 | 5  | P10715,P22006,P51907,Q561R9,Q8CJ52                                           |
| 9362 | 1,4,7,8,11, 2,3,5,6,9,1<br>12,15,17 0,13,14,16 | 8  | P10715,P19223,P22006,P36374,Q4G075,Q8CJ52,Q99041,Q9QZA6                      |
| 9363 | 1,4,7,8,11, 2,3,5,6,9,1<br>12,16,17 0,13,14,15 | 8  | P10715,P19223,P36374,Q4FZU6,Q4G075,Q8CJ52,Q99041,Q9QZA6                      |
| 9364 | 1,4,7,8,11, 2,3,5,6,9,1<br>13,14,15 0,12,16,17 | 4  | P22006,Q561R9,Q5GRG2,Q63617                                                  |
| 9365 | 1,4,7,8,11, 2,3,5,6,9,1<br>13,14,16 0,12,15,17 | 3  | Q4FZU6,Q63617,Q8CJ52                                                         |
| 9366 | 1,4,7,8,11, 2,3,5,6,9,1<br>13,14,17 0,12,15,16 | 4  | P11598,P22283,Q4FZU6,Q63617                                                  |
| 9367 | 1,4,7,8,11, 2,3,5,6,9,1<br>13,15,16 0,12,14,17 | 4  | P01835,P22006,Q561R9,Q8VD89                                                  |
| 9368 | 1,4,7,8,11, 2,3,5,6,9,1<br>13,15,17 0,12,14,16 | 1  | P22006                                                                       |
| 9369 | 1,4,7,8,11, 2,3,5,6,9,1<br>13,16,17 0,12,14,15 | 2  | Q4FZU6,Q63617                                                                |
| 9370 | 1,4,7,8,11, 2,3,5,6,9,1<br>14,15,16 0,12,13,17 | 2  | P22006,Q561R9                                                                |
| 9371 | 1,4,7,8,11, 2,3,5,6,9,1<br>14,15,17 0,12,13,16 | 1  | P22006                                                                       |
| 9372 | 1,4,7,8,11, 2,3,5,6,9,1<br>14,16,17 0,12,13,15 | 2  | Q4FZU6,Q63617                                                                |
| 9373 | 1,4,7,8,11, 2,3,5,6,9,1<br>15,16,17 0,12,13,14 | 1  | P22006                                                                       |
| 9374 | 1,4,7,8,12, 2,3,5,6,9,1<br>13,14,15 0,11,16,17 | 7  | P10758,P11598,P22006,P36374,Q5GRG2,Q8CJ52,Q9QUL6                             |
| 9375 | 1,4,7,8,12, 2,3,5,6,9,1<br>13,14,16 0,11,15,17 | 6  | P06911,P36374,Q4FZU6,Q62902,Q8CJ52,Q9QUL6                                    |
| 9376 | 1,4,7,8,12, 2,3,5,6,9,1<br>13,14,17 0,11,15,16 | 11 | P06761,P06911,P11598,P22282,P22283,P31430,P36374,Q4FZU6,Q6AYR9,Q8CJ52,Q99041 |
| 9377 | 1,4,7,8,12, 2,3,5,6,9,1<br>13,15,16 0,11,14,17 | 2  | Q8CJ52,Q9QUL6                                                                |
| 9378 | 1,4,7,8,12, 2,3,5,6,9,1<br>13,15,17 0,11,14,16 | 6  | P11598,P36374,Q8CJ52,Q99041,Q9QUL6,Q9QZA6                                    |
| 9379 | 1,4,7,8,12, 2,3,5,6,9,1<br>13,16,17 0,11,14,15 | 8  | P27213,P36374,P63029,Q4FZU6,Q8CJ52,Q99041,Q9QUL6,Q9R0T3                      |
| 9380 | 1,4,7,8,12, 2,3,5,6,9,1<br>14,15,16 0,11,13,17 | 3  | Q4FZU6,Q8CJ52,Q9QUL6                                                         |
| 9381 | 1,4,7,8,12, 2,3,5,6,9,1<br>14,15,17 0,11,13,16 | 4  | P11598,P22006,Q99041,Q9QZA6                                                  |
| 9382 | 1,4,7,8,12, 2,3,5,6,9,1<br>14,16,17 0,11,13,15 | 4  | P31430,Q4FZU6,Q8CJ52,Q99041                                                  |



|      |                                                |    |                                                                       |
|------|------------------------------------------------|----|-----------------------------------------------------------------------|
| 9383 | 1,4,7,8,12, 2,3,5,6,9,1<br>15,16,17 0,11,13,14 | 4  | P06866,P10715,Q99041,Q9QZA6                                           |
| 9384 | 1,4,7,8,13, 2,3,5,6,9,1<br>14,15,16 0,11,12,17 | 3  | P01835,Q5GRG2,Q9QUL6                                                  |
| 9385 | 1,4,7,8,13, 2,3,5,6,9,1<br>14,15,17 0,11,12,16 | 3  | P11598,P22006,Q5GRG2                                                  |
| 9386 | 1,4,7,8,13, 2,3,5,6,9,1<br>14,16,17 0,11,12,15 | 3  | P27213,Q4FZU6,Q63617                                                  |
| 9387 | 1,4,7,8,13, 2,3,5,6,9,1<br>15,16,17 0,11,12,14 | 2  | P01835,P27213                                                         |
| 9388 | 1,4,7,8,14, 2,3,5,6,9,1<br>15,16,17 0,11,12,13 | 1  | Q4FZU6                                                                |
| 9389 | 1,4,7,9,10, 2,3,5,6,8,1<br>11,12,13 4,15,16,17 | 4  | P02803,P36374,Q561R9,Q5FVI6                                           |
| 9390 | 1,4,7,9,10, 2,3,5,6,8,1<br>11,12,14 3,15,16,17 | 7  | P00714,P08753,P36374,P51907,P83121,Q561R9,Q5FVI6                      |
| 9391 | 1,4,7,9,10, 2,3,5,6,8,1<br>11,12,15 3,14,16,17 | 7  | P08753,P10758,P22006,P51907,Q561R9,Q5FVI6,Q6PCU2                      |
| 9392 | 1,4,7,9,10, 2,3,5,6,8,1<br>11,12,16 3,14,15,17 | 10 | P06757,P08753,P10536,P12368,P47967,P51907,Q561R9,Q5FVI6,Q64093,Q9WUW8 |
| 9393 | 1,4,7,9,10, 2,3,5,6,8,1<br>11,12,17 3,14,15,16 | 4  | P06757,P08753,P36374,Q5FVI6                                           |
| 9394 | 1,4,7,9,10, 2,3,5,6,8,1<br>11,13,14 2,15,16,17 | 2  | P83121,Q561R9                                                         |
| 9395 | 1,4,7,9,10, 2,3,5,6,8,1<br>11,13,15 2,14,16,17 | 3  | P22006,Q561R9,Q5FVI6                                                  |
| 9396 | 1,4,7,9,10, 2,3,5,6,8,1<br>11,13,16 2,14,15,17 | 3  | Q561R9,Q5FVI6,Q62635                                                  |
| 9397 | 1,4,7,9,10, 2,3,5,6,8,1<br>11,13,17 2,14,15,16 | 0  |                                                                       |
| 9398 | 1,4,7,9,10, 2,3,5,6,8,1<br>11,14,15 2,13,16,17 | 7  | P22006,P51907,P83121,Q561R9,Q5FVI6,Q62635,Q9Z1F2                      |
| 9399 | 1,4,7,9,10, 2,3,5,6,8,1<br>11,14,16 2,13,15,17 | 5  | P83121,Q561R9,Q5FVI6,Q62635,Q9Z1F2                                    |
| 9400 | 1,4,7,9,10, 2,3,5,6,8,1<br>11,14,17 2,13,15,16 | 1  | P83121                                                                |
| 9401 | 1,4,7,9,10, 2,3,5,6,8,1<br>11,15,16 2,13,14,17 | 6  | P22006,P51907,Q561R9,Q5FVI6,Q62635,Q9Z1F2                             |
| 9402 | 1,4,7,9,10, 2,3,5,6,8,1<br>11,15,17 2,13,14,16 | 5  | O35077,P22006,Q561R9,Q5FVI6,Q9Z1F2                                    |
| 9403 | 1,4,7,9,10, 2,3,5,6,8,1<br>11,16,17 2,13,14,15 | 3  | Q5FVI6,Q64093,Q9Z1F2                                                  |
| 9404 | 1,4,7,9,10, 2,3,5,6,8,1<br>12,13,14 1,15,16,17 | 1  | P36374                                                                |
| 9405 | 1,4,7,9,10, 2,3,5,6,8,1<br>12,13,15 1,14,16,17 | 3  | P10758,P36374,Q561R9                                                  |

|      |                                                |   |                                                  |
|------|------------------------------------------------|---|--------------------------------------------------|
| 9406 | 1,4,7,9,10, 2,3,5,6,8,1<br>12,13,16 1,14,15,17 | 4 | P02803,P36374,P47967,P97840                      |
| 9407 | 1,4,7,9,10, 2,3,5,6,8,1<br>12,13,17 1,14,15,16 | 1 | P36374                                           |
| 9408 | 1,4,7,9,10, 2,3,5,6,8,1<br>12,14,15 1,13,16,17 | 2 | P10758,P22006                                    |
| 9409 | 1,4,7,9,10, 2,3,5,6,8,1<br>12,14,16 1,13,15,17 | 0 |                                                  |
| 9410 | 1,4,7,9,10, 2,3,5,6,8,1<br>12,14,17 1,13,15,16 | 1 | P36374                                           |
| 9411 | 1,4,7,9,10, 2,3,5,6,8,1<br>12,15,16 1,13,14,17 | 4 | P97840,Q561R9,Q5FVI6,Q9Z1F2                      |
| 9412 | 1,4,7,9,10, 2,3,5,6,8,1<br>12,15,17 1,13,14,16 | 1 | P06866                                           |
| 9413 | 1,4,7,9,10, 2,3,5,6,8,1<br>12,16,17 1,13,14,15 | 1 | Q64093                                           |
| 9414 | 1,4,7,9,10, 2,3,5,6,8,1<br>13,14,15 1,12,16,17 | 4 | P06760,P22006,P50115,Q561R9                      |
| 9415 | 1,4,7,9,10, 2,3,5,6,8,1<br>13,14,16 1,12,15,17 | 3 | P06760,P50115,P62804                             |
| 9416 | 1,4,7,9,10, 2,3,5,6,8,1<br>13,14,17 1,12,15,16 | 0 |                                                  |
| 9417 | 1,4,7,9,10, 2,3,5,6,8,1<br>13,15,16 1,12,14,17 | 6 | P06760,P50115,P62804,Q00715,Q561R9,Q62635        |
| 9418 | 1,4,7,9,10, 2,3,5,6,8,1<br>13,15,17 1,12,14,16 | 1 | P62804                                           |
| 9419 | 1,4,7,9,10, 2,3,5,6,8,1<br>13,16,17 1,12,14,15 | 1 | P62804                                           |
| 9420 | 1,4,7,9,10, 2,3,5,6,8,1<br>14,15,16 1,12,13,17 | 7 | P06760,P16636,P50115,Q561R9,Q62635,Q9QZK9,Q9Z1F2 |
| 9421 | 1,4,7,9,10, 2,3,5,6,8,1<br>14,15,17 1,12,13,16 | 1 | P22006                                           |
| 9422 | 1,4,7,9,10, 2,3,5,6,8,1<br>14,16,17 1,12,13,15 | 0 |                                                  |
| 9423 | 1,4,7,9,10, 2,3,5,6,8,1<br>15,16,17 1,12,13,14 | 2 | P62804,Q9Z1F2                                    |
| 9424 | 1,4,7,9,11, 2,3,5,6,8,1<br>12,13,14 0,15,16,17 | 3 | P02803,P05539,P36374                             |
| 9425 | 1,4,7,9,11, 2,3,5,6,8,1<br>12,13,15 0,14,16,17 | 6 | P05539,P10758,P22006,P36374,P51907,Q561R9        |
| 9426 | 1,4,7,9,11, 2,3,5,6,8,1<br>12,13,16 0,14,15,17 | 2 | P02803,P36374                                    |
| 9427 | 1,4,7,9,11, 2,3,5,6,8,1<br>12,13,17 0,14,15,16 | 2 | P02803,P36374                                    |
| 9428 | 1,4,7,9,11, 2,3,5,6,8,1<br>12,14,15 0,13,16,17 | 4 | P10758,P22006,P51907,Q561R9                      |

|      |                                                |   |                                                         |
|------|------------------------------------------------|---|---------------------------------------------------------|
| 9429 | 1,4,7,9,11, 2,3,5,6,8,1<br>12,14,16 0,13,15,17 | 3 | P08753,P51907,Q4FZU6                                    |
| 9430 | 1,4,7,9,11, 2,3,5,6,8,1<br>12,14,17 0,13,15,16 | 2 | P36374,Q4FZU6                                           |
| 9431 | 1,4,7,9,11, 2,3,5,6,8,1<br>12,15,16 0,13,14,17 | 5 | P06760,P08753,P22006,P51907,Q561R9                      |
| 9432 | 1,4,7,9,11, 2,3,5,6,8,1<br>12,15,17 0,13,14,16 | 3 | P22006,P36374,P51907                                    |
| 9433 | 1,4,7,9,11, 2,3,5,6,8,1<br>12,16,17 0,13,14,15 | 2 | P36374,Q4FZU6                                           |
| 9434 | 1,4,7,9,11, 2,3,5,6,8,1<br>13,14,15 0,12,16,17 | 5 | P05539,P06760,P16636,P22006,Q561R9                      |
| 9435 | 1,4,7,9,11, 2,3,5,6,8,1<br>13,14,16 0,12,15,17 | 2 | P06760,P83121                                           |
| 9436 | 1,4,7,9,11, 2,3,5,6,8,1<br>13,14,17 0,12,15,16 | 2 | P05539,P83121                                           |
| 9437 | 1,4,7,9,11, 2,3,5,6,8,1<br>13,15,16 0,12,14,17 | 5 | P06760,P22006,P62804,Q561R9,Q62635                      |
| 9438 | 1,4,7,9,11, 2,3,5,6,8,1<br>13,15,17 0,12,14,16 | 3 | P05539,P22006,Q561R9                                    |
| 9439 | 1,4,7,9,11, 2,3,5,6,8,1<br>13,16,17 0,12,14,15 | 0 |                                                         |
| 9440 | 1,4,7,9,11, 2,3,5,6,8,1<br>14,15,16 0,12,13,17 | 8 | P06760,P16636,P22006,P51907,Q561R9,Q62635,Q99MH3,Q9QZK9 |
| 9441 | 1,4,7,9,11, 2,3,5,6,8,1<br>14,15,17 0,12,13,16 | 1 | P22006                                                  |
| 9442 | 1,4,7,9,11, 2,3,5,6,8,1<br>14,16,17 0,12,13,15 | 1 | Q4FZU6                                                  |
| 9443 | 1,4,7,9,11, 2,3,5,6,8,1<br>15,16,17 0,12,13,14 | 2 | P22006,Q9Z1F2                                           |
| 9444 | 1,4,7,9,12, 2,3,5,6,8,1<br>13,14,15 0,11,16,17 | 3 | P06760,P08649,P10758                                    |
| 9445 | 1,4,7,9,12, 2,3,5,6,8,1<br>13,14,16 0,11,15,17 | 3 | P06760,P08649,Q4FZU6                                    |
| 9446 | 1,4,7,9,12, 2,3,5,6,8,1<br>13,14,17 0,11,15,16 | 2 | P36374,Q4FZU6                                           |
| 9447 | 1,4,7,9,12, 2,3,5,6,8,1<br>13,15,16 0,11,14,17 | 3 | P06760,P08649,P62804                                    |
| 9448 | 1,4,7,9,12, 2,3,5,6,8,1<br>13,15,17 0,11,14,16 | 1 | P36374                                                  |
| 9449 | 1,4,7,9,12, 2,3,5,6,8,1<br>13,16,17 0,11,14,15 | 3 | P27213,P36374,Q4FZU6                                    |
| 9450 | 1,4,7,9,12, 2,3,5,6,8,1<br>14,15,16 0,11,13,17 | 1 | P06760                                                  |
| 9451 | 1,4,7,9,12, 2,3,5,6,8,1<br>14,15,17 0,11,13,16 | 0 |                                                         |

|      |                                                |   |                                                         |
|------|------------------------------------------------|---|---------------------------------------------------------|
| 9452 | 1,4,7,9,12, 2,3,5,6,8,1<br>14,16,17 0,11,13,15 | 1 | Q4FZU6                                                  |
| 9453 | 1,4,7,9,12, 2,3,5,6,8,1<br>15,16,17 0,11,13,14 | 1 | P06866                                                  |
| 9454 | 1,4,7,9,13, 2,3,5,6,8,1<br>14,15,16 0,11,12,17 | 6 | P06760,P11883,P16636,P50115,P62804,Q00715               |
| 9455 | 1,4,7,9,13, 2,3,5,6,8,1<br>14,15,17 0,11,12,16 | 2 | P11883,P62804                                           |
| 9456 | 1,4,7,9,13, 2,3,5,6,8,1<br>14,16,17 0,11,12,15 | 3 | P27213,P62804,Q4FZU6                                    |
| 9457 | 1,4,7,9,13, 2,3,5,6,8,1<br>15,16,17 0,11,12,14 | 4 | P11883,P27213,P62804,Q00715                             |
| 9458 | 1,4,7,9,14, 2,3,5,6,8,1<br>15,16,17 0,11,12,13 | 2 | P11883,P62804                                           |
| 9459 | 1,4,7,10,1 2,3,5,6,8,9<br>1,12,13,14 ,15,16,17 | 2 | P36374,P47727                                           |
| 9460 | 1,4,7,10,1 2,3,5,6,8,9<br>1,12,13,15 ,14,16,17 | 5 | P22006,P36374,P51907,Q561R9,Q5FVI6                      |
| 9461 | 1,4,7,10,1 2,3,5,6,8,9<br>1,12,13,16 ,14,15,17 | 5 | P06757,P36374,P47967,Q561R9,Q5FVI6                      |
| 9462 | 1,4,7,10,1 2,3,5,6,8,9<br>1,12,13,17 ,14,15,16 | 4 | P06757,P36374,Q63942,Q9QZK9                             |
| 9463 | 1,4,7,10,1 2,3,5,6,8,9<br>1,12,14,15 ,13,16,17 | 7 | P08753,P20766,P22006,P35280,P51907,Q561R9,Q5FVI6        |
| 9464 | 1,4,7,10,1 2,3,5,6,8,9<br>1,12,14,16 ,13,15,17 | 5 | P08753,P20766,P51907,P53792,Q5FVI6                      |
| 9465 | 1,4,7,10,1 2,3,5,6,8,9<br>1,12,14,17 ,13,15,16 | 1 | P36374                                                  |
| 9466 | 1,4,7,10,1 2,3,5,6,8,9<br>1,12,15,16 ,13,14,17 | 8 | P08753,P20766,P22006,P51907,P53792,Q561R9,Q5FVI6,Q9Z1F2 |
| 9467 | 1,4,7,10,1 2,3,5,6,8,9<br>1,12,15,17 ,13,14,16 | 6 | P06757,P06866,P22006,P36374,P51907,Q5FVI6               |
| 9468 | 1,4,7,10,1 2,3,5,6,8,9<br>1,12,16,17 ,13,14,15 | 6 | P06757,P06866,P20766,P36374,P53792,Q5FVI6               |
| 9469 | 1,4,7,10,1 2,3,5,6,8,9<br>1,13,14,15 ,12,16,17 | 2 | P22006,Q561R9                                           |
| 9470 | 1,4,7,10,1 2,3,5,6,8,9<br>1,13,14,16 ,12,15,17 | 2 | Q5FVI6,Q7TPB1                                           |
| 9471 | 1,4,7,10,1 2,3,5,6,8,9<br>1,13,14,17 ,12,15,16 | 0 |                                                         |
| 9472 | 1,4,7,10,1 2,3,5,6,8,9<br>1,13,15,16 ,12,14,17 | 6 | P01835,P22006,Q561R9,Q5FVI6,Q8VD89,Q9Z1F2               |
| 9473 | 1,4,7,10,1 2,3,5,6,8,9<br>1,13,15,17 ,12,14,16 | 2 | P22006,Q561R9                                           |
| 9474 | 1,4,7,10,1 2,3,5,6,8,9<br>1,13,16,17 ,12,14,15 | 1 | Q5FVI6                                                  |

|      |                          |                          |   |                                                  |
|------|--------------------------|--------------------------|---|--------------------------------------------------|
| 9475 | 1,4,7,10,1<br>1,14,15,16 | 2,3,5,6,8,9<br>,12,13,17 | 7 | P20766,P22006,P51907,Q561R9,Q5FVI6,Q62635,Q9Z1F2 |
| 9476 | 1,4,7,10,1<br>1,14,15,17 | 2,3,5,6,8,9<br>,12,13,16 | 2 | P22006,Q9Z1F2                                    |
| 9477 | 1,4,7,10,1<br>1,14,16,17 | 2,3,5,6,8,9<br>,12,13,15 | 2 | Q5FVI6,Q9Z1F2                                    |
| 9478 | 1,4,7,10,1<br>1,15,16,17 | 2,3,5,6,8,9<br>,12,13,14 | 5 | O35077,P22006,Q561R9,Q5FVI6,Q9Z1F2               |
| 9479 | 1,4,7,10,1<br>2,13,14,15 | 2,3,5,6,8,9<br>,11,16,17 | 2 | P10758,P22006                                    |
| 9480 | 1,4,7,10,1<br>2,13,14,16 | 2,3,5,6,8,9<br>,11,15,17 | 0 |                                                  |
| 9481 | 1,4,7,10,1<br>2,13,14,17 | 2,3,5,6,8,9<br>,11,15,16 | 1 | P36374                                           |
| 9482 | 1,4,7,10,1<br>2,13,15,16 | 2,3,5,6,8,9<br>,11,14,17 | 2 | P02793;Q7TP54,Q9QUL6                             |
| 9483 | 1,4,7,10,1<br>2,13,15,17 | 2,3,5,6,8,9<br>,11,14,16 | 2 | P36374,Q99MH3                                    |
| 9484 | 1,4,7,10,1<br>2,13,16,17 | 2,3,5,6,8,9<br>,11,14,15 | 2 | P27213,P36374                                    |
| 9485 | 1,4,7,10,1<br>2,14,15,16 | 2,3,5,6,8,9<br>,11,13,17 | 2 | P08721,P20766                                    |
| 9486 | 1,4,7,10,1<br>2,14,15,17 | 2,3,5,6,8,9<br>,11,13,16 | 3 | P06866,P20766,P22006                             |
| 9487 | 1,4,7,10,1<br>2,14,16,17 | 2,3,5,6,8,9<br>,11,13,15 | 1 | P20766                                           |
| 9488 | 1,4,7,10,1<br>2,15,16,17 | 2,3,5,6,8,9<br>,11,13,14 | 3 | P06866,P20766,Q9Z1F2                             |
| 9489 | 1,4,7,10,1<br>3,14,15,16 | 2,3,5,6,8,9<br>,11,12,17 | 4 | P01835,P06760,P50115,P62804                      |
| 9490 | 1,4,7,10,1<br>3,14,15,17 | 2,3,5,6,8,9<br>,11,12,16 | 1 | P22006                                           |
| 9491 | 1,4,7,10,1<br>3,14,16,17 | 2,3,5,6,8,9<br>,11,12,15 | 1 | P27213                                           |
| 9492 | 1,4,7,10,1<br>3,15,16,17 | 2,3,5,6,8,9<br>,11,12,14 | 3 | P01835,P27213,P62804                             |
| 9493 | 1,4,7,10,1<br>4,15,16,17 | 2,3,5,6,8,9<br>,11,12,13 | 2 | P20766,Q9Z1F2                                    |
| 9494 | 1,4,7,11,1<br>2,13,14,15 | 2,3,5,6,8,9<br>,10,16,17 | 5 | P05539,P10758,P22006,P36374,Q6P6R2               |
| 9495 | 1,4,7,11,1<br>2,13,14,16 | 2,3,5,6,8,9<br>,10,15,17 | 2 | P36374,Q4FZU6                                    |
| 9496 | 1,4,7,11,1<br>2,13,14,17 | 2,3,5,6,8,9<br>,10,15,16 | 2 | P36374,Q63942                                    |
| 9497 | 1,4,7,11,1<br>2,13,15,16 | 2,3,5,6,8,9<br>,10,14,17 | 3 | P22006,P51907,Q561R9                             |

|      |                          |                           |   |                                           |
|------|--------------------------|---------------------------|---|-------------------------------------------|
| 9498 | 1,4,7,11,1<br>2,13,15,17 | 2,3,5,6,8,9<br>,10,14,16  | 3 | P22006,P36374,Q63942                      |
| 9499 | 1,4,7,11,1<br>2,13,16,17 | 2,3,5,6,8,9<br>,10,14,15  | 2 | P27213,P36374                             |
| 9500 | 1,4,7,11,1<br>2,14,15,16 | 2,3,5,6,8,9<br>,10,13,17  | 3 | P20766,P22006,P51907                      |
| 9501 | 1,4,7,11,1<br>2,14,15,17 | 2,3,5,6,8,9<br>,10,13,16  | 1 | P22006                                    |
| 9502 | 1,4,7,11,1<br>2,14,16,17 | 2,3,5,6,8,9<br>,10,13,15  | 1 | Q4FZU6                                    |
| 9503 | 1,4,7,11,1<br>2,15,16,17 | 2,3,5,6,8,9<br>,10,13,14  | 4 | P06866,P20766,P22006,P51907               |
| 9504 | 1,4,7,11,1<br>3,14,15,16 | 2,3,5,6,8,9<br>,10,12,17  | 3 | P06760,P16636,P22006                      |
| 9505 | 1,4,7,11,1<br>3,14,15,17 | 2,3,5,6,8,9<br>,10,12,16  | 1 | P22006                                    |
| 9506 | 1,4,7,11,1<br>3,14,16,17 | 2,3,5,6,8,9<br>,10,12,15  | 2 | P27213,Q4FZU6                             |
| 9507 | 1,4,7,11,1<br>3,15,16,17 | 2,3,5,6,8,9<br>,10,12,14  | 1 | P27213                                    |
| 9508 | 1,4,7,11,1<br>4,15,16,17 | 2,3,5,6,8,9<br>,10,12,13  | 2 | P22006,Q9Z1F2                             |
| 9509 | 1,4,7,12,1<br>3,14,15,16 | 2,3,5,6,8,9<br>,10,11,17  | 4 | P06760,P08649,P11883,Q9QUL6               |
| 9510 | 1,4,7,12,1<br>3,14,15,17 | 2,3,5,6,8,9<br>,10,11,16  | 4 | P08649,P11883,P27213,P36374               |
| 9511 | 1,4,7,12,1<br>3,14,16,17 | 2,3,5,6,8,9<br>,10,11,15  | 4 | P08649,P27213,P36374,Q4FZU6               |
| 9512 | 1,4,7,12,1<br>3,15,16,17 | 2,3,5,6,8,9<br>,10,11,14  | 5 | P06866,P08649,P11883,P27213,Q9QUL6        |
| 9513 | 1,4,7,12,1<br>4,15,16,17 | 2,3,5,6,8,9<br>,10,11,13  | 3 | P06866,P11883,P20766                      |
| 9514 | 1,4,7,13,1<br>4,15,16,17 | 2,3,5,6,8,9<br>,10,11,12  | 3 | P11883,P27213,P62804                      |
| 9515 | 1,4,8,9,10,<br>11,12,13  | 2,3,5,6,7,1<br>4,15,16,17 | 5 | P02803,P0C0A9,P10758,P36374,Q561R9        |
| 9516 | 1,4,8,9,10,<br>11,12,14  | 2,3,5,6,7,1<br>3,15,16,17 | 6 | P00714,P02803,P0C0A9,P10758,P36374,Q561R9 |
| 9517 | 1,4,8,9,10,<br>11,12,15  | 2,3,5,6,7,1<br>3,14,16,17 | 4 | P00714,P10758,P51907,Q561R9               |
| 9518 | 1,4,8,9,10,<br>11,12,16  | 2,3,5,6,7,1<br>3,14,15,17 | 5 | P00714,P02803,P53792,Q561R9,Q9WUW8        |
| 9519 | 1,4,8,9,10,<br>11,12,17  | 2,3,5,6,7,1<br>3,14,15,16 | 4 | P02803,P06757,P16636,P36374               |
| 9520 | 1,4,8,9,10,<br>11,13,14  | 2,3,5,6,7,1<br>2,15,16,17 | 3 | P02803,P83748,Q561R9                      |

|      |                                                |   |                             |
|------|------------------------------------------------|---|-----------------------------|
| 9521 | 1,4,8,9,10, 2,3,5,6,7,1<br>11,13,15 2,14,16,17 | 1 | Q561R9                      |
| 9522 | 1,4,8,9,10, 2,3,5,6,7,1<br>11,13,16 2,14,15,17 | 3 | P02803,Q561R9,Q8CJD3        |
| 9523 | 1,4,8,9,10, 2,3,5,6,7,1<br>11,13,17 2,14,15,16 | 3 | P02803,P83748,Q561R9        |
| 9524 | 1,4,8,9,10, 2,3,5,6,7,1<br>11,14,15 2,13,16,17 | 1 | Q561R9                      |
| 9525 | 1,4,8,9,10, 2,3,5,6,7,1<br>11,14,16 2,13,15,17 | 4 | P00714,P83748,Q561R9,Q9WUW8 |
| 9526 | 1,4,8,9,10, 2,3,5,6,7,1<br>11,14,17 2,13,15,16 | 1 | P83748                      |
| 9527 | 1,4,8,9,10, 2,3,5,6,7,1<br>11,15,16 2,13,14,17 | 3 | Q561R9,Q62635,Q9Z1F2        |
| 9528 | 1,4,8,9,10, 2,3,5,6,7,1<br>11,15,17 2,13,14,16 | 3 | P80201,P83748,Q561R9        |
| 9529 | 1,4,8,9,10, 2,3,5,6,7,1<br>11,16,17 2,13,14,15 | 3 | A2RUV9,P83748,Q561R9        |
| 9530 | 1,4,8,9,10, 2,3,5,6,7,1<br>12,13,14 1,15,16,17 | 3 | P02803,P10758,P36374        |
| 9531 | 1,4,8,9,10, 2,3,5,6,7,1<br>12,13,15 1,14,16,17 | 2 | P10758,Q561R9               |
| 9532 | 1,4,8,9,10, 2,3,5,6,7,1<br>12,13,16 1,14,15,17 | 1 | P02803                      |
| 9533 | 1,4,8,9,10, 2,3,5,6,7,1<br>12,13,17 1,14,15,16 | 2 | P02803,P36374               |
| 9534 | 1,4,8,9,10, 2,3,5,6,7,1<br>12,14,15 1,13,16,17 | 2 | P10758,Q561R9               |
| 9535 | 1,4,8,9,10, 2,3,5,6,7,1<br>12,14,16 1,13,15,17 | 1 | Q9WUW8                      |
| 9536 | 1,4,8,9,10, 2,3,5,6,7,1<br>12,14,17 1,13,15,16 | 0 |                             |
| 9537 | 1,4,8,9,10, 2,3,5,6,7,1<br>12,15,16 1,13,14,17 | 2 | Q561R9,Q9WUW8               |
| 9538 | 1,4,8,9,10, 2,3,5,6,7,1<br>12,15,17 1,13,14,16 | 1 | P80201                      |
| 9539 | 1,4,8,9,10, 2,3,5,6,7,1<br>12,16,17 1,13,14,15 | 0 |                             |
| 9540 | 1,4,8,9,10, 2,3,5,6,7,1<br>13,14,15 1,12,16,17 | 3 | P09605,P25809,P17046,Q561R9 |
| 9541 | 1,4,8,9,10, 2,3,5,6,7,1<br>13,14,16 1,12,15,17 | 0 |                             |
| 9542 | 1,4,8,9,10, 2,3,5,6,7,1<br>13,14,17 1,12,15,16 | 0 |                             |
| 9543 | 1,4,8,9,10, 2,3,5,6,7,1<br>13,15,16 1,12,14,17 | 1 | Q561R9                      |

|      |                                                |   |                                    |
|------|------------------------------------------------|---|------------------------------------|
| 9544 | 1,4,8,9,10, 2,3,5,6,7,1<br>13,15,17 1,12,14,16 | 0 |                                    |
| 9545 | 1,4,8,9,10, 2,3,5,6,7,1<br>13,16,17 1,12,14,15 | 1 | P25031                             |
| 9546 | 1,4,8,9,10, 2,3,5,6,7,1<br>14,15,16 1,12,13,17 | 3 | P08937,Q561R9,Q9QZK9               |
| 9547 | 1,4,8,9,10, 2,3,5,6,7,1<br>14,15,17 1,12,13,16 | 1 | P17046                             |
| 9548 | 1,4,8,9,10, 2,3,5,6,7,1<br>14,16,17 1,12,13,15 | 0 |                                    |
| 9549 | 1,4,8,9,10, 2,3,5,6,7,1<br>15,16,17 1,12,13,14 | 1 | P25031                             |
| 9550 | 1,4,8,9,11, 2,3,5,6,7,1<br>12,13,14 0,15,16,17 | 5 | P02803,P0C0A9,P10758,P36374,P47727 |
| 9551 | 1,4,8,9,11, 2,3,5,6,7,1<br>12,13,15 0,14,16,17 | 4 | P02803,P10758,P36374,Q561R9        |
| 9552 | 1,4,8,9,11, 2,3,5,6,7,1<br>12,13,16 0,14,15,17 | 3 | P02803,P36374,Q561R9               |
| 9553 | 1,4,8,9,11, 2,3,5,6,7,1<br>12,13,17 0,14,15,16 | 2 | P02803,P36374                      |
| 9554 | 1,4,8,9,11, 2,3,5,6,7,1<br>12,14,15 0,13,16,17 | 2 | P10758,Q561R9                      |
| 9555 | 1,4,8,9,11, 2,3,5,6,7,1<br>12,14,16 0,13,15,17 | 1 | P02803                             |
| 9556 | 1,4,8,9,11, 2,3,5,6,7,1<br>12,14,17 0,13,15,16 | 2 | P02803,P36374                      |
| 9557 | 1,4,8,9,11, 2,3,5,6,7,1<br>12,15,16 0,13,14,17 | 2 | P51907,Q561R9                      |
| 9558 | 1,4,8,9,11, 2,3,5,6,7,1<br>12,15,17 0,13,14,16 | 1 | Q561R9                             |
| 9559 | 1,4,8,9,11, 2,3,5,6,7,1<br>12,16,17 0,13,14,15 | 1 | P02803                             |
| 9560 | 1,4,8,9,11, 2,3,5,6,7,1<br>13,14,15 0,12,16,17 | 1 | Q561R9                             |
| 9561 | 1,4,8,9,11, 2,3,5,6,7,1<br>13,14,16 0,12,15,17 | 1 | P02803                             |
| 9562 | 1,4,8,9,11, 2,3,5,6,7,1<br>13,14,17 0,12,15,16 | 3 | P02803,P83748,P97840               |
| 9563 | 1,4,8,9,11, 2,3,5,6,7,1<br>13,15,16 0,12,14,17 | 1 | Q561R9                             |
| 9564 | 1,4,8,9,11, 2,3,5,6,7,1<br>13,15,17 0,12,14,16 | 3 | P97840,Q561R9,Q63532               |
| 9565 | 1,4,8,9,11, 2,3,5,6,7,1<br>13,16,17 0,12,14,15 | 2 | P02803,P83748                      |
| 9566 | 1,4,8,9,11, 2,3,5,6,7,1<br>14,15,16 0,12,13,17 | 3 | Q561R9,Q99MH3,Q9QZK9               |



|      |                                                |   |                                           |
|------|------------------------------------------------|---|-------------------------------------------|
| 9567 | 1,4,8,9,11, 2,3,5,6,7,1<br>14,15,17 0,12,13,16 | 2 | P83748,P97840                             |
| 9568 | 1,4,8,9,11, 2,3,5,6,7,1<br>14,16,17 0,12,13,15 | 1 | P83748                                    |
| 9569 | 1,4,8,9,11, 2,3,5,6,7,1<br>15,16,17 0,12,13,14 | 1 | Q561R9                                    |
| 9570 | 1,4,8,9,12, 2,3,5,6,7,1<br>13,14,15 0,11,16,17 | 2 | P10758,Q9QUL6                             |
| 9571 | 1,4,8,9,12, 2,3,5,6,7,1<br>13,14,16 0,11,15,17 | 2 | P02803,Q9QUL6                             |
| 9572 | 1,4,8,9,12, 2,3,5,6,7,1<br>13,14,17 0,11,15,16 | 3 | P02803,P27213,P36374                      |
| 9573 | 1,4,8,9,12, 2,3,5,6,7,1<br>13,15,16 0,11,14,17 | 2 | P10758,Q9QUL6                             |
| 9574 | 1,4,8,9,12, 2,3,5,6,7,1<br>13,15,17 0,11,14,16 | 2 | P10758,P36374                             |
| 9575 | 1,4,8,9,12, 2,3,5,6,7,1<br>13,16,17 0,11,14,15 | 3 | P02803,P27213,P36374                      |
| 9576 | 1,4,8,9,12, 2,3,5,6,7,1<br>14,15,16 0,11,13,17 | 0 |                                           |
| 9577 | 1,4,8,9,12, 2,3,5,6,7,1<br>14,15,17 0,11,13,16 | 0 |                                           |
| 9578 | 1,4,8,9,12, 2,3,5,6,7,1<br>14,16,17 0,11,13,15 | 1 | Q4FZU6                                    |
| 9579 | 1,4,8,9,12, 2,3,5,6,7,1<br>15,16,17 0,11,13,14 | 1 | P06866                                    |
| 9580 | 1,4,8,9,13, 2,3,5,6,7,1<br>14,15,16 0,11,12,17 | 1 | Q9QZK9                                    |
| 9581 | 1,4,8,9,13, 2,3,5,6,7,1<br>14,15,17 0,11,12,16 | 1 | P11883                                    |
| 9582 | 1,4,8,9,13, 2,3,5,6,7,1<br>14,16,17 0,11,12,15 | 1 | P27213                                    |
| 9583 | 1,4,8,9,13, 2,3,5,6,7,1<br>15,16,17 0,11,12,14 | 3 | P11883,P27213,P62804                      |
| 9584 | 1,4,8,9,14, 2,3,5,6,7,1<br>15,16,17 0,11,12,13 | 0 |                                           |
| 9585 | 1,4,8,10,1 2,3,5,6,7,9<br>1,12,13,14 ,15,16,17 | 6 | P02803,P04905,P0C0A9,P10758,P36374,P47727 |
| 9586 | 1,4,8,10,1 2,3,5,6,7,9<br>1,12,13,15 ,14,16,17 | 3 | P10758,P36374,Q561R9                      |
| 9587 | 1,4,8,10,1 2,3,5,6,7,9<br>1,12,13,16 ,14,15,17 | 4 | P02803,P36374,P53792,Q561R9               |
| 9588 | 1,4,8,10,1 2,3,5,6,7,9<br>1,12,13,17 ,14,15,16 | 3 | P02803,P16636,P36374                      |
| 9589 | 1,4,8,10,1 2,3,5,6,7,9<br>1,12,14,15 ,13,16,17 | 5 | P10758,P35280,P51907,P53792,Q561R9        |

|      |                          |                          |   |                                    |
|------|--------------------------|--------------------------|---|------------------------------------|
| 9590 | 1,4,8,10,1<br>1,12,14,16 | 2,3,5,6,7,9<br>,13,15,17 | 2 | P53792,Q9WUW8                      |
| 9591 | 1,4,8,10,1<br>1,12,14,17 | 2,3,5,6,7,9<br>,13,15,16 | 1 | P36374                             |
| 9592 | 1,4,8,10,1<br>1,12,15,16 | 2,3,5,6,7,9<br>,13,14,17 | 4 | P51907,P53792,Q561R9,Q9WUW8        |
| 9593 | 1,4,8,10,1<br>1,12,15,17 | 2,3,5,6,7,9<br>,13,14,16 | 2 | P06866,Q561R9                      |
| 9594 | 1,4,8,10,1<br>1,12,16,17 | 2,3,5,6,7,9<br>,13,14,15 | 4 | P06757,P06866,P16636,P53792        |
| 9595 | 1,4,8,10,1<br>1,13,14,15 | 2,3,5,6,7,9<br>,12,16,17 | 2 | P09605;P25809,Q561R9               |
| 9596 | 1,4,8,10,1<br>1,13,14,16 | 2,3,5,6,7,9<br>,12,15,17 | 1 | Q561R9                             |
| 9597 | 1,4,8,10,1<br>1,13,14,17 | 2,3,5,6,7,9<br>,12,15,16 | 1 | P83748                             |
| 9598 | 1,4,8,10,1<br>1,13,15,16 | 2,3,5,6,7,9<br>,12,14,17 | 2 | P01835,Q561R9                      |
| 9599 | 1,4,8,10,1<br>1,13,15,17 | 2,3,5,6,7,9<br>,12,14,16 | 1 | Q561R9                             |
| 9600 | 1,4,8,10,1<br>1,13,16,17 | 2,3,5,6,7,9<br>,12,14,15 | 1 | P83748                             |
| 9601 | 1,4,8,10,1<br>1,14,15,16 | 2,3,5,6,7,9<br>,12,13,17 | 2 | P53792,Q561R9                      |
| 9602 | 1,4,8,10,1<br>1,14,15,17 | 2,3,5,6,7,9<br>,12,13,16 | 0 |                                    |
| 9603 | 1,4,8,10,1<br>1,14,16,17 | 2,3,5,6,7,9<br>,12,13,15 | 1 | P83748                             |
| 9604 | 1,4,8,10,1<br>1,15,16,17 | 2,3,5,6,7,9<br>,12,13,14 | 2 | Q561R9,Q9Z1F2                      |
| 9605 | 1,4,8,10,1<br>2,13,14,15 | 2,3,5,6,7,9<br>,11,16,17 | 4 | P09605;P25809,P10758,P15999,Q9QUL6 |
| 9606 | 1,4,8,10,1<br>2,13,14,16 | 2,3,5,6,7,9<br>,11,15,17 | 1 | Q9QUL6                             |
| 9607 | 1,4,8,10,1<br>2,13,14,17 | 2,3,5,6,7,9<br>,11,15,16 | 2 | P27213,P36374                      |
| 9608 | 1,4,8,10,1<br>2,13,15,16 | 2,3,5,6,7,9<br>,11,14,17 | 1 | Q9QUL6                             |
| 9609 | 1,4,8,10,1<br>2,13,15,17 | 2,3,5,6,7,9<br>,11,14,16 | 4 | P27213,P36374,Q99MH3,Q9QUL6        |
| 9610 | 1,4,8,10,1<br>2,13,16,17 | 2,3,5,6,7,9<br>,11,14,15 | 3 | P27213,P36374,Q9QUL6               |
| 9611 | 1,4,8,10,1<br>2,14,15,16 | 2,3,5,6,7,9<br>,11,13,17 | 2 | P08721,Q9QUL6                      |
| 9612 | 1,4,8,10,1<br>2,14,15,17 | 2,3,5,6,7,9<br>,11,13,16 | 0 |                                    |

|      |                                                |   |                             |
|------|------------------------------------------------|---|-----------------------------|
| 9613 | 1,4,8,10,1 2,3,5,6,7,9<br>2,14,16,17 ,11,13,15 | 0 |                             |
| 9614 | 1,4,8,10,1 2,3,5,6,7,9<br>2,15,16,17 ,11,13,14 | 1 | P06866                      |
| 9615 | 1,4,8,10,1 2,3,5,6,7,9<br>3,14,15,16 ,11,12,17 | 3 | P01835,P09605,P25809,Q9QUL6 |
| 9616 | 1,4,8,10,1 2,3,5,6,7,9<br>3,14,15,17 ,11,12,16 | 1 | P15999                      |
| 9617 | 1,4,8,10,1 2,3,5,6,7,9<br>3,14,16,17 ,11,12,15 | 1 | P27213                      |
| 9618 | 1,4,8,10,1 2,3,5,6,7,9<br>3,15,16,17 ,11,12,14 | 2 | P01835,P27213               |
| 9619 | 1,4,8,10,1 2,3,5,6,7,9<br>4,15,16,17 ,11,12,13 | 0 |                             |
| 9620 | 1,4,8,11,1 2,3,5,6,7,9<br>2,13,14,15 ,10,16,17 | 4 | P10758,P36374,Q561R9,Q9QUL6 |
| 9621 | 1,4,8,11,1 2,3,5,6,7,9<br>2,13,14,16 ,10,15,17 | 3 | P02803,P36374,Q9QUL6        |
| 9622 | 1,4,8,11,1 2,3,5,6,7,9<br>2,13,14,17 ,10,15,16 | 3 | P02803,P27213,P36374        |
| 9623 | 1,4,8,11,1 2,3,5,6,7,9<br>2,13,15,16 ,10,14,17 | 2 | Q561R9,Q9QUL6               |
| 9624 | 1,4,8,11,1 2,3,5,6,7,9<br>2,13,15,17 ,10,14,16 | 1 | P36374                      |
| 9625 | 1,4,8,11,1 2,3,5,6,7,9<br>2,13,16,17 ,10,14,15 | 3 | P02803,P27213,P36374        |
| 9626 | 1,4,8,11,1 2,3,5,6,7,9<br>2,14,15,16 ,10,13,17 | 1 | P51907                      |
| 9627 | 1,4,8,11,1 2,3,5,6,7,9<br>2,14,15,17 ,10,13,16 | 0 |                             |
| 9628 | 1,4,8,11,1 2,3,5,6,7,9<br>2,14,16,17 ,10,13,15 | 0 |                             |
| 9629 | 1,4,8,11,1 2,3,5,6,7,9<br>2,15,16,17 ,10,13,14 | 1 | P06866                      |
| 9630 | 1,4,8,11,1 2,3,5,6,7,9<br>3,14,15,16 ,10,12,17 | 1 | Q561R9                      |
| 9631 | 1,4,8,11,1 2,3,5,6,7,9<br>3,14,15,17 ,10,12,16 | 1 | P97840                      |
| 9632 | 1,4,8,11,1 2,3,5,6,7,9<br>3,14,16,17 ,10,12,15 | 2 | P27213,P83748               |
| 9633 | 1,4,8,11,1 2,3,5,6,7,9<br>3,15,16,17 ,10,12,14 | 1 | P27213                      |
| 9634 | 1,4,8,11,1 2,3,5,6,7,9<br>4,15,16,17 ,10,12,13 | 1 | P97840                      |
| 9635 | 1,4,8,12,1 2,3,5,6,7,9<br>3,14,15,16 ,10,11,17 | 2 | P27213,Q9QUL6               |

|      |                          |                          |    |                                                                                     |
|------|--------------------------|--------------------------|----|-------------------------------------------------------------------------------------|
| 9636 | 1,4,8,12,1<br>3,14,15,17 | 2,3,5,6,7,9<br>,10,11,16 | 2  | P27213,Q9QUL6                                                                       |
| 9637 | 1,4,8,12,1<br>3,14,16,17 | 2,3,5,6,7,9<br>,10,11,15 | 3  | P27213,Q4FZU6,Q9QUL6                                                                |
| 9638 | 1,4,8,12,1<br>3,15,16,17 | 2,3,5,6,7,9<br>,10,11,14 | 2  | P27213,Q9QUL6                                                                       |
| 9639 | 1,4,8,12,1<br>4,15,16,17 | 2,3,5,6,7,9<br>,10,11,13 | 3  | P06866,P27213,Q9QUL6                                                                |
| 9640 | 1,4,8,13,1<br>4,15,16,17 | 2,3,5,6,7,9<br>,10,11,12 | 3  | P11883,P27213,Q9QUL6                                                                |
| 9641 | 1,4,9,10,1<br>1,12,13,14 | 2,3,5,6,7,8<br>,15,16,17 | 6  | P02803,P10758,P36374,P47727,P50115,Q561R9                                           |
| 9642 | 1,4,9,10,1<br>1,12,13,15 | 2,3,5,6,7,8<br>,14,16,17 | 5  | P10758,P36374,P50115,P51907,Q561R9                                                  |
| 9643 | 1,4,9,10,1<br>1,12,13,16 | 2,3,5,6,7,8<br>,14,15,17 | 7  | P02631,P02803,P10536,P36374,P50115,Q561R9,Q9WUW8                                    |
| 9644 | 1,4,9,10,1<br>1,12,13,17 | 2,3,5,6,7,8<br>,14,15,16 | 4  | P02631,P02803,P06757,P36374                                                         |
| 9645 | 1,4,9,10,1<br>1,12,14,15 | 2,3,5,6,7,8<br>,13,16,17 | 5  | P08937,P10758,P50115,P51907,Q561R9                                                  |
| 9646 | 1,4,9,10,1<br>1,12,14,16 | 2,3,5,6,7,8<br>,13,15,17 | 7  | P08937,P10536,P50115,P51907,P53792,Q561R9,Q9WUW8                                    |
| 9647 | 1,4,9,10,1<br>1,12,14,17 | 2,3,5,6,7,8<br>,13,15,16 | 1  | P36374                                                                              |
| 9648 | 1,4,9,10,1<br>1,12,15,16 | 2,3,5,6,7,8<br>,13,14,17 | 11 | O88267,P08753,P08937,P10536,P20766,P50115,P51907,P53792,Q561R9,Q9WUW8,Q9Z1F2        |
| 9649 | 1,4,9,10,1<br>1,12,15,17 | 2,3,5,6,7,8<br>,13,14,16 | 4  | P06866,P51907,Q561R9,Q9Z1F2                                                         |
| 9650 | 1,4,9,10,1<br>1,12,16,17 | 2,3,5,6,7,8<br>,13,14,15 | 4  | P06757,P06866,P53792,Q9Z1F2                                                         |
| 9651 | 1,4,9,10,1<br>1,13,14,15 | 2,3,5,6,7,8<br>,12,16,17 | 7  | O88267,P08937,P50115,P50116,P55091,Q561R9,Q62635                                    |
| 9652 | 1,4,9,10,1<br>1,13,14,16 | 2,3,5,6,7,8<br>,12,15,17 | 7  | P08937,P50115,P55091,P83748,Q561R9,Q62635,Q7TPB1                                    |
| 9653 | 1,4,9,10,1<br>1,13,14,17 | 2,3,5,6,7,8<br>,12,15,16 | 1  | P83748                                                                              |
| 9654 | 1,4,9,10,1<br>1,13,15,16 | 2,3,5,6,7,8<br>,12,14,17 | 8  | O88267,P06760,P08937,P50115,P55091,Q561R9,Q62635,Q9Z1F2                             |
| 9655 | 1,4,9,10,1<br>1,13,15,17 | 2,3,5,6,7,8<br>,12,14,16 | 2  | P83748,Q561R9                                                                       |
| 9656 | 1,4,9,10,1<br>1,13,16,17 | 2,3,5,6,7,8<br>,12,14,15 | 2  | P02631,P83748                                                                       |
| 9657 | 1,4,9,10,1<br>1,14,15,16 | 2,3,5,6,7,8<br>,12,13,17 | 12 | O88267,P06760,P08937,P50115,P51907,P55091,P70545,Q561R9,Q62635,Q63751,Q9QZK9,Q9Z1F2 |
| 9658 | 1,4,9,10,1<br>1,14,15,17 | 2,3,5,6,7,8<br>,12,13,16 | 5  | O88267,P08937,P83748,Q561R9,Q9Z1F2                                                  |

|      |                          |                          |    |                                                                              |
|------|--------------------------|--------------------------|----|------------------------------------------------------------------------------|
| 9659 | 1,4,9,10,1<br>1,14,16,17 | 2,3,5,6,7,8<br>,12,13,15 | 3  | P08937,P83748,Q9Z1F2                                                         |
| 9660 | 1,4,9,10,1<br>1,15,16,17 | 2,3,5,6,7,8<br>,12,13,14 | 5  | O88267,P08937,P83748,Q561R9,Q9Z1F2                                           |
| 9661 | 1,4,9,10,1<br>2,13,14,15 | 2,3,5,6,7,8<br>,11,16,17 | 4  | P08937,P10758,P50115,P50116                                                  |
| 9662 | 1,4,9,10,1<br>2,13,14,16 | 2,3,5,6,7,8<br>,11,15,17 | 4  | P02631,P08937,P50115,Q63751                                                  |
| 9663 | 1,4,9,10,1<br>2,13,14,17 | 2,3,5,6,7,8<br>,11,15,16 | 1  | P36374                                                                       |
| 9664 | 1,4,9,10,1<br>2,13,15,16 | 2,3,5,6,7,8<br>,11,14,17 | 5  | P08937,P10758,P16086,P50115,Q561R9                                           |
| 9665 | 1,4,9,10,1<br>2,13,15,17 | 2,3,5,6,7,8<br>,11,14,16 | 2  | P10758,P16086                                                                |
| 9666 | 1,4,9,10,1<br>2,13,16,17 | 2,3,5,6,7,8<br>,11,14,15 | 4  | P02631,P02803,P07171,P27213                                                  |
| 9667 | 1,4,9,10,1<br>2,14,15,16 | 2,3,5,6,7,8<br>,11,13,17 | 5  | P08937,P10758,P20766,P50115,Q63751                                           |
| 9668 | 1,4,9,10,1<br>2,14,15,17 | 2,3,5,6,7,8<br>,11,13,16 | 2  | P06866,P10758                                                                |
| 9669 | 1,4,9,10,1<br>2,14,16,17 | 2,3,5,6,7,8<br>,11,13,15 | 0  |                                                                              |
| 9670 | 1,4,9,10,1<br>2,15,16,17 | 2,3,5,6,7,8<br>,11,13,14 | 3  | P06866,P16086,Q9Z1F2                                                         |
| 9671 | 1,4,9,10,1<br>3,14,15,16 | 2,3,5,6,7,8<br>,11,12,17 | 11 | P06760,P08937,P11883,P50115,P55091,P62804,Q4G075,Q561R9,Q62635,Q63751,Q9QZK9 |
| 9672 | 1,4,9,10,1<br>3,14,15,17 | 2,3,5,6,7,8<br>,11,12,16 | 2  | P08937,P11883                                                                |
| 9673 | 1,4,9,10,1<br>3,14,16,17 | 2,3,5,6,7,8<br>,11,12,15 | 3  | P02631,P08937,P27213                                                         |
| 9674 | 1,4,9,10,1<br>3,15,16,17 | 2,3,5,6,7,8<br>,11,12,14 | 6  | P08937,P11883,P27213,P62804,Q9EQS0,Q9Z1F2                                    |
| 9675 | 1,4,9,10,1<br>4,15,16,17 | 2,3,5,6,7,8<br>,11,12,13 | 4  | P08937,P11883,Q9JHB9,Q9Z1F2                                                  |
| 9676 | 1,4,9,11,1<br>2,13,14,15 | 2,3,5,6,7,8<br>,10,16,17 | 5  | P06760,P10758,P50115,Q561R9,Q6P6R2                                           |
| 9677 | 1,4,9,11,1<br>2,13,14,16 | 2,3,5,6,7,8<br>,10,15,17 | 5  | P02803,P06760,P08937,P50115,P97615                                           |
| 9678 | 1,4,9,11,1<br>2,13,14,17 | 2,3,5,6,7,8<br>,10,15,16 | 2  | P02803,P36374                                                                |
| 9679 | 1,4,9,11,1<br>2,13,15,16 | 2,3,5,6,7,8<br>,10,14,17 | 7  | P06760,P08937,P10758,P50115,P51907,P97615,Q561R9                             |
| 9680 | 1,4,9,11,1<br>2,13,15,17 | 2,3,5,6,7,8<br>,10,14,16 | 2  | P36374,P82471                                                                |
| 9681 | 1,4,9,11,1<br>2,13,16,17 | 2,3,5,6,7,8<br>,10,14,15 | 4  | P02803,P27213,P36374,P97615                                                  |

|      |                               |                          |   |                                                         |
|------|-------------------------------|--------------------------|---|---------------------------------------------------------|
| 9682 | 1,4,9,11,1<br>2,14,15,16      | 2,3,5,6,7,8<br>,10,13,17 | 5 | P06760,P08937,P50115,P51907,Q561R9                      |
| 9683 | 1,4,9,11,1<br>2,14,15,17      | 2,3,5,6,7,8<br>,10,13,16 | 0 |                                                         |
| 9684 | 1,4,9,11,1<br>2,14,16,17      | 2,3,5,6,7,8<br>,10,13,15 | 0 |                                                         |
| 9685 | 1,4,9,11,1<br>2,15,16,17      | 2,3,5,6,7,8<br>,10,13,14 | 3 | P06866,P12020,P51907                                    |
| 9686 | 1,4,9,11,1<br>3,14,15,16      | 2,3,5,6,7,8<br>,10,12,17 | 8 | P06760,P08937,P50115,P55091,Q4G075,Q561R9,Q62635,Q9QZK9 |
| 9687 | 1,4,9,11,1<br>3,14,15,17      | 2,3,5,6,7,8<br>,10,12,16 | 2 | P82471,P83748                                           |
| 9688 | 1,4,9,11,1<br>3,14,16,17      | 2,3,5,6,7,8<br>,10,12,15 | 3 | P08937,P27213,P83748                                    |
| 9689 | 1,4,9,11,1<br>3,15,16,17      | 2,3,5,6,7,8<br>,10,12,14 | 3 | P08937,P27213,Q561R9                                    |
| 9690 | 1,4,9,11,1<br>4,15,16,17      | 2,3,5,6,7,8<br>,10,12,13 | 3 | P08937,P83748,Q9Z1F2                                    |
| 9691 | 1,4,9,12,1<br>3,14,15,16      | 2,3,5,6,7,8<br>,10,11,17 | 7 | P06760,P08937,P10758,P11883,P14669,P50115,Q9QUL6        |
| 9692 | 1,4,9,12,1<br>3,14,15,17      | 2,3,5,6,7,8<br>,10,11,16 | 4 | P10758,P11883,P27213,P82471                             |
| 9693 | 1,4,9,12,1<br>3,14,16,17      | 2,3,5,6,7,8<br>,10,11,15 | 2 | P27213,P82471                                           |
| 9694 | 1,4,9,12,1<br>3,15,16,17      | 2,3,5,6,7,8<br>,10,11,14 | 5 | P06866,P11883,P16086,P27213,P82471                      |
| 9695 | 1,4,9,12,1<br>4,15,16,17      | 2,3,5,6,7,8<br>,10,11,13 | 3 | P06866,P08937,P11883                                    |
| 9696 | 1,4,9,13,1<br>4,15,16,17      | 2,3,5,6,7,8<br>,10,11,12 | 5 | P08937,P11883,P27213,P62804,P82471                      |
| 9697 | 1,4,10,11,<br>12,13,14,1<br>5 | 2,3,5,6,7,8<br>,9,16,17  | 5 | P10758,P50115,P51907,Q561R9,Q6P6R2                      |
| 9698 | 1,4,10,11,<br>12,13,14,1<br>6 | 2,3,5,6,7,8<br>,9,15,17  | 2 | P50115,P53792                                           |
| 9699 | 1,4,10,11,<br>12,13,14,1<br>7 | 2,3,5,6,7,8<br>,9,15,16  | 2 | P27213,P36374                                           |
| 9700 | 1,4,10,11,<br>12,13,15,1<br>6 | 2,3,5,6,7,8<br>,9,14,17  | 4 | P50115,P51907,P53792,Q561R9                             |
| 9701 | 1,4,10,11,<br>12,13,15,1<br>7 | 2,3,5,6,7,8<br>,9,14,16  | 3 | P06866,P36374,Q561R9                                    |

|      |                               |                         |   |                                                  |
|------|-------------------------------|-------------------------|---|--------------------------------------------------|
| 9702 | 1,4,10,11,<br>12,13,16,1<br>7 | 2,3,5,6,7,8<br>,9,14,15 | 7 | P02631,P06757,P06866,P27213,P36374,P53792,P97605 |
| 9703 | 1,4,10,11,<br>12,14,15,1<br>6 | 2,3,5,6,7,8<br>,9,13,17 | 7 | P08937,P20766,P50115,P51907,P53792,Q561R9,Q9Z1F2 |
| 9704 | 1,4,10,11,<br>12,14,15,1<br>7 | 2,3,5,6,7,8<br>,9,13,16 | 3 | P06866,P20766,P51907                             |
| 9705 | 1,4,10,11,<br>12,14,16,1<br>7 | 2,3,5,6,7,8<br>,9,13,15 | 4 | P06757,P06866,P20766,P53792                      |
| 9706 | 1,4,10,11,<br>12,15,16,1<br>7 | 2,3,5,6,7,8<br>,9,13,14 | 6 | P06757,P06866,P20766,P51907,P53792,Q9Z1F2        |
| 9707 | 1,4,10,11,<br>13,14,15,1<br>6 | 2,3,5,6,7,8<br>,9,12,17 | 5 | P08937,P09605,P25809,P50115,P55091,Q561R9        |
| 9708 | 1,4,10,11,<br>13,14,15,1<br>7 | 2,3,5,6,7,8<br>,9,12,16 | 1 | P83748                                           |
| 9709 | 1,4,10,11,<br>13,14,16,1<br>7 | 2,3,5,6,7,8<br>,9,12,15 | 2 | P27213,P83748                                    |
| 9710 | 1,4,10,11,<br>13,15,16,1<br>7 | 2,3,5,6,7,8<br>,9,12,14 | 3 | P27213,Q561R9,Q9Z1F2                             |
| 9711 | 1,4,10,11,<br>14,15,16,1<br>7 | 2,3,5,6,7,8<br>,9,12,13 | 3 | P08937,P20766,Q9Z1F2                             |
| 9712 | 1,4,10,12,<br>13,14,15,1<br>6 | 2,3,5,6,7,8<br>,9,11,17 | 4 | P08937,P27213,P50115,Q9QUL6                      |
| 9713 | 1,4,10,12,<br>13,14,15,1<br>7 | 2,3,5,6,7,8<br>,9,11,16 | 1 | P27213                                           |
| 9714 | 1,4,10,12,<br>13,14,16,1<br>7 | 2,3,5,6,7,8<br>,9,11,15 | 3 | P02631,P08932,P27213                             |
| 9715 | 1,4,10,12,<br>13,15,16,1<br>7 | 2,3,5,6,7,8<br>,9,11,14 | 4 | P02631,P06866,P27213,Q9QUL6                      |
| 9716 | 1,4,10,12,<br>14,15,16,1<br>7 | 2,3,5,6,7,8<br>,9,11,13 | 3 | P06866,P08932,P20766                             |

|      |                               |                                 |    |                                                                              |
|------|-------------------------------|---------------------------------|----|------------------------------------------------------------------------------|
| 9717 | 1,4,10,13,<br>14,15,16,1<br>7 | 2,3,5,6,7,8<br>,9,11,12         | 3  | P08937,P11883,P27213                                                         |
| 9718 | 1,4,11,12,<br>13,14,15,1<br>6 | 2,3,5,6,7,8<br>,9,10,17         | 6  | P06760,P50115,P51907,P52590,Q6P6R2,Q9QUL6                                    |
| 9719 | 1,4,11,12,<br>13,14,15,1<br>7 | 2,3,5,6,7,8<br>,9,10,16         | 2  | P27213,P36374                                                                |
| 9720 | 1,4,11,12,<br>13,14,16,1<br>7 | 2,3,5,6,7,8<br>,9,10,15         | 3  | O55006,P27213,P36374                                                         |
| 9721 | 1,4,11,12,<br>13,15,16,1<br>7 | 2,3,5,6,7,8<br>,9,10,14         | 2  | P06866,P27213                                                                |
| 9722 | 1,4,11,12,<br>14,15,16,1<br>7 | 2,3,5,6,7,8<br>,9,10,13         | 3  | P06866,P20766,P51907                                                         |
| 9723 | 1,4,11,13,<br>14,15,16,1<br>7 | 2,3,5,6,7,8<br>,9,10,12         | 1  | P27213                                                                       |
| 9724 | 1,4,12,13,<br>14,15,16,1<br>7 | 2,3,5,6,7,8<br>,9,10,11         | 5  | P06866,P11883,P27213,P82471,Q9QUL6                                           |
| 9725 | 1,5,6,7,8,9<br>,10,11         | 2,3,4,12,1<br>3,14,15,16<br>,17 | 6  | A2RUV9,P14669,P27213,P31044,Q566E6,Q9QUL6                                    |
| 9726 | 1,5,6,7,8,9<br>,10,12         | 2,3,4,11,1<br>3,14,15,16<br>,17 | 11 | F1LM93,P08723,P10715,P13432,P19218,P22283,P27213,P30120,P31044,P97840,Q8CJ52 |
| 9727 | 1,5,6,7,8,9<br>,10,13         | 2,3,4,11,1<br>2,14,15,16<br>,17 | 5  | P06866,P12020,P19218,P31044,Q5GRG2                                           |
| 9728 | 1,5,6,7,8,9<br>,10,14         | 2,3,4,11,1<br>2,13,15,16<br>,17 | 7  | P01836,P06866,P12020,P19629,P27213,P31044,Q9QUL6                             |
| 9729 | 1,5,6,7,8,9<br>,10,15         | 2,3,4,11,1<br>2,13,14,16<br>,17 | 3  | O55006,P27213,P31044                                                         |
| 9730 | 1,5,6,7,8,9<br>,10,16         | 2,3,4,11,1<br>2,13,14,15<br>,17 | 2  | P19218,P31044                                                                |
| 9731 | 1,5,6,7,8,9<br>,10,17         | 2,3,4,11,1<br>2,13,14,15<br>,16 | 4  | P01836,P06760,P52590,Q9QUL6                                                  |



|      |                       |                                 |    |                                                                                                                 |
|------|-----------------------|---------------------------------|----|-----------------------------------------------------------------------------------------------------------------|
| 9732 | 1,5,6,7,8,9<br>,11,12 | 2,3,4,10,1<br>3,14,15,16<br>,17 | 16 | F1LM93,P02781,P02782,P08723,P10715,P13432,P14669,P19629,P22283,P27213,P30120,Q63357,Q63493,Q8CJ52,Q9JHB9,Q9JI85 |
| 9733 | 1,5,6,7,8,9<br>,11,13 | 2,3,4,10,1<br>2,14,15,16<br>,17 | 6  | P01048,P06866,P22282,P22283,Q62902,Q9JI85                                                                       |
| 9734 | 1,5,6,7,8,9<br>,11,14 | 2,3,4,10,1<br>2,13,15,16<br>,17 | 5  | P06866,P14669,P19629,P27213,Q9QUL6                                                                              |
| 9735 | 1,5,6,7,8,9<br>,11,15 | 2,3,4,10,1<br>2,13,14,16<br>,17 | 5  | P10715,P14669,P19629,P27213,Q9QUL6                                                                              |
| 9736 | 1,5,6,7,8,9<br>,11,16 | 2,3,4,10,1<br>2,13,14,15<br>,17 | 3  | A2RUV9,P10715,Q9QUL6                                                                                            |
| 9737 | 1,5,6,7,8,9<br>,11,17 | 2,3,4,10,1<br>2,13,14,15<br>,16 | 7  | A2RUV9,P06760,P10715,P14669,P19629,P50115,Q9QUL6                                                                |
| 9738 | 1,5,6,7,8,9<br>,12,13 | 2,3,4,10,1<br>1,14,15,16<br>,17 | 14 | P02782,P06761,P08723,P10715,P13432,P19218,P22282,P22283,P30120,P53792,Q62902,Q8CJ52,Q9JHB9,Q9Z1F2               |
| 9739 | 1,5,6,7,8,9<br>,12,14 | 2,3,4,10,1<br>1,13,15,16<br>,17 | 9  | P02782,P08723,P10715,P13432,P19629,P22283,P30120,Q8CJ52,Q9Z1F2                                                  |
| 9740 | 1,5,6,7,8,9<br>,12,15 | 2,3,4,10,1<br>1,13,14,16<br>,17 | 4  | P10715,P13432,P19218,P19629                                                                                     |
| 9741 | 1,5,6,7,8,9<br>,12,16 | 2,3,4,10,1<br>1,13,14,15<br>,17 | 5  | P10715,P13432,P19218,P19629,Q8CJ52                                                                              |
| 9742 | 1,5,6,7,8,9<br>,12,17 | 2,3,4,10,1<br>1,13,14,15<br>,16 | 10 | F1LM93,P06760,P10715,P13432,P19629,P22282,P22283,P50115,Q8CJ52,Q99041                                           |
| 9743 | 1,5,6,7,8,9<br>,13,14 | 2,3,4,10,1<br>1,12,15,16<br>,17 | 9  | P06866,P06911,P12020,P19629,P51907,P53792,Q5GRG2,Q62902,Q9Z1F2                                                  |
| 9744 | 1,5,6,7,8,9<br>,13,15 | 2,3,4,10,1<br>1,12,14,16<br>,17 | 2  | P19218,P53792                                                                                                   |
| 9745 | 1,5,6,7,8,9<br>,13,16 | 2,3,4,10,1<br>1,12,14,15<br>,17 | 2  | P19218,P53792                                                                                                   |
| 9746 | 1,5,6,7,8,9<br>,13,17 | 2,3,4,10,1<br>1,12,14,15<br>,16 | 5  | P06760,P22282,P22283,P51907,P53792                                                                              |

|      |                        |                                 |    |                                                                                                                                                                         |
|------|------------------------|---------------------------------|----|-------------------------------------------------------------------------------------------------------------------------------------------------------------------------|
| 9747 | 1,5,6,7,8,9<br>,14,15  | 2,3,4,10,1<br>1,12,13,16<br>,17 | 3  | P16636,P19629,P53792                                                                                                                                                    |
| 9748 | 1,5,6,7,8,9<br>,14,16  | 2,3,4,10,1<br>1,12,13,15<br>,17 | 1  | P19629                                                                                                                                                                  |
| 9749 | 1,5,6,7,8,9<br>,14,17  | 2,3,4,10,1<br>1,12,13,15<br>,16 | 5  | P01836,P06760,P19629,P51907,P53792                                                                                                                                      |
| 9750 | 1,5,6,7,8,9<br>,15,16  | 2,3,4,10,1<br>1,12,13,14<br>,17 | 0  |                                                                                                                                                                         |
| 9751 | 1,5,6,7,8,9<br>,15,17  | 2,3,4,10,1<br>1,12,13,14<br>,16 | 3  | P06760,P19629,P53792                                                                                                                                                    |
| 9752 | 1,5,6,7,8,9<br>,16,17  | 2,3,4,10,1<br>1,12,13,14<br>,15 | 3  | A2RUV9,P06760,P53792                                                                                                                                                    |
| 9753 | 1,5,6,7,8,1<br>0,11,12 | 2,3,4,9,13,<br>14,15,16,1<br>7  | 24 | F1LM93,O35547,P02781,P02782,P08723,P0C0A9,P10715,P14669,P19629,P22283,P27213,P30120,P31044,P47727,P60905,P68370,Q63357,Q63493,Q6GMN2,Q6IFU7,Q6P6Q2,Q8CJ52,Q9JHB9,Q9JI85 |
| 9754 | 1,5,6,7,8,1<br>0,11,13 | 2,3,4,9,12,<br>14,15,16,1<br>7  | 11 | P06911,P12020,P14669,P22283,P31044,P47727,P68370,Q5GRG2,Q63493,Q8CJ52,Q8VD89                                                                                            |
| 9755 | 1,5,6,7,8,1<br>0,11,14 | 2,3,4,9,12,<br>13,15,16,1<br>7  | 8  | P12020,P14669,P19629,P27213,P31044,P47727,Q63493,Q9QUL6                                                                                                                 |
| 9756 | 1,5,6,7,8,1<br>0,11,15 | 2,3,4,9,12,<br>13,14,16,1<br>7  | 5  | P14669,P19629,P27213,P31044,Q566E6                                                                                                                                      |
| 9757 | 1,5,6,7,8,1<br>0,11,16 | 2,3,4,9,12,<br>13,14,15,1<br>7  | 4  | A2RUV9,P31044,P61206,P84079,P84082,Q8VD89                                                                                                                               |
| 9758 | 1,5,6,7,8,1<br>0,11,17 | 2,3,4,9,12,<br>13,14,15,1<br>6  | 9  | A2RUV9,P06760,P07150,P14669,P22283,P50115,Q566E6,Q63493,Q9QUL6                                                                                                          |
| 9759 | 1,5,6,7,8,1<br>0,12,13 | 2,3,4,9,11,<br>14,15,16,1<br>7  | 18 | F1LM93,P02781,P02782,P06761,P06911,P08723,P12020,P19218,P22282,P22283,P30120,P31044,Q498D9,Q5GRG2,Q62902,Q8CJ52,Q99MH3,Q9JHB9                                           |
| 9760 | 1,5,6,7,8,1<br>0,12,14 | 2,3,4,9,11,<br>13,15,16,1<br>7  | 11 | F1LM93,P02782,P08723,P12020,P19629,P22283,P30120,P31044,Q498D9,Q8CJ52,Q9ET32                                                                                            |
| 9761 | 1,5,6,7,8,1<br>0,12,15 | 2,3,4,9,11,<br>13,14,16,1<br>7  | 6  | F1LM93,P10715,P19218,P19629,Q8CJ52,Q99MH3                                                                                                                               |

|      |                        |                                |    |                                                                                                                                                                                       |
|------|------------------------|--------------------------------|----|---------------------------------------------------------------------------------------------------------------------------------------------------------------------------------------|
| 9762 | 1,5,6,7,8,1<br>0,12,16 | 2,3,4,9,11,<br>13,14,15,1<br>7 | 5  | F1LM93,P10715,P19218,P97840,Q8CJ52                                                                                                                                                    |
| 9763 | 1,5,6,7,8,1<br>0,12,17 | 2,3,4,9,11,<br>13,14,15,1<br>6 | 15 | F1LM93,P06760,P08723,P10715,P13432,P19629,P22282,P22283,P50115,Q10758,Q4G075,Q8CJ52,Q99041,Q99MH3,Q9QZK9                                                                              |
| 9764 | 1,5,6,7,8,1<br>0,13,14 | 2,3,4,9,11,<br>12,15,16,1<br>7 | 8  | P06866,P06911,P12020,P19629,P22283,P31044,Q498D9,Q5GRG2                                                                                                                               |
| 9765 | 1,5,6,7,8,1<br>0,13,15 | 2,3,4,9,11,<br>12,14,16,1<br>7 | 6  | P12020,P19218,P31044,Q498D9,Q5GRG2,Q6IFV1                                                                                                                                             |
| 9766 | 1,5,6,7,8,1<br>0,13,16 | 2,3,4,9,11,<br>12,14,15,1<br>7 | 4  | P12020,P19218,P31044,Q5GRG2                                                                                                                                                           |
| 9767 | 1,5,6,7,8,1<br>0,13,17 | 2,3,4,9,11,<br>12,14,15,1<br>6 | 8  | P06760,P12020,P19218,P22282,P22283,P51907,Q6IFV1,Q99MH3                                                                                                                               |
| 9768 | 1,5,6,7,8,1<br>0,14,15 | 2,3,4,9,11,<br>12,13,16,1<br>7 | 4  | P12020,P19629,P31044,Q498D9                                                                                                                                                           |
| 9769 | 1,5,6,7,8,1<br>0,14,16 | 2,3,4,9,11,<br>12,13,15,1<br>7 | 3  | P12020,P19629,P31044                                                                                                                                                                  |
| 9770 | 1,5,6,7,8,1<br>0,14,17 | 2,3,4,9,11,<br>12,13,15,1<br>6 | 4  | P01836,P06760,P12020,P19629                                                                                                                                                           |
| 9771 | 1,5,6,7,8,1<br>0,15,16 | 2,3,4,9,11,<br>12,13,14,1<br>7 | 1  | P31044                                                                                                                                                                                |
| 9772 | 1,5,6,7,8,1<br>0,15,17 | 2,3,4,9,11,<br>12,13,14,1<br>6 | 3  | P06760,Q6IFV1,Q99MH3                                                                                                                                                                  |
| 9773 | 1,5,6,7,8,1<br>0,16,17 | 2,3,4,9,11,<br>12,13,14,1<br>5 | 4  | A2RUV9,P02625,P06760,P10758                                                                                                                                                           |
| 9774 | 1,5,6,7,8,1<br>1,12,13 | 2,3,4,9,10,<br>14,15,16,1<br>7 | 26 | F1LM93,P02780,P02781,P02782,P04905,P06761,P07647,P08723,P0C0A9,P10715,P13432,P14669,P19629,P22282,P22283,P30120,P36374,P46462,P47727,Q62902,Q63493,Q6GMN2,Q8CJ52,Q9JHB9,Q9JI85,Q9Z1F2 |
| 9775 | 1,5,6,7,8,1<br>1,12,14 | 2,3,4,9,10,<br>13,15,16,1<br>7 | 20 | F1LM93,O35547,P02781,P02782,P04905,P08723,P10715,P13432,P14669,P19629,P22282,P22283,P30120,P46462,P47727,Q63493,Q8CJ52,Q9ET32,Q9JHB9,Q9JI85                                           |
| 9776 | 1,5,6,7,8,1<br>1,12,15 | 2,3,4,9,10,<br>13,14,16,1<br>7 | 12 | F1LM93,O35547,P08723,P10715,P13432,P14669,P19629,P30120,Q63493,Q8CJ52,Q9JHB9,Q9JI85                                                                                                   |

|      |                        |                                |    |                                                                                                                                                           |
|------|------------------------|--------------------------------|----|-----------------------------------------------------------------------------------------------------------------------------------------------------------|
| 9777 | 1,5,6,7,8,1<br>1,12,16 | 2,3,4,9,10,<br>13,14,15,1<br>7 | 13 | F1LM93,O35547,P08723,P10715,P13432,P17046,P19629,P30120,Q63493,Q6P6Q2,Q8CJ52,Q9JHB9,Q9JI85                                                                |
| 9778 | 1,5,6,7,8,1<br>1,12,17 | 2,3,4,9,10,<br>13,14,15,1<br>6 | 22 | F1LM93,O35547,P02781,P02782,P06760,P07150,P08723,P10715,P13432,P14669,P19629,P22282,P22283,P30120,P50115,Q4G075,Q63493,Q8CJ52,Q99041,Q9JHB9,Q9JI85,Q9QZK9 |
| 9779 | 1,5,6,7,8,1<br>1,13,14 | 2,3,4,9,10,<br>12,15,16,1<br>7 | 13 | P06866,P06911,P12020,P19629,P22282,P22283,P47727,Q5GRG2,Q62902,Q63493,Q8CJ52,Q9JI85,Q9Z1F2                                                                |
| 9780 | 1,5,6,7,8,1<br>1,13,15 | 2,3,4,9,10,<br>12,14,16,1<br>7 | 5  | P14669,P19629,Q5GRG2,Q8VD89,Q9JJS8                                                                                                                        |
| 9781 | 1,5,6,7,8,1<br>1,13,16 | 2,3,4,9,10,<br>12,14,15,1<br>7 | 4  | A2RUV9,Q62902,Q8CJ52,Q8VD89                                                                                                                               |
| 9782 | 1,5,6,7,8,1<br>1,13,17 | 2,3,4,9,10,<br>12,14,15,1<br>6 | 7  | P06760,P14669,P19629,P22282,P22283,P50115,Q63493                                                                                                          |
| 9783 | 1,5,6,7,8,1<br>1,14,15 | 2,3,4,9,10,<br>12,13,16,1<br>7 | 4  | P07171,P14669,P19629,Q5I0D1                                                                                                                               |
| 9784 | 1,5,6,7,8,1<br>1,14,16 | 2,3,4,9,10,<br>12,13,15,1<br>7 | 2  | P19629,Q8CJ52                                                                                                                                             |
| 9785 | 1,5,6,7,8,1<br>1,14,17 | 2,3,4,9,10,<br>12,13,15,1<br>6 | 7  | P06760,P07150,P14669,P19629,P22283,P50115,Q63493                                                                                                          |
| 9786 | 1,5,6,7,8,1<br>1,15,16 | 2,3,4,9,10,<br>12,13,14,1<br>7 | 3  | P10715,P19629,Q8VD89                                                                                                                                      |
| 9787 | 1,5,6,7,8,1<br>1,15,17 | 2,3,4,9,10,<br>12,13,14,1<br>6 | 6  | P06760,P10715,P14669,P19629,P50115,Q9JJS8                                                                                                                 |
| 9788 | 1,5,6,7,8,1<br>1,16,17 | 2,3,4,9,10,<br>12,13,14,1<br>5 | 7  | A2RUV9,P06760,P07150,P10715,P10758,P19629,P50115                                                                                                          |
| 9789 | 1,5,6,7,8,1<br>2,13,14 | 2,3,4,9,10,<br>11,15,16,1<br>7 | 17 | P02781,P02782,P06761,P06911,P08723,P12020,P13432,P19629,P22282,P22283,P30120,Q498D9,Q5GRG2,Q62902,Q8CJ52,Q9JHB9,Q9Z1F2                                    |
| 9790 | 1,5,6,7,8,1<br>2,13,15 | 2,3,4,9,10,<br>11,14,16,1<br>7 | 14 | P02782,P06761,P10715,P13432,P19218,P19629,P22283,P30120,Q498D9,Q5GRG2,Q62902,Q6IFV1,Q8CJ52,Q9JHB9                                                         |
| 9791 | 1,5,6,7,8,1<br>2,13,16 | 2,3,4,9,10,<br>11,14,15,1<br>7 | 11 | P02782,P06761,P10715,P13432,P19218,P22283,P30120,Q62902,Q8CJ52,Q9JHB9,Q9Z1F2                                                                              |

|      |                        |                                |    |                                                                                                                                                                                       |
|------|------------------------|--------------------------------|----|---------------------------------------------------------------------------------------------------------------------------------------------------------------------------------------|
| 9792 | 1,5,6,7,8,1<br>2,13,17 | 2,3,4,9,10,<br>11,14,15,1<br>6 | 26 | F1LM93,P02782,P06760,P06761,P08723,P10715,P13432,P19218,P19629,P22282,P22283,P23928,P30120,P36374,P50115,P51907,Q4G075,Q62635,Q62902,Q6IFV1,Q8CJ52,Q99041,Q99MH3,Q9JHB9,Q9QZK9,Q9Z1F2 |
| 9793 | 1,5,6,7,8,1<br>2,14,15 | 2,3,4,9,10,<br>11,13,16,1<br>7 | 5  | P10715,P13432,P19629,Q498D9,Q8CJ52                                                                                                                                                    |
| 9794 | 1,5,6,7,8,1<br>2,14,16 | 2,3,4,9,10,<br>11,13,15,1<br>7 | 5  | P10715,P13432,P19629,Q8CJ52,Q9ET32                                                                                                                                                    |
| 9795 | 1,5,6,7,8,1<br>2,14,17 | 2,3,4,9,10,<br>11,13,15,1<br>6 | 17 | F1LM93,P02782,P06760,P06761,P08723,P10715,P13432,P19629,P22282,P22283,P30120,P50115,Q4G075,Q561R9,Q8CJ52,Q99041,Q9QZK9                                                                |
| 9796 | 1,5,6,7,8,1<br>2,15,16 | 2,3,4,9,10,<br>11,13,14,1<br>7 | 4  | P10715,P19218,P19629,Q8CJ52                                                                                                                                                           |
| 9797 | 1,5,6,7,8,1<br>2,15,17 | 2,3,4,9,10,<br>11,13,14,1<br>6 | 11 | F1LM93,P06760,P10715,P13432,P19629,P50115,Q4G075,Q6IFV1,Q99041,Q99MH3,Q9QZK9                                                                                                          |
| 9798 | 1,5,6,7,8,1<br>2,16,17 | 2,3,4,9,10,<br>11,13,14,1<br>5 | 11 | F1LM93,P06760,P10715,P13432,P19218,P19629,P23928,P50115,Q4G075,Q8CJ52,Q99041                                                                                                          |
| 9799 | 1,5,6,7,8,1<br>3,14,15 | 2,3,4,9,10,<br>11,12,16,1<br>7 | 7  | P06911,P12020,P16636,P19629,P53792,Q498D9,Q5GRG2                                                                                                                                      |
| 9800 | 1,5,6,7,8,1<br>3,14,16 | 2,3,4,9,10,<br>11,12,15,1<br>7 | 6  | P06866,P06911,P12020,P19629,Q5GRG2,Q62902                                                                                                                                             |
| 9801 | 1,5,6,7,8,1<br>3,14,17 | 2,3,4,9,10,<br>11,12,15,1<br>6 | 13 | P06760,P06761,P06911,P10536,P12020,P19629,P22282,P22283,P51907,P53792,Q5GRG2,Q9WUW8,Q9Z1F2                                                                                            |
| 9802 | 1,5,6,7,8,1<br>3,15,16 | 2,3,4,9,10,<br>11,12,14,1<br>7 | 1  | P19218                                                                                                                                                                                |
| 9803 | 1,5,6,7,8,1<br>3,15,17 | 2,3,4,9,10,<br>11,12,14,1<br>6 | 6  | P06760,P19629,P53792,Q6IFV1,Q99MH3,Q9WUW8                                                                                                                                             |
| 9804 | 1,5,6,7,8,1<br>3,16,17 | 2,3,4,9,10,<br>11,12,14,1<br>5 | 5  | P06760,P19218,P23928,P51907,Q63661                                                                                                                                                    |
| 9805 | 1,5,6,7,8,1<br>4,15,16 | 2,3,4,9,10,<br>11,12,13,1<br>7 | 2  | P16636,P19629                                                                                                                                                                         |
| 9806 | 1,5,6,7,8,1<br>4,15,17 | 2,3,4,9,10,<br>11,12,13,1<br>6 | 4  | P06760,P10536,P19629,P53792                                                                                                                                                           |

|      |                        |                                |   |                                                                |
|------|------------------------|--------------------------------|---|----------------------------------------------------------------|
| 9807 | 1,5,6,7,8,1<br>4,16,17 | 2,3,4,9,10,<br>11,12,13,1<br>5 | 4 | P06760,P10758,P19629,Q561R9                                    |
| 9808 | 1,5,6,7,8,1<br>5,16,17 | 2,3,4,9,10,<br>11,12,13,1<br>4 | 2 | P06760,P19629                                                  |
| 9809 | 1,5,6,7,9,1<br>0,11,12 | 2,3,4,8,13,<br>14,15,16,1<br>7 | 9 | P12368,P20766,P27213,P97840,Q566E6,Q63357,Q64093,Q6IFU7,Q9QUL6 |
| 9810 | 1,5,6,7,9,1<br>0,11,13 | 2,3,4,8,12,<br>14,15,16,1<br>7 | 3 | B0BNN3,Q566E6,Q9QUL6                                           |
| 9811 | 1,5,6,7,9,1<br>0,11,14 | 2,3,4,8,12,<br>13,15,16,1<br>7 | 3 | P27213,P83121,Q9QUL6                                           |
| 9812 | 1,5,6,7,9,1<br>0,11,15 | 2,3,4,8,12,<br>13,14,16,1<br>7 | 5 | P20766,P27213,Q566E6,Q80WL1,Q9QUL6                             |
| 9813 | 1,5,6,7,9,1<br>0,11,16 | 2,3,4,8,12,<br>13,14,15,1<br>7 | 7 | A2RUV9,B0BNN3,P05712,P20766,P61206;P84079;P84082,Q64093,Q9QUL6 |
| 9814 | 1,5,6,7,9,1<br>0,11,17 | 2,3,4,8,12,<br>13,14,15,1<br>6 | 3 | Q566E6,Q64093,Q9QUL6                                           |
| 9815 | 1,5,6,7,9,1<br>0,12,13 | 2,3,4,8,11,<br>14,15,16,1<br>7 | 2 | P19218,P97840                                                  |
| 9816 | 1,5,6,7,9,1<br>0,12,14 | 2,3,4,8,11,<br>13,15,16,1<br>7 | 2 | P20766,P97840                                                  |
| 9817 | 1,5,6,7,9,1<br>0,12,15 | 2,3,4,8,11,<br>13,14,16,1<br>7 | 3 | P19218,P20766,P97840                                           |
| 9818 | 1,5,6,7,9,1<br>0,12,16 | 2,3,4,8,11,<br>13,14,15,1<br>7 | 4 | P19218,P20766,P97840,Q64093                                    |
| 9819 | 1,5,6,7,9,1<br>0,12,17 | 2,3,4,8,11,<br>13,14,15,1<br>6 | 7 | F1LM93,P13432,P19218,P20766,P97840,Q99MH3,Q9QUL6               |
| 9820 | 1,5,6,7,9,1<br>0,13,14 | 2,3,4,8,11,<br>12,15,16,1<br>7 | 1 | P12020                                                         |
| 9821 | 1,5,6,7,9,1<br>0,13,15 | 2,3,4,8,11,<br>12,14,16,1<br>7 | 3 | P19218,Q5U2V4,Q80WL1                                           |

|      |                        |                                |   |                                           |
|------|------------------------|--------------------------------|---|-------------------------------------------|
| 9822 | 1,5,6,7,9,1<br>0,13,16 | 2,3,4,8,11,<br>12,14,15,1<br>7 | 6 | B0BNN3,P02761,P19218,P62804,P97840,Q00715 |
| 9823 | 1,5,6,7,9,1<br>0,13,17 | 2,3,4,8,11,<br>12,14,15,1<br>6 | 1 | P19218                                    |
| 9824 | 1,5,6,7,9,1<br>0,14,15 | 2,3,4,8,11,<br>12,13,16,1<br>7 | 3 | P16636,P20766,Q80WL1                      |
| 9825 | 1,5,6,7,9,1<br>0,14,16 | 2,3,4,8,11,<br>12,13,15,1<br>7 | 2 | P20766,Q80WL1                             |
| 9826 | 1,5,6,7,9,1<br>0,14,17 | 2,3,4,8,11,<br>12,13,15,1<br>6 | 2 | P01836,Q9QUL6                             |
| 9827 | 1,5,6,7,9,1<br>0,15,16 | 2,3,4,8,11,<br>12,13,14,1<br>7 | 4 | P19218,P20766,Q64093,Q80WL1               |
| 9828 | 1,5,6,7,9,1<br>0,15,17 | 2,3,4,8,11,<br>12,13,14,1<br>6 | 3 | P20766,Q80WL1,Q9QUL6                      |
| 9829 | 1,5,6,7,9,1<br>0,16,17 | 2,3,4,8,11,<br>12,13,14,1<br>5 | 5 | P19218,P20766,Q64093,Q6TMA8,Q9QUL6        |
| 9830 | 1,5,6,7,9,1<br>1,12,13 | 2,3,4,8,10,<br>14,15,16,1<br>7 | 2 | P30120,Q9JHB9                             |
| 9831 | 1,5,6,7,9,1<br>1,12,14 | 2,3,4,8,10,<br>13,15,16,1<br>7 | 1 | P20766                                    |
| 9832 | 1,5,6,7,9,1<br>1,12,15 | 2,3,4,8,10,<br>13,14,16,1<br>7 | 1 | P20766                                    |
| 9833 | 1,5,6,7,9,1<br>1,12,16 | 2,3,4,8,10,<br>13,14,15,1<br>7 | 5 | P05712,P12368,P17046,P20766,Q6IFU7        |
| 9834 | 1,5,6,7,9,1<br>1,12,17 | 2,3,4,8,10,<br>13,14,15,1<br>6 | 2 | P13432,Q9QUL6                             |
| 9835 | 1,5,6,7,9,1<br>1,13,14 | 2,3,4,8,10,<br>12,15,16,1<br>7 | 2 | P06866,P83121                             |
| 9836 | 1,5,6,7,9,1<br>1,13,15 | 2,3,4,8,10,<br>12,14,16,1<br>7 | 2 | Q80WL1,Q9JJS8                             |

|      |                        |                                |   |                             |
|------|------------------------|--------------------------------|---|-----------------------------|
| 9837 | 1,5,6,7,9,1<br>1,13,16 | 2,3,4,8,10,<br>12,14,15,1<br>7 | 2 | B0BNN3,P02761               |
| 9838 | 1,5,6,7,9,1<br>1,13,17 | 2,3,4,8,10,<br>12,14,15,1<br>6 | 3 | P53792,Q9JJS8,Q9QUL6        |
| 9839 | 1,5,6,7,9,1<br>1,14,15 | 2,3,4,8,10,<br>12,13,16,1<br>7 | 3 | P16636,Q80WL1,Q9QUL6        |
| 9840 | 1,5,6,7,9,1<br>1,14,16 | 2,3,4,8,10,<br>12,13,15,1<br>7 | 2 | Q80WL1,Q9QUL6               |
| 9841 | 1,5,6,7,9,1<br>1,14,17 | 2,3,4,8,10,<br>12,13,15,1<br>6 | 2 | P83121,Q9QUL6               |
| 9842 | 1,5,6,7,9,1<br>1,15,16 | 2,3,4,8,10,<br>12,13,14,1<br>7 | 3 | P20766,P36970,Q80WL1        |
| 9843 | 1,5,6,7,9,1<br>1,15,17 | 2,3,4,8,10,<br>12,13,14,1<br>6 | 4 | Q566E6,Q80WL1,Q9JJS8,Q9QUL6 |
| 9844 | 1,5,6,7,9,1<br>1,16,17 | 2,3,4,8,10,<br>12,13,14,1<br>5 | 3 | A2RUV9,P36970,Q9QUL6        |
| 9845 | 1,5,6,7,9,1<br>2,13,14 | 2,3,4,8,10,<br>11,15,16,1<br>7 | 3 | P02761,P53792,Q9Z1F2        |
| 9846 | 1,5,6,7,9,1<br>2,13,15 | 2,3,4,8,10,<br>11,14,16,1<br>7 | 2 | P19218,P53792               |
| 9847 | 1,5,6,7,9,1<br>2,13,16 | 2,3,4,8,10,<br>11,14,15,1<br>7 | 2 | P02761,P19218               |
| 9848 | 1,5,6,7,9,1<br>2,13,17 | 2,3,4,8,10,<br>11,14,15,1<br>6 | 4 | P13432,P19218,P53792,Q9QZK9 |
| 9849 | 1,5,6,7,9,1<br>2,14,15 | 2,3,4,8,10,<br>11,13,16,1<br>7 | 2 | P16636,P20766               |
| 9850 | 1,5,6,7,9,1<br>2,14,16 | 2,3,4,8,10,<br>11,13,15,1<br>7 | 2 | P02761,P20766               |
| 9851 | 1,5,6,7,9,1<br>2,14,17 | 2,3,4,8,10,<br>11,13,15,1<br>6 | 2 | P13432,P53792               |



|      |                         |                                |   |                                                  |
|------|-------------------------|--------------------------------|---|--------------------------------------------------|
| 9852 | 1,5,6,7,9,1<br>2,15,16  | 2,3,4,8,10,<br>11,13,14,1<br>7 | 2 | P19218,P20766                                    |
| 9853 | 1,5,6,7,9,1<br>2,15,17  | 2,3,4,8,10,<br>11,13,14,1<br>6 | 4 | P13432,P19218,P20766,P53792                      |
| 9854 | 1,5,6,7,9,1<br>2,16,17  | 2,3,4,8,10,<br>11,13,14,1<br>5 | 3 | P13432,P19218,P20766                             |
| 9855 | 1,5,6,7,9,1<br>3,14,15  | 2,3,4,8,10,<br>11,12,16,1<br>7 | 4 | P16636,P19223,P53792,Q80WL1                      |
| 9856 | 1,5,6,7,9,1<br>3,14,16  | 2,3,4,8,10,<br>11,12,15,1<br>7 | 7 | B0BNN3,P02761,P19223,P53792,P62804,Q00715,Q80WL1 |
| 9857 | 1,5,6,7,9,1<br>3,14,17  | 2,3,4,8,10,<br>11,12,15,1<br>6 | 2 | P51907,P53792                                    |
| 9858 | 1,5,6,7,9,1<br>3,15,16  | 2,3,4,8,10,<br>11,12,14,1<br>7 | 6 | P19218,P19223,P53792,P62804,Q00715,Q80WL1        |
| 9859 | 1,5,6,7,9,1<br>3,15,17  | 2,3,4,8,10,<br>11,12,14,1<br>6 | 4 | P19218,P53792,Q80WL1,Q9JJS8                      |
| 9860 | 1,5,6,7,9,1<br>3,16,17  | 2,3,4,8,10,<br>11,12,14,1<br>5 | 5 | P19218,P35280,P53792,P62804,Q00715               |
| 9861 | 1,5,6,7,9,1<br>4,15,16  | 2,3,4,8,10,<br>11,12,13,1<br>7 | 5 | P16636,P19223,P20766,P53792,Q80WL1               |
| 9862 | 1,5,6,7,9,1<br>4,15,17  | 2,3,4,8,10,<br>11,12,13,1<br>6 | 3 | P16636,P53792,Q80WL1                             |
| 9863 | 1,5,6,7,9,1<br>4,16,17  | 2,3,4,8,10,<br>11,12,13,1<br>5 | 3 | P53792,Q5XI22,Q80WL1                             |
| 9864 | 1,5,6,7,9,1<br>5,16,17  | 2,3,4,8,10,<br>11,12,13,1<br>4 | 4 | P20766,P53792,P62804,Q80WL1                      |
| 9865 | 1,5,6,7,10,<br>11,12,13 | 2,3,4,8,9,1<br>4,15,16,17      | 6 | P30120,P47727,Q5QE79,Q6GMN2,Q6IFU7,Q9JHB9        |
| 9866 | 1,5,6,7,10,<br>11,12,14 | 2,3,4,8,9,1<br>3,15,16,17      | 5 | P20766,P47727,Q5QE79,Q6IFU7,Q6P6Q2               |
| 9867 | 1,5,6,7,10,<br>11,12,15 | 2,3,4,8,9,1<br>3,14,16,17      | 3 | P20766,Q566E6,Q6IFU7                             |

|      |                                                |    |                                                                              |
|------|------------------------------------------------|----|------------------------------------------------------------------------------|
| 9868 | 1,5,6,7,10, 2,3,4,8,9,1<br>11,12,16 3,14,15,17 | 9  | P05712,P12368,P17046,P20766,P61206;P84079;P84082,P97840,Q5QE79,Q6IFU7,Q6P6Q2 |
| 9869 | 1,5,6,7,10, 2,3,4,8,9,1<br>11,12,17 3,14,15,16 | 11 | F1LM93,O08815,P06757,P13432,P20766,Q10758,Q566E6,Q5QE79,Q99MH3,Q9QUL6,Q9QZK9 |
| 9870 | 1,5,6,7,10, 2,3,4,8,9,1<br>11,13,14 2,15,16,17 | 5  | P06911,P12020,P47727,Q5GRG2,Q5QE79                                           |
| 9871 | 1,5,6,7,10, 2,3,4,8,9,1<br>11,13,15 2,14,16,17 | 2  | Q566E6,Q80WL1                                                                |
| 9872 | 1,5,6,7,10, 2,3,4,8,9,1<br>11,13,16 2,14,15,17 | 3  | B0BNN3,Q5QE79,Q8VVD89                                                        |
| 9873 | 1,5,6,7,10, 2,3,4,8,9,1<br>11,13,17 2,14,15,16 | 3  | Q5QE79,Q99MH3,Q9QUL6                                                         |
| 9874 | 1,5,6,7,10, 2,3,4,8,9,1<br>11,14,15 2,13,16,17 | 4  | P16636,P20766,Q80WL1,Q9QUL6                                                  |
| 9875 | 1,5,6,7,10, 2,3,4,8,9,1<br>11,14,16 2,13,15,17 | 2  | P20766,Q5QE79                                                                |
| 9876 | 1,5,6,7,10, 2,3,4,8,9,1<br>11,14,17 2,13,15,16 | 3  | P20766,Q5QE79,Q9QUL6                                                         |
| 9877 | 1,5,6,7,10, 2,3,4,8,9,1<br>11,15,16 2,13,14,17 | 3  | P20766,Q80WL1,Q8VVD89                                                        |
| 9878 | 1,5,6,7,10, 2,3,4,8,9,1<br>11,15,17 2,13,14,16 | 4  | P20766,Q566E6,Q80WL1,Q9QUL6                                                  |
| 9879 | 1,5,6,7,10, 2,3,4,8,9,1<br>11,16,17 2,13,14,15 | 6  | A2RUV9,P10758,P20766,P36970,Q6TMA8,Q9QUL6                                    |
| 9880 | 1,5,6,7,10, 2,3,4,8,9,1<br>12,13,14 1,15,16,17 | 5  | P06911,P12020,Q498D9,Q5GRG2,Q5QE79                                           |
| 9881 | 1,5,6,7,10, 2,3,4,8,9,1<br>12,13,15 1,14,16,17 | 4  | P19218,P97840,Q498D9,Q99MH3                                                  |
| 9882 | 1,5,6,7,10, 2,3,4,8,9,1<br>12,13,16 1,14,15,17 | 4  | P02761,P19218,P97840,Q5QE79                                                  |
| 9883 | 1,5,6,7,10, 2,3,4,8,9,1<br>12,13,17 1,14,15,16 | 5  | P13432,P19218,Q5QE79,Q99MH3,Q9QZK9                                           |
| 9884 | 1,5,6,7,10, 2,3,4,8,9,1<br>12,14,15 1,13,16,17 | 2  | P20766,Q498D9                                                                |
| 9885 | 1,5,6,7,10, 2,3,4,8,9,1<br>12,14,16 1,13,15,17 | 3  | P20766,P97840,Q5QE79                                                         |
| 9886 | 1,5,6,7,10, 2,3,4,8,9,1<br>12,14,17 1,13,15,16 | 5  | P13432,P20766,Q10758,Q5QE79,Q9QZK9                                           |
| 9887 | 1,5,6,7,10, 2,3,4,8,9,1<br>12,15,16 1,13,14,17 | 3  | P19218,P20766,P97840                                                         |
| 9888 | 1,5,6,7,10, 2,3,4,8,9,1<br>12,15,17 1,13,14,16 | 6  | F1LM93,P13432,P19218,P20766,Q99MH3,Q9QZK9                                    |
| 9889 | 1,5,6,7,10, 2,3,4,8,9,1<br>12,16,17 1,13,14,15 | 8  | F1LM93,P13432,P19218,P20766,P97840,Q10758,Q6TMA8,Q99MH3                      |
| 9890 | 1,5,6,7,10, 2,3,4,8,9,1<br>13,14,15 1,12,16,17 | 6  | P12020,P16636,P19223,Q498D9,Q5GRG2,Q80WL1                                    |

|      |                                                |   |                                    |
|------|------------------------------------------------|---|------------------------------------|
| 9891 | 1,5,6,7,10, 2,3,4,8,9,1<br>13,14,16 1,12,15,17 | 4 | P02761,P12020,P19223,Q5QE79        |
| 9892 | 1,5,6,7,10, 2,3,4,8,9,1<br>13,14,17 1,12,15,16 | 2 | P12020,Q5QE79                      |
| 9893 | 1,5,6,7,10, 2,3,4,8,9,1<br>13,15,16 1,12,14,17 | 3 | P19218,P19223,Q80WL1               |
| 9894 | 1,5,6,7,10, 2,3,4,8,9,1<br>13,15,17 1,12,14,16 | 4 | P19218,Q6IFV1,Q80WL1,Q99MH3        |
| 9895 | 1,5,6,7,10, 2,3,4,8,9,1<br>13,16,17 1,12,14,15 | 2 | P19218,Q99MH3                      |
| 9896 | 1,5,6,7,10, 2,3,4,8,9,1<br>14,15,16 1,12,13,17 | 5 | P16636,P19223,P20766,P35467,Q80WL1 |
| 9897 | 1,5,6,7,10, 2,3,4,8,9,1<br>14,15,17 1,12,13,16 | 3 | P20766,Q6TMA8,Q80WL1               |
| 9898 | 1,5,6,7,10, 2,3,4,8,9,1<br>14,16,17 1,12,13,15 | 4 | P20766,Q5QE79,Q5XI22,Q6TMA8        |
| 9899 | 1,5,6,7,10, 2,3,4,8,9,1<br>15,16,17 1,12,13,14 | 3 | P20766,Q6TMA8,Q80WL1               |
| 9900 | 1,5,6,7,11, 2,3,4,8,9,1<br>12,13,14 0,15,16,17 | 5 | P30120,P47727,Q5QE79,Q62902,Q9JHB9 |
| 9901 | 1,5,6,7,11, 2,3,4,8,9,1<br>12,13,15 0,14,16,17 | 1 | Q9JHB9                             |
| 9902 | 1,5,6,7,11, 2,3,4,8,9,1<br>12,13,16 0,14,15,17 | 3 | P02761,P17046,Q9JHB9               |
| 9903 | 1,5,6,7,11, 2,3,4,8,9,1<br>12,13,17 0,14,15,16 | 5 | P13432,P17046,P36374,Q9JHB9,Q9QZK9 |
| 9904 | 1,5,6,7,11, 2,3,4,8,9,1<br>12,14,15 0,13,16,17 | 1 | P20766                             |
| 9905 | 1,5,6,7,11, 2,3,4,8,9,1<br>12,14,16 0,13,15,17 | 3 | P17046,P20766,Q6IFU7               |
| 9906 | 1,5,6,7,11, 2,3,4,8,9,1<br>12,14,17 0,13,15,16 | 3 | P13432,P20766,Q9QZK9               |
| 9907 | 1,5,6,7,11, 2,3,4,8,9,1<br>12,15,16 0,13,14,17 | 3 | P17046,P20766,Q6IFU7               |
| 9908 | 1,5,6,7,11, 2,3,4,8,9,1<br>12,15,17 0,13,14,16 | 3 | P13432,P20766,Q9QZK9               |
| 9909 | 1,5,6,7,11, 2,3,4,8,9,1<br>12,16,17 0,13,14,15 | 3 | P13432,P17046,P20766               |
| 9910 | 1,5,6,7,11, 2,3,4,8,9,1<br>13,14,15 0,12,16,17 | 4 | P16636,P19223,Q80WL1,Q9JJS8        |
| 9911 | 1,5,6,7,11, 2,3,4,8,9,1<br>13,14,16 0,12,15,17 | 4 | P02761,P17046,P19223,Q80WL1        |
| 9912 | 1,5,6,7,11, 2,3,4,8,9,1<br>13,14,17 0,12,15,16 | 0 |                                    |
| 9913 | 1,5,6,7,11, 2,3,4,8,9,1<br>13,15,16 0,12,14,17 | 4 | P17046,P19223,Q80WL1,Q8VD89        |

|      |                                                    |    |                                                                       |
|------|----------------------------------------------------|----|-----------------------------------------------------------------------|
| 9914 | 1,5,6,7,11, 2,3,4,8,9,1<br>13,15,17 0,12,14,16     | 2  | Q80WL1,Q9JJS8                                                         |
| 9915 | 1,5,6,7,11, 2,3,4,8,9,1<br>13,16,17 0,12,14,15     | 2  | P10758,P17046                                                         |
| 9916 | 1,5,6,7,11, 2,3,4,8,9,1<br>14,15,16 0,12,13,17     | 5  | P16636,P19223,P20766,Q63355,Q80WL1                                    |
| 9917 | 1,5,6,7,11, 2,3,4,8,9,1<br>14,15,17 0,12,13,16     | 3  | P20766,Q80WL1,Q9JJS8                                                  |
| 9918 | 1,5,6,7,11, 2,3,4,8,9,1<br>14,16,17 0,12,13,15     | 3  | P10758,P20766,Q80WL1                                                  |
| 9919 | 1,5,6,7,11, 2,3,4,8,9,1<br>15,16,17 0,12,13,14     | 3  | P20766,P36970,Q80WL1                                                  |
| 9920 | 1,5,6,7,12, 2,3,4,8,9,1<br>13,14,15 0,11,16,17     | 2  | P16636,Q498D9                                                         |
| 9921 | 1,5,6,7,12, 2,3,4,8,9,1<br>13,14,16 0,11,15,17     | 2  | P02761,P17046                                                         |
| 9922 | 1,5,6,7,12, 2,3,4,8,9,1<br>13,14,17 0,11,15,16     | 4  | P13432,P53792,Q561R9,Q9QZK9                                           |
| 9923 | 1,5,6,7,12, 2,3,4,8,9,1<br>13,15,16 0,11,14,17     | 2  | P17046,P19218                                                         |
| 9924 | 1,5,6,7,12, 2,3,4,8,9,1<br>13,15,17 0,11,14,16     | 6  | P13432,P19218,P53792,Q6IFV1,Q99MH3,Q9QZK9                             |
| 9925 | 1,5,6,7,12, 2,3,4,8,9,1<br>13,16,17 0,11,14,15     | 7  | P02761,P13432,P17046,P19218,P35280,Q561R9,Q9QZK9                      |
| 9926 | 1,5,6,7,12, 2,3,4,8,9,1<br>14,15,16 0,11,13,17     | 3  | P16636,P20766,P35467                                                  |
| 9927 | 1,5,6,7,12, 2,3,4,8,9,1<br>14,15,17 0,11,13,16     | 3  | P13432,P20766,P35467                                                  |
| 9928 | 1,5,6,7,12, 2,3,4,8,9,1<br>14,16,17 0,11,13,15     | 3  | P13432,P20766,Q561R9                                                  |
| 9929 | 1,5,6,7,12, 2,3,4,8,9,1<br>15,16,17 0,11,13,14     | 5  | P13432,P19218,P20766,P35467,Q6TMA8                                    |
| 9930 | 1,5,6,7,13, 2,3,4,8,9,1<br>14,15,16 0,11,12,17     | 5  | P16636,P19223,P35467,P53792,Q80WL1                                    |
| 9931 | 1,5,6,7,13, 2,3,4,8,9,1<br>14,15,17 0,11,12,16     | 4  | P16636,P53792,Q80WL1,Q9WUW8                                           |
| 9932 | 1,5,6,7,13, 2,3,4,8,9,1<br>14,16,17 0,11,12,15     | 3  | P02761,P53792,Q561R9                                                  |
| 9933 | 1,5,6,7,13, 2,3,4,8,9,1<br>15,16,17 0,11,12,14     | 5  | P19218,P53792,P62804,Q80WL1,Q9EQS0                                    |
| 9934 | 1,5,6,7,14, 2,3,4,8,9,1<br>15,16,17 0,11,12,13     | 6  | P16636,P20766,P35467,Q5XI22,Q6TMA8,Q80WL1                             |
| 9935 | 1,5,6,8,9,1 2,3,4,7,13,<br>0,11,12 14,15,16,1<br>7 | 10 | F1LM93,O35547,P02803,P30120,Q566E6,Q6IFU7,Q6IG02,Q6IMF3,Q6P6Q2,Q9JHB9 |

|      |                        |                                |   |                                                  |
|------|------------------------|--------------------------------|---|--------------------------------------------------|
| 9936 | 1,5,6,8,9,1<br>0,11,13 | 2,3,4,7,12,<br>14,15,16,1<br>7 | 3 | A2RUV9,P01836,Q566E6                             |
| 9937 | 1,5,6,8,9,1<br>0,11,14 | 2,3,4,7,12,<br>13,15,16,1<br>7 | 3 | P01836,P47727,Q9QUL6                             |
| 9938 | 1,5,6,8,9,1<br>0,11,15 | 2,3,4,7,12,<br>13,14,16,1<br>7 | 4 | P01836,P27213,Q566E6,Q9QUL6                      |
| 9939 | 1,5,6,8,9,1<br>0,11,16 | 2,3,4,7,12,<br>13,14,15,1<br>7 | 3 | A2RUV9,P01836,Q9QUL6                             |
| 9940 | 1,5,6,8,9,1<br>0,11,17 | 2,3,4,7,12,<br>13,14,15,1<br>6 | 7 | A2RUV9,P01836,P06760,P08649,Q09030,Q566E6,Q9QUL6 |
| 9941 | 1,5,6,8,9,1<br>0,12,13 | 2,3,4,7,11,<br>14,15,16,1<br>7 | 4 | P02782,P02803,P19218,Q9JHB9                      |
| 9942 | 1,5,6,8,9,1<br>0,12,14 | 2,3,4,7,11,<br>13,15,16,1<br>7 | 1 | P01836                                           |
| 9943 | 1,5,6,8,9,1<br>0,12,15 | 2,3,4,7,11,<br>13,14,16,1<br>7 | 0 |                                                  |
| 9944 | 1,5,6,8,9,1<br>0,12,16 | 2,3,4,7,11,<br>13,14,15,1<br>7 | 1 | P19218                                           |
| 9945 | 1,5,6,8,9,1<br>0,12,17 | 2,3,4,7,11,<br>13,14,15,1<br>6 | 6 | F1LM93,P01836,P06760,P13432,Q09030,Q10758        |
| 9946 | 1,5,6,8,9,1<br>0,13,14 | 2,3,4,7,11,<br>12,15,16,1<br>7 | 2 | P01836,P06866                                    |
| 9947 | 1,5,6,8,9,1<br>0,13,15 | 2,3,4,7,11,<br>12,14,16,1<br>7 | 2 | P01836,Q6IFV1                                    |
| 9948 | 1,5,6,8,9,1<br>0,13,16 | 2,3,4,7,11,<br>12,14,15,1<br>7 | 4 | A2RUV9,P01836,P19218,Q63942                      |
| 9949 | 1,5,6,8,9,1<br>0,13,17 | 2,3,4,7,11,<br>12,14,15,1<br>6 | 4 | P01836,P06760,P51907,Q6IFV1                      |
| 9950 | 1,5,6,8,9,1<br>0,14,15 | 2,3,4,7,11,<br>12,13,16,1<br>7 | 2 | P01836,Q63942                                    |

|      |                        |                                |   |                                                  |
|------|------------------------|--------------------------------|---|--------------------------------------------------|
| 9951 | 1,5,6,8,9,1<br>0,14,16 | 2,3,4,7,11,<br>12,13,15,1<br>7 | 2 | P01836,Q63942                                    |
| 9952 | 1,5,6,8,9,1<br>0,14,17 | 2,3,4,7,11,<br>12,13,15,1<br>6 | 4 | P01836,P06760,Q09030,Q9QUL6                      |
| 9953 | 1,5,6,8,9,1<br>0,15,16 | 2,3,4,7,11,<br>12,13,14,1<br>7 | 2 | P01836,Q63942                                    |
| 9954 | 1,5,6,8,9,1<br>0,15,17 | 2,3,4,7,11,<br>12,13,14,1<br>6 | 3 | P01836,P06760,Q6IFV1                             |
| 9955 | 1,5,6,8,9,1<br>0,16,17 | 2,3,4,7,11,<br>12,13,14,1<br>5 | 5 | A2RUV9,P01836,P06760,P25031,Q09030               |
| 9956 | 1,5,6,8,9,1<br>1,12,13 | 2,3,4,7,10,<br>14,15,16,1<br>7 | 7 | P02781,P02782,P02803,P0C0A9,P30120,Q9JHB9,Q9Z1F2 |
| 9957 | 1,5,6,8,9,1<br>1,12,14 | 2,3,4,7,10,<br>13,15,16,1<br>7 | 5 | O35547,P02782,P30120,P47727,Q9JHB9               |
| 9958 | 1,5,6,8,9,1<br>1,12,15 | 2,3,4,7,10,<br>13,14,16,1<br>7 | 1 | O35547                                           |
| 9959 | 1,5,6,8,9,1<br>1,12,16 | 2,3,4,7,10,<br>13,14,15,1<br>7 | 4 | A2RUV9,O35547,Q6IFU7,Q6P6Q2                      |
| 9960 | 1,5,6,8,9,1<br>1,12,17 | 2,3,4,7,10,<br>13,14,15,1<br>6 | 5 | O35547,P02782,P06760,P13432,Q09030               |
| 9961 | 1,5,6,8,9,1<br>1,13,14 | 2,3,4,7,10,<br>12,15,16,1<br>7 | 3 | P01836,P06866,P47727                             |
| 9962 | 1,5,6,8,9,1<br>1,13,15 | 2,3,4,7,10,<br>12,14,16,1<br>7 | 0 |                                                  |
| 9963 | 1,5,6,8,9,1<br>1,13,16 | 2,3,4,7,10,<br>12,14,15,1<br>7 | 1 | A2RUV9                                           |
| 9964 | 1,5,6,8,9,1<br>1,13,17 | 2,3,4,7,10,<br>12,14,15,1<br>6 | 4 | A2RUV9,P01836,P06760,Q63532                      |
| 9965 | 1,5,6,8,9,1<br>1,14,15 | 2,3,4,7,10,<br>12,13,16,1<br>7 | 2 | P01836,P14480                                    |

|      |                        |                                |   |                                                  |
|------|------------------------|--------------------------------|---|--------------------------------------------------|
| 9966 | 1,5,6,8,9,1<br>1,14,16 | 2,3,4,7,10,<br>12,13,15,1<br>7 | 2 | P01836,Q63942                                    |
| 9967 | 1,5,6,8,9,1<br>1,14,17 | 2,3,4,7,10,<br>12,13,15,1<br>6 | 4 | P01836,P04218,P06760,Q9QUL6                      |
| 9968 | 1,5,6,8,9,1<br>1,15,16 | 2,3,4,7,10,<br>12,13,14,1<br>7 | 2 | A2RUV9,Q63942                                    |
| 9969 | 1,5,6,8,9,1<br>1,15,17 | 2,3,4,7,10,<br>12,13,14,1<br>6 | 4 | A2RUV9,P01836,P06760,Q9QUL6                      |
| 9970 | 1,5,6,8,9,1<br>1,16,17 | 2,3,4,7,10,<br>12,13,14,1<br>5 | 4 | A2RUV9,P01836,P06760,Q9QUL6                      |
| 9971 | 1,5,6,8,9,1<br>2,13,14 | 2,3,4,7,10,<br>11,15,16,1<br>7 | 4 | P02782,P30120,Q9JHB9,Q9Z1F2                      |
| 9972 | 1,5,6,8,9,1<br>2,13,15 | 2,3,4,7,10,<br>11,14,16,1<br>7 | 2 | P19218,Q6IFV1                                    |
| 9973 | 1,5,6,8,9,1<br>2,13,16 | 2,3,4,7,10,<br>11,14,15,1<br>7 | 1 | P19218                                           |
| 9974 | 1,5,6,8,9,1<br>2,13,17 | 2,3,4,7,10,<br>11,14,15,1<br>6 | 7 | P02782,P06760,P13432,P19218,P51907,Q6IFV1,Q9Z1F2 |
| 9975 | 1,5,6,8,9,1<br>2,14,15 | 2,3,4,7,10,<br>11,13,16,1<br>7 | 0 |                                                  |
| 9976 | 1,5,6,8,9,1<br>2,14,16 | 2,3,4,7,10,<br>11,13,15,1<br>7 | 0 |                                                  |
| 9977 | 1,5,6,8,9,1<br>2,14,17 | 2,3,4,7,10,<br>11,13,15,1<br>6 | 6 | P01836,P02782,P06760,P13432,Q09030,Q99PP0        |
| 9978 | 1,5,6,8,9,1<br>2,15,16 | 2,3,4,7,10,<br>11,13,14,1<br>7 | 0 |                                                  |
| 9979 | 1,5,6,8,9,1<br>2,15,17 | 2,3,4,7,10,<br>11,13,14,1<br>6 | 3 | P06760,P13432,Q6IFV1                             |
| 9980 | 1,5,6,8,9,1<br>2,16,17 | 2,3,4,7,10,<br>11,13,14,1<br>5 | 3 | P06760,P13432,Q09030                             |

|      |                         |                                |    |                                                                                     |
|------|-------------------------|--------------------------------|----|-------------------------------------------------------------------------------------|
| 9981 | 1,5,6,8,9,1<br>3,14,15  | 2,3,4,7,10,<br>11,12,16,1<br>7 | 3  | P01836,P06757,P53792                                                                |
| 9982 | 1,5,6,8,9,1<br>3,14,16  | 2,3,4,7,10,<br>11,12,15,1<br>7 | 2  | P01836,Q63942                                                                       |
| 9983 | 1,5,6,8,9,1<br>3,14,17  | 2,3,4,7,10,<br>11,12,15,1<br>6 | 6  | P01836,P06760,P51907,P53792,Q5FVI6,Q9Z1F2                                           |
| 9984 | 1,5,6,8,9,1<br>3,15,16  | 2,3,4,7,10,<br>11,12,14,1<br>7 | 1  | Q63942                                                                              |
| 9985 | 1,5,6,8,9,1<br>3,15,17  | 2,3,4,7,10,<br>11,12,14,1<br>6 | 6  | P01836,P06760,P51907,P53792,Q63532,Q6IFV1                                           |
| 9986 | 1,5,6,8,9,1<br>3,16,17  | 2,3,4,7,10,<br>11,12,14,1<br>5 | 6  | A2RUV9,P01836,P06760,P35280,P51907,P53792                                           |
| 9987 | 1,5,6,8,9,1<br>4,15,16  | 2,3,4,7,10,<br>11,12,13,1<br>7 | 3  | P01836,Q63942,Q80WL1                                                                |
| 9988 | 1,5,6,8,9,1<br>4,15,17  | 2,3,4,7,10,<br>11,12,13,1<br>6 | 4  | P01836,P06760,P47967,P53792                                                         |
| 9989 | 1,5,6,8,9,1<br>4,16,17  | 2,3,4,7,10,<br>11,12,13,1<br>5 | 3  | P01836,P06760,Q63942                                                                |
| 9990 | 1,5,6,8,9,1<br>5,16,17  | 2,3,4,7,10,<br>11,12,13,1<br>4 | 4  | A2RUV9,P01836,P23593,Q63942                                                         |
| 9991 | 1,5,6,8,10,<br>11,12,13 | 2,3,4,7,9,1<br>4,15,16,17      | 11 | F1LM93,O35547,P02781,P02782,P02803,P0C0A9,P30120,P47727,Q6IFU7,Q6P6Q2,Q9JHB9        |
| 9992 | 1,5,6,8,10,<br>11,12,14 | 2,3,4,7,9,1<br>3,15,16,17      | 12 | F1LM93,O35547,P02782,P04905,P08010,P30120,P47727,Q6IFU7,Q6IG02,Q6IMF3,Q6P6Q2,Q9JHB9 |
| 9993 | 1,5,6,8,10,<br>11,12,15 | 2,3,4,7,9,1<br>3,14,16,17      | 6  | F1LM93,O35547,P08010,Q566E6,Q6IFU7,Q6P6Q2                                           |
| 9994 | 1,5,6,8,10,<br>11,12,16 | 2,3,4,7,9,1<br>3,14,15,17      | 6  | F1LM93,O35547,Q6IFU7,Q6IG02,Q6IMF3,Q6P6Q2                                           |
| 9995 | 1,5,6,8,10,<br>11,12,17 | 2,3,4,7,9,1<br>3,14,15,16      | 12 | F1LM93,O35547,P06760,P08010,P13432,Q10758,Q566E6,Q6IFU7,Q6IG02,Q6P6Q2,Q99MH3,Q9QZK9 |
| 9996 | 1,5,6,8,10,<br>11,13,14 | 2,3,4,7,9,1<br>2,15,16,17      | 2  | P01836,P47727                                                                       |
| 9997 | 1,5,6,8,10,<br>11,13,15 | 2,3,4,7,9,1<br>2,14,16,17      | 1  | Q6IFV1                                                                              |
| 9998 | 1,5,6,8,10,<br>11,13,16 | 2,3,4,7,9,1<br>2,14,15,17      | 1  | A2RUV9                                                                              |



|       |                                                |   |                                                                |
|-------|------------------------------------------------|---|----------------------------------------------------------------|
| 9999  | 1,5,6,8,10, 2,3,4,7,9,1<br>11,13,17 2,14,15,16 | 4 | A2RUV9,P01836,P06760,Q6IFV1                                    |
| 10000 | 1,5,6,8,10, 2,3,4,7,9,1<br>11,14,15 2,13,16,17 | 1 | P01836                                                         |
| 10001 | 1,5,6,8,10, 2,3,4,7,9,1<br>11,14,16 2,13,15,17 | 1 | P01836                                                         |
| 10002 | 1,5,6,8,10, 2,3,4,7,9,1<br>11,14,17 2,13,15,16 | 4 | P01836,P06760,P47727,Q9QUL6                                    |
| 10003 | 1,5,6,8,10, 2,3,4,7,9,1<br>11,15,16 2,13,14,17 | 1 | A2RUV9                                                         |
| 10004 | 1,5,6,8,10, 2,3,4,7,9,1<br>11,15,17 2,13,14,16 | 4 | P01836,P06760,Q566E6,Q6IFV1                                    |
| 10005 | 1,5,6,8,10, 2,3,4,7,9,1<br>11,16,17 2,13,14,15 | 3 | A2RUV9,P01836,P06760                                           |
| 10006 | 1,5,6,8,10, 2,3,4,7,9,1<br>12,13,14 1,15,16,17 | 6 | P02782,P06911,P30120,Q498D9,Q9JHB9,Q9Z1F2                      |
| 10007 | 1,5,6,8,10, 2,3,4,7,9,1<br>12,13,15 1,14,16,17 | 4 | P19218,Q498D9,Q6IFV1,Q99MH3                                    |
| 10008 | 1,5,6,8,10, 2,3,4,7,9,1<br>12,13,16 1,14,15,17 | 1 | P19218                                                         |
| 10009 | 1,5,6,8,10, 2,3,4,7,9,1<br>12,13,17 1,14,15,16 | 9 | F1LM93,P02782,P06760,P13432,P19218,Q10758,Q6IFV1,Q99MH3,Q9QZK9 |
| 10010 | 1,5,6,8,10, 2,3,4,7,9,1<br>12,14,15 1,13,16,17 | 1 | Q498D9                                                         |
| 10011 | 1,5,6,8,10, 2,3,4,7,9,1<br>12,14,16 1,13,15,17 | 1 | Q10758                                                         |
| 10012 | 1,5,6,8,10, 2,3,4,7,9,1<br>12,14,17 1,13,15,16 | 6 | F1LM93,P01836,P06760,P13432,Q10758,Q99PP0                      |
| 10013 | 1,5,6,8,10, 2,3,4,7,9,1<br>12,15,16 1,13,14,17 | 1 | P20766                                                         |
| 10014 | 1,5,6,8,10, 2,3,4,7,9,1<br>12,15,17 1,13,14,16 | 5 | F1LM93,P06760,P13432,Q6IFV1,Q99MH3                             |
| 10015 | 1,5,6,8,10, 2,3,4,7,9,1<br>12,16,17 1,13,14,15 | 5 | F1LM93,P06760,P13432,Q10758,Q99MH3                             |
| 10016 | 1,5,6,8,10, 2,3,4,7,9,1<br>13,14,15 1,12,16,17 | 4 | P01836,P09605,P25809,P19223,Q498D9                             |
| 10017 | 1,5,6,8,10, 2,3,4,7,9,1<br>13,14,16 1,12,15,17 | 2 | P01836,P19223                                                  |
| 10018 | 1,5,6,8,10, 2,3,4,7,9,1<br>13,14,17 1,12,15,16 | 3 | P01836,P06760,P51907                                           |
| 10019 | 1,5,6,8,10, 2,3,4,7,9,1<br>13,15,16 1,12,14,17 | 2 | P19223,Q6IFV1                                                  |
| 10020 | 1,5,6,8,10, 2,3,4,7,9,1<br>13,15,17 1,12,14,16 | 4 | P01836,P06760,Q6IFV1,Q99MH3                                    |
| 10021 | 1,5,6,8,10, 2,3,4,7,9,1<br>13,16,17 1,12,14,15 | 5 | A2RUV9,P01836,P06760,P51907,Q6IFV1                             |

|       |                                                |   |                                                                |
|-------|------------------------------------------------|---|----------------------------------------------------------------|
| 10022 | 1,5,6,8,10, 2,3,4,7,9,1<br>14,15,16 1,12,13,17 | 2 | P01836,P19223                                                  |
| 10023 | 1,5,6,8,10, 2,3,4,7,9,1<br>14,15,17 1,12,13,16 | 2 | P01836,P06760                                                  |
| 10024 | 1,5,6,8,10, 2,3,4,7,9,1<br>14,16,17 1,12,13,15 | 3 | P01836,P06760,P42854                                           |
| 10025 | 1,5,6,8,10, 2,3,4,7,9,1<br>15,16,17 1,12,13,14 | 3 | P01836,P06760,Q6IFV1                                           |
| 10026 | 1,5,6,8,11, 2,3,4,7,9,1<br>12,13,14 0,15,16,17 | 8 | O35547,P02781,P02782,P04905,P30120,P47727,Q9JHB9,Q9Z1F2        |
| 10027 | 1,5,6,8,11, 2,3,4,7,9,1<br>12,13,15 0,14,16,17 | 5 | O35547,P02782,P30120,Q6IFV1,Q9JHB9                             |
| 10028 | 1,5,6,8,11, 2,3,4,7,9,1<br>12,13,16 0,14,15,17 | 7 | O35547,P02782,P30120,Q6IFU7,Q6P6Q2,Q8CJ52,Q9JHB9               |
| 10029 | 1,5,6,8,11, 2,3,4,7,9,1<br>12,13,17 0,14,15,16 | 9 | O35547,P02782,P06760,P13432,P30120,P36374,Q6IFV1,Q9JHB9,Q9QZK9 |
| 10030 | 1,5,6,8,11, 2,3,4,7,9,1<br>12,14,15 0,13,16,17 | 3 | O35547,P47727,Q5I0D1                                           |
| 10031 | 1,5,6,8,11, 2,3,4,7,9,1<br>12,14,16 0,13,15,17 | 4 | O35547,P47727,Q6IFU7,Q6P6Q2                                    |
| 10032 | 1,5,6,8,11, 2,3,4,7,9,1<br>12,14,17 0,13,15,16 | 8 | O35547,P02782,P06760,P13432,P30120,P47727,Q99PP0,Q9JHB9        |
| 10033 | 1,5,6,8,11, 2,3,4,7,9,1<br>12,15,16 0,13,14,17 | 3 | O35547,Q6IFU7,Q6P6Q2                                           |
| 10034 | 1,5,6,8,11, 2,3,4,7,9,1<br>12,15,17 0,13,14,16 | 4 | O35547,P06760,P13432,Q6IFV1                                    |
| 10035 | 1,5,6,8,11, 2,3,4,7,9,1<br>12,16,17 0,13,14,15 | 5 | A2RUV9,O35547,P06760,P13432,Q6P6Q2                             |
| 10036 | 1,5,6,8,11, 2,3,4,7,9,1<br>13,14,15 0,12,16,17 | 2 | P19223,P47727                                                  |
| 10037 | 1,5,6,8,11, 2,3,4,7,9,1<br>13,14,16 0,12,15,17 | 2 | P19223,P47727                                                  |
| 10038 | 1,5,6,8,11, 2,3,4,7,9,1<br>13,14,17 0,12,15,16 | 3 | P01836,P06760,P47727                                           |
| 10039 | 1,5,6,8,11, 2,3,4,7,9,1<br>13,15,16 0,12,14,17 | 1 | P19223                                                         |
| 10040 | 1,5,6,8,11, 2,3,4,7,9,1<br>13,15,17 0,12,14,16 | 2 | P06760,Q6IFV1                                                  |
| 10041 | 1,5,6,8,11, 2,3,4,7,9,1<br>13,16,17 0,12,14,15 | 2 | A2RUV9,P06760                                                  |
| 10042 | 1,5,6,8,11, 2,3,4,7,9,1<br>14,15,16 0,12,13,17 | 2 | P19223,Q5I0D1                                                  |
| 10043 | 1,5,6,8,11, 2,3,4,7,9,1<br>14,15,17 0,12,13,16 | 4 | P01836,P06760,P47967,P97840                                    |
| 10044 | 1,5,6,8,11, 2,3,4,7,9,1<br>14,16,17 0,12,13,15 | 2 | P01836,P06760                                                  |

|       |                                                |   |                                                         |
|-------|------------------------------------------------|---|---------------------------------------------------------|
| 10045 | 1,5,6,8,11, 2,3,4,7,9,1<br>15,16,17 0,12,13,14 | 2 | A2RUV9,P06760                                           |
| 10046 | 1,5,6,8,12, 2,3,4,7,9,1<br>13,14,15 0,11,16,17 | 3 | P02782,Q498D9,Q9Z1F2                                    |
| 10047 | 1,5,6,8,12, 2,3,4,7,9,1<br>13,14,16 0,11,15,17 | 2 | P02782,Q9Z1F2                                           |
| 10048 | 1,5,6,8,12, 2,3,4,7,9,1<br>13,14,17 0,11,15,16 | 8 | P02782,P06760,P13432,P51907,Q561R9,Q5FVI6,Q9QZK9,Q9Z1F2 |
| 10049 | 1,5,6,8,12, 2,3,4,7,9,1<br>13,15,16 0,11,14,17 | 2 | P19218,Q6IFV1                                           |
| 10050 | 1,5,6,8,12, 2,3,4,7,9,1<br>13,15,17 0,11,14,16 | 5 | P06760,P13432,Q6IFV1,Q99MH3,Q9QZK9                      |
| 10051 | 1,5,6,8,12, 2,3,4,7,9,1<br>13,16,17 0,11,14,15 | 7 | P06760,P13432,P19218,P35280,P51907,Q5XFX0,Q6IFV1        |
| 10052 | 1,5,6,8,12, 2,3,4,7,9,1<br>14,15,16 0,11,13,17 | 0 |                                                         |
| 10053 | 1,5,6,8,12, 2,3,4,7,9,1<br>14,15,17 0,11,13,16 | 2 | P06760,P13432                                           |
| 10054 | 1,5,6,8,12, 2,3,4,7,9,1<br>14,16,17 0,11,13,15 | 3 | P06760,P13432,Q561R9                                    |
| 10055 | 1,5,6,8,12, 2,3,4,7,9,1<br>15,16,17 0,11,13,14 | 4 | P06760,P13432,Q5XFX0,Q6IFV1                             |
| 10056 | 1,5,6,8,13, 2,3,4,7,9,1<br>14,15,16 0,11,12,17 | 1 | P19223                                                  |
| 10057 | 1,5,6,8,13, 2,3,4,7,9,1<br>14,15,17 0,11,12,16 | 8 | P01836,P06760,P08753,P10536,P47967,P51907,P53792,Q6IFV1 |
| 10058 | 1,5,6,8,13, 2,3,4,7,9,1<br>14,16,17 0,11,12,15 | 5 | P01836,P06760,P08753,P51907,Q561R9                      |
| 10059 | 1,5,6,8,13, 2,3,4,7,9,1<br>15,16,17 0,11,12,14 | 2 | P06760,Q6IFV1                                           |
| 10060 | 1,5,6,8,14, 2,3,4,7,9,1<br>15,16,17 0,11,12,13 | 2 | P01836,P06760                                           |
| 10061 | 1,5,6,9,10, 2,3,4,7,8,1<br>11,12,13 4,15,16,17 | 4 | P02803,Q566E6,Q6IFU7,Q9JHB9                             |
| 10062 | 1,5,6,9,10, 2,3,4,7,8,1<br>11,12,14 3,15,16,17 | 4 | P20766,P47727,Q6IFU7,Q6P6Q2                             |
| 10063 | 1,5,6,9,10, 2,3,4,7,8,1<br>11,12,15 3,14,16,17 | 4 | P20766,Q566E6,Q6IFU7,Q6PCU2                             |
| 10064 | 1,5,6,9,10, 2,3,4,7,8,1<br>11,12,16 3,14,15,17 | 6 | P12368,P20766,P36970,Q6IFU7,Q6IMF3,Q6P6Q2               |
| 10065 | 1,5,6,9,10, 2,3,4,7,8,1<br>11,12,17 3,14,15,16 | 5 | P20766,Q09030,Q566E6,Q6IFU7,Q9QUL6                      |
| 10066 | 1,5,6,9,10, 2,3,4,7,8,1<br>11,13,14 2,15,16,17 | 6 | P01041,P01836,P19223,P47727,P55091,Q80WL1               |
| 10067 | 1,5,6,9,10, 2,3,4,7,8,1<br>11,13,15 2,14,16,17 | 5 | P19223,P31430,P55091,Q566E6,Q80WL1                      |

|       |                                                |   |                                                                |
|-------|------------------------------------------------|---|----------------------------------------------------------------|
| 10068 | 1,5,6,9,10, 2,3,4,7,8,1<br>11,13,16 2,14,15,17 | 9 | A2RUV9,B0BNN3,P01041,P02761,P19223,P31430,P36970,P55091,Q80WL1 |
| 10069 | 1,5,6,9,10, 2,3,4,7,8,1<br>11,13,17 2,14,15,16 | 5 | A2RUV9,P01836,Q566E6,Q920P0,Q9QUL6                             |
| 10070 | 1,5,6,9,10, 2,3,4,7,8,1<br>11,14,15 2,13,16,17 | 7 | P01836,P19223,P20766,P55091,P63029,Q80WL1,Q9QUL6               |
| 10071 | 1,5,6,9,10, 2,3,4,7,8,1<br>11,14,16 2,13,15,17 | 6 | P01836,P19223,P20766,P55091,Q80WL1,Q9QUL6                      |
| 10072 | 1,5,6,9,10, 2,3,4,7,8,1<br>11,14,17 2,13,15,16 | 3 | P01836,Q80WL1,Q9QUL6                                           |
| 10073 | 1,5,6,9,10, 2,3,4,7,8,1<br>11,15,16 2,13,14,17 | 8 | A2RUV9,P19223,P20766,P31430,P36970,P55091,Q80WL1,Q9QUL6        |
| 10074 | 1,5,6,9,10, 2,3,4,7,8,1<br>11,15,17 2,13,14,16 | 6 | P01836,P20766,P36970,Q566E6,Q80WL1,Q9QUL6                      |
| 10075 | 1,5,6,9,10, 2,3,4,7,8,1<br>11,16,17 2,13,14,15 | 6 | A2RUV9,P01836,P20766,P36970,Q80WL1,Q9QUL6                      |
| 10076 | 1,5,6,9,10, 2,3,4,7,8,1<br>12,13,14 1,15,16,17 | 1 | P02761                                                         |
| 10077 | 1,5,6,9,10, 2,3,4,7,8,1<br>12,13,15 1,14,16,17 | 1 | P19218                                                         |
| 10078 | 1,5,6,9,10, 2,3,4,7,8,1<br>12,13,16 1,14,15,17 | 3 | P02761,P19218,P97840                                           |
| 10079 | 1,5,6,9,10, 2,3,4,7,8,1<br>12,13,17 1,14,15,16 | 2 | P19218,Q99MH3                                                  |
| 10080 | 1,5,6,9,10, 2,3,4,7,8,1<br>12,14,15 1,13,16,17 | 1 | P20766                                                         |
| 10081 | 1,5,6,9,10, 2,3,4,7,8,1<br>12,14,16 1,13,15,17 | 2 | P02761,P20766                                                  |
| 10082 | 1,5,6,9,10, 2,3,4,7,8,1<br>12,14,17 1,13,15,16 | 4 | P01836,P20766,Q09030,Q10758                                    |
| 10083 | 1,5,6,9,10, 2,3,4,7,8,1<br>12,15,16 1,13,14,17 | 3 | P19218,P20766,Q80WL1                                           |
| 10084 | 1,5,6,9,10, 2,3,4,7,8,1<br>12,15,17 1,13,14,16 | 1 | P20766                                                         |
| 10085 | 1,5,6,9,10, 2,3,4,7,8,1<br>12,16,17 1,13,14,15 | 4 | P19218,P20766,Q09030,Q10758                                    |
| 10086 | 1,5,6,9,10, 2,3,4,7,8,1<br>13,14,15 1,12,16,17 | 4 | P01836,P19223,P55091,Q80WL1                                    |
| 10087 | 1,5,6,9,10, 2,3,4,7,8,1<br>13,14,16 1,12,15,17 | 7 | P01041,P01836,P02761,P19223,P55091,Q80WL1,Q9QZA6               |
| 10088 | 1,5,6,9,10, 2,3,4,7,8,1<br>13,14,17 1,12,15,16 | 2 | P01836,Q80WL1                                                  |
| 10089 | 1,5,6,9,10, 2,3,4,7,8,1<br>13,15,16 1,12,14,17 | 9 | P19218,P19223,P31430,P50115,P55091,Q00715,Q6AYQ8,Q80WL1,Q9EQS0 |
| 10090 | 1,5,6,9,10, 2,3,4,7,8,1<br>13,15,17 1,12,14,16 | 4 | P01836,Q6IFV1,Q80WL1,Q9EQS0                                    |

|       |                                                |   |                                           |
|-------|------------------------------------------------|---|-------------------------------------------|
| 10091 | 1,5,6,9,10, 2,3,4,7,8,1<br>13,16,17 1,12,14,15 | 6 | A2RUV9,P01836,P19218,P35280,Q80WL1,Q9EQS0 |
| 10092 | 1,5,6,9,10, 2,3,4,7,8,1<br>14,15,16 1,12,13,17 | 6 | P01836,P19223,P20766,P50115,P55091,Q80WL1 |
| 10093 | 1,5,6,9,10, 2,3,4,7,8,1<br>14,15,17 1,12,13,16 | 3 | P01836,P20766,Q80WL1                      |
| 10094 | 1,5,6,9,10, 2,3,4,7,8,1<br>14,16,17 1,12,13,15 | 4 | P01836,P20766,Q5XI22,Q80WL1               |
| 10095 | 1,5,6,9,10, 2,3,4,7,8,1<br>15,16,17 1,12,13,14 | 6 | P01836,P20766,P36970,Q6TMA8,Q80WL1,Q9EQS0 |
| 10096 | 1,5,6,9,11, 2,3,4,7,8,1<br>12,13,14 0,15,16,17 | 3 | P02761,P47727,Q9JHB9                      |
| 10097 | 1,5,6,9,11, 2,3,4,7,8,1<br>12,13,15 0,14,16,17 | 0 |                                           |
| 10098 | 1,5,6,9,11, 2,3,4,7,8,1<br>12,13,16 0,14,15,17 | 2 | P02761,Q6IFU7                             |
| 10099 | 1,5,6,9,11, 2,3,4,7,8,1<br>12,13,17 0,14,15,16 | 2 | P13432,P97574                             |
| 10100 | 1,5,6,9,11, 2,3,4,7,8,1<br>12,14,15 0,13,16,17 | 2 | P20766,Q80WL1                             |
| 10101 | 1,5,6,9,11, 2,3,4,7,8,1<br>12,14,16 0,13,15,17 | 3 | P02761,P20766,Q6IFU7                      |
| 10102 | 1,5,6,9,11, 2,3,4,7,8,1<br>12,14,17 0,13,15,16 | 2 | P01835,P13432                             |
| 10103 | 1,5,6,9,11, 2,3,4,7,8,1<br>12,15,16 0,13,14,17 | 4 | P20766,P36970,Q6IFU7,Q80WL1               |
| 10104 | 1,5,6,9,11, 2,3,4,7,8,1<br>12,15,17 0,13,14,16 | 2 | P20766,Q566E6                             |
| 10105 | 1,5,6,9,11, 2,3,4,7,8,1<br>12,16,17 0,13,14,15 | 4 | P13432,P20766,P36970,Q6IFU7               |
| 10106 | 1,5,6,9,11, 2,3,4,7,8,1<br>13,14,15 0,12,16,17 | 3 | P19223,P55091,Q80WL1                      |
| 10107 | 1,5,6,9,11, 2,3,4,7,8,1<br>13,14,16 0,12,15,17 | 5 | P01041,P02761,P19223,P55091,Q80WL1        |
| 10108 | 1,5,6,9,11, 2,3,4,7,8,1<br>13,14,17 0,12,15,16 | 2 | P01836,Q80WL1                             |
| 10109 | 1,5,6,9,11, 2,3,4,7,8,1<br>13,15,16 0,12,14,17 | 6 | P19223,P31430,P36970,P55091,Q80WL1,Q9EQS0 |
| 10110 | 1,5,6,9,11, 2,3,4,7,8,1<br>13,15,17 0,12,14,16 | 2 | Q80WL1,Q9EQS0                             |
| 10111 | 1,5,6,9,11, 2,3,4,7,8,1<br>13,16,17 0,12,14,15 | 5 | A2RUV9,P35280,P36970,Q80WL1,Q9EQS0        |
| 10112 | 1,5,6,9,11, 2,3,4,7,8,1<br>14,15,16 0,12,13,17 | 4 | P19223,P20766,P55091,Q80WL1               |
| 10113 | 1,5,6,9,11, 2,3,4,7,8,1<br>14,15,17 0,12,13,16 | 4 | P01836,P47967,Q80WL1,Q9QUL6               |

|       |                                                |    |                                                                       |
|-------|------------------------------------------------|----|-----------------------------------------------------------------------|
| 10114 | 1,5,6,9,11, 2,3,4,7,8,1<br>14,16,17 0,12,13,15 | 5  | P01836,P04218,P36970,Q80WL1,Q9QUL6                                    |
| 10115 | 1,5,6,9,11, 2,3,4,7,8,1<br>15,16,17 0,12,13,14 | 5  | A2RUV9,P20766,P36970,Q80WL1,Q9EQS0                                    |
| 10116 | 1,5,6,9,12, 2,3,4,7,8,1<br>13,14,15 0,11,16,17 | 1  | Q80WL1                                                                |
| 10117 | 1,5,6,9,12, 2,3,4,7,8,1<br>13,14,16 0,11,15,17 | 1  | P02761                                                                |
| 10118 | 1,5,6,9,12, 2,3,4,7,8,1<br>13,14,17 0,11,15,16 | 3  | P00714,P35280,P53792                                                  |
| 10119 | 1,5,6,9,12, 2,3,4,7,8,1<br>13,15,16 0,11,14,17 | 4  | P00714,P02761,P19218,Q80WL1                                           |
| 10120 | 1,5,6,9,12, 2,3,4,7,8,1<br>13,15,17 0,11,14,16 | 4  | P00714,P19218,P53792,Q6IFV1                                           |
| 10121 | 1,5,6,9,12, 2,3,4,7,8,1<br>13,16,17 0,11,14,15 | 4  | P00714,P02761,P19218,P35280                                           |
| 10122 | 1,5,6,9,12, 2,3,4,7,8,1<br>14,15,16 0,11,13,17 | 2  | P20766,Q80WL1                                                         |
| 10123 | 1,5,6,9,12, 2,3,4,7,8,1<br>14,15,17 0,11,13,16 | 2  | P20766,Q80WL1                                                         |
| 10124 | 1,5,6,9,12, 2,3,4,7,8,1<br>14,16,17 0,11,13,15 | 3  | P20766,P35280,Q5XI22                                                  |
| 10125 | 1,5,6,9,12, 2,3,4,7,8,1<br>15,16,17 0,11,13,14 | 3  | P19218,P20766,Q80WL1                                                  |
| 10126 | 1,5,6,9,13, 2,3,4,7,8,1<br>14,15,16 0,11,12,17 | 10 | P00714,P02761,P16391,P19223,P50115,P53792,P55091,P62804,Q80WL1,Q9EQS0 |
| 10127 | 1,5,6,9,13, 2,3,4,7,8,1<br>14,15,17 0,11,12,16 | 6  | P00714,P01836,P47967,P53792,Q80WL1,Q9EQS0                             |
| 10128 | 1,5,6,9,13, 2,3,4,7,8,1<br>14,16,17 0,11,12,15 | 8  | P00714,P01836,P02761,P35280,P53792,Q5XI22,Q80WL1,Q9EQS0               |
| 10129 | 1,5,6,9,13, 2,3,4,7,8,1<br>15,16,17 0,11,12,14 | 7  | P00714,P19218,P35280,P53792,P62804,Q80WL1,Q9EQS0                      |
| 10130 | 1,5,6,9,14, 2,3,4,7,8,1<br>15,16,17 0,11,12,13 | 6  | P00714,P01836,P20766,Q5XI22,Q80WL1,Q9EQS0                             |
| 10131 | 1,5,6,10,1 2,3,4,7,8,9<br>1,12,13,14 ,15,16,17 | 4  | P47727,Q5QE79,Q6IFU7,Q9JHB9                                           |
| 10132 | 1,5,6,10,1 2,3,4,7,8,9<br>1,12,13,15 ,14,16,17 | 2  | Q566E6,Q6IFU7                                                         |
| 10133 | 1,5,6,10,1 2,3,4,7,8,9<br>1,12,13,16 ,14,15,17 | 4  | P02761,Q5QE79,Q6IFU7,Q6P6Q2                                           |
| 10134 | 1,5,6,10,1 2,3,4,7,8,9<br>1,12,13,17 ,14,15,16 | 5  | Q566E6,Q5QE79,Q6IFU7,Q99MH3,Q9QZK9                                    |
| 10135 | 1,5,6,10,1 2,3,4,7,8,9<br>1,12,14,15 ,13,16,17 | 3  | P20766,P47727,Q6IFU7                                                  |
| 10136 | 1,5,6,10,1 2,3,4,7,8,9<br>1,12,14,16 ,13,15,17 | 6  | P20766,P47727,Q5QE79,Q6IFU7,Q6IMF3,Q6P6Q2                             |

|       |                          |                          |   |                                                  |
|-------|--------------------------|--------------------------|---|--------------------------------------------------|
| 10137 | 1,5,6,10,1<br>1,12,14,17 | 2,3,4,7,8,9<br>,13,15,16 | 5 | P20766,P47727,Q10758,Q5QE79,Q6IFU7               |
| 10138 | 1,5,6,10,1<br>1,12,15,16 | 2,3,4,7,8,9<br>,13,14,17 | 3 | P20766,Q6IFU7,Q6P6Q2                             |
| 10139 | 1,5,6,10,1<br>1,12,15,17 | 2,3,4,7,8,9<br>,13,14,16 | 4 | P20766,Q566E6,Q6IFU7,Q99MH3                      |
| 10140 | 1,5,6,10,1<br>1,12,16,17 | 2,3,4,7,8,9<br>,13,14,15 | 6 | P06757,P20766,P36970,Q10758,Q6IFU7,Q6P6Q2        |
| 10141 | 1,5,6,10,1<br>1,13,14,15 | 2,3,4,7,8,9<br>,12,16,17 | 4 | P19223,P47727,P55091,Q80WL1                      |
| 10142 | 1,5,6,10,1<br>1,13,14,16 | 2,3,4,7,8,9<br>,12,15,17 | 7 | P02761,P19223,P47727,P55091,Q5QE79,Q7TPB1,Q80WL1 |
| 10143 | 1,5,6,10,1<br>1,13,14,17 | 2,3,4,7,8,9<br>,12,15,16 | 4 | P01836,P47727,Q5QE79,Q80WL1                      |
| 10144 | 1,5,6,10,1<br>1,13,15,16 | 2,3,4,7,8,9<br>,12,14,17 | 5 | P19223,P31430,P55091,Q80WL1,Q9EQS0               |
| 10145 | 1,5,6,10,1<br>1,13,15,17 | 2,3,4,7,8,9<br>,12,14,16 | 4 | Q566E6,Q6IFV1,Q80WL1,Q9EQS0                      |
| 10146 | 1,5,6,10,1<br>1,13,16,17 | 2,3,4,7,8,9<br>,12,14,15 | 4 | A2RUV9,P36970,Q80WL1,Q9EQS0                      |
| 10147 | 1,5,6,10,1<br>1,14,15,16 | 2,3,4,7,8,9<br>,12,13,17 | 4 | P19223,P20766,P55091,Q80WL1                      |
| 10148 | 1,5,6,10,1<br>1,14,15,17 | 2,3,4,7,8,9<br>,12,13,16 | 4 | P01836,P20766,Q80WL1,Q9QUL6                      |
| 10149 | 1,5,6,10,1<br>1,14,16,17 | 2,3,4,7,8,9<br>,12,13,15 | 5 | P01836,P20766,Q6TMA8,Q80WL1,Q9QUL6               |
| 10150 | 1,5,6,10,1<br>1,15,16,17 | 2,3,4,7,8,9<br>,12,13,14 | 7 | A2RUV9,P05369,P20766,P36970,Q6TMA8,Q80WL1,Q9EQS0 |
| 10151 | 1,5,6,10,1<br>2,13,14,15 | 2,3,4,7,8,9<br>,11,16,17 | 1 | Q498D9                                           |
| 10152 | 1,5,6,10,1<br>2,13,14,16 | 2,3,4,7,8,9<br>,11,15,17 | 2 | P02761,Q5QE79                                    |
| 10153 | 1,5,6,10,1<br>2,13,14,17 | 2,3,4,7,8,9<br>,11,15,16 | 5 | Q10758,Q498D9,Q5QE79,Q99MH3,Q9QZK9               |
| 10154 | 1,5,6,10,1<br>2,13,15,16 | 2,3,4,7,8,9<br>,11,14,17 | 1 | P19218                                           |
| 10155 | 1,5,6,10,1<br>2,13,15,17 | 2,3,4,7,8,9<br>,11,14,16 | 4 | P19218,Q6IFV1,Q99MH3,Q9QZK9                      |
| 10156 | 1,5,6,10,1<br>2,13,16,17 | 2,3,4,7,8,9<br>,11,14,15 | 5 | P02761,P19218,P35280,Q10758,Q99MH3               |
| 10157 | 1,5,6,10,1<br>2,14,15,16 | 2,3,4,7,8,9<br>,11,13,17 | 2 | P20766,Q80WL1                                    |
| 10158 | 1,5,6,10,1<br>2,14,15,17 | 2,3,4,7,8,9<br>,11,13,16 | 2 | P20766,Q10758                                    |
| 10159 | 1,5,6,10,1<br>2,14,16,17 | 2,3,4,7,8,9<br>,11,13,15 | 5 | P20766,Q10758,Q5QE79,Q5XI22,Q6TMA8               |

|       |                          |                          |   |                                           |
|-------|--------------------------|--------------------------|---|-------------------------------------------|
| 10160 | 1,5,6,10,1<br>2,15,16,17 | 2,3,4,7,8,9<br>,11,13,14 | 4 | P19218,P20766,Q6TMA8,Q99MH3               |
| 10161 | 1,5,6,10,1<br>3,14,15,16 | 2,3,4,7,8,9<br>,11,12,17 | 5 | P19223,P50115,P55091,Q80WL1,Q9EQS0        |
| 10162 | 1,5,6,10,1<br>3,14,15,17 | 2,3,4,7,8,9<br>,11,12,16 | 3 | P01836,Q80WL1,Q9EQS0                      |
| 10163 | 1,5,6,10,1<br>3,14,16,17 | 2,3,4,7,8,9<br>,11,12,15 | 4 | P01836,P02761,Q80WL1,Q9EQS0               |
| 10164 | 1,5,6,10,1<br>3,15,16,17 | 2,3,4,7,8,9<br>,11,12,14 | 3 | P19218,Q80WL1,Q9EQS0                      |
| 10165 | 1,5,6,10,1<br>4,15,16,17 | 2,3,4,7,8,9<br>,11,12,13 | 6 | P01836,P20766,Q5XI22,Q6TMA8,Q80WL1,Q9EQS0 |
| 10166 | 1,5,6,11,1<br>2,13,14,15 | 2,3,4,7,8,9<br>,10,16,17 | 1 | P47727                                    |
| 10167 | 1,5,6,11,1<br>2,13,14,16 | 2,3,4,7,8,9<br>,10,15,17 | 4 | P02761,P19223,P47727,Q6IFU7               |
| 10168 | 1,5,6,11,1<br>2,13,14,17 | 2,3,4,7,8,9<br>,10,15,16 | 2 | P47727,Q9QZK9                             |
| 10169 | 1,5,6,11,1<br>2,13,15,16 | 2,3,4,7,8,9<br>,10,14,17 | 2 | Q6IFU7,Q80WL1                             |
| 10170 | 1,5,6,11,1<br>2,13,15,17 | 2,3,4,7,8,9<br>,10,14,16 | 1 | Q6IFV1                                    |
| 10171 | 1,5,6,11,1<br>2,13,16,17 | 2,3,4,7,8,9<br>,10,14,15 | 3 | P02761,P17046,P35280                      |
| 10172 | 1,5,6,11,1<br>2,14,15,16 | 2,3,4,7,8,9<br>,10,13,17 | 3 | P20766,Q6IFU7,Q80WL1                      |
| 10173 | 1,5,6,11,1<br>2,14,15,17 | 2,3,4,7,8,9<br>,10,13,16 | 1 | P20766                                    |
| 10174 | 1,5,6,11,1<br>2,14,16,17 | 2,3,4,7,8,9<br>,10,13,15 | 2 | P20766,Q6IFU7                             |
| 10175 | 1,5,6,11,1<br>2,15,16,17 | 2,3,4,7,8,9<br>,10,13,14 | 5 | P05369,P20766,P36970,Q6IFU7,Q80WL1        |
| 10176 | 1,5,6,11,1<br>3,14,15,16 | 2,3,4,7,8,9<br>,10,12,17 | 4 | P19223,P55091,Q80WL1,Q9EQS0               |
| 10177 | 1,5,6,11,1<br>3,14,15,17 | 2,3,4,7,8,9<br>,10,12,16 | 4 | D3ZHA0,P47967,Q80WL1,Q9EQS0               |
| 10178 | 1,5,6,11,1<br>3,14,16,17 | 2,3,4,7,8,9<br>,10,12,15 | 4 | D3ZHA0,P02761,Q80WL1,Q9EQS0               |
| 10179 | 1,5,6,11,1<br>3,15,16,17 | 2,3,4,7,8,9<br>,10,12,14 | 4 | D3ZHA0,P36970,Q80WL1,Q9EQS0               |
| 10180 | 1,5,6,11,1<br>4,15,16,17 | 2,3,4,7,8,9<br>,10,12,13 | 3 | P20766,Q80WL1,Q9EQS0                      |
| 10181 | 1,5,6,12,1<br>3,14,15,16 | 2,3,4,7,8,9<br>,10,11,17 | 4 | P00714,P02761,P19223,Q80WL1               |
| 10182 | 1,5,6,12,1<br>3,14,15,17 | 2,3,4,7,8,9<br>,10,11,16 | 1 | P00714                                    |



|       |                          |                                |   |                                    |
|-------|--------------------------|--------------------------------|---|------------------------------------|
| 10183 | 1,5,6,12,1<br>3,14,16,17 | 2,3,4,7,8,9<br>,10,11,15       | 4 | P00714,P02761,P35280,Q561R9        |
| 10184 | 1,5,6,12,1<br>3,15,16,17 | 2,3,4,7,8,9<br>,10,11,14       | 4 | P00714,P19218,P35280,Q9EQS0        |
| 10185 | 1,5,6,12,1<br>4,15,16,17 | 2,3,4,7,8,9<br>,10,11,13       | 5 | P00714,P20766,P35467,Q5XI22,Q80WL1 |
| 10186 | 1,5,6,13,1<br>4,15,16,17 | 2,3,4,7,8,9<br>,10,11,12       | 3 | P00714,Q80WL1,Q9EQS0               |
| 10187 | 1,5,7,8,9,1<br>0,11,12   | 2,3,4,6,13,<br>14,15,16,1<br>7 | 3 | P02803,P10715,P27213               |
| 10188 | 1,5,7,8,9,1<br>0,11,13   | 2,3,4,6,12,<br>14,15,16,1<br>7 | 3 | B0BNN3,P02803,Q5HZV9               |
| 10189 | 1,5,7,8,9,1<br>0,11,14   | 2,3,4,6,12,<br>13,15,16,1<br>7 | 2 | P27213,Q9QUL6                      |
| 10190 | 1,5,7,8,9,1<br>0,11,15   | 2,3,4,6,12,<br>13,14,16,1<br>7 | 4 | P14480,P25236,P27213,Q62635        |
| 10191 | 1,5,7,8,9,1<br>0,11,16   | 2,3,4,6,12,<br>13,14,15,1<br>7 | 5 | A2RUV9,B0BNN3,P25236,Q62635,Q64093 |
| 10192 | 1,5,7,8,9,1<br>0,11,17   | 2,3,4,6,12,<br>13,14,15,1<br>6 | 2 | P25236,Q9QUL6                      |
| 10193 | 1,5,7,8,9,1<br>0,12,13   | 2,3,4,6,11,<br>14,15,16,1<br>7 | 2 | P02803,P19218                      |
| 10194 | 1,5,7,8,9,1<br>0,12,14   | 2,3,4,6,11,<br>13,15,16,1<br>7 | 0 |                                    |
| 10195 | 1,5,7,8,9,1<br>0,12,15   | 2,3,4,6,11,<br>13,14,16,1<br>7 | 1 | P10715                             |
| 10196 | 1,5,7,8,9,1<br>0,12,16   | 2,3,4,6,11,<br>13,14,15,1<br>7 | 4 | P02625,P10715,P19218,Q64093        |
| 10197 | 1,5,7,8,9,1<br>0,12,17   | 2,3,4,6,11,<br>13,14,15,1<br>6 | 3 | F1LM93,P10715,P52590               |
| 10198 | 1,5,7,8,9,1<br>0,13,14   | 2,3,4,6,11,<br>12,15,16,1<br>7 | 1 | B0BNN3                             |

|       |                        |                                |   |                             |
|-------|------------------------|--------------------------------|---|-----------------------------|
| 10199 | 1,5,7,8,9,1<br>0,13,15 | 2,3,4,6,11,<br>12,14,16,1<br>7 | 1 | P01835                      |
| 10200 | 1,5,7,8,9,1<br>0,13,16 | 2,3,4,6,11,<br>12,14,15,1<br>7 | 4 | B0BNN3,P01835,P02625,P19218 |
| 10201 | 1,5,7,8,9,1<br>0,13,17 | 2,3,4,6,11,<br>12,14,15,1<br>6 | 1 | P02625                      |
| 10202 | 1,5,7,8,9,1<br>0,14,15 | 2,3,4,6,11,<br>12,13,16,1<br>7 | 3 | P14480,P16636,Q62635        |
| 10203 | 1,5,7,8,9,1<br>0,14,16 | 2,3,4,6,11,<br>12,13,15,1<br>7 | 3 | B0BNN3,P02625,Q62635        |
| 10204 | 1,5,7,8,9,1<br>0,14,17 | 2,3,4,6,11,<br>12,13,15,1<br>6 | 2 | P01836,P02625               |
| 10205 | 1,5,7,8,9,1<br>0,15,16 | 2,3,4,6,11,<br>12,13,14,1<br>7 | 3 | P01835,P25236,Q62635        |
| 10206 | 1,5,7,8,9,1<br>0,15,17 | 2,3,4,6,11,<br>12,13,14,1<br>6 | 3 | G3V686,P25236,P52590        |
| 10207 | 1,5,7,8,9,1<br>0,16,17 | 2,3,4,6,11,<br>12,13,14,1<br>5 | 4 | P02625,P25031,P25236,Q64093 |
| 10208 | 1,5,7,8,9,1<br>1,12,13 | 2,3,4,6,10,<br>14,15,16,1<br>7 | 4 | P02803,P10715,P36374,Q8CJ52 |
| 10209 | 1,5,7,8,9,1<br>1,12,14 | 2,3,4,6,10,<br>13,15,16,1<br>7 | 2 | P10715,Q4FZU6               |
| 10210 | 1,5,7,8,9,1<br>1,12,15 | 2,3,4,6,10,<br>13,14,16,1<br>7 | 2 | P10715,P14480               |
| 10211 | 1,5,7,8,9,1<br>1,12,16 | 2,3,4,6,10,<br>13,14,15,1<br>7 | 3 | P10715,Q4FZU6,Q8CJ52        |
| 10212 | 1,5,7,8,9,1<br>1,12,17 | 2,3,4,6,10,<br>13,14,15,1<br>6 | 2 | P10715,Q4FZU6               |
| 10213 | 1,5,7,8,9,1<br>1,13,14 | 2,3,4,6,10,<br>12,15,16,1<br>7 | 2 | B0BNN3,Q4FZU6               |

|       |                        |                                |   |                             |
|-------|------------------------|--------------------------------|---|-----------------------------|
| 10214 | 1,5,7,8,9,1<br>1,13,15 | 2,3,4,6,10,<br>12,14,16,1<br>7 | 2 | P14480,Q9JJS8               |
| 10215 | 1,5,7,8,9,1<br>1,13,16 | 2,3,4,6,10,<br>12,14,15,1<br>7 | 2 | B0BNN3,Q4FZU6               |
| 10216 | 1,5,7,8,9,1<br>1,13,17 | 2,3,4,6,10,<br>12,14,15,1<br>6 | 1 | Q9JJS8                      |
| 10217 | 1,5,7,8,9,1<br>1,14,15 | 2,3,4,6,10,<br>12,13,16,1<br>7 | 4 | P14480,P16636,Q63355,Q9JJS8 |
| 10218 | 1,5,7,8,9,1<br>1,14,16 | 2,3,4,6,10,<br>12,13,15,1<br>7 | 3 | B0BNN3,Q4FZU6,Q62635        |
| 10219 | 1,5,7,8,9,1<br>1,14,17 | 2,3,4,6,10,<br>12,13,15,1<br>6 | 2 | Q4FZU6,Q9QUL6               |
| 10220 | 1,5,7,8,9,1<br>1,15,16 | 2,3,4,6,10,<br>12,13,14,1<br>7 | 3 | P10715,P25236,Q62635        |
| 10221 | 1,5,7,8,9,1<br>1,15,17 | 2,3,4,6,10,<br>12,13,14,1<br>6 | 3 | P10715,P25236,Q9JJS8        |
| 10222 | 1,5,7,8,9,1<br>1,16,17 | 2,3,4,6,10,<br>12,13,14,1<br>5 | 4 | A2RUV9,P10715,P25236,Q4FZU6 |
| 10223 | 1,5,7,8,9,1<br>2,13,14 | 2,3,4,6,10,<br>11,15,16,1<br>7 | 1 | Q4FZU6                      |
| 10224 | 1,5,7,8,9,1<br>2,13,15 | 2,3,4,6,10,<br>11,14,16,1<br>7 | 2 | P10715,P19218               |
| 10225 | 1,5,7,8,9,1<br>2,13,16 | 2,3,4,6,10,<br>11,14,15,1<br>7 | 4 | P02803,P10715,P19218,Q4FZU6 |
| 10226 | 1,5,7,8,9,1<br>2,13,17 | 2,3,4,6,10,<br>11,14,15,1<br>6 | 4 | P10715,P19218,P36374,Q4FZU6 |
| 10227 | 1,5,7,8,9,1<br>2,14,15 | 2,3,4,6,10,<br>11,13,16,1<br>7 | 2 | P10715,P16636               |
| 10228 | 1,5,7,8,9,1<br>2,14,16 | 2,3,4,6,10,<br>11,13,15,1<br>7 | 2 | P10715,Q4FZU6               |

|       |                         |                                |   |                                    |
|-------|-------------------------|--------------------------------|---|------------------------------------|
| 10229 | 1,5,7,8,9,1<br>2,14,17  | 2,3,4,6,10,<br>11,13,15,1<br>6 | 2 | P10715,Q4FZU6                      |
| 10230 | 1,5,7,8,9,1<br>2,15,16  | 2,3,4,6,10,<br>11,13,14,1<br>7 | 1 | P10715                             |
| 10231 | 1,5,7,8,9,1<br>2,15,17  | 2,3,4,6,10,<br>11,13,14,1<br>6 | 1 | P10715                             |
| 10232 | 1,5,7,8,9,1<br>2,16,17  | 2,3,4,6,10,<br>11,13,14,1<br>5 | 2 | P10715,Q4FZU6                      |
| 10233 | 1,5,7,8,9,1<br>3,14,15  | 2,3,4,6,10,<br>11,12,16,1<br>7 | 4 | P00762,P06757,P16636,P53792        |
| 10234 | 1,5,7,8,9,1<br>3,14,16  | 2,3,4,6,10,<br>11,12,15,1<br>7 | 3 | B0BNN3,P00762,Q4FZU6               |
| 10235 | 1,5,7,8,9,1<br>3,14,17  | 2,3,4,6,10,<br>11,12,15,1<br>6 | 4 | P00762,P51907,P53792,Q4FZU6        |
| 10236 | 1,5,7,8,9,1<br>3,15,16  | 2,3,4,6,10,<br>11,12,14,1<br>7 | 4 | P00762,P01835,P62804,Q00715        |
| 10237 | 1,5,7,8,9,1<br>3,15,17  | 2,3,4,6,10,<br>11,12,14,1<br>6 | 3 | P00762,P53792,Q9JJS8               |
| 10238 | 1,5,7,8,9,1<br>3,16,17  | 2,3,4,6,10,<br>11,12,14,1<br>5 | 5 | P00762,P02625,P35280,P53792,Q4FZU6 |
| 10239 | 1,5,7,8,9,1<br>4,15,16  | 2,3,4,6,10,<br>11,12,13,1<br>7 | 5 | P00762,P16636,Q4FZU6,Q62635,Q9QZK9 |
| 10240 | 1,5,7,8,9,1<br>4,15,17  | 2,3,4,6,10,<br>11,12,13,1<br>6 | 4 | P00762,P16636,P47967,P53792        |
| 10241 | 1,5,7,8,9,1<br>4,16,17  | 2,3,4,6,10,<br>11,12,13,1<br>5 | 3 | P00762,P02625,Q4FZU6               |
| 10242 | 1,5,7,8,9,1<br>5,16,17  | 2,3,4,6,10,<br>11,12,13,1<br>4 | 3 | P00762,P25236,P47727               |
| 10243 | 1,5,7,8,10,<br>11,12,13 | 2,3,4,6,9,1<br>4,15,16,17      | 5 | P02803,P10715,P36374,Q5HZV9,Q8CJ52 |
| 10244 | 1,5,7,8,10,<br>11,12,14 | 2,3,4,6,9,1<br>3,15,16,17      | 3 | P10715,P47727,Q8CJ52               |

|       |                                                |   |                                    |
|-------|------------------------------------------------|---|------------------------------------|
| 10245 | 1,5,7,8,10, 2,3,4,6,9,1<br>11,12,15 3,14,16,17 | 2 | P00731,P10715                      |
| 10246 | 1,5,7,8,10, 2,3,4,6,9,1<br>11,12,16 3,14,15,17 | 2 | P10715,Q8CJ52                      |
| 10247 | 1,5,7,8,10, 2,3,4,6,9,1<br>11,12,17 3,14,15,16 | 3 | F1LM93,P10715,P16391               |
| 10248 | 1,5,7,8,10, 2,3,4,6,9,1<br>11,13,14 2,15,16,17 | 1 | P47727                             |
| 10249 | 1,5,7,8,10, 2,3,4,6,9,1<br>11,13,15 2,14,16,17 | 3 | P01835,Q5HZV9,Q9JJS8               |
| 10250 | 1,5,7,8,10, 2,3,4,6,9,1<br>11,13,16 2,14,15,17 | 4 | B0BNN3,P01835,Q5HZV9,Q8VD89        |
| 10251 | 1,5,7,8,10, 2,3,4,6,9,1<br>11,13,17 2,14,15,16 | 0 |                                    |
| 10252 | 1,5,7,8,10, 2,3,4,6,9,1<br>11,14,15 2,13,16,17 | 4 | P09605,P25809,P14480,P16636,Q63355 |
| 10253 | 1,5,7,8,10, 2,3,4,6,9,1<br>11,14,16 2,13,15,17 | 1 | P02625                             |
| 10254 | 1,5,7,8,10, 2,3,4,6,9,1<br>11,14,17 2,13,15,16 | 0 |                                    |
| 10255 | 1,5,7,8,10, 2,3,4,6,9,1<br>11,15,16 2,13,14,17 | 3 | P01835,P25236,Q62635               |
| 10256 | 1,5,7,8,10, 2,3,4,6,9,1<br>11,15,17 2,13,14,16 | 2 | P25236,Q9JJS8                      |
| 10257 | 1,5,7,8,10, 2,3,4,6,9,1<br>11,16,17 2,13,14,15 | 3 | A2RUV9,P02625,P25236               |
| 10258 | 1,5,7,8,10, 2,3,4,6,9,1<br>12,13,14 1,15,16,17 | 2 | Q498D9,Q8CJ52                      |
| 10259 | 1,5,7,8,10, 2,3,4,6,9,1<br>12,13,15 1,14,16,17 | 1 | P19218                             |
| 10260 | 1,5,7,8,10, 2,3,4,6,9,1<br>12,13,16 1,14,15,17 | 3 | P02625,P19218,Q8CJ52               |
| 10261 | 1,5,7,8,10, 2,3,4,6,9,1<br>12,13,17 1,14,15,16 | 3 | P19218,Q99MH3,Q9QZK9               |
| 10262 | 1,5,7,8,10, 2,3,4,6,9,1<br>12,14,15 1,13,16,17 | 0 |                                    |
| 10263 | 1,5,7,8,10, 2,3,4,6,9,1<br>12,14,16 1,13,15,17 | 2 | P02625,P08721                      |
| 10264 | 1,5,7,8,10, 2,3,4,6,9,1<br>12,14,17 1,13,15,16 | 0 |                                    |
| 10265 | 1,5,7,8,10, 2,3,4,6,9,1<br>12,15,16 1,13,14,17 | 1 | P10715                             |
| 10266 | 1,5,7,8,10, 2,3,4,6,9,1<br>12,15,17 1,13,14,16 | 2 | P10715,Q99MH3                      |
| 10267 | 1,5,7,8,10, 2,3,4,6,9,1<br>12,16,17 1,13,14,15 | 2 | P02625,P10715                      |

|       |                                                |   |                                    |
|-------|------------------------------------------------|---|------------------------------------|
| 10268 | 1,5,7,8,10, 2,3,4,6,9,1<br>13,14,15 1,12,16,17 | 4 | P00762,P01835,P09605;P25809,P16636 |
| 10269 | 1,5,7,8,10, 2,3,4,6,9,1<br>13,14,16 1,12,15,17 | 4 | B0BNN3,P00762,P01835,P02625        |
| 10270 | 1,5,7,8,10, 2,3,4,6,9,1<br>13,14,17 1,12,15,16 | 1 | P02625                             |
| 10271 | 1,5,7,8,10, 2,3,4,6,9,1<br>13,15,16 1,12,14,17 | 2 | P00762,P01835                      |
| 10272 | 1,5,7,8,10, 2,3,4,6,9,1<br>13,15,17 1,12,14,16 | 2 | P01835,Q99MH3                      |
| 10273 | 1,5,7,8,10, 2,3,4,6,9,1<br>13,16,17 1,12,14,15 | 2 | P01835,P02625                      |
| 10274 | 1,5,7,8,10, 2,3,4,6,9,1<br>14,15,16 1,12,13,17 | 3 | P01835,P09605;P25809,P16636        |
| 10275 | 1,5,7,8,10, 2,3,4,6,9,1<br>14,15,17 1,12,13,16 | 0 |                                    |
| 10276 | 1,5,7,8,10, 2,3,4,6,9,1<br>14,16,17 1,12,13,15 | 1 | P02625                             |
| 10277 | 1,5,7,8,10, 2,3,4,6,9,1<br>15,16,17 1,12,13,14 | 2 | P01835,P25236                      |
| 10278 | 1,5,7,8,11, 2,3,4,6,9,1<br>12,13,14 0,15,16,17 | 4 | P10715,P47727,Q4FZU6,Q8CJ52        |
| 10279 | 1,5,7,8,11, 2,3,4,6,9,1<br>12,13,15 0,14,16,17 | 2 | P10715,Q8CJ52                      |
| 10280 | 1,5,7,8,11, 2,3,4,6,9,1<br>12,13,16 0,14,15,17 | 4 | P10715,P17046,Q4FZU6,Q8CJ52        |
| 10281 | 1,5,7,8,11, 2,3,4,6,9,1<br>12,13,17 0,14,15,16 | 5 | P10715,P36374,Q4FZU6,Q8CJ52,Q9QZK9 |
| 10282 | 1,5,7,8,11, 2,3,4,6,9,1<br>12,14,15 0,13,16,17 | 3 | P10715,P19629,Q63355               |
| 10283 | 1,5,7,8,11, 2,3,4,6,9,1<br>12,14,16 0,13,15,17 | 3 | P10715,Q4FZU6,Q8CJ52               |
| 10284 | 1,5,7,8,11, 2,3,4,6,9,1<br>12,14,17 0,13,15,16 | 3 | P10715,Q4FZU6,Q8CJ52               |
| 10285 | 1,5,7,8,11, 2,3,4,6,9,1<br>12,15,16 0,13,14,17 | 1 | P10715                             |
| 10286 | 1,5,7,8,11, 2,3,4,6,9,1<br>12,15,17 0,13,14,16 | 2 | P10715,Q9QZA6                      |
| 10287 | 1,5,7,8,11, 2,3,4,6,9,1<br>12,16,17 0,13,14,15 | 4 | P10715,P17046,Q4FZU6,Q8CJ52        |
| 10288 | 1,5,7,8,11, 2,3,4,6,9,1<br>13,14,15 0,12,16,17 | 4 | P16636,Q63355,Q6P6R2,Q9JJS8        |
| 10289 | 1,5,7,8,11, 2,3,4,6,9,1<br>13,14,16 0,12,15,17 | 2 | B0BNN3,Q4FZU6                      |
| 10290 | 1,5,7,8,11, 2,3,4,6,9,1<br>13,14,17 0,12,15,16 | 2 | Q4FZU6,Q9JJS8                      |

|       |                                                |   |                                                  |
|-------|------------------------------------------------|---|--------------------------------------------------|
| 10291 | 1,5,7,8,11, 2,3,4,6,9,1<br>13,15,16 0,12,14,17 | 3 | P01835,Q8VD89,Q9JJS8                             |
| 10292 | 1,5,7,8,11, 2,3,4,6,9,1<br>13,15,17 0,12,14,16 | 2 | P04073,Q9JJS8                                    |
| 10293 | 1,5,7,8,11, 2,3,4,6,9,1<br>13,16,17 0,12,14,15 | 1 | Q4FZU6                                           |
| 10294 | 1,5,7,8,11, 2,3,4,6,9,1<br>14,15,16 0,12,13,17 | 2 | P16636,Q63355                                    |
| 10295 | 1,5,7,8,11, 2,3,4,6,9,1<br>14,15,17 0,12,13,16 | 3 | P14173,P47967,Q9JJS8                             |
| 10296 | 1,5,7,8,11, 2,3,4,6,9,1<br>14,16,17 0,12,13,15 | 1 | Q4FZU6                                           |
| 10297 | 1,5,7,8,11, 2,3,4,6,9,1<br>15,16,17 0,12,13,14 | 3 | P10715,P25236,Q9JJS8                             |
| 10298 | 1,5,7,8,12, 2,3,4,6,9,1<br>13,14,15 0,11,16,17 | 3 | P00762,P14173,P16636                             |
| 10299 | 1,5,7,8,12, 2,3,4,6,9,1<br>13,14,16 0,11,15,17 | 3 | P00762,Q4FZU6,Q8CJ52                             |
| 10300 | 1,5,7,8,12, 2,3,4,6,9,1<br>13,14,17 0,11,15,16 | 2 | P14173,Q4FZU6                                    |
| 10301 | 1,5,7,8,12, 2,3,4,6,9,1<br>13,15,16 0,11,14,17 | 4 | P00762,P10715,P14173,P19218                      |
| 10302 | 1,5,7,8,12, 2,3,4,6,9,1<br>13,15,17 0,11,14,16 | 3 | P10715,P14173,Q99MH3                             |
| 10303 | 1,5,7,8,12, 2,3,4,6,9,1<br>13,16,17 0,11,14,15 | 6 | P10715,P14173,P19218,P23928,P35280,Q4FZU6        |
| 10304 | 1,5,7,8,12, 2,3,4,6,9,1<br>14,15,16 0,11,13,17 | 3 | P14173,P16636,Q4FZU6                             |
| 10305 | 1,5,7,8,12, 2,3,4,6,9,1<br>14,15,17 0,11,13,16 | 2 | P14173,Q4FZU6                                    |
| 10306 | 1,5,7,8,12, 2,3,4,6,9,1<br>14,16,17 0,11,13,15 | 2 | P14173,Q4FZU6                                    |
| 10307 | 1,5,7,8,12, 2,3,4,6,9,1<br>15,16,17 0,11,13,14 | 3 | P10715,P14173,Q4FZU6                             |
| 10308 | 1,5,7,8,13, 2,3,4,6,9,1<br>14,15,16 0,11,12,17 | 4 | P00762,P01835,P14173,P16636                      |
| 10309 | 1,5,7,8,13, 2,3,4,6,9,1<br>14,15,17 0,11,12,16 | 7 | P00762,P14173,P16636,P47967,P53792,Q9JJS8,Q9WUW8 |
| 10310 | 1,5,7,8,13, 2,3,4,6,9,1<br>14,16,17 0,11,12,15 | 4 | P00762,P02625,P14173,Q4FZU6                      |
| 10311 | 1,5,7,8,13, 2,3,4,6,9,1<br>15,16,17 0,11,12,14 | 3 | P00762,P01835,P14173                             |
| 10312 | 1,5,7,8,14, 2,3,4,6,9,1<br>15,16,17 0,11,12,13 | 4 | P00762,P14173,P16636,Q4FZU6                      |
| 10313 | 1,5,7,9,10, 2,3,4,6,8,1<br>11,12,13 4,15,16,17 | 3 | B0BNN3,P02803,P20761                             |

|       |                                                |    |                                                                                     |
|-------|------------------------------------------------|----|-------------------------------------------------------------------------------------|
| 10314 | 1,5,7,9,10, 2,3,4,6,8,1<br>11,12,14 3,15,16,17 | 1  | P20761                                                                              |
| 10315 | 1,5,7,9,10, 2,3,4,6,8,1<br>11,12,15 3,14,16,17 | 5  | P20766,P51907,Q566E6,Q64093,Q6PCU2                                                  |
| 10316 | 1,5,7,9,10, 2,3,4,6,8,1<br>11,12,16 3,14,15,17 | 7  | B0BNN3,P10536,P12368,P20761,P20766,Q63424,Q64093                                    |
| 10317 | 1,5,7,9,10, 2,3,4,6,8,1<br>11,12,17 3,14,15,16 | 5  | P06757,P25236,Q566E6,Q64093,Q9QUL6                                                  |
| 10318 | 1,5,7,9,10, 2,3,4,6,8,1<br>11,13,14 2,15,16,17 | 5  | B0BNN3,P20761,P98089,Q4G075,Q62635                                                  |
| 10319 | 1,5,7,9,10, 2,3,4,6,8,1<br>11,13,15 2,14,16,17 | 5  | P20761,P98089,Q4G075,Q62635,Q9JJS8                                                  |
| 10320 | 1,5,7,9,10, 2,3,4,6,8,1<br>11,13,16 2,14,15,17 | 5  | B0BNN3,P20761,P98089,Q4G075,Q62635                                                  |
| 10321 | 1,5,7,9,10, 2,3,4,6,8,1<br>11,13,17 2,14,15,16 | 2  | B0BNN3,Q9QUL6                                                                       |
| 10322 | 1,5,7,9,10, 2,3,4,6,8,1<br>11,14,15 2,13,16,17 | 6  | P16636,Q4G075,Q62635,Q63355,Q80WL1,Q9QUL6                                           |
| 10323 | 1,5,7,9,10, 2,3,4,6,8,1<br>11,14,16 2,13,15,17 | 6  | B0BNN3,P20761,P62815,Q4G075,Q62635,Q9QUL6                                           |
| 10324 | 1,5,7,9,10, 2,3,4,6,8,1<br>11,14,17 2,13,15,16 | 2  | Q6TMA8,Q9QUL6                                                                       |
| 10325 | 1,5,7,9,10, 2,3,4,6,8,1<br>11,15,16 2,13,14,17 | 12 | P02782,P20761,P20766,P25236,P62815,P98089,Q62635,Q63424,Q64093,Q64319,Q80W57,Q80WL1 |
| 10326 | 1,5,7,9,10, 2,3,4,6,8,1<br>11,15,17 2,13,14,16 | 6  | P25236,Q566E6,Q64093,Q6TMA8,Q9JJS8,Q9QUL6                                           |
| 10327 | 1,5,7,9,10, 2,3,4,6,8,1<br>11,16,17 2,13,14,15 | 8  | A2RUV9,B0BNN3,O08557,P02625,P25236,Q64093,Q6TMA8,Q9QUL6                             |
| 10328 | 1,5,7,9,10, 2,3,4,6,8,1<br>12,13,14 1,15,16,17 | 2  | B0BNN3,P20761                                                                       |
| 10329 | 1,5,7,9,10, 2,3,4,6,8,1<br>12,13,15 1,14,16,17 | 1  | P19218                                                                              |
| 10330 | 1,5,7,9,10, 2,3,4,6,8,1<br>12,13,16 1,14,15,17 | 5  | B0BNN3,P02761,P19218,P20761,P97840                                                  |
| 10331 | 1,5,7,9,10, 2,3,4,6,8,1<br>12,13,17 1,14,15,16 | 2  | P14668,P19218                                                                       |
| 10332 | 1,5,7,9,10, 2,3,4,6,8,1<br>12,14,15 1,13,16,17 | 2  | P16636,P20766                                                                       |
| 10333 | 1,5,7,9,10, 2,3,4,6,8,1<br>12,14,16 1,13,15,17 | 4  | B0BNN3,P20761,P20766,Q5XI22                                                         |
| 10334 | 1,5,7,9,10, 2,3,4,6,8,1<br>12,14,17 1,13,15,16 | 2  | Q5XI22,Q6TMA8                                                                       |
| 10335 | 1,5,7,9,10, 2,3,4,6,8,1<br>12,15,16 1,13,14,17 | 4  | P19218,P20766,P97840,Q64093                                                         |
| 10336 | 1,5,7,9,10, 2,3,4,6,8,1<br>12,15,17 1,13,14,16 | 3  | P20766,P25236,Q6TMA8                                                                |



|       |                                                |    |                                                                                     |
|-------|------------------------------------------------|----|-------------------------------------------------------------------------------------|
| 10337 | 1,5,7,9,10, 2,3,4,6,8,1<br>12,16,17 1,13,14,15 | 6  | P02625,P19218,P20766,P25236,Q64093,Q6TMA8                                           |
| 10338 | 1,5,7,9,10, 2,3,4,6,8,1<br>13,14,15 1,12,16,17 | 6  | P09605,P25809,P16636,P19223,P98089,Q4G075,Q62635                                    |
| 10339 | 1,5,7,9,10, 2,3,4,6,8,1<br>13,14,16 1,12,15,17 | 11 | B0BNN3,P01015,P02625,P02761,P19223,P20761,P62804,P98089,Q00715,Q4G075,Q62635        |
| 10340 | 1,5,7,9,10, 2,3,4,6,8,1<br>13,14,17 1,12,15,16 | 1  | P14668                                                                              |
| 10341 | 1,5,7,9,10, 2,3,4,6,8,1<br>13,15,16 1,12,14,17 | 12 | B0BNN3,P01835,P16636,P19218,P19223,P20761,P62804,P98089,Q00715,Q4G075,Q62635,Q80WL1 |
| 10342 | 1,5,7,9,10, 2,3,4,6,8,1<br>13,15,17 1,12,14,16 | 3  | P14668,Q9EQS0,Q9JJS8                                                                |
| 10343 | 1,5,7,9,10, 2,3,4,6,8,1<br>13,16,17 1,12,14,15 | 7  | B0BNN3,P02625,P19218,P35280,P62804,Q00715,Q6TMA8                                    |
| 10344 | 1,5,7,9,10, 2,3,4,6,8,1<br>14,15,16 1,12,13,17 | 11 | P02782,P07647,P16636,P19223,P20766,Q4G075,Q5XI22,Q62635,Q6TMA8,Q80WL1,Q9QZK9        |
| 10345 | 1,5,7,9,10, 2,3,4,6,8,1<br>14,15,17 1,12,13,16 | 3  | P16636,Q5XI22,Q6TMA8                                                                |
| 10346 | 1,5,7,9,10, 2,3,4,6,8,1<br>14,16,17 1,12,13,15 | 3  | P02625,Q5XI22,Q6TMA8                                                                |
| 10347 | 1,5,7,9,10, 2,3,4,6,8,1<br>15,16,17 1,12,13,14 | 10 | P02780,P02782,P0C0A9,P20766,P25236,P47727,Q64093,Q6TMA8,Q80WL1,Q9JHB9               |
| 10348 | 1,5,7,9,11, 2,3,4,6,8,1<br>12,13,14 0,15,16,17 | 3  | B0BNN3,P20761,Q6P6R2                                                                |
| 10349 | 1,5,7,9,11, 2,3,4,6,8,1<br>12,13,15 0,14,16,17 | 1  | Q6P6R2                                                                              |
| 10350 | 1,5,7,9,11, 2,3,4,6,8,1<br>12,13,16 0,14,15,17 | 6  | B0BNN3,P02761,P02803,P12368,P17046,P20761                                           |
| 10351 | 1,5,7,9,11, 2,3,4,6,8,1<br>12,13,17 0,14,15,16 | 2  | P02803,P36374                                                                       |
| 10352 | 1,5,7,9,11, 2,3,4,6,8,1<br>12,14,15 0,13,16,17 | 4  | P16636,P20766,Q63355,Q6P6R2                                                         |
| 10353 | 1,5,7,9,11, 2,3,4,6,8,1<br>12,14,16 0,13,15,17 | 5  | B0BNN3,P02761,P20761,P20766,Q4FZU6                                                  |
| 10354 | 1,5,7,9,11, 2,3,4,6,8,1<br>12,14,17 0,13,15,16 | 1  | Q4FZU6                                                                              |
| 10355 | 1,5,7,9,11, 2,3,4,6,8,1<br>12,15,16 0,13,14,17 | 2  | P20766,P51907                                                                       |
| 10356 | 1,5,7,9,11, 2,3,4,6,8,1<br>12,15,17 0,13,14,16 | 0  |                                                                                     |
| 10357 | 1,5,7,9,11, 2,3,4,6,8,1<br>12,16,17 0,13,14,15 | 5  | P17046,P25236,Q4FZU6,Q64093,Q6TMA8                                                  |
| 10358 | 1,5,7,9,11, 2,3,4,6,8,1<br>13,14,15 0,12,16,17 | 8  | D4A5U3,P16636,P19223,Q4G075,Q62635,Q6P6R2,Q80WL1,Q9JJS8                             |
| 10359 | 1,5,7,9,11, 2,3,4,6,8,1<br>13,14,16 0,12,15,17 | 9  | B0BNN3,P02761,P19223,P20761,P98089,Q4FZU6,Q4G075,Q62635,Q7TPB1                      |

|       |                                                |    |                                                                                                   |
|-------|------------------------------------------------|----|---------------------------------------------------------------------------------------------------|
| 10360 | 1,5,7,9,11, 2,3,4,6,8,1<br>13,14,17 0,12,15,16 | 1  | Q9JJS8                                                                                            |
| 10361 | 1,5,7,9,11, 2,3,4,6,8,1<br>13,15,16 0,12,14,17 | 9  | P16636,P19223,P20761,P98089,Q4G075,Q62635,Q6P6R2,Q80WL1,Q9JJS8                                    |
| 10362 | 1,5,7,9,11, 2,3,4,6,8,1<br>13,15,17 0,12,14,16 | 2  | P04073,Q9JJS8                                                                                     |
| 10363 | 1,5,7,9,11, 2,3,4,6,8,1<br>13,16,17 0,12,14,15 | 3  | B0BNN3,D3ZHA0,P35280                                                                              |
| 10364 | 1,5,7,9,11, 2,3,4,6,8,1<br>14,15,16 0,12,13,17 | 9  | D4A5U3,P16636,P19223,P20766,Q4G075,Q62635,Q63355,Q80WL1,Q9QZK9                                    |
| 10365 | 1,5,7,9,11, 2,3,4,6,8,1<br>14,15,17 0,12,13,16 | 4  | P16636,Q80WL1,Q9JJS8,Q9QUL6                                                                       |
| 10366 | 1,5,7,9,11, 2,3,4,6,8,1<br>14,16,17 0,12,13,15 | 3  | Q4FZU6,Q6TMA8,Q9QUL6                                                                              |
| 10367 | 1,5,7,9,11, 2,3,4,6,8,1<br>15,16,17 0,12,13,14 | 5  | P02782,P25236,Q6TMA8,Q80WL1,Q9JJS8                                                                |
| 10368 | 1,5,7,9,12, 2,3,4,6,8,1<br>13,14,15 0,11,16,17 | 2  | P16636,Q6P6R2                                                                                     |
| 10369 | 1,5,7,9,12, 2,3,4,6,8,1<br>13,14,16 0,11,15,17 | 5  | B0BNN3,P02761,P14669,P20761,Q4FZU6                                                                |
| 10370 | 1,5,7,9,12, 2,3,4,6,8,1<br>13,14,17 0,11,15,16 | 4  | P14668,P35280,P53792,Q4FZU6                                                                       |
| 10371 | 1,5,7,9,12, 2,3,4,6,8,1<br>13,15,16 0,11,14,17 | 3  | P02761,P19218,P62804                                                                              |
| 10372 | 1,5,7,9,12, 2,3,4,6,8,1<br>13,15,17 0,11,14,16 | 3  | P14668,P19218,P53792                                                                              |
| 10373 | 1,5,7,9,12, 2,3,4,6,8,1<br>13,16,17 0,11,14,15 | 4  | P02761,P19218,P35280,Q4FZU6                                                                       |
| 10374 | 1,5,7,9,12, 2,3,4,6,8,1<br>14,15,16 0,11,13,17 | 3  | P16636,P20766,Q5XI22                                                                              |
| 10375 | 1,5,7,9,12, 2,3,4,6,8,1<br>14,15,17 0,11,13,16 | 1  | P16636                                                                                            |
| 10376 | 1,5,7,9,12, 2,3,4,6,8,1<br>14,16,17 0,11,13,15 | 5  | P20766,P35280,Q4FZU6,Q5XI22,Q6TMA8                                                                |
| 10377 | 1,5,7,9,12, 2,3,4,6,8,1<br>15,16,17 0,11,13,14 | 3  | P20766,P47727,Q6TMA8                                                                              |
| 10378 | 1,5,7,9,13, 2,3,4,6,8,1<br>14,15,16 0,11,12,17 | 13 | P00762,P02761,P11883,P14669,P16636,P19223,P53792,P62804,Q00715,Q4G075,Q62635,Q80WL1,Q9QZK9        |
| 10379 | 1,5,7,9,13, 2,3,4,6,8,1<br>14,15,17 0,11,12,16 | 7  | P00762,P11883,P14668,P16636,P53792,Q80WL1,Q9JJS8                                                  |
| 10380 | 1,5,7,9,13, 2,3,4,6,8,1<br>14,16,17 0,11,12,15 | 10 | B0BNN3,P00762,P02625,P02761,P35280,P53792,P62804,Q00715,Q4FZU6,Q5XI22                             |
| 10381 | 1,5,7,9,13, 2,3,4,6,8,1<br>15,16,17 0,11,12,14 | 14 | P00762,P0C0A9,P11883,P19218,P35280,P47727,P53792,P62804,Q00715,Q63598,Q6TMA8,Q80WL1,Q9EQS0,Q9JJS8 |
| 10382 | 1,5,7,9,14, 2,3,4,6,8,1<br>15,16,17 0,11,12,13 | 10 | P00762,P02782,P07647,P0C0A9,P11883,P16636,P62804,Q5XI22,Q6TMA8,Q80WL1                             |

|       |                          |                          |   |                                                         |
|-------|--------------------------|--------------------------|---|---------------------------------------------------------|
| 10383 | 1,5,7,10,1<br>1,12,13,14 | 2,3,4,6,8,9<br>,15,16,17 | 3 | P47727,Q5QE79,Q6P6R2                                    |
| 10384 | 1,5,7,10,1<br>1,12,13,15 | 2,3,4,6,8,9<br>,14,16,17 | 1 | Q6P6R2                                                  |
| 10385 | 1,5,7,10,1<br>1,12,13,16 | 2,3,4,6,8,9<br>,14,15,17 | 6 | B0BNN3,P02761,P12368,P17046,P20761,Q5QE79               |
| 10386 | 1,5,7,10,1<br>1,12,13,17 | 2,3,4,6,8,9<br>,14,15,16 | 3 | P36374,Q5QE79,Q9QZK9                                    |
| 10387 | 1,5,7,10,1<br>1,12,14,15 | 2,3,4,6,8,9<br>,13,16,17 | 5 | P16636,P20766,P51907,Q63355,Q6P6R2                      |
| 10388 | 1,5,7,10,1<br>1,12,14,16 | 2,3,4,6,8,9<br>,13,15,17 | 3 | P20761,P20766,Q5QE79                                    |
| 10389 | 1,5,7,10,1<br>1,12,14,17 | 2,3,4,6,8,9<br>,13,15,16 | 3 | P20766,Q5QE79,Q6TMA8                                    |
| 10390 | 1,5,7,10,1<br>1,12,15,16 | 2,3,4,6,8,9<br>,13,14,17 | 4 | P12368,P20766,P51907,Q6TMA8                             |
| 10391 | 1,5,7,10,1<br>1,12,15,17 | 2,3,4,6,8,9<br>,13,14,16 | 3 | P20766,P25236,Q6TMA8                                    |
| 10392 | 1,5,7,10,1<br>1,12,16,17 | 2,3,4,6,8,9<br>,13,14,15 | 8 | P05369,P06757,P12368,P17046,P20766,P25236,Q5QE79,Q6TMA8 |
| 10393 | 1,5,7,10,1<br>1,13,14,15 | 2,3,4,6,8,9<br>,12,16,17 | 7 | P09605;P25809,P16636,P19223,P98089,Q62635,Q6P6R2,Q9JJS8 |
| 10394 | 1,5,7,10,1<br>1,13,14,16 | 2,3,4,6,8,9<br>,12,15,17 | 8 | B0BNN3,P02761,P19223,P20761,P98089,Q5QE79,Q62635,Q7TPB1 |
| 10395 | 1,5,7,10,1<br>1,13,14,17 | 2,3,4,6,8,9<br>,12,15,16 | 1 | Q5QE79                                                  |
| 10396 | 1,5,7,10,1<br>1,13,15,16 | 2,3,4,6,8,9<br>,12,14,17 | 5 | P01835,P19223,P20761,P98089,Q62635                      |
| 10397 | 1,5,7,10,1<br>1,13,15,17 | 2,3,4,6,8,9<br>,12,14,16 | 2 | Q6TMA8,Q9JJS8                                           |
| 10398 | 1,5,7,10,1<br>1,13,16,17 | 2,3,4,6,8,9<br>,12,14,15 | 4 | B0BNN3,P02625,Q5QE79,Q6TMA8                             |
| 10399 | 1,5,7,10,1<br>1,14,15,16 | 2,3,4,6,8,9<br>,12,13,17 | 8 | P02782,P16636,P19223,P20766,Q62635,Q63355,Q6TMA8,Q80WL1 |
| 10400 | 1,5,7,10,1<br>1,14,15,17 | 2,3,4,6,8,9<br>,12,13,16 | 3 | P16636,P20766,Q6TMA8                                    |
| 10401 | 1,5,7,10,1<br>1,14,16,17 | 2,3,4,6,8,9<br>,12,13,15 | 4 | P02625,P20766,Q5QE79,Q6TMA8                             |
| 10402 | 1,5,7,10,1<br>1,15,16,17 | 2,3,4,6,8,9<br>,12,13,14 | 5 | P02782,P05369,P20766,P25236,Q6TMA8                      |
| 10403 | 1,5,7,10,1<br>2,13,14,15 | 2,3,4,6,8,9<br>,11,16,17 | 4 | P09605;P25809,P16636,Q498D9,Q6P6R2                      |
| 10404 | 1,5,7,10,1<br>2,13,14,16 | 2,3,4,6,8,9<br>,11,15,17 | 4 | B0BNN3,P02761,P20761,Q5QE79                             |
| 10405 | 1,5,7,10,1<br>2,13,14,17 | 2,3,4,6,8,9<br>,11,15,16 | 2 | P14668,Q5QE79                                           |

|       |                          |                          |   |                                                                       |
|-------|--------------------------|--------------------------|---|-----------------------------------------------------------------------|
| 10406 | 1,5,7,10,1<br>2,13,15,16 | 2,3,4,6,8,9<br>,11,14,17 | 1 | P19218                                                                |
| 10407 | 1,5,7,10,1<br>2,13,15,17 | 2,3,4,6,8,9<br>,11,14,16 | 4 | P14668,P19218,Q6TMA8,Q99MH3                                           |
| 10408 | 1,5,7,10,1<br>2,13,16,17 | 2,3,4,6,8,9<br>,11,14,15 | 5 | P02625,P19218,P35280,Q5QE79,Q6TMA8                                    |
| 10409 | 1,5,7,10,1<br>2,14,15,16 | 2,3,4,6,8,9<br>,11,13,17 | 3 | P16636,P20766,Q6TMA8                                                  |
| 10410 | 1,5,7,10,1<br>2,14,15,17 | 2,3,4,6,8,9<br>,11,13,16 | 2 | P20766,Q6TMA8                                                         |
| 10411 | 1,5,7,10,1<br>2,14,16,17 | 2,3,4,6,8,9<br>,11,13,15 | 5 | P02625,P20766,Q5QE79,Q5XI22,Q6TMA8                                    |
| 10412 | 1,5,7,10,1<br>2,15,16,17 | 2,3,4,6,8,9<br>,11,13,14 | 3 | P19218,P20766,Q6TMA8                                                  |
| 10413 | 1,5,7,10,1<br>3,14,15,16 | 2,3,4,6,8,9<br>,11,12,17 | 9 | P00762,P01835,P09605,P25809,P16636,P19223,P98089,Q4G075,Q62635,Q80WL1 |
| 10414 | 1,5,7,10,1<br>3,14,15,17 | 2,3,4,6,8,9<br>,11,12,16 | 3 | P14668,P16636,Q6TMA8                                                  |
| 10415 | 1,5,7,10,1<br>3,14,16,17 | 2,3,4,6,8,9<br>,11,12,15 | 4 | P02625,Q5QE79,Q5XI22,Q6TMA8                                           |
| 10416 | 1,5,7,10,1<br>3,15,16,17 | 2,3,4,6,8,9<br>,11,12,14 | 6 | P01835,P0C0A9,P19218,P62804,Q6TMA8,Q9EQS0                             |
| 10417 | 1,5,7,10,1<br>4,15,16,17 | 2,3,4,6,8,9<br>,11,12,13 | 9 | P02780,P02782,P07647,P0C0A9,P16636,P20766,Q5XI22,Q6TMA8,Q80WL1        |
| 10418 | 1,5,7,11,1<br>2,13,14,15 | 2,3,4,6,8,9<br>,10,16,17 | 3 | P16636,Q63355,Q6P6R2                                                  |
| 10419 | 1,5,7,11,1<br>2,13,14,16 | 2,3,4,6,8,9<br>,10,15,17 | 7 | B0BNN3,P02761,P17046,P20761,Q4FZU6,Q5QE79,Q6P6R2                      |
| 10420 | 1,5,7,11,1<br>2,13,14,17 | 2,3,4,6,8,9<br>,10,15,16 | 1 | Q5QE79                                                                |
| 10421 | 1,5,7,11,1<br>2,13,15,16 | 2,3,4,6,8,9<br>,10,14,17 | 2 | P17046,Q6P6R2                                                         |
| 10422 | 1,5,7,11,1<br>2,13,15,17 | 2,3,4,6,8,9<br>,10,14,16 | 0 |                                                                       |
| 10423 | 1,5,7,11,1<br>2,13,16,17 | 2,3,4,6,8,9<br>,10,14,15 | 4 | P17046,P35280,Q4FZU6,Q5QE79                                           |
| 10424 | 1,5,7,11,1<br>2,14,15,16 | 2,3,4,6,8,9<br>,10,13,17 | 4 | P16636,P20766,Q63355,Q6P6R2                                           |
| 10425 | 1,5,7,11,1<br>2,14,15,17 | 2,3,4,6,8,9<br>,10,13,16 | 2 | P20766,Q6TMA8                                                         |
| 10426 | 1,5,7,11,1<br>2,14,16,17 | 2,3,4,6,8,9<br>,10,13,15 | 5 | P17046,P20766,Q4FZU6,Q5QE79,Q6TMA8                                    |
| 10427 | 1,5,7,11,1<br>2,15,16,17 | 2,3,4,6,8,9<br>,10,13,14 | 4 | P05369,P17046,P20766,Q6TMA8                                           |
| 10428 | 1,5,7,11,1<br>3,14,15,16 | 2,3,4,6,8,9<br>,10,12,17 | 8 | D4A5U3,P16636,P19223,Q62635,Q63355,Q6P6R2,Q80WL1,Q9JJS8               |

|       |                          |                           |    |                                                                              |
|-------|--------------------------|---------------------------|----|------------------------------------------------------------------------------|
| 10429 | 1,5,7,11,1<br>3,14,15,17 | 2,3,4,6,8,9<br>,10,12,16  | 4  | D3ZHA0,P16636,Q6P6R2,Q9JJS8                                                  |
| 10430 | 1,5,7,11,1<br>3,14,16,17 | 2,3,4,6,8,9<br>,10,12,15  | 5  | D3ZHA0,P17046,Q4FZU6,Q5QE79,Q6TMA8                                           |
| 10431 | 1,5,7,11,1<br>3,15,16,17 | 2,3,4,6,8,9<br>,10,12,14  | 5  | D3ZHA0,P17046,Q6TMA8,Q9EQS0,Q9JJS8                                           |
| 10432 | 1,5,7,11,1<br>4,15,16,17 | 2,3,4,6,8,9<br>,10,12,13  | 5  | D3ZHA0,P16636,P20766,Q6TMA8,Q80WL1                                           |
| 10433 | 1,5,7,12,1<br>3,14,15,16 | 2,3,4,6,8,9<br>,10,11,17  | 4  | P00762,P02761,P16636,Q6P6R2                                                  |
| 10434 | 1,5,7,12,1<br>3,14,15,17 | 2,3,4,6,8,9<br>,10,11,16  | 4  | P11883,P14173,P14668,P16636                                                  |
| 10435 | 1,5,7,12,1<br>3,14,16,17 | 2,3,4,6,8,9<br>,10,11,15  | 7  | P02761,P17046,P35280,Q4FZU6,Q5QE79,Q5XI22,Q6TMA8                             |
| 10436 | 1,5,7,12,1<br>3,15,16,17 | 2,3,4,6,8,9<br>,10,11,14  | 6  | P11883,P14173,P17046,P19218,P35280,Q6TMA8                                    |
| 10437 | 1,5,7,12,1<br>4,15,16,17 | 2,3,4,6,8,9<br>,10,11,13  | 7  | P14173,P16636,P20766,P35467,Q4FZU6,Q5XI22,Q6TMA8                             |
| 10438 | 1,5,7,13,1<br>4,15,16,17 | 2,3,4,6,8,9<br>,10,11,12  | 11 | D3ZHA0,P00762,P0C0A9,P11883,P14173,P16636,P62804,Q5XI22,Q6TMA8,Q80WL1,Q9EQS0 |
| 10439 | 1,5,8,9,10,<br>11,12,13  | 2,3,4,6,7,1<br>4,15,16,17 | 3  | P02803,P09605;P25809,P20761                                                  |
| 10440 | 1,5,8,9,10,<br>11,12,14  | 2,3,4,6,7,1<br>3,15,16,17 | 3  | P02803,P09605;P25809,P20761                                                  |
| 10441 | 1,5,8,9,10,<br>11,12,15  | 2,3,4,6,7,1<br>3,14,16,17 | 2  | P09605;P25809,P14480                                                         |
| 10442 | 1,5,8,9,10,<br>11,12,16  | 2,3,4,6,7,1<br>3,14,15,17 | 3  | P02803,P20761,Q9WUW8                                                         |
| 10443 | 1,5,8,9,10,<br>11,12,17  | 2,3,4,6,7,1<br>3,14,15,16 | 3  | P02803,P25236,Q63532                                                         |
| 10444 | 1,5,8,9,10,<br>11,13,14  | 2,3,4,6,7,1<br>2,15,16,17 | 5  | P01836,P02803,P09605;P25809,P20761,P98089                                    |
| 10445 | 1,5,8,9,10,<br>11,13,15  | 2,3,4,6,7,1<br>2,14,16,17 | 5  | P09605;P25809,P14480,P20761,P98089,Q63532                                    |
| 10446 | 1,5,8,9,10,<br>11,13,16  | 2,3,4,6,7,1<br>2,14,15,17 | 7  | A2RUV9,B0BNN3,P02803,P09605;P25809,P20761,P62815,P98089                      |
| 10447 | 1,5,8,9,10,<br>11,13,17  | 2,3,4,6,7,1<br>2,14,15,16 | 6  | A2RUV9,P01836,P02803,P04073,Q63532,Q920P0                                    |
| 10448 | 1,5,8,9,10,<br>11,14,15  | 2,3,4,6,7,1<br>2,13,16,17 | 5  | P01836,P09605;P25809,P14480,P20761,Q62635                                    |
| 10449 | 1,5,8,9,10,<br>11,14,16  | 2,3,4,6,7,1<br>2,13,15,17 | 7  | P01836,P09605;P25809,P20761,P55091,P62815,Q62635,Q9QZK9                      |
| 10450 | 1,5,8,9,10,<br>11,14,17  | 2,3,4,6,7,1<br>2,13,15,16 | 2  | P01836,Q9QUL6                                                                |
| 10451 | 1,5,8,9,10,<br>11,15,16  | 2,3,4,6,7,1<br>2,13,14,17 | 8  | A2RUV9,P09605;P25809,P20761,P25236,P55091,P62815,Q62635,Q9QZK9               |

|       |                                                |   |                                                         |
|-------|------------------------------------------------|---|---------------------------------------------------------|
| 10452 | 1,5,8,9,10, 2,3,4,6,7,1<br>11,15,17 2,13,14,16 | 5 | G3V686,P01836,P25236,Q566E6,Q63532                      |
| 10453 | 1,5,8,9,10, 2,3,4,6,7,1<br>11,16,17 2,13,14,15 | 4 | A2RUV9,P01836,P02625,P25236                             |
| 10454 | 1,5,8,9,10, 2,3,4,6,7,1<br>12,13,14 1,15,16,17 | 3 | P02803,P09605,P25809,P20761                             |
| 10455 | 1,5,8,9,10, 2,3,4,6,7,1<br>12,13,15 1,14,16,17 | 2 | P09605,P25809,P16086                                    |
| 10456 | 1,5,8,9,10, 2,3,4,6,7,1<br>12,13,16 1,14,15,17 | 5 | P02631,P02803,P09605,P25809,P19218,P20761               |
| 10457 | 1,5,8,9,10, 2,3,4,6,7,1<br>12,13,17 1,14,15,16 | 4 | P02631,P02803,P16086,Q63532                             |
| 10458 | 1,5,8,9,10, 2,3,4,6,7,1<br>12,14,15 1,13,16,17 | 1 | P09605,P25809                                           |
| 10459 | 1,5,8,9,10, 2,3,4,6,7,1<br>12,14,16 1,13,15,17 | 2 | P09605,P25809,P20761                                    |
| 10460 | 1,5,8,9,10, 2,3,4,6,7,1<br>12,14,17 1,13,15,16 | 2 | P01836,Q99PP0                                           |
| 10461 | 1,5,8,9,10, 2,3,4,6,7,1<br>12,15,16 1,13,14,17 | 3 | P09605,P25809,P16086,P20761                             |
| 10462 | 1,5,8,9,10, 2,3,4,6,7,1<br>12,15,17 1,13,14,16 | 3 | G3V686,P16086,Q63532                                    |
| 10463 | 1,5,8,9,10, 2,3,4,6,7,1<br>12,16,17 1,13,14,15 | 2 | P02625,P16086                                           |
| 10464 | 1,5,8,9,10, 2,3,4,6,7,1<br>13,14,15 1,12,16,17 | 5 | P01836,P09605,P25809,P14480,P19223,P20761               |
| 10465 | 1,5,8,9,10, 2,3,4,6,7,1<br>13,14,16 1,12,15,17 | 6 | B0BNN3,P01836,P02625,P09605,P25809,P19223,P20761        |
| 10466 | 1,5,8,9,10, 2,3,4,6,7,1<br>13,14,17 1,12,15,16 | 2 | P01836,P02625                                           |
| 10467 | 1,5,8,9,10, 2,3,4,6,7,1<br>13,15,16 1,12,14,17 | 5 | P01835,P09605,P25809,P19223,P20761,P98089               |
| 10468 | 1,5,8,9,10, 2,3,4,6,7,1<br>13,15,17 1,12,14,16 | 3 | G3V686,P01836,Q63532                                    |
| 10469 | 1,5,8,9,10, 2,3,4,6,7,1<br>13,16,17 1,12,14,15 | 6 | A2RUV9,P01836,P02625,P02631,P25031,P35280               |
| 10470 | 1,5,8,9,10, 2,3,4,6,7,1<br>14,15,16 1,12,13,17 | 7 | P01836,P09605,P25809,P19223,P20761,P55091,Q62635,Q9QZK9 |
| 10471 | 1,5,8,9,10, 2,3,4,6,7,1<br>14,15,17 1,12,13,16 | 3 | G3V686,P01836,P47967                                    |
| 10472 | 1,5,8,9,10, 2,3,4,6,7,1<br>14,16,17 1,12,13,15 | 2 | P01836,P02625                                           |
| 10473 | 1,5,8,9,10, 2,3,4,6,7,1<br>15,16,17 1,12,13,14 | 4 | P01836,P16086,P25031,P25236                             |
| 10474 | 1,5,8,9,11, 2,3,4,6,7,1<br>12,13,14 0,15,16,17 | 3 | P02803,P09605,P25809,P20761                             |

|       |                                                |   |                                                         |
|-------|------------------------------------------------|---|---------------------------------------------------------|
| 10475 | 1,5,8,9,11, 2,3,4,6,7,1<br>12,13,15 0,14,16,17 | 2 | P14480,Q63532                                           |
| 10476 | 1,5,8,9,11, 2,3,4,6,7,1<br>12,13,16 0,14,15,17 | 2 | P02803,P20761                                           |
| 10477 | 1,5,8,9,11, 2,3,4,6,7,1<br>12,13,17 0,14,15,16 | 4 | P02803,P35280,P36374,Q63532                             |
| 10478 | 1,5,8,9,11, 2,3,4,6,7,1<br>12,14,15 0,13,16,17 | 2 | P09605;P25809,P14480                                    |
| 10479 | 1,5,8,9,11, 2,3,4,6,7,1<br>12,14,16 0,13,15,17 | 1 | P20761                                                  |
| 10480 | 1,5,8,9,11, 2,3,4,6,7,1<br>12,14,17 0,13,15,16 | 1 | Q99PP0                                                  |
| 10481 | 1,5,8,9,11, 2,3,4,6,7,1<br>12,15,16 0,13,14,17 | 2 | P12020,P20761                                           |
| 10482 | 1,5,8,9,11, 2,3,4,6,7,1<br>12,15,17 0,13,14,16 | 2 | P12020,Q63532                                           |
| 10483 | 1,5,8,9,11, 2,3,4,6,7,1<br>12,16,17 0,13,14,15 | 1 | P12020                                                  |
| 10484 | 1,5,8,9,11, 2,3,4,6,7,1<br>13,14,15 0,12,16,17 | 5 | P09605;P25809,P14480,P19223,P20761,Q6P6R2               |
| 10485 | 1,5,8,9,11, 2,3,4,6,7,1<br>13,14,16 0,12,15,17 | 5 | B0BNN3,P01041,P09605;P25809,P19223,P20761               |
| 10486 | 1,5,8,9,11, 2,3,4,6,7,1<br>13,14,17 0,12,15,16 | 4 | P01836,P04218,P47967,P97840                             |
| 10487 | 1,5,8,9,11, 2,3,4,6,7,1<br>13,15,16 0,12,14,17 | 4 | P09605;P25809,P19223,P20761,P98089                      |
| 10488 | 1,5,8,9,11, 2,3,4,6,7,1<br>13,15,17 0,12,14,16 | 6 | P04073,P04218,P47967,P97840,Q63532,Q9JJS8               |
| 10489 | 1,5,8,9,11, 2,3,4,6,7,1<br>13,16,17 0,12,14,15 | 3 | A2RUV9,P04218,P35280                                    |
| 10490 | 1,5,8,9,11, 2,3,4,6,7,1<br>14,15,16 0,12,13,17 | 7 | P04218,P09605;P25809,P19223,P20761,P55091,Q62635,Q9QZK9 |
| 10491 | 1,5,8,9,11, 2,3,4,6,7,1<br>14,15,17 0,12,13,16 | 4 | P01836,P04218,P47967,P97840                             |
| 10492 | 1,5,8,9,11, 2,3,4,6,7,1<br>14,16,17 0,12,13,15 | 2 | P01836,P04218                                           |
| 10493 | 1,5,8,9,11, 2,3,4,6,7,1<br>15,16,17 0,12,13,14 | 5 | A2RUV9,P04218,P06911,P12020,P25236                      |
| 10494 | 1,5,8,9,12, 2,3,4,6,7,1<br>13,14,15 0,11,16,17 | 2 | P09605;P25809,Q5FVI6                                    |
| 10495 | 1,5,8,9,12, 2,3,4,6,7,1<br>13,14,16 0,11,15,17 | 3 | P09605;P25809,P20761,Q4FZU6                             |
| 10496 | 1,5,8,9,12, 2,3,4,6,7,1<br>13,14,17 0,11,15,16 | 2 | P35280,Q5FVI6                                           |
| 10497 | 1,5,8,9,12, 2,3,4,6,7,1<br>13,15,16 0,11,14,17 | 2 | P16086,P20761                                           |

|       |                                                |   |                                                  |
|-------|------------------------------------------------|---|--------------------------------------------------|
| 10498 | 1,5,8,9,12, 2,3,4,6,7,1<br>13,15,17 0,11,14,16 | 3 | P16086,Q5FVI6,Q63532                             |
| 10499 | 1,5,8,9,12, 2,3,4,6,7,1<br>13,16,17 0,11,14,15 | 3 | P02803,P35280,Q4FZU6                             |
| 10500 | 1,5,8,9,12, 2,3,4,6,7,1<br>14,15,16 0,11,13,17 | 1 | P09605;P25809                                    |
| 10501 | 1,5,8,9,12, 2,3,4,6,7,1<br>14,15,17 0,11,13,16 | 2 | P47967,Q5FVI6                                    |
| 10502 | 1,5,8,9,12, 2,3,4,6,7,1<br>14,16,17 0,11,13,15 | 3 | P35280,Q4FZU6,Q5FVI6                             |
| 10503 | 1,5,8,9,12, 2,3,4,6,7,1<br>15,16,17 0,11,13,14 | 2 | P12020,P16086                                    |
| 10504 | 1,5,8,9,13, 2,3,4,6,7,1<br>14,15,16 0,11,12,17 | 6 | P00762,P05964,P09605;P25809,P19223,P20761,Q9QZK9 |
| 10505 | 1,5,8,9,13, 2,3,4,6,7,1<br>14,15,17 0,11,12,16 | 4 | P01836,P47967,P53792,Q5FVI6                      |
| 10506 | 1,5,8,9,13, 2,3,4,6,7,1<br>14,16,17 0,11,12,15 | 5 | P01836,P02625,P35280,Q4FZU6,Q5FVI6               |
| 10507 | 1,5,8,9,13, 2,3,4,6,7,1<br>15,16,17 0,11,12,14 | 2 | P35280,Q9EQS0                                    |
| 10508 | 1,5,8,9,14, 2,3,4,6,7,1<br>15,16,17 0,11,12,13 | 3 | P01836,P04218,P47967                             |
| 10509 | 1,5,8,10,1 2,3,4,6,7,9<br>1,12,13,14 ,15,16,17 | 4 | P02803,P09605;P25809,P20761,P47727               |
| 10510 | 1,5,8,10,1 2,3,4,6,7,9<br>1,12,13,15 ,14,16,17 | 1 | P09605;P25809                                    |
| 10511 | 1,5,8,10,1 2,3,4,6,7,9<br>1,12,13,16 ,14,15,17 | 3 | P02803,P09605;P25809,P20761                      |
| 10512 | 1,5,8,10,1 2,3,4,6,7,9<br>1,12,13,17 ,14,15,16 | 2 | P02803,Q63532                                    |
| 10513 | 1,5,8,10,1 2,3,4,6,7,9<br>1,12,14,15 ,13,16,17 | 1 | P09605;P25809                                    |
| 10514 | 1,5,8,10,1 2,3,4,6,7,9<br>1,12,14,16 ,13,15,17 | 2 | P09605;P25809,P20761                             |
| 10515 | 1,5,8,10,1 2,3,4,6,7,9<br>1,12,14,17 ,13,15,16 | 0 |                                                  |
| 10516 | 1,5,8,10,1 2,3,4,6,7,9<br>1,12,15,16 ,13,14,17 | 2 | P09605;P25809,P20761                             |
| 10517 | 1,5,8,10,1 2,3,4,6,7,9<br>1,12,15,17 ,13,14,16 | 0 |                                                  |
| 10518 | 1,5,8,10,1 2,3,4,6,7,9<br>1,12,16,17 ,13,14,15 | 2 | P05369,P25236                                    |
| 10519 | 1,5,8,10,1 2,3,4,6,7,9<br>1,13,14,15 ,12,16,17 | 3 | P09605;P25809,P14480,P19223                      |
| 10520 | 1,5,8,10,1 2,3,4,6,7,9<br>1,13,14,16 ,12,15,17 | 5 | P09605;P25809,P19223,P20761,P98089,Q7TPB1        |



|       |                          |                          |   |                                           |
|-------|--------------------------|--------------------------|---|-------------------------------------------|
| 10521 | 1,5,8,10,1<br>1,13,14,17 | 2,3,4,6,7,9<br>,12,15,16 | 1 | P01836                                    |
| 10522 | 1,5,8,10,1<br>1,13,15,16 | 2,3,4,6,7,9<br>,12,14,17 | 5 | P01835,P09605,P25809,P19223,P20761,P98089 |
| 10523 | 1,5,8,10,1<br>1,13,15,17 | 2,3,4,6,7,9<br>,12,14,16 | 2 | P04073,Q63532                             |
| 10524 | 1,5,8,10,1<br>1,13,16,17 | 2,3,4,6,7,9<br>,12,14,15 | 3 | A2RUV9,P02625,P02631                      |
| 10525 | 1,5,8,10,1<br>1,14,15,16 | 2,3,4,6,7,9<br>,12,13,17 | 5 | P09605,P25809,P19223,P20761,P55091,Q62635 |
| 10526 | 1,5,8,10,1<br>1,14,15,17 | 2,3,4,6,7,9<br>,12,13,16 | 2 | G3V686,P01836                             |
| 10527 | 1,5,8,10,1<br>1,14,16,17 | 2,3,4,6,7,9<br>,12,13,15 | 2 | P01836,P02625                             |
| 10528 | 1,5,8,10,1<br>1,15,16,17 | 2,3,4,6,7,9<br>,12,13,14 | 3 | A2RUV9,P05369,P25236                      |
| 10529 | 1,5,8,10,1<br>2,13,14,15 | 2,3,4,6,7,9<br>,11,16,17 | 2 | P09605,P25809,Q498D9                      |
| 10530 | 1,5,8,10,1<br>2,13,14,16 | 2,3,4,6,7,9<br>,11,15,17 | 2 | P09605,P25809,P20761                      |
| 10531 | 1,5,8,10,1<br>2,13,14,17 | 2,3,4,6,7,9<br>,11,15,16 | 0 |                                           |
| 10532 | 1,5,8,10,1<br>2,13,15,16 | 2,3,4,6,7,9<br>,11,14,17 | 3 | P09605,P25809,P16086,P83121               |
| 10533 | 1,5,8,10,1<br>2,13,15,17 | 2,3,4,6,7,9<br>,11,14,16 | 5 | P16086,P83121,Q63532,Q61FV1,Q99MH3        |
| 10534 | 1,5,8,10,1<br>2,13,16,17 | 2,3,4,6,7,9<br>,11,14,15 | 4 | P02625,P02631,P35280,P83121               |
| 10535 | 1,5,8,10,1<br>2,14,15,16 | 2,3,4,6,7,9<br>,11,13,17 | 1 | P09605,P25809                             |
| 10536 | 1,5,8,10,1<br>2,14,15,17 | 2,3,4,6,7,9<br>,11,13,16 | 0 |                                           |
| 10537 | 1,5,8,10,1<br>2,14,16,17 | 2,3,4,6,7,9<br>,11,13,15 | 1 | P02625                                    |
| 10538 | 1,5,8,10,1<br>2,15,16,17 | 2,3,4,6,7,9<br>,11,13,14 | 2 | P16086,P83121                             |
| 10539 | 1,5,8,10,1<br>3,14,15,16 | 2,3,4,6,7,9<br>,11,12,17 | 5 | P01835,P09605,P25809,P19223,P20761,Q498R7 |
| 10540 | 1,5,8,10,1<br>3,14,15,17 | 2,3,4,6,7,9<br>,11,12,16 | 2 | P01836,Q498R7                             |
| 10541 | 1,5,8,10,1<br>3,14,16,17 | 2,3,4,6,7,9<br>,11,12,15 | 3 | P01836,P02625,Q498R7                      |
| 10542 | 1,5,8,10,1<br>3,15,16,17 | 2,3,4,6,7,9<br>,11,12,14 | 4 | P01835,P83121,Q498R7,Q9EQS0               |
| 10543 | 1,5,8,10,1<br>4,15,16,17 | 2,3,4,6,7,9<br>,11,12,13 | 2 | P01836,Q498R7                             |

|       |                          |                          |   |                                                         |
|-------|--------------------------|--------------------------|---|---------------------------------------------------------|
| 10544 | 1,5,8,11,1<br>2,13,14,15 | 2,3,4,6,7,9<br>,10,16,17 | 2 | P09605;P25809,Q6P6R2                                    |
| 10545 | 1,5,8,11,1<br>2,13,14,16 | 2,3,4,6,7,9<br>,10,15,17 | 2 | P09605;P25809,P20761                                    |
| 10546 | 1,5,8,11,1<br>2,13,14,17 | 2,3,4,6,7,9<br>,10,15,16 | 0 |                                                         |
| 10547 | 1,5,8,11,1<br>2,13,15,16 | 2,3,4,6,7,9<br>,10,14,17 | 1 | P09605;P25809                                           |
| 10548 | 1,5,8,11,1<br>2,13,15,17 | 2,3,4,6,7,9<br>,10,14,16 | 1 | Q63532                                                  |
| 10549 | 1,5,8,11,1<br>2,13,16,17 | 2,3,4,6,7,9<br>,10,14,15 | 1 | P35280                                                  |
| 10550 | 1,5,8,11,1<br>2,14,15,16 | 2,3,4,6,7,9<br>,10,13,17 | 1 | P09605;P25809                                           |
| 10551 | 1,5,8,11,1<br>2,14,15,17 | 2,3,4,6,7,9<br>,10,13,16 | 1 | P47967                                                  |
| 10552 | 1,5,8,11,1<br>2,14,16,17 | 2,3,4,6,7,9<br>,10,13,15 | 1 | Q4FZU6                                                  |
| 10553 | 1,5,8,11,1<br>2,15,16,17 | 2,3,4,6,7,9<br>,10,13,14 | 2 | P05369,P12020                                           |
| 10554 | 1,5,8,11,1<br>3,14,15,16 | 2,3,4,6,7,9<br>,10,12,17 | 5 | P02696,P09605;P25809,P19223,P20761,Q6P6R2               |
| 10555 | 1,5,8,11,1<br>3,14,15,17 | 2,3,4,6,7,9<br>,10,12,16 | 2 | P47967,P97840                                           |
| 10556 | 1,5,8,11,1<br>3,14,16,17 | 2,3,4,6,7,9<br>,10,12,15 | 0 |                                                         |
| 10557 | 1,5,8,11,1<br>3,15,16,17 | 2,3,4,6,7,9<br>,10,12,14 | 1 | Q9EQS0                                                  |
| 10558 | 1,5,8,11,1<br>4,15,16,17 | 2,3,4,6,7,9<br>,10,12,13 | 3 | P04218,P47967,P97840                                    |
| 10559 | 1,5,8,12,1<br>3,14,15,16 | 2,3,4,6,7,9<br>,10,11,17 | 1 | P09605;P25809                                           |
| 10560 | 1,5,8,12,1<br>3,14,15,17 | 2,3,4,6,7,9<br>,10,11,16 | 2 | P47967,Q5FVI6                                           |
| 10561 | 1,5,8,12,1<br>3,14,16,17 | 2,3,4,6,7,9<br>,10,11,15 | 3 | P35280,Q4FZU6,Q5FVI6                                    |
| 10562 | 1,5,8,12,1<br>3,15,16,17 | 2,3,4,6,7,9<br>,10,11,14 | 3 | P35280,P83121,Q5XFX0                                    |
| 10563 | 1,5,8,12,1<br>4,15,16,17 | 2,3,4,6,7,9<br>,10,11,13 | 1 | P14173                                                  |
| 10564 | 1,5,8,13,1<br>4,15,16,17 | 2,3,4,6,7,9<br>,10,11,12 | 7 | P08753,P11883,P14173,P47967,Q498R7,Q5FVI6,Q9EQS0        |
| 10565 | 1,5,9,10,1<br>1,12,13,14 | 2,3,4,6,7,8<br>,15,16,17 | 7 | P02631,P02803,P09605;P25809,P16086,P20761,P50115,Q4G075 |
| 10566 | 1,5,9,10,1<br>1,12,13,15 | 2,3,4,6,7,8<br>,14,16,17 | 7 | P02631,P09605;P25809,P16086,P20761,P50115,Q6P6R2,Q9Z0V6 |

|       |                          |                          |    |                                                                                                                                                                                                                   |
|-------|--------------------------|--------------------------|----|-------------------------------------------------------------------------------------------------------------------------------------------------------------------------------------------------------------------|
| 10567 | 1,5,9,10,1<br>1,12,13,16 | 2,3,4,6,7,8<br>,14,15,17 | 12 | B0BNN3,P02631,P02761,P02803,P10536,P12368,P16086,P20761,P20762,P50115,P62815,Q9Z0V6                                                                                                                               |
| 10568 | 1,5,9,10,1<br>1,12,13,17 | 2,3,4,6,7,8<br>,14,15,16 | 6  | P02631,P02803,P16086,P20761,P20762,Q63532                                                                                                                                                                         |
| 10569 | 1,5,9,10,1<br>1,12,14,15 | 2,3,4,6,7,8<br>,13,16,17 | 7  | P09605,P25809,P16086,P20761,P20766,P50115,P51907,Q9R0T3                                                                                                                                                           |
| 10570 | 1,5,9,10,1<br>1,12,14,16 | 2,3,4,6,7,8<br>,13,15,17 | 10 | P02631,P02761,P09605,P25809,P11598,P16086,P20761,P20766,P50115,P62815,Q9WUW8                                                                                                                                      |
| 10571 | 1,5,9,10,1<br>1,12,14,17 | 2,3,4,6,7,8<br>,13,15,16 | 2  | P02631,P16086                                                                                                                                                                                                     |
| 10572 | 1,5,9,10,1<br>1,12,15,16 | 2,3,4,6,7,8<br>,13,14,17 | 14 | P06761,P06911,P11598,P12020,P16086,P20761,P20762,P20766,P22282,P29975,P50115,P51907,P53790,P62815                                                                                                                 |
| 10573 | 1,5,9,10,1<br>1,12,15,17 | 2,3,4,6,7,8<br>,13,14,16 | 7  | P06911,P12020,P16086,P20766,P25236,Q566E6,Q9R0T3                                                                                                                                                                  |
| 10574 | 1,5,9,10,1<br>1,12,16,17 | 2,3,4,6,7,8<br>,13,14,15 | 12 | O08557,P02631,P06757,P06911,P12020,P16086,P20761,P20762,P20766,P25236,Q5GRG2,Q6TMA8                                                                                                                               |
| 10575 | 1,5,9,10,1<br>1,13,14,15 | 2,3,4,6,7,8<br>,12,16,17 | 17 | P01041,P09605,P25809,P19223,P20761,P50115,P55091,P63029,P98089,Q4G075,Q62635,Q63751,Q6P6R2,Q80WL1,Q99041,Q9EQS0,Q9R0T3,Q9Z0V6                                                                                     |
| 10576 | 1,5,9,10,1<br>1,13,14,16 | 2,3,4,6,7,8<br>,12,15,17 | 20 | B0BNN3,D3ZHA0,O55004,P01041,P02631,P02761,P09605,P25809,P19223,P20761,P20762,P50115,P55091,P62815,P98089,Q4G075,Q62635,Q63751,Q7TPB1,Q99041,Q9Z0V6                                                                |
| 10577 | 1,5,9,10,1<br>1,13,14,17 | 2,3,4,6,7,8<br>,12,15,16 | 6  | D3ZHA0,P01041,P01836,P02631,P20761,Q9EQS0                                                                                                                                                                         |
| 10578 | 1,5,9,10,1<br>1,13,15,16 | 2,3,4,6,7,8<br>,12,14,17 | 26 | O88267,P01041,P02631,P06761,P09605,P25809,P11598,P16086,P19223,P20761,P20762,P22282,P31430,P50115,P55091,P62815,P98089,Q4G075,Q62635,Q63751,Q80WL1,Q923M1,Q99041,Q9EQS0,Q9QYU4,Q9R0T3,Q9Z0V6                      |
| 10579 | 1,5,9,10,1<br>1,13,15,17 | 2,3,4,6,7,8<br>,12,14,16 | 10 | D3ZHA0,P02631,P04073,P16086,P20762,Q63532,Q80WL1,Q920P0,Q9EQS0,Q9R0T3                                                                                                                                             |
| 10580 | 1,5,9,10,1<br>1,13,16,17 | 2,3,4,6,7,8<br>,12,14,15 | 14 | A2RUV9,B0BNN3,D3ZHA0,O08557,P01041,P02631,P16086,P20761,P20762,P35280,Q64611,Q920P0,Q923M1,Q9EQS0                                                                                                                 |
| 10581 | 1,5,9,10,1<br>1,14,15,16 | 2,3,4,6,7,8<br>,12,13,17 | 29 | O88267,P02780,P02782,P06761,P07647,P09605,P25809,P11598,P16086,P19223,P20761,P20766,P22282,P22283,P29975,P50115,P55091,P62815,P70545,P98089,Q4G075,Q62635,Q62902,Q63751,Q6AYR9,Q80WL1,Q99041,Q9EQS0,Q9QZK9,Q9R0T3 |
| 10582 | 1,5,9,10,1<br>1,14,15,17 | 2,3,4,6,7,8<br>,12,13,16 | 10 | P01836,P06761,P07647,P16086,Q62902,Q6TMA8,Q80WL1,Q9EQS0,Q9QUL6,Q9R0T3                                                                                                                                             |
| 10583 | 1,5,9,10,1<br>1,14,16,17 | 2,3,4,6,7,8<br>,12,13,15 | 16 | D3ZHA0,O08557,P01836,P02625,P02631,P06761,P07647,P11598,P16086,P20761,P20762,P25236,P62815,Q6TMA8,Q9EQS0,Q9QUL6                                                                                                   |
| 10584 | 1,5,9,10,1<br>1,15,16,17 | 2,3,4,6,7,8<br>,12,13,14 | 28 | A2RUV9,D3ZHA0,O08557,P02780,P02782,P06761,P06911,P07647,P11598,P12020,P16086,P20761,P20762,P20766,P22282,P22283,P25236,P29975,P30120,P62815,Q5GRG2,Q62902,Q6AYR9,Q6TMA8,Q80WL1,Q923M1,Q9EQS0,Q9R0T3               |
| 10585 | 1,5,9,10,1<br>2,13,14,15 | 2,3,4,6,7,8<br>,11,16,17 | 11 | P07150,P09605,P25809,P14669,P16086,P20761,P50115,Q4G075,Q63751,Q6P6R2,Q99041,Q9R0T3                                                                                                                               |
| 10586 | 1,5,9,10,1<br>2,13,14,16 | 2,3,4,6,7,8<br>,11,15,17 | 13 | B0BNN3,O55004,P02631,P02761,P07150,P09605,P25809,P14669,P16086,P20761,P20762,P50115,Q4G075,Q63751                                                                                                                 |
| 10587 | 1,5,9,10,1<br>2,13,14,17 | 2,3,4,6,7,8<br>,11,15,16 | 6  | P02631,P07150,P14668,P14669,P16086,P35280                                                                                                                                                                         |
| 10588 | 1,5,9,10,1<br>2,13,15,16 | 2,3,4,6,7,8<br>,11,14,17 | 14 | P02631,P02761,P07150,P09605,P25809,P14669,P16086,P19218,P20761,P20762,P50115,Q4G075,Q63751,Q9EQS0,Q9Z0V6                                                                                                          |
| 10589 | 1,5,9,10,1<br>2,13,15,17 | 2,3,4,6,7,8<br>,11,14,16 | 8  | P02631,P07150,P14668,P14669,P16086,P20762,Q63532,Q9EQS0                                                                                                                                                           |

|       |                          |                          |    |                                                                                                                                                                                                                          |
|-------|--------------------------|--------------------------|----|--------------------------------------------------------------------------------------------------------------------------------------------------------------------------------------------------------------------------|
| 10590 | 1,5,9,10,1<br>2,13,16,17 | 2,3,4,6,7,8<br>,11,14,15 | 12 | P02625,P02631,P02761,P07171,P14669,P16086,P19218,P20761,P20762,P35280,Q6TMA8,Q9EQS0                                                                                                                                      |
| 10591 | 1,5,9,10,1<br>2,14,15,16 | 2,3,4,6,7,8<br>,11,13,17 | 16 | P07150,P09605,P25809,P11598,P14669,P16086,P20761,P20762,P20766,P22282,P22283,P50115,Q4G075,Q5XI22,Q63751,Q99041,Q9R0T3                                                                                                   |
| 10592 | 1,5,9,10,1<br>2,14,15,17 | 2,3,4,6,7,8<br>,11,13,16 | 6  | P07150,P16086,P20766,Q5XI22,Q6TMA8,Q9R0T3                                                                                                                                                                                |
| 10593 | 1,5,9,10,1<br>2,14,16,17 | 2,3,4,6,7,8<br>,11,13,15 | 10 | P02625,P02631,P14669,P16086,P20761,P20762,P20766,P35280,Q5XI22,Q6TMA8                                                                                                                                                    |
| 10594 | 1,5,9,10,1<br>2,15,16,17 | 2,3,4,6,7,8<br>,11,13,14 | 14 | P02631,P06761,P06911,P12020,P14669,P16086,P20762,P20766,P22282,P25236,Q5GRG2,Q62902,Q6TMA8,Q9EQS0                                                                                                                        |
| 10595 | 1,5,9,10,1<br>3,14,15,16 | 2,3,4,6,7,8<br>,11,12,17 | 30 | O55004,P02631,P02761,P02780,P07150,P07647,P09605,P25809,P11883,P14669,P16086,P19223,P20761,P20762,P22282,P22283,P50115,P50280,P55091,P98089,Q00715,Q4G075,Q5XI22,Q62635,Q63751,Q80WL1,Q99041,Q9EQS0,Q9QZK9,Q9R0T3,Q9Z0V6 |
| 10596 | 1,5,9,10,1<br>3,14,15,17 | 2,3,4,6,7,8<br>,11,12,16 | 12 | O55004,P01836,P02631,P07150,P11883,P14668,P14669,P16086,Q80WL1,Q99041,Q9EQS0,Q9R0T3                                                                                                                                      |
| 10597 | 1,5,9,10,1<br>3,14,16,17 | 2,3,4,6,7,8<br>,11,12,15 | 16 | D3ZHA0,O55004,P01836,P02625,P02631,P02761,P14669,P16086,P20761,P20762,P35280,Q498R7,Q5XI22,Q6TMA8,Q99041,Q9EQS0                                                                                                          |
| 10598 | 1,5,9,10,1<br>3,15,16,17 | 2,3,4,6,7,8<br>,11,12,14 | 23 | D3ZHA0,P02631,P02780,P02782,P06761,P07647,P0C0A9,P11883,P14669,P16086,P20761,P20762,P22282,P22283,P24368,P30120,P35280,P62804,Q00715,Q6TMA8,Q80WL1,Q9EQS0,Q9R0T3                                                         |
| 10599 | 1,5,9,10,1<br>4,15,16,17 | 2,3,4,6,7,8<br>,11,12,13 | 28 | P01836,P02780,P02781,P02782,P06761,P07647,P0C0A9,P11598,P11883,P14669,P16086,P20762,P20766,P22282,P22283,P24368,P30120,P50280,Q498R7,Q5XI22,Q62902,Q6AYR9,Q6TMA8,Q80WL1,Q99041,Q9EQS0,Q9JHB9,Q9R0T3                      |
| 10600 | 1,5,9,11,1<br>2,13,14,15 | 2,3,4,6,7,8<br>,10,16,17 | 8  | D3ZHA0,P09605,P25809,P16086,P20761,P50115,Q4G075,Q6P6R2,Q9R0T3                                                                                                                                                           |
| 10601 | 1,5,9,11,1<br>2,13,14,16 | 2,3,4,6,7,8<br>,10,15,17 | 10 | B0BNN3,D3ZHA0,P02631,P02761,P19223,P20761,P50115,Q4G075,Q6P6R2,Q9Z0V6                                                                                                                                                    |
| 10602 | 1,5,9,11,1<br>2,13,14,17 | 2,3,4,6,7,8<br>,10,15,16 | 2  | D3ZHA0,P35280                                                                                                                                                                                                            |
| 10603 | 1,5,9,11,1<br>2,13,15,16 | 2,3,4,6,7,8<br>,10,14,17 | 11 | D3ZHA0,P02761,P12020,P16086,P20761,P20762,P50115,Q4G075,Q6P6R2,Q9EQS0,Q9Z0V6                                                                                                                                             |
| 10604 | 1,5,9,11,1<br>2,13,15,17 | 2,3,4,6,7,8<br>,10,14,16 | 5  | D3ZHA0,P12020,P16086,Q63532,Q9EQS0                                                                                                                                                                                       |
| 10605 | 1,5,9,11,1<br>2,13,16,17 | 2,3,4,6,7,8<br>,10,14,15 | 10 | D3ZHA0,P02631,P02761,P02803,P16086,P20761,P20762,P35280,P97615,Q9EQS0                                                                                                                                                    |
| 10606 | 1,5,9,11,1<br>2,14,15,16 | 2,3,4,6,7,8<br>,10,13,17 | 11 | D3ZHA0,P11598,P12020,P16086,P20761,P20766,P22282,P50115,Q4G075,Q6P6R2,Q9R0T3                                                                                                                                             |
| 10607 | 1,5,9,11,1<br>2,14,15,17 | 2,3,4,6,7,8<br>,10,13,16 | 4  | D3ZHA0,P12020,P16086,Q9R0T3                                                                                                                                                                                              |
| 10608 | 1,5,9,11,1<br>2,14,16,17 | 2,3,4,6,7,8<br>,10,13,15 | 6  | D3ZHA0,P12020,P16086,P20761,P20766,P35280                                                                                                                                                                                |
| 10609 | 1,5,9,11,1<br>2,15,16,17 | 2,3,4,6,7,8<br>,10,13,14 | 11 | D3ZHA0,P05369,P06911,P12020,P16086,P20762,P20766,P25236,Q5GRG2,Q6TMA8,Q9EQS0                                                                                                                                             |
| 10610 | 1,5,9,11,1<br>3,14,15,16 | 2,3,4,6,7,8<br>,10,12,17 | 22 | D3ZHA0,D4A5U3,O55004,P01041,P02696,P02761,P09605,P25809,P19223,P20761,P50115,P55091,P98089,Q4G075,Q62635,Q63751,Q6P6R2,Q80WL1,Q99041,Q9EQS0,Q9QZK9,Q9R0T3,Q9Z0V6                                                         |
| 10611 | 1,5,9,11,1<br>3,14,15,17 | 2,3,4,6,7,8<br>,10,12,16 | 8  | D3ZHA0,P04218,P47967,Q6P6R2,Q80WL1,Q9EQS0,Q9JJS8,Q9R0T3                                                                                                                                                                  |
| 10612 | 1,5,9,11,1<br>3,14,16,17 | 2,3,4,6,7,8<br>,10,12,15 | 10 | D3ZHA0,P01041,P02631,P02761,P04218,P20761,P20762,P35280,Q80WL1,Q9EQS0                                                                                                                                                    |

|       |                               |                          |    |                                                                                                                                                           |
|-------|-------------------------------|--------------------------|----|-----------------------------------------------------------------------------------------------------------------------------------------------------------|
| 10613 | 1,5,9,11,1<br>3,15,16,17      | 2,3,4,6,7,8<br>,10,12,14 | 10 | D3ZHA0,P04218,P06761,P12020,P16086,P20762,P35280,Q80WL1,Q9EQS0,Q9ROT3                                                                                     |
| 10614 | 1,5,9,11,1<br>4,15,16,17      | 2,3,4,6,7,8<br>,10,12,13 | 15 | D3ZHA0,P02780,P04218,P06761,P07647,P11598,P12020,P16086,P22282,P22283,Q6AYR9,Q6TMA8,Q80WL1,Q9EQS0,Q9ROT3                                                  |
| 10615 | 1,5,9,12,1<br>3,14,15,16      | 2,3,4,6,7,8<br>,10,11,17 | 17 | O55004,P00714,P02761,P07150,P09605,P25809,P11883,P14669,P16086,P19223,P20761,P20762,P50115,Q4G075,Q63751,Q6P6R2,Q9EQS0,Q9ROT3                             |
| 10616 | 1,5,9,12,1<br>3,14,15,17      | 2,3,4,6,7,8<br>,10,11,16 | 13 | D3ZHA0,P00714,P07150,P11883,P14668,P14669,P16086,P35280,P82471,Q5BJY9,Q5FVI6,Q9EQS0,Q9ROT3                                                                |
| 10617 | 1,5,9,12,1<br>3,14,16,17      | 2,3,4,6,7,8<br>,10,11,15 | 14 | D3ZHA0,P00714,P02631,P02761,P07150,P07171,P14669,P16086,P20762,P35280,Q5BJY9,Q5FVI6,Q5XI22,Q9EQS0                                                         |
| 10618 | 1,5,9,12,1<br>3,15,16,17      | 2,3,4,6,7,8<br>,10,11,14 | 13 | D3ZHA0,P00714,P02631,P07150,P11883,P12020,P14669,P16086,P19218,P20762,P35280,Q5BJY9,Q9EQS0                                                                |
| 10619 | 1,5,9,12,1<br>4,15,16,17      | 2,3,4,6,7,8<br>,10,11,13 | 12 | D3ZHA0,P07150,P11883,P12020,P14669,P16086,P20766,P35280,Q5XI22,Q6TMA8,Q9EQS0,Q9ROT3                                                                       |
| 10620 | 1,5,9,13,1<br>4,15,16,17      | 2,3,4,6,7,8<br>,10,11,12 | 22 | D3ZHA0,O55004,P00714,P02780,P05964,P07150,P07647,P0C0A9,P11883,P14669,P16086,P20762,P22283,P24368,P35280,P47967,P62804,Q5XI22,Q80WL1,Q99041,Q9EQS0,Q9ROT3 |
| 10621 | 1,5,10,11,<br>12,13,14,1<br>5 | 2,3,4,6,7,8<br>,9,16,17  | 7  | P09605,P25809,P16086,P19223,P20761,P50115,Q6P6R2,Q9ROT3                                                                                                   |
| 10622 | 1,5,10,11,<br>12,13,14,1<br>6 | 2,3,4,6,7,8<br>,9,15,17  | 8  | P02631,P02761,P09605,P25809,P19223,P20761,P50115,Q5QE79,Q7TPB1                                                                                            |
| 10623 | 1,5,10,11,<br>12,13,14,1<br>7 | 2,3,4,6,7,8<br>,9,15,16  | 3  | D3ZHA0,P02631,Q5QE79                                                                                                                                      |
| 10624 | 1,5,10,11,<br>12,13,15,1<br>6 | 2,3,4,6,7,8<br>,9,14,17  | 10 | P02631,P09605,P25809,P16086,P19223,P20761,P20762,P50115,Q6P6R2,Q9EQS0,Q9Z0V6                                                                              |
| 10625 | 1,5,10,11,<br>12,13,15,1<br>7 | 2,3,4,6,7,8<br>,9,14,16  | 3  | P02631,P16086,Q9EQS0                                                                                                                                      |
| 10626 | 1,5,10,11,<br>12,13,16,1<br>7 | 2,3,4,6,7,8<br>,9,14,15  | 9  | D3ZHA0,P02631,P16086,P20761,P20762,P35280,Q5QE79,Q6TMA8,Q9EQS0                                                                                            |
| 10627 | 1,5,10,11,<br>12,14,15,1<br>6 | 2,3,4,6,7,8<br>,9,13,17  | 9  | P09605,P25809,P16086,P19223,P20761,P20766,P22282,P50115,P51907,Q9ROT3                                                                                     |
| 10628 | 1,5,10,11,<br>12,14,15,1<br>7 | 2,3,4,6,7,8<br>,9,13,16  | 4  | P16086,P20766,Q6TMA8,Q9ROT3                                                                                                                               |
| 10629 | 1,5,10,11,<br>12,14,16,1<br>7 | 2,3,4,6,7,8<br>,9,13,15  | 6  | D3ZHA0,P02631,P16086,P20766,Q5QE79,Q6TMA8                                                                                                                 |
| 10630 | 1,5,10,11,<br>12,15,16,1<br>7 | 2,3,4,6,7,8<br>,9,13,14  | 11 | P02631,P05369,P06866,P06911,P12020,P16086,P20762,P20766,P25236,Q6TMA8,Q9EQS0                                                                              |

|       |                               |                         |    |                                                                                                                                             |
|-------|-------------------------------|-------------------------|----|---------------------------------------------------------------------------------------------------------------------------------------------|
| 10631 | 1,5,10,11,<br>13,14,15,1<br>6 | 2,3,4,6,7,8<br>,9,12,17 | 19 | D3ZHA0,O55004,P09605;P25809,P19223,P20761,P22282,P50115,P55091,P98089,Q4G075,Q62635,Q63751,Q6P6R2,Q7TPB1,Q80WL1,Q99041,Q9EQS0,Q9ROT3,Q9Z0V6 |
| 10632 | 1,5,10,11,<br>13,14,15,1<br>7 | 2,3,4,6,7,8<br>,9,12,16 | 4  | D3ZHA0,Q80WL1,Q9EQS0,Q9ROT3                                                                                                                 |
| 10633 | 1,5,10,11,<br>13,14,16,1<br>7 | 2,3,4,6,7,8<br>,9,12,15 | 8  | D3ZHA0,O55004,P02631,P20761,P20762,Q5QE79,Q6TMA8,Q9EQS0                                                                                     |
| 10634 | 1,5,10,11,<br>13,15,16,1<br>7 | 2,3,4,6,7,8<br>,9,12,14 | 8  | D3ZHA0,P02631,P06761,P16086,P20762,Q6TMA8,Q80WL1,Q9EQS0                                                                                     |
| 10635 | 1,5,10,11,<br>14,15,16,1<br>7 | 2,3,4,6,7,8<br>,9,12,13 | 14 | D3ZHA0,P02780,P02782,P06761,P07647,P16086,P20766,P22282,P22283,Q62902,Q6TMA8,Q80WL1,Q9EQS0,Q9ROT3                                           |
| 10636 | 1,5,10,12,<br>13,14,15,1<br>6 | 2,3,4,6,7,8<br>,9,11,17 | 14 | O55004,P02631,P02761,P07150,P09605;P25809,P14669,P16086,P19223,P20761,P20762,P50115,Q63751,Q6P6R2,Q9EQS0                                    |
| 10637 | 1,5,10,12,<br>13,14,15,1<br>7 | 2,3,4,6,7,8<br>,9,11,16 | 5  | P02631,P14668,P16086,Q9EQS0,Q9ROT3                                                                                                          |
| 10638 | 1,5,10,12,<br>13,14,16,1<br>7 | 2,3,4,6,7,8<br>,9,11,15 | 13 | D3ZHA0,O55004,P02625,P02631,P02761,P14669,P16086,P20762,P35280,Q5QE79,Q5XI22,Q6TMA8,Q9EQS0                                                  |
| 10639 | 1,5,10,12,<br>13,15,16,1<br>7 | 2,3,4,6,7,8<br>,9,11,14 | 10 | P02631,P14669,P16086,P19218,P20762,P35280,P83121,Q63617,Q6TMA8,Q9EQS0                                                                       |
| 10640 | 1,5,10,12,<br>14,15,16,1<br>7 | 2,3,4,6,7,8<br>,9,11,13 | 9  | P02631,P14669,P16086,P20762,P20766,Q5XI22,Q6TMA8,Q9EQS0,Q9ROT3                                                                              |
| 10641 | 1,5,10,13,<br>14,15,16,1<br>7 | 2,3,4,6,7,8<br>,9,11,12 | 16 | D3ZHA0,O55004,P02631,P02780,P07647,P0C0A9,P11883,P14669,P16086,P20762,Q498R7,Q5XI22,Q6TMA8,Q80WL1,Q9EQS0,Q9ROT3                             |
| 10642 | 1,5,11,12,<br>13,14,15,1<br>6 | 2,3,4,6,7,8<br>,9,10,17 | 8  | D3ZHA0,P02761,P09605;P25809,P16086,P19223,P20761,P50115,Q6P6R2                                                                              |
| 10643 | 1,5,11,12,<br>13,14,15,1<br>7 | 2,3,4,6,7,8<br>,9,10,16 | 4  | D3ZHA0,P16086,Q6P6R2,Q9ROT3                                                                                                                 |
| 10644 | 1,5,11,12,<br>13,14,16,1<br>7 | 2,3,4,6,7,8<br>,9,10,15 | 6  | D3ZHA0,O55006,P02631,P02761,P35280,Q5QE79                                                                                                   |
| 10645 | 1,5,11,12,<br>13,15,16,1<br>7 | 2,3,4,6,7,8<br>,9,10,14 | 7  | D3ZHA0,P02631,P12020,P16086,P20762,P35280,Q9EQS0                                                                                            |

|       |                               |                                |    |                                                                                                                                             |
|-------|-------------------------------|--------------------------------|----|---------------------------------------------------------------------------------------------------------------------------------------------|
| 10646 | 1,5,11,12,<br>14,15,16,1<br>7 | 2,3,4,6,7,8<br>,9,10,13        | 6  | D3ZHA0,P12020,P16086,P20766,Q6TMA8,Q9R0T3                                                                                                   |
| 10647 | 1,5,11,13,<br>14,15,16,1<br>7 | 2,3,4,6,7,8<br>,9,10,12        | 6  | D3ZHA0,P19223,Q6P6R2,Q80WL1,Q9EQS0,Q9R0T3                                                                                                   |
| 10648 | 1,5,12,13,<br>14,15,16,1<br>7 | 2,3,4,6,7,8<br>,9,10,11        | 10 | D3ZHA0,P00714,P02631,P11883,P14669,P16086,P35280,Q5XI22,Q6TMA8,Q9EQS0                                                                       |
| 10649 | 1,6,7,8,9,1<br>0,11,12        | 2,3,4,5,13,<br>14,15,16,1<br>7 | 20 | F1LM93,P02781,P02782,P08723,P09456,P0C0A9,P10715,P13432,P19629,P22283,P30120,P47727,P60905,P97840,Q63357,Q63493,Q6AYL6,Q8CJ52,Q9JHB9,Q9JI85 |
| 10650 | 1,6,7,8,9,1<br>0,11,13        | 2,3,4,5,12,<br>14,15,16,1<br>7 | 7  | P12020,P22283,P31044,P47727,Q5GRG2,Q62902,Q9JI85                                                                                            |
| 10651 | 1,6,7,8,9,1<br>0,11,14        | 2,3,4,5,12,<br>13,15,16,1<br>7 | 6  | P19629,P31044,P35280,P47727,P83121,Q6AYL6                                                                                                   |
| 10652 | 1,6,7,8,9,1<br>0,11,15        | 2,3,4,5,12,<br>13,14,16,1<br>7 | 4  | P22006,P31044,P35280,Q566E6                                                                                                                 |
| 10653 | 1,6,7,8,9,1<br>0,11,16        | 2,3,4,5,12,<br>13,14,15,1<br>7 | 4  | A2RUV9,P31044,P63095,Q6AYL6                                                                                                                 |
| 10654 | 1,6,7,8,9,1<br>0,11,17        | 2,3,4,5,12,<br>13,14,15,1<br>6 | 1  | Q9QUL6                                                                                                                                      |
| 10655 | 1,6,7,8,9,1<br>0,12,13        | 2,3,4,5,11,<br>14,15,16,1<br>7 | 17 | P02782,P06911,P08723,P09456,P12020,P19218,P22282,P22283,P30120,P36374,P63036,P97840,Q5GRG2,Q62902,Q6AYR9,Q8CJ52,Q9JHB9                      |
| 10656 | 1,6,7,8,9,1<br>0,12,14        | 2,3,4,5,11,<br>13,15,16,1<br>7 | 6  | P02782,P08723,P12020,P19629,P30120,P97840                                                                                                   |
| 10657 | 1,6,7,8,9,1<br>0,12,15        | 2,3,4,5,11,<br>13,14,16,1<br>7 | 4  | P08723,P10715,P19629,P97840                                                                                                                 |
| 10658 | 1,6,7,8,9,1<br>0,12,16        | 2,3,4,5,11,<br>13,14,15,1<br>7 | 5  | P08723,P10715,P19218,P47967,P97840                                                                                                          |
| 10659 | 1,6,7,8,9,1<br>0,12,17        | 2,3,4,5,11,<br>13,14,15,1<br>6 | 8  | F1LM93,P02782,P08723,P10715,P13432,P22283,P97840,Q9QZK9                                                                                     |
| 10660 | 1,6,7,8,9,1<br>0,13,14        | 2,3,4,5,11,<br>12,15,16,1<br>7 | 6  | P06911,P12020,P19629,P31044,Q5GRG2,Q62902                                                                                                   |

|       |                        |                                |    |                                                                                                                                                           |
|-------|------------------------|--------------------------------|----|-----------------------------------------------------------------------------------------------------------------------------------------------------------|
| 10661 | 1,6,7,8,9,1<br>0,13,15 | 2,3,4,5,11,<br>12,14,16,1<br>7 | 3  | P31044,P34901,Q5GRG2                                                                                                                                      |
| 10662 | 1,6,7,8,9,1<br>0,13,16 | 2,3,4,5,11,<br>12,14,15,1<br>7 | 5  | P12020,P19218,P31044,P63036,P97840                                                                                                                        |
| 10663 | 1,6,7,8,9,1<br>0,13,17 | 2,3,4,5,11,<br>12,14,15,1<br>6 | 3  | P12020,P22283,P51907                                                                                                                                      |
| 10664 | 1,6,7,8,9,1<br>0,14,15 | 2,3,4,5,11,<br>12,13,16,1<br>7 | 3  | P19629,P31044,P35280                                                                                                                                      |
| 10665 | 1,6,7,8,9,1<br>0,14,16 | 2,3,4,5,11,<br>12,13,15,1<br>7 | 2  | P19629,P31044                                                                                                                                             |
| 10666 | 1,6,7,8,9,1<br>0,14,17 | 2,3,4,5,11,<br>12,13,15,1<br>6 | 2  | P01836,P19629                                                                                                                                             |
| 10667 | 1,6,7,8,9,1<br>0,15,16 | 2,3,4,5,11,<br>12,13,14,1<br>7 | 0  |                                                                                                                                                           |
| 10668 | 1,6,7,8,9,1<br>0,15,17 | 2,3,4,5,11,<br>12,13,14,1<br>6 | 0  |                                                                                                                                                           |
| 10669 | 1,6,7,8,9,1<br>0,16,17 | 2,3,4,5,11,<br>12,13,14,1<br>5 | 1  | P25031                                                                                                                                                    |
| 10670 | 1,6,7,8,9,1<br>1,12,13 | 2,3,4,5,10,<br>14,15,16,1<br>7 | 22 | P02780,P02781,P02782,P02803,P04905,P08723,P09456,P0C0A9,P10715,P13432,P19629,P22282,P22283,P30120,P36374,P47727,Q62902,Q62997,Q63493,Q8CJ52,Q9JHB9,Q9JI85 |
| 10671 | 1,6,7,8,9,1<br>1,12,14 | 2,3,4,5,10,<br>13,15,16,1<br>7 | 18 | P02781,P02782,P04905,P08723,P0C0A9,P10715,P13432,P19629,P22283,P30120,P47727,Q62902,Q62997,Q63493,Q6AYL6,Q8CJ52,Q9JHB9,Q9JI85                             |
| 10672 | 1,6,7,8,9,1<br>1,12,15 | 2,3,4,5,10,<br>13,14,16,1<br>7 | 11 | P02782,P08723,P10715,P13432,P19629,P22006,P30120,Q62997,Q8CJ52,Q9JHB9,Q9JI85                                                                              |
| 10673 | 1,6,7,8,9,1<br>1,12,16 | 2,3,4,5,10,<br>13,14,15,1<br>7 | 10 | P02782,P08723,P10715,P13432,P19629,P30120,Q6AYL6,Q8CJ52,Q9JHB9,Q9JI85                                                                                     |
| 10674 | 1,6,7,8,9,1<br>1,12,17 | 2,3,4,5,10,<br>13,14,15,1<br>6 | 17 | P02782,P08723,P10715,P13432,P19629,P22282,P22283,P30120,P36374,Q62997,Q63493,Q6AYL6,Q8CJ52,Q99068,Q9JHB9,Q9JI85,Q9QZK9                                    |
| 10675 | 1,6,7,8,9,1<br>1,13,14 | 2,3,4,5,10,<br>12,15,16,1<br>7 | 9  | P06911,P12020,P19629,P22283,P47727,P83121,Q5GRG2,Q62902,Q9JI85                                                                                            |



|       |                        |                                |    |                                                                                                                                      |
|-------|------------------------|--------------------------------|----|--------------------------------------------------------------------------------------------------------------------------------------|
| 10676 | 1,6,7,8,9,1<br>1,13,15 | 2,3,4,5,10,<br>12,14,16,1<br>7 | 3  | P19629,P34901,Q9JJS8                                                                                                                 |
| 10677 | 1,6,7,8,9,1<br>1,13,16 | 2,3,4,5,10,<br>12,14,15,1<br>7 | 1  | Q62902                                                                                                                               |
| 10678 | 1,6,7,8,9,1<br>1,13,17 | 2,3,4,5,10,<br>12,14,15,1<br>6 | 5  | P22282,P22283,P34901,Q62902,Q9JJS8                                                                                                   |
| 10679 | 1,6,7,8,9,1<br>1,14,15 | 2,3,4,5,10,<br>12,13,16,1<br>7 | 3  | P19629,P22006,P35280                                                                                                                 |
| 10680 | 1,6,7,8,9,1<br>1,14,16 | 2,3,4,5,10,<br>12,13,15,1<br>7 | 2  | P19629,P83121                                                                                                                        |
| 10681 | 1,6,7,8,9,1<br>1,14,17 | 2,3,4,5,10,<br>12,13,15,1<br>6 | 2  | P19629,P83121                                                                                                                        |
| 10682 | 1,6,7,8,9,1<br>1,15,16 | 2,3,4,5,10,<br>12,13,14,1<br>7 | 2  | P10715,P19629                                                                                                                        |
| 10683 | 1,6,7,8,9,1<br>1,15,17 | 2,3,4,5,10,<br>12,13,14,1<br>6 | 3  | P10715,P19629,Q9JJS8                                                                                                                 |
| 10684 | 1,6,7,8,9,1<br>1,16,17 | 2,3,4,5,10,<br>12,13,14,1<br>5 | 2  | A2RUV9,P10715                                                                                                                        |
| 10685 | 1,6,7,8,9,1<br>2,13,14 | 2,3,4,5,10,<br>11,15,16,1<br>7 | 19 | P02782,P06761,P06911,P08723,P09456,P11598,P12020,P13432,P19629,P22282,P22283,P30120,Q5GRG2,Q62902,Q6AYR9,Q8CJ52,Q9JHB9,Q9JI85,Q9Z1F2 |
| 10686 | 1,6,7,8,9,1<br>2,13,15 | 2,3,4,5,10,<br>11,14,16,1<br>7 | 8  | P02782,P08723,P10715,P13432,P19218,P19629,Q62902,Q9JHB9                                                                              |
| 10687 | 1,6,7,8,9,1<br>2,13,16 | 2,3,4,5,10,<br>11,14,15,1<br>7 | 10 | P02782,P08723,P10715,P13432,P19218,P30120,P63036,Q62902,Q8CJ52,Q9JHB9                                                                |
| 10688 | 1,6,7,8,9,1<br>2,13,17 | 2,3,4,5,10,<br>11,14,15,1<br>6 | 16 | P02782,P08723,P10715,P11598,P13432,P19218,P19629,P22282,P22283,P30120,P36374,P51907,Q62902,Q8CJ52,Q9JHB9,Q9QZK9                      |
| 10689 | 1,6,7,8,9,1<br>2,14,15 | 2,3,4,5,10,<br>11,13,16,1<br>7 | 4  | P08723,P10715,P13432,P19629                                                                                                          |
| 10690 | 1,6,7,8,9,1<br>2,14,16 | 2,3,4,5,10,<br>11,13,15,1<br>7 | 5  | P08723,P10715,P13432,P19629,Q8CJ52                                                                                                   |

|       |                         |                                |    |                                                                                                                                                                                              |
|-------|-------------------------|--------------------------------|----|----------------------------------------------------------------------------------------------------------------------------------------------------------------------------------------------|
| 10691 | 1,6,7,8,9,1<br>2,14,17  | 2,3,4,5,10,<br>11,13,15,1<br>6 | 7  | P02782,P08723,P10715,P13432,P19629,P22282,P22283                                                                                                                                             |
| 10692 | 1,6,7,8,9,1<br>2,15,16  | 2,3,4,5,10,<br>11,13,14,1<br>7 | 3  | P10715,P13432,P19629                                                                                                                                                                         |
| 10693 | 1,6,7,8,9,1<br>2,15,17  | 2,3,4,5,10,<br>11,13,14,1<br>6 | 3  | P10715,P13432,P19629                                                                                                                                                                         |
| 10694 | 1,6,7,8,9,1<br>2,16,17  | 2,3,4,5,10,<br>11,13,14,1<br>5 | 3  | P10715,P13432,P19629                                                                                                                                                                         |
| 10695 | 1,6,7,8,9,1<br>3,14,15  | 2,3,4,5,10,<br>11,12,16,1<br>7 | 5  | P06911,P12020,P19629,P53792,Q5GRG2                                                                                                                                                           |
| 10696 | 1,6,7,8,9,1<br>3,14,16  | 2,3,4,5,10,<br>11,12,15,1<br>7 | 5  | P06911,P12020,P19629,Q5GRG2,Q62902                                                                                                                                                           |
| 10697 | 1,6,7,8,9,1<br>3,14,17  | 2,3,4,5,10,<br>11,12,15,1<br>6 | 10 | P06911,P11598,P12020,P19629,P22282,P22283,P51907,P53792,Q5GRG2,Q62902                                                                                                                        |
| 10698 | 1,6,7,8,9,1<br>3,15,16  | 2,3,4,5,10,<br>11,12,14,1<br>7 | 1  | P34901                                                                                                                                                                                       |
| 10699 | 1,6,7,8,9,1<br>3,15,17  | 2,3,4,5,10,<br>11,12,14,1<br>6 | 3  | P34901,P53792,Q9JJS8                                                                                                                                                                         |
| 10700 | 1,6,7,8,9,1<br>3,16,17  | 2,3,4,5,10,<br>11,12,14,1<br>5 | 2  | P34901,P51907                                                                                                                                                                                |
| 10701 | 1,6,7,8,9,1<br>4,15,16  | 2,3,4,5,10,<br>11,12,13,1<br>7 | 1  | P19629                                                                                                                                                                                       |
| 10702 | 1,6,7,8,9,1<br>4,15,17  | 2,3,4,5,10,<br>11,12,13,1<br>6 | 2  | P19629,P53792                                                                                                                                                                                |
| 10703 | 1,6,7,8,9,1<br>4,16,17  | 2,3,4,5,10,<br>11,12,13,1<br>5 | 1  | P19629                                                                                                                                                                                       |
| 10704 | 1,6,7,8,9,1<br>5,16,17  | 2,3,4,5,10,<br>11,12,13,1<br>4 | 1  | P19629                                                                                                                                                                                       |
| 10705 | 1,6,7,8,10,<br>11,12,13 | 2,3,4,5,9,1<br>4,15,16,17      | 27 | F1LM93,P02781,P02782,P04905,P06911,P08723,P09456,P0C0A9,P10715,P11598,P12020,P19629,P22282,P22283,P30120,P31044,P36374,P47727,P60905,Q5GRG2,Q62902,Q63357,Q63493,Q6AYR9,Q8CJ52,Q9JHB9,Q9JI85 |
| 10706 | 1,6,7,8,10,<br>11,12,14 | 2,3,4,5,9,1<br>3,15,16,17      | 18 | P02781,P02782,P04905,P08723,P0C0A9,P10715,P12020,P19629,P22283,P30120,P35280,P47727,Q63357,Q63493,Q6AYL6,Q8CJ52,Q9JHB9,Q9JI85                                                                |

|       |                                                |    |                                                                                                                                                                  |
|-------|------------------------------------------------|----|------------------------------------------------------------------------------------------------------------------------------------------------------------------|
| 10707 | 1,6,7,8,10, 2,3,4,5,9,1<br>11,12,15 3,14,16,17 | 15 | F1LM93,P08010,P08723,P10715,P19629,P22006,P30120,P35280,P47727,Q63357,Q63493,Q6AYL6,Q8CJ52,Q9JHB9,Q9JI85                                                         |
| 10708 | 1,6,7,8,10, 2,3,4,5,9,1<br>11,12,16 3,14,15,17 | 14 | F1LM93,P08723,P10715,P19629,P30120,P47727,P47967,P97840,Q63357,Q63493,Q6AYL6,Q8CJ52,Q9JHB9,Q9JI85                                                                |
| 10709 | 1,6,7,8,10, 2,3,4,5,9,1<br>11,12,17 3,14,15,16 | 23 | F1LM93,O08815,P02781,P02782,P08723,P10715,P13432,P14669,P19629,P22282,P22283,P30120,P36374,P47727,P60905,Q4G075,Q63357,Q63493,Q6AYL6,Q8CJ52,Q9JHB9,Q9JI85,Q9QZK9 |
| 10710 | 1,6,7,8,10, 2,3,4,5,9,1<br>11,13,14 2,15,16,17 | 10 | P06911,P12020,P19629,P22283,P31044,P47727,Q5GRG2,Q62902,Q63493,Q9JI85                                                                                            |
| 10711 | 1,6,7,8,10, 2,3,4,5,9,1<br>11,13,15 2,14,16,17 | 7  | P01835,P12020,P15999,P22006,P31044,P47727,Q5GRG2                                                                                                                 |
| 10712 | 1,6,7,8,10, 2,3,4,5,9,1<br>11,13,16 2,14,15,17 | 7  | P01835,P12020,P31044,P47727,Q5GRG2,Q62902,Q8VD89                                                                                                                 |
| 10713 | 1,6,7,8,10, 2,3,4,5,9,1<br>11,13,17 2,14,15,16 | 7  | P11598,P12020,P22282,P22283,P47727,Q5GRG2,Q63493                                                                                                                 |
| 10714 | 1,6,7,8,10, 2,3,4,5,9,1<br>11,14,15 2,13,16,17 | 5  | P19629,P22006,P31044,P35280,P47727                                                                                                                               |
| 10715 | 1,6,7,8,10, 2,3,4,5,9,1<br>11,14,16 2,13,15,17 | 4  | P19629,P31044,P47727,Q6AYL6                                                                                                                                      |
| 10716 | 1,6,7,8,10, 2,3,4,5,9,1<br>11,14,17 2,13,15,16 | 4  | P12020,P19629,P47727,Q63493                                                                                                                                      |
| 10717 | 1,6,7,8,10, 2,3,4,5,9,1<br>11,15,16 2,13,14,17 | 2  | P01835,P35280                                                                                                                                                    |
| 10718 | 1,6,7,8,10, 2,3,4,5,9,1<br>11,15,17 2,13,14,16 | 3  | P14669,P19629,P22006                                                                                                                                             |
| 10719 | 1,6,7,8,10, 2,3,4,5,9,1<br>11,16,17 2,13,14,15 | 1  | A2RUV9                                                                                                                                                           |
| 10720 | 1,6,7,8,10, 2,3,4,5,9,1<br>12,13,14 1,15,16,17 | 17 | P02782,P06761,P06911,P08723,P11598,P12020,P19629,P22282,P22283,P30120,P47727,Q498D9,Q5GRG2,Q62902,Q6AYR9,Q8CJ52,Q9JHB9                                           |
| 10721 | 1,6,7,8,10, 2,3,4,5,9,1<br>12,13,15 1,14,16,17 | 17 | P02782,P06911,P08723,P11598,P12020,P15999,P19218,P19629,P22283,P30120,P97840,Q5GRG2,Q62902,Q6IFV1,Q8CJ52,Q99MH3,Q9JHB9                                           |
| 10722 | 1,6,7,8,10, 2,3,4,5,9,1<br>12,13,16 1,14,15,17 | 13 | P02782,P06911,P08723,P12020,P19218,P22283,P30120,P47967,P97840,Q5GRG2,Q62902,Q8CJ52,Q9JHB9                                                                       |
| 10723 | 1,6,7,8,10, 2,3,4,5,9,1<br>12,13,17 1,14,15,16 | 22 | F1LM93,P02782,P06761,P06911,P08723,P11598,P12020,P13432,P19218,P22282,P22283,P30120,P36374,Q5GRG2,Q62635,Q62902,Q6AYR9,Q6IFV1,Q8CJ52,Q99MH3,Q9JHB9,Q9QZK9        |
| 10724 | 1,6,7,8,10, 2,3,4,5,9,1<br>12,14,15 1,13,16,17 | 4  | P08723,P12020,P19629,P35280                                                                                                                                      |
| 10725 | 1,6,7,8,10, 2,3,4,5,9,1<br>12,14,16 1,13,15,17 | 5  | P08723,P12020,P19629,P97840,Q8CJ52                                                                                                                               |
| 10726 | 1,6,7,8,10, 2,3,4,5,9,1<br>12,14,17 1,13,15,16 | 10 | F1LM93,P02782,P08723,P11598,P12020,P13432,P19629,P22283,Q8CJ52,Q9QZK9                                                                                            |
| 10727 | 1,6,7,8,10, 2,3,4,5,9,1<br>12,15,16 1,13,14,17 | 3  | P10715,P19629,P97840                                                                                                                                             |
| 10728 | 1,6,7,8,10, 2,3,4,5,9,1<br>12,15,17 1,13,14,16 | 8  | F1LM93,P08723,P10715,P13432,P19629,Q6IFV1,Q99MH3,Q9QZK9                                                                                                          |
| 10729 | 1,6,7,8,10, 2,3,4,5,9,1<br>12,16,17 1,13,14,15 | 7  | F1LM93,P08723,P10715,P13432,P97840,Q8CJ52,Q9QZK9                                                                                                                 |

|       |                                                |    |                                                                                                                                                                                                  |
|-------|------------------------------------------------|----|--------------------------------------------------------------------------------------------------------------------------------------------------------------------------------------------------|
| 10730 | 1,6,7,8,10, 2,3,4,5,9,1<br>13,14,15 1,12,16,17 | 6  | P06911,P12020,P15999,P19629,P31044,Q5GRG2                                                                                                                                                        |
| 10731 | 1,6,7,8,10, 2,3,4,5,9,1<br>13,14,16 1,12,15,17 | 6  | P06911,P12020,P19629,P31044,Q5GRG2,Q62902                                                                                                                                                        |
| 10732 | 1,6,7,8,10, 2,3,4,5,9,1<br>13,14,17 1,12,15,16 | 8  | P06911,P11598,P12020,P19629,P22282,P22283,P51907,Q5GRG2                                                                                                                                          |
| 10733 | 1,6,7,8,10, 2,3,4,5,9,1<br>13,15,16 1,12,14,17 | 3  | P01835,P12020,Q5GRG2                                                                                                                                                                             |
| 10734 | 1,6,7,8,10, 2,3,4,5,9,1<br>13,15,17 1,12,14,16 | 7  | P11598,P12020,P15999,P34901,Q5GRG2,Q6IFV1,Q99MH3                                                                                                                                                 |
| 10735 | 1,6,7,8,10, 2,3,4,5,9,1<br>13,16,17 1,12,14,15 | 2  | P12020,P51907                                                                                                                                                                                    |
| 10736 | 1,6,7,8,10, 2,3,4,5,9,1<br>14,15,16 1,12,13,17 | 1  | P19629                                                                                                                                                                                           |
| 10737 | 1,6,7,8,10, 2,3,4,5,9,1<br>14,15,17 1,12,13,16 | 1  | P19629                                                                                                                                                                                           |
| 10738 | 1,6,7,8,10, 2,3,4,5,9,1<br>14,16,17 1,12,13,15 | 1  | P19629                                                                                                                                                                                           |
| 10739 | 1,6,7,8,10, 2,3,4,5,9,1<br>15,16,17 1,12,13,14 | 0  |                                                                                                                                                                                                  |
| 10740 | 1,6,7,8,11, 2,3,4,5,9,1<br>12,13,14 0,15,16,17 | 27 | P02780,P02781,P02782,P04905,P06761,P06911,P08723,P09456,P0C0A9,P10715,P11598,P12020,P13432,P19629,P22282,P22283,P30120<br>,P36374,P46462,P47727,Q5GRG2,Q62902,Q63493,Q6AYR9,Q8CJ52,Q9JHB9,Q9JI85 |
| 10741 | 1,6,7,8,11, 2,3,4,5,9,1<br>12,13,15 0,14,16,17 | 17 | P02781,P02782,P08723,P10715,P11598,P13432,P19629,P22006,P22282,P22283,P30120,P47727,Q5GRG2,Q62902,Q8CJ52,Q9JHB9,Q9JI<br>85                                                                       |
| 10742 | 1,6,7,8,11, 2,3,4,5,9,1<br>12,13,16 0,14,15,17 | 15 | P02781,P02782,P08723,P10715,P13432,P19629,P22282,P22283,P30120,P47727,Q62902,Q63493,Q8CJ52,Q9JHB9,Q9JI85                                                                                         |
| 10743 | 1,6,7,8,11, 2,3,4,5,9,1<br>12,13,17 0,14,15,16 | 22 | P02781,P02782,P06761,P08723,P10715,P11598,P13432,P19629,P22282,P22283,P30120,P36374,P47727,Q62635,Q62902,Q63493,Q6AY<br>R9,Q8CJ52,Q99041,Q9JHB9,Q9JI85,Q9QZK9                                    |
| 10744 | 1,6,7,8,11, 2,3,4,5,9,1<br>12,14,15 0,13,16,17 | 13 | P02782,P08723,P10715,P13432,P19629,P22006,P30120,P35280,P47727,Q63493,Q8CJ52,Q9JHB9,Q9JI85                                                                                                       |
| 10745 | 1,6,7,8,11, 2,3,4,5,9,1<br>12,14,16 0,13,15,17 | 13 | P02782,P08723,P10715,P13432,P19629,P30120,P47727,Q62902,Q63493,Q6AYL6,Q8CJ52,Q9JHB9,Q9JI85                                                                                                       |
| 10746 | 1,6,7,8,11, 2,3,4,5,9,1<br>12,14,17 0,13,15,16 | 15 | P02782,P08723,P10715,P11598,P13432,P19629,P22282,P22283,P30120,P47727,Q63493,Q8CJ52,Q9JHB9,Q9JI85,Q9QZK9                                                                                         |
| 10747 | 1,6,7,8,11, 2,3,4,5,9,1<br>12,15,16 0,13,14,17 | 4  | P10715,P19629,Q6AYL6,Q8CJ52                                                                                                                                                                      |
| 10748 | 1,6,7,8,11, 2,3,4,5,9,1<br>12,15,17 0,13,14,16 | 12 | P02782,P08723,P10715,P13432,P19629,P22006,P22283,Q63493,Q8CJ52,Q99041,Q9JI85,Q9QZK9                                                                                                              |
| 10749 | 1,6,7,8,11, 2,3,4,5,9,1<br>12,16,17 0,13,14,15 | 11 | P02782,P08723,P10715,P13432,P19629,P22283,Q63493,Q6AYL6,Q8CJ52,Q99041,Q9QZK9                                                                                                                     |
| 10750 | 1,6,7,8,11, 2,3,4,5,9,1<br>13,14,15 0,12,16,17 | 9  | P06911,P12020,P15999,P19629,P22006,P47727,Q5GRG2,Q62902,Q9JJS8                                                                                                                                   |
| 10751 | 1,6,7,8,11, 2,3,4,5,9,1<br>13,14,16 0,12,15,17 | 7  | P06911,P12020,P19629,P47727,Q5GRG2,Q62902,Q8CJ52                                                                                                                                                 |
| 10752 | 1,6,7,8,11, 2,3,4,5,9,1<br>13,14,17 0,12,15,16 | 10 | P06911,P11598,P12020,P19629,P22282,P22283,P47727,Q5GRG2,Q62902,Q63493                                                                                                                            |

|       |                                                |    |                                                                                                                                                    |
|-------|------------------------------------------------|----|----------------------------------------------------------------------------------------------------------------------------------------------------|
| 10753 | 1,6,7,8,11, 2,3,4,5,9,1<br>13,15,16 0,12,14,17 | 5  | P01835,P19629,P34901,Q5GRG2,Q8VD89                                                                                                                 |
| 10754 | 1,6,7,8,11, 2,3,4,5,9,1<br>13,15,17 0,12,14,16 | 4  | P11598,P19629,P34901,Q9JJS8                                                                                                                        |
| 10755 | 1,6,7,8,11, 2,3,4,5,9,1<br>13,16,17 0,12,14,15 | 1  | Q62902                                                                                                                                             |
| 10756 | 1,6,7,8,11, 2,3,4,5,9,1<br>14,15,16 0,12,13,17 | 1  | P19629                                                                                                                                             |
| 10757 | 1,6,7,8,11, 2,3,4,5,9,1<br>14,15,17 0,12,13,16 | 3  | P19629,P22006,Q9JJS8                                                                                                                               |
| 10758 | 1,6,7,8,11, 2,3,4,5,9,1<br>14,16,17 0,12,13,15 | 1  | P19629                                                                                                                                             |
| 10759 | 1,6,7,8,11, 2,3,4,5,9,1<br>15,16,17 0,12,13,14 | 2  | P10715,P19629                                                                                                                                      |
| 10760 | 1,6,7,8,12, 2,3,4,5,9,1<br>13,14,15 0,11,16,17 | 15 | O08557,P02782,P06911,P08723,P11598,P12020,P15999,P19629,P22283,P30120,Q498D9,Q5GRG2,Q62902,Q8CJ52,Q9JHB9                                           |
| 10761 | 1,6,7,8,12, 2,3,4,5,9,1<br>13,14,16 0,11,15,17 | 12 | P02782,P06911,P08723,P12020,P13432,P19629,P22283,P30120,Q5GRG2,Q62902,Q8CJ52,Q9JHB9                                                                |
| 10762 | 1,6,7,8,12, 2,3,4,5,9,1<br>13,14,17 0,11,15,16 | 21 | P02782,P06761,P06911,P08723,P11598,P12020,P13432,P19629,P22282,P22283,P30120,P36374,P51907,Q5GRG2,Q62635,Q62902,Q6AYR9,Q8CJ52,Q9JHB9,Q9QZK9,Q9Z1F2 |
| 10763 | 1,6,7,8,12, 2,3,4,5,9,1<br>13,15,16 0,11,14,17 | 5  | P10715,P19218,P19629,Q62902,Q8CJ52                                                                                                                 |
| 10764 | 1,6,7,8,12, 2,3,4,5,9,1<br>13,15,17 0,11,14,16 | 14 | P02782,P08723,P10715,P11598,P13432,P15999,P19629,P22282,P22283,Q62635,Q62902,Q6IFV1,Q99MH3,Q9QZK9                                                  |
| 10765 | 1,6,7,8,12, 2,3,4,5,9,1<br>13,16,17 0,11,14,15 | 13 | P02782,P08723,P10715,P11598,P13432,P19218,P19629,P22282,P22283,P63029,Q62902,Q8CJ52,Q9QZK9                                                         |
| 10766 | 1,6,7,8,12, 2,3,4,5,9,1<br>14,15,16 0,11,13,17 | 1  | P19629                                                                                                                                             |
| 10767 | 1,6,7,8,12, 2,3,4,5,9,1<br>14,15,17 0,11,13,16 | 4  | P08723,P11598,P13432,P19629                                                                                                                        |
| 10768 | 1,6,7,8,12, 2,3,4,5,9,1<br>14,16,17 0,11,13,15 | 5  | P08723,P10715,P13432,P19629,Q8CJ52                                                                                                                 |
| 10769 | 1,6,7,8,12, 2,3,4,5,9,1<br>15,16,17 0,11,13,14 | 4  | P10715,P13432,P19629,Q5XFX0                                                                                                                        |
| 10770 | 1,6,7,8,13, 2,3,4,5,9,1<br>14,15,16 0,11,12,17 | 4  | P06911,P12020,P19629,Q5GRG2                                                                                                                        |
| 10771 | 1,6,7,8,13, 2,3,4,5,9,1<br>14,15,17 0,11,12,16 | 8  | P06911,P11598,P12020,P15999,P19629,P53792,Q5GRG2,Q9WUW8                                                                                            |
| 10772 | 1,6,7,8,13, 2,3,4,5,9,1<br>14,16,17 0,11,12,15 | 6  | P06911,P12020,P19629,P51907,Q5GRG2,Q62902                                                                                                          |
| 10773 | 1,6,7,8,13, 2,3,4,5,9,1<br>15,16,17 0,11,12,14 | 1  | P34901                                                                                                                                             |
| 10774 | 1,6,7,8,14, 2,3,4,5,9,1<br>15,16,17 0,11,12,13 | 1  | P19629                                                                                                                                             |
| 10775 | 1,6,7,9,10, 2,3,4,5,8,1<br>11,12,13 4,15,16,17 | 5  | P09456,P36374,P47727,P97840,Q9JHB9                                                                                                                 |

|       |                                                |   |                                                         |
|-------|------------------------------------------------|---|---------------------------------------------------------|
| 10776 | 1,6,7,9,10, 2,3,4,5,8,1<br>11,12,14 3,15,16,17 | 4 | P47727,P83121,P97840,Q6AYL6                             |
| 10777 | 1,6,7,9,10, 2,3,4,5,8,1<br>11,12,15 3,14,16,17 | 3 | P97840,Q566E6,Q6PCU2                                    |
| 10778 | 1,6,7,9,10, 2,3,4,5,8,1<br>11,12,16 3,14,15,17 | 8 | P06757,P10536,P12368,P20766,P47967,P97840,Q6AYL6,Q6IFU7 |
| 10779 | 1,6,7,9,10, 2,3,4,5,8,1<br>11,12,17 3,14,15,16 | 6 | O08815,P06757,P13432,P97840,Q566E6,Q9QZK9               |
| 10780 | 1,6,7,9,10, 2,3,4,5,8,1<br>11,13,14 2,15,16,17 | 3 | P12020,P47727,P83121                                    |
| 10781 | 1,6,7,9,10, 2,3,4,5,8,1<br>11,13,15 2,14,16,17 | 2 | P31430,Q9JJS8                                           |
| 10782 | 1,6,7,9,10, 2,3,4,5,8,1<br>11,13,16 2,14,15,17 | 3 | B0BNN3,P10536,P97840                                    |
| 10783 | 1,6,7,9,10, 2,3,4,5,8,1<br>11,13,17 2,14,15,16 | 0 |                                                         |
| 10784 | 1,6,7,9,10, 2,3,4,5,8,1<br>11,14,15 2,13,16,17 | 4 | P22006,P35280,P83121,Q80WL1                             |
| 10785 | 1,6,7,9,10, 2,3,4,5,8,1<br>11,14,16 2,13,15,17 | 1 | P83121                                                  |
| 10786 | 1,6,7,9,10, 2,3,4,5,8,1<br>11,14,17 2,13,15,16 | 2 | P83121,Q9QUL6                                           |
| 10787 | 1,6,7,9,10, 2,3,4,5,8,1<br>11,15,16 2,13,14,17 | 3 | P31430,P36970,Q80WL1                                    |
| 10788 | 1,6,7,9,10, 2,3,4,5,8,1<br>11,15,17 2,13,14,16 | 3 | P36970,Q566E6,Q9QUL6                                    |
| 10789 | 1,6,7,9,10, 2,3,4,5,8,1<br>11,16,17 2,13,14,15 | 4 | P35053,P36970,Q64093,Q9QUL6                             |
| 10790 | 1,6,7,9,10, 2,3,4,5,8,1<br>12,13,14 1,15,16,17 | 4 | P06911,P12020,P97840,Q6AYS4                             |
| 10791 | 1,6,7,9,10, 2,3,4,5,8,1<br>12,13,15 1,14,16,17 | 3 | P19218,P97840,Q6AYS4                                    |
| 10792 | 1,6,7,9,10, 2,3,4,5,8,1<br>12,13,16 1,14,15,17 | 5 | P02761,P19218,P47967,P97840,Q6AYS4                      |
| 10793 | 1,6,7,9,10, 2,3,4,5,8,1<br>12,13,17 1,14,15,16 | 8 | P13432,P14668,P19218,P36374,P97840,Q64194,Q99MH3,Q9QZK9 |
| 10794 | 1,6,7,9,10, 2,3,4,5,8,1<br>12,14,15 1,13,16,17 | 3 | P20766,P97840,Q6AYS4                                    |
| 10795 | 1,6,7,9,10, 2,3,4,5,8,1<br>12,14,16 1,13,15,17 | 3 | P20766,P97840,Q6AYS4                                    |
| 10796 | 1,6,7,9,10, 2,3,4,5,8,1<br>12,14,17 1,13,15,16 | 3 | P13432,P14668,P97840                                    |
| 10797 | 1,6,7,9,10, 2,3,4,5,8,1<br>12,15,16 1,13,14,17 | 4 | P19218,P20766,P97840,Q6AYS4                             |
| 10798 | 1,6,7,9,10, 2,3,4,5,8,1<br>12,15,17 1,13,14,16 | 4 | P13432,P14668,P97840,Q6AYS4                             |

|       |                                                |   |                                                  |
|-------|------------------------------------------------|---|--------------------------------------------------|
| 10799 | 1,6,7,9,10, 2,3,4,5,8,1<br>12,16,17 1,13,14,15 | 4 | P13432,P19218,P97840,Q6AYS4                      |
| 10800 | 1,6,7,9,10, 2,3,4,5,8,1<br>13,14,15 1,12,16,17 | 4 | P12020,Q5GRG2,Q6AYS4,Q80WL1                      |
| 10801 | 1,6,7,9,10, 2,3,4,5,8,1<br>13,14,16 1,12,15,17 | 5 | B0BNN3,P12020,P35053,P97840,Q6AYS4               |
| 10802 | 1,6,7,9,10, 2,3,4,5,8,1<br>13,14,17 1,12,15,16 | 2 | P12020,P14668                                    |
| 10803 | 1,6,7,9,10, 2,3,4,5,8,1<br>13,15,16 1,12,14,17 | 5 | P19218,P62804,P97840,Q6AYS4,Q80WL1               |
| 10804 | 1,6,7,9,10, 2,3,4,5,8,1<br>13,15,17 1,12,14,16 | 2 | P14668,Q6AYS4                                    |
| 10805 | 1,6,7,9,10, 2,3,4,5,8,1<br>13,16,17 1,12,14,15 | 5 | P19218,P35053,P97840,Q64194,Q6AYS4               |
| 10806 | 1,6,7,9,10, 2,3,4,5,8,1<br>14,15,16 1,12,13,17 | 3 | P16636,Q6AYS4,Q80WL1                             |
| 10807 | 1,6,7,9,10, 2,3,4,5,8,1<br>14,15,17 1,12,13,16 | 1 | Q6AYS4                                           |
| 10808 | 1,6,7,9,10, 2,3,4,5,8,1<br>14,16,17 1,12,13,15 | 3 | P35053,Q6AYS4,Q6TMA8                             |
| 10809 | 1,6,7,9,10, 2,3,4,5,8,1<br>15,16,17 1,12,13,14 | 4 | P35053,Q6AYS4,Q6TMA8,Q80WL1                      |
| 10810 | 1,6,7,9,11, 2,3,4,5,8,1<br>12,13,14 0,15,16,17 | 7 | P09456,P30120,P47727,P83121,Q62902,Q62997,Q9JHB9 |
| 10811 | 1,6,7,9,11, 2,3,4,5,8,1<br>12,13,15 0,14,16,17 | 2 | Q62997,Q9JHB9                                    |
| 10812 | 1,6,7,9,11, 2,3,4,5,8,1<br>12,13,16 0,14,15,17 | 4 | P02761,P12368,Q62902,Q9JHB9                      |
| 10813 | 1,6,7,9,11, 2,3,4,5,8,1<br>12,13,17 0,14,15,16 | 4 | P13432,P36374,Q9JHB9,Q9QZK9                      |
| 10814 | 1,6,7,9,11, 2,3,4,5,8,1<br>12,14,15 0,13,16,17 | 1 | Q62997                                           |
| 10815 | 1,6,7,9,11, 2,3,4,5,8,1<br>12,14,16 0,13,15,17 | 1 | Q6AYL6                                           |
| 10816 | 1,6,7,9,11, 2,3,4,5,8,1<br>12,14,17 0,13,15,16 | 2 | P13432,Q62997                                    |
| 10817 | 1,6,7,9,11, 2,3,4,5,8,1<br>12,15,16 0,13,14,17 | 2 | P12368,P20766                                    |
| 10818 | 1,6,7,9,11, 2,3,4,5,8,1<br>12,15,17 0,13,14,16 | 1 | P13432                                           |
| 10819 | 1,6,7,9,11, 2,3,4,5,8,1<br>12,16,17 0,13,14,15 | 3 | P12368,P13432,P36970                             |
| 10820 | 1,6,7,9,11, 2,3,4,5,8,1<br>13,14,15 0,12,16,17 | 4 | P16636,P83121,Q80WL1,Q9JJS8                      |
| 10821 | 1,6,7,9,11, 2,3,4,5,8,1<br>13,14,16 0,12,15,17 | 2 | P02761,P83121                                    |

|       |                                                |   |                                                  |
|-------|------------------------------------------------|---|--------------------------------------------------|
| 10822 | 1,6,7,9,11, 2,3,4,5,8,1<br>13,14,17 0,12,15,16 | 2 | P83121,Q9JJS8                                    |
| 10823 | 1,6,7,9,11, 2,3,4,5,8,1<br>13,15,16 0,12,14,17 | 3 | P31430,Q80WL1,Q9JJS8                             |
| 10824 | 1,6,7,9,11, 2,3,4,5,8,1<br>13,15,17 0,12,14,16 | 1 | Q9JJS8                                           |
| 10825 | 1,6,7,9,11, 2,3,4,5,8,1<br>13,16,17 0,12,14,15 | 1 | P36970                                           |
| 10826 | 1,6,7,9,11, 2,3,4,5,8,1<br>14,15,16 0,12,13,17 | 2 | P16636,Q80WL1                                    |
| 10827 | 1,6,7,9,11, 2,3,4,5,8,1<br>14,15,17 0,12,13,16 | 2 | Q80WL1,Q9JJS8                                    |
| 10828 | 1,6,7,9,11, 2,3,4,5,8,1<br>14,16,17 0,12,13,15 | 1 | P83121                                           |
| 10829 | 1,6,7,9,11, 2,3,4,5,8,1<br>15,16,17 0,12,13,14 | 2 | P36970,Q80WL1                                    |
| 10830 | 1,6,7,9,12, 2,3,4,5,8,1<br>13,14,15 0,11,16,17 | 2 | P08649,Q6AYS4                                    |
| 10831 | 1,6,7,9,12, 2,3,4,5,8,1<br>13,14,16 0,11,15,17 | 3 | P02761,P08649,Q6AYS4                             |
| 10832 | 1,6,7,9,12, 2,3,4,5,8,1<br>13,14,17 0,11,15,16 | 5 | P13432,P14668,P53792,Q64194,Q6AYS4               |
| 10833 | 1,6,7,9,12, 2,3,4,5,8,1<br>13,15,16 0,11,14,17 | 4 | P08649,P19218,P97840,Q6AYS4                      |
| 10834 | 1,6,7,9,12, 2,3,4,5,8,1<br>13,15,17 0,11,14,16 | 6 | P13432,P14668,P19218,P53792,Q64194,Q6AYS4        |
| 10835 | 1,6,7,9,12, 2,3,4,5,8,1<br>13,16,17 0,11,14,15 | 4 | P13432,P19218,Q64194,Q6AYS4                      |
| 10836 | 1,6,7,9,12, 2,3,4,5,8,1<br>14,15,16 0,11,13,17 | 2 | P20766,Q6AYS4                                    |
| 10837 | 1,6,7,9,12, 2,3,4,5,8,1<br>14,15,17 0,11,13,16 | 2 | P13432,Q6AYS4                                    |
| 10838 | 1,6,7,9,12, 2,3,4,5,8,1<br>14,16,17 0,11,13,15 | 2 | P13432,Q6AYS4                                    |
| 10839 | 1,6,7,9,12, 2,3,4,5,8,1<br>15,16,17 0,11,13,14 | 4 | P13432,P19218,P20766,Q6AYS4                      |
| 10840 | 1,6,7,9,13, 2,3,4,5,8,1<br>14,15,16 0,11,12,17 | 6 | P16391,P16636,P19223,P62804,Q6AYS4,Q80WL1        |
| 10841 | 1,6,7,9,13, 2,3,4,5,8,1<br>14,15,17 0,11,12,16 | 5 | P14668,P53792,Q6AYS4,Q80WL1,Q9JJS8               |
| 10842 | 1,6,7,9,13, 2,3,4,5,8,1<br>14,16,17 0,11,12,15 | 3 | P35053,P53792,Q6AYS4                             |
| 10843 | 1,6,7,9,13, 2,3,4,5,8,1<br>15,16,17 0,11,12,14 | 7 | P19218,P53792,P62804,Q63598,Q6AYS4,Q80WL1,Q9EQS0 |
| 10844 | 1,6,7,9,14, 2,3,4,5,8,1<br>15,16,17 0,11,12,13 | 2 | Q6AYS4,Q80WL1                                    |



|       |                          |                          |   |                                                                |
|-------|--------------------------|--------------------------|---|----------------------------------------------------------------|
| 10845 | 1,6,7,10,1<br>1,12,13,14 | 2,3,4,5,8,9<br>,15,16,17 | 9 | P04905,P06911,P12020,P30120,P47727,Q5GRG2,Q5QE79,Q62902,Q9JHB9 |
| 10846 | 1,6,7,10,1<br>1,12,13,15 | 2,3,4,5,8,9<br>,14,16,17 | 2 | P47727,Q9JHB9                                                  |
| 10847 | 1,6,7,10,1<br>1,12,13,16 | 2,3,4,5,8,9<br>,14,15,17 | 5 | P12368,P47727,P47967,P97840,Q9JHB9                             |
| 10848 | 1,6,7,10,1<br>1,12,13,17 | 2,3,4,5,8,9<br>,14,15,16 | 7 | O08815,P13432,P36374,P47727,Q99MH3,Q9JHB9,Q9QZK9               |
| 10849 | 1,6,7,10,1<br>1,12,14,15 | 2,3,4,5,8,9<br>,13,16,17 | 4 | P20766,P22006,P35280,P47727                                    |
| 10850 | 1,6,7,10,1<br>1,12,14,16 | 2,3,4,5,8,9<br>,13,15,17 | 6 | P12368,P20766,P47727,P97840,Q6AYL6,Q6IFU7                      |
| 10851 | 1,6,7,10,1<br>1,12,14,17 | 2,3,4,5,8,9<br>,13,15,16 | 5 | O08815,P13432,P20766,P47727,Q9QZK9                             |
| 10852 | 1,6,7,10,1<br>1,12,15,16 | 2,3,4,5,8,9<br>,13,14,17 | 4 | P12368,P20766,P97840,Q6IFU7                                    |
| 10853 | 1,6,7,10,1<br>1,12,15,17 | 2,3,4,5,8,9<br>,13,14,16 | 3 | P13432,P20766,Q9QZK9                                           |
| 10854 | 1,6,7,10,1<br>1,12,16,17 | 2,3,4,5,8,9<br>,13,14,15 | 7 | P06757,P12368,P13432,P20766,P97840,Q6TMA8,Q9QZK9               |
| 10855 | 1,6,7,10,1<br>1,13,14,15 | 2,3,4,5,8,9<br>,12,16,17 | 5 | P12020,P19223,P22006,P47727,Q5GRG2                             |
| 10856 | 1,6,7,10,1<br>1,13,14,16 | 2,3,4,5,8,9<br>,12,15,17 | 4 | P12020,P19223,P47727,Q7TPB1                                    |
| 10857 | 1,6,7,10,1<br>1,13,14,17 | 2,3,4,5,8,9<br>,12,15,16 | 2 | P12020,P47727                                                  |
| 10858 | 1,6,7,10,1<br>1,13,15,16 | 2,3,4,5,8,9<br>,12,14,17 | 3 | P01835,P19223,Q80WL1                                           |
| 10859 | 1,6,7,10,1<br>1,13,15,17 | 2,3,4,5,8,9<br>,12,14,16 | 1 | Q9JJS8                                                         |
| 10860 | 1,6,7,10,1<br>1,13,16,17 | 2,3,4,5,8,9<br>,12,14,15 | 0 |                                                                |
| 10861 | 1,6,7,10,1<br>1,14,15,16 | 2,3,4,5,8,9<br>,12,13,17 | 3 | P19223,P20766,Q80WL1                                           |
| 10862 | 1,6,7,10,1<br>1,14,15,17 | 2,3,4,5,8,9<br>,12,13,16 | 1 | P22006                                                         |
| 10863 | 1,6,7,10,1<br>1,14,16,17 | 2,3,4,5,8,9<br>,12,13,15 | 2 | P20766,Q6TMA8                                                  |
| 10864 | 1,6,7,10,1<br>1,15,16,17 | 2,3,4,5,8,9<br>,12,13,14 | 3 | P20766,P36970,Q6TMA8                                           |
| 10865 | 1,6,7,10,1<br>2,13,14,15 | 2,3,4,5,8,9<br>,11,16,17 | 6 | P06911,P12020,P97840,Q498D9,Q5GRG2,Q6AYS4                      |
| 10866 | 1,6,7,10,1<br>2,13,14,16 | 2,3,4,5,8,9<br>,11,15,17 | 5 | P02761,P06911,P12020,P97840,Q6AYS4                             |
| 10867 | 1,6,7,10,1<br>2,13,14,17 | 2,3,4,5,8,9<br>,11,15,16 | 7 | P06911,P12020,P13432,P14668,Q05175,Q6AYS4,Q9QZK9               |

|       |                          |                          |   |                                                  |
|-------|--------------------------|--------------------------|---|--------------------------------------------------|
| 10868 | 1,6,7,10,1<br>2,13,15,16 | 2,3,4,5,8,9<br>,11,14,17 | 3 | P19218,P97840,Q6AYS4                             |
| 10869 | 1,6,7,10,1<br>2,13,15,17 | 2,3,4,5,8,9<br>,11,14,16 | 6 | P14668,P19218,Q6AYS4,Q6IFV1,Q99MH3,Q9QZK9        |
| 10870 | 1,6,7,10,1<br>2,13,16,17 | 2,3,4,5,8,9<br>,11,14,15 | 7 | P13432,P19218,P97840,Q64194,Q6AYS4,Q99MH3,Q9QZK9 |
| 10871 | 1,6,7,10,1<br>2,14,15,16 | 2,3,4,5,8,9<br>,11,13,17 | 3 | P20766,P97840,Q6AYS4                             |
| 10872 | 1,6,7,10,1<br>2,14,15,17 | 2,3,4,5,8,9<br>,11,13,16 | 4 | P13432,P14668,P20766,Q6AYS4                      |
| 10873 | 1,6,7,10,1<br>2,14,16,17 | 2,3,4,5,8,9<br>,11,13,15 | 5 | P13432,P20766,P97840,Q6AYS4,Q6TMA8               |
| 10874 | 1,6,7,10,1<br>2,15,16,17 | 2,3,4,5,8,9<br>,11,13,14 | 5 | P19218,P20766,P97840,Q6AYS4,Q6TMA8               |
| 10875 | 1,6,7,10,1<br>3,14,15,16 | 2,3,4,5,8,9<br>,11,12,17 | 5 | P12020,P19223,Q5GRG2,Q6AYS4,Q80WL1               |
| 10876 | 1,6,7,10,1<br>3,14,15,17 | 2,3,4,5,8,9<br>,11,12,16 | 4 | P12020,P14668,Q5GRG2,Q6AYS4                      |
| 10877 | 1,6,7,10,1<br>3,14,16,17 | 2,3,4,5,8,9<br>,11,12,15 | 2 | P12020,Q6AYS4                                    |
| 10878 | 1,6,7,10,1<br>3,15,16,17 | 2,3,4,5,8,9<br>,11,12,14 | 4 | P19218,Q6AYS4,Q6TMA8,Q9EQS0                      |
| 10879 | 1,6,7,10,1<br>4,15,16,17 | 2,3,4,5,8,9<br>,11,12,13 | 4 | P20766,Q6AYS4,Q6TMA8,Q80WL1                      |
| 10880 | 1,6,7,11,1<br>2,13,14,15 | 2,3,4,5,8,9<br>,10,16,17 | 3 | P47727,Q5GRG2,Q9JHB9                             |
| 10881 | 1,6,7,11,1<br>2,13,14,16 | 2,3,4,5,8,9<br>,10,15,17 | 4 | P02761,P47727,Q62902,Q9JHB9                      |
| 10882 | 1,6,7,11,1<br>2,13,14,17 | 2,3,4,5,8,9<br>,10,15,16 | 6 | P13432,P36374,P47727,Q62902,Q9JHB9,Q9QZK9        |
| 10883 | 1,6,7,11,1<br>2,13,15,16 | 2,3,4,5,8,9<br>,10,14,17 | 0 |                                                  |
| 10884 | 1,6,7,11,1<br>2,13,15,17 | 2,3,4,5,8,9<br>,10,14,16 | 2 | P13432,Q9QZK9                                    |
| 10885 | 1,6,7,11,1<br>2,13,16,17 | 2,3,4,5,8,9<br>,10,14,15 | 3 | P13432,P17046,Q9QZK9                             |
| 10886 | 1,6,7,11,1<br>2,14,15,16 | 2,3,4,5,8,9<br>,10,13,17 | 1 | P20766                                           |
| 10887 | 1,6,7,11,1<br>2,14,15,17 | 2,3,4,5,8,9<br>,10,13,16 | 2 | P13432,P20766                                    |
| 10888 | 1,6,7,11,1<br>2,14,16,17 | 2,3,4,5,8,9<br>,10,13,15 | 2 | P13432,P20766                                    |
| 10889 | 1,6,7,11,1<br>2,15,16,17 | 2,3,4,5,8,9<br>,10,13,14 | 2 | P13432,P20766                                    |
| 10890 | 1,6,7,11,1<br>3,14,15,16 | 2,3,4,5,8,9<br>,10,12,17 | 3 | P16636,P19223,Q80WL1                             |

|       |                          |                           |   |                                                                |
|-------|--------------------------|---------------------------|---|----------------------------------------------------------------|
| 10891 | 1,6,7,11,1<br>3,14,15,17 | 2,3,4,5,8,9<br>,10,12,16  | 1 | Q9JJS8                                                         |
| 10892 | 1,6,7,11,1<br>3,14,16,17 | 2,3,4,5,8,9<br>,10,12,15  | 0 |                                                                |
| 10893 | 1,6,7,11,1<br>3,15,16,17 | 2,3,4,5,8,9<br>,10,12,14  | 2 | Q80WL1,Q9JJS8                                                  |
| 10894 | 1,6,7,11,1<br>4,15,16,17 | 2,3,4,5,8,9<br>,10,12,13  | 2 | P20766,Q80WL1                                                  |
| 10895 | 1,6,7,12,1<br>3,14,15,16 | 2,3,4,5,8,9<br>,10,11,17  | 2 | P08649,Q6AYS4                                                  |
| 10896 | 1,6,7,12,1<br>3,14,15,17 | 2,3,4,5,8,9<br>,10,11,16  | 5 | P08649,P13432,P14668,Q6AYS4,Q9QZK9                             |
| 10897 | 1,6,7,12,1<br>3,14,16,17 | 2,3,4,5,8,9<br>,10,11,15  | 3 | P08649,P13432,Q6AYS4                                           |
| 10898 | 1,6,7,12,1<br>3,15,16,17 | 2,3,4,5,8,9<br>,10,11,14  | 4 | P08649,P13432,P19218,Q6AYS4                                    |
| 10899 | 1,6,7,12,1<br>4,15,16,17 | 2,3,4,5,8,9<br>,10,11,13  | 5 | P13432,P20766,P35467,Q6AYS4,Q6TMA8                             |
| 10900 | 1,6,7,13,1<br>4,15,16,17 | 2,3,4,5,8,9<br>,10,11,12  | 2 | Q6AYS4,Q80WL1                                                  |
| 10901 | 1,6,8,9,10,<br>11,12,13  | 2,3,4,5,7,1<br>4,15,16,17 | 9 | P02781,P02782,P02803,P08723,P0C0A9,P30120,P36374,P47727,Q9JHB9 |
| 10902 | 1,6,8,9,10,<br>11,12,14  | 2,3,4,5,7,1<br>3,15,16,17 | 6 | P02782,P04905,P08723,P0C0A9,P30120,P47727                      |
| 10903 | 1,6,8,9,10,<br>11,12,15  | 2,3,4,5,7,1<br>3,14,16,17 | 2 | P08010,Q566E6                                                  |
| 10904 | 1,6,8,9,10,<br>11,12,16  | 2,3,4,5,7,1<br>3,14,15,17 | 2 | Q6IFU7,Q9WUW8                                                  |
| 10905 | 1,6,8,9,10,<br>11,12,17  | 2,3,4,5,7,1<br>3,14,15,16 | 6 | P02782,P13432,P16636,Q09030,Q566E6,Q99068                      |
| 10906 | 1,6,8,9,10,<br>11,13,14  | 2,3,4,5,7,1<br>2,15,16,17 | 2 | P01836,P47727                                                  |
| 10907 | 1,6,8,9,10,<br>11,13,15  | 2,3,4,5,7,1<br>2,14,16,17 | 0 |                                                                |
| 10908 | 1,6,8,9,10,<br>11,13,16  | 2,3,4,5,7,1<br>2,14,15,17 | 3 | A2RUV9,P11762,Q8CJD3                                           |
| 10909 | 1,6,8,9,10,<br>11,13,17  | 2,3,4,5,7,1<br>2,14,15,16 | 1 | P01836                                                         |
| 10910 | 1,6,8,9,10,<br>11,14,15  | 2,3,4,5,7,1<br>2,13,16,17 | 3 | P01836,P35280,P47727                                           |
| 10911 | 1,6,8,9,10,<br>11,14,16  | 2,3,4,5,7,1<br>2,13,15,17 | 2 | P01836,P47727                                                  |
| 10912 | 1,6,8,9,10,<br>11,14,17  | 2,3,4,5,7,1<br>2,13,15,16 | 3 | P01836,P47727,Q09030                                           |
| 10913 | 1,6,8,9,10,<br>11,15,16  | 2,3,4,5,7,1<br>2,13,14,17 | 1 | P55091                                                         |

|       |                                                |    |                                                                       |
|-------|------------------------------------------------|----|-----------------------------------------------------------------------|
| 10914 | 1,6,8,9,10, 2,3,4,5,7,1<br>11,15,17 2,13,14,16 | 2  | P01836,Q566E6                                                         |
| 10915 | 1,6,8,9,10, 2,3,4,5,7,1<br>11,16,17 2,13,14,15 | 3  | A2RUV9,P01836,Q09030                                                  |
| 10916 | 1,6,8,9,10, 2,3,4,5,7,1<br>12,13,14 1,15,16,17 | 3  | P02782,P14408,P30120                                                  |
| 10917 | 1,6,8,9,10, 2,3,4,5,7,1<br>12,13,15 1,14,16,17 | 3  | P02782,P15999,Q6IFV1                                                  |
| 10918 | 1,6,8,9,10, 2,3,4,5,7,1<br>12,13,16 1,14,15,17 | 3  | P02782,P19218,P97840                                                  |
| 10919 | 1,6,8,9,10, 2,3,4,5,7,1<br>12,13,17 1,14,15,16 | 4  | P02782,P13432,Q6IFV1,Q9QZK9                                           |
| 10920 | 1,6,8,9,10, 2,3,4,5,7,1<br>12,14,15 1,13,16,17 | 0  |                                                                       |
| 10921 | 1,6,8,9,10, 2,3,4,5,7,1<br>12,14,16 1,13,15,17 | 0  |                                                                       |
| 10922 | 1,6,8,9,10, 2,3,4,5,7,1<br>12,14,17 1,13,15,16 | 4  | P01836,P02782,P13432,Q09030                                           |
| 10923 | 1,6,8,9,10, 2,3,4,5,7,1<br>12,15,16 1,13,14,17 | 0  |                                                                       |
| 10924 | 1,6,8,9,10, 2,3,4,5,7,1<br>12,15,17 1,13,14,16 | 2  | P13432,Q6IFV1                                                         |
| 10925 | 1,6,8,9,10, 2,3,4,5,7,1<br>12,16,17 1,13,14,15 | 2  | P13432,Q09030                                                         |
| 10926 | 1,6,8,9,10, 2,3,4,5,7,1<br>13,14,15 1,12,16,17 | 2  | P01836,P15999                                                         |
| 10927 | 1,6,8,9,10, 2,3,4,5,7,1<br>13,14,16 1,12,15,17 | 2  | P01836,Q9ESW0                                                         |
| 10928 | 1,6,8,9,10, 2,3,4,5,7,1<br>13,14,17 1,12,15,16 | 2  | P01836,P51907                                                         |
| 10929 | 1,6,8,9,10, 2,3,4,5,7,1<br>13,15,16 1,12,14,17 | 2  | P34901,Q9ESW0                                                         |
| 10930 | 1,6,8,9,10, 2,3,4,5,7,1<br>13,15,17 1,12,14,16 | 4  | P01836,P15999,P34901,Q6IFV1                                           |
| 10931 | 1,6,8,9,10, 2,3,4,5,7,1<br>13,16,17 1,12,14,15 | 6  | P01836,P25031,P34901,P51907,Q8CJD3,Q9ESW0                             |
| 10932 | 1,6,8,9,10, 2,3,4,5,7,1<br>14,15,16 1,12,13,17 | 1  | P01836                                                                |
| 10933 | 1,6,8,9,10, 2,3,4,5,7,1<br>14,15,17 1,12,13,16 | 1  | P01836                                                                |
| 10934 | 1,6,8,9,10, 2,3,4,5,7,1<br>14,16,17 1,12,13,15 | 2  | P01836,Q09030                                                         |
| 10935 | 1,6,8,9,10, 2,3,4,5,7,1<br>15,16,17 1,12,13,14 | 1  | P01836                                                                |
| 10936 | 1,6,8,9,11, 2,3,4,5,7,1<br>12,13,14 0,15,16,17 | 10 | P02782,P02803,P04905,P08723,P0C0A9,P30120,P47727,Q62902,Q62997,Q9JHB9 |

|       |                                                |   |                                                         |
|-------|------------------------------------------------|---|---------------------------------------------------------|
| 10937 | 1,6,8,9,11, 2,3,4,5,7,1<br>12,13,15 0,14,16,17 | 3 | P02782,Q62997,Q9JHB9                                    |
| 10938 | 1,6,8,9,11, 2,3,4,5,7,1<br>12,13,16 0,14,15,17 | 3 | P02782,P02803,Q9JHB9                                    |
| 10939 | 1,6,8,9,11, 2,3,4,5,7,1<br>12,13,17 0,14,15,16 | 8 | P02782,P02803,P13432,P30120,P36374,Q99068,Q9JHB9,Q9QZK9 |
| 10940 | 1,6,8,9,11, 2,3,4,5,7,1<br>12,14,15 0,13,16,17 | 3 | P02782,P47727,Q62997                                    |
| 10941 | 1,6,8,9,11, 2,3,4,5,7,1<br>12,14,16 0,13,15,17 | 2 | P02782,P47727                                           |
| 10942 | 1,6,8,9,11, 2,3,4,5,7,1<br>12,14,17 0,13,15,16 | 6 | P02782,P04218,P13432,P47727,Q09030,Q62997               |
| 10943 | 1,6,8,9,11, 2,3,4,5,7,1<br>12,15,16 0,13,14,17 | 0 |                                                         |
| 10944 | 1,6,8,9,11, 2,3,4,5,7,1<br>12,15,17 0,13,14,16 | 2 | P13432,Q99068                                           |
| 10945 | 1,6,8,9,11, 2,3,4,5,7,1<br>12,16,17 0,13,14,15 | 4 | P04218,P13432,Q09030,Q99068                             |
| 10946 | 1,6,8,9,11, 2,3,4,5,7,1<br>13,14,15 0,12,16,17 | 1 | P47727                                                  |
| 10947 | 1,6,8,9,11, 2,3,4,5,7,1<br>13,14,16 0,12,15,17 | 2 | P04218,P47727                                           |
| 10948 | 1,6,8,9,11, 2,3,4,5,7,1<br>13,14,17 0,12,15,16 | 3 | P01836,P04218,P47727                                    |
| 10949 | 1,6,8,9,11, 2,3,4,5,7,1<br>13,15,16 0,12,14,17 | 1 | P34901                                                  |
| 10950 | 1,6,8,9,11, 2,3,4,5,7,1<br>13,15,17 0,12,14,16 | 2 | P04218,P34901                                           |
| 10951 | 1,6,8,9,11, 2,3,4,5,7,1<br>13,16,17 0,12,14,15 | 5 | A2RUV9,P04218,P11762,P34901,Q8CJD3                      |
| 10952 | 1,6,8,9,11, 2,3,4,5,7,1<br>14,15,16 0,12,13,17 | 1 | P04218                                                  |
| 10953 | 1,6,8,9,11, 2,3,4,5,7,1<br>14,15,17 0,12,13,16 | 2 | P01836,P04218                                           |
| 10954 | 1,6,8,9,11, 2,3,4,5,7,1<br>14,16,17 0,12,13,15 | 2 | P01836,P04218                                           |
| 10955 | 1,6,8,9,11, 2,3,4,5,7,1<br>15,16,17 0,12,13,14 | 2 | A2RUV9,P04218                                           |
| 10956 | 1,6,8,9,12, 2,3,4,5,7,1<br>13,14,15 0,11,16,17 | 2 | P02782,P15999                                           |
| 10957 | 1,6,8,9,12, 2,3,4,5,7,1<br>13,14,16 0,11,15,17 | 1 | P02782                                                  |
| 10958 | 1,6,8,9,12, 2,3,4,5,7,1<br>13,14,17 0,11,15,16 | 4 | P02782,P13432,P51907,Q9Z1F2                             |
| 10959 | 1,6,8,9,12, 2,3,4,5,7,1<br>13,15,16 0,11,14,17 | 1 | P19218                                                  |

|       |                                                |    |                                                                                     |
|-------|------------------------------------------------|----|-------------------------------------------------------------------------------------|
| 10960 | 1,6,8,9,12, 2,3,4,5,7,1<br>13,15,17 0,11,14,16 | 4  | P02782,P13432,P15999,Q6IFV1                                                         |
| 10961 | 1,6,8,9,12, 2,3,4,5,7,1<br>13,16,17 0,11,14,15 | 2  | P02782,P13432                                                                       |
| 10962 | 1,6,8,9,12, 2,3,4,5,7,1<br>14,15,16 0,11,13,17 | 0  |                                                                                     |
| 10963 | 1,6,8,9,12, 2,3,4,5,7,1<br>14,15,17 0,11,13,16 | 1  | P13432                                                                              |
| 10964 | 1,6,8,9,12, 2,3,4,5,7,1<br>14,16,17 0,11,13,15 | 2  | P13432,Q09030                                                                       |
| 10965 | 1,6,8,9,12, 2,3,4,5,7,1<br>15,16,17 0,11,13,14 | 1  | P13432                                                                              |
| 10966 | 1,6,8,9,13, 2,3,4,5,7,1<br>14,15,16 0,11,12,17 | 1  | P19223                                                                              |
| 10967 | 1,6,8,9,13, 2,3,4,5,7,1<br>14,15,17 0,11,12,16 | 4  | P01836,P15999,P53792,P61206;P84079;P84082                                           |
| 10968 | 1,6,8,9,13, 2,3,4,5,7,1<br>14,16,17 0,11,12,15 | 3  | P01836,P04218,P51907                                                                |
| 10969 | 1,6,8,9,13, 2,3,4,5,7,1<br>15,16,17 0,11,12,14 | 1  | P34901                                                                              |
| 10970 | 1,6,8,9,14, 2,3,4,5,7,1<br>15,16,17 0,11,12,13 | 2  | P01836,P04218                                                                       |
| 10971 | 1,6,8,10,1 2,3,4,5,7,9<br>1,12,13,14 ,15,16,17 | 10 | O35547,P02781,P02782,P04905,P06911,P08723,P0C0A9,P30120,P47727,Q9JHB9               |
| 10972 | 1,6,8,10,1 2,3,4,5,7,9<br>1,12,13,15 ,14,16,17 | 7  | O35547,P02782,P08010,P15999,P47727,Q6IFV1,Q9JHB9                                    |
| 10973 | 1,6,8,10,1 2,3,4,5,7,9<br>1,12,13,16 ,14,15,17 | 6  | O35547,P02782,P30120,P47727,Q6IFU7,Q9JHB9                                           |
| 10974 | 1,6,8,10,1 2,3,4,5,7,9<br>1,12,13,17 ,14,15,16 | 12 | O35547,P02782,P13432,P16636,P30120,P36374,P47727,P97605,Q6IFV1,Q99MH3,Q9JHB9,Q9QZK9 |
| 10975 | 1,6,8,10,1 2,3,4,5,7,9<br>1,12,14,15 ,13,16,17 | 4  | O35547,P08010,P35280,P47727                                                         |
| 10976 | 1,6,8,10,1 2,3,4,5,7,9<br>1,12,14,16 ,13,15,17 | 3  | O35547,P47727,Q6IFU7                                                                |
| 10977 | 1,6,8,10,1 2,3,4,5,7,9<br>1,12,14,17 ,13,15,16 | 6  | O35547,P02782,P08010,P13432,P47727,Q9QZK9                                           |
| 10978 | 1,6,8,10,1 2,3,4,5,7,9<br>1,12,15,16 ,13,14,17 | 2  | O35547,Q6IFU7                                                                       |
| 10979 | 1,6,8,10,1 2,3,4,5,7,9<br>1,12,15,17 ,13,14,16 | 5  | O35547,P08010,P13432,Q6IFV1,Q9QZK9                                                  |
| 10980 | 1,6,8,10,1 2,3,4,5,7,9<br>1,12,16,17 ,13,14,15 | 5  | O35547,P06757,P13432,P16636,P97605                                                  |
| 10981 | 1,6,8,10,1 2,3,4,5,7,9<br>1,13,14,15 ,12,16,17 | 2  | P15999,P47727                                                                       |
| 10982 | 1,6,8,10,1 2,3,4,5,7,9<br>1,13,14,16 ,12,15,17 | 3  | P19223,P47727,Q7TPB1                                                                |

|       |                          |                          |   |                                           |
|-------|--------------------------|--------------------------|---|-------------------------------------------|
| 10983 | 1,6,8,10,1<br>1,13,14,17 | 2,3,4,5,7,9<br>,12,15,16 | 2 | P01836,P47727                             |
| 10984 | 1,6,8,10,1<br>1,13,15,16 | 2,3,4,5,7,9<br>,12,14,17 | 1 | P01835                                    |
| 10985 | 1,6,8,10,1<br>1,13,15,17 | 2,3,4,5,7,9<br>,12,14,16 | 2 | P15999,Q6IFV1                             |
| 10986 | 1,6,8,10,1<br>1,13,16,17 | 2,3,4,5,7,9<br>,12,14,15 | 2 | A2RUV9,P11762                             |
| 10987 | 1,6,8,10,1<br>1,14,15,16 | 2,3,4,5,7,9<br>,12,13,17 | 0 |                                           |
| 10988 | 1,6,8,10,1<br>1,14,15,17 | 2,3,4,5,7,9<br>,12,13,16 | 1 | P01836                                    |
| 10989 | 1,6,8,10,1<br>1,14,16,17 | 2,3,4,5,7,9<br>,12,13,15 | 1 | P01836                                    |
| 10990 | 1,6,8,10,1<br>1,15,16,17 | 2,3,4,5,7,9<br>,12,13,14 | 0 |                                           |
| 10991 | 1,6,8,10,1<br>2,13,14,15 | 2,3,4,5,7,9<br>,11,16,17 | 3 | P02782,P15999,Q498D9                      |
| 10992 | 1,6,8,10,1<br>2,13,14,16 | 2,3,4,5,7,9<br>,11,15,17 | 2 | P02782,Q8K4G9                             |
| 10993 | 1,6,8,10,1<br>2,13,14,17 | 2,3,4,5,7,9<br>,11,15,16 | 5 | P02782,P13432,Q05175,Q8K4G9,Q9QZK9        |
| 10994 | 1,6,8,10,1<br>2,13,15,16 | 2,3,4,5,7,9<br>,11,14,17 | 3 | P15999,P19218,Q6IFV1                      |
| 10995 | 1,6,8,10,1<br>2,13,15,17 | 2,3,4,5,7,9<br>,11,14,16 | 5 | P02782,P15999,Q6IFV1,Q99MH3,Q9QZK9        |
| 10996 | 1,6,8,10,1<br>2,13,16,17 | 2,3,4,5,7,9<br>,11,14,15 | 6 | P02782,P13432,Q6IFV1,Q8K4G9,Q99MH3,Q9QZK9 |
| 10997 | 1,6,8,10,1<br>2,14,15,16 | 2,3,4,5,7,9<br>,11,13,17 | 0 |                                           |
| 10998 | 1,6,8,10,1<br>2,14,15,17 | 2,3,4,5,7,9<br>,11,13,16 | 1 | P13432                                    |
| 10999 | 1,6,8,10,1<br>2,14,16,17 | 2,3,4,5,7,9<br>,11,13,15 | 2 | P05539,P13432                             |
| 11000 | 1,6,8,10,1<br>2,15,16,17 | 2,3,4,5,7,9<br>,11,13,14 | 2 | P05539,Q6IFV1                             |
| 11001 | 1,6,8,10,1<br>3,14,15,16 | 2,3,4,5,7,9<br>,11,12,17 | 2 | P15999,P19223                             |
| 11002 | 1,6,8,10,1<br>3,14,15,17 | 2,3,4,5,7,9<br>,11,12,16 | 3 | P01836,P15999,Q6IFV1                      |
| 11003 | 1,6,8,10,1<br>3,14,16,17 | 2,3,4,5,7,9<br>,11,12,15 | 3 | P01836,P51907,Q498R7                      |
| 11004 | 1,6,8,10,1<br>3,15,16,17 | 2,3,4,5,7,9<br>,11,12,14 | 3 | P15999,P34901,Q6IFV1                      |
| 11005 | 1,6,8,10,1<br>4,15,16,17 | 2,3,4,5,7,9<br>,11,12,13 | 2 | P01836,Q498R7                             |

|       |                          |                          |    |                                                                       |
|-------|--------------------------|--------------------------|----|-----------------------------------------------------------------------|
| 11006 | 1,6,8,11,1<br>2,13,14,15 | 2,3,4,5,7,9<br>,10,16,17 | 6  | P02782,P15999,P30120,P47727,P52590,Q9JHB9                             |
| 11007 | 1,6,8,11,1<br>2,13,14,16 | 2,3,4,5,7,9<br>,10,15,17 | 6  | P02782,P30120,P47727,P52590,Q62902,Q9JHB9                             |
| 11008 | 1,6,8,11,1<br>2,13,14,17 | 2,3,4,5,7,9<br>,10,15,16 | 10 | P02782,P04905,P08723,P13432,P30120,P36374,P47727,Q62635,Q9JHB9,Q9QZK9 |
| 11009 | 1,6,8,11,1<br>2,13,15,16 | 2,3,4,5,7,9<br>,10,14,17 | 1  | P52590                                                                |
| 11010 | 1,6,8,11,1<br>2,13,15,17 | 2,3,4,5,7,9<br>,10,14,16 | 6  | P02782,P13432,P15999,Q6IFV1,Q9JHB9,Q9QZK9                             |
| 11011 | 1,6,8,11,1<br>2,13,16,17 | 2,3,4,5,7,9<br>,10,14,15 | 5  | P02782,P13432,P36376,Q9JHB9,Q9QZK9                                    |
| 11012 | 1,6,8,11,1<br>2,14,15,16 | 2,3,4,5,7,9<br>,10,13,17 | 1  | P52590                                                                |
| 11013 | 1,6,8,11,1<br>2,14,15,17 | 2,3,4,5,7,9<br>,10,13,16 | 2  | P02782,P13432                                                         |
| 11014 | 1,6,8,11,1<br>2,14,16,17 | 2,3,4,5,7,9<br>,10,13,15 | 4  | O35547,P02782,P13432,P47727                                           |
| 11015 | 1,6,8,11,1<br>2,15,16,17 | 2,3,4,5,7,9<br>,10,13,14 | 2  | P13432,Q99068                                                         |
| 11016 | 1,6,8,11,1<br>3,14,15,16 | 2,3,4,5,7,9<br>,10,12,17 | 2  | P19223,P52590                                                         |
| 11017 | 1,6,8,11,1<br>3,14,15,17 | 2,3,4,5,7,9<br>,10,12,16 | 2  | P15999,P47727                                                         |
| 11018 | 1,6,8,11,1<br>3,14,16,17 | 2,3,4,5,7,9<br>,10,12,15 | 2  | P04218,P47727                                                         |
| 11019 | 1,6,8,11,1<br>3,15,16,17 | 2,3,4,5,7,9<br>,10,12,14 | 1  | P34901                                                                |
| 11020 | 1,6,8,11,1<br>4,15,16,17 | 2,3,4,5,7,9<br>,10,12,13 | 1  | P04218                                                                |
| 11021 | 1,6,8,12,1<br>3,14,15,16 | 2,3,4,5,7,9<br>,10,11,17 | 2  | P15999,P52590                                                         |
| 11022 | 1,6,8,12,1<br>3,14,15,17 | 2,3,4,5,7,9<br>,10,11,16 | 5  | P02782,P13432,P15999,Q64093,Q6IFV1                                    |
| 11023 | 1,6,8,12,1<br>3,14,16,17 | 2,3,4,5,7,9<br>,10,11,15 | 3  | P02782,P13432,P51907                                                  |
| 11024 | 1,6,8,12,1<br>3,15,16,17 | 2,3,4,5,7,9<br>,10,11,14 | 4  | P13432,P15999,Q5XFX0,Q6IFV1                                           |
| 11025 | 1,6,8,12,1<br>4,15,16,17 | 2,3,4,5,7,9<br>,10,11,13 | 1  | P13432                                                                |
| 11026 | 1,6,8,13,1<br>4,15,16,17 | 2,3,4,5,7,9<br>,10,11,12 | 1  | P15999                                                                |
| 11027 | 1,6,9,10,1<br>1,12,13,14 | 2,3,4,5,7,8<br>,15,16,17 | 2  | P47727,P50115                                                         |
| 11028 | 1,6,9,10,1<br>1,12,13,15 | 2,3,4,5,7,8<br>,14,16,17 | 3  | P50115,Q566E6,Q6PCU2                                                  |



|       |                          |                          |    |                                                                       |
|-------|--------------------------|--------------------------|----|-----------------------------------------------------------------------|
| 11029 | 1,6,9,10,1<br>1,12,13,16 | 2,3,4,5,7,8<br>,14,15,17 | 6  | P02761,P10536,P12368,P50115,P97840,Q6IFU7                             |
| 11030 | 1,6,9,10,1<br>1,12,13,17 | 2,3,4,5,7,8<br>,14,15,16 | 3  | P07171,P36374,Q9QZK9                                                  |
| 11031 | 1,6,9,10,1<br>1,12,14,15 | 2,3,4,5,7,8<br>,13,16,17 | 4  | P20766,P47727,P50115,Q6PCU2                                           |
| 11032 | 1,6,9,10,1<br>1,12,14,16 | 2,3,4,5,7,8<br>,13,15,17 | 6  | P10536,P20766,P47727,P50115,Q6IFU7,Q9WUW8                             |
| 11033 | 1,6,9,10,1<br>1,12,14,17 | 2,3,4,5,7,8<br>,13,15,16 | 2  | P47727,Q09030                                                         |
| 11034 | 1,6,9,10,1<br>1,12,15,16 | 2,3,4,5,7,8<br>,13,14,17 | 8  | P10536,P12368,P20766,P36970,P50115,Q5M819,Q6IFU7,Q9WUW8               |
| 11035 | 1,6,9,10,1<br>1,12,15,17 | 2,3,4,5,7,8<br>,13,14,16 | 2  | P36970,Q566E6                                                         |
| 11036 | 1,6,9,10,1<br>1,12,16,17 | 2,3,4,5,7,8<br>,13,14,15 | 6  | P06757,P07171,P12368,P36970,Q09030,Q6IFU7                             |
| 11037 | 1,6,9,10,1<br>1,13,14,15 | 2,3,4,5,7,8<br>,12,16,17 | 9  | O88267,P19223,P47727,P50115,P50116,P55091,Q4G075,Q80WL1,Q99041        |
| 11038 | 1,6,9,10,1<br>1,13,14,16 | 2,3,4,5,7,8<br>,12,15,17 | 10 | P02761,P19223,P47727,P50115,P55091,Q4G075,Q7TPB1,Q80WL1,Q99041,Q9QZA6 |
| 11039 | 1,6,9,10,1<br>1,13,14,17 | 2,3,4,5,7,8<br>,12,15,16 | 2  | P01836,P47727                                                         |
| 11040 | 1,6,9,10,1<br>1,13,15,16 | 2,3,4,5,7,8<br>,12,14,17 | 9  | O88267,P19223,P31430,P36970,P50115,P55091,Q6AYS4,Q80WL1,Q9EQS0        |
| 11041 | 1,6,9,10,1<br>1,13,15,17 | 2,3,4,5,7,8<br>,12,14,16 | 4  | P36970,Q566E6,Q80WL1,Q9EQS0                                           |
| 11042 | 1,6,9,10,1<br>1,13,16,17 | 2,3,4,5,7,8<br>,12,14,15 | 6  | A2RUV9,P11762,P36970,Q64611,Q8CJD3,Q9EQS0                             |
| 11043 | 1,6,9,10,1<br>1,14,15,16 | 2,3,4,5,7,8<br>,12,13,17 | 8  | O88267,P08937,P19223,P50115,P55091,Q5M819,Q80WL1,Q99041               |
| 11044 | 1,6,9,10,1<br>1,14,15,17 | 2,3,4,5,7,8<br>,12,13,16 | 2  | P01836,Q80WL1                                                         |
| 11045 | 1,6,9,10,1<br>1,14,16,17 | 2,3,4,5,7,8<br>,12,13,15 | 3  | P01836,P36970,Q80WL1                                                  |
| 11046 | 1,6,9,10,1<br>1,15,16,17 | 2,3,4,5,7,8<br>,12,13,14 | 4  | P36970,Q5M819,Q80WL1,Q9EQS0                                           |
| 11047 | 1,6,9,10,1<br>2,13,14,15 | 2,3,4,5,7,8<br>,11,16,17 | 3  | P50115,P50116,Q6AYS4                                                  |
| 11048 | 1,6,9,10,1<br>2,13,14,16 | 2,3,4,5,7,8<br>,11,15,17 | 5  | P02761,P07171,P50115,P97840,Q6AYS4                                    |
| 11049 | 1,6,9,10,1<br>2,13,14,17 | 2,3,4,5,7,8<br>,11,15,16 | 3  | P07171,P14668,Q6AYS4                                                  |
| 11050 | 1,6,9,10,1<br>2,13,15,16 | 2,3,4,5,7,8<br>,11,14,17 | 6  | P07171,P19218,P20762,P50115,P97840,Q6AYS4                             |
| 11051 | 1,6,9,10,1<br>2,13,15,17 | 2,3,4,5,7,8<br>,11,14,16 | 5  | P07171,P14668,P19218,Q6AYS4,Q6IFV1                                    |

|       |                          |                          |    |                                                                                     |
|-------|--------------------------|--------------------------|----|-------------------------------------------------------------------------------------|
| 11052 | 1,6,9,10,1<br>2,13,16,17 | 2,3,4,5,7,8<br>,11,14,15 | 6  | P07171,P19218,P20762,P97840,Q64194,Q6AYS4                                           |
| 11053 | 1,6,9,10,1<br>2,14,15,16 | 2,3,4,5,7,8<br>,11,13,17 | 3  | P20766,P50115,Q6AYS4                                                                |
| 11054 | 1,6,9,10,1<br>2,14,15,17 | 2,3,4,5,7,8<br>,11,13,16 | 1  | Q6AYS4                                                                              |
| 11055 | 1,6,9,10,1<br>2,14,16,17 | 2,3,4,5,7,8<br>,11,13,15 | 4  | P07171,P20766,Q09030,Q6AYS4                                                         |
| 11056 | 1,6,9,10,1<br>2,15,16,17 | 2,3,4,5,7,8<br>,11,13,14 | 3  | P07171,P20766,Q6AYS4                                                                |
| 11057 | 1,6,9,10,1<br>3,14,15,16 | 2,3,4,5,7,8<br>,11,12,17 | 12 | P08937,P16391,P19223,P50115,P55091,Q4G075,Q63751,Q6AYS4,Q80WL1,Q99041,Q9EQS0,Q9ESW0 |
| 11058 | 1,6,9,10,1<br>3,14,15,17 | 2,3,4,5,7,8<br>,11,12,16 | 6  | P01836,P14668,Q6AYS4,Q80WL1,Q9EQS0,Q9ESW0                                           |
| 11059 | 1,6,9,10,1<br>3,14,16,17 | 2,3,4,5,7,8<br>,11,12,15 | 6  | P01836,P07171,P35053,Q6AYS4,Q9EQS0,Q9ESW0                                           |
| 11060 | 1,6,9,10,1<br>3,15,16,17 | 2,3,4,5,7,8<br>,11,12,14 | 6  | P07171,P20762,Q6AYS4,Q80WL1,Q9EQS0,Q9ESW0                                           |
| 11061 | 1,6,9,10,1<br>4,15,16,17 | 2,3,4,5,7,8<br>,11,12,13 | 5  | P01836,Q6AYS4,Q6TMA8,Q80WL1,Q9EQS0                                                  |
| 11062 | 1,6,9,11,1<br>2,13,14,15 | 2,3,4,5,7,8<br>,10,16,17 | 3  | P47727,P50115,Q62997                                                                |
| 11063 | 1,6,9,11,1<br>2,13,14,16 | 2,3,4,5,7,8<br>,10,15,17 | 4  | P02761,P47727,P50115,Q6AYS4                                                         |
| 11064 | 1,6,9,11,1<br>2,13,14,17 | 2,3,4,5,7,8<br>,10,15,16 | 2  | D3ZHA0,P47727                                                                       |
| 11065 | 1,6,9,11,1<br>2,13,15,16 | 2,3,4,5,7,8<br>,10,14,17 | 2  | P50115,Q6AYS4                                                                       |
| 11066 | 1,6,9,11,1<br>2,13,15,17 | 2,3,4,5,7,8<br>,10,14,16 | 0  |                                                                                     |
| 11067 | 1,6,9,11,1<br>2,13,16,17 | 2,3,4,5,7,8<br>,10,14,15 | 3  | D3ZHA0,P07171,P36970                                                                |
| 11068 | 1,6,9,11,1<br>2,14,15,16 | 2,3,4,5,7,8<br>,10,13,17 | 3  | P20766,P50115,Q6AYS4                                                                |
| 11069 | 1,6,9,11,1<br>2,14,15,17 | 2,3,4,5,7,8<br>,10,13,16 | 0  |                                                                                     |
| 11070 | 1,6,9,11,1<br>2,14,16,17 | 2,3,4,5,7,8<br>,10,13,15 | 2  | D3ZHA0,P04218                                                                       |
| 11071 | 1,6,9,11,1<br>2,15,16,17 | 2,3,4,5,7,8<br>,10,13,14 | 2  | P20766,P36970                                                                       |
| 11072 | 1,6,9,11,1<br>3,14,15,16 | 2,3,4,5,7,8<br>,10,12,17 | 9  | D3ZHA0,P16391,P19223,P50115,P55091,Q4G075,Q6AYS4,Q80WL1,Q9EQS0                      |
| 11073 | 1,6,9,11,1<br>3,14,15,17 | 2,3,4,5,7,8<br>,10,12,16 | 5  | D3ZHA0,P04218,P16391,Q80WL1,Q9EQS0                                                  |
| 11074 | 1,6,9,11,1<br>3,14,16,17 | 2,3,4,5,7,8<br>,10,12,15 | 5  | D3ZHA0,P04218,Q63475,Q80WL1,Q9EQS0                                                  |

|       |                               |                          |   |                                                         |
|-------|-------------------------------|--------------------------|---|---------------------------------------------------------|
| 11075 | 1,6,9,11,1<br>3,15,16,17      | 2,3,4,5,7,8<br>,10,12,14 | 5 | D3ZHA0,P04218,P36970,Q80WL1,Q9EQS0                      |
| 11076 | 1,6,9,11,1<br>4,15,16,17      | 2,3,4,5,7,8<br>,10,12,13 | 5 | D3ZHA0,P04218,P36970,Q80WL1,Q9EQS0                      |
| 11077 | 1,6,9,12,1<br>3,14,15,16      | 2,3,4,5,7,8<br>,10,11,17 | 5 | P00714,P02761,P16391,P50115,Q6AYS4                      |
| 11078 | 1,6,9,12,1<br>3,14,15,17      | 2,3,4,5,7,8<br>,10,11,16 | 5 | P00714,P14668,P16391,P61206;P84079;P84082,Q6AYS4        |
| 11079 | 1,6,9,12,1<br>3,14,16,17      | 2,3,4,5,7,8<br>,10,11,15 | 4 | P00714,P02761,P07171,Q6AYS4                             |
| 11080 | 1,6,9,12,1<br>3,15,16,17      | 2,3,4,5,7,8<br>,10,11,14 | 7 | P00714,P07171,P19218,Q5BJY9,Q64194,Q6AYS4,Q9EQS0        |
| 11081 | 1,6,9,12,1<br>4,15,16,17      | 2,3,4,5,7,8<br>,10,11,13 | 2 | P20766,Q6AYS4                                           |
| 11082 | 1,6,9,13,1<br>4,15,16,17      | 2,3,4,5,7,8<br>,10,11,12 | 8 | D3ZHA0,P00714,P16391,Q63475,Q6AYS4,Q80WL1,Q9EQS0,Q9ESW0 |
| 11083 | 1,6,10,11,<br>12,13,14,1<br>5 | 2,3,4,5,7,8<br>,9,16,17  | 3 | P47727,P50115,P52590                                    |
| 11084 | 1,6,10,11,<br>12,13,14,1<br>6 | 2,3,4,5,7,8<br>,9,15,17  | 6 | P02761,P47727,P50115,P52590,Q6IFU7,Q7TPB1               |
| 11085 | 1,6,10,11,<br>12,13,14,1<br>7 | 2,3,4,5,7,8<br>,9,15,16  | 2 | P47727,Q9QZK9                                           |
| 11086 | 1,6,10,11,<br>12,13,15,1<br>6 | 2,3,4,5,7,8<br>,9,14,17  | 4 | P50115,P52590,Q6AYS4,Q6IFU7                             |
| 11087 | 1,6,10,11,<br>12,13,15,1<br>7 | 2,3,4,5,7,8<br>,9,14,16  | 4 | P97605,Q6IFV1,Q99MH3,Q9QZK9                             |
| 11088 | 1,6,10,11,<br>12,13,16,1<br>7 | 2,3,4,5,7,8<br>,9,14,15  | 3 | P07171,P97605,Q9QZK9                                    |
| 11089 | 1,6,10,11,<br>12,14,15,1<br>6 | 2,3,4,5,7,8<br>,9,13,17  | 5 | P20766,P50115,P52590,Q6AYS4,Q6IFU7                      |
| 11090 | 1,6,10,11,<br>12,14,15,1<br>7 | 2,3,4,5,7,8<br>,9,13,16  | 1 | P20766                                                  |
| 11091 | 1,6,10,11,<br>12,14,16,1<br>7 | 2,3,4,5,7,8<br>,9,13,15  | 3 | P20766,P97605,Q6IFU7                                    |
| 11092 | 1,6,10,11,<br>12,15,16,1<br>7 | 2,3,4,5,7,8<br>,9,13,14  | 6 | P06866,P20766,P36970,P97605,Q6IFU7,Q6TMA8               |

|       |                               |                         |   |                                                  |
|-------|-------------------------------|-------------------------|---|--------------------------------------------------|
| 11093 | 1,6,10,11,<br>13,14,15,1<br>6 | 2,3,4,5,7,8<br>,9,12,17 | 7 | P19223,P50115,P52590,P55091,Q6AYS4,Q80WL1,Q9EQS0 |
| 11094 | 1,6,10,11,<br>13,14,15,1<br>7 | 2,3,4,5,7,8<br>,9,12,16 | 3 | P47727,Q80WL1,Q9EQS0                             |
| 11095 | 1,6,10,11,<br>13,14,16,1<br>7 | 2,3,4,5,7,8<br>,9,12,15 | 3 | D3ZHA0,P47727,Q9EQS0                             |
| 11096 | 1,6,10,11,<br>13,15,16,1<br>7 | 2,3,4,5,7,8<br>,9,12,14 | 4 | D3ZHA0,P36970,Q80WL1,Q9EQS0                      |
| 11097 | 1,6,10,11,<br>14,15,16,1<br>7 | 2,3,4,5,7,8<br>,9,12,13 | 5 | P20766,P36970,Q6TMA8,Q80WL1,Q9EQS0               |
| 11098 | 1,6,10,12,<br>13,14,15,1<br>6 | 2,3,4,5,7,8<br>,9,11,17 | 3 | P50115,P52590,Q6AYS4                             |
| 11099 | 1,6,10,12,<br>13,14,15,1<br>7 | 2,3,4,5,7,8<br>,9,11,16 | 3 | P14668,Q05175,Q6AYS4                             |
| 11100 | 1,6,10,12,<br>13,14,16,1<br>7 | 2,3,4,5,7,8<br>,9,11,15 | 2 | P07171,Q6AYS4                                    |
| 11101 | 1,6,10,12,<br>13,15,16,1<br>7 | 2,3,4,5,7,8<br>,9,11,14 | 5 | P07171,P19218,Q6AYS4,Q99MH3,Q9EQS0               |
| 11102 | 1,6,10,12,<br>14,15,16,1<br>7 | 2,3,4,5,7,8<br>,9,11,13 | 3 | P20766,Q6AYS4,Q6TMA8                             |
| 11103 | 1,6,10,13,<br>14,15,16,1<br>7 | 2,3,4,5,7,8<br>,9,11,12 | 4 | Q498R7,Q6AYS4,Q80WL1,Q9EQS0                      |
| 11104 | 1,6,11,12,<br>13,14,15,1<br>6 | 2,3,4,5,7,8<br>,9,10,17 | 4 | P19223,P50115,P52590,Q6AYS4                      |
| 11105 | 1,6,11,12,<br>13,14,15,1<br>7 | 2,3,4,5,7,8<br>,9,10,16 | 2 | D3ZHA0,P47727                                    |
| 11106 | 1,6,11,12,<br>13,14,16,1<br>7 | 2,3,4,5,7,8<br>,9,10,15 | 2 | D3ZHA0,P47727                                    |
| 11107 | 1,6,11,12,<br>13,15,16,1<br>7 | 2,3,4,5,7,8<br>,9,10,14 | 4 | D3ZHA0,P36970,Q6AYS4,Q9EQS0                      |

|       |                               |                           |   |                                           |
|-------|-------------------------------|---------------------------|---|-------------------------------------------|
| 11108 | 1,6,11,12,<br>14,15,16,1<br>7 | 2,3,4,5,7,8<br>9,10,13    | 2 | D3ZHA0,P20766                             |
| 11109 | 1,6,11,13,<br>14,15,16,1<br>7 | 2,3,4,5,7,8<br>9,10,12    | 4 | D3ZHA0,Q6AYS4,Q80WL1,Q9EQS0               |
| 11110 | 1,6,12,13,<br>14,15,16,1<br>7 | 2,3,4,5,7,8<br>9,10,11    | 4 | D3ZHA0,P00714,Q6AYS4,Q9EQS0               |
| 11111 | 1,7,8,9,10,<br>11,12,13       | 2,3,4,5,6,1<br>4,15,16,17 | 4 | P02803,P10715,P20760,P36374               |
| 11112 | 1,7,8,9,10,<br>11,12,14       | 2,3,4,5,6,1<br>3,15,16,17 | 4 | P10715,P20760,P47727,Q6AYL6               |
| 11113 | 1,7,8,9,10,<br>11,12,15       | 2,3,4,5,6,1<br>3,14,16,17 | 2 | P10715,P22006                             |
| 11114 | 1,7,8,9,10,<br>11,12,16       | 2,3,4,5,6,1<br>3,14,15,17 | 6 | P02803,P10715,P20760,P47967,Q6AYL6,Q9WUW8 |
| 11115 | 1,7,8,9,10,<br>11,12,17       | 2,3,4,5,6,1<br>3,14,15,16 | 3 | P02803,P10715,P36374                      |
| 11116 | 1,7,8,9,10,<br>11,13,14       | 2,3,4,5,6,1<br>2,15,16,17 | 1 | P47727                                    |
| 11117 | 1,7,8,9,10,<br>11,13,15       | 2,3,4,5,6,1<br>2,14,16,17 | 4 | P01835,P22006,P34901,Q9JJS8               |
| 11118 | 1,7,8,9,10,<br>11,13,16       | 2,3,4,5,6,1<br>2,14,15,17 | 4 | B0BNN3,P01835,P02803,P20760               |
| 11119 | 1,7,8,9,10,<br>11,13,17       | 2,3,4,5,6,1<br>2,14,15,16 | 2 | P02803,Q9JJS8                             |
| 11120 | 1,7,8,9,10,<br>11,14,15       | 2,3,4,5,6,1<br>2,13,16,17 | 2 | P22006,P35280                             |
| 11121 | 1,7,8,9,10,<br>11,14,16       | 2,3,4,5,6,1<br>2,13,15,17 | 3 | B0BNN3,P20760,Q62635                      |
| 11122 | 1,7,8,9,10,<br>11,14,17       | 2,3,4,5,6,1<br>2,13,15,16 | 0 |                                           |
| 11123 | 1,7,8,9,10,<br>11,15,16       | 2,3,4,5,6,1<br>2,13,14,17 | 2 | P01835,Q62635                             |
| 11124 | 1,7,8,9,10,<br>11,15,17       | 2,3,4,5,6,1<br>2,13,14,16 | 4 | G3V686,P22006,P25236,Q9JJS8               |
| 11125 | 1,7,8,9,10,<br>11,16,17       | 2,3,4,5,6,1<br>2,13,14,15 | 1 | P25236                                    |
| 11126 | 1,7,8,9,10,<br>12,13,14       | 2,3,4,5,6,1<br>1,15,16,17 | 1 | P02803                                    |
| 11127 | 1,7,8,9,10,<br>12,13,15       | 2,3,4,5,6,1<br>1,14,16,17 | 0 |                                           |
| 11128 | 1,7,8,9,10,<br>12,13,16       | 2,3,4,5,6,1<br>1,14,15,17 | 5 | P02803,P19218,P20760,P47967,P97840        |

|       |                                                |   |                                                  |
|-------|------------------------------------------------|---|--------------------------------------------------|
| 11129 | 1,7,8,9,10, 2,3,4,5,6,1<br>12,13,17 1,14,15,16 | 3 | P02803,P14668,P36374                             |
| 11130 | 1,7,8,9,10, 2,3,4,5,6,1<br>12,14,15 1,13,16,17 | 0 |                                                  |
| 11131 | 1,7,8,9,10, 2,3,4,5,6,1<br>12,14,16 1,13,15,17 | 0 |                                                  |
| 11132 | 1,7,8,9,10, 2,3,4,5,6,1<br>12,14,17 1,13,15,16 | 0 |                                                  |
| 11133 | 1,7,8,9,10, 2,3,4,5,6,1<br>12,15,16 1,13,14,17 | 2 | P10715,P97840                                    |
| 11134 | 1,7,8,9,10, 2,3,4,5,6,1<br>12,15,17 1,13,14,16 | 2 | G3V686,P10715                                    |
| 11135 | 1,7,8,9,10, 2,3,4,5,6,1<br>12,16,17 1,13,14,15 | 1 | P10715                                           |
| 11136 | 1,7,8,9,10, 2,3,4,5,6,1<br>13,14,15 1,12,16,17 | 1 | P01835                                           |
| 11137 | 1,7,8,9,10, 2,3,4,5,6,1<br>13,14,16 1,12,15,17 | 2 | B0BNN3,P01835                                    |
| 11138 | 1,7,8,9,10, 2,3,4,5,6,1<br>13,14,17 1,12,15,16 | 2 | P14668,Q4FZU2                                    |
| 11139 | 1,7,8,9,10, 2,3,4,5,6,1<br>13,15,16 1,12,14,17 | 2 | P01835,P34901                                    |
| 11140 | 1,7,8,9,10, 2,3,4,5,6,1<br>13,15,17 1,12,14,16 | 7 | G3V686,P01835,P14668,P34901,Q4FZU2,Q6IFW6,Q9JJS8 |
| 11141 | 1,7,8,9,10, 2,3,4,5,6,1<br>13,16,17 1,12,14,15 | 4 | P01835,P02625,P34901,Q4FZU2                      |
| 11142 | 1,7,8,9,10, 2,3,4,5,6,1<br>14,15,16 1,12,13,17 | 3 | P01835,P16636,Q62635                             |
| 11143 | 1,7,8,9,10, 2,3,4,5,6,1<br>14,15,17 1,12,13,16 | 1 | G3V686                                           |
| 11144 | 1,7,8,9,10, 2,3,4,5,6,1<br>14,16,17 1,12,13,15 | 1 | P02625                                           |
| 11145 | 1,7,8,9,10, 2,3,4,5,6,1<br>15,16,17 1,12,13,14 | 2 | P01835,P25236                                    |
| 11146 | 1,7,8,9,11, 2,3,4,5,6,1<br>12,13,14 0,15,16,17 | 7 | P02803,P10715,P20760,P36374,P47727,Q62902,Q62997 |
| 11147 | 1,7,8,9,11, 2,3,4,5,6,1<br>12,13,15 0,14,16,17 | 1 | P10715                                           |
| 11148 | 1,7,8,9,11, 2,3,4,5,6,1<br>12,13,16 0,14,15,17 | 4 | P02803,P10715,P20760,Q8CJ52                      |
| 11149 | 1,7,8,9,11, 2,3,4,5,6,1<br>12,13,17 0,14,15,16 | 3 | P02803,P10715,P36374                             |
| 11150 | 1,7,8,9,11, 2,3,4,5,6,1<br>12,14,15 0,13,16,17 | 3 | P10715,P22006,Q62997                             |
| 11151 | 1,7,8,9,11, 2,3,4,5,6,1<br>12,14,16 0,13,15,17 | 2 | P10715,P20760                                    |

|       |                                                |   |                                    |
|-------|------------------------------------------------|---|------------------------------------|
| 11152 | 1,7,8,9,11, 2,3,4,5,6,1<br>12,14,17 0,13,15,16 | 1 | P10715                             |
| 11153 | 1,7,8,9,11, 2,3,4,5,6,1<br>12,15,16 0,13,14,17 | 1 | P10715                             |
| 11154 | 1,7,8,9,11, 2,3,4,5,6,1<br>12,15,17 0,13,14,16 | 1 | P10715                             |
| 11155 | 1,7,8,9,11, 2,3,4,5,6,1<br>12,16,17 0,13,14,15 | 1 | P10715                             |
| 11156 | 1,7,8,9,11, 2,3,4,5,6,1<br>13,14,15 0,12,16,17 | 3 | P16636,P22006,Q9JJS8               |
| 11157 | 1,7,8,9,11, 2,3,4,5,6,1<br>13,14,16 0,12,15,17 | 3 | B0BNN3,P20760,Q7TPB1               |
| 11158 | 1,7,8,9,11, 2,3,4,5,6,1<br>13,14,17 0,12,15,16 | 2 | P04218,Q9JJS8                      |
| 11159 | 1,7,8,9,11, 2,3,4,5,6,1<br>13,15,16 0,12,14,17 | 3 | P01835,P34901,Q9JJS8               |
| 11160 | 1,7,8,9,11, 2,3,4,5,6,1<br>13,15,17 0,12,14,16 | 3 | P04073,P34901,Q9JJS8               |
| 11161 | 1,7,8,9,11, 2,3,4,5,6,1<br>13,16,17 0,12,14,15 | 2 | P34901,Q9JJS8                      |
| 11162 | 1,7,8,9,11, 2,3,4,5,6,1<br>14,15,16 0,12,13,17 | 5 | P16636,Q62635,Q63355,Q99MH3,Q9QZK9 |
| 11163 | 1,7,8,9,11, 2,3,4,5,6,1<br>14,15,17 0,12,13,16 | 3 | P04218,P22006,Q9JJS8               |
| 11164 | 1,7,8,9,11, 2,3,4,5,6,1<br>14,16,17 0,12,13,15 | 1 | P04218                             |
| 11165 | 1,7,8,9,11, 2,3,4,5,6,1<br>15,16,17 0,12,13,14 | 3 | P04218,P10715,Q9JJS8               |
| 11166 | 1,7,8,9,12, 2,3,4,5,6,1<br>13,14,15 0,11,16,17 | 0 |                                    |
| 11167 | 1,7,8,9,12, 2,3,4,5,6,1<br>13,14,16 0,11,15,17 | 2 | P20760,Q4FZU6                      |
| 11168 | 1,7,8,9,12, 2,3,4,5,6,1<br>13,14,17 0,11,15,16 | 1 | P14668                             |
| 11169 | 1,7,8,9,12, 2,3,4,5,6,1<br>13,15,16 0,11,14,17 | 2 | P10715,P19218                      |
| 11170 | 1,7,8,9,12, 2,3,4,5,6,1<br>13,15,17 0,11,14,16 | 2 | P10715,P14668                      |
| 11171 | 1,7,8,9,12, 2,3,4,5,6,1<br>13,16,17 0,11,14,15 | 1 | P10715                             |
| 11172 | 1,7,8,9,12, 2,3,4,5,6,1<br>14,15,16 0,11,13,17 | 0 |                                    |
| 11173 | 1,7,8,9,12, 2,3,4,5,6,1<br>14,15,17 0,11,13,16 | 0 |                                    |
| 11174 | 1,7,8,9,12, 2,3,4,5,6,1<br>14,16,17 0,11,13,15 | 2 | P10715,Q4FZU6                      |

|       |                                                |   |                                                         |
|-------|------------------------------------------------|---|---------------------------------------------------------|
| 11175 | 1,7,8,9,12, 2,3,4,5,6,1<br>15,16,17 0,11,13,14 | 1 | P10715                                                  |
| 11176 | 1,7,8,9,13, 2,3,4,5,6,1<br>14,15,16 0,11,12,17 | 5 | P00762,P01835,P16636,Q4FZU2,Q6IFW6                      |
| 11177 | 1,7,8,9,13, 2,3,4,5,6,1<br>14,15,17 0,11,12,16 | 7 | P11883,P53792,Q4FZU2,Q6IFU7,Q6IFW6,Q6IMF3,Q9JJS8        |
| 11178 | 1,7,8,9,13, 2,3,4,5,6,1<br>14,16,17 0,11,12,15 | 3 | Q4FZU2,Q4FZU6,Q6IFW6                                    |
| 11179 | 1,7,8,9,13, 2,3,4,5,6,1<br>15,16,17 0,11,12,14 | 8 | P01835,P11883,P34901,P62804,Q4FZU2,Q6IFW6,Q6IMF3,Q9JJS8 |
| 11180 | 1,7,8,9,14, 2,3,4,5,6,1<br>15,16,17 0,11,12,13 | 2 | Q4FZU2,Q6IFW6                                           |
| 11181 | 1,7,8,10,1 2,3,4,5,6,9<br>1,12,13,14 ,15,16,17 | 4 | P23593,P36374,P47727,Q8CJ52                             |
| 11182 | 1,7,8,10,1 2,3,4,5,6,9<br>1,12,13,15 ,14,16,17 | 3 | P01835,P10715,P22006                                    |
| 11183 | 1,7,8,10,1 2,3,4,5,6,9<br>1,12,13,16 ,14,15,17 | 5 | P01835,P02803,P10715,P47967,Q8CJ52                      |
| 11184 | 1,7,8,10,1 2,3,4,5,6,9<br>1,12,13,17 ,14,15,16 | 4 | P02803,P10715,P36374,Q9QZK9                             |
| 11185 | 1,7,8,10,1 2,3,4,5,6,9<br>1,12,14,15 ,13,16,17 | 3 | P22006,P23593,P35280                                    |
| 11186 | 1,7,8,10,1 2,3,4,5,6,9<br>1,12,14,16 ,13,15,17 | 3 | P10715,Q6AYL6,Q8CJ52                                    |
| 11187 | 1,7,8,10,1 2,3,4,5,6,9<br>1,12,14,17 ,13,15,16 | 1 | P47727                                                  |
| 11188 | 1,7,8,10,1 2,3,4,5,6,9<br>1,12,15,16 ,13,14,17 | 2 | P01835,P10715                                           |
| 11189 | 1,7,8,10,1 2,3,4,5,6,9<br>1,12,15,17 ,13,14,16 | 2 | P10715,P22006                                           |
| 11190 | 1,7,8,10,1 2,3,4,5,6,9<br>1,12,16,17 ,13,14,15 | 2 | P06757,P10715                                           |
| 11191 | 1,7,8,10,1 2,3,4,5,6,9<br>1,13,14,15 ,12,16,17 | 6 | P01835,P09605,P25809,P15999,P22006,P23593,Q9JJS8        |
| 11192 | 1,7,8,10,1 2,3,4,5,6,9<br>1,13,14,16 ,12,15,17 | 3 | B0BNN3,P01835,Q7TPB1                                    |
| 11193 | 1,7,8,10,1 2,3,4,5,6,9<br>1,13,14,17 ,12,15,16 | 1 | P47727                                                  |
| 11194 | 1,7,8,10,1 2,3,4,5,6,9<br>1,13,15,16 ,12,14,17 | 1 | P01835                                                  |
| 11195 | 1,7,8,10,1 2,3,4,5,6,9<br>1,13,15,17 ,12,14,16 | 4 | P01835,P22006,P34901,Q9JJS8                             |
| 11196 | 1,7,8,10,1 2,3,4,5,6,9<br>1,13,16,17 ,12,14,15 | 1 | P01835                                                  |
| 11197 | 1,7,8,10,1 2,3,4,5,6,9<br>1,14,15,16 ,12,13,17 | 3 | P01835,P22006,Q63355                                    |



|       |                          |                          |   |                             |
|-------|--------------------------|--------------------------|---|-----------------------------|
| 11198 | 1,7,8,10,1<br>1,14,15,17 | 2,3,4,5,6,9<br>,12,13,16 | 1 | P22006                      |
| 11199 | 1,7,8,10,1<br>1,14,16,17 | 2,3,4,5,6,9<br>,12,13,15 | 0 |                             |
| 11200 | 1,7,8,10,1<br>1,15,16,17 | 2,3,4,5,6,9<br>,12,13,14 | 2 | P01835,P25236               |
| 11201 | 1,7,8,10,1<br>2,13,14,15 | 2,3,4,5,6,9<br>,11,16,17 | 1 | P15999                      |
| 11202 | 1,7,8,10,1<br>2,13,14,16 | 2,3,4,5,6,9<br>,11,15,17 | 0 |                             |
| 11203 | 1,7,8,10,1<br>2,13,14,17 | 2,3,4,5,6,9<br>,11,15,16 | 1 | P14668                      |
| 11204 | 1,7,8,10,1<br>2,13,15,16 | 2,3,4,5,6,9<br>,11,14,17 | 2 | P01835,P19218               |
| 11205 | 1,7,8,10,1<br>2,13,15,17 | 2,3,4,5,6,9<br>,11,14,16 | 3 | P14668,P15999,Q99MH3        |
| 11206 | 1,7,8,10,1<br>2,13,16,17 | 2,3,4,5,6,9<br>,11,14,15 | 0 |                             |
| 11207 | 1,7,8,10,1<br>2,14,15,16 | 2,3,4,5,6,9<br>,11,13,17 | 0 |                             |
| 11208 | 1,7,8,10,1<br>2,14,15,17 | 2,3,4,5,6,9<br>,11,13,16 | 0 |                             |
| 11209 | 1,7,8,10,1<br>2,14,16,17 | 2,3,4,5,6,9<br>,11,13,15 | 1 | P02625                      |
| 11210 | 1,7,8,10,1<br>2,15,16,17 | 2,3,4,5,6,9<br>,11,13,14 | 1 | P06866                      |
| 11211 | 1,7,8,10,1<br>3,14,15,16 | 2,3,4,5,6,9<br>,11,12,17 | 3 | P01835,P09605,P25809,P16636 |
| 11212 | 1,7,8,10,1<br>3,14,15,17 | 2,3,4,5,6,9<br>,11,12,16 | 3 | P01835,P14668,P15999        |
| 11213 | 1,7,8,10,1<br>3,14,16,17 | 2,3,4,5,6,9<br>,11,12,15 | 2 | P01835,P02625               |
| 11214 | 1,7,8,10,1<br>3,15,16,17 | 2,3,4,5,6,9<br>,11,12,14 | 2 | P01835,P34901               |
| 11215 | 1,7,8,10,1<br>4,15,16,17 | 2,3,4,5,6,9<br>,11,12,13 | 1 | P01835                      |
| 11216 | 1,7,8,11,1<br>2,13,14,15 | 2,3,4,5,6,9<br>,10,16,17 | 2 | P22006,P23593               |
| 11217 | 1,7,8,11,1<br>2,13,14,16 | 2,3,4,5,6,9<br>,10,15,17 | 2 | Q62902,Q8CJ52               |
| 11218 | 1,7,8,11,1<br>2,13,14,17 | 2,3,4,5,6,9<br>,10,15,16 | 3 | P36374,P47727,Q8CJ52        |
| 11219 | 1,7,8,11,1<br>2,13,15,16 | 2,3,4,5,6,9<br>,10,14,17 | 2 | P01835,P10715               |
| 11220 | 1,7,8,11,1<br>2,13,15,17 | 2,3,4,5,6,9<br>,10,14,16 | 1 | P10715                      |

|       |                          |                          |    |                                                                                            |
|-------|--------------------------|--------------------------|----|--------------------------------------------------------------------------------------------|
| 11221 | 1,7,8,11,1<br>2,13,16,17 | 2,3,4,5,6,9<br>,10,14,15 | 3  | P10715,P36376,Q8CJ52                                                                       |
| 11222 | 1,7,8,11,1<br>2,14,15,16 | 2,3,4,5,6,9<br>,10,13,17 | 2  | P10715,Q63355                                                                              |
| 11223 | 1,7,8,11,1<br>2,14,15,17 | 2,3,4,5,6,9<br>,10,13,16 | 4  | P10715,P14173,P19629,P22006                                                                |
| 11224 | 1,7,8,11,1<br>2,14,16,17 | 2,3,4,5,6,9<br>,10,13,15 | 2  | P10715,Q4FZU6                                                                              |
| 11225 | 1,7,8,11,1<br>2,15,16,17 | 2,3,4,5,6,9<br>,10,13,14 | 1  | P10715                                                                                     |
| 11226 | 1,7,8,11,1<br>3,14,15,16 | 2,3,4,5,6,9<br>,10,12,17 | 4  | P01835,P16636,Q63355,Q9JJS8                                                                |
| 11227 | 1,7,8,11,1<br>3,14,15,17 | 2,3,4,5,6,9<br>,10,12,16 | 3  | P14173,P22006,Q9JJS8                                                                       |
| 11228 | 1,7,8,11,1<br>3,14,16,17 | 2,3,4,5,6,9<br>,10,12,15 | 0  |                                                                                            |
| 11229 | 1,7,8,11,1<br>3,15,16,17 | 2,3,4,5,6,9<br>,10,12,14 | 3  | P01835,P34901,Q9JJS8                                                                       |
| 11230 | 1,7,8,11,1<br>4,15,16,17 | 2,3,4,5,6,9<br>,10,12,13 | 1  | P14173                                                                                     |
| 11231 | 1,7,8,12,1<br>3,14,15,16 | 2,3,4,5,6,9<br>,10,11,17 | 2  | P08649,P14173                                                                              |
| 11232 | 1,7,8,12,1<br>3,14,15,17 | 2,3,4,5,6,9<br>,10,11,16 | 3  | P14173,P14668,P15999                                                                       |
| 11233 | 1,7,8,12,1<br>3,14,16,17 | 2,3,4,5,6,9<br>,10,11,15 | 2  | P14173,Q4FZU6                                                                              |
| 11234 | 1,7,8,12,1<br>3,15,16,17 | 2,3,4,5,6,9<br>,10,11,14 | 2  | P14173,Q5XFX0                                                                              |
| 11235 | 1,7,8,12,1<br>4,15,16,17 | 2,3,4,5,6,9<br>,10,11,13 | 1  | P14173                                                                                     |
| 11236 | 1,7,8,13,1<br>4,15,16,17 | 2,3,4,5,6,9<br>,10,11,12 | 6  | P01835,P11883,P14173,Q08849,Q4FZU2,Q6IFW6                                                  |
| 11237 | 1,7,9,10,1<br>1,12,13,14 | 2,3,4,5,6,8<br>,15,16,17 | 8  | B0BNN3,P02803,P06760,P20760,P20761,P23593,P47727,Q9Z0V6                                    |
| 11238 | 1,7,9,10,1<br>1,12,13,15 | 2,3,4,5,6,8<br>,14,16,17 | 6  | P02793;Q7TP54,P06760,P20760,P20761,Q6PCU2,Q9Z0V6                                           |
| 11239 | 1,7,9,10,1<br>1,12,13,16 | 2,3,4,5,6,8<br>,14,15,17 | 12 | B0BNN3,P02793;Q7TP54,P02803,P06760,P10536,P12368,P20760,P20761,P20762,P47967,P97840,Q9Z0V6 |
| 11240 | 1,7,9,10,1<br>1,12,13,17 | 2,3,4,5,6,8<br>,14,15,16 | 5  | P02803,P14668,P20762,P36374,Q9Z0V6                                                         |
| 11241 | 1,7,9,10,1<br>1,12,14,15 | 2,3,4,5,6,8<br>,13,16,17 | 7  | P06760,P20760,P20761,P22006,P51907,Q6PCU2,Q9Z0V6                                           |
| 11242 | 1,7,9,10,1<br>1,12,14,16 | 2,3,4,5,6,8<br>,13,15,17 | 8  | B0BNN3,P06760,P10536,P12368,P20760,P20761,P62815,Q9Z0V6                                    |
| 11243 | 1,7,9,10,1<br>1,12,14,17 | 2,3,4,5,6,8<br>,13,15,16 | 1  | Q9Z0V6                                                                                     |

|       |                          |                          |    |                                                                                                                                   |
|-------|--------------------------|--------------------------|----|-----------------------------------------------------------------------------------------------------------------------------------|
| 11244 | 1,7,9,10,1<br>1,12,15,16 | 2,3,4,5,6,8<br>,13,14,17 | 13 | P02793;Q7TP54,P06760,P10536,P12368,P20760,P20761,P20762,P20766,P51907,P62815,P97840,Q6PCU2,Q9Z0V6                                 |
| 11245 | 1,7,9,10,1<br>1,12,15,17 | 2,3,4,5,6,8<br>,13,14,16 | 2  | Q6TMA8,Q9Z0V6                                                                                                                     |
| 11246 | 1,7,9,10,1<br>1,12,16,17 | 2,3,4,5,6,8<br>,13,14,15 | 7  | P06757,P10536,P12368,P20762,Q64093,Q6TMA8,Q9Z0V6                                                                                  |
| 11247 | 1,7,9,10,1<br>1,13,14,15 | 2,3,4,5,6,8<br>,12,16,17 | 12 | P06760,P16636,P19223,P20760,P20761,P22006,P23593,P50115,Q4G075,Q62635,Q9JJS8,Q9Z0V6                                               |
| 11248 | 1,7,9,10,1<br>1,13,14,16 | 2,3,4,5,6,8<br>,12,15,17 | 14 | B0BNN3,P06760,P10536,P19223,P20760,P20761,P20762,P50115,P62815,Q4G075,Q62635,Q63751,Q7TPB1,Q9Z0V6                                 |
| 11249 | 1,7,9,10,1<br>1,13,14,17 | 2,3,4,5,6,8<br>,12,15,16 | 2  | P14668,Q9Z0V6                                                                                                                     |
| 11250 | 1,7,9,10,1<br>1,13,15,16 | 2,3,4,5,6,8<br>,12,14,17 | 17 | P01835,P02793;Q7TP54,P06760,P10536,P19223,P20760,P20761,P20762,P31430,P50115,P62815,P98089,Q4G075,Q62635,Q9JJS8,Q9WT<br>T6,Q9Z0V6 |
| 11251 | 1,7,9,10,1<br>1,13,15,17 | 2,3,4,5,6,8<br>,12,14,16 | 4  | P14668,P20762,Q9JJS8,Q9Z0V6                                                                                                       |
| 11252 | 1,7,9,10,1<br>1,13,16,17 | 2,3,4,5,6,8<br>,12,14,15 | 6  | B0BNN3,P02793;Q7TP54,P20762,P35053,Q6TMA8,Q9Z0V6                                                                                  |
| 11253 | 1,7,9,10,1<br>1,14,15,16 | 2,3,4,5,6,8<br>,12,13,17 | 16 | O88267,P06760,P08937,P16636,P19223,P20760,P20761,P50115,P55091,P62815,Q4G075,Q62635,Q63355,Q63751,Q9QZK9,Q9Z0V6                   |
| 11254 | 1,7,9,10,1<br>1,14,15,17 | 2,3,4,5,6,8<br>,12,13,16 | 4  | P22006,Q6TMA8,Q9JJS8,Q9Z0V6                                                                                                       |
| 11255 | 1,7,9,10,1<br>1,14,16,17 | 2,3,4,5,6,8<br>,12,13,15 | 3  | P35053,Q6TMA8,Q9Z0V6                                                                                                              |
| 11256 | 1,7,9,10,1<br>1,15,16,17 | 2,3,4,5,6,8<br>,12,13,14 | 6  | O35077,P20762,P25236,Q64093,Q6TMA8,Q9Z0V6                                                                                         |
| 11257 | 1,7,9,10,1<br>2,13,14,15 | 2,3,4,5,6,8<br>,11,16,17 | 9  | P06760,P07150,P14668,P20760,P20761,P50115,Q4G075,Q6AYS4,Q9Z0V6                                                                    |
| 11258 | 1,7,9,10,1<br>2,13,14,16 | 2,3,4,5,6,8<br>,11,15,17 | 14 | B0BNN3,P02761,P06760,P14668,P14669,P20760,P20761,P20762,P50115,P97840,Q4G075,Q63751,Q6AYS4,Q9Z0V6                                 |
| 11259 | 1,7,9,10,1<br>2,13,14,17 | 2,3,4,5,6,8<br>,11,15,16 | 2  | P14668,Q9Z0V6                                                                                                                     |
| 11260 | 1,7,9,10,1<br>2,13,15,16 | 2,3,4,5,6,8<br>,11,14,17 | 13 | P02793;Q7TP54,P06760,P07150,P14668,P14669,P19218,P20760,P20761,P20762,P50115,P97840,Q6AYS4,Q9Z0V6                                 |
| 11261 | 1,7,9,10,1<br>2,13,15,17 | 2,3,4,5,6,8<br>,11,14,16 | 4  | P02793;Q7TP54,P14668,P20762,Q9Z0V6                                                                                                |
| 11262 | 1,7,9,10,1<br>2,13,16,17 | 2,3,4,5,6,8<br>,11,14,15 | 10 | P02793;Q7TP54,P07171,P14668,P14669,P19218,P20762,P97840,Q64194,Q6TMA8,Q9Z0V6                                                      |
| 11263 | 1,7,9,10,1<br>2,14,15,16 | 2,3,4,5,6,8<br>,11,13,17 | 12 | P06760,P14668,P14669,P16636,P20760,P20761,P20766,P50115,P97840,Q63751,Q6AYS4,Q9Z0V6                                               |
| 11264 | 1,7,9,10,1<br>2,14,15,17 | 2,3,4,5,6,8<br>,11,13,16 | 3  | P14668,Q6TMA8,Q9Z0V6                                                                                                              |
| 11265 | 1,7,9,10,1<br>2,14,16,17 | 2,3,4,5,6,8<br>,11,13,15 | 5  | P14668,P14669,P20762,Q6TMA8,Q9Z0V6                                                                                                |
| 11266 | 1,7,9,10,1<br>2,15,16,17 | 2,3,4,5,6,8<br>,11,13,14 | 9  | P02793;Q7TP54,P06866,P14668,P14669,P20762,P97840,Q6AYS4,Q6TMA8,Q9Z0V6                                                             |

|       |                          |                          |    |                                                                                                                                             |
|-------|--------------------------|--------------------------|----|---------------------------------------------------------------------------------------------------------------------------------------------|
| 11267 | 1,7,9,10,1<br>3,14,15,16 | 2,3,4,5,6,8<br>,11,12,17 | 20 | P01835,P06760,P07150,P08937,P11883,P14668,P14669,P16636,P19223,P20760,P20761,P20762,P50115,P62804,Q4G075,Q62635,Q63751,Q6AYS4,Q6IFW6,Q9Z0V6 |
| 11268 | 1,7,9,10,1<br>3,14,15,17 | 2,3,4,5,6,8<br>,11,12,16 | 6  | P11883,P14668,Q4FZU2,Q6IFW6,Q9JJS8,Q9Z0V6                                                                                                   |
| 11269 | 1,7,9,10,1<br>3,14,16,17 | 2,3,4,5,6,8<br>,11,12,15 | 9  | B0BNN3,P02625,P14668,P14669,P20762,P35053,Q4FZU2,Q6TMA8,Q9Z0V6                                                                              |
| 11270 | 1,7,9,10,1<br>3,15,16,17 | 2,3,4,5,6,8<br>,11,12,14 | 12 | P01835,P02793,Q7TP54,P11883,P14668,P14669,P20762,P62804,Q6AYS4,Q6IFW6,Q6TMA8,Q9EQS0,Q9Z0V6                                                  |
| 11271 | 1,7,9,10,1<br>4,15,16,17 | 2,3,4,5,6,8<br>,11,12,13 | 14 | P02780,P02782,P07647,P0C0A9,P11883,P14668,P14669,P20762,P35053,Q5XI22,Q6AYS4,Q6TMA8,Q9JHB9,Q9Z0V6                                           |
| 11272 | 1,7,9,11,1<br>2,13,14,15 | 2,3,4,5,6,8<br>,10,16,17 | 8  | P06760,P08649,P16636,P20760,P20761,P23593,Q6P6R2,Q9Z0V6                                                                                     |
| 11273 | 1,7,9,11,1<br>2,13,14,16 | 2,3,4,5,6,8<br>,10,15,17 | 9  | B0BNN3,P02761,P06760,P08649,P20760,P20761,Q4G075,Q7TPB1,Q9Z0V6                                                                              |
| 11274 | 1,7,9,11,1<br>2,13,14,17 | 2,3,4,5,6,8<br>,10,15,16 | 4  | D3ZHA0,P14668,P36374,Q9Z0V6                                                                                                                 |
| 11275 | 1,7,9,11,1<br>2,13,15,16 | 2,3,4,5,6,8<br>,10,14,17 | 8  | P02793,Q7TP54,P06760,P08649,P20760,P20761,P20762,Q9WTT6,Q9Z0V6                                                                              |
| 11276 | 1,7,9,11,1<br>2,13,15,17 | 2,3,4,5,6,8<br>,10,14,16 | 2  | P14668,Q9Z0V6                                                                                                                               |
| 11277 | 1,7,9,11,1<br>2,13,16,17 | 2,3,4,5,6,8<br>,10,14,15 | 3  | D3ZHA0,P20762,Q9Z0V6                                                                                                                        |
| 11278 | 1,7,9,11,1<br>2,14,15,16 | 2,3,4,5,6,8<br>,10,13,17 | 7  | P06760,P16636,P20760,P20761,P51907,Q63355,Q9Z0V6                                                                                            |
| 11279 | 1,7,9,11,1<br>2,14,15,17 | 2,3,4,5,6,8<br>,10,13,16 | 1  | Q9Z0V6                                                                                                                                      |
| 11280 | 1,7,9,11,1<br>2,14,16,17 | 2,3,4,5,6,8<br>,10,13,15 | 3  | D3ZHA0,Q6TMA8,Q9Z0V6                                                                                                                        |
| 11281 | 1,7,9,11,1<br>2,15,16,17 | 2,3,4,5,6,8<br>,10,13,14 | 4  | P06866,P20762,Q6TMA8,Q9Z0V6                                                                                                                 |
| 11282 | 1,7,9,11,1<br>3,14,15,16 | 2,3,4,5,6,8<br>,10,12,17 | 15 | D3ZHA0,D4A5U3,P06760,P08937,P16636,P19223,P20760,P20761,P50115,Q4G075,Q62635,Q64361,Q9JJS8,Q9WTT6,Q9Z0V6                                    |
| 11283 | 1,7,9,11,1<br>3,14,15,17 | 2,3,4,5,6,8<br>,10,12,16 | 5  | D3ZHA0,P14668,Q64361,Q9JJS8,Q9Z0V6                                                                                                          |
| 11284 | 1,7,9,11,1<br>3,14,16,17 | 2,3,4,5,6,8<br>,10,12,15 | 4  | D3ZHA0,P04218,Q64361,Q9Z0V6                                                                                                                 |
| 11285 | 1,7,9,11,1<br>3,15,16,17 | 2,3,4,5,6,8<br>,10,12,14 | 7  | D3ZHA0,P20762,Q64361,Q9EQS0,Q9JJS8,Q9WTT6,Q9Z0V6                                                                                            |
| 11286 | 1,7,9,11,1<br>4,15,16,17 | 2,3,4,5,6,8<br>,10,12,13 | 7  | D3ZHA0,P04218,P16636,Q64361,Q6TMA8,Q9JJS8,Q9Z0V6                                                                                            |
| 11287 | 1,7,9,12,1<br>3,14,15,16 | 2,3,4,5,6,8<br>,10,11,17 | 15 | P06760,P07150,P08649,P11883,P14668,P14669,P16636,P20646,P20760,P20761,P50115,Q4G075,Q63598,Q6AYS4,Q9Z0V6                                    |
| 11288 | 1,7,9,12,1<br>3,14,15,17 | 2,3,4,5,6,8<br>,10,11,16 | 5  | P08649,P11883,P14668,Q6AYS4,Q9Z0V6                                                                                                          |
| 11289 | 1,7,9,12,1<br>3,14,16,17 | 2,3,4,5,6,8<br>,10,11,15 | 8  | D3ZHA0,P02761,P08649,P14668,P14669,P20762,Q6AYS4,Q9Z0V6                                                                                     |

|       |                               |                          |    |                                                                                                                                      |
|-------|-------------------------------|--------------------------|----|--------------------------------------------------------------------------------------------------------------------------------------|
| 11290 | 1,7,9,12,1<br>3,15,16,17      | 2,3,4,5,6,8<br>,10,11,14 | 11 | P02793;Q7TP54,P08649,P11883,P14668,P14669,P19218,P20762,Q5BJY9,Q63598,Q6AYS4,Q9Z0V6                                                  |
| 11291 | 1,7,9,12,1<br>4,15,16,17      | 2,3,4,5,6,8<br>,10,11,13 | 7  | P11883,P14668,P14669,Q63598,Q6AYS4,Q6TMA8,Q9Z0V6                                                                                     |
| 11292 | 1,7,9,13,1<br>4,15,16,17      | 2,3,4,5,6,8<br>,10,11,12 | 19 | D3ZHA0,P0C0A9,P11883,P14668,P14669,P16636,P20762,P62804,Q4FZU2,Q63598,Q64361,Q6AYS4,Q6IFW6,Q6IMF3,Q6P6Q2,Q6TMA8,Q9EQS0,Q9JJS8,Q9Z0V6 |
| 11293 | 1,7,10,11,<br>12,13,14,1<br>5 | 2,3,4,5,6,8<br>,9,16,17  | 6  | P06760,P20761,P22006,P23593,Q6P6R2,Q9Z0V6                                                                                            |
| 11294 | 1,7,10,11,<br>12,13,14,1<br>6 | 2,3,4,5,6,8<br>,9,15,17  | 8  | B0BNN3,P06760,P20760,P20761,P23593,Q5QE79,Q7TPB1,Q9Z0V6                                                                              |
| 11295 | 1,7,10,11,<br>12,13,14,1<br>7 | 2,3,4,5,6,8<br>,9,15,16  | 6  | P14668,P23593,P36374,P47727,Q5QE79,Q9Z0V6                                                                                            |
| 11296 | 1,7,10,11,<br>12,13,15,1<br>6 | 2,3,4,5,6,8<br>,9,14,17  | 9  | P01835,P02793;Q7TP54,P06760,P20760,P20761,P20762,P50115,Q9WTT6,Q9Z0V6                                                                |
| 11297 | 1,7,10,11,<br>12,13,15,1<br>7 | 2,3,4,5,6,8<br>,9,14,16  | 3  | P02793;Q7TP54,P14668,Q9Z0V6                                                                                                          |
| 11298 | 1,7,10,11,<br>12,13,16,1<br>7 | 2,3,4,5,6,8<br>,9,14,15  | 6  | P02793;Q7TP54,P06757,P20762,Q5QE79,Q6TMA8,Q9Z0V6                                                                                     |
| 11299 | 1,7,10,11,<br>12,14,15,1<br>6 | 2,3,4,5,6,8<br>,9,13,17  | 9  | P06760,P20760,P20761,P20766,P23593,P51907,Q63355,Q6TMA8,Q9Z0V6                                                                       |
| 11300 | 1,7,10,11,<br>12,14,15,1<br>7 | 2,3,4,5,6,8<br>,9,13,16  | 4  | P20766,P22006,Q6TMA8,Q9Z0V6                                                                                                          |
| 11301 | 1,7,10,11,<br>12,14,16,1<br>7 | 2,3,4,5,6,8<br>,9,13,15  | 4  | P20766,Q5QE79,Q6TMA8,Q9Z0V6                                                                                                          |
| 11302 | 1,7,10,11,<br>12,15,16,1<br>7 | 2,3,4,5,6,8<br>,9,13,14  | 7  | P02793;Q7TP54,P06757,P06866,P20762,P20766,Q6TMA8,Q9Z0V6                                                                              |
| 11303 | 1,7,10,11,<br>13,14,15,1<br>6 | 2,3,4,5,6,8<br>,9,12,17  | 12 | P01835,P06760,P16636,P19223,P20646,P20761,P23593,P50115,Q4G075,Q62635,Q7TPB1,Q9Z0V6                                                  |
| 11304 | 1,7,10,11,<br>13,14,15,1<br>7 | 2,3,4,5,6,8<br>,9,12,16  | 5  | P14668,P22006,P23593,Q9JJS8,Q9Z0V6                                                                                                   |
| 11305 | 1,7,10,11,<br>13,14,16,1<br>7 | 2,3,4,5,6,8<br>,9,12,15  | 5  | D3ZHA0,P20762,Q5QE79,Q6TMA8,Q9Z0V6                                                                                                   |

|       |                               |                         |    |                                                                                     |
|-------|-------------------------------|-------------------------|----|-------------------------------------------------------------------------------------|
| 11306 | 1,7,10,11,<br>13,15,16,1<br>7 | 2,3,4,5,6,8<br>,9,12,14 | 9  | D3ZHA0,P01835,P02793,Q7TP54,P20762,Q6TMA8,Q9EQS0,Q9JJS8,Q9WTT6,Q9Z0V6               |
| 11307 | 1,7,10,11,<br>14,15,16,1<br>7 | 2,3,4,5,6,8<br>,9,12,13 | 3  | P20766,Q6TMA8,Q9Z0V6                                                                |
| 11308 | 1,7,10,12,<br>13,14,15,1<br>6 | 2,3,4,5,6,8<br>,9,11,17 | 10 | P06760,P08649,P14668,P14669,P20646,P20761,P20762,P50115,Q6AYS4,Q9Z0V6               |
| 11309 | 1,7,10,12,<br>13,14,15,1<br>7 | 2,3,4,5,6,8<br>,9,11,16 | 4  | P14668,Q6AYS4,Q6TMA8,Q9Z0V6                                                         |
| 11310 | 1,7,10,12,<br>13,14,16,1<br>7 | 2,3,4,5,6,8<br>,9,11,15 | 7  | P14668,P14669,P20762,Q5QE79,Q6AYS4,Q6TMA8,Q9Z0V6                                    |
| 11311 | 1,7,10,12,<br>13,15,16,1<br>7 | 2,3,4,5,6,8<br>,9,11,14 | 9  | P02793;Q7TP54,P06866,P14668,P14669,P19218,P20762,Q6AYS4,Q6TMA8,Q9Z0V6               |
| 11312 | 1,7,10,12,<br>14,15,16,1<br>7 | 2,3,4,5,6,8<br>,9,11,13 | 6  | P06866,P14668,P20766,Q6AYS4,Q6TMA8,Q9Z0V6                                           |
| 11313 | 1,7,10,13,<br>14,15,16,1<br>7 | 2,3,4,5,6,8<br>,9,11,12 | 10 | P01835,P11883,P14668,P14669,P20762,Q6AYS4,Q6IFW6,Q6TMA8,Q9EQS0,Q9Z0V6               |
| 11314 | 1,7,11,12,<br>13,14,15,1<br>6 | 2,3,4,5,6,8<br>,9,10,17 | 12 | D3ZHA0,P06760,P08649,P16636,P20646,P20760,P20761,P23593,P50115,Q63355,Q6P6R2,Q9Z0V6 |
| 11315 | 1,7,11,12,<br>13,14,15,1<br>7 | 2,3,4,5,6,8<br>,9,10,16 | 4  | D3ZHA0,P14668,P23593,Q9Z0V6                                                         |
| 11316 | 1,7,11,12,<br>13,14,16,1<br>7 | 2,3,4,5,6,8<br>,9,10,15 | 3  | D3ZHA0,O55006,Q9Z0V6                                                                |
| 11317 | 1,7,11,12,<br>13,15,16,1<br>7 | 2,3,4,5,6,8<br>,9,10,14 | 6  | D3ZHA0,P02793;Q7TP54,P20762,Q6TMA8,Q9WTT6,Q9Z0V6                                    |
| 11318 | 1,7,11,12,<br>14,15,16,1<br>7 | 2,3,4,5,6,8<br>,9,10,13 | 5  | D3ZHA0,P06866,P20766,Q6TMA8,Q9Z0V6                                                  |
| 11319 | 1,7,11,13,<br>14,15,16,1<br>7 | 2,3,4,5,6,8<br>,9,10,12 | 7  | D3ZHA0,P16636,Q64361,Q6TMA8,Q9EQS0,Q9JJS8,Q9Z0V6                                    |
| 11320 | 1,7,12,13,<br>14,15,16,1<br>7 | 2,3,4,5,6,8<br>,9,10,11 | 9  | D3ZHA0,P08649,P11883,P14173,P14668,P14669,Q6AYS4,Q6TMA8,Q9Z0V6                      |

|       |                          |                          |    |                                                                                                   |
|-------|--------------------------|--------------------------|----|---------------------------------------------------------------------------------------------------|
| 11321 | 1,8,9,10,1<br>1,12,13,14 | 2,3,4,5,6,7<br>,15,16,17 | 6  | P02803,P09605;P25809,P20760,P20761,P47727,P83748                                                  |
| 11322 | 1,8,9,10,1<br>1,12,13,15 | 2,3,4,5,6,7<br>,14,16,17 | 5  | P02803,P09605;P25809,P20760,P20761,P83748                                                         |
| 11323 | 1,8,9,10,1<br>1,12,13,16 | 2,3,4,5,6,7<br>,14,15,17 | 10 | P02631,P02803,P10536,P20760,P20761,P20762,P36376,P62815,P83748,Q9WUW8                             |
| 11324 | 1,8,9,10,1<br>1,12,13,17 | 2,3,4,5,6,7<br>,14,15,16 | 8  | P02631,P02803,P20760,P20762,P36374,P36376,P83748,Q63532                                           |
| 11325 | 1,8,9,10,1<br>1,12,14,15 | 2,3,4,5,6,7<br>,13,16,17 | 4  | P09605;P25809,P20760,P20761,P83748                                                                |
| 11326 | 1,8,9,10,1<br>1,12,14,16 | 2,3,4,5,6,7<br>,13,15,17 | 7  | P08937,P20760,P20761,P62815,P83748,Q63751,Q9WUW8                                                  |
| 11327 | 1,8,9,10,1<br>1,12,14,17 | 2,3,4,5,6,7<br>,13,15,16 | 2  | P20760,P83748                                                                                     |
| 11328 | 1,8,9,10,1<br>1,12,15,16 | 2,3,4,5,6,7<br>,13,14,17 | 6  | O88267,P20760,P20761,P20762,P62815,Q9WUW8                                                         |
| 11329 | 1,8,9,10,1<br>1,12,15,17 | 2,3,4,5,6,7<br>,13,14,16 | 2  | G3V686,P83748                                                                                     |
| 11330 | 1,8,9,10,1<br>1,12,16,17 | 2,3,4,5,6,7<br>,13,14,15 | 6  | P02631,P02803,P20760,P20762,P36376,P83748                                                         |
| 11331 | 1,8,9,10,1<br>1,13,14,15 | 2,3,4,5,6,7<br>,12,16,17 | 8  | O88267,P08937,P09605;P25809,P20760,P20761,P55091,P83748,Q63751                                    |
| 11332 | 1,8,9,10,1<br>1,13,14,16 | 2,3,4,5,6,7<br>,12,15,17 | 11 | P08937,P09605;P25809,P19223,P20760,P20761,P20762,P55091,P62815,P83748,Q63751,Q7TPB1               |
| 11333 | 1,8,9,10,1<br>1,13,14,17 | 2,3,4,5,6,7<br>,12,15,16 | 3  | P01836,P20760,P83748                                                                              |
| 11334 | 1,8,9,10,1<br>1,13,15,16 | 2,3,4,5,6,7<br>,12,14,17 | 13 | O88267,P01835,P08937,P09605;P25809,P20760,P20761,P20762,P34901,P55091,P62815,P83748,Q63751,Q9Z0V6 |
| 11335 | 1,8,9,10,1<br>1,13,15,17 | 2,3,4,5,6,7<br>,12,14,16 | 6  | G3V686,P04073,P20762,P34901,P83748,Q63532                                                         |
| 11336 | 1,8,9,10,1<br>1,13,16,17 | 2,3,4,5,6,7<br>,12,14,15 | 8  | A2RUV9,P02631,P02803,P11762,P20760,P20762,P34901,P83748                                           |
| 11337 | 1,8,9,10,1<br>1,14,15,16 | 2,3,4,5,6,7<br>,12,13,17 | 11 | O88267,P08937,P09605;P25809,P20760,P20761,P55091,P62815,P83748,Q62635,Q63751,Q9QZK9               |
| 11338 | 1,8,9,10,1<br>1,14,15,17 | 2,3,4,5,6,7<br>,12,13,16 | 4  | G3V686,O88267,P01836,P83748                                                                       |
| 11339 | 1,8,9,10,1<br>1,14,16,17 | 2,3,4,5,6,7<br>,12,13,15 | 4  | P01836,P08937,P20760,P83748                                                                       |
| 11340 | 1,8,9,10,1<br>1,15,16,17 | 2,3,4,5,6,7<br>,12,13,14 | 5  | O88267,P08937,P20762,P25236,P83748                                                                |
| 11341 | 1,8,9,10,1<br>2,13,14,15 | 2,3,4,5,6,7<br>,11,16,17 | 7  | P09605;P25809,P10758,P15999,P20760,P20761,P61206;P84079;P84082,Q63751                             |
| 11342 | 1,8,9,10,1<br>2,13,14,16 | 2,3,4,5,6,7<br>,11,15,17 | 7  | P02631,P02803,P09605;P25809,P20760,P20761,P20762,Q63751                                           |
| 11343 | 1,8,9,10,1<br>2,13,14,17 | 2,3,4,5,6,7<br>,11,15,16 | 4  | P02631,P14668,P61206;P84079;P84082,P83748                                                         |

|       |                          |                          |    |                                                                                                   |
|-------|--------------------------|--------------------------|----|---------------------------------------------------------------------------------------------------|
| 11344 | 1,8,9,10,1<br>2,13,15,16 | 2,3,4,5,6,7<br>,11,14,17 | 7  | P02631,P09605;P25809,P16086,P20760,P20761,P20762,Q63751                                           |
| 11345 | 1,8,9,10,1<br>2,13,15,17 | 2,3,4,5,6,7<br>,11,14,16 | 8  | G3V686,P02631,P14668,P15999,P16086,P20762,P61206;P84079;P84082,Q63532                             |
| 11346 | 1,8,9,10,1<br>2,13,16,17 | 2,3,4,5,6,7<br>,11,14,15 | 5  | P02631,P02803,P20760,P20762,P36376                                                                |
| 11347 | 1,8,9,10,1<br>2,14,15,16 | 2,3,4,5,6,7<br>,11,13,17 | 5  | P08937,P09605;P25809,P20760,P20761,Q63751                                                         |
| 11348 | 1,8,9,10,1<br>2,14,15,17 | 2,3,4,5,6,7<br>,11,13,16 | 3  | G3V686,P61206;P84079;P84082,Q8VD89                                                                |
| 11349 | 1,8,9,10,1<br>2,14,16,17 | 2,3,4,5,6,7<br>,11,13,15 | 5  | P02631,P05539,P20760,P20762,P83748                                                                |
| 11350 | 1,8,9,10,1<br>2,15,16,17 | 2,3,4,5,6,7<br>,11,13,14 | 4  | P05539,P06866,P16086,P20762                                                                       |
| 11351 | 1,8,9,10,1<br>3,14,15,16 | 2,3,4,5,6,7<br>,11,12,17 | 13 | P01835,P08937,P09605;P25809,P19223,P20646,P20760,P20761,P20762,P55091,P83748,Q498R7,Q63751,Q9QZK9 |
| 11352 | 1,8,9,10,1<br>3,14,15,17 | 2,3,4,5,6,7<br>,11,12,16 | 7  | G3V686,P01836,P15999,P61206;P84079;P84082,P83748,Q498R7,Q6IFW6                                    |
| 11353 | 1,8,9,10,1<br>3,14,16,17 | 2,3,4,5,6,7<br>,11,12,15 | 8  | P01836,P02625,P02631,P08937,P20762,P83748,Q498R7,Q4FZU2                                           |
| 11354 | 1,8,9,10,1<br>3,15,16,17 | 2,3,4,5,6,7<br>,11,12,14 | 9  | P01835,P02631,P08937,P20762,P34901,P61206;P84079;P84082,P83748,Q498R7,Q9EQS0                      |
| 11355 | 1,8,9,10,1<br>4,15,16,17 | 2,3,4,5,6,7<br>,11,12,13 | 8  | P01836,P05539,P08937,P20762,P61206;P84079;P84082,P83748,Q498R7,Q63751                             |
| 11356 | 1,8,9,11,1<br>2,13,14,15 | 2,3,4,5,6,7<br>,10,16,17 | 5  | P09605;P25809,P10758,P20760,P20761,P83748                                                         |
| 11357 | 1,8,9,11,1<br>2,13,14,16 | 2,3,4,5,6,7<br>,10,15,17 | 8  | P02803,P04218,P20760,P20761,P36376,P83748,P97615,Q7TPB1                                           |
| 11358 | 1,8,9,11,1<br>2,13,14,17 | 2,3,4,5,6,7<br>,10,15,16 | 5  | P02803,P04218,P20760,P36376,P83748                                                                |
| 11359 | 1,8,9,11,1<br>2,13,15,16 | 2,3,4,5,6,7<br>,10,14,17 | 5  | P20760,P20761,P20762,P36376,P97615                                                                |
| 11360 | 1,8,9,11,1<br>2,13,15,17 | 2,3,4,5,6,7<br>,10,14,16 | 5  | P04218,P36376,P61206;P84079;P84082,P83748,Q63532                                                  |
| 11361 | 1,8,9,11,1<br>2,13,16,17 | 2,3,4,5,6,7<br>,10,14,15 | 8  | P02631,P02803,P04218,P20760,P20762,P36376,P83748,P97615                                           |
| 11362 | 1,8,9,11,1<br>2,14,15,16 | 2,3,4,5,6,7<br>,10,13,17 | 4  | P04218,P08937,P20760,P20761                                                                       |
| 11363 | 1,8,9,11,1<br>2,14,15,17 | 2,3,4,5,6,7<br>,10,13,16 | 3  | P04218,P61206;P84079;P84082,P83748                                                                |
| 11364 | 1,8,9,11,1<br>2,14,16,17 | 2,3,4,5,6,7<br>,10,13,15 | 4  | P04218,P20760,P36376,P83748                                                                       |
| 11365 | 1,8,9,11,1<br>2,15,16,17 | 2,3,4,5,6,7<br>,10,13,14 | 5  | P04218,P12020,P20762,P36376,P83748                                                                |
| 11366 | 1,8,9,11,1<br>3,14,15,16 | 2,3,4,5,6,7<br>,10,12,17 | 12 | P04218,P08937,P09605;P25809,P19223,P20646,P20760,P20761,P55091,P83748,Q63751,Q9QZK9,Q9Z0V6        |



|       |                               |                          |    |                                                                                                   |
|-------|-------------------------------|--------------------------|----|---------------------------------------------------------------------------------------------------|
| 11367 | 1,8,9,11,1<br>3,14,15,17      | 2,3,4,5,6,7<br>,10,12,16 | 4  | P04218,P61206;P84079;P84082,P83748,Q9JJS8                                                         |
| 11368 | 1,8,9,11,1<br>3,14,16,17      | 2,3,4,5,6,7<br>,10,12,15 | 3  | P04218,P20760,P83748                                                                              |
| 11369 | 1,8,9,11,1<br>3,15,16,17      | 2,3,4,5,6,7<br>,10,12,14 | 6  | P04218,P20762,P34901,P36376,P83748,Q9EQS0                                                         |
| 11370 | 1,8,9,11,1<br>4,15,16,17      | 2,3,4,5,6,7<br>,10,12,13 | 3  | P04218,P08937,P83748                                                                              |
| 11371 | 1,8,9,12,1<br>3,14,15,16      | 2,3,4,5,6,7<br>,10,11,17 | 8  | P08937,P09605;P25809,P20646,P20760,P20761,P28648,P61206;P84079;P84082,Q63751                      |
| 11372 | 1,8,9,12,1<br>3,14,15,17      | 2,3,4,5,6,7<br>,10,11,16 | 4  | P11883,P15999,P61206;P84079;P84082,Q5FVI6                                                         |
| 11373 | 1,8,9,12,1<br>3,14,16,17      | 2,3,4,5,6,7<br>,10,11,15 | 7  | P02631,P04218,P20760,P20762,P36376,P61206;P84079;P84082,Q5FVI6                                    |
| 11374 | 1,8,9,12,1<br>3,15,16,17      | 2,3,4,5,6,7<br>,10,11,14 | 6  | P11883,P16086,P20762,P36376,P61206;P84079;P84082,Q5BJY9                                           |
| 11375 | 1,8,9,12,1<br>4,15,16,17      | 2,3,4,5,6,7<br>,10,11,13 | 3  | P04218,P28648,P61206;P84079;P84082                                                                |
| 11376 | 1,8,9,13,1<br>4,15,16,17      | 2,3,4,5,6,7<br>,10,11,12 | 12 | P04218,P08937,P11883,P20762,P28648,P61206;P84079;P84082,P83748,Q498R7,Q4FZU2,Q5FVI6,Q6IFW6,Q9EQS0 |
| 11377 | 1,8,10,11,<br>12,13,14,1<br>5 | 2,3,4,5,6,7<br>,9,16,17  | 7  | P09605;P25809,P15999,P20646,P20760,P20761,P23593,P47727                                           |
| 11378 | 1,8,10,11,<br>12,13,14,1<br>6 | 2,3,4,5,6,7<br>,9,15,17  | 8  | P02631,P09605;P25809,P20760,P20761,P47727,P52590,P83748,Q7TPB1                                    |
| 11379 | 1,8,10,11,<br>12,13,14,1<br>7 | 2,3,4,5,6,7<br>,9,15,16  | 4  | P02631,P47727,P83748,P97605                                                                       |
| 11380 | 1,8,10,11,<br>12,13,15,1<br>6 | 2,3,4,5,6,7<br>,9,14,17  | 6  | P01835,P09605;P25809,P20760,P20761,P20762,P52590                                                  |
| 11381 | 1,8,10,11,<br>12,13,15,1<br>7 | 2,3,4,5,6,7<br>,9,14,16  | 3  | P15999,P83748,P97605                                                                              |
| 11382 | 1,8,10,11,<br>12,13,16,1<br>7 | 2,3,4,5,6,7<br>,9,14,15  | 6  | P02631,P02803,P20762,P36376,P83748,P97605                                                         |
| 11383 | 1,8,10,11,<br>12,14,15,1<br>6 | 2,3,4,5,6,7<br>,9,13,17  | 4  | P09605;P25809,P20760,P20761,P52590                                                                |
| 11384 | 1,8,10,11,<br>12,14,15,1<br>7 | 2,3,4,5,6,7<br>,9,13,16  | 1  | P83748                                                                                            |

|       |                               |                         |    |                                                                                                   |
|-------|-------------------------------|-------------------------|----|---------------------------------------------------------------------------------------------------|
| 11385 | 1,8,10,11,<br>12,14,16,1<br>7 | 2,3,4,5,6,7<br>,9,13,15 | 3  | P05539,P83748,P97605                                                                              |
| 11386 | 1,8,10,11,<br>12,15,16,1<br>7 | 2,3,4,5,6,7<br>,9,13,14 | 4  | P06866,P20762,P83748,P97605                                                                       |
| 11387 | 1,8,10,11,<br>13,14,15,1<br>6 | 2,3,4,5,6,7<br>,9,12,17 | 13 | P01835,P08937,P09605;P25809,P19223,P20646,P20760,P20761,P52590,P55091,P83748,Q498R7,Q63751,Q7TPB1 |
| 11388 | 1,8,10,11,<br>13,14,15,1<br>7 | 2,3,4,5,6,7<br>,9,12,16 | 3  | P15999,P83748,Q498R7                                                                              |
| 11389 | 1,8,10,11,<br>13,14,16,1<br>7 | 2,3,4,5,6,7<br>,9,12,15 | 4  | P02631,P20762,P83748,Q498R7                                                                       |
| 11390 | 1,8,10,11,<br>13,15,16,1<br>7 | 2,3,4,5,6,7<br>,9,12,14 | 7  | P01835,P20762,P34901,P83748,P97605,Q498R7,Q9EQS0                                                  |
| 11391 | 1,8,10,11,<br>14,15,16,1<br>7 | 2,3,4,5,6,7<br>,9,12,13 | 2  | P83748,Q498R7                                                                                     |
| 11392 | 1,8,10,12,<br>13,14,15,1<br>6 | 2,3,4,5,6,7<br>,9,11,17 | 8  | P09605;P25809,P15999,P20646,P20760,P20761,P20762,P52590,Q63751                                    |
| 11393 | 1,8,10,12,<br>13,14,15,1<br>7 | 2,3,4,5,6,7<br>,9,11,16 | 3  | P14668,P15999,P61206;P84079;P84082                                                                |
| 11394 | 1,8,10,12,<br>13,14,16,1<br>7 | 2,3,4,5,6,7<br>,9,11,15 | 3  | P02631,P20762,Q8K4G9                                                                              |
| 11395 | 1,8,10,12,<br>13,15,16,1<br>7 | 2,3,4,5,6,7<br>,9,11,14 | 5  | P02631,P15999,P20762,P61206;P84079;P84082,P83121                                                  |
| 11396 | 1,8,10,12,<br>14,15,16,1<br>7 | 2,3,4,5,6,7<br>,9,11,13 | 3  | P05539,P06866,P61206;P84079;P84082                                                                |
| 11397 | 1,8,10,13,<br>14,15,16,1<br>7 | 2,3,4,5,6,7<br>,9,11,12 | 8  | P01835,P11883,P15999,P20762,P61206;P84079;P84082,P83748,Q498R7,Q9EQS0                             |
| 11398 | 1,8,11,12,<br>13,14,15,1<br>6 | 2,3,4,5,6,7<br>,9,10,17 | 5  | P09605;P25809,P20646,P20760,P20761,P52590                                                         |
| 11399 | 1,8,11,12,<br>13,14,15,1<br>7 | 2,3,4,5,6,7<br>,9,10,16 | 3  | P15999,P61206;P84079;P84082,P83748                                                                |

|       |                               |                         |    |                                                                                                                                                                                       |
|-------|-------------------------------|-------------------------|----|---------------------------------------------------------------------------------------------------------------------------------------------------------------------------------------|
| 11400 | 1,8,11,12,<br>13,14,16,1<br>7 | 2,3,4,5,6,7<br>,9,10,15 | 3  | O55006,P36376,P83748                                                                                                                                                                  |
| 11401 | 1,8,11,12,<br>13,15,16,1<br>7 | 2,3,4,5,6,7<br>,9,10,14 | 3  | P20762,P36376,P97605                                                                                                                                                                  |
| 11402 | 1,8,11,12,<br>14,15,16,1<br>7 | 2,3,4,5,6,7<br>,9,10,13 | 2  | P04218,P83748                                                                                                                                                                         |
| 11403 | 1,8,11,13,<br>14,15,16,1<br>7 | 2,3,4,5,6,7<br>,9,10,12 | 3  | P04218,P83748,Q498R7                                                                                                                                                                  |
| 11404 | 1,8,12,13,<br>14,15,16,1<br>7 | 2,3,4,5,6,7<br>,9,10,11 | 6  | P11883,P14173,P15999,P28648,P61206;P84079;P84082,Q5FVI6                                                                                                                               |
| 11405 | 1,9,10,11,<br>12,13,14,1<br>5 | 2,3,4,5,6,7<br>,8,16,17 | 21 | O88267,P02631,P06760,P08937,P09605;P25809,P10758,P16086,P20646,P20760,P20761,P20762,P23928,P50115,P50116,P83748,Q4G075,Q63751,Q6P6R2,Q99041,Q9R0T3,Q9Z0V6                             |
| 11406 | 1,9,10,11,<br>12,13,14,1<br>6 | 2,3,4,5,6,7<br>,8,15,17 | 23 | B0BNN3,D3ZHA0,P02631,P02761,P02803,P06760,P07171,P08937,P09605;P25809,P10536,P20646,P20760,P20761,P20762,P50115,P62815,P83748,Q4G075,Q63751,Q64361,Q7TPB1,Q99041,Q9Z0V6               |
| 11407 | 1,9,10,11,<br>12,13,14,1<br>7 | 2,3,4,5,6,7<br>,8,15,16 | 11 | D3ZHA0,P02631,P02803,P07171,P08937,P14668,P20760,P20761,P20762,P83748,Q9Z0V6                                                                                                          |
| 11408 | 1,9,10,11,<br>12,13,15,1<br>6 | 2,3,4,5,6,7<br>,8,14,17 | 23 | D3ZHA0,O88267,P02631,P02793;Q7TP54,P06760,P07171,P08937,P10536,P16086,P20646,P20760,P20761,P20762,P50115,P55091,P62815,P83748,Q4G075,Q63751,Q99041,Q9EQS0,Q9WTT6,Q9Z0V6               |
| 11409 | 1,9,10,11,<br>12,13,15,1<br>7 | 2,3,4,5,6,7<br>,8,14,16 | 13 | D3ZHA0,O88267,P02631,P07171,P08937,P14668,P16086,P20760,P20761,P20762,P83748,Q9EQS0,Q9Z0V6                                                                                            |
| 11410 | 1,9,10,11,<br>12,13,16,1<br>7 | 2,3,4,5,6,7<br>,8,14,15 | 16 | D3ZHA0,O55096,P02631,P02803,P07171,P08937,P10536,P16086,P20760,P20761,P20762,P83748,P97605,P97615,Q9EQS0,Q9Z0V6                                                                       |
| 11411 | 1,9,10,11,<br>12,14,15,1<br>6 | 2,3,4,5,6,7<br>,8,13,17 | 25 | O88267,P06760,P06761,P08937,P09605;P25809,P10536,P16086,P20760,P20761,P20762,P20766,P22282,P50115,P51907,P55091,P62815,P70545,P83748,Q4G075,Q63751,Q99041,Q9EPB1,Q9R0T3,Q9WUW8,Q9Z0V6 |
| 11412 | 1,9,10,11,<br>12,14,15,1<br>7 | 2,3,4,5,6,7<br>,8,13,16 | 10 | D3ZHA0,O88267,P08937,P16086,P20760,P20761,P20762,P83748,Q9R0T3,Q9Z0V6                                                                                                                 |
| 11413 | 1,9,10,11,<br>12,14,16,1<br>7 | 2,3,4,5,6,7<br>,8,13,15 | 14 | D3ZHA0,P02631,P06761,P07171,P08937,P16086,P20760,P20761,P20762,P62815,P83748,Q63751,Q6TMA8,Q9Z0V6                                                                                     |
| 11414 | 1,9,10,11,<br>12,15,16,1<br>7 | 2,3,4,5,6,7<br>,8,13,14 | 20 | D3ZHA0,O88267,P02631,P06761,P06866,P06911,P07171,P08937,P12020,P16086,P20760,P20761,P20762,P22282,P62815,P83748,P97605,Q6TMA8,Q9EQS0,Q9Z0V6                                           |

|       |                               |                         |    |                                                                                                                                                                                                                                                                                                       |
|-------|-------------------------------|-------------------------|----|-------------------------------------------------------------------------------------------------------------------------------------------------------------------------------------------------------------------------------------------------------------------------------------------------------|
| 11415 | 1,9,10,11,<br>13,14,15,1<br>6 | 2,3,4,5,6,7<br>,8,12,17 | 35 | D3ZHA0,O55004,O88267,P02631,P06760,P06761,P07647,P08937,P09605;P25809,P10536,P19223,P20646,P20760,P20761,P20762,P22282,P50115,P55091,P62815,P83748,P98089,Q4G075,Q62635,Q63751,Q64361,Q6AYS7,Q7TPB1,Q80WL1,Q99041,Q9EPB1,Q9EQS0,Q9QZK9,Q9ROT3,Q9WTT6,Q9Z0V6                                           |
| 11416 | 1,9,10,11,<br>13,14,15,1<br>7 | 2,3,4,5,6,7<br>,8,12,16 | 18 | D3ZHA0,O88267,P02631,P06761,P08937,P14668,P20646,P20760,P20761,P20762,P83748,Q63751,Q64361,Q6AYS7,Q99041,Q9EQS0,Q9ROT3,Q9Z0V6                                                                                                                                                                         |
| 11417 | 1,9,10,11,<br>13,14,16,1<br>7 | 2,3,4,5,6,7<br>,8,12,15 | 21 | D3ZHA0,O55004,O88267,P02631,P06761,P07171,P08937,P20646,P20760,P20761,P20762,P62815,P83748,Q63751,Q64361,Q64611,Q6AYS7,Q7TPB1,Q99041,Q9EQS0,Q9Z0V6                                                                                                                                                    |
| 11418 | 1,9,10,11,<br>13,15,16,1<br>7 | 2,3,4,5,6,7<br>,8,12,14 | 24 | D3ZHA0,O88267,P02631,P04636,P06761,P07171,P07647,P08937,P16086,P20760,P20761,P20762,P62815,P83748,Q63751,Q64361,Q6AYS7,Q6TMA8,Q80WL1,Q99041,Q9EQS0,Q9ROT3,Q9WTT6,Q9Z0V6                                                                                                                               |
| 11419 | 1,9,10,11,<br>14,15,16,1<br>7 | 2,3,4,5,6,7<br>,8,12,13 | 25 | D3ZHA0,O88267,P02631,P02780,P06761,P07647,P08937,P16086,P20760,P20761,P20762,P22282,P22283,P30120,P62815,P83748,Q498R7,Q63751,Q64361,Q6TMA8,Q80WL1,Q99041,Q9EQS0,Q9ROT3,Q9Z0V6                                                                                                                        |
| 11420 | 1,9,10,12,<br>13,14,15,1<br>6 | 2,3,4,5,6,7<br>,8,11,17 | 28 | O55004,O88267,P02631,P06760,P07150,P07171,P08937,P09605;P25809,P11883,P14668,P14669,P16086,P20646,P20760,P20761,P20762,P28648,P50115,P55091,P61206;P84079;P84082,Q4G075,Q63751,Q64361,Q6AYS4,Q99041,Q9EQS0,Q9ROT3,Q9Z0V6                                                                              |
| 11421 | 1,9,10,12,<br>13,14,15,1<br>7 | 2,3,4,5,6,7<br>,8,11,16 | 21 | D3ZHA0,P02631,P07150,P07171,P08937,P11883,P14668,P14669,P16086,P20646,P20760,P20761,P20762,P61206;P84079;P84082,Q07936,Q63751,Q6AYS4,Q8VD89,Q9EQS0,Q9ROT3,Q9Z0V6                                                                                                                                      |
| 11422 | 1,9,10,12,<br>13,14,16,1<br>7 | 2,3,4,5,6,7<br>,8,11,15 | 19 | D3ZHA0,O55004,P02631,P02761,P07150,P07171,P08937,P14668,P14669,P16086,P20646,P20760,P20761,P20762,P83748,Q63751,Q6AYS4,Q9EQS0,Q9Z0V6                                                                                                                                                                  |
| 11423 | 1,9,10,12,<br>13,15,16,1<br>7 | 2,3,4,5,6,7<br>,8,11,14 | 20 | D3ZHA0,P02631,P02793;Q7TP54,P06866,P07150,P07171,P08937,P11883,P14668,P14669,P16086,P20760,P20761,P20762,P61206;P84079;P84082,Q63751,Q6AYS4,Q6TMA8,Q9EQS0,Q9Z0V6                                                                                                                                      |
| 11424 | 1,9,10,12,<br>14,15,16,1<br>7 | 2,3,4,5,6,7<br>,8,11,13 | 27 | D3ZHA0,P02631,P06761,P06866,P07150,P07171,P07647,P08937,P11883,P14668,P14669,P16086,P20760,P20761,P20762,P20766,P22282,P22283,P28648,P61206;P84079;P84082,Q5XI22,Q63751,Q6AYS4,Q6TMA8,Q9EQS0,Q9ROT3,Q9Z0V6                                                                                            |
| 11425 | 1,9,10,13,<br>14,15,16,1<br>7 | 2,3,4,5,6,7<br>,8,11,12 | 40 | D3ZHA0,O55004,O88267,P02631,P02780,P02781,P06761,P07150,P07171,P07647,P08937,P0C0A9,P11883,P14668,P14669,P16086,P20646,P20760,P20761,P20762,P22282,P22283,P28648,P30120,P50115,P61206;P84079;P84082,P83748,Q07936,Q498R7,Q63751,Q64361,Q6AYS4,Q6IFW6,Q6TMA8,Q80WL1,Q99041,Q9EQS0,Q9ESW0,Q9ROT3,Q9Z0V6 |
| 11426 | 1,9,11,12,<br>13,14,15,1<br>6 | 2,3,4,5,6,7<br>,8,10,17 | 28 | D3ZHA0,O88267,P06760,P08937,P16086,P19223,P20646,P20760,P20761,P20762,P28648,P46844,P50115,P52590,P62898,P82471,P83748,P97571,P97615,Q4G075,Q63751,Q64361,Q6P6R2,Q99041,Q9EPB1,Q9ROT3,Q9WTT6,Q9Z0V6                                                                                                   |
| 11427 | 1,9,11,12,<br>13,14,15,1<br>7 | 2,3,4,5,6,7<br>,8,10,16 | 17 | D3ZHA0,P04218,P08937,P14668,P16086,P20646,P20760,P20761,P20762,P61206;P84079;P84082,P82471,P83748,P97571,P97615,Q64361,Q9ROT3,Q9Z0V6                                                                                                                                                                  |
| 11428 | 1,9,11,12,<br>13,14,16,1<br>7 | 2,3,4,5,6,7<br>,8,10,15 | 17 | D3ZHA0,O55006,P02631,P02761,P04218,P07171,P08937,P20646,P20760,P20761,P20762,P82471,P83748,P97571,P97615,Q64361,Q9Z0V6                                                                                                                                                                                |
| 11429 | 1,9,11,12,<br>13,15,16,1<br>7 | 2,3,4,5,6,7<br>,8,10,14 | 21 | D3ZHA0,P02631,P04218,P07171,P08937,P12020,P16086,P20760,P20761,P20762,P28648,P36376,P82471,P83748,P97571,P97615,Q5BJY9,Q64361,Q9EQS0,Q9WTT6,Q9Z0V6                                                                                                                                                    |

|       |                                |                                   |    |                                                                                                                                                                                                                                        |
|-------|--------------------------------|-----------------------------------|----|----------------------------------------------------------------------------------------------------------------------------------------------------------------------------------------------------------------------------------------|
| 11430 | 1,9,11,12,<br>14,15,16,1<br>7  | 2,3,4,5,6,7<br>,8,10,13           | 20 | D3ZHA0,P04218,P06761,P06866,P07171,P08937,P12020,P16086,P20760,P20761,P20762,P28648,P82471,P83748,P97571,P97615,Q64361,Q6TMA8,Q9ROT3,Q9Z0V6                                                                                            |
| 11431 | 1,9,11,13,<br>14,15,16,1<br>7  | 2,3,4,5,6,7<br>,8,10,12           | 25 | D3ZHA0,O88267,P04218,P06761,P07647,P08937,P11883,P20646,P20760,P20761,P20762,P28648,P82471,P83748,P97571,P97615,Q63475,Q63751,Q64361,Q80WL1,Q99041,Q9EQS0,Q9ROT3,Q9WTT6,Q9Z0V6                                                         |
| 11432 | 1,9,12,13,<br>14,15,16,1<br>7  | 2,3,4,5,6,7<br>,8,10,11           | 27 | D3ZHA0,P00714,P02631,P07150,P07171,P08649,P08937,P11883,P14668,P14669,P16086,P20646,P20760,P20761,P20762,P28648,P61206,P84079,P84082,P82471,P97615,Q5BJY9,Q63598,Q63751,Q64361,Q6AYS4,Q9EQS0,Q9ROT3,Q9Z0V6                             |
| 11433 | 1,10,11,12<br>,13,14,15,<br>16 | 2,3,4,5,6,7<br>,8,9,17            | 23 | D3ZHA0,O88267,P02631,P06760,P08937,P09605,P25809,P16086,P19223,P20646,P20760,P20761,P20762,P23593,P50115,P52590,Q4G075,Q63751,Q6P6R2,Q7TPB1,Q99041,Q9EPB1,Q9WTT6,Q9Z0V6                                                                |
| 11434 | 1,10,11,12<br>,13,14,15,<br>17 | 2,3,4,5,6,7<br>,8,9,16            | 10 | D3ZHA0,P02631,P14668,P16086,P20646,P20761,P20762,P83748,P97605,Q9Z0V6                                                                                                                                                                  |
| 11435 | 1,10,11,12<br>,13,14,16,<br>17 | 2,3,4,5,6,7<br>,8,9,15            | 14 | D3ZHA0,O55006,P02631,P07171,P08937,P20646,P20760,P20761,P20762,P83748,P97605,Q5QE79,Q6TMA8,Q9Z0V6                                                                                                                                      |
| 11436 | 1,10,11,12<br>,13,15,16,<br>17 | 2,3,4,5,6,7<br>,8,9,14            | 15 | D3ZHA0,P02631,P06866,P07171,P08937,P16086,P20760,P20761,P20762,P83748,P97605,Q6TMA8,Q9EQS0,Q9WTT6,Q9Z0V6                                                                                                                               |
| 11437 | 1,10,11,12<br>,14,15,16,<br>17 | 2,3,4,5,6,7<br>,8,9,13            | 17 | D3ZHA0,O88267,P02631,P02764,P06761,P06866,P08937,P16086,P20760,P20761,P20762,P20766,P83748,P97605,Q6TMA8,Q9ROT3,Q9Z0V6                                                                                                                 |
| 11438 | 1,10,11,13<br>,14,15,16,<br>17 | 2,3,4,5,6,7<br>,8,9,12            | 22 | D3ZHA0,O55004,O55006,O88267,P02631,P06761,P07647,P08937,P20646,P20760,P20761,P20762,P83748,Q498R7,Q63751,Q64361,Q6TMA8,Q80WL1,Q99041,Q9EQS0,Q9ROT3,Q9Z0V6                                                                              |
| 11439 | 1,10,12,13<br>,14,15,16,<br>17 | 2,3,4,5,6,7<br>,8,9,11            | 21 | D3ZHA0,P02631,P06866,P07150,P07171,P08932,P08937,P11883,P14668,P14669,P16086,P20646,P20761,P20762,P28648,P61206,P84079,P84082,Q63751,Q6AYS4,Q6TMA8,Q9EQS0,Q9Z0V6                                                                       |
| 11440 | 1,11,12,13<br>,14,15,16,<br>17 | 2,3,4,5,6,7<br>,8,9,10            | 17 | D3ZHA0,O55006,P02631,P07171,P08937,P20646,P20760,P20761,P20762,P28648,P82471,P83748,P97571,P97615,Q64361,Q9EQS0,Q9Z0V6                                                                                                                 |
| 11441 | 2,3,4,5,6,7<br>,8,9            | 1,10,11,12<br>,13,14,15,<br>16,17 | 28 | D3ZHA0,O55006,O88267,P02631,P02764,P06761,P06866,P07171,P08937,P16086,P20646,P20760,P20761,P20762,P28648,P50115,P52590,P83748,P97571,P97605,Q63617,Q63751,Q64361,Q6TMA8,Q9EQS0,Q9ROT3,Q9WTT6,Q9Z0V6                                    |
| 11442 | 2,3,4,5,6,7<br>,8,10           | 1,9,11,12,<br>13,14,15,1<br>6,17  | 30 | D3ZHA0,O55006,O88267,P02631,P04218,P06761,P07171,P08649,P08937,P11883,P16086,P20646,P20760,P20761,P20762,P28648,P61206,P84079,P84082,P82471,P83748,P97571,P97615,Q63475,Q63751,Q64361,Q6AYS4,Q6TMA8,Q9EQS0,Q9ROT3,Q9WTT6,Q9Z0V6        |
| 11443 | 2,3,4,5,6,7<br>,8,11           | 1,9,10,12,<br>13,14,15,1<br>6,17  | 31 | D3ZHA0,O55004,O88267,P02631,P06761,P07150,P07171,P07647,P08937,P11883,P14668,P14669,P16086,P20646,P20760,P20761,P20762,P22282,P28648,P50115,P61206,P84079,P84082,P83748,Q63617,Q63751,Q64361,Q6AYS4,Q6TMA8,Q99041,Q9EQS0,Q9ROT3,Q9Z0V6 |
| 11444 | 2,3,4,5,6,7<br>,8,12           | 1,9,10,11,<br>13,14,15,1<br>6,17  | 33 | D3ZHA0,O55004,O88267,P02631,P02780,P06761,P07171,P07647,P08937,P16086,P19223,P20646,P20760,P20761,P20762,P22282,P22283,P30120,P50115,P62815,P83748,Q498R7,Q63475,Q63751,Q64361,Q6AYS7,Q6TMA8,Q80WL1,Q99041,Q9EQS0,Q9ROT3,Q9WTT6,Q9Z0V6 |

|       |                       |                                  |    |                                                                                                                                                                                                                                                                    |
|-------|-----------------------|----------------------------------|----|--------------------------------------------------------------------------------------------------------------------------------------------------------------------------------------------------------------------------------------------------------------------|
| 11445 | 2,3,4,5,6,7<br>,8,13  | 1,9,10,11,<br>12,14,15,1<br>6,17 | 28 | D3ZHA0,O88267,P02631,P02764,P06761,P06866,P06911,P07171,P07647,P08937,P16086,P20760,P20761,P20762,P20766,P22282,P22283,P62815,P83748,Q63617,Q63751,Q64361,Q6TMA8,Q99041,Q9EQS0,Q9R0T3,Q9WTT6,Q9Z0V6                                                                |
| 11446 | 2,3,4,5,6,7<br>,8,14  | 1,9,10,11,<br>12,13,15,1<br>6,17 | 28 | D3ZHA0,O55096,O88267,P02631,P02793,Q7TP54,P06761,P06866,P07171,P08937,P10536,P16086,P20760,P20761,P20762,P62815,P83748,P97605,P97615,Q63617,Q63751,Q64361,Q6AYS7,Q6TMA8,Q923S2,Q9EQS0,Q9R0T3,Q9WTT6,Q9Z0V6                                                         |
| 11447 | 2,3,4,5,6,7<br>,8,15  | 1,9,10,11,<br>12,13,14,1<br>6,17 | 26 | D3ZHA0,O55004,O55006,O88267,P02631,P02761,P06761,P07171,P08937,P10536,P16086,P20646,P20760,P20761,P20762,P62815,P83748,P97571,P97605,P97615,Q63751,Q64361,Q6TMA8,Q9EQS0,Q9WTT6,Q9Z0V6                                                                              |
| 11448 | 2,3,4,5,6,7<br>,8,16  | 1,9,10,11,<br>12,13,14,1<br>5,17 | 21 | D3ZHA0,O88267,P02631,P07171,P08937,P14668,P16086,P20646,P20760,P20761,P20762,P61206;P84079;P84082,P83748,Q63617,Q63751,Q64361,Q6TMA8,Q9EQS0,Q9R0T3,Q9WTT6,Q9Z0V6                                                                                                   |
| 11449 | 2,3,4,5,6,7<br>,8,17  | 1,9,10,11,<br>12,13,14,1<br>5,16 | 36 | D3ZHA0,O54858,O55004,O88267,P02631,P02761,P06760,P06761,P07171,P08937,P09605;P25809,P10536,P16086,P19223,P20646,P20760,P20761,P20762,P22282,P50115,P52590,P55091,P62815,P83748,P97571,P97615,Q4G075,Q63617,Q63751,Q64361,Q6AYS4,Q99041,Q9EQS0,Q9R0T3,Q9WTT6,Q9Z0V6 |
| 11450 | 2,3,4,5,6,7<br>,9,10  | 1,8,11,12,<br>13,14,15,1<br>6,17 | 13 | O55006,P02631,P04218,P16086,P20646,P20760,P20762,P28648,P34901,P36376,P52590,P61206;P84079;P84082,P83748                                                                                                                                                           |
| 11451 | 2,3,4,5,6,7<br>,9,11  | 1,8,10,12,<br>13,14,15,1<br>6,17 | 10 | P02631,P08937,P15999,P16086,P20646,P20760,P20762,P61206;P84079;P84082,P83748,Q63751                                                                                                                                                                                |
| 11452 | 2,3,4,5,6,7<br>,9,12  | 1,8,10,11,<br>13,14,15,1<br>6,17 | 12 | P01835,P02631,P08937,P20646,P20760,P20761,P20762,P34901,P83748,Q498R7,Q9EQS0,Q9Z0V6                                                                                                                                                                                |
| 11453 | 2,3,4,5,6,7<br>,9,13  | 1,8,10,11,<br>12,14,15,1<br>6,17 | 9  | P02631,P05539,P06866,P08937,P16086,P20760,P20762,P83748,P97605                                                                                                                                                                                                     |
| 11454 | 2,3,4,5,6,7<br>,9,14  | 1,8,10,11,<br>12,13,15,1<br>6,17 | 9  | P02631,P16086,P20760,P20762,P34901,P36376,P83748,P97605,Q9Z0V6                                                                                                                                                                                                     |
| 11455 | 2,3,4,5,6,7<br>,9,15  | 1,8,10,11,<br>12,13,14,1<br>6,17 | 8  | O55006,P02631,P20760,P20761,P20762,P36376,P83748,P97605                                                                                                                                                                                                            |
| 11456 | 2,3,4,5,6,7<br>,9,16  | 1,8,10,11,<br>12,13,14,1<br>5,17 | 7  | P02631,P15999,P16086,P20760,P20762,P61206;P84079;P84082,P83748                                                                                                                                                                                                     |
| 11457 | 2,3,4,5,6,7<br>,9,17  | 1,8,10,11,<br>12,13,14,1<br>5,16 | 13 | P02631,P08937,P09605;P25809,P16086,P20646,P20760,P20761,P20762,P23593,P52590,P83748,Q63751,Q9Z0V6                                                                                                                                                                  |
| 11458 | 2,3,4,5,6,7<br>,10,11 | 1,8,9,12,1<br>3,14,15,16<br>,17  | 16 | P02631,P04218,P08937,P11883,P16086,P20760,P20762,P28648,P34901,P36376,P61206;P84079;P84082,P83748,P97615,Q5FVI6,Q63751,Q9Z0V6                                                                                                                                      |
| 11459 | 2,3,4,5,6,7<br>,10,12 | 1,8,9,11,1<br>3,14,15,16<br>,17  | 18 | P04218,P08937,P17559,P20760,P20761,P20762,P28648,P34901,P61206;P84079;P84082,P83748,P97615,Q498R7,Q4FZU2,Q63475,Q63751,Q64361,Q9EQS0,Q9Z0V6                                                                                                                        |

|       |                       |                                 |    |                                                                                                                                             |
|-------|-----------------------|---------------------------------|----|---------------------------------------------------------------------------------------------------------------------------------------------|
| 11460 | 2,3,4,5,6,7<br>,10,13 | 1,8,9,11,1<br>2,14,15,16<br>,17 | 10 | P04218,P08937,P12020,P16086,P20760,P20762,P36376,P61206;P84079;P84082,P83748,P97615                                                         |
| 11461 | 2,3,4,5,6,7<br>,10,14 | 1,8,9,11,1<br>2,13,15,16<br>,17 | 13 | P02631,P04218,P08937,P12020,P16086,P20760,P20762,P34901,P36376,P61206;P84079;P84082,P83748,P97615,Q9Z0V6                                    |
| 11462 | 2,3,4,5,6,7<br>,10,15 | 1,8,9,11,1<br>2,13,14,16<br>,17 | 11 | P02631,P02803,P04218,P08937,P20760,P20761,P20762,P36376,P83748,P97615,Q9Z0V6                                                                |
| 11463 | 2,3,4,5,6,7<br>,10,16 | 1,8,9,11,1<br>2,13,14,15<br>,17 | 8  | P04218,P16086,P20760,P34901,P36376,P61206;P84079;P84082,P83748,Q62997                                                                       |
| 11464 | 2,3,4,5,6,7<br>,10,17 | 1,8,9,11,1<br>2,13,14,15<br>,16 | 14 | P04218,P08937,P09605;P25809,P16086,P20646,P20760,P20761,P20762,P36376,P52590,P83748,P97615,Q63751,Q9Z0V6                                    |
| 11465 | 2,3,4,5,6,7<br>,11,12 | 1,8,9,10,1<br>3,14,15,16<br>,17 | 18 | P01836,P02631,P08937,P11883,P16086,P20760,P20761,P20762,P34901,P61206;P84079;P84082,P83748,Q498R7,Q4FZU2,Q63751,Q6IFW6,Q9EQS0,Q9ESW0,Q9Z0V6 |
| 11466 | 2,3,4,5,6,7<br>,11,13 | 1,8,9,10,1<br>2,14,15,16<br>,17 | 9  | P02631,P05539,P08937,P16086,P20760,P20762,P61206;P84079;P84082,P83748,Q63751                                                                |
| 11467 | 2,3,4,5,6,7<br>,11,14 | 1,8,9,10,1<br>2,13,15,16<br>,17 | 12 | P02631,P08937,P16086,P20760,P20761,P20762,P34901,P36376,P61206;P84079;P84082,P83748,Q63751,Q9Z0V6                                           |
| 11468 | 2,3,4,5,6,7<br>,11,15 | 1,8,9,10,1<br>2,13,14,16<br>,17 | 9  | P02631,P08937,P16086,P20760,P20761,P20762,P61206;P84079;P84082,P83748,Q63751                                                                |
| 11469 | 2,3,4,5,6,7<br>,11,16 | 1,8,9,10,1<br>2,13,14,15<br>,17 | 12 | G3V686,P02631,P08937,P14668,P15999,P16086,P20760,P20762,P34901,P61206;P84079;P84082,P83748,Q63751                                           |
| 11470 | 2,3,4,5,6,7<br>,11,17 | 1,8,9,10,1<br>2,13,14,15<br>,16 | 13 | P02631,P08937,P09605;P25809,P16086,P20646,P20760,P20761,P20762,P52590,P61206;P84079;P84082,P83748,Q63751,Q9Z0V6                             |
| 11471 | 2,3,4,5,6,7<br>,12,13 | 1,8,9,10,1<br>1,14,15,16<br>,17 | 13 | O88267,P01836,P08937,P16086,P20760,P20761,P20762,P34901,P62815,P83748,Q498R7,Q63751,Q9Z0V6                                                  |
| 11472 | 2,3,4,5,6,7<br>,12,14 | 1,8,9,10,1<br>1,13,15,16<br>,17 | 14 | O88267,P01835,P02631,P08937,P11762,P16086,P20760,P20761,P20762,P34901,P83748,Q498R7,Q9EQS0,Q9Z0V6                                           |
| 11473 | 2,3,4,5,6,7<br>,12,15 | 1,8,9,10,1<br>1,13,14,16<br>,17 | 12 | P01836,P02631,P08937,P11762,P20760,P20761,P20762,P34901,P83748,Q498R7,Q63751,Q9Z0V6                                                         |
| 11474 | 2,3,4,5,6,7<br>,12,16 | 1,8,9,10,1<br>1,13,14,15<br>,17 | 13 | G3V686,O88267,P01836,P02631,P08937,P16086,P20760,P20762,P34901,P61206;P84079;P84082,P83748,Q498R7,Q9Z0V6                                    |

|       |                       |                                  |    |                                                                                                                                                                             |
|-------|-----------------------|----------------------------------|----|-----------------------------------------------------------------------------------------------------------------------------------------------------------------------------|
| 11475 | 2,3,4,5,6,7<br>,12,17 | 1,8,9,10,1<br>1,13,14,15<br>,16  | 23 | O88267,P01835,P02631,P08937,P09605;P25809,P16086,P19223,P20646,P20760,P20761,P20762,P34901,P52590,P55091,P62815,P83748<br>,P98089,Q498R7,Q62635,Q63751,Q99041,Q9QZK9,Q9Z0V6 |
| 11476 | 2,3,4,5,6,7<br>,13,14 | 1,8,9,10,1<br>1,12,15,16<br>,17  | 13 | O88267,P02631,P06866,P06911,P08937,P12020,P16086,P20760,P20761,P20762,P25236,P36376,P83748                                                                                  |
| 11477 | 2,3,4,5,6,7<br>,13,15 | 1,8,9,10,1<br>1,12,14,16<br>,17  | 8  | P02631,P08937,P16086,P20760,P20761,P20762,P36376,P83748                                                                                                                     |
| 11478 | 2,3,4,5,6,7<br>,13,16 | 1,8,9,10,1<br>1,12,14,15<br>,17  | 6  | G3V686,O88267,P08937,P16086,P20760,P83748                                                                                                                                   |
| 11479 | 2,3,4,5,6,7<br>,13,17 | 1,8,9,10,1<br>1,12,14,15<br>,16  | 12 | O88267,P08937,P09605;P25809,P16086,P20760,P20761,P20762,P62815,P83748,Q63751,Q9WUW8,Q9Z0V6                                                                                  |
| 11480 | 2,3,4,5,6,7<br>,14,15 | 1,8,9,10,1<br>1,12,13,16<br>,17  | 12 | P02631,P02803,P11762,P16086,P20760,P20761,P20762,P34901,P36376,P83748,P97605,Q9Z0V6                                                                                         |
| 11481 | 2,3,4,5,6,7<br>,14,16 | 1,8,9,10,1<br>1,12,13,15<br>,17  | 12 | G3V686,O88267,P02631,P16086,P20760,P20762,P34901,P36376,P83748,Q63532,Q6P767,Q9Z0V6                                                                                         |
| 11482 | 2,3,4,5,6,7<br>,14,17 | 1,8,9,10,1<br>1,12,13,15<br>,16  | 14 | O88267,P02631,P08937,P09605;P25809,P16086,P20760,P20761,P20762,P34901,P36376,P62815,P83748,Q63751,Q9Z0V6                                                                    |
| 11483 | 2,3,4,5,6,7<br>,15,16 | 1,8,9,10,1<br>1,12,13,14<br>,17  | 8  | P02631,P02803,P16086,P20760,P20761,P20762,P36376,P83748                                                                                                                     |
| 11484 | 2,3,4,5,6,7<br>,15,17 | 1,8,9,10,1<br>1,12,13,14<br>,16  | 14 | P02631,P02803,P08937,P09605;P25809,P16086,P20646,P20760,P20761,P20762,P52590,P62815,P83748,Q63751,Q9Z0V6                                                                    |
| 11485 | 2,3,4,5,6,7<br>,16,17 | 1,8,9,10,1<br>1,12,13,14<br>,15  | 13 | O88267,P02631,P08937,P09605;P25809,P10758,P16086,P20646,P20760,P20761,P20762,P83748,Q63751,Q9Z0V6                                                                           |
| 11486 | 2,3,4,5,6,8<br>,9,10  | 1,7,11,12,<br>13,14,15,1<br>6,17 | 8  | D3ZHA0,O55006,P08649,P20762,Q64361,Q6TMA8,Q9WTT6,Q9Z0V6                                                                                                                     |
| 11487 | 2,3,4,5,6,8<br>,9,11  | 1,7,10,12,<br>13,14,15,1<br>6,17 | 9  | D3ZHA0,P08649,P11883,P14668,P14669,P20762,Q6AYS4,Q6TMA8,Q9Z0V6                                                                                                              |
| 11488 | 2,3,4,5,6,8<br>,9,12  | 1,7,10,11,<br>13,14,15,1<br>6,17 | 11 | D3ZHA0,P01835,P08937,P20762,Q5M8C6,Q64361,Q6TMA8,Q9EQS0,Q9JJS8,Q9WTT6,Q9Z0V6                                                                                                |
| 11489 | 2,3,4,5,6,8<br>,9,13  | 1,7,10,11,<br>12,14,15,1<br>6,17 | 7  | D3ZHA0,P06866,P20762,P20766,Q6TMA8,Q9WTT6,Q9Z0V6                                                                                                                            |



|       |                       |                                  |    |                                                                                                                                                                  |
|-------|-----------------------|----------------------------------|----|------------------------------------------------------------------------------------------------------------------------------------------------------------------|
| 11490 | 2,3,4,5,6,8<br>,9,14  | 1,7,10,11,<br>12,13,15,1<br>6,17 | 8  | D3ZHA0,P02793;Q7TP54,P06866,P14668,P20762,Q6TMA8,Q9WTT6,Q9Z0V6                                                                                                   |
| 11491 | 2,3,4,5,6,8<br>,9,15  | 1,7,10,11,<br>12,13,14,1<br>6,17 | 11 | D3ZHA0,O55006,P14668,P20760,P20761,P20762,P23593,Q5QE79,Q6TMA8,Q9WTT6,Q9Z0V6                                                                                     |
| 11492 | 2,3,4,5,6,8<br>,9,16  | 1,7,10,11,<br>12,13,14,1<br>5,17 | 8  | D3ZHA0,P14668,P20762,P23593,Q63942,Q6TMA8,Q9WTT6,Q9Z0V6                                                                                                          |
| 11493 | 2,3,4,5,6,8<br>,9,17  | 1,7,10,11,<br>12,13,14,1<br>5,16 | 12 | P06760,P20646,P20760,P20761,P20762,P23593,P50115,Q4G075,Q63751,Q6TMA8,Q9WTT6,Q9Z0V6                                                                              |
| 11494 | 2,3,4,5,6,8<br>,10,11 | 1,7,9,12,1<br>3,14,15,16<br>,17  | 14 | D3ZHA0,P07150,P08649,P11883,P14668,P14669,P20762,P28648,Q5BJY9,Q63598,Q64361,Q6AYS4,Q6TMA8,Q9Z0V6                                                                |
| 11495 | 2,3,4,5,6,8<br>,10,12 | 1,7,9,11,1<br>3,14,15,16<br>,17  | 17 | D3ZHA0,P04218,P08937,P11883,P16636,P20760,P20762,P34901,Q4FZU2,Q5M8C6,Q64361,Q6IFW6,Q6TMA8,Q9EQS0,Q9JJS8,Q9WTT6,Q9Z0V6                                           |
| 11496 | 2,3,4,5,6,8<br>,10,13 | 1,7,9,11,1<br>2,14,15,16<br>,17  | 8  | D3ZHA0,P20760,P20762,P20766,Q64361,Q6TMA8,Q9WTT6,Q9Z0V6                                                                                                          |
| 11497 | 2,3,4,5,6,8<br>,10,14 | 1,7,9,11,1<br>2,13,15,16<br>,17  | 9  | D3ZHA0,P02793;Q7TP54,P08649,P20760,P20762,Q64361,Q6TMA8,Q9WTT6,Q9Z0V6                                                                                            |
| 11498 | 2,3,4,5,6,8<br>,10,15 | 1,7,9,11,1<br>2,13,14,16<br>,17  | 10 | D3ZHA0,P02761,P08649,P20760,P20761,P20762,Q64361,Q6TMA8,Q9WTT6,Q9Z0V6                                                                                            |
| 11499 | 2,3,4,5,6,8<br>,10,16 | 1,7,9,11,1<br>2,13,14,15<br>,17  | 7  | D3ZHA0,P08649,P14668,Q62997,Q64361,Q9WTT6,Q9Z0V6                                                                                                                 |
| 11500 | 2,3,4,5,6,8<br>,10,17 | 1,7,9,11,1<br>2,13,14,15<br>,16  | 16 | D3ZHA0,P06760,P08649,P08937,P16636,P20646,P20760,P20761,P20762,P50115,Q4G075,Q63751,Q64361,Q6P6R2,Q9WTT6,Q9Z0V6                                                  |
| 11501 | 2,3,4,5,6,8<br>,11,12 | 1,7,9,10,1<br>3,14,15,16<br>,17  | 23 | D3ZHA0,P07150,P07647,P08937,P0C0A9,P11883,P14668,P14669,P20762,P34901,P35053,P62804,Q4FZU2,Q5M8C6,Q63751,Q64361,Q6AYS4,Q6IFU8,Q6IFW6,Q6IMF3,Q6TMA8,Q9EQS0,Q9Z0V6 |
| 11502 | 2,3,4,5,6,8<br>,11,13 | 1,7,9,10,1<br>2,14,15,16<br>,17  | 11 | P08937,P11883,P14668,P14669,P20762,P20766,Q5XI22,Q63751,Q6AYS4,Q6TMA8,Q9Z0V6                                                                                     |
| 11503 | 2,3,4,5,6,8<br>,11,14 | 1,7,9,10,1<br>2,13,15,16<br>,17  | 14 | P02793;Q7TP54,P07150,P07171,P08649,P11883,P14668,P14669,P19218,P20762,Q64194,Q6AYS4,Q6TMA8,Q9EQS0,Q9Z0V6                                                         |
| 11504 | 2,3,4,5,6,8<br>,11,15 | 1,7,9,10,1<br>2,13,14,16<br>,17  | 12 | P02761,P07171,P08649,P14668,P14669,P20760,P20761,P20762,Q64194,Q6AYS4,Q6TMA8,Q9Z0V6                                                                              |

|       |                       |                                 |    |                                                                                                                                                                  |
|-------|-----------------------|---------------------------------|----|------------------------------------------------------------------------------------------------------------------------------------------------------------------|
| 11505 | 2,3,4,5,6,8<br>,11,16 | 1,7,9,10,1<br>2,13,14,15<br>,17 | 9  | P07150,P08649,P11883,P14668,P14669,P20762,Q6AYS4,Q6TMA8,Q9Z0V6                                                                                                   |
| 11506 | 2,3,4,5,6,8<br>,11,17 | 1,7,9,10,1<br>2,13,14,15<br>,16 | 17 | P06760,P07150,P08649,P08937,P14668,P14669,P20646,P20760,P20761,P20762,P50115,P97840,Q4G075,Q63751,Q6AYS4,Q6TMA8,Q9Z0V6                                           |
| 11507 | 2,3,4,5,6,8<br>,12,13 | 1,7,9,10,1<br>1,14,15,16<br>,17 | 12 | D3ZHA0,O88267,P02780,P02782,P07647,P08937,P20762,Q5M8C6,Q64361,Q6TMA8,Q9WTT6,Q9Z0V6                                                                              |
| 11508 | 2,3,4,5,6,8<br>,12,14 | 1,7,9,10,1<br>1,13,15,16<br>,17 | 15 | D3ZHA0,O88267,P01835,P02793;Q7TP54,P08937,P20760,P20761,P20762,P34901,Q64361,Q6TMA8,Q9EQS0,Q9JJS8,Q9WTT6,Q9Z0V6                                                  |
| 11509 | 2,3,4,5,6,8<br>,12,15 | 1,7,9,10,1<br>1,13,14,16<br>,17 | 12 | B0BNN3,D3ZHA0,P08937,P20760,P20761,P20762,P35053,Q4FZU2,Q64361,Q6TMA8,Q9WTT6,Q9Z0V6                                                                              |
| 11510 | 2,3,4,5,6,8<br>,12,16 | 1,7,9,10,1<br>1,13,14,15<br>,17 | 9  | D3ZHA0,O88267,P14668,P20762,Q4FZU2,Q6TMA8,Q9JJS8,Q9WTT6,Q9Z0V6                                                                                                   |
| 11511 | 2,3,4,5,6,8<br>,12,17 | 1,7,9,10,1<br>1,13,14,15<br>,16 | 23 | B0BNN3,O88267,P01835,P06760,P08937,P16636,P19223,P20646,P20760,P20761,P20762,P50115,P55091,P62815,P98089,Q4G075,Q5M8C6,Q62635,Q63751,Q64361,Q9JJS8,Q9WTT6,Q9Z0V6 |
| 11512 | 2,3,4,5,6,8<br>,13,14 | 1,7,9,10,1<br>1,12,15,16<br>,17 | 11 | P02793;Q7TP54,P06866,P06911,P20760,P20762,P20766,P25236,Q64093,Q6TMA8,Q9WTT6,Q9Z0V6                                                                              |
| 11513 | 2,3,4,5,6,8<br>,13,15 | 1,7,9,10,1<br>1,12,14,16<br>,17 | 6  | P20760,P20761,P20762,Q6TMA8,Q9WTT6,Q9Z0V6                                                                                                                        |
| 11514 | 2,3,4,5,6,8<br>,13,16 | 1,7,9,10,1<br>1,12,14,15<br>,17 | 4  | P14668,Q6TMA8,Q9WTT6,Q9Z0V6                                                                                                                                      |
| 11515 | 2,3,4,5,6,8<br>,13,17 | 1,7,9,10,1<br>1,12,14,15<br>,16 | 18 | O88267,P06760,P08937,P10536,P20760,P20761,P20762,P20766,P50115,P51907,P62815,Q4G075,Q63355,Q63751,Q6PCU2,Q6TMA8,Q9WTT6,Q9Z0V6                                    |
| 11516 | 2,3,4,5,6,8<br>,14,15 | 1,7,9,10,1<br>1,12,13,16<br>,17 | 13 | B0BNN3,D3ZHA0,P02793;Q7TP54,P07171,P10536,P12368,P14668,P20760,P20761,P20762,Q6TMA8,Q9WTT6,Q9Z0V6                                                                |
| 11517 | 2,3,4,5,6,8<br>,14,16 | 1,7,9,10,1<br>1,12,13,15<br>,17 | 6  | P02793;Q7TP54,P14668,P20762,Q6TMA8,Q9WTT6,Q9Z0V6                                                                                                                 |
| 11518 | 2,3,4,5,6,8<br>,14,17 | 1,7,9,10,1<br>1,12,13,15<br>,16 | 15 | O88267,P02793;Q7TP54,P06760,P08937,P10536,P12368,P20760,P20761,P20762,P50115,P62815,Q4G075,Q63751,Q9WTT6,Q9Z0V6                                                  |
| 11519 | 2,3,4,5,6,8<br>,15,16 | 1,7,9,10,1<br>1,12,13,14<br>,17 | 5  | P14668,P20760,P20762,Q6TMA8,Q9Z0V6                                                                                                                               |

|       |                       |                                 |    |                                                                                                                 |
|-------|-----------------------|---------------------------------|----|-----------------------------------------------------------------------------------------------------------------|
| 11520 | 2,3,4,5,6,8<br>,15,17 | 1,7,9,10,1<br>1,12,13,14<br>,16 | 14 | B0BNN3,P02761,P06760,P08937,P10536,P20760,P20761,P20762,P50115,P62815,Q4G075,Q63751,Q9WTT6,Q9Z0V6               |
| 11521 | 2,3,4,5,6,8<br>,16,17 | 1,7,9,10,1<br>1,12,13,14<br>,15 | 16 | O88267,P06760,P14668,P20646,P20760,P20761,P20762,P23593,P50115,P50116,Q4G075,Q63751,Q6JE36,Q6PCU2,Q9WTT6,Q9Z0V6 |
| 11522 | 2,3,4,5,6,9<br>,10,11 | 1,7,8,12,1<br>3,14,15,16<br>,17 | 4  | P08649,P11883,P14173,P34901                                                                                     |
| 11523 | 2,3,4,5,6,9<br>,10,12 | 1,7,8,11,1<br>3,14,15,16<br>,17 | 5  | P01835,P14173,P34901,Q4FZU2,Q9JJS8                                                                              |
| 11524 | 2,3,4,5,6,9<br>,10,13 | 1,7,8,11,1<br>2,14,15,16<br>,17 | 2  | P10715,P14173                                                                                                   |
| 11525 | 2,3,4,5,6,9<br>,10,14 | 1,7,8,11,1<br>2,13,15,16<br>,17 | 3  | P10715,P14173,P34901                                                                                            |
| 11526 | 2,3,4,5,6,9<br>,10,15 | 1,7,8,11,1<br>2,13,14,16<br>,17 | 1  | Q4FZU6                                                                                                          |
| 11527 | 2,3,4,5,6,9<br>,10,16 | 1,7,8,11,1<br>2,13,14,15<br>,17 | 3  | P14173,P15999,P23593                                                                                            |
| 11528 | 2,3,4,5,6,9<br>,10,17 | 1,7,8,11,1<br>2,13,14,15<br>,16 | 4  | P14173,P20760,P23593,Q63355                                                                                     |
| 11529 | 2,3,4,5,6,9<br>,11,12 | 1,7,8,10,1<br>3,14,15,16<br>,17 | 6  | P01835,P15999,P34901,Q4FZU2,Q6IFU8,Q6IFW6                                                                       |
| 11530 | 2,3,4,5,6,9<br>,11,13 | 1,7,8,10,1<br>2,14,15,16<br>,17 | 1  | Q6TMA8                                                                                                          |
| 11531 | 2,3,4,5,6,9<br>,11,14 | 1,7,8,10,1<br>2,13,15,16<br>,17 | 3  | P01835,P20762,P34901                                                                                            |
| 11532 | 2,3,4,5,6,9<br>,11,15 | 1,7,8,10,1<br>2,13,14,16<br>,17 | 1  | P02625                                                                                                          |
| 11533 | 2,3,4,5,6,9<br>,11,16 | 1,7,8,10,1<br>2,13,14,15<br>,17 | 2  | P14668,P15999                                                                                                   |
| 11534 | 2,3,4,5,6,9<br>,11,17 | 1,7,8,10,1<br>2,13,14,15<br>,16 | 3  | P01835,P15999,P20760                                                                                            |

|       |                       |                                 |    |                                                                              |
|-------|-----------------------|---------------------------------|----|------------------------------------------------------------------------------|
| 11535 | 2,3,4,5,6,9<br>,12,13 | 1,7,8,10,1<br>1,14,15,16<br>,17 | 1  | P01835                                                                       |
| 11536 | 2,3,4,5,6,9<br>,12,14 | 1,7,8,10,1<br>1,13,15,16<br>,17 | 3  | P01835,P34901,Q9JJS8                                                         |
| 11537 | 2,3,4,5,6,9<br>,12,15 | 1,7,8,10,1<br>1,13,14,16<br>,17 | 2  | P01835,P34901                                                                |
| 11538 | 2,3,4,5,6,9<br>,12,16 | 1,7,8,10,1<br>1,13,14,15<br>,17 | 5  | P01835,P15999,P23593,P34901,Q9JJS8                                           |
| 11539 | 2,3,4,5,6,9<br>,12,17 | 1,7,8,10,1<br>1,13,14,15<br>,16 | 10 | P01835,P09605,P25809,P19223,P20760,P20761,P23593,P34901,P98089,Q9JJS8,Q9Z0V6 |
| 11540 | 2,3,4,5,6,9<br>,13,14 | 1,7,8,10,1<br>1,12,15,16<br>,17 | 2  | P06866,P10715                                                                |
| 11541 | 2,3,4,5,6,9<br>,13,15 | 1,7,8,10,1<br>1,12,14,16<br>,17 | 0  |                                                                              |
| 11542 | 2,3,4,5,6,9<br>,13,16 | 1,7,8,10,1<br>1,12,14,15<br>,17 | 0  |                                                                              |
| 11543 | 2,3,4,5,6,9<br>,13,17 | 1,7,8,10,1<br>1,12,14,15<br>,16 | 3  | P20760,P23593,Q63355                                                         |
| 11544 | 2,3,4,5,6,9<br>,14,15 | 1,7,8,10,1<br>1,12,13,16<br>,17 | 1  | P34901                                                                       |
| 11545 | 2,3,4,5,6,9<br>,14,16 | 1,7,8,10,1<br>1,12,13,15<br>,17 | 2  | P15999,P34901                                                                |
| 11546 | 2,3,4,5,6,9<br>,14,17 | 1,7,8,10,1<br>1,12,13,15<br>,16 | 6  | P01835,P20760,P20761,P34901,Q5HZV9,Q9Z0V6                                    |
| 11547 | 2,3,4,5,6,9<br>,15,16 | 1,7,8,10,1<br>1,12,13,14<br>,17 | 3  | P23593,P36374,P47727                                                         |
| 11548 | 2,3,4,5,6,9<br>,15,17 | 1,7,8,10,1<br>1,12,13,14<br>,16 | 4  | P20760,P20761,P23593,P47727                                                  |
| 11549 | 2,3,4,5,6,9<br>,16,17 | 1,7,8,10,1<br>1,12,13,14<br>,15 | 4  | P15999,P20760,P23593,P47727                                                  |

|       |                        |                                |    |                                                                                     |
|-------|------------------------|--------------------------------|----|-------------------------------------------------------------------------------------|
| 11550 | 2,3,4,5,6,1<br>0,11,12 | 1,7,8,9,13,<br>14,15,16,1<br>7 | 9  | P11883,P34901,Q4FZU2,Q6IFU7,Q6IFU8,Q6IFW6,Q6IMF3,Q6P6Q2,Q9JJS8                      |
| 11551 | 2,3,4,5,6,1<br>0,11,13 | 1,7,8,9,12,<br>14,15,16,1<br>7 | 0  |                                                                                     |
| 11552 | 2,3,4,5,6,1<br>0,11,14 | 1,7,8,9,12,<br>13,15,16,1<br>7 | 2  | P20762,P34901                                                                       |
| 11553 | 2,3,4,5,6,1<br>0,11,15 | 1,7,8,9,12,<br>13,14,16,1<br>7 | 2  | P34901,Q4FZU6                                                                       |
| 11554 | 2,3,4,5,6,1<br>0,11,16 | 1,7,8,9,12,<br>13,14,15,1<br>7 | 2  | P14668,P34901                                                                       |
| 11555 | 2,3,4,5,6,1<br>0,11,17 | 1,7,8,9,12,<br>13,14,15,1<br>6 | 3  | P08649,P20760,P34901                                                                |
| 11556 | 2,3,4,5,6,1<br>0,12,13 | 1,7,8,9,11,<br>14,15,16,1<br>7 | 4  | P04218,P34901,Q4FZU2,Q9JJS8                                                         |
| 11557 | 2,3,4,5,6,1<br>0,12,14 | 1,7,8,9,11,<br>13,15,16,1<br>7 | 5  | P01835,P04218,P34901,Q4FZU2,Q9JJS8                                                  |
| 11558 | 2,3,4,5,6,1<br>0,12,15 | 1,7,8,9,11,<br>13,14,16,1<br>7 | 4  | P04218,P34901,Q4FZU2,Q9JJS8                                                         |
| 11559 | 2,3,4,5,6,1<br>0,12,16 | 1,7,8,9,11,<br>13,14,15,1<br>7 | 5  | P04218,P34901,Q4FZU2,Q6IFW6,Q9JJS8                                                  |
| 11560 | 2,3,4,5,6,1<br>0,12,17 | 1,7,8,9,11,<br>13,14,15,1<br>6 | 12 | P01835,P16636,P19223,P20760,P20761,P34901,P98089,Q10758,Q4FZU2,Q62635,Q9JJS8,Q9Z0V6 |
| 11561 | 2,3,4,5,6,1<br>0,13,14 | 1,7,8,9,11,<br>12,15,16,1<br>7 | 2  | P10715,P34901                                                                       |
| 11562 | 2,3,4,5,6,1<br>0,13,15 | 1,7,8,9,11,<br>12,14,16,1<br>7 | 3  | P04218,P10715,Q4FZU6                                                                |
| 11563 | 2,3,4,5,6,1<br>0,13,16 | 1,7,8,9,11,<br>12,14,15,1<br>7 | 2  | P10715,Q62997                                                                       |
| 11564 | 2,3,4,5,6,1<br>0,13,17 | 1,7,8,9,11,<br>12,14,15,1<br>6 | 3  | P10715,P20760,Q63355                                                                |

|       |                        |                                |    |                                                                                     |
|-------|------------------------|--------------------------------|----|-------------------------------------------------------------------------------------|
| 11565 | 2,3,4,5,6,1<br>0,14,15 | 1,7,8,9,11,<br>12,13,16,1<br>7 | 4  | P02803,P10715,P34901,P36376                                                         |
| 11566 | 2,3,4,5,6,1<br>0,14,16 | 1,7,8,9,11,<br>12,13,15,1<br>7 | 3  | P10715,P34901,Q62997                                                                |
| 11567 | 2,3,4,5,6,1<br>0,14,17 | 1,7,8,9,11,<br>12,13,15,1<br>6 | 5  | P10715,P20760,P20761,P34901,Q9Z0V6                                                  |
| 11568 | 2,3,4,5,6,1<br>0,15,16 | 1,7,8,9,11,<br>12,13,14,1<br>7 | 3  | P02803,P36374,Q62997                                                                |
| 11569 | 2,3,4,5,6,1<br>0,15,17 | 1,7,8,9,11,<br>12,13,14,1<br>6 | 5  | B0BNN3,P02803,P20760,P20761,Q9Z0V6                                                  |
| 11570 | 2,3,4,5,6,1<br>0,16,17 | 1,7,8,9,11,<br>12,13,14,1<br>5 | 3  | P20760,P23593,Q62997                                                                |
| 11571 | 2,3,4,5,6,1<br>1,12,13 | 1,7,8,9,10,<br>14,15,16,1<br>7 | 3  | P34901,Q4FZU2,Q6IFW6                                                                |
| 11572 | 2,3,4,5,6,1<br>1,12,14 | 1,7,8,9,10,<br>13,15,16,1<br>7 | 6  | P01835,P20762,P34901,Q4FZU2,Q6IFU8,Q6IFW6                                           |
| 11573 | 2,3,4,5,6,1<br>1,12,15 | 1,7,8,9,10,<br>13,14,16,1<br>7 | 4  | P02625,P34901,Q4FZU2,Q6IFW6                                                         |
| 11574 | 2,3,4,5,6,1<br>1,12,16 | 1,7,8,9,10,<br>13,14,15,1<br>7 | 8  | G3V686,P14668,P34901,Q4FZU2,Q6IFU8,Q6IFW6,Q6IMF3,Q9JJS8                             |
| 11575 | 2,3,4,5,6,1<br>1,12,17 | 1,7,8,9,10,<br>13,14,15,1<br>6 | 12 | P01835,P16636,P20760,P20761,P34901,P98089,Q4FZU2,Q62635,Q63751,Q6IFU8,Q6IFW6,Q9Z0V6 |
| 11576 | 2,3,4,5,6,1<br>1,13,14 | 1,7,8,9,10,<br>12,15,16,1<br>7 | 1  | P20762                                                                              |
| 11577 | 2,3,4,5,6,1<br>1,13,15 | 1,7,8,9,10,<br>12,14,16,1<br>7 | 1  | P02625                                                                              |
| 11578 | 2,3,4,5,6,1<br>1,13,16 | 1,7,8,9,10,<br>12,14,15,1<br>7 | 2  | G3V686,P14668                                                                       |
| 11579 | 2,3,4,5,6,1<br>1,13,17 | 1,7,8,9,10,<br>12,14,15,1<br>6 | 1  | P20760                                                                              |

|       |                        |                                |    |                                                                       |
|-------|------------------------|--------------------------------|----|-----------------------------------------------------------------------|
| 11580 | 2,3,4,5,6,1<br>1,14,15 | 1,7,8,9,10,<br>12,13,16,1<br>7 | 3  | P19218,P20762,P34901                                                  |
| 11581 | 2,3,4,5,6,1<br>1,14,16 | 1,7,8,9,10,<br>12,13,15,1<br>7 | 3  | P14668,P34901,Q6P767                                                  |
| 11582 | 2,3,4,5,6,1<br>1,14,17 | 1,7,8,9,10,<br>12,13,15,1<br>6 | 7  | P01835,P19218,P20760,P20761,P20762,P34901,Q9Z0V6                      |
| 11583 | 2,3,4,5,6,1<br>1,15,16 | 1,7,8,9,10,<br>12,13,14,1<br>7 | 2  | P14668,Q6AYR8                                                         |
| 11584 | 2,3,4,5,6,1<br>1,15,17 | 1,7,8,9,10,<br>12,13,14,1<br>6 | 3  | B0BNN3,P20760,P20761                                                  |
| 11585 | 2,3,4,5,6,1<br>1,16,17 | 1,7,8,9,10,<br>12,13,14,1<br>5 | 2  | P15999,P20760                                                         |
| 11586 | 2,3,4,5,6,1<br>2,13,14 | 1,7,8,9,10,<br>11,15,16,1<br>7 | 4  | P01835,P25236,P34901,Q9JJS8                                           |
| 11587 | 2,3,4,5,6,1<br>2,13,15 | 1,7,8,9,10,<br>11,14,16,1<br>7 | 1  | P82995                                                                |
| 11588 | 2,3,4,5,6,1<br>2,13,16 | 1,7,8,9,10,<br>11,14,15,1<br>7 | 2  | G3V686,Q9JJS8                                                         |
| 11589 | 2,3,4,5,6,1<br>2,13,17 | 1,7,8,9,10,<br>11,14,15,1<br>6 | 8  | P01835,P20760,P20761,P62815,P98089,Q62635,Q63355,Q9QZK9               |
| 11590 | 2,3,4,5,6,1<br>2,14,15 | 1,7,8,9,10,<br>11,13,16,1<br>7 | 4  | B0BNN3,P01835,P20762,P34901                                           |
| 11591 | 2,3,4,5,6,1<br>2,14,16 | 1,7,8,9,10,<br>11,13,15,1<br>7 | 4  | G3V686,P01835,P34901,Q9JJS8                                           |
| 11592 | 2,3,4,5,6,1<br>2,14,17 | 1,7,8,9,10,<br>11,13,15,1<br>6 | 10 | P01835,P20760,P20761,P20762,P31430,P34901,P98089,Q62635,Q9JJS8,Q9Z0V6 |
| 11593 | 2,3,4,5,6,1<br>2,15,16 | 1,7,8,9,10,<br>11,13,14,1<br>7 | 3  | P34901,Q4FZU2,Q9JJS8                                                  |
| 11594 | 2,3,4,5,6,1<br>2,15,17 | 1,7,8,9,10,<br>11,13,14,1<br>6 | 8  | B0BNN3,P01835,P20760,P20761,P34901,P98089,Q62635,Q9Z0V6               |

|       |                        |                                  |   |                                                                |
|-------|------------------------|----------------------------------|---|----------------------------------------------------------------|
| 11595 | 2,3,4,5,6,1<br>2,16,17 | 1,7,8,9,10,<br>11,13,14,1<br>5   | 8 | P01835,P20760,P20761,P23593,P34901,P98089,Q9JJS8,Q9Z0V6        |
| 11596 | 2,3,4,5,6,1<br>3,14,15 | 1,7,8,9,10,<br>11,12,16,1<br>7   | 2 | P10715,P25236                                                  |
| 11597 | 2,3,4,5,6,1<br>3,14,16 | 1,7,8,9,10,<br>11,12,15,1<br>7   | 2 | G3V686,P10715                                                  |
| 11598 | 2,3,4,5,6,1<br>3,14,17 | 1,7,8,9,10,<br>11,12,15,1<br>6   | 4 | P10715,P20760,P20761,Q9QW07                                    |
| 11599 | 2,3,4,5,6,1<br>3,15,16 | 1,7,8,9,10,<br>11,12,14,1<br>7   | 0 |                                                                |
| 11600 | 2,3,4,5,6,1<br>3,15,17 | 1,7,8,9,10,<br>11,12,14,1<br>6   | 3 | P20760,P20761,Q6AYL6                                           |
| 11601 | 2,3,4,5,6,1<br>3,16,17 | 1,7,8,9,10,<br>11,12,14,1<br>5   | 1 | P20760                                                         |
| 11602 | 2,3,4,5,6,1<br>4,15,16 | 1,7,8,9,10,<br>11,12,13,1<br>7   | 3 | P02803,P34901,P36374                                           |
| 11603 | 2,3,4,5,6,1<br>4,15,17 | 1,7,8,9,10,<br>11,12,13,1<br>6   | 9 | B0BNN3,P02803,P10536,P20760,P20761,P34901,P47967,Q5HZV9,Q9Z0V6 |
| 11604 | 2,3,4,5,6,1<br>4,16,17 | 1,7,8,9,10,<br>11,12,13,1<br>5   | 4 | P20760,P20761,P34901,Q9Z0V6                                    |
| 11605 | 2,3,4,5,6,1<br>5,16,17 | 1,7,8,9,10,<br>11,12,13,1<br>4   | 6 | P02803,P20760,P20761,P23593,P36374,P47727                      |
| 11606 | 2,3,4,5,7,8<br>,9,10   | 1,6,11,12,<br>13,14,15,1<br>6,17 | 6 | D3ZHA0,O55006,P52590,P97571,Q6AYS4,Q9EQS0                      |
| 11607 | 2,3,4,5,7,8<br>,9,11   | 1,6,10,12,<br>13,14,15,1<br>6,17 | 6 | P07171,P14668,P20762,Q6AYS4,Q6TMA8,Q9EQS0                      |
| 11608 | 2,3,4,5,7,8<br>,9,12   | 1,6,10,11,<br>13,14,15,1<br>6,17 | 7 | D3ZHA0,P19223,Q498R7,Q6AYS4,Q6TMA8,Q80WL1,Q9EQS0               |
| 11609 | 2,3,4,5,7,8<br>,9,13   | 1,6,10,11,<br>12,14,15,1<br>6,17 | 4 | P20766,P36970,Q6AYS4,Q6TMA8                                    |



|       |                       |                                  |    |                                                                                                                 |
|-------|-----------------------|----------------------------------|----|-----------------------------------------------------------------------------------------------------------------|
| 11610 | 2,3,4,5,7,8<br>,9,14  | 1,6,10,11,<br>12,13,15,1<br>6,17 | 8  | D3ZHA0,P07171,P20762,P36970,P97605,Q6AYS4,Q6TMA8,Q9EQS0                                                         |
| 11611 | 2,3,4,5,7,8<br>,9,15  | 1,6,10,11,<br>12,13,14,1<br>6,17 | 7  | D3ZHA0,P02761,P07171,P47727,P97605,Q5QE79,Q6TMA8                                                                |
| 11612 | 2,3,4,5,7,8<br>,9,16  | 1,6,10,11,<br>12,13,14,1<br>5,17 | 2  | D3ZHA0,P47727                                                                                                   |
| 11613 | 2,3,4,5,7,8<br>,9,17  | 1,6,10,11,<br>12,13,14,1<br>5,16 | 7  | P19223,P20761,P47727,P50115,P52590,P55091,Q6AYS4                                                                |
| 11614 | 2,3,4,5,7,8<br>,10,11 | 1,6,9,12,1<br>3,14,15,16<br>,17  | 14 | D3ZHA0,P00714,P07171,P08649,P14669,P16391,P20762,P28648,P61206,P84079;P84082,Q5BJY9,Q63475,Q64194,Q6AYS4,Q9EQS0 |
| 11615 | 2,3,4,5,7,8<br>,10,12 | 1,6,9,11,1<br>3,14,15,16<br>,17  | 9  | D3ZHA0,P04218,P08937,P16391,P36970,Q63475,Q6AYS4,Q80WL1,Q9EQS0                                                  |
| 11616 | 2,3,4,5,7,8<br>,10,13 | 1,6,9,11,1<br>2,14,15,16<br>,17  | 6  | D3ZHA0,P04218,P20766,P36970,Q6AYS4,Q80WL1                                                                       |
| 11617 | 2,3,4,5,7,8<br>,10,14 | 1,6,9,11,1<br>2,13,15,16<br>,17  | 7  | D3ZHA0,P07171,P20762,P36970,P97615,Q6AYS4,Q9EQS0                                                                |
| 11618 | 2,3,4,5,7,8<br>,10,15 | 1,6,9,11,1<br>2,13,14,16<br>,17  | 7  | D3ZHA0,P02761,P04218,P07171,P97571,P97615,Q6AYS4                                                                |
| 11619 | 2,3,4,5,7,8<br>,10,16 | 1,6,9,11,1<br>2,13,14,15<br>,17  | 2  | D3ZHA0,Q62997                                                                                                   |
| 11620 | 2,3,4,5,7,8<br>,10,17 | 1,6,9,11,1<br>2,13,14,15<br>,16  | 15 | D3ZHA0,P02761,P08937,P16391,P19223,P20760,P20761,P46844,P50115,P52590,P55091,P97571,P97615,Q6AYS4,Q80WL1        |
| 11621 | 2,3,4,5,7,8<br>,11,12 | 1,6,9,10,1<br>3,14,15,16<br>,17  | 14 | D3ZHA0,P01836,P07171,P08937,P20762,Q498R7,Q63475,Q63751,Q6AYS4,Q6TMA8,Q80WL1,Q99041,Q9EQS0,Q9ESW0               |
| 11622 | 2,3,4,5,7,8<br>,11,13 | 1,6,9,10,1<br>2,14,15,16<br>,17  | 5  | P07171,P20762,P20766,Q6AYS4,Q6TMA8                                                                              |
| 11623 | 2,3,4,5,7,8<br>,11,14 | 1,6,9,10,1<br>2,13,15,16<br>,17  | 8  | P07171,P14668,P19218,P20762,Q64194,Q6AYS4,Q6TMA8,Q9EQS0                                                         |
| 11624 | 2,3,4,5,7,8<br>,11,15 | 1,6,9,10,1<br>2,13,14,16<br>,17  | 6  | P02761,P07171,P14668,P20762,Q64194,Q6AYS4                                                                       |

|       |                       |                                 |    |                                                                                                                 |
|-------|-----------------------|---------------------------------|----|-----------------------------------------------------------------------------------------------------------------|
| 11625 | 2,3,4,5,7,8<br>,11,16 | 1,6,9,10,1<br>2,13,14,15<br>,17 | 5  | P07171,P14668,P61206;P84079;P84082,Q6AYS4,Q9EQS0                                                                |
| 11626 | 2,3,4,5,7,8<br>,11,17 | 1,6,9,10,1<br>2,13,14,15<br>,16 | 11 | P02761,P08937,P14669,P19223,P20761,P20762,P50115,P52590,P55091,Q63751,Q6AYS4                                    |
| 11627 | 2,3,4,5,7,8<br>,12,13 | 1,6,9,10,1<br>1,14,15,16<br>,17 | 10 | D3ZHA0,O88267,P01836,P08937,P20766,P36970,Q5M819,Q6TMA8,Q80WL1,Q9EQS0                                           |
| 11628 | 2,3,4,5,7,8<br>,12,14 | 1,6,9,10,1<br>1,13,15,16<br>,17 | 9  | D3ZHA0,O88267,P20762,P34901,P36970,Q63475,Q6AYS4,Q80WL1,Q9EQS0                                                  |
| 11629 | 2,3,4,5,7,8<br>,12,15 | 1,6,9,10,1<br>1,13,14,16<br>,17 | 10 | D3ZHA0,P01836,P08937,P11762,P20762,P36970,Q63475,Q64611,Q80WL1,Q9EQS0                                           |
| 11630 | 2,3,4,5,7,8<br>,12,16 | 1,6,9,10,1<br>1,13,14,15<br>,17 | 5  | D3ZHA0,O88267,P01836,Q80WL1,Q9EQS0                                                                              |
| 11631 | 2,3,4,5,7,8<br>,12,17 | 1,6,9,10,1<br>1,13,14,15<br>,16 | 16 | O88267,P08937,P19223,P20761,P20762,P50115,P52590,P55091,P98089,Q4G075,Q63751,Q6AYS4,Q80WL1,Q99041,Q9EQS0,Q9QZA6 |
| 11632 | 2,3,4,5,7,8<br>,13,14 | 1,6,9,10,1<br>1,12,15,16<br>,17 | 7  | O88267,P07171,P20762,P20766,P36970,Q5M819,Q6TMA8                                                                |
| 11633 | 2,3,4,5,7,8<br>,13,15 | 1,6,9,10,1<br>1,12,14,16<br>,17 | 5  | P07171,P20766,P36970,Q09030,Q6TMA8                                                                              |
| 11634 | 2,3,4,5,7,8<br>,13,16 | 1,6,9,10,1<br>1,12,14,15<br>,17 | 1  | P20766                                                                                                          |
| 11635 | 2,3,4,5,7,8<br>,13,17 | 1,6,9,10,1<br>1,12,14,15<br>,16 | 11 | O88267,P08937,P20761,P20766,P50115,P52590,P55091,Q5M819,Q63751,Q6AYS4,Q6IFU7                                    |
| 11636 | 2,3,4,5,7,8<br>,14,15 | 1,6,9,10,1<br>1,12,13,16<br>,17 | 5  | D3ZHA0,P07171,P20762,P36970,P97605                                                                              |
| 11637 | 2,3,4,5,7,8<br>,14,16 | 1,6,9,10,1<br>1,12,13,15<br>,17 | 2  | P36970,Q566E6                                                                                                   |
| 11638 | 2,3,4,5,7,8<br>,14,17 | 1,6,9,10,1<br>1,12,13,15<br>,16 | 12 | O88267,P10536,P20760,P20761,P20762,P36970,P50115,P52590,P55091,Q5M819,Q6AYS4,Q6IFU7                             |
| 11639 | 2,3,4,5,7,8<br>,15,16 | 1,6,9,10,1<br>1,12,13,14<br>,17 | 2  | P07171,P47727                                                                                                   |

|       |                       |                                 |    |                                                                              |
|-------|-----------------------|---------------------------------|----|------------------------------------------------------------------------------|
| 11640 | 2,3,4,5,7,8<br>,15,17 | 1,6,9,10,1<br>1,12,13,14<br>,16 | 11 | P02761,P10536,P20760,P20761,P47727,P50115,P52590,P55091,Q63751,Q6AYS4,Q6IFU7 |
| 11641 | 2,3,4,5,7,8<br>,16,17 | 1,6,9,10,1<br>1,12,13,14<br>,15 | 7  | O88267,P20761,P47727,P50115,P50116,P55091,Q6AYS4                             |
| 11642 | 2,3,4,5,7,9<br>,10,11 | 1,6,8,12,1<br>3,14,15,16<br>,17 | 3  | P15999,P34901,P61206;P84079;P84082                                           |
| 11643 | 2,3,4,5,7,9<br>,10,12 | 1,6,8,11,1<br>3,14,15,16<br>,17 | 2  | P04218,P34901                                                                |
| 11644 | 2,3,4,5,7,9<br>,10,13 | 1,6,8,11,1<br>2,14,15,16<br>,17 | 0  |                                                                              |
| 11645 | 2,3,4,5,7,9<br>,10,14 | 1,6,8,11,1<br>2,13,15,16<br>,17 | 1  | P34901                                                                       |
| 11646 | 2,3,4,5,7,9<br>,10,15 | 1,6,8,11,1<br>2,13,14,16<br>,17 | 2  | P02782,P47727                                                                |
| 11647 | 2,3,4,5,7,9<br>,10,16 | 1,6,8,11,1<br>2,13,14,15<br>,17 | 4  | P02782,P15999,P47727,Q62997                                                  |
| 11648 | 2,3,4,5,7,9<br>,10,17 | 1,6,8,11,1<br>2,13,14,15<br>,16 | 2  | P47727,P52590                                                                |
| 11649 | 2,3,4,5,7,9<br>,11,12 | 1,6,8,10,1<br>3,14,15,16<br>,17 | 5  | P01836,P15999,P34901,Q498R7,Q9EQS0                                           |
| 11650 | 2,3,4,5,7,9<br>,11,13 | 1,6,8,10,1<br>2,14,15,16<br>,17 | 1  | P05539                                                                       |
| 11651 | 2,3,4,5,7,9<br>,11,14 | 1,6,8,10,1<br>2,13,15,16<br>,17 | 4  | P15999,P34901,Q6IFV1,Q99MH3                                                  |
| 11652 | 2,3,4,5,7,9<br>,11,15 | 1,6,8,10,1<br>2,13,14,16<br>,17 | 1  | Q8K4G9                                                                       |
| 11653 | 2,3,4,5,7,9<br>,11,16 | 1,6,8,10,1<br>2,13,14,15<br>,17 | 2  | P15999,Q6IFV1                                                                |
| 11654 | 2,3,4,5,7,9<br>,11,17 | 1,6,8,10,1<br>2,13,14,15<br>,16 | 2  | P15999,P52590                                                                |

|       |                       |                                 |   |                                                  |
|-------|-----------------------|---------------------------------|---|--------------------------------------------------|
| 11655 | 2,3,4,5,7,9<br>,12,13 | 1,6,8,10,1<br>1,14,15,16<br>,17 | 1 | P01836                                           |
| 11656 | 2,3,4,5,7,9<br>,12,14 | 1,6,8,10,1<br>1,13,15,16<br>,17 | 1 | P34901                                           |
| 11657 | 2,3,4,5,7,9<br>,12,15 | 1,6,8,10,1<br>1,13,14,16<br>,17 | 3 | P01836,P34901,P47727                             |
| 11658 | 2,3,4,5,7,9<br>,12,16 | 1,6,8,10,1<br>1,13,14,15<br>,17 | 4 | P01836,P15999,P34901,P47727                      |
| 11659 | 2,3,4,5,7,9<br>,12,17 | 1,6,8,10,1<br>1,13,14,15<br>,16 | 7 | P15999,P19223,P34901,P47727,P52590,P55091,P98089 |
| 11660 | 2,3,4,5,7,9<br>,13,14 | 1,6,8,10,1<br>1,12,15,16<br>,17 | 1 | P97605                                           |
| 11661 | 2,3,4,5,7,9<br>,13,15 | 1,6,8,10,1<br>1,12,14,16<br>,17 | 1 | P47727                                           |
| 11662 | 2,3,4,5,7,9<br>,13,16 | 1,6,8,10,1<br>1,12,14,15<br>,17 | 2 | P08010,P47727                                    |
| 11663 | 2,3,4,5,7,9<br>,13,17 | 1,6,8,10,1<br>1,12,14,15<br>,16 | 2 | P47727,P52590                                    |
| 11664 | 2,3,4,5,7,9<br>,14,15 | 1,6,8,10,1<br>1,12,13,16<br>,17 | 4 | P16636,P34901,P97605,Q9QZK9                      |
| 11665 | 2,3,4,5,7,9<br>,14,16 | 1,6,8,10,1<br>1,12,13,15<br>,17 | 6 | P08010,P15999,P34901,Q6IFV1,Q99MH3,Q9QZK9        |
| 11666 | 2,3,4,5,7,9<br>,14,17 | 1,6,8,10,1<br>1,12,13,15<br>,16 | 2 | P34901,P52590                                    |
| 11667 | 2,3,4,5,7,9<br>,15,16 | 1,6,8,10,1<br>1,12,13,14<br>,17 | 4 | P02782,P47727,Q9JHB9,Q9QZK9                      |
| 11668 | 2,3,4,5,7,9<br>,15,17 | 1,6,8,10,1<br>1,12,13,14<br>,16 | 3 | P02782,P47727,P52590                             |
| 11669 | 2,3,4,5,7,9<br>,16,17 | 1,6,8,10,1<br>1,12,13,14<br>,15 | 5 | P02782,P08010,P15999,P47727,P52590               |

|       |                        |                                |   |                                                                |
|-------|------------------------|--------------------------------|---|----------------------------------------------------------------|
| 11670 | 2,3,4,5,7,1<br>0,11,12 | 1,6,8,9,13,<br>14,15,16,1<br>7 | 7 | P01836,P04218,P34901,P61206;P84079;P84082,Q63475,Q9EQSO,Q9ESW0 |
| 11671 | 2,3,4,5,7,1<br>0,11,13 | 1,6,8,9,12,<br>14,15,16,1<br>7 | 0 |                                                                |
| 11672 | 2,3,4,5,7,1<br>0,11,14 | 1,6,8,9,12,<br>13,15,16,1<br>7 | 1 | P34901                                                         |
| 11673 | 2,3,4,5,7,1<br>0,11,15 | 1,6,8,9,12,<br>13,14,16,1<br>7 | 2 | P02782,P51907                                                  |
| 11674 | 2,3,4,5,7,1<br>0,11,16 | 1,6,8,9,12,<br>13,14,15,1<br>7 | 5 | P02782,P15999,P34901,P61206;P84079;P84082,Q5FVI6               |
| 11675 | 2,3,4,5,7,1<br>0,11,17 | 1,6,8,9,12,<br>13,14,15,1<br>6 | 1 | P52590                                                         |
| 11676 | 2,3,4,5,7,1<br>0,12,13 | 1,6,8,9,11,<br>14,15,16,1<br>7 | 3 | P01836,P04218,P34901                                           |
| 11677 | 2,3,4,5,7,1<br>0,12,14 | 1,6,8,9,11,<br>13,15,16,1<br>7 | 4 | A2RUV9,P04218,P34901,Q9EQSO                                    |
| 11678 | 2,3,4,5,7,1<br>0,12,15 | 1,6,8,9,11,<br>13,14,16,1<br>7 | 3 | P01836,P04218,P34901                                           |
| 11679 | 2,3,4,5,7,1<br>0,12,16 | 1,6,8,9,11,<br>13,14,15,1<br>7 | 4 | P01836,P04218,P34901,Q9JJS8                                    |
| 11680 | 2,3,4,5,7,1<br>0,12,17 | 1,6,8,9,11,<br>13,14,15,1<br>6 | 6 | P04218,P19223,P34901,P52590,P55091,P98089                      |
| 11681 | 2,3,4,5,7,1<br>0,13,14 | 1,6,8,9,11,<br>12,15,16,1<br>7 | 2 | P04218,Q99068                                                  |
| 11682 | 2,3,4,5,7,1<br>0,13,15 | 1,6,8,9,11,<br>12,14,16,1<br>7 | 2 | P04218,Q09030                                                  |
| 11683 | 2,3,4,5,7,1<br>0,13,16 | 1,6,8,9,11,<br>12,14,15,1<br>7 | 2 | P04218,Q62997                                                  |
| 11684 | 2,3,4,5,7,1<br>0,13,17 | 1,6,8,9,11,<br>12,14,15,1<br>6 | 2 | P04218,P52590                                                  |

|       |                        |                                |   |                                                  |
|-------|------------------------|--------------------------------|---|--------------------------------------------------|
| 11685 | 2,3,4,5,7,1<br>0,14,15 | 1,6,8,9,11,<br>12,13,16,1<br>7 | 6 | P02782,P02803,P04218,P34901,P36376,Q99068        |
| 11686 | 2,3,4,5,7,1<br>0,14,16 | 1,6,8,9,11,<br>12,13,15,1<br>7 | 5 | P02782,P34901,Q62997,Q63532,Q99068               |
| 11687 | 2,3,4,5,7,1<br>0,14,17 | 1,6,8,9,11,<br>12,13,15,1<br>6 | 2 | P34901,P52590                                    |
| 11688 | 2,3,4,5,7,1<br>0,15,16 | 1,6,8,9,11,<br>12,13,14,1<br>7 | 6 | P02782,P04218,P13432,P47727,Q62997,Q9JHB9        |
| 11689 | 2,3,4,5,7,1<br>0,15,17 | 1,6,8,9,11,<br>12,13,14,1<br>6 | 3 | P02782,P47727,P52590                             |
| 11690 | 2,3,4,5,7,1<br>0,16,17 | 1,6,8,9,11,<br>12,13,14,1<br>5 | 4 | P02782,P47727,P52590,Q62997                      |
| 11691 | 2,3,4,5,7,1<br>1,12,13 | 1,6,8,9,10,<br>14,15,16,1<br>7 | 3 | P01836,P34901,Q498R7                             |
| 11692 | 2,3,4,5,7,1<br>1,12,14 | 1,6,8,9,10,<br>13,15,16,1<br>7 | 4 | P01836,P34901,Q9EQS0,Q9ESW0                      |
| 11693 | 2,3,4,5,7,1<br>1,12,15 | 1,6,8,9,10,<br>13,14,16,1<br>7 | 5 | P01836,P34901,P51907,Q498R7,Q9ESW0               |
| 11694 | 2,3,4,5,7,1<br>1,12,16 | 1,6,8,9,10,<br>13,14,15,1<br>7 | 3 | P01836,P15999,P34901                             |
| 11695 | 2,3,4,5,7,1<br>1,12,17 | 1,6,8,9,10,<br>13,14,15,1<br>6 | 7 | P01836,P19223,P34901,P55091,P98089,Q63751,Q9ESW0 |
| 11696 | 2,3,4,5,7,1<br>1,13,14 | 1,6,8,9,10,<br>12,15,16,1<br>7 | 0 |                                                  |
| 11697 | 2,3,4,5,7,1<br>1,13,15 | 1,6,8,9,10,<br>12,14,16,1<br>7 | 3 | P01836,P05539,Q09030                             |
| 11698 | 2,3,4,5,7,1<br>1,13,16 | 1,6,8,9,10,<br>12,14,15,1<br>7 | 1 | P01836                                           |
| 11699 | 2,3,4,5,7,1<br>1,13,17 | 1,6,8,9,10,<br>12,14,15,1<br>6 | 0 |                                                  |

|       |                        |                                |   |                                           |
|-------|------------------------|--------------------------------|---|-------------------------------------------|
| 11700 | 2,3,4,5,7,1<br>1,14,15 | 1,6,8,9,10,<br>12,13,16,1<br>7 | 3 | P19218,P34901,Q64194                      |
| 11701 | 2,3,4,5,7,1<br>1,14,16 | 1,6,8,9,10,<br>12,13,15,1<br>7 | 4 | P15999,P34901,Q6IFV1,Q99MH3               |
| 11702 | 2,3,4,5,7,1<br>1,14,17 | 1,6,8,9,10,<br>12,13,15,1<br>6 | 2 | P19218,P34901                             |
| 11703 | 2,3,4,5,7,1<br>1,15,16 | 1,6,8,9,10,<br>12,13,14,1<br>7 | 4 | P01836,P02782,P14408,Q6AYR8               |
| 11704 | 2,3,4,5,7,1<br>1,15,17 | 1,6,8,9,10,<br>12,13,14,1<br>6 | 0 |                                           |
| 11705 | 2,3,4,5,7,1<br>1,16,17 | 1,6,8,9,10,<br>12,13,14,1<br>5 | 1 | P15999                                    |
| 11706 | 2,3,4,5,7,1<br>2,13,14 | 1,6,8,9,10,<br>11,15,16,1<br>7 | 4 | A2RUV9,P01836,P34901,P36970               |
| 11707 | 2,3,4,5,7,1<br>2,13,15 | 1,6,8,9,10,<br>11,14,16,1<br>7 | 2 | P01836,Q09030                             |
| 11708 | 2,3,4,5,7,1<br>2,13,16 | 1,6,8,9,10,<br>11,14,15,1<br>7 | 1 | P01836                                    |
| 11709 | 2,3,4,5,7,1<br>2,13,17 | 1,6,8,9,10,<br>11,14,15,1<br>6 | 3 | P01836,P19223,P55091                      |
| 11710 | 2,3,4,5,7,1<br>2,14,15 | 1,6,8,9,10,<br>11,13,16,1<br>7 | 5 | A2RUV9,P01836,P11762,P34901,Q8CJD3        |
| 11711 | 2,3,4,5,7,1<br>2,14,16 | 1,6,8,9,10,<br>11,13,15,1<br>7 | 3 | P01836,P34901,Q63532                      |
| 11712 | 2,3,4,5,7,1<br>2,14,17 | 1,6,8,9,10,<br>11,13,15,1<br>6 | 6 | P19223,P31430,P34901,P55091,P98089,Q8CJD3 |
| 11713 | 2,3,4,5,7,1<br>2,15,16 | 1,6,8,9,10,<br>11,13,14,1<br>7 | 3 | P01836,P34901,P47727                      |
| 11714 | 2,3,4,5,7,1<br>2,15,17 | 1,6,8,9,10,<br>11,13,14,1<br>6 | 6 | P01836,P19223,P34901,P47727,P55091,P98089 |

|       |                        |                                 |   |                                                         |
|-------|------------------------|---------------------------------|---|---------------------------------------------------------|
| 11715 | 2,3,4,5,7,1<br>2,16,17 | 1,6,8,9,10,<br>11,13,14,1<br>5  | 7 | P01836,P15999,P19223,P34901,P47727,P55091,P98089        |
| 11716 | 2,3,4,5,7,1<br>3,14,15 | 1,6,8,9,10,<br>11,12,16,1<br>7  | 3 | P16636,Q09030,Q99068                                    |
| 11717 | 2,3,4,5,7,1<br>3,14,16 | 1,6,8,9,10,<br>11,12,15,1<br>7  | 3 | P08010,Q566E6,Q99068                                    |
| 11718 | 2,3,4,5,7,1<br>3,14,17 | 1,6,8,9,10,<br>11,12,15,1<br>6  | 3 | Q6IFU7,Q9QW07,Q9WUW8                                    |
| 11719 | 2,3,4,5,7,1<br>3,15,16 | 1,6,8,9,10,<br>11,12,14,1<br>7  | 4 | P01836,P02782,P47727,Q09030                             |
| 11720 | 2,3,4,5,7,1<br>3,15,17 | 1,6,8,9,10,<br>11,12,14,1<br>6  | 3 | P47727,Q6IFU7,Q9WUW8                                    |
| 11721 | 2,3,4,5,7,1<br>3,16,17 | 1,6,8,9,10,<br>11,12,14,1<br>5  | 2 | P08010,P47727                                           |
| 11722 | 2,3,4,5,7,1<br>4,15,16 | 1,6,8,9,10,<br>11,12,13,1<br>7  | 8 | P02782,P02803,P16636,P34901,P36374,P47727,Q9JHB9,Q9QZK9 |
| 11723 | 2,3,4,5,7,1<br>4,15,17 | 1,6,8,9,10,<br>11,12,13,1<br>6  | 2 | P02803,P34901                                           |
| 11724 | 2,3,4,5,7,1<br>4,16,17 | 1,6,8,9,10,<br>11,12,13,1<br>5  | 2 | P08010,P34901                                           |
| 11725 | 2,3,4,5,7,1<br>5,16,17 | 1,6,8,9,10,<br>11,12,13,1<br>4  | 7 | P02782,P02803,P04905,P0C0A9,P30120,P47727,Q9JHB9        |
| 11726 | 2,3,4,5,8,9<br>,10,11  | 1,6,7,12,1<br>3,14,15,16<br>,17 | 4 | P08649,P14668,Q6AYS4,Q6TMA8                             |
| 11727 | 2,3,4,5,8,9<br>,10,12  | 1,6,7,11,1<br>3,14,15,16<br>,17 | 4 | D3ZHA0,Q6TMA8,Q80WL1,Q9JJS8                             |
| 11728 | 2,3,4,5,8,9<br>,10,13  | 1,6,7,11,1<br>2,14,15,16<br>,17 | 2 | P20766,Q6TMA8                                           |
| 11729 | 2,3,4,5,8,9<br>,10,14  | 1,6,7,11,1<br>2,13,15,16<br>,17 | 0 |                                                         |



|       |                       |                                 |   |                                                  |
|-------|-----------------------|---------------------------------|---|--------------------------------------------------|
| 11730 | 2,3,4,5,8,9<br>,10,15 | 1,6,7,11,1<br>2,13,14,16<br>,17 | 2 | D3ZHA0,Q5QE79                                    |
| 11731 | 2,3,4,5,8,9<br>,10,16 | 1,6,7,11,1<br>2,13,14,15<br>,17 | 2 | Q62997,Q9QZK9                                    |
| 11732 | 2,3,4,5,8,9<br>,10,17 | 1,6,7,11,1<br>2,13,14,15<br>,16 | 2 | P08649,Q6AYS4                                    |
| 11733 | 2,3,4,5,8,9<br>,11,12 | 1,6,7,10,1<br>3,14,15,16<br>,17 | 5 | P14668,Q6AYS4,Q6TMA8,Q80WL1,Q9EQS0               |
| 11734 | 2,3,4,5,8,9<br>,11,13 | 1,6,7,10,1<br>2,14,15,16<br>,17 | 3 | P20766,Q6AYS4,Q6TMA8                             |
| 11735 | 2,3,4,5,8,9<br>,11,14 | 1,6,7,10,1<br>2,13,15,16<br>,17 | 7 | P14668,P19218,P97840,Q64194,Q6AYS4,Q6TMA8,Q99MH3 |
| 11736 | 2,3,4,5,8,9<br>,11,15 | 1,6,7,10,1<br>2,13,14,16<br>,17 | 6 | P14668,P97840,Q5QE79,Q64194,Q6AYS4,Q6TMA8        |
| 11737 | 2,3,4,5,8,9<br>,11,16 | 1,6,7,10,1<br>2,13,14,15<br>,17 | 4 | P14668,Q6AYS4,Q6TMA8,Q9QZK9                      |
| 11738 | 2,3,4,5,8,9<br>,11,17 | 1,6,7,10,1<br>2,13,14,15<br>,16 | 3 | P50115,P97840,Q6AYS4                             |
| 11739 | 2,3,4,5,8,9<br>,12,13 | 1,6,7,10,1<br>1,14,15,16<br>,17 | 3 | P20766,Q6TMA8,Q80WL1                             |
| 11740 | 2,3,4,5,8,9<br>,12,14 | 1,6,7,10,1<br>1,13,15,16<br>,17 | 6 | P34901,P36970,Q6TMA8,Q80WL1,Q9EQS0,Q9JJS8        |
| 11741 | 2,3,4,5,8,9<br>,12,15 | 1,6,7,10,1<br>1,13,14,16<br>,17 | 2 | Q5QE79,Q6TMA8                                    |
| 11742 | 2,3,4,5,8,9<br>,12,16 | 1,6,7,10,1<br>1,13,14,15<br>,17 | 2 | Q80WL1,Q9JJS8                                    |
| 11743 | 2,3,4,5,8,9<br>,12,17 | 1,6,7,10,1<br>1,13,14,15<br>,16 | 6 | P19223,P50115,P55091,P98089,Q6AYS4,Q80WL1        |
| 11744 | 2,3,4,5,8,9<br>,13,14 | 1,6,7,10,1<br>1,12,15,16<br>,17 | 3 | P20766,P36970,Q6TMA8                             |

|       |                        |                                 |   |                                                         |
|-------|------------------------|---------------------------------|---|---------------------------------------------------------|
| 11745 | 2,3,4,5,8,9<br>,13,15  | 1,6,7,10,1<br>1,12,14,16<br>,17 | 3 | P20766,Q5QE79,Q6TMA8                                    |
| 11746 | 2,3,4,5,8,9<br>,13,16  | 1,6,7,10,1<br>1,12,14,15<br>,17 | 2 | P20766,Q6TMA8                                           |
| 11747 | 2,3,4,5,8,9<br>,13,17  | 1,6,7,10,1<br>1,12,14,15<br>,16 | 1 | P20766                                                  |
| 11748 | 2,3,4,5,8,9<br>,14,15  | 1,6,7,10,1<br>1,12,13,16<br>,17 | 4 | P97840,Q5QE79,Q6TMA8,Q9QZK9                             |
| 11749 | 2,3,4,5,8,9<br>,14,16  | 1,6,7,10,1<br>1,12,13,15<br>,17 | 2 | Q99MH3,Q9QZK9                                           |
| 11750 | 2,3,4,5,8,9<br>,14,17  | 1,6,7,10,1<br>1,12,13,15<br>,16 | 2 | P97840,Q6AYS4                                           |
| 11751 | 2,3,4,5,8,9<br>,15,16  | 1,6,7,10,1<br>1,12,13,14<br>,17 | 4 | P36374,P47727,Q5QE79,Q9QZK9                             |
| 11752 | 2,3,4,5,8,9<br>,15,17  | 1,6,7,10,1<br>1,12,13,14<br>,16 | 4 | P02761,P47727,P97840,Q5QE79                             |
| 11753 | 2,3,4,5,8,9<br>,16,17  | 1,6,7,10,1<br>1,12,13,14<br>,15 | 2 | P23593,P47727                                           |
| 11754 | 2,3,4,5,8,1<br>0,11,12 | 1,6,7,9,13,<br>14,15,16,1<br>7  | 8 | P34901,P35053,P53792,P62804,Q63598,Q6AYS4,Q80WL1,Q9EQS0 |
| 11755 | 2,3,4,5,8,1<br>0,11,13 | 1,6,7,9,12,<br>14,15,16,1<br>7  | 3 | P20766,Q6AYS4,Q6TMA8                                    |
| 11756 | 2,3,4,5,8,1<br>0,11,14 | 1,6,7,9,12,<br>13,15,16,1<br>7  | 6 | P08649,P14668,P19218,Q63598,Q64194,Q6AYS4               |
| 11757 | 2,3,4,5,8,1<br>0,11,15 | 1,6,7,9,12,<br>13,14,16,1<br>7  | 5 | P02761,P08649,P14668,Q64194,Q6AYS4                      |
| 11758 | 2,3,4,5,8,1<br>0,11,16 | 1,6,7,9,12,<br>13,14,15,1<br>7  | 5 | P08649,P14668,P53792,Q64194,Q6AYS4                      |
| 11759 | 2,3,4,5,8,1<br>0,11,17 | 1,6,7,9,12,<br>13,14,15,1<br>6  | 3 | P02761,P08649,Q6AYS4                                    |

|       |                        |                                |   |                                                         |
|-------|------------------------|--------------------------------|---|---------------------------------------------------------|
| 11760 | 2,3,4,5,8,1<br>0,12,13 | 1,6,7,9,11,<br>14,15,16,1<br>7 | 4 | P36970,Q6TMA8,Q80WL1,Q9JJS8                             |
| 11761 | 2,3,4,5,8,1<br>0,12,14 | 1,6,7,9,11,<br>13,15,16,1<br>7 | 5 | P34901,P36970,Q80WL1,Q9EQS0,Q9JJS8                      |
| 11762 | 2,3,4,5,8,1<br>0,12,15 | 1,6,7,9,11,<br>13,14,16,1<br>7 | 2 | D3ZHA0,P35053                                           |
| 11763 | 2,3,4,5,8,1<br>0,12,16 | 1,6,7,9,11,<br>13,14,15,1<br>7 | 2 | Q80WL1,Q9JJS8                                           |
| 11764 | 2,3,4,5,8,1<br>0,12,17 | 1,6,7,9,11,<br>13,14,15,1<br>6 | 8 | P16636,P19223,P55091,P98089,Q4G075,Q6AYS4,Q80WL1,Q9JJS8 |
| 11765 | 2,3,4,5,8,1<br>0,13,14 | 1,6,7,9,11,<br>12,15,16,1<br>7 | 3 | P20766,P36970,Q6TMA8                                    |
| 11766 | 2,3,4,5,8,1<br>0,13,15 | 1,6,7,9,11,<br>12,14,16,1<br>7 | 2 | P13432,Q6TMA8                                           |
| 11767 | 2,3,4,5,8,1<br>0,13,16 | 1,6,7,9,11,<br>12,14,15,1<br>7 | 1 | Q62997                                                  |
| 11768 | 2,3,4,5,8,1<br>0,13,17 | 1,6,7,9,11,<br>12,14,15,1<br>6 | 2 | P20766,Q6AYS4                                           |
| 11769 | 2,3,4,5,8,1<br>0,14,15 | 1,6,7,9,11,<br>12,13,16,1<br>7 | 1 | P36970                                                  |
| 11770 | 2,3,4,5,8,1<br>0,14,16 | 1,6,7,9,11,<br>12,13,15,1<br>7 | 1 | Q62997                                                  |
| 11771 | 2,3,4,5,8,1<br>0,14,17 | 1,6,7,9,11,<br>12,13,15,1<br>6 | 1 | Q6AYS4                                                  |
| 11772 | 2,3,4,5,8,1<br>0,15,16 | 1,6,7,9,11,<br>12,13,14,1<br>7 | 4 | P13432,P36374,P47727,Q62997                             |
| 11773 | 2,3,4,5,8,1<br>0,15,17 | 1,6,7,9,11,<br>12,13,14,1<br>6 | 3 | P02761,P47727,Q62902                                    |
| 11774 | 2,3,4,5,8,1<br>0,16,17 | 1,6,7,9,11,<br>12,13,14,1<br>5 | 2 | P47727,Q62997                                           |

|       |                        |                                |    |                                                                       |
|-------|------------------------|--------------------------------|----|-----------------------------------------------------------------------|
| 11775 | 2,3,4,5,8,1<br>1,12,13 | 1,6,7,9,10,<br>14,15,16,1<br>7 | 5  | P20766,P35053,Q6AYS4,Q6TMA8,Q80WL1                                    |
| 11776 | 2,3,4,5,8,1<br>1,12,14 | 1,6,7,9,10,<br>13,15,16,1<br>7 | 10 | P14668,P19218,P34901,P35053,P62804,Q64194,Q6AYS4,Q6TMA8,Q80WL1,Q9EQSO |
| 11777 | 2,3,4,5,8,1<br>1,12,15 | 1,6,7,9,10,<br>13,14,16,1<br>7 | 6  | P14668,P35053,Q64194,Q6AYS4,Q6TMA8,Q9ESW0                             |
| 11778 | 2,3,4,5,8,1<br>1,12,16 | 1,6,7,9,10,<br>13,14,15,1<br>7 | 3  | P14668,Q6AYS4,Q80WL1                                                  |
| 11779 | 2,3,4,5,8,1<br>1,12,17 | 1,6,7,9,10,<br>13,14,15,1<br>6 | 10 | P19223,P35053,P50115,P55091,P62804,P98089,Q4G075,Q6AYS4,Q80WL1,Q9ESW0 |
| 11780 | 2,3,4,5,8,1<br>1,13,14 | 1,6,7,9,10,<br>12,15,16,1<br>7 | 6  | P19218,P20766,P97840,Q64194,Q6AYS4,Q6TMA8                             |
| 11781 | 2,3,4,5,8,1<br>1,13,15 | 1,6,7,9,10,<br>12,14,16,1<br>7 | 4  | P20766,P97840,Q6AYS4,Q6TMA8                                           |
| 11782 | 2,3,4,5,8,1<br>1,13,16 | 1,6,7,9,10,<br>12,14,15,1<br>7 | 4  | P14668,P20766,Q6AYS4,Q6TMA8                                           |
| 11783 | 2,3,4,5,8,1<br>1,13,17 | 1,6,7,9,10,<br>12,14,15,1<br>6 | 3  | P20766,P97840,Q6AYS4                                                  |
| 11784 | 2,3,4,5,8,1<br>1,14,15 | 1,6,7,9,10,<br>12,13,16,1<br>7 | 6  | P14668,P19218,P97840,Q64194,Q6AYS4,Q6TMA8                             |
| 11785 | 2,3,4,5,8,1<br>1,14,16 | 1,6,7,9,10,<br>12,13,15,1<br>7 | 6  | P14668,P19218,P97840,Q64194,Q6AYS4,Q99MH3                             |
| 11786 | 2,3,4,5,8,1<br>1,14,17 | 1,6,7,9,10,<br>12,13,15,1<br>6 | 3  | P19218,P97840,Q6AYS4                                                  |
| 11787 | 2,3,4,5,8,1<br>1,15,16 | 1,6,7,9,10,<br>12,13,14,1<br>7 | 4  | P14668,P97840,Q64194,Q6AYS4                                           |
| 11788 | 2,3,4,5,8,1<br>1,15,17 | 1,6,7,9,10,<br>12,13,14,1<br>6 | 3  | P02761,P97840,Q6AYS4                                                  |
| 11789 | 2,3,4,5,8,1<br>1,16,17 | 1,6,7,9,10,<br>12,13,14,1<br>5 | 3  | P14668,P97840,Q6AYS4                                                  |

|       |                        |                                |   |                                                         |
|-------|------------------------|--------------------------------|---|---------------------------------------------------------|
| 11790 | 2,3,4,5,8,1<br>2,13,14 | 1,6,7,9,10,<br>11,15,16,1<br>7 | 4 | P20766,P36970,Q6TMA8,Q80WL1                             |
| 11791 | 2,3,4,5,8,1<br>2,13,15 | 1,6,7,9,10,<br>11,14,16,1<br>7 | 4 | P35053,P36970,Q6TMA8,Q9QUL6                             |
| 11792 | 2,3,4,5,8,1<br>2,13,16 | 1,6,7,9,10,<br>11,14,15,1<br>7 | 4 | Q6TMA8,Q80WL1,Q9JJS8,Q9QUL6                             |
| 11793 | 2,3,4,5,8,1<br>2,13,17 | 1,6,7,9,10,<br>11,14,15,1<br>6 | 6 | P19223,P20766,P55091,P98089,Q62635,Q80WL1               |
| 11794 | 2,3,4,5,8,1<br>2,14,15 | 1,6,7,9,10,<br>11,13,16,1<br>7 | 4 | P34901,P35053,P36970,Q6TMA8                             |
| 11795 | 2,3,4,5,8,1<br>2,14,16 | 1,6,7,9,10,<br>11,13,15,1<br>7 | 3 | P34901,Q566E6,Q9JJS8                                    |
| 11796 | 2,3,4,5,8,1<br>2,14,17 | 1,6,7,9,10,<br>11,13,15,1<br>6 | 7 | P19223,P31430,P34901,P36970,P55091,P98089,Q80WL1        |
| 11797 | 2,3,4,5,8,1<br>2,15,16 | 1,6,7,9,10,<br>11,13,14,1<br>7 | 2 | P47727,P83121                                           |
| 11798 | 2,3,4,5,8,1<br>2,15,17 | 1,6,7,9,10,<br>11,13,14,1<br>6 | 8 | B0BNN3,P02761,P19223,P35053,P47727,P55091,P83121,P98089 |
| 11799 | 2,3,4,5,8,1<br>2,16,17 | 1,6,7,9,10,<br>11,13,14,1<br>5 | 5 | P19223,P47727,P98089,Q80WL1,Q9JJS8                      |
| 11800 | 2,3,4,5,8,1<br>3,14,15 | 1,6,7,9,10,<br>11,12,16,1<br>7 | 8 | P06757,P12368,P20766,P36970,P97840,Q64093,Q6AYL6,Q6TMA8 |
| 11801 | 2,3,4,5,8,1<br>3,14,16 | 1,6,7,9,10,<br>11,12,15,1<br>7 | 3 | P20766,P36970,Q566E6                                    |
| 11802 | 2,3,4,5,8,1<br>3,14,17 | 1,6,7,9,10,<br>11,12,15,1<br>6 | 6 | P12368,P20766,P36970,P97840,Q6PCU2,Q9QW07               |
| 11803 | 2,3,4,5,8,1<br>3,15,16 | 1,6,7,9,10,<br>11,12,14,1<br>7 | 1 | P47727                                                  |
| 11804 | 2,3,4,5,8,1<br>3,15,17 | 1,6,7,9,10,<br>11,12,14,1<br>6 | 4 | P12368,P20766,P97840,Q6AYL6                             |

|       |                        |                                |    |                                                                       |
|-------|------------------------|--------------------------------|----|-----------------------------------------------------------------------|
| 11805 | 2,3,4,5,8,1<br>3,16,17 | 1,6,7,9,10,<br>11,12,14,1<br>5 | 2  | P20766,Q6PCU2                                                         |
| 11806 | 2,3,4,5,8,1<br>4,15,16 | 1,6,7,9,10,<br>11,12,13,1<br>7 | 2  | P36374,Q9QZK9                                                         |
| 11807 | 2,3,4,5,8,1<br>4,15,17 | 1,6,7,9,10,<br>11,12,13,1<br>6 | 6  | B0BNN3,P02761,P10536,P12368,P47967,P97840                             |
| 11808 | 2,3,4,5,8,1<br>4,16,17 | 1,6,7,9,10,<br>11,12,13,1<br>5 | 3  | P97840,Q566E6,Q6PCU2                                                  |
| 11809 | 2,3,4,5,8,1<br>5,16,17 | 1,6,7,9,10,<br>11,12,13,1<br>4 | 4  | P09456,P47727,P97840,Q9JHB9                                           |
| 11810 | 2,3,4,5,9,1<br>0,11,12 | 1,6,7,8,13,<br>14,15,16,1<br>7 | 4  | P14173,P15999,P19629,P34901                                           |
| 11811 | 2,3,4,5,9,1<br>0,11,13 | 1,6,7,8,12,<br>14,15,16,1<br>7 | 4  | P12785,P13432,P14173,P19629                                           |
| 11812 | 2,3,4,5,9,1<br>0,11,14 | 1,6,7,8,12,<br>13,15,16,1<br>7 | 5  | P13432,P14173,P19218,P34901,Q5XFX0                                    |
| 11813 | 2,3,4,5,9,1<br>0,11,15 | 1,6,7,8,12,<br>13,14,16,1<br>7 | 7  | P02782,P06911,P11598,P13432,P19629,Q62902,Q8CJ52                      |
| 11814 | 2,3,4,5,9,1<br>0,11,16 | 1,6,7,8,12,<br>13,14,15,1<br>7 | 10 | P02782,P06911,P11598,P13432,P14173,P15999,P19629,Q5GRG2,Q62902,Q9QZK9 |
| 11815 | 2,3,4,5,9,1<br>0,11,17 | 1,6,7,8,12,<br>13,14,15,1<br>6 | 5  | P06911,P15999,P19629,Q5GRG2,Q62902                                    |
| 11816 | 2,3,4,5,9,1<br>0,12,13 | 1,6,7,8,11,<br>14,15,16,1<br>7 | 1  | P19629                                                                |
| 11817 | 2,3,4,5,9,1<br>0,12,14 | 1,6,7,8,11,<br>13,15,16,1<br>7 | 2  | P34901,Q9JJS8                                                         |
| 11818 | 2,3,4,5,9,1<br>0,12,15 | 1,6,7,8,11,<br>13,14,16,1<br>7 | 3  | P19629,P34901,Q62902                                                  |
| 11819 | 2,3,4,5,9,1<br>0,12,16 | 1,6,7,8,11,<br>13,14,15,1<br>7 | 6  | P11598,P15999,P19629,P34901,Q5GRG2,Q9JJS8                             |

|       |                        |                                |    |                                                                                                                                             |
|-------|------------------------|--------------------------------|----|---------------------------------------------------------------------------------------------------------------------------------------------|
| 11820 | 2,3,4,5,9,1<br>0,12,17 | 1,6,7,8,11,<br>13,14,15,1<br>6 | 5  | P19223,P19629,P34901,Q5GRG2,Q9JJS8                                                                                                          |
| 11821 | 2,3,4,5,9,1<br>0,13,14 | 1,6,7,8,11,<br>12,15,16,1<br>7 | 3  | P10715,P13432,P19629                                                                                                                        |
| 11822 | 2,3,4,5,9,1<br>0,13,15 | 1,6,7,8,11,<br>12,14,16,1<br>7 | 6  | P10715,P13432,P19629,Q63493,Q6AYL6,Q8CJ52                                                                                                   |
| 11823 | 2,3,4,5,9,1<br>0,13,16 | 1,6,7,8,11,<br>12,14,15,1<br>7 | 4  | P10715,P13432,P19629,Q62997                                                                                                                 |
| 11824 | 2,3,4,5,9,1<br>0,13,17 | 1,6,7,8,11,<br>12,14,15,1<br>6 | 5  | P10715,P19629,Q63355,Q6AYL6,Q8CJ52                                                                                                          |
| 11825 | 2,3,4,5,9,1<br>0,14,15 | 1,6,7,8,11,<br>12,13,16,1<br>7 | 9  | P02782,P10715,P13432,P22283,P34901,Q62902,Q8CJ52,Q9JHB9,Q9QZK9                                                                              |
| 11826 | 2,3,4,5,9,1<br>0,14,16 | 1,6,7,8,11,<br>12,13,15,1<br>7 | 12 | P02782,P10715,P11598,P13432,P19629,P22283,P34901,Q62902,Q62997,Q8CJ52,Q9JHB9,Q9QZK9                                                         |
| 11827 | 2,3,4,5,9,1<br>0,14,17 | 1,6,7,8,11,<br>12,13,15,1<br>6 | 5  | P10715,P34901,Q62902,Q8CJ52,Q9JHB9                                                                                                          |
| 11828 | 2,3,4,5,9,1<br>0,15,16 | 1,6,7,8,11,<br>12,13,14,1<br>7 | 20 | P02781,P02782,P04905,P06911,P08723,P11598,P13432,P19629,P22282,P22283,P30120,P36374,P47727,Q62902,Q62997,Q63493,Q8CJ52,Q9JHB9,Q9JH85,Q9QZK9 |
| 11829 | 2,3,4,5,9,1<br>0,15,17 | 1,6,7,8,11,<br>12,13,14,1<br>6 | 9  | P02782,P06911,P08723,P19629,P30120,P47727,Q62902,Q8CJ52,Q9JHB9                                                                              |
| 11830 | 2,3,4,5,9,1<br>0,16,17 | 1,6,7,8,11,<br>12,13,14,1<br>5 | 14 | P02782,P06911,P08723,P11598,P15999,P19629,P30120,P47727,Q5GRG2,Q62902,Q62997,Q8CJ52,Q9JHB9,Q9JH85                                           |
| 11831 | 2,3,4,5,9,1<br>1,12,13 | 1,6,7,8,10,<br>14,15,16,1<br>7 | 0  |                                                                                                                                             |
| 11832 | 2,3,4,5,9,1<br>1,12,14 | 1,6,7,8,10,<br>13,15,16,1<br>7 | 2  | P01835,P34901                                                                                                                               |
| 11833 | 2,3,4,5,9,1<br>1,12,15 | 1,6,7,8,10,<br>13,14,16,1<br>7 | 4  | P06911,P12020,P34901,P51907                                                                                                                 |
| 11834 | 2,3,4,5,9,1<br>1,12,16 | 1,6,7,8,10,<br>13,14,15,1<br>7 | 6  | P06911,P11598,P12020,P15999,P34901,Q5GRG2                                                                                                   |

|       |                        |                                |    |                                                                                            |
|-------|------------------------|--------------------------------|----|--------------------------------------------------------------------------------------------|
| 11835 | 2,3,4,5,9,1<br>1,12,17 | 1,6,7,8,10,<br>13,14,15,1<br>6 | 6  | P01835,P06911,P12020,P15999,P34901,Q5GRG2                                                  |
| 11836 | 2,3,4,5,9,1<br>1,13,14 | 1,6,7,8,10,<br>12,15,16,1<br>7 | 0  |                                                                                            |
| 11837 | 2,3,4,5,9,1<br>1,13,15 | 1,6,7,8,10,<br>12,14,16,1<br>7 | 2  | P13432,P19629                                                                              |
| 11838 | 2,3,4,5,9,1<br>1,13,16 | 1,6,7,8,10,<br>12,14,15,1<br>7 | 2  | P13432,P19629                                                                              |
| 11839 | 2,3,4,5,9,1<br>1,13,17 | 1,6,7,8,10,<br>12,14,15,1<br>6 | 1  | P19629                                                                                     |
| 11840 | 2,3,4,5,9,1<br>1,14,15 | 1,6,7,8,10,<br>12,13,16,1<br>7 | 6  | P13432,P19218,P34901,P97840,Q99MH3,Q9QZK9                                                  |
| 11841 | 2,3,4,5,9,1<br>1,14,16 | 1,6,7,8,10,<br>12,13,15,1<br>7 | 8  | P11598,P13432,P15999,P19218,P34901,Q6IFV1,Q99MH3,Q9QZK9                                    |
| 11842 | 2,3,4,5,9,1<br>1,14,17 | 1,6,7,8,10,<br>12,13,15,1<br>6 | 3  | P19218,P34901,P97840                                                                       |
| 11843 | 2,3,4,5,9,1<br>1,15,16 | 1,6,7,8,10,<br>12,13,14,1<br>7 | 13 | P02782,P06911,P08723,P11598,P12020,P13432,P19629,P22282,P22283,Q5GRG2,Q62902,Q6AYR9,Q9QZK9 |
| 11844 | 2,3,4,5,9,1<br>1,15,17 | 1,6,7,8,10,<br>12,13,14,1<br>6 | 7  | P06911,P08723,P12020,P97840,Q5GRG2,Q62902,Q8CJ52                                           |
| 11845 | 2,3,4,5,9,1<br>1,16,17 | 1,6,7,8,10,<br>12,13,14,1<br>5 | 9  | P06911,P08723,P11598,P12020,P15999,P19629,Q498D9,Q5GRG2,Q62902                             |
| 11846 | 2,3,4,5,9,1<br>2,13,14 | 1,6,7,8,10,<br>11,15,16,1<br>7 | 1  | P34901                                                                                     |
| 11847 | 2,3,4,5,9,1<br>2,13,15 | 1,6,7,8,10,<br>11,14,16,1<br>7 | 0  |                                                                                            |
| 11848 | 2,3,4,5,9,1<br>2,13,16 | 1,6,7,8,10,<br>11,14,15,1<br>7 | 1  | P19629                                                                                     |
| 11849 | 2,3,4,5,9,1<br>2,13,17 | 1,6,7,8,10,<br>11,14,15,1<br>6 | 2  | P19629,P35280                                                                              |



|       |                        |                                |    |                                                                                                                               |
|-------|------------------------|--------------------------------|----|-------------------------------------------------------------------------------------------------------------------------------|
| 11850 | 2,3,4,5,9,1<br>2,14,15 | 1,6,7,8,10,<br>11,13,16,1<br>7 | 1  | P34901                                                                                                                        |
| 11851 | 2,3,4,5,9,1<br>2,14,16 | 1,6,7,8,10,<br>11,13,15,1<br>7 | 3  | P15999,P34901,Q9JJS8                                                                                                          |
| 11852 | 2,3,4,5,9,1<br>2,14,17 | 1,6,7,8,10,<br>11,13,15,1<br>6 | 4  | P01835,P31430,P34901,Q8VD89                                                                                                   |
| 11853 | 2,3,4,5,9,1<br>2,15,16 | 1,6,7,8,10,<br>11,13,14,1<br>7 | 7  | P06911,P11598,P12020,P22283,P34901,P47727,Q5GRG2                                                                              |
| 11854 | 2,3,4,5,9,1<br>2,15,17 | 1,6,7,8,10,<br>11,13,14,1<br>6 | 6  | P06911,P12020,P34901,P47727,Q5GRG2,Q62902                                                                                     |
| 11855 | 2,3,4,5,9,1<br>2,16,17 | 1,6,7,8,10,<br>11,13,14,1<br>5 | 9  | P06911,P12020,P15999,P19629,P34901,P35280,P47727,Q5GRG2,Q9JJS8                                                                |
| 11856 | 2,3,4,5,9,1<br>3,14,15 | 1,6,7,8,10,<br>11,12,16,1<br>7 | 6  | F1LM93,P10715,P13432,Q6AYL6,Q8CJ52,Q9QZK9                                                                                     |
| 11857 | 2,3,4,5,9,1<br>3,14,16 | 1,6,7,8,10,<br>11,12,15,1<br>7 | 5  | F1LM93,P08010,P10715,P13432,Q9QZK9                                                                                            |
| 11858 | 2,3,4,5,9,1<br>3,14,17 | 1,6,7,8,10,<br>11,12,15,1<br>6 | 3  | P10715,P35280,Q6AYL6                                                                                                          |
| 11859 | 2,3,4,5,9,1<br>3,15,16 | 1,6,7,8,10,<br>11,12,14,1<br>7 | 12 | P02782,P08723,P13432,P19629,P22283,P30120,P47727,Q63493,Q6AYL6,Q8CJ52,Q9JHB9,Q9QZK9                                           |
| 11860 | 2,3,4,5,9,1<br>3,15,17 | 1,6,7,8,10,<br>11,12,14,1<br>6 | 5  | P08723,P19629,P47727,Q6AYL6,Q8CJ52                                                                                            |
| 11861 | 2,3,4,5,9,1<br>3,16,17 | 1,6,7,8,10,<br>11,12,14,1<br>5 | 7  | P08010,P08723,P19629,P22006,P35280,P47727,Q6AYL6                                                                              |
| 11862 | 2,3,4,5,9,1<br>4,15,16 | 1,6,7,8,10,<br>11,12,13,1<br>7 | 18 | P02781,P02782,P08723,P11598,P13432,P22282,P22283,P30120,P34901,P36374,P47727,Q62902,Q63493,Q8CJ52,Q99MH3,Q9JHB9,Q9JI85,Q9QZK9 |
| 11863 | 2,3,4,5,9,1<br>4,15,17 | 1,6,7,8,10,<br>11,12,13,1<br>6 | 10 | P02782,P08723,P30120,P47727,P47967,P97840,Q62902,Q63357,Q8CJ52,Q9JHB9                                                         |
| 11864 | 2,3,4,5,9,1<br>4,16,17 | 1,6,7,8,10,<br>11,12,13,1<br>5 | 11 | P02782,P08723,P15999,P30120,P34901,P47727,Q5GRG2,Q62902,Q8CJ52,Q9JHB9,Q9JI85                                                  |

|       |                         |                                |    |                                                                                                                                             |
|-------|-------------------------|--------------------------------|----|---------------------------------------------------------------------------------------------------------------------------------------------|
| 11865 | 2,3,4,5,9,1<br>5,16,17  | 1,6,7,8,10,<br>11,12,13,1<br>4 | 20 | P02781,P02782,P04905,P06911,P08723,P09456,P0C0A9,P11598,P12020,P19629,P22283,P30120,P36374,P47727,Q5GRG2,Q62902,Q63493,Q8CJ52,Q9JHB9,Q9JH85 |
| 11866 | 2,3,4,5,10,<br>11,12,13 | 1,6,7,8,9,1<br>4,15,16,17      | 2  | P19629,P34901                                                                                                                               |
| 11867 | 2,3,4,5,10,<br>11,12,14 | 1,6,7,8,9,1<br>3,15,16,17      | 2  | P34901,P53792                                                                                                                               |
| 11868 | 2,3,4,5,10,<br>11,12,15 | 1,6,7,8,9,1<br>3,14,16,17      | 3  | P34901,P51907,P53792                                                                                                                        |
| 11869 | 2,3,4,5,10,<br>11,12,16 | 1,6,7,8,9,1<br>3,14,15,17      | 4  | P19629,P34901,P53792,Q9JJS8                                                                                                                 |
| 11870 | 2,3,4,5,10,<br>11,12,17 | 1,6,7,8,9,1<br>3,14,15,16      | 1  | P34901                                                                                                                                      |
| 11871 | 2,3,4,5,10,<br>11,13,14 | 1,6,7,8,9,1<br>2,15,16,17      | 3  | P10715,P13432,P34901                                                                                                                        |
| 11872 | 2,3,4,5,10,<br>11,13,15 | 1,6,7,8,9,1<br>2,14,16,17      | 2  | P13432,P19629                                                                                                                               |
| 11873 | 2,3,4,5,10,<br>11,13,16 | 1,6,7,8,9,1<br>2,14,15,17      | 2  | P13432,P19629                                                                                                                               |
| 11874 | 2,3,4,5,10,<br>11,13,17 | 1,6,7,8,9,1<br>2,14,15,16      | 1  | P19629                                                                                                                                      |
| 11875 | 2,3,4,5,10,<br>11,14,15 | 1,6,7,8,9,1<br>2,13,16,17      | 5  | P13432,P19218,P34901,Q62902,Q64194                                                                                                          |
| 11876 | 2,3,4,5,10,<br>11,14,16 | 1,6,7,8,9,1<br>2,13,15,17      | 4  | P13432,P19218,P34901,Q6IFV1                                                                                                                 |
| 11877 | 2,3,4,5,10,<br>11,14,17 | 1,6,7,8,9,1<br>2,13,15,16      | 2  | P19218,P34901                                                                                                                               |
| 11878 | 2,3,4,5,10,<br>11,15,16 | 1,6,7,8,9,1<br>2,13,14,17      | 11 | P02782,P06911,P08723,P11598,P13432,P19629,P22282,P22283,P51907,Q62902,Q9Z1F2                                                                |
| 11879 | 2,3,4,5,10,<br>11,15,17 | 1,6,7,8,9,1<br>2,13,14,16      | 4  | P02782,P06911,P19629,Q62902                                                                                                                 |
| 11880 | 2,3,4,5,10,<br>11,16,17 | 1,6,7,8,9,1<br>2,13,14,15      | 5  | P02782,P06911,P19629,Q5GRG2,Q62902                                                                                                          |
| 11881 | 2,3,4,5,10,<br>12,13,14 | 1,6,7,8,9,1<br>1,15,16,17      | 2  | P34901,Q9JJS8                                                                                                                               |
| 11882 | 2,3,4,5,10,<br>12,13,15 | 1,6,7,8,9,1<br>1,14,16,17      | 2  | P04218,P19629                                                                                                                               |
| 11883 | 2,3,4,5,10,<br>12,13,16 | 1,6,7,8,9,1<br>1,14,15,17      | 4  | P19629,P34901,Q62997,Q9JJS8                                                                                                                 |
| 11884 | 2,3,4,5,10,<br>12,13,17 | 1,6,7,8,9,1<br>1,14,15,16      | 1  | P19629                                                                                                                                      |
| 11885 | 2,3,4,5,10,<br>12,14,15 | 1,6,7,8,9,1<br>1,13,16,17      | 2  | A2RUV9,P34901                                                                                                                               |
| 11886 | 2,3,4,5,10,<br>12,14,16 | 1,6,7,8,9,1<br>1,13,15,17      | 2  | P34901,Q9JJS8                                                                                                                               |

|       |                                                |    |                                                                                                                               |
|-------|------------------------------------------------|----|-------------------------------------------------------------------------------------------------------------------------------|
| 11887 | 2,3,4,5,10, 1,6,7,8,9,1<br>12,14,17 1,13,15,16 | 3  | P31430,P34901,Q9JJS8                                                                                                          |
| 11888 | 2,3,4,5,10, 1,6,7,8,9,1<br>12,15,16 1,13,14,17 | 6  | P19629,P34901,P47727,Q62902,Q62997,Q9JJS8                                                                                     |
| 11889 | 2,3,4,5,10, 1,6,7,8,9,1<br>12,15,17 1,13,14,16 | 3  | P34901,P47727,Q62902                                                                                                          |
| 11890 | 2,3,4,5,10, 1,6,7,8,9,1<br>12,16,17 1,13,14,15 | 6  | P19629,P34901,P47727,Q5GRG2,Q62997,Q9JJS8                                                                                     |
| 11891 | 2,3,4,5,10, 1,6,7,8,9,1<br>13,14,15 1,12,16,17 | 4  | P10715,P13432,Q6AYL6,Q99068                                                                                                   |
| 11892 | 2,3,4,5,10, 1,6,7,8,9,1<br>13,14,16 1,12,15,17 | 5  | P10715,P13432,P19629,Q62997,Q99068                                                                                            |
| 11893 | 2,3,4,5,10, 1,6,7,8,9,1<br>13,14,17 1,12,15,16 | 2  | P10715,Q6AYL6                                                                                                                 |
| 11894 | 2,3,4,5,10, 1,6,7,8,9,1<br>13,15,16 1,12,14,17 | 10 | P02782,P08723,P10715,P13432,P19629,P22283,P47727,Q62997,Q63493,Q9JHB9                                                         |
| 11895 | 2,3,4,5,10, 1,6,7,8,9,1<br>13,15,17 1,12,14,16 | 5  | P10715,P19629,P47727,Q6AYL6,Q8CJ52                                                                                            |
| 11896 | 2,3,4,5,10, 1,6,7,8,9,1<br>13,16,17 1,12,14,15 | 4  | P10715,P19629,P47727,Q62997                                                                                                   |
| 11897 | 2,3,4,5,10, 1,6,7,8,9,1<br>14,15,16 1,12,13,17 | 16 | P02782,P08723,P10715,P13432,P22282,P22283,P30120,P34901,P36374,Q62902,Q62997,Q63493,Q8CJ52,Q9JHB9,Q9JI85,Q9QZK9               |
| 11898 | 2,3,4,5,10, 1,6,7,8,9,1<br>14,15,17 1,12,13,16 | 8  | P02782,P02803,P10715,P30120,P34901,Q62902,Q8CJ52,Q9JHB9                                                                       |
| 11899 | 2,3,4,5,10, 1,6,7,8,9,1<br>14,16,17 1,12,13,15 | 8  | P02782,P10715,P30120,P34901,Q62902,Q62997,Q9JHB9,Q9JI85                                                                       |
| 11900 | 2,3,4,5,10, 1,6,7,8,9,1<br>15,16,17 1,12,13,14 | 18 | P02781,P02782,P04905,P06911,P08723,P09456,P0C0A9,P19629,P22282,P22283,P30120,P36374,P47727,Q62902,Q62997,Q8CJ52,Q9JHB9,Q9JI85 |
| 11901 | 2,3,4,5,11, 1,6,7,8,9,1<br>12,13,14 0,15,16,17 | 1  | P34901                                                                                                                        |
| 11902 | 2,3,4,5,11, 1,6,7,8,9,1<br>12,13,15 0,14,16,17 | 1  | P01836                                                                                                                        |
| 11903 | 2,3,4,5,11, 1,6,7,8,9,1<br>12,13,16 0,14,15,17 | 1  | P01836                                                                                                                        |
| 11904 | 2,3,4,5,11, 1,6,7,8,9,1<br>12,13,17 0,14,15,16 | 0  |                                                                                                                               |
| 11905 | 2,3,4,5,11, 1,6,7,8,9,1<br>12,14,15 0,13,16,17 | 4  | P19218,P34901,P51907,Q64194                                                                                                   |
| 11906 | 2,3,4,5,11, 1,6,7,8,9,1<br>12,14,16 0,13,15,17 | 2  | P34901,Q6IFV1                                                                                                                 |
| 11907 | 2,3,4,5,11, 1,6,7,8,9,1<br>12,14,17 0,13,15,16 | 5  | P01835,P19218,P31430,P34901,Q6AYQ8                                                                                            |
| 11908 | 2,3,4,5,11, 1,6,7,8,9,1<br>12,15,16 0,13,14,17 | 5  | P01836,P06911,P12020,P34901,P51907                                                                                            |
| 11909 | 2,3,4,5,11, 1,6,7,8,9,1<br>12,15,17 0,13,14,16 | 4  | P06911,P12020,P34901,P63036                                                                                                   |

|       |                                                |    |                                                                                            |
|-------|------------------------------------------------|----|--------------------------------------------------------------------------------------------|
| 11910 | 2,3,4,5,11, 1,6,7,8,9,1<br>12,16,17 0,13,14,15 | 5  | P06911,P12020,P15999,P34901,Q5GRG2                                                         |
| 11911 | 2,3,4,5,11, 1,6,7,8,9,1<br>13,14,15 0,12,16,17 | 2  | P13432,P97840                                                                              |
| 11912 | 2,3,4,5,11, 1,6,7,8,9,1<br>13,14,16 0,12,15,17 | 1  | P13432                                                                                     |
| 11913 | 2,3,4,5,11, 1,6,7,8,9,1<br>13,14,17 0,12,15,16 | 2  | P19218,P97840                                                                              |
| 11914 | 2,3,4,5,11, 1,6,7,8,9,1<br>13,15,16 0,12,14,17 | 4  | P08723,P13432,P19629,Q6AYR8                                                                |
| 11915 | 2,3,4,5,11, 1,6,7,8,9,1<br>13,15,17 0,12,14,16 | 1  | P97840                                                                                     |
| 11916 | 2,3,4,5,11, 1,6,7,8,9,1<br>13,16,17 0,12,14,15 | 1  | P19629                                                                                     |
| 11917 | 2,3,4,5,11, 1,6,7,8,9,1<br>14,15,16 0,12,13,17 | 10 | P02782,P08723,P13432,P19218,P22283,P34901,P36374,Q64194,Q99MH3,Q9QZK9                      |
| 11918 | 2,3,4,5,11, 1,6,7,8,9,1<br>14,15,17 0,12,13,16 | 6  | P19218,P34901,P47967,P63036,P97840,Q62902                                                  |
| 11919 | 2,3,4,5,11, 1,6,7,8,9,1<br>14,16,17 0,12,13,15 | 3  | P19218,P34901,P97840                                                                       |
| 11920 | 2,3,4,5,11, 1,6,7,8,9,1<br>15,16,17 0,12,13,14 | 11 | P02782,P06911,P08723,P09456,P12020,P22283,P30120,P97840,Q5GRG2,Q62902,Q9JHB9               |
| 11921 | 2,3,4,5,12, 1,6,7,8,9,1<br>13,14,15 0,11,16,17 | 3  | A2RUV9,P34901,Q9QUL6                                                                       |
| 11922 | 2,3,4,5,12, 1,6,7,8,9,1<br>13,14,16 0,11,15,17 | 4  | P34901,Q566E6,Q9JJS8,Q9QUL6                                                                |
| 11923 | 2,3,4,5,12, 1,6,7,8,9,1<br>13,14,17 0,11,15,16 | 3  | P31430,P34901,Q9QW07                                                                       |
| 11924 | 2,3,4,5,12, 1,6,7,8,9,1<br>13,15,16 0,11,14,17 | 3  | P01836,P47727,Q9QUL6                                                                       |
| 11925 | 2,3,4,5,12, 1,6,7,8,9,1<br>13,15,17 0,11,14,16 | 1  | Q6AYL6                                                                                     |
| 11926 | 2,3,4,5,12, 1,6,7,8,9,1<br>13,16,17 0,11,14,15 | 3  | P19629,P22006,P35280                                                                       |
| 11927 | 2,3,4,5,12, 1,6,7,8,9,1<br>14,15,16 0,11,13,17 | 1  | P34901                                                                                     |
| 11928 | 2,3,4,5,12, 1,6,7,8,9,1<br>14,15,17 0,11,13,16 | 4  | B0BNN3,P31430,P34901,Q8CJD3                                                                |
| 11929 | 2,3,4,5,12, 1,6,7,8,9,1<br>14,16,17 0,11,13,15 | 3  | P31430,P34901,Q9JJS8                                                                       |
| 11930 | 2,3,4,5,12, 1,6,7,8,9,1<br>15,16,17 0,11,13,14 | 7  | P06911,P12020,P34901,P47727,P83121,Q5GRG2,Q62902                                           |
| 11931 | 2,3,4,5,13, 1,6,7,8,9,1<br>14,15,16 0,11,12,17 | 13 | F1LM93,P08723,P10715,P13432,P22283,P36374,P60905,Q566E6,Q63357,Q63493,Q6AYL6,Q99068,Q9QZK9 |
| 11932 | 2,3,4,5,13, 1,6,7,8,9,1<br>14,15,17 0,11,12,16 | 9  | P10715,P12368,P47967,P63095,P97840,Q63357,Q6AYL6,Q8CJ52,Q9QW07                             |

|       |                         |                                  |    |                                                                                                                                                                  |
|-------|-------------------------|----------------------------------|----|------------------------------------------------------------------------------------------------------------------------------------------------------------------|
| 11933 | 2,3,4,5,13,<br>14,16,17 | 1,6,7,8,9,1<br>0,11,12,15        | 8  | P08010,P10715,P35280,Q566E6,Q63357,Q6AYL6,Q6PCU2,Q9QW07                                                                                                          |
| 11934 | 2,3,4,5,13,<br>15,16,17 | 1,6,7,8,9,1<br>0,11,12,14        | 11 | P02782,P04905,P08723,P0C0A9,P19629,P30120,P47727,Q63357,Q63493,Q6AYL6,Q9JHB9                                                                                     |
| 11935 | 2,3,4,5,14,<br>15,16,17 | 1,6,7,8,9,1<br>0,11,12,13        | 16 | P02781,P02782,P02803,P04905,P08723,P09456,P0C0A9,P22283,P30120,P36374,P47727,Q62902,Q63357,Q8CJ52,Q9JHB9,Q9JI85                                                  |
| 11936 | 2,3,4,6,7,8<br>,9,10    | 1,5,11,12,<br>13,14,15,1<br>6,17 | 13 | D3ZHA0,O55006,P02631,P02761,P16086,P20761,P20762,Q63617,Q6P6R2,Q6TMA8,Q9EQS0,Q9R0T3,Q9Z0V6                                                                       |
| 11937 | 2,3,4,6,7,8<br>,9,11    | 1,5,10,12,<br>13,14,15,1<br>6,17 | 16 | D3ZHA0,O55004,P02631,P02761,P07150,P11883,P14669,P16086,P20761,P20762,Q5XI22,Q63617,Q6TMA8,Q9EQS0,Q9R0T3,Q9Z0V6                                                  |
| 11938 | 2,3,4,6,7,8<br>,9,12    | 1,5,10,11,<br>13,14,15,1<br>6,17 | 20 | D3ZHA0,O55004,P02631,P02780,P06761,P07647,P16086,P19223,P20761,P20762,P22282,P22283,Q498R7,Q63617,Q6TMA8,Q80WL1,Q99041,Q9EQS0,Q9R0T3,Q9Z0V6                      |
| 11939 | 2,3,4,6,7,8<br>,9,13    | 1,5,10,11,<br>12,14,15,1<br>6,17 | 13 | D3ZHA0,P02631,P06761,P06911,P16086,P20761,P20762,P20766,P22282,Q63617,Q6TMA8,Q9EQS0,Q9R0T3                                                                       |
| 11940 | 2,3,4,6,7,8<br>,9,14    | 1,5,10,11,<br>12,13,15,1<br>6,17 | 9  | D3ZHA0,P02631,P16086,P20761,P20762,Q63617,Q6TMA8,Q9EQS0,Q9Z0V6                                                                                                   |
| 11941 | 2,3,4,6,7,8<br>,9,15    | 1,5,10,11,<br>12,13,14,1<br>6,17 | 12 | D3ZHA0,O55006,P02631,P02761,P16086,P20761,P20762,Q5QE79,Q63617,Q6TMA8,Q9EQS0,Q9Z0V6                                                                              |
| 11942 | 2,3,4,6,7,8<br>,9,16    | 1,5,10,11,<br>12,13,14,1<br>5,17 | 11 | D3ZHA0,P02631,P16086,P20761,P20762,Q63617,Q6P6R2,Q6TMA8,Q9EQS0,Q9R0T3,Q9Z0V6                                                                                     |
| 11943 | 2,3,4,6,7,8<br>,9,17    | 1,5,10,11,<br>12,13,14,1<br>5,16 | 20 | D3ZHA0,O55004,P02631,P02761,P09605,P25809,P16086,P19223,P20761,P20762,P50115,P55091,Q4G075,Q63617,Q63751,Q6P6R2,Q6TMA8,Q99041,Q9EQS0,Q9R0T3,Q9Z0V6               |
| 11944 | 2,3,4,6,7,8<br>,10,11   | 1,5,9,12,1<br>3,14,15,16<br>,17  | 21 | D3ZHA0,O55004,P00714,P02631,P02761,P07150,P11883,P14669,P16086,P20761,P20762,P35280,P82471,Q5BJY9,Q5FVI6,Q5XI22,Q63617,Q6TMA8,Q9EQS0,Q9R0T3,Q9Z0V6               |
| 11945 | 2,3,4,6,7,8<br>,10,12   | 1,5,9,11,1<br>3,14,15,16<br>,17  | 23 | D3ZHA0,O55004,P01041,P02631,P04218,P06761,P07647,P08723,P16086,P19223,P20761,P20762,P22282,P22283,P35280,Q64361,Q6AYR9,Q6TMA8,Q80WL1,Q99041,Q9EQS0,Q9R0T3,Q9Z0V6 |
| 11946 | 2,3,4,6,7,8<br>,10,13   | 1,5,9,11,1<br>2,14,15,16<br>,17  | 17 | D3ZHA0,P02631,P04218,P06761,P06911,P07647,P12020,P16086,P20761,P20762,P20766,P22282,Q5GRG2,Q6TMA8,Q9EQS0,Q9R0T3,Q9Z0V6                                           |
| 11947 | 2,3,4,6,7,8<br>,10,14   | 1,5,9,11,1<br>2,13,15,16<br>,17  | 13 | D3ZHA0,P02631,P06761,P12020,P16086,P20761,P20762,P35280,P97615,Q6TMA8,Q9EQS0,Q9R0T3,Q9Z0V6                                                                       |
| 11948 | 2,3,4,6,7,8<br>,10,15   | 1,5,9,11,1<br>2,13,14,16<br>,17  | 11 | D3ZHA0,P02631,P02761,P16086,P20761,P20762,P35280,P97615,Q6TMA8,Q9EQS0,Q9Z0V6                                                                                     |

|       |                       |                                 |    |                                                                                                                                                                                                                                                                           |
|-------|-----------------------|---------------------------------|----|---------------------------------------------------------------------------------------------------------------------------------------------------------------------------------------------------------------------------------------------------------------------------|
| 11949 | 2,3,4,6,7,8<br>,10,16 | 1,5,9,11,1<br>2,13,14,15<br>,17 | 9  | D3ZHA0,P02631,P16086,P20761,P82471,Q6P6R2,Q9EQS0,Q9ROT3,Q9Z0V6                                                                                                                                                                                                            |
| 11950 | 2,3,4,6,7,8<br>,10,17 | 1,5,9,11,1<br>2,13,14,15<br>,16 | 21 | D3ZHA0,O55004,P02631,P02761,P09605,P25809,P16086,P19223,P20760,P20761,P20762,P46844,P50115,P55091,P97615,Q4G075,Q63751,Q6P6R2,Q99041,Q9EQS0,Q9ROT3,Q9Z0V6                                                                                                                 |
| 11951 | 2,3,4,6,7,8<br>,11,12 | 1,5,9,10,1<br>3,14,15,16<br>,17 | 38 | D3ZHA0,O55004,P01836,P02631,P02780,P02781,P02782,P06761,P07150,P07647,P08723,P0C0A9,P11883,P14669,P16086,P19223,P20761,P20762,P22282,P22283,P24368,P30120,P35280,P50280,Q498R7,Q5XI22,Q63493,Q63617,Q63751,Q6TMA8,Q80WL1,Q8CJ52,Q99041,Q9EQS0,Q9JHB9,Q9JI85,Q9ROT3,Q9Z0V6 |
| 11952 | 2,3,4,6,7,8<br>,11,13 | 1,5,9,10,1<br>2,14,15,16<br>,17 | 21 | P02631,P06761,P06911,P07150,P07647,P11598,P14669,P16086,P20761,P20762,P20766,P22282,P22283,P50280,Q5XI22,Q62902,Q63617,Q63751,Q6TMA8,Q9EQS0,Q9ROT3                                                                                                                        |
| 11953 | 2,3,4,6,7,8<br>,11,14 | 1,5,9,10,1<br>2,13,15,16<br>,17 | 18 | D3ZHA0,P02631,P06761,P07150,P07171,P11883,P14669,P16086,P19218,P20761,P20762,P22282,P35280,Q63617,Q6TMA8,Q9EQS0,Q9ROT3,Q9Z0V6                                                                                                                                             |
| 11954 | 2,3,4,6,7,8<br>,11,15 | 1,5,9,10,1<br>2,13,14,16<br>,17 | 18 | D3ZHA0,O55004,P02625,P02631,P02761,P07150,P07171,P14669,P16086,P20761,P20762,P35280,Q5XI22,Q63617,Q63751,Q6TMA8,Q9EQS0,Q9Z0V6                                                                                                                                             |
| 11955 | 2,3,4,6,7,8<br>,11,16 | 1,5,9,10,1<br>2,13,14,15<br>,17 | 13 | D3ZHA0,P02631,P07150,P14668,P14669,P16086,P20761,P20762,Q63617,Q6TMA8,Q9EQS0,Q9ROT3,Q9Z0V6                                                                                                                                                                                |
| 11956 | 2,3,4,6,7,8<br>,11,17 | 1,5,9,10,1<br>2,13,14,15<br>,16 | 23 | O55004,P02631,P02761,P07150,P09605,P25809,P14669,P16086,P19223,P20761,P20762,P22282,P22283,P50115,P55091,Q4G075,Q5XI22,Q63617,Q63751,Q6P6R2,Q99041,Q9EQS0,Q9ROT3,Q9Z0V6                                                                                                   |
| 11957 | 2,3,4,6,7,8<br>,12,13 | 1,5,9,10,1<br>1,14,15,16<br>,17 | 35 | D3ZHA0,O08557,O88267,P01836,P02631,P02780,P02782,P06761,P06911,P07647,P08723,P08937,P11598,P12020,P16086,P20761,P20762,P22282,P22283,P25236,P29975,P30120,P50280,P62815,Q62902,Q63751,Q6AYR9,Q6TMA8,Q80WL1,Q99041,Q9EQS0,Q9JHB9,Q9ROT3,Q9Z0V6                             |
| 11958 | 2,3,4,6,7,8<br>,12,14 | 1,5,9,10,1<br>1,13,15,16<br>,17 | 31 | D3ZHA0,O08557,O88267,P01041,P02631,P02780,P02782,P06761,P07647,P08723,P11598,P16086,P20761,P20762,P22282,P22283,P25236,P29975,P30120,P62815,Q63618,Q6AYR9,Q6AYS7,Q6TMA8,Q80WL1,Q920P0,Q923M1,Q99041,Q9EQS0,Q9ROT3,Q9Z0V6                                                  |
| 11959 | 2,3,4,6,7,8<br>,12,15 | 1,5,9,10,1<br>1,13,14,16<br>,17 | 24 | B0BNN3,D3ZHA0,O08557,O55004,P01041,P01836,P02625,P02631,P02761,P06761,P16086,P20761,P20762,P35280,P62815,P83748,Q63751,Q64611,Q6TMA8,Q80WL1,Q99041,Q9EQS0,Q9ROT3,Q9Z0V6                                                                                                   |
| 11960 | 2,3,4,6,7,8<br>,12,16 | 1,5,9,10,1<br>1,13,14,15<br>,17 | 16 | D3ZHA0,O55004,O88267,P01041,P01836,P02631,P06761,P16086,P20761,P20762,Q6TMA8,Q80WL1,Q99041,Q9EQS0,Q9ROT3,Q9Z0V6                                                                                                                                                           |
| 11961 | 2,3,4,6,7,8<br>,12,17 | 1,5,9,10,1<br>1,13,14,15<br>,16 | 32 | D3ZHA0,O55004,O88267,P01041,P02631,P02761,P06761,P07647,P08937,P09605,P25809,P11598,P16086,P19223,P20760,P20761,P20762,P22282,P22283,P50115,P55091,P62815,P98089,Q4G075,Q62635,Q63751,Q6P6R2,Q80WL1,Q99041,Q9EQS0,Q9QZK9,Q9ROT3,Q9Z0V6                                    |
| 11962 | 2,3,4,6,7,8<br>,13,14 | 1,5,9,10,1<br>1,12,15,16<br>,17 | 23 | D3ZHA0,O08557,P02631,P06761,P06911,P11598,P12020,P16086,P20761,P20762,P20766,P22282,P25236,P29975,P53790,P62815,Q5GRG2,Q62902,Q63617,Q6TMA8,Q9EQS0,Q9ROT3,Q9Z0V6                                                                                                          |
| 11963 | 2,3,4,6,7,8<br>,13,15 | 1,5,9,10,1<br>1,12,14,16<br>,17 | 12 | D3ZHA0,P02631,P06761,P06911,P16086,P20761,P20762,P20766,P62815,Q5GRG2,Q6TMA8,Q9Z0V6                                                                                                                                                                                       |

|       |                       |                                 |    |                                                                                                                                                                                                         |
|-------|-----------------------|---------------------------------|----|---------------------------------------------------------------------------------------------------------------------------------------------------------------------------------------------------------|
| 11964 | 2,3,4,6,7,8<br>,13,16 | 1,5,9,10,1<br>1,12,14,15<br>,17 | 11 | D3ZHA0,P02631,P06761,P06911,P16086,P20761,P20762,P20766,Q63617,Q6TMA8,Q9R0T3                                                                                                                            |
| 11965 | 2,3,4,6,7,8<br>,13,17 | 1,5,9,10,1<br>1,12,14,15<br>,16 | 27 | O88267,P02631,P06761,P06911,P09605,P25809,P11598,P16086,P19223,P20760,P20761,P20762,P20766,P22282,P22283,P29975,P50115<br>,P51907,P55091,P62815,P70545,Q4G075,Q63617,Q63751,Q6TMA8,Q99041,Q9R0T3,Q9Z0V6 |
| 11966 | 2,3,4,6,7,8<br>,14,15 | 1,5,9,10,1<br>1,12,13,16<br>,17 | 15 | B0BNN3,D3ZHA0,O08557,P02631,P02761,P02803,P07171,P16086,P20761,P20762,P35280,Q6TMA8,Q923S2,Q9EQS0,Q9Z0V6                                                                                                |
| 11967 | 2,3,4,6,7,8<br>,14,16 | 1,5,9,10,1<br>1,12,13,15<br>,17 | 13 | D3ZHA0,P02631,P16086,P20761,P20762,P97574,Q566E6,Q63532,Q63617,Q6TMA8,Q9EQS0,Q9R0T3,Q9Z0V6                                                                                                              |
| 11968 | 2,3,4,6,7,8<br>,14,17 | 1,5,9,10,1<br>1,12,13,15<br>,16 | 25 | O88267,P02631,P02761,P06761,P09605,P25809,P10536,P11598,P16086,P19223,P20760,P20761,P20762,P22282,P50115,P55091,P62815<br>,Q4G075,Q63617,Q63751,Q6P6R2,Q923S2,Q99041,Q9EQS0,Q9R0T3,Q9Z0V6               |
| 11969 | 2,3,4,6,7,8<br>,15,16 | 1,5,9,10,1<br>1,12,13,14<br>,17 | 7  | D3ZHA0,P02631,P02803,P16086,P20761,P20762,Q9Z0V6                                                                                                                                                        |
| 11970 | 2,3,4,6,7,8<br>,15,17 | 1,5,9,10,1<br>1,12,13,14<br>,16 | 21 | B0BNN3,D3ZHA0,O55004,P01041,P02631,P02761,P02803,P09605,P25809,P10536,P16086,P19223,P20760,P20761,P20762,P50115,P550<br>91,P62815,Q4G075,Q63751,Q99041,Q9Z0V6                                           |
| 11971 | 2,3,4,6,7,8<br>,16,17 | 1,5,9,10,1<br>1,12,13,14<br>,15 | 16 | O88267,P02631,P09605,P25809,P16086,P19223,P20761,P20762,P50115,P55091,Q4G075,Q63617,Q63751,Q6P6R2,Q99041,Q9R0T3,Q9<br>Z0V6                                                                              |
| 11972 | 2,3,4,6,7,9<br>,10,11 | 1,5,8,12,1<br>3,14,15,16<br>,17 | 4  | P11883,P14173,P16086,Q5FVI6                                                                                                                                                                             |
| 11973 | 2,3,4,6,7,9<br>,10,12 | 1,5,8,11,1<br>3,14,15,16<br>,17 | 5  | P04218,P47967,P97840,Q498R7,Q9EQS0                                                                                                                                                                      |
| 11974 | 2,3,4,6,7,9<br>,10,13 | 1,5,8,11,1<br>2,14,15,16<br>,17 | 1  | P16086                                                                                                                                                                                                  |
| 11975 | 2,3,4,6,7,9<br>,10,14 | 1,5,8,11,1<br>2,13,15,16<br>,17 | 2  | P02631,P16086                                                                                                                                                                                           |
| 11976 | 2,3,4,6,7,9<br>,10,15 | 1,5,8,11,1<br>2,13,14,16<br>,17 | 2  | P02631,Q4FZU6                                                                                                                                                                                           |
| 11977 | 2,3,4,6,7,9<br>,10,16 | 1,5,8,11,1<br>2,13,14,15<br>,17 | 3  | P16086,P47967,Q5FVI6                                                                                                                                                                                    |
| 11978 | 2,3,4,6,7,9<br>,10,17 | 1,5,8,11,1<br>2,13,14,15<br>,16 | 5  | P09605,P25809,P16086,P19223,P20761,Q6P6R2                                                                                                                                                               |

|       |                       |                                 |   |                                                                |
|-------|-----------------------|---------------------------------|---|----------------------------------------------------------------|
| 11979 | 2,3,4,6,7,9<br>,11,12 | 1,5,8,10,1<br>3,14,15,16<br>,17 | 6 | P01835,P01836,P02631,P16086,Q498R7,Q9EQS0                      |
| 11980 | 2,3,4,6,7,9<br>,11,13 | 1,5,8,10,1<br>2,14,15,16<br>,17 | 2 | P02631,P16086                                                  |
| 11981 | 2,3,4,6,7,9<br>,11,14 | 1,5,8,10,1<br>2,13,15,16<br>,17 | 4 | P02631,P16086,P20762,P83121                                    |
| 11982 | 2,3,4,6,7,9<br>,11,15 | 1,5,8,10,1<br>2,13,14,16<br>,17 | 3 | P02625,P02631,P16086                                           |
| 11983 | 2,3,4,6,7,9<br>,11,16 | 1,5,8,10,1<br>2,13,14,15<br>,17 | 2 | P02631,P16086                                                  |
| 11984 | 2,3,4,6,7,9<br>,11,17 | 1,5,8,10,1<br>2,13,14,15<br>,16 | 4 | P02631,P09605,P25809,P16086,P20761                             |
| 11985 | 2,3,4,6,7,9<br>,12,13 | 1,5,8,10,1<br>1,14,15,16<br>,17 | 4 | P01836,P16086,P25236,Q498R7                                    |
| 11986 | 2,3,4,6,7,9<br>,12,14 | 1,5,8,10,1<br>1,13,15,16<br>,17 | 8 | A2RUV9,P01835,P02631,P16086,P20762,P25236,Q498R7,Q9EQS0        |
| 11987 | 2,3,4,6,7,9<br>,12,15 | 1,5,8,10,1<br>1,13,14,16<br>,17 | 4 | P01836,P02625,P02631,Q498R7                                    |
| 11988 | 2,3,4,6,7,9<br>,12,16 | 1,5,8,10,1<br>1,13,14,15<br>,17 | 1 | P01836                                                         |
| 11989 | 2,3,4,6,7,9<br>,12,17 | 1,5,8,10,1<br>1,13,14,15<br>,16 | 8 | P01835,P09605,P25809,P19223,P20761,P55091,P98089,Q498R7,Q62635 |
| 11990 | 2,3,4,6,7,9<br>,13,14 | 1,5,8,10,1<br>1,12,15,16<br>,17 | 5 | P02631,P06911,P12020,P16086,P25236                             |
| 11991 | 2,3,4,6,7,9<br>,13,15 | 1,5,8,10,1<br>1,12,14,16<br>,17 | 2 | P02631,P16086                                                  |
| 11992 | 2,3,4,6,7,9<br>,13,16 | 1,5,8,10,1<br>1,12,14,15<br>,17 | 1 | P16086                                                         |
| 11993 | 2,3,4,6,7,9<br>,13,17 | 1,5,8,10,1<br>1,12,14,15<br>,16 | 4 | P09605,P25809,P16086,P20761,P20766                             |



|       |                        |                                 |    |                                                                       |
|-------|------------------------|---------------------------------|----|-----------------------------------------------------------------------|
| 11994 | 2,3,4,6,7,9<br>,14,15  | 1,5,8,10,1<br>1,12,13,16<br>,17 | 4  | P02631,P02803,P16086,P20762                                           |
| 11995 | 2,3,4,6,7,9<br>,14,16  | 1,5,8,10,1<br>1,12,13,15<br>,17 | 3  | P02631,P16086,Q63532                                                  |
| 11996 | 2,3,4,6,7,9<br>,14,17  | 1,5,8,10,1<br>1,12,13,15<br>,16 | 4  | P02631,P09605;P25809,P16086,P20761                                    |
| 11997 | 2,3,4,6,7,9<br>,15,16  | 1,5,8,10,1<br>1,12,13,14<br>,17 | 1  | P02631                                                                |
| 11998 | 2,3,4,6,7,9<br>,15,17  | 1,5,8,10,1<br>1,12,13,14<br>,16 | 3  | P02631,P09605;P25809,P20761                                           |
| 11999 | 2,3,4,6,7,9<br>,16,17  | 1,5,8,10,1<br>1,12,13,14<br>,15 | 4  | P09605;P25809,P16086,P20761,Q6P6R2                                    |
| 12000 | 2,3,4,6,7,1<br>0,11,12 | 1,5,8,9,13,<br>14,15,16,1<br>7  | 10 | P01836,P04218,P05964,P11883,P16086,P35280,P47967,Q498R7,Q5FVI6,Q9EQS0 |
| 12001 | 2,3,4,6,7,1<br>0,11,13 | 1,5,8,9,12,<br>14,15,16,1<br>7  | 3  | P12020,P16086,Q5FVI6                                                  |
| 12002 | 2,3,4,6,7,1<br>0,11,14 | 1,5,8,9,12,<br>13,15,16,1<br>7  | 6  | P02631,P16086,P20762,P35280,Q5FVI6,Q63532                             |
| 12003 | 2,3,4,6,7,1<br>0,11,15 | 1,5,8,9,12,<br>13,14,16,1<br>7  | 5  | P02631,P16086,P35280,Q4FZU6,Q5FVI6                                    |
| 12004 | 2,3,4,6,7,1<br>0,11,16 | 1,5,8,9,12,<br>13,14,15,1<br>7  | 4  | P16086,P47967,P61206;P84079;P84082,Q5FVI6                             |
| 12005 | 2,3,4,6,7,1<br>0,11,17 | 1,5,8,9,12,<br>13,14,15,1<br>6  | 4  | P09605;P25809,P16086,P20761,Q5FVI6                                    |
| 12006 | 2,3,4,6,7,1<br>0,12,13 | 1,5,8,9,11,<br>14,15,16,1<br>7  | 7  | P01836,P04218,P12020,P16086,P25236,P47967,P97840                      |
| 12007 | 2,3,4,6,7,1<br>0,12,14 | 1,5,8,9,11,<br>13,15,16,1<br>7  | 8  | A2RUV9,P04218,P12020,P16086,P25236,Q63532,Q9EQS0,Q9JJS8               |
| 12008 | 2,3,4,6,7,1<br>0,12,15 | 1,5,8,9,11,<br>13,14,16,1<br>7  | 6  | P01041,P01836,P02631,P04218,P35280,Q4FZU6                             |

|       |                        |                                |    |                                                                              |
|-------|------------------------|--------------------------------|----|------------------------------------------------------------------------------|
| 12009 | 2,3,4,6,7,1<br>0,12,16 | 1,5,8,9,11,<br>13,14,15,1<br>7 | 8  | P01836,P04073,P04218,P16086,P47967,P97840,Q5FVI6,Q9JJS8                      |
| 12010 | 2,3,4,6,7,1<br>0,12,17 | 1,5,8,9,11,<br>13,14,15,1<br>6 | 10 | P01041,P02696,P04218,P09605;P25809,P19223,P20761,P55091,P98089,Q62635,Q9QZK9 |
| 12011 | 2,3,4,6,7,1<br>0,13,14 | 1,5,8,9,11,<br>12,15,16,1<br>7 | 5  | P04218,P06911,P12020,P16086,P25236                                           |
| 12012 | 2,3,4,6,7,1<br>0,13,15 | 1,5,8,9,11,<br>12,14,16,1<br>7 | 3  | P04218,P16086,Q4FZU6                                                         |
| 12013 | 2,3,4,6,7,1<br>0,13,16 | 1,5,8,9,11,<br>12,14,15,1<br>7 | 3  | P04218,P16086,P47967                                                         |
| 12014 | 2,3,4,6,7,1<br>0,13,17 | 1,5,8,9,11,<br>12,14,15,1<br>6 | 4  | P09605;P25809,P12020,P16086,P20761                                           |
| 12015 | 2,3,4,6,7,1<br>0,14,15 | 1,5,8,9,11,<br>12,13,16,1<br>7 | 5  | P02631,P02803,P16086,P35280,Q63532                                           |
| 12016 | 2,3,4,6,7,1<br>0,14,16 | 1,5,8,9,11,<br>12,13,15,1<br>7 | 3  | P04073,P16086,Q63532                                                         |
| 12017 | 2,3,4,6,7,1<br>0,14,17 | 1,5,8,9,11,<br>12,13,15,1<br>6 | 3  | P09605;P25809,P16086,P20761                                                  |
| 12018 | 2,3,4,6,7,1<br>0,15,16 | 1,5,8,9,11,<br>12,13,14,1<br>7 | 3  | P02803,P16086,Q5FVI6                                                         |
| 12019 | 2,3,4,6,7,1<br>0,15,17 | 1,5,8,9,11,<br>12,13,14,1<br>6 | 5  | P02803,P09605;P25809,P16086,P20761,Q4FZU6                                    |
| 12020 | 2,3,4,6,7,1<br>0,16,17 | 1,5,8,9,11,<br>12,13,14,1<br>5 | 6  | P09605;P25809,P14480,P16086,P20761,Q62997,Q6P6R2                             |
| 12021 | 2,3,4,6,7,1<br>1,12,13 | 1,5,8,9,10,<br>14,15,16,1<br>7 | 6  | P01836,P16086,P25236,Q498R7,Q5XI22,Q9JHB9                                    |
| 12022 | 2,3,4,6,7,1<br>1,12,14 | 1,5,8,9,10,<br>13,15,16,1<br>7 | 8  | P01836,P02631,P16086,P20762,P25236,Q498R7,Q63532,Q9EQS0                      |
| 12023 | 2,3,4,6,7,1<br>1,12,15 | 1,5,8,9,10,<br>13,14,16,1<br>7 | 8  | O55004,P01836,P02625,P02631,P16086,P20762,P35280,Q498R7                      |

|       |                        |                                |    |                                                                                                   |
|-------|------------------------|--------------------------------|----|---------------------------------------------------------------------------------------------------|
| 12024 | 2,3,4,6,7,1<br>1,12,16 | 1,5,8,9,10,<br>13,14,15,1<br>7 | 4  | G3V686,P01836,P16086,Q498R7                                                                       |
| 12025 | 2,3,4,6,7,1<br>1,12,17 | 1,5,8,9,10,<br>13,14,15,1<br>6 | 13 | O55004,P01836,P02631,P09605;P25809,P16086,P19223,P20761,P55091,P98089,Q498R7,Q62635,Q63751,Q9QZK9 |
| 12026 | 2,3,4,6,7,1<br>1,13,14 | 1,5,8,9,10,<br>12,15,16,1<br>7 | 6  | P02631,P06911,P12020,P16086,P20762,P25236                                                         |
| 12027 | 2,3,4,6,7,1<br>1,13,15 | 1,5,8,9,10,<br>12,14,16,1<br>7 | 4  | P01836,P02625,P02631,P16086                                                                       |
| 12028 | 2,3,4,6,7,1<br>1,13,16 | 1,5,8,9,10,<br>12,14,15,1<br>7 | 3  | G3V686,P01836,P16086                                                                              |
| 12029 | 2,3,4,6,7,1<br>1,13,17 | 1,5,8,9,10,<br>12,14,15,1<br>6 | 4  | P09605;P25809,P16086,P20761,Q63751                                                                |
| 12030 | 2,3,4,6,7,1<br>1,14,15 | 1,5,8,9,10,<br>12,13,16,1<br>7 | 7  | P02625,P02631,P02803,P16086,P19218,P20762,P35280                                                  |
| 12031 | 2,3,4,6,7,1<br>1,14,16 | 1,5,8,9,10,<br>12,13,15,1<br>7 | 4  | G3V686,P02631,P16086,Q63532                                                                       |
| 12032 | 2,3,4,6,7,1<br>1,14,17 | 1,5,8,9,10,<br>12,13,15,1<br>6 | 6  | P02631,P09605;P25809,P16086,P19218,P20761,P20762                                                  |
| 12033 | 2,3,4,6,7,1<br>1,15,16 | 1,5,8,9,10,<br>12,13,14,1<br>7 | 3  | P01836,P02631,P16086                                                                              |
| 12034 | 2,3,4,6,7,1<br>1,15,17 | 1,5,8,9,10,<br>12,13,14,1<br>6 | 6  | P02631,P02803,P09605;P25809,P16086,P20761,Q63751                                                  |
| 12035 | 2,3,4,6,7,1<br>1,16,17 | 1,5,8,9,10,<br>12,13,14,1<br>5 | 3  | P09605;P25809,P16086,P20761                                                                       |
| 12036 | 2,3,4,6,7,1<br>2,13,14 | 1,5,8,9,10,<br>11,15,16,1<br>7 | 8  | A2RUV9,P01836,P06911,P12020,P16086,P20762,P25236,Q63532                                           |
| 12037 | 2,3,4,6,7,1<br>2,13,15 | 1,5,8,9,10,<br>11,14,16,1<br>7 | 6  | P01836,P02625,P02631,P16086,P25236,P83748                                                         |
| 12038 | 2,3,4,6,7,1<br>2,13,16 | 1,5,8,9,10,<br>11,14,15,1<br>7 | 4  | G3V686,P01836,P16086,P25236                                                                       |

|       |                        |                                |    |                                                                                                   |
|-------|------------------------|--------------------------------|----|---------------------------------------------------------------------------------------------------|
| 12039 | 2,3,4,6,7,1<br>2,13,17 | 1,5,8,9,10,<br>11,14,15,1<br>6 | 11 | P01836,P09605,P25809,P16086,P19223,P20761,P55091,P62815,P98089,Q62635,Q63751,Q9QZK9               |
| 12040 | 2,3,4,6,7,1<br>2,14,15 | 1,5,8,9,10,<br>11,13,16,1<br>7 | 10 | A2RUV9,P01836,P02625,P02631,P02803,P16086,P20761,P20762,P25236,Q63532                             |
| 12041 | 2,3,4,6,7,1<br>2,14,16 | 1,5,8,9,10,<br>11,13,15,1<br>7 | 9  | G3V686,P01836,P02631,P04073,P16086,P25236,Q63532,Q920P0,Q9JJS8                                    |
| 12042 | 2,3,4,6,7,1<br>2,14,17 | 1,5,8,9,10,<br>11,13,15,1<br>6 | 13 | A2RUV9,P01835,P02631,P09605,P25809,P16086,P19223,P20761,P20762,P31430,P55091,P62815,P98089,Q62635 |
| 12043 | 2,3,4,6,7,1<br>2,15,16 | 1,5,8,9,10,<br>11,13,14,1<br>7 | 3  | P01836,P02631,P83748                                                                              |
| 12044 | 2,3,4,6,7,1<br>2,15,17 | 1,5,8,9,10,<br>11,13,14,1<br>6 | 12 | B0BNN3,P01041,P01836,P02631,P09605,P25809,P19223,P20761,P55091,P62815,P98089,Q62635,Q63751        |
| 12045 | 2,3,4,6,7,1<br>2,16,17 | 1,5,8,9,10,<br>11,13,14,1<br>5 | 9  | P01836,P09605,P25809,P14480,P16086,P19223,P20761,P55091,P98089,Q62635                             |
| 12046 | 2,3,4,6,7,1<br>3,14,15 | 1,5,8,9,10,<br>11,12,16,1<br>7 | 7  | A2RUV9,P02631,P02803,P06911,P12020,P16086,P25236                                                  |
| 12047 | 2,3,4,6,7,1<br>3,14,16 | 1,5,8,9,10,<br>11,12,15,1<br>7 | 7  | G3V686,P06911,P12020,P16086,P25236,Q566E6,Q63532                                                  |
| 12048 | 2,3,4,6,7,1<br>3,14,17 | 1,5,8,9,10,<br>11,12,15,1<br>6 | 7  | P06911,P09605,P25809,P12020,P16086,P20761,P25236,P62815                                           |
| 12049 | 2,3,4,6,7,1<br>3,15,16 | 1,5,8,9,10,<br>11,12,14,1<br>7 | 3  | P01836,P16086,Q99PP0                                                                              |
| 12050 | 2,3,4,6,7,1<br>3,15,17 | 1,5,8,9,10,<br>11,12,14,1<br>6 | 6  | P02631,P09605,P25809,P16086,P20761,P62815,Q9WUW8                                                  |
| 12051 | 2,3,4,6,7,1<br>3,16,17 | 1,5,8,9,10,<br>11,12,14,1<br>5 | 4  | P09605,P25809,P14480,P16086,P20761                                                                |
| 12052 | 2,3,4,6,7,1<br>4,15,16 | 1,5,8,9,10,<br>11,12,13,1<br>7 | 4  | P02631,P02803,P16086,Q63532                                                                       |
| 12053 | 2,3,4,6,7,1<br>4,15,17 | 1,5,8,9,10,<br>11,12,13,1<br>6 | 8  | B0BNN3,P02631,P02803,P09605,P25809,P16086,P20761,P20762,P62815                                    |

|       |                        |                                 |    |                                                                              |
|-------|------------------------|---------------------------------|----|------------------------------------------------------------------------------|
| 12054 | 2,3,4,6,7,1<br>4,16,17 | 1,5,8,9,10,<br>11,12,13,1<br>5  | 6  | P02803,P09605,P25809,P14480,P16086,P20761,Q63532                             |
| 12055 | 2,3,4,6,7,1<br>5,16,17 | 1,5,8,9,10,<br>11,12,13,1<br>4  | 5  | P02631,P02803,P09605,P25809,P16086,P20761                                    |
| 12056 | 2,3,4,6,8,9<br>,10,11  | 1,5,7,12,1<br>3,14,15,16<br>,17 | 11 | D3ZHA0,P00714,P02761,P08649,P11883,P14173,P14669,P16636,Q4FZU6,Q5XI22,Q6TMA8 |
| 12057 | 2,3,4,6,8,9<br>,10,12  | 1,5,7,11,1<br>3,14,15,16<br>,17 | 6  | D3ZHA0,P16636,Q6TMA8,Q80WL1,Q9EQS0,Q9JJS8                                    |
| 12058 | 2,3,4,6,8,9<br>,10,13  | 1,5,7,11,1<br>2,14,15,16<br>,17 | 5  | D3ZHA0,P14173,P17046,P20766,Q6TMA8                                           |
| 12059 | 2,3,4,6,8,9<br>,10,14  | 1,5,7,11,1<br>2,13,15,16<br>,17 | 3  | D3ZHA0,P17046,Q6TMA8                                                         |
| 12060 | 2,3,4,6,8,9<br>,10,15  | 1,5,7,11,1<br>2,13,14,16<br>,17 | 6  | D3ZHA0,P02761,P17046,Q4FZU6,Q5QE79,Q6TMA8                                    |
| 12061 | 2,3,4,6,8,9<br>,10,16  | 1,5,7,11,1<br>2,13,14,15<br>,17 | 3  | D3ZHA0,Q6P6R2,Q6TMA8                                                         |
| 12062 | 2,3,4,6,8,9<br>,10,17  | 1,5,7,11,1<br>2,13,14,15<br>,16 | 9  | D3ZHA0,P02761,P16636,P17046,P19223,P20761,Q63355,Q6P6R2,Q9Z0V6               |
| 12063 | 2,3,4,6,8,9<br>,11,12  | 1,5,7,10,1<br>3,14,15,16<br>,17 | 10 | P01835,P02782,P0C0A9,P11883,P14669,P16636,Q5XI22,Q6TMA8,Q80WL1,Q9EQS0        |
| 12064 | 2,3,4,6,8,9<br>,11,13  | 1,5,7,10,1<br>2,14,15,16<br>,17 | 4  | P14669,P20766,Q5XI22,Q6TMA8                                                  |
| 12065 | 2,3,4,6,8,9<br>,11,14  | 1,5,7,10,1<br>2,13,15,16<br>,17 | 6  | P14668,P14669,P19218,P20762,Q6TMA8,Q9EQS0                                    |
| 12066 | 2,3,4,6,8,9<br>,11,15  | 1,5,7,10,1<br>2,13,14,16<br>,17 | 7  | P02625,P02761,P14668,P14669,Q5QE79,Q5XI22,Q6TMA8                             |
| 12067 | 2,3,4,6,8,9<br>,11,16  | 1,5,7,10,1<br>2,13,14,15<br>,17 | 2  | P14668,Q6TMA8                                                                |
| 12068 | 2,3,4,6,8,9<br>,11,17  | 1,5,7,10,1<br>2,13,14,15<br>,16 | 10 | P02761,P09605,P25809,P14669,P16636,P19223,P20761,P50115,Q6P6R2,Q6TMA8,Q9Z0V6 |

|       |                       |                                 |    |                                                                                                                 |
|-------|-----------------------|---------------------------------|----|-----------------------------------------------------------------------------------------------------------------|
| 12069 | 2,3,4,6,8,9<br>,12,13 | 1,5,7,10,1<br>1,14,15,16<br>,17 | 8  | P02782,P07647,P16636,P20766,P25236,Q06496,Q6TMA8,Q80WL1                                                         |
| 12070 | 2,3,4,6,8,9<br>,12,14 | 1,5,7,10,1<br>1,13,15,16<br>,17 | 9  | D3ZHA0,P01835,P02782,P20762,P25236,Q6TMA8,Q80WL1,Q9EQS0,Q9JJS8                                                  |
| 12071 | 2,3,4,6,8,9<br>,12,15 | 1,5,7,10,1<br>1,13,14,16<br>,17 | 5  | B0BNN3,D3ZHA0,P02625,Q5QE79,Q6TMA8                                                                              |
| 12072 | 2,3,4,6,8,9<br>,12,16 | 1,5,7,10,1<br>1,13,14,15<br>,17 | 3  | Q6TMA8,Q80WL1,Q9JJS8                                                                                            |
| 12073 | 2,3,4,6,8,9<br>,12,17 | 1,5,7,10,1<br>1,13,14,15<br>,16 | 15 | P01835,P09605,P25809,P16636,P19223,P20761,P50115,P55091,P98089,Q4G075,Q62635,Q63355,Q6P6R2,Q6TMA8,Q80WL1,Q9Z0V6 |
| 12074 | 2,3,4,6,8,9<br>,13,14 | 1,5,7,10,1<br>1,12,15,16<br>,17 | 3  | P20766,P25236,Q6TMA8                                                                                            |
| 12075 | 2,3,4,6,8,9<br>,13,15 | 1,5,7,10,1<br>1,12,14,16<br>,17 | 3  | P20766,Q5QE79,Q6TMA8                                                                                            |
| 12076 | 2,3,4,6,8,9<br>,13,16 | 1,5,7,10,1<br>1,12,14,15<br>,17 | 2  | P20766,Q6TMA8                                                                                                   |
| 12077 | 2,3,4,6,8,9<br>,13,17 | 1,5,7,10,1<br>1,12,14,15<br>,16 | 6  | P16636,P20761,P20766,P51907,Q63355,Q6TMA8                                                                       |
| 12078 | 2,3,4,6,8,9<br>,14,15 | 1,5,7,10,1<br>1,12,13,16<br>,17 | 5  | B0BNN3,P17046,P20762,Q5QE79,Q6TMA8                                                                              |
| 12079 | 2,3,4,6,8,9<br>,14,16 | 1,5,7,10,1<br>1,12,13,15<br>,17 | 1  | Q6TMA8                                                                                                          |
| 12080 | 2,3,4,6,8,9<br>,14,17 | 1,5,7,10,1<br>1,12,13,15<br>,16 | 5  | P17046,P20761,Q6P6R2,Q6TMA8,Q9Z0V6                                                                              |
| 12081 | 2,3,4,6,8,9<br>,15,16 | 1,5,7,10,1<br>1,12,13,14<br>,17 | 2  | Q5QE79,Q6TMA8                                                                                                   |
| 12082 | 2,3,4,6,8,9<br>,15,17 | 1,5,7,10,1<br>1,12,13,14<br>,16 | 6  | B0BNN3,P02761,P20761,Q5QE79,Q6TMA8,Q9Z0V6                                                                       |
| 12083 | 2,3,4,6,8,9<br>,16,17 | 1,5,7,10,1<br>1,12,13,14<br>,15 | 5  | P09605,P25809,P16636,P20761,P23593,Q6P6R2                                                                       |

|       |                        |                                |    |                                                                                                                               |
|-------|------------------------|--------------------------------|----|-------------------------------------------------------------------------------------------------------------------------------|
| 12084 | 2,3,4,6,8,1<br>0,11,12 | 1,5,7,9,13,<br>14,15,16,1<br>7 | 18 | D3ZHA0,P00714,P00762,P0C0A9,P11883,P14669,P16636,P35280,P53792,P62804,Q00715,Q4FZU6,Q5XI22,Q63598,Q6TMA8,Q80WL1,Q9EQS0,Q9JJS8 |
| 12085 | 2,3,4,6,8,1<br>0,11,13 | 1,5,7,9,12,<br>14,15,16,1<br>7 | 7  | P11883,P14669,P16636,P20766,Q4FZU6,Q5XI22,Q6TMA8                                                                              |
| 12086 | 2,3,4,6,8,1<br>0,11,14 | 1,5,7,9,12,<br>13,15,16,1<br>7 | 9  | P11883,P14669,P19218,P20762,P35280,P62804,Q63598,Q6TMA8,Q9EQS0                                                                |
| 12087 | 2,3,4,6,8,1<br>0,11,15 | 1,5,7,9,12,<br>13,14,16,1<br>7 | 7  | D3ZHA0,P02761,P14669,P35280,Q4FZU6,Q5XI22,Q6TMA8                                                                              |
| 12088 | 2,3,4,6,8,1<br>0,11,16 | 1,5,7,9,12,<br>13,14,15,1<br>7 | 6  | P11883,P14668,P14669,P16636,P53792,Q6TMA8                                                                                     |
| 12089 | 2,3,4,6,8,1<br>0,11,17 | 1,5,7,9,12,<br>13,14,15,1<br>6 | 11 | P02761,P07150,P08649,P11883,P14669,P16636,P20761,Q4FZU6,Q4G075,Q6P6R2,Q9Z0V6                                                  |
| 12090 | 2,3,4,6,8,1<br>0,12,13 | 1,5,7,9,11,<br>14,15,16,1<br>7 | 10 | D3ZHA0,P02782,P07647,P16636,P20766,P25236,Q6AYR9,Q6TMA8,Q80WL1,Q9JJS8                                                         |
| 12091 | 2,3,4,6,8,1<br>0,12,14 | 1,5,7,9,11,<br>13,15,16,1<br>7 | 7  | D3ZHA0,P25236,Q6TMA8,Q80WL1,Q9EQS0,Q9JJS8,Q9Z0V6                                                                              |
| 12092 | 2,3,4,6,8,1<br>0,12,15 | 1,5,7,9,11,<br>13,14,16,1<br>7 | 7  | B0BNN3,D3ZHA0,P02761,P35280,Q4FZU6,Q6TMA8,Q9JJS8                                                                              |
| 12093 | 2,3,4,6,8,1<br>0,12,16 | 1,5,7,9,11,<br>13,14,15,1<br>7 | 4  | D3ZHA0,P16636,Q80WL1,Q9JJS8                                                                                                   |
| 12094 | 2,3,4,6,8,1<br>0,12,17 | 1,5,7,9,11,<br>13,14,15,1<br>6 | 17 | B0BNN3,D3ZHA0,D4A5U3,P02761,P16636,P19223,P20761,P55091,P98089,Q4G075,Q62635,Q63355,Q6P6R2,Q80WL1,Q9JJS8,Q9QZK9,Q9Z0V6        |
| 12095 | 2,3,4,6,8,1<br>0,13,14 | 1,5,7,9,11,<br>12,15,16,1<br>7 | 5  | P06911,P12020,P20766,P25236,Q6TMA8                                                                                            |
| 12096 | 2,3,4,6,8,1<br>0,13,15 | 1,5,7,9,11,<br>12,14,16,1<br>7 | 4  | D3ZHA0,P20766,Q4FZU6,Q6TMA8                                                                                                   |
| 12097 | 2,3,4,6,8,1<br>0,13,16 | 1,5,7,9,11,<br>12,14,15,1<br>7 | 2  | P20766,Q6TMA8                                                                                                                 |
| 12098 | 2,3,4,6,8,1<br>0,13,17 | 1,5,7,9,11,<br>12,14,15,1<br>6 | 7  | P16636,P20761,P20766,Q4G075,Q63355,Q6TMA8,Q9Z0V6                                                                              |

|       |                        |                                |    |                                                                                                                                                                         |
|-------|------------------------|--------------------------------|----|-------------------------------------------------------------------------------------------------------------------------------------------------------------------------|
| 12099 | 2,3,4,6,8,1<br>0,14,15 | 1,5,7,9,11,<br>12,13,16,1<br>7 | 7  | B0BNN3,D3ZHA0,P02761,P17046,P35280,Q4FZU6,Q6TMA8                                                                                                                        |
| 12100 | 2,3,4,6,8,1<br>0,14,16 | 1,5,7,9,11,<br>12,13,15,1<br>7 | 0  |                                                                                                                                                                         |
| 12101 | 2,3,4,6,8,1<br>0,14,17 | 1,5,7,9,11,<br>12,13,15,1<br>6 | 4  | P02761,P20761,Q6P6R2,Q9Z0V6                                                                                                                                             |
| 12102 | 2,3,4,6,8,1<br>0,15,16 | 1,5,7,9,11,<br>12,13,14,1<br>7 | 2  | D3ZHA0,Q4FZU6                                                                                                                                                           |
| 12103 | 2,3,4,6,8,1<br>0,15,17 | 1,5,7,9,11,<br>12,13,14,1<br>6 | 6  | B0BNN3,P02761,P20761,Q4FZU6,Q4G075,Q9Z0V6                                                                                                                               |
| 12104 | 2,3,4,6,8,1<br>0,16,17 | 1,5,7,9,11,<br>12,13,14,1<br>5 | 6  | P16636,P20761,Q4G075,Q62997,Q6P6R2,Q9Z0V6                                                                                                                               |
| 12105 | 2,3,4,6,8,1<br>1,12,13 | 1,5,7,9,10,<br>14,15,16,1<br>7 | 14 | P02780,P02782,P07647,P0C0A9,P14669,P16636,P20766,P25236,P30120,Q5XI22,Q6TMA8,Q80WL1,Q9EQS0,Q9JHB9                                                                       |
| 12106 | 2,3,4,6,8,1<br>1,12,14 | 1,5,7,9,10,<br>13,15,16,1<br>7 | 13 | P02782,P0C0A9,P11883,P14669,P19218,P20762,P25236,P30120,P62804,Q00715,Q6TMA8,Q80WL1,Q9EQS0                                                                              |
| 12107 | 2,3,4,6,8,1<br>1,12,15 | 1,5,7,9,10,<br>13,14,16,1<br>7 | 10 | B0BNN3,P02625,P02761,P14669,P20762,P35280,P62804,Q00715,Q5XI22,Q6TMA8                                                                                                   |
| 12108 | 2,3,4,6,8,1<br>1,12,16 | 1,5,7,9,10,<br>13,14,15,1<br>7 | 7  | P11883,P14668,P16636,Q6TMA8,Q80WL1,Q9EQS0,Q9JJS8                                                                                                                        |
| 12109 | 2,3,4,6,8,1<br>1,12,17 | 1,5,7,9,10,<br>13,14,15,1<br>6 | 23 | B0BNN3,P00762,P02761,P02782,P07150,P09605,P25809,P14669,P16636,P19223,P20761,P50115,P55091,P62804,P98089,Q00715,Q4G075,Q62635,Q63751,Q6TMA8,Q80WL1,Q9EQS0,Q9QZK9,Q9Z0V6 |
| 12110 | 2,3,4,6,8,1<br>1,13,14 | 1,5,7,9,10,<br>12,15,16,1<br>7 | 8  | P06911,P14669,P19218,P20762,P20766,P25236,Q64093,Q6TMA8                                                                                                                 |
| 12111 | 2,3,4,6,8,1<br>1,13,15 | 1,5,7,9,10,<br>12,14,16,1<br>7 | 6  | P02625,P14669,P20766,Q4FZU6,Q5XI22,Q6TMA8                                                                                                                               |
| 12112 | 2,3,4,6,8,1<br>1,13,16 | 1,5,7,9,10,<br>12,14,15,1<br>7 | 4  | P14668,P20766,Q5XI22,Q6TMA8                                                                                                                                             |
| 12113 | 2,3,4,6,8,1<br>1,13,17 | 1,5,7,9,10,<br>12,14,15,1<br>6 | 7  | P14669,P16636,P20761,P20766,Q4G075,Q5XI22,Q6TMA8                                                                                                                        |



|       |                        |                                |    |                                                                                                                               |
|-------|------------------------|--------------------------------|----|-------------------------------------------------------------------------------------------------------------------------------|
| 12114 | 2,3,4,6,8,1<br>1,14,15 | 1,5,7,9,10,<br>12,13,16,1<br>7 | 9  | B0BNN3,P02625,P02761,P14668,P14669,P19218,P20762,P35280,Q6TMA8                                                                |
| 12115 | 2,3,4,6,8,1<br>1,14,16 | 1,5,7,9,10,<br>12,13,15,1<br>7 | 3  | P14668,P19218,Q6TMA8                                                                                                          |
| 12116 | 2,3,4,6,8,1<br>1,14,17 | 1,5,7,9,10,<br>12,13,15,1<br>6 | 9  | P02761,P07150,P14669,P19218,P20761,P20762,Q4G075,Q6TMA8,Q9Z0V6                                                                |
| 12117 | 2,3,4,6,8,1<br>1,15,16 | 1,5,7,9,10,<br>12,13,14,1<br>7 | 2  | P14668,Q6TMA8                                                                                                                 |
| 12118 | 2,3,4,6,8,1<br>1,15,17 | 1,5,7,9,10,<br>12,13,14,1<br>6 | 6  | B0BNN3,P02761,P14669,P20761,Q4G075,Q9Z0V6                                                                                     |
| 12119 | 2,3,4,6,8,1<br>1,16,17 | 1,5,7,9,10,<br>12,13,14,1<br>5 | 8  | P07150,P14668,P14669,P16636,P20761,Q4G075,Q6P6R2,Q9Z0V6                                                                       |
| 12120 | 2,3,4,6,8,1<br>2,13,14 | 1,5,7,9,10,<br>11,15,16,1<br>7 | 15 | O08557,P02782,P06911,P07647,P20762,P20766,P25236,P29975,Q64093,Q6AYR9,Q6TMA8,Q80WL1,Q923M1,Q9EQS0,Q9QUL6                      |
| 12121 | 2,3,4,6,8,1<br>2,13,15 | 1,5,7,9,10,<br>11,14,16,1<br>7 | 7  | B0BNN3,P02625,P20766,P25236,Q64093,Q6TMA8,Q9QUL6                                                                              |
| 12122 | 2,3,4,6,8,1<br>2,13,16 | 1,5,7,9,10,<br>11,14,15,1<br>7 | 7  | P16636,P20766,P25236,Q6TMA8,Q80WL1,Q9JJS8,Q9QUL6                                                                              |
| 12123 | 2,3,4,6,8,1<br>2,13,17 | 1,5,7,9,10,<br>11,14,15,1<br>6 | 18 | P02782,P07647,P16636,P19223,P20761,P20766,P25236,P55091,P62815,P98089,Q4G075,Q62635,Q63355,Q6AYR9,Q6TMA8,Q80WL1,Q9QZK9,Q9Z0V6 |
| 12124 | 2,3,4,6,8,1<br>2,14,15 | 1,5,7,9,10,<br>11,13,16,1<br>7 | 9  | A2RUV9,B0BNN3,O08557,P02625,P20762,P25236,Q64093,Q6TMA8,Q9Z0V6                                                                |
| 12125 | 2,3,4,6,8,1<br>2,14,16 | 1,5,7,9,10,<br>11,13,15,1<br>7 | 6  | P04073,P25236,Q566E6,Q6TMA8,Q9EQS0,Q9JJS8                                                                                     |
| 12126 | 2,3,4,6,8,1<br>2,14,17 | 1,5,7,9,10,<br>11,13,15,1<br>6 | 18 | B0BNN3,P01835,P02782,P19223,P20761,P20762,P25236,P31430,P55091,P62815,P98089,Q4G075,Q62635,Q6TMA8,Q80WL1,Q923M1,Q9JJS8,Q9Z0V6 |
| 12127 | 2,3,4,6,8,1<br>2,15,16 | 1,5,7,9,10,<br>11,13,14,1<br>7 | 4  | B0BNN3,Q6TMA8,Q9JJS8,Q9QUL6                                                                                                   |
| 12128 | 2,3,4,6,8,1<br>2,15,17 | 1,5,7,9,10,<br>11,13,14,1<br>6 | 10 | B0BNN3,P02761,P19223,P20761,P55091,P62815,P98089,Q4G075,Q62635,Q9Z0V6                                                         |

|       |                        |                                |    |                                                                                            |
|-------|------------------------|--------------------------------|----|--------------------------------------------------------------------------------------------|
| 12129 | 2,3,4,6,8,1<br>2,16,17 | 1,5,7,9,10,<br>11,13,14,1<br>5 | 12 | P09605;P25809,P16636,P19223,P20761,P55091,P98089,Q4G075,Q62635,Q6P6R2,Q80WL1,Q9JJS8,Q9Z0V6 |
| 12130 | 2,3,4,6,8,1<br>3,14,15 | 1,5,7,9,10,<br>11,12,16,1<br>7 | 7  | B0BNN3,P06757,P12368,P20766,P25236,Q64093,Q6TMA8                                           |
| 12131 | 2,3,4,6,8,1<br>3,14,16 | 1,5,7,9,10,<br>11,12,15,1<br>7 | 5  | P20766,P25236,Q566E6,Q64093,Q6TMA8                                                         |
| 12132 | 2,3,4,6,8,1<br>3,14,17 | 1,5,7,9,10,<br>11,12,15,1<br>6 | 13 | P12368,P20761,P20766,P25236,P51907,P53790,P62815,Q63424,Q64093,Q64319,Q6PCU2,Q6TMA8,Q9Z0V6 |
| 12133 | 2,3,4,6,8,1<br>3,15,16 | 1,5,7,9,10,<br>11,12,14,1<br>7 | 3  | P20766,Q6TMA8,Q9QUL6                                                                       |
| 12134 | 2,3,4,6,8,1<br>3,15,17 | 1,5,7,9,10,<br>11,12,14,1<br>6 | 7  | B0BNN3,P02761,P20761,P20766,P62815,Q6TMA8,Q9Z0V6                                           |
| 12135 | 2,3,4,6,8,1<br>3,16,17 | 1,5,7,9,10,<br>11,12,14,1<br>5 | 6  | P16636,P20761,P20766,P51907,Q63355,Q6PCU2                                                  |
| 12136 | 2,3,4,6,8,1<br>4,15,16 | 1,5,7,9,10,<br>11,12,13,1<br>7 | 4  | B0BNN3,P02803,P36374,Q6TMA8                                                                |
| 12137 | 2,3,4,6,8,1<br>4,15,17 | 1,5,7,9,10,<br>11,12,13,1<br>6 | 8  | B0BNN3,P02761,P02803,P10536,P12368,P20761,P20762,Q9Z0V6                                    |
| 12138 | 2,3,4,6,8,1<br>4,16,17 | 1,5,7,9,10,<br>11,12,13,1<br>5 | 4  | P20761,Q6P6R2,Q6PCU2,Q9Z0V6                                                                |
| 12139 | 2,3,4,6,8,1<br>5,16,17 | 1,5,7,9,10,<br>11,12,13,1<br>4 | 4  | B0BNN3,P02803,P20761,Q9Z0V6                                                                |
| 12140 | 2,3,4,6,9,1<br>0,11,12 | 1,5,7,8,13,<br>14,15,16,1<br>7 | 6  | P00762,P01835,P11883,P14173,P16636,Q4FZU6                                                  |
| 12141 | 2,3,4,6,9,1<br>0,11,13 | 1,5,7,8,12,<br>14,15,16,1<br>7 | 3  | P12785,P14173,Q4FZU6                                                                       |
| 12142 | 2,3,4,6,9,1<br>0,11,14 | 1,5,7,8,12,<br>13,15,16,1<br>7 | 3  | P14173,P19218,Q4FZU6                                                                       |
| 12143 | 2,3,4,6,9,1<br>0,11,15 | 1,5,7,8,12,<br>13,14,16,1<br>7 | 2  | P14173,Q4FZU6                                                                              |

|       |                        |                                |   |                                                  |
|-------|------------------------|--------------------------------|---|--------------------------------------------------|
| 12144 | 2,3,4,6,9,1<br>0,11,16 | 1,5,7,8,12,<br>13,14,15,1<br>7 | 2 | P14173,Q4FZU6                                    |
| 12145 | 2,3,4,6,9,1<br>0,11,17 | 1,5,7,8,12,<br>13,14,15,1<br>6 | 4 | P00762,P14173,P16636,Q4FZU6                      |
| 12146 | 2,3,4,6,9,1<br>0,12,13 | 1,5,7,8,11,<br>14,15,16,1<br>7 | 5 | P14173,P25236,Q4FZU6,Q63355,Q9JJS8               |
| 12147 | 2,3,4,6,9,1<br>0,12,14 | 1,5,7,8,11,<br>13,15,16,1<br>7 | 4 | P01835,P14173,P25236,Q9JJS8                      |
| 12148 | 2,3,4,6,9,1<br>0,12,15 | 1,5,7,8,11,<br>13,14,16,1<br>7 | 1 | Q4FZU6                                           |
| 12149 | 2,3,4,6,9,1<br>0,12,16 | 1,5,7,8,11,<br>13,14,15,1<br>7 | 2 | P14173,Q9JJS8                                    |
| 12150 | 2,3,4,6,9,1<br>0,12,17 | 1,5,7,8,11,<br>13,14,15,1<br>6 | 7 | P00762,P01835,P16636,P19223,P98089,Q63355,Q9JJS8 |
| 12151 | 2,3,4,6,9,1<br>0,13,14 | 1,5,7,8,11,<br>12,15,16,1<br>7 | 3 | P10715,P14173,P25236                             |
| 12152 | 2,3,4,6,9,1<br>0,13,15 | 1,5,7,8,11,<br>12,14,16,1<br>7 | 2 | P10715,Q4FZU6                                    |
| 12153 | 2,3,4,6,9,1<br>0,13,16 | 1,5,7,8,11,<br>12,14,15,1<br>7 | 2 | P10715,P14173                                    |
| 12154 | 2,3,4,6,9,1<br>0,13,17 | 1,5,7,8,11,<br>12,14,15,1<br>6 | 4 | P10715,P14173,Q4FZU6,Q63355                      |
| 12155 | 2,3,4,6,9,1<br>0,14,15 | 1,5,7,8,11,<br>12,13,16,1<br>7 | 4 | P10715,P17046,Q4FZU6,Q8CJ52                      |

---

Day 7

---

| Random allocation | Group1          | Group2                     | Numbers of differential urinary proteins | Differential protein ID                                                                                                                                                                                                  |
|-------------------|-----------------|----------------------------|------------------------------------------|--------------------------------------------------------------------------------------------------------------------------------------------------------------------------------------------------------------------------|
| 1                 | 1,2,3,4,5,6,7,8 | 18,19,20,21,22,23,24,25,26 | 29                                       | O35783,O55006,P00731,P01681,P01836,P02631,P02803,P05371,P08010,P10715,P16086,P18418,P20762,P50398,P52590,P61206,P84079;P84082,Q09030,Q30KJ2,Q4V885,Q63317,Q63475,Q63617,Q64057,Q6AYQ8,Q6IE51,Q7TP52,Q8N7M5,Q91ZS3,Q9ESW0 |

|    |                      |                                   |    |                                                                                                                                                                                              |
|----|----------------------|-----------------------------------|----|----------------------------------------------------------------------------------------------------------------------------------------------------------------------------------------------|
| 2  | 1,2,3,4,5,6<br>,7,18 | 8,19,20,21<br>,22,23,24,<br>25,26 | 22 | O35783,O55006,P00731,P01681,P01836,P02631,P05371,P05964,P16086,P18418,P20762,P25031,P34901,P52590,P61206;P84079;P84082,Q63317,Q63475,Q63942,Q6IE51,Q7TP52,Q91ZS3,Q9ESW0                      |
| 3  | 1,2,3,4,5,6<br>,7,19 | 8,18,20,21<br>,22,23,24,<br>25,26 | 19 | O55006,P00731,P01681,P02631,P15399,P16086,P18418,P20762,P52590,P61206;P84079;P84082,P97580,Q09030,Q30KJ2,Q63317,Q63475,Q63532,Q6IE51,Q7TP52,Q8N7M5                                           |
| 4  | 1,2,3,4,5,6<br>,7,20 | 8,18,19,21<br>,22,23,24,<br>25,26 | 19 | O35783,O55006,P00731,P01681,P01836,P02631,P08010,P16086,P18418,P20762,P42854,P52590,P61206;P84079;P84082,Q63317,Q63475,Q6IE51,Q6IRE4,Q7TP52,Q91ZS3                                           |
| 5  | 1,2,3,4,5,6<br>,7,21 | 8,18,19,20<br>,22,23,24,<br>25,26 | 24 | O35783,O54800;Q5DWV2,O55006,P00731,P01681,P01836,P02631,P16086,P18418,P20646,P20762,P25031,P34901,P42854,P52590,P61206;P84079;P84082,Q4V885,Q63317,Q63475,Q6IE51,Q6IRE4,Q7TP52,Q91ZS3,Q9ESW0 |
| 6  | 1,2,3,4,5,6<br>,7,22 | 8,18,19,20<br>,21,23,24,<br>25,26 | 14 | P01681,P01836,P02631,P08010,P16086,P18418,P20762,P34901,P52590,Q63317,Q63475,Q6IE51,Q7TP52,Q9QW07                                                                                            |
| 7  | 1,2,3,4,5,6<br>,7,23 | 8,18,19,20<br>,21,22,24,<br>25,26 | 20 | P01681,P02631,P05371,P15399,P16086,P18418,P20762,P28648,P34901,P36376,P52590,P55053,P55314,P97580,Q09030,Q30KJ2,Q63317,Q63475,Q6IE51,Q7TP52                                                  |
| 8  | 1,2,3,4,5,6<br>,7,24 | 8,18,19,20<br>,21,22,23,<br>25,26 | 15 | O55006,P01681,P01836,P02631,P05371,P08010,P18418,P20762,P34901,P52590,P61206;P84079;P84082,Q63317,Q63475,Q6IE51,Q7TP52                                                                       |
| 9  | 1,2,3,4,5,6<br>,7,25 | 8,18,19,20<br>,21,22,23,<br>24,26 | 17 | O35783,P01681,P01836,P02631,P05371,P12020,P16086,P18418,P20762,P52590,P55314,P61206;P84079;P84082,Q5GRG2,Q63475,Q6IE51,Q7TP52,Q91ZS3                                                         |
| 10 | 1,2,3,4,5,6<br>,7,26 | 8,18,19,20<br>,21,22,23,<br>24,25 | 23 | O35783,P01681,P01836,P01946,P02631,P05539,P08010,P18418,P20760,P20761,P20762,P36376,P52590,P61206;P84079;P84082,P83748,Q30KJ2,Q4FZU2,Q63475,Q63661,Q6AYQ8,Q6IE51,Q7TP52,Q9ESW0               |
| 11 | 1,2,3,4,5,6<br>,8,18 | 7,19,20,21<br>,22,23,24,<br>25,26 | 15 | O55006,P00731,P01681,P02803,P18418,P20762,P22006,P25031,P52590,Q63317,Q63475,Q63942,Q64361,Q7TP52,Q9ESW0                                                                                     |
| 12 | 1,2,3,4,5,6<br>,8,19 | 7,18,20,21<br>,22,23,24,<br>25,26 | 10 | O55006,P00731,P01681,P02803,P20762,P22006,Q30KJ2,Q63317,Q63475,Q7TP52                                                                                                                        |
| 13 | 1,2,3,4,5,6<br>,8,20 | 7,18,19,21<br>,22,23,24,<br>25,26 | 7  | O55006,P01681,P20762,P22006,Q63317,Q63475,Q7TP52                                                                                                                                             |
| 14 | 1,2,3,4,5,6<br>,8,21 | 7,18,19,20<br>,22,23,24,<br>25,26 | 9  | P00731,P01681,P02761,P20646,P20762,P52590,Q63317,Q63475,Q9Z0V6                                                                                                                               |
| 15 | 1,2,3,4,5,6<br>,8,22 | 7,18,19,20<br>,21,23,24,<br>25,26 | 7  | P01681,P20762,P20766,P22006,Q63317,Q7TP52,Q9QW07                                                                                                                                             |
| 16 | 1,2,3,4,5,6<br>,8,23 | 7,18,19,20<br>,21,22,24,<br>25,26 | 11 | P01681,P20762,P22006,P28648,P34901,P55314,P97580,Q30KJ2,Q63317,Q63475,Q9Z0V6                                                                                                                 |

|    |                       |                                   |    |                                                                                                          |
|----|-----------------------|-----------------------------------|----|----------------------------------------------------------------------------------------------------------|
| 17 | 1,2,3,4,5,6<br>,8,24  | 7,18,19,20<br>,21,22,23,<br>25,26 | 9  | D3ZHA0,O55006,P01681,P08010,P20762,P34901,Q63317,Q63475,Q7TP52                                           |
| 18 | 1,2,3,4,5,6<br>,8,25  | 7,18,19,20<br>,21,22,23,<br>24,26 | 7  | P01681,P20762,P55314,Q5GRG2,Q63475,Q7TP52,Q9Z0V6                                                         |
| 19 | 1,2,3,4,5,6<br>,8,26  | 7,18,19,20<br>,21,22,23,<br>24,25 | 12 | P01681,P10959,P20760,P20761,P20762,P83748,Q4FZU2,Q5QE79,Q6AY33,Q6AYQ8,Q7TP52,Q9Z0V6                      |
| 20 | 1,2,3,4,5,6<br>,18,19 | 7,8,20,21,<br>22,23,24,2<br>5,26  | 11 | O55006,P00731,P01681,P02803,P14173,P22006,P25031,Q30KJ2,Q63661,Q63942,Q7TP52                             |
| 21 | 1,2,3,4,5,6<br>,18,20 | 7,8,19,21,<br>22,23,24,2<br>5,26  | 8  | P00731,P01681,P20762,P22006,P25031,Q4FZU2,Q7TP52,Q9ESW0                                                  |
| 22 | 1,2,3,4,5,6<br>,18,21 | 7,8,19,20,<br>22,23,24,2<br>5,26  | 8  | P00731,P01681,P01835,P25031,P34901,Q4FZU2,Q63661,Q9ESW0                                                  |
| 23 | 1,2,3,4,5,6<br>,18,22 | 7,8,19,20,<br>21,23,24,2<br>5,26  | 5  | P01681,P22006,P34901,Q7TP52,Q9QW07                                                                       |
| 24 | 1,2,3,4,5,6<br>,18,23 | 7,8,19,20,<br>21,22,24,2<br>5,26  | 15 | P01681,P12785,P20762,P22006,P25031,P28648,P34901,P55314,P97580,Q4FZU2,Q5XI22,Q63661,Q63942,Q6IFW6,Q7TP52 |
| 25 | 1,2,3,4,5,6<br>,18,24 | 7,8,19,20,<br>21,22,23,2<br>5,26  | 4  | P01681,P34901,Q63942,Q7TP52                                                                              |
| 26 | 1,2,3,4,5,6<br>,18,25 | 7,8,19,20,<br>21,22,23,2<br>4,26  | 7  | P00731,P01681,P14173,P25031,P55314,P98089,Q7TP52                                                         |
| 27 | 1,2,3,4,5,6<br>,18,26 | 7,8,19,20,<br>21,22,23,2<br>4,25  | 15 | P00774,P01681,P20760,P20761,P20762,P25031,P34901,P83748,Q4FZU2,Q63355,Q63661,Q63942,Q6IFW6,Q7TP52,Q9ESW0 |
| 28 | 1,2,3,4,5,6<br>,19,20 | 7,8,18,21,<br>22,23,24,2<br>5,26  | 5  | P00731,P01681,P22006,Q30KJ2,Q7TP52                                                                       |
| 29 | 1,2,3,4,5,6<br>,19,21 | 7,8,18,20,<br>22,23,24,2<br>5,26  | 4  | P00731,P01681,P34901,Q30KJ2                                                                              |
| 30 | 1,2,3,4,5,6<br>,19,22 | 7,8,18,20,<br>21,23,24,2<br>5,26  | 5  | P01681,P22006,Q30KJ2,Q7TP52,Q9QW07                                                                       |
| 31 | 1,2,3,4,5,6<br>,19,23 | 7,8,18,20,<br>21,22,24,2<br>5,26  | 9  | P01681,P15399,P22006,P28648,P34901,P55314,P97580,Q30KJ2,Q7TP52                                           |

|    |                       |                                  |    |                                                                                            |
|----|-----------------------|----------------------------------|----|--------------------------------------------------------------------------------------------|
| 32 | 1,2,3,4,5,6<br>,19,24 | 7,8,18,20,<br>21,22,23,2<br>5,26 | 5  | P01681,P34901,Q30KJ2,Q63532,Q7TP52                                                         |
| 33 | 1,2,3,4,5,6<br>,19,25 | 7,8,18,20,<br>21,22,23,2<br>4,26 | 6  | P00731,P01681,P14173,P55314,Q30KJ2,Q7TP52                                                  |
| 34 | 1,2,3,4,5,6<br>,19,26 | 7,8,18,20,<br>21,22,23,2<br>4,25 | 8  | P01681,P20760,P20761,P83748,Q30KJ2,Q4FZU2,Q63661,Q7TP52                                    |
| 35 | 1,2,3,4,5,6<br>,20,21 | 7,8,18,19,<br>22,23,24,2<br>5,26 | 8  | P00731,P01681,P01835,P01836,P20762,P34901,Q6IRE4,Q7TPB1                                    |
| 36 | 1,2,3,4,5,6<br>,20,22 | 7,8,18,19,<br>21,23,24,2<br>5,26 | 6  | P01681,P22006,P82995,Q62997,Q7TP52,Q9QW07                                                  |
| 37 | 1,2,3,4,5,6<br>,20,23 | 7,8,18,19,<br>21,22,24,2<br>5,26 | 9  | P01681,P20762,P22006,P28648,P34901,P55314,P82995,P97580,Q4FZU2                             |
| 38 | 1,2,3,4,5,6<br>,20,24 | 7,8,18,19,<br>21,22,23,2<br>5,26 | 5  | P01681,P08010,P34901,P82995,Q7TP52                                                         |
| 39 | 1,2,3,4,5,6<br>,20,25 | 7,8,18,19,<br>21,22,23,2<br>4,26 | 4  | P01681,P55314,Q7TP52,Q91ZS3                                                                |
| 40 | 1,2,3,4,5,6<br>,20,26 | 7,8,18,19,<br>21,22,23,2<br>4,25 | 8  | P01681,P01836,P05539,P20760,P20761,P20762,Q4FZU2,Q7TP52                                    |
| 41 | 1,2,3,4,5,6<br>,21,22 | 7,8,18,19,<br>20,23,24,2<br>5,26 | 4  | P01681,P34901,Q7TP52,Q9QW07                                                                |
| 42 | 1,2,3,4,5,6<br>,21,23 | 7,8,18,19,<br>20,22,24,2<br>5,26 | 10 | P01681,P01835,P20762,P25236,P28648,P34901,P55314,P97580,Q4FZU2,Q6P777                      |
| 43 | 1,2,3,4,5,6<br>,21,24 | 7,8,18,19,<br>20,22,23,2<br>5,26 | 2  | P01681,P34901                                                                              |
| 44 | 1,2,3,4,5,6<br>,21,25 | 7,8,18,19,<br>20,22,23,2<br>4,26 | 8  | P00731,P01681,P01835,P20646,P34901,P55314,Q6P777,Q91ZS3                                    |
| 45 | 1,2,3,4,5,6<br>,21,26 | 7,8,18,19,<br>20,22,23,2<br>4,25 | 13 | P01681,P01835,P01836,P20760,P20761,P20762,P25236,P34901,P83748,Q4FZU2,Q63661,Q7TP52,Q9EQV9 |
| 46 | 1,2,3,4,5,6<br>,22,23 | 7,8,18,19,<br>20,21,24,2<br>5,26 | 12 | G3V686,P01681,P22006,P28648,P34901,P36376,P55314,P82995,P97580,Q6P767,Q7TP52,Q9QW07        |

|    |                       |                                   |    |                                                                                                                                      |
|----|-----------------------|-----------------------------------|----|--------------------------------------------------------------------------------------------------------------------------------------|
| 47 | 1,2,3,4,5,6<br>,22,24 | 7,8,18,19,<br>20,21,23,2<br>5,26  | 6  | P01681,P08010,P34901,P82995,Q7TP52,Q9QW07                                                                                            |
| 48 | 1,2,3,4,5,6<br>,22,25 | 7,8,18,19,<br>20,21,23,2<br>4,26  | 5  | P01681,P06911,P55314,Q7TP52,Q9QW07                                                                                                   |
| 49 | 1,2,3,4,5,6<br>,22,26 | 7,8,18,19,<br>20,21,23,2<br>4,25  | 11 | O54728,P01681,P05539,P20760,P20761,P20762,P34901,P83748,Q4FZU2,Q7TP52,Q9QW07                                                         |
| 50 | 1,2,3,4,5,6<br>,23,24 | 7,8,18,19,<br>20,21,22,2<br>5,26  | 7  | P01681,P28648,P34901,P55314,P82995,P97580,Q63751                                                                                     |
| 51 | 1,2,3,4,5,6<br>,23,25 | 7,8,18,19,<br>20,21,22,2<br>4,26  | 8  | P01681,P28648,P34901,P36376,P55314,P97580,Q63751,Q6P777                                                                              |
| 52 | 1,2,3,4,5,6<br>,23,26 | 7,8,18,19,<br>20,21,22,2<br>4,25  | 18 | P01681,P01946,P20760,P20761,P20762,P28648,P34901,P36376,P55314,P97580,Q30KJ2,Q4FZU2,Q63661,Q6IFU8,Q6IFW6,Q6IMF3,Q6P6Q2,Q7TP52        |
| 53 | 1,2,3,4,5,6<br>,24,25 | 7,8,18,19,<br>20,21,22,2<br>3,26  | 4  | P01681,P34901,P55314,Q7TP52                                                                                                          |
| 54 | 1,2,3,4,5,6<br>,24,26 | 7,8,18,19,<br>20,21,22,2<br>3,25  | 7  | P01681,P08010,P20760,P20761,P34901,Q4FZU2,Q7TP52                                                                                     |
| 55 | 1,2,3,4,5,6<br>,25,26 | 7,8,18,19,<br>20,21,22,2<br>3,24  | 6  | P01681,P20760,P20761,P55314,Q4FZU2,Q7TP52                                                                                            |
| 56 | 1,2,3,4,5,7<br>,8,18  | 6,19,20,21<br>,22,23,24,<br>25,26 | 19 | O35783,O55006,P00731,P01836,P02803,P10715,P18418,P20762,P25031,P42854,P50398,P52590,Q09030,Q4V885,Q63317,Q63475,Q64057,Q9ESW0,Q9QZA6 |
| 57 | 1,2,3,4,5,7<br>,8,19  | 6,18,20,21<br>,22,23,24,<br>25,26 | 13 | O55006,P00731,P02803,P18418,P52590,Q09030,Q4V885,Q63317,Q63475,Q63532,Q64057,Q6IE51,Q9ESW0                                           |
| 58 | 1,2,3,4,5,7<br>,8,20  | 6,18,19,21<br>,22,23,24,<br>25,26 | 14 | O55006,P01681,P01836,P08010,P10715,P18418,P20762,P42854,P52590,P97608,Q63317,Q63475,Q6IRE4,Q9ESW0                                    |
| 59 | 1,2,3,4,5,7<br>,8,21  | 6,18,19,20<br>,22,23,24,<br>25,26 | 17 | O35783,O54800;Q5DWV2,P00731,P01836,P02761,P02803,P18418,P20762,P42854,P52590,Q09030,Q4V885,Q63317,Q63475,Q64057,Q80WL1,Q9ESW0        |
| 60 | 1,2,3,4,5,7<br>,8,22  | 6,18,19,20<br>,21,23,24,<br>25,26 | 11 | P01836,P08010,P18418,P20766,P52590,P83121,Q63317,Q63475,Q7TP52,Q9ESW0,Q9QW07                                                         |
| 61 | 1,2,3,4,5,7<br>,8,23  | 6,18,19,20<br>,21,22,24,<br>25,26 | 13 | P01836,P02803,P18418,P20762,P28648,P34901,P36970,P52590,Q09030,Q63317,Q63475,Q64057,Q9ESW0                                           |

|    |                       |                                   |    |                                                                                                                                                           |
|----|-----------------------|-----------------------------------|----|-----------------------------------------------------------------------------------------------------------------------------------------------------------|
| 62 | 1,2,3,4,5,7<br>,8,24  | 6,18,19,20<br>,21,22,23,<br>25,26 | 11 | O55006,P01836,P08010,P18418,P34901,P52590,P83121,Q09030,Q63317,Q63475,Q9ESW0                                                                              |
| 63 | 1,2,3,4,5,7<br>,8,25  | 6,18,19,20<br>,21,22,23,<br>24,26 | 13 | P01836,P02803,P10715,P18418,P19629,P52590,P55314,Q09030,Q5GRG2,Q63475,Q64057,Q6AYS4,Q9ESW0                                                                |
| 64 | 1,2,3,4,5,7<br>,8,26  | 6,18,19,20<br>,21,22,23,<br>24,25 | 21 | O35783,P01041,P01681,P01836,P01946,P02770,P08010,P10959,P18418,P20760,P20761,P20762,P52590,P83748,Q09030,Q63475,Q64057,Q6AYQ8,Q9ESW0,Q9QX79,Q9R1T1        |
| 65 | 1,2,3,4,5,7<br>,18,19 | 6,8,20,21,<br>22,23,24,2<br>5,26  | 17 | O89117,P00731,P01836,P02803,P05964,P07150,P18418,P25031,P52590,Q03191,Q09030,Q63475,Q63532,Q63661,Q6IE51,Q9ESW0,Q9WTT6                                    |
| 66 | 1,2,3,4,5,7<br>,18,20 | 6,8,19,21,<br>22,23,24,2<br>5,26  | 12 | O35783,P00731,P01836,P07150,P18418,P25031,P42854,P52590,P61206;P84079;P84082,Q63475,Q6IE51,Q9ESW0                                                         |
| 67 | 1,2,3,4,5,7<br>,18,21 | 6,8,19,20,<br>22,23,24,2<br>5,26  | 16 | O35783,O89117,P00731,P01836,P05964,P18418,P25031,P34901,P42854,P52590,P61206;P84079;P84082,Q09030,Q63467,Q63475,Q63661,Q9ESW0                             |
| 68 | 1,2,3,4,5,7<br>,18,22 | 6,8,19,20,<br>21,23,24,2<br>5,26  | 10 | P01836,P07150,P18418,P25031,P34901,P52590,Q63475,Q7TP52,Q9ESW0,Q9QW07                                                                                     |
| 69 | 1,2,3,4,5,7<br>,18,23 | 6,8,19,20,<br>21,22,24,2<br>5,26  | 16 | P01836,P05964,P12785,P18418,P25031,P28648,P34901,P52590,Q09030,Q5XI22,Q62636,Q63475,Q63661,Q6IE51,Q99068,Q9ESW0                                           |
| 70 | 1,2,3,4,5,7<br>,18,24 | 6,8,19,20,<br>21,22,23,2<br>5,26  | 10 | P01836,P08010,P18418,P25031,P34901,P52590,Q09030,Q63475,Q6IE51,Q9ESW0                                                                                     |
| 71 | 1,2,3,4,5,7<br>,18,25 | 6,8,19,20,<br>21,22,23,2<br>4,26  | 13 | O35783,P00731,P01836,P08721,P18418,P25031,P52590,P55314,P61206;P84079;P84082,Q09030,Q63475,Q6IE51,Q9ESW0                                                  |
| 72 | 1,2,3,4,5,7<br>,18,26 | 6,8,19,20,<br>21,22,23,2<br>4,25  | 20 | O35783,P01041,P01836,P01946,P16636,P18418,P25031,P52590,P61206;P84079;P84082,P83748,Q09030,Q4FZU2,Q63475,Q63661,Q63942,Q6AYQ8,Q6IE51,Q8VD89,Q9ESW0,Q9R1T1 |
| 73 | 1,2,3,4,5,7<br>,19,20 | 6,8,18,21,<br>22,23,24,2<br>5,26  | 8  | P01836,P07150,P14669,P42854,P52590,Q63475,Q63532,Q6IE51                                                                                                   |
| 74 | 1,2,3,4,5,7<br>,19,21 | 6,8,18,20,<br>22,23,24,2<br>5,26  | 11 | O89117,P00731,P01836,P34901,P42854,P52590,Q09030,Q63475,Q63532,Q6IE51,Q9ESW0                                                                              |
| 75 | 1,2,3,4,5,7<br>,19,22 | 6,8,18,20,<br>21,23,24,2<br>5,26  | 13 | P01836,P07150,P08010,P14669,P18418,P52590,Q63317,Q63475,Q63532,Q6IE51,Q7TP52,Q9QW07,Q9WTT6                                                                |
| 76 | 1,2,3,4,5,7<br>,19,23 | 6,8,18,20,<br>21,22,24,2<br>5,26  | 11 | P15399,P28648,P34901,P52590,P97580,Q09030,Q30KJ2,Q63317,Q63475,Q63532,Q6IE51                                                                              |



|    |                       |                                  |    |                                                                                                                 |
|----|-----------------------|----------------------------------|----|-----------------------------------------------------------------------------------------------------------------|
| 77 | 1,2,3,4,5,7<br>,19,24 | 6,8,18,20,<br>21,22,23,2<br>5,26 | 12 | P01836,P07150,P08010,P18418,P34901,P52590,Q09030,Q63317,Q63475,Q63532,Q6IE51,Q9WTT6                             |
| 78 | 1,2,3,4,5,7<br>,19,25 | 6,8,18,20,<br>21,22,23,2<br>4,26 | 6  | P52590,P55314,Q09030,Q63475,Q63532,Q6IE51                                                                       |
| 79 | 1,2,3,4,5,7<br>,19,26 | 6,8,18,20,<br>21,22,23,2<br>4,25 | 11 | O54728,P01836,P01946,P05539,P52590,P83748,Q09030,Q63475,Q63532,Q63661,Q6IE51                                    |
| 80 | 1,2,3,4,5,7<br>,20,21 | 6,8,18,19,<br>22,23,24,2<br>5,26 | 9  | O35783,P01681,P01836,P34901,P42854,P52590,Q63475,Q6IRE4,Q9ESW0                                                  |
| 81 | 1,2,3,4,5,7<br>,20,22 | 6,8,18,19,<br>21,23,24,2<br>5,26 | 9  | P01836,P07150,P08010,P14669,P52590,Q62997,Q63475,Q7TP52,Q9QW07                                                  |
| 82 | 1,2,3,4,5,7<br>,20,23 | 6,8,18,19,<br>21,22,24,2<br>5,26 | 8  | P01836,P14408,P28648,P34901,P52590,Q63475,Q6IE51,Q9ESW0                                                         |
| 83 | 1,2,3,4,5,7<br>,20,24 | 6,8,18,19,<br>21,22,23,2<br>5,26 | 8  | P01836,P07150,P08010,P14669,P34901,P52590,Q63475,Q6IRE4                                                         |
| 84 | 1,2,3,4,5,7<br>,20,25 | 6,8,18,19,<br>21,22,23,2<br>4,26 | 4  | P01836,P52590,P55314,Q63475                                                                                     |
| 85 | 1,2,3,4,5,7<br>,20,26 | 6,8,18,19,<br>21,22,23,2<br>4,25 | 12 | O35783,O54728,P01041,P01681,P01836,P01946,P05539,P08010,P52590,P83748,Q63475,Q9ESW0                             |
| 86 | 1,2,3,4,5,7<br>,21,22 | 6,8,18,19,<br>20,23,24,2<br>5,26 | 7  | P01836,P34901,P42854,P52590,Q63475,Q9ESW0,Q9QW07                                                                |
| 87 | 1,2,3,4,5,7<br>,21,23 | 6,8,18,19,<br>20,22,24,2<br>5,26 | 9  | P01836,P28648,P34901,P42854,P52590,Q09030,Q63475,Q6IE51,Q9ESW0                                                  |
| 88 | 1,2,3,4,5,7<br>,21,24 | 6,8,18,19,<br>20,22,23,2<br>5,26 | 8  | O89117,P01836,P34901,P42854,P52590,Q09030,Q63475,Q9ESW0                                                         |
| 89 | 1,2,3,4,5,7<br>,21,25 | 6,8,18,19,<br>20,22,23,2<br>4,26 | 10 | O35783,P01836,P34901,P42854,P52590,P55314,P61206,P84079,P84082,Q09030,Q63475,Q9ESW0                             |
| 90 | 1,2,3,4,5,7<br>,21,26 | 6,8,18,19,<br>20,22,23,2<br>4,25 | 15 | O35783,O54800,Q5DWV2,P01041,P01681,P01836,P01946,P34901,P42854,P52590,P83748,Q09030,Q63475,Q63661,Q9EQV9,Q9ESW0 |
| 91 | 1,2,3,4,5,7<br>,22,23 | 6,8,18,19,<br>20,21,24,2<br>5,26 | 8  | P01836,P28648,P34901,P36376,P52590,Q63317,Q63475,Q9QW07                                                         |

|     |                       |                                  |    |                                                                                                                        |
|-----|-----------------------|----------------------------------|----|------------------------------------------------------------------------------------------------------------------------|
| 92  | 1,2,3,4,5,7<br>,22,24 | 6,8,18,19,<br>20,21,23,2<br>5,26 | 10 | P01836,P07150,P08010,P14669,P34901,P52590,Q63317,Q63475,Q9QW07,Q9WTT6                                                  |
| 93  | 1,2,3,4,5,7<br>,22,25 | 6,8,18,19,<br>20,21,23,2<br>4,26 | 6  | P01836,P52590,P55314,Q63475,Q7TP52,Q9QW07                                                                              |
| 94  | 1,2,3,4,5,7<br>,22,26 | 6,8,18,19,<br>20,21,23,2<br>4,25 | 11 | O54728,P01836,P01946,P05539,P08010,P34901,P52590,P55159,P83748,Q7TP52,Q9QW07                                           |
| 95  | 1,2,3,4,5,7<br>,23,24 | 6,8,18,19,<br>20,21,22,2<br>5,26 | 9  | P01836,P28648,P34901,P52590,Q09030,Q63317,Q63475,Q6IE51,Q8K4G9                                                         |
| 96  | 1,2,3,4,5,7<br>,23,25 | 6,8,18,19,<br>20,21,22,2<br>4,26 | 11 | P01836,P05371,P28648,P34901,P36376,P52590,P55314,Q09030,Q63475,Q63751,Q6IE51                                           |
| 97  | 1,2,3,4,5,7<br>,23,26 | 6,8,18,19,<br>20,21,22,2<br>4,25 | 17 | O54728,P01836,P01946,P02091,P05539,P28648,P34901,P36376,P52590,P83748,Q09030,Q4FZU2,Q63475,Q63661,Q6IE51,Q9ESW0,Q9R1T1 |
| 98  | 1,2,3,4,5,7<br>,24,25 | 6,8,18,19,<br>20,21,22,2<br>3,26 | 7  | P01836,P08010,P34901,P52590,P55314,Q09030,Q63475                                                                       |
| 99  | 1,2,3,4,5,7<br>,24,26 | 6,8,18,19,<br>20,21,22,2<br>3,25 | 11 | P01836,P01946,P02091,P08010,P20760,P34901,P52590,P83748,Q09030,Q63475,Q8CJD3                                           |
| 100 | 1,2,3,4,5,7<br>,25,26 | 6,8,18,19,<br>20,21,22,2<br>3,24 | 12 | O35783,P01836,P01946,P02091,P05539,P52590,P55314,P61206,P84079,P84082,P83748,Q09030,Q63475,Q9R1T1                      |
| 101 | 1,2,3,4,5,8<br>,18,19 | 6,7,20,21,<br>22,23,24,2<br>5,26 | 7  | P00731,P02803,P22006,P83121,Q03191,Q63942,Q9ESW0                                                                       |
| 102 | 1,2,3,4,5,8<br>,18,20 | 6,7,19,21,<br>22,23,24,2<br>5,26 | 6  | P01681,P22006,P83121,Q63475,Q9ESW0,Q9QZK9                                                                              |
| 103 | 1,2,3,4,5,8<br>,18,21 | 6,7,19,20,<br>22,23,24,2<br>5,26 | 11 | O89117,P00731,P01681,P02761,P02803,P10758,P25031,P83121,Q63475,Q6AYS4,Q9ESW0                                           |
| 104 | 1,2,3,4,5,8<br>,18,22 | 6,7,19,20,<br>21,23,24,2<br>5,26 | 5  | P20766,P22006,P83121,Q9ESW0,Q9QW07                                                                                     |
| 105 | 1,2,3,4,5,8<br>,18,23 | 6,7,19,20,<br>21,22,24,2<br>5,26 | 11 | P02803,P12785,P22006,P28648,P34901,Q5XI22,Q63475,Q63942,Q64194,Q6AY61,Q9ESW0                                           |
| 106 | 1,2,3,4,5,8<br>,18,24 | 6,7,19,20,<br>21,22,23,2<br>5,26 | 4  | P34901,P83121,Q63475,Q9ESW0                                                                                            |

|     |                       |                                  |   |                                                  |
|-----|-----------------------|----------------------------------|---|--------------------------------------------------|
| 107 | 1,2,3,4,5,8<br>,18,25 | 6,7,19,20,<br>21,22,23,2<br>4,26 | 4 | P02803,P08721,Q6AYS4,Q9ESW0                      |
| 108 | 1,2,3,4,5,8<br>,18,26 | 6,7,19,20,<br>21,22,23,2<br>4,25 | 6 | P01681,P10959,Q4FZU2,Q63661,Q63942,Q9ESW0        |
| 109 | 1,2,3,4,5,8<br>,19,20 | 6,7,18,21,<br>22,23,24,2<br>5,26 | 4 | P01681,P22006,P83121,Q62894                      |
| 110 | 1,2,3,4,5,8<br>,19,21 | 6,7,18,20,<br>22,23,24,2<br>5,26 | 6 | P00731,P01681,P02761,P02803,P35281,P83121        |
| 111 | 1,2,3,4,5,8<br>,19,22 | 6,7,18,20,<br>21,23,24,2<br>5,26 | 4 | P20766,P22006,P83121,Q9QW07                      |
| 112 | 1,2,3,4,5,8<br>,19,23 | 6,7,18,20,<br>21,22,24,2<br>5,26 | 6 | P02803,P22006,P28648,P34901,P36970,Q63317        |
| 113 | 1,2,3,4,5,8<br>,19,24 | 6,7,18,20,<br>21,22,23,2<br>5,26 | 2 | P34901,P83121                                    |
| 114 | 1,2,3,4,5,8<br>,19,25 | 6,7,18,20,<br>21,22,23,2<br>4,26 | 1 | P02803                                           |
| 115 | 1,2,3,4,5,8<br>,19,26 | 6,7,18,20,<br>21,22,23,2<br>4,25 | 4 | O54728,P01681,P10959,Q63661                      |
| 116 | 1,2,3,4,5,8<br>,20,21 | 6,7,18,19,<br>22,23,24,2<br>5,26 | 6 | P01681,P01836,P02761,P42854,Q63475,Q9ESW0        |
| 117 | 1,2,3,4,5,8<br>,20,22 | 6,7,18,19,<br>21,23,24,2<br>5,26 | 5 | P01681,P22006,P83121,Q62997,Q9QW07               |
| 118 | 1,2,3,4,5,8<br>,20,23 | 6,7,18,19,<br>21,22,24,2<br>5,26 | 7 | P01681,P22006,P28648,P34901,P97840,Q63475,Q9QZK9 |
| 119 | 1,2,3,4,5,8<br>,20,24 | 6,7,18,19,<br>21,22,23,2<br>5,26 | 6 | P08010,P34901,P83121,P97840,Q63475,Q9QZK9        |
| 120 | 1,2,3,4,5,8<br>,20,25 | 6,7,18,19,<br>21,22,23,2<br>4,26 | 2 | P01681,P55314                                    |
| 121 | 1,2,3,4,5,8<br>,20,26 | 6,7,18,19,<br>21,22,23,2<br>4,25 | 5 | O54728,P01681,P01836,P10959,P97840               |

|     |                       |                                  |    |                                                                                                          |
|-----|-----------------------|----------------------------------|----|----------------------------------------------------------------------------------------------------------|
| 122 | 1,2,3,4,5,8<br>,21,22 | 6,7,18,19,<br>20,23,24,2<br>5,26 | 5  | P01681,P34901,P83121,Q80WL1,Q9QW07                                                                       |
| 123 | 1,2,3,4,5,8<br>,21,23 | 6,7,18,19,<br>20,22,24,2<br>5,26 | 4  | P01681,P34901,Q63475,Q9ESW0                                                                              |
| 124 | 1,2,3,4,5,8<br>,21,24 | 6,7,18,19,<br>20,22,23,2<br>5,26 | 4  | P02761,P34901,P83121,Q63475                                                                              |
| 125 | 1,2,3,4,5,8<br>,21,25 | 6,7,18,19,<br>20,22,23,2<br>4,26 | 1  | Q6AYS4                                                                                                   |
| 126 | 1,2,3,4,5,8<br>,21,26 | 6,7,18,19,<br>20,22,23,2<br>4,25 | 8  | P01681,P01836,P02761,P10959,Q5QE79,Q63661,Q9EQV9,Q9ESW0                                                  |
| 127 | 1,2,3,4,5,8<br>,22,23 | 6,7,18,19,<br>20,21,24,2<br>5,26 | 7  | P20766,P22006,P28648,P34901,P36970,Q63317,Q9QW07                                                         |
| 128 | 1,2,3,4,5,8<br>,22,24 | 6,7,18,19,<br>20,21,23,2<br>5,26 | 5  | P08010,P34901,P83121,Q63317,Q9QW07                                                                       |
| 129 | 1,2,3,4,5,8<br>,22,25 | 6,7,18,19,<br>20,21,23,2<br>4,26 | 2  | P20766,Q9QW07                                                                                            |
| 130 | 1,2,3,4,5,8<br>,22,26 | 6,7,18,19,<br>20,21,23,2<br>4,25 | 7  | O54728,P01681,P10959,P20766,P55159,Q5QE79,Q9QW07                                                         |
| 131 | 1,2,3,4,5,8<br>,23,24 | 6,7,18,19,<br>20,21,22,2<br>5,26 | 7  | P28648,P34901,P36970,P83121,P97840,Q63317,Q63475                                                         |
| 132 | 1,2,3,4,5,8<br>,23,25 | 6,7,18,19,<br>20,21,22,2<br>4,26 | 3  | P28648,P34901,P55314                                                                                     |
| 133 | 1,2,3,4,5,8<br>,23,26 | 6,7,18,19,<br>20,21,22,2<br>4,25 | 15 | O54728,P01681,P01946,P10959,P28648,P34901,P47967,P97840,Q4FZU2,Q5I0D1,Q5QE79,Q63661,Q6IFU8,Q6IFW6,Q6IG02 |
| 134 | 1,2,3,4,5,8<br>,24,25 | 6,7,18,19,<br>20,21,22,2<br>3,26 | 1  | P34901                                                                                                   |
| 135 | 1,2,3,4,5,8<br>,24,26 | 6,7,18,19,<br>20,21,22,2<br>3,25 | 6  | P08010,P10959,P34901,P47967,P97840,Q62902                                                                |
| 136 | 1,2,3,4,5,8<br>,25,26 | 6,7,18,19,<br>20,21,22,2<br>3,24 | 3  | P10959,P55314,Q62902                                                                                     |

|     |                        |                                 |    |                                                                              |
|-----|------------------------|---------------------------------|----|------------------------------------------------------------------------------|
| 137 | 1,2,3,4,5,1<br>8,19,20 | 6,7,8,21,2<br>2,23,24,25<br>,26 | 6  | P00731,P07150,P22006,P83121,Q9QZK9,Q9WTT6                                    |
| 138 | 1,2,3,4,5,1<br>8,19,21 | 6,7,8,20,2<br>2,23,24,25<br>,26 | 9  | O89117,P00731,P02803,P05964,P10758,P25031,P34901,Q63661,Q9ESW0               |
| 139 | 1,2,3,4,5,1<br>8,19,22 | 6,7,8,20,2<br>1,23,24,25<br>,26 | 6  | P07150,P22006,P83121,Q6P6R2,Q9QW07,Q9WTT6                                    |
| 140 | 1,2,3,4,5,1<br>8,19,23 | 6,7,8,20,2<br>1,22,24,25<br>,26 | 11 | P02803,P05964,P12785,P22006,P28648,P34901,Q03191,Q63661,Q64194,Q99068,Q99MH3 |
| 141 | 1,2,3,4,5,1<br>8,19,24 | 6,7,8,20,2<br>1,22,23,25<br>,26 | 4  | P07150,P34901,P83121,Q9WTT6                                                  |
| 142 | 1,2,3,4,5,1<br>8,19,25 | 6,7,8,20,2<br>1,22,23,24<br>,26 | 3  | P00731,P02803,P14173                                                         |
| 143 | 1,2,3,4,5,1<br>8,19,26 | 6,7,8,20,2<br>1,22,23,24<br>,25 | 4  | Q03191,Q4FZU2,Q63661,Q63942                                                  |
| 144 | 1,2,3,4,5,1<br>8,20,21 | 6,7,8,19,2<br>2,23,24,25<br>,26 | 8  | P00731,P01681,P01836,P25031,P34901,P42854,Q9ESW0,Q9QZK9                      |
| 145 | 1,2,3,4,5,1<br>8,20,22 | 6,7,8,19,2<br>1,23,24,25<br>,26 | 7  | P07150,P22006,P83121,Q62997,Q9QW07,Q9QZK9,Q9WTT6                             |
| 146 | 1,2,3,4,5,1<br>8,20,23 | 6,7,8,19,2<br>1,22,24,25<br>,26 | 8  | P12785,P22006,P28648,P34901,Q4FZU2,Q6IG02,Q9ESW0,Q9QZK9                      |
| 147 | 1,2,3,4,5,1<br>8,20,24 | 6,7,8,19,2<br>1,22,23,25<br>,26 | 4  | P07150,P34901,P83121,Q9QZK9                                                  |
| 148 | 1,2,3,4,5,1<br>8,20,25 | 6,7,8,19,2<br>1,22,23,24<br>,26 | 0  |                                                                              |
| 149 | 1,2,3,4,5,1<br>8,20,26 | 6,7,8,19,2<br>1,22,23,24<br>,25 | 9  | P01681,P01836,Q4FZU2,Q63355,Q63661,Q63942,Q6IG02,Q99041,Q9ESW0               |
| 150 | 1,2,3,4,5,1<br>8,21,22 | 6,7,8,19,2<br>0,23,24,25<br>,26 | 4  | P25031,P34901,Q9ESW0,Q9QW07                                                  |
| 151 | 1,2,3,4,5,1<br>8,21,23 | 6,7,8,19,2<br>0,22,24,25<br>,26 | 8  | P12785,P25031,P28648,P34901,Q4FZU2,Q62636,Q63661,Q9ESW0                      |

|     |                        |                                 |    |                                                                                                                               |
|-----|------------------------|---------------------------------|----|-------------------------------------------------------------------------------------------------------------------------------|
| 152 | 1,2,3,4,5,1<br>8,21,24 | 6,7,8,19,2<br>0,22,23,25<br>,26 | 4  | O89117,P25031,P34901,Q9ESW0                                                                                                   |
| 153 | 1,2,3,4,5,1<br>8,21,25 | 6,7,8,19,2<br>0,22,23,24<br>,26 | 7  | P00731,P08721,P25031,P31430,P34901,P98089,Q9ESW0                                                                              |
| 154 | 1,2,3,4,5,1<br>8,21,26 | 6,7,8,19,2<br>0,22,23,24<br>,25 | 10 | P00774,P01681,P01836,P25031,P34901,Q4FZU2,Q63661,Q63942,Q9EQV9,Q9ESW0                                                         |
| 155 | 1,2,3,4,5,1<br>8,22,23 | 6,7,8,19,2<br>0,21,24,25<br>,26 | 5  | P12785,P22006,P28648,P34901,Q9QW07                                                                                            |
| 156 | 1,2,3,4,5,1<br>8,22,24 | 6,7,8,19,2<br>0,21,23,25<br>,26 | 6  | P07150,P34901,P83121,Q9QW07,Q9QZK9,Q9WTT6                                                                                     |
| 157 | 1,2,3,4,5,1<br>8,22,25 | 6,7,8,19,2<br>0,21,23,24<br>,26 | 1  | Q9QW07                                                                                                                        |
| 158 | 1,2,3,4,5,1<br>8,22,26 | 6,7,8,19,2<br>0,21,23,24<br>,25 | 11 | O54728,P34901,P55159,P63036,Q4FZU2,Q63661,Q63942,Q6P6R2,Q7TP52,Q99041,Q9QW07                                                  |
| 159 | 1,2,3,4,5,1<br>8,23,24 | 6,7,8,19,2<br>0,21,22,25<br>,26 | 5  | P12785,P28648,P34901,Q99068,Q9QZK9                                                                                            |
| 160 | 1,2,3,4,5,1<br>8,23,25 | 6,7,8,19,2<br>0,21,22,24<br>,26 | 6  | P12785,P28648,P34901,P55314,Q99068,Q99MH3                                                                                     |
| 161 | 1,2,3,4,5,1<br>8,23,26 | 6,7,8,19,2<br>0,21,22,24<br>,25 | 18 | P01946,P12785,P19939,P28648,P34901,P35467,Q4FZU2,Q62636,Q63661,Q63942,Q64194,Q6AY61,Q6IFU8,Q6IFW6,Q6IG02,Q6IMF3,Q6P6Q2,Q9ESW0 |
| 162 | 1,2,3,4,5,1<br>8,24,25 | 6,7,8,19,2<br>0,21,22,23<br>,26 | 2  | P34901,Q62902                                                                                                                 |
| 163 | 1,2,3,4,5,1<br>8,24,26 | 6,7,8,19,2<br>0,21,22,23<br>,25 | 6  | P34901,Q4FZU2,Q62902,Q63661,Q63942,Q99041                                                                                     |
| 164 | 1,2,3,4,5,1<br>8,25,26 | 6,7,8,19,2<br>0,21,22,23<br>,24 | 7  | P00774,P08721,P55314,Q4FZU2,Q62902,Q63661,Q63942                                                                              |
| 165 | 1,2,3,4,5,1<br>9,20,21 | 6,7,8,18,2<br>2,23,24,25<br>,26 | 2  | P01681,P01836                                                                                                                 |
| 166 | 1,2,3,4,5,1<br>9,20,22 | 6,7,8,18,2<br>1,23,24,25<br>,26 | 10 | O54728,P07150,P14669,P22006,P55091,P83121,Q62997,Q6P6R2,Q9QW07,Q9WTT6                                                         |

|     |                        |                                 |   |                                                         |
|-----|------------------------|---------------------------------|---|---------------------------------------------------------|
| 167 | 1,2,3,4,5,1<br>9,20,23 | 6,7,8,18,2<br>1,22,24,25<br>,26 | 3 | P22006,P34901,Q9QZK9                                    |
| 168 | 1,2,3,4,5,1<br>9,20,24 | 6,7,8,18,2<br>1,22,23,25<br>,26 | 6 | P07150,P14669,P34901,P83121,Q9QZK9,Q9WTT6               |
| 169 | 1,2,3,4,5,1<br>9,20,25 | 6,7,8,18,2<br>1,22,23,24<br>,26 | 0 |                                                         |
| 170 | 1,2,3,4,5,1<br>9,20,26 | 6,7,8,18,2<br>1,22,23,24<br>,25 | 4 | O54728,P01681,P01836,P07150                             |
| 171 | 1,2,3,4,5,1<br>9,21,22 | 6,7,8,18,2<br>0,23,24,25<br>,26 | 2 | P34901,Q9QW07                                           |
| 172 | 1,2,3,4,5,1<br>9,21,23 | 6,7,8,18,2<br>0,22,24,25<br>,26 | 2 | P34901,Q63661                                           |
| 173 | 1,2,3,4,5,1<br>9,21,24 | 6,7,8,18,2<br>0,22,23,25<br>,26 | 2 | O89117,P34901                                           |
| 174 | 1,2,3,4,5,1<br>9,21,25 | 6,7,8,18,2<br>0,22,23,24<br>,26 | 0 |                                                         |
| 175 | 1,2,3,4,5,1<br>9,21,26 | 6,7,8,18,2<br>0,22,23,24<br>,25 | 3 | P01681,P01836,Q63661                                    |
| 176 | 1,2,3,4,5,1<br>9,22,23 | 6,7,8,18,2<br>0,21,24,25<br>,26 | 4 | O54728,P22006,P34901,Q9QW07                             |
| 177 | 1,2,3,4,5,1<br>9,22,24 | 6,7,8,18,2<br>0,21,23,25<br>,26 | 7 | P07150,P08010,P14669,P34901,P83121,Q9QW07,Q9WTT6        |
| 178 | 1,2,3,4,5,1<br>9,22,25 | 6,7,8,18,2<br>0,21,23,24<br>,26 | 1 | Q9QW07                                                  |
| 179 | 1,2,3,4,5,1<br>9,22,26 | 6,7,8,18,2<br>0,21,23,24<br>,25 | 8 | O54728,P07150,P55159,P63036,Q63661,Q6P6R2,Q7TP52,Q9QW07 |
| 180 | 1,2,3,4,5,1<br>9,23,24 | 6,7,8,18,2<br>0,21,22,25<br>,26 | 1 | P34901                                                  |
| 181 | 1,2,3,4,5,1<br>9,23,25 | 6,7,8,18,2<br>0,21,22,24<br>,26 | 2 | P34901,P55314                                           |

|     |                        |                                 |    |                                                                       |
|-----|------------------------|---------------------------------|----|-----------------------------------------------------------------------|
| 182 | 1,2,3,4,5,1<br>9,23,26 | 6,7,8,18,2<br>0,21,22,24<br>,25 | 7  | O54728,P01946,P28648,P34901,Q4FZU2,Q63661,Q6IFU8                      |
| 183 | 1,2,3,4,5,1<br>9,24,25 | 6,7,8,18,2<br>0,21,22,23<br>,26 | 2  | P34901,Q62902                                                         |
| 184 | 1,2,3,4,5,1<br>9,24,26 | 6,7,8,18,2<br>0,21,22,23<br>,25 | 4  | O54728,P34901,Q62902,Q63661                                           |
| 185 | 1,2,3,4,5,1<br>9,25,26 | 6,7,8,18,2<br>0,21,22,23<br>,24 | 3  | P55314,Q62902,Q63661                                                  |
| 186 | 1,2,3,4,5,2<br>0,21,22 | 6,7,8,18,1<br>9,23,24,25<br>,26 | 6  | P01681,P01836,P34901,Q62997,Q7TPB1,Q9QW07                             |
| 187 | 1,2,3,4,5,2<br>0,21,23 | 6,7,8,18,1<br>9,22,24,25<br>,26 | 3  | P01681,P01836,P34901                                                  |
| 188 | 1,2,3,4,5,2<br>0,21,24 | 6,7,8,18,1<br>9,22,23,25<br>,26 | 3  | P01681,P01836,P34901                                                  |
| 189 | 1,2,3,4,5,2<br>0,21,25 | 6,7,8,18,1<br>9,22,23,24<br>,26 | 2  | P01681,P01836                                                         |
| 190 | 1,2,3,4,5,2<br>0,21,26 | 6,7,8,18,1<br>9,22,23,24<br>,25 | 5  | P01681,P01836,P34901,Q4FZU2,Q63661                                    |
| 191 | 1,2,3,4,5,2<br>0,22,23 | 6,7,8,18,1<br>9,21,24,25<br>,26 | 5  | P22006,P34901,Q62997,Q9QW07,Q9QZK9                                    |
| 192 | 1,2,3,4,5,2<br>0,22,24 | 6,7,8,18,1<br>9,21,23,25<br>,26 | 10 | P01836,P07150,P08010,P14669,P34901,P83121,Q62997,Q9QW07,Q9QZK9,Q9WTT6 |
| 193 | 1,2,3,4,5,2<br>0,22,25 | 6,7,8,18,1<br>9,21,23,24<br>,26 | 2  | Q62997,Q9QW07                                                         |
| 194 | 1,2,3,4,5,2<br>0,22,26 | 6,7,8,18,1<br>9,21,23,24<br>,25 | 9  | O54728,P01681,P01836,P05539,P07150,P55159,Q62997,Q99041,Q9QW07        |
| 195 | 1,2,3,4,5,2<br>0,23,24 | 6,7,8,18,1<br>9,21,22,25<br>,26 | 4  | P34901,P82995,P97840,Q9QZK9                                           |
| 196 | 1,2,3,4,5,2<br>0,23,25 | 6,7,8,18,1<br>9,21,22,24<br>,26 | 2  | P34901,P55314                                                         |



|     |                        |                                 |    |                                                                              |
|-----|------------------------|---------------------------------|----|------------------------------------------------------------------------------|
| 197 | 1,2,3,4,5,2<br>0,23,26 | 6,7,8,18,1<br>9,21,22,24<br>,25 | 11 | O54728,P01681,P01836,P01946,P34901,P97840,Q4FZU2,Q6IFU8,Q6IFW6,Q6IG02,Q6IMF3 |
| 198 | 1,2,3,4,5,2<br>0,24,25 | 6,7,8,18,1<br>9,21,22,23<br>,26 | 1  | P34901                                                                       |
| 199 | 1,2,3,4,5,2<br>0,24,26 | 6,7,8,18,1<br>9,21,22,23<br>,25 | 6  | P01681,P01836,P08010,P34901,P97840,Q99041                                    |
| 200 | 1,2,3,4,5,2<br>0,25,26 | 6,7,8,18,1<br>9,21,22,23<br>,24 | 3  | P01681,P01836,P55314                                                         |
| 201 | 1,2,3,4,5,2<br>1,22,23 | 6,7,8,18,1<br>9,20,24,25<br>,26 | 2  | P34901,Q9QW07                                                                |
| 202 | 1,2,3,4,5,2<br>1,22,24 | 6,7,8,18,1<br>9,20,23,25<br>,26 | 3  | P01836,P34901,Q9QW07                                                         |
| 203 | 1,2,3,4,5,2<br>1,22,25 | 6,7,8,18,1<br>9,20,23,24<br>,26 | 2  | P34901,Q9QW07                                                                |
| 204 | 1,2,3,4,5,2<br>1,22,26 | 6,7,8,18,1<br>9,20,23,24<br>,25 | 7  | O54728,P01681,P01836,P34901,P63036,Q63661,Q9QW07                             |
| 205 | 1,2,3,4,5,2<br>1,23,24 | 6,7,8,18,1<br>9,20,22,25<br>,26 | 1  | P34901                                                                       |
| 206 | 1,2,3,4,5,2<br>1,23,25 | 6,7,8,18,1<br>9,20,22,24<br>,26 | 3  | P34901,P55314,Q6P777                                                         |
| 207 | 1,2,3,4,5,2<br>1,23,26 | 6,7,8,18,1<br>9,20,22,24<br>,25 | 8  | P01681,P01836,P01946,P34901,Q4FZU2,Q63661,Q6IFU8,Q6IMF3                      |
| 208 | 1,2,3,4,5,2<br>1,24,25 | 6,7,8,18,1<br>9,20,22,23<br>,26 | 1  | P34901                                                                       |
| 209 | 1,2,3,4,5,2<br>1,24,26 | 6,7,8,18,1<br>9,20,22,23<br>,25 | 7  | P01681,P01836,P34901,P80020,Q63661,Q8CJD3,Q9EQV9                             |
| 210 | 1,2,3,4,5,2<br>1,25,26 | 6,7,8,18,1<br>9,20,22,23<br>,24 | 5  | P01681,P01836,P34901,P55314,Q63661                                           |
| 211 | 1,2,3,4,5,2<br>2,23,24 | 6,7,8,18,1<br>9,20,21,25<br>,26 | 3  | P34901,P82471,Q9QW07                                                         |

|     |                        |                                   |    |                                                                                                                                                                                |
|-----|------------------------|-----------------------------------|----|--------------------------------------------------------------------------------------------------------------------------------------------------------------------------------|
| 212 | 1,2,3,4,5,2<br>2,23,25 | 6,7,8,18,1<br>9,20,21,24<br>,26   | 3  | P34901,P55314,Q9QW07                                                                                                                                                           |
| 213 | 1,2,3,4,5,2<br>2,23,26 | 6,7,8,18,1<br>9,20,21,24<br>,25   | 9  | O54728,P01946,P05539,P34901,P36376,P55159,Q4FZU2,Q63661,Q9QW07                                                                                                                 |
| 214 | 1,2,3,4,5,2<br>2,24,25 | 6,7,8,18,1<br>9,20,21,23<br>,26   | 2  | P34901,Q9QW07                                                                                                                                                                  |
| 215 | 1,2,3,4,5,2<br>2,24,26 | 6,7,8,18,1<br>9,20,21,23<br>,25   | 6  | O54728,P01836,P08010,P34901,Q99041,Q9QW07                                                                                                                                      |
| 216 | 1,2,3,4,5,2<br>2,25,26 | 6,7,8,18,1<br>9,20,21,23<br>,24   | 4  | O54728,P05539,P55314,Q9QW07                                                                                                                                                    |
| 217 | 1,2,3,4,5,2<br>3,24,25 | 6,7,8,18,1<br>9,20,21,22<br>,26   | 4  | P34901,P55314,Q62902,Q63751                                                                                                                                                    |
| 218 | 1,2,3,4,5,2<br>3,24,26 | 6,7,8,18,1<br>9,20,21,22<br>,25   | 10 | O54728,P01946,P02091,P34901,P47967,P97840,Q4FZU2,Q62902,Q63661,Q6IFU8                                                                                                          |
| 219 | 1,2,3,4,5,2<br>3,25,26 | 6,7,8,18,1<br>9,20,21,22<br>,24   | 10 | P01946,P02091,P34901,P36376,P55314,Q4FZU2,Q62902,Q63661,Q6IFU8,Q6IFW6                                                                                                          |
| 220 | 1,2,3,4,5,2<br>4,25,26 | 6,7,8,18,1<br>9,20,21,22<br>,23   | 6  | P01946,P34901,P55314,P60905,Q62902,Q8CJD3                                                                                                                                      |
| 221 | 1,2,3,4,6,7<br>,8,18   | 5,19,20,21<br>,22,23,24,<br>25,26 | 24 | O35783,O54800;Q5DWW2,O55006,P00731,P01836,P02631,P02803,P05964,P10715,P16086,P18418,P20762,P25031,P35280,P42854,Q30KJ2,Q63475,Q63617,Q64057,Q6AYQ8,Q6IE51,Q7TP52,Q91ZS3,Q9R0T3 |
| 222 | 1,2,3,4,6,7<br>,8,19   | 5,18,20,21<br>,22,23,24,<br>25,26 | 20 | O55006,P00731,P01836,P02631,P02803,P15399,P16086,P18418,P20762,P35280,P97580,Q30KJ2,Q63317,Q63475,Q63532,Q63617,Q64057,Q6IE51,Q7TP52,Q9QZQ5                                    |
| 223 | 1,2,3,4,6,7<br>,8,20   | 5,18,19,21<br>,22,23,24,<br>25,26 | 21 | D3ZUK3,O35783,O55006,P00731,P01041,P01681,P01836,P02631,P10715,P16086,P18418,P20762,P35280,P42854,Q30KJ2,Q63317,Q63475,Q63617,Q64057,Q8K1G0,Q91ZS3                             |
| 224 | 1,2,3,4,6,7<br>,8,21   | 5,18,19,20<br>,22,23,24,<br>25,26 | 24 | D4A1J4,O35783,O54800;Q5DWW2,P00731,P01681,P01836,P02631,P02761,P08723,P16086,P18418,P20762,P25236,P42854,Q30KJ2,Q4V885,Q63317,Q63475,Q63617,Q64057,Q80WL1,Q91ZS3,Q9JH85,Q9R0T3 |
| 225 | 1,2,3,4,6,7<br>,8,22   | 5,18,19,20<br>,21,23,24,<br>25,26 | 15 | D3ZUK3,D4A1J4,O54800;Q5DWW2,P01836,P02631,P16086,P18418,P20762,P20766,Q30KJ2,Q63317,Q63475,Q63617,Q7TP52,Q9R0T3                                                                |
| 226 | 1,2,3,4,6,7<br>,8,23   | 5,18,19,20<br>,21,22,24,<br>25,26 | 19 | D3ZUK3,O35783,P01836,P02631,P05371,P15399,P16086,P18418,P20762,P34901,P50280,P97580,Q30KJ2,Q5XI22,Q63317,Q63475,Q63617,Q64057,Q6IE51                                           |

|     |                   |                           |    |                                                                                                                                                                                                     |
|-----|-------------------|---------------------------|----|-----------------------------------------------------------------------------------------------------------------------------------------------------------------------------------------------------|
| 227 | 1,2,3,4,6,7,8,24  | 5,18,19,20,21,22,23,25,26 | 13 | D3ZHA0,O54800;Q5DWV2,O55006,P01836,P02631,P08010,P16086,P18418,P20762,Q30KJ2,Q63317,Q63475,Q63617                                                                                                   |
| 228 | 1,2,3,4,6,7,8,25  | 5,18,19,20,21,22,23,24,26 | 24 | O35783,O54800;Q5DWV2,P01836,P02631,P05371,P06911,P10715,P12020,P16086,P18418,P19629,P20762,P20766,P31044,P35280,P55314,P68370,Q30KJ2,Q5GRG2,Q63475,Q63617,Q64057,Q6AYQ8,Q91ZS3                      |
| 229 | 1,2,3,4,6,7,8,26  | 5,18,19,20,21,22,23,24,25 | 27 | O35783,O54800;Q5DWV2,P01041,P01681,P01836,P01946,P02631,P02770,P10959,P16086,P18418,P20760,P20761,P20762,P20766,P35280,P83748,Q30KJ2,Q5QE79,Q63475,Q63617,Q64057,Q6AY33,Q6AYQ8,Q7TP52,Q91ZS3,Q9R0T3 |
| 230 | 1,2,3,4,6,7,18,19 | 5,8,20,21,22,23,24,25,26  | 17 | O55006,P00731,P01836,P02631,P05964,P06760,P15399,P16086,P18418,P25031,P35280,P97580,Q30KJ2,Q5FVI6,Q63532,Q6IE51,Q7TP52                                                                              |
| 231 | 1,2,3,4,6,7,18,20 | 5,8,19,21,22,23,24,25,26  | 16 | O35783,P00731,P01041,P01836,P02631,P06760,P16086,P18418,P20762,P25031,P35280,P42854,Q63475,Q6IE51,Q7TP52,Q91ZS3                                                                                     |
| 232 | 1,2,3,4,6,7,18,21 | 5,8,19,20,22,23,24,25,26  | 17 | O35783,O54800;Q5DWV2,P00731,P01836,P02631,P05964,P16086,P18418,P25031,P25236,P42854,P98089,Q63475,Q63661,Q6IE51,Q91ZS3,Q9JI85                                                                       |
| 233 | 1,2,3,4,6,7,18,22 | 5,8,19,20,21,23,24,25,26  | 8  | P01836,P02631,P06760,P16086,P18418,P25031,Q6IE51,Q7TP52                                                                                                                                             |
| 234 | 1,2,3,4,6,7,18,23 | 5,8,19,20,21,22,24,25,26  | 18 | O35783,P01836,P02631,P05371,P05964,P12785,P15399,P16086,P18418,P20762,P25031,P34901,P55053,P97580,Q30KJ2,Q5XI22,Q63475,Q6IE51                                                                       |
| 235 | 1,2,3,4,6,7,18,24 | 5,8,19,20,21,22,23,25,26  | 10 | O35783,P01836,P02631,P06760,P16086,P18418,P25031,Q63475,Q6IE51,Q7TP52                                                                                                                               |
| 236 | 1,2,3,4,6,7,18,25 | 5,8,19,20,21,22,23,24,26  | 20 | O35783,O54800;Q5DWV2,P00731,P01836,P02631,P05371,P05964,P12020,P16086,P18418,P25031,P35280,P55314,P61206,P84079,P84082,P98089,Q5GRG2,Q63475,Q6IE51,Q7TP52,Q91ZS3                                    |
| 237 | 1,2,3,4,6,7,18,26 | 5,8,19,20,21,22,23,24,25  | 26 | O35783,O54800;Q5DWV2,P00774,P01041,P01836,P01946,P02631,P02770,P05964,P06760,P16086,P18418,P20761,P20762,P25031,P35280,P83748,Q30KJ2,Q4FZU2,Q63661,Q63942,Q6AYQ8,Q6IE51,Q7TP52,Q8VD89,Q91ZS3        |
| 238 | 1,2,3,4,6,7,19,20 | 5,8,18,21,22,23,24,25,26  | 16 | P00731,P01836,P02631,P15399,P16086,P18418,P35280,P42854,P97580,Q30KJ2,Q5FVI6,Q63475,Q63532,Q6IE51,Q7TP52,Q91ZS3                                                                                     |
| 239 | 1,2,3,4,6,7,19,21 | 5,8,18,20,22,23,24,25,26  | 17 | O54800;Q5DWV2,P00731,P01836,P02631,P05964,P15399,P16086,P18418,P25236,P42854,P47967,P97580,Q30KJ2,Q63475,Q63532,Q6IE51,Q91ZS3                                                                       |
| 240 | 1,2,3,4,6,7,19,22 | 5,8,18,20,21,23,24,25,26  | 10 | P01836,P02631,P15399,P16086,P18418,P97580,Q30KJ2,Q63532,Q6IE51,Q7TP52                                                                                                                               |
| 241 | 1,2,3,4,6,7,19,23 | 5,8,18,20,21,22,24,25,26  | 13 | P01836,P02631,P05964,P15399,P16086,P18418,P34901,P97580,Q30KJ2,Q5FVI6,Q63475,Q63532,Q6IE51                                                                                                          |

|     |                       |                                  |    |                                                                                                                                                    |
|-----|-----------------------|----------------------------------|----|----------------------------------------------------------------------------------------------------------------------------------------------------|
| 242 | 1,2,3,4,6,7<br>,19,24 | 5,8,18,20,<br>21,22,23,2<br>5,26 | 10 | P01836,P02631,P15399,P16086,P18418,P97580,Q30KJ2,Q63475,Q63532,Q6IE51                                                                              |
| 243 | 1,2,3,4,6,7<br>,19,25 | 5,8,18,20,<br>21,22,23,2<br>4,26 | 21 | P00731,P01836,P02631,P05371,P06911,P12020,P15399,P16086,P18418,P35280,P47967,P55314,P97580,P97840,Q30KJ2,Q5FVI6,Q5GRG2,Q63532,Q6IE51,Q7TP52,Q91ZS3 |
| 244 | 1,2,3,4,6,7<br>,19,26 | 5,8,18,20,<br>21,22,23,2<br>4,25 | 19 | P01041,P01836,P01946,P02631,P02770,P06760,P15399,P16086,P18418,P20761,P35280,P83748,P97580,Q30KJ2,Q5FVI6,Q63532,Q63661,Q6IE51,Q7TP52               |
| 245 | 1,2,3,4,6,7<br>,20,21 | 5,8,18,19,<br>22,23,24,2<br>5,26 | 14 | O35783,O54800;Q5DWV2,P00731,P01041,P01681,P01836,P02631,P16086,P18418,P20762,P25236,P42854,Q63475,Q91ZS3                                           |
| 246 | 1,2,3,4,6,7<br>,20,22 | 5,8,18,19,<br>21,23,24,2<br>5,26 | 7  | P01836,P02631,P16086,P18418,Q62997,Q7TP52,Q91ZS3                                                                                                   |
| 247 | 1,2,3,4,6,7<br>,20,23 | 5,8,18,19,<br>21,22,24,2<br>5,26 | 14 | O35783,P01836,P02631,P15399,P16086,P18418,P20762,P34901,P55053,P97580,Q30KJ2,Q63475,Q6IE51,Q91ZS3                                                  |
| 248 | 1,2,3,4,6,7<br>,20,24 | 5,8,18,19,<br>21,22,23,2<br>5,26 | 8  | P01836,P02631,P08010,P16086,P18418,Q63475,Q6IE51,Q91ZS3                                                                                            |
| 249 | 1,2,3,4,6,7<br>,20,25 | 5,8,18,19,<br>21,22,23,2<br>4,26 | 13 | O35783,P01836,P02631,P05371,P12020,P16086,P18418,P35280,P55314,Q5GRG2,Q63475,Q6IE51,Q91ZS3                                                         |
| 250 | 1,2,3,4,6,7<br>,20,26 | 5,8,18,19,<br>21,22,23,2<br>4,25 | 20 | O35783,P01041,P01681,P01836,P01946,P02631,P05539,P06760,P16086,P18418,P20761,P20762,P35280,P83748,Q30KJ2,Q5FVI6,Q6AYQ8,Q6IE51,Q7TP52,Q91ZS3        |
| 251 | 1,2,3,4,6,7<br>,21,22 | 5,8,18,19,<br>20,23,24,2<br>5,26 | 12 | D4A1J4,O35783,O54800;Q5DWV2,P01836,P02631,P13432,P16086,P18418,P25236,P42854,Q7TP52,Q91ZS3                                                         |
| 252 | 1,2,3,4,6,7<br>,21,23 | 5,8,18,19,<br>20,22,24,2<br>5,26 | 17 | O35783,P01836,P02631,P05964,P15399,P16086,P18418,P20762,P25236,P34901,P42854,P55053,P97580,Q30KJ2,Q63475,Q6IE51,Q91ZS3                             |
| 253 | 1,2,3,4,6,7<br>,21,24 | 5,8,18,19,<br>20,22,23,2<br>5,26 | 12 | O35783,O54800;Q5DWV2,P01836,P02631,P13432,P16086,P18418,P25236,P42854,Q63475,Q6IE51,Q91ZS3                                                         |
| 254 | 1,2,3,4,6,7<br>,21,25 | 5,8,18,19,<br>20,22,23,2<br>4,26 | 18 | O35783,O54800;Q5DWV2,P00731,P01836,P02631,P05371,P09605;P25809,P12020,P16086,P18418,P19629,P25236,P42854,P47967,P55314,Q5GRG2,Q63475,Q91ZS3        |
| 255 | 1,2,3,4,6,7<br>,21,26 | 5,8,18,19,<br>20,22,23,2<br>4,25 | 20 | O35783,O54800;Q5DWV2,P01041,P01681,P01836,P01946,P02631,P02770,P16086,P18418,P20761,P20762,P25236,P42854,P80020,P83748,Q30KJ2,Q63661,Q91ZS3,Q9EQV9 |
| 256 | 1,2,3,4,6,7<br>,22,23 | 5,8,18,19,<br>20,21,24,2<br>5,26 | 12 | G3V686,P01836,P02631,P15399,P16086,P18418,P20762,P34901,P97580,Q30KJ2,Q6IE51,Q7TP52                                                                |

|     |                       |                                  |    |                                                                                                                                                                         |
|-----|-----------------------|----------------------------------|----|-------------------------------------------------------------------------------------------------------------------------------------------------------------------------|
| 257 | 1,2,3,4,6,7<br>,22,24 | 5,8,18,19,<br>20,21,23,2<br>5,26 | 7  | P01836,P02631,P08010,P16086,P18418,Q6IE51,Q7TP52                                                                                                                        |
| 258 | 1,2,3,4,6,7<br>,22,25 | 5,8,18,19,<br>20,21,23,2<br>4,26 | 13 | G3V686,P01836,P02631,P05371,P06911,P12020,P16086,P18418,P19629,P55314,Q5GRG2,Q7TP52,Q91ZS3                                                                              |
| 259 | 1,2,3,4,6,7<br>,22,26 | 5,8,18,19,<br>20,21,23,2<br>4,25 | 16 | O35783,O54800;Q5DWV2,P01041,P01836,P01946,P02631,P05539,P08010,P16086,P18418,P20761,P20762,P55159,P83748,Q30KJ2,Q7TP52                                                  |
| 260 | 1,2,3,4,6,7<br>,23,24 | 5,8,18,19,<br>20,21,22,2<br>5,26 | 11 | P01836,P02631,P15399,P16086,P18418,P34901,P97580,Q30KJ2,Q63475,Q63751,Q6IE51                                                                                            |
| 261 | 1,2,3,4,6,7<br>,23,25 | 5,8,18,19,<br>20,21,22,2<br>4,26 | 21 | G3V686,O35783,P01836,P02631,P05371,P06911,P12020,P15399,P16086,P18418,P19629,P34901,P50280,P55314,P97580,Q30KJ2,Q5GRG2,Q63475,Q63751,Q6IE51,Q91ZS3                      |
| 262 | 1,2,3,4,6,7<br>,23,26 | 5,8,18,19,<br>20,21,22,2<br>4,25 | 20 | O35783,P01836,P01946,P02091,P02631,P05539,P15399,P16086,P20761,P20762,P25236,P34901,P55053,P83748,P97580,Q30KJ2,Q4FZU2,Q63661,Q6AYQ8,Q6IE51                             |
| 263 | 1,2,3,4,6,7<br>,24,25 | 5,8,18,19,<br>20,21,22,2<br>3,26 | 12 | P01836,P02631,P05371,P12020,P16086,P18418,P19629,P55314,Q5GRG2,Q63475,Q6IE51,Q91ZS3                                                                                     |
| 264 | 1,2,3,4,6,7<br>,24,26 | 5,8,18,19,<br>20,21,22,2<br>3,25 | 16 | O35783,P01041,P01836,P01946,P02091,P02631,P02770,P08010,P18418,P20760,P20761,P83748,Q30KJ2,Q6AYQ8,Q6IE51,Q7TP52                                                         |
| 265 | 1,2,3,4,6,7<br>,25,26 | 5,8,18,19,<br>20,21,22,2<br>3,24 | 23 | O35783,O54800;Q5DWV2,P01041,P01836,P01946,P02091,P02631,P05371,P05539,P12020,P18418,P19629,P20761,P35280,P55314,P83748,Q30KJ2,Q5FVI6,Q5GRG2,Q6AYQ8,Q6IE51,Q7TP52,Q91ZS3 |
| 266 | 1,2,3,4,6,8<br>,18,19 | 5,7,20,21,<br>22,23,24,2<br>5,26 | 8  | P00731,P02803,P05964,P22006,P35280,Q30KJ2,Q63355,Q63942                                                                                                                 |
| 267 | 1,2,3,4,6,8<br>,18,20 | 5,7,19,21,<br>22,23,24,2<br>5,26 | 7  | P00731,P01681,P20762,P22006,P35280,Q63355,Q91ZS3                                                                                                                        |
| 268 | 1,2,3,4,6,8<br>,18,21 | 5,7,19,20,<br>22,23,24,2<br>5,26 | 13 | O35547,P00731,P01681,P02761,P02803,P05964,P08723,P0C0A9,P10758,P25031,P25236,P98089,Q91ZS3                                                                              |
| 269 | 1,2,3,4,6,8<br>,18,22 | 5,7,19,20,<br>21,23,24,2<br>5,26 | 3  | P20766,P22006,Q7TP52                                                                                                                                                    |
| 270 | 1,2,3,4,6,8<br>,18,23 | 5,7,19,20,<br>21,22,24,2<br>5,26 | 9  | P02803,P05964,P12785,P20762,P34901,P35467,P97580,Q5XI22,Q63942                                                                                                          |
| 271 | 1,2,3,4,6,8<br>,18,24 | 5,7,19,20,<br>21,22,23,2<br>5,26 | 0  |                                                                                                                                                                         |

|     |                       |                                  |    |                                                                                                          |
|-----|-----------------------|----------------------------------|----|----------------------------------------------------------------------------------------------------------|
| 272 | 1,2,3,4,6,8<br>,18,25 | 5,7,19,20,<br>21,22,23,2<br>4,26 | 5  | P00731,P02803,P35280,P98089,Q91ZS3                                                                       |
| 273 | 1,2,3,4,6,8<br>,18,26 | 5,7,19,20,<br>21,22,23,2<br>4,25 | 15 | P00774,P01681,P02770,P10959,P20761,P20762,P35280,Q4FZU2,Q5QE79,Q63355,Q63661,Q63942,Q6AY33,Q6AYQ8,Q7TP52 |
| 274 | 1,2,3,4,6,8<br>,19,20 | 5,7,18,21,<br>22,23,24,2<br>5,26 | 7  | P00731,P01681,P22006,P35280,Q30KJ2,Q63355,Q66H69                                                         |
| 275 | 1,2,3,4,6,8<br>,19,21 | 5,7,18,20,<br>22,23,24,2<br>5,26 | 8  | P00731,P01681,P02761,P02782,P0C0A9,P25236,P35281,Q30KJ2                                                  |
| 276 | 1,2,3,4,6,8<br>,19,22 | 5,7,18,20,<br>21,23,24,2<br>5,26 | 3  | P20766,Q30KJ2,Q7TP52                                                                                     |
| 277 | 1,2,3,4,6,8<br>,19,23 | 5,7,18,20,<br>21,22,24,2<br>5,26 | 5  | P15399,P50280,P97580,Q30KJ2,Q5XI22                                                                       |
| 278 | 1,2,3,4,6,8<br>,19,24 | 5,7,18,20,<br>21,22,23,2<br>5,26 | 1  | Q30KJ2                                                                                                   |
| 279 | 1,2,3,4,6,8<br>,19,25 | 5,7,18,20,<br>21,22,23,2<br>4,26 | 5  | P06911,P35280,Q30KJ2,Q5GRG2,Q9QUL6                                                                       |
| 280 | 1,2,3,4,6,8<br>,19,26 | 5,7,18,20,<br>21,22,23,2<br>4,25 | 8  | P01681,P02770,P10959,P20761,P35280,Q30KJ2,Q5QE79,Q63355                                                  |
| 281 | 1,2,3,4,6,8<br>,20,21 | 5,7,18,19,<br>22,23,24,2<br>5,26 | 11 | P00731,P01681,P01836,P02761,P20762,P25236,P42854,P62804,Q00715,Q8K1G0,Q91ZS3                             |
| 282 | 1,2,3,4,6,8<br>,20,22 | 5,7,18,19,<br>21,23,24,2<br>5,26 | 5  | P01681,P20766,P22006,Q62997,Q7TP52                                                                       |
| 283 | 1,2,3,4,6,8<br>,20,23 | 5,7,18,19,<br>21,22,24,2<br>5,26 | 5  | P01681,P20762,P22006,P97580,Q5XI22                                                                       |
| 284 | 1,2,3,4,6,8<br>,20,24 | 5,7,18,19,<br>21,22,23,2<br>5,26 | 1  | P01681                                                                                                   |
| 285 | 1,2,3,4,6,8<br>,20,25 | 5,7,18,19,<br>21,22,23,2<br>4,26 | 4  | P01681,P35280,Q5GRG2,Q91ZS3                                                                              |
| 286 | 1,2,3,4,6,8<br>,20,26 | 5,7,18,19,<br>21,22,23,2<br>4,25 | 13 | P01681,P01836,P02770,P10959,P20761,P20762,P25236,P35280,P62804,Q00715,Q5QE79,Q63355,Q6AYQ8               |

|     |                       |                                  |    |                                                                                                          |
|-----|-----------------------|----------------------------------|----|----------------------------------------------------------------------------------------------------------|
| 287 | 1,2,3,4,6,8<br>,21,22 | 5,7,18,19,<br>20,23,24,2<br>5,26 | 7  | P01681,P02761,P02782,P08723,P13432,P25236,Q80WL1                                                         |
| 288 | 1,2,3,4,6,8<br>,21,23 | 5,7,18,19,<br>20,22,24,2<br>5,26 | 7  | P01681,P02761,P20762,P25236,P34901,P97580,Q5XI22                                                         |
| 289 | 1,2,3,4,6,8<br>,21,24 | 5,7,18,19,<br>20,22,23,2<br>5,26 | 5  | D3ZHA0,P01836,P02761,P13432,P25236                                                                       |
| 290 | 1,2,3,4,6,8<br>,21,25 | 5,7,18,19,<br>20,22,23,2<br>4,26 | 7  | P00731,P01681,P25236,Q6P6R2,Q91ZS3,Q9WTT6,Q9Z0V6                                                         |
| 291 | 1,2,3,4,6,8<br>,21,26 | 5,7,18,19,<br>20,22,23,2<br>4,25 | 12 | P01681,P01836,P02761,P02770,P10959,P20761,P20762,P25236,Q00715,Q5QE79,Q63661,Q9EQV9                      |
| 292 | 1,2,3,4,6,8<br>,22,23 | 5,7,18,19,<br>20,21,24,2<br>5,26 | 6  | P20762,P20766,P34901,P50280,P97580,Q5XI22                                                                |
| 293 | 1,2,3,4,6,8<br>,22,24 | 5,7,18,19,<br>20,21,23,2<br>5,26 | 2  | P20766,Q7TP52                                                                                            |
| 294 | 1,2,3,4,6,8<br>,22,25 | 5,7,18,19,<br>20,21,23,2<br>4,26 | 5  | P06911,P12020,P20766,Q5GRG2,Q7TP52                                                                       |
| 295 | 1,2,3,4,6,8<br>,22,26 | 5,7,18,19,<br>20,21,23,2<br>4,25 | 8  | P01681,P02770,P10959,P20761,P20762,P20766,Q5QE79,Q7TP52                                                  |
| 296 | 1,2,3,4,6,8<br>,23,24 | 5,7,18,19,<br>20,21,22,2<br>5,26 | 4  | P34901,P97580,Q30KJ2,Q5XI22                                                                              |
| 297 | 1,2,3,4,6,8<br>,23,25 | 5,7,18,19,<br>20,21,22,2<br>4,26 | 12 | P06911,P12020,P50280,P55314,P97580,Q30KJ2,Q5GRG2,Q5XI22,Q63751,Q6P6R2,Q9WTT6,Q9Z0V6                      |
| 298 | 1,2,3,4,6,8<br>,23,26 | 5,7,18,19,<br>20,21,22,2<br>4,25 | 15 | D4A5U3,P01681,P02770,P10959,P20761,P20762,P25236,P34901,P97580,Q30KJ2,Q4FZU2,Q5QE79,Q6AYQ8,Q6IFU8,Q6IFW6 |
| 299 | 1,2,3,4,6,8<br>,24,25 | 5,7,18,19,<br>20,21,22,2<br>3,26 | 1  | Q5GRG2                                                                                                   |
| 300 | 1,2,3,4,6,8<br>,24,26 | 5,7,18,19,<br>20,21,22,2<br>3,25 | 7  | D3ZHA0,P02770,P10959,P20760,P20761,Q5QE79,Q6AYQ8                                                         |
| 301 | 1,2,3,4,6,8<br>,25,26 | 5,7,18,19,<br>20,21,22,2<br>3,24 | 10 | P01681,P02770,P10959,P20761,P20766,P35280,Q5QE79,Q6AYQ8,Q91ZS3,Q9Z0V6                                    |

|     |                        |                                 |    |                                                                       |
|-----|------------------------|---------------------------------|----|-----------------------------------------------------------------------|
| 302 | 1,2,3,4,6,1<br>8,19,20 | 5,7,8,21,2<br>2,23,24,25<br>,26 | 5  | P00731,P22006,P35280,Q30KJ2,Q63355                                    |
| 303 | 1,2,3,4,6,1<br>8,19,21 | 5,7,8,20,2<br>2,23,24,25<br>,26 | 9  | O89117,P00731,P05964,P10758,P14173,P25031,P25236,Q30KJ2,Q63661        |
| 304 | 1,2,3,4,6,1<br>8,19,22 | 5,7,8,20,2<br>1,23,24,25<br>,26 | 4  | P02625,P22006,Q30KJ2,Q7TP52                                           |
| 305 | 1,2,3,4,6,1<br>8,19,23 | 5,7,8,20,2<br>1,22,24,25<br>,26 | 10 | P02625,P05964,P12785,P15399,P34901,P97580,Q30KJ2,Q5XI22,Q63661,Q8CJD3 |
| 306 | 1,2,3,4,6,1<br>8,19,24 | 5,7,8,20,2<br>1,22,23,25<br>,26 | 2  | Q30KJ2,Q63532                                                         |
| 307 | 1,2,3,4,6,1<br>8,19,25 | 5,7,8,20,2<br>1,22,23,24<br>,26 | 6  | P00731,P14173,P35280,P98089,Q30KJ2,Q4FZU6                             |
| 308 | 1,2,3,4,6,1<br>8,19,26 | 5,7,8,20,2<br>1,22,23,24<br>,25 | 9  | P05964,P06760,P35280,Q30KJ2,Q4FZU2,Q63355,Q63661,Q63942,Q7TP52        |
| 309 | 1,2,3,4,6,1<br>8,20,21 | 5,7,8,19,2<br>2,23,24,25<br>,26 | 8  | P00731,P01681,P01835,P01836,P25031,P25236,P42854,Q91ZS3               |
| 310 | 1,2,3,4,6,1<br>8,20,22 | 5,7,8,19,2<br>1,23,24,25<br>,26 | 2  | P22006,Q7TP52                                                         |
| 311 | 1,2,3,4,6,1<br>8,20,23 | 5,7,8,19,2<br>1,22,24,25<br>,26 | 5  | P12785,P22006,P34901,Q4FZU2,Q5XI22                                    |
| 312 | 1,2,3,4,6,1<br>8,20,24 | 5,7,8,19,2<br>1,22,23,25<br>,26 | 0  |                                                                       |
| 313 | 1,2,3,4,6,1<br>8,20,25 | 5,7,8,19,2<br>1,22,23,24<br>,26 | 3  | P35280,P98089,Q91ZS3                                                  |
| 314 | 1,2,3,4,6,1<br>8,20,26 | 5,7,8,19,2<br>1,22,23,24<br>,25 | 7  | P01681,P01836,P35280,Q4FZU2,Q63355,Q63661,Q63942                      |
| 315 | 1,2,3,4,6,1<br>8,21,22 | 5,7,8,19,2<br>0,23,24,25<br>,26 | 3  | P01836,P25031,P25236                                                  |
| 316 | 1,2,3,4,6,1<br>8,21,23 | 5,7,8,19,2<br>0,22,24,25<br>,26 | 8  | P05964,P12785,P25031,P25236,P34901,Q4FZU2,Q5XI22,Q63661               |



|     |                        |                                 |    |                                                                                                                        |
|-----|------------------------|---------------------------------|----|------------------------------------------------------------------------------------------------------------------------|
| 317 | 1,2,3,4,6,1<br>8,21,24 | 5,7,8,19,2<br>0,22,23,25<br>,26 | 4  | P01836,P13432,P25031,P25236                                                                                            |
| 318 | 1,2,3,4,6,1<br>8,21,25 | 5,7,8,19,2<br>0,22,23,24<br>,26 | 7  | P00731,P00774,P25031,P25236,P31430,P98089,Q91ZS3                                                                       |
| 319 | 1,2,3,4,6,1<br>8,21,26 | 5,7,8,19,2<br>0,22,23,24<br>,25 | 10 | P00774,P01681,P01836,P20761,P25031,P25236,Q4FZU2,Q63661,Q63942,Q9EQV9                                                  |
| 320 | 1,2,3,4,6,1<br>8,22,23 | 5,7,8,19,2<br>0,21,24,25<br>,26 | 5  | G3V686,P02625,P12785,P34901,Q5XI22                                                                                     |
| 321 | 1,2,3,4,6,1<br>8,22,24 | 5,7,8,19,2<br>0,21,23,25<br>,26 | 1  | Q7TP52                                                                                                                 |
| 322 | 1,2,3,4,6,1<br>8,22,25 | 5,7,8,19,2<br>0,21,23,24<br>,26 | 3  | P98089,Q4FZU6,Q7TP52                                                                                                   |
| 323 | 1,2,3,4,6,1<br>8,22,26 | 5,7,8,19,2<br>0,21,23,24<br>,25 | 5  | P20761,Q4FZU2,Q63661,Q63942,Q7TP52                                                                                     |
| 324 | 1,2,3,4,6,1<br>8,23,24 | 5,7,8,19,2<br>0,21,22,25<br>,26 | 3  | P12785,P34901,Q5XI22                                                                                                   |
| 325 | 1,2,3,4,6,1<br>8,23,25 | 5,7,8,19,2<br>0,21,22,24<br>,26 | 6  | P00774,P12785,P34901,P55314,P98089,Q5XI22                                                                              |
| 326 | 1,2,3,4,6,1<br>8,23,26 | 5,7,8,19,2<br>0,21,22,24<br>,25 | 17 | P00774,P12785,P20761,P25236,P34901,P35467,Q4FZU2,Q5XI22,Q63355,Q63661,Q63942,Q6AY61,Q6IFU8,Q6IFW6,Q6IG02,Q6IMF3,Q6P6Q2 |
| 327 | 1,2,3,4,6,1<br>8,24,25 | 5,7,8,19,2<br>0,21,22,23<br>,26 | 2  | P98089,Q4FZU6                                                                                                          |
| 328 | 1,2,3,4,6,1<br>8,24,26 | 5,7,8,19,2<br>0,21,22,23<br>,25 | 6  | P00774,P01836,P20761,Q4FZU2,Q63661,Q63942                                                                              |
| 329 | 1,2,3,4,6,1<br>8,25,26 | 5,7,8,19,2<br>0,21,22,23<br>,24 | 8  | P00774,P35280,P55091,P98089,Q4FZU2,Q63661,Q63942,Q91ZS3                                                                |
| 330 | 1,2,3,4,6,1<br>9,20,21 | 5,7,8,18,2<br>2,23,24,25<br>,26 | 5  | P00731,P01681,P01836,P25236,Q30KJ2                                                                                     |
| 331 | 1,2,3,4,6,1<br>9,20,22 | 5,7,8,18,2<br>1,23,24,25<br>,26 | 5  | P07150,P22006,Q30KJ2,Q62997,Q7TP52                                                                                     |

|     |                        |                                 |   |                                                  |
|-----|------------------------|---------------------------------|---|--------------------------------------------------|
| 332 | 1,2,3,4,6,1<br>9,20,23 | 5,7,8,18,2<br>1,22,24,25<br>,26 | 6 | P01681,P15399,P22006,P82995,P97580,Q30KJ2        |
| 333 | 1,2,3,4,6,1<br>9,20,24 | 5,7,8,18,2<br>1,22,23,25<br>,26 | 2 | P82995,Q30KJ2                                    |
| 334 | 1,2,3,4,6,1<br>9,20,25 | 5,7,8,18,2<br>1,22,23,24<br>,26 | 2 | P35280,Q30KJ2                                    |
| 335 | 1,2,3,4,6,1<br>9,20,26 | 5,7,8,18,2<br>1,22,23,24<br>,25 | 6 | P01681,P01836,P25236,P35280,Q30KJ2,Q63355        |
| 336 | 1,2,3,4,6,1<br>9,21,22 | 5,7,8,18,2<br>0,23,24,25<br>,26 | 2 | P25236,Q30KJ2                                    |
| 337 | 1,2,3,4,6,1<br>9,21,23 | 5,7,8,18,2<br>0,22,24,25<br>,26 | 5 | P15399,P25236,P34901,P97580,Q30KJ2               |
| 338 | 1,2,3,4,6,1<br>9,21,24 | 5,7,8,18,2<br>0,22,23,25<br>,26 | 2 | P25236,Q30KJ2                                    |
| 339 | 1,2,3,4,6,1<br>9,21,25 | 5,7,8,18,2<br>0,22,23,24<br>,26 | 7 | P00731,P14173,P25236,P47967,P97840,Q30KJ2,Q91ZS3 |
| 340 | 1,2,3,4,6,1<br>9,21,26 | 5,7,8,18,2<br>0,22,23,24<br>,25 | 7 | P01681,P01836,P20761,P25236,Q30KJ2,Q63661,Q9EQV9 |
| 341 | 1,2,3,4,6,1<br>9,22,23 | 5,7,8,18,2<br>0,21,24,25<br>,26 | 5 | P02625,P15399,P34901,P97580,Q30KJ2               |
| 342 | 1,2,3,4,6,1<br>9,22,24 | 5,7,8,18,2<br>0,21,23,25<br>,26 | 2 | Q30KJ2,Q7TP52                                    |
| 343 | 1,2,3,4,6,1<br>9,22,25 | 5,7,8,18,2<br>0,21,23,24<br>,26 | 4 | P06911,Q30KJ2,Q4FZU6,Q7TP52                      |
| 344 | 1,2,3,4,6,1<br>9,22,26 | 5,7,8,18,2<br>0,21,23,24<br>,25 | 4 | P20761,P55159,Q30KJ2,Q7TP52                      |
| 345 | 1,2,3,4,6,1<br>9,23,24 | 5,7,8,18,2<br>0,21,22,25<br>,26 | 6 | P15399,P34901,P82995,P97580,Q30KJ2,Q63532        |
| 346 | 1,2,3,4,6,1<br>9,23,25 | 5,7,8,18,2<br>0,21,22,24<br>,26 | 7 | P15399,P34901,P50280,P55314,P97580,Q30KJ2,Q4FZU6 |

|     |                        |                                 |    |                                                                       |
|-----|------------------------|---------------------------------|----|-----------------------------------------------------------------------|
| 347 | 1,2,3,4,6,1<br>9,23,26 | 5,7,8,18,2<br>0,21,22,24<br>,25 | 10 | P01946,P15399,P20761,P25236,P34901,P97580,Q30KJ2,Q4FZU2,Q63661,Q6IFU8 |
| 348 | 1,2,3,4,6,1<br>9,24,25 | 5,7,8,18,2<br>0,21,22,23<br>,26 | 2  | Q30KJ2,Q4FZU6                                                         |
| 349 | 1,2,3,4,6,1<br>9,24,26 | 5,7,8,18,2<br>0,21,22,23<br>,25 | 2  | P20761,Q30KJ2                                                         |
| 350 | 1,2,3,4,6,1<br>9,25,26 | 5,7,8,18,2<br>0,21,22,23<br>,24 | 3  | P35280,Q30KJ2,Q63661                                                  |
| 351 | 1,2,3,4,6,2<br>0,21,22 | 5,7,8,18,1<br>9,23,24,25<br>,26 | 4  | P01681,P01836,P25236,Q7TPB1                                           |
| 352 | 1,2,3,4,6,2<br>0,21,23 | 5,7,8,18,1<br>9,22,24,25<br>,26 | 5  | P01681,P01835,P01836,P25236,P34901                                    |
| 353 | 1,2,3,4,6,2<br>0,21,24 | 5,7,8,18,1<br>9,22,23,25<br>,26 | 4  | P01681,P01836,P13432,P25236                                           |
| 354 | 1,2,3,4,6,2<br>0,21,25 | 5,7,8,18,1<br>9,22,23,24<br>,26 | 4  | P01681,P01836,P25236,Q91ZS3                                           |
| 355 | 1,2,3,4,6,2<br>0,21,26 | 5,7,8,18,1<br>9,22,23,24<br>,25 | 9  | P01681,P01835,P01836,P20761,P25236,P80020,Q4FZU2,Q91ZS3,Q9EQV9        |
| 356 | 1,2,3,4,6,2<br>0,22,23 | 5,7,8,18,1<br>9,21,24,25<br>,26 | 5  | G3V686,P22006,P34901,P82995,Q62997                                    |
| 357 | 1,2,3,4,6,2<br>0,22,24 | 5,7,8,18,1<br>9,21,23,25<br>,26 | 3  | P01836,P82995,Q7TP52                                                  |
| 358 | 1,2,3,4,6,2<br>0,22,25 | 5,7,8,18,1<br>9,21,23,24<br>,26 | 2  | P06911,Q7TP52                                                         |
| 359 | 1,2,3,4,6,2<br>0,22,26 | 5,7,8,18,1<br>9,21,23,24<br>,25 | 6  | P01681,P01836,P20761,P55159,Q62997,Q7TP52                             |
| 360 | 1,2,3,4,6,2<br>0,23,24 | 5,7,8,18,1<br>9,21,22,25<br>,26 | 2  | P34901,P82995                                                         |
| 361 | 1,2,3,4,6,2<br>0,23,25 | 5,7,8,18,1<br>9,21,22,24<br>,26 | 4  | P34901,P55314,P70709,Q91ZS3                                           |

|     |                        |                                 |    |                                                                              |
|-----|------------------------|---------------------------------|----|------------------------------------------------------------------------------|
| 362 | 1,2,3,4,6,2<br>0,23,26 | 5,7,8,18,1<br>9,21,22,24<br>,25 | 10 | P01681,P01836,P20761,P20762,P25236,P34901,Q4FZU2,Q6IFU8,Q6IFW6,Q6IMF3        |
| 363 | 1,2,3,4,6,2<br>0,24,25 | 5,7,8,18,1<br>9,21,22,23<br>,26 | 1  | Q91ZS3                                                                       |
| 364 | 1,2,3,4,6,2<br>0,24,26 | 5,7,8,18,1<br>9,21,22,23<br>,25 | 3  | P01681,P01836,P20761                                                         |
| 365 | 1,2,3,4,6,2<br>0,25,26 | 5,7,8,18,1<br>9,21,22,23<br>,24 | 5  | P01681,P01836,P25236,P35280,Q91ZS3                                           |
| 366 | 1,2,3,4,6,2<br>1,22,23 | 5,7,8,18,1<br>9,20,24,25<br>,26 | 2  | P25236,P34901                                                                |
| 367 | 1,2,3,4,6,2<br>1,22,24 | 5,7,8,18,1<br>9,20,23,25<br>,26 | 4  | P01836,P13432,P25236,P34901                                                  |
| 368 | 1,2,3,4,6,2<br>1,22,25 | 5,7,8,18,1<br>9,20,23,24<br>,26 | 4  | P06911,P09605,P25809,P25236,Q91ZS3                                           |
| 369 | 1,2,3,4,6,2<br>1,22,26 | 5,7,8,18,1<br>9,20,23,24<br>,25 | 5  | P01681,P01836,P20761,P25236,Q63661                                           |
| 370 | 1,2,3,4,6,2<br>1,23,24 | 5,7,8,18,1<br>9,20,22,25<br>,26 | 3  | P01836,P25236,P34901                                                         |
| 371 | 1,2,3,4,6,2<br>1,23,25 | 5,7,8,18,1<br>9,20,22,24<br>,26 | 7  | P25236,P34901,P55314,P70709,Q63751,Q6P6R2,Q91ZS3                             |
| 372 | 1,2,3,4,6,2<br>1,23,26 | 5,7,8,18,1<br>9,20,22,24<br>,25 | 11 | P01681,P01836,P01946,P20761,P25236,P34901,Q4FZU2,Q63661,Q6IFU8,Q6IMF3,Q9EQV9 |
| 373 | 1,2,3,4,6,2<br>1,24,25 | 5,7,8,18,1<br>9,20,22,23<br>,26 | 4  | P01836,P25236,Q4FZU6,Q91ZS3                                                  |
| 374 | 1,2,3,4,6,2<br>1,24,26 | 5,7,8,18,1<br>9,20,22,23<br>,25 | 6  | P01681,P01836,P20761,P25236,P80020,Q9EQV9                                    |
| 375 | 1,2,3,4,6,2<br>1,25,26 | 5,7,8,18,1<br>9,20,22,23<br>,24 | 7  | P01681,P01836,P19223,P20761,P25236,Q63661,Q91ZS3                             |
| 376 | 1,2,3,4,6,2<br>2,23,24 | 5,7,8,18,1<br>9,20,21,25<br>,26 | 3  | P34901,P82471,P82995                                                         |

|     |                        |                                  |    |                                                                                                                               |
|-----|------------------------|----------------------------------|----|-------------------------------------------------------------------------------------------------------------------------------|
| 377 | 1,2,3,4,6,2<br>2,23,25 | 5,7,8,18,1<br>9,20,21,24<br>,26  | 8  | G3V686,P06911,P34901,P50280,P55314,P70709,Q4FZU6,Q5GRG2                                                                       |
| 378 | 1,2,3,4,6,2<br>2,23,26 | 5,7,8,18,1<br>9,20,21,24<br>,25  | 5  | P20761,P25236,P34901,Q4FZU2,Q7TP52                                                                                            |
| 379 | 1,2,3,4,6,2<br>2,24,25 | 5,7,8,18,1<br>9,20,21,23<br>,26  | 3  | P06911,Q4FZU6,Q7TP52                                                                                                          |
| 380 | 1,2,3,4,6,2<br>2,24,26 | 5,7,8,18,1<br>9,20,21,23<br>,25  | 4  | P01836,P08010,P20761,Q7TP52                                                                                                   |
| 381 | 1,2,3,4,6,2<br>2,25,26 | 5,7,8,18,1<br>9,20,21,23<br>,24  | 1  | Q7TP52                                                                                                                        |
| 382 | 1,2,3,4,6,2<br>3,24,25 | 5,7,8,18,1<br>9,20,21,22<br>,26  | 6  | P34901,P55314,P70709,P97580,Q4FZU6,Q63751                                                                                     |
| 383 | 1,2,3,4,6,2<br>3,24,26 | 5,7,8,18,1<br>9,20,21,22<br>,25  | 8  | P01946,P20761,P25236,P27590,P34901,Q30KJ2,Q4FZU2,Q6IFU8                                                                       |
| 384 | 1,2,3,4,6,2<br>3,25,26 | 5,7,8,18,1<br>9,20,21,22<br>,24  | 8  | P01946,P25236,P34901,P55314,Q30KJ2,Q4FZU2,Q63661,Q6IFU8                                                                       |
| 385 | 1,2,3,4,6,2<br>4,25,26 | 5,7,8,18,1<br>9,20,21,22<br>,23  | 2  | P14480,P20761                                                                                                                 |
| 386 | 1,2,3,4,7,8<br>,18,19  | 5,6,19,20,<br>22,23,24,2<br>5,26 | 13 | P00731,P01836,P02803,P05964,P06760,P16086,P18418,P35280,P42854,Q09030,Q63475,Q63532,Q64057                                    |
| 387 | 1,2,3,4,7,8<br>,18,20  | 5,6,19,21,<br>22,23,24,2<br>5,26 | 11 | O35783,P00731,P01041,P01836,P10715,P18418,P35280,P42854,Q63475,Q64057,Q9QZA6                                                  |
| 388 | 1,2,3,4,7,8<br>,18,21  | 5,6,19,20,<br>22,23,24,2<br>5,26 | 17 | O35783,O54800;Q5DWV2,O89117,P00731,P01041,P01836,P02761,P02803,P05964,P18418,P25031,P42854,Q63475,Q64057,Q80WL1,Q9ESW0,Q9QZA6 |
| 389 | 1,2,3,4,7,8<br>,18,22  | 5,6,19,20,<br>21,23,24,2<br>5,26 | 6  | P01836,P18418,P20766,Q63475,Q64057,Q80WL1                                                                                     |
| 390 | 1,2,3,4,7,8<br>,18,23  | 5,6,19,20,<br>21,22,24,2<br>5,26 | 11 | P01836,P02803,P05964,P12785,P18418,P34901,Q09030,Q498D9,Q5XI22,Q63475,Q64057                                                  |
| 391 | 1,2,3,4,7,8<br>,18,24  | 5,6,19,20,<br>21,22,23,2<br>5,26 | 4  | P01836,P10715,P18418,Q63475                                                                                                   |

|     |                       |                                  |    |                                                                                                                                                                                |
|-----|-----------------------|----------------------------------|----|--------------------------------------------------------------------------------------------------------------------------------------------------------------------------------|
| 392 | 1,2,3,4,7,8<br>,18,25 | 5,6,19,20,<br>21,22,23,2<br>4,26 | 14 | O35783,O54800;Q5DWV2,P01836,P02803,P08721,P10715,P18418,P19629,P35280,P98089,Q09030,Q63475,Q64057,Q9QZA6                                                                       |
| 393 | 1,2,3,4,7,8<br>,18,26 | 5,6,19,20,<br>21,22,23,2<br>4,25 | 24 | O35783,O54800;Q5DWV2,P01041,P01836,P01946,P02770,P05964,P06760,P10959,P18418,P19223,P20766,P35280,P55091,P82995,Q5QE79,Q63475,Q63661,Q63942,Q64057,Q6AYQ8,Q8VD89,Q9ESW0,Q9R1T1 |
| 394 | 1,2,3,4,7,8<br>,19,20 | 5,6,18,21,<br>22,23,24,2<br>5,26 | 8  | P01836,P18418,P35280,P36970,P42854,Q63475,Q63532,Q64057                                                                                                                        |
| 395 | 1,2,3,4,7,8<br>,19,21 | 5,6,18,20,<br>22,23,24,2<br>5,26 | 15 | O89117,P00731,P01836,P02761,P02803,P05964,P16086,P18418,P35281,P36970,P42854,Q63475,Q63532,Q64057,Q80WL1                                                                       |
| 396 | 1,2,3,4,7,8<br>,19,22 | 5,6,18,20,<br>21,23,24,2<br>5,26 | 7  | P01836,P16086,P18418,P20766,P36970,Q63532,Q80WL1                                                                                                                               |
| 397 | 1,2,3,4,7,8<br>,19,23 | 5,6,18,20,<br>21,22,24,2<br>5,26 | 15 | P01836,P02803,P05964,P15399,P16086,P18418,P36970,P97580,Q09030,Q30KJ2,Q5XI22,Q63475,Q63532,Q64057,Q99041                                                                       |
| 398 | 1,2,3,4,7,8<br>,19,24 | 5,6,18,20,<br>21,22,23,2<br>5,26 | 5  | P01836,P18418,P36970,Q63475,Q63532                                                                                                                                             |
| 399 | 1,2,3,4,7,8<br>,19,25 | 5,6,18,20,<br>21,22,23,2<br>4,26 | 15 | P01836,P02803,P10715,P18418,P19629,P20766,P35280,P47967,Q09030,Q5GRG2,Q63475,Q63532,Q64057,Q6IFU7,Q9QUL6                                                                       |
| 400 | 1,2,3,4,7,8<br>,19,26 | 5,6,18,20,<br>21,22,23,2<br>4,25 | 13 | P01041,P01836,P01946,P02770,P06760,P10959,P15978,P18418,P20766,P35280,Q63532,Q64057,Q6AYQ8                                                                                     |
| 401 | 1,2,3,4,7,8<br>,20,21 | 5,6,18,19,<br>22,23,24,2<br>5,26 | 11 | O35783,O54800;Q5DWV2,P01041,P01836,P02761,P18418,P42854,Q63475,Q64057,Q80WL1,Q8K1G0                                                                                            |
| 402 | 1,2,3,4,7,8<br>,20,22 | 5,6,18,19,<br>21,23,24,2<br>5,26 | 6  | P01836,P18418,P20766,P36970,Q62997,Q63475                                                                                                                                      |
| 403 | 1,2,3,4,7,8<br>,20,23 | 5,6,18,19,<br>21,22,24,2<br>5,26 | 7  | P01836,P18418,P36970,Q5XI22,Q63475,Q63617,Q64057                                                                                                                               |
| 404 | 1,2,3,4,7,8<br>,20,24 | 5,6,18,19,<br>21,22,23,2<br>5,26 | 8  | P01836,P02761,P08010,P10715,P18418,P36970,Q63475,Q63617                                                                                                                        |
| 405 | 1,2,3,4,7,8<br>,20,25 | 5,6,18,19,<br>21,22,23,2<br>4,26 | 9  | O35783,P01836,P10715,P18418,P19629,P35280,Q5GRG2,Q63475,Q64057                                                                                                                 |
| 406 | 1,2,3,4,7,8<br>,20,26 | 5,6,18,19,<br>21,22,23,2<br>4,25 | 13 | O35783,P01041,P01836,P01946,P02770,P10959,P18418,P20761,P20762,P35280,Q5QE79,Q63475,Q6AYQ8                                                                                     |

|     |                       |                                  |    |                                                                                                                                             |
|-----|-----------------------|----------------------------------|----|---------------------------------------------------------------------------------------------------------------------------------------------|
| 407 | 1,2,3,4,7,8<br>,21,22 | 5,6,18,19,<br>20,23,24,2<br>5,26 | 11 | D4A1J4,O54800;Q5DWV2,P01836,P02761,P18418,P20766,P36970,P42854,Q63475,Q64057,Q80WL1                                                         |
| 408 | 1,2,3,4,7,8<br>,21,23 | 5,6,18,19,<br>20,22,24,2<br>5,26 | 11 | O35783,P01836,P02761,P18418,P34901,P36970,P42854,Q5XI22,Q63475,Q64057,Q80WL1                                                                |
| 409 | 1,2,3,4,7,8<br>,21,24 | 5,6,18,19,<br>20,22,23,2<br>5,26 | 8  | O54800;Q5DWV2,P01836,P02761,P18418,P36970,P42854,Q63475,Q80WL1                                                                              |
| 410 | 1,2,3,4,7,8<br>,21,25 | 5,6,18,19,<br>20,22,23,2<br>4,26 | 15 | O35783,O54800;Q5DWV2,P01836,P02761,P08721,P10715,P18418,P19629,P42854,Q5GRG2,Q63475,Q64057,Q6IFU7,Q80WL1,Q91ZS3                             |
| 411 | 1,2,3,4,7,8<br>,21,26 | 5,6,18,19,<br>20,22,23,2<br>4,25 | 19 | O35783,O54800;Q5DWV2,P01041,P01836,P01946,P02761,P02770,P10959,P18418,P19223,P20761,P42854,Q5QE79,Q63475,Q63661,Q64057,Q6AYQ8,Q80WL1,Q9EQV9 |
| 412 | 1,2,3,4,7,8<br>,22,23 | 5,6,18,19,<br>20,21,24,2<br>5,26 | 9  | D3ZUK3,P01836,P18418,P20766,P34901,P36970,Q63475,Q64057,Q80WL1                                                                              |
| 413 | 1,2,3,4,7,8<br>,22,24 | 5,6,18,19,<br>20,21,23,2<br>5,26 | 6  | P01836,P08010,P18418,P20766,P36970,Q63475                                                                                                   |
| 414 | 1,2,3,4,7,8<br>,22,25 | 5,6,18,19,<br>20,21,23,2<br>4,26 | 9  | P01836,P06911,P10715,P18418,P19629,P20766,Q5GRG2,Q80WL1,Q9QUL6                                                                              |
| 415 | 1,2,3,4,7,8<br>,22,26 | 5,6,18,19,<br>20,21,23,2<br>4,25 | 14 | O54800;Q5DWV2,P01041,P01836,P01946,P02770,P08010,P10959,P18418,P20761,P20766,P55159,Q5QE79,Q6AYQ8,Q80WL1                                    |
| 416 | 1,2,3,4,7,8<br>,23,24 | 5,6,18,19,<br>20,21,22,2<br>5,26 | 5  | P01836,P18418,P34901,P36970,Q63475                                                                                                          |
| 417 | 1,2,3,4,7,8<br>,23,25 | 5,6,18,19,<br>20,21,22,2<br>4,26 | 13 | P01836,P10715,P18418,P19629,P20766,P36970,P55314,Q09030,Q5GRG2,Q63475,Q63751,Q64057,Q99041                                                  |
| 418 | 1,2,3,4,7,8<br>,23,26 | 5,6,18,19,<br>20,21,22,2<br>4,25 | 16 | O35783,P01836,P01946,P02091,P02770,P10959,P18418,P20761,P20762,P20766,Q5QE79,Q63475,Q64057,Q6AYQ8,Q6IE52,Q9R1T1                             |
| 419 | 1,2,3,4,7,8<br>,24,25 | 5,6,18,19,<br>20,21,22,2<br>3,26 | 7  | P01836,P10715,P18418,P19629,Q5GRG2,Q63475,Q9QUL6                                                                                            |
| 420 | 1,2,3,4,7,8<br>,24,26 | 5,6,18,19,<br>20,21,22,2<br>3,25 | 13 | D3ZHA0,P01041,P01836,P01946,P02091,P02770,P08010,P10959,P18418,P20761,Q5QE79,Q63475,Q6AYQ8                                                  |
| 421 | 1,2,3,4,7,8<br>,25,26 | 5,6,18,19,<br>20,21,22,2<br>3,24 | 18 | O35783,O54800;Q5DWV2,P01041,P01836,P01946,P02091,P02770,P08721,P10715,P10959,P18418,P19223,P19629,P20766,P35280,Q5QE79,Q64057,Q6AYQ8        |

|     |                        |                                 |    |                                                                                                                        |
|-----|------------------------|---------------------------------|----|------------------------------------------------------------------------------------------------------------------------|
| 422 | 1,2,3,4,7,1<br>8,19,20 | 5,6,8,21,2<br>2,23,24,25<br>,26 | 10 | P00731,P01836,P05964,P06760,P07150,P35280,P42854,Q63532,Q6IE51,Q9WTT6                                                  |
| 423 | 1,2,3,4,7,1<br>8,19,21 | 5,6,8,20,2<br>2,23,24,25<br>,26 | 12 | D3ZUC6,O89117,P00731,P01836,P05964,P06760,P10758,P25031,P42854,Q63532,Q63661,Q6IE51                                    |
| 424 | 1,2,3,4,7,1<br>8,19,22 | 5,6,8,20,2<br>1,23,24,25<br>,26 | 6  | P01836,P05964,P06760,P07150,Q63532,Q9WTT6                                                                              |
| 425 | 1,2,3,4,7,1<br>8,19,23 | 5,6,8,20,2<br>1,22,24,25<br>,26 | 17 | P01836,P05964,P06760,P12785,P15399,P16086,P34901,P97580,Q03191,Q09030,Q30KJ2,Q498D9,Q5XI22,Q63532,Q63661,Q6IE51,Q99MH3 |
| 426 | 1,2,3,4,7,1<br>8,19,24 | 5,6,8,20,2<br>1,22,23,25<br>,26 | 7  | O89117,P01836,P05964,P06760,Q63532,Q6IE51,Q9WTT6                                                                       |
| 427 | 1,2,3,4,7,1<br>8,19,25 | 5,6,8,20,2<br>1,22,23,24<br>,26 | 8  | P00731,P01836,P05964,P35280,P47967,Q09030,Q63532,Q6IE51                                                                |
| 428 | 1,2,3,4,7,1<br>8,19,26 | 5,6,8,20,2<br>1,22,23,24<br>,25 | 10 | P01041,P01836,P01946,P05964,P06760,P35280,Q63532,Q63661,Q6IE51,Q99PP0                                                  |
| 429 | 1,2,3,4,7,1<br>8,20,21 | 5,6,8,19,2<br>2,23,24,25<br>,26 | 10 | O35783,O54800;Q5DWV2,P00731,P01041,P01836,P06760,P25031,P42854,Q63475,Q9ESW0                                           |
| 430 | 1,2,3,4,7,1<br>8,20,22 | 5,6,8,19,2<br>1,23,24,25<br>,26 | 6  | P01836,P06760,P07150,P42854,Q62997,Q9WTT6                                                                              |
| 431 | 1,2,3,4,7,1<br>8,20,23 | 5,6,8,19,2<br>1,22,24,25<br>,26 | 7  | A2RUV9,P01836,P06760,P12785,P34901,Q5XI22,Q63475                                                                       |
| 432 | 1,2,3,4,7,1<br>8,20,24 | 5,6,8,19,2<br>1,22,23,25<br>,26 | 6  | P01836,P06760,P07150,Q63475,Q9QZK9,Q9WTT6                                                                              |
| 433 | 1,2,3,4,7,1<br>8,20,25 | 5,6,8,19,2<br>1,22,23,24<br>,26 | 3  | O35783,P01836,P35280                                                                                                   |
| 434 | 1,2,3,4,7,1<br>8,20,26 | 5,6,8,19,2<br>1,22,23,24<br>,25 | 7  | O35783,P01041,P01836,P01946,P06760,P35280,Q63661                                                                       |
| 435 | 1,2,3,4,7,1<br>8,21,22 | 5,6,8,19,2<br>0,23,24,25<br>,26 | 7  | O35783,O54800;Q5DWV2,P01836,P06760,P25031,P42854,Q80WL1                                                                |
| 436 | 1,2,3,4,7,1<br>8,21,23 | 5,6,8,19,2<br>0,22,24,25<br>,26 | 14 | D3ZUC6,O35783,P01836,P05964,P12785,P14668,P25031,P34901,P42854,Q5XI22,Q62636,Q63475,Q63661,Q64057                      |



|     |                        |                                 |    |                                                                                                                                                    |
|-----|------------------------|---------------------------------|----|----------------------------------------------------------------------------------------------------------------------------------------------------|
| 437 | 1,2,3,4,7,1<br>8,21,24 | 5,6,8,19,2<br>0,22,23,25<br>,26 | 10 | D3ZUC6,O35783,O54800;Q5DWV2,O89117,P01836,P05964,P06760,P25031,P42854,Q63475                                                                       |
| 438 | 1,2,3,4,7,1<br>8,21,25 | 5,6,8,19,2<br>0,22,23,24<br>,26 | 12 | O35783,O54800;Q5DWV2,P00731,P01836,P05964,P08721,P25031,P31430,P42854,P47967,P98089,Q91ZS3                                                         |
| 439 | 1,2,3,4,7,1<br>8,21,26 | 5,6,8,19,2<br>0,22,23,24<br>,25 | 19 | D3ZUC6,O35783,O54800;Q5DWV2,O89117,P00774,P01041,P01836,P01946,P02770,P05964,P06760,P19223,P25031,P42854,P55091,P82995,Q63661,Q9EQV9,Q9ESW0        |
| 440 | 1,2,3,4,7,1<br>8,22,23 | 5,6,8,19,2<br>0,21,24,25<br>,26 | 5  | P01836,P06760,P12785,P34901,Q5XI22                                                                                                                 |
| 441 | 1,2,3,4,7,1<br>8,22,24 | 5,6,8,19,2<br>0,21,23,25<br>,26 | 5  | P01836,P06760,P07150,P08010,Q9WTT6                                                                                                                 |
| 442 | 1,2,3,4,7,1<br>8,22,25 | 5,6,8,19,2<br>0,21,23,24<br>,26 | 1  | P01836                                                                                                                                             |
| 443 | 1,2,3,4,7,1<br>8,22,26 | 5,6,8,19,2<br>0,21,23,24<br>,25 | 8  | O35783,P01041,P01836,P01946,P06760,P55159,Q63661,Q8VD89                                                                                            |
| 444 | 1,2,3,4,7,1<br>8,23,24 | 5,6,8,19,2<br>0,21,22,25<br>,26 | 9  | A2RUV9,P01836,P06760,P12785,P34901,Q5XI22,Q63475,Q6IE51,Q99068                                                                                     |
| 445 | 1,2,3,4,7,1<br>8,23,25 | 5,6,8,19,2<br>0,21,22,24<br>,26 | 10 | A2RUV9,P01836,P05964,P12785,P34901,P55314,Q09030,Q5XI22,Q99068,Q99MH3                                                                              |
| 446 | 1,2,3,4,7,1<br>8,23,26 | 5,6,8,19,2<br>0,21,22,24<br>,25 | 21 | A2RUV9,O35783,P01836,P01946,P02091,P05964,P06760,P12785,P34901,P35467,Q4FZU2,Q5XI22,Q62636,Q63661,Q6AY61,Q6IFU8,Q6IFW6,Q6IG02,Q6P6Q2,Q8VD89,Q9R1T1 |
| 447 | 1,2,3,4,7,1<br>8,24,25 | 5,6,8,19,2<br>0,21,22,23<br>,26 | 2  | P01836,P08721                                                                                                                                      |
| 448 | 1,2,3,4,7,1<br>8,24,26 | 5,6,8,19,2<br>0,21,22,23<br>,25 | 10 | O35783,P01041,P01836,P01946,P02091,P02770,P06760,P55091,Q63661,Q8VD89                                                                              |
| 449 | 1,2,3,4,7,1<br>8,25,26 | 5,6,8,19,2<br>0,21,22,23<br>,24 | 13 | O35783,P00774,P01041,P01836,P01946,P02091,P08721,P19223,P35280,P55091,P82995,Q63661,Q6AYQ8                                                         |
| 450 | 1,2,3,4,7,1<br>9,20,21 | 5,6,8,18,2<br>2,23,24,25<br>,26 | 4  | P00731,P01836,P42854,Q63532                                                                                                                        |
| 451 | 1,2,3,4,7,1<br>9,20,22 | 5,6,8,18,2<br>1,23,24,25<br>,26 | 7  | P01836,P06760,P07150,P14669,Q62997,Q63532,Q9WTT6                                                                                                   |

|     |                        |                                 |    |                                                                                     |
|-----|------------------------|---------------------------------|----|-------------------------------------------------------------------------------------|
| 452 | 1,2,3,4,7,1<br>9,20,23 | 5,6,8,18,2<br>1,22,24,25<br>,26 | 8  | P01836,P06760,P15399,P16086,P97580,Q30KJ2,Q63532,Q6IE51                             |
| 453 | 1,2,3,4,7,1<br>9,20,24 | 5,6,8,18,2<br>1,22,23,25<br>,26 | 7  | P01836,P06760,P07150,P14669,Q63532,Q6IE51,Q9WTT6                                    |
| 454 | 1,2,3,4,7,1<br>9,20,25 | 5,6,8,18,2<br>1,22,23,24<br>,26 | 4  | P01836,P35280,P47967,Q63532                                                         |
| 455 | 1,2,3,4,7,1<br>9,20,26 | 5,6,8,18,2<br>1,22,23,24<br>,25 | 7  | P01041,P01836,P01946,P06760,P35280,Q5FVI6,Q63532                                    |
| 456 | 1,2,3,4,7,1<br>9,21,22 | 5,6,8,18,2<br>0,23,24,25<br>,26 | 3  | P01836,P42854,Q63532                                                                |
| 457 | 1,2,3,4,7,1<br>9,21,23 | 5,6,8,18,2<br>0,22,24,25<br>,26 | 12 | D3ZUC6,P01836,P05964,P14668,P15399,P16086,P34901,P42854,P97580,Q30KJ2,Q63532,Q6IE51 |
| 458 | 1,2,3,4,7,1<br>9,21,24 | 5,6,8,18,2<br>0,22,23,25<br>,26 | 6  | D3ZUC6,O89117,P01836,P42854,Q63532,Q6IE51                                           |
| 459 | 1,2,3,4,7,1<br>9,21,25 | 5,6,8,18,2<br>0,22,23,24<br>,26 | 5  | P01836,P42854,P47967,P97840,Q63532                                                  |
| 460 | 1,2,3,4,7,1<br>9,21,26 | 5,6,8,18,2<br>0,22,23,24<br>,25 | 8  | P01041,P01836,P01946,P06760,P42854,Q63532,Q63661,Q9EQV9                             |
| 461 | 1,2,3,4,7,1<br>9,22,23 | 5,6,8,18,2<br>0,21,24,25<br>,26 | 10 | P01836,P06760,P15399,P16086,P34901,P97580,Q30KJ2,Q63532,Q6IE51,Q9WTT6               |
| 462 | 1,2,3,4,7,1<br>9,22,24 | 5,6,8,18,2<br>0,21,23,25<br>,26 | 7  | P01836,P06760,P07150,P08010,P14669,Q63532,Q9WTT6                                    |
| 463 | 1,2,3,4,7,1<br>9,22,25 | 5,6,8,18,2<br>0,21,23,24<br>,26 | 3  | P01836,P47967,Q63532                                                                |
| 464 | 1,2,3,4,7,1<br>9,22,26 | 5,6,8,18,2<br>0,21,23,24<br>,25 | 8  | O54728,P01836,P01946,P05539,P06760,P55159,Q63532,Q9WTT6                             |
| 465 | 1,2,3,4,7,1<br>9,23,24 | 5,6,8,18,2<br>0,21,22,25<br>,26 | 8  | P01836,P06760,P15399,P34901,P97580,Q30KJ2,Q63532,Q6IE51                             |
| 466 | 1,2,3,4,7,1<br>9,23,25 | 5,6,8,18,2<br>0,21,22,24<br>,26 | 8  | P01836,P15399,P55314,P97580,Q09030,Q30KJ2,Q63532,Q6IE51                             |

|     |                        |                                 |    |                                                                                     |
|-----|------------------------|---------------------------------|----|-------------------------------------------------------------------------------------|
| 467 | 1,2,3,4,7,1<br>9,23,26 | 5,6,8,18,2<br>0,21,22,24<br>,25 | 12 | O54728,P01836,P01946,P02091,P06760,P15399,P34901,P97580,Q30KJ2,Q63532,Q63661,Q6IE51 |
| 468 | 1,2,3,4,7,1<br>9,24,25 | 5,6,8,18,2<br>0,21,22,23<br>,26 | 3  | P01836,Q63532,Q6IE51                                                                |
| 469 | 1,2,3,4,7,1<br>9,24,26 | 5,6,8,18,2<br>0,21,22,23<br>,25 | 7  | P01836,P01946,P02091,P06760,Q63532,Q6IE51,Q9WTT6                                    |
| 470 | 1,2,3,4,7,1<br>9,25,26 | 5,6,8,18,2<br>0,21,22,23<br>,24 | 7  | P01836,P01946,P02091,P35280,Q5FVI6,Q63532,Q63661                                    |
| 471 | 1,2,3,4,7,2<br>0,21,22 | 5,6,8,18,1<br>9,23,24,25<br>,26 | 2  | P01836,P42854                                                                       |
| 472 | 1,2,3,4,7,2<br>0,21,23 | 5,6,8,18,1<br>9,22,24,25<br>,26 | 5  | O35783,P01836,P34901,P42854,Q63475                                                  |
| 473 | 1,2,3,4,7,2<br>0,21,24 | 5,6,8,18,1<br>9,22,23,25<br>,26 | 4  | P01836,P02761,P42854,Q63475                                                         |
| 474 | 1,2,3,4,7,2<br>0,21,25 | 5,6,8,18,1<br>9,22,23,24<br>,26 | 5  | O35783,P01836,P42854,P47967,Q91ZS3                                                  |
| 475 | 1,2,3,4,7,2<br>0,21,26 | 5,6,8,18,1<br>9,22,23,24<br>,25 | 9  | O35783,O54800;Q5DWV2,P01041,P01836,P01946,P06760,P19223,P42854,Q9EQV9               |
| 476 | 1,2,3,4,7,2<br>0,22,23 | 5,6,8,18,1<br>9,21,24,25<br>,26 | 4  | P01836,P06760,P34901,Q62997                                                         |
| 477 | 1,2,3,4,7,2<br>0,22,24 | 5,6,8,18,1<br>9,21,23,25<br>,26 | 6  | P01836,P06760,P07150,P08010,P14669,Q9WTT6                                           |
| 478 | 1,2,3,4,7,2<br>0,22,25 | 5,6,8,18,1<br>9,21,23,24<br>,26 | 1  | P01836                                                                              |
| 479 | 1,2,3,4,7,2<br>0,22,26 | 5,6,8,18,1<br>9,21,23,24<br>,25 | 10 | O54728,P01041,P01836,P01946,P05539,P06760,P07150,P08010,P55159,Q62997               |
| 480 | 1,2,3,4,7,2<br>0,23,24 | 5,6,8,18,1<br>9,21,22,25<br>,26 | 4  | A2RUV9,P01836,P34901,Q63475                                                         |
| 481 | 1,2,3,4,7,2<br>0,23,25 | 5,6,8,18,1<br>9,21,22,24<br>,26 | 4  | A2RUV9,P01836,P34901,P55314                                                         |

|     |                        |                                 |    |                                                                                     |
|-----|------------------------|---------------------------------|----|-------------------------------------------------------------------------------------|
| 482 | 1,2,3,4,7,2<br>0,23,26 | 5,6,8,18,1<br>9,21,22,24<br>,25 | 9  | A2RUV9,O35783,P01041,P01836,P01946,P02091,P05539,P06760,P34901                      |
| 483 | 1,2,3,4,7,2<br>0,24,25 | 5,6,8,18,1<br>9,21,22,23<br>,26 | 1  | P01836                                                                              |
| 484 | 1,2,3,4,7,2<br>0,24,26 | 5,6,8,18,1<br>9,21,22,23<br>,25 | 6  | P01041,P01836,P01946,P02091,P06760,P08010                                           |
| 485 | 1,2,3,4,7,2<br>0,25,26 | 5,6,8,18,1<br>9,21,22,23<br>,24 | 8  | O35783,P01041,P01836,P01946,P02091,P05539,P19223,P35280                             |
| 486 | 1,2,3,4,7,2<br>1,22,23 | 5,6,8,18,1<br>9,20,24,25<br>,26 | 3  | P01836,P34901,P42854                                                                |
| 487 | 1,2,3,4,7,2<br>1,22,24 | 5,6,8,18,1<br>9,20,23,25<br>,26 | 1  | P01836                                                                              |
| 488 | 1,2,3,4,7,2<br>1,22,25 | 5,6,8,18,1<br>9,20,23,24<br>,26 | 4  | O54800;Q5DWV2,P01836,P42854,P47967                                                  |
| 489 | 1,2,3,4,7,2<br>1,22,26 | 5,6,8,18,1<br>9,20,23,24<br>,25 | 10 | O35783,O54800;Q5DWV2,P01041,P01836,P01946,P06760,P42854,Q63661,Q80WL1,Q9EQV9        |
| 490 | 1,2,3,4,7,2<br>1,23,24 | 5,6,8,18,1<br>9,20,22,25<br>,26 | 4  | D3ZUC6,P01836,P34901,Q63475                                                         |
| 491 | 1,2,3,4,7,2<br>1,23,25 | 5,6,8,18,1<br>9,20,22,24<br>,26 | 5  | O35783,P01836,P34901,P42854,P55314                                                  |
| 492 | 1,2,3,4,7,2<br>1,23,26 | 5,6,8,18,1<br>9,20,22,24<br>,25 | 9  | O35783,P01041,P01836,P01946,P02091,P34901,P42854,Q63661,Q9EQV9                      |
| 493 | 1,2,3,4,7,2<br>1,24,25 | 5,6,8,18,1<br>9,20,22,23<br>,26 | 3  | O35783,P01836,P22006                                                                |
| 494 | 1,2,3,4,7,2<br>1,24,26 | 5,6,8,18,1<br>9,20,22,23<br>,25 | 9  | O35783,O54800;Q5DWV2,P01041,P01836,P01946,P02091,P80020,Q63661,Q9EQV9               |
| 495 | 1,2,3,4,7,2<br>1,25,26 | 5,6,8,18,1<br>9,20,22,23<br>,24 | 11 | O35783,O54800;Q5DWV2,P01041,P01836,P01946,P02091,P08721,P19223,P22006,P42854,Q63661 |
| 496 | 1,2,3,4,7,2<br>2,23,24 | 5,6,8,18,1<br>9,20,21,25<br>,26 | 3  | P01836,P34901,P82471                                                                |

|     |                        |                                 |    |                                                                       |
|-----|------------------------|---------------------------------|----|-----------------------------------------------------------------------|
| 497 | 1,2,3,4,7,2<br>2,23,25 | 5,6,8,18,1<br>9,20,21,24<br>,26 | 5  | P01836,P06911,P34901,P55314,Q5GRG2                                    |
| 498 | 1,2,3,4,7,2<br>2,23,26 | 5,6,8,18,1<br>9,20,21,24<br>,25 | 8  | O54728,P01836,P01946,P02091,P05539,P06760,P34901,P55159               |
| 499 | 1,2,3,4,7,2<br>2,24,25 | 5,6,8,18,1<br>9,20,21,23<br>,26 | 1  | P01836                                                                |
| 500 | 1,2,3,4,7,2<br>2,24,26 | 5,6,8,18,1<br>9,20,21,23<br>,25 | 5  | P01836,P01946,P02091,P06760,P08010                                    |
| 501 | 1,2,3,4,7,2<br>2,25,26 | 5,6,8,18,1<br>9,20,21,23<br>,24 | 4  | P01836,P01946,P02091,P05539                                           |
| 502 | 1,2,3,4,7,2<br>3,24,25 | 5,6,8,18,1<br>9,20,21,22<br>,26 | 4  | P01836,P34901,P55314,Q63751                                           |
| 503 | 1,2,3,4,7,2<br>3,24,26 | 5,6,8,18,1<br>9,20,21,22<br>,25 | 6  | A2RUV9,P01836,P01946,P02091,P06760,P34901                             |
| 504 | 1,2,3,4,7,2<br>3,25,26 | 5,6,8,18,1<br>9,20,21,22<br>,24 | 7  | O35783,P01836,P01946,P02091,P34901,P55314,Q63661                      |
| 505 | 1,2,3,4,7,2<br>4,25,26 | 5,6,8,18,1<br>9,20,21,22<br>,23 | 4  | O35783,P01836,P01946,P02091                                           |
| 506 | 1,2,3,4,8,1<br>8,19,20 | 5,6,7,21,2<br>2,23,24,25<br>,26 | 5  | P00731,P22006,P35280,P83121,Q63355                                    |
| 507 | 1,2,3,4,8,1<br>8,19,21 | 5,6,7,20,2<br>2,23,24,25<br>,26 | 9  | O89117,P00731,P02761,P02803,P05964,P10758,P35281,Q64057,Q80WL1        |
| 508 | 1,2,3,4,8,1<br>8,19,22 | 5,6,7,20,2<br>1,23,24,25<br>,26 | 3  | P20766,P22006,P83121                                                  |
| 509 | 1,2,3,4,8,1<br>8,19,23 | 5,6,7,20,2<br>1,22,24,25<br>,26 | 10 | P02803,P05964,P12785,P35467,Q03191,Q498D9,Q5XI22,Q64194,Q6AY61,Q99MH3 |
| 510 | 1,2,3,4,8,1<br>8,19,24 | 5,6,7,20,2<br>1,22,23,25<br>,26 | 1  | P83121                                                                |
| 511 | 1,2,3,4,8,1<br>8,19,25 | 5,6,7,20,2<br>1,22,23,24<br>,26 | 2  | P02803,P35280                                                         |

|     |                        |                                 |    |                                                                                     |
|-----|------------------------|---------------------------------|----|-------------------------------------------------------------------------------------|
| 512 | 1,2,3,4,8,1<br>8,19,26 | 5,6,7,20,2<br>1,22,23,24<br>,25 | 6  | P02770,P10959,P35280,Q63355,Q63661,Q63942                                           |
| 513 | 1,2,3,4,8,1<br>8,20,21 | 5,6,7,19,2<br>2,23,24,25<br>,26 | 5  | P00731,P01836,P02761,P10758,P42854                                                  |
| 514 | 1,2,3,4,8,1<br>8,20,22 | 5,6,7,19,2<br>1,23,24,25<br>,26 | 4  | P22006,P83121,Q62997,Q9QZK9                                                         |
| 515 | 1,2,3,4,8,1<br>8,20,23 | 5,6,7,19,2<br>1,22,24,25<br>,26 | 6  | P12785,P22006,Q498D9,Q5XI22,Q6TMA8,Q9QZK9                                           |
| 516 | 1,2,3,4,8,1<br>8,20,24 | 5,6,7,19,2<br>1,22,23,25<br>,26 | 2  | P83121,Q9QZK9                                                                       |
| 517 | 1,2,3,4,8,1<br>8,20,25 | 5,6,7,19,2<br>1,22,23,24<br>,26 | 1  | P35280                                                                              |
| 518 | 1,2,3,4,8,1<br>8,20,26 | 5,6,7,19,2<br>1,22,23,24<br>,25 | 6  | P01836,P02770,P10959,P35280,Q5QE79,Q63355                                           |
| 519 | 1,2,3,4,8,1<br>8,21,22 | 5,6,7,19,2<br>0,23,24,25<br>,26 | 4  | P01836,P02761,P10758,Q80WL1                                                         |
| 520 | 1,2,3,4,8,1<br>8,21,23 | 5,6,7,19,2<br>0,22,24,25<br>,26 | 10 | P02761,P02803,P05964,P10758,P12785,P34901,Q5XI22,Q64057,Q6AY61,Q80WL1               |
| 521 | 1,2,3,4,8,1<br>8,21,24 | 5,6,7,19,2<br>0,22,23,25<br>,26 | 3  | P01836,P02761,P10758                                                                |
| 522 | 1,2,3,4,8,1<br>8,21,25 | 5,6,7,19,2<br>0,22,23,24<br>,26 | 7  | P00731,P02761,P02803,P08721,P31430,P98089,Q80WL1                                    |
| 523 | 1,2,3,4,8,1<br>8,21,26 | 5,6,7,19,2<br>0,22,23,24<br>,25 | 12 | P00774,P01836,P02761,P02770,P10758,P10959,P19223,Q5QE79,Q63661,Q63942,Q80WL1,Q9EQV9 |
| 524 | 1,2,3,4,8,1<br>8,22,23 | 5,6,7,19,2<br>0,21,24,25<br>,26 | 3  | P20766,P34901,Q5XI22                                                                |
| 525 | 1,2,3,4,8,1<br>8,22,24 | 5,6,7,19,2<br>0,21,23,25<br>,26 | 1  | P83121                                                                              |
| 526 | 1,2,3,4,8,1<br>8,22,25 | 5,6,7,19,2<br>0,21,23,24<br>,26 | 1  | P20766                                                                              |

|     |                        |                                 |    |                                                                                                                               |
|-----|------------------------|---------------------------------|----|-------------------------------------------------------------------------------------------------------------------------------|
| 527 | 1,2,3,4,8,1<br>8,22,26 | 5,6,7,19,2<br>0,21,23,24<br>,25 | 6  | P02770,P10959,P20766,Q5QE79,Q63942,Q80WL1                                                                                     |
| 528 | 1,2,3,4,8,1<br>8,23,24 | 5,6,7,19,2<br>0,21,22,25<br>,26 | 3  | P12785,P34901,Q5XI22                                                                                                          |
| 529 | 1,2,3,4,8,1<br>8,23,25 | 5,6,7,19,2<br>0,21,22,24<br>,26 | 6  | P00714,P02803,P12785,Q5XI22,Q63598,Q99MH3                                                                                     |
| 530 | 1,2,3,4,8,1<br>8,23,26 | 5,6,7,19,2<br>0,21,22,24<br>,25 | 18 | P01946,P02770,P10959,P12785,P34901,P35467,Q4FZU2,Q5QE79,Q5XI22,Q63661,Q63942,Q64194,Q6AY61,Q6IFU8,Q6IFW6,Q6IG02,Q6IMF3,Q6P6Q2 |
| 531 | 1,2,3,4,8,1<br>8,24,25 | 5,6,7,19,2<br>0,21,22,23<br>,26 | 1  | P08721                                                                                                                        |
| 532 | 1,2,3,4,8,1<br>8,24,26 | 5,6,7,19,2<br>0,21,22,23<br>,25 | 5  | P01836,P02770,P10959,Q5QE79,Q63942                                                                                            |
| 533 | 1,2,3,4,8,1<br>8,25,26 | 5,6,7,19,2<br>0,21,22,23<br>,24 | 9  | P00774,P02770,P08721,P10959,P19223,P35280,P55091,Q5QE79,Q63661                                                                |
| 534 | 1,2,3,4,8,1<br>9,20,21 | 5,6,7,18,2<br>2,23,24,25<br>,26 | 4  | P01836,P02761,P35281,P42854                                                                                                   |
| 535 | 1,2,3,4,8,1<br>9,20,22 | 5,6,7,18,2<br>1,23,24,25<br>,26 | 5  | P20766,P22006,P36970,P83121,Q62997                                                                                            |
| 536 | 1,2,3,4,8,1<br>9,20,23 | 5,6,7,18,2<br>1,22,24,25<br>,26 | 3  | P22006,P36970,Q5XI22                                                                                                          |
| 537 | 1,2,3,4,8,1<br>9,20,24 | 5,6,7,18,2<br>1,22,23,25<br>,26 | 2  | P36970,P83121                                                                                                                 |
| 538 | 1,2,3,4,8,1<br>9,20,25 | 5,6,7,18,2<br>1,22,23,24<br>,26 | 2  | P35280,Q9QUL6                                                                                                                 |
| 539 | 1,2,3,4,8,1<br>9,20,26 | 5,6,7,18,2<br>1,22,23,24<br>,25 | 5  | P01836,P02770,P10959,P35280,Q63355                                                                                            |
| 540 | 1,2,3,4,8,1<br>9,21,22 | 5,6,7,18,2<br>0,23,24,25<br>,26 | 3  | P02761,P36970,Q80WL1                                                                                                          |
| 541 | 1,2,3,4,8,1<br>9,21,23 | 5,6,7,18,2<br>0,22,24,25<br>,26 | 5  | P02761,P34901,P35281,P36970,Q5XI22                                                                                            |

|     |                        |                                 |   |                                                                |
|-----|------------------------|---------------------------------|---|----------------------------------------------------------------|
| 542 | 1,2,3,4,8,1<br>9,21,24 | 5,6,7,18,2<br>0,22,23,25<br>,26 | 2 | P02761,P36970                                                  |
| 543 | 1,2,3,4,8,1<br>9,21,25 | 5,6,7,18,2<br>0,22,23,24<br>,26 | 2 | P47967,Q9QUL6                                                  |
| 544 | 1,2,3,4,8,1<br>9,21,26 | 5,6,7,18,2<br>0,22,23,24<br>,25 | 9 | P01836,P02761,P02770,P10959,P35281,Q5QE79,Q63661,Q80WL1,Q9EQV9 |
| 545 | 1,2,3,4,8,1<br>9,22,23 | 5,6,7,18,2<br>0,21,24,25<br>,26 | 2 | P20766,P36970                                                  |
| 546 | 1,2,3,4,8,1<br>9,22,24 | 5,6,7,18,2<br>0,21,23,25<br>,26 | 4 | P20766,P36970,P83121,Q9QUL6                                    |
| 547 | 1,2,3,4,8,1<br>9,22,25 | 5,6,7,18,2<br>0,21,23,24<br>,26 | 2 | P20766,Q9QUL6                                                  |
| 548 | 1,2,3,4,8,1<br>9,22,26 | 5,6,7,18,2<br>0,21,23,24<br>,25 | 5 | O54728,P02770,P10959,P20766,P55159                             |
| 549 | 1,2,3,4,8,1<br>9,23,24 | 5,6,7,18,2<br>0,21,22,25<br>,26 | 2 | P34901,P36970                                                  |
| 550 | 1,2,3,4,8,1<br>9,23,25 | 5,6,7,18,2<br>0,21,22,24<br>,26 | 2 | P36970,Q9QUL6                                                  |
| 551 | 1,2,3,4,8,1<br>9,23,26 | 5,6,7,18,2<br>0,21,22,24<br>,25 | 5 | P01946,P02770,P10959,Q63661,Q6AY61                             |
| 552 | 1,2,3,4,8,1<br>9,24,25 | 5,6,7,18,2<br>0,21,22,23<br>,26 | 1 | Q9QUL6                                                         |
| 553 | 1,2,3,4,8,1<br>9,24,26 | 5,6,7,18,2<br>0,21,22,23<br>,25 | 2 | P02770,P10959                                                  |
| 554 | 1,2,3,4,8,1<br>9,25,26 | 5,6,7,18,2<br>0,21,22,23<br>,24 | 1 | P35280                                                         |
| 555 | 1,2,3,4,8,2<br>0,21,22 | 5,6,7,18,1<br>9,23,24,25<br>,26 | 4 | P01836,P02761,Q7TPB1,Q80WL1                                    |
| 556 | 1,2,3,4,8,2<br>0,21,23 | 5,6,7,18,1<br>9,22,24,25<br>,26 | 5 | P01836,P02761,P34901,P36970,Q5XI22                             |



|     |                        |                                 |   |                                                         |
|-----|------------------------|---------------------------------|---|---------------------------------------------------------|
| 557 | 1,2,3,4,8,2<br>0,21,24 | 5,6,7,18,1<br>9,22,23,25<br>,26 | 3 | P01836,P02761,Q5XFX0                                    |
| 558 | 1,2,3,4,8,2<br>0,21,25 | 5,6,7,18,1<br>9,22,23,24<br>,26 | 2 | P01836,P02761                                           |
| 559 | 1,2,3,4,8,2<br>0,21,26 | 5,6,7,18,1<br>9,22,23,24<br>,25 | 8 | P01836,P02761,P02770,P19223,P62804,Q00715,Q5QE79,Q9EQV9 |
| 560 | 1,2,3,4,8,2<br>0,22,23 | 5,6,7,18,1<br>9,21,24,25<br>,26 | 4 | P20766,P22006,P36970,Q62997                             |
| 561 | 1,2,3,4,8,2<br>0,22,24 | 5,6,7,18,1<br>9,21,23,25<br>,26 | 3 | P01836,P36970,P83121                                    |
| 562 | 1,2,3,4,8,2<br>0,22,25 | 5,6,7,18,1<br>9,21,23,24<br>,26 | 2 | P20766,Q9QUL6                                           |
| 563 | 1,2,3,4,8,2<br>0,22,26 | 5,6,7,18,1<br>9,21,23,24<br>,25 | 7 | O54728,P01836,P10959,P20766,P55159,Q5QE79,Q62997        |
| 564 | 1,2,3,4,8,2<br>0,23,24 | 5,6,7,18,1<br>9,21,22,25<br>,26 | 4 | P34901,P36970,P97840,Q9QZK9                             |
| 565 | 1,2,3,4,8,2<br>0,23,25 | 5,6,7,18,1<br>9,21,22,24<br>,26 | 0 |                                                         |
| 566 | 1,2,3,4,8,2<br>0,23,26 | 5,6,7,18,1<br>9,21,22,24<br>,25 | 7 | P01836,P01946,P10959,P19218,P97840,Q5QE79,Q6IG02        |
| 567 | 1,2,3,4,8,2<br>0,24,25 | 5,6,7,18,1<br>9,21,22,23<br>,26 | 1 | Q9QUL6                                                  |
| 568 | 1,2,3,4,8,2<br>0,24,26 | 5,6,7,18,1<br>9,21,22,23<br>,25 | 6 | P01836,P02761,P02770,P10959,P97840,Q5QE79               |
| 569 | 1,2,3,4,8,2<br>0,25,26 | 5,6,7,18,1<br>9,21,22,23<br>,24 | 4 | P01836,P19223,P35280,Q5QE79                             |
| 570 | 1,2,3,4,8,2<br>1,22,23 | 5,6,7,18,1<br>9,20,24,25<br>,26 | 3 | P34901,P36970,Q80WL1                                    |
| 571 | 1,2,3,4,8,2<br>1,22,24 | 5,6,7,18,1<br>9,20,23,25<br>,26 | 4 | P01836,P02761,Q5XFX0,Q80WL1                             |

|     |                        |                                 |    |                                                                              |
|-----|------------------------|---------------------------------|----|------------------------------------------------------------------------------|
| 572 | 1,2,3,4,8,2<br>1,22,25 | 5,6,7,18,1<br>9,20,23,24<br>,26 | 2  | P20766,Q80WL1                                                                |
| 573 | 1,2,3,4,8,2<br>1,22,26 | 5,6,7,18,1<br>9,20,23,24<br>,25 | 8  | P01836,P02761,P02770,P20766,P63036,Q5QE79,Q80WL1,Q9EQV9                      |
| 574 | 1,2,3,4,8,2<br>1,23,24 | 5,6,7,18,1<br>9,20,22,25<br>,26 | 4  | P01836,P02761,P34901,P36970                                                  |
| 575 | 1,2,3,4,8,2<br>1,23,25 | 5,6,7,18,1<br>9,20,22,24<br>,26 | 1  | P34901                                                                       |
| 576 | 1,2,3,4,8,2<br>1,23,26 | 5,6,7,18,1<br>9,20,22,24<br>,25 | 11 | P01836,P01946,P02761,P02770,P10959,P34901,Q5QE79,Q63661,Q6AY61,Q80WL1,Q9EQV9 |
| 577 | 1,2,3,4,8,2<br>1,24,25 | 5,6,7,18,1<br>9,20,22,23<br>,26 | 2  | P01836,P02761                                                                |
| 578 | 1,2,3,4,8,2<br>1,24,26 | 5,6,7,18,1<br>9,20,22,23<br>,25 | 7  | P01836,P02761,P02770,P10959,Q5QE79,Q68FV8,Q9EQV9                             |
| 579 | 1,2,3,4,8,2<br>1,25,26 | 5,6,7,18,1<br>9,20,22,23<br>,24 | 7  | P01836,P02761,P08721,P19223,Q5QE79,Q80WL1,Q9EQV9                             |
| 580 | 1,2,3,4,8,2<br>2,23,24 | 5,6,7,18,1<br>9,20,21,25<br>,26 | 3  | P20766,P34901,P36970                                                         |
| 581 | 1,2,3,4,8,2<br>2,23,25 | 5,6,7,18,1<br>9,20,21,24<br>,26 | 4  | P06911,P20766,P34901,P36970                                                  |
| 582 | 1,2,3,4,8,2<br>2,23,26 | 5,6,7,18,1<br>9,20,21,24<br>,25 | 7  | O54728,P01946,P10959,P20766,P34901,Q5QE79,Q6IE52                             |
| 583 | 1,2,3,4,8,2<br>2,24,25 | 5,6,7,18,1<br>9,20,21,23<br>,26 | 2  | P20766,Q9QUL6                                                                |
| 584 | 1,2,3,4,8,2<br>2,24,26 | 5,6,7,18,1<br>9,20,21,23<br>,25 | 7  | P01836,P02770,P10959,P20766,P36953,Q5QE79,Q64573                             |
| 585 | 1,2,3,4,8,2<br>2,25,26 | 5,6,7,18,1<br>9,20,21,23<br>,24 | 2  | P20766,Q5QE79                                                                |
| 586 | 1,2,3,4,8,2<br>3,24,25 | 5,6,7,18,1<br>9,20,21,22<br>,26 | 3  | P34901,P36970,Q63751                                                         |

|     |                         |                                 |    |                                                                       |
|-----|-------------------------|---------------------------------|----|-----------------------------------------------------------------------|
| 587 | 1,2,3,4,8,2<br>3,24,26  | 5,6,7,18,1<br>9,20,21,22<br>,25 | 6  | P01946,P02770,P10959,P34901,P97840,Q5QE79                             |
| 588 | 1,2,3,4,8,2<br>3,25,26  | 5,6,7,18,1<br>9,20,21,22<br>,24 | 4  | P01946,P10959,P55314,Q5QE79                                           |
| 589 | 1,2,3,4,8,2<br>4,25,26  | 5,6,7,18,1<br>9,20,21,22<br>,23 | 3  | P10959,Q5QE79,Q68FV8                                                  |
| 590 | 1,2,3,4,18,<br>19,20,21 | 5,6,7,8,22,<br>23,24,25,2<br>6  | 4  | P00731,P01836,P10758,P42854                                           |
| 591 | 1,2,3,4,18,<br>19,20,22 | 5,6,7,8,21,<br>23,24,25,2<br>6  | 8  | P06760,P07150,P14669,P22006,P83121,Q62997,Q9QZK9,Q9WTT6               |
| 592 | 1,2,3,4,18,<br>19,20,23 | 5,6,7,8,21,<br>22,24,25,2<br>6  | 6  | P06760,P12785,P22006,Q498D9,Q5XI22,Q9QZK9                             |
| 593 | 1,2,3,4,18,<br>19,20,24 | 5,6,7,8,21,<br>22,23,25,2<br>6  | 5  | P06760,P07150,P83121,Q9QZK9,Q9WTT6                                    |
| 594 | 1,2,3,4,18,<br>19,20,25 | 5,6,7,8,21,<br>22,23,24,2<br>6  | 1  | P35280                                                                |
| 595 | 1,2,3,4,18,<br>19,20,26 | 5,6,7,8,21,<br>22,23,24,2<br>5  | 5  | P01836,P06760,P35280,Q63355,Q63661                                    |
| 596 | 1,2,3,4,18,<br>19,21,22 | 5,6,7,8,20,<br>23,24,25,2<br>6  | 3  | O89117,P10758,Q63661                                                  |
| 597 | 1,2,3,4,18,<br>19,21,23 | 5,6,7,8,20,<br>22,24,25,2<br>6  | 10 | D3ZUC6,O89117,P05964,P10758,P12785,P34901,Q03191,Q5XI22,Q63661,Q99MH3 |
| 598 | 1,2,3,4,18,<br>19,21,24 | 5,6,7,8,20,<br>22,23,25,2<br>6  | 4  | D3ZUC6,O89117,P01836,P10758                                           |
| 599 | 1,2,3,4,18,<br>19,21,25 | 5,6,7,8,20,<br>22,23,24,2<br>6  | 6  | P00731,P05964,P31430,P47967,P98089,Q63661                             |
| 600 | 1,2,3,4,18,<br>19,21,26 | 5,6,7,8,20,<br>22,23,24,2<br>5  | 8  | D3ZUC6,O89117,P01836,P05964,P06760,P10758,Q63661,Q9EQV9               |
| 601 | 1,2,3,4,18,<br>19,22,23 | 5,6,7,8,20,<br>21,24,25,2<br>6  | 6  | P02625,P06760,P12785,P34901,Q5XI22,Q9WTT6                             |

|     |                         |                                |    |                                                                                                   |
|-----|-------------------------|--------------------------------|----|---------------------------------------------------------------------------------------------------|
| 602 | 1,2,3,4,18,<br>19,22,24 | 5,6,7,8,20,<br>21,23,25,2<br>6 | 4  | P06760,P07150,P83121,Q9WTT6                                                                       |
| 603 | 1,2,3,4,18,<br>19,22,25 | 5,6,7,8,20,<br>21,23,24,2<br>6 | 0  |                                                                                                   |
| 604 | 1,2,3,4,18,<br>19,22,26 | 5,6,7,8,20,<br>21,23,24,2<br>5 | 4  | P06760,P55159,Q63661,Q9WTT6                                                                       |
| 605 | 1,2,3,4,18,<br>19,23,24 | 5,6,7,8,20,<br>21,22,25,2<br>6 | 6  | P06760,P12785,P34901,Q03191,Q5XI22,Q9WTT6                                                         |
| 606 | 1,2,3,4,18,<br>19,23,25 | 5,6,7,8,20,<br>21,22,24,2<br>6 | 5  | P05964,P12785,P34901,Q5XI22,Q99MH3                                                                |
| 607 | 1,2,3,4,18,<br>19,23,26 | 5,6,7,8,20,<br>21,22,24,2<br>5 | 14 | P01946,P05964,P06760,P12785,P34901,P35467,Q03191,Q4FZU2,Q63661,Q63942,Q64194,Q6AY61,Q6IFU8,Q6P6Q2 |
| 608 | 1,2,3,4,18,<br>19,24,25 | 5,6,7,8,20,<br>21,22,23,2<br>6 | 0  |                                                                                                   |
| 609 | 1,2,3,4,18,<br>19,24,26 | 5,6,7,8,20,<br>21,22,23,2<br>5 | 3  | P06760,Q63661,Q9WTT6                                                                              |
| 610 | 1,2,3,4,18,<br>19,25,26 | 5,6,7,8,20,<br>21,22,23,2<br>4 | 2  | P35280,Q63661                                                                                     |
| 611 | 1,2,3,4,18,<br>20,21,22 | 5,6,7,8,19,<br>23,24,25,2<br>6 | 2  | P01836,P10758                                                                                     |
| 612 | 1,2,3,4,18,<br>20,21,23 | 5,6,7,8,19,<br>22,24,25,2<br>6 | 6  | P01836,P10758,P12785,P34901,Q5XI22,Q9QZK9                                                         |
| 613 | 1,2,3,4,18,<br>20,21,24 | 5,6,7,8,19,<br>22,23,25,2<br>6 | 2  | P01836,Q9QZK9                                                                                     |
| 614 | 1,2,3,4,18,<br>20,21,25 | 5,6,7,8,19,<br>22,23,24,2<br>6 | 3  | P01836,P31430,P98089                                                                              |
| 615 | 1,2,3,4,18,<br>20,21,26 | 5,6,7,8,19,<br>22,23,24,2<br>5 | 6  | P01836,P06760,Q4FZU2,Q63661,Q99041,Q9EQV9                                                         |
| 616 | 1,2,3,4,18,<br>20,22,23 | 5,6,7,8,19,<br>21,24,25,2<br>6 | 7  | P06760,P12785,P22006,P34901,Q5XI22,Q62997,Q9QZK9                                                  |

|     |                         |                                |    |                                                                                                                 |
|-----|-------------------------|--------------------------------|----|-----------------------------------------------------------------------------------------------------------------|
| 617 | 1,2,3,4,18,<br>20,22,24 | 5,6,7,8,19,<br>21,23,25,2<br>6 | 8  | P01836,P06760,P07150,P14669,P83121,Q99041,Q9QZK9,Q9WTT6                                                         |
| 618 | 1,2,3,4,18,<br>20,22,25 | 5,6,7,8,19,<br>21,23,24,2<br>6 | 0  |                                                                                                                 |
| 619 | 1,2,3,4,18,<br>20,22,26 | 5,6,7,8,19,<br>21,23,24,2<br>5 | 5  | P01836,P06760,P55159,Q62997,Q99041                                                                              |
| 620 | 1,2,3,4,18,<br>20,23,24 | 5,6,7,8,19,<br>21,22,25,2<br>6 | 5  | A2RUV9,P12785,P34901,Q5XI22,Q9QZK9                                                                              |
| 621 | 1,2,3,4,18,<br>20,23,25 | 5,6,7,8,19,<br>21,22,24,2<br>6 | 3  | A2RUV9,P12785,P34901                                                                                            |
| 622 | 1,2,3,4,18,<br>20,23,26 | 5,6,7,8,19,<br>21,22,24,2<br>5 | 16 | A2RUV9,P01836,P01946,P06760,P12785,P19218,P34901,P35467,Q4FZU2,Q63661,Q6AY61,Q6IFU8,Q6IFW6,Q6IG02,Q6IMF3,Q6P6Q2 |
| 623 | 1,2,3,4,18,<br>20,24,25 | 5,6,7,8,19,<br>21,22,23,2<br>6 | 0  |                                                                                                                 |
| 624 | 1,2,3,4,18,<br>20,24,26 | 5,6,7,8,19,<br>21,22,23,2<br>5 | 4  | P01836,P06760,Q99041,Q9QZK9                                                                                     |
| 625 | 1,2,3,4,18,<br>20,25,26 | 5,6,7,8,19,<br>21,22,23,2<br>4 | 2  | P01836,P35280                                                                                                   |
| 626 | 1,2,3,4,18,<br>21,22,23 | 5,6,7,8,19,<br>20,24,25,2<br>6 | 6  | P01836,P10758,P12785,P34901,Q5XI22,Q63661                                                                       |
| 627 | 1,2,3,4,18,<br>21,22,24 | 5,6,7,8,19,<br>20,23,25,2<br>6 | 2  | P01836,P34901                                                                                                   |
| 628 | 1,2,3,4,18,<br>21,22,25 | 5,6,7,8,19,<br>20,23,24,2<br>6 | 3  | P01836,P31430,P98089                                                                                            |
| 629 | 1,2,3,4,18,<br>21,22,26 | 5,6,7,8,19,<br>20,23,24,2<br>5 | 5  | P01836,P06760,P63036,Q63661,Q99041                                                                              |
| 630 | 1,2,3,4,18,<br>21,23,24 | 5,6,7,8,19,<br>20,22,25,2<br>6 | 5  | D3ZUC6,P01836,P12785,P34901,Q5XI22                                                                              |
| 631 | 1,2,3,4,18,<br>21,23,25 | 5,6,7,8,19,<br>20,22,24,2<br>6 | 7  | P12785,P31430,P34901,P98089,Q62636,Q63661,Q99MH3                                                                |

|     |                         |                                |    |                                                                                                                 |
|-----|-------------------------|--------------------------------|----|-----------------------------------------------------------------------------------------------------------------|
| 632 | 1,2,3,4,18,<br>21,23,26 | 5,6,7,8,19,<br>20,22,24,2<br>5 | 16 | D3ZUC6,P00774,P01836,P01946,P12785,P34901,Q4FZU2,Q62636,Q63661,Q6AY61,Q6IFU8,Q6IFW6,Q6IG02,Q6IMF3,Q6P6Q2,Q9EQV9 |
| 633 | 1,2,3,4,18,<br>21,24,25 | 5,6,7,8,19,<br>20,22,23,2<br>6 | 4  | P01836,P08721,P31430,P98089                                                                                     |
| 634 | 1,2,3,4,18,<br>21,24,26 | 5,6,7,8,19,<br>20,22,23,2<br>5 | 5  | D3ZUC6,P01836,Q63661,Q99041,Q9EQV9                                                                              |
| 635 | 1,2,3,4,18,<br>21,25,26 | 5,6,7,8,19,<br>20,22,23,2<br>4 | 9  | P00774,P01836,P08721,P19223,P25031,P31430,P55091,P98089,Q63661                                                  |
| 636 | 1,2,3,4,18,<br>22,23,24 | 5,6,7,8,19,<br>20,21,25,2<br>6 | 4  | P12785,P34901,P82471,Q9QZK9                                                                                     |
| 637 | 1,2,3,4,18,<br>22,23,25 | 5,6,7,8,19,<br>20,21,24,2<br>6 | 2  | P12785,P34901                                                                                                   |
| 638 | 1,2,3,4,18,<br>22,23,26 | 5,6,7,8,19,<br>20,21,24,2<br>5 | 9  | P01946,P06760,P12785,P34901,Q4FZU2,Q63661,Q6AY61,Q6IFU8,Q6P6Q2                                                  |
| 639 | 1,2,3,4,18,<br>22,24,25 | 5,6,7,8,19,<br>20,21,23,2<br>6 | 0  |                                                                                                                 |
| 640 | 1,2,3,4,18,<br>22,24,26 | 5,6,7,8,19,<br>20,21,23,2<br>5 | 4  | P01836,P06760,Q99041,Q9WTT6                                                                                     |
| 641 | 1,2,3,4,18,<br>22,25,26 | 5,6,7,8,19,<br>20,21,23,2<br>4 | 2  | P01836,Q63661                                                                                                   |
| 642 | 1,2,3,4,18,<br>23,24,25 | 5,6,7,8,19,<br>20,21,22,2<br>6 | 2  | P12785,P34901                                                                                                   |
| 643 | 1,2,3,4,18,<br>23,24,26 | 5,6,7,8,19,<br>20,21,22,2<br>5 | 12 | A2RUV9,P01836,P01946,P06760,P12785,P34901,Q4FZU2,Q63661,Q6IFU8,Q6IFW6,Q6IG02,Q6P6Q2                             |
| 644 | 1,2,3,4,18,<br>23,25,26 | 5,6,7,8,19,<br>20,21,22,2<br>4 | 13 | P00774,P01946,P12785,P34901,P55314,Q4FZU2,Q63661,Q6AY61,Q6IFU8,Q6IFW6,Q6IG02,Q6IMF3,Q6P6Q2                      |
| 645 | 1,2,3,4,18,<br>24,25,26 | 5,6,7,8,19,<br>20,21,22,2<br>3 | 6  | P00774,P01836,P08721,P55091,Q62902,Q63661                                                                       |
| 646 | 1,2,3,4,19,<br>20,21,22 | 5,6,7,8,18,<br>23,24,25,2<br>6 | 1  | P01836                                                                                                          |

|     |                         |                                |   |                                                  |
|-----|-------------------------|--------------------------------|---|--------------------------------------------------|
| 647 | 1,2,3,4,19,<br>20,21,23 | 5,6,7,8,18,<br>22,24,25,2<br>6 | 2 | P01836,P34901                                    |
| 648 | 1,2,3,4,19,<br>20,21,24 | 5,6,7,8,18,<br>22,23,25,2<br>6 | 1 | P01836                                           |
| 649 | 1,2,3,4,19,<br>20,21,25 | 5,6,7,8,18,<br>22,23,24,2<br>6 | 2 | P01836,P47967                                    |
| 650 | 1,2,3,4,19,<br>20,21,26 | 5,6,7,8,18,<br>22,23,24,2<br>5 | 3 | P01836,Q63661,Q9EQV9                             |
| 651 | 1,2,3,4,19,<br>20,22,23 | 5,6,7,8,18,<br>21,24,25,2<br>6 | 5 | P22006,P34901,P55091,Q62997,Q9WTT6               |
| 652 | 1,2,3,4,19,<br>20,22,24 | 5,6,7,8,18,<br>21,23,25,2<br>6 | 7 | P01836,P06760,P07150,P14669,P83121,Q62997,Q9WTT6 |
| 653 | 1,2,3,4,19,<br>20,22,25 | 5,6,7,8,18,<br>21,23,24,2<br>6 | 1 | Q62997                                           |
| 654 | 1,2,3,4,19,<br>20,22,26 | 5,6,7,8,18,<br>21,23,24,2<br>5 | 7 | O54728,P01836,P06760,P07150,P55159,Q62997,Q9WTT6 |
| 655 | 1,2,3,4,19,<br>20,23,24 | 5,6,7,8,18,<br>21,22,25,2<br>6 | 2 | P34901,Q9QZK9                                    |
| 656 | 1,2,3,4,19,<br>20,23,25 | 5,6,7,8,18,<br>21,22,24,2<br>6 | 0 |                                                  |
| 657 | 1,2,3,4,19,<br>20,23,26 | 5,6,7,8,18,<br>21,22,24,2<br>5 | 6 | O54728,P01836,P01946,P06760,P19218,Q63661        |
| 658 | 1,2,3,4,19,<br>20,24,25 | 5,6,7,8,18,<br>21,22,23,2<br>6 | 0 |                                                  |
| 659 | 1,2,3,4,19,<br>20,24,26 | 5,6,7,8,18,<br>21,22,23,2<br>5 | 3 | P01836,P06760,Q9WTT6                             |
| 660 | 1,2,3,4,19,<br>20,25,26 | 5,6,7,8,18,<br>21,22,23,2<br>4 | 2 | P01836,P35280                                    |
| 661 | 1,2,3,4,19,<br>21,22,23 | 5,6,7,8,18,<br>20,24,25,2<br>6 | 1 | P34901                                           |

|     |                         |                                |   |                                                  |
|-----|-------------------------|--------------------------------|---|--------------------------------------------------|
| 662 | 1,2,3,4,19,<br>21,22,24 | 5,6,7,8,18,<br>20,23,25,2<br>6 | 1 | P01836                                           |
| 663 | 1,2,3,4,19,<br>21,22,25 | 5,6,7,8,18,<br>20,23,24,2<br>6 | 1 | P47967                                           |
| 664 | 1,2,3,4,19,<br>21,22,26 | 5,6,7,8,18,<br>20,23,24,2<br>5 | 3 | P01836,P63036,Q63661                             |
| 665 | 1,2,3,4,19,<br>21,23,24 | 5,6,7,8,18,<br>20,22,25,2<br>6 | 2 | D3ZUC6,P34901                                    |
| 666 | 1,2,3,4,19,<br>21,23,25 | 5,6,7,8,18,<br>20,22,24,2<br>6 | 1 | P34901                                           |
| 667 | 1,2,3,4,19,<br>21,23,26 | 5,6,7,8,18,<br>20,22,24,2<br>5 | 5 | D3ZUC6,P01836,P01946,P34901,Q63661               |
| 668 | 1,2,3,4,19,<br>21,24,25 | 5,6,7,8,18,<br>20,22,23,2<br>6 | 0 |                                                  |
| 669 | 1,2,3,4,19,<br>21,24,26 | 5,6,7,8,18,<br>20,22,23,2<br>5 | 4 | D3ZUC6,P01836,Q63661,Q9EQV9                      |
| 670 | 1,2,3,4,19,<br>21,25,26 | 5,6,7,8,18,<br>20,22,23,2<br>4 | 3 | P01836,P19223,Q63661                             |
| 671 | 1,2,3,4,19,<br>22,23,24 | 5,6,7,8,18,<br>20,21,25,2<br>6 | 3 | P34901,P82471,Q9WTT6                             |
| 672 | 1,2,3,4,19,<br>22,23,25 | 5,6,7,8,18,<br>20,21,24,2<br>6 | 2 | P34901,P82471                                    |
| 673 | 1,2,3,4,19,<br>22,23,26 | 5,6,7,8,18,<br>20,21,24,2<br>5 | 7 | O54728,P01946,P06760,P34901,P55159,P82471,Q63661 |
| 674 | 1,2,3,4,19,<br>22,24,25 | 5,6,7,8,18,<br>20,21,23,2<br>6 | 1 | P82471                                           |
| 675 | 1,2,3,4,19,<br>22,24,26 | 5,6,7,8,18,<br>20,21,23,2<br>5 | 4 | O54728,P01836,P06760,Q9WTT6                      |
| 676 | 1,2,3,4,19,<br>22,25,26 | 5,6,7,8,18,<br>20,21,23,2<br>4 | 0 |                                                  |



|     |                         |                                |   |                                           |
|-----|-------------------------|--------------------------------|---|-------------------------------------------|
| 677 | 1,2,3,4,19,<br>23,24,25 | 5,6,7,8,18,<br>20,21,22,2<br>6 | 2 | P34901,P82471                             |
| 678 | 1,2,3,4,19,<br>23,24,26 | 5,6,7,8,18,<br>20,21,22,2<br>5 | 5 | P01946,P02091,P34901,P82471,Q63661        |
| 679 | 1,2,3,4,19,<br>23,25,26 | 5,6,7,8,18,<br>20,21,22,2<br>4 | 4 | P01946,P02091,P55314,Q63661               |
| 680 | 1,2,3,4,19,<br>24,25,26 | 5,6,7,8,18,<br>20,21,22,2<br>3 | 2 | P01946,P14480                             |
| 681 | 1,2,3,4,20,<br>21,22,23 | 5,6,7,8,18,<br>19,24,25,2<br>6 | 2 | P01836,P34901                             |
| 682 | 1,2,3,4,20,<br>21,22,24 | 5,6,7,8,18,<br>19,23,25,2<br>6 | 2 | P01836,Q5XFX0                             |
| 683 | 1,2,3,4,20,<br>21,22,25 | 5,6,7,8,18,<br>19,23,24,2<br>6 | 1 | P01836                                    |
| 684 | 1,2,3,4,20,<br>21,22,26 | 5,6,7,8,18,<br>19,23,24,2<br>5 | 2 | P01836,Q99041                             |
| 685 | 1,2,3,4,20,<br>21,23,24 | 5,6,7,8,18,<br>19,22,25,2<br>6 | 2 | P01836,P34901                             |
| 686 | 1,2,3,4,20,<br>21,23,25 | 5,6,7,8,18,<br>19,22,24,2<br>6 | 2 | P01836,P34901                             |
| 687 | 1,2,3,4,20,<br>21,23,26 | 5,6,7,8,18,<br>19,22,24,2<br>5 | 6 | P01836,P01946,P34901,Q4FZU2,Q63661,Q6IFU8 |
| 688 | 1,2,3,4,20,<br>21,24,25 | 5,6,7,8,18,<br>19,22,23,2<br>6 | 1 | P01836                                    |
| 689 | 1,2,3,4,20,<br>21,24,26 | 5,6,7,8,18,<br>19,22,23,2<br>5 | 5 | P01015,P01836,P80020,Q99041,Q9EQV9        |
| 690 | 1,2,3,4,20,<br>21,25,26 | 5,6,7,8,18,<br>19,22,23,2<br>4 | 2 | P01836,P19223                             |
| 691 | 1,2,3,4,20,<br>22,23,24 | 5,6,7,8,18,<br>19,21,25,2<br>6 | 5 | P01836,P34901,P82995,Q62997,Q9QZK9        |

|     |                         |                                |   |                                                  |
|-----|-------------------------|--------------------------------|---|--------------------------------------------------|
| 692 | 1,2,3,4,20,<br>22,23,25 | 5,6,7,8,18,<br>19,21,24,2<br>6 | 2 | P34901,Q62997                                    |
| 693 | 1,2,3,4,20,<br>22,23,26 | 5,6,7,8,18,<br>19,21,24,2<br>5 | 6 | O54728,P01836,P01946,P34901,P55159,Q62997        |
| 694 | 1,2,3,4,20,<br>22,24,25 | 5,6,7,8,18,<br>19,21,23,2<br>6 | 1 | P01836                                           |
| 695 | 1,2,3,4,20,<br>22,24,26 | 5,6,7,8,18,<br>19,21,23,2<br>5 | 7 | P01836,P06760,P07150,P08010,P36953,Q62997,Q99041 |
| 696 | 1,2,3,4,20,<br>22,25,26 | 5,6,7,8,18,<br>19,21,23,2<br>4 | 2 | P01836,Q62997                                    |
| 697 | 1,2,3,4,20,<br>23,24,25 | 5,6,7,8,18,<br>19,21,22,2<br>6 | 1 | P34901                                           |
| 698 | 1,2,3,4,20,<br>23,24,26 | 5,6,7,8,18,<br>19,21,22,2<br>5 | 5 | P01836,P01946,P19218,P34901,P97840               |
| 699 | 1,2,3,4,20,<br>23,25,26 | 5,6,7,8,18,<br>19,21,22,2<br>4 | 4 | P01836,P01946,P19218,P55314                      |
| 700 | 1,2,3,4,20,<br>24,25,26 | 5,6,7,8,18,<br>19,21,22,2<br>3 | 1 | P01836                                           |
| 701 | 1,2,3,4,21,<br>22,23,24 | 5,6,7,8,18,<br>19,20,25,2<br>6 | 2 | P01836,P34901                                    |
| 702 | 1,2,3,4,21,<br>22,23,25 | 5,6,7,8,18,<br>19,20,24,2<br>6 | 1 | P34901                                           |
| 703 | 1,2,3,4,21,<br>22,23,26 | 5,6,7,8,18,<br>19,20,24,2<br>5 | 4 | P01836,P01946,P34901,Q63661                      |
| 704 | 1,2,3,4,21,<br>22,24,25 | 5,6,7,8,18,<br>19,20,23,2<br>6 | 1 | P01836                                           |
| 705 | 1,2,3,4,21,<br>22,24,26 | 5,6,7,8,18,<br>19,20,23,2<br>5 | 4 | P01836,P80020,Q99041,Q9EQV9                      |
| 706 | 1,2,3,4,21,<br>22,25,26 | 5,6,7,8,18,<br>19,20,23,2<br>4 | 1 | P01836                                           |

|     |                         |                                   |    |                                                                                            |
|-----|-------------------------|-----------------------------------|----|--------------------------------------------------------------------------------------------|
| 707 | 1,2,3,4,21,<br>23,24,25 | 5,6,7,8,18,<br>19,20,22,2<br>6    | 3  | P01836,P34901,Q63751                                                                       |
| 708 | 1,2,3,4,21,<br>23,24,26 | 5,6,7,8,18,<br>19,20,22,2<br>5    | 5  | P01836,P01946,P34901,Q63661,Q9EQV9                                                         |
| 709 | 1,2,3,4,21,<br>23,25,26 | 5,6,7,8,18,<br>19,20,22,2<br>4    | 5  | P01836,P01946,P34901,P55314,Q63661                                                         |
| 710 | 1,2,3,4,21,<br>24,25,26 | 5,6,7,8,18,<br>19,20,22,2<br>3    | 3  | P01836,Q68FV8,Q9EQV9                                                                       |
| 711 | 1,2,3,4,22,<br>23,24,25 | 5,6,7,8,18,<br>19,20,21,2<br>6    | 2  | P34901,P82471                                                                              |
| 712 | 1,2,3,4,22,<br>23,24,26 | 5,6,7,8,18,<br>19,20,21,2<br>5    | 7  | O54728,P00731,P01836,P01946,P34901,P36953,P82471                                           |
| 713 | 1,2,3,4,22,<br>23,25,26 | 5,6,7,8,18,<br>19,20,21,2<br>4    | 4  | P01946,P34901,P55314,P82471                                                                |
| 714 | 1,2,3,4,22,<br>24,25,26 | 5,6,7,8,18,<br>19,20,21,2<br>3    | 3  | P01836,P36953,P82471                                                                       |
| 715 | 1,2,3,4,23,<br>24,25,26 | 5,6,7,8,18,<br>19,20,21,2<br>2    | 7  | P01946,P02091,P34901,P55314,P82471,Q62902,Q7TPB1                                           |
| 716 | 1,2,3,5,6,7<br>,8,18    | 4,19,20,21<br>,22,23,24,<br>25,26 | 13 | O55006,P00731,P02631,P02803,P10715,P16086,P25031,P52590,Q63942,Q6IRE4,Q8N7M5,Q91ZS3,Q9ET32 |
| 717 | 1,2,3,5,6,7<br>,8,19    | 4,18,20,21<br>,22,23,24,<br>25,26 | 11 | O55006,P00731,P02631,P16086,P52590,P53792,P97580,Q30KJ2,Q63532,Q6IRE4,Q8N7M5               |
| 718 | 1,2,3,5,6,7<br>,8,20    | 4,18,19,21<br>,22,23,24,<br>25,26 | 10 | O55006,P02631,P10715,P16086,P20762,P27213,P52590,Q6IRE4,Q91ZS3,Q9ET32                      |
| 719 | 1,2,3,5,6,7<br>,8,21    | 4,18,19,20<br>,22,23,24,<br>25,26 | 10 | O55006,P00731,P02631,P16086,P52590,P53792,Q6IRE4,Q8N7M5,Q91ZS3,Q9ET32                      |
| 720 | 1,2,3,5,6,7<br>,8,22    | 4,18,19,20<br>,21,23,24,<br>25,26 | 9  | P02631,P16086,P20766,P27213,P52590,Q6IRE4,Q8N7M5,Q9ET32,Q9QW07                             |
| 721 | 1,2,3,5,6,7<br>,8,23    | 4,18,19,20<br>,21,22,24,<br>25,26 | 11 | P02631,P16086,P20762,P28648,P51907,P52590,P97580,Q30KJ2,Q6IRE4,Q8N7M5,Q9ET32               |

|     |                       |                                   |    |                                                                                                                 |
|-----|-----------------------|-----------------------------------|----|-----------------------------------------------------------------------------------------------------------------|
| 722 | 1,2,3,5,6,7<br>,8,24  | 4,18,19,20<br>,21,22,23,<br>25,26 | 8  | O55006,P02631,P10715,P52590,P83121,Q6IRE4,Q8N7M5,Q9ET32                                                         |
| 723 | 1,2,3,5,6,7<br>,8,25  | 4,18,19,20<br>,21,22,23,<br>24,26 | 16 | P02631,P05371,P10715,P12020,P16086,P19629,P36374,P52590,P53792,P55314,P68370,Q5GRG2,Q6IRE4,Q8N7M5,Q91ZS3,Q9ET32 |
| 724 | 1,2,3,5,6,7<br>,8,26  | 4,18,19,20<br>,21,22,23,<br>24,25 | 9  | P01946,P02631,P10715,P20762,P30904,P52590,P83748,Q6IRE4,Q91ZS3                                                  |
| 725 | 1,2,3,5,6,7<br>,18,19 | 4,8,20,21,<br>22,23,24,2<br>5,26  | 11 | O55006,P00731,P02631,P16086,P25031,P52590,P53792,Q30KJ2,Q63532,Q63942,Q6IE51                                    |
| 726 | 1,2,3,5,6,7<br>,18,20 | 4,8,19,21,<br>22,23,24,2<br>5,26  | 8  | P00731,P02631,P16086,P25031,P27213,P52590,Q6IRE4,Q91ZS3                                                         |
| 727 | 1,2,3,5,6,7<br>,18,21 | 4,8,19,20,<br>22,23,24,2<br>5,26  | 10 | O35783,P00731,P02631,P16086,P25031,P42854,P52590,P53792,Q6IRE4,Q91ZS3                                           |
| 728 | 1,2,3,5,6,7<br>,18,22 | 4,8,19,20,<br>21,23,24,2<br>5,26  | 6  | P02631,P16086,P25031,P27213,P52590,Q9QW07                                                                       |
| 729 | 1,2,3,5,6,7<br>,18,23 | 4,8,19,20,<br>21,22,24,2<br>5,26  | 10 | P02631,P16086,P25031,P28648,P34901,P52590,P97580,Q63942,Q6IE51,Q6IRE4                                           |
| 730 | 1,2,3,5,6,7<br>,18,24 | 4,8,19,20,<br>21,22,23,2<br>5,26  | 7  | O55006,P02631,P25031,P27213,P52590,Q6IE51,Q6IRE4                                                                |
| 731 | 1,2,3,5,6,7<br>,18,25 | 4,8,19,20,<br>21,22,23,2<br>4,26  | 11 | P00731,P02631,P05371,P10715,P19629,P25031,P52590,P55314,P61206,P84079,P84082,Q6IRE4,Q91ZS3                      |
| 732 | 1,2,3,5,6,7<br>,18,26 | 4,8,19,20,<br>21,22,23,2<br>4,25  | 12 | O35783,P01946,P02631,P16636,P25031,P30904,P52590,P83748,Q63661,Q63942,Q6IRE4,Q91ZS3                             |
| 733 | 1,2,3,5,6,7<br>,19,20 | 4,8,18,21,<br>22,23,24,2<br>5,26  | 11 | P00714,P02631,P07150,P16086,P27213,P52590,P53792,Q30KJ2,Q63532,Q6IE51,Q6IRE4                                    |
| 734 | 1,2,3,5,6,7<br>,19,21 | 4,8,18,20,<br>22,23,24,2<br>5,26  | 11 | P00714,P00731,P02631,P16086,P52590,P53792,Q30KJ2,Q63532,Q6IE51,Q6IRE4,Q8N7M5                                    |
| 735 | 1,2,3,5,6,7<br>,19,22 | 4,8,18,20,<br>21,23,24,2<br>5,26  | 10 | P00714,P02631,P16086,P17046,P27213,P52590,Q30KJ2,Q63532,Q8N7M5,Q9QW07                                           |
| 736 | 1,2,3,5,6,7<br>,19,23 | 4,8,18,20,<br>21,22,24,2<br>5,26  | 8  | P02631,P15399,P16086,P52590,P97580,Q30KJ2,Q63532,Q6IE51                                                         |

|     |                       |                                  |    |                                                                                                   |
|-----|-----------------------|----------------------------------|----|---------------------------------------------------------------------------------------------------|
| 737 | 1,2,3,5,6,7<br>,19,24 | 4,8,18,20,<br>21,22,23,2<br>5,26 | 11 | P00714,P02631,P16086,P30904,P52590,P53792,Q30KJ2,Q63532,Q6IE51,Q6IRE4,Q8N7M5                      |
| 738 | 1,2,3,5,6,7<br>,19,25 | 4,8,18,20,<br>21,22,23,2<br>4,26 | 14 | P02631,P12020,P16086,P17046,P52590,P53792,P55314,P97580,P97840,Q30KJ2,Q63532,Q6IE51,Q8N7M5,Q91ZS3 |
| 739 | 1,2,3,5,6,7<br>,19,26 | 4,8,18,20,<br>21,22,23,2<br>4,25 | 10 | P01946,P02631,P16086,P30904,P52590,P53792,P83748,Q30KJ2,Q63532,Q6IE51                             |
| 740 | 1,2,3,5,6,7<br>,20,21 | 4,8,18,19,<br>22,23,24,2<br>5,26 | 9  | P00714,P00731,P02631,P16086,P42854,P52590,P53792,Q6IRE4,Q91ZS3                                    |
| 741 | 1,2,3,5,6,7<br>,20,22 | 4,8,18,19,<br>21,23,24,2<br>5,26 | 8  | P00714,P02631,P07150,P16086,P27213,P52590,Q6IRE4,Q9QW07                                           |
| 742 | 1,2,3,5,6,7<br>,20,23 | 4,8,18,19,<br>21,22,24,2<br>5,26 | 6  | P02631,P16086,P52590,P97580,Q6IRE4,Q91ZS3                                                         |
| 743 | 1,2,3,5,6,7<br>,20,24 | 4,8,18,19,<br>21,22,23,2<br>5,26 | 6  | P00714,P02631,P08010,P27213,P52590,Q6IRE4                                                         |
| 744 | 1,2,3,5,6,7<br>,20,25 | 4,8,18,19,<br>21,22,23,2<br>4,26 | 7  | P02631,P10715,P12020,P52590,P55314,Q6IRE4,Q91ZS3                                                  |
| 745 | 1,2,3,5,6,7<br>,20,26 | 4,8,18,19,<br>21,22,23,2<br>4,25 | 7  | P01681,P01946,P30904,P52590,P83748,Q6IRE4,Q91ZS3                                                  |
| 746 | 1,2,3,5,6,7<br>,21,22 | 4,8,18,19,<br>20,23,24,2<br>5,26 | 6  | P00714,P16086,P19218,P52590,Q6IRE4,Q9QW07                                                         |
| 747 | 1,2,3,5,6,7<br>,21,23 | 4,8,18,19,<br>20,22,24,2<br>5,26 | 8  | P02631,P16086,P34901,P52590,P97580,Q30KJ2,Q6IRE4,Q91ZS3                                           |
| 748 | 1,2,3,5,6,7<br>,21,24 | 4,8,18,19,<br>20,22,23,2<br>5,26 | 6  | P00714,P02631,P13432,P52590,P53792,Q6IRE4                                                         |
| 749 | 1,2,3,5,6,7<br>,21,25 | 4,8,18,19,<br>20,22,23,2<br>4,26 | 7  | P02631,P19629,P52590,P53792,P55314,Q6IRE4,Q91ZS3                                                  |
| 750 | 1,2,3,5,6,7<br>,21,26 | 4,8,18,19,<br>20,22,23,2<br>4,25 | 8  | O35783,P01946,P30904,P52590,P53792,P83748,Q6IRE4,Q91ZS3                                           |
| 751 | 1,2,3,5,6,7<br>,22,23 | 4,8,18,19,<br>20,21,24,2<br>5,26 | 6  | P02631,P16086,P34901,P52590,P97580,Q9QW07                                                         |

|     |                       |                                  |    |                                                                                                          |
|-----|-----------------------|----------------------------------|----|----------------------------------------------------------------------------------------------------------|
| 752 | 1,2,3,5,6,7<br>,22,24 | 4,8,18,19,<br>20,21,23,2<br>5,26 | 8  | P00714,P02631,P08010,P27213,P52590,Q6IRE4,Q8N7M5,Q9QW07                                                  |
| 753 | 1,2,3,5,6,7<br>,22,25 | 4,8,18,19,<br>20,21,23,2<br>4,26 | 9  | P06911,P12020,P17046,P19629,P52590,P55314,Q5GRG2,Q91ZS3,Q9QW07                                           |
| 754 | 1,2,3,5,6,7<br>,22,26 | 4,8,18,19,<br>20,21,23,2<br>4,25 | 5  | O54728,P01946,P52590,P83748,Q9QW07                                                                       |
| 755 | 1,2,3,5,6,7<br>,23,24 | 4,8,18,19,<br>20,21,22,2<br>5,26 | 9  | P02631,P16086,P34901,P36374,P52590,P97580,Q30KJ2,Q6IE51,Q6IRE4                                           |
| 756 | 1,2,3,5,6,7<br>,23,25 | 4,8,18,19,<br>20,21,22,2<br>4,26 | 15 | P02631,P05371,P12020,P16086,P17046,P19629,P36374,P52590,P55314,P97580,Q30KJ2,Q5GRG2,Q63751,Q6IRE4,Q91ZS3 |
| 757 | 1,2,3,5,6,7<br>,23,26 | 4,8,18,19,<br>20,21,22,2<br>4,25 | 14 | P01946,P02091,P02631,P16086,P28648,P34901,P36376,P52590,P55314,P83748,P97580,Q30KJ2,Q4FZU2,Q6IRE4        |
| 758 | 1,2,3,5,6,7<br>,24,25 | 4,8,18,19,<br>20,21,22,2<br>3,26 | 9  | P02631,P12020,P19629,P36374,P52590,P55314,Q6IRE4,Q8N7M5,Q91ZS3                                           |
| 759 | 1,2,3,5,6,7<br>,24,26 | 4,8,18,19,<br>20,21,22,2<br>3,25 | 8  | P01946,P02091,P08010,P30904,P52590,P83748,Q6IRE4,Q8CJD3                                                  |
| 760 | 1,2,3,5,6,7<br>,25,26 | 4,8,18,19,<br>20,21,22,2<br>3,24 | 9  | P01946,P02091,P19629,P30904,P52590,P55314,P83748,Q6IRE4,Q91ZS3                                           |
| 761 | 1,2,3,5,6,8<br>,18,19 | 4,7,20,21,<br>22,23,24,2<br>5,26 | 8  | O55006,P00731,P02803,P22006,P53792,P83121,Q63942,Q9Z1F2                                                  |
| 762 | 1,2,3,5,6,8<br>,18,20 | 4,7,19,21,<br>22,23,24,2<br>5,26 | 6  | P00731,P22006,P27213,P83121,Q63942,Q6IRE4                                                                |
| 763 | 1,2,3,5,6,8<br>,18,21 | 4,7,19,20,<br>22,23,24,2<br>5,26 | 4  | O35547,P00731,P25031,Q63942                                                                              |
| 764 | 1,2,3,5,6,8<br>,18,22 | 4,7,19,20,<br>21,23,24,2<br>5,26 | 5  | P22006,P27213,P83121,Q63942,Q9QW07                                                                       |
| 765 | 1,2,3,5,6,8<br>,18,23 | 4,7,19,20,<br>21,22,24,2<br>5,26 | 6  | P22006,P28648,P51907,Q5XI22,Q63942,Q9Z1F2                                                                |
| 766 | 1,2,3,5,6,8<br>,18,24 | 4,7,19,20,<br>21,22,23,2<br>5,26 | 3  | O55006,P83121,Q63942                                                                                     |

|     |                       |                                  |   |                                                         |
|-----|-----------------------|----------------------------------|---|---------------------------------------------------------|
| 767 | 1,2,3,5,6,8<br>,18,25 | 4,7,19,20,<br>21,22,23,2<br>4,26 | 4 | P55314,Q63942,Q91ZS3,Q9Z1F2                             |
| 768 | 1,2,3,5,6,8<br>,18,26 | 4,7,19,20,<br>21,22,23,2<br>4,25 | 2 | Q4FZU2,Q63942                                           |
| 769 | 1,2,3,5,6,8<br>,19,20 | 4,7,18,21,<br>22,23,24,2<br>5,26 | 4 | P22006,P53792,P83121,Q6IRE4                             |
| 770 | 1,2,3,5,6,8<br>,19,21 | 4,7,18,20,<br>22,23,24,2<br>5,26 | 3 | P00731,P35281,P53792                                    |
| 771 | 1,2,3,5,6,8<br>,19,22 | 4,7,18,20,<br>21,23,24,2<br>5,26 | 5 | P00714,P08753,P22006,P83121,Q9QW07                      |
| 772 | 1,2,3,5,6,8<br>,19,23 | 4,7,18,20,<br>21,22,24,2<br>5,26 | 6 | P15399,P22006,P51907,P97580,Q30KJ2,Q9Z1F2               |
| 773 | 1,2,3,5,6,8<br>,19,24 | 4,7,18,20,<br>21,22,23,2<br>5,26 | 1 | P83121                                                  |
| 774 | 1,2,3,5,6,8<br>,19,25 | 4,7,18,20,<br>21,22,23,2<br>4,26 | 4 | P08753,P53792,P55314,Q9Z1F2                             |
| 775 | 1,2,3,5,6,8<br>,19,26 | 4,7,18,20,<br>21,22,23,2<br>4,25 | 0 |                                                         |
| 776 | 1,2,3,5,6,8<br>,20,21 | 4,7,18,19,<br>22,23,24,2<br>5,26 | 5 | P00714,P01681,P62804,Q6IRE4,Q91ZS3                      |
| 777 | 1,2,3,5,6,8<br>,20,22 | 4,7,18,19,<br>21,23,24,2<br>5,26 | 8 | P00714,P08753,P22006,P27213,P82995,P83121,Q6IRE4,Q9QW07 |
| 778 | 1,2,3,5,6,8<br>,20,23 | 4,7,18,19,<br>21,22,24,2<br>5,26 | 3 | P22006,P82995,Q6IRE4                                    |
| 779 | 1,2,3,5,6,8<br>,20,24 | 4,7,18,19,<br>21,22,23,2<br>5,26 | 6 | P00714,P22006,P27213,P82995,P83121,Q6IRE4               |
| 780 | 1,2,3,5,6,8<br>,20,25 | 4,7,18,19,<br>21,22,23,2<br>4,26 | 3 | P55314,Q6IRE4,Q91ZS3                                    |
| 781 | 1,2,3,5,6,8<br>,20,26 | 4,7,18,19,<br>21,22,23,2<br>4,25 | 4 | P01681,P22006,P62804,Q6IRE4                             |

|     |                       |                                  |   |                                    |
|-----|-----------------------|----------------------------------|---|------------------------------------|
| 782 | 1,2,3,5,6,8<br>,21,22 | 4,7,18,19,<br>20,23,24,2<br>5,26 | 2 | P00714,Q9QW07                      |
| 783 | 1,2,3,5,6,8<br>,21,23 | 4,7,18,19,<br>20,22,24,2<br>5,26 | 3 | P34901,P51907,Q9Z1F2               |
| 784 | 1,2,3,5,6,8<br>,21,24 | 4,7,18,19,<br>20,22,23,2<br>5,26 | 4 | P00714,P13432,P83121,Q6IRE4        |
| 785 | 1,2,3,5,6,8<br>,21,25 | 4,7,18,19,<br>20,22,23,2<br>4,26 | 4 | P06760,P55314,Q91ZS3,Q9WTT6        |
| 786 | 1,2,3,5,6,8<br>,21,26 | 4,7,18,19,<br>20,22,23,2<br>4,25 | 2 | P01681,Q00715                      |
| 787 | 1,2,3,5,6,8<br>,22,23 | 4,7,18,19,<br>20,21,24,2<br>5,26 | 5 | P08753,P22006,P51907,Q9QW07,Q9Z1F2 |
| 788 | 1,2,3,5,6,8<br>,22,24 | 4,7,18,19,<br>20,21,23,2<br>5,26 | 5 | P00714,P08753,P27213,P83121,Q9QW07 |
| 789 | 1,2,3,5,6,8<br>,22,25 | 4,7,18,19,<br>20,21,23,2<br>4,26 | 5 | P06911,P08753,P20766,P55314,Q9QW07 |
| 790 | 1,2,3,5,6,8<br>,22,26 | 4,7,18,19,<br>20,21,23,2<br>4,25 | 3 | P08753,P20766,Q9QW07               |
| 791 | 1,2,3,5,6,8<br>,23,24 | 4,7,18,19,<br>20,21,22,2<br>5,26 | 4 | P34901,P36374,P51907,P82995        |
| 792 | 1,2,3,5,6,8<br>,23,25 | 4,7,18,19,<br>20,21,22,2<br>4,26 | 5 | P08753,P36374,P51907,P55314,Q9Z1F2 |
| 793 | 1,2,3,5,6,8<br>,23,26 | 4,7,18,19,<br>20,21,22,2<br>4,25 | 5 | P01946,P51907,Q4FZU2,Q5I0D1,Q6IFU8 |
| 794 | 1,2,3,5,6,8<br>,24,25 | 4,7,18,19,<br>20,21,22,2<br>3,26 | 3 | P08753,P36374,P55314               |
| 795 | 1,2,3,5,6,8<br>,24,26 | 4,7,18,19,<br>20,21,22,2<br>3,25 | 0 |                                    |
| 796 | 1,2,3,5,6,8<br>,25,26 | 4,7,18,19,<br>20,21,22,2<br>3,24 | 3 | P08753,P55314,Q91ZS3               |



|     |                        |                                 |   |                                                  |
|-----|------------------------|---------------------------------|---|--------------------------------------------------|
| 797 | 1,2,3,5,6,1<br>8,19,20 | 4,7,8,21,2<br>2,23,24,25<br>,26 | 4 | P00731,P22006,P83121,Q02253                      |
| 798 | 1,2,3,5,6,1<br>8,19,21 | 4,7,8,20,2<br>2,23,24,25<br>,26 | 4 | P00731,P25031,P53792,Q63942                      |
| 799 | 1,2,3,5,6,1<br>8,19,22 | 4,7,8,20,2<br>1,23,24,25<br>,26 | 4 | P22006,P83121,Q63942,Q9QW07                      |
| 800 | 1,2,3,5,6,1<br>8,19,23 | 4,7,8,20,2<br>1,22,24,25<br>,26 | 7 | P15399,P22006,P97580,Q03191,Q30KJ2,Q63942,Q9Z1F2 |
| 801 | 1,2,3,5,6,1<br>8,19,24 | 4,7,8,20,2<br>1,22,23,25<br>,26 | 2 | P83121,Q63942                                    |
| 802 | 1,2,3,5,6,1<br>8,19,25 | 4,7,8,20,2<br>1,22,23,24<br>,26 | 3 | P00731,P14173,P55314                             |
| 803 | 1,2,3,5,6,1<br>8,19,26 | 4,7,8,20,2<br>1,22,23,24<br>,25 | 2 | Q63661,Q63942                                    |
| 804 | 1,2,3,5,6,1<br>8,20,21 | 4,7,8,19,2<br>2,23,24,25<br>,26 | 6 | P00731,P01681,P01835,P25031,Q6IRE4,Q91ZS3        |
| 805 | 1,2,3,5,6,1<br>8,20,22 | 4,7,8,19,2<br>1,23,24,25<br>,26 | 6 | P07150,P22006,P27213,P83121,Q99041,Q9QW07        |
| 806 | 1,2,3,5,6,1<br>8,20,23 | 4,7,8,19,2<br>1,22,24,25<br>,26 | 4 | P22006,Q4FZU2,Q63942,Q6IRE4                      |
| 807 | 1,2,3,5,6,1<br>8,20,24 | 4,7,8,19,2<br>1,22,23,25<br>,26 | 5 | P22006,P27213,P83121,Q6IRE4,Q99041               |
| 808 | 1,2,3,5,6,1<br>8,20,25 | 4,7,8,19,2<br>1,22,23,24<br>,26 | 3 | P55314,Q6IRE4,Q91ZS3                             |
| 809 | 1,2,3,5,6,1<br>8,20,26 | 4,7,8,19,2<br>1,22,23,24<br>,25 | 6 | P01681,P22006,Q4FZU2,Q63942,Q6IRE4,Q99041        |
| 810 | 1,2,3,5,6,1<br>8,21,22 | 4,7,8,19,2<br>0,23,24,25<br>,26 | 3 | P00714,P25031,Q9QW07                             |
| 811 | 1,2,3,5,6,1<br>8,21,23 | 4,7,8,19,2<br>0,22,24,25<br>,26 | 3 | P25031,P34901,Q63942                             |

|     |                        |                                 |    |                                                                                            |
|-----|------------------------|---------------------------------|----|--------------------------------------------------------------------------------------------|
| 812 | 1,2,3,5,6,1<br>8,21,24 | 4,7,8,19,2<br>0,22,23,25<br>,26 | 2  | P00714,P25031                                                                              |
| 813 | 1,2,3,5,6,1<br>8,21,25 | 4,7,8,19,2<br>0,22,23,24<br>,26 | 6  | P00731,P25031,P31430,P55314,P98089,Q91ZS3                                                  |
| 814 | 1,2,3,5,6,1<br>8,21,26 | 4,7,8,19,2<br>0,22,23,24<br>,25 | 8  | P00774,P25031,P83748,Q4FZU2,Q63661,Q63942,Q99041,Q9QUL6                                    |
| 815 | 1,2,3,5,6,1<br>8,22,23 | 4,7,8,19,2<br>0,21,24,25<br>,26 | 4  | P22006,P34901,Q63942,Q9QW07                                                                |
| 816 | 1,2,3,5,6,1<br>8,22,24 | 4,7,8,19,2<br>0,21,23,25<br>,26 | 5  | P00714,P27213,P83121,Q99041,Q9QW07                                                         |
| 817 | 1,2,3,5,6,1<br>8,22,25 | 4,7,8,19,2<br>0,21,23,24<br>,26 | 2  | P55314,Q9QW07                                                                              |
| 818 | 1,2,3,5,6,1<br>8,22,26 | 4,7,8,19,2<br>0,21,23,24<br>,25 | 3  | Q63942,Q99041,Q9QW07                                                                       |
| 819 | 1,2,3,5,6,1<br>8,23,24 | 4,7,8,19,2<br>0,21,22,25<br>,26 | 2  | P34901,Q63942                                                                              |
| 820 | 1,2,3,5,6,1<br>8,23,25 | 4,7,8,19,2<br>0,21,22,24<br>,26 | 2  | P55314,Q63942                                                                              |
| 821 | 1,2,3,5,6,1<br>8,23,26 | 4,7,8,19,2<br>0,21,22,24<br>,25 | 13 | P01946,P28648,P34901,Q4FZU2,Q63661,Q63942,Q6IFU7,Q6IFU8,Q6IFW6,Q6IG02,Q6IMF3,Q6P6Q2,Q9QUL6 |
| 822 | 1,2,3,5,6,1<br>8,24,25 | 4,7,8,19,2<br>0,21,22,23<br>,26 | 1  | P55314                                                                                     |
| 823 | 1,2,3,5,6,1<br>8,24,26 | 4,7,8,19,2<br>0,21,22,23<br>,25 | 2  | Q63942,Q99041                                                                              |
| 824 | 1,2,3,5,6,1<br>8,25,26 | 4,7,8,19,2<br>0,21,22,23<br>,24 | 6  | P00774,P55314,Q4FZU2,Q63661,Q63942,Q91ZS3                                                  |
| 825 | 1,2,3,5,6,1<br>9,20,21 | 4,7,8,18,2<br>2,23,24,25<br>,26 | 5  | P00714,P00731,P01681,P53792,Q6IRE4                                                         |
| 826 | 1,2,3,5,6,1<br>9,20,22 | 4,7,8,18,2<br>1,23,24,25<br>,26 | 9  | P00714,P07150,P14669,P22006,P27213,P55091,P82995,P83121,Q9QW07                             |

|     |                        |                                 |   |                                                                |
|-----|------------------------|---------------------------------|---|----------------------------------------------------------------|
| 827 | 1,2,3,5,6,1<br>9,20,23 | 4,7,8,18,2<br>1,22,24,25<br>,26 | 6 | P15399,P22006,P55091,P82995,P97580,Q30KJ2                      |
| 828 | 1,2,3,5,6,1<br>9,20,24 | 4,7,8,18,2<br>1,22,23,25<br>,26 | 8 | P00714,P07150,P22006,P27213,P82995,P83121,Q6IRE4,Q80WL1        |
| 829 | 1,2,3,5,6,1<br>9,20,25 | 4,7,8,18,2<br>1,22,23,24<br>,26 | 1 | P55314                                                         |
| 830 | 1,2,3,5,6,1<br>9,20,26 | 4,7,8,18,2<br>1,22,23,24<br>,25 | 3 | P00714,P01681,P22006                                           |
| 831 | 1,2,3,5,6,1<br>9,21,22 | 4,7,8,18,2<br>0,23,24,25<br>,26 | 2 | P00714,Q9QW07                                                  |
| 832 | 1,2,3,5,6,1<br>9,21,23 | 4,7,8,18,2<br>0,22,24,25<br>,26 | 5 | P00714,P15399,P34901,P97580,Q30KJ2                             |
| 833 | 1,2,3,5,6,1<br>9,21,24 | 4,7,8,18,2<br>0,22,23,25<br>,26 | 2 | P00714,P53792                                                  |
| 834 | 1,2,3,5,6,1<br>9,21,25 | 4,7,8,18,2<br>0,22,23,24<br>,26 | 3 | P53792,P55314,P97840                                           |
| 835 | 1,2,3,5,6,1<br>9,21,26 | 4,7,8,18,2<br>0,22,23,24<br>,25 | 4 | P00714,P01681,P53792,Q63661                                    |
| 836 | 1,2,3,5,6,1<br>9,22,23 | 4,7,8,18,2<br>0,21,24,25<br>,26 | 9 | P00714,P15399,P22006,P34901,P55091,P82995,P97580,Q30KJ2,Q9QW07 |
| 837 | 1,2,3,5,6,1<br>9,22,24 | 4,7,8,18,2<br>0,21,23,25<br>,26 | 7 | P00714,P07150,P14669,P27213,P82995,P83121,Q9QW07               |
| 838 | 1,2,3,5,6,1<br>9,22,25 | 4,7,8,18,2<br>0,21,23,24<br>,26 | 4 | P17046,P55314,Q4FZU6,Q9QW07                                    |
| 839 | 1,2,3,5,6,1<br>9,22,26 | 4,7,8,18,2<br>0,21,23,24<br>,25 | 5 | O54728,P00714,P55159,Q9QW07,Q9R044                             |
| 840 | 1,2,3,5,6,1<br>9,23,24 | 4,7,8,18,2<br>0,21,22,25<br>,26 | 6 | P00714,P15399,P34901,P82995,P97580,Q30KJ2                      |
| 841 | 1,2,3,5,6,1<br>9,23,25 | 4,7,8,18,2<br>0,21,22,24<br>,26 | 5 | P15399,P17046,P55314,P97580,Q30KJ2                             |

|     |                        |                                 |    |                                                                       |
|-----|------------------------|---------------------------------|----|-----------------------------------------------------------------------|
| 842 | 1,2,3,5,6,1<br>9,23,26 | 4,7,8,18,2<br>0,21,22,24<br>,25 | 6  | P01946,P15399,P97580,Q30KJ2,Q63661,Q6IFU8                             |
| 843 | 1,2,3,5,6,1<br>9,24,25 | 4,7,8,18,2<br>0,21,22,23<br>,26 | 2  | P55314,Q4FZU6                                                         |
| 844 | 1,2,3,5,6,1<br>9,24,26 | 4,7,8,18,2<br>0,21,22,23<br>,25 | 2  | P00714,Q9R044                                                         |
| 845 | 1,2,3,5,6,1<br>9,25,26 | 4,7,8,18,2<br>0,21,22,23<br>,24 | 1  | P55314                                                                |
| 846 | 1,2,3,5,6,2<br>0,21,22 | 4,7,8,18,1<br>9,23,24,25<br>,26 | 5  | P00714,P01681,P27213,Q6IRE4,Q9QW07                                    |
| 847 | 1,2,3,5,6,2<br>0,21,23 | 4,7,8,18,1<br>9,22,24,25<br>,26 | 5  | P00714,P01681,P01835,P34901,Q6IRE4                                    |
| 848 | 1,2,3,5,6,2<br>0,21,24 | 4,7,8,18,1<br>9,22,23,25<br>,26 | 3  | P00714,Q5XFX0,Q6IRE4                                                  |
| 849 | 1,2,3,5,6,2<br>0,21,25 | 4,7,8,18,1<br>9,22,23,24<br>,26 | 3  | P55314,Q6IRE4,Q91ZS3                                                  |
| 850 | 1,2,3,5,6,2<br>0,21,26 | 4,7,8,18,1<br>9,22,23,24<br>,25 | 5  | P00714,P01681,P62804,Q6IRE4,Q99041                                    |
| 851 | 1,2,3,5,6,2<br>0,22,23 | 4,7,8,18,1<br>9,21,24,25<br>,26 | 7  | P00714,P22006,P27213,P34901,P55091,P82995,Q9QW07                      |
| 852 | 1,2,3,5,6,2<br>0,22,24 | 4,7,8,18,1<br>9,21,23,25<br>,26 | 10 | P00714,P07150,P14669,P22006,P27213,P82995,P83121,Q6IRE4,Q99041,Q9QW07 |
| 853 | 1,2,3,5,6,2<br>0,22,25 | 4,7,8,18,1<br>9,21,23,24<br>,26 | 2  | P55314,Q9QW07                                                         |
| 854 | 1,2,3,5,6,2<br>0,22,26 | 4,7,8,18,1<br>9,21,23,24<br>,25 | 6  | O54728,P00714,P01681,P22006,Q99041,Q9QW07                             |
| 855 | 1,2,3,5,6,2<br>0,23,24 | 4,7,8,18,1<br>9,21,22,25<br>,26 | 5  | P00714,P34901,P82995,Q6IRE4,Q80WL1                                    |
| 856 | 1,2,3,5,6,2<br>0,23,25 | 4,7,8,18,1<br>9,21,22,24<br>,26 | 4  | P36374,P55314,P82995,Q6IRE4                                           |

|     |                        |                                 |   |                                                         |
|-----|------------------------|---------------------------------|---|---------------------------------------------------------|
| 857 | 1,2,3,5,6,2<br>0,23,26 | 4,7,8,18,1<br>9,21,22,24<br>,25 | 8 | P01681,P01946,Q4FZU2,Q6IFU8,Q6IFW6,Q6IG02,Q6IMF3,Q6IRE4 |
| 858 | 1,2,3,5,6,2<br>0,24,25 | 4,7,8,18,1<br>9,21,22,23<br>,26 | 3 | P55314,Q6IRE4,Q80WL1                                    |
| 859 | 1,2,3,5,6,2<br>0,24,26 | 4,7,8,18,1<br>9,21,22,23<br>,25 | 3 | P00714,Q6IRE4,Q99041                                    |
| 860 | 1,2,3,5,6,2<br>0,25,26 | 4,7,8,18,1<br>9,21,22,23<br>,24 | 3 | P55314,Q6IRE4,Q91ZS3                                    |
| 861 | 1,2,3,5,6,2<br>1,22,23 | 4,7,8,18,1<br>9,20,24,25<br>,26 | 3 | P00714,P34901,Q9QW07                                    |
| 862 | 1,2,3,5,6,2<br>1,22,24 | 4,7,8,18,1<br>9,20,23,25<br>,26 | 4 | P00714,P13432,Q5XFX0,Q9QW07                             |
| 863 | 1,2,3,5,6,2<br>1,22,25 | 4,7,8,18,1<br>9,20,23,24<br>,26 | 2 | P55314,Q9QW07                                           |
| 864 | 1,2,3,5,6,2<br>1,22,26 | 4,7,8,18,1<br>9,20,23,24<br>,25 | 3 | P00714,Q99041,Q9QW07                                    |
| 865 | 1,2,3,5,6,2<br>1,23,24 | 4,7,8,18,1<br>9,20,22,25<br>,26 | 2 | P00714,P34901                                           |
| 866 | 1,2,3,5,6,2<br>1,23,25 | 4,7,8,18,1<br>9,20,22,24<br>,26 | 4 | P34901,P55314,Q6P6R2,Q91ZS3                             |
| 867 | 1,2,3,5,6,2<br>1,23,26 | 4,7,8,18,1<br>9,20,22,24<br>,25 | 8 | P01681,P01946,P34901,Q4FZU2,Q63661,Q6IFU8,Q6IFV1,Q6IMF3 |
| 868 | 1,2,3,5,6,2<br>1,24,25 | 4,7,8,18,1<br>9,20,22,23<br>,26 | 1 | P55314                                                  |
| 869 | 1,2,3,5,6,2<br>1,24,26 | 4,7,8,18,1<br>9,20,22,23<br>,25 | 3 | P00714,Q8CJD3,Q99041                                    |
| 870 | 1,2,3,5,6,2<br>1,25,26 | 4,7,8,18,1<br>9,20,22,23<br>,24 | 2 | P55314,Q91ZS3                                           |
| 871 | 1,2,3,5,6,2<br>2,23,24 | 4,7,8,18,1<br>9,20,21,25<br>,26 | 4 | P00714,P34901,P82995,Q9QW07                             |

|     |                        |                                  |   |                                                                |
|-----|------------------------|----------------------------------|---|----------------------------------------------------------------|
| 872 | 1,2,3,5,6,2<br>2,23,25 | 4,7,8,18,1<br>9,20,21,24<br>,26  | 5 | P06911,P34901,P55314,Q4FZU6,Q9QW07                             |
| 873 | 1,2,3,5,6,2<br>2,23,26 | 4,7,8,18,1<br>9,20,21,24<br>,25  | 4 | O54728,P01946,P34901,Q9QW07                                    |
| 874 | 1,2,3,5,6,2<br>2,24,25 | 4,7,8,18,1<br>9,20,21,23<br>,26  | 3 | P55314,Q4FZU6,Q9QW07                                           |
| 875 | 1,2,3,5,6,2<br>2,24,26 | 4,7,8,18,1<br>9,20,21,23<br>,25  | 3 | P00714,Q99041,Q9QW07                                           |
| 876 | 1,2,3,5,6,2<br>2,25,26 | 4,7,8,18,1<br>9,20,21,23<br>,24  | 2 | P55314,Q9QW07                                                  |
| 877 | 1,2,3,5,6,2<br>3,24,25 | 4,7,8,18,1<br>9,20,21,22<br>,26  | 5 | P34901,P36374,P55314,Q4FZU6,Q63751                             |
| 878 | 1,2,3,5,6,2<br>3,24,26 | 4,7,8,18,1<br>9,20,21,22<br>,25  | 5 | P01946,P02091,P34901,P47967,Q6IFU8                             |
| 879 | 1,2,3,5,6,2<br>3,25,26 | 4,7,8,18,1<br>9,20,21,22<br>,24  | 5 | P01946,P02091,P55314,Q4FZU2,Q6IFU8                             |
| 880 | 1,2,3,5,6,2<br>4,25,26 | 4,7,8,18,1<br>9,20,21,22<br>,23  | 4 | P01946,P55314,Q62902,Q8CJD3                                    |
| 881 | 1,2,3,5,7,8<br>,18,19  | 4,6,20,21,<br>22,23,24,2<br>5,26 | 9 | P00731,P02803,P52590,P53792,P83121,Q03191,Q09030,Q63532,Q63942 |
| 882 | 1,2,3,5,7,8<br>,18,20  | 4,6,19,21,<br>22,23,24,2<br>5,26 | 5 | P10715,P27213,P52590,P83121,Q6IRE4                             |
| 883 | 1,2,3,5,7,8<br>,18,21  | 4,6,19,20,<br>22,23,24,2<br>5,26 | 9 | P00731,P02803,P25031,P42854,P52590,P83121,Q09030,Q63467,Q6IRE4 |
| 884 | 1,2,3,5,7,8<br>,18,22  | 4,6,19,20,<br>21,23,24,2<br>5,26 | 5 | P20766,P27213,P52590,P83121,Q9QW07                             |
| 885 | 1,2,3,5,7,8<br>,18,23  | 4,6,19,20,<br>21,22,24,2<br>5,26 | 7 | P02803,P28648,P52590,Q03191,Q09030,Q5XI22,Q63942               |
| 886 | 1,2,3,5,7,8<br>,18,24  | 4,6,19,20,<br>21,22,23,2<br>5,26 | 4 | P10715,P52590,P83121,Q09030                                    |

|     |                       |                                  |   |                                           |
|-----|-----------------------|----------------------------------|---|-------------------------------------------|
| 887 | 1,2,3,5,7,8<br>,18,25 | 4,6,19,20,<br>21,22,23,2<br>4,26 | 5 | P02803,P10715,P19629,P52590,Q09030        |
| 888 | 1,2,3,5,7,8<br>,18,26 | 4,6,19,20,<br>21,22,23,2<br>4,25 | 6 | P01946,P10715,P16636,P52590,Q63942,Q9R1T1 |
| 889 | 1,2,3,5,7,8<br>,19,20 | 4,6,18,21,<br>22,23,24,2<br>5,26 | 5 | P27213,P52590,P53792,P83121,Q6IRE4        |
| 890 | 1,2,3,5,7,8<br>,19,21 | 4,6,18,20,<br>22,23,24,2<br>5,26 | 5 | P00731,P52590,P53792,P83121,Q09030        |
| 891 | 1,2,3,5,7,8<br>,19,22 | 4,6,18,20,<br>21,23,24,2<br>5,26 | 5 | P20766,P27213,P52590,P83121,Q9QW07        |
| 892 | 1,2,3,5,7,8<br>,19,23 | 4,6,18,20,<br>21,22,24,2<br>5,26 | 5 | P52590,P97580,Q03191,Q09030,Q63532        |
| 893 | 1,2,3,5,7,8<br>,19,24 | 4,6,18,20,<br>21,22,23,2<br>5,26 | 4 | P52590,P83121,Q09030,Q63532               |
| 894 | 1,2,3,5,7,8<br>,19,25 | 4,6,18,20,<br>21,22,23,2<br>4,26 | 6 | P10715,P19629,P52590,P53792,Q09030,Q6IFU7 |
| 895 | 1,2,3,5,7,8<br>,19,26 | 4,6,18,20,<br>21,22,23,2<br>4,25 | 4 | O54728,P01946,P52590,Q09030               |
| 896 | 1,2,3,5,7,8<br>,20,21 | 4,6,18,19,<br>22,23,24,2<br>5,26 | 3 | P42854,P52590,Q6IRE4                      |
| 897 | 1,2,3,5,7,8<br>,20,22 | 4,6,18,19,<br>21,23,24,2<br>5,26 | 5 | P27213,P52590,P83121,Q6IRE4,Q9QW07        |
| 898 | 1,2,3,5,7,8<br>,20,23 | 4,6,18,19,<br>21,22,24,2<br>5,26 | 2 | P52590,Q6IRE4                             |
| 899 | 1,2,3,5,7,8<br>,20,24 | 4,6,18,19,<br>21,22,23,2<br>5,26 | 5 | P10715,P27213,P52590,P83121,Q6IRE4        |
| 900 | 1,2,3,5,7,8<br>,20,25 | 4,6,18,19,<br>21,22,23,2<br>4,26 | 4 | P10715,P19629,P52590,Q6IRE4               |
| 901 | 1,2,3,5,7,8<br>,20,26 | 4,6,18,19,<br>21,22,23,2<br>4,25 | 4 | P01946,P10715,P52590,Q6IRE4               |

|     |                       |                                  |   |                                           |
|-----|-----------------------|----------------------------------|---|-------------------------------------------|
| 902 | 1,2,3,5,7,8<br>,21,22 | 4,6,18,19,<br>20,23,24,2<br>5,26 | 3 | P52590,P83121,Q9QW07                      |
| 903 | 1,2,3,5,7,8<br>,21,23 | 4,6,18,19,<br>20,22,24,2<br>5,26 | 4 | P34901,P52590,Q09030,Q6IRE4               |
| 904 | 1,2,3,5,7,8<br>,21,24 | 4,6,18,19,<br>20,22,23,2<br>5,26 | 3 | P52590,P83121,Q6IRE4                      |
| 905 | 1,2,3,5,7,8<br>,21,25 | 4,6,18,19,<br>20,22,23,2<br>4,26 | 5 | P10715,P19629,P52590,Q6IFU7,Q6IRE4        |
| 906 | 1,2,3,5,7,8<br>,21,26 | 4,6,18,19,<br>20,22,23,2<br>4,25 | 4 | P01946,P52590,P83748,Q6IRE4               |
| 907 | 1,2,3,5,7,8<br>,22,23 | 4,6,18,19,<br>20,21,24,2<br>5,26 | 3 | P20766,P52590,Q9QW07                      |
| 908 | 1,2,3,5,7,8<br>,22,24 | 4,6,18,19,<br>20,21,23,2<br>5,26 | 5 | P08010,P27213,P52590,P83121,Q9QW07        |
| 909 | 1,2,3,5,7,8<br>,22,25 | 4,6,18,19,<br>20,21,23,2<br>4,26 | 6 | P10715,P19629,P20766,P52590,Q5GRG2,Q9QW07 |
| 910 | 1,2,3,5,7,8<br>,22,26 | 4,6,18,19,<br>20,21,23,2<br>4,25 | 6 | O54728,P01946,P20766,P52590,P55159,Q9QW07 |
| 911 | 1,2,3,5,7,8<br>,23,24 | 4,6,18,19,<br>20,21,22,2<br>5,26 | 4 | P34901,P52590,P83121,Q09030               |
| 912 | 1,2,3,5,7,8<br>,23,25 | 4,6,18,19,<br>20,21,22,2<br>4,26 | 6 | P10715,P19629,P36374,P52590,P55314,Q09030 |
| 913 | 1,2,3,5,7,8<br>,23,26 | 4,6,18,19,<br>20,21,22,2<br>4,25 | 5 | O54728,P01946,P02091,P52590,Q09030        |
| 914 | 1,2,3,5,7,8<br>,24,25 | 4,6,18,19,<br>20,21,22,2<br>3,26 | 3 | P10715,P19629,P52590                      |
| 915 | 1,2,3,5,7,8<br>,24,26 | 4,6,18,19,<br>20,21,22,2<br>3,25 | 5 | P01946,P02091,P08010,P52590,Q8CJD3        |
| 916 | 1,2,3,5,7,8<br>,25,26 | 4,6,18,19,<br>20,21,22,2<br>3,24 | 5 | P01946,P02091,P10715,P19629,P52590        |



|     |                        |                                 |   |                                                                |
|-----|------------------------|---------------------------------|---|----------------------------------------------------------------|
| 917 | 1,2,3,5,7,1<br>8,19,20 | 4,6,8,21,2<br>2,23,24,25<br>,26 | 6 | P07150,P27213,P52590,P83121,Q6IRE4,Q9WTT6                      |
| 918 | 1,2,3,5,7,1<br>8,19,21 | 4,6,8,20,2<br>2,23,24,25<br>,26 | 7 | P00731,P14668,P25031,P52590,P53792,Q03191,Q09030               |
| 919 | 1,2,3,5,7,1<br>8,19,22 | 4,6,8,20,2<br>1,23,24,25<br>,26 | 8 | P07150,P14669,P27213,P52590,P83121,Q6P6R2,Q9QW07,Q9WTT6        |
| 920 | 1,2,3,5,7,1<br>8,19,23 | 4,6,8,20,2<br>1,22,24,25<br>,26 | 5 | P52590,Q03191,Q09030,Q63532,Q6IE51                             |
| 921 | 1,2,3,5,7,1<br>8,19,24 | 4,6,8,20,2<br>1,22,23,25<br>,26 | 7 | P07150,P52590,P83121,Q03191,Q09030,Q63532,Q9WTT6               |
| 922 | 1,2,3,5,7,1<br>8,19,25 | 4,6,8,20,2<br>1,22,23,24<br>,26 | 3 | P17046,P52590,Q09030                                           |
| 923 | 1,2,3,5,7,1<br>8,19,26 | 4,6,8,20,2<br>1,22,23,24<br>,25 | 8 | P01946,P06760,P16636,P52590,Q03191,Q63661,Q63942,Q9WTT6        |
| 924 | 1,2,3,5,7,1<br>8,20,21 | 4,6,8,19,2<br>2,23,24,25<br>,26 | 5 | P00731,P25031,P42854,P52590,Q6IRE4                             |
| 925 | 1,2,3,5,7,1<br>8,20,22 | 4,6,8,19,2<br>1,23,24,25<br>,26 | 9 | P07150,P14669,P27213,P52590,P83121,Q6IRE4,Q6P6R2,Q9QW07,Q9WTT6 |
| 926 | 1,2,3,5,7,1<br>8,20,23 | 4,6,8,19,2<br>1,22,24,25<br>,26 | 3 | P52590,Q6IRE4,Q9QZK9                                           |
| 927 | 1,2,3,5,7,1<br>8,20,24 | 4,6,8,19,2<br>1,22,23,25<br>,26 | 7 | P07150,P27213,P52590,P83121,Q6IRE4,Q9QZK9,Q9WTT6               |
| 928 | 1,2,3,5,7,1<br>8,20,25 | 4,6,8,19,2<br>1,22,23,24<br>,26 | 3 | P10715,P52590,Q6IRE4                                           |
| 929 | 1,2,3,5,7,1<br>8,20,26 | 4,6,8,19,2<br>1,22,23,24<br>,25 | 4 | P01946,P06760,P52590,Q6IRE4                                    |
| 930 | 1,2,3,5,7,1<br>8,21,22 | 4,6,8,19,2<br>0,23,24,25<br>,26 | 3 | P25031,P52590,Q9QW07                                           |
| 931 | 1,2,3,5,7,1<br>8,21,23 | 4,6,8,19,2<br>0,22,24,25<br>,26 | 7 | P14668,P25031,P34901,P52590,Q09030,Q63467,Q6IRE4               |

|     |                        |                                 |    |                                                                                     |
|-----|------------------------|---------------------------------|----|-------------------------------------------------------------------------------------|
| 932 | 1,2,3,5,7,1<br>8,21,24 | 4,6,8,19,2<br>0,22,23,25<br>,26 | 3  | P25031,P52590,Q6IRE4                                                                |
| 933 | 1,2,3,5,7,1<br>8,21,25 | 4,6,8,19,2<br>0,22,23,24<br>,26 | 4  | P25031,P31430,P52590,Q6IRE4                                                         |
| 934 | 1,2,3,5,7,1<br>8,21,26 | 4,6,8,19,2<br>0,22,23,24<br>,25 | 7  | O35783,P01946,P25031,P52590,P82995,P83748,Q63661                                    |
| 935 | 1,2,3,5,7,1<br>8,22,23 | 4,6,8,19,2<br>0,21,24,25<br>,26 | 3  | P34901,P52590,Q9QW07                                                                |
| 936 | 1,2,3,5,7,1<br>8,22,24 | 4,6,8,19,2<br>0,21,23,25<br>,26 | 7  | P07150,P14669,P27213,P52590,P83121,Q9QW07,Q9WTT6                                    |
| 937 | 1,2,3,5,7,1<br>8,22,25 | 4,6,8,19,2<br>0,21,23,24<br>,26 | 3  | P17046,P52590,Q9QW07                                                                |
| 938 | 1,2,3,5,7,1<br>8,22,26 | 4,6,8,19,2<br>0,21,23,24<br>,25 | 8  | O54728,P01946,P06760,P16636,P52590,P55159,Q6P6R2,Q9QW07                             |
| 939 | 1,2,3,5,7,1<br>8,23,24 | 4,6,8,19,2<br>0,21,22,25<br>,26 | 3  | P34901,P52590,Q09030                                                                |
| 940 | 1,2,3,5,7,1<br>8,23,25 | 4,6,8,19,2<br>0,21,22,24<br>,26 | 4  | P52590,P55314,Q09030,Q99MH3                                                         |
| 941 | 1,2,3,5,7,1<br>8,23,26 | 4,6,8,19,2<br>0,21,22,24<br>,25 | 12 | P01946,P02091,P16636,P28648,P34901,P52590,Q07523,Q63661,Q63942,Q6IFU8,Q6IG02,Q6P6Q2 |
| 942 | 1,2,3,5,7,1<br>8,24,25 | 4,6,8,19,2<br>0,21,22,23<br>,26 | 1  | P52590                                                                              |
| 943 | 1,2,3,5,7,1<br>8,24,26 | 4,6,8,19,2<br>0,21,22,23<br>,25 | 6  | P01946,P02091,P16636,P52590,Q63942,Q8CJD3                                           |
| 944 | 1,2,3,5,7,1<br>8,25,26 | 4,6,8,19,2<br>0,21,22,23<br>,24 | 6  | P01946,P02091,P52590,P55091,P82995,Q63661                                           |
| 945 | 1,2,3,5,7,1<br>9,20,21 | 4,6,8,18,2<br>2,23,24,25<br>,26 | 5  | P00714,P42854,P52590,P53792,Q6IRE4                                                  |
| 946 | 1,2,3,5,7,1<br>9,20,22 | 4,6,8,18,2<br>1,23,24,25<br>,26 | 10 | P00714,P00774,P07150,P14669,P27213,P52590,P83121,Q6P6R2,Q9QW07,Q9WTT6               |

|     |                        |                                 |    |                                                                              |
|-----|------------------------|---------------------------------|----|------------------------------------------------------------------------------|
| 947 | 1,2,3,5,7,1<br>9,20,23 | 4,6,8,18,2<br>1,22,24,25<br>,26 | 2  | P52590,Q6IRE4                                                                |
| 948 | 1,2,3,5,7,1<br>9,20,24 | 4,6,8,18,2<br>1,22,23,25<br>,26 | 8  | P00714,P07150,P14669,P27213,P52590,P83121,Q6IRE4,Q9WTT6                      |
| 949 | 1,2,3,5,7,1<br>9,20,25 | 4,6,8,18,2<br>1,22,23,24<br>,26 | 3  | P17046,P52590,Q6IRE4                                                         |
| 950 | 1,2,3,5,7,1<br>9,20,26 | 4,6,8,18,2<br>1,22,23,24<br>,25 | 5  | O54728,P01946,P07150,P52590,Q6IRE4                                           |
| 951 | 1,2,3,5,7,1<br>9,21,22 | 4,6,8,18,2<br>0,23,24,25<br>,26 | 4  | P00714,P17046,P52590,Q9QW07                                                  |
| 952 | 1,2,3,5,7,1<br>9,21,23 | 4,6,8,18,2<br>0,22,24,25<br>,26 | 4  | P14668,P34901,P52590,Q09030                                                  |
| 953 | 1,2,3,5,7,1<br>9,21,24 | 4,6,8,18,2<br>0,22,23,25<br>,26 | 3  | P00714,P52590,P53792                                                         |
| 954 | 1,2,3,5,7,1<br>9,21,25 | 4,6,8,18,2<br>0,22,23,24<br>,26 | 5  | P17046,P47967,P52590,P53792,P97840                                           |
| 955 | 1,2,3,5,7,1<br>9,21,26 | 4,6,8,18,2<br>0,22,23,24<br>,25 | 5  | P01946,P52590,P53792,P83748,Q63661                                           |
| 956 | 1,2,3,5,7,1<br>9,22,23 | 4,6,8,18,2<br>0,21,24,25<br>,26 | 5  | P17046,P52590,Q63532,Q9QW07,Q9WTT6                                           |
| 957 | 1,2,3,5,7,1<br>9,22,24 | 4,6,8,18,2<br>0,21,23,25<br>,26 | 11 | P00714,P07150,P14669,P17046,P27213,P52590,P83121,Q63532,Q6P6R2,Q9QW07,Q9WTT6 |
| 958 | 1,2,3,5,7,1<br>9,22,25 | 4,6,8,18,2<br>0,21,23,24<br>,26 | 4  | P08644,P17046,P52590,Q9QW07                                                  |
| 959 | 1,2,3,5,7,1<br>9,22,26 | 4,6,8,18,2<br>0,21,23,24<br>,25 | 8  | O54728,P01946,P07150,P52590,P55159,Q6P6R2,Q9QW07,Q9WTT6                      |
| 960 | 1,2,3,5,7,1<br>9,23,24 | 4,6,8,18,2<br>0,21,22,25<br>,26 | 5  | P34901,P52590,Q09030,Q63532,Q9WTT6                                           |
| 961 | 1,2,3,5,7,1<br>9,23,25 | 4,6,8,18,2<br>0,21,22,24<br>,26 | 6  | P17046,P52590,P55314,P97580,Q09030,Q63532                                    |

|     |                        |                                 |    |                                                                       |
|-----|------------------------|---------------------------------|----|-----------------------------------------------------------------------|
| 962 | 1,2,3,5,7,1<br>9,23,26 | 4,6,8,18,2<br>0,21,22,24<br>,25 | 7  | O54728,P01946,P02091,P52590,Q09030,Q63532,Q63661                      |
| 963 | 1,2,3,5,7,1<br>9,24,25 | 4,6,8,18,2<br>0,21,22,23<br>,26 | 3  | P17046,P52590,Q63532                                                  |
| 964 | 1,2,3,5,7,1<br>9,24,26 | 4,6,8,18,2<br>0,21,22,23<br>,25 | 5  | P01946,P02091,P52590,Q63532,Q9WTT6                                    |
| 965 | 1,2,3,5,7,1<br>9,25,26 | 4,6,8,18,2<br>0,21,22,23<br>,24 | 5  | P01946,P02091,P08644,P17046,P52590                                    |
| 966 | 1,2,3,5,7,2<br>0,21,22 | 4,6,8,18,1<br>9,23,24,25<br>,26 | 5  | P00714,P27213,P52590,Q6IRE4,Q9QW07                                    |
| 967 | 1,2,3,5,7,2<br>0,21,23 | 4,6,8,18,1<br>9,22,24,25<br>,26 | 4  | P14668,P34901,P52590,Q6IRE4                                           |
| 968 | 1,2,3,5,7,2<br>0,21,24 | 4,6,8,18,1<br>9,22,23,25<br>,26 | 3  | P00714,P52590,Q6IRE4                                                  |
| 969 | 1,2,3,5,7,2<br>0,21,25 | 4,6,8,18,1<br>9,22,23,24<br>,26 | 3  | P52590,Q6IRE4,Q91ZS3                                                  |
| 970 | 1,2,3,5,7,2<br>0,21,26 | 4,6,8,18,1<br>9,22,23,24<br>,25 | 4  | P01041,P01946,P52590,Q6IRE4                                           |
| 971 | 1,2,3,5,7,2<br>0,22,23 | 4,6,8,18,1<br>9,21,24,25<br>,26 | 5  | P27213,P34901,P52590,Q6IRE4,Q9QW07                                    |
| 972 | 1,2,3,5,7,2<br>0,22,24 | 4,6,8,18,1<br>9,21,23,25<br>,26 | 10 | P00714,P07150,P08010,P14669,P27213,P52590,P83121,Q6IRE4,Q9QW07,Q9WTT6 |
| 973 | 1,2,3,5,7,2<br>0,22,25 | 4,6,8,18,1<br>9,21,23,24<br>,26 | 4  | P17046,P52590,Q6IRE4,Q9QW07                                           |
| 974 | 1,2,3,5,7,2<br>0,22,26 | 4,6,8,18,1<br>9,21,23,24<br>,25 | 9  | O54728,P01946,P07150,P14669,P27213,P52590,P55159,Q6P6R2,Q9QW07        |
| 975 | 1,2,3,5,7,2<br>0,23,24 | 4,6,8,18,1<br>9,21,22,25<br>,26 | 3  | P34901,P52590,Q6IRE4                                                  |
| 976 | 1,2,3,5,7,2<br>0,23,25 | 4,6,8,18,1<br>9,21,22,24<br>,26 | 3  | P52590,P55314,Q6IRE4                                                  |

|     |                        |                                 |   |                                                  |
|-----|------------------------|---------------------------------|---|--------------------------------------------------|
| 977 | 1,2,3,5,7,2<br>0,23,26 | 4,6,8,18,1<br>9,21,22,24<br>,25 | 5 | O54728,P01946,P02091,P52590,Q6IRE4               |
| 978 | 1,2,3,5,7,2<br>0,24,25 | 4,6,8,18,1<br>9,21,22,23<br>,26 | 3 | P0C0A9,P52590,Q6IRE4                             |
| 979 | 1,2,3,5,7,2<br>0,24,26 | 4,6,8,18,1<br>9,21,22,23<br>,25 | 7 | P01946,P02091,P07150,P08010,P52590,Q6IRE4,Q8CJD3 |
| 980 | 1,2,3,5,7,2<br>0,25,26 | 4,6,8,18,1<br>9,21,22,23<br>,24 | 4 | P01946,P02091,P52590,Q6IRE4                      |
| 981 | 1,2,3,5,7,2<br>1,22,23 | 4,6,8,18,1<br>9,20,24,25<br>,26 | 4 | P14668,P34901,P52590,Q9QW07                      |
| 982 | 1,2,3,5,7,2<br>1,22,24 | 4,6,8,18,1<br>9,20,23,25<br>,26 | 4 | P00714,P52590,P83121,Q9QW07                      |
| 983 | 1,2,3,5,7,2<br>1,22,25 | 4,6,8,18,1<br>9,20,23,24<br>,26 | 3 | P17046,P52590,Q9QW07                             |
| 984 | 1,2,3,5,7,2<br>1,22,26 | 4,6,8,18,1<br>9,20,23,24<br>,25 | 5 | O54728,P01946,P52590,P83748,Q9QW07               |
| 985 | 1,2,3,5,7,2<br>1,23,24 | 4,6,8,18,1<br>9,20,22,25<br>,26 | 4 | P00507,P34901,P52590,Q6IRE4                      |
| 986 | 1,2,3,5,7,2<br>1,23,25 | 4,6,8,18,1<br>9,20,22,24<br>,26 | 4 | P34901,P52590,P55314,Q6IRE4                      |
| 987 | 1,2,3,5,7,2<br>1,23,26 | 4,6,8,18,1<br>9,20,22,24<br>,25 | 5 | P01946,P02091,P34901,P52590,Q63661               |
| 988 | 1,2,3,5,7,2<br>1,24,25 | 4,6,8,18,1<br>9,20,22,23<br>,26 | 2 | P52590,Q6IRE4                                    |
| 989 | 1,2,3,5,7,2<br>1,24,26 | 4,6,8,18,1<br>9,20,22,23<br>,25 | 5 | P01946,P02091,P52590,Q6IRE4,Q8CJD3               |
| 990 | 1,2,3,5,7,2<br>1,25,26 | 4,6,8,18,1<br>9,20,22,23<br>,24 | 3 | P01946,P02091,P52590                             |
| 991 | 1,2,3,5,7,2<br>2,23,24 | 4,6,8,18,1<br>9,20,21,25<br>,26 | 3 | P34901,P52590,Q9QW07                             |

|      |                        |                                 |   |                                                                |
|------|------------------------|---------------------------------|---|----------------------------------------------------------------|
| 992  | 1,2,3,5,7,2<br>2,23,25 | 4,6,8,18,1<br>9,20,21,24<br>,26 | 5 | P17046,P34901,P52590,P55314,Q9QW07                             |
| 993  | 1,2,3,5,7,2<br>2,23,26 | 4,6,8,18,1<br>9,20,21,24<br>,25 | 7 | O54728,P01946,P02091,P34901,P52590,P55159,Q9QW07               |
| 994  | 1,2,3,5,7,2<br>2,24,25 | 4,6,8,18,1<br>9,20,21,23<br>,26 | 5 | P0C0A9,P17046,P52590,Q6AYR9,Q9QW07                             |
| 995  | 1,2,3,5,7,2<br>2,24,26 | 4,6,8,18,1<br>9,20,21,23<br>,25 | 9 | O54728,P01946,P02091,P07150,P08010,P52590,Q6AYR9,Q8CJD3,Q9QW07 |
| 996  | 1,2,3,5,7,2<br>2,25,26 | 4,6,8,18,1<br>9,20,21,23<br>,24 | 6 | O54728,P01946,P02091,P17046,P52590,Q9QW07                      |
| 997  | 1,2,3,5,7,2<br>3,24,25 | 4,6,8,18,1<br>9,20,21,22<br>,26 | 7 | P0C0A9,P17046,P34901,P36374,P52590,P55314,Q63751               |
| 998  | 1,2,3,5,7,2<br>3,24,26 | 4,6,8,18,1<br>9,20,21,22<br>,25 | 4 | P01946,P02091,P34901,P52590                                    |
| 999  | 1,2,3,5,7,2<br>3,25,26 | 4,6,8,18,1<br>9,20,21,22<br>,24 | 4 | P01946,P02091,P52590,P55314                                    |
| 1000 | 1,2,3,5,7,2<br>4,25,26 | 4,6,8,18,1<br>9,20,21,22<br>,23 | 7 | P01946,P02091,P0C0A9,P52590,Q62902,Q6AYR9,Q8CJD3               |
| 1001 | 1,2,3,5,8,1<br>8,19,20 | 4,6,7,21,2<br>2,23,24,25<br>,26 | 4 | P09605,P25809,P22006,P83121,Q9QZK9                             |
| 1002 | 1,2,3,5,8,1<br>8,19,21 | 4,6,7,20,2<br>2,23,24,25<br>,26 | 4 | P00731,P02803,P83121,Q03191                                    |
| 1003 | 1,2,3,5,8,1<br>8,19,22 | 4,6,7,20,2<br>1,23,24,25<br>,26 | 4 | P09605,P25809,P22006,P83121,Q9QW07                             |
| 1004 | 1,2,3,5,8,1<br>8,19,23 | 4,6,7,20,2<br>1,22,24,25<br>,26 | 8 | P02803,P09605,P25809,P22006,P35467,P83121,Q03191,Q63942,Q64194 |
| 1005 | 1,2,3,5,8,1<br>8,19,24 | 4,6,7,20,2<br>1,22,23,25<br>,26 | 5 | P05539,P09605,P25809,P83121,Q03191,Q63942                      |
| 1006 | 1,2,3,5,8,1<br>8,19,25 | 4,6,7,20,2<br>1,22,23,24<br>,26 | 3 | P02803,P62815,P83121                                           |

|      |                        |                                 |   |                                                  |
|------|------------------------|---------------------------------|---|--------------------------------------------------|
| 1007 | 1,2,3,5,8,1<br>8,19,26 | 4,6,7,20,2<br>1,22,23,24<br>,25 | 5 | P09605;P25809,P83121,Q03191,Q63661,Q63942        |
| 1008 | 1,2,3,5,8,1<br>8,20,21 | 4,6,7,19,2<br>2,23,24,25<br>,26 | 3 | P62804,P83121,Q6IRE4                             |
| 1009 | 1,2,3,5,8,1<br>8,20,22 | 4,6,7,19,2<br>1,23,24,25<br>,26 | 6 | P22006,P27213,P83121,Q99041,Q9QW07,Q9QZK9        |
| 1010 | 1,2,3,5,8,1<br>8,20,23 | 4,6,7,19,2<br>1,22,24,25<br>,26 | 5 | P09605;P25809,P22006,P83121,Q6IG02,Q9QZK9        |
| 1011 | 1,2,3,5,8,1<br>8,20,24 | 4,6,7,19,2<br>1,22,23,25<br>,26 | 6 | P09605;P25809,P22006,P27213,P83121,Q99041,Q9QZK9 |
| 1012 | 1,2,3,5,8,1<br>8,20,25 | 4,6,7,19,2<br>1,22,23,24<br>,26 | 1 | P83121                                           |
| 1013 | 1,2,3,5,8,1<br>8,20,26 | 4,6,7,19,2<br>1,22,23,24<br>,25 | 5 | P09605;P25809,P22006,P83121,Q63942,Q99041        |
| 1014 | 1,2,3,5,8,1<br>8,21,22 | 4,6,7,19,2<br>0,23,24,25<br>,26 | 3 | P83121,Q5FVI6,Q9QW07                             |
| 1015 | 1,2,3,5,8,1<br>8,21,23 | 4,6,7,19,2<br>0,22,24,25<br>,26 | 1 | P34901                                           |
| 1016 | 1,2,3,5,8,1<br>8,21,24 | 4,6,7,19,2<br>0,22,23,25<br>,26 | 3 | P05539,P83121,Q5FVI6                             |
| 1017 | 1,2,3,5,8,1<br>8,21,25 | 4,6,7,19,2<br>0,22,23,24<br>,26 | 1 | P31430                                           |
| 1018 | 1,2,3,5,8,1<br>8,21,26 | 4,6,7,19,2<br>0,22,23,24<br>,25 | 2 | Q63661,Q63942                                    |
| 1019 | 1,2,3,5,8,1<br>8,22,23 | 4,6,7,19,2<br>0,21,24,25<br>,26 | 4 | P22006,P83121,Q5FVI6,Q9QW07                      |
| 1020 | 1,2,3,5,8,1<br>8,22,24 | 4,6,7,19,2<br>0,21,23,25<br>,26 | 4 | P27213,P83121,Q5FVI6,Q9QW07                      |
| 1021 | 1,2,3,5,8,1<br>8,22,25 | 4,6,7,19,2<br>0,21,23,24<br>,26 | 2 | P83121,Q9QW07                                    |

|      |                        |                                 |    |                                                                                                   |
|------|------------------------|---------------------------------|----|---------------------------------------------------------------------------------------------------|
| 1022 | 1,2,3,5,8,1<br>8,22,26 | 4,6,7,19,2<br>0,21,23,24<br>,25 | 4  | P83121,Q63942,Q99041,Q9QW07                                                                       |
| 1023 | 1,2,3,5,8,1<br>8,23,24 | 4,6,7,19,2<br>0,21,22,25<br>,26 | 5  | P09605;P25809,P34901,P83121,Q63942,Q9QZK9                                                         |
| 1024 | 1,2,3,5,8,1<br>8,23,25 | 4,6,7,19,2<br>0,21,22,24<br>,26 | 2  | P55314,Q99MH3                                                                                     |
| 1025 | 1,2,3,5,8,1<br>8,23,26 | 4,6,7,19,2<br>0,21,22,24<br>,25 | 13 | P01946,P09605;P25809,P35467,P47967,Q4FZU2,Q63661,Q63942,Q64194,Q6IFU8,Q6IFW6,Q6IG02,Q6IMF3,Q6P6Q2 |
| 1026 | 1,2,3,5,8,1<br>8,24,25 | 4,6,7,19,2<br>0,21,22,23<br>,26 | 1  | P83121                                                                                            |
| 1027 | 1,2,3,5,8,1<br>8,24,26 | 4,6,7,19,2<br>0,21,22,23<br>,25 | 5  | P09605;P25809,P47967,P83121,Q63942,Q99041                                                         |
| 1028 | 1,2,3,5,8,1<br>8,25,26 | 4,6,7,19,2<br>0,21,22,23<br>,24 | 2  | P55091,Q63942                                                                                     |
| 1029 | 1,2,3,5,8,1<br>9,20,21 | 4,6,7,18,2<br>2,23,24,25<br>,26 | 3  | P00714,P62804,P83121                                                                              |
| 1030 | 1,2,3,5,8,1<br>9,20,22 | 4,6,7,18,2<br>1,23,24,25<br>,26 | 6  | P00714,P00774,P22006,P27213,P83121,Q9QW07                                                         |
| 1031 | 1,2,3,5,8,1<br>9,20,23 | 4,6,7,18,2<br>1,22,24,25<br>,26 | 3  | P09605;P25809,P22006,P83121                                                                       |
| 1032 | 1,2,3,5,8,1<br>9,20,24 | 4,6,7,18,2<br>1,22,23,25<br>,26 | 3  | P00714,P09605;P25809,P83121                                                                       |
| 1033 | 1,2,3,5,8,1<br>9,20,25 | 4,6,7,18,2<br>1,22,23,24<br>,26 | 1  | P83121                                                                                            |
| 1034 | 1,2,3,5,8,1<br>9,20,26 | 4,6,7,18,2<br>1,22,23,24<br>,25 | 4  | O54728,P09605;P25809,P22006,P83121                                                                |
| 1035 | 1,2,3,5,8,1<br>9,21,22 | 4,6,7,18,2<br>0,23,24,25<br>,26 | 3  | P00714,P83121,Q9QW07                                                                              |
| 1036 | 1,2,3,5,8,1<br>9,21,23 | 4,6,7,18,2<br>0,22,24,25<br>,26 | 0  |                                                                                                   |



|      |                        |                                 |   |                                    |
|------|------------------------|---------------------------------|---|------------------------------------|
| 1037 | 1,2,3,5,8,1<br>9,21,24 | 4,6,7,18,2<br>0,22,23,25<br>,26 | 2 | P00714,P83121                      |
| 1038 | 1,2,3,5,8,1<br>9,21,25 | 4,6,7,18,2<br>0,22,23,24<br>,26 | 0 |                                    |
| 1039 | 1,2,3,5,8,1<br>9,21,26 | 4,6,7,18,2<br>0,22,23,24<br>,25 | 0 |                                    |
| 1040 | 1,2,3,5,8,1<br>9,22,23 | 4,6,7,18,2<br>0,21,24,25<br>,26 | 3 | P22006,P83121,Q9QW07               |
| 1041 | 1,2,3,5,8,1<br>9,22,24 | 4,6,7,18,2<br>0,21,23,25<br>,26 | 3 | P00714,P83121,Q9QW07               |
| 1042 | 1,2,3,5,8,1<br>9,22,25 | 4,6,7,18,2<br>0,21,23,24<br>,26 | 4 | P08753,P20766,P83121,Q9QW07        |
| 1043 | 1,2,3,5,8,1<br>9,22,26 | 4,6,7,18,2<br>0,21,23,24<br>,25 | 5 | O54728,P20766,P55159,P83121,Q9QW07 |
| 1044 | 1,2,3,5,8,1<br>9,23,24 | 4,6,7,18,2<br>0,21,22,25<br>,26 | 3 | P09605;P25809,P34901,P83121        |
| 1045 | 1,2,3,5,8,1<br>9,23,25 | 4,6,7,18,2<br>0,21,22,24<br>,26 | 1 | P55314                             |
| 1046 | 1,2,3,5,8,1<br>9,23,26 | 4,6,7,18,2<br>0,21,22,24<br>,25 | 3 | O54728,P01946,P09605;P25809        |
| 1047 | 1,2,3,5,8,1<br>9,24,25 | 4,6,7,18,2<br>0,21,22,23<br>,26 | 1 | P83121                             |
| 1048 | 1,2,3,5,8,1<br>9,24,26 | 4,6,7,18,2<br>0,21,22,23<br>,25 | 2 | P09605;P25809,P83121               |
| 1049 | 1,2,3,5,8,1<br>9,25,26 | 4,6,7,18,2<br>0,21,22,23<br>,24 | 0 |                                    |
| 1050 | 1,2,3,5,8,2<br>0,21,22 | 4,6,7,18,1<br>9,23,24,25<br>,26 | 5 | P00714,P83121,Q5FVI6,Q5XFX0,Q9QW07 |
| 1051 | 1,2,3,5,8,2<br>0,21,23 | 4,6,7,18,1<br>9,22,24,25<br>,26 | 1 | Q6IRE4                             |

|      |                        |                                 |   |                                                  |
|------|------------------------|---------------------------------|---|--------------------------------------------------|
| 1052 | 1,2,3,5,8,2<br>0,21,24 | 4,6,7,18,1<br>9,22,23,25<br>,26 | 4 | P00714,P83121,Q5XFX0,Q6IRE4                      |
| 1053 | 1,2,3,5,8,2<br>0,21,25 | 4,6,7,18,1<br>9,22,23,24<br>,26 | 1 | Q6IRE4                                           |
| 1054 | 1,2,3,5,8,2<br>0,21,26 | 4,6,7,18,1<br>9,22,23,24<br>,25 | 2 | P62804,Q6IRE4                                    |
| 1055 | 1,2,3,5,8,2<br>0,22,23 | 4,6,7,18,1<br>9,21,24,25<br>,26 | 4 | P22006,P83121,Q9QW07,Q9QZK9                      |
| 1056 | 1,2,3,5,8,2<br>0,22,24 | 4,6,7,18,1<br>9,21,23,25<br>,26 | 7 | P00714,P27213,P83121,Q5FVI6,Q5XFX0,Q9QW07,Q9QZK9 |
| 1057 | 1,2,3,5,8,2<br>0,22,25 | 4,6,7,18,1<br>9,21,23,24<br>,26 | 2 | P83121,Q9QW07                                    |
| 1058 | 1,2,3,5,8,2<br>0,22,26 | 4,6,7,18,1<br>9,21,23,24<br>,25 | 5 | O54728,P22006,P83121,Q99041,Q9QW07               |
| 1059 | 1,2,3,5,8,2<br>0,23,24 | 4,6,7,18,1<br>9,21,22,25<br>,26 | 6 | P09605;P25809,P34901,P47967,P83121,P97840,Q9QZK9 |
| 1060 | 1,2,3,5,8,2<br>0,23,25 | 4,6,7,18,1<br>9,21,22,24<br>,26 | 1 | P55314                                           |
| 1061 | 1,2,3,5,8,2<br>0,23,26 | 4,6,7,18,1<br>9,21,22,24<br>,25 | 6 | O54728,P01946,P09605;P25809,P47967,P97840,Q6IG02 |
| 1062 | 1,2,3,5,8,2<br>0,24,25 | 4,6,7,18,1<br>9,21,22,23<br>,26 | 2 | P08649,P83121                                    |
| 1063 | 1,2,3,5,8,2<br>0,24,26 | 4,6,7,18,1<br>9,21,22,23<br>,25 | 4 | P47967,P83121,P97840,Q99041                      |
| 1064 | 1,2,3,5,8,2<br>0,25,26 | 4,6,7,18,1<br>9,21,22,23<br>,24 | 0 |                                                  |
| 1065 | 1,2,3,5,8,2<br>1,22,23 | 4,6,7,18,1<br>9,20,24,25<br>,26 | 3 | P34901,Q5FVI6,Q9QW07                             |
| 1066 | 1,2,3,5,8,2<br>1,22,24 | 4,6,7,18,1<br>9,20,23,25<br>,26 | 5 | P00714,P83121,Q5FVI6,Q5XFX0,Q9QW07               |

|      |                        |                                 |   |                                    |
|------|------------------------|---------------------------------|---|------------------------------------|
| 1067 | 1,2,3,5,8,2<br>1,22,25 | 4,6,7,18,1<br>9,20,23,24<br>,26 | 2 | Q5FVI6,Q9QW07                      |
| 1068 | 1,2,3,5,8,2<br>1,22,26 | 4,6,7,18,1<br>9,20,23,24<br>,25 | 1 | Q9QW07                             |
| 1069 | 1,2,3,5,8,2<br>1,23,24 | 4,6,7,18,1<br>9,20,22,25<br>,26 | 3 | P34901,P83121,Q5FVI6               |
| 1070 | 1,2,3,5,8,2<br>1,23,25 | 4,6,7,18,1<br>9,20,22,24<br>,26 | 1 | P55314                             |
| 1071 | 1,2,3,5,8,2<br>1,23,26 | 4,6,7,18,1<br>9,20,22,24<br>,25 | 1 | P01946                             |
| 1072 | 1,2,3,5,8,2<br>1,24,25 | 4,6,7,18,1<br>9,20,22,23<br>,26 | 1 | P83121                             |
| 1073 | 1,2,3,5,8,2<br>1,24,26 | 4,6,7,18,1<br>9,20,22,23<br>,25 | 2 | P83121,Q8CJD3                      |
| 1074 | 1,2,3,5,8,2<br>1,25,26 | 4,6,7,18,1<br>9,20,22,23<br>,24 | 0 |                                    |
| 1075 | 1,2,3,5,8,2<br>2,23,24 | 4,6,7,18,1<br>9,20,21,25<br>,26 | 5 | P34901,P47967,P83121,Q5FVI6,Q9QW07 |
| 1076 | 1,2,3,5,8,2<br>2,23,25 | 4,6,7,18,1<br>9,20,21,24<br>,26 | 4 | P08753,P20766,P55314,Q9QW07        |
| 1077 | 1,2,3,5,8,2<br>2,23,26 | 4,6,7,18,1<br>9,20,21,24<br>,25 | 5 | O54728,P01946,P20766,P47967,Q9QW07 |
| 1078 | 1,2,3,5,8,2<br>2,24,25 | 4,6,7,18,1<br>9,20,21,23<br>,26 | 4 | P08753,P83121,Q5FVI6,Q9QW07        |
| 1079 | 1,2,3,5,8,2<br>2,24,26 | 4,6,7,18,1<br>9,20,21,23<br>,25 | 5 | O54728,P47967,P83121,Q99041,Q9QW07 |
| 1080 | 1,2,3,5,8,2<br>2,25,26 | 4,6,7,18,1<br>9,20,21,23<br>,24 | 3 | P08753,P20766,Q9QW07               |
| 1081 | 1,2,3,5,8,2<br>3,24,25 | 4,6,7,18,1<br>9,20,21,22<br>,26 | 3 | P34901,P36374,P55314               |

|      |                         |                                 |    |                                                                              |
|------|-------------------------|---------------------------------|----|------------------------------------------------------------------------------|
| 1082 | 1,2,3,5,8,2<br>3,24,26  | 4,6,7,18,1<br>9,20,21,22<br>,25 | 6  | P01946,P02091,P09605,P25809,P34901,P47967,P97840                             |
| 1083 | 1,2,3,5,8,2<br>3,25,26  | 4,6,7,18,1<br>9,20,21,22<br>,24 | 3  | P01946,P02091,P55314                                                         |
| 1084 | 1,2,3,5,8,2<br>4,25,26  | 4,6,7,18,1<br>9,20,21,22<br>,23 | 3  | P01946,Q62902,Q8CJD3                                                         |
| 1085 | 1,2,3,5,18,<br>19,20,21 | 4,6,7,8,22,<br>23,24,25,2<br>6  | 5  | P00731,P06911,P83121,Q02253,Q63617                                           |
| 1086 | 1,2,3,5,18,<br>19,20,22 | 4,6,7,8,21,<br>23,24,25,2<br>6  | 10 | P07150,P14669,P22006,P27213,P83121,Q6P6R2,Q99041,Q9QW07,Q9QZK9,Q9WTT6        |
| 1087 | 1,2,3,5,18,<br>19,20,23 | 4,6,7,8,21,<br>22,24,25,2<br>6  | 6  | P09605,P25809,P22006,P83121,Q03191,Q9QZK9,Q9WTT6                             |
| 1088 | 1,2,3,5,18,<br>19,20,24 | 4,6,7,8,21,<br>22,23,25,2<br>6  | 8  | P06911,P07150,P14669,P22006,P83121,Q99041,Q9QZK9,Q9WTT6                      |
| 1089 | 1,2,3,5,18,<br>19,20,25 | 4,6,7,8,21,<br>22,23,24,2<br>6  | 4  | P22282,P62815,P83121,Q02253                                                  |
| 1090 | 1,2,3,5,18,<br>19,20,26 | 4,6,7,8,21,<br>22,23,24,2<br>5  | 10 | P06911,P07150,P09605,P25809,P22006,P83121,Q63617,Q63942,Q6P6R2,Q99041,Q9WTT6 |
| 1091 | 1,2,3,5,18,<br>19,21,22 | 4,6,7,8,20,<br>23,24,25,2<br>6  | 4  | P00714,P83121,Q63617,Q9QW07                                                  |
| 1092 | 1,2,3,5,18,<br>19,21,23 | 4,6,7,8,20,<br>22,24,25,2<br>6  | 5  | P14668,P34901,Q03191,Q63617,Q63661                                           |
| 1093 | 1,2,3,5,18,<br>19,21,24 | 4,6,7,8,20,<br>22,23,25,2<br>6  | 2  | P83121,Q63617                                                                |
| 1094 | 1,2,3,5,18,<br>19,21,25 | 4,6,7,8,20,<br>22,23,24,2<br>6  | 2  | P31430,Q63617                                                                |
| 1095 | 1,2,3,5,18,<br>19,21,26 | 4,6,7,8,20,<br>22,23,24,2<br>5  | 5  | P06911,Q63617,Q63661,Q63942,Q99041                                           |
| 1096 | 1,2,3,5,18,<br>19,22,23 | 4,6,7,8,20,<br>21,24,25,2<br>6  | 6  | P22006,P34901,P83121,Q03191,Q9QW07,Q9WTT6                                    |

|      |                         |                                |    |                                                                                     |
|------|-------------------------|--------------------------------|----|-------------------------------------------------------------------------------------|
| 1097 | 1,2,3,5,18,<br>19,22,24 | 4,6,7,8,20,<br>21,23,25,2<br>6 | 6  | P07150,P14669,P83121,Q6P6R2,Q99041,Q9WTT6                                           |
| 1098 | 1,2,3,5,18,<br>19,22,25 | 4,6,7,8,20,<br>21,23,24,2<br>6 | 3  | P83121,Q63617,Q9QW07                                                                |
| 1099 | 1,2,3,5,18,<br>19,22,26 | 4,6,7,8,20,<br>21,23,24,2<br>5 | 11 | O54728,P07150,P55159,P83121,Q63617,Q63661,Q63942,Q6P6R2,Q99041,Q9QW07,Q9WTT6        |
| 1100 | 1,2,3,5,18,<br>19,23,24 | 4,6,7,8,20,<br>21,22,25,2<br>6 | 6  | P09605;P25809,P34901,P83121,Q03191,Q9QZK9,Q9WTT6                                    |
| 1101 | 1,2,3,5,18,<br>19,23,25 | 4,6,7,8,20,<br>21,22,24,2<br>6 | 3  | P55314,Q03191,Q99MH3                                                                |
| 1102 | 1,2,3,5,18,<br>19,23,26 | 4,6,7,8,20,<br>21,22,24,2<br>5 | 11 | P01946,P09605;P25809,P35467,Q03191,Q07523,Q63617,Q63661,Q63942,Q6IFU8,Q6IG02,Q6P6Q2 |
| 1103 | 1,2,3,5,18,<br>19,24,25 | 4,6,7,8,20,<br>21,22,23,2<br>6 | 3  | P22282,P83121,Q63617                                                                |
| 1104 | 1,2,3,5,18,<br>19,24,26 | 4,6,7,8,20,<br>21,22,23,2<br>5 | 9  | P06911,P09605;P25809,P83121,Q03191,Q63617,Q63661,Q63942,Q99041,Q9WTT6               |
| 1105 | 1,2,3,5,18,<br>19,25,26 | 4,6,7,8,20,<br>21,22,23,2<br>4 | 3  | Q63617,Q63661,Q63942                                                                |
| 1106 | 1,2,3,5,18,<br>20,21,22 | 4,6,7,8,19,<br>23,24,25,2<br>6 | 5  | P00714,P83121,Q99041,Q9QW07,Q9QZK9                                                  |
| 1107 | 1,2,3,5,18,<br>20,21,23 | 4,6,7,8,19,<br>22,24,25,2<br>6 | 3  | P34901,Q6IRE4,Q9QZK9                                                                |
| 1108 | 1,2,3,5,18,<br>20,21,24 | 4,6,7,8,19,<br>22,23,25,2<br>6 | 7  | P00714,P06911,P12020,P83121,Q6IRE4,Q99041,Q9QZK9                                    |
| 1109 | 1,2,3,5,18,<br>20,21,25 | 4,6,7,8,19,<br>22,23,24,2<br>6 | 2  | P31430,Q6IRE4                                                                       |
| 1110 | 1,2,3,5,18,<br>20,21,26 | 4,6,7,8,19,<br>22,23,24,2<br>5 | 5  | P06911,P12020,Q63617,Q63661,Q99041                                                  |
| 1111 | 1,2,3,5,18,<br>20,22,23 | 4,6,7,8,19,<br>21,24,25,2<br>6 | 5  | P22006,P34901,P83121,Q9QW07,Q9QZK9                                                  |

|      |                         |                                |    |                                                                                            |
|------|-------------------------|--------------------------------|----|--------------------------------------------------------------------------------------------|
| 1112 | 1,2,3,5,18,<br>20,22,24 | 4,6,7,8,19,<br>21,23,25,2<br>6 | 12 | P00714,P07150,P14669,P22006,P27213,P83121,Q5FVI6,Q6P6R2,Q99041,Q9QW07,Q9QZK9,Q9WTT6        |
| 1113 | 1,2,3,5,18,<br>20,22,25 | 4,6,7,8,19,<br>21,23,24,2<br>6 | 3  | P83121,Q99041,Q9QW07                                                                       |
| 1114 | 1,2,3,5,18,<br>20,22,26 | 4,6,7,8,19,<br>21,23,24,2<br>5 | 9  | O54728,P07150,P22006,P55159,P83121,Q6P6R2,Q99041,Q9QW07,Q9QZK9                             |
| 1115 | 1,2,3,5,18,<br>20,23,24 | 4,6,7,8,19,<br>21,22,25,2<br>6 | 3  | P34901,P83121,Q9QZK9                                                                       |
| 1116 | 1,2,3,5,18,<br>20,23,25 | 4,6,7,8,19,<br>21,22,24,2<br>6 | 1  | P55314                                                                                     |
| 1117 | 1,2,3,5,18,<br>20,23,26 | 4,6,7,8,19,<br>21,22,24,2<br>5 | 12 | P01946,P09605,P25809,P22006,Q4FZU2,Q63942,Q6IFU8,Q6IFW6,Q6IG02,Q6IMF3,Q6P6Q2,Q9JJ50,Q9QZK9 |
| 1118 | 1,2,3,5,18,<br>20,24,25 | 4,6,7,8,19,<br>21,22,23,2<br>6 | 3  | P22282,P83121,Q99041                                                                       |
| 1119 | 1,2,3,5,18,<br>20,24,26 | 4,6,7,8,19,<br>21,22,23,2<br>5 | 7  | P06911,P07150,P12020,P47967,P83121,Q99041,Q9QZK9                                           |
| 1120 | 1,2,3,5,18,<br>20,25,26 | 4,6,7,8,19,<br>21,22,23,2<br>4 | 1  | Q99041                                                                                     |
| 1121 | 1,2,3,5,18,<br>21,22,23 | 4,6,7,8,19,<br>20,24,25,2<br>6 | 2  | P34901,Q9QW07                                                                              |
| 1122 | 1,2,3,5,18,<br>21,22,24 | 4,6,7,8,19,<br>20,23,25,2<br>6 | 6  | P00714,P83121,Q5FVI6,Q63617,Q99041,Q9QW07                                                  |
| 1123 | 1,2,3,5,18,<br>21,22,25 | 4,6,7,8,19,<br>20,23,24,2<br>6 | 3  | P31430,Q63617,Q9QW07                                                                       |
| 1124 | 1,2,3,5,18,<br>21,22,26 | 4,6,7,8,19,<br>20,23,24,2<br>5 | 5  | P63036,Q63617,Q63661,Q99041,Q9QW07                                                         |
| 1125 | 1,2,3,5,18,<br>21,23,24 | 4,6,7,8,19,<br>20,22,25,2<br>6 | 1  | P34901                                                                                     |
| 1126 | 1,2,3,5,18,<br>21,23,25 | 4,6,7,8,19,<br>20,22,24,2<br>6 | 5  | P31430,P34901,P55314,Q63617,Q99MH3                                                         |

|      |                         |                                |    |                                                                                            |
|------|-------------------------|--------------------------------|----|--------------------------------------------------------------------------------------------|
| 1127 | 1,2,3,5,18,<br>21,23,26 | 4,6,7,8,19,<br>20,22,24,2<br>5 | 11 | P01946,P34901,Q4FZU2,Q63617,Q63661,Q63942,Q6IFU8,Q6IFW6,Q6IG02,Q6IMF3,Q6P6Q2               |
| 1128 | 1,2,3,5,18,<br>21,24,25 | 4,6,7,8,19,<br>20,22,23,2<br>6 | 2  | P31430,Q63617                                                                              |
| 1129 | 1,2,3,5,18,<br>21,24,26 | 4,6,7,8,19,<br>20,22,23,2<br>5 | 6  | P06911,P12020,Q63617,Q63661,Q8CJD3,Q99041                                                  |
| 1130 | 1,2,3,5,18,<br>21,25,26 | 4,6,7,8,19,<br>20,22,23,2<br>4 | 7  | P00774,P25031,P31430,P55091,Q63617,Q63661,Q99041                                           |
| 1131 | 1,2,3,5,18,<br>22,23,24 | 4,6,7,8,19,<br>20,21,25,2<br>6 | 6  | P34901,P83121,Q4G075,Q5FVI6,Q9QZK9,Q9WTT6                                                  |
| 1132 | 1,2,3,5,18,<br>22,23,25 | 4,6,7,8,19,<br>20,21,24,2<br>6 | 4  | P01015,P34901,P55314,Q9QW07                                                                |
| 1133 | 1,2,3,5,18,<br>22,23,26 | 4,6,7,8,19,<br>20,21,24,2<br>5 | 9  | O54728,P01946,P34901,Q63661,Q63942,Q6IFU8,Q6IG02,Q6P6Q2,Q9QW07                             |
| 1134 | 1,2,3,5,18,<br>22,24,25 | 4,6,7,8,19,<br>20,21,23,2<br>6 | 3  | P83121,Q5FVI6,Q99041                                                                       |
| 1135 | 1,2,3,5,18,<br>22,24,26 | 4,6,7,8,19,<br>20,21,23,2<br>5 | 5  | P83121,Q63617,Q6P6R2,Q99041,Q9WTT6                                                         |
| 1136 | 1,2,3,5,18,<br>22,25,26 | 4,6,7,8,19,<br>20,21,23,2<br>4 | 3  | Q63617,Q99041,Q9QW07                                                                       |
| 1137 | 1,2,3,5,18,<br>23,24,25 | 4,6,7,8,19,<br>20,21,22,2<br>6 | 2  | P34901,P55314                                                                              |
| 1138 | 1,2,3,5,18,<br>23,24,26 | 4,6,7,8,19,<br>20,21,22,2<br>5 | 12 | P01946,P02091,P09605,P25809,P34901,P47967,Q07523,Q63661,Q63942,Q6IFU8,Q6IFW6,Q6IG02,Q6P6Q2 |
| 1139 | 1,2,3,5,18,<br>23,25,26 | 4,6,7,8,19,<br>20,21,22,2<br>4 | 12 | P01946,P02091,P55314,Q4FZU2,Q63617,Q63661,Q63942,Q6IFU8,Q6IFW6,Q6IG02,Q6IMF3,Q6P6Q2        |
| 1140 | 1,2,3,5,18,<br>24,25,26 | 4,6,7,8,19,<br>20,21,22,2<br>3 | 8  | P01946,P22282,P55091,Q62902,Q63617,Q7TPB1,Q8CJD3,Q99041                                    |
| 1141 | 1,2,3,5,19,<br>20,21,22 | 4,6,7,8,18,<br>23,24,25,2<br>6 | 3  | P00714,P83121,Q9QW07                                                                       |

|      |                         |                                |    |                                                                                            |
|------|-------------------------|--------------------------------|----|--------------------------------------------------------------------------------------------|
| 1142 | 1,2,3,5,19,<br>20,21,23 | 4,6,7,8,18,<br>22,24,25,2<br>6 | 1  | P00714                                                                                     |
| 1143 | 1,2,3,5,19,<br>20,21,24 | 4,6,7,8,18,<br>22,23,25,2<br>6 | 3  | P00714,P11598,P83121                                                                       |
| 1144 | 1,2,3,5,19,<br>20,21,25 | 4,6,7,8,18,<br>22,23,24,2<br>6 | 1  | Q8VD89                                                                                     |
| 1145 | 1,2,3,5,19,<br>20,21,26 | 4,6,7,8,18,<br>22,23,24,2<br>5 | 4  | P00714,P06911,Q63617,Q99041                                                                |
| 1146 | 1,2,3,5,19,<br>20,22,23 | 4,6,7,8,18,<br>21,24,25,2<br>6 | 13 | O54728,P00714,P07150,P11598,P14669,P22006,P55091,P82995,P83121,Q62997,Q9QW07,Q9QZK9,Q9WTT6 |
| 1147 | 1,2,3,5,19,<br>20,22,24 | 4,6,7,8,18,<br>21,23,25,2<br>6 | 12 | P00714,P00774,P07150,P11598,P14669,P27213,P82995,P83121,Q6P6R2,Q99041,Q9QZK9,Q9WTT6        |
| 1148 | 1,2,3,5,19,<br>20,22,25 | 4,6,7,8,18,<br>21,23,24,2<br>6 | 5  | P07150,P11598,P14669,P17046,P83121                                                         |
| 1149 | 1,2,3,5,19,<br>20,22,26 | 4,6,7,8,18,<br>21,23,24,2<br>5 | 12 | O54728,P00714,P07150,P14669,P22006,P55159,P83121,Q62997,Q6P6R2,Q99041,Q9QW07,Q9WTT6        |
| 1150 | 1,2,3,5,19,<br>20,23,24 | 4,6,7,8,18,<br>21,22,25,2<br>6 | 7  | P00714,P11598,P34901,P82995,P83121,Q9QZK9,Q9WTT6                                           |
| 1151 | 1,2,3,5,19,<br>20,23,25 | 4,6,7,8,18,<br>21,22,24,2<br>6 | 2  | P11598,P55314                                                                              |
| 1152 | 1,2,3,5,19,<br>20,23,26 | 4,6,7,8,18,<br>21,22,24,2<br>5 | 3  | O54728,P01946,P11598                                                                       |
| 1153 | 1,2,3,5,19,<br>20,24,25 | 4,6,7,8,18,<br>21,22,23,2<br>6 | 5  | P0C0A9,P11598,P22282,P22283,P83121                                                         |
| 1154 | 1,2,3,5,19,<br>20,24,26 | 4,6,7,8,18,<br>21,22,23,2<br>5 | 8  | O54728,P00714,P07150,P11598,P14669,P83121,Q99041,Q9WTT6                                    |
| 1155 | 1,2,3,5,19,<br>20,25,26 | 4,6,7,8,18,<br>21,22,23,2<br>4 | 1  | P11598                                                                                     |
| 1156 | 1,2,3,5,19,<br>21,22,23 | 4,6,7,8,18,<br>20,24,25,2<br>6 | 4  | P00714,P34901,Q63617,Q9QW07                                                                |



|      |                         |                                |    |                                                                                     |
|------|-------------------------|--------------------------------|----|-------------------------------------------------------------------------------------|
| 1157 | 1,2,3,5,19,<br>21,22,24 | 4,6,7,8,18,<br>20,23,25,2<br>6 | 4  | P00714,P83121,Q63617,Q9QW07                                                         |
| 1158 | 1,2,3,5,19,<br>21,22,25 | 4,6,7,8,18,<br>20,23,24,2<br>6 | 3  | P17046,Q63617,Q9QW07                                                                |
| 1159 | 1,2,3,5,19,<br>21,22,26 | 4,6,7,8,18,<br>20,23,24,2<br>5 | 6  | O54728,P00714,P63036,Q63617,Q99041,Q9QW07                                           |
| 1160 | 1,2,3,5,19,<br>21,23,24 | 4,6,7,8,18,<br>20,22,25,2<br>6 | 3  | P00714,P11598,P34901                                                                |
| 1161 | 1,2,3,5,19,<br>21,23,25 | 4,6,7,8,18,<br>20,22,24,2<br>6 | 2  | P55314,Q63617                                                                       |
| 1162 | 1,2,3,5,19,<br>21,23,26 | 4,6,7,8,18,<br>20,22,24,2<br>5 | 4  | P01946,P34901,Q63617,Q63661                                                         |
| 1163 | 1,2,3,5,19,<br>21,24,25 | 4,6,7,8,18,<br>20,22,23,2<br>6 | 2  | P11598,Q63617                                                                       |
| 1164 | 1,2,3,5,19,<br>21,24,26 | 4,6,7,8,18,<br>20,22,23,2<br>5 | 3  | P00714,Q63617,Q8CJD3                                                                |
| 1165 | 1,2,3,5,19,<br>21,25,26 | 4,6,7,8,18,<br>20,22,23,2<br>4 | 2  | Q63617,Q63661                                                                       |
| 1166 | 1,2,3,5,19,<br>22,23,24 | 4,6,7,8,18,<br>20,21,25,2<br>6 | 7  | P00714,P11598,P34901,P82471,P82995,P83121,Q9WTT6                                    |
| 1167 | 1,2,3,5,19,<br>22,23,25 | 4,6,7,8,18,<br>20,21,24,2<br>6 | 5  | P11598,P17046,P55314,P82471,Q6AYR8                                                  |
| 1168 | 1,2,3,5,19,<br>22,23,26 | 4,6,7,8,18,<br>20,21,24,2<br>5 | 5  | O54728,P01946,P55159,P82471,Q63617                                                  |
| 1169 | 1,2,3,5,19,<br>22,24,25 | 4,6,7,8,18,<br>20,21,23,2<br>6 | 7  | P02780,P0C0A9,P11598,P14669,P17046,P22283,P83121                                    |
| 1170 | 1,2,3,5,19,<br>22,24,26 | 4,6,7,8,18,<br>20,21,23,2<br>5 | 12 | O54728,P00714,P07150,P11598,P14669,P24368,P83121,Q63617,Q6P6R2,Q99041,Q9R044,Q9WTT6 |
| 1171 | 1,2,3,5,19,<br>22,25,26 | 4,6,7,8,18,<br>20,21,23,2<br>4 | 2  | O54728,Q63617                                                                       |

|      |                         |                                |    |                                                                       |
|------|-------------------------|--------------------------------|----|-----------------------------------------------------------------------|
| 1172 | 1,2,3,5,19,<br>23,24,25 | 4,6,7,8,18,<br>20,21,22,2<br>6 | 4  | P11598,P22283,P34901,P55314                                           |
| 1173 | 1,2,3,5,19,<br>23,24,26 | 4,6,7,8,18,<br>20,21,22,2<br>5 | 7  | O54728,P01946,P02091,P09605,P25809,P11598,P34901,Q63617               |
| 1174 | 1,2,3,5,19,<br>23,25,26 | 4,6,7,8,18,<br>20,21,22,2<br>4 | 6  | P01946,P02091,P11598,P13432,P55314,Q63617                             |
| 1175 | 1,2,3,5,19,<br>24,25,26 | 4,6,7,8,18,<br>20,21,22,2<br>3 | 6  | P01946,P11598,P22283,Q62902,Q63617,Q8CJD3                             |
| 1176 | 1,2,3,5,20,<br>21,22,23 | 4,6,7,8,18,<br>19,24,25,2<br>6 | 3  | P00714,P34901,Q9QW07                                                  |
| 1177 | 1,2,3,5,20,<br>21,22,24 | 4,6,7,8,18,<br>19,23,25,2<br>6 | 7  | P00714,P27213,P83121,Q5FVI6,Q5XFX0,Q99041,Q9QW07                      |
| 1178 | 1,2,3,5,20,<br>21,22,25 | 4,6,7,8,18,<br>19,23,24,2<br>6 | 1  | Q9QW07                                                                |
| 1179 | 1,2,3,5,20,<br>21,22,26 | 4,6,7,8,18,<br>19,23,24,2<br>5 | 5  | O54728,P00714,Q5BJY9,Q99041,Q9QW07                                    |
| 1180 | 1,2,3,5,20,<br>21,23,24 | 4,6,7,8,18,<br>19,22,25,2<br>6 | 5  | P00714,P11598,P34901,Q6IRE4,Q9QZK9                                    |
| 1181 | 1,2,3,5,20,<br>21,23,25 | 4,6,7,8,18,<br>19,22,24,2<br>6 | 3  | P34901,P55314,Q6IRE4                                                  |
| 1182 | 1,2,3,5,20,<br>21,23,26 | 4,6,7,8,18,<br>19,22,24,2<br>5 | 3  | P01946,P34901,Q6IFU8                                                  |
| 1183 | 1,2,3,5,20,<br>21,24,25 | 4,6,7,8,18,<br>19,22,23,2<br>6 | 3  | P11598,Q5XFX0,Q6IRE4                                                  |
| 1184 | 1,2,3,5,20,<br>21,24,26 | 4,6,7,8,18,<br>19,22,23,2<br>5 | 6  | P00714,P06911,P12020,Q6IRE4,Q8CJD3,Q99041                             |
| 1185 | 1,2,3,5,20,<br>21,25,26 | 4,6,7,8,18,<br>19,22,23,2<br>4 | 1  | Q63617                                                                |
| 1186 | 1,2,3,5,20,<br>22,23,24 | 4,6,7,8,18,<br>19,21,25,2<br>6 | 10 | P00714,P0C0A9,P11598,P14669,P34901,P82995,P83121,Q4G075,Q5FVI6,Q9QZK9 |

|      |                         |                                |    |                                                                       |
|------|-------------------------|--------------------------------|----|-----------------------------------------------------------------------|
| 1187 | 1,2,3,5,20,<br>22,23,25 | 4,6,7,8,18,<br>19,21,24,2<br>6 | 3  | P0C0A9,P11598,P55314                                                  |
| 1188 | 1,2,3,5,20,<br>22,23,26 | 4,6,7,8,18,<br>19,21,24,2<br>5 | 4  | O54728,P01946,P47967,Q9QW07                                           |
| 1189 | 1,2,3,5,20,<br>22,24,25 | 4,6,7,8,18,<br>19,21,23,2<br>6 | 7  | P0C0A9,P11598,P14669,P22282,P22283,P83121,Q99041                      |
| 1190 | 1,2,3,5,20,<br>22,24,26 | 4,6,7,8,18,<br>19,21,23,2<br>5 | 10 | O54728,P00714,P07150,P0C0A9,P11598,P14669,P47967,P83121,Q6P6R2,Q99041 |
| 1191 | 1,2,3,5,20,<br>22,25,26 | 4,6,7,8,18,<br>19,21,23,2<br>4 | 4  | O54728,P0C0A9,Q99041,Q9QW07                                           |
| 1192 | 1,2,3,5,20,<br>23,24,25 | 4,6,7,8,18,<br>19,21,22,2<br>6 | 7  | P0C0A9,P11598,P22282,P22283,P34901,P36374,P55314                      |
| 1193 | 1,2,3,5,20,<br>23,24,26 | 4,6,7,8,18,<br>19,21,22,2<br>5 | 9  | D4A1J4,P01946,P02091,P0C0A9,P11598,P34901,P47967,P97840,Q9QZK9        |
| 1194 | 1,2,3,5,20,<br>23,25,26 | 4,6,7,8,18,<br>19,21,22,2<br>4 | 5  | P01946,P02091,P0C0A9,P11598,P55314                                    |
| 1195 | 1,2,3,5,20,<br>24,25,26 | 4,6,7,8,18,<br>19,21,22,2<br>3 | 9  | P01946,P08723,P0C0A9,P11598,P22282,P22283,Q62902,Q8CJD3,Q99041        |
| 1196 | 1,2,3,5,21,<br>22,23,24 | 4,6,7,8,18,<br>19,20,25,2<br>6 | 6  | P00714,P11598,P34901,P35280,Q5FVI6,Q9QW07                             |
| 1197 | 1,2,3,5,21,<br>22,23,25 | 4,6,7,8,18,<br>19,20,24,2<br>6 | 4  | P34901,P35280,P55314,Q9QW07                                           |
| 1198 | 1,2,3,5,21,<br>22,23,26 | 4,6,7,8,18,<br>19,20,24,2<br>5 | 5  | O54728,P01946,P34901,Q63617,Q9QW07                                    |
| 1199 | 1,2,3,5,21,<br>22,24,25 | 4,6,7,8,18,<br>19,20,23,2<br>6 | 7  | P11598,P35280,P35467,Q5FVI6,Q5XFX0,Q63617,Q9QW07                      |
| 1200 | 1,2,3,5,21,<br>22,24,26 | 4,6,7,8,18,<br>19,20,23,2<br>5 | 7  | P00714,P07171,Q5BJY9,Q63617,Q8CJD3,Q99041,Q9QW07                      |
| 1201 | 1,2,3,5,21,<br>22,25,26 | 4,6,7,8,18,<br>19,20,23,2<br>4 | 2  | Q63617,Q9QW07                                                         |

|      |                         |                                  |    |                                                                                     |
|------|-------------------------|----------------------------------|----|-------------------------------------------------------------------------------------|
| 1202 | 1,2,3,5,21,<br>23,24,25 | 4,6,7,8,18,<br>19,20,22,2<br>6   | 4  | P11598,P34901,P35280,P55314                                                         |
| 1203 | 1,2,3,5,21,<br>23,24,26 | 4,6,7,8,18,<br>19,20,22,2<br>5   | 4  | P01946,P02091,P34901,Q63617                                                         |
| 1204 | 1,2,3,5,21,<br>23,25,26 | 4,6,7,8,18,<br>19,20,22,2<br>4   | 6  | P01946,P02091,P34901,P55314,Q63617,Q63661                                           |
| 1205 | 1,2,3,5,21,<br>24,25,26 | 4,6,7,8,18,<br>19,20,22,2<br>3   | 3  | P01946,Q63617,Q8CJD3                                                                |
| 1206 | 1,2,3,5,22,<br>23,24,25 | 4,6,7,8,18,<br>19,20,21,2<br>6   | 8  | P0C0A9,P11598,P34901,P35280,P55314,P82471,Q5FVI6,Q6AYR9                             |
| 1207 | 1,2,3,5,22,<br>23,24,26 | 4,6,7,8,18,<br>19,20,21,2<br>5   | 11 | O54728,P00731,P01946,P02091,P11598,P34901,P36953,P47967,P82471,Q63556,Q6AYR9        |
| 1208 | 1,2,3,5,22,<br>23,25,26 | 4,6,7,8,18,<br>19,20,21,2<br>4   | 8  | O54728,P01946,P02091,P11598,P34901,P55314,P82471,Q6AYR9                             |
| 1209 | 1,2,3,5,22,<br>24,25,26 | 4,6,7,8,18,<br>19,20,21,2<br>3   | 11 | P01946,P02780,P0C0A9,P11598,P24368,P36953,Q62902,Q63617,Q6AYR9,Q8CJD3,Q99041        |
| 1210 | 1,2,3,5,23,<br>24,25,26 | 4,6,7,8,18,<br>19,20,21,2<br>2   | 12 | P01946,P02091,P08723,P0C0A9,P11598,P22283,P34901,P55314,P60905,Q62902,Q6AYR9,Q7TPB1 |
| 1211 | 1,2,3,6,7,8<br>,18,19   | 4,5,20,21,<br>22,23,24,2<br>5,26 | 11 | O55006,P00731,P02631,P02803,P05964,P16086,P35280,Q30KJ2,Q63532,Q63942,Q91ZS3        |
| 1212 | 1,2,3,6,7,8<br>,18,20   | 4,5,19,21,<br>22,23,24,2<br>5,26 | 6  | P00731,P02631,P10715,P16086,P35280,Q91ZS3                                           |
| 1213 | 1,2,3,6,7,8<br>,18,21   | 4,5,19,20,<br>22,23,24,2<br>5,26 | 10 | D4A1J4,O35783,O54800,Q5DWV2,P00731,P02631,P16086,P25031,P42854,Q6AYL6,Q91ZS3        |
| 1214 | 1,2,3,6,7,8<br>,18,22   | 4,5,19,20,<br>21,23,24,2<br>5,26 | 5  | D4A1J4,P02631,P16086,P20766,Q91ZS3                                                  |
| 1215 | 1,2,3,6,7,8<br>,18,23   | 4,5,19,20,<br>21,22,24,2<br>5,26 | 8  | P02631,P16086,P51907,P97580,Q30KJ2,Q5XI22,Q63942,Q91ZS3                             |
| 1216 | 1,2,3,6,7,8<br>,18,24   | 4,5,19,20,<br>21,22,23,2<br>5,26 | 5  | O55006,P02631,P10715,P16086,Q91ZS3                                                  |

|      |                       |                                  |    |                                                                                                                 |
|------|-----------------------|----------------------------------|----|-----------------------------------------------------------------------------------------------------------------|
| 1217 | 1,2,3,6,7,8<br>,18,25 | 4,5,19,20,<br>21,22,23,2<br>4,26 | 12 | O35783,P00731,P02631,P10715,P12020,P16086,P19629,P31044,P35280,P68370,Q5GRG2,Q91ZS3                             |
| 1218 | 1,2,3,6,7,8<br>,18,26 | 4,5,19,20,<br>21,22,23,2<br>4,25 | 12 | O35783,O54800;Q5DWV2,P01041,P01946,P02631,P02770,P10715,P16086,P35280,P83748,Q63942,Q91ZS3                      |
| 1219 | 1,2,3,6,7,8<br>,19,20 | 4,5,18,21,<br>22,23,24,2<br>5,26 | 6  | P02631,P16086,P35280,Q30KJ2,Q63532,Q91ZS3                                                                       |
| 1220 | 1,2,3,6,7,8<br>,19,21 | 4,5,18,20,<br>22,23,24,2<br>5,26 | 10 | D4A1J4,P00731,P02631,P15399,P16086,P35281,P53792,Q30KJ2,Q63532,Q91ZS3                                           |
| 1221 | 1,2,3,6,7,8<br>,19,22 | 4,5,18,20,<br>21,23,24,2<br>5,26 | 6  | D4A1J4,P02631,P16086,P20766,Q30KJ2,Q63532                                                                       |
| 1222 | 1,2,3,6,7,8<br>,19,23 | 4,5,18,20,<br>21,22,24,2<br>5,26 | 7  | P02631,P15399,P16086,P51907,P97580,Q30KJ2,Q63532                                                                |
| 1223 | 1,2,3,6,7,8<br>,19,24 | 4,5,18,20,<br>21,22,23,2<br>5,26 | 4  | P02631,P16086,Q30KJ2,Q63532                                                                                     |
| 1224 | 1,2,3,6,7,8<br>,19,25 | 4,5,18,20,<br>21,22,23,2<br>4,26 | 16 | P02631,P06911,P10715,P12020,P16086,P19629,P31044,P35280,P47967,P68370,P97580,P97840,Q30KJ2,Q5GRG2,Q63532,Q91ZS3 |
| 1225 | 1,2,3,6,7,8<br>,19,26 | 4,5,18,20,<br>21,22,23,2<br>4,25 | 8  | P01946,P02631,P02770,P16086,P35280,Q30KJ2,Q63532,Q91ZS3                                                         |
| 1226 | 1,2,3,6,7,8<br>,20,21 | 4,5,18,19,<br>22,23,24,2<br>5,26 | 6  | O35783,P02631,P16086,P42854,P62804,Q91ZS3                                                                       |
| 1227 | 1,2,3,6,7,8<br>,20,22 | 4,5,18,19,<br>21,23,24,2<br>5,26 | 6  | P02631,P10715,P16086,P20766,P27213,Q91ZS3                                                                       |
| 1228 | 1,2,3,6,7,8<br>,20,23 | 4,5,18,19,<br>21,22,24,2<br>5,26 | 5  | P02631,P16086,P97580,Q30KJ2,Q91ZS3                                                                              |
| 1229 | 1,2,3,6,7,8<br>,20,24 | 4,5,18,19,<br>21,22,23,2<br>5,26 | 4  | P02631,P10715,P16086,Q91ZS3                                                                                     |
| 1230 | 1,2,3,6,7,8<br>,20,25 | 4,5,18,19,<br>21,22,23,2<br>4,26 | 10 | P02631,P10715,P12020,P16086,P19629,P31044,P35280,P68370,Q5GRG2,Q91ZS3                                           |
| 1231 | 1,2,3,6,7,8<br>,20,26 | 4,5,18,19,<br>21,22,23,2<br>4,25 | 10 | O35783,P01041,P01946,P02631,P02770,P10715,P16086,P35280,P62804,Q91ZS3                                           |

|      |                       |                                  |    |                                                                                                                               |
|------|-----------------------|----------------------------------|----|-------------------------------------------------------------------------------------------------------------------------------|
| 1232 | 1,2,3,6,7,8<br>,21,22 | 4,5,18,19,<br>20,23,24,2<br>5,26 | 6  | D4A1J4,O54800;Q5DWV2,P02631,P13432,P16086,Q91ZS3                                                                              |
| 1233 | 1,2,3,6,7,8<br>,21,23 | 4,5,18,19,<br>20,22,24,2<br>5,26 | 6  | P02631,P15399,P16086,P97580,Q30KJ2,Q91ZS3                                                                                     |
| 1234 | 1,2,3,6,7,8<br>,21,24 | 4,5,18,19,<br>20,22,23,2<br>5,26 | 4  | P02631,P13432,P16086,Q91ZS3                                                                                                   |
| 1235 | 1,2,3,6,7,8<br>,21,25 | 4,5,18,19,<br>20,22,23,2<br>4,26 | 13 | O35783,O54800;Q5DWV2,P02631,P10715,P12020,P16086,P19629,P47967,P68370,Q5GRG2,Q6P6R2,Q91ZS3,Q9WTT6                             |
| 1236 | 1,2,3,6,7,8<br>,21,26 | 4,5,18,19,<br>20,22,23,2<br>4,25 | 11 | O35783,O54800;Q5DWV2,P01041,P01946,P02631,P02770,P16086,P83748,Q00715,Q5QE79,Q91ZS3                                           |
| 1237 | 1,2,3,6,7,8<br>,22,23 | 4,5,18,19,<br>20,21,24,2<br>5,26 | 6  | P02631,P16086,P20766,P51907,P97580,Q30KJ2                                                                                     |
| 1238 | 1,2,3,6,7,8<br>,22,24 | 4,5,18,19,<br>20,21,23,2<br>5,26 | 3  | P02631,P16086,P20766                                                                                                          |
| 1239 | 1,2,3,6,7,8<br>,22,25 | 4,5,18,19,<br>20,21,23,2<br>4,26 | 11 | P02631,P06911,P10715,P12020,P16086,P19629,P20766,P31044,P68370,Q5GRG2,Q91ZS3                                                  |
| 1240 | 1,2,3,6,7,8<br>,22,26 | 4,5,18,19,<br>20,21,23,2<br>4,25 | 6  | P01946,P02631,P02770,P16086,P20766,Q91ZS3                                                                                     |
| 1241 | 1,2,3,6,7,8<br>,23,24 | 4,5,18,19,<br>20,21,22,2<br>5,26 | 5  | P02631,P16086,P51907,P97580,Q30KJ2                                                                                            |
| 1242 | 1,2,3,6,7,8<br>,23,25 | 4,5,18,19,<br>20,21,22,2<br>4,26 | 18 | P02631,P05371,P06911,P10715,P12020,P16086,P19629,P31044,P51907,P55314,P68370,P97580,Q30KJ2,Q5GRG2,Q63751,Q6P6R2,Q6P9T8,Q91ZS3 |
| 1243 | 1,2,3,6,7,8<br>,23,26 | 4,5,18,19,<br>20,21,22,2<br>4,25 | 10 | P01946,P02091,P02631,P02770,P16086,P51907,P97580,Q30KJ2,Q5QE79,Q91ZS3                                                         |
| 1244 | 1,2,3,6,7,8<br>,24,25 | 4,5,18,19,<br>20,21,22,2<br>3,26 | 8  | P02631,P10715,P12020,P16086,P19629,P68370,Q5GRG2,Q91ZS3                                                                       |
| 1245 | 1,2,3,6,7,8<br>,24,26 | 4,5,18,19,<br>20,21,22,2<br>3,25 | 5  | P01946,P02091,P02631,P02770,Q91ZS3                                                                                            |
| 1246 | 1,2,3,6,7,8<br>,25,26 | 4,5,18,19,<br>20,21,22,2<br>3,24 | 14 | O35783,P01946,P02091,P02631,P02770,P10715,P12020,P19629,P20766,P35280,P68370,Q5GRG2,Q6P9T8,Q91ZS3                             |

|      |                        |                                 |    |                                                                                     |
|------|------------------------|---------------------------------|----|-------------------------------------------------------------------------------------|
| 1247 | 1,2,3,6,7,1<br>8,19,20 | 4,5,8,21,2<br>2,23,24,25<br>,26 | 9  | P00731,P02631,P06760,P16086,P35280,Q30KJ2,Q63532,Q6AYS4,Q91ZS3                      |
| 1248 | 1,2,3,6,7,1<br>8,19,21 | 4,5,8,20,2<br>2,23,24,25<br>,26 | 12 | P00731,P02631,P05964,P14668,P15399,P16086,P25031,P53792,P97840,Q30KJ2,Q63532,Q91ZS3 |
| 1249 | 1,2,3,6,7,1<br>8,19,22 | 4,5,8,20,2<br>1,23,24,25<br>,26 | 5  | P02631,P06760,P16086,Q30KJ2,Q63532                                                  |
| 1250 | 1,2,3,6,7,1<br>8,19,23 | 4,5,8,20,2<br>1,22,24,25<br>,26 | 10 | P02631,P05964,P15399,P16086,P97580,Q03191,Q30KJ2,Q5XI22,Q63532,Q6IE51               |
| 1251 | 1,2,3,6,7,1<br>8,19,24 | 4,5,8,20,2<br>1,22,23,25<br>,26 | 7  | P02631,P06760,P16086,Q30KJ2,Q63532,Q6AYS4,Q6IE51                                    |
| 1252 | 1,2,3,6,7,1<br>8,19,25 | 4,5,8,20,2<br>1,22,23,24<br>,26 | 10 | P00731,P02631,P12020,P16086,P35280,P47967,P97840,Q30KJ2,Q63532,Q91ZS3               |
| 1253 | 1,2,3,6,7,1<br>8,19,26 | 4,5,8,20,2<br>1,22,23,24<br>,25 | 9  | P01946,P02631,P06760,P16086,P35280,Q30KJ2,Q63532,Q63661,Q63942                      |
| 1254 | 1,2,3,6,7,1<br>8,20,21 | 4,5,8,19,2<br>2,23,24,25<br>,26 | 7  | O35783,P00731,P02631,P16086,P25031,P42854,Q91ZS3                                    |
| 1255 | 1,2,3,6,7,1<br>8,20,22 | 4,5,8,19,2<br>1,23,24,25<br>,26 | 5  | P02631,P06760,P16086,P27213,Q91ZS3                                                  |
| 1256 | 1,2,3,6,7,1<br>8,20,23 | 4,5,8,19,2<br>1,22,24,25<br>,26 | 6  | A2RUV9,P02631,P16086,P97580,Q5XI22,Q91ZS3                                           |
| 1257 | 1,2,3,6,7,1<br>8,20,24 | 4,5,8,19,2<br>1,22,23,25<br>,26 | 4  | P02631,P06760,P16086,Q91ZS3                                                         |
| 1258 | 1,2,3,6,7,1<br>8,20,25 | 4,5,8,19,2<br>1,22,23,24<br>,26 | 5  | P02631,P10715,P16086,P35280,Q91ZS3                                                  |
| 1259 | 1,2,3,6,7,1<br>8,20,26 | 4,5,8,19,2<br>1,22,23,24<br>,25 | 6  | O35783,P01041,P01946,P06760,P35280,Q91ZS3                                           |
| 1260 | 1,2,3,6,7,1<br>8,21,22 | 4,5,8,19,2<br>0,23,24,25<br>,26 | 5  | D4A1J4,P13432,P16086,P25031,Q91ZS3                                                  |
| 1261 | 1,2,3,6,7,1<br>8,21,23 | 4,5,8,19,2<br>0,22,24,25<br>,26 | 9  | P02631,P05964,P14668,P15399,P16086,P25031,P97580,Q5XI22,Q91ZS3                      |

|      |                        |                                 |    |                                                                                            |
|------|------------------------|---------------------------------|----|--------------------------------------------------------------------------------------------|
| 1262 | 1,2,3,6,7,1<br>8,21,24 | 4,5,8,19,2<br>0,22,23,25<br>,26 | 5  | P02631,P13432,P16086,P25031,Q91ZS3                                                         |
| 1263 | 1,2,3,6,7,1<br>8,21,25 | 4,5,8,19,2<br>0,22,23,24<br>,26 | 12 | O35783,O54800;Q5DWV2,P00731,P02631,P16086,P19629,P25031,P31430,P47967,P97840,P98089,Q91ZS3 |
| 1264 | 1,2,3,6,7,1<br>8,21,26 | 4,5,8,19,2<br>0,22,23,24<br>,25 | 10 | O35783,O54800;Q5DWV2,P00774,P01041,P01946,P16086,P25031,P83748,Q63661,Q91ZS3               |
| 1265 | 1,2,3,6,7,1<br>8,22,23 | 4,5,8,19,2<br>0,21,24,25<br>,26 | 3  | P02631,P16086,P97580                                                                       |
| 1266 | 1,2,3,6,7,1<br>8,22,24 | 4,5,8,19,2<br>0,21,23,25<br>,26 | 3  | P02631,P06760,P16086                                                                       |
| 1267 | 1,2,3,6,7,1<br>8,22,25 | 4,5,8,19,2<br>0,21,23,24<br>,26 | 7  | P06911,P12020,P16086,P19629,P97840,Q5GRG2,Q91ZS3                                           |
| 1268 | 1,2,3,6,7,1<br>8,22,26 | 4,5,8,19,2<br>0,21,23,24<br>,25 | 4  | P01946,P06760,P16086,P83748                                                                |
| 1269 | 1,2,3,6,7,1<br>8,23,24 | 4,5,8,19,2<br>0,21,22,25<br>,26 | 3  | P02631,P16086,P97580                                                                       |
| 1270 | 1,2,3,6,7,1<br>8,23,25 | 4,5,8,19,2<br>0,21,22,24<br>,26 | 9  | P02631,P05371,P12020,P16086,P19629,P55314,P97580,Q5GRG2,Q91ZS3                             |
| 1271 | 1,2,3,6,7,1<br>8,23,26 | 4,5,8,19,2<br>0,21,22,24<br>,25 | 13 | P01946,P02091,P02631,P16086,P55053,P97580,Q30KJ2,Q63661,Q63942,Q6IFU8,Q6IMF3,Q6P6Q2,Q91ZS3 |
| 1272 | 1,2,3,6,7,1<br>8,24,25 | 4,5,8,19,2<br>0,21,22,23<br>,26 | 3  | P02631,P19629,Q91ZS3                                                                       |
| 1273 | 1,2,3,6,7,1<br>8,24,26 | 4,5,8,19,2<br>0,21,22,23<br>,25 | 5  | P01946,P02091,P06760,Q63942,Q91ZS3                                                         |
| 1274 | 1,2,3,6,7,1<br>8,25,26 | 4,5,8,19,2<br>0,21,22,23<br>,24 | 8  | O35783,P00774,P01946,P02091,P19629,P35280,P55091,Q91ZS3                                    |
| 1275 | 1,2,3,6,7,1<br>9,20,21 | 4,5,8,18,2<br>2,23,24,25<br>,26 | 10 | P00714,P00731,P02631,P15399,P16086,P42854,P53792,Q30KJ2,Q63532,Q91ZS3                      |
| 1276 | 1,2,3,6,7,1<br>9,20,22 | 4,5,8,18,2<br>1,23,24,25<br>,26 | 10 | P00714,P02631,P06760,P07150,P14669,P16086,P27213,Q30KJ2,Q63532,Q6AYS4                      |



|      |                        |                                 |    |                                                                                                   |
|------|------------------------|---------------------------------|----|---------------------------------------------------------------------------------------------------|
| 1277 | 1,2,3,6,7,1<br>9,20,23 | 4,5,8,18,2<br>1,22,24,25<br>,26 | 7  | P02631,P15399,P16086,P97580,Q30KJ2,Q63532,Q6AYS4                                                  |
| 1278 | 1,2,3,6,7,1<br>9,20,24 | 4,5,8,18,2<br>1,22,23,25<br>,26 | 6  | P00714,P02631,P16086,Q30KJ2,Q63532,Q6AYS4                                                         |
| 1279 | 1,2,3,6,7,1<br>9,20,25 | 4,5,8,18,2<br>1,22,23,24<br>,26 | 9  | P02631,P12020,P16086,P35280,P47967,P97840,Q30KJ2,Q63532,Q91ZS3                                    |
| 1280 | 1,2,3,6,7,1<br>9,20,26 | 4,5,8,18,2<br>1,22,23,24<br>,25 | 8  | P01946,P06760,P16086,P35280,Q30KJ2,Q63532,Q6AYS4,Q91ZS3                                           |
| 1281 | 1,2,3,6,7,1<br>9,21,22 | 4,5,8,18,2<br>0,23,24,25<br>,26 | 7  | D4A1J4,P00714,P02631,P16086,P97840,Q30KJ2,Q63532                                                  |
| 1282 | 1,2,3,6,7,1<br>9,21,23 | 4,5,8,18,2<br>0,22,24,25<br>,26 | 7  | P02631,P14668,P15399,P16086,P97580,Q30KJ2,Q63532                                                  |
| 1283 | 1,2,3,6,7,1<br>9,21,24 | 4,5,8,18,2<br>0,22,23,25<br>,26 | 6  | P00714,P02631,P16086,P53792,Q30KJ2,Q63532                                                         |
| 1284 | 1,2,3,6,7,1<br>9,21,25 | 4,5,8,18,2<br>0,22,23,24<br>,26 | 12 | P00731,P02631,P12020,P15399,P16086,P19629,P47967,P53792,P97840,Q30KJ2,Q63532,Q91ZS3               |
| 1285 | 1,2,3,6,7,1<br>9,21,26 | 4,5,8,18,2<br>0,22,23,24<br>,25 | 8  | P01946,P16086,P53792,P83748,Q30KJ2,Q63532,Q63661,Q91ZS3                                           |
| 1286 | 1,2,3,6,7,1<br>9,22,23 | 4,5,8,18,2<br>0,21,24,25<br>,26 | 6  | P02631,P15399,P16086,P97580,Q30KJ2,Q63532                                                         |
| 1287 | 1,2,3,6,7,1<br>9,22,24 | 4,5,8,18,2<br>0,21,23,25<br>,26 | 6  | P00714,P02631,P16086,Q30KJ2,Q63532,Q6AYS4                                                         |
| 1288 | 1,2,3,6,7,1<br>9,22,25 | 4,5,8,18,2<br>0,21,23,24<br>,26 | 13 | P02631,P06911,P12020,P16086,P17046,P19629,P47967,P97840,Q30KJ2,Q4FZU6,Q5GRG2,Q63532,Q91ZS3        |
| 1289 | 1,2,3,6,7,1<br>9,22,26 | 4,5,8,18,2<br>0,21,23,24<br>,25 | 7  | P01946,P06760,P16086,P55159,Q30KJ2,Q63532,Q6AYS4                                                  |
| 1290 | 1,2,3,6,7,1<br>9,23,24 | 4,5,8,18,2<br>0,21,22,25<br>,26 | 8  | P02631,P15399,P16086,P97580,Q30KJ2,Q63532,Q6AYS4,Q6IE51                                           |
| 1291 | 1,2,3,6,7,1<br>9,23,25 | 4,5,8,18,2<br>0,21,22,24<br>,26 | 14 | P02631,P06911,P12020,P15399,P16086,P19629,P55314,P97580,P97840,Q30KJ2,Q4FZU6,Q5GRG2,Q63532,Q91ZS3 |

|      |                        |                                 |    |                                                                       |
|------|------------------------|---------------------------------|----|-----------------------------------------------------------------------|
| 1292 | 1,2,3,6,7,1<br>9,23,26 | 4,5,8,18,2<br>0,21,22,24<br>,25 | 9  | P01946,P02091,P02631,P15399,P16086,P97580,Q30KJ2,Q63532,Q63661        |
| 1293 | 1,2,3,6,7,1<br>9,24,25 | 4,5,8,18,2<br>0,21,22,23<br>,26 | 9  | P02631,P12020,P16086,P19629,P97840,Q30KJ2,Q4FZU6,Q63532,Q91ZS3        |
| 1294 | 1,2,3,6,7,1<br>9,24,26 | 4,5,8,18,2<br>0,21,22,23<br>,25 | 8  | P01946,P02091,P02631,P06760,P16086,Q30KJ2,Q63532,Q6AYS4               |
| 1295 | 1,2,3,6,7,1<br>9,25,26 | 4,5,8,18,2<br>0,21,22,23<br>,24 | 10 | P01946,P02091,P12020,P16086,P19629,P35280,P97840,Q30KJ2,Q63532,Q91ZS3 |
| 1296 | 1,2,3,6,7,2<br>0,21,22 | 4,5,8,18,1<br>9,23,24,25<br>,26 | 4  | P00714,P13432,P16086,Q91ZS3                                           |
| 1297 | 1,2,3,6,7,2<br>0,21,23 | 4,5,8,18,1<br>9,22,24,25<br>,26 | 6  | P02631,P14668,P15399,P16086,P97580,Q91ZS3                             |
| 1298 | 1,2,3,6,7,2<br>0,21,24 | 4,5,8,18,1<br>9,22,23,25<br>,26 | 4  | P00714,P13432,P16086,Q91ZS3                                           |
| 1299 | 1,2,3,6,7,2<br>0,21,25 | 4,5,8,18,1<br>9,22,23,24<br>,26 | 6  | O35783,P09605,P25809,P16086,P19629,P47967,Q91ZS3                      |
| 1300 | 1,2,3,6,7,2<br>0,21,26 | 4,5,8,18,1<br>9,22,23,24<br>,25 | 6  | O35783,P01041,P01946,P16086,P83748,Q91ZS3                             |
| 1301 | 1,2,3,6,7,2<br>0,22,23 | 4,5,8,18,1<br>9,21,24,25<br>,26 | 3  | P02631,P16086,P97580                                                  |
| 1302 | 1,2,3,6,7,2<br>0,22,24 | 4,5,8,18,1<br>9,21,23,25<br>,26 | 5  | P00714,P14669,P16086,P27213,Q6AYS4                                    |
| 1303 | 1,2,3,6,7,2<br>0,22,25 | 4,5,8,18,1<br>9,21,23,24<br>,26 | 6  | P06911,P12020,P16086,P19629,Q5GRG2,Q91ZS3                             |
| 1304 | 1,2,3,6,7,2<br>0,22,26 | 4,5,8,18,1<br>9,21,23,24<br>,25 | 6  | P01041,P01946,P06760,P55159,Q6AYS4,Q91ZS3                             |
| 1305 | 1,2,3,6,7,2<br>0,23,24 | 4,5,8,18,1<br>9,21,22,25<br>,26 | 4  | P02631,P16086,P97580,Q6AYS4                                           |
| 1306 | 1,2,3,6,7,2<br>0,23,25 | 4,5,8,18,1<br>9,21,22,24<br>,26 | 8  | P02631,P12020,P16086,P19629,P55314,P97580,Q5GRG2,Q91ZS3               |

|      |                        |                                 |    |                                                                                     |
|------|------------------------|---------------------------------|----|-------------------------------------------------------------------------------------|
| 1307 | 1,2,3,6,7,2<br>0,23,26 | 4,5,8,18,1<br>9,21,22,24<br>,25 | 6  | P01946,P02091,P16086,P97580,Q30KJ2,Q91ZS3                                           |
| 1308 | 1,2,3,6,7,2<br>0,24,25 | 4,5,8,18,1<br>9,21,22,23<br>,26 | 4  | P10715,P12020,P19629,Q91ZS3                                                         |
| 1309 | 1,2,3,6,7,2<br>0,24,26 | 4,5,8,18,1<br>9,21,22,23<br>,25 | 6  | P01041,P01946,P02091,P06760,Q6AYS4,Q91ZS3                                           |
| 1310 | 1,2,3,6,7,2<br>0,25,26 | 4,5,8,18,1<br>9,21,22,23<br>,24 | 6  | O35783,P01946,P02091,P12020,P35280,Q91ZS3                                           |
| 1311 | 1,2,3,6,7,2<br>1,22,23 | 4,5,8,18,1<br>9,20,24,25<br>,26 | 3  | P14668,P16086,P97580                                                                |
| 1312 | 1,2,3,6,7,2<br>1,22,24 | 4,5,8,18,1<br>9,20,23,25<br>,26 | 3  | P00714,P13432,P16086                                                                |
| 1313 | 1,2,3,6,7,2<br>1,22,25 | 4,5,8,18,1<br>9,20,23,24<br>,26 | 9  | P06911,P09605,P25809,P12020,P16086,P19629,P47967,P97840,Q5GRG2,Q91ZS3               |
| 1314 | 1,2,3,6,7,2<br>1,22,26 | 4,5,8,18,1<br>9,20,23,24<br>,25 | 5  | O54800;Q5DWV2,P01946,P16086,P83748,Q91ZS3                                           |
| 1315 | 1,2,3,6,7,2<br>1,23,24 | 4,5,8,18,1<br>9,20,22,25<br>,26 | 3  | P02631,P16086,P97580                                                                |
| 1316 | 1,2,3,6,7,2<br>1,23,25 | 4,5,8,18,1<br>9,20,22,24<br>,26 | 12 | P02631,P12020,P14668,P15399,P16086,P19629,P55314,P97580,P97840,Q5GRG2,Q6P6R2,Q91ZS3 |
| 1317 | 1,2,3,6,7,2<br>1,23,26 | 4,5,8,18,1<br>9,20,22,24<br>,25 | 8  | O35783,P01946,P02091,P16086,P97580,Q30KJ2,Q63661,Q91ZS3                             |
| 1318 | 1,2,3,6,7,2<br>1,24,25 | 4,5,8,18,1<br>9,20,22,23<br>,26 | 4  | P16086,P19629,P97840,Q91ZS3                                                         |
| 1319 | 1,2,3,6,7,2<br>1,24,26 | 4,5,8,18,1<br>9,20,22,23<br>,25 | 5  | O35783,P01946,P02091,P83748,Q91ZS3                                                  |
| 1320 | 1,2,3,6,7,2<br>1,25,26 | 4,5,8,18,1<br>9,20,22,23<br>,24 | 8  | O35783,O54800;Q5DWV2,P01946,P02091,P19629,P83748,Q91ZS3,Q9QZK9                      |
| 1321 | 1,2,3,6,7,2<br>2,23,24 | 4,5,8,18,1<br>9,20,21,25<br>,26 | 3  | P02631,P16086,P97580                                                                |

|      |                        |                                 |    |                                                                              |
|------|------------------------|---------------------------------|----|------------------------------------------------------------------------------|
| 1322 | 1,2,3,6,7,2<br>2,23,25 | 4,5,8,18,1<br>9,20,21,24<br>,26 | 9  | P06911,P12020,P16086,P19629,P55314,P97580,Q4FZU6,Q5GRG2,Q91ZS3               |
| 1323 | 1,2,3,6,7,2<br>2,23,26 | 4,5,8,18,1<br>9,20,21,24<br>,25 | 5  | P01946,P02091,P16086,P97580,Q30KJ2                                           |
| 1324 | 1,2,3,6,7,2<br>2,24,25 | 4,5,8,18,1<br>9,20,21,23<br>,26 | 6  | P06911,P12020,P19629,Q4FZU6,Q5GRG2,Q91ZS3                                    |
| 1325 | 1,2,3,6,7,2<br>2,24,26 | 4,5,8,18,1<br>9,20,21,23<br>,25 | 4  | P01946,P02091,P06760,P08010                                                  |
| 1326 | 1,2,3,6,7,2<br>2,25,26 | 4,5,8,18,1<br>9,20,21,23<br>,24 | 7  | P01946,P02091,P06911,P12020,P19629,Q5GRG2,Q91ZS3                             |
| 1327 | 1,2,3,6,7,2<br>3,24,25 | 4,5,8,18,1<br>9,20,21,22<br>,26 | 11 | P02631,P12020,P16086,P19629,P36374,P55314,P97580,Q4FZU6,Q5GRG2,Q63751,Q91ZS3 |
| 1328 | 1,2,3,6,7,2<br>3,24,26 | 4,5,8,18,1<br>9,20,21,22<br>,25 | 5  | P01946,P02091,P16086,P97580,Q30KJ2                                           |
| 1329 | 1,2,3,6,7,2<br>3,25,26 | 4,5,8,18,1<br>9,20,21,22<br>,24 | 10 | P01946,P02091,P12020,P16086,P19629,P55314,P97580,Q30KJ2,Q5GRG2,Q91ZS3        |
| 1330 | 1,2,3,6,7,2<br>4,25,26 | 4,5,8,18,1<br>9,20,21,22<br>,23 | 4  | P01946,P02091,P19629,Q91ZS3                                                  |
| 1331 | 1,2,3,6,8,1<br>8,19,20 | 4,5,7,21,2<br>2,23,24,25<br>,26 | 5  | P00731,P22006,P35280,P83121,Q66H69                                           |
| 1332 | 1,2,3,6,8,1<br>8,19,21 | 4,5,7,20,2<br>2,23,24,25<br>,26 | 4  | O35547,P00731,P05539,P35281                                                  |
| 1333 | 1,2,3,6,8,1<br>8,19,22 | 4,5,7,20,2<br>1,23,24,25<br>,26 | 2  | P22006,P83121                                                                |
| 1334 | 1,2,3,6,8,1<br>8,19,23 | 4,5,7,20,2<br>1,22,24,25<br>,26 | 11 | P15399,P22006,P35467,P51907,P97580,Q03191,Q30KJ2,Q5XI22,Q63942,Q8CJD3,Q9Z1F2 |
| 1335 | 1,2,3,6,8,1<br>8,19,24 | 4,5,7,20,2<br>1,22,23,25<br>,26 | 3  | P05539,P83121,Q63942                                                         |
| 1336 | 1,2,3,6,8,1<br>8,19,25 | 4,5,7,20,2<br>1,22,23,24<br>,26 | 6  | P00731,P35280,Q4FZU6,Q62635,Q91ZS3,Q9Z1F2                                    |

|      |                        |                                 |   |                                                  |
|------|------------------------|---------------------------------|---|--------------------------------------------------|
| 1337 | 1,2,3,6,8,1<br>8,19,26 | 4,5,7,20,2<br>1,22,23,24<br>,25 | 4 | P02770,P35280,Q63355,Q63942                      |
| 1338 | 1,2,3,6,8,1<br>8,20,21 | 4,5,7,19,2<br>2,23,24,25<br>,26 | 4 | O35547,P00731,P62804,Q91ZS3                      |
| 1339 | 1,2,3,6,8,1<br>8,20,22 | 4,5,7,19,2<br>1,23,24,25<br>,26 | 2 | P22006,P83121                                    |
| 1340 | 1,2,3,6,8,1<br>8,20,23 | 4,5,7,19,2<br>1,22,24,25<br>,26 | 2 | P22006,Q5XI22                                    |
| 1341 | 1,2,3,6,8,1<br>8,20,24 | 4,5,7,19,2<br>1,22,23,25<br>,26 | 1 | P83121                                           |
| 1342 | 1,2,3,6,8,1<br>8,20,25 | 4,5,7,19,2<br>1,22,23,24<br>,26 | 2 | P35280,Q91ZS3                                    |
| 1343 | 1,2,3,6,8,1<br>8,20,26 | 4,5,7,19,2<br>1,22,23,24<br>,25 | 6 | P02770,P35280,P62804,Q63355,Q63942,Q91ZS3        |
| 1344 | 1,2,3,6,8,1<br>8,21,22 | 4,5,7,19,2<br>0,23,24,25<br>,26 | 3 | O35547,P02782,P13432                             |
| 1345 | 1,2,3,6,8,1<br>8,21,23 | 4,5,7,19,2<br>0,22,24,25<br>,26 | 2 | O35547,Q5XI22                                    |
| 1346 | 1,2,3,6,8,1<br>8,21,24 | 4,5,7,19,2<br>0,22,23,25<br>,26 | 2 | P05539,P13432                                    |
| 1347 | 1,2,3,6,8,1<br>8,21,25 | 4,5,7,19,2<br>0,22,23,24<br>,26 | 5 | P00731,P31430,P98089,Q91ZS3,Q9WTT6               |
| 1348 | 1,2,3,6,8,1<br>8,21,26 | 4,5,7,19,2<br>0,22,23,24<br>,25 | 7 | P00774,P02770,Q00715,Q5QE79,Q63661,Q63942,Q91ZS3 |
| 1349 | 1,2,3,6,8,1<br>8,22,23 | 4,5,7,19,2<br>0,21,24,25<br>,26 | 4 | P22006,P51907,Q5XI22,Q9Z1F2                      |
| 1350 | 1,2,3,6,8,1<br>8,22,24 | 4,5,7,19,2<br>0,21,23,25<br>,26 | 1 | P83121                                           |
| 1351 | 1,2,3,6,8,1<br>8,22,25 | 4,5,7,19,2<br>0,21,23,24<br>,26 | 3 | P20766,Q4FZU6,Q91ZS3                             |

|      |                        |                                 |    |                                                                                            |
|------|------------------------|---------------------------------|----|--------------------------------------------------------------------------------------------|
| 1352 | 1,2,3,6,8,1<br>8,22,26 | 4,5,7,19,2<br>0,21,23,24<br>,25 | 4  | P02770,P20766,Q5QE79,Q63942                                                                |
| 1353 | 1,2,3,6,8,1<br>8,23,24 | 4,5,7,19,2<br>0,21,22,25<br>,26 | 4  | P05539,P51907,Q5XI22,Q63942                                                                |
| 1354 | 1,2,3,6,8,1<br>8,23,25 | 4,5,7,19,2<br>0,21,22,24<br>,26 | 5  | P51907,P55314,Q5XI22,Q91ZS3,Q9Z1F2                                                         |
| 1355 | 1,2,3,6,8,1<br>8,23,26 | 4,5,7,19,2<br>0,21,22,24<br>,25 | 13 | P01946,P02770,P35467,P51907,Q4FZU2,Q5QE79,Q5XI22,Q63942,Q6IFU8,Q6IFW6,Q6IG02,Q6IMF3,Q6P6Q2 |
| 1356 | 1,2,3,6,8,1<br>8,24,25 | 4,5,7,19,2<br>0,21,22,23<br>,26 | 3  | P05539,Q4FZU6,Q91ZS3                                                                       |
| 1357 | 1,2,3,6,8,1<br>8,24,26 | 4,5,7,19,2<br>0,21,22,23<br>,25 | 2  | P02770,Q63942                                                                              |
| 1358 | 1,2,3,6,8,1<br>8,25,26 | 4,5,7,19,2<br>0,21,22,23<br>,24 | 6  | P00774,P35280,P55091,Q5QE79,Q63942,Q91ZS3                                                  |
| 1359 | 1,2,3,6,8,1<br>9,20,21 | 4,5,7,18,2<br>2,23,24,25<br>,26 | 4  | P00714,P35281,P62804,Q91ZS3                                                                |
| 1360 | 1,2,3,6,8,1<br>9,20,22 | 4,5,7,18,2<br>1,23,24,25<br>,26 | 3  | P00714,P22006,P83121                                                                       |
| 1361 | 1,2,3,6,8,1<br>9,20,23 | 4,5,7,18,2<br>1,22,24,25<br>,26 | 6  | P15399,P22006,P82995,P97580,Q30KJ2,Q66H69                                                  |
| 1362 | 1,2,3,6,8,1<br>9,20,24 | 4,5,7,18,2<br>1,22,23,25<br>,26 | 4  | P00714,P82995,P83121,Q66H69                                                                |
| 1363 | 1,2,3,6,8,1<br>9,20,25 | 4,5,7,18,2<br>1,22,23,24<br>,26 | 3  | P35280,Q66H69,Q91ZS3                                                                       |
| 1364 | 1,2,3,6,8,1<br>9,20,26 | 4,5,7,18,2<br>1,22,23,24<br>,25 | 3  | P35280,P62804,Q66H69                                                                       |
| 1365 | 1,2,3,6,8,1<br>9,21,22 | 4,5,7,18,2<br>0,23,24,25<br>,26 | 3  | P00714,P02782,P35281                                                                       |
| 1366 | 1,2,3,6,8,1<br>9,21,23 | 4,5,7,18,2<br>0,22,24,25<br>,26 | 5  | P15399,P35281,P51907,P97580,Q30KJ2                                                         |

|      |                        |                                 |   |                                                         |
|------|------------------------|---------------------------------|---|---------------------------------------------------------|
| 1367 | 1,2,3,6,8,1<br>9,21,24 | 4,5,7,18,2<br>0,22,23,25<br>,26 | 3 | P00714,P05539,P35281                                    |
| 1368 | 1,2,3,6,8,1<br>9,21,25 | 4,5,7,18,2<br>0,22,23,24<br>,26 | 4 | P47967,P97840,Q4FZU6,Q91ZS3                             |
| 1369 | 1,2,3,6,8,1<br>9,21,26 | 4,5,7,18,2<br>0,22,23,24<br>,25 | 3 | P02770,P35281,Q00715                                    |
| 1370 | 1,2,3,6,8,1<br>9,22,23 | 4,5,7,18,2<br>0,21,24,25<br>,26 | 6 | P15399,P20766,P22006,P51907,P97580,Q30KJ2               |
| 1371 | 1,2,3,6,8,1<br>9,22,24 | 4,5,7,18,2<br>0,21,23,25<br>,26 | 2 | P00714,P83121                                           |
| 1372 | 1,2,3,6,8,1<br>9,22,25 | 4,5,7,18,2<br>0,21,23,24<br>,26 | 4 | P06911,P20766,Q4FZU6,Q5GRG2                             |
| 1373 | 1,2,3,6,8,1<br>9,22,26 | 4,5,7,18,2<br>0,21,23,24<br>,25 | 1 | P20766                                                  |
| 1374 | 1,2,3,6,8,1<br>9,23,24 | 4,5,7,18,2<br>0,21,22,25<br>,26 | 4 | P15399,P51907,P97580,Q30KJ2                             |
| 1375 | 1,2,3,6,8,1<br>9,23,25 | 4,5,7,18,2<br>0,21,22,24<br>,26 | 8 | P06911,P15399,P51907,P55314,P97580,Q30KJ2,Q4FZU6,Q9Z1F2 |
| 1376 | 1,2,3,6,8,1<br>9,23,26 | 4,5,7,18,2<br>0,21,22,24<br>,25 | 5 | P01946,P15399,P51907,P97580,Q30KJ2                      |
| 1377 | 1,2,3,6,8,1<br>9,24,25 | 4,5,7,18,2<br>0,21,22,23<br>,26 | 1 | Q4FZU6                                                  |
| 1378 | 1,2,3,6,8,1<br>9,24,26 | 4,5,7,18,2<br>0,21,22,23<br>,25 | 1 | P02770                                                  |
| 1379 | 1,2,3,6,8,1<br>9,25,26 | 4,5,7,18,2<br>0,21,22,23<br>,24 | 1 | P35280                                                  |
| 1380 | 1,2,3,6,8,2<br>0,21,22 | 4,5,7,18,1<br>9,23,24,25<br>,26 | 6 | P00714,P02782,P13432,P62804,Q5XFX0,Q91ZS3               |
| 1381 | 1,2,3,6,8,2<br>0,21,23 | 4,5,7,18,1<br>9,22,24,25<br>,26 | 2 | P62804,Q91ZS3                                           |

|      |                        |                                 |   |                                    |
|------|------------------------|---------------------------------|---|------------------------------------|
| 1382 | 1,2,3,6,8,2<br>0,21,24 | 4,5,7,18,1<br>9,22,23,25<br>,26 | 4 | P00714,P13432,Q5XFX0,Q91ZS3        |
| 1383 | 1,2,3,6,8,2<br>0,21,25 | 4,5,7,18,1<br>9,22,23,24<br>,26 | 4 | P62804,Q6P6R2,Q91ZS3,Q9WTT6        |
| 1384 | 1,2,3,6,8,2<br>0,21,26 | 4,5,7,18,1<br>9,22,23,24<br>,25 | 4 | P62804,Q00715,Q5QE79,Q91ZS3        |
| 1385 | 1,2,3,6,8,2<br>0,22,23 | 4,5,7,18,1<br>9,21,24,25<br>,26 | 2 | P22006,P82995                      |
| 1386 | 1,2,3,6,8,2<br>0,22,24 | 4,5,7,18,1<br>9,21,23,25<br>,26 | 5 | P00714,P27213,P82995,P83121,Q5XFX0 |
| 1387 | 1,2,3,6,8,2<br>0,22,25 | 4,5,7,18,1<br>9,21,23,24<br>,26 | 2 | P06911,Q91ZS3                      |
| 1388 | 1,2,3,6,8,2<br>0,22,26 | 4,5,7,18,1<br>9,21,23,24<br>,25 | 2 | P20766,Q5QE79                      |
| 1389 | 1,2,3,6,8,2<br>0,23,24 | 4,5,7,18,1<br>9,21,22,25<br>,26 | 1 | P82995                             |
| 1390 | 1,2,3,6,8,2<br>0,23,25 | 4,5,7,18,1<br>9,21,22,24<br>,26 | 3 | P55314,Q6P6R2,Q91ZS3               |
| 1391 | 1,2,3,6,8,2<br>0,23,26 | 4,5,7,18,1<br>9,21,22,24<br>,25 | 2 | P01946,Q5QE79                      |
| 1392 | 1,2,3,6,8,2<br>0,24,25 | 4,5,7,18,1<br>9,21,22,23<br>,26 | 1 | Q91ZS3                             |
| 1393 | 1,2,3,6,8,2<br>0,24,26 | 4,5,7,18,1<br>9,21,22,23<br>,25 | 1 | P02770                             |
| 1394 | 1,2,3,6,8,2<br>0,25,26 | 4,5,7,18,1<br>9,21,22,23<br>,24 | 2 | P35280,Q91ZS3                      |
| 1395 | 1,2,3,6,8,2<br>1,22,23 | 4,5,7,18,1<br>9,20,24,25<br>,26 | 1 | P02782                             |
| 1396 | 1,2,3,6,8,2<br>1,22,24 | 4,5,7,18,1<br>9,20,23,25<br>,26 | 5 | P00714,P02782,P13432,P14408,Q5XFX0 |



|      |                        |                                 |   |                                                  |
|------|------------------------|---------------------------------|---|--------------------------------------------------|
| 1397 | 1,2,3,6,8,2<br>1,22,25 | 4,5,7,18,1<br>9,20,23,24<br>,26 | 4 | P06911,Q4FZU6,Q91ZS3,Q9WTT6                      |
| 1398 | 1,2,3,6,8,2<br>1,22,26 | 4,5,7,18,1<br>9,20,23,24<br>,25 | 2 | Q00715,Q5QE79                                    |
| 1399 | 1,2,3,6,8,2<br>1,23,24 | 4,5,7,18,1<br>9,20,22,25<br>,26 | 1 | P05539                                           |
| 1400 | 1,2,3,6,8,2<br>1,23,25 | 4,5,7,18,1<br>9,20,22,24<br>,26 | 4 | P55314,Q6P6R2,Q91ZS3,Q9WTT6                      |
| 1401 | 1,2,3,6,8,2<br>1,23,26 | 4,5,7,18,1<br>9,20,22,24<br>,25 | 4 | P01946,Q00715,Q5QE79,Q6IFV1                      |
| 1402 | 1,2,3,6,8,2<br>1,24,25 | 4,5,7,18,1<br>9,20,22,23<br>,26 | 6 | P05539,Q4FZU6,Q5XFX0,Q6P6R2,Q91ZS3,Q9WTT6        |
| 1403 | 1,2,3,6,8,2<br>1,24,26 | 4,5,7,18,1<br>9,20,22,23<br>,25 | 2 | P02770,Q5QE79                                    |
| 1404 | 1,2,3,6,8,2<br>1,25,26 | 4,5,7,18,1<br>9,20,22,23<br>,24 | 4 | Q00715,Q5QE79,Q91ZS3,Q9WTT6                      |
| 1405 | 1,2,3,6,8,2<br>2,23,24 | 4,5,7,18,1<br>9,20,21,25<br>,26 | 2 | P51907,P82995                                    |
| 1406 | 1,2,3,6,8,2<br>2,23,25 | 4,5,7,18,1<br>9,20,21,24<br>,26 | 6 | P06911,P20766,P51907,P55314,Q4FZU6,Q5GRG2        |
| 1407 | 1,2,3,6,8,2<br>2,23,26 | 4,5,7,18,1<br>9,20,21,24<br>,25 | 2 | P20766,Q5QE79                                    |
| 1408 | 1,2,3,6,8,2<br>2,24,25 | 4,5,7,18,1<br>9,20,21,23<br>,26 | 2 | P06911,Q4FZU6                                    |
| 1409 | 1,2,3,6,8,2<br>2,24,26 | 4,5,7,18,1<br>9,20,21,23<br>,25 | 3 | P02770,P20766,Q5QE79                             |
| 1410 | 1,2,3,6,8,2<br>2,25,26 | 4,5,7,18,1<br>9,20,21,23<br>,24 | 2 | P20766,Q5QE79                                    |
| 1411 | 1,2,3,6,8,2<br>3,24,25 | 4,5,7,18,1<br>9,20,21,22<br>,26 | 7 | P19629,P36374,P51907,P55314,Q4FZU6,Q63751,Q6P6R2 |

|      |                         |                                 |   |                                                  |
|------|-------------------------|---------------------------------|---|--------------------------------------------------|
| 1412 | 1,2,3,6,8,2<br>3,24,26  | 4,5,7,18,1<br>9,20,21,22<br>,25 | 3 | P01946,P51907,Q5QE79                             |
| 1413 | 1,2,3,6,8,2<br>3,25,26  | 4,5,7,18,1<br>9,20,21,22<br>,24 | 7 | P01946,P51907,P55314,Q5QE79,Q6P6R2,Q91ZS3,Q9WTT6 |
| 1414 | 1,2,3,6,8,2<br>4,25,26  | 4,5,7,18,1<br>9,20,21,22<br>,23 | 0 |                                                  |
| 1415 | 1,2,3,6,18,<br>19,20,21 | 4,5,7,8,22,<br>23,24,25,2<br>6  | 3 | P00731,Q02253,Q91ZS3                             |
| 1416 | 1,2,3,6,18,<br>19,20,22 | 4,5,7,8,21,<br>23,24,25,2<br>6  | 5 | P06760,P07150,P22006,P83121,Q6AYS4               |
| 1417 | 1,2,3,6,18,<br>19,20,23 | 4,5,7,8,21,<br>22,24,25,2<br>6  | 5 | P15399,P22006,P97580,Q30KJ2,Q6AYS4               |
| 1418 | 1,2,3,6,18,<br>19,20,24 | 4,5,7,8,21,<br>22,23,25,2<br>6  | 2 | P83121,Q6AYS4                                    |
| 1419 | 1,2,3,6,18,<br>19,20,25 | 4,5,7,8,21,<br>22,23,24,2<br>6  | 3 | P35280,Q02253,Q91ZS3                             |
| 1420 | 1,2,3,6,18,<br>19,20,26 | 4,5,7,8,21,<br>22,23,24,2<br>5  | 6 | P06760,P35280,Q63355,Q63942,Q6AYS4,Q99041        |
| 1421 | 1,2,3,6,18,<br>19,21,22 | 4,5,7,8,20,<br>23,24,25,2<br>6  | 0 |                                                  |
| 1422 | 1,2,3,6,18,<br>19,21,23 | 4,5,7,8,20,<br>22,24,25,2<br>6  | 6 | P05964,P14668,P15399,P97580,Q30KJ2,Q63661        |
| 1423 | 1,2,3,6,18,<br>19,21,24 | 4,5,7,8,20,<br>22,23,25,2<br>6  | 1 | P05539                                           |
| 1424 | 1,2,3,6,18,<br>19,21,25 | 4,5,7,8,20,<br>22,23,24,2<br>6  | 7 | P00731,P31430,P47967,P97840,P98089,Q4FZU6,Q91ZS3 |
| 1425 | 1,2,3,6,18,<br>19,21,26 | 4,5,7,8,20,<br>22,23,24,2<br>5  | 2 | Q63661,Q63942                                    |
| 1426 | 1,2,3,6,18,<br>19,22,23 | 4,5,7,8,20,<br>21,24,25,2<br>6  | 5 | P15399,P22006,P97580,Q30KJ2,Q8CJD3               |

|      |                         |                                |   |                                                                |
|------|-------------------------|--------------------------------|---|----------------------------------------------------------------|
| 1427 | 1,2,3,6,18,<br>19,22,24 | 4,5,7,8,20,<br>21,23,25,2<br>6 | 2 | P83121,Q6AYS4                                                  |
| 1428 | 1,2,3,6,18,<br>19,22,25 | 4,5,7,8,20,<br>21,23,24,2<br>6 | 2 | P97840,Q4FZU6                                                  |
| 1429 | 1,2,3,6,18,<br>19,22,26 | 4,5,7,8,20,<br>21,23,24,2<br>5 | 4 | P06760,Q63661,Q63942,Q99041                                    |
| 1430 | 1,2,3,6,18,<br>19,23,24 | 4,5,7,8,20,<br>21,22,25,2<br>6 | 4 | P15399,P97580,Q30KJ2,Q6AYS4                                    |
| 1431 | 1,2,3,6,18,<br>19,23,25 | 4,5,7,8,20,<br>21,22,24,2<br>6 | 6 | P15399,P55314,P97580,Q30KJ2,Q4FZU6,Q99MH3                      |
| 1432 | 1,2,3,6,18,<br>19,23,26 | 4,5,7,8,20,<br>21,22,24,2<br>5 | 9 | P01946,P15399,P35467,P97580,Q30KJ2,Q63661,Q63942,Q6IFU8,Q6P6Q2 |
| 1433 | 1,2,3,6,18,<br>19,24,25 | 4,5,7,8,20,<br>21,22,23,2<br>6 | 1 | Q4FZU6                                                         |
| 1434 | 1,2,3,6,18,<br>19,24,26 | 4,5,7,8,20,<br>21,22,23,2<br>5 | 3 | P06760,Q63942,Q6AYS4                                           |
| 1435 | 1,2,3,6,18,<br>19,25,26 | 4,5,7,8,20,<br>21,22,23,2<br>4 | 4 | P35280,Q4FZU6,Q63661,Q63942                                    |
| 1436 | 1,2,3,6,18,<br>20,21,22 | 4,5,7,8,19,<br>23,24,25,2<br>6 | 3 | P00714,Q91ZS3,Q99041                                           |
| 1437 | 1,2,3,6,18,<br>20,21,23 | 4,5,7,8,19,<br>22,24,25,2<br>6 | 1 | Q91ZS3                                                         |
| 1438 | 1,2,3,6,18,<br>20,21,24 | 4,5,7,8,19,<br>22,23,25,2<br>6 | 4 | P00714,P13432,Q91ZS3,Q99041                                    |
| 1439 | 1,2,3,6,18,<br>20,21,25 | 4,5,7,8,19,<br>22,23,24,2<br>6 | 3 | P31430,P98089,Q91ZS3                                           |
| 1440 | 1,2,3,6,18,<br>20,21,26 | 4,5,7,8,19,<br>22,23,24,2<br>5 | 4 | P25031,P62804,Q91ZS3,Q99041                                    |
| 1441 | 1,2,3,6,18,<br>20,22,23 | 4,5,7,8,19,<br>21,24,25,2<br>6 | 1 | P22006                                                         |

|      |                         |                                |   |                                                         |
|------|-------------------------|--------------------------------|---|---------------------------------------------------------|
| 1442 | 1,2,3,6,18,<br>20,22,24 | 4,5,7,8,19,<br>21,23,25,2<br>6 | 5 | P00714,P27213,P83121,Q6AYS4,Q99041                      |
| 1443 | 1,2,3,6,18,<br>20,22,25 | 4,5,7,8,19,<br>21,23,24,2<br>6 | 1 | Q91ZS3                                                  |
| 1444 | 1,2,3,6,18,<br>20,22,26 | 4,5,7,8,19,<br>21,23,24,2<br>5 | 2 | P06760,Q99041                                           |
| 1445 | 1,2,3,6,18,<br>20,23,24 | 4,5,7,8,19,<br>21,22,25,2<br>6 | 1 | Q6AYS4                                                  |
| 1446 | 1,2,3,6,18,<br>20,23,25 | 4,5,7,8,19,<br>21,22,24,2<br>6 | 2 | P55314,Q91ZS3                                           |
| 1447 | 1,2,3,6,18,<br>20,23,26 | 4,5,7,8,19,<br>21,22,24,2<br>5 | 8 | P01946,Q4FZU2,Q63942,Q6IFU8,Q6IFW6,Q6IG02,Q6IMF3,Q6P6Q2 |
| 1448 | 1,2,3,6,18,<br>20,24,25 | 4,5,7,8,19,<br>21,22,23,2<br>6 | 1 | Q91ZS3                                                  |
| 1449 | 1,2,3,6,18,<br>20,24,26 | 4,5,7,8,19,<br>21,22,23,2<br>5 | 3 | P06760,Q6AYS4,Q99041                                    |
| 1450 | 1,2,3,6,18,<br>20,25,26 | 4,5,7,8,19,<br>21,22,23,2<br>4 | 3 | P35280,Q91ZS3,Q99041                                    |
| 1451 | 1,2,3,6,18,<br>21,22,23 | 4,5,7,8,19,<br>20,24,25,2<br>6 | 0 |                                                         |
| 1452 | 1,2,3,6,18,<br>21,22,24 | 4,5,7,8,19,<br>20,23,25,2<br>6 | 3 | P00714,P13432,Q99041                                    |
| 1453 | 1,2,3,6,18,<br>21,22,25 | 4,5,7,8,19,<br>20,23,24,2<br>6 | 5 | P31430,P97840,P98089,Q4FZU6,Q91ZS3                      |
| 1454 | 1,2,3,6,18,<br>21,22,26 | 4,5,7,8,19,<br>20,23,24,2<br>5 | 2 | Q63661,Q99041                                           |
| 1455 | 1,2,3,6,18,<br>21,23,24 | 4,5,7,8,19,<br>20,22,25,2<br>6 | 2 | P05539,P34901                                           |
| 1456 | 1,2,3,6,18,<br>21,23,25 | 4,5,7,8,19,<br>20,22,24,2<br>6 | 5 | P31430,P55314,P98089,Q6P6R2,Q91ZS3                      |

|      |                         |                                |    |                                                                       |
|------|-------------------------|--------------------------------|----|-----------------------------------------------------------------------|
| 1457 | 1,2,3,6,18,<br>21,23,26 | 4,5,7,8,19,<br>20,22,24,2<br>5 | 9  | P00774,P01946,Q4FZU2,Q63661,Q63942,Q6IFU8,Q6IFV1,Q6IMF3,Q6P6Q2        |
| 1458 | 1,2,3,6,18,<br>21,24,25 | 4,5,7,8,19,<br>20,22,23,2<br>6 | 5  | P05539,P31430,P98089,Q4FZU6,Q91ZS3                                    |
| 1459 | 1,2,3,6,18,<br>21,24,26 | 4,5,7,8,19,<br>20,22,23,2<br>5 | 2  | Q63661,Q99041                                                         |
| 1460 | 1,2,3,6,18,<br>21,25,26 | 4,5,7,8,19,<br>20,22,23,2<br>4 | 7  | P00774,P25031,P31430,P55091,P98089,Q63661,Q91ZS3                      |
| 1461 | 1,2,3,6,18,<br>22,23,24 | 4,5,7,8,19,<br>20,21,25,2<br>6 | 0  |                                                                       |
| 1462 | 1,2,3,6,18,<br>22,23,25 | 4,5,7,8,19,<br>20,21,24,2<br>6 | 2  | P55314,Q4FZU6                                                         |
| 1463 | 1,2,3,6,18,<br>22,23,26 | 4,5,7,8,19,<br>20,21,24,2<br>5 | 6  | Q63661,Q63942,Q6IFU7,Q6IFU8,Q6IMF3,Q6P6Q2                             |
| 1464 | 1,2,3,6,18,<br>22,24,25 | 4,5,7,8,19,<br>20,21,23,2<br>6 | 1  | Q4FZU6                                                                |
| 1465 | 1,2,3,6,18,<br>22,24,26 | 4,5,7,8,19,<br>20,21,23,2<br>5 | 2  | P06760,Q99041                                                         |
| 1466 | 1,2,3,6,18,<br>22,25,26 | 4,5,7,8,19,<br>20,21,23,2<br>4 | 2  | Q4FZU6,Q99041                                                         |
| 1467 | 1,2,3,6,18,<br>23,24,25 | 4,5,7,8,19,<br>20,21,22,2<br>6 | 2  | P55314,Q4FZU6                                                         |
| 1468 | 1,2,3,6,18,<br>23,24,26 | 4,5,7,8,19,<br>20,21,22,2<br>5 | 6  | P01946,Q63942,Q6IFU7,Q6IFU8,Q6IMF3,Q6P6Q2                             |
| 1469 | 1,2,3,6,18,<br>23,25,26 | 4,5,7,8,19,<br>20,21,22,2<br>4 | 10 | P00774,P01946,P55314,Q4FZU2,Q63661,Q63942,Q6IFU8,Q6IMF3,Q6P6Q2,Q91ZS3 |
| 1470 | 1,2,3,6,18,<br>24,25,26 | 4,5,7,8,19,<br>20,21,22,2<br>3 | 5  | P00774,P08494,P55091,Q4FZU6,Q7TPB1                                    |
| 1471 | 1,2,3,6,19,<br>20,21,22 | 4,5,7,8,18,<br>23,24,25,2<br>6 | 2  | P00714,Q6AYS4                                                         |

|      |                         |                                |   |                                                         |
|------|-------------------------|--------------------------------|---|---------------------------------------------------------|
| 1472 | 1,2,3,6,19,<br>20,21,23 | 4,5,7,8,18,<br>22,24,25,2<br>6 | 5 | P00714,P15399,P97580,Q30KJ2,Q6AYS4                      |
| 1473 | 1,2,3,6,19,<br>20,21,24 | 4,5,7,8,18,<br>22,23,25,2<br>6 | 2 | P00714,Q6AYS4                                           |
| 1474 | 1,2,3,6,19,<br>20,21,25 | 4,5,7,8,18,<br>22,23,24,2<br>6 | 4 | P47967,P97840,Q8VD89,Q91ZS3                             |
| 1475 | 1,2,3,6,19,<br>20,21,26 | 4,5,7,8,18,<br>22,23,24,2<br>5 | 3 | P00714,P62804,Q6AYS4                                    |
| 1476 | 1,2,3,6,19,<br>20,22,23 | 4,5,7,8,18,<br>21,24,25,2<br>6 | 8 | P00714,P15399,P22006,P55091,P82995,P97580,Q30KJ2,Q6AYS4 |
| 1477 | 1,2,3,6,19,<br>20,22,24 | 4,5,7,8,18,<br>21,23,25,2<br>6 | 6 | P00714,P07150,P14669,P82995,P83121,Q6AYS4               |
| 1478 | 1,2,3,6,19,<br>20,22,25 | 4,5,7,8,18,<br>21,23,24,2<br>6 | 2 | Q4FZU6,Q6AYS4                                           |
| 1479 | 1,2,3,6,19,<br>20,22,26 | 4,5,7,8,18,<br>21,23,24,2<br>5 | 3 | P00714,P55159,Q6AYS4                                    |
| 1480 | 1,2,3,6,19,<br>20,23,24 | 4,5,7,8,18,<br>21,22,25,2<br>6 | 6 | P00714,P15399,P82995,P97580,Q30KJ2,Q6AYS4               |
| 1481 | 1,2,3,6,19,<br>20,23,25 | 4,5,7,8,18,<br>21,22,24,2<br>6 | 5 | P15399,P55314,P97580,Q30KJ2,Q6AYS4                      |
| 1482 | 1,2,3,6,19,<br>20,23,26 | 4,5,7,8,18,<br>21,22,24,2<br>5 | 6 | P01946,P15399,P97580,Q30KJ2,Q66H69,Q6AYS4               |
| 1483 | 1,2,3,6,19,<br>20,24,25 | 4,5,7,8,18,<br>21,22,23,2<br>6 | 2 | Q4FZU6,Q6AYS4                                           |
| 1484 | 1,2,3,6,19,<br>20,24,26 | 4,5,7,8,18,<br>21,22,23,2<br>5 | 2 | P00714,Q6AYS4                                           |
| 1485 | 1,2,3,6,19,<br>20,25,26 | 4,5,7,8,18,<br>21,22,23,2<br>4 | 3 | P35280,Q6AYS4,Q91ZS3                                    |
| 1486 | 1,2,3,6,19,<br>21,22,23 | 4,5,7,8,18,<br>20,24,25,2<br>6 | 4 | P00714,P15399,P97580,Q30KJ2                             |

|      |                         |                                |   |                                                  |
|------|-------------------------|--------------------------------|---|--------------------------------------------------|
| 1487 | 1,2,3,6,19,<br>21,22,24 | 4,5,7,8,18,<br>20,23,25,2<br>6 | 3 | P00714,P07171,Q6AYS4                             |
| 1488 | 1,2,3,6,19,<br>21,22,25 | 4,5,7,8,18,<br>20,23,24,2<br>6 | 3 | P47967,P97840,Q4FZU6                             |
| 1489 | 1,2,3,6,19,<br>21,22,26 | 4,5,7,8,18,<br>20,23,24,2<br>5 | 2 | P00714,P07171                                    |
| 1490 | 1,2,3,6,19,<br>21,23,24 | 4,5,7,8,18,<br>20,22,25,2<br>6 | 5 | P00714,P15399,P97580,Q30KJ2,Q6AYS4               |
| 1491 | 1,2,3,6,19,<br>21,23,25 | 4,5,7,8,18,<br>20,22,24,2<br>6 | 7 | P15399,P55314,P97580,P97840,Q30KJ2,Q4FZU6,Q6P6R2 |
| 1492 | 1,2,3,6,19,<br>21,23,26 | 4,5,7,8,18,<br>20,22,24,2<br>5 | 5 | P01946,P15399,P97580,Q30KJ2,Q63661               |
| 1493 | 1,2,3,6,19,<br>21,24,25 | 4,5,7,8,18,<br>20,22,23,2<br>6 | 2 | P97840,Q4FZU6                                    |
| 1494 | 1,2,3,6,19,<br>21,24,26 | 4,5,7,8,18,<br>20,22,23,2<br>5 | 3 | P00714,P07171,Q6AYS4                             |
| 1495 | 1,2,3,6,19,<br>21,25,26 | 4,5,7,8,18,<br>20,22,23,2<br>4 | 2 | P97840,Q91ZS3                                    |
| 1496 | 1,2,3,6,19,<br>22,23,24 | 4,5,7,8,18,<br>20,21,25,2<br>6 | 7 | P00714,P15399,P82471,P82995,P97580,Q30KJ2,Q6AYS4 |
| 1497 | 1,2,3,6,19,<br>22,23,25 | 4,5,7,8,18,<br>20,21,24,2<br>6 | 6 | P06911,P15399,P55314,P97580,Q30KJ2,Q4FZU6        |
| 1498 | 1,2,3,6,19,<br>22,23,26 | 4,5,7,8,18,<br>20,21,24,2<br>5 | 5 | P01946,P15399,P97580,Q30KJ2,Q6AYS4               |
| 1499 | 1,2,3,6,19,<br>22,24,25 | 4,5,7,8,18,<br>20,21,23,2<br>6 | 2 | Q4FZU6,Q6AYS4                                    |
| 1500 | 1,2,3,6,19,<br>22,24,26 | 4,5,7,8,18,<br>20,21,23,2<br>5 | 4 | P00714,P20646,Q6AYS4,Q9R044                      |
| 1501 | 1,2,3,6,19,<br>22,25,26 | 4,5,7,8,18,<br>20,21,23,2<br>4 | 1 | Q4FZU6                                           |

|      |                         |                                |   |                                                  |
|------|-------------------------|--------------------------------|---|--------------------------------------------------|
| 1502 | 1,2,3,6,19,<br>23,24,25 | 4,5,7,8,18,<br>20,21,22,2<br>6 | 5 | P15399,P55314,P97580,Q30KJ2,Q4FZU6               |
| 1503 | 1,2,3,6,19,<br>23,24,26 | 4,5,7,8,18,<br>20,21,22,2<br>5 | 6 | P01946,P02091,P15399,P97580,Q30KJ2,Q6AYS4        |
| 1504 | 1,2,3,6,19,<br>23,25,26 | 4,5,7,8,18,<br>20,21,22,2<br>4 | 7 | P01946,P02091,P15399,P55314,P97580,Q30KJ2,Q4FZU6 |
| 1505 | 1,2,3,6,19,<br>24,25,26 | 4,5,7,8,18,<br>20,21,22,2<br>3 | 4 | P01946,P14480,Q4FZU6,Q6AYS4                      |
| 1506 | 1,2,3,6,20,<br>21,22,23 | 4,5,7,8,18,<br>19,24,25,2<br>6 | 2 | P00714,P82995                                    |
| 1507 | 1,2,3,6,20,<br>21,22,24 | 4,5,7,8,18,<br>19,23,25,2<br>6 | 6 | P00714,P13432,P82995,Q5XFX0,Q6AYS4,Q99041        |
| 1508 | 1,2,3,6,20,<br>21,22,25 | 4,5,7,8,18,<br>19,23,24,2<br>6 | 2 | Q03191,Q91ZS3                                    |
| 1509 | 1,2,3,6,20,<br>21,22,26 | 4,5,7,8,18,<br>19,23,24,2<br>5 | 2 | P00714,Q99041                                    |
| 1510 | 1,2,3,6,20,<br>21,23,24 | 4,5,7,8,18,<br>19,22,25,2<br>6 | 3 | P00714,P82995,Q6AYS4                             |
| 1511 | 1,2,3,6,20,<br>21,23,25 | 4,5,7,8,18,<br>19,22,24,2<br>6 | 3 | P55314,Q6P6R2,Q91ZS3                             |
| 1512 | 1,2,3,6,20,<br>21,23,26 | 4,5,7,8,18,<br>19,22,24,2<br>5 | 3 | P01946,Q6IFU8,Q6IFV1                             |
| 1513 | 1,2,3,6,20,<br>21,24,25 | 4,5,7,8,18,<br>19,22,23,2<br>6 | 2 | Q5XFX0,Q91ZS3                                    |
| 1514 | 1,2,3,6,20,<br>21,24,26 | 4,5,7,8,18,<br>19,22,23,2<br>5 | 3 | P00714,Q6AYS4,Q99041                             |
| 1515 | 1,2,3,6,20,<br>21,25,26 | 4,5,7,8,18,<br>19,22,23,2<br>4 | 1 | Q91ZS3                                           |
| 1516 | 1,2,3,6,20,<br>22,23,24 | 4,5,7,8,18,<br>19,21,25,2<br>6 | 3 | P00714,P82995,Q6AYS4                             |



|      |                         |                                |   |                                    |
|------|-------------------------|--------------------------------|---|------------------------------------|
| 1517 | 1,2,3,6,20,<br>22,23,25 | 4,5,7,8,18,<br>19,21,24,2<br>6 | 3 | P06911,P55314,P82995               |
| 1518 | 1,2,3,6,20,<br>22,23,26 | 4,5,7,8,18,<br>19,21,24,2<br>5 | 1 | Q6AYS4                             |
| 1519 | 1,2,3,6,20,<br>22,24,25 | 4,5,7,8,18,<br>19,21,23,2<br>6 | 4 | P82995,Q4FZU6,Q5XFX0,Q6AYS4        |
| 1520 | 1,2,3,6,20,<br>22,24,26 | 4,5,7,8,18,<br>19,21,23,2<br>5 | 5 | P00714,P02803,Q6AYS4,Q99041,Q99MH3 |
| 1521 | 1,2,3,6,20,<br>22,25,26 | 4,5,7,8,18,<br>19,21,23,2<br>4 | 1 | Q91ZS3                             |
| 1522 | 1,2,3,6,20,<br>23,24,25 | 4,5,7,8,18,<br>19,21,22,2<br>6 | 3 | P55314,P82995,Q4FZU6               |
| 1523 | 1,2,3,6,20,<br>23,24,26 | 4,5,7,8,18,<br>19,21,22,2<br>5 | 3 | P01946,P02091,Q6AYS4               |
| 1524 | 1,2,3,6,20,<br>23,25,26 | 4,5,7,8,18,<br>19,21,22,2<br>4 | 3 | P01946,P55314,Q91ZS3               |
| 1525 | 1,2,3,6,20,<br>24,25,26 | 4,5,7,8,18,<br>19,21,22,2<br>3 | 2 | Q6AYS4,Q91ZS3                      |
| 1526 | 1,2,3,6,21,<br>22,23,24 | 4,5,7,8,18,<br>19,20,25,2<br>6 | 3 | P00714,P13432,P34901               |
| 1527 | 1,2,3,6,21,<br>22,23,25 | 4,5,7,8,18,<br>19,20,24,2<br>6 | 4 | P06911,P55314,Q4FZU6,Q6P6R2        |
| 1528 | 1,2,3,6,21,<br>22,23,26 | 4,5,7,8,18,<br>19,20,24,2<br>5 | 1 | P01946                             |
| 1529 | 1,2,3,6,21,<br>22,24,25 | 4,5,7,8,18,<br>19,20,23,2<br>6 | 3 | P35467,Q4FZU6,Q5XFX0               |
| 1530 | 1,2,3,6,21,<br>22,24,26 | 4,5,7,8,18,<br>19,20,23,2<br>5 | 4 | P00714,P07171,P13432,Q99041        |
| 1531 | 1,2,3,6,21,<br>22,25,26 | 4,5,7,8,18,<br>19,20,23,2<br>4 | 3 | P07171,Q4FZU6,Q91ZS3               |

|      |                         |                                 |   |                                                                |
|------|-------------------------|---------------------------------|---|----------------------------------------------------------------|
| 1532 | 1,2,3,6,21,<br>23,24,25 | 4,5,7,8,18,<br>19,20,22,2<br>6  | 4 | P55314,Q4FZU6,Q63751,Q6P6R2                                    |
| 1533 | 1,2,3,6,21,<br>23,24,26 | 4,5,7,8,18,<br>19,20,22,2<br>5  | 2 | P01946,Q6IFV1                                                  |
| 1534 | 1,2,3,6,21,<br>23,25,26 | 4,5,7,8,18,<br>19,20,22,2<br>4  | 4 | P01946,P55314,Q6P6R2,Q91ZS3                                    |
| 1535 | 1,2,3,6,21,<br>24,25,26 | 4,5,7,8,18,<br>19,20,22,2<br>3  | 2 | Q4FZU6,Q91ZS3                                                  |
| 1536 | 1,2,3,6,22,<br>23,24,25 | 4,5,7,8,18,<br>19,20,21,2<br>6  | 5 | P06911,P55314,P82471,P82995,Q4FZU6                             |
| 1537 | 1,2,3,6,22,<br>23,24,26 | 4,5,7,8,18,<br>19,20,21,2<br>5  | 4 | P00731,P01946,P82471,Q6AYS4                                    |
| 1538 | 1,2,3,6,22,<br>23,25,26 | 4,5,7,8,18,<br>19,20,21,2<br>4  | 3 | P01946,P55314,Q4FZU6                                           |
| 1539 | 1,2,3,6,22,<br>24,25,26 | 4,5,7,8,18,<br>19,20,21,2<br>3  | 1 | Q4FZU6                                                         |
| 1540 | 1,2,3,6,23,<br>24,25,26 | 4,5,7,8,18,<br>19,20,21,2<br>2  | 5 | P01946,P02091,P55314,Q4FZU6,Q7TPB1                             |
| 1541 | 1,2,3,7,8,1<br>8,19,20  | 4,5,6,21,2<br>2,23,24,25<br>,26 | 4 | P06760,P35280,P83121,Q08849                                    |
| 1542 | 1,2,3,7,8,1<br>8,19,21  | 4,5,6,20,2<br>2,23,24,25<br>,26 | 4 | P00731,P02803,P05964,P42854                                    |
| 1543 | 1,2,3,7,8,1<br>8,19,22  | 4,5,6,20,2<br>1,23,24,25<br>,26 | 4 | P01835,P06760,P20766,P83121                                    |
| 1544 | 1,2,3,7,8,1<br>8,19,23  | 4,5,6,20,2<br>1,22,24,25<br>,26 | 9 | P02803,P05964,P16086,P35467,Q03191,Q498D9,Q5XI22,Q63532,Q99MH3 |
| 1545 | 1,2,3,7,8,1<br>8,19,24  | 4,5,6,20,2<br>1,22,23,25<br>,26 | 4 | P01835,P06760,P83121,Q63532                                    |
| 1546 | 1,2,3,7,8,1<br>8,19,25  | 4,5,6,20,2<br>1,22,23,24<br>,26 | 5 | P01835,P02803,P10715,P19629,P35280                             |

|      |                        |                                 |   |                                                                       |
|------|------------------------|---------------------------------|---|-----------------------------------------------------------------------|
| 1547 | 1,2,3,7,8,1<br>8,19,26 | 4,5,6,20,2<br>1,22,23,24<br>,25 | 5 | P01946,P02770,P06760,P35280,Q63942                                    |
| 1548 | 1,2,3,7,8,1<br>8,20,21 | 4,5,6,19,2<br>2,23,24,25<br>,26 | 2 | P42854,Q91ZS3                                                         |
| 1549 | 1,2,3,7,8,1<br>8,20,22 | 4,5,6,19,2<br>1,23,24,25<br>,26 | 5 | P06760,P10715,P27213,P83121,Q08849                                    |
| 1550 | 1,2,3,7,8,1<br>8,20,23 | 4,5,6,19,2<br>1,22,24,25<br>,26 | 4 | A2RUV9,P10715,Q08849,Q5XI22                                           |
| 1551 | 1,2,3,7,8,1<br>8,20,24 | 4,5,6,19,2<br>1,22,23,25<br>,26 | 3 | P06760,P10715,P83121                                                  |
| 1552 | 1,2,3,7,8,1<br>8,20,25 | 4,5,6,19,2<br>1,22,23,24<br>,26 | 4 | P10715,P19629,P35280,Q91ZS3                                           |
| 1553 | 1,2,3,7,8,1<br>8,20,26 | 4,5,6,19,2<br>1,22,23,24<br>,25 | 7 | P01041,P01946,P02770,P06760,P10715,P35280,Q08849                      |
| 1554 | 1,2,3,7,8,1<br>8,21,22 | 4,5,6,19,2<br>0,23,24,25<br>,26 | 1 | D4A1J4                                                                |
| 1555 | 1,2,3,7,8,1<br>8,21,23 | 4,5,6,19,2<br>0,22,24,25<br>,26 | 2 | P14668,Q5XI22                                                         |
| 1556 | 1,2,3,7,8,1<br>8,21,24 | 4,5,6,19,2<br>0,22,23,25<br>,26 | 1 | P05539                                                                |
| 1557 | 1,2,3,7,8,1<br>8,21,25 | 4,5,6,19,2<br>0,22,23,24<br>,26 | 8 | O35783,P08721,P10715,P19629,P25031,P31430,P98089,Q91ZS3               |
| 1558 | 1,2,3,7,8,1<br>8,21,26 | 4,5,6,19,2<br>0,22,23,24<br>,25 | 9 | O35783,O54800;Q5DWV2,P01041,P01946,P02770,P25031,P55091,P82995,Q63661 |
| 1559 | 1,2,3,7,8,1<br>8,22,23 | 4,5,6,19,2<br>0,21,24,25<br>,26 | 2 | P20766,Q5XI22                                                         |
| 1560 | 1,2,3,7,8,1<br>8,22,24 | 4,5,6,19,2<br>0,21,23,25<br>,26 | 3 | P01835,P06760,P83121                                                  |
| 1561 | 1,2,3,7,8,1<br>8,22,25 | 4,5,6,19,2<br>0,21,23,24<br>,26 | 4 | P01835,P10715,P19629,P20766                                           |

|      |                        |                                 |    |                                                                       |
|------|------------------------|---------------------------------|----|-----------------------------------------------------------------------|
| 1562 | 1,2,3,7,8,1<br>8,22,26 | 4,5,6,19,2<br>0,21,23,24<br>,25 | 5  | P01041,P01946,P02770,P06760,P20766                                    |
| 1563 | 1,2,3,7,8,1<br>8,23,24 | 4,5,6,19,2<br>0,21,22,25<br>,26 | 1  | Q5XI22                                                                |
| 1564 | 1,2,3,7,8,1<br>8,23,25 | 4,5,6,19,2<br>0,21,22,24<br>,26 | 4  | P10715,P19629,Q5XI22,Q99MH3                                           |
| 1565 | 1,2,3,7,8,1<br>8,23,26 | 4,5,6,19,2<br>0,21,22,24<br>,25 | 7  | A2RUV9,P01946,P02091,P02770,P35467,Q63942,Q6P6Q2                      |
| 1566 | 1,2,3,7,8,1<br>8,24,25 | 4,5,6,19,2<br>0,21,22,23<br>,26 | 3  | P01835,P10715,P19629                                                  |
| 1567 | 1,2,3,7,8,1<br>8,24,26 | 4,5,6,19,2<br>0,21,22,23<br>,25 | 6  | P01946,P02091,P02770,P06760,P10715,P55091                             |
| 1568 | 1,2,3,7,8,1<br>8,25,26 | 4,5,6,19,2<br>0,21,22,23<br>,24 | 10 | O35783,P01946,P02091,P02770,P08721,P10715,P19629,P35280,P55091,P82995 |
| 1569 | 1,2,3,7,8,1<br>9,20,21 | 4,5,6,18,2<br>2,23,24,25<br>,26 | 2  | P42854,Q6IFU7                                                         |
| 1570 | 1,2,3,7,8,1<br>9,20,22 | 4,5,6,18,2<br>1,23,24,25<br>,26 | 3  | P20766,P83121,Q08849                                                  |
| 1571 | 1,2,3,7,8,1<br>9,20,23 | 4,5,6,18,2<br>1,22,24,25<br>,26 | 2  | P16086,Q08849                                                         |
| 1572 | 1,2,3,7,8,1<br>9,20,24 | 4,5,6,18,2<br>1,22,23,25<br>,26 | 1  | P83121                                                                |
| 1573 | 1,2,3,7,8,1<br>9,20,25 | 4,5,6,18,2<br>1,22,23,24<br>,26 | 5  | P10715,P19629,P35280,Q08849,Q6IFU7                                    |
| 1574 | 1,2,3,7,8,1<br>9,20,26 | 4,5,6,18,2<br>1,22,23,24<br>,25 | 6  | P01041,P01946,P02770,P06760,P35280,Q08849                             |
| 1575 | 1,2,3,7,8,1<br>9,21,22 | 4,5,6,18,2<br>0,23,24,25<br>,26 | 1  | D4A1J4                                                                |
| 1576 | 1,2,3,7,8,1<br>9,21,23 | 4,5,6,18,2<br>0,22,24,25<br>,26 | 3  | P14668,P15399,P16086                                                  |

|      |                        |                                 |   |                                                  |
|------|------------------------|---------------------------------|---|--------------------------------------------------|
| 1577 | 1,2,3,7,8,1<br>9,21,24 | 4,5,6,18,2<br>0,22,23,25<br>,26 | 0 |                                                  |
| 1578 | 1,2,3,7,8,1<br>9,21,25 | 4,5,6,18,2<br>0,22,23,24<br>,26 | 5 | P10715,P19629,P47967,P97840,Q6IFU7               |
| 1579 | 1,2,3,7,8,1<br>9,21,26 | 4,5,6,18,2<br>0,22,23,24<br>,25 | 2 | P01946,P02770                                    |
| 1580 | 1,2,3,7,8,1<br>9,22,23 | 4,5,6,18,2<br>0,21,24,25<br>,26 | 4 | P01835,P16086,P20766,Q63532                      |
| 1581 | 1,2,3,7,8,1<br>9,22,24 | 4,5,6,18,2<br>0,21,23,25<br>,26 | 6 | P01835,P20646,P20766,P83121,Q63532,Q6IMF3        |
| 1582 | 1,2,3,7,8,1<br>9,22,25 | 4,5,6,18,2<br>0,21,23,24<br>,26 | 6 | P01835,P10715,P19629,P20766,Q5GRG2,Q6IFU7        |
| 1583 | 1,2,3,7,8,1<br>9,22,26 | 4,5,6,18,2<br>0,21,23,24<br>,25 | 7 | O54728,P01835,P01946,P02770,P06760,P20766,P55159 |
| 1584 | 1,2,3,7,8,1<br>9,23,24 | 4,5,6,18,2<br>0,21,22,25<br>,26 | 2 | P01835,Q63532                                    |
| 1585 | 1,2,3,7,8,1<br>9,23,25 | 4,5,6,18,2<br>0,21,22,24<br>,26 | 4 | P01835,P10715,P19629,P97580                      |
| 1586 | 1,2,3,7,8,1<br>9,23,26 | 4,5,6,18,2<br>0,21,22,24<br>,25 | 3 | P01946,P02091,Q08849                             |
| 1587 | 1,2,3,7,8,1<br>9,24,25 | 4,5,6,18,2<br>0,21,22,23<br>,26 | 4 | P01835,P10715,P19629,Q63532                      |
| 1588 | 1,2,3,7,8,1<br>9,24,26 | 4,5,6,18,2<br>0,21,22,23<br>,25 | 6 | P01835,P01946,P02091,P02770,P06760,Q63532        |
| 1589 | 1,2,3,7,8,1<br>9,25,26 | 4,5,6,18,2<br>0,21,22,23<br>,24 | 6 | P01835,P01946,P02091,P10715,P19629,P35280        |
| 1590 | 1,2,3,7,8,2<br>0,21,22 | 4,5,6,18,1<br>9,23,24,25<br>,26 | 1 | P42854                                           |
| 1591 | 1,2,3,7,8,2<br>0,21,23 | 4,5,6,18,1<br>9,22,24,25<br>,26 | 0 |                                                  |

|      |                        |                                 |   |                                                         |
|------|------------------------|---------------------------------|---|---------------------------------------------------------|
| 1592 | 1,2,3,7,8,2<br>0,21,24 | 4,5,6,18,1<br>9,22,23,25<br>,26 | 1 | Q5XFX0                                                  |
| 1593 | 1,2,3,7,8,2<br>0,21,25 | 4,5,6,18,1<br>9,22,23,24<br>,26 | 4 | P10715,P19629,Q6IFU7,Q91ZS3                             |
| 1594 | 1,2,3,7,8,2<br>0,21,26 | 4,5,6,18,1<br>9,22,23,24<br>,25 | 6 | O35783,P01041,P01946,P02770,P62804,Q00715               |
| 1595 | 1,2,3,7,8,2<br>0,22,23 | 4,5,6,18,1<br>9,21,24,25<br>,26 | 2 | P20766,Q08849                                           |
| 1596 | 1,2,3,7,8,2<br>0,22,24 | 4,5,6,18,1<br>9,21,23,25<br>,26 | 3 | P27213,P83121,Q5XFX0                                    |
| 1597 | 1,2,3,7,8,2<br>0,22,25 | 4,5,6,18,1<br>9,21,23,24<br>,26 | 5 | P10715,P19629,P20766,Q08849,Q5GRG2                      |
| 1598 | 1,2,3,7,8,2<br>0,22,26 | 4,5,6,18,1<br>9,21,23,24<br>,25 | 6 | P01041,P01946,P06760,P20766,P55159,Q08849               |
| 1599 | 1,2,3,7,8,2<br>0,23,24 | 4,5,6,18,1<br>9,21,22,25<br>,26 | 1 | Q08849                                                  |
| 1600 | 1,2,3,7,8,2<br>0,23,25 | 4,5,6,18,1<br>9,21,22,24<br>,26 | 3 | P10715,P19629,Q08849                                    |
| 1601 | 1,2,3,7,8,2<br>0,23,26 | 4,5,6,18,1<br>9,21,22,24<br>,25 | 3 | P01946,P02091,Q08849                                    |
| 1602 | 1,2,3,7,8,2<br>0,24,25 | 4,5,6,18,1<br>9,21,22,23<br>,26 | 2 | P10715,P19629                                           |
| 1603 | 1,2,3,7,8,2<br>0,24,26 | 4,5,6,18,1<br>9,21,22,23<br>,25 | 5 | P01041,P01946,P02091,P02770,P10715                      |
| 1604 | 1,2,3,7,8,2<br>0,25,26 | 4,5,6,18,1<br>9,21,22,23<br>,24 | 8 | P01041,P01946,P02091,P10715,P19629,P35280,Q08849,Q91ZS3 |
| 1605 | 1,2,3,7,8,2<br>1,22,23 | 4,5,6,18,1<br>9,20,24,25<br>,26 | 0 |                                                         |
| 1606 | 1,2,3,7,8,2<br>1,22,24 | 4,5,6,18,1<br>9,20,23,25<br>,26 | 2 | P00714,Q5XFX0                                           |

|      |                        |                                 |   |                                                         |
|------|------------------------|---------------------------------|---|---------------------------------------------------------|
| 1607 | 1,2,3,7,8,2<br>1,22,25 | 4,5,6,18,1<br>9,20,23,24<br>,26 | 4 | P10715,P19629,P20766,Q6IFU7                             |
| 1608 | 1,2,3,7,8,2<br>1,22,26 | 4,5,6,18,1<br>9,20,23,24<br>,25 | 5 | O54800;Q5DWV2,P01041,P01946,P02770,P20766               |
| 1609 | 1,2,3,7,8,2<br>1,23,24 | 4,5,6,18,1<br>9,20,22,25<br>,26 | 0 |                                                         |
| 1610 | 1,2,3,7,8,2<br>1,23,25 | 4,5,6,18,1<br>9,20,22,24<br>,26 | 2 | P10715,P19629                                           |
| 1611 | 1,2,3,7,8,2<br>1,23,26 | 4,5,6,18,1<br>9,20,22,24<br>,25 | 3 | P01946,P02091,P02770                                    |
| 1612 | 1,2,3,7,8,2<br>1,24,25 | 4,5,6,18,1<br>9,20,22,23<br>,26 | 2 | P10715,P19629                                           |
| 1613 | 1,2,3,7,8,2<br>1,24,26 | 4,5,6,18,1<br>9,20,22,23<br>,25 | 4 | P01041,P01946,P02091,P02770                             |
| 1614 | 1,2,3,7,8,2<br>1,25,26 | 4,5,6,18,1<br>9,20,22,23<br>,24 | 7 | O35783,O54800;Q5DWV2,P01946,P02091,P10715,P19629,Q91ZS3 |
| 1615 | 1,2,3,7,8,2<br>2,23,24 | 4,5,6,18,1<br>9,20,21,25<br>,26 | 2 | P01835,P20766                                           |
| 1616 | 1,2,3,7,8,2<br>2,23,25 | 4,5,6,18,1<br>9,20,21,24<br>,26 | 6 | P01835,P06911,P10715,P19629,P20766,Q5GRG2               |
| 1617 | 1,2,3,7,8,2<br>2,23,26 | 4,5,6,18,1<br>9,20,21,24<br>,25 | 4 | O54728,P01946,P02091,P20766                             |
| 1618 | 1,2,3,7,8,2<br>2,24,25 | 4,5,6,18,1<br>9,20,21,23<br>,26 | 5 | P01835,P10715,P19629,P20766,Q5GRG2                      |
| 1619 | 1,2,3,7,8,2<br>2,24,26 | 4,5,6,18,1<br>9,20,21,23<br>,25 | 5 | P01835,P01946,P02091,P02770,P20766                      |
| 1620 | 1,2,3,7,8,2<br>2,25,26 | 4,5,6,18,1<br>9,20,21,23<br>,24 | 6 | P01835,P01946,P02091,P10715,P19629,P20766               |
| 1621 | 1,2,3,7,8,2<br>3,24,25 | 4,5,6,18,1<br>9,20,21,22<br>,26 | 4 | P01835,P10715,P19629,Q63751                             |

|      |                         |                                 |   |                                                         |
|------|-------------------------|---------------------------------|---|---------------------------------------------------------|
| 1622 | 1,2,3,7,8,2<br>3,24,26  | 4,5,6,18,1<br>9,20,21,22<br>,25 | 3 | P01946,P02091,P02770                                    |
| 1623 | 1,2,3,7,8,2<br>3,25,26  | 4,5,6,18,1<br>9,20,21,22<br>,24 | 4 | P01946,P02091,P10715,P19629                             |
| 1624 | 1,2,3,7,8,2<br>4,25,26  | 4,5,6,18,1<br>9,20,21,22<br>,23 | 5 | P01835,P01946,P02091,P10715,P19629                      |
| 1625 | 1,2,3,7,18,<br>19,20,21 | 4,5,6,8,22,<br>23,24,25,2<br>6  | 6 | P00731,P06760,P14668,P25031,P42854,Q9Z0V6               |
| 1626 | 1,2,3,7,18,<br>19,20,22 | 4,5,6,8,21,<br>23,24,25,2<br>6  | 6 | P06760,P07150,P14669,P83121,Q9WTT6,Q9Z0V6               |
| 1627 | 1,2,3,7,18,<br>19,20,23 | 4,5,6,8,21,<br>22,24,25,2<br>6  | 4 | P06760,P14668,Q9WTT6,Q9Z0V6                             |
| 1628 | 1,2,3,7,18,<br>19,20,24 | 4,5,6,8,21,<br>22,23,25,2<br>6  | 7 | P06760,P07150,P14669,P83121,Q6AYS4,Q9WTT6,Q9Z0V6        |
| 1629 | 1,2,3,7,18,<br>19,20,25 | 4,5,6,8,21,<br>22,23,24,2<br>6  | 2 | P35280,P47967                                           |
| 1630 | 1,2,3,7,18,<br>19,20,26 | 4,5,6,8,21,<br>22,23,24,2<br>5  | 7 | P01041,P01946,P06760,P07150,P35280,Q9WTT6,Q9Z0V6        |
| 1631 | 1,2,3,7,18,<br>19,21,22 | 4,5,6,8,20,<br>23,24,25,2<br>6  | 3 | P06760,P14668,P97840                                    |
| 1632 | 1,2,3,7,18,<br>19,21,23 | 4,5,6,8,20,<br>22,24,25,2<br>6  | 8 | D3ZUC6,P05964,P14668,P15399,P16086,Q03191,Q63661,Q99MH3 |
| 1633 | 1,2,3,7,18,<br>19,21,24 | 4,5,6,8,20,<br>22,23,25,2<br>6  | 2 | D3ZUC6,P06760                                           |
| 1634 | 1,2,3,7,18,<br>19,21,25 | 4,5,6,8,20,<br>22,23,24,2<br>6  | 7 | P00731,P14668,P20760,P25031,P31430,P47967,P97840        |
| 1635 | 1,2,3,7,18,<br>19,21,26 | 4,5,6,8,20,<br>22,23,24,2<br>5  | 6 | D3ZUC6,P01946,P06760,P25031,P82995,Q63661               |
| 1636 | 1,2,3,7,18,<br>19,22,23 | 4,5,6,8,20,<br>21,24,25,2<br>6  | 4 | P06760,P14668,Q63532,Q9WTT6                             |



|      |                         |                                |   |                                                                |
|------|-------------------------|--------------------------------|---|----------------------------------------------------------------|
| 1637 | 1,2,3,7,18,<br>19,22,24 | 4,5,6,8,20,<br>21,23,25,2<br>6 | 9 | P01835,P06760,P07150,P14669,P20646,P83121,Q63532,Q9WTT6,Q9Z0V6 |
| 1638 | 1,2,3,7,18,<br>19,22,25 | 4,5,6,8,20,<br>21,23,24,2<br>6 | 3 | P01835,P47967,P97840                                           |
| 1639 | 1,2,3,7,18,<br>19,22,26 | 4,5,6,8,20,<br>21,23,24,2<br>5 | 7 | P01946,P06760,P07150,P55159,Q63661,Q9WTT6,Q9Z0V6               |
| 1640 | 1,2,3,7,18,<br>19,23,24 | 4,5,6,8,20,<br>21,22,25,2<br>6 | 4 | P06760,Q03191,Q63532,Q9WTT6                                    |
| 1641 | 1,2,3,7,18,<br>19,23,25 | 4,5,6,8,20,<br>21,22,24,2<br>6 | 4 | P14668,Q03191,Q63532,Q99MH3                                    |
| 1642 | 1,2,3,7,18,<br>19,23,26 | 4,5,6,8,20,<br>21,22,24,2<br>5 | 8 | P01946,P02091,P06760,P35467,Q03191,Q07523,Q63532,Q63661        |
| 1643 | 1,2,3,7,18,<br>19,24,25 | 4,5,6,8,20,<br>21,22,23,2<br>6 | 2 | P01835,Q63532                                                  |
| 1644 | 1,2,3,7,18,<br>19,24,26 | 4,5,6,8,20,<br>21,22,23,2<br>5 | 5 | P01946,P02091,P06760,Q63532,Q9WTT6                             |
| 1645 | 1,2,3,7,18,<br>19,25,26 | 4,5,6,8,20,<br>21,22,23,2<br>4 | 6 | P01946,P02091,P35280,P55091,P82995,Q63661                      |
| 1646 | 1,2,3,7,18,<br>20,21,22 | 4,5,6,8,19,<br>23,24,25,2<br>6 | 2 | P06760,P42854                                                  |
| 1647 | 1,2,3,7,18,<br>20,21,23 | 4,5,6,8,19,<br>22,24,25,2<br>6 | 3 | A2RUV9,P14668,P25031                                           |
| 1648 | 1,2,3,7,18,<br>20,21,24 | 4,5,6,8,19,<br>22,23,25,2<br>6 | 1 | P06760                                                         |
| 1649 | 1,2,3,7,18,<br>20,21,25 | 4,5,6,8,19,<br>22,23,24,2<br>6 | 4 | O35783,P25031,P31430,Q91ZS3                                    |
| 1650 | 1,2,3,7,18,<br>20,21,26 | 4,5,6,8,19,<br>22,23,24,2<br>5 | 6 | O35783,P01041,P01946,P06760,P25031,P42854                      |
| 1651 | 1,2,3,7,18,<br>20,22,23 | 4,5,6,8,19,<br>21,24,25,2<br>6 | 3 | A2RUV9,P06760,Q9WTT6                                           |

|      |                         |                                |   |                                                                |
|------|-------------------------|--------------------------------|---|----------------------------------------------------------------|
| 1652 | 1,2,3,7,18,<br>20,22,24 | 4,5,6,8,19,<br>21,23,25,2<br>6 | 9 | P06760,P07150,P14669,P27213,P83121,Q99041,Q9QZK9,Q9WTT6,Q9Z0V6 |
| 1653 | 1,2,3,7,18,<br>20,22,25 | 4,5,6,8,19,<br>21,23,24,2<br>6 | 0 |                                                                |
| 1654 | 1,2,3,7,18,<br>20,22,26 | 4,5,6,8,19,<br>21,23,24,2<br>5 | 8 | P01041,P01946,P06760,P07150,P55159,Q99041,Q9WTT6,Q9Z0V6        |
| 1655 | 1,2,3,7,18,<br>20,23,24 | 4,5,6,8,19,<br>21,22,25,2<br>6 | 3 | A2RUV9,P06760,Q9QZK9                                           |
| 1656 | 1,2,3,7,18,<br>20,23,25 | 4,5,6,8,19,<br>21,22,24,2<br>6 | 1 | A2RUV9                                                         |
| 1657 | 1,2,3,7,18,<br>20,23,26 | 4,5,6,8,19,<br>21,22,24,2<br>5 | 7 | A2RUV9,P01946,P02091,P06760,Q6IFU8,Q6IG02,Q6P6Q2               |
| 1658 | 1,2,3,7,18,<br>20,24,25 | 4,5,6,8,19,<br>21,22,23,2<br>6 | 1 | P10715                                                         |
| 1659 | 1,2,3,7,18,<br>20,24,26 | 4,5,6,8,19,<br>21,22,23,2<br>5 | 6 | P01041,P01946,P02091,P06760,Q99041,Q9WTT6                      |
| 1660 | 1,2,3,7,18,<br>20,25,26 | 4,5,6,8,19,<br>21,22,23,2<br>4 | 6 | O35783,P01041,P01946,P02091,P35280,Q91ZS3                      |
| 1661 | 1,2,3,7,18,<br>21,22,23 | 4,5,6,8,19,<br>20,24,25,2<br>6 | 1 | P14668                                                         |
| 1662 | 1,2,3,7,18,<br>21,22,24 | 4,5,6,8,19,<br>20,23,25,2<br>6 | 1 | P06760                                                         |
| 1663 | 1,2,3,7,18,<br>21,22,25 | 4,5,6,8,19,<br>20,23,24,2<br>6 | 3 | P25031,P31430,P97840                                           |
| 1664 | 1,2,3,7,18,<br>21,22,26 | 4,5,6,8,19,<br>20,23,24,2<br>5 | 5 | P01041,P01946,P06760,P25031,Q63661                             |
| 1665 | 1,2,3,7,18,<br>21,23,24 | 4,5,6,8,19,<br>20,22,25,2<br>6 | 2 | D3ZUC6,P14668                                                  |
| 1666 | 1,2,3,7,18,<br>21,23,25 | 4,5,6,8,19,<br>20,22,24,2<br>6 | 4 | P14668,P25031,P31430,Q99MH3                                    |

|      |                         |                                |    |                                                                                     |
|------|-------------------------|--------------------------------|----|-------------------------------------------------------------------------------------|
| 1667 | 1,2,3,7,18,<br>21,23,26 | 4,5,6,8,19,<br>20,22,24,2<br>5 | 10 | A2RUV9,D3ZUC6,O35783,P01946,P02091,P14668,P25031,Q63661,Q61FU8,Q6P6Q2               |
| 1668 | 1,2,3,7,18,<br>21,24,25 | 4,5,6,8,19,<br>20,22,23,2<br>6 | 2  | P31430,P98089                                                                       |
| 1669 | 1,2,3,7,18,<br>21,24,26 | 4,5,6,8,19,<br>20,22,23,2<br>5 | 8  | D3ZUC6,P01041,P01946,P02091,P06760,P25031,P55091,Q63661                             |
| 1670 | 1,2,3,7,18,<br>21,25,26 | 4,5,6,8,19,<br>20,22,23,2<br>4 | 12 | O35783,P00774,P01946,P02091,P08721,P25031,P31430,P55091,P82995,P98089,Q63661,Q91ZS3 |
| 1671 | 1,2,3,7,18,<br>22,23,24 | 4,5,6,8,19,<br>20,21,25,2<br>6 | 2  | P06760,Q9WTT6                                                                       |
| 1672 | 1,2,3,7,18,<br>22,23,25 | 4,5,6,8,19,<br>20,21,24,2<br>6 | 0  |                                                                                     |
| 1673 | 1,2,3,7,18,<br>22,23,26 | 4,5,6,8,19,<br>20,21,24,2<br>5 | 5  | A2RUV9,P01946,P02091,P06760,Q63661                                                  |
| 1674 | 1,2,3,7,18,<br>22,24,25 | 4,5,6,8,19,<br>20,21,23,2<br>6 | 1  | P01835                                                                              |
| 1675 | 1,2,3,7,18,<br>22,24,26 | 4,5,6,8,19,<br>20,21,23,2<br>5 | 5  | P01946,P02091,P06760,Q99041,Q9WTT6                                                  |
| 1676 | 1,2,3,7,18,<br>22,25,26 | 4,5,6,8,19,<br>20,21,23,2<br>4 | 3  | P01946,P02091,P55091                                                                |
| 1677 | 1,2,3,7,18,<br>23,24,25 | 4,5,6,8,19,<br>20,21,22,2<br>6 | 1  | A2RUV9                                                                              |
| 1678 | 1,2,3,7,18,<br>23,24,26 | 4,5,6,8,19,<br>20,21,22,2<br>5 | 5  | A2RUV9,P01946,P02091,P06760,Q07523                                                  |
| 1679 | 1,2,3,7,18,<br>23,25,26 | 4,5,6,8,19,<br>20,21,22,2<br>4 | 5  | A2RUV9,P01946,P02091,P55091,Q63661                                                  |
| 1680 | 1,2,3,7,18,<br>24,25,26 | 4,5,6,8,19,<br>20,21,22,2<br>3 | 4  | P01946,P02091,P55091,Q7TPB1                                                         |
| 1681 | 1,2,3,7,19,<br>20,21,22 | 4,5,6,8,18,<br>23,24,25,2<br>6 | 3  | P00714,P06760,Q9Z0V6                                                                |

|      |                         |                                |    |                                                                                     |
|------|-------------------------|--------------------------------|----|-------------------------------------------------------------------------------------|
| 1682 | 1,2,3,7,19,<br>20,21,23 | 4,5,6,8,18,<br>22,24,25,2<br>6 | 3  | P14668,P15399,P16086                                                                |
| 1683 | 1,2,3,7,19,<br>20,21,24 | 4,5,6,8,18,<br>22,23,25,2<br>6 | 2  | P00714,P06760                                                                       |
| 1684 | 1,2,3,7,19,<br>20,21,25 | 4,5,6,8,18,<br>22,23,24,2<br>6 | 2  | P47967,P97840                                                                       |
| 1685 | 1,2,3,7,19,<br>20,21,26 | 4,5,6,8,18,<br>22,23,24,2<br>5 | 3  | P01041,P01946,P06760                                                                |
| 1686 | 1,2,3,7,19,<br>20,22,23 | 4,5,6,8,18,<br>21,24,25,2<br>6 | 5  | P06760,P07150,P20646,Q08849,Q9WTT6                                                  |
| 1687 | 1,2,3,7,19,<br>20,22,24 | 4,5,6,8,18,<br>21,23,25,2<br>6 | 12 | P00714,P00774,P06760,P07150,P14669,P20646,P27213,P83121,Q6AYS4,Q6P6Q2,Q9WTT6,Q9Z0V6 |
| 1688 | 1,2,3,7,19,<br>20,22,25 | 4,5,6,8,18,<br>21,23,24,2<br>6 | 1  | P14669                                                                              |
| 1689 | 1,2,3,7,19,<br>20,22,26 | 4,5,6,8,18,<br>21,23,24,2<br>5 | 10 | O54728,P01946,P06760,P07150,P14669,P20646,P55159,Q6AYS4,Q9WTT6,Q9Z0V6               |
| 1690 | 1,2,3,7,19,<br>20,23,24 | 4,5,6,8,18,<br>21,22,25,2<br>6 | 4  | P06760,Q63532,Q6AYS4,Q9WTT6                                                         |
| 1691 | 1,2,3,7,19,<br>20,23,25 | 4,5,6,8,18,<br>21,22,24,2<br>6 | 1  | Q08849                                                                              |
| 1692 | 1,2,3,7,19,<br>20,23,26 | 4,5,6,8,18,<br>21,22,24,2<br>5 | 4  | P01946,P02091,P06760,Q08849                                                         |
| 1693 | 1,2,3,7,19,<br>20,24,25 | 4,5,6,8,18,<br>21,22,23,2<br>6 | 0  |                                                                                     |
| 1694 | 1,2,3,7,19,<br>20,24,26 | 4,5,6,8,18,<br>21,22,23,2<br>5 | 7  | P01946,P02091,P06760,P07150,P20646,Q6AYS4,Q9WTT6                                    |
| 1695 | 1,2,3,7,19,<br>20,25,26 | 4,5,6,8,18,<br>21,22,23,2<br>4 | 3  | P01946,P02091,P35280                                                                |
| 1696 | 1,2,3,7,19,<br>21,22,23 | 4,5,6,8,18,<br>20,24,25,2<br>6 | 2  | P14668,P16086                                                                       |

|      |                         |                                |   |                                                         |
|------|-------------------------|--------------------------------|---|---------------------------------------------------------|
| 1697 | 1,2,3,7,19,<br>21,22,24 | 4,5,6,8,18,<br>20,23,25,2<br>6 | 3 | P00714,P06760,Q6IG02                                    |
| 1698 | 1,2,3,7,19,<br>21,22,25 | 4,5,6,8,18,<br>20,23,24,2<br>6 | 2 | P47967,P97840                                           |
| 1699 | 1,2,3,7,19,<br>21,22,26 | 4,5,6,8,18,<br>20,23,24,2<br>5 | 2 | P01946,P06760                                           |
| 1700 | 1,2,3,7,19,<br>21,23,24 | 4,5,6,8,18,<br>20,22,25,2<br>6 | 1 | Q63532                                                  |
| 1701 | 1,2,3,7,19,<br>21,23,25 | 4,5,6,8,18,<br>20,22,24,2<br>6 | 4 | P14668,P15399,P47967,P97840                             |
| 1702 | 1,2,3,7,19,<br>21,23,26 | 4,5,6,8,18,<br>20,22,24,2<br>5 | 4 | P01946,P02091,P14668,Q63661                             |
| 1703 | 1,2,3,7,19,<br>21,24,25 | 4,5,6,8,18,<br>20,22,23,2<br>6 | 2 | P47967,P97840                                           |
| 1704 | 1,2,3,7,19,<br>21,24,26 | 4,5,6,8,18,<br>20,22,23,2<br>5 | 3 | P01946,P02091,P06760                                    |
| 1705 | 1,2,3,7,19,<br>21,25,26 | 4,5,6,8,18,<br>20,22,23,2<br>4 | 4 | P01946,P02091,P47967,P97840                             |
| 1706 | 1,2,3,7,19,<br>22,23,24 | 4,5,6,8,18,<br>20,21,25,2<br>6 | 6 | P01835,P06760,P20646,P82471,Q63532,Q9WTT6               |
| 1707 | 1,2,3,7,19,<br>22,23,25 | 4,5,6,8,18,<br>20,21,24,2<br>6 | 2 | P01835,P17046                                           |
| 1708 | 1,2,3,7,19,<br>22,23,26 | 4,5,6,8,18,<br>20,21,24,2<br>5 | 7 | O54728,P01946,P02091,P06760,P20646,P55159,Q9WTT6        |
| 1709 | 1,2,3,7,19,<br>22,24,25 | 4,5,6,8,18,<br>20,21,23,2<br>6 | 4 | P01835,P17046,Q6IMF3,Q6P6Q2                             |
| 1710 | 1,2,3,7,19,<br>22,24,26 | 4,5,6,8,18,<br>20,21,23,2<br>5 | 8 | P01835,P01946,P02091,P06760,P07150,P20646,Q6AYS4,Q9WTT6 |
| 1711 | 1,2,3,7,19,<br>22,25,26 | 4,5,6,8,18,<br>20,21,23,2<br>4 | 3 | P01835,P01946,P02091                                    |

|      |                         |                                |   |                                    |
|------|-------------------------|--------------------------------|---|------------------------------------|
| 1712 | 1,2,3,7,19,<br>23,24,25 | 4,5,6,8,18,<br>20,21,22,2<br>6 | 2 | P01835,Q63532                      |
| 1713 | 1,2,3,7,19,<br>23,24,26 | 4,5,6,8,18,<br>20,21,22,2<br>5 | 5 | P01946,P02091,P06760,P20646,Q63532 |
| 1714 | 1,2,3,7,19,<br>23,25,26 | 4,5,6,8,18,<br>20,21,22,2<br>4 | 2 | P01946,P02091                      |
| 1715 | 1,2,3,7,19,<br>24,25,26 | 4,5,6,8,18,<br>20,21,22,2<br>3 | 4 | P01835,P01946,P02091,Q7TPB1        |
| 1716 | 1,2,3,7,20,<br>21,22,23 | 4,5,6,8,18,<br>19,24,25,2<br>6 | 1 | P14668                             |
| 1717 | 1,2,3,7,20,<br>21,22,24 | 4,5,6,8,18,<br>19,23,25,2<br>6 | 2 | P00714,Q5XFX0                      |
| 1718 | 1,2,3,7,20,<br>21,22,25 | 4,5,6,8,18,<br>19,23,24,2<br>6 | 0 |                                    |
| 1719 | 1,2,3,7,20,<br>21,22,26 | 4,5,6,8,18,<br>19,23,24,2<br>5 | 5 | P00714,P01041,P01836,P01946,P06760 |
| 1720 | 1,2,3,7,20,<br>21,23,24 | 4,5,6,8,18,<br>19,22,25,2<br>6 | 0 |                                    |
| 1721 | 1,2,3,7,20,<br>21,23,25 | 4,5,6,8,18,<br>19,22,24,2<br>6 | 2 | P14668,Q91ZS3                      |
| 1722 | 1,2,3,7,20,<br>21,23,26 | 4,5,6,8,18,<br>19,22,24,2<br>5 | 2 | P01946,P02091                      |
| 1723 | 1,2,3,7,20,<br>21,24,25 | 4,5,6,8,18,<br>19,22,23,2<br>6 | 0 |                                    |
| 1724 | 1,2,3,7,20,<br>21,24,26 | 4,5,6,8,18,<br>19,22,23,2<br>5 | 5 | P01041,P01836,P01946,P02091,P06760 |
| 1725 | 1,2,3,7,20,<br>21,25,26 | 4,5,6,8,18,<br>19,22,23,2<br>4 | 5 | O35783,P01041,P01946,P02091,Q91ZS3 |
| 1726 | 1,2,3,7,20,<br>22,23,24 | 4,5,6,8,18,<br>19,21,25,2<br>6 | 3 | P06760,P20646,Q9WTT6               |

|      |                         |                                |    |                                                                              |
|------|-------------------------|--------------------------------|----|------------------------------------------------------------------------------|
| 1727 | 1,2,3,7,20,<br>22,23,25 | 4,5,6,8,18,<br>19,21,24,2<br>6 | 1  | Q08849                                                                       |
| 1728 | 1,2,3,7,20,<br>22,23,26 | 4,5,6,8,18,<br>19,21,24,2<br>5 | 6  | O54728,P01946,P02091,P06760,P55159,Q08849                                    |
| 1729 | 1,2,3,7,20,<br>22,24,25 | 4,5,6,8,18,<br>19,21,23,2<br>6 | 2  | P0C0A9,P14669                                                                |
| 1730 | 1,2,3,7,20,<br>22,24,26 | 4,5,6,8,18,<br>19,21,23,2<br>5 | 11 | P00714,P01946,P02091,P02803,P06760,P07150,P08010,P14669,P20646,Q99041,Q9WTT6 |
| 1731 | 1,2,3,7,20,<br>22,25,26 | 4,5,6,8,18,<br>19,21,23,2<br>4 | 2  | P01946,P02091                                                                |
| 1732 | 1,2,3,7,20,<br>23,24,25 | 4,5,6,8,18,<br>19,21,22,2<br>6 | 2  | A2RUV9,P0C0A9                                                                |
| 1733 | 1,2,3,7,20,<br>23,24,26 | 4,5,6,8,18,<br>19,21,22,2<br>5 | 4  | A2RUV9,P01946,P02091,P06760                                                  |
| 1734 | 1,2,3,7,20,<br>23,25,26 | 4,5,6,8,18,<br>19,21,22,2<br>4 | 4  | A2RUV9,P01946,P02091,Q08849                                                  |
| 1735 | 1,2,3,7,20,<br>24,25,26 | 4,5,6,8,18,<br>19,21,22,2<br>3 | 3  | P01946,P02091,P0C0A9                                                         |
| 1736 | 1,2,3,7,21,<br>22,23,24 | 4,5,6,8,18,<br>19,20,25,2<br>6 | 2  | P00714,P34901                                                                |
| 1737 | 1,2,3,7,21,<br>22,23,25 | 4,5,6,8,18,<br>19,20,24,2<br>6 | 1  | P14668                                                                       |
| 1738 | 1,2,3,7,21,<br>22,23,26 | 4,5,6,8,18,<br>19,20,24,2<br>5 | 2  | P01946,P02091                                                                |
| 1739 | 1,2,3,7,21,<br>22,24,25 | 4,5,6,8,18,<br>19,20,23,2<br>6 | 1  | P35467                                                                       |
| 1740 | 1,2,3,7,21,<br>22,24,26 | 4,5,6,8,18,<br>19,20,23,2<br>5 | 4  | P00714,P01946,P02091,P06760                                                  |
| 1741 | 1,2,3,7,21,<br>22,25,26 | 4,5,6,8,18,<br>19,20,23,2<br>4 | 2  | P01946,P02091                                                                |

|      |                         |                                |   |                                           |
|------|-------------------------|--------------------------------|---|-------------------------------------------|
| 1742 | 1,2,3,7,21,<br>23,24,25 | 4,5,6,8,18,<br>19,20,22,2<br>6 | 1 | P22006                                    |
| 1743 | 1,2,3,7,21,<br>23,24,26 | 4,5,6,8,18,<br>19,20,22,2<br>5 | 2 | P01946,P02091                             |
| 1744 | 1,2,3,7,21,<br>23,25,26 | 4,5,6,8,18,<br>19,20,22,2<br>4 | 3 | P01946,P02091,P22006                      |
| 1745 | 1,2,3,7,21,<br>24,25,26 | 4,5,6,8,18,<br>19,20,22,2<br>3 | 3 | P01946,P02091,P22006                      |
| 1746 | 1,2,3,7,22,<br>23,24,25 | 4,5,6,8,18,<br>19,20,21,2<br>6 | 3 | P01835,P0C0A9,P82471                      |
| 1747 | 1,2,3,7,22,<br>23,24,26 | 4,5,6,8,18,<br>19,20,21,2<br>5 | 6 | P00731,P01946,P02091,P06760,P20646,P82471 |
| 1748 | 1,2,3,7,22,<br>23,25,26 | 4,5,6,8,18,<br>19,20,21,2<br>4 | 2 | P01946,P02091                             |
| 1749 | 1,2,3,7,22,<br>24,25,26 | 4,5,6,8,18,<br>19,20,21,2<br>3 | 4 | P01835,P01946,P02091,P0C0A9               |
| 1750 | 1,2,3,7,23,<br>24,25,26 | 4,5,6,8,18,<br>19,20,21,2<br>2 | 3 | P01946,P02091,Q7TPB1                      |
| 1751 | 1,2,3,8,18,<br>19,20,21 | 4,5,6,7,22,<br>23,24,25,2<br>6 | 5 | P05539,P20760,P35281,P62804,P83121        |
| 1752 | 1,2,3,8,18,<br>19,20,22 | 4,5,6,7,21,<br>23,24,25,2<br>6 | 3 | P22006,P83121,Q08849                      |
| 1753 | 1,2,3,8,18,<br>19,20,23 | 4,5,6,7,21,<br>22,24,25,2<br>6 | 6 | P22006,P35467,P83121,Q08849,Q5XI22,Q9QZK9 |
| 1754 | 1,2,3,8,18,<br>19,20,24 | 4,5,6,7,21,<br>22,23,25,2<br>6 | 3 | P05539,P83121,Q9QZK9                      |
| 1755 | 1,2,3,8,18,<br>19,20,25 | 4,5,6,7,21,<br>22,23,24,2<br>6 | 4 | P20760,P35280,P83121,Q08849               |
| 1756 | 1,2,3,8,18,<br>19,20,26 | 4,5,6,7,21,<br>22,23,24,2<br>5 | 6 | P06760,P35280,P83121,Q08849,Q63355,Q63942 |



|      |                         |                                |   |                                                         |
|------|-------------------------|--------------------------------|---|---------------------------------------------------------|
| 1757 | 1,2,3,8,18,<br>19,21,22 | 4,5,6,7,20,<br>23,24,25,2<br>6 | 1 | P83121                                                  |
| 1758 | 1,2,3,8,18,<br>19,21,23 | 4,5,6,7,20,<br>22,24,25,2<br>6 | 5 | P05539,P20760,Q03191,Q5XI22,Q99MH3                      |
| 1759 | 1,2,3,8,18,<br>19,21,24 | 4,5,6,7,20,<br>22,23,25,2<br>6 | 2 | P05539,P83121                                           |
| 1760 | 1,2,3,8,18,<br>19,21,25 | 4,5,6,7,20,<br>22,23,24,2<br>6 | 5 | P05539,P20760,P31430,P47967,P98089                      |
| 1761 | 1,2,3,8,18,<br>19,21,26 | 4,5,6,7,20,<br>22,23,24,2<br>5 | 2 | Q63661,Q63942                                           |
| 1762 | 1,2,3,8,18,<br>19,22,23 | 4,5,6,7,20,<br>21,24,25,2<br>6 | 4 | P20646,P22006,P83121,Q5XI22                             |
| 1763 | 1,2,3,8,18,<br>19,22,24 | 4,5,6,7,20,<br>21,23,25,2<br>6 | 4 | P01835,P05539,P20646,P83121                             |
| 1764 | 1,2,3,8,18,<br>19,22,25 | 4,5,6,7,20,<br>21,23,24,2<br>6 | 4 | P01835,P20760,P20766,P83121                             |
| 1765 | 1,2,3,8,18,<br>19,22,26 | 4,5,6,7,20,<br>21,23,24,2<br>5 | 5 | P06760,P20646,P20766,P83121,Q63942                      |
| 1766 | 1,2,3,8,18,<br>19,23,24 | 4,5,6,7,20,<br>21,22,25,2<br>6 | 5 | P05539,P09605,P25809,P83121,Q03191,Q5XI22               |
| 1767 | 1,2,3,8,18,<br>19,23,25 | 4,5,6,7,20,<br>21,22,24,2<br>6 | 2 | P20760,Q99MH3                                           |
| 1768 | 1,2,3,8,18,<br>19,23,26 | 4,5,6,7,20,<br>21,22,24,2<br>5 | 7 | P01946,P09605,P25809,P35467,Q03191,Q63661,Q63942,Q6P6Q2 |
| 1769 | 1,2,3,8,18,<br>19,24,25 | 4,5,6,7,20,<br>21,22,23,2<br>6 | 3 | P01835,P05539,P83121                                    |
| 1770 | 1,2,3,8,18,<br>19,24,26 | 4,5,6,7,20,<br>21,22,23,2<br>5 | 5 | P02770,P06760,P09605,P25809,P83121,Q63942               |
| 1771 | 1,2,3,8,18,<br>19,25,26 | 4,5,6,7,20,<br>21,22,23,2<br>4 | 2 | P35280,Q63942                                           |

|      |                         |                                |   |                                                         |
|------|-------------------------|--------------------------------|---|---------------------------------------------------------|
| 1772 | 1,2,3,8,18,<br>20,21,22 | 4,5,6,7,19,<br>23,24,25,2<br>6 | 2 | P83121,Q99041                                           |
| 1773 | 1,2,3,8,18,<br>20,21,23 | 4,5,6,7,19,<br>22,24,25,2<br>6 | 1 | Q5XI22                                                  |
| 1774 | 1,2,3,8,18,<br>20,21,24 | 4,5,6,7,19,<br>22,23,25,2<br>6 | 2 | P05539,P83121                                           |
| 1775 | 1,2,3,8,18,<br>20,21,25 | 4,5,6,7,19,<br>22,23,24,2<br>6 | 2 | P20760,P31430                                           |
| 1776 | 1,2,3,8,18,<br>20,21,26 | 4,5,6,7,19,<br>22,23,24,2<br>5 | 3 | P62804,Q00715,Q99041                                    |
| 1777 | 1,2,3,8,18,<br>20,22,23 | 4,5,6,7,19,<br>21,24,25,2<br>6 | 4 | P22006,P83121,Q08849,Q9QZK9                             |
| 1778 | 1,2,3,8,18,<br>20,22,24 | 4,5,6,7,19,<br>21,23,25,2<br>6 | 4 | P83121,Q5FVI6,Q99041,Q9QZK9                             |
| 1779 | 1,2,3,8,18,<br>20,22,25 | 4,5,6,7,19,<br>21,23,24,2<br>6 | 3 | P20760,P83121,Q08849                                    |
| 1780 | 1,2,3,8,18,<br>20,22,26 | 4,5,6,7,19,<br>21,23,24,2<br>5 | 3 | P83121,Q08849,Q99041                                    |
| 1781 | 1,2,3,8,18,<br>20,23,24 | 4,5,6,7,19,<br>21,22,25,2<br>6 | 4 | P05539,P83121,Q5XI22,Q9QZK9                             |
| 1782 | 1,2,3,8,18,<br>20,23,25 | 4,5,6,7,19,<br>21,22,24,2<br>6 | 2 | P20760,Q08849                                           |
| 1783 | 1,2,3,8,18,<br>20,23,26 | 4,5,6,7,19,<br>21,22,24,2<br>5 | 8 | P01946,P19218,P35467,Q08849,Q63942,Q6IFU8,Q6IG02,Q6P6Q2 |
| 1784 | 1,2,3,8,18,<br>20,24,25 | 4,5,6,7,19,<br>21,22,23,2<br>6 | 2 | P05539,P83121                                           |
| 1785 | 1,2,3,8,18,<br>20,24,26 | 4,5,6,7,19,<br>21,22,23,2<br>5 | 2 | P83121,Q99041                                           |
| 1786 | 1,2,3,8,18,<br>20,25,26 | 4,5,6,7,19,<br>21,22,23,2<br>4 | 2 | P35280,Q08849                                           |

|      |                         |                                |   |                                                         |
|------|-------------------------|--------------------------------|---|---------------------------------------------------------|
| 1787 | 1,2,3,8,18,<br>21,22,23 | 4,5,6,7,19,<br>20,24,25,2<br>6 | 1 | Q5XI22                                                  |
| 1788 | 1,2,3,8,18,<br>21,22,24 | 4,5,6,7,19,<br>20,23,25,2<br>6 | 3 | P05539,P83121,Q5FVI6                                    |
| 1789 | 1,2,3,8,18,<br>21,22,25 | 4,5,6,7,19,<br>20,23,24,2<br>6 | 2 | P20760,P31430                                           |
| 1790 | 1,2,3,8,18,<br>21,22,26 | 4,5,6,7,19,<br>20,23,24,2<br>5 | 2 | Q5QE79,Q99041                                           |
| 1791 | 1,2,3,8,18,<br>21,23,24 | 4,5,6,7,19,<br>20,22,25,2<br>6 | 2 | P05539,Q5XI22                                           |
| 1792 | 1,2,3,8,18,<br>21,23,25 | 4,5,6,7,19,<br>20,22,24,2<br>6 | 5 | P05539,P20760,P31430,P98089,Q99MH3                      |
| 1793 | 1,2,3,8,18,<br>21,23,26 | 4,5,6,7,19,<br>20,22,24,2<br>5 | 8 | P01946,P35467,Q5QE79,Q63661,Q63942,Q6IFU8,Q6IFV1,Q6P6Q2 |
| 1794 | 1,2,3,8,18,<br>21,24,25 | 4,5,6,7,19,<br>20,22,23,2<br>6 | 3 | P05539,P31430,P98089                                    |
| 1795 | 1,2,3,8,18,<br>21,24,26 | 4,5,6,7,19,<br>20,22,23,2<br>5 | 2 | P02770,Q99041                                           |
| 1796 | 1,2,3,8,18,<br>21,25,26 | 4,5,6,7,19,<br>20,22,23,2<br>4 | 5 | P00774,P08721,P31430,P55091,P98089                      |
| 1797 | 1,2,3,8,18,<br>22,23,24 | 4,5,6,7,19,<br>20,21,25,2<br>6 | 2 | P83121,Q5FVI6                                           |
| 1798 | 1,2,3,8,18,<br>22,23,25 | 4,5,6,7,19,<br>20,21,24,2<br>6 | 2 | P20760,P20766                                           |
| 1799 | 1,2,3,8,18,<br>22,23,26 | 4,5,6,7,19,<br>20,21,24,2<br>5 | 5 | P01946,P20766,P35467,Q63942,Q6P6Q2                      |
| 1800 | 1,2,3,8,18,<br>22,24,25 | 4,5,6,7,19,<br>20,21,23,2<br>6 | 3 | P01835,P83121,Q5FVI6                                    |
| 1801 | 1,2,3,8,18,<br>22,24,26 | 4,5,6,7,19,<br>20,21,23,2<br>5 | 2 | P83121,Q99041                                           |

|      |                         |                                |   |                                                  |
|------|-------------------------|--------------------------------|---|--------------------------------------------------|
| 1802 | 1,2,3,8,18,<br>22,25,26 | 4,5,6,7,19,<br>20,21,23,2<br>4 | 1 | P20766                                           |
| 1803 | 1,2,3,8,18,<br>23,24,25 | 4,5,6,7,19,<br>20,21,22,2<br>6 | 1 | P05539                                           |
| 1804 | 1,2,3,8,18,<br>23,24,26 | 4,5,6,7,19,<br>20,21,22,2<br>5 | 5 | P01946,P09605;P25809,P35467,Q63942,Q6P6Q2        |
| 1805 | 1,2,3,8,18,<br>23,25,26 | 4,5,6,7,19,<br>20,21,22,2<br>4 | 6 | P01946,P35467,P55091,Q63942,Q6IFU8,Q6P6Q2        |
| 1806 | 1,2,3,8,18,<br>24,25,26 | 4,5,6,7,19,<br>20,21,22,2<br>3 | 2 | P55091,Q7TPB1                                    |
| 1807 | 1,2,3,8,19,<br>20,21,22 | 4,5,6,7,18,<br>23,24,25,2<br>6 | 2 | P00714,P83121                                    |
| 1808 | 1,2,3,8,19,<br>20,21,23 | 4,5,6,7,18,<br>22,24,25,2<br>6 | 0 |                                                  |
| 1809 | 1,2,3,8,19,<br>20,21,24 | 4,5,6,7,18,<br>22,23,25,2<br>6 | 3 | P00714,P05539,P83121                             |
| 1810 | 1,2,3,8,19,<br>20,21,25 | 4,5,6,7,18,<br>22,23,24,2<br>6 | 2 | P20760,Q8VD89                                    |
| 1811 | 1,2,3,8,19,<br>20,21,26 | 4,5,6,7,18,<br>22,23,24,2<br>5 | 3 | P62804,Q00715,Q8K4G9                             |
| 1812 | 1,2,3,8,19,<br>20,22,23 | 4,5,6,7,18,<br>21,24,25,2<br>6 | 5 | P20646,P22006,P61206;P84079;P84082,P83121,Q08849 |
| 1813 | 1,2,3,8,19,<br>20,22,24 | 4,5,6,7,18,<br>21,23,25,2<br>6 | 5 | P00714,P00774,P20646,P61206;P84079;P84082,P83121 |
| 1814 | 1,2,3,8,19,<br>20,22,25 | 4,5,6,7,18,<br>21,23,24,2<br>6 | 3 | P20760,P83121,Q08849                             |
| 1815 | 1,2,3,8,19,<br>20,22,26 | 4,5,6,7,18,<br>21,23,24,2<br>5 | 5 | O54728,P20646,P55159,P83121,Q08849               |
| 1816 | 1,2,3,8,19,<br>20,23,24 | 4,5,6,7,18,<br>21,22,25,2<br>6 | 5 | P20646,P61206;P84079;P84082,P83121,P83748,Q08849 |

|      |                         |                                |   |                                           |
|------|-------------------------|--------------------------------|---|-------------------------------------------|
| 1817 | 1,2,3,8,19,<br>20,23,25 | 4,5,6,7,18,<br>21,22,24,2<br>6 | 2 | P20760,Q08849                             |
| 1818 | 1,2,3,8,19,<br>20,23,26 | 4,5,6,7,18,<br>21,22,24,2<br>5 | 2 | P01946,Q08849                             |
| 1819 | 1,2,3,8,19,<br>20,24,25 | 4,5,6,7,18,<br>21,22,23,2<br>6 | 1 | P83121                                    |
| 1820 | 1,2,3,8,19,<br>20,24,26 | 4,5,6,7,18,<br>21,22,23,2<br>5 | 2 | P20646,P83121                             |
| 1821 | 1,2,3,8,19,<br>20,25,26 | 4,5,6,7,18,<br>21,22,23,2<br>4 | 3 | P35280,Q08849,Q8K4G9                      |
| 1822 | 1,2,3,8,19,<br>21,22,23 | 4,5,6,7,18,<br>20,24,25,2<br>6 | 1 | P61206;P84079;P84082                      |
| 1823 | 1,2,3,8,19,<br>21,22,24 | 4,5,6,7,18,<br>20,23,25,2<br>6 | 4 | P00714,P05539,P61206;P84079;P84082,P83121 |
| 1824 | 1,2,3,8,19,<br>21,22,25 | 4,5,6,7,18,<br>20,23,24,2<br>6 | 1 | P20760                                    |
| 1825 | 1,2,3,8,19,<br>21,22,26 | 4,5,6,7,18,<br>20,23,24,2<br>5 | 0 |                                           |
| 1826 | 1,2,3,8,19,<br>21,23,24 | 4,5,6,7,18,<br>20,22,25,2<br>6 | 2 | P05539,P61206;P84079;P84082               |
| 1827 | 1,2,3,8,19,<br>21,23,25 | 4,5,6,7,18,<br>20,22,24,2<br>6 | 1 | P20760                                    |
| 1828 | 1,2,3,8,19,<br>21,23,26 | 4,5,6,7,18,<br>20,22,24,2<br>5 | 2 | P01946,Q63661                             |
| 1829 | 1,2,3,8,19,<br>21,24,25 | 4,5,6,7,18,<br>20,22,23,2<br>6 | 1 | P05539                                    |
| 1830 | 1,2,3,8,19,<br>21,24,26 | 4,5,6,7,18,<br>20,22,23,2<br>5 | 0 |                                           |
| 1831 | 1,2,3,8,19,<br>21,25,26 | 4,5,6,7,18,<br>20,22,23,2<br>4 | 0 |                                           |

|      |                         |                                |   |                                                  |
|------|-------------------------|--------------------------------|---|--------------------------------------------------|
| 1832 | 1,2,3,8,19,<br>22,23,24 | 4,5,6,7,18,<br>20,21,25,2<br>6 | 5 | P01835,P20646,P61206;P84079;P84082,P82471,P83121 |
| 1833 | 1,2,3,8,19,<br>22,23,25 | 4,5,6,7,18,<br>20,21,24,2<br>6 | 4 | P01835,P20760,P20766,Q08849                      |
| 1834 | 1,2,3,8,19,<br>22,23,26 | 4,5,6,7,18,<br>20,21,24,2<br>5 | 5 | O54728,P01946,P20646,P20766,Q08849               |
| 1835 | 1,2,3,8,19,<br>22,24,25 | 4,5,6,7,18,<br>20,21,23,2<br>6 | 2 | P01835,P83121                                    |
| 1836 | 1,2,3,8,19,<br>22,24,26 | 4,5,6,7,18,<br>20,21,23,2<br>5 | 4 | P01835,P20646,P36953,P83121                      |
| 1837 | 1,2,3,8,19,<br>22,25,26 | 4,5,6,7,18,<br>20,21,23,2<br>4 | 2 | P01835,P20766                                    |
| 1838 | 1,2,3,8,19,<br>23,24,25 | 4,5,6,7,18,<br>20,21,22,2<br>6 | 2 | P01835,P83748                                    |
| 1839 | 1,2,3,8,19,<br>23,24,26 | 4,5,6,7,18,<br>20,21,22,2<br>5 | 4 | P01946,P02091,P09605;P25809,P20646               |
| 1840 | 1,2,3,8,19,<br>23,25,26 | 4,5,6,7,18,<br>20,21,22,2<br>4 | 3 | P01946,P02091,Q08849                             |
| 1841 | 1,2,3,8,19,<br>24,25,26 | 4,5,6,7,18,<br>20,21,22,2<br>3 | 2 | P01835,P01946                                    |
| 1842 | 1,2,3,8,20,<br>21,22,23 | 4,5,6,7,18,<br>19,24,25,2<br>6 | 0 |                                                  |
| 1843 | 1,2,3,8,20,<br>21,22,24 | 4,5,6,7,18,<br>19,23,25,2<br>6 | 4 | P00714,P83121,Q5FVI6,Q5XFX0                      |
| 1844 | 1,2,3,8,20,<br>21,22,25 | 4,5,6,7,18,<br>19,23,24,2<br>6 | 2 | P20760,Q5XFX0                                    |
| 1845 | 1,2,3,8,20,<br>21,22,26 | 4,5,6,7,18,<br>19,23,24,2<br>5 | 1 | Q99041                                           |
| 1846 | 1,2,3,8,20,<br>21,23,24 | 4,5,6,7,18,<br>19,22,25,2<br>6 | 1 | P05539                                           |

|      |                         |                                |   |                                                                |
|------|-------------------------|--------------------------------|---|----------------------------------------------------------------|
| 1847 | 1,2,3,8,20,<br>21,23,25 | 4,5,6,7,18,<br>19,22,24,2<br>6 | 1 | P20760                                                         |
| 1848 | 1,2,3,8,20,<br>21,23,26 | 4,5,6,7,18,<br>19,22,24,2<br>5 | 3 | P01946,P62804,Q5QE79                                           |
| 1849 | 1,2,3,8,20,<br>21,24,25 | 4,5,6,7,18,<br>19,22,23,2<br>6 | 2 | P05539,Q5XFX0                                                  |
| 1850 | 1,2,3,8,20,<br>21,24,26 | 4,5,6,7,18,<br>19,22,23,2<br>5 | 1 | Q99041                                                         |
| 1851 | 1,2,3,8,20,<br>21,25,26 | 4,5,6,7,18,<br>19,22,23,2<br>4 | 0 |                                                                |
| 1852 | 1,2,3,8,20,<br>22,23,24 | 4,5,6,7,18,<br>19,21,25,2<br>6 | 7 | P20646,P61206;P84079;P84082,P82995,P83121,Q08849,Q5FVI6,Q9QZK9 |
| 1853 | 1,2,3,8,20,<br>22,23,25 | 4,5,6,7,18,<br>19,21,24,2<br>6 | 1 | Q08849                                                         |
| 1854 | 1,2,3,8,20,<br>22,23,26 | 4,5,6,7,18,<br>19,21,24,2<br>5 | 3 | O54728,P01946,Q08849                                           |
| 1855 | 1,2,3,8,20,<br>22,24,25 | 4,5,6,7,18,<br>19,21,23,2<br>6 | 3 | P83121,Q5FVI6,Q5XFX0                                           |
| 1856 | 1,2,3,8,20,<br>22,24,26 | 4,5,6,7,18,<br>19,21,23,2<br>5 | 5 | P20646,P36953,P83121,Q64573,Q99041                             |
| 1857 | 1,2,3,8,20,<br>22,25,26 | 4,5,6,7,18,<br>19,21,23,2<br>4 | 2 | P20766,Q08849                                                  |
| 1858 | 1,2,3,8,20,<br>23,24,25 | 4,5,6,7,18,<br>19,21,22,2<br>6 | 2 | P83748,Q08849                                                  |
| 1859 | 1,2,3,8,20,<br>23,24,26 | 4,5,6,7,18,<br>19,21,22,2<br>5 | 5 | P01946,P19218,P47967,P97840,Q08849                             |
| 1860 | 1,2,3,8,20,<br>23,25,26 | 4,5,6,7,18,<br>19,21,22,2<br>4 | 3 | P01946,P19218,Q08849                                           |
| 1861 | 1,2,3,8,20,<br>24,25,26 | 4,5,6,7,18,<br>19,21,22,2<br>3 | 0 |                                                                |

|      |                         |                                |   |                                                  |
|------|-------------------------|--------------------------------|---|--------------------------------------------------|
| 1862 | 1,2,3,8,21,<br>22,23,24 | 4,5,6,7,18,<br>19,20,25,2<br>6 | 2 | P61206;P84079;P84082,Q5FVI6                      |
| 1863 | 1,2,3,8,21,<br>22,23,25 | 4,5,6,7,18,<br>19,20,24,2<br>6 | 1 | P20760                                           |
| 1864 | 1,2,3,8,21,<br>22,23,26 | 4,5,6,7,18,<br>19,20,24,2<br>5 | 2 | P01946,Q5QE79                                    |
| 1865 | 1,2,3,8,21,<br>22,24,25 | 4,5,6,7,18,<br>19,20,23,2<br>6 | 2 | Q5FVI6,Q5XFX0                                    |
| 1866 | 1,2,3,8,21,<br>22,24,26 | 4,5,6,7,18,<br>19,20,23,2<br>5 | 1 | Q99041                                           |
| 1867 | 1,2,3,8,21,<br>22,25,26 | 4,5,6,7,18,<br>19,20,23,2<br>4 | 2 | P20766,Q5QE79                                    |
| 1868 | 1,2,3,8,21,<br>23,24,25 | 4,5,6,7,18,<br>19,20,22,2<br>6 | 1 | P05539                                           |
| 1869 | 1,2,3,8,21,<br>23,24,26 | 4,5,6,7,18,<br>19,20,22,2<br>5 | 2 | P01946,Q5QE79                                    |
| 1870 | 1,2,3,8,21,<br>23,25,26 | 4,5,6,7,18,<br>19,20,22,2<br>4 | 2 | P01946,Q5QE79                                    |
| 1871 | 1,2,3,8,21,<br>24,25,26 | 4,5,6,7,18,<br>19,20,22,2<br>3 | 1 | P01946                                           |
| 1872 | 1,2,3,8,22,<br>23,24,25 | 4,5,6,7,18,<br>19,20,21,2<br>6 | 3 | P01835,P82471,Q5FVI6                             |
| 1873 | 1,2,3,8,22,<br>23,24,26 | 4,5,6,7,18,<br>19,20,21,2<br>5 | 7 | P00731,P01946,P20646,P36953,P47967,P82471,Q63556 |
| 1874 | 1,2,3,8,22,<br>23,25,26 | 4,5,6,7,18,<br>19,20,21,2<br>4 | 2 | P01946,P20766                                    |
| 1875 | 1,2,3,8,22,<br>24,25,26 | 4,5,6,7,18,<br>19,20,21,2<br>3 | 3 | P01835,P20766,P36953                             |
| 1876 | 1,2,3,8,23,<br>24,25,26 | 4,5,6,7,18,<br>19,20,21,2<br>2 | 3 | P01946,P02091,Q7TPB1                             |



|      |                          |                           |    |                                                                                     |
|------|--------------------------|---------------------------|----|-------------------------------------------------------------------------------------|
| 1877 | 1,2,3,18,1<br>9,20,21,22 | 4,5,6,7,8,2<br>3,24,25,26 | 7  | P00714,P06760,P20760,P83121,Q02253,Q99041,Q9Z0V6                                    |
| 1878 | 1,2,3,18,1<br>9,20,21,23 | 4,5,6,7,8,2<br>2,24,25,26 | 2  | P14668,P20760                                                                       |
| 1879 | 1,2,3,18,1<br>9,20,21,24 | 4,5,6,7,8,2<br>2,23,25,26 | 7  | P00714,P05539,P06760,P06911,P83121,Q99041,Q9Z0V6                                    |
| 1880 | 1,2,3,18,1<br>9,20,21,25 | 4,5,6,7,8,2<br>2,23,24,26 | 4  | P20760,P31430,P47967,Q02253                                                         |
| 1881 | 1,2,3,18,1<br>9,20,21,26 | 4,5,6,7,8,2<br>2,23,24,25 | 5  | P06760,P06911,Q63617,Q63661,Q99041                                                  |
| 1882 | 1,2,3,18,1<br>9,20,22,23 | 4,5,6,7,8,2<br>1,24,25,26 | 8  | P06760,P20646,P20760,P22006,P83121,Q9QZK9,Q9WTT6,Q9Z0V6                             |
| 1883 | 1,2,3,18,1<br>9,20,22,24 | 4,5,6,7,8,2<br>1,23,25,26 | 12 | P00714,P06760,P07150,P14669,P20646,P83121,Q6AYS4,Q6P6R2,Q99041,Q9QZK9,Q9WTT6,Q9Z0V6 |
| 1884 | 1,2,3,18,1<br>9,20,22,25 | 4,5,6,7,8,2<br>1,23,24,26 | 2  | P20760,P83121                                                                       |
| 1885 | 1,2,3,18,1<br>9,20,22,26 | 4,5,6,7,8,2<br>1,23,24,25 | 9  | P06760,P07150,P20646,P55159,P83121,Q6P6R2,Q99041,Q9WTT6,Q9Z0V6                      |
| 1886 | 1,2,3,18,1<br>9,20,23,24 | 4,5,6,7,8,2<br>1,22,25,26 | 8  | P06760,P20646,P83121,P83748,Q6AYS4,Q9QZK9,Q9WTT6,Q9Z0V6                             |
| 1887 | 1,2,3,18,1<br>9,20,23,25 | 4,5,6,7,8,2<br>1,22,24,26 | 1  | P20760                                                                              |
| 1888 | 1,2,3,18,1<br>9,20,23,26 | 4,5,6,7,8,2<br>1,22,24,25 | 7  | P01946,P06760,P35467,Q63661,Q6IFU8,Q6IG02,Q6P6Q2                                    |
| 1889 | 1,2,3,18,1<br>9,20,24,25 | 4,5,6,7,8,2<br>1,22,23,26 | 3  | P20760,P22282,P83121                                                                |
| 1890 | 1,2,3,18,1<br>9,20,24,26 | 4,5,6,7,8,2<br>1,22,23,25 | 9  | P06760,P06911,P07150,P20646,P83121,Q6AYS4,Q99041,Q9WTT6,Q9Z0V6                      |
| 1891 | 1,2,3,18,1<br>9,20,25,26 | 4,5,6,7,8,2<br>1,22,23,24 | 1  | P35280                                                                              |
| 1892 | 1,2,3,18,1<br>9,21,22,23 | 4,5,6,7,8,2<br>0,24,25,26 | 2  | P14668,P20760                                                                       |
| 1893 | 1,2,3,18,1<br>9,21,22,24 | 4,5,6,7,8,2<br>0,23,25,26 | 7  | P00714,P05539,P83121,Q63617,Q99041,Q9WTT6,Q9Z0V6                                    |
| 1894 | 1,2,3,18,1<br>9,21,22,25 | 4,5,6,7,8,2<br>0,23,24,26 | 5  | P20760,P31430,P47967,P97840,Q63617                                                  |
| 1895 | 1,2,3,18,1<br>9,21,22,26 | 4,5,6,7,8,2<br>0,23,24,25 | 4  | P06760,Q63617,Q63661,Q99041                                                         |
| 1896 | 1,2,3,18,1<br>9,21,23,24 | 4,5,6,7,8,2<br>0,22,25,26 | 3  | D3ZUC6,P05539,Q03191                                                                |
| 1897 | 1,2,3,18,1<br>9,21,23,25 | 4,5,6,7,8,2<br>0,22,24,26 | 5  | P14668,P20760,P31430,Q63617,Q99MH3                                                  |
| 1898 | 1,2,3,18,1<br>9,21,23,26 | 4,5,6,7,8,2<br>0,22,24,25 | 9  | D3ZUC6,P01946,P35467,Q03191,Q07523,Q63617,Q63661,Q6IFU8,Q6P6Q2                      |
| 1899 | 1,2,3,18,1<br>9,21,24,25 | 4,5,6,7,8,2<br>0,22,23,26 | 4  | P05539,P20760,P31430,Q63617                                                         |

|      |                                                 |    |                                                                              |
|------|-------------------------------------------------|----|------------------------------------------------------------------------------|
| 1900 | 1,2,3,18,1 4,5,6,7,8,2<br>9,21,24,26 0,22,23,25 | 6  | D3ZUC6,P06760,P06911,Q63617,Q63661,Q99041                                    |
| 1901 | 1,2,3,18,1 4,5,6,7,8,2<br>9,21,25,26 0,22,23,24 | 3  | P31430,Q63617,Q63661                                                         |
| 1902 | 1,2,3,18,1 4,5,6,7,8,2<br>9,22,23,24 0,21,25,26 | 5  | P06760,P20646,P82471,P83121,Q9WTT6                                           |
| 1903 | 1,2,3,18,1 4,5,6,7,8,2<br>9,22,23,25 0,21,24,26 | 2  | P20760,Q99MH3                                                                |
| 1904 | 1,2,3,18,1 4,5,6,7,8,2<br>9,22,23,26 0,21,24,25 | 6  | P01946,P06760,P20646,P35467,Q63661,Q9WTT6                                    |
| 1905 | 1,2,3,18,1 4,5,6,7,8,2<br>9,22,24,25 0,21,23,26 | 3  | P01835,P20760,P83121                                                         |
| 1906 | 1,2,3,18,1 4,5,6,7,8,2<br>9,22,24,26 0,21,23,25 | 9  | P06760,P07150,P20646,P83121,Q63617,Q6P6R2,Q99041,Q9WTT6,Q9Z0V6               |
| 1907 | 1,2,3,18,1 4,5,6,7,8,2<br>9,22,25,26 0,21,23,24 | 1  | Q63617                                                                       |
| 1908 | 1,2,3,18,1 4,5,6,7,8,2<br>9,23,24,25 0,21,22,26 | 2  | P20760,Q99MH3                                                                |
| 1909 | 1,2,3,18,1 4,5,6,7,8,2<br>9,23,24,26 0,21,22,25 | 10 | P01946,P02091,P06760,P09605,P25809,P20646,P35467,Q03191,Q07523,Q63661,Q9WTT6 |
| 1910 | 1,2,3,18,1 4,5,6,7,8,2<br>9,23,25,26 0,21,22,24 | 6  | P01946,P02091,P35467,Q63617,Q63661,Q99MH3                                    |
| 1911 | 1,2,3,18,1 4,5,6,7,8,2<br>9,24,25,26 0,21,22,23 | 3  | P01946,Q63617,Q7TPB1                                                         |
| 1912 | 1,2,3,18,2 4,5,6,7,8,1<br>0,21,22,23 9,24,25,26 | 2  | P20760,Q9QZK9                                                                |
| 1913 | 1,2,3,18,2 4,5,6,7,8,1<br>0,21,22,24 9,23,25,26 | 5  | P00714,P83121,Q5FVI6,Q99041,Q9QZK9                                           |
| 1914 | 1,2,3,18,2 4,5,6,7,8,1<br>0,21,22,25 9,23,24,26 | 3  | P20760,P31430,Q99041                                                         |
| 1915 | 1,2,3,18,2 4,5,6,7,8,1<br>0,21,22,26 9,23,24,25 | 2  | P06760,Q99041                                                                |
| 1916 | 1,2,3,18,2 4,5,6,7,8,1<br>0,21,23,24 9,22,25,26 | 2  | P05539,Q9QZK9                                                                |
| 1917 | 1,2,3,18,2 4,5,6,7,8,1<br>0,21,23,25 9,22,24,26 | 2  | P20760,P31430                                                                |
| 1918 | 1,2,3,18,2 4,5,6,7,8,1<br>0,21,23,26 9,22,24,25 | 5  | P01946,Q63661,Q6IFU8,Q6IG02,Q6P6Q2                                           |
| 1919 | 1,2,3,18,2 4,5,6,7,8,1<br>0,21,24,25 9,22,23,26 | 4  | P05539,P20760,P31430,Q99041                                                  |
| 1920 | 1,2,3,18,2 4,5,6,7,8,1<br>0,21,24,26 9,22,23,25 | 4  | P06760,P06911,P12020,Q99041                                                  |
| 1921 | 1,2,3,18,2 4,5,6,7,8,1<br>0,21,25,26 9,22,23,24 | 2  | P31430,Q99041                                                                |
| 1922 | 1,2,3,18,2 4,5,6,7,8,1<br>0,22,23,24 9,21,25,26 | 6  | P06760,P20646,P83121,Q4G075,Q9QZK9,Q9WTT6                                    |

|      |                          |                           |   |                                                         |
|------|--------------------------|---------------------------|---|---------------------------------------------------------|
| 1923 | 1,2,3,18,2<br>0,22,23,25 | 4,5,6,7,8,1<br>9,21,24,26 | 1 | P20760                                                  |
| 1924 | 1,2,3,18,2<br>0,22,23,26 | 4,5,6,7,8,1<br>9,21,24,25 | 6 | P01946,P06760,P20646,Q6IG02,Q6P6Q2,Q9QZK9               |
| 1925 | 1,2,3,18,2<br>0,22,24,25 | 4,5,6,7,8,1<br>9,21,23,26 | 3 | P20760,P83121,Q99041                                    |
| 1926 | 1,2,3,18,2<br>0,22,24,26 | 4,5,6,7,8,1<br>9,21,23,25 | 8 | P06760,P07150,P20646,P83121,Q99041,Q9QZK9,Q9WTT6,Q9Z0V6 |
| 1927 | 1,2,3,18,2<br>0,22,25,26 | 4,5,6,7,8,1<br>9,21,23,24 | 1 | Q99041                                                  |
| 1928 | 1,2,3,18,2<br>0,23,24,25 | 4,5,6,7,8,1<br>9,21,22,26 | 4 | A2RUV9,P20760,P22282,P83748                             |
| 1929 | 1,2,3,18,2<br>0,23,24,26 | 4,5,6,7,8,1<br>9,21,22,25 | 8 | A2RUV9,P01946,P06760,P19218,Q6IFU8,Q6IG02,Q6P6Q2,Q9QZK9 |
| 1930 | 1,2,3,18,2<br>0,23,25,26 | 4,5,6,7,8,1<br>9,21,22,24 | 6 | A2RUV9,P01946,P19218,Q6IFU8,Q6IG02,Q6P6Q2               |
| 1931 | 1,2,3,18,2<br>0,24,25,26 | 4,5,6,7,8,1<br>9,21,22,23 | 3 | P22282,Q7TPB1,Q99041                                    |
| 1932 | 1,2,3,18,2<br>1,22,23,24 | 4,5,6,7,8,1<br>9,20,25,26 | 2 | P34901,Q5FVI6                                           |
| 1933 | 1,2,3,18,2<br>1,22,23,25 | 4,5,6,7,8,1<br>9,20,24,26 | 2 | P20760,P31430                                           |
| 1934 | 1,2,3,18,2<br>1,22,23,26 | 4,5,6,7,8,1<br>9,20,24,25 | 4 | P01946,Q63617,Q63661,Q6P6Q2                             |
| 1935 | 1,2,3,18,2<br>1,22,24,25 | 4,5,6,7,8,1<br>9,20,23,26 | 3 | P20760,P31430,Q99041                                    |
| 1936 | 1,2,3,18,2<br>1,22,24,26 | 4,5,6,7,8,1<br>9,20,23,25 | 3 | P06760,Q63617,Q99041                                    |
| 1937 | 1,2,3,18,2<br>1,22,25,26 | 4,5,6,7,8,1<br>9,20,23,24 | 3 | P31430,Q63617,Q99041                                    |
| 1938 | 1,2,3,18,2<br>1,23,24,25 | 4,5,6,7,8,1<br>9,20,22,26 | 3 | P05539,P20760,P31430                                    |
| 1939 | 1,2,3,18,2<br>1,23,24,26 | 4,5,6,7,8,1<br>9,20,22,25 | 6 | D3ZUC6,P01946,Q63617,Q63661,Q6IFU8,Q6P6Q2               |
| 1940 | 1,2,3,18,2<br>1,23,25,26 | 4,5,6,7,8,1<br>9,20,22,24 | 8 | P00774,P01946,P31430,P55091,Q63617,Q63661,Q6IFU8,Q6P6Q2 |
| 1941 | 1,2,3,18,2<br>1,24,25,26 | 4,5,6,7,8,1<br>9,20,22,23 | 6 | P00774,P01946,P31430,P55091,Q63617,Q99041               |
| 1942 | 1,2,3,18,2<br>2,23,24,25 | 4,5,6,7,8,1<br>9,20,21,26 | 2 | P20760,P82471                                           |
| 1943 | 1,2,3,18,2<br>2,23,24,26 | 4,5,6,7,8,1<br>9,20,21,25 | 5 | P00731,P01946,P06760,P20646,P82471                      |
| 1944 | 1,2,3,18,2<br>2,23,25,26 | 4,5,6,7,8,1<br>9,20,21,24 | 1 | P01946                                                  |
| 1945 | 1,2,3,18,2<br>2,24,25,26 | 4,5,6,7,8,1<br>9,20,21,23 | 2 | Q7TPB1,Q99041                                           |

|      |                          |                           |    |                                                                                            |
|------|--------------------------|---------------------------|----|--------------------------------------------------------------------------------------------|
| 1946 | 1,2,3,18,2<br>3,24,25,26 | 4,5,6,7,8,1<br>9,20,21,22 | 5  | P01946,P02091,P55091,Q6P6Q2,Q7TPB1                                                         |
| 1947 | 1,2,3,19,2<br>0,21,22,23 | 4,5,6,7,8,1<br>8,24,25,26 | 3  | P00714,P20760,P61206;P84079;P84082                                                         |
| 1948 | 1,2,3,19,2<br>0,21,22,24 | 4,5,6,7,8,1<br>8,23,25,26 | 6  | P00714,P61206;P84079;P84082,P83121,Q6AYS4,Q99041,Q9Z0V6                                    |
| 1949 | 1,2,3,19,2<br>0,21,22,25 | 4,5,6,7,8,1<br>8,23,24,26 | 2  | P20760,Q8VD89                                                                              |
| 1950 | 1,2,3,19,2<br>0,21,22,26 | 4,5,6,7,8,1<br>8,23,24,25 | 4  | O70377,P00714,P07171,Q99041                                                                |
| 1951 | 1,2,3,19,2<br>0,21,23,24 | 4,5,6,7,8,1<br>8,22,25,26 | 3  | P00714,P61206;P84079;P84082,Q6AYS4                                                         |
| 1952 | 1,2,3,19,2<br>0,21,23,25 | 4,5,6,7,8,1<br>8,22,24,26 | 2  | P20760,Q8VD89                                                                              |
| 1953 | 1,2,3,19,2<br>0,21,23,26 | 4,5,6,7,8,1<br>8,22,24,25 | 1  | P01946                                                                                     |
| 1954 | 1,2,3,19,2<br>0,21,24,25 | 4,5,6,7,8,1<br>8,22,23,26 | 2  | P20760,Q8VD89                                                                              |
| 1955 | 1,2,3,19,2<br>0,21,24,26 | 4,5,6,7,8,1<br>8,22,23,25 | 4  | P00714,P06911,Q6AYS4,Q99041                                                                |
| 1956 | 1,2,3,19,2<br>0,21,25,26 | 4,5,6,7,8,1<br>8,22,23,24 | 1  | Q63617                                                                                     |
| 1957 | 1,2,3,19,2<br>0,22,23,24 | 4,5,6,7,8,1<br>8,21,25,26 | 11 | P00714,P07150,P14669,P20646,P61206;P84079;P84082,P82995,P83121,P83748,Q6AYS4,Q9QZK9,Q9WTT6 |
| 1958 | 1,2,3,19,2<br>0,22,23,25 | 4,5,6,7,8,1<br>8,21,24,26 | 3  | P20760,P83748,Q08849                                                                       |
| 1959 | 1,2,3,19,2<br>0,22,23,26 | 4,5,6,7,8,1<br>8,21,24,25 | 8  | O54728,P01946,P06760,P20646,P55159,Q08849,Q6AYS4,Q9WTT6                                    |
| 1960 | 1,2,3,19,2<br>0,22,24,25 | 4,5,6,7,8,1<br>8,21,23,26 | 5  | P0C0A9,P14669,P83121,P83748,Q6AYS4                                                         |
| 1961 | 1,2,3,19,2<br>0,22,24,26 | 4,5,6,7,8,1<br>8,21,23,25 | 11 | O54728,P00714,P06760,P07150,P14669,P20646,P83121,Q6AYS4,Q99041,Q9WTT6,Q9Z0V6               |
| 1962 | 1,2,3,19,2<br>0,22,25,26 | 4,5,6,7,8,1<br>8,21,23,24 | 0  |                                                                                            |
| 1963 | 1,2,3,19,2<br>0,23,24,25 | 4,5,6,7,8,1<br>8,21,22,26 | 3  | P20760,P83748,Q6AYS4                                                                       |
| 1964 | 1,2,3,19,2<br>0,23,24,26 | 4,5,6,7,8,1<br>8,21,22,25 | 6  | P01946,P02091,P06760,P19218,P20646,Q6AYS4                                                  |
| 1965 | 1,2,3,19,2<br>0,23,25,26 | 4,5,6,7,8,1<br>8,21,22,24 | 4  | P01946,P02091,P19218,Q08849                                                                |
| 1966 | 1,2,3,19,2<br>0,24,25,26 | 4,5,6,7,8,1<br>8,21,22,23 | 3  | P01946,P22283,Q6AYS4                                                                       |
| 1967 | 1,2,3,19,2<br>1,22,23,24 | 4,5,6,7,8,1<br>8,20,25,26 | 3  | P00714,P61206;P84079;P84082,P82471                                                         |
| 1968 | 1,2,3,19,2<br>1,22,23,25 | 4,5,6,7,8,1<br>8,20,24,26 | 1  | P20760                                                                                     |

|      |                                                 |    |                                                                                                   |
|------|-------------------------------------------------|----|---------------------------------------------------------------------------------------------------|
| 1969 | 1,2,3,19,2 4,5,6,7,8,1<br>1,22,23,26 8,20,24,25 | 3  | P01946,Q63617,Q63661                                                                              |
| 1970 | 1,2,3,19,2 4,5,6,7,8,1<br>1,22,24,25 8,20,23,26 | 2  | P07171,P20760                                                                                     |
| 1971 | 1,2,3,19,2 4,5,6,7,8,1<br>1,22,24,26 8,20,23,25 | 5  | O70377,P00714,P07171,Q63617,Q99041                                                                |
| 1972 | 1,2,3,19,2 4,5,6,7,8,1<br>1,22,25,26 8,20,23,24 | 2  | P07171,Q63617                                                                                     |
| 1973 | 1,2,3,19,2 4,5,6,7,8,1<br>1,23,24,25 8,20,22,26 | 1  | P20760                                                                                            |
| 1974 | 1,2,3,19,2 4,5,6,7,8,1<br>1,23,24,26 8,20,22,25 | 4  | P01946,P02091,Q63617,Q63661                                                                       |
| 1975 | 1,2,3,19,2 4,5,6,7,8,1<br>1,23,25,26 8,20,22,24 | 4  | P01946,P02091,Q63617,Q63661                                                                       |
| 1976 | 1,2,3,19,2 4,5,6,7,8,1<br>1,24,25,26 8,20,22,23 | 3  | P01946,P07171,Q63617                                                                              |
| 1977 | 1,2,3,19,2 4,5,6,7,8,1<br>2,23,24,25 8,20,21,26 | 4  | P01835,P20646,P82471,P83748                                                                       |
| 1978 | 1,2,3,19,2 4,5,6,7,8,1<br>2,23,24,26 8,20,21,25 | 12 | O54728,P00731,P01946,P02091,P06760,P20646,P36953,P61206;P84079;P84082,P82471,Q63556,Q6AYS4,Q9WTT6 |
| 1979 | 1,2,3,19,2 4,5,6,7,8,1<br>2,23,25,26 8,20,21,24 | 3  | P01946,P02091,P82471                                                                              |
| 1980 | 1,2,3,19,2 4,5,6,7,8,1<br>2,24,25,26 8,20,21,23 | 6  | P01835,P01946,P20646,P36953,P82471,Q63617                                                         |
| 1981 | 1,2,3,19,2 4,5,6,7,8,1<br>3,24,25,26 8,20,21,22 | 4  | P01946,P02091,P82471,Q7TPB1                                                                       |
| 1982 | 1,2,3,20,2 4,5,6,7,8,1<br>1,22,23,24 8,19,25,26 | 3  | P00714,P61206;P84079;P84082,Q5FVI6                                                                |
| 1983 | 1,2,3,20,2 4,5,6,7,8,1<br>1,22,23,25 8,19,24,26 | 1  | P20760                                                                                            |
| 1984 | 1,2,3,20,2 4,5,6,7,8,1<br>1,22,23,26 8,19,24,25 | 1  | P01946                                                                                            |
| 1985 | 1,2,3,20,2 4,5,6,7,8,1<br>1,22,24,25 8,19,23,26 | 4  | P20760,P35467,Q5XFX0,Q99041                                                                       |
| 1986 | 1,2,3,20,2 4,5,6,7,8,1<br>1,22,24,26 8,19,23,25 | 6  | O70377,P00714,P02803,P07171,Q5BJY9,Q99041                                                         |
| 1987 | 1,2,3,20,2 4,5,6,7,8,1<br>1,22,25,26 8,19,23,24 | 1  | Q99041                                                                                            |
| 1988 | 1,2,3,20,2 4,5,6,7,8,1<br>1,23,24,25 8,19,22,26 | 1  | P20760                                                                                            |
| 1989 | 1,2,3,20,2 4,5,6,7,8,1<br>1,23,24,26 8,19,22,25 | 1  | P01946                                                                                            |
| 1990 | 1,2,3,20,2 4,5,6,7,8,1<br>1,23,25,26 8,19,22,24 | 1  | P01946                                                                                            |
| 1991 | 1,2,3,20,2 4,5,6,7,8,1<br>1,24,25,26 8,19,22,23 | 2  | P01946,Q99041                                                                                     |

|      |                          |                                   |    |                                                                                                                                                                                       |
|------|--------------------------|-----------------------------------|----|---------------------------------------------------------------------------------------------------------------------------------------------------------------------------------------|
| 1992 | 1,2,3,20,2<br>2,23,24,25 | 4,5,6,7,8,1<br>8,19,21,26         | 2  | P0C0A9,P83748                                                                                                                                                                         |
| 1993 | 1,2,3,20,2<br>2,23,24,26 | 4,5,6,7,8,1<br>8,19,21,25         | 6  | P00731,P01946,P02803,P20646,P36953,Q6AYS4                                                                                                                                             |
| 1994 | 1,2,3,20,2<br>2,23,25,26 | 4,5,6,7,8,1<br>8,19,21,24         | 3  | P01946,P0C0A9,Q08849                                                                                                                                                                  |
| 1995 | 1,2,3,20,2<br>2,24,25,26 | 4,5,6,7,8,1<br>8,19,21,23         | 5  | P00731,P02803,P0C0A9,P36953,Q99041                                                                                                                                                    |
| 1996 | 1,2,3,20,2<br>3,24,25,26 | 4,5,6,7,8,1<br>8,19,21,22         | 5  | P01946,P02091,P0C0A9,P19218,Q7TPB1                                                                                                                                                    |
| 1997 | 1,2,3,21,2<br>2,23,24,25 | 4,5,6,7,8,1<br>8,19,20,26         | 2  | P82471,Q5FVI6                                                                                                                                                                         |
| 1998 | 1,2,3,21,2<br>2,23,24,26 | 4,5,6,7,8,1<br>8,19,20,25         | 6  | P00714,P00731,P01946,P34901,P36953,P82471                                                                                                                                             |
| 1999 | 1,2,3,21,2<br>2,23,25,26 | 4,5,6,7,8,1<br>8,19,20,24         | 1  | P01946                                                                                                                                                                                |
| 2000 | 1,2,3,21,2<br>2,24,25,26 | 4,5,6,7,8,1<br>8,19,20,23         | 4  | P07171,Q5BJY9,Q63617,Q99041                                                                                                                                                           |
| 2001 | 1,2,3,21,2<br>3,24,25,26 | 4,5,6,7,8,1<br>8,19,20,22         | 3  | P01946,P02091,Q7TPB1                                                                                                                                                                  |
| 2002 | 1,2,3,22,2<br>3,24,25,26 | 4,5,6,7,8,1<br>8,19,20,21         | 7  | P00731,P01946,P02091,P0C0A9,P36953,P82471,Q7TPB1                                                                                                                                      |
| 2003 | 1,2,4,5,6,7<br>,8,18     | 3,19,20,21<br>,22,23,24,<br>25,26 | 22 | O55006,P00731,P02631,P02803,P0DP29;P0DP30;P0DP31,P10715,P18418,P20762,P25031,P50398,P52590,P61206;P84079;P84082,Q63475,Q63617,Q63942,Q64057,Q6AYQ8,Q6IE51,Q7TP52,Q9ESW0,Q9QZA6,Q9R0T3 |
| 2004 | 1,2,4,5,6,7<br>,8,19     | 3,18,20,21<br>,22,23,24,<br>25,26 | 17 | O55006,P00731,P02631,P02803,P15399,P18418,P20762,P50398,P52590,P97580,Q30KJ2,Q63475,Q63532,Q63617,Q6IE51,Q7TP52,Q9QZQ5                                                                |
| 2005 | 1,2,4,5,6,7<br>,8,20     | 3,18,19,21<br>,22,23,24,<br>25,26 | 14 | O55006,P00731,P02631,P02803,P10715,P18418,P20762,P50398,P52590,P61206;P84079;P84082,P68370,Q63475,Q63617,Q7TP52                                                                       |
| 2006 | 1,2,4,5,6,7<br>,8,21     | 3,18,19,20<br>,22,23,24,<br>25,26 | 22 | O55006,P00731,P02631,P02803,P0C0A9,P13432,P18418,P20646,P20762,P25236,P42854,P52590,P61206;P84079;P84082,P68370,P83748,Q63475,Q63617,Q64057,Q7TP52,Q8CJ52,Q9JI85,Q9R0T3               |
| 2007 | 1,2,4,5,6,7<br>,8,22     | 3,18,19,20<br>,21,23,24,<br>25,26 | 10 | O55006,O88267,P02631,P18418,P20762,P52590,P68370,Q63475,Q63617,Q7TP52                                                                                                                 |
| 2008 | 1,2,4,5,6,7<br>,8,23     | 3,18,19,20<br>,21,22,24,<br>25,26 | 17 | P02631,P02803,P05371,P0DP29;P0DP30;P0DP31,P15399,P18418,P20762,P28648,P50280,P52590,P97580,Q30KJ2,Q63475,Q63617,Q6IE51,Q7TP52,Q99041                                                  |
| 2009 | 1,2,4,5,6,7<br>,8,24     | 3,18,19,20<br>,21,22,23,<br>25,26 | 10 | D3ZHA0,O55006,O88267,P02631,P18418,P20762,P52590,Q63475,Q63617,Q7TP52                                                                                                                 |
| 2010 | 1,2,4,5,6,7<br>,8,25     | 3,18,19,20<br>,21,22,23,<br>24,26 | 21 | P00731,P02631,P02803,P05371,P06911,P10715,P12020,P18418,P19629,P20762,P31044,P52590,P61206;P84079;P84082,P68370,Q5GRG2,Q63475,Q63617,Q6AYQ8,Q7TP52,Q91ZS3,Q9Z0V6                      |

|      |                   |                           |    |                                                                                                                                                                  |
|------|-------------------|---------------------------|----|------------------------------------------------------------------------------------------------------------------------------------------------------------------|
| 2011 | 1,2,4,5,6,7,8,26  | 3,18,19,20,21,22,23,24,25 | 16 | P02631,P02803,P05539,P18418,P20760,P20761,P20762,P52590,P61206;P84079;P84082,P83748,Q1WIM3,Q63475,Q63617,Q6AY33,Q6AYQ8,Q7TP52                                    |
| 2012 | 1,2,4,5,6,7,18,19 | 3,8,20,21,22,23,24,25,26  | 18 | O55006,P00731,P02631,P02803,P05964,P15399,P16636,P18418,P25031,P52590,P61206;P84079;P84082,P97580,Q03191,Q30KJ2,Q63532,Q63942,Q6IE51,Q7TP52                      |
| 2013 | 1,2,4,5,6,7,18,20 | 3,8,19,21,22,23,24,25,26  | 10 | P00731,P02631,P18418,P20762,P25031,P52590,P61206;P84079;P84082,Q63475,Q6IE51,Q7TP52                                                                              |
| 2014 | 1,2,4,5,6,7,18,21 | 3,8,19,20,22,23,24,25,26  | 21 | O89117,P00731,P02631,P02803,P05964,P18418,P20646,P20762,P25031,P25236,P42854,P52590,P61206;P84079;P84082,P83748,Q08849,Q63467,Q63475,Q6IE51,Q7TP52,Q9ESW0,Q9JI85 |
| 2015 | 1,2,4,5,6,7,18,22 | 3,8,19,20,21,23,24,25,26  | 8  | P02631,P18418,P20762,P25031,P52590,P61206;P84079;P84082,Q6IE51,Q7TP52                                                                                            |
| 2016 | 1,2,4,5,6,7,18,23 | 3,8,19,20,21,22,24,25,26  | 17 | P02631,P02803,P05964,P15399,P18418,P20762,P25031,P28648,P52590,P55053,P61206;P84079;P84082,P97580,Q30KJ2,Q63475,Q63942,Q6IE51,Q7TP52                             |
| 2017 | 1,2,4,5,6,7,18,24 | 3,8,19,20,21,22,23,25,26  | 10 | O55006,P02631,P16636,P18418,P25031,P52590,P61206;P84079;P84082,Q63475,Q6IE51,Q7TP52                                                                              |
| 2018 | 1,2,4,5,6,7,18,25 | 3,8,19,20,21,22,23,24,26  | 14 | P00731,P02631,P02803,P05371,P12020,P18418,P25031,P52590,P61206;P84079;P84082,P98089,Q5GRG2,Q6IE51,Q7TP52,Q91ZS3                                                  |
| 2019 | 1,2,4,5,6,7,18,26 | 3,8,19,20,21,22,23,24,25  | 20 | P02631,P05539,P16636,P18418,P20760,P20761,P20762,P25031,P51886,P52590,P61206;P84079;P84082,P70502,P83748,Q63661,Q63942,Q6AY33,Q6AYQ8,Q6IE51,Q7TP52,Q8VD89        |
| 2020 | 1,2,4,5,6,7,19,20 | 3,8,18,21,22,23,24,25,26  | 11 | P00731,P02631,P15399,P18418,P20762,P52590,P97580,Q30KJ2,Q63532,Q6IE51,Q7TP52                                                                                     |
| 2021 | 1,2,4,5,6,7,19,21 | 3,8,18,20,22,23,24,25,26  | 15 | P00731,P02631,P02803,P15399,P18418,P20762,P25236,P42854,P52590,P61206;P84079;P84082,P97580,Q30KJ2,Q63532,Q6IE51,Q7TP52                                           |
| 2022 | 1,2,4,5,6,7,19,22 | 3,8,18,20,21,23,24,25,26  | 8  | P02631,P18418,P52590,P97580,Q30KJ2,Q63532,Q6IE51,Q7TP52                                                                                                          |
| 2023 | 1,2,4,5,6,7,19,23 | 3,8,18,20,21,22,24,25,26  | 12 | P02631,P02803,P15399,P18418,P20762,P28648,P52590,P97580,Q30KJ2,Q63532,Q6IE51,Q7TP52                                                                              |
| 2024 | 1,2,4,5,6,7,19,24 | 3,8,18,20,21,22,23,25,26  | 10 | O55006,P02631,P15399,P18418,P52590,P97580,Q30KJ2,Q63532,Q6IE51,Q7TP52                                                                                            |
| 2025 | 1,2,4,5,6,7,19,25 | 3,8,18,20,21,22,23,24,26  | 15 | P00731,P02631,P02803,P12020,P15399,P18418,P52590,P61206;P84079;P84082,P97580,P97840,Q30KJ2,Q5GRG2,Q63532,Q6IE51,Q7TP52                                           |

|      |                       |                                  |    |                                                                                                                               |
|------|-----------------------|----------------------------------|----|-------------------------------------------------------------------------------------------------------------------------------|
| 2026 | 1,2,4,5,6,7<br>,19,26 | 3,8,18,20,<br>21,22,23,2<br>4,25 | 15 | P02631,P05539,P18418,P20760,P20761,P20762,P52590,P61206;P84079;P84082,P83748,P97580,Q30KJ2,Q5FVI6,Q63532,Q6IE51,Q7TP52        |
| 2027 | 1,2,4,5,6,7<br>,20,21 | 3,8,18,19,<br>22,23,24,2<br>5,26 | 13 | P00731,P02631,P18418,P20646,P20762,P25236,P35467,P42854,P52590,P61206;P84079;P84082,Q63475,Q7TP52,Q91ZS3                      |
| 2028 | 1,2,4,5,6,7<br>,20,22 | 3,8,18,19,<br>21,23,24,2<br>5,26 | 7  | P02631,P18418,P20762,P35467,P52590,Q62997,Q7TP52                                                                              |
| 2029 | 1,2,4,5,6,7<br>,20,23 | 3,8,18,19,<br>21,22,24,2<br>5,26 | 12 | P02631,P14408,P15399,P18418,P20762,P28648,P52590,P97580,Q30KJ2,Q63475,Q6IE51,Q7TP52                                           |
| 2030 | 1,2,4,5,6,7<br>,20,24 | 3,8,18,19,<br>21,22,23,2<br>5,26 | 9  | P02631,P18418,P20762,P35467,P52590,P61206;P84079;P84082,Q63475,Q6IE51,Q7TP52                                                  |
| 2031 | 1,2,4,5,6,7<br>,20,25 | 3,8,18,19,<br>21,22,23,2<br>4,26 | 11 | P02631,P12020,P18418,P20762,P35467,P52590,P61206;P84079;P84082,P68370,Q5GRG2,Q7TP52,Q91ZS3                                    |
| 2032 | 1,2,4,5,6,7<br>,20,26 | 3,8,18,19,<br>21,22,23,2<br>4,25 | 12 | P02631,P05539,P14408,P18418,P20760,P20761,P20762,P52590,P61206;P84079;P84082,P83748,Q6AYQ8,Q7TP52                             |
| 2033 | 1,2,4,5,6,7<br>,21,22 | 3,8,18,19,<br>20,23,24,2<br>5,26 | 9  | P02631,P13432,P18418,P19218,P20762,P35467,P52590,P83748,Q7TP52                                                                |
| 2034 | 1,2,4,5,6,7<br>,21,23 | 3,8,18,19,<br>20,22,24,2<br>5,26 | 13 | P02631,P02803,P15399,P18418,P20762,P25236,P28648,P52590,P61206;P84079;P84082,P97580,Q30KJ2,Q63475,Q6IE51                      |
| 2035 | 1,2,4,5,6,7<br>,21,24 | 3,8,18,19,<br>20,22,23,2<br>5,26 | 10 | P02631,P13432,P18418,P20762,P35467,P52590,P61206;P84079;P84082,Q08849,Q63475,Q6IE51                                           |
| 2036 | 1,2,4,5,6,7<br>,21,25 | 3,8,18,19,<br>20,22,23,2<br>4,26 | 16 | P00731,P02631,P02803,P12020,P18418,P20646,P25236,P35467,P52590,P61206;P84079;P84082,P68370,P97840,Q5GRG2,Q63475,Q7TP52,Q91ZS3 |
| 2037 | 1,2,4,5,6,7<br>,21,26 | 3,8,18,19,<br>20,22,23,2<br>4,25 | 12 | P02631,P05539,P18418,P20760,P20761,P20762,P25236,P52590,P61206;P84079;P84082,P83748,Q7TP52,Q9EQV9                             |
| 2038 | 1,2,4,5,6,7<br>,22,23 | 3,8,18,19,<br>20,21,24,2<br>5,26 | 11 | G3V686,P02631,P18418,P20762,P28648,P36376,P52590,P97580,Q30KJ2,Q6IE51,Q7TP52                                                  |
| 2039 | 1,2,4,5,6,7<br>,22,24 | 3,8,18,19,<br>20,21,23,2<br>5,26 | 7  | O88267,P02631,P18418,P35467,P52590,Q6IE51,Q7TP52                                                                              |
| 2040 | 1,2,4,5,6,7<br>,22,25 | 3,8,18,19,<br>20,21,23,2<br>4,26 | 11 | P02631,P05371,P06911,P12020,P18418,P19629,P35467,P52590,P61206;P84079;P84082,Q5GRG2,Q7TP52                                    |



|      |                       |                                  |    |                                                                                                                                                               |
|------|-----------------------|----------------------------------|----|---------------------------------------------------------------------------------------------------------------------------------------------------------------|
| 2041 | 1,2,4,5,6,7<br>,22,26 | 3,8,18,19,<br>20,21,23,2<br>4,25 | 9  | P05539,P18418,P20760,P20761,P20762,P52590,P61206;P84079;P84082,P83748,Q7TP52                                                                                  |
| 2042 | 1,2,4,5,6,7<br>,23,24 | 3,8,18,19,<br>20,21,22,2<br>5,26 | 12 | P02631,P15399,P18418,P20762,P28648,P34901,P52590,P97580,Q30KJ2,Q63475,Q6IE51,Q7TP52                                                                           |
| 2043 | 1,2,4,5,6,7<br>,23,25 | 3,8,18,19,<br>20,21,22,2<br>4,26 | 20 | P02631,P02803,P05371,P06911,P12020,P15399,P18418,P19629,P20762,P28648,P36376,P50280,P52590,P61206;P84079;P84082,P70709,<br>P97580,Q30KJ2,Q5GRG2,Q6IE51,Q7TP52 |
| 2044 | 1,2,4,5,6,7<br>,23,26 | 3,8,18,19,<br>20,21,22,2<br>4,25 | 17 | P02631,P05539,P18418,P20760,P20761,P20762,P28648,P36376,P52590,P55053,P61206;P84079;P84082,P83748,P97580,Q30KJ2,Q6AYQ<br>8,Q6IE51,Q7TP52                      |
| 2045 | 1,2,4,5,6,7<br>,24,25 | 3,8,18,19,<br>20,21,22,2<br>3,26 | 11 | P02631,P05371,P12020,P18418,P19629,P35467,P52590,P61206;P84079;P84082,Q5GRG2,Q6IE51,Q7TP52                                                                    |
| 2046 | 1,2,4,5,6,7<br>,24,26 | 3,8,18,19,<br>20,21,22,2<br>3,25 | 11 | P02631,P18418,P20760,P20761,P20762,P52590,P61206;P84079;P84082,P83748,Q6AYQ8,Q6IE51,Q7TP52                                                                    |
| 2047 | 1,2,4,5,6,7<br>,25,26 | 3,8,18,19,<br>20,21,22,2<br>3,24 | 14 | P02631,P05539,P12020,P18418,P20760,P20762,P52590,P61206;P84079;P84082,P83748,Q5GRG2,Q6AY33,Q6AYQ8,Q7TP52,Q91ZS3                                               |
| 2048 | 1,2,4,5,6,8<br>,18,19 | 3,7,20,21,<br>22,23,24,2<br>5,26 | 8  | O55006,P00731,P02803,P18418,P22006,Q03191,Q63942,Q7TP52                                                                                                       |
| 2049 | 1,2,4,5,6,8<br>,18,20 | 3,7,19,21,<br>22,23,24,2<br>5,26 | 6  | P00731,P02803,P20762,P22006,Q63942,Q7TP52                                                                                                                     |
| 2050 | 1,2,4,5,6,8<br>,18,21 | 3,7,19,20,<br>22,23,24,2<br>5,26 | 11 | O35547,P00731,P02803,P0C0A9,P18418,P20646,P20762,P25031,P25236,Q63942,Q9QZA6                                                                                  |
| 2051 | 1,2,4,5,6,8<br>,18,22 | 3,7,19,20,<br>21,23,24,2<br>5,26 | 5  | P18418,P20762,P22006,Q63942,Q7TP52                                                                                                                            |
| 2052 | 1,2,4,5,6,8<br>,18,23 | 3,7,19,20,<br>21,22,24,2<br>5,26 | 6  | P02803,P20762,P22006,P28648,Q63598,Q63942                                                                                                                     |
| 2053 | 1,2,4,5,6,8<br>,18,24 | 3,7,19,20,<br>21,22,23,2<br>5,26 | 4  | O55006,P18418,Q63942,Q7TP52                                                                                                                                   |
| 2054 | 1,2,4,5,6,8<br>,18,25 | 3,7,19,20,<br>21,22,23,2<br>4,26 | 6  | P00731,P02803,P18418,P98089,Q63942,Q7TP52                                                                                                                     |
| 2055 | 1,2,4,5,6,8<br>,18,26 | 3,7,19,20,<br>21,22,23,2<br>4,25 | 8  | P02803,P20760,P20762,P83748,Q63942,Q6AY33,Q6AYQ8,Q7TP52                                                                                                       |

|      |                       |                                  |   |                                                         |
|------|-----------------------|----------------------------------|---|---------------------------------------------------------|
| 2056 | 1,2,4,5,6,8<br>,19,20 | 3,7,18,21,<br>22,23,24,2<br>5,26 | 5 | P00731,P02803,P20762,P22006,Q7TP52                      |
| 2057 | 1,2,4,5,6,8<br>,19,21 | 3,7,18,20,<br>22,23,24,2<br>5,26 | 8 | A2RUV9,O35547,P00731,P02803,P0C0A9,P20762,P25236,P35281 |
| 2058 | 1,2,4,5,6,8<br>,19,22 | 3,7,18,20,<br>21,23,24,2<br>5,26 | 3 | A2RUV9,P22006,Q7TP52                                    |
| 2059 | 1,2,4,5,6,8<br>,19,23 | 3,7,18,20,<br>21,22,24,2<br>5,26 | 7 | P02803,P15399,P20762,P28648,P50280,P97580,Q30KJ2        |
| 2060 | 1,2,4,5,6,8<br>,19,24 | 3,7,18,20,<br>21,22,23,2<br>5,26 | 2 | A2RUV9,Q7TP52                                           |
| 2061 | 1,2,4,5,6,8<br>,19,25 | 3,7,18,20,<br>21,22,23,2<br>4,26 | 5 | A2RUV9,P00731,P02803,Q5GRG2,Q7TP52                      |
| 2062 | 1,2,4,5,6,8<br>,19,26 | 3,7,18,20,<br>21,22,23,2<br>4,25 | 5 | P02803,P20760,P20762,P83748,Q7TP52                      |
| 2063 | 1,2,4,5,6,8<br>,20,21 | 3,7,18,19,<br>22,23,24,2<br>5,26 | 5 | P00731,P01681,P20762,P25236,P62804                      |
| 2064 | 1,2,4,5,6,8<br>,20,22 | 3,7,18,19,<br>21,23,24,2<br>5,26 | 4 | P20762,P22006,Q62997,Q7TP52                             |
| 2065 | 1,2,4,5,6,8<br>,20,23 | 3,7,18,19,<br>21,22,24,2<br>5,26 | 2 | P20762,P22006                                           |
| 2066 | 1,2,4,5,6,8<br>,20,24 | 3,7,18,19,<br>21,22,23,2<br>5,26 | 2 | P20762,Q7TP52                                           |
| 2067 | 1,2,4,5,6,8<br>,20,25 | 3,7,18,19,<br>21,22,23,2<br>4,26 | 3 | P20762,Q5GRG2,Q7TP52                                    |
| 2068 | 1,2,4,5,6,8<br>,20,26 | 3,7,18,19,<br>21,22,23,2<br>4,25 | 7 | P01681,P20760,P20762,P62804,P83748,Q6AYQ8,Q7TP52        |
| 2069 | 1,2,4,5,6,8<br>,21,22 | 3,7,18,19,<br>20,23,24,2<br>5,26 | 7 | A2RUV9,O35547,P13432,P20762,P25236,Q7TP52,Q80WL1        |
| 2070 | 1,2,4,5,6,8<br>,21,23 | 3,7,18,19,<br>20,22,24,2<br>5,26 | 6 | P02803,P0C0A9,P20762,P25236,P50280,Q9Z0V6               |

|      |                        |                                  |    |                                                                                                   |
|------|------------------------|----------------------------------|----|---------------------------------------------------------------------------------------------------|
| 2071 | 1,2,4,5,6,8<br>,21,24  | 3,7,18,19,<br>20,22,23,2<br>5,26 | 2  | P13432,P20762                                                                                     |
| 2072 | 1,2,4,5,6,8<br>,21,25  | 3,7,18,19,<br>20,22,23,2<br>4,26 | 8  | P00731,P02803,P06760,P20646,P25236,Q6P6R2,Q9WTT6,Q9Z0V6                                           |
| 2073 | 1,2,4,5,6,8<br>,21,26  | 3,7,18,19,<br>20,22,23,2<br>4,25 | 9  | P0C0A9,P20760,P20761,P20762,P25236,P83748,Q00715,Q9EQV9,Q9Z0V6                                    |
| 2074 | 1,2,4,5,6,8<br>,22,23  | 3,7,18,19,<br>20,21,24,2<br>5,26 | 3  | P20762,P50280,Q7TP52                                                                              |
| 2075 | 1,2,4,5,6,8<br>,22,24  | 3,7,18,19,<br>20,21,23,2<br>5,26 | 1  | Q7TP52                                                                                            |
| 2076 | 1,2,4,5,6,8<br>,22,25  | 3,7,18,19,<br>20,21,23,2<br>4,26 | 4  | P06911,Q5GRG2,Q7TP52,Q9Z0V6                                                                       |
| 2077 | 1,2,4,5,6,8<br>,22,26  | 3,7,18,19,<br>20,21,23,2<br>4,25 | 5  | P20760,P20761,P20762,P83748,Q7TP52                                                                |
| 2078 | 1,2,4,5,6,8<br>,23,24  | 3,7,18,19,<br>20,21,22,2<br>5,26 | 1  | P20762                                                                                            |
| 2079 | 1,2,4,5,6,8<br>,23,25  | 3,7,18,19,<br>20,21,22,2<br>4,26 | 11 | P02803,P06760,P06911,P12020,P20762,P28648,P50280,Q5GRG2,Q6P6R2,Q9WTT6,Q9Z0V6                      |
| 2080 | 1,2,4,5,6,8<br>,23,26  | 3,7,18,19,<br>20,21,22,2<br>4,25 | 13 | D4A5U3,P02793,Q7TP54,P20760,P20761,P20762,P28648,Q6AYQ8,Q6IFU8,Q6IFW6,Q6IMF3,Q6P6Q2,Q7TP52,Q9Z0V6 |
| 2081 | 1,2,4,5,6,8<br>,24,25  | 3,7,18,19,<br>20,21,22,2<br>3,26 | 3  | Q5GRG2,Q7TP52,Q9Z0V6                                                                              |
| 2082 | 1,2,4,5,6,8<br>,24,26  | 3,7,18,19,<br>20,21,22,2<br>3,25 | 5  | P20760,P20761,P20762,Q6AYQ8,Q7TP52                                                                |
| 2083 | 1,2,4,5,6,8<br>,25,26  | 3,7,18,19,<br>20,21,22,2<br>3,24 | 10 | P02803,P20760,P20762,P83748,Q66HD0,Q6AY33,Q6AYQ8,Q7TP52,Q9WTT6,Q9Z0V6                             |
| 2084 | 1,2,4,5,6,1<br>8,19,20 | 3,7,8,21,2<br>2,23,24,25<br>,26  | 4  | P00731,P02803,P22006,Q7TP52                                                                       |
| 2085 | 1,2,4,5,6,1<br>8,19,21 | 3,7,8,20,2<br>2,23,24,25<br>,26  | 7  | O35547,O89117,P00731,P02803,P25031,P25236,Q08849                                                  |

|      |                        |                                 |   |                                                                |
|------|------------------------|---------------------------------|---|----------------------------------------------------------------|
| 2086 | 1,2,4,5,6,1<br>8,19,22 | 3,7,8,20,2<br>1,23,24,25<br>,26 | 2 | P22006,Q7TP52                                                  |
| 2087 | 1,2,4,5,6,1<br>8,19,23 | 3,7,8,20,2<br>1,22,24,25<br>,26 | 9 | P02803,P15399,P22006,P28648,P97580,Q03191,Q30KJ2,Q63942,Q7TP52 |
| 2088 | 1,2,4,5,6,1<br>8,19,24 | 3,7,8,20,2<br>1,22,23,25<br>,26 | 2 | Q63942,Q7TP52                                                  |
| 2089 | 1,2,4,5,6,1<br>8,19,25 | 3,7,8,20,2<br>1,22,23,24<br>,26 | 4 | P00731,P02803,P98089,Q7TP52                                    |
| 2090 | 1,2,4,5,6,1<br>8,19,26 | 3,7,8,20,2<br>1,22,23,24<br>,25 | 7 | P02803,P20760,P83748,Q63355,Q63661,Q63942,Q7TP52               |
| 2091 | 1,2,4,5,6,1<br>8,20,21 | 3,7,8,19,2<br>2,23,24,25<br>,26 | 4 | P00731,P01835,P25031,P25236                                    |
| 2092 | 1,2,4,5,6,1<br>8,20,22 | 3,7,8,19,2<br>1,23,24,25<br>,26 | 3 | P22006,Q62997,Q7TP52                                           |
| 2093 | 1,2,4,5,6,1<br>8,20,23 | 3,7,8,19,2<br>1,22,24,25<br>,26 | 3 | P22006,P28648,Q6IFU7                                           |
| 2094 | 1,2,4,5,6,1<br>8,20,24 | 3,7,8,19,2<br>1,22,23,25<br>,26 | 1 | Q7TP52                                                         |
| 2095 | 1,2,4,5,6,1<br>8,20,25 | 3,7,8,19,2<br>1,22,23,24<br>,26 | 2 | P98089,Q7TP52                                                  |
| 2096 | 1,2,4,5,6,1<br>8,20,26 | 3,7,8,19,2<br>1,22,23,24<br>,25 | 6 | P20760,P20762,P83748,Q63355,Q63942,Q7TP52                      |
| 2097 | 1,2,4,5,6,1<br>8,21,22 | 3,7,8,19,2<br>0,23,24,25<br>,26 | 5 | O35547,P25031,P25236,Q08849,Q7TP52                             |
| 2098 | 1,2,4,5,6,1<br>8,21,23 | 3,7,8,19,2<br>0,22,24,25<br>,26 | 6 | O35547,P02803,P25031,P25236,P28648,Q63942                      |
| 2099 | 1,2,4,5,6,1<br>8,21,24 | 3,7,8,19,2<br>0,22,23,25<br>,26 | 3 | P13432,P25031,Q08849                                           |
| 2100 | 1,2,4,5,6,1<br>8,21,25 | 3,7,8,19,2<br>0,22,23,24<br>,26 | 8 | P00731,P02803,P20646,P25031,P25236,P31430,P98089,Q08849        |

|      |                        |                                 |    |                                                                                     |
|------|------------------------|---------------------------------|----|-------------------------------------------------------------------------------------|
| 2101 | 1,2,4,5,6,1<br>8,21,26 | 3,7,8,19,2<br>0,22,23,24<br>,25 | 8  | P20760,P25031,P25236,P83748,Q08849,Q63661,Q63942,Q7TP52                             |
| 2102 | 1,2,4,5,6,1<br>8,22,23 | 3,7,8,19,2<br>0,21,24,25<br>,26 | 5  | P22006,P28648,Q63942,Q6IFU7,Q7TP52                                                  |
| 2103 | 1,2,4,5,6,1<br>8,22,24 | 3,7,8,19,2<br>0,21,23,25<br>,26 | 1  | Q7TP52                                                                              |
| 2104 | 1,2,4,5,6,1<br>8,22,25 | 3,7,8,19,2<br>0,21,23,24<br>,26 | 2  | P98089,Q7TP52                                                                       |
| 2105 | 1,2,4,5,6,1<br>8,22,26 | 3,7,8,19,2<br>0,21,23,24<br>,25 | 4  | P20760,P83748,Q63942,Q7TP52                                                         |
| 2106 | 1,2,4,5,6,1<br>8,23,24 | 3,7,8,19,2<br>0,21,22,25<br>,26 | 4  | P28648,P34901,Q63942,Q6IFU7                                                         |
| 2107 | 1,2,4,5,6,1<br>8,23,25 | 3,7,8,19,2<br>0,21,22,24<br>,26 | 4  | P02803,P28648,P98089,Q99MH3                                                         |
| 2108 | 1,2,4,5,6,1<br>8,23,26 | 3,7,8,19,2<br>0,21,22,24<br>,25 | 12 | P20760,P20762,P28648,Q63661,Q63942,Q6IFU7,Q6IFU8,Q6IFW6,Q6IG02,Q6IMF3,Q6P6Q2,Q7TP52 |
| 2109 | 1,2,4,5,6,1<br>8,24,25 | 3,7,8,19,2<br>0,21,22,23<br>,26 | 2  | P98089,Q7TP52                                                                       |
| 2110 | 1,2,4,5,6,1<br>8,24,26 | 3,7,8,19,2<br>0,21,22,23<br>,25 | 4  | P20760,P83748,Q63942,Q7TP52                                                         |
| 2111 | 1,2,4,5,6,1<br>8,25,26 | 3,7,8,19,2<br>0,21,22,23<br>,24 | 8  | P00774,P20760,P55091,P83748,P98089,Q63942,Q6AY33,Q7TP52                             |
| 2112 | 1,2,4,5,6,1<br>9,20,21 | 3,7,8,18,2<br>2,23,24,25<br>,26 | 2  | P00731,P25236                                                                       |
| 2113 | 1,2,4,5,6,1<br>9,20,22 | 3,7,8,18,2<br>1,23,24,25<br>,26 | 3  | P22006,Q62997,Q7TP52                                                                |
| 2114 | 1,2,4,5,6,1<br>9,20,23 | 3,7,8,18,2<br>1,22,24,25<br>,26 | 4  | P15399,P22006,P97580,Q30KJ2                                                         |
| 2115 | 1,2,4,5,6,1<br>9,20,24 | 3,7,8,18,2<br>1,22,23,25<br>,26 | 1  | Q7TP52                                                                              |

|      |                        |                                 |   |                                                  |
|------|------------------------|---------------------------------|---|--------------------------------------------------|
| 2116 | 1,2,4,5,6,1<br>9,20,25 | 3,7,8,18,2<br>1,22,23,24<br>,26 | 1 | Q7TP52                                           |
| 2117 | 1,2,4,5,6,1<br>9,20,26 | 3,7,8,18,2<br>1,22,23,24<br>,25 | 3 | P05539,P20760,Q7TP52                             |
| 2118 | 1,2,4,5,6,1<br>9,21,22 | 3,7,8,18,2<br>0,23,24,25<br>,26 | 4 | A2RUV9,P25236,P35467,Q7TP52                      |
| 2119 | 1,2,4,5,6,1<br>9,21,23 | 3,7,8,18,2<br>0,22,24,25<br>,26 | 5 | P02803,P15399,P25236,P97580,Q30KJ2               |
| 2120 | 1,2,4,5,6,1<br>9,21,24 | 3,7,8,18,2<br>0,22,23,25<br>,26 | 3 | A2RUV9,P35467,Q08849                             |
| 2121 | 1,2,4,5,6,1<br>9,21,25 | 3,7,8,18,2<br>0,22,23,24<br>,26 | 7 | A2RUV9,P00731,P02803,P20646,P25236,P35467,P97840 |
| 2122 | 1,2,4,5,6,1<br>9,21,26 | 3,7,8,18,2<br>0,22,23,24<br>,25 | 5 | P20760,P25236,P83748,Q63661,Q7TP52               |
| 2123 | 1,2,4,5,6,1<br>9,22,23 | 3,7,8,18,2<br>0,21,24,25<br>,26 | 4 | P15399,P97580,Q30KJ2,Q7TP52                      |
| 2124 | 1,2,4,5,6,1<br>9,22,24 | 3,7,8,18,2<br>0,21,23,25<br>,26 | 3 | A2RUV9,P35467,Q7TP52                             |
| 2125 | 1,2,4,5,6,1<br>9,22,25 | 3,7,8,18,2<br>0,21,23,24<br>,26 | 4 | A2RUV9,P06911,P35467,Q7TP52                      |
| 2126 | 1,2,4,5,6,1<br>9,22,26 | 3,7,8,18,2<br>0,21,23,24<br>,25 | 4 | P05539,P20760,P83748,Q7TP52                      |
| 2127 | 1,2,4,5,6,1<br>9,23,24 | 3,7,8,18,2<br>0,21,22,25<br>,26 | 3 | P15399,P97580,Q30KJ2                             |
| 2128 | 1,2,4,5,6,1<br>9,23,25 | 3,7,8,18,2<br>0,21,22,24<br>,26 | 5 | P02803,P15399,P50280,P97580,Q30KJ2               |
| 2129 | 1,2,4,5,6,1<br>9,23,26 | 3,7,8,18,2<br>0,21,22,24<br>,25 | 7 | P15399,P20760,P28648,P97580,Q30KJ2,Q6IFU8,Q7TP52 |
| 2130 | 1,2,4,5,6,1<br>9,24,25 | 3,7,8,18,2<br>0,21,22,23<br>,26 | 2 | P35467,Q7TP52                                    |

|      |                        |                                 |   |                                                         |
|------|------------------------|---------------------------------|---|---------------------------------------------------------|
| 2131 | 1,2,4,5,6,1<br>9,24,26 | 3,7,8,18,2<br>0,21,22,23<br>,25 | 2 | P20760,Q7TP52                                           |
| 2132 | 1,2,4,5,6,1<br>9,25,26 | 3,7,8,18,2<br>0,21,22,23<br>,24 | 2 | P20760,Q7TP52                                           |
| 2133 | 1,2,4,5,6,2<br>0,21,22 | 3,7,8,18,1<br>9,23,24,25<br>,26 | 4 | P25236,P35467,Q7TP52,Q7TPB1                             |
| 2134 | 1,2,4,5,6,2<br>0,21,23 | 3,7,8,18,1<br>9,22,24,25<br>,26 | 3 | P01835,P20762,P25236                                    |
| 2135 | 1,2,4,5,6,2<br>0,21,24 | 3,7,8,18,1<br>9,22,23,25<br>,26 | 3 | P13432,P25236,P35467                                    |
| 2136 | 1,2,4,5,6,2<br>0,21,25 | 3,7,8,18,1<br>9,22,23,24<br>,26 | 4 | P20646,P25236,P35467,Q91ZS3                             |
| 2137 | 1,2,4,5,6,2<br>0,21,26 | 3,7,8,18,1<br>9,22,23,24<br>,25 | 8 | P01681,P01835,P20760,P20762,P25236,P62804,P80020,P83748 |
| 2138 | 1,2,4,5,6,2<br>0,22,23 | 3,7,8,18,1<br>9,21,24,25<br>,26 | 3 | P22006,Q62997,Q7TP52                                    |
| 2139 | 1,2,4,5,6,2<br>0,22,24 | 3,7,8,18,1<br>9,21,23,25<br>,26 | 2 | P35467,Q7TP52                                           |
| 2140 | 1,2,4,5,6,2<br>0,22,25 | 3,7,8,18,1<br>9,21,23,24<br>,26 | 4 | P35467,Q07523,Q62997,Q7TP52                             |
| 2141 | 1,2,4,5,6,2<br>0,22,26 | 3,7,8,18,1<br>9,21,23,24<br>,25 | 4 | P05539,P20760,Q62997,Q7TP52                             |
| 2142 | 1,2,4,5,6,2<br>0,23,24 | 3,7,8,18,1<br>9,21,22,25<br>,26 | 1 | P34901                                                  |
| 2143 | 1,2,4,5,6,2<br>0,23,25 | 3,7,8,18,1<br>9,21,22,24<br>,26 | 1 | P70709                                                  |
| 2144 | 1,2,4,5,6,2<br>0,23,26 | 3,7,8,18,1<br>9,21,22,24<br>,25 | 8 | P05539,P20760,P20762,P36376,Q6IFU8,Q6IFW6,Q6IMF3,Q7TP52 |
| 2145 | 1,2,4,5,6,2<br>0,24,25 | 3,7,8,18,1<br>9,21,22,23<br>,26 | 2 | P35467,Q7TP52                                           |

|      |                        |                                 |   |                                                         |
|------|------------------------|---------------------------------|---|---------------------------------------------------------|
| 2146 | 1,2,4,5,6,2<br>0,24,26 | 3,7,8,18,1<br>9,21,22,23<br>,25 | 2 | P20760,Q7TP52                                           |
| 2147 | 1,2,4,5,6,2<br>0,25,26 | 3,7,8,18,1<br>9,21,22,23<br>,24 | 3 | P05539,P20760,Q7TP52                                    |
| 2148 | 1,2,4,5,6,2<br>1,22,23 | 3,7,8,18,1<br>9,20,24,25<br>,26 | 1 | P25236                                                  |
| 2149 | 1,2,4,5,6,2<br>1,22,24 | 3,7,8,18,1<br>9,20,23,25<br>,26 | 4 | P13432,P35467,Q08849,Q7TP52                             |
| 2150 | 1,2,4,5,6,2<br>1,22,25 | 3,7,8,18,1<br>9,20,23,24<br>,26 | 3 | P25236,P35467,Q7TP52                                    |
| 2151 | 1,2,4,5,6,2<br>1,22,26 | 3,7,8,18,1<br>9,20,23,24<br>,25 | 4 | P20760,P25236,P83748,Q7TP52                             |
| 2152 | 1,2,4,5,6,2<br>1,23,24 | 3,7,8,18,1<br>9,20,22,25<br>,26 | 2 | P25236,P34901                                           |
| 2153 | 1,2,4,5,6,2<br>1,23,25 | 3,7,8,18,1<br>9,20,22,24<br>,26 | 6 | P06760,P20646,P25236,P50280,P70709,Q6P6R2               |
| 2154 | 1,2,4,5,6,2<br>1,23,26 | 3,7,8,18,1<br>9,20,22,24<br>,25 | 8 | P20760,P20762,P25236,P83748,Q63661,Q6IFU8,Q6IMF3,Q6P6Q2 |
| 2155 | 1,2,4,5,6,2<br>1,24,25 | 3,7,8,18,1<br>9,20,22,23<br>,26 | 4 | P20646,P25236,P35467,Q08849                             |
| 2156 | 1,2,4,5,6,2<br>1,24,26 | 3,7,8,18,1<br>9,20,22,23<br>,25 | 6 | P20760,P25236,P80020,P83748,Q08849,Q9EQV9               |
| 2157 | 1,2,4,5,6,2<br>1,25,26 | 3,7,8,18,1<br>9,20,22,23<br>,24 | 4 | P20646,P20760,P25236,P83748                             |
| 2158 | 1,2,4,5,6,2<br>2,23,24 | 3,7,8,18,1<br>9,20,21,25<br>,26 | 3 | P34901,Q6IFU7,Q7TP52                                    |
| 2159 | 1,2,4,5,6,2<br>2,23,25 | 3,7,8,18,1<br>9,20,21,24<br>,26 | 6 | G3V686,P06911,P50280,P70709,Q5GRG2,Q7TP52               |
| 2160 | 1,2,4,5,6,2<br>2,23,26 | 3,7,8,18,1<br>9,20,21,24<br>,25 | 5 | P05539,P20760,P36376,Q6IFU7,Q7TP52                      |



|      |                        |                                  |    |                                                                                                                                      |
|------|------------------------|----------------------------------|----|--------------------------------------------------------------------------------------------------------------------------------------|
| 2161 | 1,2,4,5,6,2<br>2,24,25 | 3,7,8,18,1<br>9,20,21,23<br>,26  | 2  | P35467,Q7TP52                                                                                                                        |
| 2162 | 1,2,4,5,6,2<br>2,24,26 | 3,7,8,18,1<br>9,20,21,23<br>,25  | 2  | P20760,Q7TP52                                                                                                                        |
| 2163 | 1,2,4,5,6,2<br>2,25,26 | 3,7,8,18,1<br>9,20,21,23<br>,24  | 3  | P05539,P20760,Q7TP52                                                                                                                 |
| 2164 | 1,2,4,5,6,2<br>3,24,25 | 3,7,8,18,1<br>9,20,21,22<br>,26  | 2  | P34901,P70709                                                                                                                        |
| 2165 | 1,2,4,5,6,2<br>3,24,26 | 3,7,8,18,1<br>9,20,21,22<br>,25  | 8  | P20760,P27590,P34901,P47967,Q6IFU7,Q6IFU8,Q6IMF3,Q7TP52                                                                              |
| 2166 | 1,2,4,5,6,2<br>3,25,26 | 3,7,8,18,1<br>9,20,21,22<br>,24  | 6  | P05539,P20760,P36376,Q6IFU8,Q6IMF3,Q7TP52                                                                                            |
| 2167 | 1,2,4,5,6,2<br>4,25,26 | 3,7,8,18,1<br>9,20,21,22<br>,23  | 2  | P20760,Q7TP52                                                                                                                        |
| 2168 | 1,2,4,5,7,8<br>,18,19  | 3,6,20,21,<br>22,23,24,2<br>5,26 | 12 | P00731,P02803,P05964,P16636,P18418,P52590,Q03191,Q63475,Q63532,Q63942,Q64057,Q9QZA6                                                  |
| 2169 | 1,2,4,5,7,8<br>,18,20  | 3,6,19,21,<br>22,23,24,2<br>5,26 | 8  | P00731,P02803,P10715,P18418,P52590,Q63475,Q9ESW0,Q9QZA6                                                                              |
| 2170 | 1,2,4,5,7,8<br>,18,21  | 3,6,19,20,<br>22,23,24,2<br>5,26 | 15 | O89117,P00731,P02803,P18418,P25031,P42854,P52590,P61206;P84079;P84082,Q63467,Q63475,Q64057,Q6AYS4,Q80WL1,Q9ESW0,Q9QZA6               |
| 2171 | 1,2,4,5,7,8<br>,18,22  | 3,6,19,20,<br>21,23,24,2<br>5,26 | 4  | P18418,P52590,Q7TP52,Q80WL1                                                                                                          |
| 2172 | 1,2,4,5,7,8<br>,18,23  | 3,6,19,20,<br>21,22,24,2<br>5,26 | 12 | P02803,P18418,P28648,P52590,Q03191,Q63467,Q63475,Q63942,Q64057,Q99MH3,Q9ESW0,Q9QZA6                                                  |
| 2173 | 1,2,4,5,7,8<br>,18,24  | 3,6,19,20,<br>21,22,23,2<br>5,26 | 6  | P10715,P16636,P18418,P52590,Q63475,Q9QZA6                                                                                            |
| 2174 | 1,2,4,5,7,8<br>,18,25  | 3,6,19,20,<br>21,22,23,2<br>4,26 | 14 | P00714,P00731,P02803,P08721,P10715,P18418,P19629,P52590,P61206;P84079;P84082,P98089,Q63475,Q64057,Q6AYS4,Q9QZA6                      |
| 2175 | 1,2,4,5,7,8<br>,18,26  | 3,6,19,20,<br>21,22,23,2<br>4,25 | 17 | P02803,P16636,P18418,P20762,P51886,P52590,P55091,P61206;P84079;P84082,P82995,P83748,Q63942,Q64057,Q6AY33,Q6AYQ8,Q8VD89,Q9ESW0,Q9QZA6 |

|      |                       |                                  |    |                                                                                     |
|------|-----------------------|----------------------------------|----|-------------------------------------------------------------------------------------|
| 2176 | 1,2,4,5,7,8<br>,19,20 | 3,6,18,21,<br>22,23,24,2<br>5,26 | 5  | P02803,P18418,P52590,Q63475,Q63532                                                  |
| 2177 | 1,2,4,5,7,8<br>,19,21 | 3,6,18,20,<br>22,23,24,2<br>5,26 | 11 | O89117,P00731,P02803,P18418,P35281,P42854,P52590,Q63475,Q63532,Q64057,Q80WL1        |
| 2178 | 1,2,4,5,7,8<br>,19,22 | 3,6,18,20,<br>21,23,24,2<br>5,26 | 4  | P18418,P52590,Q63532,Q7TP52                                                         |
| 2179 | 1,2,4,5,7,8<br>,19,23 | 3,6,18,20,<br>21,22,24,2<br>5,26 | 12 | P02803,P15399,P18418,P28648,P52590,P97580,Q03191,Q30KJ2,Q63475,Q63532,Q64057,Q99041 |
| 2180 | 1,2,4,5,7,8<br>,19,24 | 3,6,18,20,<br>21,22,23,2<br>5,26 | 4  | P18418,P52590,Q63475,Q63532                                                         |
| 2181 | 1,2,4,5,7,8<br>,19,25 | 3,6,18,20,<br>21,22,23,2<br>4,26 | 8  | P02803,P10715,P18418,P52590,P68370,P80204,Q5GRG2,Q63532                             |
| 2182 | 1,2,4,5,7,8<br>,19,26 | 3,6,18,20,<br>21,22,23,2<br>4,25 | 6  | P02803,P18418,P20760,P52590,P83748,Q63532                                           |
| 2183 | 1,2,4,5,7,8<br>,20,21 | 3,6,18,19,<br>22,23,24,2<br>5,26 | 8  | P02761,P02803,P18418,P20762,P42854,P52590,Q63475,Q9QZA6                             |
| 2184 | 1,2,4,5,7,8<br>,20,22 | 3,6,18,19,<br>21,23,24,2<br>5,26 | 5  | P18418,P52590,Q62997,Q63475,Q63617                                                  |
| 2185 | 1,2,4,5,7,8<br>,20,23 | 3,6,18,19,<br>21,22,24,2<br>5,26 | 8  | P02803,P14408,P18418,P20762,P28648,P52590,Q63475,Q63617                             |
| 2186 | 1,2,4,5,7,8<br>,20,24 | 3,6,18,19,<br>21,22,23,2<br>5,26 | 5  | P10715,P18418,P52590,Q63475,Q63617                                                  |
| 2187 | 1,2,4,5,7,8<br>,20,25 | 3,6,18,19,<br>21,22,23,2<br>4,26 | 7  | P02803,P10715,P18418,P52590,P68370,Q5GRG2,Q63475                                    |
| 2188 | 1,2,4,5,7,8<br>,20,26 | 3,6,18,19,<br>21,22,23,2<br>4,25 | 8  | P05539,P18418,P20760,P20762,P52590,P83748,Q63475,Q6AYQ8                             |
| 2189 | 1,2,4,5,7,8<br>,21,22 | 3,6,18,19,<br>20,23,24,2<br>5,26 | 4  | P18418,P52590,Q63475,Q80WL1                                                         |
| 2190 | 1,2,4,5,7,8<br>,21,23 | 3,6,18,19,<br>20,22,24,2<br>5,26 | 7  | P02803,P18418,P20762,P52590,Q63475,Q64057,Q80WL1                                    |

|      |                        |                                  |    |                                                                                            |
|------|------------------------|----------------------------------|----|--------------------------------------------------------------------------------------------|
| 2191 | 1,2,4,5,7,8<br>,21,24  | 3,6,18,19,<br>20,22,23,2<br>5,26 | 4  | P02761,P18418,P52590,Q63475                                                                |
| 2192 | 1,2,4,5,7,8<br>,21,25  | 3,6,18,19,<br>20,22,23,2<br>4,26 | 13 | P02803,P10715,P18418,P19629,P20646,P52590,P68370,Q5GRG2,Q63475,Q64057,Q6AYS4,Q80WL1,Q9QZA6 |
| 2193 | 1,2,4,5,7,8<br>,21,26  | 3,6,18,19,<br>20,22,23,2<br>4,25 | 11 | P02803,P18418,P19223,P20762,P52590,P82995,P83748,Q63475,Q64057,Q80WL1,Q9EQV9               |
| 2194 | 1,2,4,5,7,8<br>,22,23  | 3,6,18,19,<br>20,21,24,2<br>5,26 | 4  | P18418,P28648,P52590,Q63475                                                                |
| 2195 | 1,2,4,5,7,8<br>,22,24  | 3,6,18,19,<br>20,21,23,2<br>5,26 | 3  | P18418,P52590,Q63475                                                                       |
| 2196 | 1,2,4,5,7,8<br>,22,25  | 3,6,18,19,<br>20,21,23,2<br>4,26 | 9  | P06911,P10715,P18418,P19629,P52590,P68370,P80204,Q5GRG2,Q6AYS4                             |
| 2197 | 1,2,4,5,7,8<br>,22,26  | 3,6,18,19,<br>20,21,23,2<br>4,25 | 8  | P05539,P18418,P20760,P52590,P83748,Q6AYQ8,Q7TP52,Q80WL1                                    |
| 2198 | 1,2,4,5,7,8<br>,23,24  | 3,6,18,19,<br>20,21,22,2<br>5,26 | 4  | P18418,P28648,P52590,Q63475                                                                |
| 2199 | 1,2,4,5,7,8<br>,23,25  | 3,6,18,19,<br>20,21,22,2<br>4,26 | 10 | P02803,P10715,P18418,P19629,P28648,P52590,Q5GRG2,Q63475,Q6AYS4,Q99041                      |
| 2200 | 1,2,4,5,7,8<br>,23,26  | 3,6,18,19,<br>20,21,22,2<br>4,25 | 9  | P02803,P18418,P20760,P20762,P28648,P52590,P83748,Q63475,Q6AYQ8                             |
| 2201 | 1,2,4,5,7,8<br>,24,25  | 3,6,18,19,<br>20,21,22,2<br>3,26 | 6  | P10715,P18418,P19629,P52590,Q5GRG2,Q63475                                                  |
| 2202 | 1,2,4,5,7,8<br>,24,26  | 3,6,18,19,<br>20,21,22,2<br>3,25 | 6  | P18418,P20760,P52590,P83748,Q63475,Q6AYQ8                                                  |
| 2203 | 1,2,4,5,7,8<br>,25,26  | 3,6,18,19,<br>20,21,22,2<br>3,24 | 10 | P02803,P10715,P18418,P19629,P52590,P61206,P84079,P84082,P82995,P83748,Q6AY33,Q6AYQ8        |
| 2204 | 1,2,4,5,7,1<br>8,19,20 | 3,6,8,21,2<br>2,23,24,25<br>,26  | 9  | P00731,P02803,P07150,P14408,P18418,P52590,Q63532,Q6IE51,Q9WTT6                             |
| 2205 | 1,2,4,5,7,1<br>8,19,21 | 3,6,8,20,2<br>2,23,24,25<br>,26  | 13 | D3ZUC6,O89117,P00731,P02803,P05964,P18418,P25031,P42854,P52590,Q03191,Q63467,Q63532,Q6IE51 |

|      |                        |                                 |    |                                                                                            |
|------|------------------------|---------------------------------|----|--------------------------------------------------------------------------------------------|
| 2206 | 1,2,4,5,7,1<br>8,19,22 | 3,6,8,20,2<br>1,23,24,25<br>,26 | 8  | P07150,P16636,P18418,P52590,Q03191,Q63532,Q7TP52,Q9WTT6                                    |
| 2207 | 1,2,4,5,7,1<br>8,19,23 | 3,6,8,20,2<br>1,22,24,25<br>,26 | 13 | P02803,P05964,P14408,P15399,P16636,P18418,P28648,P52590,P97580,Q03191,Q63532,Q6IE51,Q99MH3 |
| 2208 | 1,2,4,5,7,1<br>8,19,24 | 3,6,8,20,2<br>1,22,23,25<br>,26 | 8  | O89117,P16636,P18418,P52590,Q03191,Q63532,Q6IE51,Q9WTT6                                    |
| 2209 | 1,2,4,5,7,1<br>8,19,25 | 3,6,8,20,2<br>1,22,23,24<br>,26 | 8  | P00731,P02803,P18418,P52590,P61206;P84079;P84082,Q03191,Q63532,Q6IE51                      |
| 2210 | 1,2,4,5,7,1<br>8,19,26 | 3,6,8,20,2<br>1,22,23,24<br>,25 | 11 | P02803,P16636,P51886,P52590,P82995,P83748,Q03191,Q63532,Q63661,Q63942,Q6IE51               |
| 2211 | 1,2,4,5,7,1<br>8,20,21 | 3,6,8,19,2<br>2,23,24,25<br>,26 | 7  | P00731,P25031,P42854,P52590,P61206;P84079;P84082,Q63467,Q9ESW0                             |
| 2212 | 1,2,4,5,7,1<br>8,20,22 | 3,6,8,19,2<br>1,23,24,25<br>,26 | 4  | P07150,P52590,Q62997,Q7TP52                                                                |
| 2213 | 1,2,4,5,7,1<br>8,20,23 | 3,6,8,19,2<br>1,22,24,25<br>,26 | 4  | P14408,P28648,P52590,Q9QZK9                                                                |
| 2214 | 1,2,4,5,7,1<br>8,20,24 | 3,6,8,19,2<br>1,22,23,25<br>,26 | 3  | P18418,P52590,Q9QZK9                                                                       |
| 2215 | 1,2,4,5,7,1<br>8,20,25 | 3,6,8,19,2<br>1,22,23,24<br>,26 | 3  | P14408,P52590,P61206;P84079;P84082                                                         |
| 2216 | 1,2,4,5,7,1<br>8,20,26 | 3,6,8,19,2<br>1,22,23,24<br>,25 | 7  | P05539,P14408,P16636,P52590,P61206;P84079;P84082,P83748,Q9ESW0                             |
| 2217 | 1,2,4,5,7,1<br>8,21,22 | 3,6,8,19,2<br>0,23,24,25<br>,26 | 5  | O89117,P18418,P25031,P42854,P52590                                                         |
| 2218 | 1,2,4,5,7,1<br>8,21,23 | 3,6,8,19,2<br>0,22,24,25<br>,26 | 12 | D3ZUC6,O89117,P02803,P05964,P25031,P28648,P52590,Q03191,Q62636,Q63467,Q99MH3,Q9ESW0        |
| 2219 | 1,2,4,5,7,1<br>8,21,24 | 3,6,8,19,2<br>0,22,23,25<br>,26 | 6  | D3ZUC6,O89117,P18418,P25031,P52590,Q63475                                                  |
| 2220 | 1,2,4,5,7,1<br>8,21,25 | 3,6,8,19,2<br>0,22,23,24<br>,26 | 10 | P00731,P02803,P08721,P18418,P20646,P25031,P31430,P52590,P61206;P84079;P84082,P98089        |

|      |                        |                                 |    |                                                                                                                 |
|------|------------------------|---------------------------------|----|-----------------------------------------------------------------------------------------------------------------|
| 2221 | 1,2,4,5,7,1<br>8,21,26 | 3,6,8,19,2<br>0,22,23,24<br>,25 | 14 | D3ZUC6,O89117,P16636,P25031,P52590,P55091,P61206;P84079;P84082,P82995,P83748,Q62636,Q63661,Q71MB6,Q9EQV9,Q9ESW0 |
| 2222 | 1,2,4,5,7,1<br>8,22,23 | 3,6,8,19,2<br>0,21,24,25<br>,26 | 2  | P28648,P52590                                                                                                   |
| 2223 | 1,2,4,5,7,1<br>8,22,24 | 3,6,8,19,2<br>0,21,23,25<br>,26 | 4  | P16636,P18418,P52590,Q9WTT6                                                                                     |
| 2224 | 1,2,4,5,7,1<br>8,22,25 | 3,6,8,19,2<br>0,21,23,24<br>,26 | 4  | P18418,P52590,P61206;P84079;P84082,Q7TP52                                                                       |
| 2225 | 1,2,4,5,7,1<br>8,22,26 | 3,6,8,19,2<br>0,21,23,24<br>,25 | 7  | O88797,P05539,P16636,P52590,P82995,P83748,Q7TP52                                                                |
| 2226 | 1,2,4,5,7,1<br>8,23,24 | 3,6,8,19,2<br>0,21,22,25<br>,26 | 6  | P16636,P28648,P34901,P52590,Q03191,Q6IE51                                                                       |
| 2227 | 1,2,4,5,7,1<br>8,23,25 | 3,6,8,19,2<br>0,21,22,24<br>,26 | 6  | P02803,P14408,P28648,P52590,P61206;P84079;P84082,Q99MH3                                                         |
| 2228 | 1,2,4,5,7,1<br>8,23,26 | 3,6,8,19,2<br>0,21,22,24<br>,25 | 13 | P14408,P16636,P28648,P52590,P83748,Q03191,Q62636,Q63661,Q63942,Q6IFU8,Q6IFW6,Q6IMF3,Q6P6Q2                      |
| 2229 | 1,2,4,5,7,1<br>8,24,25 | 3,6,8,19,2<br>0,21,22,23<br>,26 | 3  | P18418,P52590,P61206;P84079;P84082                                                                              |
| 2230 | 1,2,4,5,7,1<br>8,24,26 | 3,6,8,19,2<br>0,21,22,23<br>,25 | 7  | P16636,P52590,P55091,P82995,P83748,Q63942,Q8VD89                                                                |
| 2231 | 1,2,4,5,7,1<br>8,25,26 | 3,6,8,19,2<br>0,21,22,23<br>,24 | 8  | P02803,P08721,P16636,P52590,P55091,P61206;P84079;P84082,P82995,P83748                                           |
| 2232 | 1,2,4,5,7,1<br>9,20,21 | 3,6,8,18,2<br>2,23,24,25<br>,26 | 3  | P00731,P42854,P52590                                                                                            |
| 2233 | 1,2,4,5,7,1<br>9,20,22 | 3,6,8,18,2<br>1,23,24,25<br>,26 | 9  | P00774,P07150,P14408,P14669,P52590,Q62997,Q63532,Q7TP52,Q9WTT6                                                  |
| 2234 | 1,2,4,5,7,1<br>9,20,23 | 3,6,8,18,2<br>1,22,24,25<br>,26 | 6  | P14408,P15399,P52590,P97580,Q63532,Q6IE51                                                                       |
| 2235 | 1,2,4,5,7,1<br>9,20,24 | 3,6,8,18,2<br>1,22,23,25<br>,26 | 6  | P07150,P14408,P52590,Q63532,Q6IE51,Q9WTT6                                                                       |

|      |                        |                                 |   |                                                                |
|------|------------------------|---------------------------------|---|----------------------------------------------------------------|
| 2236 | 1,2,4,5,7,1<br>9,20,25 | 3,6,8,18,2<br>1,22,23,24<br>,26 | 2 | P14408,P52590                                                  |
| 2237 | 1,2,4,5,7,1<br>9,20,26 | 3,6,8,18,2<br>1,22,23,24<br>,25 | 4 | P05539,P14408,P52590,P83748                                    |
| 2238 | 1,2,4,5,7,1<br>9,21,22 | 3,6,8,18,2<br>0,23,24,25<br>,26 | 4 | O89117,P35467,P52590,Q63532                                    |
| 2239 | 1,2,4,5,7,1<br>9,21,23 | 3,6,8,18,2<br>0,22,24,25<br>,26 | 8 | D3ZUC6,O89117,P02803,P15399,P52590,P97580,Q63532,Q6IE51        |
| 2240 | 1,2,4,5,7,1<br>9,21,24 | 3,6,8,18,2<br>0,22,23,25<br>,26 | 6 | D3ZUC6,O89117,P35467,P52590,Q63532,Q6IE51                      |
| 2241 | 1,2,4,5,7,1<br>9,21,25 | 3,6,8,18,2<br>0,22,23,24<br>,26 | 5 | P02803,P35467,P47967,P52590,P97840                             |
| 2242 | 1,2,4,5,7,1<br>9,21,26 | 3,6,8,18,2<br>0,22,23,24<br>,25 | 4 | O89117,P52590,P83748,Q63661                                    |
| 2243 | 1,2,4,5,7,1<br>9,22,23 | 3,6,8,18,2<br>0,21,24,25<br>,26 | 4 | P52590,P97580,Q63532,Q6IE51                                    |
| 2244 | 1,2,4,5,7,1<br>9,22,24 | 3,6,8,18,2<br>0,21,23,25<br>,26 | 5 | P07150,P35467,P52590,Q63532,Q9WTT6                             |
| 2245 | 1,2,4,5,7,1<br>9,22,25 | 3,6,8,18,2<br>0,21,23,24<br>,26 | 4 | P35467,P52590,Q63532,Q7TP52                                    |
| 2246 | 1,2,4,5,7,1<br>9,22,26 | 3,6,8,18,2<br>0,21,23,24<br>,25 | 5 | P05539,P52590,P83748,Q63532,Q7TP52                             |
| 2247 | 1,2,4,5,7,1<br>9,23,24 | 3,6,8,18,2<br>0,21,22,25<br>,26 | 6 | P15399,P52590,P97580,Q03191,Q63532,Q6IE51                      |
| 2248 | 1,2,4,5,7,1<br>9,23,25 | 3,6,8,18,2<br>0,21,22,24<br>,26 | 8 | P02803,P14408,P15399,P52590,P97580,Q63532,Q6IE51,Q99041        |
| 2249 | 1,2,4,5,7,1<br>9,23,26 | 3,6,8,18,2<br>0,21,22,24<br>,25 | 9 | P05539,P14408,P28648,P52590,P97580,Q03191,Q30KJ2,Q63532,Q6IE51 |
| 2250 | 1,2,4,5,7,1<br>9,24,25 | 3,6,8,18,2<br>0,21,22,23<br>,26 | 4 | P35467,P52590,Q63532,Q6IE51                                    |

|      |                        |                                 |   |                                                  |
|------|------------------------|---------------------------------|---|--------------------------------------------------|
| 2251 | 1,2,4,5,7,1<br>9,24,26 | 3,6,8,18,2<br>0,21,22,23<br>,25 | 6 | P16636,P20760,P52590,P83748,Q63532,Q6IE51        |
| 2252 | 1,2,4,5,7,1<br>9,25,26 | 3,6,8,18,2<br>0,21,22,23<br>,24 | 5 | P05539,P14408,P52590,P83748,Q63532               |
| 2253 | 1,2,4,5,7,2<br>0,21,22 | 3,6,8,18,1<br>9,23,24,25<br>,26 | 4 | P01836,P35467,P42854,P52590                      |
| 2254 | 1,2,4,5,7,2<br>0,21,23 | 3,6,8,18,1<br>9,22,24,25<br>,26 | 4 | P14408,P42854,P52590,Q63475                      |
| 2255 | 1,2,4,5,7,2<br>0,21,24 | 3,6,8,18,1<br>9,22,23,25<br>,26 | 4 | P01836,P35467,P52590,Q63475                      |
| 2256 | 1,2,4,5,7,2<br>0,21,25 | 3,6,8,18,1<br>9,22,23,24<br>,26 | 4 | P35467,P42854,P52590,P61206;P84079;P84082        |
| 2257 | 1,2,4,5,7,2<br>0,21,26 | 3,6,8,18,1<br>9,22,23,24<br>,25 | 7 | P01041,P01836,P05539,P14408,P42854,P52590,P83748 |
| 2258 | 1,2,4,5,7,2<br>0,22,23 | 3,6,8,18,1<br>9,21,24,25<br>,26 | 3 | P14408,P52590,Q62997                             |
| 2259 | 1,2,4,5,7,2<br>0,22,24 | 3,6,8,18,1<br>9,21,23,25<br>,26 | 6 | P07150,P14669,P35467,P52590,Q62997,Q9WTT6        |
| 2260 | 1,2,4,5,7,2<br>0,22,25 | 3,6,8,18,1<br>9,21,23,24<br>,26 | 4 | P14408,P35467,P52590,Q62997                      |
| 2261 | 1,2,4,5,7,2<br>0,22,26 | 3,6,8,18,1<br>9,21,23,24<br>,25 | 6 | P05539,P14408,P52590,P83748,Q62997,Q7TP52        |
| 2262 | 1,2,4,5,7,2<br>0,23,24 | 3,6,8,18,1<br>9,21,22,25<br>,26 | 3 | P14408,P52590,Q63475                             |
| 2263 | 1,2,4,5,7,2<br>0,23,25 | 3,6,8,18,1<br>9,21,22,24<br>,26 | 2 | P14408,P52590                                    |
| 2264 | 1,2,4,5,7,2<br>0,23,26 | 3,6,8,18,1<br>9,21,22,24<br>,25 | 4 | P05539,P14408,P36376,P52590                      |
| 2265 | 1,2,4,5,7,2<br>0,24,25 | 3,6,8,18,1<br>9,21,22,23<br>,26 | 3 | P14408,P35467,P52590                             |

|      |                        |                                 |   |                                                  |
|------|------------------------|---------------------------------|---|--------------------------------------------------|
| 2266 | 1,2,4,5,7,2<br>0,24,26 | 3,6,8,18,1<br>9,21,22,23<br>,25 | 4 | P01836,P14408,P20760,P52590                      |
| 2267 | 1,2,4,5,7,2<br>0,25,26 | 3,6,8,18,1<br>9,21,22,23<br>,24 | 4 | P05539,P14408,P52590,P61206;P84079;P84082        |
| 2268 | 1,2,4,5,7,2<br>1,22,23 | 3,6,8,18,1<br>9,20,24,25<br>,26 | 1 | P52590                                           |
| 2269 | 1,2,4,5,7,2<br>1,22,24 | 3,6,8,18,1<br>9,20,23,25<br>,26 | 2 | P35467,P52590                                    |
| 2270 | 1,2,4,5,7,2<br>1,22,25 | 3,6,8,18,1<br>9,20,23,24<br>,26 | 2 | P35467,P52590                                    |
| 2271 | 1,2,4,5,7,2<br>1,22,26 | 3,6,8,18,1<br>9,20,23,24<br>,25 | 4 | P01836,P05539,P52590,P83748                      |
| 2272 | 1,2,4,5,7,2<br>1,23,24 | 3,6,8,18,1<br>9,20,22,25<br>,26 | 4 | D3ZUC6,P34901,P52590,Q63475                      |
| 2273 | 1,2,4,5,7,2<br>1,23,25 | 3,6,8,18,1<br>9,20,22,24<br>,26 | 2 | P02803,P52590                                    |
| 2274 | 1,2,4,5,7,2<br>1,23,26 | 3,6,8,18,1<br>9,20,22,24<br>,25 | 3 | P52590,P83748,Q63661                             |
| 2275 | 1,2,4,5,7,2<br>1,24,25 | 3,6,8,18,1<br>9,20,22,23<br>,26 | 3 | P22006,P35467,P52590                             |
| 2276 | 1,2,4,5,7,2<br>1,24,26 | 3,6,8,18,1<br>9,20,22,23<br>,25 | 6 | P01836,P20760,P52590,P80020,P83748,Q9EQV9        |
| 2277 | 1,2,4,5,7,2<br>1,25,26 | 3,6,8,18,1<br>9,20,22,23<br>,24 | 5 | P19223,P52590,P61206;P84079;P84082,P82995,P83748 |
| 2278 | 1,2,4,5,7,2<br>2,23,24 | 3,6,8,18,1<br>9,20,21,25<br>,26 | 2 | P34901,P52590                                    |
| 2279 | 1,2,4,5,7,2<br>2,23,25 | 3,6,8,18,1<br>9,20,21,24<br>,26 | 3 | P06911,P52590,Q5GRG2                             |
| 2280 | 1,2,4,5,7,2<br>2,23,26 | 3,6,8,18,1<br>9,20,21,24<br>,25 | 4 | P05539,P36376,P52590,P83748                      |



|      |                        |                                 |   |                                                                       |
|------|------------------------|---------------------------------|---|-----------------------------------------------------------------------|
| 2281 | 1,2,4,5,7,2<br>2,24,25 | 3,6,8,18,1<br>9,20,21,23<br>,26 | 2 | P35467,P52590                                                         |
| 2282 | 1,2,4,5,7,2<br>2,24,26 | 3,6,8,18,1<br>9,20,21,23<br>,25 | 6 | P05539,P08010,P20760,P52590,P83748,Q7TP52                             |
| 2283 | 1,2,4,5,7,2<br>2,25,26 | 3,6,8,18,1<br>9,20,21,23<br>,24 | 4 | P05539,P52590,P83748,Q7TP52                                           |
| 2284 | 1,2,4,5,7,2<br>3,24,25 | 3,6,8,18,1<br>9,20,21,22<br>,26 | 1 | P52590                                                                |
| 2285 | 1,2,4,5,7,2<br>3,24,26 | 3,6,8,18,1<br>9,20,21,22<br>,25 | 4 | P01946,P20760,P34901,P52590                                           |
| 2286 | 1,2,4,5,7,2<br>3,25,26 | 3,6,8,18,1<br>9,20,21,22<br>,24 | 5 | P01946,P05539,P14408,P36376,P52590                                    |
| 2287 | 1,2,4,5,7,2<br>4,25,26 | 3,6,8,18,1<br>9,20,21,22<br>,23 | 1 | P52590                                                                |
| 2288 | 1,2,4,5,8,1<br>8,19,20 | 3,6,7,21,2<br>2,23,24,25<br>,26 | 5 | P00731,P02803,P22006,P83121,Q9QZK9                                    |
| 2289 | 1,2,4,5,8,1<br>8,19,21 | 3,6,7,20,2<br>2,23,24,25<br>,26 | 6 | O89117,P00731,P02803,P10758,P35281,Q03191                             |
| 2290 | 1,2,4,5,8,1<br>8,19,22 | 3,6,7,20,2<br>1,23,24,25<br>,26 | 2 | P22006,P83121                                                         |
| 2291 | 1,2,4,5,8,1<br>8,19,23 | 3,6,7,20,2<br>1,22,24,25<br>,26 | 9 | P02803,P09605,P25809,P22006,P28648,Q03191,Q63598,Q63942,Q64194,Q99MH3 |
| 2292 | 1,2,4,5,8,1<br>8,19,24 | 3,6,7,20,2<br>1,22,23,25<br>,26 | 3 | P09605,P25809,P83121,Q03191                                           |
| 2293 | 1,2,4,5,8,1<br>8,19,25 | 3,6,7,20,2<br>1,22,23,24<br>,26 | 3 | P00731,P02803,Q03191                                                  |
| 2294 | 1,2,4,5,8,1<br>8,19,26 | 3,6,7,20,2<br>1,22,23,24<br>,25 | 4 | P02803,P09605,P25809,Q03191,Q63942                                    |
| 2295 | 1,2,4,5,8,1<br>8,20,21 | 3,6,7,19,2<br>2,23,24,25<br>,26 | 6 | P00731,P02761,P02803,P62804,Q9ESW0,Q9QZA6                             |

|      |                        |                                 |   |                                                         |
|------|------------------------|---------------------------------|---|---------------------------------------------------------|
| 2296 | 1,2,4,5,8,1<br>8,20,22 | 3,6,7,19,2<br>1,23,24,25<br>,26 | 4 | P22006,P83121,Q62997,Q9QZK9                             |
| 2297 | 1,2,4,5,8,1<br>8,20,23 | 3,6,7,19,2<br>1,22,24,25<br>,26 | 4 | P02803,P22006,P28648,Q9QZK9                             |
| 2298 | 1,2,4,5,8,1<br>8,20,24 | 3,6,7,19,2<br>1,22,23,25<br>,26 | 2 | P83121,Q9QZK9                                           |
| 2299 | 1,2,4,5,8,1<br>8,20,25 | 3,6,7,19,2<br>1,22,23,24<br>,26 | 1 | P02803                                                  |
| 2300 | 1,2,4,5,8,1<br>8,20,26 | 3,6,7,19,2<br>1,22,23,24<br>,25 | 1 | Q63942                                                  |
| 2301 | 1,2,4,5,8,1<br>8,21,22 | 3,6,7,19,2<br>0,23,24,25<br>,26 | 1 | Q80WL1                                                  |
| 2302 | 1,2,4,5,8,1<br>8,21,23 | 3,6,7,19,2<br>0,22,24,25<br>,26 | 5 | P02803,Q03191,Q62636,Q63598,Q99MH3                      |
| 2303 | 1,2,4,5,8,1<br>8,21,24 | 3,6,7,19,2<br>0,22,23,25<br>,26 | 1 | O89117                                                  |
| 2304 | 1,2,4,5,8,1<br>8,21,25 | 3,6,7,19,2<br>0,22,23,24<br>,26 | 8 | P00731,P02803,P08721,P20646,P31430,P98089,Q6AYS4,Q9QZA6 |
| 2305 | 1,2,4,5,8,1<br>8,21,26 | 3,6,7,19,2<br>0,22,23,24<br>,25 | 7 | P02803,Q63661,Q63942,Q80WL1,Q9EQV9,Q9ESW0,Q9QZA6        |
| 2306 | 1,2,4,5,8,1<br>8,22,23 | 3,6,7,19,2<br>0,21,24,25<br>,26 | 1 | P22006                                                  |
| 2307 | 1,2,4,5,8,1<br>8,22,24 | 3,6,7,19,2<br>0,21,23,25<br>,26 | 1 | P83121                                                  |
| 2308 | 1,2,4,5,8,1<br>8,22,25 | 3,6,7,19,2<br>0,21,23,24<br>,26 | 1 | Q6AYS4                                                  |
| 2309 | 1,2,4,5,8,1<br>8,22,26 | 3,6,7,19,2<br>0,21,23,24<br>,25 | 1 | Q63942                                                  |
| 2310 | 1,2,4,5,8,1<br>8,23,24 | 3,6,7,19,2<br>0,21,22,25<br>,26 | 4 | P09605,P25809,P28648,Q03191,Q63942                      |

|      |                        |                                 |    |                                                                                            |
|------|------------------------|---------------------------------|----|--------------------------------------------------------------------------------------------|
| 2311 | 1,2,4,5,8,1<br>8,23,25 | 3,6,7,19,2<br>0,21,22,24<br>,26 | 6  | P00714,P02803,P28648,Q63598,Q6AYS4,Q99MH3                                                  |
| 2312 | 1,2,4,5,8,1<br>8,23,26 | 3,6,7,19,2<br>0,21,22,24<br>,25 | 12 | P02803,P09605,P25809,P28648,Q03191,Q63942,Q64194,Q6AY61,Q6IFU8,Q6IFW6,Q6IG02,Q6IMF3,Q6P6Q2 |
| 2313 | 1,2,4,5,8,1<br>8,24,25 | 3,6,7,19,2<br>0,21,22,23<br>,26 | 0  |                                                                                            |
| 2314 | 1,2,4,5,8,1<br>8,24,26 | 3,6,7,19,2<br>0,21,22,23<br>,25 | 1  | Q63942                                                                                     |
| 2315 | 1,2,4,5,8,1<br>8,25,26 | 3,6,7,19,2<br>0,21,22,23<br>,24 | 6  | P00714,P02803,P08721,P55091,Q63942,Q6AY33                                                  |
| 2316 | 1,2,4,5,8,1<br>9,20,21 | 3,6,7,18,2<br>2,23,24,25<br>,26 | 4  | P02761,P02803,P35281,P62804                                                                |
| 2317 | 1,2,4,5,8,1<br>9,20,22 | 3,6,7,18,2<br>1,23,24,25<br>,26 | 4  | P00774,P22006,P83121,Q62997                                                                |
| 2318 | 1,2,4,5,8,1<br>9,20,23 | 3,6,7,18,2<br>1,22,24,25<br>,26 | 2  | P02803,P22006                                                                              |
| 2319 | 1,2,4,5,8,1<br>9,20,24 | 3,6,7,18,2<br>1,22,23,25<br>,26 | 1  | P83121                                                                                     |
| 2320 | 1,2,4,5,8,1<br>9,20,25 | 3,6,7,18,2<br>1,22,23,24<br>,26 | 1  | P02803                                                                                     |
| 2321 | 1,2,4,5,8,1<br>9,20,26 | 3,6,7,18,2<br>1,22,23,24<br>,25 | 0  |                                                                                            |
| 2322 | 1,2,4,5,8,1<br>9,21,22 | 3,6,7,18,2<br>0,23,24,25<br>,26 | 2  | A2RUV9,Q80WL1                                                                              |
| 2323 | 1,2,4,5,8,1<br>9,21,23 | 3,6,7,18,2<br>0,22,24,25<br>,26 | 2  | P02803,P35281                                                                              |
| 2324 | 1,2,4,5,8,1<br>9,21,24 | 3,6,7,18,2<br>0,22,23,25<br>,26 | 2  | A2RUV9,O89117                                                                              |
| 2325 | 1,2,4,5,8,1<br>9,21,25 | 3,6,7,18,2<br>0,22,23,24<br>,26 | 2  | A2RUV9,P02803                                                                              |

|      |                        |                                 |   |                             |
|------|------------------------|---------------------------------|---|-----------------------------|
| 2326 | 1,2,4,5,8,1<br>9,21,26 | 3,6,7,18,2<br>0,22,23,24<br>,25 | 2 | P02803,Q9EQV9               |
| 2327 | 1,2,4,5,8,1<br>9,22,23 | 3,6,7,18,2<br>0,21,24,25<br>,26 | 0 |                             |
| 2328 | 1,2,4,5,8,1<br>9,22,24 | 3,6,7,18,2<br>0,21,23,25<br>,26 | 2 | A2RUV9,P83121               |
| 2329 | 1,2,4,5,8,1<br>9,22,25 | 3,6,7,18,2<br>0,21,23,24<br>,26 | 1 | A2RUV9                      |
| 2330 | 1,2,4,5,8,1<br>9,22,26 | 3,6,7,18,2<br>0,21,23,24<br>,25 | 0 |                             |
| 2331 | 1,2,4,5,8,1<br>9,23,24 | 3,6,7,18,2<br>0,21,22,25<br>,26 | 2 | P09605;P25809,Q03191        |
| 2332 | 1,2,4,5,8,1<br>9,23,25 | 3,6,7,18,2<br>0,21,22,24<br>,26 | 1 | P02803                      |
| 2333 | 1,2,4,5,8,1<br>9,23,26 | 3,6,7,18,2<br>0,21,22,24<br>,25 | 3 | P02803,P09605;P25809,Q03191 |
| 2334 | 1,2,4,5,8,1<br>9,24,25 | 3,6,7,18,2<br>0,21,22,23<br>,26 | 0 |                             |
| 2335 | 1,2,4,5,8,1<br>9,24,26 | 3,6,7,18,2<br>0,21,22,23<br>,25 | 0 |                             |
| 2336 | 1,2,4,5,8,1<br>9,25,26 | 3,6,7,18,2<br>0,21,22,23<br>,24 | 1 | P02803                      |
| 2337 | 1,2,4,5,8,2<br>0,21,22 | 3,6,7,18,1<br>9,23,24,25<br>,26 | 0 |                             |
| 2338 | 1,2,4,5,8,2<br>0,21,23 | 3,6,7,18,1<br>9,22,24,25<br>,26 | 0 |                             |
| 2339 | 1,2,4,5,8,2<br>0,21,24 | 3,6,7,18,1<br>9,22,23,25<br>,26 | 1 | P02761                      |
| 2340 | 1,2,4,5,8,2<br>0,21,25 | 3,6,7,18,1<br>9,22,23,24<br>,26 | 0 |                             |

|      |                        |                                 |   |                      |
|------|------------------------|---------------------------------|---|----------------------|
| 2341 | 1,2,4,5,8,2<br>0,21,26 | 3,6,7,18,1<br>9,22,23,24<br>,25 | 3 | P02761,P62804,Q9EQV9 |
| 2342 | 1,2,4,5,8,2<br>0,22,23 | 3,6,7,18,1<br>9,21,24,25<br>,26 | 2 | P22006,Q62997        |
| 2343 | 1,2,4,5,8,2<br>0,22,24 | 3,6,7,18,1<br>9,21,23,25<br>,26 | 3 | P83121,Q62997,Q9QZK9 |
| 2344 | 1,2,4,5,8,2<br>0,22,25 | 3,6,7,18,1<br>9,21,23,24<br>,26 | 1 | Q62997               |
| 2345 | 1,2,4,5,8,2<br>0,22,26 | 3,6,7,18,1<br>9,21,23,24<br>,25 | 1 | Q62997               |
| 2346 | 1,2,4,5,8,2<br>0,23,24 | 3,6,7,18,1<br>9,21,22,25<br>,26 | 2 | P97840,Q9QZK9        |
| 2347 | 1,2,4,5,8,2<br>0,23,25 | 3,6,7,18,1<br>9,21,22,24<br>,26 | 0 |                      |
| 2348 | 1,2,4,5,8,2<br>0,23,26 | 3,6,7,18,1<br>9,21,22,24<br>,25 | 1 | P97840               |
| 2349 | 1,2,4,5,8,2<br>0,24,25 | 3,6,7,18,1<br>9,21,22,23<br>,26 | 0 |                      |
| 2350 | 1,2,4,5,8,2<br>0,24,26 | 3,6,7,18,1<br>9,21,22,23<br>,25 | 2 | P47967,P97840        |
| 2351 | 1,2,4,5,8,2<br>0,25,26 | 3,6,7,18,1<br>9,21,22,23<br>,24 | 0 |                      |
| 2352 | 1,2,4,5,8,2<br>1,22,23 | 3,6,7,18,1<br>9,20,24,25<br>,26 | 1 | Q80WL1               |
| 2353 | 1,2,4,5,8,2<br>1,22,24 | 3,6,7,18,1<br>9,20,23,25<br>,26 | 0 |                      |
| 2354 | 1,2,4,5,8,2<br>1,22,25 | 3,6,7,18,1<br>9,20,23,24<br>,26 | 2 | Q6AYS4,Q80WL1        |
| 2355 | 1,2,4,5,8,2<br>1,22,26 | 3,6,7,18,1<br>9,20,23,24<br>,25 | 2 | Q80WL1,Q9EQV9        |

|      |                        |                                 |   |                             |
|------|------------------------|---------------------------------|---|-----------------------------|
| 2356 | 1,2,4,5,8,2<br>1,23,24 | 3,6,7,18,1<br>9,20,22,25<br>,26 | 1 | P34901                      |
| 2357 | 1,2,4,5,8,2<br>1,23,25 | 3,6,7,18,1<br>9,20,22,24<br>,26 | 3 | P02803,P06760,Q6AYS4        |
| 2358 | 1,2,4,5,8,2<br>1,23,26 | 3,6,7,18,1<br>9,20,22,24<br>,25 | 1 | Q9EQV9                      |
| 2359 | 1,2,4,5,8,2<br>1,24,25 | 3,6,7,18,1<br>9,20,22,23<br>,26 | 0 |                             |
| 2360 | 1,2,4,5,8,2<br>1,24,26 | 3,6,7,18,1<br>9,20,22,23<br>,25 | 2 | P02761,Q9EQV9               |
| 2361 | 1,2,4,5,8,2<br>1,25,26 | 3,6,7,18,1<br>9,20,22,23<br>,24 | 4 | P02803,P19223,Q6AYS4,Q9EQV9 |
| 2362 | 1,2,4,5,8,2<br>2,23,24 | 3,6,7,18,1<br>9,20,21,25<br>,26 | 0 |                             |
| 2363 | 1,2,4,5,8,2<br>2,23,25 | 3,6,7,18,1<br>9,20,21,24<br>,26 | 0 |                             |
| 2364 | 1,2,4,5,8,2<br>2,23,26 | 3,6,7,18,1<br>9,20,21,24<br>,25 | 0 |                             |
| 2365 | 1,2,4,5,8,2<br>2,24,25 | 3,6,7,18,1<br>9,20,21,23<br>,26 | 0 |                             |
| 2366 | 1,2,4,5,8,2<br>2,24,26 | 3,6,7,18,1<br>9,20,21,23<br>,25 | 0 |                             |
| 2367 | 1,2,4,5,8,2<br>2,25,26 | 3,6,7,18,1<br>9,20,21,23<br>,24 | 0 |                             |
| 2368 | 1,2,4,5,8,2<br>3,24,25 | 3,6,7,18,1<br>9,20,21,22<br>,26 | 0 |                             |
| 2369 | 1,2,4,5,8,2<br>3,24,26 | 3,6,7,18,1<br>9,20,21,22<br>,25 | 2 | P47967,P97840               |
| 2370 | 1,2,4,5,8,2<br>3,25,26 | 3,6,7,18,1<br>9,20,21,22<br>,24 | 1 | P02803                      |

|      |                         |                                 |   |                                                  |
|------|-------------------------|---------------------------------|---|--------------------------------------------------|
| 2371 | 1,2,4,5,8,2<br>4,25,26  | 3,6,7,18,1<br>9,20,21,22<br>,23 | 1 | Q68FV8                                           |
| 2372 | 1,2,4,5,18,<br>19,20,21 | 3,6,7,8,22,<br>23,24,25,2<br>6  | 3 | P00731,P02803,Q63751                             |
| 2373 | 1,2,4,5,18,<br>19,20,22 | 3,6,7,8,21,<br>23,24,25,2<br>6  | 7 | P07150,P22006,Q62997,Q63751,Q6P6R2,Q9QZK9,Q9WTT6 |
| 2374 | 1,2,4,5,18,<br>19,20,23 | 3,6,7,8,21,<br>22,24,25,2<br>6  | 5 | P02803,P14408,P22006,Q03191,Q9QZK9               |
| 2375 | 1,2,4,5,18,<br>19,20,24 | 3,6,7,8,21,<br>22,23,25,2<br>6  | 4 | P07150,P83121,Q9QZK9,Q9WTT6                      |
| 2376 | 1,2,4,5,18,<br>19,20,25 | 3,6,7,8,21,<br>22,23,24,2<br>6  | 2 | P02803,P14408                                    |
| 2377 | 1,2,4,5,18,<br>19,20,26 | 3,6,7,8,21,<br>22,23,24,2<br>5  | 4 | P14408,Q63355,Q63751,Q63942                      |
| 2378 | 1,2,4,5,18,<br>19,21,22 | 3,6,7,8,20,<br>23,24,25,2<br>6  | 1 | O89117                                           |
| 2379 | 1,2,4,5,18,<br>19,21,23 | 3,6,7,8,20,<br>22,24,25,2<br>6  | 7 | D3ZUC6,O89117,P02803,P05369,P05964,Q03191,Q99MH3 |
| 2380 | 1,2,4,5,18,<br>19,21,24 | 3,6,7,8,20,<br>22,23,25,2<br>6  | 3 | D3ZUC6,O89117,Q03191                             |
| 2381 | 1,2,4,5,18,<br>19,21,25 | 3,6,7,8,20,<br>22,23,24,2<br>6  | 5 | O89117,P00731,P02803,P31430,P98089               |
| 2382 | 1,2,4,5,18,<br>19,21,26 | 3,6,7,8,20,<br>22,23,24,2<br>5  | 7 | D3ZUC6,O89117,P02803,Q03191,Q63661,Q63751,Q63942 |
| 2383 | 1,2,4,5,18,<br>19,22,23 | 3,6,7,8,20,<br>21,24,25,2<br>6  | 2 | P22006,Q03191                                    |
| 2384 | 1,2,4,5,18,<br>19,22,24 | 3,6,7,8,20,<br>21,23,25,2<br>6  | 4 | P07150,P83121,Q6P6R2,Q9WTT6                      |
| 2385 | 1,2,4,5,18,<br>19,22,25 | 3,6,7,8,20,<br>21,23,24,2<br>6  | 0 |                                                  |

|      |                         |                                |    |                                                                                     |
|------|-------------------------|--------------------------------|----|-------------------------------------------------------------------------------------|
| 2386 | 1,2,4,5,18,<br>19,22,26 | 3,6,7,8,20,<br>21,23,24,2<br>5 | 6  | Q63661,Q63751,Q63942,Q6P6R2,Q7TP52,Q9WTT6                                           |
| 2387 | 1,2,4,5,18,<br>19,23,24 | 3,6,7,8,20,<br>21,22,25,2<br>6 | 2  | Q03191,Q99MH3                                                                       |
| 2388 | 1,2,4,5,18,<br>19,23,25 | 3,6,7,8,20,<br>21,22,24,2<br>6 | 3  | P02803,Q03191,Q99MH3                                                                |
| 2389 | 1,2,4,5,18,<br>19,23,26 | 3,6,7,8,20,<br>21,22,24,2<br>5 | 11 | P02803,P09605,P25809,P28648,Q03191,Q5XFX0,Q63661,Q63942,Q6IFU8,Q6IFW6,Q6P6Q2,Q99MH3 |
| 2390 | 1,2,4,5,18,<br>19,24,25 | 3,6,7,8,20,<br>21,22,23,2<br>6 | 0  |                                                                                     |
| 2391 | 1,2,4,5,18,<br>19,24,26 | 3,6,7,8,20,<br>21,22,23,2<br>5 | 2  | Q03191,Q63942                                                                       |
| 2392 | 1,2,4,5,18,<br>19,25,26 | 3,6,7,8,20,<br>21,22,23,2<br>4 | 3  | P02803,Q63661,Q63942                                                                |
| 2393 | 1,2,4,5,18,<br>20,21,22 | 3,6,7,8,19,<br>23,24,25,2<br>6 | 1  | Q9QZK9                                                                              |
| 2394 | 1,2,4,5,18,<br>20,21,23 | 3,6,7,8,19,<br>22,24,25,2<br>6 | 1  | Q9QZK9                                                                              |
| 2395 | 1,2,4,5,18,<br>20,21,24 | 3,6,7,8,19,<br>22,23,25,2<br>6 | 1  | Q9QZK9                                                                              |
| 2396 | 1,2,4,5,18,<br>20,21,25 | 3,6,7,8,19,<br>22,23,24,2<br>6 | 2  | P31430,P98089                                                                       |
| 2397 | 1,2,4,5,18,<br>20,21,26 | 3,6,7,8,19,<br>22,23,24,2<br>5 | 1  | P25031                                                                              |
| 2398 | 1,2,4,5,18,<br>20,22,23 | 3,6,7,8,19,<br>21,24,25,2<br>6 | 3  | P22006,Q62997,Q9QZK9                                                                |
| 2399 | 1,2,4,5,18,<br>20,22,24 | 3,6,7,8,19,<br>21,23,25,2<br>6 | 5  | P07150,P83121,Q99041,Q9QZK9,Q9WTT6                                                  |
| 2400 | 1,2,4,5,18,<br>20,22,25 | 3,6,7,8,19,<br>21,23,24,2<br>6 | 1  | Q62997                                                                              |



|      |                         |                                |   |                                                                |
|------|-------------------------|--------------------------------|---|----------------------------------------------------------------|
| 2401 | 1,2,4,5,18,<br>20,22,26 | 3,6,7,8,19,<br>21,23,24,2<br>5 | 3 | Q62997,Q6P6R2,Q99041                                           |
| 2402 | 1,2,4,5,18,<br>20,23,24 | 3,6,7,8,19,<br>21,22,25,2<br>6 | 1 | Q9QZK9                                                         |
| 2403 | 1,2,4,5,18,<br>20,23,25 | 3,6,7,8,19,<br>21,22,24,2<br>6 | 2 | P14408,Q99MH3                                                  |
| 2404 | 1,2,4,5,18,<br>20,23,26 | 3,6,7,8,19,<br>21,22,24,2<br>5 | 9 | P14408,Q63942,Q6IFU8,Q6IFW6,Q6IG02,Q6IMF3,Q6P6Q2,Q9JJ50,Q9QZK9 |
| 2405 | 1,2,4,5,18,<br>20,24,25 | 3,6,7,8,19,<br>21,22,23,2<br>6 | 0 |                                                                |
| 2406 | 1,2,4,5,18,<br>20,24,26 | 3,6,7,8,19,<br>21,22,23,2<br>5 | 2 | Q99041,Q9QZK9                                                  |
| 2407 | 1,2,4,5,18,<br>20,25,26 | 3,6,7,8,19,<br>21,22,23,2<br>4 | 1 | P14408                                                         |
| 2408 | 1,2,4,5,18,<br>21,22,23 | 3,6,7,8,19,<br>20,24,25,2<br>6 | 0 |                                                                |
| 2409 | 1,2,4,5,18,<br>21,22,24 | 3,6,7,8,19,<br>20,23,25,2<br>6 | 0 |                                                                |
| 2410 | 1,2,4,5,18,<br>21,22,25 | 3,6,7,8,19,<br>20,23,24,2<br>6 | 2 | P31430,P98089                                                  |
| 2411 | 1,2,4,5,18,<br>21,22,26 | 3,6,7,8,19,<br>20,23,24,2<br>5 | 1 | Q63661                                                         |
| 2412 | 1,2,4,5,18,<br>21,23,24 | 3,6,7,8,19,<br>20,22,25,2<br>6 | 3 | D3ZUC6,O89117,P34901                                           |
| 2413 | 1,2,4,5,18,<br>21,23,25 | 3,6,7,8,19,<br>20,22,24,2<br>6 | 5 | P02803,P31430,P98089,Q62636,Q99MH3                             |
| 2414 | 1,2,4,5,18,<br>21,23,26 | 3,6,7,8,19,<br>20,22,24,2<br>5 | 8 | D3ZUC6,Q62636,Q63661,Q63942,Q6IFU8,Q6IFW6,Q6IMF3,Q6P6Q2        |
| 2415 | 1,2,4,5,18,<br>21,24,25 | 3,6,7,8,19,<br>20,22,23,2<br>6 | 2 | P31430,P98089                                                  |

|      |                         |                                |   |                                                         |
|------|-------------------------|--------------------------------|---|---------------------------------------------------------|
| 2416 | 1,2,4,5,18,<br>21,24,26 | 3,6,7,8,19,<br>20,22,23,2<br>5 | 4 | D3ZUC6,O89117,Q63661,Q9EQV9                             |
| 2417 | 1,2,4,5,18,<br>21,25,26 | 3,6,7,8,19,<br>20,22,23,2<br>4 | 6 | P08721,P25031,P31430,P55091,P98089,Q63661               |
| 2418 | 1,2,4,5,18,<br>22,23,24 | 3,6,7,8,19,<br>20,21,25,2<br>6 | 3 | P34901,Q6IFU7,Q9QZK9                                    |
| 2419 | 1,2,4,5,18,<br>22,23,25 | 3,6,7,8,19,<br>20,21,24,2<br>6 | 1 | Q99MH3                                                  |
| 2420 | 1,2,4,5,18,<br>22,23,26 | 3,6,7,8,19,<br>20,21,24,2<br>5 | 7 | Q63661,Q63942,Q6IFU7,Q6IFU8,Q6IFW6,Q6IMF3,Q6P6Q2        |
| 2421 | 1,2,4,5,18,<br>22,24,25 | 3,6,7,8,19,<br>20,21,23,2<br>6 | 0 |                                                         |
| 2422 | 1,2,4,5,18,<br>22,24,26 | 3,6,7,8,19,<br>20,21,23,2<br>5 | 1 | Q99041                                                  |
| 2423 | 1,2,4,5,18,<br>22,25,26 | 3,6,7,8,19,<br>20,21,23,2<br>4 | 1 | O55145                                                  |
| 2424 | 1,2,4,5,18,<br>23,24,25 | 3,6,7,8,19,<br>20,21,22,2<br>6 | 2 | P34901,Q99MH3                                           |
| 2425 | 1,2,4,5,18,<br>23,24,26 | 3,6,7,8,19,<br>20,21,22,2<br>5 | 8 | P34901,P47967,Q63942,Q6IFU7,Q6IFU8,Q6IFW6,Q6IMF3,Q6P6Q2 |
| 2426 | 1,2,4,5,18,<br>23,25,26 | 3,6,7,8,19,<br>20,21,22,2<br>4 | 7 | Q63661,Q63942,Q6IFU8,Q6IFW6,Q6IMF3,Q6P6Q2,Q99MH3        |
| 2427 | 1,2,4,5,18,<br>24,25,26 | 3,6,7,8,19,<br>20,21,22,2<br>3 | 3 | P55091,Q62902,Q7TPB1                                    |
| 2428 | 1,2,4,5,19,<br>20,21,22 | 3,6,7,8,18,<br>23,24,25,2<br>6 | 2 | P35467,Q62997                                           |
| 2429 | 1,2,4,5,19,<br>20,21,23 | 3,6,7,8,18,<br>22,24,25,2<br>6 | 0 |                                                         |
| 2430 | 1,2,4,5,19,<br>20,21,24 | 3,6,7,8,18,<br>22,23,25,2<br>6 | 1 | P35467                                                  |

|      |                         |                                |   |                                                         |
|------|-------------------------|--------------------------------|---|---------------------------------------------------------|
| 2431 | 1,2,4,5,19,<br>20,21,25 | 3,6,7,8,18,<br>22,23,24,2<br>6 | 1 | P35467                                                  |
| 2432 | 1,2,4,5,19,<br>20,21,26 | 3,6,7,8,18,<br>22,23,24,2<br>5 | 1 | Q63751                                                  |
| 2433 | 1,2,4,5,19,<br>20,22,23 | 3,6,7,8,18,<br>21,24,25,2<br>6 | 5 | P00774,P22006,P55091,Q62997,Q9QZK9                      |
| 2434 | 1,2,4,5,19,<br>20,22,24 | 3,6,7,8,18,<br>21,23,25,2<br>6 | 8 | P00774,P07150,P14669,P35467,P83121,Q62997,Q9QZK9,Q9WTT6 |
| 2435 | 1,2,4,5,19,<br>20,22,25 | 3,6,7,8,18,<br>21,23,24,2<br>6 | 2 | P35467,Q62997                                           |
| 2436 | 1,2,4,5,19,<br>20,22,26 | 3,6,7,8,18,<br>21,23,24,2<br>5 | 6 | O54728,P05539,P07150,Q62997,Q63751,Q6P6R2               |
| 2437 | 1,2,4,5,19,<br>20,23,24 | 3,6,7,8,18,<br>21,22,25,2<br>6 | 1 | Q9QZK9                                                  |
| 2438 | 1,2,4,5,19,<br>20,23,25 | 3,6,7,8,18,<br>21,22,24,2<br>6 | 1 | P14408                                                  |
| 2439 | 1,2,4,5,19,<br>20,23,26 | 3,6,7,8,18,<br>21,22,24,2<br>5 | 1 | P14408                                                  |
| 2440 | 1,2,4,5,19,<br>20,24,25 | 3,6,7,8,18,<br>21,22,23,2<br>6 | 1 | P35467                                                  |
| 2441 | 1,2,4,5,19,<br>20,24,26 | 3,6,7,8,18,<br>21,22,23,2<br>5 | 0 |                                                         |
| 2442 | 1,2,4,5,19,<br>20,25,26 | 3,6,7,8,18,<br>21,22,23,2<br>4 | 1 | P14408                                                  |
| 2443 | 1,2,4,5,19,<br>21,22,23 | 3,6,7,8,18,<br>20,24,25,2<br>6 | 0 |                                                         |
| 2444 | 1,2,4,5,19,<br>21,22,24 | 3,6,7,8,18,<br>20,23,25,2<br>6 | 2 | A2RUV9,P35467                                           |
| 2445 | 1,2,4,5,19,<br>21,22,25 | 3,6,7,8,18,<br>20,23,24,2<br>6 | 2 | A2RUV9,P35467                                           |

|      |                         |                                |   |                      |
|------|-------------------------|--------------------------------|---|----------------------|
| 2446 | 1,2,4,5,19,<br>21,22,26 | 3,6,7,8,18,<br>20,23,24,2<br>5 | 0 |                      |
| 2447 | 1,2,4,5,19,<br>21,23,24 | 3,6,7,8,18,<br>20,22,25,2<br>6 | 2 | D3ZUC6,P34901        |
| 2448 | 1,2,4,5,19,<br>21,23,25 | 3,6,7,8,18,<br>20,22,24,2<br>6 | 1 | P02803               |
| 2449 | 1,2,4,5,19,<br>21,23,26 | 3,6,7,8,18,<br>20,22,24,2<br>5 | 1 | Q63661               |
| 2450 | 1,2,4,5,19,<br>21,24,25 | 3,6,7,8,18,<br>20,22,23,2<br>6 | 1 | P35467               |
| 2451 | 1,2,4,5,19,<br>21,24,26 | 3,6,7,8,18,<br>20,22,23,2<br>5 | 2 | O89117,Q9EQV9        |
| 2452 | 1,2,4,5,19,<br>21,25,26 | 3,6,7,8,18,<br>20,22,23,2<br>4 | 0 |                      |
| 2453 | 1,2,4,5,19,<br>22,23,24 | 3,6,7,8,18,<br>20,21,25,2<br>6 | 3 | P34901,P82471,Q9WTT6 |
| 2454 | 1,2,4,5,19,<br>22,23,25 | 3,6,7,8,18,<br>20,21,24,2<br>6 | 0 |                      |
| 2455 | 1,2,4,5,19,<br>22,23,26 | 3,6,7,8,18,<br>20,21,24,2<br>5 | 2 | O54728,P05539        |
| 2456 | 1,2,4,5,19,<br>22,24,25 | 3,6,7,8,18,<br>20,21,23,2<br>6 | 1 | P35467               |
| 2457 | 1,2,4,5,19,<br>22,24,26 | 3,6,7,8,18,<br>20,21,23,2<br>5 | 2 | Q6P6R2,Q9WTT6        |
| 2458 | 1,2,4,5,19,<br>22,25,26 | 3,6,7,8,18,<br>20,21,23,2<br>4 | 1 | P05539               |
| 2459 | 1,2,4,5,19,<br>23,24,25 | 3,6,7,8,18,<br>20,21,22,2<br>6 | 0 |                      |
| 2460 | 1,2,4,5,19,<br>23,24,26 | 3,6,7,8,18,<br>20,21,22,2<br>5 | 0 |                      |

|      |                         |                                |   |                      |
|------|-------------------------|--------------------------------|---|----------------------|
| 2461 | 1,2,4,5,19,<br>23,25,26 | 3,6,7,8,18,<br>20,21,22,2<br>4 | 0 |                      |
| 2462 | 1,2,4,5,19,<br>24,25,26 | 3,6,7,8,18,<br>20,21,22,2<br>3 | 2 | P14480,Q62902        |
| 2463 | 1,2,4,5,20,<br>21,22,23 | 3,6,7,8,18,<br>19,24,25,2<br>6 | 1 | Q62997               |
| 2464 | 1,2,4,5,20,<br>21,22,24 | 3,6,7,8,18,<br>19,23,25,2<br>6 | 1 | P35467               |
| 2465 | 1,2,4,5,20,<br>21,22,25 | 3,6,7,8,18,<br>19,23,24,2<br>6 | 1 | P35467               |
| 2466 | 1,2,4,5,20,<br>21,22,26 | 3,6,7,8,18,<br>19,23,24,2<br>5 | 1 | P51907               |
| 2467 | 1,2,4,5,20,<br>21,23,24 | 3,6,7,8,18,<br>19,22,25,2<br>6 | 2 | P34901,Q9QZK9        |
| 2468 | 1,2,4,5,20,<br>21,23,25 | 3,6,7,8,18,<br>19,22,24,2<br>6 | 0 |                      |
| 2469 | 1,2,4,5,20,<br>21,23,26 | 3,6,7,8,18,<br>19,22,24,2<br>5 | 1 | Q6IFU8               |
| 2470 | 1,2,4,5,20,<br>21,24,25 | 3,6,7,8,18,<br>19,22,23,2<br>6 | 1 | P35467               |
| 2471 | 1,2,4,5,20,<br>21,24,26 | 3,6,7,8,18,<br>19,22,23,2<br>5 | 3 | P01015,P80020,Q9EQV9 |
| 2472 | 1,2,4,5,20,<br>21,25,26 | 3,6,7,8,18,<br>19,22,23,2<br>4 | 0 |                      |
| 2473 | 1,2,4,5,20,<br>22,23,24 | 3,6,7,8,18,<br>19,21,25,2<br>6 | 3 | P34901,Q62997,Q9QZK9 |
| 2474 | 1,2,4,5,20,<br>22,23,25 | 3,6,7,8,18,<br>19,21,24,2<br>6 | 1 | Q62997               |
| 2475 | 1,2,4,5,20,<br>22,23,26 | 3,6,7,8,18,<br>19,21,24,2<br>5 | 2 | P05539,Q62997        |

|      |                         |                                |   |                      |
|------|-------------------------|--------------------------------|---|----------------------|
| 2476 | 1,2,4,5,20,<br>22,24,25 | 3,6,7,8,18,<br>19,21,23,2<br>6 | 1 | P35467               |
| 2477 | 1,2,4,5,20,<br>22,24,26 | 3,6,7,8,18,<br>19,21,23,2<br>5 | 3 | O70594,Q62997,Q99041 |
| 2478 | 1,2,4,5,20,<br>22,25,26 | 3,6,7,8,18,<br>19,21,23,2<br>4 | 2 | P05539,Q62997        |
| 2479 | 1,2,4,5,20,<br>23,24,25 | 3,6,7,8,18,<br>19,21,22,2<br>6 | 0 |                      |
| 2480 | 1,2,4,5,20,<br>23,24,26 | 3,6,7,8,18,<br>19,21,22,2<br>5 | 3 | D4A1J4,P47967,P97840 |
| 2481 | 1,2,4,5,20,<br>23,25,26 | 3,6,7,8,18,<br>19,21,22,2<br>4 | 2 | P05539,P14408        |
| 2482 | 1,2,4,5,20,<br>24,25,26 | 3,6,7,8,18,<br>19,21,22,2<br>3 | 0 |                      |
| 2483 | 1,2,4,5,21,<br>22,23,24 | 3,6,7,8,18,<br>19,20,25,2<br>6 | 2 | P34901,P35280        |
| 2484 | 1,2,4,5,21,<br>22,23,25 | 3,6,7,8,18,<br>19,20,24,2<br>6 | 0 |                      |
| 2485 | 1,2,4,5,21,<br>22,23,26 | 3,6,7,8,18,<br>19,20,24,2<br>5 | 0 |                      |
| 2486 | 1,2,4,5,21,<br>22,24,25 | 3,6,7,8,18,<br>19,20,23,2<br>6 | 1 | P35467               |
| 2487 | 1,2,4,5,21,<br>22,24,26 | 3,6,7,8,18,<br>19,20,23,2<br>5 | 0 |                      |
| 2488 | 1,2,4,5,21,<br>22,25,26 | 3,6,7,8,18,<br>19,20,23,2<br>4 | 0 |                      |
| 2489 | 1,2,4,5,21,<br>23,24,25 | 3,6,7,8,18,<br>19,20,22,2<br>6 | 2 | P34901,P35280        |
| 2490 | 1,2,4,5,21,<br>23,24,26 | 3,6,7,8,18,<br>19,20,22,2<br>5 | 1 | P34901               |

|      |                         |                                  |    |                                                                                                                                                                                                                          |
|------|-------------------------|----------------------------------|----|--------------------------------------------------------------------------------------------------------------------------------------------------------------------------------------------------------------------------|
| 2491 | 1,2,4,5,21,<br>23,25,26 | 3,6,7,8,18,<br>19,20,22,2<br>4   | 0  |                                                                                                                                                                                                                          |
| 2492 | 1,2,4,5,21,<br>24,25,26 | 3,6,7,8,18,<br>19,20,22,2<br>3   | 0  |                                                                                                                                                                                                                          |
| 2493 | 1,2,4,5,22,<br>23,24,25 | 3,6,7,8,18,<br>19,20,21,2<br>6   | 3  | P34901,P35280,P82471                                                                                                                                                                                                     |
| 2494 | 1,2,4,5,22,<br>23,24,26 | 3,6,7,8,18,<br>19,20,21,2<br>5   | 4  | P00731,P34901,P47967,P82471                                                                                                                                                                                              |
| 2495 | 1,2,4,5,22,<br>23,25,26 | 3,6,7,8,18,<br>19,20,21,2<br>4   | 1  | P05539                                                                                                                                                                                                                   |
| 2496 | 1,2,4,5,22,<br>24,25,26 | 3,6,7,8,18,<br>19,20,21,2<br>3   | 0  |                                                                                                                                                                                                                          |
| 2497 | 1,2,4,5,23,<br>24,25,26 | 3,6,7,8,18,<br>19,20,21,2<br>2   | 2  | Q62902,Q7TPB1                                                                                                                                                                                                            |
| 2498 | 1,2,4,6,7,8<br>,18,19   | 3,5,20,21,<br>22,23,24,2<br>5,26 | 22 | O55006,P00731,P02631,P02803,P05964,P0C0A9,P11598,P15399,P18418,P31044,P35280,P97580,Q30KJ2,Q63532,Q63617,Q64057,Q6IE51,Q7TP52,Q8CJD3,Q9JI85,Q9QZQ5,Q9R0T3                                                                |
| 2499 | 1,2,4,6,7,8<br>,18,20   | 3,5,19,21,<br>22,23,24,2<br>5,26 | 16 | P00731,P02631,P02803,P10715,P11598,P18418,P20762,P31044,P35280,Q63617,Q64057,Q6AYR8,Q91ZS3,Q9JI85,Q9QZA6,Q9R0T3                                                                                                          |
| 2500 | 1,2,4,6,7,8<br>,18,21   | 3,5,19,20,<br>22,23,24,2<br>5,26 | 31 | P00731,P02631,P02761,P02782,P02803,P05964,P07647,P08723,P0C0A9,P11598,P13432,P18418,P20762,P22282,P22283,P25031,P25236,P42854,P98089,Q63475,Q63617,Q64057,Q6AYL6,Q6AYR8,Q6AYR9,Q80WL1,Q8CJ52,Q91ZS3,Q9JI85,Q9QZA6,Q9R0T3 |
| 2501 | 1,2,4,6,7,8<br>,18,22   | 3,5,19,20,<br>21,23,24,2<br>5,26 | 11 | P02631,P11598,P18418,P20762,P22282,P31044,Q63617,Q7TP52,Q80WL1,Q9JI85,Q9R0T3                                                                                                                                             |
| 2502 | 1,2,4,6,7,8<br>,18,23   | 3,5,19,20,<br>21,22,24,2<br>5,26 | 19 | P02631,P02803,P05964,P11598,P15399,P18418,P20762,P31044,P50280,P97580,Q30KJ2,Q5XI22,Q63617,Q63942,Q64057,Q8CJD3,Q9JI85,Q9QZA6,Q9R0T3                                                                                     |
| 2503 | 1,2,4,6,7,8<br>,18,24   | 3,5,19,20,<br>21,22,23,2<br>5,26 | 9  | O55006,P02631,P10715,P18418,P20762,Q63475,Q63617,Q9JI85,Q9R0T3                                                                                                                                                           |
| 2504 | 1,2,4,6,7,8<br>,18,25   | 3,5,19,20,<br>21,22,23,2<br>4,26 | 23 | P00714,P00731,P02631,P02803,P05371,P06911,P10715,P11598,P12020,P18418,P19629,P31044,P35280,P61206,P84079,P84082,P68370,P98089,Q5GRG2,Q63617,Q64057,Q6AYQ8,Q91ZS3,Q9JI85,Q9QZA6                                           |
| 2505 | 1,2,4,6,7,8<br>,18,26   | 3,5,19,20,<br>21,22,23,2<br>4,25 | 23 | P01041,P02631,P02803,P11598,P18418,P20761,P20762,P25236,P35280,P51886,P55091,P82995,P83748,Q63617,Q63942,Q64057,Q6AY33,Q6AYQ8,Q7TP52,Q8VD89,Q91ZS3,Q9QZA6,Q9R0T3                                                         |

|      |                       |                                  |    |                                                                                                                                                                                |
|------|-----------------------|----------------------------------|----|--------------------------------------------------------------------------------------------------------------------------------------------------------------------------------|
| 2506 | 1,2,4,6,7,8<br>,19,20 | 3,5,18,21,<br>22,23,24,2<br>5,26 | 13 | P00731,P02631,P02803,P15399,P18418,P20762,P35280,P97580,Q30KJ2,Q63532,Q63617,Q9JI85,Q9QZQ5                                                                                     |
| 2507 | 1,2,4,6,7,8<br>,19,21 | 3,5,18,20,<br>22,23,24,2<br>5,26 | 25 | P00731,P02631,P02761,P02782,P02803,P07647,P08723,P0C0A9,P15399,P18418,P20762,P22282,P25236,P35281,P42854,P97580,Q30KJ2,Q63532,Q63617,Q64057,Q6AYL6,Q80WL1,Q8CJ52,Q9JI85,Q9R0T3 |
| 2508 | 1,2,4,6,7,8<br>,19,22 | 3,5,18,20,<br>21,23,24,2<br>5,26 | 14 | P02631,P12020,P15399,P18418,P22282,P31044,P97580,Q30KJ2,Q63532,Q63617,Q7TP52,Q8CJD3,Q9JI85,Q9R0T3                                                                              |
| 2509 | 1,2,4,6,7,8<br>,19,23 | 3,5,18,20,<br>21,22,24,2<br>5,26 | 18 | P02631,P02803,P12020,P15399,P16086,P18418,P20762,P25236,P31044,P50280,P97580,Q30KJ2,Q63532,Q63617,Q64057,Q6IE51,Q8CJD3,Q99041                                                  |
| 2510 | 1,2,4,6,7,8<br>,19,24 | 3,5,18,20,<br>21,22,23,2<br>5,26 | 9  | O55006,P02631,P15399,P18418,P97580,Q30KJ2,Q63532,Q63617,Q6IE51                                                                                                                 |
| 2511 | 1,2,4,6,7,8<br>,19,25 | 3,5,18,20,<br>21,22,23,2<br>4,26 | 21 | P00731,P02631,P02803,P06911,P10715,P12020,P15399,P18418,P19629,P31044,P35280,P47967,P68370,P97580,P97840,Q30KJ2,Q5GRG2,Q63532,Q63617,Q64057,Q91ZS3                             |
| 2512 | 1,2,4,6,7,8<br>,19,26 | 3,5,18,20,<br>21,22,23,2<br>4,25 | 18 | P02631,P02803,P15399,P18418,P20760,P20761,P20762,P25236,P35280,P83748,P97580,Q30KJ2,Q5FVI6,Q63532,Q63617,Q6AYQ8,Q7TP52,Q9R0T3                                                  |
| 2513 | 1,2,4,6,7,8<br>,20,21 | 3,5,18,19,<br>22,23,24,2<br>5,26 | 24 | O55004,P00731,P02631,P02761,P02782,P07647,P08723,P0C0A9,P13432,P18418,P20762,P25236,P42854,P62804,Q00715,Q63475,Q63617,Q64057,Q6AYL6,Q6AYR8,Q8CJ52,Q91ZS3,Q9JI85,Q9R0T3        |
| 2514 | 1,2,4,6,7,8<br>,20,22 | 3,5,18,19,<br>21,23,24,2<br>5,26 | 8  | P02631,P18418,P20762,Q07523,Q63617,Q7TP52,Q9JI85,Q9R0T3                                                                                                                        |
| 2515 | 1,2,4,6,7,8<br>,20,23 | 3,5,18,19,<br>21,22,24,2<br>5,26 | 12 | P02631,P15399,P18418,P20762,P25236,P50280,P97580,Q30KJ2,Q63475,Q63617,Q8CJD3,Q9JI85                                                                                            |
| 2516 | 1,2,4,6,7,8<br>,20,24 | 3,5,18,19,<br>21,22,23,2<br>5,26 | 6  | P02631,P10715,P18418,P20762,Q63475,Q63617                                                                                                                                      |
| 2517 | 1,2,4,6,7,8<br>,20,25 | 3,5,18,19,<br>21,22,23,2<br>4,26 | 13 | P02631,P06911,P10715,P12020,P18418,P19629,P20762,P31044,P35280,P68370,Q5GRG2,Q63617,Q91ZS3                                                                                     |
| 2518 | 1,2,4,6,7,8<br>,20,26 | 3,5,18,19,<br>21,22,23,2<br>4,25 | 15 | P01041,P02631,P18418,P20760,P20761,P20762,P25236,P35280,P62804,P83748,Q63617,Q6AYQ8,Q7TP52,Q91ZS3,Q9R0T3                                                                       |
| 2519 | 1,2,4,6,7,8<br>,21,22 | 3,5,18,19,<br>20,23,24,2<br>5,26 | 17 | D4A1J4,P02631,P02782,P07647,P08723,P0C0A9,P13432,P18418,P20762,P22282,P25236,P42854,Q63617,Q80WL1,Q8CJ52,Q9JI85,Q9R0T3                                                         |
| 2520 | 1,2,4,6,7,8<br>,21,23 | 3,5,18,19,<br>20,22,24,2<br>5,26 | 22 | P02631,P02782,P02803,P08723,P0C0A9,P15399,P18418,P20762,P22282,P25236,P50280,P97580,Q30KJ2,Q63475,Q63617,Q64057,Q6AYL6,Q80WL1,Q8CJ52,Q99041,Q9JI85,Q9R0T3                      |



|      |                        |                                  |    |                                                                                                                                                                                                     |
|------|------------------------|----------------------------------|----|-----------------------------------------------------------------------------------------------------------------------------------------------------------------------------------------------------|
| 2521 | 1,2,4,6,7,8<br>,21,24  | 3,5,18,19,<br>20,22,23,2<br>5,26 | 15 | D3ZHA0,P02631,P02761,P02782,P08723,P13432,P18418,P20762,P25236,Q63475,Q63617,Q6AYL6,Q8CJ52,Q9JI85,Q9ROT3                                                                                            |
| 2522 | 1,2,4,6,7,8<br>,21,25  | 3,5,18,19,<br>20,22,23,2<br>4,26 | 25 | P00731,P02631,P02803,P06911,P08723,P09605,P25809,P10715,P12020,P18418,P19629,P20646,P25236,P31044,P47967,P68370,Q5GRG2,Q63617,Q64057,Q6AYL6,Q6P6R2,Q6P9T8,Q80WL1,Q91ZS3,Q9JI85,Q9WTT6               |
| 2523 | 1,2,4,6,7,8<br>,21,26  | 3,5,18,19,<br>20,22,23,2<br>4,25 | 27 | O54800;Q5DWV2,P01041,P02631,P02761,P02782,P0C0A9,P18418,P19223,P20760,P20761,P20762,P22282,P25236,P42854,P83748,Q00715,Q5QE79,Q63617,Q64057,Q6AYQ8,Q6AYR8,Q80WL1,Q8CJ52,Q91ZS3,Q9EQV9,Q9ROT3,Q9WUF4 |
| 2524 | 1,2,4,6,7,8<br>,22,23  | 3,5,18,19,<br>20,21,24,2<br>5,26 | 13 | P02631,P12020,P15399,P18418,P20762,P22282,P50280,P97580,Q30KJ2,Q63617,Q7TP52,Q8CJD3,Q9ROT3                                                                                                          |
| 2525 | 1,2,4,6,7,8<br>,22,24  | 3,5,18,19,<br>20,21,23,2<br>5,26 | 4  | P02631,P18418,Q63617,Q7TP52                                                                                                                                                                         |
| 2526 | 1,2,4,6,7,8<br>,22,25  | 3,5,18,19,<br>20,21,23,2<br>4,26 | 13 | P02631,P06911,P10715,P12020,P18418,P19629,P31044,P68370,Q07523,Q5GRG2,Q63617,Q7TP52,Q91ZS3                                                                                                          |
| 2527 | 1,2,4,6,7,8<br>,22,26  | 3,5,18,19,<br>20,21,23,2<br>4,25 | 13 | P02631,P18418,P20760,P20761,P20762,P22282,P25236,P83748,Q63617,Q6AYQ8,Q7TP52,Q80WL1,Q9ROT3                                                                                                          |
| 2528 | 1,2,4,6,7,8<br>,23,24  | 3,5,18,19,<br>20,21,22,2<br>5,26 | 9  | P02631,P15399,P18418,P20762,P50280,P97580,Q30KJ2,Q63475,Q63617                                                                                                                                      |
| 2529 | 1,2,4,6,7,8<br>,23,25  | 3,5,18,19,<br>20,21,22,2<br>4,26 | 25 | P02631,P02803,P05371,P06911,P10715,P12020,P15399,P18418,P19629,P20762,P25236,P31044,P50280,P68370,P70709,P97580,Q30KJ2,Q5GRG2,Q63617,Q64057,Q6P6R2,Q6P9T8,Q91ZS3,Q99041,Q9WTT6                      |
| 2530 | 1,2,4,6,7,8<br>,23,26  | 3,5,18,19,<br>20,21,22,2<br>4,25 | 15 | P02631,P15399,P18418,P20760,P20761,P20762,P22282,P25236,P50280,P83748,P97580,Q30KJ2,Q63617,Q6AYQ8,Q9ROT3                                                                                            |
| 2531 | 1,2,4,6,7,8<br>,24,25  | 3,5,18,19,<br>20,21,22,2<br>3,26 | 11 | P02631,P06911,P10715,P12020,P18418,P19629,P31044,P68370,Q5GRG2,Q63617,Q91ZS3                                                                                                                        |
| 2532 | 1,2,4,6,7,8<br>,24,26  | 3,5,18,19,<br>20,21,22,2<br>3,25 | 10 | D3ZHA0,P02631,P18418,P20760,P20761,P20762,P83748,Q63617,Q6AYQ8,Q7TP52                                                                                                                               |
| 2533 | 1,2,4,6,7,8<br>,25,26  | 3,5,18,19,<br>20,21,22,2<br>3,24 | 21 | P02631,P06911,P10715,P12020,P18418,P19223,P19629,P20761,P20762,P25236,P31044,P35280,P68370,P83748,Q5GRG2,Q63617,Q6AY33,Q6AYQ8,Q6P9T8,Q7TP52,Q91ZS3                                                  |
| 2534 | 1,2,4,6,7,1<br>8,19,20 | 3,5,8,21,2<br>2,23,24,25<br>,26  | 11 | P00731,P02631,P15399,P18418,P35280,P97580,Q30KJ2,Q63532,Q6IE51,Q7TP52,Q9JI85                                                                                                                        |
| 2535 | 1,2,4,6,7,1<br>8,19,21 | 3,5,8,20,2<br>2,23,24,25<br>,26  | 21 | D3ZUC6,O89117,P00731,P02631,P02803,P05964,P08723,P0C0A9,P15399,P18418,P25031,P25236,P42854,P47967,P97580,P97840,Q30KJ2,Q63532,Q6AYL6,Q6IE51,Q9JI85                                                  |

|      |                        |                                 |    |                                                                                                                                                                      |
|------|------------------------|---------------------------------|----|----------------------------------------------------------------------------------------------------------------------------------------------------------------------|
| 2536 | 1,2,4,6,7,1<br>8,19,22 | 3,5,8,20,2<br>1,23,24,25<br>,26 | 10 | P02631,P15399,P18418,P97580,Q30KJ2,Q63532,Q6IE51,Q7TP52,Q8CJD3,Q9JI85                                                                                                |
| 2537 | 1,2,4,6,7,1<br>8,19,23 | 3,5,8,20,2<br>1,22,24,25<br>,26 | 13 | P02631,P02803,P05964,P15399,P18418,P97580,Q03191,Q30KJ2,Q5BJY9,Q63532,Q6IE51,Q8CJD3,Q99MH3                                                                           |
| 2538 | 1,2,4,6,7,1<br>8,19,24 | 3,5,8,20,2<br>1,22,23,25<br>,26 | 9  | P02631,P05964,P15399,P18418,P97580,Q30KJ2,Q63532,Q6IE51,Q7TP52                                                                                                       |
| 2539 | 1,2,4,6,7,1<br>8,19,25 | 3,5,8,20,2<br>1,22,23,24<br>,26 | 19 | P00731,P02631,P02803,P05964,P12020,P15399,P18418,P35280,P47967,P97580,P97840,P98089,Q30KJ2,Q5GRG2,Q62635,Q63532,Q6IE51,Q7TP52,Q91ZS3                                 |
| 2540 | 1,2,4,6,7,1<br>8,19,26 | 3,5,8,20,2<br>1,22,23,24<br>,25 | 17 | P02631,P05964,P06760,P15399,P18418,P25236,P35280,P83748,P97580,Q30KJ2,Q5FVI6,Q63532,Q63661,Q63942,Q6IE51,Q7TP52,Q99P<br>P0                                           |
| 2541 | 1,2,4,6,7,1<br>8,20,21 | 3,5,8,19,2<br>2,23,24,25<br>,26 | 14 | O54861,P00731,P02631,P08723,P13432,P18418,P25031,P25236,P42854,Q6AYL6,Q6AYR8,Q6AYR9,Q91ZS3,Q9JI85                                                                    |
| 2542 | 1,2,4,6,7,1<br>8,20,22 | 3,5,8,19,2<br>1,23,24,25<br>,26 | 4  | P02631,P18418,Q7TP52,Q9JI85                                                                                                                                          |
| 2543 | 1,2,4,6,7,1<br>8,20,23 | 3,5,8,19,2<br>1,22,24,25<br>,26 | 11 | P02631,P15399,P18418,P20762,P25236,P55053,P97580,Q30KJ2,Q6IE51,Q8CJD3,Q9JI85                                                                                         |
| 2544 | 1,2,4,6,7,1<br>8,20,24 | 3,5,8,19,2<br>1,22,23,25<br>,26 | 2  | P02631,P18418                                                                                                                                                        |
| 2545 | 1,2,4,6,7,1<br>8,20,25 | 3,5,8,19,2<br>1,22,23,24<br>,26 | 8  | P02631,P12020,P18418,P35280,P61206,P84079,P84082,P98089,Q5GRG2,Q91ZS3                                                                                                |
| 2546 | 1,2,4,6,7,1<br>8,20,26 | 3,5,8,19,2<br>1,22,23,24<br>,25 | 10 | P01041,P02631,P18418,P20762,P25236,P35280,P83748,Q6AYQ8,Q7TP52,Q91ZS3                                                                                                |
| 2547 | 1,2,4,6,7,1<br>8,21,22 | 3,5,8,19,2<br>0,23,24,25<br>,26 | 9  | P02631,P08723,P13432,P18418,P25031,P25236,P42854,Q7TP52,Q9JI85                                                                                                       |
| 2548 | 1,2,4,6,7,1<br>8,21,23 | 3,5,8,19,2<br>0,22,24,25<br>,26 | 14 | D3ZUC6,P02631,P02803,P05964,P15399,P18418,P25031,P25236,P42854,P97580,Q30KJ2,Q6AYL6,Q6IE51,Q9JI85                                                                    |
| 2549 | 1,2,4,6,7,1<br>8,21,24 | 3,5,8,19,2<br>0,22,23,25<br>,26 | 9  | D3ZUC6,P02631,P13432,P18418,P25031,P25236,P98089,Q6AYL6,Q9JI85                                                                                                       |
| 2550 | 1,2,4,6,7,1<br>8,21,25 | 3,5,8,19,2<br>0,22,23,24<br>,26 | 20 | O54728,P00731,P02631,P02803,P05964,P09605,P25809,P12020,P18418,P25031,P25236,P31430,P42854,P47967,P61206,P84079,P84082<br>,P97840,P98089,Q5GRG2,Q6AYL6,Q91ZS3,Q9JI85 |

|      |                        |                                 |    |                                                                                                                                             |
|------|------------------------|---------------------------------|----|---------------------------------------------------------------------------------------------------------------------------------------------|
| 2551 | 1,2,4,6,7,1<br>8,21,26 | 3,5,8,19,2<br>0,22,23,24<br>,25 | 18 | D3ZUC6,O35783,P01041,P02631,P05964,P18418,P19223,P25031,P25236,P42854,P55091,P61206,P84079,P84082,P82995,P83748,P98089,Q63661,Q91ZS3,Q9EQV9 |
| 2552 | 1,2,4,6,7,1<br>8,22,23 | 3,5,8,19,2<br>0,21,24,25<br>,26 | 8  | G3V686,P02631,P15399,P18418,P97580,Q30KJ2,Q7TP52,Q8CJD3                                                                                     |
| 2553 | 1,2,4,6,7,1<br>8,22,24 | 3,5,8,19,2<br>0,21,23,25<br>,26 | 3  | P02631,P18418,Q7TP52                                                                                                                        |
| 2554 | 1,2,4,6,7,1<br>8,22,25 | 3,5,8,19,2<br>0,21,23,24<br>,26 | 9  | P02631,P06911,P12020,P18418,P97840,P98089,Q5GRG2,Q7TP52,Q91ZS3                                                                              |
| 2555 | 1,2,4,6,7,1<br>8,22,26 | 3,5,8,19,2<br>0,21,23,24<br>,25 | 3  | P18418,P83748,Q7TP52                                                                                                                        |
| 2556 | 1,2,4,6,7,1<br>8,23,24 | 3,5,8,19,2<br>0,21,22,25<br>,26 | 6  | P02631,P15399,P18418,P97580,Q30KJ2,Q6IE51                                                                                                   |
| 2557 | 1,2,4,6,7,1<br>8,23,25 | 3,5,8,19,2<br>0,21,22,24<br>,26 | 18 | P00714,P02631,P02803,P05371,P05964,P06911,P12020,P15399,P18418,P19629,P50280,P97580,P98089,Q30KJ2,Q5GRG2,Q6IE51,Q91ZS3,Q99MH3               |
| 2558 | 1,2,4,6,7,1<br>8,23,26 | 3,5,8,19,2<br>0,21,22,24<br>,25 | 18 | P02631,P05964,P15399,P18418,P20762,P25236,P55053,P83748,P97580,Q30KJ2,Q63661,Q63942,Q6AYQ8,Q6IE51,Q6IFU8,Q6IMF3,Q6P6Q2,Q8VD89               |
| 2559 | 1,2,4,6,7,1<br>8,24,25 | 3,5,8,19,2<br>0,21,22,23<br>,26 | 7  | P02631,P12020,P18418,P19629,P98089,Q5GRG2,Q91ZS3                                                                                            |
| 2560 | 1,2,4,6,7,1<br>8,24,26 | 3,5,8,19,2<br>0,21,22,23<br>,25 | 7  | P02631,P18418,P55091,P83748,Q6AYQ8,Q7TP52,Q8VD89                                                                                            |
| 2561 | 1,2,4,6,7,1<br>8,25,26 | 3,5,8,19,2<br>0,21,22,23<br>,24 | 17 | P00774,P02631,P12020,P18418,P25031,P25236,P35280,P55091,P61206,P84079,P84082,P82995,P83748,P98089,Q5GRG2,Q6AY33,Q6AYQ8,Q7TP52,Q91ZS3        |
| 2562 | 1,2,4,6,7,1<br>9,20,21 | 3,5,8,18,2<br>2,23,24,25<br>,26 | 13 | O54861,P00731,P02631,P15399,P18418,P25236,P42854,P47967,P97580,Q30KJ2,Q63532,Q6IE51,Q9JI85                                                  |
| 2563 | 1,2,4,6,7,1<br>9,20,22 | 3,5,8,18,2<br>1,23,24,25<br>,26 | 8  | P02631,P15399,P18418,P97580,Q30KJ2,Q62997,Q63532,Q7TP52                                                                                     |
| 2564 | 1,2,4,6,7,1<br>9,20,23 | 3,5,8,18,2<br>1,22,24,25<br>,26 | 8  | P02631,P15399,P25236,P97580,Q30KJ2,Q63532,Q6IE51,Q8CJD3                                                                                     |
| 2565 | 1,2,4,6,7,1<br>9,20,24 | 3,5,8,18,2<br>1,22,23,25<br>,26 | 7  | P02631,P15399,P18418,P97580,Q30KJ2,Q63532,Q6IE51                                                                                            |

|      |                        |                                 |    |                                                                                                                                      |
|------|------------------------|---------------------------------|----|--------------------------------------------------------------------------------------------------------------------------------------|
| 2566 | 1,2,4,6,7,1<br>9,20,25 | 3,5,8,18,2<br>1,22,23,24<br>,26 | 13 | P02631,P12020,P15399,P18418,P35280,P47967,P97580,P97840,Q30KJ2,Q5GRG2,Q6IE51,Q91ZS3                                                  |
| 2567 | 1,2,4,6,7,1<br>9,20,26 | 3,5,8,18,2<br>1,22,23,24<br>,25 | 12 | P02631,P05539,P15399,P25236,P35280,P83748,P97580,Q30KJ2,Q5FVI6,Q63532,Q6IE51,Q7TP52                                                  |
| 2568 | 1,2,4,6,7,1<br>9,21,22 | 3,5,8,18,2<br>0,23,24,25<br>,26 | 15 | D4A1J4,P02631,P08723,P15399,P18418,P25236,P35467,P47967,P97580,P97840,Q30KJ2,Q63532,Q6IG02,Q7TP52,Q9JI85                             |
| 2569 | 1,2,4,6,7,1<br>9,21,23 | 3,5,8,18,2<br>0,22,24,25<br>,26 | 15 | D3ZUC6,P02631,P02803,P05964,P15399,P16086,P18418,P25236,P50280,P97580,Q30KJ2,Q63532,Q6IE51,Q8CJD3,Q9JI85                             |
| 2570 | 1,2,4,6,7,1<br>9,21,24 | 3,5,8,18,2<br>0,22,23,25<br>,26 | 12 | D3ZUC6,P02631,P13432,P15399,P18418,P25236,P35467,P97580,Q30KJ2,Q63532,Q6IE51,Q6IG02                                                  |
| 2571 | 1,2,4,6,7,1<br>9,21,25 | 3,5,8,18,2<br>0,22,23,24<br>,26 | 18 | P00731,P02631,P02803,P09605,P25809,P12020,P15399,P18418,P25236,P35467,P47967,P97580,P97840,Q30KJ2,Q5GRG2,Q63532,Q6IE51,Q8CIZ5,Q91ZS3 |
| 2572 | 1,2,4,6,7,1<br>9,21,26 | 3,5,8,18,2<br>0,22,23,24<br>,25 | 12 | D3ZUC6,P02631,P15399,P18418,P25236,P83748,P97580,Q30KJ2,Q5FVI6,Q63532,Q6IE51,Q9EQV9                                                  |
| 2573 | 1,2,4,6,7,1<br>9,22,23 | 3,5,8,18,2<br>0,21,24,25<br>,26 | 10 | P02631,P15399,P18418,P50280,P97580,Q30KJ2,Q63532,Q6IE51,Q7TP52,Q8CJD3                                                                |
| 2574 | 1,2,4,6,7,1<br>9,22,24 | 3,5,8,18,2<br>0,21,23,25<br>,26 | 9  | P02631,P18418,P35467,P97580,Q30KJ2,Q63532,Q6IE51,Q6IG02,Q7TP52                                                                       |
| 2575 | 1,2,4,6,7,1<br>9,22,25 | 3,5,8,18,2<br>0,21,23,24<br>,26 | 14 | P02631,P06911,P12020,P15399,P18418,P35467,P47967,P97580,P97840,Q30KJ2,Q5GRG2,Q63532,Q6IG02,Q7TP52                                    |
| 2576 | 1,2,4,6,7,1<br>9,22,26 | 3,5,8,18,2<br>0,21,23,24<br>,25 | 10 | P02631,P05539,P18418,P25236,P83748,P97580,Q30KJ2,Q5FVI6,Q63532,Q7TP52                                                                |
| 2577 | 1,2,4,6,7,1<br>9,23,24 | 3,5,8,18,2<br>0,21,22,25<br>,26 | 8  | P02631,P15399,P18418,P50280,P97580,Q30KJ2,Q63532,Q6IE51                                                                              |
| 2578 | 1,2,4,6,7,1<br>9,23,25 | 3,5,8,18,2<br>0,21,22,24<br>,26 | 17 | P02631,P02803,P06911,P12020,P15399,P18418,P19629,P25236,P47967,P50280,P97580,P97840,Q30KJ2,Q5GRG2,Q63532,Q6IE51,Q99041               |
| 2579 | 1,2,4,6,7,1<br>9,23,26 | 3,5,8,18,2<br>0,21,22,24<br>,25 | 9  | P02631,P15399,P25236,P83748,P97580,Q30KJ2,Q5FVI6,Q63532,Q6IE51                                                                       |
| 2580 | 1,2,4,6,7,1<br>9,24,25 | 3,5,8,18,2<br>0,21,22,23<br>,26 | 12 | P02631,P06911,P12020,P15399,P18418,P35467,P97580,P97840,Q30KJ2,Q5GRG2,Q63532,Q6IE51                                                  |

|      |                        |                                 |    |                                                                                                                        |
|------|------------------------|---------------------------------|----|------------------------------------------------------------------------------------------------------------------------|
| 2581 | 1,2,4,6,7,1<br>9,24,26 | 3,5,8,18,2<br>0,21,22,23<br>,25 | 11 | P02631,P14480,P18418,P20760,P83748,P97580,Q30KJ2,Q5FVI6,Q63532,Q6IE51,Q7TP52                                           |
| 2582 | 1,2,4,6,7,1<br>9,25,26 | 3,5,8,18,2<br>0,21,22,23<br>,24 | 17 | P02631,P05539,P12020,P14480,P15399,P18418,P25236,P35280,P83748,P97580,P97840,Q30KJ2,Q5FVI6,Q5GRG2,Q63532,Q6IE51,Q7TP52 |
| 2583 | 1,2,4,6,7,2<br>0,21,22 | 3,5,8,18,1<br>9,23,24,25<br>,26 | 10 | O55004,P01836,P08723,P13432,P18418,P25236,P35467,P42854,Q07523,Q9JI85                                                  |
| 2584 | 1,2,4,6,7,2<br>0,21,23 | 3,5,8,18,1<br>9,22,24,25<br>,26 | 10 | P02631,P15399,P20762,P25236,P42854,P97580,Q30KJ2,Q6AYL6,Q91ZS3,Q9JI85                                                  |
| 2585 | 1,2,4,6,7,2<br>0,21,24 | 3,5,8,18,1<br>9,22,23,25<br>,26 | 10 | O54861,P01836,P02631,P13432,P18418,P25236,P35467,P42854,Q91ZS3,Q9JI85                                                  |
| 2586 | 1,2,4,6,7,2<br>0,21,25 | 3,5,8,18,1<br>9,22,23,24<br>,26 | 8  | P09605,P25809,P12020,P25236,P35467,P42854,P47967,Q5GRG2,Q91ZS3                                                         |
| 2587 | 1,2,4,6,7,2<br>0,21,26 | 3,5,8,18,1<br>9,22,23,24<br>,25 | 14 | O54861,O55004,P01015,P01041,P01836,P19223,P20761,P20762,P25236,P42854,P80020,P83748,Q91ZS3,Q9EQV9                      |
| 2588 | 1,2,4,6,7,2<br>0,22,23 | 3,5,8,18,1<br>9,21,24,25<br>,26 | 8  | G3V686,P02631,P15399,P97580,Q30KJ2,Q62997,Q7TP52,Q8CJD3                                                                |
| 2589 | 1,2,4,6,7,2<br>0,22,24 | 3,5,8,18,1<br>9,21,23,25<br>,26 | 4  | P02631,P18418,P35467,Q7TP52                                                                                            |
| 2590 | 1,2,4,6,7,2<br>0,22,25 | 3,5,8,18,1<br>9,21,23,24<br>,26 | 8  | P06911,P12020,P18418,P35467,Q07523,Q5GRG2,Q7TP52,Q91ZS3                                                                |
| 2591 | 1,2,4,6,7,2<br>0,22,26 | 3,5,8,18,1<br>9,21,23,24<br>,25 | 6  | P01041,P01836,P05539,P25236,P83748,Q7TP52                                                                              |
| 2592 | 1,2,4,6,7,2<br>0,23,24 | 3,5,8,18,1<br>9,21,22,25<br>,26 | 5  | P02631,P15399,P97580,Q30KJ2,Q6IE51                                                                                     |
| 2593 | 1,2,4,6,7,2<br>0,23,25 | 3,5,8,18,1<br>9,21,22,24<br>,26 | 11 | P02631,P06911,P12020,P15399,P25236,P50280,P70709,P97580,Q30KJ2,Q5GRG2,Q91ZS3                                           |
| 2594 | 1,2,4,6,7,2<br>0,23,26 | 3,5,8,18,1<br>9,21,22,24<br>,25 | 8  | P02631,P05539,P15399,P20762,P25236,P55053,P97580,Q30KJ2                                                                |
| 2595 | 1,2,4,6,7,2<br>0,24,25 | 3,5,8,18,1<br>9,21,22,23<br>,26 | 6  | P02631,P12020,P18418,P35467,Q5GRG2,Q91ZS3                                                                              |

|      |                        |                                 |    |                                                                                                                        |
|------|------------------------|---------------------------------|----|------------------------------------------------------------------------------------------------------------------------|
| 2596 | 1,2,4,6,7,2<br>0,24,26 | 3,5,8,18,1<br>9,21,22,23<br>,25 | 6  | P01015,P01836,P20760,P20761,P83748,Q7TP52                                                                              |
| 2597 | 1,2,4,6,7,2<br>0,25,26 | 3,5,8,18,1<br>9,21,22,23<br>,24 | 9  | P05539,P12020,P25236,P35280,P83748,Q5GRG2,Q6AYQ8,Q7TP52,Q91ZS3                                                         |
| 2598 | 1,2,4,6,7,2<br>1,22,23 | 3,5,8,18,1<br>9,20,24,25<br>,26 | 9  | G3V686,P02631,P13432,P15399,P25236,P50280,P97580,Q30KJ2,Q9JI85                                                         |
| 2599 | 1,2,4,6,7,2<br>1,22,24 | 3,5,8,18,1<br>9,20,23,25<br>,26 | 6  | P02631,P13432,P18418,P25236,P35467,Q6IG02                                                                              |
| 2600 | 1,2,4,6,7,2<br>1,22,25 | 3,5,8,18,1<br>9,20,23,24<br>,26 | 11 | P06911,P09605,P25809,P12020,P18418,P19629,P25236,P35467,P47967,P97840,Q5GRG2,Q91ZS3                                    |
| 2601 | 1,2,4,6,7,2<br>1,22,26 | 3,5,8,18,1<br>9,20,23,24<br>,25 | 7  | P01836,P05539,P13432,P20761,P25236,P83748,Q7TP52                                                                       |
| 2602 | 1,2,4,6,7,2<br>1,23,24 | 3,5,8,18,1<br>9,20,22,25<br>,26 | 8  | D3ZUC6,P02631,P13432,P15399,P18418,P25236,P97580,Q30KJ2                                                                |
| 2603 | 1,2,4,6,7,2<br>1,23,25 | 3,5,8,18,1<br>9,20,22,24<br>,26 | 16 | P02631,P06911,P09605,P25809,P12020,P15399,P19629,P25236,P50280,P70709,P83121,P97580,P97840,Q30KJ2,Q5GRG2,Q6P6R2,Q91ZS3 |
| 2604 | 1,2,4,6,7,2<br>1,23,26 | 3,5,8,18,1<br>9,20,22,24<br>,25 | 11 | D3ZUC6,P02631,P15399,P20761,P20762,P25236,P83121,P83748,P97580,Q30KJ2,Q9EQV9                                           |
| 2605 | 1,2,4,6,7,2<br>1,24,25 | 3,5,8,18,1<br>9,20,22,23<br>,26 | 13 | P02631,P09605,P25809,P12020,P13432,P18418,P19629,P22006,P25236,P35467,P97840,Q5GRG2,Q6P6R2,Q91ZS3                      |
| 2606 | 1,2,4,6,7,2<br>1,24,26 | 3,5,8,18,1<br>9,20,22,23<br>,25 | 9  | D3ZUC6,P01836,P13432,P20760,P20761,P25236,P80020,P83748,Q9EQV9                                                         |
| 2607 | 1,2,4,6,7,2<br>1,25,26 | 3,5,8,18,1<br>9,20,22,23<br>,24 | 11 | P09605,P25809,P12020,P19223,P19629,P22006,P25236,P83121,P83748,Q5GRG2,Q91ZS3,Q9QZK9                                    |
| 2608 | 1,2,4,6,7,2<br>2,23,24 | 3,5,8,18,1<br>9,20,21,25<br>,26 | 5  | G3V686,P02631,P18418,P97580,Q30KJ2                                                                                     |
| 2609 | 1,2,4,6,7,2<br>2,23,25 | 3,5,8,18,1<br>9,20,21,24<br>,26 | 12 | G3V686,P02631,P06911,P12020,P15399,P19629,P50280,P70709,P97580,Q30KJ2,Q5GRG2,Q7TP52                                    |
| 2610 | 1,2,4,6,7,2<br>2,23,26 | 3,5,8,18,1<br>9,20,21,24<br>,25 | 8  | G3V686,P05539,P20761,P25236,P83748,P97580,Q30KJ2,Q7TP52                                                                |

|      |                        |                                 |    |                                                                                                                        |
|------|------------------------|---------------------------------|----|------------------------------------------------------------------------------------------------------------------------|
| 2611 | 1,2,4,6,7,2<br>2,24,25 | 3,5,8,18,1<br>9,20,21,23<br>,26 | 9  | P02631,P06911,P12020,P18418,P19629,P35467,Q5GRG2,Q6IG02,Q7TP52                                                         |
| 2612 | 1,2,4,6,7,2<br>2,24,26 | 3,5,8,18,1<br>9,20,21,23<br>,25 | 5  | P18418,P20760,P20761,P83748,Q7TP52                                                                                     |
| 2613 | 1,2,4,6,7,2<br>2,25,26 | 3,5,8,18,1<br>9,20,21,23<br>,24 | 8  | P05539,P06911,P12020,P19629,P25236,P83748,Q5GRG2,Q7TP52                                                                |
| 2614 | 1,2,4,6,7,2<br>3,24,25 | 3,5,8,18,1<br>9,20,21,22<br>,26 | 14 | P02631,P05371,P06911,P12020,P15399,P18418,P19629,P50280,P70709,P97580,Q30KJ2,Q5GRG2,Q6IE51,Q6P6R2                      |
| 2615 | 1,2,4,6,7,2<br>3,24,26 | 3,5,8,18,1<br>9,20,21,22<br>,25 | 7  | P02631,P20760,P20761,P25236,P97580,Q30KJ2,Q6IE51                                                                       |
| 2616 | 1,2,4,6,7,2<br>3,25,26 | 3,5,8,18,1<br>9,20,21,22<br>,24 | 16 | P01946,P02631,P05539,P06911,P12020,P15399,P19629,P25236,P50280,P83121,P83748,P97580,Q30KJ2,Q5GRG2,Q6AYQ8,Q91ZS3        |
| 2617 | 1,2,4,6,7,2<br>4,25,26 | 3,5,8,18,1<br>9,20,21,22<br>,23 | 8  | P12020,P14480,P18418,P19629,P83748,Q5GRG2,Q6AYQ8,Q7TP52                                                                |
| 2618 | 1,2,4,6,8,1<br>8,19,20 | 3,5,7,21,2<br>2,23,24,25<br>,26 | 7  | P00731,P02803,P22006,P35280,P35281,Q63355,Q8CJD3                                                                       |
| 2619 | 1,2,4,6,8,1<br>8,19,21 | 3,5,7,20,2<br>2,23,24,25<br>,26 | 16 | O35547,P00731,P02761,P02782,P02803,P05964,P07647,P08723,P0C0A9,P10758,P25236,P35281,P98089,Q62635,Q6AYR9,Q8CJD3        |
| 2620 | 1,2,4,6,8,1<br>8,19,22 | 3,5,7,20,2<br>1,23,24,25<br>,26 | 2  | Q7TP52,Q8CJD3                                                                                                          |
| 2621 | 1,2,4,6,8,1<br>8,19,23 | 3,5,7,20,2<br>1,22,24,25<br>,26 | 16 | P02803,P05964,P0C0A9,P15399,P25236,P35281,P50280,P97580,Q03191,Q30KJ2,Q5BJY9,Q5XI22,Q63598,Q63942,Q8CJD3,Q99MH3        |
| 2622 | 1,2,4,6,8,1<br>8,19,24 | 3,5,7,20,2<br>1,22,23,25<br>,26 | 0  |                                                                                                                        |
| 2623 | 1,2,4,6,8,1<br>8,19,25 | 3,5,7,20,2<br>1,22,23,24<br>,26 | 5  | P00731,P02803,P35280,P98089,Q62635                                                                                     |
| 2624 | 1,2,4,6,8,1<br>8,19,26 | 3,5,7,20,2<br>1,22,23,24<br>,25 | 7  | P02803,P0C0A9,P25236,P35280,Q63355,Q63942,Q7TP52                                                                       |
| 2625 | 1,2,4,6,8,1<br>8,20,21 | 3,5,7,19,2<br>2,23,24,25<br>,26 | 17 | O35547,P00731,P02761,P02782,P02803,P07647,P08723,P0C0A9,P13432,P17046,P25236,P62804,Q00715,Q6AYR8,Q6AYR9,Q91ZS3,Q9QZA6 |

|      |                        |                                 |    |                                                                                                          |
|------|------------------------|---------------------------------|----|----------------------------------------------------------------------------------------------------------|
| 2626 | 1,2,4,6,8,1<br>8,20,22 | 3,5,7,19,2<br>1,23,24,25<br>,26 | 3  | P22006,Q7TP52,Q8CJD3                                                                                     |
| 2627 | 1,2,4,6,8,1<br>8,20,23 | 3,5,7,19,2<br>1,22,24,25<br>,26 | 5  | P20762,P22006,P25236,Q5XI22,Q8CJD3                                                                       |
| 2628 | 1,2,4,6,8,1<br>8,20,24 | 3,5,7,19,2<br>1,22,23,25<br>,26 | 0  |                                                                                                          |
| 2629 | 1,2,4,6,8,1<br>8,20,25 | 3,5,7,19,2<br>1,22,23,24<br>,26 | 4  | P02803,P35280,P98089,Q91ZS3                                                                              |
| 2630 | 1,2,4,6,8,1<br>8,20,26 | 3,5,7,19,2<br>1,22,23,24<br>,25 | 8  | P17046,P20762,P25236,P35280,P62804,Q63355,Q63942,Q6AYQ8                                                  |
| 2631 | 1,2,4,6,8,1<br>8,21,22 | 3,5,7,19,2<br>0,23,24,25<br>,26 | 8  | O35547,P02782,P07647,P08723,P0C0A9,P13432,P25236,Q80WL1                                                  |
| 2632 | 1,2,4,6,8,1<br>8,21,23 | 3,5,7,19,2<br>0,22,24,25<br>,26 | 12 | O35547,P02782,P02803,P05964,P08644,P08723,P0C0A9,P25236,P98089,Q5XI22,Q63598,Q8CJD3                      |
| 2633 | 1,2,4,6,8,1<br>8,21,24 | 3,5,7,19,2<br>0,22,23,25<br>,26 | 8  | O54728,P02761,P02782,P08723,P0C0A9,P13432,P25236,P98089                                                  |
| 2634 | 1,2,4,6,8,1<br>8,21,25 | 3,5,7,19,2<br>0,22,23,24<br>,26 | 11 | O54728,P00731,P02803,P08723,P0C0A9,P25236,P31430,P98089,Q6P6R2,Q91ZS3,Q9WTT6                             |
| 2635 | 1,2,4,6,8,1<br>8,21,26 | 3,5,7,19,2<br>0,22,23,24<br>,25 | 15 | P02761,P02782,P02803,P0C0A9,P17046,P19223,P25031,P25236,P98089,Q00715,Q5QE79,Q63942,Q6AYR8,Q80WL1,Q9EQV9 |
| 2636 | 1,2,4,6,8,1<br>8,22,23 | 3,5,7,19,2<br>0,21,24,25<br>,26 | 3  | P50280,Q5XI22,Q8CJD3                                                                                     |
| 2637 | 1,2,4,6,8,1<br>8,22,24 | 3,5,7,19,2<br>0,21,23,25<br>,26 | 1  | Q7TP52                                                                                                   |
| 2638 | 1,2,4,6,8,1<br>8,22,25 | 3,5,7,19,2<br>0,21,23,24<br>,26 | 4  | P06911,P98089,Q5GRG2,Q7TP52                                                                              |
| 2639 | 1,2,4,6,8,1<br>8,22,26 | 3,5,7,19,2<br>0,21,23,24<br>,25 | 3  | P25236,Q63942,Q7TP52                                                                                     |
| 2640 | 1,2,4,6,8,1<br>8,23,24 | 3,5,7,19,2<br>0,21,22,25<br>,26 | 2  | Q5XI22,Q63942                                                                                            |



|      |                        |                                 |    |                                                                                     |
|------|------------------------|---------------------------------|----|-------------------------------------------------------------------------------------|
| 2641 | 1,2,4,6,8,1<br>8,23,25 | 3,5,7,19,2<br>0,21,22,24<br>,26 | 12 | P00714,P02803,P06911,P25236,P50280,P98089,Q5GRG2,Q5XI22,Q63598,Q6P6R2,Q8CJD3,Q99MH3 |
| 2642 | 1,2,4,6,8,1<br>8,23,26 | 3,5,7,19,2<br>0,21,22,24<br>,25 | 11 | P02803,P20762,P25236,Q5QE79,Q63942,Q6AYQ8,Q6IFU7,Q6IFU8,Q6IFW6,Q6IMF3,Q6P6Q2        |
| 2643 | 1,2,4,6,8,1<br>8,24,25 | 3,5,7,19,2<br>0,21,22,23<br>,26 | 2  | O54728,P98089                                                                       |
| 2644 | 1,2,4,6,8,1<br>8,24,26 | 3,5,7,19,2<br>0,21,22,23<br>,25 | 3  | P17046,Q63942,Q6AYQ8                                                                |
| 2645 | 1,2,4,6,8,1<br>8,25,26 | 3,5,7,19,2<br>0,21,22,23<br>,24 | 11 | P00714,P00774,P02803,P19223,P25236,P35280,P55091,P98089,Q63942,Q6AY33,Q6AYQ8        |
| 2646 | 1,2,4,6,8,1<br>9,20,21 | 3,5,7,18,2<br>2,23,24,25<br>,26 | 10 | P00731,P02761,P02782,P08723,P0C0A9,P25236,P30120,P35281,P62804,Q00715               |
| 2647 | 1,2,4,6,8,1<br>9,20,22 | 3,5,7,18,2<br>1,23,24,25<br>,26 | 4  | P22006,Q62997,Q7TP52,Q8CJD3                                                         |
| 2648 | 1,2,4,6,8,1<br>9,20,23 | 3,5,7,18,2<br>1,22,24,25<br>,26 | 7  | P15399,P25236,P35281,P50280,P97580,Q30KJ2,Q8CJD3                                    |
| 2649 | 1,2,4,6,8,1<br>9,20,24 | 3,5,7,18,2<br>1,22,23,25<br>,26 | 0  |                                                                                     |
| 2650 | 1,2,4,6,8,1<br>9,20,25 | 3,5,7,18,2<br>1,22,23,24<br>,26 | 2  | P35280,Q5GRG2                                                                       |
| 2651 | 1,2,4,6,8,1<br>9,20,26 | 3,5,7,18,2<br>1,22,23,24<br>,25 | 5  | P25236,P35280,P62804,Q00715,Q63355                                                  |
| 2652 | 1,2,4,6,8,1<br>9,21,22 | 3,5,7,18,2<br>0,23,24,25<br>,26 | 9  | A2RUV9,O35547,P02782,P07647,P08723,P0C0A9,P25236,P35281,Q80WL1                      |
| 2653 | 1,2,4,6,8,1<br>9,21,23 | 3,5,7,18,2<br>0,22,24,25<br>,26 | 11 | P02782,P02803,P08723,P0C0A9,P15399,P25236,P35281,P50280,P97580,Q30KJ2,Q8CJD3        |
| 2654 | 1,2,4,6,8,1<br>9,21,24 | 3,5,7,18,2<br>0,22,23,25<br>,26 | 6  | P02761,P02782,P0C0A9,P13432,P25236,P35281                                           |
| 2655 | 1,2,4,6,8,1<br>9,21,25 | 3,5,7,18,2<br>0,22,23,24<br>,26 | 12 | P00731,P02803,P0C0A9,P25236,P35281,P47967,P97840,Q5GRG2,Q62635,Q6P6R2,Q8CIZ5,Q9WTT6 |

|      |                        |                                 |    |                                                                                     |
|------|------------------------|---------------------------------|----|-------------------------------------------------------------------------------------|
| 2656 | 1,2,4,6,8,1<br>9,21,26 | 3,5,7,18,2<br>0,22,23,24<br>,25 | 7  | P02761,P02782,P0C0A9,P25236,P35281,Q00715,Q9EQV9                                    |
| 2657 | 1,2,4,6,8,1<br>9,22,23 | 3,5,7,18,2<br>0,21,24,25<br>,26 | 6  | P15399,P25236,P50280,P97580,Q30KJ2,Q8CJD3                                           |
| 2658 | 1,2,4,6,8,1<br>9,22,24 | 3,5,7,18,2<br>0,21,23,25<br>,26 | 1  | Q7TP52                                                                              |
| 2659 | 1,2,4,6,8,1<br>9,22,25 | 3,5,7,18,2<br>0,21,23,24<br>,26 | 4  | P06911,P12020,Q5GRG2,Q7TP52                                                         |
| 2660 | 1,2,4,6,8,1<br>9,22,26 | 3,5,7,18,2<br>0,21,23,24<br>,25 | 2  | P25236,Q7TP52                                                                       |
| 2661 | 1,2,4,6,8,1<br>9,23,24 | 3,5,7,18,2<br>0,21,22,25<br>,26 | 4  | P15399,P50280,P97580,Q30KJ2                                                         |
| 2662 | 1,2,4,6,8,1<br>9,23,25 | 3,5,7,18,2<br>0,21,22,24<br>,26 | 12 | P02803,P06911,P12020,P15399,P25236,P50280,P97580,Q30KJ2,Q5GRG2,Q6P6R2,Q8CJD3,Q99041 |
| 2663 | 1,2,4,6,8,1<br>9,23,26 | 3,5,7,18,2<br>0,21,22,24<br>,25 | 6  | D4A5U3,P15399,P25236,P50280,P97580,Q30KJ2                                           |
| 2664 | 1,2,4,6,8,1<br>9,24,25 | 3,5,7,18,2<br>0,21,22,23<br>,26 | 1  | Q5GRG2                                                                              |
| 2665 | 1,2,4,6,8,1<br>9,24,26 | 3,5,7,18,2<br>0,21,22,23<br>,25 | 1  | P25236                                                                              |
| 2666 | 1,2,4,6,8,1<br>9,25,26 | 3,5,7,18,2<br>0,21,22,23<br>,24 | 4  | P02803,P25236,P35280,Q5GRG2                                                         |
| 2667 | 1,2,4,6,8,2<br>0,21,22 | 3,5,7,18,1<br>9,23,24,25<br>,26 | 8  | P02761,P02782,P07647,P08723,P13432,P25236,P62804,Q07523                             |
| 2668 | 1,2,4,6,8,2<br>0,21,23 | 3,5,7,18,1<br>9,22,24,25<br>,26 | 7  | P02761,P02782,P0C0A9,P20762,P25236,P62804,Q8CJD3                                    |
| 2669 | 1,2,4,6,8,2<br>0,21,24 | 3,5,7,18,1<br>9,22,23,25<br>,26 | 4  | P02761,P02782,P13432,P25236                                                         |
| 2670 | 1,2,4,6,8,2<br>0,21,25 | 3,5,7,18,1<br>9,22,23,24<br>,26 | 8  | P25236,P30120,P47727,P62804,Q07523,Q6P6R2,Q91ZS3,Q9WTT6                             |

|      |                        |                                 |    |                                                                                            |
|------|------------------------|---------------------------------|----|--------------------------------------------------------------------------------------------|
| 2671 | 1,2,4,6,8,2<br>0,21,26 | 3,5,7,18,1<br>9,22,23,24<br>,25 | 13 | P01015,P02761,P02782,P0C0A9,P17046,P19223,P20762,P25236,P62804,Q00715,Q5QE79,Q6AYR8,Q9EQV9 |
| 2672 | 1,2,4,6,8,2<br>0,22,23 | 3,5,7,18,1<br>9,21,24,25<br>,26 | 4  | P25236,P50280,Q62997,Q8CJD3                                                                |
| 2673 | 1,2,4,6,8,2<br>0,22,24 | 3,5,7,18,1<br>9,21,23,25<br>,26 | 1  | Q07523                                                                                     |
| 2674 | 1,2,4,6,8,2<br>0,22,25 | 3,5,7,18,1<br>9,21,23,24<br>,26 | 4  | P06911,P12020,Q07523,Q5GRG2                                                                |
| 2675 | 1,2,4,6,8,2<br>0,22,26 | 3,5,7,18,1<br>9,21,23,24<br>,25 | 2  | P25236,Q7TP52                                                                              |
| 2676 | 1,2,4,6,8,2<br>0,23,24 | 3,5,7,18,1<br>9,21,22,25<br>,26 | 0  |                                                                                            |
| 2677 | 1,2,4,6,8,2<br>0,23,25 | 3,5,7,18,1<br>9,21,22,24<br>,26 | 8  | P06911,P12020,P25236,P50280,P70709,Q5GRG2,Q6P6R2,Q9WTT6                                    |
| 2678 | 1,2,4,6,8,2<br>0,23,26 | 3,5,7,18,1<br>9,21,22,24<br>,25 | 3  | P20762,P25236,Q5QE79                                                                       |
| 2679 | 1,2,4,6,8,2<br>0,24,25 | 3,5,7,18,1<br>9,21,22,23<br>,26 | 1  | Q5GRG2                                                                                     |
| 2680 | 1,2,4,6,8,2<br>0,24,26 | 3,5,7,18,1<br>9,21,22,23<br>,25 | 3  | P01015,P17046,P25236                                                                       |
| 2681 | 1,2,4,6,8,2<br>0,25,26 | 3,5,7,18,1<br>9,21,22,23<br>,24 | 5  | P19223,P25236,P35280,Q6AYQ8,Q91ZS3                                                         |
| 2682 | 1,2,4,6,8,2<br>1,22,23 | 3,5,7,18,1<br>9,20,24,25<br>,26 | 8  | P02782,P08723,P0C0A9,P13432,P25236,P50280,Q80WL1,Q8CJD3                                    |
| 2683 | 1,2,4,6,8,2<br>1,22,24 | 3,5,7,18,1<br>9,20,23,25<br>,26 | 4  | P02782,P08723,P13432,P25236                                                                |
| 2684 | 1,2,4,6,8,2<br>1,22,25 | 3,5,7,18,1<br>9,20,23,24<br>,26 | 8  | P02782,P06911,P08723,P25236,Q07523,Q5GRG2,Q80WL1,Q9WTT6                                    |
| 2685 | 1,2,4,6,8,2<br>1,22,26 | 3,5,7,18,1<br>9,20,23,24<br>,25 | 9  | P02782,P0C0A9,P13432,P20761,P25236,Q00715,Q5QE79,Q80WL1,Q9EQV9                             |

|      |                        |                                 |    |                                                                                     |
|------|------------------------|---------------------------------|----|-------------------------------------------------------------------------------------|
| 2686 | 1,2,4,6,8,2<br>1,23,24 | 3,5,7,18,1<br>9,20,22,25<br>,26 | 4  | P02782,P13432,P25236,P50280                                                         |
| 2687 | 1,2,4,6,8,2<br>1,23,25 | 3,5,7,18,1<br>9,20,22,24<br>,26 | 12 | P02803,P06911,P07150,P12020,P14669,P25236,P50280,P70709,Q5GRG2,Q6P6R2,Q9WTT6,Q9Z0V6 |
| 2688 | 1,2,4,6,8,2<br>1,23,26 | 3,5,7,18,1<br>9,20,22,24<br>,25 | 12 | D4A5U3,P02782,P0C0A9,P14669,P20761,P20762,P25236,Q00715,Q5QE79,Q6IFV1,Q9EQV9,Q9WTT6 |
| 2689 | 1,2,4,6,8,2<br>1,24,25 | 3,5,7,18,1<br>9,20,22,23<br>,26 | 5  | O54728,P13432,P25236,Q6P6R2,Q9WTT6                                                  |
| 2690 | 1,2,4,6,8,2<br>1,24,26 | 3,5,7,18,1<br>9,20,22,23<br>,25 | 9  | P01015,P02761,P02782,P13432,P20761,P25236,P80020,Q5QE79,Q9EQV9                      |
| 2691 | 1,2,4,6,8,2<br>1,25,26 | 3,5,7,18,1<br>9,20,22,23<br>,24 | 10 | P19223,P25236,Q00715,Q5QE79,Q66HD0,Q6P6R2,Q91ZS3,Q9EQV9,Q9WTT6,Q9Z0V6               |
| 2692 | 1,2,4,6,8,2<br>2,23,24 | 3,5,7,18,1<br>9,20,21,25<br>,26 | 1  | P50280                                                                              |
| 2693 | 1,2,4,6,8,2<br>2,23,25 | 3,5,7,18,1<br>9,20,21,24<br>,26 | 7  | P06911,P12020,P25236,P50280,P70709,Q5GRG2,Q8CJD3                                    |
| 2694 | 1,2,4,6,8,2<br>2,23,26 | 3,5,7,18,1<br>9,20,21,24<br>,25 | 4  | D4A5U3,P25236,P50280,Q5QE79                                                         |
| 2695 | 1,2,4,6,8,2<br>2,24,25 | 3,5,7,18,1<br>9,20,21,23<br>,26 | 3  | P06911,Q07523,Q5GRG2                                                                |
| 2696 | 1,2,4,6,8,2<br>2,24,26 | 3,5,7,18,1<br>9,20,21,23<br>,25 | 2  | P20761,Q7TP52                                                                       |
| 2697 | 1,2,4,6,8,2<br>2,25,26 | 3,5,7,18,1<br>9,20,21,23<br>,24 | 5  | P06911,P25236,Q5GRG2,Q5QE79,Q7TP52                                                  |
| 2698 | 1,2,4,6,8,2<br>3,24,25 | 3,5,7,18,1<br>9,20,21,22<br>,26 | 6  | P06911,P12020,P50280,P70709,Q5GRG2,Q6P6R2                                           |
| 2699 | 1,2,4,6,8,2<br>3,24,26 | 3,5,7,18,1<br>9,20,21,22<br>,25 | 4  | D4A5U3,P20761,P25236,P27590                                                         |
| 2700 | 1,2,4,6,8,2<br>3,25,26 | 3,5,7,18,1<br>9,20,21,22<br>,24 | 11 | D4A5U3,P06911,P12020,P25236,P50280,Q5GRG2,Q5QE79,Q6AYQ8,Q6P6R2,Q9WTT6,Q9Z0V6        |

|      |                         |                                 |    |                                                                              |
|------|-------------------------|---------------------------------|----|------------------------------------------------------------------------------|
| 2701 | 1,2,4,6,8,2<br>4,25,26  | 3,5,7,18,1<br>9,20,21,22<br>,23 | 3  | P14480,P25236,Q6AYQ8                                                         |
| 2702 | 1,2,4,6,18,<br>19,20,21 | 3,5,7,8,22,<br>23,24,25,2<br>6  | 4  | P00731,P25236,P35281,Q6AYR9                                                  |
| 2703 | 1,2,4,6,18,<br>19,20,22 | 3,5,7,8,21,<br>23,24,25,2<br>6  | 4  | P22006,Q62997,Q7TP52,Q8CJD3                                                  |
| 2704 | 1,2,4,6,18,<br>19,20,23 | 3,5,7,8,21,<br>22,24,25,2<br>6  | 6  | P15399,P22006,P25236,P97580,Q30KJ2,Q8CJD3                                    |
| 2705 | 1,2,4,6,18,<br>19,20,24 | 3,5,7,8,21,<br>22,23,25,2<br>6  | 0  |                                                                              |
| 2706 | 1,2,4,6,18,<br>19,20,25 | 3,5,7,8,21,<br>22,23,24,2<br>6  | 2  | P35280,P98089                                                                |
| 2707 | 1,2,4,6,18,<br>19,20,26 | 3,5,7,8,21,<br>22,23,24,2<br>5  | 5  | P25236,P35280,Q63355,Q63751,Q63942                                           |
| 2708 | 1,2,4,6,18,<br>19,21,22 | 3,5,7,8,20,<br>23,24,25,2<br>6  | 5  | D3ZUC6,O35547,P08723,P25236,Q8CJD3                                           |
| 2709 | 1,2,4,6,18,<br>19,21,23 | 3,5,7,8,20,<br>22,24,25,2<br>6  | 11 | D3ZUC6,O35547,P02803,P05964,P0C0A9,P15399,P25236,P97580,Q30KJ2,Q8CJD3,Q99MH3 |
| 2710 | 1,2,4,6,18,<br>19,21,24 | 3,5,7,8,20,<br>22,23,25,2<br>6  | 4  | D3ZUC6,O89117,P13432,P25236                                                  |
| 2711 | 1,2,4,6,18,<br>19,21,25 | 3,5,7,8,20,<br>22,23,24,2<br>6  | 9  | P00731,P02803,P25236,P31430,P47967,P97840,P98089,Q62635,Q8CIZ5               |
| 2712 | 1,2,4,6,18,<br>19,21,26 | 3,5,7,8,20,<br>22,23,24,2<br>5  | 8  | D3ZUC6,P05964,P0C0A9,P25031,P25236,Q63661,Q63942,Q9EQV9                      |
| 2713 | 1,2,4,6,18,<br>19,22,23 | 3,5,7,8,20,<br>21,24,25,2<br>6  | 4  | P15399,P97580,Q30KJ2,Q8CJD3                                                  |
| 2714 | 1,2,4,6,18,<br>19,22,24 | 3,5,7,8,20,<br>21,23,25,2<br>6  | 1  | Q7TP52                                                                       |
| 2715 | 1,2,4,6,18,<br>19,22,25 | 3,5,7,8,20,<br>21,23,24,2<br>6  | 4  | P06911,P97840,P98089,Q7TP52                                                  |

|      |                         |                                |    |                                                                              |
|------|-------------------------|--------------------------------|----|------------------------------------------------------------------------------|
| 2716 | 1,2,4,6,18,<br>19,22,26 | 3,5,7,8,20,<br>21,23,24,2<br>5 | 3  | P25236,Q63942,Q7TP52                                                         |
| 2717 | 1,2,4,6,18,<br>19,23,24 | 3,5,7,8,20,<br>21,22,25,2<br>6 | 4  | P15399,P97580,Q30KJ2,Q6IFU7                                                  |
| 2718 | 1,2,4,6,18,<br>19,23,25 | 3,5,7,8,20,<br>21,22,24,2<br>6 | 11 | P02803,P15399,P25236,P50280,P97580,P98089,Q30KJ2,Q5BJY9,Q62635,Q8CJD3,Q99MH3 |
| 2719 | 1,2,4,6,18,<br>19,23,26 | 3,5,7,8,20,<br>21,22,24,2<br>5 | 11 | P15399,P25236,P97580,Q03191,Q30KJ2,Q63661,Q63942,Q6IFU7,Q6IFU8,Q6IMF3,Q6P6Q2 |
| 2720 | 1,2,4,6,18,<br>19,24,25 | 3,5,7,8,20,<br>21,22,23,2<br>6 | 1  | P98089                                                                       |
| 2721 | 1,2,4,6,18,<br>19,24,26 | 3,5,7,8,20,<br>21,22,23,2<br>5 | 2  | P25236,Q63942                                                                |
| 2722 | 1,2,4,6,18,<br>19,25,26 | 3,5,7,8,20,<br>21,22,23,2<br>4 | 4  | P25236,P35280,P98089,Q63942                                                  |
| 2723 | 1,2,4,6,18,<br>20,21,22 | 3,5,7,8,19,<br>23,24,25,2<br>6 | 3  | P08723,P13432,P25236                                                         |
| 2724 | 1,2,4,6,18,<br>20,21,23 | 3,5,7,8,19,<br>22,24,25,2<br>6 | 2  | P25236,Q8CJD3                                                                |
| 2725 | 1,2,4,6,18,<br>20,21,24 | 3,5,7,8,19,<br>22,23,25,2<br>6 | 2  | P13432,P25236                                                                |
| 2726 | 1,2,4,6,18,<br>20,21,25 | 3,5,7,8,19,<br>22,23,24,2<br>6 | 6  | O54728,P25031,P25236,P31430,P98089,Q91ZS3                                    |
| 2727 | 1,2,4,6,18,<br>20,21,26 | 3,5,7,8,19,<br>22,23,24,2<br>5 | 5  | P01015,P25031,P25236,P62804,Q9EQV9                                           |
| 2728 | 1,2,4,6,18,<br>20,22,23 | 3,5,7,8,19,<br>21,24,25,2<br>6 | 4  | P22006,P25236,Q6IFU7,Q8CJD3                                                  |
| 2729 | 1,2,4,6,18,<br>20,22,24 | 3,5,7,8,19,<br>21,23,25,2<br>6 | 1  | Q7TP52                                                                       |
| 2730 | 1,2,4,6,18,<br>20,22,25 | 3,5,7,8,19,<br>21,23,24,2<br>6 | 2  | P98089,Q7TP52                                                                |

|      |                         |                                |    |                                                                                            |
|------|-------------------------|--------------------------------|----|--------------------------------------------------------------------------------------------|
| 2731 | 1,2,4,6,18,<br>20,22,26 | 3,5,7,8,19,<br>21,23,24,2<br>5 | 2  | P25236,Q7TP52                                                                              |
| 2732 | 1,2,4,6,18,<br>20,23,24 | 3,5,7,8,19,<br>21,22,25,2<br>6 | 1  | Q6IFU7                                                                                     |
| 2733 | 1,2,4,6,18,<br>20,23,25 | 3,5,7,8,19,<br>21,22,24,2<br>6 | 2  | P25236,P98089                                                                              |
| 2734 | 1,2,4,6,18,<br>20,23,26 | 3,5,7,8,19,<br>21,22,24,2<br>5 | 9  | P25236,Q63355,Q63942,Q6IFU7,Q6IFU8,Q6IFW6,Q6IG02,Q6IMF3,Q6P6Q2                             |
| 2735 | 1,2,4,6,18,<br>20,24,25 | 3,5,7,8,19,<br>21,22,23,2<br>6 | 1  | P98089                                                                                     |
| 2736 | 1,2,4,6,18,<br>20,24,26 | 3,5,7,8,19,<br>21,22,23,2<br>5 | 2  | P01015,P25236                                                                              |
| 2737 | 1,2,4,6,18,<br>20,25,26 | 3,5,7,8,19,<br>21,22,23,2<br>4 | 4  | P25236,P35280,P98089,Q91ZS3                                                                |
| 2738 | 1,2,4,6,18,<br>21,22,23 | 3,5,7,8,19,<br>20,24,25,2<br>6 | 2  | P25236,Q8CJD3                                                                              |
| 2739 | 1,2,4,6,18,<br>21,22,24 | 3,5,7,8,19,<br>20,23,25,2<br>6 | 2  | P13432,P25236                                                                              |
| 2740 | 1,2,4,6,18,<br>21,22,25 | 3,5,7,8,19,<br>20,23,24,2<br>6 | 4  | P25236,P31430,P97840,P98089                                                                |
| 2741 | 1,2,4,6,18,<br>21,22,26 | 3,5,7,8,19,<br>20,23,24,2<br>5 | 2  | P25031,P25236                                                                              |
| 2742 | 1,2,4,6,18,<br>21,23,24 | 3,5,7,8,19,<br>20,22,25,2<br>6 | 4  | D3ZUC6,P13432,P25236,Q6IFU7                                                                |
| 2743 | 1,2,4,6,18,<br>21,23,25 | 3,5,7,8,19,<br>20,22,24,2<br>6 | 8  | P02803,P25236,P31430,P50280,P70709,P98089,Q6P6R2,Q99MH3                                    |
| 2744 | 1,2,4,6,18,<br>21,23,26 | 3,5,7,8,19,<br>20,22,24,2<br>5 | 13 | D3ZUC6,P25031,P25236,Q62636,Q63661,Q63942,Q6IFU7,Q6IFU8,Q6IFV1,Q6IFW6,Q6IMF3,Q6P6Q2,Q9EQV9 |
| 2745 | 1,2,4,6,18,<br>21,24,25 | 3,5,7,8,19,<br>20,22,23,2<br>6 | 4  | O54728,P25236,P31430,P98089                                                                |

|      |                         |                                |    |                                                                              |
|------|-------------------------|--------------------------------|----|------------------------------------------------------------------------------|
| 2746 | 1,2,4,6,18,<br>21,24,26 | 3,5,7,8,19,<br>20,22,23,2<br>5 | 5  | D3ZUC6,P13432,P25236,P80020,Q9EQV9                                           |
| 2747 | 1,2,4,6,18,<br>21,25,26 | 3,5,7,8,19,<br>20,22,23,2<br>4 | 9  | P00774,P19223,P25031,P25236,P31430,P55091,P98089,Q63661,Q91ZS3               |
| 2748 | 1,2,4,6,18,<br>22,23,24 | 3,5,7,8,19,<br>20,21,25,2<br>6 | 1  | Q6IFU7                                                                       |
| 2749 | 1,2,4,6,18,<br>22,23,25 | 3,5,7,8,19,<br>20,21,24,2<br>6 | 7  | G3V686,P06911,P25236,P50280,P98089,Q5GRG2,Q8CJD3                             |
| 2750 | 1,2,4,6,18,<br>22,23,26 | 3,5,7,8,19,<br>20,21,24,2<br>5 | 7  | P25236,Q63942,Q6IFU7,Q6IFU8,Q6IMF3,Q6P6Q2,Q7TP52                             |
| 2751 | 1,2,4,6,18,<br>22,24,25 | 3,5,7,8,19,<br>20,21,23,2<br>6 | 2  | P98089,Q7TP52                                                                |
| 2752 | 1,2,4,6,18,<br>22,24,26 | 3,5,7,8,19,<br>20,21,23,2<br>5 | 1  | Q7TP52                                                                       |
| 2753 | 1,2,4,6,18,<br>22,25,26 | 3,5,7,8,19,<br>20,21,23,2<br>4 | 3  | P25236,P98089,Q7TP52                                                         |
| 2754 | 1,2,4,6,18,<br>23,24,25 | 3,5,7,8,19,<br>20,21,22,2<br>6 | 2  | P98089,Q6IFU7                                                                |
| 2755 | 1,2,4,6,18,<br>23,24,26 | 3,5,7,8,19,<br>20,21,22,2<br>5 | 8  | P25236,P27590,Q63942,Q6IFU7,Q6IFU8,Q6IFW6,Q6IMF3,Q6P6Q2                      |
| 2756 | 1,2,4,6,18,<br>23,25,26 | 3,5,7,8,19,<br>20,21,22,2<br>4 | 11 | P00714,P00774,P25236,P55091,P98089,Q63942,Q6IFU7,Q6IFU8,Q6IFW6,Q6IMF3,Q6P6Q2 |
| 2757 | 1,2,4,6,18,<br>24,25,26 | 3,5,7,8,19,<br>20,21,22,2<br>3 | 5  | P14480,P25236,P55091,P98089,Q7TPB1                                           |
| 2758 | 1,2,4,6,19,<br>20,21,22 | 3,5,7,8,18,<br>23,24,25,2<br>6 | 2  | P25236,P35467                                                                |
| 2759 | 1,2,4,6,19,<br>20,21,23 | 3,5,7,8,18,<br>22,24,25,2<br>6 | 5  | P15399,P25236,P97580,Q30KJ2,Q8CJD3                                           |
| 2760 | 1,2,4,6,19,<br>20,21,24 | 3,5,7,8,18,<br>22,23,25,2<br>6 | 3  | P13432,P25236,P35467                                                         |



|      |                         |                                |   |                                                  |
|------|-------------------------|--------------------------------|---|--------------------------------------------------|
| 2761 | 1,2,4,6,19,<br>20,21,25 | 3,5,7,8,18,<br>22,23,24,2<br>6 | 4 | P25236,P35467,P47967,P97840                      |
| 2762 | 1,2,4,6,19,<br>20,21,26 | 3,5,7,8,18,<br>22,23,24,2<br>5 | 5 | P01015,P25236,P62804,P80020,Q9EQV9               |
| 2763 | 1,2,4,6,19,<br>20,22,23 | 3,5,7,8,18,<br>21,24,25,2<br>6 | 6 | P15399,P25236,P97580,Q30KJ2,Q62997,Q8CJD3        |
| 2764 | 1,2,4,6,19,<br>20,22,24 | 3,5,7,8,18,<br>21,23,25,2<br>6 | 2 | P35467,Q7TP52                                    |
| 2765 | 1,2,4,6,19,<br>20,22,25 | 3,5,7,8,18,<br>21,23,24,2<br>6 | 4 | P06911,P35467,Q62997,Q7TP52                      |
| 2766 | 1,2,4,6,19,<br>20,22,26 | 3,5,7,8,18,<br>21,23,24,2<br>5 | 3 | P25236,Q62997,Q7TP52                             |
| 2767 | 1,2,4,6,19,<br>20,23,24 | 3,5,7,8,18,<br>21,22,25,2<br>6 | 3 | P15399,P97580,Q30KJ2                             |
| 2768 | 1,2,4,6,19,<br>20,23,25 | 3,5,7,8,18,<br>21,22,24,2<br>6 | 7 | P15399,P25236,P50280,P70709,P97580,Q30KJ2,Q8CJD3 |
| 2769 | 1,2,4,6,19,<br>20,23,26 | 3,5,7,8,18,<br>21,22,24,2<br>5 | 4 | P15399,P25236,P97580,Q30KJ2                      |
| 2770 | 1,2,4,6,19,<br>20,24,25 | 3,5,7,8,18,<br>21,22,23,2<br>6 | 1 | P35467                                           |
| 2771 | 1,2,4,6,19,<br>20,24,26 | 3,5,7,8,18,<br>21,22,23,2<br>5 | 2 | P01015,P25236                                    |
| 2772 | 1,2,4,6,19,<br>20,25,26 | 3,5,7,8,18,<br>21,22,23,2<br>4 | 2 | P25236,P35280                                    |
| 2773 | 1,2,4,6,19,<br>21,22,23 | 3,5,7,8,18,<br>20,24,25,2<br>6 | 6 | P15399,P25236,P50280,P97580,Q30KJ2,Q8CJD3        |
| 2774 | 1,2,4,6,19,<br>21,22,24 | 3,5,7,8,18,<br>20,23,25,2<br>6 | 4 | P13432,P25236,P35467,Q6IG02                      |
| 2775 | 1,2,4,6,19,<br>21,22,25 | 3,5,7,8,18,<br>20,23,24,2<br>6 | 6 | P06911,P25236,P35467,P47967,P97840,Q6IG02        |

|      |                         |                                |    |                                                                              |
|------|-------------------------|--------------------------------|----|------------------------------------------------------------------------------|
| 2776 | 1,2,4,6,19,<br>21,22,26 | 3,5,7,8,18,<br>20,23,24,2<br>5 | 1  | P25236                                                                       |
| 2777 | 1,2,4,6,19,<br>21,23,24 | 3,5,7,8,18,<br>20,22,25,2<br>6 | 5  | D3ZUC6,P15399,P25236,P97580,Q30KJ2                                           |
| 2778 | 1,2,4,6,19,<br>21,23,25 | 3,5,7,8,18,<br>20,22,24,2<br>6 | 9  | P15399,P25236,P47967,P50280,P70709,P97580,P97840,Q30KJ2,Q6P6R2               |
| 2779 | 1,2,4,6,19,<br>21,23,26 | 3,5,7,8,18,<br>20,22,24,2<br>5 | 6  | D3ZUC6,P15399,P25236,P97580,Q30KJ2,Q63661                                    |
| 2780 | 1,2,4,6,19,<br>21,24,25 | 3,5,7,8,18,<br>20,22,23,2<br>6 | 4  | P25236,P35467,P47967,P97840                                                  |
| 2781 | 1,2,4,6,19,<br>21,24,26 | 3,5,7,8,18,<br>20,22,23,2<br>5 | 4  | D3ZUC6,P25236,P80020,Q9EQV9                                                  |
| 2782 | 1,2,4,6,19,<br>21,25,26 | 3,5,7,8,18,<br>20,22,23,2<br>4 | 2  | P25236,P97840                                                                |
| 2783 | 1,2,4,6,19,<br>22,23,24 | 3,5,7,8,18,<br>20,21,25,2<br>6 | 4  | P15399,P50280,P97580,Q30KJ2                                                  |
| 2784 | 1,2,4,6,19,<br>22,23,25 | 3,5,7,8,18,<br>20,21,24,2<br>6 | 11 | P06911,P12020,P15399,P25236,P50280,P70709,P97580,Q30KJ2,Q4FZU6,Q5GRG2,Q8CJD3 |
| 2785 | 1,2,4,6,19,<br>22,23,26 | 3,5,7,8,18,<br>20,21,24,2<br>5 | 5  | P15399,P25236,P97580,Q30KJ2,Q7TP52                                           |
| 2786 | 1,2,4,6,19,<br>22,24,25 | 3,5,7,8,18,<br>20,21,23,2<br>6 | 4  | P06911,P35467,Q4FZU6,Q6IG02                                                  |
| 2787 | 1,2,4,6,19,<br>22,24,26 | 3,5,7,8,18,<br>20,21,23,2<br>5 | 2  | P14480,Q7TP52                                                                |
| 2788 | 1,2,4,6,19,<br>22,25,26 | 3,5,7,8,18,<br>20,21,23,2<br>4 | 3  | P06911,P25236,Q7TP52                                                         |
| 2789 | 1,2,4,6,19,<br>23,24,25 | 3,5,7,8,18,<br>20,21,22,2<br>6 | 6  | P15399,P50280,P70709,P97580,Q30KJ2,Q4FZU6                                    |
| 2790 | 1,2,4,6,19,<br>23,24,26 | 3,5,7,8,18,<br>20,21,22,2<br>5 | 6  | P14480,P15399,P25236,P97580,Q30KJ2,Q6IFU7                                    |

|      |                         |                                |   |                                                  |
|------|-------------------------|--------------------------------|---|--------------------------------------------------|
| 2791 | 1,2,4,6,19,<br>23,25,26 | 3,5,7,8,18,<br>20,21,22,2<br>4 | 7 | P14480,P15399,P25236,P27213,P50280,P97580,Q30KJ2 |
| 2792 | 1,2,4,6,19,<br>24,25,26 | 3,5,7,8,18,<br>20,21,22,2<br>3 | 2 | P14480,P25236                                    |
| 2793 | 1,2,4,6,20,<br>21,22,23 | 3,5,7,8,18,<br>19,24,25,2<br>6 | 2 | P25236,Q8CJD3                                    |
| 2794 | 1,2,4,6,20,<br>21,22,24 | 3,5,7,8,18,<br>19,23,25,2<br>6 | 4 | P13432,P25236,P35467,Q07523                      |
| 2795 | 1,2,4,6,20,<br>21,22,25 | 3,5,7,8,18,<br>19,23,24,2<br>6 | 5 | P09605;P25809,P25236,P35467,P70709,Q07523        |
| 2796 | 1,2,4,6,20,<br>21,22,26 | 3,5,7,8,18,<br>19,23,24,2<br>5 | 3 | P01015,P25236,P80020                             |
| 2797 | 1,2,4,6,20,<br>21,23,24 | 3,5,7,8,18,<br>19,22,25,2<br>6 | 2 | P13432,P25236                                    |
| 2798 | 1,2,4,6,20,<br>21,23,25 | 3,5,7,8,18,<br>19,22,24,2<br>6 | 4 | P25236,P70709,Q6P6R2,Q91ZS3                      |
| 2799 | 1,2,4,6,20,<br>21,23,26 | 3,5,7,8,18,<br>19,22,24,2<br>5 | 3 | P01015,P25236,Q6IFU8                             |
| 2800 | 1,2,4,6,20,<br>21,24,25 | 3,5,7,8,18,<br>19,22,23,2<br>6 | 3 | P25236,P35467,P70709                             |
| 2801 | 1,2,4,6,20,<br>21,24,26 | 3,5,7,8,18,<br>19,22,23,2<br>5 | 5 | P01015,P13432,P25236,P80020,Q9EQV9               |
| 2802 | 1,2,4,6,20,<br>21,25,26 | 3,5,7,8,18,<br>19,22,23,2<br>4 | 3 | P19223,P25236,Q91ZS3                             |
| 2803 | 1,2,4,6,20,<br>22,23,24 | 3,5,7,8,18,<br>19,21,25,2<br>6 | 1 | P82995                                           |
| 2804 | 1,2,4,6,20,<br>22,23,25 | 3,5,7,8,18,<br>19,21,24,2<br>6 | 6 | G3V686,P06911,P25236,P50280,P70709,Q5GRG2        |
| 2805 | 1,2,4,6,20,<br>22,23,26 | 3,5,7,8,18,<br>19,21,24,2<br>5 | 3 | P05539,P25236,Q62997                             |

|      |                         |                                |   |                                                  |
|------|-------------------------|--------------------------------|---|--------------------------------------------------|
| 2806 | 1,2,4,6,20,<br>22,24,25 | 3,5,7,8,18,<br>19,21,23,2<br>6 | 2 | P35467,Q07523                                    |
| 2807 | 1,2,4,6,20,<br>22,24,26 | 3,5,7,8,18,<br>19,21,23,2<br>5 | 4 | O70594,P01015,P25236,Q7TP52                      |
| 2808 | 1,2,4,6,20,<br>22,25,26 | 3,5,7,8,18,<br>19,21,23,2<br>4 | 3 | P05539,P25236,Q7TP52                             |
| 2809 | 1,2,4,6,20,<br>23,24,25 | 3,5,7,8,18,<br>19,21,22,2<br>6 | 2 | P25236,P70709                                    |
| 2810 | 1,2,4,6,20,<br>23,24,26 | 3,5,7,8,18,<br>19,21,22,2<br>5 | 2 | P25236,Q6IFU7                                    |
| 2811 | 1,2,4,6,20,<br>23,25,26 | 3,5,7,8,18,<br>19,21,22,2<br>4 | 1 | P25236                                           |
| 2812 | 1,2,4,6,20,<br>24,25,26 | 3,5,7,8,18,<br>19,21,22,2<br>3 | 1 | P25236                                           |
| 2813 | 1,2,4,6,21,<br>22,23,24 | 3,5,7,8,18,<br>19,20,25,2<br>6 | 2 | P13432,P25236                                    |
| 2814 | 1,2,4,6,21,<br>22,23,25 | 3,5,7,8,18,<br>19,20,24,2<br>6 | 6 | P06911,P25236,P50280,P70709,Q5GRG2,Q6P6R2        |
| 2815 | 1,2,4,6,21,<br>22,23,26 | 3,5,7,8,18,<br>19,20,24,2<br>5 | 1 | P25236                                           |
| 2816 | 1,2,4,6,21,<br>22,24,25 | 3,5,7,8,18,<br>19,20,23,2<br>6 | 6 | P09605,P25809,P13432,P25236,P35467,P70709,Q6IG02 |
| 2817 | 1,2,4,6,21,<br>22,24,26 | 3,5,7,8,18,<br>19,20,23,2<br>5 | 4 | P13432,P25236,P80020,Q9EQV9                      |
| 2818 | 1,2,4,6,21,<br>22,25,26 | 3,5,7,8,18,<br>19,20,23,2<br>4 | 1 | P25236                                           |
| 2819 | 1,2,4,6,21,<br>23,24,25 | 3,5,7,8,18,<br>19,20,22,2<br>6 | 4 | P25236,P50280,P70709,Q6P6R2                      |
| 2820 | 1,2,4,6,21,<br>23,24,26 | 3,5,7,8,18,<br>19,20,22,2<br>5 | 6 | D3ZUC6,P25236,P80020,Q6IFU7,Q6IFV1,Q9EQV9        |

|      |                         |                                 |    |                                                                                                   |
|------|-------------------------|---------------------------------|----|---------------------------------------------------------------------------------------------------|
| 2821 | 1,2,4,6,21,<br>23,25,26 | 3,5,7,8,18,<br>19,20,22,2<br>4  | 5  | P25236,P27213,P70709,P83121,Q6P6R2                                                                |
| 2822 | 1,2,4,6,21,<br>24,25,26 | 3,5,7,8,18,<br>19,20,22,2<br>3  | 4  | P14480,P25236,P80020,Q9EQV9                                                                       |
| 2823 | 1,2,4,6,22,<br>23,24,25 | 3,5,7,8,18,<br>19,20,21,2<br>6  | 6  | P06911,P50280,P70709,P82471,Q4FZU6,Q5GRG2                                                         |
| 2824 | 1,2,4,6,22,<br>23,24,26 | 3,5,7,8,18,<br>19,20,21,2<br>5  | 3  | P00731,P25236,Q6IFU7                                                                              |
| 2825 | 1,2,4,6,22,<br>23,25,26 | 3,5,7,8,18,<br>19,20,21,2<br>4  | 5  | P06911,P25236,P50280,P70709,Q5GRG2                                                                |
| 2826 | 1,2,4,6,22,<br>24,25,26 | 3,5,7,8,18,<br>19,20,21,2<br>3  | 2  | P14480,Q7TP52                                                                                     |
| 2827 | 1,2,4,6,23,<br>24,25,26 | 3,5,7,8,18,<br>19,20,21,2<br>2  | 4  | P14480,P25236,P27590,Q7TPB1                                                                       |
| 2828 | 1,2,4,7,8,1<br>8,19,20  | 3,5,6,21,2<br>2,23,24,25<br>,26 | 7  | P00731,P02803,P18418,P35280,Q63532,Q64057,Q9QZA6                                                  |
| 2829 | 1,2,4,7,8,1<br>8,19,21  | 3,5,6,20,2<br>2,23,24,25<br>,26 | 14 | D3ZUC6,O89117,P00731,P02761,P02803,P05964,P10758,P18418,P35281,P42854,Q63532,Q64057,Q80WL1,Q9QZA6 |
| 2830 | 1,2,4,7,8,1<br>8,19,22  | 3,5,6,20,2<br>1,23,24,25<br>,26 | 5  | P01835,P18418,Q63532,Q80WL1,Q8CJD3                                                                |
| 2831 | 1,2,4,7,8,1<br>8,19,23  | 3,5,6,20,2<br>1,22,24,25<br>,26 | 12 | P02803,P05964,P15399,P18418,P97580,Q03191,Q5BJY9,Q5XI22,Q63532,Q64057,Q8CJD3,Q99MH3               |
| 2832 | 1,2,4,7,8,1<br>8,19,24  | 3,5,6,20,2<br>1,22,23,25<br>,26 | 3  | P01835,P18418,Q63532                                                                              |
| 2833 | 1,2,4,7,8,1<br>8,19,25  | 3,5,6,20,2<br>1,22,23,24<br>,26 | 13 | P00714,P00731,P02803,P05964,P10715,P18418,P31044,P35280,P47967,P98089,Q63532,Q64057,Q99MH3        |
| 2834 | 1,2,4,7,8,1<br>8,19,26  | 3,5,6,20,2<br>1,22,23,24<br>,25 | 10 | P02803,P05964,P15978,P18418,P35280,P82995,Q63532,Q63942,Q64057,Q6AYQ8                             |
| 2835 | 1,2,4,7,8,1<br>8,20,21  | 3,5,6,19,2<br>2,23,24,25<br>,26 | 12 | P00731,P02761,P02803,P18418,P25031,P42854,Q64057,Q6AYL6,Q6AYR8,Q80WL1,Q9JI85,Q9QZA6               |

|      |                        |                                 |    |                                                                                                                               |
|------|------------------------|---------------------------------|----|-------------------------------------------------------------------------------------------------------------------------------|
| 2836 | 1,2,4,7,8,1<br>8,20,22 | 3,5,6,19,2<br>1,23,24,25<br>,26 | 2  | P18418,Q63617                                                                                                                 |
| 2837 | 1,2,4,7,8,1<br>8,20,23 | 3,5,6,19,2<br>1,22,24,25<br>,26 | 7  | P02803,P18418,Q5XI22,Q63617,Q64057,Q8CJD3,Q9QZA6                                                                              |
| 2838 | 1,2,4,7,8,1<br>8,20,24 | 3,5,6,19,2<br>1,22,23,25<br>,26 | 4  | P10715,P18418,Q63617,Q9QZA6                                                                                                   |
| 2839 | 1,2,4,7,8,1<br>8,20,25 | 3,5,6,19,2<br>1,22,23,24<br>,26 | 8  | P02803,P10715,P18418,P35280,P98089,Q63617,Q64057,Q9QZA6                                                                       |
| 2840 | 1,2,4,7,8,1<br>8,20,26 | 3,5,6,19,2<br>1,22,23,24<br>,25 | 8  | P01041,P10715,P18418,P19223,P35280,P82995,Q6AYQ8,Q9QZA6                                                                       |
| 2841 | 1,2,4,7,8,1<br>8,21,22 | 3,5,6,19,2<br>0,23,24,25<br>,26 | 8  | D3ZUC6,P18418,P42854,Q64057,Q80WL1,Q8CJ52,Q9QZA6,Q9R0T3                                                                       |
| 2842 | 1,2,4,7,8,1<br>8,21,23 | 3,5,6,19,2<br>0,22,24,25<br>,26 | 12 | D3ZUC6,P02803,P05964,P18418,P42854,Q5XI22,Q62636,Q64057,Q6AYL6,Q80WL1,Q99MH3,Q9QZA6                                           |
| 2843 | 1,2,4,7,8,1<br>8,21,24 | 3,5,6,19,2<br>0,22,23,25<br>,26 | 6  | D3ZUC6,O89117,P02761,P18418,Q80WL1,Q9QZA6                                                                                     |
| 2844 | 1,2,4,7,8,1<br>8,21,25 | 3,5,6,19,2<br>0,22,23,24<br>,26 | 15 | P00731,P02803,P08721,P10715,P18418,P19629,P25031,P31430,P42854,P47967,P55091,P98089,Q64057,Q80WL1,Q9QZA6                      |
| 2845 | 1,2,4,7,8,1<br>8,21,26 | 3,5,6,19,2<br>0,22,23,24<br>,25 | 18 | D3ZUC6,P01041,P02761,P02803,P05964,P18418,P19223,P25031,P42854,P55091,P82995,Q64057,Q6AYQ8,Q6AYR8,Q80WL1,Q9EQV9,Q9QZA6,Q9WUF4 |
| 2846 | 1,2,4,7,8,1<br>8,22,23 | 3,5,6,19,2<br>0,21,24,25<br>,26 | 5  | P18418,Q63617,Q64057,Q80WL1,Q8CJD3                                                                                            |
| 2847 | 1,2,4,7,8,1<br>8,22,24 | 3,5,6,19,2<br>0,21,23,25<br>,26 | 2  | P01835,P18418                                                                                                                 |
| 2848 | 1,2,4,7,8,1<br>8,22,25 | 3,5,6,19,2<br>0,21,23,24<br>,26 | 7  | P10715,P18418,P19629,P31044,P98089,Q5GRG2,Q80WL1                                                                              |
| 2849 | 1,2,4,7,8,1<br>8,22,26 | 3,5,6,19,2<br>0,21,23,24<br>,25 | 5  | P01041,P18418,P82995,Q6AYQ8,Q80WL1                                                                                            |
| 2850 | 1,2,4,7,8,1<br>8,23,24 | 3,5,6,19,2<br>0,21,22,25<br>,26 | 3  | P18418,Q5XI22,Q63617                                                                                                          |

|      |                        |                                 |    |                                                                                                          |
|------|------------------------|---------------------------------|----|----------------------------------------------------------------------------------------------------------|
| 2851 | 1,2,4,7,8,1<br>8,23,25 | 3,5,6,19,2<br>0,21,22,24<br>,26 | 12 | P00714,P02803,P10715,P18418,P19629,P31044,P98089,Q5GRG2,Q63598,Q64057,Q99MH3,Q9QZA6                      |
| 2852 | 1,2,4,7,8,1<br>8,23,26 | 3,5,6,19,2<br>0,21,22,24<br>,25 | 9  | P02803,P18418,P55091,P82995,Q63942,Q64057,Q6AYQ8,Q6P6Q2,Q9QZA6                                           |
| 2853 | 1,2,4,7,8,1<br>8,24,25 | 3,5,6,19,2<br>0,21,22,23<br>,26 | 7  | P08721,P10715,P18418,P19629,P55091,P98089,Q9QZA6                                                         |
| 2854 | 1,2,4,7,8,1<br>8,24,26 | 3,5,6,19,2<br>0,21,22,23<br>,25 | 4  | P18418,P55091,P82995,Q6AYQ8                                                                              |
| 2855 | 1,2,4,7,8,1<br>8,25,26 | 3,5,6,19,2<br>0,21,22,23<br>,24 | 15 | P00714,P02803,P08721,P10715,P18418,P19223,P19629,P24594,P35280,P55091,P82995,P98089,Q64057,Q6AYQ8,Q9QZA6 |
| 2856 | 1,2,4,7,8,1<br>9,20,21 | 3,5,6,18,2<br>2,23,24,25<br>,26 | 8  | P00731,P02761,P02803,P18418,P35281,P42854,Q64057,Q80WL1                                                  |
| 2857 | 1,2,4,7,8,1<br>9,20,22 | 3,5,6,18,2<br>1,23,24,25<br>,26 | 5  | P00774,P18418,Q62997,Q63532,Q63617                                                                       |
| 2858 | 1,2,4,7,8,1<br>9,20,23 | 3,5,6,18,2<br>1,22,24,25<br>,26 | 7  | P02803,P15399,P18418,P97580,Q63532,Q63617,Q8CJD3                                                         |
| 2859 | 1,2,4,7,8,1<br>9,20,24 | 3,5,6,18,2<br>1,22,23,25<br>,26 | 3  | P18418,Q63532,Q63617                                                                                     |
| 2860 | 1,2,4,7,8,1<br>9,20,25 | 3,5,6,18,2<br>1,22,23,24<br>,26 | 7  | P02803,P10715,P18418,P35280,P47967,Q5GRG2,Q63617                                                         |
| 2861 | 1,2,4,7,8,1<br>9,20,26 | 3,5,6,18,2<br>1,22,23,24<br>,25 | 4  | P01041,P15978,P18418,P35280                                                                              |
| 2862 | 1,2,4,7,8,1<br>9,21,22 | 3,5,6,18,2<br>0,23,24,25<br>,26 | 3  | D4A1J4,P18418,Q80WL1                                                                                     |
| 2863 | 1,2,4,7,8,1<br>9,21,23 | 3,5,6,18,2<br>0,22,24,25<br>,26 | 11 | D3ZUC6,P02803,P05964,P15399,P18418,P35281,P97580,Q63532,Q64057,Q80WL1,Q99041                             |
| 2864 | 1,2,4,7,8,1<br>9,21,24 | 3,5,6,18,2<br>0,22,23,25<br>,26 | 5  | D3ZUC6,O89117,P02761,P18418,Q63532                                                                       |
| 2865 | 1,2,4,7,8,1<br>9,21,25 | 3,5,6,18,2<br>0,22,23,24<br>,26 | 8  | P02803,P18418,P19629,P47967,P97840,Q5GRG2,Q64057,Q80WL1                                                  |

|      |                        |                                 |    |                                                                                     |
|------|------------------------|---------------------------------|----|-------------------------------------------------------------------------------------|
| 2866 | 1,2,4,7,8,1<br>9,21,26 | 3,5,6,18,2<br>0,22,23,24<br>,25 | 12 | D3ZUC6,P02761,P02803,P15978,P18418,P19223,P35281,P82995,Q64057,Q80WL1,Q9EQV9,Q9WUF4 |
| 2867 | 1,2,4,7,8,1<br>9,22,23 | 3,5,6,18,2<br>0,21,24,25<br>,26 | 7  | P01835,P15399,P18418,P97580,Q63532,Q80WL1,Q8CJD3                                    |
| 2868 | 1,2,4,7,8,1<br>9,22,24 | 3,5,6,18,2<br>0,21,23,25<br>,26 | 5  | P01835,P18418,Q4FZU2,Q63532,Q6IG02                                                  |
| 2869 | 1,2,4,7,8,1<br>9,22,25 | 3,5,6,18,2<br>0,21,23,24<br>,26 | 10 | P01835,P06911,P12020,P18418,P19629,P31044,P47967,Q5GRG2,Q63532,Q80WL1               |
| 2870 | 1,2,4,7,8,1<br>9,22,26 | 3,5,6,18,2<br>0,21,23,24<br>,25 | 4  | P01835,P18418,Q63532,Q80WL1                                                         |
| 2871 | 1,2,4,7,8,1<br>9,23,24 | 3,5,6,18,2<br>0,21,22,25<br>,26 | 5  | P01835,P15399,P18418,P97580,Q63532                                                  |
| 2872 | 1,2,4,7,8,1<br>9,23,25 | 3,5,6,18,2<br>0,21,22,24<br>,26 | 12 | P02803,P06911,P12020,P15399,P18418,P19629,P31044,P97580,Q5GRG2,Q63532,Q64057,Q99041 |
| 2873 | 1,2,4,7,8,1<br>9,23,26 | 3,5,6,18,2<br>0,21,22,24<br>,25 | 6  | P02803,P15399,P97580,Q30KJ2,Q63532,Q64057                                           |
| 2874 | 1,2,4,7,8,1<br>9,24,25 | 3,5,6,18,2<br>0,21,22,23<br>,26 | 6  | P01835,P10715,P18418,P19629,Q5GRG2,Q63532                                           |
| 2875 | 1,2,4,7,8,1<br>9,24,26 | 3,5,6,18,2<br>0,21,22,23<br>,25 | 3  | P01835,P18418,Q63532                                                                |
| 2876 | 1,2,4,7,8,1<br>9,25,26 | 3,5,6,18,2<br>0,21,22,23<br>,24 | 10 | P01835,P02803,P10715,P15978,P18418,P19223,P35280,P82995,Q5GRG2,Q63532               |
| 2877 | 1,2,4,7,8,2<br>0,21,22 | 3,5,6,18,1<br>9,23,24,25<br>,26 | 7  | P01836,P02761,P18418,P42854,Q07523,Q63617,Q80WL1                                    |
| 2878 | 1,2,4,7,8,2<br>0,21,23 | 3,5,6,18,1<br>9,22,24,25<br>,26 | 4  | P02761,P42854,Q63617,Q64057                                                         |
| 2879 | 1,2,4,7,8,2<br>0,21,24 | 3,5,6,18,1<br>9,22,23,25<br>,26 | 5  | P01836,P02761,P18418,P42854,Q63617                                                  |
| 2880 | 1,2,4,7,8,2<br>0,21,25 | 3,5,6,18,1<br>9,22,23,24<br>,26 | 8  | P10715,P18418,P19629,P42854,Q5GRG2,Q64057,Q80WL1,Q9QZA6                             |



|      |                        |                                 |    |                                                                                            |
|------|------------------------|---------------------------------|----|--------------------------------------------------------------------------------------------|
| 2881 | 1,2,4,7,8,2<br>0,21,26 | 3,5,6,18,1<br>9,22,23,24<br>,25 | 13 | O55004,P01015,P01041,P01836,P02761,P19223,P30836,P42854,P62804,Q00715,Q6AYR8,Q80WL1,Q9EQV9 |
| 2882 | 1,2,4,7,8,2<br>0,22,23 | 3,5,6,18,1<br>9,21,24,25<br>,26 | 3  | Q62997,Q63617,Q8CJD3                                                                       |
| 2883 | 1,2,4,7,8,2<br>0,22,24 | 3,5,6,18,1<br>9,21,23,25<br>,26 | 2  | P18418,Q63617                                                                              |
| 2884 | 1,2,4,7,8,2<br>0,22,25 | 3,5,6,18,1<br>9,21,23,24<br>,26 | 7  | P06911,P10715,P18418,P19629,Q07523,Q5GRG2,Q63617                                           |
| 2885 | 1,2,4,7,8,2<br>0,22,26 | 3,5,6,18,1<br>9,21,23,24<br>,25 | 4  | P01041,P01836,Q62997,Q63617                                                                |
| 2886 | 1,2,4,7,8,2<br>0,23,24 | 3,5,6,18,1<br>9,21,22,25<br>,26 | 2  | P18418,Q63617                                                                              |
| 2887 | 1,2,4,7,8,2<br>0,23,25 | 3,5,6,18,1<br>9,21,22,24<br>,26 | 4  | P10715,P19629,Q5GRG2,Q63617                                                                |
| 2888 | 1,2,4,7,8,2<br>0,23,26 | 3,5,6,18,1<br>9,21,22,24<br>,25 | 2  | Q63617,Q6AYQ8                                                                              |
| 2889 | 1,2,4,7,8,2<br>0,24,25 | 3,5,6,18,1<br>9,21,22,23<br>,26 | 5  | P10715,P18418,P19629,Q5GRG2,Q63617                                                         |
| 2890 | 1,2,4,7,8,2<br>0,24,26 | 3,5,6,18,1<br>9,21,22,23<br>,25 | 5  | P01015,P01041,P01836,Q63617,Q6AYQ8                                                         |
| 2891 | 1,2,4,7,8,2<br>0,25,26 | 3,5,6,18,1<br>9,21,22,23<br>,24 | 5  | P01041,P10715,P19223,P35280,Q6AYQ8                                                         |
| 2892 | 1,2,4,7,8,2<br>1,22,23 | 3,5,6,18,1<br>9,20,24,25<br>,26 | 3  | P18418,Q64057,Q80WL1                                                                       |
| 2893 | 1,2,4,7,8,2<br>1,22,24 | 3,5,6,18,1<br>9,20,23,25<br>,26 | 4  | P02761,P18418,P35467,Q80WL1                                                                |
| 2894 | 1,2,4,7,8,2<br>1,22,25 | 3,5,6,18,1<br>9,20,23,24<br>,26 | 5  | P06911,P18418,P19629,Q5GRG2,Q80WL1                                                         |
| 2895 | 1,2,4,7,8,2<br>1,22,26 | 3,5,6,18,1<br>9,20,23,24<br>,25 | 9  | P01041,P01836,P18418,P19223,P30836,P82995,Q80WL1,Q8CJ52,Q9EQV9                             |

|      |                        |                                 |    |                                                                       |
|------|------------------------|---------------------------------|----|-----------------------------------------------------------------------|
| 2896 | 1,2,4,7,8,2<br>1,23,24 | 3,5,6,18,1<br>9,20,22,25<br>,26 | 3  | D3ZUC6,P02761,P18418                                                  |
| 2897 | 1,2,4,7,8,2<br>1,23,25 | 3,5,6,18,1<br>9,20,22,24<br>,26 | 7  | P02803,P18418,P19629,Q5GRG2,Q64057,Q80WL1,Q99041                      |
| 2898 | 1,2,4,7,8,2<br>1,23,26 | 3,5,6,18,1<br>9,20,22,24<br>,25 | 5  | D3ZUC6,P25236,Q64057,Q80WL1,Q9EQV9                                    |
| 2899 | 1,2,4,7,8,2<br>1,24,25 | 3,5,6,18,1<br>9,20,22,23<br>,26 | 5  | P10715,P18418,P19629,P22006,Q5GRG2                                    |
| 2900 | 1,2,4,7,8,2<br>1,24,26 | 3,5,6,18,1<br>9,20,22,23<br>,25 | 8  | D3ZUC6,P01041,P01836,P02761,P18418,P19223,Q80WL1,Q9EQV9               |
| 2901 | 1,2,4,7,8,2<br>1,25,26 | 3,5,6,18,1<br>9,20,22,23<br>,24 | 10 | P08721,P10715,P19223,P19629,P22006,P55091,P82995,Q64057,Q80WL1,Q9EQV9 |
| 2902 | 1,2,4,7,8,2<br>2,23,24 | 3,5,6,18,1<br>9,20,21,25<br>,26 | 3  | P01835,P18418,Q63617                                                  |
| 2903 | 1,2,4,7,8,2<br>2,23,25 | 3,5,6,18,1<br>9,20,21,24<br>,26 | 8  | P06911,P10715,P12020,P18418,P19629,Q5GRG2,Q63617,Q80WL1               |
| 2904 | 1,2,4,7,8,2<br>2,23,26 | 3,5,6,18,1<br>9,20,21,24<br>,25 | 1  | Q80WL1                                                                |
| 2905 | 1,2,4,7,8,2<br>2,24,25 | 3,5,6,18,1<br>9,20,21,23<br>,26 | 6  | P01835,P06911,P10715,P18418,P19629,Q5GRG2                             |
| 2906 | 1,2,4,7,8,2<br>2,24,26 | 3,5,6,18,1<br>9,20,21,23<br>,25 | 2  | P01835,P18418                                                         |
| 2907 | 1,2,4,7,8,2<br>2,25,26 | 3,5,6,18,1<br>9,20,21,23<br>,24 | 10 | P01835,P06911,P10715,P18418,P19223,P19629,P20766,Q5GRG2,Q6AYQ8,Q80WL1 |
| 2908 | 1,2,4,7,8,2<br>3,24,25 | 3,5,6,18,1<br>9,20,21,22<br>,26 | 5  | P10715,P18418,P19629,Q5GRG2,Q63617                                    |
| 2909 | 1,2,4,7,8,2<br>3,24,26 | 3,5,6,18,1<br>9,20,21,22<br>,25 | 1  | Q6AYQ8                                                                |
| 2910 | 1,2,4,7,8,2<br>3,25,26 | 3,5,6,18,1<br>9,20,21,22<br>,24 | 6  | P00714,P01946,P10715,P19629,Q5GRG2,Q6AYQ8                             |

|      |                         |                                 |    |                                                                                     |
|------|-------------------------|---------------------------------|----|-------------------------------------------------------------------------------------|
| 2911 | 1,2,4,7,8,2<br>4,25,26  | 3,5,6,18,1<br>9,20,21,22<br>,23 | 7  | P01835,P10715,P18418,P19223,P19629,P55091,Q6AYQ8                                    |
| 2912 | 1,2,4,7,18,<br>19,20,21 | 3,5,6,8,22,<br>23,24,25,2<br>6  | 6  | D3ZUC6,O89117,P00731,P05964,P25031,P42854                                           |
| 2913 | 1,2,4,7,18,<br>19,20,22 | 3,5,6,8,21,<br>23,24,25,2<br>6  | 5  | P06760,P07150,Q62997,Q63532,Q9WTT6                                                  |
| 2914 | 1,2,4,7,18,<br>19,20,23 | 3,5,6,8,21,<br>22,24,25,2<br>6  | 8  | P05964,P06760,P15399,P97580,Q03191,Q63532,Q8CJD3,Q99MH3                             |
| 2915 | 1,2,4,7,18,<br>19,20,24 | 3,5,6,8,21,<br>22,23,25,2<br>6  | 3  | P06760,Q63532,Q9WTT6                                                                |
| 2916 | 1,2,4,7,18,<br>19,20,25 | 3,5,6,8,21,<br>22,23,24,2<br>6  | 2  | P35280,P47967                                                                       |
| 2917 | 1,2,4,7,18,<br>19,20,26 | 3,5,6,8,21,<br>22,23,24,2<br>5  | 6  | P01041,P06760,P35280,P82995,Q63532,Q63751                                           |
| 2918 | 1,2,4,7,18,<br>19,21,22 | 3,5,6,8,20,<br>23,24,25,2<br>6  | 7  | D3ZUC6,O89117,P05964,P42854,P97840,Q63532,Q80WL1                                    |
| 2919 | 1,2,4,7,18,<br>19,21,23 | 3,5,6,8,20,<br>22,24,25,2<br>6  | 11 | D3ZUC6,O89117,P02803,P05964,P14668,P15399,P97580,Q03191,Q63532,Q8CJD3,Q99MH3        |
| 2920 | 1,2,4,7,18,<br>19,21,24 | 3,5,6,8,20,<br>22,23,25,2<br>6  | 4  | D3ZUC6,O89117,P05964,Q63532                                                         |
| 2921 | 1,2,4,7,18,<br>19,21,25 | 3,5,6,8,20,<br>22,23,24,2<br>6  | 12 | D3ZUC6,O89117,P00731,P02803,P05964,P06757,P25031,P31430,P47967,P97840,P98089,Q99MH3 |
| 2922 | 1,2,4,7,18,<br>19,21,26 | 3,5,6,8,20,<br>22,23,24,2<br>5  | 9  | D3ZUC6,O89117,P05964,P06760,P25031,P36374,P82995,Q63661,Q9EQV9                      |
| 2923 | 1,2,4,7,18,<br>19,22,23 | 3,5,6,8,20,<br>21,24,25,2<br>6  | 9  | P05964,P06760,P15399,P97580,Q03191,Q63532,Q8CJD3,Q99MH3,Q9WTT6                      |
| 2924 | 1,2,4,7,18,<br>19,22,24 | 3,5,6,8,20,<br>21,23,25,2<br>6  | 4  | P01835,P06760,Q63532,Q9WTT6                                                         |
| 2925 | 1,2,4,7,18,<br>19,22,25 | 3,5,6,8,20,<br>21,23,24,2<br>6  | 3  | P47967,P97840,Q63532                                                                |

|      |                         |                                |    |                                                                              |
|------|-------------------------|--------------------------------|----|------------------------------------------------------------------------------|
| 2926 | 1,2,4,7,18,<br>19,22,26 | 3,5,6,8,20,<br>21,23,24,2<br>5 | 4  | P06760,P82995,Q63532,Q9WTT6                                                  |
| 2927 | 1,2,4,7,18,<br>19,23,24 | 3,5,6,8,20,<br>21,22,25,2<br>6 | 9  | D3ZUC6,P05964,P15399,P97580,Q03191,Q63532,Q6IE51,Q99MH3,Q9WTT6               |
| 2928 | 1,2,4,7,18,<br>19,23,25 | 3,5,6,8,20,<br>21,22,24,2<br>6 | 9  | P00714,P02803,P05964,P15399,P97580,Q03191,Q5BJY9,Q63532,Q99MH3               |
| 2929 | 1,2,4,7,18,<br>19,23,26 | 3,5,6,8,20,<br>21,22,24,2<br>5 | 11 | D3ZUC6,P05964,P06760,P15399,P82995,P97580,Q03191,Q5XFX0,Q63532,Q63661,Q99MH3 |
| 2930 | 1,2,4,7,18,<br>19,24,25 | 3,5,6,8,20,<br>21,22,23,2<br>6 | 1  | Q63532                                                                       |
| 2931 | 1,2,4,7,18,<br>19,24,26 | 3,5,6,8,20,<br>21,22,23,2<br>5 | 5  | D3ZUC6,P06760,P82995,Q63532,Q9WTT6                                           |
| 2932 | 1,2,4,7,18,<br>19,25,26 | 3,5,6,8,20,<br>21,22,23,2<br>4 | 6  | P00714,P35280,P55091,P82995,Q63532,Q63661                                    |
| 2933 | 1,2,4,7,18,<br>20,21,22 | 3,5,6,8,19,<br>23,24,25,2<br>6 | 3  | P01836,P25031,P42854                                                         |
| 2934 | 1,2,4,7,18,<br>20,21,23 | 3,5,6,8,19,<br>22,24,25,2<br>6 | 4  | D3ZUC6,P25031,P42854,Q62636                                                  |
| 2935 | 1,2,4,7,18,<br>20,21,24 | 3,5,6,8,19,<br>22,23,25,2<br>6 | 3  | D3ZUC6,P01836,P42854                                                         |
| 2936 | 1,2,4,7,18,<br>20,21,25 | 3,5,6,8,19,<br>22,23,24,2<br>6 | 5  | P25031,P31430,P42854,P47967,P98089                                           |
| 2937 | 1,2,4,7,18,<br>20,21,26 | 3,5,6,8,19,<br>22,23,24,2<br>5 | 8  | D3ZUC6,P01041,P01836,P19223,P25031,P42854,P82995,Q9EQV9                      |
| 2938 | 1,2,4,7,18,<br>20,22,23 | 3,5,6,8,19,<br>21,24,25,2<br>6 | 2  | Q62997,Q8CJD3                                                                |
| 2939 | 1,2,4,7,18,<br>20,22,24 | 3,5,6,8,19,<br>21,23,25,2<br>6 | 3  | P06760,P07150,Q9WTT6                                                         |
| 2940 | 1,2,4,7,18,<br>20,22,25 | 3,5,6,8,19,<br>21,23,24,2<br>6 | 0  |                                                                              |

|      |                         |                                |    |                                                                       |
|------|-------------------------|--------------------------------|----|-----------------------------------------------------------------------|
| 2941 | 1,2,4,7,18,<br>20,22,26 | 3,5,6,8,19,<br>21,23,24,2<br>5 | 4  | O70594,P01041,P01836,P06760                                           |
| 2942 | 1,2,4,7,18,<br>20,23,24 | 3,5,6,8,19,<br>21,22,25,2<br>6 | 1  | Q9QZK9                                                                |
| 2943 | 1,2,4,7,18,<br>20,23,25 | 3,5,6,8,19,<br>21,22,24,2<br>6 | 1  | Q99MH3                                                                |
| 2944 | 1,2,4,7,18,<br>20,23,26 | 3,5,6,8,19,<br>21,22,24,2<br>5 | 3  | P06760,Q6IFU8,Q6P6Q2                                                  |
| 2945 | 1,2,4,7,18,<br>20,24,25 | 3,5,6,8,19,<br>21,22,23,2<br>6 | 0  |                                                                       |
| 2946 | 1,2,4,7,18,<br>20,24,26 | 3,5,6,8,19,<br>21,22,23,2<br>5 | 4  | O70594,P01041,P01836,P06760                                           |
| 2947 | 1,2,4,7,18,<br>20,25,26 | 3,5,6,8,19,<br>21,22,23,2<br>4 | 5  | P01041,P19223,P35280,P55091,P82995                                    |
| 2948 | 1,2,4,7,18,<br>21,22,23 | 3,5,6,8,19,<br>20,24,25,2<br>6 | 2  | D3ZUC6,Q80WL1                                                         |
| 2949 | 1,2,4,7,18,<br>21,22,24 | 3,5,6,8,19,<br>20,23,25,2<br>6 | 3  | D3ZUC6,O89117,P01836                                                  |
| 2950 | 1,2,4,7,18,<br>21,22,25 | 3,5,6,8,19,<br>20,23,24,2<br>6 | 6  | P25031,P31430,P47967,P97840,P98089,Q80WL1                             |
| 2951 | 1,2,4,7,18,<br>21,22,26 | 3,5,6,8,19,<br>20,23,24,2<br>5 | 8  | D3ZUC6,P01041,P01836,P25031,P36374,P82995,Q63661,Q80WL1               |
| 2952 | 1,2,4,7,18,<br>21,23,24 | 3,5,6,8,19,<br>20,22,25,2<br>6 | 2  | D3ZUC6,O89117                                                         |
| 2953 | 1,2,4,7,18,<br>21,23,25 | 3,5,6,8,19,<br>20,22,24,2<br>6 | 8  | D3ZUC6,P02803,P05964,P25031,P31430,P98089,Q62636,Q99MH3               |
| 2954 | 1,2,4,7,18,<br>21,23,26 | 3,5,6,8,19,<br>20,22,24,2<br>5 | 10 | D3ZUC6,P05964,P25031,P55091,P82995,Q62636,Q63661,Q6IFU8,Q6P6Q2,Q9EQV9 |
| 2955 | 1,2,4,7,18,<br>21,24,25 | 3,5,6,8,19,<br>20,22,23,2<br>6 | 7  | D3ZUC6,P08721,P22006,P25031,P31430,P55091,P98089                      |

|      |                         |                                |    |                                                                       |
|------|-------------------------|--------------------------------|----|-----------------------------------------------------------------------|
| 2956 | 1,2,4,7,18,<br>21,24,26 | 3,5,6,8,19,<br>20,22,23,2<br>5 | 9  | D3ZUC6,O89117,P01041,P01836,P25031,P55091,P82995,Q9EQV9,Q9JID2        |
| 2957 | 1,2,4,7,18,<br>21,25,26 | 3,5,6,8,19,<br>20,22,23,2<br>4 | 10 | D3ZUC6,P08721,P19223,P22006,P25031,P31430,P55091,P82995,P98089,Q63661 |
| 2958 | 1,2,4,7,18,<br>22,23,24 | 3,5,6,8,19,<br>20,21,25,2<br>6 | 0  |                                                                       |
| 2959 | 1,2,4,7,18,<br>22,23,25 | 3,5,6,8,19,<br>20,21,24,2<br>6 | 2  | Q5GRG2,Q99MH3                                                         |
| 2960 | 1,2,4,7,18,<br>22,23,26 | 3,5,6,8,19,<br>20,21,24,2<br>5 | 1  | P06760                                                                |
| 2961 | 1,2,4,7,18,<br>22,24,25 | 3,5,6,8,19,<br>20,21,23,2<br>6 | 0  |                                                                       |
| 2962 | 1,2,4,7,18,<br>22,24,26 | 3,5,6,8,19,<br>20,21,23,2<br>5 | 2  | O70594,P06760                                                         |
| 2963 | 1,2,4,7,18,<br>22,25,26 | 3,5,6,8,19,<br>20,21,23,2<br>4 | 2  | P55091,P82995                                                         |
| 2964 | 1,2,4,7,18,<br>23,24,25 | 3,5,6,8,19,<br>20,21,22,2<br>6 | 1  | Q99MH3                                                                |
| 2965 | 1,2,4,7,18,<br>23,24,26 | 3,5,6,8,19,<br>20,21,22,2<br>5 | 3  | D3ZUC6,P06760,P55091                                                  |
| 2966 | 1,2,4,7,18,<br>23,25,26 | 3,5,6,8,19,<br>20,21,22,2<br>4 | 7  | P00714,P01946,P24594,P55091,P82995,Q6P6Q2,Q99MH3                      |
| 2967 | 1,2,4,7,18,<br>24,25,26 | 3,5,6,8,19,<br>20,21,22,2<br>3 | 4  | P08721,P55091,P82995,Q7TPB1                                           |
| 2968 | 1,2,4,7,19,<br>20,21,22 | 3,5,6,8,18,<br>23,24,25,2<br>6 | 3  | P01836,P35467,P42854                                                  |
| 2969 | 1,2,4,7,19,<br>20,21,23 | 3,5,6,8,18,<br>22,24,25,2<br>6 | 4  | D3ZUC6,P15399,P42854,P97580                                           |
| 2970 | 1,2,4,7,19,<br>20,21,24 | 3,5,6,8,18,<br>22,23,25,2<br>6 | 4  | D3ZUC6,P01836,P35467,Q63532                                           |

|      |                         |                                |   |                                                         |
|------|-------------------------|--------------------------------|---|---------------------------------------------------------|
| 2971 | 1,2,4,7,19,<br>20,21,25 | 3,5,6,8,18,<br>22,23,24,2<br>6 | 4 | P35467,P42854,P47967,P97840                             |
| 2972 | 1,2,4,7,19,<br>20,21,26 | 3,5,6,8,18,<br>22,23,24,2<br>5 | 7 | D3ZUC6,P01015,P01041,P01836,P42854,Q63751,Q9EQV9        |
| 2973 | 1,2,4,7,19,<br>20,22,23 | 3,5,6,8,18,<br>21,24,25,2<br>6 | 7 | P00774,P15399,P97580,Q62997,Q63532,Q8CJD3,Q9WTT6        |
| 2974 | 1,2,4,7,19,<br>20,22,24 | 3,5,6,8,18,<br>21,23,25,2<br>6 | 8 | P00774,P06760,P07150,P14669,P35467,Q62997,Q63532,Q9WTT6 |
| 2975 | 1,2,4,7,19,<br>20,22,25 | 3,5,6,8,18,<br>21,23,24,2<br>6 | 3 | P35467,P47967,Q62997                                    |
| 2976 | 1,2,4,7,19,<br>20,22,26 | 3,5,6,8,18,<br>21,23,24,2<br>5 | 6 | P01836,P05539,P06760,Q62997,Q63751,Q9WTT6               |
| 2977 | 1,2,4,7,19,<br>20,23,24 | 3,5,6,8,18,<br>21,22,25,2<br>6 | 3 | P15399,P97580,Q63532                                    |
| 2978 | 1,2,4,7,19,<br>20,23,25 | 3,5,6,8,18,<br>21,22,24,2<br>6 | 3 | P15399,P97580,Q63532                                    |
| 2979 | 1,2,4,7,19,<br>20,23,26 | 3,5,6,8,18,<br>21,22,24,2<br>5 | 5 | P05539,P06760,P15399,P97580,Q63532                      |
| 2980 | 1,2,4,7,19,<br>20,24,25 | 3,5,6,8,18,<br>21,22,23,2<br>6 | 2 | P35467,Q63532                                           |
| 2981 | 1,2,4,7,19,<br>20,24,26 | 3,5,6,8,18,<br>21,22,23,2<br>5 | 5 | P01015,P01836,P06760,Q63532,Q9WTT6                      |
| 2982 | 1,2,4,7,19,<br>20,25,26 | 3,5,6,8,18,<br>21,22,23,2<br>4 | 2 | P05539,P35280                                           |
| 2983 | 1,2,4,7,19,<br>21,22,23 | 3,5,6,8,18,<br>20,24,25,2<br>6 | 4 | D3ZUC6,P15399,P97580,Q63532                             |
| 2984 | 1,2,4,7,19,<br>21,22,24 | 3,5,6,8,18,<br>20,23,25,2<br>6 | 4 | D3ZUC6,P35467,Q63532,Q6IG02                             |
| 2985 | 1,2,4,7,19,<br>21,22,25 | 3,5,6,8,18,<br>20,23,24,2<br>6 | 4 | P35467,P47967,P97840,Q6IG02                             |

|      |                         |                                |   |                                                         |
|------|-------------------------|--------------------------------|---|---------------------------------------------------------|
| 2986 | 1,2,4,7,19,<br>21,22,26 | 3,5,6,8,18,<br>20,23,24,2<br>5 | 3 | D3ZUC6,P01836,Q80WL1                                    |
| 2987 | 1,2,4,7,19,<br>21,23,24 | 3,5,6,8,18,<br>20,22,25,2<br>6 | 5 | D3ZUC6,O89117,P15399,P97580,Q63532                      |
| 2988 | 1,2,4,7,19,<br>21,23,25 | 3,5,6,8,18,<br>20,22,24,2<br>6 | 8 | D3ZUC6,P02803,P15399,P47967,P97580,P97840,Q63532,Q99041 |
| 2989 | 1,2,4,7,19,<br>21,23,26 | 3,5,6,8,18,<br>20,22,24,2<br>5 | 6 | D3ZUC6,P15399,P25236,P97580,Q63532,Q63661               |
| 2990 | 1,2,4,7,19,<br>21,24,25 | 3,5,6,8,18,<br>20,22,23,2<br>6 | 7 | D3ZUC6,P22006,P35467,P47967,P97840,Q63532,Q6IG02        |
| 2991 | 1,2,4,7,19,<br>21,24,26 | 3,5,6,8,18,<br>20,22,23,2<br>5 | 6 | D3ZUC6,O89117,P01836,P80020,Q63532,Q9EQV9               |
| 2992 | 1,2,4,7,19,<br>21,25,26 | 3,5,6,8,18,<br>20,22,23,2<br>4 | 6 | D3ZUC6,P19223,P22006,P47967,P82995,P97840               |
| 2993 | 1,2,4,7,19,<br>22,23,24 | 3,5,6,8,18,<br>20,21,25,2<br>6 | 4 | P01835,P97580,Q63532,Q9WTT6                             |
| 2994 | 1,2,4,7,19,<br>22,23,25 | 3,5,6,8,18,<br>20,21,24,2<br>6 | 5 | P06911,P15399,P97580,Q5GRG2,Q63532                      |
| 2995 | 1,2,4,7,19,<br>22,23,26 | 3,5,6,8,18,<br>20,21,24,2<br>5 | 3 | P05539,P97580,Q63532                                    |
| 2996 | 1,2,4,7,19,<br>22,24,25 | 3,5,6,8,18,<br>20,21,23,2<br>6 | 5 | P01835,P35467,Q4FZU2,Q63532,Q6IG02                      |
| 2997 | 1,2,4,7,19,<br>22,24,26 | 3,5,6,8,18,<br>20,21,23,2<br>5 | 4 | P01835,P06760,Q63532,Q9WTT6                             |
| 2998 | 1,2,4,7,19,<br>22,25,26 | 3,5,6,8,18,<br>20,21,23,2<br>4 | 2 | P01835,P05539                                           |
| 2999 | 1,2,4,7,19,<br>23,24,25 | 3,5,6,8,18,<br>20,21,22,2<br>6 | 3 | P15399,P97580,Q63532                                    |
| 3000 | 1,2,4,7,19,<br>23,24,26 | 3,5,6,8,18,<br>20,21,22,2<br>5 | 4 | P01946,P14480,P97580,Q63532                             |



|      |                         |                                |   |                                                  |
|------|-------------------------|--------------------------------|---|--------------------------------------------------|
| 3001 | 1,2,4,7,19,<br>23,25,26 | 3,5,6,8,18,<br>20,21,22,2<br>4 | 5 | P01946,P14480,P15399,P97580,Q63532               |
| 3002 | 1,2,4,7,19,<br>24,25,26 | 3,5,6,8,18,<br>20,21,22,2<br>3 | 3 | P01835,P14480,Q63532                             |
| 3003 | 1,2,4,7,20,<br>21,22,23 | 3,5,6,8,18,<br>19,24,25,2<br>6 | 1 | P01836                                           |
| 3004 | 1,2,4,7,20,<br>21,22,24 | 3,5,6,8,18,<br>19,23,25,2<br>6 | 3 | P01836,P35467,P51907                             |
| 3005 | 1,2,4,7,20,<br>21,22,25 | 3,5,6,8,18,<br>19,23,24,2<br>6 | 6 | P01836,P09605,P25809,P35467,P47967,P51907,Q07523 |
| 3006 | 1,2,4,7,20,<br>21,22,26 | 3,5,6,8,18,<br>19,23,24,2<br>5 | 6 | P01015,P01041,P01836,P05539,P30836,P51907        |
| 3007 | 1,2,4,7,20,<br>21,23,24 | 3,5,6,8,18,<br>19,22,25,2<br>6 | 2 | D3ZUC6,P01836                                    |
| 3008 | 1,2,4,7,20,<br>21,23,25 | 3,5,6,8,18,<br>19,22,24,2<br>6 | 0 |                                                  |
| 3009 | 1,2,4,7,20,<br>21,23,26 | 3,5,6,8,18,<br>19,22,24,2<br>5 | 3 | D3ZUC6,P01836,P25236                             |
| 3010 | 1,2,4,7,20,<br>21,24,25 | 3,5,6,8,18,<br>19,22,23,2<br>6 | 4 | P01836,P22006,P35467,P51907                      |
| 3011 | 1,2,4,7,20,<br>21,24,26 | 3,5,6,8,18,<br>19,22,23,2<br>5 | 7 | D3ZUC6,P01015,P01041,P01836,P51907,P80020,Q9EQV9 |
| 3012 | 1,2,4,7,20,<br>21,25,26 | 3,5,6,8,18,<br>19,22,23,2<br>4 | 5 | P01041,P01836,P19223,P51907,P82995               |
| 3013 | 1,2,4,7,20,<br>22,23,24 | 3,5,6,8,18,<br>19,21,25,2<br>6 | 0 |                                                  |
| 3014 | 1,2,4,7,20,<br>22,23,25 | 3,5,6,8,18,<br>19,21,24,2<br>6 | 2 | P06911,Q5GRG2                                    |
| 3015 | 1,2,4,7,20,<br>22,23,26 | 3,5,6,8,18,<br>19,21,24,2<br>5 | 3 | P01836,P05539,Q62997                             |

|      |                         |                                |   |                                    |
|------|-------------------------|--------------------------------|---|------------------------------------|
| 3016 | 1,2,4,7,20,<br>22,24,25 | 3,5,6,8,18,<br>19,21,23,2<br>6 | 1 | P35467                             |
| 3017 | 1,2,4,7,20,<br>22,24,26 | 3,5,6,8,18,<br>19,21,23,2<br>5 | 3 | O70594,P01836,P06760               |
| 3018 | 1,2,4,7,20,<br>22,25,26 | 3,5,6,8,18,<br>19,21,23,2<br>4 | 2 | P01836,P05539                      |
| 3019 | 1,2,4,7,20,<br>23,24,25 | 3,5,6,8,18,<br>19,21,22,2<br>6 | 0 |                                    |
| 3020 | 1,2,4,7,20,<br>23,24,26 | 3,5,6,8,18,<br>19,21,22,2<br>5 | 1 | P01836                             |
| 3021 | 1,2,4,7,20,<br>23,25,26 | 3,5,6,8,18,<br>19,21,22,2<br>4 | 2 | P01946,P05539                      |
| 3022 | 1,2,4,7,20,<br>24,25,26 | 3,5,6,8,18,<br>19,21,22,2<br>3 | 1 | P01836                             |
| 3023 | 1,2,4,7,21,<br>22,23,24 | 3,5,6,8,18,<br>19,20,25,2<br>6 | 1 | D3ZUC6                             |
| 3024 | 1,2,4,7,21,<br>22,23,25 | 3,5,6,8,18,<br>19,20,24,2<br>6 | 2 | P06911,Q5GRG2                      |
| 3025 | 1,2,4,7,21,<br>22,23,26 | 3,5,6,8,18,<br>19,20,24,2<br>5 | 3 | D3ZUC6,P01836,Q80WL1               |
| 3026 | 1,2,4,7,21,<br>22,24,25 | 3,5,6,8,18,<br>19,20,23,2<br>6 | 3 | P22006,P35467,Q6IG02               |
| 3027 | 1,2,4,7,21,<br>22,24,26 | 3,5,6,8,18,<br>19,20,23,2<br>5 | 4 | D3ZUC6,P01836,P80020,Q9EQV9        |
| 3028 | 1,2,4,7,21,<br>22,25,26 | 3,5,6,8,18,<br>19,20,23,2<br>4 | 5 | P01836,P19223,P22006,P82995,Q80WL1 |
| 3029 | 1,2,4,7,21,<br>23,24,25 | 3,5,6,8,18,<br>19,20,22,2<br>6 | 2 | D3ZUC6,P22006                      |
| 3030 | 1,2,4,7,21,<br>23,24,26 | 3,5,6,8,18,<br>19,20,22,2<br>5 | 5 | D3ZUC6,P01836,P01946,P22006,Q9EQV9 |

|      |                         |                                |    |                                                                              |
|------|-------------------------|--------------------------------|----|------------------------------------------------------------------------------|
| 3031 | 1,2,4,7,21,<br>23,25,26 | 3,5,6,8,18,<br>19,20,22,2<br>4 | 8  | D3ZUC6,P01946,P19223,P22006,P25236,P27213,P82995,P83121                      |
| 3032 | 1,2,4,7,21,<br>24,25,26 | 3,5,6,8,18,<br>19,20,22,2<br>3 | 7  | D3ZUC6,P01836,P19223,P22006,P55091,P82995,Q9EQV9                             |
| 3033 | 1,2,4,7,22,<br>23,24,25 | 3,5,6,8,18,<br>19,20,21,2<br>6 | 2  | P06911,Q5GRG2                                                                |
| 3034 | 1,2,4,7,22,<br>23,24,26 | 3,5,6,8,18,<br>19,20,21,2<br>5 | 1  | P00731                                                                       |
| 3035 | 1,2,4,7,22,<br>23,25,26 | 3,5,6,8,18,<br>19,20,21,2<br>4 | 3  | P01946,P05539,Q5GRG2                                                         |
| 3036 | 1,2,4,7,22,<br>24,25,26 | 3,5,6,8,18,<br>19,20,21,2<br>3 | 2  | O70594,P01835                                                                |
| 3037 | 1,2,4,7,23,<br>24,25,26 | 3,5,6,8,18,<br>19,20,21,2<br>2 | 3  | P01946,P14480,Q7TPB1                                                         |
| 3038 | 1,2,4,8,18,<br>19,20,21 | 3,5,6,7,22,<br>23,24,25,2<br>6 | 7  | P00731,P02761,P02803,P10758,P35281,P62804,Q63751                             |
| 3039 | 1,2,4,8,18,<br>19,20,22 | 3,5,6,7,21,<br>23,24,25,2<br>6 | 4  | P22006,Q62997,Q63751,Q8CJD3                                                  |
| 3040 | 1,2,4,8,18,<br>19,20,23 | 3,5,6,7,21,<br>22,24,25,2<br>6 | 7  | P02803,P22006,Q03191,Q5BJY9,Q5XI22,Q8CJD3,Q99MH3                             |
| 3041 | 1,2,4,8,18,<br>19,20,24 | 3,5,6,7,21,<br>22,23,25,2<br>6 | 1  | Q9QZK9                                                                       |
| 3042 | 1,2,4,8,18,<br>19,20,25 | 3,5,6,7,21,<br>22,23,24,2<br>6 | 2  | P02803,P35280                                                                |
| 3043 | 1,2,4,8,18,<br>19,20,26 | 3,5,6,7,21,<br>22,23,24,2<br>5 | 4  | P35280,Q63355,Q63751,Q63942                                                  |
| 3044 | 1,2,4,8,18,<br>19,21,22 | 3,5,6,7,20,<br>23,24,25,2<br>6 | 4  | D3ZUC6,P10758,P35281,Q80WL1                                                  |
| 3045 | 1,2,4,8,18,<br>19,21,23 | 3,5,6,7,20,<br>22,24,25,2<br>6 | 11 | D3ZUC6,O89117,P02803,P05964,P10758,P35281,Q03191,Q5XI22,Q80WL1,Q8CJD3,Q99MH3 |

|      |                         |                                |    |                                                                                     |
|------|-------------------------|--------------------------------|----|-------------------------------------------------------------------------------------|
| 3046 | 1,2,4,8,18,<br>19,21,24 | 3,5,6,7,20,<br>22,23,25,2<br>6 | 5  | D3ZUC6,O89117,P02761,P10758,P35281                                                  |
| 3047 | 1,2,4,8,18,<br>19,21,25 | 3,5,6,7,20,<br>22,23,24,2<br>6 | 8  | P00731,P02803,P31430,P35281,P47967,P98089,Q80WL1,Q99MH3                             |
| 3048 | 1,2,4,8,18,<br>19,21,26 | 3,5,6,7,20,<br>22,23,24,2<br>5 | 12 | D3ZUC6,O89117,P02761,P02803,P10758,P19223,P35281,Q63661,Q63751,Q63942,Q80WL1,Q9EQV9 |
| 3049 | 1,2,4,8,18,<br>19,22,23 | 3,5,6,7,20,<br>21,24,25,2<br>6 | 3  | Q03191,Q8CJD3,Q99MH3                                                                |
| 3050 | 1,2,4,8,18,<br>19,22,24 | 3,5,6,7,20,<br>21,23,25,2<br>6 | 2  | P01835,P83121                                                                       |
| 3051 | 1,2,4,8,18,<br>19,22,25 | 3,5,6,7,20,<br>21,23,24,2<br>6 | 0  |                                                                                     |
| 3052 | 1,2,4,8,18,<br>19,22,26 | 3,5,6,7,20,<br>21,23,24,2<br>5 | 3  | Q63751,Q63942,Q80WL1                                                                |
| 3053 | 1,2,4,8,18,<br>19,23,24 | 3,5,6,7,20,<br>21,22,25,2<br>6 | 2  | Q03191,Q99MH3                                                                       |
| 3054 | 1,2,4,8,18,<br>19,23,25 | 3,5,6,7,20,<br>21,22,24,2<br>6 | 7  | P00714,P02803,Q03191,Q5BJY9,Q63598,Q8CJD3,Q99MH3                                    |
| 3055 | 1,2,4,8,18,<br>19,23,26 | 3,5,6,7,20,<br>21,22,24,2<br>5 | 8  | P02803,P35467,Q03191,Q63661,Q63942,Q6AY61,Q6P6Q2,Q99MH3                             |
| 3056 | 1,2,4,8,18,<br>19,24,25 | 3,5,6,7,20,<br>21,22,23,2<br>6 | 0  |                                                                                     |
| 3057 | 1,2,4,8,18,<br>19,24,26 | 3,5,6,7,20,<br>21,22,23,2<br>5 | 1  | Q63942                                                                              |
| 3058 | 1,2,4,8,18,<br>19,25,26 | 3,5,6,7,20,<br>21,22,23,2<br>4 | 7  | P00714,P02803,P19223,P35280,P55091,Q561R9,Q63942                                    |
| 3059 | 1,2,4,8,18,<br>20,21,22 | 3,5,6,7,19,<br>23,24,25,2<br>6 | 3  | P02761,P10758,Q80WL1                                                                |
| 3060 | 1,2,4,8,18,<br>20,21,23 | 3,5,6,7,19,<br>22,24,25,2<br>6 | 6  | P02761,P02803,P10758,P17046,Q5XI22,Q6TMA8                                           |

|      |                         |                                |    |                                                                              |
|------|-------------------------|--------------------------------|----|------------------------------------------------------------------------------|
| 3061 | 1,2,4,8,18,<br>20,21,24 | 3,5,6,7,19,<br>22,23,25,2<br>6 | 3  | P02761,P10758,P17046                                                         |
| 3062 | 1,2,4,8,18,<br>20,21,25 | 3,5,6,7,19,<br>22,23,24,2<br>6 | 4  | P02803,P31430,P98089,Q9QZA6                                                  |
| 3063 | 1,2,4,8,18,<br>20,21,26 | 3,5,6,7,19,<br>22,23,24,2<br>5 | 11 | P01015,P02761,P10758,P17046,P19223,P62804,Q00715,Q6AYR8,Q80WL1,Q9EQV9,Q9QZA6 |
| 3064 | 1,2,4,8,18,<br>20,22,23 | 3,5,6,7,19,<br>21,24,25,2<br>6 | 4  | P22006,Q62997,Q8CJD3,Q9QZK9                                                  |
| 3065 | 1,2,4,8,18,<br>20,22,24 | 3,5,6,7,19,<br>21,23,25,2<br>6 | 2  | P83121,Q9QZK9                                                                |
| 3066 | 1,2,4,8,18,<br>20,22,25 | 3,5,6,7,19,<br>21,23,24,2<br>6 | 0  |                                                                              |
| 3067 | 1,2,4,8,18,<br>20,22,26 | 3,5,6,7,19,<br>21,23,24,2<br>5 | 0  |                                                                              |
| 3068 | 1,2,4,8,18,<br>20,23,24 | 3,5,6,7,19,<br>21,22,25,2<br>6 | 1  | Q9QZK9                                                                       |
| 3069 | 1,2,4,8,18,<br>20,23,25 | 3,5,6,7,19,<br>21,22,24,2<br>6 | 3  | P00714,P02803,Q99MH3                                                         |
| 3070 | 1,2,4,8,18,<br>20,23,26 | 3,5,6,7,19,<br>21,22,24,2<br>5 | 6  | P17046,P19218,Q63942,Q6IFU8,Q6IG02,Q6P6Q2                                    |
| 3071 | 1,2,4,8,18,<br>20,24,25 | 3,5,6,7,19,<br>21,22,23,2<br>6 | 0  |                                                                              |
| 3072 | 1,2,4,8,18,<br>20,24,26 | 3,5,6,7,19,<br>21,22,23,2<br>5 | 2  | P01015,P17046                                                                |
| 3073 | 1,2,4,8,18,<br>20,25,26 | 3,5,6,7,19,<br>21,22,23,2<br>4 | 3  | P19223,P35280,P55091                                                         |
| 3074 | 1,2,4,8,18,<br>21,22,23 | 3,5,6,7,19,<br>20,24,25,2<br>6 | 4  | D3ZUC6,P10758,Q80WL1,Q8CJD3                                                  |
| 3075 | 1,2,4,8,18,<br>21,22,24 | 3,5,6,7,19,<br>20,23,25,2<br>6 | 4  | D3ZUC6,P02761,P10758,Q80WL1                                                  |

|      |                         |                                |    |                                                                                            |
|------|-------------------------|--------------------------------|----|--------------------------------------------------------------------------------------------|
| 3076 | 1,2,4,8,18,<br>21,22,25 | 3,5,6,7,19,<br>20,23,24,2<br>6 | 3  | P31430,P98089,Q80WL1                                                                       |
| 3077 | 1,2,4,8,18,<br>21,22,26 | 3,5,6,7,19,<br>20,23,24,2<br>5 | 5  | D3ZUC6,P19223,P36374,Q80WL1,Q9EQV9                                                         |
| 3078 | 1,2,4,8,18,<br>21,23,24 | 3,5,6,7,19,<br>20,22,25,2<br>6 | 3  | D3ZUC6,P02761,P10758                                                                       |
| 3079 | 1,2,4,8,18,<br>21,23,25 | 3,5,6,7,19,<br>20,22,24,2<br>6 | 6  | P02803,P31430,P98089,Q63598,Q80WL1,Q99MH3                                                  |
| 3080 | 1,2,4,8,18,<br>21,23,26 | 3,5,6,7,19,<br>20,22,24,2<br>5 | 13 | D3ZUC6,P02803,P17046,P25236,Q62636,Q63661,Q63942,Q6AY61,Q6IFU8,Q6IFV1,Q6P6Q2,Q80WL1,Q9EQV9 |
| 3081 | 1,2,4,8,18,<br>21,24,25 | 3,5,6,7,19,<br>20,22,23,2<br>6 | 4  | O54728,P08721,P31430,P98089                                                                |
| 3082 | 1,2,4,8,18,<br>21,24,26 | 3,5,6,7,19,<br>20,22,23,2<br>5 | 6  | D3ZUC6,P02761,P17046,P55091,Q9EQV9,Q9JID2                                                  |
| 3083 | 1,2,4,8,18,<br>21,25,26 | 3,5,6,7,19,<br>20,22,23,2<br>4 | 8  | P02803,P08721,P19223,P31430,P55091,P98089,Q80WL1,Q9EQV9                                    |
| 3084 | 1,2,4,8,18,<br>22,23,24 | 3,5,6,7,19,<br>20,21,25,2<br>6 | 0  |                                                                                            |
| 3085 | 1,2,4,8,18,<br>22,23,25 | 3,5,6,7,19,<br>20,21,24,2<br>6 | 3  | Q63598,Q8CJD3,Q99MH3                                                                       |
| 3086 | 1,2,4,8,18,<br>22,23,26 | 3,5,6,7,19,<br>20,21,24,2<br>5 | 3  | Q63942,Q6P6Q2,Q80WL1                                                                       |
| 3087 | 1,2,4,8,18,<br>22,24,25 | 3,5,6,7,19,<br>20,21,23,2<br>6 | 0  |                                                                                            |
| 3088 | 1,2,4,8,18,<br>22,24,26 | 3,5,6,7,19,<br>20,21,23,2<br>5 | 0  |                                                                                            |
| 3089 | 1,2,4,8,18,<br>22,25,26 | 3,5,6,7,19,<br>20,21,23,2<br>4 | 2  | P55091,Q80WL1                                                                              |
| 3090 | 1,2,4,8,18,<br>23,24,25 | 3,5,6,7,19,<br>20,21,22,2<br>6 | 2  | Q63598,Q99MH3                                                                              |

|      |                         |                                |   |                                                         |
|------|-------------------------|--------------------------------|---|---------------------------------------------------------|
| 3091 | 1,2,4,8,18,<br>23,24,26 | 3,5,6,7,19,<br>20,21,22,2<br>5 | 3 | P17046,Q63942,Q6P6Q2                                    |
| 3092 | 1,2,4,8,18,<br>23,25,26 | 3,5,6,7,19,<br>20,21,22,2<br>4 | 8 | P00714,P02803,P55091,Q63598,Q63942,Q6IFU8,Q6P6Q2,Q99MH3 |
| 3093 | 1,2,4,8,18,<br>24,25,26 | 3,5,6,7,19,<br>20,21,22,2<br>3 | 3 | P08721,P55091,Q7TPB1                                    |
| 3094 | 1,2,4,8,19,<br>20,21,22 | 3,5,6,7,18,<br>23,24,25,2<br>6 | 4 | P02761,P35281,Q63751,Q80WL1                             |
| 3095 | 1,2,4,8,19,<br>20,21,23 | 3,5,6,7,18,<br>22,24,25,2<br>6 | 3 | P02761,P35281,Q8CJD3                                    |
| 3096 | 1,2,4,8,19,<br>20,21,24 | 3,5,6,7,18,<br>22,23,25,2<br>6 | 2 | P02761,P35281                                           |
| 3097 | 1,2,4,8,19,<br>20,21,25 | 3,5,6,7,18,<br>22,23,24,2<br>6 | 2 | P35281,P47967                                           |
| 3098 | 1,2,4,8,19,<br>20,21,26 | 3,5,6,7,18,<br>22,23,24,2<br>5 | 8 | P01015,P02761,P19223,P35281,P62804,Q00715,Q63751,Q9EQV9 |
| 3099 | 1,2,4,8,19,<br>20,22,23 | 3,5,6,7,18,<br>21,24,25,2<br>6 | 3 | P00774,Q62997,Q8CJD3                                    |
| 3100 | 1,2,4,8,19,<br>20,22,24 | 3,5,6,7,18,<br>21,23,25,2<br>6 | 3 | P00774,P83121,Q62997                                    |
| 3101 | 1,2,4,8,19,<br>20,22,25 | 3,5,6,7,18,<br>21,23,24,2<br>6 | 1 | Q62997                                                  |
| 3102 | 1,2,4,8,19,<br>20,22,26 | 3,5,6,7,18,<br>21,23,24,2<br>5 | 2 | Q62997,Q63751                                           |
| 3103 | 1,2,4,8,19,<br>20,23,24 | 3,5,6,7,18,<br>21,22,25,2<br>6 | 0 |                                                         |
| 3104 | 1,2,4,8,19,<br>20,23,25 | 3,5,6,7,18,<br>21,22,24,2<br>6 | 0 |                                                         |
| 3105 | 1,2,4,8,19,<br>20,23,26 | 3,5,6,7,18,<br>21,22,24,2<br>5 | 1 | P19218                                                  |

|      |                         |                                |   |                                    |
|------|-------------------------|--------------------------------|---|------------------------------------|
| 3106 | 1,2,4,8,19,<br>20,24,25 | 3,5,6,7,18,<br>21,22,23,2<br>6 | 0 |                                    |
| 3107 | 1,2,4,8,19,<br>20,24,26 | 3,5,6,7,18,<br>21,22,23,2<br>5 | 1 | P01015                             |
| 3108 | 1,2,4,8,19,<br>20,25,26 | 3,5,6,7,18,<br>21,22,23,2<br>4 | 1 | P35280                             |
| 3109 | 1,2,4,8,19,<br>21,22,23 | 3,5,6,7,18,<br>20,24,25,2<br>6 | 3 | P35281,Q80WL1,Q8CJD3               |
| 3110 | 1,2,4,8,19,<br>21,22,24 | 3,5,6,7,18,<br>20,23,25,2<br>6 | 2 | Q6IG02,Q80WL1                      |
| 3111 | 1,2,4,8,19,<br>21,22,25 | 3,5,6,7,18,<br>20,23,24,2<br>6 | 2 | P47967,Q80WL1                      |
| 3112 | 1,2,4,8,19,<br>21,22,26 | 3,5,6,7,18,<br>20,23,24,2<br>5 | 3 | Q63751,Q80WL1,Q9EQV9               |
| 3113 | 1,2,4,8,19,<br>21,23,24 | 3,5,6,7,18,<br>20,22,25,2<br>6 | 1 | D3ZUC6                             |
| 3114 | 1,2,4,8,19,<br>21,23,25 | 3,5,6,7,18,<br>20,22,24,2<br>6 | 2 | P02803,P27213                      |
| 3115 | 1,2,4,8,19,<br>21,23,26 | 3,5,6,7,18,<br>20,22,24,2<br>5 | 5 | D3ZUC6,P25236,P35281,Q80WL1,Q9EQV9 |
| 3116 | 1,2,4,8,19,<br>21,24,25 | 3,5,6,7,18,<br>20,22,23,2<br>6 | 0 |                                    |
| 3117 | 1,2,4,8,19,<br>21,24,26 | 3,5,6,7,18,<br>20,22,23,2<br>5 | 3 | D3ZUC6,P02761,Q9EQV9               |
| 3118 | 1,2,4,8,19,<br>21,25,26 | 3,5,6,7,18,<br>20,22,23,2<br>4 | 5 | P02803,P19223,P27213,Q80WL1,Q9EQV9 |
| 3119 | 1,2,4,8,19,<br>22,23,24 | 3,5,6,7,18,<br>20,21,25,2<br>6 | 1 | P01835                             |
| 3120 | 1,2,4,8,19,<br>22,23,25 | 3,5,6,7,18,<br>20,21,24,2<br>6 | 3 | P06911,Q5GRG2,Q8CJD3               |



|      |                         |                                |   |                                    |
|------|-------------------------|--------------------------------|---|------------------------------------|
| 3121 | 1,2,4,8,19,<br>22,23,26 | 3,5,6,7,18,<br>20,21,24,2<br>5 | 0 |                                    |
| 3122 | 1,2,4,8,19,<br>22,24,25 | 3,5,6,7,18,<br>20,21,23,2<br>6 | 2 | P01835,Q6IG02                      |
| 3123 | 1,2,4,8,19,<br>22,24,26 | 3,5,6,7,18,<br>20,21,23,2<br>5 | 1 | P01835                             |
| 3124 | 1,2,4,8,19,<br>22,25,26 | 3,5,6,7,18,<br>20,21,23,2<br>4 | 1 | P01835                             |
| 3125 | 1,2,4,8,19,<br>23,24,25 | 3,5,6,7,18,<br>20,21,22,2<br>6 | 0 |                                    |
| 3126 | 1,2,4,8,19,<br>23,24,26 | 3,5,6,7,18,<br>20,21,22,2<br>5 | 0 |                                    |
| 3127 | 1,2,4,8,19,<br>23,25,26 | 3,5,6,7,18,<br>20,21,22,2<br>4 | 2 | P02803,P27213                      |
| 3128 | 1,2,4,8,19,<br>24,25,26 | 3,5,6,7,18,<br>20,21,22,2<br>3 | 2 | P01835,P14480                      |
| 3129 | 1,2,4,8,20,<br>21,22,23 | 3,5,6,7,18,<br>19,24,25,2<br>6 | 1 | Q80WL1                             |
| 3130 | 1,2,4,8,20,<br>21,22,24 | 3,5,6,7,18,<br>19,23,25,2<br>6 | 2 | P02761,Q5XFX0                      |
| 3131 | 1,2,4,8,20,<br>21,22,25 | 3,5,6,7,18,<br>19,23,24,2<br>6 | 2 | Q07523,Q80WL1                      |
| 3132 | 1,2,4,8,20,<br>21,22,26 | 3,5,6,7,18,<br>19,23,24,2<br>5 | 5 | P01015,P02761,Q00715,Q80WL1,Q9EQV9 |
| 3133 | 1,2,4,8,20,<br>21,23,24 | 3,5,6,7,18,<br>19,22,25,2<br>6 | 1 | P02761                             |
| 3134 | 1,2,4,8,20,<br>21,23,25 | 3,5,6,7,18,<br>19,22,24,2<br>6 | 0 |                                    |
| 3135 | 1,2,4,8,20,<br>21,23,26 | 3,5,6,7,18,<br>19,22,24,2<br>5 | 4 | P02761,P17046,P25236,Q9EQV9        |

|      |                         |                                |   |                             |
|------|-------------------------|--------------------------------|---|-----------------------------|
| 3136 | 1,2,4,8,20,<br>21,24,25 | 3,5,6,7,18,<br>19,22,23,2<br>6 | 1 | P02761                      |
| 3137 | 1,2,4,8,20,<br>21,24,26 | 3,5,6,7,18,<br>19,22,23,2<br>5 | 4 | P01015,P02761,P17046,Q9EQV9 |
| 3138 | 1,2,4,8,20,<br>21,25,26 | 3,5,6,7,18,<br>19,22,23,2<br>4 | 3 | P19223,Q00715,Q9EQV9        |
| 3139 | 1,2,4,8,20,<br>22,23,24 | 3,5,6,7,18,<br>19,21,25,2<br>6 | 1 | Q9QZK9                      |
| 3140 | 1,2,4,8,20,<br>22,23,25 | 3,5,6,7,18,<br>19,21,24,2<br>6 | 0 |                             |
| 3141 | 1,2,4,8,20,<br>22,23,26 | 3,5,6,7,18,<br>19,21,24,2<br>5 | 1 | Q62997                      |
| 3142 | 1,2,4,8,20,<br>22,24,25 | 3,5,6,7,18,<br>19,21,23,2<br>6 | 1 | Q07523                      |
| 3143 | 1,2,4,8,20,<br>22,24,26 | 3,5,6,7,18,<br>19,21,23,2<br>5 | 1 | P01015                      |
| 3144 | 1,2,4,8,20,<br>22,25,26 | 3,5,6,7,18,<br>19,21,23,2<br>4 | 0 |                             |
| 3145 | 1,2,4,8,20,<br>23,24,25 | 3,5,6,7,18,<br>19,21,22,2<br>6 | 0 |                             |
| 3146 | 1,2,4,8,20,<br>23,24,26 | 3,5,6,7,18,<br>19,21,22,2<br>5 | 2 | P19218,P97840               |
| 3147 | 1,2,4,8,20,<br>23,25,26 | 3,5,6,7,18,<br>19,21,22,2<br>4 | 1 | P19218                      |
| 3148 | 1,2,4,8,20,<br>24,25,26 | 3,5,6,7,18,<br>19,21,22,2<br>3 | 0 |                             |
| 3149 | 1,2,4,8,21,<br>22,23,24 | 3,5,6,7,18,<br>19,20,25,2<br>6 | 1 | Q80WL1                      |
| 3150 | 1,2,4,8,21,<br>22,23,25 | 3,5,6,7,18,<br>19,20,24,2<br>6 | 1 | Q80WL1                      |

|      |                          |                                |   |                                                  |
|------|--------------------------|--------------------------------|---|--------------------------------------------------|
| 3151 | 1,2,4,8,21,<br>22,23,26  | 3,5,6,7,18,<br>19,20,24,2<br>5 | 4 | P25236,Q5QE79,Q80WL1,Q9EQV9                      |
| 3152 | 1,2,4,8,21,<br>22,24,25  | 3,5,6,7,18,<br>19,20,23,2<br>6 | 2 | P35467,Q80WL1                                    |
| 3153 | 1,2,4,8,21,<br>22,24,26  | 3,5,6,7,18,<br>19,20,23,2<br>5 | 3 | P02761,Q80WL1,Q9EQV9                             |
| 3154 | 1,2,4,8,21,<br>22,25,26  | 3,5,6,7,18,<br>19,20,23,2<br>4 | 2 | P19223,Q80WL1                                    |
| 3155 | 1,2,4,8,21,<br>23,24,25  | 3,5,6,7,18,<br>19,20,22,2<br>6 | 1 | Q5U2V4                                           |
| 3156 | 1,2,4,8,21,<br>23,24,26  | 3,5,6,7,18,<br>19,20,22,2<br>5 | 4 | D3ZUC6,P02761,Q68FV8,Q9EQV9                      |
| 3157 | 1,2,4,8,21,<br>23,25,26  | 3,5,6,7,18,<br>19,20,22,2<br>4 | 7 | P14669,P19223,P25236,P27213,Q80WL1,Q9EQV9,Q9WTT6 |
| 3158 | 1,2,4,8,21,<br>24,25,26  | 3,5,6,7,18,<br>19,20,22,2<br>3 | 3 | P19223,Q68FV8,Q9EQV9                             |
| 3159 | 1,2,4,8,22,<br>23,24,25  | 3,5,6,7,18,<br>19,20,21,2<br>6 | 1 | P06911                                           |
| 3160 | 1,2,4,8,22,<br>23,24,26  | 3,5,6,7,18,<br>19,20,21,2<br>5 | 1 | P00731                                           |
| 3161 | 1,2,4,8,22,<br>23,25,26  | 3,5,6,7,18,<br>19,20,21,2<br>4 | 0 |                                                  |
| 3162 | 1,2,4,8,22,<br>24,25,26  | 3,5,6,7,18,<br>19,20,21,2<br>3 | 1 | P01835                                           |
| 3163 | 1,2,4,8,23,<br>24,25,26  | 3,5,6,7,18,<br>19,20,21,2<br>2 | 2 | Q68FV8,Q7TPB1                                    |
| 3164 | 1,2,4,18,1<br>9,20,21,22 | 3,5,6,7,8,2<br>3,24,25,26      | 4 | D3ZUC6,P10758,P36374,Q63751                      |
| 3165 | 1,2,4,18,1<br>9,20,21,23 | 3,5,6,7,8,2<br>2,24,25,26      | 4 | D3ZUC6,P10758,Q8CJD3,Q99MH3                      |
| 3166 | 1,2,4,18,1<br>9,20,21,24 | 3,5,6,7,8,2<br>2,23,25,26      | 2 | D3ZUC6,P10758                                    |

|      |                          |                           |   |                                                                |
|------|--------------------------|---------------------------|---|----------------------------------------------------------------|
| 3167 | 1,2,4,18,1<br>9,20,21,25 | 3,5,6,7,8,2<br>2,23,24,26 | 3 | P31430,P47967,P98089                                           |
| 3168 | 1,2,4,18,1<br>9,20,21,26 | 3,5,6,7,8,2<br>2,23,24,25 | 7 | D3ZUC6,P01015,P10758,P36374,Q63661,Q63751,Q9EQV9               |
| 3169 | 1,2,4,18,1<br>9,20,22,23 | 3,5,6,7,8,2<br>1,24,25,26 | 5 | P22006,Q62997,Q8CJD3,Q9QZK9,Q9WTT6                             |
| 3170 | 1,2,4,18,1<br>9,20,22,24 | 3,5,6,7,8,2<br>1,23,25,26 | 4 | P06760,P07150,Q9QZK9,Q9WTT6                                    |
| 3171 | 1,2,4,18,1<br>9,20,22,25 | 3,5,6,7,8,2<br>1,23,24,26 | 1 | Q62997                                                         |
| 3172 | 1,2,4,18,1<br>9,20,22,26 | 3,5,6,7,8,2<br>1,23,24,25 | 5 | P06760,P08937,Q62997,Q63751,Q9WTT6                             |
| 3173 | 1,2,4,18,1<br>9,20,23,24 | 3,5,6,7,8,2<br>1,22,25,26 | 2 | Q9QZK9,Q9WTT6                                                  |
| 3174 | 1,2,4,18,1<br>9,20,23,25 | 3,5,6,7,8,2<br>1,22,24,26 | 2 | Q8CJD3,Q99MH3                                                  |
| 3175 | 1,2,4,18,1<br>9,20,23,26 | 3,5,6,7,8,2<br>1,22,24,25 | 3 | P19218,Q6IFU8,Q6P6Q2                                           |
| 3176 | 1,2,4,18,1<br>9,20,24,25 | 3,5,6,7,8,2<br>1,22,23,26 | 0 |                                                                |
| 3177 | 1,2,4,18,1<br>9,20,24,26 | 3,5,6,7,8,2<br>1,22,23,25 | 3 | P06760,Q63751,Q9WTT6                                           |
| 3178 | 1,2,4,18,1<br>9,20,25,26 | 3,5,6,7,8,2<br>1,22,23,24 | 1 | P35280                                                         |
| 3179 | 1,2,4,18,1<br>9,21,22,23 | 3,5,6,7,8,2<br>0,24,25,26 | 4 | D3ZUC6,P10758,Q8CJD3,Q99MH3                                    |
| 3180 | 1,2,4,18,1<br>9,21,22,24 | 3,5,6,7,8,2<br>0,23,25,26 | 3 | D3ZUC6,O89117,P10758                                           |
| 3181 | 1,2,4,18,1<br>9,21,22,25 | 3,5,6,7,8,2<br>0,23,24,26 | 5 | D3ZUC6,P31430,P47967,P97840,P98089                             |
| 3182 | 1,2,4,18,1<br>9,21,22,26 | 3,5,6,7,8,2<br>0,23,24,25 | 5 | D3ZUC6,P10758,P36374,Q63661,Q63751                             |
| 3183 | 1,2,4,18,1<br>9,21,23,24 | 3,5,6,7,8,2<br>0,22,25,26 | 5 | D3ZUC6,O89117,P10758,Q03191,Q99MH3                             |
| 3184 | 1,2,4,18,1<br>9,21,23,25 | 3,5,6,7,8,2<br>0,22,24,26 | 7 | D3ZUC6,P02803,P05964,P27213,P31430,P98089,Q99MH3               |
| 3185 | 1,2,4,18,1<br>9,21,23,26 | 3,5,6,7,8,2<br>0,22,24,25 | 9 | D3ZUC6,P05964,P10758,P25236,Q03191,Q63661,Q6IFU8,Q6P6Q2,Q99MH3 |
| 3186 | 1,2,4,18,1<br>9,21,24,25 | 3,5,6,7,8,2<br>0,22,23,26 | 3 | D3ZUC6,P31430,P98089                                           |
| 3187 | 1,2,4,18,1<br>9,21,24,26 | 3,5,6,7,8,2<br>0,22,23,25 | 4 | D3ZUC6,O89117,Q63661,Q9EQV9                                    |
| 3188 | 1,2,4,18,1<br>9,21,25,26 | 3,5,6,7,8,2<br>0,22,23,24 | 7 | D3ZUC6,P19223,P27213,P31430,P55091,P98089,Q63661               |
| 3189 | 1,2,4,18,1<br>9,22,23,24 | 3,5,6,7,8,2<br>0,21,25,26 | 1 | Q9WTT6                                                         |

|      |                                                 |   |                                                  |
|------|-------------------------------------------------|---|--------------------------------------------------|
| 3190 | 1,2,4,18,1 3,5,6,7,8,2<br>9,22,23,25 0,21,24,26 | 2 | Q8CJD3,Q99MH3                                    |
| 3191 | 1,2,4,18,1 3,5,6,7,8,2<br>9,22,23,26 0,21,24,25 | 1 | Q63661                                           |
| 3192 | 1,2,4,18,1 3,5,6,7,8,2<br>9,22,24,25 0,21,23,26 | 0 |                                                  |
| 3193 | 1,2,4,18,1 3,5,6,7,8,2<br>9,22,24,26 0,21,23,25 | 2 | P06760,Q9WTT6                                    |
| 3194 | 1,2,4,18,1 3,5,6,7,8,2<br>9,22,25,26 0,21,23,24 | 0 |                                                  |
| 3195 | 1,2,4,18,1 3,5,6,7,8,2<br>9,23,24,25 0,21,22,26 | 1 | Q99MH3                                           |
| 3196 | 1,2,4,18,1 3,5,6,7,8,2<br>9,23,24,26 0,21,22,25 | 4 | D3ZUC6,Q03191,Q63661,Q6IFU7                      |
| 3197 | 1,2,4,18,1 3,5,6,7,8,2<br>9,23,25,26 0,21,22,24 | 6 | P00714,P27213,Q03191,Q63661,Q6P6Q2,Q99MH3        |
| 3198 | 1,2,4,18,1 3,5,6,7,8,2<br>9,24,25,26 0,21,22,23 | 3 | P14480,P55091,Q7TPB1                             |
| 3199 | 1,2,4,18,2 3,5,6,7,8,1<br>0,21,22,23 9,24,25,26 | 2 | P10758,Q8CJD3                                    |
| 3200 | 1,2,4,18,2 3,5,6,7,8,1<br>0,21,22,24 9,23,25,26 | 3 | P51907,Q99041,Q9QZK9                             |
| 3201 | 1,2,4,18,2 3,5,6,7,8,1<br>0,21,22,25 9,23,24,26 | 3 | P31430,P51907,P98089                             |
| 3202 | 1,2,4,18,2 3,5,6,7,8,1<br>0,21,22,26 9,23,24,25 | 4 | P36374,P51907,Q63751,Q99041                      |
| 3203 | 1,2,4,18,2 3,5,6,7,8,1<br>0,21,23,24 9,22,25,26 | 2 | D3ZUC6,Q9QZK9                                    |
| 3204 | 1,2,4,18,2 3,5,6,7,8,1<br>0,21,23,25 9,22,24,26 | 3 | P31430,P98089,Q99MH3                             |
| 3205 | 1,2,4,18,2 3,5,6,7,8,1<br>0,21,23,26 9,22,24,25 | 7 | D3ZUC6,P25236,Q62636,Q63661,Q6IFU8,Q6IMF3,Q6P6Q2 |
| 3206 | 1,2,4,18,2 3,5,6,7,8,1<br>0,21,24,25 9,22,23,26 | 3 | P31430,P51907,P98089                             |
| 3207 | 1,2,4,18,2 3,5,6,7,8,1<br>0,21,24,26 9,22,23,25 | 6 | D3ZUC6,P01015,P51907,P80020,Q99041,Q9EQV9        |
| 3208 | 1,2,4,18,2 3,5,6,7,8,1<br>0,21,25,26 9,22,23,24 | 5 | P19223,P31430,P51907,P55091,P98089               |
| 3209 | 1,2,4,18,2 3,5,6,7,8,1<br>0,22,23,24 9,21,25,26 | 2 | P53792,Q9QZK9                                    |
| 3210 | 1,2,4,18,2 3,5,6,7,8,1<br>0,22,23,25 9,21,24,26 | 0 |                                                  |
| 3211 | 1,2,4,18,2 3,5,6,7,8,1<br>0,22,23,26 9,21,24,25 | 3 | P53792,Q62997,Q6P6Q2                             |
| 3212 | 1,2,4,18,2 3,5,6,7,8,1<br>0,22,24,25 9,21,23,26 | 0 |                                                  |

|      |                          |                           |    |                                                                                     |
|------|--------------------------|---------------------------|----|-------------------------------------------------------------------------------------|
| 3213 | 1,2,4,18,2<br>0,22,24,26 | 3,5,6,7,8,1<br>9,21,23,25 | 5  | O70594,P06760,Q99041,Q9QZK9,Q9WTT6                                                  |
| 3214 | 1,2,4,18,2<br>0,22,25,26 | 3,5,6,7,8,1<br>9,21,23,24 | 0  |                                                                                     |
| 3215 | 1,2,4,18,2<br>0,23,24,25 | 3,5,6,7,8,1<br>9,21,22,26 | 0  |                                                                                     |
| 3216 | 1,2,4,18,2<br>0,23,24,26 | 3,5,6,7,8,1<br>9,21,22,25 | 5  | P19218,Q6IFU7,Q6IFU8,Q6P6Q2,Q9QZK9                                                  |
| 3217 | 1,2,4,18,2<br>0,23,25,26 | 3,5,6,7,8,1<br>9,21,22,24 | 3  | P19218,Q6IFU8,Q6P6Q2                                                                |
| 3218 | 1,2,4,18,2<br>0,24,25,26 | 3,5,6,7,8,1<br>9,21,22,23 | 1  | P55091                                                                              |
| 3219 | 1,2,4,18,2<br>1,22,23,24 | 3,5,6,7,8,1<br>9,20,25,26 | 1  | D3ZUC6                                                                              |
| 3220 | 1,2,4,18,2<br>1,22,23,25 | 3,5,6,7,8,1<br>9,20,24,26 | 3  | P31430,P98089,Q99MH3                                                                |
| 3221 | 1,2,4,18,2<br>1,22,23,26 | 3,5,6,7,8,1<br>9,20,24,25 | 4  | D3ZUC6,Q63661,Q6IFU8,Q6P6Q2                                                         |
| 3222 | 1,2,4,18,2<br>1,22,24,25 | 3,5,6,7,8,1<br>9,20,23,26 | 2  | P31430,P98089                                                                       |
| 3223 | 1,2,4,18,2<br>1,22,24,26 | 3,5,6,7,8,1<br>9,20,23,25 | 4  | D3ZUC6,Q99041,Q9EQV9,Q9JID2                                                         |
| 3224 | 1,2,4,18,2<br>1,22,25,26 | 3,5,6,7,8,1<br>9,20,23,24 | 4  | P19223,P31430,P55091,P98089                                                         |
| 3225 | 1,2,4,18,2<br>1,23,24,25 | 3,5,6,7,8,1<br>9,20,22,26 | 4  | D3ZUC6,P31430,P98089,Q99MH3                                                         |
| 3226 | 1,2,4,18,2<br>1,23,24,26 | 3,5,6,7,8,1<br>9,20,22,25 | 6  | D3ZUC6,Q63661,Q6IFU7,Q6IFU8,Q6P6Q2,Q9EQV9                                           |
| 3227 | 1,2,4,18,2<br>1,23,25,26 | 3,5,6,7,8,1<br>9,20,22,24 | 12 | D3ZUC6,P00774,P25236,P27213,P31430,P55091,P98089,Q62636,Q63661,Q6IFU8,Q6P6Q2,Q99MH3 |
| 3228 | 1,2,4,18,2<br>1,24,25,26 | 3,5,6,7,8,1<br>9,20,22,23 | 6  | D3ZUC6,P08721,P31430,P55091,P98089,Q9EQV9                                           |
| 3229 | 1,2,4,18,2<br>2,23,24,25 | 3,5,6,7,8,1<br>9,20,21,26 | 1  | P53792                                                                              |
| 3230 | 1,2,4,18,2<br>2,23,24,26 | 3,5,6,7,8,1<br>9,20,21,25 | 3  | P00731,P53792,Q6IFU7                                                                |
| 3231 | 1,2,4,18,2<br>2,23,25,26 | 3,5,6,7,8,1<br>9,20,21,24 | 1  | Q6P6Q2                                                                              |
| 3232 | 1,2,4,18,2<br>2,24,25,26 | 3,5,6,7,8,1<br>9,20,21,23 | 2  | O70594,P55091                                                                       |
| 3233 | 1,2,4,18,2<br>3,24,25,26 | 3,5,6,7,8,1<br>9,20,21,22 | 3  | P55091,Q6P6Q2,Q7TPB1                                                                |
| 3234 | 1,2,4,19,2<br>0,21,22,23 | 3,5,6,7,8,1<br>8,24,25,26 | 1  | Q8CJD3                                                                              |
| 3235 | 1,2,4,19,2<br>0,21,22,24 | 3,5,6,7,8,1<br>8,23,25,26 | 2  | P35467,P51907                                                                       |

|      |                                                 |   |                                           |
|------|-------------------------------------------------|---|-------------------------------------------|
| 3236 | 1,2,4,19,2 3,5,6,7,8,1<br>0,21,22,25 8,23,24,26 | 3 | P35467,P47967,P51907                      |
| 3237 | 1,2,4,19,2 3,5,6,7,8,1<br>0,21,22,26 8,23,24,25 | 6 | O70377,P01015,P08937,P36374,P51907,Q63751 |
| 3238 | 1,2,4,19,2 3,5,6,7,8,1<br>0,21,23,24 8,22,25,26 | 1 | D3ZUC6                                    |
| 3239 | 1,2,4,19,2 3,5,6,7,8,1<br>0,21,23,25 8,22,24,26 | 0 |                                           |
| 3240 | 1,2,4,19,2 3,5,6,7,8,1<br>0,21,23,26 8,22,24,25 | 2 | D3ZUC6,P25236                             |
| 3241 | 1,2,4,19,2 3,5,6,7,8,1<br>0,21,24,25 8,22,23,26 | 1 | P35467                                    |
| 3242 | 1,2,4,19,2 3,5,6,7,8,1<br>0,21,24,26 8,22,23,25 | 5 | D3ZUC6,P01015,P51907,P80020,Q9EQV9        |
| 3243 | 1,2,4,19,2 3,5,6,7,8,1<br>0,21,25,26 8,22,23,24 | 2 | P19223,P51907                             |
| 3244 | 1,2,4,19,2 3,5,6,7,8,1<br>0,22,23,24 8,21,25,26 | 4 | P00774,Q62997,Q9QZK9,Q9WTT6               |
| 3245 | 1,2,4,19,2 3,5,6,7,8,1<br>0,22,23,25 8,21,24,26 | 2 | Q62997,Q8CJD3                             |
| 3246 | 1,2,4,19,2 3,5,6,7,8,1<br>0,22,23,26 8,21,24,25 | 1 | Q62997                                    |
| 3247 | 1,2,4,19,2 3,5,6,7,8,1<br>0,22,24,25 8,21,23,26 | 1 | P35467                                    |
| 3248 | 1,2,4,19,2 3,5,6,7,8,1<br>0,22,24,26 8,21,23,25 | 4 | P01015,P06760,Q62997,Q9WTT6               |
| 3249 | 1,2,4,19,2 3,5,6,7,8,1<br>0,22,25,26 8,21,23,24 | 1 | Q62997                                    |
| 3250 | 1,2,4,19,2 3,5,6,7,8,1<br>0,23,24,25 8,21,22,26 | 0 |                                           |
| 3251 | 1,2,4,19,2 3,5,6,7,8,1<br>0,23,24,26 8,21,22,25 | 1 | P19218                                    |
| 3252 | 1,2,4,19,2 3,5,6,7,8,1<br>0,23,25,26 8,21,22,24 | 1 | P19218                                    |
| 3253 | 1,2,4,19,2 3,5,6,7,8,1<br>0,24,25,26 8,21,22,23 | 1 | P14480                                    |
| 3254 | 1,2,4,19,2 3,5,6,7,8,1<br>1,22,23,24 8,20,25,26 | 1 | D3ZUC6                                    |
| 3255 | 1,2,4,19,2 3,5,6,7,8,1<br>1,22,23,25 8,20,24,26 | 0 |                                           |
| 3256 | 1,2,4,19,2 3,5,6,7,8,1<br>1,22,23,26 8,20,24,25 | 2 | D3ZUC6,P25236                             |
| 3257 | 1,2,4,19,2 3,5,6,7,8,1<br>1,22,24,25 8,20,23,26 | 2 | P35467,Q6IG02                             |
| 3258 | 1,2,4,19,2 3,5,6,7,8,1<br>1,22,24,26 8,20,23,25 | 2 | D3ZUC6,O70377                             |

|      |                                                 |   |                                                  |
|------|-------------------------------------------------|---|--------------------------------------------------|
| 3259 | 1,2,4,19,2 3,5,6,7,8,1<br>1,22,25,26 8,20,23,24 | 0 |                                                  |
| 3260 | 1,2,4,19,2 3,5,6,7,8,1<br>1,23,24,25 8,20,22,26 | 1 | D3ZUC6                                           |
| 3261 | 1,2,4,19,2 3,5,6,7,8,1<br>1,23,24,26 8,20,22,25 | 2 | D3ZUC6,Q9EQV9                                    |
| 3262 | 1,2,4,19,2 3,5,6,7,8,1<br>1,23,25,26 8,20,22,24 | 4 | D3ZUC6,P25236,P27213,Q63661                      |
| 3263 | 1,2,4,19,2 3,5,6,7,8,1<br>1,24,25,26 8,20,22,23 | 3 | D3ZUC6,P14480,P27213                             |
| 3264 | 1,2,4,19,2 3,5,6,7,8,1<br>2,23,24,25 8,20,21,26 | 1 | P82471                                           |
| 3265 | 1,2,4,19,2 3,5,6,7,8,1<br>2,23,24,26 8,20,21,25 | 2 | P00731,P82471                                    |
| 3266 | 1,2,4,19,2 3,5,6,7,8,1<br>2,23,25,26 8,20,21,24 | 1 | P82471                                           |
| 3267 | 1,2,4,19,2 3,5,6,7,8,1<br>2,24,25,26 8,20,21,23 | 2 | P01835,P14480                                    |
| 3268 | 1,2,4,19,2 3,5,6,7,8,1<br>3,24,25,26 8,20,21,22 | 3 | P14480,P27213,Q7TPB1                             |
| 3269 | 1,2,4,20,2 3,5,6,7,8,1<br>1,22,23,24 8,19,25,26 | 0 |                                                  |
| 3270 | 1,2,4,20,2 3,5,6,7,8,1<br>1,22,23,25 8,19,24,26 | 0 |                                                  |
| 3271 | 1,2,4,20,2 3,5,6,7,8,1<br>1,22,23,26 8,19,24,25 | 1 | P25236                                           |
| 3272 | 1,2,4,20,2 3,5,6,7,8,1<br>1,22,24,25 8,19,23,26 | 3 | P35467,P51907,Q07523                             |
| 3273 | 1,2,4,20,2 3,5,6,7,8,1<br>1,22,24,26 8,19,23,25 | 7 | O70377,O70594,P01015,P01836,P51907,P80020,Q99041 |
| 3274 | 1,2,4,20,2 3,5,6,7,8,1<br>1,22,25,26 8,19,23,24 | 2 | P19223,P51907                                    |
| 3275 | 1,2,4,20,2 3,5,6,7,8,1<br>1,23,24,25 8,19,22,26 | 0 |                                                  |
| 3276 | 1,2,4,20,2 3,5,6,7,8,1<br>1,23,24,26 8,19,22,25 | 5 | D3ZUC6,P01015,P25236,P80020,Q9EQV9               |
| 3277 | 1,2,4,20,2 3,5,6,7,8,1<br>1,23,25,26 8,19,22,24 | 1 | P25236                                           |
| 3278 | 1,2,4,20,2 3,5,6,7,8,1<br>1,24,25,26 8,19,22,23 | 2 | P01015,P51907                                    |
| 3279 | 1,2,4,20,2 3,5,6,7,8,1<br>2,23,24,25 8,19,21,26 | 1 | P53792                                           |
| 3280 | 1,2,4,20,2 3,5,6,7,8,1<br>2,23,24,26 8,19,21,25 | 3 | P00731,P53792,Q62997                             |
| 3281 | 1,2,4,20,2 3,5,6,7,8,1<br>2,23,25,26 8,19,21,24 | 1 | Q62997                                           |



|      |                          |                                  |    |                                                                                                          |
|------|--------------------------|----------------------------------|----|----------------------------------------------------------------------------------------------------------|
| 3282 | 1,2,4,20,2<br>2,24,25,26 | 3,5,6,7,8,1<br>8,19,21,23        | 3  | O70594,P00731,P51907                                                                                     |
| 3283 | 1,2,4,20,2<br>3,24,25,26 | 3,5,6,7,8,1<br>8,19,21,22        | 2  | P19218,Q7TPB1                                                                                            |
| 3284 | 1,2,4,21,2<br>2,23,24,25 | 3,5,6,7,8,1<br>8,19,20,26        | 0  |                                                                                                          |
| 3285 | 1,2,4,21,2<br>2,23,24,26 | 3,5,6,7,8,1<br>8,19,20,25        | 2  | D3ZUC6,P00731                                                                                            |
| 3286 | 1,2,4,21,2<br>2,23,25,26 | 3,5,6,7,8,1<br>8,19,20,24        | 2  | P25236,P27213                                                                                            |
| 3287 | 1,2,4,21,2<br>2,24,25,26 | 3,5,6,7,8,1<br>8,19,20,23        | 1  | P35467                                                                                                   |
| 3288 | 1,2,4,21,2<br>3,24,25,26 | 3,5,6,7,8,1<br>8,19,20,22        | 4  | D3ZUC6,P22006,P27213,Q7TPB1                                                                              |
| 3289 | 1,2,4,22,2<br>3,24,25,26 | 3,5,6,7,8,1<br>8,19,20,21        | 4  | P00731,P53792,P82471,Q7TPB1                                                                              |
| 3290 | 1,2,5,6,7,8<br>,18,19    | 3,4,20,21,<br>22,23,24,2<br>5,26 | 10 | O55006,P00731,P02631,P02803,P16636,P52590,P53792,Q03191,Q63532,Q63942                                    |
| 3291 | 1,2,5,6,7,8<br>,18,20    | 3,4,19,21,<br>22,23,24,2<br>5,26 | 7  | P00731,P02631,P02803,P10715,P52590,Q63942,Q91ZS3                                                         |
| 3292 | 1,2,5,6,7,8<br>,18,21    | 3,4,19,20,<br>22,23,24,2<br>5,26 | 11 | O35547,P00731,P02631,P02803,P13432,P25031,P52590,P53792,Q63467,Q63942,Q91ZS3                             |
| 3293 | 1,2,5,6,7,8<br>,18,22    | 3,4,19,20,<br>21,23,24,2<br>5,26 | 3  | P02631,P52590,Q63942                                                                                     |
| 3294 | 1,2,5,6,7,8<br>,18,23    | 3,4,19,20,<br>21,22,24,2<br>5,26 | 7  | P02631,P02803,P0DP29,P0DP30,P0DP31,P28648,P52590,Q03191,Q63942                                           |
| 3295 | 1,2,5,6,7,8<br>,18,24    | 3,4,19,20,<br>21,22,23,2<br>5,26 | 6  | O55006,P02631,P10715,P16636,P52590,Q63942                                                                |
| 3296 | 1,2,5,6,7,8<br>,18,25    | 3,4,19,20,<br>21,22,23,2<br>4,26 | 13 | P00731,P02631,P02803,P10715,P12020,P19629,P31044,P52590,P61206,P84079,P84082,P68370,Q5GRG2,Q63942,Q91ZS3 |
| 3297 | 1,2,5,6,7,8<br>,18,26    | 3,4,19,20,<br>21,22,23,2<br>4,25 | 8  | P02631,P02803,P10715,P16636,P52590,P83748,Q63942,Q6AY33                                                  |
| 3298 | 1,2,5,6,7,8<br>,19,20    | 3,4,18,21,<br>22,23,24,2<br>5,26 | 5  | P02631,P12785,P52590,P53792,Q63532                                                                       |
| 3299 | 1,2,5,6,7,8<br>,19,21    | 3,4,18,20,<br>22,23,24,2<br>5,26 | 10 | A2RUV9,P00731,P02631,P02803,P12785,P19218,P35281,P52590,P53792,Q63532                                    |

|      |                       |                                  |    |                                                                                                   |
|------|-----------------------|----------------------------------|----|---------------------------------------------------------------------------------------------------|
| 3300 | 1,2,5,6,7,8<br>,19,22 | 3,4,18,20,<br>21,23,24,2<br>5,26 | 6  | A2RUV9,P02631,P12785,P52590,Q63532,Q8N7M5                                                         |
| 3301 | 1,2,5,6,7,8<br>,19,23 | 3,4,18,20,<br>21,22,24,2<br>5,26 | 7  | P02631,P02803,P15399,P52590,P97580,Q30KJ2,Q63532                                                  |
| 3302 | 1,2,5,6,7,8<br>,19,24 | 3,4,18,20,<br>21,22,23,2<br>5,26 | 7  | O55006,P02631,P12785,P52590,P53792,Q63532,Q8N7M5                                                  |
| 3303 | 1,2,5,6,7,8<br>,19,25 | 3,4,18,20,<br>21,22,23,2<br>4,26 | 13 | P02631,P02803,P10715,P12020,P12785,P19629,P31044,P52590,P53792,P68370,P97840,Q5GRG2,Q63532        |
| 3304 | 1,2,5,6,7,8<br>,19,26 | 3,4,18,20,<br>21,22,23,2<br>4,25 | 6  | P02631,P52590,P53792,P83748,Q30KJ2,Q63532                                                         |
| 3305 | 1,2,5,6,7,8<br>,20,21 | 3,4,18,19,<br>22,23,24,2<br>5,26 | 9  | P00731,P02631,P12785,P13432,P52590,P53792,P62804,P68370,Q91ZS3                                    |
| 3306 | 1,2,5,6,7,8<br>,20,22 | 3,4,18,19,<br>21,23,24,2<br>5,26 | 5  | P02631,P10715,P12785,P27213,P52590                                                                |
| 3307 | 1,2,5,6,7,8<br>,20,23 | 3,4,18,19,<br>21,22,24,2<br>5,26 | 3  | P02631,P20762,P52590                                                                              |
| 3308 | 1,2,5,6,7,8<br>,20,24 | 3,4,18,19,<br>21,22,23,2<br>5,26 | 4  | P02631,P10715,P12785,P52590                                                                       |
| 3309 | 1,2,5,6,7,8<br>,20,25 | 3,4,18,19,<br>21,22,23,2<br>4,26 | 10 | P02631,P10715,P12020,P12785,P19629,P31044,P52590,P68370,Q5GRG2,Q91ZS3                             |
| 3310 | 1,2,5,6,7,8<br>,20,26 | 3,4,18,19,<br>21,22,23,2<br>4,25 | 6  | P10715,P20762,P52590,P62804,P83748,Q91ZS3                                                         |
| 3311 | 1,2,5,6,7,8<br>,21,22 | 3,4,18,19,<br>20,23,24,2<br>5,26 | 5  | P02631,P12785,P13432,P19218,P52590                                                                |
| 3312 | 1,2,5,6,7,8<br>,21,23 | 3,4,18,19,<br>20,22,24,2<br>5,26 | 3  | P02631,P02803,P52590                                                                              |
| 3313 | 1,2,5,6,7,8<br>,21,24 | 3,4,18,19,<br>20,22,23,2<br>5,26 | 4  | P02631,P12785,P13432,P52590                                                                       |
| 3314 | 1,2,5,6,7,8<br>,21,25 | 3,4,18,19,<br>20,22,23,2<br>4,26 | 14 | P02631,P02803,P06760,P10715,P12020,P12785,P19629,P20646,P52590,P53792,P68370,Q5GRG2,Q91ZS3,Q9WTT6 |

|      |                        |                                  |    |                                                                                            |
|------|------------------------|----------------------------------|----|--------------------------------------------------------------------------------------------|
| 3315 | 1,2,5,6,7,8<br>,21,26  | 3,4,18,19,<br>20,22,23,2<br>4,25 | 4  | P52590,P53792,P83748,Q91ZS3                                                                |
| 3316 | 1,2,5,6,7,8<br>,22,23  | 3,4,18,19,<br>20,21,24,2<br>5,26 | 2  | P02631,P52590                                                                              |
| 3317 | 1,2,5,6,7,8<br>,22,24  | 3,4,18,19,<br>20,21,23,2<br>5,26 | 4  | O88267,P02631,P12785,P52590                                                                |
| 3318 | 1,2,5,6,7,8<br>,22,25  | 3,4,18,19,<br>20,21,23,2<br>4,26 | 10 | P02631,P06911,P10715,P12020,P12785,P19629,P31044,P52590,P68370,Q5GRG2                      |
| 3319 | 1,2,5,6,7,8<br>,22,26  | 3,4,18,19,<br>20,21,23,2<br>4,25 | 3  | P12785,P52590,P83748                                                                       |
| 3320 | 1,2,5,6,7,8<br>,23,24  | 3,4,18,19,<br>20,21,22,2<br>5,26 | 2  | P02631,P52590                                                                              |
| 3321 | 1,2,5,6,7,8<br>,23,25  | 3,4,18,19,<br>20,21,22,2<br>4,26 | 13 | P02631,P02803,P05371,P06911,P10715,P12020,P19629,P31044,P52590,P68370,Q5GRG2,Q6P9T8,Q91ZS3 |
| 3322 | 1,2,5,6,7,8<br>,23,26  | 3,4,18,19,<br>20,21,22,2<br>4,25 | 4  | P02631,P20762,P52590,P83748                                                                |
| 3323 | 1,2,5,6,7,8<br>,24,25  | 3,4,18,19,<br>20,21,22,2<br>3,26 | 9  | P02631,P10715,P12020,P12785,P19629,P52590,P68370,Q5GRG2,Q91ZS3                             |
| 3324 | 1,2,5,6,7,8<br>,24,26  | 3,4,18,19,<br>20,21,22,2<br>3,25 | 2  | P52590,P83748                                                                              |
| 3325 | 1,2,5,6,7,8<br>,25,26  | 3,4,18,19,<br>20,21,22,2<br>3,24 | 9  | P10715,P12020,P19629,P52590,P68370,P83748,Q5GRG2,Q6P9T8,Q91ZS3                             |
| 3326 | 1,2,5,6,7,1<br>8,19,20 | 3,4,8,21,2<br>2,23,24,25<br>,26  | 5  | P00731,P02631,P52590,P53792,Q63532                                                         |
| 3327 | 1,2,5,6,7,1<br>8,19,21 | 3,4,8,20,2<br>2,23,24,25<br>,26  | 11 | P00731,P02631,P02803,P19218,P25031,P52590,P53792,P97840,Q03191,Q63532,Q9QUL6               |
| 3328 | 1,2,5,6,7,1<br>8,19,22 | 3,4,8,20,2<br>1,23,24,25<br>,26  | 4  | P02631,P16636,P52590,Q63532                                                                |
| 3329 | 1,2,5,6,7,1<br>8,19,23 | 3,4,8,20,2<br>1,22,24,25<br>,26  | 11 | P02631,P02803,P15399,P16636,P52590,P97580,Q03191,Q30KJ2,Q63532,Q63942,Q6IE51               |

|      |                        |                                 |    |                                                                                     |
|------|------------------------|---------------------------------|----|-------------------------------------------------------------------------------------|
| 3330 | 1,2,5,6,7,1<br>8,19,24 | 3,4,8,20,2<br>1,22,23,25<br>,26 | 6  | P02631,P16636,P52590,Q03191,Q63532,Q61E51                                           |
| 3331 | 1,2,5,6,7,1<br>8,19,25 | 3,4,8,20,2<br>1,22,23,24<br>,26 | 8  | P00731,P02631,P02803,P12020,P52590,P53792,P97840,Q63532                             |
| 3332 | 1,2,5,6,7,1<br>8,19,26 | 3,4,8,20,2<br>1,22,23,24<br>,25 | 8  | P02631,P16636,P52590,P83748,Q03191,Q63532,Q63942,Q9QUL6                             |
| 3333 | 1,2,5,6,7,1<br>8,20,21 | 3,4,8,19,2<br>2,23,24,25<br>,26 | 5  | P00731,P25031,P52590,Q91ZS3,Q9QUL6                                                  |
| 3334 | 1,2,5,6,7,1<br>8,20,22 | 3,4,8,19,2<br>1,23,24,25<br>,26 | 3  | P27213,P52590,Q9QUL6                                                                |
| 3335 | 1,2,5,6,7,1<br>8,20,23 | 3,4,8,19,2<br>1,22,24,25<br>,26 | 3  | P02631,P52590,Q9QUL6                                                                |
| 3336 | 1,2,5,6,7,1<br>8,20,24 | 3,4,8,19,2<br>1,22,23,25<br>,26 | 3  | P27213,P52590,Q9QUL6                                                                |
| 3337 | 1,2,5,6,7,1<br>8,20,25 | 3,4,8,19,2<br>1,22,23,24<br>,26 | 4  | P10715,P52590,P61206;P84079;P84082,Q91ZS3                                           |
| 3338 | 1,2,5,6,7,1<br>8,20,26 | 3,4,8,19,2<br>1,22,23,24<br>,25 | 7  | P16636,P25031,P52590,P83748,Q63942,Q91ZS3,Q9QUL6                                    |
| 3339 | 1,2,5,6,7,1<br>8,21,22 | 3,4,8,19,2<br>0,23,24,25<br>,26 | 5  | P13432,P19218,P25031,P52590,Q9QUL6                                                  |
| 3340 | 1,2,5,6,7,1<br>8,21,23 | 3,4,8,19,2<br>0,22,24,25<br>,26 | 6  | P02631,P14668,P25031,P52590,Q63467,Q9QUL6                                           |
| 3341 | 1,2,5,6,7,1<br>8,21,24 | 3,4,8,19,2<br>0,22,23,25<br>,26 | 4  | P13432,P25031,P52590,Q9QUL6                                                         |
| 3342 | 1,2,5,6,7,1<br>8,21,25 | 3,4,8,19,2<br>0,22,23,24<br>,26 | 10 | P00731,P02803,P19629,P25031,P31430,P52590,P61206;P84079;P84082,P97840,P98089,Q91ZS3 |
| 3343 | 1,2,5,6,7,1<br>8,21,26 | 3,4,8,19,2<br>0,22,23,24<br>,25 | 8  | P16636,P25031,P52590,P82995,P83748,Q63942,Q91ZS3,Q9QUL6                             |
| 3344 | 1,2,5,6,7,1<br>8,22,23 | 3,4,8,19,2<br>0,21,24,25<br>,26 | 3  | P02631,P52590,Q9QUL6                                                                |

|      |                        |                                 |    |                                                                                     |
|------|------------------------|---------------------------------|----|-------------------------------------------------------------------------------------|
| 3345 | 1,2,5,6,7,1<br>8,22,24 | 3,4,8,19,2<br>0,21,23,25<br>,26 | 2  | P16636,P52590                                                                       |
| 3346 | 1,2,5,6,7,1<br>8,22,25 | 3,4,8,19,2<br>0,21,23,24<br>,26 | 5  | P12020,P19629,P52590,P97840,Q5GRG2                                                  |
| 3347 | 1,2,5,6,7,1<br>8,22,26 | 3,4,8,19,2<br>0,21,23,24<br>,25 | 5  | P16636,P52590,P83748,Q63942,Q9QUL6                                                  |
| 3348 | 1,2,5,6,7,1<br>8,23,24 | 3,4,8,19,2<br>0,21,22,25<br>,26 | 4  | P02631,P16636,P52590,Q9QUL6                                                         |
| 3349 | 1,2,5,6,7,1<br>8,23,25 | 3,4,8,19,2<br>0,21,22,24<br>,26 | 8  | P02631,P02803,P12020,P19629,P52590,Q5GRG2,Q91ZS3,Q99MH3                             |
| 3350 | 1,2,5,6,7,1<br>8,23,26 | 3,4,8,19,2<br>0,21,22,24<br>,25 | 9  | P16636,P28648,P52590,P83748,Q63942,Q6IFU8,Q6IMF3,Q6P6Q2,Q9QUL6                      |
| 3351 | 1,2,5,6,7,1<br>8,24,25 | 3,4,8,19,2<br>0,21,22,23<br>,26 | 2  | P19629,P52590                                                                       |
| 3352 | 1,2,5,6,7,1<br>8,24,26 | 3,4,8,19,2<br>0,21,22,23<br>,25 | 5  | P16636,P52590,P83748,Q63942,Q9QUL6                                                  |
| 3353 | 1,2,5,6,7,1<br>8,25,26 | 3,4,8,19,2<br>0,21,22,23<br>,24 | 10 | P16636,P25031,P52590,P55091,P61206,P84079,P84082,P82995,P83748,Q63942,Q91ZS3,Q9QUL6 |
| 3354 | 1,2,5,6,7,1<br>9,20,21 | 3,4,8,18,2<br>2,23,24,25<br>,26 | 6  | P00714,P00731,P35467,P52590,P53792,Q63532                                           |
| 3355 | 1,2,5,6,7,1<br>9,20,22 | 3,4,8,18,2<br>1,23,24,25<br>,26 | 7  | P00714,P00774,P07150,P12785,P27213,P35467,Q63532                                    |
| 3356 | 1,2,5,6,7,1<br>9,20,23 | 3,4,8,18,2<br>1,22,24,25<br>,26 | 5  | P02631,P15399,P97580,Q30KJ2,Q63532                                                  |
| 3357 | 1,2,5,6,7,1<br>9,20,24 | 3,4,8,18,2<br>1,22,23,25<br>,26 | 4  | P00714,P02631,P35467,Q63532                                                         |
| 3358 | 1,2,5,6,7,1<br>9,20,25 | 3,4,8,18,2<br>1,22,23,24<br>,26 | 6  | P12020,P35467,P53792,P97840,Q63532,Q91ZS3                                           |
| 3359 | 1,2,5,6,7,1<br>9,20,26 | 3,4,8,18,2<br>1,22,23,24<br>,25 | 2  | P83748,Q63532                                                                       |

|      |                        |                                 |    |                                                                       |
|------|------------------------|---------------------------------|----|-----------------------------------------------------------------------|
| 3360 | 1,2,5,6,7,1<br>9,21,22 | 3,4,8,18,2<br>0,23,24,25<br>,26 | 8  | A2RUV9,P00714,P12785,P19218,P35467,P52590,P97840,Q63532               |
| 3361 | 1,2,5,6,7,1<br>9,21,23 | 3,4,8,18,2<br>0,22,24,25<br>,26 | 6  | P02631,P15399,P52590,P97580,Q30KJ2,Q63532                             |
| 3362 | 1,2,5,6,7,1<br>9,21,24 | 3,4,8,18,2<br>0,22,23,25<br>,26 | 6  | P00714,P02631,P35467,P52590,P53792,Q63532                             |
| 3363 | 1,2,5,6,7,1<br>9,21,25 | 3,4,8,18,2<br>0,22,23,24<br>,26 | 9  | P00731,P12020,P35467,P47967,P52590,P53792,P97840,Q63532,Q91ZS3        |
| 3364 | 1,2,5,6,7,1<br>9,21,26 | 3,4,8,18,2<br>0,22,23,24<br>,25 | 4  | P52590,P53792,P83748,Q63532                                           |
| 3365 | 1,2,5,6,7,1<br>9,22,23 | 3,4,8,18,2<br>0,21,24,25<br>,26 | 5  | P02631,P15399,P97580,Q30KJ2,Q63532                                    |
| 3366 | 1,2,5,6,7,1<br>9,22,24 | 3,4,8,18,2<br>0,21,23,25<br>,26 | 5  | P00714,P02631,P12785,P35467,Q63532                                    |
| 3367 | 1,2,5,6,7,1<br>9,22,25 | 3,4,8,18,2<br>0,21,23,24<br>,26 | 9  | P06911,P12020,P12785,P17046,P19629,P35467,P97840,Q5GRG2,Q63532        |
| 3368 | 1,2,5,6,7,1<br>9,22,26 | 3,4,8,18,2<br>0,21,23,24<br>,25 | 2  | P83748,Q63532                                                         |
| 3369 | 1,2,5,6,7,1<br>9,23,24 | 3,4,8,18,2<br>0,21,22,25<br>,26 | 7  | P02631,P15399,P52590,P97580,Q30KJ2,Q63532,Q6IE51                      |
| 3370 | 1,2,5,6,7,1<br>9,23,25 | 3,4,8,18,2<br>0,21,22,24<br>,26 | 10 | P02631,P12020,P15399,P19629,P52590,P97580,P97840,Q30KJ2,Q5GRG2,Q63532 |
| 3371 | 1,2,5,6,7,1<br>9,23,26 | 3,4,8,18,2<br>0,21,22,24<br>,25 | 6  | P02631,P15399,P83748,P97580,Q30KJ2,Q63532                             |
| 3372 | 1,2,5,6,7,1<br>9,24,25 | 3,4,8,18,2<br>0,21,22,23<br>,26 | 7  | P02631,P12020,P19629,P35467,P52590,P97840,Q63532                      |
| 3373 | 1,2,5,6,7,1<br>9,24,26 | 3,4,8,18,2<br>0,21,22,23<br>,25 | 3  | P16636,P83748,Q63532                                                  |
| 3374 | 1,2,5,6,7,1<br>9,25,26 | 3,4,8,18,2<br>0,21,22,23<br>,24 | 5  | P12020,P53792,P83748,P97840,Q63532                                    |

|      |                        |                                 |   |                                           |
|------|------------------------|---------------------------------|---|-------------------------------------------|
| 3375 | 1,2,5,6,7,2<br>0,21,22 | 3,4,8,18,1<br>9,23,24,25<br>,26 | 5 | P00714,P12785,P13432,P35467,P52590        |
| 3376 | 1,2,5,6,7,2<br>0,21,23 | 3,4,8,18,1<br>9,22,24,25<br>,26 | 2 | P52590,Q9QUL6                             |
| 3377 | 1,2,5,6,7,2<br>0,21,24 | 3,4,8,18,1<br>9,22,23,25<br>,26 | 4 | P00714,P13432,P35467,P52590               |
| 3378 | 1,2,5,6,7,2<br>0,21,25 | 3,4,8,18,1<br>9,22,23,24<br>,26 | 4 | P35467,P52590,P97840,Q91ZS3               |
| 3379 | 1,2,5,6,7,2<br>0,21,26 | 3,4,8,18,1<br>9,22,23,24<br>,25 | 5 | P52590,P62804,P83748,Q91ZS3,Q9QUL6        |
| 3380 | 1,2,5,6,7,2<br>0,22,23 | 3,4,8,18,1<br>9,21,24,25<br>,26 | 1 | P52590                                    |
| 3381 | 1,2,5,6,7,2<br>0,22,24 | 3,4,8,18,1<br>9,21,23,25<br>,26 | 4 | P00714,P12785,P27213,P35467               |
| 3382 | 1,2,5,6,7,2<br>0,22,25 | 3,4,8,18,1<br>9,21,23,24<br>,26 | 6 | P12020,P12785,P35467,P52590,Q5GRG2,Q91ZS3 |
| 3383 | 1,2,5,6,7,2<br>0,22,26 | 3,4,8,18,1<br>9,21,23,24<br>,25 | 2 | P83748,Q9QUL6                             |
| 3384 | 1,2,5,6,7,2<br>0,23,24 | 3,4,8,18,1<br>9,21,22,25<br>,26 | 1 | P52590                                    |
| 3385 | 1,2,5,6,7,2<br>0,23,25 | 3,4,8,18,1<br>9,21,22,24<br>,26 | 5 | P12020,P19629,P52590,Q5GRG2,Q91ZS3        |
| 3386 | 1,2,5,6,7,2<br>0,23,26 | 3,4,8,18,1<br>9,21,22,24<br>,25 | 2 | P83748,Q9QUL6                             |
| 3387 | 1,2,5,6,7,2<br>0,24,25 | 3,4,8,18,1<br>9,21,22,23<br>,26 | 6 | P10715,P12785,P19629,P35467,P52590,Q91ZS3 |
| 3388 | 1,2,5,6,7,2<br>0,24,26 | 3,4,8,18,1<br>9,21,22,23<br>,25 | 2 | P83748,Q9QUL6                             |
| 3389 | 1,2,5,6,7,2<br>0,25,26 | 3,4,8,18,1<br>9,21,22,23<br>,24 | 3 | P10758,P83748,Q91ZS3                      |

|      |                        |                                 |   |                                                                |
|------|------------------------|---------------------------------|---|----------------------------------------------------------------|
| 3390 | 1,2,5,6,7,2<br>1,22,23 | 3,4,8,18,1<br>9,20,24,25<br>,26 | 1 | P52590                                                         |
| 3391 | 1,2,5,6,7,2<br>1,22,24 | 3,4,8,18,1<br>9,20,23,25<br>,26 | 6 | P00714,P12785,P13432,P19218,P35467,P52590                      |
| 3392 | 1,2,5,6,7,2<br>1,22,25 | 3,4,8,18,1<br>9,20,23,24<br>,26 | 9 | P12020,P12785,P19218,P19629,P35467,P52590,P97840,Q5GRG2,Q91ZS3 |
| 3393 | 1,2,5,6,7,2<br>1,22,26 | 3,4,8,18,1<br>9,20,23,24<br>,25 | 3 | P52590,P83748,Q9QUL6                                           |
| 3394 | 1,2,5,6,7,2<br>1,23,24 | 3,4,8,18,1<br>9,20,22,25<br>,26 | 2 | P13432,P52590                                                  |
| 3395 | 1,2,5,6,7,2<br>1,23,25 | 3,4,8,18,1<br>9,20,22,24<br>,26 | 7 | P12020,P19629,P52590,P97840,Q5GRG2,Q6P6R2,Q91ZS3               |
| 3396 | 1,2,5,6,7,2<br>1,23,26 | 3,4,8,18,1<br>9,20,22,24<br>,25 | 4 | P52590,P83748,Q6IFV1,Q9QUL6                                    |
| 3397 | 1,2,5,6,7,2<br>1,24,25 | 3,4,8,18,1<br>9,20,22,23<br>,26 | 5 | P19629,P35467,P52590,P97840,Q91ZS3                             |
| 3398 | 1,2,5,6,7,2<br>1,24,26 | 3,4,8,18,1<br>9,20,22,23<br>,25 | 4 | P13432,P52590,P83748,Q9QUL6                                    |
| 3399 | 1,2,5,6,7,2<br>1,25,26 | 3,4,8,18,1<br>9,20,22,23<br>,24 | 4 | P19629,P52590,P83748,Q91ZS3                                    |
| 3400 | 1,2,5,6,7,2<br>2,23,24 | 3,4,8,18,1<br>9,20,21,25<br>,26 | 1 | P52590                                                         |
| 3401 | 1,2,5,6,7,2<br>2,23,25 | 3,4,8,18,1<br>9,20,21,24<br>,26 | 5 | P06911,P12020,P19629,P52590,Q5GRG2                             |
| 3402 | 1,2,5,6,7,2<br>2,23,26 | 3,4,8,18,1<br>9,20,21,24<br>,25 | 2 | P83748,Q9QUL6                                                  |
| 3403 | 1,2,5,6,7,2<br>2,24,25 | 3,4,8,18,1<br>9,20,21,23<br>,26 | 7 | P06911,P12020,P12785,P19629,P35467,P52590,Q5GRG2               |
| 3404 | 1,2,5,6,7,2<br>2,24,26 | 3,4,8,18,1<br>9,20,21,23<br>,25 | 1 | P83748                                                         |



|      |                        |                                 |   |                                                                |
|------|------------------------|---------------------------------|---|----------------------------------------------------------------|
| 3405 | 1,2,5,6,7,2<br>2,25,26 | 3,4,8,18,1<br>9,20,21,23<br>,24 | 5 | P10758,P12020,P19629,P83748,Q5GRG2                             |
| 3406 | 1,2,5,6,7,2<br>3,24,25 | 3,4,8,18,1<br>9,20,21,22<br>,26 | 4 | P12020,P19629,P52590,Q5GRG2                                    |
| 3407 | 1,2,5,6,7,2<br>3,24,26 | 3,4,8,18,1<br>9,20,21,22<br>,25 | 4 | P01946,P52590,P83748,Q9QUL6                                    |
| 3408 | 1,2,5,6,7,2<br>3,25,26 | 3,4,8,18,1<br>9,20,21,22<br>,24 | 7 | P01946,P10758,P12020,P19629,P52590,P83748,Q5GRG2               |
| 3409 | 1,2,5,6,7,2<br>4,25,26 | 3,4,8,18,1<br>9,20,21,22<br>,23 | 4 | P10758,P19629,P52590,P83748                                    |
| 3410 | 1,2,5,6,8,1<br>8,19,20 | 3,4,7,21,2<br>2,23,24,25<br>,26 | 6 | P00731,P02803,P22006,P62804,P83121,Q63942                      |
| 3411 | 1,2,5,6,8,1<br>8,19,21 | 3,4,7,20,2<br>2,23,24,25<br>,26 | 9 | A2RUV9,O35547,P00731,P02803,P35281,P53792,Q03191,Q63942,Q9Z1F2 |
| 3412 | 1,2,5,6,8,1<br>8,19,22 | 3,4,7,20,2<br>1,23,24,25<br>,26 | 5 | A2RUV9,P22006,P83121,Q63942,Q9Z1F2                             |
| 3413 | 1,2,5,6,8,1<br>8,19,23 | 3,4,7,20,2<br>1,22,24,25<br>,26 | 6 | P02803,P15399,P22006,Q03191,Q63942,Q9Z1F2                      |
| 3414 | 1,2,5,6,8,1<br>8,19,24 | 3,4,7,20,2<br>1,22,23,25<br>,26 | 3 | P83121,Q03191,Q63942                                           |
| 3415 | 1,2,5,6,8,1<br>8,19,25 | 3,4,7,20,2<br>1,22,23,24<br>,26 | 5 | P00731,P02803,Q62635,Q63942,Q9Z1F2                             |
| 3416 | 1,2,5,6,8,1<br>8,19,26 | 3,4,7,20,2<br>1,22,23,24<br>,25 | 3 | P02803,Q03191,Q63942                                           |
| 3417 | 1,2,5,6,8,1<br>8,20,21 | 3,4,7,19,2<br>2,23,24,25<br>,26 | 4 | O35547,P00731,P62804,Q63942                                    |
| 3418 | 1,2,5,6,8,1<br>8,20,22 | 3,4,7,19,2<br>1,23,24,25<br>,26 | 4 | P22006,P27213,P83121,Q63942                                    |
| 3419 | 1,2,5,6,8,1<br>8,20,23 | 3,4,7,19,2<br>1,22,24,25<br>,26 | 3 | P22006,Q63942,Q9Z1F2                                           |

|      |                        |                                 |   |                                                                |
|------|------------------------|---------------------------------|---|----------------------------------------------------------------|
| 3420 | 1,2,5,6,8,1<br>8,20,24 | 3,4,7,19,2<br>1,22,23,25<br>,26 | 3 | P22006,P83121,Q63942                                           |
| 3421 | 1,2,5,6,8,1<br>8,20,25 | 3,4,7,19,2<br>1,22,23,24<br>,26 | 2 | Q63942,Q91ZS3                                                  |
| 3422 | 1,2,5,6,8,1<br>8,20,26 | 3,4,7,19,2<br>1,22,23,24<br>,25 | 3 | P22006,P62804,Q63942                                           |
| 3423 | 1,2,5,6,8,1<br>8,21,22 | 3,4,7,19,2<br>0,23,24,25<br>,26 | 3 | O35547,P13432,Q63942                                           |
| 3424 | 1,2,5,6,8,1<br>8,21,23 | 3,4,7,19,2<br>0,22,24,25<br>,26 | 4 | O35547,P02803,Q63942,Q9Z1F2                                    |
| 3425 | 1,2,5,6,8,1<br>8,21,24 | 3,4,7,19,2<br>0,22,23,25<br>,26 | 3 | P05539,P13432,Q63942                                           |
| 3426 | 1,2,5,6,8,1<br>8,21,25 | 3,4,7,19,2<br>0,22,23,24<br>,26 | 9 | O35547,P00731,P02803,P06760,P31430,P98089,Q63942,Q91ZS3,Q9WTT6 |
| 3427 | 1,2,5,6,8,1<br>8,21,26 | 3,4,7,19,2<br>0,22,23,24<br>,25 | 4 | P25031,P83748,Q63942,Q9QUL6                                    |
| 3428 | 1,2,5,6,8,1<br>8,22,23 | 3,4,7,19,2<br>0,21,24,25<br>,26 | 3 | P22006,Q63942,Q9Z1F2                                           |
| 3429 | 1,2,5,6,8,1<br>8,22,24 | 3,4,7,19,2<br>0,21,23,25<br>,26 | 2 | P83121,Q63942                                                  |
| 3430 | 1,2,5,6,8,1<br>8,22,25 | 3,4,7,19,2<br>0,21,23,24<br>,26 | 1 | Q63942                                                         |
| 3431 | 1,2,5,6,8,1<br>8,22,26 | 3,4,7,19,2<br>0,21,23,24<br>,25 | 1 | Q63942                                                         |
| 3432 | 1,2,5,6,8,1<br>8,23,24 | 3,4,7,19,2<br>0,21,22,25<br>,26 | 1 | Q63942                                                         |
| 3433 | 1,2,5,6,8,1<br>8,23,25 | 3,4,7,19,2<br>0,21,22,24<br>,26 | 4 | P02803,Q63942,Q99MH3,Q9Z1F2                                    |
| 3434 | 1,2,5,6,8,1<br>8,23,26 | 3,4,7,19,2<br>0,21,22,24<br>,25 | 9 | Q63942,Q6IFU7,Q6IFU8,Q6IFV1,Q6IFW6,Q6IG02,Q6IMF3,Q6P6Q2,Q9QUL6 |

|      |                        |                                 |   |                                                         |
|------|------------------------|---------------------------------|---|---------------------------------------------------------|
| 3435 | 1,2,5,6,8,1<br>8,24,25 | 3,4,7,19,2<br>0,21,22,23<br>,26 | 1 | Q63942                                                  |
| 3436 | 1,2,5,6,8,1<br>8,24,26 | 3,4,7,19,2<br>0,21,22,23<br>,25 | 1 | Q63942                                                  |
| 3437 | 1,2,5,6,8,1<br>8,25,26 | 3,4,7,19,2<br>0,21,22,23<br>,24 | 2 | P55091,Q63942                                           |
| 3438 | 1,2,5,6,8,1<br>9,20,21 | 3,4,7,18,2<br>2,23,24,25<br>,26 | 8 | A2RUV9,O35547,P00714,P00731,P12785,P35281,P53792,P62804 |
| 3439 | 1,2,5,6,8,1<br>9,20,22 | 3,4,7,18,2<br>1,23,24,25<br>,26 | 6 | A2RUV9,P00714,P00774,P12785,P22006,P83121               |
| 3440 | 1,2,5,6,8,1<br>9,20,23 | 3,4,7,18,2<br>1,22,24,25<br>,26 | 3 | P15399,P22006,Q9Z1F2                                    |
| 3441 | 1,2,5,6,8,1<br>9,20,24 | 3,4,7,18,2<br>1,22,23,25<br>,26 | 2 | P12785,P83121                                           |
| 3442 | 1,2,5,6,8,1<br>9,20,25 | 3,4,7,18,2<br>1,22,23,24<br>,26 | 1 | P12785                                                  |
| 3443 | 1,2,5,6,8,1<br>9,20,26 | 3,4,7,18,2<br>1,22,23,24<br>,25 | 2 | P22006,P62804                                           |
| 3444 | 1,2,5,6,8,1<br>9,21,22 | 3,4,7,18,2<br>0,23,24,25<br>,26 | 6 | A2RUV9,O35547,P00714,P02782,P12785,P19218               |
| 3445 | 1,2,5,6,8,1<br>9,21,23 | 3,4,7,18,2<br>0,22,24,25<br>,26 | 5 | O35547,P02803,P15399,P35281,Q9Z1F2                      |
| 3446 | 1,2,5,6,8,1<br>9,21,24 | 3,4,7,18,2<br>0,22,23,25<br>,26 | 4 | A2RUV9,P00714,P12785,P53792                             |
| 3447 | 1,2,5,6,8,1<br>9,21,25 | 3,4,7,18,2<br>0,22,23,24<br>,26 | 7 | A2RUV9,P02803,P06760,P12785,P53792,P97840,Q9WTT6        |
| 3448 | 1,2,5,6,8,1<br>9,21,26 | 3,4,7,18,2<br>0,22,23,24<br>,25 | 4 | A2RUV9,P35281,P53792,Q00715                             |
| 3449 | 1,2,5,6,8,1<br>9,22,23 | 3,4,7,18,2<br>0,21,24,25<br>,26 | 3 | P15399,P22006,Q9Z1F2                                    |

|      |                        |                                 |   |                                           |
|------|------------------------|---------------------------------|---|-------------------------------------------|
| 3450 | 1,2,5,6,8,1<br>9,22,24 | 3,4,7,18,2<br>0,21,23,25<br>,26 | 4 | A2RUV9,P00714,P12785,P83121               |
| 3451 | 1,2,5,6,8,1<br>9,22,25 | 3,4,7,18,2<br>0,21,23,24<br>,26 | 4 | A2RUV9,P06911,P12785,Q5GRG2               |
| 3452 | 1,2,5,6,8,1<br>9,22,26 | 3,4,7,18,2<br>0,21,23,24<br>,25 | 2 | A2RUV9,P12785                             |
| 3453 | 1,2,5,6,8,1<br>9,23,24 | 3,4,7,18,2<br>0,21,22,25<br>,26 | 2 | P15399,P97580                             |
| 3454 | 1,2,5,6,8,1<br>9,23,25 | 3,4,7,18,2<br>0,21,22,24<br>,26 | 6 | P02803,P06760,P15399,P50280,P97580,Q9Z1F2 |
| 3455 | 1,2,5,6,8,1<br>9,23,26 | 3,4,7,18,2<br>0,21,22,24<br>,25 | 1 | P15399                                    |
| 3456 | 1,2,5,6,8,1<br>9,24,25 | 3,4,7,18,2<br>0,21,22,23<br>,26 | 2 | A2RUV9,P12785                             |
| 3457 | 1,2,5,6,8,1<br>9,24,26 | 3,4,7,18,2<br>0,21,22,23<br>,25 | 0 |                                           |
| 3458 | 1,2,5,6,8,1<br>9,25,26 | 3,4,7,18,2<br>0,21,22,23<br>,24 | 1 | A2RUV9                                    |
| 3459 | 1,2,5,6,8,2<br>0,21,22 | 3,4,7,18,1<br>9,23,24,25<br>,26 | 4 | P00714,P12785,P13432,P62804               |
| 3460 | 1,2,5,6,8,2<br>0,21,23 | 3,4,7,18,1<br>9,22,24,25<br>,26 | 1 | P62804                                    |
| 3461 | 1,2,5,6,8,2<br>0,21,24 | 3,4,7,18,1<br>9,22,23,25<br>,26 | 5 | P00714,P12785,P13432,P62804,Q5XFX0        |
| 3462 | 1,2,5,6,8,2<br>0,21,25 | 3,4,7,18,1<br>9,22,23,24<br>,26 | 5 | P06760,P12785,P62804,Q91ZS3,Q9WTT6        |
| 3463 | 1,2,5,6,8,2<br>0,21,26 | 3,4,7,18,1<br>9,22,23,24<br>,25 | 2 | P62804,Q00715                             |
| 3464 | 1,2,5,6,8,2<br>0,22,23 | 3,4,7,18,1<br>9,21,24,25<br>,26 | 1 | P22006                                    |

|      |                        |                                 |   |                                           |
|------|------------------------|---------------------------------|---|-------------------------------------------|
| 3465 | 1,2,5,6,8,2<br>0,22,24 | 3,4,7,18,1<br>9,21,23,25<br>,26 | 5 | P00714,P12785,P27213,P83121,Q5XFX0        |
| 3466 | 1,2,5,6,8,2<br>0,22,25 | 3,4,7,18,1<br>9,21,23,24<br>,26 | 1 | P12785                                    |
| 3467 | 1,2,5,6,8,2<br>0,22,26 | 3,4,7,18,1<br>9,21,23,24<br>,25 | 2 | P12785,P22006                             |
| 3468 | 1,2,5,6,8,2<br>0,23,24 | 3,4,7,18,1<br>9,21,22,25<br>,26 | 0 |                                           |
| 3469 | 1,2,5,6,8,2<br>0,23,25 | 3,4,7,18,1<br>9,21,22,24<br>,26 | 1 | P06760                                    |
| 3470 | 1,2,5,6,8,2<br>0,23,26 | 3,4,7,18,1<br>9,21,22,24<br>,25 | 2 | P62804,Q6IFV1                             |
| 3471 | 1,2,5,6,8,2<br>0,24,25 | 3,4,7,18,1<br>9,21,22,23<br>,26 | 1 | P12785                                    |
| 3472 | 1,2,5,6,8,2<br>0,24,26 | 3,4,7,18,1<br>9,21,22,23<br>,25 | 0 |                                           |
| 3473 | 1,2,5,6,8,2<br>0,25,26 | 3,4,7,18,1<br>9,21,22,23<br>,24 | 1 | Q91ZS3                                    |
| 3474 | 1,2,5,6,8,2<br>1,22,23 | 3,4,7,18,1<br>9,20,24,25<br>,26 | 1 | O35547                                    |
| 3475 | 1,2,5,6,8,2<br>1,22,24 | 3,4,7,18,1<br>9,20,23,25<br>,26 | 6 | A2RUV9,P00714,P12785,P13432,P35467,Q5XFX0 |
| 3476 | 1,2,5,6,8,2<br>1,22,25 | 3,4,7,18,1<br>9,20,23,24<br>,26 | 5 | A2RUV9,P06760,P12785,P35467,Q9WTT6        |
| 3477 | 1,2,5,6,8,2<br>1,22,26 | 3,4,7,18,1<br>9,20,23,24<br>,25 | 2 | P12785,P83748                             |
| 3478 | 1,2,5,6,8,2<br>1,23,24 | 3,4,7,18,1<br>9,20,22,25<br>,26 | 1 | P13432                                    |
| 3479 | 1,2,5,6,8,2<br>1,23,25 | 3,4,7,18,1<br>9,20,22,24<br>,26 | 5 | P02803,P06760,Q6P6R2,Q9WTT6,Q9Z1F2        |

|      |                         |                                 |   |                             |
|------|-------------------------|---------------------------------|---|-----------------------------|
| 3480 | 1,2,5,6,8,2<br>1,23,26  | 3,4,7,18,1<br>9,20,22,24<br>,25 | 1 | Q6IFV1                      |
| 3481 | 1,2,5,6,8,2<br>1,24,25  | 3,4,7,18,1<br>9,20,22,23<br>,26 | 4 | P06760,P12785,P35467,Q9WTT6 |
| 3482 | 1,2,5,6,8,2<br>1,24,26  | 3,4,7,18,1<br>9,20,22,23<br>,25 | 1 | P13432                      |
| 3483 | 1,2,5,6,8,2<br>1,25,26  | 3,4,7,18,1<br>9,20,22,23<br>,24 | 3 | P06760,Q91ZS3,Q9WTT6        |
| 3484 | 1,2,5,6,8,2<br>2,23,24  | 3,4,7,18,1<br>9,20,21,25<br>,26 | 0 |                             |
| 3485 | 1,2,5,6,8,2<br>2,23,25  | 3,4,7,18,1<br>9,20,21,24<br>,26 | 4 | P06760,P06911,Q5GRG2,Q9Z1F2 |
| 3486 | 1,2,5,6,8,2<br>2,23,26  | 3,4,7,18,1<br>9,20,21,24<br>,25 | 0 |                             |
| 3487 | 1,2,5,6,8,2<br>2,24,25  | 3,4,7,18,1<br>9,20,21,23<br>,26 | 3 | P06911,P12785,P35467        |
| 3488 | 1,2,5,6,8,2<br>2,24,26  | 3,4,7,18,1<br>9,20,21,23<br>,25 | 1 | P12785                      |
| 3489 | 1,2,5,6,8,2<br>2,25,26  | 3,4,7,18,1<br>9,20,21,23<br>,24 | 1 | P12785                      |
| 3490 | 1,2,5,6,8,2<br>3,24,25  | 3,4,7,18,1<br>9,20,21,22<br>,26 | 1 | P06760                      |
| 3491 | 1,2,5,6,8,2<br>3,24,26  | 3,4,7,18,1<br>9,20,21,22<br>,25 | 2 | P47967,Q6IFV1               |
| 3492 | 1,2,5,6,8,2<br>3,25,26  | 3,4,7,18,1<br>9,20,21,22<br>,24 | 2 | P06760,Q9WTT6               |
| 3493 | 1,2,5,6,8,2<br>4,25,26  | 3,4,7,18,1<br>9,20,21,22<br>,23 | 0 |                             |
| 3494 | 1,2,5,6,18,<br>19,20,21 | 3,4,7,8,22,<br>23,24,25,2<br>6  | 3 | O35547,P00731,Q9QUL6        |

|      |                         |                                |   |                                                  |
|------|-------------------------|--------------------------------|---|--------------------------------------------------|
| 3495 | 1,2,5,6,18,<br>19,20,22 | 3,4,7,8,21,<br>23,24,25,2<br>6 | 2 | P22006,Q63751                                    |
| 3496 | 1,2,5,6,18,<br>19,20,23 | 3,4,7,8,21,<br>22,24,25,2<br>6 | 5 | P15399,P22006,Q03191,Q63942,Q9QUL6               |
| 3497 | 1,2,5,6,18,<br>19,20,24 | 3,4,7,8,21,<br>22,23,25,2<br>6 | 1 | P22006                                           |
| 3498 | 1,2,5,6,18,<br>19,20,25 | 3,4,7,8,21,<br>22,23,24,2<br>6 | 0 |                                                  |
| 3499 | 1,2,5,6,18,<br>19,20,26 | 3,4,7,8,21,<br>22,23,24,2<br>5 | 4 | P22006,Q63751,Q63942,Q9QUL6                      |
| 3500 | 1,2,5,6,18,<br>19,21,22 | 3,4,7,8,20,<br>23,24,25,2<br>6 | 2 | A2RUV9,O35547                                    |
| 3501 | 1,2,5,6,18,<br>19,21,23 | 3,4,7,8,20,<br>22,24,25,2<br>6 | 7 | O35547,P02803,P05369,P15399,Q03191,Q63942,Q9QUL6 |
| 3502 | 1,2,5,6,18,<br>19,21,24 | 3,4,7,8,20,<br>22,23,25,2<br>6 | 0 |                                                  |
| 3503 | 1,2,5,6,18,<br>19,21,25 | 3,4,7,8,20,<br>22,23,24,2<br>6 | 4 | P00731,P02803,P97840,P98089                      |
| 3504 | 1,2,5,6,18,<br>19,21,26 | 3,4,7,8,20,<br>22,23,24,2<br>5 | 4 | P25031,Q63661,Q63942,Q9QUL6                      |
| 3505 | 1,2,5,6,18,<br>19,22,23 | 3,4,7,8,20,<br>21,24,25,2<br>6 | 5 | P15399,P22006,Q03191,Q63942,Q6IFU7               |
| 3506 | 1,2,5,6,18,<br>19,22,24 | 3,4,7,8,20,<br>21,23,25,2<br>6 | 1 | P83121                                           |
| 3507 | 1,2,5,6,18,<br>19,22,25 | 3,4,7,8,20,<br>21,23,24,2<br>6 | 1 | P97840                                           |
| 3508 | 1,2,5,6,18,<br>19,22,26 | 3,4,7,8,20,<br>21,23,24,2<br>5 | 3 | Q63751,Q63942,Q9QUL6                             |
| 3509 | 1,2,5,6,18,<br>19,23,24 | 3,4,7,8,20,<br>21,22,25,2<br>6 | 4 | P15399,Q03191,Q63942,Q6IFU7                      |

|      |                         |                                |   |                                                                |
|------|-------------------------|--------------------------------|---|----------------------------------------------------------------|
| 3510 | 1,2,5,6,18,<br>19,23,25 | 3,4,7,8,20,<br>21,22,24,2<br>6 | 6 | P02803,P15399,Q03191,Q63942,Q99MH3,Q9Z1F2                      |
| 3511 | 1,2,5,6,18,<br>19,23,26 | 3,4,7,8,20,<br>21,22,24,2<br>5 | 9 | P15399,Q03191,Q63661,Q63942,Q6IFU7,Q6IFU8,Q6IMF3,Q6P6Q2,Q9QUL6 |
| 3512 | 1,2,5,6,18,<br>19,24,25 | 3,4,7,8,20,<br>21,22,23,2<br>6 | 0 |                                                                |
| 3513 | 1,2,5,6,18,<br>19,24,26 | 3,4,7,8,20,<br>21,22,23,2<br>5 | 2 | Q63942,Q9QUL6                                                  |
| 3514 | 1,2,5,6,18,<br>19,25,26 | 3,4,7,8,20,<br>21,22,23,2<br>4 | 1 | Q63942                                                         |
| 3515 | 1,2,5,6,18,<br>20,21,22 | 3,4,7,8,19,<br>23,24,25,2<br>6 | 4 | O35547,P00714,Q99041,Q9QUL6                                    |
| 3516 | 1,2,5,6,18,<br>20,21,23 | 3,4,7,8,19,<br>22,24,25,2<br>6 | 1 | Q9QUL6                                                         |
| 3517 | 1,2,5,6,18,<br>20,21,24 | 3,4,7,8,19,<br>22,23,25,2<br>6 | 4 | P00714,P13432,Q99041,Q9QUL6                                    |
| 3518 | 1,2,5,6,18,<br>20,21,25 | 3,4,7,8,19,<br>22,23,24,2<br>6 | 4 | P25031,P31430,P98089,Q91ZS3                                    |
| 3519 | 1,2,5,6,18,<br>20,21,26 | 3,4,7,8,19,<br>22,23,24,2<br>5 | 5 | P25031,P62804,Q63942,Q99041,Q9QUL6                             |
| 3520 | 1,2,5,6,18,<br>20,22,23 | 3,4,7,8,19,<br>21,24,25,2<br>6 | 3 | P22006,Q6IFU7,Q9QUL6                                           |
| 3521 | 1,2,5,6,18,<br>20,22,24 | 3,4,7,8,19,<br>21,23,25,2<br>6 | 5 | P00714,P22006,P27213,Q99041,Q9QUL6                             |
| 3522 | 1,2,5,6,18,<br>20,22,25 | 3,4,7,8,19,<br>21,23,24,2<br>6 | 0 |                                                                |
| 3523 | 1,2,5,6,18,<br>20,22,26 | 3,4,7,8,19,<br>21,23,24,2<br>5 | 4 | P22006,Q63942,Q99041,Q9QUL6                                    |
| 3524 | 1,2,5,6,18,<br>20,23,24 | 3,4,7,8,19,<br>21,22,25,2<br>6 | 2 | Q6IFU7,Q9QUL6                                                  |



|      |                         |                                |   |                                                                |
|------|-------------------------|--------------------------------|---|----------------------------------------------------------------|
| 3525 | 1,2,5,6,18,<br>20,23,25 | 3,4,7,8,19,<br>21,22,24,2<br>6 | 0 |                                                                |
| 3526 | 1,2,5,6,18,<br>20,23,26 | 3,4,7,8,19,<br>21,22,24,2<br>5 | 9 | Q63942,Q6IFU7,Q6IFU8,Q6IFV1,Q6IFW6,Q6IG02,Q6IMF3,Q6P6Q2,Q9QUL6 |
| 3527 | 1,2,5,6,18,<br>20,24,25 | 3,4,7,8,19,<br>21,22,23,2<br>6 | 0 |                                                                |
| 3528 | 1,2,5,6,18,<br>20,24,26 | 3,4,7,8,19,<br>21,22,23,2<br>5 | 3 | Q63942,Q99041,Q9QUL6                                           |
| 3529 | 1,2,5,6,18,<br>20,25,26 | 3,4,7,8,19,<br>21,22,23,2<br>4 | 3 | Q63942,Q91ZS3,Q9QUL6                                           |
| 3530 | 1,2,5,6,18,<br>21,22,23 | 3,4,7,8,19,<br>20,24,25,2<br>6 | 2 | O35547,Q9QUL6                                                  |
| 3531 | 1,2,5,6,18,<br>21,22,24 | 3,4,7,8,19,<br>20,23,25,2<br>6 | 4 | P00714,P13432,Q99041,Q9QUL6                                    |
| 3532 | 1,2,5,6,18,<br>21,22,25 | 3,4,7,8,19,<br>20,23,24,2<br>6 | 3 | P31430,P97840,P98089                                           |
| 3533 | 1,2,5,6,18,<br>21,22,26 | 3,4,7,8,19,<br>20,23,24,2<br>5 | 5 | P25031,P83748,Q63942,Q99041,Q9QUL6                             |
| 3534 | 1,2,5,6,18,<br>21,23,24 | 3,4,7,8,19,<br>20,22,25,2<br>6 | 2 | Q6IFU7,Q9QUL6                                                  |
| 3535 | 1,2,5,6,18,<br>21,23,25 | 3,4,7,8,19,<br>20,22,24,2<br>6 | 5 | P31430,P98089,Q6P6R2,Q99MH3,Q9QUL6                             |
| 3536 | 1,2,5,6,18,<br>21,23,26 | 3,4,7,8,19,<br>20,22,24,2<br>5 | 9 | P25031,Q63661,Q63942,Q6IFU7,Q6IFU8,Q6IFV1,Q6IMF3,Q6P6Q2,Q9QUL6 |
| 3537 | 1,2,5,6,18,<br>21,24,25 | 3,4,7,8,19,<br>20,22,23,2<br>6 | 3 | O54728,P31430,P98089                                           |
| 3538 | 1,2,5,6,18,<br>21,24,26 | 3,4,7,8,19,<br>20,22,23,2<br>5 | 3 | Q63942,Q99041,Q9QUL6                                           |
| 3539 | 1,2,5,6,18,<br>21,25,26 | 3,4,7,8,19,<br>20,22,23,2<br>4 | 7 | P25031,P31430,P55091,P98089,Q63942,Q91ZS3,Q9QUL6               |

|      |                         |                                |   |                                                         |
|------|-------------------------|--------------------------------|---|---------------------------------------------------------|
| 3540 | 1,2,5,6,18,<br>22,23,24 | 3,4,7,8,19,<br>20,21,25,2<br>6 | 2 | Q6IFU7,Q9QUL6                                           |
| 3541 | 1,2,5,6,18,<br>22,23,25 | 3,4,7,8,19,<br>20,21,24,2<br>6 | 0 |                                                         |
| 3542 | 1,2,5,6,18,<br>22,23,26 | 3,4,7,8,19,<br>20,21,24,2<br>5 | 6 | Q63942,Q6IFU7,Q6IFU8,Q6IMF3,Q6P6Q2,Q9QUL6               |
| 3543 | 1,2,5,6,18,<br>22,24,25 | 3,4,7,8,19,<br>20,21,23,2<br>6 | 0 |                                                         |
| 3544 | 1,2,5,6,18,<br>22,24,26 | 3,4,7,8,19,<br>20,21,23,2<br>5 | 3 | Q63942,Q99041,Q9QUL6                                    |
| 3545 | 1,2,5,6,18,<br>22,25,26 | 3,4,7,8,19,<br>20,21,23,2<br>4 | 2 | O55145,Q63942                                           |
| 3546 | 1,2,5,6,18,<br>23,24,25 | 3,4,7,8,19,<br>20,21,22,2<br>6 | 1 | Q6IFU7                                                  |
| 3547 | 1,2,5,6,18,<br>23,24,26 | 3,4,7,8,19,<br>20,21,22,2<br>5 | 8 | P47967,Q63942,Q6IFU7,Q6IFU8,Q6IFV1,Q6IMF3,Q6P6Q2,Q9QUL6 |
| 3548 | 1,2,5,6,18,<br>23,25,26 | 3,4,7,8,19,<br>20,21,22,2<br>4 | 7 | Q63942,Q6IFU7,Q6IFU8,Q6IFW6,Q6IMF3,Q6P6Q2,Q9QUL6        |
| 3549 | 1,2,5,6,18,<br>24,25,26 | 3,4,7,8,19,<br>20,21,22,2<br>3 | 3 | P55091,Q63942,Q7TPB1                                    |
| 3550 | 1,2,5,6,19,<br>20,21,22 | 3,4,7,8,18,<br>23,24,25,2<br>6 | 4 | A2RUV9,P00714,P12785,P35467                             |
| 3551 | 1,2,5,6,19,<br>20,21,23 | 3,4,7,8,18,<br>22,24,25,2<br>6 | 2 | P00714,P15399                                           |
| 3552 | 1,2,5,6,19,<br>20,21,24 | 3,4,7,8,18,<br>22,23,25,2<br>6 | 2 | P00714,P35467                                           |
| 3553 | 1,2,5,6,19,<br>20,21,25 | 3,4,7,8,18,<br>22,23,24,2<br>6 | 3 | P35467,P97840,Q8VD89                                    |
| 3554 | 1,2,5,6,19,<br>20,21,26 | 3,4,7,8,18,<br>22,23,24,2<br>5 | 3 | P00714,P62804,Q63751                                    |

|      |                         |                                |   |                                                         |
|------|-------------------------|--------------------------------|---|---------------------------------------------------------|
| 3555 | 1,2,5,6,19,<br>20,22,23 | 3,4,7,8,18,<br>21,24,25,2<br>6 | 7 | P00714,P00774,P15399,P22006,P31430,P55091,P82995        |
| 3556 | 1,2,5,6,19,<br>20,22,24 | 3,4,7,8,18,<br>21,23,25,2<br>6 | 8 | P00714,P00774,P07150,P12785,P14669,P31430,P35467,P82995 |
| 3557 | 1,2,5,6,19,<br>20,22,25 | 3,4,7,8,18,<br>21,23,24,2<br>6 | 2 | P12785,P35467                                           |
| 3558 | 1,2,5,6,19,<br>20,22,26 | 3,4,7,8,18,<br>21,23,24,2<br>5 | 3 | P00714,P22006,Q63751                                    |
| 3559 | 1,2,5,6,19,<br>20,23,24 | 3,4,7,8,18,<br>21,22,25,2<br>6 | 5 | P00714,P15399,P31430,P82995,Q80WL1                      |
| 3560 | 1,2,5,6,19,<br>20,23,25 | 3,4,7,8,18,<br>21,22,24,2<br>6 | 1 | P15399                                                  |
| 3561 | 1,2,5,6,19,<br>20,23,26 | 3,4,7,8,18,<br>21,22,24,2<br>5 | 1 | P15399                                                  |
| 3562 | 1,2,5,6,19,<br>20,24,25 | 3,4,7,8,18,<br>21,22,23,2<br>6 | 2 | P35467,Q80WL1                                           |
| 3563 | 1,2,5,6,19,<br>20,24,26 | 3,4,7,8,18,<br>21,22,23,2<br>5 | 1 | P00714                                                  |
| 3564 | 1,2,5,6,19,<br>20,25,26 | 3,4,7,8,18,<br>21,22,23,2<br>4 | 0 |                                                         |
| 3565 | 1,2,5,6,19,<br>21,22,23 | 3,4,7,8,18,<br>20,24,25,2<br>6 | 2 | P00714,P15399                                           |
| 3566 | 1,2,5,6,19,<br>21,22,24 | 3,4,7,8,18,<br>20,23,25,2<br>6 | 5 | A2RUV9,P00714,P12785,P13432,P35467                      |
| 3567 | 1,2,5,6,19,<br>21,22,25 | 3,4,7,8,18,<br>20,23,24,2<br>6 | 4 | A2RUV9,P12785,P35467,P97840                             |
| 3568 | 1,2,5,6,19,<br>21,22,26 | 3,4,7,8,18,<br>20,23,24,2<br>5 | 2 | A2RUV9,P00714                                           |
| 3569 | 1,2,5,6,19,<br>21,23,24 | 3,4,7,8,18,<br>20,22,25,2<br>6 | 2 | P00714,P15399                                           |

|      |                         |                                |   |                             |
|------|-------------------------|--------------------------------|---|-----------------------------|
| 3570 | 1,2,5,6,19,<br>21,23,25 | 3,4,7,8,18,<br>20,22,24,2<br>6 | 3 | P15399,P97840,Q6P6R2        |
| 3571 | 1,2,5,6,19,<br>21,23,26 | 3,4,7,8,18,<br>20,22,24,2<br>5 | 2 | P15399,Q6IFV1               |
| 3572 | 1,2,5,6,19,<br>21,24,25 | 3,4,7,8,18,<br>20,22,23,2<br>6 | 3 | A2RUV9,P35467,P97840        |
| 3573 | 1,2,5,6,19,<br>21,24,26 | 3,4,7,8,18,<br>20,22,23,2<br>5 | 1 | P00714                      |
| 3574 | 1,2,5,6,19,<br>21,25,26 | 3,4,7,8,18,<br>20,22,23,2<br>4 | 1 | P97840                      |
| 3575 | 1,2,5,6,19,<br>22,23,24 | 3,4,7,8,18,<br>20,21,25,2<br>6 | 2 | P00714,P31430               |
| 3576 | 1,2,5,6,19,<br>22,23,25 | 3,4,7,8,18,<br>20,21,24,2<br>6 | 2 | P06911,P15399               |
| 3577 | 1,2,5,6,19,<br>22,23,26 | 3,4,7,8,18,<br>20,21,24,2<br>5 | 0 |                             |
| 3578 | 1,2,5,6,19,<br>22,24,25 | 3,4,7,8,18,<br>20,21,23,2<br>6 | 4 | A2RUV9,P12785,P35467,Q4FZU6 |
| 3579 | 1,2,5,6,19,<br>22,24,26 | 3,4,7,8,18,<br>20,21,23,2<br>5 | 1 | P00714                      |
| 3580 | 1,2,5,6,19,<br>22,25,26 | 3,4,7,8,18,<br>20,21,23,2<br>4 | 0 |                             |
| 3581 | 1,2,5,6,19,<br>23,24,25 | 3,4,7,8,18,<br>20,21,22,2<br>6 | 1 | P15399                      |
| 3582 | 1,2,5,6,19,<br>23,24,26 | 3,4,7,8,18,<br>20,21,22,2<br>5 | 1 | Q6IFU7                      |
| 3583 | 1,2,5,6,19,<br>23,25,26 | 3,4,7,8,18,<br>20,21,22,2<br>4 | 1 | P15399                      |
| 3584 | 1,2,5,6,19,<br>24,25,26 | 3,4,7,8,18,<br>20,21,22,2<br>3 | 0 |                             |

|      |                         |                                |   |                                           |
|------|-------------------------|--------------------------------|---|-------------------------------------------|
| 3585 | 1,2,5,6,20,<br>21,22,23 | 3,4,7,8,18,<br>19,24,25,2<br>6 | 1 | P00714                                    |
| 3586 | 1,2,5,6,20,<br>21,22,24 | 3,4,7,8,18,<br>19,23,25,2<br>6 | 6 | P00714,P12785,P13432,P35467,Q5XFX0,Q99041 |
| 3587 | 1,2,5,6,20,<br>21,22,25 | 3,4,7,8,18,<br>19,23,24,2<br>6 | 2 | P12785,P35467                             |
| 3588 | 1,2,5,6,20,<br>21,22,26 | 3,4,7,8,18,<br>19,23,24,2<br>5 | 3 | P00714,Q99041,Q9QUL6                      |
| 3589 | 1,2,5,6,20,<br>21,23,24 | 3,4,7,8,18,<br>19,22,25,2<br>6 | 1 | P00714                                    |
| 3590 | 1,2,5,6,20,<br>21,23,25 | 3,4,7,8,18,<br>19,22,24,2<br>6 | 2 | P06760,Q6P6R2                             |
| 3591 | 1,2,5,6,20,<br>21,23,26 | 3,4,7,8,18,<br>19,22,24,2<br>5 | 3 | Q6IFU8,Q6IFV1,Q9QUL6                      |
| 3592 | 1,2,5,6,20,<br>21,24,25 | 3,4,7,8,18,<br>19,22,23,2<br>6 | 1 | P35467                                    |
| 3593 | 1,2,5,6,20,<br>21,24,26 | 3,4,7,8,18,<br>19,22,23,2<br>5 | 3 | P00714,Q99041,Q9QUL6                      |
| 3594 | 1,2,5,6,20,<br>21,25,26 | 3,4,7,8,18,<br>19,22,23,2<br>4 | 1 | Q91ZS3                                    |
| 3595 | 1,2,5,6,20,<br>22,23,24 | 3,4,7,8,18,<br>19,21,25,2<br>6 | 2 | P00714,P82995                             |
| 3596 | 1,2,5,6,20,<br>22,23,25 | 3,4,7,8,18,<br>19,21,24,2<br>6 | 0 |                                           |
| 3597 | 1,2,5,6,20,<br>22,23,26 | 3,4,7,8,18,<br>19,21,24,2<br>5 | 2 | Q6IFU7,Q9QUL6                             |
| 3598 | 1,2,5,6,20,<br>22,24,25 | 3,4,7,8,18,<br>19,21,23,2<br>6 | 2 | P12785,P35467                             |
| 3599 | 1,2,5,6,20,<br>22,24,26 | 3,4,7,8,18,<br>19,21,23,2<br>5 | 2 | P00714,Q99041                             |

|      |                         |                                |   |                             |
|------|-------------------------|--------------------------------|---|-----------------------------|
| 3600 | 1,2,5,6,20,<br>22,25,26 | 3,4,7,8,18,<br>19,21,23,2<br>4 | 0 |                             |
| 3601 | 1,2,5,6,20,<br>23,24,25 | 3,4,7,8,18,<br>19,21,22,2<br>6 | 1 | Q80WL1                      |
| 3602 | 1,2,5,6,20,<br>23,24,26 | 3,4,7,8,18,<br>19,21,22,2<br>5 | 4 | D4A1J4,P47967,Q6IFU7,Q9QUL6 |
| 3603 | 1,2,5,6,20,<br>23,25,26 | 3,4,7,8,18,<br>19,21,22,2<br>4 | 0 |                             |
| 3604 | 1,2,5,6,20,<br>24,25,26 | 3,4,7,8,18,<br>19,21,22,2<br>3 | 0 |                             |
| 3605 | 1,2,5,6,21,<br>22,23,24 | 3,4,7,8,18,<br>19,20,25,2<br>6 | 3 | P00714,P13432,P35280        |
| 3606 | 1,2,5,6,21,<br>22,23,25 | 3,4,7,8,18,<br>19,20,24,2<br>6 | 1 | P06760                      |
| 3607 | 1,2,5,6,21,<br>22,23,26 | 3,4,7,8,18,<br>19,20,24,2<br>5 | 2 | Q6IFV1,Q9QUL6               |
| 3608 | 1,2,5,6,21,<br>22,24,25 | 3,4,7,8,18,<br>19,20,23,2<br>6 | 3 | P12785,P13432,P35467        |
| 3609 | 1,2,5,6,21,<br>22,24,26 | 3,4,7,8,18,<br>19,20,23,2<br>5 | 3 | P00714,P13432,Q99041        |
| 3610 | 1,2,5,6,21,<br>22,25,26 | 3,4,7,8,18,<br>19,20,23,2<br>4 | 0 |                             |
| 3611 | 1,2,5,6,21,<br>23,24,25 | 3,4,7,8,18,<br>19,20,22,2<br>6 | 2 | P06760,Q6P6R2               |
| 3612 | 1,2,5,6,21,<br>23,24,26 | 3,4,7,8,18,<br>19,20,22,2<br>5 | 3 | Q6IFU7,Q6IFV1,Q9QUL6        |
| 3613 | 1,2,5,6,21,<br>23,25,26 | 3,4,7,8,18,<br>19,20,22,2<br>4 | 2 | Q6IFV1,Q6P6R2               |
| 3614 | 1,2,5,6,21,<br>24,25,26 | 3,4,7,8,18,<br>19,20,22,2<br>3 | 0 |                             |

|      |                         |                                 |   |                                                                |
|------|-------------------------|---------------------------------|---|----------------------------------------------------------------|
| 3615 | 1,2,5,6,22,<br>23,24,25 | 3,4,7,8,18,<br>19,20,21,2<br>6  | 1 | P35280                                                         |
| 3616 | 1,2,5,6,22,<br>23,24,26 | 3,4,7,8,18,<br>19,20,21,2<br>5  | 3 | P00731,P47967,Q6IFU7                                           |
| 3617 | 1,2,5,6,22,<br>23,25,26 | 3,4,7,8,18,<br>19,20,21,2<br>4  | 0 |                                                                |
| 3618 | 1,2,5,6,22,<br>24,25,26 | 3,4,7,8,18,<br>19,20,21,2<br>3  | 1 | Q5XI22                                                         |
| 3619 | 1,2,5,6,23,<br>24,25,26 | 3,4,7,8,18,<br>19,20,21,2<br>2  | 2 | Q6IFU7,Q7TPB1                                                  |
| 3620 | 1,2,5,7,8,1<br>8,19,20  | 3,4,6,21,2<br>2,23,24,25<br>,26 | 5 | P00762,P02803,P52590,P83121,Q03191                             |
| 3621 | 1,2,5,7,8,1<br>8,19,21  | 3,4,6,20,2<br>2,23,24,25<br>,26 | 6 | P00731,P02803,P52590,P53792,Q03191,Q63467                      |
| 3622 | 1,2,5,7,8,1<br>8,19,22  | 3,4,6,20,2<br>1,23,24,25<br>,26 | 6 | P00762,P01835,P16636,P52590,P83121,Q03191                      |
| 3623 | 1,2,5,7,8,1<br>8,19,23  | 3,4,6,20,2<br>1,22,24,25<br>,26 | 6 | P02803,P16636,P52590,Q03191,Q63942,Q99MH3                      |
| 3624 | 1,2,5,7,8,1<br>8,19,24  | 3,4,6,20,2<br>1,22,23,25<br>,26 | 7 | P00762,P01835,P16636,P52590,P83121,Q03191,Q63532               |
| 3625 | 1,2,5,7,8,1<br>8,19,25  | 3,4,6,20,2<br>1,22,23,24<br>,26 | 9 | P00762,P01835,P02803,P10715,P16636,P19629,P52590,P62815,Q03191 |
| 3626 | 1,2,5,7,8,1<br>8,19,26  | 3,4,6,20,2<br>1,22,23,24<br>,25 | 6 | P02803,P16636,P52590,P82995,Q03191,Q63942                      |
| 3627 | 1,2,5,7,8,1<br>8,20,21  | 3,4,6,19,2<br>2,23,24,25<br>,26 | 7 | P00731,P02803,P25031,P52590,P62804,Q63467,Q9QZA6               |
| 3628 | 1,2,5,7,8,1<br>8,20,22  | 3,4,6,19,2<br>1,23,24,25<br>,26 | 5 | P00762,P10715,P27213,P52590,P83121                             |
| 3629 | 1,2,5,7,8,1<br>8,20,23  | 3,4,6,19,2<br>1,22,24,25<br>,26 | 2 | P10715,P52590                                                  |

|      |                        |                                 |   |                                                         |
|------|------------------------|---------------------------------|---|---------------------------------------------------------|
| 3630 | 1,2,5,7,8,1<br>8,20,24 | 3,4,6,19,2<br>1,22,23,25<br>,26 | 4 | P00762,P10715,P52590,P83121                             |
| 3631 | 1,2,5,7,8,1<br>8,20,25 | 3,4,6,19,2<br>1,22,23,24<br>,26 | 5 | P00762,P02803,P10715,P19629,P52590                      |
| 3632 | 1,2,5,7,8,1<br>8,20,26 | 3,4,6,19,2<br>1,22,23,24<br>,25 | 5 | P00762,P10715,P16636,P52590,Q63942                      |
| 3633 | 1,2,5,7,8,1<br>8,21,22 | 3,4,6,19,2<br>0,23,24,25<br>,26 | 1 | P52590                                                  |
| 3634 | 1,2,5,7,8,1<br>8,21,23 | 3,4,6,19,2<br>0,22,24,25<br>,26 | 6 | P02803,P05369,P52590,Q03191,Q63467,Q99MH3               |
| 3635 | 1,2,5,7,8,1<br>8,21,24 | 3,4,6,19,2<br>0,22,23,25<br>,26 | 1 | P52590                                                  |
| 3636 | 1,2,5,7,8,1<br>8,21,25 | 3,4,6,19,2<br>0,22,23,24<br>,26 | 7 | P02803,P10715,P19629,P25031,P31430,P52590,P98089        |
| 3637 | 1,2,5,7,8,1<br>8,21,26 | 3,4,6,19,2<br>0,22,23,24<br>,25 | 8 | P02803,P16636,P25031,P52590,P55091,P82995,P83748,Q63942 |
| 3638 | 1,2,5,7,8,1<br>8,22,23 | 3,4,6,19,2<br>0,21,24,25<br>,26 | 1 | P52590                                                  |
| 3639 | 1,2,5,7,8,1<br>8,22,24 | 3,4,6,19,2<br>0,21,23,25<br>,26 | 5 | P00762,P01835,P16636,P52590,P83121                      |
| 3640 | 1,2,5,7,8,1<br>8,22,25 | 3,4,6,19,2<br>0,21,23,24<br>,26 | 5 | P00762,P01835,P10715,P19629,P52590                      |
| 3641 | 1,2,5,7,8,1<br>8,22,26 | 3,4,6,19,2<br>0,21,23,24<br>,25 | 5 | P00762,P16636,P52590,P82995,Q63942                      |
| 3642 | 1,2,5,7,8,1<br>8,23,24 | 3,4,6,19,2<br>0,21,22,25<br>,26 | 3 | P16636,P52590,Q03191                                    |
| 3643 | 1,2,5,7,8,1<br>8,23,25 | 3,4,6,19,2<br>0,21,22,24<br>,26 | 5 | P02803,P10715,P19629,P52590,Q99MH3                      |
| 3644 | 1,2,5,7,8,1<br>8,23,26 | 3,4,6,19,2<br>0,21,22,24<br>,25 | 7 | P02803,P16636,P52590,P82995,Q03191,Q63942,Q6P6Q2        |



|      |                        |                                 |   |                                                                |
|------|------------------------|---------------------------------|---|----------------------------------------------------------------|
| 3645 | 1,2,5,7,8,1<br>8,24,25 | 3,4,6,19,2<br>0,21,22,23<br>,26 | 5 | P00762,P01835,P10715,P19629,P52590                             |
| 3646 | 1,2,5,7,8,1<br>8,24,26 | 3,4,6,19,2<br>0,21,22,23<br>,25 | 7 | P00762,P10715,P16636,P52590,P55091,P82995,Q63942               |
| 3647 | 1,2,5,7,8,1<br>8,25,26 | 3,4,6,19,2<br>0,21,22,23<br>,24 | 9 | P00762,P02803,P10715,P16636,P19629,P52590,P55091,P82995,Q63942 |
| 3648 | 1,2,5,7,8,1<br>9,20,21 | 3,4,6,18,2<br>2,23,24,25<br>,26 | 4 | P12785,P52590,P53792,P62804                                    |
| 3649 | 1,2,5,7,8,1<br>9,20,22 | 3,4,6,18,2<br>1,23,24,25<br>,26 | 6 | P00762,P00774,P01835,P12785,P27213,P83121                      |
| 3650 | 1,2,5,7,8,1<br>9,20,23 | 3,4,6,18,2<br>1,22,24,25<br>,26 | 2 | P00774,P52590                                                  |
| 3651 | 1,2,5,7,8,1<br>9,20,24 | 3,4,6,18,2<br>1,22,23,25<br>,26 | 6 | P00762,P00774,P01835,P12785,P52590,P83121                      |
| 3652 | 1,2,5,7,8,1<br>9,20,25 | 3,4,6,18,2<br>1,22,23,24<br>,26 | 4 | P00762,P10715,P12785,P52590                                    |
| 3653 | 1,2,5,7,8,1<br>9,20,26 | 3,4,6,18,2<br>1,22,23,24<br>,25 | 2 | P00762,Q63751                                                  |
| 3654 | 1,2,5,7,8,1<br>9,21,22 | 3,4,6,18,2<br>0,23,24,25<br>,26 | 2 | P12785,P52590                                                  |
| 3655 | 1,2,5,7,8,1<br>9,21,23 | 3,4,6,18,2<br>0,22,24,25<br>,26 | 3 | P02803,P52590,Q03191                                           |
| 3656 | 1,2,5,7,8,1<br>9,21,24 | 3,4,6,18,2<br>0,22,23,25<br>,26 | 3 | P12785,P52590,P53792                                           |
| 3657 | 1,2,5,7,8,1<br>9,21,25 | 3,4,6,18,2<br>0,22,23,24<br>,26 | 7 | P02803,P10715,P12785,P19629,P52590,P53792,P97840               |
| 3658 | 1,2,5,7,8,1<br>9,21,26 | 3,4,6,18,2<br>0,22,23,24<br>,25 | 3 | P52590,P53792,P83748                                           |
| 3659 | 1,2,5,7,8,1<br>9,22,23 | 3,4,6,18,2<br>0,21,24,25<br>,26 | 3 | P00774,P01835,P52590                                           |

|      |                        |                                 |   |                                                         |
|------|------------------------|---------------------------------|---|---------------------------------------------------------|
| 3660 | 1,2,5,7,8,1<br>9,22,24 | 3,4,6,18,2<br>0,21,23,25<br>,26 | 7 | P00762,P00774,P01835,P12785,P52590,P83121,Q4FZU2        |
| 3661 | 1,2,5,7,8,1<br>9,22,25 | 3,4,6,18,2<br>0,21,23,24<br>,26 | 8 | P00762,P01835,P10715,P12785,P19629,P52590,Q4FZU2,Q5GRG2 |
| 3662 | 1,2,5,7,8,1<br>9,22,26 | 3,4,6,18,2<br>0,21,23,24<br>,25 | 3 | P00762,P01835,P12785                                    |
| 3663 | 1,2,5,7,8,1<br>9,23,24 | 3,4,6,18,2<br>0,21,22,25<br>,26 | 4 | P01835,P52590,Q03191,Q63532                             |
| 3664 | 1,2,5,7,8,1<br>9,23,25 | 3,4,6,18,2<br>0,21,22,24<br>,26 | 5 | P01835,P02803,P10715,P19629,P52590                      |
| 3665 | 1,2,5,7,8,1<br>9,23,26 | 3,4,6,18,2<br>0,21,22,24<br>,25 | 2 | P52590,Q03191                                           |
| 3666 | 1,2,5,7,8,1<br>9,24,25 | 3,4,6,18,2<br>0,21,22,23<br>,26 | 7 | P00762,P01835,P10715,P12785,P19629,P52590,Q4FZU2        |
| 3667 | 1,2,5,7,8,1<br>9,24,26 | 3,4,6,18,2<br>0,21,22,23<br>,25 | 2 | P01835,P16636                                           |
| 3668 | 1,2,5,7,8,1<br>9,25,26 | 3,4,6,18,2<br>0,21,22,23<br>,24 | 6 | P00762,P01835,P02803,P10715,P19629,P52590               |
| 3669 | 1,2,5,7,8,2<br>0,21,22 | 3,4,6,18,1<br>9,23,24,25<br>,26 | 2 | P12785,P52590                                           |
| 3670 | 1,2,5,7,8,2<br>0,21,23 | 3,4,6,18,1<br>9,22,24,25<br>,26 | 1 | P52590                                                  |
| 3671 | 1,2,5,7,8,2<br>0,21,24 | 3,4,6,18,1<br>9,22,23,25<br>,26 | 3 | P02625,P12785,P52590                                    |
| 3672 | 1,2,5,7,8,2<br>0,21,25 | 3,4,6,18,1<br>9,22,23,24<br>,26 | 6 | P02625,P10715,P12785,P19629,P52590,P68370               |
| 3673 | 1,2,5,7,8,2<br>0,21,26 | 3,4,6,18,1<br>9,22,23,24<br>,25 | 4 | P02625,P52590,P62804,P83748                             |
| 3674 | 1,2,5,7,8,2<br>0,22,23 | 3,4,6,18,1<br>9,21,24,25<br>,26 | 2 | P00774,P52590                                           |

|      |                        |                                 |   |                                                  |
|------|------------------------|---------------------------------|---|--------------------------------------------------|
| 3675 | 1,2,5,7,8,2<br>0,22,24 | 3,4,6,18,1<br>9,21,23,25<br>,26 | 7 | P00762,P00774,P01835,P12785,P27213,P52590,P83121 |
| 3676 | 1,2,5,7,8,2<br>0,22,25 | 3,4,6,18,1<br>9,21,23,24<br>,26 | 7 | P00762,P02625,P10715,P12785,P19629,P52590,Q5GRG2 |
| 3677 | 1,2,5,7,8,2<br>0,22,26 | 3,4,6,18,1<br>9,21,23,24<br>,25 | 2 | P00762,P12785                                    |
| 3678 | 1,2,5,7,8,2<br>0,23,24 | 3,4,6,18,1<br>9,21,22,25<br>,26 | 1 | P52590                                           |
| 3679 | 1,2,5,7,8,2<br>0,23,25 | 3,4,6,18,1<br>9,21,22,24<br>,26 | 3 | P10715,P19629,P52590                             |
| 3680 | 1,2,5,7,8,2<br>0,23,26 | 3,4,6,18,1<br>9,21,22,24<br>,25 | 1 | P52590                                           |
| 3681 | 1,2,5,7,8,2<br>0,24,25 | 3,4,6,18,1<br>9,21,22,23<br>,26 | 6 | P00762,P02625,P10715,P12785,P19629,P52590        |
| 3682 | 1,2,5,7,8,2<br>0,24,26 | 3,4,6,18,1<br>9,21,22,23<br>,25 | 4 | P00762,P02625,P10715,P52590                      |
| 3683 | 1,2,5,7,8,2<br>0,25,26 | 3,4,6,18,1<br>9,21,22,23<br>,24 | 5 | P00762,P02625,P10715,P19629,P52590               |
| 3684 | 1,2,5,7,8,2<br>1,22,23 | 3,4,6,18,1<br>9,20,24,25<br>,26 | 1 | P52590                                           |
| 3685 | 1,2,5,7,8,2<br>1,22,24 | 3,4,6,18,1<br>9,20,23,25<br>,26 | 3 | P12785,P35467,P52590                             |
| 3686 | 1,2,5,7,8,2<br>1,22,25 | 3,4,6,18,1<br>9,20,23,24<br>,26 | 5 | P10715,P12785,P19629,P35467,P52590               |
| 3687 | 1,2,5,7,8,2<br>1,22,26 | 3,4,6,18,1<br>9,20,23,24<br>,25 | 3 | P12785,P52590,P83748                             |
| 3688 | 1,2,5,7,8,2<br>1,23,24 | 3,4,6,18,1<br>9,20,22,25<br>,26 | 1 | P52590                                           |
| 3689 | 1,2,5,7,8,2<br>1,23,25 | 3,4,6,18,1<br>9,20,22,24<br>,26 | 4 | P02803,P10715,P19629,P52590                      |

|      |                         |                                 |   |                                                                |
|------|-------------------------|---------------------------------|---|----------------------------------------------------------------|
| 3690 | 1,2,5,7,8,2<br>1,23,26  | 3,4,6,18,1<br>9,20,22,24<br>,25 | 1 | P52590                                                         |
| 3691 | 1,2,5,7,8,2<br>1,24,25  | 3,4,6,18,1<br>9,20,22,23<br>,26 | 6 | P02625,P10715,P12785,P19629,P35467,P52590                      |
| 3692 | 1,2,5,7,8,2<br>1,24,26  | 3,4,6,18,1<br>9,20,22,23<br>,25 | 1 | P52590                                                         |
| 3693 | 1,2,5,7,8,2<br>1,25,26  | 3,4,6,18,1<br>9,20,22,23<br>,24 | 6 | P02625,P10715,P19629,P52590,P82995,P83748                      |
| 3694 | 1,2,5,7,8,2<br>2,23,24  | 3,4,6,18,1<br>9,20,21,25<br>,26 | 2 | P01835,P52590                                                  |
| 3695 | 1,2,5,7,8,2<br>2,23,25  | 3,4,6,18,1<br>9,20,21,24<br>,26 | 6 | P01835,P06911,P10715,P19629,P52590,Q5GRG2                      |
| 3696 | 1,2,5,7,8,2<br>2,23,26  | 3,4,6,18,1<br>9,20,21,24<br>,25 | 1 | P52590                                                         |
| 3697 | 1,2,5,7,8,2<br>2,24,25  | 3,4,6,18,1<br>9,20,21,23<br>,26 | 9 | P00762,P01835,P10715,P12785,P19629,P35467,P52590,Q4FZU2,Q5GRG2 |
| 3698 | 1,2,5,7,8,2<br>2,24,26  | 3,4,6,18,1<br>9,20,21,23<br>,25 | 4 | P00762,P01835,P12785,P52590                                    |
| 3699 | 1,2,5,7,8,2<br>2,25,26  | 3,4,6,18,1<br>9,20,21,23<br>,24 | 6 | P00762,P01835,P10715,P12785,P19629,P52590                      |
| 3700 | 1,2,5,7,8,2<br>3,24,25  | 3,4,6,18,1<br>9,20,21,22<br>,26 | 4 | P01835,P10715,P19629,P52590                                    |
| 3701 | 1,2,5,7,8,2<br>3,24,26  | 3,4,6,18,1<br>9,20,21,22<br>,25 | 2 | P01946,P52590                                                  |
| 3702 | 1,2,5,7,8,2<br>3,25,26  | 3,4,6,18,1<br>9,20,21,22<br>,24 | 4 | P01946,P10715,P19629,P52590                                    |
| 3703 | 1,2,5,7,8,2<br>4,25,26  | 3,4,6,18,1<br>9,20,21,22<br>,23 | 6 | P00762,P01835,P02625,P10715,P19629,P52590                      |
| 3704 | 1,2,5,7,18,<br>19,20,21 | 3,4,6,8,22,<br>23,24,25,2<br>6  | 3 | P00731,P25031,Q63751                                           |

|      |                         |                                |    |                                                                       |
|------|-------------------------|--------------------------------|----|-----------------------------------------------------------------------|
| 3705 | 1,2,5,7,18,<br>19,20,22 | 3,4,6,8,21,<br>23,24,25,2<br>6 | 8  | P00762,P07150,P14669,P27213,Q63751,Q6P6R2,Q9WTT6,Q9Z0V6               |
| 3706 | 1,2,5,7,18,<br>19,20,23 | 3,4,6,8,21,<br>22,24,25,2<br>6 | 2  | Q03191,Q9WTT6                                                         |
| 3707 | 1,2,5,7,18,<br>19,20,24 | 3,4,6,8,21,<br>22,23,25,2<br>6 | 5  | P00762,P07150,P16636,P83121,Q9WTT6                                    |
| 3708 | 1,2,5,7,18,<br>19,20,25 | 3,4,6,8,21,<br>22,23,24,2<br>6 | 1  | P00762                                                                |
| 3709 | 1,2,5,7,18,<br>19,20,26 | 3,4,6,8,21,<br>22,23,24,2<br>5 | 5  | P16636,Q03191,Q63751,Q63942,Q9WTT6                                    |
| 3710 | 1,2,5,7,18,<br>19,21,22 | 3,4,6,8,20,<br>23,24,25,2<br>6 | 1  | P97840                                                                |
| 3711 | 1,2,5,7,18,<br>19,21,23 | 3,4,6,8,20,<br>22,24,25,2<br>6 | 8  | D3ZUC6,P02803,P05369,P14668,P25031,Q03191,Q63467,Q99MH3               |
| 3712 | 1,2,5,7,18,<br>19,21,24 | 3,4,6,8,20,<br>22,23,25,2<br>6 | 3  | D3ZUC6,P16636,Q03191                                                  |
| 3713 | 1,2,5,7,18,<br>19,21,25 | 3,4,6,8,20,<br>22,23,24,2<br>6 | 7  | P00731,P02803,P25031,P31430,P47967,P52590,P97840                      |
| 3714 | 1,2,5,7,18,<br>19,21,26 | 3,4,6,8,20,<br>22,23,24,2<br>5 | 10 | D3ZUC6,P16636,P25031,P82995,P83748,Q03191,Q63661,Q63751,Q63942,Q9QUL6 |
| 3715 | 1,2,5,7,18,<br>19,22,23 | 3,4,6,8,20,<br>21,24,25,2<br>6 | 3  | P16636,Q03191,Q9WTT6                                                  |
| 3716 | 1,2,5,7,18,<br>19,22,24 | 3,4,6,8,20,<br>21,23,25,2<br>6 | 7  | P00762,P01835,P07150,P16636,P83121,Q6P6R2,Q9WTT6                      |
| 3717 | 1,2,5,7,18,<br>19,22,25 | 3,4,6,8,20,<br>21,23,24,2<br>6 | 3  | P00762,P01835,P97840                                                  |
| 3718 | 1,2,5,7,18,<br>19,22,26 | 3,4,6,8,20,<br>21,23,24,2<br>5 | 6  | P16636,Q03191,Q63751,Q63942,Q6P6R2,Q9WTT6                             |
| 3719 | 1,2,5,7,18,<br>19,23,24 | 3,4,6,8,20,<br>21,22,25,2<br>6 | 4  | P16636,Q03191,Q63532,Q9WTT6                                           |

|      |                         |                                |   |                                                  |
|------|-------------------------|--------------------------------|---|--------------------------------------------------|
| 3720 | 1,2,5,7,18,<br>19,23,25 | 3,4,6,8,20,<br>21,22,24,2<br>6 | 3 | P02803,Q03191,Q99MH3                             |
| 3721 | 1,2,5,7,18,<br>19,23,26 | 3,4,6,8,20,<br>21,22,24,2<br>5 | 5 | P16636,Q03191,Q63661,Q63942,Q9QUL6               |
| 3722 | 1,2,5,7,18,<br>19,24,25 | 3,4,6,8,20,<br>21,22,23,2<br>6 | 4 | P00762,P01835,P16636,Q03191                      |
| 3723 | 1,2,5,7,18,<br>19,24,26 | 3,4,6,8,20,<br>21,22,23,2<br>5 | 4 | P16636,Q03191,Q63942,Q9WTT6                      |
| 3724 | 1,2,5,7,18,<br>19,25,26 | 3,4,6,8,20,<br>21,22,23,2<br>4 | 3 | P16636,P82995,Q03191                             |
| 3725 | 1,2,5,7,18,<br>20,21,22 | 3,4,6,8,19,<br>23,24,25,2<br>6 | 2 | P25031,Q9QUL6                                    |
| 3726 | 1,2,5,7,18,<br>20,21,23 | 3,4,6,8,19,<br>22,24,25,2<br>6 | 5 | P14668,P25031,P52590,Q63467,Q9QUL6               |
| 3727 | 1,2,5,7,18,<br>20,21,24 | 3,4,6,8,19,<br>22,23,25,2<br>6 | 1 | Q9QUL6                                           |
| 3728 | 1,2,5,7,18,<br>20,21,25 | 3,4,6,8,19,<br>22,23,24,2<br>6 | 4 | P02625,P25031,P31430,P52590                      |
| 3729 | 1,2,5,7,18,<br>20,21,26 | 3,4,6,8,19,<br>22,23,24,2<br>5 | 5 | P16636,P25031,P82995,P83748,Q9QUL6               |
| 3730 | 1,2,5,7,18,<br>20,22,23 | 3,4,6,8,19,<br>21,24,25,2<br>6 | 2 | Q9QUL6,Q9QZK9                                    |
| 3731 | 1,2,5,7,18,<br>20,22,24 | 3,4,6,8,19,<br>21,23,25,2<br>6 | 7 | P00762,P07150,P14669,P27213,P83121,Q9QZK9,Q9WTT6 |
| 3732 | 1,2,5,7,18,<br>20,22,25 | 3,4,6,8,19,<br>21,23,24,2<br>6 | 1 | P00762                                           |
| 3733 | 1,2,5,7,18,<br>20,22,26 | 3,4,6,8,19,<br>21,23,24,2<br>5 | 5 | P00762,P16636,Q6P6R2,Q99041,Q9QUL6               |
| 3734 | 1,2,5,7,18,<br>20,23,24 | 3,4,6,8,19,<br>21,22,25,2<br>6 | 2 | Q9QUL6,Q9QZK9                                    |

|      |                         |                                |    |                                                                                     |
|------|-------------------------|--------------------------------|----|-------------------------------------------------------------------------------------|
| 3735 | 1,2,5,7,18,<br>20,23,25 | 3,4,6,8,19,<br>21,22,24,2<br>6 | 0  |                                                                                     |
| 3736 | 1,2,5,7,18,<br>20,23,26 | 3,4,6,8,19,<br>21,22,24,2<br>5 | 5  | P16636,Q63942,Q6IFU8,Q6P6Q2,Q9QUL6                                                  |
| 3737 | 1,2,5,7,18,<br>20,24,25 | 3,4,6,8,19,<br>21,22,23,2<br>6 | 2  | P00762,P10715                                                                       |
| 3738 | 1,2,5,7,18,<br>20,24,26 | 3,4,6,8,19,<br>21,22,23,2<br>5 | 3  | P00762,P16636,Q9QUL6                                                                |
| 3739 | 1,2,5,7,18,<br>20,25,26 | 3,4,6,8,19,<br>21,22,23,2<br>4 | 4  | P00762,P02625,P16636,P82995                                                         |
| 3740 | 1,2,5,7,18,<br>21,22,23 | 3,4,6,8,19,<br>20,24,25,2<br>6 | 3  | P14668,P52590,Q9QUL6                                                                |
| 3741 | 1,2,5,7,18,<br>21,22,24 | 3,4,6,8,19,<br>20,23,25,2<br>6 | 0  |                                                                                     |
| 3742 | 1,2,5,7,18,<br>21,22,25 | 3,4,6,8,19,<br>20,23,24,2<br>6 | 4  | P25031,P31430,P52590,P97840                                                         |
| 3743 | 1,2,5,7,18,<br>21,22,26 | 3,4,6,8,19,<br>20,23,24,2<br>5 | 5  | P16636,P25031,P82995,P83748,Q9QUL6                                                  |
| 3744 | 1,2,5,7,18,<br>21,23,24 | 3,4,6,8,19,<br>20,22,25,2<br>6 | 4  | D3ZUC6,P52590,Q03191,Q9QUL6                                                         |
| 3745 | 1,2,5,7,18,<br>21,23,25 | 3,4,6,8,19,<br>20,22,24,2<br>6 | 6  | P02803,P14668,P25031,P31430,P52590,Q99MH3                                           |
| 3746 | 1,2,5,7,18,<br>21,23,26 | 3,4,6,8,19,<br>20,22,24,2<br>5 | 12 | D3ZUC6,P16636,P25031,P82995,P83748,Q03191,Q62636,Q63661,Q63942,Q6IFU8,Q6P6Q2,Q9QUL6 |
| 3747 | 1,2,5,7,18,<br>21,24,25 | 3,4,6,8,19,<br>20,22,23,2<br>6 | 3  | P25031,P31430,P52590                                                                |
| 3748 | 1,2,5,7,18,<br>21,24,26 | 3,4,6,8,19,<br>20,22,23,2<br>5 | 8  | D3ZUC6,P16636,P25031,P55091,P82995,P83748,Q71MB6,Q9QUL6                             |
| 3749 | 1,2,5,7,18,<br>21,25,26 | 3,4,6,8,19,<br>20,22,23,2<br>4 | 7  | P16636,P25031,P31430,P55091,P82995,P83748,Q9QUL6                                    |

|      |                         |                                |   |                                                         |
|------|-------------------------|--------------------------------|---|---------------------------------------------------------|
| 3750 | 1,2,5,7,18,<br>22,23,24 | 3,4,6,8,19,<br>20,21,25,2<br>6 | 2 | P16636,Q9WTT6                                           |
| 3751 | 1,2,5,7,18,<br>22,23,25 | 3,4,6,8,19,<br>20,21,24,2<br>6 | 1 | Q99MH3                                                  |
| 3752 | 1,2,5,7,18,<br>22,23,26 | 3,4,6,8,19,<br>20,21,24,2<br>5 | 3 | P16636,Q63942,Q9QUL6                                    |
| 3753 | 1,2,5,7,18,<br>22,24,25 | 3,4,6,8,19,<br>20,21,23,2<br>6 | 2 | P00762,P01835                                           |
| 3754 | 1,2,5,7,18,<br>22,24,26 | 3,4,6,8,19,<br>20,21,23,2<br>5 | 4 | P00762,P16636,Q9QUL6,Q9WTT6                             |
| 3755 | 1,2,5,7,18,<br>22,25,26 | 3,4,6,8,19,<br>20,21,23,2<br>4 | 4 | P00762,P16636,P55091,P82995                             |
| 3756 | 1,2,5,7,18,<br>23,24,25 | 3,4,6,8,19,<br>20,21,22,2<br>6 | 1 | Q99MH3                                                  |
| 3757 | 1,2,5,7,18,<br>23,24,26 | 3,4,6,8,19,<br>20,21,22,2<br>5 | 6 | P01946,P16636,Q03191,Q63942,Q6P6Q2,Q9QUL6               |
| 3758 | 1,2,5,7,18,<br>23,25,26 | 3,4,6,8,19,<br>20,21,22,2<br>4 | 8 | P01946,P16636,P55091,P82995,Q63942,Q6P6Q2,Q99MH3,Q9QUL6 |
| 3759 | 1,2,5,7,18,<br>24,25,26 | 3,4,6,8,19,<br>20,21,22,2<br>3 | 5 | P00762,P16636,P55091,P82995,Q7TPB1                      |
| 3760 | 1,2,5,7,19,<br>20,21,22 | 3,4,6,8,18,<br>23,24,25,2<br>6 | 5 | P00714,P00774,P12785,P35467,Q63751                      |
| 3761 | 1,2,5,7,19,<br>20,21,23 | 3,4,6,8,18,<br>22,24,25,2<br>6 | 0 |                                                         |
| 3762 | 1,2,5,7,19,<br>20,21,24 | 3,4,6,8,18,<br>22,23,25,2<br>6 | 2 | P00714,P35467                                           |
| 3763 | 1,2,5,7,19,<br>20,21,25 | 3,4,6,8,18,<br>22,23,24,2<br>6 | 5 | O70417,P02625,P35467,P47967,P97840                      |
| 3764 | 1,2,5,7,19,<br>20,21,26 | 3,4,6,8,18,<br>22,23,24,2<br>5 | 1 | Q63751                                                  |



|      |                         |                                |    |                                                                                     |
|------|-------------------------|--------------------------------|----|-------------------------------------------------------------------------------------|
| 3765 | 1,2,5,7,19,<br>20,22,23 | 3,4,6,8,18,<br>21,24,25,2<br>6 | 2  | P00774,Q9WTT6                                                                       |
| 3766 | 1,2,5,7,19,<br>20,22,24 | 3,4,6,8,18,<br>21,23,25,2<br>6 | 12 | P00714,P00762,P00774,P01835,P07150,P12785,P14669,P27213,P35467,P83121,Q6P6R2,Q9WTT6 |
| 3767 | 1,2,5,7,19,<br>20,22,25 | 3,4,6,8,18,<br>21,23,24,2<br>6 | 4  | P00762,P00774,P12785,P35467                                                         |
| 3768 | 1,2,5,7,19,<br>20,22,26 | 3,4,6,8,18,<br>21,23,24,2<br>5 | 5  | P00762,P07150,Q63751,Q6P6R2,Q9WTT6                                                  |
| 3769 | 1,2,5,7,19,<br>20,23,24 | 3,4,6,8,18,<br>21,22,25,2<br>6 | 2  | P00774,Q9WTT6                                                                       |
| 3770 | 1,2,5,7,19,<br>20,23,25 | 3,4,6,8,18,<br>21,22,24,2<br>6 | 0  |                                                                                     |
| 3771 | 1,2,5,7,19,<br>20,23,26 | 3,4,6,8,18,<br>21,22,24,2<br>5 | 0  |                                                                                     |
| 3772 | 1,2,5,7,19,<br>20,24,25 | 3,4,6,8,18,<br>21,22,23,2<br>6 | 3  | O70417,P00762,P35467                                                                |
| 3773 | 1,2,5,7,19,<br>20,24,26 | 3,4,6,8,18,<br>21,22,23,2<br>5 | 2  | O70417,Q9WTT6                                                                       |
| 3774 | 1,2,5,7,19,<br>20,25,26 | 3,4,6,8,18,<br>21,22,23,2<br>4 | 2  | O70417,P02625                                                                       |
| 3775 | 1,2,5,7,19,<br>21,22,23 | 3,4,6,8,18,<br>20,24,25,2<br>6 | 0  |                                                                                     |
| 3776 | 1,2,5,7,19,<br>21,22,24 | 3,4,6,8,18,<br>20,23,25,2<br>6 | 5  | P00714,P12785,P35467,Q4FZU2,Q6IG02                                                  |
| 3777 | 1,2,5,7,19,<br>21,22,25 | 3,4,6,8,18,<br>20,23,24,2<br>6 | 6  | P12785,P17046,P35467,P47967,P97840,Q6IG02                                           |
| 3778 | 1,2,5,7,19,<br>21,22,26 | 3,4,6,8,18,<br>20,23,24,2<br>5 | 2  | P83748,Q63751                                                                       |
| 3779 | 1,2,5,7,19,<br>21,23,24 | 3,4,6,8,18,<br>20,22,25,2<br>6 | 0  |                                                                                     |

|      |                         |                                |   |                                                  |
|------|-------------------------|--------------------------------|---|--------------------------------------------------|
| 3780 | 1,2,5,7,19,<br>21,23,25 | 3,4,6,8,18,<br>20,22,24,2<br>6 | 1 | P97840                                           |
| 3781 | 1,2,5,7,19,<br>21,23,26 | 3,4,6,8,18,<br>20,22,24,2<br>5 | 1 | Q03191                                           |
| 3782 | 1,2,5,7,19,<br>21,24,25 | 3,4,6,8,18,<br>20,22,23,2<br>6 | 4 | O70417,P35467,P97840,Q6IG02                      |
| 3783 | 1,2,5,7,19,<br>21,24,26 | 3,4,6,8,18,<br>20,22,23,2<br>5 | 0 |                                                  |
| 3784 | 1,2,5,7,19,<br>21,25,26 | 3,4,6,8,18,<br>20,22,23,2<br>4 | 2 | P82995,P97840                                    |
| 3785 | 1,2,5,7,19,<br>22,23,24 | 3,4,6,8,18,<br>20,21,25,2<br>6 | 4 | P00774,P01835,Q63532,Q9WTT6                      |
| 3786 | 1,2,5,7,19,<br>22,23,25 | 3,4,6,8,18,<br>20,21,24,2<br>6 | 2 | P01835,P17046                                    |
| 3787 | 1,2,5,7,19,<br>22,23,26 | 3,4,6,8,18,<br>20,21,24,2<br>5 | 0 |                                                  |
| 3788 | 1,2,5,7,19,<br>22,24,25 | 3,4,6,8,18,<br>20,21,23,2<br>6 | 7 | P00762,P01835,P12785,P17046,P35467,Q4FZU2,Q6IG02 |
| 3789 | 1,2,5,7,19,<br>22,24,26 | 3,4,6,8,18,<br>20,21,23,2<br>5 | 3 | P01835,Q6P6R2,Q9WTT6                             |
| 3790 | 1,2,5,7,19,<br>22,25,26 | 3,4,6,8,18,<br>20,21,23,2<br>4 | 4 | P00762,P01835,P08644,Q5XI22                      |
| 3791 | 1,2,5,7,19,<br>23,24,25 | 3,4,6,8,18,<br>20,21,22,2<br>6 | 2 | P01835,Q63532                                    |
| 3792 | 1,2,5,7,19,<br>23,24,26 | 3,4,6,8,18,<br>20,21,22,2<br>5 | 4 | P01946,P16636,Q03191,Q63532                      |
| 3793 | 1,2,5,7,19,<br>23,25,26 | 3,4,6,8,18,<br>20,21,22,2<br>4 | 1 | P01946                                           |
| 3794 | 1,2,5,7,19,<br>24,25,26 | 3,4,6,8,18,<br>20,21,22,2<br>3 | 3 | O70417,P01835,Q7TPB1                             |

|      |                         |                                |   |                             |
|------|-------------------------|--------------------------------|---|-----------------------------|
| 3795 | 1,2,5,7,20,<br>21,22,23 | 3,4,6,8,18,<br>19,24,25,2<br>6 | 0 |                             |
| 3796 | 1,2,5,7,20,<br>21,22,24 | 3,4,6,8,18,<br>19,23,25,2<br>6 | 4 | P00714,P12785,P35467,Q5XFX0 |
| 3797 | 1,2,5,7,20,<br>21,22,25 | 3,4,6,8,18,<br>19,23,24,2<br>6 | 3 | P02625,P12785,P35467        |
| 3798 | 1,2,5,7,20,<br>21,22,26 | 3,4,6,8,18,<br>19,23,24,2<br>5 | 0 |                             |
| 3799 | 1,2,5,7,20,<br>21,23,24 | 3,4,6,8,18,<br>19,22,25,2<br>6 | 0 |                             |
| 3800 | 1,2,5,7,20,<br>21,23,25 | 3,4,6,8,18,<br>19,22,24,2<br>6 | 0 |                             |
| 3801 | 1,2,5,7,20,<br>21,23,26 | 3,4,6,8,18,<br>19,22,24,2<br>5 | 1 | Q9QUL6                      |
| 3802 | 1,2,5,7,20,<br>21,24,25 | 3,4,6,8,18,<br>19,22,23,2<br>6 | 2 | P02625,P35467               |
| 3803 | 1,2,5,7,20,<br>21,24,26 | 3,4,6,8,18,<br>19,22,23,2<br>5 | 1 | P02625                      |
| 3804 | 1,2,5,7,20,<br>21,25,26 | 3,4,6,8,18,<br>19,22,23,2<br>4 | 1 | P02625                      |
| 3805 | 1,2,5,7,20,<br>22,23,24 | 3,4,6,8,18,<br>19,21,25,2<br>6 | 1 | P00774                      |
| 3806 | 1,2,5,7,20,<br>22,23,25 | 3,4,6,8,18,<br>19,21,24,2<br>6 | 0 |                             |
| 3807 | 1,2,5,7,20,<br>22,23,26 | 3,4,6,8,18,<br>19,21,24,2<br>5 | 0 |                             |
| 3808 | 1,2,5,7,20,<br>22,24,25 | 3,4,6,8,18,<br>19,21,23,2<br>6 | 4 | P00762,P02625,P12785,P35467 |
| 3809 | 1,2,5,7,20,<br>22,24,26 | 3,4,6,8,18,<br>19,21,23,2<br>5 | 2 | P00762,P07150               |

|      |                         |                                |   |                      |
|------|-------------------------|--------------------------------|---|----------------------|
| 3810 | 1,2,5,7,20,<br>22,25,26 | 3,4,6,8,18,<br>19,21,23,2<br>4 | 3 | P00762,P02625,Q5XI22 |
| 3811 | 1,2,5,7,20,<br>23,24,25 | 3,4,6,8,18,<br>19,21,22,2<br>6 | 0 |                      |
| 3812 | 1,2,5,7,20,<br>23,24,26 | 3,4,6,8,18,<br>19,21,22,2<br>5 | 1 | P01946               |
| 3813 | 1,2,5,7,20,<br>23,25,26 | 3,4,6,8,18,<br>19,21,22,2<br>4 | 1 | P01946               |
| 3814 | 1,2,5,7,20,<br>24,25,26 | 3,4,6,8,18,<br>19,21,22,2<br>3 | 2 | P00762,P02625        |
| 3815 | 1,2,5,7,21,<br>22,23,24 | 3,4,6,8,18,<br>19,20,25,2<br>6 | 2 | P00714,P35280        |
| 3816 | 1,2,5,7,21,<br>22,23,25 | 3,4,6,8,18,<br>19,20,24,2<br>6 | 0 |                      |
| 3817 | 1,2,5,7,21,<br>22,23,26 | 3,4,6,8,18,<br>19,20,24,2<br>5 | 1 | Q9QUL6               |
| 3818 | 1,2,5,7,21,<br>22,24,25 | 3,4,6,8,18,<br>19,20,23,2<br>6 | 3 | P12785,P35467,Q6IG02 |
| 3819 | 1,2,5,7,21,<br>22,24,26 | 3,4,6,8,18,<br>19,20,23,2<br>5 | 2 | P00714,P35467        |
| 3820 | 1,2,5,7,21,<br>22,25,26 | 3,4,6,8,18,<br>19,20,23,2<br>4 | 2 | P35467,Q5XI22        |
| 3821 | 1,2,5,7,21,<br>23,24,25 | 3,4,6,8,18,<br>19,20,22,2<br>6 | 1 | P35280               |
| 3822 | 1,2,5,7,21,<br>23,24,26 | 3,4,6,8,18,<br>19,20,22,2<br>5 | 2 | P01946,Q9QUL6        |
| 3823 | 1,2,5,7,21,<br>23,25,26 | 3,4,6,8,18,<br>19,20,22,2<br>4 | 1 | P01946               |
| 3824 | 1,2,5,7,21,<br>24,25,26 | 3,4,6,8,18,<br>19,20,22,2<br>3 | 3 | P02625,P22006,Q8CJD3 |

|      |                         |                                |   |                                                         |
|------|-------------------------|--------------------------------|---|---------------------------------------------------------|
| 3825 | 1,2,5,7,22,<br>23,24,25 | 3,4,6,8,18,<br>19,20,21,2<br>6 | 2 | P01835,P35280                                           |
| 3826 | 1,2,5,7,22,<br>23,24,26 | 3,4,6,8,18,<br>19,20,21,2<br>5 | 2 | P00731,P01946                                           |
| 3827 | 1,2,5,7,22,<br>23,25,26 | 3,4,6,8,18,<br>19,20,21,2<br>4 | 1 | P01946                                                  |
| 3828 | 1,2,5,7,22,<br>24,25,26 | 3,4,6,8,18,<br>19,20,21,2<br>3 | 3 | P00762,P01835,Q5XI22                                    |
| 3829 | 1,2,5,7,23,<br>24,25,26 | 3,4,6,8,18,<br>19,20,21,2<br>2 | 2 | P01946,Q7TPB1                                           |
| 3830 | 1,2,5,8,18,<br>19,20,21 | 3,4,6,7,22,<br>23,24,25,2<br>6 | 6 | P00731,P02803,P35281,P62804,P83121,Q63751               |
| 3831 | 1,2,5,8,18,<br>19,20,22 | 3,4,6,7,21,<br>23,24,25,2<br>6 | 4 | P22006,P83121,Q63751,Q9QZK9                             |
| 3832 | 1,2,5,8,18,<br>19,20,23 | 3,4,6,7,21,<br>22,24,25,2<br>6 | 7 | P02803,P09605,P25809,P22006,P83121,Q03191,Q63942,Q9QZK9 |
| 3833 | 1,2,5,8,18,<br>19,20,24 | 3,4,6,7,21,<br>22,23,25,2<br>6 | 3 | P09605,P25809,P83121,Q9QZK9                             |
| 3834 | 1,2,5,8,18,<br>19,20,25 | 3,4,6,7,21,<br>22,23,24,2<br>6 | 2 | P02803,P62815                                           |
| 3835 | 1,2,5,8,18,<br>19,20,26 | 3,4,6,7,21,<br>22,23,24,2<br>5 | 5 | P09605,P25809,P22006,P62804,Q63751,Q63942               |
| 3836 | 1,2,5,8,18,<br>19,21,22 | 3,4,6,7,20,<br>23,24,25,2<br>6 | 3 | A2RUV9,P83121,Q63751                                    |
| 3837 | 1,2,5,8,18,<br>19,21,23 | 3,4,6,7,20,<br>22,24,25,2<br>6 | 5 | P02803,P05369,Q03191,Q63942,Q99MH3                      |
| 3838 | 1,2,5,8,18,<br>19,21,24 | 3,4,6,7,20,<br>22,23,25,2<br>6 | 3 | P05539,P83121,Q03191                                    |
| 3839 | 1,2,5,8,18,<br>19,21,25 | 3,4,6,7,20,<br>22,23,24,2<br>6 | 2 | P02803,P31430                                           |

|      |                         |                                |   |                                                  |
|------|-------------------------|--------------------------------|---|--------------------------------------------------|
| 3840 | 1,2,5,8,18,<br>19,21,26 | 3,4,6,7,20,<br>22,23,24,2<br>5 | 4 | P02803,Q03191,Q63751,Q63942                      |
| 3841 | 1,2,5,8,18,<br>19,22,23 | 3,4,6,7,20,<br>21,24,25,2<br>6 | 5 | P09605;P25809,P22006,P83121,Q03191,Q63942        |
| 3842 | 1,2,5,8,18,<br>19,22,24 | 3,4,6,7,20,<br>21,23,25,2<br>6 | 3 | P01835,P09605;P25809,P83121                      |
| 3843 | 1,2,5,8,18,<br>19,22,25 | 3,4,6,7,20,<br>21,23,24,2<br>6 | 2 | P01835,P83121                                    |
| 3844 | 1,2,5,8,18,<br>19,22,26 | 3,4,6,7,20,<br>21,23,24,2<br>5 | 5 | P09605;P25809,P83121,Q03191,Q63751,Q63942        |
| 3845 | 1,2,5,8,18,<br>19,23,24 | 3,4,6,7,20,<br>21,22,25,2<br>6 | 4 | P09605;P25809,P83121,Q03191,Q63942               |
| 3846 | 1,2,5,8,18,<br>19,23,25 | 3,4,6,7,20,<br>21,22,24,2<br>6 | 4 | P02803,Q03191,Q63942,Q99MH3                      |
| 3847 | 1,2,5,8,18,<br>19,23,26 | 3,4,6,7,20,<br>21,22,24,2<br>5 | 6 | P02803,P09605;P25809,P35467,Q03191,Q63942,Q6P6Q2 |
| 3848 | 1,2,5,8,18,<br>19,24,25 | 3,4,6,7,20,<br>21,22,23,2<br>6 | 2 | P01835,P83121                                    |
| 3849 | 1,2,5,8,18,<br>19,24,26 | 3,4,6,7,20,<br>21,22,23,2<br>5 | 4 | P09605;P25809,P83121,Q03191,Q63942               |
| 3850 | 1,2,5,8,18,<br>19,25,26 | 3,4,6,7,20,<br>21,22,23,2<br>4 | 3 | P02803,Q03191,Q63942                             |
| 3851 | 1,2,5,8,18,<br>20,21,22 | 3,4,6,7,19,<br>23,24,25,2<br>6 | 2 | P83121,Q5FVI6                                    |
| 3852 | 1,2,5,8,18,<br>20,21,23 | 3,4,6,7,19,<br>22,24,25,2<br>6 | 0 |                                                  |
| 3853 | 1,2,5,8,18,<br>20,21,24 | 3,4,6,7,19,<br>22,23,25,2<br>6 | 3 | P83121,Q5FVI6,Q9QZK9                             |
| 3854 | 1,2,5,8,18,<br>20,21,25 | 3,4,6,7,19,<br>22,23,24,2<br>6 | 2 | P02625,P31430                                    |

|      |                         |                                |   |                                                  |
|------|-------------------------|--------------------------------|---|--------------------------------------------------|
| 3855 | 1,2,5,8,18,<br>20,21,26 | 3,4,6,7,19,<br>22,23,24,2<br>5 | 3 | P62804,Q63751,Q63942                             |
| 3856 | 1,2,5,8,18,<br>20,22,23 | 3,4,6,7,19,<br>21,24,25,2<br>6 | 4 | P22006,P83121,Q5FVI6,Q9QZK9                      |
| 3857 | 1,2,5,8,18,<br>20,22,24 | 3,4,6,7,19,<br>21,23,25,2<br>6 | 5 | P27213,P83121,Q5FVI6,Q99041,Q9QZK9               |
| 3858 | 1,2,5,8,18,<br>20,22,25 | 3,4,6,7,19,<br>21,23,24,2<br>6 | 3 | P00762,P83121,Q5FVI6                             |
| 3859 | 1,2,5,8,18,<br>20,22,26 | 3,4,6,7,19,<br>21,23,24,2<br>5 | 5 | P22006,P83121,Q63751,Q63942,Q99041               |
| 3860 | 1,2,5,8,18,<br>20,23,24 | 3,4,6,7,19,<br>21,22,25,2<br>6 | 4 | P09605;P25809,P83121,Q5FVI6,Q9QZK9               |
| 3861 | 1,2,5,8,18,<br>20,23,25 | 3,4,6,7,19,<br>21,22,24,2<br>6 | 1 | Q99MH3                                           |
| 3862 | 1,2,5,8,18,<br>20,23,26 | 3,4,6,7,19,<br>21,22,24,2<br>5 | 6 | P09605;P25809,P47967,Q63942,Q6IFU8,Q6IG02,Q6P6Q2 |
| 3863 | 1,2,5,8,18,<br>20,24,25 | 3,4,6,7,19,<br>21,22,23,2<br>6 | 2 | P02625,P83121                                    |
| 3864 | 1,2,5,8,18,<br>20,24,26 | 3,4,6,7,19,<br>21,22,23,2<br>5 | 6 | P09605;P25809,P47967,P83121,Q63942,Q99041,Q9QZK9 |
| 3865 | 1,2,5,8,18,<br>20,25,26 | 3,4,6,7,19,<br>21,22,23,2<br>4 | 2 | P02625,Q63942                                    |
| 3866 | 1,2,5,8,18,<br>21,22,23 | 3,4,6,7,19,<br>20,24,25,2<br>6 | 1 | Q5FVI6                                           |
| 3867 | 1,2,5,8,18,<br>21,22,24 | 3,4,6,7,19,<br>20,23,25,2<br>6 | 2 | P83121,Q5FVI6                                    |
| 3868 | 1,2,5,8,18,<br>21,22,25 | 3,4,6,7,19,<br>20,23,24,2<br>6 | 2 | P31430,Q5FVI6                                    |
| 3869 | 1,2,5,8,18,<br>21,22,26 | 3,4,6,7,19,<br>20,23,24,2<br>5 | 1 | Q63942                                           |

|      |                         |                                |   |                                                  |
|------|-------------------------|--------------------------------|---|--------------------------------------------------|
| 3870 | 1,2,5,8,18,<br>21,23,24 | 3,4,6,7,19,<br>20,22,25,2<br>6 | 2 | P05539,Q5FVI6                                    |
| 3871 | 1,2,5,8,18,<br>21,23,25 | 3,4,6,7,19,<br>20,22,24,2<br>6 | 3 | P02803,P31430,Q99MH3                             |
| 3872 | 1,2,5,8,18,<br>21,23,26 | 3,4,6,7,19,<br>20,22,24,2<br>5 | 7 | P05369,Q03191,Q63942,Q6IFU8,Q6IFV1,Q6P6Q2,Q9QUL6 |
| 3873 | 1,2,5,8,18,<br>21,24,25 | 3,4,6,7,19,<br>20,22,23,2<br>6 | 3 | P05539,P31430,Q5FVI6                             |
| 3874 | 1,2,5,8,18,<br>21,24,26 | 3,4,6,7,19,<br>20,22,23,2<br>5 | 1 | Q63942                                           |
| 3875 | 1,2,5,8,18,<br>21,25,26 | 3,4,6,7,19,<br>20,22,23,2<br>4 | 3 | P31430,P55091,Q63942                             |
| 3876 | 1,2,5,8,18,<br>22,23,24 | 3,4,6,7,19,<br>20,21,25,2<br>6 | 3 | P09605;P25809,P83121,Q5FVI6                      |
| 3877 | 1,2,5,8,18,<br>22,23,25 | 3,4,6,7,19,<br>20,21,24,2<br>6 | 2 | Q5FVI6,Q99MH3                                    |
| 3878 | 1,2,5,8,18,<br>22,23,26 | 3,4,6,7,19,<br>20,21,24,2<br>5 | 4 | P09605;P25809,P47967,Q63942,Q6P6Q2               |
| 3879 | 1,2,5,8,18,<br>22,24,25 | 3,4,6,7,19,<br>20,21,23,2<br>6 | 3 | P01835,P83121,Q5FVI6                             |
| 3880 | 1,2,5,8,18,<br>22,24,26 | 3,4,6,7,19,<br>20,21,23,2<br>5 | 5 | P09605;P25809,P47967,P83121,Q63942,Q99041        |
| 3881 | 1,2,5,8,18,<br>22,25,26 | 3,4,6,7,19,<br>20,21,23,2<br>4 | 1 | Q63942                                           |
| 3882 | 1,2,5,8,18,<br>23,24,25 | 3,4,6,7,19,<br>20,21,22,2<br>6 | 2 | Q5FVI6,Q99MH3                                    |
| 3883 | 1,2,5,8,18,<br>23,24,26 | 3,4,6,7,19,<br>20,21,22,2<br>5 | 5 | P09605;P25809,P47967,Q03191,Q63942,Q6P6Q2        |
| 3884 | 1,2,5,8,18,<br>23,25,26 | 3,4,6,7,19,<br>20,21,22,2<br>4 | 5 | P55091,Q63942,Q6IFU8,Q6P6Q2,Q99MH3               |



|      |                         |                                |   |                                           |
|------|-------------------------|--------------------------------|---|-------------------------------------------|
| 3885 | 1,2,5,8,18,<br>24,25,26 | 3,4,6,7,19,<br>20,21,22,2<br>3 | 3 | P55091,Q63942,Q7TPB1                      |
| 3886 | 1,2,5,8,19,<br>20,21,22 | 3,4,6,7,18,<br>23,24,25,2<br>6 | 6 | A2RUV9,P00714,P00774,P12785,P83121,Q63751 |
| 3887 | 1,2,5,8,19,<br>20,21,23 | 3,4,6,7,18,<br>22,24,25,2<br>6 | 0 |                                           |
| 3888 | 1,2,5,8,19,<br>20,21,24 | 3,4,6,7,18,<br>22,23,25,2<br>6 | 3 | P00714,P12785,P83121                      |
| 3889 | 1,2,5,8,19,<br>20,21,25 | 3,4,6,7,18,<br>22,23,24,2<br>6 | 3 | P02625,P12785,Q8VD89                      |
| 3890 | 1,2,5,8,19,<br>20,21,26 | 3,4,6,7,18,<br>22,23,24,2<br>5 | 2 | P62804,Q63751                             |
| 3891 | 1,2,5,8,19,<br>20,22,23 | 3,4,6,7,18,<br>21,24,25,2<br>6 | 3 | P00774,P22006,P83121                      |
| 3892 | 1,2,5,8,19,<br>20,22,24 | 3,4,6,7,18,<br>21,23,25,2<br>6 | 5 | P00714,P00774,P01835,P12785,P83121        |
| 3893 | 1,2,5,8,19,<br>20,22,25 | 3,4,6,7,18,<br>21,23,24,2<br>6 | 3 | P00774,P12785,P83121                      |
| 3894 | 1,2,5,8,19,<br>20,22,26 | 3,4,6,7,18,<br>21,23,24,2<br>5 | 3 | P12785,P83121,Q63751                      |
| 3895 | 1,2,5,8,19,<br>20,23,24 | 3,4,6,7,18,<br>21,22,25,2<br>6 | 4 | P00774,P09605,P25809,P83121,Q9QZK9        |
| 3896 | 1,2,5,8,19,<br>20,23,25 | 3,4,6,7,18,<br>21,22,24,2<br>6 | 0 |                                           |
| 3897 | 1,2,5,8,19,<br>20,23,26 | 3,4,6,7,18,<br>21,22,24,2<br>5 | 1 | P09605,P25809                             |
| 3898 | 1,2,5,8,19,<br>20,24,25 | 3,4,6,7,18,<br>21,22,23,2<br>6 | 3 | P02625,P12785,P83121                      |
| 3899 | 1,2,5,8,19,<br>20,24,26 | 3,4,6,7,18,<br>21,22,23,2<br>5 | 2 | P09605,P25809,P83121                      |

|      |                         |                                |   |                                    |
|------|-------------------------|--------------------------------|---|------------------------------------|
| 3900 | 1,2,5,8,19,<br>20,25,26 | 3,4,6,7,18,<br>21,22,23,2<br>4 | 1 | P02625                             |
| 3901 | 1,2,5,8,19,<br>21,22,23 | 3,4,6,7,18,<br>20,24,25,2<br>6 | 0 |                                    |
| 3902 | 1,2,5,8,19,<br>21,22,24 | 3,4,6,7,18,<br>20,23,25,2<br>6 | 5 | A2RUV9,P00714,P12785,P83121,Q4FZU2 |
| 3903 | 1,2,5,8,19,<br>21,22,25 | 3,4,6,7,18,<br>20,23,24,2<br>6 | 2 | A2RUV9,P12785                      |
| 3904 | 1,2,5,8,19,<br>21,22,26 | 3,4,6,7,18,<br>20,23,24,2<br>5 | 3 | A2RUV9,P12785,Q63751               |
| 3905 | 1,2,5,8,19,<br>21,23,24 | 3,4,6,7,18,<br>20,22,25,2<br>6 | 0 |                                    |
| 3906 | 1,2,5,8,19,<br>21,23,25 | 3,4,6,7,18,<br>20,22,24,2<br>6 | 2 | P02803,P06760                      |
| 3907 | 1,2,5,8,19,<br>21,23,26 | 3,4,6,7,18,<br>20,22,24,2<br>5 | 1 | Q03191                             |
| 3908 | 1,2,5,8,19,<br>21,24,25 | 3,4,6,7,18,<br>20,22,23,2<br>6 | 2 | A2RUV9,P12785                      |
| 3909 | 1,2,5,8,19,<br>21,24,26 | 3,4,6,7,18,<br>20,22,23,2<br>5 | 0 |                                    |
| 3910 | 1,2,5,8,19,<br>21,25,26 | 3,4,6,7,18,<br>20,22,23,2<br>4 | 0 |                                    |
| 3911 | 1,2,5,8,19,<br>22,23,24 | 3,4,6,7,18,<br>20,21,25,2<br>6 | 4 | P00774,P01835,P09605;P25809,P83121 |
| 3912 | 1,2,5,8,19,<br>22,23,25 | 3,4,6,7,18,<br>20,21,24,2<br>6 | 1 | P01835                             |
| 3913 | 1,2,5,8,19,<br>22,23,26 | 3,4,6,7,18,<br>20,21,24,2<br>5 | 1 | P09605;P25809                      |
| 3914 | 1,2,5,8,19,<br>22,24,25 | 3,4,6,7,18,<br>20,21,23,2<br>6 | 5 | A2RUV9,P01835,P12785,P83121,Q4FZU2 |

|      |                         |                                |   |                                           |
|------|-------------------------|--------------------------------|---|-------------------------------------------|
| 3915 | 1,2,5,8,19,<br>22,24,26 | 3,4,6,7,18,<br>20,21,23,2<br>5 | 4 | P01835,P09605,P25809,P12785,P83121        |
| 3916 | 1,2,5,8,19,<br>22,25,26 | 3,4,6,7,18,<br>20,21,23,2<br>4 | 2 | P01835,P12785                             |
| 3917 | 1,2,5,8,19,<br>23,24,25 | 3,4,6,7,18,<br>20,21,22,2<br>6 | 1 | P01835                                    |
| 3918 | 1,2,5,8,19,<br>23,24,26 | 3,4,6,7,18,<br>20,21,22,2<br>5 | 2 | P09605,P25809,Q03191                      |
| 3919 | 1,2,5,8,19,<br>23,25,26 | 3,4,6,7,18,<br>20,21,22,2<br>4 | 0 |                                           |
| 3920 | 1,2,5,8,19,<br>24,25,26 | 3,4,6,7,18,<br>20,21,22,2<br>3 | 2 | P01835,Q7TPB1                             |
| 3921 | 1,2,5,8,20,<br>21,22,23 | 3,4,6,7,18,<br>19,24,25,2<br>6 | 1 | Q5FVI6                                    |
| 3922 | 1,2,5,8,20,<br>21,22,24 | 3,4,6,7,18,<br>19,23,25,2<br>6 | 6 | P00714,P12785,P35467,P83121,Q5FVI6,Q5XFX0 |
| 3923 | 1,2,5,8,20,<br>21,22,25 | 3,4,6,7,18,<br>19,23,24,2<br>6 | 4 | P02625,P12785,P35467,Q5FVI6               |
| 3924 | 1,2,5,8,20,<br>21,22,26 | 3,4,6,7,18,<br>19,23,24,2<br>5 | 3 | P12785,P62804,Q63751                      |
| 3925 | 1,2,5,8,20,<br>21,23,24 | 3,4,6,7,18,<br>19,22,25,2<br>6 | 1 | Q5FVI6                                    |
| 3926 | 1,2,5,8,20,<br>21,23,25 | 3,4,6,7,18,<br>19,22,24,2<br>6 | 1 | P06760                                    |
| 3927 | 1,2,5,8,20,<br>21,23,26 | 3,4,6,7,18,<br>19,22,24,2<br>5 | 2 | P62804,Q6IFV1                             |
| 3928 | 1,2,5,8,20,<br>21,24,25 | 3,4,6,7,18,<br>19,22,23,2<br>6 | 5 | P02625,P12785,P35467,Q5FVI6,Q5XFX0        |
| 3929 | 1,2,5,8,20,<br>21,24,26 | 3,4,6,7,18,<br>19,22,23,2<br>5 | 2 | P02625,P62804                             |

|      |                         |                                |   |                                                  |
|------|-------------------------|--------------------------------|---|--------------------------------------------------|
| 3930 | 1,2,5,8,20,<br>21,25,26 | 3,4,6,7,18,<br>19,22,23,2<br>4 | 2 | P02625,P62804                                    |
| 3931 | 1,2,5,8,20,<br>22,23,24 | 3,4,6,7,18,<br>19,21,25,2<br>6 | 5 | P00774,P47967,P83121,Q5FVI6,Q9QZK9               |
| 3932 | 1,2,5,8,20,<br>22,23,25 | 3,4,6,7,18,<br>19,21,24,2<br>6 | 1 | Q5FVI6                                           |
| 3933 | 1,2,5,8,20,<br>22,23,26 | 3,4,6,7,18,<br>19,21,24,2<br>5 | 1 | P47967                                           |
| 3934 | 1,2,5,8,20,<br>22,24,25 | 3,4,6,7,18,<br>19,21,23,2<br>6 | 7 | P00762,P02625,P12785,P35467,P83121,Q5FVI6,Q5XFX0 |
| 3935 | 1,2,5,8,20,<br>22,24,26 | 3,4,6,7,18,<br>19,21,23,2<br>5 | 4 | P12785,P47967,P83121,Q99041                      |
| 3936 | 1,2,5,8,20,<br>22,25,26 | 3,4,6,7,18,<br>19,21,23,2<br>4 | 2 | P02625,P12785                                    |
| 3937 | 1,2,5,8,20,<br>23,24,25 | 3,4,6,7,18,<br>19,21,22,2<br>6 | 1 | P08649                                           |
| 3938 | 1,2,5,8,20,<br>23,24,26 | 3,4,6,7,18,<br>19,21,22,2<br>5 | 4 | D4A1J4,P09605,P25809,P47967,P97840               |
| 3939 | 1,2,5,8,20,<br>23,25,26 | 3,4,6,7,18,<br>19,21,22,2<br>4 | 0 |                                                  |
| 3940 | 1,2,5,8,20,<br>24,25,26 | 3,4,6,7,18,<br>19,21,22,2<br>3 | 1 | P02625                                           |
| 3941 | 1,2,5,8,21,<br>22,23,24 | 3,4,6,7,18,<br>19,20,25,2<br>6 | 2 | P35280,Q5FVI6                                    |
| 3942 | 1,2,5,8,21,<br>22,23,25 | 3,4,6,7,18,<br>19,20,24,2<br>6 | 2 | P06760,Q5FVI6                                    |
| 3943 | 1,2,5,8,21,<br>22,23,26 | 3,4,6,7,18,<br>19,20,24,2<br>5 | 0 |                                                  |
| 3944 | 1,2,5,8,21,<br>22,24,25 | 3,4,6,7,18,<br>19,20,23,2<br>6 | 4 | P12785,P35467,Q5FVI6,Q5XFX0                      |

|      |                          |                                |   |                                    |
|------|--------------------------|--------------------------------|---|------------------------------------|
| 3945 | 1,2,5,8,21,<br>22,24,26  | 3,4,6,7,18,<br>19,20,23,2<br>5 | 2 | P12785,Q5FVI6                      |
| 3946 | 1,2,5,8,21,<br>22,25,26  | 3,4,6,7,18,<br>19,20,23,2<br>4 | 1 | P12785                             |
| 3947 | 1,2,5,8,21,<br>23,24,25  | 3,4,6,7,18,<br>19,20,22,2<br>6 | 3 | P06760,P35280,Q5FVI6               |
| 3948 | 1,2,5,8,21,<br>23,24,26  | 3,4,6,7,18,<br>19,20,22,2<br>5 | 1 | Q6IFV1                             |
| 3949 | 1,2,5,8,21,<br>23,25,26  | 3,4,6,7,18,<br>19,20,22,2<br>4 | 0 |                                    |
| 3950 | 1,2,5,8,21,<br>24,25,26  | 3,4,6,7,18,<br>19,20,22,2<br>3 | 1 | P02625                             |
| 3951 | 1,2,5,8,22,<br>23,24,25  | 3,4,6,7,18,<br>19,20,21,2<br>6 | 3 | P01835,P35280,Q5FVI6               |
| 3952 | 1,2,5,8,22,<br>23,24,26  | 3,4,6,7,18,<br>19,20,21,2<br>5 | 3 | P00731,P09605,P25809,P47967        |
| 3953 | 1,2,5,8,22,<br>23,25,26  | 3,4,6,7,18,<br>19,20,21,2<br>4 | 0 |                                    |
| 3954 | 1,2,5,8,22,<br>24,25,26  | 3,4,6,7,18,<br>19,20,21,2<br>3 | 2 | P01835,P12785                      |
| 3955 | 1,2,5,8,23,<br>24,25,26  | 3,4,6,7,18,<br>19,20,21,2<br>2 | 1 | Q7TPB1                             |
| 3956 | 1,2,5,18,1<br>9,20,21,22 | 3,4,6,7,8,2<br>3,24,25,26      | 5 | P00714,P20761,P83121,Q63751,Q99041 |
| 3957 | 1,2,5,18,1<br>9,20,21,23 | 3,4,6,7,8,2<br>2,24,25,26      | 2 | P20761,Q03191                      |
| 3958 | 1,2,5,18,1<br>9,20,21,24 | 3,4,6,7,8,2<br>2,23,25,26      | 5 | P06911,P20761,P83121,Q99041,Q9QZK9 |
| 3959 | 1,2,5,18,1<br>9,20,21,25 | 3,4,6,7,8,2<br>2,23,24,26      | 1 | P20761                             |
| 3960 | 1,2,5,18,1<br>9,20,21,26 | 3,4,6,7,8,2<br>2,23,24,25      | 5 | P06911,P12020,Q63751,Q99041,Q9QUL6 |
| 3961 | 1,2,5,18,1<br>9,20,22,23 | 3,4,6,7,8,2<br>1,24,25,26      | 5 | P20761,P22006,Q03191,Q9QZK9,Q9WTT6 |

|      |                                                 |    |                                                                              |
|------|-------------------------------------------------|----|------------------------------------------------------------------------------|
| 3962 | 1,2,5,18,1 3,4,6,7,8,2<br>9,20,22,24 1,23,25,26 | 11 | P00714,P07150,P14669,P20761,P83121,Q63751,Q6P6R2,Q99041,Q9QZK9,Q9WTT6,Q9Z0V6 |
| 3963 | 1,2,5,18,1 3,4,6,7,8,2<br>9,20,22,25 1,23,24,26 | 1  | P20761                                                                       |
| 3964 | 1,2,5,18,1 3,4,6,7,8,2<br>9,20,22,26 1,23,24,25 | 6  | P07150,P22006,Q63751,Q6P6R2,Q99041,Q9WTT6                                    |
| 3965 | 1,2,5,18,1 3,4,6,7,8,2<br>9,20,23,24 1,22,25,26 | 5  | P09605;P25809,P20761,Q03191,Q9QZK9,Q9WTT6                                    |
| 3966 | 1,2,5,18,1 3,4,6,7,8,2<br>9,20,23,25 1,22,24,26 | 3  | P20761,Q03191,Q99MH3                                                         |
| 3967 | 1,2,5,18,1 3,4,6,7,8,2<br>9,20,23,26 1,22,24,25 | 6  | P09605;P25809,Q03191,Q63942,Q6IFU8,Q6P6Q2,Q9QUL6                             |
| 3968 | 1,2,5,18,1 3,4,6,7,8,2<br>9,20,24,25 1,22,23,26 | 3  | O70417,P20761,P22282                                                         |
| 3969 | 1,2,5,18,1 3,4,6,7,8,2<br>9,20,24,26 1,22,23,25 | 6  | P06911,P09605;P25809,Q63751,Q99041,Q9QZK9,Q9WTT6                             |
| 3970 | 1,2,5,18,1 3,4,6,7,8,2<br>9,20,25,26 1,22,23,24 | 1  | Q63751                                                                       |
| 3971 | 1,2,5,18,1 3,4,6,7,8,2<br>9,21,22,23 0,24,25,26 | 2  | P20761,Q03191                                                                |
| 3972 | 1,2,5,18,1 3,4,6,7,8,2<br>9,21,22,24 0,23,25,26 | 3  | P00714,P83121,Q99041                                                         |
| 3973 | 1,2,5,18,1 3,4,6,7,8,2<br>9,21,22,25 0,23,24,26 | 3  | P20761,P97840,Q63617                                                         |
| 3974 | 1,2,5,18,1 3,4,6,7,8,2<br>9,21,22,26 0,23,24,25 | 3  | Q63617,Q63751,Q99041                                                         |
| 3975 | 1,2,5,18,1 3,4,6,7,8,2<br>9,21,23,24 0,22,25,26 | 3  | D3ZUC6,P05369,Q03191                                                         |
| 3976 | 1,2,5,18,1 3,4,6,7,8,2<br>9,21,23,25 0,22,24,26 | 5  | P02803,P05369,P20761,Q03191,Q99MH3                                           |
| 3977 | 1,2,5,18,1 3,4,6,7,8,2<br>9,21,23,26 0,22,24,25 | 9  | D3ZUC6,P05369,Q03191,Q63617,Q63661,Q63942,Q6IFU8,Q6P6Q2,Q9QUL6               |
| 3978 | 1,2,5,18,1 3,4,6,7,8,2<br>9,21,24,25 0,22,23,26 | 2  | P20761,Q63617                                                                |
| 3979 | 1,2,5,18,1 3,4,6,7,8,2<br>9,21,24,26 0,22,23,25 | 6  | D3ZUC6,P06911,P12020,Q03191,Q63617,Q99041                                    |
| 3980 | 1,2,5,18,1 3,4,6,7,8,2<br>9,21,25,26 0,22,23,24 | 2  | P31430,Q63617                                                                |
| 3981 | 1,2,5,18,1 3,4,6,7,8,2<br>9,22,23,24 0,21,25,26 | 6  | P09605;P25809,P20761,P83121,Q03191,Q9QZK9,Q9WTT6                             |
| 3982 | 1,2,5,18,1 3,4,6,7,8,2<br>9,22,23,25 0,21,24,26 | 3  | P20761,Q03191,Q99MH3                                                         |
| 3983 | 1,2,5,18,1 3,4,6,7,8,2<br>9,22,23,26 0,21,24,25 | 3  | P09605;P25809,Q03191,Q63942                                                  |
| 3984 | 1,2,5,18,1 3,4,6,7,8,2<br>9,22,24,25 0,21,23,26 | 3  | P01835,P20761,P83121                                                         |

|      |                                                 |   |                                                         |
|------|-------------------------------------------------|---|---------------------------------------------------------|
| 3985 | 1,2,5,18,1 3,4,6,7,8,2<br>9,22,24,26 0,21,23,25 | 7 | P09605;P25809,P83121,Q63751,Q63942,Q6P6R2,Q99041,Q9WTT6 |
| 3986 | 1,2,5,18,1 3,4,6,7,8,2<br>9,22,25,26 0,21,23,24 | 2 | O55145,Q63617                                           |
| 3987 | 1,2,5,18,1 3,4,6,7,8,2<br>9,23,24,25 0,21,22,26 | 3 | P20761,Q03191,Q99MH3                                    |
| 3988 | 1,2,5,18,1 3,4,6,7,8,2<br>9,23,24,26 0,21,22,25 | 4 | P09605;P25809,Q03191,Q63942,Q6IFU7                      |
| 3989 | 1,2,5,18,1 3,4,6,7,8,2<br>9,23,25,26 0,21,22,24 | 4 | Q03191,Q63942,Q6P6Q2,Q99MH3                             |
| 3990 | 1,2,5,18,1 3,4,6,7,8,2<br>9,24,25,26 0,21,22,23 | 2 | Q63617,Q7TPB1                                           |
| 3991 | 1,2,5,18,2 3,4,6,7,8,1<br>0,21,22,23 9,24,25,26 | 3 | Q5FVI6,Q9QUL6,Q9QZK9                                    |
| 3992 | 1,2,5,18,2 3,4,6,7,8,1<br>0,21,22,24 9,23,25,26 | 5 | P00714,P83121,Q5FVI6,Q99041,Q9QZK9                      |
| 3993 | 1,2,5,18,2 3,4,6,7,8,1<br>0,21,22,25 9,23,24,26 | 3 | P20761,P31430,Q99041                                    |
| 3994 | 1,2,5,18,2 3,4,6,7,8,1<br>0,21,22,26 9,23,24,25 | 3 | Q63751,Q99041,Q9QUL6                                    |
| 3995 | 1,2,5,18,2 3,4,6,7,8,1<br>0,21,23,24 9,22,25,26 | 2 | Q9QUL6,Q9QZK9                                           |
| 3996 | 1,2,5,18,2 3,4,6,7,8,1<br>0,21,23,25 9,22,24,26 | 2 | P20761,P31430                                           |
| 3997 | 1,2,5,18,2 3,4,6,7,8,1<br>0,21,23,26 9,22,24,25 | 5 | Q6IFU8,Q6IFV1,Q6IMF3,Q6P6Q2,Q9QUL6                      |
| 3998 | 1,2,5,18,2 3,4,6,7,8,1<br>0,21,24,25 9,22,23,26 | 3 | P02625,P20761,P31430                                    |
| 3999 | 1,2,5,18,2 3,4,6,7,8,1<br>0,21,24,26 9,22,23,25 | 4 | P06911,P12020,Q99041,Q9QUL6                             |
| 4000 | 1,2,5,18,2 3,4,6,7,8,1<br>0,21,25,26 9,22,23,24 | 4 | P02625,P31430,Q99041,Q9QUL6                             |
| 4001 | 1,2,5,18,2 3,4,6,7,8,1<br>0,22,23,24 9,21,25,26 | 5 | P20761,P83121,Q5FVI6,Q9QZK9,Q9WTT6                      |
| 4002 | 1,2,5,18,2 3,4,6,7,8,1<br>0,22,23,25 9,21,24,26 | 1 | P20761                                                  |
| 4003 | 1,2,5,18,2 3,4,6,7,8,1<br>0,22,23,26 9,21,24,25 | 5 | Q6IFU7,Q6IFU8,Q6P6Q2,Q9QUL6,Q9QZK9                      |
| 4004 | 1,2,5,18,2 3,4,6,7,8,1<br>0,22,24,25 9,21,23,26 | 3 | P20761,Q5FVI6,Q99041                                    |
| 4005 | 1,2,5,18,2 3,4,6,7,8,1<br>0,22,24,26 9,21,23,25 | 6 | P07150,Q6P6R2,Q99041,Q9QUL6,Q9QZK9,Q9WTT6               |
| 4006 | 1,2,5,18,2 3,4,6,7,8,1<br>0,22,25,26 9,21,23,24 | 1 | Q99041                                                  |
| 4007 | 1,2,5,18,2 3,4,6,7,8,1<br>0,23,24,25 9,21,22,26 | 1 | P20761                                                  |

|      |                                                 |    |                                                                              |
|------|-------------------------------------------------|----|------------------------------------------------------------------------------|
| 4008 | 1,2,5,18,2 3,4,6,7,8,1<br>0,23,24,26 9,21,22,25 | 10 | D4A1J4,P09605;P25809,P47967,Q63942,Q6IFU7,Q6IFU8,Q6P6Q2,Q9JJ50,Q9QUL6,Q9QZK9 |
| 4009 | 1,2,5,18,2 3,4,6,7,8,1<br>0,23,25,26 9,21,22,24 | 3  | Q6IFU8,Q6P6Q2,Q9QUL6                                                         |
| 4010 | 1,2,5,18,2 3,4,6,7,8,1<br>0,24,25,26 9,21,22,23 | 4  | P02625,P16086,Q7TPB1,Q99041                                                  |
| 4011 | 1,2,5,18,2 3,4,6,7,8,1<br>1,22,23,24 9,20,25,26 | 3  | P35280,Q5FVI6,Q9QUL6                                                         |
| 4012 | 1,2,5,18,2 3,4,6,7,8,1<br>1,22,23,25 9,20,24,26 | 4  | P20761,P31430,Q5FVI6,Q99MH3                                                  |
| 4013 | 1,2,5,18,2 3,4,6,7,8,1<br>1,22,23,26 9,20,24,25 | 4  | Q6IFU8,Q6IFV1,Q6P6Q2,Q9QUL6                                                  |
| 4014 | 1,2,5,18,2 3,4,6,7,8,1<br>1,22,24,25 9,20,23,26 | 2  | P31430,Q5FVI6                                                                |
| 4015 | 1,2,5,18,2 3,4,6,7,8,1<br>1,22,24,26 9,20,23,25 | 3  | Q63617,Q99041,Q9QUL6                                                         |
| 4016 | 1,2,5,18,2 3,4,6,7,8,1<br>1,22,25,26 9,20,23,24 | 4  | O55145,P31430,Q63617,Q99041                                                  |
| 4017 | 1,2,5,18,2 3,4,6,7,8,1<br>1,23,24,25 9,20,22,26 | 2  | P31430,Q99MH3                                                                |
| 4018 | 1,2,5,18,2 3,4,6,7,8,1<br>1,23,24,26 9,20,22,25 | 7  | D3ZUC6,Q63942,Q6IFU7,Q6IFU8,Q6IFV1,Q6P6Q2,Q9QUL6                             |
| 4019 | 1,2,5,18,2 3,4,6,7,8,1<br>1,23,25,26 9,20,22,24 | 7  | P31430,P55091,Q63617,Q6IFU8,Q6P6Q2,Q99MH3,Q9QUL6                             |
| 4020 | 1,2,5,18,2 3,4,6,7,8,1<br>1,24,25,26 9,20,22,23 | 4  | P31430,P55091,Q63617,Q99041                                                  |
| 4021 | 1,2,5,18,2 3,4,6,7,8,1<br>2,23,24,25 9,20,21,26 | 3  | P20761,P35280,Q5FVI6                                                         |
| 4022 | 1,2,5,18,2 3,4,6,7,8,1<br>2,23,24,26 9,20,21,25 | 6  | P00731,P47967,Q63942,Q6IFU7,Q6P6Q2,Q9QUL6                                    |
| 4023 | 1,2,5,18,2 3,4,6,7,8,1<br>2,23,25,26 9,20,21,24 | 1  | Q6P6Q2                                                                       |
| 4024 | 1,2,5,18,2 3,4,6,7,8,1<br>2,24,25,26 9,20,21,23 | 3  | P16086,Q7TPB1,Q99041                                                         |
| 4025 | 1,2,5,18,2 3,4,6,7,8,1<br>3,24,25,26 9,20,21,22 | 5  | P55091,Q63942,Q6IFU7,Q6P6Q2,Q7TPB1                                           |
| 4026 | 1,2,5,19,2 3,4,6,7,8,1<br>0,21,22,23 8,24,25,26 | 2  | P00714,P00774                                                                |
| 4027 | 1,2,5,19,2 3,4,6,7,8,1<br>0,21,22,24 8,23,25,26 | 6  | O70417,P00714,P00774,P12785,P35467,P83121                                    |
| 4028 | 1,2,5,19,2 3,4,6,7,8,1<br>0,21,22,25 8,23,24,26 | 5  | O70417,P12785,P20761,P35467,Q8VD89                                           |
| 4029 | 1,2,5,19,2 3,4,6,7,8,1<br>0,21,22,26 8,23,24,25 | 3  | P00714,Q63751,Q99041                                                         |
| 4030 | 1,2,5,19,2 3,4,6,7,8,1<br>0,21,23,24 8,22,25,26 | 1  | P00714                                                                       |



|      |                                                 |   |                                                                |
|------|-------------------------------------------------|---|----------------------------------------------------------------|
| 4031 | 1,2,5,19,2 3,4,6,7,8,1<br>0,21,23,25 8,22,24,26 | 3 | O70417,P20761,Q8VD89                                           |
| 4032 | 1,2,5,19,2 3,4,6,7,8,1<br>0,21,23,26 8,22,24,25 | 0 |                                                                |
| 4033 | 1,2,5,19,2 3,4,6,7,8,1<br>0,21,24,25 8,22,23,26 | 5 | O70417,P02625,P20761,P35467,Q8VD89                             |
| 4034 | 1,2,5,19,2 3,4,6,7,8,1<br>0,21,24,26 8,22,23,25 | 5 | O70417,P00714,P06911,Q63751,Q99041                             |
| 4035 | 1,2,5,19,2 3,4,6,7,8,1<br>0,21,25,26 8,22,23,24 | 2 | O70417,P02625                                                  |
| 4036 | 1,2,5,19,2 3,4,6,7,8,1<br>0,22,23,24 8,21,25,26 | 7 | P00714,P00774,P20761,P31430,P83121,Q9QZK9,Q9WTT6               |
| 4037 | 1,2,5,19,2 3,4,6,7,8,1<br>0,22,23,25 8,21,24,26 | 1 | P20761                                                         |
| 4038 | 1,2,5,19,2 3,4,6,7,8,1<br>0,22,23,26 8,21,24,25 | 2 | O54728,Q62997                                                  |
| 4039 | 1,2,5,19,2 3,4,6,7,8,1<br>0,22,24,25 8,21,23,26 | 6 | O70417,P00774,P12785,P14669,P20761,P35467                      |
| 4040 | 1,2,5,19,2 3,4,6,7,8,1<br>0,22,24,26 8,21,23,25 | 9 | O70417,P00714,P07150,P14669,Q5XI22,Q63751,Q6P6R2,Q99041,Q9WTT6 |
| 4041 | 1,2,5,19,2 3,4,6,7,8,1<br>0,22,25,26 8,21,23,24 | 2 | O70417,Q5XI22                                                  |
| 4042 | 1,2,5,19,2 3,4,6,7,8,1<br>0,23,24,25 8,21,22,26 | 3 | O70417,P11598,P20761                                           |
| 4043 | 1,2,5,19,2 3,4,6,7,8,1<br>0,23,24,26 8,21,22,25 | 2 | D4A1J4,P09605,P25809                                           |
| 4044 | 1,2,5,19,2 3,4,6,7,8,1<br>0,23,25,26 8,21,22,24 | 1 | O70417                                                         |
| 4045 | 1,2,5,19,2 3,4,6,7,8,1<br>0,24,25,26 8,21,22,23 | 3 | O70417,P02625,Q5XI22                                           |
| 4046 | 1,2,5,19,2 3,4,6,7,8,1<br>1,22,23,24 8,20,25,26 | 2 | P00714,P35280                                                  |
| 4047 | 1,2,5,19,2 3,4,6,7,8,1<br>1,22,23,25 8,20,24,26 | 1 | P20761                                                         |
| 4048 | 1,2,5,19,2 3,4,6,7,8,1<br>1,22,23,26 8,20,24,25 | 0 |                                                                |
| 4049 | 1,2,5,19,2 3,4,6,7,8,1<br>1,22,24,25 8,20,23,26 | 6 | A2RUV9,O70417,P12785,P35467,Q4FZU2,Q6IG02                      |
| 4050 | 1,2,5,19,2 3,4,6,7,8,1<br>1,22,24,26 8,20,23,25 | 5 | O70377,P00714,Q5XI22,Q63617,Q99041                             |
| 4051 | 1,2,5,19,2 3,4,6,7,8,1<br>1,22,25,26 8,20,23,24 | 3 | O70417,Q5XI22,Q63617                                           |
| 4052 | 1,2,5,19,2 3,4,6,7,8,1<br>1,23,24,25 8,20,22,26 | 1 | O70417                                                         |
| 4053 | 1,2,5,19,2 3,4,6,7,8,1<br>1,23,24,26 8,20,22,25 | 0 |                                                                |

|      |                                                 |   |                                           |
|------|-------------------------------------------------|---|-------------------------------------------|
| 4054 | 1,2,5,19,2 3,4,6,7,8,1<br>1,23,25,26 8,20,22,24 | 1 | Q63617                                    |
| 4055 | 1,2,5,19,2 3,4,6,7,8,1<br>1,24,25,26 8,20,22,23 | 3 | O70417,Q5XI22,Q63617                      |
| 4056 | 1,2,5,19,2 3,4,6,7,8,1<br>2,23,24,25 8,20,21,26 | 4 | P01835,P11598,P20761,P82471               |
| 4057 | 1,2,5,19,2 3,4,6,7,8,1<br>2,23,24,26 8,20,21,25 | 2 | P00731,P82471                             |
| 4058 | 1,2,5,19,2 3,4,6,7,8,1<br>2,23,25,26 8,20,21,24 | 0 |                                           |
| 4059 | 1,2,5,19,2 3,4,6,7,8,1<br>2,24,25,26 8,20,21,23 | 3 | O70417,P01835,Q5XI22                      |
| 4060 | 1,2,5,19,2 3,4,6,7,8,1<br>3,24,25,26 8,20,21,22 | 2 | O70417,Q7TPB1                             |
| 4061 | 1,2,5,20,2 3,4,6,7,8,1<br>1,22,23,24 8,19,25,26 | 4 | P00714,P35280,Q5FVI6,Q9QZK9               |
| 4062 | 1,2,5,20,2 3,4,6,7,8,1<br>1,22,23,25 8,19,24,26 | 1 | P20761                                    |
| 4063 | 1,2,5,20,2 3,4,6,7,8,1<br>1,22,23,26 8,19,24,25 | 1 | Q9QUL6                                    |
| 4064 | 1,2,5,20,2 3,4,6,7,8,1<br>1,22,24,25 8,19,23,26 | 5 | P02625,P12785,P35467,Q5FVI6,Q5XFX0        |
| 4065 | 1,2,5,20,2 3,4,6,7,8,1<br>1,22,24,26 8,19,23,25 | 6 | O70377,P00714,P35467,Q5BJY9,Q5XI22,Q99041 |
| 4066 | 1,2,5,20,2 3,4,6,7,8,1<br>1,22,25,26 8,19,23,24 | 3 | P02625,Q5XI22,Q99041                      |
| 4067 | 1,2,5,20,2 3,4,6,7,8,1<br>1,23,24,25 8,19,22,26 | 0 |                                           |
| 4068 | 1,2,5,20,2 3,4,6,7,8,1<br>1,23,24,26 8,19,22,25 | 1 | Q9QUL6                                    |
| 4069 | 1,2,5,20,2 3,4,6,7,8,1<br>1,23,25,26 8,19,22,24 | 0 |                                           |
| 4070 | 1,2,5,20,2 3,4,6,7,8,1<br>1,24,25,26 8,19,22,23 | 6 | O70417,P02625,P16086,Q5XI22,Q8CJD3,Q99041 |
| 4071 | 1,2,5,20,2 3,4,6,7,8,1<br>2,23,24,25 8,19,21,26 | 5 | P0C0A9,P11598,P20761,P35280,Q5FVI6        |
| 4072 | 1,2,5,20,2 3,4,6,7,8,1<br>2,23,24,26 8,19,21,25 | 3 | P00731,P47967,Q9QZK9                      |
| 4073 | 1,2,5,20,2 3,4,6,7,8,1<br>2,23,25,26 8,19,21,24 | 0 |                                           |
| 4074 | 1,2,5,20,2 3,4,6,7,8,1<br>2,24,25,26 8,19,21,23 | 6 | P00731,P02625,P0C0A9,P16086,Q5XI22,Q99041 |
| 4075 | 1,2,5,20,2 3,4,6,7,8,1<br>3,24,25,26 8,19,21,22 | 2 | D4A1J4,Q7TPB1                             |
| 4076 | 1,2,5,21,2 3,4,6,7,8,1<br>2,23,24,25 8,19,20,26 | 2 | P35280,Q5FVI6                             |

|      |                          |                                 |    |                                                                                                                 |
|------|--------------------------|---------------------------------|----|-----------------------------------------------------------------------------------------------------------------|
| 4077 | 1,2,5,21,2<br>2,23,24,26 | 3,4,6,7,8,1<br>8,19,20,25       | 3  | P00714,P00731,P35280                                                                                            |
| 4078 | 1,2,5,21,2<br>2,23,25,26 | 3,4,6,7,8,1<br>8,19,20,24       | 0  |                                                                                                                 |
| 4079 | 1,2,5,21,2<br>2,24,25,26 | 3,4,6,7,8,1<br>8,19,20,23       | 4  | P35467,Q5XI22,Q63617,Q99041                                                                                     |
| 4080 | 1,2,5,21,2<br>3,24,25,26 | 3,4,6,7,8,1<br>8,19,20,22       | 2  | P35280,Q7TPB1                                                                                                   |
| 4081 | 1,2,5,22,2<br>3,24,25,26 | 3,4,6,7,8,1<br>8,19,20,21       | 4  | P00731,P35280,P82471,Q7TPB1                                                                                     |
| 4082 | 1,2,6,7,8,1<br>8,19,20   | 3,4,5,21,2<br>2,23,24,25<br>,26 | 7  | P00731,P02631,P02803,P10715,P35280,Q63532,Q91ZS3                                                                |
| 4083 | 1,2,6,7,8,1<br>8,19,21   | 3,4,5,20,2<br>2,23,24,25<br>,26 | 16 | O35547,P00731,P02631,P02782,P02803,P05964,P08723,P25031,P35281,P53792,P97840,Q63532,Q6AYL6,Q6AYR8,Q91ZS3,Q9JI85 |
| 4084 | 1,2,6,7,8,1<br>8,19,22   | 3,4,5,20,2<br>1,23,24,25<br>,26 | 4  | D4A1J4,P02631,Q63532,Q8CJD3                                                                                     |
| 4085 | 1,2,6,7,8,1<br>8,19,23   | 3,4,5,20,2<br>1,22,24,25<br>,26 | 12 | P02631,P02803,P05964,P15399,P31044,P97580,Q03191,Q30KJ2,Q63532,Q63942,Q8CJD3,Q99MH3                             |
| 4086 | 1,2,6,7,8,1<br>8,19,24   | 3,4,5,20,2<br>1,22,23,25<br>,26 | 2  | P02631,Q63532                                                                                                   |
| 4087 | 1,2,6,7,8,1<br>8,19,25   | 3,4,5,20,2<br>1,22,23,24<br>,26 | 15 | P00731,P02631,P02803,P10715,P12020,P19629,P31044,P35280,P47967,P68370,P97840,Q5GRG2,Q62635,Q63532,Q91ZS3        |
| 4088 | 1,2,6,7,8,1<br>8,19,26   | 3,4,5,20,2<br>1,22,23,24<br>,25 | 6  | P02631,P02803,P35280,P83748,Q63532,Q63942                                                                       |
| 4089 | 1,2,6,7,8,1<br>8,20,21   | 3,4,5,19,2<br>2,23,24,25<br>,26 | 11 | P00731,P02631,P02782,P08723,P13432,P25031,P62804,Q6AYL6,Q6AYR8,Q91ZS3,Q9JI85                                    |
| 4090 | 1,2,6,7,8,1<br>8,20,22   | 3,4,5,19,2<br>1,23,24,25<br>,26 | 4  | P02631,P10715,Q91ZS3,Q9JI85                                                                                     |
| 4091 | 1,2,6,7,8,1<br>8,20,23   | 3,4,5,19,2<br>1,22,24,25<br>,26 | 4  | P02631,P10715,Q8CJD3,Q91ZS3                                                                                     |
| 4092 | 1,2,6,7,8,1<br>8,20,24   | 3,4,5,19,2<br>1,22,23,25<br>,26 | 4  | P02631,P10715,Q6AYR8,Q91ZS3                                                                                     |
| 4093 | 1,2,6,7,8,1<br>8,20,25   | 3,4,5,19,2<br>1,22,23,24<br>,26 | 9  | P02631,P10715,P12020,P19629,P31044,P35280,P68370,Q5GRG2,Q91ZS3                                                  |

|      |                        |                                 |    |                                                                                                                                                    |
|------|------------------------|---------------------------------|----|----------------------------------------------------------------------------------------------------------------------------------------------------|
| 4094 | 1,2,6,7,8,1<br>8,20,26 | 3,4,5,19,2<br>1,22,23,24<br>,25 | 7  | P01041,P10715,P35280,P62804,Q63942,Q6AYR8,Q91ZS3                                                                                                   |
| 4095 | 1,2,6,7,8,1<br>8,21,22 | 3,4,5,19,2<br>0,23,24,25<br>,26 | 9  | D4A1J4,P02631,P02782,P08723,P11598,P13432,P25031,Q91ZS3,Q9JI85                                                                                     |
| 4096 | 1,2,6,7,8,1<br>8,21,23 | 3,4,5,19,2<br>0,22,24,25<br>,26 | 9  | P02631,P02782,P02803,P08723,P25031,Q6AYL6,Q6AYR8,Q91ZS3,Q9JI85                                                                                     |
| 4097 | 1,2,6,7,8,1<br>8,21,24 | 3,4,5,19,2<br>0,22,23,25<br>,26 | 8  | O54728,P02631,P02782,P13432,Q6AYL6,Q6AYR8,Q91ZS3,Q9JI85                                                                                            |
| 4098 | 1,2,6,7,8,1<br>8,21,25 | 3,4,5,19,2<br>0,22,23,24<br>,26 | 21 | O54728,P00731,P02631,P02803,P08723,P10715,P12020,P19629,P25031,P31044,P31430,P47967,P68370,P97840,P98089,Q5GRG2,Q6AYL6,Q6P6R2,Q6P9T8,Q91ZS3,Q9WTT6 |
| 4099 | 1,2,6,7,8,1<br>8,21,26 | 3,4,5,19,2<br>0,22,23,24<br>,25 | 10 | P02782,P11598,P25031,P55091,P82995,P83748,Q00715,Q63942,Q6AYR8,Q91ZS3                                                                              |
| 4100 | 1,2,6,7,8,1<br>8,22,23 | 3,4,5,19,2<br>0,21,24,25<br>,26 | 2  | P02631,Q8CJD3                                                                                                                                      |
| 4101 | 1,2,6,7,8,1<br>8,22,24 | 3,4,5,19,2<br>0,21,23,25<br>,26 | 1  | P02631                                                                                                                                             |
| 4102 | 1,2,6,7,8,1<br>8,22,25 | 3,4,5,19,2<br>0,21,23,24<br>,26 | 10 | P02631,P06911,P10715,P12020,P19629,P31044,P68370,P97840,Q5GRG2,Q91ZS3                                                                              |
| 4103 | 1,2,6,7,8,1<br>8,22,26 | 3,4,5,19,2<br>0,21,23,24<br>,25 | 2  | P83748,Q63942                                                                                                                                      |
| 4104 | 1,2,6,7,8,1<br>8,23,24 | 3,4,5,19,2<br>0,21,22,25<br>,26 | 1  | P02631                                                                                                                                             |
| 4105 | 1,2,6,7,8,1<br>8,23,25 | 3,4,5,19,2<br>0,21,22,24<br>,26 | 13 | P02631,P02803,P06911,P10715,P12020,P19629,P31044,P68370,Q5GRG2,Q6P6R2,Q6P9T8,Q91ZS3,Q99MH3                                                         |
| 4106 | 1,2,6,7,8,1<br>8,23,26 | 3,4,5,19,2<br>0,21,22,24<br>,25 | 3  | P02631,Q63942,Q6P6Q2                                                                                                                               |
| 4107 | 1,2,6,7,8,1<br>8,24,25 | 3,4,5,19,2<br>0,21,22,23<br>,26 | 9  | O54728,P02631,P10715,P12020,P19629,P31044,P68370,Q5GRG2,Q91ZS3                                                                                     |
| 4108 | 1,2,6,7,8,1<br>8,24,26 | 3,4,5,19,2<br>0,21,22,23<br>,25 | 3  | P10715,P55091,Q63942                                                                                                                               |

|      |                        |                                 |    |                                                                                                                               |
|------|------------------------|---------------------------------|----|-------------------------------------------------------------------------------------------------------------------------------|
| 4109 | 1,2,6,7,8,1<br>8,25,26 | 3,4,5,19,2<br>0,21,22,23<br>,24 | 12 | P10715,P12020,P19629,P31044,P35280,P55091,P68370,P82995,Q5GRG2,Q63942,Q6P9T8,Q91ZS3                                           |
| 4110 | 1,2,6,7,8,1<br>9,20,21 | 3,4,5,18,2<br>2,23,24,25<br>,26 | 12 | P00731,P02631,P02782,P12785,P35281,P53792,P62804,Q63532,Q6AYL6,Q6AYR8,Q91ZS3,Q9JI85                                           |
| 4111 | 1,2,6,7,8,1<br>9,20,22 | 3,4,5,18,2<br>1,23,24,25<br>,26 | 4  | P00774,P02631,P12785,Q63532                                                                                                   |
| 4112 | 1,2,6,7,8,1<br>9,20,23 | 3,4,5,18,2<br>1,22,24,25<br>,26 | 6  | P02631,P15399,P97580,Q30KJ2,Q63532,Q8CJD3                                                                                     |
| 4113 | 1,2,6,7,8,1<br>9,20,24 | 3,4,5,18,2<br>1,22,23,25<br>,26 | 3  | P02631,P12785,Q63532                                                                                                          |
| 4114 | 1,2,6,7,8,1<br>9,20,25 | 3,4,5,18,2<br>1,22,23,24<br>,26 | 13 | P02631,P10715,P12020,P12785,P19629,P31044,P35280,P47967,P68370,P97840,Q5GRG2,Q63532,Q91ZS3                                    |
| 4115 | 1,2,6,7,8,1<br>9,20,26 | 3,4,5,18,2<br>1,22,23,24<br>,25 | 3  | P35280,P62804,Q63532                                                                                                          |
| 4116 | 1,2,6,7,8,1<br>9,21,22 | 3,4,5,18,2<br>0,23,24,25<br>,26 | 12 | D4A1J4,P02631,P02782,P08723,P12785,P13432,P19218,P35281,P97840,Q63532,Q6IG02,Q9JI85                                           |
| 4117 | 1,2,6,7,8,1<br>9,21,23 | 3,4,5,18,2<br>0,22,24,25<br>,26 | 11 | P02631,P02782,P02803,P15399,P16086,P35281,P97580,Q30KJ2,Q63532,Q6AYL6,Q8CJD3                                                  |
| 4118 | 1,2,6,7,8,1<br>9,21,24 | 3,4,5,18,2<br>0,22,23,25<br>,26 | 7  | P02631,P02782,P12785,P13432,P35281,Q63532,Q6IG02                                                                              |
| 4119 | 1,2,6,7,8,1<br>9,21,25 | 3,4,5,18,2<br>0,22,23,24<br>,26 | 18 | P00731,P02631,P02803,P10715,P12020,P12785,P19629,P31044,P47967,P53792,P68370,P97840,Q5GRG2,Q63532,Q6IG02,Q6P6R2,Q91ZS3,Q9QZK9 |
| 4120 | 1,2,6,7,8,1<br>9,21,26 | 3,4,5,18,2<br>0,22,23,24<br>,25 | 6  | P02782,P35281,P53792,P83748,Q00715,Q63532                                                                                     |
| 4121 | 1,2,6,7,8,1<br>9,22,23 | 3,4,5,18,2<br>0,21,24,25<br>,26 | 7  | P02631,P15399,P50280,P97580,Q30KJ2,Q63532,Q8CJD3                                                                              |
| 4122 | 1,2,6,7,8,1<br>9,22,24 | 3,4,5,18,2<br>0,21,23,25<br>,26 | 6  | P01835,P02631,P12785,Q4FZU2,Q63532,Q6IG02                                                                                     |
| 4123 | 1,2,6,7,8,1<br>9,22,25 | 3,4,5,18,2<br>0,21,23,24<br>,26 | 15 | P01835,P02631,P06911,P10715,P12020,P12785,P19629,P31044,P47967,P68370,P97840,Q4FZU2,Q5GRG2,Q63532,Q6IG02                      |

|      |                        |                                 |    |                                                                                                                               |
|------|------------------------|---------------------------------|----|-------------------------------------------------------------------------------------------------------------------------------|
| 4124 | 1,2,6,7,8,1<br>9,22,26 | 3,4,5,18,2<br>0,21,23,24<br>,25 | 2  | P12785,Q63532                                                                                                                 |
| 4125 | 1,2,6,7,8,1<br>9,23,24 | 3,4,5,18,2<br>0,21,22,25<br>,26 | 5  | P02631,P15399,P97580,Q30KJ2,Q63532                                                                                            |
| 4126 | 1,2,6,7,8,1<br>9,23,25 | 3,4,5,18,2<br>0,21,22,24<br>,26 | 18 | P02631,P02803,P06911,P10715,P12020,P15399,P19629,P31044,P50280,P68370,P97580,P97840,Q30KJ2,Q5GRG2,Q63532,Q6P6R2,Q6P9T8,Q99041 |
| 4127 | 1,2,6,7,8,1<br>9,23,26 | 3,4,5,18,2<br>0,21,22,24<br>,25 | 5  | P02631,P15399,P97580,Q30KJ2,Q63532                                                                                            |
| 4128 | 1,2,6,7,8,1<br>9,24,25 | 3,4,5,18,2<br>0,21,22,23<br>,26 | 14 | P01835,P02631,P06911,P10715,P12020,P12785,P19629,P31044,P68370,P97840,Q4FZU2,Q5GRG2,Q63532,Q6IG02                             |
| 4129 | 1,2,6,7,8,1<br>9,24,26 | 3,4,5,18,2<br>0,21,22,23<br>,25 | 2  | P02631,Q63532                                                                                                                 |
| 4130 | 1,2,6,7,8,1<br>9,25,26 | 3,4,5,18,2<br>0,21,22,23<br>,24 | 11 | P10715,P12020,P19629,P31044,P35280,P68370,P97840,Q5GRG2,Q63532,Q91ZS3,Q9QZK9                                                  |
| 4131 | 1,2,6,7,8,2<br>0,21,22 | 3,4,5,18,1<br>9,23,24,25<br>,26 | 6  | P02782,P08723,P12785,P13432,Q91ZS3,Q9JI85                                                                                     |
| 4132 | 1,2,6,7,8,2<br>0,21,23 | 3,4,5,18,1<br>9,22,24,25<br>,26 | 5  | P02631,P62804,Q6AYL6,Q6AYR8,Q91ZS3                                                                                            |
| 4133 | 1,2,6,7,8,2<br>0,21,24 | 3,4,5,18,1<br>9,22,23,25<br>,26 | 6  | P02782,P12785,P13432,Q6AYL6,Q6AYR8,Q91ZS3                                                                                     |
| 4134 | 1,2,6,7,8,2<br>0,21,25 | 3,4,5,18,1<br>9,22,23,24<br>,26 | 12 | P10715,P12020,P12785,P19629,P47727,P47967,P68370,Q5GRG2,Q6AYL6,Q6P6R2,Q91ZS3,Q9WTT6                                           |
| 4135 | 1,2,6,7,8,2<br>0,21,26 | 3,4,5,18,1<br>9,22,23,24<br>,25 | 6  | P01041,P62804,P83748,Q00715,Q6AYR8,Q91ZS3                                                                                     |
| 4136 | 1,2,6,7,8,2<br>0,22,23 | 3,4,5,18,1<br>9,21,24,25<br>,26 | 2  | P02631,Q8CJD3                                                                                                                 |
| 4137 | 1,2,6,7,8,2<br>0,22,24 | 3,4,5,18,1<br>9,21,23,25<br>,26 | 1  | P12785                                                                                                                        |
| 4138 | 1,2,6,7,8,2<br>0,22,25 | 3,4,5,18,1<br>9,21,23,24<br>,26 | 9  | P06911,P10715,P12020,P12785,P19629,P31044,P68370,Q5GRG2,Q91ZS3                                                                |

|      |                        |                                 |    |                                                                                                                        |
|------|------------------------|---------------------------------|----|------------------------------------------------------------------------------------------------------------------------|
| 4139 | 1,2,6,7,8,2<br>0,22,26 | 3,4,5,18,1<br>9,21,23,24<br>,25 | 1  | P12785                                                                                                                 |
| 4140 | 1,2,6,7,8,2<br>0,23,24 | 3,4,5,18,1<br>9,21,22,25<br>,26 | 1  | P02631                                                                                                                 |
| 4141 | 1,2,6,7,8,2<br>0,23,25 | 3,4,5,18,1<br>9,21,22,24<br>,26 | 11 | P02631,P06911,P10715,P12020,P19629,P31044,P47727,P68370,Q5GRG2,Q6P6R2,Q91ZS3                                           |
| 4142 | 1,2,6,7,8,2<br>0,23,26 | 3,4,5,18,1<br>9,21,22,24<br>,25 | 1  | Q91ZS3                                                                                                                 |
| 4143 | 1,2,6,7,8,2<br>0,24,25 | 3,4,5,18,1<br>9,21,22,23<br>,26 | 7  | P10715,P12020,P12785,P19629,P68370,Q5GRG2,Q91ZS3                                                                       |
| 4144 | 1,2,6,7,8,2<br>0,24,26 | 3,4,5,18,1<br>9,21,22,23<br>,25 | 1  | P10715                                                                                                                 |
| 4145 | 1,2,6,7,8,2<br>0,25,26 | 3,4,5,18,1<br>9,21,22,23<br>,24 | 7  | P10715,P12020,P19629,P35280,P68370,Q5GRG2,Q91ZS3                                                                       |
| 4146 | 1,2,6,7,8,2<br>1,22,23 | 3,4,5,18,1<br>9,20,24,25<br>,26 | 4  | P02631,P02782,P08723,P13432                                                                                            |
| 4147 | 1,2,6,7,8,2<br>1,22,24 | 3,4,5,18,1<br>9,20,23,25<br>,26 | 5  | P02782,P12785,P13432,P35467,Q6IG02                                                                                     |
| 4148 | 1,2,6,7,8,2<br>1,22,25 | 3,4,5,18,1<br>9,20,23,24<br>,26 | 16 | D4A1J4,P06911,P08723,P10715,P12020,P12785,P13432,P19629,P35467,P47967,P68370,P97840,Q5GRG2,Q6IG02,Q91ZS3,Q9WTT6        |
| 4149 | 1,2,6,7,8,2<br>1,22,26 | 3,4,5,18,1<br>9,20,23,24<br>,25 | 5  | P02782,P12785,P13432,P83748,Q00715                                                                                     |
| 4150 | 1,2,6,7,8,2<br>1,23,24 | 3,4,5,18,1<br>9,20,22,25<br>,26 | 3  | P02631,P13432,Q6AYL6                                                                                                   |
| 4151 | 1,2,6,7,8,2<br>1,23,25 | 3,4,5,18,1<br>9,20,22,24<br>,26 | 17 | P02631,P06911,P07150,P10715,P12020,P19629,P31044,P47727,P50280,P68370,P97840,Q5GRG2,Q6AYL6,Q6P6R2,Q6P9T8,Q91ZS3,Q9WTT6 |
| 4152 | 1,2,6,7,8,2<br>1,23,26 | 3,4,5,18,1<br>9,20,22,24<br>,25 | 4  | P83748,Q00715,Q6IFV1,Q91ZS3                                                                                            |
| 4153 | 1,2,6,7,8,2<br>1,24,25 | 3,4,5,18,1<br>9,20,22,23<br>,26 | 15 | O54728,P10715,P12020,P12785,P13432,P19629,P22006,P35467,P68370,P97840,Q5GRG2,Q6IG02,Q6P6R2,Q91ZS3,Q9WTT6               |

|      |                         |                                 |    |                                                                                     |
|------|-------------------------|---------------------------------|----|-------------------------------------------------------------------------------------|
| 4154 | 1,2,6,7,8,2<br>1,24,26  | 3,4,5,18,1<br>9,20,22,23<br>,25 | 2  | P13432,P83748                                                                       |
| 4155 | 1,2,6,7,8,2<br>1,25,26  | 3,4,5,18,1<br>9,20,22,23<br>,24 | 12 | P10715,P12020,P19629,P68370,P83748,Q00715,Q5GRG2,Q6P6R2,Q6P9T8,Q91ZS3,Q9QZK9,Q9WTT6 |
| 4156 | 1,2,6,7,8,2<br>2,23,24  | 3,4,5,18,1<br>9,20,21,25<br>,26 | 1  | P02631                                                                              |
| 4157 | 1,2,6,7,8,2<br>2,23,25  | 3,4,5,18,1<br>9,20,21,24<br>,26 | 9  | P02631,P06911,P10715,P12020,P19629,P31044,P50280,P68370,Q5GRG2                      |
| 4158 | 1,2,6,7,8,2<br>2,23,26  | 3,4,5,18,1<br>9,20,21,24<br>,25 | 0  |                                                                                     |
| 4159 | 1,2,6,7,8,2<br>2,24,25  | 3,4,5,18,1<br>9,20,21,23<br>,26 | 11 | P01835,P06911,P10715,P12020,P12785,P19629,P35467,P68370,Q4FZU2,Q5GRG2,Q6IG02        |
| 4160 | 1,2,6,7,8,2<br>2,24,26  | 3,4,5,18,1<br>9,20,21,23<br>,25 | 1  | P12785                                                                              |
| 4161 | 1,2,6,7,8,2<br>2,25,26  | 3,4,5,18,1<br>9,20,21,23<br>,24 | 9  | P06911,P10715,P12020,P12785,P19629,P31044,P68370,Q5GRG2,Q91ZS3                      |
| 4162 | 1,2,6,7,8,2<br>3,24,25  | 3,4,5,18,1<br>9,20,21,22<br>,26 | 10 | P02631,P06911,P10715,P12020,P19629,P31044,P50280,P68370,Q5GRG2,Q6P6R2               |
| 4163 | 1,2,6,7,8,2<br>3,24,26  | 3,4,5,18,1<br>9,20,21,22<br>,25 | 0  |                                                                                     |
| 4164 | 1,2,6,7,8,2<br>3,25,26  | 3,4,5,18,1<br>9,20,21,22<br>,24 | 12 | P01946,P06911,P10715,P12020,P19629,P31044,P68370,Q5GRG2,Q6P6R2,Q6P9T8,Q91ZS3,Q9WTT6 |
| 4165 | 1,2,6,7,8,2<br>4,25,26  | 3,4,5,18,1<br>9,20,21,22<br>,23 | 6  | P10715,P12020,P19629,P68370,Q5GRG2,Q91ZS3                                           |
| 4166 | 1,2,6,7,18,<br>19,20,21 | 3,4,5,8,22,<br>23,24,25,2<br>6  | 8  | O54861,P00731,P25031,P97840,Q63532,Q6AYL6,Q91ZS3,Q9JI85                             |
| 4167 | 1,2,6,7,18,<br>19,20,22 | 3,4,5,8,21,<br>23,24,25,2<br>6  | 2  | Q63532,Q6AYS4                                                                       |
| 4168 | 1,2,6,7,18,<br>19,20,23 | 3,4,5,8,21,<br>22,24,25,2<br>6  | 7  | P02631,P15399,P97580,Q30KJ2,Q63532,Q6AYS4,Q8CJD3                                    |



|      |                         |                                |    |                                                                                                   |
|------|-------------------------|--------------------------------|----|---------------------------------------------------------------------------------------------------|
| 4169 | 1,2,6,7,18,<br>19,20,24 | 3,4,5,8,21,<br>22,23,25,2<br>6 | 3  | P02631,Q63532,Q6AYS4                                                                              |
| 4170 | 1,2,6,7,18,<br>19,20,25 | 3,4,5,8,21,<br>22,23,24,2<br>6 | 6  | P12020,P35280,P47967,P97840,Q63532,Q91ZS3                                                         |
| 4171 | 1,2,6,7,18,<br>19,20,26 | 3,4,5,8,21,<br>22,23,24,2<br>5 | 5  | P06760,P35280,Q63532,Q63751,Q6AYS4                                                                |
| 4172 | 1,2,6,7,18,<br>19,21,22 | 3,4,5,8,20,<br>23,24,25,2<br>6 | 6  | D4A1J4,P08723,P19218,P25031,P97840,Q63532                                                         |
| 4173 | 1,2,6,7,18,<br>19,21,23 | 3,4,5,8,20,<br>22,24,25,2<br>6 | 14 | D3ZUC6,P02631,P05964,P14668,P15399,P25031,P97580,P97840,Q03191,Q30KJ2,Q63532,Q6AYL6,Q8CJD3,Q99MH3 |
| 4174 | 1,2,6,7,18,<br>19,21,24 | 3,4,5,8,20,<br>22,23,25,2<br>6 | 6  | D3ZUC6,P02631,P13432,P97840,Q63532,Q6AYL6                                                         |
| 4175 | 1,2,6,7,18,<br>19,21,25 | 3,4,5,8,20,<br>22,23,24,2<br>6 | 13 | O54728,P00731,P02803,P25031,P31430,P47967,P97840,P98089,Q62635,Q63532,Q6AYL6,Q8CIZ5,Q91ZS3        |
| 4176 | 1,2,6,7,18,<br>19,21,26 | 3,4,5,8,20,<br>22,23,24,2<br>5 | 7  | D3ZUC6,P25031,P82995,P83748,P97840,Q63532,Q63661                                                  |
| 4177 | 1,2,6,7,18,<br>19,22,23 | 3,4,5,8,20,<br>21,24,25,2<br>6 | 6  | P02631,P15399,P97580,Q30KJ2,Q63532,Q8CJD3                                                         |
| 4178 | 1,2,6,7,18,<br>19,22,24 | 3,4,5,8,20,<br>21,23,25,2<br>6 | 3  | P02631,Q63532,Q6AYS4                                                                              |
| 4179 | 1,2,6,7,18,<br>19,22,25 | 3,4,5,8,20,<br>21,23,24,2<br>6 | 6  | P06911,P12020,P47967,P97840,Q5GRG2,Q63532                                                         |
| 4180 | 1,2,6,7,18,<br>19,22,26 | 3,4,5,8,20,<br>21,23,24,2<br>5 | 3  | P06760,Q63532,Q63942                                                                              |
| 4181 | 1,2,6,7,18,<br>19,23,24 | 3,4,5,8,20,<br>21,22,25,2<br>6 | 7  | P02631,P15399,P97580,Q03191,Q30KJ2,Q63532,Q6AYS4                                                  |
| 4182 | 1,2,6,7,18,<br>19,23,25 | 3,4,5,8,20,<br>21,22,24,2<br>6 | 13 | P02631,P02803,P12020,P15399,P19629,P97580,P97840,Q30KJ2,Q5GRG2,Q62635,Q63532,Q8CJD3,Q99MH3        |
| 4183 | 1,2,6,7,18,<br>19,23,26 | 3,4,5,8,20,<br>21,22,24,2<br>5 | 7  | P02631,P15399,P97580,Q03191,Q30KJ2,Q63532,Q63942                                                  |

|      |                         |                                |   |                                                         |
|------|-------------------------|--------------------------------|---|---------------------------------------------------------|
| 4184 | 1,2,6,7,18,<br>19,24,25 | 3,4,5,8,20,<br>21,22,23,2<br>6 | 5 | P02631,P12020,P19629,P97840,Q63532                      |
| 4185 | 1,2,6,7,18,<br>19,24,26 | 3,4,5,8,20,<br>21,22,23,2<br>5 | 4 | P06760,Q63532,Q63942,Q6AYS4                             |
| 4186 | 1,2,6,7,18,<br>19,25,26 | 3,4,5,8,20,<br>21,22,23,2<br>4 | 7 | P12020,P35280,P55091,P82995,P97840,Q63532,Q91ZS3        |
| 4187 | 1,2,6,7,18,<br>20,21,22 | 3,4,5,8,19,<br>23,24,25,2<br>6 | 4 | P13432,P25031,Q91ZS3,Q9JH85                             |
| 4188 | 1,2,6,7,18,<br>20,21,23 | 3,4,5,8,19,<br>22,24,25,2<br>6 | 5 | P14668,P25031,Q6AYL6,Q91ZS3,Q9QUL6                      |
| 4189 | 1,2,6,7,18,<br>20,21,24 | 3,4,5,8,19,<br>22,23,25,2<br>6 | 6 | O54728,O54861,P13432,P25031,Q6AYL6,Q91ZS3               |
| 4190 | 1,2,6,7,18,<br>20,21,25 | 3,4,5,8,19,<br>22,23,24,2<br>6 | 8 | O54728,P25031,P31430,P47967,P97840,P98089,Q6AYL6,Q91ZS3 |
| 4191 | 1,2,6,7,18,<br>20,21,26 | 3,4,5,8,19,<br>22,23,24,2<br>5 | 7 | O54861,P01041,P25031,P83748,Q6AYR8,Q91ZS3,Q9QUL6        |
| 4192 | 1,2,6,7,18,<br>20,22,23 | 3,4,5,8,19,<br>21,24,25,2<br>6 | 1 | Q8CJD3                                                  |
| 4193 | 1,2,6,7,18,<br>20,22,24 | 3,4,5,8,19,<br>21,23,25,2<br>6 | 1 | Q6AYS4                                                  |
| 4194 | 1,2,6,7,18,<br>20,22,25 | 3,4,5,8,19,<br>21,23,24,2<br>6 | 4 | P12020,P97840,Q5GRG2,Q91ZS3                             |
| 4195 | 1,2,6,7,18,<br>20,22,26 | 3,4,5,8,19,<br>21,23,24,2<br>5 | 2 | P06760,Q9QUL6                                           |
| 4196 | 1,2,6,7,18,<br>20,23,24 | 3,4,5,8,19,<br>21,22,25,2<br>6 | 1 | Q6AYS4                                                  |
| 4197 | 1,2,6,7,18,<br>20,23,25 | 3,4,5,8,19,<br>21,22,24,2<br>6 | 4 | P12020,P19629,Q5GRG2,Q91ZS3                             |
| 4198 | 1,2,6,7,18,<br>20,23,26 | 3,4,5,8,19,<br>21,22,24,2<br>5 | 5 | Q63942,Q6IFU8,Q6P6Q2,Q91ZS3,Q9QUL6                      |

|      |                         |                                |    |                                                                                     |
|------|-------------------------|--------------------------------|----|-------------------------------------------------------------------------------------|
| 4199 | 1,2,6,7,18,<br>20,24,25 | 3,4,5,8,19,<br>21,22,23,2<br>6 | 4  | O54728,P10715,P19629,Q91ZS3                                                         |
| 4200 | 1,2,6,7,18,<br>20,24,26 | 3,4,5,8,19,<br>21,22,23,2<br>5 | 3  | P06760,Q6AYS4,Q9QUL6                                                                |
| 4201 | 1,2,6,7,18,<br>20,25,26 | 3,4,5,8,19,<br>21,22,23,2<br>4 | 3  | P35280,P55091,Q91ZS3                                                                |
| 4202 | 1,2,6,7,18,<br>21,22,23 | 3,4,5,8,19,<br>20,24,25,2<br>6 | 4  | P13432,P14668,P25031,Q9QUL6                                                         |
| 4203 | 1,2,6,7,18,<br>21,22,24 | 3,4,5,8,19,<br>20,23,25,2<br>6 | 1  | P13432                                                                              |
| 4204 | 1,2,6,7,18,<br>21,22,25 | 3,4,5,8,19,<br>20,23,24,2<br>6 | 10 | P09605,P25809,P12020,P19629,P25031,P31430,P47967,P97840,P98089,Q5GRG2,Q91ZS3        |
| 4205 | 1,2,6,7,18,<br>21,22,26 | 3,4,5,8,19,<br>20,23,24,2<br>5 | 4  | P13432,P25031,P83748,Q9QUL6                                                         |
| 4206 | 1,2,6,7,18,<br>21,23,24 | 3,4,5,8,19,<br>20,22,25,2<br>6 | 4  | D3ZUC6,P13432,Q6AYL6,Q9QUL6                                                         |
| 4207 | 1,2,6,7,18,<br>21,23,25 | 3,4,5,8,19,<br>20,22,24,2<br>6 | 12 | O54728,P12020,P14668,P19629,P25031,P31430,P97840,P98089,Q6AYL6,Q6P6R2,Q91ZS3,Q99MH3 |
| 4208 | 1,2,6,7,18,<br>21,23,26 | 3,4,5,8,19,<br>20,22,24,2<br>5 | 10 | D3ZUC6,P25031,P83748,Q63661,Q63942,Q6IFU8,Q6IFV1,Q6P6Q2,Q91ZS3,Q9QUL6               |
| 4209 | 1,2,6,7,18,<br>21,24,25 | 3,4,5,8,19,<br>20,22,23,2<br>6 | 10 | O54728,P13432,P19629,P25031,P31430,P97840,P98089,Q62997,Q6AYL6,Q91ZS3               |
| 4210 | 1,2,6,7,18,<br>21,24,26 | 3,4,5,8,19,<br>20,22,23,2<br>5 | 6  | D3ZUC6,P13432,P25031,P55091,P83748,Q9QUL6                                           |
| 4211 | 1,2,6,7,18,<br>21,25,26 | 3,4,5,8,19,<br>20,22,23,2<br>4 | 9  | P19629,P25031,P31430,P55091,P82995,P83748,P97840,P98089,Q91ZS3                      |
| 4212 | 1,2,6,7,18,<br>22,23,24 | 3,4,5,8,19,<br>20,21,25,2<br>6 | 0  |                                                                                     |
| 4213 | 1,2,6,7,18,<br>22,23,25 | 3,4,5,8,19,<br>20,21,24,2<br>6 | 5  | P06911,P12020,P19629,P97840,Q5GRG2                                                  |

|      |                         |                                |   |                                                         |
|------|-------------------------|--------------------------------|---|---------------------------------------------------------|
| 4214 | 1,2,6,7,18,<br>22,23,26 | 3,4,5,8,19,<br>20,21,24,2<br>5 | 2 | Q63942,Q9QUL6                                           |
| 4215 | 1,2,6,7,18,<br>22,24,25 | 3,4,5,8,19,<br>20,21,23,2<br>6 | 4 | P12020,P19629,P97840,Q5GRG2                             |
| 4216 | 1,2,6,7,18,<br>22,24,26 | 3,4,5,8,19,<br>20,21,23,2<br>5 | 0 |                                                         |
| 4217 | 1,2,6,7,18,<br>22,25,26 | 3,4,5,8,19,<br>20,21,23,2<br>4 | 6 | P12020,P19629,P55091,P97840,Q5GRG2,Q91ZS3               |
| 4218 | 1,2,6,7,18,<br>23,24,25 | 3,4,5,8,19,<br>20,21,22,2<br>6 | 3 | P12020,P19629,Q5GRG2                                    |
| 4219 | 1,2,6,7,18,<br>23,24,26 | 3,4,5,8,19,<br>20,21,22,2<br>5 | 3 | Q63942,Q6IFU7,Q9QUL6                                    |
| 4220 | 1,2,6,7,18,<br>23,25,26 | 3,4,5,8,19,<br>20,21,22,2<br>4 | 7 | P01946,P12020,P19629,P55091,Q63942,Q6P6Q2,Q91ZS3        |
| 4221 | 1,2,6,7,18,<br>24,25,26 | 3,4,5,8,19,<br>20,21,22,2<br>3 | 4 | P19629,P55091,Q7TPB1,Q91ZS3                             |
| 4222 | 1,2,6,7,19,<br>20,21,22 | 3,4,5,8,18,<br>23,24,25,2<br>6 | 5 | P00714,P12785,P35467,P97840,Q6AYS4                      |
| 4223 | 1,2,6,7,19,<br>20,21,23 | 3,4,5,8,18,<br>22,24,25,2<br>6 | 4 | P15399,P97580,Q30KJ2,Q63532                             |
| 4224 | 1,2,6,7,19,<br>20,21,24 | 3,4,5,8,18,<br>22,23,25,2<br>6 | 6 | O54861,P00714,P13432,P35467,Q63532,Q6AYS4               |
| 4225 | 1,2,6,7,19,<br>20,21,25 | 3,4,5,8,18,<br>22,23,24,2<br>6 | 5 | P12020,P35467,P47967,P97840,Q91ZS3                      |
| 4226 | 1,2,6,7,19,<br>20,21,26 | 3,4,5,8,18,<br>22,23,24,2<br>5 | 4 | O54861,P83748,Q6AYS4,Q91ZS3                             |
| 4227 | 1,2,6,7,19,<br>20,22,23 | 3,4,5,8,18,<br>21,24,25,2<br>6 | 8 | P00774,P15399,P31430,P97580,Q30KJ2,Q63532,Q6AYS4,Q8CJD3 |
| 4228 | 1,2,6,7,19,<br>20,22,24 | 3,4,5,8,18,<br>21,23,25,2<br>6 | 6 | P00714,P00774,P12785,P35467,Q63532,Q6AYS4               |

|      |                         |                                |    |                                                                                            |
|------|-------------------------|--------------------------------|----|--------------------------------------------------------------------------------------------|
| 4229 | 1,2,6,7,19,<br>20,22,25 | 3,4,5,8,18,<br>21,23,24,2<br>6 | 9  | P06911,P12020,P12785,P35467,P47967,P97840,Q5GRG2,Q63532,Q91ZS3                             |
| 4230 | 1,2,6,7,19,<br>20,22,26 | 3,4,5,8,18,<br>21,23,24,2<br>5 | 3  | Q63532,Q63751,Q6AYS4                                                                       |
| 4231 | 1,2,6,7,19,<br>20,23,24 | 3,4,5,8,18,<br>21,22,25,2<br>6 | 6  | P02631,P15399,P97580,Q30KJ2,Q63532,Q6AYS4                                                  |
| 4232 | 1,2,6,7,19,<br>20,23,25 | 3,4,5,8,18,<br>21,22,24,2<br>6 | 8  | P12020,P15399,P97580,P97840,Q30KJ2,Q5GRG2,Q63532,Q91ZS3                                    |
| 4233 | 1,2,6,7,19,<br>20,23,26 | 3,4,5,8,18,<br>21,22,24,2<br>5 | 5  | P15399,P97580,Q30KJ2,Q63532,Q6AYS4                                                         |
| 4234 | 1,2,6,7,19,<br>20,24,25 | 3,4,5,8,18,<br>21,22,23,2<br>6 | 6  | P12020,P35467,P97840,Q63532,Q6AYS4,Q91ZS3                                                  |
| 4235 | 1,2,6,7,19,<br>20,24,26 | 3,4,5,8,18,<br>21,22,23,2<br>5 | 2  | Q63532,Q6AYS4                                                                              |
| 4236 | 1,2,6,7,19,<br>20,25,26 | 3,4,5,8,18,<br>21,22,23,2<br>4 | 5  | P12020,P35280,P97840,Q63532,Q91ZS3                                                         |
| 4237 | 1,2,6,7,19,<br>21,22,23 | 3,4,5,8,18,<br>20,24,25,2<br>6 | 7  | P14668,P15399,P97580,P97840,Q30KJ2,Q63532,Q8CJD3                                           |
| 4238 | 1,2,6,7,19,<br>21,22,24 | 3,4,5,8,18,<br>20,23,25,2<br>6 | 9  | P00714,P12785,P13432,P35467,P97840,Q4FZU2,Q63532,Q6AYS4,Q6IG02                             |
| 4239 | 1,2,6,7,19,<br>21,22,25 | 3,4,5,8,18,<br>20,23,24,2<br>6 | 12 | P06911,P09605,P25809,P12020,P12785,P19629,P35467,P47967,P97840,Q5GRG2,Q63532,Q6IG02,Q91ZS3 |
| 4240 | 1,2,6,7,19,<br>21,22,26 | 3,4,5,8,18,<br>20,23,24,2<br>5 | 3  | P83748,P97840,Q63532                                                                       |
| 4241 | 1,2,6,7,19,<br>21,23,24 | 3,4,5,8,18,<br>20,22,25,2<br>6 | 6  | P02631,P15399,P97580,P97840,Q30KJ2,Q63532                                                  |
| 4242 | 1,2,6,7,19,<br>21,23,25 | 3,4,5,8,18,<br>20,22,24,2<br>6 | 11 | P12020,P15399,P19629,P47967,P97580,P97840,Q30KJ2,Q5GRG2,Q63532,Q6P6R2,Q91ZS3               |
| 4243 | 1,2,6,7,19,<br>21,23,26 | 3,4,5,8,18,<br>20,22,24,2<br>5 | 4  | P15399,P97580,Q30KJ2,Q63532                                                                |

|      |                         |                                |    |                                                                                            |
|------|-------------------------|--------------------------------|----|--------------------------------------------------------------------------------------------|
| 4244 | 1,2,6,7,19,<br>21,24,25 | 3,4,5,8,18,<br>20,22,23,2<br>6 | 9  | P12020,P19629,P22006,P35467,P47967,P97840,Q63532,Q6IG02,Q91ZS3                             |
| 4245 | 1,2,6,7,19,<br>21,24,26 | 3,4,5,8,18,<br>20,22,23,2<br>5 | 2  | Q63532,Q6AYS4                                                                              |
| 4246 | 1,2,6,7,19,<br>21,25,26 | 3,4,5,8,18,<br>20,22,23,2<br>4 | 7  | P12020,P47967,P83748,P97840,Q63532,Q91ZS3,Q9QZK9                                           |
| 4247 | 1,2,6,7,19,<br>22,23,24 | 3,4,5,8,18,<br>20,21,25,2<br>6 | 7  | P02631,P15399,P31430,P97580,Q30KJ2,Q63532,Q6AYS4                                           |
| 4248 | 1,2,6,7,19,<br>22,23,25 | 3,4,5,8,18,<br>20,21,24,2<br>6 | 10 | P06911,P12020,P15399,P19629,P50280,P97580,P97840,Q30KJ2,Q5GRG2,Q63532                      |
| 4249 | 1,2,6,7,19,<br>22,23,26 | 3,4,5,8,18,<br>20,21,24,2<br>5 | 5  | P15399,P97580,Q30KJ2,Q63532,Q6AYS4                                                         |
| 4250 | 1,2,6,7,19,<br>22,24,25 | 3,4,5,8,18,<br>20,21,23,2<br>6 | 13 | P01835,P06911,P12020,P12785,P19629,P35467,P97840,Q4FZU2,Q4FZU6,Q5GRG2,Q63532,Q6IG02,Q6P6Q2 |
| 4251 | 1,2,6,7,19,<br>22,24,26 | 3,4,5,8,18,<br>20,21,23,2<br>5 | 2  | Q63532,Q6AYS4                                                                              |
| 4252 | 1,2,6,7,19,<br>22,25,26 | 3,4,5,8,18,<br>20,21,23,2<br>4 | 6  | P06911,P12020,P19629,P97840,Q5GRG2,Q63532                                                  |
| 4253 | 1,2,6,7,19,<br>23,24,25 | 3,4,5,8,18,<br>20,21,22,2<br>6 | 10 | P02631,P06911,P12020,P15399,P19629,P97580,P97840,Q30KJ2,Q5GRG2,Q63532                      |
| 4254 | 1,2,6,7,19,<br>23,24,26 | 3,4,5,8,18,<br>20,21,22,2<br>5 | 6  | P01946,P15399,P97580,Q30KJ2,Q63532,Q6AYS4                                                  |
| 4255 | 1,2,6,7,19,<br>23,25,26 | 3,4,5,8,18,<br>20,21,22,2<br>4 | 9  | P01946,P12020,P15399,P19629,P97580,P97840,Q30KJ2,Q5GRG2,Q63532                             |
| 4256 | 1,2,6,7,19,<br>24,25,26 | 3,4,5,8,18,<br>20,21,22,2<br>3 | 6  | P12020,P14480,P19629,P97840,Q63532,Q7TPB1                                                  |
| 4257 | 1,2,6,7,20,<br>21,22,23 | 3,4,5,8,18,<br>19,24,25,2<br>6 | 1  | P13432                                                                                     |
| 4258 | 1,2,6,7,20,<br>21,22,24 | 3,4,5,8,18,<br>19,23,25,2<br>6 | 6  | P00714,P12785,P13432,P35467,Q5XFX0,Q64194                                                  |

|      |                         |                                |   |                                                                       |
|------|-------------------------|--------------------------------|---|-----------------------------------------------------------------------|
| 4259 | 1,2,6,7,20,<br>21,22,25 | 3,4,5,8,18,<br>19,23,24,2<br>6 | 9 | P09605;P25809,P12020,P12785,P19629,P35467,P47967,P97840,Q5GRG2,Q91ZS3 |
| 4260 | 1,2,6,7,20,<br>21,22,26 | 3,4,5,8,18,<br>19,23,24,2<br>5 | 3 | P13432,P83748,Q91ZS3                                                  |
| 4261 | 1,2,6,7,20,<br>21,23,24 | 3,4,5,8,18,<br>19,22,25,2<br>6 | 1 | P13432                                                                |
| 4262 | 1,2,6,7,20,<br>21,23,25 | 3,4,5,8,18,<br>19,22,24,2<br>6 | 6 | P12020,P19629,P97840,Q5GRG2,Q6P6R2,Q91ZS3                             |
| 4263 | 1,2,6,7,20,<br>21,23,26 | 3,4,5,8,18,<br>19,22,24,2<br>5 | 2 | Q91ZS3,Q9QUL6                                                         |
| 4264 | 1,2,6,7,20,<br>21,24,25 | 3,4,5,8,18,<br>19,22,23,2<br>6 | 8 | O54728,P09605;P25809,P13432,P19629,P35467,P97840,Q64194,Q91ZS3        |
| 4265 | 1,2,6,7,20,<br>21,24,26 | 3,4,5,8,18,<br>19,22,23,2<br>5 | 4 | O54861,P13432,Q6AYS4,Q91ZS3                                           |
| 4266 | 1,2,6,7,20,<br>21,25,26 | 3,4,5,8,18,<br>19,22,23,2<br>4 | 1 | Q91ZS3                                                                |
| 4267 | 1,2,6,7,20,<br>22,23,24 | 3,4,5,8,18,<br>19,21,25,2<br>6 | 1 | Q6AYS4                                                                |
| 4268 | 1,2,6,7,20,<br>22,23,25 | 3,4,5,8,18,<br>19,21,24,2<br>6 | 5 | P06911,P12020,P19629,Q5GRG2,Q91ZS3                                    |
| 4269 | 1,2,6,7,20,<br>22,23,26 | 3,4,5,8,18,<br>19,21,24,2<br>5 | 1 | Q6AYS4                                                                |
| 4270 | 1,2,6,7,20,<br>22,24,25 | 3,4,5,8,18,<br>19,21,23,2<br>6 | 8 | P06911,P12020,P12785,P19629,P35467,Q5GRG2,Q64194,Q91ZS3               |
| 4271 | 1,2,6,7,20,<br>22,24,26 | 3,4,5,8,18,<br>19,21,23,2<br>5 | 1 | Q6AYS4                                                                |
| 4272 | 1,2,6,7,20,<br>22,25,26 | 3,4,5,8,18,<br>19,21,23,2<br>4 | 4 | P12020,P19629,Q5GRG2,Q91ZS3                                           |
| 4273 | 1,2,6,7,20,<br>23,24,25 | 3,4,5,8,18,<br>19,21,22,2<br>6 | 4 | P12020,P19629,Q5GRG2,Q91ZS3                                           |

|      |                         |                                |    |                                                                                                   |
|------|-------------------------|--------------------------------|----|---------------------------------------------------------------------------------------------------|
| 4274 | 1,2,6,7,20,<br>23,24,26 | 3,4,5,8,18,<br>19,21,22,2<br>5 | 1  | Q6AYS4                                                                                            |
| 4275 | 1,2,6,7,20,<br>23,25,26 | 3,4,5,8,18,<br>19,21,22,2<br>4 | 5  | P01946,P12020,P19629,Q5GRG2,Q91ZS3                                                                |
| 4276 | 1,2,6,7,20,<br>24,25,26 | 3,4,5,8,18,<br>19,21,22,2<br>3 | 2  | P19629,Q91ZS3                                                                                     |
| 4277 | 1,2,6,7,21,<br>22,23,24 | 3,4,5,8,18,<br>19,20,25,2<br>6 | 1  | P13432                                                                                            |
| 4278 | 1,2,6,7,21,<br>22,23,25 | 3,4,5,8,18,<br>19,20,24,2<br>6 | 9  | P06911,P09605,P25809,P12020,P19629,P70709,P97840,Q5GRG2,Q6P6R2,Q91ZS3                             |
| 4279 | 1,2,6,7,21,<br>22,23,26 | 3,4,5,8,18,<br>19,20,24,2<br>5 | 1  | P83748                                                                                            |
| 4280 | 1,2,6,7,21,<br>22,24,25 | 3,4,5,8,18,<br>19,20,23,2<br>6 | 13 | P06911,P09605,P25809,P12020,P12785,P13432,P19629,P22006,P35467,P97840,Q5GRG2,Q64194,Q6IG02,Q91ZS3 |
| 4281 | 1,2,6,7,21,<br>22,24,26 | 3,4,5,8,18,<br>19,20,23,2<br>5 | 4  | P00714,P13432,P35467,P83748                                                                       |
| 4282 | 1,2,6,7,21,<br>22,25,26 | 3,4,5,8,18,<br>19,20,23,2<br>4 | 9  | P09605,P25809,P12020,P19629,P35467,P83748,P97840,Q5GRG2,Q91ZS3,Q9QZK9                             |
| 4283 | 1,2,6,7,21,<br>23,24,25 | 3,4,5,8,18,<br>19,20,22,2<br>6 | 7  | P12020,P19629,P22006,P97840,Q5GRG2,Q6P6R2,Q91ZS3                                                  |
| 4284 | 1,2,6,7,21,<br>23,24,26 | 3,4,5,8,18,<br>19,20,22,2<br>5 | 1  | Q6IFV1                                                                                            |
| 4285 | 1,2,6,7,21,<br>23,25,26 | 3,4,5,8,18,<br>19,20,22,2<br>4 | 9  | P01946,P12020,P19629,P22006,P83121,P97840,Q5GRG2,Q6P6R2,Q91ZS3                                    |
| 4286 | 1,2,6,7,21,<br>24,25,26 | 3,4,5,8,18,<br>19,20,22,2<br>3 | 4  | P19629,P22006,P97840,Q91ZS3                                                                       |
| 4287 | 1,2,6,7,22,<br>23,24,25 | 3,4,5,8,18,<br>19,20,21,2<br>6 | 5  | P06911,P12020,P19629,Q4FZU6,Q5GRG2                                                                |
| 4288 | 1,2,6,7,22,<br>23,24,26 | 3,4,5,8,18,<br>19,20,21,2<br>5 | 2  | P00731,Q6AYS4                                                                                     |



|      |                         |                                |    |                                                                                     |
|------|-------------------------|--------------------------------|----|-------------------------------------------------------------------------------------|
| 4289 | 1,2,6,7,22,<br>23,25,26 | 3,4,5,8,18,<br>19,20,21,2<br>4 | 5  | P01946,P06911,P12020,P19629,Q5GRG2                                                  |
| 4290 | 1,2,6,7,22,<br>24,25,26 | 3,4,5,8,18,<br>19,20,21,2<br>3 | 4  | P06911,P12020,P19629,Q5GRG2                                                         |
| 4291 | 1,2,6,7,23,<br>24,25,26 | 3,4,5,8,18,<br>19,20,21,2<br>2 | 5  | P01946,P12020,P19629,Q5GRG2,Q7TPB1                                                  |
| 4292 | 1,2,6,8,18,<br>19,20,21 | 3,4,5,7,22,<br>23,24,25,2<br>6 | 9  | O35547,P00731,P02782,P08723,P35281,P62804,Q63751,Q6AYR8,Q8K4G9                      |
| 4293 | 1,2,6,8,18,<br>19,20,22 | 3,4,5,7,21,<br>23,24,25,2<br>6 | 4  | P22006,Q63751,Q8CJD3,Q8K4G9                                                         |
| 4294 | 1,2,6,8,18,<br>19,20,23 | 3,4,5,7,21,<br>22,24,25,2<br>6 | 4  | P15399,P22006,Q8CJD3,Q9Z1F2                                                         |
| 4295 | 1,2,6,8,18,<br>19,20,24 | 3,4,5,7,21,<br>22,23,25,2<br>6 | 0  |                                                                                     |
| 4296 | 1,2,6,8,18,<br>19,20,25 | 3,4,5,7,21,<br>22,23,24,2<br>6 | 4  | P35280,Q62635,Q8K4G9,Q91ZS3                                                         |
| 4297 | 1,2,6,8,18,<br>19,20,26 | 3,4,5,7,21,<br>22,23,24,2<br>5 | 6  | P35280,P62804,Q63355,Q63751,Q63942,Q8K4G9                                           |
| 4298 | 1,2,6,8,18,<br>19,21,22 | 3,4,5,7,20,<br>23,24,25,2<br>6 | 5  | O35547,P02782,P08723,P35281,Q8CJD3                                                  |
| 4299 | 1,2,6,8,18,<br>19,21,23 | 3,4,5,7,20,<br>22,24,25,2<br>6 | 11 | O35547,P02782,P02803,P15399,P35281,Q03191,Q62635,Q63942,Q8CJD3,Q99MH3,Q9Z1F2        |
| 4300 | 1,2,6,8,18,<br>19,21,24 | 3,4,5,7,20,<br>22,23,25,2<br>6 | 5  | O35547,P02782,P05539,P13432,P35281                                                  |
| 4301 | 1,2,6,8,18,<br>19,21,25 | 3,4,5,7,20,<br>22,23,24,2<br>6 | 12 | O35547,O54728,P00731,P02803,P31430,P35281,P47967,P97840,P98089,Q62635,Q8CIZ5,Q91ZS3 |
| 4302 | 1,2,6,8,18,<br>19,21,26 | 3,4,5,7,20,<br>22,23,24,2<br>5 | 6  | P02782,P35281,Q00715,Q63751,Q63942,Q8K4G9                                           |
| 4303 | 1,2,6,8,18,<br>19,22,23 | 3,4,5,7,20,<br>21,24,25,2<br>6 | 4  | P15399,Q63942,Q8CJD3,Q9Z1F2                                                         |

|      |                         |                                |   |                                                         |
|------|-------------------------|--------------------------------|---|---------------------------------------------------------|
| 4304 | 1,2,6,8,18,<br>19,22,24 | 3,4,5,7,20,<br>21,23,25,2<br>6 | 1 | P83121                                                  |
| 4305 | 1,2,6,8,18,<br>19,22,25 | 3,4,5,7,20,<br>21,23,24,2<br>6 | 4 | P06911,P97840,Q4FZU6,Q62635                             |
| 4306 | 1,2,6,8,18,<br>19,22,26 | 3,4,5,7,20,<br>21,23,24,2<br>5 | 3 | Q63751,Q63942,Q8K4G9                                    |
| 4307 | 1,2,6,8,18,<br>19,23,24 | 3,4,5,7,20,<br>21,22,25,2<br>6 | 4 | P05539,P15399,Q03191,Q63942                             |
| 4308 | 1,2,6,8,18,<br>19,23,25 | 3,4,5,7,20,<br>21,22,24,2<br>6 | 7 | P02803,P15399,P50280,Q62635,Q8CJD3,Q99MH3,Q9Z1F2        |
| 4309 | 1,2,6,8,18,<br>19,23,26 | 3,4,5,7,20,<br>21,22,24,2<br>5 | 6 | P15399,P35467,Q03191,Q63942,Q6IFV1,Q6P6Q2               |
| 4310 | 1,2,6,8,18,<br>19,24,25 | 3,4,5,7,20,<br>21,22,23,2<br>6 | 3 | P05539,Q4FZU6,Q62635                                    |
| 4311 | 1,2,6,8,18,<br>19,24,26 | 3,4,5,7,20,<br>21,22,23,2<br>5 | 1 | Q63942                                                  |
| 4312 | 1,2,6,8,18,<br>19,25,26 | 3,4,5,7,20,<br>21,22,23,2<br>4 | 4 | P35280,Q62635,Q63942,Q8K4G9                             |
| 4313 | 1,2,6,8,18,<br>20,21,22 | 3,4,5,7,19,<br>23,24,25,2<br>6 | 5 | O35547,P02782,P08723,P13432,P62804                      |
| 4314 | 1,2,6,8,18,<br>20,21,23 | 3,4,5,7,19,<br>22,24,25,2<br>6 | 5 | O35547,P02782,P62804,Q6AYR8,Q8CJD3                      |
| 4315 | 1,2,6,8,18,<br>20,21,24 | 3,4,5,7,19,<br>22,23,25,2<br>6 | 6 | O54728,P02782,P05539,P13432,P62804,Q6AYR8               |
| 4316 | 1,2,6,8,18,<br>20,21,25 | 3,4,5,7,19,<br>22,23,24,2<br>6 | 8 | O54728,P31430,P47727,P62804,P98089,Q8K4G9,Q91ZS3,Q9WTT6 |
| 4317 | 1,2,6,8,18,<br>20,21,26 | 3,4,5,7,19,<br>22,23,24,2<br>5 | 7 | P02782,P62804,Q00715,Q63942,Q6AYR8,Q8K4G9,Q91ZS3        |
| 4318 | 1,2,6,8,18,<br>20,22,23 | 3,4,5,7,19,<br>21,24,25,2<br>6 | 2 | P22006,Q8CJD3                                           |

|      |                         |                                |    |                                                                       |
|------|-------------------------|--------------------------------|----|-----------------------------------------------------------------------|
| 4319 | 1,2,6,8,18,<br>20,22,24 | 3,4,5,7,19,<br>21,23,25,2<br>6 | 0  |                                                                       |
| 4320 | 1,2,6,8,18,<br>20,22,25 | 3,4,5,7,19,<br>21,23,24,2<br>6 | 1  | Q91ZS3                                                                |
| 4321 | 1,2,6,8,18,<br>20,22,26 | 3,4,5,7,19,<br>21,23,24,2<br>5 | 2  | Q63942,Q8K4G9                                                         |
| 4322 | 1,2,6,8,18,<br>20,23,24 | 3,4,5,7,19,<br>21,22,25,2<br>6 | 0  |                                                                       |
| 4323 | 1,2,6,8,18,<br>20,23,25 | 3,4,5,7,19,<br>21,22,24,2<br>6 | 1  | Q91ZS3                                                                |
| 4324 | 1,2,6,8,18,<br>20,23,26 | 3,4,5,7,19,<br>21,22,24,2<br>5 | 4  | Q63942,Q6IFU8,Q6IFV1,Q6P6Q2                                           |
| 4325 | 1,2,6,8,18,<br>20,24,25 | 3,4,5,7,19,<br>21,22,23,2<br>6 | 2  | O54728,Q91ZS3                                                         |
| 4326 | 1,2,6,8,18,<br>20,24,26 | 3,4,5,7,19,<br>21,22,23,2<br>5 | 1  | Q63942                                                                |
| 4327 | 1,2,6,8,18,<br>20,25,26 | 3,4,5,7,19,<br>21,22,23,2<br>4 | 4  | P35280,Q63942,Q8K4G9,Q91ZS3                                           |
| 4328 | 1,2,6,8,18,<br>21,22,23 | 3,4,5,7,19,<br>20,24,25,2<br>6 | 5  | O35547,P02782,P08723,P13432,Q8CJD3                                    |
| 4329 | 1,2,6,8,18,<br>21,22,24 | 3,4,5,7,19,<br>20,23,25,2<br>6 | 3  | P02782,P05539,P13432                                                  |
| 4330 | 1,2,6,8,18,<br>21,22,25 | 3,4,5,7,19,<br>20,23,24,2<br>6 | 7  | O35547,P02782,P08723,P31430,P97840,P98089,Q91ZS3                      |
| 4331 | 1,2,6,8,18,<br>21,22,26 | 3,4,5,7,19,<br>20,23,24,2<br>5 | 4  | P02782,P13432,Q00715,Q63942                                           |
| 4332 | 1,2,6,8,18,<br>21,23,24 | 3,4,5,7,19,<br>20,22,25,2<br>6 | 4  | O54728,P02782,P05539,P13432                                           |
| 4333 | 1,2,6,8,18,<br>21,23,25 | 3,4,5,7,19,<br>20,22,24,2<br>6 | 10 | O54728,P02803,P07150,P14669,P31430,P98089,Q6P6R2,Q91ZS3,Q99MH3,Q9WTT6 |

|      |                         |                                |   |                                                                |
|------|-------------------------|--------------------------------|---|----------------------------------------------------------------|
| 4334 | 1,2,6,8,18,<br>21,23,26 | 3,4,5,7,19,<br>20,22,24,2<br>5 | 7 | P02782,P14669,Q00715,Q63942,Q6IFU8,Q6IFV1,Q6P6Q2               |
| 4335 | 1,2,6,8,18,<br>21,24,25 | 3,4,5,7,19,<br>20,22,23,2<br>6 | 9 | O54728,P05539,P13432,P31430,P98089,Q62997,Q6P6R2,Q91ZS3,Q9WTT6 |
| 4336 | 1,2,6,8,18,<br>21,24,26 | 3,4,5,7,19,<br>20,22,23,2<br>5 | 3 | P02782,P13432,Q63942                                           |
| 4337 | 1,2,6,8,18,<br>21,25,26 | 3,4,5,7,19,<br>20,22,23,2<br>4 | 7 | P31430,P55091,P98089,Q00715,Q63942,Q91ZS3,Q9WTT6               |
| 4338 | 1,2,6,8,18,<br>22,23,24 | 3,4,5,7,19,<br>20,21,25,2<br>6 | 0 |                                                                |
| 4339 | 1,2,6,8,18,<br>22,23,25 | 3,4,5,7,19,<br>20,21,24,2<br>6 | 3 | P06911,Q5GRG2,Q8CJD3                                           |
| 4340 | 1,2,6,8,18,<br>22,23,26 | 3,4,5,7,19,<br>20,21,24,2<br>5 | 4 | Q63942,Q6IFU7,Q6IFV1,Q6P6Q2                                    |
| 4341 | 1,2,6,8,18,<br>22,24,25 | 3,4,5,7,19,<br>20,21,23,2<br>6 | 1 | Q4FZU6                                                         |
| 4342 | 1,2,6,8,18,<br>22,24,26 | 3,4,5,7,19,<br>20,21,23,2<br>5 | 1 | Q63942                                                         |
| 4343 | 1,2,6,8,18,<br>22,25,26 | 3,4,5,7,19,<br>20,21,23,2<br>4 | 1 | Q63942                                                         |
| 4344 | 1,2,6,8,18,<br>23,24,25 | 3,4,5,7,19,<br>20,21,22,2<br>6 | 3 | O54728,P05539,Q6P6R2                                           |
| 4345 | 1,2,6,8,18,<br>23,24,26 | 3,4,5,7,19,<br>20,21,22,2<br>5 | 4 | Q63942,Q6IFU7,Q6IFV1,Q6P6Q2                                    |
| 4346 | 1,2,6,8,18,<br>23,25,26 | 3,4,5,7,19,<br>20,21,22,2<br>4 | 4 | P55091,Q63942,Q6IFU8,Q6P6Q2                                    |
| 4347 | 1,2,6,8,18,<br>24,25,26 | 3,4,5,7,19,<br>20,21,22,2<br>3 | 3 | P55091,Q63942,Q7TPB1                                           |
| 4348 | 1,2,6,8,19,<br>20,21,22 | 3,4,5,7,18,<br>23,24,25,2<br>6 | 6 | P00714,P02782,P12785,P35281,P62804,Q8K4G9                      |

|      |                         |                                |   |                                                         |
|------|-------------------------|--------------------------------|---|---------------------------------------------------------|
| 4349 | 1,2,6,8,19,<br>20,21,23 | 3,4,5,7,18,<br>22,24,25,2<br>6 | 6 | P02782,P15399,P35281,P62804,Q8CJD3,Q8K4G9               |
| 4350 | 1,2,6,8,19,<br>20,21,24 | 3,4,5,7,18,<br>22,23,25,2<br>6 | 7 | P00714,P02782,P12785,P13432,P35281,P62804,Q8K4G9        |
| 4351 | 1,2,6,8,19,<br>20,21,25 | 3,4,5,7,18,<br>22,23,24,2<br>6 | 8 | P12785,P35281,P47967,P62804,P97840,Q8K4G9,Q8VD89,Q91ZS3 |
| 4352 | 1,2,6,8,19,<br>20,21,26 | 3,4,5,7,18,<br>22,23,24,2<br>5 | 6 | P02782,P35281,P62804,Q00715,Q63751,Q8K4G9               |
| 4353 | 1,2,6,8,19,<br>20,22,23 | 3,4,5,7,18,<br>21,24,25,2<br>6 | 4 | P00774,P15399,P22006,Q8CJD3                             |
| 4354 | 1,2,6,8,19,<br>20,22,24 | 3,4,5,7,18,<br>21,23,25,2<br>6 | 3 | P00714,P00774,P12785                                    |
| 4355 | 1,2,6,8,19,<br>20,22,25 | 3,4,5,7,18,<br>21,23,24,2<br>6 | 4 | P06911,P12785,Q5GRG2,Q8K4G9                             |
| 4356 | 1,2,6,8,19,<br>20,22,26 | 3,4,5,7,18,<br>21,23,24,2<br>5 | 3 | P12785,Q63751,Q8K4G9                                    |
| 4357 | 1,2,6,8,19,<br>20,23,24 | 3,4,5,7,18,<br>21,22,25,2<br>6 | 1 | P15399                                                  |
| 4358 | 1,2,6,8,19,<br>20,23,25 | 3,4,5,7,18,<br>21,22,24,2<br>6 | 3 | P15399,Q8CJD3,Q8K4G9                                    |
| 4359 | 1,2,6,8,19,<br>20,23,26 | 3,4,5,7,18,<br>21,22,24,2<br>5 | 4 | P15399,P62804,Q66H69,Q8K4G9                             |
| 4360 | 1,2,6,8,19,<br>20,24,25 | 3,4,5,7,18,<br>21,22,23,2<br>6 | 2 | P12785,Q8K4G9                                           |
| 4361 | 1,2,6,8,19,<br>20,24,26 | 3,4,5,7,18,<br>21,22,23,2<br>5 | 1 | Q8K4G9                                                  |
| 4362 | 1,2,6,8,19,<br>20,25,26 | 3,4,5,7,18,<br>21,22,23,2<br>4 | 2 | P35280,Q8K4G9                                           |
| 4363 | 1,2,6,8,19,<br>21,22,23 | 3,4,5,7,18,<br>20,24,25,2<br>6 | 5 | O35547,P02782,P15399,P35281,Q8CJD3                      |

|      |                         |                                |   |                                                                |
|------|-------------------------|--------------------------------|---|----------------------------------------------------------------|
| 4364 | 1,2,6,8,19,<br>21,22,24 | 3,4,5,7,18,<br>20,23,25,2<br>6 | 6 | A2RUV9,P00714,P02782,P12785,P13432,Q6IG02                      |
| 4365 | 1,2,6,8,19,<br>21,22,25 | 3,4,5,7,18,<br>20,23,24,2<br>6 | 9 | A2RUV9,P02782,P06911,P12785,P47967,P97840,Q4FZU6,Q5GRG2,Q6IG02 |
| 4366 | 1,2,6,8,19,<br>21,22,26 | 3,4,5,7,18,<br>20,23,24,2<br>5 | 5 | A2RUV9,P02782,P12785,Q00715,Q8K4G9                             |
| 4367 | 1,2,6,8,19,<br>21,23,24 | 3,4,5,7,18,<br>20,22,25,2<br>6 | 4 | P02782,P05539,P15399,P35281                                    |
| 4368 | 1,2,6,8,19,<br>21,23,25 | 3,4,5,7,18,<br>20,22,24,2<br>6 | 7 | P02803,P15399,P35281,P50280,P97840,Q6P6R2,Q9WTT6               |
| 4369 | 1,2,6,8,19,<br>21,23,26 | 3,4,5,7,18,<br>20,22,24,2<br>5 | 5 | P02782,P15399,P35281,Q00715,Q6IFV1                             |
| 4370 | 1,2,6,8,19,<br>21,24,25 | 3,4,5,7,18,<br>20,22,23,2<br>6 | 5 | P05539,P12785,P97840,Q4FZU6,Q6IG02                             |
| 4371 | 1,2,6,8,19,<br>21,24,26 | 3,4,5,7,18,<br>20,22,23,2<br>5 | 1 | P02782                                                         |
| 4372 | 1,2,6,8,19,<br>21,25,26 | 3,4,5,7,18,<br>20,22,23,2<br>4 | 4 | P97840,Q00715,Q8K4G9,Q9WTT6                                    |
| 4373 | 1,2,6,8,19,<br>22,23,24 | 3,4,5,7,18,<br>20,21,25,2<br>6 | 1 | P15399                                                         |
| 4374 | 1,2,6,8,19,<br>22,23,25 | 3,4,5,7,18,<br>20,21,24,2<br>6 | 7 | P06911,P12020,P15399,P50280,Q4FZU6,Q5GRG2,Q8CJD3               |
| 4375 | 1,2,6,8,19,<br>22,23,26 | 3,4,5,7,18,<br>20,21,24,2<br>5 | 0 |                                                                |
| 4376 | 1,2,6,8,19,<br>22,24,25 | 3,4,5,7,18,<br>20,21,23,2<br>6 | 7 | P01835,P06911,P12785,Q4FZU2,Q4FZU6,Q5GRG2,Q6IG02               |
| 4377 | 1,2,6,8,19,<br>22,24,26 | 3,4,5,7,18,<br>20,21,23,2<br>5 | 1 | P12785                                                         |
| 4378 | 1,2,6,8,19,<br>22,25,26 | 3,4,5,7,18,<br>20,21,23,2<br>4 | 3 | P06911,P12785,Q8K4G9                                           |

|      |                         |                                |   |                                                         |
|------|-------------------------|--------------------------------|---|---------------------------------------------------------|
| 4379 | 1,2,6,8,19,<br>23,24,25 | 3,4,5,7,18,<br>20,21,22,2<br>6 | 4 | P15399,P50280,Q4FZU6,Q6P6R2                             |
| 4380 | 1,2,6,8,19,<br>23,24,26 | 3,4,5,7,18,<br>20,21,22,2<br>5 | 1 | P15399                                                  |
| 4381 | 1,2,6,8,19,<br>23,25,26 | 3,4,5,7,18,<br>20,21,22,2<br>4 | 1 | P15399                                                  |
| 4382 | 1,2,6,8,19,<br>24,25,26 | 3,4,5,7,18,<br>20,21,22,2<br>3 | 0 |                                                         |
| 4383 | 1,2,6,8,20,<br>21,22,23 | 3,4,5,7,18,<br>19,24,25,2<br>6 | 3 | P02782,P13432,Q8CJD3                                    |
| 4384 | 1,2,6,8,20,<br>21,22,24 | 3,4,5,7,18,<br>19,23,25,2<br>6 | 6 | P00714,P02782,P12785,P13432,P35467,Q5XFX0               |
| 4385 | 1,2,6,8,20,<br>21,22,25 | 3,4,5,7,18,<br>19,23,24,2<br>6 | 6 | P12785,P35467,P47727,Q8K4G9,Q91ZS3,Q9WTT6               |
| 4386 | 1,2,6,8,20,<br>21,22,26 | 3,4,5,7,18,<br>19,23,24,2<br>5 | 7 | P02782,P12785,P13432,P62804,Q00715,Q8K4G9,Q99068        |
| 4387 | 1,2,6,8,20,<br>21,23,24 | 3,4,5,7,18,<br>19,22,25,2<br>6 | 2 | P02782,P13432                                           |
| 4388 | 1,2,6,8,20,<br>21,23,25 | 3,4,5,7,18,<br>19,22,24,2<br>6 | 4 | P47727,Q6P6R2,Q91ZS3,Q9WTT6                             |
| 4389 | 1,2,6,8,20,<br>21,23,26 | 3,4,5,7,18,<br>19,22,24,2<br>5 | 3 | P62804,Q00715,Q6IFV1                                    |
| 4390 | 1,2,6,8,20,<br>21,24,25 | 3,4,5,7,18,<br>19,22,23,2<br>6 | 8 | O54728,P12785,P13432,P35467,Q5XFX0,Q6P6R2,Q91ZS3,Q9WTT6 |
| 4391 | 1,2,6,8,20,<br>21,24,26 | 3,4,5,7,18,<br>19,22,23,2<br>5 | 5 | P02782,P13432,P62804,Q00715,Q6AYR8                      |
| 4392 | 1,2,6,8,20,<br>21,25,26 | 3,4,5,7,18,<br>19,22,23,2<br>4 | 5 | P62804,Q00715,Q8K4G9,Q91ZS3,Q9WTT6                      |
| 4393 | 1,2,6,8,20,<br>22,23,24 | 3,4,5,7,18,<br>19,21,25,2<br>6 | 1 | P82995                                                  |

|      |                         |                                |   |                                           |
|------|-------------------------|--------------------------------|---|-------------------------------------------|
| 4394 | 1,2,6,8,20,<br>22,23,25 | 3,4,5,7,18,<br>19,21,24,2<br>6 | 2 | P06911,Q5GRG2                             |
| 4395 | 1,2,6,8,20,<br>22,23,26 | 3,4,5,7,18,<br>19,21,24,2<br>5 | 0 |                                           |
| 4396 | 1,2,6,8,20,<br>22,24,25 | 3,4,5,7,18,<br>19,21,23,2<br>6 | 3 | P12785,P35467,Q5XFX0                      |
| 4397 | 1,2,6,8,20,<br>22,24,26 | 3,4,5,7,18,<br>19,21,23,2<br>5 | 1 | P12785                                    |
| 4398 | 1,2,6,8,20,<br>22,25,26 | 3,4,5,7,18,<br>19,21,23,2<br>4 | 2 | P12785,Q8K4G9                             |
| 4399 | 1,2,6,8,20,<br>23,24,25 | 3,4,5,7,18,<br>19,21,22,2<br>6 | 1 | Q6P6R2                                    |
| 4400 | 1,2,6,8,20,<br>23,24,26 | 3,4,5,7,18,<br>19,21,22,2<br>5 | 1 | Q6IFV1                                    |
| 4401 | 1,2,6,8,20,<br>23,25,26 | 3,4,5,7,18,<br>19,21,22,2<br>4 | 2 | Q6P6R2,Q9WTT6                             |
| 4402 | 1,2,6,8,20,<br>24,25,26 | 3,4,5,7,18,<br>19,21,22,2<br>3 | 0 |                                           |
| 4403 | 1,2,6,8,21,<br>22,23,24 | 3,4,5,7,18,<br>19,20,25,2<br>6 | 2 | P02782,P13432                             |
| 4404 | 1,2,6,8,21,<br>22,23,25 | 3,4,5,7,18,<br>19,20,24,2<br>6 | 6 | P06911,P50280,P70709,Q5GRG2,Q6P6R2,Q9WTT6 |
| 4405 | 1,2,6,8,21,<br>22,23,26 | 3,4,5,7,18,<br>19,20,24,2<br>5 | 2 | P02782,Q6IFV1                             |
| 4406 | 1,2,6,8,21,<br>22,24,25 | 3,4,5,7,18,<br>19,20,23,2<br>6 | 6 | P12785,P13432,P35467,Q4FZU6,Q5XFX0,Q6IG02 |
| 4407 | 1,2,6,8,21,<br>22,24,26 | 3,4,5,7,18,<br>19,20,23,2<br>5 | 3 | P02782,P12785,P13432                      |
| 4408 | 1,2,6,8,21,<br>22,25,26 | 3,4,5,7,18,<br>19,20,23,2<br>4 | 2 | P12785,Q9WTT6                             |



|      |                          |                                |   |                                           |
|------|--------------------------|--------------------------------|---|-------------------------------------------|
| 4409 | 1,2,6,8,21,<br>23,24,25  | 3,4,5,7,18,<br>19,20,22,2<br>6 | 5 | O54728,P19629,Q5U2V4,Q6P6R2,Q9WTT6        |
| 4410 | 1,2,6,8,21,<br>23,24,26  | 3,4,5,7,18,<br>19,20,22,2<br>5 | 2 | P02782,Q6IFV1                             |
| 4411 | 1,2,6,8,21,<br>23,25,26  | 3,4,5,7,18,<br>19,20,22,2<br>4 | 6 | P07150,P14669,Q6IFV1,Q6P6R2,Q91ZS3,Q9WTT6 |
| 4412 | 1,2,6,8,21,<br>24,25,26  | 3,4,5,7,18,<br>19,20,22,2<br>3 | 2 | Q6P6R2,Q9WTT6                             |
| 4413 | 1,2,6,8,22,<br>23,24,25  | 3,4,5,7,18,<br>19,20,21,2<br>6 | 5 | P06911,P19629,P50280,Q4FZU6,Q5GRG2        |
| 4414 | 1,2,6,8,22,<br>23,24,26  | 3,4,5,7,18,<br>19,20,21,2<br>5 | 1 | P00731                                    |
| 4415 | 1,2,6,8,22,<br>23,25,26  | 3,4,5,7,18,<br>19,20,21,2<br>4 | 2 | P06911,Q5GRG2                             |
| 4416 | 1,2,6,8,22,<br>24,25,26  | 3,4,5,7,18,<br>19,20,21,2<br>3 | 1 | P12785                                    |
| 4417 | 1,2,6,8,23,<br>24,25,26  | 3,4,5,7,18,<br>19,20,21,2<br>2 | 2 | Q6P6R2,Q7TPB1                             |
| 4418 | 1,2,6,18,1<br>9,20,21,22 | 3,4,5,7,8,2<br>3,24,25,26      | 2 | O35547,Q63751                             |
| 4419 | 1,2,6,18,1<br>9,20,21,23 | 3,4,5,7,8,2<br>2,24,25,26      | 2 | P15399,Q8CJD3                             |
| 4420 | 1,2,6,18,1<br>9,20,21,24 | 3,4,5,7,8,2<br>2,23,25,26      | 2 | P13432,Q6AYS4                             |
| 4421 | 1,2,6,18,1<br>9,20,21,25 | 3,4,5,7,8,2<br>2,23,24,26      | 4 | P47967,P97840,P98089,Q91ZS3               |
| 4422 | 1,2,6,18,1<br>9,20,21,26 | 3,4,5,7,8,2<br>2,23,24,25      | 4 | P62804,Q63751,Q6AYS4,Q8K4G9               |
| 4423 | 1,2,6,18,1<br>9,20,22,23 | 3,4,5,7,8,2<br>1,24,25,26      | 4 | P15399,P22006,Q6AYS4,Q8CJD3               |
| 4424 | 1,2,6,18,1<br>9,20,22,24 | 3,4,5,7,8,2<br>1,23,25,26      | 1 | Q6AYS4                                    |
| 4425 | 1,2,6,18,1<br>9,20,22,25 | 3,4,5,7,8,2<br>1,23,24,26      | 1 | P97840                                    |
| 4426 | 1,2,6,18,1<br>9,20,22,26 | 3,4,5,7,8,2<br>1,23,24,25      | 3 | Q63751,Q6AYS4,Q99041                      |

|      |                                                 |    |                                                                       |
|------|-------------------------------------------------|----|-----------------------------------------------------------------------|
| 4427 | 1,2,6,18,1 3,4,5,7,8,2<br>9,20,23,24 1,22,25,26 | 3  | P15399,Q6AYS4,Q6IFU7                                                  |
| 4428 | 1,2,6,18,1 3,4,5,7,8,2<br>9,20,23,25 1,22,24,26 | 2  | P15399,Q8CJD3                                                         |
| 4429 | 1,2,6,18,1 3,4,5,7,8,2<br>9,20,23,26 1,22,24,25 | 6  | P15399,Q63942,Q6AYS4,Q6IFU7,Q6IFU8,Q6P6Q2                             |
| 4430 | 1,2,6,18,1 3,4,5,7,8,2<br>9,20,24,25 1,22,23,26 | 1  | Q6AYS4                                                                |
| 4431 | 1,2,6,18,1 3,4,5,7,8,2<br>9,20,24,26 1,22,23,25 | 2  | Q6AYS4,Q99041                                                         |
| 4432 | 1,2,6,18,1 3,4,5,7,8,2<br>9,20,25,26 1,22,23,24 | 2  | P35280,Q8K4G9                                                         |
| 4433 | 1,2,6,18,1 3,4,5,7,8,2<br>9,21,22,23 0,24,25,26 | 3  | O35547,P15399,Q8CJD3                                                  |
| 4434 | 1,2,6,18,1 3,4,5,7,8,2<br>9,21,22,24 0,23,25,26 | 2  | P00714,P13432                                                         |
| 4435 | 1,2,6,18,1 3,4,5,7,8,2<br>9,21,22,25 0,23,24,26 | 4  | P47967,P97840,P98089,Q4FZU6                                           |
| 4436 | 1,2,6,18,1 3,4,5,7,8,2<br>9,21,22,26 0,23,24,25 | 1  | Q63751                                                                |
| 4437 | 1,2,6,18,1 3,4,5,7,8,2<br>9,21,23,24 0,22,25,26 | 3  | D3ZUC6,P05539,P15399                                                  |
| 4438 | 1,2,6,18,1 3,4,5,7,8,2<br>9,21,23,25 0,22,24,26 | 6  | P15399,P97840,P98089,Q62635,Q6P6R2,Q99MH3                             |
| 4439 | 1,2,6,18,1 3,4,5,7,8,2<br>9,21,23,26 0,22,24,25 | 10 | D3ZUC6,P15399,Q03191,Q63661,Q63942,Q6IFU7,Q6IFU8,Q6IFV1,Q6P6Q2,Q9QUL6 |
| 4440 | 1,2,6,18,1 3,4,5,7,8,2<br>9,21,24,25 0,22,23,26 | 5  | O54728,P05539,P97840,P98089,Q4FZU6                                    |
| 4441 | 1,2,6,18,1 3,4,5,7,8,2<br>9,21,24,26 0,22,23,25 | 2  | D3ZUC6,Q6AYS4                                                         |
| 4442 | 1,2,6,18,1 3,4,5,7,8,2<br>9,21,25,26 0,22,23,24 | 4  | P31430,P97840,P98089,Q62635                                           |
| 4443 | 1,2,6,18,1 3,4,5,7,8,2<br>9,22,23,24 0,21,25,26 | 3  | P15399,Q6AYS4,Q6IFU7                                                  |
| 4444 | 1,2,6,18,1 3,4,5,7,8,2<br>9,22,23,25 0,21,24,26 | 5  | P15399,P97840,Q4FZU6,Q8CJD3,Q99MH3                                    |
| 4445 | 1,2,6,18,1 3,4,5,7,8,2<br>9,22,23,26 0,21,24,25 | 3  | Q63942,Q6AYS4,Q6IFU7                                                  |
| 4446 | 1,2,6,18,1 3,4,5,7,8,2<br>9,22,24,25 0,21,23,26 | 2  | P97840,Q4FZU6                                                         |
| 4447 | 1,2,6,18,1 3,4,5,7,8,2<br>9,22,24,26 0,21,23,25 | 3  | Q5M819,Q6AYS4,Q99041                                                  |
| 4448 | 1,2,6,18,1 3,4,5,7,8,2<br>9,22,25,26 0,21,23,24 | 1  | P97840                                                                |
| 4449 | 1,2,6,18,1 3,4,5,7,8,2<br>9,23,24,25 0,21,22,26 | 3  | P15399,Q4FZU6,Q99MH3                                                  |

|      |                                                 |   |                                                  |
|------|-------------------------------------------------|---|--------------------------------------------------|
| 4450 | 1,2,6,18,1 3,4,5,7,8,2<br>9,23,24,26 0,21,22,25 | 5 | P15399,Q03191,Q63942,Q6AYS4,Q6IFU7               |
| 4451 | 1,2,6,18,1 3,4,5,7,8,2<br>9,23,25,26 0,21,22,24 | 5 | P15399,Q63942,Q6IFU8,Q6P6Q2,Q99MH3               |
| 4452 | 1,2,6,18,1 3,4,5,7,8,2<br>9,24,25,26 0,21,22,23 | 1 | Q7TPB1                                           |
| 4453 | 1,2,6,18,2 3,4,5,7,8,1<br>0,21,22,23 9,24,25,26 | 2 | Q8CJD3,Q9QUL6                                    |
| 4454 | 1,2,6,18,2 3,4,5,7,8,1<br>0,21,22,24 9,23,25,26 | 3 | P00714,P13432,Q99041                             |
| 4455 | 1,2,6,18,2 3,4,5,7,8,1<br>0,21,22,25 9,23,24,26 | 3 | P97840,P98089,Q91ZS3                             |
| 4456 | 1,2,6,18,2 3,4,5,7,8,1<br>0,21,22,26 9,23,24,25 | 3 | Q63751,Q99041,Q9QUL6                             |
| 4457 | 1,2,6,18,2 3,4,5,7,8,1<br>0,21,23,24 9,22,25,26 | 3 | P13432,Q6IFU7,Q9QUL6                             |
| 4458 | 1,2,6,18,2 3,4,5,7,8,1<br>0,21,23,25 9,22,24,26 | 4 | O54728,P98089,Q6P6R2,Q91ZS3                      |
| 4459 | 1,2,6,18,2 3,4,5,7,8,1<br>0,21,23,26 9,22,24,25 | 6 | Q6IFU7,Q6IFU8,Q6IFV1,Q6IMF3,Q6P6Q2,Q9QUL6        |
| 4460 | 1,2,6,18,2 3,4,5,7,8,1<br>0,21,24,25 9,22,23,26 | 3 | O54728,P98089,Q91ZS3                             |
| 4461 | 1,2,6,18,2 3,4,5,7,8,1<br>0,21,24,26 9,22,23,25 | 4 | P13432,Q6AYS4,Q99041,Q9QUL6                      |
| 4462 | 1,2,6,18,2 3,4,5,7,8,1<br>0,21,25,26 9,22,23,24 | 3 | P31430,P98089,Q91ZS3                             |
| 4463 | 1,2,6,18,2 3,4,5,7,8,1<br>0,22,23,24 9,21,25,26 | 2 | Q6AYS4,Q6IFU7                                    |
| 4464 | 1,2,6,18,2 3,4,5,7,8,1<br>0,22,23,25 9,21,24,26 | 1 | Q8CJD3                                           |
| 4465 | 1,2,6,18,2 3,4,5,7,8,1<br>0,22,23,26 9,21,24,25 | 5 | Q6AYS4,Q6IFU7,Q6IFU8,Q6P6Q2,Q9QUL6               |
| 4466 | 1,2,6,18,2 3,4,5,7,8,1<br>0,22,24,25 9,21,23,26 | 0 |                                                  |
| 4467 | 1,2,6,18,2 3,4,5,7,8,1<br>0,22,24,26 9,21,23,25 | 2 | Q6AYS4,Q99041                                    |
| 4468 | 1,2,6,18,2 3,4,5,7,8,1<br>0,22,25,26 9,21,23,24 | 1 | Q99041                                           |
| 4469 | 1,2,6,18,2 3,4,5,7,8,1<br>0,23,24,25 9,21,22,26 | 0 |                                                  |
| 4470 | 1,2,6,18,2 3,4,5,7,8,1<br>0,23,24,26 9,21,22,25 | 7 | Q63942,Q6AYS4,Q6IFU7,Q6IFU8,Q6IFV1,Q6P6Q2,Q9QUL6 |
| 4471 | 1,2,6,18,2 3,4,5,7,8,1<br>0,23,25,26 9,21,22,24 | 3 | Q6IFU7,Q6IFU8,Q6P6Q2                             |
| 4472 | 1,2,6,18,2 3,4,5,7,8,1<br>0,24,25,26 9,21,22,23 | 2 | Q7TPB1,Q99041                                    |

|      |                                                 |   |                                                                |
|------|-------------------------------------------------|---|----------------------------------------------------------------|
| 4473 | 1,2,6,18,2 3,4,5,7,8,1<br>1,22,23,24 9,20,25,26 | 2 | P13432,Q6IFU7                                                  |
| 4474 | 1,2,6,18,2 3,4,5,7,8,1<br>1,22,23,25 9,20,24,26 | 3 | P97840,P98089,Q6P6R2                                           |
| 4475 | 1,2,6,18,2 3,4,5,7,8,1<br>1,22,23,26 9,20,24,25 | 5 | Q6IFU7,Q6IFU8,Q6IFV1,Q6P6Q2,Q9QUL6                             |
| 4476 | 1,2,6,18,2 3,4,5,7,8,1<br>1,22,24,25 9,20,23,26 | 5 | O54728,P13432,P97840,P98089,Q4FZU6                             |
| 4477 | 1,2,6,18,2 3,4,5,7,8,1<br>1,22,24,26 9,20,23,25 | 3 | P13432,Q99041,Q9QUL6                                           |
| 4478 | 1,2,6,18,2 3,4,5,7,8,1<br>1,22,25,26 9,20,23,24 | 3 | P31430,P97840,P98089                                           |
| 4479 | 1,2,6,18,2 3,4,5,7,8,1<br>1,23,24,25 9,20,22,26 | 3 | O54728,P98089,Q6P6R2                                           |
| 4480 | 1,2,6,18,2 3,4,5,7,8,1<br>1,23,24,26 9,20,22,25 | 7 | D3ZUC6,Q63942,Q6IFU7,Q6IFU8,Q6IFV1,Q6P6Q2,Q9QUL6               |
| 4481 | 1,2,6,18,2 3,4,5,7,8,1<br>1,23,25,26 9,20,22,24 | 9 | P00774,P31430,P55091,P98089,Q6IFU8,Q6IFV1,Q6P6Q2,Q6P6R2,Q91ZS3 |
| 4482 | 1,2,6,18,2 3,4,5,7,8,1<br>1,24,25,26 9,20,22,23 | 3 | P31430,P55091,P98089                                           |
| 4483 | 1,2,6,18,2 3,4,5,7,8,1<br>2,23,24,25 9,20,21,26 | 2 | Q4FZU6,Q6IFU7                                                  |
| 4484 | 1,2,6,18,2 3,4,5,7,8,1<br>2,23,24,26 9,20,21,25 | 5 | P00731,Q63942,Q6IFU7,Q6IFV1,Q9QUL6                             |
| 4485 | 1,2,6,18,2 3,4,5,7,8,1<br>2,23,25,26 9,20,21,24 | 2 | Q6IFU7,Q6P6Q2                                                  |
| 4486 | 1,2,6,18,2 3,4,5,7,8,1<br>2,24,25,26 9,20,21,23 | 3 | Q4FZU6,Q7TPB1,Q99041                                           |
| 4487 | 1,2,6,18,2 3,4,5,7,8,1<br>3,24,25,26 9,20,21,22 | 6 | P55091,Q63942,Q6IFU7,Q6IFU8,Q6P6Q2,Q7TPB1                      |
| 4488 | 1,2,6,19,2 3,4,5,7,8,1<br>0,21,22,23 8,24,25,26 | 4 | P00714,P15399,Q6AYS4,Q8CJD3                                    |
| 4489 | 1,2,6,19,2 3,4,5,7,8,1<br>0,21,22,24 8,23,25,26 | 6 | P00714,P00774,P12785,P13432,P35467,Q6AYS4                      |
| 4490 | 1,2,6,19,2 3,4,5,7,8,1<br>0,21,22,25 8,23,24,26 | 5 | P12785,P35467,P47967,P97840,Q8VD89                             |
| 4491 | 1,2,6,19,2 3,4,5,7,8,1<br>0,21,22,26 8,23,24,25 | 3 | P00714,Q63751,Q6AYS4                                           |
| 4492 | 1,2,6,19,2 3,4,5,7,8,1<br>0,21,23,24 8,22,25,26 | 3 | P00714,P15399,Q6AYS4                                           |
| 4493 | 1,2,6,19,2 3,4,5,7,8,1<br>0,21,23,25 8,22,24,26 | 4 | P15399,P97840,Q6P6R2,Q8VD89                                    |
| 4494 | 1,2,6,19,2 3,4,5,7,8,1<br>0,21,23,26 8,22,24,25 | 3 | P15399,Q6AYS4,Q6IFV1                                           |
| 4495 | 1,2,6,19,2 3,4,5,7,8,1<br>0,21,24,25 8,22,23,26 | 5 | P35467,P97840,Q64194,Q6AYS4,Q8VD89                             |

|      |                                                 |   |                                           |
|------|-------------------------------------------------|---|-------------------------------------------|
| 4496 | 1,2,6,19,2 3,4,5,7,8,1<br>0,21,24,26 8,22,23,25 | 2 | P00714,Q6AYS4                             |
| 4497 | 1,2,6,19,2 3,4,5,7,8,1<br>0,21,25,26 8,22,23,24 | 3 | P97840,Q8K4G9,Q91ZS3                      |
| 4498 | 1,2,6,19,2 3,4,5,7,8,1<br>0,22,23,24 8,21,25,26 | 6 | P00714,P00774,P15399,P31430,P82995,Q6AYS4 |
| 4499 | 1,2,6,19,2 3,4,5,7,8,1<br>0,22,23,25 8,21,24,26 | 4 | P06911,P15399,Q6AYS4,Q8CJD3               |
| 4500 | 1,2,6,19,2 3,4,5,7,8,1<br>0,22,23,26 8,21,24,25 | 1 | Q6AYS4                                    |
| 4501 | 1,2,6,19,2 3,4,5,7,8,1<br>0,22,24,25 8,21,23,26 | 5 | P12785,P35467,Q4FZU6,Q6AYS4,Q9ESW0        |
| 4502 | 1,2,6,19,2 3,4,5,7,8,1<br>0,22,24,26 8,21,23,25 | 4 | P00714,P20646,Q6AYS4,Q99041               |
| 4503 | 1,2,6,19,2 3,4,5,7,8,1<br>0,22,25,26 8,21,23,24 | 1 | Q6AYS4                                    |
| 4504 | 1,2,6,19,2 3,4,5,7,8,1<br>0,23,24,25 8,21,22,26 | 2 | P15399,Q6AYS4                             |
| 4505 | 1,2,6,19,2 3,4,5,7,8,1<br>0,23,24,26 8,21,22,25 | 2 | P15399,Q6AYS4                             |
| 4506 | 1,2,6,19,2 3,4,5,7,8,1<br>0,23,25,26 8,21,22,24 | 2 | P15399,Q6AYS4                             |
| 4507 | 1,2,6,19,2 3,4,5,7,8,1<br>0,24,25,26 8,21,22,23 | 1 | Q6AYS4                                    |
| 4508 | 1,2,6,19,2 3,4,5,7,8,1<br>1,22,23,24 8,20,25,26 | 3 | P00714,P15399,Q6AYS4                      |
| 4509 | 1,2,6,19,2 3,4,5,7,8,1<br>1,22,23,25 8,20,24,26 | 4 | P06911,P15399,P97840,Q4FZU6               |
| 4510 | 1,2,6,19,2 3,4,5,7,8,1<br>1,22,23,26 8,20,24,25 | 1 | P15399                                    |
| 4511 | 1,2,6,19,2 3,4,5,7,8,1<br>1,22,24,25 8,20,23,26 | 5 | P12785,P35467,P97840,Q4FZU6,Q6IG02        |
| 4512 | 1,2,6,19,2 3,4,5,7,8,1<br>1,22,24,26 8,20,23,25 | 4 | O70377,P00714,P07171,Q6AYS4               |
| 4513 | 1,2,6,19,2 3,4,5,7,8,1<br>1,22,25,26 8,20,23,24 | 1 | P97840                                    |
| 4514 | 1,2,6,19,2 3,4,5,7,8,1<br>1,23,24,25 8,20,22,26 | 4 | P15399,P97840,Q4FZU6,Q6P6R2               |
| 4515 | 1,2,6,19,2 3,4,5,7,8,1<br>1,23,24,26 8,20,22,25 | 3 | P15399,Q6AYS4,Q6IFV1                      |
| 4516 | 1,2,6,19,2 3,4,5,7,8,1<br>1,23,25,26 8,20,22,24 | 3 | P15399,P97840,Q6P6R2                      |
| 4517 | 1,2,6,19,2 3,4,5,7,8,1<br>1,24,25,26 8,20,22,23 | 2 | P14480,P97840                             |
| 4518 | 1,2,6,19,2 3,4,5,7,8,1<br>2,23,24,25 8,20,21,26 | 6 | P06911,P15399,P82471,Q4FZU6,Q6AYS4,Q9ESW0 |

|      |                                                 |   |                                                  |
|------|-------------------------------------------------|---|--------------------------------------------------|
| 4519 | 1,2,6,19,2 3,4,5,7,8,1<br>2,23,24,26 8,20,21,25 | 5 | P00731,P20646,P82471,Q6AYS4,Q6IFU7               |
| 4520 | 1,2,6,19,2 3,4,5,7,8,1<br>2,23,25,26 8,20,21,24 | 3 | P06911,P15399,Q4FZU6                             |
| 4521 | 1,2,6,19,2 3,4,5,7,8,1<br>2,24,25,26 8,20,21,23 | 4 | P14480,Q4FZU6,Q6AYS4,Q9ESW0                      |
| 4522 | 1,2,6,19,2 3,4,5,7,8,1<br>3,24,25,26 8,20,21,22 | 5 | P14480,P15399,Q4FZU6,Q6AYS4,Q7TPB1               |
| 4523 | 1,2,6,20,2 3,4,5,7,8,1<br>1,22,23,24 8,19,25,26 | 3 | P00714,P13432,Q6AYS4                             |
| 4524 | 1,2,6,20,2 3,4,5,7,8,1<br>1,22,23,25 8,19,24,26 | 2 | P70709,Q6P6R2                                    |
| 4525 | 1,2,6,20,2 3,4,5,7,8,1<br>1,22,23,26 8,19,24,25 | 1 | Q6IFV1                                           |
| 4526 | 1,2,6,20,2 3,4,5,7,8,1<br>1,22,24,25 8,19,23,26 | 6 | P12785,P13432,P35467,P55016,Q5XFX0,Q64194        |
| 4527 | 1,2,6,20,2 3,4,5,7,8,1<br>1,22,24,26 8,19,23,25 | 7 | O70377,P00714,P13432,P35467,P55016,Q6AYS4,Q99041 |
| 4528 | 1,2,6,20,2 3,4,5,7,8,1<br>1,22,25,26 8,19,23,24 | 1 | Q91ZS3                                           |
| 4529 | 1,2,6,20,2 3,4,5,7,8,1<br>1,23,24,25 8,19,22,26 | 2 | P70709,Q6P6R2                                    |
| 4530 | 1,2,6,20,2 3,4,5,7,8,1<br>1,23,24,26 8,19,22,25 | 2 | Q6AYS4,Q6IFV1                                    |
| 4531 | 1,2,6,20,2 3,4,5,7,8,1<br>1,23,25,26 8,19,22,24 | 2 | Q6P6R2,Q91ZS3                                    |
| 4532 | 1,2,6,20,2 3,4,5,7,8,1<br>1,24,25,26 8,19,22,23 | 2 | P55016,Q91ZS3                                    |
| 4533 | 1,2,6,20,2 3,4,5,7,8,1<br>2,23,24,25 8,19,21,26 | 1 | Q6AYS4                                           |
| 4534 | 1,2,6,20,2 3,4,5,7,8,1<br>2,23,24,26 8,19,21,25 | 3 | P00731,Q6AYS4,Q6IFU7                             |
| 4535 | 1,2,6,20,2 3,4,5,7,8,1<br>2,23,25,26 8,19,21,24 | 0 |                                                  |
| 4536 | 1,2,6,20,2 3,4,5,7,8,1<br>2,24,25,26 8,19,21,23 | 3 | P00731,Q6AYS4,Q99041                             |
| 4537 | 1,2,6,20,2 3,4,5,7,8,1<br>3,24,25,26 8,19,21,22 | 2 | Q6AYS4,Q7TPB1                                    |
| 4538 | 1,2,6,21,2 3,4,5,7,8,1<br>2,23,24,25 8,19,20,26 | 3 | P70709,Q4FZU6,Q6P6R2                             |
| 4539 | 1,2,6,21,2 3,4,5,7,8,1<br>2,23,24,26 8,19,20,25 | 4 | P00731,P13432,Q6IFU7,Q6IFV1                      |
| 4540 | 1,2,6,21,2 3,4,5,7,8,1<br>2,23,25,26 8,19,20,24 | 1 | Q6P6R2                                           |
| 4541 | 1,2,6,21,2 3,4,5,7,8,1<br>2,24,25,26 8,19,20,23 | 1 | P35467                                           |

|      |                          |                                |   |                                                         |
|------|--------------------------|--------------------------------|---|---------------------------------------------------------|
| 4542 | 1,2,6,21,2<br>3,24,25,26 | 3,4,5,7,8,1<br>8,19,20,22      | 3 | Q6IFV1,Q6P6R2,Q7TPB1                                    |
| 4543 | 1,2,6,22,2<br>3,24,25,26 | 3,4,5,7,8,1<br>8,19,20,21      | 5 | P00731,P82471,Q4FZU6,Q6IFU7,Q7TPB1                      |
| 4544 | 1,2,7,8,18,<br>19,20,21  | 3,4,5,6,22,<br>23,24,25,2<br>6 | 7 | P00731,P02803,P35281,P62804,Q63751,Q6AYL6,Q6AYR8        |
| 4545 | 1,2,7,8,18,<br>19,20,22  | 3,4,5,6,21,<br>23,24,25,2<br>6 | 2 | P01835,Q63751                                           |
| 4546 | 1,2,7,8,18,<br>19,20,23  | 3,4,5,6,21,<br>22,24,25,2<br>6 | 2 | Q03191,Q8CJD3                                           |
| 4547 | 1,2,7,8,18,<br>19,20,24  | 3,4,5,6,21,<br>22,23,25,2<br>6 | 2 | P01835,P83121                                           |
| 4548 | 1,2,7,8,18,<br>19,20,25  | 3,4,5,6,21,<br>22,23,24,2<br>6 | 5 | P01835,P02803,P10715,P35280,P47967                      |
| 4549 | 1,2,7,8,18,<br>19,20,26  | 3,4,5,6,21,<br>22,23,24,2<br>5 | 5 | P01835,P06760,P35280,P82995,Q63751                      |
| 4550 | 1,2,7,8,18,<br>19,21,22  | 3,4,5,6,20,<br>23,24,25,2<br>6 | 3 | D4A1J4,P01835,P97840                                    |
| 4551 | 1,2,7,8,18,<br>19,21,23  | 3,4,5,6,20,<br>22,24,25,2<br>6 | 7 | D3ZUC6,P02803,P05964,P14668,Q03191,Q8CJD3,Q99MH3        |
| 4552 | 1,2,7,8,18,<br>19,21,24  | 3,4,5,6,20,<br>22,23,25,2<br>6 | 3 | D3ZUC6,P01835,P05539                                    |
| 4553 | 1,2,7,8,18,<br>19,21,25  | 3,4,5,6,20,<br>22,23,24,2<br>6 | 8 | P00731,P02803,P10715,P19629,P31430,P47967,P97840,P98089 |
| 4554 | 1,2,7,8,18,<br>19,21,26  | 3,4,5,6,20,<br>22,23,24,2<br>5 | 4 | D3ZUC6,P02803,P82995,Q63751                             |
| 4555 | 1,2,7,8,18,<br>19,22,23  | 3,4,5,6,20,<br>21,24,25,2<br>6 | 4 | P01835,Q03191,Q8CJD3,Q99MH3                             |
| 4556 | 1,2,7,8,18,<br>19,22,24  | 3,4,5,6,20,<br>21,23,25,2<br>6 | 3 | P01835,P83121,Q4FZU2                                    |
| 4557 | 1,2,7,8,18,<br>19,22,25  | 3,4,5,6,20,<br>21,23,24,2<br>6 | 6 | P01835,P10715,P19629,P47967,P97840,Q4FZU2               |

|      |                         |                                |   |                                                  |
|------|-------------------------|--------------------------------|---|--------------------------------------------------|
| 4558 | 1,2,7,8,18,<br>19,22,26 | 3,4,5,6,20,<br>21,23,24,2<br>5 | 4 | P01835,P06760,P82995,Q63751                      |
| 4559 | 1,2,7,8,18,<br>19,23,24 | 3,4,5,6,20,<br>21,22,25,2<br>6 | 4 | P01835,Q03191,Q63532,Q99MH3                      |
| 4560 | 1,2,7,8,18,<br>19,23,25 | 3,4,5,6,20,<br>21,22,24,2<br>6 | 7 | P01835,P02803,P10715,P19629,P31044,Q03191,Q99MH3 |
| 4561 | 1,2,7,8,18,<br>19,23,26 | 3,4,5,6,20,<br>21,22,24,2<br>5 | 6 | P01835,P02803,P82995,Q03191,Q63942,Q99MH3        |
| 4562 | 1,2,7,8,18,<br>19,24,25 | 3,4,5,6,20,<br>21,22,23,2<br>6 | 4 | P01835,P10715,P19629,Q4FZU2                      |
| 4563 | 1,2,7,8,18,<br>19,24,26 | 3,4,5,6,20,<br>21,22,23,2<br>5 | 3 | P01835,P82995,Q63942                             |
| 4564 | 1,2,7,8,18,<br>19,25,26 | 3,4,5,6,20,<br>21,22,23,2<br>4 | 7 | P01835,P02803,P10715,P19629,P35280,P55091,P82995 |
| 4565 | 1,2,7,8,18,<br>20,21,22 | 3,4,5,6,19,<br>23,24,25,2<br>6 | 0 |                                                  |
| 4566 | 1,2,7,8,18,<br>20,21,23 | 3,4,5,6,19,<br>22,24,25,2<br>6 | 3 | P14668,Q6AYL6,Q6AYR8                             |
| 4567 | 1,2,7,8,18,<br>20,21,24 | 3,4,5,6,19,<br>22,23,25,2<br>6 | 2 | Q6AYL6,Q6AYR8                                    |
| 4568 | 1,2,7,8,18,<br>20,21,25 | 3,4,5,6,19,<br>22,23,24,2<br>6 | 6 | P10715,P19629,P31430,P98089,Q6AYL6,Q91ZS3        |
| 4569 | 1,2,7,8,18,<br>20,21,26 | 3,4,5,6,19,<br>22,23,24,2<br>5 | 5 | P01041,P62804,P82995,Q00715,Q6AYR8               |
| 4570 | 1,2,7,8,18,<br>20,22,23 | 3,4,5,6,19,<br>21,24,25,2<br>6 | 1 | Q8CJD3                                           |
| 4571 | 1,2,7,8,18,<br>20,22,24 | 3,4,5,6,19,<br>21,23,25,2<br>6 | 3 | P01835,P10715,P83121                             |
| 4572 | 1,2,7,8,18,<br>20,22,25 | 3,4,5,6,19,<br>21,23,24,2<br>6 | 3 | P01835,P10715,P19629                             |



|      |                         |                                |   |                                                  |
|------|-------------------------|--------------------------------|---|--------------------------------------------------|
| 4573 | 1,2,7,8,18,<br>20,22,26 | 3,4,5,6,19,<br>21,23,24,2<br>5 | 2 | P01835,Q63751                                    |
| 4574 | 1,2,7,8,18,<br>20,23,24 | 3,4,5,6,19,<br>21,22,25,2<br>6 | 1 | P10715                                           |
| 4575 | 1,2,7,8,18,<br>20,23,25 | 3,4,5,6,19,<br>21,22,24,2<br>6 | 3 | P10715,P19629,Q99MH3                             |
| 4576 | 1,2,7,8,18,<br>20,23,26 | 3,4,5,6,19,<br>21,22,24,2<br>5 | 0 |                                                  |
| 4577 | 1,2,7,8,18,<br>20,24,25 | 3,4,5,6,19,<br>21,22,23,2<br>6 | 3 | P01835,P10715,P19629                             |
| 4578 | 1,2,7,8,18,<br>20,24,26 | 3,4,5,6,19,<br>21,22,23,2<br>5 | 2 | P01835,P10715                                    |
| 4579 | 1,2,7,8,18,<br>20,25,26 | 3,4,5,6,19,<br>21,22,23,2<br>4 | 5 | P10715,P19629,P35280,P55091,P82995               |
| 4580 | 1,2,7,8,18,<br>21,22,23 | 3,4,5,6,19,<br>20,24,25,2<br>6 | 1 | P14668                                           |
| 4581 | 1,2,7,8,18,<br>21,22,24 | 3,4,5,6,19,<br>20,23,25,2<br>6 | 1 | P01835                                           |
| 4582 | 1,2,7,8,18,<br>21,22,25 | 3,4,5,6,19,<br>20,23,24,2<br>6 | 5 | P10715,P19629,P31430,P97840,P98089               |
| 4583 | 1,2,7,8,18,<br>21,22,26 | 3,4,5,6,19,<br>20,23,24,2<br>5 | 2 | P82995,Q80WL1                                    |
| 4584 | 1,2,7,8,18,<br>21,23,24 | 3,4,5,6,19,<br>20,22,25,2<br>6 | 2 | D3ZUC6,P05539                                    |
| 4585 | 1,2,7,8,18,<br>21,23,25 | 3,4,5,6,19,<br>20,22,24,2<br>6 | 6 | P02803,P10715,P19629,P31430,P98089,Q99MH3        |
| 4586 | 1,2,7,8,18,<br>21,23,26 | 3,4,5,6,19,<br>20,22,24,2<br>5 | 4 | D3ZUC6,P55091,P82995,Q6IFV1                      |
| 4587 | 1,2,7,8,18,<br>21,24,25 | 3,4,5,6,19,<br>20,22,23,2<br>6 | 7 | O54728,P05539,P10715,P19629,P31430,P55091,P98089 |

|      |                         |                                |   |                                                         |
|------|-------------------------|--------------------------------|---|---------------------------------------------------------|
| 4588 | 1,2,7,8,18,<br>21,24,26 | 3,4,5,6,19,<br>20,22,23,2<br>5 | 3 | D3ZUC6,P55091,P82995                                    |
| 4589 | 1,2,7,8,18,<br>21,25,26 | 3,4,5,6,19,<br>20,22,23,2<br>4 | 7 | P08721,P10715,P19629,P31430,P55091,P82995,P98089        |
| 4590 | 1,2,7,8,18,<br>22,23,24 | 3,4,5,6,19,<br>20,21,25,2<br>6 | 1 | P01835                                                  |
| 4591 | 1,2,7,8,18,<br>22,23,25 | 3,4,5,6,19,<br>20,21,24,2<br>6 | 5 | P01835,P10715,P19629,Q5GRG2,Q99MH3                      |
| 4592 | 1,2,7,8,18,<br>22,23,26 | 3,4,5,6,19,<br>20,21,24,2<br>5 | 1 | P01835                                                  |
| 4593 | 1,2,7,8,18,<br>22,24,25 | 3,4,5,6,19,<br>20,21,23,2<br>6 | 4 | P01835,P10715,P19629,Q4FZU2                             |
| 4594 | 1,2,7,8,18,<br>22,24,26 | 3,4,5,6,19,<br>20,21,23,2<br>5 | 1 | P01835                                                  |
| 4595 | 1,2,7,8,18,<br>22,25,26 | 3,4,5,6,19,<br>20,21,23,2<br>4 | 5 | P01835,P10715,P19629,P55091,P82995                      |
| 4596 | 1,2,7,8,18,<br>23,24,25 | 3,4,5,6,19,<br>20,21,22,2<br>6 | 4 | P01835,P10715,P19629,Q99MH3                             |
| 4597 | 1,2,7,8,18,<br>23,24,26 | 3,4,5,6,19,<br>20,21,22,2<br>5 | 4 | P01835,P01946,P55091,Q63942                             |
| 4598 | 1,2,7,8,18,<br>23,25,26 | 3,4,5,6,19,<br>20,21,22,2<br>4 | 8 | P01835,P01946,P10715,P19629,P24594,P55091,P82995,Q99MH3 |
| 4599 | 1,2,7,8,18,<br>24,25,26 | 3,4,5,6,19,<br>20,21,22,2<br>3 | 6 | P01835,P10715,P19629,P55091,P82995,Q7TPB1               |
| 4600 | 1,2,7,8,19,<br>20,21,22 | 3,4,5,6,18,<br>23,24,25,2<br>6 | 5 | P00774,P12785,Q4FZU2,Q63751,Q6IFW6                      |
| 4601 | 1,2,7,8,19,<br>20,21,23 | 3,4,5,6,18,<br>22,24,25,2<br>6 | 0 |                                                         |
| 4602 | 1,2,7,8,19,<br>20,21,24 | 3,4,5,6,18,<br>22,23,25,2<br>6 | 3 | P12785,Q4FZU2,Q6IFW6                                    |

|      |                         |                                |    |                                                                              |
|------|-------------------------|--------------------------------|----|------------------------------------------------------------------------------|
| 4603 | 1,2,7,8,19,<br>20,21,25 | 3,4,5,6,18,<br>22,23,24,2<br>6 | 7  | P10715,P12785,P19629,P47967,P97840,Q4FZU2,Q6IFW6                             |
| 4604 | 1,2,7,8,19,<br>20,21,26 | 3,4,5,6,18,<br>22,23,24,2<br>5 | 3  | P62804,Q00715,Q63751                                                         |
| 4605 | 1,2,7,8,19,<br>20,22,23 | 3,4,5,6,18,<br>21,24,25,2<br>6 | 4  | P00774,P01835,Q08849,Q8CJD3                                                  |
| 4606 | 1,2,7,8,19,<br>20,22,24 | 3,4,5,6,18,<br>21,23,25,2<br>6 | 10 | P00774,P01835,P12785,P20646,P83121,Q4FZU2,Q6IFU8,Q6IFW6,Q6IMF3,Q6P6Q2        |
| 4607 | 1,2,7,8,19,<br>20,22,25 | 3,4,5,6,18,<br>21,23,24,2<br>6 | 10 | P00774,P01835,P10715,P12785,P19629,Q4FZU2,Q5GRG2,Q6IFW6,Q6IMF3,Q6P6Q2        |
| 4608 | 1,2,7,8,19,<br>20,22,26 | 3,4,5,6,18,<br>21,23,24,2<br>5 | 3  | P01835,P12785,Q63751                                                         |
| 4609 | 1,2,7,8,19,<br>20,23,24 | 3,4,5,6,18,<br>21,22,25,2<br>6 | 2  | P00774,P01835                                                                |
| 4610 | 1,2,7,8,19,<br>20,23,25 | 3,4,5,6,18,<br>21,22,24,2<br>6 | 4  | P01835,P10715,P19629,Q08849                                                  |
| 4611 | 1,2,7,8,19,<br>20,23,26 | 3,4,5,6,18,<br>21,22,24,2<br>5 | 2  | P01835,Q08849                                                                |
| 4612 | 1,2,7,8,19,<br>20,24,25 | 3,4,5,6,18,<br>21,22,23,2<br>6 | 8  | P01835,P10715,P12785,P19629,Q4FZU2,Q6IFW6,Q6IMF3,Q6P6Q2                      |
| 4613 | 1,2,7,8,19,<br>20,24,26 | 3,4,5,6,18,<br>21,22,23,2<br>5 | 1  | P01835                                                                       |
| 4614 | 1,2,7,8,19,<br>20,25,26 | 3,4,5,6,18,<br>21,22,23,2<br>4 | 3  | P01835,P10715,P35280                                                         |
| 4615 | 1,2,7,8,19,<br>21,22,23 | 3,4,5,6,18,<br>20,24,25,2<br>6 | 1  | P01835                                                                       |
| 4616 | 1,2,7,8,19,<br>21,22,24 | 3,4,5,6,18,<br>20,23,25,2<br>6 | 8  | P01835,P12785,Q4FZU2,Q6IFU8,Q6IFW6,Q6IG02,Q6IMF3,Q6P6Q2                      |
| 4617 | 1,2,7,8,19,<br>21,22,25 | 3,4,5,6,18,<br>20,23,24,2<br>6 | 11 | P01835,P12785,P19629,P47967,P97840,Q4FZU2,Q5GRG2,Q6IFW6,Q6IG02,Q6IMF3,Q6P6Q2 |

|      |                         |                                |    |                                                                              |
|------|-------------------------|--------------------------------|----|------------------------------------------------------------------------------|
| 4618 | 1,2,7,8,19,<br>21,22,26 | 3,4,5,6,18,<br>20,23,24,2<br>5 | 3  | P01835,P12785,Q63751                                                         |
| 4619 | 1,2,7,8,19,<br>21,23,24 | 3,4,5,6,18,<br>20,22,25,2<br>6 | 2  | D3ZUC6,P01835                                                                |
| 4620 | 1,2,7,8,19,<br>21,23,25 | 3,4,5,6,18,<br>20,22,24,2<br>6 | 4  | P02803,P19629,P47967,P97840                                                  |
| 4621 | 1,2,7,8,19,<br>21,23,26 | 3,4,5,6,18,<br>20,22,24,2<br>5 | 1  | D3ZUC6                                                                       |
| 4622 | 1,2,7,8,19,<br>21,24,25 | 3,4,5,6,18,<br>20,22,23,2<br>6 | 11 | P01835,P10715,P12785,P19629,P22006,P47967,P97840,Q4FZU2,Q6IFW6,Q6IG02,Q6IMF3 |
| 4623 | 1,2,7,8,19,<br>21,24,26 | 3,4,5,6,18,<br>20,22,23,2<br>5 | 1  | P01835                                                                       |
| 4624 | 1,2,7,8,19,<br>21,25,26 | 3,4,5,6,18,<br>20,22,23,2<br>4 | 3  | P19629,P82995,P97840                                                         |
| 4625 | 1,2,7,8,19,<br>22,23,24 | 3,4,5,6,18,<br>20,21,25,2<br>6 | 5  | P00774,P01835,P20646,Q4FZU2,Q63532                                           |
| 4626 | 1,2,7,8,19,<br>22,23,25 | 3,4,5,6,18,<br>20,21,24,2<br>6 | 5  | P01835,P06911,P19629,Q4FZU2,Q5GRG2                                           |
| 4627 | 1,2,7,8,19,<br>22,23,26 | 3,4,5,6,18,<br>20,21,24,2<br>5 | 1  | P01835                                                                       |
| 4628 | 1,2,7,8,19,<br>22,24,25 | 3,4,5,6,18,<br>20,21,23,2<br>6 | 11 | P01835,P10715,P12785,P19629,Q4FZU2,Q5GRG2,Q6IFU8,Q6IFW6,Q6IG02,Q6IMF3,Q6P6Q2 |
| 4629 | 1,2,7,8,19,<br>22,24,26 | 3,4,5,6,18,<br>20,21,23,2<br>5 | 3  | P01835,P12785,P20646                                                         |
| 4630 | 1,2,7,8,19,<br>22,25,26 | 3,4,5,6,18,<br>20,21,23,2<br>4 | 4  | P01835,P12785,P19629,Q5GRG2                                                  |
| 4631 | 1,2,7,8,19,<br>23,24,25 | 3,4,5,6,18,<br>20,21,22,2<br>6 | 4  | P01835,P10715,P19629,Q4FZU2                                                  |
| 4632 | 1,2,7,8,19,<br>23,24,26 | 3,4,5,6,18,<br>20,21,22,2<br>5 | 2  | P01835,P01946                                                                |

|      |                         |                                |   |                                                         |
|------|-------------------------|--------------------------------|---|---------------------------------------------------------|
| 4633 | 1,2,7,8,19,<br>23,25,26 | 3,4,5,6,18,<br>20,21,22,2<br>4 | 3 | P01835,P01946,P19629                                    |
| 4634 | 1,2,7,8,19,<br>24,25,26 | 3,4,5,6,18,<br>20,21,22,2<br>3 | 4 | P01835,P10715,P19629,Q7TPB1                             |
| 4635 | 1,2,7,8,20,<br>21,22,23 | 3,4,5,6,18,<br>19,24,25,2<br>6 | 0 |                                                         |
| 4636 | 1,2,7,8,20,<br>21,22,24 | 3,4,5,6,18,<br>19,23,25,2<br>6 | 6 | P00714,P12785,P35467,Q4FZU2,Q5XFX0,Q6IFW6               |
| 4637 | 1,2,7,8,20,<br>21,22,25 | 3,4,5,6,18,<br>19,23,24,2<br>6 | 6 | P10715,P12785,P19629,P35467,Q4FZU2,Q6IFW6               |
| 4638 | 1,2,7,8,20,<br>21,22,26 | 3,4,5,6,18,<br>19,23,24,2<br>5 | 1 | P12785                                                  |
| 4639 | 1,2,7,8,20,<br>21,23,24 | 3,4,5,6,18,<br>19,22,25,2<br>6 | 0 |                                                         |
| 4640 | 1,2,7,8,20,<br>21,23,25 | 3,4,5,6,18,<br>19,22,24,2<br>6 | 2 | P10715,P19629                                           |
| 4641 | 1,2,7,8,20,<br>21,23,26 | 3,4,5,6,18,<br>19,22,24,2<br>5 | 0 |                                                         |
| 4642 | 1,2,7,8,20,<br>21,24,25 | 3,4,5,6,18,<br>19,22,23,2<br>6 | 8 | P02625,P10715,P12785,P19629,P35467,Q4FZU2,Q5XFX0,Q6IFW6 |
| 4643 | 1,2,7,8,20,<br>21,24,26 | 3,4,5,6,18,<br>19,22,23,2<br>5 | 1 | P02625                                                  |
| 4644 | 1,2,7,8,20,<br>21,25,26 | 3,4,5,6,18,<br>19,22,23,2<br>4 | 5 | P02625,P10715,P19629,P82995,Q91ZS3                      |
| 4645 | 1,2,7,8,20,<br>22,23,24 | 3,4,5,6,18,<br>19,21,25,2<br>6 | 2 | P00774,P01835                                           |
| 4646 | 1,2,7,8,20,<br>22,23,25 | 3,4,5,6,18,<br>19,21,24,2<br>6 | 6 | P01835,P06911,P10715,P19629,Q08849,Q5GRG2               |
| 4647 | 1,2,7,8,20,<br>22,23,26 | 3,4,5,6,18,<br>19,21,24,2<br>5 | 2 | P01835,Q08849                                           |

|      |                         |                                |    |                                                                       |
|------|-------------------------|--------------------------------|----|-----------------------------------------------------------------------|
| 4648 | 1,2,7,8,20,<br>22,24,25 | 3,4,5,6,18,<br>19,21,23,2<br>6 | 9  | P01835,P10715,P12785,P19629,P35467,Q4FZU2,Q5GRG2,Q6IFW6,Q6IMF3        |
| 4649 | 1,2,7,8,20,<br>22,24,26 | 3,4,5,6,18,<br>19,21,23,2<br>5 | 2  | P01835,P12785                                                         |
| 4650 | 1,2,7,8,20,<br>22,25,26 | 3,4,5,6,18,<br>19,21,23,2<br>4 | 4  | P01835,P10715,P12785,P19629                                           |
| 4651 | 1,2,7,8,20,<br>23,24,25 | 3,4,5,6,18,<br>19,21,22,2<br>6 | 3  | P01835,P10715,P19629                                                  |
| 4652 | 1,2,7,8,20,<br>23,24,26 | 3,4,5,6,18,<br>19,21,22,2<br>5 | 2  | P01835,P01946                                                         |
| 4653 | 1,2,7,8,20,<br>23,25,26 | 3,4,5,6,18,<br>19,21,22,2<br>4 | 4  | P01946,P10715,P19629,Q08849                                           |
| 4654 | 1,2,7,8,20,<br>24,25,26 | 3,4,5,6,18,<br>19,21,22,2<br>3 | 4  | P01835,P02625,P10715,P19629                                           |
| 4655 | 1,2,7,8,21,<br>22,23,24 | 3,4,5,6,18,<br>19,20,25,2<br>6 | 1  | P01835                                                                |
| 4656 | 1,2,7,8,21,<br>22,23,25 | 3,4,5,6,18,<br>19,20,24,2<br>6 | 3  | P06911,P19629,Q5GRG2                                                  |
| 4657 | 1,2,7,8,21,<br>22,23,26 | 3,4,5,6,18,<br>19,20,24,2<br>5 | 0  |                                                                       |
| 4658 | 1,2,7,8,21,<br>22,24,25 | 3,4,5,6,18,<br>19,20,23,2<br>6 | 10 | P01835,P10715,P12785,P19629,P22006,P35467,Q4FZU2,Q6IFW6,Q6IG02,Q6IMF3 |
| 4659 | 1,2,7,8,21,<br>22,24,26 | 3,4,5,6,18,<br>19,20,23,2<br>5 | 2  | P01835,P12785                                                         |
| 4660 | 1,2,7,8,21,<br>22,25,26 | 3,4,5,6,18,<br>19,20,23,2<br>4 | 3  | P12785,P19629,P82995                                                  |
| 4661 | 1,2,7,8,21,<br>23,24,25 | 3,4,5,6,18,<br>19,20,22,2<br>6 | 3  | P10715,P19629,P22006                                                  |
| 4662 | 1,2,7,8,21,<br>23,24,26 | 3,4,5,6,18,<br>19,20,22,2<br>5 | 1  | P01946                                                                |

|      |                          |                                |   |                                                         |
|------|--------------------------|--------------------------------|---|---------------------------------------------------------|
| 4663 | 1,2,7,8,21,<br>23,25,26  | 3,4,5,6,18,<br>19,20,22,2<br>4 | 4 | P01946,P19629,P22006,P82995                             |
| 4664 | 1,2,7,8,21,<br>24,25,26  | 3,4,5,6,18,<br>19,20,22,2<br>3 | 6 | P02625,P10715,P19629,P22006,P55091,P82995               |
| 4665 | 1,2,7,8,22,<br>23,24,25  | 3,4,5,6,18,<br>19,20,21,2<br>6 | 6 | P01835,P06911,P10715,P19629,Q4FZU2,Q5GRG2               |
| 4666 | 1,2,7,8,22,<br>23,24,26  | 3,4,5,6,18,<br>19,20,21,2<br>5 | 2 | P00731,P01835                                           |
| 4667 | 1,2,7,8,22,<br>23,25,26  | 3,4,5,6,18,<br>19,20,21,2<br>4 | 6 | P01835,P01946,P06911,P10715,P19629,Q5GRG2               |
| 4668 | 1,2,7,8,22,<br>24,25,26  | 3,4,5,6,18,<br>19,20,21,2<br>3 | 4 | P01835,P10715,P12785,P19629                             |
| 4669 | 1,2,7,8,23,<br>24,25,26  | 3,4,5,6,18,<br>19,20,21,2<br>2 | 5 | P01835,P01946,P10715,P19629,Q7TPB1                      |
| 4670 | 1,2,7,18,1<br>9,20,21,22 | 3,4,5,6,8,2<br>3,24,25,26      | 4 | P06760,P97840,Q63751,Q9Z0V6                             |
| 4671 | 1,2,7,18,1<br>9,20,21,23 | 3,4,5,6,8,2<br>2,24,25,26      | 4 | D3ZUC6,P14668,Q03191,Q9Z0V6                             |
| 4672 | 1,2,7,18,1<br>9,20,21,24 | 3,4,5,6,8,2<br>2,23,25,26      | 2 | D3ZUC6,Q9Z0V6                                           |
| 4673 | 1,2,7,18,1<br>9,20,21,25 | 3,4,5,6,8,2<br>2,23,24,26      | 5 | P02793;Q7TP54,P20760,P31430,P47967,P97840               |
| 4674 | 1,2,7,18,1<br>9,20,21,26 | 3,4,5,6,8,2<br>2,23,24,25      | 5 | D3ZUC6,P06760,P82995,Q63751,Q9Z0V6                      |
| 4675 | 1,2,7,18,1<br>9,20,22,23 | 3,4,5,6,8,2<br>1,24,25,26      | 4 | P06760,Q8CJD3,Q9WTT6,Q9Z0V6                             |
| 4676 | 1,2,7,18,1<br>9,20,22,24 | 3,4,5,6,8,2<br>1,23,25,26      | 8 | P01835,P06760,P07150,P14669,P20646,Q6AYS4,Q9WTT6,Q9Z0V6 |
| 4677 | 1,2,7,18,1<br>9,20,22,25 | 3,4,5,6,8,2<br>1,23,24,26      | 5 | P01835,P20760,P47967,P97840,Q9Z0V6                      |
| 4678 | 1,2,7,18,1<br>9,20,22,26 | 3,4,5,6,8,2<br>1,23,24,25      | 7 | P01835,P06760,P07150,P20646,Q63751,Q9WTT6,Q9Z0V6        |
| 4679 | 1,2,7,18,1<br>9,20,23,24 | 3,4,5,6,8,2<br>1,22,25,26      | 5 | P06760,Q03191,Q6AYS4,Q9WTT6,Q9Z0V6                      |
| 4680 | 1,2,7,18,1<br>9,20,23,25 | 3,4,5,6,8,2<br>1,22,24,26      | 2 | P20760,Q99MH3                                           |
| 4681 | 1,2,7,18,1<br>9,20,23,26 | 3,4,5,6,8,2<br>1,22,24,25      | 3 | P06760,Q03191,Q9Z0V6                                    |

|      |                                                 |   |                                                         |
|------|-------------------------------------------------|---|---------------------------------------------------------|
| 4682 | 1,2,7,18,1 3,4,5,6,8,2<br>9,20,24,25 1,22,23,26 | 2 | P01835,Q9Z0V6                                           |
| 4683 | 1,2,7,18,1 3,4,5,6,8,2<br>9,20,24,26 1,22,23,25 | 6 | P01835,P06760,Q63751,Q6AYS4,Q9WTT6,Q9Z0V6               |
| 4684 | 1,2,7,18,1 3,4,5,6,8,2<br>9,20,25,26 1,22,23,24 | 2 | P35280,P82995                                           |
| 4685 | 1,2,7,18,1 3,4,5,6,8,2<br>9,21,22,23 0,24,25,26 | 5 | D3ZUC6,P14668,P97840,Q03191,Q8CJD3                      |
| 4686 | 1,2,7,18,1 3,4,5,6,8,2<br>9,21,22,24 0,23,25,26 | 6 | D3ZUC6,P01835,P97840,Q4FZU2,Q9WTT6,Q9Z0V6               |
| 4687 | 1,2,7,18,1 3,4,5,6,8,2<br>9,21,22,25 0,23,24,26 | 3 | P20760,P47967,P97840                                    |
| 4688 | 1,2,7,18,1 3,4,5,6,8,2<br>9,21,22,26 0,23,24,25 | 7 | D3ZUC6,P06760,P36374,P82995,P97840,Q63751,Q9Z0V6        |
| 4689 | 1,2,7,18,1 3,4,5,6,8,2<br>9,21,23,24 0,22,25,26 | 4 | D3ZUC6,P14668,Q03191,Q99MH3                             |
| 4690 | 1,2,7,18,1 3,4,5,6,8,2<br>9,21,23,25 0,22,24,26 | 8 | D3ZUC6,P02803,P14668,P20760,P47967,P97840,Q03191,Q99MH3 |
| 4691 | 1,2,7,18,1 3,4,5,6,8,2<br>9,21,23,26 0,22,24,25 | 6 | D3ZUC6,P14668,P82995,Q03191,Q63661,Q99MH3               |
| 4692 | 1,2,7,18,1 3,4,5,6,8,2<br>9,21,24,25 0,22,23,26 | 4 | D3ZUC6,P31430,P47967,P97840                             |
| 4693 | 1,2,7,18,1 3,4,5,6,8,2<br>9,21,24,26 0,22,23,25 | 3 | D3ZUC6,P06760,P82995                                    |
| 4694 | 1,2,7,18,1 3,4,5,6,8,2<br>9,21,25,26 0,22,23,24 | 6 | D3ZUC6,P31430,P47967,P55091,P82995,P97840               |
| 4695 | 1,2,7,18,1 3,4,5,6,8,2<br>9,22,23,24 0,21,25,26 | 7 | P01835,P06760,P20646,Q03191,Q63532,Q9WTT6,Q9Z0V6        |
| 4696 | 1,2,7,18,1 3,4,5,6,8,2<br>9,22,23,25 0,21,24,26 | 4 | P01835,P20760,P97840,Q99MH3                             |
| 4697 | 1,2,7,18,1 3,4,5,6,8,2<br>9,22,23,26 0,21,24,25 | 5 | P01835,P06760,P20646,Q03191,Q9WTT6                      |
| 4698 | 1,2,7,18,1 3,4,5,6,8,2<br>9,22,24,25 0,21,23,26 | 3 | P01835,P97840,Q4FZU2                                    |
| 4699 | 1,2,7,18,1 3,4,5,6,8,2<br>9,22,24,26 0,21,23,25 | 5 | P01835,P06760,P20646,Q9WTT6,Q9Z0V6                      |
| 4700 | 1,2,7,18,1 3,4,5,6,8,2<br>9,22,25,26 0,21,23,24 | 3 | P01835,P82995,P97840                                    |
| 4701 | 1,2,7,18,1 3,4,5,6,8,2<br>9,23,24,25 0,21,22,26 | 4 | P01835,Q03191,Q63532,Q99MH3                             |
| 4702 | 1,2,7,18,1 3,4,5,6,8,2<br>9,23,24,26 0,21,22,25 | 6 | P01835,P01946,P06760,Q03191,Q63532,Q9WTT6               |
| 4703 | 1,2,7,18,1 3,4,5,6,8,2<br>9,23,25,26 0,21,22,24 | 6 | P01835,P01946,P55091,P82995,Q03191,Q99MH3               |
| 4704 | 1,2,7,18,1 3,4,5,6,8,2<br>9,24,25,26 0,21,22,23 | 4 | P01835,P55091,P82995,Q7TPB1                             |



|      |                                                 |   |                                    |
|------|-------------------------------------------------|---|------------------------------------|
| 4705 | 1,2,7,18,2 3,4,5,6,8,1<br>0,21,22,23 9,24,25,26 | 1 | P14668                             |
| 4706 | 1,2,7,18,2 3,4,5,6,8,1<br>0,21,22,24 9,23,25,26 | 1 | Q9Z0V6                             |
| 4707 | 1,2,7,18,2 3,4,5,6,8,1<br>0,21,22,25 9,23,24,26 | 3 | P20760,P31430,P97840               |
| 4708 | 1,2,7,18,2 3,4,5,6,8,1<br>0,21,22,26 9,23,24,25 | 5 | P06760,P82995,Q63751,Q99041,Q9Z0V6 |
| 4709 | 1,2,7,18,2 3,4,5,6,8,1<br>0,21,23,24 9,22,25,26 | 1 | D3ZUC6                             |
| 4710 | 1,2,7,18,2 3,4,5,6,8,1<br>0,21,23,25 9,22,24,26 | 4 | P14668,P20760,P31430,Q99MH3        |
| 4711 | 1,2,7,18,2 3,4,5,6,8,1<br>0,21,23,26 9,22,24,25 | 3 | D3ZUC6,P14668,Q9QUL6               |
| 4712 | 1,2,7,18,2 3,4,5,6,8,1<br>0,21,24,25 9,22,23,26 | 2 | O54728,P31430                      |
| 4713 | 1,2,7,18,2 3,4,5,6,8,1<br>0,21,24,26 9,22,23,25 | 2 | D3ZUC6,P06760                      |
| 4714 | 1,2,7,18,2 3,4,5,6,8,1<br>0,21,25,26 9,22,23,24 | 4 | P31430,P55091,P82995,Q91ZS3        |
| 4715 | 1,2,7,18,2 3,4,5,6,8,1<br>0,22,23,24 9,21,25,26 | 4 | P06760,Q9QZK9,Q9WTT6,Q9Z0V6        |
| 4716 | 1,2,7,18,2 3,4,5,6,8,1<br>0,22,23,25 9,21,24,26 | 0 |                                    |
| 4717 | 1,2,7,18,2 3,4,5,6,8,1<br>0,22,23,26 9,21,24,25 | 1 | P06760                             |
| 4718 | 1,2,7,18,2 3,4,5,6,8,1<br>0,22,24,25 9,21,23,26 | 1 | P01835                             |
| 4719 | 1,2,7,18,2 3,4,5,6,8,1<br>0,22,24,26 9,21,23,25 | 5 | P01835,P06760,Q99041,Q9WTT6,Q9Z0V6 |
| 4720 | 1,2,7,18,2 3,4,5,6,8,1<br>0,22,25,26 9,21,23,24 | 1 | P82995                             |
| 4721 | 1,2,7,18,2 3,4,5,6,8,1<br>0,23,24,25 9,21,22,26 | 0 |                                    |
| 4722 | 1,2,7,18,2 3,4,5,6,8,1<br>0,23,24,26 9,21,22,25 | 2 | P01946,P06760                      |
| 4723 | 1,2,7,18,2 3,4,5,6,8,1<br>0,23,25,26 9,21,22,24 | 1 | P01946                             |
| 4724 | 1,2,7,18,2 3,4,5,6,8,1<br>0,24,25,26 9,21,22,23 | 2 | P55091,Q7TPB1                      |
| 4725 | 1,2,7,18,2 3,4,5,6,8,1<br>1,22,23,24 9,20,25,26 | 1 | D3ZUC6                             |
| 4726 | 1,2,7,18,2 3,4,5,6,8,1<br>1,22,23,25 9,20,24,26 | 5 | P14668,P20760,P31430,P97840,Q99MH3 |
| 4727 | 1,2,7,18,2 3,4,5,6,8,1<br>1,22,23,26 9,20,24,25 | 4 | D3ZUC6,P14668,P82995,Q9QUL6        |

|      |                                                 |    |                                                                              |
|------|-------------------------------------------------|----|------------------------------------------------------------------------------|
| 4728 | 1,2,7,18,2 3,4,5,6,8,1<br>1,22,24,25 9,20,23,26 | 2  | P31430,P97840                                                                |
| 4729 | 1,2,7,18,2 3,4,5,6,8,1<br>1,22,24,26 9,20,23,25 | 3  | D3ZUC6,P06760,P82995                                                         |
| 4730 | 1,2,7,18,2 3,4,5,6,8,1<br>1,22,25,26 9,20,23,24 | 4  | P31430,P55091,P82995,P97840                                                  |
| 4731 | 1,2,7,18,2 3,4,5,6,8,1<br>1,23,24,25 9,20,22,26 | 4  | D3ZUC6,P22006,P31430,Q99MH3                                                  |
| 4732 | 1,2,7,18,2 3,4,5,6,8,1<br>1,23,24,26 9,20,22,25 | 5  | D3ZUC6,P01946,P55091,P82995,Q9QUL6                                           |
| 4733 | 1,2,7,18,2 3,4,5,6,8,1<br>1,23,25,26 9,20,22,24 | 7  | D3ZUC6,P01946,P22006,P31430,P55091,P82995,Q99MH3                             |
| 4734 | 1,2,7,18,2 3,4,5,6,8,1<br>1,24,25,26 9,20,22,23 | 7  | D3ZUC6,P22006,P31430,P55091,P82995,P98089,Q7TPB1                             |
| 4735 | 1,2,7,18,2 3,4,5,6,8,1<br>2,23,24,25 9,20,21,26 | 1  | P01835                                                                       |
| 4736 | 1,2,7,18,2 3,4,5,6,8,1<br>2,23,24,26 9,20,21,25 | 4  | P00731,P01835,P06760,P20646                                                  |
| 4737 | 1,2,7,18,2 3,4,5,6,8,1<br>2,23,25,26 9,20,21,24 | 4  | P01835,P01946,P55091,P82995                                                  |
| 4738 | 1,2,7,18,2 3,4,5,6,8,1<br>2,24,25,26 9,20,21,23 | 4  | P01835,P55091,P82995,Q7TPB1                                                  |
| 4739 | 1,2,7,18,2 3,4,5,6,8,1<br>3,24,25,26 9,20,21,22 | 4  | P01835,P01946,P55091,Q7TPB1                                                  |
| 4740 | 1,2,7,19,2 3,4,5,6,8,1<br>0,21,22,23 8,24,25,26 | 2  | P00774,P14668                                                                |
| 4741 | 1,2,7,19,2 3,4,5,6,8,1<br>0,21,22,24 8,23,25,26 | 11 | P00714,P00774,P12785,P35467,Q4FZU2,Q6AYS4,Q6IFW6,Q6IG02,Q6IMF3,Q6P6Q2,Q9Z0V6 |
| 4742 | 1,2,7,19,2 3,4,5,6,8,1<br>0,21,22,25 8,23,24,26 | 9  | P02793;Q7TP54,P12785,P35467,P47967,P97840,Q4FZU2,Q6IFW6,Q6IG02,Q6P6Q2        |
| 4743 | 1,2,7,19,2 3,4,5,6,8,1<br>0,21,22,26 8,23,24,25 | 2  | Q63751,Q9Z0V6                                                                |
| 4744 | 1,2,7,19,2 3,4,5,6,8,1<br>0,21,23,24 8,22,25,26 | 0  |                                                                              |
| 4745 | 1,2,7,19,2 3,4,5,6,8,1<br>0,21,23,25 8,22,24,26 | 3  | P14668,P47967,P97840                                                         |
| 4746 | 1,2,7,19,2 3,4,5,6,8,1<br>0,21,23,26 8,22,24,25 | 0  |                                                                              |
| 4747 | 1,2,7,19,2 3,4,5,6,8,1<br>0,21,24,25 8,22,23,26 | 8  | P02793;Q7TP54,P35467,P47967,P97840,Q4FZU2,Q6IFW6,Q6IG02,Q6P6Q2               |
| 4748 | 1,2,7,19,2 3,4,5,6,8,1<br>0,21,24,26 8,22,23,25 | 1  | Q6AYS4                                                                       |
| 4749 | 1,2,7,19,2 3,4,5,6,8,1<br>0,21,25,26 8,22,23,24 | 2  | P47967,P97840                                                                |
| 4750 | 1,2,7,19,2 3,4,5,6,8,1<br>0,22,23,24 8,21,25,26 | 7  | P00774,P01835,P20646,P31430,Q6AYS4,Q9WTT6,Q9Z0V6                             |

|      |                                                 |    |                                                                                     |
|------|-------------------------------------------------|----|-------------------------------------------------------------------------------------|
| 4751 | 1,2,7,19,2 3,4,5,6,8,1<br>0,22,23,25 8,21,24,26 | 1  | P01835                                                                              |
| 4752 | 1,2,7,19,2 3,4,5,6,8,1<br>0,22,23,26 8,21,24,25 | 6  | P01835,P06760,P20646,Q6AYS4,Q9WTT6,Q9Z0V6                                           |
| 4753 | 1,2,7,19,2 3,4,5,6,8,1<br>0,22,24,25 8,21,23,26 | 10 | P00774,P01835,P12785,P35467,Q4FZU2,Q6IFU8,Q6IFW6,Q6IG02,Q6IMF3,Q6P6Q2               |
| 4754 | 1,2,7,19,2 3,4,5,6,8,1<br>0,22,24,26 8,21,23,25 | 9  | P01835,P06760,P07150,P14669,P20646,Q63751,Q6AYS4,Q9WTT6,Q9Z0V6                      |
| 4755 | 1,2,7,19,2 3,4,5,6,8,1<br>0,22,25,26 8,21,23,24 | 1  | P01835                                                                              |
| 4756 | 1,2,7,19,2 3,4,5,6,8,1<br>0,23,24,25 8,21,22,26 | 1  | P01835                                                                              |
| 4757 | 1,2,7,19,2 3,4,5,6,8,1<br>0,23,24,26 8,21,22,25 | 5  | P01835,P01946,P06760,P20646,Q6AYS4                                                  |
| 4758 | 1,2,7,19,2 3,4,5,6,8,1<br>0,23,25,26 8,21,22,24 | 1  | P01946                                                                              |
| 4759 | 1,2,7,19,2 3,4,5,6,8,1<br>0,24,25,26 8,21,22,23 | 1  | P01835                                                                              |
| 4760 | 1,2,7,19,2 3,4,5,6,8,1<br>1,22,23,24 8,20,25,26 | 3  | D3ZUC6,P01835,Q4FZU2                                                                |
| 4761 | 1,2,7,19,2 3,4,5,6,8,1<br>1,22,23,25 8,20,24,26 | 3  | P14668,P47967,P97840                                                                |
| 4762 | 1,2,7,19,2 3,4,5,6,8,1<br>1,22,23,26 8,20,24,25 | 1  | D3ZUC6                                                                              |
| 4763 | 1,2,7,19,2 3,4,5,6,8,1<br>1,22,24,25 8,20,23,26 | 12 | P01835,P12785,P22006,P35467,P47967,P97840,Q4FZU2,Q6IFU8,Q6IFW6,Q6IG02,Q6IMF3,Q6P6Q2 |
| 4764 | 1,2,7,19,2 3,4,5,6,8,1<br>1,22,24,26 8,20,23,25 | 2  | D3ZUC6,P01835                                                                       |
| 4765 | 1,2,7,19,2 3,4,5,6,8,1<br>1,22,25,26 8,20,23,24 | 2  | P47967,P97840                                                                       |
| 4766 | 1,2,7,19,2 3,4,5,6,8,1<br>1,23,24,25 8,20,22,26 | 2  | P22006,P97840                                                                       |
| 4767 | 1,2,7,19,2 3,4,5,6,8,1<br>1,23,24,26 8,20,22,25 | 2  | D3ZUC6,P01946                                                                       |
| 4768 | 1,2,7,19,2 3,4,5,6,8,1<br>1,23,25,26 8,20,22,24 | 3  | P01946,P22006,P97840                                                                |
| 4769 | 1,2,7,19,2 3,4,5,6,8,1<br>1,24,25,26 8,20,22,23 | 2  | P22006,P97840                                                                       |
| 4770 | 1,2,7,19,2 3,4,5,6,8,1<br>2,23,24,25 8,20,21,26 | 3  | P01835,P82471,Q4FZU2                                                                |
| 4771 | 1,2,7,19,2 3,4,5,6,8,1<br>2,23,24,26 8,20,21,25 | 8  | P00731,P01835,P01946,P06760,P20646,P82471,Q6AYS4,Q9WTT6                             |
| 4772 | 1,2,7,19,2 3,4,5,6,8,1<br>2,23,25,26 8,20,21,24 | 2  | P01835,P01946                                                                       |
| 4773 | 1,2,7,19,2 3,4,5,6,8,1<br>2,24,25,26 8,20,21,23 | 2  | P01835,Q7TPB1                                                                       |

|      |                                                 |   |                                                         |
|------|-------------------------------------------------|---|---------------------------------------------------------|
| 4774 | 1,2,7,19,2 3,4,5,6,8,1<br>3,24,25,26 8,20,21,22 | 4 | P01835,P01946,P14480,Q7TPB1                             |
| 4775 | 1,2,7,20,2 3,4,5,6,8,1<br>1,22,23,24 8,19,25,26 | 1 | P00714                                                  |
| 4776 | 1,2,7,20,2 3,4,5,6,8,1<br>1,22,23,25 8,19,24,26 | 0 |                                                         |
| 4777 | 1,2,7,20,2 3,4,5,6,8,1<br>1,22,23,26 8,19,24,25 | 0 |                                                         |
| 4778 | 1,2,7,20,2 3,4,5,6,8,1<br>1,22,24,25 8,19,23,26 | 8 | P12785,P35467,Q4FZU2,Q5XFX0,Q64194,Q6IFW6,Q6IG02,Q6P6Q2 |
| 4779 | 1,2,7,20,2 3,4,5,6,8,1<br>1,22,24,26 8,19,23,25 | 2 | P00714,P35467                                           |
| 4780 | 1,2,7,20,2 3,4,5,6,8,1<br>1,22,25,26 8,19,23,24 | 1 | P35467                                                  |
| 4781 | 1,2,7,20,2 3,4,5,6,8,1<br>1,23,24,25 8,19,22,26 | 0 |                                                         |
| 4782 | 1,2,7,20,2 3,4,5,6,8,1<br>1,23,24,26 8,19,22,25 | 1 | P01946                                                  |
| 4783 | 1,2,7,20,2 3,4,5,6,8,1<br>1,23,25,26 8,19,22,24 | 1 | P01946                                                  |
| 4784 | 1,2,7,20,2 3,4,5,6,8,1<br>1,24,25,26 8,19,22,23 | 3 | P02625,P22006,P35467                                    |
| 4785 | 1,2,7,20,2 3,4,5,6,8,1<br>2,23,24,25 8,19,21,26 | 1 | P01835                                                  |
| 4786 | 1,2,7,20,2 3,4,5,6,8,1<br>2,23,24,26 8,19,21,25 | 4 | P00731,P01835,P20646,Q6AYS4                             |
| 4787 | 1,2,7,20,2 3,4,5,6,8,1<br>2,23,25,26 8,19,21,24 | 1 | P01946                                                  |
| 4788 | 1,2,7,20,2 3,4,5,6,8,1<br>2,24,25,26 8,19,21,23 | 3 | P00731,P01835,P35467                                    |
| 4789 | 1,2,7,20,2 3,4,5,6,8,1<br>3,24,25,26 8,19,21,22 | 2 | P01946,Q7TPB1                                           |
| 4790 | 1,2,7,21,2 3,4,5,6,8,1<br>2,23,24,25 8,19,20,26 | 1 | P22006                                                  |
| 4791 | 1,2,7,21,2 3,4,5,6,8,1<br>2,23,24,26 8,19,20,25 | 3 | D3ZUC6,P00731,P01946                                    |
| 4792 | 1,2,7,21,2 3,4,5,6,8,1<br>2,23,25,26 8,19,20,24 | 2 | P01946,P22006                                           |
| 4793 | 1,2,7,21,2 3,4,5,6,8,1<br>2,24,25,26 8,19,20,23 | 2 | P22006,P35467                                           |
| 4794 | 1,2,7,21,2 3,4,5,6,8,1<br>3,24,25,26 8,19,20,22 | 3 | P01946,P22006,Q7TPB1                                    |
| 4795 | 1,2,7,22,2 3,4,5,6,8,1<br>3,24,25,26 8,19,20,21 | 5 | P00731,P01835,P01946,P82471,Q7TPB1                      |
| 4796 | 1,2,8,18,1 3,4,5,6,7,2<br>9,20,21,22 3,24,25,26 | 3 | P20760,Q63751,Q8K4G9                                    |

|      |                                                 |   |                                           |
|------|-------------------------------------------------|---|-------------------------------------------|
| 4797 | 1,2,8,18,1 3,4,5,6,7,2<br>9,20,21,23 2,24,25,26 | 5 | P20760,P35281,Q03191,Q8CJD3,Q8K4G9        |
| 4798 | 1,2,8,18,1 3,4,5,6,7,2<br>9,20,21,24 2,23,25,26 | 4 | P05539,P83121,Q63751,Q8K4G9               |
| 4799 | 1,2,8,18,1 3,4,5,6,7,2<br>9,20,21,25 2,23,24,26 | 4 | P20760,P31430,P47967,Q8K4G9               |
| 4800 | 1,2,8,18,1 3,4,5,6,7,2<br>9,20,21,26 2,23,24,25 | 4 | P62804,Q00715,Q63751,Q8K4G9               |
| 4801 | 1,2,8,18,1 3,4,5,6,7,2<br>9,20,22,23 1,24,25,26 | 5 | P20646,P22006,Q8CJD3,Q8K4G9,Q9QZK9        |
| 4802 | 1,2,8,18,1 3,4,5,6,7,2<br>9,20,22,24 1,23,25,26 | 6 | P01835,P20646,P83121,Q63751,Q8K4G9,Q9QZK9 |
| 4803 | 1,2,8,18,1 3,4,5,6,7,2<br>9,20,22,25 1,23,24,26 | 4 | P01835,P20760,P20761,Q8K4G9               |
| 4804 | 1,2,8,18,1 3,4,5,6,7,2<br>9,20,22,26 1,23,24,25 | 4 | P01835,P20646,Q63751,Q8K4G9               |
| 4805 | 1,2,8,18,1 3,4,5,6,7,2<br>9,20,23,24 1,22,25,26 | 4 | P05539,P09605;P25809,Q03191,Q9QZK9        |
| 4806 | 1,2,8,18,1 3,4,5,6,7,2<br>9,20,23,25 1,22,24,26 | 5 | P20760,P20761,Q8CJD3,Q8K4G9,Q99MH3        |
| 4807 | 1,2,8,18,1 3,4,5,6,7,2<br>9,20,23,26 1,22,24,25 | 4 | P09605;P25809,Q03191,Q63942,Q8K4G9        |
| 4808 | 1,2,8,18,1 3,4,5,6,7,2<br>9,20,24,25 1,22,23,26 | 4 | P01835,P05539,P20760,Q8K4G9               |
| 4809 | 1,2,8,18,1 3,4,5,6,7,2<br>9,20,24,26 1,22,23,25 | 4 | P01835,P09605;P25809,Q63751,Q8K4G9        |
| 4810 | 1,2,8,18,1 3,4,5,6,7,2<br>9,20,25,26 1,22,23,24 | 3 | P35280,Q63751,Q8K4G9                      |
| 4811 | 1,2,8,18,1 3,4,5,6,7,2<br>9,21,22,23 0,24,25,26 | 4 | P20760,Q03191,Q8CJD3,Q99MH3               |
| 4812 | 1,2,8,18,1 3,4,5,6,7,2<br>9,21,22,24 0,23,25,26 | 4 | P01835,P05539,P83121,Q4FZU2               |
| 4813 | 1,2,8,18,1 3,4,5,6,7,2<br>9,21,22,25 0,23,24,26 | 5 | P20760,P31430,P47967,P97840,Q8K4G9        |
| 4814 | 1,2,8,18,1 3,4,5,6,7,2<br>9,21,22,26 0,23,24,25 | 2 | Q63751,Q8K4G9                             |
| 4815 | 1,2,8,18,1 3,4,5,6,7,2<br>9,21,23,24 0,22,25,26 | 4 | D3ZUC6,P05539,Q03191,Q99MH3               |
| 4816 | 1,2,8,18,1 3,4,5,6,7,2<br>9,21,23,25 0,22,24,26 | 6 | P02803,P05539,P20760,P31430,Q03191,Q99MH3 |
| 4817 | 1,2,8,18,1 3,4,5,6,7,2<br>9,21,23,26 0,22,24,25 | 5 | D3ZUC6,Q03191,Q63942,Q6IFV1,Q99MH3        |
| 4818 | 1,2,8,18,1 3,4,5,6,7,2<br>9,21,24,25 0,22,23,26 | 4 | P05539,P20760,P31430,P98089               |
| 4819 | 1,2,8,18,1 3,4,5,6,7,2<br>9,21,24,26 0,22,23,25 | 2 | D3ZUC6,Q63751                             |

|      |                                                 |   |                                           |
|------|-------------------------------------------------|---|-------------------------------------------|
| 4820 | 1,2,8,18,1 3,4,5,6,7,2<br>9,21,25,26 0,22,23,24 | 4 | P31430,P55091,P98089,Q8K4G9               |
| 4821 | 1,2,8,18,1 3,4,5,6,7,2<br>9,22,23,24 0,21,25,26 | 5 | P01835,P05539,P20646,P83121,Q03191        |
| 4822 | 1,2,8,18,1 3,4,5,6,7,2<br>9,22,23,25 0,21,24,26 | 4 | P01835,P20760,Q8CJD3,Q99MH3               |
| 4823 | 1,2,8,18,1 3,4,5,6,7,2<br>9,22,23,26 0,21,24,25 | 4 | P01835,P20646,Q03191,Q63942               |
| 4824 | 1,2,8,18,1 3,4,5,6,7,2<br>9,22,24,25 0,21,23,26 | 2 | P01835,Q4FZU2                             |
| 4825 | 1,2,8,18,1 3,4,5,6,7,2<br>9,22,24,26 0,21,23,25 | 3 | P01835,P20646,Q63751                      |
| 4826 | 1,2,8,18,1 3,4,5,6,7,2<br>9,22,25,26 0,21,23,24 | 2 | P01835,Q8K4G9                             |
| 4827 | 1,2,8,18,1 3,4,5,6,7,2<br>9,23,24,25 0,21,22,26 | 5 | P01835,P05539,P20760,Q03191,Q99MH3        |
| 4828 | 1,2,8,18,1 3,4,5,6,7,2<br>9,23,24,26 0,21,22,25 | 5 | P01835,P09605,P25809,P20646,Q03191,Q63942 |
| 4829 | 1,2,8,18,1 3,4,5,6,7,2<br>9,23,25,26 0,21,22,24 | 4 | P01835,Q03191,Q63942,Q99MH3               |
| 4830 | 1,2,8,18,1 3,4,5,6,7,2<br>9,24,25,26 0,21,22,23 | 3 | P01835,P55091,Q7TPB1                      |
| 4831 | 1,2,8,18,2 3,4,5,6,7,1<br>0,21,22,23 9,24,25,26 | 3 | P20760,Q5FVI6,Q8CJD3                      |
| 4832 | 1,2,8,18,2 3,4,5,6,7,1<br>0,21,22,24 9,23,25,26 | 4 | P05539,P83121,Q5FVI6,Q99041               |
| 4833 | 1,2,8,18,2 3,4,5,6,7,1<br>0,21,22,25 9,23,24,26 | 4 | P20760,P31430,Q5FVI6,Q8K4G9               |
| 4834 | 1,2,8,18,2 3,4,5,6,7,1<br>0,21,22,26 9,23,24,25 | 4 | P62804,Q63751,Q8K4G9,Q99041               |
| 4835 | 1,2,8,18,2 3,4,5,6,7,1<br>0,21,23,24 9,22,25,26 | 3 | P05539,Q5FVI6,Q9QZK9                      |
| 4836 | 1,2,8,18,2 3,4,5,6,7,1<br>0,21,23,25 9,22,24,26 | 3 | P20760,P31430,Q99MH3                      |
| 4837 | 1,2,8,18,2 3,4,5,6,7,1<br>0,21,23,26 9,22,24,25 | 4 | P62804,Q6IFV1,Q6P6Q2,Q8K4G9               |
| 4838 | 1,2,8,18,2 3,4,5,6,7,1<br>0,21,24,25 9,22,23,26 | 4 | O54728,P05539,P20760,P31430               |
| 4839 | 1,2,8,18,2 3,4,5,6,7,1<br>0,21,24,26 9,22,23,25 | 3 | P62804,Q8K4G9,Q99041                      |
| 4840 | 1,2,8,18,2 3,4,5,6,7,1<br>0,21,25,26 9,22,23,24 | 4 | P31430,P55091,P62804,Q8K4G9               |
| 4841 | 1,2,8,18,2 3,4,5,6,7,1<br>0,22,23,24 9,21,25,26 | 2 | Q5FVI6,Q9QZK9                             |
| 4842 | 1,2,8,18,2 3,4,5,6,7,1<br>0,22,23,25 9,21,24,26 | 1 | P20760                                    |

|      |                                                 |   |                                                  |
|------|-------------------------------------------------|---|--------------------------------------------------|
| 4843 | 1,2,8,18,2 3,4,5,6,7,1<br>0,22,23,26 9,21,24,25 | 0 |                                                  |
| 4844 | 1,2,8,18,2 3,4,5,6,7,1<br>0,22,24,25 9,21,23,26 | 2 | P01835,Q5FVI6                                    |
| 4845 | 1,2,8,18,2 3,4,5,6,7,1<br>0,22,24,26 9,21,23,25 | 3 | P01835,P20646,Q99041                             |
| 4846 | 1,2,8,18,2 3,4,5,6,7,1<br>0,22,25,26 9,21,23,24 | 1 | Q8K4G9                                           |
| 4847 | 1,2,8,18,2 3,4,5,6,7,1<br>0,23,24,25 9,21,22,26 | 0 |                                                  |
| 4848 | 1,2,8,18,2 3,4,5,6,7,1<br>0,23,24,26 9,21,22,25 | 1 | P09605;P25809                                    |
| 4849 | 1,2,8,18,2 3,4,5,6,7,1<br>0,23,25,26 9,21,22,24 | 2 | Q6P6Q2,Q8K4G9                                    |
| 4850 | 1,2,8,18,2 3,4,5,6,7,1<br>0,24,25,26 9,21,22,23 | 3 | P55091,Q7TPB1,Q8K4G9                             |
| 4851 | 1,2,8,18,2 3,4,5,6,7,1<br>1,22,23,24 9,20,25,26 | 2 | P05539,Q5FVI6                                    |
| 4852 | 1,2,8,18,2 3,4,5,6,7,1<br>1,22,23,25 9,20,24,26 | 4 | P20760,P31430,Q5FVI6,Q99MH3                      |
| 4853 | 1,2,8,18,2 3,4,5,6,7,1<br>1,22,23,26 9,20,24,25 | 1 | Q6IFV1                                           |
| 4854 | 1,2,8,18,2 3,4,5,6,7,1<br>1,22,24,25 9,20,23,26 | 4 | P05539,P20760,P31430,Q5FVI6                      |
| 4855 | 1,2,8,18,2 3,4,5,6,7,1<br>1,22,24,26 9,20,23,25 | 1 | Q99041                                           |
| 4856 | 1,2,8,18,2 3,4,5,6,7,1<br>1,22,25,26 9,20,23,24 | 2 | P31430,P55091                                    |
| 4857 | 1,2,8,18,2 3,4,5,6,7,1<br>1,23,24,25 9,20,22,26 | 7 | O54728,P05539,P20760,P31430,P98089,Q5FVI6,Q99MH3 |
| 4858 | 1,2,8,18,2 3,4,5,6,7,1<br>1,23,24,26 9,20,22,25 | 2 | D3ZUC6,Q6IFV1                                    |
| 4859 | 1,2,8,18,2 3,4,5,6,7,1<br>1,23,25,26 9,20,22,24 | 7 | P14669,P31430,P55091,P98089,Q6IFV1,Q6P6Q2,Q99MH3 |
| 4860 | 1,2,8,18,2 3,4,5,6,7,1<br>1,24,25,26 9,20,22,23 | 4 | P31430,P55091,P98089,Q7TPB1                      |
| 4861 | 1,2,8,18,2 3,4,5,6,7,1<br>2,23,24,25 9,20,21,26 | 2 | P01835,Q5FVI6                                    |
| 4862 | 1,2,8,18,2 3,4,5,6,7,1<br>2,23,24,26 9,20,21,25 | 3 | P00731,P01835,P20646                             |
| 4863 | 1,2,8,18,2 3,4,5,6,7,1<br>2,23,25,26 9,20,21,24 | 1 | P01835                                           |
| 4864 | 1,2,8,18,2 3,4,5,6,7,1<br>2,24,25,26 9,20,21,23 | 3 | P01835,P55091,Q7TPB1                             |
| 4865 | 1,2,8,18,2 3,4,5,6,7,1<br>3,24,25,26 9,20,21,22 | 3 | P01835,P55091,Q7TPB1                             |

|      |                                                 |   |                                                                       |
|------|-------------------------------------------------|---|-----------------------------------------------------------------------|
| 4866 | 1,2,8,19,2 3,4,5,6,7,1<br>0,21,22,23 8,24,25,26 | 4 | P00774,P61206;P84079;P84082,Q8CJD3,Q8K4G9                             |
| 4867 | 1,2,8,19,2 3,4,5,6,7,1<br>0,21,22,24 8,23,25,26 | 8 | P00714,P00774,P12785,P61206;P84079;P84082,P83121,Q4FZU2,Q6IFW6,Q8K4G9 |
| 4868 | 1,2,8,19,2 3,4,5,6,7,1<br>0,21,22,25 8,23,24,26 | 6 | P12785,P20760,Q4FZU2,Q6IFW6,Q8K4G9,Q8VD89                             |
| 4869 | 1,2,8,19,2 3,4,5,6,7,1<br>0,21,22,26 8,23,24,25 | 3 | P62804,Q63751,Q8K4G9                                                  |
| 4870 | 1,2,8,19,2 3,4,5,6,7,1<br>0,21,23,24 8,22,25,26 | 2 | P05539,P61206;P84079;P84082                                           |
| 4871 | 1,2,8,19,2 3,4,5,6,7,1<br>0,21,23,25 8,22,24,26 | 3 | P20760,Q8K4G9,Q8VD89                                                  |
| 4872 | 1,2,8,19,2 3,4,5,6,7,1<br>0,21,23,26 8,22,24,25 | 2 | P62804,Q8K4G9                                                         |
| 4873 | 1,2,8,19,2 3,4,5,6,7,1<br>0,21,24,25 8,22,23,26 | 6 | P05539,P12785,Q4FZU2,Q6IFW6,Q8K4G9,Q8VD89                             |
| 4874 | 1,2,8,19,2 3,4,5,6,7,1<br>0,21,24,26 8,22,23,25 | 3 | P62804,Q63751,Q8K4G9                                                  |
| 4875 | 1,2,8,19,2 3,4,5,6,7,1<br>0,21,25,26 8,22,23,24 | 2 | P62804,Q8K4G9                                                         |
| 4876 | 1,2,8,19,2 3,4,5,6,7,1<br>0,22,23,24 8,21,25,26 | 5 | P00774,P01835,P20646,P25031,P61206;P84079;P84082                      |
| 4877 | 1,2,8,19,2 3,4,5,6,7,1<br>0,22,23,25 8,21,24,26 | 6 | P01835,P20760,P25031,Q08849,Q8CJD3,Q8K4G9                             |
| 4878 | 1,2,8,19,2 3,4,5,6,7,1<br>0,22,23,26 8,21,24,25 | 5 | P01835,P20646,P25031,Q08849,Q8K4G9                                    |
| 4879 | 1,2,8,19,2 3,4,5,6,7,1<br>0,22,24,25 8,21,23,26 | 9 | P00774,P01835,P12785,P25031,Q4FZU2,Q6IFW6,Q6IMF3,Q6P6Q2,Q8K4G9        |
| 4880 | 1,2,8,19,2 3,4,5,6,7,1<br>0,22,24,26 8,21,23,25 | 6 | P01835,P12785,P20646,P25031,Q63751,Q8K4G9                             |
| 4881 | 1,2,8,19,2 3,4,5,6,7,1<br>0,22,25,26 8,21,23,24 | 4 | P01835,P12785,Q63751,Q8K4G9                                           |
| 4882 | 1,2,8,19,2 3,4,5,6,7,1<br>0,23,24,25 8,21,22,26 | 3 | P01835,P25031,P83748                                                  |
| 4883 | 1,2,8,19,2 3,4,5,6,7,1<br>0,23,24,26 8,21,22,25 | 4 | P01835,P09605;P25809,P20646,P25031                                    |
| 4884 | 1,2,8,19,2 3,4,5,6,7,1<br>0,23,25,26 8,21,22,24 | 2 | Q08849,Q8K4G9                                                         |
| 4885 | 1,2,8,19,2 3,4,5,6,7,1<br>0,24,25,26 8,21,22,23 | 2 | P01835,Q8K4G9                                                         |
| 4886 | 1,2,8,19,2 3,4,5,6,7,1<br>1,22,23,24 8,20,25,26 | 2 | P01835,P61206;P84079;P84082                                           |
| 4887 | 1,2,8,19,2 3,4,5,6,7,1<br>1,22,23,25 8,20,24,26 | 1 | P20760                                                                |
| 4888 | 1,2,8,19,2 3,4,5,6,7,1<br>1,22,23,26 8,20,24,25 | 0 |                                                                       |



|      |                                                 |   |                                                  |
|------|-------------------------------------------------|---|--------------------------------------------------|
| 4889 | 1,2,8,19,2 3,4,5,6,7,1<br>1,22,24,25 8,20,23,26 | 6 | P01835,P12785,Q4FZU2,Q6IFW6,Q6IG02,Q6IMF3        |
| 4890 | 1,2,8,19,2 3,4,5,6,7,1<br>1,22,24,26 8,20,23,25 | 2 | P01835,P12785                                    |
| 4891 | 1,2,8,19,2 3,4,5,6,7,1<br>1,22,25,26 8,20,23,24 | 1 | Q8K4G9                                           |
| 4892 | 1,2,8,19,2 3,4,5,6,7,1<br>1,23,24,25 8,20,22,26 | 1 | P05539                                           |
| 4893 | 1,2,8,19,2 3,4,5,6,7,1<br>1,23,24,26 8,20,22,25 | 1 | D3ZUC6                                           |
| 4894 | 1,2,8,19,2 3,4,5,6,7,1<br>1,23,25,26 8,20,22,24 | 1 | Q8K4G9                                           |
| 4895 | 1,2,8,19,2 3,4,5,6,7,1<br>1,24,25,26 8,20,22,23 | 1 | Q8K4G9                                           |
| 4896 | 1,2,8,19,2 3,4,5,6,7,1<br>2,23,24,25 8,20,21,26 | 4 | P01835,P25031,P61206;P84079;P84082,Q4FZU2        |
| 4897 | 1,2,8,19,2 3,4,5,6,7,1<br>2,23,24,26 8,20,21,25 | 5 | P00731,P01835,P20646,P25031,P61206;P84079;P84082 |
| 4898 | 1,2,8,19,2 3,4,5,6,7,1<br>2,23,25,26 8,20,21,24 | 1 | P01835                                           |
| 4899 | 1,2,8,19,2 3,4,5,6,7,1<br>2,24,25,26 8,20,21,23 | 3 | P01835,P12785,P25031                             |
| 4900 | 1,2,8,19,2 3,4,5,6,7,1<br>3,24,25,26 8,20,21,22 | 3 | P01835,P25031,Q7TPB1                             |
| 4901 | 1,2,8,20,2 3,4,5,6,7,1<br>1,22,23,24 8,19,25,26 | 2 | P61206;P84079;P84082,Q5FVI6                      |
| 4902 | 1,2,8,20,2 3,4,5,6,7,1<br>1,22,23,25 8,19,24,26 | 2 | P20760,Q5FVI6                                    |
| 4903 | 1,2,8,20,2 3,4,5,6,7,1<br>1,22,23,26 8,19,24,25 | 1 | Q8K4G9                                           |
| 4904 | 1,2,8,20,2 3,4,5,6,7,1<br>1,22,24,25 8,19,23,26 | 6 | P12785,P35467,Q4FZU2,Q5FVI6,Q5XFX0,Q6IFW6        |
| 4905 | 1,2,8,20,2 3,4,5,6,7,1<br>1,22,24,26 8,19,23,25 | 6 | O70377,P00714,P12785,Q5XFX0,Q8K4G9,Q99041        |
| 4906 | 1,2,8,20,2 3,4,5,6,7,1<br>1,22,25,26 8,19,23,24 | 3 | P02625,P12785,Q8K4G9                             |
| 4907 | 1,2,8,20,2 3,4,5,6,7,1<br>1,23,24,25 8,19,22,26 | 0 |                                                  |
| 4908 | 1,2,8,20,2 3,4,5,6,7,1<br>1,23,24,26 8,19,22,25 | 1 | Q6IFV1                                           |
| 4909 | 1,2,8,20,2 3,4,5,6,7,1<br>1,23,25,26 8,19,22,24 | 1 | Q8K4G9                                           |
| 4910 | 1,2,8,20,2 3,4,5,6,7,1<br>1,24,25,26 8,19,22,23 | 2 | P02625,Q8K4G9                                    |
| 4911 | 1,2,8,20,2 3,4,5,6,7,1<br>2,23,24,25 8,19,21,26 | 4 | P01835,P25031,P83748,Q5FVI6                      |

|      |                                                     |   |                                                  |
|------|-----------------------------------------------------|---|--------------------------------------------------|
| 4912 | 1,2,8,20,2 3,4,5,6,7,1<br>2,23,24,26 8,19,21,25     | 5 | P00731,P01835,P20646,P25031,P47967               |
| 4913 | 1,2,8,20,2 3,4,5,6,7,1<br>2,23,25,26 8,19,21,24     | 1 | Q08849                                           |
| 4914 | 1,2,8,20,2 3,4,5,6,7,1<br>2,24,25,26 8,19,21,23     | 3 | P00731,P01835,P12785                             |
| 4915 | 1,2,8,20,2 3,4,5,6,7,1<br>3,24,25,26 8,19,21,22     | 2 | P19218,Q7TPB1                                    |
| 4916 | 1,2,8,21,2 3,4,5,6,7,1<br>2,23,24,25 8,19,20,26     | 1 | Q5FVI6                                           |
| 4917 | 1,2,8,21,2 3,4,5,6,7,1<br>2,23,24,26 8,19,20,25     | 2 | P00731,Q6IFV1                                    |
| 4918 | 1,2,8,21,2 3,4,5,6,7,1<br>2,23,25,26 8,19,20,24     | 0 |                                                  |
| 4919 | 1,2,8,21,2 3,4,5,6,7,1<br>2,24,25,26 8,19,20,23     | 1 | P12785                                           |
| 4920 | 1,2,8,21,2 3,4,5,6,7,1<br>3,24,25,26 8,19,20,22     | 1 | Q7TPB1                                           |
| 4921 | 1,2,8,22,2 3,4,5,6,7,1<br>3,24,25,26 8,19,20,21     | 4 | P00731,P01835,P25031,Q7TPB1                      |
| 4922 | 1,2,18,19, 3,4,5,6,7,8<br>20,21,22,2 ,24,25,26<br>3 | 4 | P20760,P20761,Q8CJD3,Q9Z0V6                      |
| 4923 | 1,2,18,19, 3,4,5,6,7,8<br>20,21,22,2 ,23,25,26<br>4 | 7 | P00714,P20760,P20761,Q63751,Q99041,Q9WTT6,Q9Z0V6 |
| 4924 | 1,2,18,19, 3,4,5,6,7,8<br>20,21,22,2 ,23,24,26<br>5 | 5 | P20760,P20761,P47967,P97840,Q63751               |
| 4925 | 1,2,18,19, 3,4,5,6,7,8<br>20,21,22,2 ,23,24,25<br>6 | 7 | O70377,P08937,P36374,Q63751,Q8K4G9,Q99041,Q9Z0V6 |
| 4926 | 1,2,18,19, 3,4,5,6,7,8<br>20,21,23,2 ,22,25,26<br>4 | 6 | D3ZUC6,P05539,P20760,P20761,Q9QZK9,Q9Z0V6        |
| 4927 | 1,2,18,19, 3,4,5,6,7,8<br>20,21,23,2 ,22,24,26<br>5 | 3 | P20760,P20761,Q99MH3                             |
| 4928 | 1,2,18,19, 3,4,5,6,7,8<br>20,21,23,2 ,22,24,25<br>6 | 1 | D3ZUC6                                           |
| 4929 | 1,2,18,19, 3,4,5,6,7,8<br>20,21,24,2 ,22,23,26<br>5 | 3 | P05539,P20760,P20761                             |

|      |                               |                          |    |                                                                              |
|------|-------------------------------|--------------------------|----|------------------------------------------------------------------------------|
| 4930 | 1,2,18,19,<br>20,21,24,2<br>6 | 3,4,5,6,7,8<br>,22,23,25 | 7  | D3ZUC6,P06911,P12020,Q63751,Q6AYS4,Q99041,Q9Z0V6                             |
| 4931 | 1,2,18,19,<br>20,21,25,2<br>6 | 3,4,5,6,7,8<br>,22,23,24 | 3  | P31430,Q63751,Q8K4G9                                                         |
| 4932 | 1,2,18,19,<br>20,22,23,2<br>4 | 3,4,5,6,7,8<br>,21,25,26 | 6  | P20646,P20761,Q6AYS4,Q9QZK9,Q9WTT6,Q9Z0V6                                    |
| 4933 | 1,2,18,19,<br>20,22,23,2<br>5 | 3,4,5,6,7,8<br>,21,24,26 | 3  | P20760,P20761,Q8CJD3                                                         |
| 4934 | 1,2,18,19,<br>20,22,23,2<br>6 | 3,4,5,6,7,8<br>,21,24,25 | 5  | P06760,P20646,Q6AYS4,Q9WTT6,Q9Z0V6                                           |
| 4935 | 1,2,18,19,<br>20,22,24,2<br>5 | 3,4,5,6,7,8<br>,21,23,26 | 4  | P01835,P20760,P20761,Q9Z0V6                                                  |
| 4936 | 1,2,18,19,<br>20,22,24,2<br>6 | 3,4,5,6,7,8<br>,21,23,25 | 11 | O70377,P01835,P06760,P07150,P20646,Q63751,Q6AYS4,Q6P6R2,Q99041,Q9WTT6,Q9Z0V6 |
| 4937 | 1,2,18,19,<br>20,22,25,2<br>6 | 3,4,5,6,7,8<br>,21,23,24 | 3  | Q63751,Q8K4G9,Q99041                                                         |
| 4938 | 1,2,18,19,<br>20,23,24,2<br>5 | 3,4,5,6,7,8<br>,21,22,26 | 3  | P20760,P20761,P83748                                                         |
| 4939 | 1,2,18,19,<br>20,23,24,2<br>6 | 3,4,5,6,7,8<br>,21,22,25 | 6  | P06760,P20646,Q6AYS4,Q9QZK9,Q9WTT6,Q9Z0V6                                    |
| 4940 | 1,2,18,19,<br>20,23,25,2<br>6 | 3,4,5,6,7,8<br>,21,22,24 | 0  |                                                                              |
| 4941 | 1,2,18,19,<br>20,24,25,2<br>6 | 3,4,5,6,7,8<br>,21,22,23 | 2  | Q7TPB1,Q99041                                                                |
| 4942 | 1,2,18,19,<br>21,22,23,2<br>4 | 3,4,5,6,7,8<br>,20,25,26 | 3  | D3ZUC6,P20760,P20761                                                         |
| 4943 | 1,2,18,19,<br>21,22,23,2<br>5 | 3,4,5,6,7,8<br>,20,24,26 | 4  | P20760,P20761,P97840,Q99MH3                                                  |
| 4944 | 1,2,18,19,<br>21,22,23,2<br>6 | 3,4,5,6,7,8<br>,20,24,25 | 1  | D3ZUC6                                                                       |

|      |                               |                          |   |                                                  |
|------|-------------------------------|--------------------------|---|--------------------------------------------------|
| 4945 | 1,2,18,19,<br>21,22,24,2<br>5 | 3,4,5,6,7,8<br>,20,23,26 | 4 | P20760,P20761,P97840,Q4FZU2                      |
| 4946 | 1,2,18,19,<br>21,22,24,2<br>6 | 3,4,5,6,7,8<br>,20,23,25 | 6 | D3ZUC6,O70377,Q63617,Q63751,Q99041,Q9Z0V6        |
| 4947 | 1,2,18,19,<br>21,22,25,2<br>6 | 3,4,5,6,7,8<br>,20,23,24 | 4 | P31430,P97840,Q63617,Q63751                      |
| 4948 | 1,2,18,19,<br>21,23,24,2<br>5 | 3,4,5,6,7,8<br>,20,22,26 | 5 | D3ZUC6,P05539,P20760,P20761,Q99MH3               |
| 4949 | 1,2,18,19,<br>21,23,24,2<br>6 | 3,4,5,6,7,8<br>,20,22,25 | 2 | D3ZUC6,Q03191                                    |
| 4950 | 1,2,18,19,<br>21,23,25,2<br>6 | 3,4,5,6,7,8<br>,20,22,24 | 4 | D3ZUC6,P31430,Q63661,Q99MH3                      |
| 4951 | 1,2,18,19,<br>21,24,25,2<br>6 | 3,4,5,6,7,8<br>,20,22,23 | 5 | D3ZUC6,P31430,P55091,Q63617,Q7TPB1               |
| 4952 | 1,2,18,19,<br>22,23,24,2<br>5 | 3,4,5,6,7,8<br>,20,21,26 | 5 | P01835,P20760,P20761,P82471,Q99MH3               |
| 4953 | 1,2,18,19,<br>22,23,24,2<br>6 | 3,4,5,6,7,8<br>,20,21,25 | 7 | P00731,P01835,P06760,P20646,Q6AYS4,Q6IFU7,Q9WTT6 |
| 4954 | 1,2,18,19,<br>22,23,25,2<br>6 | 3,4,5,6,7,8<br>,20,21,24 | 2 | P01835,Q99MH3                                    |
| 4955 | 1,2,18,19,<br>22,24,25,2<br>6 | 3,4,5,6,7,8<br>,20,21,23 | 3 | P01835,Q7TPB1,Q99041                             |
| 4956 | 1,2,18,19,<br>23,24,25,2<br>6 | 3,4,5,6,7,8<br>,20,21,22 | 4 | P01835,Q03191,Q7TPB1,Q99MH3                      |
| 4957 | 1,2,18,20,<br>21,22,23,2<br>4 | 3,4,5,6,7,8<br>,19,25,26 | 4 | P20761,P55016,Q5FVI6,Q9QZK9                      |
| 4958 | 1,2,18,20,<br>21,22,23,2<br>5 | 3,4,5,6,7,8<br>,19,24,26 | 2 | P20760,P20761                                    |
| 4959 | 1,2,18,20,<br>21,22,23,2<br>6 | 3,4,5,6,7,8<br>,19,24,25 | 3 | P55016,Q6IFV1,Q9QUL6                             |

|      |                               |                          |   |                                    |
|------|-------------------------------|--------------------------|---|------------------------------------|
| 4960 | 1,2,18,20,<br>21,22,24,2<br>5 | 3,4,5,6,7,8<br>,19,23,26 | 5 | P20760,P20761,P55016,Q5FVI6,Q99041 |
| 4961 | 1,2,18,20,<br>21,22,24,2<br>6 | 3,4,5,6,7,8<br>,19,23,25 | 5 | O70377,P55016,Q63751,Q99041,Q9Z0V6 |
| 4962 | 1,2,18,20,<br>21,22,25,2<br>6 | 3,4,5,6,7,8<br>,19,23,24 | 3 | P31430,P55016,Q99041               |
| 4963 | 1,2,18,20,<br>21,23,24,2<br>5 | 3,4,5,6,7,8<br>,19,22,26 | 2 | P20760,P20761                      |
| 4964 | 1,2,18,20,<br>21,23,24,2<br>6 | 3,4,5,6,7,8<br>,19,22,25 | 4 | D3ZUC6,P55016,Q6IFV1,Q9QUL6        |
| 4965 | 1,2,18,20,<br>21,23,25,2<br>6 | 3,4,5,6,7,8<br>,19,22,24 | 2 | P31430,Q6P6Q2                      |
| 4966 | 1,2,18,20,<br>21,24,25,2<br>6 | 3,4,5,6,7,8<br>,19,22,23 | 4 | P31430,P55016,P55091,Q99041        |
| 4967 | 1,2,18,20,<br>22,23,24,2<br>5 | 3,4,5,6,7,8<br>,19,21,26 | 4 | P20760,P20761,P83748,Q5FVI6        |
| 4968 | 1,2,18,20,<br>22,23,24,2<br>6 | 3,4,5,6,7,8<br>,19,21,25 | 4 | P00731,P20646,Q6IFU7,Q9QZK9        |
| 4969 | 1,2,18,20,<br>22,23,25,2<br>6 | 3,4,5,6,7,8<br>,19,21,24 | 0 |                                    |
| 4970 | 1,2,18,20,<br>22,24,25,2<br>6 | 3,4,5,6,7,8<br>,19,21,23 | 3 | P00731,Q7TPB1,Q99041               |
| 4971 | 1,2,18,20,<br>23,24,25,2<br>6 | 3,4,5,6,7,8<br>,19,21,22 | 2 | P19218,Q7TPB1                      |
| 4972 | 1,2,18,21,<br>22,23,24,2<br>5 | 3,4,5,6,7,8<br>,19,20,26 | 3 | P20760,P20761,Q5FVI6               |
| 4973 | 1,2,18,21,<br>22,23,24,2<br>6 | 3,4,5,6,7,8<br>,19,20,25 | 4 | D3ZUC6,P00731,Q6IFU7,Q6IFV1        |
| 4974 | 1,2,18,21,<br>22,23,25,2<br>6 | 3,4,5,6,7,8<br>,19,20,24 | 1 | P31430                             |

|      |                               |                          |    |                                                                       |
|------|-------------------------------|--------------------------|----|-----------------------------------------------------------------------|
| 4975 | 1,2,18,21,<br>22,24,25,2<br>6 | 3,4,5,6,7,8<br>,19,20,23 | 3  | P31430,P55091,Q99041                                                  |
| 4976 | 1,2,18,21,<br>23,24,25,2<br>6 | 3,4,5,6,7,8<br>,19,20,22 | 4  | D3ZUC6,P31430,P55091,Q7TPB1                                           |
| 4977 | 1,2,18,22,<br>23,24,25,2<br>6 | 3,4,5,6,7,8<br>,19,20,21 | 5  | P00731,P01835,P82471,Q6IFU7,Q7TPB1                                    |
| 4978 | 1,2,19,20,<br>21,22,23,2<br>4 | 3,4,5,6,7,8<br>,18,25,26 | 5  | P00714,P00774,P20761,P61206;P84079;P84082,Q6AYS4                      |
| 4979 | 1,2,19,20,<br>21,22,23,2<br>5 | 3,4,5,6,7,8<br>,18,24,26 | 3  | P20760,P20761,Q8VD89                                                  |
| 4980 | 1,2,19,20,<br>21,22,23,2<br>6 | 3,4,5,6,7,8<br>,18,24,25 | 0  |                                                                       |
| 4981 | 1,2,19,20,<br>21,22,24,2<br>5 | 3,4,5,6,7,8<br>,18,23,26 | 10 | P12785,P20760,P20761,P35467,P55016,Q4FZU2,Q6IFW6,Q6IG02,Q6P6Q2,Q8VD89 |
| 4982 | 1,2,19,20,<br>21,22,24,2<br>6 | 3,4,5,6,7,8<br>,18,23,25 | 7  | O70377,P00714,P55016,Q63751,Q6AYS4,Q99041,Q9Z0V6                      |
| 4983 | 1,2,19,20,<br>21,22,25,2<br>6 | 3,4,5,6,7,8<br>,18,23,24 | 3  | P55016,Q63751,Q8K4G9                                                  |
| 4984 | 1,2,19,20,<br>21,23,24,2<br>5 | 3,4,5,6,7,8<br>,18,22,26 | 3  | P20760,P20761,Q8VD89                                                  |
| 4985 | 1,2,19,20,<br>21,23,24,2<br>6 | 3,4,5,6,7,8<br>,18,22,25 | 2  | P55016,Q6AYS4                                                         |
| 4986 | 1,2,19,20,<br>21,23,25,2<br>6 | 3,4,5,6,7,8<br>,18,22,24 | 0  |                                                                       |
| 4987 | 1,2,19,20,<br>21,24,25,2<br>6 | 3,4,5,6,7,8<br>,18,22,23 | 1  | P55016                                                                |
| 4988 | 1,2,19,20,<br>22,23,24,2<br>5 | 3,4,5,6,7,8<br>,18,21,26 | 8  | P00774,P01835,P20646,P20760,P20761,P25031,P83748,Q6AYS4               |
| 4989 | 1,2,19,20,<br>22,23,24,2<br>6 | 3,4,5,6,7,8<br>,18,21,25 | 8  | P00731,P01835,P20646,P25031,P61206;P84079;P84082,Q6AYS4,Q9WTT6,Q9Z0V6 |

|      |                               |                          |   |                                           |
|------|-------------------------------|--------------------------|---|-------------------------------------------|
| 4990 | 1,2,19,20,<br>22,23,25,2<br>6 | 3,4,5,6,7,8<br>,18,21,24 | 0 |                                           |
| 4991 | 1,2,19,20,<br>22,24,25,2<br>6 | 3,4,5,6,7,8<br>,18,21,23 | 4 | P00731,P01835,P20646,Q6AYS4               |
| 4992 | 1,2,19,20,<br>23,24,25,2<br>6 | 3,4,5,6,7,8<br>,18,21,22 | 2 | Q6AYS4,Q7TPB1                             |
| 4993 | 1,2,19,21,<br>22,23,24,2<br>5 | 3,4,5,6,7,8<br>,18,20,26 | 3 | P20760,P20761,P82471                      |
| 4994 | 1,2,19,21,<br>22,23,24,2<br>6 | 3,4,5,6,7,8<br>,18,20,25 | 4 | D3ZUC6,O70377,P00731,P61206;P84079;P84082 |
| 4995 | 1,2,19,21,<br>22,23,25,2<br>6 | 3,4,5,6,7,8<br>,18,20,24 | 0 |                                           |
| 4996 | 1,2,19,21,<br>22,24,25,2<br>6 | 3,4,5,6,7,8<br>,18,20,23 | 1 | P07171                                    |
| 4997 | 1,2,19,21,<br>23,24,25,2<br>6 | 3,4,5,6,7,8<br>,18,20,22 | 1 | Q7TPB1                                    |
| 4998 | 1,2,19,22,<br>23,24,25,2<br>6 | 3,4,5,6,7,8<br>,18,20,21 | 6 | P00731,P01835,P20646,P25031,P82471,Q7TPB1 |
| 4999 | 1,2,20,21,<br>22,23,24,2<br>5 | 3,4,5,6,7,8<br>,18,19,26 | 4 | P20760,P20761,P55016,Q5FVI6               |
| 5000 | 1,2,20,21,<br>22,23,24,2<br>6 | 3,4,5,6,7,8<br>,18,19,25 | 4 | O70377,P00714,P00731,P55016               |
| 5001 | 1,2,20,21,<br>22,23,25,2<br>6 | 3,4,5,6,7,8<br>,18,19,24 | 1 | P55016                                    |
| 5002 | 1,2,20,21,<br>22,24,25,2<br>6 | 3,4,5,6,7,8<br>,18,19,23 | 5 | P00731,P02625,P35467,P55016,Q99041        |
| 5003 | 1,2,20,21,<br>23,24,25,2<br>6 | 3,4,5,6,7,8<br>,18,19,22 | 2 | P55016,Q7TPB1                             |
| 5004 | 1,2,20,22,<br>23,24,25,2<br>6 | 3,4,5,6,7,8<br>,18,19,21 | 2 | P00731,Q7TPB1                             |

|      |                               |                                   |    |                                                                                                                                          |
|------|-------------------------------|-----------------------------------|----|------------------------------------------------------------------------------------------------------------------------------------------|
| 5005 | 1,2,21,22,<br>23,24,25,2<br>6 | 3,4,5,6,7,8<br>,18,19,20          | 2  | P00731,Q7TPB1                                                                                                                            |
| 5006 | 1,3,4,5,6,7<br>,8,18          | 2,19,20,21<br>,22,23,24,<br>25,26 | 11 | O55006,P00731,P01681,P02803,P18418,P52590,P61206;P84079;P84082,Q63617,Q6IRE4,Q8VD89,Q9ESW0                                               |
| 5007 | 1,3,4,5,6,7<br>,8,19          | 2,18,20,21<br>,22,23,24,<br>25,26 | 9  | O55006,P00731,P01681,P16086,P18418,P52590,Q30KJ2,Q5FVI6,Q63617                                                                           |
| 5008 | 1,3,4,5,6,7<br>,8,20          | 2,18,19,21<br>,22,23,24,<br>25,26 | 8  | O55006,P00731,P01681,P18418,P52590,Q63617,Q6IRE4,Q9ESW0                                                                                  |
| 5009 | 1,3,4,5,6,7<br>,8,21          | 2,18,19,20<br>,22,23,24,<br>25,26 | 12 | O55006,P00731,P01681,P18418,P20646,P42854,P52590,P61206;P84079;P84082,Q63617,Q6IRE4,Q7TPB1,Q9ESW0                                        |
| 5010 | 1,3,4,5,6,7<br>,8,22          | 2,18,19,20<br>,21,23,24,<br>25,26 | 6  | O55006,P01681,P18418,P52590,Q63617,Q9QW07                                                                                                |
| 5011 | 1,3,4,5,6,7<br>,8,23          | 2,18,19,20<br>,21,22,24,<br>25,26 | 10 | P01681,P18418,P28648,P52590,P97580,Q63617,Q63751,Q6IRE4,Q99041,Q9ESW0                                                                    |
| 5012 | 1,3,4,5,6,7<br>,8,24          | 2,18,19,20<br>,21,22,23,<br>25,26 | 6  | O55006,P01681,P18418,P52590,Q63617,Q6IRE4                                                                                                |
| 5013 | 1,3,4,5,6,7<br>,8,25          | 2,18,19,20<br>,21,22,23,<br>24,26 | 15 | O55006,O70377,P01681,P06911,P10715,P12020,P18418,P19629,P52590,P61206;P84079;P84082,Q4AEF8,Q5GRG2,Q63617,Q6IRE4,Q9Z<br>0V6               |
| 5014 | 1,3,4,5,6,7<br>,8,26          | 2,18,19,20<br>,21,22,23,<br>24,25 | 17 | O55006,P01681,P04041,P05539,P18418,P20760,P20761,P52590,P61206;P84079;P84082,P83748,Q4FZU2,Q5FVI6,Q63617,Q6AY33,Q6IR<br>E4,Q8VD89,Q9ESW0 |
| 5015 | 1,3,4,5,6,7<br>,18,19         | 2,8,20,21,<br>22,23,24,2<br>5,26  | 7  | O55006,P00731,P01681,P18418,P61206;P84079;P84082,Q5FVI6,Q9ESW0                                                                           |
| 5016 | 1,3,4,5,6,7<br>,18,20         | 2,8,19,21,<br>22,23,24,2<br>5,26  | 8  | O55006,P00731,P01681,P18418,P61206;P84079;P84082,Q4FZU2,Q6IRE4,Q9ESW0                                                                    |
| 5017 | 1,3,4,5,6,7<br>,18,21         | 2,8,19,20,<br>22,23,24,2<br>5,26  | 11 | P00731,P01681,P01835,P18418,P20646,P25031,P42854,P52590,P61206;P84079;P84082,Q6IRE4,Q9ESW0                                               |
| 5018 | 1,3,4,5,6,7<br>,18,22         | 2,8,19,20,<br>21,23,24,2<br>5,26  | 7  | P01681,P18418,P61206;P84079;P84082,Q8K4G9,Q8VD89,Q9ESW0,Q9QW07                                                                           |
| 5019 | 1,3,4,5,6,7<br>,18,23         | 2,8,19,20,<br>21,22,24,2<br>5,26  | 14 | P01681,P12785,P18418,P28648,P52590,P55053,P61206;P84079;P84082,Q4FZU2,Q6IFW6,Q6IG02,Q6IRE4,Q8K4G9,Q8VD89,Q9ESW0                          |



|      |                       |                                  |    |                                                                                                                            |
|------|-----------------------|----------------------------------|----|----------------------------------------------------------------------------------------------------------------------------|
| 5020 | 1,3,4,5,6,7<br>,18,24 | 2,8,19,20,<br>21,22,23,2<br>5,26 | 9  | O55006,P01681,P18418,P52590,P61206;P84079;P84082,Q6IRE4,Q8K4G9,Q8VD89,Q9ESW0                                               |
| 5021 | 1,3,4,5,6,7<br>,18,25 | 2,8,19,20,<br>21,22,23,2<br>4,26 | 8  | P00731,P01681,P18418,P25031,P52590,P61206;P84079;P84082,Q6IRE4,Q9ESW0                                                      |
| 5022 | 1,3,4,5,6,7<br>,18,26 | 2,8,19,20,<br>21,22,23,2<br>4,25 | 15 | P01681,P05539,P18418,P20760,P20761,P25031,P61206;P84079;P84082,P83748,Q4FZU2,Q5FVI6,Q6AY33,Q6IFW6,Q6IRE4,Q8VD89,Q9E<br>SW0 |
| 5023 | 1,3,4,5,6,7<br>,19,20 | 2,8,18,21,<br>22,23,24,2<br>5,26 | 6  | P00731,P01681,P18418,P55091,Q5FVI6,Q6IRE4                                                                                  |
| 5024 | 1,3,4,5,6,7<br>,19,21 | 2,8,18,20,<br>22,23,24,2<br>5,26 | 8  | P00731,P01681,P16086,P18418,P52590,Q30KJ2,Q5FVI6,Q6IRE4                                                                    |
| 5025 | 1,3,4,5,6,7<br>,19,22 | 2,8,18,20,<br>21,23,24,2<br>5,26 | 5  | P01681,P18418,P55091,Q5FVI6,Q9QW07                                                                                         |
| 5026 | 1,3,4,5,6,7<br>,19,23 | 2,8,18,20,<br>21,22,24,2<br>5,26 | 8  | P01681,P15399,P16086,P18418,P97580,Q30KJ2,Q5FVI6,Q99041                                                                    |
| 5027 | 1,3,4,5,6,7<br>,19,24 | 2,8,18,20,<br>21,22,23,2<br>5,26 | 5  | O55006,P01681,P18418,Q30KJ2,Q5FVI6                                                                                         |
| 5028 | 1,3,4,5,6,7<br>,19,25 | 2,8,18,20,<br>21,22,23,2<br>4,26 | 8  | P00731,P01681,P12020,P17046,P18418,P61206;P84079;P84082,Q30KJ2,Q5FVI6                                                      |
| 5029 | 1,3,4,5,6,7<br>,19,26 | 2,8,18,20,<br>21,22,23,2<br>4,25 | 10 | O54728,P01681,P05539,P18418,P20760,P20761,P83748,Q30KJ2,Q4FZU2,Q5FVI6                                                      |
| 5030 | 1,3,4,5,6,7<br>,20,21 | 2,8,18,19,<br>22,23,24,2<br>5,26 | 10 | P00731,P01681,P01835,P18418,P42854,P52590,P61206;P84079;P84082,Q6IRE4,Q7TPB1,Q9ESW0                                        |
| 5031 | 1,3,4,5,6,7<br>,20,22 | 2,8,18,19,<br>21,23,24,2<br>5,26 | 7  | P01681,P18418,P55091,Q6IRE4,Q7TPB1,Q99MH3,Q9QW07                                                                           |
| 5032 | 1,3,4,5,6,7<br>,20,23 | 2,8,18,19,<br>21,22,24,2<br>5,26 | 3  | P01681,Q4FZU2,Q6IRE4                                                                                                       |
| 5033 | 1,3,4,5,6,7<br>,20,24 | 2,8,18,19,<br>21,22,23,2<br>5,26 | 4  | P01681,P18418,Q6IRE4,Q99MH3                                                                                                |
| 5034 | 1,3,4,5,6,7<br>,20,25 | 2,8,18,19,<br>21,22,23,2<br>4,26 | 5  | P01681,P18418,P55314,P61206;P84079;P84082,Q6IRE4                                                                           |

|      |                       |                                  |    |                                                                                                                               |
|------|-----------------------|----------------------------------|----|-------------------------------------------------------------------------------------------------------------------------------|
| 5035 | 1,3,4,5,6,7<br>,20,26 | 2,8,18,19,<br>21,22,23,2<br>4,25 | 11 | O54728,P01681,P05539,P20760,P20761,P61206;P84079;P84082,P83748,Q4FZU2,Q5FVI6,Q6IRE4,Q99MH3                                    |
| 5036 | 1,3,4,5,6,7<br>,21,22 | 2,8,18,19,<br>20,23,24,2<br>5,26 | 8  | P01681,P13432,P18418,P19218,P52590,Q6IRE4,Q7TPB1,Q9QW07                                                                       |
| 5037 | 1,3,4,5,6,7<br>,21,23 | 2,8,18,19,<br>20,22,24,2<br>5,26 | 9  | P01681,P01835,P34901,P52590,Q4FZU2,Q63751,Q6IRE4,Q8K4G9,Q9ESW0                                                                |
| 5038 | 1,3,4,5,6,7<br>,21,24 | 2,8,18,19,<br>20,22,23,2<br>5,26 | 6  | P01681,P13432,P18418,P52590,Q6IRE4,Q8K4G9                                                                                     |
| 5039 | 1,3,4,5,6,7<br>,21,25 | 2,8,18,19,<br>20,22,23,2<br>4,26 | 8  | P00731,P01681,P01835,P18418,P20646,P52590,P61206;P84079;P84082,Q6IRE4                                                         |
| 5040 | 1,3,4,5,6,7<br>,21,26 | 2,8,18,19,<br>20,22,23,2<br>4,25 | 12 | P01681,P01835,P05539,P20760,P20761,P52590,P61206;P84079;P84082,P83748,Q4FZU2,Q5FVI6,Q6IRE4,Q9ESW0                             |
| 5041 | 1,3,4,5,6,7<br>,22,23 | 2,8,18,19,<br>20,21,24,2<br>5,26 | 4  | P01681,P34901,Q8K4G9,Q9QW07                                                                                                   |
| 5042 | 1,3,4,5,6,7<br>,22,24 | 2,8,18,19,<br>20,21,23,2<br>5,26 | 6  | P01681,P08010,P18418,Q8K4G9,Q99MH3,Q9QW07                                                                                     |
| 5043 | 1,3,4,5,6,7<br>,22,25 | 2,8,18,19,<br>20,21,23,2<br>4,26 | 8  | P01681,P06911,P12020,P17046,P18418,P61206;P84079;P84082,Q5GRG2,Q9QW07                                                         |
| 5044 | 1,3,4,5,6,7<br>,22,26 | 2,8,18,19,<br>20,21,23,2<br>4,25 | 9  | O54728,P01681,P05539,P20760,P20761,P83748,Q8VD89,Q99MH3,Q9QW07                                                                |
| 5045 | 1,3,4,5,6,7<br>,23,24 | 2,8,18,19,<br>20,21,22,2<br>5,26 | 6  | P01681,P18418,P34901,Q63751,Q6IRE4,Q8K4G9                                                                                     |
| 5046 | 1,3,4,5,6,7<br>,23,25 | 2,8,18,19,<br>20,21,22,2<br>4,26 | 10 | P01681,P06911,P12020,P55314,P61206;P84079;P84082,Q5GRG2,Q63751,Q6IRE4,Q8K4G9,Q99041                                           |
| 5047 | 1,3,4,5,6,7<br>,23,26 | 2,8,18,19,<br>20,21,22,2<br>4,25 | 18 | O54728,P01681,P01946,P02091,P05539,P20760,P20761,P83748,Q4FZU2,Q5FVI6,Q6IFU8,Q6IFW6,Q6IG02,Q6IMF3,Q6IRE4,Q6P6Q2,Q8K4G9,Q8VD89 |
| 5048 | 1,3,4,5,6,7<br>,24,25 | 2,8,18,19,<br>20,21,22,2<br>3,26 | 5  | P01681,P18418,P61206;P84079;P84082,Q6IRE4,Q8K4G9                                                                              |
| 5049 | 1,3,4,5,6,7<br>,24,26 | 2,8,18,19,<br>20,21,22,2<br>3,25 | 14 | P01681,P02091,P05539,P18418,P20760,P20761,P83748,Q4FZU2,Q5FVI6,Q6IRE4,Q8CJD3,Q8K4G9,Q8VD89,Q99MH3                             |

|      |                       |                                  |    |                                                                                                   |
|------|-----------------------|----------------------------------|----|---------------------------------------------------------------------------------------------------|
| 5050 | 1,3,4,5,6,7<br>,25,26 | 2,8,18,19,<br>20,21,22,2<br>3,24 | 12 | P01681,P02091,P05539,P20760,P20761,P55314,P61206;P84079;P84082,P83748,Q4FZU2,Q5FVI6,Q6AY33,Q6IRE4 |
| 5051 | 1,3,4,5,6,8<br>,18,19 | 2,7,20,21,<br>22,23,24,2<br>5,26 | 5  | O55006,P00731,P01681,P02803,P22006                                                                |
| 5052 | 1,3,4,5,6,8<br>,18,20 | 2,7,19,21,<br>22,23,24,2<br>5,26 | 7  | O55006,P00731,P01681,P22006,Q4FZU2,Q6IRE4,Q9ESW0                                                  |
| 5053 | 1,3,4,5,6,8<br>,18,21 | 2,7,19,20,<br>22,23,24,2<br>5,26 | 8  | O35547,P00731,P01681,P01835,P0C0A9,P25031,Q4FZU2,Q9ESW0                                           |
| 5054 | 1,3,4,5,6,8<br>,18,22 | 2,7,19,20,<br>21,23,24,2<br>5,26 | 3  | P01681,P22006,Q9QW07                                                                              |
| 5055 | 1,3,4,5,6,8<br>,18,23 | 2,7,19,20,<br>21,22,24,2<br>5,26 | 8  | P01681,P12785,P35467,Q4FZU2,Q5XI22,Q6IFW6,Q6IG02,Q9ESW0                                           |
| 5056 | 1,3,4,5,6,8<br>,18,24 | 2,7,19,20,<br>21,22,23,2<br>5,26 | 2  | O55006,P01681                                                                                     |
| 5057 | 1,3,4,5,6,8<br>,18,25 | 2,7,19,20,<br>21,22,23,2<br>4,26 | 2  | P00731,P01681                                                                                     |
| 5058 | 1,3,4,5,6,8<br>,18,26 | 2,7,19,20,<br>21,22,23,2<br>4,25 | 11 | P01681,P04041,P20760,P20761,Q4FZU2,Q63942,Q6AY33,Q6IFW6,Q6IG02,Q8VD89,Q9ESW0                      |
| 5059 | 1,3,4,5,6,8<br>,19,20 | 2,7,18,21,<br>22,23,24,2<br>5,26 | 6  | P00731,P01681,P22006,P35281,P55091,P82995                                                         |
| 5060 | 1,3,4,5,6,8<br>,19,21 | 2,7,18,20,<br>22,23,24,2<br>5,26 | 5  | O35547,P00731,P01681,P0C0A9,P35281                                                                |
| 5061 | 1,3,4,5,6,8<br>,19,22 | 2,7,18,20,<br>21,23,24,2<br>5,26 | 4  | P01681,P22006,P55091,Q9QW07                                                                       |
| 5062 | 1,3,4,5,6,8<br>,19,23 | 2,7,18,20,<br>21,22,24,2<br>5,26 | 6  | P01681,P15399,P55091,P82995,P97580,Q30KJ2                                                         |
| 5063 | 1,3,4,5,6,8<br>,19,24 | 2,7,18,20,<br>21,22,23,2<br>5,26 | 3  | O55006,P01681,P82995                                                                              |
| 5064 | 1,3,4,5,6,8<br>,19,25 | 2,7,18,20,<br>21,22,23,2<br>4,26 | 1  | P01681                                                                                            |

|      |                       |                                  |   |                                                         |
|------|-----------------------|----------------------------------|---|---------------------------------------------------------|
| 5065 | 1,3,4,5,6,8<br>,19,26 | 2,7,18,20,<br>21,22,23,2<br>4,25 | 5 | O54728,P01681,P20760,P20761,Q4FZU2                      |
| 5066 | 1,3,4,5,6,8<br>,20,21 | 2,7,18,19,<br>22,23,24,2<br>5,26 | 5 | P00731,P01681,P01835,Q6IRE4,Q7TPB1                      |
| 5067 | 1,3,4,5,6,8<br>,20,22 | 2,7,18,19,<br>21,23,24,2<br>5,26 | 8 | D3ZUC6,P01681,P22006,P55091,P82995,Q7TPB1,Q99MH3,Q9QW07 |
| 5068 | 1,3,4,5,6,8<br>,20,23 | 2,7,18,19,<br>21,22,24,2<br>5,26 | 8 | P01681,P22006,P55091,P82995,P97840,Q4FZU2,Q6IG02,Q6IRE4 |
| 5069 | 1,3,4,5,6,8<br>,20,24 | 2,7,18,19,<br>21,22,23,2<br>5,26 | 5 | P01681,P82995,P97840,Q6IRE4,Q99MH3                      |
| 5070 | 1,3,4,5,6,8<br>,20,25 | 2,7,18,19,<br>21,22,23,2<br>4,26 | 3 | D3ZUC6,P01681,Q6IRE4                                    |
| 5071 | 1,3,4,5,6,8<br>,20,26 | 2,7,18,19,<br>21,22,23,2<br>4,25 | 8 | O54728,P01681,P20760,P20761,P97840,Q4FZU2,Q6IRE4,Q99MH3 |
| 5072 | 1,3,4,5,6,8<br>,21,22 | 2,7,18,19,<br>20,23,24,2<br>5,26 | 4 | P01681,P13432,Q7TPB1,Q9QW07                             |
| 5073 | 1,3,4,5,6,8<br>,21,23 | 2,7,18,19,<br>20,22,24,2<br>5,26 | 4 | P01681,P01835,Q4FZU2,Q9Z0V6                             |
| 5074 | 1,3,4,5,6,8<br>,21,24 | 2,7,18,19,<br>20,22,23,2<br>5,26 | 2 | P01681,P13432                                           |
| 5075 | 1,3,4,5,6,8<br>,21,25 | 2,7,18,19,<br>20,22,23,2<br>4,26 | 7 | P00731,P01681,P01835,P06760,P20646,Q9WTT6,Q9Z0V6        |
| 5076 | 1,3,4,5,6,8<br>,21,26 | 2,7,18,19,<br>20,22,23,2<br>4,25 | 6 | P01681,P01835,P20760,P20761,Q4FZU2,Q5M872               |
| 5077 | 1,3,4,5,6,8<br>,22,23 | 2,7,18,19,<br>20,21,24,2<br>5,26 | 4 | P01681,P55091,P82995,Q9QW07                             |
| 5078 | 1,3,4,5,6,8<br>,22,24 | 2,7,18,19,<br>20,21,23,2<br>5,26 | 4 | P01681,P82995,Q99MH3,Q9QW07                             |
| 5079 | 1,3,4,5,6,8<br>,22,25 | 2,7,18,19,<br>20,21,23,2<br>4,26 | 4 | D3ZUC6,P01681,P06911,Q9QW07                             |

|      |                        |                                  |    |                                                                                                                 |
|------|------------------------|----------------------------------|----|-----------------------------------------------------------------------------------------------------------------|
| 5080 | 1,3,4,5,6,8<br>,22,26  | 2,7,18,19,<br>20,21,23,2<br>4,25 | 7  | O54728,P01681,P20760,P20761,Q4FZU2,Q99MH3,Q9QW07                                                                |
| 5081 | 1,3,4,5,6,8<br>,23,24  | 2,7,18,19,<br>20,21,22,2<br>5,26 | 5  | P01681,P34901,P82995,P97840,Q63751                                                                              |
| 5082 | 1,3,4,5,6,8<br>,23,25  | 2,7,18,19,<br>20,21,22,2<br>4,26 | 7  | P01681,P06760,P06911,P55314,Q63751,Q9WTT6,Q9Z0V6                                                                |
| 5083 | 1,3,4,5,6,8<br>,23,26  | 2,7,18,19,<br>20,21,22,2<br>4,25 | 15 | O54728,P01681,P02793;Q7TP54,P20760,P20761,P47967,P97840,Q4FZU2,Q5I0D1,Q6IFU8,Q6IFW6,Q6IG02,Q6IMF3,Q6P6Q2,Q9Z0V6 |
| 5084 | 1,3,4,5,6,8<br>,24,25  | 2,7,18,19,<br>20,21,22,2<br>3,26 | 2  | P01681,Q9Z0V6                                                                                                   |
| 5085 | 1,3,4,5,6,8<br>,24,26  | 2,7,18,19,<br>20,21,22,2<br>3,25 | 7  | P01681,P20760,P20761,P47967,P97840,Q4FZU2,Q99MH3                                                                |
| 5086 | 1,3,4,5,6,8<br>,25,26  | 2,7,18,19,<br>20,21,22,2<br>3,24 | 6  | P01681,P20761,Q4FZU2,Q6AY33,Q9WTT6,Q9Z0V6                                                                       |
| 5087 | 1,3,4,5,6,1<br>8,19,20 | 2,7,8,21,2<br>2,23,24,25<br>,26  | 4  | P00731,P01681,P22006,Q4FZU2                                                                                     |
| 5088 | 1,3,4,5,6,1<br>8,19,21 | 2,7,8,20,2<br>2,23,24,25<br>,26  | 5  | O35547,P00731,P01681,P01835,P25031                                                                              |
| 5089 | 1,3,4,5,6,1<br>8,19,22 | 2,7,8,20,2<br>1,23,24,25<br>,26  | 3  | P01681,P22006,Q9QW07                                                                                            |
| 5090 | 1,3,4,5,6,1<br>8,19,23 | 2,7,8,20,2<br>1,22,24,25<br>,26  | 8  | P01681,P02625,P12785,P15399,P22006,P97580,Q4FZU2,Q6IFW6                                                         |
| 5091 | 1,3,4,5,6,1<br>8,19,24 | 2,7,8,20,2<br>1,22,23,25<br>,26  | 1  | P01681                                                                                                          |
| 5092 | 1,3,4,5,6,1<br>8,19,25 | 2,7,8,20,2<br>1,22,23,24<br>,26  | 2  | P00731,P01681                                                                                                   |
| 5093 | 1,3,4,5,6,1<br>8,19,26 | 2,7,8,20,2<br>1,22,23,24<br>,25  | 4  | P01681,Q4FZU2,Q63942,Q6IFW6                                                                                     |
| 5094 | 1,3,4,5,6,1<br>8,20,21 | 2,7,8,19,2<br>2,23,24,25<br>,26  | 7  | P00731,P01681,P01835,P25031,Q4FZU2,Q6IRE4,Q9ESW0                                                                |

|      |                        |                                 |    |                                                                       |
|------|------------------------|---------------------------------|----|-----------------------------------------------------------------------|
| 5095 | 1,3,4,5,6,1<br>8,20,22 | 2,7,8,19,2<br>1,23,24,25<br>,26 | 4  | P01681,P22006,Q4FZU2,Q9QW07                                           |
| 5096 | 1,3,4,5,6,1<br>8,20,23 | 2,7,8,19,2<br>1,22,24,25<br>,26 | 9  | P01681,P01835,P12785,P22006,Q4FZU2,Q6IFW6,Q6IG02,Q6IMF3,Q6IRE4        |
| 5097 | 1,3,4,5,6,1<br>8,20,24 | 2,7,8,19,2<br>1,22,23,25<br>,26 | 3  | P01681,Q4FZU2,Q6IRE4                                                  |
| 5098 | 1,3,4,5,6,1<br>8,20,25 | 2,7,8,19,2<br>1,22,23,24<br>,26 | 4  | P01681,P01835,Q4FZU2,Q6IRE4                                           |
| 5099 | 1,3,4,5,6,1<br>8,20,26 | 2,7,8,19,2<br>1,22,23,24<br>,25 | 7  | P01681,P01835,Q4FZU2,Q6IFW6,Q6IG02,Q6IRE4,Q9ESW0                      |
| 5100 | 1,3,4,5,6,1<br>8,21,22 | 2,7,8,19,2<br>0,23,24,25<br>,26 | 5  | O35547,P01681,P01835,P25031,Q9QW07                                    |
| 5101 | 1,3,4,5,6,1<br>8,21,23 | 2,7,8,19,2<br>0,22,24,25<br>,26 | 10 | P01681,P01835,P12785,P25031,P34901,Q4FZU2,Q6IFW6,Q6IG02,Q6IMF3,Q9ESW0 |
| 5102 | 1,3,4,5,6,1<br>8,21,24 | 2,7,8,19,2<br>0,22,23,25<br>,26 | 3  | P01681,P01835,P13432                                                  |
| 5103 | 1,3,4,5,6,1<br>8,21,25 | 2,7,8,19,2<br>0,22,23,24<br>,26 | 7  | P00731,P01681,P01835,P20646,P25031,P31430,Q4FZU2                      |
| 5104 | 1,3,4,5,6,1<br>8,21,26 | 2,7,8,19,2<br>0,22,23,24<br>,25 | 6  | P01681,P01835,P25031,Q4FZU2,Q6IFW6,Q9ESW0                             |
| 5105 | 1,3,4,5,6,1<br>8,22,23 | 2,7,8,19,2<br>0,21,24,25<br>,26 | 7  | P01681,P02625,P12785,P34901,Q4FZU2,Q6IFW6,Q9QW07                      |
| 5106 | 1,3,4,5,6,1<br>8,22,24 | 2,7,8,19,2<br>0,21,23,25<br>,26 | 2  | P01681,Q9QW07                                                         |
| 5107 | 1,3,4,5,6,1<br>8,22,25 | 2,7,8,19,2<br>0,21,23,24<br>,26 | 2  | P01681,Q9QW07                                                         |
| 5108 | 1,3,4,5,6,1<br>8,22,26 | 2,7,8,19,2<br>0,21,23,24<br>,25 | 7  | O54728,P01681,P05539,Q4FZU2,Q6IFW6,Q8VD89,Q9QW07                      |
| 5109 | 1,3,4,5,6,1<br>8,23,24 | 2,7,8,19,2<br>0,21,22,25<br>,26 | 7  | P01681,P12785,P34901,Q4FZU2,Q63751,Q6IFU7,Q6IFW6                      |

|      |                        |                                 |    |                                                                                                   |
|------|------------------------|---------------------------------|----|---------------------------------------------------------------------------------------------------|
| 5110 | 1,3,4,5,6,1<br>8,23,25 | 2,7,8,19,2<br>0,21,22,24<br>,26 | 7  | P01681,P12785,P55314,Q4FZU2,Q63751,Q6IFW6,Q6IG02                                                  |
| 5111 | 1,3,4,5,6,1<br>8,23,26 | 2,7,8,19,2<br>0,21,22,24<br>,25 | 14 | P01681,P01835,P12785,P35467,Q4FZU2,Q5I0D1,Q63942,Q6IFU7,Q6IFU8,Q6IFW6,Q6IG02,Q6IMF3,Q6P6Q2,Q8VD89 |
| 5112 | 1,3,4,5,6,1<br>8,24,25 | 2,7,8,19,2<br>0,21,22,23<br>,26 | 1  | P01681                                                                                            |
| 5113 | 1,3,4,5,6,1<br>8,24,26 | 2,7,8,19,2<br>0,21,22,23<br>,25 | 5  | P01681,P20760,Q4FZU2,Q6IFW6,Q8VD89                                                                |
| 5114 | 1,3,4,5,6,1<br>8,25,26 | 2,7,8,19,2<br>0,21,22,23<br>,24 | 4  | P01681,Q4FZU2,Q6AY33,Q6IFW6                                                                       |
| 5115 | 1,3,4,5,6,1<br>9,20,21 | 2,7,8,18,2<br>2,23,24,25<br>,26 | 6  | P00731,P01681,P01835,P55091,Q6IRE4,Q7TPB1                                                         |
| 5116 | 1,3,4,5,6,1<br>9,20,22 | 2,7,8,18,2<br>1,23,24,25<br>,26 | 8  | O54728,P01681,P22006,P55091,P82995,Q62997,Q99MH3,Q9QW07                                           |
| 5117 | 1,3,4,5,6,1<br>9,20,23 | 2,7,8,18,2<br>1,22,24,25<br>,26 | 7  | P01681,P15399,P22006,P55091,P82995,P97580,Q4FZU2                                                  |
| 5118 | 1,3,4,5,6,1<br>9,20,24 | 2,7,8,18,2<br>1,22,23,25<br>,26 | 5  | P01681,P55091,P82995,Q80WL1,Q99MH3                                                                |
| 5119 | 1,3,4,5,6,1<br>9,20,25 | 2,7,8,18,2<br>1,22,23,24<br>,26 | 1  | P01681                                                                                            |
| 5120 | 1,3,4,5,6,1<br>9,20,26 | 2,7,8,18,2<br>1,22,23,24<br>,25 | 5  | O54728,P01681,P05539,Q4FZU2,Q99MH3                                                                |
| 5121 | 1,3,4,5,6,1<br>9,21,22 | 2,7,8,18,2<br>0,23,24,25<br>,26 | 4  | P01681,P55091,Q7TPB1,Q9QW07                                                                       |
| 5122 | 1,3,4,5,6,1<br>9,21,23 | 2,7,8,18,2<br>0,22,24,25<br>,26 | 5  | P01681,P01835,P15399,P55091,P97580                                                                |
| 5123 | 1,3,4,5,6,1<br>9,21,24 | 2,7,8,18,2<br>0,22,23,25<br>,26 | 1  | P01681                                                                                            |
| 5124 | 1,3,4,5,6,1<br>9,21,25 | 2,7,8,18,2<br>0,22,23,24<br>,26 | 3  | P00731,P01681,P01835                                                                              |

|      |                        |                                 |    |                                                                                     |
|------|------------------------|---------------------------------|----|-------------------------------------------------------------------------------------|
| 5125 | 1,3,4,5,6,1<br>9,21,26 | 2,7,8,18,2<br>0,22,23,24<br>,25 | 3  | P01681,P01835,Q4FZU2                                                                |
| 5126 | 1,3,4,5,6,1<br>9,22,23 | 2,7,8,18,2<br>0,21,24,25<br>,26 | 8  | O54728,P01681,P02625,P15399,P55091,P82995,P97580,Q9QW07                             |
| 5127 | 1,3,4,5,6,1<br>9,22,24 | 2,7,8,18,2<br>0,21,23,25<br>,26 | 5  | P01681,P55091,P82995,Q99MH3,Q9QW07                                                  |
| 5128 | 1,3,4,5,6,1<br>9,22,25 | 2,7,8,18,2<br>0,21,23,24<br>,26 | 3  | P01681,P17046,Q9QW07                                                                |
| 5129 | 1,3,4,5,6,1<br>9,22,26 | 2,7,8,18,2<br>0,21,23,24<br>,25 | 5  | O54728,P01681,P05539,Q99MH3,Q9QW07                                                  |
| 5130 | 1,3,4,5,6,1<br>9,23,24 | 2,7,8,18,2<br>0,21,22,25<br>,26 | 6  | P01681,P15399,P34901,P55091,P82995,P97580                                           |
| 5131 | 1,3,4,5,6,1<br>9,23,25 | 2,7,8,18,2<br>0,21,22,24<br>,26 | 5  | P01681,P15399,P55314,P97580,Q6BEA2                                                  |
| 5132 | 1,3,4,5,6,1<br>9,23,26 | 2,7,8,18,2<br>0,21,22,24<br>,25 | 12 | O54728,P01681,P05539,P15399,P97580,Q30KJ2,Q4FZU2,Q6IFU8,Q6IFW6,Q6IG02,Q6IMF3,Q6P6Q2 |
| 5133 | 1,3,4,5,6,1<br>9,24,25 | 2,7,8,18,2<br>0,21,22,23<br>,26 | 1  | P01681                                                                              |
| 5134 | 1,3,4,5,6,1<br>9,24,26 | 2,7,8,18,2<br>0,21,22,23<br>,25 | 3  | O54728,P01681,P20760                                                                |
| 5135 | 1,3,4,5,6,1<br>9,25,26 | 2,7,8,18,2<br>0,21,22,23<br>,24 | 3  | P01681,P05539,Q4FZU2                                                                |
| 5136 | 1,3,4,5,6,2<br>0,21,22 | 2,7,8,18,1<br>9,23,24,25<br>,26 | 8  | P01681,P01835,P55091,P82995,Q6IRE4,Q7TPB1,Q99MH3,Q9QW07                             |
| 5137 | 1,3,4,5,6,2<br>0,21,23 | 2,7,8,18,1<br>9,22,24,25<br>,26 | 6  | P01681,P01835,P55091,P82995,Q4FZU2,Q6IRE4                                           |
| 5138 | 1,3,4,5,6,2<br>0,21,24 | 2,7,8,18,1<br>9,22,23,25<br>,26 | 6  | P01681,P01835,P13432,P82995,Q6IRE4,Q99MH3                                           |
| 5139 | 1,3,4,5,6,2<br>0,21,25 | 2,7,8,18,1<br>9,22,23,24<br>,26 | 4  | P01681,P01835,P20646,Q6IRE4                                                         |



|      |                        |                                 |    |                                                                                            |
|------|------------------------|---------------------------------|----|--------------------------------------------------------------------------------------------|
| 5140 | 1,3,4,5,6,2<br>0,21,26 | 2,7,8,18,1<br>9,22,23,24<br>,25 | 5  | P01681,P01835,Q4FZU2,Q6IRE4,Q99MH3                                                         |
| 5141 | 1,3,4,5,6,2<br>0,22,23 | 2,7,8,18,1<br>9,21,24,25<br>,26 | 6  | P01681,P22006,P55091,P82995,Q4FZU2,Q9QW07                                                  |
| 5142 | 1,3,4,5,6,2<br>0,22,24 | 2,7,8,18,1<br>9,21,23,25<br>,26 | 5  | P01681,P55091,P82995,Q99MH3,Q9QW07                                                         |
| 5143 | 1,3,4,5,6,2<br>0,22,25 | 2,7,8,18,1<br>9,21,23,24<br>,26 | 6  | D3ZUC6,P01681,P82995,Q03191,Q99MH3,Q9QW07                                                  |
| 5144 | 1,3,4,5,6,2<br>0,22,26 | 2,7,8,18,1<br>9,21,23,24<br>,25 | 6  | O54728,P01681,P05539,Q4FZU2,Q99MH3,Q9QW07                                                  |
| 5145 | 1,3,4,5,6,2<br>0,23,24 | 2,7,8,18,1<br>9,21,22,25<br>,26 | 8  | P01681,P34901,P55091,P82995,P97840,Q4FZU2,Q6IRE4,Q80WL1                                    |
| 5146 | 1,3,4,5,6,2<br>0,23,25 | 2,7,8,18,1<br>9,21,22,24<br>,26 | 7  | P01681,P01835,P55314,P82995,Q4FZU2,Q63751,Q6IRE4                                           |
| 5147 | 1,3,4,5,6,2<br>0,23,26 | 2,7,8,18,1<br>9,21,22,24<br>,25 | 13 | O54728,P01681,P01835,P05539,P47967,P97840,Q4FZU2,Q6IFU8,Q6IFW6,Q6IG02,Q6IMF3,Q6IRE4,Q6P6Q2 |
| 5148 | 1,3,4,5,6,2<br>0,24,25 | 2,7,8,18,1<br>9,21,22,23<br>,26 | 4  | P01681,P82995,Q6IRE4,Q80WL1                                                                |
| 5149 | 1,3,4,5,6,2<br>0,24,26 | 2,7,8,18,1<br>9,21,22,23<br>,25 | 8  | P01681,P20760,P47967,P97840,Q4FZU2,Q6IRE4,Q8CJD3,Q99MH3                                    |
| 5150 | 1,3,4,5,6,2<br>0,25,26 | 2,7,8,18,1<br>9,21,22,23<br>,24 | 5  | P01681,P01835,P05539,Q4FZU2,Q6IRE4                                                         |
| 5151 | 1,3,4,5,6,2<br>1,22,23 | 2,7,8,18,1<br>9,20,24,25<br>,26 | 6  | P01681,P01835,P34901,P55091,P82995,Q9QW07                                                  |
| 5152 | 1,3,4,5,6,2<br>1,22,24 | 2,7,8,18,1<br>9,20,23,25<br>,26 | 5  | P01681,P13432,P82995,Q99MH3,Q9QW07                                                         |
| 5153 | 1,3,4,5,6,2<br>1,22,25 | 2,7,8,18,1<br>9,20,23,24<br>,26 | 3  | P01681,P01835,Q9QW07                                                                       |
| 5154 | 1,3,4,5,6,2<br>1,22,26 | 2,7,8,18,1<br>9,20,23,24<br>,25 | 7  | O54728,P01681,P01835,P05539,Q4FZU2,Q99MH3,Q9QW07                                           |

|      |                        |                                 |    |                                                                                                   |
|------|------------------------|---------------------------------|----|---------------------------------------------------------------------------------------------------|
| 5155 | 1,3,4,5,6,2<br>1,23,24 | 2,7,8,18,1<br>9,20,22,25<br>,26 | 5  | P01681,P01835,P34901,P82995,Q63751                                                                |
| 5156 | 1,3,4,5,6,2<br>1,23,25 | 2,7,8,18,1<br>9,20,22,24<br>,26 | 9  | P01681,P01835,P06760,P20646,P34901,P55314,Q4FZU2,Q63751,Q6P777                                    |
| 5157 | 1,3,4,5,6,2<br>1,23,26 | 2,7,8,18,1<br>9,20,22,24<br>,25 | 9  | P01681,P01835,P34901,Q4FZU2,Q6IFU8,Q6IFW6,Q6IG02,Q6IMF3,Q6P6Q2                                    |
| 5158 | 1,3,4,5,6,2<br>1,24,25 | 2,7,8,18,1<br>9,20,22,23<br>,26 | 2  | P01681,P01835                                                                                     |
| 5159 | 1,3,4,5,6,2<br>1,24,26 | 2,7,8,18,1<br>9,20,22,23<br>,25 | 6  | P01681,P01835,P20760,Q4FZU2,Q8CJD3,Q99MH3                                                         |
| 5160 | 1,3,4,5,6,2<br>1,25,26 | 2,7,8,18,1<br>9,20,22,23<br>,24 | 4  | P01681,P01835,P20646,Q4FZU2                                                                       |
| 5161 | 1,3,4,5,6,2<br>2,23,24 | 2,7,8,18,1<br>9,20,21,25<br>,26 | 6  | P01681,P34901,P55091,P82995,Q63751,Q9QW07                                                         |
| 5162 | 1,3,4,5,6,2<br>2,23,25 | 2,7,8,18,1<br>9,20,21,24<br>,26 | 7  | P01681,P06911,P55314,P82995,Q63751,Q6P767,Q9QW07                                                  |
| 5163 | 1,3,4,5,6,2<br>2,23,26 | 2,7,8,18,1<br>9,20,21,24<br>,25 | 12 | O54728,P01681,P05539,P34901,P47967,Q4FZU2,Q6IFU8,Q6IFW6,Q6IG02,Q6IMF3,Q6P6Q2,Q9QW07               |
| 5164 | 1,3,4,5,6,2<br>2,24,25 | 2,7,8,18,1<br>9,20,21,23<br>,26 | 4  | P01681,P62804,P82995,Q9QW07                                                                       |
| 5165 | 1,3,4,5,6,2<br>2,24,26 | 2,7,8,18,1<br>9,20,21,23<br>,25 | 6  | O54728,P01681,P20760,P47967,Q99MH3,Q9QW07                                                         |
| 5166 | 1,3,4,5,6,2<br>2,25,26 | 2,7,8,18,1<br>9,20,21,23<br>,24 | 5  | O54728,P01681,P05539,Q4FZU2,Q9QW07                                                                |
| 5167 | 1,3,4,5,6,2<br>3,24,25 | 2,7,8,18,1<br>9,20,21,22<br>,26 | 5  | P01681,P34901,P55314,P82995,Q63751                                                                |
| 5168 | 1,3,4,5,6,2<br>3,24,26 | 2,7,8,18,1<br>9,20,21,22<br>,25 | 14 | O54728,P01681,P02091,P20760,P27590,P34901,P47967,P97840,Q4FZU2,Q6IFU8,Q6IFW6,Q6IG02,Q6IMF3,Q6P6Q2 |
| 5169 | 1,3,4,5,6,2<br>3,25,26 | 2,7,8,18,1<br>9,20,21,22<br>,24 | 12 | P01681,P02091,P05539,P55314,Q4FZU2,Q5I0D1,Q63751,Q6IFU8,Q6IFW6,Q6IG02,Q6IMF3,Q6P6Q2               |

|      |                        |                                  |    |                                                                                     |
|------|------------------------|----------------------------------|----|-------------------------------------------------------------------------------------|
| 5170 | 1,3,4,5,6,2<br>4,25,26 | 2,7,8,18,1<br>9,20,21,22<br>,23  | 3  | P01681,Q4FZU2,Q8CJD3                                                                |
| 5171 | 1,3,4,5,7,8<br>,18,19  | 2,6,20,21,<br>22,23,24,2<br>5,26 | 5  | P00731,P02803,P18418,P52590,Q9ESW0                                                  |
| 5172 | 1,3,4,5,7,8<br>,18,20  | 2,6,19,21,<br>22,23,24,2<br>5,26 | 9  | P00731,P01681,P10715,P18418,P52590,P97608,Q4FZU6,Q6IRE4,Q9ESW0                      |
| 5173 | 1,3,4,5,7,8<br>,18,21  | 2,6,19,20,<br>22,23,24,2<br>5,26 | 10 | P00731,P02803,P18418,P25031,P42854,P52590,Q4FZU6,Q6AYS4,Q6IRE4,Q9ESW0               |
| 5174 | 1,3,4,5,7,8<br>,18,22  | 2,6,19,20,<br>21,23,24,2<br>5,26 | 5  | P18418,P52590,Q8VD89,Q9ESW0,Q9QW07                                                  |
| 5175 | 1,3,4,5,7,8<br>,18,23  | 2,6,19,20,<br>21,22,24,2<br>5,26 | 12 | P02803,P12785,P18418,P28648,P35467,P52590,Q4FZU6,Q5XI22,Q64194,Q6IG02,Q8VD89,Q9ESW0 |
| 5176 | 1,3,4,5,7,8<br>,18,24  | 2,6,19,20,<br>21,22,23,2<br>5,26 | 4  | P18418,P52590,Q8VD89,Q9ESW0                                                         |
| 5177 | 1,3,4,5,7,8<br>,18,25  | 2,6,19,20,<br>21,22,23,2<br>4,26 | 9  | P00714,P02803,P08721,P10715,P18418,P52590,P61206;P84079;P84082,Q6AYS4,Q9ESW0        |
| 5178 | 1,3,4,5,7,8<br>,18,26  | 2,6,19,20,<br>21,22,23,2<br>4,25 | 11 | P04041,P18418,P52590,Q4FZU2,Q4FZU6,Q6AY33,Q6IG02,Q8VD89,Q9ESW0,Q9QX79,Q9R1T1        |
| 5179 | 1,3,4,5,7,8<br>,19,20  | 2,6,18,21,<br>22,23,24,2<br>5,26 | 5  | P01681,P18418,Q4FZU6,Q6IRE4,Q9ESW0                                                  |
| 5180 | 1,3,4,5,7,8<br>,19,21  | 2,6,18,20,<br>22,23,24,2<br>5,26 | 6  | P00731,P01681,P18418,P35281,P52590,Q9ESW0                                           |
| 5181 | 1,3,4,5,7,8<br>,19,22  | 2,6,18,20,<br>21,23,24,2<br>5,26 | 4  | O54728,P18418,Q6P6R2,Q9QW07                                                         |
| 5182 | 1,3,4,5,7,8<br>,19,23  | 2,6,18,20,<br>21,22,24,2<br>5,26 | 2  | P18418,Q99041                                                                       |
| 5183 | 1,3,4,5,7,8<br>,19,24  | 2,6,18,20,<br>21,22,23,2<br>5,26 | 1  | P18418                                                                              |
| 5184 | 1,3,4,5,7,8<br>,19,25  | 2,6,18,20,<br>21,22,23,2<br>4,26 | 3  | P10715,P18418,Q9QUL6                                                                |

|      |                       |                                  |   |                                                         |
|------|-----------------------|----------------------------------|---|---------------------------------------------------------|
| 5185 | 1,3,4,5,7,8<br>,19,26 | 2,6,18,20,<br>21,22,23,2<br>4,25 | 6 | O54728,P01681,P18418,Q4FZU6,Q5FVI6,Q9ESW0               |
| 5186 | 1,3,4,5,7,8<br>,20,21 | 2,6,18,19,<br>22,23,24,2<br>5,26 | 8 | P01681,P18418,P42854,P52590,Q4FZU6,Q6IRE4,Q7TPB1,Q9ESW0 |
| 5187 | 1,3,4,5,7,8<br>,20,22 | 2,6,18,19,<br>21,23,24,2<br>5,26 | 8 | O54728,P01681,P18418,Q4FZU6,Q63617,Q6IRE4,Q9ESW0,Q9QW07 |
| 5188 | 1,3,4,5,7,8<br>,20,23 | 2,6,18,19,<br>21,22,24,2<br>5,26 | 6 | P01681,P97840,Q4FZU6,Q63617,Q6IRE4,Q9ESW0               |
| 5189 | 1,3,4,5,7,8<br>,20,24 | 2,6,18,19,<br>21,22,23,2<br>5,26 | 5 | P18418,P97840,Q4FZU6,Q63617,Q6IRE4                      |
| 5190 | 1,3,4,5,7,8<br>,20,25 | 2,6,18,19,<br>21,22,23,2<br>4,26 | 4 | P10715,P18418,Q6IRE4,Q9ESW0                             |
| 5191 | 1,3,4,5,7,8<br>,20,26 | 2,6,18,19,<br>21,22,23,2<br>4,25 | 7 | O54728,P01681,P05539,P97840,Q4FZU6,Q6IRE4,Q9ESW0        |
| 5192 | 1,3,4,5,7,8<br>,21,22 | 2,6,18,19,<br>20,23,24,2<br>5,26 | 5 | P18418,P52590,Q7TPB1,Q9ESW0,Q9QW07                      |
| 5193 | 1,3,4,5,7,8<br>,21,23 | 2,6,18,19,<br>20,22,24,2<br>5,26 | 6 | P18418,P52590,Q4FZU6,Q6IRE4,Q99041,Q9ESW0               |
| 5194 | 1,3,4,5,7,8<br>,21,24 | 2,6,18,19,<br>20,22,23,2<br>5,26 | 4 | P18418,P52590,Q6IRE4,Q9ESW0                             |
| 5195 | 1,3,4,5,7,8<br>,21,25 | 2,6,18,19,<br>20,22,23,2<br>4,26 | 8 | P08721,P10715,P18418,P20646,P52590,Q6AYS4,Q6IRE4,Q9ESW0 |
| 5196 | 1,3,4,5,7,8<br>,21,26 | 2,6,18,19,<br>20,22,23,2<br>4,25 | 4 | P01681,P52590,Q4FZU6,Q9ESW0                             |
| 5197 | 1,3,4,5,7,8<br>,22,23 | 2,6,18,19,<br>20,21,24,2<br>5,26 | 3 | O54728,P18418,Q9QW07                                    |
| 5198 | 1,3,4,5,7,8<br>,22,24 | 2,6,18,19,<br>20,21,23,2<br>5,26 | 3 | P08010,P18418,Q9QW07                                    |
| 5199 | 1,3,4,5,7,8<br>,22,25 | 2,6,18,19,<br>20,21,23,2<br>4,26 | 3 | P10715,P18418,Q9QW07                                    |

|      |                        |                                  |    |                                                                                            |
|------|------------------------|----------------------------------|----|--------------------------------------------------------------------------------------------|
| 5200 | 1,3,4,5,7,8<br>,22,26  | 2,6,18,19,<br>20,21,23,2<br>4,25 | 7  | O54728,P05539,P18418,Q4FZU6,Q8VD89,Q9ESW0,Q9QW07                                           |
| 5201 | 1,3,4,5,7,8<br>,23,24  | 2,6,18,19,<br>20,21,22,2<br>5,26 | 4  | P18418,P34901,P97840,Q63751                                                                |
| 5202 | 1,3,4,5,7,8<br>,23,25  | 2,6,18,19,<br>20,21,22,2<br>4,26 | 8  | P10715,P18418,P19629,P52590,P55314,Q63751,Q6AYS4,Q99041                                    |
| 5203 | 1,3,4,5,7,8<br>,23,26  | 2,6,18,19,<br>20,21,22,2<br>4,25 | 13 | O54728,P01681,P01946,P02091,P05539,P97840,Q4FZU2,Q4FZU6,Q5I0D1,Q6IG02,Q8VD89,Q9ESW0,Q9QX79 |
| 5204 | 1,3,4,5,7,8<br>,24,25  | 2,6,18,19,<br>20,21,22,2<br>3,26 | 4  | P10715,P18418,P19629,P52590                                                                |
| 5205 | 1,3,4,5,7,8<br>,24,26  | 2,6,18,19,<br>20,21,22,2<br>3,25 | 7  | O54728,P02091,P18418,P97840,Q4FZU6,Q8CJD3,Q8VD89                                           |
| 5206 | 1,3,4,5,7,8<br>,25,26  | 2,6,18,19,<br>20,21,22,2<br>3,24 | 4  | P02091,P05539,P10715,Q9ESW0                                                                |
| 5207 | 1,3,4,5,7,1<br>8,19,20 | 2,6,8,21,2<br>2,23,24,25<br>,26  | 7  | P00731,P07150,Q4FZU6,Q6IRE4,Q6P6R2,Q9ESW0,Q9WTT6                                           |
| 5208 | 1,3,4,5,7,1<br>8,19,21 | 2,6,8,20,2<br>2,23,24,25<br>,26  | 3  | P00731,P25031,Q9ESW0                                                                       |
| 5209 | 1,3,4,5,7,1<br>8,19,22 | 2,6,8,20,2<br>1,23,24,25<br>,26  | 5  | P07150,Q6P6R2,Q9ESW0,Q9QW07,Q9WTT6                                                         |
| 5210 | 1,3,4,5,7,1<br>8,19,23 | 2,6,8,20,2<br>1,22,24,25<br>,26  | 4  | P02680,P12785,Q03191,Q9ESW0                                                                |
| 5211 | 1,3,4,5,7,1<br>8,19,24 | 2,6,8,20,2<br>1,22,23,25<br>,26  | 2  | Q6P6R2,Q9WTT6                                                                              |
| 5212 | 1,3,4,5,7,1<br>8,19,25 | 2,6,8,20,2<br>1,22,23,24<br>,26  | 2  | P00731,Q9ESW0                                                                              |
| 5213 | 1,3,4,5,7,1<br>8,19,26 | 2,6,8,20,2<br>1,22,23,24<br>,25  | 5  | O54728,Q4FZU6,Q5FVI6,Q6P6R2,Q9ESW0                                                         |
| 5214 | 1,3,4,5,7,1<br>8,20,21 | 2,6,8,19,2<br>2,23,24,25<br>,26  | 7  | P00731,P01681,P25031,P42854,Q4FZU6,Q6IRE4,Q9ESW0                                           |

|      |                        |                                 |   |                                                                |
|------|------------------------|---------------------------------|---|----------------------------------------------------------------|
| 5215 | 1,3,4,5,7,1<br>8,20,22 | 2,6,8,19,2<br>1,23,24,25<br>,26 | 7 | P07150,Q4FZU6,Q6IRE4,Q6P6R2,Q9ESW0,Q9QW07,Q9WTT6               |
| 5216 | 1,3,4,5,7,1<br>8,20,23 | 2,6,8,19,2<br>1,22,24,25<br>,26 | 7 | A2RUV9,P12785,Q4FZU2,Q4FZU6,Q6IG02,Q6IRE4,Q9ESW0               |
| 5217 | 1,3,4,5,7,1<br>8,20,24 | 2,6,8,19,2<br>1,22,23,25<br>,26 | 5 | Q4FZU6,Q6IRE4,Q6P6R2,Q9ESW0,Q9WTT6                             |
| 5218 | 1,3,4,5,7,1<br>8,20,25 | 2,6,8,19,2<br>1,22,23,24<br>,26 | 3 | P61206;P84079;P84082,Q6IRE4,Q9ESW0                             |
| 5219 | 1,3,4,5,7,1<br>8,20,26 | 2,6,8,19,2<br>1,22,23,24<br>,25 | 9 | O54728,P01681,P05539,Q4FZU2,Q4FZU6,Q6IG02,Q6IRE4,Q6P6R2,Q9ESW0 |
| 5220 | 1,3,4,5,7,1<br>8,21,22 | 2,6,8,19,2<br>0,23,24,25<br>,26 | 3 | P25031,Q9ESW0,Q9QW07                                           |
| 5221 | 1,3,4,5,7,1<br>8,21,23 | 2,6,8,19,2<br>0,22,24,25<br>,26 | 7 | P12785,P25031,P34901,Q4FZU6,Q62636,Q8K4G9,Q9ESW0               |
| 5222 | 1,3,4,5,7,1<br>8,21,24 | 2,6,8,19,2<br>0,22,23,25<br>,26 | 4 | P25031,Q6IRE4,Q8K4G9,Q9ESW0                                    |
| 5223 | 1,3,4,5,7,1<br>8,21,25 | 2,6,8,19,2<br>0,22,23,24<br>,26 | 6 | P00731,P08721,P25031,P31430,P61206;P84079;P84082,Q9ESW0        |
| 5224 | 1,3,4,5,7,1<br>8,21,26 | 2,6,8,19,2<br>0,22,23,24<br>,25 | 6 | P01681,P25031,P61206;P84079;P84082,Q4FZU2,Q4FZU6,Q9ESW0        |
| 5225 | 1,3,4,5,7,1<br>8,22,23 | 2,6,8,19,2<br>0,21,24,25<br>,26 | 7 | P12785,P34901,P62804,Q8K4G9,Q8VD89,Q9ESW0,Q9QW07               |
| 5226 | 1,3,4,5,7,1<br>8,22,24 | 2,6,8,19,2<br>0,21,23,25<br>,26 | 7 | P62804,Q00715,Q6P6R2,Q8K4G9,Q8VD89,Q9QW07,Q9WTT6               |
| 5227 | 1,3,4,5,7,1<br>8,22,25 | 2,6,8,19,2<br>0,21,23,24<br>,26 | 2 | P62804,Q9QW07                                                  |
| 5228 | 1,3,4,5,7,1<br>8,22,26 | 2,6,8,19,2<br>0,21,23,24<br>,25 | 7 | O54728,P05539,Q4FZU6,Q6P6R2,Q8VD89,Q9ESW0,Q9QW07               |
| 5229 | 1,3,4,5,7,1<br>8,23,24 | 2,6,8,19,2<br>0,21,22,25<br>,26 | 7 | P12785,P34901,P62804,Q00715,Q8K4G9,Q8VD89,Q9ESW0               |

|      |                        |                                 |    |                                                                                                                 |
|------|------------------------|---------------------------------|----|-----------------------------------------------------------------------------------------------------------------|
| 5230 | 1,3,4,5,7,1<br>8,23,25 | 2,6,8,19,2<br>0,21,22,24<br>,26 | 7  | P00714,P12785,P55314,P62804,Q63751,Q8K4G9,Q9ESW0                                                                |
| 5231 | 1,3,4,5,7,1<br>8,23,26 | 2,6,8,19,2<br>0,21,22,24<br>,25 | 16 | O54728,P01946,P02091,P05539,P12785,P35467,Q4FZU2,Q4FZU6,Q64194,Q6IFU8,Q6IFW6,Q6IG02,Q6IMF3,Q6P6Q2,Q8VD89,Q9ESW0 |
| 5232 | 1,3,4,5,7,1<br>8,24,25 | 2,6,8,19,2<br>0,21,22,23<br>,26 | 4  | P08721,P62804,Q00715,Q8K4G9                                                                                     |
| 5233 | 1,3,4,5,7,1<br>8,24,26 | 2,6,8,19,2<br>0,21,22,23<br>,25 | 5  | P02091,Q6P6R2,Q8CJD3,Q8VD89,Q9ESW0                                                                              |
| 5234 | 1,3,4,5,7,1<br>8,25,26 | 2,6,8,19,2<br>0,21,22,23<br>,24 | 6  | P02091,P05539,P08721,P61206,P84079,P84082,Q4FZU2,Q9ESW0                                                         |
| 5235 | 1,3,4,5,7,1<br>9,20,21 | 2,6,8,18,2<br>2,23,24,25<br>,26 | 6  | P00731,P01681,P42854,Q4FZU6,Q6IRE4,Q9ESW0                                                                       |
| 5236 | 1,3,4,5,7,1<br>9,20,22 | 2,6,8,18,2<br>1,23,24,25<br>,26 | 10 | O54728,P00774,P07150,P14669,P55091,P98089,Q62997,Q6P6R2,Q9QW07,Q9WTT6                                           |
| 5237 | 1,3,4,5,7,1<br>9,20,23 | 2,6,8,18,2<br>1,22,24,25<br>,26 | 5  | O54728,P55091,P98089,Q4FZU6,Q6IRE4                                                                              |
| 5238 | 1,3,4,5,7,1<br>9,20,24 | 2,6,8,18,2<br>1,22,23,25<br>,26 | 5  | P07150,P14669,Q6IRE4,Q6P6R2,Q9WTT6                                                                              |
| 5239 | 1,3,4,5,7,1<br>9,20,25 | 2,6,8,18,2<br>1,22,23,24<br>,26 | 1  | Q6IRE4                                                                                                          |
| 5240 | 1,3,4,5,7,1<br>9,20,26 | 2,6,8,18,2<br>1,22,23,24<br>,25 | 6  | O54728,P01681,P05539,Q4FZU6,Q5FVI6,Q6P6R2                                                                       |
| 5241 | 1,3,4,5,7,1<br>9,21,22 | 2,6,8,18,2<br>0,23,24,25<br>,26 | 1  | Q9QW07                                                                                                          |
| 5242 | 1,3,4,5,7,1<br>9,21,23 | 2,6,8,18,2<br>0,22,24,25<br>,26 | 0  |                                                                                                                 |
| 5243 | 1,3,4,5,7,1<br>9,21,24 | 2,6,8,18,2<br>0,22,23,25<br>,26 | 0  |                                                                                                                 |
| 5244 | 1,3,4,5,7,1<br>9,21,25 | 2,6,8,18,2<br>0,22,23,24<br>,26 | 1  | P17046                                                                                                          |

|      |                        |                                 |   |                                                  |
|------|------------------------|---------------------------------|---|--------------------------------------------------|
| 5245 | 1,3,4,5,7,1<br>9,21,26 | 2,6,8,18,2<br>0,22,23,24<br>,25 | 6 | O54728,P01681,P05539,Q4FZU6,Q5FVI6,Q9ESW0        |
| 5246 | 1,3,4,5,7,1<br>9,22,23 | 2,6,8,18,2<br>0,21,24,25<br>,26 | 6 | O54728,P17046,P55091,P62804,Q9QW07,Q9WTT6        |
| 5247 | 1,3,4,5,7,1<br>9,22,24 | 2,6,8,18,2<br>0,21,23,25<br>,26 | 7 | O54728,P07150,P14669,P62804,Q6P6R2,Q9QW07,Q9WTT6 |
| 5248 | 1,3,4,5,7,1<br>9,22,25 | 2,6,8,18,2<br>0,21,23,24<br>,26 | 3 | P17046,P62804,Q9QW07                             |
| 5249 | 1,3,4,5,7,1<br>9,22,26 | 2,6,8,18,2<br>0,21,23,24<br>,25 | 5 | O54728,P05539,Q6P6R2,Q9QW07,Q9WTT6               |
| 5250 | 1,3,4,5,7,1<br>9,23,24 | 2,6,8,18,2<br>0,21,22,25<br>,26 | 4 | P34901,P62804,Q00715,Q8K4G9                      |
| 5251 | 1,3,4,5,7,1<br>9,23,25 | 2,6,8,18,2<br>0,21,22,24<br>,26 | 4 | P17046,P55314,P62804,Q99041                      |
| 5252 | 1,3,4,5,7,1<br>9,23,26 | 2,6,8,18,2<br>0,21,22,24<br>,25 | 6 | O54728,P01946,P02091,P05539,Q4FZU2,Q5FVI6        |
| 5253 | 1,3,4,5,7,1<br>9,24,25 | 2,6,8,18,2<br>0,21,22,23<br>,26 | 2 | P17046,P62804                                    |
| 5254 | 1,3,4,5,7,1<br>9,24,26 | 2,6,8,18,2<br>0,21,22,23<br>,25 | 4 | O54728,P02091,Q6P6R2,Q8CJD3                      |
| 5255 | 1,3,4,5,7,1<br>9,25,26 | 2,6,8,18,2<br>0,21,22,23<br>,24 | 4 | O54728,P02091,P05539,Q5FVI6                      |
| 5256 | 1,3,4,5,7,2<br>0,21,22 | 2,6,8,18,1<br>9,23,24,25<br>,26 | 7 | P01681,Q4FZU6,Q6IRE4,Q7TPB1,Q99MH3,Q9ESW0,Q9QW07 |
| 5257 | 1,3,4,5,7,2<br>0,21,23 | 2,6,8,18,1<br>9,22,24,25<br>,26 | 4 | P01681,Q4FZU6,Q6IRE4,Q9ESW0                      |
| 5258 | 1,3,4,5,7,2<br>0,21,24 | 2,6,8,18,1<br>9,22,23,25<br>,26 | 4 | P01681,Q4FZU6,Q6IRE4,Q9ESW0                      |
| 5259 | 1,3,4,5,7,2<br>0,21,25 | 2,6,8,18,1<br>9,22,23,24<br>,26 | 3 | P01681,Q6IRE4,Q9ESW0                             |



|      |                        |                                 |    |                                                                                            |
|------|------------------------|---------------------------------|----|--------------------------------------------------------------------------------------------|
| 5260 | 1,3,4,5,7,2<br>0,21,26 | 2,6,8,18,1<br>9,22,23,24<br>,25 | 6  | O54728,P01681,P05539,Q4FZU6,Q6IRE4,Q9ESW0                                                  |
| 5261 | 1,3,4,5,7,2<br>0,22,23 | 2,6,8,18,1<br>9,21,24,25<br>,26 | 7  | O54728,P55091,P98089,Q4FZU6,Q62997,Q6IRE4,Q9QW07                                           |
| 5262 | 1,3,4,5,7,2<br>0,22,24 | 2,6,8,18,1<br>9,21,23,25<br>,26 | 9  | P07150,P08010,P14669,Q62635,Q6IRE4,Q6P6R2,Q99MH3,Q9QW07,Q9WTT6                             |
| 5263 | 1,3,4,5,7,2<br>0,22,25 | 2,6,8,18,1<br>9,21,23,24<br>,26 | 2  | Q6IRE4,Q9QW07                                                                              |
| 5264 | 1,3,4,5,7,2<br>0,22,26 | 2,6,8,18,1<br>9,21,23,24<br>,25 | 8  | O54728,P01681,P05539,Q4FZU6,Q62635,Q6P6R2,Q99MH3,Q9QW07                                    |
| 5265 | 1,3,4,5,7,2<br>0,23,24 | 2,6,8,18,1<br>9,21,22,25<br>,26 | 5  | P34901,P97840,Q4FZU6,Q6IRE4,Q8K4G9                                                         |
| 5266 | 1,3,4,5,7,2<br>0,23,25 | 2,6,8,18,1<br>9,21,22,24<br>,26 | 2  | P55314,Q6IRE4                                                                              |
| 5267 | 1,3,4,5,7,2<br>0,23,26 | 2,6,8,18,1<br>9,21,22,24<br>,25 | 13 | O54728,P01681,P01946,P02091,P05539,P97840,Q4FZU2,Q4FZU6,Q6IFW6,Q6IG02,Q6IRE4,Q8CIZ5,Q9ESW0 |
| 5268 | 1,3,4,5,7,2<br>0,24,25 | 2,6,8,18,1<br>9,21,22,23<br>,26 | 1  | Q6IRE4                                                                                     |
| 5269 | 1,3,4,5,7,2<br>0,24,26 | 2,6,8,18,1<br>9,21,22,23<br>,25 | 11 | O54728,P01681,P02091,P05539,P08010,P97840,Q4FZU6,Q62635,Q6IRE4,Q8CJD3,Q99MH3               |
| 5270 | 1,3,4,5,7,2<br>0,25,26 | 2,6,8,18,1<br>9,21,22,23<br>,24 | 5  | O54728,P01681,P02091,P05539,Q6IRE4                                                         |
| 5271 | 1,3,4,5,7,2<br>1,22,23 | 2,6,8,18,1<br>9,20,24,25<br>,26 | 3  | P34901,Q8K4G9,Q9QW07                                                                       |
| 5272 | 1,3,4,5,7,2<br>1,22,24 | 2,6,8,18,1<br>9,20,23,25<br>,26 | 2  | Q8K4G9,Q9QW07                                                                              |
| 5273 | 1,3,4,5,7,2<br>1,22,25 | 2,6,8,18,1<br>9,20,23,24<br>,26 | 2  | P17046,Q9QW07                                                                              |
| 5274 | 1,3,4,5,7,2<br>1,22,26 | 2,6,8,18,1<br>9,20,23,24<br>,25 | 6  | O54728,P01681,P05539,Q4FZU6,Q9ESW0,Q9QW07                                                  |

|      |                        |                                 |    |                                                                              |
|------|------------------------|---------------------------------|----|------------------------------------------------------------------------------|
| 5275 | 1,3,4,5,7,2<br>1,23,24 | 2,6,8,18,1<br>9,20,22,25<br>,26 | 4  | P34901,Q63751,Q6IRE4,Q8K4G9                                                  |
| 5276 | 1,3,4,5,7,2<br>1,23,25 | 2,6,8,18,1<br>9,20,22,24<br>,26 | 4  | P55314,Q63751,Q6IRE4,Q8K4G9                                                  |
| 5277 | 1,3,4,5,7,2<br>1,23,26 | 2,6,8,18,1<br>9,20,22,24<br>,25 | 9  | O54728,P01681,P01946,P02091,P05539,P34901,Q4FZU2,Q4FZU6,Q9ESW0               |
| 5278 | 1,3,4,5,7,2<br>1,24,25 | 2,6,8,18,1<br>9,20,22,23<br>,26 | 3  | P22006,Q6IRE4,Q8K4G9                                                         |
| 5279 | 1,3,4,5,7,2<br>1,24,26 | 2,6,8,18,1<br>9,20,22,23<br>,25 | 4  | P02091,Q4FZU6,Q8CJD3,Q9ESW0                                                  |
| 5280 | 1,3,4,5,7,2<br>1,25,26 | 2,6,8,18,1<br>9,20,22,23<br>,24 | 4  | P01681,P02091,P05539,Q9ESW0                                                  |
| 5281 | 1,3,4,5,7,2<br>2,23,24 | 2,6,8,18,1<br>9,20,21,25<br>,26 | 6  | O54728,P34901,P62804,Q00715,Q8K4G9,Q9QW07                                    |
| 5282 | 1,3,4,5,7,2<br>2,23,25 | 2,6,8,18,1<br>9,20,21,24<br>,26 | 6  | P17046,P55314,P62804,Q63751,Q8K4G9,Q9QW07                                    |
| 5283 | 1,3,4,5,7,2<br>2,23,26 | 2,6,8,18,1<br>9,20,21,24<br>,25 | 8  | O54728,P01946,P02091,P05539,Q4FZU2,Q8CIZ5,Q8K4G9,Q9QW07                      |
| 5284 | 1,3,4,5,7,2<br>2,24,25 | 2,6,8,18,1<br>9,20,21,23<br>,26 | 5  | P17046,P62804,Q00715,Q8K4G9,Q9QW07                                           |
| 5285 | 1,3,4,5,7,2<br>2,24,26 | 2,6,8,18,1<br>9,20,21,23<br>,25 | 11 | O54728,P02091,P05539,P08010,Q62635,Q6P6R2,Q8CJD3,Q8K4G9,Q8VD89,Q99MH3,Q9QW07 |
| 5286 | 1,3,4,5,7,2<br>2,25,26 | 2,6,8,18,1<br>9,20,21,23<br>,24 | 4  | O54728,P02091,P05539,Q9QW07                                                  |
| 5287 | 1,3,4,5,7,2<br>3,24,25 | 2,6,8,18,1<br>9,20,21,22<br>,26 | 6  | P34901,P55314,P62804,Q00715,Q63751,Q8K4G9                                    |
| 5288 | 1,3,4,5,7,2<br>3,24,26 | 2,6,8,18,1<br>9,20,21,22<br>,25 | 9  | O54728,P01946,P02091,P34901,P47967,P97840,Q4FZU2,Q8K4G9,Q8VD89               |
| 5289 | 1,3,4,5,7,2<br>3,25,26 | 2,6,8,18,1<br>9,20,21,22<br>,24 | 6  | O54728,P01946,P02091,P05539,P55314,Q4FZU2                                    |

|      |                        |                                 |    |                                                                       |
|------|------------------------|---------------------------------|----|-----------------------------------------------------------------------|
| 5290 | 1,3,4,5,7,2<br>4,25,26 | 2,6,8,18,1<br>9,20,21,22<br>,23 | 3  | P01946,P02091,Q8CJD3                                                  |
| 5291 | 1,3,4,5,8,1<br>8,19,20 | 2,6,7,21,2<br>2,23,24,25<br>,26 | 5  | P00731,P01681,P22006,P83121,Q9ESW0                                    |
| 5292 | 1,3,4,5,8,1<br>8,19,21 | 2,6,7,20,2<br>2,23,24,25<br>,26 | 6  | P00731,P01681,P02803,P10758,P35281,Q9ESW0                             |
| 5293 | 1,3,4,5,8,1<br>8,19,22 | 2,6,7,20,2<br>1,23,24,25<br>,26 | 4  | P22006,P83121,Q6P6R2,Q9QW07                                           |
| 5294 | 1,3,4,5,8,1<br>8,19,23 | 2,6,7,20,2<br>1,22,24,25<br>,26 | 8  | P02803,P09605,P25809,P12785,P35467,Q03191,Q64194,Q6IG02,Q9ESW0        |
| 5295 | 1,3,4,5,8,1<br>8,19,24 | 2,6,7,20,2<br>1,22,23,25<br>,26 | 2  | P09605,P25809,P83121                                                  |
| 5296 | 1,3,4,5,8,1<br>8,19,25 | 2,6,7,20,2<br>1,22,23,24<br>,26 | 1  | P02803                                                                |
| 5297 | 1,3,4,5,8,1<br>8,19,26 | 2,6,7,20,2<br>1,22,23,24<br>,25 | 6  | O54728,P01681,P09605,P25809,Q4FZU2,Q63942,Q9ESW0                      |
| 5298 | 1,3,4,5,8,1<br>8,20,21 | 2,6,7,19,2<br>2,23,24,25<br>,26 | 7  | P00731,P01681,P10758,P14480,Q4FZU6,Q6IRE4,Q9ESW0                      |
| 5299 | 1,3,4,5,8,1<br>8,20,22 | 2,6,7,19,2<br>1,23,24,25<br>,26 | 7  | P01681,P22006,P83121,P97840,Q6P6R2,Q9ESW0,Q9QW07                      |
| 5300 | 1,3,4,5,8,1<br>8,20,23 | 2,6,7,19,2<br>1,22,24,25<br>,26 | 10 | P01681,P12785,P22006,P35467,P97840,Q4FZU2,Q4FZU6,Q6IFW6,Q6IG02,Q9ESW0 |
| 5301 | 1,3,4,5,8,1<br>8,20,24 | 2,6,7,19,2<br>1,22,23,25<br>,26 | 4  | P83121,P97840,Q9ESW0,Q9QZK9                                           |
| 5302 | 1,3,4,5,8,1<br>8,20,25 | 2,6,7,19,2<br>1,22,23,24<br>,26 | 1  | Q9ESW0                                                                |
| 5303 | 1,3,4,5,8,1<br>8,20,26 | 2,6,7,19,2<br>1,22,23,24<br>,25 | 8  | O54728,P01681,P97840,Q4FZU2,Q4FZU6,Q6IFW6,Q6IG02,Q9ESW0               |
| 5304 | 1,3,4,5,8,1<br>8,21,22 | 2,6,7,19,2<br>0,23,24,25<br>,26 | 3  | P10758,Q9ESW0,Q9QW07                                                  |

|      |                        |                                 |    |                                                                                                                                             |
|------|------------------------|---------------------------------|----|---------------------------------------------------------------------------------------------------------------------------------------------|
| 5305 | 1,3,4,5,8,1<br>8,21,23 | 2,6,7,19,2<br>0,22,24,25<br>,26 | 6  | P01681,P10758,P12785,Q4FZU2,Q6IG02,Q9ESW0                                                                                                   |
| 5306 | 1,3,4,5,8,1<br>8,21,24 | 2,6,7,19,2<br>0,22,23,25<br>,26 | 2  | P10758,Q9ESW0                                                                                                                               |
| 5307 | 1,3,4,5,8,1<br>8,21,25 | 2,6,7,19,2<br>0,22,23,24<br>,26 | 5  | P00731,P08721,P31430,Q6AYS4,Q9ESW0                                                                                                          |
| 5308 | 1,3,4,5,8,1<br>8,21,26 | 2,6,7,19,2<br>0,22,23,24<br>,25 | 6  | P01681,P10758,Q4FZU2,Q4FZU6,Q6IG02,Q9ESW0                                                                                                   |
| 5309 | 1,3,4,5,8,1<br>8,22,23 | 2,6,7,19,2<br>0,21,24,25<br>,26 | 4  | P97840,Q64194,Q6IG02,Q9QW07                                                                                                                 |
| 5310 | 1,3,4,5,8,1<br>8,22,24 | 2,6,7,19,2<br>0,21,23,25<br>,26 | 4  | P83121,P97840,Q6P6R2,Q9QW07                                                                                                                 |
| 5311 | 1,3,4,5,8,1<br>8,22,25 | 2,6,7,19,2<br>0,21,23,24<br>,26 | 2  | Q6AYS4,Q9QW07                                                                                                                               |
| 5312 | 1,3,4,5,8,1<br>8,22,26 | 2,6,7,19,2<br>0,21,23,24<br>,25 | 5  | O54728,P97840,Q6P6R2,Q9ESW0,Q9QW07                                                                                                          |
| 5313 | 1,3,4,5,8,1<br>8,23,24 | 2,6,7,19,2<br>0,21,22,25<br>,26 | 6  | P09605;P25809,P12785,P34901,P47967,P97840,Q6IG02                                                                                            |
| 5314 | 1,3,4,5,8,1<br>8,23,25 | 2,6,7,19,2<br>0,21,22,24<br>,26 | 4  | P00714,P12785,Q6AYS4,Q6IG02                                                                                                                 |
| 5315 | 1,3,4,5,8,1<br>8,23,26 | 2,6,7,19,2<br>0,21,22,24<br>,25 | 19 | O54728,P01681,P09605;P25809,P12785,P35467,P47967,P97840,Q4FZU2,Q4FZU6,Q5I0D1,Q63942,Q64194,Q6AY61,Q6IFU8,Q6IFW6,Q6IG02,Q6IMF3,Q6P6Q2,Q9ESW0 |
| 5316 | 1,3,4,5,8,1<br>8,24,25 | 2,6,7,19,2<br>0,21,22,23<br>,26 | 1  | P08721                                                                                                                                      |
| 5317 | 1,3,4,5,8,1<br>8,24,26 | 2,6,7,19,2<br>0,21,22,23<br>,25 | 6  | P09605;P25809,P47967,P97840,Q4FZU2,Q8VD89,Q9ESW0                                                                                            |
| 5318 | 1,3,4,5,8,1<br>8,25,26 | 2,6,7,19,2<br>0,21,22,23<br>,24 | 6  | P00714,P08721,Q4FZU2,Q6AY33,Q6IG02,Q9ESW0                                                                                                   |
| 5319 | 1,3,4,5,8,1<br>9,20,21 | 2,6,7,18,2<br>2,23,24,25<br>,26 | 3  | P01681,P35281,P55091                                                                                                                        |

|      |                        |                                 |    |                                                                              |
|------|------------------------|---------------------------------|----|------------------------------------------------------------------------------|
| 5320 | 1,3,4,5,8,1<br>9,20,22 | 2,6,7,18,2<br>1,23,24,25<br>,26 | 11 | O54728,P00774,P01681,P22006,P55091,P83121,P98089,Q62894,Q62997,Q6P6R2,Q9QW07 |
| 5321 | 1,3,4,5,8,1<br>9,20,23 | 2,6,7,18,2<br>1,22,24,25<br>,26 | 4  | P01681,P22006,P55091,P97840                                                  |
| 5322 | 1,3,4,5,8,1<br>9,20,24 | 2,6,7,18,2<br>1,22,23,25<br>,26 | 3  | P55091,P83121,P97840                                                         |
| 5323 | 1,3,4,5,8,1<br>9,20,25 | 2,6,7,18,2<br>1,22,23,24<br>,26 | 2  | P01681,Q9QUL6                                                                |
| 5324 | 1,3,4,5,8,1<br>9,20,26 | 2,6,7,18,2<br>1,22,23,24<br>,25 | 5  | O54728,P01681,P97840,Q4FZU6,Q62894                                           |
| 5325 | 1,3,4,5,8,1<br>9,21,22 | 2,6,7,18,2<br>0,23,24,25<br>,26 | 2  | P01681,Q9QW07                                                                |
| 5326 | 1,3,4,5,8,1<br>9,21,23 | 2,6,7,18,2<br>0,22,24,25<br>,26 | 2  | P01681,P35281                                                                |
| 5327 | 1,3,4,5,8,1<br>9,21,24 | 2,6,7,18,2<br>0,22,23,25<br>,26 | 0  |                                                                              |
| 5328 | 1,3,4,5,8,1<br>9,21,25 | 2,6,7,18,2<br>0,22,23,24<br>,26 | 1  | Q9QUL6                                                                       |
| 5329 | 1,3,4,5,8,1<br>9,21,26 | 2,6,7,18,2<br>0,22,23,24<br>,25 | 3  | O54728,P01681,P35281                                                         |
| 5330 | 1,3,4,5,8,1<br>9,22,23 | 2,6,7,18,2<br>0,21,24,25<br>,26 | 3  | O54728,P55091,Q9QW07                                                         |
| 5331 | 1,3,4,5,8,1<br>9,22,24 | 2,6,7,18,2<br>0,21,23,25<br>,26 | 4  | O54728,P83121,Q6P6R2,Q9QW07                                                  |
| 5332 | 1,3,4,5,8,1<br>9,22,25 | 2,6,7,18,2<br>0,21,23,24<br>,26 | 2  | Q9QUL6,Q9QW07                                                                |
| 5333 | 1,3,4,5,8,1<br>9,22,26 | 2,6,7,18,2<br>0,21,23,24<br>,25 | 4  | O54728,P01681,Q6P6R2,Q9QW07                                                  |
| 5334 | 1,3,4,5,8,1<br>9,23,24 | 2,6,7,18,2<br>0,21,22,25<br>,26 | 1  | P09605;P25809                                                                |

|      |                        |                                 |   |                                                         |
|------|------------------------|---------------------------------|---|---------------------------------------------------------|
| 5335 | 1,3,4,5,8,1<br>9,23,25 | 2,6,7,18,2<br>0,21,22,24<br>,26 | 2 | Q99041,Q9QUL6                                           |
| 5336 | 1,3,4,5,8,1<br>9,23,26 | 2,6,7,18,2<br>0,21,22,24<br>,25 | 7 | O54728,P01681,P09605;P25809,P35467,P97840,Q4FZU2,Q6IG02 |
| 5337 | 1,3,4,5,8,1<br>9,24,25 | 2,6,7,18,2<br>0,21,22,23<br>,26 | 1 | Q9QUL6                                                  |
| 5338 | 1,3,4,5,8,1<br>9,24,26 | 2,6,7,18,2<br>0,21,22,23<br>,25 | 3 | O54728,P09605;P25809,P97840                             |
| 5339 | 1,3,4,5,8,1<br>9,25,26 | 2,6,7,18,2<br>0,21,22,23<br>,24 | 2 | O54728,P01681                                           |
| 5340 | 1,3,4,5,8,2<br>0,21,22 | 2,6,7,18,1<br>9,23,24,25<br>,26 | 4 | P01681,P55091,Q7TPB1,Q9QW07                             |
| 5341 | 1,3,4,5,8,2<br>0,21,23 | 2,6,7,18,1<br>9,22,24,25<br>,26 | 5 | P01681,P97840,Q4FZU6,Q6IRE4,Q9ESW0                      |
| 5342 | 1,3,4,5,8,2<br>0,21,24 | 2,6,7,18,1<br>9,22,23,25<br>,26 | 4 | P01681,P97840,Q5XFX0,Q6IRE4                             |
| 5343 | 1,3,4,5,8,2<br>0,21,25 | 2,6,7,18,1<br>9,22,23,24<br>,26 | 2 | P01681,Q6IRE4                                           |
| 5344 | 1,3,4,5,8,2<br>0,21,26 | 2,6,7,18,1<br>9,22,23,24<br>,25 | 6 | O54728,P01681,P97840,Q4FZU2,Q4FZU6,Q9ESW0               |
| 5345 | 1,3,4,5,8,2<br>0,22,23 | 2,6,7,18,1<br>9,21,24,25<br>,26 | 7 | O54728,P01681,P22006,P55091,P82995,P97840,Q9QW07        |
| 5346 | 1,3,4,5,8,2<br>0,22,24 | 2,6,7,18,1<br>9,21,23,25<br>,26 | 6 | P55091,P82995,P83121,P97840,Q99MH3,Q9QW07               |
| 5347 | 1,3,4,5,8,2<br>0,22,25 | 2,6,7,18,1<br>9,21,23,24<br>,26 | 2 | D3ZUC6,Q9QW07                                           |
| 5348 | 1,3,4,5,8,2<br>0,22,26 | 2,6,7,18,1<br>9,21,23,24<br>,25 | 8 | O54728,P01681,P05539,P97840,Q4FZU6,Q6P6R2,Q99MH3,Q9QW07 |
| 5349 | 1,3,4,5,8,2<br>0,23,24 | 2,6,7,18,1<br>9,21,22,25<br>,26 | 3 | P47967,P82995,P97840                                    |

|      |                        |                                 |    |                                                                              |
|------|------------------------|---------------------------------|----|------------------------------------------------------------------------------|
| 5350 | 1,3,4,5,8,2<br>0,23,25 | 2,6,7,18,1<br>9,21,22,24<br>,26 | 1  | P01681                                                                       |
| 5351 | 1,3,4,5,8,2<br>0,23,26 | 2,6,7,18,1<br>9,21,22,24<br>,25 | 11 | O54728,P01681,P47967,P97840,Q4FZU2,Q4FZU6,Q6IFW6,Q6IG02,Q6IMF3,Q6P6Q2,Q8CIZ5 |
| 5352 | 1,3,4,5,8,2<br>0,24,25 | 2,6,7,18,1<br>9,21,22,23<br>,26 | 0  |                                                                              |
| 5353 | 1,3,4,5,8,2<br>0,24,26 | 2,6,7,18,1<br>9,21,22,23<br>,25 | 7  | O54728,P01681,P47967,P97840,Q4FZU6,Q8CJD3,Q99MH3                             |
| 5354 | 1,3,4,5,8,2<br>0,25,26 | 2,6,7,18,1<br>9,21,22,23<br>,24 | 3  | O54728,P01681,P97840                                                         |
| 5355 | 1,3,4,5,8,2<br>1,22,23 | 2,6,7,18,1<br>9,20,24,25<br>,26 | 2  | P01681,Q9QW07                                                                |
| 5356 | 1,3,4,5,8,2<br>1,22,24 | 2,6,7,18,1<br>9,20,23,25<br>,26 | 2  | Q5XFX0,Q9QW07                                                                |
| 5357 | 1,3,4,5,8,2<br>1,22,25 | 2,6,7,18,1<br>9,20,23,24<br>,26 | 2  | Q6AYS4,Q9QW07                                                                |
| 5358 | 1,3,4,5,8,2<br>1,22,26 | 2,6,7,18,1<br>9,20,23,24<br>,25 | 3  | O54728,P01681,Q9QW07                                                         |
| 5359 | 1,3,4,5,8,2<br>1,23,24 | 2,6,7,18,1<br>9,20,22,25<br>,26 | 2  | P34901,P97840                                                                |
| 5360 | 1,3,4,5,8,2<br>1,23,25 | 2,6,7,18,1<br>9,20,22,24<br>,26 | 3  | P06760,Q63751,Q6AYS4                                                         |
| 5361 | 1,3,4,5,8,2<br>1,23,26 | 2,6,7,18,1<br>9,20,22,24<br>,25 | 10 | O54728,P01681,P97840,Q4FZU2,Q4FZU6,Q6IFW6,Q6IG02,Q6IMF3,Q6P6Q2,Q9ESW0        |
| 5362 | 1,3,4,5,8,2<br>1,24,25 | 2,6,7,18,1<br>9,20,22,23<br>,26 | 0  |                                                                              |
| 5363 | 1,3,4,5,8,2<br>1,24,26 | 2,6,7,18,1<br>9,20,22,23<br>,25 | 3  | P01681,P97840,Q8CJD3                                                         |
| 5364 | 1,3,4,5,8,2<br>1,25,26 | 2,6,7,18,1<br>9,20,22,23<br>,24 | 2  | P01681,Q6AYS4                                                                |

|      |                         |                                 |   |                                                                       |
|------|-------------------------|---------------------------------|---|-----------------------------------------------------------------------|
| 5365 | 1,3,4,5,8,2<br>2,23,24  | 2,6,7,18,1<br>9,20,21,25<br>,26 | 5 | P34901,P47967,P82995,P97840,Q9QW07                                    |
| 5366 | 1,3,4,5,8,2<br>2,23,25  | 2,6,7,18,1<br>9,20,21,24<br>,26 | 1 | Q9QW07                                                                |
| 5367 | 1,3,4,5,8,2<br>2,23,26  | 2,6,7,18,1<br>9,20,21,24<br>,25 | 8 | O54728,P01681,P47967,P97840,Q4FZU2,Q6IG02,Q8CIZ5,Q9QW07               |
| 5368 | 1,3,4,5,8,2<br>2,24,25  | 2,6,7,18,1<br>9,20,21,23<br>,26 | 2 | Q9QUL6,Q9QW07                                                         |
| 5369 | 1,3,4,5,8,2<br>2,24,26  | 2,6,7,18,1<br>9,20,21,23<br>,25 | 6 | O54728,P47967,P97840,Q6P6R2,Q99MH3,Q9QW07                             |
| 5370 | 1,3,4,5,8,2<br>2,25,26  | 2,6,7,18,1<br>9,20,21,23<br>,24 | 2 | O54728,Q9QW07                                                         |
| 5371 | 1,3,4,5,8,2<br>3,24,25  | 2,6,7,18,1<br>9,20,21,22<br>,26 | 1 | Q63751                                                                |
| 5372 | 1,3,4,5,8,2<br>3,24,26  | 2,6,7,18,1<br>9,20,21,22<br>,25 | 9 | O54728,P02091,P09605,P25809,P34901,P47967,P97840,Q4FZU2,Q5I0D1,Q6IG02 |
| 5373 | 1,3,4,5,8,2<br>3,25,26  | 2,6,7,18,1<br>9,20,21,22<br>,24 | 7 | O54728,P02091,Q4FZU2,Q5I0D1,Q6IFW6,Q6IG02,Q6P6Q2                      |
| 5374 | 1,3,4,5,8,2<br>4,25,26  | 2,6,7,18,1<br>9,20,21,22<br>,23 | 2 | Q62902,Q8CJD3                                                         |
| 5375 | 1,3,4,5,18,<br>19,20,21 | 2,6,7,8,22,<br>23,24,25,2<br>6  | 4 | P00731,P01681,P10758,Q9ESW0                                           |
| 5376 | 1,3,4,5,18,<br>19,20,22 | 2,6,7,8,21,<br>23,24,25,2<br>6  | 8 | O54728,P07150,P14669,P22006,Q62997,Q6P6R2,Q9QW07,Q9WTT6               |
| 5377 | 1,3,4,5,18,<br>19,20,23 | 2,6,7,8,21,<br>22,24,25,2<br>6  | 4 | P12785,P22006,Q4FZU2,Q6IG02                                           |
| 5378 | 1,3,4,5,18,<br>19,20,24 | 2,6,7,8,21,<br>22,23,25,2<br>6  | 5 | P07150,P83121,Q6P6R2,Q9QZK9,Q9WTT6                                    |
| 5379 | 1,3,4,5,18,<br>19,20,25 | 2,6,7,8,21,<br>22,23,24,2<br>6  | 0 |                                                                       |



|      |                         |                                |    |                                                                                            |
|------|-------------------------|--------------------------------|----|--------------------------------------------------------------------------------------------|
| 5380 | 1,3,4,5,18,<br>19,20,26 | 2,6,7,8,21,<br>22,23,24,2<br>5 | 6  | O54728,P01681,Q4FZU2,Q4FZU6,Q6IG02,Q6P6R2                                                  |
| 5381 | 1,3,4,5,18,<br>19,21,22 | 2,6,7,8,20,<br>23,24,25,2<br>6 | 2  | P10758,Q9QW07                                                                              |
| 5382 | 1,3,4,5,18,<br>19,21,23 | 2,6,7,8,20,<br>22,24,25,2<br>6 | 3  | P10758,P12785,Q9ESW0                                                                       |
| 5383 | 1,3,4,5,18,<br>19,21,24 | 2,6,7,8,20,<br>22,23,25,2<br>6 | 1  | P10758                                                                                     |
| 5384 | 1,3,4,5,18,<br>19,21,25 | 2,6,7,8,20,<br>22,23,24,2<br>6 | 2  | P00731,P31430                                                                              |
| 5385 | 1,3,4,5,18,<br>19,21,26 | 2,6,7,8,20,<br>22,23,24,2<br>5 | 5  | P01681,P10758,P12020,Q4FZU2,Q9ESW0                                                         |
| 5386 | 1,3,4,5,18,<br>19,22,23 | 2,6,7,8,20,<br>21,24,25,2<br>6 | 4  | O54728,P12785,Q9QW07,Q9WTT6                                                                |
| 5387 | 1,3,4,5,18,<br>19,22,24 | 2,6,7,8,20,<br>21,23,25,2<br>6 | 6  | P07150,P62804,P83121,Q6P6R2,Q9QW07,Q9WTT6                                                  |
| 5388 | 1,3,4,5,18,<br>19,22,25 | 2,6,7,8,20,<br>21,23,24,2<br>6 | 1  | Q9QW07                                                                                     |
| 5389 | 1,3,4,5,18,<br>19,22,26 | 2,6,7,8,20,<br>21,23,24,2<br>5 | 4  | O54728,Q6P6R2,Q9QW07,Q9WTT6                                                                |
| 5390 | 1,3,4,5,18,<br>19,23,24 | 2,6,7,8,20,<br>21,22,25,2<br>6 | 5  | P09605;P25809,P12785,P34901,Q03191,Q9WTT6                                                  |
| 5391 | 1,3,4,5,18,<br>19,23,25 | 2,6,7,8,20,<br>21,22,24,2<br>6 | 2  | P12785,Q6BEA2                                                                              |
| 5392 | 1,3,4,5,18,<br>19,23,26 | 2,6,7,8,20,<br>21,22,24,2<br>5 | 12 | O54728,P09605;P25809,P12785,P35467,Q03191,Q4FZU2,Q64194,Q6IFU8,Q6IFW6,Q6IG02,Q6IMF3,Q6P6Q2 |
| 5393 | 1,3,4,5,18,<br>19,24,25 | 2,6,7,8,20,<br>21,22,23,2<br>6 | 0  |                                                                                            |
| 5394 | 1,3,4,5,18,<br>19,24,26 | 2,6,7,8,20,<br>21,22,23,2<br>5 | 4  | O54728,P09605;P25809,Q6P6R2,Q9WTT6                                                         |

|      |                         |                                |    |                                                                                                   |
|------|-------------------------|--------------------------------|----|---------------------------------------------------------------------------------------------------|
| 5395 | 1,3,4,5,18,<br>19,25,26 | 2,6,7,8,20,<br>21,22,23,2<br>4 | 1  | Q4FZU2                                                                                            |
| 5396 | 1,3,4,5,18,<br>20,21,22 | 2,6,7,8,19,<br>23,24,25,2<br>6 | 4  | P01681,P10758,Q9ESW0,Q9QW07                                                                       |
| 5397 | 1,3,4,5,18,<br>20,21,23 | 2,6,7,8,19,<br>22,24,25,2<br>6 | 8  | P01681,P01835,P10758,P12785,Q4FZU2,Q4FZU6,Q6IG02,Q9ESW0                                           |
| 5398 | 1,3,4,5,18,<br>20,21,24 | 2,6,7,8,19,<br>22,23,25,2<br>6 | 4  | P01681,P12020,Q6IRE4,Q9ESW0                                                                       |
| 5399 | 1,3,4,5,18,<br>20,21,25 | 2,6,7,8,19,<br>22,23,24,2<br>6 | 3  | P01681,P31430,Q9ESW0                                                                              |
| 5400 | 1,3,4,5,18,<br>20,21,26 | 2,6,7,8,19,<br>22,23,24,2<br>5 | 8  | P01681,P01835,P06911,P12020,Q4FZU2,Q4FZU6,Q6IG02,Q9ESW0                                           |
| 5401 | 1,3,4,5,18,<br>20,22,23 | 2,6,7,8,19,<br>21,24,25,2<br>6 | 7  | P12785,P22006,P97840,Q4FZU2,Q6IG02,Q9QW07,Q9QZK9                                                  |
| 5402 | 1,3,4,5,18,<br>20,22,24 | 2,6,7,8,19,<br>21,23,25,2<br>6 | 8  | P07150,P14669,P83121,P97840,Q6P6R2,Q9QW07,Q9QZK9,Q9WTT6                                           |
| 5403 | 1,3,4,5,18,<br>20,22,25 | 2,6,7,8,19,<br>21,23,24,2<br>6 | 1  | Q9QW07                                                                                            |
| 5404 | 1,3,4,5,18,<br>20,22,26 | 2,6,7,8,19,<br>21,23,24,2<br>5 | 10 | O54728,P01681,P05539,P97840,Q4FZU2,Q4FZU6,Q6IG02,Q6P6R2,Q99041,Q9QW07                             |
| 5405 | 1,3,4,5,18,<br>20,23,24 | 2,6,7,8,19,<br>21,22,25,2<br>6 | 7  | P12785,P34901,P47967,P97840,Q4FZU2,Q6IG02,Q9QZK9                                                  |
| 5406 | 1,3,4,5,18,<br>20,23,25 | 2,6,7,8,19,<br>21,22,24,2<br>6 | 3  | P12785,Q4FZU2,Q6IG02                                                                              |
| 5407 | 1,3,4,5,18,<br>20,23,26 | 2,6,7,8,19,<br>21,22,24,2<br>5 | 14 | O54728,P01681,P12785,P35467,P47967,P97840,Q4FZU2,Q4FZU6,Q6IFU8,Q6IFW6,Q6IG02,Q6IMF3,Q6P6Q2,Q9ESW0 |
| 5408 | 1,3,4,5,18,<br>20,24,25 | 2,6,7,8,19,<br>21,22,23,2<br>6 | 0  |                                                                                                   |
| 5409 | 1,3,4,5,18,<br>20,24,26 | 2,6,7,8,19,<br>21,22,23,2<br>5 | 10 | P01681,P06911,P12020,P47967,P97840,Q4FZU2,Q4FZU6,Q6IG02,Q6P6R2,Q8CJD3                             |

|      |                         |                                |    |                                                                                     |
|------|-------------------------|--------------------------------|----|-------------------------------------------------------------------------------------|
| 5410 | 1,3,4,5,18,<br>20,25,26 | 2,6,7,8,19,<br>21,22,23,2<br>4 | 3  | P01681,Q4FZU2,Q6IG02                                                                |
| 5411 | 1,3,4,5,18,<br>21,22,23 | 2,6,7,8,19,<br>20,24,25,2<br>6 | 4  | P10758,P12785,P34901,Q9QW07                                                         |
| 5412 | 1,3,4,5,18,<br>21,22,24 | 2,6,7,8,19,<br>20,23,25,2<br>6 | 1  | Q9QW07                                                                              |
| 5413 | 1,3,4,5,18,<br>21,22,25 | 2,6,7,8,19,<br>20,23,24,2<br>6 | 2  | P31430,Q9QW07                                                                       |
| 5414 | 1,3,4,5,18,<br>21,22,26 | 2,6,7,8,19,<br>20,23,24,2<br>5 | 5  | O54728,P01681,Q4FZU2,Q9ESW0,Q9QW07                                                  |
| 5415 | 1,3,4,5,18,<br>21,23,24 | 2,6,7,8,19,<br>20,22,25,2<br>6 | 2  | P12785,P34901                                                                       |
| 5416 | 1,3,4,5,18,<br>21,23,25 | 2,6,7,8,19,<br>20,22,24,2<br>6 | 4  | P12785,P31430,P34901,Q4FZU2                                                         |
| 5417 | 1,3,4,5,18,<br>21,23,26 | 2,6,7,8,19,<br>20,22,24,2<br>5 | 11 | P01681,P12785,P34901,Q4FZU2,Q62636,Q6IFU8,Q6IFW6,Q6IG02,Q6IMF3,Q6P6Q2,Q9ESW0        |
| 5418 | 1,3,4,5,18,<br>21,24,25 | 2,6,7,8,19,<br>20,22,23,2<br>6 | 2  | P08721,P31430                                                                       |
| 5419 | 1,3,4,5,18,<br>21,24,26 | 2,6,7,8,19,<br>20,22,23,2<br>5 | 6  | P01681,P06911,P12020,Q4FZU2,Q8CJD3,Q9ESW0                                           |
| 5420 | 1,3,4,5,18,<br>21,25,26 | 2,6,7,8,19,<br>20,22,23,2<br>4 | 5  | P01681,P08721,P31430,Q4FZU2,Q9ESW0                                                  |
| 5421 | 1,3,4,5,18,<br>22,23,24 | 2,6,7,8,19,<br>20,21,25,2<br>6 | 6  | P12785,P34901,P62804,P97840,Q00715,Q9QW07                                           |
| 5422 | 1,3,4,5,18,<br>22,23,25 | 2,6,7,8,19,<br>20,21,24,2<br>6 | 3  | P12785,P62804,Q9QW07                                                                |
| 5423 | 1,3,4,5,18,<br>22,23,26 | 2,6,7,8,19,<br>20,21,24,2<br>5 | 12 | O54728,P12785,P34901,P47967,P97840,Q4FZU2,Q6IFU8,Q6IFW6,Q6IG02,Q6IMF3,Q6P6Q2,Q9QW07 |
| 5424 | 1,3,4,5,18,<br>22,24,25 | 2,6,7,8,19,<br>20,21,23,2<br>6 | 3  | P62804,Q00715,Q9QW07                                                                |

|      |                         |                                |    |                                                                                                          |
|------|-------------------------|--------------------------------|----|----------------------------------------------------------------------------------------------------------|
| 5425 | 1,3,4,5,18,<br>22,24,26 | 2,6,7,8,19,<br>20,21,23,2<br>5 | 5  | O54728,P47967,P97840,Q6P6R2,Q9QW07                                                                       |
| 5426 | 1,3,4,5,18,<br>22,25,26 | 2,6,7,8,19,<br>20,21,23,2<br>4 | 2  | O54728,Q9QW07                                                                                            |
| 5427 | 1,3,4,5,18,<br>23,24,25 | 2,6,7,8,19,<br>20,21,22,2<br>6 | 5  | P12785,P34901,P62804,Q00715,Q63751                                                                       |
| 5428 | 1,3,4,5,18,<br>23,24,26 | 2,6,7,8,19,<br>20,21,22,2<br>5 | 14 | O54728,P02091,P09605,P25809,P12785,P34901,P35467,P47967,P97840,Q4FZU2,Q6IFU8,Q6IFW6,Q6IG02,Q6IMF3,Q6P6Q2 |
| 5429 | 1,3,4,5,18,<br>23,25,26 | 2,6,7,8,19,<br>20,21,22,2<br>4 | 11 | P00714,P02091,P12785,P35467,Q4FZU2,Q5I0D1,Q6IFU8,Q6IFW6,Q6IG02,Q6IMF3,Q6P6Q2                             |
| 5430 | 1,3,4,5,18,<br>24,25,26 | 2,6,7,8,19,<br>20,21,22,2<br>3 | 3  | Q4FZU2,Q62902,Q8CJD3                                                                                     |
| 5431 | 1,3,4,5,19,<br>20,21,22 | 2,6,7,8,18,<br>23,24,25,2<br>6 | 5  | O54728,P01681,P55091,Q7TPB1,Q9QW07                                                                       |
| 5432 | 1,3,4,5,19,<br>20,21,23 | 2,6,7,8,18,<br>22,24,25,2<br>6 | 2  | P01681,P55091                                                                                            |
| 5433 | 1,3,4,5,19,<br>20,21,24 | 2,6,7,8,18,<br>22,23,25,2<br>6 | 2  | P01681,P55091                                                                                            |
| 5434 | 1,3,4,5,19,<br>20,21,25 | 2,6,7,8,18,<br>22,23,24,2<br>6 | 1  | P01681                                                                                                   |
| 5435 | 1,3,4,5,19,<br>20,21,26 | 2,6,7,8,18,<br>22,23,24,2<br>5 | 3  | O54728,P01681,Q4FZU6                                                                                     |
| 5436 | 1,3,4,5,19,<br>20,22,23 | 2,6,7,8,18,<br>21,24,25,2<br>6 | 9  | O54728,P00774,P22006,P55091,P82995,P98089,Q62997,Q9QW07,Q9WTT6                                           |
| 5437 | 1,3,4,5,19,<br>20,22,24 | 2,6,7,8,18,<br>21,23,25,2<br>6 | 12 | O54728,P00774,P07150,P14669,P55091,P82995,P83121,P98089,Q6P6R2,Q99MH3,Q9QW07,Q9WTT6                      |
| 5438 | 1,3,4,5,19,<br>20,22,25 | 2,6,7,8,18,<br>21,23,24,2<br>6 | 3  | O54728,P55091,Q9QW07                                                                                     |
| 5439 | 1,3,4,5,19,<br>20,22,26 | 2,6,7,8,18,<br>21,23,24,2<br>5 | 10 | O54728,P01681,P05539,P07150,P98089,Q62997,Q6P6R2,Q99MH3,Q9QW07,Q9WTT6                                    |

|      |                         |                                |   |                                                                |
|------|-------------------------|--------------------------------|---|----------------------------------------------------------------|
| 5440 | 1,3,4,5,19,<br>20,23,24 | 2,6,7,8,18,<br>21,22,25,2<br>6 | 4 | P34901,P55091,P82995,P98089                                    |
| 5441 | 1,3,4,5,19,<br>20,23,25 | 2,6,7,8,18,<br>21,22,24,2<br>6 | 0 |                                                                |
| 5442 | 1,3,4,5,19,<br>20,23,26 | 2,6,7,8,18,<br>21,22,24,2<br>5 | 9 | O54728,P01681,P05539,P97840,P98089,Q4FZU2,Q4FZU6,Q6IFW6,Q6IG02 |
| 5443 | 1,3,4,5,19,<br>20,24,25 | 2,6,7,8,18,<br>21,22,23,2<br>6 | 0 |                                                                |
| 5444 | 1,3,4,5,19,<br>20,24,26 | 2,6,7,8,18,<br>21,22,23,2<br>5 | 6 | O54728,P01681,P97840,P98089,Q6P6R2,Q99MH3                      |
| 5445 | 1,3,4,5,19,<br>20,25,26 | 2,6,7,8,18,<br>21,22,23,2<br>4 | 3 | O54728,P01681,P05539                                           |
| 5446 | 1,3,4,5,19,<br>21,22,23 | 2,6,7,8,18,<br>20,24,25,2<br>6 | 4 | O54728,P34901,P55091,Q9QW07                                    |
| 5447 | 1,3,4,5,19,<br>21,22,24 | 2,6,7,8,18,<br>20,23,25,2<br>6 | 1 | Q9QW07                                                         |
| 5448 | 1,3,4,5,19,<br>21,22,25 | 2,6,7,8,18,<br>20,23,24,2<br>6 | 2 | P17046,Q9QW07                                                  |
| 5449 | 1,3,4,5,19,<br>21,22,26 | 2,6,7,8,18,<br>20,23,24,2<br>5 | 3 | O54728,P01681,Q9QW07                                           |
| 5450 | 1,3,4,5,19,<br>21,23,24 | 2,6,7,8,18,<br>20,22,25,2<br>6 | 1 | P34901                                                         |
| 5451 | 1,3,4,5,19,<br>21,23,25 | 2,6,7,8,18,<br>20,22,24,2<br>6 | 0 |                                                                |
| 5452 | 1,3,4,5,19,<br>21,23,26 | 2,6,7,8,18,<br>20,22,24,2<br>5 | 3 | O54728,P01681,Q4FZU2                                           |
| 5453 | 1,3,4,5,19,<br>21,24,25 | 2,6,7,8,18,<br>20,22,23,2<br>6 | 0 |                                                                |
| 5454 | 1,3,4,5,19,<br>21,24,26 | 2,6,7,8,18,<br>20,22,23,2<br>5 | 3 | O54728,P01681,Q8CJD3                                           |

|      |                         |                                |    |                                                                       |
|------|-------------------------|--------------------------------|----|-----------------------------------------------------------------------|
| 5455 | 1,3,4,5,19,<br>21,25,26 | 2,6,7,8,18,<br>20,22,23,2<br>4 | 1  | P01681                                                                |
| 5456 | 1,3,4,5,19,<br>22,23,24 | 2,6,7,8,18,<br>20,21,25,2<br>6 | 10 | O54728,P34901,P55091,P62804,P82471,P82995,P98089,Q00715,Q9QW07,Q9WTT6 |
| 5457 | 1,3,4,5,19,<br>22,23,25 | 2,6,7,8,18,<br>20,21,24,2<br>6 | 5  | O54728,P17046,P62804,Q6AYR8,Q9QW07                                    |
| 5458 | 1,3,4,5,19,<br>22,23,26 | 2,6,7,8,18,<br>20,21,24,2<br>5 | 4  | O54728,P05539,P98089,Q9QW07                                           |
| 5459 | 1,3,4,5,19,<br>22,24,25 | 2,6,7,8,18,<br>20,21,23,2<br>6 | 5  | P17046,P62804,Q00715,Q6AYR8,Q9QW07                                    |
| 5460 | 1,3,4,5,19,<br>22,24,26 | 2,6,7,8,18,<br>20,21,23,2<br>5 | 6  | O54728,P98089,Q6P6R2,Q99MH3,Q9QW07,Q9WTT6                             |
| 5461 | 1,3,4,5,19,<br>22,25,26 | 2,6,7,8,18,<br>20,21,23,2<br>4 | 4  | O54728,P05539,Q6AYR8,Q9QW07                                           |
| 5462 | 1,3,4,5,19,<br>23,24,25 | 2,6,7,8,18,<br>20,21,22,2<br>6 | 3  | P34901,P62804,Q00715                                                  |
| 5463 | 1,3,4,5,19,<br>23,24,26 | 2,6,7,8,18,<br>20,21,22,2<br>5 | 5  | O54728,P02091,P09605,P25809,P34901,P98089                             |
| 5464 | 1,3,4,5,19,<br>23,25,26 | 2,6,7,8,18,<br>20,21,22,2<br>4 | 3  | O54728,P02091,Q4FZU2                                                  |
| 5465 | 1,3,4,5,19,<br>24,25,26 | 2,6,7,8,18,<br>20,21,22,2<br>3 | 3  | O54728,Q62902,Q8CJD3                                                  |
| 5466 | 1,3,4,5,20,<br>21,22,23 | 2,6,7,8,18,<br>19,24,25,2<br>6 | 4  | P01681,P34901,P55091,Q9QW07                                           |
| 5467 | 1,3,4,5,20,<br>21,22,24 | 2,6,7,8,18,<br>19,23,25,2<br>6 | 6  | P01681,P55091,Q5XFX0,Q62635,Q99MH3,Q9QW07                             |
| 5468 | 1,3,4,5,20,<br>21,22,25 | 2,6,7,8,18,<br>19,23,24,2<br>6 | 2  | P01681,Q9QW07                                                         |
| 5469 | 1,3,4,5,20,<br>21,22,26 | 2,6,7,8,18,<br>19,23,24,2<br>5 | 6  | O54728,P01681,P05539,Q4FZU6,Q99MH3,Q9QW07                             |

|      |                         |                                |    |                                                                                     |
|------|-------------------------|--------------------------------|----|-------------------------------------------------------------------------------------|
| 5470 | 1,3,4,5,20,<br>21,23,24 | 2,6,7,8,18,<br>19,22,25,2<br>6 | 5  | P01681,P34901,P82995,P97840,Q6IRE4                                                  |
| 5471 | 1,3,4,5,20,<br>21,23,25 | 2,6,7,8,18,<br>19,22,24,2<br>6 | 2  | P01681,Q6IRE4                                                                       |
| 5472 | 1,3,4,5,20,<br>21,23,26 | 2,6,7,8,18,<br>19,22,24,2<br>5 | 11 | O54728,P01681,P01835,P97840,Q4FZU2,Q4FZU6,Q6IFU8,Q6IFW6,Q6IG02,Q6IMF3,Q6P6Q2        |
| 5473 | 1,3,4,5,20,<br>21,24,25 | 2,6,7,8,18,<br>19,22,23,2<br>6 | 1  | Q6IRE4                                                                              |
| 5474 | 1,3,4,5,20,<br>21,24,26 | 2,6,7,8,18,<br>19,22,23,2<br>5 | 6  | P01681,P12020,P97840,Q4FZU6,Q8CJD3,Q99MH3                                           |
| 5475 | 1,3,4,5,20,<br>21,25,26 | 2,6,7,8,18,<br>19,22,23,2<br>4 | 2  | P01681,Q4FZU2                                                                       |
| 5476 | 1,3,4,5,20,<br>22,23,24 | 2,6,7,8,18,<br>19,21,25,2<br>6 | 11 | O54728,P34901,P47967,P55091,P82995,P97840,P98089,Q62635,Q8CIZ5,Q9QW07,Q9QZK9        |
| 5477 | 1,3,4,5,20,<br>22,23,25 | 2,6,7,8,18,<br>19,21,24,2<br>6 | 2  | P82995,Q9QW07                                                                       |
| 5478 | 1,3,4,5,20,<br>22,23,26 | 2,6,7,8,18,<br>19,21,24,2<br>5 | 12 | O54728,P01681,P05539,P47967,P97840,P98089,Q4FZU2,Q62997,Q6IFW6,Q6IG02,Q8CIZ5,Q9QW07 |
| 5479 | 1,3,4,5,20,<br>22,24,25 | 2,6,7,8,18,<br>19,21,23,2<br>6 | 2  | P82995,Q9QW07                                                                       |
| 5480 | 1,3,4,5,20,<br>22,24,26 | 2,6,7,8,18,<br>19,21,23,2<br>5 | 11 | O54728,P01681,P47967,P97840,P98089,Q62635,Q6P6R2,Q8CIZ5,Q8CJD3,Q99MH3,Q9QW07        |
| 5481 | 1,3,4,5,20,<br>22,25,26 | 2,6,7,8,18,<br>19,21,23,2<br>4 | 4  | O54728,P01681,P05539,Q9QW07                                                         |
| 5482 | 1,3,4,5,20,<br>23,24,25 | 2,6,7,8,18,<br>19,21,22,2<br>6 | 3  | P34901,P82995,Q63751                                                                |
| 5483 | 1,3,4,5,20,<br>23,24,26 | 2,6,7,8,18,<br>19,21,22,2<br>5 | 12 | D4A1J4,O54728,P01681,P02091,P34901,P47967,P97840,P98089,Q4FZU2,Q6IFW6,Q6IG02,Q8CIZ5 |
| 5484 | 1,3,4,5,20,<br>23,25,26 | 2,6,7,8,18,<br>19,21,22,2<br>4 | 8  | O54728,P01681,P02091,P05539,Q4FZU2,Q6IFW6,Q6IG02,Q6IMF3                             |

|      |                         |                                |    |                                                                              |
|------|-------------------------|--------------------------------|----|------------------------------------------------------------------------------|
| 5485 | 1,3,4,5,20,<br>24,25,26 | 2,6,7,8,18,<br>19,21,22,2<br>3 | 1  | Q8CJD3                                                                       |
| 5486 | 1,3,4,5,21,<br>22,23,24 | 2,6,7,8,18,<br>19,20,25,2<br>6 | 3  | P34901,P35280,Q9QW07                                                         |
| 5487 | 1,3,4,5,21,<br>22,23,25 | 2,6,7,8,18,<br>19,20,24,2<br>6 | 3  | P34901,P35280,Q9QW07                                                         |
| 5488 | 1,3,4,5,21,<br>22,23,26 | 2,6,7,8,18,<br>19,20,24,2<br>5 | 5  | O54728,P01681,P34901,Q4FZU2,Q9QW07                                           |
| 5489 | 1,3,4,5,21,<br>22,24,25 | 2,6,7,8,18,<br>19,20,23,2<br>6 | 2  | P35280,Q9QW07                                                                |
| 5490 | 1,3,4,5,21,<br>22,24,26 | 2,6,7,8,18,<br>19,20,23,2<br>5 | 5  | O54728,P01681,Q8CJD3,Q99MH3,Q9QW07                                           |
| 5491 | 1,3,4,5,21,<br>22,25,26 | 2,6,7,8,18,<br>19,20,23,2<br>4 | 3  | O54728,P01681,Q9QW07                                                         |
| 5492 | 1,3,4,5,21,<br>23,24,25 | 2,6,7,8,18,<br>19,20,22,2<br>6 | 3  | P34901,P35280,Q63751                                                         |
| 5493 | 1,3,4,5,21,<br>23,24,26 | 2,6,7,8,18,<br>19,20,22,2<br>5 | 7  | O54728,P01681,P02091,P34901,P47967,P97840,Q4FZU2                             |
| 5494 | 1,3,4,5,21,<br>23,25,26 | 2,6,7,8,18,<br>19,20,22,2<br>4 | 3  | P01681,Q4FZU2,Q6IMF3                                                         |
| 5495 | 1,3,4,5,21,<br>24,25,26 | 2,6,7,8,18,<br>19,20,22,2<br>3 | 1  | Q8CJD3                                                                       |
| 5496 | 1,3,4,5,22,<br>23,24,25 | 2,6,7,8,18,<br>19,20,21,2<br>6 | 8  | P34901,P35280,P62804,P82471,Q00715,Q63751,Q6AYR8,Q9QW07                      |
| 5497 | 1,3,4,5,22,<br>23,24,26 | 2,6,7,8,18,<br>19,20,21,2<br>5 | 11 | O54728,P00731,P02091,P34901,P47967,P62804,P82471,P97840,P98089,Q8CIZ5,Q9QW07 |
| 5498 | 1,3,4,5,22,<br>23,25,26 | 2,6,7,8,18,<br>19,20,21,2<br>4 | 6  | O54728,P02091,P05539,P62804,Q4FZU2,Q9QW07                                    |
| 5499 | 1,3,4,5,22,<br>24,25,26 | 2,6,7,8,18,<br>19,20,21,2<br>3 | 4  | O54728,P62804,Q8CJD3,Q9QW07                                                  |



|      |                         |                                  |    |                                                                                                                               |
|------|-------------------------|----------------------------------|----|-------------------------------------------------------------------------------------------------------------------------------|
| 5500 | 1,3,4,5,23,<br>24,25,26 | 2,6,7,8,18,<br>19,20,21,2<br>2   | 11 | O54728,P01946,P02091,P34901,P60905,P62804,Q4FZU2,Q62902,Q63751,Q7TPB1,Q8CJD3                                                  |
| 5501 | 1,3,4,6,7,8<br>,18,19   | 2,5,20,21,<br>22,23,24,2<br>5,26 | 10 | O55006,P00731,P02803,P16086,P18418,P35280,P35281,Q30KJ2,Q5FVI6,Q63617                                                         |
| 5502 | 1,3,4,6,7,8<br>,18,20   | 2,5,19,21,<br>22,23,24,2<br>5,26 | 8  | O55006,O70417,P00731,P01681,P10715,P18418,P35280,Q63617                                                                       |
| 5503 | 1,3,4,6,7,8<br>,18,21   | 2,5,19,20,<br>22,23,24,2<br>5,26 | 18 | D4A1J4,O70417,P00731,P01681,P08723,P0C0A9,P11598,P13432,P16086,P18418,P22282,P22283,P25031,P42854,Q63617,Q6AYL6,Q8CJ52,Q9JI85 |
| 5504 | 1,3,4,6,7,8<br>,18,22   | 2,5,19,20,<br>21,23,24,2<br>5,26 | 5  | D4A1J4,O70417,P18418,Q63617,Q8VD89                                                                                            |
| 5505 | 1,3,4,6,7,8<br>,18,23   | 2,5,19,20,<br>21,22,24,2<br>5,26 | 9  | O70417,P12785,P16086,P18418,P35467,Q5XI22,Q63617,Q8VD89,Q99041                                                                |
| 5506 | 1,3,4,6,7,8<br>,18,24   | 2,5,19,20,<br>21,22,23,2<br>5,26 | 5  | O55006,O70417,P18418,Q63617,Q8VD89                                                                                            |
| 5507 | 1,3,4,6,7,8<br>,18,25   | 2,5,19,20,<br>21,22,23,2<br>4,26 | 12 | P00714,P00731,P06911,P08721,P10715,P12020,P18418,P19629,P31044,P35280,Q5GRG2,Q63617                                           |
| 5508 | 1,3,4,6,7,8<br>,18,26   | 2,5,19,20,<br>21,22,23,2<br>4,25 | 12 | O70417,P01681,P02770,P11598,P18418,P20761,P35280,Q4FZU2,Q5FVI6,Q63617,Q6AY33,Q8VD89                                           |
| 5509 | 1,3,4,6,7,8<br>,19,20   | 2,5,18,21,<br>22,23,24,2<br>5,26 | 9  | P00731,P01681,P16086,P18418,P35280,P35281,Q30KJ2,Q5FVI6,Q63617                                                                |
| 5510 | 1,3,4,6,7,8<br>,19,21   | 2,5,18,20,<br>22,23,24,2<br>5,26 | 12 | D4A1J4,P00731,P01681,P08723,P0C0A9,P16086,P18418,P22282,P35281,Q30KJ2,Q5FVI6,Q63617                                           |
| 5511 | 1,3,4,6,7,8<br>,19,22   | 2,5,18,20,<br>21,23,24,2<br>5,26 | 7  | D4A1J4,P16086,P18418,P22282,Q30KJ2,Q63617,Q9QUL6                                                                              |
| 5512 | 1,3,4,6,7,8<br>,19,23   | 2,5,18,20,<br>21,22,24,2<br>5,26 | 8  | P15399,P16086,P18418,P97580,Q30KJ2,Q5FVI6,Q63617,Q99041                                                                       |
| 5513 | 1,3,4,6,7,8<br>,19,24   | 2,5,18,20,<br>21,22,23,2<br>5,26 | 7  | O55006,P16086,P18418,Q30KJ2,Q5FVI6,Q63617,Q9QUL6                                                                              |
| 5514 | 1,3,4,6,7,8<br>,19,25   | 2,5,18,20,<br>21,22,23,2<br>4,26 | 15 | P00731,P06911,P10715,P12020,P16086,P18418,P19629,P31044,P35280,Q30KJ2,Q5FVI6,Q5GRG2,Q63617,Q9QUL6,Q9QZK9                      |

|      |                       |                                  |    |                                                                                     |
|------|-----------------------|----------------------------------|----|-------------------------------------------------------------------------------------|
| 5515 | 1,3,4,6,7,8<br>,19,26 | 2,5,18,20,<br>21,22,23,2<br>4,25 | 9  | P01681,P02770,P16086,P18418,P20761,P35280,Q30KJ2,Q5FVI6,Q63617                      |
| 5516 | 1,3,4,6,7,8<br>,20,21 | 2,5,18,19,<br>22,23,24,2<br>5,26 | 10 | P00731,P01681,P08723,P13432,P16086,P18418,P42854,Q63617,Q7TPB1,Q9JI85               |
| 5517 | 1,3,4,6,7,8<br>,20,22 | 2,5,18,19,<br>21,23,24,2<br>5,26 | 5  | P01681,P18418,Q03191,Q63617,Q99MH3                                                  |
| 5518 | 1,3,4,6,7,8<br>,20,23 | 2,5,18,19,<br>21,22,24,2<br>5,26 | 5  | P01681,P16086,P18418,Q63617,Q99041                                                  |
| 5519 | 1,3,4,6,7,8<br>,20,24 | 2,5,18,19,<br>21,22,23,2<br>5,26 | 3  | P18418,Q63617,Q99MH3                                                                |
| 5520 | 1,3,4,6,7,8<br>,20,25 | 2,5,18,19,<br>21,22,23,2<br>4,26 | 9  | P01681,P06911,P10715,P12020,P18418,P19629,P35280,Q5GRG2,Q63617                      |
| 5521 | 1,3,4,6,7,8<br>,20,26 | 2,5,18,19,<br>21,22,23,2<br>4,25 | 8  | P01681,P02770,P18418,P20761,P35280,Q5FVI6,Q63617,Q99MH3                             |
| 5522 | 1,3,4,6,7,8<br>,21,22 | 2,5,18,19,<br>20,23,24,2<br>5,26 | 12 | D4A1J4,O70417,P01681,P02782,P08723,P13432,P16086,P18418,P22282,Q63617,Q7TPB1,Q8CJ52 |
| 5523 | 1,3,4,6,7,8<br>,21,23 | 2,5,18,19,<br>20,22,24,2<br>5,26 | 8  | O70417,P01681,P08723,P16086,P18418,P22282,Q63617,Q99041                             |
| 5524 | 1,3,4,6,7,8<br>,21,24 | 2,5,18,19,<br>20,22,23,2<br>5,26 | 3  | P13432,P18418,Q63617                                                                |
| 5525 | 1,3,4,6,7,8<br>,21,25 | 2,5,18,19,<br>20,22,23,2<br>4,26 | 11 | P00731,P06911,P08723,P10715,P12020,P18418,P19629,Q5GRG2,Q63617,Q9QZK9,Q9WTT6        |
| 5526 | 1,3,4,6,7,8<br>,21,26 | 2,5,18,19,<br>20,22,23,2<br>4,25 | 9  | O35783,P01681,P02770,P18418,P20761,P22282,Q5FVI6,Q63617,Q9EQV9                      |
| 5527 | 1,3,4,6,7,8<br>,22,23 | 2,5,18,19,<br>20,21,24,2<br>5,26 | 6  | O70417,P16086,P18418,P22282,Q63617,Q99041                                           |
| 5528 | 1,3,4,6,7,8<br>,22,24 | 2,5,18,19,<br>20,21,23,2<br>5,26 | 3  | P18418,Q63617,Q99MH3                                                                |
| 5529 | 1,3,4,6,7,8<br>,22,25 | 2,5,18,19,<br>20,21,23,2<br>4,26 | 8  | P06911,P10715,P12020,P18418,P19629,Q5GRG2,Q63617,Q9QUL6                             |

|      |                        |                                  |    |                                                                                            |
|------|------------------------|----------------------------------|----|--------------------------------------------------------------------------------------------|
| 5530 | 1,3,4,6,7,8<br>,22,26  | 2,5,18,19,<br>20,21,23,2<br>4,25 | 9  | P01681,P02770,P05539,P18418,P20761,P22282,Q63617,Q8VD89,Q99MH3                             |
| 5531 | 1,3,4,6,7,8<br>,23,24  | 2,5,18,19,<br>20,21,22,2<br>5,26 | 5  | P16086,P18418,Q63617,Q63751,Q99041                                                         |
| 5532 | 1,3,4,6,7,8<br>,23,25  | 2,5,18,19,<br>20,21,22,2<br>4,26 | 11 | P06911,P10715,P12020,P16086,P18418,P19629,P31044,Q5GRG2,Q63617,Q63751,Q99041               |
| 5533 | 1,3,4,6,7,8<br>,23,26  | 2,5,18,19,<br>20,21,22,2<br>4,25 | 12 | O70417,P01681,P01946,P02091,P02770,P18418,P20761,P22282,Q4FZU2,Q5FVI6,Q63617,Q8VD89        |
| 5534 | 1,3,4,6,7,8<br>,24,25  | 2,5,18,19,<br>20,21,22,2<br>3,26 | 8  | P06911,P10715,P12020,P18418,P19629,Q5GRG2,Q63617,Q9QUL6                                    |
| 5535 | 1,3,4,6,7,8<br>,24,26  | 2,5,18,19,<br>20,21,22,2<br>3,25 | 7  | P02091,P02770,P18418,P20761,Q63617,Q8VD89,Q99MH3                                           |
| 5536 | 1,3,4,6,7,8<br>,25,26  | 2,5,18,19,<br>20,21,22,2<br>3,24 | 13 | P02091,P06911,P10715,P12020,P18418,P19629,P20761,P35280,Q5FVI6,Q5GRG2,Q63617,Q6AY33,Q9QZK9 |
| 5537 | 1,3,4,6,7,1<br>8,19,20 | 2,5,8,21,2<br>2,23,24,25<br>,26  | 4  | P00731,P16086,P35280,Q5FVI6                                                                |
| 5538 | 1,3,4,6,7,1<br>8,19,21 | 2,5,8,20,2<br>2,23,24,25<br>,26  | 7  | P00731,P08723,P16086,P18418,P25031,P42854,Q5FVI6                                           |
| 5539 | 1,3,4,6,7,1<br>8,19,22 | 2,5,8,20,2<br>1,23,24,25<br>,26  | 4  | P02625,P16086,P18418,Q5FVI6                                                                |
| 5540 | 1,3,4,6,7,1<br>8,19,23 | 2,5,8,20,2<br>1,22,24,25<br>,26  | 9  | P02625,P12785,P15399,P16086,P97580,Q30KJ2,Q5BJY9,Q5FVI6,Q5XI22                             |
| 5541 | 1,3,4,6,7,1<br>8,19,24 | 2,5,8,20,2<br>1,22,23,25<br>,26  | 2  | P18418,Q5FVI6                                                                              |
| 5542 | 1,3,4,6,7,1<br>8,19,25 | 2,5,8,20,2<br>1,22,23,24<br>,26  | 7  | P00731,P12020,P16086,P18418,P35280,P47967,Q5FVI6                                           |
| 5543 | 1,3,4,6,7,1<br>8,19,26 | 2,5,8,20,2<br>1,22,23,24<br>,25  | 4  | P06760,P35280,Q30KJ2,Q5FVI6                                                                |
| 5544 | 1,3,4,6,7,1<br>8,20,21 | 2,5,8,19,2<br>2,23,24,25<br>,26  | 7  | P00731,P01681,P01835,P13432,P25031,P42854,Q9JI85                                           |

|      |                        |                                 |   |                                           |
|------|------------------------|---------------------------------|---|-------------------------------------------|
| 5545 | 1,3,4,6,7,1<br>8,20,22 | 2,5,8,19,2<br>1,23,24,25<br>,26 | 0 |                                           |
| 5546 | 1,3,4,6,7,1<br>8,20,23 | 2,5,8,19,2<br>1,22,24,25<br>,26 | 6 | A2RUV9,P12785,P16086,Q4FZU2,Q5XI22,Q6IG02 |
| 5547 | 1,3,4,6,7,1<br>8,20,24 | 2,5,8,19,2<br>1,22,23,25<br>,26 | 0 |                                           |
| 5548 | 1,3,4,6,7,1<br>8,20,25 | 2,5,8,19,2<br>1,22,23,24<br>,26 | 2 | P35280,Q5FVI6                             |
| 5549 | 1,3,4,6,7,1<br>8,20,26 | 2,5,8,19,2<br>1,22,23,24<br>,25 | 5 | P01681,P06760,P35280,Q4FZU2,Q5FVI6        |
| 5550 | 1,3,4,6,7,1<br>8,21,22 | 2,5,8,19,2<br>0,23,24,25<br>,26 | 4 | D4A1J4,P08723,P13432,P25031               |
| 5551 | 1,3,4,6,7,1<br>8,21,23 | 2,5,8,19,2<br>0,22,24,25<br>,26 | 5 | P12785,P16086,P25031,Q4FZU2,Q5XI22        |
| 5552 | 1,3,4,6,7,1<br>8,21,24 | 2,5,8,19,2<br>0,22,23,25<br>,26 | 3 | P13432,P18418,P25031                      |
| 5553 | 1,3,4,6,7,1<br>8,21,25 | 2,5,8,19,2<br>0,22,23,24<br>,26 | 4 | P00731,P25031,P31430,P47967               |
| 5554 | 1,3,4,6,7,1<br>8,21,26 | 2,5,8,19,2<br>0,22,23,24<br>,25 | 6 | O35783,P01681,P20761,P25031,Q4FZU2,Q5FVI6 |
| 5555 | 1,3,4,6,7,1<br>8,22,23 | 2,5,8,19,2<br>0,21,24,25<br>,26 | 4 | P02625,P12785,P16086,Q8VD89               |
| 5556 | 1,3,4,6,7,1<br>8,22,24 | 2,5,8,19,2<br>0,21,23,25<br>,26 | 2 | P18418,Q8VD89                             |
| 5557 | 1,3,4,6,7,1<br>8,22,25 | 2,5,8,19,2<br>0,21,23,24<br>,26 | 3 | P06911,P12020,Q5GRG2                      |
| 5558 | 1,3,4,6,7,1<br>8,22,26 | 2,5,8,19,2<br>0,21,23,24<br>,25 | 5 | P05539,P06760,P20761,Q5FVI6,Q8VD89        |
| 5559 | 1,3,4,6,7,1<br>8,23,24 | 2,5,8,19,2<br>0,21,22,25<br>,26 | 3 | P12785,Q63751,Q8VD89                      |

|      |                        |                                 |    |                                                                                                          |
|------|------------------------|---------------------------------|----|----------------------------------------------------------------------------------------------------------|
| 5560 | 1,3,4,6,7,1<br>8,23,25 | 2,5,8,19,2<br>0,21,22,24<br>,26 | 5  | P00714,P06911,P12020,P12785,Q63751                                                                       |
| 5561 | 1,3,4,6,7,1<br>8,23,26 | 2,5,8,19,2<br>0,21,22,24<br>,25 | 15 | A2RUV9,P01946,P02091,P12785,P20761,P35467,P55053,Q4FZU2,Q5FVI6,Q6IFU8,Q6IFW6,Q6IG02,Q6IMF3,Q6P6Q2,Q8VD89 |
| 5562 | 1,3,4,6,7,1<br>8,24,25 | 2,5,8,19,2<br>0,21,22,23<br>,26 | 1  | P18418                                                                                                   |
| 5563 | 1,3,4,6,7,1<br>8,24,26 | 2,5,8,19,2<br>0,21,22,23<br>,25 | 5  | P02091,P06760,P20761,Q5FVI6,Q8VD89                                                                       |
| 5564 | 1,3,4,6,7,1<br>8,25,26 | 2,5,8,19,2<br>0,21,22,23<br>,24 | 6  | P00714,P02091,P35280,P61206,P84079,P84082,Q4FZU2,Q5FVI6                                                  |
| 5565 | 1,3,4,6,7,1<br>9,20,21 | 2,5,8,18,2<br>2,23,24,25<br>,26 | 5  | P00731,P01681,P16086,P42854,Q5FVI6                                                                       |
| 5566 | 1,3,4,6,7,1<br>9,20,22 | 2,5,8,18,2<br>1,23,24,25<br>,26 | 4  | P16086,P55091,Q5FVI6,Q99MH3                                                                              |
| 5567 | 1,3,4,6,7,1<br>9,20,23 | 2,5,8,18,2<br>1,22,24,25<br>,26 | 6  | P15399,P16086,P55091,P97580,Q30KJ2,Q5FVI6                                                                |
| 5568 | 1,3,4,6,7,1<br>9,20,24 | 2,5,8,18,2<br>1,22,23,25<br>,26 | 1  | Q5FVI6                                                                                                   |
| 5569 | 1,3,4,6,7,1<br>9,20,25 | 2,5,8,18,2<br>1,22,23,24<br>,26 | 3  | P12020,P35280,Q5FVI6                                                                                     |
| 5570 | 1,3,4,6,7,1<br>9,20,26 | 2,5,8,18,2<br>1,22,23,24<br>,25 | 5  | P01681,P05539,P35280,Q30KJ2,Q5FVI6                                                                       |
| 5571 | 1,3,4,6,7,1<br>9,21,22 | 2,5,8,18,2<br>0,23,24,25<br>,26 | 4  | D4A1J4,P08723,P16086,Q5FVI6                                                                              |
| 5572 | 1,3,4,6,7,1<br>9,21,23 | 2,5,8,18,2<br>0,22,24,25<br>,26 | 6  | P15399,P16086,P97580,Q30KJ2,Q5FVI6,Q99041                                                                |
| 5573 | 1,3,4,6,7,1<br>9,21,24 | 2,5,8,18,2<br>0,22,23,25<br>,26 | 3  | P13432,P16086,Q5FVI6                                                                                     |
| 5574 | 1,3,4,6,7,1<br>9,21,25 | 2,5,8,18,2<br>0,22,23,24<br>,26 | 8  | P00731,P12020,P15399,P16086,P47967,P97840,Q5FVI6,Q9QZK9                                                  |

|      |                        |                                 |    |                                                                              |
|------|------------------------|---------------------------------|----|------------------------------------------------------------------------------|
| 5575 | 1,3,4,6,7,1<br>9,21,26 | 2,5,8,18,2<br>0,22,23,24<br>,25 | 5  | P01681,P16086,P20761,Q30KJ2,Q5FVI6                                           |
| 5576 | 1,3,4,6,7,1<br>9,22,23 | 2,5,8,18,2<br>0,21,24,25<br>,26 | 7  | P02625,P15399,P16086,P55091,P97580,Q30KJ2,Q5FVI6                             |
| 5577 | 1,3,4,6,7,1<br>9,22,24 | 2,5,8,18,2<br>0,21,23,25<br>,26 | 0  |                                                                              |
| 5578 | 1,3,4,6,7,1<br>9,22,25 | 2,5,8,18,2<br>0,21,23,24<br>,26 | 6  | P06911,P12020,P16086,P47967,Q5FVI6,Q5GRG2                                    |
| 5579 | 1,3,4,6,7,1<br>9,22,26 | 2,5,8,18,2<br>0,21,23,24<br>,25 | 5  | O54728,P05539,P20761,Q30KJ2,Q5FVI6                                           |
| 5580 | 1,3,4,6,7,1<br>9,23,24 | 2,5,8,18,2<br>0,21,22,25<br>,26 | 5  | P15399,P16086,P97580,Q30KJ2,Q5FVI6                                           |
| 5581 | 1,3,4,6,7,1<br>9,23,25 | 2,5,8,18,2<br>0,21,22,24<br>,26 | 9  | P06911,P12020,P15399,P16086,P97580,Q30KJ2,Q5FVI6,Q5GRG2,Q99041               |
| 5582 | 1,3,4,6,7,1<br>9,23,26 | 2,5,8,18,2<br>0,21,22,24<br>,25 | 11 | O54728,P01946,P02091,P05539,P15399,P16086,P20761,P97580,Q30KJ2,Q4FZU2,Q5FVI6 |
| 5583 | 1,3,4,6,7,1<br>9,24,25 | 2,5,8,18,2<br>0,21,22,23<br>,26 | 2  | P12020,Q5FVI6                                                                |
| 5584 | 1,3,4,6,7,1<br>9,24,26 | 2,5,8,18,2<br>0,21,22,23<br>,25 | 4  | P02091,P20761,Q30KJ2,Q5FVI6                                                  |
| 5585 | 1,3,4,6,7,1<br>9,25,26 | 2,5,8,18,2<br>0,21,22,23<br>,24 | 7  | P02091,P05539,P12020,P35280,Q30KJ2,Q5FVI6,Q9QZK9                             |
| 5586 | 1,3,4,6,7,2<br>0,21,22 | 2,5,8,18,1<br>9,23,24,25<br>,26 | 6  | P01681,P13432,P42854,Q03191,Q7TPB1,Q99MH3                                    |
| 5587 | 1,3,4,6,7,2<br>0,21,23 | 2,5,8,18,1<br>9,22,24,25<br>,26 | 3  | P01681,P01835,P16086                                                         |
| 5588 | 1,3,4,6,7,2<br>0,21,24 | 2,5,8,18,1<br>9,22,23,25<br>,26 | 3  | P01681,P13432,Q99MH3                                                         |
| 5589 | 1,3,4,6,7,2<br>0,21,25 | 2,5,8,18,1<br>9,22,23,24<br>,26 | 3  | P01681,P09605,P25809,Q03191                                                  |

|      |                        |                                 |    |                                                                       |
|------|------------------------|---------------------------------|----|-----------------------------------------------------------------------|
| 5590 | 1,3,4,6,7,2<br>0,21,26 | 2,5,8,18,1<br>9,22,23,24<br>,25 | 9  | O35783,P01681,P01835,P01836,P05539,P20761,Q4FZU2,Q5FVI6,Q99MH3        |
| 5591 | 1,3,4,6,7,2<br>0,22,23 | 2,5,8,18,1<br>9,21,24,25<br>,26 | 2  | P16086,P55091                                                         |
| 5592 | 1,3,4,6,7,2<br>0,22,24 | 2,5,8,18,1<br>9,21,23,25<br>,26 | 2  | Q03191,Q99MH3                                                         |
| 5593 | 1,3,4,6,7,2<br>0,22,25 | 2,5,8,18,1<br>9,21,23,24<br>,26 | 4  | P06911,P12020,Q03191,Q5GRG2                                           |
| 5594 | 1,3,4,6,7,2<br>0,22,26 | 2,5,8,18,1<br>9,21,23,24<br>,25 | 7  | O54728,P01681,P05539,P20761,Q03191,Q5FVI6,Q99MH3                      |
| 5595 | 1,3,4,6,7,2<br>0,23,24 | 2,5,8,18,1<br>9,21,22,25<br>,26 | 1  | Q63751                                                                |
| 5596 | 1,3,4,6,7,2<br>0,23,25 | 2,5,8,18,1<br>9,21,22,24<br>,26 | 5  | P06911,P12020,Q5FVI6,Q5GRG2,Q63751                                    |
| 5597 | 1,3,4,6,7,2<br>0,23,26 | 2,5,8,18,1<br>9,21,22,24<br>,25 | 10 | A2RUV9,P01681,P01946,P02091,P05539,P20761,Q4FZU2,Q5FVI6,Q6IFW6,Q6IG02 |
| 5598 | 1,3,4,6,7,2<br>0,24,25 | 2,5,8,18,1<br>9,21,22,23<br>,26 | 2  | P12020,Q03191                                                         |
| 5599 | 1,3,4,6,7,2<br>0,24,26 | 2,5,8,18,1<br>9,21,22,23<br>,25 | 5  | P01681,P02091,P20761,Q5FVI6,Q99MH3                                    |
| 5600 | 1,3,4,6,7,2<br>0,25,26 | 2,5,8,18,1<br>9,21,22,23<br>,24 | 6  | P01681,P02091,P05539,P35280,Q03191,Q5FVI6                             |
| 5601 | 1,3,4,6,7,2<br>1,22,23 | 2,5,8,18,1<br>9,20,24,25<br>,26 | 1  | P16086                                                                |
| 5602 | 1,3,4,6,7,2<br>1,22,24 | 2,5,8,18,1<br>9,20,23,25<br>,26 | 2  | P13432,Q99MH3                                                         |
| 5603 | 1,3,4,6,7,2<br>1,22,25 | 2,5,8,18,1<br>9,20,23,24<br>,26 | 6  | P06911,P09605,P25809,P12020,Q03191,Q5GRG2,Q9QZK9                      |
| 5604 | 1,3,4,6,7,2<br>1,22,26 | 2,5,8,18,1<br>9,20,23,24<br>,25 | 5  | P01681,P05539,P13432,P20761,Q99MH3                                    |

|      |                        |                                 |    |                                                                                     |
|------|------------------------|---------------------------------|----|-------------------------------------------------------------------------------------|
| 5605 | 1,3,4,6,7,2<br>1,23,24 | 2,5,8,18,1<br>9,20,22,25<br>,26 | 2  | P13432,Q63751                                                                       |
| 5606 | 1,3,4,6,7,2<br>1,23,25 | 2,5,8,18,1<br>9,20,22,24<br>,26 | 9  | P06911,P12020,P15399,P16086,P83121,Q5GRG2,Q63751,Q6P6R2,Q99041                      |
| 5607 | 1,3,4,6,7,2<br>1,23,26 | 2,5,8,18,1<br>9,20,22,24<br>,25 | 7  | P01681,P01946,P02091,P20761,P83121,Q4FZU2,Q5FVI6                                    |
| 5608 | 1,3,4,6,7,2<br>1,24,25 | 2,5,8,18,1<br>9,20,22,23<br>,26 | 3  | P09605,P25809,P13432,P22006                                                         |
| 5609 | 1,3,4,6,7,2<br>1,24,26 | 2,5,8,18,1<br>9,20,22,23<br>,25 | 6  | P01681,P02091,P13432,P20761,Q5FVI6,Q99MH3                                           |
| 5610 | 1,3,4,6,7,2<br>1,25,26 | 2,5,8,18,1<br>9,20,22,23<br>,24 | 9  | O35783,P01681,P02091,P09605,P25809,P20761,P22006,P83121,Q5FVI6,Q9QZK9               |
| 5611 | 1,3,4,6,7,2<br>2,23,24 | 2,5,8,18,1<br>9,20,21,25<br>,26 | 2  | P62804,Q63751                                                                       |
| 5612 | 1,3,4,6,7,2<br>2,23,25 | 2,5,8,18,1<br>9,20,21,24<br>,26 | 5  | P06911,P12020,P62804,Q5GRG2,Q63751                                                  |
| 5613 | 1,3,4,6,7,2<br>2,23,26 | 2,5,8,18,1<br>9,20,21,24<br>,25 | 8  | O54728,P01946,P02091,P05539,P20761,Q4FZU2,Q5FVI6,Q8VD89                             |
| 5614 | 1,3,4,6,7,2<br>2,24,25 | 2,5,8,18,1<br>9,20,21,23<br>,26 | 5  | P06911,P12020,P62804,Q03191,Q5GRG2                                                  |
| 5615 | 1,3,4,6,7,2<br>2,24,26 | 2,5,8,18,1<br>9,20,21,23<br>,25 | 4  | P02091,P20761,Q8VD89,Q99MH3                                                         |
| 5616 | 1,3,4,6,7,2<br>2,25,26 | 2,5,8,18,1<br>9,20,21,23<br>,24 | 9  | P02091,P05539,P06911,P12020,P20761,Q03191,Q5FVI6,Q5GRG2,Q9QZK9                      |
| 5617 | 1,3,4,6,7,2<br>3,24,25 | 2,5,8,18,1<br>9,20,21,22<br>,26 | 6  | P06911,P12020,P19629,P62804,Q5GRG2,Q63751                                           |
| 5618 | 1,3,4,6,7,2<br>3,24,26 | 2,5,8,18,1<br>9,20,21,22<br>,25 | 7  | P01946,P02091,P20761,Q4FZU2,Q5FVI6,Q63751,Q8VD89                                    |
| 5619 | 1,3,4,6,7,2<br>3,25,26 | 2,5,8,18,1<br>9,20,21,22<br>,24 | 12 | P01946,P02091,P05539,P06911,P12020,P20761,P55314,P83121,Q4FZU2,Q5FVI6,Q5GRG2,Q63751 |



|      |                        |                                 |   |                                                                |
|------|------------------------|---------------------------------|---|----------------------------------------------------------------|
| 5620 | 1,3,4,6,7,2<br>4,25,26 | 2,5,8,18,1<br>9,20,21,22<br>,23 | 3 | P02091,P20761,Q5FVI6                                           |
| 5621 | 1,3,4,6,8,1<br>8,19,20 | 2,5,7,21,2<br>2,23,24,25<br>,26 | 5 | P00731,P01681,P22006,P35280,P35281                             |
| 5622 | 1,3,4,6,8,1<br>8,19,21 | 2,5,7,20,2<br>2,23,24,25<br>,26 | 8 | O35547,P00731,P01681,P02782,P08723,P0C0A9,P10758,P35281        |
| 5623 | 1,3,4,6,8,1<br>8,19,22 | 2,5,7,20,2<br>1,23,24,25<br>,26 | 1 | P02625                                                         |
| 5624 | 1,3,4,6,8,1<br>8,19,23 | 2,5,7,20,2<br>1,22,24,25<br>,26 | 9 | P02625,P12785,P15399,P35281,P35467,P97580,Q30KJ2,Q5BJY9,Q5XI22 |
| 5625 | 1,3,4,6,8,1<br>8,19,24 | 2,5,7,20,2<br>1,22,23,25<br>,26 | 0 |                                                                |
| 5626 | 1,3,4,6,8,1<br>8,19,25 | 2,5,7,20,2<br>1,22,23,24<br>,26 | 2 | P00731,P35280                                                  |
| 5627 | 1,3,4,6,8,1<br>8,19,26 | 2,5,7,20,2<br>1,22,23,24<br>,25 | 5 | P01681,P02770,P35280,Q4FZU2,Q63942                             |
| 5628 | 1,3,4,6,8,1<br>8,20,21 | 2,5,7,19,2<br>2,23,24,25<br>,26 | 7 | O35547,P00731,P01681,P01835,P08723,P0C0A9,P10758               |
| 5629 | 1,3,4,6,8,1<br>8,20,22 | 2,5,7,19,2<br>1,23,24,25<br>,26 | 3 | O70417,P01681,P22006                                           |
| 5630 | 1,3,4,6,8,1<br>8,20,23 | 2,5,7,19,2<br>1,22,24,25<br>,26 | 8 | O70417,P01681,P12785,P22006,P35467,Q4FZU2,Q5XI22,Q6IG02        |
| 5631 | 1,3,4,6,8,1<br>8,20,24 | 2,5,7,19,2<br>1,22,23,25<br>,26 | 0 |                                                                |
| 5632 | 1,3,4,6,8,1<br>8,20,25 | 2,5,7,19,2<br>1,22,23,24<br>,26 | 2 | P01681,P35280                                                  |
| 5633 | 1,3,4,6,8,1<br>8,20,26 | 2,5,7,19,2<br>1,22,23,24<br>,25 | 4 | P01681,P35280,Q4FZU2,Q6IG02                                    |
| 5634 | 1,3,4,6,8,1<br>8,21,22 | 2,5,7,19,2<br>0,23,24,25<br>,26 | 8 | O35547,O70417,P01681,P02782,P08723,P0C0A9,P10758,P13432        |

|      |                        |                                 |    |                                                                                            |
|------|------------------------|---------------------------------|----|--------------------------------------------------------------------------------------------|
| 5635 | 1,3,4,6,8,1<br>8,21,23 | 2,5,7,19,2<br>0,22,24,25<br>,26 | 10 | O35547,O70417,P01681,P08644,P08723,P0C0A9,P10758,P12785,Q4FZU2,Q5XI22                      |
| 5636 | 1,3,4,6,8,1<br>8,21,24 | 2,5,7,19,2<br>0,22,23,25<br>,26 | 2  | P10758,P13432                                                                              |
| 5637 | 1,3,4,6,8,1<br>8,21,25 | 2,5,7,19,2<br>0,22,23,24<br>,26 | 4  | P00731,P08723,P31430,Q9WTT6                                                                |
| 5638 | 1,3,4,6,8,1<br>8,21,26 | 2,5,7,19,2<br>0,22,23,24<br>,25 | 8  | O70417,P01681,P02770,P0C0A9,P10758,P20761,Q4FZU2,Q9EQV9                                    |
| 5639 | 1,3,4,6,8,1<br>8,22,23 | 2,5,7,19,2<br>0,21,24,25<br>,26 | 3  | O70417,P02625,Q5XI22                                                                       |
| 5640 | 1,3,4,6,8,1<br>8,22,24 | 2,5,7,19,2<br>0,21,23,25<br>,26 | 0  |                                                                                            |
| 5641 | 1,3,4,6,8,1<br>8,22,25 | 2,5,7,19,2<br>0,21,23,24<br>,26 | 1  | P06911                                                                                     |
| 5642 | 1,3,4,6,8,1<br>8,22,26 | 2,5,7,19,2<br>0,21,23,24<br>,25 | 3  | O70417,P01681,Q4FZU2                                                                       |
| 5643 | 1,3,4,6,8,1<br>8,23,24 | 2,5,7,19,2<br>0,21,22,25<br>,26 | 3  | O70417,P12785,Q5XI22                                                                       |
| 5644 | 1,3,4,6,8,1<br>8,23,25 | 2,5,7,19,2<br>0,21,22,24<br>,26 | 4  | P00714,P12785,Q5XI22,Q63751                                                                |
| 5645 | 1,3,4,6,8,1<br>8,23,26 | 2,5,7,19,2<br>0,21,22,24<br>,25 | 13 | O70417,P01681,P12785,P35467,Q4FZU2,Q5XI22,Q63942,Q6AY61,Q6IFU8,Q6IFW6,Q6IG02,Q6IMF3,Q6P6Q2 |
| 5646 | 1,3,4,6,8,1<br>8,24,25 | 2,5,7,19,2<br>0,21,22,23<br>,26 | 0  |                                                                                            |
| 5647 | 1,3,4,6,8,1<br>8,24,26 | 2,5,7,19,2<br>0,21,22,23<br>,25 | 4  | P02770,P20761,Q4FZU2,Q8VD89                                                                |
| 5648 | 1,3,4,6,8,1<br>8,25,26 | 2,5,7,19,2<br>0,21,22,23<br>,24 | 4  | P00714,P35280,Q4FZU2,Q6AY33                                                                |
| 5649 | 1,3,4,6,8,1<br>9,20,21 | 2,5,7,18,2<br>2,23,24,25<br>,26 | 5  | P00731,P01681,P08723,P35281,Q7TPB1                                                         |

|      |                        |                                 |   |                                                  |
|------|------------------------|---------------------------------|---|--------------------------------------------------|
| 5650 | 1,3,4,6,8,1<br>9,20,22 | 2,5,7,18,2<br>1,23,24,25<br>,26 | 4 | P01681,P22006,P55091,P82995                      |
| 5651 | 1,3,4,6,8,1<br>9,20,23 | 2,5,7,18,2<br>1,22,24,25<br>,26 | 7 | P01681,P15399,P35281,P55091,P82995,P97580,Q30KJ2 |
| 5652 | 1,3,4,6,8,1<br>9,20,24 | 2,5,7,18,2<br>1,22,23,25<br>,26 | 2 | P01681,P82995                                    |
| 5653 | 1,3,4,6,8,1<br>9,20,25 | 2,5,7,18,2<br>1,22,23,24<br>,26 | 3 | P01681,P35280,Q9QUL6                             |
| 5654 | 1,3,4,6,8,1<br>9,20,26 | 2,5,7,18,2<br>1,22,23,24<br>,25 | 2 | P01681,P35280                                    |
| 5655 | 1,3,4,6,8,1<br>9,21,22 | 2,5,7,18,2<br>0,23,24,25<br>,26 | 6 | P01681,P02782,P08723,P0C0A9,P35281,Q7TPB1        |
| 5656 | 1,3,4,6,8,1<br>9,21,23 | 2,5,7,18,2<br>0,22,24,25<br>,26 | 6 | P01681,P0C0A9,P15399,P35281,P97580,Q30KJ2        |
| 5657 | 1,3,4,6,8,1<br>9,21,24 | 2,5,7,18,2<br>0,22,23,25<br>,26 | 3 | P02782,P13432,P35281                             |
| 5658 | 1,3,4,6,8,1<br>9,21,25 | 2,5,7,18,2<br>0,22,23,24<br>,26 | 5 | P00731,P01681,P35281,Q9QUL6,Q9WTT6               |
| 5659 | 1,3,4,6,8,1<br>9,21,26 | 2,5,7,18,2<br>0,22,23,24<br>,25 | 4 | P01681,P0C0A9,P20761,P35281                      |
| 5660 | 1,3,4,6,8,1<br>9,22,23 | 2,5,7,18,2<br>0,21,24,25<br>,26 | 6 | P02625,P15399,P55091,P82995,P97580,Q30KJ2        |
| 5661 | 1,3,4,6,8,1<br>9,22,24 | 2,5,7,18,2<br>0,21,23,25<br>,26 | 2 | P82995,Q9QUL6                                    |
| 5662 | 1,3,4,6,8,1<br>9,22,25 | 2,5,7,18,2<br>0,21,23,24<br>,26 | 2 | P06911,Q9QUL6                                    |
| 5663 | 1,3,4,6,8,1<br>9,22,26 | 2,5,7,18,2<br>0,21,23,24<br>,25 | 2 | O54728,P01681                                    |
| 5664 | 1,3,4,6,8,1<br>9,23,24 | 2,5,7,18,2<br>0,21,22,25<br>,26 | 4 | P15399,P82995,P97580,Q30KJ2                      |

|      |                        |                                 |   |                                                         |
|------|------------------------|---------------------------------|---|---------------------------------------------------------|
| 5665 | 1,3,4,6,8,1<br>9,23,25 | 2,5,7,18,2<br>0,21,22,24<br>,26 | 6 | P06911,P15399,P97580,Q30KJ2,Q99041,Q9QUL6               |
| 5666 | 1,3,4,6,8,1<br>9,23,26 | 2,5,7,18,2<br>0,21,22,24<br>,25 | 6 | P01681,P15399,P35467,P97580,Q30KJ2,Q4FZU2               |
| 5667 | 1,3,4,6,8,1<br>9,24,25 | 2,5,7,18,2<br>0,21,22,23<br>,26 | 1 | Q9QUL6                                                  |
| 5668 | 1,3,4,6,8,1<br>9,24,26 | 2,5,7,18,2<br>0,21,22,23<br>,25 | 2 | P01681,P20761                                           |
| 5669 | 1,3,4,6,8,1<br>9,25,26 | 2,5,7,18,2<br>0,21,22,23<br>,24 | 3 | P01681,P35280,Q9QUL6                                    |
| 5670 | 1,3,4,6,8,2<br>0,21,22 | 2,5,7,18,1<br>9,23,24,25<br>,26 | 8 | P01681,P02782,P08723,P13432,P16636,Q03191,Q7TPB1,Q99MH3 |
| 5671 | 1,3,4,6,8,2<br>0,21,23 | 2,5,7,18,1<br>9,22,24,25<br>,26 | 3 | P01681,P01835,P16636                                    |
| 5672 | 1,3,4,6,8,2<br>0,21,24 | 2,5,7,18,1<br>9,22,23,25<br>,26 | 4 | P01681,P13432,Q5XFX0,Q99MH3                             |
| 5673 | 1,3,4,6,8,2<br>0,21,25 | 2,5,7,18,1<br>9,22,23,24<br>,26 | 4 | P01681,P16636,Q03191,Q9WTT6                             |
| 5674 | 1,3,4,6,8,2<br>0,21,26 | 2,5,7,18,1<br>9,22,23,24<br>,25 | 5 | P01681,P01835,P20761,Q4FZU2,Q99MH3                      |
| 5675 | 1,3,4,6,8,2<br>0,22,23 | 2,5,7,18,1<br>9,21,24,25<br>,26 | 3 | P01681,P55091,P82995                                    |
| 5676 | 1,3,4,6,8,2<br>0,22,24 | 2,5,7,18,1<br>9,21,23,25<br>,26 | 3 | P82995,Q03191,Q99MH3                                    |
| 5677 | 1,3,4,6,8,2<br>0,22,25 | 2,5,7,18,1<br>9,21,23,24<br>,26 | 5 | P01681,P06911,P16636,Q03191,Q9QUL6                      |
| 5678 | 1,3,4,6,8,2<br>0,22,26 | 2,5,7,18,1<br>9,21,23,24<br>,25 | 5 | O54728,P01681,P20761,Q03191,Q99MH3                      |
| 5679 | 1,3,4,6,8,2<br>0,23,24 | 2,5,7,18,1<br>9,21,22,25<br>,26 | 3 | P01681,P82995,P97840                                    |

|      |                        |                                 |   |                                                         |
|------|------------------------|---------------------------------|---|---------------------------------------------------------|
| 5680 | 1,3,4,6,8,2<br>0,23,25 | 2,5,7,18,1<br>9,21,22,24<br>,26 | 4 | P01681,P06911,P16636,Q63751                             |
| 5681 | 1,3,4,6,8,2<br>0,23,26 | 2,5,7,18,1<br>9,21,22,24<br>,25 | 8 | P01681,P20761,P97840,Q4FZU2,Q6IFW6,Q6IG02,Q6IMF3,Q6P6Q2 |
| 5682 | 1,3,4,6,8,2<br>0,24,25 | 2,5,7,18,1<br>9,21,22,23<br>,26 | 2 | Q03191,Q9QUL6                                           |
| 5683 | 1,3,4,6,8,2<br>0,24,26 | 2,5,7,18,1<br>9,21,22,23<br>,25 | 5 | B0BNN3,P01681,P20761,P97840,Q99MH3                      |
| 5684 | 1,3,4,6,8,2<br>0,25,26 | 2,5,7,18,1<br>9,21,22,23<br>,24 | 3 | P01681,P35280,Q03191                                    |
| 5685 | 1,3,4,6,8,2<br>1,22,23 | 2,5,7,18,1<br>9,20,24,25<br>,26 | 4 | O70417,P01681,P02782,P08723                             |
| 5686 | 1,3,4,6,8,2<br>1,22,24 | 2,5,7,18,1<br>9,20,23,25<br>,26 | 4 | P02782,P13432,Q5XFX0,Q99MH3                             |
| 5687 | 1,3,4,6,8,2<br>1,22,25 | 2,5,7,18,1<br>9,20,23,24<br>,26 | 5 | P06911,P08723,P16636,Q03191,Q9WTT6                      |
| 5688 | 1,3,4,6,8,2<br>1,22,26 | 2,5,7,18,1<br>9,20,23,24<br>,25 | 5 | P01681,P02782,P20761,Q5QE79,Q99MH3                      |
| 5689 | 1,3,4,6,8,2<br>1,23,24 | 2,5,7,18,1<br>9,20,22,25<br>,26 | 2 | P13432,Q63751                                           |
| 5690 | 1,3,4,6,8,2<br>1,23,25 | 2,5,7,18,1<br>9,20,22,24<br>,26 | 7 | P01681,P06911,P07150,P16636,Q63751,Q6P6R2,Q9WTT6        |
| 5691 | 1,3,4,6,8,2<br>1,23,26 | 2,5,7,18,1<br>9,20,22,24<br>,25 | 6 | P01681,P20761,Q4FZU2,Q5QE79,Q6IMF3,Q6P6Q2               |
| 5692 | 1,3,4,6,8,2<br>1,24,25 | 2,5,7,18,1<br>9,20,22,23<br>,26 | 2 | P13432,Q9WTT6                                           |
| 5693 | 1,3,4,6,8,2<br>1,24,26 | 2,5,7,18,1<br>9,20,22,23<br>,25 | 5 | P01681,P13432,P20761,Q99MH3,Q9EQV9                      |
| 5694 | 1,3,4,6,8,2<br>1,25,26 | 2,5,7,18,1<br>9,20,22,23<br>,24 | 5 | P01681,P20761,Q5QE79,Q9QZK9,Q9WTT6                      |

|      |                         |                                 |   |                                    |
|------|-------------------------|---------------------------------|---|------------------------------------|
| 5695 | 1,3,4,6,8,2<br>2,23,24  | 2,5,7,18,1<br>9,20,21,25<br>,26 | 2 | P82995,Q63751                      |
| 5696 | 1,3,4,6,8,2<br>2,23,25  | 2,5,7,18,1<br>9,20,21,24<br>,26 | 3 | P06911,Q5GRG2,Q63751               |
| 5697 | 1,3,4,6,8,2<br>2,23,26  | 2,5,7,18,1<br>9,20,21,24<br>,25 | 4 | O54728,P01681,P20761,Q4FZU2        |
| 5698 | 1,3,4,6,8,2<br>2,24,25  | 2,5,7,18,1<br>9,20,21,23<br>,26 | 3 | P06911,Q03191,Q9QUL6               |
| 5699 | 1,3,4,6,8,2<br>2,24,26  | 2,5,7,18,1<br>9,20,21,23<br>,25 | 2 | P20761,Q99MH3                      |
| 5700 | 1,3,4,6,8,2<br>2,25,26  | 2,5,7,18,1<br>9,20,21,23<br>,24 | 2 | P06911,Q03191                      |
| 5701 | 1,3,4,6,8,2<br>3,24,25  | 2,5,7,18,1<br>9,20,21,22<br>,26 | 2 | P06911,Q63751                      |
| 5702 | 1,3,4,6,8,2<br>3,24,26  | 2,5,7,18,1<br>9,20,21,22<br>,25 | 4 | P20761,P27590,P97840,Q4FZU2        |
| 5703 | 1,3,4,6,8,2<br>3,25,26  | 2,5,7,18,1<br>9,20,21,22<br>,24 | 4 | P01681,Q4FZU2,Q63751,Q9WTT6        |
| 5704 | 1,3,4,6,8,2<br>4,25,26  | 2,5,7,18,1<br>9,20,21,22<br>,23 | 1 | P20761                             |
| 5705 | 1,3,4,6,18,<br>19,20,21 | 2,5,7,8,22,<br>23,24,25,2<br>6  | 5 | P00731,P01681,P01835,P10758,P35281 |
| 5706 | 1,3,4,6,18,<br>19,20,22 | 2,5,7,8,21,<br>23,24,25,2<br>6  | 1 | P22006                             |
| 5707 | 1,3,4,6,18,<br>19,20,23 | 2,5,7,8,21,<br>22,24,25,2<br>6  | 5 | P02625,P12785,P15399,P22006,Q4FZU2 |
| 5708 | 1,3,4,6,18,<br>19,20,24 | 2,5,7,8,21,<br>22,23,25,2<br>6  | 0 |                                    |
| 5709 | 1,3,4,6,18,<br>19,20,25 | 2,5,7,8,21,<br>22,23,24,2<br>6  | 1 | P35280                             |

|      |                         |                                |    |                                                                              |
|------|-------------------------|--------------------------------|----|------------------------------------------------------------------------------|
| 5710 | 1,3,4,6,18,<br>19,20,26 | 2,5,7,8,21,<br>22,23,24,2<br>5 | 4  | P01681,P35280,Q4FZU2,Q63355                                                  |
| 5711 | 1,3,4,6,18,<br>19,21,22 | 2,5,7,8,20,<br>23,24,25,2<br>6 | 4  | O35547,P02625,P08723,P10758                                                  |
| 5712 | 1,3,4,6,18,<br>19,21,23 | 2,5,7,8,20,<br>22,24,25,2<br>6 | 4  | P02625,P10758,P12785,P15399                                                  |
| 5713 | 1,3,4,6,18,<br>19,21,24 | 2,5,7,8,20,<br>22,23,25,2<br>6 | 1  | P10758                                                                       |
| 5714 | 1,3,4,6,18,<br>19,21,25 | 2,5,7,8,20,<br>22,23,24,2<br>6 | 2  | P00731,P47967                                                                |
| 5715 | 1,3,4,6,18,<br>19,21,26 | 2,5,7,8,20,<br>22,23,24,2<br>5 | 3  | P01681,P10758,Q4FZU2                                                         |
| 5716 | 1,3,4,6,18,<br>19,22,23 | 2,5,7,8,20,<br>21,24,25,2<br>6 | 3  | P02625,P12785,P15399                                                         |
| 5717 | 1,3,4,6,18,<br>19,22,24 | 2,5,7,8,20,<br>21,23,25,2<br>6 | 1  | P02625                                                                       |
| 5718 | 1,3,4,6,18,<br>19,22,25 | 2,5,7,8,20,<br>21,23,24,2<br>6 | 0  |                                                                              |
| 5719 | 1,3,4,6,18,<br>19,22,26 | 2,5,7,8,20,<br>21,23,24,2<br>5 | 1  | P02625                                                                       |
| 5720 | 1,3,4,6,18,<br>19,23,24 | 2,5,7,8,20,<br>21,22,25,2<br>6 | 3  | P02625,P12785,P15399                                                         |
| 5721 | 1,3,4,6,18,<br>19,23,25 | 2,5,7,8,20,<br>21,22,24,2<br>6 | 3  | P12785,P15399,P97580                                                         |
| 5722 | 1,3,4,6,18,<br>19,23,26 | 2,5,7,8,20,<br>21,22,24,2<br>5 | 11 | P02625,P12785,P15399,P35467,Q30KJ2,Q4FZU2,Q6IFU8,Q6IFW6,Q6IG02,Q6IMF3,Q6P6Q2 |
| 5723 | 1,3,4,6,18,<br>19,24,25 | 2,5,7,8,20,<br>21,22,23,2<br>6 | 0  |                                                                              |
| 5724 | 1,3,4,6,18,<br>19,24,26 | 2,5,7,8,20,<br>21,22,23,2<br>5 | 0  |                                                                              |

|      |                         |                                |   |                                                                |
|------|-------------------------|--------------------------------|---|----------------------------------------------------------------|
| 5725 | 1,3,4,6,18,<br>19,25,26 | 2,5,7,8,20,<br>21,22,23,2<br>4 | 2 | P35280,Q4FZU2                                                  |
| 5726 | 1,3,4,6,18,<br>20,21,22 | 2,5,7,8,19,<br>23,24,25,2<br>6 | 4 | P01681,P01835,P10758,P13432                                    |
| 5727 | 1,3,4,6,18,<br>20,21,23 | 2,5,7,8,19,<br>22,24,25,2<br>6 | 6 | P01681,P01835,P10758,P12785,Q4FZU2,Q6IG02                      |
| 5728 | 1,3,4,6,18,<br>20,21,24 | 2,5,7,8,19,<br>22,23,25,2<br>6 | 3 | P01681,P01835,P13432                                           |
| 5729 | 1,3,4,6,18,<br>20,21,25 | 2,5,7,8,19,<br>22,23,24,2<br>6 | 3 | P01681,P01835,P31430                                           |
| 5730 | 1,3,4,6,18,<br>20,21,26 | 2,5,7,8,19,<br>22,23,24,2<br>5 | 3 | P01681,P01835,Q4FZU2                                           |
| 5731 | 1,3,4,6,18,<br>20,22,23 | 2,5,7,8,19,<br>21,24,25,2<br>6 | 3 | P02625,P12785,Q4FZU2                                           |
| 5732 | 1,3,4,6,18,<br>20,22,24 | 2,5,7,8,19,<br>21,23,25,2<br>6 | 0 |                                                                |
| 5733 | 1,3,4,6,18,<br>20,22,25 | 2,5,7,8,19,<br>21,23,24,2<br>6 | 0 |                                                                |
| 5734 | 1,3,4,6,18,<br>20,22,26 | 2,5,7,8,19,<br>21,23,24,2<br>5 | 2 | P01681,Q4FZU2                                                  |
| 5735 | 1,3,4,6,18,<br>20,23,24 | 2,5,7,8,19,<br>21,22,25,2<br>6 | 3 | P12785,P82995,Q4FZU2                                           |
| 5736 | 1,3,4,6,18,<br>20,23,25 | 2,5,7,8,19,<br>21,22,24,2<br>6 | 3 | P12785,Q4FZU2,Q6IG02                                           |
| 5737 | 1,3,4,6,18,<br>20,23,26 | 2,5,7,8,19,<br>21,22,24,2<br>5 | 9 | P01681,P12785,P35467,Q4FZU2,Q6IFU8,Q6IFW6,Q6IG02,Q6IMF3,Q6P6Q2 |
| 5738 | 1,3,4,6,18,<br>20,24,25 | 2,5,7,8,19,<br>21,22,23,2<br>6 | 0 |                                                                |
| 5739 | 1,3,4,6,18,<br>20,24,26 | 2,5,7,8,19,<br>21,22,23,2<br>5 | 2 | P01681,Q4FZU2                                                  |



|      |                         |                                |   |                                                                |
|------|-------------------------|--------------------------------|---|----------------------------------------------------------------|
| 5740 | 1,3,4,6,18,<br>20,25,26 | 2,5,7,8,19,<br>21,22,23,2<br>4 | 3 | P01681,P35280,Q4FZU2                                           |
| 5741 | 1,3,4,6,18,<br>21,22,23 | 2,5,7,8,19,<br>20,24,25,2<br>6 | 3 | P02625,P10758,P12785                                           |
| 5742 | 1,3,4,6,18,<br>21,22,24 | 2,5,7,8,19,<br>20,23,25,2<br>6 | 1 | P13432                                                         |
| 5743 | 1,3,4,6,18,<br>21,22,25 | 2,5,7,8,19,<br>20,23,24,2<br>6 | 1 | P31430                                                         |
| 5744 | 1,3,4,6,18,<br>21,22,26 | 2,5,7,8,19,<br>20,23,24,2<br>5 | 2 | P01681,Q4FZU2                                                  |
| 5745 | 1,3,4,6,18,<br>21,23,24 | 2,5,7,8,19,<br>20,22,25,2<br>6 | 2 | P12785,P13432                                                  |
| 5746 | 1,3,4,6,18,<br>21,23,25 | 2,5,7,8,19,<br>20,22,24,2<br>6 | 4 | P01835,P12785,P31430,Q4FZU2                                    |
| 5747 | 1,3,4,6,18,<br>21,23,26 | 2,5,7,8,19,<br>20,22,24,2<br>5 | 9 | P01681,P01835,P12785,Q4FZU2,Q6IFU8,Q6IFW6,Q6IG02,Q6IMF3,Q6P6Q2 |
| 5748 | 1,3,4,6,18,<br>21,24,25 | 2,5,7,8,19,<br>20,22,23,2<br>6 | 1 | P31430                                                         |
| 5749 | 1,3,4,6,18,<br>21,24,26 | 2,5,7,8,19,<br>20,22,23,2<br>5 | 3 | P01681,P13432,Q4FZU2                                           |
| 5750 | 1,3,4,6,18,<br>21,25,26 | 2,5,7,8,19,<br>20,22,23,2<br>4 | 5 | P00774,P01681,P01835,P31430,Q4FZU2                             |
| 5751 | 1,3,4,6,18,<br>22,23,24 | 2,5,7,8,19,<br>20,21,25,2<br>6 | 5 | P02625,P12785,P16391,P62804,Q6IFU7                             |
| 5752 | 1,3,4,6,18,<br>22,23,25 | 2,5,7,8,19,<br>20,21,24,2<br>6 | 2 | P06911,P12785                                                  |
| 5753 | 1,3,4,6,18,<br>22,23,26 | 2,5,7,8,19,<br>20,21,24,2<br>5 | 9 | P02625,P12785,Q4FZU2,Q6IFU7,Q6IFU8,Q6IFW6,Q6IG02,Q6IMF3,Q6P6Q2 |
| 5754 | 1,3,4,6,18,<br>22,24,25 | 2,5,7,8,19,<br>20,21,23,2<br>6 | 1 | P62804                                                         |

|      |                         |                                |    |                                                                              |
|------|-------------------------|--------------------------------|----|------------------------------------------------------------------------------|
| 5755 | 1,3,4,6,18,<br>22,24,26 | 2,5,7,8,19,<br>20,21,23,2<br>5 | 1  | Q8VD89                                                                       |
| 5756 | 1,3,4,6,18,<br>22,25,26 | 2,5,7,8,19,<br>20,21,23,2<br>4 | 1  | Q4FZU2                                                                       |
| 5757 | 1,3,4,6,18,<br>23,24,25 | 2,5,7,8,19,<br>20,21,22,2<br>6 | 3  | P12785,P62804,Q63751                                                         |
| 5758 | 1,3,4,6,18,<br>23,24,26 | 2,5,7,8,19,<br>20,21,22,2<br>5 | 11 | P12785,P27590,P35467,Q4FZU2,Q6IFU7,Q6IFU8,Q6IFW6,Q6IG02,Q6IMF3,Q6P6Q2,Q8VD89 |
| 5759 | 1,3,4,6,18,<br>23,25,26 | 2,5,7,8,19,<br>20,21,22,2<br>4 | 10 | P00714,P00774,P12785,P35467,Q4FZU2,Q6IFU8,Q6IFW6,Q6IG02,Q6IMF3,Q6P6Q2        |
| 5760 | 1,3,4,6,18,<br>24,25,26 | 2,5,7,8,19,<br>20,21,22,2<br>3 | 1  | Q4FZU2                                                                       |
| 5761 | 1,3,4,6,19,<br>20,21,22 | 2,5,7,8,18,<br>23,24,25,2<br>6 | 5  | P01681,P55091,P82995,Q7TPB1,Q99MH3                                           |
| 5762 | 1,3,4,6,19,<br>20,21,23 | 2,5,7,8,18,<br>22,24,25,2<br>6 | 5  | P01681,P01835,P15399,P55091,P82995                                           |
| 5763 | 1,3,4,6,19,<br>20,21,24 | 2,5,7,8,18,<br>22,23,25,2<br>6 | 2  | P01681,P82995                                                                |
| 5764 | 1,3,4,6,19,<br>20,21,25 | 2,5,7,8,18,<br>22,23,24,2<br>6 | 3  | P01681,P16636,P47967                                                         |
| 5765 | 1,3,4,6,19,<br>20,21,26 | 2,5,7,8,18,<br>22,23,24,2<br>5 | 2  | P01681,P01835                                                                |
| 5766 | 1,3,4,6,19,<br>20,22,23 | 2,5,7,8,18,<br>21,24,25,2<br>6 | 5  | P02625,P15399,P31430,P55091,P82995                                           |
| 5767 | 1,3,4,6,19,<br>20,22,24 | 2,5,7,8,18,<br>21,23,25,2<br>6 | 3  | P55091,P82995,Q99MH3                                                         |
| 5768 | 1,3,4,6,19,<br>20,22,25 | 2,5,7,8,18,<br>21,23,24,2<br>6 | 2  | P55091,P82995                                                                |
| 5769 | 1,3,4,6,19,<br>20,22,26 | 2,5,7,8,18,<br>21,23,24,2<br>5 | 4  | O54728,P01681,P05539,Q99MH3                                                  |

|      |                         |                                |   |                                           |
|------|-------------------------|--------------------------------|---|-------------------------------------------|
| 5770 | 1,3,4,6,19,<br>20,23,24 | 2,5,7,8,18,<br>21,22,25,2<br>6 | 3 | P15399,P55091,P82995                      |
| 5771 | 1,3,4,6,19,<br>20,23,25 | 2,5,7,8,18,<br>21,22,24,2<br>6 | 3 | P15399,P82995,P97580                      |
| 5772 | 1,3,4,6,19,<br>20,23,26 | 2,5,7,8,18,<br>21,22,24,2<br>5 | 6 | O54728,P01681,P15399,Q30KJ2,Q4FZU2,Q6IG02 |
| 5773 | 1,3,4,6,19,<br>20,24,25 | 2,5,7,8,18,<br>21,22,23,2<br>6 | 1 | P82995                                    |
| 5774 | 1,3,4,6,19,<br>20,24,26 | 2,5,7,8,18,<br>21,22,23,2<br>5 | 2 | P01681,Q99MH3                             |
| 5775 | 1,3,4,6,19,<br>20,25,26 | 2,5,7,8,18,<br>21,22,23,2<br>4 | 2 | P01681,P35280                             |
| 5776 | 1,3,4,6,19,<br>21,22,23 | 2,5,7,8,18,<br>20,24,25,2<br>6 | 4 | P02625,P15399,P55091,P82995               |
| 5777 | 1,3,4,6,19,<br>21,22,24 | 2,5,7,8,18,<br>20,23,25,2<br>6 | 1 | P13432                                    |
| 5778 | 1,3,4,6,19,<br>21,22,25 | 2,5,7,8,18,<br>20,23,24,2<br>6 | 1 | P47967                                    |
| 5779 | 1,3,4,6,19,<br>21,22,26 | 2,5,7,8,18,<br>20,23,24,2<br>5 | 1 | P01681                                    |
| 5780 | 1,3,4,6,19,<br>21,23,24 | 2,5,7,8,18,<br>20,22,25,2<br>6 | 3 | P15399,P82995,P97580                      |
| 5781 | 1,3,4,6,19,<br>21,23,25 | 2,5,7,8,18,<br>20,22,24,2<br>6 | 2 | P15399,P97580                             |
| 5782 | 1,3,4,6,19,<br>21,23,26 | 2,5,7,8,18,<br>20,22,24,2<br>5 | 5 | P00762,P01681,P15399,Q30KJ2,Q4FZU2        |
| 5783 | 1,3,4,6,19,<br>21,24,25 | 2,5,7,8,18,<br>20,22,23,2<br>6 | 0 |                                           |
| 5784 | 1,3,4,6,19,<br>21,24,26 | 2,5,7,8,18,<br>20,22,23,2<br>5 | 1 | P01681                                    |

|      |                         |                                |   |                                                  |
|------|-------------------------|--------------------------------|---|--------------------------------------------------|
| 5785 | 1,3,4,6,19,<br>21,25,26 | 2,5,7,8,18,<br>20,22,23,2<br>4 | 2 | P01681,Q9QZK9                                    |
| 5786 | 1,3,4,6,19,<br>22,23,24 | 2,5,7,8,18,<br>20,21,25,2<br>6 | 7 | P02625,P15399,P31430,P55091,P62804,P82471,P82995 |
| 5787 | 1,3,4,6,19,<br>22,23,25 | 2,5,7,8,18,<br>20,21,24,2<br>6 | 4 | P06911,P15399,P82995,P97580                      |
| 5788 | 1,3,4,6,19,<br>22,23,26 | 2,5,7,8,18,<br>20,21,24,2<br>5 | 4 | O54728,P02625,P15399,Q30KJ2                      |
| 5789 | 1,3,4,6,19,<br>22,24,25 | 2,5,7,8,18,<br>20,21,23,2<br>6 | 4 | P06911,P62804,P82995,Q9QUL6                      |
| 5790 | 1,3,4,6,19,<br>22,24,26 | 2,5,7,8,18,<br>20,21,23,2<br>5 | 2 | O54728,Q99MH3                                    |
| 5791 | 1,3,4,6,19,<br>22,25,26 | 2,5,7,8,18,<br>20,21,23,2<br>4 | 0 |                                                  |
| 5792 | 1,3,4,6,19,<br>23,24,25 | 2,5,7,8,18,<br>20,21,22,2<br>6 | 5 | P15399,P62804,P82995,P97580,Q63751               |
| 5793 | 1,3,4,6,19,<br>23,24,26 | 2,5,7,8,18,<br>20,21,22,2<br>5 | 4 | P02091,P15399,Q30KJ2,Q4FZU2                      |
| 5794 | 1,3,4,6,19,<br>23,25,26 | 2,5,7,8,18,<br>20,21,22,2<br>4 | 5 | P02091,P15399,P97580,Q30KJ2,Q4FZU2               |
| 5795 | 1,3,4,6,19,<br>24,25,26 | 2,5,7,8,18,<br>20,21,22,2<br>3 | 0 |                                                  |
| 5796 | 1,3,4,6,20,<br>21,22,23 | 2,5,7,8,18,<br>19,24,25,2<br>6 | 5 | P01681,P01835,P16636,P55091,P82995               |
| 5797 | 1,3,4,6,20,<br>21,22,24 | 2,5,7,8,18,<br>19,23,25,2<br>6 | 7 | P01681,P13432,P16636,P82995,Q03191,Q5XFX0,Q99MH3 |
| 5798 | 1,3,4,6,20,<br>21,22,25 | 2,5,7,8,18,<br>19,23,24,2<br>6 | 4 | P01681,P09605,P25809,P16636,Q03191               |
| 5799 | 1,3,4,6,20,<br>21,22,26 | 2,5,7,8,18,<br>19,23,24,2<br>5 | 4 | P01681,P01835,Q03191,Q99MH3                      |

|      |                         |                                |   |                                                  |
|------|-------------------------|--------------------------------|---|--------------------------------------------------|
| 5800 | 1,3,4,6,20,<br>21,23,24 | 2,5,7,8,18,<br>19,22,25,2<br>6 | 4 | P01681,P01835,P13432,P82995                      |
| 5801 | 1,3,4,6,20,<br>21,23,25 | 2,5,7,8,18,<br>19,22,24,2<br>6 | 4 | P01681,P01835,P16636,Q6P6R2                      |
| 5802 | 1,3,4,6,20,<br>21,23,26 | 2,5,7,8,18,<br>19,22,24,2<br>5 | 7 | P01681,P01835,Q4FZU2,Q6IFU8,Q6IFW6,Q6IG02,Q6IMF3 |
| 5803 | 1,3,4,6,20,<br>21,24,25 | 2,5,7,8,18,<br>19,22,23,2<br>6 | 3 | P01681,P16636,Q03191                             |
| 5804 | 1,3,4,6,20,<br>21,24,26 | 2,5,7,8,18,<br>19,22,23,2<br>5 | 6 | B0BNN3,P01681,P01835,P13432,Q03191,Q99MH3        |
| 5805 | 1,3,4,6,20,<br>21,25,26 | 2,5,7,8,18,<br>19,22,23,2<br>4 | 4 | P01681,P01835,Q03191,Q4FZU2                      |
| 5806 | 1,3,4,6,20,<br>22,23,24 | 2,5,7,8,18,<br>19,21,25,2<br>6 | 2 | P55091,P82995                                    |
| 5807 | 1,3,4,6,20,<br>22,23,25 | 2,5,7,8,18,<br>19,21,24,2<br>6 | 3 | P06911,P16636,P82995                             |
| 5808 | 1,3,4,6,20,<br>22,23,26 | 2,5,7,8,18,<br>19,21,24,2<br>5 | 5 | O54728,P01681,P05539,Q4FZU2,Q6IG02               |
| 5809 | 1,3,4,6,20,<br>22,24,25 | 2,5,7,8,18,<br>19,21,23,2<br>6 | 3 | P82995,Q03191,Q99MH3                             |
| 5810 | 1,3,4,6,20,<br>22,24,26 | 2,5,7,8,18,<br>19,21,23,2<br>5 | 4 | P01681,P02803,Q03191,Q99MH3                      |
| 5811 | 1,3,4,6,20,<br>22,25,26 | 2,5,7,8,18,<br>19,21,23,2<br>4 | 4 | P01681,P05539,Q03191,Q99MH3                      |
| 5812 | 1,3,4,6,20,<br>23,24,25 | 2,5,7,8,18,<br>19,21,22,2<br>6 | 2 | P82995,Q63751                                    |
| 5813 | 1,3,4,6,20,<br>23,24,26 | 2,5,7,8,18,<br>19,21,22,2<br>5 | 6 | P01681,P97840,Q4FZU2,Q6IFW6,Q6IG02,Q6IMF3        |
| 5814 | 1,3,4,6,20,<br>23,25,26 | 2,5,7,8,18,<br>19,21,22,2<br>4 | 5 | P01681,Q4FZU2,Q6IFW6,Q6IG02,Q6IMF3               |

|      |                         |                                |   |                                                  |
|------|-------------------------|--------------------------------|---|--------------------------------------------------|
| 5815 | 1,3,4,6,20,<br>24,25,26 | 2,5,7,8,18,<br>19,21,22,2<br>3 | 3 | P01681,Q03191,Q99MH3                             |
| 5816 | 1,3,4,6,21,<br>22,23,24 | 2,5,7,8,18,<br>19,20,25,2<br>6 | 2 | P13432,P82995                                    |
| 5817 | 1,3,4,6,21,<br>22,23,25 | 2,5,7,8,18,<br>19,20,24,2<br>6 | 3 | P06911,P16636,Q63751                             |
| 5818 | 1,3,4,6,21,<br>22,23,26 | 2,5,7,8,18,<br>19,20,24,2<br>5 | 3 | P01681,Q4FZU2,Q6IMF3                             |
| 5819 | 1,3,4,6,21,<br>22,24,25 | 2,5,7,8,18,<br>19,20,23,2<br>6 | 2 | P13432,Q03191                                    |
| 5820 | 1,3,4,6,21,<br>22,24,26 | 2,5,7,8,18,<br>19,20,23,2<br>5 | 4 | P01681,P13432,Q03191,Q99MH3                      |
| 5821 | 1,3,4,6,21,<br>22,25,26 | 2,5,7,8,18,<br>19,20,23,2<br>4 | 2 | P01681,Q03191                                    |
| 5822 | 1,3,4,6,21,<br>23,24,25 | 2,5,7,8,18,<br>19,20,22,2<br>6 | 2 | Q63751,Q6P6R2                                    |
| 5823 | 1,3,4,6,21,<br>23,24,26 | 2,5,7,8,18,<br>19,20,22,2<br>5 | 3 | P01681,Q4FZU2,Q6IMF3                             |
| 5824 | 1,3,4,6,21,<br>23,25,26 | 2,5,7,8,18,<br>19,20,22,2<br>4 | 7 | P01681,P01835,P27213,P83121,Q4FZU2,Q6IFU8,Q6IMF3 |
| 5825 | 1,3,4,6,21,<br>24,25,26 | 2,5,7,8,18,<br>19,20,22,2<br>3 | 1 | P01681                                           |
| 5826 | 1,3,4,6,22,<br>23,24,25 | 2,5,7,8,18,<br>19,20,21,2<br>6 | 5 | P06911,P62804,P82471,P82995,Q63751               |
| 5827 | 1,3,4,6,22,<br>23,24,26 | 2,5,7,8,18,<br>19,20,21,2<br>5 | 3 | O54728,P00731,P82471                             |
| 5828 | 1,3,4,6,22,<br>23,25,26 | 2,5,7,8,18,<br>19,20,21,2<br>4 | 3 | P05539,P06911,Q4FZU2                             |
| 5829 | 1,3,4,6,22,<br>24,25,26 | 2,5,7,8,18,<br>19,20,21,2<br>3 | 2 | Q03191,Q99MH3                                    |

|      |                         |                                 |   |                                                  |
|------|-------------------------|---------------------------------|---|--------------------------------------------------|
| 5830 | 1,3,4,6,23,<br>24,25,26 | 2,5,7,8,18,<br>19,20,21,2<br>2  | 5 | P02091,P27590,Q4FZU2,Q63751,Q7TPB1               |
| 5831 | 1,3,4,7,8,1<br>8,19,20  | 2,5,6,21,2<br>2,23,24,25<br>,26 | 3 | P00731,P18418,P35280                             |
| 5832 | 1,3,4,7,8,1<br>8,19,21  | 2,5,6,20,2<br>2,23,24,25<br>,26 | 6 | P00731,P02803,P10758,P18418,P35281,P42854        |
| 5833 | 1,3,4,7,8,1<br>8,19,22  | 2,5,6,20,2<br>1,23,24,25<br>,26 | 1 | P18418                                           |
| 5834 | 1,3,4,7,8,1<br>8,19,23  | 2,5,6,20,2<br>1,22,24,25<br>,26 | 6 | P02803,P12785,P35467,Q5BJY9,Q5XI22,Q99041        |
| 5835 | 1,3,4,7,8,1<br>8,19,24  | 2,5,6,20,2<br>1,22,23,25<br>,26 | 1 | P18418                                           |
| 5836 | 1,3,4,7,8,1<br>8,19,25  | 2,5,6,20,2<br>1,22,23,24<br>,26 | 7 | P00714,P00731,P02803,P10715,P18418,P35280,Q9QUL6 |
| 5837 | 1,3,4,7,8,1<br>8,19,26  | 2,5,6,20,2<br>1,22,23,24<br>,25 | 4 | P02770,P06760,P35280,Q5FVI6                      |
| 5838 | 1,3,4,7,8,1<br>8,20,21  | 2,5,6,19,2<br>2,23,24,25<br>,26 | 5 | P00731,P10758,P42854,Q4FZU6,Q9ESW0               |
| 5839 | 1,3,4,7,8,1<br>8,20,22  | 2,5,6,19,2<br>1,23,24,25<br>,26 | 1 | Q63617                                           |
| 5840 | 1,3,4,7,8,1<br>8,20,23  | 2,5,6,19,2<br>1,22,24,25<br>,26 | 7 | A2RUV9,P12785,P35467,Q4FZU6,Q5XI22,Q63617,Q6IG02 |
| 5841 | 1,3,4,7,8,1<br>8,20,24  | 2,5,6,19,2<br>1,22,23,25<br>,26 | 3 | P10715,P18418,Q63617                             |
| 5842 | 1,3,4,7,8,1<br>8,20,25  | 2,5,6,19,2<br>1,22,23,24<br>,26 | 4 | P00714,P10715,P35280,Q63617                      |
| 5843 | 1,3,4,7,8,1<br>8,20,26  | 2,5,6,19,2<br>1,22,23,24<br>,25 | 3 | P02770,P35280,Q4FZU6                             |
| 5844 | 1,3,4,7,8,1<br>8,21,22  | 2,5,6,19,2<br>0,23,24,25<br>,26 | 4 | D4A1J4,P10758,P18418,Q80WL1                      |

|      |                        |                                 |    |                                                                                                   |
|------|------------------------|---------------------------------|----|---------------------------------------------------------------------------------------------------|
| 5845 | 1,3,4,7,8,1<br>8,21,23 | 2,5,6,19,2<br>0,22,24,25<br>,26 | 4  | P10758,P12785,Q5XI22,Q9ESW0                                                                       |
| 5846 | 1,3,4,7,8,1<br>8,21,24 | 2,5,6,19,2<br>0,22,23,25<br>,26 | 2  | P10758,P18418                                                                                     |
| 5847 | 1,3,4,7,8,1<br>8,21,25 | 2,5,6,19,2<br>0,22,23,24<br>,26 | 5  | P00731,P08721,P10715,P18418,P31430                                                                |
| 5848 | 1,3,4,7,8,1<br>8,21,26 | 2,5,6,19,2<br>0,22,23,24<br>,25 | 7  | P02770,P10758,P82995,Q4FZU6,Q9EQV9,Q9ESW0,Q9JID2                                                  |
| 5849 | 1,3,4,7,8,1<br>8,22,23 | 2,5,6,19,2<br>0,21,24,25<br>,26 | 3  | Q5XI22,Q63617,Q8VD89                                                                              |
| 5850 | 1,3,4,7,8,1<br>8,22,24 | 2,5,6,19,2<br>0,21,23,25<br>,26 | 2  | P18418,Q8VD89                                                                                     |
| 5851 | 1,3,4,7,8,1<br>8,22,25 | 2,5,6,19,2<br>0,21,23,24<br>,26 | 3  | P08721,P10715,P18418                                                                              |
| 5852 | 1,3,4,7,8,1<br>8,22,26 | 2,5,6,19,2<br>0,21,23,24<br>,25 | 2  | P02770,Q8VD89                                                                                     |
| 5853 | 1,3,4,7,8,1<br>8,23,24 | 2,5,6,19,2<br>0,21,22,25<br>,26 | 4  | P12785,Q5XI22,Q63617,Q8VD89                                                                       |
| 5854 | 1,3,4,7,8,1<br>8,23,25 | 2,5,6,19,2<br>0,21,22,24<br>,26 | 6  | P00714,P10715,P12785,P19629,Q5XI22,Q99041                                                         |
| 5855 | 1,3,4,7,8,1<br>8,23,26 | 2,5,6,19,2<br>0,21,22,24<br>,25 | 14 | A2RUV9,P01946,P02091,P02770,P12785,P35467,Q4FZU2,Q4FZU6,Q5XI22,Q6AY61,Q6IFW6,Q6IG02,Q6P6Q2,Q8VD89 |
| 5856 | 1,3,4,7,8,1<br>8,24,25 | 2,5,6,19,2<br>0,21,22,23<br>,26 | 3  | P08721,P10715,P18418                                                                              |
| 5857 | 1,3,4,7,8,1<br>8,24,26 | 2,5,6,19,2<br>0,21,22,23<br>,25 | 3  | P02091,P02770,Q8VD89                                                                              |
| 5858 | 1,3,4,7,8,1<br>8,25,26 | 2,5,6,19,2<br>0,21,22,23<br>,24 | 7  | B4F795,P00714,P02091,P08721,P10715,P35280,P82995                                                  |
| 5859 | 1,3,4,7,8,1<br>9,20,21 | 2,5,6,18,2<br>2,23,24,25<br>,26 | 3  | P35281,P42854,Q6IFU7                                                                              |



|      |                        |                                 |   |                                    |
|------|------------------------|---------------------------------|---|------------------------------------|
| 5860 | 1,3,4,7,8,1<br>9,20,22 | 2,5,6,18,2<br>1,23,24,25<br>,26 | 4 | P00774,P55091,Q63617,Q9QUL6        |
| 5861 | 1,3,4,7,8,1<br>9,20,23 | 2,5,6,18,2<br>1,22,24,25<br>,26 | 2 | Q63617,Q99041                      |
| 5862 | 1,3,4,7,8,1<br>9,20,24 | 2,5,6,18,2<br>1,22,23,25<br>,26 | 2 | Q63617,Q9QUL6                      |
| 5863 | 1,3,4,7,8,1<br>9,20,25 | 2,5,6,18,2<br>1,22,23,24<br>,26 | 5 | P10715,P35280,Q63617,Q6IFU7,Q9QUL6 |
| 5864 | 1,3,4,7,8,1<br>9,20,26 | 2,5,6,18,2<br>1,22,23,24<br>,25 | 4 | O54728,P35280,Q4FZU6,Q5FVI6        |
| 5865 | 1,3,4,7,8,1<br>9,21,22 | 2,5,6,18,2<br>0,23,24,25<br>,26 | 3 | D4A1J4,P35281,Q9QUL6               |
| 5866 | 1,3,4,7,8,1<br>9,21,23 | 2,5,6,18,2<br>0,22,24,25<br>,26 | 2 | P35281,Q99041                      |
| 5867 | 1,3,4,7,8,1<br>9,21,24 | 2,5,6,18,2<br>0,22,23,25<br>,26 | 2 | P35281,Q9QUL6                      |
| 5868 | 1,3,4,7,8,1<br>9,21,25 | 2,5,6,18,2<br>0,22,23,24<br>,26 | 3 | P47967,Q6IFU7,Q9QUL6               |
| 5869 | 1,3,4,7,8,1<br>9,21,26 | 2,5,6,18,2<br>0,22,23,24<br>,25 | 3 | P02770,P35281,Q5FVI6               |
| 5870 | 1,3,4,7,8,1<br>9,22,23 | 2,5,6,18,2<br>0,21,24,25<br>,26 | 2 | Q99041,Q9QUL6                      |
| 5871 | 1,3,4,7,8,1<br>9,22,24 | 2,5,6,18,2<br>0,21,23,25<br>,26 | 1 | Q9QUL6                             |
| 5872 | 1,3,4,7,8,1<br>9,22,25 | 2,5,6,18,2<br>0,21,23,24<br>,26 | 3 | P06911,Q5GRG2,Q9QUL6               |
| 5873 | 1,3,4,7,8,1<br>9,22,26 | 2,5,6,18,2<br>0,21,23,24<br>,25 | 1 | O54728                             |
| 5874 | 1,3,4,7,8,1<br>9,23,24 | 2,5,6,18,2<br>0,21,22,25<br>,26 | 2 | Q99041,Q9QUL6                      |

|      |                        |                                 |   |                                           |
|------|------------------------|---------------------------------|---|-------------------------------------------|
| 5875 | 1,3,4,7,8,1<br>9,23,25 | 2,5,6,18,2<br>0,21,22,24<br>,26 | 2 | Q99041,Q9QUL6                             |
| 5876 | 1,3,4,7,8,1<br>9,23,26 | 2,5,6,18,2<br>0,21,22,24<br>,25 | 6 | O54728,P01946,P02091,P35467,Q5FVI6,Q99041 |
| 5877 | 1,3,4,7,8,1<br>9,24,25 | 2,5,6,18,2<br>0,21,22,23<br>,26 | 2 | P10715,Q9QUL6                             |
| 5878 | 1,3,4,7,8,1<br>9,24,26 | 2,5,6,18,2<br>0,21,22,23<br>,25 | 2 | P02091,P02770                             |
| 5879 | 1,3,4,7,8,1<br>9,25,26 | 2,5,6,18,2<br>0,21,22,23<br>,24 | 4 | P02091,P35280,Q5FVI6,Q9QUL6               |
| 5880 | 1,3,4,7,8,2<br>0,21,22 | 2,5,6,18,1<br>9,23,24,25<br>,26 | 3 | P42854,Q63617,Q7TPB1                      |
| 5881 | 1,3,4,7,8,2<br>0,21,23 | 2,5,6,18,1<br>9,22,24,25<br>,26 | 2 | Q4FZU6,Q63617                             |
| 5882 | 1,3,4,7,8,2<br>0,21,24 | 2,5,6,18,1<br>9,22,23,25<br>,26 | 1 | Q63617                                    |
| 5883 | 1,3,4,7,8,2<br>0,21,25 | 2,5,6,18,1<br>9,22,23,24<br>,26 | 3 | P10715,Q6IFU7,Q9QUL6                      |
| 5884 | 1,3,4,7,8,2<br>0,21,26 | 2,5,6,18,1<br>9,22,23,24<br>,25 | 4 | P01041,P01836,P42854,Q4FZU6               |
| 5885 | 1,3,4,7,8,2<br>0,22,23 | 2,5,6,18,1<br>9,21,24,25<br>,26 | 1 | Q63617                                    |
| 5886 | 1,3,4,7,8,2<br>0,22,24 | 2,5,6,18,1<br>9,21,23,25<br>,26 | 2 | Q63617,Q99MH3                             |
| 5887 | 1,3,4,7,8,2<br>0,22,25 | 2,5,6,18,1<br>9,21,23,24<br>,26 | 4 | P10715,Q03191,Q63617,Q9QUL6               |
| 5888 | 1,3,4,7,8,2<br>0,22,26 | 2,5,6,18,1<br>9,21,23,24<br>,25 | 5 | O54728,P05539,Q4FZU6,Q63617,Q99MH3        |
| 5889 | 1,3,4,7,8,2<br>0,23,24 | 2,5,6,18,1<br>9,21,22,25<br>,26 | 2 | P97840,Q63617                             |

|      |                        |                                 |   |                                                         |
|------|------------------------|---------------------------------|---|---------------------------------------------------------|
| 5890 | 1,3,4,7,8,2<br>0,23,25 | 2,5,6,18,1<br>9,21,22,24<br>,26 | 4 | P10715,Q63617,Q99041,Q9QUL6                             |
| 5891 | 1,3,4,7,8,2<br>0,23,26 | 2,5,6,18,1<br>9,21,22,24<br>,25 | 8 | A2RUV9,O54728,P01946,P02091,P97840,Q4FZU6,Q63617,Q6IG02 |
| 5892 | 1,3,4,7,8,2<br>0,24,25 | 2,5,6,18,1<br>9,21,22,23<br>,26 | 3 | P10715,Q63617,Q9QUL6                                    |
| 5893 | 1,3,4,7,8,2<br>0,24,26 | 2,5,6,18,1<br>9,21,22,23<br>,25 | 5 | P02091,P97840,Q4FZU6,Q63617,Q99MH3                      |
| 5894 | 1,3,4,7,8,2<br>0,25,26 | 2,5,6,18,1<br>9,21,22,23<br>,24 | 3 | P02091,P10715,P35280                                    |
| 5895 | 1,3,4,7,8,2<br>1,22,23 | 2,5,6,18,1<br>9,20,24,25<br>,26 | 0 |                                                         |
| 5896 | 1,3,4,7,8,2<br>1,22,24 | 2,5,6,18,1<br>9,20,23,25<br>,26 | 0 |                                                         |
| 5897 | 1,3,4,7,8,2<br>1,22,25 | 2,5,6,18,1<br>9,20,23,24<br>,26 | 2 | P19629,Q9QUL6                                           |
| 5898 | 1,3,4,7,8,2<br>1,22,26 | 2,5,6,18,1<br>9,20,23,24<br>,25 | 1 | Q80WL1                                                  |
| 5899 | 1,3,4,7,8,2<br>1,23,24 | 2,5,6,18,1<br>9,20,22,25<br>,26 | 0 |                                                         |
| 5900 | 1,3,4,7,8,2<br>1,23,25 | 2,5,6,18,1<br>9,20,22,24<br>,26 | 3 | P19629,Q63751,Q99041                                    |
| 5901 | 1,3,4,7,8,2<br>1,23,26 | 2,5,6,18,1<br>9,20,22,24<br>,25 | 3 | P01946,P02091,Q4FZU6                                    |
| 5902 | 1,3,4,7,8,2<br>1,24,25 | 2,5,6,18,1<br>9,20,22,23<br>,26 | 5 | P08721,P10715,P19629,P22006,Q9QUL6                      |
| 5903 | 1,3,4,7,8,2<br>1,24,26 | 2,5,6,18,1<br>9,20,22,23<br>,25 | 3 | P02091,P02770,Q9EQV9                                    |
| 5904 | 1,3,4,7,8,2<br>1,25,26 | 2,5,6,18,1<br>9,20,22,23<br>,24 | 4 | P02091,P08721,P19223,P22006                             |

|      |                         |                                 |   |                                                  |
|------|-------------------------|---------------------------------|---|--------------------------------------------------|
| 5905 | 1,3,4,7,8,2<br>2,23,24  | 2,5,6,18,1<br>9,20,21,25<br>,26 | 1 | Q63617                                           |
| 5906 | 1,3,4,7,8,2<br>2,23,25  | 2,5,6,18,1<br>9,20,21,24<br>,26 | 7 | P06911,P19629,Q5GRG2,Q63617,Q63751,Q99041,Q9QUL6 |
| 5907 | 1,3,4,7,8,2<br>2,23,26  | 2,5,6,18,1<br>9,20,21,24<br>,25 | 3 | O54728,P01946,P02091                             |
| 5908 | 1,3,4,7,8,2<br>2,24,25  | 2,5,6,18,1<br>9,20,21,23<br>,26 | 4 | P06911,P10715,P19629,Q9QUL6                      |
| 5909 | 1,3,4,7,8,2<br>2,24,26  | 2,5,6,18,1<br>9,20,21,23<br>,25 | 4 | O54728,P02091,P02770,Q99MH3                      |
| 5910 | 1,3,4,7,8,2<br>2,25,26  | 2,5,6,18,1<br>9,20,21,23<br>,24 | 3 | P02091,P10715,Q9QUL6                             |
| 5911 | 1,3,4,7,8,2<br>3,24,25  | 2,5,6,18,1<br>9,20,21,22<br>,26 | 6 | P10715,P19629,Q63617,Q63751,Q99041,Q9QUL6        |
| 5912 | 1,3,4,7,8,2<br>3,24,26  | 2,5,6,18,1<br>9,20,21,22<br>,25 | 4 | P01946,P02091,P97840,Q8VD89                      |
| 5913 | 1,3,4,7,8,2<br>3,25,26  | 2,5,6,18,1<br>9,20,21,22<br>,24 | 6 | P00714,P01946,P02091,P10715,P19629,Q99041        |
| 5914 | 1,3,4,7,8,2<br>4,25,26  | 2,5,6,18,1<br>9,20,21,22<br>,23 | 6 | P01946,P02091,P08721,P10715,P19629,Q9QUL6        |
| 5915 | 1,3,4,7,18,<br>19,20,21 | 2,5,6,8,22,<br>23,24,25,2<br>6  | 4 | P00731,P06760,P10758,P42854                      |
| 5916 | 1,3,4,7,18,<br>19,20,22 | 2,5,6,8,21,<br>23,24,25,2<br>6  | 5 | P06760,P07150,Q5U2V4,Q6P6R2,Q9WTT6               |
| 5917 | 1,3,4,7,18,<br>19,20,23 | 2,5,6,8,21,<br>22,24,25,2<br>6  | 3 | P06760,P12785,Q9WTT6                             |
| 5918 | 1,3,4,7,18,<br>19,20,24 | 2,5,6,8,21,<br>22,23,25,2<br>6  | 3 | P06760,P07150,Q9WTT6                             |
| 5919 | 1,3,4,7,18,<br>19,20,25 | 2,5,6,8,21,<br>22,23,24,2<br>6  | 1 | P35280                                           |

|      |                         |                                |   |                                                                |
|------|-------------------------|--------------------------------|---|----------------------------------------------------------------|
| 5920 | 1,3,4,7,18,<br>19,20,26 | 2,5,6,8,21,<br>22,23,24,2<br>5 | 6 | P06760,P35280,Q4FZU6,Q5FVI6,Q6P6R2,Q9WTT6                      |
| 5921 | 1,3,4,7,18,<br>19,21,22 | 2,5,6,8,20,<br>23,24,25,2<br>6 | 2 | P06760,P10758                                                  |
| 5922 | 1,3,4,7,18,<br>19,21,23 | 2,5,6,8,20,<br>22,24,25,2<br>6 | 2 | P10758,P12785                                                  |
| 5923 | 1,3,4,7,18,<br>19,21,24 | 2,5,6,8,20,<br>22,23,25,2<br>6 | 1 | P10758                                                         |
| 5924 | 1,3,4,7,18,<br>19,21,25 | 2,5,6,8,20,<br>22,23,24,2<br>6 | 3 | P00731,P31430,P47967                                           |
| 5925 | 1,3,4,7,18,<br>19,21,26 | 2,5,6,8,20,<br>22,23,24,2<br>5 | 3 | P06760,P10758,Q5FVI6                                           |
| 5926 | 1,3,4,7,18,<br>19,22,23 | 2,5,6,8,20,<br>21,24,25,2<br>6 | 5 | P02625,P06760,P12785,P62804,Q9WTT6                             |
| 5927 | 1,3,4,7,18,<br>19,22,24 | 2,5,6,8,20,<br>21,23,25,2<br>6 | 4 | P06760,P62804,Q6P6R2,Q9WTT6                                    |
| 5928 | 1,3,4,7,18,<br>19,22,25 | 2,5,6,8,20,<br>21,23,24,2<br>6 | 1 | P62804                                                         |
| 5929 | 1,3,4,7,18,<br>19,22,26 | 2,5,6,8,20,<br>21,23,24,2<br>5 | 5 | O54728,P06760,Q5FVI6,Q6P6R2,Q9WTT6                             |
| 5930 | 1,3,4,7,18,<br>19,23,24 | 2,5,6,8,20,<br>21,22,25,2<br>6 | 4 | P06760,P12785,P62804,Q9WTT6                                    |
| 5931 | 1,3,4,7,18,<br>19,23,25 | 2,5,6,8,20,<br>21,22,24,2<br>6 | 3 | P00714,P12785,P62804                                           |
| 5932 | 1,3,4,7,18,<br>19,23,26 | 2,5,6,8,20,<br>21,22,24,2<br>5 | 9 | O54728,P01946,P02091,P06760,P12785,P35467,Q5FVI6,Q6IG02,Q6P6Q2 |
| 5933 | 1,3,4,7,18,<br>19,24,25 | 2,5,6,8,20,<br>21,22,23,2<br>6 | 1 | P62804                                                         |
| 5934 | 1,3,4,7,18,<br>19,24,26 | 2,5,6,8,20,<br>21,22,23,2<br>5 | 4 | P02091,P06760,Q5FVI6,Q9WTT6                                    |

|      |                         |                                |    |                                                                                            |
|------|-------------------------|--------------------------------|----|--------------------------------------------------------------------------------------------|
| 5935 | 1,3,4,7,18,<br>19,25,26 | 2,5,6,8,20,<br>21,22,23,2<br>4 | 4  | P00714,P02091,P35280,Q5FVI6                                                                |
| 5936 | 1,3,4,7,18,<br>20,21,22 | 2,5,6,8,19,<br>23,24,25,2<br>6 | 2  | P10758,P42854                                                                              |
| 5937 | 1,3,4,7,18,<br>20,21,23 | 2,5,6,8,19,<br>22,24,25,2<br>6 | 5  | A2RUV9,P10758,P12785,P42854,Q4FZU6                                                         |
| 5938 | 1,3,4,7,18,<br>20,21,24 | 2,5,6,8,19,<br>22,23,25,2<br>6 | 0  |                                                                                            |
| 5939 | 1,3,4,7,18,<br>20,21,25 | 2,5,6,8,19,<br>22,23,24,2<br>6 | 2  | P31430,P42854                                                                              |
| 5940 | 1,3,4,7,18,<br>20,21,26 | 2,5,6,8,19,<br>22,23,24,2<br>5 | 5  | P01041,P01836,P06760,P42854,Q4FZU6                                                         |
| 5941 | 1,3,4,7,18,<br>20,22,23 | 2,5,6,8,19,<br>21,24,25,2<br>6 | 4  | A2RUV9,P06760,P12785,Q9WTT6                                                                |
| 5942 | 1,3,4,7,18,<br>20,22,24 | 2,5,6,8,19,<br>21,23,25,2<br>6 | 4  | P06760,P07150,Q6P6R2,Q9WTT6                                                                |
| 5943 | 1,3,4,7,18,<br>20,22,25 | 2,5,6,8,19,<br>21,23,24,2<br>6 | 0  |                                                                                            |
| 5944 | 1,3,4,7,18,<br>20,22,26 | 2,5,6,8,19,<br>21,23,24,2<br>5 | 6  | O54728,P05539,P06760,Q4FZU6,Q6P6R2,Q9WTT6                                                  |
| 5945 | 1,3,4,7,18,<br>20,23,24 | 2,5,6,8,19,<br>21,22,25,2<br>6 | 3  | A2RUV9,P06760,P12785                                                                       |
| 5946 | 1,3,4,7,18,<br>20,23,25 | 2,5,6,8,19,<br>21,22,24,2<br>6 | 2  | A2RUV9,P12785                                                                              |
| 5947 | 1,3,4,7,18,<br>20,23,26 | 2,5,6,8,19,<br>21,22,24,2<br>5 | 13 | A2RUV9,P01946,P02091,P06760,P12785,P35467,Q4FZU2,Q4FZU6,Q6IFU8,Q6IFW6,Q6IG02,Q6IMF3,Q6P6Q2 |
| 5948 | 1,3,4,7,18,<br>20,24,25 | 2,5,6,8,19,<br>21,22,23,2<br>6 | 0  |                                                                                            |
| 5949 | 1,3,4,7,18,<br>20,24,26 | 2,5,6,8,19,<br>21,22,23,2<br>5 | 3  | P02091,P06760,Q4FZU6                                                                       |

|      |                         |                                |    |                                                                       |
|------|-------------------------|--------------------------------|----|-----------------------------------------------------------------------|
| 5950 | 1,3,4,7,18,<br>20,25,26 | 2,5,6,8,19,<br>21,22,23,2<br>4 | 2  | P02091,P35280                                                         |
| 5951 | 1,3,4,7,18,<br>21,22,23 | 2,5,6,8,19,<br>20,24,25,2<br>6 | 2  | P10758,P12785                                                         |
| 5952 | 1,3,4,7,18,<br>21,22,24 | 2,5,6,8,19,<br>20,23,25,2<br>6 | 0  |                                                                       |
| 5953 | 1,3,4,7,18,<br>21,22,25 | 2,5,6,8,19,<br>20,23,24,2<br>6 | 2  | P08721,P31430                                                         |
| 5954 | 1,3,4,7,18,<br>21,22,26 | 2,5,6,8,19,<br>20,23,24,2<br>5 | 2  | P06760,Q9JID2                                                         |
| 5955 | 1,3,4,7,18,<br>21,23,24 | 2,5,6,8,19,<br>20,22,25,2<br>6 | 1  | P12785                                                                |
| 5956 | 1,3,4,7,18,<br>21,23,25 | 2,5,6,8,19,<br>20,22,24,2<br>6 | 2  | P12785,P31430                                                         |
| 5957 | 1,3,4,7,18,<br>21,23,26 | 2,5,6,8,19,<br>20,22,24,2<br>5 | 10 | A2RUV9,P01946,P02091,P12785,Q4FZU2,Q62636,Q6IFU8,Q6IG02,Q6IMF3,Q6P6Q2 |
| 5958 | 1,3,4,7,18,<br>21,24,25 | 2,5,6,8,19,<br>20,22,23,2<br>6 | 3  | P08721,P22006,P31430                                                  |
| 5959 | 1,3,4,7,18,<br>21,24,26 | 2,5,6,8,19,<br>20,22,23,2<br>5 | 3  | P02091,P06760,Q9JID2                                                  |
| 5960 | 1,3,4,7,18,<br>21,25,26 | 2,5,6,8,19,<br>20,22,23,2<br>4 | 6  | O35783,P02091,P08721,P22006,P31430,P82995                             |
| 5961 | 1,3,4,7,18,<br>22,23,24 | 2,5,6,8,19,<br>20,21,25,2<br>6 | 5  | P06760,P12785,P62804,Q8VD89,Q9WTT6                                    |
| 5962 | 1,3,4,7,18,<br>22,23,25 | 2,5,6,8,19,<br>20,21,24,2<br>6 | 2  | P12785,P62804                                                         |
| 5963 | 1,3,4,7,18,<br>22,23,26 | 2,5,6,8,19,<br>20,21,24,2<br>5 | 9  | A2RUV9,O54728,P01946,P02091,P06760,P12785,Q6IG02,Q6P6Q2,Q8VD89        |
| 5964 | 1,3,4,7,18,<br>22,24,25 | 2,5,6,8,19,<br>20,21,23,2<br>6 | 1  | P62804                                                                |

|      |                         |                                |   |                                                         |
|------|-------------------------|--------------------------------|---|---------------------------------------------------------|
| 5965 | 1,3,4,7,18,<br>22,24,26 | 2,5,6,8,19,<br>20,21,23,2<br>5 | 5 | P02091,P06760,Q6P6R2,Q8VD89,Q9WTT6                      |
| 5966 | 1,3,4,7,18,<br>22,25,26 | 2,5,6,8,19,<br>20,21,23,2<br>4 | 1 | P02091                                                  |
| 5967 | 1,3,4,7,18,<br>23,24,25 | 2,5,6,8,19,<br>20,21,22,2<br>6 | 4 | A2RUV9,P12785,P62804,Q63751                             |
| 5968 | 1,3,4,7,18,<br>23,24,26 | 2,5,6,8,19,<br>20,21,22,2<br>5 | 8 | A2RUV9,P01946,P02091,P06760,P12785,Q6IG02,Q6P6Q2,Q8VD89 |
| 5969 | 1,3,4,7,18,<br>23,25,26 | 2,5,6,8,19,<br>20,21,22,2<br>4 | 8 | A2RUV9,P00714,P01946,P02091,P12785,Q4FZU2,Q6IG02,Q6P6Q2 |
| 5970 | 1,3,4,7,18,<br>24,25,26 | 2,5,6,8,19,<br>20,21,22,2<br>3 | 4 | B4F795,P01946,P02091,P08721                             |
| 5971 | 1,3,4,7,19,<br>20,21,22 | 2,5,6,8,18,<br>23,24,25,2<br>6 | 2 | P55091,Q7TPB1                                           |
| 5972 | 1,3,4,7,19,<br>20,21,23 | 2,5,6,8,18,<br>22,24,25,2<br>6 | 0 |                                                         |
| 5973 | 1,3,4,7,19,<br>20,21,24 | 2,5,6,8,18,<br>22,23,25,2<br>6 | 0 |                                                         |
| 5974 | 1,3,4,7,19,<br>20,21,25 | 2,5,6,8,18,<br>22,23,24,2<br>6 | 1 | P47967                                                  |
| 5975 | 1,3,4,7,19,<br>20,21,26 | 2,5,6,8,18,<br>22,23,24,2<br>5 | 2 | Q4FZU6,Q5FVI6                                           |
| 5976 | 1,3,4,7,19,<br>20,22,23 | 2,5,6,8,18,<br>21,24,25,2<br>6 | 4 | O54728,P00774,P55091,Q9WTT6                             |
| 5977 | 1,3,4,7,19,<br>20,22,24 | 2,5,6,8,18,<br>21,23,25,2<br>6 | 8 | P00774,P06760,P07150,P14669,P55091,Q6P6R2,Q99MH3,Q9WTT6 |
| 5978 | 1,3,4,7,19,<br>20,22,25 | 2,5,6,8,18,<br>21,23,24,2<br>6 | 1 | Q9QUL6                                                  |
| 5979 | 1,3,4,7,19,<br>20,22,26 | 2,5,6,8,18,<br>21,23,24,2<br>5 | 7 | O54728,P05539,P06760,Q5FVI6,Q6P6R2,Q99MH3,Q9WTT6        |



|      |                         |                                |   |                                           |
|------|-------------------------|--------------------------------|---|-------------------------------------------|
| 5980 | 1,3,4,7,19,<br>20,23,24 | 2,5,6,8,18,<br>21,22,25,2<br>6 | 1 | Q9WTT6                                    |
| 5981 | 1,3,4,7,19,<br>20,23,25 | 2,5,6,8,18,<br>21,22,24,2<br>6 | 0 |                                           |
| 5982 | 1,3,4,7,19,<br>20,23,26 | 2,5,6,8,18,<br>21,22,24,2<br>5 | 6 | O54728,P01946,P02091,P05539,P06760,Q5FVI6 |
| 5983 | 1,3,4,7,19,<br>20,24,25 | 2,5,6,8,18,<br>21,22,23,2<br>6 | 1 | Q9QUL6                                    |
| 5984 | 1,3,4,7,19,<br>20,24,26 | 2,5,6,8,18,<br>21,22,23,2<br>5 | 5 | O54728,P02091,P06760,Q5FVI6,Q9WTT6        |
| 5985 | 1,3,4,7,19,<br>20,25,26 | 2,5,6,8,18,<br>21,22,23,2<br>4 | 4 | P02091,P05539,P35280,Q5FVI6               |
| 5986 | 1,3,4,7,19,<br>21,22,23 | 2,5,6,8,18,<br>20,24,25,2<br>6 | 0 |                                           |
| 5987 | 1,3,4,7,19,<br>21,22,24 | 2,5,6,8,18,<br>20,23,25,2<br>6 | 0 |                                           |
| 5988 | 1,3,4,7,19,<br>21,22,25 | 2,5,6,8,18,<br>20,23,24,2<br>6 | 1 | P47967                                    |
| 5989 | 1,3,4,7,19,<br>21,22,26 | 2,5,6,8,18,<br>20,23,24,2<br>5 | 1 | O54728                                    |
| 5990 | 1,3,4,7,19,<br>21,23,24 | 2,5,6,8,18,<br>20,22,25,2<br>6 | 0 |                                           |
| 5991 | 1,3,4,7,19,<br>21,23,25 | 2,5,6,8,18,<br>20,22,24,2<br>6 | 3 | P15399,P47967,Q99041                      |
| 5992 | 1,3,4,7,19,<br>21,23,26 | 2,5,6,8,18,<br>20,22,24,2<br>5 | 4 | O54728,P01946,P02091,Q5FVI6               |
| 5993 | 1,3,4,7,19,<br>21,24,25 | 2,5,6,8,18,<br>20,22,23,2<br>6 | 2 | P22006,P47967                             |
| 5994 | 1,3,4,7,19,<br>21,24,26 | 2,5,6,8,18,<br>20,22,23,2<br>5 | 2 | P02091,Q5FVI6                             |

|      |                         |                                |   |                                           |
|------|-------------------------|--------------------------------|---|-------------------------------------------|
| 5995 | 1,3,4,7,19,<br>21,25,26 | 2,5,6,8,18,<br>20,22,23,2<br>4 | 3 | P02091,P22006,Q5FVI6                      |
| 5996 | 1,3,4,7,19,<br>22,23,24 | 2,5,6,8,18,<br>20,21,25,2<br>6 | 2 | P62804,Q9WTT6                             |
| 5997 | 1,3,4,7,19,<br>22,23,25 | 2,5,6,8,18,<br>20,21,24,2<br>6 | 2 | P06911,P62804                             |
| 5998 | 1,3,4,7,19,<br>22,23,26 | 2,5,6,8,18,<br>20,21,24,2<br>5 | 6 | O54728,P01946,P02091,P05539,P06760,Q5FVI6 |
| 5999 | 1,3,4,7,19,<br>22,24,25 | 2,5,6,8,18,<br>20,21,23,2<br>6 | 2 | P62804,Q9QUL6                             |
| 6000 | 1,3,4,7,19,<br>22,24,26 | 2,5,6,8,18,<br>20,21,23,2<br>5 | 5 | O54728,P02091,P06760,Q6P6R2,Q9WTT6        |
| 6001 | 1,3,4,7,19,<br>22,25,26 | 2,5,6,8,18,<br>20,21,23,2<br>4 | 4 | O54728,P02091,P05539,Q5FVI6               |
| 6002 | 1,3,4,7,19,<br>23,24,25 | 2,5,6,8,18,<br>20,21,22,2<br>6 | 1 | P62804                                    |
| 6003 | 1,3,4,7,19,<br>23,24,26 | 2,5,6,8,18,<br>20,21,22,2<br>5 | 5 | O54728,P01946,P02091,P06760,Q5FVI6        |
| 6004 | 1,3,4,7,19,<br>23,25,26 | 2,5,6,8,18,<br>20,21,22,2<br>4 | 5 | O54728,P01946,P02091,P05539,Q5FVI6        |
| 6005 | 1,3,4,7,19,<br>24,25,26 | 2,5,6,8,18,<br>20,21,22,2<br>3 | 3 | P01946,P02091,Q5FVI6                      |
| 6006 | 1,3,4,7,20,<br>21,22,23 | 2,5,6,8,18,<br>19,24,25,2<br>6 | 0 |                                           |
| 6007 | 1,3,4,7,20,<br>21,22,24 | 2,5,6,8,18,<br>19,23,25,2<br>6 | 4 | P01836,Q03191,Q63942,Q99MH3               |
| 6008 | 1,3,4,7,20,<br>21,22,25 | 2,5,6,8,18,<br>19,23,24,2<br>6 | 2 | Q03191,Q63942                             |
| 6009 | 1,3,4,7,20,<br>21,22,26 | 2,5,6,8,18,<br>19,23,24,2<br>5 | 5 | O54728,P01836,P05539,Q4FZU6,Q99MH3        |

|      |                         |                                |    |                                                                       |
|------|-------------------------|--------------------------------|----|-----------------------------------------------------------------------|
| 6010 | 1,3,4,7,20,<br>21,23,24 | 2,5,6,8,18,<br>19,22,25,2<br>6 | 0  |                                                                       |
| 6011 | 1,3,4,7,20,<br>21,23,25 | 2,5,6,8,18,<br>19,22,24,2<br>6 | 0  |                                                                       |
| 6012 | 1,3,4,7,20,<br>21,23,26 | 2,5,6,8,18,<br>19,22,24,2<br>5 | 6  | A2RUV9,P01836,P01946,P02091,Q4FZU2,Q4FZU6                             |
| 6013 | 1,3,4,7,20,<br>21,24,25 | 2,5,6,8,18,<br>19,22,23,2<br>6 | 2  | P22006,Q63942                                                         |
| 6014 | 1,3,4,7,20,<br>21,24,26 | 2,5,6,8,18,<br>19,22,23,2<br>5 | 4  | P01836,P02091,Q4FZU6,Q99MH3                                           |
| 6015 | 1,3,4,7,20,<br>21,25,26 | 2,5,6,8,18,<br>19,22,23,2<br>4 | 2  | P01836,P02091                                                         |
| 6016 | 1,3,4,7,20,<br>22,23,24 | 2,5,6,8,18,<br>19,21,25,2<br>6 | 1  | Q9WTT6                                                                |
| 6017 | 1,3,4,7,20,<br>22,23,25 | 2,5,6,8,18,<br>19,21,24,2<br>6 | 0  |                                                                       |
| 6018 | 1,3,4,7,20,<br>22,23,26 | 2,5,6,8,18,<br>19,21,24,2<br>5 | 6  | A2RUV9,O54728,P01946,P02091,P05539,P06760                             |
| 6019 | 1,3,4,7,20,<br>22,24,25 | 2,5,6,8,18,<br>19,21,23,2<br>6 | 2  | Q03191,Q63942                                                         |
| 6020 | 1,3,4,7,20,<br>22,24,26 | 2,5,6,8,18,<br>19,21,23,2<br>5 | 10 | O54728,P01836,P02091,P02803,P05539,P06760,Q62635,Q6P6R2,Q99MH3,Q9WTT6 |
| 6021 | 1,3,4,7,20,<br>22,25,26 | 2,5,6,8,18,<br>19,21,23,2<br>4 | 4  | O54728,P02091,P05539,Q03191                                           |
| 6022 | 1,3,4,7,20,<br>23,24,25 | 2,5,6,8,18,<br>19,21,22,2<br>6 | 2  | A2RUV9,Q63751                                                         |
| 6023 | 1,3,4,7,20,<br>23,24,26 | 2,5,6,8,18,<br>19,21,22,2<br>5 | 5  | A2RUV9,O54728,P01946,P02091,P97840                                    |
| 6024 | 1,3,4,7,20,<br>23,25,26 | 2,5,6,8,18,<br>19,21,22,2<br>4 | 4  | A2RUV9,P01946,P02091,P05539                                           |

|      |                         |                                |   |                                    |
|------|-------------------------|--------------------------------|---|------------------------------------|
| 6025 | 1,3,4,7,20,<br>24,25,26 | 2,5,6,8,18,<br>19,21,22,2<br>3 | 2 | P01946,P02091                      |
| 6026 | 1,3,4,7,21,<br>22,23,24 | 2,5,6,8,18,<br>19,20,25,2<br>6 | 1 | P62804                             |
| 6027 | 1,3,4,7,21,<br>22,23,25 | 2,5,6,8,18,<br>19,20,24,2<br>6 | 1 | P62804                             |
| 6028 | 1,3,4,7,21,<br>22,23,26 | 2,5,6,8,18,<br>19,20,24,2<br>5 | 4 | O54728,P01946,P02091,P05539        |
| 6029 | 1,3,4,7,21,<br>22,24,25 | 2,5,6,8,18,<br>19,20,23,2<br>6 | 3 | P22006,P62804,Q63942               |
| 6030 | 1,3,4,7,21,<br>22,24,26 | 2,5,6,8,18,<br>19,20,23,2<br>5 | 3 | P01836,P02091,Q99MH3               |
| 6031 | 1,3,4,7,21,<br>22,25,26 | 2,5,6,8,18,<br>19,20,23,2<br>4 | 3 | P02091,P05539,P22006               |
| 6032 | 1,3,4,7,21,<br>23,24,25 | 2,5,6,8,18,<br>19,20,22,2<br>6 | 3 | P22006,P62804,Q63751               |
| 6033 | 1,3,4,7,21,<br>23,24,26 | 2,5,6,8,18,<br>19,20,22,2<br>5 | 3 | P01946,P02091,P22006               |
| 6034 | 1,3,4,7,21,<br>23,25,26 | 2,5,6,8,18,<br>19,20,22,2<br>4 | 5 | P01946,P02091,P22006,P27213,P83121 |
| 6035 | 1,3,4,7,21,<br>24,25,26 | 2,5,6,8,18,<br>19,20,22,2<br>3 | 3 | P01946,P02091,P22006               |
| 6036 | 1,3,4,7,22,<br>23,24,25 | 2,5,6,8,18,<br>19,20,21,2<br>6 | 4 | P62804,P82471,Q00715,Q63751        |
| 6037 | 1,3,4,7,22,<br>23,24,26 | 2,5,6,8,18,<br>19,20,21,2<br>5 | 5 | O54728,P00731,P01946,P02091,P62804 |
| 6038 | 1,3,4,7,22,<br>23,25,26 | 2,5,6,8,18,<br>19,20,21,2<br>4 | 5 | O54728,P01946,P02091,P05539,P62804 |
| 6039 | 1,3,4,7,22,<br>24,25,26 | 2,5,6,8,18,<br>19,20,21,2<br>3 | 3 | P01946,P02091,P62804               |

|      |                         |                                |   |                                           |
|------|-------------------------|--------------------------------|---|-------------------------------------------|
| 6040 | 1,3,4,7,23,<br>24,25,26 | 2,5,6,8,18,<br>19,20,21,2<br>2 | 6 | A2RUV9,P01946,P02091,P62804,Q63751,Q7TPB1 |
| 6041 | 1,3,4,8,18,<br>19,20,21 | 2,5,6,7,22,<br>23,24,25,2<br>6 | 3 | P00731,P10758,P35281                      |
| 6042 | 1,3,4,8,18,<br>19,20,22 | 2,5,6,7,21,<br>23,24,25,2<br>6 | 2 | P22006,Q6P6R2                             |
| 6043 | 1,3,4,8,18,<br>19,20,23 | 2,5,6,7,21,<br>22,24,25,2<br>6 | 5 | P12785,P35467,P83748,Q5XI22,Q6IG02        |
| 6044 | 1,3,4,8,18,<br>19,20,24 | 2,5,6,7,21,<br>22,23,25,2<br>6 | 1 | P83748                                    |
| 6045 | 1,3,4,8,18,<br>19,20,25 | 2,5,6,7,21,<br>22,23,24,2<br>6 | 3 | P35280,P83748,Q9QUL6                      |
| 6046 | 1,3,4,8,18,<br>19,20,26 | 2,5,6,7,21,<br>22,23,24,2<br>5 | 2 | P35280,Q64268                             |
| 6047 | 1,3,4,8,18,<br>19,21,22 | 2,5,6,7,20,<br>23,24,25,2<br>6 | 2 | P10758,P35281                             |
| 6048 | 1,3,4,8,18,<br>19,21,23 | 2,5,6,7,20,<br>22,24,25,2<br>6 | 5 | P10758,P12785,P35281,P35467,Q5XI22        |
| 6049 | 1,3,4,8,18,<br>19,21,24 | 2,5,6,7,20,<br>22,23,25,2<br>6 | 2 | P10758,P35281                             |
| 6050 | 1,3,4,8,18,<br>19,21,25 | 2,5,6,7,20,<br>22,23,24,2<br>6 | 4 | P00731,P10758,P31430,P35281               |
| 6051 | 1,3,4,8,18,<br>19,21,26 | 2,5,6,7,20,<br>22,23,24,2<br>5 | 3 | P10758,P35281,Q64268                      |
| 6052 | 1,3,4,8,18,<br>19,22,23 | 2,5,6,7,20,<br>21,24,25,2<br>6 | 4 | P02625,P12785,P35467,Q5XI22               |
| 6053 | 1,3,4,8,18,<br>19,22,24 | 2,5,6,7,20,<br>21,23,25,2<br>6 | 1 | P83121                                    |
| 6054 | 1,3,4,8,18,<br>19,22,25 | 2,5,6,7,20,<br>21,23,24,2<br>6 | 1 | Q9QUL6                                    |

|      |                         |                                |   |                                                                       |
|------|-------------------------|--------------------------------|---|-----------------------------------------------------------------------|
| 6055 | 1,3,4,8,18,<br>19,22,26 | 2,5,6,7,20,<br>21,23,24,2<br>5 | 2 | O54728,Q6P6R2                                                         |
| 6056 | 1,3,4,8,18,<br>19,23,24 | 2,5,6,7,20,<br>21,22,25,2<br>6 | 5 | P09605;P25809,P12785,P35467,P83748,Q5XI22                             |
| 6057 | 1,3,4,8,18,<br>19,23,25 | 2,5,6,7,20,<br>21,22,24,2<br>6 | 6 | P00714,P12785,P35467,P83748,Q5XI22,Q9QUL6                             |
| 6058 | 1,3,4,8,18,<br>19,23,26 | 2,5,6,7,20,<br>21,22,24,2<br>5 | 9 | P09605;P25809,P12785,P35467,Q4FZU2,Q64194,Q6AY61,Q6IFW6,Q6IG02,Q6P6Q2 |
| 6059 | 1,3,4,8,18,<br>19,24,25 | 2,5,6,7,20,<br>21,22,23,2<br>6 | 2 | P83748,Q9QUL6                                                         |
| 6060 | 1,3,4,8,18,<br>19,24,26 | 2,5,6,7,20,<br>21,22,23,2<br>5 | 0 |                                                                       |
| 6061 | 1,3,4,8,18,<br>19,25,26 | 2,5,6,7,20,<br>21,22,23,2<br>4 | 2 | P00714,P35280                                                         |
| 6062 | 1,3,4,8,18,<br>20,21,22 | 2,5,6,7,19,<br>23,24,25,2<br>6 | 1 | P10758                                                                |
| 6063 | 1,3,4,8,18,<br>20,21,23 | 2,5,6,7,19,<br>22,24,25,2<br>6 | 4 | P10758,P12785,Q5XI22,Q6IG02                                           |
| 6064 | 1,3,4,8,18,<br>20,21,24 | 2,5,6,7,19,<br>22,23,25,2<br>6 | 1 | P10758                                                                |
| 6065 | 1,3,4,8,18,<br>20,21,25 | 2,5,6,7,19,<br>22,23,24,2<br>6 | 2 | P10758,P31430                                                         |
| 6066 | 1,3,4,8,18,<br>20,21,26 | 2,5,6,7,19,<br>22,23,24,2<br>5 | 4 | P10758,Q4FZU2,Q4FZU6,Q6IG02                                           |
| 6067 | 1,3,4,8,18,<br>20,22,23 | 2,5,6,7,19,<br>21,24,25,2<br>6 | 4 | P83748,P97840,Q5XI22,Q6IG02                                           |
| 6068 | 1,3,4,8,18,<br>20,22,24 | 2,5,6,7,19,<br>21,23,25,2<br>6 | 3 | P83121,P83748,P97840                                                  |
| 6069 | 1,3,4,8,18,<br>20,22,25 | 2,5,6,7,19,<br>21,23,24,2<br>6 | 0 |                                                                       |

|      |                         |                                |    |                                                                                            |
|------|-------------------------|--------------------------------|----|--------------------------------------------------------------------------------------------|
| 6070 | 1,3,4,8,18,<br>20,22,26 | 2,5,6,7,19,<br>21,23,24,2<br>5 | 2  | O54728,P97840                                                                              |
| 6071 | 1,3,4,8,18,<br>20,23,24 | 2,5,6,7,19,<br>21,22,25,2<br>6 | 6  | P12785,P83748,P97840,Q5XI22,Q6IG02,Q9QZK9                                                  |
| 6072 | 1,3,4,8,18,<br>20,23,25 | 2,5,6,7,19,<br>21,22,24,2<br>6 | 4  | P00714,P12785,P83748,Q6IG02                                                                |
| 6073 | 1,3,4,8,18,<br>20,23,26 | 2,5,6,7,19,<br>21,22,24,2<br>5 | 13 | A2RUV9,P12785,P19218,P35467,P97840,Q4FZU2,Q4FZU6,Q6AY61,Q6IFU8,Q6IFW6,Q6IG02,Q6IMF3,Q6P6Q2 |
| 6074 | 1,3,4,8,18,<br>20,24,25 | 2,5,6,7,19,<br>21,22,23,2<br>6 | 1  | P83748                                                                                     |
| 6075 | 1,3,4,8,18,<br>20,24,26 | 2,5,6,7,19,<br>21,22,23,2<br>5 | 1  | P97840                                                                                     |
| 6076 | 1,3,4,8,18,<br>20,25,26 | 2,5,6,7,19,<br>21,22,23,2<br>4 | 3  | P00714,P35280,Q6IG02                                                                       |
| 6077 | 1,3,4,8,18,<br>21,22,23 | 2,5,6,7,19,<br>20,24,25,2<br>6 | 2  | P10758,Q5XI22                                                                              |
| 6078 | 1,3,4,8,18,<br>21,22,24 | 2,5,6,7,19,<br>20,23,25,2<br>6 | 1  | P10758                                                                                     |
| 6079 | 1,3,4,8,18,<br>21,22,25 | 2,5,6,7,19,<br>20,23,24,2<br>6 | 3  | P08721,P10758,P31430                                                                       |
| 6080 | 1,3,4,8,18,<br>21,22,26 | 2,5,6,7,19,<br>20,23,24,2<br>5 | 2  | P10758,Q9JID2                                                                              |
| 6081 | 1,3,4,8,18,<br>21,23,24 | 2,5,6,7,19,<br>20,22,25,2<br>6 | 3  | P10758,P12785,Q5XI22                                                                       |
| 6082 | 1,3,4,8,18,<br>21,23,25 | 2,5,6,7,19,<br>20,22,24,2<br>6 | 3  | P10758,P12785,P31430                                                                       |
| 6083 | 1,3,4,8,18,<br>21,23,26 | 2,5,6,7,19,<br>20,22,24,2<br>5 | 10 | P10758,P12785,P35467,Q4FZU2,Q6AY61,Q6IFU8,Q6IFW6,Q6IG02,Q6IMF3,Q6P6Q2                      |
| 6084 | 1,3,4,8,18,<br>21,24,25 | 2,5,6,7,19,<br>20,22,23,2<br>6 | 2  | P08721,P31430                                                                              |

|      |                         |                                |   |                                                                |
|------|-------------------------|--------------------------------|---|----------------------------------------------------------------|
| 6085 | 1,3,4,8,18,<br>21,24,26 | 2,5,6,7,19,<br>20,22,23,2<br>5 | 3 | P10758,Q9EQV9,Q9JID2                                           |
| 6086 | 1,3,4,8,18,<br>21,25,26 | 2,5,6,7,19,<br>20,22,23,2<br>4 | 2 | P08721,P31430                                                  |
| 6087 | 1,3,4,8,18,<br>22,23,24 | 2,5,6,7,19,<br>20,21,25,2<br>6 | 2 | P83748,P97840                                                  |
| 6088 | 1,3,4,8,18,<br>22,23,25 | 2,5,6,7,19,<br>20,21,24,2<br>6 | 1 | P83748                                                         |
| 6089 | 1,3,4,8,18,<br>22,23,26 | 2,5,6,7,19,<br>20,21,24,2<br>5 | 9 | O54728,P12785,P35467,P97840,Q4FZU2,Q6AY61,Q6IFW6,Q6IG02,Q6P6Q2 |
| 6090 | 1,3,4,8,18,<br>22,24,25 | 2,5,6,7,19,<br>20,21,23,2<br>6 | 2 | P83748,Q9QUL6                                                  |
| 6091 | 1,3,4,8,18,<br>22,24,26 | 2,5,6,7,19,<br>20,21,23,2<br>5 | 1 | P97840                                                         |
| 6092 | 1,3,4,8,18,<br>22,25,26 | 2,5,6,7,19,<br>20,21,23,2<br>4 | 0 |                                                                |
| 6093 | 1,3,4,8,18,<br>23,24,25 | 2,5,6,7,19,<br>20,21,22,2<br>6 | 3 | P12785,P83748,Q63751                                           |
| 6094 | 1,3,4,8,18,<br>23,24,26 | 2,5,6,7,19,<br>20,21,22,2<br>5 | 8 | P12785,P35467,P47967,P97840,Q4FZU2,Q6IFW6,Q6IG02,Q6P6Q2        |
| 6095 | 1,3,4,8,18,<br>23,25,26 | 2,5,6,7,19,<br>20,21,22,2<br>4 | 9 | P00714,P12785,P35467,Q4FZU2,Q6AY61,Q6IFU8,Q6IFW6,Q6IG02,Q6P6Q2 |
| 6096 | 1,3,4,8,18,<br>24,25,26 | 2,5,6,7,19,<br>20,21,22,2<br>3 | 2 | B4F795,P08721                                                  |
| 6097 | 1,3,4,8,19,<br>20,21,22 | 2,5,6,7,18,<br>23,24,25,2<br>6 | 5 | P10758,P35281,P55091,Q7TPB1,Q9QUL6                             |
| 6098 | 1,3,4,8,19,<br>20,21,23 | 2,5,6,7,18,<br>22,24,25,2<br>6 | 3 | P10758,P35281,P55091                                           |
| 6099 | 1,3,4,8,19,<br>20,21,24 | 2,5,6,7,18,<br>22,23,25,2<br>6 | 2 | P35281,Q9QUL6                                                  |



|      |                         |                                |   |                                                  |
|------|-------------------------|--------------------------------|---|--------------------------------------------------|
| 6100 | 1,3,4,8,19,<br>20,21,25 | 2,5,6,7,18,<br>22,23,24,2<br>6 | 3 | P16636,P35281,Q9QUL6                             |
| 6101 | 1,3,4,8,19,<br>20,21,26 | 2,5,6,7,18,<br>22,23,24,2<br>5 | 1 | P35281                                           |
| 6102 | 1,3,4,8,19,<br>20,22,23 | 2,5,6,7,18,<br>21,24,25,2<br>6 | 7 | O54728,P00774,P25031,P55091,P82995,P83748,Q9QUL6 |
| 6103 | 1,3,4,8,19,<br>20,22,24 | 2,5,6,7,18,<br>21,23,25,2<br>6 | 7 | P00774,P25031,P55091,P82995,P83121,P83748,Q9QUL6 |
| 6104 | 1,3,4,8,19,<br>20,22,25 | 2,5,6,7,18,<br>21,23,24,2<br>6 | 2 | P83748,Q9QUL6                                    |
| 6105 | 1,3,4,8,19,<br>20,22,26 | 2,5,6,7,18,<br>21,23,24,2<br>5 | 2 | O54728,Q6P6R2                                    |
| 6106 | 1,3,4,8,19,<br>20,23,24 | 2,5,6,7,18,<br>21,22,25,2<br>6 | 5 | P25031,P55091,P82995,P83748,Q9QUL6               |
| 6107 | 1,3,4,8,19,<br>20,23,25 | 2,5,6,7,18,<br>21,22,24,2<br>6 | 2 | P83748,Q9QUL6                                    |
| 6108 | 1,3,4,8,19,<br>20,23,26 | 2,5,6,7,18,<br>21,22,24,2<br>5 | 4 | O54728,P35467,P97840,Q6IG02                      |
| 6109 | 1,3,4,8,19,<br>20,24,25 | 2,5,6,7,18,<br>21,22,23,2<br>6 | 3 | P25031,P83748,Q9QUL6                             |
| 6110 | 1,3,4,8,19,<br>20,24,26 | 2,5,6,7,18,<br>21,22,23,2<br>5 | 1 | P97840                                           |
| 6111 | 1,3,4,8,19,<br>20,25,26 | 2,5,6,7,18,<br>21,22,23,2<br>4 | 2 | P35280,Q9QUL6                                    |
| 6112 | 1,3,4,8,19,<br>21,22,23 | 2,5,6,7,18,<br>20,24,25,2<br>6 | 2 | P10758,P35281                                    |
| 6113 | 1,3,4,8,19,<br>21,22,24 | 2,5,6,7,18,<br>20,23,25,2<br>6 | 1 | Q9QUL6                                           |
| 6114 | 1,3,4,8,19,<br>21,22,25 | 2,5,6,7,18,<br>20,23,24,2<br>6 | 1 | Q9QUL6                                           |

|      |                         |                                |   |                             |
|------|-------------------------|--------------------------------|---|-----------------------------|
| 6115 | 1,3,4,8,19,<br>21,22,26 | 2,5,6,7,18,<br>20,23,24,2<br>5 | 1 | O54728                      |
| 6116 | 1,3,4,8,19,<br>21,23,24 | 2,5,6,7,18,<br>20,22,25,2<br>6 | 1 | P35281                      |
| 6117 | 1,3,4,8,19,<br>21,23,25 | 2,5,6,7,18,<br>20,22,24,2<br>6 | 3 | P35281,Q99041,Q9QUL6        |
| 6118 | 1,3,4,8,19,<br>21,23,26 | 2,5,6,7,18,<br>20,22,24,2<br>5 | 1 | P35281                      |
| 6119 | 1,3,4,8,19,<br>21,24,25 | 2,5,6,7,18,<br>20,22,23,2<br>6 | 1 | Q9QUL6                      |
| 6120 | 1,3,4,8,19,<br>21,24,26 | 2,5,6,7,18,<br>20,22,23,2<br>5 | 1 | Q9EQV9                      |
| 6121 | 1,3,4,8,19,<br>21,25,26 | 2,5,6,7,18,<br>20,22,23,2<br>4 | 1 | Q9QUL6                      |
| 6122 | 1,3,4,8,19,<br>22,23,24 | 2,5,6,7,18,<br>20,21,25,2<br>6 | 3 | P25031,P83748,Q9QUL6        |
| 6123 | 1,3,4,8,19,<br>22,23,25 | 2,5,6,7,18,<br>20,21,24,2<br>6 | 4 | P06911,P25031,P83748,Q9QUL6 |
| 6124 | 1,3,4,8,19,<br>22,23,26 | 2,5,6,7,18,<br>20,21,24,2<br>5 | 1 | O54728                      |
| 6125 | 1,3,4,8,19,<br>22,24,25 | 2,5,6,7,18,<br>20,21,23,2<br>6 | 3 | P25031,P83748,Q9QUL6        |
| 6126 | 1,3,4,8,19,<br>22,24,26 | 2,5,6,7,18,<br>20,21,23,2<br>5 | 3 | O54728,P25031,Q9QUL6        |
| 6127 | 1,3,4,8,19,<br>22,25,26 | 2,5,6,7,18,<br>20,21,23,2<br>4 | 2 | O54728,Q9QUL6               |
| 6128 | 1,3,4,8,19,<br>23,24,25 | 2,5,6,7,18,<br>20,21,22,2<br>6 | 3 | P25031,P83748,Q9QUL6        |
| 6129 | 1,3,4,8,19,<br>23,24,26 | 2,5,6,7,18,<br>20,21,22,2<br>5 | 2 | O54728,P02091               |

|      |                         |                                |   |                             |
|------|-------------------------|--------------------------------|---|-----------------------------|
| 6130 | 1,3,4,8,19,<br>23,25,26 | 2,5,6,7,18,<br>20,21,22,2<br>4 | 1 | Q9QUL6                      |
| 6131 | 1,3,4,8,19,<br>24,25,26 | 2,5,6,7,18,<br>20,21,22,2<br>3 | 1 | Q9QUL6                      |
| 6132 | 1,3,4,8,20,<br>21,22,23 | 2,5,6,7,18,<br>19,24,25,2<br>6 | 1 | P16636                      |
| 6133 | 1,3,4,8,20,<br>21,22,24 | 2,5,6,7,18,<br>19,23,25,2<br>6 | 3 | Q03191,Q5XFX0,Q99MH3        |
| 6134 | 1,3,4,8,20,<br>21,22,25 | 2,5,6,7,18,<br>19,23,24,2<br>6 | 3 | P16636,Q03191,Q9QUL6        |
| 6135 | 1,3,4,8,20,<br>21,22,26 | 2,5,6,7,18,<br>19,23,24,2<br>5 | 2 | O54728,Q99MH3               |
| 6136 | 1,3,4,8,20,<br>21,23,24 | 2,5,6,7,18,<br>19,22,25,2<br>6 | 2 | P83748,P97840               |
| 6137 | 1,3,4,8,20,<br>21,23,25 | 2,5,6,7,18,<br>19,22,24,2<br>6 | 2 | P16636,P83748               |
| 6138 | 1,3,4,8,20,<br>21,23,26 | 2,5,6,7,18,<br>19,22,24,2<br>5 | 4 | P97840,Q4FZU2,Q4FZU6,Q6IG02 |
| 6139 | 1,3,4,8,20,<br>21,24,25 | 2,5,6,7,18,<br>19,22,23,2<br>6 | 4 | P16636,Q03191,Q5XFX0,Q9QUL6 |
| 6140 | 1,3,4,8,20,<br>21,24,26 | 2,5,6,7,18,<br>19,22,23,2<br>5 | 4 | B0BNN3,P97840,Q99MH3,Q9EQV9 |
| 6141 | 1,3,4,8,20,<br>21,25,26 | 2,5,6,7,18,<br>19,22,23,2<br>4 | 0 |                             |
| 6142 | 1,3,4,8,20,<br>22,23,24 | 2,5,6,7,18,<br>19,21,25,2<br>6 | 4 | P25031,P82995,P83748,P97840 |
| 6143 | 1,3,4,8,20,<br>22,23,25 | 2,5,6,7,18,<br>19,21,24,2<br>6 | 3 | P16636,P83748,Q9QUL6        |
| 6144 | 1,3,4,8,20,<br>22,23,26 | 2,5,6,7,18,<br>19,21,24,2<br>5 | 3 | O54728,P97840,Q6IG02        |

|      |                         |                                |   |                                    |
|------|-------------------------|--------------------------------|---|------------------------------------|
| 6145 | 1,3,4,8,20,<br>22,24,25 | 2,5,6,7,18,<br>19,21,23,2<br>6 | 5 | P25031,P83748,Q03191,Q5XFX0,Q9QUL6 |
| 6146 | 1,3,4,8,20,<br>22,24,26 | 2,5,6,7,18,<br>19,21,23,2<br>5 | 4 | O54728,P97840,Q64573,Q99MH3        |
| 6147 | 1,3,4,8,20,<br>22,25,26 | 2,5,6,7,18,<br>19,21,23,2<br>4 | 2 | O54728,Q03191                      |
| 6148 | 1,3,4,8,20,<br>23,24,25 | 2,5,6,7,18,<br>19,21,22,2<br>6 | 3 | P25031,P83748,Q9QUL6               |
| 6149 | 1,3,4,8,20,<br>23,24,26 | 2,5,6,7,18,<br>19,21,22,2<br>5 | 4 | P19218,P47967,P97840,Q6IG02        |
| 6150 | 1,3,4,8,20,<br>23,25,26 | 2,5,6,7,18,<br>19,21,22,2<br>4 | 2 | P19218,Q6IG02                      |
| 6151 | 1,3,4,8,20,<br>24,25,26 | 2,5,6,7,18,<br>19,21,22,2<br>3 | 0 |                                    |
| 6152 | 1,3,4,8,21,<br>22,23,24 | 2,5,6,7,18,<br>19,20,25,2<br>6 | 0 |                                    |
| 6153 | 1,3,4,8,21,<br>22,23,25 | 2,5,6,7,18,<br>19,20,24,2<br>6 | 2 | P16636,Q9QUL6                      |
| 6154 | 1,3,4,8,21,<br>22,23,26 | 2,5,6,7,18,<br>19,20,24,2<br>5 | 1 | O54728                             |
| 6155 | 1,3,4,8,21,<br>22,24,25 | 2,5,6,7,18,<br>19,20,23,2<br>6 | 2 | Q5XFX0,Q9QUL6                      |
| 6156 | 1,3,4,8,21,<br>22,24,26 | 2,5,6,7,18,<br>19,20,23,2<br>5 | 1 | Q99MH3                             |
| 6157 | 1,3,4,8,21,<br>22,25,26 | 2,5,6,7,18,<br>19,20,23,2<br>4 | 0 |                                    |
| 6158 | 1,3,4,8,21,<br>23,24,25 | 2,5,6,7,18,<br>19,20,22,2<br>6 | 3 | P83748,Q63751,Q9QUL6               |
| 6159 | 1,3,4,8,21,<br>23,24,26 | 2,5,6,7,18,<br>19,20,22,2<br>5 | 1 | P97840                             |

|      |                          |                                |   |                                                                |
|------|--------------------------|--------------------------------|---|----------------------------------------------------------------|
| 6160 | 1,3,4,8,21,<br>23,25,26  | 2,5,6,7,18,<br>19,20,22,2<br>4 | 1 | P27213                                                         |
| 6161 | 1,3,4,8,21,<br>24,25,26  | 2,5,6,7,18,<br>19,20,22,2<br>3 | 0 |                                                                |
| 6162 | 1,3,4,8,22,<br>23,24,25  | 2,5,6,7,18,<br>19,20,21,2<br>6 | 5 | P25031,P62804,P83748,Q63751,Q9QUL6                             |
| 6163 | 1,3,4,8,22,<br>23,24,26  | 2,5,6,7,18,<br>19,20,21,2<br>5 | 5 | O54728,P00731,P25031,P47967,P97840                             |
| 6164 | 1,3,4,8,22,<br>23,25,26  | 2,5,6,7,18,<br>19,20,21,2<br>4 | 1 | O54728                                                         |
| 6165 | 1,3,4,8,22,<br>24,25,26  | 2,5,6,7,18,<br>19,20,21,2<br>3 | 1 | Q9QUL6                                                         |
| 6166 | 1,3,4,8,23,<br>24,25,26  | 2,5,6,7,18,<br>19,20,21,2<br>2 | 2 | P02091,Q7TPB1                                                  |
| 6167 | 1,3,4,18,1<br>9,20,21,22 | 2,5,6,7,8,2<br>3,24,25,26      | 2 | P10758,P36374                                                  |
| 6168 | 1,3,4,18,1<br>9,20,21,23 | 2,5,6,7,8,2<br>2,24,25,26      | 2 | P10758,P12785                                                  |
| 6169 | 1,3,4,18,1<br>9,20,21,24 | 2,5,6,7,8,2<br>2,23,25,26      | 1 | P10758                                                         |
| 6170 | 1,3,4,18,1<br>9,20,21,25 | 2,5,6,7,8,2<br>2,23,24,26      | 2 | P10758,P31430                                                  |
| 6171 | 1,3,4,18,1<br>9,20,21,26 | 2,5,6,7,8,2<br>2,23,24,25      | 3 | P10758,P12020,P36374                                           |
| 6172 | 1,3,4,18,1<br>9,20,22,23 | 2,5,6,7,8,2<br>1,24,25,26      | 3 | P12785,P83748,Q9WTT6                                           |
| 6173 | 1,3,4,18,1<br>9,20,22,24 | 2,5,6,7,8,2<br>1,23,25,26      | 6 | P06760,P07150,P14669,P83748,Q6P6R2,Q9WTT6                      |
| 6174 | 1,3,4,18,1<br>9,20,22,25 | 2,5,6,7,8,2<br>1,23,24,26      | 1 | P83748                                                         |
| 6175 | 1,3,4,18,1<br>9,20,22,26 | 2,5,6,7,8,2<br>1,23,24,25      | 4 | O54728,P06760,Q6P6R2,Q9WTT6                                    |
| 6176 | 1,3,4,18,1<br>9,20,23,24 | 2,5,6,7,8,2<br>1,22,25,26      | 4 | P12785,P83748,Q9QZK9,Q9WTT6                                    |
| 6177 | 1,3,4,18,1<br>9,20,23,25 | 2,5,6,7,8,2<br>1,22,24,26      | 2 | P12785,P83748                                                  |
| 6178 | 1,3,4,18,1<br>9,20,23,26 | 2,5,6,7,8,2<br>1,22,24,25      | 9 | O54728,P06760,P12785,P35467,Q4FZU2,Q6IFU8,Q6IFW6,Q6IG02,Q6P6Q2 |

|      |                          |                           |   |                                                         |
|------|--------------------------|---------------------------|---|---------------------------------------------------------|
| 6179 | 1,3,4,18,1<br>9,20,24,25 | 2,5,6,7,8,2<br>1,22,23,26 | 1 | P83748                                                  |
| 6180 | 1,3,4,18,1<br>9,20,24,26 | 2,5,6,7,8,2<br>1,22,23,25 | 3 | P06760,Q6P6R2,Q9WTT6                                    |
| 6181 | 1,3,4,18,1<br>9,20,25,26 | 2,5,6,7,8,2<br>1,22,23,24 | 1 | P35280                                                  |
| 6182 | 1,3,4,18,1<br>9,21,22,23 | 2,5,6,7,8,2<br>0,24,25,26 | 2 | P10758,P12785                                           |
| 6183 | 1,3,4,18,1<br>9,21,22,24 | 2,5,6,7,8,2<br>0,23,25,26 | 1 | P10758                                                  |
| 6184 | 1,3,4,18,1<br>9,21,22,25 | 2,5,6,7,8,2<br>0,23,24,26 | 1 | P10758                                                  |
| 6185 | 1,3,4,18,1<br>9,21,22,26 | 2,5,6,7,8,2<br>0,23,24,25 | 2 | P10758,P36374                                           |
| 6186 | 1,3,4,18,1<br>9,21,23,24 | 2,5,6,7,8,2<br>0,22,25,26 | 2 | P10758,P12785                                           |
| 6187 | 1,3,4,18,1<br>9,21,23,25 | 2,5,6,7,8,2<br>0,22,24,26 | 2 | P10758,P12785                                           |
| 6188 | 1,3,4,18,1<br>9,21,23,26 | 2,5,6,7,8,2<br>0,22,24,25 | 8 | P10758,P12785,P35467,Q4FZU2,Q6IFU8,Q6IG02,Q6IMF3,Q6P6Q2 |
| 6189 | 1,3,4,18,1<br>9,21,24,25 | 2,5,6,7,8,2<br>0,22,23,26 | 1 | P31430                                                  |
| 6190 | 1,3,4,18,1<br>9,21,24,26 | 2,5,6,7,8,2<br>0,22,23,25 | 2 | P10758,P12020                                           |
| 6191 | 1,3,4,18,1<br>9,21,25,26 | 2,5,6,7,8,2<br>0,22,23,24 | 1 | P31430                                                  |
| 6192 | 1,3,4,18,1<br>9,22,23,24 | 2,5,6,7,8,2<br>0,21,25,26 | 5 | P02625,P12785,P62804,P83748,Q9WTT6                      |
| 6193 | 1,3,4,18,1<br>9,22,23,25 | 2,5,6,7,8,2<br>0,21,24,26 | 3 | P12785,P62804,P83748                                    |
| 6194 | 1,3,4,18,1<br>9,22,23,26 | 2,5,6,7,8,2<br>0,21,24,25 | 8 | O54728,P02625,P06760,P12785,P35467,Q6IG02,Q6P6Q2,Q9WTT6 |
| 6195 | 1,3,4,18,1<br>9,22,24,25 | 2,5,6,7,8,2<br>0,21,23,26 | 2 | P62804,P83748                                           |
| 6196 | 1,3,4,18,1<br>9,22,24,26 | 2,5,6,7,8,2<br>0,21,23,25 | 4 | O54728,P06760,Q6P6R2,Q9WTT6                             |
| 6197 | 1,3,4,18,1<br>9,22,25,26 | 2,5,6,7,8,2<br>0,21,23,24 | 0 |                                                         |
| 6198 | 1,3,4,18,1<br>9,23,24,25 | 2,5,6,7,8,2<br>0,21,22,26 | 3 | P12785,P62804,P83748                                    |
| 6199 | 1,3,4,18,1<br>9,23,24,26 | 2,5,6,7,8,2<br>0,21,22,25 | 6 | P02091,P06760,P12785,P35467,Q6IG02,Q6P6Q2               |
| 6200 | 1,3,4,18,1<br>9,23,25,26 | 2,5,6,7,8,2<br>0,21,22,24 | 6 | P00714,P12785,P35467,Q4FZU2,Q6IG02,Q6P6Q2               |
| 6201 | 1,3,4,18,1<br>9,24,25,26 | 2,5,6,7,8,2<br>0,21,22,23 | 0 |                                                         |

|      |                                                 |    |                                                                              |
|------|-------------------------------------------------|----|------------------------------------------------------------------------------|
| 6202 | 1,3,4,18,2 2,5,6,7,8,1<br>0,21,22,23 9,24,25,26 | 2  | P10758,P12785                                                                |
| 6203 | 1,3,4,18,2 2,5,6,7,8,1<br>0,21,22,24 9,23,25,26 | 1  | P10758                                                                       |
| 6204 | 1,3,4,18,2 2,5,6,7,8,1<br>0,21,22,25 9,23,24,26 | 1  | P31430                                                                       |
| 6205 | 1,3,4,18,2 2,5,6,7,8,1<br>0,21,22,26 9,23,24,25 | 2  | P10758,P36374                                                                |
| 6206 | 1,3,4,18,2 2,5,6,7,8,1<br>0,21,23,24 9,22,25,26 | 3  | P10758,P12785,P83748                                                         |
| 6207 | 1,3,4,18,2 2,5,6,7,8,1<br>0,21,23,25 9,22,24,26 | 2  | P12785,P31430                                                                |
| 6208 | 1,3,4,18,2 2,5,6,7,8,1<br>0,21,23,26 9,22,24,25 | 10 | A2RUV9,P10758,P12785,Q4FZU2,Q4FZU6,Q6IFU8,Q6IFW6,Q6IG02,Q6IMF3,Q6P6Q2        |
| 6209 | 1,3,4,18,2 2,5,6,7,8,1<br>0,21,24,25 9,22,23,26 | 1  | P31430                                                                       |
| 6210 | 1,3,4,18,2 2,5,6,7,8,1<br>0,21,24,26 9,22,23,25 | 2  | P06911,P12020                                                                |
| 6211 | 1,3,4,18,2 2,5,6,7,8,1<br>0,21,25,26 9,22,23,24 | 2  | P31430,Q4FZU2                                                                |
| 6212 | 1,3,4,18,2 2,5,6,7,8,1<br>0,22,23,24 9,21,25,26 | 5  | P12785,P83748,P97840,Q9QZK9,Q9WTT6                                           |
| 6213 | 1,3,4,18,2 2,5,6,7,8,1<br>0,22,23,25 9,21,24,26 | 2  | P12785,P83748                                                                |
| 6214 | 1,3,4,18,2 2,5,6,7,8,1<br>0,22,23,26 9,21,24,25 | 11 | A2RUV9,O54728,P06760,P12785,P97840,Q4FZU2,Q6IFU8,Q6IFW6,Q6IG02,Q6IMF3,Q6P6Q2 |
| 6215 | 1,3,4,18,2 2,5,6,7,8,1<br>0,22,24,25 9,21,23,26 | 1  | P83748                                                                       |
| 6216 | 1,3,4,18,2 2,5,6,7,8,1<br>0,22,24,26 9,21,23,25 | 5  | P06760,P97840,Q6P6R2,Q99041,Q9WTT6                                           |
| 6217 | 1,3,4,18,2 2,5,6,7,8,1<br>0,22,25,26 9,21,23,24 | 0  |                                                                              |
| 6218 | 1,3,4,18,2 2,5,6,7,8,1<br>0,23,24,25 9,21,22,26 | 3  | A2RUV9,P12785,P83748                                                         |
| 6219 | 1,3,4,18,2 2,5,6,7,8,1<br>0,23,24,26 9,21,22,25 | 11 | A2RUV9,P12785,P19218,P47967,P97840,Q4FZU2,Q6IFU8,Q6IFW6,Q6IG02,Q6IMF3,Q6P6Q2 |
| 6220 | 1,3,4,18,2 2,5,6,7,8,1<br>0,23,25,26 9,21,22,24 | 10 | A2RUV9,P12785,P19218,P35467,Q4FZU2,Q6IFU8,Q6IFW6,Q6IG02,Q6IMF3,Q6P6Q2        |
| 6221 | 1,3,4,18,2 2,5,6,7,8,1<br>0,24,25,26 9,21,22,23 | 0  |                                                                              |
| 6222 | 1,3,4,18,2 2,5,6,7,8,1<br>1,22,23,24 9,20,25,26 | 2  | P10758,P12785                                                                |
| 6223 | 1,3,4,18,2 2,5,6,7,8,1<br>1,22,23,25 9,20,24,26 | 2  | P12785,P31430                                                                |
| 6224 | 1,3,4,18,2 2,5,6,7,8,1<br>1,22,23,26 9,20,24,25 | 7  | P10758,P12785,Q4FZU2,Q6IFU8,Q6IG02,Q6IMF3,Q6P6Q2                             |

|      |                          |                           |    |                                                                       |
|------|--------------------------|---------------------------|----|-----------------------------------------------------------------------|
| 6225 | 1,3,4,18,2<br>1,22,24,25 | 2,5,6,7,8,1<br>9,20,23,26 | 1  | P31430                                                                |
| 6226 | 1,3,4,18,2<br>1,22,24,26 | 2,5,6,7,8,1<br>9,20,23,25 | 1  | Q9JID2                                                                |
| 6227 | 1,3,4,18,2<br>1,22,25,26 | 2,5,6,7,8,1<br>9,20,23,24 | 1  | P31430                                                                |
| 6228 | 1,3,4,18,2<br>1,23,24,25 | 2,5,6,7,8,1<br>9,20,22,26 | 3  | P12785,P31430,P83748                                                  |
| 6229 | 1,3,4,18,2<br>1,23,24,26 | 2,5,6,7,8,1<br>9,20,22,25 | 7  | P12785,Q4FZU2,Q6IFU8,Q6IG02,Q6IMF3,Q6P6Q2,Q9JID2                      |
| 6230 | 1,3,4,18,2<br>1,23,25,26 | 2,5,6,7,8,1<br>9,20,22,24 | 10 | P00774,P12785,P27213,P31430,Q4FZU2,Q6IFU8,Q6IFW6,Q6IG02,Q6IMF3,Q6P6Q2 |
| 6231 | 1,3,4,18,2<br>1,24,25,26 | 2,5,6,7,8,1<br>9,20,22,23 | 2  | P08721,P31430                                                         |
| 6232 | 1,3,4,18,2<br>2,23,24,25 | 2,5,6,7,8,1<br>9,20,21,26 | 5  | P12785,P62804,P82471,P83748,Q00715                                    |
| 6233 | 1,3,4,18,2<br>2,23,24,26 | 2,5,6,7,8,1<br>9,20,21,25 | 8  | O54728,P00731,P12785,P47967,P62804,P97840,Q6IG02,Q6P6Q2               |
| 6234 | 1,3,4,18,2<br>2,23,25,26 | 2,5,6,7,8,1<br>9,20,21,24 | 5  | P12785,P62804,Q4FZU2,Q6IG02,Q6P6Q2                                    |
| 6235 | 1,3,4,18,2<br>2,24,25,26 | 2,5,6,7,8,1<br>9,20,21,23 | 1  | P62804                                                                |
| 6236 | 1,3,4,18,2<br>3,24,25,26 | 2,5,6,7,8,1<br>9,20,21,22 | 9  | A2RUV9,P02091,P12785,P62804,Q4FZU2,Q6IFU8,Q6IG02,Q6P6Q2,Q7TPB1        |
| 6237 | 1,3,4,19,2<br>0,21,22,23 | 2,5,6,7,8,1<br>8,24,25,26 | 1  | P55091                                                                |
| 6238 | 1,3,4,19,2<br>0,21,22,24 | 2,5,6,7,8,1<br>8,23,25,26 | 3  | P00774,P55091,Q99MH3                                                  |
| 6239 | 1,3,4,19,2<br>0,21,22,25 | 2,5,6,7,8,1<br>8,23,24,26 | 2  | P16636,Q63942                                                         |
| 6240 | 1,3,4,19,2<br>0,21,22,26 | 2,5,6,7,8,1<br>8,23,24,25 | 2  | O54728,Q99MH3                                                         |
| 6241 | 1,3,4,19,2<br>0,21,23,24 | 2,5,6,7,8,1<br>8,22,25,26 | 2  | P55091,P83748                                                         |
| 6242 | 1,3,4,19,2<br>0,21,23,25 | 2,5,6,7,8,1<br>8,22,24,26 | 2  | P16636,P83748                                                         |
| 6243 | 1,3,4,19,2<br>0,21,23,26 | 2,5,6,7,8,1<br>8,22,24,25 | 1  | O54728                                                                |
| 6244 | 1,3,4,19,2<br>0,21,24,25 | 2,5,6,7,8,1<br>8,22,23,26 | 1  | P83748                                                                |
| 6245 | 1,3,4,19,2<br>0,21,24,26 | 2,5,6,7,8,1<br>8,22,23,25 | 0  |                                                                       |
| 6246 | 1,3,4,19,2<br>0,21,25,26 | 2,5,6,7,8,1<br>8,22,23,24 | 0  |                                                                       |
| 6247 | 1,3,4,19,2<br>0,22,23,24 | 2,5,6,7,8,1<br>8,21,25,26 | 8  | P00774,P25031,P31430,P55091,P82995,P83748,P98089,Q9WTT6               |



|      |                                                 |   |                                                                |
|------|-------------------------------------------------|---|----------------------------------------------------------------|
| 6248 | 1,3,4,19,2 2,5,6,7,8,1<br>0,22,23,25 8,21,24,26 | 2 | P55091,P83748                                                  |
| 6249 | 1,3,4,19,2 2,5,6,7,8,1<br>0,22,23,26 8,21,24,25 | 3 | O54728,P98089,Q62997                                           |
| 6250 | 1,3,4,19,2 2,5,6,7,8,1<br>0,22,24,25 8,21,23,26 | 3 | P25031,P83748,Q9QUL6                                           |
| 6251 | 1,3,4,19,2 2,5,6,7,8,1<br>0,22,24,26 8,21,23,25 | 9 | O54728,P06760,P07150,P14669,P20646,P98089,Q6P6R2,Q99MH3,Q9WTT6 |
| 6252 | 1,3,4,19,2 2,5,6,7,8,1<br>0,22,25,26 8,21,23,24 | 1 | O54728                                                         |
| 6253 | 1,3,4,19,2 2,5,6,7,8,1<br>0,23,24,25 8,21,22,26 | 3 | P25031,P82995,P83748                                           |
| 6254 | 1,3,4,19,2 2,5,6,7,8,1<br>0,23,24,26 8,21,22,25 | 3 | O54728,P02091,P98089                                           |
| 6255 | 1,3,4,19,2 2,5,6,7,8,1<br>0,23,25,26 8,21,22,24 | 2 | O54728,P02091                                                  |
| 6256 | 1,3,4,19,2 2,5,6,7,8,1<br>0,24,25,26 8,21,22,23 | 0 |                                                                |
| 6257 | 1,3,4,19,2 2,5,6,7,8,1<br>1,22,23,24 8,20,25,26 | 1 | P83748                                                         |
| 6258 | 1,3,4,19,2 2,5,6,7,8,1<br>1,22,23,25 8,20,24,26 | 0 |                                                                |
| 6259 | 1,3,4,19,2 2,5,6,7,8,1<br>1,22,23,26 8,20,24,25 | 1 | O54728                                                         |
| 6260 | 1,3,4,19,2 2,5,6,7,8,1<br>1,22,24,25 8,20,23,26 | 1 | Q9QUL6                                                         |
| 6261 | 1,3,4,19,2 2,5,6,7,8,1<br>1,22,24,26 8,20,23,25 | 1 | O54728                                                         |
| 6262 | 1,3,4,19,2 2,5,6,7,8,1<br>1,22,25,26 8,20,23,24 | 0 |                                                                |
| 6263 | 1,3,4,19,2 2,5,6,7,8,1<br>1,23,24,25 8,20,22,26 | 1 | P83748                                                         |
| 6264 | 1,3,4,19,2 2,5,6,7,8,1<br>1,23,24,26 8,20,22,25 | 0 |                                                                |
| 6265 | 1,3,4,19,2 2,5,6,7,8,1<br>1,23,25,26 8,20,22,24 | 1 | P27213                                                         |
| 6266 | 1,3,4,19,2 2,5,6,7,8,1<br>1,24,25,26 8,20,22,23 | 0 |                                                                |
| 6267 | 1,3,4,19,2 2,5,6,7,8,1<br>2,23,24,25 8,20,21,26 | 6 | P25031,P62804,P82471,P83748,Q00715,Q9QUL6                      |
| 6268 | 1,3,4,19,2 2,5,6,7,8,1<br>2,23,24,26 8,20,21,25 | 9 | O54728,P00731,P02091,P20646,P25031,P62804,P82471,P98089,Q9WTT6 |
| 6269 | 1,3,4,19,2 2,5,6,7,8,1<br>2,23,25,26 8,20,21,24 | 4 | O54728,P02091,P62804,P82471                                    |
| 6270 | 1,3,4,19,2 2,5,6,7,8,1<br>2,24,25,26 8,20,21,23 | 2 | O54728,P62804                                                  |

|      |                                                 |   |                                                                |
|------|-------------------------------------------------|---|----------------------------------------------------------------|
| 6271 | 1,3,4,19,2 2,5,6,7,8,1<br>3,24,25,26 8,20,21,22 | 5 | P01946,P02091,P62804,P82471,Q7TPB1                             |
| 6272 | 1,3,4,20,2 2,5,6,7,8,1<br>1,22,23,24 8,19,25,26 | 3 | P16636,P82995,P83748                                           |
| 6273 | 1,3,4,20,2 2,5,6,7,8,1<br>1,22,23,25 8,19,24,26 | 3 | P16636,P83748,Q63942                                           |
| 6274 | 1,3,4,20,2 2,5,6,7,8,1<br>1,22,23,26 8,19,24,25 | 1 | O54728                                                         |
| 6275 | 1,3,4,20,2 2,5,6,7,8,1<br>1,22,24,25 8,19,23,26 | 5 | P16636,P83748,Q03191,Q5XFX0,Q63942                             |
| 6276 | 1,3,4,20,2 2,5,6,7,8,1<br>1,22,24,26 8,19,23,25 | 3 | P02803,Q03191,Q99MH3                                           |
| 6277 | 1,3,4,20,2 2,5,6,7,8,1<br>1,22,25,26 8,19,23,24 | 1 | Q03191                                                         |
| 6278 | 1,3,4,20,2 2,5,6,7,8,1<br>1,23,24,25 8,19,22,26 | 2 | P16636,P83748                                                  |
| 6279 | 1,3,4,20,2 2,5,6,7,8,1<br>1,23,24,26 8,19,22,25 | 1 | P97840                                                         |
| 6280 | 1,3,4,20,2 2,5,6,7,8,1<br>1,23,25,26 8,19,22,24 | 1 | Q4FZU2                                                         |
| 6281 | 1,3,4,20,2 2,5,6,7,8,1<br>1,24,25,26 8,19,22,23 | 1 | Q03191                                                         |
| 6282 | 1,3,4,20,2 2,5,6,7,8,1<br>2,23,24,25 8,19,21,26 | 3 | P25031,P82995,P83748                                           |
| 6283 | 1,3,4,20,2 2,5,6,7,8,1<br>2,23,24,26 8,19,21,25 | 9 | O54728,P00731,P02803,P47967,P53792,P97840,P98089,Q62635,Q8CIZ5 |
| 6284 | 1,3,4,20,2 2,5,6,7,8,1<br>2,23,25,26 8,19,21,24 | 2 | O54728,P05539                                                  |
| 6285 | 1,3,4,20,2 2,5,6,7,8,1<br>2,24,25,26 8,19,21,23 | 4 | P00731,P02803,Q03191,Q99MH3                                    |
| 6286 | 1,3,4,20,2 2,5,6,7,8,1<br>3,24,25,26 8,19,21,22 | 3 | P02091,P19218,Q7TPB1                                           |
| 6287 | 1,3,4,21,2 2,5,6,7,8,1<br>2,23,24,25 8,19,20,26 | 3 | P62804,P83748,Q63751                                           |
| 6288 | 1,3,4,21,2 2,5,6,7,8,1<br>2,23,24,26 8,19,20,25 | 2 | O54728,P00731                                                  |
| 6289 | 1,3,4,21,2 2,5,6,7,8,1<br>2,23,25,26 8,19,20,24 | 0 |                                                                |
| 6290 | 1,3,4,21,2 2,5,6,7,8,1<br>2,24,25,26 8,19,20,23 | 1 | Q03191                                                         |
| 6291 | 1,3,4,21,2 2,5,6,7,8,1<br>3,24,25,26 8,19,20,22 | 4 | P02091,P22006,P27213,Q7TPB1                                    |
| 6292 | 1,3,4,22,2 2,5,6,7,8,1<br>3,24,25,26 8,19,20,21 | 6 | O54728,P00731,P02091,P62804,P82471,Q7TPB1                      |

|      |                       |                                  |   |                                                         |
|------|-----------------------|----------------------------------|---|---------------------------------------------------------|
| 6293 | 1,3,5,6,7,8<br>,18,19 | 2,4,20,21,<br>22,23,24,2<br>5,26 | 5 | O55006,P00731,P51907,P53792,Q6IRE4                      |
| 6294 | 1,3,5,6,7,8<br>,18,20 | 2,4,19,21,<br>22,23,24,2<br>5,26 | 6 | O55006,P00731,P10715,P27213,Q6IRE4,Q9ET32               |
| 6295 | 1,3,5,6,7,8<br>,18,21 | 2,4,19,20,<br>22,23,24,2<br>5,26 | 6 | P00731,P19218,P25031,P53792,Q6IRE4,Q9ET32               |
| 6296 | 1,3,5,6,7,8<br>,18,22 | 2,4,19,20,<br>21,23,24,2<br>5,26 | 4 | P27213,Q6IRE4,Q9ET32,Q9QW07                             |
| 6297 | 1,3,5,6,7,8<br>,18,23 | 2,4,19,20,<br>21,22,24,2<br>5,26 | 3 | P51907,Q6IRE4,Q9ET32                                    |
| 6298 | 1,3,5,6,7,8<br>,18,24 | 2,4,19,20,<br>21,22,23,2<br>5,26 | 4 | O55006,P10715,Q6IRE4,Q9ET32                             |
| 6299 | 1,3,5,6,7,8<br>,18,25 | 2,4,19,20,<br>21,22,23,2<br>4,26 | 6 | P00731,P01015,P10715,P19629,Q6IRE4,Q9ET32               |
| 6300 | 1,3,5,6,7,8<br>,18,26 | 2,4,19,20,<br>21,22,23,2<br>4,25 | 6 | P04041,P83748,Q63942,Q6IRE4,Q8VD89,Q9ET32               |
| 6301 | 1,3,5,6,7,8<br>,19,20 | 2,4,18,21,<br>22,23,24,2<br>5,26 | 5 | O55006,P53792,P55091,P98089,Q6IRE4                      |
| 6302 | 1,3,5,6,7,8<br>,19,21 | 2,4,18,20,<br>22,23,24,2<br>5,26 | 6 | P00731,P16086,P19218,P35281,P53792,Q6IRE4               |
| 6303 | 1,3,5,6,7,8<br>,19,22 | 2,4,18,20,<br>21,23,24,2<br>5,26 | 5 | P17046,P19218,P55091,Q6IRE4,Q9QW07                      |
| 6304 | 1,3,5,6,7,8<br>,19,23 | 2,4,18,20,<br>21,22,24,2<br>5,26 | 8 | O70594,P15399,P16086,P51907,P97580,Q30KJ2,Q6IRE4,Q99041 |
| 6305 | 1,3,5,6,7,8<br>,19,24 | 2,4,18,20,<br>21,22,23,2<br>5,26 | 3 | O55006,P53792,Q6IRE4                                    |
| 6306 | 1,3,5,6,7,8<br>,19,25 | 2,4,18,20,<br>21,22,23,2<br>4,26 | 6 | P10715,P12020,P17046,P19629,P53792,Q6IRE4               |
| 6307 | 1,3,5,6,7,8<br>,19,26 | 2,4,18,20,<br>21,22,23,2<br>4,25 | 3 | O54728,P53792,Q6IRE4                                    |

|      |                       |                                  |    |                                                                       |
|------|-----------------------|----------------------------------|----|-----------------------------------------------------------------------|
| 6308 | 1,3,5,6,7,8<br>,20,21 | 2,4,18,19,<br>22,23,24,2<br>5,26 | 5  | P01681,P53792,Q6IRE4,Q99MH3,Q9ET32                                    |
| 6309 | 1,3,5,6,7,8<br>,20,22 | 2,4,18,19,<br>21,23,24,2<br>5,26 | 8  | D3ZUC6,P27213,P55091,P98089,Q6IRE4,Q99MH3,Q9ET32,Q9QW07               |
| 6310 | 1,3,5,6,7,8<br>,20,23 | 2,4,18,19,<br>21,22,24,2<br>5,26 | 3  | P98089,Q6IRE4,Q9ET32                                                  |
| 6311 | 1,3,5,6,7,8<br>,20,24 | 2,4,18,19,<br>21,22,23,2<br>5,26 | 5  | P10715,P27213,Q6IRE4,Q99MH3,Q9ET32                                    |
| 6312 | 1,3,5,6,7,8<br>,20,25 | 2,4,18,19,<br>21,22,23,2<br>4,26 | 6  | D3ZUC6,P10715,P12020,P19629,Q6IRE4,Q9ET32                             |
| 6313 | 1,3,5,6,7,8<br>,20,26 | 2,4,18,19,<br>21,22,23,2<br>4,25 | 4  | P01681,Q6IRE4,Q99MH3,Q9ET32                                           |
| 6314 | 1,3,5,6,7,8<br>,21,22 | 2,4,18,19,<br>20,23,24,2<br>5,26 | 5  | P13432,P19218,Q6IRE4,Q9ET32,Q9QW07                                    |
| 6315 | 1,3,5,6,7,8<br>,21,23 | 2,4,18,19,<br>20,22,24,2<br>5,26 | 3  | P51907,Q6IRE4,Q9ET32                                                  |
| 6316 | 1,3,5,6,7,8<br>,21,24 | 2,4,18,19,<br>20,22,23,2<br>5,26 | 4  | P13432,P53792,Q6IRE4,Q9ET32                                           |
| 6317 | 1,3,5,6,7,8<br>,21,25 | 2,4,18,19,<br>20,22,23,2<br>4,26 | 8  | P10715,P19218,P19629,P53792,Q6IRE4,Q9ET32,Q9QZK9,Q9WTT6               |
| 6318 | 1,3,5,6,7,8<br>,21,26 | 2,4,18,19,<br>20,22,23,2<br>4,25 | 6  | F1LM93,P01681,P53792,P83748,Q6IRE4,Q9ET32                             |
| 6319 | 1,3,5,6,7,8<br>,22,23 | 2,4,18,19,<br>20,21,24,2<br>5,26 | 4  | P51907,Q6IRE4,Q9ET32,Q9QW07                                           |
| 6320 | 1,3,5,6,7,8<br>,22,24 | 2,4,18,19,<br>20,21,23,2<br>5,26 | 4  | P27213,Q6IRE4,Q99MH3,Q9QW07                                           |
| 6321 | 1,3,5,6,7,8<br>,22,25 | 2,4,18,19,<br>20,21,23,2<br>4,26 | 10 | D3ZUC6,P06911,P10715,P12020,P17046,P19629,Q5GRG2,Q6IRE4,Q9ET32,Q9QW07 |
| 6322 | 1,3,5,6,7,8<br>,22,26 | 2,4,18,19,<br>20,21,23,2<br>4,25 | 4  | O54728,Q6IRE4,Q99MH3,Q9QW07                                           |

|      |                        |                                  |    |                                                                                            |
|------|------------------------|----------------------------------|----|--------------------------------------------------------------------------------------------|
| 6323 | 1,3,5,6,7,8<br>,23,24  | 2,4,18,19,<br>20,21,22,2<br>5,26 | 5  | P08937,P51907,Q63751,Q6IRE4,Q9ET32                                                         |
| 6324 | 1,3,5,6,7,8<br>,23,25  | 2,4,18,19,<br>20,21,22,2<br>4,26 | 13 | O70377,P01015,P06911,P10715,P12020,P19629,P51907,P55314,Q5GRG2,Q63751,Q6IRE4,Q99041,Q9ET32 |
| 6325 | 1,3,5,6,7,8<br>,23,26  | 2,4,18,19,<br>20,21,22,2<br>4,25 | 7  | P01946,P02091,P51907,Q5I0D1,Q6IG02,Q6IRE4,Q9ET32                                           |
| 6326 | 1,3,5,6,7,8<br>,24,25  | 2,4,18,19,<br>20,21,22,2<br>3,26 | 4  | P10715,P19629,Q6IRE4,Q9ET32                                                                |
| 6327 | 1,3,5,6,7,8<br>,24,26  | 2,4,18,19,<br>20,21,22,2<br>3,25 | 4  | P02091,Q6IRE4,Q8CJD3,Q99MH3                                                                |
| 6328 | 1,3,5,6,7,8<br>,25,26  | 2,4,18,19,<br>20,21,22,2<br>3,24 | 5  | P02091,P10715,P19629,Q6IRE4,Q9QZK9                                                         |
| 6329 | 1,3,5,6,7,1<br>8,19,20 | 2,4,8,21,2<br>2,23,24,25<br>,26  | 5  | P00731,P53792,Q5U2V4,Q6IRE4,Q80WL1                                                         |
| 6330 | 1,3,5,6,7,1<br>8,19,21 | 2,4,8,20,2<br>2,23,24,25<br>,26  | 5  | P00731,P19218,P25031,P53792,Q6IRE4                                                         |
| 6331 | 1,3,5,6,7,1<br>8,19,22 | 2,4,8,20,2<br>1,23,24,25<br>,26  | 5  | P17046,P19218,Q5U2V4,Q6IRE4,Q9QW07                                                         |
| 6332 | 1,3,5,6,7,1<br>8,19,23 | 2,4,8,20,2<br>1,22,24,25<br>,26  | 6  | P15399,P16086,P97580,Q03191,Q30KJ2,Q6IRE4                                                  |
| 6333 | 1,3,5,6,7,1<br>8,19,24 | 2,4,8,20,2<br>1,22,23,25<br>,26  | 3  | P53792,Q6IRE4,Q80WL1                                                                       |
| 6334 | 1,3,5,6,7,1<br>8,19,25 | 2,4,8,20,2<br>1,22,23,24<br>,26  | 5  | P00731,P01015,P17046,P53792,Q6IRE4                                                         |
| 6335 | 1,3,5,6,7,1<br>8,19,26 | 2,4,8,20,2<br>1,22,23,24<br>,25  | 3  | P53792,Q5U2V4,Q6IRE4                                                                       |
| 6336 | 1,3,5,6,7,1<br>8,20,21 | 2,4,8,19,2<br>2,23,24,25<br>,26  | 4  | P00731,P01835,P25031,Q6IRE4                                                                |
| 6337 | 1,3,5,6,7,1<br>8,20,22 | 2,4,8,19,2<br>1,23,24,25<br>,26  | 4  | P27213,Q5U2V4,Q6IRE4,Q9QW07                                                                |

|      |                        |                                 |   |                                    |
|------|------------------------|---------------------------------|---|------------------------------------|
| 6338 | 1,3,5,6,7,1<br>8,20,23 | 2,4,8,19,2<br>1,22,24,25<br>,26 | 3 | Q6IG02,Q6IRE4,Q80WL1               |
| 6339 | 1,3,5,6,7,1<br>8,20,24 | 2,4,8,19,2<br>1,22,23,25<br>,26 | 3 | P27213,Q6IRE4,Q80WL1               |
| 6340 | 1,3,5,6,7,1<br>8,20,25 | 2,4,8,19,2<br>1,22,23,24<br>,26 | 2 | Q6IRE4,Q80WL1                      |
| 6341 | 1,3,5,6,7,1<br>8,20,26 | 2,4,8,19,2<br>1,22,23,24<br>,25 | 4 | Q4FZU2,Q6IG02,Q6IRE4,Q80WL1        |
| 6342 | 1,3,5,6,7,1<br>8,21,22 | 2,4,8,19,2<br>0,23,24,25<br>,26 | 5 | P13432,P19218,P25031,Q6IRE4,Q9QW07 |
| 6343 | 1,3,5,6,7,1<br>8,21,23 | 2,4,8,19,2<br>0,22,24,25<br>,26 | 2 | P25031,Q6IRE4                      |
| 6344 | 1,3,5,6,7,1<br>8,21,24 | 2,4,8,19,2<br>0,22,23,25<br>,26 | 4 | P13432,P25031,Q62997,Q6IRE4        |
| 6345 | 1,3,5,6,7,1<br>8,21,25 | 2,4,8,19,2<br>0,22,23,24<br>,26 | 4 | P00731,P25031,P53792,Q6IRE4        |
| 6346 | 1,3,5,6,7,1<br>8,21,26 | 2,4,8,19,2<br>0,22,23,24<br>,25 | 4 | P25031,P83748,Q4FZU2,Q6IRE4        |
| 6347 | 1,3,5,6,7,1<br>8,22,23 | 2,4,8,19,2<br>0,21,24,25<br>,26 | 3 | P01015,Q6IRE4,Q9QW07               |
| 6348 | 1,3,5,6,7,1<br>8,22,24 | 2,4,8,19,2<br>0,21,23,25<br>,26 | 3 | P27213,Q6IRE4,Q9QW07               |
| 6349 | 1,3,5,6,7,1<br>8,22,25 | 2,4,8,19,2<br>0,21,23,24<br>,26 | 4 | P01015,P17046,Q6IRE4,Q9QW07        |
| 6350 | 1,3,5,6,7,1<br>8,22,26 | 2,4,8,19,2<br>0,21,23,24<br>,25 | 5 | O54728,Q5U2V4,Q6IRE4,Q8VD89,Q9QW07 |
| 6351 | 1,3,5,6,7,1<br>8,23,24 | 2,4,8,19,2<br>0,21,22,25<br>,26 | 2 | Q6IRE4,Q80WL1                      |
| 6352 | 1,3,5,6,7,1<br>8,23,25 | 2,4,8,19,2<br>0,21,22,24<br>,26 | 5 | P01015,P17046,P55314,Q63751,Q6IRE4 |

|      |                        |                                 |    |                                                                                            |
|------|------------------------|---------------------------------|----|--------------------------------------------------------------------------------------------|
| 6353 | 1,3,5,6,7,1<br>8,23,26 | 2,4,8,19,2<br>0,21,22,24<br>,25 | 12 | P01946,P02091,P35467,Q4FZU2,Q63942,Q6IFU8,Q6IFW6,Q6IG02,Q6IMF3,Q6IRE4,Q6P6Q2,Q8VD89        |
| 6354 | 1,3,5,6,7,1<br>8,24,25 | 2,4,8,19,2<br>0,21,22,23<br>,26 | 3  | P17046,Q6IRE4,Q80WL1                                                                       |
| 6355 | 1,3,5,6,7,1<br>8,24,26 | 2,4,8,19,2<br>0,21,22,23<br>,25 | 5  | P02091,Q6IRE4,Q80WL1,Q8CJD3,Q8VD89                                                         |
| 6356 | 1,3,5,6,7,1<br>8,25,26 | 2,4,8,19,2<br>0,21,22,23<br>,24 | 3  | P02091,P61206,P84079,P84082,Q6IRE4                                                         |
| 6357 | 1,3,5,6,7,1<br>9,20,21 | 2,4,8,18,2<br>2,23,24,25<br>,26 | 6  | P00714,P00731,P01681,P53792,P55091,Q6IRE4                                                  |
| 6358 | 1,3,5,6,7,1<br>9,20,22 | 2,4,8,18,2<br>1,23,24,25<br>,26 | 13 | P00714,P00774,P07150,P14669,P17046,P27213,P31430,P55091,P98089,Q5U2V4,Q6IRE4,Q99MH3,Q9QW07 |
| 6359 | 1,3,5,6,7,1<br>9,20,23 | 2,4,8,18,2<br>1,22,24,25<br>,26 | 9  | P15399,P16086,P31430,P55091,P97580,P98089,Q30KJ2,Q6IRE4,Q80WL1                             |
| 6360 | 1,3,5,6,7,1<br>9,20,24 | 2,4,8,18,2<br>1,22,23,25<br>,26 | 8  | P00714,P31430,P53792,P55091,P98089,Q6IRE4,Q80WL1,Q99MH3                                    |
| 6361 | 1,3,5,6,7,1<br>9,20,25 | 2,4,8,18,2<br>1,22,23,24<br>,26 | 4  | P17046,P53792,Q6IRE4,Q80WL1                                                                |
| 6362 | 1,3,5,6,7,1<br>9,20,26 | 2,4,8,18,2<br>1,22,23,24<br>,25 | 8  | O54728,P01681,P53792,P98089,Q5U2V4,Q6IRE4,Q80WL1,Q99MH3                                    |
| 6363 | 1,3,5,6,7,1<br>9,21,22 | 2,4,8,18,2<br>0,23,24,25<br>,26 | 7  | P00714,P17046,P19218,P55091,Q6IRE4,Q6TMA8,Q9QW07                                           |
| 6364 | 1,3,5,6,7,1<br>9,21,23 | 2,4,8,18,2<br>0,22,24,25<br>,26 | 6  | P15399,P16086,P17046,P97580,Q30KJ2,Q6IRE4                                                  |
| 6365 | 1,3,5,6,7,1<br>9,21,24 | 2,4,8,18,2<br>0,22,23,25<br>,26 | 5  | P00714,P19218,P53792,Q6IRE4,Q6TMA8                                                         |
| 6366 | 1,3,5,6,7,1<br>9,21,25 | 2,4,8,18,2<br>0,22,23,24<br>,26 | 7  | P00731,P17046,P19218,P53792,P97840,Q6IRE4,Q9QZK9                                           |
| 6367 | 1,3,5,6,7,1<br>9,21,26 | 2,4,8,18,2<br>0,22,23,24<br>,25 | 3  | P53792,P83748,Q6IRE4                                                                       |

|      |                        |                                 |    |                                                                       |
|------|------------------------|---------------------------------|----|-----------------------------------------------------------------------|
| 6368 | 1,3,5,6,7,1<br>9,22,23 | 2,4,8,18,2<br>0,21,24,25<br>,26 | 10 | P15399,P16086,P17046,P31430,P55091,P97580,P98089,Q30KJ2,Q6IRE4,Q9QW07 |
| 6369 | 1,3,5,6,7,1<br>9,22,24 | 2,4,8,18,2<br>0,21,23,25<br>,26 | 9  | P00714,P17046,P31430,P55091,P98089,Q6IRE4,Q6TMA8,Q99MH3,Q9QW07        |
| 6370 | 1,3,5,6,7,1<br>9,22,25 | 2,4,8,18,2<br>0,21,23,24<br>,26 | 6  | P06911,P12020,P17046,Q6IRE4,Q6TMA8,Q9QW07                             |
| 6371 | 1,3,5,6,7,1<br>9,22,26 | 2,4,8,18,2<br>0,21,23,24<br>,25 | 7  | O54728,P17046,P98089,Q5U2V4,Q6TMA8,Q99MH3,Q9QW07                      |
| 6372 | 1,3,5,6,7,1<br>9,23,24 | 2,4,8,18,2<br>0,21,22,25<br>,26 | 9  | P15399,P17046,P19223,P31430,P97580,P98089,Q30KJ2,Q6IRE4,Q80WL1        |
| 6373 | 1,3,5,6,7,1<br>9,23,25 | 2,4,8,18,2<br>0,21,22,24<br>,26 | 9  | P01015,P12020,P15399,P17046,P55314,P97580,Q30KJ2,Q6IRE4,Q80WL1        |
| 6374 | 1,3,5,6,7,1<br>9,23,26 | 2,4,8,18,2<br>0,21,22,24<br>,25 | 8  | O54728,P01946,P02091,P15399,P97580,P98089,Q30KJ2,Q6IRE4               |
| 6375 | 1,3,5,6,7,1<br>9,24,25 | 2,4,8,18,2<br>0,21,22,23<br>,26 | 5  | P17046,P53792,Q6IRE4,Q6TMA8,Q80WL1                                    |
| 6376 | 1,3,5,6,7,1<br>9,24,26 | 2,4,8,18,2<br>0,21,22,23<br>,25 | 6  | P02091,P98089,Q6IRE4,Q6TMA8,Q80WL1,Q99MH3                             |
| 6377 | 1,3,5,6,7,1<br>9,25,26 | 2,4,8,18,2<br>0,21,22,23<br>,24 | 5  | P02091,P17046,P53792,Q6IRE4,Q9QZK9                                    |
| 6378 | 1,3,5,6,7,2<br>0,21,22 | 2,4,8,18,1<br>9,23,24,25<br>,26 | 8  | P00714,P13432,P27213,P55091,Q6IRE4,Q7TPB1,Q99MH3,Q9QW07               |
| 6379 | 1,3,5,6,7,2<br>0,21,23 | 2,4,8,18,1<br>9,22,24,25<br>,26 | 2  | P01835,Q6IRE4                                                         |
| 6380 | 1,3,5,6,7,2<br>0,21,24 | 2,4,8,18,1<br>9,22,23,25<br>,26 | 4  | P00714,P13432,Q6IRE4,Q99MH3                                           |
| 6381 | 1,3,5,6,7,2<br>0,21,25 | 2,4,8,18,1<br>9,22,23,24<br>,26 | 1  | Q6IRE4                                                                |
| 6382 | 1,3,5,6,7,2<br>0,21,26 | 2,4,8,18,1<br>9,22,23,24<br>,25 | 3  | P01681,Q6IRE4,Q99MH3                                                  |



|      |                        |                                 |    |                                                                       |
|------|------------------------|---------------------------------|----|-----------------------------------------------------------------------|
| 6383 | 1,3,5,6,7,2<br>0,22,23 | 2,4,8,18,1<br>9,21,24,25<br>,26 | 6  | P27213,P31430,P55091,P98089,Q6IRE4,Q9QW07                             |
| 6384 | 1,3,5,6,7,2<br>0,22,24 | 2,4,8,18,1<br>9,21,23,25<br>,26 | 10 | P00714,P14669,P27213,P31430,P55091,P98089,Q6IRE4,Q80WL1,Q99MH3,Q9QW07 |
| 6385 | 1,3,5,6,7,2<br>0,22,25 | 2,4,8,18,1<br>9,21,23,24<br>,26 | 5  | D3ZUC6,P17046,Q6IRE4,Q99MH3,Q9QW07                                    |
| 6386 | 1,3,5,6,7,2<br>0,22,26 | 2,4,8,18,1<br>9,21,23,24<br>,25 | 6  | O54728,P98089,Q5U2V4,Q6IRE4,Q99MH3,Q9QW07                             |
| 6387 | 1,3,5,6,7,2<br>0,23,24 | 2,4,8,18,1<br>9,21,22,25<br>,26 | 4  | P31430,P98089,Q6IRE4,Q80WL1                                           |
| 6388 | 1,3,5,6,7,2<br>0,23,25 | 2,4,8,18,1<br>9,21,22,24<br>,26 | 5  | P17046,P55314,Q63751,Q6IRE4,Q80WL1                                    |
| 6389 | 1,3,5,6,7,2<br>0,23,26 | 2,4,8,18,1<br>9,21,22,24<br>,25 | 9  | O54728,P01681,P01946,P02091,P98089,Q4FZU2,Q6IG02,Q6IRE4,Q80WL1        |
| 6390 | 1,3,5,6,7,2<br>0,24,25 | 2,4,8,18,1<br>9,21,22,23<br>,26 | 4  | P17046,Q6IRE4,Q80WL1,Q99MH3                                           |
| 6391 | 1,3,5,6,7,2<br>0,24,26 | 2,4,8,18,1<br>9,21,22,23<br>,25 | 6  | P02091,P98089,Q6IRE4,Q80WL1,Q8CJD3,Q99MH3                             |
| 6392 | 1,3,5,6,7,2<br>0,25,26 | 2,4,8,18,1<br>9,21,22,23<br>,24 | 5  | D3ZUC6,P02091,Q6IRE4,Q80WL1,Q99MH3                                    |
| 6393 | 1,3,5,6,7,2<br>1,22,23 | 2,4,8,18,1<br>9,20,24,25<br>,26 | 3  | P17046,Q6IRE4,Q9QW07                                                  |
| 6394 | 1,3,5,6,7,2<br>1,22,24 | 2,4,8,18,1<br>9,20,23,25<br>,26 | 7  | P00714,P13432,P19218,Q6IRE4,Q6TMA8,Q99MH3,Q9QW07                      |
| 6395 | 1,3,5,6,7,2<br>1,22,25 | 2,4,8,18,1<br>9,20,23,24<br>,26 | 4  | P17046,P19218,Q6IRE4,Q9QW07                                           |
| 6396 | 1,3,5,6,7,2<br>1,22,26 | 2,4,8,18,1<br>9,20,23,24<br>,25 | 5  | O54728,P83748,Q6IRE4,Q99MH3,Q9QW07                                    |
| 6397 | 1,3,5,6,7,2<br>1,23,24 | 2,4,8,18,1<br>9,20,22,25<br>,26 | 2  | Q63751,Q6IRE4                                                         |

|      |                        |                                 |    |                                                                       |
|------|------------------------|---------------------------------|----|-----------------------------------------------------------------------|
| 6398 | 1,3,5,6,7,2<br>1,23,25 | 2,4,8,18,1<br>9,20,22,24<br>,26 | 5  | P17046,P19629,P55314,Q63751,Q6IRE4                                    |
| 6399 | 1,3,5,6,7,2<br>1,23,26 | 2,4,8,18,1<br>9,20,22,24<br>,25 | 4  | P01946,P02091,Q4FZU2,Q6IRE4                                           |
| 6400 | 1,3,5,6,7,2<br>1,24,25 | 2,4,8,18,1<br>9,20,22,23<br>,26 | 4  | P17046,P19629,Q62997,Q6IRE4                                           |
| 6401 | 1,3,5,6,7,2<br>1,24,26 | 2,4,8,18,1<br>9,20,22,23<br>,25 | 5  | P02091,P13432,Q6IRE4,Q8CJD3,Q99MH3                                    |
| 6402 | 1,3,5,6,7,2<br>1,25,26 | 2,4,8,18,1<br>9,20,22,23<br>,24 | 4  | P02091,P83748,Q6IRE4,Q9QZK9                                           |
| 6403 | 1,3,5,6,7,2<br>2,23,24 | 2,4,8,18,1<br>9,20,21,25<br>,26 | 8  | P17046,P19223,P31430,P62804,P98089,Q63751,Q6IRE4,Q9QW07               |
| 6404 | 1,3,5,6,7,2<br>2,23,25 | 2,4,8,18,1<br>9,20,21,24<br>,26 | 10 | P01015,P06911,P12020,P17046,P19629,P55314,Q5GRG2,Q63751,Q6IRE4,Q9QW07 |
| 6405 | 1,3,5,6,7,2<br>2,23,26 | 2,4,8,18,1<br>9,20,21,24<br>,25 | 6  | O54728,P01946,P02091,P98089,Q6IRE4,Q9QW07                             |
| 6406 | 1,3,5,6,7,2<br>2,24,25 | 2,4,8,18,1<br>9,20,21,23<br>,26 | 6  | P17046,P19629,P62804,Q6IRE4,Q6TMA8,Q9QW07                             |
| 6407 | 1,3,5,6,7,2<br>2,24,26 | 2,4,8,18,1<br>9,20,21,23<br>,25 | 8  | O54728,P02091,P98089,Q6IRE4,Q6TMA8,Q8CJD3,Q99MH3,Q9QW07               |
| 6408 | 1,3,5,6,7,2<br>2,25,26 | 2,4,8,18,1<br>9,20,21,23<br>,24 | 6  | O54728,P02091,P17046,Q6IRE4,Q6TMA8,Q9QW07                             |
| 6409 | 1,3,5,6,7,2<br>3,24,25 | 2,4,8,18,1<br>9,20,21,22<br>,26 | 8  | P08937,P17046,P19629,P55314,P62804,Q63751,Q6IRE4,Q80WL1               |
| 6410 | 1,3,5,6,7,2<br>3,24,26 | 2,4,8,18,1<br>9,20,21,22<br>,25 | 5  | P01946,P02091,P98089,Q6IRE4,Q80WL1                                    |
| 6411 | 1,3,5,6,7,2<br>3,25,26 | 2,4,8,18,1<br>9,20,21,22<br>,24 | 6  | P01946,P02091,P17046,P55314,Q63751,Q6IRE4                             |
| 6412 | 1,3,5,6,7,2<br>4,25,26 | 2,4,8,18,1<br>9,20,21,22<br>,23 | 7  | P01946,P02091,P17046,Q6IRE4,Q6TMA8,Q80WL1,Q8CJD3                      |

|      |                        |                                 |   |                                           |
|------|------------------------|---------------------------------|---|-------------------------------------------|
| 6413 | 1,3,5,6,8,1<br>8,19,20 | 2,4,7,21,2<br>2,23,24,25<br>,26 | 4 | P00731,P22006,P83121,Q6IRE4               |
| 6414 | 1,3,5,6,8,1<br>8,19,21 | 2,4,7,20,2<br>2,23,24,25<br>,26 | 5 | O35547,P00731,P35281,P53792,Q6IRE4        |
| 6415 | 1,3,5,6,8,1<br>8,19,22 | 2,4,7,20,2<br>1,23,24,25<br>,26 | 3 | P22006,P83121,Q9QW07                      |
| 6416 | 1,3,5,6,8,1<br>8,19,23 | 2,4,7,20,2<br>1,22,24,25<br>,26 | 5 | O70594,P22006,P35467,P51907,Q9Z1F2        |
| 6417 | 1,3,5,6,8,1<br>8,19,24 | 2,4,7,20,2<br>1,22,23,25<br>,26 | 2 | P83121,Q920P0                             |
| 6418 | 1,3,5,6,8,1<br>8,19,25 | 2,4,7,20,2<br>1,22,23,24<br>,26 | 1 | P00731                                    |
| 6419 | 1,3,5,6,8,1<br>8,19,26 | 2,4,7,20,2<br>1,22,23,24<br>,25 | 1 | Q63942                                    |
| 6420 | 1,3,5,6,8,1<br>8,20,21 | 2,4,7,19,2<br>2,23,24,25<br>,26 | 6 | O35547,P00731,P01681,P01835,P14480,Q6IRE4 |
| 6421 | 1,3,5,6,8,1<br>8,20,22 | 2,4,7,19,2<br>1,23,24,25<br>,26 | 6 | P14480,P22006,P27213,P83121,Q6IRE4,Q9QW07 |
| 6422 | 1,3,5,6,8,1<br>8,20,23 | 2,4,7,19,2<br>1,22,24,25<br>,26 | 4 | P22006,Q4FZU2,Q6IG02,Q6IRE4               |
| 6423 | 1,3,5,6,8,1<br>8,20,24 | 2,4,7,19,2<br>1,22,23,25<br>,26 | 3 | P83121,Q6IRE4,Q80WL1                      |
| 6424 | 1,3,5,6,8,1<br>8,20,25 | 2,4,7,19,2<br>1,22,23,24<br>,26 | 2 | D3ZUC6,Q6IRE4                             |
| 6425 | 1,3,5,6,8,1<br>8,20,26 | 2,4,7,19,2<br>1,22,23,24<br>,25 | 6 | P01681,P22006,Q4FZU2,Q63942,Q6IG02,Q6IRE4 |
| 6426 | 1,3,5,6,8,1<br>8,21,22 | 2,4,7,19,2<br>0,23,24,25<br>,26 | 6 | O35547,P13432,P14480,P19218,Q6IRE4,Q9QW07 |
| 6427 | 1,3,5,6,8,1<br>8,21,23 | 2,4,7,19,2<br>0,22,24,25<br>,26 | 4 | O35547,O70594,P51907,Q6IRE4               |

|      |                        |                                 |    |                                                                                     |
|------|------------------------|---------------------------------|----|-------------------------------------------------------------------------------------|
| 6428 | 1,3,5,6,8,1<br>8,21,24 | 2,4,7,19,2<br>0,22,23,25<br>,26 | 3  | P13432,Q62997,Q6IRE4                                                                |
| 6429 | 1,3,5,6,8,1<br>8,21,25 | 2,4,7,19,2<br>0,22,23,24<br>,26 | 4  | P00731,P31430,Q6IRE4,Q9WTT6                                                         |
| 6430 | 1,3,5,6,8,1<br>8,21,26 | 2,4,7,19,2<br>0,22,23,24<br>,25 | 4  | P01681,Q4FZU2,Q63942,Q6IRE4                                                         |
| 6431 | 1,3,5,6,8,1<br>8,22,23 | 2,4,7,19,2<br>0,21,24,25<br>,26 | 3  | P22006,P51907,Q9QW07                                                                |
| 6432 | 1,3,5,6,8,1<br>8,22,24 | 2,4,7,19,2<br>0,21,23,25<br>,26 | 2  | P83121,Q9QW07                                                                       |
| 6433 | 1,3,5,6,8,1<br>8,22,25 | 2,4,7,19,2<br>0,21,23,24<br>,26 | 2  | P01015,Q9QW07                                                                       |
| 6434 | 1,3,5,6,8,1<br>8,22,26 | 2,4,7,19,2<br>0,21,23,24<br>,25 | 2  | Q63942,Q9QW07                                                                       |
| 6435 | 1,3,5,6,8,1<br>8,23,24 | 2,4,7,19,2<br>0,21,22,25<br>,26 | 3  | P47967,P51907,Q6IRE4                                                                |
| 6436 | 1,3,5,6,8,1<br>8,23,25 | 2,4,7,19,2<br>0,21,22,24<br>,26 | 4  | P01015,P51907,P55314,Q6IRE4                                                         |
| 6437 | 1,3,5,6,8,1<br>8,23,26 | 2,4,7,19,2<br>0,21,22,24<br>,25 | 12 | P35467,P47967,P51907,Q4FZU2,Q5I0D1,Q63942,Q6IFU8,Q6IFV1,Q6IFW6,Q6IG02,Q6IMF3,Q6P6Q2 |
| 6438 | 1,3,5,6,8,1<br>8,24,25 | 2,4,7,19,2<br>0,21,22,23<br>,26 | 1  | Q6IRE4                                                                              |
| 6439 | 1,3,5,6,8,1<br>8,24,26 | 2,4,7,19,2<br>0,21,22,23<br>,25 | 3  | P47967,Q63942,Q6IRE4                                                                |
| 6440 | 1,3,5,6,8,1<br>8,25,26 | 2,4,7,19,2<br>0,21,22,23<br>,24 | 1  | Q63942                                                                              |
| 6441 | 1,3,5,6,8,1<br>9,20,21 | 2,4,7,18,2<br>2,23,24,25<br>,26 | 5  | P01681,P35281,P53792,P55091,Q6IRE4                                                  |
| 6442 | 1,3,5,6,8,1<br>9,20,22 | 2,4,7,18,2<br>1,23,24,25<br>,26 | 12 | D3ZUC6,P00774,P22006,P27213,P31430,P55091,P82995,P83121,P98089,Q6IRE4,Q99MH3,Q9QW07 |

|      |                        |                                 |   |                                                         |
|------|------------------------|---------------------------------|---|---------------------------------------------------------|
| 6443 | 1,3,5,6,8,1<br>9,20,23 | 2,4,7,18,2<br>1,22,24,25<br>,26 | 6 | P22006,P31430,P55091,P82995,P98089,Q6IRE4               |
| 6444 | 1,3,5,6,8,1<br>9,20,24 | 2,4,7,18,2<br>1,22,23,25<br>,26 | 8 | P31430,P55091,P82995,P83121,P98089,Q6IRE4,Q80WL1,Q99MH3 |
| 6445 | 1,3,5,6,8,1<br>9,20,25 | 2,4,7,18,2<br>1,22,23,24<br>,26 | 2 | D3ZUC6,Q6IRE4                                           |
| 6446 | 1,3,5,6,8,1<br>9,20,26 | 2,4,7,18,2<br>1,22,23,24<br>,25 | 5 | O54728,P01681,P98089,Q6IRE4,Q99MH3                      |
| 6447 | 1,3,5,6,8,1<br>9,21,22 | 2,4,7,18,2<br>0,23,24,25<br>,26 | 6 | O35547,P00714,P19218,P35281,P55091,Q9QW07               |
| 6448 | 1,3,5,6,8,1<br>9,21,23 | 2,4,7,18,2<br>0,22,24,25<br>,26 | 5 | O70594,P35281,P51907,P55091,Q6IRE4                      |
| 6449 | 1,3,5,6,8,1<br>9,21,24 | 2,4,7,18,2<br>0,22,23,25<br>,26 | 4 | P00714,P35281,P53792,Q6IRE4                             |
| 6450 | 1,3,5,6,8,1<br>9,21,25 | 2,4,7,18,2<br>0,22,23,24<br>,26 | 4 | P06760,P35281,P53792,Q6IRE4                             |
| 6451 | 1,3,5,6,8,1<br>9,21,26 | 2,4,7,18,2<br>0,22,23,24<br>,25 | 3 | P01681,P35281,P53792                                    |
| 6452 | 1,3,5,6,8,1<br>9,22,23 | 2,4,7,18,2<br>0,21,24,25<br>,26 | 7 | P22006,P31430,P51907,P55091,P82995,P98089,Q9QW07        |
| 6453 | 1,3,5,6,8,1<br>9,22,24 | 2,4,7,18,2<br>0,21,23,25<br>,26 | 8 | P00714,P31430,P55091,P82995,P83121,P98089,Q99MH3,Q9QW07 |
| 6454 | 1,3,5,6,8,1<br>9,22,25 | 2,4,7,18,2<br>0,21,23,24<br>,26 | 3 | D3ZUC6,P17046,Q9QW07                                    |
| 6455 | 1,3,5,6,8,1<br>9,22,26 | 2,4,7,18,2<br>0,21,23,24<br>,25 | 4 | O54728,P98089,Q99MH3,Q9QW07                             |
| 6456 | 1,3,5,6,8,1<br>9,23,24 | 2,4,7,18,2<br>0,21,22,25<br>,26 | 5 | P31430,P51907,P55091,P82995,P98089                      |
| 6457 | 1,3,5,6,8,1<br>9,23,25 | 2,4,7,18,2<br>0,21,22,24<br>,26 | 4 | O70594,P01015,P51907,P55314                             |

|      |                        |                                 |    |                                                                              |
|------|------------------------|---------------------------------|----|------------------------------------------------------------------------------|
| 6458 | 1,3,5,6,8,1<br>9,23,26 | 2,4,7,18,2<br>0,21,22,24<br>,25 | 5  | O54728,P35467,P51907,P98089,Q6IG02                                           |
| 6459 | 1,3,5,6,8,1<br>9,24,25 | 2,4,7,18,2<br>0,21,22,23<br>,26 | 0  |                                                                              |
| 6460 | 1,3,5,6,8,1<br>9,24,26 | 2,4,7,18,2<br>0,21,22,23<br>,25 | 2  | P98089,Q99MH3                                                                |
| 6461 | 1,3,5,6,8,1<br>9,25,26 | 2,4,7,18,2<br>0,21,22,23<br>,24 | 0  |                                                                              |
| 6462 | 1,3,5,6,8,2<br>0,21,22 | 2,4,7,18,1<br>9,23,24,25<br>,26 | 11 | P00714,P01681,P13432,P14480,P55091,P82995,Q5XFX0,Q6IRE4,Q7TPB1,Q99MH3,Q9QW07 |
| 6463 | 1,3,5,6,8,2<br>0,21,23 | 2,4,7,18,1<br>9,22,24,25<br>,26 | 5  | P01681,P01835,P55091,P82995,Q6IRE4                                           |
| 6464 | 1,3,5,6,8,2<br>0,21,24 | 2,4,7,18,1<br>9,22,23,25<br>,26 | 7  | P00714,P01681,P13432,P82995,Q5XFX0,Q6IRE4,Q99MH3                             |
| 6465 | 1,3,5,6,8,2<br>0,21,25 | 2,4,7,18,1<br>9,22,23,24<br>,26 | 4  | P01681,P06760,Q6IRE4,Q9WTT6                                                  |
| 6466 | 1,3,5,6,8,2<br>0,21,26 | 2,4,7,18,1<br>9,22,23,24<br>,25 | 3  | P01681,Q6IRE4,Q99MH3                                                         |
| 6467 | 1,3,5,6,8,2<br>0,22,23 | 2,4,7,18,1<br>9,21,24,25<br>,26 | 8  | D3ZUC6,P22006,P31430,P55091,P82995,P98089,Q6IRE4,Q9QW07                      |
| 6468 | 1,3,5,6,8,2<br>0,22,24 | 2,4,7,18,1<br>9,21,23,25<br>,26 | 11 | D3ZUC6,P00714,P27213,P55091,P82995,P83121,P98089,Q5XFX0,Q6IRE4,Q99MH3,Q9QW07 |
| 6469 | 1,3,5,6,8,2<br>0,22,25 | 2,4,7,18,1<br>9,21,23,24<br>,26 | 5  | D3ZUC6,P82995,Q6IRE4,Q99MH3,Q9QW07                                           |
| 6470 | 1,3,5,6,8,2<br>0,22,26 | 2,4,7,18,1<br>9,21,23,24<br>,25 | 7  | D3ZUC6,O54728,P01681,P98089,Q6IRE4,Q99MH3,Q9QW07                             |
| 6471 | 1,3,5,6,8,2<br>0,23,24 | 2,4,7,18,1<br>9,21,22,25<br>,26 | 7  | P47967,P55091,P82995,P97840,P98089,Q6IRE4,Q80WL1                             |
| 6472 | 1,3,5,6,8,2<br>0,23,25 | 2,4,7,18,1<br>9,21,22,24<br>,26 | 5  | D3ZUC6,P06760,P55314,P82995,Q6IRE4                                           |

|      |                        |                                 |    |                                                                              |
|------|------------------------|---------------------------------|----|------------------------------------------------------------------------------|
| 6473 | 1,3,5,6,8,2<br>0,23,26 | 2,4,7,18,1<br>9,21,22,24<br>,25 | 11 | O54728,P01681,P47967,P97840,P98089,Q4FZU2,Q6IFW6,Q6IG02,Q6IMF3,Q6IRE4,Q6P6Q2 |
| 6474 | 1,3,5,6,8,2<br>0,24,25 | 2,4,7,18,1<br>9,21,22,23<br>,26 | 4  | D3ZUC6,P82995,Q6IRE4,Q80WL1                                                  |
| 6475 | 1,3,5,6,8,2<br>0,24,26 | 2,4,7,18,1<br>9,21,22,23<br>,25 | 8  | P01681,P47967,P97840,P98089,Q6IRE4,Q80WL1,Q8CJD3,Q99MH3                      |
| 6476 | 1,3,5,6,8,2<br>0,25,26 | 2,4,7,18,1<br>9,21,22,23<br>,24 | 3  | D3ZUC6,P01681,Q6IRE4                                                         |
| 6477 | 1,3,5,6,8,2<br>1,22,23 | 2,4,7,18,1<br>9,20,24,25<br>,26 | 5  | P51907,P55091,P82995,Q6IRE4,Q9QW07                                           |
| 6478 | 1,3,5,6,8,2<br>1,22,24 | 2,4,7,18,1<br>9,20,23,25<br>,26 | 7  | P00714,P13432,P82995,Q5XFX0,Q6IRE4,Q99MH3,Q9QW07                             |
| 6479 | 1,3,5,6,8,2<br>1,22,25 | 2,4,7,18,1<br>9,20,23,24<br>,26 | 4  | P06760,Q6IRE4,Q9QW07,Q9WTT6                                                  |
| 6480 | 1,3,5,6,8,2<br>1,22,26 | 2,4,7,18,1<br>9,20,23,24<br>,25 | 3  | P01681,Q99MH3,Q9QW07                                                         |
| 6481 | 1,3,5,6,8,2<br>1,23,24 | 2,4,7,18,1<br>9,20,22,25<br>,26 | 3  | P51907,P82995,Q6IRE4                                                         |
| 6482 | 1,3,5,6,8,2<br>1,23,25 | 2,4,7,18,1<br>9,20,22,24<br>,26 | 8  | O70594,P06760,P51907,P55314,Q63751,Q6IRE4,Q6P6R2,Q9WTT6                      |
| 6483 | 1,3,5,6,8,2<br>1,23,26 | 2,4,7,18,1<br>9,20,22,24<br>,25 | 8  | P01681,P51907,Q4FZU2,Q6IFV1,Q6IG02,Q6IMF3,Q6IRE4,Q6P6Q2                      |
| 6484 | 1,3,5,6,8,2<br>1,24,25 | 2,4,7,18,1<br>9,20,22,23<br>,26 | 5  | P06760,Q5XFX0,Q62997,Q6IRE4,Q9WTT6                                           |
| 6485 | 1,3,5,6,8,2<br>1,24,26 | 2,4,7,18,1<br>9,20,22,23<br>,25 | 4  | P01681,Q6IRE4,Q8CJD3,Q99MH3                                                  |
| 6486 | 1,3,5,6,8,2<br>1,25,26 | 2,4,7,18,1<br>9,20,22,23<br>,24 | 5  | P01681,P06760,Q6IRE4,Q9QZK9,Q9WTT6                                           |
| 6487 | 1,3,5,6,8,2<br>2,23,24 | 2,4,7,18,1<br>9,20,21,25<br>,26 | 7  | P31430,P47967,P51907,P55091,P82995,P98089,Q9QW07                             |

|      |                         |                                 |   |                                                                |
|------|-------------------------|---------------------------------|---|----------------------------------------------------------------|
| 6488 | 1,3,5,6,8,2<br>2,23,25  | 2,4,7,18,1<br>9,20,21,24<br>,26 | 8 | D3ZUC6,P01015,P06760,P06911,P51907,P55314,P82995,Q9QW07        |
| 6489 | 1,3,5,6,8,2<br>2,23,26  | 2,4,7,18,1<br>9,20,21,24<br>,25 | 5 | O54728,P47967,P51907,P98089,Q9QW07                             |
| 6490 | 1,3,5,6,8,2<br>2,24,25  | 2,4,7,18,1<br>9,20,21,23<br>,26 | 3 | D3ZUC6,P82995,Q9QW07                                           |
| 6491 | 1,3,5,6,8,2<br>2,24,26  | 2,4,7,18,1<br>9,20,21,23<br>,25 | 5 | O54728,P47967,P98089,Q99MH3,Q9QW07                             |
| 6492 | 1,3,5,6,8,2<br>2,25,26  | 2,4,7,18,1<br>9,20,21,23<br>,24 | 2 | D3ZUC6,Q9QW07                                                  |
| 6493 | 1,3,5,6,8,2<br>3,24,25  | 2,4,7,18,1<br>9,20,21,22<br>,26 | 7 | P06760,P36374,P51907,P55314,P82995,Q63751,Q6IRE4               |
| 6494 | 1,3,5,6,8,2<br>3,24,26  | 2,4,7,18,1<br>9,20,21,22<br>,25 | 8 | P02091,P47967,P51907,P97840,P98089,Q5I0D1,Q6IG02,Q6IRE4        |
| 6495 | 1,3,5,6,8,2<br>3,25,26  | 2,4,7,18,1<br>9,20,21,22<br>,24 | 8 | P02091,P51907,P55314,Q4FZU2,Q5I0D1,Q6IG02,Q6P6Q2,Q9WTT6        |
| 6496 | 1,3,5,6,8,2<br>4,25,26  | 2,4,7,18,1<br>9,20,21,22<br>,23 | 2 | Q6IRE4,Q8CJD3                                                  |
| 6497 | 1,3,5,6,18,<br>19,20,21 | 2,4,7,8,22,<br>23,24,25,2<br>6  | 5 | P00731,P01681,P01835,Q02253,Q6IRE4                             |
| 6498 | 1,3,5,6,18,<br>19,20,22 | 2,4,7,8,21,<br>23,24,25,2<br>6  | 9 | P07150,P22006,P27213,P55091,Q02253,Q5U2V4,Q6IRE4,Q80WL1,Q9QW07 |
| 6499 | 1,3,5,6,18,<br>19,20,23 | 2,4,7,8,21,<br>22,24,25,2<br>6  | 5 | P22006,P82995,Q6IG02,Q6IRE4,Q80WL1                             |
| 6500 | 1,3,5,6,18,<br>19,20,24 | 2,4,7,8,21,<br>22,23,25,2<br>6  | 3 | P82995,Q6IRE4,Q80WL1                                           |
| 6501 | 1,3,5,6,18,<br>19,20,25 | 2,4,7,8,21,<br>22,23,24,2<br>6  | 3 | Q02253,Q6IRE4,Q80WL1                                           |
| 6502 | 1,3,5,6,18,<br>19,20,26 | 2,4,7,8,21,<br>22,23,24,2<br>5  | 6 | P01681,P22006,Q4FZU2,Q6IG02,Q6IRE4,Q80WL1                      |



|      |                         |                                |    |                                                                       |
|------|-------------------------|--------------------------------|----|-----------------------------------------------------------------------|
| 6503 | 1,3,5,6,18,<br>19,21,22 | 2,4,7,8,20,<br>23,24,25,2<br>6 | 3  | O35547,P19218,Q9QW07                                                  |
| 6504 | 1,3,5,6,18,<br>19,21,23 | 2,4,7,8,20,<br>22,24,25,2<br>6 | 2  | O35547,Q6IRE4                                                         |
| 6505 | 1,3,5,6,18,<br>19,21,24 | 2,4,7,8,20,<br>22,23,25,2<br>6 | 1  | Q6IRE4                                                                |
| 6506 | 1,3,5,6,18,<br>19,21,25 | 2,4,7,8,20,<br>22,23,24,2<br>6 | 2  | P00731,P53792                                                         |
| 6507 | 1,3,5,6,18,<br>19,21,26 | 2,4,7,8,20,<br>22,23,24,2<br>5 | 2  | P01681,Q4FZU2                                                         |
| 6508 | 1,3,5,6,18,<br>19,22,23 | 2,4,7,8,20,<br>21,24,25,2<br>6 | 3  | P19223,P22006,Q9QW07                                                  |
| 6509 | 1,3,5,6,18,<br>19,22,24 | 2,4,7,8,20,<br>21,23,25,2<br>6 | 3  | P83121,Q80WL1,Q9QW07                                                  |
| 6510 | 1,3,5,6,18,<br>19,22,25 | 2,4,7,8,20,<br>21,23,24,2<br>6 | 3  | P01015,P17046,Q9QW07                                                  |
| 6511 | 1,3,5,6,18,<br>19,22,26 | 2,4,7,8,20,<br>21,23,24,2<br>5 | 2  | O54728,Q9QW07                                                         |
| 6512 | 1,3,5,6,18,<br>19,23,24 | 2,4,7,8,20,<br>21,22,25,2<br>6 | 3  | P19223,P30836,Q80WL1                                                  |
| 6513 | 1,3,5,6,18,<br>19,23,25 | 2,4,7,8,20,<br>21,22,24,2<br>6 | 4  | P01015,P17046,P55314,Q80WL1                                           |
| 6514 | 1,3,5,6,18,<br>19,23,26 | 2,4,7,8,20,<br>21,22,24,2<br>5 | 10 | P35467,Q07523,Q4FZU2,Q63942,Q6IFU8,Q6IFW6,Q6IG02,Q6IMF3,Q6P6Q2,Q80WL1 |
| 6515 | 1,3,5,6,18,<br>19,24,25 | 2,4,7,8,20,<br>21,22,23,2<br>6 | 2  | P30836,Q80WL1                                                         |
| 6516 | 1,3,5,6,18,<br>19,24,26 | 2,4,7,8,20,<br>21,22,23,2<br>5 | 1  | Q80WL1                                                                |
| 6517 | 1,3,5,6,18,<br>19,25,26 | 2,4,7,8,20,<br>21,22,23,2<br>4 | 1  | Q80WL1                                                                |

|      |                         |                                |    |                                                                              |
|------|-------------------------|--------------------------------|----|------------------------------------------------------------------------------|
| 6518 | 1,3,5,6,18,<br>20,21,22 | 2,4,7,8,19,<br>23,24,25,2<br>6 | 5  | P00714,P01835,P14480,Q6IRE4,Q9QW07                                           |
| 6519 | 1,3,5,6,18,<br>20,21,23 | 2,4,7,8,19,<br>22,24,25,2<br>6 | 5  | P01681,P01835,Q4FZU2,Q6IG02,Q6IRE4                                           |
| 6520 | 1,3,5,6,18,<br>20,21,24 | 2,4,7,8,19,<br>22,23,25,2<br>6 | 5  | P01835,P13432,P20766,Q6IRE4,Q80WL1                                           |
| 6521 | 1,3,5,6,18,<br>20,21,25 | 2,4,7,8,19,<br>22,23,24,2<br>6 | 2  | P01835,Q6IRE4                                                                |
| 6522 | 1,3,5,6,18,<br>20,21,26 | 2,4,7,8,19,<br>22,23,24,2<br>5 | 6  | P01681,P01835,Q4FZU2,Q6IG02,Q6IRE4,Q99041                                    |
| 6523 | 1,3,5,6,18,<br>20,22,23 | 2,4,7,8,19,<br>21,24,25,2<br>6 | 6  | P22006,P82995,Q6IG02,Q6IRE4,Q80WL1,Q9QW07                                    |
| 6524 | 1,3,5,6,18,<br>20,22,24 | 2,4,7,8,19,<br>21,23,25,2<br>6 | 8  | P00714,P27213,P82995,P83121,Q6IRE4,Q80WL1,Q99041,Q9QW07                      |
| 6525 | 1,3,5,6,18,<br>20,22,25 | 2,4,7,8,19,<br>21,23,24,2<br>6 | 4  | D3ZUC6,Q6IRE4,Q80WL1,Q9QW07                                                  |
| 6526 | 1,3,5,6,18,<br>20,22,26 | 2,4,7,8,19,<br>21,23,24,2<br>5 | 6  | O54728,P22006,Q4FZU2,Q6IRE4,Q99041,Q9QW07                                    |
| 6527 | 1,3,5,6,18,<br>20,23,24 | 2,4,7,8,19,<br>21,22,25,2<br>6 | 4  | P82995,Q6IG02,Q6IRE4,Q80WL1                                                  |
| 6528 | 1,3,5,6,18,<br>20,23,25 | 2,4,7,8,19,<br>21,22,24,2<br>6 | 5  | P55314,Q4FZU2,Q6IG02,Q6IRE4,Q80WL1                                           |
| 6529 | 1,3,5,6,18,<br>20,23,26 | 2,4,7,8,19,<br>21,22,24,2<br>5 | 11 | P01681,P35467,P47967,Q4FZU2,Q6IFU8,Q6IFW6,Q6IG02,Q6IMF3,Q6IRE4,Q6P6Q2,Q80WL1 |
| 6530 | 1,3,5,6,18,<br>20,24,25 | 2,4,7,8,19,<br>21,22,23,2<br>6 | 2  | Q6IRE4,Q80WL1                                                                |
| 6531 | 1,3,5,6,18,<br>20,24,26 | 2,4,7,8,19,<br>21,22,23,2<br>5 | 6  | P47967,Q4FZU2,Q6IG02,Q6IRE4,Q80WL1,Q99041                                    |
| 6532 | 1,3,5,6,18,<br>20,25,26 | 2,4,7,8,19,<br>21,22,23,2<br>4 | 4  | Q4FZU2,Q6IG02,Q6IRE4,Q80WL1                                                  |

|      |                         |                                |    |                                                                       |
|------|-------------------------|--------------------------------|----|-----------------------------------------------------------------------|
| 6533 | 1,3,5,6,18,<br>21,22,23 | 2,4,7,8,19,<br>20,24,25,2<br>6 | 1  | Q9QW07                                                                |
| 6534 | 1,3,5,6,18,<br>21,22,24 | 2,4,7,8,19,<br>20,23,25,2<br>6 | 4  | P00714,P13432,Q6IRE4,Q9QW07                                           |
| 6535 | 1,3,5,6,18,<br>21,22,25 | 2,4,7,8,19,<br>20,23,24,2<br>6 | 1  | Q9QW07                                                                |
| 6536 | 1,3,5,6,18,<br>21,22,26 | 2,4,7,8,19,<br>20,23,24,2<br>5 | 3  | Q4FZU2,Q99041,Q9QW07                                                  |
| 6537 | 1,3,5,6,18,<br>21,23,24 | 2,4,7,8,19,<br>20,22,25,2<br>6 | 1  | Q6IRE4                                                                |
| 6538 | 1,3,5,6,18,<br>21,23,25 | 2,4,7,8,19,<br>20,22,24,2<br>6 | 2  | P55314,Q6IRE4                                                         |
| 6539 | 1,3,5,6,18,<br>21,23,26 | 2,4,7,8,19,<br>20,22,24,2<br>5 | 9  | P01835,Q4FZU2,Q6IFU8,Q6IFV1,Q6IFW6,Q6IG02,Q6IMF3,Q6IRE4,Q6P6Q2        |
| 6540 | 1,3,5,6,18,<br>21,24,25 | 2,4,7,8,19,<br>20,22,23,2<br>6 | 2  | Q62997,Q6IRE4                                                         |
| 6541 | 1,3,5,6,18,<br>21,24,26 | 2,4,7,8,19,<br>20,22,23,2<br>5 | 4  | Q4FZU2,Q6IRE4,Q8CJD3,Q99041                                           |
| 6542 | 1,3,5,6,18,<br>21,25,26 | 2,4,7,8,19,<br>20,22,23,2<br>4 | 3  | P31430,Q4FZU2,Q6IRE4                                                  |
| 6543 | 1,3,5,6,18,<br>22,23,24 | 2,4,7,8,19,<br>20,21,25,2<br>6 | 5  | P19223,P82995,Q6IFU7,Q80WL1,Q9QW07                                    |
| 6544 | 1,3,5,6,18,<br>22,23,25 | 2,4,7,8,19,<br>20,21,24,2<br>6 | 5  | P01015,P02761,P17046,P55314,Q9QW07                                    |
| 6545 | 1,3,5,6,18,<br>22,23,26 | 2,4,7,8,19,<br>20,21,24,2<br>5 | 10 | O54728,P47967,Q4FZU2,Q6IFU7,Q6IFU8,Q6IFW6,Q6IG02,Q6IMF3,Q6P6Q2,Q9QW07 |
| 6546 | 1,3,5,6,18,<br>22,24,25 | 2,4,7,8,19,<br>20,21,23,2<br>6 | 2  | Q80WL1,Q9QW07                                                         |
| 6547 | 1,3,5,6,18,<br>22,24,26 | 2,4,7,8,19,<br>20,21,23,2<br>5 | 3  | P47967,Q99041,Q9QW07                                                  |

|      |                         |                                |    |                                                                                                   |
|------|-------------------------|--------------------------------|----|---------------------------------------------------------------------------------------------------|
| 6548 | 1,3,5,6,18,<br>22,25,26 | 2,4,7,8,19,<br>20,21,23,2<br>4 | 1  | Q9QW07                                                                                            |
| 6549 | 1,3,5,6,18,<br>23,24,25 | 2,4,7,8,19,<br>20,21,22,2<br>6 | 4  | P55314,Q63751,Q6IRE4,Q80WL1                                                                       |
| 6550 | 1,3,5,6,18,<br>23,24,26 | 2,4,7,8,19,<br>20,21,22,2<br>5 | 10 | P02091,P47967,Q4FZU2,Q6IFU7,Q6IFU8,Q6IFW6,Q6IG02,Q6IMF3,Q6P6Q2,Q80WL1                             |
| 6551 | 1,3,5,6,18,<br>23,25,26 | 2,4,7,8,19,<br>20,21,22,2<br>4 | 10 | P02091,P55314,Q4FZU2,Q5I0D1,Q6IFU8,Q6IFW6,Q6IG02,Q6IMF3,Q6P6Q2,Q80WL1                             |
| 6552 | 1,3,5,6,18,<br>24,25,26 | 2,4,7,8,19,<br>20,21,22,2<br>3 | 2  | Q80WL1,Q8CJD3                                                                                     |
| 6553 | 1,3,5,6,19,<br>20,21,22 | 2,4,7,8,18,<br>23,24,25,2<br>6 | 7  | P00714,P01681,P55091,P82995,Q6IRE4,Q99MH3,Q9QW07                                                  |
| 6554 | 1,3,5,6,19,<br>20,21,23 | 2,4,7,8,18,<br>22,24,25,2<br>6 | 7  | P00714,P01681,P01835,P55091,P82995,Q6IRE4,Q80WL1                                                  |
| 6555 | 1,3,5,6,19,<br>20,21,24 | 2,4,7,8,18,<br>22,23,25,2<br>6 | 7  | P00714,P20766,P55091,P82995,Q6IRE4,Q80WL1,Q99MH3                                                  |
| 6556 | 1,3,5,6,19,<br>20,21,25 | 2,4,7,8,18,<br>22,23,24,2<br>6 | 3  | P53792,Q6IRE4,Q80WL1                                                                              |
| 6557 | 1,3,5,6,19,<br>20,21,26 | 2,4,7,8,18,<br>22,23,24,2<br>5 | 4  | P00714,P01681,Q6IRE4,Q99MH3                                                                       |
| 6558 | 1,3,5,6,19,<br>20,22,23 | 2,4,7,8,18,<br>21,24,25,2<br>6 | 12 | O54728,P00714,P00774,P19223,P22006,P31430,P55091,P82995,P98089,Q6IRE4,Q80WL1,Q9QW07               |
| 6559 | 1,3,5,6,19,<br>20,22,24 | 2,4,7,8,18,<br>21,23,25,2<br>6 | 14 | P00714,P00774,P07150,P14669,P24594,P27213,P31430,P55091,P82995,P98089,Q64057,Q6IRE4,Q80WL1,Q99MH3 |
| 6560 | 1,3,5,6,19,<br>20,22,25 | 2,4,7,8,18,<br>21,23,24,2<br>6 | 7  | D3ZUC6,P17046,P55091,P82995,Q6IRE4,Q80WL1,Q9QW07                                                  |
| 6561 | 1,3,5,6,19,<br>20,22,26 | 2,4,7,8,18,<br>21,23,24,2<br>5 | 9  | O54728,P00714,P01681,P31430,P55091,P98089,Q80WL1,Q99MH3,Q9QW07                                    |
| 6562 | 1,3,5,6,19,<br>20,23,24 | 2,4,7,8,18,<br>21,22,25,2<br>6 | 8  | P00714,P19223,P31430,P55091,P82995,P98089,Q6IRE4,Q80WL1                                           |

|      |                         |                                |   |                                                         |
|------|-------------------------|--------------------------------|---|---------------------------------------------------------|
| 6563 | 1,3,5,6,19,<br>20,23,25 | 2,4,7,8,18,<br>21,22,24,2<br>6 | 6 | P17046,P55091,P55314,P82995,Q6IRE4,Q80WL1               |
| 6564 | 1,3,5,6,19,<br>20,23,26 | 2,4,7,8,18,<br>21,22,24,2<br>5 | 8 | O54728,P01681,P31430,P98089,Q4FZU2,Q6IG02,Q6IRE4,Q80WL1 |
| 6565 | 1,3,5,6,19,<br>20,24,25 | 2,4,7,8,18,<br>21,22,23,2<br>6 | 3 | P82995,Q6IRE4,Q80WL1                                    |
| 6566 | 1,3,5,6,19,<br>20,24,26 | 2,4,7,8,18,<br>21,22,23,2<br>5 | 6 | P00714,P31430,P98089,Q6IRE4,Q80WL1,Q99MH3               |
| 6567 | 1,3,5,6,19,<br>20,25,26 | 2,4,7,8,18,<br>21,22,23,2<br>4 | 4 | D3ZUC6,P01681,Q6IRE4,Q80WL1                             |
| 6568 | 1,3,5,6,19,<br>21,22,23 | 2,4,7,8,18,<br>20,24,25,2<br>6 | 4 | P00714,P55091,P82995,Q9QW07                             |
| 6569 | 1,3,5,6,19,<br>21,22,24 | 2,4,7,8,18,<br>20,23,25,2<br>6 | 7 | P00714,P13432,P19218,P55091,P82995,Q99MH3,Q9QW07        |
| 6570 | 1,3,5,6,19,<br>21,22,25 | 2,4,7,8,18,<br>20,23,24,2<br>6 | 3 | P17046,P19218,Q9QW07                                    |
| 6571 | 1,3,5,6,19,<br>21,22,26 | 2,4,7,8,18,<br>20,23,24,2<br>5 | 5 | O54728,P00714,P01681,Q99MH3,Q9QW07                      |
| 6572 | 1,3,5,6,19,<br>21,23,24 | 2,4,7,8,18,<br>20,22,25,2<br>6 | 5 | P00714,P55091,P82995,Q6IRE4,Q80WL1                      |
| 6573 | 1,3,5,6,19,<br>21,23,25 | 2,4,7,8,18,<br>20,22,24,2<br>6 | 2 | P17046,Q6IRE4                                           |
| 6574 | 1,3,5,6,19,<br>21,23,26 | 2,4,7,8,18,<br>20,22,24,2<br>5 | 2 | P01681,Q4FZU2                                           |
| 6575 | 1,3,5,6,19,<br>21,24,25 | 2,4,7,8,18,<br>20,22,23,2<br>6 | 3 | P17046,Q6IRE4,Q80WL1                                    |
| 6576 | 1,3,5,6,19,<br>21,24,26 | 2,4,7,8,18,<br>20,22,23,2<br>5 | 3 | P00714,Q8CJD3,Q99MH3                                    |
| 6577 | 1,3,5,6,19,<br>21,25,26 | 2,4,7,8,18,<br>20,22,23,2<br>4 | 1 | P53792                                                  |

|      |                         |                                |   |                                                         |
|------|-------------------------|--------------------------------|---|---------------------------------------------------------|
| 6578 | 1,3,5,6,19,<br>22,23,24 | 2,4,7,8,18,<br>20,21,25,2<br>6 | 8 | P00714,P17046,P19223,P31430,P55091,P82995,P98089,Q80WL1 |
| 6579 | 1,3,5,6,19,<br>22,23,25 | 2,4,7,8,18,<br>20,21,24,2<br>6 | 7 | P01015,P02761,P17046,P55091,P55314,P82995,Q9QW07        |
| 6580 | 1,3,5,6,19,<br>22,23,26 | 2,4,7,8,18,<br>20,21,24,2<br>5 | 4 | O54728,P31430,P98089,Q9QW07                             |
| 6581 | 1,3,5,6,19,<br>22,24,25 | 2,4,7,8,18,<br>20,21,23,2<br>6 | 4 | P17046,P82995,Q6TMA8,Q80WL1                             |
| 6582 | 1,3,5,6,19,<br>22,24,26 | 2,4,7,8,18,<br>20,21,23,2<br>5 | 7 | O54728,P00714,P31430,P98089,Q6TMA8,Q80WL1,Q99MH3        |
| 6583 | 1,3,5,6,19,<br>22,25,26 | 2,4,7,8,18,<br>20,21,23,2<br>4 | 3 | O54728,P17046,Q9QW07                                    |
| 6584 | 1,3,5,6,19,<br>23,24,25 | 2,4,7,8,18,<br>20,21,22,2<br>6 | 3 | P17046,P82995,Q80WL1                                    |
| 6585 | 1,3,5,6,19,<br>23,24,26 | 2,4,7,8,18,<br>20,21,22,2<br>5 | 5 | O54728,P02091,P31430,P98089,Q80WL1                      |
| 6586 | 1,3,5,6,19,<br>23,25,26 | 2,4,7,8,18,<br>20,21,22,2<br>4 | 4 | P02091,P17046,P55314,Q80WL1                             |
| 6587 | 1,3,5,6,19,<br>24,25,26 | 2,4,7,8,18,<br>20,21,22,2<br>3 | 2 | Q80WL1,Q8CJD3                                           |
| 6588 | 1,3,5,6,20,<br>21,22,23 | 2,4,7,8,18,<br>19,24,25,2<br>6 | 7 | P00714,P01681,P01835,P55091,P82995,Q6IRE4,Q9QW07        |
| 6589 | 1,3,5,6,20,<br>21,22,24 | 2,4,7,8,18,<br>19,23,25,2<br>6 | 8 | P00714,P13432,P55091,P82995,Q5XFX0,Q6IRE4,Q99MH3,Q9QW07 |
| 6590 | 1,3,5,6,20,<br>21,22,25 | 2,4,7,8,18,<br>19,23,24,2<br>6 | 4 | Q03191,Q6IRE4,Q99MH3,Q9QW07                             |
| 6591 | 1,3,5,6,20,<br>21,22,26 | 2,4,7,8,18,<br>19,23,24,2<br>5 | 6 | O54728,P00714,P01681,Q6IRE4,Q99MH3,Q9QW07               |
| 6592 | 1,3,5,6,20,<br>21,23,24 | 2,4,7,8,18,<br>19,22,25,2<br>6 | 7 | P00714,P01835,P20766,P55091,P82995,Q6IRE4,Q80WL1        |

|      |                         |                                |    |                                                                              |
|------|-------------------------|--------------------------------|----|------------------------------------------------------------------------------|
| 6593 | 1,3,5,6,20,<br>21,23,25 | 2,4,7,8,18,<br>19,22,24,2<br>6 | 5  | P01835,P55314,P82995,Q6IRE4,Q80WL1                                           |
| 6594 | 1,3,5,6,20,<br>21,23,26 | 2,4,7,8,18,<br>19,22,24,2<br>5 | 9  | P01681,P01835,Q4FZU2,Q6IFU8,Q6IFV1,Q6IG02,Q6IMF3,Q6IRE4,Q6P6Q2               |
| 6595 | 1,3,5,6,20,<br>21,24,25 | 2,4,7,8,18,<br>19,22,23,2<br>6 | 5  | P82995,Q5XFX0,Q6IRE4,Q80WL1,Q99MH3                                           |
| 6596 | 1,3,5,6,20,<br>21,24,26 | 2,4,7,8,18,<br>19,22,23,2<br>5 | 6  | P00714,P01681,Q6IRE4,Q80WL1,Q8CJD3,Q99MH3                                    |
| 6597 | 1,3,5,6,20,<br>21,25,26 | 2,4,7,8,18,<br>19,22,23,2<br>4 | 4  | P01681,P01835,Q6IRE4,Q99MH3                                                  |
| 6598 | 1,3,5,6,20,<br>22,23,24 | 2,4,7,8,18,<br>19,21,25,2<br>6 | 10 | P00714,P19223,P31430,P47967,P55091,P82995,P98089,Q6IRE4,Q80WL1,Q9QW07        |
| 6599 | 1,3,5,6,20,<br>22,23,25 | 2,4,7,8,18,<br>19,21,24,2<br>6 | 8  | D3ZUC6,P17046,P55091,P55314,P82995,Q6IRE4,Q80WL1,Q9QW07                      |
| 6600 | 1,3,5,6,20,<br>22,23,26 | 2,4,7,8,18,<br>19,21,24,2<br>5 | 10 | O54728,P01681,P31430,P47967,P98089,Q4FZU2,Q6IG02,Q6IRE4,Q80WL1,Q9QW07        |
| 6601 | 1,3,5,6,20,<br>22,24,25 | 2,4,7,8,18,<br>19,21,23,2<br>6 | 8  | D3ZUC6,P82995,Q03191,Q5XFX0,Q64057,Q6IRE4,Q80WL1,Q99MH3                      |
| 6602 | 1,3,5,6,20,<br>22,24,26 | 2,4,7,8,18,<br>19,21,23,2<br>5 | 11 | O54728,P00714,P02803,P47967,P98089,Q64057,Q6IRE4,Q80WL1,Q99041,Q99MH3,Q9QW07 |
| 6603 | 1,3,5,6,20,<br>22,25,26 | 2,4,7,8,18,<br>19,21,23,2<br>4 | 6  | D3ZUC6,O54728,Q6IRE4,Q80WL1,Q99MH3,Q9QW07                                    |
| 6604 | 1,3,5,6,20,<br>23,24,25 | 2,4,7,8,18,<br>19,21,22,2<br>6 | 5  | P55314,P82995,Q63751,Q6IRE4,Q80WL1                                           |
| 6605 | 1,3,5,6,20,<br>23,24,26 | 2,4,7,8,18,<br>19,21,22,2<br>5 | 9  | P02091,P47967,P97840,P98089,Q4FZU2,Q6IG02,Q6IMF3,Q6IRE4,Q80WL1               |
| 6606 | 1,3,5,6,20,<br>23,25,26 | 2,4,7,8,18,<br>19,21,22,2<br>4 | 10 | D3ZUC6,P02091,P55314,Q4FZU2,Q6IFU8,Q6IFW6,Q6IG02,Q6IMF3,Q6IRE4,Q80WL1        |
| 6607 | 1,3,5,6,20,<br>24,25,26 | 2,4,7,8,18,<br>19,21,22,2<br>3 | 5  | D3ZUC6,Q6IRE4,Q80WL1,Q8CJD3,Q99MH3                                           |

|      |                         |                                |   |                                                  |
|------|-------------------------|--------------------------------|---|--------------------------------------------------|
| 6608 | 1,3,5,6,21,<br>22,23,24 | 2,4,7,8,18,<br>19,20,25,2<br>6 | 7 | P00714,P13432,P35280,P55091,P82995,Q6IRE4,Q9QW07 |
| 6609 | 1,3,5,6,21,<br>22,23,25 | 2,4,7,8,18,<br>19,20,24,2<br>6 | 5 | P17046,P35280,P55314,Q6IRE4,Q9QW07               |
| 6610 | 1,3,5,6,21,<br>22,23,26 | 2,4,7,8,18,<br>19,20,24,2<br>5 | 4 | O54728,Q4FZU2,Q6IMF3,Q9QW07                      |
| 6611 | 1,3,5,6,21,<br>22,24,25 | 2,4,7,8,18,<br>19,20,23,2<br>6 | 6 | P13432,P17046,P35280,Q5XFX0,Q6IRE4,Q9QW07        |
| 6612 | 1,3,5,6,21,<br>22,24,26 | 2,4,7,8,18,<br>19,20,23,2<br>5 | 5 | P00714,P13432,Q8CJD3,Q99MH3,Q9QW07               |
| 6613 | 1,3,5,6,21,<br>22,25,26 | 2,4,7,8,18,<br>19,20,23,2<br>4 | 1 | Q9QW07                                           |
| 6614 | 1,3,5,6,21,<br>23,24,25 | 2,4,7,8,18,<br>19,20,22,2<br>6 | 4 | P35280,Q63751,Q6IRE4,Q80WL1                      |
| 6615 | 1,3,5,6,21,<br>23,24,26 | 2,4,7,8,18,<br>19,20,22,2<br>5 | 5 | P02091,Q4FZU2,Q6IFV1,Q6IMF3,Q6IRE4               |
| 6616 | 1,3,5,6,21,<br>23,25,26 | 2,4,7,8,18,<br>19,20,22,2<br>4 | 6 | P02091,P55314,Q4FZU2,Q6IFU8,Q6IMF3,Q6IRE4        |
| 6617 | 1,3,5,6,21,<br>24,25,26 | 2,4,7,8,18,<br>19,20,22,2<br>3 | 2 | Q6IRE4,Q8CJD3                                    |
| 6618 | 1,3,5,6,22,<br>23,24,25 | 2,4,7,8,18,<br>19,20,21,2<br>6 | 7 | P17046,P35280,P55314,P62804,P82995,Q63751,Q80WL1 |
| 6619 | 1,3,5,6,22,<br>23,24,26 | 2,4,7,8,18,<br>19,20,21,2<br>5 | 7 | O54728,P00731,P02091,P31430,P47967,P98089,Q80WL1 |
| 6620 | 1,3,5,6,22,<br>23,25,26 | 2,4,7,8,18,<br>19,20,21,2<br>4 | 5 | O54728,P02091,P02761,P55314,Q9QW07               |
| 6621 | 1,3,5,6,22,<br>24,25,26 | 2,4,7,8,18,<br>19,20,21,2<br>3 | 4 | Q64057,Q80WL1,Q8CJD3,Q99MH3                      |
| 6622 | 1,3,5,6,23,<br>24,25,26 | 2,4,7,8,18,<br>19,20,21,2<br>2 | 6 | P01946,P02091,P55314,Q63751,Q7TPB1,Q80WL1        |



|      |                        |                                 |   |                                                  |
|------|------------------------|---------------------------------|---|--------------------------------------------------|
| 6623 | 1,3,5,7,8,1<br>8,19,20 | 2,4,6,21,2<br>2,23,24,25<br>,26 | 4 | P25236,P83121,Q6IRE4,Q6P6R2                      |
| 6624 | 1,3,5,7,8,1<br>8,19,21 | 2,4,6,20,2<br>2,23,24,25<br>,26 | 3 | P00731,P53792,Q6IRE4                             |
| 6625 | 1,3,5,7,8,1<br>8,19,22 | 2,4,6,20,2<br>1,23,24,25<br>,26 | 4 | P25236,P83121,Q6P6R2,Q9QW07                      |
| 6626 | 1,3,5,7,8,1<br>8,19,23 | 2,4,6,20,2<br>1,22,24,25<br>,26 | 4 | P09605;P25809,P25236,P35467,Q03191               |
| 6627 | 1,3,5,7,8,1<br>8,19,24 | 2,4,6,20,2<br>1,22,23,25<br>,26 | 4 | P09605;P25809,P25236,P83121,Q6IRE4               |
| 6628 | 1,3,5,7,8,1<br>8,19,25 | 2,4,6,20,2<br>1,22,23,24<br>,26 | 5 | P01015,P10715,P25236,P32755,P62815               |
| 6629 | 1,3,5,7,8,1<br>8,19,26 | 2,4,6,20,2<br>1,22,23,24<br>,25 | 4 | O54728,P09605;P25809,P70709,Q6P6R2               |
| 6630 | 1,3,5,7,8,1<br>8,20,21 | 2,4,6,19,2<br>2,23,24,25<br>,26 | 4 | P14480,Q4FZU6,Q6IRE4,Q9ET32                      |
| 6631 | 1,3,5,7,8,1<br>8,20,22 | 2,4,6,19,2<br>1,23,24,25<br>,26 | 7 | P14480,P25236,P27213,P83121,Q6IRE4,Q6P6R2,Q9QW07 |
| 6632 | 1,3,5,7,8,1<br>8,20,23 | 2,4,6,19,2<br>1,22,24,25<br>,26 | 6 | P14480,P25236,Q4FZU6,Q6IG02,Q6IRE4,Q9ET32        |
| 6633 | 1,3,5,7,8,1<br>8,20,24 | 2,4,6,19,2<br>1,22,23,25<br>,26 | 5 | P10715,P25236,P27213,P83121,Q6IRE4               |
| 6634 | 1,3,5,7,8,1<br>8,20,25 | 2,4,6,19,2<br>1,22,23,24<br>,26 | 3 | P10715,P25236,Q6IRE4                             |
| 6635 | 1,3,5,7,8,1<br>8,20,26 | 2,4,6,19,2<br>1,22,23,24<br>,25 | 5 | P10715,P50280,Q4FZU6,Q6IG02,Q6IRE4               |
| 6636 | 1,3,5,7,8,1<br>8,21,22 | 2,4,6,19,2<br>0,23,24,25<br>,26 | 3 | P14480,Q6IRE4,Q9QW07                             |
| 6637 | 1,3,5,7,8,1<br>8,21,23 | 2,4,6,19,2<br>0,22,24,25<br>,26 | 1 | Q6IRE4                                           |

|      |                        |                                 |    |                                                                                     |
|------|------------------------|---------------------------------|----|-------------------------------------------------------------------------------------|
| 6638 | 1,3,5,7,8,1<br>8,21,24 | 2,4,6,19,2<br>0,22,23,25<br>,26 | 1  | Q6IRE4                                                                              |
| 6639 | 1,3,5,7,8,1<br>8,21,25 | 2,4,6,19,2<br>0,22,23,24<br>,26 | 4  | P08721,P10715,P31430,Q6IRE4                                                         |
| 6640 | 1,3,5,7,8,1<br>8,21,26 | 2,4,6,19,2<br>0,22,23,24<br>,25 | 2  | Q4FZU6,Q6IRE4                                                                       |
| 6641 | 1,3,5,7,8,1<br>8,22,23 | 2,4,6,19,2<br>0,21,24,25<br>,26 | 3  | P01015,P25236,Q9QW07                                                                |
| 6642 | 1,3,5,7,8,1<br>8,22,24 | 2,4,6,19,2<br>0,21,23,25<br>,26 | 6  | P25236,P27213,P83121,Q6IRE4,Q6P6R2,Q9QW07                                           |
| 6643 | 1,3,5,7,8,1<br>8,22,25 | 2,4,6,19,2<br>0,21,23,24<br>,26 | 5  | P01015,P10715,P19629,P25236,Q9QW07                                                  |
| 6644 | 1,3,5,7,8,1<br>8,22,26 | 2,4,6,19,2<br>0,21,23,24<br>,25 | 5  | O54728,P25236,Q6P6R2,Q8VD89,Q9QW07                                                  |
| 6645 | 1,3,5,7,8,1<br>8,23,24 | 2,4,6,19,2<br>0,21,22,25<br>,26 | 3  | P09605;P25809,P25236,Q6IRE4                                                         |
| 6646 | 1,3,5,7,8,1<br>8,23,25 | 2,4,6,19,2<br>0,21,22,24<br>,26 | 5  | P01015,P10715,P19629,P25236,Q6IRE4                                                  |
| 6647 | 1,3,5,7,8,1<br>8,23,26 | 2,4,6,19,2<br>0,21,22,24<br>,25 | 11 | O54728,P01946,P02091,P09605;P25809,P35467,Q4FZU6,Q6IFW6,Q6IG02,Q6IRE4,Q6P6Q2,Q8VD89 |
| 6648 | 1,3,5,7,8,1<br>8,24,25 | 2,4,6,19,2<br>0,21,22,23<br>,26 | 4  | P10715,P19629,P25236,Q6IRE4                                                         |
| 6649 | 1,3,5,7,8,1<br>8,24,26 | 2,4,6,19,2<br>0,21,22,23<br>,25 | 6  | P02091,P09605;P25809,P25236,Q6IRE4,Q8CJD3,Q8VD89                                    |
| 6650 | 1,3,5,7,8,1<br>8,25,26 | 2,4,6,19,2<br>0,21,22,23<br>,24 | 4  | P02091,P10715,P32755,Q6IRE4                                                         |
| 6651 | 1,3,5,7,8,1<br>9,20,21 | 2,4,6,18,2<br>2,23,24,25<br>,26 | 3  | P53792,Q4FZU6,Q6IRE4                                                                |
| 6652 | 1,3,5,7,8,1<br>9,20,22 | 2,4,6,18,2<br>1,23,24,25<br>,26 | 10 | O54728,P00774,P25236,P27213,P55091,P83121,P98089,Q6IRE4,Q6P6R2,Q9QW07               |

|      |                        |                                 |   |                                                  |
|------|------------------------|---------------------------------|---|--------------------------------------------------|
| 6653 | 1,3,5,7,8,1<br>9,20,23 | 2,4,6,18,2<br>1,22,24,25<br>,26 | 4 | P00774,P55091,P98089,Q6IRE4                      |
| 6654 | 1,3,5,7,8,1<br>9,20,24 | 2,4,6,18,2<br>1,22,23,25<br>,26 | 5 | P00774,P25236,P83121,P98089,Q6IRE4               |
| 6655 | 1,3,5,7,8,1<br>9,20,25 | 2,4,6,18,2<br>1,22,23,24<br>,26 | 5 | P10715,P17046,P25236,Q6IFU7,Q6IRE4               |
| 6656 | 1,3,5,7,8,1<br>9,20,26 | 2,4,6,18,2<br>1,22,23,24<br>,25 | 4 | O54728,P98089,Q4FZU6,Q6IRE4                      |
| 6657 | 1,3,5,7,8,1<br>9,21,22 | 2,4,6,18,2<br>0,23,24,25<br>,26 | 2 | P19218,Q9QW07                                    |
| 6658 | 1,3,5,7,8,1<br>9,21,23 | 2,4,6,18,2<br>0,22,24,25<br>,26 | 2 | O70594,Q6IRE4                                    |
| 6659 | 1,3,5,7,8,1<br>9,21,24 | 2,4,6,18,2<br>0,22,23,25<br>,26 | 2 | P53792,Q6IRE4                                    |
| 6660 | 1,3,5,7,8,1<br>9,21,25 | 2,4,6,18,2<br>0,22,23,24<br>,26 | 4 | P17046,P53792,Q6IFU7,Q6IRE4                      |
| 6661 | 1,3,5,7,8,1<br>9,21,26 | 2,4,6,18,2<br>0,22,23,24<br>,25 | 3 | O54728,P53792,Q6IRE4                             |
| 6662 | 1,3,5,7,8,1<br>9,22,23 | 2,4,6,18,2<br>0,21,24,25<br>,26 | 7 | O54728,P00774,P17046,P25236,P55091,P98089,Q9QW07 |
| 6663 | 1,3,5,7,8,1<br>9,22,24 | 2,4,6,18,2<br>0,21,23,25<br>,26 | 7 | P00774,P25236,P83121,P98089,Q6P6R2,Q6TMA8,Q9QW07 |
| 6664 | 1,3,5,7,8,1<br>9,22,25 | 2,4,6,18,2<br>0,21,23,24<br>,26 | 4 | P10715,P17046,P25236,Q9QW07                      |
| 6665 | 1,3,5,7,8,1<br>9,22,26 | 2,4,6,18,2<br>0,21,23,24<br>,25 | 4 | O54728,P98089,Q6P6R2,Q9QW07                      |
| 6666 | 1,3,5,7,8,1<br>9,23,24 | 2,4,6,18,2<br>0,21,22,25<br>,26 | 4 | P09605,P25809,P25236,P98089,Q6IRE4               |
| 6667 | 1,3,5,7,8,1<br>9,23,25 | 2,4,6,18,2<br>0,21,22,24<br>,26 | 5 | O70594,P01015,P17046,P19629,Q99041               |

|      |                        |                                 |    |                                                                       |
|------|------------------------|---------------------------------|----|-----------------------------------------------------------------------|
| 6668 | 1,3,5,7,8,1<br>9,23,26 | 2,4,6,18,2<br>0,21,22,24<br>,25 | 5  | O54728,P01946,P02091,P09605,P25809,P98089                             |
| 6669 | 1,3,5,7,8,1<br>9,24,25 | 2,4,6,18,2<br>0,21,22,23<br>,26 | 5  | P10715,P17046,P19629,P25236,Q6IRE4                                    |
| 6670 | 1,3,5,7,8,1<br>9,24,26 | 2,4,6,18,2<br>0,21,22,23<br>,25 | 5  | O54728,P02091,P25236,P98089,Q8CJD3                                    |
| 6671 | 1,3,5,7,8,1<br>9,25,26 | 2,4,6,18,2<br>0,21,22,23<br>,24 | 4  | O54728,P02091,P10715,P32755                                           |
| 6672 | 1,3,5,7,8,2<br>0,21,22 | 2,4,6,18,1<br>9,23,24,25<br>,26 | 4  | P14480,Q6IRE4,Q99MH3,Q9QW07                                           |
| 6673 | 1,3,5,7,8,2<br>0,21,23 | 2,4,6,18,1<br>9,22,24,25<br>,26 | 3  | P14480,Q4FZU6,Q6IRE4                                                  |
| 6674 | 1,3,5,7,8,2<br>0,21,24 | 2,4,6,18,1<br>9,22,23,25<br>,26 | 3  | Q5XFX0,Q6IRE4,Q99MH3                                                  |
| 6675 | 1,3,5,7,8,2<br>0,21,25 | 2,4,6,18,1<br>9,22,23,24<br>,26 | 3  | P10715,Q6IFU7,Q6IRE4                                                  |
| 6676 | 1,3,5,7,8,2<br>0,21,26 | 2,4,6,18,1<br>9,22,23,24<br>,25 | 3  | Q4FZU6,Q6IRE4,Q99MH3                                                  |
| 6677 | 1,3,5,7,8,2<br>0,22,23 | 2,4,6,18,1<br>9,21,24,25<br>,26 | 9  | O54728,P00774,P14480,P25236,P55091,P98089,Q6IRE4,Q8CIZ5,Q9QW07        |
| 6678 | 1,3,5,7,8,2<br>0,22,24 | 2,4,6,18,1<br>9,21,23,25<br>,26 | 10 | P00774,P25236,P27213,P83121,P98089,Q5XFX0,Q6IRE4,Q6P6R2,Q99MH3,Q9QW07 |
| 6679 | 1,3,5,7,8,2<br>0,22,25 | 2,4,6,18,1<br>9,21,23,24<br>,26 | 5  | D3ZUC6,P10715,P25236,Q6IRE4,Q9QW07                                    |
| 6680 | 1,3,5,7,8,2<br>0,22,26 | 2,4,6,18,1<br>9,21,23,24<br>,25 | 8  | O54728,P98089,Q4FZU6,Q6IRE4,Q6P6R2,Q8CIZ5,Q99MH3,Q9QW07               |
| 6681 | 1,3,5,7,8,2<br>0,23,24 | 2,4,6,18,1<br>9,21,22,25<br>,26 | 5  | P25236,P97840,P98089,Q6IRE4,Q8CIZ5                                    |
| 6682 | 1,3,5,7,8,2<br>0,23,25 | 2,4,6,18,1<br>9,21,22,24<br>,26 | 3  | P10715,P19629,Q6IRE4                                                  |

|      |                        |                                 |    |                                                                       |
|------|------------------------|---------------------------------|----|-----------------------------------------------------------------------|
| 6683 | 1,3,5,7,8,2<br>0,23,26 | 2,4,6,18,1<br>9,21,22,24<br>,25 | 9  | O54728,P01946,P02091,P97840,P98089,Q4FZU6,Q6IG02,Q6IRE4,Q8CIZ5        |
| 6684 | 1,3,5,7,8,2<br>0,24,25 | 2,4,6,18,1<br>9,21,22,23<br>,26 | 4  | P10715,P19629,P25236,Q6IRE4                                           |
| 6685 | 1,3,5,7,8,2<br>0,24,26 | 2,4,6,18,1<br>9,21,22,23<br>,25 | 10 | O54728,P02091,P25236,P97840,P98089,Q4FZU6,Q6IRE4,Q8CIZ5,Q8CJD3,Q99MH3 |
| 6686 | 1,3,5,7,8,2<br>0,25,26 | 2,4,6,18,1<br>9,21,22,23<br>,24 | 3  | P02091,P10715,Q6IRE4                                                  |
| 6687 | 1,3,5,7,8,2<br>1,22,23 | 2,4,6,18,1<br>9,20,24,25<br>,26 | 2  | Q6IRE4,Q9QW07                                                         |
| 6688 | 1,3,5,7,8,2<br>1,22,24 | 2,4,6,18,1<br>9,20,23,25<br>,26 | 3  | Q5XFX0,Q6IRE4,Q9QW07                                                  |
| 6689 | 1,3,5,7,8,2<br>1,22,25 | 2,4,6,18,1<br>9,20,23,24<br>,26 | 5  | P10715,P17046,P19629,Q6IRE4,Q9QW07                                    |
| 6690 | 1,3,5,7,8,2<br>1,22,26 | 2,4,6,18,1<br>9,20,23,24<br>,25 | 3  | O54728,Q6IRE4,Q9QW07                                                  |
| 6691 | 1,3,5,7,8,2<br>1,23,24 | 2,4,6,18,1<br>9,20,22,25<br>,26 | 1  | Q6IRE4                                                                |
| 6692 | 1,3,5,7,8,2<br>1,23,25 | 2,4,6,18,1<br>9,20,22,24<br>,26 | 2  | P19629,Q6IRE4                                                         |
| 6693 | 1,3,5,7,8,2<br>1,23,26 | 2,4,6,18,1<br>9,20,22,24<br>,25 | 4  | P01946,P02091,Q4FZU6,Q6IRE4                                           |
| 6694 | 1,3,5,7,8,2<br>1,24,25 | 2,4,6,18,1<br>9,20,22,23<br>,26 | 4  | P10715,P19629,Q62997,Q6IRE4                                           |
| 6695 | 1,3,5,7,8,2<br>1,24,26 | 2,4,6,18,1<br>9,20,22,23<br>,25 | 3  | P02091,Q6IRE4,Q8CJD3                                                  |
| 6696 | 1,3,5,7,8,2<br>1,25,26 | 2,4,6,18,1<br>9,20,22,23<br>,24 | 4  | P02091,P10715,P19629,Q6IRE4                                           |
| 6697 | 1,3,5,7,8,2<br>2,23,24 | 2,4,6,18,1<br>9,20,21,25<br>,26 | 5  | P25236,P98089,Q6IRE4,Q8CIZ5,Q9QW07                                    |

|      |                         |                                 |    |                                                                       |
|------|-------------------------|---------------------------------|----|-----------------------------------------------------------------------|
| 6698 | 1,3,5,7,8,2<br>2,23,25  | 2,4,6,18,1<br>9,20,21,24<br>,26 | 6  | P01015,P10715,P17046,P19629,P25236,Q9QW07                             |
| 6699 | 1,3,5,7,8,2<br>2,23,26  | 2,4,6,18,1<br>9,20,21,24<br>,25 | 6  | O54728,P01946,P02091,P98089,Q8CIZ5,Q9QW07                             |
| 6700 | 1,3,5,7,8,2<br>2,24,25  | 2,4,6,18,1<br>9,20,21,23<br>,26 | 6  | P10715,P17046,P19629,P25236,Q6IRE4,Q9QW07                             |
| 6701 | 1,3,5,7,8,2<br>2,24,26  | 2,4,6,18,1<br>9,20,21,23<br>,25 | 9  | O54728,P02091,P25236,P98089,Q6P6R2,Q8CIZ5,Q8CJD3,Q99MH3,Q9QW07        |
| 6702 | 1,3,5,7,8,2<br>2,25,26  | 2,4,6,18,1<br>9,20,21,23<br>,24 | 5  | O54728,P02091,P10715,P19629,Q9QW07                                    |
| 6703 | 1,3,5,7,8,2<br>3,24,25  | 2,4,6,18,1<br>9,20,21,22<br>,26 | 5  | P10715,P19629,P25236,Q63751,Q6IRE4                                    |
| 6704 | 1,3,5,7,8,2<br>3,24,26  | 2,4,6,18,1<br>9,20,21,22<br>,25 | 8  | O54728,P01946,P02091,P47967,P97840,P98089,Q6IRE4,Q8CIZ5               |
| 6705 | 1,3,5,7,8,2<br>3,25,26  | 2,4,6,18,1<br>9,20,21,22<br>,24 | 6  | O54728,P01946,P02091,P10715,P19629,Q6IRE4                             |
| 6706 | 1,3,5,7,8,2<br>4,25,26  | 2,4,6,18,1<br>9,20,21,22<br>,23 | 7  | P01946,P02091,P10715,P19629,P25236,Q6IRE4,Q8CJD3                      |
| 6707 | 1,3,5,7,18,<br>19,20,21 | 2,4,6,8,22,<br>23,24,25,2<br>6  | 2  | P00731,Q6IRE4                                                         |
| 6708 | 1,3,5,7,18,<br>19,20,22 | 2,4,6,8,21,<br>23,24,25,2<br>6  | 10 | P07150,P14669,P25236,P27213,Q5U2V4,Q6IRE4,Q6P6R2,Q9QW07,Q9WTT6,Q9Z0V6 |
| 6709 | 1,3,5,7,18,<br>19,20,23 | 2,4,6,8,21,<br>22,24,25,2<br>6  | 4  | P25236,Q6IRE4,Q80WL1,Q9WTT6                                           |
| 6710 | 1,3,5,7,18,<br>19,20,24 | 2,4,6,8,21,<br>22,23,25,2<br>6  | 10 | P07150,P14669,P25236,P50280,P83121,Q6IRE4,Q6P6R2,Q80WL1,Q9WTT6,Q9Z0V6 |
| 6711 | 1,3,5,7,18,<br>19,20,25 | 2,4,6,8,21,<br>22,23,24,2<br>6  | 4  | P17046,P25236,P62815,Q6IRE4                                           |
| 6712 | 1,3,5,7,18,<br>19,20,26 | 2,4,6,8,21,<br>22,23,24,2<br>5  | 7  | O54728,P50280,Q4FZU6,Q5U2V4,Q6IRE4,Q6P6R2,Q9WTT6                      |

|      |                         |                                |    |                                                                              |
|------|-------------------------|--------------------------------|----|------------------------------------------------------------------------------|
| 6713 | 1,3,5,7,18,<br>19,21,22 | 2,4,6,8,20,<br>23,24,25,2<br>6 | 3  | P17046,P19218,Q9QW07                                                         |
| 6714 | 1,3,5,7,18,<br>19,21,23 | 2,4,6,8,20,<br>22,24,25,2<br>6 | 3  | P14668,Q03191,Q6IRE4                                                         |
| 6715 | 1,3,5,7,18,<br>19,21,24 | 2,4,6,8,20,<br>22,23,25,2<br>6 | 1  | Q6IRE4                                                                       |
| 6716 | 1,3,5,7,18,<br>19,21,25 | 2,4,6,8,20,<br>22,23,24,2<br>6 | 4  | P00731,P17046,P53792,Q6IRE4                                                  |
| 6717 | 1,3,5,7,18,<br>19,21,26 | 2,4,6,8,20,<br>22,23,24,2<br>5 | 1  | Q6IRE4                                                                       |
| 6718 | 1,3,5,7,18,<br>19,22,23 | 2,4,6,8,20,<br>21,24,25,2<br>6 | 5  | P01015,P17046,P25236,Q9QW07,Q9WTT6                                           |
| 6719 | 1,3,5,7,18,<br>19,22,24 | 2,4,6,8,20,<br>21,23,25,2<br>6 | 11 | P07150,P14669,P17046,P25236,P62804,P83121,Q00715,Q6P6R2,Q9QW07,Q9WTT6,Q9Z0V6 |
| 6720 | 1,3,5,7,18,<br>19,22,25 | 2,4,6,8,20,<br>21,23,24,2<br>6 | 5  | P01015,P17046,P25236,P62804,Q9QW07                                           |
| 6721 | 1,3,5,7,18,<br>19,22,26 | 2,4,6,8,20,<br>21,23,24,2<br>5 | 6  | O54728,P25236,Q5U2V4,Q6P6R2,Q9QW07,Q9WTT6                                    |
| 6722 | 1,3,5,7,18,<br>19,23,24 | 2,4,6,8,20,<br>21,22,25,2<br>6 | 5  | P25236,Q00715,Q03191,Q80WL1,Q9WTT6                                           |
| 6723 | 1,3,5,7,18,<br>19,23,25 | 2,4,6,8,20,<br>21,22,24,2<br>6 | 3  | P01015,P17046,P25236                                                         |
| 6724 | 1,3,5,7,18,<br>19,23,26 | 2,4,6,8,20,<br>21,22,24,2<br>5 | 9  | O54728,P01946,P02091,P09605,P25809,P35467,Q03191,Q07523,Q6IG02,Q6P6Q2        |
| 6725 | 1,3,5,7,18,<br>19,24,25 | 2,4,6,8,20,<br>21,22,23,2<br>6 | 5  | P17046,P25236,P62804,Q00715,Q80WL1                                           |
| 6726 | 1,3,5,7,18,<br>19,24,26 | 2,4,6,8,20,<br>21,22,23,2<br>5 | 4  | P02091,P25236,Q6P6R2,Q9WTT6                                                  |
| 6727 | 1,3,5,7,18,<br>19,25,26 | 2,4,6,8,20,<br>21,22,23,2<br>4 | 3  | P02091,P17046,P32755                                                         |

|      |                         |                                |    |                                                                                            |
|------|-------------------------|--------------------------------|----|--------------------------------------------------------------------------------------------|
| 6728 | 1,3,5,7,18,<br>20,21,22 | 2,4,6,8,19,<br>23,24,25,2<br>6 | 4  | P14480,P50280,Q6IRE4,Q9QW07                                                                |
| 6729 | 1,3,5,7,18,<br>20,21,23 | 2,4,6,8,19,<br>22,24,25,2<br>6 | 3  | P14480,Q4FZU6,Q6IRE4                                                                       |
| 6730 | 1,3,5,7,18,<br>20,21,24 | 2,4,6,8,19,<br>22,23,25,2<br>6 | 2  | P50280,Q6IRE4                                                                              |
| 6731 | 1,3,5,7,18,<br>20,21,25 | 2,4,6,8,19,<br>22,23,24,2<br>6 | 1  | Q6IRE4                                                                                     |
| 6732 | 1,3,5,7,18,<br>20,21,26 | 2,4,6,8,19,<br>22,23,24,2<br>5 | 4  | P06911,P50280,Q4FZU6,Q6IRE4                                                                |
| 6733 | 1,3,5,7,18,<br>20,22,23 | 2,4,6,8,19,<br>21,24,25,2<br>6 | 6  | P14480,P25236,Q6IRE4,Q8CIZ5,Q9QW07,Q9WTT6                                                  |
| 6734 | 1,3,5,7,18,<br>20,22,24 | 2,4,6,8,19,<br>21,23,25,2<br>6 | 11 | P07150,P14669,P25236,P27213,P50280,P83121,Q6IRE4,Q6P6R2,Q9QW07,Q9WTT6,Q9Z0V6               |
| 6735 | 1,3,5,7,18,<br>20,22,25 | 2,4,6,8,19,<br>21,23,24,2<br>6 | 4  | P17046,P25236,Q6IRE4,Q9QW07                                                                |
| 6736 | 1,3,5,7,18,<br>20,22,26 | 2,4,6,8,19,<br>21,23,24,2<br>5 | 10 | O54728,P07150,P50280,Q4FZU6,Q5U2V4,Q6IRE4,Q6P6R2,Q8CIZ5,Q9QW07,Q9WTT6                      |
| 6737 | 1,3,5,7,18,<br>20,23,24 | 2,4,6,8,19,<br>21,22,25,2<br>6 | 3  | P25236,Q6IRE4,Q80WL1                                                                       |
| 6738 | 1,3,5,7,18,<br>20,23,25 | 2,4,6,8,19,<br>21,22,24,2<br>6 | 2  | Q6IRE4,Q80WL1                                                                              |
| 6739 | 1,3,5,7,18,<br>20,23,26 | 2,4,6,8,19,<br>21,22,24,2<br>5 | 13 | A2RUV9,O54728,P01946,P02091,Q4FZU2,Q4FZU6,Q6IFU8,Q6IFW6,Q6IG02,Q6IMF3,Q6IRE4,Q6P6Q2,Q8CIZ5 |
| 6740 | 1,3,5,7,18,<br>20,24,25 | 2,4,6,8,19,<br>21,22,23,2<br>6 | 3  | P25236,Q6IRE4,Q80WL1                                                                       |
| 6741 | 1,3,5,7,18,<br>20,24,26 | 2,4,6,8,19,<br>21,22,23,2<br>5 | 8  | P02091,P25236,P50280,Q4FZU6,Q6IRE4,Q6P6R2,Q80WL1,Q8CJD3                                    |
| 6742 | 1,3,5,7,18,<br>20,25,26 | 2,4,6,8,19,<br>21,22,23,2<br>4 | 2  | P02091,Q6IRE4                                                                              |



|      |                         |                                |   |                                                                |
|------|-------------------------|--------------------------------|---|----------------------------------------------------------------|
| 6743 | 1,3,5,7,18,<br>21,22,23 | 2,4,6,8,19,<br>20,24,25,2<br>6 | 2 | Q6IRE4,Q9QW07                                                  |
| 6744 | 1,3,5,7,18,<br>21,22,24 | 2,4,6,8,19,<br>20,23,25,2<br>6 | 2 | Q6IRE4,Q9QW07                                                  |
| 6745 | 1,3,5,7,18,<br>21,22,25 | 2,4,6,8,19,<br>20,23,24,2<br>6 | 3 | P17046,Q6IRE4,Q9QW07                                           |
| 6746 | 1,3,5,7,18,<br>21,22,26 | 2,4,6,8,19,<br>20,23,24,2<br>5 | 4 | O54728,P50280,Q6IRE4,Q9QW07                                    |
| 6747 | 1,3,5,7,18,<br>21,23,24 | 2,4,6,8,19,<br>20,22,25,2<br>6 | 1 | Q6IRE4                                                         |
| 6748 | 1,3,5,7,18,<br>21,23,25 | 2,4,6,8,19,<br>20,22,24,2<br>6 | 3 | P01015,P17046,Q6IRE4                                           |
| 6749 | 1,3,5,7,18,<br>21,23,26 | 2,4,6,8,19,<br>20,22,24,2<br>5 | 9 | P01946,P02091,Q4FZU2,Q4FZU6,Q6IFU8,Q6IG02,Q6IMF3,Q6IRE4,Q6P6Q2 |
| 6750 | 1,3,5,7,18,<br>21,24,25 | 2,4,6,8,19,<br>20,22,23,2<br>6 | 2 | Q62997,Q6IRE4                                                  |
| 6751 | 1,3,5,7,18,<br>21,24,26 | 2,4,6,8,19,<br>20,22,23,2<br>5 | 4 | P02091,P50280,Q6IRE4,Q8CJD3                                    |
| 6752 | 1,3,5,7,18,<br>21,25,26 | 2,4,6,8,19,<br>20,22,23,2<br>4 | 3 | P02091,P31430,Q6IRE4                                           |
| 6753 | 1,3,5,7,18,<br>22,23,24 | 2,4,6,8,19,<br>20,21,25,2<br>6 | 5 | P25236,P62804,Q00715,Q9QW07,Q9WTT6                             |
| 6754 | 1,3,5,7,18,<br>22,23,25 | 2,4,6,8,19,<br>20,21,24,2<br>6 | 6 | P01015,P17046,P25236,P62804,Q00715,Q9QW07                      |
| 6755 | 1,3,5,7,18,<br>22,23,26 | 2,4,6,8,19,<br>20,21,24,2<br>5 | 8 | O54728,P01946,P02091,Q6IG02,Q6P6Q2,Q8CIZ5,Q8VD89,Q9QW07        |
| 6756 | 1,3,5,7,18,<br>22,24,25 | 2,4,6,8,19,<br>20,21,23,2<br>6 | 5 | P17046,P25236,P62804,Q00715,Q9QW07                             |
| 6757 | 1,3,5,7,18,<br>22,24,26 | 2,4,6,8,19,<br>20,21,23,2<br>5 | 9 | O54728,P02091,P25236,P50280,Q6P6R2,Q8CJD3,Q8VD89,Q9QW07,Q9WTT6 |

|      |                         |                                |    |                                                                                                                        |
|------|-------------------------|--------------------------------|----|------------------------------------------------------------------------------------------------------------------------|
| 6758 | 1,3,5,7,18,<br>22,25,26 | 2,4,6,8,19,<br>20,21,23,2<br>4 | 4  | O54728,P02091,P17046,Q9QW07                                                                                            |
| 6759 | 1,3,5,7,18,<br>23,24,25 | 2,4,6,8,19,<br>20,21,22,2<br>6 | 8  | P01015,P17046,P25236,P62804,Q00715,Q63751,Q6IRE4,Q80WL1                                                                |
| 6760 | 1,3,5,7,18,<br>23,24,26 | 2,4,6,8,19,<br>20,21,22,2<br>5 | 9  | P01946,P02091,P47967,Q07523,Q6IG02,Q6IRE4,Q6P6Q2,Q8CIZ5,Q8VD89                                                         |
| 6761 | 1,3,5,7,18,<br>23,25,26 | 2,4,6,8,19,<br>20,21,22,2<br>4 | 5  | P01946,P02091,Q6IG02,Q6IRE4,Q6P6Q2                                                                                     |
| 6762 | 1,3,5,7,18,<br>24,25,26 | 2,4,6,8,19,<br>20,21,22,2<br>3 | 5  | P01946,P02091,P25236,Q6IRE4,Q8CJD3                                                                                     |
| 6763 | 1,3,5,7,19,<br>20,21,22 | 2,4,6,8,18,<br>23,24,25,2<br>6 | 6  | P00714,P00774,P17046,P55091,Q6IRE4,Q9QW07                                                                              |
| 6764 | 1,3,5,7,19,<br>20,21,23 | 2,4,6,8,18,<br>22,24,25,2<br>6 | 2  | P55091,Q6IRE4                                                                                                          |
| 6765 | 1,3,5,7,19,<br>20,21,24 | 2,4,6,8,18,<br>22,23,25,2<br>6 | 3  | P00714,P00774,Q6IRE4                                                                                                   |
| 6766 | 1,3,5,7,19,<br>20,21,25 | 2,4,6,8,18,<br>22,23,24,2<br>6 | 3  | P17046,P53792,Q6IRE4                                                                                                   |
| 6767 | 1,3,5,7,19,<br>20,21,26 | 2,4,6,8,18,<br>22,23,24,2<br>5 | 4  | O54728,P50280,Q4FZU6,Q6IRE4                                                                                            |
| 6768 | 1,3,5,7,19,<br>20,22,23 | 2,4,6,8,18,<br>21,24,25,2<br>6 | 10 | O54728,P00774,P17046,P25236,P31430,P55091,P98089,Q6IRE4,Q9QW07,Q9WTT6                                                  |
| 6769 | 1,3,5,7,19,<br>20,22,24 | 2,4,6,8,18,<br>21,23,25,2<br>6 | 17 | O54728,P00714,P00774,P07150,P14669,P17046,P25236,P27213,P31430,P55091,P83121,P98089,Q6IRE4,Q6P6R2,Q99MH3,Q9WTT6,Q9Z0V6 |
| 6770 | 1,3,5,7,19,<br>20,22,25 | 2,4,6,8,18,<br>21,23,24,2<br>6 | 6  | P00774,P14669,P17046,P25236,Q6IRE4,Q9QW07                                                                              |
| 6771 | 1,3,5,7,19,<br>20,22,26 | 2,4,6,8,18,<br>21,23,24,2<br>5 | 10 | O54728,P07150,P14669,P98089,Q5U2V4,Q6IRE4,Q6P6R2,Q99MH3,Q9QW07,Q9WTT6                                                  |
| 6772 | 1,3,5,7,19,<br>20,23,24 | 2,4,6,8,18,<br>21,22,25,2<br>6 | 8  | P00774,P25236,P31430,P55091,P98089,Q6IRE4,Q80WL1,Q9WTT6                                                                |

|      |                         |                                |    |                                                                                            |
|------|-------------------------|--------------------------------|----|--------------------------------------------------------------------------------------------|
| 6773 | 1,3,5,7,19,<br>20,23,25 | 2,4,6,8,18,<br>21,22,24,2<br>6 | 3  | P17046,Q6IRE4,Q80WL1                                                                       |
| 6774 | 1,3,5,7,19,<br>20,23,26 | 2,4,6,8,18,<br>21,22,24,2<br>5 | 7  | O54728,P01946,P02091,P98089,Q4FZU6,Q6IRE4,Q80WL1                                           |
| 6775 | 1,3,5,7,19,<br>20,24,25 | 2,4,6,8,18,<br>21,22,23,2<br>6 | 4  | P17046,P25236,Q6IRE4,Q80WL1                                                                |
| 6776 | 1,3,5,7,19,<br>20,24,26 | 2,4,6,8,18,<br>21,22,23,2<br>5 | 13 | O54728,P02091,P07150,P14669,P25236,P50280,P98089,Q6IRE4,Q6P6R2,Q80WL1,Q8CJD3,Q99MH3,Q9WTT6 |
| 6777 | 1,3,5,7,19,<br>20,25,26 | 2,4,6,8,18,<br>21,22,23,2<br>4 | 5  | O54728,P02091,P17046,Q6IRE4,Q80WL1                                                         |
| 6778 | 1,3,5,7,19,<br>21,22,23 | 2,4,6,8,18,<br>20,24,25,2<br>6 | 3  | P17046,P55091,Q9QW07                                                                       |
| 6779 | 1,3,5,7,19,<br>21,22,24 | 2,4,6,8,18,<br>20,23,25,2<br>6 | 6  | P00714,P00774,P17046,P19218,Q6TMA8,Q9QW07                                                  |
| 6780 | 1,3,5,7,19,<br>21,22,25 | 2,4,6,8,18,<br>20,23,24,2<br>6 | 4  | P17046,P19218,Q6TMA8,Q9QW07                                                                |
| 6781 | 1,3,5,7,19,<br>21,22,26 | 2,4,6,8,18,<br>20,23,24,2<br>5 | 4  | O54728,P17046,Q6TMA8,Q9QW07                                                                |
| 6782 | 1,3,5,7,19,<br>21,23,24 | 2,4,6,8,18,<br>20,22,25,2<br>6 | 2  | P17046,Q6IRE4                                                                              |
| 6783 | 1,3,5,7,19,<br>21,23,25 | 2,4,6,8,18,<br>20,22,24,2<br>6 | 2  | P17046,Q6IRE4                                                                              |
| 6784 | 1,3,5,7,19,<br>21,23,26 | 2,4,6,8,18,<br>20,22,24,2<br>5 | 4  | O54728,P01946,P02091,Q6IRE4                                                                |
| 6785 | 1,3,5,7,19,<br>21,24,25 | 2,4,6,8,18,<br>20,22,23,2<br>6 | 3  | P17046,Q6IRE4,Q6TMA8                                                                       |
| 6786 | 1,3,5,7,19,<br>21,24,26 | 2,4,6,8,18,<br>20,22,23,2<br>5 | 4  | P02091,Q6IRE4,Q6TMA8,Q8CJD3                                                                |
| 6787 | 1,3,5,7,19,<br>21,25,26 | 2,4,6,8,18,<br>20,22,23,2<br>4 | 3  | P02091,P17046,Q6IRE4                                                                       |

|      |                         |                                |    |                                                                              |
|------|-------------------------|--------------------------------|----|------------------------------------------------------------------------------|
| 6788 | 1,3,5,7,19,<br>22,23,24 | 2,4,6,8,18,<br>20,21,25,2<br>6 | 11 | O54728,P00774,P17046,P19223,P25236,P31430,P55091,P62804,P98089,Q00715,Q9WTT6 |
| 6789 | 1,3,5,7,19,<br>22,23,25 | 2,4,6,8,18,<br>20,21,24,2<br>6 | 5  | P01015,P17046,P25236,P62804,Q6AYR8                                           |
| 6790 | 1,3,5,7,19,<br>22,23,26 | 2,4,6,8,18,<br>20,21,24,2<br>5 | 7  | O54728,P01946,P02091,P17046,P98089,Q9QW07,Q9WTT6                             |
| 6791 | 1,3,5,7,19,<br>22,24,25 | 2,4,6,8,18,<br>20,21,23,2<br>6 | 5  | P17046,P25236,P62804,Q00715,Q6TMA8                                           |
| 6792 | 1,3,5,7,19,<br>22,24,26 | 2,4,6,8,18,<br>20,21,23,2<br>5 | 11 | O54728,P02091,P14669,P17046,P25236,P98089,Q6P6R2,Q6TMA8,Q8CJD3,Q99MH3,Q9WTT6 |
| 6793 | 1,3,5,7,19,<br>22,25,26 | 2,4,6,8,18,<br>20,21,23,2<br>4 | 6  | O54728,P02091,P08644,P17046,Q6TMA8,Q9QW07                                    |
| 6794 | 1,3,5,7,19,<br>23,24,25 | 2,4,6,8,18,<br>20,21,22,2<br>6 | 5  | P17046,P25236,P62804,Q00715,Q80WL1                                           |
| 6795 | 1,3,5,7,19,<br>23,24,26 | 2,4,6,8,18,<br>20,21,22,2<br>5 | 5  | O54728,P01946,P02091,P98089,Q80WL1                                           |
| 6796 | 1,3,5,7,19,<br>23,25,26 | 2,4,6,8,18,<br>20,21,22,2<br>4 | 4  | O54728,P01946,P02091,P17046                                                  |
| 6797 | 1,3,5,7,19,<br>24,25,26 | 2,4,6,8,18,<br>20,21,22,2<br>3 | 7  | P01946,P02091,P17046,P25236,Q6TMA8,Q80WL1,Q8CJD3                             |
| 6798 | 1,3,5,7,20,<br>21,22,23 | 2,4,6,8,18,<br>19,24,25,2<br>6 | 3  | P55091,Q6IRE4,Q9QW07                                                         |
| 6799 | 1,3,5,7,20,<br>21,22,24 | 2,4,6,8,18,<br>19,23,25,2<br>6 | 7  | P00714,P00774,Q5XFX0,Q62635,Q6IRE4,Q99MH3,Q9QW07                             |
| 6800 | 1,3,5,7,20,<br>21,22,25 | 2,4,6,8,18,<br>19,23,24,2<br>6 | 3  | P17046,Q6IRE4,Q9QW07                                                         |
| 6801 | 1,3,5,7,20,<br>21,22,26 | 2,4,6,8,18,<br>19,23,24,2<br>5 | 6  | O54728,P50280,Q4FZU6,Q6IRE4,Q99MH3,Q9QW07                                    |
| 6802 | 1,3,5,7,20,<br>21,23,24 | 2,4,6,8,18,<br>19,22,25,2<br>6 | 1  | Q6IRE4                                                                       |

|      |                         |                                |    |                                                                                                                        |
|------|-------------------------|--------------------------------|----|------------------------------------------------------------------------------------------------------------------------|
| 6803 | 1,3,5,7,20,<br>21,23,25 | 2,4,6,8,18,<br>19,22,24,2<br>6 | 2  | P17046,Q6IRE4                                                                                                          |
| 6804 | 1,3,5,7,20,<br>21,23,26 | 2,4,6,8,18,<br>19,22,24,2<br>5 | 5  | O54728,P01946,P02091,Q4FZU6,Q6IRE4                                                                                     |
| 6805 | 1,3,5,7,20,<br>21,24,25 | 2,4,6,8,18,<br>19,22,23,2<br>6 | 1  | Q6IRE4                                                                                                                 |
| 6806 | 1,3,5,7,20,<br>21,24,26 | 2,4,6,8,18,<br>19,22,23,2<br>5 | 6  | P02091,P50280,Q4FZU6,Q6IRE4,Q8CJD3,Q99MH3                                                                              |
| 6807 | 1,3,5,7,20,<br>21,25,26 | 2,4,6,8,18,<br>19,22,23,2<br>4 | 2  | P02091,Q6IRE4                                                                                                          |
| 6808 | 1,3,5,7,20,<br>22,23,24 | 2,4,6,8,18,<br>19,21,25,2<br>6 | 10 | P00774,P25236,P31430,P55091,P98089,Q62635,Q6IRE4,Q80WL1,Q8CIZ5,Q9WTT6                                                  |
| 6809 | 1,3,5,7,20,<br>22,23,25 | 2,4,6,8,18,<br>19,21,24,2<br>6 | 4  | P17046,P25236,Q6IRE4,Q9QW07                                                                                            |
| 6810 | 1,3,5,7,20,<br>22,23,26 | 2,4,6,8,18,<br>19,21,24,2<br>5 | 9  | O54728,P01946,P02091,P98089,Q4FZU6,Q62635,Q6IRE4,Q8CIZ5,Q9QW07                                                         |
| 6811 | 1,3,5,7,20,<br>22,24,25 | 2,4,6,8,18,<br>19,21,23,2<br>6 | 6  | P0C0A9,P14669,P17046,P25236,Q6IRE4,Q99MH3                                                                              |
| 6812 | 1,3,5,7,20,<br>22,24,26 | 2,4,6,8,18,<br>19,21,23,2<br>5 | 17 | O54728,P02091,P02803,P07150,P14669,P25236,P50280,P98089,Q62635,Q63598,Q6IRE4,Q6P6R2,Q8CIZ5,Q8CJD3,Q99MH3,Q9QW07,Q9WTT6 |
| 6813 | 1,3,5,7,20,<br>22,25,26 | 2,4,6,8,18,<br>19,21,23,2<br>4 | 6  | O54728,P02091,P17046,Q6IRE4,Q99MH3,Q9QW07                                                                              |
| 6814 | 1,3,5,7,20,<br>23,24,25 | 2,4,6,8,18,<br>19,21,22,2<br>6 | 6  | P0C0A9,P17046,P25236,Q63751,Q6IRE4,Q80WL1                                                                              |
| 6815 | 1,3,5,7,20,<br>23,24,26 | 2,4,6,8,18,<br>19,21,22,2<br>5 | 11 | O54728,P01946,P02091,P47967,P97840,P98089,Q4FZU6,Q62635,Q6IRE4,Q80WL1,Q8CIZ5                                           |
| 6816 | 1,3,5,7,20,<br>23,25,26 | 2,4,6,8,18,<br>19,21,22,2<br>4 | 6  | O54728,P01946,P02091,Q6IG02,Q6IRE4,Q80WL1                                                                              |
| 6817 | 1,3,5,7,20,<br>24,25,26 | 2,4,6,8,18,<br>19,21,22,2<br>3 | 7  | P01946,P02091,P0C0A9,Q6IRE4,Q80WL1,Q8CJD3,Q99MH3                                                                       |

|      |                         |                                |    |                                                                                     |
|------|-------------------------|--------------------------------|----|-------------------------------------------------------------------------------------|
| 6818 | 1,3,5,7,21,<br>22,23,24 | 2,4,6,8,18,<br>19,20,25,2<br>6 | 3  | P35280,Q6IRE4,Q9QW07                                                                |
| 6819 | 1,3,5,7,21,<br>22,23,25 | 2,4,6,8,18,<br>19,20,24,2<br>6 | 4  | P17046,P35280,Q6IRE4,Q9QW07                                                         |
| 6820 | 1,3,5,7,21,<br>22,23,26 | 2,4,6,8,18,<br>19,20,24,2<br>5 | 5  | O54728,P01946,P02091,Q6IRE4,Q9QW07                                                  |
| 6821 | 1,3,5,7,21,<br>22,24,25 | 2,4,6,8,18,<br>19,20,23,2<br>6 | 6  | P17046,P35280,Q63355,Q6IRE4,Q6TMA8,Q9QW07                                           |
| 6822 | 1,3,5,7,21,<br>22,24,26 | 2,4,6,8,18,<br>19,20,23,2<br>5 | 8  | O54728,P00714,P02091,Q6IRE4,Q6TMA8,Q8CJD3,Q99MH3,Q9QW07                             |
| 6823 | 1,3,5,7,21,<br>22,25,26 | 2,4,6,8,18,<br>19,20,23,2<br>4 | 5  | O54728,P02091,P17046,Q6IRE4,Q9QW07                                                  |
| 6824 | 1,3,5,7,21,<br>23,24,25 | 2,4,6,8,18,<br>19,20,22,2<br>6 | 5  | P17046,P22006,P35280,Q63751,Q6IRE4                                                  |
| 6825 | 1,3,5,7,21,<br>23,24,26 | 2,4,6,8,18,<br>19,20,22,2<br>5 | 4  | P01946,P02091,Q6IRE4,Q8CJD3                                                         |
| 6826 | 1,3,5,7,21,<br>23,25,26 | 2,4,6,8,18,<br>19,20,22,2<br>4 | 3  | P01946,P02091,Q6IRE4                                                                |
| 6827 | 1,3,5,7,21,<br>24,25,26 | 2,4,6,8,18,<br>19,20,22,2<br>3 | 5  | P01946,P02091,P22006,Q6IRE4,Q8CJD3                                                  |
| 6828 | 1,3,5,7,22,<br>23,24,25 | 2,4,6,8,18,<br>19,20,21,2<br>6 | 9  | P01015,P0C0A9,P17046,P25236,P35280,P62804,Q00715,Q63751,Q6AYR9                      |
| 6829 | 1,3,5,7,22,<br>23,24,26 | 2,4,6,8,18,<br>19,20,21,2<br>5 | 10 | O54728,P00731,P01946,P02091,P47967,P62804,P98089,Q62635,Q6AYR9,Q8CIZ5               |
| 6830 | 1,3,5,7,22,<br>23,25,26 | 2,4,6,8,18,<br>19,20,21,2<br>4 | 6  | O54728,P01946,P02091,P17046,P62804,Q9QW07                                           |
| 6831 | 1,3,5,7,22,<br>24,25,26 | 2,4,6,8,18,<br>19,20,21,2<br>3 | 12 | O54728,P01946,P02091,P0C0A9,P17046,P24368,P25236,P62804,Q5XI22,Q6AYR9,Q6TMA8,Q8CJD3 |
| 6832 | 1,3,5,7,23,<br>24,25,26 | 2,4,6,8,18,<br>19,20,21,2<br>2 | 11 | P01946,P02091,P0C0A9,P17046,P62804,Q63751,Q6AYR9,Q6IRE4,Q7TPB1,Q80WL1,Q8CJD3        |

|      |                         |                                |   |                                                         |
|------|-------------------------|--------------------------------|---|---------------------------------------------------------|
| 6833 | 1,3,5,8,18,<br>19,20,21 | 2,4,6,7,22,<br>23,24,25,2<br>6 | 5 | P00731,P14480,P35281,P83121,Q6IRE4                      |
| 6834 | 1,3,5,8,18,<br>19,20,22 | 2,4,6,7,21,<br>23,24,25,2<br>6 | 7 | P09605;P25809,P14480,P22006,P25236,P83121,Q6P6R2,Q9QW07 |
| 6835 | 1,3,5,8,18,<br>19,20,23 | 2,4,6,7,21,<br>22,24,25,2<br>6 | 5 | P09605;P25809,P22006,P35467,P83121,Q6IG02               |
| 6836 | 1,3,5,8,18,<br>19,20,24 | 2,4,6,7,21,<br>22,23,25,2<br>6 | 5 | P09605;P25809,P25236,P83121,Q6IRE4,Q6P6R2               |
| 6837 | 1,3,5,8,18,<br>19,20,25 | 2,4,6,7,21,<br>22,23,24,2<br>6 | 2 | P25236,P62815                                           |
| 6838 | 1,3,5,8,18,<br>19,20,26 | 2,4,6,7,21,<br>22,23,24,2<br>5 | 4 | O54728,P09605;P25809,Q6IG02,Q6P6R2                      |
| 6839 | 1,3,5,8,18,<br>19,21,22 | 2,4,6,7,20,<br>23,24,25,2<br>6 | 2 | P83121,Q9QW07                                           |
| 6840 | 1,3,5,8,18,<br>19,21,23 | 2,4,6,7,20,<br>22,24,25,2<br>6 | 3 | O70594,P35467,Q03191                                    |
| 6841 | 1,3,5,8,18,<br>19,21,24 | 2,4,6,7,20,<br>22,23,25,2<br>6 | 2 | P05539,P83121                                           |
| 6842 | 1,3,5,8,18,<br>19,21,25 | 2,4,6,7,20,<br>22,23,24,2<br>6 | 0 |                                                         |
| 6843 | 1,3,5,8,18,<br>19,21,26 | 2,4,6,7,20,<br>22,23,24,2<br>5 | 1 | P12020                                                  |
| 6844 | 1,3,5,8,18,<br>19,22,23 | 2,4,6,7,20,<br>21,24,25,2<br>6 | 6 | P09605;P25809,P22006,P25236,P35467,P83121,Q9QW07        |
| 6845 | 1,3,5,8,18,<br>19,22,24 | 2,4,6,7,20,<br>21,23,25,2<br>6 | 5 | P09605;P25809,P25236,P83121,Q6P6R2,Q9QW07               |
| 6846 | 1,3,5,8,18,<br>19,22,25 | 2,4,6,7,20,<br>21,23,24,2<br>6 | 4 | P01015,P25236,P83121,Q9QW07                             |
| 6847 | 1,3,5,8,18,<br>19,22,26 | 2,4,6,7,20,<br>21,23,24,2<br>5 | 5 | O54728,P09605;P25809,P83121,Q6P6R2,Q9QW07               |

|      |                         |                                |   |                                                                       |
|------|-------------------------|--------------------------------|---|-----------------------------------------------------------------------|
| 6848 | 1,3,5,8,18,<br>19,23,24 | 2,4,6,7,20,<br>21,22,25,2<br>6 | 5 | P09605;P25809,P25236,P35467,P83121,Q03191                             |
| 6849 | 1,3,5,8,18,<br>19,23,25 | 2,4,6,7,20,<br>21,22,24,2<br>6 | 3 | O70594,P01015,P35467                                                  |
| 6850 | 1,3,5,8,18,<br>19,23,26 | 2,4,6,7,20,<br>21,22,24,2<br>5 | 9 | O54728,P09605;P25809,P35467,Q03191,Q07523,Q63942,Q64194,Q6IG02,Q6P6Q2 |
| 6851 | 1,3,5,8,18,<br>19,24,25 | 2,4,6,7,20,<br>21,22,23,2<br>6 | 2 | P25236,P83121                                                         |
| 6852 | 1,3,5,8,18,<br>19,24,26 | 2,4,6,7,20,<br>21,22,23,2<br>5 | 4 | P09605;P25809,P25236,P83121,Q6P6R2                                    |
| 6853 | 1,3,5,8,18,<br>19,25,26 | 2,4,6,7,20,<br>21,22,23,2<br>4 | 1 | P32755                                                                |
| 6854 | 1,3,5,8,18,<br>20,21,22 | 2,4,6,7,19,<br>23,24,25,2<br>6 | 4 | P14480,P83121,Q6IRE4,Q9QW07                                           |
| 6855 | 1,3,5,8,18,<br>20,21,23 | 2,4,6,7,19,<br>22,24,25,2<br>6 | 3 | P14480,Q6IG02,Q6IRE4                                                  |
| 6856 | 1,3,5,8,18,<br>20,21,24 | 2,4,6,7,19,<br>22,23,25,2<br>6 | 3 | P12020,P83121,Q6IRE4                                                  |
| 6857 | 1,3,5,8,18,<br>20,21,25 | 2,4,6,7,19,<br>22,23,24,2<br>6 | 3 | P31430,Q63532,Q6IRE4                                                  |
| 6858 | 1,3,5,8,18,<br>20,21,26 | 2,4,6,7,19,<br>22,23,24,2<br>5 | 7 | P06911,P12020,P50280,Q4FZU6,Q63532,Q6IG02,Q6IRE4                      |
| 6859 | 1,3,5,8,18,<br>20,22,23 | 2,4,6,7,19,<br>21,24,25,2<br>6 | 9 | P09605;P25809,P14480,P22006,P83121,P97840,Q6IG02,Q8CIZ5,Q9QW07,Q9QZK9 |
| 6860 | 1,3,5,8,18,<br>20,22,24 | 2,4,6,7,19,<br>21,23,25,2<br>6 | 8 | P25236,P27213,P83121,P97840,Q6IRE4,Q6P6R2,Q9QW07,Q9QZK9               |
| 6861 | 1,3,5,8,18,<br>20,22,25 | 2,4,6,7,19,<br>21,23,24,2<br>6 | 3 | P25236,P83121,Q9QW07                                                  |
| 6862 | 1,3,5,8,18,<br>20,22,26 | 2,4,6,7,19,<br>21,23,24,2<br>5 | 9 | O54728,P47967,P50280,P83121,P97840,Q6IG02,Q6P6R2,Q99041,Q9QW07        |



|      |                         |                                |    |                                                                                                          |
|------|-------------------------|--------------------------------|----|----------------------------------------------------------------------------------------------------------|
| 6863 | 1,3,5,8,18,<br>20,23,24 | 2,4,6,7,19,<br>21,22,25,2<br>6 | 8  | P09605;P25809,P25236,P47967,P83121,P97840,Q6IG02,Q6IRE4,Q9QZK9                                           |
| 6864 | 1,3,5,8,18,<br>20,23,25 | 2,4,6,7,19,<br>21,22,24,2<br>6 | 2  | Q6IG02,Q6IRE4                                                                                            |
| 6865 | 1,3,5,8,18,<br>20,23,26 | 2,4,6,7,19,<br>21,22,24,2<br>5 | 14 | O54728,P09605;P25809,P35467,P47967,P97840,Q4FZU2,Q4FZU6,Q6IFU8,Q6IFW6,Q6IG02,Q6IMF3,Q6IRE4,Q6P6Q2,Q8CIZ5 |
| 6866 | 1,3,5,8,18,<br>20,24,25 | 2,4,6,7,19,<br>21,22,23,2<br>6 | 4  | P08649,P25236,P83121,Q6IRE4                                                                              |
| 6867 | 1,3,5,8,18,<br>20,24,26 | 2,4,6,7,19,<br>21,22,23,2<br>5 | 11 | P06911,P09605;P25809,P12020,P47967,P50280,P83121,P97840,Q6IG02,Q6IRE4,Q8CJD3,Q99041                      |
| 6868 | 1,3,5,8,18,<br>20,25,26 | 2,4,6,7,19,<br>21,22,23,2<br>4 | 2  | Q6IG02,Q6IRE4                                                                                            |
| 6869 | 1,3,5,8,18,<br>21,22,23 | 2,4,6,7,19,<br>20,24,25,2<br>6 | 2  | P14480,Q9QW07                                                                                            |
| 6870 | 1,3,5,8,18,<br>21,22,24 | 2,4,6,7,19,<br>20,23,25,2<br>6 | 2  | P83121,Q9QW07                                                                                            |
| 6871 | 1,3,5,8,18,<br>21,22,25 | 2,4,6,7,19,<br>20,23,24,2<br>6 | 1  | Q9QW07                                                                                                   |
| 6872 | 1,3,5,8,18,<br>21,22,26 | 2,4,6,7,19,<br>20,23,24,2<br>5 | 1  | Q9QW07                                                                                                   |
| 6873 | 1,3,5,8,18,<br>21,23,24 | 2,4,6,7,19,<br>20,22,25,2<br>6 | 0  |                                                                                                          |
| 6874 | 1,3,5,8,18,<br>21,23,25 | 2,4,6,7,19,<br>20,22,24,2<br>6 | 0  |                                                                                                          |
| 6875 | 1,3,5,8,18,<br>21,23,26 | 2,4,6,7,19,<br>20,22,24,2<br>5 | 8  | P35467,Q4FZU2,Q6IFU8,Q6IFV1,Q6IFW6,Q6IG02,Q6IMF3,Q6P6Q2                                                  |
| 6876 | 1,3,5,8,18,<br>21,24,25 | 2,4,6,7,19,<br>20,22,23,2<br>6 | 2  | P31430,Q62997                                                                                            |
| 6877 | 1,3,5,8,18,<br>21,24,26 | 2,4,6,7,19,<br>20,22,23,2<br>5 | 3  | P06911,P12020,Q8CJD3                                                                                     |

|      |                         |                                |   |                                                                       |
|------|-------------------------|--------------------------------|---|-----------------------------------------------------------------------|
| 6878 | 1,3,5,8,18,<br>21,25,26 | 2,4,6,7,19,<br>20,22,23,2<br>4 | 1 | P31430                                                                |
| 6879 | 1,3,5,8,18,<br>22,23,24 | 2,4,6,7,19,<br>20,21,25,2<br>6 | 6 | P09605;P25809,P25236,P47967,P83121,P97840,Q9QW07                      |
| 6880 | 1,3,5,8,18,<br>22,23,25 | 2,4,6,7,19,<br>20,21,24,2<br>6 | 3 | P01015,P25236,Q9QW07                                                  |
| 6881 | 1,3,5,8,18,<br>22,23,26 | 2,4,6,7,19,<br>20,21,24,2<br>5 | 9 | O54728,P09605;P25809,P35467,P47967,P97840,Q6IG02,Q6P6Q2,Q8CIZ5,Q9QW07 |
| 6882 | 1,3,5,8,18,<br>22,24,25 | 2,4,6,7,19,<br>20,21,23,2<br>6 | 3 | P25236,P83121,Q9QW07                                                  |
| 6883 | 1,3,5,8,18,<br>22,24,26 | 2,4,6,7,19,<br>20,21,23,2<br>5 | 9 | O54728,P09605;P25809,P25236,P47967,P83121,P97840,Q6P6R2,Q99041,Q9QW07 |
| 6884 | 1,3,5,8,18,<br>22,25,26 | 2,4,6,7,19,<br>20,21,23,2<br>4 | 1 | Q9QW07                                                                |
| 6885 | 1,3,5,8,18,<br>23,24,25 | 2,4,6,7,19,<br>20,21,22,2<br>6 | 1 | P25236                                                                |
| 6886 | 1,3,5,8,18,<br>23,24,26 | 2,4,6,7,19,<br>20,21,22,2<br>5 | 8 | P02091,P09605;P25809,P35467,P47967,P97840,Q6IFW6,Q6IG02,Q6P6Q2        |
| 6887 | 1,3,5,8,18,<br>23,25,26 | 2,4,6,7,19,<br>20,21,22,2<br>4 | 7 | P02091,P35467,Q5I0D1,Q6IFU8,Q6IFW6,Q6IG02,Q6P6Q2                      |
| 6888 | 1,3,5,8,18,<br>24,25,26 | 2,4,6,7,19,<br>20,21,22,2<br>3 | 2 | B4F795,Q8CJD3                                                         |
| 6889 | 1,3,5,8,19,<br>20,21,22 | 2,4,6,7,18,<br>23,24,25,2<br>6 | 6 | P00714,P00774,P14480,P55091,P83121,Q9QW07                             |
| 6890 | 1,3,5,8,19,<br>20,21,23 | 2,4,6,7,18,<br>22,24,25,2<br>6 | 2 | P55091,Q6IRE4                                                         |
| 6891 | 1,3,5,8,19,<br>20,21,24 | 2,4,6,7,18,<br>22,23,25,2<br>6 | 5 | P00714,P00774,P55091,P83121,Q6IRE4                                    |
| 6892 | 1,3,5,8,19,<br>20,21,25 | 2,4,6,7,18,<br>22,23,24,2<br>6 | 1 | Q6IRE4                                                                |

|      |                         |                                |    |                                                                                            |
|------|-------------------------|--------------------------------|----|--------------------------------------------------------------------------------------------|
| 6893 | 1,3,5,8,19,<br>20,21,26 | 2,4,6,7,18,<br>22,23,24,2<br>5 | 2  | O54728,Q6IRE4                                                                              |
| 6894 | 1,3,5,8,19,<br>20,22,23 | 2,4,6,7,18,<br>21,24,25,2<br>6 | 11 | O54728,P00774,P09605;P25809,P22006,P25031,P31430,P55091,P82995,P83121,P98089,Q9QW07        |
| 6895 | 1,3,5,8,19,<br>20,22,24 | 2,4,6,7,18,<br>21,23,25,2<br>6 | 12 | P00714,P00774,P25031,P25236,P31430,P55091,P82995,P83121,P98089,Q6P6R2,Q99MH3,Q9QW07        |
| 6896 | 1,3,5,8,19,<br>20,22,25 | 2,4,6,7,18,<br>21,23,24,2<br>6 | 6  | D3ZUC6,P00774,P25236,P55091,P83121,Q9QW07                                                  |
| 6897 | 1,3,5,8,19,<br>20,22,26 | 2,4,6,7,18,<br>21,23,24,2<br>5 | 6  | O54728,P83121,P98089,Q6P6R2,Q99MH3,Q9QW07                                                  |
| 6898 | 1,3,5,8,19,<br>20,23,24 | 2,4,6,7,18,<br>21,22,25,2<br>6 | 12 | P00774,P09605;P25809,P25031,P25236,P31430,P55091,P82995,P83121,P83748,P98089,Q6IRE4,Q80WL1 |
| 6899 | 1,3,5,8,19,<br>20,23,25 | 2,4,6,7,18,<br>21,22,24,2<br>6 | 1  | P83748                                                                                     |
| 6900 | 1,3,5,8,19,<br>20,23,26 | 2,4,6,7,18,<br>21,22,24,2<br>5 | 6  | O54728,P09605;P25809,P97840,P98089,Q08849,Q6IG02                                           |
| 6901 | 1,3,5,8,19,<br>20,24,25 | 2,4,6,7,18,<br>21,22,23,2<br>6 | 4  | P25236,P83121,P83748,Q6IRE4                                                                |
| 6902 | 1,3,5,8,19,<br>20,24,26 | 2,4,6,7,18,<br>21,22,23,2<br>5 | 7  | O54728,P09605;P25809,P83121,P97840,P98089,Q6P6R2,Q99MH3                                    |
| 6903 | 1,3,5,8,19,<br>20,25,26 | 2,4,6,7,18,<br>21,22,23,2<br>4 | 1  | O54728                                                                                     |
| 6904 | 1,3,5,8,19,<br>21,22,23 | 2,4,6,7,18,<br>20,24,25,2<br>6 | 2  | P55091,Q9QW07                                                                              |
| 6905 | 1,3,5,8,19,<br>21,22,24 | 2,4,6,7,18,<br>20,23,25,2<br>6 | 4  | P00714,P00774,P83121,Q9QW07                                                                |
| 6906 | 1,3,5,8,19,<br>21,22,25 | 2,4,6,7,18,<br>20,23,24,2<br>6 | 2  | P17046,Q9QW07                                                                              |
| 6907 | 1,3,5,8,19,<br>21,22,26 | 2,4,6,7,18,<br>20,23,24,2<br>5 | 2  | O54728,Q9QW07                                                                              |

|      |                         |                                |    |                                                                                     |
|------|-------------------------|--------------------------------|----|-------------------------------------------------------------------------------------|
| 6908 | 1,3,5,8,19,<br>21,23,24 | 2,4,6,7,18,<br>20,22,25,2<br>6 | 0  |                                                                                     |
| 6909 | 1,3,5,8,19,<br>21,23,25 | 2,4,6,7,18,<br>20,22,24,2<br>6 | 1  | O70594                                                                              |
| 6910 | 1,3,5,8,19,<br>21,23,26 | 2,4,6,7,18,<br>20,22,24,2<br>5 | 1  | O54728                                                                              |
| 6911 | 1,3,5,8,19,<br>21,24,25 | 2,4,6,7,18,<br>20,22,23,2<br>6 | 0  |                                                                                     |
| 6912 | 1,3,5,8,19,<br>21,24,26 | 2,4,6,7,18,<br>20,22,23,2<br>5 | 1  | Q8CJD3                                                                              |
| 6913 | 1,3,5,8,19,<br>21,25,26 | 2,4,6,7,18,<br>20,22,23,2<br>4 | 0  |                                                                                     |
| 6914 | 1,3,5,8,19,<br>22,23,24 | 2,4,6,7,18,<br>20,21,25,2<br>6 | 11 | O54728,P00774,P09605;P25809,P19223,P25031,P25236,P31430,P55091,P82995,P83121,P98089 |
| 6915 | 1,3,5,8,19,<br>22,23,25 | 2,4,6,7,18,<br>20,21,24,2<br>6 | 3  | P01015,P17046,Q9QW07                                                                |
| 6916 | 1,3,5,8,19,<br>22,23,26 | 2,4,6,7,18,<br>20,21,24,2<br>5 | 4  | O54728,P09605;P25809,P98089,Q9QW07                                                  |
| 6917 | 1,3,5,8,19,<br>22,24,25 | 2,4,6,7,18,<br>20,21,23,2<br>6 | 4  | P17046,P25031,P25236,P83121                                                         |
| 6918 | 1,3,5,8,19,<br>22,24,26 | 2,4,6,7,18,<br>20,21,23,2<br>5 | 8  | O54728,P09605;P25809,P25236,P83121,P98089,Q6P6R2,Q99MH3,Q9QW07                      |
| 6919 | 1,3,5,8,19,<br>22,25,26 | 2,4,6,7,18,<br>20,21,23,2<br>4 | 2  | O54728,Q9QW07                                                                       |
| 6920 | 1,3,5,8,19,<br>23,24,25 | 2,4,6,7,18,<br>20,21,22,2<br>6 | 3  | P25031,P25236,P83748                                                                |
| 6921 | 1,3,5,8,19,<br>23,24,26 | 2,4,6,7,18,<br>20,21,22,2<br>5 | 5  | O54728,P02091,P09605;P25809,P47967,P98089                                           |
| 6922 | 1,3,5,8,19,<br>23,25,26 | 2,4,6,7,18,<br>20,21,22,2<br>4 | 2  | O54728,P02091                                                                       |

|      |                         |                                |    |                                                                                            |
|------|-------------------------|--------------------------------|----|--------------------------------------------------------------------------------------------|
| 6923 | 1,3,5,8,19,<br>24,25,26 | 2,4,6,7,18,<br>20,21,22,2<br>3 | 1  | Q8CJD3                                                                                     |
| 6924 | 1,3,5,8,20,<br>21,22,23 | 2,4,6,7,18,<br>19,24,25,2<br>6 | 4  | P14480,P55091,Q6IRE4,Q9QW07                                                                |
| 6925 | 1,3,5,8,20,<br>21,22,24 | 2,4,6,7,18,<br>19,23,25,2<br>6 | 7  | P00714,P00774,P83121,Q5XFX0,Q6IRE4,Q99MH3,Q9QW07                                           |
| 6926 | 1,3,5,8,20,<br>21,22,25 | 2,4,6,7,18,<br>19,23,24,2<br>6 | 4  | Q5XFX0,Q63532,Q6IRE4,Q9QW07                                                                |
| 6927 | 1,3,5,8,20,<br>21,22,26 | 2,4,6,7,18,<br>19,23,24,2<br>5 | 5  | O54728,Q63532,Q6IRE4,Q99MH3,Q9QW07                                                         |
| 6928 | 1,3,5,8,20,<br>21,23,24 | 2,4,6,7,18,<br>19,22,25,2<br>6 | 3  | P82995,P97840,Q6IRE4                                                                       |
| 6929 | 1,3,5,8,20,<br>21,23,25 | 2,4,6,7,18,<br>19,22,24,2<br>6 | 2  | P06760,Q6IRE4                                                                              |
| 6930 | 1,3,5,8,20,<br>21,23,26 | 2,4,6,7,18,<br>19,22,24,2<br>5 | 5  | O54728,P97840,Q4FZU6,Q6IG02,Q6IRE4                                                         |
| 6931 | 1,3,5,8,20,<br>21,24,25 | 2,4,6,7,18,<br>19,22,23,2<br>6 | 2  | Q5XFX0,Q6IRE4                                                                              |
| 6932 | 1,3,5,8,20,<br>21,24,26 | 2,4,6,7,18,<br>19,22,23,2<br>5 | 6  | P12020,P50280,P97840,Q6IRE4,Q8CJD3,Q99MH3                                                  |
| 6933 | 1,3,5,8,20,<br>21,25,26 | 2,4,6,7,18,<br>19,22,23,2<br>4 | 2  | Q63532,Q6IRE4                                                                              |
| 6934 | 1,3,5,8,20,<br>22,23,24 | 2,4,6,7,18,<br>19,21,25,2<br>6 | 13 | P00774,P25031,P25236,P47967,P55091,P82995,P83121,P83748,P97840,P98089,Q6IRE4,Q8CIZ5,Q9QW07 |
| 6935 | 1,3,5,8,20,<br>22,23,25 | 2,4,6,7,18,<br>19,21,24,2<br>6 | 2  | D3ZUC6,Q9QW07                                                                              |
| 6936 | 1,3,5,8,20,<br>22,23,26 | 2,4,6,7,18,<br>19,21,24,2<br>5 | 7  | O54728,P47967,P97840,P98089,Q6IG02,Q8CIZ5,Q9QW07                                           |
| 6937 | 1,3,5,8,20,<br>22,24,25 | 2,4,6,7,18,<br>19,21,23,2<br>6 | 8  | D3ZUC6,P25031,P25236,P83121,Q5XFX0,Q6IRE4,Q99MH3,Q9QW07                                    |

|      |                         |                                |    |                                                                              |
|------|-------------------------|--------------------------------|----|------------------------------------------------------------------------------|
| 6938 | 1,3,5,8,20,<br>22,24,26 | 2,4,6,7,18,<br>19,21,23,2<br>5 | 11 | O54728,P47967,P83121,P97840,P98089,Q62635,Q6P6R2,Q8CIZ5,Q8CJD3,Q99MH3,Q9QW07 |
| 6939 | 1,3,5,8,20,<br>22,25,26 | 2,4,6,7,18,<br>19,21,23,2<br>4 | 5  | D3ZUC6,O54728,Q63532,Q99MH3,Q9QW07                                           |
| 6940 | 1,3,5,8,20,<br>23,24,25 | 2,4,6,7,18,<br>19,21,22,2<br>6 | 6  | P08649,P25236,P82995,P83748,Q6IRE4,Q80WL1                                    |
| 6941 | 1,3,5,8,20,<br>23,24,26 | 2,4,6,7,18,<br>19,21,22,2<br>5 | 9  | O54728,P02091,P09605,P25809,P47967,P97840,P98089,Q6IG02,Q6IRE4,Q8CIZ5        |
| 6942 | 1,3,5,8,20,<br>23,25,26 | 2,4,6,7,18,<br>19,21,22,2<br>4 | 4  | O54728,P02091,Q6IG02,Q6IRE4                                                  |
| 6943 | 1,3,5,8,20,<br>24,25,26 | 2,4,6,7,18,<br>19,21,22,2<br>3 | 2  | Q6IRE4,Q8CJD3                                                                |
| 6944 | 1,3,5,8,21,<br>22,23,24 | 2,4,6,7,18,<br>19,20,25,2<br>6 | 2  | P35280,Q9QW07                                                                |
| 6945 | 1,3,5,8,21,<br>22,23,25 | 2,4,6,7,18,<br>19,20,24,2<br>6 | 3  | P06760,P35280,Q9QW07                                                         |
| 6946 | 1,3,5,8,21,<br>22,23,26 | 2,4,6,7,18,<br>19,20,24,2<br>5 | 2  | O54728,Q9QW07                                                                |
| 6947 | 1,3,5,8,21,<br>22,24,25 | 2,4,6,7,18,<br>19,20,23,2<br>6 | 3  | P35280,Q5XFX0,Q9QW07                                                         |
| 6948 | 1,3,5,8,21,<br>22,24,26 | 2,4,6,7,18,<br>19,20,23,2<br>5 | 4  | O54728,Q8CJD3,Q99MH3,Q9QW07                                                  |
| 6949 | 1,3,5,8,21,<br>22,25,26 | 2,4,6,7,18,<br>19,20,23,2<br>4 | 2  | Q63532,Q9QW07                                                                |
| 6950 | 1,3,5,8,21,<br>23,24,25 | 2,4,6,7,18,<br>19,20,22,2<br>6 | 3  | P06760,P35280,Q63751                                                         |
| 6951 | 1,3,5,8,21,<br>23,24,26 | 2,4,6,7,18,<br>19,20,22,2<br>5 | 4  | P02091,P47967,P97840,Q9QZQ5                                                  |
| 6952 | 1,3,5,8,21,<br>23,25,26 | 2,4,6,7,18,<br>19,20,22,2<br>4 | 0  |                                                                              |

|      |                          |                                |    |                                                                                            |
|------|--------------------------|--------------------------------|----|--------------------------------------------------------------------------------------------|
| 6953 | 1,3,5,8,21,<br>24,25,26  | 2,4,6,7,18,<br>19,20,22,2<br>3 | 1  | Q8CJD3                                                                                     |
| 6954 | 1,3,5,8,22,<br>23,24,25  | 2,4,6,7,18,<br>19,20,21,2<br>6 | 4  | P25031,P25236,P35280,P83748                                                                |
| 6955 | 1,3,5,8,22,<br>23,24,26  | 2,4,6,7,18,<br>19,20,21,2<br>5 | 9  | O54728,P00731,P02091,P09605;P25809,P47967,P97840,P98089,Q8CIZ5,Q9QW07                      |
| 6956 | 1,3,5,8,22,<br>23,25,26  | 2,4,6,7,18,<br>19,20,21,2<br>4 | 3  | O54728,P02091,Q9QW07                                                                       |
| 6957 | 1,3,5,8,22,<br>24,25,26  | 2,4,6,7,18,<br>19,20,21,2<br>3 | 4  | O54728,P25236,Q8CJD3,Q9QW07                                                                |
| 6958 | 1,3,5,8,23,<br>24,25,26  | 2,4,6,7,18,<br>19,20,21,2<br>2 | 5  | P01946,P02091,Q5I0D1,Q7TPB1,Q8CJD3                                                         |
| 6959 | 1,3,5,18,1<br>9,20,21,22 | 2,4,6,7,8,2<br>3,24,25,26      | 6  | P12020,P50280,P83121,Q02253,Q6P6R2,Q9QW07                                                  |
| 6960 | 1,3,5,18,1<br>9,20,21,23 | 2,4,6,7,8,2<br>2,24,25,26      | 2  | P12020,Q6IRE4                                                                              |
| 6961 | 1,3,5,18,1<br>9,20,21,24 | 2,4,6,7,8,2<br>2,23,25,26      | 7  | P06911,P12020,P20766,P50280,P83121,Q5GRG2,Q6IRE4                                           |
| 6962 | 1,3,5,18,1<br>9,20,21,25 | 2,4,6,7,8,2<br>2,23,24,26      | 4  | P20760,P20761,Q02253,Q6IRE4                                                                |
| 6963 | 1,3,5,18,1<br>9,20,21,26 | 2,4,6,7,8,2<br>2,23,24,25      | 5  | P06911,P12020,P50280,Q5GRG2,Q6IRE4                                                         |
| 6964 | 1,3,5,18,1<br>9,20,22,23 | 2,4,6,7,8,2<br>1,24,25,26      | 8  | O54728,P20761,P22006,P55091,Q6P6R2,Q9QW07,Q9QZK9,Q9WTT6                                    |
| 6965 | 1,3,5,18,1<br>9,20,22,24 | 2,4,6,7,8,2<br>1,23,25,26      | 13 | P07150,P12020,P14669,P25236,P27213,P50280,P83121,Q6P6R2,Q80WL1,Q99041,Q9QZK9,Q9WTT6,Q9Z0V6 |
| 6966 | 1,3,5,18,1<br>9,20,22,25 | 2,4,6,7,8,2<br>1,23,24,26      | 4  | P17046,P20761,P20762,P25236                                                                |
| 6967 | 1,3,5,18,1<br>9,20,22,26 | 2,4,6,7,8,2<br>1,23,24,25      | 10 | O54728,P07150,P12020,P50280,Q5U2V4,Q6P6R2,Q99041,Q9QW07,Q9WTT6,Q9Z0V6                      |
| 6968 | 1,3,5,18,1<br>9,20,23,24 | 2,4,6,7,8,2<br>1,22,25,26      | 8  | P09605;P25809,P12020,P19223,P25236,P83748,Q80WL1,Q9QZK9,Q9WTT6                             |
| 6969 | 1,3,5,18,1<br>9,20,23,25 | 2,4,6,7,8,2<br>1,22,24,26      | 2  | P20761,Q80WL1                                                                              |
| 6970 | 1,3,5,18,1<br>9,20,23,26 | 2,4,6,7,8,2<br>1,22,24,25      | 10 | O54728,P09605;P25809,P12020,P35467,Q4FZU2,Q6IFU8,Q6IFW6,Q6IG02,Q6P6Q2,Q80WL1               |
| 6971 | 1,3,5,18,1<br>9,20,24,25 | 2,4,6,7,8,2<br>1,22,23,26      | 5  | P20761,P20762,P22282,P25236,Q80WL1                                                         |
| 6972 | 1,3,5,18,1<br>9,20,24,26 | 2,4,6,7,8,2<br>1,22,23,25      | 10 | O54728,P06911,P09605;P25809,P12020,P50280,Q5GRG2,Q6P6R2,Q80WL1,Q99041,Q9WTT6               |

|      |                                                 |    |                                                                              |
|------|-------------------------------------------------|----|------------------------------------------------------------------------------|
| 6973 | 1,3,5,18,1 2,4,6,7,8,2<br>9,20,25,26 1,22,23,24 | 1  | Q80WL1                                                                       |
| 6974 | 1,3,5,18,1 2,4,6,7,8,2<br>9,21,22,23 0,24,25,26 | 1  | Q9QW07                                                                       |
| 6975 | 1,3,5,18,1 2,4,6,7,8,2<br>9,21,22,24 0,23,25,26 | 6  | P00714,P12020,P20762,P83121,Q6P6R2,Q9QW07                                    |
| 6976 | 1,3,5,18,1 2,4,6,7,8,2<br>9,21,22,25 0,23,24,26 | 6  | P17046,P20760,P20761,P20762,Q63617,Q9QW07                                    |
| 6977 | 1,3,5,18,1 2,4,6,7,8,2<br>9,21,22,26 0,23,24,25 | 5  | O54728,P12020,Q63617,Q6P6R2,Q9QW07                                           |
| 6978 | 1,3,5,18,1 2,4,6,7,8,2<br>9,21,23,24 0,22,25,26 | 1  | P12020                                                                       |
| 6979 | 1,3,5,18,1 2,4,6,7,8,2<br>9,21,23,25 0,22,24,26 | 2  | P20760,P20761                                                                |
| 6980 | 1,3,5,18,1 2,4,6,7,8,2<br>9,21,23,26 0,22,24,25 | 10 | P12020,P35467,Q03191,Q07523,Q4FZU2,Q63617,Q6IFU8,Q6IG02,Q6IMF3,Q6P6Q2        |
| 6981 | 1,3,5,18,1 2,4,6,7,8,2<br>9,21,24,25 0,22,23,26 | 2  | P20762,Q63617                                                                |
| 6982 | 1,3,5,18,1 2,4,6,7,8,2<br>9,21,24,26 0,22,23,25 | 6  | P06911,P12020,P50280,Q5GRG2,Q63617,Q8CJD3                                    |
| 6983 | 1,3,5,18,1 2,4,6,7,8,2<br>9,21,25,26 0,22,23,24 | 1  | Q63617                                                                       |
| 6984 | 1,3,5,18,1 2,4,6,7,8,2<br>9,22,23,24 0,21,25,26 | 8  | P09605;P25809,P19223,P25236,P62804,P83121,Q00715,Q6P6R2,Q9WTT6               |
| 6985 | 1,3,5,18,1 2,4,6,7,8,2<br>9,22,23,25 0,21,24,26 | 9  | O55004,P01015,P02761,P17046,P20761,P20762,P25236,P62804,Q6AYR8               |
| 6986 | 1,3,5,18,1 2,4,6,7,8,2<br>9,22,23,26 0,21,24,25 | 7  | O54728,P09605;P25809,P35467,Q6IG02,Q6P6Q2,Q6P6R2,Q9WTT6                      |
| 6987 | 1,3,5,18,1 2,4,6,7,8,2<br>9,22,24,25 0,21,23,26 | 7  | P17046,P20761,P20762,P25236,P62804,P83121,Q00715                             |
| 6988 | 1,3,5,18,1 2,4,6,7,8,2<br>9,22,24,26 0,21,23,25 | 9  | O54728,P09605;P25809,P12020,P25236,P50280,P83121,Q6P6R2,Q99041,Q9WTT6        |
| 6989 | 1,3,5,18,1 2,4,6,7,8,2<br>9,22,25,26 0,21,23,24 | 2  | O54728,Q63617                                                                |
| 6990 | 1,3,5,18,1 2,4,6,7,8,2<br>9,23,24,25 0,21,22,26 | 10 | O55004,P01015,P20761,P20762,P25236,P30836,P62804,P83748,Q00715,Q80WL1        |
| 6991 | 1,3,5,18,1 2,4,6,7,8,2<br>9,23,24,26 0,21,22,25 | 10 | O54728,P02091,P09605;P25809,P12020,P35467,Q03191,Q07523,Q6IG02,Q6P6Q2,Q80WL1 |
| 6992 | 1,3,5,18,1 2,4,6,7,8,2<br>9,23,25,26 0,21,22,24 | 6  | P02091,P35467,Q07523,Q6IFU8,Q6IG02,Q6P6Q2                                    |
| 6993 | 1,3,5,18,1 2,4,6,7,8,2<br>9,24,25,26 0,21,22,23 | 5  | P20762,Q63617,Q7TPB1,Q80WL1,Q8CJD3                                           |
| 6994 | 1,3,5,18,2 2,4,6,7,8,1<br>0,21,22,23 9,24,25,26 | 3  | P14480,Q6IRE4,Q9QW07                                                         |
| 6995 | 1,3,5,18,2 2,4,6,7,8,1<br>0,21,22,24 9,23,25,26 | 7  | P00714,P12020,P50280,P83121,Q6IRE4,Q99041,Q9QW07                             |



|      |                                                 |    |                                                                                                                               |
|------|-------------------------------------------------|----|-------------------------------------------------------------------------------------------------------------------------------|
| 6996 | 1,3,5,18,2 2,4,6,7,8,1<br>0,21,22,25 9,23,24,26 | 3  | Q63532,Q6IRE4,Q9QW07                                                                                                          |
| 6997 | 1,3,5,18,2 2,4,6,7,8,1<br>0,21,22,26 9,23,24,25 | 9  | O54728,P02631,P12020,P50280,Q63532,Q6IRE4,Q6P6R2,Q99041,Q9QW07                                                                |
| 6998 | 1,3,5,18,2 2,4,6,7,8,1<br>0,21,23,24 9,22,25,26 | 4  | P12020,P20766,Q6IRE4,Q9QZK9                                                                                                   |
| 6999 | 1,3,5,18,2 2,4,6,7,8,1<br>0,21,23,25 9,22,24,26 | 1  | Q6IRE4                                                                                                                        |
| 7000 | 1,3,5,18,2 2,4,6,7,8,1<br>0,21,23,26 9,22,24,25 | 11 | P06911,P12020,Q4FZU2,Q4FZU6,Q6IFU8,Q6IFW6,Q6IG02,Q6IMF3,Q6IRE4,Q6P6Q2,Q9QZQ5                                                  |
| 7001 | 1,3,5,18,2 2,4,6,7,8,1<br>0,21,24,25 9,22,23,26 | 1  | Q6IRE4                                                                                                                        |
| 7002 | 1,3,5,18,2 2,4,6,7,8,1<br>0,21,24,26 9,22,23,25 | 7  | P06911,P12020,P50280,Q5GRG2,Q6IRE4,Q8CJD3,Q99041                                                                              |
| 7003 | 1,3,5,18,2 2,4,6,7,8,1<br>0,21,25,26 9,22,23,24 | 5  | P02631,P31430,P50280,Q63532,Q6IRE4                                                                                            |
| 7004 | 1,3,5,18,2 2,4,6,7,8,1<br>0,22,23,24 9,21,25,26 | 10 | P19223,P25236,P47967,P82995,P83121,P97840,Q80WL1,Q8CIZ5,Q9QZK9,Q9WTT6                                                         |
| 7005 | 1,3,5,18,2 2,4,6,7,8,1<br>0,22,23,25 9,21,24,26 | 1  | P20761                                                                                                                        |
| 7006 | 1,3,5,18,2 2,4,6,7,8,1<br>0,22,23,26 9,21,24,25 | 12 | O54728,P47967,P97840,Q4FZU2,Q6IFU8,Q6IFW6,Q6IG02,Q6IMF3,Q6P6Q2,Q6P6R2,Q8CIZ5,Q9QW07                                           |
| 7007 | 1,3,5,18,2 2,4,6,7,8,1<br>0,22,24,25 9,21,23,26 | 5  | P0C0A9,P20762,P25236,Q80WL1,Q99041                                                                                            |
| 7008 | 1,3,5,18,2 2,4,6,7,8,1<br>0,22,24,26 9,21,23,25 | 13 | O54728,P02803,P07150,P12020,P25236,P47967,P50280,P97840,Q6P6R2,Q8CIZ5,Q8CJD3,Q99041,Q9WTT6                                    |
| 7009 | 1,3,5,18,2 2,4,6,7,8,1<br>0,22,25,26 9,21,23,24 | 4  | O54728,P02631,Q99041,Q9QW07                                                                                                   |
| 7010 | 1,3,5,18,2 2,4,6,7,8,1<br>0,23,24,25 9,21,22,26 | 4  | P25236,P83748,Q6IRE4,Q80WL1                                                                                                   |
| 7011 | 1,3,5,18,2 2,4,6,7,8,1<br>0,23,24,26 9,21,22,25 | 17 | D4A1J4,P02091,P06911,P09605,P25809,P12020,P47967,P97840,Q4FZU2,Q6IFU8,Q6IFW6,Q6IG02,Q6IMF3,Q6IRE4,Q6P6Q2,Q80WL1,Q8CIZ5,Q9QZQ5 |
| 7012 | 1,3,5,18,2 2,4,6,7,8,1<br>0,23,25,26 9,21,22,24 | 9  | P02091,Q4FZU2,Q6IFU8,Q6IFW6,Q6IG02,Q6IMF3,Q6IRE4,Q6P6Q2,Q80WL1                                                                |
| 7013 | 1,3,5,18,2 2,4,6,7,8,1<br>0,24,25,26 9,21,22,23 | 6  | P22282,P50280,Q6IRE4,Q80WL1,Q8CJD3,Q99041                                                                                     |
| 7014 | 1,3,5,18,2 2,4,6,7,8,1<br>1,22,23,24 9,20,25,26 | 2  | P35280,Q9QW07                                                                                                                 |
| 7015 | 1,3,5,18,2 2,4,6,7,8,1<br>1,22,23,25 9,20,24,26 | 3  | P01015,P35280,Q9QW07                                                                                                          |
| 7016 | 1,3,5,18,2 2,4,6,7,8,1<br>1,22,23,26 9,20,24,25 | 9  | O54728,P12020,Q4FZU2,Q6IFU8,Q6IG02,Q6IMF3,Q6P6Q2,Q9QW07,Q9QZQ5                                                                |
| 7017 | 1,3,5,18,2 2,4,6,7,8,1<br>1,22,24,25 9,20,23,26 | 3  | P20762,P35280,Q9QW07                                                                                                          |
| 7018 | 1,3,5,18,2 2,4,6,7,8,1<br>1,22,24,26 9,20,23,25 | 6  | P12020,P50280,Q63617,Q8CJD3,Q99041,Q9QW07                                                                                     |

|      |                          |                           |    |                                                                                                                 |
|------|--------------------------|---------------------------|----|-----------------------------------------------------------------------------------------------------------------|
| 7019 | 1,3,5,18,2<br>1,22,25,26 | 2,4,6,7,8,1<br>9,20,23,24 | 4  | P02631,Q63532,Q63617,Q9QW07                                                                                     |
| 7020 | 1,3,5,18,2<br>1,23,24,25 | 2,4,6,7,8,1<br>9,20,22,26 | 1  | P35280                                                                                                          |
| 7021 | 1,3,5,18,2<br>1,23,24,26 | 2,4,6,7,8,1<br>9,20,22,25 | 10 | P02091,P06911,P12020,P47967,Q4FZU2,Q6IFU8,Q6IG02,Q6IMF3,Q6P6Q2,Q9QZQ5                                           |
| 7022 | 1,3,5,18,2<br>1,23,25,26 | 2,4,6,7,8,1<br>9,20,22,24 | 7  | Q4FZU2,Q63617,Q6IFU8,Q6IG02,Q6IMF3,Q6P6Q2,Q9QZQ5                                                                |
| 7023 | 1,3,5,18,2<br>1,24,25,26 | 2,4,6,7,8,1<br>9,20,22,23 | 3  | P31430,Q63617,Q8CJD3                                                                                            |
| 7024 | 1,3,5,18,2<br>2,23,24,25 | 2,4,6,7,8,1<br>9,20,21,26 | 7  | O55004,P01015,P20762,P25236,P35280,P62804,Q00715                                                                |
| 7025 | 1,3,5,18,2<br>2,23,24,26 | 2,4,6,7,8,1<br>9,20,21,25 | 10 | O54728,P00731,P02091,P09605,P25809,P47967,P97840,Q6IG02,Q6P6Q2,Q8CIZ5,Q9QZQ5                                    |
| 7026 | 1,3,5,18,2<br>2,23,25,26 | 2,4,6,7,8,1<br>9,20,21,24 | 5  | O54728,P02091,Q6IG02,Q6P6Q2,Q9QZQ5                                                                              |
| 7027 | 1,3,5,18,2<br>2,24,25,26 | 2,4,6,7,8,1<br>9,20,21,23 | 3  | P25236,Q8CJD3,Q99041                                                                                            |
| 7028 | 1,3,5,18,2<br>3,24,25,26 | 2,4,6,7,8,1<br>9,20,21,22 | 8  | P01946,P02091,Q6IFU8,Q6IG02,Q6P6Q2,Q7TPB1,Q80WL1,Q9QZQ5                                                         |
| 7029 | 1,3,5,19,2<br>0,21,22,23 | 2,4,6,7,8,1<br>8,24,25,26 | 7  | O54728,P00714,P00774,P55091,P82995,P98089,Q9QW07                                                                |
| 7030 | 1,3,5,19,2<br>0,21,22,24 | 2,4,6,7,8,1<br>8,23,25,26 | 9  | P00714,P00774,P12020,P55091,P82995,P83121,P98089,Q99MH3,Q9QW07                                                  |
| 7031 | 1,3,5,19,2<br>0,21,22,25 | 2,4,6,7,8,1<br>8,23,24,26 | 3  | P17046,P55091,Q9QW07                                                                                            |
| 7032 | 1,3,5,19,2<br>0,21,22,26 | 2,4,6,7,8,1<br>8,23,24,25 | 8  | O54728,P00714,P12020,P50280,P98089,Q6P6R2,Q99MH3,Q9QW07                                                         |
| 7033 | 1,3,5,19,2<br>0,21,23,24 | 2,4,6,7,8,1<br>8,22,25,26 | 7  | P00714,P20766,P55091,P82995,P98089,Q6IRE4,Q80WL1                                                                |
| 7034 | 1,3,5,19,2<br>0,21,23,25 | 2,4,6,7,8,1<br>8,22,24,26 | 1  | Q6IRE4                                                                                                          |
| 7035 | 1,3,5,19,2<br>0,21,23,26 | 2,4,6,7,8,1<br>8,22,24,25 | 3  | O54728,P98089,Q6IRE4                                                                                            |
| 7036 | 1,3,5,19,2<br>0,21,24,25 | 2,4,6,7,8,1<br>8,22,23,26 | 3  | P20762,Q6IRE4,Q80WL1                                                                                            |
| 7037 | 1,3,5,19,2<br>0,21,24,26 | 2,4,6,7,8,1<br>8,22,23,25 | 9  | P00714,P06911,P12020,P50280,P98089,Q5GRG2,Q6IRE4,Q8CJD3,Q99MH3                                                  |
| 7038 | 1,3,5,19,2<br>0,21,25,26 | 2,4,6,7,8,1<br>8,22,23,24 | 1  | Q6IRE4                                                                                                          |
| 7039 | 1,3,5,19,2<br>0,22,23,24 | 2,4,6,7,8,1<br>8,21,25,26 | 16 | O54728,P00714,P00774,P11598,P14669,P19223,P25031,P25236,P31430,P55091,P82995,P83121,P83748,P98089,Q80WL1,Q9WTT6 |
| 7040 | 1,3,5,19,2<br>0,22,23,25 | 2,4,6,7,8,1<br>8,21,24,26 | 9  | O54728,P00774,P11598,P17046,P20761,P55091,P82995,P83748,Q80WL1                                                  |
| 7041 | 1,3,5,19,2<br>0,22,23,26 | 2,4,6,7,8,1<br>8,21,24,25 | 6  | O54728,P31430,P55091,P98089,Q6P6R2,Q9WTT6                                                                       |

|      |                                                 |    |                                                                                                                        |
|------|-------------------------------------------------|----|------------------------------------------------------------------------------------------------------------------------|
| 7042 | 1,3,5,19,2 2,4,6,7,8,1<br>0,22,24,25 8,21,23,26 | 13 | P00774,P0C0A9,P11598,P14669,P17046,P20762,P25031,P25236,P55091,P82995,P83748,Q64057,Q80WL1                             |
| 7043 | 1,3,5,19,2 2,4,6,7,8,1<br>0,22,24,26 8,21,23,25 | 17 | O54728,P00714,P00774,P02803,P07150,P11598,P12020,P14669,P31430,P50280,P98089,Q64057,Q6P6R2,Q80WL1,Q99041,Q99MH3,Q9WTT6 |
| 7044 | 1,3,5,19,2 2,4,6,7,8,1<br>0,22,25,26 8,21,23,24 | 2  | O54728,P17046                                                                                                          |
| 7045 | 1,3,5,19,2 2,4,6,7,8,1<br>0,23,24,25 8,21,22,26 | 8  | P0C0A9,P11598,P17046,P25236,P82995,P83748,Q80WL1,Q9R0T3                                                                |
| 7046 | 1,3,5,19,2 2,4,6,7,8,1<br>0,23,24,26 8,21,22,25 | 9  | D4A1J4,O54728,P02091,P09605,P25809,P11598,P31430,P47967,P98089,Q80WL1                                                  |
| 7047 | 1,3,5,19,2 2,4,6,7,8,1<br>0,23,25,26 8,21,22,24 | 3  | O54728,P02091,Q80WL1                                                                                                   |
| 7048 | 1,3,5,19,2 2,4,6,7,8,1<br>0,24,25,26 8,21,22,23 | 5  | O54728,P0C0A9,P11598,Q80WL1,Q8CJD3                                                                                     |
| 7049 | 1,3,5,19,2 2,4,6,7,8,1<br>1,22,23,24 8,20,25,26 | 6  | P00714,P35280,P55091,P82995,P98089,Q9QW07                                                                              |
| 7050 | 1,3,5,19,2 2,4,6,7,8,1<br>1,22,23,25 8,20,24,26 | 3  | P17046,P35280,Q9QW07                                                                                                   |
| 7051 | 1,3,5,19,2 2,4,6,7,8,1<br>1,22,23,26 8,20,24,25 | 4  | O54728,P98089,Q9QW07,Q9QZQ5                                                                                            |
| 7052 | 1,3,5,19,2 2,4,6,7,8,1<br>1,22,24,25 8,20,23,26 | 4  | P17046,P20762,P35280,Q9QW07                                                                                            |
| 7053 | 1,3,5,19,2 2,4,6,7,8,1<br>1,22,24,26 8,20,23,25 | 10 | O54728,P00714,P07171,P12020,P98089,Q63617,Q6P6R2,Q8CJD3,Q99MH3,Q9QW07                                                  |
| 7054 | 1,3,5,19,2 2,4,6,7,8,1<br>1,22,25,26 8,20,23,24 | 4  | O54728,P17046,Q63617,Q9QW07                                                                                            |
| 7055 | 1,3,5,19,2 2,4,6,7,8,1<br>1,23,24,25 8,20,22,26 | 4  | P11598,P17046,P20762,P35280                                                                                            |
| 7056 | 1,3,5,19,2 2,4,6,7,8,1<br>1,23,24,26 8,20,22,25 | 3  | O54728,P02091,Q9QZQ5                                                                                                   |
| 7057 | 1,3,5,19,2 2,4,6,7,8,1<br>1,23,25,26 8,20,22,24 | 3  | P02091,Q63617,Q9QZQ5                                                                                                   |
| 7058 | 1,3,5,19,2 2,4,6,7,8,1<br>1,24,25,26 8,20,22,23 | 2  | Q63617,Q8CJD3                                                                                                          |
| 7059 | 1,3,5,19,2 2,4,6,7,8,1<br>2,23,24,25 8,20,21,26 | 15 | O55004,P01041,P11598,P17046,P20762,P25031,P25236,P35280,P62804,P82471,P82995,P83748,Q00715,Q6AYR8,Q80WL1               |
| 7060 | 1,3,5,19,2 2,4,6,7,8,1<br>2,23,24,26 8,20,21,25 | 13 | O54728,P00731,P02091,P09605,P25809,P11598,P20646,P31430,P47967,P82471,P98089,Q6P6R2,Q9QZQ5,Q9WTT6                      |
| 7061 | 1,3,5,19,2 2,4,6,7,8,1<br>2,23,25,26 8,20,21,24 | 5  | O54728,P02091,P17046,P82471,Q6AYR8                                                                                     |
| 7062 | 1,3,5,19,2 2,4,6,7,8,1<br>2,24,25,26 8,20,21,23 | 11 | O54728,P11598,P17046,P20762,P24368,P25236,Q5XI22,Q6AYR8,Q6AYR9,Q6TMA8,Q8CJD3                                           |
| 7063 | 1,3,5,19,2 2,4,6,7,8,1<br>3,24,25,26 8,20,21,22 | 8  | O54728,P01946,P02091,P11598,P42854,Q7TPB1,Q80WL1,Q9QZQ5                                                                |
| 7064 | 1,3,5,20,2 2,4,6,7,8,1<br>1,22,23,24 8,19,25,26 | 8  | P00714,P35280,P55091,P82995,P98089,Q62635,Q6IRE4,Q9QW07                                                                |

|      |                          |                                 |    |                                                                                                          |
|------|--------------------------|---------------------------------|----|----------------------------------------------------------------------------------------------------------|
| 7065 | 1,3,5,20,2<br>1,22,23,25 | 2,4,6,7,8,1<br>8,19,24,26       | 3  | P35280,Q6IRE4,Q9QW07                                                                                     |
| 7066 | 1,3,5,20,2<br>1,22,23,26 | 2,4,6,7,8,1<br>8,19,24,25       | 6  | O54728,P02631,P98089,Q6IRE4,Q9QW07,Q9QZQ5                                                                |
| 7067 | 1,3,5,20,2<br>1,22,24,25 | 2,4,6,7,8,1<br>8,19,23,26       | 6  | P02631,P35280,Q5XFX0,Q6IRE4,Q99MH3,Q9QW07                                                                |
| 7068 | 1,3,5,20,2<br>1,22,24,26 | 2,4,6,7,8,1<br>8,19,23,25       | 14 | O54728,P00714,P02631,P02803,P12020,P50280,P98089,Q5BJY9,Q62635,Q6IRE4,Q8CJD3,Q99041,Q99MH3,Q9QW07        |
| 7069 | 1,3,5,20,2<br>1,22,25,26 | 2,4,6,7,8,1<br>8,19,23,24       | 7  | O54728,P02631,Q5BJY9,Q63532,Q6IRE4,Q99MH3,Q9QW07                                                         |
| 7070 | 1,3,5,20,2<br>1,23,24,25 | 2,4,6,7,8,1<br>8,19,22,26       | 4  | P11598,P35280,Q6IRE4,Q80WL1                                                                              |
| 7071 | 1,3,5,20,2<br>1,23,24,26 | 2,4,6,7,8,1<br>8,19,22,25       | 8  | P02091,P12020,P47967,P97840,P98089,Q6IRE4,Q8CJD3,Q9QZQ5                                                  |
| 7072 | 1,3,5,20,2<br>1,23,25,26 | 2,4,6,7,8,1<br>8,19,22,24       | 6  | P02091,P02631,Q63532,Q6IG02,Q6IRE4,Q9QZQ5                                                                |
| 7073 | 1,3,5,20,2<br>1,24,25,26 | 2,4,6,7,8,1<br>8,19,22,23       | 5  | P02631,P50280,Q6IRE4,Q8CJD3,Q99MH3                                                                       |
| 7074 | 1,3,5,20,2<br>2,23,24,25 | 2,4,6,7,8,1<br>8,19,21,26       | 9  | P0C0A9,P11598,P25031,P25236,P35280,P82995,P83748,Q00715,Q80WL1                                           |
| 7075 | 1,3,5,20,2<br>2,23,24,26 | 2,4,6,7,8,1<br>8,19,21,25       | 14 | O54728,P00731,P02091,P02803,P0C0A9,P11598,P47967,P97840,P98089,Q62635,Q64057,Q80WL1,Q8CIZ5,Q9QZQ5        |
| 7076 | 1,3,5,20,2<br>2,23,25,26 | 2,4,6,7,8,1<br>8,19,21,24       | 5  | O54728,P02091,P02631,P0C0A9,Q9QZQ5                                                                       |
| 7077 | 1,3,5,20,2<br>2,24,25,26 | 2,4,6,7,8,1<br>8,19,21,23       | 13 | O54728,P00731,P02631,P02803,P05964,P0C0A9,P11598,Q5XI22,Q64057,Q80WL1,Q8CJD3,Q99041,Q99MH3               |
| 7078 | 1,3,5,20,2<br>3,24,25,26 | 2,4,6,7,8,1<br>8,19,21,22       | 11 | D4A1J4,P01946,P02091,P07647,P0C0A9,P11598,Q6IRE4,Q7TPB1,Q80WL1,Q8CJD3,Q9QZQ5                             |
| 7079 | 1,3,5,21,2<br>2,23,24,25 | 2,4,6,7,8,1<br>8,19,20,26       | 6  | P11598,P17046,P35280,P62804,Q9QW07,Q9QZQ5                                                                |
| 7080 | 1,3,5,21,2<br>2,23,24,26 | 2,4,6,7,8,1<br>8,19,20,25       | 8  | O54728,P00731,P02091,P35280,P47967,P98089,Q9QW07,Q9QZQ5                                                  |
| 7081 | 1,3,5,21,2<br>2,23,25,26 | 2,4,6,7,8,1<br>8,19,20,24       | 6  | O54728,P02091,P02631,P35280,Q9QW07,Q9QZQ5                                                                |
| 7082 | 1,3,5,21,2<br>2,24,25,26 | 2,4,6,7,8,1<br>8,19,20,23       | 8  | P02631,P35280,Q498D9,Q5BJY9,Q5XI22,Q63617,Q8CJD3,Q9QW07                                                  |
| 7083 | 1,3,5,21,2<br>3,24,25,26 | 2,4,6,7,8,1<br>8,19,20,22       | 6  | P01946,P02091,P35280,Q7TPB1,Q8CJD3,Q9QZQ5                                                                |
| 7084 | 1,3,5,22,2<br>3,24,25,26 | 2,4,6,7,8,1<br>8,19,20,21       | 15 | O54728,P00731,P01946,P02091,P0C0A9,P11598,P35280,P42854,P62804,P82471,Q6AYR8,Q6AYR9,Q7TPB1,Q8CJD3,Q9QZQ5 |
| 7085 | 1,3,6,7,8,1<br>8,19,20   | 2,4,5,21,2<br>2,23,24,25<br>,26 | 3  | P00731,P16086,P35280                                                                                     |
| 7086 | 1,3,6,7,8,1<br>8,19,21   | 2,4,5,20,2<br>2,23,24,25<br>,26 | 6  | D4A1J4,P00731,P08723,P16086,P35281,P53792                                                                |

|      |                        |                                 |   |                                                  |
|------|------------------------|---------------------------------|---|--------------------------------------------------|
| 7087 | 1,3,6,7,8,1<br>8,19,22 | 2,4,5,20,2<br>1,23,24,25<br>,26 | 2 | D4A1J4,P16086                                    |
| 7088 | 1,3,6,7,8,1<br>8,19,23 | 2,4,5,20,2<br>1,22,24,25<br>,26 | 7 | P15399,P16086,P35467,P51907,P97580,Q30KJ2,Q5XI22 |
| 7089 | 1,3,6,7,8,1<br>8,19,24 | 2,4,5,20,2<br>1,22,23,25<br>,26 | 0 |                                                  |
| 7090 | 1,3,6,7,8,1<br>8,19,25 | 2,4,5,20,2<br>1,22,23,24<br>,26 | 7 | P00731,P10715,P12020,P16086,P19629,P31044,P35280 |
| 7091 | 1,3,6,7,8,1<br>8,19,26 | 2,4,5,20,2<br>1,22,23,24<br>,25 | 2 | P02770,P35280                                    |
| 7092 | 1,3,6,7,8,1<br>8,20,21 | 2,4,5,19,2<br>2,23,24,25<br>,26 | 4 | P00731,P08723,P13432,Q6AYL6                      |
| 7093 | 1,3,6,7,8,1<br>8,20,22 | 2,4,5,19,2<br>1,23,24,25<br>,26 | 0 |                                                  |
| 7094 | 1,3,6,7,8,1<br>8,20,23 | 2,4,5,19,2<br>1,22,24,25<br>,26 | 2 | P16086,Q5XI22                                    |
| 7095 | 1,3,6,7,8,1<br>8,20,24 | 2,4,5,19,2<br>1,22,23,25<br>,26 | 1 | P10715                                           |
| 7096 | 1,3,6,7,8,1<br>8,20,25 | 2,4,5,19,2<br>1,22,23,24<br>,26 | 3 | P10715,P19629,P35280                             |
| 7097 | 1,3,6,7,8,1<br>8,20,26 | 2,4,5,19,2<br>1,22,23,24<br>,25 | 2 | P10715,P35280                                    |
| 7098 | 1,3,6,7,8,1<br>8,21,22 | 2,4,5,19,2<br>0,23,24,25<br>,26 | 4 | D4A1J4,P08723,P13432,P19218                      |
| 7099 | 1,3,6,7,8,1<br>8,21,23 | 2,4,5,19,2<br>0,22,24,25<br>,26 | 5 | P08723,P16086,P51907,Q5XI22,Q6AYL6               |
| 7100 | 1,3,6,7,8,1<br>8,21,24 | 2,4,5,19,2<br>0,22,23,25<br>,26 | 2 | P13432,Q62997                                    |
| 7101 | 1,3,6,7,8,1<br>8,21,25 | 2,4,5,19,2<br>0,22,23,24<br>,26 | 6 | P00731,P10715,P19629,P31430,Q62997,Q9WTT6        |

|      |                        |                                 |   |                                                  |
|------|------------------------|---------------------------------|---|--------------------------------------------------|
| 7102 | 1,3,6,7,8,1<br>8,21,26 | 2,4,5,19,2<br>0,22,23,24<br>,25 | 2 | P02770,Q62997                                    |
| 7103 | 1,3,6,7,8,1<br>8,22,23 | 2,4,5,19,2<br>0,21,24,25<br>,26 | 2 | P16086,P51907                                    |
| 7104 | 1,3,6,7,8,1<br>8,22,24 | 2,4,5,19,2<br>0,21,23,25<br>,26 | 0 |                                                  |
| 7105 | 1,3,6,7,8,1<br>8,22,25 | 2,4,5,19,2<br>0,21,23,24<br>,26 | 5 | P06911,P10715,P12020,P19629,Q5GRG2               |
| 7106 | 1,3,6,7,8,1<br>8,22,26 | 2,4,5,19,2<br>0,21,23,24<br>,25 | 1 | Q8VD89                                           |
| 7107 | 1,3,6,7,8,1<br>8,23,24 | 2,4,5,19,2<br>0,21,22,25<br>,26 | 1 | P51907                                           |
| 7108 | 1,3,6,7,8,1<br>8,23,25 | 2,4,5,19,2<br>0,21,22,24<br>,26 | 7 | P06911,P10715,P12020,P19629,P51907,Q5GRG2,Q63751 |
| 7109 | 1,3,6,7,8,1<br>8,23,26 | 2,4,5,19,2<br>0,21,22,24<br>,25 | 7 | P01946,P02091,P35467,P51907,Q6IG02,Q6P6Q2,Q8VD89 |
| 7110 | 1,3,6,7,8,1<br>8,24,25 | 2,4,5,19,2<br>0,21,22,23<br>,26 | 3 | P10715,P19629,Q62997                             |
| 7111 | 1,3,6,7,8,1<br>8,24,26 | 2,4,5,19,2<br>0,21,22,23<br>,25 | 3 | P02091,P02770,Q8VD89                             |
| 7112 | 1,3,6,7,8,1<br>8,25,26 | 2,4,5,19,2<br>0,21,22,23<br>,24 | 4 | P02091,P10715,P19629,P35280                      |
| 7113 | 1,3,6,7,8,1<br>9,20,21 | 2,4,5,18,2<br>2,23,24,25<br>,26 | 4 | P00731,P16086,P35281,P53792                      |
| 7114 | 1,3,6,7,8,1<br>9,20,22 | 2,4,5,18,2<br>1,23,24,25<br>,26 | 5 | P00774,P16086,P31430,P55091,Q99MH3               |
| 7115 | 1,3,6,7,8,1<br>9,20,23 | 2,4,5,18,2<br>1,22,24,25<br>,26 | 6 | P15399,P16086,P31430,P55091,P97580,Q30KJ2        |
| 7116 | 1,3,6,7,8,1<br>9,20,24 | 2,4,5,18,2<br>1,22,23,25<br>,26 | 1 | Q99MH3                                           |

|      |                        |                                 |    |                                                                              |
|------|------------------------|---------------------------------|----|------------------------------------------------------------------------------|
| 7117 | 1,3,6,7,8,1<br>9,20,25 | 2,4,5,18,2<br>1,22,23,24<br>,26 | 4  | P10715,P12020,P19629,P35280                                                  |
| 7118 | 1,3,6,7,8,1<br>9,20,26 | 2,4,5,18,2<br>1,22,23,24<br>,25 | 2  | P35280,Q99MH3                                                                |
| 7119 | 1,3,6,7,8,1<br>9,21,22 | 2,4,5,18,2<br>0,23,24,25<br>,26 | 7  | D4A1J4,P02782,P08723,P13432,P16086,P19218,P35281                             |
| 7120 | 1,3,6,7,8,1<br>9,21,23 | 2,4,5,18,2<br>0,22,24,25<br>,26 | 8  | O70594,P15399,P16086,P35281,P51907,P97580,Q30KJ2,Q99041                      |
| 7121 | 1,3,6,7,8,1<br>9,21,24 | 2,4,5,18,2<br>0,22,23,25<br>,26 | 4  | P13432,P16086,P35281,P53792                                                  |
| 7122 | 1,3,6,7,8,1<br>9,21,25 | 2,4,5,18,2<br>0,22,23,24<br>,26 | 8  | P12020,P16086,P19629,P35281,P47967,P53792,P97840,Q9QZK9                      |
| 7123 | 1,3,6,7,8,1<br>9,21,26 | 2,4,5,18,2<br>0,22,23,24<br>,25 | 3  | P16086,P35281,P53792                                                         |
| 7124 | 1,3,6,7,8,1<br>9,22,23 | 2,4,5,18,2<br>0,21,24,25<br>,26 | 7  | P15399,P16086,P31430,P51907,P55091,P97580,Q30KJ2                             |
| 7125 | 1,3,6,7,8,1<br>9,22,24 | 2,4,5,18,2<br>0,21,23,25<br>,26 | 1  | P31430                                                                       |
| 7126 | 1,3,6,7,8,1<br>9,22,25 | 2,4,5,18,2<br>0,21,23,24<br>,26 | 6  | P06911,P10715,P12020,P16086,P19629,Q5GRG2                                    |
| 7127 | 1,3,6,7,8,1<br>9,22,26 | 2,4,5,18,2<br>0,21,23,24<br>,25 | 1  | O54728                                                                       |
| 7128 | 1,3,6,7,8,1<br>9,23,24 | 2,4,5,18,2<br>0,21,22,25<br>,26 | 6  | P15399,P16086,P31430,P51907,P97580,Q30KJ2                                    |
| 7129 | 1,3,6,7,8,1<br>9,23,25 | 2,4,5,18,2<br>0,21,22,24<br>,26 | 11 | O70594,P06911,P12020,P15399,P16086,P19629,P51907,P97580,Q30KJ2,Q5GRG2,Q99041 |
| 7130 | 1,3,6,7,8,1<br>9,23,26 | 2,4,5,18,2<br>0,21,22,24<br>,25 | 7  | P01946,P02091,P15399,P16086,P51907,P97580,Q30KJ2                             |
| 7131 | 1,3,6,7,8,1<br>9,24,25 | 2,4,5,18,2<br>0,21,22,23<br>,26 | 3  | P10715,P12020,P19629                                                         |

|      |                        |                                 |   |                                                  |
|------|------------------------|---------------------------------|---|--------------------------------------------------|
| 7132 | 1,3,6,7,8,1<br>9,24,26 | 2,4,5,18,2<br>0,21,22,23<br>,25 | 1 | P02091                                           |
| 7133 | 1,3,6,7,8,1<br>9,25,26 | 2,4,5,18,2<br>0,21,22,23<br>,24 | 6 | P02091,P10715,P12020,P19629,P35280,Q9QZK9        |
| 7134 | 1,3,6,7,8,2<br>0,21,22 | 2,4,5,18,1<br>9,23,24,25<br>,26 | 6 | P08723,P13432,Q03191,Q5XFX0,Q7TPB1,Q99MH3        |
| 7135 | 1,3,6,7,8,2<br>0,21,23 | 2,4,5,18,1<br>9,22,24,25<br>,26 | 1 | P16086                                           |
| 7136 | 1,3,6,7,8,2<br>0,21,24 | 2,4,5,18,1<br>9,22,23,25<br>,26 | 3 | P13432,Q5XFX0,Q99MH3                             |
| 7137 | 1,3,6,7,8,2<br>0,21,25 | 2,4,5,18,1<br>9,22,23,24<br>,26 | 4 | P10715,P19629,Q03191,Q9WTT6                      |
| 7138 | 1,3,6,7,8,2<br>0,21,26 | 2,4,5,18,1<br>9,22,23,24<br>,25 | 1 | Q99MH3                                           |
| 7139 | 1,3,6,7,8,2<br>0,22,23 | 2,4,5,18,1<br>9,21,24,25<br>,26 | 2 | P16086,P55091                                    |
| 7140 | 1,3,6,7,8,2<br>0,22,24 | 2,4,5,18,1<br>9,21,23,25<br>,26 | 3 | Q03191,Q5XFX0,Q99MH3                             |
| 7141 | 1,3,6,7,8,2<br>0,22,25 | 2,4,5,18,1<br>9,21,23,24<br>,26 | 7 | D3ZUC6,P06911,P10715,P12020,P19629,Q03191,Q5GRG2 |
| 7142 | 1,3,6,7,8,2<br>0,22,26 | 2,4,5,18,1<br>9,21,23,24<br>,25 | 1 | Q99MH3                                           |
| 7143 | 1,3,6,7,8,2<br>0,23,24 | 2,4,5,18,1<br>9,21,22,25<br>,26 | 0 |                                                  |
| 7144 | 1,3,6,7,8,2<br>0,23,25 | 2,4,5,18,1<br>9,21,22,24<br>,26 | 5 | P06911,P10715,P12020,P19629,Q5GRG2               |
| 7145 | 1,3,6,7,8,2<br>0,23,26 | 2,4,5,18,1<br>9,21,22,24<br>,25 | 3 | P01946,P02091,Q6IG02                             |
| 7146 | 1,3,6,7,8,2<br>0,24,25 | 2,4,5,18,1<br>9,21,22,23<br>,26 | 3 | P10715,P12020,P19629                             |



|      |                        |                                 |    |                                                                                     |
|------|------------------------|---------------------------------|----|-------------------------------------------------------------------------------------|
| 7147 | 1,3,6,7,8,2<br>0,24,26 | 2,4,5,18,1<br>9,21,22,23<br>,25 | 2  | P02091,Q99MH3                                                                       |
| 7148 | 1,3,6,7,8,2<br>0,25,26 | 2,4,5,18,1<br>9,21,22,23<br>,24 | 4  | P02091,P10715,P19629,P35280                                                         |
| 7149 | 1,3,6,7,8,2<br>1,22,23 | 2,4,5,18,1<br>9,20,24,25<br>,26 | 3  | P08723,P13432,P16086                                                                |
| 7150 | 1,3,6,7,8,2<br>1,22,24 | 2,4,5,18,1<br>9,20,23,25<br>,26 | 4  | P13432,P14408,Q5XFX0,Q99MH3                                                         |
| 7151 | 1,3,6,7,8,2<br>1,22,25 | 2,4,5,18,1<br>9,20,23,24<br>,26 | 9  | D4A1J4,P06911,P10715,P12020,P13432,P19218,P19629,Q5GRG2,Q9QZK9                      |
| 7152 | 1,3,6,7,8,2<br>1,22,26 | 2,4,5,18,1<br>9,20,23,24<br>,25 | 2  | P13432,Q99MH3                                                                       |
| 7153 | 1,3,6,7,8,2<br>1,23,24 | 2,4,5,18,1<br>9,20,22,25<br>,26 | 3  | P13432,Q62997,Q63751                                                                |
| 7154 | 1,3,6,7,8,2<br>1,23,25 | 2,4,5,18,1<br>9,20,22,24<br>,26 | 12 | P06911,P12020,P16086,P19629,Q5GRG2,Q62997,Q63751,Q6P6R2,Q6P9T8,Q99041,Q9QZK9,Q9WTT6 |
| 7155 | 1,3,6,7,8,2<br>1,23,26 | 2,4,5,18,1<br>9,20,22,24<br>,25 | 2  | P01946,P02091                                                                       |
| 7156 | 1,3,6,7,8,2<br>1,24,25 | 2,4,5,18,1<br>9,20,22,23<br>,26 | 6  | P10715,P13432,P19629,P22006,Q62997,Q9WTT6                                           |
| 7157 | 1,3,6,7,8,2<br>1,24,26 | 2,4,5,18,1<br>9,20,22,23<br>,25 | 4  | P02091,P13432,Q62997,Q99MH3                                                         |
| 7158 | 1,3,6,7,8,2<br>1,25,26 | 2,4,5,18,1<br>9,20,22,23<br>,24 | 7  | P02091,P10715,P19629,Q62997,Q6P9T8,Q9QZK9,Q9WTT6                                    |
| 7159 | 1,3,6,7,8,2<br>2,23,24 | 2,4,5,18,1<br>9,20,21,25<br>,26 | 1  | P51907                                                                              |
| 7160 | 1,3,6,7,8,2<br>2,23,25 | 2,4,5,18,1<br>9,20,21,24<br>,26 | 7  | P06911,P10715,P12020,P19629,P51907,Q5GRG2,Q63751                                    |
| 7161 | 1,3,6,7,8,2<br>2,23,26 | 2,4,5,18,1<br>9,20,21,24<br>,25 | 4  | O54728,P01946,P02091,P51907                                                         |

|      |                         |                                 |    |                                                                       |
|------|-------------------------|---------------------------------|----|-----------------------------------------------------------------------|
| 7162 | 1,3,6,7,8,2<br>2,24,25  | 2,4,5,18,1<br>9,20,21,23<br>,26 | 5  | P06911,P10715,P12020,P19629,Q5GRG2                                    |
| 7163 | 1,3,6,7,8,2<br>2,24,26  | 2,4,5,18,1<br>9,20,21,23<br>,25 | 2  | P02091,Q99MH3                                                         |
| 7164 | 1,3,6,7,8,2<br>2,25,26  | 2,4,5,18,1<br>9,20,21,23<br>,24 | 7  | P02091,P06911,P10715,P12020,P19629,Q5GRG2,Q9QZK9                      |
| 7165 | 1,3,6,7,8,2<br>3,24,25  | 2,4,5,18,1<br>9,20,21,22<br>,26 | 7  | P06911,P10715,P12020,P19629,P51907,Q5GRG2,Q63751                      |
| 7166 | 1,3,6,7,8,2<br>3,24,26  | 2,4,5,18,1<br>9,20,21,22<br>,25 | 3  | P01946,P02091,P51907                                                  |
| 7167 | 1,3,6,7,8,2<br>3,25,26  | 2,4,5,18,1<br>9,20,21,22<br>,24 | 10 | P01946,P02091,P06911,P10715,P12020,P19629,P51907,Q5GRG2,Q6P9T8,Q9QZK9 |
| 7168 | 1,3,6,7,8,2<br>4,25,26  | 2,4,5,18,1<br>9,20,21,22<br>,23 | 5  | P01946,P02091,P10715,P19629,Q9QZK9                                    |
| 7169 | 1,3,6,7,18,<br>19,20,21 | 2,4,5,8,22,<br>23,24,25,2<br>6  | 2  | P00731,P16086                                                         |
| 7170 | 1,3,6,7,18,<br>19,20,22 | 2,4,5,8,21,<br>23,24,25,2<br>6  | 4  | P06760,P16086,Q5U2V4,Q6AYS4                                           |
| 7171 | 1,3,6,7,18,<br>19,20,23 | 2,4,5,8,21,<br>22,24,25,2<br>6  | 5  | P15399,P16086,P97580,Q6AYS4,Q80WL1                                    |
| 7172 | 1,3,6,7,18,<br>19,20,24 | 2,4,5,8,21,<br>22,23,25,2<br>6  | 3  | P06760,Q6AYS4,Q80WL1                                                  |
| 7173 | 1,3,6,7,18,<br>19,20,25 | 2,4,5,8,21,<br>22,23,24,2<br>6  | 2  | P35280,Q80WL1                                                         |
| 7174 | 1,3,6,7,18,<br>19,20,26 | 2,4,5,8,21,<br>22,23,24,2<br>5  | 4  | P06760,P35280,Q5U2V4,Q6AYS4                                           |
| 7175 | 1,3,6,7,18,<br>19,21,22 | 2,4,5,8,20,<br>23,24,25,2<br>6  | 4  | D4A1J4,P16086,P19218,P97840                                           |
| 7176 | 1,3,6,7,18,<br>19,21,23 | 2,4,5,8,20,<br>22,24,25,2<br>6  | 4  | P14668,P15399,P16086,P97580                                           |

|      |                         |                                |   |                                                                |
|------|-------------------------|--------------------------------|---|----------------------------------------------------------------|
| 7177 | 1,3,6,7,18,<br>19,21,24 | 2,4,5,8,20,<br>22,23,25,2<br>6 | 2 | P13432,Q62997                                                  |
| 7178 | 1,3,6,7,18,<br>19,21,25 | 2,4,5,8,20,<br>22,23,24,2<br>6 | 3 | P00731,P47967,P97840                                           |
| 7179 | 1,3,6,7,18,<br>19,21,26 | 2,4,5,8,20,<br>22,23,24,2<br>5 | 0 |                                                                |
| 7180 | 1,3,6,7,18,<br>19,22,23 | 2,4,5,8,20,<br>21,24,25,2<br>6 | 3 | P15399,P16086,P97580                                           |
| 7181 | 1,3,6,7,18,<br>19,22,24 | 2,4,5,8,20,<br>21,23,25,2<br>6 | 2 | P06760,Q6AYS4                                                  |
| 7182 | 1,3,6,7,18,<br>19,22,25 | 2,4,5,8,20,<br>21,23,24,2<br>6 | 2 | P17046,P97840                                                  |
| 7183 | 1,3,6,7,18,<br>19,22,26 | 2,4,5,8,20,<br>21,23,24,2<br>5 | 2 | P06760,Q5U2V4                                                  |
| 7184 | 1,3,6,7,18,<br>19,23,24 | 2,4,5,8,20,<br>21,22,25,2<br>6 | 5 | P15399,P16086,P97580,Q6AYS4,Q80WL1                             |
| 7185 | 1,3,6,7,18,<br>19,23,25 | 2,4,5,8,20,<br>21,22,24,2<br>6 | 4 | P15399,P16086,P97580,Q30KJ2                                    |
| 7186 | 1,3,6,7,18,<br>19,23,26 | 2,4,5,8,20,<br>21,22,24,2<br>5 | 9 | P01946,P02091,P15399,P16086,P35467,P97580,Q30KJ2,Q6IG02,Q6P6Q2 |
| 7187 | 1,3,6,7,18,<br>19,24,25 | 2,4,5,8,20,<br>21,22,23,2<br>6 | 1 | Q80WL1                                                         |
| 7188 | 1,3,6,7,18,<br>19,24,26 | 2,4,5,8,20,<br>21,22,23,2<br>5 | 3 | P02091,P06760,Q6AYS4                                           |
| 7189 | 1,3,6,7,18,<br>19,25,26 | 2,4,5,8,20,<br>21,22,23,2<br>4 | 2 | P02091,P35280                                                  |
| 7190 | 1,3,6,7,18,<br>20,21,22 | 2,4,5,8,19,<br>23,24,25,2<br>6 | 1 | P13432                                                         |
| 7191 | 1,3,6,7,18,<br>20,21,23 | 2,4,5,8,19,<br>22,24,25,2<br>6 | 1 | P16086                                                         |

|      |                         |                                |   |                                                                |
|------|-------------------------|--------------------------------|---|----------------------------------------------------------------|
| 7192 | 1,3,6,7,18,<br>20,21,24 | 2,4,5,8,19,<br>22,23,25,2<br>6 | 1 | P13432                                                         |
| 7193 | 1,3,6,7,18,<br>20,21,25 | 2,4,5,8,19,<br>22,23,24,2<br>6 | 0 |                                                                |
| 7194 | 1,3,6,7,18,<br>20,21,26 | 2,4,5,8,19,<br>22,23,24,2<br>5 | 0 |                                                                |
| 7195 | 1,3,6,7,18,<br>20,22,23 | 2,4,5,8,19,<br>21,24,25,2<br>6 | 0 |                                                                |
| 7196 | 1,3,6,7,18,<br>20,22,24 | 2,4,5,8,19,<br>21,23,25,2<br>6 | 2 | P27213,Q6AYS4                                                  |
| 7197 | 1,3,6,7,18,<br>20,22,25 | 2,4,5,8,19,<br>21,23,24,2<br>6 | 0 |                                                                |
| 7198 | 1,3,6,7,18,<br>20,22,26 | 2,4,5,8,19,<br>21,23,24,2<br>5 | 2 | P06760,Q5U2V4                                                  |
| 7199 | 1,3,6,7,18,<br>20,23,24 | 2,4,5,8,19,<br>21,22,25,2<br>6 | 3 | A2RUV9,Q6AYS4,Q80WL1                                           |
| 7200 | 1,3,6,7,18,<br>20,23,25 | 2,4,5,8,19,<br>21,22,24,2<br>6 | 2 | A2RUV9,Q80WL1                                                  |
| 7201 | 1,3,6,7,18,<br>20,23,26 | 2,4,5,8,19,<br>21,22,24,2<br>5 | 9 | A2RUV9,P01946,P02091,Q4FZU2,Q6IFU8,Q6IFW6,Q6IG02,Q6IMF3,Q6P6Q2 |
| 7202 | 1,3,6,7,18,<br>20,24,25 | 2,4,5,8,19,<br>21,22,23,2<br>6 | 1 | Q80WL1                                                         |
| 7203 | 1,3,6,7,18,<br>20,24,26 | 2,4,5,8,19,<br>21,22,23,2<br>5 | 4 | P02091,P06760,Q6AYS4,Q80WL1                                    |
| 7204 | 1,3,6,7,18,<br>20,25,26 | 2,4,5,8,19,<br>21,22,23,2<br>4 | 2 | P02091,P35280                                                  |
| 7205 | 1,3,6,7,18,<br>21,22,23 | 2,4,5,8,19,<br>20,24,25,2<br>6 | 1 | P16086                                                         |
| 7206 | 1,3,6,7,18,<br>21,22,24 | 2,4,5,8,19,<br>20,23,25,2<br>6 | 1 | P13432                                                         |

|      |                         |                                |   |                                                  |
|------|-------------------------|--------------------------------|---|--------------------------------------------------|
| 7207 | 1,3,6,7,18,<br>21,22,25 | 2,4,5,8,19,<br>20,23,24,2<br>6 | 1 | P97840                                           |
| 7208 | 1,3,6,7,18,<br>21,22,26 | 2,4,5,8,19,<br>20,23,24,2<br>5 | 0 |                                                  |
| 7209 | 1,3,6,7,18,<br>21,23,24 | 2,4,5,8,19,<br>20,22,25,2<br>6 | 2 | P13432,Q62997                                    |
| 7210 | 1,3,6,7,18,<br>21,23,25 | 2,4,5,8,19,<br>20,22,24,2<br>6 | 2 | P19629,Q62997                                    |
| 7211 | 1,3,6,7,18,<br>21,23,26 | 2,4,5,8,19,<br>20,22,24,2<br>5 | 7 | P01946,P02091,Q4FZU2,Q6IFU8,Q6IG02,Q6IMF3,Q6P6Q2 |
| 7212 | 1,3,6,7,18,<br>21,24,25 | 2,4,5,8,19,<br>20,22,23,2<br>6 | 4 | P13432,P19629,P22006,Q62997                      |
| 7213 | 1,3,6,7,18,<br>21,24,26 | 2,4,5,8,19,<br>20,22,23,2<br>5 | 3 | P02091,P13432,Q62997                             |
| 7214 | 1,3,6,7,18,<br>21,25,26 | 2,4,5,8,19,<br>20,22,23,2<br>4 | 5 | P02091,P25031,P31430,Q62997,Q9QZK9               |
| 7215 | 1,3,6,7,18,<br>22,23,24 | 2,4,5,8,19,<br>20,21,25,2<br>6 | 1 | P62804                                           |
| 7216 | 1,3,6,7,18,<br>22,23,25 | 2,4,5,8,19,<br>20,21,24,2<br>6 | 5 | P01015,P06911,P12020,P19629,P62804               |
| 7217 | 1,3,6,7,18,<br>22,23,26 | 2,4,5,8,19,<br>20,21,24,2<br>5 | 4 | P01946,P02091,Q6P6Q2,Q8VD89                      |
| 7218 | 1,3,6,7,18,<br>22,24,25 | 2,4,5,8,19,<br>20,21,23,2<br>6 | 2 | P19629,P62804                                    |
| 7219 | 1,3,6,7,18,<br>22,24,26 | 2,4,5,8,19,<br>20,21,23,2<br>5 | 3 | P02091,P06760,Q8VD89                             |
| 7220 | 1,3,6,7,18,<br>22,25,26 | 2,4,5,8,19,<br>20,21,23,2<br>4 | 1 | P02091                                           |
| 7221 | 1,3,6,7,18,<br>23,24,25 | 2,4,5,8,19,<br>20,21,22,2<br>6 | 4 | P19629,P62804,Q63751,Q80WL1                      |

|      |                         |                                |   |                                                                |
|------|-------------------------|--------------------------------|---|----------------------------------------------------------------|
| 7222 | 1,3,6,7,18,<br>23,24,26 | 2,4,5,8,19,<br>20,21,22,2<br>5 | 6 | A2RUV9,P01946,P02091,Q6IG02,Q6P6Q2,Q8VD89                      |
| 7223 | 1,3,6,7,18,<br>23,25,26 | 2,4,5,8,19,<br>20,21,22,2<br>4 | 5 | A2RUV9,P01946,P02091,Q6IG02,Q6P6Q2                             |
| 7224 | 1,3,6,7,18,<br>24,25,26 | 2,4,5,8,19,<br>20,21,22,2<br>3 | 2 | P01946,P02091                                                  |
| 7225 | 1,3,6,7,19,<br>20,21,22 | 2,4,5,8,18,<br>23,24,25,2<br>6 | 5 | P00714,P16086,P55091,Q6AYS4,Q99MH3                             |
| 7226 | 1,3,6,7,19,<br>20,21,23 | 2,4,5,8,18,<br>22,24,25,2<br>6 | 5 | P15399,P16086,P55091,P97580,Q6AYS4                             |
| 7227 | 1,3,6,7,19,<br>20,21,24 | 2,4,5,8,18,<br>22,23,25,2<br>6 | 4 | P00714,P13432,Q6AYS4,Q99MH3                                    |
| 7228 | 1,3,6,7,19,<br>20,21,25 | 2,4,5,8,18,<br>22,23,24,2<br>6 | 2 | P47967,P97840                                                  |
| 7229 | 1,3,6,7,19,<br>20,21,26 | 2,4,5,8,18,<br>22,23,24,2<br>5 | 2 | Q6AYS4,Q99MH3                                                  |
| 7230 | 1,3,6,7,19,<br>20,22,23 | 2,4,5,8,18,<br>21,24,25,2<br>6 | 8 | P00774,P15399,P16086,P31430,P55091,P97580,P98089,Q6AYS4        |
| 7231 | 1,3,6,7,19,<br>20,22,24 | 2,4,5,8,18,<br>21,23,25,2<br>6 | 9 | P00714,P00774,P14669,P31430,P55091,P98089,Q6AYS4,Q80WL1,Q99MH3 |
| 7232 | 1,3,6,7,19,<br>20,22,25 | 2,4,5,8,18,<br>21,23,24,2<br>6 | 2 | P12020,P17046                                                  |
| 7233 | 1,3,6,7,19,<br>20,22,26 | 2,4,5,8,18,<br>21,23,24,2<br>5 | 7 | O54728,P06760,P31430,P98089,Q5U2V4,Q6AYS4,Q99MH3               |
| 7234 | 1,3,6,7,19,<br>20,23,24 | 2,4,5,8,18,<br>21,22,25,2<br>6 | 8 | P15399,P16086,P31430,P55091,P97580,P98089,Q6AYS4,Q80WL1        |
| 7235 | 1,3,6,7,19,<br>20,23,25 | 2,4,5,8,18,<br>21,22,24,2<br>6 | 6 | P12020,P15399,P16086,P97580,Q30KJ2,Q80WL1                      |
| 7236 | 1,3,6,7,19,<br>20,23,26 | 2,4,5,8,18,<br>21,22,24,2<br>5 | 9 | P01946,P02091,P15399,P31430,P97580,P98089,Q30KJ2,Q6AYS4,Q80WL1 |

|      |                         |                                |   |                                                                |
|------|-------------------------|--------------------------------|---|----------------------------------------------------------------|
| 7237 | 1,3,6,7,19,<br>20,24,25 | 2,4,5,8,18,<br>21,22,23,2<br>6 | 2 | Q6AYS4,Q80WL1                                                  |
| 7238 | 1,3,6,7,19,<br>20,24,26 | 2,4,5,8,18,<br>21,22,23,2<br>5 | 5 | P02091,P98089,Q6AYS4,Q80WL1,Q99MH3                             |
| 7239 | 1,3,6,7,19,<br>20,25,26 | 2,4,5,8,18,<br>21,22,23,2<br>4 | 4 | P02091,P35280,Q6AYS4,Q80WL1                                    |
| 7240 | 1,3,6,7,19,<br>21,22,23 | 2,4,5,8,18,<br>20,24,25,2<br>6 | 4 | P15399,P16086,P55091,P97580                                    |
| 7241 | 1,3,6,7,19,<br>21,22,24 | 2,4,5,8,18,<br>20,23,25,2<br>6 | 6 | P00714,P13432,P19218,Q6AYS4,Q6TMA8,Q99MH3                      |
| 7242 | 1,3,6,7,19,<br>21,22,25 | 2,4,5,8,18,<br>20,23,24,2<br>6 | 7 | D4A1J4,P06911,P17046,P19218,P47967,P97840,Q9QZK9               |
| 7243 | 1,3,6,7,19,<br>21,22,26 | 2,4,5,8,18,<br>20,23,24,2<br>5 | 1 | Q99MH3                                                         |
| 7244 | 1,3,6,7,19,<br>21,23,24 | 2,4,5,8,18,<br>20,22,25,2<br>6 | 5 | P15399,P16086,P97580,Q30KJ2,Q6AYS4                             |
| 7245 | 1,3,6,7,19,<br>21,23,25 | 2,4,5,8,18,<br>20,22,24,2<br>6 | 9 | P12020,P15399,P16086,P17046,P47967,P97580,P97840,Q30KJ2,Q9QZK9 |
| 7246 | 1,3,6,7,19,<br>21,23,26 | 2,4,5,8,18,<br>20,22,24,2<br>5 | 6 | P01946,P02091,P15399,P16086,P97580,Q30KJ2                      |
| 7247 | 1,3,6,7,19,<br>21,24,25 | 2,4,5,8,18,<br>20,22,23,2<br>6 | 4 | P22006,P47967,P97840,Q62997                                    |
| 7248 | 1,3,6,7,19,<br>21,24,26 | 2,4,5,8,18,<br>20,22,23,2<br>5 | 2 | P02091,Q6AYS4                                                  |
| 7249 | 1,3,6,7,19,<br>21,25,26 | 2,4,5,8,18,<br>20,22,23,2<br>4 | 3 | P02091,P97840,Q9QZK9                                           |
| 7250 | 1,3,6,7,19,<br>22,23,24 | 2,4,5,8,18,<br>20,21,25,2<br>6 | 9 | P15399,P16086,P31430,P55091,P62804,P97580,P98089,Q30KJ2,Q6AYS4 |
| 7251 | 1,3,6,7,19,<br>22,23,25 | 2,4,5,8,18,<br>20,21,24,2<br>6 | 9 | P06911,P12020,P15399,P16086,P17046,P62804,P97580,Q30KJ2,Q5GRG2 |

|      |                         |                                |    |                                                                       |
|------|-------------------------|--------------------------------|----|-----------------------------------------------------------------------|
| 7252 | 1,3,6,7,19,<br>22,23,26 | 2,4,5,8,18,<br>20,21,24,2<br>5 | 10 | O54728,P01946,P02091,P15399,P16086,P31430,P97580,P98089,Q30KJ2,Q6AYS4 |
| 7253 | 1,3,6,7,19,<br>22,24,25 | 2,4,5,8,18,<br>20,21,23,2<br>6 | 5  | P06911,P12020,P17046,P62804,Q6TMA8                                    |
| 7254 | 1,3,6,7,19,<br>22,24,26 | 2,4,5,8,18,<br>20,21,23,2<br>5 | 6  | P02091,P31430,P98089,Q6AYS4,Q6TMA8,Q99MH3                             |
| 7255 | 1,3,6,7,19,<br>22,25,26 | 2,4,5,8,18,<br>20,21,23,2<br>4 | 3  | P02091,P17046,Q9QZK9                                                  |
| 7256 | 1,3,6,7,19,<br>23,24,25 | 2,4,5,8,18,<br>20,21,22,2<br>6 | 9  | P12020,P15399,P17046,P19629,P62804,P97580,Q30KJ2,Q63751,Q80WL1        |
| 7257 | 1,3,6,7,19,<br>23,24,26 | 2,4,5,8,18,<br>20,21,22,2<br>5 | 9  | P01946,P02091,P15399,P31430,P97580,P98089,Q30KJ2,Q6AYS4,Q80WL1        |
| 7258 | 1,3,6,7,19,<br>23,25,26 | 2,4,5,8,18,<br>20,21,22,2<br>4 | 7  | P01946,P02091,P12020,P15399,P97580,Q30KJ2,Q9QZK9                      |
| 7259 | 1,3,6,7,19,<br>24,25,26 | 2,4,5,8,18,<br>20,21,22,2<br>3 | 4  | P01946,P02091,Q80WL1,Q9QZK9                                           |
| 7260 | 1,3,6,7,20,<br>21,22,23 | 2,4,5,8,18,<br>19,24,25,2<br>6 | 1  | P55091                                                                |
| 7261 | 1,3,6,7,20,<br>21,22,24 | 2,4,5,8,18,<br>19,23,25,2<br>6 | 7  | P00714,P02803,P13432,Q03191,Q5XFX0,Q6AYS4,Q99MH3                      |
| 7262 | 1,3,6,7,20,<br>21,22,25 | 2,4,5,8,18,<br>19,23,24,2<br>6 | 2  | P09605,P25809,Q03191                                                  |
| 7263 | 1,3,6,7,20,<br>21,22,26 | 2,4,5,8,18,<br>19,23,24,2<br>5 | 2  | Q03191,Q99MH3                                                         |
| 7264 | 1,3,6,7,20,<br>21,23,24 | 2,4,5,8,18,<br>19,22,25,2<br>6 | 1  | P13432                                                                |
| 7265 | 1,3,6,7,20,<br>21,23,25 | 2,4,5,8,18,<br>19,22,24,2<br>6 | 0  |                                                                       |
| 7266 | 1,3,6,7,20,<br>21,23,26 | 2,4,5,8,18,<br>19,22,24,2<br>5 | 2  | P01946,P02091                                                         |



|      |                         |                                |   |                                                  |
|------|-------------------------|--------------------------------|---|--------------------------------------------------|
| 7267 | 1,3,6,7,20,<br>21,24,25 | 2,4,5,8,18,<br>19,22,23,2<br>6 | 2 | P13432,Q03191                                    |
| 7268 | 1,3,6,7,20,<br>21,24,26 | 2,4,5,8,18,<br>19,22,23,2<br>5 | 4 | P02091,P13432,Q6AYS4,Q99MH3                      |
| 7269 | 1,3,6,7,20,<br>21,25,26 | 2,4,5,8,18,<br>19,22,23,2<br>4 | 2 | P02091,Q03191                                    |
| 7270 | 1,3,6,7,20,<br>22,23,24 | 2,4,5,8,18,<br>19,21,25,2<br>6 | 6 | P02803,P31430,P55091,P98089,Q6AYS4,Q80WL1        |
| 7271 | 1,3,6,7,20,<br>22,23,25 | 2,4,5,8,18,<br>19,21,24,2<br>6 | 3 | P06911,P12020,Q5GRG2                             |
| 7272 | 1,3,6,7,20,<br>22,23,26 | 2,4,5,8,18,<br>19,21,24,2<br>5 | 5 | O54728,P01946,P02091,P98089,Q6AYS4               |
| 7273 | 1,3,6,7,20,<br>22,24,25 | 2,4,5,8,18,<br>19,21,23,2<br>6 | 3 | P02803,Q03191,Q99MH3                             |
| 7274 | 1,3,6,7,20,<br>22,24,26 | 2,4,5,8,18,<br>19,21,23,2<br>5 | 7 | P02091,P02803,P98089,Q03191,Q63598,Q6AYS4,Q99MH3 |
| 7275 | 1,3,6,7,20,<br>22,25,26 | 2,4,5,8,18,<br>19,21,23,2<br>4 | 3 | P02091,Q03191,Q99MH3                             |
| 7276 | 1,3,6,7,20,<br>23,24,25 | 2,4,5,8,18,<br>19,21,22,2<br>6 | 3 | P19629,Q63751,Q80WL1                             |
| 7277 | 1,3,6,7,20,<br>23,24,26 | 2,4,5,8,18,<br>19,21,22,2<br>5 | 5 | P01946,P02091,P98089,Q6AYS4,Q80WL1               |
| 7278 | 1,3,6,7,20,<br>23,25,26 | 2,4,5,8,18,<br>19,21,22,2<br>4 | 3 | P01946,P02091,Q80WL1                             |
| 7279 | 1,3,6,7,20,<br>24,25,26 | 2,4,5,8,18,<br>19,21,22,2<br>3 | 5 | P01946,P02091,Q03191,Q80WL1,Q99MH3               |
| 7280 | 1,3,6,7,21,<br>22,23,24 | 2,4,5,8,18,<br>19,20,25,2<br>6 | 1 | P13432                                           |
| 7281 | 1,3,6,7,21,<br>22,23,25 | 2,4,5,8,18,<br>19,20,24,2<br>6 | 5 | P06911,P12020,P17046,P19629,Q5GRG2               |

|      |                         |                                |   |                                                  |
|------|-------------------------|--------------------------------|---|--------------------------------------------------|
| 7282 | 1,3,6,7,21,<br>22,23,26 | 2,4,5,8,18,<br>19,20,24,2<br>5 | 2 | P01946,P02091                                    |
| 7283 | 1,3,6,7,21,<br>22,24,25 | 2,4,5,8,18,<br>19,20,23,2<br>6 | 5 | P09605;P25809,P13432,P19629,P22006,Q03191        |
| 7284 | 1,3,6,7,21,<br>22,24,26 | 2,4,5,8,18,<br>19,20,23,2<br>5 | 3 | P02091,P13432,Q99MH3                             |
| 7285 | 1,3,6,7,21,<br>22,25,26 | 2,4,5,8,18,<br>19,20,23,2<br>4 | 4 | P02091,P22006,Q03191,Q9QZK9                      |
| 7286 | 1,3,6,7,21,<br>23,24,25 | 2,4,5,8,18,<br>19,20,22,2<br>6 | 5 | P19629,P22006,Q62997,Q63751,Q6P6R2               |
| 7287 | 1,3,6,7,21,<br>23,24,26 | 2,4,5,8,18,<br>19,20,22,2<br>5 | 2 | P01946,P02091                                    |
| 7288 | 1,3,6,7,21,<br>23,25,26 | 2,4,5,8,18,<br>19,20,22,2<br>4 | 6 | P01946,P02091,P19629,P22006,P83121,Q9QZK9        |
| 7289 | 1,3,6,7,21,<br>24,25,26 | 2,4,5,8,18,<br>19,20,22,2<br>3 | 6 | P01946,P02091,P19629,P22006,Q62997,Q9QZK9        |
| 7290 | 1,3,6,7,22,<br>23,24,25 | 2,4,5,8,18,<br>19,20,21,2<br>6 | 7 | P06911,P12020,P17046,P19629,P62804,Q5GRG2,Q63751 |
| 7291 | 1,3,6,7,22,<br>23,24,26 | 2,4,5,8,18,<br>19,20,21,2<br>5 | 5 | P00731,P01946,P02091,P98089,Q6AYS4               |
| 7292 | 1,3,6,7,22,<br>23,25,26 | 2,4,5,8,18,<br>19,20,21,2<br>4 | 5 | P01946,P02091,P06911,P12020,P19629               |
| 7293 | 1,3,6,7,22,<br>24,25,26 | 2,4,5,8,18,<br>19,20,21,2<br>3 | 4 | P02091,P19629,Q03191,Q99MH3                      |
| 7294 | 1,3,6,7,23,<br>24,25,26 | 2,4,5,8,18,<br>19,20,21,2<br>2 | 6 | P01946,P02091,P19629,Q63751,Q7TPB1,Q80WL1        |
| 7295 | 1,3,6,8,18,<br>19,20,21 | 2,4,5,7,22,<br>23,24,25,2<br>6 | 4 | O35547,P00731,P35281,P36376                      |
| 7296 | 1,3,6,8,18,<br>19,20,22 | 2,4,5,7,21,<br>23,24,25,2<br>6 | 1 | P22006                                           |

|      |                         |                                |   |                                           |
|------|-------------------------|--------------------------------|---|-------------------------------------------|
| 7297 | 1,3,6,8,18,<br>19,20,23 | 2,4,5,7,21,<br>22,24,25,2<br>6 | 2 | P22006,P35467                             |
| 7298 | 1,3,6,8,18,<br>19,20,24 | 2,4,5,7,21,<br>22,23,25,2<br>6 | 0 |                                           |
| 7299 | 1,3,6,8,18,<br>19,20,25 | 2,4,5,7,21,<br>22,23,24,2<br>6 | 1 | P35280                                    |
| 7300 | 1,3,6,8,18,<br>19,20,26 | 2,4,5,7,21,<br>22,23,24,2<br>5 | 1 | P35280                                    |
| 7301 | 1,3,6,8,18,<br>19,21,22 | 2,4,5,7,20,<br>23,24,25,2<br>6 | 5 | O35547,P02782,P08723,P14408,P35281        |
| 7302 | 1,3,6,8,18,<br>19,21,23 | 2,4,5,7,20,<br>22,24,25,2<br>6 | 5 | O35547,O70594,P35281,P35467,P51907        |
| 7303 | 1,3,6,8,18,<br>19,21,24 | 2,4,5,7,20,<br>22,23,25,2<br>6 | 6 | P05539,P13432,P14408,P35281,P36376,Q62997 |
| 7304 | 1,3,6,8,18,<br>19,21,25 | 2,4,5,7,20,<br>22,23,24,2<br>6 | 3 | O35547,P00731,P35281                      |
| 7305 | 1,3,6,8,18,<br>19,21,26 | 2,4,5,7,20,<br>22,23,24,2<br>5 | 1 | P35281                                    |
| 7306 | 1,3,6,8,18,<br>19,22,23 | 2,4,5,7,20,<br>21,24,25,2<br>6 | 2 | P35467,P51907                             |
| 7307 | 1,3,6,8,18,<br>19,22,24 | 2,4,5,7,20,<br>21,23,25,2<br>6 | 1 | P83121                                    |
| 7308 | 1,3,6,8,18,<br>19,22,25 | 2,4,5,7,20,<br>21,23,24,2<br>6 | 0 |                                           |
| 7309 | 1,3,6,8,18,<br>19,22,26 | 2,4,5,7,20,<br>21,23,24,2<br>5 | 0 |                                           |
| 7310 | 1,3,6,8,18,<br>19,23,24 | 2,4,5,7,20,<br>21,22,25,2<br>6 | 2 | P35467,P51907                             |
| 7311 | 1,3,6,8,18,<br>19,23,25 | 2,4,5,7,20,<br>21,22,24,2<br>6 | 3 | O70594,P35467,P51907                      |

|      |                         |                                |   |                                    |
|------|-------------------------|--------------------------------|---|------------------------------------|
| 7312 | 1,3,6,8,18,<br>19,23,26 | 2,4,5,7,20,<br>21,22,24,2<br>5 | 5 | P35467,P51907,Q63942,Q6IG02,Q6P6Q2 |
| 7313 | 1,3,6,8,18,<br>19,24,25 | 2,4,5,7,20,<br>21,22,23,2<br>6 | 0 |                                    |
| 7314 | 1,3,6,8,18,<br>19,24,26 | 2,4,5,7,20,<br>21,22,23,2<br>5 | 0 |                                    |
| 7315 | 1,3,6,8,18,<br>19,25,26 | 2,4,5,7,20,<br>21,22,23,2<br>4 | 1 | P35280                             |
| 7316 | 1,3,6,8,18,<br>20,21,22 | 2,4,5,7,19,<br>23,24,25,2<br>6 | 5 | O35547,P02782,P08723,P13432,P14480 |
| 7317 | 1,3,6,8,18,<br>20,21,23 | 2,4,5,7,19,<br>22,24,25,2<br>6 | 1 | O35547                             |
| 7318 | 1,3,6,8,18,<br>20,21,24 | 2,4,5,7,19,<br>22,23,25,2<br>6 | 3 | P05539,P13432,P36376               |
| 7319 | 1,3,6,8,18,<br>20,21,25 | 2,4,5,7,19,<br>22,23,24,2<br>6 | 1 | Q9WTT6                             |
| 7320 | 1,3,6,8,18,<br>20,21,26 | 2,4,5,7,19,<br>22,23,24,2<br>5 | 0 |                                    |
| 7321 | 1,3,6,8,18,<br>20,22,23 | 2,4,5,7,19,<br>21,24,25,2<br>6 | 1 | P22006                             |
| 7322 | 1,3,6,8,18,<br>20,22,24 | 2,4,5,7,19,<br>21,23,25,2<br>6 | 0 |                                    |
| 7323 | 1,3,6,8,18,<br>20,22,25 | 2,4,5,7,19,<br>21,23,24,2<br>6 | 0 |                                    |
| 7324 | 1,3,6,8,18,<br>20,22,26 | 2,4,5,7,19,<br>21,23,24,2<br>5 | 0 |                                    |
| 7325 | 1,3,6,8,18,<br>20,23,24 | 2,4,5,7,19,<br>21,22,25,2<br>6 | 1 | P82995                             |
| 7326 | 1,3,6,8,18,<br>20,23,25 | 2,4,5,7,19,<br>21,22,24,2<br>6 | 0 |                                    |

|      |                         |                                |   |                                                  |
|------|-------------------------|--------------------------------|---|--------------------------------------------------|
| 7327 | 1,3,6,8,18,<br>20,23,26 | 2,4,5,7,19,<br>21,22,24,2<br>5 | 7 | P35467,Q4FZU2,Q6IFU8,Q6IFW6,Q6IG02,Q6IMF3,Q6P6Q2 |
| 7328 | 1,3,6,8,18,<br>20,24,25 | 2,4,5,7,19,<br>21,22,23,2<br>6 | 0 |                                                  |
| 7329 | 1,3,6,8,18,<br>20,24,26 | 2,4,5,7,19,<br>21,22,23,2<br>5 | 0 |                                                  |
| 7330 | 1,3,6,8,18,<br>20,25,26 | 2,4,5,7,19,<br>21,22,23,2<br>4 | 1 | P35280                                           |
| 7331 | 1,3,6,8,18,<br>21,22,23 | 2,4,5,7,19,<br>20,24,25,2<br>6 | 3 | O35547,P02782,P08723                             |
| 7332 | 1,3,6,8,18,<br>21,22,24 | 2,4,5,7,19,<br>20,23,25,2<br>6 | 3 | P02782,P13432,P14408                             |
| 7333 | 1,3,6,8,18,<br>21,22,25 | 2,4,5,7,19,<br>20,23,24,2<br>6 | 1 | P14408                                           |
| 7334 | 1,3,6,8,18,<br>21,22,26 | 2,4,5,7,19,<br>20,23,24,2<br>5 | 2 | P02782,P14408                                    |
| 7335 | 1,3,6,8,18,<br>21,23,24 | 2,4,5,7,19,<br>20,22,25,2<br>6 | 3 | P05539,P13432,Q62997                             |
| 7336 | 1,3,6,8,18,<br>21,23,25 | 2,4,5,7,19,<br>20,22,24,2<br>6 | 4 | P07150,Q62997,Q6P6R2,Q9WTT6                      |
| 7337 | 1,3,6,8,18,<br>21,23,26 | 2,4,5,7,19,<br>20,22,24,2<br>5 | 7 | P35467,Q4FZU2,Q6IFU8,Q6IFV1,Q6IG02,Q6IMF3,Q6P6Q2 |
| 7338 | 1,3,6,8,18,<br>21,24,25 | 2,4,5,7,19,<br>20,22,23,2<br>6 | 4 | P05539,P13432,P14408,Q62997                      |
| 7339 | 1,3,6,8,18,<br>21,24,26 | 2,4,5,7,19,<br>20,22,23,2<br>5 | 3 | P13432,P14408,Q62997                             |
| 7340 | 1,3,6,8,18,<br>21,25,26 | 2,4,5,7,19,<br>20,22,23,2<br>4 | 3 | P31430,Q62997,Q9WTT6                             |
| 7341 | 1,3,6,8,18,<br>22,23,24 | 2,4,5,7,19,<br>20,21,25,2<br>6 | 1 | P51907                                           |

|      |                         |                                |   |                                                         |
|------|-------------------------|--------------------------------|---|---------------------------------------------------------|
| 7342 | 1,3,6,8,18,<br>22,23,25 | 2,4,5,7,19,<br>20,21,24,2<br>6 | 2 | P06911,P51907                                           |
| 7343 | 1,3,6,8,18,<br>22,23,26 | 2,4,5,7,19,<br>20,21,24,2<br>5 | 4 | P35467,P51907,Q6IG02,Q6P6Q2                             |
| 7344 | 1,3,6,8,18,<br>22,24,25 | 2,4,5,7,19,<br>20,21,23,2<br>6 | 1 | P14408                                                  |
| 7345 | 1,3,6,8,18,<br>22,24,26 | 2,4,5,7,19,<br>20,21,23,2<br>5 | 0 |                                                         |
| 7346 | 1,3,6,8,18,<br>22,25,26 | 2,4,5,7,19,<br>20,21,23,2<br>4 | 0 |                                                         |
| 7347 | 1,3,6,8,18,<br>23,24,25 | 2,4,5,7,19,<br>20,21,22,2<br>6 | 2 | P51907,Q63751                                           |
| 7348 | 1,3,6,8,18,<br>23,24,26 | 2,4,5,7,19,<br>20,21,22,2<br>5 | 7 | P35467,P47967,P51907,Q6IFV1,Q6IG02,Q6IMF3,Q6P6Q2        |
| 7349 | 1,3,6,8,18,<br>23,25,26 | 2,4,5,7,19,<br>20,21,22,2<br>4 | 8 | P35467,P51907,Q4FZU2,Q6IFU8,Q6IFW6,Q6IG02,Q6IMF3,Q6P6Q2 |
| 7350 | 1,3,6,8,18,<br>24,25,26 | 2,4,5,7,19,<br>20,21,22,2<br>3 | 1 | P08494                                                  |
| 7351 | 1,3,6,8,19,<br>20,21,22 | 2,4,5,7,18,<br>23,24,25,2<br>6 | 6 | P00714,P02782,P35281,P55091,P82995,Q99MH3               |
| 7352 | 1,3,6,8,19,<br>20,21,23 | 2,4,5,7,18,<br>22,24,25,2<br>6 | 3 | P35281,P55091,P82995                                    |
| 7353 | 1,3,6,8,19,<br>20,21,24 | 2,4,5,7,18,<br>22,23,25,2<br>6 | 5 | P00714,P13432,P35281,P82995,Q99MH3                      |
| 7354 | 1,3,6,8,19,<br>20,21,25 | 2,4,5,7,18,<br>22,23,24,2<br>6 | 2 | P16636,P35281                                           |
| 7355 | 1,3,6,8,19,<br>20,21,26 | 2,4,5,7,18,<br>22,23,24,2<br>5 | 2 | P35281,Q99MH3                                           |
| 7356 | 1,3,6,8,19,<br>20,22,23 | 2,4,5,7,18,<br>21,24,25,2<br>6 | 6 | P00774,P22006,P31430,P55091,P82995,P98089               |

|      |                         |                                |   |                                                                |
|------|-------------------------|--------------------------------|---|----------------------------------------------------------------|
| 7357 | 1,3,6,8,19,<br>20,22,24 | 2,4,5,7,18,<br>21,23,25,2<br>6 | 9 | P00714,P00774,P25031,P31430,P55091,P82995,P98089,Q62636,Q99MH3 |
| 7358 | 1,3,6,8,19,<br>20,22,25 | 2,4,5,7,18,<br>21,23,24,2<br>6 | 2 | D3ZUC6,P82995                                                  |
| 7359 | 1,3,6,8,19,<br>20,22,26 | 2,4,5,7,18,<br>21,23,24,2<br>5 | 3 | O54728,P98089,Q99MH3                                           |
| 7360 | 1,3,6,8,19,<br>20,23,24 | 2,4,5,7,18,<br>21,22,25,2<br>6 | 6 | P25031,P31430,P55091,P82995,P98089,Q80WL1                      |
| 7361 | 1,3,6,8,19,<br>20,23,25 | 2,4,5,7,18,<br>21,22,24,2<br>6 | 1 | P82995                                                         |
| 7362 | 1,3,6,8,19,<br>20,23,26 | 2,4,5,7,18,<br>21,22,24,2<br>5 | 2 | P98089,Q6IG02                                                  |
| 7363 | 1,3,6,8,19,<br>20,24,25 | 2,4,5,7,18,<br>21,22,23,2<br>6 | 2 | P82995,Q80WL1                                                  |
| 7364 | 1,3,6,8,19,<br>20,24,26 | 2,4,5,7,18,<br>21,22,23,2<br>5 | 2 | P98089,Q99MH3                                                  |
| 7365 | 1,3,6,8,19,<br>20,25,26 | 2,4,5,7,18,<br>21,22,23,2<br>4 | 1 | P35280                                                         |
| 7366 | 1,3,6,8,19,<br>21,22,23 | 2,4,5,7,18,<br>20,24,25,2<br>6 | 4 | P02782,P35281,P51907,P55091                                    |
| 7367 | 1,3,6,8,19,<br>21,22,24 | 2,4,5,7,18,<br>20,23,25,2<br>6 | 4 | P00714,P02782,P13432,P14408                                    |
| 7368 | 1,3,6,8,19,<br>21,22,25 | 2,4,5,7,18,<br>20,23,24,2<br>6 | 0 |                                                                |
| 7369 | 1,3,6,8,19,<br>21,22,26 | 2,4,5,7,18,<br>20,23,24,2<br>5 | 2 | P02782,P35281                                                  |
| 7370 | 1,3,6,8,19,<br>21,23,24 | 2,4,5,7,18,<br>20,22,25,2<br>6 | 3 | P35281,P51907,P82995                                           |
| 7371 | 1,3,6,8,19,<br>21,23,25 | 2,4,5,7,18,<br>20,22,24,2<br>6 | 6 | O70594,P15399,P35281,P51907,Q6P6R2,Q9WTT6                      |

|      |                         |                                |   |                                           |
|------|-------------------------|--------------------------------|---|-------------------------------------------|
| 7372 | 1,3,6,8,19,<br>21,23,26 | 2,4,5,7,18,<br>20,22,24,2<br>5 | 2 | P35281,Q6IFV1                             |
| 7373 | 1,3,6,8,19,<br>21,24,25 | 2,4,5,7,18,<br>20,22,23,2<br>6 | 1 | Q62997                                    |
| 7374 | 1,3,6,8,19,<br>21,24,26 | 2,4,5,7,18,<br>20,22,23,2<br>5 | 0 |                                           |
| 7375 | 1,3,6,8,19,<br>21,25,26 | 2,4,5,7,18,<br>20,22,23,2<br>4 | 2 | Q9QZK9,Q9WTT6                             |
| 7376 | 1,3,6,8,19,<br>22,23,24 | 2,4,5,7,18,<br>20,21,25,2<br>6 | 6 | P25031,P31430,P51907,P55091,P82995,P98089 |
| 7377 | 1,3,6,8,19,<br>22,23,25 | 2,4,5,7,18,<br>20,21,24,2<br>6 | 3 | P06911,P51907,Q71MB6                      |
| 7378 | 1,3,6,8,19,<br>22,23,26 | 2,4,5,7,18,<br>20,21,24,2<br>5 | 3 | O54728,P51907,P98089                      |
| 7379 | 1,3,6,8,19,<br>22,24,25 | 2,4,5,7,18,<br>20,21,23,2<br>6 | 1 | P06911                                    |
| 7380 | 1,3,6,8,19,<br>22,24,26 | 2,4,5,7,18,<br>20,21,23,2<br>5 | 2 | P98089,Q99MH3                             |
| 7381 | 1,3,6,8,19,<br>22,25,26 | 2,4,5,7,18,<br>20,21,23,2<br>4 | 0 |                                           |
| 7382 | 1,3,6,8,19,<br>23,24,25 | 2,4,5,7,18,<br>20,21,22,2<br>6 | 2 | P51907,P82995                             |
| 7383 | 1,3,6,8,19,<br>23,24,26 | 2,4,5,7,18,<br>20,21,22,2<br>5 | 3 | P02091,P51907,P98089                      |
| 7384 | 1,3,6,8,19,<br>23,25,26 | 2,4,5,7,18,<br>20,21,22,2<br>4 | 2 | P02091,P51907                             |
| 7385 | 1,3,6,8,19,<br>24,25,26 | 2,4,5,7,18,<br>20,21,22,2<br>3 | 0 |                                           |
| 7386 | 1,3,6,8,20,<br>21,22,23 | 2,4,5,7,18,<br>19,24,25,2<br>6 | 3 | P16636,P55091,P82995                      |



|      |                         |                                |   |                                                  |
|------|-------------------------|--------------------------------|---|--------------------------------------------------|
| 7387 | 1,3,6,8,20,<br>21,22,24 | 2,4,5,7,18,<br>19,23,25,2<br>6 | 7 | P00714,P02782,P13432,P82995,Q03191,Q5XFX0,Q99MH3 |
| 7388 | 1,3,6,8,20,<br>21,22,25 | 2,4,5,7,18,<br>19,23,24,2<br>6 | 3 | P16636,Q03191,Q5XFX0                             |
| 7389 | 1,3,6,8,20,<br>21,22,26 | 2,4,5,7,18,<br>19,23,24,2<br>5 | 3 | Q03191,Q99068,Q99MH3                             |
| 7390 | 1,3,6,8,20,<br>21,23,24 | 2,4,5,7,18,<br>19,22,25,2<br>6 | 2 | P13432,P82995                                    |
| 7391 | 1,3,6,8,20,<br>21,23,25 | 2,4,5,7,18,<br>19,22,24,2<br>6 | 4 | P16636,P46720,Q6P6R2,Q9WTT6                      |
| 7392 | 1,3,6,8,20,<br>21,23,26 | 2,4,5,7,18,<br>19,22,24,2<br>5 | 2 | Q6IFV1,Q6IG02                                    |
| 7393 | 1,3,6,8,20,<br>21,24,25 | 2,4,5,7,18,<br>19,22,23,2<br>6 | 4 | P13432,P16636,Q03191,Q5XFX0                      |
| 7394 | 1,3,6,8,20,<br>21,24,26 | 2,4,5,7,18,<br>19,22,23,2<br>5 | 2 | P13432,Q99MH3                                    |
| 7395 | 1,3,6,8,20,<br>21,25,26 | 2,4,5,7,18,<br>19,22,23,2<br>4 | 2 | Q03191,Q9WTT6                                    |
| 7396 | 1,3,6,8,20,<br>22,23,24 | 2,4,5,7,18,<br>19,21,25,2<br>6 | 5 | P25031,P31430,P55091,P82995,P98089               |
| 7397 | 1,3,6,8,20,<br>22,23,25 | 2,4,5,7,18,<br>19,21,24,2<br>6 | 4 | D3ZUC6,P06911,P16636,P82995                      |
| 7398 | 1,3,6,8,20,<br>22,23,26 | 2,4,5,7,18,<br>19,21,24,2<br>5 | 2 | O54728,P98089                                    |
| 7399 | 1,3,6,8,20,<br>22,24,25 | 2,4,5,7,18,<br>19,21,23,2<br>6 | 5 | D3ZUC6,P82995,Q03191,Q5XFX0,Q99MH3               |
| 7400 | 1,3,6,8,20,<br>22,24,26 | 2,4,5,7,18,<br>19,21,23,2<br>5 | 4 | P02803,P98089,Q03191,Q99MH3                      |
| 7401 | 1,3,6,8,20,<br>22,25,26 | 2,4,5,7,18,<br>19,21,23,2<br>4 | 3 | D3ZUC6,Q03191,Q99MH3                             |

|      |                         |                                |   |                                    |
|------|-------------------------|--------------------------------|---|------------------------------------|
| 7402 | 1,3,6,8,20,<br>23,24,25 | 2,4,5,7,18,<br>19,21,22,2<br>6 | 4 | P82995,P83748,Q63751,Q80WL1        |
| 7403 | 1,3,6,8,20,<br>23,24,26 | 2,4,5,7,18,<br>19,21,22,2<br>5 | 4 | P47967,P97840,P98089,Q6IG02        |
| 7404 | 1,3,6,8,20,<br>23,25,26 | 2,4,5,7,18,<br>19,21,22,2<br>4 | 1 | Q6IG02                             |
| 7405 | 1,3,6,8,20,<br>24,25,26 | 2,4,5,7,18,<br>19,21,22,2<br>3 | 2 | Q03191,Q99MH3                      |
| 7406 | 1,3,6,8,21,<br>22,23,24 | 2,4,5,7,18,<br>19,20,25,2<br>6 | 3 | P13432,P14408,P82995               |
| 7407 | 1,3,6,8,21,<br>22,23,25 | 2,4,5,7,18,<br>19,20,24,2<br>6 | 3 | P06911,P16636,Q9WTT6               |
| 7408 | 1,3,6,8,21,<br>22,23,26 | 2,4,5,7,18,<br>19,20,24,2<br>5 | 1 | Q6IFV1                             |
| 7409 | 1,3,6,8,21,<br>22,24,25 | 2,4,5,7,18,<br>19,20,23,2<br>6 | 4 | P13432,P14408,Q03191,Q5XFX0        |
| 7410 | 1,3,6,8,21,<br>22,24,26 | 2,4,5,7,18,<br>19,20,23,2<br>5 | 3 | P13432,P14408,Q99MH3               |
| 7411 | 1,3,6,8,21,<br>22,25,26 | 2,4,5,7,18,<br>19,20,23,2<br>4 | 3 | Q03191,Q9QZK9,Q9WTT6               |
| 7412 | 1,3,6,8,21,<br>23,24,25 | 2,4,5,7,18,<br>19,20,22,2<br>6 | 4 | Q62997,Q63751,Q6P6R2,Q9WTT6        |
| 7413 | 1,3,6,8,21,<br>23,24,26 | 2,4,5,7,18,<br>19,20,22,2<br>5 | 1 | Q6IFV1                             |
| 7414 | 1,3,6,8,21,<br>23,25,26 | 2,4,5,7,18,<br>19,20,22,2<br>4 | 5 | P07150,P14669,Q6P6R2,Q9QZK9,Q9WTT6 |
| 7415 | 1,3,6,8,21,<br>24,25,26 | 2,4,5,7,18,<br>19,20,22,2<br>3 | 2 | Q62997,Q9WTT6                      |
| 7416 | 1,3,6,8,22,<br>23,24,25 | 2,4,5,7,18,<br>19,20,21,2<br>6 | 4 | P06911,P51907,P82995,Q63751        |

|      |                          |                                |   |                                                                |
|------|--------------------------|--------------------------------|---|----------------------------------------------------------------|
| 7417 | 1,3,6,8,22,<br>23,24,26  | 2,4,5,7,18,<br>19,20,21,2<br>5 | 3 | P00731,P47967,P98089                                           |
| 7418 | 1,3,6,8,22,<br>23,25,26  | 2,4,5,7,18,<br>19,20,21,2<br>4 | 1 | P06911                                                         |
| 7419 | 1,3,6,8,22,<br>24,25,26  | 2,4,5,7,18,<br>19,20,21,2<br>3 | 2 | Q03191,Q99MH3                                                  |
| 7420 | 1,3,6,8,23,<br>24,25,26  | 2,4,5,7,18,<br>19,20,21,2<br>2 | 4 | P02091,P51907,Q63751,Q7TPB1                                    |
| 7421 | 1,3,6,18,1<br>9,20,21,22 | 2,4,5,7,8,2<br>3,24,25,26      | 2 | Q02253,Q6AYS4                                                  |
| 7422 | 1,3,6,18,1<br>9,20,21,23 | 2,4,5,7,8,2<br>2,24,25,26      | 0 |                                                                |
| 7423 | 1,3,6,18,1<br>9,20,21,24 | 2,4,5,7,8,2<br>2,23,25,26      | 2 | P36376,Q6AYS4                                                  |
| 7424 | 1,3,6,18,1<br>9,20,21,25 | 2,4,5,7,8,2<br>2,23,24,26      | 1 | Q02253                                                         |
| 7425 | 1,3,6,18,1<br>9,20,21,26 | 2,4,5,7,8,2<br>2,23,24,25      | 1 | Q6AYS4                                                         |
| 7426 | 1,3,6,18,1<br>9,20,22,23 | 2,4,5,7,8,2<br>1,24,25,26      | 4 | P22006,P55091,P82995,Q6AYS4                                    |
| 7427 | 1,3,6,18,1<br>9,20,22,24 | 2,4,5,7,8,2<br>1,23,25,26      | 3 | P82995,Q6AYS4,Q80WL1                                           |
| 7428 | 1,3,6,18,1<br>9,20,22,25 | 2,4,5,7,8,2<br>1,23,24,26      | 0 |                                                                |
| 7429 | 1,3,6,18,1<br>9,20,22,26 | 2,4,5,7,8,2<br>1,23,24,25      | 3 | P06760,Q5U2V4,Q6AYS4                                           |
| 7430 | 1,3,6,18,1<br>9,20,23,24 | 2,4,5,7,8,2<br>1,22,25,26      | 4 | P30836,P82995,Q6AYS4,Q80WL1                                    |
| 7431 | 1,3,6,18,1<br>9,20,23,25 | 2,4,5,7,8,2<br>1,22,24,26      | 1 | Q80WL1                                                         |
| 7432 | 1,3,6,18,1<br>9,20,23,26 | 2,4,5,7,8,2<br>1,22,24,25      | 9 | P35467,Q4FZU2,Q6AYS4,Q6IFU8,Q6IFW6,Q6IG02,Q6IMF3,Q6P6Q2,Q80WL1 |
| 7433 | 1,3,6,18,1<br>9,20,24,25 | 2,4,5,7,8,2<br>1,22,23,26      | 2 | Q6AYS4,Q80WL1                                                  |
| 7434 | 1,3,6,18,1<br>9,20,24,26 | 2,4,5,7,8,2<br>1,22,23,25      | 2 | Q6AYS4,Q80WL1                                                  |
| 7435 | 1,3,6,18,1<br>9,20,25,26 | 2,4,5,7,8,2<br>1,22,23,24      | 2 | P35280,Q80WL1                                                  |
| 7436 | 1,3,6,18,1<br>9,21,22,23 | 2,4,5,7,8,2<br>0,24,25,26      | 0 |                                                                |
| 7437 | 1,3,6,18,1<br>9,21,22,24 | 2,4,5,7,8,2<br>0,23,25,26      | 3 | P00714,P13432,Q6AYS4                                           |

|      |                                                 |   |                                                  |
|------|-------------------------------------------------|---|--------------------------------------------------|
| 7438 | 1,3,6,18,1 2,4,5,7,8,2<br>9,21,22,25 0,23,24,26 | 1 | P97840                                           |
| 7439 | 1,3,6,18,1 2,4,5,7,8,2<br>9,21,22,26 0,23,24,25 | 0 |                                                  |
| 7440 | 1,3,6,18,1 2,4,5,7,8,2<br>9,21,23,24 0,22,25,26 | 0 |                                                  |
| 7441 | 1,3,6,18,1 2,4,5,7,8,2<br>9,21,23,25 0,22,24,26 | 1 | P15399                                           |
| 7442 | 1,3,6,18,1 2,4,5,7,8,2<br>9,21,23,26 0,22,24,25 | 7 | P35467,Q4FZU2,Q6IFU8,Q6IFV1,Q6IG02,Q6IMF3,Q6P6Q2 |
| 7443 | 1,3,6,18,1 2,4,5,7,8,2<br>9,21,24,25 0,22,23,26 | 1 | Q62997                                           |
| 7444 | 1,3,6,18,1 2,4,5,7,8,2<br>9,21,24,26 0,22,23,25 | 1 | Q6AYS4                                           |
| 7445 | 1,3,6,18,1 2,4,5,7,8,2<br>9,21,25,26 0,22,23,24 | 0 |                                                  |
| 7446 | 1,3,6,18,1 2,4,5,7,8,2<br>9,22,23,24 0,21,25,26 | 3 | P19223,P82995,Q6AYS4                             |
| 7447 | 1,3,6,18,1 2,4,5,7,8,2<br>9,22,23,25 0,21,24,26 | 0 |                                                  |
| 7448 | 1,3,6,18,1 2,4,5,7,8,2<br>9,22,23,26 0,21,24,25 | 3 | P35467,Q6AYS4,Q6P6Q2                             |
| 7449 | 1,3,6,18,1 2,4,5,7,8,2<br>9,22,24,25 0,21,23,26 | 1 | P20762                                           |
| 7450 | 1,3,6,18,1 2,4,5,7,8,2<br>9,22,24,26 0,21,23,25 | 2 | P20646,Q6AYS4                                    |
| 7451 | 1,3,6,18,1 2,4,5,7,8,2<br>9,22,25,26 0,21,23,24 | 0 |                                                  |
| 7452 | 1,3,6,18,1 2,4,5,7,8,2<br>9,23,24,25 0,21,22,26 | 2 | P30836,Q80WL1                                    |
| 7453 | 1,3,6,18,1 2,4,5,7,8,2<br>9,23,24,26 0,21,22,25 | 6 | P02091,P35467,Q6AYS4,Q6IFU7,Q6P6Q2,Q80WL1        |
| 7454 | 1,3,6,18,1 2,4,5,7,8,2<br>9,23,25,26 0,21,22,24 | 5 | P02091,P35467,Q6IFU8,Q6IG02,Q6P6Q2               |
| 7455 | 1,3,6,18,1 2,4,5,7,8,2<br>9,24,25,26 0,21,22,23 | 2 | Q7TPB1,Q80WL1                                    |
| 7456 | 1,3,6,18,2 2,4,5,7,8,1<br>0,21,22,23 9,24,25,26 | 0 |                                                  |
| 7457 | 1,3,6,18,2 2,4,5,7,8,1<br>0,21,22,24 9,23,25,26 | 3 | P00714,P13432,Q99041                             |
| 7458 | 1,3,6,18,2 2,4,5,7,8,1<br>0,21,22,25 9,23,24,26 | 0 |                                                  |
| 7459 | 1,3,6,18,2 2,4,5,7,8,1<br>0,21,22,26 9,23,24,25 | 1 | Q99041                                           |
| 7460 | 1,3,6,18,2 2,4,5,7,8,1<br>0,21,23,24 9,22,25,26 | 1 | P13432                                           |

|      |                                                 |   |                                                                |
|------|-------------------------------------------------|---|----------------------------------------------------------------|
| 7461 | 1,3,6,18,2 2,4,5,7,8,1<br>0,21,23,25 9,22,24,26 | 0 |                                                                |
| 7462 | 1,3,6,18,2 2,4,5,7,8,1<br>0,21,23,26 9,22,24,25 | 8 | P01835,Q4FZU2,Q6IFU8,Q6IFV1,Q6IFW6,Q6IG02,Q6IMF3,Q6P6Q2        |
| 7463 | 1,3,6,18,2 2,4,5,7,8,1<br>0,21,24,25 9,22,23,26 | 0 |                                                                |
| 7464 | 1,3,6,18,2 2,4,5,7,8,1<br>0,21,24,26 9,22,23,25 | 3 | P13432,Q6AYS4,Q99041                                           |
| 7465 | 1,3,6,18,2 2,4,5,7,8,1<br>0,21,25,26 9,22,23,24 | 0 |                                                                |
| 7466 | 1,3,6,18,2 2,4,5,7,8,1<br>0,22,23,24 9,21,25,26 | 4 | P16391,P82995,Q6AYS4,Q80WL1                                    |
| 7467 | 1,3,6,18,2 2,4,5,7,8,1<br>0,22,23,25 9,21,24,26 | 0 |                                                                |
| 7468 | 1,3,6,18,2 2,4,5,7,8,1<br>0,22,23,26 9,21,24,25 | 8 | Q4FZU2,Q6AYS4,Q6IFU7,Q6IFU8,Q6IFW6,Q6IG02,Q6IMF3,Q6P6Q2        |
| 7469 | 1,3,6,18,2 2,4,5,7,8,1<br>0,22,24,25 9,21,23,26 | 1 | Q80WL1                                                         |
| 7470 | 1,3,6,18,2 2,4,5,7,8,1<br>0,22,24,26 9,21,23,25 | 4 | P02803,Q6AYS4,Q80WL1,Q99041                                    |
| 7471 | 1,3,6,18,2 2,4,5,7,8,1<br>0,22,25,26 9,21,23,24 | 0 |                                                                |
| 7472 | 1,3,6,18,2 2,4,5,7,8,1<br>0,23,24,25 9,21,22,26 | 2 | P83748,Q80WL1                                                  |
| 7473 | 1,3,6,18,2 2,4,5,7,8,1<br>0,23,24,26 9,21,22,25 | 9 | Q4FZU2,Q6AYS4,Q6IFU7,Q6IFU8,Q6IFW6,Q6IG02,Q6IMF3,Q6P6Q2,Q80WL1 |
| 7474 | 1,3,6,18,2 2,4,5,7,8,1<br>0,23,25,26 9,21,22,24 | 7 | Q4FZU2,Q6IFU8,Q6IFW6,Q6IG02,Q6IMF3,Q6P6Q2,Q80WL1               |
| 7475 | 1,3,6,18,2 2,4,5,7,8,1<br>0,24,25,26 9,21,22,23 | 1 | Q80WL1                                                         |
| 7476 | 1,3,6,18,2 2,4,5,7,8,1<br>1,22,23,24 9,20,25,26 | 1 | P13432                                                         |
| 7477 | 1,3,6,18,2 2,4,5,7,8,1<br>1,22,23,25 9,20,24,26 | 0 |                                                                |
| 7478 | 1,3,6,18,2 2,4,5,7,8,1<br>1,22,23,26 9,20,24,25 | 5 | Q4FZU2,Q6IFU8,Q6IFV1,Q6IMF3,Q6P6Q2                             |
| 7479 | 1,3,6,18,2 2,4,5,7,8,1<br>1,22,24,25 9,20,23,26 | 1 | P13432                                                         |
| 7480 | 1,3,6,18,2 2,4,5,7,8,1<br>1,22,24,26 9,20,23,25 | 2 | P13432,Q99041                                                  |
| 7481 | 1,3,6,18,2 2,4,5,7,8,1<br>1,22,25,26 9,20,23,24 | 0 |                                                                |
| 7482 | 1,3,6,18,2 2,4,5,7,8,1<br>1,23,24,25 9,20,22,26 | 2 | Q62997,Q63751                                                  |
| 7483 | 1,3,6,18,2 2,4,5,7,8,1<br>1,23,24,26 9,20,22,25 | 8 | Q4FZU2,Q62997,Q6IFU7,Q6IFU8,Q6IFV1,Q6IG02,Q6IMF3,Q6P6Q2        |

|      |                                                 |    |                                                                                     |
|------|-------------------------------------------------|----|-------------------------------------------------------------------------------------|
| 7484 | 1,3,6,18,2 2,4,5,7,8,1<br>1,23,25,26 9,20,22,24 | 5  | Q4FZU2,Q6IFU8,Q6IG02,Q6IMF3,Q6P6Q2                                                  |
| 7485 | 1,3,6,18,2 2,4,5,7,8,1<br>1,24,25,26 9,20,22,23 | 1  | Q62997                                                                              |
| 7486 | 1,3,6,18,2 2,4,5,7,8,1<br>2,23,24,25 9,20,21,26 | 2  | P16391,P62804                                                                       |
| 7487 | 1,3,6,18,2 2,4,5,7,8,1<br>2,23,24,26 9,20,21,25 | 4  | P00731,Q6AYS4,Q6IFU7,Q6P6Q2                                                         |
| 7488 | 1,3,6,18,2 2,4,5,7,8,1<br>2,23,25,26 9,20,21,24 | 2  | Q6IG02,Q6P6Q2                                                                       |
| 7489 | 1,3,6,18,2 2,4,5,7,8,1<br>2,24,25,26 9,20,21,23 | 0  |                                                                                     |
| 7490 | 1,3,6,18,2 2,4,5,7,8,1<br>3,24,25,26 9,20,21,22 | 6  | P02091,Q6IFU8,Q6IG02,Q6P6Q2,Q7TPB1,Q80WL1                                           |
| 7491 | 1,3,6,19,2 2,4,5,7,8,1<br>0,21,22,23 8,24,25,26 | 4  | P00714,P55091,P82995,Q6AYS4                                                         |
| 7492 | 1,3,6,19,2 2,4,5,7,8,1<br>0,21,22,24 8,23,25,26 | 9  | P00714,P00774,P13432,P55091,P82995,Q01205,Q05175,Q6AYS4,Q99MH3                      |
| 7493 | 1,3,6,19,2 2,4,5,7,8,1<br>0,21,22,25 8,23,24,26 | 2  | P16636,Q05175                                                                       |
| 7494 | 1,3,6,19,2 2,4,5,7,8,1<br>0,21,22,26 8,23,24,25 | 3  | P00714,Q6AYS4,Q99MH3                                                                |
| 7495 | 1,3,6,19,2 2,4,5,7,8,1<br>0,21,23,24 8,22,25,26 | 5  | P00714,P55091,P82995,Q6AYS4,Q80WL1                                                  |
| 7496 | 1,3,6,19,2 2,4,5,7,8,1<br>0,21,23,25 8,22,24,26 | 2  | P15399,P16636                                                                       |
| 7497 | 1,3,6,19,2 2,4,5,7,8,1<br>0,21,23,26 8,22,24,25 | 1  | Q6AYS4                                                                              |
| 7498 | 1,3,6,19,2 2,4,5,7,8,1<br>0,21,24,25 8,22,23,26 | 3  | Q05175,Q6AYS4,Q80WL1                                                                |
| 7499 | 1,3,6,19,2 2,4,5,7,8,1<br>0,21,24,26 8,22,23,25 | 3  | P00714,Q6AYS4,Q99MH3                                                                |
| 7500 | 1,3,6,19,2 2,4,5,7,8,1<br>0,21,25,26 8,22,23,24 | 0  |                                                                                     |
| 7501 | 1,3,6,19,2 2,4,5,7,8,1<br>0,22,23,24 8,21,25,26 | 12 | P00714,P00774,P19223,P20646,P25031,P31430,P55091,P82995,P83748,P98089,Q6AYS4,Q80WL1 |
| 7502 | 1,3,6,19,2 2,4,5,7,8,1<br>0,22,23,25 8,21,24,26 | 4  | P55091,P82995,Q6AYS4,Q80WL1                                                         |
| 7503 | 1,3,6,19,2 2,4,5,7,8,1<br>0,22,23,26 8,21,24,25 | 5  | O54728,P31430,P55091,P98089,Q6AYS4                                                  |
| 7504 | 1,3,6,19,2 2,4,5,7,8,1<br>0,22,24,25 8,21,23,26 | 4  | P82995,Q6AYS4,Q80WL1,Q99MH3                                                         |
| 7505 | 1,3,6,19,2 2,4,5,7,8,1<br>0,22,24,26 8,21,23,25 | 10 | O54728,P00714,P02803,P20646,P31430,P98089,Q64057,Q6AYS4,Q80WL1,Q99MH3               |
| 7506 | 1,3,6,19,2 2,4,5,7,8,1<br>0,22,25,26 8,21,23,24 | 2  | Q6AYS4,Q99MH3                                                                       |

|      |                                                 |   |                                                                |
|------|-------------------------------------------------|---|----------------------------------------------------------------|
| 7507 | 1,3,6,19,2 2,4,5,7,8,1<br>0,23,24,25 8,21,22,26 | 4 | P82995,P83748,Q6AYS4,Q80WL1                                    |
| 7508 | 1,3,6,19,2 2,4,5,7,8,1<br>0,23,24,26 8,21,22,25 | 5 | P02091,P31430,P98089,Q6AYS4,Q80WL1                             |
| 7509 | 1,3,6,19,2 2,4,5,7,8,1<br>0,23,25,26 8,21,22,24 | 3 | P02091,Q6AYS4,Q80WL1                                           |
| 7510 | 1,3,6,19,2 2,4,5,7,8,1<br>0,24,25,26 8,21,22,23 | 3 | Q6AYS4,Q80WL1,Q99MH3                                           |
| 7511 | 1,3,6,19,2 2,4,5,7,8,1<br>1,22,23,24 8,20,25,26 | 4 | P00714,P55091,P82995,Q6AYS4                                    |
| 7512 | 1,3,6,19,2 2,4,5,7,8,1<br>1,22,23,25 8,20,24,26 | 0 |                                                                |
| 7513 | 1,3,6,19,2 2,4,5,7,8,1<br>1,22,23,26 8,20,24,25 | 0 |                                                                |
| 7514 | 1,3,6,19,2 2,4,5,7,8,1<br>1,22,24,25 8,20,23,26 | 0 |                                                                |
| 7515 | 1,3,6,19,2 2,4,5,7,8,1<br>1,22,24,26 8,20,23,25 | 4 | P00714,P07171,Q6AYS4,Q99MH3                                    |
| 7516 | 1,3,6,19,2 2,4,5,7,8,1<br>1,22,25,26 8,20,23,24 | 2 | P07171,Q9QZK9                                                  |
| 7517 | 1,3,6,19,2 2,4,5,7,8,1<br>1,23,24,25 8,20,22,26 | 0 |                                                                |
| 7518 | 1,3,6,19,2 2,4,5,7,8,1<br>1,23,24,26 8,20,22,25 | 2 | P02091,Q6AYS4                                                  |
| 7519 | 1,3,6,19,2 2,4,5,7,8,1<br>1,23,25,26 8,20,22,24 | 2 | P02091,Q9QZK9                                                  |
| 7520 | 1,3,6,19,2 2,4,5,7,8,1<br>1,24,25,26 8,20,22,23 | 1 | Q62997                                                         |
| 7521 | 1,3,6,19,2 2,4,5,7,8,1<br>2,23,24,25 8,20,21,26 | 7 | P06911,P62804,P82471,P82995,P83748,Q6AYS4,Q80WL1               |
| 7522 | 1,3,6,19,2 2,4,5,7,8,1<br>2,23,24,26 8,20,21,25 | 8 | O54728,P00731,P02091,P20646,P31430,P82471,P98089,Q6AYS4        |
| 7523 | 1,3,6,19,2 2,4,5,7,8,1<br>2,23,25,26 8,20,21,24 | 1 | P02091                                                         |
| 7524 | 1,3,6,19,2 2,4,5,7,8,1<br>2,24,25,26 8,20,21,23 | 1 | Q6AYS4                                                         |
| 7525 | 1,3,6,19,2 2,4,5,7,8,1<br>3,24,25,26 8,20,21,22 | 5 | P01946,P02091,Q6AYS4,Q7TPB1,Q80WL1                             |
| 7526 | 1,3,6,20,2 2,4,5,7,8,1<br>1,22,23,24 8,19,25,26 | 7 | P00714,P02803,P13432,P16636,P55091,P82995,Q6AYS4               |
| 7527 | 1,3,6,20,2 2,4,5,7,8,1<br>1,22,23,25 8,19,24,26 | 2 | P16636,P82995                                                  |
| 7528 | 1,3,6,20,2 2,4,5,7,8,1<br>1,22,23,26 8,19,24,25 | 0 |                                                                |
| 7529 | 1,3,6,20,2 2,4,5,7,8,1<br>1,22,24,25 8,19,23,26 | 9 | P02803,P13432,P16636,P82995,Q03191,Q05175,Q5XFX0,Q64194,Q99MH3 |

|      |                          |                            |   |                                                         |
|------|--------------------------|----------------------------|---|---------------------------------------------------------|
| 7530 | 1,3,6,20,2<br>1,22,24,26 | 2,4,5,7,8,1<br>8,19,23,25  | 8 | P00714,P02803,P13432,Q01205,Q03191,Q6AYS4,Q99041,Q99MH3 |
| 7531 | 1,3,6,20,2<br>1,22,25,26 | 2,4,5,7,8,1<br>8,19,23,24  | 2 | Q03191,Q99MH3                                           |
| 7532 | 1,3,6,20,2<br>1,23,24,25 | 2,4,5,7,8,1<br>8,19,22,26  | 3 | P16636,P82995,Q80WL1                                    |
| 7533 | 1,3,6,20,2<br>1,23,24,26 | 2,4,5,7,8,1<br>8,19,22,25  | 2 | Q6AYS4,Q6IFV1                                           |
| 7534 | 1,3,6,20,2<br>1,23,25,26 | 2,4,5,7,8,1<br>8,19,22,24  | 0 |                                                         |
| 7535 | 1,3,6,20,2<br>1,24,25,26 | 2,4,5,7,8,1<br>8,19,22,23  | 2 | Q03191,Q99MH3                                           |
| 7536 | 1,3,6,20,2<br>2,23,24,25 | 2,4,5,7,8,1<br>8,19,21,26  | 5 | P02803,P82995,P83748,Q6AYS4,Q80WL1                      |
| 7537 | 1,3,6,20,2<br>2,23,24,26 | 2,4,5,7,8,1<br>8,19,21,25  | 8 | P00731,P02803,P31430,P47967,P98089,Q6AYS4,Q80WL1,Q99MH3 |
| 7538 | 1,3,6,20,2<br>2,23,25,26 | 2,4,5,7,8,1<br>8,19,21,24  | 0 |                                                         |
| 7539 | 1,3,6,20,2<br>2,24,25,26 | 2,4,5,7,8,1<br>8,19,21,23  | 7 | P00731,P02803,Q03191,Q64057,Q6AYS4,Q80WL1,Q99MH3        |
| 7540 | 1,3,6,20,2<br>3,24,25,26 | 2,4,5,7,8,1<br>8,19,21,22  | 4 | P02091,Q6AYS4,Q7TPB1,Q80WL1                             |
| 7541 | 1,3,6,21,2<br>2,23,24,25 | 2,4,5,7,8,1<br>8,19,20,26  | 2 | P82995,Q63751                                           |
| 7542 | 1,3,6,21,2<br>2,23,24,26 | 2,4,5,7,8,1<br>8,19,20,25  | 2 | P00731,P02803                                           |
| 7543 | 1,3,6,21,2<br>2,23,25,26 | 2,4,5,7,8,1<br>8,19,20,24  | 0 |                                                         |
| 7544 | 1,3,6,21,2<br>2,24,25,26 | 2,4,5,7,8,1<br>8,19,20,23  | 5 | P02803,P07171,Q03191,Q498D9,Q99MH3                      |
| 7545 | 1,3,6,21,2<br>3,24,25,26 | 2,4,5,7,8,1<br>8,19,20,22  | 3 | P02091,Q62997,Q7TPB1                                    |
| 7546 | 1,3,6,22,2<br>3,24,25,26 | 2,4,5,7,8,1<br>8,19,20,21  | 6 | P00731,P02091,P02803,P42854,P82471,Q7TPB1               |
| 7547 | 1,3,7,8,18,<br>19,20,21  | 2,4,5,6,22,<br>23,24,25,26 | 4 | P00731,P20760,P35281,P36376                             |
| 7548 | 1,3,7,8,18,<br>19,20,22  | 2,4,5,6,21,<br>23,24,25,26 | 4 | P06760,Q08849,Q6P6R2,Q9Z0V6                             |
| 7549 | 1,3,7,8,18,<br>19,20,23  | 2,4,5,6,21,<br>22,24,25,26 | 3 | P20760,P35467,Q08849                                    |
| 7550 | 1,3,7,8,18,<br>19,20,24  | 2,4,5,6,21,<br>22,23,25,26 | 1 | P83121                                                  |



|      |                         |                                |   |                             |
|------|-------------------------|--------------------------------|---|-----------------------------|
| 7551 | 1,3,7,8,18,<br>19,20,25 | 2,4,5,6,21,<br>22,23,24,2<br>6 | 4 | P10715,P20760,P35280,Q08849 |
| 7552 | 1,3,7,8,18,<br>19,20,26 | 2,4,5,6,21,<br>22,23,24,2<br>5 | 3 | P06760,P35280,Q08849        |
| 7553 | 1,3,7,8,18,<br>19,21,22 | 2,4,5,6,20,<br>23,24,25,2<br>6 | 2 | D4A1J4,P20760               |
| 7554 | 1,3,7,8,18,<br>19,21,23 | 2,4,5,6,20,<br>22,24,25,2<br>6 | 2 | P14668,P20760               |
| 7555 | 1,3,7,8,18,<br>19,21,24 | 2,4,5,6,20,<br>22,23,25,2<br>6 | 1 | P36376                      |
| 7556 | 1,3,7,8,18,<br>19,21,25 | 2,4,5,6,20,<br>22,23,24,2<br>6 | 3 | P10715,P20760,P47967        |
| 7557 | 1,3,7,8,18,<br>19,21,26 | 2,4,5,6,20,<br>22,23,24,2<br>5 | 0 |                             |
| 7558 | 1,3,7,8,18,<br>19,22,23 | 2,4,5,6,20,<br>21,24,25,2<br>6 | 0 |                             |
| 7559 | 1,3,7,8,18,<br>19,22,24 | 2,4,5,6,20,<br>21,23,25,2<br>6 | 4 | P01835,P20646,P83121,Q6P6R2 |
| 7560 | 1,3,7,8,18,<br>19,22,25 | 2,4,5,6,20,<br>21,23,24,2<br>6 | 3 | P01835,P10715,P20760        |
| 7561 | 1,3,7,8,18,<br>19,22,26 | 2,4,5,6,20,<br>21,23,24,2<br>5 | 3 | O54728,P06760,Q6P6R2        |
| 7562 | 1,3,7,8,18,<br>19,23,24 | 2,4,5,6,20,<br>21,22,25,2<br>6 | 0 |                             |
| 7563 | 1,3,7,8,18,<br>19,23,25 | 2,4,5,6,20,<br>21,22,24,2<br>6 | 4 | P10715,P19629,P20760,P35467 |
| 7564 | 1,3,7,8,18,<br>19,23,26 | 2,4,5,6,20,<br>21,22,24,2<br>5 | 4 | P01946,P02091,P35467,Q6IG02 |
| 7565 | 1,3,7,8,18,<br>19,24,25 | 2,4,5,6,20,<br>21,22,23,2<br>6 | 3 | P01835,P10715,P20760        |

|      |                         |                                |   |                                                         |
|------|-------------------------|--------------------------------|---|---------------------------------------------------------|
| 7566 | 1,3,7,8,18,<br>19,24,26 | 2,4,5,6,20,<br>21,22,23,2<br>5 | 2 | P02091,P06760                                           |
| 7567 | 1,3,7,8,18,<br>19,25,26 | 2,4,5,6,20,<br>21,22,23,2<br>4 | 3 | P02091,P10715,P35280                                    |
| 7568 | 1,3,7,8,18,<br>20,21,22 | 2,4,5,6,19,<br>23,24,25,2<br>6 | 2 | P14480,P20760                                           |
| 7569 | 1,3,7,8,18,<br>20,21,23 | 2,4,5,6,19,<br>22,24,25,2<br>6 | 1 | P20760                                                  |
| 7570 | 1,3,7,8,18,<br>20,21,24 | 2,4,5,6,19,<br>22,23,25,2<br>6 | 1 | P36376                                                  |
| 7571 | 1,3,7,8,18,<br>20,21,25 | 2,4,5,6,19,<br>22,23,24,2<br>6 | 3 | P10715,P20760,P31430                                    |
| 7572 | 1,3,7,8,18,<br>20,21,26 | 2,4,5,6,19,<br>22,23,24,2<br>5 | 1 | Q4FZU6                                                  |
| 7573 | 1,3,7,8,18,<br>20,22,23 | 2,4,5,6,19,<br>21,24,25,2<br>6 | 1 | Q08849                                                  |
| 7574 | 1,3,7,8,18,<br>20,22,24 | 2,4,5,6,19,<br>21,23,25,2<br>6 | 1 | P83121                                                  |
| 7575 | 1,3,7,8,18,<br>20,22,25 | 2,4,5,6,19,<br>21,23,24,2<br>6 | 3 | P10715,P20760,Q08849                                    |
| 7576 | 1,3,7,8,18,<br>20,22,26 | 2,4,5,6,19,<br>21,23,24,2<br>5 | 3 | P06760,Q08849,Q6P6R2                                    |
| 7577 | 1,3,7,8,18,<br>20,23,24 | 2,4,5,6,19,<br>21,22,25,2<br>6 | 1 | A2RUV9                                                  |
| 7578 | 1,3,7,8,18,<br>20,23,25 | 2,4,5,6,19,<br>21,22,24,2<br>6 | 4 | A2RUV9,P10715,P20760,Q08849                             |
| 7579 | 1,3,7,8,18,<br>20,23,26 | 2,4,5,6,19,<br>21,22,24,2<br>5 | 8 | A2RUV9,P01946,P02091,P35467,Q08849,Q4FZU6,Q6IG02,Q6P6Q2 |
| 7580 | 1,3,7,8,18,<br>20,24,25 | 2,4,5,6,19,<br>21,22,23,2<br>6 | 1 | P10715                                                  |

|      |                         |                                |   |                                                         |
|------|-------------------------|--------------------------------|---|---------------------------------------------------------|
| 7581 | 1,3,7,8,18,<br>20,24,26 | 2,4,5,6,19,<br>21,22,23,2<br>5 | 3 | P02091,P06760,P10715                                    |
| 7582 | 1,3,7,8,18,<br>20,25,26 | 2,4,5,6,19,<br>21,22,23,2<br>4 | 4 | P02091,P10715,P35280,Q08849                             |
| 7583 | 1,3,7,8,18,<br>21,22,23 | 2,4,5,6,19,<br>20,24,25,2<br>6 | 1 | P20760                                                  |
| 7584 | 1,3,7,8,18,<br>21,22,24 | 2,4,5,6,19,<br>20,23,25,2<br>6 | 0 |                                                         |
| 7585 | 1,3,7,8,18,<br>21,22,25 | 2,4,5,6,19,<br>20,23,24,2<br>6 | 4 | P10715,P19629,P20760,P31430                             |
| 7586 | 1,3,7,8,18,<br>21,22,26 | 2,4,5,6,19,<br>20,23,24,2<br>5 | 0 |                                                         |
| 7587 | 1,3,7,8,18,<br>21,23,24 | 2,4,5,6,19,<br>20,22,25,2<br>6 | 1 | Q62997                                                  |
| 7588 | 1,3,7,8,18,<br>21,23,25 | 2,4,5,6,19,<br>20,22,24,2<br>6 | 5 | P10715,P19629,P20760,P31430,Q62997                      |
| 7589 | 1,3,7,8,18,<br>21,23,26 | 2,4,5,6,19,<br>20,22,24,2<br>5 | 5 | P01946,P02091,P35467,Q6IG02,Q6P6Q2                      |
| 7590 | 1,3,7,8,18,<br>21,24,25 | 2,4,5,6,19,<br>20,22,23,2<br>6 | 7 | P08721,P10715,P19629,P20760,P22006,P31430,Q62997        |
| 7591 | 1,3,7,8,18,<br>21,24,26 | 2,4,5,6,19,<br>20,22,23,2<br>5 | 2 | P02091,Q62997                                           |
| 7592 | 1,3,7,8,18,<br>21,25,26 | 2,4,5,6,19,<br>20,22,23,2<br>4 | 8 | B4F795,P02091,P08721,P10715,P31430,P55091,P82995,Q62997 |
| 7593 | 1,3,7,8,18,<br>22,23,24 | 2,4,5,6,19,<br>20,21,25,2<br>6 | 0 |                                                         |
| 7594 | 1,3,7,8,18,<br>22,23,25 | 2,4,5,6,19,<br>20,21,24,2<br>6 | 4 | P01015,P10715,P19629,P20760                             |
| 7595 | 1,3,7,8,18,<br>22,23,26 | 2,4,5,6,19,<br>20,21,24,2<br>5 | 7 | O54728,P01946,P02091,P35467,Q6IG02,Q6P6Q2,Q8VD89        |

|      |                         |                                |   |                                                         |
|------|-------------------------|--------------------------------|---|---------------------------------------------------------|
| 7596 | 1,3,7,8,18,<br>22,24,25 | 2,4,5,6,19,<br>20,21,23,2<br>6 | 3 | P01835,P10715,P19629                                    |
| 7597 | 1,3,7,8,18,<br>22,24,26 | 2,4,5,6,19,<br>20,21,23,2<br>5 | 3 | P02091,P06760,Q8VD89                                    |
| 7598 | 1,3,7,8,18,<br>22,25,26 | 2,4,5,6,19,<br>20,21,23,2<br>4 | 3 | P02091,P10715,P19629                                    |
| 7599 | 1,3,7,8,18,<br>23,24,25 | 2,4,5,6,19,<br>20,21,22,2<br>6 | 3 | P10715,P19629,Q63751                                    |
| 7600 | 1,3,7,8,18,<br>23,24,26 | 2,4,5,6,19,<br>20,21,22,2<br>5 | 7 | A2RUV9,P01946,P02091,P35467,Q6IG02,Q6P6Q2,Q8VD89        |
| 7601 | 1,3,7,8,18,<br>23,25,26 | 2,4,5,6,19,<br>20,21,22,2<br>4 | 8 | A2RUV9,P01946,P02091,P10715,P19629,P35467,Q6IG02,Q6P6Q2 |
| 7602 | 1,3,7,8,18,<br>24,25,26 | 2,4,5,6,19,<br>20,21,22,2<br>3 | 8 | B4F795,P01946,P02091,P08721,P10715,P19629,P55091,Q7TPB1 |
| 7603 | 1,3,7,8,19,<br>20,21,22 | 2,4,5,6,18,<br>23,24,25,2<br>6 | 1 | P00774                                                  |
| 7604 | 1,3,7,8,19,<br>20,21,23 | 2,4,5,6,18,<br>22,24,25,2<br>6 | 0 |                                                         |
| 7605 | 1,3,7,8,19,<br>20,21,24 | 2,4,5,6,18,<br>22,23,25,2<br>6 | 1 | P00774                                                  |
| 7606 | 1,3,7,8,19,<br>20,21,25 | 2,4,5,6,18,<br>22,23,24,2<br>6 | 4 | P10715,P20760,P47967,Q6IFU7                             |
| 7607 | 1,3,7,8,19,<br>20,21,26 | 2,4,5,6,18,<br>22,23,24,2<br>5 | 0 |                                                         |
| 7608 | 1,3,7,8,19,<br>20,22,23 | 2,4,5,6,18,<br>21,24,25,2<br>6 | 5 | P00774,P31430,P55091,P98089,Q08849                      |
| 7609 | 1,3,7,8,19,<br>20,22,24 | 2,4,5,6,18,<br>21,23,25,2<br>6 | 7 | P00774,P20646,P31430,P83121,P98089,Q6IFU8,Q99MH3        |
| 7610 | 1,3,7,8,19,<br>20,22,25 | 2,4,5,6,18,<br>21,23,24,2<br>6 | 5 | P00774,P10715,P20760,Q08849,Q6IFU7                      |

|      |                         |                                |   |                                           |
|------|-------------------------|--------------------------------|---|-------------------------------------------|
| 7611 | 1,3,7,8,19,<br>20,22,26 | 2,4,5,6,18,<br>21,23,24,2<br>5 | 6 | O54728,P20646,P98089,Q08849,Q6P6R2,Q99MH3 |
| 7612 | 1,3,7,8,19,<br>20,23,24 | 2,4,5,6,18,<br>21,22,25,2<br>6 | 4 | P00774,P31430,P98089,Q08849               |
| 7613 | 1,3,7,8,19,<br>20,23,25 | 2,4,5,6,18,<br>21,22,24,2<br>6 | 3 | P10715,P20760,Q08849                      |
| 7614 | 1,3,7,8,19,<br>20,23,26 | 2,4,5,6,18,<br>21,22,24,2<br>5 | 5 | O54728,P01946,P02091,P98089,Q08849        |
| 7615 | 1,3,7,8,19,<br>20,24,25 | 2,4,5,6,18,<br>21,22,23,2<br>6 | 1 | P10715                                    |
| 7616 | 1,3,7,8,19,<br>20,24,26 | 2,4,5,6,18,<br>21,22,23,2<br>5 | 3 | P02091,P98089,Q08849                      |
| 7617 | 1,3,7,8,19,<br>20,25,26 | 2,4,5,6,18,<br>21,22,23,2<br>4 | 4 | P02091,P10715,P35280,Q08849               |
| 7618 | 1,3,7,8,19,<br>21,22,23 | 2,4,5,6,18,<br>20,24,25,2<br>6 | 0 |                                           |
| 7619 | 1,3,7,8,19,<br>21,22,24 | 2,4,5,6,18,<br>20,23,25,2<br>6 | 2 | P00774,Q6IFU8                             |
| 7620 | 1,3,7,8,19,<br>21,22,25 | 2,4,5,6,18,<br>20,23,24,2<br>6 | 5 | D4A1J4,P19629,P20760,P47967,Q6IFU7        |
| 7621 | 1,3,7,8,19,<br>21,22,26 | 2,4,5,6,18,<br>20,23,24,2<br>5 | 1 | O54728                                    |
| 7622 | 1,3,7,8,19,<br>21,23,24 | 2,4,5,6,18,<br>20,22,25,2<br>6 | 0 |                                           |
| 7623 | 1,3,7,8,19,<br>21,23,25 | 2,4,5,6,18,<br>20,22,24,2<br>6 | 4 | O70594,P19629,P20760,Q99041               |
| 7624 | 1,3,7,8,19,<br>21,23,26 | 2,4,5,6,18,<br>20,22,24,2<br>5 | 2 | P01946,P02091                             |
| 7625 | 1,3,7,8,19,<br>21,24,25 | 2,4,5,6,18,<br>20,22,23,2<br>6 | 3 | P19629,P22006,Q62997                      |

|      |                         |                                |   |                                           |
|------|-------------------------|--------------------------------|---|-------------------------------------------|
| 7626 | 1,3,7,8,19,<br>21,24,26 | 2,4,5,6,18,<br>20,22,23,2<br>5 | 1 | P02091                                    |
| 7627 | 1,3,7,8,19,<br>21,25,26 | 2,4,5,6,18,<br>20,22,23,2<br>4 | 2 | P02091,P22006                             |
| 7628 | 1,3,7,8,19,<br>22,23,24 | 2,4,5,6,18,<br>20,21,25,2<br>6 | 5 | P00774,P01835,P20646,P31430,P98089        |
| 7629 | 1,3,7,8,19,<br>22,23,25 | 2,4,5,6,18,<br>20,21,24,2<br>6 | 6 | P01835,P06911,P17046,P19629,P20760,Q08849 |
| 7630 | 1,3,7,8,19,<br>22,23,26 | 2,4,5,6,18,<br>20,21,24,2<br>5 | 6 | O54728,P01946,P02091,P20646,P98089,Q08849 |
| 7631 | 1,3,7,8,19,<br>22,24,25 | 2,4,5,6,18,<br>20,21,23,2<br>6 | 5 | P01835,P10715,P19629,Q6IFU8,Q6IMF3        |
| 7632 | 1,3,7,8,19,<br>22,24,26 | 2,4,5,6,18,<br>20,21,23,2<br>5 | 5 | O54728,P01835,P02091,P20646,P98089        |
| 7633 | 1,3,7,8,19,<br>22,25,26 | 2,4,5,6,18,<br>20,21,23,2<br>4 | 3 | O54728,P01835,P02091                      |
| 7634 | 1,3,7,8,19,<br>23,24,25 | 2,4,5,6,18,<br>20,21,22,2<br>6 | 2 | P01835,P19629                             |
| 7635 | 1,3,7,8,19,<br>23,24,26 | 2,4,5,6,18,<br>20,21,22,2<br>5 | 3 | P01946,P02091,P98089                      |
| 7636 | 1,3,7,8,19,<br>23,25,26 | 2,4,5,6,18,<br>20,21,22,2<br>4 | 4 | P01946,P02091,P19629,Q08849               |
| 7637 | 1,3,7,8,19,<br>24,25,26 | 2,4,5,6,18,<br>20,21,22,2<br>3 | 5 | P01835,P01946,P02091,P10715,P19629        |
| 7638 | 1,3,7,8,20,<br>21,22,23 | 2,4,5,6,18,<br>19,24,25,2<br>6 | 0 |                                           |
| 7639 | 1,3,7,8,20,<br>21,22,24 | 2,4,5,6,18,<br>19,23,25,2<br>6 | 3 | P00774,Q5XFX0,Q99MH3                      |
| 7640 | 1,3,7,8,20,<br>21,22,25 | 2,4,5,6,18,<br>19,23,24,2<br>6 | 5 | P10715,P20760,Q03191,Q5XFX0,Q6IFU7        |

|      |                         |                                |   |                                           |
|------|-------------------------|--------------------------------|---|-------------------------------------------|
| 7641 | 1,3,7,8,20,<br>21,22,26 | 2,4,5,6,18,<br>19,23,24,2<br>5 | 1 | Q99MH3                                    |
| 7642 | 1,3,7,8,20,<br>21,23,24 | 2,4,5,6,18,<br>19,22,25,2<br>6 | 0 |                                           |
| 7643 | 1,3,7,8,20,<br>21,23,25 | 2,4,5,6,18,<br>19,22,24,2<br>6 | 3 | P10715,P19629,P20760                      |
| 7644 | 1,3,7,8,20,<br>21,23,26 | 2,4,5,6,18,<br>19,22,24,2<br>5 | 3 | P01946,P02091,Q4FZU6                      |
| 7645 | 1,3,7,8,20,<br>21,24,25 | 2,4,5,6,18,<br>19,22,23,2<br>6 | 3 | P10715,P19629,Q5XFX0                      |
| 7646 | 1,3,7,8,20,<br>21,24,26 | 2,4,5,6,18,<br>19,22,23,2<br>5 | 2 | P02091,Q99MH3                             |
| 7647 | 1,3,7,8,20,<br>21,25,26 | 2,4,5,6,18,<br>19,22,23,2<br>4 | 2 | P02091,P10715                             |
| 7648 | 1,3,7,8,20,<br>22,23,24 | 2,4,5,6,18,<br>19,21,25,2<br>6 | 3 | P00774,P98089,Q08849                      |
| 7649 | 1,3,7,8,20,<br>22,23,25 | 2,4,5,6,18,<br>19,21,24,2<br>6 | 4 | P10715,P19629,P20760,Q08849               |
| 7650 | 1,3,7,8,20,<br>22,23,26 | 2,4,5,6,18,<br>19,21,24,2<br>5 | 6 | O54728,P01946,P02091,P98089,Q08849,Q8CIZ5 |
| 7651 | 1,3,7,8,20,<br>22,24,25 | 2,4,5,6,18,<br>19,21,23,2<br>6 | 4 | P10715,P19629,Q03191,Q5XFX0               |
| 7652 | 1,3,7,8,20,<br>22,24,26 | 2,4,5,6,18,<br>19,21,23,2<br>5 | 4 | O54728,P02091,P98089,Q99MH3               |
| 7653 | 1,3,7,8,20,<br>22,25,26 | 2,4,5,6,18,<br>19,21,23,2<br>4 | 3 | P02091,P10715,Q08849                      |
| 7654 | 1,3,7,8,20,<br>23,24,25 | 2,4,5,6,18,<br>19,21,22,2<br>6 | 3 | P10715,P19629,Q08849                      |
| 7655 | 1,3,7,8,20,<br>23,24,26 | 2,4,5,6,18,<br>19,21,22,2<br>5 | 6 | A2RUV9,P01946,P02091,P97840,P98089,Q08849 |

|      |                         |                                |   |                                           |
|------|-------------------------|--------------------------------|---|-------------------------------------------|
| 7656 | 1,3,7,8,20,<br>23,25,26 | 2,4,5,6,18,<br>19,21,22,2<br>4 | 5 | P01946,P02091,P10715,P19629,Q08849        |
| 7657 | 1,3,7,8,20,<br>24,25,26 | 2,4,5,6,18,<br>19,21,22,2<br>3 | 4 | P01946,P02091,P10715,P19629               |
| 7658 | 1,3,7,8,21,<br>22,23,24 | 2,4,5,6,18,<br>19,20,25,2<br>6 | 0 |                                           |
| 7659 | 1,3,7,8,21,<br>22,23,25 | 2,4,5,6,18,<br>19,20,24,2<br>6 | 2 | P19629,P20760                             |
| 7660 | 1,3,7,8,21,<br>22,23,26 | 2,4,5,6,18,<br>19,20,24,2<br>5 | 3 | O54728,P01946,P02091                      |
| 7661 | 1,3,7,8,21,<br>22,24,25 | 2,4,5,6,18,<br>19,20,23,2<br>6 | 3 | P19629,P22006,Q5XFX0                      |
| 7662 | 1,3,7,8,21,<br>22,24,26 | 2,4,5,6,18,<br>19,20,23,2<br>5 | 2 | P02091,Q99MH3                             |
| 7663 | 1,3,7,8,21,<br>22,25,26 | 2,4,5,6,18,<br>19,20,23,2<br>4 | 3 | P02091,P19629,P22006                      |
| 7664 | 1,3,7,8,21,<br>23,24,25 | 2,4,5,6,18,<br>19,20,22,2<br>6 | 4 | P19629,P22006,Q62997,Q63751               |
| 7665 | 1,3,7,8,21,<br>23,24,26 | 2,4,5,6,18,<br>19,20,22,2<br>5 | 2 | P01946,P02091                             |
| 7666 | 1,3,7,8,21,<br>23,25,26 | 2,4,5,6,18,<br>19,20,22,2<br>4 | 4 | P01946,P02091,P19629,P22006               |
| 7667 | 1,3,7,8,21,<br>24,25,26 | 2,4,5,6,18,<br>19,20,22,2<br>3 | 6 | P01946,P02091,P10715,P19629,P22006,Q62997 |
| 7668 | 1,3,7,8,22,<br>23,24,25 | 2,4,5,6,18,<br>19,20,21,2<br>6 | 6 | P01835,P06911,P10715,P19629,P62804,Q63751 |
| 7669 | 1,3,7,8,22,<br>23,24,26 | 2,4,5,6,18,<br>19,20,21,2<br>5 | 6 | O54728,P00731,P01946,P02091,P20646,P98089 |
| 7670 | 1,3,7,8,22,<br>23,25,26 | 2,4,5,6,18,<br>19,20,21,2<br>4 | 5 | O54728,P01946,P02091,P19629,Q08849        |



|      |                          |                                |   |                                                                |
|------|--------------------------|--------------------------------|---|----------------------------------------------------------------|
| 7671 | 1,3,7,8,22,<br>24,25,26  | 2,4,5,6,18,<br>19,20,21,2<br>3 | 5 | P01835,P01946,P02091,P10715,P19629                             |
| 7672 | 1,3,7,8,23,<br>24,25,26  | 2,4,5,6,18,<br>19,20,21,2<br>2 | 5 | P01946,P02091,P10715,P19629,Q7TPB1                             |
| 7673 | 1,3,7,18,1<br>9,20,21,22 | 2,4,5,6,8,2<br>3,24,25,26      | 4 | P06760,P20760,Q9WTT6,Q9Z0V6                                    |
| 7674 | 1,3,7,18,1<br>9,20,21,23 | 2,4,5,6,8,2<br>2,24,25,26      | 3 | P14668,P20760,Q9Z0V6                                           |
| 7675 | 1,3,7,18,1<br>9,20,21,24 | 2,4,5,6,8,2<br>2,23,25,26      | 3 | P06760,P20760,Q9Z0V6                                           |
| 7676 | 1,3,7,18,1<br>9,20,21,25 | 2,4,5,6,8,2<br>2,23,24,26      | 2 | P20760,P47967                                                  |
| 7677 | 1,3,7,18,1<br>9,20,21,26 | 2,4,5,6,8,2<br>2,23,24,25      | 3 | P06760,P50280,Q9Z0V6                                           |
| 7678 | 1,3,7,18,1<br>9,20,22,23 | 2,4,5,6,8,2<br>1,24,25,26      | 6 | P06760,P20646,P20760,Q08849,Q9WTT6,Q9Z0V6                      |
| 7679 | 1,3,7,18,1<br>9,20,22,24 | 2,4,5,6,8,2<br>1,23,25,26      | 8 | P06760,P07150,P14669,P20646,Q6AYS4,Q6P6R2,Q9WTT6,Q9Z0V6        |
| 7680 | 1,3,7,18,1<br>9,20,22,25 | 2,4,5,6,8,2<br>1,23,24,26      | 3 | P20760,P20762,Q9Z0V6                                           |
| 7681 | 1,3,7,18,1<br>9,20,22,26 | 2,4,5,6,8,2<br>1,23,24,25      | 8 | O54728,P06760,P07150,P20646,Q5U2V4,Q6P6R2,Q9WTT6,Q9Z0V6        |
| 7682 | 1,3,7,18,1<br>9,20,23,24 | 2,4,5,6,8,2<br>1,22,25,26      | 5 | P06760,Q6AYS4,Q80WL1,Q9WTT6,Q9Z0V6                             |
| 7683 | 1,3,7,18,1<br>9,20,23,25 | 2,4,5,6,8,2<br>1,22,24,26      | 2 | P20760,Q08849                                                  |
| 7684 | 1,3,7,18,1<br>9,20,23,26 | 2,4,5,6,8,2<br>1,22,24,25      | 9 | A2RUV9,P01946,P02091,P06760,P35467,Q08849,Q6IG02,Q9WTT6,Q9Z0V6 |
| 7685 | 1,3,7,18,1<br>9,20,24,25 | 2,4,5,6,8,2<br>1,22,23,26      | 4 | P20760,P20762,Q80WL1,Q9Z0V6                                    |
| 7686 | 1,3,7,18,1<br>9,20,24,26 | 2,4,5,6,8,2<br>1,22,23,25      | 8 | P02091,P06760,P20646,P50280,Q6AYS4,Q6P6R2,Q9WTT6,Q9Z0V6        |
| 7687 | 1,3,7,18,1<br>9,20,25,26 | 2,4,5,6,8,2<br>1,22,23,24      | 3 | P02091,P35280,Q9Z0V6                                           |
| 7688 | 1,3,7,18,1<br>9,21,22,23 | 2,4,5,6,8,2<br>0,24,25,26      | 3 | P14668,P20760,Q9Z0V6                                           |
| 7689 | 1,3,7,18,1<br>9,21,22,24 | 2,4,5,6,8,2<br>0,23,25,26      | 5 | P06760,P20760,P20762,Q9WTT6,Q9Z0V6                             |
| 7690 | 1,3,7,18,1<br>9,21,22,25 | 2,4,5,6,8,2<br>0,23,24,26      | 5 | P17046,P20760,P20762,P47967,P97840                             |
| 7691 | 1,3,7,18,1<br>9,21,22,26 | 2,4,5,6,8,2<br>0,23,24,25      | 2 | P06760,Q9Z0V6                                                  |
| 7692 | 1,3,7,18,1<br>9,21,23,24 | 2,4,5,6,8,2<br>0,22,25,26      | 1 | P20760                                                         |

|      |                                                 |   |                                                         |
|------|-------------------------------------------------|---|---------------------------------------------------------|
| 7693 | 1,3,7,18,1 2,4,5,6,8,2<br>9,21,23,25 0,22,24,26 | 2 | P14668,P20760                                           |
| 7694 | 1,3,7,18,1 2,4,5,6,8,2<br>9,21,23,26 0,22,24,25 | 5 | P01946,P02091,P14668,P35467,Q07523                      |
| 7695 | 1,3,7,18,1 2,4,5,6,8,2<br>9,21,24,25 0,22,23,26 | 4 | P20760,P20762,P22006,Q62997                             |
| 7696 | 1,3,7,18,1 2,4,5,6,8,2<br>9,21,24,26 0,22,23,25 | 3 | P02091,P06760,Q9Z0V6                                    |
| 7697 | 1,3,7,18,1 2,4,5,6,8,2<br>9,21,25,26 0,22,23,24 | 2 | P02091,P82995                                           |
| 7698 | 1,3,7,18,1 2,4,5,6,8,2<br>9,22,23,24 0,21,25,26 | 6 | P06760,P20646,P62804,Q00715,Q9WTT6,Q9Z0V6               |
| 7699 | 1,3,7,18,1 2,4,5,6,8,2<br>9,22,23,25 0,21,24,26 | 4 | P01015,P17046,P20760,P62804                             |
| 7700 | 1,3,7,18,1 2,4,5,6,8,2<br>9,22,23,26 0,21,24,25 | 8 | O54728,P01946,P02091,P06760,P20646,P35467,Q9WTT6,Q9Z0V6 |
| 7701 | 1,3,7,18,1 2,4,5,6,8,2<br>9,22,24,25 0,21,23,26 | 7 | P01835,P17046,P20760,P20762,P62804,Q00715,Q9Z0V6        |
| 7702 | 1,3,7,18,1 2,4,5,6,8,2<br>9,22,24,26 0,21,23,25 | 6 | P02091,P06760,P20646,Q6P6R2,Q9WTT6,Q9Z0V6               |
| 7703 | 1,3,7,18,1 2,4,5,6,8,2<br>9,22,25,26 0,21,23,24 | 1 | P02091                                                  |
| 7704 | 1,3,7,18,1 2,4,5,6,8,2<br>9,23,24,25 0,21,22,26 | 4 | P20760,P20762,P62804,Q00715                             |
| 7705 | 1,3,7,18,1 2,4,5,6,8,2<br>9,23,24,26 0,21,22,25 | 8 | P01946,P02091,P06760,P20646,P35467,Q07523,Q9WTT6,Q9Z0V6 |
| 7706 | 1,3,7,18,1 2,4,5,6,8,2<br>9,23,25,26 0,21,22,24 | 3 | P01946,P02091,P35467                                    |
| 7707 | 1,3,7,18,1 2,4,5,6,8,2<br>9,24,25,26 0,21,22,23 | 4 | P01946,P02091,P20762,Q7TPB1                             |
| 7708 | 1,3,7,18,2 2,4,5,6,8,1<br>0,21,22,23 9,24,25,26 | 3 | P14668,P20760,Q9Z0V6                                    |
| 7709 | 1,3,7,18,2 2,4,5,6,8,1<br>0,21,22,24 9,23,25,26 | 1 | Q9Z0V6                                                  |
| 7710 | 1,3,7,18,2 2,4,5,6,8,1<br>0,21,22,25 9,23,24,26 | 1 | P20760                                                  |
| 7711 | 1,3,7,18,2 2,4,5,6,8,1<br>0,21,22,26 9,23,24,25 | 3 | P06760,P50280,Q9Z0V6                                    |
| 7712 | 1,3,7,18,2 2,4,5,6,8,1<br>0,21,23,24 9,22,25,26 | 2 | A2RUV9,P20760                                           |
| 7713 | 1,3,7,18,2 2,4,5,6,8,1<br>0,21,23,25 9,22,24,26 | 2 | A2RUV9,P20760                                           |
| 7714 | 1,3,7,18,2 2,4,5,6,8,1<br>0,21,23,26 9,22,24,25 | 6 | A2RUV9,P01946,P02091,Q4FZU6,Q6IG02,Q6P6Q2               |
| 7715 | 1,3,7,18,2 2,4,5,6,8,1<br>0,21,24,25 9,22,23,26 | 1 | P20760                                                  |

|      |                                                 |   |                                                                |
|------|-------------------------------------------------|---|----------------------------------------------------------------|
| 7716 | 1,3,7,18,2 2,4,5,6,8,1<br>0,21,24,26 9,22,23,25 | 4 | P02091,P06760,P50280,Q9Z0V6                                    |
| 7717 | 1,3,7,18,2 2,4,5,6,8,1<br>0,21,25,26 9,22,23,24 | 2 | P02091,P31430                                                  |
| 7718 | 1,3,7,18,2 2,4,5,6,8,1<br>0,22,23,24 9,21,25,26 | 5 | A2RUV9,P06760,P20646,Q9WTT6,Q9Z0V6                             |
| 7719 | 1,3,7,18,2 2,4,5,6,8,1<br>0,22,23,25 9,21,24,26 | 3 | A2RUV9,P20760,Q08849                                           |
| 7720 | 1,3,7,18,2 2,4,5,6,8,1<br>0,22,23,26 9,21,24,25 | 8 | A2RUV9,Q54728,P01946,P02091,P06760,Q08849,Q6IG02,Q9Z0V6        |
| 7721 | 1,3,7,18,2 2,4,5,6,8,1<br>0,22,24,25 9,21,23,26 | 3 | P20760,P20762,Q9Z0V6                                           |
| 7722 | 1,3,7,18,2 2,4,5,6,8,1<br>0,22,24,26 9,21,23,25 | 9 | P02091,P02803,P06760,P20646,P50280,Q6P6R2,Q99041,Q9WTT6,Q9Z0V6 |
| 7723 | 1,3,7,18,2 2,4,5,6,8,1<br>0,22,25,26 9,21,23,24 | 1 | P02091                                                         |
| 7724 | 1,3,7,18,2 2,4,5,6,8,1<br>0,23,24,25 9,21,22,26 | 3 | A2RUV9,P20760,Q80WL1                                           |
| 7725 | 1,3,7,18,2 2,4,5,6,8,1<br>0,23,24,26 9,21,22,25 | 6 | A2RUV9,P01946,P02091,P06760,Q6IG02,Q9Z0V6                      |
| 7726 | 1,3,7,18,2 2,4,5,6,8,1<br>0,23,25,26 9,21,22,24 | 6 | A2RUV9,P01946,P02091,Q08849,Q6IG02,Q6P6Q2                      |
| 7727 | 1,3,7,18,2 2,4,5,6,8,1<br>0,24,25,26 9,21,22,23 | 2 | P01946,P02091                                                  |
| 7728 | 1,3,7,18,2 2,4,5,6,8,1<br>1,22,23,24 9,20,25,26 | 0 |                                                                |
| 7729 | 1,3,7,18,2 2,4,5,6,8,1<br>1,22,23,25 9,20,24,26 | 2 | P14668,P20760                                                  |
| 7730 | 1,3,7,18,2 2,4,5,6,8,1<br>1,22,23,26 9,20,24,25 | 2 | P01946,P02091                                                  |
| 7731 | 1,3,7,18,2 2,4,5,6,8,1<br>1,22,24,25 9,20,23,26 | 3 | P20760,P20762,P22006                                           |
| 7732 | 1,3,7,18,2 2,4,5,6,8,1<br>1,22,24,26 9,20,23,25 | 2 | P02091,P06760                                                  |
| 7733 | 1,3,7,18,2 2,4,5,6,8,1<br>1,22,25,26 9,20,23,24 | 2 | P02091,P31430                                                  |
| 7734 | 1,3,7,18,2 2,4,5,6,8,1<br>1,23,24,25 9,20,22,26 | 3 | P20760,P22006,Q62997                                           |
| 7735 | 1,3,7,18,2 2,4,5,6,8,1<br>1,23,24,26 9,20,22,25 | 4 | A2RUV9,P01946,P02091,Q6P6Q2                                    |
| 7736 | 1,3,7,18,2 2,4,5,6,8,1<br>1,23,25,26 9,20,22,24 | 6 | A2RUV9,P01946,P02091,P22006,P31430,Q6P6Q2                      |
| 7737 | 1,3,7,18,2 2,4,5,6,8,1<br>1,24,25,26 9,20,22,23 | 6 | P01946,P02091,P22006,P31430,P55091,Q62997                      |
| 7738 | 1,3,7,18,2 2,4,5,6,8,1<br>2,23,24,25 9,20,21,26 | 3 | P20760,P62804,Q00715                                           |

|      |                                                 |    |                                                                                                                 |
|------|-------------------------------------------------|----|-----------------------------------------------------------------------------------------------------------------|
| 7739 | 1,3,7,18,2 2,4,5,6,8,1<br>2,23,24,26 9,20,21,25 | 9  | A2RUV9,P00731,P01946,P02091,P06760,P20646,P62804,Q8VD89,Q9WTT6                                                  |
| 7740 | 1,3,7,18,2 2,4,5,6,8,1<br>2,23,25,26 9,20,21,24 | 4  | A2RUV9,P01946,P02091,P62804                                                                                     |
| 7741 | 1,3,7,18,2 2,4,5,6,8,1<br>2,24,25,26 9,20,21,23 | 3  | P01946,P02091,P62804                                                                                            |
| 7742 | 1,3,7,18,2 2,4,5,6,8,1<br>3,24,25,26 9,20,21,22 | 5  | A2RUV9,P01946,P02091,P62804,Q7TPB1                                                                              |
| 7743 | 1,3,7,19,2 2,4,5,6,8,1<br>0,21,22,23 8,24,25,26 | 4  | P00774,P20760,P55091,Q9Z0V6                                                                                     |
| 7744 | 1,3,7,19,2 2,4,5,6,8,1<br>0,21,22,24 8,23,25,26 | 8  | P00714,P00774,Q63598,Q63942,Q6AYS4,Q99MH3,Q9WTT6,Q9Z0V6                                                         |
| 7745 | 1,3,7,19,2 2,4,5,6,8,1<br>0,21,22,25 8,23,24,26 | 4  | P17046,P20760,P47967,Q63942                                                                                     |
| 7746 | 1,3,7,19,2 2,4,5,6,8,1<br>0,21,22,26 8,23,24,25 | 5  | O54728,P06760,Q63598,Q99MH3,Q9Z0V6                                                                              |
| 7747 | 1,3,7,19,2 2,4,5,6,8,1<br>0,21,23,24 8,22,25,26 | 2  | Q6AYS4,Q9Z0V6                                                                                                   |
| 7748 | 1,3,7,19,2 2,4,5,6,8,1<br>0,21,23,25 8,22,24,26 | 1  | P20760                                                                                                          |
| 7749 | 1,3,7,19,2 2,4,5,6,8,1<br>0,21,23,26 8,22,24,25 | 2  | P01946,P02091                                                                                                   |
| 7750 | 1,3,7,19,2 2,4,5,6,8,1<br>0,21,24,25 8,22,23,26 | 2  | P20760,Q63942                                                                                                   |
| 7751 | 1,3,7,19,2 2,4,5,6,8,1<br>0,21,24,26 8,22,23,25 | 6  | P02091,P06760,Q63598,Q6AYS4,Q99MH3,Q9Z0V6                                                                       |
| 7752 | 1,3,7,19,2 2,4,5,6,8,1<br>0,21,25,26 8,22,23,24 | 1  | P02091                                                                                                          |
| 7753 | 1,3,7,19,2 2,4,5,6,8,1<br>0,22,23,24 8,21,25,26 | 10 | P00774,P06760,P14669,P20646,P31430,P55091,P98089,Q6AYS4,Q9WTT6,Q9Z0V6                                           |
| 7754 | 1,3,7,19,2 2,4,5,6,8,1<br>0,22,23,25 8,21,24,26 | 4  | P00774,P17046,P20760,Q08849                                                                                     |
| 7755 | 1,3,7,19,2 2,4,5,6,8,1<br>0,22,23,26 8,21,24,25 | 11 | O54728,P01946,P02091,P06760,P20646,P31430,P98089,Q08849,Q6AYS4,Q9WTT6,Q9Z0V6                                    |
| 7756 | 1,3,7,19,2 2,4,5,6,8,1<br>0,22,24,25 8,21,23,26 | 7  | P00774,P14669,P17046,P20760,P20762,Q63942,Q9Z0V6                                                                |
| 7757 | 1,3,7,19,2 2,4,5,6,8,1<br>0,22,24,26 8,21,23,25 | 16 | O54728,P00774,P02091,P02803,P06760,P07150,P14669,P20646,P31430,P98089,Q63598,Q6AYS4,Q6P6R2,Q99MH3,Q9WTT6,Q9Z0V6 |
| 7758 | 1,3,7,19,2 2,4,5,6,8,1<br>0,22,25,26 8,21,23,24 | 3  | O54728,P02091,Q08849                                                                                            |
| 7759 | 1,3,7,19,2 2,4,5,6,8,1<br>0,23,24,25 8,21,22,26 | 3  | P20760,P83748,Q80WL1                                                                                            |
| 7760 | 1,3,7,19,2 2,4,5,6,8,1<br>0,23,24,26 8,21,22,25 | 11 | O54728,P01946,P02091,P06760,P20646,P31430,P98089,Q6AYS4,Q80WL1,Q9WTT6,Q9Z0V6                                    |
| 7761 | 1,3,7,19,2 2,4,5,6,8,1<br>0,23,25,26 8,21,22,24 | 3  | P01946,P02091,Q08849                                                                                            |

|      |                                                 |    |                                                                                     |
|------|-------------------------------------------------|----|-------------------------------------------------------------------------------------|
| 7762 | 1,3,7,19,2 2,4,5,6,8,1<br>0,24,25,26 8,21,22,23 | 4  | P01946,P02091,Q6AYS4,Q80WL1                                                         |
| 7763 | 1,3,7,19,2 2,4,5,6,8,1<br>1,22,23,24 8,20,25,26 | 0  |                                                                                     |
| 7764 | 1,3,7,19,2 2,4,5,6,8,1<br>1,22,23,25 8,20,24,26 | 3  | P17046,P20760,P97840                                                                |
| 7765 | 1,3,7,19,2 2,4,5,6,8,1<br>1,22,23,26 8,20,24,25 | 3  | O54728,P01946,P02091                                                                |
| 7766 | 1,3,7,19,2 2,4,5,6,8,1<br>1,22,24,25 8,20,23,26 | 7  | P17046,P20760,P20762,P22006,P97840,Q63942,Q6TMA8                                    |
| 7767 | 1,3,7,19,2 2,4,5,6,8,1<br>1,22,24,26 8,20,23,25 | 2  | P02091,P06760                                                                       |
| 7768 | 1,3,7,19,2 2,4,5,6,8,1<br>1,22,25,26 8,20,23,24 | 2  | P02091,P22006                                                                       |
| 7769 | 1,3,7,19,2 2,4,5,6,8,1<br>1,23,24,25 8,20,22,26 | 2  | P20760,P22006                                                                       |
| 7770 | 1,3,7,19,2 2,4,5,6,8,1<br>1,23,24,26 8,20,22,25 | 2  | P01946,P02091                                                                       |
| 7771 | 1,3,7,19,2 2,4,5,6,8,1<br>1,23,25,26 8,20,22,24 | 3  | P01946,P02091,P22006                                                                |
| 7772 | 1,3,7,19,2 2,4,5,6,8,1<br>1,24,25,26 8,20,22,23 | 3  | P01946,P02091,P22006                                                                |
| 7773 | 1,3,7,19,2 2,4,5,6,8,1<br>2,23,24,25 8,20,21,26 | 7  | P01835,P17046,P20760,P20762,P62804,P82471,Q00715                                    |
| 7774 | 1,3,7,19,2 2,4,5,6,8,1<br>2,23,24,26 8,20,21,25 | 12 | O54728,P00731,P01946,P02091,P06760,P20646,P31430,P62804,P82471,P98089,Q6AYS4,Q9WTT6 |
| 7775 | 1,3,7,19,2 2,4,5,6,8,1<br>2,23,25,26 8,20,21,24 | 5  | O54728,P01946,P02091,P17046,P62804                                                  |
| 7776 | 1,3,7,19,2 2,4,5,6,8,1<br>2,24,25,26 8,20,21,23 | 7  | P01835,P01946,P02091,P17046,P20762,P62804,Q6TMA8                                    |
| 7777 | 1,3,7,19,2 2,4,5,6,8,1<br>3,24,25,26 8,20,21,22 | 4  | P01946,P02091,P62804,Q7TPB1                                                         |
| 7778 | 1,3,7,20,2 2,4,5,6,8,1<br>1,22,23,24 8,19,25,26 | 3  | P00714,P02803,Q63942                                                                |
| 7779 | 1,3,7,20,2 2,4,5,6,8,1<br>1,22,23,25 8,19,24,26 | 2  | P20760,Q63942                                                                       |
| 7780 | 1,3,7,20,2 2,4,5,6,8,1<br>1,22,23,26 8,19,24,25 | 3  | O54728,P01946,P02091                                                                |
| 7781 | 1,3,7,20,2 2,4,5,6,8,1<br>1,22,24,25 8,19,23,26 | 6  | P02803,P20760,P35467,Q03191,Q5XFX0,Q63942                                           |
| 7782 | 1,3,7,20,2 2,4,5,6,8,1<br>1,22,24,26 8,19,23,25 | 7  | P00714,P02091,P02803,P50280,Q62635,Q63598,Q99MH3                                    |
| 7783 | 1,3,7,20,2 2,4,5,6,8,1<br>1,22,25,26 8,19,23,24 | 2  | P02091,Q03191                                                                       |
| 7784 | 1,3,7,20,2 2,4,5,6,8,1<br>1,23,24,25 8,19,22,26 | 3  | P20760,P22006,Q63942                                                                |

|      |                                                 |    |                                                                                            |
|------|-------------------------------------------------|----|--------------------------------------------------------------------------------------------|
| 7785 | 1,3,7,20,2 2,4,5,6,8,1<br>1,23,24,26 8,19,22,25 | 3  | A2RUV9,P01946,P02091                                                                       |
| 7786 | 1,3,7,20,2 2,4,5,6,8,1<br>1,23,25,26 8,19,22,24 | 2  | P01946,P02091                                                                              |
| 7787 | 1,3,7,20,2 2,4,5,6,8,1<br>1,24,25,26 8,19,22,23 | 3  | P01946,P02091,P22006                                                                       |
| 7788 | 1,3,7,20,2 2,4,5,6,8,1<br>2,23,24,25 8,19,21,26 | 4  | P02803,P0C0A9,P20760,Q63942                                                                |
| 7789 | 1,3,7,20,2 2,4,5,6,8,1<br>2,23,24,26 8,19,21,25 | 13 | A2RUV9,O54728,P00731,P01946,P02091,P02803,P06760,P20646,P98089,Q62635,Q6AYS4,Q8CIZ5,Q9WTT6 |
| 7790 | 1,3,7,20,2 2,4,5,6,8,1<br>2,23,25,26 8,19,21,24 | 5  | A2RUV9,O54728,P01946,P02091,Q08849                                                         |
| 7791 | 1,3,7,20,2 2,4,5,6,8,1<br>2,24,25,26 8,19,21,23 | 7  | P00731,P01946,P02091,P02803,P0C0A9,Q03191,Q99MH3                                           |
| 7792 | 1,3,7,20,2 2,4,5,6,8,1<br>3,24,25,26 8,19,21,22 | 6  | A2RUV9,P01946,P02091,P0C0A9,Q7TPB1,Q80WL1                                                  |
| 7793 | 1,3,7,21,2 2,4,5,6,8,1<br>2,23,24,25 8,19,20,26 | 5  | P20760,P22006,P62804,Q63355,Q63942                                                         |
| 7794 | 1,3,7,21,2 2,4,5,6,8,1<br>2,23,24,26 8,19,20,25 | 3  | P00731,P01946,P02091                                                                       |
| 7795 | 1,3,7,21,2 2,4,5,6,8,1<br>2,23,25,26 8,19,20,24 | 3  | P01946,P02091,P22006                                                                       |
| 7796 | 1,3,7,21,2 2,4,5,6,8,1<br>2,24,25,26 8,19,20,23 | 3  | P01946,P02091,P22006                                                                       |
| 7797 | 1,3,7,21,2 2,4,5,6,8,1<br>3,24,25,26 8,19,20,22 | 5  | P01946,P02091,P22006,Q62997,Q7TPB1                                                         |
| 7798 | 1,3,7,22,2 2,4,5,6,8,1<br>3,24,25,26 8,19,20,21 | 6  | P00731,P01946,P02091,P62804,P82471,Q7TPB1                                                  |
| 7799 | 1,3,8,18,1 2,4,5,6,7,2<br>9,20,21,22 3,24,25,26 | 4  | P20760,P35281,P36376,P83748                                                                |
| 7800 | 1,3,8,18,1 2,4,5,6,7,2<br>9,20,21,23 2,24,25,26 | 3  | P20760,P35281,P83748                                                                       |
| 7801 | 1,3,8,18,1 2,4,5,6,7,2<br>9,20,21,24 2,23,25,26 | 5  | P05539,P20760,P36376,P83121,P83748                                                         |
| 7802 | 1,3,8,18,1 2,4,5,6,7,2<br>9,20,21,25 2,23,24,26 | 3  | P20760,P36376,P83748                                                                       |
| 7803 | 1,3,8,18,1 2,4,5,6,7,2<br>9,20,21,26 2,23,24,25 | 1  | P35281                                                                                     |
| 7804 | 1,3,8,18,1 2,4,5,6,7,2<br>9,20,22,23 1,24,25,26 | 5  | P20646,P20760,P22006,P83748,Q08849                                                         |
| 7805 | 1,3,8,18,1 2,4,5,6,7,2<br>9,20,22,24 1,23,25,26 | 7  | P20646,P20760,P36376,P83121,P83748,Q6P6R2,Q9Z0V6                                           |
| 7806 | 1,3,8,18,1 2,4,5,6,7,2<br>9,20,22,25 1,23,24,26 | 4  | P20760,P20762,P83748,Q08849                                                                |
| 7807 | 1,3,8,18,1 2,4,5,6,7,2<br>9,20,22,26 1,23,24,25 | 4  | O54728,P20646,Q08849,Q6P6R2                                                                |

|      |                                                 |   |                                                                |
|------|-------------------------------------------------|---|----------------------------------------------------------------|
| 7808 | 1,3,8,18,1 2,4,5,6,7,2<br>9,20,23,24 1,22,25,26 | 6 | P09605;P25809,P20646,P20760,P35467,P83748,Q08849               |
| 7809 | 1,3,8,18,1 2,4,5,6,7,2<br>9,20,23,25 1,22,24,26 | 4 | P20760,P35467,P83748,Q08849                                    |
| 7810 | 1,3,8,18,1 2,4,5,6,7,2<br>9,20,23,26 1,22,24,25 | 5 | P09605;P25809,P35467,Q08849,Q6IG02,Q6P6Q2                      |
| 7811 | 1,3,8,18,1 2,4,5,6,7,2<br>9,20,24,25 1,22,23,26 | 4 | P20760,P20762,P36376,P83748                                    |
| 7812 | 1,3,8,18,1 2,4,5,6,7,2<br>9,20,24,26 1,22,23,25 | 2 | P09605;P25809,P20646                                           |
| 7813 | 1,3,8,18,1 2,4,5,6,7,2<br>9,20,25,26 1,22,23,24 | 2 | P35280,Q08849                                                  |
| 7814 | 1,3,8,18,1 2,4,5,6,7,2<br>9,21,22,23 0,24,25,26 | 2 | P20760,P83748                                                  |
| 7815 | 1,3,8,18,1 2,4,5,6,7,2<br>9,21,22,24 0,23,25,26 | 6 | P05539,P20760,P20762,P36376,P83121,P83748                      |
| 7816 | 1,3,8,18,1 2,4,5,6,7,2<br>9,21,22,25 0,23,24,26 | 4 | P20760,P20762,P36376,P83748                                    |
| 7817 | 1,3,8,18,1 2,4,5,6,7,2<br>9,21,22,26 0,23,24,25 | 0 |                                                                |
| 7818 | 1,3,8,18,1 2,4,5,6,7,2<br>9,21,23,24 0,22,25,26 | 3 | P05539,P20760,P83748                                           |
| 7819 | 1,3,8,18,1 2,4,5,6,7,2<br>9,21,23,25 0,22,24,26 | 3 | O70594,P20760,P83748                                           |
| 7820 | 1,3,8,18,1 2,4,5,6,7,2<br>9,21,23,26 0,22,24,25 | 3 | P35467,Q6IG02,Q6P6Q2                                           |
| 7821 | 1,3,8,18,1 2,4,5,6,7,2<br>9,21,24,25 0,22,23,26 | 6 | P05539,P20760,P20762,P36376,P83748,Q62997                      |
| 7822 | 1,3,8,18,1 2,4,5,6,7,2<br>9,21,24,26 0,22,23,25 | 1 | P12020                                                         |
| 7823 | 1,3,8,18,1 2,4,5,6,7,2<br>9,21,25,26 0,22,23,24 | 1 | P31430                                                         |
| 7824 | 1,3,8,18,1 2,4,5,6,7,2<br>9,22,23,24 0,21,25,26 | 6 | P09605;P25809,P20646,P20760,P61206;P84079;P84082,P83121,P83748 |
| 7825 | 1,3,8,18,1 2,4,5,6,7,2<br>9,22,23,25 0,21,24,26 | 2 | P20760,P83748                                                  |
| 7826 | 1,3,8,18,1 2,4,5,6,7,2<br>9,22,23,26 0,21,24,25 | 6 | O54728,P09605;P25809,P20646,P35467,Q6IG02,Q6P6Q2               |
| 7827 | 1,3,8,18,1 2,4,5,6,7,2<br>9,22,24,25 0,21,23,26 | 5 | P01835,P20760,P20762,P83121,P83748                             |
| 7828 | 1,3,8,18,1 2,4,5,6,7,2<br>9,22,24,26 0,21,23,25 | 4 | P09605;P25809,P20646,P83121,Q6P6R2                             |
| 7829 | 1,3,8,18,1 2,4,5,6,7,2<br>9,22,25,26 0,21,23,24 | 0 |                                                                |
| 7830 | 1,3,8,18,1 2,4,5,6,7,2<br>9,23,24,25 0,21,22,26 | 4 | P05539,P20760,P20762,P83748                                    |

|      |                                                 |   |                                                                |
|------|-------------------------------------------------|---|----------------------------------------------------------------|
| 7831 | 1,3,8,18,1 2,4,5,6,7,2<br>9,23,24,26 0,21,22,25 | 6 | P02091,P09605;P25809,P20646,P35467,Q6IG02,Q6P6Q2               |
| 7832 | 1,3,8,18,1 2,4,5,6,7,2<br>9,23,25,26 0,21,22,24 | 3 | P35467,Q6IG02,Q6P6Q2                                           |
| 7833 | 1,3,8,18,1 2,4,5,6,7,2<br>9,24,25,26 0,21,22,23 | 2 | P20762,Q7TPB1                                                  |
| 7834 | 1,3,8,18,2 2,4,5,6,7,1<br>0,21,22,23 9,24,25,26 | 3 | P14480,P20760,P83748                                           |
| 7835 | 1,3,8,18,2 2,4,5,6,7,1<br>0,21,22,24 9,23,25,26 | 5 | P20760,P36376,P83121,P83748,Q5XFX0                             |
| 7836 | 1,3,8,18,2 2,4,5,6,7,1<br>0,21,22,25 9,23,24,26 | 4 | P20760,P36376,P83748,Q63532                                    |
| 7837 | 1,3,8,18,2 2,4,5,6,7,1<br>0,21,22,26 9,23,24,25 | 2 | Q63532,Q99041                                                  |
| 7838 | 1,3,8,18,2 2,4,5,6,7,1<br>0,21,23,24 9,22,25,26 | 3 | P05539,P20760,P83748                                           |
| 7839 | 1,3,8,18,2 2,4,5,6,7,1<br>0,21,23,25 9,22,24,26 | 2 | P20760,P83748                                                  |
| 7840 | 1,3,8,18,2 2,4,5,6,7,1<br>0,21,23,26 9,22,24,25 | 4 | P35467,Q6IFV1,Q6IG02,Q6P6Q2                                    |
| 7841 | 1,3,8,18,2 2,4,5,6,7,1<br>0,21,24,25 9,22,23,26 | 4 | P05539,P20760,P36376,P83748                                    |
| 7842 | 1,3,8,18,2 2,4,5,6,7,1<br>0,21,24,26 9,22,23,25 | 4 | P06911,P12020,P50280,Q99041                                    |
| 7843 | 1,3,8,18,2 2,4,5,6,7,1<br>0,21,25,26 9,22,23,24 | 2 | P31430,Q63532                                                  |
| 7844 | 1,3,8,18,2 2,4,5,6,7,1<br>0,22,23,24 9,21,25,26 | 6 | P20646,P20760,P83748,P97840,Q08849,Q9QZK9                      |
| 7845 | 1,3,8,18,2 2,4,5,6,7,1<br>0,22,23,25 9,21,24,26 | 3 | P20760,P83748,Q08849                                           |
| 7846 | 1,3,8,18,2 2,4,5,6,7,1<br>0,22,23,26 9,21,24,25 | 6 | O54728,P35467,P97840,Q08849,Q6IG02,Q6P6Q2                      |
| 7847 | 1,3,8,18,2 2,4,5,6,7,1<br>0,22,24,25 9,21,23,26 | 2 | P20760,P83748                                                  |
| 7848 | 1,3,8,18,2 2,4,5,6,7,1<br>0,22,24,26 9,21,23,25 | 4 | P20646,P97840,Q6P6R2,Q99041                                    |
| 7849 | 1,3,8,18,2 2,4,5,6,7,1<br>0,22,25,26 9,21,23,24 | 2 | Q08849,Q63532                                                  |
| 7850 | 1,3,8,18,2 2,4,5,6,7,1<br>0,23,24,25 9,21,22,26 | 3 | P20760,P83748,Q08849                                           |
| 7851 | 1,3,8,18,2 2,4,5,6,7,1<br>0,23,24,26 9,21,22,25 | 8 | A2RUV9,P09605;P25809,P35467,P47967,P97840,Q08849,Q6IG02,Q6P6Q2 |
| 7852 | 1,3,8,18,2 2,4,5,6,7,1<br>0,23,25,26 9,21,22,24 | 4 | P35467,Q08849,Q6IG02,Q6P6Q2                                    |
| 7853 | 1,3,8,18,2 2,4,5,6,7,1<br>0,24,25,26 9,21,22,23 | 0 |                                                                |



|      |                                                 |    |                                                                                     |
|------|-------------------------------------------------|----|-------------------------------------------------------------------------------------|
| 7854 | 1,3,8,18,2 2,4,5,6,7,1<br>1,22,23,24 9,20,25,26 | 3  | P05539,P20760,P83748                                                                |
| 7855 | 1,3,8,18,2 2,4,5,6,7,1<br>1,22,23,25 9,20,24,26 | 2  | P20760,P83748                                                                       |
| 7856 | 1,3,8,18,2 2,4,5,6,7,1<br>1,22,23,26 9,20,24,25 | 3  | P35467,Q6IG02,Q6P6Q2                                                                |
| 7857 | 1,3,8,18,2 2,4,5,6,7,1<br>1,22,24,25 9,20,23,26 | 6  | P05539,P14408,P20760,P20762,P36376,P83748                                           |
| 7858 | 1,3,8,18,2 2,4,5,6,7,1<br>1,22,24,26 9,20,23,25 | 1  | Q99041                                                                              |
| 7859 | 1,3,8,18,2 2,4,5,6,7,1<br>1,22,25,26 9,20,23,24 | 2  | P31430,Q63532                                                                       |
| 7860 | 1,3,8,18,2 2,4,5,6,7,1<br>1,23,24,25 9,20,22,26 | 4  | P05539,P20760,P83748,Q62997                                                         |
| 7861 | 1,3,8,18,2 2,4,5,6,7,1<br>1,23,24,26 9,20,22,25 | 6  | P35467,Q62997,Q6IFV1,Q6IG02,Q6P6Q2,Q9QZQ5                                           |
| 7862 | 1,3,8,18,2 2,4,5,6,7,1<br>1,23,25,26 9,20,22,24 | 4  | P31430,P35467,Q6IG02,Q6P6Q2                                                         |
| 7863 | 1,3,8,18,2 2,4,5,6,7,1<br>1,24,25,26 9,20,22,23 | 3  | B4F795,P31430,Q62997                                                                |
| 7864 | 1,3,8,18,2 2,4,5,6,7,1<br>2,23,24,25 9,20,21,26 | 3  | P20760,P83748,Q9Z0J6                                                                |
| 7865 | 1,3,8,18,2 2,4,5,6,7,1<br>2,23,24,26 9,20,21,25 | 8  | P00731,P09605,P25809,P20646,P35467,P47967,P97840,Q6IG02,Q6P6Q2                      |
| 7866 | 1,3,8,18,2 2,4,5,6,7,1<br>2,23,25,26 9,20,21,24 | 3  | P35467,Q6IG02,Q6P6Q2                                                                |
| 7867 | 1,3,8,18,2 2,4,5,6,7,1<br>2,24,25,26 9,20,21,23 | 1  | B4F795                                                                              |
| 7868 | 1,3,8,18,2 2,4,5,6,7,1<br>3,24,25,26 9,20,21,22 | 6  | P01946,P02091,P35467,Q6IG02,Q6P6Q2,Q7TPB1                                           |
| 7869 | 1,3,8,19,2 2,4,5,6,7,1<br>0,21,22,23 8,24,25,26 | 5  | P00774,P20760,P55091,P61206;P84079;P84082,P83748                                    |
| 7870 | 1,3,8,19,2 2,4,5,6,7,1<br>0,21,22,24 8,23,25,26 | 10 | P00714,P00774,P20760,P36376,P55091,P61206;P84079;P84082,P83121,P83748,Q5XFX0,Q99MH3 |
| 7871 | 1,3,8,19,2 2,4,5,6,7,1<br>0,21,22,25 8,23,24,26 | 4  | P16636,P20760,P36376,P83748                                                         |
| 7872 | 1,3,8,19,2 2,4,5,6,7,1<br>0,21,22,26 8,23,24,25 | 2  | O54728,Q99MH3                                                                       |
| 7873 | 1,3,8,19,2 2,4,5,6,7,1<br>0,21,23,24 8,22,25,26 | 4  | P20760,P55091,P61206;P84079;P84082,P83748                                           |
| 7874 | 1,3,8,19,2 2,4,5,6,7,1<br>0,21,23,25 8,22,24,26 | 3  | P16636,P20760,P83748                                                                |
| 7875 | 1,3,8,19,2 2,4,5,6,7,1<br>0,21,23,26 8,22,24,25 | 0  |                                                                                     |
| 7876 | 1,3,8,19,2 2,4,5,6,7,1<br>0,21,24,25 8,22,23,26 | 3  | P20760,P36376,P83748                                                                |

|      |                                                 |    |                                                                                            |
|------|-------------------------------------------------|----|--------------------------------------------------------------------------------------------|
| 7877 | 1,3,8,19,2 2,4,5,6,7,1<br>0,21,24,26 8,22,23,25 | 0  |                                                                                            |
| 7878 | 1,3,8,19,2 2,4,5,6,7,1<br>0,21,25,26 8,22,23,24 | 0  |                                                                                            |
| 7879 | 1,3,8,19,2 2,4,5,6,7,1<br>0,22,23,24 8,21,25,26 | 11 | P00774,P20646,P20760,P25031,P31430,P55091,P61206;P84079;P84082,P82995,P83748,P98089,Q08849 |
| 7880 | 1,3,8,19,2 2,4,5,6,7,1<br>0,22,23,25 8,21,24,26 | 6  | P00774,P20760,P25031,P55091,P83748,Q08849                                                  |
| 7881 | 1,3,8,19,2 2,4,5,6,7,1<br>0,22,23,26 8,21,24,25 | 6  | O54728,P20646,P25031,P61206;P84079;P84082,P98089,Q08849                                    |
| 7882 | 1,3,8,19,2 2,4,5,6,7,1<br>0,22,24,25 8,21,23,26 | 6  | P00774,P20760,P20762,P25031,P83748,Q08849                                                  |
| 7883 | 1,3,8,19,2 2,4,5,6,7,1<br>0,22,24,26 8,21,23,25 | 9  | O54728,P00774,P20646,P25031,P61206;P84079;P84082,P98089,Q08849,Q6P6R2,Q99MH3               |
| 7884 | 1,3,8,19,2 2,4,5,6,7,1<br>0,22,25,26 8,21,23,24 | 3  | O54728,P25031,Q08849                                                                       |
| 7885 | 1,3,8,19,2 2,4,5,6,7,1<br>0,23,24,25 8,21,22,26 | 4  | P20760,P25031,P83748,Q08849                                                                |
| 7886 | 1,3,8,19,2 2,4,5,6,7,1<br>0,23,24,26 8,21,22,25 | 7  | P02091,P09605,P25809,P20646,P25031,P61206;P84079;P84082,P98089,Q08849                      |
| 7887 | 1,3,8,19,2 2,4,5,6,7,1<br>0,23,25,26 8,21,22,24 | 3  | P02091,P25031,Q08849                                                                       |
| 7888 | 1,3,8,19,2 2,4,5,6,7,1<br>0,24,25,26 8,21,22,23 | 2  | P25031,Q08849                                                                              |
| 7889 | 1,3,8,19,2 2,4,5,6,7,1<br>1,22,23,24 8,20,25,26 | 3  | P20760,P61206;P84079;P84082,P83748                                                         |
| 7890 | 1,3,8,19,2 2,4,5,6,7,1<br>1,22,23,25 8,20,24,26 | 2  | P20760,P83748                                                                              |
| 7891 | 1,3,8,19,2 2,4,5,6,7,1<br>1,22,23,26 8,20,24,25 | 2  | O54728,P61206;P84079;P84082                                                                |
| 7892 | 1,3,8,19,2 2,4,5,6,7,1<br>1,22,24,25 8,20,23,26 | 4  | P20760,P20762,P36376,P83748                                                                |
| 7893 | 1,3,8,19,2 2,4,5,6,7,1<br>1,22,24,26 8,20,23,25 | 1  | P61206;P84079;P84082                                                                       |
| 7894 | 1,3,8,19,2 2,4,5,6,7,1<br>1,22,25,26 8,20,23,24 | 0  |                                                                                            |
| 7895 | 1,3,8,19,2 2,4,5,6,7,1<br>1,23,24,25 8,20,22,26 | 3  | P05539,P20760,P83748                                                                       |
| 7896 | 1,3,8,19,2 2,4,5,6,7,1<br>1,23,24,26 8,20,22,25 | 1  | P61206;P84079;P84082                                                                       |
| 7897 | 1,3,8,19,2 2,4,5,6,7,1<br>1,23,25,26 8,20,22,24 | 0  |                                                                                            |
| 7898 | 1,3,8,19,2 2,4,5,6,7,1<br>1,24,25,26 8,20,22,23 | 0  |                                                                                            |
| 7899 | 1,3,8,19,2 2,4,5,6,7,1<br>2,23,24,25 8,20,21,26 | 7  | P01835,P20760,P20762,P25031,P61206;P84079;P84082,P82471,P83748                             |

|      |                                                 |    |                                                                                            |
|------|-------------------------------------------------|----|--------------------------------------------------------------------------------------------|
| 7900 | 1,3,8,19,2 2,4,5,6,7,1<br>2,23,24,26 8,20,21,25 | 8  | O54728,P00731,P02091,P09605,P25809,P20646,P25031,P61206;P84079;P84082,P98089               |
| 7901 | 1,3,8,19,2 2,4,5,6,7,1<br>2,23,25,26 8,20,21,24 | 4  | O54728,P02091,P25031,Q08849                                                                |
| 7902 | 1,3,8,19,2 2,4,5,6,7,1<br>2,24,25,26 8,20,21,23 | 3  | P01835,P20762,P25031                                                                       |
| 7903 | 1,3,8,19,2 2,4,5,6,7,1<br>3,24,25,26 8,20,21,22 | 4  | P01946,P02091,P25031,Q7TPB1                                                                |
| 7904 | 1,3,8,20,2 2,4,5,6,7,1<br>1,22,23,24 8,19,25,26 | 4  | P20760,P61206;P84079;P84082,P82995,P83748                                                  |
| 7905 | 1,3,8,20,2 2,4,5,6,7,1<br>1,22,23,25 8,19,24,26 | 4  | P16636,P20760,P83748,Q63532                                                                |
| 7906 | 1,3,8,20,2 2,4,5,6,7,1<br>1,22,23,26 8,19,24,25 | 2  | O54728,Q63532                                                                              |
| 7907 | 1,3,8,20,2 2,4,5,6,7,1<br>1,22,24,25 8,19,23,26 | 6  | P16636,P20760,P36376,P83748,Q03191,Q5XFX0                                                  |
| 7908 | 1,3,8,20,2 2,4,5,6,7,1<br>1,22,24,26 8,19,23,25 | 3  | P02803,Q5XFX0,Q99MH3                                                                       |
| 7909 | 1,3,8,20,2 2,4,5,6,7,1<br>1,22,25,26 8,19,23,24 | 4  | P02631,Q03191,Q63532,Q6IE51                                                                |
| 7910 | 1,3,8,20,2 2,4,5,6,7,1<br>1,23,24,25 8,19,22,26 | 3  | P16636,P20760,P83748                                                                       |
| 7911 | 1,3,8,20,2 2,4,5,6,7,1<br>1,23,24,26 8,19,22,25 | 2  | P97840,Q9QZQ5                                                                              |
| 7912 | 1,3,8,20,2 2,4,5,6,7,1<br>1,23,25,26 8,19,22,24 | 1  | Q63532                                                                                     |
| 7913 | 1,3,8,20,2 2,4,5,6,7,1<br>1,24,25,26 8,19,22,23 | 1  | Q63532                                                                                     |
| 7914 | 1,3,8,20,2 2,4,5,6,7,1<br>2,23,24,25 8,19,21,26 | 5  | P20760,P25031,P82995,P83748,Q08849                                                         |
| 7915 | 1,3,8,20,2 2,4,5,6,7,1<br>2,23,24,26 8,19,21,25 | 11 | O54728,P00731,P02803,P20646,P25031,P47967,P61206;P84079;P84082,P97840,P98089,Q08849,Q8CIZ5 |
| 7916 | 1,3,8,20,2 2,4,5,6,7,1<br>2,23,25,26 8,19,21,24 | 3  | O54728,P25031,Q08849                                                                       |
| 7917 | 1,3,8,20,2 2,4,5,6,7,1<br>2,24,25,26 8,19,21,23 | 5  | P00731,P02803,P25031,Q03191,Q99MH3                                                         |
| 7918 | 1,3,8,20,2 2,4,5,6,7,1<br>3,24,25,26 8,19,21,22 | 5  | P01946,P02091,P25031,Q08849,Q7TPB1                                                         |
| 7919 | 1,3,8,21,2 2,4,5,6,7,1<br>2,23,24,25 8,19,20,26 | 2  | P20760,P83748                                                                              |
| 7920 | 1,3,8,21,2 2,4,5,6,7,1<br>2,23,24,26 8,19,20,25 | 3  | P00731,P61206;P84079;P84082,Q9QZQ5                                                         |
| 7921 | 1,3,8,21,2 2,4,5,6,7,1<br>2,23,25,26 8,19,20,24 | 1  | Q9QZQ5                                                                                     |
| 7922 | 1,3,8,21,2 2,4,5,6,7,1<br>2,24,25,26 8,19,20,23 | 1  | P02631                                                                                     |

|      |                               |                           |    |                                                                                            |
|------|-------------------------------|---------------------------|----|--------------------------------------------------------------------------------------------|
| 7923 | 1,3,8,21,2<br>3,24,25,26      | 2,4,5,6,7,1<br>8,19,20,22 | 5  | P01946,P02091,Q62997,Q7TPB1,Q9QZQ5                                                         |
| 7924 | 1,3,8,22,2<br>3,24,25,26      | 2,4,5,6,7,1<br>8,19,20,21 | 6  | P00731,P02091,P25031,P42854,Q7TPB1,Q9QZQ5                                                  |
| 7925 | 1,3,18,19,<br>20,21,22,2<br>3 | 2,4,5,6,7,8<br>,24,25,26  | 4  | P20760,P20761,P83748,Q9Z0V6                                                                |
| 7926 | 1,3,18,19,<br>20,21,22,2<br>4 | 2,4,5,6,7,8<br>,23,25,26  | 10 | P00714,P12020,P20760,P20762,P36376,P83748,Q6AYS4,Q99041,Q9WTT6,Q9Z0V6                      |
| 7927 | 1,3,18,19,<br>20,21,22,2<br>5 | 2,4,5,6,7,8<br>,23,24,26  | 7  | P20760,P20761,P20762,P36376,P83748,Q02253,Q9Z0V6                                           |
| 7928 | 1,3,18,19,<br>20,21,22,2<br>6 | 2,4,5,6,7,8<br>,23,24,25  | 6  | P06760,P12020,P36374,P50280,Q99041,Q9Z0V6                                                  |
| 7929 | 1,3,18,19,<br>20,21,23,2<br>4 | 2,4,5,6,7,8<br>,22,25,26  | 6  | P12020,P20760,P20762,P20766,P83748,Q9Z0V6                                                  |
| 7930 | 1,3,18,19,<br>20,21,23,2<br>5 | 2,4,5,6,7,8<br>,22,24,26  | 4  | P20760,P20761,P20762,P83748                                                                |
| 7931 | 1,3,18,19,<br>20,21,23,2<br>6 | 2,4,5,6,7,8<br>,22,24,25  | 5  | P12020,P35467,Q6IG02,Q6P6Q2,Q9Z0V6                                                         |
| 7932 | 1,3,18,19,<br>20,21,24,2<br>5 | 2,4,5,6,7,8<br>,22,23,26  | 5  | P20760,P20761,P20762,P36376,P83748                                                         |
| 7933 | 1,3,18,19,<br>20,21,24,2<br>6 | 2,4,5,6,7,8<br>,22,23,25  | 9  | P06760,P06911,P12020,P20762,P50280,Q5GRG2,Q6AYS4,Q99041,Q9Z0V6                             |
| 7934 | 1,3,18,19,<br>20,21,25,2<br>6 | 2,4,5,6,7,8<br>,22,23,24  | 1  | P20762                                                                                     |
| 7935 | 1,3,18,19,<br>20,22,23,2<br>4 | 2,4,5,6,7,8<br>,21,25,26  | 11 | P20646,P20760,P20761,P20762,P61206;P84079;P84082,P83748,Q07936,Q6AYS4,Q9QZK9,Q9WTT6,Q9Z0V6 |
| 7936 | 1,3,18,19,<br>20,22,23,2<br>5 | 2,4,5,6,7,8<br>,21,24,26  | 6  | P20760,P20761,P20762,P83748,Q08849,Q9Z0V6                                                  |
| 7937 | 1,3,18,19,<br>20,22,23,2<br>6 | 2,4,5,6,7,8<br>,21,24,25  | 9  | O54728,P06760,P20646,P35467,Q08849,Q6AYS4,Q6IG02,Q9WTT6,Q9Z0V6                             |
| 7938 | 1,3,18,19,<br>20,22,24,2<br>5 | 2,4,5,6,7,8<br>,21,23,26  | 5  | P20760,P20761,P20762,P83748,Q9Z0V6                                                         |

|      |                               |                          |    |                                                                                                   |
|------|-------------------------------|--------------------------|----|---------------------------------------------------------------------------------------------------|
| 7939 | 1,3,18,19,<br>20,22,24,2<br>6 | 2,4,5,6,7,8<br>,21,23,25 | 14 | O54728,P02803,P06760,P07150,P12020,P14669,P20646,P20762,P50280,Q6AYS4,Q6P6R2,Q99041,Q9WTT6,Q9Z0V6 |
| 7940 | 1,3,18,19,<br>20,22,25,2<br>6 | 2,4,5,6,7,8<br>,21,23,24 | 2  | P20762,Q9Z0V6                                                                                     |
| 7941 | 1,3,18,19,<br>20,23,24,2<br>5 | 2,4,5,6,7,8<br>,21,22,26 | 5  | P20760,P20761,P20762,P83748,Q80WL1                                                                |
| 7942 | 1,3,18,19,<br>20,23,24,2<br>6 | 2,4,5,6,7,8<br>,21,22,25 | 11 | P02091,P06760,P09605,P25809,P12020,P20646,P35467,Q6AYS4,Q6IG02,Q80WL1,Q9WTT6,Q9Z0V6               |
| 7943 | 1,3,18,19,<br>20,23,25,2<br>6 | 2,4,5,6,7,8<br>,21,22,24 | 5  | P02091,P35467,Q08849,Q6IG02,Q6P6Q2                                                                |
| 7944 | 1,3,18,19,<br>20,24,25,2<br>6 | 2,4,5,6,7,8<br>,21,22,23 | 3  | P20762,Q80WL1,Q9Z0V6                                                                              |
| 7945 | 1,3,18,19,<br>21,22,23,2<br>4 | 2,4,5,6,7,8<br>,20,25,26 | 5  | P20760,P20762,P61206,P84079,P84082,P83748,Q9Z0V6                                                  |
| 7946 | 1,3,18,19,<br>21,22,23,2<br>5 | 2,4,5,6,7,8<br>,20,24,26 | 4  | P20760,P20761,P20762,P83748                                                                       |
| 7947 | 1,3,18,19,<br>21,22,23,2<br>6 | 2,4,5,6,7,8<br>,20,24,25 | 1  | Q9QZQ5                                                                                            |
| 7948 | 1,3,18,19,<br>21,22,24,2<br>5 | 2,4,5,6,7,8<br>,20,23,26 | 5  | P20760,P20761,P20762,P36376,P83748                                                                |
| 7949 | 1,3,18,19,<br>21,22,24,2<br>6 | 2,4,5,6,7,8<br>,20,23,25 | 5  | P12020,P20762,Q63617,Q99041,Q9Z0V6                                                                |
| 7950 | 1,3,18,19,<br>21,22,25,2<br>6 | 2,4,5,6,7,8<br>,20,23,24 | 2  | P20762,Q63617                                                                                     |
| 7951 | 1,3,18,19,<br>21,23,24,2<br>5 | 2,4,5,6,7,8<br>,20,22,26 | 5  | P05539,P20760,P20761,P20762,P83748                                                                |
| 7952 | 1,3,18,19,<br>21,23,24,2<br>6 | 2,4,5,6,7,8<br>,20,22,25 | 4  | P12020,Q07523,Q6P6Q2,Q9QZQ5                                                                       |
| 7953 | 1,3,18,19,<br>21,23,25,2<br>6 | 2,4,5,6,7,8<br>,20,22,24 | 3  | P20762,Q6P6Q2,Q9QZQ5                                                                              |

|      |                               |                          |    |                                                                       |
|------|-------------------------------|--------------------------|----|-----------------------------------------------------------------------|
| 7954 | 1,3,18,19,<br>21,24,25,2<br>6 | 2,4,5,6,7,8<br>,20,22,23 | 3  | P20762,Q62997,Q63617                                                  |
| 7955 | 1,3,18,19,<br>22,23,24,2<br>5 | 2,4,5,6,7,8<br>,20,21,26 | 8  | P20646,P20760,P20761,P20762,P62804,P82471,P83748,Q00715               |
| 7956 | 1,3,18,19,<br>22,23,24,2<br>6 | 2,4,5,6,7,8<br>,20,21,25 | 10 | O54728,P00731,P02091,P06760,P20646,P20762,P82471,Q6AYS4,Q9WTT6,Q9Z0V6 |
| 7957 | 1,3,18,19,<br>22,23,25,2<br>6 | 2,4,5,6,7,8<br>,20,21,24 | 2  | P02091,P20762                                                         |
| 7958 | 1,3,18,19,<br>22,24,25,2<br>6 | 2,4,5,6,7,8<br>,20,21,23 | 3  | P20646,P20762,P62804                                                  |
| 7959 | 1,3,18,19,<br>23,24,25,2<br>6 | 2,4,5,6,7,8<br>,20,21,22 | 6  | P01946,P02091,P20762,Q7TPB1,Q80WL1,Q9QZQ5                             |
| 7960 | 1,3,18,20,<br>21,22,23,2<br>4 | 2,4,5,6,7,8<br>,19,25,26 | 3  | P20760,P83748,Q9Z0V6                                                  |
| 7961 | 1,3,18,20,<br>21,22,23,2<br>5 | 2,4,5,6,7,8<br>,19,24,26 | 4  | P20760,P20761,P20762,P83748                                           |
| 7962 | 1,3,18,20,<br>21,22,23,2<br>6 | 2,4,5,6,7,8<br>,19,24,25 | 4  | P02631,Q6IG02,Q6P6Q2,Q9QZQ5                                           |
| 7963 | 1,3,18,20,<br>21,22,24,2<br>5 | 2,4,5,6,7,8<br>,19,23,26 | 7  | P02631,P20760,P20761,P20762,P36376,P83748,Q99041                      |
| 7964 | 1,3,18,20,<br>21,22,24,2<br>6 | 2,4,5,6,7,8<br>,19,23,25 | 6  | P02631,P02803,P12020,P50280,Q99041,Q9Z0V6                             |
| 7965 | 1,3,18,20,<br>21,22,25,2<br>6 | 2,4,5,6,7,8<br>,19,23,24 | 4  | P02631,P20762,Q63532,Q99041                                           |
| 7966 | 1,3,18,20,<br>21,23,24,2<br>5 | 2,4,5,6,7,8<br>,19,22,26 | 4  | P20760,P20761,P20762,P83748                                           |
| 7967 | 1,3,18,20,<br>21,23,24,2<br>6 | 2,4,5,6,7,8<br>,19,22,25 | 6  | A2RUV9,P06911,P12020,Q6IG02,Q6P6Q2,Q9QZQ5                             |
| 7968 | 1,3,18,20,<br>21,23,25,2<br>6 | 2,4,5,6,7,8<br>,19,22,24 | 6  | P02631,Q63532,Q6IFU8,Q6IG02,Q6P6Q2,Q9QZQ5                             |

|      |                               |                          |    |                                                                                                   |
|------|-------------------------------|--------------------------|----|---------------------------------------------------------------------------------------------------|
| 7969 | 1,3,18,20,<br>21,24,25,2<br>6 | 2,4,5,6,7,8<br>,19,22,23 | 4  | P02631,P20762,P50280,Q99041                                                                       |
| 7970 | 1,3,18,20,<br>22,23,24,2<br>5 | 2,4,5,6,7,8<br>,19,21,26 | 4  | P20760,P20761,P20762,P83748                                                                       |
| 7971 | 1,3,18,20,<br>22,23,24,2<br>6 | 2,4,5,6,7,8<br>,19,21,25 | 13 | A2RUV9,P00731,P02803,P06760,P20646,P47967,P97840,Q6AYS4,Q6IG02,Q8CIZ5,Q9QZQ5,Q9WTT6,Q9Z0V6        |
| 7972 | 1,3,18,20,<br>22,23,25,2<br>6 | 2,4,5,6,7,8<br>,19,21,24 | 5  | P02631,Q08849,Q6IG02,Q6P6Q2,Q9QZQ5                                                                |
| 7973 | 1,3,18,20,<br>22,24,25,2<br>6 | 2,4,5,6,7,8<br>,19,21,23 | 5  | P00731,P02631,P02803,P20762,Q99041                                                                |
| 7974 | 1,3,18,20,<br>23,24,25,2<br>6 | 2,4,5,6,7,8<br>,19,21,22 | 8  | A2RUV9,P01946,P02091,Q6IG02,Q6P6Q2,Q7TPB1,Q80WL1,Q9QZQ5                                           |
| 7975 | 1,3,18,21,<br>22,23,24,2<br>5 | 2,4,5,6,7,8<br>,19,20,26 | 4  | P20760,P20762,P62804,P83748                                                                       |
| 7976 | 1,3,18,21,<br>22,23,24,2<br>6 | 2,4,5,6,7,8<br>,19,20,25 | 3  | P00731,Q6P6Q2,Q9QZQ5                                                                              |
| 7977 | 1,3,18,21,<br>22,23,25,2<br>6 | 2,4,5,6,7,8<br>,19,20,24 | 4  | P02631,P20762,Q6P6Q2,Q9QZQ5                                                                       |
| 7978 | 1,3,18,21,<br>22,24,25,2<br>6 | 2,4,5,6,7,8<br>,19,20,23 | 3  | P02631,P20762,Q99041                                                                              |
| 7979 | 1,3,18,21,<br>23,24,25,2<br>6 | 2,4,5,6,7,8<br>,19,20,22 | 7  | P01946,P02091,P20762,Q62997,Q6P6Q2,Q7TPB1,Q9QZQ5                                                  |
| 7980 | 1,3,18,22,<br>23,24,25,2<br>6 | 2,4,5,6,7,8<br>,19,20,21 | 8  | P00731,P02091,P20762,P42854,P62804,P82471,Q7TPB1,Q9QZQ5                                           |
| 7981 | 1,3,19,20,<br>21,22,23,2<br>4 | 2,4,5,6,7,8<br>,18,25,26 | 12 | P00714,P00774,P20760,P20762,P55091,P61206;P84079;P84082,P82995,P83748,P98089,Q6AYQ8,Q6AYS4,Q9Z0V6 |
| 7982 | 1,3,19,20,<br>21,22,23,2<br>5 | 2,4,5,6,7,8<br>,18,24,26 | 6  | P16636,P20760,P20761,P20762,P55091,P83748                                                         |
| 7983 | 1,3,19,20,<br>21,22,23,2<br>6 | 2,4,5,6,7,8<br>,18,24,25 | 4  | O54728,P61206;P84079;P84082,P98089,Q9QZQ5                                                         |

|      |                               |                          |    |                                                                                                                               |
|------|-------------------------------|--------------------------|----|-------------------------------------------------------------------------------------------------------------------------------|
| 7984 | 1,3,19,20,<br>21,22,24,2<br>5 | 2,4,5,6,7,8<br>,18,23,26 | 9  | P20760,P20761,P20762,P28648,P36376,P83748,Q01205,Q05175,Q63942                                                                |
| 7985 | 1,3,19,20,<br>21,22,24,2<br>6 | 2,4,5,6,7,8<br>,18,23,25 | 16 | O54728,O70377,P00714,P02631,P02803,P07171,P12020,P20762,P61206;P84079;P84082,P98089,Q01205,Q63598,Q6AYS4,Q99041,Q99MH3,Q9Z0V6 |
| 7986 | 1,3,19,20,<br>21,22,25,2<br>6 | 2,4,5,6,7,8<br>,18,23,24 | 2  | P02631,P20762                                                                                                                 |
| 7987 | 1,3,19,20,<br>21,23,24,2<br>5 | 2,4,5,6,7,8<br>,18,22,26 | 4  | P20760,P20761,P20762,P83748                                                                                                   |
| 7988 | 1,3,19,20,<br>21,23,24,2<br>6 | 2,4,5,6,7,8<br>,18,22,25 | 4  | P02091,P61206;P84079;P84082,Q6AYS4,Q9QZQ5                                                                                     |
| 7989 | 1,3,19,20,<br>21,23,25,2<br>6 | 2,4,5,6,7,8<br>,18,22,24 | 2  | P02091,Q9QZQ5                                                                                                                 |
| 7990 | 1,3,19,20,<br>21,24,25,2<br>6 | 2,4,5,6,7,8<br>,18,22,23 | 2  | P02631,P20762                                                                                                                 |
| 7991 | 1,3,19,20,<br>22,23,24,2<br>5 | 2,4,5,6,7,8<br>,18,21,26 | 13 | P00774,P0C0A9,P20646,P20760,P20761,P20762,P25031,P55091,P61206;P84079;P84082,P82995,P83748,Q6AYS4,Q80WL1                      |
| 7992 | 1,3,19,20,<br>22,23,24,2<br>6 | 2,4,5,6,7,8<br>,18,21,25 | 13 | O54728,P00731,P02091,P02803,P20646,P25031,P31430,P61206;P84079;P84082,P98089,Q6AYS4,Q9QZQ5,Q9WTT6,Q9Z0V6                      |
| 7993 | 1,3,19,20,<br>22,23,25,2<br>6 | 2,4,5,6,7,8<br>,18,21,24 | 6  | O54728,P02091,P20646,P20762,P25031,Q08849                                                                                     |
| 7994 | 1,3,19,20,<br>22,24,25,2<br>6 | 2,4,5,6,7,8<br>,18,21,23 | 10 | O54728,P00731,P02631,P02803,P20646,P20762,P25031,Q64057,Q6AYS4,Q99MH3                                                         |
| 7995 | 1,3,19,20,<br>23,24,25,2<br>6 | 2,4,5,6,7,8<br>,18,21,22 | 8  | P01946,P02091,P20762,P25031,Q6AYS4,Q7TPB1,Q80WL1,Q9QZQ5                                                                       |
| 7996 | 1,3,19,21,<br>22,23,24,2<br>5 | 2,4,5,6,7,8<br>,18,20,26 | 6  | P20760,P20762,P61206;P84079;P84082,P62804,P82471,P83748                                                                       |
| 7997 | 1,3,19,21,<br>22,23,24,2<br>6 | 2,4,5,6,7,8<br>,18,20,25 | 6  | O54728,P00731,P20762,P61206;P84079;P84082,P82471,Q9QZQ5                                                                       |
| 7998 | 1,3,19,21,<br>22,23,25,2<br>6 | 2,4,5,6,7,8<br>,18,20,24 | 2  | P20762,Q9QZQ5                                                                                                                 |



|      |                               |                                  |    |                                                                                                                                      |
|------|-------------------------------|----------------------------------|----|--------------------------------------------------------------------------------------------------------------------------------------|
| 7999 | 1,3,19,21,<br>22,24,25,2<br>6 | 2,4,5,6,7,8<br>,18,20,23         | 3  | P02631,P07171,P20762                                                                                                                 |
| 8000 | 1,3,19,21,<br>23,24,25,2<br>6 | 2,4,5,6,7,8<br>,18,20,22         | 5  | P01946,P02091,P20762,Q7TPB1,Q9QZQ5                                                                                                   |
| 8001 | 1,3,19,22,<br>23,24,25,2<br>6 | 2,4,5,6,7,8<br>,18,20,21         | 13 | O54728,P00731,P01946,P02091,P20646,P20762,P25031,P42854,P61206;P84079;P84082,P62804,P82471,Q7TPB1,Q9QZQ5                             |
| 8002 | 1,3,20,21,<br>22,23,24,2<br>5 | 2,4,5,6,7,8<br>,18,19,26         | 9  | P02631,P02803,P16636,P20760,P20762,P51886,P83748,Q63942,Q9QZQ5                                                                       |
| 8003 | 1,3,20,21,<br>22,23,24,2<br>6 | 2,4,5,6,7,8<br>,18,19,25         | 7  | P00714,P00731,P02631,P02803,P61206;P84079;P84082,P98089,Q9QZQ5                                                                       |
| 8004 | 1,3,20,21,<br>22,23,25,2<br>6 | 2,4,5,6,7,8<br>,18,19,24         | 3  | P02631,Q63532,Q9QZQ5                                                                                                                 |
| 8005 | 1,3,20,21,<br>22,24,25,2<br>6 | 2,4,5,6,7,8<br>,18,19,23         | 13 | P00731,P02631,P02803,P07171,P20762,P28648,Q01205,Q03191,Q5BJY9,Q5XFX0,Q63532,Q99041,Q99MH3                                           |
| 8006 | 1,3,20,21,<br>23,24,25,2<br>6 | 2,4,5,6,7,8<br>,18,19,22         | 5  | P01946,P02091,P02631,Q7TPB1,Q9QZQ5                                                                                                   |
| 8007 | 1,3,20,22,<br>23,24,25,2<br>6 | 2,4,5,6,7,8<br>,18,19,21         | 9  | P00731,P02091,P02631,P02803,P0C0A9,P20762,P25031,Q7TPB1,Q9QZQ5                                                                       |
| 8008 | 1,3,21,22,<br>23,24,25,2<br>6 | 2,4,5,6,7,8<br>,18,19,20         | 8  | P00731,P02091,P02631,P02803,P20762,P82471,Q7TPB1,Q9QZQ5                                                                              |
| 8009 | 1,4,5,6,7,8<br>,18,19         | 2,3,20,21,<br>22,23,24,2<br>5,26 | 8  | O55006,P00731,P02803,P0C0A9,P18418,P61206;P84079;P84082,Q5FVI6,Q63617                                                                |
| 8010 | 1,4,5,6,7,8<br>,18,20         | 2,3,19,21,<br>22,23,24,2<br>5,26 | 8  | O55006,P00731,P02803,P10715,P18418,P61206;P84079;P84082,Q63617,Q9ESW0                                                                |
| 8011 | 1,4,5,6,7,8<br>,18,21         | 2,3,19,20,<br>22,23,24,2<br>5,26 | 17 | O35547,P00731,P02803,P08723,P0C0A9,P13432,P18418,P20646,P22282,P22283,P25031,P61206;P84079;P84082,Q63617,Q8CJ52,Q9ESW0,Q9JI85,Q9QZA6 |
| 8012 | 1,4,5,6,7,8<br>,18,22         | 2,3,19,20,<br>21,23,24,2<br>5,26 | 5  | P18418,P22282,P61206;P84079;P84082,Q63617,Q8VD89                                                                                     |
| 8013 | 1,4,5,6,7,8<br>,18,23         | 2,3,19,20,<br>21,22,24,2<br>5,26 | 8  | P02803,P07171,P18418,P28648,P61206;P84079;P84082,Q63617,Q8VD89,Q99041                                                                |

|      |                       |                                  |    |                                                                                                          |
|------|-----------------------|----------------------------------|----|----------------------------------------------------------------------------------------------------------|
| 8014 | 1,4,5,6,7,8<br>,18,24 | 2,3,19,20,<br>21,22,23,2<br>5,26 | 5  | O55006,P18418,P61206;P84079;P84082,Q63617,Q8VD89                                                         |
| 8015 | 1,4,5,6,7,8<br>,18,25 | 2,3,19,20,<br>21,22,23,2<br>4,26 | 12 | O70377,P00714,P00731,P02803,P10715,P12020,P18418,P19629,P31044,P61206;P84079;P84082,Q5GRG2,Q63617        |
| 8016 | 1,4,5,6,7,8<br>,18,26 | 2,3,19,20,<br>21,22,23,2<br>4,25 | 11 | P02803,P04041,P18418,P20760,P61206;P84079;P84082,P83748,Q63617,Q63942,Q6AY33,Q8VD89,Q9ESW0               |
| 8017 | 1,4,5,6,7,8<br>,19,20 | 2,3,18,21,<br>22,23,24,2<br>5,26 | 7  | O55006,P00731,P00774,P18418,P35281,Q5FVI6,Q63617                                                         |
| 8018 | 1,4,5,6,7,8<br>,19,21 | 2,3,18,20,<br>22,23,24,2<br>5,26 | 10 | P00731,P02803,P08723,P0C0A9,P18418,P19218,P22282,P35281,Q63617,Q8CJ52                                    |
| 8019 | 1,4,5,6,7,8<br>,19,22 | 2,3,18,20,<br>21,23,24,2<br>5,26 | 5  | P00774,P18418,P22282,Q63617,Q9JJS8                                                                       |
| 8020 | 1,4,5,6,7,8<br>,19,23 | 2,3,18,20,<br>21,22,24,2<br>5,26 | 8  | P02803,P15399,P18418,P22282,P97580,Q30KJ2,Q63617,Q99041                                                  |
| 8021 | 1,4,5,6,7,8<br>,19,24 | 2,3,18,20,<br>21,22,23,2<br>5,26 | 3  | O55006,P18418,Q63617                                                                                     |
| 8022 | 1,4,5,6,7,8<br>,19,25 | 2,3,18,20,<br>21,22,23,2<br>4,26 | 13 | P00731,P02803,P06911,P10715,P12020,P18418,P19629,P31044,P61206;P84079;P84082,Q5FVI6,Q5GRG2,Q63617,Q9JJS8 |
| 8023 | 1,4,5,6,7,8<br>,19,26 | 2,3,18,20,<br>21,22,23,2<br>4,25 | 8  | P02803,P05539,P18418,P20760,P83748,Q5FVI6,Q63617,Q9JJS8                                                  |
| 8024 | 1,4,5,6,7,8<br>,20,21 | 2,3,18,19,<br>22,23,24,2<br>5,26 | 11 | F1LM93,P00731,P0C0A9,P13432,P18418,P20646,P61206;P84079;P84082,Q63617,Q7TPB1,Q8CJ52,Q9JI85               |
| 8025 | 1,4,5,6,7,8<br>,20,22 | 2,3,18,19,<br>21,23,24,2<br>5,26 | 4  | P00774,P18418,Q07523,Q63617                                                                              |
| 8026 | 1,4,5,6,7,8<br>,20,23 | 2,3,18,19,<br>21,22,24,2<br>5,26 | 3  | P18418,Q63617,Q99041                                                                                     |
| 8027 | 1,4,5,6,7,8<br>,20,24 | 2,3,18,19,<br>21,22,23,2<br>5,26 | 3  | O55006,P18418,Q63617                                                                                     |
| 8028 | 1,4,5,6,7,8<br>,20,25 | 2,3,18,19,<br>21,22,23,2<br>4,26 | 8  | P10715,P12020,P18418,P19629,P61206;P84079;P84082,P68370,Q5GRG2,Q63617                                    |

|      |                       |                                  |    |                                                                                                                               |
|------|-----------------------|----------------------------------|----|-------------------------------------------------------------------------------------------------------------------------------|
| 8029 | 1,4,5,6,7,8<br>,20,26 | 2,3,18,19,<br>21,22,23,2<br>4,25 | 8  | P05539,P18418,P20760,P20761,P61206;P84079;P84082,P83748,Q63617,Q6AY33                                                         |
| 8030 | 1,4,5,6,7,8<br>,21,22 | 2,3,18,19,<br>20,23,24,2<br>5,26 | 11 | P06761,P07647,P08723,P0C0A9,P13432,P18418,P19218,P22282,Q63617,Q7TPB1,Q8CJ52                                                  |
| 8031 | 1,4,5,6,7,8<br>,21,23 | 2,3,18,19,<br>20,22,24,2<br>5,26 | 9  | F1LM93,P02803,P0C0A9,P18418,P20646,P22282,Q63617,Q8CJ52,Q99041                                                                |
| 8032 | 1,4,5,6,7,8<br>,21,24 | 2,3,18,19,<br>20,22,23,2<br>5,26 | 5  | F1LM93,P13432,P18418,Q63617,Q8CJ52                                                                                            |
| 8033 | 1,4,5,6,7,8<br>,21,25 | 2,3,18,19,<br>20,22,23,2<br>4,26 | 16 | F1LM93,P00731,P02803,P06760,P10715,P12020,P18418,P19629,P20646,P61206;P84079;P84082,P68370,Q5GRG2,Q63617,Q9QZK9,Q9WTT6,Q9Z0V6 |
| 8034 | 1,4,5,6,7,8<br>,21,26 | 2,3,18,19,<br>20,22,23,2<br>4,25 | 12 | F1LM93,P0C0A9,P18418,P20646,P20760,P20761,P22282,P61206;P84079;P84082,P83748,Q63617,Q6AY33,Q8CJ52                             |
| 8035 | 1,4,5,6,7,8<br>,22,23 | 2,3,18,19,<br>20,21,24,2<br>5,26 | 4  | P18418,P22282,Q63617,Q99041                                                                                                   |
| 8036 | 1,4,5,6,7,8<br>,22,24 | 2,3,18,19,<br>20,21,23,2<br>5,26 | 2  | P18418,Q63617                                                                                                                 |
| 8037 | 1,4,5,6,7,8<br>,22,25 | 2,3,18,19,<br>20,21,23,2<br>4,26 | 8  | P06911,P10715,P12020,P18418,P19629,P61206;P84079;P84082,Q5GRG2,Q63617                                                         |
| 8038 | 1,4,5,6,7,8<br>,22,26 | 2,3,18,19,<br>20,21,23,2<br>4,25 | 7  | P05539,P18418,P20760,P20761,P22282,P83748,Q63617                                                                              |
| 8039 | 1,4,5,6,7,8<br>,23,24 | 2,3,18,19,<br>20,21,22,2<br>5,26 | 3  | P18418,Q63617,Q99041                                                                                                          |
| 8040 | 1,4,5,6,7,8<br>,23,25 | 2,3,18,19,<br>20,21,22,2<br>4,26 | 15 | O70377,P02803,P06760,P06911,P10715,P12020,P18418,P19629,P31044,P61206;P84079;P84082,Q5GRG2,Q63617,Q99041,Q9WTT6,Q9Z0V6        |
| 8041 | 1,4,5,6,7,8<br>,23,26 | 2,3,18,19,<br>20,21,22,2<br>4,25 | 9  | P05539,P18418,P20760,P20761,P22282,P83748,Q63617,Q8VD89,Q99041                                                                |
| 8042 | 1,4,5,6,7,8<br>,24,25 | 2,3,18,19,<br>20,21,22,2<br>3,26 | 8  | P06911,P10715,P12020,P18418,P19629,P61206;P84079;P84082,Q5GRG2,Q63617                                                         |
| 8043 | 1,4,5,6,7,8<br>,24,26 | 2,3,18,19,<br>20,21,22,2<br>3,25 | 7  | P18418,P20760,P20761,P83748,Q63617,Q6AY33,Q8VD89                                                                              |

|      |                        |                                  |    |                                                                                                                        |
|------|------------------------|----------------------------------|----|------------------------------------------------------------------------------------------------------------------------|
| 8044 | 1,4,5,6,7,8<br>,25,26  | 2,3,18,19,<br>20,21,22,2<br>3,24 | 15 | P05539,P10715,P12020,P18418,P19629,P20760,P61206;P84079;P84082,P83748,Q5FVI6,Q5GRG2,Q63617,Q6AY33,Q9QZK9,Q9WTT6,Q9Z0V6 |
| 8045 | 1,4,5,6,7,1<br>8,19,20 | 2,3,8,21,2<br>2,23,24,25<br>,26  | 4  | P00731,P18418,P61206;P84079;P84082,Q5FVI6                                                                              |
| 8046 | 1,4,5,6,7,1<br>8,19,21 | 2,3,8,20,2<br>2,23,24,25<br>,26  | 8  | P00731,P02803,P0C0A9,P18418,P19218,P25031,P61206;P84079;P84082,Q5FVI6                                                  |
| 8047 | 1,4,5,6,7,1<br>8,19,22 | 2,3,8,20,2<br>1,23,24,25<br>,26  | 1  | P18418                                                                                                                 |
| 8048 | 1,4,5,6,7,1<br>8,19,23 | 2,3,8,20,2<br>1,22,24,25<br>,26  | 8  | P02803,P15399,P18418,P97580,Q03191,Q30KJ2,Q5BJY9,Q5FVI6                                                                |
| 8049 | 1,4,5,6,7,1<br>8,19,24 | 2,3,8,20,2<br>1,22,23,25<br>,26  | 1  | P18418                                                                                                                 |
| 8050 | 1,4,5,6,7,1<br>8,19,25 | 2,3,8,20,2<br>1,22,23,24<br>,26  | 6  | P00731,P02803,P12020,P18418,P61206;P84079;P84082,Q5FVI6                                                                |
| 8051 | 1,4,5,6,7,1<br>8,19,26 | 2,3,8,20,2<br>1,22,23,24<br>,25  | 7  | P05539,P16636,P18418,P20760,P61206;P84079;P84082,P83748,Q5FVI6                                                         |
| 8052 | 1,4,5,6,7,1<br>8,20,21 | 2,3,8,19,2<br>2,23,24,25<br>,26  | 10 | P00731,P01835,P13432,P18418,P20646,P20766,P25031,P61206;P84079;P84082,Q9ESW0,Q9JI85                                    |
| 8053 | 1,4,5,6,7,1<br>8,20,22 | 2,3,8,19,2<br>1,23,24,25<br>,26  | 2  | P18418,P61206;P84079;P84082                                                                                            |
| 8054 | 1,4,5,6,7,1<br>8,20,23 | 2,3,8,19,2<br>1,22,24,25<br>,26  | 2  | P18418,P61206;P84079;P84082                                                                                            |
| 8055 | 1,4,5,6,7,1<br>8,20,24 | 2,3,8,19,2<br>1,22,23,25<br>,26  | 3  | P18418,P20766,P61206;P84079;P84082                                                                                     |
| 8056 | 1,4,5,6,7,1<br>8,20,25 | 2,3,8,19,2<br>1,22,23,24<br>,26  | 2  | P18418,P61206;P84079;P84082                                                                                            |
| 8057 | 1,4,5,6,7,1<br>8,20,26 | 2,3,8,19,2<br>1,22,23,24<br>,25  | 6  | P05539,P18418,P20760,P61206;P84079;P84082,P83748,Q5FVI6                                                                |
| 8058 | 1,4,5,6,7,1<br>8,21,22 | 2,3,8,19,2<br>0,23,24,25<br>,26  | 5  | P13432,P18418,P19218,P25031,P61206;P84079;P84082                                                                       |

|      |                        |                                 |    |                                                                                                   |
|------|------------------------|---------------------------------|----|---------------------------------------------------------------------------------------------------|
| 8059 | 1,4,5,6,7,1<br>8,21,23 | 2,3,8,19,2<br>0,22,24,25<br>,26 | 4  | P02803,P18418,P25031,P61206;P84079;P84082                                                         |
| 8060 | 1,4,5,6,7,1<br>8,21,24 | 2,3,8,19,2<br>0,22,23,25<br>,26 | 6  | P13432,P18418,P20766,P25031,P61206;P84079;P84082,Q08849                                           |
| 8061 | 1,4,5,6,7,1<br>8,21,25 | 2,3,8,19,2<br>0,22,23,24<br>,26 | 7  | P00731,P02803,P18418,P20646,P25031,P31430,P61206;P84079;P84082                                    |
| 8062 | 1,4,5,6,7,1<br>8,21,26 | 2,3,8,19,2<br>0,22,23,24<br>,25 | 7  | P18418,P20760,P25031,P61206;P84079;P84082,P83748,Q5FVI6,Q9ESW0                                    |
| 8063 | 1,4,5,6,7,1<br>8,22,23 | 2,3,8,19,2<br>0,21,24,25<br>,26 | 2  | P18418,Q8VD89                                                                                     |
| 8064 | 1,4,5,6,7,1<br>8,22,24 | 2,3,8,19,2<br>0,21,23,25<br>,26 | 2  | P18418,Q8VD89                                                                                     |
| 8065 | 1,4,5,6,7,1<br>8,22,25 | 2,3,8,19,2<br>0,21,23,24<br>,26 | 5  | P06911,P12020,P18418,P61206;P84079;P84082,Q5GRG2                                                  |
| 8066 | 1,4,5,6,7,1<br>8,22,26 | 2,3,8,19,2<br>0,21,23,24<br>,25 | 6  | P05539,P18418,P20760,P61206;P84079;P84082,P83748,Q8VD89                                           |
| 8067 | 1,4,5,6,7,1<br>8,23,24 | 2,3,8,19,2<br>0,21,22,25<br>,26 | 2  | P18418,Q8VD89                                                                                     |
| 8068 | 1,4,5,6,7,1<br>8,23,25 | 2,3,8,19,2<br>0,21,22,24<br>,26 | 6  | P00714,P02803,P12020,P18418,P61206;P84079;P84082,Q99041                                           |
| 8069 | 1,4,5,6,7,1<br>8,23,26 | 2,3,8,19,2<br>0,21,22,24<br>,25 | 12 | P05539,P20760,P61206;P84079;P84082,P83748,Q5FVI6,Q6IFU7,Q6IFU8,Q6IFW6,Q6IG02,Q6IMF3,Q6P6Q2,Q8VD89 |
| 8070 | 1,4,5,6,7,1<br>8,24,25 | 2,3,8,19,2<br>0,21,22,23<br>,26 | 2  | P18418,P61206;P84079;P84082                                                                       |
| 8071 | 1,4,5,6,7,1<br>8,24,26 | 2,3,8,19,2<br>0,21,22,23<br>,25 | 6  | P16636,P18418,P20760,P61206;P84079;P84082,P83748,Q8VD89                                           |
| 8072 | 1,4,5,6,7,1<br>8,25,26 | 2,3,8,19,2<br>0,21,22,23<br>,24 | 7  | P00714,P05539,P18418,P61206;P84079;P84082,P83748,Q5FVI6,Q6AY33                                    |
| 8073 | 1,4,5,6,7,1<br>9,20,21 | 2,3,8,18,2<br>2,23,24,25<br>,26 | 3  | P00731,P20766,Q5FVI6                                                                              |

|      |                        |                                 |    |                                                                                     |
|------|------------------------|---------------------------------|----|-------------------------------------------------------------------------------------|
| 8074 | 1,4,5,6,7,1<br>9,20,22 | 2,3,8,18,2<br>1,23,24,25<br>,26 | 3  | P00774,P31430,P55091                                                                |
| 8075 | 1,4,5,6,7,1<br>9,20,23 | 2,3,8,18,2<br>1,22,24,25<br>,26 | 7  | P14408,P15399,P55091,P97580,Q30KJ2,Q5FVI6,Q99041                                    |
| 8076 | 1,4,5,6,7,1<br>9,20,24 | 2,3,8,18,2<br>1,22,23,25<br>,26 | 2  | P00774,P18418                                                                       |
| 8077 | 1,4,5,6,7,1<br>9,20,25 | 2,3,8,18,2<br>1,22,23,24<br>,26 | 3  | P12020,P61206,P84079,P84082,Q5FVI6                                                  |
| 8078 | 1,4,5,6,7,1<br>9,20,26 | 2,3,8,18,2<br>1,22,23,24<br>,25 | 4  | P05539,P20760,P83748,Q5FVI6                                                         |
| 8079 | 1,4,5,6,7,1<br>9,21,22 | 2,3,8,18,2<br>0,23,24,25<br>,26 | 4  | P13432,P18418,P19218,P35467                                                         |
| 8080 | 1,4,5,6,7,1<br>9,21,23 | 2,3,8,18,2<br>0,22,24,25<br>,26 | 5  | P15399,P97580,Q30KJ2,Q5FVI6,Q99041                                                  |
| 8081 | 1,4,5,6,7,1<br>9,21,24 | 2,3,8,18,2<br>0,22,23,25<br>,26 | 5  | P13432,P18418,P20766,P35467,Q08849                                                  |
| 8082 | 1,4,5,6,7,1<br>9,21,25 | 2,3,8,18,2<br>0,22,23,24<br>,26 | 10 | P00731,P12020,P18418,P19218,P20646,P47967,P61206,P84079,P84082,P97840,Q5FVI6,Q9QZK9 |
| 8083 | 1,4,5,6,7,1<br>9,21,26 | 2,3,8,18,2<br>0,22,23,24<br>,25 | 5  | P05539,P20760,P61206,P84079,P84082,P83748,Q5FVI6                                    |
| 8084 | 1,4,5,6,7,1<br>9,22,23 | 2,3,8,18,2<br>0,21,24,25<br>,26 | 6  | P15399,P31430,P55091,P97580,Q30KJ2,Q99041                                           |
| 8085 | 1,4,5,6,7,1<br>9,22,24 | 2,3,8,18,2<br>0,21,23,25<br>,26 | 4  | P00774,P18418,P31430,P35467                                                         |
| 8086 | 1,4,5,6,7,1<br>9,22,25 | 2,3,8,18,2<br>0,21,23,24<br>,26 | 5  | P06911,P12020,P17046,P18418,Q5GRG2                                                  |
| 8087 | 1,4,5,6,7,1<br>9,22,26 | 2,3,8,18,2<br>0,21,23,24<br>,25 | 4  | P05539,P20760,P83748,Q5FVI6                                                         |
| 8088 | 1,4,5,6,7,1<br>9,23,24 | 2,3,8,18,2<br>0,21,22,25<br>,26 | 4  | P15399,P97580,Q30KJ2,Q99041                                                         |

|      |                        |                                 |   |                                                                |
|------|------------------------|---------------------------------|---|----------------------------------------------------------------|
| 8089 | 1,4,5,6,7,1<br>9,23,25 | 2,3,8,18,2<br>0,21,22,24<br>,26 | 8 | P06911,P12020,P15399,P97580,Q30KJ2,Q5FVI6,Q5GRG2,Q99041        |
| 8090 | 1,4,5,6,7,1<br>9,23,26 | 2,3,8,18,2<br>0,21,22,24<br>,25 | 7 | P05539,P15399,P20760,P83748,P97580,Q30KJ2,Q5FVI6               |
| 8091 | 1,4,5,6,7,1<br>9,24,25 | 2,3,8,18,2<br>0,21,22,23<br>,26 | 2 | P12020,P18418                                                  |
| 8092 | 1,4,5,6,7,1<br>9,24,26 | 2,3,8,18,2<br>0,21,22,23<br>,25 | 4 | P05539,P20760,P83748,Q5FVI6                                    |
| 8093 | 1,4,5,6,7,1<br>9,25,26 | 2,3,8,18,2<br>0,21,22,23<br>,24 | 7 | P05539,P12020,P20760,P61206;P84079;P84082,P83748,Q5FVI6,Q9QZK9 |
| 8094 | 1,4,5,6,7,2<br>0,21,22 | 2,3,8,18,1<br>9,23,24,25<br>,26 | 4 | P13432,P35467,Q7TPB1,Q99MH3                                    |
| 8095 | 1,4,5,6,7,2<br>0,21,23 | 2,3,8,18,1<br>9,22,24,25<br>,26 | 2 | P01835,P20766                                                  |
| 8096 | 1,4,5,6,7,2<br>0,21,24 | 2,3,8,18,1<br>9,22,23,25<br>,26 | 3 | P13432,P20766,P35467                                           |
| 8097 | 1,4,5,6,7,2<br>0,21,25 | 2,3,8,18,1<br>9,22,23,24<br>,26 | 3 | P20646,P35467,P61206;P84079;P84082                             |
| 8098 | 1,4,5,6,7,2<br>0,21,26 | 2,3,8,18,1<br>9,22,23,24<br>,25 | 7 | P01681,P01835,P05539,P20760,P61206;P84079;P84082,P83748,Q5FVI6 |
| 8099 | 1,4,5,6,7,2<br>0,22,23 | 2,3,8,18,1<br>9,21,24,25<br>,26 | 1 | P55091                                                         |
| 8100 | 1,4,5,6,7,2<br>0,22,24 | 2,3,8,18,1<br>9,21,23,25<br>,26 | 3 | P00774,P35467,Q99MH3                                           |
| 8101 | 1,4,5,6,7,2<br>0,22,25 | 2,3,8,18,1<br>9,21,23,24<br>,26 | 6 | P06911,P12020,P35467,P61206;P84079;P84082,Q07523,Q5GRG2        |
| 8102 | 1,4,5,6,7,2<br>0,22,26 | 2,3,8,18,1<br>9,21,23,24<br>,25 | 4 | P05539,P20760,P83748,Q99MH3                                    |
| 8103 | 1,4,5,6,7,2<br>0,23,24 | 2,3,8,18,1<br>9,21,22,25<br>,26 | 0 |                                                                |

|      |                        |                                 |   |                                                                                     |
|------|------------------------|---------------------------------|---|-------------------------------------------------------------------------------------|
| 8104 | 1,4,5,6,7,2<br>0,23,25 | 2,3,8,18,1<br>9,21,22,24<br>,26 | 5 | P12020,P14408,P61206;P84079;P84082,Q5GRG2,Q99041                                    |
| 8105 | 1,4,5,6,7,2<br>0,23,26 | 2,3,8,18,1<br>9,21,22,24<br>,25 | 6 | P05539,P14408,P20760,Q5FVI6,Q6IFW6,Q6IMF3                                           |
| 8106 | 1,4,5,6,7,2<br>0,24,25 | 2,3,8,18,1<br>9,21,22,23<br>,26 | 2 | P35467,P61206;P84079;P84082                                                         |
| 8107 | 1,4,5,6,7,2<br>0,24,26 | 2,3,8,18,1<br>9,21,22,23<br>,25 | 3 | P05539,P20760,Q99MH3                                                                |
| 8108 | 1,4,5,6,7,2<br>0,25,26 | 2,3,8,18,1<br>9,21,22,23<br>,24 | 5 | P05539,P20760,P61206;P84079;P84082,P83748,Q5FVI6                                    |
| 8109 | 1,4,5,6,7,2<br>1,22,23 | 2,3,8,18,1<br>9,20,24,25<br>,26 | 1 | P13432                                                                              |
| 8110 | 1,4,5,6,7,2<br>1,22,24 | 2,3,8,18,1<br>9,20,23,25<br>,26 | 5 | P13432,P18418,P19218,P35467,Q08849                                                  |
| 8111 | 1,4,5,6,7,2<br>1,22,25 | 2,3,8,18,1<br>9,20,23,24<br>,26 | 9 | P06911,P09605;P25809,P12020,P13432,P19218,P20646,P35467,P61206;P84079;P84082,Q5GRG2 |
| 8112 | 1,4,5,6,7,2<br>1,22,26 | 2,3,8,18,1<br>9,20,23,24<br>,25 | 4 | P05539,P13432,P20760,P83748                                                         |
| 8113 | 1,4,5,6,7,2<br>1,23,24 | 2,3,8,18,1<br>9,20,22,25<br>,26 | 2 | P13432,P20766                                                                       |
| 8114 | 1,4,5,6,7,2<br>1,23,25 | 2,3,8,18,1<br>9,20,22,24<br>,26 | 7 | P06760,P12020,P20646,P61206;P84079;P84082,P83121,Q5GRG2,Q99041                      |
| 8115 | 1,4,5,6,7,2<br>1,23,26 | 2,3,8,18,1<br>9,20,22,24<br>,25 | 7 | F1LM93,P05539,P20760,P83121,P83748,Q5FVI6,Q6IMF3                                    |
| 8116 | 1,4,5,6,7,2<br>1,24,25 | 2,3,8,18,1<br>9,20,22,23<br>,26 | 6 | P13432,P20646,P22006,P35467,P61206;P84079;P84082,Q08849                             |
| 8117 | 1,4,5,6,7,2<br>1,24,26 | 2,3,8,18,1<br>9,20,22,23<br>,25 | 5 | P13432,P20760,P61206;P84079;P84082,P83748,Q08849                                    |
| 8118 | 1,4,5,6,7,2<br>1,25,26 | 2,3,8,18,1<br>9,20,22,23<br>,24 | 9 | P05539,P20646,P20760,P22006,P61206;P84079;P84082,P83121,P83748,Q5FVI6,Q9QZK9        |



|      |                        |                                 |   |                                                                |
|------|------------------------|---------------------------------|---|----------------------------------------------------------------|
| 8119 | 1,4,5,6,7,2<br>2,23,24 | 2,3,8,18,1<br>9,20,21,25<br>,26 | 2 | P62804,Q8K4G9                                                  |
| 8120 | 1,4,5,6,7,2<br>2,23,25 | 2,3,8,18,1<br>9,20,21,24<br>,26 | 4 | P06911,P12020,Q5GRG2,Q99041                                    |
| 8121 | 1,4,5,6,7,2<br>2,23,26 | 2,3,8,18,1<br>9,20,21,24<br>,25 | 3 | P05539,P20760,P83748                                           |
| 8122 | 1,4,5,6,7,2<br>2,24,25 | 2,3,8,18,1<br>9,20,21,23<br>,26 | 6 | P06911,P12020,P18418,P35467,P62804,Q5GRG2                      |
| 8123 | 1,4,5,6,7,2<br>2,24,26 | 2,3,8,18,1<br>9,20,21,23<br>,25 | 5 | P05539,P20760,P83748,Q8VD89,Q99MH3                             |
| 8124 | 1,4,5,6,7,2<br>2,25,26 | 2,3,8,18,1<br>9,20,21,23<br>,24 | 7 | P05539,P06911,P12020,P20760,P61206;P84079;P84082,P83748,Q5GRG2 |
| 8125 | 1,4,5,6,7,2<br>3,24,25 | 2,3,8,18,1<br>9,20,21,22<br>,26 | 5 | P06911,P12020,P62804,Q5GRG2,Q99041                             |
| 8126 | 1,4,5,6,7,2<br>3,24,26 | 2,3,8,18,1<br>9,20,21,22<br>,25 | 3 | P05539,P20760,Q8VD89                                           |
| 8127 | 1,4,5,6,7,2<br>3,25,26 | 2,3,8,18,1<br>9,20,21,22<br>,24 | 6 | P05539,P12020,P20760,P61206;P84079;P84082,P83121,Q5FVI6        |
| 8128 | 1,4,5,6,7,2<br>4,25,26 | 2,3,8,18,1<br>9,20,21,22<br>,23 | 3 | P05539,P20760,P61206;P84079;P84082                             |
| 8129 | 1,4,5,6,8,1<br>8,19,20 | 2,3,7,21,2<br>2,23,24,25<br>,26 | 4 | P00731,P02803,P22006,P35281                                    |
| 8130 | 1,4,5,6,8,1<br>8,19,21 | 2,3,7,20,2<br>2,23,24,25<br>,26 | 8 | A2RUV9,O35547,P00731,P02803,P08723,P0C0A9,P10758,P35281        |
| 8131 | 1,4,5,6,8,1<br>8,19,22 | 2,3,7,20,2<br>1,23,24,25<br>,26 | 1 | P22006                                                         |
| 8132 | 1,4,5,6,8,1<br>8,19,23 | 2,3,7,20,2<br>1,22,24,25<br>,26 | 5 | P02803,P15399,P35281,Q03191,Q5BJY9                             |
| 8133 | 1,4,5,6,8,1<br>8,19,24 | 2,3,7,20,2<br>1,22,23,25<br>,26 | 0 |                                                                |

|      |                        |                                 |   |                                                         |
|------|------------------------|---------------------------------|---|---------------------------------------------------------|
| 8134 | 1,4,5,6,8,1<br>8,19,25 | 2,3,7,20,2<br>1,22,23,24<br>,26 | 2 | P00731,P02803                                           |
| 8135 | 1,4,5,6,8,1<br>8,19,26 | 2,3,7,20,2<br>1,22,23,24<br>,25 | 3 | P02803,P0C0A9,Q63942                                    |
| 8136 | 1,4,5,6,8,1<br>8,20,21 | 2,3,7,19,2<br>2,23,24,25<br>,26 | 5 | O35547,P00731,P01835,P0C0A9,P13432                      |
| 8137 | 1,4,5,6,8,1<br>8,20,22 | 2,3,7,19,2<br>1,23,24,25<br>,26 | 1 | P22006                                                  |
| 8138 | 1,4,5,6,8,1<br>8,20,23 | 2,3,7,19,2<br>1,22,24,25<br>,26 | 2 | P22006,Q6IG02                                           |
| 8139 | 1,4,5,6,8,1<br>8,20,24 | 2,3,7,19,2<br>1,22,23,25<br>,26 | 0 |                                                         |
| 8140 | 1,4,5,6,8,1<br>8,20,25 | 2,3,7,19,2<br>1,22,23,24<br>,26 | 0 |                                                         |
| 8141 | 1,4,5,6,8,1<br>8,20,26 | 2,3,7,19,2<br>1,22,23,24<br>,25 | 4 | P01681,Q63942,Q6AY33,Q6IG02                             |
| 8142 | 1,4,5,6,8,1<br>8,21,22 | 2,3,7,19,2<br>0,23,24,25<br>,26 | 5 | O35547,P02782,P08723,P0C0A9,P13432                      |
| 8143 | 1,4,5,6,8,1<br>8,21,23 | 2,3,7,19,2<br>0,22,24,25<br>,26 | 3 | O35547,P02803,P0C0A9                                    |
| 8144 | 1,4,5,6,8,1<br>8,21,24 | 2,3,7,19,2<br>0,22,23,25<br>,26 | 3 | O35547,P0C0A9,P13432                                    |
| 8145 | 1,4,5,6,8,1<br>8,21,25 | 2,3,7,19,2<br>0,22,23,24<br>,26 | 8 | O35547,P00731,P02803,P06760,P0C0A9,P20646,P31430,Q9WTT6 |
| 8146 | 1,4,5,6,8,1<br>8,21,26 | 2,3,7,19,2<br>0,22,23,24<br>,25 | 3 | P0C0A9,Q63942,Q6AY33                                    |
| 8147 | 1,4,5,6,8,1<br>8,22,23 | 2,3,7,19,2<br>0,21,24,25<br>,26 | 0 |                                                         |
| 8148 | 1,4,5,6,8,1<br>8,22,24 | 2,3,7,19,2<br>0,21,23,25<br>,26 | 0 |                                                         |

|      |                        |                                 |    |                                                                              |
|------|------------------------|---------------------------------|----|------------------------------------------------------------------------------|
| 8149 | 1,4,5,6,8,1<br>8,22,25 | 2,3,7,19,2<br>0,21,23,24<br>,26 | 1  | P06911                                                                       |
| 8150 | 1,4,5,6,8,1<br>8,22,26 | 2,3,7,19,2<br>0,21,23,24<br>,25 | 2  | Q63942,Q6AY33                                                                |
| 8151 | 1,4,5,6,8,1<br>8,23,24 | 2,3,7,19,2<br>0,21,22,25<br>,26 | 1  | Q6IFU7                                                                       |
| 8152 | 1,4,5,6,8,1<br>8,23,25 | 2,3,7,19,2<br>0,21,22,24<br>,26 | 3  | P00714,P02803,P06760                                                         |
| 8153 | 1,4,5,6,8,1<br>8,23,26 | 2,3,7,19,2<br>0,21,22,24<br>,25 | 10 | P02793;Q7TP54,P35467,Q5I0D1,Q63942,Q6IFU7,Q6IFU8,Q6IFW6,Q6IG02,Q6IMF3,Q6P6Q2 |
| 8154 | 1,4,5,6,8,1<br>8,24,25 | 2,3,7,19,2<br>0,21,22,23<br>,26 | 0  |                                                                              |
| 8155 | 1,4,5,6,8,1<br>8,24,26 | 2,3,7,19,2<br>0,21,22,23<br>,25 | 3  | P20760,Q63942,Q6AY33                                                         |
| 8156 | 1,4,5,6,8,1<br>8,25,26 | 2,3,7,19,2<br>0,21,22,23<br>,24 | 3  | P00714,Q63942,Q6AY33                                                         |
| 8157 | 1,4,5,6,8,1<br>9,20,21 | 2,3,7,18,2<br>2,23,24,25<br>,26 | 6  | A2RUV9,O35547,P00731,P01681,P0C0A9,P35281                                    |
| 8158 | 1,4,5,6,8,1<br>9,20,22 | 2,3,7,18,2<br>1,23,24,25<br>,26 | 4  | A2RUV9,P00774,P22006,P55091                                                  |
| 8159 | 1,4,5,6,8,1<br>9,20,23 | 2,3,7,18,2<br>1,22,24,25<br>,26 | 4  | P15399,P22006,P35281,P55091                                                  |
| 8160 | 1,4,5,6,8,1<br>9,20,24 | 2,3,7,18,2<br>1,22,23,25<br>,26 | 1  | P00774                                                                       |
| 8161 | 1,4,5,6,8,1<br>9,20,25 | 2,3,7,18,2<br>1,22,23,24<br>,26 | 0  |                                                                              |
| 8162 | 1,4,5,6,8,1<br>9,20,26 | 2,3,7,18,2<br>1,22,23,24<br>,25 | 2  | P01681,P20760                                                                |
| 8163 | 1,4,5,6,8,1<br>9,21,22 | 2,3,7,18,2<br>0,23,24,25<br>,26 | 7  | A2RUV9,O35547,P02782,P08723,P0C0A9,P19218,P35281                             |

|      |                        |                                 |   |                                                         |
|------|------------------------|---------------------------------|---|---------------------------------------------------------|
| 8164 | 1,4,5,6,8,1<br>9,21,23 | 2,3,7,18,2<br>0,22,24,25<br>,26 | 6 | O35547,P02803,P0C0A9,P15399,P35281,Q99041               |
| 8165 | 1,4,5,6,8,1<br>9,21,24 | 2,3,7,18,2<br>0,22,23,25<br>,26 | 4 | A2RUV9,P0C0A9,P13432,P35281                             |
| 8166 | 1,4,5,6,8,1<br>9,21,25 | 2,3,7,18,2<br>0,22,23,24<br>,26 | 8 | A2RUV9,P00731,P02803,P06760,P0C0A9,P20646,P35281,Q9WTT6 |
| 8167 | 1,4,5,6,8,1<br>9,21,26 | 2,3,7,18,2<br>0,22,23,24<br>,25 | 4 | A2RUV9,P01681,P0C0A9,P35281                             |
| 8168 | 1,4,5,6,8,1<br>9,22,23 | 2,3,7,18,2<br>0,21,24,25<br>,26 | 1 | P55091                                                  |
| 8169 | 1,4,5,6,8,1<br>9,22,24 | 2,3,7,18,2<br>0,21,23,25<br>,26 | 2 | A2RUV9,P00774                                           |
| 8170 | 1,4,5,6,8,1<br>9,22,25 | 2,3,7,18,2<br>0,21,23,24<br>,26 | 2 | A2RUV9,P06911                                           |
| 8171 | 1,4,5,6,8,1<br>9,22,26 | 2,3,7,18,2<br>0,21,23,24<br>,25 | 2 | A2RUV9,P20760                                           |
| 8172 | 1,4,5,6,8,1<br>9,23,24 | 2,3,7,18,2<br>0,21,22,25<br>,26 | 0 |                                                         |
| 8173 | 1,4,5,6,8,1<br>9,23,25 | 2,3,7,18,2<br>0,21,22,24<br>,26 | 5 | P02803,P06760,P06911,P15399,Q99041                      |
| 8174 | 1,4,5,6,8,1<br>9,23,26 | 2,3,7,18,2<br>0,21,22,24<br>,25 | 2 | P02793;Q7TP54,P20760                                    |
| 8175 | 1,4,5,6,8,1<br>9,24,25 | 2,3,7,18,2<br>0,21,22,23<br>,26 | 1 | A2RUV9                                                  |
| 8176 | 1,4,5,6,8,1<br>9,24,26 | 2,3,7,18,2<br>0,21,22,23<br>,25 | 1 | P20760                                                  |
| 8177 | 1,4,5,6,8,1<br>9,25,26 | 2,3,7,18,2<br>0,21,22,23<br>,24 | 0 |                                                         |
| 8178 | 1,4,5,6,8,2<br>0,21,22 | 2,3,7,18,1<br>9,23,24,25<br>,26 | 4 | O35547,P13432,Q07523,Q7TPB1                             |

|      |                        |                                 |   |                                                                |
|------|------------------------|---------------------------------|---|----------------------------------------------------------------|
| 8179 | 1,4,5,6,8,2<br>0,21,23 | 2,3,7,18,1<br>9,22,24,25<br>,26 | 3 | P01681,P01835,P0C0A9                                           |
| 8180 | 1,4,5,6,8,2<br>0,21,24 | 2,3,7,18,1<br>9,22,23,25<br>,26 | 1 | P13432                                                         |
| 8181 | 1,4,5,6,8,2<br>0,21,25 | 2,3,7,18,1<br>9,22,23,24<br>,26 | 4 | P06760,P20646,Q07523,Q9WTT6                                    |
| 8182 | 1,4,5,6,8,2<br>0,21,26 | 2,3,7,18,1<br>9,22,23,24<br>,25 | 5 | F1LM93,P01681,P01835,P0C0A9,P20760                             |
| 8183 | 1,4,5,6,8,2<br>0,22,23 | 2,3,7,18,1<br>9,21,24,25<br>,26 | 3 | P22006,P55091,P82995                                           |
| 8184 | 1,4,5,6,8,2<br>0,22,24 | 2,3,7,18,1<br>9,21,23,25<br>,26 | 4 | P00774,P82995,Q07523,Q99MH3                                    |
| 8185 | 1,4,5,6,8,2<br>0,22,25 | 2,3,7,18,1<br>9,21,23,24<br>,26 | 3 | D3ZUC6,P06911,Q07523                                           |
| 8186 | 1,4,5,6,8,2<br>0,22,26 | 2,3,7,18,1<br>9,21,23,24<br>,25 | 3 | P05539,P20760,Q99MH3                                           |
| 8187 | 1,4,5,6,8,2<br>0,23,24 | 2,3,7,18,1<br>9,21,22,25<br>,26 | 2 | P82995,P97840                                                  |
| 8188 | 1,4,5,6,8,2<br>0,23,25 | 2,3,7,18,1<br>9,21,22,24<br>,26 | 2 | P06760,Q9WTT6                                                  |
| 8189 | 1,4,5,6,8,2<br>0,23,26 | 2,3,7,18,1<br>9,21,22,24<br>,25 | 9 | P01681,P05539,P20760,P47967,P97840,Q6IFW6,Q6IG02,Q6IMF3,Q6P6Q2 |
| 8190 | 1,4,5,6,8,2<br>0,24,25 | 2,3,7,18,1<br>9,21,22,23<br>,26 | 0 |                                                                |
| 8191 | 1,4,5,6,8,2<br>0,24,26 | 2,3,7,18,1<br>9,21,22,23<br>,25 | 4 | P20760,P47967,P97840,Q99MH3                                    |
| 8192 | 1,4,5,6,8,2<br>0,25,26 | 2,3,7,18,1<br>9,21,22,23<br>,24 | 2 | P05539,Q9WTT6                                                  |
| 8193 | 1,4,5,6,8,2<br>1,22,23 | 2,3,7,18,1<br>9,20,24,25<br>,26 | 3 | O35547,P0C0A9,P13432                                           |

|      |                        |                                 |   |                                                                |
|------|------------------------|---------------------------------|---|----------------------------------------------------------------|
| 8194 | 1,4,5,6,8,2<br>1,22,24 | 2,3,7,18,1<br>9,20,23,25<br>,26 | 2 | A2RUV9,P13432                                                  |
| 8195 | 1,4,5,6,8,2<br>1,22,25 | 2,3,7,18,1<br>9,20,23,24<br>,26 | 6 | A2RUV9,P06760,P06911,P20646,Q07523,Q9WTT6                      |
| 8196 | 1,4,5,6,8,2<br>1,22,26 | 2,3,7,18,1<br>9,20,23,24<br>,25 | 3 | P0C0A9,P13432,P20760                                           |
| 8197 | 1,4,5,6,8,2<br>1,23,24 | 2,3,7,18,1<br>9,20,22,25<br>,26 | 1 | P13432                                                         |
| 8198 | 1,4,5,6,8,2<br>1,23,25 | 2,3,7,18,1<br>9,20,22,24<br>,26 | 9 | P02803,P06760,P07150,P14669,P20646,Q6P6R2,Q99041,Q9WTT6,Q9Z0V6 |
| 8199 | 1,4,5,6,8,2<br>1,23,26 | 2,3,7,18,1<br>9,20,22,24<br>,25 | 8 | F1LM93,P0C0A9,P20760,Q6IFV1,Q6IMF3,Q6P6Q2,Q9WTT6,Q9Z0V6        |
| 8200 | 1,4,5,6,8,2<br>1,24,25 | 2,3,7,18,1<br>9,20,22,23<br>,26 | 5 | P06760,P13432,P20646,Q9WTT6,Q9Z0V6                             |
| 8201 | 1,4,5,6,8,2<br>1,24,26 | 2,3,7,18,1<br>9,20,22,23<br>,25 | 3 | F1LM93,P13432,P20760                                           |
| 8202 | 1,4,5,6,8,2<br>1,25,26 | 2,3,7,18,1<br>9,20,22,23<br>,24 | 6 | F1LM93,P06760,P20646,Q9QZK9,Q9WTT6,Q9Z0V6                      |
| 8203 | 1,4,5,6,8,2<br>2,23,24 | 2,3,7,18,1<br>9,20,21,25<br>,26 | 1 | P82995                                                         |
| 8204 | 1,4,5,6,8,2<br>2,23,25 | 2,3,7,18,1<br>9,20,21,24<br>,26 | 4 | P06760,P06911,Q5GRG2,Q9Z0V6                                    |
| 8205 | 1,4,5,6,8,2<br>2,23,26 | 2,3,7,18,1<br>9,20,21,24<br>,25 | 4 | P02793;Q7TP54,P05539,P20760,P47967                             |
| 8206 | 1,4,5,6,8,2<br>2,24,25 | 2,3,7,18,1<br>9,20,21,23<br>,26 | 1 | P06911                                                         |
| 8207 | 1,4,5,6,8,2<br>2,24,26 | 2,3,7,18,1<br>9,20,21,23<br>,25 | 3 | P20760,P47967,Q99MH3                                           |
| 8208 | 1,4,5,6,8,2<br>2,25,26 | 2,3,7,18,1<br>9,20,21,23<br>,24 | 2 | P05539,P06911                                                  |

|      |                         |                                 |   |                                                  |
|------|-------------------------|---------------------------------|---|--------------------------------------------------|
| 8209 | 1,4,5,6,8,2<br>3,24,25  | 2,3,7,18,1<br>9,20,21,22<br>,26 | 3 | P06760,P06911,Q9Z0V6                             |
| 8210 | 1,4,5,6,8,2<br>3,24,26  | 2,3,7,18,1<br>9,20,21,22<br>,25 | 5 | P02793;Q7TP54,P20760,P47967,P97840,Q6P6Q2        |
| 8211 | 1,4,5,6,8,2<br>3,25,26  | 2,3,7,18,1<br>9,20,21,22<br>,24 | 7 | P06760,Q5I0D1,Q6IFW6,Q6IMF3,Q6P6Q2,Q9WTT6,Q9Z0V6 |
| 8212 | 1,4,5,6,8,2<br>4,25,26  | 2,3,7,18,1<br>9,20,21,22<br>,23 | 2 | P20760,Q6AY33                                    |
| 8213 | 1,4,5,6,18,<br>19,20,21 | 2,3,7,8,22,<br>23,24,25,2<br>6  | 5 | O35547,P00731,P01835,P20766,P35281               |
| 8214 | 1,4,5,6,18,<br>19,20,22 | 2,3,7,8,21,<br>23,24,25,2<br>6  | 1 | P22006                                           |
| 8215 | 1,4,5,6,18,<br>19,20,23 | 2,3,7,8,21,<br>22,24,25,2<br>6  | 3 | P15399,P20766,P22006                             |
| 8216 | 1,4,5,6,18,<br>19,20,24 | 2,3,7,8,21,<br>22,23,25,2<br>6  | 1 | P20766                                           |
| 8217 | 1,4,5,6,18,<br>19,20,25 | 2,3,7,8,21,<br>22,23,24,2<br>6  | 0 |                                                  |
| 8218 | 1,4,5,6,18,<br>19,20,26 | 2,3,7,8,21,<br>22,23,24,2<br>5  | 0 |                                                  |
| 8219 | 1,4,5,6,18,<br>19,21,22 | 2,3,7,8,20,<br>23,24,25,2<br>6  | 2 | O35547,P19218                                    |
| 8220 | 1,4,5,6,18,<br>19,21,23 | 2,3,7,8,20,<br>22,24,25,2<br>6  | 6 | O35547,P02803,P05369,P15399,P20766,Q10758        |
| 8221 | 1,4,5,6,18,<br>19,21,24 | 2,3,7,8,20,<br>22,23,25,2<br>6  | 3 | P13432,P20766,Q08849                             |
| 8222 | 1,4,5,6,18,<br>19,21,25 | 2,3,7,8,20,<br>22,23,24,2<br>6  | 3 | P00731,P02803,P20646                             |
| 8223 | 1,4,5,6,18,<br>19,21,26 | 2,3,7,8,20,<br>22,23,24,2<br>5  | 1 | P0C0A9                                           |

|      |                         |                                |   |                                                                |
|------|-------------------------|--------------------------------|---|----------------------------------------------------------------|
| 8224 | 1,4,5,6,18,<br>19,22,23 | 2,3,7,8,20,<br>21,24,25,2<br>6 | 1 | Q6IFU7                                                         |
| 8225 | 1,4,5,6,18,<br>19,22,24 | 2,3,7,8,20,<br>21,23,25,2<br>6 | 0 |                                                                |
| 8226 | 1,4,5,6,18,<br>19,22,25 | 2,3,7,8,20,<br>21,23,24,2<br>6 | 0 |                                                                |
| 8227 | 1,4,5,6,18,<br>19,22,26 | 2,3,7,8,20,<br>21,23,24,2<br>5 | 0 |                                                                |
| 8228 | 1,4,5,6,18,<br>19,23,24 | 2,3,7,8,20,<br>21,22,25,2<br>6 | 2 | P20766,Q6IFU7                                                  |
| 8229 | 1,4,5,6,18,<br>19,23,25 | 2,3,7,8,20,<br>21,22,24,2<br>6 | 2 | P02803,P15399                                                  |
| 8230 | 1,4,5,6,18,<br>19,23,26 | 2,3,7,8,20,<br>21,22,24,2<br>5 | 9 | Q03191,Q10758,Q63942,Q6IFU7,Q6IFU8,Q6IFW6,Q6IG02,Q6IMF3,Q6P6Q2 |
| 8231 | 1,4,5,6,18,<br>19,24,25 | 2,3,7,8,20,<br>21,22,23,2<br>6 | 0 |                                                                |
| 8232 | 1,4,5,6,18,<br>19,24,26 | 2,3,7,8,20,<br>21,22,23,2<br>5 | 0 |                                                                |
| 8233 | 1,4,5,6,18,<br>19,25,26 | 2,3,7,8,20,<br>21,22,23,2<br>4 | 0 |                                                                |
| 8234 | 1,4,5,6,18,<br>20,21,22 | 2,3,7,8,19,<br>23,24,25,2<br>6 | 3 | O35547,P01835,P13432                                           |
| 8235 | 1,4,5,6,18,<br>20,21,23 | 2,3,7,8,19,<br>22,24,25,2<br>6 | 2 | P01835,P20766                                                  |
| 8236 | 1,4,5,6,18,<br>20,21,24 | 2,3,7,8,19,<br>22,23,25,2<br>6 | 3 | P01835,P13432,P20766                                           |
| 8237 | 1,4,5,6,18,<br>20,21,25 | 2,3,7,8,19,<br>22,23,24,2<br>6 | 3 | P01835,P20646,P20766                                           |
| 8238 | 1,4,5,6,18,<br>20,21,26 | 2,3,7,8,19,<br>22,23,24,2<br>5 | 3 | P01681,P01835,P20766                                           |



|      |                         |                                |   |                                                  |
|------|-------------------------|--------------------------------|---|--------------------------------------------------|
| 8239 | 1,4,5,6,18,<br>20,22,23 | 2,3,7,8,19,<br>21,24,25,2<br>6 | 2 | P22006,Q6IFU7                                    |
| 8240 | 1,4,5,6,18,<br>20,22,24 | 2,3,7,8,19,<br>21,23,25,2<br>6 | 0 |                                                  |
| 8241 | 1,4,5,6,18,<br>20,22,25 | 2,3,7,8,19,<br>21,23,24,2<br>6 | 0 |                                                  |
| 8242 | 1,4,5,6,18,<br>20,22,26 | 2,3,7,8,19,<br>21,23,24,2<br>5 | 1 | P05539                                           |
| 8243 | 1,4,5,6,18,<br>20,23,24 | 2,3,7,8,19,<br>21,22,25,2<br>6 | 2 | P20766,Q6IFU7                                    |
| 8244 | 1,4,5,6,18,<br>20,23,25 | 2,3,7,8,19,<br>21,22,24,2<br>6 | 0 |                                                  |
| 8245 | 1,4,5,6,18,<br>20,23,26 | 2,3,7,8,19,<br>21,22,24,2<br>5 | 7 | P05539,Q6IFU7,Q6IFU8,Q6IFW6,Q6IG02,Q6IMF3,Q6P6Q2 |
| 8246 | 1,4,5,6,18,<br>20,24,25 | 2,3,7,8,19,<br>21,22,23,2<br>6 | 1 | P20766                                           |
| 8247 | 1,4,5,6,18,<br>20,24,26 | 2,3,7,8,19,<br>21,22,23,2<br>5 | 1 | P20766                                           |
| 8248 | 1,4,5,6,18,<br>20,25,26 | 2,3,7,8,19,<br>21,22,23,2<br>4 | 1 | P05539                                           |
| 8249 | 1,4,5,6,18,<br>21,22,23 | 2,3,7,8,19,<br>20,24,25,2<br>6 | 2 | O35547,Q6IFU7                                    |
| 8250 | 1,4,5,6,18,<br>21,22,24 | 2,3,7,8,19,<br>20,23,25,2<br>6 | 2 | P13432,Q08849                                    |
| 8251 | 1,4,5,6,18,<br>21,22,25 | 2,3,7,8,19,<br>20,23,24,2<br>6 | 0 |                                                  |
| 8252 | 1,4,5,6,18,<br>21,22,26 | 2,3,7,8,19,<br>20,23,24,2<br>5 | 0 |                                                  |
| 8253 | 1,4,5,6,18,<br>21,23,24 | 2,3,7,8,19,<br>20,22,25,2<br>6 | 4 | P13432,P20766,Q08849,Q6IFU7                      |

|      |                         |                                |   |                                                                |
|------|-------------------------|--------------------------------|---|----------------------------------------------------------------|
| 8254 | 1,4,5,6,18,<br>21,23,25 | 2,3,7,8,19,<br>20,22,24,2<br>6 | 3 | P01835,P06760,P20646                                           |
| 8255 | 1,4,5,6,18,<br>21,23,26 | 2,3,7,8,19,<br>20,22,24,2<br>5 | 9 | P01835,Q10758,Q6IFU7,Q6IFU8,Q6IFV1,Q6IFW6,Q6IG02,Q6IMF3,Q6P6Q2 |
| 8256 | 1,4,5,6,18,<br>21,24,25 | 2,3,7,8,19,<br>20,22,23,2<br>6 | 4 | P13432,P20646,P20766,Q08849                                    |
| 8257 | 1,4,5,6,18,<br>21,24,26 | 2,3,7,8,19,<br>20,22,23,2<br>5 | 3 | P13432,P20766,Q08849                                           |
| 8258 | 1,4,5,6,18,<br>21,25,26 | 2,3,7,8,19,<br>20,22,23,2<br>4 | 2 | P20646,P31430                                                  |
| 8259 | 1,4,5,6,18,<br>22,23,24 | 2,3,7,8,19,<br>20,21,25,2<br>6 | 1 | Q6IFU7                                                         |
| 8260 | 1,4,5,6,18,<br>22,23,25 | 2,3,7,8,19,<br>20,21,24,2<br>6 | 2 | P06911,Q6IFU7                                                  |
| 8261 | 1,4,5,6,18,<br>22,23,26 | 2,3,7,8,19,<br>20,21,24,2<br>5 | 7 | P05539,Q6IFU7,Q6IFU8,Q6IFW6,Q6IG02,Q6IMF3,Q6P6Q2               |
| 8262 | 1,4,5,6,18,<br>22,24,25 | 2,3,7,8,19,<br>20,21,23,2<br>6 | 0 |                                                                |
| 8263 | 1,4,5,6,18,<br>22,24,26 | 2,3,7,8,19,<br>20,21,23,2<br>5 | 1 | P20760                                                         |
| 8264 | 1,4,5,6,18,<br>22,25,26 | 2,3,7,8,19,<br>20,21,23,2<br>4 | 1 | P05539                                                         |
| 8265 | 1,4,5,6,18,<br>23,24,25 | 2,3,7,8,19,<br>20,21,22,2<br>6 | 1 | Q6IFU7                                                         |
| 8266 | 1,4,5,6,18,<br>23,24,26 | 2,3,7,8,19,<br>20,21,22,2<br>5 | 7 | P47967,Q6IFU7,Q6IFU8,Q6IFW6,Q6IG02,Q6IMF3,Q6P6Q2               |
| 8267 | 1,4,5,6,18,<br>23,25,26 | 2,3,7,8,19,<br>20,21,22,2<br>4 | 7 | P00714,Q6IFU7,Q6IFU8,Q6IFW6,Q6IG02,Q6IMF3,Q6P6Q2               |
| 8268 | 1,4,5,6,18,<br>24,25,26 | 2,3,7,8,19,<br>20,21,22,2<br>3 | 0 |                                                                |

|      |                         |                                |   |                                           |
|------|-------------------------|--------------------------------|---|-------------------------------------------|
| 8269 | 1,4,5,6,19,<br>20,21,22 | 2,3,7,8,18,<br>23,24,25,2<br>6 | 5 | A2RUV9,P00774,P35467,P55091,Q7TPB1        |
| 8270 | 1,4,5,6,19,<br>20,21,23 | 2,3,7,8,18,<br>22,24,25,2<br>6 | 4 | P01835,P15399,P20766,P55091               |
| 8271 | 1,4,5,6,19,<br>20,21,24 | 2,3,7,8,18,<br>22,23,25,2<br>6 | 2 | P13432,P20766                             |
| 8272 | 1,4,5,6,19,<br>20,21,25 | 2,3,7,8,18,<br>22,23,24,2<br>6 | 1 | P20766                                    |
| 8273 | 1,4,5,6,19,<br>20,21,26 | 2,3,7,8,18,<br>22,23,24,2<br>5 | 3 | P01681,P01835,P20766                      |
| 8274 | 1,4,5,6,19,<br>20,22,23 | 2,3,7,8,18,<br>21,24,25,2<br>6 | 6 | P00774,P22006,P31430,P55091,P82995,Q62997 |
| 8275 | 1,4,5,6,19,<br>20,22,24 | 2,3,7,8,18,<br>21,23,25,2<br>6 | 5 | P00774,P31430,P55091,P82995,Q99MH3        |
| 8276 | 1,4,5,6,19,<br>20,22,25 | 2,3,7,8,18,<br>21,23,24,2<br>6 | 1 | P55091                                    |
| 8277 | 1,4,5,6,19,<br>20,22,26 | 2,3,7,8,18,<br>21,23,24,2<br>5 | 4 | O54728,P05539,Q62997,Q99MH3               |
| 8278 | 1,4,5,6,19,<br>20,23,24 | 2,3,7,8,18,<br>21,22,25,2<br>6 | 6 | P00774,P20766,P31430,P55091,P82995,Q80WL1 |
| 8279 | 1,4,5,6,19,<br>20,23,25 | 2,3,7,8,18,<br>21,22,24,2<br>6 | 1 | P15399                                    |
| 8280 | 1,4,5,6,19,<br>20,23,26 | 2,3,7,8,18,<br>21,22,24,2<br>5 | 3 | P05539,Q6IFW6,Q6IMF3                      |
| 8281 | 1,4,5,6,19,<br>20,24,25 | 2,3,7,8,18,<br>21,22,23,2<br>6 | 2 | P20766,Q80WL1                             |
| 8282 | 1,4,5,6,19,<br>20,24,26 | 2,3,7,8,18,<br>21,22,23,2<br>5 | 3 | P20760,P20766,Q99MH3                      |
| 8283 | 1,4,5,6,19,<br>20,25,26 | 2,3,7,8,18,<br>21,22,23,2<br>4 | 1 | P05539                                    |

|      |                         |                                |   |                             |
|------|-------------------------|--------------------------------|---|-----------------------------|
| 8284 | 1,4,5,6,19,<br>21,22,23 | 2,3,7,8,18,<br>20,24,25,2<br>6 | 2 | P15399,P55091               |
| 8285 | 1,4,5,6,19,<br>21,22,24 | 2,3,7,8,18,<br>20,23,25,2<br>6 | 4 | A2RUV9,P13432,P35467,Q08849 |
| 8286 | 1,4,5,6,19,<br>21,22,25 | 2,3,7,8,18,<br>20,23,24,2<br>6 | 3 | A2RUV9,P19218,P35467        |
| 8287 | 1,4,5,6,19,<br>21,22,26 | 2,3,7,8,18,<br>20,23,24,2<br>5 | 2 | A2RUV9,P05539               |
| 8288 | 1,4,5,6,19,<br>21,23,24 | 2,3,7,8,18,<br>20,22,25,2<br>6 | 2 | P15399,P20766               |
| 8289 | 1,4,5,6,19,<br>21,23,25 | 2,3,7,8,18,<br>20,22,24,2<br>6 | 2 | P06760,P15399               |
| 8290 | 1,4,5,6,19,<br>21,23,26 | 2,3,7,8,18,<br>20,22,24,2<br>5 | 2 | P15399,Q6IMF3               |
| 8291 | 1,4,5,6,19,<br>21,24,25 | 2,3,7,8,18,<br>20,22,23,2<br>6 | 4 | A2RUV9,P20766,P35467,Q08849 |
| 8292 | 1,4,5,6,19,<br>21,24,26 | 2,3,7,8,18,<br>20,22,23,2<br>5 | 3 | P20760,P20766,Q08849        |
| 8293 | 1,4,5,6,19,<br>21,25,26 | 2,3,7,8,18,<br>20,22,23,2<br>4 | 1 | Q9QZK9                      |
| 8294 | 1,4,5,6,19,<br>22,23,24 | 2,3,7,8,18,<br>20,21,25,2<br>6 | 4 | P00774,P31430,P55091,P82995 |
| 8295 | 1,4,5,6,19,<br>22,23,25 | 2,3,7,8,18,<br>20,21,24,2<br>6 | 1 | P06911                      |
| 8296 | 1,4,5,6,19,<br>22,23,26 | 2,3,7,8,18,<br>20,21,24,2<br>5 | 3 | O54728,P05539,Q6IFU7        |
| 8297 | 1,4,5,6,19,<br>22,24,25 | 2,3,7,8,18,<br>20,21,23,2<br>6 | 2 | A2RUV9,P35467               |
| 8298 | 1,4,5,6,19,<br>22,24,26 | 2,3,7,8,18,<br>20,21,23,2<br>5 | 2 | P20760,Q99MH3               |

|      |                         |                                |   |                                                         |
|------|-------------------------|--------------------------------|---|---------------------------------------------------------|
| 8299 | 1,4,5,6,19,<br>22,25,26 | 2,3,7,8,18,<br>20,21,23,2<br>4 | 1 | P05539                                                  |
| 8300 | 1,4,5,6,19,<br>23,24,25 | 2,3,7,8,18,<br>20,21,22,2<br>6 | 2 | P01041,P15399                                           |
| 8301 | 1,4,5,6,19,<br>23,24,26 | 2,3,7,8,18,<br>20,21,22,2<br>5 | 2 | P20760,Q6IFU7                                           |
| 8302 | 1,4,5,6,19,<br>23,25,26 | 2,3,7,8,18,<br>20,21,22,2<br>4 | 1 | P05539                                                  |
| 8303 | 1,4,5,6,19,<br>24,25,26 | 2,3,7,8,18,<br>20,21,22,2<br>3 | 0 |                                                         |
| 8304 | 1,4,5,6,20,<br>21,22,23 | 2,3,7,8,18,<br>19,24,25,2<br>6 | 2 | P01835,P55091                                           |
| 8305 | 1,4,5,6,20,<br>21,22,24 | 2,3,7,8,18,<br>19,23,25,2<br>6 | 3 | P13432,P35467,Q99MH3                                    |
| 8306 | 1,4,5,6,20,<br>21,22,25 | 2,3,7,8,18,<br>19,23,24,2<br>6 | 2 | P35467,Q07523                                           |
| 8307 | 1,4,5,6,20,<br>21,22,26 | 2,3,7,8,18,<br>19,23,24,2<br>5 | 4 | P01681,P01835,P05539,Q99MH3                             |
| 8308 | 1,4,5,6,20,<br>21,23,24 | 2,3,7,8,18,<br>19,22,25,2<br>6 | 4 | P01835,P13432,P20766,P82995                             |
| 8309 | 1,4,5,6,20,<br>21,23,25 | 2,3,7,8,18,<br>19,22,24,2<br>6 | 4 | P01835,P06760,P20646,P20766                             |
| 8310 | 1,4,5,6,20,<br>21,23,26 | 2,3,7,8,18,<br>19,22,24,2<br>5 | 8 | P01681,P01835,P05539,P20766,Q6IFU8,Q6IFW6,Q6IMF3,Q6P6Q2 |
| 8311 | 1,4,5,6,20,<br>21,24,25 | 2,3,7,8,18,<br>19,22,23,2<br>6 | 3 | P13432,P20766,P35467                                    |
| 8312 | 1,4,5,6,20,<br>21,24,26 | 2,3,7,8,18,<br>19,22,23,2<br>5 | 6 | P01681,P01835,P13432,P20760,P20766,Q99MH3               |
| 8313 | 1,4,5,6,20,<br>21,25,26 | 2,3,7,8,18,<br>19,22,23,2<br>4 | 4 | P01681,P01835,P05539,P20646                             |

|      |                         |                                |   |                                                  |
|------|-------------------------|--------------------------------|---|--------------------------------------------------|
| 8314 | 1,4,5,6,20,<br>22,23,24 | 2,3,7,8,18,<br>19,21,25,2<br>6 | 5 | P00774,P31430,P55091,P82995,Q6IFU7               |
| 8315 | 1,4,5,6,20,<br>22,23,25 | 2,3,7,8,18,<br>19,21,24,2<br>6 | 2 | P06911,P82995                                    |
| 8316 | 1,4,5,6,20,<br>22,23,26 | 2,3,7,8,18,<br>19,21,24,2<br>5 | 5 | P05539,P47967,Q6IFU7,Q6IFW6,Q6IMF3               |
| 8317 | 1,4,5,6,20,<br>22,24,25 | 2,3,7,8,18,<br>19,21,23,2<br>6 | 2 | P35467,Q07523                                    |
| 8318 | 1,4,5,6,20,<br>22,24,26 | 2,3,7,8,18,<br>19,21,23,2<br>5 | 4 | P05539,P20760,P47967,Q99MH3                      |
| 8319 | 1,4,5,6,20,<br>22,25,26 | 2,3,7,8,18,<br>19,21,23,2<br>4 | 1 | P05539                                           |
| 8320 | 1,4,5,6,20,<br>23,24,25 | 2,3,7,8,18,<br>19,21,22,2<br>6 | 3 | P20766,P82995,Q80WL1                             |
| 8321 | 1,4,5,6,20,<br>23,24,26 | 2,3,7,8,18,<br>19,21,22,2<br>5 | 7 | D4A1J4,P20760,P47967,P97840,Q6IFU7,Q6IFW6,Q6IMF3 |
| 8322 | 1,4,5,6,20,<br>23,25,26 | 2,3,7,8,18,<br>19,21,22,2<br>4 | 5 | P05539,Q6IFU8,Q6IFW6,Q6IMF3,Q6P6Q2               |
| 8323 | 1,4,5,6,20,<br>24,25,26 | 2,3,7,8,18,<br>19,21,22,2<br>3 | 0 |                                                  |
| 8324 | 1,4,5,6,21,<br>22,23,24 | 2,3,7,8,18,<br>19,20,25,2<br>6 | 2 | P13432,P35280                                    |
| 8325 | 1,4,5,6,21,<br>22,23,25 | 2,3,7,8,18,<br>19,20,24,2<br>6 | 2 | P06760,P06911                                    |
| 8326 | 1,4,5,6,21,<br>22,23,26 | 2,3,7,8,18,<br>19,20,24,2<br>5 | 2 | P05539,Q6IMF3                                    |
| 8327 | 1,4,5,6,21,<br>22,24,25 | 2,3,7,8,18,<br>19,20,23,2<br>6 | 3 | P13432,P35467,Q08849                             |
| 8328 | 1,4,5,6,21,<br>22,24,26 | 2,3,7,8,18,<br>19,20,23,2<br>5 | 4 | P13432,P20760,Q08849,Q99MH3                      |

|      |                         |                                 |   |                                                  |
|------|-------------------------|---------------------------------|---|--------------------------------------------------|
| 8329 | 1,4,5,6,21,<br>22,25,26 | 2,3,7,8,18,<br>19,20,23,2<br>4  | 1 | P05539                                           |
| 8330 | 1,4,5,6,21,<br>23,24,25 | 2,3,7,8,18,<br>19,20,22,2<br>6  | 2 | P06760,P20766                                    |
| 8331 | 1,4,5,6,21,<br>23,24,26 | 2,3,7,8,18,<br>19,20,22,2<br>5  | 5 | P20760,P20766,Q6IFU7,Q6IFV1,Q6IMF3               |
| 8332 | 1,4,5,6,21,<br>23,25,26 | 2,3,7,8,18,<br>19,20,22,2<br>4  | 7 | P06760,P20646,P27213,P83121,Q6IFU8,Q6IMF3,Q6P6Q2 |
| 8333 | 1,4,5,6,21,<br>24,25,26 | 2,3,7,8,18,<br>19,20,22,2<br>3  | 2 | Q08849,Q498D9                                    |
| 8334 | 1,4,5,6,22,<br>23,24,25 | 2,3,7,8,18,<br>19,20,21,2<br>6  | 3 | P06911,P35280,P62804                             |
| 8335 | 1,4,5,6,22,<br>23,24,26 | 2,3,7,8,18,<br>19,20,21,2<br>5  | 5 | P00731,P05539,P20760,P47967,Q6IFU7               |
| 8336 | 1,4,5,6,22,<br>23,25,26 | 2,3,7,8,18,<br>19,20,21,2<br>4  | 2 | P05539,P06911                                    |
| 8337 | 1,4,5,6,22,<br>24,25,26 | 2,3,7,8,18,<br>19,20,21,2<br>3  | 3 | P05539,Q498D9,Q5XI22                             |
| 8338 | 1,4,5,6,23,<br>24,25,26 | 2,3,7,8,18,<br>19,20,21,2<br>2  | 2 | Q6IFU7,Q7TPB1                                    |
| 8339 | 1,4,5,7,8,1<br>8,19,20  | 2,3,6,21,2<br>2,23,24,25<br>,26 | 5 | P00731,P02803,P18418,Q4FZU6,Q63617               |
| 8340 | 1,4,5,7,8,1<br>8,19,21  | 2,3,6,20,2<br>2,23,24,25<br>,26 | 7 | P00731,P02803,P10758,P18418,P35281,Q4FZU6,Q9ESW0 |
| 8341 | 1,4,5,7,8,1<br>8,19,22  | 2,3,6,20,2<br>1,23,24,25<br>,26 | 2 | P18418,Q6P6R2                                    |
| 8342 | 1,4,5,7,8,1<br>8,19,23  | 2,3,6,20,2<br>1,22,24,25<br>,26 | 6 | P02803,P18418,Q03191,Q4FZU6,Q5BJY9,Q99041        |
| 8343 | 1,4,5,7,8,1<br>8,19,24  | 2,3,6,20,2<br>1,22,23,25<br>,26 | 1 | P18418                                           |

|      |                        |                                 |    |                                                                                            |
|------|------------------------|---------------------------------|----|--------------------------------------------------------------------------------------------|
| 8344 | 1,4,5,7,8,1<br>8,19,25 | 2,3,6,20,2<br>1,22,23,24<br>,26 | 5  | P00714,P00731,P02803,P10715,P18418                                                         |
| 8345 | 1,4,5,7,8,1<br>8,19,26 | 2,3,6,20,2<br>1,22,23,24<br>,25 | 5  | P02803,P16636,P18418,P82995,Q4FZU6                                                         |
| 8346 | 1,4,5,7,8,1<br>8,20,21 | 2,3,6,19,2<br>2,23,24,25<br>,26 | 6  | P00731,P02803,P18418,Q4FZU6,Q9ESW0,Q9QZA6                                                  |
| 8347 | 1,4,5,7,8,1<br>8,20,22 | 2,3,6,19,2<br>1,23,24,25<br>,26 | 3  | P18418,Q4FZU6,Q63617                                                                       |
| 8348 | 1,4,5,7,8,1<br>8,20,23 | 2,3,6,19,2<br>1,22,24,25<br>,26 | 6  | P02803,P07171,P18418,Q4FZU6,Q63617,Q9ESW0                                                  |
| 8349 | 1,4,5,7,8,1<br>8,20,24 | 2,3,6,19,2<br>1,22,23,25<br>,26 | 4  | P10715,P18418,Q4FZU6,Q63617                                                                |
| 8350 | 1,4,5,7,8,1<br>8,20,25 | 2,3,6,19,2<br>1,22,23,24<br>,26 | 6  | P00714,P02803,P10715,P18418,P61206;P84079;P84082,Q63617                                    |
| 8351 | 1,4,5,7,8,1<br>8,20,26 | 2,3,6,19,2<br>1,22,23,24<br>,25 | 3  | P18418,Q4FZU6,Q9ESW0                                                                       |
| 8352 | 1,4,5,7,8,1<br>8,21,22 | 2,3,6,19,2<br>0,23,24,25<br>,26 | 5  | P18418,Q4FZU6,Q6AYS4,Q8CJ52,Q9ESW0                                                         |
| 8353 | 1,4,5,7,8,1<br>8,21,23 | 2,3,6,19,2<br>0,22,24,25<br>,26 | 5  | P02803,P18418,Q4FZU6,Q6AYS4,Q9ESW0                                                         |
| 8354 | 1,4,5,7,8,1<br>8,21,24 | 2,3,6,19,2<br>0,22,23,25<br>,26 | 3  | P18418,Q4FZU6,Q9ESW0                                                                       |
| 8355 | 1,4,5,7,8,1<br>8,21,25 | 2,3,6,19,2<br>0,22,23,24<br>,26 | 11 | P00731,P02803,P08721,P10715,P18418,P20646,P31430,P61206;P84079;P84082,Q6AYS4,Q9ESW0,Q9QZA6 |
| 8356 | 1,4,5,7,8,1<br>8,21,26 | 2,3,6,19,2<br>0,22,23,24<br>,25 | 8  | P02803,P18418,P82995,Q4FZU6,Q8CJ52,Q9ESW0,Q9JID2,Q9QZA6                                    |
| 8357 | 1,4,5,7,8,1<br>8,22,23 | 2,3,6,19,2<br>0,21,24,25<br>,26 | 4  | P18418,Q4FZU6,Q63617,Q8VD89                                                                |
| 8358 | 1,4,5,7,8,1<br>8,22,24 | 2,3,6,19,2<br>0,21,23,25<br>,26 | 2  | P18418,Q8VD89                                                                              |



|      |                        |                                 |   |                                                                              |
|------|------------------------|---------------------------------|---|------------------------------------------------------------------------------|
| 8359 | 1,4,5,7,8,1<br>8,22,25 | 2,3,6,19,2<br>0,21,23,24<br>,26 | 3 | P10715,P18418,Q6AYS4                                                         |
| 8360 | 1,4,5,7,8,1<br>8,22,26 | 2,3,6,19,2<br>0,21,23,24<br>,25 | 4 | P18418,Q4FZU6,Q6P6R2,Q8VD89                                                  |
| 8361 | 1,4,5,7,8,1<br>8,23,24 | 2,3,6,19,2<br>0,21,22,25<br>,26 | 4 | P18418,Q4FZU6,Q63617,Q8VD89                                                  |
| 8362 | 1,4,5,7,8,1<br>8,23,25 | 2,3,6,19,2<br>0,21,22,24<br>,26 | 6 | P00714,P02803,P10715,P18418,Q6AYS4,Q99041                                    |
| 8363 | 1,4,5,7,8,1<br>8,23,26 | 2,3,6,19,2<br>0,21,22,24<br>,25 | 9 | P02803,P18418,Q4FZU6,Q6IFW6,Q6IG02,Q6IMF3,Q6P6Q2,Q8VD89,Q9ESW0               |
| 8364 | 1,4,5,7,8,1<br>8,24,25 | 2,3,6,19,2<br>0,21,22,23<br>,26 | 3 | P08721,P10715,P18418                                                         |
| 8365 | 1,4,5,7,8,1<br>8,24,26 | 2,3,6,19,2<br>0,21,22,23<br>,25 | 4 | P16636,P18418,Q4FZU6,Q8VD89                                                  |
| 8366 | 1,4,5,7,8,1<br>8,25,26 | 2,3,6,19,2<br>0,21,22,23<br>,24 | 9 | P00714,P02803,P08721,P10715,P18418,P61206;P84079;P84082,P82995,Q6AY33,Q6AYS4 |
| 8367 | 1,4,5,7,8,1<br>9,20,21 | 2,3,6,18,2<br>2,23,24,25<br>,26 | 4 | P00731,P00774,P35281,Q4FZU6                                                  |
| 8368 | 1,4,5,7,8,1<br>9,20,22 | 2,3,6,18,2<br>1,23,24,25<br>,26 | 6 | P00774,P18418,P55091,Q4FZU6,Q63617,Q6P6R2                                    |
| 8369 | 1,4,5,7,8,1<br>9,20,23 | 2,3,6,18,2<br>1,22,24,25<br>,26 | 4 | P00774,Q4FZU6,Q63617,Q99041                                                  |
| 8370 | 1,4,5,7,8,1<br>9,20,24 | 2,3,6,18,2<br>1,22,23,25<br>,26 | 4 | P00774,P18418,Q4FZU6,Q63617                                                  |
| 8371 | 1,4,5,7,8,1<br>9,20,25 | 2,3,6,18,2<br>1,22,23,24<br>,26 | 2 | P10715,Q63617                                                                |
| 8372 | 1,4,5,7,8,1<br>9,20,26 | 2,3,6,18,2<br>1,22,23,24<br>,25 | 2 | P05539,Q4FZU6                                                                |
| 8373 | 1,4,5,7,8,1<br>9,21,22 | 2,3,6,18,2<br>0,23,24,25<br>,26 | 3 | P00774,P18418,P19218                                                         |

|      |                        |                                 |   |                             |
|------|------------------------|---------------------------------|---|-----------------------------|
| 8374 | 1,4,5,7,8,1<br>9,21,23 | 2,3,6,18,2<br>0,22,24,25<br>,26 | 4 | P02803,P35281,Q4FZU6,Q99041 |
| 8375 | 1,4,5,7,8,1<br>9,21,24 | 2,3,6,18,2<br>0,22,23,25<br>,26 | 1 | P18418                      |
| 8376 | 1,4,5,7,8,1<br>9,21,25 | 2,3,6,18,2<br>0,22,23,24<br>,26 | 2 | P02803,P18418               |
| 8377 | 1,4,5,7,8,1<br>9,21,26 | 2,3,6,18,2<br>0,22,23,24<br>,25 | 3 | P02803,P35281,Q4FZU6        |
| 8378 | 1,4,5,7,8,1<br>9,22,23 | 2,3,6,18,2<br>0,21,24,25<br>,26 | 3 | P00774,Q63617,Q99041        |
| 8379 | 1,4,5,7,8,1<br>9,22,24 | 2,3,6,18,2<br>0,21,23,25<br>,26 | 2 | P00774,P18418               |
| 8380 | 1,4,5,7,8,1<br>9,22,25 | 2,3,6,18,2<br>0,21,23,24<br>,26 | 2 | P18418,Q5GRG2               |
| 8381 | 1,4,5,7,8,1<br>9,22,26 | 2,3,6,18,2<br>0,21,23,24<br>,25 | 4 | O54728,P05539,Q4FZU6,Q6P6R2 |
| 8382 | 1,4,5,7,8,1<br>9,23,24 | 2,3,6,18,2<br>0,21,22,25<br>,26 | 3 | P18418,Q63617,Q99041        |
| 8383 | 1,4,5,7,8,1<br>9,23,25 | 2,3,6,18,2<br>0,21,22,24<br>,26 | 2 | P02803,Q99041               |
| 8384 | 1,4,5,7,8,1<br>9,23,26 | 2,3,6,18,2<br>0,21,22,24<br>,25 | 3 | P05539,Q4FZU6,Q99041        |
| 8385 | 1,4,5,7,8,1<br>9,24,25 | 2,3,6,18,2<br>0,21,22,23<br>,26 | 2 | P10715,P18418               |
| 8386 | 1,4,5,7,8,1<br>9,24,26 | 2,3,6,18,2<br>0,21,22,23<br>,25 | 1 | Q4FZU6                      |
| 8387 | 1,4,5,7,8,1<br>9,25,26 | 2,3,6,18,2<br>0,21,22,23<br>,24 | 3 | P02803,P05539,Q5FVI6        |
| 8388 | 1,4,5,7,8,2<br>0,21,22 | 2,3,6,18,1<br>9,23,24,25<br>,26 | 4 | P00774,Q4FZU6,Q63617,Q7TPB1 |

|      |                        |                                 |   |                             |
|------|------------------------|---------------------------------|---|-----------------------------|
| 8389 | 1,4,5,7,8,2<br>0,21,23 | 2,3,6,18,1<br>9,22,24,25<br>,26 | 2 | Q4FZU6,Q63617               |
| 8390 | 1,4,5,7,8,2<br>0,21,24 | 2,3,6,18,1<br>9,22,23,25<br>,26 | 2 | Q4FZU6,Q63617               |
| 8391 | 1,4,5,7,8,2<br>0,21,25 | 2,3,6,18,1<br>9,22,23,24<br>,26 | 2 | P10715,P20646               |
| 8392 | 1,4,5,7,8,2<br>0,21,26 | 2,3,6,18,1<br>9,22,23,24<br>,25 | 1 | Q4FZU6                      |
| 8393 | 1,4,5,7,8,2<br>0,22,23 | 2,3,6,18,1<br>9,21,24,25<br>,26 | 3 | P00774,Q4FZU6,Q63617        |
| 8394 | 1,4,5,7,8,2<br>0,22,24 | 2,3,6,18,1<br>9,21,23,25<br>,26 | 3 | P00774,Q4FZU6,Q63617        |
| 8395 | 1,4,5,7,8,2<br>0,22,25 | 2,3,6,18,1<br>9,21,23,24<br>,26 | 3 | P10715,Q07523,Q63617        |
| 8396 | 1,4,5,7,8,2<br>0,22,26 | 2,3,6,18,1<br>9,21,23,24<br>,25 | 4 | O54728,P05539,Q4FZU6,Q63617 |
| 8397 | 1,4,5,7,8,2<br>0,23,24 | 2,3,6,18,1<br>9,21,22,25<br>,26 | 4 | P00774,P97840,Q4FZU6,Q63617 |
| 8398 | 1,4,5,7,8,2<br>0,23,25 | 2,3,6,18,1<br>9,21,22,24<br>,26 | 3 | P10715,Q63617,Q99041        |
| 8399 | 1,4,5,7,8,2<br>0,23,26 | 2,3,6,18,1<br>9,21,22,24<br>,25 | 4 | P05539,P97840,Q4FZU6,Q63617 |
| 8400 | 1,4,5,7,8,2<br>0,24,25 | 2,3,6,18,1<br>9,21,22,23<br>,26 | 2 | P10715,Q63617               |
| 8401 | 1,4,5,7,8,2<br>0,24,26 | 2,3,6,18,1<br>9,21,22,23<br>,25 | 3 | P97840,Q4FZU6,Q63617        |
| 8402 | 1,4,5,7,8,2<br>0,25,26 | 2,3,6,18,1<br>9,21,22,23<br>,24 | 2 | P05539,P10715               |
| 8403 | 1,4,5,7,8,2<br>1,22,23 | 2,3,6,18,1<br>9,20,24,25<br>,26 | 1 | Q4FZU6                      |

|      |                        |                                 |   |                                           |
|------|------------------------|---------------------------------|---|-------------------------------------------|
| 8404 | 1,4,5,7,8,2<br>1,22,24 | 2,3,6,18,1<br>9,20,23,25<br>,26 | 1 | P18418                                    |
| 8405 | 1,4,5,7,8,2<br>1,22,25 | 2,3,6,18,1<br>9,20,23,24<br>,26 | 1 | Q6AYS4                                    |
| 8406 | 1,4,5,7,8,2<br>1,22,26 | 2,3,6,18,1<br>9,20,23,24<br>,25 | 3 | P05539,Q4FZU6,Q8CJ52                      |
| 8407 | 1,4,5,7,8,2<br>1,23,24 | 2,3,6,18,1<br>9,20,22,25<br>,26 | 1 | Q4FZU6                                    |
| 8408 | 1,4,5,7,8,2<br>1,23,25 | 2,3,6,18,1<br>9,20,22,24<br>,26 | 6 | P02803,P06760,P19629,P20646,Q6AYS4,Q99041 |
| 8409 | 1,4,5,7,8,2<br>1,23,26 | 2,3,6,18,1<br>9,20,22,24<br>,25 | 2 | F1LM93,Q4FZU6                             |
| 8410 | 1,4,5,7,8,2<br>1,24,25 | 2,3,6,18,1<br>9,20,22,23<br>,26 | 4 | P10715,P18418,P19629,P22006               |
| 8411 | 1,4,5,7,8,2<br>1,24,26 | 2,3,6,18,1<br>9,20,22,23<br>,25 | 1 | Q4FZU6                                    |
| 8412 | 1,4,5,7,8,2<br>1,25,26 | 2,3,6,18,1<br>9,20,22,23<br>,24 | 3 | P22006,P82995,Q6AYS4                      |
| 8413 | 1,4,5,7,8,2<br>2,23,24 | 2,3,6,18,1<br>9,20,21,25<br>,26 | 1 | Q63617                                    |
| 8414 | 1,4,5,7,8,2<br>2,23,25 | 2,3,6,18,1<br>9,20,21,24<br>,26 | 5 | P06911,P19629,Q5GRG2,Q63617,Q99041        |
| 8415 | 1,4,5,7,8,2<br>2,23,26 | 2,3,6,18,1<br>9,20,21,24<br>,25 | 3 | O54728,P05539,Q4FZU6                      |
| 8416 | 1,4,5,7,8,2<br>2,24,25 | 2,3,6,18,1<br>9,20,21,23<br>,26 | 4 | P10715,P18418,P19629,Q63617               |
| 8417 | 1,4,5,7,8,2<br>2,24,26 | 2,3,6,18,1<br>9,20,21,23<br>,25 | 1 | Q4FZU6                                    |
| 8418 | 1,4,5,7,8,2<br>2,25,26 | 2,3,6,18,1<br>9,20,21,23<br>,24 | 2 | P05539,P10715                             |

|      |                         |                                 |   |                                    |
|------|-------------------------|---------------------------------|---|------------------------------------|
| 8419 | 1,4,5,7,8,2<br>3,24,25  | 2,3,6,18,1<br>9,20,21,22<br>,26 | 4 | P10715,P19629,Q63617,Q99041        |
| 8420 | 1,4,5,7,8,2<br>3,24,26  | 2,3,6,18,1<br>9,20,21,22<br>,25 | 3 | P47967,P97840,Q4FZU6               |
| 8421 | 1,4,5,7,8,2<br>3,25,26  | 2,3,6,18,1<br>9,20,21,22<br>,24 | 4 | P00714,P05539,P10715,Q99041        |
| 8422 | 1,4,5,7,8,2<br>4,25,26  | 2,3,6,18,1<br>9,20,21,22<br>,23 | 1 | P10715                             |
| 8423 | 1,4,5,7,18,<br>19,20,21 | 2,3,6,8,22,<br>23,24,25,2<br>6  | 3 | P00731,P20766,Q4FZU6               |
| 8424 | 1,4,5,7,18,<br>19,20,22 | 2,3,6,8,21,<br>23,24,25,2<br>6  | 4 | P07150,Q4FZU6,Q6P6R2,Q9WTT6        |
| 8425 | 1,4,5,7,18,<br>19,20,23 | 2,3,6,8,21,<br>22,24,25,2<br>6  | 3 | P14408,Q03191,Q4FZU6               |
| 8426 | 1,4,5,7,18,<br>19,20,24 | 2,3,6,8,21,<br>22,23,25,2<br>6  | 4 | P20766,Q4FZU6,Q6P6R2,Q9WTT6        |
| 8427 | 1,4,5,7,18,<br>19,20,25 | 2,3,6,8,21,<br>22,23,24,2<br>6  | 1 | P14408                             |
| 8428 | 1,4,5,7,18,<br>19,20,26 | 2,3,6,8,21,<br>22,23,24,2<br>5  | 5 | P05539,P14408,Q4FZU6,Q5FVI6,Q6P6R2 |
| 8429 | 1,4,5,7,18,<br>19,21,22 | 2,3,6,8,20,<br>23,24,25,2<br>6  | 2 | P19218,P36374                      |
| 8430 | 1,4,5,7,18,<br>19,21,23 | 2,3,6,8,20,<br>22,24,25,2<br>6  | 4 | P02803,P05369,Q03191,Q4FZU6        |
| 8431 | 1,4,5,7,18,<br>19,21,24 | 2,3,6,8,20,<br>22,23,25,2<br>6  | 1 | P20766                             |
| 8432 | 1,4,5,7,18,<br>19,21,25 | 2,3,6,8,20,<br>22,23,24,2<br>6  | 3 | P00731,P02803,P47967               |
| 8433 | 1,4,5,7,18,<br>19,21,26 | 2,3,6,8,20,<br>22,23,24,2<br>5  | 4 | P36374,P82995,Q4FZU6,Q5FVI6        |

|      |                         |                                |   |                                                  |
|------|-------------------------|--------------------------------|---|--------------------------------------------------|
| 8434 | 1,4,5,7,18,<br>19,22,23 | 2,3,6,8,20,<br>21,24,25,2<br>6 | 2 | Q03191,Q9WTT6                                    |
| 8435 | 1,4,5,7,18,<br>19,22,24 | 2,3,6,8,20,<br>21,23,25,2<br>6 | 4 | P62804,Q00715,Q6P6R2,Q9WTT6                      |
| 8436 | 1,4,5,7,18,<br>19,22,25 | 2,3,6,8,20,<br>21,23,24,2<br>6 | 1 | P62804                                           |
| 8437 | 1,4,5,7,18,<br>19,22,26 | 2,3,6,8,20,<br>21,23,24,2<br>5 | 5 | P05539,P16636,Q4FZU6,Q6P6R2,Q9WTT6               |
| 8438 | 1,4,5,7,18,<br>19,23,24 | 2,3,6,8,20,<br>21,22,25,2<br>6 | 4 | P62804,Q00715,Q03191,Q9WTT6                      |
| 8439 | 1,4,5,7,18,<br>19,23,25 | 2,3,6,8,20,<br>21,22,24,2<br>6 | 4 | P00714,P02803,Q03191,Q99041                      |
| 8440 | 1,4,5,7,18,<br>19,23,26 | 2,3,6,8,20,<br>21,22,24,2<br>5 | 7 | P05539,P16636,Q03191,Q4FZU6,Q5FVI6,Q5XFX0,Q6P6Q2 |
| 8441 | 1,4,5,7,18,<br>19,24,25 | 2,3,6,8,20,<br>21,22,23,2<br>6 | 2 | P62804,Q00715                                    |
| 8442 | 1,4,5,7,18,<br>19,24,26 | 2,3,6,8,20,<br>21,22,23,2<br>5 | 4 | P16636,Q4FZU6,Q6P6R2,Q9WTT6                      |
| 8443 | 1,4,5,7,18,<br>19,25,26 | 2,3,6,8,20,<br>21,22,23,2<br>4 | 5 | P00714,P05539,P61206;P84079;P84082,P82995,Q5FVI6 |
| 8444 | 1,4,5,7,18,<br>20,21,22 | 2,3,6,8,19,<br>23,24,25,2<br>6 | 1 | Q4FZU6                                           |
| 8445 | 1,4,5,7,18,<br>20,21,23 | 2,3,6,8,19,<br>22,24,25,2<br>6 | 3 | P20766,Q4FZU6,Q9ESW0                             |
| 8446 | 1,4,5,7,18,<br>20,21,24 | 2,3,6,8,19,<br>22,23,25,2<br>6 | 2 | P20766,Q4FZU6                                    |
| 8447 | 1,4,5,7,18,<br>20,21,25 | 2,3,6,8,19,<br>22,23,24,2<br>6 | 3 | P20766,P31430,P61206;P84079;P84082               |
| 8448 | 1,4,5,7,18,<br>20,21,26 | 2,3,6,8,19,<br>22,23,24,2<br>5 | 4 | P36374,P61206;P84079;P84082,Q4FZU6,Q9ESW0        |

|      |                         |                                |   |                                                         |
|------|-------------------------|--------------------------------|---|---------------------------------------------------------|
| 8449 | 1,4,5,7,18,<br>20,22,23 | 2,3,6,8,19,<br>21,24,25,2<br>6 | 1 | Q4FZU6                                                  |
| 8450 | 1,4,5,7,18,<br>20,22,24 | 2,3,6,8,19,<br>21,23,25,2<br>6 | 3 | Q4FZU6,Q6P6R2,Q9WTT6                                    |
| 8451 | 1,4,5,7,18,<br>20,22,25 | 2,3,6,8,19,<br>21,23,24,2<br>6 | 0 |                                                         |
| 8452 | 1,4,5,7,18,<br>20,22,26 | 2,3,6,8,19,<br>21,23,24,2<br>5 | 3 | P05539,Q4FZU6,Q6P6R2                                    |
| 8453 | 1,4,5,7,18,<br>20,23,24 | 2,3,6,8,19,<br>21,22,25,2<br>6 | 2 | P20766,Q4FZU6                                           |
| 8454 | 1,4,5,7,18,<br>20,23,25 | 2,3,6,8,19,<br>21,22,24,2<br>6 | 2 | P00714,P14408                                           |
| 8455 | 1,4,5,7,18,<br>20,23,26 | 2,3,6,8,19,<br>21,22,24,2<br>5 | 8 | P05539,P14408,Q4FZU6,Q6IFU8,Q6IFW6,Q6IG02,Q6IMF3,Q6P6Q2 |
| 8456 | 1,4,5,7,18,<br>20,24,25 | 2,3,6,8,19,<br>21,22,23,2<br>6 | 0 |                                                         |
| 8457 | 1,4,5,7,18,<br>20,24,26 | 2,3,6,8,19,<br>21,22,23,2<br>5 | 2 | Q4FZU6,Q6P6R2                                           |
| 8458 | 1,4,5,7,18,<br>20,25,26 | 2,3,6,8,19,<br>21,22,23,2<br>4 | 3 | P05539,P14408,P61206;P84079;P84082                      |
| 8459 | 1,4,5,7,18,<br>21,22,23 | 2,3,6,8,19,<br>20,24,25,2<br>6 | 1 | Q4FZU6                                                  |
| 8460 | 1,4,5,7,18,<br>21,22,24 | 2,3,6,8,19,<br>20,23,25,2<br>6 | 0 |                                                         |
| 8461 | 1,4,5,7,18,<br>21,22,25 | 2,3,6,8,19,<br>20,23,24,2<br>6 | 1 | P31430                                                  |
| 8462 | 1,4,5,7,18,<br>21,22,26 | 2,3,6,8,19,<br>20,23,24,2<br>5 | 5 | P05539,P36374,P82995,Q4FZU6,Q9JID2                      |
| 8463 | 1,4,5,7,18,<br>21,23,24 | 2,3,6,8,19,<br>20,22,25,2<br>6 | 2 | P20766,Q4FZU6                                           |

|      |                         |                                |   |                                                         |
|------|-------------------------|--------------------------------|---|---------------------------------------------------------|
| 8464 | 1,4,5,7,18,<br>21,23,25 | 2,3,6,8,19,<br>20,22,24,2<br>6 | 2 | P02803,P31430                                           |
| 8465 | 1,4,5,7,18,<br>21,23,26 | 2,3,6,8,19,<br>20,22,24,2<br>5 | 8 | Q4FZU6,Q62636,Q6IFU8,Q6IG02,Q6IMF3,Q6P6Q2,Q9ESW0,Q9JID2 |
| 8466 | 1,4,5,7,18,<br>21,24,25 | 2,3,6,8,19,<br>20,22,23,2<br>6 | 4 | P08721,P20766,P22006,P31430                             |
| 8467 | 1,4,5,7,18,<br>21,24,26 | 2,3,6,8,19,<br>20,22,23,2<br>5 | 2 | Q4FZU6,Q9JID2                                           |
| 8468 | 1,4,5,7,18,<br>21,25,26 | 2,3,6,8,19,<br>20,22,23,2<br>4 | 5 | P08721,P22006,P31430,P61206;P84079;P84082,P82995        |
| 8469 | 1,4,5,7,18,<br>22,23,24 | 2,3,6,8,19,<br>20,21,25,2<br>6 | 3 | P62804,Q00715,Q8VD89                                    |
| 8470 | 1,4,5,7,18,<br>22,23,25 | 2,3,6,8,19,<br>20,21,24,2<br>6 | 1 | P62804                                                  |
| 8471 | 1,4,5,7,18,<br>22,23,26 | 2,3,6,8,19,<br>20,21,24,2<br>5 | 4 | P05539,Q4FZU6,Q6P6Q2,Q8VD89                             |
| 8472 | 1,4,5,7,18,<br>22,24,25 | 2,3,6,8,19,<br>20,21,23,2<br>6 | 2 | P62804,Q00715                                           |
| 8473 | 1,4,5,7,18,<br>22,24,26 | 2,3,6,8,19,<br>20,21,23,2<br>5 | 4 | P16636,Q4FZU6,Q6P6R2,Q8VD89                             |
| 8474 | 1,4,5,7,18,<br>22,25,26 | 2,3,6,8,19,<br>20,21,23,2<br>4 | 2 | P05539,P61206;P84079;P84082                             |
| 8475 | 1,4,5,7,18,<br>23,24,25 | 2,3,6,8,19,<br>20,21,22,2<br>6 | 2 | P62804,Q00715                                           |
| 8476 | 1,4,5,7,18,<br>23,24,26 | 2,3,6,8,19,<br>20,21,22,2<br>5 | 4 | P16636,Q4FZU6,Q6P6Q2,Q8VD89                             |
| 8477 | 1,4,5,7,18,<br>23,25,26 | 2,3,6,8,19,<br>20,21,22,2<br>4 | 6 | P00714,P05539,P61206;P84079;P84082,Q6IFW6,Q6IG02,Q6P6Q2 |
| 8478 | 1,4,5,7,18,<br>24,25,26 | 2,3,6,8,19,<br>20,21,22,2<br>3 | 2 | P08721,P61206;P84079;P84082                             |



|      |                         |                                |   |                                                         |
|------|-------------------------|--------------------------------|---|---------------------------------------------------------|
| 8479 | 1,4,5,7,19,<br>20,21,22 | 2,3,6,8,18,<br>23,24,25,2<br>6 | 4 | P00774,P35467,P55091,Q4FZU6                             |
| 8480 | 1,4,5,7,19,<br>20,21,23 | 2,3,6,8,18,<br>22,24,25,2<br>6 | 4 | P00774,P14408,P20766,Q4FZU6                             |
| 8481 | 1,4,5,7,19,<br>20,21,24 | 2,3,6,8,18,<br>22,23,25,2<br>6 | 4 | P00774,P20766,P35467,Q4FZU6                             |
| 8482 | 1,4,5,7,19,<br>20,21,25 | 2,3,6,8,18,<br>22,23,24,2<br>6 | 1 | P35467                                                  |
| 8483 | 1,4,5,7,19,<br>20,21,26 | 2,3,6,8,18,<br>22,23,24,2<br>5 | 3 | P05539,Q4FZU6,Q5FVI6                                    |
| 8484 | 1,4,5,7,19,<br>20,22,23 | 2,3,6,8,18,<br>21,24,25,2<br>6 | 8 | P00774,P14408,P31430,P55091,P98089,Q4FZU6,Q62997,Q9WTT6 |
| 8485 | 1,4,5,7,19,<br>20,22,24 | 2,3,6,8,18,<br>21,23,25,2<br>6 | 8 | P00774,P07150,P14669,P35467,P55091,P98089,Q6P6R2,Q9WTT6 |
| 8486 | 1,4,5,7,19,<br>20,22,25 | 2,3,6,8,18,<br>21,23,24,2<br>6 | 2 | P00774,P35467                                           |
| 8487 | 1,4,5,7,19,<br>20,22,26 | 2,3,6,8,18,<br>21,23,24,2<br>5 | 8 | O54728,P00774,P05539,P98089,Q4FZU6,Q62997,Q6P6R2,Q9WTT6 |
| 8488 | 1,4,5,7,19,<br>20,23,24 | 2,3,6,8,18,<br>21,22,25,2<br>6 | 3 | P00774,P14408,Q4FZU6                                    |
| 8489 | 1,4,5,7,19,<br>20,23,25 | 2,3,6,8,18,<br>21,22,24,2<br>6 | 2 | P14408,Q99041                                           |
| 8490 | 1,4,5,7,19,<br>20,23,26 | 2,3,6,8,18,<br>21,22,24,2<br>5 | 5 | O54728,P05539,P14408,Q4FZU6,Q5FVI6                      |
| 8491 | 1,4,5,7,19,<br>20,24,25 | 2,3,6,8,18,<br>21,22,23,2<br>6 | 2 | P00774,P35467                                           |
| 8492 | 1,4,5,7,19,<br>20,24,26 | 2,3,6,8,18,<br>21,22,23,2<br>5 | 3 | P05539,Q4FZU6,Q6P6R2                                    |
| 8493 | 1,4,5,7,19,<br>20,25,26 | 2,3,6,8,18,<br>21,22,23,2<br>4 | 3 | P05539,P14408,Q5FVI6                                    |

|      |                         |                                |   |                                    |
|------|-------------------------|--------------------------------|---|------------------------------------|
| 8494 | 1,4,5,7,19,<br>21,22,23 | 2,3,6,8,18,<br>20,24,25,2<br>6 | 1 | P00774                             |
| 8495 | 1,4,5,7,19,<br>21,22,24 | 2,3,6,8,18,<br>20,23,25,2<br>6 | 2 | P00774,P35467                      |
| 8496 | 1,4,5,7,19,<br>21,22,25 | 2,3,6,8,18,<br>20,23,24,2<br>6 | 1 | P35467                             |
| 8497 | 1,4,5,7,19,<br>21,22,26 | 2,3,6,8,18,<br>20,23,24,2<br>5 | 2 | P05539,Q4FZU6                      |
| 8498 | 1,4,5,7,19,<br>21,23,24 | 2,3,6,8,18,<br>20,22,25,2<br>6 | 1 | P20766                             |
| 8499 | 1,4,5,7,19,<br>21,23,25 | 2,3,6,8,18,<br>20,22,24,2<br>6 | 1 | Q99041                             |
| 8500 | 1,4,5,7,19,<br>21,23,26 | 2,3,6,8,18,<br>20,22,24,2<br>5 | 3 | P05539,Q4FZU6,Q5FVI6               |
| 8501 | 1,4,5,7,19,<br>21,24,25 | 2,3,6,8,18,<br>20,22,23,2<br>6 | 2 | P22006,P35467                      |
| 8502 | 1,4,5,7,19,<br>21,24,26 | 2,3,6,8,18,<br>20,22,23,2<br>5 | 1 | Q4FZU6                             |
| 8503 | 1,4,5,7,19,<br>21,25,26 | 2,3,6,8,18,<br>20,22,23,2<br>4 | 3 | P05539,P22006,Q5FVI6               |
| 8504 | 1,4,5,7,19,<br>22,23,24 | 2,3,6,8,18,<br>20,21,25,2<br>6 | 5 | P00774,P31430,P62804,Q00715,Q9WTT6 |
| 8505 | 1,4,5,7,19,<br>22,23,25 | 2,3,6,8,18,<br>20,21,24,2<br>6 | 3 | P17046,P62804,Q99041               |
| 8506 | 1,4,5,7,19,<br>22,23,26 | 2,3,6,8,18,<br>20,21,24,2<br>5 | 3 | O54728,P05539,Q4FZU6               |
| 8507 | 1,4,5,7,19,<br>22,24,25 | 2,3,6,8,18,<br>20,21,23,2<br>6 | 4 | P00774,P35467,P62804,Q00715        |
| 8508 | 1,4,5,7,19,<br>22,24,26 | 2,3,6,8,18,<br>20,21,23,2<br>5 | 4 | O54728,P05539,Q6P6R2,Q9WTT6        |

|      |                         |                                |   |                             |
|------|-------------------------|--------------------------------|---|-----------------------------|
| 8509 | 1,4,5,7,19,<br>22,25,26 | 2,3,6,8,18,<br>20,21,23,2<br>4 | 1 | P05539                      |
| 8510 | 1,4,5,7,19,<br>23,24,25 | 2,3,6,8,18,<br>20,21,22,2<br>6 | 3 | P62804,Q00715,Q99041        |
| 8511 | 1,4,5,7,19,<br>23,24,26 | 2,3,6,8,18,<br>20,21,22,2<br>5 | 1 | Q4FZU6                      |
| 8512 | 1,4,5,7,19,<br>23,25,26 | 2,3,6,8,18,<br>20,21,22,2<br>4 | 4 | P05539,P14408,Q5FVI6,Q99041 |
| 8513 | 1,4,5,7,19,<br>24,25,26 | 2,3,6,8,18,<br>20,21,22,2<br>3 | 0 |                             |
| 8514 | 1,4,5,7,20,<br>21,22,23 | 2,3,6,8,18,<br>19,24,25,2<br>6 | 2 | P00774,Q4FZU6               |
| 8515 | 1,4,5,7,20,<br>21,22,24 | 2,3,6,8,18,<br>19,23,25,2<br>6 | 4 | P00774,P35467,Q4FZU6,Q99MH3 |
| 8516 | 1,4,5,7,20,<br>21,22,25 | 2,3,6,8,18,<br>19,23,24,2<br>6 | 1 | P35467                      |
| 8517 | 1,4,5,7,20,<br>21,22,26 | 2,3,6,8,18,<br>19,23,24,2<br>5 | 3 | P05539,Q4FZU6,Q99MH3        |
| 8518 | 1,4,5,7,20,<br>21,23,24 | 2,3,6,8,18,<br>19,22,25,2<br>6 | 2 | P20766,Q4FZU6               |
| 8519 | 1,4,5,7,20,<br>21,23,25 | 2,3,6,8,18,<br>19,22,24,2<br>6 | 1 | P14408                      |
| 8520 | 1,4,5,7,20,<br>21,23,26 | 2,3,6,8,18,<br>19,22,24,2<br>5 | 3 | P05539,P14408,Q4FZU6        |
| 8521 | 1,4,5,7,20,<br>21,24,25 | 2,3,6,8,18,<br>19,22,23,2<br>6 | 2 | P20766,P35467               |
| 8522 | 1,4,5,7,20,<br>21,24,26 | 2,3,6,8,18,<br>19,22,23,2<br>5 | 3 | P20766,Q4FZU6,Q8CJD3        |
| 8523 | 1,4,5,7,20,<br>21,25,26 | 2,3,6,8,18,<br>19,22,23,2<br>4 | 1 | P05539                      |

|      |                         |                                |   |                                           |
|------|-------------------------|--------------------------------|---|-------------------------------------------|
| 8524 | 1,4,5,7,20,<br>22,23,24 | 2,3,6,8,18,<br>19,21,25,2<br>6 | 4 | P00774,P98089,Q4FZU6,Q8CIZ5               |
| 8525 | 1,4,5,7,20,<br>22,23,25 | 2,3,6,8,18,<br>19,21,24,2<br>6 | 1 | P14408                                    |
| 8526 | 1,4,5,7,20,<br>22,23,26 | 2,3,6,8,18,<br>19,21,24,2<br>5 | 6 | O54728,P05539,P14408,P98089,Q4FZU6,Q8CIZ5 |
| 8527 | 1,4,5,7,20,<br>22,24,25 | 2,3,6,8,18,<br>19,21,23,2<br>6 | 2 | P00774,P35467                             |
| 8528 | 1,4,5,7,20,<br>22,24,26 | 2,3,6,8,18,<br>19,21,23,2<br>5 | 6 | P05539,Q4FZU6,Q62635,Q6P6R2,Q8CIZ5,Q99MH3 |
| 8529 | 1,4,5,7,20,<br>22,25,26 | 2,3,6,8,18,<br>19,21,23,2<br>4 | 2 | P05539,Q5XI22                             |
| 8530 | 1,4,5,7,20,<br>23,24,25 | 2,3,6,8,18,<br>19,21,22,2<br>6 | 1 | P14408                                    |
| 8531 | 1,4,5,7,20,<br>23,24,26 | 2,3,6,8,18,<br>19,21,22,2<br>5 | 6 | P05539,P14408,P47967,P97840,Q4FZU6,Q8CIZ5 |
| 8532 | 1,4,5,7,20,<br>23,25,26 | 2,3,6,8,18,<br>19,21,22,2<br>4 | 2 | P05539,P14408                             |
| 8533 | 1,4,5,7,20,<br>24,25,26 | 2,3,6,8,18,<br>19,21,22,2<br>3 | 2 | P05539,Q8CJD3                             |
| 8534 | 1,4,5,7,21,<br>22,23,24 | 2,3,6,8,18,<br>19,20,25,2<br>6 | 1 | P35280                                    |
| 8535 | 1,4,5,7,21,<br>22,23,25 | 2,3,6,8,18,<br>19,20,24,2<br>6 | 0 |                                           |
| 8536 | 1,4,5,7,21,<br>22,23,26 | 2,3,6,8,18,<br>19,20,24,2<br>5 | 2 | P05539,Q4FZU6                             |
| 8537 | 1,4,5,7,21,<br>22,24,25 | 2,3,6,8,18,<br>19,20,23,2<br>6 | 2 | P22006,P35467                             |
| 8538 | 1,4,5,7,21,<br>22,24,26 | 2,3,6,8,18,<br>19,20,23,2<br>5 | 1 | Q4FZU6                                    |

|      |                         |                                |   |                                           |
|------|-------------------------|--------------------------------|---|-------------------------------------------|
| 8539 | 1,4,5,7,21,<br>22,25,26 | 2,3,6,8,18,<br>19,20,23,2<br>4 | 3 | P05539,P22006,Q5XI22                      |
| 8540 | 1,4,5,7,21,<br>23,24,25 | 2,3,6,8,18,<br>19,20,22,2<br>6 | 1 | P22006                                    |
| 8541 | 1,4,5,7,21,<br>23,24,26 | 2,3,6,8,18,<br>19,20,22,2<br>5 | 1 | Q4FZU6                                    |
| 8542 | 1,4,5,7,21,<br>23,25,26 | 2,3,6,8,18,<br>19,20,22,2<br>4 | 3 | P05539,P22006,P83121                      |
| 8543 | 1,4,5,7,21,<br>24,25,26 | 2,3,6,8,18,<br>19,20,22,2<br>3 | 2 | P22006,Q8CJD3                             |
| 8544 | 1,4,5,7,22,<br>23,24,25 | 2,3,6,8,18,<br>19,20,21,2<br>6 | 3 | P35280,P62804,Q00715                      |
| 8545 | 1,4,5,7,22,<br>23,24,26 | 2,3,6,8,18,<br>19,20,21,2<br>5 | 6 | O54728,P00731,P05539,P47967,P62804,Q8CIZ5 |
| 8546 | 1,4,5,7,22,<br>23,25,26 | 2,3,6,8,18,<br>19,20,21,2<br>4 | 2 | P05539,P62804                             |
| 8547 | 1,4,5,7,22,<br>24,25,26 | 2,3,6,8,18,<br>19,20,21,2<br>3 | 3 | P05539,P62804,Q5XI22                      |
| 8548 | 1,4,5,7,23,<br>24,25,26 | 2,3,6,8,18,<br>19,20,21,2<br>2 | 3 | P05539,P62804,Q7TPB1                      |
| 8549 | 1,4,5,8,18,<br>19,20,21 | 2,3,6,7,22,<br>23,24,25,2<br>6 | 5 | P00731,P02803,P10758,P35281,Q4FZU6        |
| 8550 | 1,4,5,8,18,<br>19,20,22 | 2,3,6,7,21,<br>23,24,25,2<br>6 | 2 | P22006,Q6P6R2                             |
| 8551 | 1,4,5,8,18,<br>19,20,23 | 2,3,6,7,21,<br>22,24,25,2<br>6 | 4 | P02803,P09605,P25809,P22006,Q4FZU6        |
| 8552 | 1,4,5,8,18,<br>19,20,24 | 2,3,6,7,21,<br>22,23,25,2<br>6 | 1 | P09605,P25809                             |
| 8553 | 1,4,5,8,18,<br>19,20,25 | 2,3,6,7,21,<br>22,23,24,2<br>6 | 1 | P02803                                    |

|      |                         |                                |    |                                                                              |
|------|-------------------------|--------------------------------|----|------------------------------------------------------------------------------|
| 8554 | 1,4,5,8,18,<br>19,20,26 | 2,3,6,7,21,<br>22,23,24,2<br>5 | 3  | P09605;P25809,Q4FZU6,Q63751                                                  |
| 8555 | 1,4,5,8,18,<br>19,21,22 | 2,3,6,7,20,<br>23,24,25,2<br>6 | 2  | P10758,P35281                                                                |
| 8556 | 1,4,5,8,18,<br>19,21,23 | 2,3,6,7,20,<br>22,24,25,2<br>6 | 5  | P02803,P05369,P10758,P35281,Q03191                                           |
| 8557 | 1,4,5,8,18,<br>19,21,24 | 2,3,6,7,20,<br>22,23,25,2<br>6 | 2  | P10758,P35281                                                                |
| 8558 | 1,4,5,8,18,<br>19,21,25 | 2,3,6,7,20,<br>22,23,24,2<br>6 | 4  | P00731,P02803,P31430,P35281                                                  |
| 8559 | 1,4,5,8,18,<br>19,21,26 | 2,3,6,7,20,<br>22,23,24,2<br>5 | 5  | P02803,P10758,P35281,P36374,Q4FZU6                                           |
| 8560 | 1,4,5,8,18,<br>19,22,23 | 2,3,6,7,20,<br>21,24,25,2<br>6 | 2  | P09605;P25809,Q03191                                                         |
| 8561 | 1,4,5,8,18,<br>19,22,24 | 2,3,6,7,20,<br>21,23,25,2<br>6 | 1  | Q6P6R2                                                                       |
| 8562 | 1,4,5,8,18,<br>19,22,25 | 2,3,6,7,20,<br>21,23,24,2<br>6 | 0  |                                                                              |
| 8563 | 1,4,5,8,18,<br>19,22,26 | 2,3,6,7,20,<br>21,23,24,2<br>5 | 1  | Q6P6R2                                                                       |
| 8564 | 1,4,5,8,18,<br>19,23,24 | 2,3,6,7,20,<br>21,22,25,2<br>6 | 2  | P09605;P25809,Q03191                                                         |
| 8565 | 1,4,5,8,18,<br>19,23,25 | 2,3,6,7,20,<br>21,22,24,2<br>6 | 4  | P00714,P02803,Q03191,Q5BJY9                                                  |
| 8566 | 1,4,5,8,18,<br>19,23,26 | 2,3,6,7,20,<br>21,22,24,2<br>5 | 10 | P02803,P09605;P25809,P35467,Q03191,Q4FZU6,Q63942,Q64194,Q6IFW6,Q6IG02,Q6P6Q2 |
| 8567 | 1,4,5,8,18,<br>19,24,25 | 2,3,6,7,20,<br>21,22,23,2<br>6 | 0  |                                                                              |
| 8568 | 1,4,5,8,18,<br>19,24,26 | 2,3,6,7,20,<br>21,22,23,2<br>5 | 1  | P09605;P25809                                                                |

|      |                         |                                |   |                                                                       |
|------|-------------------------|--------------------------------|---|-----------------------------------------------------------------------|
| 8569 | 1,4,5,8,18,<br>19,25,26 | 2,3,6,7,20,<br>21,22,23,2<br>4 | 2 | P00714,P02803                                                         |
| 8570 | 1,4,5,8,18,<br>20,21,22 | 2,3,6,7,19,<br>23,24,25,2<br>6 | 2 | P10758,Q4FZU6                                                         |
| 8571 | 1,4,5,8,18,<br>20,21,23 | 2,3,6,7,19,<br>22,24,25,2<br>6 | 2 | P10758,Q4FZU6                                                         |
| 8572 | 1,4,5,8,18,<br>20,21,24 | 2,3,6,7,19,<br>22,23,25,2<br>6 | 2 | P10758,Q4FZU6                                                         |
| 8573 | 1,4,5,8,18,<br>20,21,25 | 2,3,6,7,19,<br>22,23,24,2<br>6 | 1 | P31430                                                                |
| 8574 | 1,4,5,8,18,<br>20,21,26 | 2,3,6,7,19,<br>22,23,24,2<br>5 | 2 | Q4FZU6,Q9ESW0                                                         |
| 8575 | 1,4,5,8,18,<br>20,22,23 | 2,3,6,7,19,<br>21,24,25,2<br>6 | 3 | P22006,P97840,Q4FZU6                                                  |
| 8576 | 1,4,5,8,18,<br>20,22,24 | 2,3,6,7,19,<br>21,23,25,2<br>6 | 3 | P97840,Q6P6R2,Q9QZK9                                                  |
| 8577 | 1,4,5,8,18,<br>20,22,25 | 2,3,6,7,19,<br>21,23,24,2<br>6 | 0 |                                                                       |
| 8578 | 1,4,5,8,18,<br>20,22,26 | 2,3,6,7,19,<br>21,23,24,2<br>5 | 4 | P16086,P97840,Q4FZU6,Q6P6R2                                           |
| 8579 | 1,4,5,8,18,<br>20,23,24 | 2,3,6,7,19,<br>21,22,25,2<br>6 | 5 | P09605;P25809,P47967,P97840,Q4FZU6,Q9QZK9                             |
| 8580 | 1,4,5,8,18,<br>20,23,25 | 2,3,6,7,19,<br>21,22,24,2<br>6 | 1 | P00714                                                                |
| 8581 | 1,4,5,8,18,<br>20,23,26 | 2,3,6,7,19,<br>21,22,24,2<br>5 | 9 | P09605;P25809,P47967,P97840,Q4FZU6,Q6IFU8,Q6IFW6,Q6IG02,Q6IMF3,Q6P6Q2 |
| 8582 | 1,4,5,8,18,<br>20,24,25 | 2,3,6,7,19,<br>21,22,23,2<br>6 | 1 | P16086                                                                |
| 8583 | 1,4,5,8,18,<br>20,24,26 | 2,3,6,7,19,<br>21,22,23,2<br>5 | 5 | P09605;P25809,P16086,P47967,P97840,Q4FZU6                             |

|      |                         |                                |   |                                                         |
|------|-------------------------|--------------------------------|---|---------------------------------------------------------|
| 8584 | 1,4,5,8,18,<br>20,25,26 | 2,3,6,7,19,<br>21,22,23,2<br>4 | 2 | P00714,P16086                                           |
| 8585 | 1,4,5,8,18,<br>21,22,23 | 2,3,6,7,19,<br>20,24,25,2<br>6 | 1 | P10758                                                  |
| 8586 | 1,4,5,8,18,<br>21,22,24 | 2,3,6,7,19,<br>20,23,25,2<br>6 | 1 | P10758                                                  |
| 8587 | 1,4,5,8,18,<br>21,22,25 | 2,3,6,7,19,<br>20,23,24,2<br>6 | 2 | P31430,Q6AYS4                                           |
| 8588 | 1,4,5,8,18,<br>21,22,26 | 2,3,6,7,19,<br>20,23,24,2<br>5 | 3 | P36374,Q4FZU6,Q9JID2                                    |
| 8589 | 1,4,5,8,18,<br>21,23,24 | 2,3,6,7,19,<br>20,22,25,2<br>6 | 1 | P10758                                                  |
| 8590 | 1,4,5,8,18,<br>21,23,25 | 2,3,6,7,19,<br>20,22,24,2<br>6 | 5 | P00714,P02803,P06760,P31430,Q6AYS4                      |
| 8591 | 1,4,5,8,18,<br>21,23,26 | 2,3,6,7,19,<br>20,22,24,2<br>5 | 8 | Q4FZU6,Q6IFU8,Q6IFV1,Q6IFW6,Q6IG02,Q6IMF3,Q6P6Q2,Q9JID2 |
| 8592 | 1,4,5,8,18,<br>21,24,25 | 2,3,6,7,19,<br>20,22,23,2<br>6 | 2 | P08721,P31430                                           |
| 8593 | 1,4,5,8,18,<br>21,24,26 | 2,3,6,7,19,<br>20,22,23,2<br>5 | 3 | P16086,Q4FZU6,Q9JID2                                    |
| 8594 | 1,4,5,8,18,<br>21,25,26 | 2,3,6,7,19,<br>20,22,23,2<br>4 | 4 | P08721,P16086,P31430,Q6AYS4                             |
| 8595 | 1,4,5,8,18,<br>22,23,24 | 2,3,6,7,19,<br>20,21,25,2<br>6 | 2 | P47967,P97840                                           |
| 8596 | 1,4,5,8,18,<br>22,23,25 | 2,3,6,7,19,<br>20,21,24,2<br>6 | 1 | P00714                                                  |
| 8597 | 1,4,5,8,18,<br>22,23,26 | 2,3,6,7,19,<br>20,21,24,2<br>5 | 7 | P47967,P97840,Q4FZU6,Q6IFW6,Q6IG02,Q6IMF3,Q6P6Q2        |
| 8598 | 1,4,5,8,18,<br>22,24,25 | 2,3,6,7,19,<br>20,21,23,2<br>6 | 1 | P16086                                                  |



|      |                         |                                |   |                                                                |
|------|-------------------------|--------------------------------|---|----------------------------------------------------------------|
| 8599 | 1,4,5,8,18,<br>22,24,26 | 2,3,6,7,19,<br>20,21,23,2<br>5 | 4 | P16086,P47967,P97840,Q6P6R2                                    |
| 8600 | 1,4,5,8,18,<br>22,25,26 | 2,3,6,7,19,<br>20,21,23,2<br>4 | 1 | P16086                                                         |
| 8601 | 1,4,5,8,18,<br>23,24,25 | 2,3,6,7,19,<br>20,21,22,2<br>6 | 1 | P00714                                                         |
| 8602 | 1,4,5,8,18,<br>23,24,26 | 2,3,6,7,19,<br>20,21,22,2<br>5 | 8 | P09605;P25809,P47967,P97840,Q4FZU6,Q6IFW6,Q6IG02,Q6IMF3,Q6P6Q2 |
| 8603 | 1,4,5,8,18,<br>23,25,26 | 2,3,6,7,19,<br>20,21,22,2<br>4 | 7 | P00714,Q5I0D1,Q6IFU8,Q6IFW6,Q6IG02,Q6IMF3,Q6P6Q2               |
| 8604 | 1,4,5,8,18,<br>24,25,26 | 2,3,6,7,19,<br>20,21,22,2<br>3 | 2 | P08721,P16086                                                  |
| 8605 | 1,4,5,8,19,<br>20,21,22 | 2,3,6,7,18,<br>23,24,25,2<br>6 | 5 | A2RUV9,P00774,P35281,P55091,Q4FZU6                             |
| 8606 | 1,4,5,8,19,<br>20,21,23 | 2,3,6,7,18,<br>22,24,25,2<br>6 | 4 | P00774,P35281,P55091,Q4FZU6                                    |
| 8607 | 1,4,5,8,19,<br>20,21,24 | 2,3,6,7,18,<br>22,23,25,2<br>6 | 2 | P00774,P35281                                                  |
| 8608 | 1,4,5,8,19,<br>20,21,25 | 2,3,6,7,18,<br>22,23,24,2<br>6 | 1 | P35281                                                         |
| 8609 | 1,4,5,8,19,<br>20,21,26 | 2,3,6,7,18,<br>22,23,24,2<br>5 | 2 | P35281,Q4FZU6                                                  |
| 8610 | 1,4,5,8,19,<br>20,22,23 | 2,3,6,7,18,<br>21,24,25,2<br>6 | 4 | P00774,P55091,P98089,Q62997                                    |
| 8611 | 1,4,5,8,19,<br>20,22,24 | 2,3,6,7,18,<br>21,23,25,2<br>6 | 4 | P00774,P25031,P55091,Q6P6R2                                    |
| 8612 | 1,4,5,8,19,<br>20,22,25 | 2,3,6,7,18,<br>21,23,24,2<br>6 | 1 | P00774                                                         |
| 8613 | 1,4,5,8,19,<br>20,22,26 | 2,3,6,7,18,<br>21,23,24,2<br>5 | 6 | O54728,P00774,P05539,Q4FZU6,Q62997,Q6P6R2                      |

|      |                         |                                |   |                                    |
|------|-------------------------|--------------------------------|---|------------------------------------|
| 8614 | 1,4,5,8,19,<br>20,23,24 | 2,3,6,7,18,<br>21,22,25,2<br>6 | 4 | P00774,P09605,P25809,P25031,P55091 |
| 8615 | 1,4,5,8,19,<br>20,23,25 | 2,3,6,7,18,<br>21,22,24,2<br>6 | 0 |                                    |
| 8616 | 1,4,5,8,19,<br>20,23,26 | 2,3,6,7,18,<br>21,22,24,2<br>5 | 4 | O54728,P09605,P25809,P97840,Q4FZU6 |
| 8617 | 1,4,5,8,19,<br>20,24,25 | 2,3,6,7,18,<br>21,22,23,2<br>6 | 1 | P00774                             |
| 8618 | 1,4,5,8,19,<br>20,24,26 | 2,3,6,7,18,<br>21,22,23,2<br>5 | 3 | P09605,P25809,P97840,Q4FZU6        |
| 8619 | 1,4,5,8,19,<br>20,25,26 | 2,3,6,7,18,<br>21,22,23,2<br>4 | 0 |                                    |
| 8620 | 1,4,5,8,19,<br>21,22,23 | 2,3,6,7,18,<br>20,24,25,2<br>6 | 2 | P00774,P35281                      |
| 8621 | 1,4,5,8,19,<br>21,22,24 | 2,3,6,7,18,<br>20,23,25,2<br>6 | 2 | A2RUV9,P00774                      |
| 8622 | 1,4,5,8,19,<br>21,22,25 | 2,3,6,7,18,<br>20,23,24,2<br>6 | 1 | A2RUV9                             |
| 8623 | 1,4,5,8,19,<br>21,22,26 | 2,3,6,7,18,<br>20,23,24,2<br>5 | 1 | A2RUV9                             |
| 8624 | 1,4,5,8,19,<br>21,23,24 | 2,3,6,7,18,<br>20,22,25,2<br>6 | 1 | P35281                             |
| 8625 | 1,4,5,8,19,<br>21,23,25 | 2,3,6,7,18,<br>20,22,24,2<br>6 | 3 | P02803,P06760,Q99041               |
| 8626 | 1,4,5,8,19,<br>21,23,26 | 2,3,6,7,18,<br>20,22,24,2<br>5 | 2 | P35281,Q4FZU6                      |
| 8627 | 1,4,5,8,19,<br>21,24,25 | 2,3,6,7,18,<br>20,22,23,2<br>6 | 1 | A2RUV9                             |
| 8628 | 1,4,5,8,19,<br>21,24,26 | 2,3,6,7,18,<br>20,22,23,2<br>5 | 0 |                                    |

|      |                         |                                |   |                      |
|------|-------------------------|--------------------------------|---|----------------------|
| 8629 | 1,4,5,8,19,<br>21,25,26 | 2,3,6,7,18,<br>20,22,23,2<br>4 | 0 |                      |
| 8630 | 1,4,5,8,19,<br>22,23,24 | 2,3,6,7,18,<br>20,21,25,2<br>6 | 2 | P00774,P25031        |
| 8631 | 1,4,5,8,19,<br>22,23,25 | 2,3,6,7,18,<br>20,21,24,2<br>6 | 0 |                      |
| 8632 | 1,4,5,8,19,<br>22,23,26 | 2,3,6,7,18,<br>20,21,24,2<br>5 | 1 | O54728               |
| 8633 | 1,4,5,8,19,<br>22,24,25 | 2,3,6,7,18,<br>20,21,23,2<br>6 | 3 | A2RUV9,P00774,P25031 |
| 8634 | 1,4,5,8,19,<br>22,24,26 | 2,3,6,7,18,<br>20,21,23,2<br>5 | 2 | O54728,Q6P6R2        |
| 8635 | 1,4,5,8,19,<br>22,25,26 | 2,3,6,7,18,<br>20,21,23,2<br>4 | 0 |                      |
| 8636 | 1,4,5,8,19,<br>23,24,25 | 2,3,6,7,18,<br>20,21,22,2<br>6 | 1 | P25031               |
| 8637 | 1,4,5,8,19,<br>23,24,26 | 2,3,6,7,18,<br>20,21,22,2<br>5 | 1 | P09605;P25809        |
| 8638 | 1,4,5,8,19,<br>23,25,26 | 2,3,6,7,18,<br>20,21,22,2<br>4 | 0 |                      |
| 8639 | 1,4,5,8,19,<br>24,25,26 | 2,3,6,7,18,<br>20,21,22,2<br>3 | 1 | P16086               |
| 8640 | 1,4,5,8,20,<br>21,22,23 | 2,3,6,7,18,<br>19,24,25,2<br>6 | 2 | P00774,Q4FZU6        |
| 8641 | 1,4,5,8,20,<br>21,22,24 | 2,3,6,7,18,<br>19,23,25,2<br>6 | 2 | P00774,Q5XFX0        |
| 8642 | 1,4,5,8,20,<br>21,22,25 | 2,3,6,7,18,<br>19,23,24,2<br>6 | 1 | Q07523               |
| 8643 | 1,4,5,8,20,<br>21,22,26 | 2,3,6,7,18,<br>19,23,24,2<br>5 | 1 | Q4FZU6               |

|      |                         |                                |   |                                                  |
|------|-------------------------|--------------------------------|---|--------------------------------------------------|
| 8644 | 1,4,5,8,20,<br>21,23,24 | 2,3,6,7,18,<br>19,22,25,2<br>6 | 2 | P97840,Q4FZU6                                    |
| 8645 | 1,4,5,8,20,<br>21,23,25 | 2,3,6,7,18,<br>19,22,24,2<br>6 | 1 | P06760                                           |
| 8646 | 1,4,5,8,20,<br>21,23,26 | 2,3,6,7,18,<br>19,22,24,2<br>5 | 2 | P97840,Q4FZU6                                    |
| 8647 | 1,4,5,8,20,<br>21,24,25 | 2,3,6,7,18,<br>19,22,23,2<br>6 | 1 | P16086                                           |
| 8648 | 1,4,5,8,20,<br>21,24,26 | 2,3,6,7,18,<br>19,22,23,2<br>5 | 3 | P16086,P97840,Q4FZU6                             |
| 8649 | 1,4,5,8,20,<br>21,25,26 | 2,3,6,7,18,<br>19,22,23,2<br>4 | 1 | P16086                                           |
| 8650 | 1,4,5,8,20,<br>22,23,24 | 2,3,6,7,18,<br>19,21,25,2<br>6 | 6 | P00774,P25031,P47967,P55091,P97840,Q8CIZ5        |
| 8651 | 1,4,5,8,20,<br>22,23,25 | 2,3,6,7,18,<br>19,21,24,2<br>6 | 0 |                                                  |
| 8652 | 1,4,5,8,20,<br>22,23,26 | 2,3,6,7,18,<br>19,21,24,2<br>5 | 6 | O54728,P05539,P47967,P97840,Q4FZU6,Q8CIZ5        |
| 8653 | 1,4,5,8,20,<br>22,24,25 | 2,3,6,7,18,<br>19,21,23,2<br>6 | 3 | P00774,P16086,Q07523                             |
| 8654 | 1,4,5,8,20,<br>22,24,26 | 2,3,6,7,18,<br>19,21,23,2<br>5 | 7 | P16086,P47967,P97840,Q4FZU6,Q6P6R2,Q8CIZ5,Q99MH3 |
| 8655 | 1,4,5,8,20,<br>22,25,26 | 2,3,6,7,18,<br>19,21,23,2<br>4 | 2 | P05539,P16086                                    |
| 8656 | 1,4,5,8,20,<br>23,24,25 | 2,3,6,7,18,<br>19,21,22,2<br>6 | 0 |                                                  |
| 8657 | 1,4,5,8,20,<br>23,24,26 | 2,3,6,7,18,<br>19,21,22,2<br>5 | 5 | D4A1J4,P47967,P97840,Q4FZU6,Q8CIZ5               |
| 8658 | 1,4,5,8,20,<br>23,25,26 | 2,3,6,7,18,<br>19,21,22,2<br>4 | 0 |                                                  |

|      |                         |                                |   |                             |
|------|-------------------------|--------------------------------|---|-----------------------------|
| 8659 | 1,4,5,8,20,<br>24,25,26 | 2,3,6,7,18,<br>19,21,22,2<br>3 | 1 | P16086                      |
| 8660 | 1,4,5,8,21,<br>22,23,24 | 2,3,6,7,18,<br>19,20,25,2<br>6 | 1 | P35280                      |
| 8661 | 1,4,5,8,21,<br>22,23,25 | 2,3,6,7,18,<br>19,20,24,2<br>6 | 2 | P06760,Q6AYS4               |
| 8662 | 1,4,5,8,21,<br>22,23,26 | 2,3,6,7,18,<br>19,20,24,2<br>5 | 1 | Q4FZU6                      |
| 8663 | 1,4,5,8,21,<br>22,24,25 | 2,3,6,7,18,<br>19,20,23,2<br>6 | 1 | P35467                      |
| 8664 | 1,4,5,8,21,<br>22,24,26 | 2,3,6,7,18,<br>19,20,23,2<br>5 | 1 | P16086                      |
| 8665 | 1,4,5,8,21,<br>22,25,26 | 2,3,6,7,18,<br>19,20,23,2<br>4 | 1 | P16086                      |
| 8666 | 1,4,5,8,21,<br>23,24,25 | 2,3,6,7,18,<br>19,20,22,2<br>6 | 1 | P06760                      |
| 8667 | 1,4,5,8,21,<br>23,24,26 | 2,3,6,7,18,<br>19,20,22,2<br>5 | 3 | P47967,P97840,Q4FZU6        |
| 8668 | 1,4,5,8,21,<br>23,25,26 | 2,3,6,7,18,<br>19,20,22,2<br>4 | 4 | P06760,P07150,P27213,Q9WTT6 |
| 8669 | 1,4,5,8,21,<br>24,25,26 | 2,3,6,7,18,<br>19,20,22,2<br>3 | 2 | P16086,Q8CJD3               |
| 8670 | 1,4,5,8,22,<br>23,24,25 | 2,3,6,7,18,<br>19,20,21,2<br>6 | 2 | P25031,P35280               |
| 8671 | 1,4,5,8,22,<br>23,24,26 | 2,3,6,7,18,<br>19,20,21,2<br>5 | 4 | P00731,P47967,P97840,Q8CIZ5 |
| 8672 | 1,4,5,8,22,<br>23,25,26 | 2,3,6,7,18,<br>19,20,21,2<br>4 | 0 |                             |
| 8673 | 1,4,5,8,22,<br>24,25,26 | 2,3,6,7,18,<br>19,20,21,2<br>3 | 1 | P16086                      |

|      |                          |                                |   |                                                                |
|------|--------------------------|--------------------------------|---|----------------------------------------------------------------|
| 8674 | 1,4,5,8,23,<br>24,25,26  | 2,3,6,7,18,<br>19,20,21,2<br>2 | 2 | P16086,Q7TPB1                                                  |
| 8675 | 1,4,5,18,1<br>9,20,21,22 | 2,3,6,7,8,2<br>3,24,25,26      | 2 | P10758,P36374                                                  |
| 8676 | 1,4,5,18,1<br>9,20,21,23 | 2,3,6,7,8,2<br>2,24,25,26      | 3 | P10758,P20766,Q4FZU6                                           |
| 8677 | 1,4,5,18,1<br>9,20,21,24 | 2,3,6,7,8,2<br>2,23,25,26      | 3 | P10758,P12020,P20766                                           |
| 8678 | 1,4,5,18,1<br>9,20,21,25 | 2,3,6,7,8,2<br>2,23,24,26      | 1 | P20766                                                         |
| 8679 | 1,4,5,18,1<br>9,20,21,26 | 2,3,6,7,8,2<br>2,23,24,25      | 6 | P06911,P12020,P20766,P36374,Q4FZU6,Q63751                      |
| 8680 | 1,4,5,18,1<br>9,20,22,23 | 2,3,6,7,8,2<br>1,24,25,26      | 3 | P22006,Q62997,Q9WTT6                                           |
| 8681 | 1,4,5,18,1<br>9,20,22,24 | 2,3,6,7,8,2<br>1,23,25,26      | 5 | P07150,P14669,Q6P6R2,Q9QZK9,Q9WTT6                             |
| 8682 | 1,4,5,18,1<br>9,20,22,25 | 2,3,6,7,8,2<br>1,23,24,26      | 0 |                                                                |
| 8683 | 1,4,5,18,1<br>9,20,22,26 | 2,3,6,7,8,2<br>1,23,24,25      | 6 | O54728,P05539,Q4FZU6,Q63751,Q6P6R2,Q9WTT6                      |
| 8684 | 1,4,5,18,1<br>9,20,23,24 | 2,3,6,7,8,2<br>1,22,25,26      | 3 | P20766,Q9QZK9,Q9WTT6                                           |
| 8685 | 1,4,5,18,1<br>9,20,23,25 | 2,3,6,7,8,2<br>1,22,24,26      | 1 | P14408                                                         |
| 8686 | 1,4,5,18,1<br>9,20,23,26 | 2,3,6,7,8,2<br>1,22,24,25      | 8 | P09605;P25809,P14408,Q4FZU6,Q6IFU8,Q6IFW6,Q6IG02,Q6IMF3,Q6P6Q2 |
| 8687 | 1,4,5,18,1<br>9,20,24,25 | 2,3,6,7,8,2<br>1,22,23,26      | 1 | P20766                                                         |
| 8688 | 1,4,5,18,1<br>9,20,24,26 | 2,3,6,7,8,2<br>1,22,23,25      | 6 | P12020,P16086,P20766,Q4FZU6,Q6P6R2,Q9WTT6                      |
| 8689 | 1,4,5,18,1<br>9,20,25,26 | 2,3,6,7,8,2<br>1,22,23,24      | 0 |                                                                |
| 8690 | 1,4,5,18,1<br>9,21,22,23 | 2,3,6,7,8,2<br>0,24,25,26      | 1 | P10758                                                         |
| 8691 | 1,4,5,18,1<br>9,21,22,24 | 2,3,6,7,8,2<br>0,23,25,26      | 1 | P10758                                                         |
| 8692 | 1,4,5,18,1<br>9,21,22,25 | 2,3,6,7,8,2<br>0,23,24,26      | 0 |                                                                |
| 8693 | 1,4,5,18,1<br>9,21,22,26 | 2,3,6,7,8,2<br>0,23,24,25      | 1 | P36374                                                         |
| 8694 | 1,4,5,18,1<br>9,21,23,24 | 2,3,6,7,8,2<br>0,22,25,26      | 4 | P05369,P10758,P20766,Q03191                                    |
| 8695 | 1,4,5,18,1<br>9,21,23,25 | 2,3,6,7,8,2<br>0,22,24,26      | 2 | P02803,P20766                                                  |

|      |                                                 |   |                                                  |
|------|-------------------------------------------------|---|--------------------------------------------------|
| 8696 | 1,4,5,18,1 2,3,6,7,8,2<br>9,21,23,26 0,22,24,25 | 6 | P05369,Q03191,Q4FZU6,Q6IFU8,Q6IMF3,Q6P6Q2        |
| 8697 | 1,4,5,18,1 2,3,6,7,8,2<br>9,21,24,25 0,22,23,26 | 1 | P20766                                           |
| 8698 | 1,4,5,18,1 2,3,6,7,8,2<br>9,21,24,26 0,22,23,25 | 2 | P12020,P20766                                    |
| 8699 | 1,4,5,18,1 2,3,6,7,8,2<br>9,21,25,26 0,22,23,24 | 1 | P31430                                           |
| 8700 | 1,4,5,18,1 2,3,6,7,8,2<br>9,22,23,24 0,21,25,26 | 3 | P62804,Q00715,Q9WTT6                             |
| 8701 | 1,4,5,18,1 2,3,6,7,8,2<br>9,22,23,25 0,21,24,26 | 1 | P62804                                           |
| 8702 | 1,4,5,18,1 2,3,6,7,8,2<br>9,22,23,26 0,21,24,25 | 3 | O54728,Q6IFU7,Q6P6Q2                             |
| 8703 | 1,4,5,18,1 2,3,6,7,8,2<br>9,22,24,25 0,21,23,26 | 2 | P62804,Q00715                                    |
| 8704 | 1,4,5,18,1 2,3,6,7,8,2<br>9,22,24,26 0,21,23,25 | 2 | Q6P6R2,Q9WTT6                                    |
| 8705 | 1,4,5,18,1 2,3,6,7,8,2<br>9,22,25,26 0,21,23,24 | 0 |                                                  |
| 8706 | 1,4,5,18,1 2,3,6,7,8,2<br>9,23,24,25 0,21,22,26 | 2 | P62804,Q00715                                    |
| 8707 | 1,4,5,18,1 2,3,6,7,8,2<br>9,23,24,26 0,21,22,25 | 4 | P09605;P25809,Q03191,Q6IFU7,Q6P6Q2               |
| 8708 | 1,4,5,18,1 2,3,6,7,8,2<br>9,23,25,26 0,21,22,24 | 3 | P00714,Q6IFU8,Q6P6Q2                             |
| 8709 | 1,4,5,18,1 2,3,6,7,8,2<br>9,24,25,26 0,21,22,23 | 1 | P16086                                           |
| 8710 | 1,4,5,18,2 2,3,6,7,8,1<br>0,21,22,23 9,24,25,26 | 1 | Q4FZU6                                           |
| 8711 | 1,4,5,18,2 2,3,6,7,8,1<br>0,21,22,24 9,23,25,26 | 1 | P20766                                           |
| 8712 | 1,4,5,18,2 2,3,6,7,8,1<br>0,21,22,25 9,23,24,26 | 0 |                                                  |
| 8713 | 1,4,5,18,2 2,3,6,7,8,1<br>0,21,22,26 9,23,24,25 | 3 | P16086,P36374,Q4FZU6                             |
| 8714 | 1,4,5,18,2 2,3,6,7,8,1<br>0,21,23,24 9,22,25,26 | 2 | P20766,Q4FZU6                                    |
| 8715 | 1,4,5,18,2 2,3,6,7,8,1<br>0,21,23,25 9,22,24,26 | 1 | P20766                                           |
| 8716 | 1,4,5,18,2 2,3,6,7,8,1<br>0,21,23,26 9,22,24,25 | 7 | P20766,Q4FZU6,Q6IFU8,Q6IFW6,Q6IG02,Q6IMF3,Q6P6Q2 |
| 8717 | 1,4,5,18,2 2,3,6,7,8,1<br>0,21,24,25 9,22,23,26 | 2 | P16086,P20766                                    |
| 8718 | 1,4,5,18,2 2,3,6,7,8,1<br>0,21,24,26 9,22,23,25 | 5 | P06911,P12020,P16086,P20766,Q4FZU6               |

|      |                                                 |    |                                                                                     |
|------|-------------------------------------------------|----|-------------------------------------------------------------------------------------|
| 8719 | 1,4,5,18,2 2,3,6,7,8,1<br>0,21,25,26 9,22,23,24 | 3  | P16086,P20766,P31430                                                                |
| 8720 | 1,4,5,18,2 2,3,6,7,8,1<br>0,22,23,24 9,21,25,26 | 3  | P97840,Q6IFU7,Q9QZK9                                                                |
| 8721 | 1,4,5,18,2 2,3,6,7,8,1<br>0,22,23,25 9,21,24,26 | 0  |                                                                                     |
| 8722 | 1,4,5,18,2 2,3,6,7,8,1<br>0,22,23,26 9,21,24,25 | 11 | P05539,P47967,P97840,Q4FZU6,Q6IFU7,Q6IFU8,Q6IFW6,Q6IG02,Q6IMF3,Q6P6Q2,Q8CIZ5        |
| 8723 | 1,4,5,18,2 2,3,6,7,8,1<br>0,22,24,25 9,21,23,26 | 1  | P16086                                                                              |
| 8724 | 1,4,5,18,2 2,3,6,7,8,1<br>0,22,24,26 9,21,23,25 | 6  | P16086,P47967,P97840,Q4FZU6,Q6P6R2,Q99041                                           |
| 8725 | 1,4,5,18,2 2,3,6,7,8,1<br>0,22,25,26 9,21,23,24 | 2  | P05539,P16086                                                                       |
| 8726 | 1,4,5,18,2 2,3,6,7,8,1<br>0,23,24,25 9,21,22,26 | 2  | P16086,P20766                                                                       |
| 8727 | 1,4,5,18,2 2,3,6,7,8,1<br>0,23,24,26 9,21,22,25 | 12 | D4A1J4,P16086,P20766,P47967,P97840,Q4FZU6,Q6IFU7,Q6IFU8,Q6IFW6,Q6IG02,Q6IMF3,Q6P6Q2 |
| 8728 | 1,4,5,18,2 2,3,6,7,8,1<br>0,23,25,26 9,21,22,24 | 8  | P00714,P14408,P16086,Q6IFU8,Q6IFW6,Q6IG02,Q6IMF3,Q6P6Q2                             |
| 8729 | 1,4,5,18,2 2,3,6,7,8,1<br>0,24,25,26 9,21,22,23 | 1  | P16086                                                                              |
| 8730 | 1,4,5,18,2 2,3,6,7,8,1<br>1,22,23,24 9,20,25,26 | 1  | P35280                                                                              |
| 8731 | 1,4,5,18,2 2,3,6,7,8,1<br>1,22,23,25 9,20,24,26 | 0  |                                                                                     |
| 8732 | 1,4,5,18,2 2,3,6,7,8,1<br>1,22,23,26 9,20,24,25 | 5  | Q4FZU6,Q6IFU8,Q6IMF3,Q6P6Q2,Q9JID2                                                  |
| 8733 | 1,4,5,18,2 2,3,6,7,8,1<br>1,22,24,25 9,20,23,26 | 1  | P16086                                                                              |
| 8734 | 1,4,5,18,2 2,3,6,7,8,1<br>1,22,24,26 9,20,23,25 | 3  | P16086,P36374,Q9JID2                                                                |
| 8735 | 1,4,5,18,2 2,3,6,7,8,1<br>1,22,25,26 9,20,23,24 | 2  | P16086,P31430                                                                       |
| 8736 | 1,4,5,18,2 2,3,6,7,8,1<br>1,23,24,25 9,20,22,26 | 1  | P20766                                                                              |
| 8737 | 1,4,5,18,2 2,3,6,7,8,1<br>1,23,24,26 9,20,22,25 | 7  | P20766,Q4FZU6,Q6IFU7,Q6IFU8,Q6IMF3,Q6P6Q2,Q9JID2                                    |
| 8738 | 1,4,5,18,2 2,3,6,7,8,1<br>1,23,25,26 9,20,22,24 | 7  | P27213,P31430,Q6IFU8,Q6IFW6,Q6IG02,Q6IMF3,Q6P6Q2                                    |
| 8739 | 1,4,5,18,2 2,3,6,7,8,1<br>1,24,25,26 9,20,22,23 | 3  | P16086,P20766,P31430                                                                |
| 8740 | 1,4,5,18,2 2,3,6,7,8,1<br>2,23,24,25 9,20,21,26 | 2  | P62804,Q00715                                                                       |
| 8741 | 1,4,5,18,2 2,3,6,7,8,1<br>2,23,24,26 9,20,21,25 | 6  | P00731,P16086,P47967,P97840,Q6IFU7,Q6P6Q2                                           |



|      |                                                 |   |                                                  |
|------|-------------------------------------------------|---|--------------------------------------------------|
| 8742 | 1,4,5,18,2 2,3,6,7,8,1<br>2,23,25,26 9,20,21,24 | 2 | P16086,Q6P6Q2                                    |
| 8743 | 1,4,5,18,2 2,3,6,7,8,1<br>2,24,25,26 9,20,21,23 | 1 | P16086                                           |
| 8744 | 1,4,5,18,2 2,3,6,7,8,1<br>3,24,25,26 9,20,21,22 | 7 | P16086,Q6IFU7,Q6IFU8,Q6IFW6,Q6IMF3,Q6P6Q2,Q7TPB1 |
| 8745 | 1,4,5,19,2 2,3,6,7,8,1<br>0,21,22,23 8,24,25,26 | 2 | P00774,P55091                                    |
| 8746 | 1,4,5,19,2 2,3,6,7,8,1<br>0,21,22,24 8,23,25,26 | 3 | P00774,P35467,P55091                             |
| 8747 | 1,4,5,19,2 2,3,6,7,8,1<br>0,21,22,25 8,23,24,26 | 2 | P00774,P35467                                    |
| 8748 | 1,4,5,19,2 2,3,6,7,8,1<br>0,21,22,26 8,23,24,25 | 5 | O54728,P05539,P36374,Q4FZU6,Q63751               |
| 8749 | 1,4,5,19,2 2,3,6,7,8,1<br>0,21,23,24 8,22,25,26 | 3 | P00774,P20766,P55091                             |
| 8750 | 1,4,5,19,2 2,3,6,7,8,1<br>0,21,23,25 8,22,24,26 | 1 | P20766                                           |
| 8751 | 1,4,5,19,2 2,3,6,7,8,1<br>0,21,23,26 8,22,24,25 | 2 | P20766,Q4FZU6                                    |
| 8752 | 1,4,5,19,2 2,3,6,7,8,1<br>0,21,24,25 8,22,23,26 | 2 | P20766,P35467                                    |
| 8753 | 1,4,5,19,2 2,3,6,7,8,1<br>0,21,24,26 8,22,23,25 | 2 | P20766,Q4FZU6                                    |
| 8754 | 1,4,5,19,2 2,3,6,7,8,1<br>0,21,25,26 8,22,23,24 | 1 | P20766                                           |
| 8755 | 1,4,5,19,2 2,3,6,7,8,1<br>0,22,23,24 8,21,25,26 | 7 | P00774,P25031,P31430,P55091,P82995,P98089,Q9WTT6 |
| 8756 | 1,4,5,19,2 2,3,6,7,8,1<br>0,22,23,25 8,21,24,26 | 2 | P00774,P55091                                    |
| 8757 | 1,4,5,19,2 2,3,6,7,8,1<br>0,22,23,26 8,21,24,25 | 6 | O54728,P00774,P05539,P98089,Q4FZU6,Q62997        |
| 8758 | 1,4,5,19,2 2,3,6,7,8,1<br>0,22,24,25 8,21,23,26 | 2 | P00774,P35467                                    |
| 8759 | 1,4,5,19,2 2,3,6,7,8,1<br>0,22,24,26 8,21,23,25 | 7 | O54728,P00774,P16086,P98089,Q6P6R2,Q99MH3,Q9WTT6 |
| 8760 | 1,4,5,19,2 2,3,6,7,8,1<br>0,22,25,26 8,21,23,24 | 3 | O54728,P05539,Q5XI22                             |
| 8761 | 1,4,5,19,2 2,3,6,7,8,1<br>0,23,24,25 8,21,22,26 | 1 | P20766                                           |
| 8762 | 1,4,5,19,2 2,3,6,7,8,1<br>0,23,24,26 8,21,22,25 | 4 | D4A1J4,P20766,P98089,Q4FZU6                      |
| 8763 | 1,4,5,19,2 2,3,6,7,8,1<br>0,23,25,26 8,21,22,24 | 2 | P05539,P14408                                    |
| 8764 | 1,4,5,19,2 2,3,6,7,8,1<br>0,24,25,26 8,21,22,23 | 2 | P16086,Q5XI22                                    |

|      |                                                 |   |                                           |
|------|-------------------------------------------------|---|-------------------------------------------|
| 8765 | 1,4,5,19,2 2,3,6,7,8,1<br>1,22,23,24 8,20,25,26 | 2 | P00774,P35280                             |
| 8766 | 1,4,5,19,2 2,3,6,7,8,1<br>1,22,23,25 8,20,24,26 | 0 |                                           |
| 8767 | 1,4,5,19,2 2,3,6,7,8,1<br>1,22,23,26 8,20,24,25 | 1 | O54728                                    |
| 8768 | 1,4,5,19,2 2,3,6,7,8,1<br>1,22,24,25 8,20,23,26 | 1 | P35467                                    |
| 8769 | 1,4,5,19,2 2,3,6,7,8,1<br>1,22,24,26 8,20,23,25 | 0 |                                           |
| 8770 | 1,4,5,19,2 2,3,6,7,8,1<br>1,22,25,26 8,20,23,24 | 1 | Q5XI22                                    |
| 8771 | 1,4,5,19,2 2,3,6,7,8,1<br>1,23,24,25 8,20,22,26 | 1 | P20766                                    |
| 8772 | 1,4,5,19,2 2,3,6,7,8,1<br>1,23,24,26 8,20,22,25 | 1 | P20766                                    |
| 8773 | 1,4,5,19,2 2,3,6,7,8,1<br>1,23,25,26 8,20,22,24 | 1 | P27213                                    |
| 8774 | 1,4,5,19,2 2,3,6,7,8,1<br>1,24,25,26 8,20,22,23 | 3 | P16086,P20766,Q5XI22                      |
| 8775 | 1,4,5,19,2 2,3,6,7,8,1<br>2,23,24,25 8,20,21,26 | 5 | P01041,P25031,P62804,P82471,Q00715        |
| 8776 | 1,4,5,19,2 2,3,6,7,8,1<br>2,23,24,26 8,20,21,25 | 4 | O54728,P00731,P82471,P98089               |
| 8777 | 1,4,5,19,2 2,3,6,7,8,1<br>2,23,25,26 8,20,21,24 | 2 | O54728,P05539                             |
| 8778 | 1,4,5,19,2 2,3,6,7,8,1<br>2,24,25,26 8,20,21,23 | 2 | P16086,Q5XI22                             |
| 8779 | 1,4,5,19,2 2,3,6,7,8,1<br>3,24,25,26 8,20,21,22 | 1 | Q7TPB1                                    |
| 8780 | 1,4,5,20,2 2,3,6,7,8,1<br>1,22,23,24 8,19,25,26 | 3 | P00774,P35280,P55091                      |
| 8781 | 1,4,5,20,2 2,3,6,7,8,1<br>1,22,23,25 8,19,24,26 | 0 |                                           |
| 8782 | 1,4,5,20,2 2,3,6,7,8,1<br>1,22,23,26 8,19,24,25 | 2 | P05539,Q4FZU6                             |
| 8783 | 1,4,5,20,2 2,3,6,7,8,1<br>1,22,24,25 8,19,23,26 | 2 | P16086,P35467                             |
| 8784 | 1,4,5,20,2 2,3,6,7,8,1<br>1,22,24,26 8,19,23,25 | 6 | P02631,P16086,P51907,Q4FZU6,Q5XI22,Q99MH3 |
| 8785 | 1,4,5,20,2 2,3,6,7,8,1<br>1,22,25,26 8,19,23,24 | 5 | P02631,P05539,P16086,P51907,Q5XI22        |
| 8786 | 1,4,5,20,2 2,3,6,7,8,1<br>1,23,24,25 8,19,22,26 | 1 | P20766                                    |
| 8787 | 1,4,5,20,2 2,3,6,7,8,1<br>1,23,24,26 8,19,22,25 | 6 | D4A1J4,P16086,P20766,P47967,P97840,Q4FZU6 |

|      |                          |                                 |    |                                                                                                                                                    |
|------|--------------------------|---------------------------------|----|----------------------------------------------------------------------------------------------------------------------------------------------------|
| 8788 | 1,4,5,20,2<br>1,23,25,26 | 2,3,6,7,8,1<br>8,19,22,24       | 1  | P16086                                                                                                                                             |
| 8789 | 1,4,5,20,2<br>1,24,25,26 | 2,3,6,7,8,1<br>8,19,22,23       | 4  | P16086,P20766,Q5XI22,Q8CJD3                                                                                                                        |
| 8790 | 1,4,5,20,2<br>2,23,24,25 | 2,3,6,7,8,1<br>8,19,21,26       | 2  | P16086,P35280                                                                                                                                      |
| 8791 | 1,4,5,20,2<br>2,23,24,26 | 2,3,6,7,8,1<br>8,19,21,25       | 10 | D4A1J4,O54728,P00731,P05539,P16086,P47967,P97840,P98089,Q4FZU6,Q8CIZ5                                                                              |
| 8792 | 1,4,5,20,2<br>2,23,25,26 | 2,3,6,7,8,1<br>8,19,21,24       | 2  | P05539,P16086                                                                                                                                      |
| 8793 | 1,4,5,20,2<br>2,24,25,26 | 2,3,6,7,8,1<br>8,19,21,23       | 5  | P00731,P02631,P05539,P16086,Q5XI22                                                                                                                 |
| 8794 | 1,4,5,20,2<br>3,24,25,26 | 2,3,6,7,8,1<br>8,19,21,22       | 3  | D4A1J4,P16086,Q7TPB1                                                                                                                               |
| 8795 | 1,4,5,21,2<br>2,23,24,25 | 2,3,6,7,8,1<br>8,19,20,26       | 2  | P35280,P62804                                                                                                                                      |
| 8796 | 1,4,5,21,2<br>2,23,24,26 | 2,3,6,7,8,1<br>8,19,20,25       | 3  | P00731,P35280,P47967                                                                                                                               |
| 8797 | 1,4,5,21,2<br>2,23,25,26 | 2,3,6,7,8,1<br>8,19,20,24       | 1  | P05539                                                                                                                                             |
| 8798 | 1,4,5,21,2<br>2,24,25,26 | 2,3,6,7,8,1<br>8,19,20,23       | 5  | P02631,P16086,Q498D9,Q5XI22,Q8CJD3                                                                                                                 |
| 8799 | 1,4,5,21,2<br>3,24,25,26 | 2,3,6,7,8,1<br>8,19,20,22       | 3  | P16086,P27213,Q7TPB1                                                                                                                               |
| 8800 | 1,4,5,22,2<br>3,24,25,26 | 2,3,6,7,8,1<br>8,19,20,21       | 6  | P00731,P16086,P35280,P62804,P82471,Q7TPB1                                                                                                          |
| 8801 | 1,4,6,7,8,1<br>8,19,20   | 2,3,5,21,2<br>2,23,24,25<br>,26 | 10 | P00731,P02803,P0C0A9,P11598,P18418,P35280,P35281,Q5FVI6,Q63617,Q9JI85                                                                              |
| 8802 | 1,4,6,7,8,1<br>8,19,21   | 2,3,5,20,2<br>2,23,24,25<br>,26 | 21 | O35547,P00731,P02782,P02803,P07647,P08723,P0C0A9,P10758,P11598,P13432,P18418,P22282,P22283,P35281,Q5FVI6,Q63617,Q6AYL6,Q6AYR9,Q8CJ52,Q9JI85,Q9R0T3 |
| 8803 | 1,4,6,7,8,1<br>8,19,22   | 2,3,5,20,2<br>1,23,24,25<br>,26 | 7  | P0C0A9,P11598,P18418,P22282,P22283,Q63617,Q9JI85                                                                                                   |
| 8804 | 1,4,6,7,8,1<br>8,19,23   | 2,3,5,20,2<br>1,22,24,25<br>,26 | 16 | P02803,P0C0A9,P11598,P15399,P18418,P22282,P22283,P35281,P97580,Q30KJ2,Q5BJY9,Q5FVI6,Q63617,Q8CJD3,Q99041,Q9JI85                                    |
| 8805 | 1,4,6,7,8,1<br>8,19,24   | 2,3,5,20,2<br>1,22,23,25<br>,26 | 3  | P11598,P18418,Q63617                                                                                                                               |
| 8806 | 1,4,6,7,8,1<br>8,19,25   | 2,3,5,20,2<br>1,22,23,24<br>,26 | 15 | P00714,P00731,P02803,P06911,P10715,P11598,P12020,P18418,P19629,P31044,P35280,P47967,Q5FVI6,Q5GRG2,Q63617                                           |

|      |                        |                                 |    |                                                                                                                                                           |
|------|------------------------|---------------------------------|----|-----------------------------------------------------------------------------------------------------------------------------------------------------------|
| 8807 | 1,4,6,7,8,1<br>8,19,26 | 2,3,5,20,2<br>1,22,23,24<br>,25 | 9  | P02803,P0C0A9,P11598,P18418,P22282,P22283,P35280,Q5FVI6,Q63617                                                                                            |
| 8808 | 1,4,6,7,8,1<br>8,20,21 | 2,3,5,19,2<br>2,23,24,25<br>,26 | 20 | P00731,P02782,P07647,P08723,P0C0A9,P11598,P13432,P18418,P22282,P22283,P30120,P82471,Q63357,Q63617,Q6AYL6,Q6AYR8,Q6AYR9,Q8CJ52,Q9JI85,Q9QZA6               |
| 8809 | 1,4,6,7,8,1<br>8,20,22 | 2,3,5,19,2<br>1,23,24,25<br>,26 | 6  | P11598,P18418,P22282,P22283,Q63617,Q9JI85                                                                                                                 |
| 8810 | 1,4,6,7,8,1<br>8,20,23 | 2,3,5,19,2<br>1,22,24,25<br>,26 | 6  | P11598,P18418,P22283,Q63617,Q8CJD3,Q9JI85                                                                                                                 |
| 8811 | 1,4,6,7,8,1<br>8,20,24 | 2,3,5,19,2<br>1,22,23,25<br>,26 | 5  | P10715,P11598,P18418,Q63617,Q9JI85                                                                                                                        |
| 8812 | 1,4,6,7,8,1<br>8,20,25 | 2,3,5,19,2<br>1,22,23,24<br>,26 | 11 | P00714,P10715,P11598,P12020,P18418,P19629,P31044,P35280,Q5GRG2,Q63617,Q9JI85                                                                              |
| 8813 | 1,4,6,7,8,1<br>8,20,26 | 2,3,5,19,2<br>1,22,23,24<br>,25 | 7  | P11598,P18418,P35280,Q5FVI6,Q63617,Q6AY33,Q6AYR8                                                                                                          |
| 8814 | 1,4,6,7,8,1<br>8,21,22 | 2,3,5,19,2<br>0,23,24,25<br>,26 | 16 | D4A1J4,O35547,P02782,P06761,P07647,P08723,P0C0A9,P11598,P13432,P18418,P22282,P22283,Q63617,Q8CJ52,Q9JI85,Q9ROT3                                           |
| 8815 | 1,4,6,7,8,1<br>8,21,23 | 2,3,5,19,2<br>0,22,24,25<br>,26 | 16 | P02782,P02803,P08644,P08723,P0C0A9,P11598,P13432,P18418,P22282,P22283,Q63617,Q6AYL6,Q6AYR9,Q8CJ52,Q99041,Q9JI85                                           |
| 8816 | 1,4,6,7,8,1<br>8,21,24 | 2,3,5,19,2<br>0,22,23,25<br>,26 | 12 | P02782,P08723,P0C0A9,P11598,P13432,P18418,P22282,P22283,Q63617,Q6AYL6,Q8CJ52,Q9JI85                                                                       |
| 8817 | 1,4,6,7,8,1<br>8,21,25 | 2,3,5,19,2<br>0,22,23,24<br>,26 | 22 | P00714,P00731,P02803,P08721,P08723,P0C0A9,P10715,P11598,P12020,P13432,P18418,P19629,P20646,P31044,P31430,P47967,Q5GRG2,Q63617,Q6AYL6,Q8CJ52,Q9JI85,Q9WTT6 |
| 8818 | 1,4,6,7,8,1<br>8,21,26 | 2,3,5,19,2<br>0,22,23,24<br>,25 | 18 | P02782,P08723,P0C0A9,P11598,P13432,P18418,P22282,P22283,P82995,P83748,Q63617,Q6AY33,Q6AYR8,Q8CJ52,Q9EQV9,Q9JI85,Q9ROT3,Q9WUF4                             |
| 8819 | 1,4,6,7,8,1<br>8,22,23 | 2,3,5,19,2<br>0,21,24,25<br>,26 | 8  | P11598,P18418,P22282,P22283,Q63617,Q8CJD3,Q8VD89,Q9JI85                                                                                                   |
| 8820 | 1,4,6,7,8,1<br>8,22,24 | 2,3,5,19,2<br>0,21,23,25<br>,26 | 4  | P11598,P18418,Q63617,Q8VD89                                                                                                                               |
| 8821 | 1,4,6,7,8,1<br>8,22,25 | 2,3,5,19,2<br>0,21,23,24<br>,26 | 9  | P06911,P10715,P11598,P12020,P18418,P19629,P31044,Q5GRG2,Q63617                                                                                            |

|      |                        |                                 |    |                                                                                                                        |
|------|------------------------|---------------------------------|----|------------------------------------------------------------------------------------------------------------------------|
| 8822 | 1,4,6,7,8,1<br>8,22,26 | 2,3,5,19,2<br>0,21,23,24<br>,25 | 7  | P11598,P18418,P22282,P22283,Q63617,Q8VD89,Q9ROT3                                                                       |
| 8823 | 1,4,6,7,8,1<br>8,23,24 | 2,3,5,19,2<br>0,21,22,25<br>,26 | 3  | P18418,Q63617,Q8VD89                                                                                                   |
| 8824 | 1,4,6,7,8,1<br>8,23,25 | 2,3,5,19,2<br>0,21,22,24<br>,26 | 12 | P00714,P02803,P06911,P10715,P11598,P12020,P18418,P19629,P31044,Q5GRG2,Q63617,Q99041                                    |
| 8825 | 1,4,6,7,8,1<br>8,23,26 | 2,3,5,19,2<br>0,21,22,24<br>,25 | 11 | P11598,P18418,P22282,P22283,Q5FVI6,Q63617,Q6IFW6,Q6IG02,Q6IMF3,Q6P6Q2,Q8VD89                                           |
| 8826 | 1,4,6,7,8,1<br>8,24,25 | 2,3,5,19,2<br>0,21,22,23<br>,26 | 9  | P00714,P06911,P10715,P12020,P18418,P19629,P31044,Q5GRG2,Q63617                                                         |
| 8827 | 1,4,6,7,8,1<br>8,24,26 | 2,3,5,19,2<br>0,21,22,23<br>,25 | 5  | P11598,P18418,Q63617,Q6AY33,Q8VD89                                                                                     |
| 8828 | 1,4,6,7,8,1<br>8,25,26 | 2,3,5,19,2<br>0,21,22,23<br>,24 | 15 | P00714,P10715,P11598,P12020,P18418,P19629,P31044,P35280,P55091,P61206,P84079,P84082,P82995,Q5FVI6,Q5GRG2,Q63617,Q6AY33 |
| 8829 | 1,4,6,7,8,1<br>9,20,21 | 2,3,5,18,2<br>2,23,24,25<br>,26 | 15 | P00731,P02782,P07647,P08723,P0C0A9,P13432,P18418,P22282,P30120,P35281,Q5FVI6,Q63617,Q6AYL6,Q8CJ52,Q9JI85               |
| 8830 | 1,4,6,7,8,1<br>9,20,22 | 2,3,5,18,2<br>1,23,24,25<br>,26 | 5  | P00774,P18418,P22282,Q63617,Q9JI85                                                                                     |
| 8831 | 1,4,6,7,8,1<br>9,20,23 | 2,3,5,18,2<br>1,22,24,25<br>,26 | 9  | P15399,P18418,P35281,P97580,Q30KJ2,Q5FVI6,Q63617,Q8CJD3,Q99041                                                         |
| 8832 | 1,4,6,7,8,1<br>9,20,24 | 2,3,5,18,2<br>1,22,23,25<br>,26 | 3  | P00774,P18418,Q63617                                                                                                   |
| 8833 | 1,4,6,7,8,1<br>9,20,25 | 2,3,5,18,2<br>1,22,23,24<br>,26 | 10 | P06911,P10715,P12020,P18418,P19629,P31044,P35280,Q5FVI6,Q5GRG2,Q63617                                                  |
| 8834 | 1,4,6,7,8,1<br>9,20,26 | 2,3,5,18,2<br>1,22,23,24<br>,25 | 4  | P18418,P35280,Q5FVI6,Q63617                                                                                            |
| 8835 | 1,4,6,7,8,1<br>9,21,22 | 2,3,5,18,2<br>0,23,24,25<br>,26 | 15 | D4A1J4,P02782,P06761,P07647,P08723,P0C0A9,P13432,P18418,P19218,P22282,P22283,P35281,Q63617,Q8CJ52,Q9JI85               |
| 8836 | 1,4,6,7,8,1<br>9,21,23 | 2,3,5,18,2<br>0,22,24,25<br>,26 | 16 | P02782,P02803,P08723,P0C0A9,P15399,P18418,P22282,P35281,P97580,Q30KJ2,Q5FVI6,Q63617,Q6AYL6,Q8CJ52,Q99041,Q9JI85        |

|      |                        |                                 |    |                                                                                                                                      |
|------|------------------------|---------------------------------|----|--------------------------------------------------------------------------------------------------------------------------------------|
| 8837 | 1,4,6,7,8,1<br>9,21,24 | 2,3,5,18,2<br>0,22,23,25<br>,26 | 10 | P02782,P08723,P0C0A9,P13432,P18418,P22282,P35281,Q63617,Q8CJ52,Q9JI85                                                                |
| 8838 | 1,4,6,7,8,1<br>9,21,25 | 2,3,5,18,2<br>0,22,23,24<br>,26 | 19 | P00731,P02803,P06911,P08723,P0C0A9,P12020,P18418,P19629,P22282,P30120,P35281,P47967,P97840,Q5FVI6,Q5GRG2,Q63617,Q9JI85,Q9QZK9,Q9WTT6 |
| 8839 | 1,4,6,7,8,1<br>9,21,26 | 2,3,5,18,2<br>0,22,23,24<br>,25 | 10 | P02782,P08723,P0C0A9,P11598,P18418,P22282,P35281,Q5FVI6,Q63617,Q8CJ52                                                                |
| 8840 | 1,4,6,7,8,1<br>9,22,23 | 2,3,5,18,2<br>0,21,24,25<br>,26 | 8  | P15399,P18418,P22282,P97580,Q30KJ2,Q63617,Q8CJD3,Q99041                                                                              |
| 8841 | 1,4,6,7,8,1<br>9,22,24 | 2,3,5,18,2<br>0,21,23,25<br>,26 | 4  | P00774,P18418,P22282,Q63617                                                                                                          |
| 8842 | 1,4,6,7,8,1<br>9,22,25 | 2,3,5,18,2<br>0,21,23,24<br>,26 | 8  | P06911,P12020,P18418,P19629,P31044,Q5GRG2,Q63617,Q9QZK9                                                                              |
| 8843 | 1,4,6,7,8,1<br>9,22,26 | 2,3,5,18,2<br>0,21,23,24<br>,25 | 5  | P05539,P18418,P22282,Q5FVI6,Q63617                                                                                                   |
| 8844 | 1,4,6,7,8,1<br>9,23,24 | 2,3,5,18,2<br>0,21,22,25<br>,26 | 6  | P15399,P18418,P97580,Q30KJ2,Q63617,Q99041                                                                                            |
| 8845 | 1,4,6,7,8,1<br>9,23,25 | 2,3,5,18,2<br>0,21,22,24<br>,26 | 15 | P00714,P02803,P06911,P12020,P15399,P18418,P19629,P31044,P50280,P97580,Q30KJ2,Q5FVI6,Q5GRG2,Q63617,Q99041                             |
| 8846 | 1,4,6,7,8,1<br>9,23,26 | 2,3,5,18,2<br>0,21,22,24<br>,25 | 8  | P15399,P18418,P22282,P97580,Q30KJ2,Q5FVI6,Q63617,Q99041                                                                              |
| 8847 | 1,4,6,7,8,1<br>9,24,25 | 2,3,5,18,2<br>0,21,22,23<br>,26 | 8  | P06911,P10715,P12020,P18418,P19629,P31044,Q5GRG2,Q63617                                                                              |
| 8848 | 1,4,6,7,8,1<br>9,24,26 | 2,3,5,18,2<br>0,21,22,23<br>,25 | 3  | P18418,Q5FVI6,Q63617                                                                                                                 |
| 8849 | 1,4,6,7,8,1<br>9,25,26 | 2,3,5,18,2<br>0,21,22,23<br>,24 | 10 | P06911,P12020,P18418,P19629,P31044,P35280,Q5FVI6,Q5GRG2,Q63617,Q9QZK9                                                                |
| 8850 | 1,4,6,7,8,2<br>0,21,22 | 2,3,5,18,1<br>9,23,24,25<br>,26 | 14 | P02782,P07647,P08723,P0C0A9,P13432,P18418,P22282,P30120,Q07523,Q62902,Q63617,Q7TPB1,Q8CJ52,Q9JI85                                    |
| 8851 | 1,4,6,7,8,2<br>0,21,23 | 2,3,5,18,1<br>9,22,24,25<br>,26 | 12 | P02782,P08723,P0C0A9,P13432,P18418,P22282,P30120,Q63617,Q6AYL6,Q8CJ52,Q99041,Q9JI85                                                  |

|      |                        |                                 |    |                                                                                                                 |
|------|------------------------|---------------------------------|----|-----------------------------------------------------------------------------------------------------------------|
| 8852 | 1,4,6,7,8,2<br>0,21,24 | 2,3,5,18,1<br>9,22,23,25<br>,26 | 9  | P02782,P08723,P13432,P18418,Q63617,Q6AYL6,Q6AYR8,Q8CJ52,Q9JI85                                                  |
| 8853 | 1,4,6,7,8,2<br>0,21,25 | 2,3,5,18,1<br>9,22,23,24<br>,26 | 15 | P08723,P09605,P25809,P10715,P12020,P13432,P18418,P19629,P30120,P47727,Q07523,Q5GRG2,Q63617,Q6AYL6,Q9JI85,Q9WTT6 |
| 8854 | 1,4,6,7,8,2<br>0,21,26 | 2,3,5,18,1<br>9,22,23,24<br>,25 | 13 | F1LM93,P02782,P08723,P0C0A9,P11598,P13432,P18418,P20761,P22282,Q5FVI6,Q63617,Q6AYR8,Q8CJ52                      |
| 8855 | 1,4,6,7,8,2<br>0,22,23 | 2,3,5,18,1<br>9,21,24,25<br>,26 | 3  | P18418,P22282,Q63617                                                                                            |
| 8856 | 1,4,6,7,8,2<br>0,22,24 | 2,3,5,18,1<br>9,21,23,25<br>,26 | 5  | P00774,P18418,Q07523,Q63617,Q99MH3                                                                              |
| 8857 | 1,4,6,7,8,2<br>0,22,25 | 2,3,5,18,1<br>9,21,23,24<br>,26 | 10 | P06911,P10715,P12020,P18418,P19629,P47727,Q03191,Q07523,Q5GRG2,Q63617                                           |
| 8858 | 1,4,6,7,8,2<br>0,22,26 | 2,3,5,18,1<br>9,21,23,24<br>,25 | 5  | P05539,P18418,P22282,Q63617,Q99MH3                                                                              |
| 8859 | 1,4,6,7,8,2<br>0,23,24 | 2,3,5,18,1<br>9,21,22,25<br>,26 | 2  | P18418,Q63617                                                                                                   |
| 8860 | 1,4,6,7,8,2<br>0,23,25 | 2,3,5,18,1<br>9,21,22,24<br>,26 | 11 | P06911,P10715,P12020,P18418,P19629,P31044,P47727,P63036,Q5GRG2,Q63617,Q99041                                    |
| 8861 | 1,4,6,7,8,2<br>0,23,26 | 2,3,5,18,1<br>9,21,22,24<br>,25 | 4  | P05539,P22282,Q5FVI6,Q63617                                                                                     |
| 8862 | 1,4,6,7,8,2<br>0,24,25 | 2,3,5,18,1<br>9,21,22,23<br>,26 | 7  | P06911,P10715,P12020,P18418,P19629,Q5GRG2,Q63617                                                                |
| 8863 | 1,4,6,7,8,2<br>0,24,26 | 2,3,5,18,1<br>9,21,22,23<br>,25 | 4  | P18418,P20761,Q63617,Q99MH3                                                                                     |
| 8864 | 1,4,6,7,8,2<br>0,25,26 | 2,3,5,18,1<br>9,21,22,23<br>,24 | 9  | P05539,P10715,P12020,P18418,P19629,P35280,Q5FVI6,Q5GRG2,Q63617                                                  |
| 8865 | 1,4,6,7,8,2<br>1,22,23 | 2,3,5,18,1<br>9,20,24,25<br>,26 | 12 | P02782,P06761,P08723,P0C0A9,P13432,P18418,P22282,P22283,Q63617,Q8CJ52,Q99041,Q9JI85                             |
| 8866 | 1,4,6,7,8,2<br>1,22,24 | 2,3,5,18,1<br>9,20,23,25<br>,26 | 8  | P02782,P08723,P13432,P18418,P22282,Q63617,Q8CJ52,Q9JI85                                                         |

|      |                        |                                 |    |                                                                                                                                             |
|------|------------------------|---------------------------------|----|---------------------------------------------------------------------------------------------------------------------------------------------|
| 8867 | 1,4,6,7,8,2<br>1,22,25 | 2,3,5,18,1<br>9,20,23,24<br>,26 | 17 | D4A1J4,P06761,P06911,P08723,P09605,P25809,P12020,P13432,P18418,P19629,P22282,Q07523,Q5GRG2,Q63617,Q8CJ52,Q9JI85,Q9QZK9,Q9WTT6               |
| 8868 | 1,4,6,7,8,2<br>1,22,26 | 2,3,5,18,1<br>9,20,23,24<br>,25 | 13 | P02782,P06761,P08723,P0C0A9,P11598,P13432,P18418,P20761,P22282,P22283,Q63617,Q8CJ52,Q9R0T3                                                  |
| 8869 | 1,4,6,7,8,2<br>1,23,24 | 2,3,5,18,1<br>9,20,22,25<br>,26 | 10 | P02782,P08723,P0C0A9,P13432,P18418,P22282,Q63617,Q6AYL6,Q8CJ52,Q99041                                                                       |
| 8870 | 1,4,6,7,8,2<br>1,23,25 | 2,3,5,18,1<br>9,20,22,24<br>,26 | 20 | P06911,P07150,P08723,P0C0A9,P12020,P14669,P18418,P19629,P22282,P47727,P50280,P83121,Q5GRG2,Q63617,Q6AYL6,Q6P6R2,Q6P9T8,Q99041,Q9QZK9,Q9WTT6 |
| 8871 | 1,4,6,7,8,2<br>1,23,26 | 2,3,5,18,1<br>9,20,22,24<br>,25 | 12 | F1LM93,P08723,P0C0A9,P14669,P18418,P20761,P22282,P22283,P83121,Q63617,Q8CJ52,Q99041                                                         |
| 8872 | 1,4,6,7,8,2<br>1,24,25 | 2,3,5,18,1<br>9,20,22,23<br>,26 | 12 | P06911,P08723,P10715,P12020,P13432,P18418,P19629,P22006,Q5GRG2,Q63617,Q9QZK9,Q9WTT6                                                         |
| 8873 | 1,4,6,7,8,2<br>1,24,26 | 2,3,5,18,1<br>9,20,22,23<br>,25 | 10 | P02782,P0C0A9,P13432,P18418,P20761,P22006,P22282,Q63617,Q8CJ52,Q9EQV9                                                                       |
| 8874 | 1,4,6,7,8,2<br>1,25,26 | 2,3,5,18,1<br>9,20,22,23<br>,24 | 16 | P07150,P0C0A9,P12020,P18418,P19223,P19629,P22006,P22282,P83121,Q5FVI6,Q5GRG2,Q63617,Q6P9T8,Q8CJ52,Q9QZK9,Q9WTT6                             |
| 8875 | 1,4,6,7,8,2<br>2,23,24 | 2,3,5,18,1<br>9,20,21,25<br>,26 | 3  | P18418,P22282,Q63617                                                                                                                        |
| 8876 | 1,4,6,7,8,2<br>2,23,25 | 2,3,5,18,1<br>9,20,21,24<br>,26 | 10 | P06911,P12020,P18418,P19629,P22282,P31044,P50280,Q5GRG2,Q63617,Q99041                                                                       |
| 8877 | 1,4,6,7,8,2<br>2,23,26 | 2,3,5,18,1<br>9,20,21,24<br>,25 | 4  | P05539,P18418,P22282,Q63617                                                                                                                 |
| 8878 | 1,4,6,7,8,2<br>2,24,25 | 2,3,5,18,1<br>9,20,21,23<br>,26 | 8  | P06911,P10715,P12020,P18418,P19629,Q07523,Q5GRG2,Q63617                                                                                     |
| 8879 | 1,4,6,7,8,2<br>2,24,26 | 2,3,5,18,1<br>9,20,21,23<br>,25 | 5  | P18418,P20761,P22282,Q63617,Q99MH3                                                                                                          |
| 8880 | 1,4,6,7,8,2<br>2,25,26 | 2,3,5,18,1<br>9,20,21,23<br>,24 | 10 | P05539,P06911,P10715,P12020,P18418,P19629,P22282,Q5GRG2,Q63617,Q9QZK9                                                                       |
| 8881 | 1,4,6,7,8,2<br>3,24,25 | 2,3,5,18,1<br>9,20,21,22<br>,26 | 9  | P06911,P10715,P12020,P18418,P19629,P50280,Q5GRG2,Q63617,Q99041                                                                              |



|      |                         |                                 |    |                                                                                                   |
|------|-------------------------|---------------------------------|----|---------------------------------------------------------------------------------------------------|
| 8882 | 1,4,6,7,8,2<br>3,24,26  | 2,3,5,18,1<br>9,20,21,22<br>,25 | 4  | P18418,P20761,P22282,Q63617                                                                       |
| 8883 | 1,4,6,7,8,2<br>3,25,26  | 2,3,5,18,1<br>9,20,21,22<br>,24 | 14 | P00714,P06911,P10715,P12020,P18418,P19629,P83121,Q5FVI6,Q5GRG2,Q63617,Q6P9T8,Q99041,Q9QZK9,Q9WTT6 |
| 8884 | 1,4,6,7,8,2<br>4,25,26  | 2,3,5,18,1<br>9,20,21,22<br>,23 | 8  | P06911,P10715,P12020,P18418,P19629,Q5GRG2,Q63617,Q9QZK9                                           |
| 8885 | 1,4,6,7,18,<br>19,20,21 | 2,3,5,8,22,<br>23,24,25,2<br>6  | 9  | P00731,P08723,P0C0A9,P35281,P36374,Q5FVI6,Q6AYL6,Q6AYR9,Q9JI85                                    |
| 8886 | 1,4,6,7,18,<br>19,20,22 | 2,3,5,8,21,<br>23,24,25,2<br>6  | 1  | Q9JI85                                                                                            |
| 8887 | 1,4,6,7,18,<br>19,20,23 | 2,3,5,8,21,<br>22,24,25,2<br>6  | 6  | P15399,P97580,Q30KJ2,Q5BJY9,Q5FVI6,Q8CJD3                                                         |
| 8888 | 1,4,6,7,18,<br>19,20,24 | 2,3,5,8,21,<br>22,23,25,2<br>6  | 1  | Q5FVI6                                                                                            |
| 8889 | 1,4,6,7,18,<br>19,20,25 | 2,3,5,8,21,<br>22,23,24,2<br>6  | 4  | P12020,P35280,P47967,Q5FVI6                                                                       |
| 8890 | 1,4,6,7,18,<br>19,20,26 | 2,3,5,8,21,<br>22,23,24,2<br>5  | 2  | P35280,Q5FVI6                                                                                     |
| 8891 | 1,4,6,7,18,<br>19,21,22 | 2,3,5,8,20,<br>23,24,25,2<br>6  | 8  | D4A1J4,P08723,P0C0A9,P13432,P19218,P36374,P97840,Q9JI85                                           |
| 8892 | 1,4,6,7,18,<br>19,21,23 | 2,3,5,8,20,<br>22,24,25,2<br>6  | 11 | P02803,P08723,P0C0A9,P15399,P97580,Q30KJ2,Q5FVI6,Q6AYL6,Q8CJD3,Q99041,Q9JI85                      |
| 8893 | 1,4,6,7,18,<br>19,21,24 | 2,3,5,8,20,<br>22,23,25,2<br>6  | 4  | P08723,P13432,Q6AYL6,Q9JI85                                                                       |
| 8894 | 1,4,6,7,18,<br>19,21,25 | 2,3,5,8,20,<br>22,23,24,2<br>6  | 8  | P00731,P02803,P06757,P08723,P47967,P97840,Q5FVI6,Q6AYL6                                           |
| 8895 | 1,4,6,7,18,<br>19,21,26 | 2,3,5,8,20,<br>22,23,24,2<br>5  | 3  | P0C0A9,P36374,Q5FVI6                                                                              |
| 8896 | 1,4,6,7,18,<br>19,22,23 | 2,3,5,8,20,<br>21,24,25,2<br>6  | 4  | P15399,P97580,Q30KJ2,Q8CJD3                                                                       |

|      |                         |                                |    |                                                                       |
|------|-------------------------|--------------------------------|----|-----------------------------------------------------------------------|
| 8897 | 1,4,6,7,18,<br>19,22,24 | 2,3,5,8,20,<br>21,23,25,2<br>6 | 0  |                                                                       |
| 8898 | 1,4,6,7,18,<br>19,22,25 | 2,3,5,8,20,<br>21,23,24,2<br>6 | 6  | P06911,P12020,P47967,P97840,Q5FVI6,Q5GRG2                             |
| 8899 | 1,4,6,7,18,<br>19,22,26 | 2,3,5,8,20,<br>21,23,24,2<br>5 | 2  | P05539,Q5FVI6                                                         |
| 8900 | 1,4,6,7,18,<br>19,23,24 | 2,3,5,8,20,<br>21,22,25,2<br>6 | 5  | P15399,P97580,Q30KJ2,Q5BJY9,Q5FVI6                                    |
| 8901 | 1,4,6,7,18,<br>19,23,25 | 2,3,5,8,20,<br>21,22,24,2<br>6 | 10 | P00714,P02803,P06911,P12020,P15399,P97580,Q30KJ2,Q5BJY9,Q5FVI6,Q99041 |
| 8902 | 1,4,6,7,18,<br>19,23,26 | 2,3,5,8,20,<br>21,22,24,2<br>5 | 6  | P15399,P97580,Q30KJ2,Q5FVI6,Q5XFX0,Q6P6Q2                             |
| 8903 | 1,4,6,7,18,<br>19,24,25 | 2,3,5,8,20,<br>21,22,23,2<br>6 | 2  | P12020,Q5FVI6                                                         |
| 8904 | 1,4,6,7,18,<br>19,24,26 | 2,3,5,8,20,<br>21,22,23,2<br>5 | 1  | Q5FVI6                                                                |
| 8905 | 1,4,6,7,18,<br>19,25,26 | 2,3,5,8,20,<br>21,22,23,2<br>4 | 3  | P00714,P35280,Q5FVI6                                                  |
| 8906 | 1,4,6,7,18,<br>20,21,22 | 2,3,5,8,19,<br>23,24,25,2<br>6 | 4  | P08723,P13432,P36374,Q9JI85                                           |
| 8907 | 1,4,6,7,18,<br>20,21,23 | 2,3,5,8,19,<br>22,24,25,2<br>6 | 3  | P08723,Q6AYL6,Q9JI85                                                  |
| 8908 | 1,4,6,7,18,<br>20,21,24 | 2,3,5,8,19,<br>22,23,25,2<br>6 | 4  | P13432,P20766,Q6AYL6,Q9JI85                                           |
| 8909 | 1,4,6,7,18,<br>20,21,25 | 2,3,5,8,19,<br>22,23,24,2<br>6 | 6  | P08723,P09605,P25809,P31430,P47967,Q6AYL6,Q9JI85                      |
| 8910 | 1,4,6,7,18,<br>20,21,26 | 2,3,5,8,19,<br>22,23,24,2<br>5 | 4  | P13432,P25031,P36374,Q5FVI6                                           |
| 8911 | 1,4,6,7,18,<br>20,22,23 | 2,3,5,8,19,<br>21,24,25,2<br>6 | 1  | Q8CJD3                                                                |

|      |                         |                                |   |                                                                       |
|------|-------------------------|--------------------------------|---|-----------------------------------------------------------------------|
| 8912 | 1,4,6,7,18,<br>20,22,24 | 2,3,5,8,19,<br>21,23,25,2<br>6 | 0 |                                                                       |
| 8913 | 1,4,6,7,18,<br>20,22,25 | 2,3,5,8,19,<br>21,23,24,2<br>6 | 3 | P06911,P12020,Q5GRG2                                                  |
| 8914 | 1,4,6,7,18,<br>20,22,26 | 2,3,5,8,19,<br>21,23,24,2<br>5 | 1 | P05539                                                                |
| 8915 | 1,4,6,7,18,<br>20,23,24 | 2,3,5,8,19,<br>21,22,25,2<br>6 | 0 |                                                                       |
| 8916 | 1,4,6,7,18,<br>20,23,25 | 2,3,5,8,19,<br>21,22,24,2<br>6 | 2 | P00714,P12020                                                         |
| 8917 | 1,4,6,7,18,<br>20,23,26 | 2,3,5,8,19,<br>21,22,24,2<br>5 | 7 | P05539,Q5FVI6,Q6IFU8,Q6IFW6,Q6IG02,Q6IMF3,Q6P6Q2                      |
| 8918 | 1,4,6,7,18,<br>20,24,25 | 2,3,5,8,19,<br>21,22,23,2<br>6 | 0 |                                                                       |
| 8919 | 1,4,6,7,18,<br>20,24,26 | 2,3,5,8,19,<br>21,22,23,2<br>5 | 0 |                                                                       |
| 8920 | 1,4,6,7,18,<br>20,25,26 | 2,3,5,8,19,<br>21,22,23,2<br>4 | 5 | P05539,P35280,P61206;P84079;P84082,P83121,Q5FVI6                      |
| 8921 | 1,4,6,7,18,<br>21,22,23 | 2,3,5,8,19,<br>20,24,25,2<br>6 | 3 | P08723,P13432,Q9JI85                                                  |
| 8922 | 1,4,6,7,18,<br>21,22,24 | 2,3,5,8,19,<br>20,23,25,2<br>6 | 3 | P08723,P13432,Q9JI85                                                  |
| 8923 | 1,4,6,7,18,<br>21,22,25 | 2,3,5,8,19,<br>20,23,24,2<br>6 | 9 | P06911,P08723,P09605;P25809,P12020,P13432,P47967,P97840,Q5GRG2,Q9JI85 |
| 8924 | 1,4,6,7,18,<br>21,22,26 | 2,3,5,8,19,<br>20,23,24,2<br>5 | 3 | P08723,P13432,P36374                                                  |
| 8925 | 1,4,6,7,18,<br>21,23,24 | 2,3,5,8,19,<br>20,22,25,2<br>6 | 2 | P13432,Q6AYL6                                                         |
| 8926 | 1,4,6,7,18,<br>21,23,25 | 2,3,5,8,19,<br>20,22,24,2<br>6 | 7 | P08723,P12020,P31430,P83121,Q6AYL6,Q6P6R2,Q99041                      |

|      |                         |                                |   |                                                                              |
|------|-------------------------|--------------------------------|---|------------------------------------------------------------------------------|
| 8927 | 1,4,6,7,18,<br>21,23,26 | 2,3,5,8,19,<br>20,22,24,2<br>5 | 5 | P83121,Q5FVI6,Q6IFU8,Q6IMF3,Q6P6Q2                                           |
| 8928 | 1,4,6,7,18,<br>21,24,25 | 2,3,5,8,19,<br>20,22,23,2<br>6 | 4 | P13432,P22006,P31430,Q6AYL6                                                  |
| 8929 | 1,4,6,7,18,<br>21,24,26 | 2,3,5,8,19,<br>20,22,23,2<br>5 | 2 | P13432,Q9JID2                                                                |
| 8930 | 1,4,6,7,18,<br>21,25,26 | 2,3,5,8,19,<br>20,22,23,2<br>4 | 9 | P22006,P25031,P31430,P55091,P61206;P84079;P84082,P82995,P83121,Q5FVI6,Q9QZK9 |
| 8931 | 1,4,6,7,18,<br>22,23,24 | 2,3,5,8,19,<br>20,21,25,2<br>6 | 2 | P62804,Q8VD89                                                                |
| 8932 | 1,4,6,7,18,<br>22,23,25 | 2,3,5,8,19,<br>20,21,24,2<br>6 | 4 | P06911,P12020,P62804,Q5GRG2                                                  |
| 8933 | 1,4,6,7,18,<br>22,23,26 | 2,3,5,8,19,<br>20,21,24,2<br>5 | 4 | P05539,Q6IFU7,Q6P6Q2,Q8VD89                                                  |
| 8934 | 1,4,6,7,18,<br>22,24,25 | 2,3,5,8,19,<br>20,21,23,2<br>6 | 4 | P06911,P12020,P62804,Q5GRG2                                                  |
| 8935 | 1,4,6,7,18,<br>22,24,26 | 2,3,5,8,19,<br>20,21,23,2<br>5 | 1 | Q8VD89                                                                       |
| 8936 | 1,4,6,7,18,<br>22,25,26 | 2,3,5,8,19,<br>20,21,23,2<br>4 | 4 | P05539,P06911,P12020,Q5GRG2                                                  |
| 8937 | 1,4,6,7,18,<br>23,24,25 | 2,3,5,8,19,<br>20,21,22,2<br>6 | 2 | P12020,P62804                                                                |
| 8938 | 1,4,6,7,18,<br>23,24,26 | 2,3,5,8,19,<br>20,21,22,2<br>5 | 4 | Q6IFU7,Q6IMF3,Q6P6Q2,Q8VD89                                                  |
| 8939 | 1,4,6,7,18,<br>23,25,26 | 2,3,5,8,19,<br>20,21,22,2<br>4 | 6 | P00714,P12020,P83121,Q5FVI6,Q6IMF3,Q6P6Q2                                    |
| 8940 | 1,4,6,7,18,<br>24,25,26 | 2,3,5,8,19,<br>20,21,22,2<br>3 | 2 | P55091,Q5FVI6                                                                |
| 8941 | 1,4,6,7,19,<br>20,21,22 | 2,3,5,8,18,<br>23,24,25,2<br>6 | 5 | P00774,P08723,P13432,P35467,Q9JI85                                           |

|      |                         |                                |   |                                                         |
|------|-------------------------|--------------------------------|---|---------------------------------------------------------|
| 8942 | 1,4,6,7,19,<br>20,21,23 | 2,3,5,8,18,<br>22,24,25,2<br>6 | 5 | P15399,P97580,Q30KJ2,Q5FVI6,Q99041                      |
| 8943 | 1,4,6,7,19,<br>20,21,24 | 2,3,5,8,18,<br>22,23,25,2<br>6 | 3 | P13432,P20766,P35467                                    |
| 8944 | 1,4,6,7,19,<br>20,21,25 | 2,3,5,8,18,<br>22,23,24,2<br>6 | 7 | P09605;P25809,P12020,P30120,P35467,P47967,P97840,Q5FVI6 |
| 8945 | 1,4,6,7,19,<br>20,21,26 | 2,3,5,8,18,<br>22,23,24,2<br>5 | 3 | P05539,P36374,Q5FVI6                                    |
| 8946 | 1,4,6,7,19,<br>20,22,23 | 2,3,5,8,18,<br>21,24,25,2<br>6 | 7 | P00774,P15399,P31430,P55091,P97580,Q30KJ2,Q8CJD3        |
| 8947 | 1,4,6,7,19,<br>20,22,24 | 2,3,5,8,18,<br>21,23,25,2<br>6 | 4 | P00774,P31430,P35467,Q99MH3                             |
| 8948 | 1,4,6,7,19,<br>20,22,25 | 2,3,5,8,18,<br>21,23,24,2<br>6 | 6 | P06911,P12020,P35467,P47967,Q5FVI6,Q5GRG2               |
| 8949 | 1,4,6,7,19,<br>20,22,26 | 2,3,5,8,18,<br>21,23,24,2<br>5 | 3 | P05539,Q5FVI6,Q99MH3                                    |
| 8950 | 1,4,6,7,19,<br>20,23,24 | 2,3,5,8,18,<br>21,22,25,2<br>6 | 6 | P00774,P15399,P31430,P97580,Q30KJ2,Q5FVI6               |
| 8951 | 1,4,6,7,19,<br>20,23,25 | 2,3,5,8,18,<br>21,22,24,2<br>6 | 8 | P06911,P12020,P15399,P97580,Q30KJ2,Q5FVI6,Q5GRG2,Q99041 |
| 8952 | 1,4,6,7,19,<br>20,23,26 | 2,3,5,8,18,<br>21,22,24,2<br>5 | 5 | P05539,P15399,P97580,Q30KJ2,Q5FVI6                      |
| 8953 | 1,4,6,7,19,<br>20,24,25 | 2,3,5,8,18,<br>21,22,23,2<br>6 | 2 | P12020,Q5FVI6                                           |
| 8954 | 1,4,6,7,19,<br>20,24,26 | 2,3,5,8,18,<br>21,22,23,2<br>5 | 1 | Q5FVI6                                                  |
| 8955 | 1,4,6,7,19,<br>20,25,26 | 2,3,5,8,18,<br>21,22,23,2<br>4 | 5 | P05539,P12020,P35280,P83121,Q5FVI6                      |
| 8956 | 1,4,6,7,19,<br>21,22,23 | 2,3,5,8,18,<br>20,24,25,2<br>6 | 5 | P08723,P15399,P97580,Q30KJ2,Q99041                      |

|      |                         |                                |    |                                                                                            |
|------|-------------------------|--------------------------------|----|--------------------------------------------------------------------------------------------|
| 8957 | 1,4,6,7,19,<br>21,22,24 | 2,3,5,8,18,<br>20,23,25,2<br>6 | 3  | P08723,P13432,P35467                                                                       |
| 8958 | 1,4,6,7,19,<br>21,22,25 | 2,3,5,8,18,<br>20,23,24,2<br>6 | 10 | P06911,P08723,P09605,P25809,P12020,P19218,P35467,P47967,P97840,Q5GRG2,Q9QZK9               |
| 8959 | 1,4,6,7,19,<br>21,22,26 | 2,3,5,8,18,<br>20,23,24,2<br>5 | 3  | P05539,P36374,Q5FVI6                                                                       |
| 8960 | 1,4,6,7,19,<br>21,23,24 | 2,3,5,8,18,<br>20,22,25,2<br>6 | 5  | P13432,P15399,P97580,Q30KJ2,Q99041                                                         |
| 8961 | 1,4,6,7,19,<br>21,23,25 | 2,3,5,8,18,<br>20,22,24,2<br>6 | 13 | P06911,P12020,P15399,P47967,P83121,P97580,P97840,Q30KJ2,Q5FVI6,Q5GRG2,Q6P6R2,Q99041,Q9QZK9 |
| 8962 | 1,4,6,7,19,<br>21,23,26 | 2,3,5,8,18,<br>20,22,24,2<br>5 | 5  | P15399,P83121,P97580,Q30KJ2,Q5FVI6                                                         |
| 8963 | 1,4,6,7,19,<br>21,24,25 | 2,3,5,8,18,<br>20,22,23,2<br>6 | 8  | P12020,P13432,P22006,P35467,P47967,P97840,Q5FVI6,Q9QZK9                                    |
| 8964 | 1,4,6,7,19,<br>21,24,26 | 2,3,5,8,18,<br>20,22,23,2<br>5 | 3  | P13432,P22006,Q5FVI6                                                                       |
| 8965 | 1,4,6,7,19,<br>21,25,26 | 2,3,5,8,18,<br>20,22,23,2<br>4 | 8  | P12020,P22006,P27213,P47967,P83121,P97840,Q5FVI6,Q9QZK9                                    |
| 8966 | 1,4,6,7,19,<br>22,23,24 | 2,3,5,8,18,<br>20,21,25,2<br>6 | 6  | P00774,P15399,P31430,P62804,P97580,Q30KJ2                                                  |
| 8967 | 1,4,6,7,19,<br>22,23,25 | 2,3,5,8,18,<br>20,21,24,2<br>6 | 9  | P06911,P12020,P15399,P62804,P97580,Q30KJ2,Q5FVI6,Q5GRG2,Q99041                             |
| 8968 | 1,4,6,7,19,<br>22,23,26 | 2,3,5,8,18,<br>20,21,24,2<br>5 | 5  | P05539,P15399,P97580,Q30KJ2,Q5FVI6                                                         |
| 8969 | 1,4,6,7,19,<br>22,24,25 | 2,3,5,8,18,<br>20,21,23,2<br>6 | 5  | P06911,P12020,P35467,P62804,Q5GRG2                                                         |
| 8970 | 1,4,6,7,19,<br>22,24,26 | 2,3,5,8,18,<br>20,21,23,2<br>5 | 1  | Q5FVI6                                                                                     |
| 8971 | 1,4,6,7,19,<br>22,25,26 | 2,3,5,8,18,<br>20,21,23,2<br>4 | 6  | P05539,P06911,P12020,Q5FVI6,Q5GRG2,Q9QZK9                                                  |

|      |                         |                                |    |                                                                                     |
|------|-------------------------|--------------------------------|----|-------------------------------------------------------------------------------------|
| 8972 | 1,4,6,7,19,<br>23,24,25 | 2,3,5,8,18,<br>20,21,22,2<br>6 | 9  | P06911,P12020,P15399,P62804,P97580,Q30KJ2,Q5FVI6,Q5GRG2,Q99041                      |
| 8973 | 1,4,6,7,19,<br>23,24,26 | 2,3,5,8,18,<br>20,21,22,2<br>5 | 4  | P15399,P97580,Q30KJ2,Q5FVI6                                                         |
| 8974 | 1,4,6,7,19,<br>23,25,26 | 2,3,5,8,18,<br>20,21,22,2<br>4 | 12 | P05539,P06911,P12020,P15399,P27213,P83121,P97580,Q30KJ2,Q5FVI6,Q5GRG2,Q99041,Q9QZK9 |
| 8975 | 1,4,6,7,19,<br>24,25,26 | 2,3,5,8,18,<br>20,21,22,2<br>3 | 4  | P12020,P14480,Q5FVI6,Q9QZK9                                                         |
| 8976 | 1,4,6,7,20,<br>21,22,23 | 2,3,5,8,18,<br>19,24,25,2<br>6 | 3  | P08723,P13432,Q9JI85                                                                |
| 8977 | 1,4,6,7,20,<br>21,22,24 | 2,3,5,8,18,<br>19,23,25,2<br>6 | 5  | P13432,P35467,Q03191,Q07523,Q99MH3                                                  |
| 8978 | 1,4,6,7,20,<br>21,22,25 | 2,3,5,8,18,<br>19,23,24,2<br>6 | 9  | P06911,P08723,P09605,P25809,P12020,P13432,P35467,Q03191,Q07523,Q5GRG2               |
| 8979 | 1,4,6,7,20,<br>21,22,26 | 2,3,5,8,18,<br>19,23,24,2<br>5 | 5  | P05539,P13432,P36374,Q03191,Q99MH3                                                  |
| 8980 | 1,4,6,7,20,<br>21,23,24 | 2,3,5,8,18,<br>19,22,25,2<br>6 | 2  | P13432,P20766                                                                       |
| 8981 | 1,4,6,7,20,<br>21,23,25 | 2,3,5,8,18,<br>19,22,24,2<br>6 | 6  | P09605,P25809,P12020,P83121,Q5GRG2,Q6P6R2,Q99041                                    |
| 8982 | 1,4,6,7,20,<br>21,23,26 | 2,3,5,8,18,<br>19,22,24,2<br>5 | 3  | P05539,P83121,Q5FVI6                                                                |
| 8983 | 1,4,6,7,20,<br>21,24,25 | 2,3,5,8,18,<br>19,22,23,2<br>6 | 6  | P09605,P25809,P13432,P22006,P35467,Q03191,Q64194                                    |
| 8984 | 1,4,6,7,20,<br>21,24,26 | 2,3,5,8,18,<br>19,22,23,2<br>5 | 3  | P01015,P13432,Q99MH3                                                                |
| 8985 | 1,4,6,7,20,<br>21,25,26 | 2,3,5,8,18,<br>19,22,23,2<br>4 | 6  | P05539,P09605,P25809,P22006,P83121,Q03191,Q5FVI6                                    |
| 8986 | 1,4,6,7,20,<br>22,23,24 | 2,3,5,8,18,<br>19,21,25,2<br>6 | 1  | P00774                                                                              |

|      |                         |                                |   |                                                                |
|------|-------------------------|--------------------------------|---|----------------------------------------------------------------|
| 8987 | 1,4,6,7,20,<br>22,23,25 | 2,3,5,8,18,<br>19,21,24,2<br>6 | 3 | P06911,P12020,Q5GRG2                                           |
| 8988 | 1,4,6,7,20,<br>22,23,26 | 2,3,5,8,18,<br>19,21,24,2<br>5 | 1 | P05539                                                         |
| 8989 | 1,4,6,7,20,<br>22,24,25 | 2,3,5,8,18,<br>19,21,23,2<br>6 | 6 | P06911,P12020,P35467,Q03191,Q07523,Q5GRG2                      |
| 8990 | 1,4,6,7,20,<br>22,24,26 | 2,3,5,8,18,<br>19,21,23,2<br>5 | 2 | P05539,Q99MH3                                                  |
| 8991 | 1,4,6,7,20,<br>22,25,26 | 2,3,5,8,18,<br>19,21,23,2<br>4 | 6 | P05539,P06911,P12020,Q03191,Q5FVI6,Q5GRG2                      |
| 8992 | 1,4,6,7,20,<br>23,24,25 | 2,3,5,8,18,<br>19,21,22,2<br>6 | 4 | P06911,P12020,P63036,Q5GRG2                                    |
| 8993 | 1,4,6,7,20,<br>23,24,26 | 2,3,5,8,18,<br>19,21,22,2<br>5 | 1 | P05539                                                         |
| 8994 | 1,4,6,7,20,<br>23,25,26 | 2,3,5,8,18,<br>19,21,22,2<br>4 | 4 | P05539,P12020,P83121,Q5FVI6                                    |
| 8995 | 1,4,6,7,20,<br>24,25,26 | 2,3,5,8,18,<br>19,21,22,2<br>3 | 2 | P05539,Q5FVI6                                                  |
| 8996 | 1,4,6,7,21,<br>22,23,24 | 2,3,5,8,18,<br>19,20,25,2<br>6 | 1 | P13432                                                         |
| 8997 | 1,4,6,7,21,<br>22,23,25 | 2,3,5,8,18,<br>19,20,24,2<br>6 | 7 | P06911,P08723,P09605;P25809,P12020,P83121,Q5GRG2,Q99041        |
| 8998 | 1,4,6,7,21,<br>22,23,26 | 2,3,5,8,18,<br>19,20,24,2<br>5 | 3 | P05539,P22282,P83121                                           |
| 8999 | 1,4,6,7,21,<br>22,24,25 | 2,3,5,8,18,<br>19,20,23,2<br>6 | 8 | P06911,P09605;P25809,P12020,P13432,P22006,P35467,Q03191,Q5GRG2 |
| 9000 | 1,4,6,7,21,<br>22,24,26 | 2,3,5,8,18,<br>19,20,23,2<br>5 | 3 | P13432,P22006,Q99MH3                                           |
| 9001 | 1,4,6,7,21,<br>22,25,26 | 2,3,5,8,18,<br>19,20,23,2<br>4 | 8 | P05539,P06911,P09605;P25809,P12020,P22006,P83121,Q5GRG2,Q9QZK9 |



|      |                         |                                |    |                                                                              |
|------|-------------------------|--------------------------------|----|------------------------------------------------------------------------------|
| 9002 | 1,4,6,7,21,<br>23,24,25 | 2,3,5,8,18,<br>19,20,22,2<br>6 | 9  | P06911,P12020,P13432,P19629,P22006,P83121,Q5GRG2,Q6P6R2,Q99041               |
| 9003 | 1,4,6,7,21,<br>23,24,26 | 2,3,5,8,18,<br>19,20,22,2<br>5 | 3  | P13432,P22006,P83121                                                         |
| 9004 | 1,4,6,7,21,<br>23,25,26 | 2,3,5,8,18,<br>19,20,22,2<br>4 | 8  | P05539,P12020,P22006,P27213,P83121,Q5FVI6,Q6P6R2,Q9QZK9                      |
| 9005 | 1,4,6,7,21,<br>24,25,26 | 2,3,5,8,18,<br>19,20,22,2<br>3 | 4  | P13432,P22006,P83121,Q9QZK9                                                  |
| 9006 | 1,4,6,7,22,<br>23,24,25 | 2,3,5,8,18,<br>19,20,21,2<br>6 | 5  | P06911,P12020,P19629,P62804,Q5GRG2                                           |
| 9007 | 1,4,6,7,22,<br>23,24,26 | 2,3,5,8,18,<br>19,20,21,2<br>5 | 2  | P00731,P05539                                                                |
| 9008 | 1,4,6,7,22,<br>23,25,26 | 2,3,5,8,18,<br>19,20,21,2<br>4 | 5  | P05539,P06911,P12020,P83121,Q5GRG2                                           |
| 9009 | 1,4,6,7,22,<br>24,25,26 | 2,3,5,8,18,<br>19,20,21,2<br>3 | 4  | P05539,P06911,P12020,Q5GRG2                                                  |
| 9010 | 1,4,6,7,23,<br>24,25,26 | 2,3,5,8,18,<br>19,20,21,2<br>2 | 5  | P06911,P12020,P83121,Q5FVI6,Q7TPB1                                           |
| 9011 | 1,4,6,8,18,<br>19,20,21 | 2,3,5,7,22,<br>23,24,25,2<br>6 | 11 | O35547,P00731,P02782,P07647,P08723,P0C0A9,P10758,P30120,P35281,P36374,Q6AYR9 |
| 9012 | 1,4,6,8,18,<br>19,20,22 | 2,3,5,7,21,<br>23,24,25,2<br>6 | 3  | P22006,P35281,Q8CJD3                                                         |
| 9013 | 1,4,6,8,18,<br>19,20,23 | 2,3,5,7,21,<br>22,24,25,2<br>6 | 4  | P15399,P35281,Q5BJY9,Q8CJD3                                                  |
| 9014 | 1,4,6,8,18,<br>19,20,24 | 2,3,5,7,21,<br>22,23,25,2<br>6 | 1  | P35281                                                                       |
| 9015 | 1,4,6,8,18,<br>19,20,25 | 2,3,5,7,21,<br>22,23,24,2<br>6 | 2  | P35280,P35281                                                                |
| 9016 | 1,4,6,8,18,<br>19,20,26 | 2,3,5,7,21,<br>22,23,24,2<br>5 | 2  | P35280,P35281                                                                |

|      |                         |                                |    |                                                                              |
|------|-------------------------|--------------------------------|----|------------------------------------------------------------------------------|
| 9017 | 1,4,6,8,18,<br>19,21,22 | 2,3,5,7,20,<br>23,24,25,2<br>6 | 10 | O35547,P02782,P07647,P08723,P0C0A9,P10758,P13432,P35281,P36374,Q6AYR9        |
| 9018 | 1,4,6,8,18,<br>19,21,23 | 2,3,5,7,20,<br>22,24,25,2<br>6 | 11 | O35547,P02782,P02803,P08723,P0C0A9,P10758,P15399,P35281,Q5BJY9,Q6AYR9,Q8CJD3 |
| 9019 | 1,4,6,8,18,<br>19,21,24 | 2,3,5,7,20,<br>22,23,25,2<br>6 | 7  | O35547,P02782,P08723,P0C0A9,P10758,P13432,P35281                             |
| 9020 | 1,4,6,8,18,<br>19,21,25 | 2,3,5,7,20,<br>22,23,24,2<br>6 | 9  | O35547,P00731,P02803,P08723,P0C0A9,P31430,P35281,P47967,Q6AYR9               |
| 9021 | 1,4,6,8,18,<br>19,21,26 | 2,3,5,7,20,<br>22,23,24,2<br>5 | 8  | O35547,P02782,P08723,P0C0A9,P10758,P35281,P36374,Q6AYR9                      |
| 9022 | 1,4,6,8,18,<br>19,22,23 | 2,3,5,7,20,<br>21,24,25,2<br>6 | 1  | Q8CJD3                                                                       |
| 9023 | 1,4,6,8,18,<br>19,22,24 | 2,3,5,7,20,<br>21,23,25,2<br>6 | 0  |                                                                              |
| 9024 | 1,4,6,8,18,<br>19,22,25 | 2,3,5,7,20,<br>21,23,24,2<br>6 | 1  | P06911                                                                       |
| 9025 | 1,4,6,8,18,<br>19,22,26 | 2,3,5,7,20,<br>21,23,24,2<br>5 | 1  | P0C0A9                                                                       |
| 9026 | 1,4,6,8,18,<br>19,23,24 | 2,3,5,7,20,<br>21,22,25,2<br>6 | 2  | P15399,Q5BJY9                                                                |
| 9027 | 1,4,6,8,18,<br>19,23,25 | 2,3,5,7,20,<br>21,22,24,2<br>6 | 7  | P00714,P02803,P06911,P15399,Q5BJY9,Q8CJD3,Q99041                             |
| 9028 | 1,4,6,8,18,<br>19,23,26 | 2,3,5,7,20,<br>21,22,24,2<br>5 | 6  | P0C0A9,P35467,Q63942,Q6IG02,Q6IMF3,Q6P6Q2                                    |
| 9029 | 1,4,6,8,18,<br>19,24,25 | 2,3,5,7,20,<br>21,22,23,2<br>6 | 0  |                                                                              |
| 9030 | 1,4,6,8,18,<br>19,24,26 | 2,3,5,7,20,<br>21,22,23,2<br>5 | 0  |                                                                              |
| 9031 | 1,4,6,8,18,<br>19,25,26 | 2,3,5,7,20,<br>21,22,23,2<br>4 | 2  | P00714,P35280                                                                |

|      |                         |                                |   |                                                                |
|------|-------------------------|--------------------------------|---|----------------------------------------------------------------|
| 9032 | 1,4,6,8,18,<br>20,21,22 | 2,3,5,7,19,<br>23,24,25,2<br>6 | 9 | O35547,P02782,P07647,P08723,P0C0A9,P10758,P13432,P36374,Q6AYR9 |
| 9033 | 1,4,6,8,18,<br>20,21,23 | 2,3,5,7,19,<br>22,24,25,2<br>6 | 7 | O35547,P02782,P08644,P08723,P0C0A9,P10758,Q6AYR9               |
| 9034 | 1,4,6,8,18,<br>20,21,24 | 2,3,5,7,19,<br>22,23,25,2<br>6 | 7 | P02782,P08644,P08723,P0C0A9,P10758,P13432,Q6AYR8               |
| 9035 | 1,4,6,8,18,<br>20,21,25 | 2,3,5,7,19,<br>22,23,24,2<br>6 | 7 | P08723,P0C0A9,P30120,P31430,P47727,Q6AYR9,Q9WTT6               |
| 9036 | 1,4,6,8,18,<br>20,21,26 | 2,3,5,7,19,<br>22,23,24,2<br>5 | 7 | P02782,P08723,P0C0A9,P17046,P36374,Q6AYR8,Q6AYR9               |
| 9037 | 1,4,6,8,18,<br>20,22,23 | 2,3,5,7,19,<br>21,24,25,2<br>6 | 1 | Q8CJD3                                                         |
| 9038 | 1,4,6,8,18,<br>20,22,24 | 2,3,5,7,19,<br>21,23,25,2<br>6 | 0 |                                                                |
| 9039 | 1,4,6,8,18,<br>20,22,25 | 2,3,5,7,19,<br>21,23,24,2<br>6 | 2 | P06911,Q07523                                                  |
| 9040 | 1,4,6,8,18,<br>20,22,26 | 2,3,5,7,19,<br>21,23,24,2<br>5 | 0 |                                                                |
| 9041 | 1,4,6,8,18,<br>20,23,24 | 2,3,5,7,19,<br>21,22,25,2<br>6 | 0 |                                                                |
| 9042 | 1,4,6,8,18,<br>20,23,25 | 2,3,5,7,19,<br>21,22,24,2<br>6 | 1 | P00714                                                         |
| 9043 | 1,4,6,8,18,<br>20,23,26 | 2,3,5,7,19,<br>21,22,24,2<br>5 | 6 | Q6IFU7,Q6IFU8,Q6IFW6,Q6IG02,Q6IMF3,Q6P6Q2                      |
| 9044 | 1,4,6,8,18,<br>20,24,25 | 2,3,5,7,19,<br>21,22,23,2<br>6 | 0 |                                                                |
| 9045 | 1,4,6,8,18,<br>20,24,26 | 2,3,5,7,19,<br>21,22,23,2<br>5 | 0 |                                                                |
| 9046 | 1,4,6,8,18,<br>20,25,26 | 2,3,5,7,19,<br>21,22,23,2<br>4 | 2 | P00714,P35280                                                  |

|      |                         |                                |    |                                                                                     |
|------|-------------------------|--------------------------------|----|-------------------------------------------------------------------------------------|
| 9047 | 1,4,6,8,18,<br>21,22,23 | 2,3,5,7,19,<br>20,24,25,2<br>6 | 8  | O35547,P02782,P08644,P08723,P0C0A9,P10758,P13432,Q8CJD3                             |
| 9048 | 1,4,6,8,18,<br>21,22,24 | 2,3,5,7,19,<br>20,23,25,2<br>6 | 5  | O35547,P02782,P08723,P0C0A9,P13432                                                  |
| 9049 | 1,4,6,8,18,<br>21,22,25 | 2,3,5,7,19,<br>20,23,24,2<br>6 | 8  | O35547,P02782,P06911,P08723,P0C0A9,P13432,P31430,Q9WTT6                             |
| 9050 | 1,4,6,8,18,<br>21,22,26 | 2,3,5,7,19,<br>20,23,24,2<br>5 | 5  | P02782,P08723,P0C0A9,P13432,P36374                                                  |
| 9051 | 1,4,6,8,18,<br>21,23,24 | 2,3,5,7,19,<br>20,22,25,2<br>6 | 5  | P02782,P08644,P08723,P0C0A9,P13432                                                  |
| 9052 | 1,4,6,8,18,<br>21,23,25 | 2,3,5,7,19,<br>20,22,24,2<br>6 | 12 | O35547,P00714,P02803,P07150,P08644,P08723,P0C0A9,P14669,P27213,P31430,Q6P6R2,Q9WTT6 |
| 9053 | 1,4,6,8,18,<br>21,23,26 | 2,3,5,7,19,<br>20,22,24,2<br>5 | 11 | P02782,P08644,P08723,P0C0A9,P14669,Q6IFU8,Q6IFV1,Q6IFW6,Q6IG02,Q6IMF3,Q6P6Q2        |
| 9054 | 1,4,6,8,18,<br>21,24,25 | 2,3,5,7,19,<br>20,22,23,2<br>6 | 5  | O54728,P08723,P13432,P31430,Q9WTT6                                                  |
| 9055 | 1,4,6,8,18,<br>21,24,26 | 2,3,5,7,19,<br>20,22,23,2<br>5 | 6  | P02782,P08644,P0C0A9,P13432,Q9EQV9,Q9JID2                                           |
| 9056 | 1,4,6,8,18,<br>21,25,26 | 2,3,5,7,19,<br>20,22,23,2<br>4 | 7  | P00714,P07150,P0C0A9,P14669,P27213,P31430,Q9WTT6                                    |
| 9057 | 1,4,6,8,18,<br>22,23,24 | 2,3,5,7,19,<br>20,21,25,2<br>6 | 1  | Q6IFU7                                                                              |
| 9058 | 1,4,6,8,18,<br>22,23,25 | 2,3,5,7,19,<br>20,21,24,2<br>6 | 4  | P00714,P06911,Q5GRG2,Q8CJD3                                                         |
| 9059 | 1,4,6,8,18,<br>22,23,26 | 2,3,5,7,19,<br>20,21,24,2<br>5 | 3  | Q6IFU7,Q6IMF3,Q6P6Q2                                                                |
| 9060 | 1,4,6,8,18,<br>22,24,25 | 2,3,5,7,19,<br>20,21,23,2<br>6 | 1  | P06911                                                                              |
| 9061 | 1,4,6,8,18,<br>22,24,26 | 2,3,5,7,19,<br>20,21,23,2<br>5 | 0  |                                                                                     |

|      |                         |                                |    |                                                                                     |
|------|-------------------------|--------------------------------|----|-------------------------------------------------------------------------------------|
| 9062 | 1,4,6,8,18,<br>22,25,26 | 2,3,5,7,19,<br>20,21,23,2<br>4 | 0  |                                                                                     |
| 9063 | 1,4,6,8,18,<br>23,24,25 | 2,3,5,7,19,<br>20,21,22,2<br>6 | 1  | P00714                                                                              |
| 9064 | 1,4,6,8,18,<br>23,24,26 | 2,3,5,7,19,<br>20,21,22,2<br>5 | 5  | Q6IFU7,Q6IFW6,Q6IG02,Q6IMF3,Q6P6Q2                                                  |
| 9065 | 1,4,6,8,18,<br>23,25,26 | 2,3,5,7,19,<br>20,21,22,2<br>4 | 8  | P00714,P27213,Q6IFU8,Q6IFW6,Q6IG02,Q6IMF3,Q6P6Q2,Q9WTT6                             |
| 9066 | 1,4,6,8,18,<br>24,25,26 | 2,3,5,7,19,<br>20,21,22,2<br>3 | 1  | P00714                                                                              |
| 9067 | 1,4,6,8,19,<br>20,21,22 | 2,3,5,7,18,<br>23,24,25,2<br>6 | 12 | O35547,P00774,P02782,P07647,P08723,P0C0A9,P13432,P30120,P35281,P55091,Q07523,Q7TPB1 |
| 9068 | 1,4,6,8,19,<br>20,21,23 | 2,3,5,7,18,<br>22,24,25,2<br>6 | 7  | P02782,P08723,P0C0A9,P15399,P30120,P35281,Q8CJD3                                    |
| 9069 | 1,4,6,8,19,<br>20,21,24 | 2,3,5,7,18,<br>22,23,25,2<br>6 | 6  | O35956,P02782,P08723,P0C0A9,P13432,P35281                                           |
| 9070 | 1,4,6,8,19,<br>20,21,25 | 2,3,5,7,18,<br>22,23,24,2<br>6 | 6  | P08723,P0C0A9,P30120,P35281,P47727,Q9WTT6                                           |
| 9071 | 1,4,6,8,19,<br>20,21,26 | 2,3,5,7,18,<br>22,23,24,2<br>5 | 3  | P02782,P0C0A9,P35281                                                                |
| 9072 | 1,4,6,8,19,<br>20,22,23 | 2,3,5,7,18,<br>21,24,25,2<br>6 | 5  | P00774,P31430,P55091,P82995,Q8CJD3                                                  |
| 9073 | 1,4,6,8,19,<br>20,22,24 | 2,3,5,7,18,<br>21,23,25,2<br>6 | 3  | P00774,P55091,P82995                                                                |
| 9074 | 1,4,6,8,19,<br>20,22,25 | 2,3,5,7,18,<br>21,23,24,2<br>6 | 2  | P06911,Q07523                                                                       |
| 9075 | 1,4,6,8,19,<br>20,22,26 | 2,3,5,7,18,<br>21,23,24,2<br>5 | 0  |                                                                                     |
| 9076 | 1,4,6,8,19,<br>20,23,24 | 2,3,5,7,18,<br>21,22,25,2<br>6 | 3  | P00774,P15399,P82995                                                                |

|      |                         |                                |    |                                                                                            |
|------|-------------------------|--------------------------------|----|--------------------------------------------------------------------------------------------|
| 9077 | 1,4,6,8,19,<br>20,23,25 | 2,3,5,7,18,<br>21,22,24,2<br>6 | 3  | P06911,P15399,Q99041                                                                       |
| 9078 | 1,4,6,8,19,<br>20,23,26 | 2,3,5,7,18,<br>21,22,24,2<br>5 | 0  |                                                                                            |
| 9079 | 1,4,6,8,19,<br>20,24,25 | 2,3,5,7,18,<br>21,22,23,2<br>6 | 0  |                                                                                            |
| 9080 | 1,4,6,8,19,<br>20,24,26 | 2,3,5,7,18,<br>21,22,23,2<br>5 | 0  |                                                                                            |
| 9081 | 1,4,6,8,19,<br>20,25,26 | 2,3,5,7,18,<br>21,22,23,2<br>4 | 2  | P35280,P80201                                                                              |
| 9082 | 1,4,6,8,19,<br>21,22,23 | 2,3,5,7,18,<br>20,24,25,2<br>6 | 7  | O35547,P02782,P08723,P0C0A9,P15399,P35281,Q8CJD3                                           |
| 9083 | 1,4,6,8,19,<br>21,22,24 | 2,3,5,7,18,<br>20,23,25,2<br>6 | 6  | A2RUV9,P02782,P08723,P0C0A9,P13432,P35281                                                  |
| 9084 | 1,4,6,8,19,<br>21,22,25 | 2,3,5,7,18,<br>20,23,24,2<br>6 | 8  | A2RUV9,P02782,P06911,P08723,P0C0A9,P30120,P35281,Q07523                                    |
| 9085 | 1,4,6,8,19,<br>21,22,26 | 2,3,5,7,18,<br>20,23,24,2<br>5 | 5  | P02782,P08723,P0C0A9,P35281,P36374                                                         |
| 9086 | 1,4,6,8,19,<br>21,23,24 | 2,3,5,7,18,<br>20,22,25,2<br>6 | 5  | P02782,P0C0A9,P13432,P15399,P35281                                                         |
| 9087 | 1,4,6,8,19,<br>21,23,25 | 2,3,5,7,18,<br>20,22,24,2<br>6 | 13 | P02803,P06760,P06911,P07150,P08723,P0C0A9,P15399,P27213,P35281,P50280,Q6P6R2,Q99041,Q9WTT6 |
| 9088 | 1,4,6,8,19,<br>21,23,26 | 2,3,5,7,18,<br>20,22,24,2<br>5 | 4  | P02782,P0C0A9,P15399,P35281                                                                |
| 9089 | 1,4,6,8,19,<br>21,24,25 | 2,3,5,7,18,<br>20,22,23,2<br>6 | 2  | P13432,P35281                                                                              |
| 9090 | 1,4,6,8,19,<br>21,24,26 | 2,3,5,7,18,<br>20,22,23,2<br>5 | 5  | P02782,P0C0A9,P13432,P35281,Q9EQV9                                                         |
| 9091 | 1,4,6,8,19,<br>21,25,26 | 2,3,5,7,18,<br>20,22,23,2<br>4 | 5  | P0C0A9,P27213,P35281,Q9QZK9,Q9WTT6                                                         |

|      |                         |                                |   |                                                                |
|------|-------------------------|--------------------------------|---|----------------------------------------------------------------|
| 9092 | 1,4,6,8,19,<br>22,23,24 | 2,3,5,7,18,<br>20,21,25,2<br>6 | 3 | P00774,P25031,P31430                                           |
| 9093 | 1,4,6,8,19,<br>22,23,25 | 2,3,5,7,18,<br>20,21,24,2<br>6 | 8 | P06911,P12020,P15399,P50280,Q5GRG2,Q71MB6,Q8CJD3,Q99041        |
| 9094 | 1,4,6,8,19,<br>22,23,26 | 2,3,5,7,18,<br>20,21,24,2<br>5 | 0 |                                                                |
| 9095 | 1,4,6,8,19,<br>22,24,25 | 2,3,5,7,18,<br>20,21,23,2<br>6 | 1 | P06911                                                         |
| 9096 | 1,4,6,8,19,<br>22,24,26 | 2,3,5,7,18,<br>20,21,23,2<br>5 | 0 |                                                                |
| 9097 | 1,4,6,8,19,<br>22,25,26 | 2,3,5,7,18,<br>20,21,23,2<br>4 | 2 | P06911,Q9QZK9                                                  |
| 9098 | 1,4,6,8,19,<br>23,24,25 | 2,3,5,7,18,<br>20,21,22,2<br>6 | 4 | P06911,P15399,P50280,Q99041                                    |
| 9099 | 1,4,6,8,19,<br>23,24,26 | 2,3,5,7,18,<br>20,21,22,2<br>5 | 0 |                                                                |
| 9100 | 1,4,6,8,19,<br>23,25,26 | 2,3,5,7,18,<br>20,21,22,2<br>4 | 5 | P00714,P06911,P15399,P27213,Q99041                             |
| 9101 | 1,4,6,8,19,<br>24,25,26 | 2,3,5,7,18,<br>20,21,22,2<br>3 | 0 |                                                                |
| 9102 | 1,4,6,8,20,<br>21,22,23 | 2,3,5,7,18,<br>19,24,25,2<br>6 | 4 | P02782,P08723,P0C0A9,P13432                                    |
| 9103 | 1,4,6,8,20,<br>21,22,24 | 2,3,5,7,18,<br>19,23,25,2<br>6 | 7 | P02782,P08723,P13432,Q03191,Q07523,Q5XFX0,Q99MH3               |
| 9104 | 1,4,6,8,20,<br>21,22,25 | 2,3,5,7,18,<br>19,23,24,2<br>6 | 9 | P02782,P06911,P08723,P13432,P30120,P47727,Q03191,Q07523,Q9WTT6 |
| 9105 | 1,4,6,8,20,<br>21,22,26 | 2,3,5,7,18,<br>19,23,24,2<br>5 | 6 | P02782,P08723,P0C0A9,P13432,Q03191,Q99MH3                      |
| 9106 | 1,4,6,8,20,<br>21,23,24 | 2,3,5,7,18,<br>19,22,25,2<br>6 | 2 | P02782,P13432                                                  |

|      |                         |                                |   |                                           |
|------|-------------------------|--------------------------------|---|-------------------------------------------|
| 9107 | 1,4,6,8,20,<br>21,23,25 | 2,3,5,7,18,<br>19,22,24,2<br>6 | 6 | P06760,P07150,P30120,P47727,Q6P6R2,Q9WTT6 |
| 9108 | 1,4,6,8,20,<br>21,23,26 | 2,3,5,7,18,<br>19,22,24,2<br>5 | 3 | P02782,P0C0A9,Q6IFV1                      |
| 9109 | 1,4,6,8,20,<br>21,24,25 | 2,3,5,7,18,<br>19,22,23,2<br>6 | 5 | P13432,P30120,Q03191,Q07523,Q9WTT6        |
| 9110 | 1,4,6,8,20,<br>21,24,26 | 2,3,5,7,18,<br>19,22,23,2<br>5 | 5 | P01015,P02782,P13432,Q99MH3,Q9EQV9        |
| 9111 | 1,4,6,8,20,<br>21,25,26 | 2,3,5,7,18,<br>19,22,23,2<br>4 | 2 | Q03191,Q9WTT6                             |
| 9112 | 1,4,6,8,20,<br>22,23,24 | 2,3,5,7,18,<br>19,21,25,2<br>6 | 2 | P00774,P82995                             |
| 9113 | 1,4,6,8,20,<br>22,23,25 | 2,3,5,7,18,<br>19,21,24,2<br>6 | 2 | P06911,Q5GRG2                             |
| 9114 | 1,4,6,8,20,<br>22,23,26 | 2,3,5,7,18,<br>19,21,24,2<br>5 | 0 |                                           |
| 9115 | 1,4,6,8,20,<br>22,24,25 | 2,3,5,7,18,<br>19,21,23,2<br>6 | 3 | P06911,Q03191,Q07523                      |
| 9116 | 1,4,6,8,20,<br>22,24,26 | 2,3,5,7,18,<br>19,21,23,2<br>5 | 2 | Q03191,Q99MH3                             |
| 9117 | 1,4,6,8,20,<br>22,25,26 | 2,3,5,7,18,<br>19,21,23,2<br>4 | 2 | P06911,Q03191                             |
| 9118 | 1,4,6,8,20,<br>23,24,25 | 2,3,5,7,18,<br>19,21,22,2<br>6 | 1 | P63036                                    |
| 9119 | 1,4,6,8,20,<br>23,24,26 | 2,3,5,7,18,<br>19,21,22,2<br>5 | 1 | P97840                                    |
| 9120 | 1,4,6,8,20,<br>23,25,26 | 2,3,5,7,18,<br>19,21,22,2<br>4 | 1 | Q9WTT6                                    |
| 9121 | 1,4,6,8,20,<br>24,25,26 | 2,3,5,7,18,<br>19,21,22,2<br>3 | 0 |                                           |



|      |                         |                                |   |                                                         |
|------|-------------------------|--------------------------------|---|---------------------------------------------------------|
| 9122 | 1,4,6,8,21,<br>22,23,24 | 2,3,5,7,18,<br>19,20,25,2<br>6 | 3 | P02782,P08723,P13432                                    |
| 9123 | 1,4,6,8,21,<br>22,23,25 | 2,3,5,7,18,<br>19,20,24,2<br>6 | 8 | P06760,P06911,P07150,P08723,P50280,Q5GRG2,Q6P6R2,Q9WTT6 |
| 9124 | 1,4,6,8,21,<br>22,23,26 | 2,3,5,7,18,<br>19,20,24,2<br>5 | 5 | P02782,P08723,P0C0A9,P22282,Q6IFV1                      |
| 9125 | 1,4,6,8,21,<br>22,24,25 | 2,3,5,7,18,<br>19,20,23,2<br>6 | 7 | P02782,P06911,P08723,P13432,Q03191,Q07523,Q9WTT6        |
| 9126 | 1,4,6,8,21,<br>22,24,26 | 2,3,5,7,18,<br>19,20,23,2<br>5 | 3 | P02782,P13432,Q99MH3                                    |
| 9127 | 1,4,6,8,21,<br>22,25,26 | 2,3,5,7,18,<br>19,20,23,2<br>4 | 3 | P06911,Q9QZK9,Q9WTT6                                    |
| 9128 | 1,4,6,8,21,<br>23,24,25 | 2,3,5,7,18,<br>19,20,22,2<br>6 | 6 | P06760,P07150,P13432,P27213,Q6P6R2,Q9WTT6               |
| 9129 | 1,4,6,8,21,<br>23,24,26 | 2,3,5,7,18,<br>19,20,22,2<br>5 | 3 | P02782,P13432,Q6IFV1                                    |
| 9130 | 1,4,6,8,21,<br>23,25,26 | 2,3,5,7,18,<br>19,20,22,2<br>4 | 7 | P07150,P14669,P27213,P83121,Q6P6R2,Q9QZK9,Q9WTT6        |
| 9131 | 1,4,6,8,21,<br>24,25,26 | 2,3,5,7,18,<br>19,20,22,2<br>3 | 4 | P13432,P22006,P27213,Q9WTT6                             |
| 9132 | 1,4,6,8,22,<br>23,24,25 | 2,3,5,7,18,<br>19,20,21,2<br>6 | 2 | P06911,Q5GRG2                                           |
| 9133 | 1,4,6,8,22,<br>23,24,26 | 2,3,5,7,18,<br>19,20,21,2<br>5 | 2 | P00731,Q6IFU7                                           |
| 9134 | 1,4,6,8,22,<br>23,25,26 | 2,3,5,7,18,<br>19,20,21,2<br>4 | 2 | P06911,Q5GRG2                                           |
| 9135 | 1,4,6,8,22,<br>24,25,26 | 2,3,5,7,18,<br>19,20,21,2<br>3 | 1 | P06911                                                  |
| 9136 | 1,4,6,8,23,<br>24,25,26 | 2,3,5,7,18,<br>19,20,21,2<br>2 | 3 | P27213,Q7TPB1,Q9WTT6                                    |

|      |                                                 |   |                                                                |
|------|-------------------------------------------------|---|----------------------------------------------------------------|
| 9137 | 1,4,6,18,1 2,3,5,7,8,2<br>9,20,21,22 3,24,25,26 | 6 | O35547,P08723,P10758,P13432,P36374,Q6AYR9                      |
| 9138 | 1,4,6,18,1 2,3,5,7,8,2<br>9,20,21,23 2,24,25,26 | 7 | O35547,P10758,P15399,P20766,P35281,Q6AYR9,Q8CJD3               |
| 9139 | 1,4,6,18,1 2,3,5,7,8,2<br>9,20,21,24 2,23,25,26 | 3 | P10758,P13432,P20766                                           |
| 9140 | 1,4,6,18,1 2,3,5,7,8,2<br>9,20,21,25 2,23,24,26 | 3 | P20766,P47967,Q6AYR9                                           |
| 9141 | 1,4,6,18,1 2,3,5,7,8,2<br>9,20,21,26 2,23,24,25 | 4 | P20766,P35281,P36374,Q6AYR9                                    |
| 9142 | 1,4,6,18,1 2,3,5,7,8,2<br>9,20,22,23 1,24,25,26 | 2 | P15399,Q8CJD3                                                  |
| 9143 | 1,4,6,18,1 2,3,5,7,8,2<br>9,20,22,24 1,23,25,26 | 0 |                                                                |
| 9144 | 1,4,6,18,1 2,3,5,7,8,2<br>9,20,22,25 1,23,24,26 | 0 |                                                                |
| 9145 | 1,4,6,18,1 2,3,5,7,8,2<br>9,20,22,26 1,23,24,25 | 1 | Q63751                                                         |
| 9146 | 1,4,6,18,1 2,3,5,7,8,2<br>9,20,23,24 1,22,25,26 | 3 | P15399,P20766,Q6IFU7                                           |
| 9147 | 1,4,6,18,1 2,3,5,7,8,2<br>9,20,23,25 1,22,24,26 | 2 | P15399,Q8CJD3                                                  |
| 9148 | 1,4,6,18,1 2,3,5,7,8,2<br>9,20,23,26 1,22,24,25 | 7 | P15399,Q6IFU7,Q6IFU8,Q6IFW6,Q6IG02,Q6IMF3,Q6P6Q2               |
| 9149 | 1,4,6,18,1 2,3,5,7,8,2<br>9,20,24,25 1,22,23,26 | 0 |                                                                |
| 9150 | 1,4,6,18,1 2,3,5,7,8,2<br>9,20,24,26 1,22,23,25 | 0 |                                                                |
| 9151 | 1,4,6,18,1 2,3,5,7,8,2<br>9,20,25,26 1,22,23,24 | 1 | P35280                                                         |
| 9152 | 1,4,6,18,1 2,3,5,7,8,2<br>9,21,22,23 0,24,25,26 | 5 | O35547,P08723,P10758,P15399,Q8CJD3                             |
| 9153 | 1,4,6,18,1 2,3,5,7,8,2<br>9,21,22,24 0,23,25,26 | 4 | P08723,P10758,P13432,P36374                                    |
| 9154 | 1,4,6,18,1 2,3,5,7,8,2<br>9,21,22,25 0,23,24,26 | 3 | P08723,P47967,P97840                                           |
| 9155 | 1,4,6,18,1 2,3,5,7,8,2<br>9,21,22,26 0,23,24,25 | 2 | P0C0A9,P36374                                                  |
| 9156 | 1,4,6,18,1 2,3,5,7,8,2<br>9,21,23,24 0,22,25,26 | 4 | P10758,P15399,P20766,Q6IFU7                                    |
| 9157 | 1,4,6,18,1 2,3,5,7,8,2<br>9,21,23,25 0,22,24,26 | 2 | P15399,P27213                                                  |
| 9158 | 1,4,6,18,1 2,3,5,7,8,2<br>9,21,23,26 0,22,24,25 | 9 | P0C0A9,P15399,P36374,Q10758,Q6IFU7,Q6IFU8,Q6IFV1,Q6IMF3,Q6P6Q2 |
| 9159 | 1,4,6,18,1 2,3,5,7,8,2<br>9,21,24,25 0,22,23,26 | 1 | P20766                                                         |

|      |                                                 |   |                                                                |
|------|-------------------------------------------------|---|----------------------------------------------------------------|
| 9160 | 1,4,6,18,1 2,3,5,7,8,2<br>9,21,24,26 0,22,23,25 | 2 | P20766,P36374                                                  |
| 9161 | 1,4,6,18,1 2,3,5,7,8,2<br>9,21,25,26 0,22,23,24 | 1 | P27213                                                         |
| 9162 | 1,4,6,18,1 2,3,5,7,8,2<br>9,22,23,24 0,21,25,26 | 1 | Q6IFU7                                                         |
| 9163 | 1,4,6,18,1 2,3,5,7,8,2<br>9,22,23,25 0,21,24,26 | 3 | P06911,P15399,Q8CJD3                                           |
| 9164 | 1,4,6,18,1 2,3,5,7,8,2<br>9,22,23,26 0,21,24,25 | 2 | Q6IFU7,Q6P6Q2                                                  |
| 9165 | 1,4,6,18,1 2,3,5,7,8,2<br>9,22,24,25 0,21,23,26 | 0 |                                                                |
| 9166 | 1,4,6,18,1 2,3,5,7,8,2<br>9,22,24,26 0,21,23,25 | 1 | Q5M819                                                         |
| 9167 | 1,4,6,18,1 2,3,5,7,8,2<br>9,22,25,26 0,21,23,24 | 0 |                                                                |
| 9168 | 1,4,6,18,1 2,3,5,7,8,2<br>9,23,24,25 0,21,22,26 | 1 | P15399                                                         |
| 9169 | 1,4,6,18,1 2,3,5,7,8,2<br>9,23,24,26 0,21,22,25 | 2 | Q6IFU7,Q6P6Q2                                                  |
| 9170 | 1,4,6,18,1 2,3,5,7,8,2<br>9,23,25,26 0,21,22,24 | 8 | P00714,P15399,P27213,P83121,Q6IFU7,Q6IFU8,Q6IMF3,Q6P6Q2        |
| 9171 | 1,4,6,18,1 2,3,5,7,8,2<br>9,24,25,26 0,21,22,23 | 0 |                                                                |
| 9172 | 1,4,6,18,2 2,3,5,7,8,1<br>0,21,22,23 9,24,25,26 | 2 | P08723,P13432                                                  |
| 9173 | 1,4,6,18,2 2,3,5,7,8,1<br>0,21,22,24 9,23,25,26 | 1 | P13432                                                         |
| 9174 | 1,4,6,18,2 2,3,5,7,8,1<br>0,21,22,25 9,23,24,26 | 2 | P08723,P13432                                                  |
| 9175 | 1,4,6,18,2 2,3,5,7,8,1<br>0,21,22,26 9,23,24,25 | 2 | P13432,P36374                                                  |
| 9176 | 1,4,6,18,2 2,3,5,7,8,1<br>0,21,23,24 9,22,25,26 | 3 | P13432,P20766,Q6IFU7                                           |
| 9177 | 1,4,6,18,2 2,3,5,7,8,1<br>0,21,23,25 9,22,24,26 | 1 | P20766                                                         |
| 9178 | 1,4,6,18,2 2,3,5,7,8,1<br>0,21,23,26 9,22,24,25 | 9 | P01835,P20766,Q6IFU7,Q6IFU8,Q6IFV1,Q6IFW6,Q6IG02,Q6IMF3,Q6P6Q2 |
| 9179 | 1,4,6,18,2 2,3,5,7,8,1<br>0,21,24,25 9,22,23,26 | 2 | P13432,P20766                                                  |
| 9180 | 1,4,6,18,2 2,3,5,7,8,1<br>0,21,24,26 9,22,23,25 | 3 | P13432,P20766,P36374                                           |
| 9181 | 1,4,6,18,2 2,3,5,7,8,1<br>0,21,25,26 9,22,23,24 | 1 | P31430                                                         |
| 9182 | 1,4,6,18,2 2,3,5,7,8,1<br>0,22,23,24 9,21,25,26 | 1 | Q6IFU7                                                         |

|      |                                                 |   |                                                         |
|------|-------------------------------------------------|---|---------------------------------------------------------|
| 9183 | 1,4,6,18,2 2,3,5,7,8,1<br>0,22,23,25 9,21,24,26 | 1 | P06911                                                  |
| 9184 | 1,4,6,18,2 2,3,5,7,8,1<br>0,22,23,26 9,21,24,25 | 6 | Q6IFU7,Q6IFU8,Q6IFW6,Q6IG02,Q6IMF3,Q6P6Q2               |
| 9185 | 1,4,6,18,2 2,3,5,7,8,1<br>0,22,24,25 9,21,23,26 | 0 |                                                         |
| 9186 | 1,4,6,18,2 2,3,5,7,8,1<br>0,22,24,26 9,21,23,25 | 0 |                                                         |
| 9187 | 1,4,6,18,2 2,3,5,7,8,1<br>0,22,25,26 9,21,23,24 | 0 |                                                         |
| 9188 | 1,4,6,18,2 2,3,5,7,8,1<br>0,23,24,25 9,21,22,26 | 1 | Q6IFU7                                                  |
| 9189 | 1,4,6,18,2 2,3,5,7,8,1<br>0,23,24,26 9,21,22,25 | 6 | Q6IFU7,Q6IFU8,Q6IFW6,Q6IG02,Q6IMF3,Q6P6Q2               |
| 9190 | 1,4,6,18,2 2,3,5,7,8,1<br>0,23,25,26 9,21,22,24 | 8 | P00714,P83121,Q6IFU7,Q6IFU8,Q6IFW6,Q6IG02,Q6IMF3,Q6P6Q2 |
| 9191 | 1,4,6,18,2 2,3,5,7,8,1<br>0,24,25,26 9,21,22,23 | 0 |                                                         |
| 9192 | 1,4,6,18,2 2,3,5,7,8,1<br>1,22,23,24 9,20,25,26 | 2 | P13432,Q6IFU7                                           |
| 9193 | 1,4,6,18,2 2,3,5,7,8,1<br>1,22,23,25 9,20,24,26 | 2 | P06911,P08723                                           |
| 9194 | 1,4,6,18,2 2,3,5,7,8,1<br>1,22,23,26 9,20,24,25 | 6 | P36374,Q6IFU7,Q6IFU8,Q6IFV1,Q6IMF3,Q6P6Q2               |
| 9195 | 1,4,6,18,2 2,3,5,7,8,1<br>1,22,24,25 9,20,23,26 | 1 | P13432                                                  |
| 9196 | 1,4,6,18,2 2,3,5,7,8,1<br>1,22,24,26 9,20,23,25 | 3 | P13432,P36374,Q9JID2                                    |
| 9197 | 1,4,6,18,2 2,3,5,7,8,1<br>1,22,25,26 9,20,23,24 | 2 | P31430,P36374                                           |
| 9198 | 1,4,6,18,2 2,3,5,7,8,1<br>1,23,24,25 9,20,22,26 | 2 | P20766,Q6P6R2                                           |
| 9199 | 1,4,6,18,2 2,3,5,7,8,1<br>1,23,24,26 9,20,22,25 | 7 | P13432,P20766,Q6IFU7,Q6IFU8,Q6IFV1,Q6IMF3,Q6P6Q2        |
| 9200 | 1,4,6,18,2 2,3,5,7,8,1<br>1,23,25,26 9,20,22,24 | 8 | P04905,P27213,P31430,P83121,Q6IFU7,Q6IFU8,Q6IMF3,Q6P6Q2 |
| 9201 | 1,4,6,18,2 2,3,5,7,8,1<br>1,24,25,26 9,20,22,23 | 2 | P27213,P31430                                           |
| 9202 | 1,4,6,18,2 2,3,5,7,8,1<br>2,23,24,25 9,20,21,26 | 3 | P06911,P62804,Q6IFU7                                    |
| 9203 | 1,4,6,18,2 2,3,5,7,8,1<br>2,23,24,26 9,20,21,25 | 3 | Q6IFU7,Q6IMF3,Q6P6Q2                                    |
| 9204 | 1,4,6,18,2 2,3,5,7,8,1<br>2,23,25,26 9,20,21,24 | 3 | Q6IFU7,Q6IMF3,Q6P6Q2                                    |
| 9205 | 1,4,6,18,2 2,3,5,7,8,1<br>2,24,25,26 9,20,21,23 | 0 |                                                         |

|      |                                                 |   |                                           |
|------|-------------------------------------------------|---|-------------------------------------------|
| 9206 | 1,4,6,18,2 2,3,5,7,8,1<br>3,24,25,26 9,20,21,22 | 6 | P27213,Q6IFU7,Q6IFU8,Q6IMF3,Q6P6Q2,Q7TPB1 |
| 9207 | 1,4,6,19,2 2,3,5,7,8,1<br>0,21,22,23 8,24,25,26 | 4 | P00774,P15399,P55091,Q8CJD3               |
| 9208 | 1,4,6,19,2 2,3,5,7,8,1<br>0,21,22,24 8,23,25,26 | 5 | P00774,P13432,P35467,P55091,Q99MH3        |
| 9209 | 1,4,6,19,2 2,3,5,7,8,1<br>0,21,22,25 8,23,24,26 | 4 | P30120,P35467,P47967,Q07523               |
| 9210 | 1,4,6,19,2 2,3,5,7,8,1<br>0,21,22,26 8,23,24,25 | 2 | P36374,Q99MH3                             |
| 9211 | 1,4,6,19,2 2,3,5,7,8,1<br>0,21,23,24 8,22,25,26 | 2 | P15399,P20766                             |
| 9212 | 1,4,6,19,2 2,3,5,7,8,1<br>0,21,23,25 8,22,24,26 | 2 | P15399,P20766                             |
| 9213 | 1,4,6,19,2 2,3,5,7,8,1<br>0,21,23,26 8,22,24,25 | 1 | P15399                                    |
| 9214 | 1,4,6,19,2 2,3,5,7,8,1<br>0,21,24,25 8,22,23,26 | 2 | P20766,P35467                             |
| 9215 | 1,4,6,19,2 2,3,5,7,8,1<br>0,21,24,26 8,22,23,25 | 2 | P01015,P20766                             |
| 9216 | 1,4,6,19,2 2,3,5,7,8,1<br>0,21,25,26 8,22,23,24 | 0 |                                           |
| 9217 | 1,4,6,19,2 2,3,5,7,8,1<br>0,22,23,24 8,21,25,26 | 4 | P00774,P31430,P55091,P82995               |
| 9218 | 1,4,6,19,2 2,3,5,7,8,1<br>0,22,23,25 8,21,24,26 | 2 | P06911,P15399                             |
| 9219 | 1,4,6,19,2 2,3,5,7,8,1<br>0,22,23,26 8,21,24,25 | 2 | P05539,P31430                             |
| 9220 | 1,4,6,19,2 2,3,5,7,8,1<br>0,22,24,25 8,21,23,26 | 2 | P00774,P35467                             |
| 9221 | 1,4,6,19,2 2,3,5,7,8,1<br>0,22,24,26 8,21,23,25 | 1 | Q99MH3                                    |
| 9222 | 1,4,6,19,2 2,3,5,7,8,1<br>0,22,25,26 8,21,23,24 | 1 | P05539                                    |
| 9223 | 1,4,6,19,2 2,3,5,7,8,1<br>0,23,24,25 8,21,22,26 | 1 | P15399                                    |
| 9224 | 1,4,6,19,2 2,3,5,7,8,1<br>0,23,24,26 8,21,22,25 | 1 | Q6IFU7                                    |
| 9225 | 1,4,6,19,2 2,3,5,7,8,1<br>0,23,25,26 8,21,22,24 | 2 | P15399,P83121                             |
| 9226 | 1,4,6,19,2 2,3,5,7,8,1<br>0,24,25,26 8,21,22,23 | 0 |                                           |
| 9227 | 1,4,6,19,2 2,3,5,7,8,1<br>1,22,23,24 8,20,25,26 | 2 | P13432,P15399                             |
| 9228 | 1,4,6,19,2 2,3,5,7,8,1<br>1,22,23,25 8,20,24,26 | 2 | P06911,P15399                             |

|      |                                                 |   |                                           |
|------|-------------------------------------------------|---|-------------------------------------------|
| 9229 | 1,4,6,19,2 2,3,5,7,8,1<br>1,22,23,26 8,20,24,25 | 1 | P15399                                    |
| 9230 | 1,4,6,19,2 2,3,5,7,8,1<br>1,22,24,25 8,20,23,26 | 2 | P13432,P35467                             |
| 9231 | 1,4,6,19,2 2,3,5,7,8,1<br>1,22,24,26 8,20,23,25 | 1 | P13432                                    |
| 9232 | 1,4,6,19,2 2,3,5,7,8,1<br>1,22,25,26 8,20,23,24 | 1 | Q9QZK9                                    |
| 9233 | 1,4,6,19,2 2,3,5,7,8,1<br>1,23,24,25 8,20,22,26 | 3 | P15399,P20766,P27213                      |
| 9234 | 1,4,6,19,2 2,3,5,7,8,1<br>1,23,24,26 8,20,22,25 | 1 | P15399                                    |
| 9235 | 1,4,6,19,2 2,3,5,7,8,1<br>1,23,25,26 8,20,22,24 | 4 | P15399,P27213,P83121,Q9QZK9               |
| 9236 | 1,4,6,19,2 2,3,5,7,8,1<br>1,24,25,26 8,20,22,23 | 2 | P22006,P27213                             |
| 9237 | 1,4,6,19,2 2,3,5,7,8,1<br>2,23,24,25 8,20,21,26 | 2 | P06911,P62804                             |
| 9238 | 1,4,6,19,2 2,3,5,7,8,1<br>2,23,24,26 8,20,21,25 | 3 | P00731,P31430,Q6IFU7                      |
| 9239 | 1,4,6,19,2 2,3,5,7,8,1<br>2,23,25,26 8,20,21,24 | 2 | P05539,P06911                             |
| 9240 | 1,4,6,19,2 2,3,5,7,8,1<br>2,24,25,26 8,20,21,23 | 0 |                                           |
| 9241 | 1,4,6,19,2 2,3,5,7,8,1<br>3,24,25,26 8,20,21,22 | 3 | P14480,P27213,Q7TPB1                      |
| 9242 | 1,4,6,20,2 2,3,5,7,8,1<br>1,22,23,24 8,19,25,26 | 2 | P13432,P82995                             |
| 9243 | 1,4,6,20,2 2,3,5,7,8,1<br>1,22,23,25 8,19,24,26 | 2 | P06911,P16636                             |
| 9244 | 1,4,6,20,2 2,3,5,7,8,1<br>1,22,23,26 8,19,24,25 | 0 |                                           |
| 9245 | 1,4,6,20,2 2,3,5,7,8,1<br>1,22,24,25 8,19,23,26 | 6 | P13432,P35467,Q03191,Q07523,Q5XFX0,Q64194 |
| 9246 | 1,4,6,20,2 2,3,5,7,8,1<br>1,22,24,26 8,19,23,25 | 4 | P01015,P13432,Q03191,Q99MH3               |
| 9247 | 1,4,6,20,2 2,3,5,7,8,1<br>1,22,25,26 8,19,23,24 | 1 | Q03191                                    |
| 9248 | 1,4,6,20,2 2,3,5,7,8,1<br>1,23,24,25 8,19,22,26 | 2 | P20766,Q6P6R2                             |
| 9249 | 1,4,6,20,2 2,3,5,7,8,1<br>1,23,24,26 8,19,22,25 | 4 | P13432,P20766,Q6IFU7,Q6IFV1               |
| 9250 | 1,4,6,20,2 2,3,5,7,8,1<br>1,23,25,26 8,19,22,24 | 2 | P27213,P83121                             |
| 9251 | 1,4,6,20,2 2,3,5,7,8,1<br>1,24,25,26 8,19,22,23 | 2 | P20766,Q03191                             |

|      |                          |                                |   |                                                                |
|------|--------------------------|--------------------------------|---|----------------------------------------------------------------|
| 9252 | 1,4,6,20,2<br>2,23,24,25 | 2,3,5,7,8,1<br>8,19,21,26      | 2 | P06911,P82995                                                  |
| 9253 | 1,4,6,20,2<br>2,23,24,26 | 2,3,5,7,8,1<br>8,19,21,25      | 2 | P00731,Q6IFU7                                                  |
| 9254 | 1,4,6,20,2<br>2,23,25,26 | 2,3,5,7,8,1<br>8,19,21,24      | 3 | P05539,P06911,P83121                                           |
| 9255 | 1,4,6,20,2<br>2,24,25,26 | 2,3,5,7,8,1<br>8,19,21,23      | 2 | Q03191,Q99MH3                                                  |
| 9256 | 1,4,6,20,2<br>3,24,25,26 | 2,3,5,7,8,1<br>8,19,21,22      | 1 | Q7TPB1                                                         |
| 9257 | 1,4,6,21,2<br>2,23,24,25 | 2,3,5,7,8,1<br>8,19,20,26      | 2 | P06911,P13432                                                  |
| 9258 | 1,4,6,21,2<br>2,23,24,26 | 2,3,5,7,8,1<br>8,19,20,25      | 3 | P00731,P13432,Q6IFU7                                           |
| 9259 | 1,4,6,21,2<br>2,23,25,26 | 2,3,5,7,8,1<br>8,19,20,24      | 3 | P06911,P27213,P83121                                           |
| 9260 | 1,4,6,21,2<br>2,24,25,26 | 2,3,5,7,8,1<br>8,19,20,23      | 4 | P13432,P22006,Q03191,Q498D9                                    |
| 9261 | 1,4,6,21,2<br>3,24,25,26 | 2,3,5,7,8,1<br>8,19,20,22      | 5 | P22006,P27213,P83121,Q6P6R2,Q7TPB1                             |
| 9262 | 1,4,6,22,2<br>3,24,25,26 | 2,3,5,7,8,1<br>8,19,20,21      | 5 | P00731,P06911,P62804,Q6IFU7,Q7TPB1                             |
| 9263 | 1,4,7,8,18,<br>19,20,21  | 2,3,5,6,22,<br>23,24,25,2<br>6 | 9 | P00731,P02803,P10758,P35281,P36374,Q4FZU6,Q63617,Q6AYL6,Q6AYR9 |
| 9264 | 1,4,7,8,18,<br>19,20,22  | 2,3,5,6,21,<br>23,24,25,2<br>6 | 1 | Q63617                                                         |
| 9265 | 1,4,7,8,18,<br>19,20,23  | 2,3,5,6,21,<br>22,24,25,2<br>6 | 5 | P02803,Q4FZU6,Q5BJY9,Q63617,Q8CJD3                             |
| 9266 | 1,4,7,8,18,<br>19,20,24  | 2,3,5,6,21,<br>22,23,25,2<br>6 | 1 | Q63617                                                         |
| 9267 | 1,4,7,8,18,<br>19,20,25  | 2,3,5,6,21,<br>22,23,24,2<br>6 | 5 | P00714,P02803,P10715,P35280,Q63617                             |
| 9268 | 1,4,7,8,18,<br>19,20,26  | 2,3,5,6,21,<br>22,23,24,2<br>5 | 4 | P35280,Q4FZU6,Q5FVI6,Q63617                                    |
| 9269 | 1,4,7,8,18,<br>19,21,22  | 2,3,5,6,20,<br>23,24,25,2<br>6 | 8 | D4A1J4,P08723,P10758,P11598,P35281,P36374,Q80WL1,Q8CJ52        |
| 9270 | 1,4,7,8,18,<br>19,21,23  | 2,3,5,6,20,<br>22,24,25,2<br>6 | 4 | P02803,P10758,P35281,Q99041                                    |

|      |                         |                                |   |                                                                |
|------|-------------------------|--------------------------------|---|----------------------------------------------------------------|
| 9271 | 1,4,7,8,18,<br>19,21,24 | 2,3,5,6,20,<br>22,23,25,2<br>6 | 3 | P10758,P18418,P35281                                           |
| 9272 | 1,4,7,8,18,<br>19,21,25 | 2,3,5,6,20,<br>22,23,24,2<br>6 | 6 | P00714,P00731,P02803,P31430,P35281,P47967                      |
| 9273 | 1,4,7,8,18,<br>19,21,26 | 2,3,5,6,20,<br>22,23,24,2<br>5 | 9 | P02803,P10758,P11598,P35281,P36374,P82995,Q4FZU6,Q561R9,Q8CJ52 |
| 9274 | 1,4,7,8,18,<br>19,22,23 | 2,3,5,6,20,<br>21,24,25,2<br>6 | 2 | Q63617,Q8CJD3                                                  |
| 9275 | 1,4,7,8,18,<br>19,22,24 | 2,3,5,6,20,<br>21,23,25,2<br>6 | 3 | P01835,P18418,Q63617                                           |
| 9276 | 1,4,7,8,18,<br>19,22,25 | 2,3,5,6,20,<br>21,23,24,2<br>6 | 1 | P00714                                                         |
| 9277 | 1,4,7,8,18,<br>19,22,26 | 2,3,5,6,20,<br>21,23,24,2<br>5 | 0 |                                                                |
| 9278 | 1,4,7,8,18,<br>19,23,24 | 2,3,5,6,20,<br>21,22,25,2<br>6 | 3 | Q5BJY9,Q63617,Q99041                                           |
| 9279 | 1,4,7,8,18,<br>19,23,25 | 2,3,5,6,20,<br>21,22,24,2<br>6 | 6 | P00714,P02803,Q5BJY9,Q63617,Q99041,Q99MH3                      |
| 9280 | 1,4,7,8,18,<br>19,23,26 | 2,3,5,6,20,<br>21,22,24,2<br>5 | 5 | P02803,P35467,Q4FZU6,Q5FVI6,Q6P6Q2                             |
| 9281 | 1,4,7,8,18,<br>19,24,25 | 2,3,5,6,20,<br>21,22,23,2<br>6 | 3 | P00714,P10715,P18418                                           |
| 9282 | 1,4,7,8,18,<br>19,24,26 | 2,3,5,6,20,<br>21,22,23,2<br>5 | 0 |                                                                |
| 9283 | 1,4,7,8,18,<br>19,25,26 | 2,3,5,6,20,<br>21,22,23,2<br>4 | 7 | P00714,P02803,P10715,P35280,P82995,Q561R9,Q5FVI6               |
| 9284 | 1,4,7,8,18,<br>20,21,22 | 2,3,5,6,19,<br>23,24,25,2<br>6 | 7 | P08723,P10758,P11598,P36374,Q4FZU6,Q63617,Q8CJ52               |
| 9285 | 1,4,7,8,18,<br>20,21,23 | 2,3,5,6,19,<br>22,24,25,2<br>6 | 4 | P10758,Q4FZU6,Q63617,Q6AYL6                                    |



|      |                         |                                |   |                                                  |
|------|-------------------------|--------------------------------|---|--------------------------------------------------|
| 9286 | 1,4,7,8,18,<br>20,21,24 | 2,3,5,6,19,<br>22,23,25,2<br>6 | 3 | Q4FZU6,Q63617,Q6AYL6                             |
| 9287 | 1,4,7,8,18,<br>20,21,25 | 2,3,5,6,19,<br>22,23,24,2<br>6 | 5 | P10715,P31430,Q63617,Q6AYL6,Q9QZA6               |
| 9288 | 1,4,7,8,18,<br>20,21,26 | 2,3,5,6,19,<br>22,23,24,2<br>5 | 7 | P11598,P36374,P82995,Q4FZU6,Q6AYR8,Q8CJ52,Q9QZA6 |
| 9289 | 1,4,7,8,18,<br>20,22,23 | 2,3,5,6,19,<br>21,24,25,2<br>6 | 2 | Q4FZU6,Q63617                                    |
| 9290 | 1,4,7,8,18,<br>20,22,24 | 2,3,5,6,19,<br>21,23,25,2<br>6 | 1 | Q63617                                           |
| 9291 | 1,4,7,8,18,<br>20,22,25 | 2,3,5,6,19,<br>21,23,24,2<br>6 | 2 | P10715,Q63617                                    |
| 9292 | 1,4,7,8,18,<br>20,22,26 | 2,3,5,6,19,<br>21,23,24,2<br>5 | 2 | Q4FZU6,Q63617                                    |
| 9293 | 1,4,7,8,18,<br>20,23,24 | 2,3,5,6,19,<br>21,22,25,2<br>6 | 2 | Q4FZU6,Q63617                                    |
| 9294 | 1,4,7,8,18,<br>20,23,25 | 2,3,5,6,19,<br>21,22,24,2<br>6 | 3 | P00714,P10715,Q63617                             |
| 9295 | 1,4,7,8,18,<br>20,23,26 | 2,3,5,6,19,<br>21,22,24,2<br>5 | 4 | Q4FZU6,Q63617,Q6IG02,Q6P6Q2                      |
| 9296 | 1,4,7,8,18,<br>20,24,25 | 2,3,5,6,19,<br>21,22,23,2<br>6 | 2 | P10715,Q63617                                    |
| 9297 | 1,4,7,8,18,<br>20,24,26 | 2,3,5,6,19,<br>21,22,23,2<br>5 | 2 | Q4FZU6,Q63617                                    |
| 9298 | 1,4,7,8,18,<br>20,25,26 | 2,3,5,6,19,<br>21,22,23,2<br>4 | 5 | P00714,P10715,P35280,P82995,Q63617               |
| 9299 | 1,4,7,8,18,<br>21,22,23 | 2,3,5,6,19,<br>20,24,25,2<br>6 | 5 | P08723,P10758,Q63617,Q80WL1,Q8CJ52               |
| 9300 | 1,4,7,8,18,<br>21,22,24 | 2,3,5,6,19,<br>20,23,25,2<br>6 | 2 | P13432,Q8CJ52                                    |

|      |                         |                                |    |                                                                       |
|------|-------------------------|--------------------------------|----|-----------------------------------------------------------------------|
| 9301 | 1,4,7,8,18,<br>21,22,25 | 2,3,5,6,19,<br>20,23,24,2<br>6 | 3  | P08721,P31430,Q80WL1                                                  |
| 9302 | 1,4,7,8,18,<br>21,22,26 | 2,3,5,6,19,<br>20,23,24,2<br>5 | 7  | P11598,P36374,P82995,Q4FZU6,Q80WL1,Q8CJ52,Q9JID2                      |
| 9303 | 1,4,7,8,18,<br>21,23,24 | 2,3,5,6,19,<br>20,22,25,2<br>6 | 1  | Q63617                                                                |
| 9304 | 1,4,7,8,18,<br>21,23,25 | 2,3,5,6,19,<br>20,22,24,2<br>6 | 4  | P00714,P02803,P31430,Q99041                                           |
| 9305 | 1,4,7,8,18,<br>21,23,26 | 2,3,5,6,19,<br>20,22,24,2<br>5 | 6  | P11598,P82995,Q4FZU6,Q6P6Q2,Q8CJ52,Q9JID2                             |
| 9306 | 1,4,7,8,18,<br>21,24,25 | 2,3,5,6,19,<br>20,22,23,2<br>6 | 4  | P08721,P10715,P22006,P31430                                           |
| 9307 | 1,4,7,8,18,<br>21,24,26 | 2,3,5,6,19,<br>20,22,23,2<br>5 | 6  | P22006,P82995,Q4FZU6,Q8CJ52,Q9EQV9,Q9JID2                             |
| 9308 | 1,4,7,8,18,<br>21,25,26 | 2,3,5,6,19,<br>20,22,23,2<br>4 | 10 | P00714,P08721,P10715,P11598,P19223,P22006,P31430,P55091,P82995,Q561R9 |
| 9309 | 1,4,7,8,18,<br>22,23,24 | 2,3,5,6,19,<br>20,21,25,2<br>6 | 2  | Q63617,Q8VD89                                                         |
| 9310 | 1,4,7,8,18,<br>22,23,25 | 2,3,5,6,19,<br>20,21,24,2<br>6 | 5  | P00714,P06911,P19629,Q5GRG2,Q63617                                    |
| 9311 | 1,4,7,8,18,<br>22,23,26 | 2,3,5,6,19,<br>20,21,24,2<br>5 | 4  | Q4FZU6,Q63617,Q6P6Q2,Q8VD89                                           |
| 9312 | 1,4,7,8,18,<br>22,24,25 | 2,3,5,6,19,<br>20,21,23,2<br>6 | 3  | P10715,P19629,Q63617                                                  |
| 9313 | 1,4,7,8,18,<br>22,24,26 | 2,3,5,6,19,<br>20,21,23,2<br>5 | 1  | Q8VD89                                                                |
| 9314 | 1,4,7,8,18,<br>22,25,26 | 2,3,5,6,19,<br>20,21,23,2<br>4 | 4  | P00714,P10715,P82995,Q561R9                                           |
| 9315 | 1,4,7,8,18,<br>23,24,25 | 2,3,5,6,19,<br>20,21,22,2<br>6 | 5  | P00714,P10715,P19629,Q63617,Q99041                                    |

|      |                         |                                |   |                                    |
|------|-------------------------|--------------------------------|---|------------------------------------|
| 9316 | 1,4,7,8,18,<br>23,24,26 | 2,3,5,6,19,<br>20,21,22,2<br>5 | 4 | Q4FZU6,Q63617,Q6P6Q2,Q8VD89        |
| 9317 | 1,4,7,8,18,<br>23,25,26 | 2,3,5,6,19,<br>20,21,22,2<br>4 | 5 | P00714,P10715,P27213,P82995,Q6P6Q2 |
| 9318 | 1,4,7,8,18,<br>24,25,26 | 2,3,5,6,19,<br>20,21,22,2<br>3 | 5 | P00714,P08721,P10715,P55091,P82995 |
| 9319 | 1,4,7,8,19,<br>20,21,22 | 2,3,5,6,18,<br>23,24,25,2<br>6 | 4 | P00774,P35281,P36374,Q63617        |
| 9320 | 1,4,7,8,19,<br>20,21,23 | 2,3,5,6,18,<br>22,24,25,2<br>6 | 5 | P00774,P35281,Q4FZU6,Q63617,Q99041 |
| 9321 | 1,4,7,8,19,<br>20,21,24 | 2,3,5,6,18,<br>22,23,25,2<br>6 | 3 | P00774,P35281,Q63617               |
| 9322 | 1,4,7,8,19,<br>20,21,25 | 2,3,5,6,18,<br>22,23,24,2<br>6 | 3 | P35281,P47967,Q63617               |
| 9323 | 1,4,7,8,19,<br>20,21,26 | 2,3,5,6,18,<br>22,23,24,2<br>5 | 3 | P35281,P36374,Q4FZU6               |
| 9324 | 1,4,7,8,19,<br>20,22,23 | 2,3,5,6,18,<br>21,24,25,2<br>6 | 5 | P00774,P55091,Q63617,Q8CJD3,Q99041 |
| 9325 | 1,4,7,8,19,<br>20,22,24 | 2,3,5,6,18,<br>21,23,25,2<br>6 | 3 | P00774,Q63617,Q6IFU8               |
| 9326 | 1,4,7,8,19,<br>20,22,25 | 2,3,5,6,18,<br>21,23,24,2<br>6 | 4 | P00774,Q5GRG2,Q63617,Q9QUL6        |
| 9327 | 1,4,7,8,19,<br>20,22,26 | 2,3,5,6,18,<br>21,23,24,2<br>5 | 4 | P00774,P05539,Q4FZU6,Q63617        |
| 9328 | 1,4,7,8,19,<br>20,23,24 | 2,3,5,6,18,<br>21,22,25,2<br>6 | 3 | P00774,Q63617,Q99041               |
| 9329 | 1,4,7,8,19,<br>20,23,25 | 2,3,5,6,18,<br>21,22,24,2<br>6 | 2 | Q63617,Q99041                      |
| 9330 | 1,4,7,8,19,<br>20,23,26 | 2,3,5,6,18,<br>21,22,24,2<br>5 | 3 | Q4FZU6,Q5FVI6,Q63617               |

|      |                         |                                |   |                             |
|------|-------------------------|--------------------------------|---|-----------------------------|
| 9331 | 1,4,7,8,19,<br>20,24,25 | 2,3,5,6,18,<br>21,22,23,2<br>6 | 4 | P00774,P10715,Q63617,Q9QUL6 |
| 9332 | 1,4,7,8,19,<br>20,24,26 | 2,3,5,6,18,<br>21,22,23,2<br>5 | 2 | Q4FZU6,Q63617               |
| 9333 | 1,4,7,8,19,<br>20,25,26 | 2,3,5,6,18,<br>21,22,23,2<br>4 | 4 | P10715,P35280,Q5FVI6,Q63617 |
| 9334 | 1,4,7,8,19,<br>21,22,23 | 2,3,5,6,18,<br>20,24,25,2<br>6 | 4 | P00774,P35281,Q63617,Q99041 |
| 9335 | 1,4,7,8,19,<br>21,22,24 | 2,3,5,6,18,<br>20,23,25,2<br>6 | 2 | P00774,Q6IFU8               |
| 9336 | 1,4,7,8,19,<br>21,22,25 | 2,3,5,6,18,<br>20,23,24,2<br>6 | 1 | P47967                      |
| 9337 | 1,4,7,8,19,<br>21,22,26 | 2,3,5,6,18,<br>20,23,24,2<br>5 | 2 | P36374,Q8CJ52               |
| 9338 | 1,4,7,8,19,<br>21,23,24 | 2,3,5,6,18,<br>20,22,25,2<br>6 | 3 | P35281,Q63617,Q99041        |
| 9339 | 1,4,7,8,19,<br>21,23,25 | 2,3,5,6,18,<br>20,22,24,2<br>6 | 4 | P02803,P27213,P35281,Q99041 |
| 9340 | 1,4,7,8,19,<br>21,23,26 | 2,3,5,6,18,<br>20,22,24,2<br>5 | 3 | P35281,Q4FZU6,Q99041        |
| 9341 | 1,4,7,8,19,<br>21,24,25 | 2,3,5,6,18,<br>20,22,23,2<br>6 | 1 | P22006                      |
| 9342 | 1,4,7,8,19,<br>21,24,26 | 2,3,5,6,18,<br>20,22,23,2<br>5 | 2 | P22006,Q9EQV9               |
| 9343 | 1,4,7,8,19,<br>21,25,26 | 2,3,5,6,18,<br>20,22,23,2<br>4 | 4 | P22006,P27213,P82995,Q5FVI6 |
| 9344 | 1,4,7,8,19,<br>22,23,24 | 2,3,5,6,18,<br>20,21,25,2<br>6 | 4 | P00774,P01835,Q63617,Q99041 |
| 9345 | 1,4,7,8,19,<br>22,23,25 | 2,3,5,6,18,<br>20,21,24,2<br>6 | 4 | P06911,Q5GRG2,Q63617,Q99041 |

|      |                         |                                |   |                                                         |
|------|-------------------------|--------------------------------|---|---------------------------------------------------------|
| 9346 | 1,4,7,8,19,<br>22,23,26 | 2,3,5,6,18,<br>20,21,24,2<br>5 | 1 | Q63617                                                  |
| 9347 | 1,4,7,8,19,<br>22,24,25 | 2,3,5,6,18,<br>20,21,23,2<br>6 | 8 | P00774,P01835,P06911,Q4FZU2,Q5GRG2,Q63617,Q6IFU8,Q9QUL6 |
| 9348 | 1,4,7,8,19,<br>22,24,26 | 2,3,5,6,18,<br>20,21,23,2<br>5 | 1 | P01835                                                  |
| 9349 | 1,4,7,8,19,<br>22,25,26 | 2,3,5,6,18,<br>20,21,23,2<br>4 | 1 | P01835                                                  |
| 9350 | 1,4,7,8,19,<br>23,24,25 | 2,3,5,6,18,<br>20,21,22,2<br>6 | 3 | P19629,Q63617,Q99041                                    |
| 9351 | 1,4,7,8,19,<br>23,24,26 | 2,3,5,6,18,<br>20,21,22,2<br>5 | 1 | Q63617                                                  |
| 9352 | 1,4,7,8,19,<br>23,25,26 | 2,3,5,6,18,<br>20,21,22,2<br>4 | 4 | P00714,P27213,Q5FVI6,Q99041                             |
| 9353 | 1,4,7,8,19,<br>24,25,26 | 2,3,5,6,18,<br>20,21,22,2<br>3 | 1 | P01835                                                  |
| 9354 | 1,4,7,8,20,<br>21,22,23 | 2,3,5,6,18,<br>19,24,25,2<br>6 | 3 | P00774,Q4FZU6,Q63617                                    |
| 9355 | 1,4,7,8,20,<br>21,22,24 | 2,3,5,6,18,<br>19,23,25,2<br>6 | 5 | P00774,P13432,Q07523,Q5XFX0,Q63617                      |
| 9356 | 1,4,7,8,20,<br>21,22,25 | 2,3,5,6,18,<br>19,23,24,2<br>6 | 2 | Q07523,Q63617                                           |
| 9357 | 1,4,7,8,20,<br>21,22,26 | 2,3,5,6,18,<br>19,23,24,2<br>5 | 4 | P36374,Q4FZU6,Q63617,Q8CJ52                             |
| 9358 | 1,4,7,8,20,<br>21,23,24 | 2,3,5,6,18,<br>19,22,25,2<br>6 | 2 | Q4FZU6,Q63617                                           |
| 9359 | 1,4,7,8,20,<br>21,23,25 | 2,3,5,6,18,<br>19,22,24,2<br>6 | 2 | Q63617,Q99041                                           |
| 9360 | 1,4,7,8,20,<br>21,23,26 | 2,3,5,6,18,<br>19,22,24,2<br>5 | 2 | Q4FZU6,Q63617                                           |

|      |                         |                                |   |                                    |
|------|-------------------------|--------------------------------|---|------------------------------------|
| 9361 | 1,4,7,8,20,<br>21,24,25 | 2,3,5,6,18,<br>19,22,23,2<br>6 | 3 | P10715,P22006,Q63617               |
| 9362 | 1,4,7,8,20,<br>21,24,26 | 2,3,5,6,18,<br>19,22,23,2<br>5 | 4 | P01015,Q4FZU6,Q63617,Q9EQV9        |
| 9363 | 1,4,7,8,20,<br>21,25,26 | 2,3,5,6,18,<br>19,22,23,2<br>4 | 3 | P10715,P19223,P22006               |
| 9364 | 1,4,7,8,20,<br>22,23,24 | 2,3,5,6,18,<br>19,21,25,2<br>6 | 2 | P00774,Q63617                      |
| 9365 | 1,4,7,8,20,<br>22,23,25 | 2,3,5,6,18,<br>19,21,24,2<br>6 | 5 | P06911,P10715,Q5GRG2,Q63617,Q99041 |
| 9366 | 1,4,7,8,20,<br>22,23,26 | 2,3,5,6,18,<br>19,21,24,2<br>5 | 3 | P05539,Q4FZU6,Q63617               |
| 9367 | 1,4,7,8,20,<br>22,24,25 | 2,3,5,6,18,<br>19,21,23,2<br>6 | 4 | P00774,P10715,Q07523,Q63617        |
| 9368 | 1,4,7,8,20,<br>22,24,26 | 2,3,5,6,18,<br>19,21,23,2<br>5 | 3 | Q4FZU6,Q63617,Q99MH3               |
| 9369 | 1,4,7,8,20,<br>22,25,26 | 2,3,5,6,18,<br>19,21,23,2<br>4 | 3 | P05539,P10715,Q63617               |
| 9370 | 1,4,7,8,20,<br>23,24,25 | 2,3,5,6,18,<br>19,21,22,2<br>6 | 5 | P10715,P19629,P63036,Q63617,Q99041 |
| 9371 | 1,4,7,8,20,<br>23,24,26 | 2,3,5,6,18,<br>19,21,22,2<br>5 | 3 | P97840,Q4FZU6,Q63617               |
| 9372 | 1,4,7,8,20,<br>23,25,26 | 2,3,5,6,18,<br>19,21,22,2<br>4 | 3 | P00714,P10715,Q63617               |
| 9373 | 1,4,7,8,20,<br>24,25,26 | 2,3,5,6,18,<br>19,21,22,2<br>3 | 2 | P10715,Q63617                      |
| 9374 | 1,4,7,8,21,<br>22,23,24 | 2,3,5,6,18,<br>19,20,25,2<br>6 | 1 | Q63617                             |
| 9375 | 1,4,7,8,21,<br>22,23,25 | 2,3,5,6,18,<br>19,20,24,2<br>6 | 5 | P06911,P19629,Q5GRG2,Q63617,Q99041 |

|      |                          |                                |   |                                                         |
|------|--------------------------|--------------------------------|---|---------------------------------------------------------|
| 9376 | 1,4,7,8,21,<br>22,23,26  | 2,3,5,6,18,<br>19,20,24,2<br>5 | 2 | Q4FZU6,Q8CJ52                                           |
| 9377 | 1,4,7,8,21,<br>22,24,25  | 2,3,5,6,18,<br>19,20,23,2<br>6 | 3 | P19629,P22006,P35467                                    |
| 9378 | 1,4,7,8,21,<br>22,24,26  | 2,3,5,6,18,<br>19,20,23,2<br>5 | 2 | P22006,Q8CJ52                                           |
| 9379 | 1,4,7,8,21,<br>22,25,26  | 2,3,5,6,18,<br>19,20,23,2<br>4 | 1 | P22006                                                  |
| 9380 | 1,4,7,8,21,<br>23,24,25  | 2,3,5,6,18,<br>19,20,22,2<br>6 | 4 | P19629,P22006,Q63617,Q99041                             |
| 9381 | 1,4,7,8,21,<br>23,24,26  | 2,3,5,6,18,<br>19,20,22,2<br>5 | 2 | P22006,Q4FZU6                                           |
| 9382 | 1,4,7,8,21,<br>23,25,26  | 2,3,5,6,18,<br>19,20,22,2<br>4 | 8 | P00714,P07150,P14669,P19629,P22006,P27213,P83121,Q99041 |
| 9383 | 1,4,7,8,21,<br>24,25,26  | 2,3,5,6,18,<br>19,20,22,2<br>3 | 2 | P19629,P22006                                           |
| 9384 | 1,4,7,8,22,<br>23,24,25  | 2,3,5,6,18,<br>19,20,21,2<br>6 | 6 | P06911,P19629,P62804,Q5GRG2,Q63617,Q99041               |
| 9385 | 1,4,7,8,22,<br>23,24,26  | 2,3,5,6,18,<br>19,20,21,2<br>5 | 3 | P00731,Q02253,Q63617                                    |
| 9386 | 1,4,7,8,22,<br>23,25,26  | 2,3,5,6,18,<br>19,20,21,2<br>4 | 6 | P00714,P05539,P06911,P19629,Q5GRG2,Q63617               |
| 9387 | 1,4,7,8,22,<br>24,25,26  | 2,3,5,6,18,<br>19,20,21,2<br>3 | 3 | P01835,P10715,P19629                                    |
| 9388 | 1,4,7,8,23,<br>24,25,26  | 2,3,5,6,18,<br>19,20,21,2<br>2 | 4 | P00714,P19629,Q63617,Q7TPB1                             |
| 9389 | 1,4,7,18,1<br>9,20,21,22 | 2,3,5,6,8,2<br>3,24,25,26      | 2 | P10758,P36374                                           |
| 9390 | 1,4,7,18,1<br>9,20,21,23 | 2,3,5,6,8,2<br>2,24,25,26      | 3 | P10758,P20766,Q4FZU6                                    |
| 9391 | 1,4,7,18,1<br>9,20,21,24 | 2,3,5,6,8,2<br>2,23,25,26      | 3 | P10758,P20766,P36374                                    |

|      |                          |                           |   |                                                         |
|------|--------------------------|---------------------------|---|---------------------------------------------------------|
| 9392 | 1,4,7,18,1<br>9,20,21,25 | 2,3,5,6,8,2<br>2,23,24,26 | 1 | P47967                                                  |
| 9393 | 1,4,7,18,1<br>9,20,21,26 | 2,3,5,6,8,2<br>2,23,24,25 | 4 | P36374,Q4FZU6,Q5FVI6,Q63751                             |
| 9394 | 1,4,7,18,1<br>9,20,22,23 | 2,3,5,6,8,2<br>1,24,25,26 | 2 | Q8CJD3,Q9WTT6                                           |
| 9395 | 1,4,7,18,1<br>9,20,22,24 | 2,3,5,6,8,2<br>1,23,25,26 | 4 | P06760,P07150,Q6P6R2,Q9WTT6                             |
| 9396 | 1,4,7,18,1<br>9,20,22,25 | 2,3,5,6,8,2<br>1,23,24,26 | 0 |                                                         |
| 9397 | 1,4,7,18,1<br>9,20,22,26 | 2,3,5,6,8,2<br>1,23,24,25 | 6 | P05539,P06760,Q4FZU6,Q63751,Q6P6R2,Q9WTT6               |
| 9398 | 1,4,7,18,1<br>9,20,23,24 | 2,3,5,6,8,2<br>1,22,25,26 | 1 | Q9WTT6                                                  |
| 9399 | 1,4,7,18,1<br>9,20,23,25 | 2,3,5,6,8,2<br>1,22,24,26 | 1 | P00714                                                  |
| 9400 | 1,4,7,18,1<br>9,20,23,26 | 2,3,5,6,8,2<br>1,22,24,25 | 3 | P06760,Q4FZU6,Q5FVI6                                    |
| 9401 | 1,4,7,18,1<br>9,20,24,25 | 2,3,5,6,8,2<br>1,22,23,26 | 0 |                                                         |
| 9402 | 1,4,7,18,1<br>9,20,24,26 | 2,3,5,6,8,2<br>1,22,23,25 | 3 | P06760,Q4FZU6,Q9WTT6                                    |
| 9403 | 1,4,7,18,1<br>9,20,25,26 | 2,3,5,6,8,2<br>1,22,23,24 | 3 | P00714,P35280,Q5FVI6                                    |
| 9404 | 1,4,7,18,1<br>9,21,22,23 | 2,3,5,6,8,2<br>0,24,25,26 | 2 | P10758,P36374                                           |
| 9405 | 1,4,7,18,1<br>9,21,22,24 | 2,3,5,6,8,2<br>0,23,25,26 | 1 | P36374                                                  |
| 9406 | 1,4,7,18,1<br>9,21,22,25 | 2,3,5,6,8,2<br>0,23,24,26 | 3 | P36374,P47967,P97840                                    |
| 9407 | 1,4,7,18,1<br>9,21,22,26 | 2,3,5,6,8,2<br>0,23,24,25 | 2 | P36374,P82995                                           |
| 9408 | 1,4,7,18,1<br>9,21,23,24 | 2,3,5,6,8,2<br>0,22,25,26 | 2 | D3ZUC6,P20766                                           |
| 9409 | 1,4,7,18,1<br>9,21,23,25 | 2,3,5,6,8,2<br>0,22,24,26 | 6 | P00714,P02803,P27213,P47967,Q99041,Q99MH3               |
| 9410 | 1,4,7,18,1<br>9,21,23,26 | 2,3,5,6,8,2<br>0,22,24,25 | 6 | D3ZUC6,P36374,P82995,Q4FZU6,Q5FVI6,Q6P6Q2               |
| 9411 | 1,4,7,18,1<br>9,21,24,25 | 2,3,5,6,8,2<br>0,22,23,26 | 2 | P22006,P47967                                           |
| 9412 | 1,4,7,18,1<br>9,21,24,26 | 2,3,5,6,8,2<br>0,22,23,25 | 3 | D3ZUC6,P36374,P82995                                    |
| 9413 | 1,4,7,18,1<br>9,21,25,26 | 2,3,5,6,8,2<br>0,22,23,24 | 8 | P22006,P27213,P31430,P36374,P47967,P82995,Q561R9,Q5FVI6 |
| 9414 | 1,4,7,18,1<br>9,22,23,24 | 2,3,5,6,8,2<br>0,21,25,26 | 2 | P62804,Q9WTT6                                           |



|      |                          |                           |   |                             |
|------|--------------------------|---------------------------|---|-----------------------------|
| 9415 | 1,4,7,18,1<br>9,22,23,25 | 2,3,5,6,8,2<br>0,21,24,26 | 1 | P62804                      |
| 9416 | 1,4,7,18,1<br>9,22,23,26 | 2,3,5,6,8,2<br>0,21,24,25 | 2 | P06760,Q9WTT6               |
| 9417 | 1,4,7,18,1<br>9,22,24,25 | 2,3,5,6,8,2<br>0,21,23,26 | 1 | P62804                      |
| 9418 | 1,4,7,18,1<br>9,22,24,26 | 2,3,5,6,8,2<br>0,21,23,25 | 3 | P06760,Q6P6R2,Q9WTT6        |
| 9419 | 1,4,7,18,1<br>9,22,25,26 | 2,3,5,6,8,2<br>0,21,23,24 | 1 | P82995                      |
| 9420 | 1,4,7,18,1<br>9,23,24,25 | 2,3,5,6,8,2<br>0,21,22,26 | 2 | P00714,P62804               |
| 9421 | 1,4,7,18,1<br>9,23,24,26 | 2,3,5,6,8,2<br>0,21,22,25 | 1 | P06760                      |
| 9422 | 1,4,7,18,1<br>9,23,25,26 | 2,3,5,6,8,2<br>0,21,22,24 | 4 | P00714,P27213,Q5FVI6,Q5XFX0 |
| 9423 | 1,4,7,18,1<br>9,24,25,26 | 2,3,5,6,8,2<br>0,21,22,23 | 3 | P82995,Q5FVI6,Q7TPB1        |
| 9424 | 1,4,7,18,2<br>0,21,22,23 | 2,3,5,6,8,1<br>9,24,25,26 | 2 | P36374,Q4FZU6               |
| 9425 | 1,4,7,18,2<br>0,21,22,24 | 2,3,5,6,8,1<br>9,23,25,26 | 1 | P36374                      |
| 9426 | 1,4,7,18,2<br>0,21,22,25 | 2,3,5,6,8,1<br>9,23,24,26 | 1 | P31430                      |
| 9427 | 1,4,7,18,2<br>0,21,22,26 | 2,3,5,6,8,1<br>9,23,24,25 | 2 | P36374,Q4FZU6               |
| 9428 | 1,4,7,18,2<br>0,21,23,24 | 2,3,5,6,8,1<br>9,22,25,26 | 2 | P20766,Q4FZU6               |
| 9429 | 1,4,7,18,2<br>0,21,23,25 | 2,3,5,6,8,1<br>9,22,24,26 | 1 | P31430                      |
| 9430 | 1,4,7,18,2<br>0,21,23,26 | 2,3,5,6,8,1<br>9,22,24,25 | 3 | P36374,Q4FZU6,Q6P6Q2        |
| 9431 | 1,4,7,18,2<br>0,21,24,25 | 2,3,5,6,8,1<br>9,22,23,26 | 3 | P20766,P22006,P31430        |
| 9432 | 1,4,7,18,2<br>0,21,24,26 | 2,3,5,6,8,1<br>9,22,23,25 | 3 | P20766,P36374,Q4FZU6        |
| 9433 | 1,4,7,18,2<br>0,21,25,26 | 2,3,5,6,8,1<br>9,22,23,24 | 3 | P31430,P36374,P82995        |
| 9434 | 1,4,7,18,2<br>0,22,23,24 | 2,3,5,6,8,1<br>9,21,25,26 | 1 | Q9WTT6                      |
| 9435 | 1,4,7,18,2<br>0,22,23,25 | 2,3,5,6,8,1<br>9,21,24,26 | 0 |                             |
| 9436 | 1,4,7,18,2<br>0,22,23,26 | 2,3,5,6,8,1<br>9,21,24,25 | 3 | P05539,Q4FZU6,Q6P6Q2        |
| 9437 | 1,4,7,18,2<br>0,22,24,25 | 2,3,5,6,8,1<br>9,21,23,26 | 0 |                             |

|      |                                                 |   |                                                  |
|------|-------------------------------------------------|---|--------------------------------------------------|
| 9438 | 1,4,7,18,2 2,3,5,6,8,1<br>0,22,24,26 9,21,23,25 | 4 | P06760,Q4FZU6,Q6P6R2,Q9WTT6                      |
| 9439 | 1,4,7,18,2 2,3,5,6,8,1<br>0,22,25,26 9,21,23,24 | 1 | P05539                                           |
| 9440 | 1,4,7,18,2 2,3,5,6,8,1<br>0,23,24,25 9,21,22,26 | 0 |                                                  |
| 9441 | 1,4,7,18,2 2,3,5,6,8,1<br>0,23,24,26 9,21,22,25 | 2 | Q4FZU6,Q6P6Q2                                    |
| 9442 | 1,4,7,18,2 2,3,5,6,8,1<br>0,23,25,26 9,21,22,24 | 3 | P00714,Q6IG02,Q6P6Q2                             |
| 9443 | 1,4,7,18,2 2,3,5,6,8,1<br>0,24,25,26 9,21,22,23 | 0 |                                                  |
| 9444 | 1,4,7,18,2 2,3,5,6,8,1<br>1,22,23,24 9,20,25,26 | 0 |                                                  |
| 9445 | 1,4,7,18,2 2,3,5,6,8,1<br>1,22,23,25 9,20,24,26 | 0 |                                                  |
| 9446 | 1,4,7,18,2 2,3,5,6,8,1<br>1,22,23,26 9,20,24,25 | 4 | P36374,Q4FZU6,Q6P6Q2,Q9JID2                      |
| 9447 | 1,4,7,18,2 2,3,5,6,8,1<br>1,22,24,25 9,20,23,26 | 3 | P22006,P31430,P62804                             |
| 9448 | 1,4,7,18,2 2,3,5,6,8,1<br>1,22,24,26 9,20,23,25 | 3 | P22006,P36374,Q9JID2                             |
| 9449 | 1,4,7,18,2 2,3,5,6,8,1<br>1,22,25,26 9,20,23,24 | 4 | P22006,P31430,P36374,P82995                      |
| 9450 | 1,4,7,18,2 2,3,5,6,8,1<br>1,23,24,25 9,20,22,26 | 2 | P22006,P31430                                    |
| 9451 | 1,4,7,18,2 2,3,5,6,8,1<br>1,23,24,26 9,20,22,25 | 4 | D3ZUC6,P22006,Q6P6Q2,Q9JID2                      |
| 9452 | 1,4,7,18,2 2,3,5,6,8,1<br>1,23,25,26 9,20,22,24 | 7 | P00714,P22006,P27213,P31430,P82995,P83121,Q6P6Q2 |
| 9453 | 1,4,7,18,2 2,3,5,6,8,1<br>1,24,25,26 9,20,22,23 | 6 | P08721,P22006,P31430,P55091,P82995,Q9JID2        |
| 9454 | 1,4,7,18,2 2,3,5,6,8,1<br>2,23,24,25 9,20,21,26 | 2 | P62804,Q00715                                    |
| 9455 | 1,4,7,18,2 2,3,5,6,8,1<br>2,23,24,26 9,20,21,25 | 3 | P00731,P62804,Q8VD89                             |
| 9456 | 1,4,7,18,2 2,3,5,6,8,1<br>2,23,25,26 9,20,21,24 | 3 | P00714,P05539,P62804                             |
| 9457 | 1,4,7,18,2 2,3,5,6,8,1<br>2,24,25,26 9,20,21,23 | 1 | P62804                                           |
| 9458 | 1,4,7,18,2 2,3,5,6,8,1<br>3,24,25,26 9,20,21,22 | 3 | P00714,P62804,Q7TPB1                             |
| 9459 | 1,4,7,19,2 2,3,5,6,8,1<br>0,21,22,23 8,24,25,26 | 2 | P00774,P55091                                    |
| 9460 | 1,4,7,19,2 2,3,5,6,8,1<br>0,21,22,24 8,23,25,26 | 3 | P00774,P35467,Q63942                             |

|      |                                                 |   |                                                  |
|------|-------------------------------------------------|---|--------------------------------------------------|
| 9461 | 1,4,7,19,2 2,3,5,6,8,1<br>0,21,22,25 8,23,24,26 | 4 | P00774,P35467,P47967,Q63942                      |
| 9462 | 1,4,7,19,2 2,3,5,6,8,1<br>0,21,22,26 8,23,24,25 | 3 | P05539,P36374,Q4FZU6                             |
| 9463 | 1,4,7,19,2 2,3,5,6,8,1<br>0,21,23,24 8,22,25,26 | 2 | P00774,P20766                                    |
| 9464 | 1,4,7,19,2 2,3,5,6,8,1<br>0,21,23,25 8,22,24,26 | 2 | P47967,Q99041                                    |
| 9465 | 1,4,7,19,2 2,3,5,6,8,1<br>0,21,23,26 8,22,24,25 | 2 | Q4FZU6,Q5FVI6                                    |
| 9466 | 1,4,7,19,2 2,3,5,6,8,1<br>0,21,24,25 8,22,23,26 | 5 | P20766,P22006,P35467,P47967,Q63942               |
| 9467 | 1,4,7,19,2 2,3,5,6,8,1<br>0,21,24,26 8,22,23,25 | 3 | P20766,P36374,Q4FZU6                             |
| 9468 | 1,4,7,19,2 2,3,5,6,8,1<br>0,21,25,26 8,22,23,24 | 2 | P22006,Q5FVI6                                    |
| 9469 | 1,4,7,19,2 2,3,5,6,8,1<br>0,22,23,24 8,21,25,26 | 4 | P00774,P31430,P55091,Q9WTT6                      |
| 9470 | 1,4,7,19,2 2,3,5,6,8,1<br>0,22,23,25 8,21,24,26 | 1 | P00774                                           |
| 9471 | 1,4,7,19,2 2,3,5,6,8,1<br>0,22,23,26 8,21,24,25 | 4 | O54728,P00774,P05539,Q4FZU6                      |
| 9472 | 1,4,7,19,2 2,3,5,6,8,1<br>0,22,24,25 8,21,23,26 | 3 | P00774,P35467,Q63942                             |
| 9473 | 1,4,7,19,2 2,3,5,6,8,1<br>0,22,24,26 8,21,23,25 | 5 | P00774,P05539,P06760,Q6P6R2,Q9WTT6               |
| 9474 | 1,4,7,19,2 2,3,5,6,8,1<br>0,22,25,26 8,21,23,24 | 1 | P05539                                           |
| 9475 | 1,4,7,19,2 2,3,5,6,8,1<br>0,23,24,25 8,21,22,26 | 0 |                                                  |
| 9476 | 1,4,7,19,2 2,3,5,6,8,1<br>0,23,24,26 8,21,22,25 | 1 | Q4FZU6                                           |
| 9477 | 1,4,7,19,2 2,3,5,6,8,1<br>0,23,25,26 8,21,22,24 | 2 | P05539,Q5FVI6                                    |
| 9478 | 1,4,7,19,2 2,3,5,6,8,1<br>0,24,25,26 8,21,22,23 | 1 | Q5FVI6                                           |
| 9479 | 1,4,7,19,2 2,3,5,6,8,1<br>1,22,23,24 8,20,25,26 | 1 | P00774                                           |
| 9480 | 1,4,7,19,2 2,3,5,6,8,1<br>1,22,23,25 8,20,24,26 | 3 | P47967,P97840,Q99041                             |
| 9481 | 1,4,7,19,2 2,3,5,6,8,1<br>1,22,23,26 8,20,24,25 | 2 | P05539,P36374                                    |
| 9482 | 1,4,7,19,2 2,3,5,6,8,1<br>1,22,24,25 8,20,23,26 | 7 | P22006,P35467,P47967,P62804,P97840,Q63942,Q6IG02 |
| 9483 | 1,4,7,19,2 2,3,5,6,8,1<br>1,22,24,26 8,20,23,25 | 2 | P22006,P36374                                    |

|      |                                                 |   |                                           |
|------|-------------------------------------------------|---|-------------------------------------------|
| 9484 | 1,4,7,19,2 2,3,5,6,8,1<br>1,22,25,26 8,20,23,24 | 3 | P05539,P22006,P36374                      |
| 9485 | 1,4,7,19,2 2,3,5,6,8,1<br>1,23,24,25 8,20,22,26 | 3 | P22006,P27213,Q99041                      |
| 9486 | 1,4,7,19,2 2,3,5,6,8,1<br>1,23,24,26 8,20,22,25 | 1 | P22006                                    |
| 9487 | 1,4,7,19,2 2,3,5,6,8,1<br>1,23,25,26 8,20,22,24 | 5 | P22006,P27213,P83121,Q5FVI6,Q99041        |
| 9488 | 1,4,7,19,2 2,3,5,6,8,1<br>1,24,25,26 8,20,22,23 | 2 | P22006,P27213                             |
| 9489 | 1,4,7,19,2 2,3,5,6,8,1<br>2,23,24,25 8,20,21,26 | 3 | P06911,P62804,Q00715                      |
| 9490 | 1,4,7,19,2 2,3,5,6,8,1<br>2,23,24,26 8,20,21,25 | 3 | P00731,P62804,Q9WTT6                      |
| 9491 | 1,4,7,19,2 2,3,5,6,8,1<br>2,23,25,26 8,20,21,24 | 2 | P05539,P62804                             |
| 9492 | 1,4,7,19,2 2,3,5,6,8,1<br>2,24,25,26 8,20,21,23 | 2 | P01835,P62804                             |
| 9493 | 1,4,7,19,2 2,3,5,6,8,1<br>3,24,25,26 8,20,21,22 | 5 | P14480,P27213,P62804,Q5FVI6,Q7TPB1        |
| 9494 | 1,4,7,20,2 2,3,5,6,8,1<br>1,22,23,24 8,19,25,26 | 2 | P00774,Q63942                             |
| 9495 | 1,4,7,20,2 2,3,5,6,8,1<br>1,22,23,25 8,19,24,26 | 1 | Q63942                                    |
| 9496 | 1,4,7,20,2 2,3,5,6,8,1<br>1,22,23,26 8,19,24,25 | 2 | P05539,Q4FZU6                             |
| 9497 | 1,4,7,20,2 2,3,5,6,8,1<br>1,22,24,25 8,19,23,26 | 6 | P22006,P35467,P51907,Q03191,Q07523,Q63942 |
| 9498 | 1,4,7,20,2 2,3,5,6,8,1<br>1,22,24,26 8,19,23,25 | 5 | P36374,P51907,Q4FZU6,Q99MH3,Q9Z1F2        |
| 9499 | 1,4,7,20,2 2,3,5,6,8,1<br>1,22,25,26 8,19,23,24 | 4 | P05539,P22006,P51907,Q03191               |
| 9500 | 1,4,7,20,2 2,3,5,6,8,1<br>1,23,24,25 8,19,22,26 | 3 | P20766,P22006,Q63942                      |
| 9501 | 1,4,7,20,2 2,3,5,6,8,1<br>1,23,24,26 8,19,22,25 | 2 | P20766,Q4FZU6                             |
| 9502 | 1,4,7,20,2 2,3,5,6,8,1<br>1,23,25,26 8,19,22,24 | 4 | P05539,P22006,P27213,P83121               |
| 9503 | 1,4,7,20,2 2,3,5,6,8,1<br>1,24,25,26 8,19,22,23 | 3 | P22006,P51907,Q9Z1F2                      |
| 9504 | 1,4,7,20,2 2,3,5,6,8,1<br>2,23,24,25 8,19,21,26 | 1 | Q63942                                    |
| 9505 | 1,4,7,20,2 2,3,5,6,8,1<br>2,23,24,26 8,19,21,25 | 2 | P00731,P05539                             |
| 9506 | 1,4,7,20,2 2,3,5,6,8,1<br>2,23,25,26 8,19,21,24 | 1 | P05539                                    |

|      |                                                 |   |                                    |
|------|-------------------------------------------------|---|------------------------------------|
| 9507 | 1,4,7,20,2 2,3,5,6,8,1<br>2,24,25,26 8,19,21,23 | 4 | P00731,P05539,Q03191,Q9Z1F2        |
| 9508 | 1,4,7,20,2 2,3,5,6,8,1<br>3,24,25,26 8,19,21,22 | 1 | Q7TPB1                             |
| 9509 | 1,4,7,21,2 2,3,5,6,8,1<br>2,23,24,25 8,19,20,26 | 3 | P22006,P62804,Q63942               |
| 9510 | 1,4,7,21,2 2,3,5,6,8,1<br>2,23,24,26 8,19,20,25 | 2 | P00731,P22006                      |
| 9511 | 1,4,7,21,2 2,3,5,6,8,1<br>2,23,25,26 8,19,20,24 | 4 | P05539,P22006,P27213,P83121        |
| 9512 | 1,4,7,21,2 2,3,5,6,8,1<br>2,24,25,26 8,19,20,23 | 1 | P22006                             |
| 9513 | 1,4,7,21,2 2,3,5,6,8,1<br>3,24,25,26 8,19,20,22 | 4 | P22006,P27213,P83121,Q7TPB1        |
| 9514 | 1,4,7,22,2 2,3,5,6,8,1<br>3,24,25,26 8,19,20,21 | 3 | P00731,P62804,Q7TPB1               |
| 9515 | 1,4,8,18,1 2,3,5,6,7,2<br>9,20,21,22 3,24,25,26 | 5 | P10758,P35281,P36374,P36376,Q63751 |
| 9516 | 1,4,8,18,1 2,3,5,6,7,2<br>9,20,21,23 2,24,25,26 | 3 | P10758,P35281,Q8CJD3               |
| 9517 | 1,4,8,18,1 2,3,5,6,7,2<br>9,20,21,24 2,23,25,26 | 4 | P10758,P35281,P36374,P36376        |
| 9518 | 1,4,8,18,1 2,3,5,6,7,2<br>9,20,21,25 2,23,24,26 | 4 | P10758,P31430,P35281,P36376        |
| 9519 | 1,4,8,18,1 2,3,5,6,7,2<br>9,20,21,26 2,23,24,25 | 5 | P10758,P35281,P36374,Q4FZU6,Q63751 |
| 9520 | 1,4,8,18,1 2,3,5,6,7,2<br>9,20,22,23 1,24,25,26 | 2 | P83748,Q8CJD3                      |
| 9521 | 1,4,8,18,1 2,3,5,6,7,2<br>9,20,22,24 1,23,25,26 | 1 | P83748                             |
| 9522 | 1,4,8,18,1 2,3,5,6,7,2<br>9,20,22,25 1,23,24,26 | 1 | P83748                             |
| 9523 | 1,4,8,18,1 2,3,5,6,7,2<br>9,20,22,26 1,23,24,25 | 2 | Q63751,Q6P6R2                      |
| 9524 | 1,4,8,18,1 2,3,5,6,7,2<br>9,20,23,24 1,22,25,26 | 1 | P83748                             |
| 9525 | 1,4,8,18,1 2,3,5,6,7,2<br>9,20,23,25 1,22,24,26 | 3 | P00714,P83748,Q5BJY9               |
| 9526 | 1,4,8,18,1 2,3,5,6,7,2<br>9,20,23,26 1,22,24,25 | 4 | P35467,Q4FZU6,Q6IG02,Q6P6Q2        |
| 9527 | 1,4,8,18,1 2,3,5,6,7,2<br>9,20,24,25 1,22,23,26 | 1 | P83748                             |
| 9528 | 1,4,8,18,1 2,3,5,6,7,2<br>9,20,24,26 1,22,23,25 | 0 |                                    |
| 9529 | 1,4,8,18,1 2,3,5,6,7,2<br>9,20,25,26 1,22,23,24 | 3 | P00714,P35280,P80201               |

|      |                                                 |   |                                           |
|------|-------------------------------------------------|---|-------------------------------------------|
| 9530 | 1,4,8,18,1 2,3,5,6,7,2<br>9,21,22,23 0,24,25,26 | 4 | P10758,P35281,P36374,Q8CJD3               |
| 9531 | 1,4,8,18,1 2,3,5,6,7,2<br>9,21,22,24 0,23,25,26 | 4 | P10758,P35281,P36374,P36376               |
| 9532 | 1,4,8,18,1 2,3,5,6,7,2<br>9,21,22,25 0,23,24,26 | 3 | P10758,P35281,P36374                      |
| 9533 | 1,4,8,18,1 2,3,5,6,7,2<br>9,21,22,26 0,23,24,25 | 4 | P10758,P35281,P36374,Q63751               |
| 9534 | 1,4,8,18,1 2,3,5,6,7,2<br>9,21,23,24 0,22,25,26 | 2 | P10758,P35281                             |
| 9535 | 1,4,8,18,1 2,3,5,6,7,2<br>9,21,23,25 0,22,24,26 | 6 | P00714,P02803,P10758,P27213,P35281,Q99MH3 |
| 9536 | 1,4,8,18,1 2,3,5,6,7,2<br>9,21,23,26 0,22,24,25 | 5 | P10758,P35281,P35467,P36374,Q6P6Q2        |
| 9537 | 1,4,8,18,1 2,3,5,6,7,2<br>9,21,24,25 0,22,23,26 | 4 | P10758,P31430,P35281,P36376               |
| 9538 | 1,4,8,18,1 2,3,5,6,7,2<br>9,21,24,26 0,22,23,25 | 3 | P10758,P35281,P36374                      |
| 9539 | 1,4,8,18,1 2,3,5,6,7,2<br>9,21,25,26 0,22,23,24 | 6 | P00714,P27213,P31430,P35281,P36374,Q561R9 |
| 9540 | 1,4,8,18,1 2,3,5,6,7,2<br>9,22,23,24 0,21,25,26 | 1 | P83748                                    |
| 9541 | 1,4,8,18,1 2,3,5,6,7,2<br>9,22,23,25 0,21,24,26 | 3 | P00714,P83748,Q8CJD3                      |
| 9542 | 1,4,8,18,1 2,3,5,6,7,2<br>9,22,23,26 0,21,24,25 | 2 | P35467,Q6P6Q2                             |
| 9543 | 1,4,8,18,1 2,3,5,6,7,2<br>9,22,24,25 0,21,23,26 | 1 | P83748                                    |
| 9544 | 1,4,8,18,1 2,3,5,6,7,2<br>9,22,24,26 0,21,23,25 | 0 |                                           |
| 9545 | 1,4,8,18,1 2,3,5,6,7,2<br>9,22,25,26 0,21,23,24 | 2 | P00714,Q561R9                             |
| 9546 | 1,4,8,18,1 2,3,5,6,7,2<br>9,23,24,25 0,21,22,26 | 3 | P00714,P83748,Q5BJY9                      |
| 9547 | 1,4,8,18,1 2,3,5,6,7,2<br>9,23,24,26 0,21,22,25 | 3 | P09605;P25809,P35467,Q6P6Q2               |
| 9548 | 1,4,8,18,1 2,3,5,6,7,2<br>9,23,25,26 0,21,22,24 | 5 | P00714,P27213,P35467,Q561R9,Q6P6Q2        |
| 9549 | 1,4,8,18,1 2,3,5,6,7,2<br>9,24,25,26 0,21,22,23 | 2 | P00714,Q7TPB1                             |
| 9550 | 1,4,8,18,2 2,3,5,6,7,1<br>0,21,22,23 9,24,25,26 | 1 | P10758                                    |
| 9551 | 1,4,8,18,2 2,3,5,6,7,1<br>0,21,22,24 9,23,25,26 | 2 | P10758,P36374                             |
| 9552 | 1,4,8,18,2 2,3,5,6,7,1<br>0,21,22,25 9,23,24,26 | 1 | P31430                                    |

|      |                                                 |   |                                           |
|------|-------------------------------------------------|---|-------------------------------------------|
| 9553 | 1,4,8,18,2 2,3,5,6,7,1<br>0,21,22,26 9,23,24,25 | 3 | P10758,P36374,Q4FZU6                      |
| 9554 | 1,4,8,18,2 2,3,5,6,7,1<br>0,21,23,24 9,22,25,26 | 1 | P10758                                    |
| 9555 | 1,4,8,18,2 2,3,5,6,7,1<br>0,21,23,25 9,22,24,26 | 1 | P31430                                    |
| 9556 | 1,4,8,18,2 2,3,5,6,7,1<br>0,21,23,26 9,22,24,25 | 6 | P10758,P17046,P36374,Q4FZU6,Q6IG02,Q6P6Q2 |
| 9557 | 1,4,8,18,2 2,3,5,6,7,1<br>0,21,24,25 9,22,23,26 | 1 | P31430                                    |
| 9558 | 1,4,8,18,2 2,3,5,6,7,1<br>0,21,24,26 9,22,23,25 | 5 | P10758,P17046,P36374,Q4FZU6,Q9EQV9        |
| 9559 | 1,4,8,18,2 2,3,5,6,7,1<br>0,21,25,26 9,22,23,24 | 1 | P31430                                    |
| 9560 | 1,4,8,18,2 2,3,5,6,7,1<br>0,22,23,24 9,21,25,26 | 4 | P53792,P83748,P97840,Q9QZK9               |
| 9561 | 1,4,8,18,2 2,3,5,6,7,1<br>0,22,23,25 9,21,24,26 | 1 | P83748                                    |
| 9562 | 1,4,8,18,2 2,3,5,6,7,1<br>0,22,23,26 9,21,24,25 | 4 | P97840,Q4FZU6,Q6IG02,Q6P6Q2               |
| 9563 | 1,4,8,18,2 2,3,5,6,7,1<br>0,22,24,25 9,21,23,26 | 1 | P83748                                    |
| 9564 | 1,4,8,18,2 2,3,5,6,7,1<br>0,22,24,26 9,21,23,25 | 1 | P97840                                    |
| 9565 | 1,4,8,18,2 2,3,5,6,7,1<br>0,22,25,26 9,21,23,24 | 0 |                                           |
| 9566 | 1,4,8,18,2 2,3,5,6,7,1<br>0,23,24,25 9,21,22,26 | 1 | P83748                                    |
| 9567 | 1,4,8,18,2 2,3,5,6,7,1<br>0,23,24,26 9,21,22,25 | 5 | P47967,P97840,Q4FZU6,Q6IG02,Q6P6Q2        |
| 9568 | 1,4,8,18,2 2,3,5,6,7,1<br>0,23,25,26 9,21,22,24 | 3 | P00714,Q6IG02,Q6P6Q2                      |
| 9569 | 1,4,8,18,2 2,3,5,6,7,1<br>0,24,25,26 9,21,22,23 | 1 | P16086                                    |
| 9570 | 1,4,8,18,2 2,3,5,6,7,1<br>1,22,23,24 9,20,25,26 | 1 | P10758                                    |
| 9571 | 1,4,8,18,2 2,3,5,6,7,1<br>1,22,23,25 9,20,24,26 | 1 | P31430                                    |
| 9572 | 1,4,8,18,2 2,3,5,6,7,1<br>1,22,23,26 9,20,24,25 | 4 | P10758,P36374,Q6P6Q2,Q9JID2               |
| 9573 | 1,4,8,18,2 2,3,5,6,7,1<br>1,22,24,25 9,20,23,26 | 1 | P31430                                    |
| 9574 | 1,4,8,18,2 2,3,5,6,7,1<br>1,22,24,26 9,20,23,25 | 3 | P10758,P36374,Q9JID2                      |
| 9575 | 1,4,8,18,2 2,3,5,6,7,1<br>1,22,25,26 9,20,23,24 | 3 | P31430,P36374,Q561R9                      |

|      |                          |                           |   |                                           |
|------|--------------------------|---------------------------|---|-------------------------------------------|
| 9576 | 1,4,8,18,2<br>1,23,24,25 | 2,3,5,6,7,1<br>9,20,22,26 | 2 | P27213,P31430                             |
| 9577 | 1,4,8,18,2<br>1,23,24,26 | 2,3,5,6,7,1<br>9,20,22,25 | 4 | P10758,Q6IFV1,Q6P6Q2,Q9JID2               |
| 9578 | 1,4,8,18,2<br>1,23,25,26 | 2,3,5,6,7,1<br>9,20,22,24 | 6 | P00714,P07150,P14669,P27213,P31430,Q6P6Q2 |
| 9579 | 1,4,8,18,2<br>1,24,25,26 | 2,3,5,6,7,1<br>9,20,22,23 | 6 | P08721,P16086,P27213,P31430,P55091,Q9JID2 |
| 9580 | 1,4,8,18,2<br>2,23,24,25 | 2,3,5,6,7,1<br>9,20,21,26 | 1 | P83748                                    |
| 9581 | 1,4,8,18,2<br>2,23,24,26 | 2,3,5,6,7,1<br>9,20,21,25 | 5 | P00731,P47967,P53792,P97840,Q6P6Q2        |
| 9582 | 1,4,8,18,2<br>2,23,25,26 | 2,3,5,6,7,1<br>9,20,21,24 | 2 | P00714,Q6P6Q2                             |
| 9583 | 1,4,8,18,2<br>2,24,25,26 | 2,3,5,6,7,1<br>9,20,21,23 | 1 | P16086                                    |
| 9584 | 1,4,8,18,2<br>3,24,25,26 | 2,3,5,6,7,1<br>9,20,21,22 | 4 | P00714,P27213,Q6P6Q2,Q7TPB1               |
| 9585 | 1,4,8,19,2<br>0,21,22,23 | 2,3,5,6,7,1<br>8,24,25,26 | 3 | P00774,P35281,P55091                      |
| 9586 | 1,4,8,19,2<br>0,21,22,24 | 2,3,5,6,7,1<br>8,23,25,26 | 3 | O35956,P00774,P35281                      |
| 9587 | 1,4,8,19,2<br>0,21,22,25 | 2,3,5,6,7,1<br>8,23,24,26 | 3 | P00774,P35281,Q07523                      |
| 9588 | 1,4,8,19,2<br>0,21,22,26 | 2,3,5,6,7,1<br>8,23,24,25 | 3 | P35281,P36374,Q63751                      |
| 9589 | 1,4,8,19,2<br>0,21,23,24 | 2,3,5,6,7,1<br>8,22,25,26 | 3 | P00774,P35281,P83748                      |
| 9590 | 1,4,8,19,2<br>0,21,23,25 | 2,3,5,6,7,1<br>8,22,24,26 | 2 | P35281,P83748                             |
| 9591 | 1,4,8,19,2<br>0,21,23,26 | 2,3,5,6,7,1<br>8,22,24,25 | 2 | P35281,Q4FZU6                             |
| 9592 | 1,4,8,19,2<br>0,21,24,25 | 2,3,5,6,7,1<br>8,22,23,26 | 3 | O35956,P35281,P83748                      |
| 9593 | 1,4,8,19,2<br>0,21,24,26 | 2,3,5,6,7,1<br>8,22,23,25 | 2 | P01015,P35281                             |
| 9594 | 1,4,8,19,2<br>0,21,25,26 | 2,3,5,6,7,1<br>8,22,23,24 | 3 | P27213,P35281,P80201                      |
| 9595 | 1,4,8,19,2<br>0,22,23,24 | 2,3,5,6,7,1<br>8,21,25,26 | 5 | P00774,P25031,P31430,P55091,P83748        |
| 9596 | 1,4,8,19,2<br>0,22,23,25 | 2,3,5,6,7,1<br>8,21,24,26 | 3 | P00774,P25031,P83748                      |
| 9597 | 1,4,8,19,2<br>0,22,23,26 | 2,3,5,6,7,1<br>8,21,24,25 | 3 | O54728,P00774,P25031                      |
| 9598 | 1,4,8,19,2<br>0,22,24,25 | 2,3,5,6,7,1<br>8,21,23,26 | 4 | P00774,P25031,P83748,Q9QUL6               |



|      |                                                 |   |                      |
|------|-------------------------------------------------|---|----------------------|
| 9599 | 1,4,8,19,2 2,3,5,6,7,1<br>0,22,24,26 8,21,23,25 | 2 | P00774,P25031        |
| 9600 | 1,4,8,19,2 2,3,5,6,7,1<br>0,22,25,26 8,21,23,24 | 1 | P25031               |
| 9601 | 1,4,8,19,2 2,3,5,6,7,1<br>0,23,24,25 8,21,22,26 | 2 | P25031,P83748        |
| 9602 | 1,4,8,19,2 2,3,5,6,7,1<br>0,23,24,26 8,21,22,25 | 1 | P25031               |
| 9603 | 1,4,8,19,2 2,3,5,6,7,1<br>0,23,25,26 8,21,22,24 | 3 | P25031,P27213,P80201 |
| 9604 | 1,4,8,19,2 2,3,5,6,7,1<br>0,24,25,26 8,21,22,23 | 1 | P25031               |
| 9605 | 1,4,8,19,2 2,3,5,6,7,1<br>1,22,23,24 8,20,25,26 | 1 | P00774               |
| 9606 | 1,4,8,19,2 2,3,5,6,7,1<br>1,22,23,25 8,20,24,26 | 0 |                      |
| 9607 | 1,4,8,19,2 2,3,5,6,7,1<br>1,22,23,26 8,20,24,25 | 0 |                      |
| 9608 | 1,4,8,19,2 2,3,5,6,7,1<br>1,22,24,25 8,20,23,26 | 1 | Q9QUL6               |
| 9609 | 1,4,8,19,2 2,3,5,6,7,1<br>1,22,24,26 8,20,23,25 | 1 | P36374               |
| 9610 | 1,4,8,19,2 2,3,5,6,7,1<br>1,22,25,26 8,20,23,24 | 1 | P27213               |
| 9611 | 1,4,8,19,2 2,3,5,6,7,1<br>1,23,24,25 8,20,22,26 | 2 | P27213,P83748        |
| 9612 | 1,4,8,19,2 2,3,5,6,7,1<br>1,23,24,26 8,20,22,25 | 0 |                      |
| 9613 | 1,4,8,19,2 2,3,5,6,7,1<br>1,23,25,26 8,20,22,24 | 1 | P27213               |
| 9614 | 1,4,8,19,2 2,3,5,6,7,1<br>1,24,25,26 8,20,22,23 | 2 | P22006,P27213        |
| 9615 | 1,4,8,19,2 2,3,5,6,7,1<br>2,23,24,25 8,20,21,26 | 3 | P25031,P83748,Q9QUL6 |
| 9616 | 1,4,8,19,2 2,3,5,6,7,1<br>2,23,24,26 8,20,21,25 | 2 | P00731,P25031        |
| 9617 | 1,4,8,19,2 2,3,5,6,7,1<br>2,23,25,26 8,20,21,24 | 2 | P25031,P27213        |
| 9618 | 1,4,8,19,2 2,3,5,6,7,1<br>2,24,25,26 8,20,21,23 | 2 | P01835,P25031        |
| 9619 | 1,4,8,19,2 2,3,5,6,7,1<br>3,24,25,26 8,20,21,22 | 3 | P25031,P27213,Q7TPB1 |
| 9620 | 1,4,8,20,2 2,3,5,6,7,1<br>1,22,23,24 8,19,25,26 | 2 | P00774,P83748        |
| 9621 | 1,4,8,20,2 2,3,5,6,7,1<br>1,22,23,25 8,19,24,26 | 0 |                      |

|      |                                                     |   |                                    |
|------|-----------------------------------------------------|---|------------------------------------|
| 9622 | 1,4,8,20,2 2,3,5,6,7,1<br>1,22,23,26 8,19,24,25     | 1 | Q4FZU6                             |
| 9623 | 1,4,8,20,2 2,3,5,6,7,1<br>1,22,24,25 8,19,23,26     | 4 | P35467,Q03191,Q07523,Q5XFX0        |
| 9624 | 1,4,8,20,2 2,3,5,6,7,1<br>1,22,24,26 8,19,23,25     | 2 | P01015,Q99MH3                      |
| 9625 | 1,4,8,20,2 2,3,5,6,7,1<br>1,22,25,26 8,19,23,24     | 1 | Q03191                             |
| 9626 | 1,4,8,20,2 2,3,5,6,7,1<br>1,23,24,25 8,19,22,26     | 1 | P83748                             |
| 9627 | 1,4,8,20,2 2,3,5,6,7,1<br>1,23,24,26 8,19,22,25     | 2 | P97840,Q4FZU6                      |
| 9628 | 1,4,8,20,2 2,3,5,6,7,1<br>1,23,25,26 8,19,22,24     | 1 | P27213                             |
| 9629 | 1,4,8,20,2 2,3,5,6,7,1<br>1,24,25,26 8,19,22,23     | 1 | P16086                             |
| 9630 | 1,4,8,20,2 2,3,5,6,7,1<br>2,23,24,25 8,19,21,26     | 3 | P25031,P53792,P83748               |
| 9631 | 1,4,8,20,2 2,3,5,6,7,1<br>2,23,24,26 8,19,21,25     | 5 | P00731,P25031,P47967,P53792,P97840 |
| 9632 | 1,4,8,20,2 2,3,5,6,7,1<br>2,23,25,26 8,19,21,24     | 1 | P25031                             |
| 9633 | 1,4,8,20,2 2,3,5,6,7,1<br>2,24,25,26 8,19,21,23     | 4 | P00731,P16086,P25031,Q03191        |
| 9634 | 1,4,8,20,2 2,3,5,6,7,1<br>3,24,25,26 8,19,21,22     | 2 | P25031,Q7TPB1                      |
| 9635 | 1,4,8,21,2 2,3,5,6,7,1<br>2,23,24,25 8,19,20,26     | 1 | P83748                             |
| 9636 | 1,4,8,21,2 2,3,5,6,7,1<br>2,23,24,26 8,19,20,25     | 1 | P00731                             |
| 9637 | 1,4,8,21,2 2,3,5,6,7,1<br>2,23,25,26 8,19,20,24     | 1 | P27213                             |
| 9638 | 1,4,8,21,2 2,3,5,6,7,1<br>2,24,25,26 8,19,20,23     | 2 | P16086,P22006                      |
| 9639 | 1,4,8,21,2 2,3,5,6,7,1<br>3,24,25,26 8,19,20,22     | 4 | P07150,P22006,P27213,Q7TPB1        |
| 9640 | 1,4,8,22,2 2,3,5,6,7,1<br>3,24,25,26 8,19,20,21     | 4 | P00731,P25031,P53792,Q7TPB1        |
| 9641 | 1,4,18,19, 2,3,5,6,7,8<br>20,21,22,2 ,24,25,26<br>3 | 3 | P10758,P36374,Q8CJD3               |
| 9642 | 1,4,18,19, 2,3,5,6,7,8<br>20,21,22,2 ,23,25,26<br>4 | 2 | P10758,P36374                      |

|      |                               |                          |   |                                           |
|------|-------------------------------|--------------------------|---|-------------------------------------------|
| 9643 | 1,4,18,19,<br>20,21,22,2<br>5 | 2,3,5,6,7,8<br>,23,24,26 | 1 | P36374                                    |
| 9644 | 1,4,18,19,<br>20,21,22,2<br>6 | 2,3,5,6,7,8<br>,23,24,25 | 3 | P10758,P36374,Q63751                      |
| 9645 | 1,4,18,19,<br>20,21,23,2<br>4 | 2,3,5,6,7,8<br>,22,25,26 | 3 | P10758,P20766,P83748                      |
| 9646 | 1,4,18,19,<br>20,21,23,2<br>5 | 2,3,5,6,7,8<br>,22,24,26 | 2 | P20766,P83748                             |
| 9647 | 1,4,18,19,<br>20,21,23,2<br>6 | 2,3,5,6,7,8<br>,22,24,25 | 6 | P10758,P20766,P36374,Q4FZU6,Q6P6Q2,Q8N7M5 |
| 9648 | 1,4,18,19,<br>20,21,24,2<br>5 | 2,3,5,6,7,8<br>,22,23,26 | 1 | P20766                                    |
| 9649 | 1,4,18,19,<br>20,21,24,2<br>6 | 2,3,5,6,7,8<br>,22,23,25 | 5 | P06911,P10758,P12020,P20766,P36374        |
| 9650 | 1,4,18,19,<br>20,21,25,2<br>6 | 2,3,5,6,7,8<br>,22,23,24 | 2 | P31430,P36374                             |
| 9651 | 1,4,18,19,<br>20,22,23,2<br>4 | 2,3,5,6,7,8<br>,21,25,26 | 3 | P83748,Q9QZK9,Q9WTT6                      |
| 9652 | 1,4,18,19,<br>20,22,23,2<br>5 | 2,3,5,6,7,8<br>,21,24,26 | 1 | P83748                                    |
| 9653 | 1,4,18,19,<br>20,22,23,2<br>6 | 2,3,5,6,7,8<br>,21,24,25 | 1 | Q9WTT6                                    |
| 9654 | 1,4,18,19,<br>20,22,24,2<br>5 | 2,3,5,6,7,8<br>,21,23,26 | 1 | P83748                                    |
| 9655 | 1,4,18,19,<br>20,22,24,2<br>6 | 2,3,5,6,7,8<br>,21,23,25 | 4 | P06760,Q63751,Q6P6R2,Q9WTT6               |
| 9656 | 1,4,18,19,<br>20,22,25,2<br>6 | 2,3,5,6,7,8<br>,21,23,24 | 0 |                                           |
| 9657 | 1,4,18,19,<br>20,23,24,2<br>5 | 2,3,5,6,7,8<br>,21,22,26 | 2 | P20766,P83748                             |

|      |                               |                          |   |                                    |
|------|-------------------------------|--------------------------|---|------------------------------------|
| 9658 | 1,4,18,19,<br>20,23,24,2<br>6 | 2,3,5,6,7,8<br>,21,22,25 | 2 | Q6IFU7,Q6P6Q2                      |
| 9659 | 1,4,18,19,<br>20,23,25,2<br>6 | 2,3,5,6,7,8<br>,21,22,24 | 3 | P00714,Q6P6Q2,Q8N7M5               |
| 9660 | 1,4,18,19,<br>20,24,25,2<br>6 | 2,3,5,6,7,8<br>,21,22,23 | 0 |                                    |
| 9661 | 1,4,18,19,<br>21,22,23,2<br>4 | 2,3,5,6,7,8<br>,20,25,26 | 1 | P10758                             |
| 9662 | 1,4,18,19,<br>21,22,23,2<br>5 | 2,3,5,6,7,8<br>,20,24,26 | 0 |                                    |
| 9663 | 1,4,18,19,<br>21,22,23,2<br>6 | 2,3,5,6,7,8<br>,20,24,25 | 3 | P10758,P36374,Q6P6Q2               |
| 9664 | 1,4,18,19,<br>21,22,24,2<br>5 | 2,3,5,6,7,8<br>,20,23,26 | 1 | P20762                             |
| 9665 | 1,4,18,19,<br>21,22,24,2<br>6 | 2,3,5,6,7,8<br>,20,23,25 | 2 | P10758,P36374                      |
| 9666 | 1,4,18,19,<br>21,22,25,2<br>6 | 2,3,5,6,7,8<br>,20,23,24 | 1 | P36374                             |
| 9667 | 1,4,18,19,<br>21,23,24,2<br>5 | 2,3,5,6,7,8<br>,20,22,26 | 3 | P20766,P27213,P83748               |
| 9668 | 1,4,18,19,<br>21,23,24,2<br>6 | 2,3,5,6,7,8<br>,20,22,25 | 5 | D3ZUC6,P10758,P20766,P36374,Q6P6Q2 |
| 9669 | 1,4,18,19,<br>21,23,25,2<br>6 | 2,3,5,6,7,8<br>,20,22,24 | 3 | P00714,P27213,Q6P6Q2               |
| 9670 | 1,4,18,19,<br>21,24,25,2<br>6 | 2,3,5,6,7,8<br>,20,22,23 | 2 | P27213,P31430                      |
| 9671 | 1,4,18,19,<br>22,23,24,2<br>5 | 2,3,5,6,7,8<br>,20,21,26 | 3 | P62804,P83748,Q00715               |
| 9672 | 1,4,18,19,<br>22,23,24,2<br>6 | 2,3,5,6,7,8<br>,20,21,25 | 3 | P00731,Q6IFU7,Q9WTT6               |

|      |                               |                          |   |                                           |
|------|-------------------------------|--------------------------|---|-------------------------------------------|
| 9673 | 1,4,18,19,<br>22,23,25,2<br>6 | 2,3,5,6,7,8<br>,20,21,24 | 0 |                                           |
| 9674 | 1,4,18,19,<br>22,24,25,2<br>6 | 2,3,5,6,7,8<br>,20,21,23 | 1 | P62804                                    |
| 9675 | 1,4,18,19,<br>23,24,25,2<br>6 | 2,3,5,6,7,8<br>,20,21,22 | 3 | P00714,P27213,Q7TPB1                      |
| 9676 | 1,4,18,20,<br>21,22,23,2<br>4 | 2,3,5,6,7,8<br>,19,25,26 | 1 | P10758                                    |
| 9677 | 1,4,18,20,<br>21,22,23,2<br>5 | 2,3,5,6,7,8<br>,19,24,26 | 0 |                                           |
| 9678 | 1,4,18,20,<br>21,22,23,2<br>6 | 2,3,5,6,7,8<br>,19,24,25 | 5 | P10758,P36374,Q4FZU6,Q6P6Q2,Q8N7M5        |
| 9679 | 1,4,18,20,<br>21,22,24,2<br>5 | 2,3,5,6,7,8<br>,19,23,26 | 1 | P51907                                    |
| 9680 | 1,4,18,20,<br>21,22,24,2<br>6 | 2,3,5,6,7,8<br>,19,23,25 | 5 | P02631,P16086,P36374,P51907,Q99041        |
| 9681 | 1,4,18,20,<br>21,22,25,2<br>6 | 2,3,5,6,7,8<br>,19,23,24 | 6 | P02631,P16086,P31430,P36374,P51907,Q8N7M5 |
| 9682 | 1,4,18,20,<br>21,23,24,2<br>5 | 2,3,5,6,7,8<br>,19,22,26 | 2 | P20766,P83748                             |
| 9683 | 1,4,18,20,<br>21,23,24,2<br>6 | 2,3,5,6,7,8<br>,19,22,25 | 5 | P20766,Q4FZU6,Q6IFU7,Q6P6Q2,Q8N7M5        |
| 9684 | 1,4,18,20,<br>21,23,25,2<br>6 | 2,3,5,6,7,8<br>,19,22,24 | 6 | P27213,P31430,Q6IFU8,Q6IG02,Q6P6Q2,Q8N7M5 |
| 9685 | 1,4,18,20,<br>21,24,25,2<br>6 | 2,3,5,6,7,8<br>,19,22,23 | 4 | P16086,P20766,P31430,P51907               |
| 9686 | 1,4,18,20,<br>22,23,24,2<br>5 | 2,3,5,6,7,8<br>,19,21,26 | 2 | P53792,P83748                             |
| 9687 | 1,4,18,20,<br>22,23,24,2<br>6 | 2,3,5,6,7,8<br>,19,21,25 | 6 | P00731,P53792,P97840,Q6IFU7,Q6P6Q2,Q8N7M5 |

|      |                               |                          |   |                                                  |
|------|-------------------------------|--------------------------|---|--------------------------------------------------|
| 9688 | 1,4,18,20,<br>22,23,25,2<br>6 | 2,3,5,6,7,8<br>,19,21,24 | 3 | P53792,Q6P6Q2,Q8N7M5                             |
| 9689 | 1,4,18,20,<br>22,24,25,2<br>6 | 2,3,5,6,7,8<br>,19,21,23 | 2 | P02631,P16086                                    |
| 9690 | 1,4,18,20,<br>23,24,25,2<br>6 | 2,3,5,6,7,8<br>,19,21,22 | 5 | P16086,P19218,Q6P6Q2,Q7TPB1,Q8N7M5               |
| 9691 | 1,4,18,21,<br>22,23,24,2<br>5 | 2,3,5,6,7,8<br>,19,20,26 | 1 | P62804                                           |
| 9692 | 1,4,18,21,<br>22,23,24,2<br>6 | 2,3,5,6,7,8<br>,19,20,25 | 5 | P00731,P36374,Q6IFU7,Q6P6Q2,Q9JID2               |
| 9693 | 1,4,18,21,<br>22,23,25,2<br>6 | 2,3,5,6,7,8<br>,19,20,24 | 3 | P27213,P31430,Q6P6Q2                             |
| 9694 | 1,4,18,21,<br>22,24,25,2<br>6 | 2,3,5,6,7,8<br>,19,20,23 | 5 | P02631,P16086,P31430,P36374,Q9JID2               |
| 9695 | 1,4,18,21,<br>23,24,25,2<br>6 | 2,3,5,6,7,8<br>,19,20,22 | 6 | P22006,P27213,P31430,Q6P6Q2,Q7TPB1,Q9JID2        |
| 9696 | 1,4,18,22,<br>23,24,25,2<br>6 | 2,3,5,6,7,8<br>,19,20,21 | 7 | P00731,P16086,P53792,P62804,Q6IFU7,Q6P6Q2,Q7TPB1 |
| 9697 | 1,4,19,20,<br>21,22,23,2<br>4 | 2,3,5,6,7,8<br>,18,25,26 | 3 | P00774,P55091,P83748                             |
| 9698 | 1,4,19,20,<br>21,22,23,2<br>5 | 2,3,5,6,7,8<br>,18,24,26 | 1 | P83748                                           |
| 9699 | 1,4,19,20,<br>21,22,23,2<br>6 | 2,3,5,6,7,8<br>,18,24,25 | 1 | P36374                                           |
| 9700 | 1,4,19,20,<br>21,22,24,2<br>5 | 2,3,5,6,7,8<br>,18,23,26 | 5 | P00774,P35467,P51907,P83748,Q63942               |
| 9701 | 1,4,19,20,<br>21,22,24,2<br>6 | 2,3,5,6,7,8<br>,18,23,25 | 4 | O70377,P36374,P51907,Q99MH3                      |
| 9702 | 1,4,19,20,<br>21,22,25,2<br>6 | 2,3,5,6,7,8<br>,18,23,24 | 3 | P02631,P36374,P51907                             |

|      |                               |                          |   |                                                  |
|------|-------------------------------|--------------------------|---|--------------------------------------------------|
| 9703 | 1,4,19,20,<br>21,23,24,2<br>5 | 2,3,5,6,7,8<br>,18,22,26 | 2 | P20766,P83748                                    |
| 9704 | 1,4,19,20,<br>21,23,24,2<br>6 | 2,3,5,6,7,8<br>,18,22,25 | 1 | P20766                                           |
| 9705 | 1,4,19,20,<br>21,23,25,2<br>6 | 2,3,5,6,7,8<br>,18,22,24 | 1 | P27213                                           |
| 9706 | 1,4,19,20,<br>21,24,25,2<br>6 | 2,3,5,6,7,8<br>,18,22,23 | 2 | P20766,P51907                                    |
| 9707 | 1,4,19,20,<br>22,23,24,2<br>5 | 2,3,5,6,7,8<br>,18,21,26 | 3 | P00774,P25031,P83748                             |
| 9708 | 1,4,19,20,<br>22,23,24,2<br>6 | 2,3,5,6,7,8<br>,18,21,25 | 7 | P00731,P00774,P20646,P25031,P31430,P98089,Q9WTT6 |
| 9709 | 1,4,19,20,<br>22,23,25,2<br>6 | 2,3,5,6,7,8<br>,18,21,24 | 2 | P05539,P25031                                    |
| 9710 | 1,4,19,20,<br>22,24,25,2<br>6 | 2,3,5,6,7,8<br>,18,21,23 | 2 | P00731,P25031                                    |
| 9711 | 1,4,19,20,<br>23,24,25,2<br>6 | 2,3,5,6,7,8<br>,18,21,22 | 2 | P25031,Q7TPB1                                    |
| 9712 | 1,4,19,21,<br>22,23,24,2<br>5 | 2,3,5,6,7,8<br>,18,20,26 | 2 | P62804,P83748                                    |
| 9713 | 1,4,19,21,<br>22,23,24,2<br>6 | 2,3,5,6,7,8<br>,18,20,25 | 1 | P00731                                           |
| 9714 | 1,4,19,21,<br>22,23,25,2<br>6 | 2,3,5,6,7,8<br>,18,20,24 | 1 | P27213                                           |
| 9715 | 1,4,19,21,<br>22,24,25,2<br>6 | 2,3,5,6,7,8<br>,18,20,23 | 1 | P22006                                           |
| 9716 | 1,4,19,21,<br>23,24,25,2<br>6 | 2,3,5,6,7,8<br>,18,20,22 | 3 | P22006,P27213,Q7TPB1                             |
| 9717 | 1,4,19,22,<br>23,24,25,2<br>6 | 2,3,5,6,7,8<br>,18,20,21 | 5 | P00731,P25031,P62804,P82471,Q7TPB1               |

|      |                               |                                 |   |                                                  |
|------|-------------------------------|---------------------------------|---|--------------------------------------------------|
| 9718 | 1,4,20,21,<br>22,23,24,2<br>5 | 2,3,5,6,7,8<br>,18,19,26        | 2 | P83748,Q63942                                    |
| 9719 | 1,4,20,21,<br>22,23,24,2<br>6 | 2,3,5,6,7,8<br>,18,19,25        | 2 | P00731,P02631                                    |
| 9720 | 1,4,20,21,<br>22,23,25,2<br>6 | 2,3,5,6,7,8<br>,18,19,24        | 1 | P02631                                           |
| 9721 | 1,4,20,21,<br>22,24,25,2<br>6 | 2,3,5,6,7,8<br>,18,19,23        | 6 | P00731,P02631,P16086,P51907,Q03191,Q498D9        |
| 9722 | 1,4,20,21,<br>23,24,25,2<br>6 | 2,3,5,6,7,8<br>,18,19,22        | 3 | P20766,P27213,Q7TPB1                             |
| 9723 | 1,4,20,22,<br>23,24,25,2<br>6 | 2,3,5,6,7,8<br>,18,19,21        | 6 | P00731,P02631,P16086,P25031,P53792,Q7TPB1        |
| 9724 | 1,4,21,22,<br>23,24,25,2<br>6 | 2,3,5,6,7,8<br>,18,19,20        | 5 | P00731,P02631,P22006,P27213,Q7TPB1               |
| 9725 | 1,5,6,7,8,1<br>8,19,20        | 2,3,4,21,2<br>2,23,24,25<br>,26 | 2 | P00731,P53792                                    |
| 9726 | 1,5,6,7,8,1<br>8,19,21        | 2,3,4,20,2<br>2,23,24,25<br>,26 | 6 | O35547,P00731,P02803,P19218,P35281,P53792        |
| 9727 | 1,5,6,7,8,1<br>8,19,22        | 2,3,4,20,2<br>1,23,24,25<br>,26 | 2 | P19218,Q9JJS8                                    |
| 9728 | 1,5,6,7,8,1<br>8,19,23        | 2,3,4,20,2<br>1,22,24,25<br>,26 | 3 | P02803,P15399,Q03191                             |
| 9729 | 1,5,6,7,8,1<br>8,19,24        | 2,3,4,20,2<br>1,22,23,25<br>,26 | 0 |                                                  |
| 9730 | 1,5,6,7,8,1<br>8,19,25        | 2,3,4,20,2<br>1,22,23,24<br>,26 | 7 | P00731,P02803,P10715,P12020,P19629,P53792,Q9JJS8 |
| 9731 | 1,5,6,7,8,1<br>8,19,26        | 2,3,4,20,2<br>1,22,23,24<br>,25 | 3 | P16636,P53792,Q63942                             |
| 9732 | 1,5,6,7,8,1<br>8,20,21        | 2,3,4,19,2<br>2,23,24,25<br>,26 | 5 | P00731,P13432,P82471,Q6AYL6,Q9ET32               |



|      |                        |                                 |   |                                                                |
|------|------------------------|---------------------------------|---|----------------------------------------------------------------|
| 9733 | 1,5,6,7,8,1<br>8,20,22 | 2,3,4,19,2<br>1,23,24,25<br>,26 | 1 | P27213                                                         |
| 9734 | 1,5,6,7,8,1<br>8,20,23 | 2,3,4,19,2<br>1,22,24,25<br>,26 | 1 | Q9ET32                                                         |
| 9735 | 1,5,6,7,8,1<br>8,20,24 | 2,3,4,19,2<br>1,22,23,25<br>,26 | 1 | P10715                                                         |
| 9736 | 1,5,6,7,8,1<br>8,20,25 | 2,3,4,19,2<br>1,22,23,24<br>,26 | 2 | P10715,P19629                                                  |
| 9737 | 1,5,6,7,8,1<br>8,20,26 | 2,3,4,19,2<br>1,22,23,24<br>,25 | 2 | P10715,Q63942                                                  |
| 9738 | 1,5,6,7,8,1<br>8,21,22 | 2,3,4,19,2<br>0,23,24,25<br>,26 | 5 | O35547,P08723,P13432,P19218,Q8CJ52                             |
| 9739 | 1,5,6,7,8,1<br>8,21,23 | 2,3,4,19,2<br>0,22,24,25<br>,26 | 2 | O35547,P02803                                                  |
| 9740 | 1,5,6,7,8,1<br>8,21,24 | 2,3,4,19,2<br>0,22,23,25<br>,26 | 3 | P13432,P19218,Q62997                                           |
| 9741 | 1,5,6,7,8,1<br>8,21,25 | 2,3,4,19,2<br>0,22,23,24<br>,26 | 9 | P00731,P02803,P06760,P10715,P19218,P19629,P20646,Q62997,Q9WTT6 |
| 9742 | 1,5,6,7,8,1<br>8,21,26 | 2,3,4,19,2<br>0,22,23,24<br>,25 | 4 | F1LM93,P83748,Q63942,Q8CJ52                                    |
| 9743 | 1,5,6,7,8,1<br>8,22,23 | 2,3,4,19,2<br>0,21,24,25<br>,26 | 0 |                                                                |
| 9744 | 1,5,6,7,8,1<br>8,22,24 | 2,3,4,19,2<br>0,21,23,25<br>,26 | 1 | P19218                                                         |
| 9745 | 1,5,6,7,8,1<br>8,22,25 | 2,3,4,19,2<br>0,21,23,24<br>,26 | 6 | P06911,P10715,P12020,P19218,P19629,Q5GRG2                      |
| 9746 | 1,5,6,7,8,1<br>8,22,26 | 2,3,4,19,2<br>0,21,23,24<br>,25 | 3 | P83748,Q63942,Q8VD89                                           |
| 9747 | 1,5,6,7,8,1<br>8,23,24 | 2,3,4,19,2<br>0,21,22,25<br>,26 | 0 |                                                                |

|      |                        |                                 |    |                                                                                                   |
|------|------------------------|---------------------------------|----|---------------------------------------------------------------------------------------------------|
| 9748 | 1,5,6,7,8,1<br>8,23,25 | 2,3,4,19,2<br>0,21,22,24<br>,26 | 6  | O70377,P02803,P10715,P12020,P19629,Q5GRG2                                                         |
| 9749 | 1,5,6,7,8,1<br>8,23,26 | 2,3,4,19,2<br>0,21,22,24<br>,25 | 5  | Q63942,Q6IG02,Q6IMF3,Q6P6Q2,Q8VD89                                                                |
| 9750 | 1,5,6,7,8,1<br>8,24,25 | 2,3,4,19,2<br>0,21,22,23<br>,26 | 2  | P10715,P19629                                                                                     |
| 9751 | 1,5,6,7,8,1<br>8,24,26 | 2,3,4,19,2<br>0,21,22,23<br>,25 | 3  | P16636,Q63942,Q8VD89                                                                              |
| 9752 | 1,5,6,7,8,1<br>8,25,26 | 2,3,4,19,2<br>0,21,22,23<br>,24 | 4  | P10715,P19629,Q63942,Q6AY33                                                                       |
| 9753 | 1,5,6,7,8,1<br>9,20,21 | 2,3,4,18,2<br>2,23,24,25<br>,26 | 5  | P00731,P00774,P12785,P35281,P53792                                                                |
| 9754 | 1,5,6,7,8,1<br>9,20,22 | 2,3,4,18,2<br>1,23,24,25<br>,26 | 5  | P00774,P12785,P31430,P55091,P98089                                                                |
| 9755 | 1,5,6,7,8,1<br>9,20,23 | 2,3,4,18,2<br>1,22,24,25<br>,26 | 5  | P00774,P15399,P31430,P55091,P98089                                                                |
| 9756 | 1,5,6,7,8,1<br>9,20,24 | 2,3,4,18,2<br>1,22,23,25<br>,26 | 4  | P00774,P12785,P31430,P98089                                                                       |
| 9757 | 1,5,6,7,8,1<br>9,20,25 | 2,3,4,18,2<br>1,22,23,24<br>,26 | 5  | P10715,P12020,P12785,P19629,P53792                                                                |
| 9758 | 1,5,6,7,8,1<br>9,20,26 | 2,3,4,18,2<br>1,22,23,24<br>,25 | 2  | P53792,P98089                                                                                     |
| 9759 | 1,5,6,7,8,1<br>9,21,22 | 2,3,4,18,2<br>0,23,24,25<br>,26 | 7  | A2RUV9,P00774,P12785,P13432,P19218,P35281,Q9JJS8                                                  |
| 9760 | 1,5,6,7,8,1<br>9,21,23 | 2,3,4,18,2<br>0,22,24,25<br>,26 | 4  | P02803,P15399,P35281,Q99041                                                                       |
| 9761 | 1,5,6,7,8,1<br>9,21,24 | 2,3,4,18,2<br>0,22,23,25<br>,26 | 5  | P12785,P13432,P19218,P35281,P53792                                                                |
| 9762 | 1,5,6,7,8,1<br>9,21,25 | 2,3,4,18,2<br>0,22,23,24<br>,26 | 14 | A2RUV9,P00731,P02803,P06760,P12020,P12785,P19218,P19629,P35281,P53792,P97840,Q9JJS8,Q9QZK9,Q9WTT6 |

|      |                        |                                 |    |                                                                       |
|------|------------------------|---------------------------------|----|-----------------------------------------------------------------------|
| 9763 | 1,5,6,7,8,1<br>9,21,26 | 2,3,4,18,2<br>0,22,23,24<br>,25 | 4  | F1LM93,P35281,P53792,P83748                                           |
| 9764 | 1,5,6,7,8,1<br>9,22,23 | 2,3,4,18,2<br>0,21,24,25<br>,26 | 5  | P00774,P15399,P31430,P55091,P98089                                    |
| 9765 | 1,5,6,7,8,1<br>9,22,24 | 2,3,4,18,2<br>0,21,23,25<br>,26 | 6  | P00774,P12785,P19218,P31430,Q6TMA8,Q9JJS8                             |
| 9766 | 1,5,6,7,8,1<br>9,22,25 | 2,3,4,18,2<br>0,21,23,24<br>,26 | 10 | A2RUV9,P06911,P10715,P12020,P12785,P17046,P19218,P19629,Q5GRG2,Q9JJS8 |
| 9767 | 1,5,6,7,8,1<br>9,22,26 | 2,3,4,18,2<br>0,21,23,24<br>,25 | 2  | P12785,Q9JJS8                                                         |
| 9768 | 1,5,6,7,8,1<br>9,23,24 | 2,3,4,18,2<br>0,21,22,25<br>,26 | 3  | P15399,P31430,Q99041                                                  |
| 9769 | 1,5,6,7,8,1<br>9,23,25 | 2,3,4,18,2<br>0,21,22,24<br>,26 | 8  | P02803,P06760,P06911,P12020,P15399,P19629,Q5GRG2,Q99041               |
| 9770 | 1,5,6,7,8,1<br>9,23,26 | 2,3,4,18,2<br>0,21,22,24<br>,25 | 1  | P15399                                                                |
| 9771 | 1,5,6,7,8,1<br>9,24,25 | 2,3,4,18,2<br>0,21,22,23<br>,26 | 5  | P10715,P12020,P12785,P19629,Q9JJS8                                    |
| 9772 | 1,5,6,7,8,1<br>9,24,26 | 2,3,4,18,2<br>0,21,22,23<br>,25 | 0  |                                                                       |
| 9773 | 1,5,6,7,8,1<br>9,25,26 | 2,3,4,18,2<br>0,21,22,23<br>,24 | 6  | P10715,P12020,P19629,P53792,Q9JJS8,Q9QZK9                             |
| 9774 | 1,5,6,7,8,2<br>0,21,22 | 2,3,4,18,1<br>9,23,24,25<br>,26 | 4  | P00774,P12785,P13432,Q99MH3                                           |
| 9775 | 1,5,6,7,8,2<br>0,21,23 | 2,3,4,18,1<br>9,22,24,25<br>,26 | 1  | F1LM93                                                                |
| 9776 | 1,5,6,7,8,2<br>0,21,24 | 2,3,4,18,1<br>9,22,23,25<br>,26 | 4  | P12785,P13432,Q5XFX0,Q99MH3                                           |
| 9777 | 1,5,6,7,8,2<br>0,21,25 | 2,3,4,18,1<br>9,22,23,24<br>,26 | 5  | P06760,P10715,P12785,P19629,Q9WTT6                                    |

|      |                        |                                 |    |                                                                              |
|------|------------------------|---------------------------------|----|------------------------------------------------------------------------------|
| 9778 | 1,5,6,7,8,2<br>0,21,26 | 2,3,4,18,1<br>9,22,23,24<br>,25 | 3  | F1LM93,P83748,Q99MH3                                                         |
| 9779 | 1,5,6,7,8,2<br>0,22,23 | 2,3,4,18,1<br>9,21,24,25<br>,26 | 4  | P00774,P31430,P55091,P98089                                                  |
| 9780 | 1,5,6,7,8,2<br>0,22,24 | 2,3,4,18,1<br>9,21,23,25<br>,26 | 6  | P00774,P12785,P27213,P31430,P98089,Q99MH3                                    |
| 9781 | 1,5,6,7,8,2<br>0,22,25 | 2,3,4,18,1<br>9,21,23,24<br>,26 | 7  | D3ZUC6,P06911,P10715,P12020,P12785,P19629,Q5GRG2                             |
| 9782 | 1,5,6,7,8,2<br>0,22,26 | 2,3,4,18,1<br>9,21,23,24<br>,25 | 3  | P12785,P98089,Q99MH3                                                         |
| 9783 | 1,5,6,7,8,2<br>0,23,24 | 2,3,4,18,1<br>9,21,22,25<br>,26 | 2  | P00774,P31430                                                                |
| 9784 | 1,5,6,7,8,2<br>0,23,25 | 2,3,4,18,1<br>9,21,22,24<br>,26 | 6  | P06760,P10715,P12020,P19629,P63036,Q5GRG2                                    |
| 9785 | 1,5,6,7,8,2<br>0,23,26 | 2,3,4,18,1<br>9,21,22,24<br>,25 | 0  |                                                                              |
| 9786 | 1,5,6,7,8,2<br>0,24,25 | 2,3,4,18,1<br>9,21,22,23<br>,26 | 3  | P10715,P12785,P19629                                                         |
| 9787 | 1,5,6,7,8,2<br>0,24,26 | 2,3,4,18,1<br>9,21,22,23<br>,25 | 1  | Q99MH3                                                                       |
| 9788 | 1,5,6,7,8,2<br>0,25,26 | 2,3,4,18,1<br>9,21,22,23<br>,24 | 2  | P10715,P19629                                                                |
| 9789 | 1,5,6,7,8,2<br>1,22,23 | 2,3,4,18,1<br>9,20,24,25<br>,26 | 1  | P13432                                                                       |
| 9790 | 1,5,6,7,8,2<br>1,22,24 | 2,3,4,18,1<br>9,20,23,25<br>,26 | 4  | P12785,P13432,P19218,P35467                                                  |
| 9791 | 1,5,6,7,8,2<br>1,22,25 | 2,3,4,18,1<br>9,20,23,24<br>,26 | 11 | P06760,P06911,P10715,P12020,P12785,P13432,P19218,P19629,Q5GRG2,Q9QZK9,Q9WTT6 |
| 9792 | 1,5,6,7,8,2<br>1,22,26 | 2,3,4,18,1<br>9,20,23,24<br>,25 | 5  | F1LM93,P12785,P13432,P83748,Q8CJ52                                           |

|      |                        |                                 |    |                                                                       |
|------|------------------------|---------------------------------|----|-----------------------------------------------------------------------|
| 9793 | 1,5,6,7,8,2<br>1,23,24 | 2,3,4,18,1<br>9,20,22,25<br>,26 | 2  | F1LM93,P13432                                                         |
| 9794 | 1,5,6,7,8,2<br>1,23,25 | 2,3,4,18,1<br>9,20,22,24<br>,26 | 10 | F1LM93,P06760,P07150,P12020,P19629,Q5GRG2,Q6P6R2,Q6P9T8,Q99041,Q9WTT6 |
| 9795 | 1,5,6,7,8,2<br>1,23,26 | 2,3,4,18,1<br>9,20,22,24<br>,25 | 3  | F1LM93,P83748,Q6IFV1                                                  |
| 9796 | 1,5,6,7,8,2<br>1,24,25 | 2,3,4,18,1<br>9,20,22,23<br>,26 | 8  | P06760,P10715,P12785,P13432,P19218,P19629,Q62997,Q9WTT6               |
| 9797 | 1,5,6,7,8,2<br>1,24,26 | 2,3,4,18,1<br>9,20,22,23<br>,25 | 3  | F1LM93,P13432,P83748                                                  |
| 9798 | 1,5,6,7,8,2<br>1,25,26 | 2,3,4,18,1<br>9,20,22,23<br>,24 | 7  | F1LM93,P06760,P10715,P19629,P83748,Q9QZK9,Q9WTT6                      |
| 9799 | 1,5,6,7,8,2<br>2,23,24 | 2,3,4,18,1<br>9,20,21,25<br>,26 | 2  | P00774,P31430                                                         |
| 9800 | 1,5,6,7,8,2<br>2,23,25 | 2,3,4,18,1<br>9,20,21,24<br>,26 | 6  | P06760,P06911,P10715,P12020,P19629,Q5GRG2                             |
| 9801 | 1,5,6,7,8,2<br>2,23,26 | 2,3,4,18,1<br>9,20,21,24<br>,25 | 0  |                                                                       |
| 9802 | 1,5,6,7,8,2<br>2,24,25 | 2,3,4,18,1<br>9,20,21,23<br>,26 | 7  | P06911,P10715,P12020,P12785,P19629,Q5GRG2,Q6TMA8                      |
| 9803 | 1,5,6,7,8,2<br>2,24,26 | 2,3,4,18,1<br>9,20,21,23<br>,25 | 2  | P12785,Q99MH3                                                         |
| 9804 | 1,5,6,7,8,2<br>2,25,26 | 2,3,4,18,1<br>9,20,21,23<br>,24 | 7  | P06911,P10715,P12020,P12785,P19629,Q5GRG2,Q9QZK9                      |
| 9805 | 1,5,6,7,8,2<br>3,24,25 | 2,3,4,18,1<br>9,20,21,22<br>,26 | 8  | P06760,P06911,P10715,P12020,P19629,P63036,Q5GRG2,Q99041               |
| 9806 | 1,5,6,7,8,2<br>3,24,26 | 2,3,4,18,1<br>9,20,21,22<br>,25 | 1  | P47967                                                                |
| 9807 | 1,5,6,7,8,2<br>3,25,26 | 2,3,4,18,1<br>9,20,21,22<br>,24 | 7  | P10715,P12020,P19629,Q5GRG2,Q6P9T8,Q9QZK9,Q9WTT6                      |

|      |                         |                                 |   |                                    |
|------|-------------------------|---------------------------------|---|------------------------------------|
| 9808 | 1,5,6,7,8,2<br>4,25,26  | 2,3,4,18,1<br>9,20,21,22<br>,23 | 2 | P10715,P19629                      |
| 9809 | 1,5,6,7,18,<br>19,20,21 | 2,3,4,8,22,<br>23,24,25,2<br>6  | 3 | P00731,P20766,P53792               |
| 9810 | 1,5,6,7,18,<br>19,20,22 | 2,3,4,8,21,<br>23,24,25,2<br>6  | 1 | Q5U2V4                             |
| 9811 | 1,5,6,7,18,<br>19,20,23 | 2,3,4,8,21,<br>22,24,25,2<br>6  | 3 | P15399,P20766,Q80WL1               |
| 9812 | 1,5,6,7,18,<br>19,20,24 | 2,3,4,8,21,<br>22,23,25,2<br>6  | 2 | P20766,Q80WL1                      |
| 9813 | 1,5,6,7,18,<br>19,20,25 | 2,3,4,8,21,<br>22,23,24,2<br>6  | 1 | Q80WL1                             |
| 9814 | 1,5,6,7,18,<br>19,20,26 | 2,3,4,8,21,<br>22,23,24,2<br>5  | 1 | Q80WL1                             |
| 9815 | 1,5,6,7,18,<br>19,21,22 | 2,3,4,8,20,<br>23,24,25,2<br>6  | 3 | P13432,P19218,P97840               |
| 9816 | 1,5,6,7,18,<br>19,21,23 | 2,3,4,8,20,<br>22,24,25,2<br>6  | 4 | P05369,P15399,P20766,Q03191        |
| 9817 | 1,5,6,7,18,<br>19,21,24 | 2,3,4,8,20,<br>22,23,25,2<br>6  | 4 | P13432,P19218,P20766,P53792        |
| 9818 | 1,5,6,7,18,<br>19,21,25 | 2,3,4,8,20,<br>22,23,24,2<br>6  | 5 | P00731,P19218,P47967,P53792,P97840 |
| 9819 | 1,5,6,7,18,<br>19,21,26 | 2,3,4,8,20,<br>22,23,24,2<br>5  | 3 | P53792,P83748,Q9QUL6               |
| 9820 | 1,5,6,7,18,<br>19,22,23 | 2,3,4,8,20,<br>21,24,25,2<br>6  | 1 | P15399                             |
| 9821 | 1,5,6,7,18,<br>19,22,24 | 2,3,4,8,20,<br>21,23,25,2<br>6  | 2 | P19218,Q6TMA8                      |
| 9822 | 1,5,6,7,18,<br>19,22,25 | 2,3,4,8,20,<br>21,23,24,2<br>6  | 4 | P02761,P17046,P19218,P97840        |

|      |                         |                                |   |                                           |
|------|-------------------------|--------------------------------|---|-------------------------------------------|
| 9823 | 1,5,6,7,18,<br>19,22,26 | 2,3,4,8,20,<br>21,23,24,2<br>5 | 2 | P16636,Q5U2V4                             |
| 9824 | 1,5,6,7,18,<br>19,23,24 | 2,3,4,8,20,<br>21,22,25,2<br>6 | 4 | P15399,P20766,Q03191,Q80WL1               |
| 9825 | 1,5,6,7,18,<br>19,23,25 | 2,3,4,8,20,<br>21,22,24,2<br>6 | 3 | P01015,P02761,P15399                      |
| 9826 | 1,5,6,7,18,<br>19,23,26 | 2,3,4,8,20,<br>21,22,24,2<br>5 | 6 | P15399,P16636,Q03191,Q63942,Q6P6Q2,Q9QUL6 |
| 9827 | 1,5,6,7,18,<br>19,24,25 | 2,3,4,8,20,<br>21,22,23,2<br>6 | 1 | Q80WL1                                    |
| 9828 | 1,5,6,7,18,<br>19,24,26 | 2,3,4,8,20,<br>21,22,23,2<br>5 | 2 | P16636,Q80WL1                             |
| 9829 | 1,5,6,7,18,<br>19,25,26 | 2,3,4,8,20,<br>21,22,23,2<br>4 | 0 |                                           |
| 9830 | 1,5,6,7,18,<br>20,21,22 | 2,3,4,8,19,<br>23,24,25,2<br>6 | 2 | P13432,Q9QUL6                             |
| 9831 | 1,5,6,7,18,<br>20,21,23 | 2,3,4,8,19,<br>22,24,25,2<br>6 | 2 | P20766,Q9QUL6                             |
| 9832 | 1,5,6,7,18,<br>20,21,24 | 2,3,4,8,19,<br>22,23,25,2<br>6 | 3 | P13432,P20766,Q9QUL6                      |
| 9833 | 1,5,6,7,18,<br>20,21,25 | 2,3,4,8,19,<br>22,23,24,2<br>6 | 1 | P20766                                    |
| 9834 | 1,5,6,7,18,<br>20,21,26 | 2,3,4,8,19,<br>22,23,24,2<br>5 | 4 | P20766,P25031,P83748,Q9QUL6               |
| 9835 | 1,5,6,7,18,<br>20,22,23 | 2,3,4,8,19,<br>21,24,25,2<br>6 | 0 |                                           |
| 9836 | 1,5,6,7,18,<br>20,22,24 | 2,3,4,8,19,<br>21,23,25,2<br>6 | 2 | P27213,Q80WL1                             |
| 9837 | 1,5,6,7,18,<br>20,22,25 | 2,3,4,8,19,<br>21,23,24,2<br>6 | 0 |                                           |

|      |                         |                                |   |                                                  |
|------|-------------------------|--------------------------------|---|--------------------------------------------------|
| 9838 | 1,5,6,7,18,<br>20,22,26 | 2,3,4,8,19,<br>21,23,24,2<br>5 | 1 | Q9QUL6                                           |
| 9839 | 1,5,6,7,18,<br>20,23,24 | 2,3,4,8,19,<br>21,22,25,2<br>6 | 2 | P20766,Q80WL1                                    |
| 9840 | 1,5,6,7,18,<br>20,23,25 | 2,3,4,8,19,<br>21,22,24,2<br>6 | 2 | P63036,Q80WL1                                    |
| 9841 | 1,5,6,7,18,<br>20,23,26 | 2,3,4,8,19,<br>21,22,24,2<br>5 | 7 | Q6IFU8,Q6IFW6,Q6IG02,Q6IMF3,Q6P6Q2,Q80WL1,Q9QUL6 |
| 9842 | 1,5,6,7,18,<br>20,24,25 | 2,3,4,8,19,<br>21,22,23,2<br>6 | 2 | P20766,Q80WL1                                    |
| 9843 | 1,5,6,7,18,<br>20,24,26 | 2,3,4,8,19,<br>21,22,23,2<br>5 | 3 | P20766,Q80WL1,Q9QUL6                             |
| 9844 | 1,5,6,7,18,<br>20,25,26 | 2,3,4,8,19,<br>21,22,23,2<br>4 | 2 | P61206;P84079;P84082,Q80WL1                      |
| 9845 | 1,5,6,7,18,<br>21,22,23 | 2,3,4,8,19,<br>20,24,25,2<br>6 | 2 | P13432,Q9QUL6                                    |
| 9846 | 1,5,6,7,18,<br>21,22,24 | 2,3,4,8,19,<br>20,23,25,2<br>6 | 2 | P13432,P19218                                    |
| 9847 | 1,5,6,7,18,<br>21,22,25 | 2,3,4,8,19,<br>20,23,24,2<br>6 | 2 | P19218,P97840                                    |
| 9848 | 1,5,6,7,18,<br>21,22,26 | 2,3,4,8,19,<br>20,23,24,2<br>5 | 3 | P13432,P83748,Q9QUL6                             |
| 9849 | 1,5,6,7,18,<br>21,23,24 | 2,3,4,8,19,<br>20,22,25,2<br>6 | 4 | P13432,P20766,Q62997,Q9QUL6                      |
| 9850 | 1,5,6,7,18,<br>21,23,25 | 2,3,4,8,19,<br>20,22,24,2<br>6 | 0 |                                                  |
| 9851 | 1,5,6,7,18,<br>21,23,26 | 2,3,4,8,19,<br>20,22,24,2<br>5 | 6 | P83748,Q6IFU8,Q6IFV1,Q6IMF3,Q6P6Q2,Q9QUL6        |
| 9852 | 1,5,6,7,18,<br>21,24,25 | 2,3,4,8,19,<br>20,22,23,2<br>6 | 4 | P13432,P19218,P20766,Q62997                      |



|      |                         |                                |   |                                                         |
|------|-------------------------|--------------------------------|---|---------------------------------------------------------|
| 9853 | 1,5,6,7,18,<br>21,24,26 | 2,3,4,8,19,<br>20,22,23,2<br>5 | 5 | P13432,P20766,P83748,Q62997,Q9QUL6                      |
| 9854 | 1,5,6,7,18,<br>21,25,26 | 2,3,4,8,19,<br>20,22,23,2<br>4 | 4 | P25031,P36970,P61206;P84079;P84082,P83748               |
| 9855 | 1,5,6,7,18,<br>22,23,24 | 2,3,4,8,19,<br>20,21,25,2<br>6 | 0 |                                                         |
| 9856 | 1,5,6,7,18,<br>22,23,25 | 2,3,4,8,19,<br>20,21,24,2<br>6 | 4 | P01015,P02761,P06911,P12020                             |
| 9857 | 1,5,6,7,18,<br>22,23,26 | 2,3,4,8,19,<br>20,21,24,2<br>5 | 4 | Q6IFU7,Q6P6Q2,Q8VD89,Q9QUL6                             |
| 9858 | 1,5,6,7,18,<br>22,24,25 | 2,3,4,8,19,<br>20,21,23,2<br>6 | 0 |                                                         |
| 9859 | 1,5,6,7,18,<br>22,24,26 | 2,3,4,8,19,<br>20,21,23,2<br>5 | 3 | P16636,Q8VD89,Q9QUL6                                    |
| 9860 | 1,5,6,7,18,<br>22,25,26 | 2,3,4,8,19,<br>20,21,23,2<br>4 | 1 | P02761                                                  |
| 9861 | 1,5,6,7,18,<br>23,24,25 | 2,3,4,8,19,<br>20,21,22,2<br>6 | 2 | P19629,Q80WL1                                           |
| 9862 | 1,5,6,7,18,<br>23,24,26 | 2,3,4,8,19,<br>20,21,22,2<br>5 | 7 | P16636,Q6IFU7,Q6IMF3,Q6P6Q2,Q80WL1,Q8VD89,Q9QUL6        |
| 9863 | 1,5,6,7,18,<br>23,25,26 | 2,3,4,8,19,<br>20,21,22,2<br>4 | 4 | P02761,Q6IFU8,Q6IMF3,Q6P6Q2                             |
| 9864 | 1,5,6,7,18,<br>24,25,26 | 2,3,4,8,19,<br>20,21,22,2<br>3 | 2 | Q7TPB1,Q80WL1                                           |
| 9865 | 1,5,6,7,19,<br>20,21,22 | 2,3,4,8,18,<br>23,24,25,2<br>6 | 7 | P00714,P00774,P12785,P13432,P19218,P35467,P55091        |
| 9866 | 1,5,6,7,19,<br>20,21,23 | 2,3,4,8,18,<br>22,24,25,2<br>6 | 4 | P00774,P15399,P20766,P55091                             |
| 9867 | 1,5,6,7,19,<br>20,21,24 | 2,3,4,8,18,<br>22,23,25,2<br>6 | 8 | P00714,P00774,P13432,P20766,P35467,P53792,Q6AY61,Q80WL1 |

|      |                         |                                |    |                                                                                     |
|------|-------------------------|--------------------------------|----|-------------------------------------------------------------------------------------|
| 9868 | 1,5,6,7,19,<br>20,21,25 | 2,3,4,8,18,<br>22,23,24,2<br>6 | 4  | P20766,P35467,P53792,P97840                                                         |
| 9869 | 1,5,6,7,19,<br>20,21,26 | 2,3,4,8,18,<br>22,23,24,2<br>5 | 2  | P20766,P53792                                                                       |
| 9870 | 1,5,6,7,19,<br>20,22,23 | 2,3,4,8,18,<br>21,24,25,2<br>6 | 5  | P00774,P15399,P31430,P55091,P98089                                                  |
| 9871 | 1,5,6,7,19,<br>20,22,24 | 2,3,4,8,18,<br>21,23,25,2<br>6 | 12 | P00714,P00774,P12785,P14669,P31430,P35467,P55091,P98089,Q6AY61,Q6TMA8,Q80WL1,Q99MH3 |
| 9872 | 1,5,6,7,19,<br>20,22,25 | 2,3,4,8,18,<br>21,23,24,2<br>6 | 5  | P00774,P12785,P17046,P35467,Q6AY61                                                  |
| 9873 | 1,5,6,7,19,<br>20,22,26 | 2,3,4,8,18,<br>21,23,24,2<br>5 | 6  | P00774,P31430,P98089,Q5U2V4,Q5XI22,Q99MH3                                           |
| 9874 | 1,5,6,7,19,<br>20,23,24 | 2,3,4,8,18,<br>21,22,25,2<br>6 | 7  | P00774,P15399,P20766,P31430,P55091,P98089,Q80WL1                                    |
| 9875 | 1,5,6,7,19,<br>20,23,25 | 2,3,4,8,18,<br>21,22,24,2<br>6 | 4  | P12020,P15399,P63036,Q80WL1                                                         |
| 9876 | 1,5,6,7,19,<br>20,23,26 | 2,3,4,8,18,<br>21,22,24,2<br>5 | 4  | P15399,P31430,P98089,Q80WL1                                                         |
| 9877 | 1,5,6,7,19,<br>20,24,25 | 2,3,4,8,18,<br>21,22,23,2<br>6 | 5  | P00774,P20766,P35467,Q6AY61,Q80WL1                                                  |
| 9878 | 1,5,6,7,19,<br>20,24,26 | 2,3,4,8,18,<br>21,22,23,2<br>5 | 6  | P20766,P31430,P98089,Q5XI22,Q80WL1,Q99MH3                                           |
| 9879 | 1,5,6,7,19,<br>20,25,26 | 2,3,4,8,18,<br>21,22,23,2<br>4 | 2  | Q5XI22,Q80WL1                                                                       |
| 9880 | 1,5,6,7,19,<br>21,22,23 | 2,3,4,8,18,<br>20,24,25,2<br>6 | 3  | P00774,P15399,P55091                                                                |
| 9881 | 1,5,6,7,19,<br>21,22,24 | 2,3,4,8,18,<br>20,23,25,2<br>6 | 8  | P00714,P00774,P12785,P13432,P19218,P35467,Q6AY61,Q6TMA8                             |
| 9882 | 1,5,6,7,19,<br>21,22,25 | 2,3,4,8,18,<br>20,23,24,2<br>6 | 8  | A2RUV9,P12785,P17046,P19218,P35467,P97840,Q6TMA8,Q9QZK9                             |

|      |                         |                                |   |                                                         |
|------|-------------------------|--------------------------------|---|---------------------------------------------------------|
| 9883 | 1,5,6,7,19,<br>21,22,26 | 2,3,4,8,18,<br>20,23,24,2<br>5 | 3 | P83748,Q5XI22,Q6TMA8                                    |
| 9884 | 1,5,6,7,19,<br>21,23,24 | 2,3,4,8,18,<br>20,22,25,2<br>6 | 2 | P15399,P20766                                           |
| 9885 | 1,5,6,7,19,<br>21,23,25 | 2,3,4,8,18,<br>20,22,24,2<br>6 | 5 | P12020,P15399,P17046,P97840,Q99041                      |
| 9886 | 1,5,6,7,19,<br>21,23,26 | 2,3,4,8,18,<br>20,22,24,2<br>5 | 1 | P15399                                                  |
| 9887 | 1,5,6,7,19,<br>21,24,25 | 2,3,4,8,18,<br>20,22,23,2<br>6 | 8 | P17046,P19218,P20766,P35467,P53792,P97840,Q6AY61,Q6TMA8 |
| 9888 | 1,5,6,7,19,<br>21,24,26 | 2,3,4,8,18,<br>20,22,23,2<br>5 | 3 | P20766,P53792,Q6TMA8                                    |
| 9889 | 1,5,6,7,19,<br>21,25,26 | 2,3,4,8,18,<br>20,22,23,2<br>4 | 4 | P53792,P97840,Q5XI22,Q9QZK9                             |
| 9890 | 1,5,6,7,19,<br>22,23,24 | 2,3,4,8,18,<br>20,21,25,2<br>6 | 6 | P00774,P15399,P19223,P31430,P55091,P98089               |
| 9891 | 1,5,6,7,19,<br>22,23,25 | 2,3,4,8,18,<br>20,21,24,2<br>6 | 6 | P02761,P06911,P12020,P15399,P17046,Q5GRG2               |
| 9892 | 1,5,6,7,19,<br>22,23,26 | 2,3,4,8,18,<br>20,21,24,2<br>5 | 3 | P15399,P31430,P98089                                    |
| 9893 | 1,5,6,7,19,<br>22,24,25 | 2,3,4,8,18,<br>20,21,23,2<br>6 | 8 | P00774,P12785,P17046,P19218,P35467,Q5XI22,Q6AY61,Q6TMA8 |
| 9894 | 1,5,6,7,19,<br>22,24,26 | 2,3,4,8,18,<br>20,21,23,2<br>5 | 5 | P31430,P98089,Q5XI22,Q6TMA8,Q99MH3                      |
| 9895 | 1,5,6,7,19,<br>22,25,26 | 2,3,4,8,18,<br>20,21,23,2<br>4 | 6 | P02761,P17046,Q5XI22,Q6TMA8,Q9JJS8,Q9QZK9               |
| 9896 | 1,5,6,7,19,<br>23,24,25 | 2,3,4,8,18,<br>20,21,22,2<br>6 | 4 | P12020,P15399,P17046,Q80WL1                             |
| 9897 | 1,5,6,7,19,<br>23,24,26 | 2,3,4,8,18,<br>20,21,22,2<br>5 | 4 | P15399,P31430,P98089,Q80WL1                             |

|      |                         |                                |   |                                                         |
|------|-------------------------|--------------------------------|---|---------------------------------------------------------|
| 9898 | 1,5,6,7,19,<br>23,25,26 | 2,3,4,8,18,<br>20,21,22,2<br>4 | 4 | P02761,P12020,P15399,Q80WL1                             |
| 9899 | 1,5,6,7,19,<br>24,25,26 | 2,3,4,8,18,<br>20,21,22,2<br>3 | 3 | Q5XI22,Q6TMA8,Q80WL1                                    |
| 9900 | 1,5,6,7,20,<br>21,22,23 | 2,3,4,8,18,<br>19,24,25,2<br>6 | 3 | P00774,P13432,P55091                                    |
| 9901 | 1,5,6,7,20,<br>21,22,24 | 2,3,4,8,18,<br>19,23,25,2<br>6 | 8 | P00714,P00774,P12785,P13432,P35467,Q5XFX0,Q6AY61,Q99MH3 |
| 9902 | 1,5,6,7,20,<br>21,22,25 | 2,3,4,8,18,<br>19,23,24,2<br>6 | 4 | P12785,P35467,Q5XI22,Q6AY61                             |
| 9903 | 1,5,6,7,20,<br>21,22,26 | 2,3,4,8,18,<br>19,23,24,2<br>5 | 4 | P13432,P83748,Q5XI22,Q99MH3                             |
| 9904 | 1,5,6,7,20,<br>21,23,24 | 2,3,4,8,18,<br>19,22,25,2<br>6 | 3 | P13432,P20766,Q80WL1                                    |
| 9905 | 1,5,6,7,20,<br>21,23,25 | 2,3,4,8,18,<br>19,22,24,2<br>6 | 1 | P20766                                                  |
| 9906 | 1,5,6,7,20,<br>21,23,26 | 2,3,4,8,18,<br>19,22,24,2<br>5 | 3 | P20766,Q6IFV1,Q9QUL6                                    |
| 9907 | 1,5,6,7,20,<br>21,24,25 | 2,3,4,8,18,<br>19,22,23,2<br>6 | 7 | P12785,P13432,P20766,P35467,Q64194,Q6AY61,Q80WL1        |
| 9908 | 1,5,6,7,20,<br>21,24,26 | 2,3,4,8,18,<br>19,22,23,2<br>5 | 4 | P13432,P20766,Q5XI22,Q99MH3                             |
| 9909 | 1,5,6,7,20,<br>21,25,26 | 2,3,4,8,18,<br>19,22,23,2<br>4 | 1 | Q5XI22                                                  |
| 9910 | 1,5,6,7,20,<br>22,23,24 | 2,3,4,8,18,<br>19,21,25,2<br>6 | 5 | P00774,P31430,P55091,P98089,Q80WL1                      |
| 9911 | 1,5,6,7,20,<br>22,23,25 | 2,3,4,8,18,<br>19,21,24,2<br>6 | 4 | P02761,P06911,P12020,Q5GRG2                             |
| 9912 | 1,5,6,7,20,<br>22,23,26 | 2,3,4,8,18,<br>19,21,24,2<br>5 | 2 | P31430,P98089                                           |

|      |                         |                                |    |                                                                              |
|------|-------------------------|--------------------------------|----|------------------------------------------------------------------------------|
| 9913 | 1,5,6,7,20,<br>22,24,25 | 2,3,4,8,18,<br>19,21,23,2<br>6 | 8  | P00774,P12785,P35467,Q5XI22,Q64194,Q6AY61,Q80WL1,Q99MH3                      |
| 9914 | 1,5,6,7,20,<br>22,24,26 | 2,3,4,8,18,<br>19,21,23,2<br>5 | 5  | P31430,P98089,Q5XI22,Q80WL1,Q99MH3                                           |
| 9915 | 1,5,6,7,20,<br>22,25,26 | 2,3,4,8,18,<br>19,21,23,2<br>4 | 2  | Q5XI22,Q99MH3                                                                |
| 9916 | 1,5,6,7,20,<br>23,24,25 | 2,3,4,8,18,<br>19,21,22,2<br>6 | 3  | P20766,P63036,Q80WL1                                                         |
| 9917 | 1,5,6,7,20,<br>23,24,26 | 2,3,4,8,18,<br>19,21,22,2<br>5 | 4  | P20766,P31430,P98089,Q80WL1                                                  |
| 9918 | 1,5,6,7,20,<br>23,25,26 | 2,3,4,8,18,<br>19,21,22,2<br>4 | 1  | Q80WL1                                                                       |
| 9919 | 1,5,6,7,20,<br>24,25,26 | 2,3,4,8,18,<br>19,21,22,2<br>3 | 4  | Q5XI22,Q80WL1,Q8CJD3,Q99MH3                                                  |
| 9920 | 1,5,6,7,21,<br>22,23,24 | 2,3,4,8,18,<br>19,20,25,2<br>6 | 2  | P13432,P35280                                                                |
| 9921 | 1,5,6,7,21,<br>22,23,25 | 2,3,4,8,18,<br>19,20,24,2<br>6 | 4  | P06911,P12020,P17046,P19629                                                  |
| 9922 | 1,5,6,7,21,<br>22,23,26 | 2,3,4,8,18,<br>19,20,24,2<br>5 | 0  |                                                                              |
| 9923 | 1,5,6,7,21,<br>22,24,25 | 2,3,4,8,18,<br>19,20,23,2<br>6 | 11 | P12785,P13432,P17046,P19218,P19629,P35467,Q498D9,Q5XI22,Q64194,Q6AY61,Q6TMA8 |
| 9924 | 1,5,6,7,21,<br>22,24,26 | 2,3,4,8,18,<br>19,20,23,2<br>5 | 5  | P13432,Q498D9,Q5XI22,Q6TMA8,Q99MH3                                           |
| 9925 | 1,5,6,7,21,<br>22,25,26 | 2,3,4,8,18,<br>19,20,23,2<br>4 | 4  | P83748,Q498D9,Q5XI22,Q9QZK9                                                  |
| 9926 | 1,5,6,7,21,<br>23,24,25 | 2,3,4,8,18,<br>19,20,22,2<br>6 | 5  | P06760,P19629,P20766,P22006,Q62997                                           |
| 9927 | 1,5,6,7,21,<br>23,24,26 | 2,3,4,8,18,<br>19,20,22,2<br>5 | 2  | P20766,Q6IFV1                                                                |

|      |                         |                                |   |                                                  |
|------|-------------------------|--------------------------------|---|--------------------------------------------------|
| 9928 | 1,5,6,7,21,<br>23,25,26 | 2,3,4,8,18,<br>19,20,22,2<br>4 | 3 | P22006,P83121,Q9QZK9                             |
| 9929 | 1,5,6,7,21,<br>24,25,26 | 2,3,4,8,18,<br>19,20,22,2<br>3 | 6 | P22006,Q498D9,Q5XI22,Q62997,Q8CJD3,Q9QZK9        |
| 9930 | 1,5,6,7,22,<br>23,24,25 | 2,3,4,8,18,<br>19,20,21,2<br>6 | 7 | P02761,P06911,P12020,P17046,P19629,P62804,Q5GRG2 |
| 9931 | 1,5,6,7,22,<br>23,24,26 | 2,3,4,8,18,<br>19,20,21,2<br>5 | 3 | P00731,P31430,P98089                             |
| 9932 | 1,5,6,7,22,<br>23,25,26 | 2,3,4,8,18,<br>19,20,21,2<br>4 | 4 | P02761,P06911,P12020,P19629                      |
| 9933 | 1,5,6,7,22,<br>24,25,26 | 2,3,4,8,18,<br>19,20,21,2<br>3 | 3 | Q498D9,Q5XI22,Q6TMA8                             |
| 9934 | 1,5,6,7,23,<br>24,25,26 | 2,3,4,8,18,<br>19,20,21,2<br>2 | 3 | P19629,Q7TPB1,Q80WL1                             |
| 9935 | 1,5,6,8,18,<br>19,20,21 | 2,3,4,7,22,<br>23,24,25,2<br>6 | 3 | O35547,P00731,P35281                             |
| 9936 | 1,5,6,8,18,<br>19,20,22 | 2,3,4,7,21,<br>23,24,25,2<br>6 | 2 | P01836,P22006                                    |
| 9937 | 1,5,6,8,18,<br>19,20,23 | 2,3,4,7,21,<br>22,24,25,2<br>6 | 2 | P01836,P22006                                    |
| 9938 | 1,5,6,8,18,<br>19,20,24 | 2,3,4,7,21,<br>22,23,25,2<br>6 | 2 | P01836,Q80WL1                                    |
| 9939 | 1,5,6,8,18,<br>19,20,25 | 2,3,4,7,21,<br>22,23,24,2<br>6 | 1 | P01836                                           |
| 9940 | 1,5,6,8,18,<br>19,20,26 | 2,3,4,7,21,<br>22,23,24,2<br>5 | 1 | Q63942                                           |
| 9941 | 1,5,6,8,18,<br>19,21,22 | 2,3,4,7,20,<br>23,24,25,2<br>6 | 6 | A2RUV9,O35547,P01836,P02782,P19218,P35281        |
| 9942 | 1,5,6,8,18,<br>19,21,23 | 2,3,4,7,20,<br>22,24,25,2<br>6 | 6 | O35547,P01836,P02803,P05369,P35281,Q03191        |

|      |                         |                                |    |                                                                              |
|------|-------------------------|--------------------------------|----|------------------------------------------------------------------------------|
| 9943 | 1,5,6,8,18,<br>19,21,24 | 2,3,4,7,20,<br>22,23,25,2<br>6 | 4  | A2RUV9,O35547,P13432,P35281                                                  |
| 9944 | 1,5,6,8,18,<br>19,21,25 | 2,3,4,7,20,<br>22,23,24,2<br>6 | 7  | A2RUV9,O35547,P00731,P01836,P02803,P06760,P35281                             |
| 9945 | 1,5,6,8,18,<br>19,21,26 | 2,3,4,7,20,<br>22,23,24,2<br>5 | 3  | O35547,P35281,Q63942                                                         |
| 9946 | 1,5,6,8,18,<br>19,22,23 | 2,3,4,7,20,<br>21,24,25,2<br>6 | 2  | P01836,P22006                                                                |
| 9947 | 1,5,6,8,18,<br>19,22,24 | 2,3,4,7,20,<br>21,23,25,2<br>6 | 2  | A2RUV9,P01836                                                                |
| 9948 | 1,5,6,8,18,<br>19,22,25 | 2,3,4,7,20,<br>21,23,24,2<br>6 | 2  | A2RUV9,P01836                                                                |
| 9949 | 1,5,6,8,18,<br>19,22,26 | 2,3,4,7,20,<br>21,23,24,2<br>5 | 2  | P01836,Q63942                                                                |
| 9950 | 1,5,6,8,18,<br>19,23,24 | 2,3,4,7,20,<br>21,22,25,2<br>6 | 3  | P01836,P09605,P25809,Q03191                                                  |
| 9951 | 1,5,6,8,18,<br>19,23,25 | 2,3,4,7,20,<br>21,22,24,2<br>6 | 4  | P01836,P02803,P06760,Q9Z1F2                                                  |
| 9952 | 1,5,6,8,18,<br>19,23,26 | 2,3,4,7,20,<br>21,22,24,2<br>5 | 10 | P01836,P09605,P25809,P35467,Q03191,Q63942,Q6IFU8,Q6IFV1,Q6IG02,Q6IMF3,Q6P6Q2 |
| 9953 | 1,5,6,8,18,<br>19,24,25 | 2,3,4,7,20,<br>21,22,23,2<br>6 | 1  | P01836                                                                       |
| 9954 | 1,5,6,8,18,<br>19,24,26 | 2,3,4,7,20,<br>21,22,23,2<br>5 | 2  | P09605,P25809,Q63942                                                         |
| 9955 | 1,5,6,8,18,<br>19,25,26 | 2,3,4,7,20,<br>21,22,23,2<br>4 | 2  | P01836,Q63942                                                                |
| 9956 | 1,5,6,8,18,<br>20,21,22 | 2,3,4,7,19,<br>23,24,25,2<br>6 | 3  | O35547,P13432,P14480                                                         |
| 9957 | 1,5,6,8,18,<br>20,21,23 | 2,3,4,7,19,<br>22,24,25,2<br>6 | 1  | O35547                                                                       |

|      |                         |                                |   |                                                                |
|------|-------------------------|--------------------------------|---|----------------------------------------------------------------|
| 9958 | 1,5,6,8,18,<br>20,21,24 | 2,3,4,7,19,<br>22,23,25,2<br>6 | 1 | P13432                                                         |
| 9959 | 1,5,6,8,18,<br>20,21,25 | 2,3,4,7,19,<br>22,23,24,2<br>6 | 3 | O35547,P06760,Q9WTT6                                           |
| 9960 | 1,5,6,8,18,<br>20,21,26 | 2,3,4,7,19,<br>22,23,24,2<br>5 | 0 |                                                                |
| 9961 | 1,5,6,8,18,<br>20,22,23 | 2,3,4,7,19,<br>21,24,25,2<br>6 | 2 | P01836,P22006                                                  |
| 9962 | 1,5,6,8,18,<br>20,22,24 | 2,3,4,7,19,<br>21,23,25,2<br>6 | 0 |                                                                |
| 9963 | 1,5,6,8,18,<br>20,22,25 | 2,3,4,7,19,<br>21,23,24,2<br>6 | 1 | P01836                                                         |
| 9964 | 1,5,6,8,18,<br>20,22,26 | 2,3,4,7,19,<br>21,23,24,2<br>5 | 0 |                                                                |
| 9965 | 1,5,6,8,18,<br>20,23,24 | 2,3,4,7,19,<br>21,22,25,2<br>6 | 3 | P01836,P47967,Q80WL1                                           |
| 9966 | 1,5,6,8,18,<br>20,23,25 | 2,3,4,7,19,<br>21,22,24,2<br>6 | 2 | P01836,P06760                                                  |
| 9967 | 1,5,6,8,18,<br>20,23,26 | 2,3,4,7,19,<br>21,22,24,2<br>5 | 9 | P47967,Q63942,Q6IFU7,Q6IFU8,Q6IFV1,Q6IFW6,Q6IG02,Q6IMF3,Q6P6Q2 |
| 9968 | 1,5,6,8,18,<br>20,24,25 | 2,3,4,7,19,<br>21,22,23,2<br>6 | 2 | P01836,Q80WL1                                                  |
| 9969 | 1,5,6,8,18,<br>20,24,26 | 2,3,4,7,19,<br>21,22,23,2<br>5 | 1 | P47967                                                         |
| 9970 | 1,5,6,8,18,<br>20,25,26 | 2,3,4,7,19,<br>21,22,23,2<br>4 | 0 |                                                                |
| 9971 | 1,5,6,8,18,<br>21,22,23 | 2,3,4,7,19,<br>20,24,25,2<br>6 | 2 | O35547,P13432                                                  |
| 9972 | 1,5,6,8,18,<br>21,22,24 | 2,3,4,7,19,<br>20,23,25,2<br>6 | 3 | O35547,P13432,P19218                                           |



|      |                         |                                |   |                                                         |
|------|-------------------------|--------------------------------|---|---------------------------------------------------------|
| 9973 | 1,5,6,8,18,<br>21,22,25 | 2,3,4,7,19,<br>20,23,24,2<br>6 | 3 | O35547,P06760,P19218                                    |
| 9974 | 1,5,6,8,18,<br>21,22,26 | 2,3,4,7,19,<br>20,23,24,2<br>5 | 2 | O35547,P13432                                           |
| 9975 | 1,5,6,8,18,<br>21,23,24 | 2,3,4,7,19,<br>20,22,25,2<br>6 | 3 | O35547,P13432,Q62997                                    |
| 9976 | 1,5,6,8,18,<br>21,23,25 | 2,3,4,7,19,<br>20,22,24,2<br>6 | 6 | O35547,P01836,P06760,P07150,P14669,Q9WTT6               |
| 9977 | 1,5,6,8,18,<br>21,23,26 | 2,3,4,7,19,<br>20,22,24,2<br>5 | 7 | Q63942,Q6IFU8,Q6IFV1,Q6IFW6,Q6IG02,Q6IMF3,Q6P6Q2        |
| 9978 | 1,5,6,8,18,<br>21,24,25 | 2,3,4,7,19,<br>20,22,23,2<br>6 | 4 | P06760,P13432,Q62997,Q9WTT6                             |
| 9979 | 1,5,6,8,18,<br>21,24,26 | 2,3,4,7,19,<br>20,22,23,2<br>5 | 3 | P13432,Q62997,Q63942                                    |
| 9980 | 1,5,6,8,18,<br>21,25,26 | 2,3,4,7,19,<br>20,22,23,2<br>4 | 3 | P06760,P31430,Q9WTT6                                    |
| 9981 | 1,5,6,8,18,<br>22,23,24 | 2,3,4,7,19,<br>20,21,25,2<br>6 | 2 | P01836,Q6IFU7                                           |
| 9982 | 1,5,6,8,18,<br>22,23,25 | 2,3,4,7,19,<br>20,21,24,2<br>6 | 4 | P01015,P01836,P06760,P06911                             |
| 9983 | 1,5,6,8,18,<br>22,23,26 | 2,3,4,7,19,<br>20,21,24,2<br>5 | 8 | P01836,P47967,Q63942,Q6IFU7,Q6IFV1,Q6IG02,Q6IMF3,Q6P6Q2 |
| 9984 | 1,5,6,8,18,<br>22,24,25 | 2,3,4,7,19,<br>20,21,23,2<br>6 | 1 | P01836                                                  |
| 9985 | 1,5,6,8,18,<br>22,24,26 | 2,3,4,7,19,<br>20,21,23,2<br>5 | 2 | P47967,Q63942                                           |
| 9986 | 1,5,6,8,18,<br>22,25,26 | 2,3,4,7,19,<br>20,21,23,2<br>4 | 0 |                                                         |
| 9987 | 1,5,6,8,18,<br>23,24,25 | 2,3,4,7,19,<br>20,21,22,2<br>6 | 2 | P01836,P06760                                           |

|       |                         |                                |    |                                                                       |
|-------|-------------------------|--------------------------------|----|-----------------------------------------------------------------------|
| 9988  | 1,5,6,8,18,<br>23,24,26 | 2,3,4,7,19,<br>20,21,22,2<br>5 | 9  | P47967,Q63942,Q6IFU7,Q6IFU8,Q6IFV1,Q6IFW6,Q6IG02,Q6IMF3,Q6P6Q2        |
| 9989  | 1,5,6,8,18,<br>23,25,26 | 2,3,4,7,19,<br>20,21,22,2<br>4 | 8  | P01836,Q63942,Q6IFU8,Q6IFW6,Q6IG02,Q6IMF3,Q6P6Q2,Q9WTT6               |
| 9990  | 1,5,6,8,18,<br>24,25,26 | 2,3,4,7,19,<br>20,21,22,2<br>3 | 0  |                                                                       |
| 9991  | 1,5,6,8,19,<br>20,21,22 | 2,3,4,7,18,<br>23,24,25,2<br>6 | 7  | A2RUV9,O35547,P00714,P00774,P12785,P35281,P55091                      |
| 9992  | 1,5,6,8,19,<br>20,21,23 | 2,3,4,7,18,<br>22,24,25,2<br>6 | 4  | O35547,P00774,P35281,P55091                                           |
| 9993  | 1,5,6,8,19,<br>20,21,24 | 2,3,4,7,18,<br>22,23,25,2<br>6 | 6  | A2RUV9,P00714,P00774,P12785,P13432,P35281                             |
| 9994  | 1,5,6,8,19,<br>20,21,25 | 2,3,4,7,18,<br>22,23,24,2<br>6 | 4  | A2RUV9,P06760,P12785,P35281                                           |
| 9995  | 1,5,6,8,19,<br>20,21,26 | 2,3,4,7,18,<br>22,23,24,2<br>5 | 1  | P35281                                                                |
| 9996  | 1,5,6,8,19,<br>20,22,23 | 2,3,4,7,18,<br>21,24,25,2<br>6 | 7  | P00774,P01836,P22006,P31430,P55091,P82995,P98089                      |
| 9997  | 1,5,6,8,19,<br>20,22,24 | 2,3,4,7,18,<br>21,23,25,2<br>6 | 10 | A2RUV9,P00714,P00774,P12785,P31430,P55091,P82995,P98089,Q62636,Q99MH3 |
| 9998  | 1,5,6,8,19,<br>20,22,25 | 2,3,4,7,18,<br>21,23,24,2<br>6 | 5  | A2RUV9,D3ZUC6,P00774,P01836,P12785                                    |
| 9999  | 1,5,6,8,19,<br>20,22,26 | 2,3,4,7,18,<br>21,23,24,2<br>5 | 5  | P00774,P12785,P31430,P98089,Q99MH3                                    |
| 10000 | 1,5,6,8,19,<br>20,23,24 | 2,3,4,7,18,<br>21,22,25,2<br>6 | 7  | P00774,P01836,P31430,P55091,P82995,P98089,Q80WL1                      |
| 10001 | 1,5,6,8,19,<br>20,23,25 | 2,3,4,7,18,<br>21,22,24,2<br>6 | 2  | P01836,P06760                                                         |
| 10002 | 1,5,6,8,19,<br>20,23,26 | 2,3,4,7,18,<br>21,22,24,2<br>5 | 2  | P31430,P98089                                                         |

|       |                         |                                |    |                                                                       |
|-------|-------------------------|--------------------------------|----|-----------------------------------------------------------------------|
| 10003 | 1,5,6,8,19,<br>20,24,25 | 2,3,4,7,18,<br>21,22,23,2<br>6 | 4  | P00774,P01836,P12785,Q80WL1                                           |
| 10004 | 1,5,6,8,19,<br>20,24,26 | 2,3,4,7,18,<br>21,22,23,2<br>5 | 4  | P31430,P98089,Q80WL1,Q99MH3                                           |
| 10005 | 1,5,6,8,19,<br>20,25,26 | 2,3,4,7,18,<br>21,22,23,2<br>4 | 0  |                                                                       |
| 10006 | 1,5,6,8,19,<br>21,22,23 | 2,3,4,7,18,<br>20,24,25,2<br>6 | 5  | O35547,P00774,P01836,P35281,P55091                                    |
| 10007 | 1,5,6,8,19,<br>21,22,24 | 2,3,4,7,18,<br>20,23,25,2<br>6 | 7  | A2RUV9,P00714,P00774,P02782,P12785,P13432,P19218                      |
| 10008 | 1,5,6,8,19,<br>21,22,25 | 2,3,4,7,18,<br>20,23,24,2<br>6 | 5  | A2RUV9,P01836,P06760,P12785,P19218                                    |
| 10009 | 1,5,6,8,19,<br>21,22,26 | 2,3,4,7,18,<br>20,23,24,2<br>5 | 3  | A2RUV9,P12785,Q99068                                                  |
| 10010 | 1,5,6,8,19,<br>21,23,24 | 2,3,4,7,18,<br>20,22,25,2<br>6 | 2  | P01836,P35281                                                         |
| 10011 | 1,5,6,8,19,<br>21,23,25 | 2,3,4,7,18,<br>20,22,24,2<br>6 | 4  | P01836,P06760,P35281,Q9WTT6                                           |
| 10012 | 1,5,6,8,19,<br>21,23,26 | 2,3,4,7,18,<br>20,22,24,2<br>5 | 2  | P35281,Q6IFV1                                                         |
| 10013 | 1,5,6,8,19,<br>21,24,25 | 2,3,4,7,18,<br>20,22,23,2<br>6 | 4  | A2RUV9,P01836,P06760,P12785                                           |
| 10014 | 1,5,6,8,19,<br>21,24,26 | 2,3,4,7,18,<br>20,22,23,2<br>5 | 1  | A2RUV9                                                                |
| 10015 | 1,5,6,8,19,<br>21,25,26 | 2,3,4,7,18,<br>20,22,23,2<br>4 | 4  | A2RUV9,P06760,Q9QZK9,Q9WTT6                                           |
| 10016 | 1,5,6,8,19,<br>22,23,24 | 2,3,4,7,18,<br>20,21,25,2<br>6 | 10 | P00774,P01041,P01836,P19223,P25031,P31430,P42854,P55091,P82995,P98089 |
| 10017 | 1,5,6,8,19,<br>22,23,25 | 2,3,4,7,18,<br>20,21,24,2<br>6 | 4  | P01041,P01836,P06760,P06911                                           |

|       |                         |                                |   |                                           |
|-------|-------------------------|--------------------------------|---|-------------------------------------------|
| 10018 | 1,5,6,8,19,<br>22,23,26 | 2,3,4,7,18,<br>20,21,24,2<br>5 | 3 | P01836,P31430,P98089                      |
| 10019 | 1,5,6,8,19,<br>22,24,25 | 2,3,4,7,18,<br>20,21,23,2<br>6 | 5 | A2RUV9,P00774,P01836,P12785,P42854        |
| 10020 | 1,5,6,8,19,<br>22,24,26 | 2,3,4,7,18,<br>20,21,23,2<br>5 | 5 | A2RUV9,P12785,P31430,P98089,Q99MH3        |
| 10021 | 1,5,6,8,19,<br>22,25,26 | 2,3,4,7,18,<br>20,21,23,2<br>4 | 3 | A2RUV9,P01836,P12785                      |
| 10022 | 1,5,6,8,19,<br>23,24,25 | 2,3,4,7,18,<br>20,21,22,2<br>6 | 4 | P01041,P01836,P06760,P42854               |
| 10023 | 1,5,6,8,19,<br>23,24,26 | 2,3,4,7,18,<br>20,21,22,2<br>5 | 4 | P01836,P31430,P42854,P98089               |
| 10024 | 1,5,6,8,19,<br>23,25,26 | 2,3,4,7,18,<br>20,21,22,2<br>4 | 2 | P01836,P06760                             |
| 10025 | 1,5,6,8,19,<br>24,25,26 | 2,3,4,7,18,<br>20,21,22,2<br>3 | 2 | P01836,P42854                             |
| 10026 | 1,5,6,8,20,<br>21,22,23 | 2,3,4,7,18,<br>19,24,25,2<br>6 | 4 | O35547,P00774,P13432,P55091               |
| 10027 | 1,5,6,8,20,<br>21,22,24 | 2,3,4,7,18,<br>19,23,25,2<br>6 | 6 | P00714,P00774,P12785,P13432,Q5XFX0,Q99MH3 |
| 10028 | 1,5,6,8,20,<br>21,22,25 | 2,3,4,7,18,<br>19,23,24,2<br>6 | 4 | P06760,P12785,Q5XFX0,Q9WTT6               |
| 10029 | 1,5,6,8,20,<br>21,22,26 | 2,3,4,7,18,<br>19,23,24,2<br>5 | 4 | P12785,P13432,Q99068,Q99MH3               |
| 10030 | 1,5,6,8,20,<br>21,23,24 | 2,3,4,7,18,<br>19,22,25,2<br>6 | 1 | P13432                                    |
| 10031 | 1,5,6,8,20,<br>21,23,25 | 2,3,4,7,18,<br>19,22,24,2<br>6 | 3 | P06760,Q6P6R2,Q9WTT6                      |
| 10032 | 1,5,6,8,20,<br>21,23,26 | 2,3,4,7,18,<br>19,22,24,2<br>5 | 2 | F1LM93,Q6IFV1                             |

|       |                         |                                |   |                                           |
|-------|-------------------------|--------------------------------|---|-------------------------------------------|
| 10033 | 1,5,6,8,20,<br>21,24,25 | 2,3,4,7,18,<br>19,22,23,2<br>6 | 5 | P06760,P12785,P13432,Q5XFX0,Q9WTT6        |
| 10034 | 1,5,6,8,20,<br>21,24,26 | 2,3,4,7,18,<br>19,22,23,2<br>5 | 2 | P13432,Q99MH3                             |
| 10035 | 1,5,6,8,20,<br>21,25,26 | 2,3,4,7,18,<br>19,22,23,2<br>4 | 2 | P06760,Q9WTT6                             |
| 10036 | 1,5,6,8,20,<br>22,23,24 | 2,3,4,7,18,<br>19,21,25,2<br>6 | 6 | P00774,P31430,P47967,P55091,P82995,P98089 |
| 10037 | 1,5,6,8,20,<br>22,23,25 | 2,3,4,7,18,<br>19,21,24,2<br>6 | 4 | D3ZUC6,P01836,P06760,P06911               |
| 10038 | 1,5,6,8,20,<br>22,23,26 | 2,3,4,7,18,<br>19,21,24,2<br>5 | 3 | P31430,P47967,P98089                      |
| 10039 | 1,5,6,8,20,<br>22,24,25 | 2,3,4,7,18,<br>19,21,23,2<br>6 | 5 | D3ZUC6,P00774,P12785,Q5XFX0,Q99MH3        |
| 10040 | 1,5,6,8,20,<br>22,24,26 | 2,3,4,7,18,<br>19,21,23,2<br>5 | 4 | P12785,P47967,P98089,Q99MH3               |
| 10041 | 1,5,6,8,20,<br>22,25,26 | 2,3,4,7,18,<br>19,21,23,2<br>4 | 3 | D3ZUC6,P12785,Q99MH3                      |
| 10042 | 1,5,6,8,20,<br>23,24,25 | 2,3,4,7,18,<br>19,21,22,2<br>6 | 5 | P01836,P06760,P63036,P82995,Q80WL1        |
| 10043 | 1,5,6,8,20,<br>23,24,26 | 2,3,4,7,18,<br>19,21,22,2<br>5 | 5 | P47967,P97840,P98089,Q6IFV1,Q80WL1        |
| 10044 | 1,5,6,8,20,<br>23,25,26 | 2,3,4,7,18,<br>19,21,22,2<br>4 | 2 | P06760,Q9WTT6                             |
| 10045 | 1,5,6,8,20,<br>24,25,26 | 2,3,4,7,18,<br>19,21,22,2<br>3 | 1 | Q80WL1                                    |
| 10046 | 1,5,6,8,21,<br>22,23,24 | 2,3,4,7,18,<br>19,20,25,2<br>6 | 2 | P13432,P35280                             |
| 10047 | 1,5,6,8,21,<br>22,23,25 | 2,3,4,7,18,<br>19,20,24,2<br>6 | 4 | P01836,P06760,P06911,Q9WTT6               |

|       |                          |                                |   |                                                         |
|-------|--------------------------|--------------------------------|---|---------------------------------------------------------|
| 10048 | 1,5,6,8,21,<br>22,23,26  | 2,3,4,7,18,<br>19,20,24,2<br>5 | 1 | Q6IFV1                                                  |
| 10049 | 1,5,6,8,21,<br>22,24,25  | 2,3,4,7,18,<br>19,20,23,2<br>6 | 8 | A2RUV9,P06760,P12785,P13432,P19218,P35467,Q498D9,Q5XFX0 |
| 10050 | 1,5,6,8,21,<br>22,24,26  | 2,3,4,7,18,<br>19,20,23,2<br>5 | 4 | P12785,P13432,Q498D9,Q99MH3                             |
| 10051 | 1,5,6,8,21,<br>22,25,26  | 2,3,4,7,18,<br>19,20,23,2<br>4 | 4 | P06760,P12785,Q9QZK9,Q9WTT6                             |
| 10052 | 1,5,6,8,21,<br>23,24,25  | 2,3,4,7,18,<br>19,20,22,2<br>6 | 5 | P06760,P07150,Q62997,Q6P6R2,Q9WTT6                      |
| 10053 | 1,5,6,8,21,<br>23,24,26  | 2,3,4,7,18,<br>19,20,22,2<br>5 | 3 | F1LM93,P47967,Q6IFV1                                    |
| 10054 | 1,5,6,8,21,<br>23,25,26  | 2,3,4,7,18,<br>19,20,22,2<br>4 | 6 | F1LM93,P06760,P07150,P14669,Q6IFV1,Q9WTT6               |
| 10055 | 1,5,6,8,21,<br>24,25,26  | 2,3,4,7,18,<br>19,20,22,2<br>3 | 4 | P06760,Q498D9,Q62997,Q9WTT6                             |
| 10056 | 1,5,6,8,22,<br>23,24,25  | 2,3,4,7,18,<br>19,20,21,2<br>6 | 5 | P01041,P01836,P06760,P06911,P42854                      |
| 10057 | 1,5,6,8,22,<br>23,24,26  | 2,3,4,7,18,<br>19,20,21,2<br>5 | 6 | P00731,P31430,P42854,P47967,P98089,Q6IFU7               |
| 10058 | 1,5,6,8,22,<br>23,25,26  | 2,3,4,7,18,<br>19,20,21,2<br>4 | 4 | P01836,P06760,P06911,P42854                             |
| 10059 | 1,5,6,8,22,<br>24,25,26  | 2,3,4,7,18,<br>19,20,21,2<br>3 | 4 | P12785,P42854,Q498D9,Q5XI22                             |
| 10060 | 1,5,6,8,23,<br>24,25,26  | 2,3,4,7,18,<br>19,20,21,2<br>2 | 4 | P06760,P42854,Q7TPB1,Q9WTT6                             |
| 10061 | 1,5,6,18,1<br>9,20,21,22 | 2,3,4,7,8,2<br>3,24,25,26      | 2 | O35547,P20766                                           |
| 10062 | 1,5,6,18,1<br>9,20,21,23 | 2,3,4,7,8,2<br>2,24,25,26      | 2 | O35547,P20766                                           |
| 10063 | 1,5,6,18,1<br>9,20,21,24 | 2,3,4,7,8,2<br>2,23,25,26      | 3 | P13432,P20766,Q80WL1                                    |

|       |                          |                           |   |                                                                |
|-------|--------------------------|---------------------------|---|----------------------------------------------------------------|
| 10064 | 1,5,6,18,1<br>9,20,21,25 | 2,3,4,7,8,2<br>2,23,24,26 | 1 | P20766                                                         |
| 10065 | 1,5,6,18,1<br>9,20,21,26 | 2,3,4,7,8,2<br>2,23,24,25 | 3 | P20766,Q63751,Q9QUL6                                           |
| 10066 | 1,5,6,18,1<br>9,20,22,23 | 2,3,4,7,8,2<br>1,24,25,26 | 5 | P01836,P19223,P22006,P55091,Q80WL1                             |
| 10067 | 1,5,6,18,1<br>9,20,22,24 | 2,3,4,7,8,2<br>1,23,25,26 | 2 | Q64057,Q80WL1                                                  |
| 10068 | 1,5,6,18,1<br>9,20,22,25 | 2,3,4,7,8,2<br>1,23,24,26 | 2 | P01836,Q80WL1                                                  |
| 10069 | 1,5,6,18,1<br>9,20,22,26 | 2,3,4,7,8,2<br>1,23,24,25 | 1 | Q63751                                                         |
| 10070 | 1,5,6,18,1<br>9,20,23,24 | 2,3,4,7,8,2<br>1,22,25,26 | 5 | P01836,P19223,P20766,Q6IFU7,Q80WL1                             |
| 10071 | 1,5,6,18,1<br>9,20,23,25 | 2,3,4,7,8,2<br>1,22,24,26 | 3 | P01836,P20766,Q80WL1                                           |
| 10072 | 1,5,6,18,1<br>9,20,23,26 | 2,3,4,7,8,2<br>1,22,24,25 | 9 | P20766,Q6IFU7,Q6IFU8,Q6IFW6,Q6IG02,Q6IMF3,Q6P6Q2,Q80WL1,Q9QUL6 |
| 10073 | 1,5,6,18,1<br>9,20,24,25 | 2,3,4,7,8,2<br>1,22,23,26 | 3 | P01836,P20766,Q80WL1                                           |
| 10074 | 1,5,6,18,1<br>9,20,24,26 | 2,3,4,7,8,2<br>1,22,23,25 | 2 | P20766,Q80WL1                                                  |
| 10075 | 1,5,6,18,1<br>9,20,25,26 | 2,3,4,7,8,2<br>1,22,23,24 | 1 | Q80WL1                                                         |
| 10076 | 1,5,6,18,1<br>9,21,22,23 | 2,3,4,7,8,2<br>0,24,25,26 | 2 | O35547,P01836                                                  |
| 10077 | 1,5,6,18,1<br>9,21,22,24 | 2,3,4,7,8,2<br>0,23,25,26 | 4 | A2RUV9,P13432,P19218,P20766                                    |
| 10078 | 1,5,6,18,1<br>9,21,22,25 | 2,3,4,7,8,2<br>0,23,24,26 | 5 | A2RUV9,O35547,P01836,P19218,P97840                             |
| 10079 | 1,5,6,18,1<br>9,21,22,26 | 2,3,4,7,8,2<br>0,23,24,25 | 0 |                                                                |
| 10080 | 1,5,6,18,1<br>9,21,23,24 | 2,3,4,7,8,2<br>0,22,25,26 | 3 | P05369,P20766,Q6IFU7                                           |
| 10081 | 1,5,6,18,1<br>9,21,23,25 | 2,3,4,7,8,2<br>0,22,24,26 | 2 | P01836,P20766                                                  |
| 10082 | 1,5,6,18,1<br>9,21,23,26 | 2,3,4,7,8,2<br>0,22,24,25 | 9 | P05369,P20766,Q10758,Q6IFU7,Q6IFU8,Q6IFV1,Q6IMF3,Q6P6Q2,Q9QUL6 |
| 10083 | 1,5,6,18,1<br>9,21,24,25 | 2,3,4,7,8,2<br>0,22,23,26 | 2 | P20766,Q62997                                                  |
| 10084 | 1,5,6,18,1<br>9,21,24,26 | 2,3,4,7,8,2<br>0,22,23,25 | 1 | P20766                                                         |
| 10085 | 1,5,6,18,1<br>9,21,25,26 | 2,3,4,7,8,2<br>0,22,23,24 | 2 | P20766,P36970                                                  |
| 10086 | 1,5,6,18,1<br>9,22,23,24 | 2,3,4,7,8,2<br>0,21,25,26 | 5 | P01041,P01836,P19223,Q6IFU7,Q80WL1                             |

|       |                          |                           |   |                                                                |
|-------|--------------------------|---------------------------|---|----------------------------------------------------------------|
| 10087 | 1,5,6,18,1<br>9,22,23,25 | 2,3,4,7,8,2<br>0,21,24,26 | 4 | P01015,P01041,P01836,P02761                                    |
| 10088 | 1,5,6,18,1<br>9,22,23,26 | 2,3,4,7,8,2<br>0,21,24,25 | 3 | P01836,Q6IFU7,Q6P6Q2                                           |
| 10089 | 1,5,6,18,1<br>9,22,24,25 | 2,3,4,7,8,2<br>0,21,23,26 | 2 | P01836,Q80WL1                                                  |
| 10090 | 1,5,6,18,1<br>9,22,24,26 | 2,3,4,7,8,2<br>0,21,23,25 | 0 |                                                                |
| 10091 | 1,5,6,18,1<br>9,22,25,26 | 2,3,4,7,8,2<br>0,21,23,24 | 2 | P01836,P02761                                                  |
| 10092 | 1,5,6,18,1<br>9,23,24,25 | 2,3,4,7,8,2<br>0,21,22,26 | 6 | P01041,P01836,P20766,P30836,P42854,Q80WL1                      |
| 10093 | 1,5,6,18,1<br>9,23,24,26 | 2,3,4,7,8,2<br>0,21,22,25 | 7 | P01836,P20766,P42854,Q63942,Q6IFU7,Q6P6Q2,Q80WL1               |
| 10094 | 1,5,6,18,1<br>9,23,25,26 | 2,3,4,7,8,2<br>0,21,22,24 | 7 | P01836,P02761,Q6IFU7,Q6IFU8,Q6IMF3,Q6P6Q2,Q80WL1               |
| 10095 | 1,5,6,18,1<br>9,24,25,26 | 2,3,4,7,8,2<br>0,21,22,23 | 3 | P42854,Q7TPB1,Q80WL1                                           |
| 10096 | 1,5,6,18,2<br>0,21,22,23 | 2,3,4,7,8,1<br>9,24,25,26 | 2 | O35547,Q9QUL6                                                  |
| 10097 | 1,5,6,18,2<br>0,21,22,24 | 2,3,4,7,8,1<br>9,23,25,26 | 3 | P00714,P13432,P20766                                           |
| 10098 | 1,5,6,18,2<br>0,21,22,25 | 2,3,4,7,8,1<br>9,23,24,26 | 0 |                                                                |
| 10099 | 1,5,6,18,2<br>0,21,22,26 | 2,3,4,7,8,1<br>9,23,24,25 | 2 | Q99041,Q9QUL6                                                  |
| 10100 | 1,5,6,18,2<br>0,21,23,24 | 2,3,4,7,8,1<br>9,22,25,26 | 5 | P13432,P20766,Q6IFU7,Q80WL1,Q9QUL6                             |
| 10101 | 1,5,6,18,2<br>0,21,23,25 | 2,3,4,7,8,1<br>9,22,24,26 | 1 | P20766                                                         |
| 10102 | 1,5,6,18,2<br>0,21,23,26 | 2,3,4,7,8,1<br>9,22,24,25 | 9 | P20766,Q6IFU7,Q6IFU8,Q6IFV1,Q6IFW6,Q6IG02,Q6IMF3,Q6P6Q2,Q9QUL6 |
| 10103 | 1,5,6,18,2<br>0,21,24,25 | 2,3,4,7,8,1<br>9,22,23,26 | 3 | P13432,P20766,Q80WL1                                           |
| 10104 | 1,5,6,18,2<br>0,21,24,26 | 2,3,4,7,8,1<br>9,22,23,25 | 5 | P13432,P20766,Q80WL1,Q99041,Q9QUL6                             |
| 10105 | 1,5,6,18,2<br>0,21,25,26 | 2,3,4,7,8,1<br>9,22,23,24 | 2 | P20766,P36970                                                  |
| 10106 | 1,5,6,18,2<br>0,22,23,24 | 2,3,4,7,8,1<br>9,21,25,26 | 5 | P15978,P19223,P82995,Q6IFU7,Q80WL1                             |
| 10107 | 1,5,6,18,2<br>0,22,23,25 | 2,3,4,7,8,1<br>9,21,24,26 | 3 | P01836,P02761,Q80WL1                                           |
| 10108 | 1,5,6,18,2<br>0,22,23,26 | 2,3,4,7,8,1<br>9,21,24,25 | 8 | P47967,Q6IFU7,Q6IFU8,Q6IFW6,Q6IG02,Q6IMF3,Q6P6Q2,Q9QUL6        |
| 10109 | 1,5,6,18,2<br>0,22,24,25 | 2,3,4,7,8,1<br>9,21,23,26 | 2 | Q64057,Q80WL1                                                  |



|       |                          |                           |    |                                                                                     |
|-------|--------------------------|---------------------------|----|-------------------------------------------------------------------------------------|
| 10110 | 1,5,6,18,2<br>0,22,24,26 | 2,3,4,7,8,1<br>9,21,23,25 | 5  | P47967,Q64057,Q80WL1,Q99041,Q9QUL6                                                  |
| 10111 | 1,5,6,18,2<br>0,22,25,26 | 2,3,4,7,8,1<br>9,21,23,24 | 1  | P36970                                                                              |
| 10112 | 1,5,6,18,2<br>0,23,24,25 | 2,3,4,7,8,1<br>9,21,22,26 | 5  | P01836,P20766,P63036,Q6IFU7,Q80WL1                                                  |
| 10113 | 1,5,6,18,2<br>0,23,24,26 | 2,3,4,7,8,1<br>9,21,22,25 | 12 | D4A1J4,P20766,P47967,Q6IFU7,Q6IFU8,Q6IFV1,Q6IFW6,Q6IG02,Q6IMF3,Q6P6Q2,Q80WL1,Q9QUL6 |
| 10114 | 1,5,6,18,2<br>0,23,25,26 | 2,3,4,7,8,1<br>9,21,22,24 | 7  | Q6IFU7,Q6IFU8,Q6IFW6,Q6IG02,Q6IMF3,Q6P6Q2,Q80WL1                                    |
| 10115 | 1,5,6,18,2<br>0,24,25,26 | 2,3,4,7,8,1<br>9,21,22,23 | 3  | P20766,P36970,Q80WL1                                                                |
| 10116 | 1,5,6,18,2<br>1,22,23,24 | 2,3,4,7,8,1<br>9,20,25,26 | 4  | P13432,P15978,P35280,Q6IFU7                                                         |
| 10117 | 1,5,6,18,2<br>1,22,23,25 | 2,3,4,7,8,1<br>9,20,24,26 | 1  | P06760                                                                              |
| 10118 | 1,5,6,18,2<br>1,22,23,26 | 2,3,4,7,8,1<br>9,20,24,25 | 6  | Q6IFU7,Q6IFU8,Q6IFV1,Q6IMF3,Q6P6Q2,Q9QUL6                                           |
| 10119 | 1,5,6,18,2<br>1,22,24,25 | 2,3,4,7,8,1<br>9,20,23,26 | 2  | P13432,P19218                                                                       |
| 10120 | 1,5,6,18,2<br>1,22,24,26 | 2,3,4,7,8,1<br>9,20,23,25 | 3  | P13432,Q99041,Q9QUL6                                                                |
| 10121 | 1,5,6,18,2<br>1,22,25,26 | 2,3,4,7,8,1<br>9,20,23,24 | 1  | P36970                                                                              |
| 10122 | 1,5,6,18,2<br>1,23,24,25 | 2,3,4,7,8,1<br>9,20,22,26 | 3  | P06760,P20766,Q62997                                                                |
| 10123 | 1,5,6,18,2<br>1,23,24,26 | 2,3,4,7,8,1<br>9,20,22,25 | 7  | P20766,Q6IFU7,Q6IFU8,Q6IFV1,Q6IMF3,Q6P6Q2,Q9QUL6                                    |
| 10124 | 1,5,6,18,2<br>1,23,25,26 | 2,3,4,7,8,1<br>9,20,22,24 | 7  | P20766,Q6IFU7,Q6IFU8,Q6IFV1,Q6IMF3,Q6P6Q2,Q9QUL6                                    |
| 10125 | 1,5,6,18,2<br>1,24,25,26 | 2,3,4,7,8,1<br>9,20,22,23 | 3  | P20766,P36970,Q62997                                                                |
| 10126 | 1,5,6,18,2<br>2,23,24,25 | 2,3,4,7,8,1<br>9,20,21,26 | 8  | P01041,P01836,P02761,P15978,P42854,P62804,Q6IFU7,Q80WL1                             |
| 10127 | 1,5,6,18,2<br>2,23,24,26 | 2,3,4,7,8,1<br>9,20,21,25 | 8  | P00731,P42854,P47967,Q6IFU7,Q6IFV1,Q6IMF3,Q6P6Q2,Q9QUL6                             |
| 10128 | 1,5,6,18,2<br>2,23,25,26 | 2,3,4,7,8,1<br>9,20,21,24 | 5  | P02761,P42854,Q6IFU7,Q6IMF3,Q6P6Q2                                                  |
| 10129 | 1,5,6,18,2<br>2,24,25,26 | 2,3,4,7,8,1<br>9,20,21,23 | 2  | P42854,Q64057                                                                       |
| 10130 | 1,5,6,18,2<br>3,24,25,26 | 2,3,4,7,8,1<br>9,20,21,22 | 7  | P42854,Q6IFU7,Q6IFU8,Q6IMF3,Q6P6Q2,Q7TPB1,Q80WL1                                    |
| 10131 | 1,5,6,19,2<br>0,21,22,23 | 2,3,4,7,8,1<br>8,24,25,26 | 4  | P00714,P00774,P55091,P82995                                                         |
| 10132 | 1,5,6,19,2<br>0,21,22,24 | 2,3,4,7,8,1<br>8,23,25,26 | 12 | A2RUV9,P00714,P00774,P12785,P13432,P20766,P24594,P35467,P55091,P82995,Q64057,Q99MH3 |

|       |                                                 |    |                                                                                            |
|-------|-------------------------------------------------|----|--------------------------------------------------------------------------------------------|
| 10133 | 1,5,6,19,2 2,3,4,7,8,1<br>0,21,22,25 8,23,24,26 | 5  | A2RUV9,P00774,P12785,P35467,Q5XI22                                                         |
| 10134 | 1,5,6,19,2 2,3,4,7,8,1<br>0,21,22,26 8,23,24,25 | 4  | P00714,Q5XI22,Q63751,Q99MH3                                                                |
| 10135 | 1,5,6,19,2 2,3,4,7,8,1<br>0,21,23,24 8,22,25,26 | 6  | P00714,P00774,P20766,P55091,P82995,Q80WL1                                                  |
| 10136 | 1,5,6,19,2 2,3,4,7,8,1<br>0,21,23,25 8,22,24,26 | 3  | P06760,P20766,Q80WL1                                                                       |
| 10137 | 1,5,6,19,2 2,3,4,7,8,1<br>0,21,23,26 8,22,24,25 | 2  | P20766,Q6IFV1                                                                              |
| 10138 | 1,5,6,19,2 2,3,4,7,8,1<br>0,21,24,25 8,22,23,26 | 5  | P20766,P35467,Q5XI22,Q6AY61,Q80WL1                                                         |
| 10139 | 1,5,6,19,2 2,3,4,7,8,1<br>0,21,24,26 8,22,23,25 | 5  | P00714,P20766,Q5XI22,Q80WL1,Q99MH3                                                         |
| 10140 | 1,5,6,19,2 2,3,4,7,8,1<br>0,21,25,26 8,22,23,24 | 2  | P20766,Q5XI22                                                                              |
| 10141 | 1,5,6,19,2 2,3,4,7,8,1<br>0,22,23,24 8,21,25,26 | 12 | O54800;Q5DWV2,P00714,P00774,P01041,P19223,P24594,P31430,P55091,P82995,P98089,Q64057,Q80WL1 |
| 10142 | 1,5,6,19,2 2,3,4,7,8,1<br>0,22,23,25 8,21,24,26 | 7  | P00774,P01041,P01836,P02761,P55091,P82995,Q80WL1                                           |
| 10143 | 1,5,6,19,2 2,3,4,7,8,1<br>0,22,23,26 8,21,24,25 | 6  | O54728,P00774,P31430,P55091,P98089,Q80WL1                                                  |
| 10144 | 1,5,6,19,2 2,3,4,7,8,1<br>0,22,24,25 8,21,23,26 | 8  | P00774,P12785,P35467,P82995,Q5XI22,Q64057,Q6AY61,Q80WL1                                    |
| 10145 | 1,5,6,19,2 2,3,4,7,8,1<br>0,22,24,26 8,21,23,25 | 8  | P00714,P00774,P31430,P98089,Q5XI22,Q64057,Q80WL1,Q99MH3                                    |
| 10146 | 1,5,6,19,2 2,3,4,7,8,1<br>0,22,25,26 8,21,23,24 | 2  | Q5XI22,Q80WL1                                                                              |
| 10147 | 1,5,6,19,2 2,3,4,7,8,1<br>0,23,24,25 8,21,22,26 | 6  | P01041,P01836,P20766,P63036,P82995,Q80WL1                                                  |
| 10148 | 1,5,6,19,2 2,3,4,7,8,1<br>0,23,24,26 8,21,22,25 | 5  | P20766,P31430,P98089,Q6IFU7,Q80WL1                                                         |
| 10149 | 1,5,6,19,2 2,3,4,7,8,1<br>0,23,25,26 8,21,22,24 | 1  | Q80WL1                                                                                     |
| 10150 | 1,5,6,19,2 2,3,4,7,8,1<br>0,24,25,26 8,21,22,23 | 4  | P20766,Q5XI22,Q64057,Q80WL1                                                                |
| 10151 | 1,5,6,19,2 2,3,4,7,8,1<br>1,22,23,24 8,20,25,26 | 8  | P00714,P00774,P01041,P13432,P19223,P35280,P55091,P82995                                    |
| 10152 | 1,5,6,19,2 2,3,4,7,8,1<br>1,22,23,25 8,20,24,26 | 4  | P01041,P01836,P06760,P17046                                                                |
| 10153 | 1,5,6,19,2 2,3,4,7,8,1<br>1,22,23,26 8,20,24,25 | 1  | Q6IFV1                                                                                     |
| 10154 | 1,5,6,19,2 2,3,4,7,8,1<br>1,22,24,25 8,20,23,26 | 7  | A2RUV9,P12785,P19218,P35467,Q498D9,Q5XI22,Q6TMA8                                           |
| 10155 | 1,5,6,19,2 2,3,4,7,8,1<br>1,22,24,26 8,20,23,25 | 6  | A2RUV9,P00714,P13432,Q498D9,Q5XI22,Q99MH3                                                  |

|       |                                                 |    |                                                                              |
|-------|-------------------------------------------------|----|------------------------------------------------------------------------------|
| 10156 | 1,5,6,19,2 2,3,4,7,8,1<br>1,22,25,26 8,20,23,24 | 3  | A2RUV9,Q5XI22,Q9QZK9                                                         |
| 10157 | 1,5,6,19,2 2,3,4,7,8,1<br>1,23,24,25 8,20,22,26 | 5  | P01041,P01836,P06760,P20766,Q80WL1                                           |
| 10158 | 1,5,6,19,2 2,3,4,7,8,1<br>1,23,24,26 8,20,22,25 | 2  | P20766,Q6IFV1                                                                |
| 10159 | 1,5,6,19,2 2,3,4,7,8,1<br>1,23,25,26 8,20,22,24 | 0  |                                                                              |
| 10160 | 1,5,6,19,2 2,3,4,7,8,1<br>1,24,25,26 8,20,22,23 | 3  | P20766,Q498D9,Q5XI22                                                         |
| 10161 | 1,5,6,19,2 2,3,4,7,8,1<br>2,23,24,25 8,20,21,26 | 10 | P01041,P01836,P02761,P17046,P19223,P42854,P62804,P82995,Q64057,Q80WL1        |
| 10162 | 1,5,6,19,2 2,3,4,7,8,1<br>2,23,24,26 8,20,21,25 | 7  | P00731,P31430,P42854,P98089,Q64057,Q6IFU7,Q80WL1                             |
| 10163 | 1,5,6,19,2 2,3,4,7,8,1<br>2,23,25,26 8,20,21,24 | 3  | P01836,P02761,P42854                                                         |
| 10164 | 1,5,6,19,2 2,3,4,7,8,1<br>2,24,25,26 8,20,21,23 | 6  | P42854,Q498D9,Q5XI22,Q64057,Q6TMA8,Q80WL1                                    |
| 10165 | 1,5,6,19,2 2,3,4,7,8,1<br>3,24,25,26 8,20,21,22 | 4  | P01836,P42854,Q7TPB1,Q80WL1                                                  |
| 10166 | 1,5,6,20,2 2,3,4,7,8,1<br>1,22,23,24 8,19,25,26 | 8  | P00714,P00774,P13432,P15978,P20766,P35280,P55091,P82995                      |
| 10167 | 1,5,6,20,2 2,3,4,7,8,1<br>1,22,23,25 8,19,24,26 | 1  | P06760                                                                       |
| 10168 | 1,5,6,20,2 2,3,4,7,8,1<br>1,22,23,26 8,19,24,25 | 1  | Q6IFV1                                                                       |
| 10169 | 1,5,6,20,2 2,3,4,7,8,1<br>1,22,24,25 8,19,23,26 | 11 | P12785,P13432,P20766,P35467,Q498D9,Q5XFX0,Q5XI22,Q64057,Q64194,Q6AY61,Q99MH3 |
| 10170 | 1,5,6,20,2 2,3,4,7,8,1<br>1,22,24,26 8,19,23,25 | 7  | P00714,P13432,Q498D9,Q5XI22,Q64057,Q99041,Q99MH3                             |
| 10171 | 1,5,6,20,2 2,3,4,7,8,1<br>1,22,25,26 8,19,23,24 | 3  | Q498D9,Q5XI22,Q99MH3                                                         |
| 10172 | 1,5,6,20,2 2,3,4,7,8,1<br>1,23,24,25 8,19,22,26 | 3  | P06760,P20766,Q80WL1                                                         |
| 10173 | 1,5,6,20,2 2,3,4,7,8,1<br>1,23,24,26 8,19,22,25 | 4  | P20766,Q6IFU7,Q6IFV1,Q80WL1                                                  |
| 10174 | 1,5,6,20,2 2,3,4,7,8,1<br>1,23,25,26 8,19,22,24 | 3  | P06760,P20766,Q6IFV1                                                         |
| 10175 | 1,5,6,20,2 2,3,4,7,8,1<br>1,24,25,26 8,19,22,23 | 6  | P20766,Q498D9,Q5XI22,Q80WL1,Q8CJD3,Q99MH3                                    |
| 10176 | 1,5,6,20,2 2,3,4,7,8,1<br>2,23,24,25 8,19,21,26 | 5  | P01041,P42854,P82995,Q64057,Q80WL1                                           |
| 10177 | 1,5,6,20,2 2,3,4,7,8,1<br>2,23,24,26 8,19,21,25 | 8  | P00731,P31430,P42854,P47967,P98089,Q64057,Q6IFU7,Q80WL1                      |
| 10178 | 1,5,6,20,2 2,3,4,7,8,1<br>2,23,25,26 8,19,21,24 | 2  | P02761,Q80WL1                                                                |

|       |                          |                            |   |                                                         |
|-------|--------------------------|----------------------------|---|---------------------------------------------------------|
| 10179 | 1,5,6,20,2<br>2,24,25,26 | 2,3,4,7,8,1<br>8,19,21,23  | 8 | P00731,P05964,P42854,Q498D9,Q5XI22,Q64057,Q80WL1,Q99MH3 |
| 10180 | 1,5,6,20,2<br>3,24,25,26 | 2,3,4,7,8,1<br>8,19,21,22  | 6 | D4A1J4,P20766,P42854,Q64057,Q7TPB1,Q80WL1               |
| 10181 | 1,5,6,21,2<br>2,23,24,25 | 2,3,4,7,8,1<br>8,19,20,26  | 4 | P01041,P06760,P15978,P35280                             |
| 10182 | 1,5,6,21,2<br>2,23,24,26 | 2,3,4,7,8,1<br>8,19,20,25  | 5 | P00731,P13432,P35280,Q6IFU7,Q6IFV1                      |
| 10183 | 1,5,6,21,2<br>2,23,25,26 | 2,3,4,7,8,1<br>8,19,20,24  | 1 | P06760                                                  |
| 10184 | 1,5,6,21,2<br>2,24,25,26 | 2,3,4,7,8,1<br>8,19,20,23  | 5 | P13432,P35467,Q498D9,Q5XI22,Q64057                      |
| 10185 | 1,5,6,21,2<br>3,24,25,26 | 2,3,4,7,8,1<br>8,19,20,22  | 4 | P06760,P20766,Q6IFV1,Q7TPB1                             |
| 10186 | 1,5,6,22,2<br>3,24,25,26 | 2,3,4,7,8,1<br>8,19,20,21  | 7 | P00731,P02761,P42854,Q64057,Q6IFU7,Q7TPB1,Q80WL1        |
| 10187 | 1,5,7,8,18,<br>19,20,21  | 2,3,4,6,22,<br>23,24,25,26 | 3 | P00731,P35281,Q4FZU6                                    |
| 10188 | 1,5,7,8,18,<br>19,20,22  | 2,3,4,6,21,<br>23,24,25,26 | 5 | P00762,P00774,P25236,Q4FZU6,Q6P6R2                      |
| 10189 | 1,5,7,8,18,<br>19,20,23  | 2,3,4,6,21,<br>22,24,25,26 | 3 | P09605,P25809,Q03191,Q4FZU6                             |
| 10190 | 1,5,7,8,18,<br>19,20,24  | 2,3,4,6,21,<br>22,23,25,26 | 3 | P00762,P25236,Q4FZU6                                    |
| 10191 | 1,5,7,8,18,<br>19,20,25  | 2,3,4,6,21,<br>22,23,24,26 | 3 | P00762,P10715,P62815                                    |
| 10192 | 1,5,7,8,18,<br>19,20,26  | 2,3,4,6,21,<br>22,23,24,25 | 3 | Q4FZU6,Q63751,Q6P6R2                                    |
| 10193 | 1,5,7,8,18,<br>19,21,22  | 2,3,4,6,20,<br>23,24,25,26 | 1 | P19218                                                  |
| 10194 | 1,5,7,8,18,<br>19,21,23  | 2,3,4,6,20,<br>22,24,25,26 | 3 | P02803,P05369,Q03191                                    |
| 10195 | 1,5,7,8,18,<br>19,21,24  | 2,3,4,6,20,<br>22,23,25,26 | 0 |                                                         |
| 10196 | 1,5,7,8,18,<br>19,21,25  | 2,3,4,6,20,<br>22,23,24,26 | 3 | P00731,P02803,P10715                                    |

|       |                         |                                |   |                                                  |
|-------|-------------------------|--------------------------------|---|--------------------------------------------------|
| 10197 | 1,5,7,8,18,<br>19,21,26 | 2,3,4,6,20,<br>22,23,24,2<br>5 | 2 | P82995,Q4FZU6                                    |
| 10198 | 1,5,7,8,18,<br>19,22,23 | 2,3,4,6,20,<br>21,24,25,2<br>6 | 1 | Q03191                                           |
| 10199 | 1,5,7,8,18,<br>19,22,24 | 2,3,4,6,20,<br>21,23,25,2<br>6 | 4 | P00762,P01835,P25236,Q6P6R2                      |
| 10200 | 1,5,7,8,18,<br>19,22,25 | 2,3,4,6,20,<br>21,23,24,2<br>6 | 4 | P00762,P01835,P10715,P25236                      |
| 10201 | 1,5,7,8,18,<br>19,22,26 | 2,3,4,6,20,<br>21,23,24,2<br>5 | 2 | P16636,Q6P6R2                                    |
| 10202 | 1,5,7,8,18,<br>19,23,24 | 2,3,4,6,20,<br>21,22,25,2<br>6 | 2 | P09605;P25809,Q03191                             |
| 10203 | 1,5,7,8,18,<br>19,23,25 | 2,3,4,6,20,<br>21,22,24,2<br>6 | 5 | P01015,P02803,P10715,Q03191,Q99041               |
| 10204 | 1,5,7,8,18,<br>19,23,26 | 2,3,4,6,20,<br>21,22,24,2<br>5 | 6 | P09605;P25809,P16636,P35467,Q03191,Q4FZU6,Q6P6Q2 |
| 10205 | 1,5,7,8,18,<br>19,24,25 | 2,3,4,6,20,<br>21,22,23,2<br>6 | 4 | P00762,P01835,P10715,P25236                      |
| 10206 | 1,5,7,8,18,<br>19,24,26 | 2,3,4,6,20,<br>21,22,23,2<br>5 | 2 | P09605;P25809,P16636                             |
| 10207 | 1,5,7,8,18,<br>19,25,26 | 2,3,4,6,20,<br>21,22,23,2<br>4 | 2 | P10715,P82995                                    |
| 10208 | 1,5,7,8,18,<br>20,21,22 | 2,3,4,6,19,<br>23,24,25,2<br>6 | 2 | P14480,Q4FZU6                                    |
| 10209 | 1,5,7,8,18,<br>20,21,23 | 2,3,4,6,19,<br>22,24,25,2<br>6 | 2 | P14480,Q4FZU6                                    |
| 10210 | 1,5,7,8,18,<br>20,21,24 | 2,3,4,6,19,<br>22,23,25,2<br>6 | 1 | Q4FZU6                                           |
| 10211 | 1,5,7,8,18,<br>20,21,25 | 2,3,4,6,19,<br>22,23,24,2<br>6 | 2 | P02625,P10715                                    |

|       |                         |                                |   |                             |
|-------|-------------------------|--------------------------------|---|-----------------------------|
| 10212 | 1,5,7,8,18,<br>20,21,26 | 2,3,4,6,19,<br>22,23,24,2<br>5 | 1 | Q4FZU6                      |
| 10213 | 1,5,7,8,18,<br>20,22,23 | 2,3,4,6,19,<br>21,24,25,2<br>6 | 2 | P14480,Q4FZU6               |
| 10214 | 1,5,7,8,18,<br>20,22,24 | 2,3,4,6,19,<br>21,23,25,2<br>6 | 3 | P00762,P25236,Q6P6R2        |
| 10215 | 1,5,7,8,18,<br>20,22,25 | 2,3,4,6,19,<br>21,23,24,2<br>6 | 3 | P00762,P10715,P25236        |
| 10216 | 1,5,7,8,18,<br>20,22,26 | 2,3,4,6,19,<br>21,23,24,2<br>5 | 3 | P00762,Q4FZU6,Q6P6R2        |
| 10217 | 1,5,7,8,18,<br>20,23,24 | 2,3,4,6,19,<br>21,22,25,2<br>6 | 1 | Q4FZU6                      |
| 10218 | 1,5,7,8,18,<br>20,23,25 | 2,3,4,6,19,<br>21,22,24,2<br>6 | 1 | P10715                      |
| 10219 | 1,5,7,8,18,<br>20,23,26 | 2,3,4,6,19,<br>21,22,24,2<br>5 | 3 | Q4FZU6,Q6IG02,Q6P6Q2        |
| 10220 | 1,5,7,8,18,<br>20,24,25 | 2,3,4,6,19,<br>21,22,23,2<br>6 | 4 | P00762,P02625,P10715,P25236 |
| 10221 | 1,5,7,8,18,<br>20,24,26 | 2,3,4,6,19,<br>21,22,23,2<br>5 | 3 | P00762,P10715,Q4FZU6        |
| 10222 | 1,5,7,8,18,<br>20,25,26 | 2,3,4,6,19,<br>21,22,23,2<br>4 | 3 | P00762,P02625,P10715        |
| 10223 | 1,5,7,8,18,<br>21,22,23 | 2,3,4,6,19,<br>20,24,25,2<br>6 | 0 |                             |
| 10224 | 1,5,7,8,18,<br>21,22,24 | 2,3,4,6,19,<br>20,23,25,2<br>6 | 1 | P19218                      |
| 10225 | 1,5,7,8,18,<br>21,22,25 | 2,3,4,6,19,<br>20,23,24,2<br>6 | 2 | P10715,P19218               |
| 10226 | 1,5,7,8,18,<br>21,22,26 | 2,3,4,6,19,<br>20,23,24,2<br>5 | 2 | P82995,Q4FZU6               |

|       |                         |                                |   |                                                  |
|-------|-------------------------|--------------------------------|---|--------------------------------------------------|
| 10227 | 1,5,7,8,18,<br>21,23,24 | 2,3,4,6,19,<br>20,22,25,2<br>6 | 0 |                                                  |
| 10228 | 1,5,7,8,18,<br>21,23,25 | 2,3,4,6,19,<br>20,22,24,2<br>6 | 3 | P02803,P10715,P19629                             |
| 10229 | 1,5,7,8,18,<br>21,23,26 | 2,3,4,6,19,<br>20,22,24,2<br>5 | 3 | Q4FZU6,Q6IFV1,Q6P6Q2                             |
| 10230 | 1,5,7,8,18,<br>21,24,25 | 2,3,4,6,19,<br>20,22,23,2<br>6 | 3 | P10715,P19629,Q62997                             |
| 10231 | 1,5,7,8,18,<br>21,24,26 | 2,3,4,6,19,<br>20,22,23,2<br>5 | 3 | P82995,Q4FZU6,Q62997                             |
| 10232 | 1,5,7,8,18,<br>21,25,26 | 2,3,4,6,19,<br>20,22,23,2<br>4 | 4 | P10715,P31430,P55091,P82995                      |
| 10233 | 1,5,7,8,18,<br>22,23,24 | 2,3,4,6,19,<br>20,21,25,2<br>6 | 1 | P25236                                           |
| 10234 | 1,5,7,8,18,<br>22,23,25 | 2,3,4,6,19,<br>20,21,24,2<br>6 | 3 | P01015,P10715,P19629                             |
| 10235 | 1,5,7,8,18,<br>22,23,26 | 2,3,4,6,19,<br>20,21,24,2<br>5 | 2 | Q4FZU6,Q6P6Q2                                    |
| 10236 | 1,5,7,8,18,<br>22,24,25 | 2,3,4,6,19,<br>20,21,23,2<br>6 | 5 | P00762,P01835,P10715,P19629,P25236               |
| 10237 | 1,5,7,8,18,<br>22,24,26 | 2,3,4,6,19,<br>20,21,23,2<br>5 | 4 | P00762,P16636,Q6P6R2,Q8VD89                      |
| 10238 | 1,5,7,8,18,<br>22,25,26 | 2,3,4,6,19,<br>20,21,23,2<br>4 | 3 | P00762,P10715,P82995                             |
| 10239 | 1,5,7,8,18,<br>23,24,25 | 2,3,4,6,19,<br>20,21,22,2<br>6 | 2 | P10715,P19629                                    |
| 10240 | 1,5,7,8,18,<br>23,24,26 | 2,3,4,6,19,<br>20,21,22,2<br>5 | 6 | P09605,P25809,P16636,P47967,Q4FZU6,Q6P6Q2,Q8VD89 |
| 10241 | 1,5,7,8,18,<br>23,25,26 | 2,3,4,6,19,<br>20,21,22,2<br>4 | 3 | P10715,P19629,Q6P6Q2                             |

|       |                         |                                |   |                                                                |
|-------|-------------------------|--------------------------------|---|----------------------------------------------------------------|
| 10242 | 1,5,7,8,18,<br>24,25,26 | 2,3,4,6,19,<br>20,21,22,2<br>3 | 5 | P00762,P10715,P19629,P55091,Q7TPB1                             |
| 10243 | 1,5,7,8,19,<br>20,21,22 | 2,3,4,6,18,<br>23,24,25,2<br>6 | 3 | P00774,P12785,Q4FZU6                                           |
| 10244 | 1,5,7,8,19,<br>20,21,23 | 2,3,4,6,18,<br>22,24,25,2<br>6 | 2 | P00774,Q4FZU6                                                  |
| 10245 | 1,5,7,8,19,<br>20,21,24 | 2,3,4,6,18,<br>22,23,25,2<br>6 | 3 | P00774,P12785,Q4FZU6                                           |
| 10246 | 1,5,7,8,19,<br>20,21,25 | 2,3,4,6,18,<br>22,23,24,2<br>6 | 4 | P00774,P02625,P10715,P12785                                    |
| 10247 | 1,5,7,8,19,<br>20,21,26 | 2,3,4,6,18,<br>22,23,24,2<br>5 | 1 | Q4FZU6                                                         |
| 10248 | 1,5,7,8,19,<br>20,22,23 | 2,3,4,6,18,<br>21,24,25,2<br>6 | 4 | P00774,P31430,P55091,P98089                                    |
| 10249 | 1,5,7,8,19,<br>20,22,24 | 2,3,4,6,18,<br>21,23,25,2<br>6 | 9 | P00762,P00774,P01835,P12785,P25236,P31430,P98089,Q6IFU8,Q6P6R2 |
| 10250 | 1,5,7,8,19,<br>20,22,25 | 2,3,4,6,18,<br>21,23,24,2<br>6 | 5 | P00762,P00774,P10715,P12785,P25236                             |
| 10251 | 1,5,7,8,19,<br>20,22,26 | 2,3,4,6,18,<br>21,23,24,2<br>5 | 8 | O54728,P00762,P00774,P12785,P98089,Q4FZU6,Q63751,Q6P6R2        |
| 10252 | 1,5,7,8,19,<br>20,23,24 | 2,3,4,6,18,<br>21,22,25,2<br>6 | 3 | P00774,P31430,P98089                                           |
| 10253 | 1,5,7,8,19,<br>20,23,25 | 2,3,4,6,18,<br>21,22,24,2<br>6 | 3 | P00774,P10715,Q99041                                           |
| 10254 | 1,5,7,8,19,<br>20,23,26 | 2,3,4,6,18,<br>21,22,24,2<br>5 | 3 | P00774,P98089,Q4FZU6                                           |
| 10255 | 1,5,7,8,19,<br>20,24,25 | 2,3,4,6,18,<br>21,22,23,2<br>6 | 6 | P00762,P00774,P02625,P10715,P12785,P25236                      |
| 10256 | 1,5,7,8,19,<br>20,24,26 | 2,3,4,6,18,<br>21,22,23,2<br>5 | 3 | P00774,P98089,Q4FZU6                                           |



|       |                         |                                |    |                                                                       |
|-------|-------------------------|--------------------------------|----|-----------------------------------------------------------------------|
| 10257 | 1,5,7,8,19,<br>20,25,26 | 2,3,4,6,18,<br>21,22,23,2<br>4 | 2  | P02625,P10715                                                         |
| 10258 | 1,5,7,8,19,<br>21,22,23 | 2,3,4,6,18,<br>20,24,25,2<br>6 | 1  | P00774                                                                |
| 10259 | 1,5,7,8,19,<br>21,22,24 | 2,3,4,6,18,<br>20,23,25,2<br>6 | 5  | P00774,P12785,P19218,Q4FZU2,Q6TMA8                                    |
| 10260 | 1,5,7,8,19,<br>21,22,25 | 2,3,4,6,18,<br>20,23,24,2<br>6 | 3  | P00774,P12785,P19218                                                  |
| 10261 | 1,5,7,8,19,<br>21,22,26 | 2,3,4,6,18,<br>20,23,24,2<br>5 | 1  | P12785                                                                |
| 10262 | 1,5,7,8,19,<br>21,23,24 | 2,3,4,6,18,<br>20,22,25,2<br>6 | 1  | P00774                                                                |
| 10263 | 1,5,7,8,19,<br>21,23,25 | 2,3,4,6,18,<br>20,22,24,2<br>6 | 3  | P02803,P19629,Q99041                                                  |
| 10264 | 1,5,7,8,19,<br>21,23,26 | 2,3,4,6,18,<br>20,22,24,2<br>5 | 1  | Q4FZU6                                                                |
| 10265 | 1,5,7,8,19,<br>21,24,25 | 2,3,4,6,18,<br>20,22,23,2<br>6 | 3  | P12785,P19629,P22006                                                  |
| 10266 | 1,5,7,8,19,<br>21,24,26 | 2,3,4,6,18,<br>20,22,23,2<br>5 | 0  |                                                                       |
| 10267 | 1,5,7,8,19,<br>21,25,26 | 2,3,4,6,18,<br>20,22,23,2<br>4 | 0  |                                                                       |
| 10268 | 1,5,7,8,19,<br>22,23,24 | 2,3,4,6,18,<br>20,21,25,2<br>6 | 5  | P00774,P01835,P25236,P31430,P98089                                    |
| 10269 | 1,5,7,8,19,<br>22,23,25 | 2,3,4,6,18,<br>20,21,24,2<br>6 | 5  | P00774,P01835,P17046,P19629,Q99041                                    |
| 10270 | 1,5,7,8,19,<br>22,23,26 | 2,3,4,6,18,<br>20,21,24,2<br>5 | 2  | O54728,P98089                                                         |
| 10271 | 1,5,7,8,19,<br>22,24,25 | 2,3,4,6,18,<br>20,21,23,2<br>6 | 10 | P00762,P00774,P01835,P12785,P17046,P19629,P25236,Q4FZU2,Q6IFU8,Q6TMA8 |

|       |                         |                                |   |                                           |
|-------|-------------------------|--------------------------------|---|-------------------------------------------|
| 10272 | 1,5,7,8,19,<br>22,24,26 | 2,3,4,6,18,<br>20,21,23,2<br>5 | 6 | P00774,P01835,P12785,P98089,Q6P6R2,Q6TMA8 |
| 10273 | 1,5,7,8,19,<br>22,25,26 | 2,3,4,6,18,<br>20,21,23,2<br>4 | 5 | P00762,P01835,P12785,Q5XI22,Q9JJS8        |
| 10274 | 1,5,7,8,19,<br>23,24,25 | 2,3,4,6,18,<br>20,21,22,2<br>6 | 3 | P01835,P19629,Q99041                      |
| 10275 | 1,5,7,8,19,<br>23,24,26 | 2,3,4,6,18,<br>20,21,22,2<br>5 | 2 | P09605,P25809,P98089                      |
| 10276 | 1,5,7,8,19,<br>23,25,26 | 2,3,4,6,18,<br>20,21,22,2<br>4 | 0 |                                           |
| 10277 | 1,5,7,8,19,<br>24,25,26 | 2,3,4,6,18,<br>20,21,22,2<br>3 | 2 | P01835,P10715                             |
| 10278 | 1,5,7,8,20,<br>21,22,23 | 2,3,4,6,18,<br>19,24,25,2<br>6 | 3 | P00774,P14480,Q4FZU6                      |
| 10279 | 1,5,7,8,20,<br>21,22,24 | 2,3,4,6,18,<br>19,23,25,2<br>6 | 6 | P00774,P12785,P35467,Q4FZU6,Q5XFX0,Q99MH3 |
| 10280 | 1,5,7,8,20,<br>21,22,25 | 2,3,4,6,18,<br>19,23,24,2<br>6 | 5 | P00774,P02625,P10715,P12785,P35467        |
| 10281 | 1,5,7,8,20,<br>21,22,26 | 2,3,4,6,18,<br>19,23,24,2<br>5 | 3 | P12785,Q4FZU6,Q99MH3                      |
| 10282 | 1,5,7,8,20,<br>21,23,24 | 2,3,4,6,18,<br>19,22,25,2<br>6 | 2 | P00774,Q4FZU6                             |
| 10283 | 1,5,7,8,20,<br>21,23,25 | 2,3,4,6,18,<br>19,22,24,2<br>6 | 3 | P06760,P10715,P19629                      |
| 10284 | 1,5,7,8,20,<br>21,23,26 | 2,3,4,6,18,<br>19,22,24,2<br>5 | 1 | Q4FZU6                                    |
| 10285 | 1,5,7,8,20,<br>21,24,25 | 2,3,4,6,18,<br>19,22,23,2<br>6 | 5 | P02625,P10715,P12785,P35467,Q5XFX0        |
| 10286 | 1,5,7,8,20,<br>21,24,26 | 2,3,4,6,18,<br>19,22,23,2<br>5 | 3 | P02625,Q4FZU6,Q8CJD3                      |

|       |                         |                                |   |                                                         |
|-------|-------------------------|--------------------------------|---|---------------------------------------------------------|
| 10287 | 1,5,7,8,20,<br>21,25,26 | 2,3,4,6,18,<br>19,22,23,2<br>4 | 2 | P02625,P10715                                           |
| 10288 | 1,5,7,8,20,<br>22,23,24 | 2,3,4,6,18,<br>19,21,25,2<br>6 | 5 | P00774,P14173,P31430,P98089,Q8CIZ5                      |
| 10289 | 1,5,7,8,20,<br>22,23,25 | 2,3,4,6,18,<br>19,21,24,2<br>6 | 3 | P00774,P10715,P19629                                    |
| 10290 | 1,5,7,8,20,<br>22,23,26 | 2,3,4,6,18,<br>19,21,24,2<br>5 | 6 | O54728,P00774,P14173,P98089,Q4FZU6,Q8CIZ5               |
| 10291 | 1,5,7,8,20,<br>22,24,25 | 2,3,4,6,18,<br>19,21,23,2<br>6 | 8 | P00762,P00774,P02625,P10715,P12785,P19629,P25236,P35467 |
| 10292 | 1,5,7,8,20,<br>22,24,26 | 2,3,4,6,18,<br>19,21,23,2<br>5 | 8 | P00762,P00774,P12785,P98089,Q4FZU6,Q6P6R2,Q8CIZ5,Q99MH3 |
| 10293 | 1,5,7,8,20,<br>22,25,26 | 2,3,4,6,18,<br>19,21,23,2<br>4 | 5 | P00762,P02625,P10715,P12785,Q5XI22                      |
| 10294 | 1,5,7,8,20,<br>23,24,25 | 2,3,4,6,18,<br>19,21,22,2<br>6 | 3 | P10715,P19629,P63036                                    |
| 10295 | 1,5,7,8,20,<br>23,24,26 | 2,3,4,6,18,<br>19,21,22,2<br>5 | 6 | P14173,P47967,P97840,P98089,Q4FZU6,Q8CIZ5               |
| 10296 | 1,5,7,8,20,<br>23,25,26 | 2,3,4,6,18,<br>19,21,22,2<br>4 | 1 | P10715                                                  |
| 10297 | 1,5,7,8,20,<br>24,25,26 | 2,3,4,6,18,<br>19,21,22,2<br>3 | 4 | P00762,P02625,P10715,Q8CJD3                             |
| 10298 | 1,5,7,8,21,<br>22,23,24 | 2,3,4,6,18,<br>19,20,25,2<br>6 | 2 | P00774,P35280                                           |
| 10299 | 1,5,7,8,21,<br>22,23,25 | 2,3,4,6,18,<br>19,20,24,2<br>6 | 3 | P06760,P19629,Q63355                                    |
| 10300 | 1,5,7,8,21,<br>22,23,26 | 2,3,4,6,18,<br>19,20,24,2<br>5 | 1 | Q4FZU6                                                  |
| 10301 | 1,5,7,8,21,<br>22,24,25 | 2,3,4,6,18,<br>19,20,23,2<br>6 | 7 | P12785,P19218,P19629,P22006,P35467,Q5XFX0,Q63355        |

|       |                          |                                |   |                                           |
|-------|--------------------------|--------------------------------|---|-------------------------------------------|
| 10302 | 1,5,7,8,21,<br>22,24,26  | 2,3,4,6,18,<br>19,20,23,2<br>5 | 1 | P12785                                    |
| 10303 | 1,5,7,8,21,<br>22,25,26  | 2,3,4,6,18,<br>19,20,23,2<br>4 | 4 | P02625,P12785,P19629,Q5XI22               |
| 10304 | 1,5,7,8,21,<br>23,24,25  | 2,3,4,6,18,<br>19,20,22,2<br>6 | 4 | P06760,P19629,P22006,Q62997               |
| 10305 | 1,5,7,8,21,<br>23,24,26  | 2,3,4,6,18,<br>19,20,22,2<br>5 | 1 | Q4FZU6                                    |
| 10306 | 1,5,7,8,21,<br>23,25,26  | 2,3,4,6,18,<br>19,20,22,2<br>4 | 2 | P19629,P22006                             |
| 10307 | 1,5,7,8,21,<br>24,25,26  | 2,3,4,6,18,<br>19,20,22,2<br>3 | 6 | P02625,P10715,P19629,P22006,Q62997,Q8CJD3 |
| 10308 | 1,5,7,8,22,<br>23,24,25  | 2,3,4,6,18,<br>19,20,21,2<br>6 | 3 | P01835,P10715,P19629                      |
| 10309 | 1,5,7,8,22,<br>23,24,26  | 2,3,4,6,18,<br>19,20,21,2<br>5 | 4 | P00731,P47967,P98089,Q8CIZ5               |
| 10310 | 1,5,7,8,22,<br>23,25,26  | 2,3,4,6,18,<br>19,20,21,2<br>4 | 1 | P19629                                    |
| 10311 | 1,5,7,8,22,<br>24,25,26  | 2,3,4,6,18,<br>19,20,21,2<br>3 | 6 | P00762,P01835,P10715,P12785,P19629,Q5XI22 |
| 10312 | 1,5,7,8,23,<br>24,25,26  | 2,3,4,6,18,<br>19,20,21,2<br>2 | 3 | P10715,P19629,Q7TPB1                      |
| 10313 | 1,5,7,18,1<br>9,20,21,22 | 2,3,4,6,8,2<br>3,24,25,26      | 3 | P20761,Q63751,Q9Z0V6                      |
| 10314 | 1,5,7,18,1<br>9,20,21,23 | 2,3,4,6,8,2<br>2,24,25,26      | 3 | P20761,P20766,Q4FZU6                      |
| 10315 | 1,5,7,18,1<br>9,20,21,24 | 2,3,4,6,8,2<br>2,23,25,26      | 2 | P20766,Q9Z0V6                             |
| 10316 | 1,5,7,18,1<br>9,20,21,25 | 2,3,4,6,8,2<br>2,23,24,26      | 2 | P20761,P20766                             |
| 10317 | 1,5,7,18,1<br>9,20,21,26 | 2,3,4,6,8,2<br>2,23,24,25      | 5 | P06911,P20766,P50280,Q4FZU6,Q63751        |
| 10318 | 1,5,7,18,1<br>9,20,22,23 | 2,3,4,6,8,2<br>1,24,25,26      | 4 | P00774,P20761,Q9WTT6,Q9Z0V6               |

|       |                          |                           |    |                                                                       |
|-------|--------------------------|---------------------------|----|-----------------------------------------------------------------------|
| 10319 | 1,5,7,18,1<br>9,20,22,24 | 2,3,4,6,8,2<br>1,23,25,26 | 10 | P00762,P00774,P07150,P14669,P20761,P25236,Q5QE79,Q6P6R2,Q9WTT6,Q9Z0V6 |
| 10320 | 1,5,7,18,1<br>9,20,22,25 | 2,3,4,6,8,2<br>1,23,24,26 | 4  | P00762,P20761,P25236,Q5QE79                                           |
| 10321 | 1,5,7,18,1<br>9,20,22,26 | 2,3,4,6,8,2<br>1,23,24,25 | 6  | Q4FZU6,Q5U2V4,Q63751,Q6P6R2,Q9WTT6,Q9Z0V6                             |
| 10322 | 1,5,7,18,1<br>9,20,23,24 | 2,3,4,6,8,2<br>1,22,25,26 | 7  | P20761,P20766,Q03191,Q5QE79,Q80WL1,Q9WTT6,Q9Z0V6                      |
| 10323 | 1,5,7,18,1<br>9,20,23,25 | 2,3,4,6,8,2<br>1,22,24,26 | 3  | P20761,Q5QE79,Q80WL1                                                  |
| 10324 | 1,5,7,18,1<br>9,20,23,26 | 2,3,4,6,8,2<br>1,22,24,25 | 4  | Q03191,Q4FZU6,Q6IG02,Q6P6Q2                                           |
| 10325 | 1,5,7,18,1<br>9,20,24,25 | 2,3,4,6,8,2<br>1,22,23,26 | 5  | P20761,P20766,P25236,Q5QE79,Q80WL1                                    |
| 10326 | 1,5,7,18,1<br>9,20,24,26 | 2,3,4,6,8,2<br>1,22,23,25 | 8  | P16636,P20766,P50280,Q4FZU6,Q6P6R2,Q80WL1,Q9WTT6,Q9Z0V6               |
| 10327 | 1,5,7,18,1<br>9,20,25,26 | 2,3,4,6,8,2<br>1,22,23,24 | 0  |                                                                       |
| 10328 | 1,5,7,18,1<br>9,21,22,23 | 2,3,4,6,8,2<br>0,24,25,26 | 1  | Q03191                                                                |
| 10329 | 1,5,7,18,1<br>9,21,22,24 | 2,3,4,6,8,2<br>0,23,25,26 | 2  | P19218,Q9Z0V6                                                         |
| 10330 | 1,5,7,18,1<br>9,21,22,25 | 2,3,4,6,8,2<br>0,23,24,26 | 4  | P17046,P19218,P20761,P97840                                           |
| 10331 | 1,5,7,18,1<br>9,21,22,26 | 2,3,4,6,8,2<br>0,23,24,25 | 3  | P36374,Q63751,Q6P6R2                                                  |
| 10332 | 1,5,7,18,1<br>9,21,23,24 | 2,3,4,6,8,2<br>0,22,25,26 | 3  | P05369,P20766,Q03191                                                  |
| 10333 | 1,5,7,18,1<br>9,21,23,25 | 2,3,4,6,8,2<br>0,22,24,26 | 4  | P20761,P20766,P97840,Q03191                                           |
| 10334 | 1,5,7,18,1<br>9,21,23,26 | 2,3,4,6,8,2<br>0,22,24,25 | 5  | P05369,P20766,Q03191,Q4FZU6,Q6P6Q2                                    |
| 10335 | 1,5,7,18,1<br>9,21,24,25 | 2,3,4,6,8,2<br>0,22,23,26 | 2  | P20761,P20766                                                         |
| 10336 | 1,5,7,18,1<br>9,21,24,26 | 2,3,4,6,8,2<br>0,22,23,25 | 2  | P16636,P20766                                                         |
| 10337 | 1,5,7,18,1<br>9,21,25,26 | 2,3,4,6,8,2<br>0,22,23,24 | 1  | P82995                                                                |
| 10338 | 1,5,7,18,1<br>9,22,23,24 | 2,3,4,6,8,2<br>0,21,25,26 | 6  | P20761,P25236,P62804,Q00715,Q03191,Q9WTT6                             |
| 10339 | 1,5,7,18,1<br>9,22,23,25 | 2,3,4,6,8,2<br>0,21,24,26 | 5  | P01015,P02761,P17046,P20761,P62804                                    |
| 10340 | 1,5,7,18,1<br>9,22,23,26 | 2,3,4,6,8,2<br>0,21,24,25 | 4  | P16636,Q03191,Q6P6R2,Q9WTT6                                           |
| 10341 | 1,5,7,18,1<br>9,22,24,25 | 2,3,4,6,8,2<br>0,21,23,26 | 10 | P00762,P01835,P17046,P20761,P20762,P25236,P62804,Q00715,Q5QE79,Q6TMA8 |

|       |                          |                           |   |                                                  |
|-------|--------------------------|---------------------------|---|--------------------------------------------------|
| 10342 | 1,5,7,18,1<br>9,22,24,26 | 2,3,4,6,8,2<br>0,21,23,25 | 5 | P16636,Q6P6R2,Q6TMA8,Q9WTT6,Q9Z0V6               |
| 10343 | 1,5,7,18,1<br>9,22,25,26 | 2,3,4,6,8,2<br>0,21,23,24 | 0 |                                                  |
| 10344 | 1,5,7,18,1<br>9,23,24,25 | 2,3,4,6,8,2<br>0,21,22,26 | 6 | P20761,P62804,Q00715,Q03191,Q5QE79,Q80WL1        |
| 10345 | 1,5,7,18,1<br>9,23,24,26 | 2,3,4,6,8,2<br>0,21,22,25 | 3 | P09605,P25809,P16636,Q03191                      |
| 10346 | 1,5,7,18,1<br>9,23,25,26 | 2,3,4,6,8,2<br>0,21,22,24 | 1 | Q03191                                           |
| 10347 | 1,5,7,18,1<br>9,24,25,26 | 2,3,4,6,8,2<br>0,21,22,23 | 2 | P16636,Q7TPB1                                    |
| 10348 | 1,5,7,18,2<br>0,21,22,23 | 2,3,4,6,8,1<br>9,24,25,26 | 2 | P14480,Q4FZU6                                    |
| 10349 | 1,5,7,18,2<br>0,21,22,24 | 2,3,4,6,8,1<br>9,23,25,26 | 2 | P20766,Q9Z0V6                                    |
| 10350 | 1,5,7,18,2<br>0,21,22,25 | 2,3,4,6,8,1<br>9,23,24,26 | 1 | P20761                                           |
| 10351 | 1,5,7,18,2<br>0,21,22,26 | 2,3,4,6,8,1<br>9,23,24,25 | 3 | P50280,Q4FZU6,Q9QUL6                             |
| 10352 | 1,5,7,18,2<br>0,21,23,24 | 2,3,4,6,8,1<br>9,22,25,26 | 2 | P20766,Q4FZU6                                    |
| 10353 | 1,5,7,18,2<br>0,21,23,25 | 2,3,4,6,8,1<br>9,22,24,26 | 2 | P20761,P20766                                    |
| 10354 | 1,5,7,18,2<br>0,21,23,26 | 2,3,4,6,8,1<br>9,22,24,25 | 5 | P20766,Q4FZU6,Q6IG02,Q6P6Q2,Q9QUL6               |
| 10355 | 1,5,7,18,2<br>0,21,24,25 | 2,3,4,6,8,1<br>9,22,23,26 | 2 | P02625,P20766                                    |
| 10356 | 1,5,7,18,2<br>0,21,24,26 | 2,3,4,6,8,1<br>9,22,23,25 | 5 | P06911,P20766,P50280,Q4FZU6,Q9QUL6               |
| 10357 | 1,5,7,18,2<br>0,21,25,26 | 2,3,4,6,8,1<br>9,22,23,24 | 3 | P02625,P20766,P82995                             |
| 10358 | 1,5,7,18,2<br>0,22,23,24 | 2,3,4,6,8,1<br>9,21,25,26 | 3 | P25236,Q8CIZ5,Q9WTT6                             |
| 10359 | 1,5,7,18,2<br>0,22,23,25 | 2,3,4,6,8,1<br>9,21,24,26 | 2 | P02761,P20761                                    |
| 10360 | 1,5,7,18,2<br>0,22,23,26 | 2,3,4,6,8,1<br>9,21,24,25 | 5 | Q4FZU6,Q6IG02,Q6P6Q2,Q8CIZ5,Q9QUL6               |
| 10361 | 1,5,7,18,2<br>0,22,24,25 | 2,3,4,6,8,1<br>9,21,23,26 | 3 | P00762,P20761,P25236                             |
| 10362 | 1,5,7,18,2<br>0,22,24,26 | 2,3,4,6,8,1<br>9,21,23,25 | 7 | P00762,P50280,Q4FZU6,Q6P6R2,Q8CIZ5,Q9WTT6,Q9Z0V6 |
| 10363 | 1,5,7,18,2<br>0,22,25,26 | 2,3,4,6,8,1<br>9,21,23,24 | 1 | P00762                                           |
| 10364 | 1,5,7,18,2<br>0,23,24,25 | 2,3,4,6,8,1<br>9,21,22,26 | 4 | P20761,P20766,P63036,Q80WL1                      |

|       |                                                 |   |                                                         |
|-------|-------------------------------------------------|---|---------------------------------------------------------|
| 10365 | 1,5,7,18,2 2,3,4,6,8,1<br>0,23,24,26 9,21,22,25 | 8 | P20766,P47967,Q4FZU6,Q6IG02,Q6P6Q2,Q80WL1,Q8CIZ5,Q9QUL6 |
| 10366 | 1,5,7,18,2 2,3,4,6,8,1<br>0,23,25,26 9,21,22,24 | 2 | Q6IG02,Q6P6Q2                                           |
| 10367 | 1,5,7,18,2 2,3,4,6,8,1<br>0,24,25,26 9,21,22,23 | 4 | P00762,P02625,Q80WL1,Q8CJD3                             |
| 10368 | 1,5,7,18,2 2,3,4,6,8,1<br>1,22,23,24 9,20,25,26 | 1 | P35280                                                  |
| 10369 | 1,5,7,18,2 2,3,4,6,8,1<br>1,22,23,25 9,20,24,26 | 1 | P20761                                                  |
| 10370 | 1,5,7,18,2 2,3,4,6,8,1<br>1,22,23,26 9,20,24,25 | 3 | Q4FZU6,Q6P6Q2,Q9QUL6                                    |
| 10371 | 1,5,7,18,2 2,3,4,6,8,1<br>1,22,24,25 9,20,23,26 | 0 |                                                         |
| 10372 | 1,5,7,18,2 2,3,4,6,8,1<br>1,22,24,26 9,20,23,25 | 0 |                                                         |
| 10373 | 1,5,7,18,2 2,3,4,6,8,1<br>1,22,25,26 9,20,23,24 | 1 | P82995                                                  |
| 10374 | 1,5,7,18,2 2,3,4,6,8,1<br>1,23,24,25 9,20,22,26 | 3 | P20766,P22006,Q62997                                    |
| 10375 | 1,5,7,18,2 2,3,4,6,8,1<br>1,23,24,26 9,20,22,25 | 4 | P20766,Q4FZU6,Q6P6Q2,Q9QUL6                             |
| 10376 | 1,5,7,18,2 2,3,4,6,8,1<br>1,23,25,26 9,20,22,24 | 2 | P82995,Q6P6Q2                                           |
| 10377 | 1,5,7,18,2 2,3,4,6,8,1<br>1,24,25,26 9,20,22,23 | 6 | P20766,P22006,P55091,P82995,Q62997,Q8CJD3               |
| 10378 | 1,5,7,18,2 2,3,4,6,8,1<br>2,23,24,25 9,20,21,26 | 5 | P02761,P20761,P25236,P62804,Q00715                      |
| 10379 | 1,5,7,18,2 2,3,4,6,8,1<br>2,23,24,26 9,20,21,25 | 5 | P00731,P16636,P47967,Q8CIZ5,Q8VD89                      |
| 10380 | 1,5,7,18,2 2,3,4,6,8,1<br>2,23,25,26 9,20,21,24 | 2 | P02761,Q6P6Q2                                           |
| 10381 | 1,5,7,18,2 2,3,4,6,8,1<br>2,24,25,26 9,20,21,23 | 2 | P00762,P62804                                           |
| 10382 | 1,5,7,18,2 2,3,4,6,8,1<br>3,24,25,26 9,20,21,22 | 2 | Q6P6Q2,Q7TPB1                                           |
| 10383 | 1,5,7,19,2 2,3,4,6,8,1<br>0,21,22,23 8,24,25,26 | 3 | P00774,P55091,P98089                                    |
| 10384 | 1,5,7,19,2 2,3,4,6,8,1<br>0,21,22,24 8,23,25,26 | 7 | P00714,P00774,P12785,P35467,Q5XI22,Q6AY61,Q9Z0V6        |
| 10385 | 1,5,7,19,2 2,3,4,6,8,1<br>0,21,22,25 8,23,24,26 | 6 | P00774,P12785,P17046,P20761,P35467,Q5XI22               |
| 10386 | 1,5,7,19,2 2,3,4,6,8,1<br>0,21,22,26 8,23,24,25 | 4 | P00774,Q4FZU6,Q5XI22,Q63751                             |
| 10387 | 1,5,7,19,2 2,3,4,6,8,1<br>0,21,23,24 8,22,25,26 | 2 | P00774,P20766                                           |

|       |                                                 |    |                                                                                                   |
|-------|-------------------------------------------------|----|---------------------------------------------------------------------------------------------------|
| 10388 | 1,5,7,19,2 2,3,4,6,8,1<br>0,21,23,25 8,22,24,26 | 2  | P20761,P20766                                                                                     |
| 10389 | 1,5,7,19,2 2,3,4,6,8,1<br>0,21,23,26 8,22,24,25 | 2  | P20766,Q4FZU6                                                                                     |
| 10390 | 1,5,7,19,2 2,3,4,6,8,1<br>0,21,24,25 8,22,23,26 | 6  | P00774,P02625,P20766,P35467,Q5XI22,Q6AY61                                                         |
| 10391 | 1,5,7,19,2 2,3,4,6,8,1<br>0,21,24,26 8,22,23,25 | 3  | P20766,Q4FZU6,Q5XI22                                                                              |
| 10392 | 1,5,7,19,2 2,3,4,6,8,1<br>0,21,25,26 8,22,23,24 | 3  | P02625,P20766,Q5XI22                                                                              |
| 10393 | 1,5,7,19,2 2,3,4,6,8,1<br>0,22,23,24 8,21,25,26 | 7  | P00774,P19223,P31430,P55091,P98089,Q80WL1,Q9WTT6                                                  |
| 10394 | 1,5,7,19,2 2,3,4,6,8,1<br>0,22,23,25 8,21,24,26 | 4  | P00774,P02761,P17046,P20761                                                                       |
| 10395 | 1,5,7,19,2 2,3,4,6,8,1<br>0,22,23,26 8,21,24,25 | 6  | O54728,P00774,P31430,P98089,Q4FZU6,Q9WTT6                                                         |
| 10396 | 1,5,7,19,2 2,3,4,6,8,1<br>0,22,24,25 8,21,23,26 | 13 | P00762,P00774,P12785,P14669,P17046,P20761,P25236,P35467,Q5QE79,Q5XI22,Q6AY61,Q6TMA8,Q80WL1        |
| 10397 | 1,5,7,19,2 2,3,4,6,8,1<br>0,22,24,26 8,21,23,25 | 11 | O54728,P00774,P07150,P14669,P31430,P98089,Q5XI22,Q6P6R2,Q99MH3,Q9WTT6,Q9Z0V6                      |
| 10398 | 1,5,7,19,2 2,3,4,6,8,1<br>0,22,25,26 8,21,23,24 | 2  | P00774,Q5XI22                                                                                     |
| 10399 | 1,5,7,19,2 2,3,4,6,8,1<br>0,23,24,25 8,21,22,26 | 6  | P00774,P20761,P20766,P63036,Q5QE79,Q80WL1                                                         |
| 10400 | 1,5,7,19,2 2,3,4,6,8,1<br>0,23,24,26 8,21,22,25 | 6  | P00774,P20766,P31430,P98089,Q4FZU6,Q80WL1                                                         |
| 10401 | 1,5,7,19,2 2,3,4,6,8,1<br>0,23,25,26 8,21,22,24 | 1  | Q80WL1                                                                                            |
| 10402 | 1,5,7,19,2 2,3,4,6,8,1<br>0,24,25,26 8,21,22,23 | 3  | P02625,Q5XI22,Q80WL1                                                                              |
| 10403 | 1,5,7,19,2 2,3,4,6,8,1<br>1,22,23,24 8,20,25,26 | 2  | P00774,P35280                                                                                     |
| 10404 | 1,5,7,19,2 2,3,4,6,8,1<br>1,22,23,25 8,20,24,26 | 3  | P17046,P20761,P97840                                                                              |
| 10405 | 1,5,7,19,2 2,3,4,6,8,1<br>1,22,23,26 8,20,24,25 | 0  |                                                                                                   |
| 10406 | 1,5,7,19,2 2,3,4,6,8,1<br>1,22,24,25 8,20,23,26 | 14 | P00774,P12785,P17046,P19218,P20762,P22006,P35467,P97840,Q4FZU2,Q5XI22,Q63355,Q6AY61,Q6IG02,Q6TMA8 |
| 10407 | 1,5,7,19,2 2,3,4,6,8,1<br>1,22,24,26 8,20,23,25 | 2  | Q5XI22,Q6TMA8                                                                                     |
| 10408 | 1,5,7,19,2 2,3,4,6,8,1<br>1,22,25,26 8,20,23,24 | 3  | P17046,Q5XI22,Q6TMA8                                                                              |
| 10409 | 1,5,7,19,2 2,3,4,6,8,1<br>1,23,24,25 8,20,22,26 | 3  | P17046,P20766,P22006                                                                              |
| 10410 | 1,5,7,19,2 2,3,4,6,8,1<br>1,23,24,26 8,20,22,25 | 1  | P20766                                                                                            |



|       |                                                 |   |                                                                |
|-------|-------------------------------------------------|---|----------------------------------------------------------------|
| 10411 | 1,5,7,19,2 2,3,4,6,8,1<br>1,23,25,26 8,20,22,24 | 1 | P22006                                                         |
| 10412 | 1,5,7,19,2 2,3,4,6,8,1<br>1,24,25,26 8,20,22,23 | 5 | P20766,P22006,Q5XI22,Q6TMA8,Q8CJD3                             |
| 10413 | 1,5,7,19,2 2,3,4,6,8,1<br>2,23,24,25 8,20,21,26 | 7 | P00774,P01835,P02761,P17046,P20761,P62804,Q00715               |
| 10414 | 1,5,7,19,2 2,3,4,6,8,1<br>2,23,24,26 8,20,21,25 | 6 | O54728,P00731,P00774,P31430,P98089,Q9WTT6                      |
| 10415 | 1,5,7,19,2 2,3,4,6,8,1<br>2,23,25,26 8,20,21,24 | 2 | P02761,P17046                                                  |
| 10416 | 1,5,7,19,2 2,3,4,6,8,1<br>2,24,25,26 8,20,21,23 | 5 | P01835,P17046,P62804,Q5XI22,Q6TMA8                             |
| 10417 | 1,5,7,19,2 2,3,4,6,8,1<br>3,24,25,26 8,20,21,22 | 2 | Q7TPB1,Q80WL1                                                  |
| 10418 | 1,5,7,20,2 2,3,4,6,8,1<br>1,22,23,24 8,19,25,26 | 2 | P00774,P35280                                                  |
| 10419 | 1,5,7,20,2 2,3,4,6,8,1<br>1,22,23,25 8,19,24,26 | 0 |                                                                |
| 10420 | 1,5,7,20,2 2,3,4,6,8,1<br>1,22,23,26 8,19,24,25 | 2 | P14173,Q4FZU6                                                  |
| 10421 | 1,5,7,20,2 2,3,4,6,8,1<br>1,22,24,25 8,19,23,26 | 9 | P00774,P02625,P12785,P35467,Q5XFX0,Q5XI22,Q63355,Q64194,Q6AY61 |
| 10422 | 1,5,7,20,2 2,3,4,6,8,1<br>1,22,24,26 8,19,23,25 | 4 | P00714,Q4FZU6,Q5XI22,Q99MH3                                    |
| 10423 | 1,5,7,20,2 2,3,4,6,8,1<br>1,22,25,26 8,19,23,24 | 2 | P02625,Q5XI22                                                  |
| 10424 | 1,5,7,20,2 2,3,4,6,8,1<br>1,23,24,25 8,19,22,26 | 1 | P20766                                                         |
| 10425 | 1,5,7,20,2 2,3,4,6,8,1<br>1,23,24,26 8,19,22,25 | 2 | P20766,Q4FZU6                                                  |
| 10426 | 1,5,7,20,2 2,3,4,6,8,1<br>1,23,25,26 8,19,22,24 | 2 | P02625,P20766                                                  |
| 10427 | 1,5,7,20,2 2,3,4,6,8,1<br>1,24,25,26 8,19,22,23 | 5 | P02625,P20766,P22006,Q5XI22,Q8CJD3                             |
| 10428 | 1,5,7,20,2 2,3,4,6,8,1<br>2,23,24,25 8,19,21,26 | 3 | P00774,Q00715,Q80WL1                                           |
| 10429 | 1,5,7,20,2 2,3,4,6,8,1<br>2,23,24,26 8,19,21,25 | 9 | P00731,P00774,P14173,P31430,P47967,P98089,Q4FZU6,Q62635,Q8CIZ5 |
| 10430 | 1,5,7,20,2 2,3,4,6,8,1<br>2,23,25,26 8,19,21,24 | 0 |                                                                |
| 10431 | 1,5,7,20,2 2,3,4,6,8,1<br>2,24,25,26 8,19,21,23 | 6 | P00731,P00762,P02625,Q5XI22,Q8CJD3,Q99MH3                      |
| 10432 | 1,5,7,20,2 2,3,4,6,8,1<br>3,24,25,26 8,19,21,22 | 2 | Q7TPB1,Q80WL1                                                  |
| 10433 | 1,5,7,21,2 2,3,4,6,8,1<br>2,23,24,25 8,19,20,26 | 5 | P17046,P22006,P35280,P62804,Q63355                             |

|       |                          |                           |   |                                                  |
|-------|--------------------------|---------------------------|---|--------------------------------------------------|
| 10434 | 1,5,7,21,2<br>2,23,24,26 | 2,3,4,6,8,1<br>8,19,20,25 | 2 | P00731,P35280                                    |
| 10435 | 1,5,7,21,2<br>2,23,25,26 | 2,3,4,6,8,1<br>8,19,20,24 | 1 | P22006                                           |
| 10436 | 1,5,7,21,2<br>2,24,25,26 | 2,3,4,6,8,1<br>8,19,20,23 | 7 | P02625,P22006,P35467,Q498D9,Q5XI22,Q6TMA8,Q8CJD3 |
| 10437 | 1,5,7,21,2<br>3,24,25,26 | 2,3,4,6,8,1<br>8,19,20,22 | 3 | P20766,P22006,Q7TPB1                             |
| 10438 | 1,5,7,22,2<br>3,24,25,26 | 2,3,4,6,8,1<br>8,19,20,21 | 4 | P00731,P02761,P62804,Q7TPB1                      |
| 10439 | 1,5,8,18,1<br>9,20,21,22 | 2,3,4,6,7,2<br>3,24,25,26 | 3 | P14480,P20761,Q63751                             |
| 10440 | 1,5,8,18,1<br>9,20,21,23 | 2,3,4,6,7,2<br>2,24,25,26 | 4 | P05369,P20761,P35281,Q4FZU6                      |
| 10441 | 1,5,8,18,1<br>9,20,21,24 | 2,3,4,6,7,2<br>2,23,25,26 | 4 | G3V686,P12020,P20761,P36376                      |
| 10442 | 1,5,8,18,1<br>9,20,21,25 | 2,3,4,6,7,2<br>2,23,24,26 | 1 | P20761                                           |
| 10443 | 1,5,8,18,1<br>9,20,21,26 | 2,3,4,6,7,2<br>2,23,24,25 | 6 | G3V686,P06911,P12020,P35281,Q4FZU6,Q63751        |
| 10444 | 1,5,8,18,1<br>9,20,22,23 | 2,3,4,6,7,2<br>1,24,25,26 | 5 | P00774,P01836,P09605,P25809,P20761,P22006        |
| 10445 | 1,5,8,18,1<br>9,20,22,24 | 2,3,4,6,7,2<br>1,23,25,26 | 6 | P00774,P09605,P25809,P20761,P25236,P83121,Q6P6R2 |
| 10446 | 1,5,8,18,1<br>9,20,22,25 | 2,3,4,6,7,2<br>1,23,24,26 | 2 | P01836,P20761                                    |
| 10447 | 1,5,8,18,1<br>9,20,22,26 | 2,3,4,6,7,2<br>1,23,24,25 | 3 | P09605,P25809,Q63751,Q6P6R2                      |
| 10448 | 1,5,8,18,1<br>9,20,23,24 | 2,3,4,6,7,2<br>1,22,25,26 | 4 | P01836,P09605,P25809,P20761,Q9QZK9               |
| 10449 | 1,5,8,18,1<br>9,20,23,25 | 2,3,4,6,7,2<br>1,22,24,26 | 2 | P01836,P20761                                    |
| 10450 | 1,5,8,18,1<br>9,20,23,26 | 2,3,4,6,7,2<br>1,22,24,25 | 6 | P09605,P25809,P35467,Q03191,Q4FZU6,Q6IG02,Q6P6Q2 |
| 10451 | 1,5,8,18,1<br>9,20,24,25 | 2,3,4,6,7,2<br>1,22,23,26 | 3 | P01836,P20761,P25236                             |
| 10452 | 1,5,8,18,1<br>9,20,24,26 | 2,3,4,6,7,2<br>1,22,23,25 | 4 | P09605,P25809,P12020,P16086,Q6P6R2               |
| 10453 | 1,5,8,18,1<br>9,20,25,26 | 2,3,4,6,7,2<br>1,22,23,24 | 0 |                                                  |
| 10454 | 1,5,8,18,1<br>9,21,22,23 | 2,3,4,6,7,2<br>0,24,25,26 | 4 | P01836,P05369,P20761,Q03191                      |
| 10455 | 1,5,8,18,1<br>9,21,22,24 | 2,3,4,6,7,2<br>0,23,25,26 | 1 | P83121                                           |
| 10456 | 1,5,8,18,1<br>9,21,22,25 | 2,3,4,6,7,2<br>0,23,24,26 | 3 | A2RUV9,P01836,P20761                             |

|       |                                                 |   |                                                  |
|-------|-------------------------------------------------|---|--------------------------------------------------|
| 10457 | 1,5,8,18,1 2,3,4,6,7,2<br>9,21,22,26 0,23,24,25 | 2 | P36374,Q63751                                    |
| 10458 | 1,5,8,18,1 2,3,4,6,7,2<br>9,21,23,24 0,22,25,26 | 2 | P05369,Q03191                                    |
| 10459 | 1,5,8,18,1 2,3,4,6,7,2<br>9,21,23,25 0,22,24,26 | 7 | P01836,P02803,P05369,P06760,P08010,P20761,Q03191 |
| 10460 | 1,5,8,18,1 2,3,4,6,7,2<br>9,21,23,26 0,22,24,25 | 4 | P05369,Q03191,Q61FV1,Q6P6Q2                      |
| 10461 | 1,5,8,18,1 2,3,4,6,7,2<br>9,21,24,25 0,22,23,26 | 1 | P20761                                           |
| 10462 | 1,5,8,18,1 2,3,4,6,7,2<br>9,21,24,26 0,22,23,25 | 2 | G3V686,P12020                                    |
| 10463 | 1,5,8,18,1 2,3,4,6,7,2<br>9,21,25,26 0,22,23,24 | 0 |                                                  |
| 10464 | 1,5,8,18,1 2,3,4,6,7,2<br>9,22,23,24 0,21,25,26 | 5 | P01041,P01836,P09605,P25809,P20761,Q03191        |
| 10465 | 1,5,8,18,1 2,3,4,6,7,2<br>9,22,23,25 0,21,24,26 | 4 | P01015,P01041,P01836,P20761                      |
| 10466 | 1,5,8,18,1 2,3,4,6,7,2<br>9,22,23,26 0,21,24,25 | 4 | P01836,P09605,P25809,Q03191,Q6P6Q2               |
| 10467 | 1,5,8,18,1 2,3,4,6,7,2<br>9,22,24,25 0,21,23,26 | 5 | P01835,P01836,P20761,P20762,P25236               |
| 10468 | 1,5,8,18,1 2,3,4,6,7,2<br>9,22,24,26 0,21,23,25 | 2 | P09605,P25809,Q6P6R2                             |
| 10469 | 1,5,8,18,1 2,3,4,6,7,2<br>9,22,25,26 0,21,23,24 | 1 | P01836                                           |
| 10470 | 1,5,8,18,1 2,3,4,6,7,2<br>9,23,24,25 0,21,22,26 | 5 | P01041,P01836,P20761,P42854,Q03191               |
| 10471 | 1,5,8,18,1 2,3,4,6,7,2<br>9,23,24,26 0,21,22,25 | 4 | P09605,P25809,P47967,Q03191,Q6P6Q2               |
| 10472 | 1,5,8,18,1 2,3,4,6,7,2<br>9,23,25,26 0,21,22,24 | 3 | P01836,Q03191,Q6P6Q2                             |
| 10473 | 1,5,8,18,1 2,3,4,6,7,2<br>9,24,25,26 0,21,22,23 | 2 | P16086,Q7TPB1                                    |
| 10474 | 1,5,8,18,2 2,3,4,6,7,1<br>0,21,22,23 9,24,25,26 | 3 | P14480,P20761,Q63532                             |
| 10475 | 1,5,8,18,2 2,3,4,6,7,1<br>0,21,22,24 9,23,25,26 | 1 | Q5FVI6                                           |
| 10476 | 1,5,8,18,2 2,3,4,6,7,1<br>0,21,22,25 9,23,24,26 | 2 | P20761,Q63532                                    |
| 10477 | 1,5,8,18,2 2,3,4,6,7,1<br>0,21,22,26 9,23,24,25 | 4 | P16086,Q4FZU6,Q63532,Q63751                      |
| 10478 | 1,5,8,18,2 2,3,4,6,7,1<br>0,21,23,24 9,22,25,26 | 0 |                                                  |
| 10479 | 1,5,8,18,2 2,3,4,6,7,1<br>0,21,23,25 9,22,24,26 | 3 | P06760,P20761,Q63532                             |

|       |                          |                           |   |                                                                       |
|-------|--------------------------|---------------------------|---|-----------------------------------------------------------------------|
| 10480 | 1,5,8,18,2<br>0,21,23,26 | 2,3,4,6,7,1<br>9,22,24,25 | 6 | Q4FZU6,Q63532,Q6IFU8,Q6IFV1,Q6IG02,Q6P6Q2                             |
| 10481 | 1,5,8,18,2<br>0,21,24,25 | 2,3,4,6,7,1<br>9,22,23,26 | 4 | P02625,P16086,P20761,Q63532                                           |
| 10482 | 1,5,8,18,2<br>0,21,24,26 | 2,3,4,6,7,1<br>9,22,23,25 | 6 | P06911,P12020,P16086,P50280,Q4FZU6,Q63532                             |
| 10483 | 1,5,8,18,2<br>0,21,25,26 | 2,3,4,6,7,1<br>9,22,23,24 | 4 | P02625,P16086,P31430,Q63532                                           |
| 10484 | 1,5,8,18,2<br>0,22,23,24 | 2,3,4,6,7,1<br>9,21,25,26 | 7 | P09605,P25809,P20761,P47967,P97840,Q5FVI6,Q8CIZ5,Q9QZK9               |
| 10485 | 1,5,8,18,2<br>0,22,23,25 | 2,3,4,6,7,1<br>9,21,24,26 | 2 | P01836,P20761                                                         |
| 10486 | 1,5,8,18,2<br>0,22,23,26 | 2,3,4,6,7,1<br>9,21,24,25 | 7 | P09605,P25809,P47967,P97840,Q4FZU6,Q6IG02,Q6P6Q2,Q8CIZ5               |
| 10487 | 1,5,8,18,2<br>0,22,24,25 | 2,3,4,6,7,1<br>9,21,23,26 | 3 | P16086,P20761,P25236                                                  |
| 10488 | 1,5,8,18,2<br>0,22,24,26 | 2,3,4,6,7,1<br>9,21,23,25 | 8 | P04073,P09605,P25809,P16086,P47967,P97840,Q6P6R2,Q8CIZ5,Q99041        |
| 10489 | 1,5,8,18,2<br>0,22,25,26 | 2,3,4,6,7,1<br>9,21,23,24 | 2 | P16086,Q63532                                                         |
| 10490 | 1,5,8,18,2<br>0,23,24,25 | 2,3,4,6,7,1<br>9,21,22,26 | 5 | P01836,P08649,P16086,P20761,P83748                                    |
| 10491 | 1,5,8,18,2<br>0,23,24,26 | 2,3,4,6,7,1<br>9,21,22,25 | 9 | D4A1J4,P09605,P25809,P16086,P47967,P97840,Q4FZU6,Q6IG02,Q6P6Q2,Q8CIZ5 |
| 10492 | 1,5,8,18,2<br>0,23,25,26 | 2,3,4,6,7,1<br>9,21,22,24 | 3 | P16086,Q6IG02,Q6P6Q2                                                  |
| 10493 | 1,5,8,18,2<br>0,24,25,26 | 2,3,4,6,7,1<br>9,21,22,23 | 2 | P02625,P16086                                                         |
| 10494 | 1,5,8,18,2<br>1,22,23,24 | 2,3,4,6,7,1<br>9,20,25,26 | 2 | P35280,Q5FVI6                                                         |
| 10495 | 1,5,8,18,2<br>1,22,23,25 | 2,3,4,6,7,1<br>9,20,24,26 | 2 | P06760,P20761                                                         |
| 10496 | 1,5,8,18,2<br>1,22,23,26 | 2,3,4,6,7,1<br>9,20,24,25 | 2 | Q6IFV1,Q6P6Q2                                                         |
| 10497 | 1,5,8,18,2<br>1,22,24,25 | 2,3,4,6,7,1<br>9,20,23,26 | 2 | P16086,Q5FVI6                                                         |
| 10498 | 1,5,8,18,2<br>1,22,24,26 | 2,3,4,6,7,1<br>9,20,23,25 | 1 | P16086                                                                |
| 10499 | 1,5,8,18,2<br>1,22,25,26 | 2,3,4,6,7,1<br>9,20,23,24 | 3 | P02631,P16086,Q63532                                                  |
| 10500 | 1,5,8,18,2<br>1,23,24,25 | 2,3,4,6,7,1<br>9,20,22,26 | 2 | P06760,Q62997                                                         |
| 10501 | 1,5,8,18,2<br>1,23,24,26 | 2,3,4,6,7,1<br>9,20,22,25 | 4 | P47967,Q6IFV1,Q6P6Q2,Q9QZQ5                                           |
| 10502 | 1,5,8,18,2<br>1,23,25,26 | 2,3,4,6,7,1<br>9,20,22,24 | 3 | P14669,Q6IFV1,Q6P6Q2                                                  |

|       |                          |                           |    |                                                                                     |
|-------|--------------------------|---------------------------|----|-------------------------------------------------------------------------------------|
| 10503 | 1,5,8,18,2<br>1,24,25,26 | 2,3,4,6,7,1<br>9,20,22,23 | 4  | P02625,P16086,P31430,Q62997                                                         |
| 10504 | 1,5,8,18,2<br>2,23,24,25 | 2,3,4,6,7,1<br>9,20,21,26 | 4  | P01041,P01836,P20761,P42854                                                         |
| 10505 | 1,5,8,18,2<br>2,23,24,26 | 2,3,4,6,7,1<br>9,20,21,25 | 9  | P00731,P09605,P25809,P16086,P42854,P47967,P97840,Q6IFU7,Q6P6Q2,Q8CIZ5               |
| 10506 | 1,5,8,18,2<br>2,23,25,26 | 2,3,4,6,7,1<br>9,20,21,24 | 3  | P16086,P42854,Q6P6Q2                                                                |
| 10507 | 1,5,8,18,2<br>2,24,25,26 | 2,3,4,6,7,1<br>9,20,21,23 | 2  | P16086,P42854                                                                       |
| 10508 | 1,5,8,18,2<br>3,24,25,26 | 2,3,4,6,7,1<br>9,20,21,22 | 4  | P16086,P42854,Q6P6Q2,Q7TPB1                                                         |
| 10509 | 1,5,8,19,2<br>0,21,22,23 | 2,3,4,6,7,1<br>8,24,25,26 | 3  | P00774,P20761,P55091                                                                |
| 10510 | 1,5,8,19,2<br>0,21,22,24 | 2,3,4,6,7,1<br>8,23,25,26 | 5  | A2RUV9,P00714,P00774,P12785,P55091                                                  |
| 10511 | 1,5,8,19,2<br>0,21,22,25 | 2,3,4,6,7,1<br>8,23,24,26 | 4  | A2RUV9,P00774,P12785,P20761                                                         |
| 10512 | 1,5,8,19,2<br>0,21,22,26 | 2,3,4,6,7,1<br>8,23,24,25 | 4  | P00774,P12785,Q4FZU6,Q63751                                                         |
| 10513 | 1,5,8,19,2<br>0,21,23,24 | 2,3,4,6,7,1<br>8,22,25,26 | 2  | P00774,P55091                                                                       |
| 10514 | 1,5,8,19,2<br>0,21,23,25 | 2,3,4,6,7,1<br>8,22,24,26 | 2  | P06760,P20761                                                                       |
| 10515 | 1,5,8,19,2<br>0,21,23,26 | 2,3,4,6,7,1<br>8,22,24,25 | 1  | Q4FZU6                                                                              |
| 10516 | 1,5,8,19,2<br>0,21,24,25 | 2,3,4,6,7,1<br>8,22,23,26 | 4  | P00774,P02625,P12785,P20761                                                         |
| 10517 | 1,5,8,19,2<br>0,21,24,26 | 2,3,4,6,7,1<br>8,22,23,25 | 1  | G3V686                                                                              |
| 10518 | 1,5,8,19,2<br>0,21,25,26 | 2,3,4,6,7,1<br>8,22,23,24 | 1  | P02625                                                                              |
| 10519 | 1,5,8,19,2<br>0,22,23,24 | 2,3,4,6,7,1<br>8,21,25,26 | 10 | O54800;Q5DWV2,P00774,P09605,P25809,P20761,P25031,P31430,P55091,P82995,P83748,P98089 |
| 10520 | 1,5,8,19,2<br>0,22,23,25 | 2,3,4,6,7,1<br>8,21,24,26 | 5  | P00774,P01836,P20761,P25031,P55091                                                  |
| 10521 | 1,5,8,19,2<br>0,22,23,26 | 2,3,4,6,7,1<br>8,21,24,25 | 6  | O54728,P00774,P09605,P25809,P25031,P31430,P98089                                    |
| 10522 | 1,5,8,19,2<br>0,22,24,25 | 2,3,4,6,7,1<br>8,21,23,26 | 5  | P00774,P12785,P20761,P25031,P25236                                                  |
| 10523 | 1,5,8,19,2<br>0,22,24,26 | 2,3,4,6,7,1<br>8,21,23,25 | 10 | P00774,P09605,P25809,P12785,P16086,P25031,P31430,P98089,Q5XI22,Q6P6R2,Q99MH3        |
| 10524 | 1,5,8,19,2<br>0,22,25,26 | 2,3,4,6,7,1<br>8,21,23,24 | 4  | P00774,P12785,P25031,Q5XI22                                                         |
| 10525 | 1,5,8,19,2<br>0,23,24,25 | 2,3,4,6,7,1<br>8,21,22,26 | 6  | P00774,P01836,P20761,P25031,P83748,Q80WL1                                           |

|       |                                                 |   |                                                                       |
|-------|-------------------------------------------------|---|-----------------------------------------------------------------------|
| 10526 | 1,5,8,19,2 2,3,4,6,7,1<br>0,23,24,26 8,21,22,25 | 6 | P00774,P09605,P25809,P25031,P31430,P47967,P98089                      |
| 10527 | 1,5,8,19,2 2,3,4,6,7,1<br>0,23,25,26 8,21,22,24 | 1 | P25031                                                                |
| 10528 | 1,5,8,19,2 2,3,4,6,7,1<br>0,24,25,26 8,21,22,23 | 4 | P02625,P16086,P25031,Q5XI22                                           |
| 10529 | 1,5,8,19,2 2,3,4,6,7,1<br>1,22,23,24 8,20,25,26 | 2 | P00774,P35280                                                         |
| 10530 | 1,5,8,19,2 2,3,4,6,7,1<br>1,22,23,25 8,20,24,26 | 4 | P01041,P01836,P06760,P20761                                           |
| 10531 | 1,5,8,19,2 2,3,4,6,7,1<br>1,22,23,26 8,20,24,25 | 0 |                                                                       |
| 10532 | 1,5,8,19,2 2,3,4,6,7,1<br>1,22,24,25 8,20,23,26 | 5 | A2RUV9,P00774,P12785,P20762,Q4FZU2                                    |
| 10533 | 1,5,8,19,2 2,3,4,6,7,1<br>1,22,24,26 8,20,23,25 | 3 | A2RUV9,P12785,Q5XI22                                                  |
| 10534 | 1,5,8,19,2 2,3,4,6,7,1<br>1,22,25,26 8,20,23,24 | 3 | A2RUV9,P12785,Q5XI22                                                  |
| 10535 | 1,5,8,19,2 2,3,4,6,7,1<br>1,23,24,25 8,20,22,26 | 3 | P01041,P01836,P06760                                                  |
| 10536 | 1,5,8,19,2 2,3,4,6,7,1<br>1,23,24,26 8,20,22,25 | 0 |                                                                       |
| 10537 | 1,5,8,19,2 2,3,4,6,7,1<br>1,23,25,26 8,20,22,24 | 1 | P06760                                                                |
| 10538 | 1,5,8,19,2 2,3,4,6,7,1<br>1,24,25,26 8,20,22,23 | 3 | P02625,P16086,Q5XI22                                                  |
| 10539 | 1,5,8,19,2 2,3,4,6,7,1<br>2,23,24,25 8,20,21,26 | 8 | P00774,P01041,P01835,P01836,P20761,P25031,P42854,P83748               |
| 10540 | 1,5,8,19,2 2,3,4,6,7,1<br>2,23,24,26 8,20,21,25 | 9 | O54728,P00731,P00774,P09605,P25809,P25031,P31430,P42854,P47967,P98089 |
| 10541 | 1,5,8,19,2 2,3,4,6,7,1<br>2,23,25,26 8,20,21,24 | 3 | P01836,P25031,P42854                                                  |
| 10542 | 1,5,8,19,2 2,3,4,6,7,1<br>2,24,25,26 8,20,21,23 | 6 | P01835,P12785,P16086,P25031,P42854,Q5XI22                             |
| 10543 | 1,5,8,19,2 2,3,4,6,7,1<br>3,24,25,26 8,20,21,22 | 4 | P01836,P25031,P42854,Q7TPB1                                           |
| 10544 | 1,5,8,20,2 2,3,4,6,7,1<br>1,22,23,24 8,19,25,26 | 3 | P00774,P35280,Q5FVI6                                                  |
| 10545 | 1,5,8,20,2 2,3,4,6,7,1<br>1,22,23,25 8,19,24,26 | 3 | P06760,P20761,Q63532                                                  |
| 10546 | 1,5,8,20,2 2,3,4,6,7,1<br>1,22,23,26 8,19,24,25 | 2 | Q4FZU6,Q63532                                                         |
| 10547 | 1,5,8,20,2 2,3,4,6,7,1<br>1,22,24,25 8,19,23,26 | 9 | P00774,P02625,P12785,P16086,P35467,Q5FVI6,Q5XFX0,Q63532,Q6IE51        |
| 10548 | 1,5,8,20,2 2,3,4,6,7,1<br>1,22,24,26 8,19,23,25 | 8 | P02631,P12785,P16086,Q5XFX0,Q5XI22,Q63532,Q6IE51,Q99MH3               |

|       |                                                     |    |                                                                              |
|-------|-----------------------------------------------------|----|------------------------------------------------------------------------------|
| 10549 | 1,5,8,20,2 2,3,4,6,7,1<br>1,22,25,26 8,19,23,24     | 7  | P02625,P02631,P12785,P16086,Q5XI22,Q63532,Q6IE51                             |
| 10550 | 1,5,8,20,2 2,3,4,6,7,1<br>1,23,24,25 8,19,22,26     | 2  | P02625,P06760                                                                |
| 10551 | 1,5,8,20,2 2,3,4,6,7,1<br>1,23,24,26 8,19,22,25     | 6  | P16086,P47967,P97840,Q4FZU6,Q6IFV1,Q9QZQ5                                    |
| 10552 | 1,5,8,20,2 2,3,4,6,7,1<br>1,23,25,26 8,19,22,24     | 4  | P02625,P06760,P16086,Q63532                                                  |
| 10553 | 1,5,8,20,2 2,3,4,6,7,1<br>1,24,25,26 8,19,22,23     | 6  | P02625,P02631,P16086,Q5XI22,Q63532,Q8CJD3                                    |
| 10554 | 1,5,8,20,2 2,3,4,6,7,1<br>2,23,24,25 8,19,21,26     | 6  | P00774,P16086,P20761,P25031,P42854,P83748                                    |
| 10555 | 1,5,8,20,2 2,3,4,6,7,1<br>2,23,24,26 8,19,21,25     | 10 | P00731,P00774,P09605,P25809,P14173,P16086,P25031,P47967,P97840,P98089,Q8CIZ5 |
| 10556 | 1,5,8,20,2 2,3,4,6,7,1<br>2,23,25,26 8,19,21,24     | 3  | P16086,P25031,Q63532                                                         |
| 10557 | 1,5,8,20,2 2,3,4,6,7,1<br>2,24,25,26 8,19,21,23     | 10 | P00731,P02625,P02631,P05964,P12785,P16086,P25031,Q5XI22,Q63532,Q99MH3        |
| 10558 | 1,5,8,20,2 2,3,4,6,7,1<br>3,24,25,26 8,19,21,22     | 5  | D4A1J4,P16086,P25031,P42854,Q7TPB1                                           |
| 10559 | 1,5,8,21,2 2,3,4,6,7,1<br>2,23,24,25 8,19,20,26     | 3  | P06760,P35280,Q5FVI6                                                         |
| 10560 | 1,5,8,21,2 2,3,4,6,7,1<br>2,23,24,26 8,19,20,25     | 5  | P00731,P35280,P47967,Q6IFV1,Q9QZQ5                                           |
| 10561 | 1,5,8,21,2 2,3,4,6,7,1<br>2,23,25,26 8,19,20,24     | 4  | P02631,P06760,Q63532,Q9QZQ5                                                  |
| 10562 | 1,5,8,21,2 2,3,4,6,7,1<br>2,24,25,26 8,19,20,23     | 9  | P02625,P02631,P12785,P16086,Q498D9,Q5XI22,Q63532,Q6IE51,Q8CJD3               |
| 10563 | 1,5,8,21,2 2,3,4,6,7,1<br>3,24,25,26 8,19,20,22     | 4  | P06760,P16086,Q7TPB1,Q9QZQ5                                                  |
| 10564 | 1,5,8,22,2 2,3,4,6,7,1<br>3,24,25,26 8,19,20,21     | 6  | P00731,P16086,P25031,P42854,Q7TPB1,Q9QZQ5                                    |
| 10565 | 1,5,18,19, 2,3,4,6,7,8<br>20,21,22,2 ,24,25,26<br>3 | 3  | P20761,P20766,Q6AYQ8                                                         |
| 10566 | 1,5,18,19, 2,3,4,6,7,8<br>20,21,22,2 ,23,25,26<br>4 | 9  | P00714,P00774,P12020,P20761,P20762,P20766,Q6AYQ8,Q6P6R2,Q9Z0V6               |
| 10567 | 1,5,18,19, 2,3,4,6,7,8<br>20,21,22,2 ,23,24,26<br>5 | 3  | P20760,P20761,P20762                                                         |
| 10568 | 1,5,18,19, 2,3,4,6,7,8<br>20,21,22,2 ,23,24,25<br>6 | 8  | P02631,P12020,P36374,P50280,Q63751,Q6P6R2,Q99041,Q9Z0V6                      |

|       |                               |                          |    |                                                                                                   |
|-------|-------------------------------|--------------------------|----|---------------------------------------------------------------------------------------------------|
| 10569 | 1,5,18,19,<br>20,21,23,2<br>4 | 2,3,4,6,7,8<br>,22,25,26 | 3  | P12020,P20761,P20766                                                                              |
| 10570 | 1,5,18,19,<br>20,21,23,2<br>5 | 2,3,4,6,7,8<br>,22,24,26 | 3  | P20760,P20761,P20766                                                                              |
| 10571 | 1,5,18,19,<br>20,21,23,2<br>6 | 2,3,4,6,7,8<br>,22,24,25 | 6  | P06911,P12020,P20766,Q4FZU6,Q6IG02,Q6P6Q2                                                         |
| 10572 | 1,5,18,19,<br>20,21,24,2<br>5 | 2,3,4,6,7,8<br>,22,23,26 | 4  | D3ZUK3,P20761,P20762,P20766                                                                       |
| 10573 | 1,5,18,19,<br>20,21,24,2<br>6 | 2,3,4,6,7,8<br>,22,23,25 | 9  | D3ZUK3,P06911,P12020,P16086,P20766,P50280,Q5GRG2,Q63751,Q99041                                    |
| 10574 | 1,5,18,19,<br>20,21,25,2<br>6 | 2,3,4,6,7,8<br>,22,23,24 | 3  | P02631,P16086,P20766                                                                              |
| 10575 | 1,5,18,19,<br>20,22,23,2<br>4 | 2,3,4,6,7,8<br>,21,25,26 | 12 | O54800;Q5DWV2,P00774,P09605;P25809,P19223,P20761,P20762,P83748,Q6P6R2,Q80WL1,Q9QZK9,Q9WTT6,Q9Z0V6 |
| 10576 | 1,5,18,19,<br>20,22,23,2<br>5 | 2,3,4,6,7,8<br>,21,24,26 | 7  | D3ZHA0,O54800;Q5DWV2,P01836,P02761,P20760,P20761,P20762                                           |
| 10577 | 1,5,18,19,<br>20,22,23,2<br>6 | 2,3,4,6,7,8<br>,21,24,25 | 5  | O54728,P09605;P25809,Q6P6Q2,Q6P6R2,Q9WTT6                                                         |
| 10578 | 1,5,18,19,<br>20,22,24,2<br>5 | 2,3,4,6,7,8<br>,21,23,26 | 6  | P16086,P20761,P20762,P25236,Q64057,Q80WL1                                                         |
| 10579 | 1,5,18,19,<br>20,22,24,2<br>6 | 2,3,4,6,7,8<br>,21,23,25 | 12 | P02631,P09605;P25809,P12020,P16086,P50280,Q63751,Q64057,Q6P6R2,Q80WL1,Q99041,Q9WTT6,Q9Z0V6        |
| 10580 | 1,5,18,19,<br>20,22,25,2<br>6 | 2,3,4,6,7,8<br>,21,23,24 | 4  | P02631,P16086,P20762,Q63751                                                                       |
| 10581 | 1,5,18,19,<br>20,23,24,2<br>5 | 2,3,4,6,7,8<br>,21,22,26 | 7  | O54800;Q5DWV2,P01836,P20761,P20762,P20766,P83748,Q80WL1                                           |
| 10582 | 1,5,18,19,<br>20,23,24,2<br>6 | 2,3,4,6,7,8<br>,21,22,25 | 8  | D4A1J4,P09605;P25809,P12020,P20766,Q6IFU7,Q6IG02,Q6P6Q2,Q80WL1                                    |
| 10583 | 1,5,18,19,<br>20,23,25,2<br>6 | 2,3,4,6,7,8<br>,21,22,24 | 3  | Q6IG02,Q6P6Q2,Q80WL1                                                                              |



|       |                               |                          |   |                                                                |
|-------|-------------------------------|--------------------------|---|----------------------------------------------------------------|
| 10584 | 1,5,18,19,<br>20,24,25,2<br>6 | 2,3,4,6,7,8<br>,21,22,23 | 6 | D3ZUK3,P16086,P20762,P20766,Q7TPB1,Q80WL1                      |
| 10585 | 1,5,18,19,<br>21,22,23,2<br>4 | 2,3,4,6,7,8<br>,20,25,26 | 5 | P20761,P20762,P20766,P35280,Q6AYQ8                             |
| 10586 | 1,5,18,19,<br>21,22,23,2<br>5 | 2,3,4,6,7,8<br>,20,24,26 | 5 | P01041,P01836,P20760,P20761,P20762                             |
| 10587 | 1,5,18,19,<br>21,22,23,2<br>6 | 2,3,4,6,7,8<br>,20,24,25 | 1 | Q6P6Q2                                                         |
| 10588 | 1,5,18,19,<br>21,22,24,2<br>5 | 2,3,4,6,7,8<br>,20,23,26 | 2 | P20761,P20762                                                  |
| 10589 | 1,5,18,19,<br>21,22,24,2<br>6 | 2,3,4,6,7,8<br>,20,23,25 | 6 | P02631,P12020,P16086,P20762,Q6P6R2,Q99041                      |
| 10590 | 1,5,18,19,<br>21,22,25,2<br>6 | 2,3,4,6,7,8<br>,20,23,24 | 3 | P02631,P20762,Q63617                                           |
| 10591 | 1,5,18,19,<br>21,23,24,2<br>5 | 2,3,4,6,7,8<br>,20,22,26 | 4 | P01041,P20761,P20762,P20766                                    |
| 10592 | 1,5,18,19,<br>21,23,24,2<br>6 | 2,3,4,6,7,8<br>,20,22,25 | 7 | P05369,P12020,P20766,Q03191,Q6IFV1,Q6P6Q2,Q9QZQ5               |
| 10593 | 1,5,18,19,<br>21,23,25,2<br>6 | 2,3,4,6,7,8<br>,20,22,24 | 2 | P20766,Q6P6Q2                                                  |
| 10594 | 1,5,18,19,<br>21,24,25,2<br>6 | 2,3,4,6,7,8<br>,20,22,23 | 6 | D3ZUK3,P02631,P16086,P20762,P20766,Q63617                      |
| 10595 | 1,5,18,19,<br>22,23,24,2<br>5 | 2,3,4,6,7,8<br>,20,21,26 | 9 | P01041,P01836,P02761,P20761,P20762,P42854,P62804,P83748,Q00715 |
| 10596 | 1,5,18,19,<br>22,23,24,2<br>6 | 2,3,4,6,7,8<br>,20,21,25 | 6 | P00731,P09605,P25809,P42854,Q6IFU7,Q6P6R2,Q9WTT6               |
| 10597 | 1,5,18,19,<br>22,23,25,2<br>6 | 2,3,4,6,7,8<br>,20,21,24 | 4 | P01836,P02761,P20762,P42854                                    |
| 10598 | 1,5,18,19,<br>22,24,25,2<br>6 | 2,3,4,6,7,8<br>,20,21,23 | 6 | P02631,P16086,P20762,P42854,Q5XI22,Q7TPB1                      |

|       |                               |                          |    |                                                                                            |
|-------|-------------------------------|--------------------------|----|--------------------------------------------------------------------------------------------|
| 10599 | 1,5,18,19,<br>23,24,25,2<br>6 | 2,3,4,6,7,8<br>,20,21,22 | 6  | P16086,P20762,P42854,Q6P6Q2,Q7TPB1,Q80WL1                                                  |
| 10600 | 1,5,18,20,<br>21,22,23,2<br>4 | 2,3,4,6,7,8<br>,19,25,26 | 5  | P12020,P20761,P20766,P35280,Q9QZK9                                                         |
| 10601 | 1,5,18,20,<br>21,22,23,2<br>5 | 2,3,4,6,7,8<br>,19,24,26 | 4  | P02631,P20760,P20761,Q63532                                                                |
| 10602 | 1,5,18,20,<br>21,22,23,2<br>6 | 2,3,4,6,7,8<br>,19,24,25 | 9  | P02631,P12020,Q4FZU6,Q63532,Q6IFV1,Q6IG02,Q6P6Q2,Q9QUL6,Q9QZQ5                             |
| 10603 | 1,5,18,20,<br>21,22,24,2<br>5 | 2,3,4,6,7,8<br>,19,23,26 | 6  | P02631,P16086,P20761,P20762,P20766,Q63532                                                  |
| 10604 | 1,5,18,20,<br>21,22,24,2<br>6 | 2,3,4,6,7,8<br>,19,23,25 | 7  | P02631,P12020,P16086,P20766,P50280,Q63532,Q99041                                           |
| 10605 | 1,5,18,20,<br>21,22,25,2<br>6 | 2,3,4,6,7,8<br>,19,23,24 | 4  | P02631,P16086,Q63532,Q99041                                                                |
| 10606 | 1,5,18,20,<br>21,23,24,2<br>5 | 2,3,4,6,7,8<br>,19,22,26 | 3  | P16086,P20761,P20766                                                                       |
| 10607 | 1,5,18,20,<br>21,23,24,2<br>6 | 2,3,4,6,7,8<br>,19,22,25 | 13 | P02631,P06911,P12020,P16086,P20766,P47967,Q4FZU6,Q6IFU7,Q6IFV1,Q6IG02,Q6P6Q2,Q9QUL6,Q9QZQ5 |
| 10608 | 1,5,18,20,<br>21,23,25,2<br>6 | 2,3,4,6,7,8<br>,19,22,24 | 8  | P02631,P16086,P20766,Q63532,Q6IFU8,Q6IG02,Q6P6Q2,Q9QZQ5                                    |
| 10609 | 1,5,18,20,<br>21,24,25,2<br>6 | 2,3,4,6,7,8<br>,19,22,23 | 8  | D3ZUK3,P02625,P02631,P16086,P20766,Q63532,Q8CJD3,Q99041                                    |
| 10610 | 1,5,18,20,<br>22,23,24,2<br>5 | 2,3,4,6,7,8<br>,19,21,26 | 6  | P16086,P20761,P20762,P83748,Q00715,Q80WL1                                                  |
| 10611 | 1,5,18,20,<br>22,23,24,2<br>6 | 2,3,4,6,7,8<br>,19,21,25 | 12 | P00731,P02631,P09605,P25809,P16086,P47967,P97840,Q64057,Q6IFU7,Q6P6Q2,Q80WL1,Q8CIZ5,Q9QZQ5 |
| 10612 | 1,5,18,20,<br>22,23,25,2<br>6 | 2,3,4,6,7,8<br>,19,21,24 | 6  | P02631,P02761,P16086,Q63532,Q6IG02,Q6P6Q2                                                  |
| 10613 | 1,5,18,20,<br>22,24,25,2<br>6 | 2,3,4,6,7,8<br>,19,21,23 | 8  | P00731,P02631,P16086,P20762,Q5XI22,Q64057,Q80WL1,Q99041                                    |

|       |                               |                          |    |                                                                                     |
|-------|-------------------------------|--------------------------|----|-------------------------------------------------------------------------------------|
| 10614 | 1,5,18,20,<br>23,24,25,2<br>6 | 2,3,4,6,7,8<br>,19,21,22 | 10 | D4A1J4,P02631,P16086,P20766,P42854,Q6IG02,Q6P6Q2,Q7TPB1,Q80WL1,Q9QZQ5               |
| 10615 | 1,5,18,21,<br>22,23,24,2<br>5 | 2,3,4,6,7,8<br>,19,20,26 | 4  | P16086,P20761,P20762,P35280                                                         |
| 10616 | 1,5,18,21,<br>22,23,24,2<br>6 | 2,3,4,6,7,8<br>,19,20,25 | 11 | P00731,P02631,P12020,P16086,P35280,P47967,Q6IFU7,Q6IFV1,Q6P6Q2,Q9QUL6,Q9QZQ5        |
| 10617 | 1,5,18,21,<br>22,23,25,2<br>6 | 2,3,4,6,7,8<br>,19,20,24 | 5  | P02631,P16086,Q63532,Q6P6Q2,Q9QZQ5                                                  |
| 10618 | 1,5,18,21,<br>22,24,25,2<br>6 | 2,3,4,6,7,8<br>,19,20,23 | 6  | P02631,P16086,P20762,Q5XI22,Q63532,Q99041                                           |
| 10619 | 1,5,18,21,<br>23,24,25,2<br>6 | 2,3,4,6,7,8<br>,19,20,22 | 6  | P02631,P16086,P20766,Q6P6Q2,Q7TPB1,Q9QZQ5                                           |
| 10620 | 1,5,18,22,<br>23,24,25,2<br>6 | 2,3,4,6,7,8<br>,19,20,21 | 11 | P00731,P02631,P02761,P16086,P20762,P42854,P62804,Q6IFU7,Q6P6Q2,Q7TPB1,Q9QZQ5        |
| 10621 | 1,5,19,20,<br>21,22,23,2<br>4 | 2,3,4,6,7,8<br>,18,25,26 | 8  | P00714,P00774,P20761,P20766,P35280,P55091,P98089,Q6AYQ8                             |
| 10622 | 1,5,19,20,<br>21,22,23,2<br>5 | 2,3,4,6,7,8<br>,18,24,26 | 5  | P00774,P20761,P20762,P55091,Q6AYQ8                                                  |
| 10623 | 1,5,19,20,<br>21,22,23,2<br>6 | 2,3,4,6,7,8<br>,18,24,25 | 4  | O54728,P00774,P02631,P98089                                                         |
| 10624 | 1,5,19,20,<br>21,22,24,2<br>5 | 2,3,4,6,7,8<br>,18,23,26 | 12 | P00774,P02631,P12785,P20761,P20762,P20766,P35467,Q5XI22,Q63203,Q64057,Q6AY61,Q6AYQ8 |
| 10625 | 1,5,19,20,<br>21,22,24,2<br>6 | 2,3,4,6,7,8<br>,18,23,25 | 12 | P00714,P00774,P02631,P12020,P16086,P20766,P98089,Q5XI22,Q63751,Q64057,Q6P6R2,Q99MH3 |
| 10626 | 1,5,19,20,<br>21,22,25,2<br>6 | 2,3,4,6,7,8<br>,18,23,24 | 4  | P02631,P16086,P20762,Q5XI22                                                         |
| 10627 | 1,5,19,20,<br>21,23,24,2<br>5 | 2,3,4,6,7,8<br>,18,22,26 | 5  | P00774,P20761,P20762,P20766,Q80WL1                                                  |
| 10628 | 1,5,19,20,<br>21,23,24,2<br>6 | 2,3,4,6,7,8<br>,18,22,25 | 5  | P12020,P20766,P98089,Q80WL1,Q9QZQ5                                                  |

|       |                               |                          |    |                                                                                                                 |
|-------|-------------------------------|--------------------------|----|-----------------------------------------------------------------------------------------------------------------|
| 10629 | 1,5,19,20,<br>21,23,25,2<br>6 | 2,3,4,6,7,8<br>,18,22,24 | 2  | P02631,P20766                                                                                                   |
| 10630 | 1,5,19,20,<br>21,24,25,2<br>6 | 2,3,4,6,7,8<br>,18,22,23 | 8  | D3ZUK3,P02625,P02631,P16086,P20762,P20766,Q5XI22,Q8CJD3                                                         |
| 10631 | 1,5,19,20,<br>22,23,24,2<br>5 | 2,3,4,6,7,8<br>,18,21,26 | 12 | O54800;Q5DWV2,P00774,P01041,P20761,P20762,P25031,P42854,P55091,P83748,Q00715,Q64057,Q80WL1                      |
| 10632 | 1,5,19,20,<br>22,23,24,2<br>6 | 2,3,4,6,7,8<br>,18,21,25 | 15 | O54728,O54800;Q5DWV2,P00731,P00774,P02631,P20646,P25031,P31430,P42854,P47967,P98089,Q64057,Q6P6R2,Q80WL1,Q9WTT6 |
| 10633 | 1,5,19,20,<br>22,23,25,2<br>6 | 2,3,4,6,7,8<br>,18,21,24 | 4  | O54728,P02631,P02761,P25031                                                                                     |
| 10634 | 1,5,19,20,<br>22,24,25,2<br>6 | 2,3,4,6,7,8<br>,18,21,23 | 10 | P00731,P00774,P02631,P16086,P20762,P25031,P42854,Q5XI22,Q64057,Q80WL1                                           |
| 10635 | 1,5,19,20,<br>23,24,25,2<br>6 | 2,3,4,6,7,8<br>,18,21,22 | 7  | D4A1J4,P16086,P20766,P25031,P42854,Q7TPB1,Q80WL1                                                                |
| 10636 | 1,5,19,21,<br>22,23,24,2<br>5 | 2,3,4,6,7,8<br>,18,20,26 | 6  | P00774,P01041,P20761,P20762,P35280,Q6AYQ8                                                                       |
| 10637 | 1,5,19,21,<br>22,23,24,2<br>6 | 2,3,4,6,7,8<br>,18,20,25 | 5  | P00731,P02631,P35280,P98089,Q9QZQ5                                                                              |
| 10638 | 1,5,19,21,<br>22,23,25,2<br>6 | 2,3,4,6,7,8<br>,18,20,24 | 2  | P02631,Q9QZQ5                                                                                                   |
| 10639 | 1,5,19,21,<br>22,24,25,2<br>6 | 2,3,4,6,7,8<br>,18,20,23 | 6  | P02631,P16086,P20762,Q498D9,Q5XI22,Q6TMA8                                                                       |
| 10640 | 1,5,19,21,<br>23,24,25,2<br>6 | 2,3,4,6,7,8<br>,18,20,22 | 5  | P02631,P20762,P20766,Q7TPB1,Q9QZQ5                                                                              |
| 10641 | 1,5,19,22,<br>23,24,25,2<br>6 | 2,3,4,6,7,8<br>,18,20,21 | 12 | P00731,P02631,P02761,P16086,P20762,P25031,P42854,P62804,P82471,Q64057,Q7TPB1,Q9QZQ5                             |
| 10642 | 1,5,20,21,<br>22,23,24,2<br>5 | 2,3,4,6,7,8<br>,18,19,26 | 7  | P00774,P02631,P16086,P20761,P20762,P20766,P35280                                                                |
| 10643 | 1,5,20,21,<br>22,23,24,2<br>6 | 2,3,4,6,7,8<br>,18,19,25 | 9  | P00731,P02631,P16086,P20766,P35280,P47967,P98089,Q64057,Q9QZQ5                                                  |

|       |                               |                                |    |                                                                                                   |
|-------|-------------------------------|--------------------------------|----|---------------------------------------------------------------------------------------------------|
| 10644 | 1,5,20,21,<br>22,23,25,2<br>6 | 2,3,4,6,7,8<br>,18,19,24       | 4  | P02631,P16086,Q63532,Q9QZQ5                                                                       |
| 10645 | 1,5,20,21,<br>22,24,25,2<br>6 | 2,3,4,6,7,8<br>,18,19,23       | 12 | P00731,P02625,P02631,P16086,P35467,Q498D9,Q5BJY9,Q5XI22,Q63532,Q64057,Q8CJD3,Q99MH3               |
| 10646 | 1,5,20,21,<br>23,24,25,2<br>6 | 2,3,4,6,7,8<br>,18,19,22       | 9  | D4A1J4,P02625,P02631,P16086,P20766,Q63532,Q7TPB1,Q80WL1,Q9QZQ5                                    |
| 10647 | 1,5,20,22,<br>23,24,25,2<br>6 | 2,3,4,6,7,8<br>,18,19,21       | 11 | D4A1J4,P00731,P02631,P05964,P16086,P25031,P42854,Q64057,Q7TPB1,Q80WL1,Q9QZQ5                      |
| 10648 | 1,5,21,22,<br>23,24,25,2<br>6 | 2,3,4,6,7,8<br>,18,19,20       | 6  | P00731,P02631,P16086,P35280,Q7TPB1,Q9QZQ5                                                         |
| 10649 | 1,6,7,8,18,<br>19,20,21       | 2,3,4,5,22,<br>23,24,25,2<br>6 | 14 | O35547,P00731,P02782,P08723,P11598,P13432,P34901,P35281,P36376,Q62902,Q6AYL6,Q6AYR8,Q6AYR9,Q9JI85 |
| 10650 | 1,6,7,8,18,<br>19,20,22       | 2,3,4,5,21,<br>23,24,25,2<br>6 | 1  | P34901                                                                                            |
| 10651 | 1,6,7,8,18,<br>19,20,23       | 2,3,4,5,21,<br>22,24,25,2<br>6 | 2  | P15399,Q8CJD3                                                                                     |
| 10652 | 1,6,7,8,18,<br>19,20,24       | 2,3,4,5,21,<br>22,23,25,2<br>6 | 1  | P34901                                                                                            |
| 10653 | 1,6,7,8,18,<br>19,20,25       | 2,3,4,5,21,<br>22,23,24,2<br>6 | 6  | P10715,P12020,P19629,P31044,P34901,P35280                                                         |
| 10654 | 1,6,7,8,18,<br>19,20,26       | 2,3,4,5,21,<br>22,23,24,2<br>5 | 2  | P34901,P35280                                                                                     |
| 10655 | 1,6,7,8,18,<br>19,21,22       | 2,3,4,5,20,<br>23,24,25,2<br>6 | 13 | D4A1J4,O35547,P02782,P08723,P11598,P13432,P19218,P22283,P34901,P35281,P97840,Q8CJ52,Q9JI85        |
| 10656 | 1,6,7,8,18,<br>19,21,23       | 2,3,4,5,20,<br>22,24,25,2<br>6 | 9  | O35547,P02782,P02803,P08723,P11598,P15399,P35281,Q6AYL6,Q8CJD3                                    |
| 10657 | 1,6,7,8,18,<br>19,21,24       | 2,3,4,5,20,<br>22,23,25,2<br>6 | 7  | P02782,P08723,P13432,P35281,P36376,Q62997,Q6AYL6                                                  |
| 10658 | 1,6,7,8,18,<br>19,21,25       | 2,3,4,5,20,<br>22,23,24,2<br>6 | 12 | P00731,P02803,P08723,P10715,P19629,P34901,P35281,P47967,P97840,Q62997,Q6AYL6,Q9QZK9               |

|       |                         |                                |    |                                                                       |
|-------|-------------------------|--------------------------------|----|-----------------------------------------------------------------------|
| 10659 | 1,6,7,8,18,<br>19,21,26 | 2,3,4,5,20,<br>22,23,24,2<br>5 | 5  | P02782,P08723,P11598,P34901,P35281                                    |
| 10660 | 1,6,7,8,18,<br>19,22,23 | 2,3,4,5,20,<br>21,24,25,2<br>6 | 2  | P15399,Q8CJD3                                                         |
| 10661 | 1,6,7,8,18,<br>19,22,24 | 2,3,4,5,20,<br>21,23,25,2<br>6 | 0  |                                                                       |
| 10662 | 1,6,7,8,18,<br>19,22,25 | 2,3,4,5,20,<br>21,23,24,2<br>6 | 8  | P06911,P10715,P12020,P19629,P31044,P34901,P97840,Q5GRG2               |
| 10663 | 1,6,7,8,18,<br>19,22,26 | 2,3,4,5,20,<br>21,23,24,2<br>5 | 1  | P34901                                                                |
| 10664 | 1,6,7,8,18,<br>19,23,24 | 2,3,4,5,20,<br>21,22,25,2<br>6 | 1  | P15399                                                                |
| 10665 | 1,6,7,8,18,<br>19,23,25 | 2,3,4,5,20,<br>21,22,24,2<br>6 | 10 | P02803,P06911,P10715,P12020,P15399,P19629,P31044,P63036,Q5GRG2,Q99041 |
| 10666 | 1,6,7,8,18,<br>19,23,26 | 2,3,4,5,20,<br>21,22,24,2<br>5 | 3  | P15399,P35467,Q6P6Q2                                                  |
| 10667 | 1,6,7,8,18,<br>19,24,25 | 2,3,4,5,20,<br>21,22,23,2<br>6 | 4  | P10715,P12020,P19629,P34901                                           |
| 10668 | 1,6,7,8,18,<br>19,24,26 | 2,3,4,5,20,<br>21,22,23,2<br>5 | 0  |                                                                       |
| 10669 | 1,6,7,8,18,<br>19,25,26 | 2,3,4,5,20,<br>21,22,23,2<br>4 | 5  | P10715,P19629,P34901,P35280,Q9QZK9                                    |
| 10670 | 1,6,7,8,18,<br>20,21,22 | 2,3,4,5,19,<br>23,24,25,2<br>6 | 8  | P02782,P08723,P11598,P13432,P34901,Q62902,Q8CJ52,Q9JI85               |
| 10671 | 1,6,7,8,18,<br>20,21,23 | 2,3,4,5,19,<br>22,24,25,2<br>6 | 7  | P02782,P08723,P11598,P13432,Q6AYL6,Q6AYR8,Q9JI85                      |
| 10672 | 1,6,7,8,18,<br>20,21,24 | 2,3,4,5,19,<br>22,23,25,2<br>6 | 5  | P02782,P08723,P13432,Q6AYL6,Q6AYR8                                    |
| 10673 | 1,6,7,8,18,<br>20,21,25 | 2,3,4,5,19,<br>22,23,24,2<br>6 | 9  | P08723,P10715,P11598,P13432,P19629,P34901,P47727,Q6AYL6,Q9WTT6        |

|       |                         |                                |    |                                                                                     |
|-------|-------------------------|--------------------------------|----|-------------------------------------------------------------------------------------|
| 10674 | 1,6,7,8,18,<br>20,21,26 | 2,3,4,5,19,<br>22,23,24,2<br>5 | 4  | P11598,P13432,P34901,Q6AYR8                                                         |
| 10675 | 1,6,7,8,18,<br>20,22,23 | 2,3,4,5,19,<br>21,24,25,2<br>6 | 1  | Q8CJD3                                                                              |
| 10676 | 1,6,7,8,18,<br>20,22,24 | 2,3,4,5,19,<br>21,23,25,2<br>6 | 0  |                                                                                     |
| 10677 | 1,6,7,8,18,<br>20,22,25 | 2,3,4,5,19,<br>21,23,24,2<br>6 | 6  | P06911,P10715,P12020,P19629,P34901,Q5GRG2                                           |
| 10678 | 1,6,7,8,18,<br>20,22,26 | 2,3,4,5,19,<br>21,23,24,2<br>5 | 1  | P34901                                                                              |
| 10679 | 1,6,7,8,18,<br>20,23,24 | 2,3,4,5,19,<br>21,22,25,2<br>6 | 0  |                                                                                     |
| 10680 | 1,6,7,8,18,<br>20,23,25 | 2,3,4,5,19,<br>21,22,24,2<br>6 | 6  | P10715,P12020,P19629,P47727,P63036,Q5GRG2                                           |
| 10681 | 1,6,7,8,18,<br>20,23,26 | 2,3,4,5,19,<br>21,22,24,2<br>5 | 2  | Q6IG02,Q6P6Q2                                                                       |
| 10682 | 1,6,7,8,18,<br>20,24,25 | 2,3,4,5,19,<br>21,22,23,2<br>6 | 4  | P10715,P19629,P34901,P63036                                                         |
| 10683 | 1,6,7,8,18,<br>20,24,26 | 2,3,4,5,19,<br>21,22,23,2<br>5 | 1  | P10715                                                                              |
| 10684 | 1,6,7,8,18,<br>20,25,26 | 2,3,4,5,19,<br>21,22,23,2<br>4 | 4  | P10715,P19629,P34901,P35280                                                         |
| 10685 | 1,6,7,8,18,<br>21,22,23 | 2,3,4,5,19,<br>20,24,25,2<br>6 | 8  | O35547,P02782,P08723,P11598,P13432,P22283,Q8CJ52,Q9JI85                             |
| 10686 | 1,6,7,8,18,<br>21,22,24 | 2,3,4,5,19,<br>20,23,25,2<br>6 | 5  | P02782,P08723,P13432,P19218,Q8CJ52                                                  |
| 10687 | 1,6,7,8,18,<br>21,22,25 | 2,3,4,5,19,<br>20,23,24,2<br>6 | 12 | D4A1J4,P06911,P08723,P10715,P11598,P12020,P13432,P19218,P19629,P34901,P97840,Q5GRG2 |
| 10688 | 1,6,7,8,18,<br>21,22,26 | 2,3,4,5,19,<br>20,23,24,2<br>5 | 6  | P02782,P08723,P11598,P13432,P22283,Q8CJ52                                           |

|       |                         |                                |    |                                                                                            |
|-------|-------------------------|--------------------------------|----|--------------------------------------------------------------------------------------------|
| 10689 | 1,6,7,8,18,<br>21,23,24 | 2,3,4,5,19,<br>20,22,25,2<br>6 | 5  | P02782,P08723,P13432,Q62997,Q6AYL6                                                         |
| 10690 | 1,6,7,8,18,<br>21,23,25 | 2,3,4,5,19,<br>20,22,24,2<br>6 | 13 | P07150,P08723,P10715,P12020,P14669,P19629,P47727,Q5GRG2,Q62997,Q6AYL6,Q6P6R2,Q6P9T8,Q9WTT6 |
| 10691 | 1,6,7,8,18,<br>21,23,26 | 2,3,4,5,19,<br>20,22,24,2<br>5 | 6  | P11598,P14669,P22283,Q62997,Q6IFV1,Q6P6Q2                                                  |
| 10692 | 1,6,7,8,18,<br>21,24,25 | 2,3,4,5,19,<br>20,22,23,2<br>6 | 7  | O54728,P10715,P13432,P19629,P22006,Q62997,Q6AYL6                                           |
| 10693 | 1,6,7,8,18,<br>21,24,26 | 2,3,4,5,19,<br>20,22,23,2<br>5 | 3  | P13432,Q62997,Q6AYR8                                                                       |
| 10694 | 1,6,7,8,18,<br>21,25,26 | 2,3,4,5,19,<br>20,22,23,2<br>4 | 12 | P10715,P11598,P19629,P22006,P31430,P34901,P55091,P82995,Q62997,Q6P9T8,Q9QZK9,Q9WTT6        |
| 10695 | 1,6,7,8,18,<br>22,23,24 | 2,3,4,5,19,<br>20,21,25,2<br>6 | 0  |                                                                                            |
| 10696 | 1,6,7,8,18,<br>22,23,25 | 2,3,4,5,19,<br>20,21,24,2<br>6 | 6  | P06911,P10715,P12020,P19629,P31044,Q5GRG2                                                  |
| 10697 | 1,6,7,8,18,<br>22,23,26 | 2,3,4,5,19,<br>20,21,24,2<br>5 | 2  | Q6P6Q2,Q8VD89                                                                              |
| 10698 | 1,6,7,8,18,<br>22,24,25 | 2,3,4,5,19,<br>20,21,23,2<br>6 | 5  | P06911,P10715,P12020,P19629,Q5GRG2                                                         |
| 10699 | 1,6,7,8,18,<br>22,24,26 | 2,3,4,5,19,<br>20,21,23,2<br>5 | 1  | Q8VD89                                                                                     |
| 10700 | 1,6,7,8,18,<br>22,25,26 | 2,3,4,5,19,<br>20,21,23,2<br>4 | 6  | P06911,P10715,P12020,P19629,P34901,Q5GRG2                                                  |
| 10701 | 1,6,7,8,18,<br>23,24,25 | 2,3,4,5,19,<br>20,21,22,2<br>6 | 7  | P06911,P10715,P12020,P19629,P63036,Q5GRG2,Q62997                                           |
| 10702 | 1,6,7,8,18,<br>23,24,26 | 2,3,4,5,19,<br>20,21,22,2<br>5 | 2  | Q6P6Q2,Q8VD89                                                                              |
| 10703 | 1,6,7,8,18,<br>23,25,26 | 2,3,4,5,19,<br>20,21,22,2<br>4 | 5  | P10715,P12020,P19629,Q6P6Q2,Q6P9T8                                                         |



|       |                         |                                |    |                                                                                     |
|-------|-------------------------|--------------------------------|----|-------------------------------------------------------------------------------------|
| 10704 | 1,6,7,8,18,<br>24,25,26 | 2,3,4,5,19,<br>20,21,22,2<br>3 | 5  | P10715,P19629,P55091,Q62997,Q7TPB1                                                  |
| 10705 | 1,6,7,8,19,<br>20,21,22 | 2,3,4,5,18,<br>23,24,25,2<br>6 | 9  | P00774,P02782,P08723,P12785,P13432,P30120,P34901,P35281,Q62902                      |
| 10706 | 1,6,7,8,19,<br>20,21,23 | 2,3,4,5,18,<br>22,24,25,2<br>6 | 7  | P00774,P02782,P08723,P15399,P35281,Q62902,Q6AYL6                                    |
| 10707 | 1,6,7,8,19,<br>20,21,24 | 2,3,4,5,18,<br>22,23,25,2<br>6 | 6  | P00774,P02782,P12785,P13432,P35281,Q6AYL6                                           |
| 10708 | 1,6,7,8,19,<br>20,21,25 | 2,3,4,5,18,<br>22,23,24,2<br>6 | 12 | P08723,P10715,P12020,P12785,P19629,P30120,P34901,P35281,P47727,P47967,P97840,Q6AYL6 |
| 10709 | 1,6,7,8,19,<br>20,21,26 | 2,3,4,5,18,<br>22,23,24,2<br>5 | 4  | P02782,P34901,P35281,Q99068                                                         |
| 10710 | 1,6,7,8,19,<br>20,22,23 | 2,3,4,5,18,<br>21,24,25,2<br>6 | 6  | P00774,P15399,P31430,P55091,P98089,Q8CJD3                                           |
| 10711 | 1,6,7,8,19,<br>20,22,24 | 2,3,4,5,18,<br>21,23,25,2<br>6 | 5  | P00774,P12785,P31430,P34901,Q99MH3                                                  |
| 10712 | 1,6,7,8,19,<br>20,22,25 | 2,3,4,5,18,<br>21,23,24,2<br>6 | 8  | P00774,P06911,P10715,P12020,P12785,P19629,P34901,Q5GRG2                             |
| 10713 | 1,6,7,8,19,<br>20,22,26 | 2,3,4,5,18,<br>21,23,24,2<br>5 | 5  | P00774,P12785,P31430,P34901,Q99MH3                                                  |
| 10714 | 1,6,7,8,19,<br>20,23,24 | 2,3,4,5,18,<br>21,22,25,2<br>6 | 3  | P00774,P15399,P31430                                                                |
| 10715 | 1,6,7,8,19,<br>20,23,25 | 2,3,4,5,18,<br>21,22,24,2<br>6 | 9  | P06911,P10715,P12020,P15399,P19629,P47727,P63036,Q5GRG2,Q99041                      |
| 10716 | 1,6,7,8,19,<br>20,23,26 | 2,3,4,5,18,<br>21,22,24,2<br>5 | 2  | P15399,P31430                                                                       |
| 10717 | 1,6,7,8,19,<br>20,24,25 | 2,3,4,5,18,<br>21,22,23,2<br>6 | 7  | P00774,P10715,P12020,P12785,P19629,P34901,P63036                                    |
| 10718 | 1,6,7,8,19,<br>20,24,26 | 2,3,4,5,18,<br>21,22,23,2<br>5 | 1  | P34901                                                                              |

|       |                         |                                |    |                                                                                            |
|-------|-------------------------|--------------------------------|----|--------------------------------------------------------------------------------------------|
| 10719 | 1,6,7,8,19,<br>20,25,26 | 2,3,4,5,18,<br>21,22,23,2<br>4 | 5  | P10715,P12020,P19629,P34901,P35280                                                         |
| 10720 | 1,6,7,8,19,<br>21,22,23 | 2,3,4,5,18,<br>20,24,25,2<br>6 | 8  | P00774,P02782,P08723,P13432,P15399,P22282,P35281,Q62902                                    |
| 10721 | 1,6,7,8,19,<br>21,22,24 | 2,3,4,5,18,<br>20,23,25,2<br>6 | 7  | P00774,P02782,P08723,P12785,P13432,P19218,Q4FZU2                                           |
| 10722 | 1,6,7,8,19,<br>21,22,25 | 2,3,4,5,18,<br>20,23,24,2<br>6 | 12 | D4A1J4,P06911,P08723,P12020,P12785,P19218,P19629,P34901,P47967,P97840,Q5GRG2,Q9QZK9        |
| 10723 | 1,6,7,8,19,<br>21,22,26 | 2,3,4,5,18,<br>20,23,24,2<br>5 | 7  | P02782,P08723,P12785,P13432,P34901,P35281,Q99068                                           |
| 10724 | 1,6,7,8,19,<br>21,23,24 | 2,3,4,5,18,<br>20,22,25,2<br>6 | 6  | P02782,P13432,P15399,P35281,Q62997,Q99041                                                  |
| 10725 | 1,6,7,8,19,<br>21,23,25 | 2,3,4,5,18,<br>20,22,24,2<br>6 | 13 | P06911,P07150,P12020,P15399,P19629,P35281,P47967,P97840,Q5GRG2,Q6P6R2,Q99041,Q9QZK9,Q9WTT6 |
| 10726 | 1,6,7,8,19,<br>21,23,26 | 2,3,4,5,18,<br>20,22,24,2<br>5 | 3  | P02782,P15399,P35281                                                                       |
| 10727 | 1,6,7,8,19,<br>21,24,25 | 2,3,4,5,18,<br>20,22,23,2<br>6 | 9  | P12020,P12785,P13432,P19629,P22006,P47967,P97840,Q62997,Q9QZK9                             |
| 10728 | 1,6,7,8,19,<br>21,24,26 | 2,3,4,5,18,<br>20,22,23,2<br>5 | 3  | P02782,P13432,Q62997                                                                       |
| 10729 | 1,6,7,8,19,<br>21,25,26 | 2,3,4,5,18,<br>20,22,23,2<br>4 | 7  | P12020,P19629,P22006,P34901,P97840,Q9QZK9,Q9WTT6                                           |
| 10730 | 1,6,7,8,19,<br>22,23,24 | 2,3,4,5,18,<br>20,21,25,2<br>6 | 3  | P00774,P15399,P31430                                                                       |
| 10731 | 1,6,7,8,19,<br>22,23,25 | 2,3,4,5,18,<br>20,21,24,2<br>6 | 6  | P06911,P12020,P15399,P19629,Q5GRG2,Q99041                                                  |
| 10732 | 1,6,7,8,19,<br>22,23,26 | 2,3,4,5,18,<br>20,21,24,2<br>5 | 2  | P15399,P31430                                                                              |
| 10733 | 1,6,7,8,19,<br>22,24,25 | 2,3,4,5,18,<br>20,21,23,2<br>6 | 11 | P00774,P01835,P06911,P10715,P12020,P12785,P19629,P34901,Q4FZU2,Q5GRG2,Q6IFU8               |

|       |                         |                                |    |                                                                                            |
|-------|-------------------------|--------------------------------|----|--------------------------------------------------------------------------------------------|
| 10734 | 1,6,7,8,19,<br>22,24,26 | 2,3,4,5,18,<br>20,21,23,2<br>5 | 2  | P12785,P31430                                                                              |
| 10735 | 1,6,7,8,19,<br>22,25,26 | 2,3,4,5,18,<br>20,21,23,2<br>4 | 8  | P06911,P12020,P12785,P19629,P34901,Q5GRG2,Q9JJS8,Q9QZK9                                    |
| 10736 | 1,6,7,8,19,<br>23,24,25 | 2,3,4,5,18,<br>20,21,22,2<br>6 | 7  | P06911,P12020,P15399,P19629,P63036,Q5GRG2,Q99041                                           |
| 10737 | 1,6,7,8,19,<br>23,24,26 | 2,3,4,5,18,<br>20,21,22,2<br>5 | 2  | P15399,P31430                                                                              |
| 10738 | 1,6,7,8,19,<br>23,25,26 | 2,3,4,5,18,<br>20,21,22,2<br>4 | 8  | P06911,P12020,P15399,P19629,Q5GRG2,Q6P9T8,Q99041,Q9QZK9                                    |
| 10739 | 1,6,7,8,19,<br>24,25,26 | 2,3,4,5,18,<br>20,21,22,2<br>3 | 5  | P10715,P12020,P19629,P34901,Q9QZK9                                                         |
| 10740 | 1,6,7,8,20,<br>21,22,23 | 2,3,4,5,18,<br>19,24,25,2<br>6 | 5  | P00774,P02782,P08723,P13432,Q62902                                                         |
| 10741 | 1,6,7,8,20,<br>21,22,24 | 2,3,4,5,18,<br>19,23,25,2<br>6 | 8  | P00774,P02782,P08723,P12785,P13432,P35467,Q5XFX0,Q99MH3                                    |
| 10742 | 1,6,7,8,20,<br>21,22,25 | 2,3,4,5,18,<br>19,23,24,2<br>6 | 13 | P06911,P08723,P10715,P12020,P12785,P13432,P19629,P30120,P34901,P35467,P47727,Q03191,Q5GRG2 |
| 10743 | 1,6,7,8,20,<br>21,22,26 | 2,3,4,5,18,<br>19,23,24,2<br>5 | 6  | P02782,P12785,P13432,P34901,Q99068,Q99MH3                                                  |
| 10744 | 1,6,7,8,20,<br>21,23,24 | 2,3,4,5,18,<br>19,22,25,2<br>6 | 2  | P13432,Q6AYL6                                                                              |
| 10745 | 1,6,7,8,20,<br>21,23,25 | 2,3,4,5,18,<br>19,22,24,2<br>6 | 11 | P10715,P12020,P19629,P30120,P47727,P63036,Q5GRG2,Q6AYL6,Q6P6R2,Q99041,Q9WTT6               |
| 10746 | 1,6,7,8,20,<br>21,23,26 | 2,3,4,5,18,<br>19,22,24,2<br>5 | 2  | F1LM93,Q6IFV1                                                                              |
| 10747 | 1,6,7,8,20,<br>21,24,25 | 2,3,4,5,18,<br>19,22,23,2<br>6 | 9  | P10715,P12785,P13432,P19629,P35467,Q5XFX0,Q64194,Q6AYL6,Q9WTT6                             |
| 10748 | 1,6,7,8,20,<br>21,24,26 | 2,3,4,5,18,<br>19,22,23,2<br>5 | 3  | P13432,Q6AYR8,Q99MH3                                                                       |

|       |                         |                                |    |                                                                                     |
|-------|-------------------------|--------------------------------|----|-------------------------------------------------------------------------------------|
| 10749 | 1,6,7,8,20,<br>21,25,26 | 2,3,4,5,18,<br>19,22,23,2<br>4 | 6  | P10715,P19629,P34901,Q99068,Q9QZK9,Q9WTT6                                           |
| 10750 | 1,6,7,8,20,<br>22,23,24 | 2,3,4,5,18,<br>19,21,25,2<br>6 | 3  | P00774,P31430,Q63617                                                                |
| 10751 | 1,6,7,8,20,<br>22,23,25 | 2,3,4,5,18,<br>19,21,24,2<br>6 | 6  | P06911,P10715,P12020,P19629,P47727,Q5GRG2                                           |
| 10752 | 1,6,7,8,20,<br>22,23,26 | 2,3,4,5,18,<br>19,21,24,2<br>5 | 0  |                                                                                     |
| 10753 | 1,6,7,8,20,<br>22,24,25 | 2,3,4,5,18,<br>19,21,23,2<br>6 | 11 | P00774,P06911,P10715,P12020,P12785,P19629,P35467,Q03191,Q5GRG2,Q64194,Q6AY61        |
| 10754 | 1,6,7,8,20,<br>22,24,26 | 2,3,4,5,18,<br>19,21,23,2<br>5 | 2  | P12785,Q99MH3                                                                       |
| 10755 | 1,6,7,8,20,<br>22,25,26 | 2,3,4,5,18,<br>19,21,23,2<br>4 | 8  | P06911,P10715,P12020,P12785,P19629,P34901,Q03191,Q5GRG2                             |
| 10756 | 1,6,7,8,20,<br>23,24,25 | 2,3,4,5,18,<br>19,21,22,2<br>6 | 6  | P06911,P10715,P12020,P19629,P63036,Q5GRG2                                           |
| 10757 | 1,6,7,8,20,<br>23,24,26 | 2,3,4,5,18,<br>19,21,22,2<br>5 | 0  |                                                                                     |
| 10758 | 1,6,7,8,20,<br>23,25,26 | 2,3,4,5,18,<br>19,21,22,2<br>4 | 4  | P10715,P12020,P19629,Q5GRG2                                                         |
| 10759 | 1,6,7,8,20,<br>24,25,26 | 2,3,4,5,18,<br>19,21,22,2<br>3 | 3  | P10715,P19629,P34901                                                                |
| 10760 | 1,6,7,8,21,<br>22,23,24 | 2,3,4,5,18,<br>19,20,25,2<br>6 | 3  | P02782,P08723,P13432                                                                |
| 10761 | 1,6,7,8,21,<br>22,23,25 | 2,3,4,5,18,<br>19,20,24,2<br>6 | 11 | P06911,P08723,P12020,P13432,P19629,P47727,Q5GRG2,Q6P6R2,Q99041,Q9QZK9,Q9WTT6        |
| 10762 | 1,6,7,8,21,<br>22,23,26 | 2,3,4,5,18,<br>19,20,24,2<br>5 | 4  | P02782,P13432,P22282,Q6IFV1                                                         |
| 10763 | 1,6,7,8,21,<br>22,24,25 | 2,3,4,5,18,<br>19,20,23,2<br>6 | 12 | P06911,P10715,P12020,P12785,P13432,P19218,P19629,P22006,P35467,Q5GRG2,Q5XFX0,Q64194 |

|       |                          |                                |    |                                                                                     |
|-------|--------------------------|--------------------------------|----|-------------------------------------------------------------------------------------|
| 10764 | 1,6,7,8,21,<br>22,24,26  | 2,3,4,5,18,<br>19,20,23,2<br>5 | 4  | P02782,P12785,P13432,Q99MH3                                                         |
| 10765 | 1,6,7,8,21,<br>22,25,26  | 2,3,4,5,18,<br>19,20,23,2<br>4 | 11 | P06911,P12020,P12785,P13432,P19629,P22006,P34901,Q5GRG2,Q99068,Q9QZK9,Q9WTT6        |
| 10766 | 1,6,7,8,21,<br>23,24,25  | 2,3,4,5,18,<br>19,20,22,2<br>6 | 11 | P06911,P07150,P12020,P13432,P19629,P22006,Q5GRG2,Q62997,Q6P6R2,Q99041,Q9WTT6        |
| 10767 | 1,6,7,8,21,<br>23,24,26  | 2,3,4,5,18,<br>19,20,22,2<br>5 | 4  | P13432,P22006,Q62997,Q6IFV1                                                         |
| 10768 | 1,6,7,8,21,<br>23,25,26  | 2,3,4,5,18,<br>19,20,22,2<br>4 | 12 | P07150,P12020,P14669,P19629,P22006,P83121,Q5GRG2,Q62997,Q6P6R2,Q6P9T8,Q9QZK9,Q9WTT6 |
| 10769 | 1,6,7,8,21,<br>24,25,26  | 2,3,4,5,18,<br>19,20,22,2<br>3 | 7  | P10715,P13432,P19629,P22006,Q62997,Q9QZK9,Q9WTT6                                    |
| 10770 | 1,6,7,8,22,<br>23,24,25  | 2,3,4,5,18,<br>19,20,21,2<br>6 | 5  | P06911,P10715,P12020,P19629,Q5GRG2                                                  |
| 10771 | 1,6,7,8,22,<br>23,24,26  | 2,3,4,5,18,<br>19,20,21,2<br>5 | 1  | P00731                                                                              |
| 10772 | 1,6,7,8,22,<br>23,25,26  | 2,3,4,5,18,<br>19,20,21,2<br>4 | 5  | P06911,P12020,P19629,Q5GRG2,Q9QZK9                                                  |
| 10773 | 1,6,7,8,22,<br>24,25,26  | 2,3,4,5,18,<br>19,20,21,2<br>3 | 7  | P06911,P10715,P12020,P12785,P19629,Q5GRG2,Q9QZK9                                    |
| 10774 | 1,6,7,8,23,<br>24,25,26  | 2,3,4,5,18,<br>19,20,21,2<br>2 | 6  | P06911,P10715,P12020,P19629,Q5GRG2,Q7TPB1                                           |
| 10775 | 1,6,7,18,1<br>9,20,21,22 | 2,3,4,5,8,2<br>3,24,25,26      | 6  | P08723,P13432,P34901,P36374,P97840,Q62902                                           |
| 10776 | 1,6,7,18,1<br>9,20,21,23 | 2,3,4,5,8,2<br>2,24,25,26      | 3  | P15399,P20766,Q6AYL6                                                                |
| 10777 | 1,6,7,18,1<br>9,20,21,24 | 2,3,4,5,8,2<br>2,23,25,26      | 4  | P13432,P20766,Q6AYL6,Q6AYS4                                                         |
| 10778 | 1,6,7,18,1<br>9,20,21,25 | 2,3,4,5,8,2<br>2,23,24,26      | 5  | P20766,P34901,P47967,P97840,Q6AYL6                                                  |
| 10779 | 1,6,7,18,1<br>9,20,21,26 | 2,3,4,5,8,2<br>2,23,24,25      | 3  | P20766,P34901,P36374                                                                |
| 10780 | 1,6,7,18,1<br>9,20,22,23 | 2,3,4,5,8,2<br>1,24,25,26      | 3  | P15399,Q6AYS4,Q8CJD3                                                                |

|       |                          |                           |   |                                                  |
|-------|--------------------------|---------------------------|---|--------------------------------------------------|
| 10781 | 1,6,7,18,1<br>9,20,22,24 | 2,3,4,5,8,2<br>1,23,25,26 | 1 | Q6AYS4                                           |
| 10782 | 1,6,7,18,1<br>9,20,22,25 | 2,3,4,5,8,2<br>1,23,24,26 | 2 | P34901,P97840                                    |
| 10783 | 1,6,7,18,1<br>9,20,22,26 | 2,3,4,5,8,2<br>1,23,24,25 | 4 | P34901,Q5U2V4,Q63751,Q6AYS4                      |
| 10784 | 1,6,7,18,1<br>9,20,23,24 | 2,3,4,5,8,2<br>1,22,25,26 | 4 | P15399,P20766,Q6AYS4,Q80WL1                      |
| 10785 | 1,6,7,18,1<br>9,20,23,25 | 2,3,4,5,8,2<br>1,22,24,26 | 3 | P15399,P63036,Q80WL1                             |
| 10786 | 1,6,7,18,1<br>9,20,23,26 | 2,3,4,5,8,2<br>1,22,24,25 | 2 | P15399,Q6AYS4                                    |
| 10787 | 1,6,7,18,1<br>9,20,24,25 | 2,3,4,5,8,2<br>1,22,23,26 | 3 | P63036,Q6AYS4,Q80WL1                             |
| 10788 | 1,6,7,18,1<br>9,20,24,26 | 2,3,4,5,8,2<br>1,22,23,25 | 2 | Q6AYS4,Q80WL1                                    |
| 10789 | 1,6,7,18,1<br>9,20,25,26 | 2,3,4,5,8,2<br>1,22,23,24 | 3 | P34901,P35053,P35280                             |
| 10790 | 1,6,7,18,1<br>9,21,22,23 | 2,3,4,5,8,2<br>0,24,25,26 | 4 | P08723,P15399,P97840,Q8CJD3                      |
| 10791 | 1,6,7,18,1<br>9,21,22,24 | 2,3,4,5,8,2<br>0,23,25,26 | 3 | P13432,P19218,P97840                             |
| 10792 | 1,6,7,18,1<br>9,21,22,25 | 2,3,4,5,8,2<br>0,23,24,26 | 4 | P08723,P19218,P47967,P97840                      |
| 10793 | 1,6,7,18,1<br>9,21,22,26 | 2,3,4,5,8,2<br>0,23,24,25 | 2 | P36374,P97840                                    |
| 10794 | 1,6,7,18,1<br>9,21,23,24 | 2,3,4,5,8,2<br>0,22,25,26 | 5 | P13432,P15399,P20766,Q62997,Q6AYL6               |
| 10795 | 1,6,7,18,1<br>9,21,23,25 | 2,3,4,5,8,2<br>0,22,24,26 | 4 | P15399,P47967,P97840,Q6AYL6                      |
| 10796 | 1,6,7,18,1<br>9,21,23,26 | 2,3,4,5,8,2<br>0,22,24,25 | 3 | P15399,Q6IFV1,Q6P6Q2                             |
| 10797 | 1,6,7,18,1<br>9,21,24,25 | 2,3,4,5,8,2<br>0,22,23,26 | 6 | P13432,P20766,P22006,P47967,P97840,Q62997        |
| 10798 | 1,6,7,18,1<br>9,21,24,26 | 2,3,4,5,8,2<br>0,22,23,25 | 3 | P13432,P20766,Q62997                             |
| 10799 | 1,6,7,18,1<br>9,21,25,26 | 2,3,4,5,8,2<br>0,22,23,24 | 7 | P22006,P34901,P47967,P82995,P97840,Q62997,Q9QZK9 |
| 10800 | 1,6,7,18,1<br>9,22,23,24 | 2,3,4,5,8,2<br>0,21,25,26 | 2 | P15399,Q6AYS4                                    |
| 10801 | 1,6,7,18,1<br>9,22,23,25 | 2,3,4,5,8,2<br>0,21,24,26 | 5 | P02761,P06911,P12020,P15399,P97840               |
| 10802 | 1,6,7,18,1<br>9,22,23,26 | 2,3,4,5,8,2<br>0,21,24,25 | 1 | P15399                                           |
| 10803 | 1,6,7,18,1<br>9,22,24,25 | 2,3,4,5,8,2<br>0,21,23,26 | 2 | P62804,P97840                                    |

|       |                          |                           |   |                             |
|-------|--------------------------|---------------------------|---|-----------------------------|
| 10804 | 1,6,7,18,1<br>9,22,24,26 | 2,3,4,5,8,2<br>0,21,23,25 | 2 | Q5M819,Q6AYS4               |
| 10805 | 1,6,7,18,1<br>9,22,25,26 | 2,3,4,5,8,2<br>0,21,23,24 | 2 | P34901,P97840               |
| 10806 | 1,6,7,18,1<br>9,23,24,25 | 2,3,4,5,8,2<br>0,21,22,26 | 3 | P15399,P63036,Q80WL1        |
| 10807 | 1,6,7,18,1<br>9,23,24,26 | 2,3,4,5,8,2<br>0,21,22,25 | 3 | P15399,Q6AYS4,Q6IFU7        |
| 10808 | 1,6,7,18,1<br>9,23,25,26 | 2,3,4,5,8,2<br>0,21,22,24 | 1 | P15399                      |
| 10809 | 1,6,7,18,1<br>9,24,25,26 | 2,3,4,5,8,2<br>0,21,22,23 | 1 | Q7TPB1                      |
| 10810 | 1,6,7,18,2<br>0,21,22,23 | 2,3,4,5,8,1<br>9,24,25,26 | 3 | P08723,P13432,Q62902        |
| 10811 | 1,6,7,18,2<br>0,21,22,24 | 2,3,4,5,8,1<br>9,23,25,26 | 1 | P13432                      |
| 10812 | 1,6,7,18,2<br>0,21,22,25 | 2,3,4,5,8,1<br>9,23,24,26 | 3 | P09605;P25809,P13432,P97840 |
| 10813 | 1,6,7,18,2<br>0,21,22,26 | 2,3,4,5,8,1<br>9,23,24,25 | 2 | P13432,P36374               |
| 10814 | 1,6,7,18,2<br>0,21,23,24 | 2,3,4,5,8,1<br>9,22,25,26 | 3 | P13432,P20766,Q6AYL6        |
| 10815 | 1,6,7,18,2<br>0,21,23,25 | 2,3,4,5,8,1<br>9,22,24,26 | 2 | P20766,Q6AYL6               |
| 10816 | 1,6,7,18,2<br>0,21,23,26 | 2,3,4,5,8,1<br>9,22,24,25 | 4 | P20766,Q6IFV1,Q6P6Q2,Q9QUL6 |
| 10817 | 1,6,7,18,2<br>0,21,24,25 | 2,3,4,5,8,1<br>9,22,23,26 | 4 | O54728,P13432,P20766,Q6AYL6 |
| 10818 | 1,6,7,18,2<br>0,21,24,26 | 2,3,4,5,8,1<br>9,22,23,25 | 2 | P13432,P20766               |
| 10819 | 1,6,7,18,2<br>0,21,25,26 | 2,3,4,5,8,1<br>9,22,23,24 | 1 | P34901                      |
| 10820 | 1,6,7,18,2<br>0,22,23,24 | 2,3,4,5,8,1<br>9,21,25,26 | 1 | Q6AYS4                      |
| 10821 | 1,6,7,18,2<br>0,22,23,25 | 2,3,4,5,8,1<br>9,21,24,26 | 2 | P06911,P12020               |
| 10822 | 1,6,7,18,2<br>0,22,23,26 | 2,3,4,5,8,1<br>9,21,24,25 | 1 | Q6P6Q2                      |
| 10823 | 1,6,7,18,2<br>0,22,24,25 | 2,3,4,5,8,1<br>9,21,23,26 | 0 |                             |
| 10824 | 1,6,7,18,2<br>0,22,24,26 | 2,3,4,5,8,1<br>9,21,23,25 | 1 | Q6AYS4                      |
| 10825 | 1,6,7,18,2<br>0,22,25,26 | 2,3,4,5,8,1<br>9,21,23,24 | 1 | P34901                      |
| 10826 | 1,6,7,18,2<br>0,23,24,25 | 2,3,4,5,8,1<br>9,21,22,26 | 2 | P63036,Q80WL1               |

|       |                          |                           |   |                                                                       |
|-------|--------------------------|---------------------------|---|-----------------------------------------------------------------------|
| 10827 | 1,6,7,18,2<br>0,23,24,26 | 2,3,4,5,8,1<br>9,21,22,25 | 4 | Q6AYS4,Q6IFU7,Q6P6Q2,Q80WL1                                           |
| 10828 | 1,6,7,18,2<br>0,23,25,26 | 2,3,4,5,8,1<br>9,21,22,24 | 2 | P83121,Q6P6Q2                                                         |
| 10829 | 1,6,7,18,2<br>0,24,25,26 | 2,3,4,5,8,1<br>9,21,22,23 | 1 | Q80WL1                                                                |
| 10830 | 1,6,7,18,2<br>1,22,23,24 | 2,3,4,5,8,1<br>9,20,25,26 | 1 | P13432                                                                |
| 10831 | 1,6,7,18,2<br>1,22,23,25 | 2,3,4,5,8,1<br>9,20,24,26 | 3 | P06911,P19629,P97840                                                  |
| 10832 | 1,6,7,18,2<br>1,22,23,26 | 2,3,4,5,8,1<br>9,20,24,25 | 3 | Q6IFV1,Q6P6Q2,Q9QUL6                                                  |
| 10833 | 1,6,7,18,2<br>1,22,24,25 | 2,3,4,5,8,1<br>9,20,23,26 | 5 | P13432,P19218,P19629,P22006,P97840                                    |
| 10834 | 1,6,7,18,2<br>1,22,24,26 | 2,3,4,5,8,1<br>9,20,23,25 | 1 | P13432                                                                |
| 10835 | 1,6,7,18,2<br>1,22,25,26 | 2,3,4,5,8,1<br>9,20,23,24 | 3 | P22006,P97840,Q9QZK9                                                  |
| 10836 | 1,6,7,18,2<br>1,23,24,25 | 2,3,4,5,8,1<br>9,20,22,26 | 6 | P13432,P19629,P20766,P22006,Q62997,Q6AYL6                             |
| 10837 | 1,6,7,18,2<br>1,23,24,26 | 2,3,4,5,8,1<br>9,20,22,25 | 7 | P13432,P20766,Q62997,Q6IFU7,Q6IFV1,Q6P6Q2,Q9QUL6                      |
| 10838 | 1,6,7,18,2<br>1,23,25,26 | 2,3,4,5,8,1<br>9,20,22,24 | 4 | P22006,P83121,Q62997,Q6P6Q2                                           |
| 10839 | 1,6,7,18,2<br>1,24,25,26 | 2,3,4,5,8,1<br>9,20,22,23 | 4 | P13432,P22006,P55091,Q62997                                           |
| 10840 | 1,6,7,18,2<br>2,23,24,25 | 2,3,4,5,8,1<br>9,20,21,26 | 4 | P06911,P12020,P19629,P62804                                           |
| 10841 | 1,6,7,18,2<br>2,23,24,26 | 2,3,4,5,8,1<br>9,20,21,25 | 2 | Q6IFU7,Q8VD89                                                         |
| 10842 | 1,6,7,18,2<br>2,23,25,26 | 2,3,4,5,8,1<br>9,20,21,24 | 1 | P06911                                                                |
| 10843 | 1,6,7,18,2<br>2,24,25,26 | 2,3,4,5,8,1<br>9,20,21,23 | 0 |                                                                       |
| 10844 | 1,6,7,18,2<br>3,24,25,26 | 2,3,4,5,8,1<br>9,20,21,22 | 2 | P19629,Q7TPB1                                                         |
| 10845 | 1,6,7,19,2<br>0,21,22,23 | 2,3,4,5,8,1<br>8,24,25,26 | 5 | P00774,P15399,P55091,Q62902,Q6AYS4                                    |
| 10846 | 1,6,7,19,2<br>0,21,22,24 | 2,3,4,5,8,1<br>8,23,25,26 | 9 | P00714,P00774,P12785,P13432,P35467,Q64194,Q6AY61,Q6AYS4,Q99MH3        |
| 10847 | 1,6,7,19,2<br>0,21,22,25 | 2,3,4,5,8,1<br>8,23,24,26 | 9 | P00774,P09605,P25809,P12785,P34901,P35467,P47967,P97840,Q64194,Q6AY61 |
| 10848 | 1,6,7,19,2<br>0,21,22,26 | 2,3,4,5,8,1<br>8,23,24,25 | 3 | P34901,Q6AYS4,Q99MH3                                                  |
| 10849 | 1,6,7,19,2<br>0,21,23,24 | 2,3,4,5,8,1<br>8,22,25,26 | 5 | P00774,P13432,P15399,P20766,Q6AYS4                                    |



|       |                                                 |    |                                                                                     |
|-------|-------------------------------------------------|----|-------------------------------------------------------------------------------------|
| 10850 | 1,6,7,19,2 2,3,4,5,8,1<br>0,21,23,25 8,22,24,26 | 5  | P12020,P15399,P20766,P47967,P97840                                                  |
| 10851 | 1,6,7,19,2 2,3,4,5,8,1<br>0,21,23,26 8,22,24,25 | 2  | P15399,Q6AYS4                                                                       |
| 10852 | 1,6,7,19,2 2,3,4,5,8,1<br>0,21,24,25 8,22,23,26 | 8  | P13432,P20766,P35467,P47967,P97840,Q64194,Q6AY61,Q6AYS4                             |
| 10853 | 1,6,7,19,2 2,3,4,5,8,1<br>0,21,24,26 8,22,23,25 | 4  | P13432,P20766,Q6AYS4,Q99MH3                                                         |
| 10854 | 1,6,7,19,2 2,3,4,5,8,1<br>0,21,25,26 8,22,23,24 | 3  | P34901,P97840,Q9QZK9                                                                |
| 10855 | 1,6,7,19,2 2,3,4,5,8,1<br>0,22,23,24 8,21,25,26 | 7  | P00774,P15399,P31430,P55091,P98089,Q6AYS4,Q80WL1                                    |
| 10856 | 1,6,7,19,2 2,3,4,5,8,1<br>0,22,23,25 8,21,24,26 | 5  | P00774,P06911,P12020,P15399,Q5GRG2                                                  |
| 10857 | 1,6,7,19,2 2,3,4,5,8,1<br>0,22,23,26 8,21,24,25 | 5  | P00774,P15399,P31430,P98089,Q6AYS4                                                  |
| 10858 | 1,6,7,19,2 2,3,4,5,8,1<br>0,22,24,25 8,21,23,26 | 7  | P00774,P12785,P35467,Q64194,Q6AY61,Q6AYS4,Q80WL1                                    |
| 10859 | 1,6,7,19,2 2,3,4,5,8,1<br>0,22,24,26 8,21,23,25 | 5  | P00774,P31430,P98089,Q6AYS4,Q99MH3                                                  |
| 10860 | 1,6,7,19,2 2,3,4,5,8,1<br>0,22,25,26 8,21,23,24 | 2  | P34901,Q6AYS4                                                                       |
| 10861 | 1,6,7,19,2 2,3,4,5,8,1<br>0,23,24,25 8,21,22,26 | 5  | P12020,P15399,P63036,Q6AYS4,Q80WL1                                                  |
| 10862 | 1,6,7,19,2 2,3,4,5,8,1<br>0,23,24,26 8,21,22,25 | 5  | P15399,P31430,P98089,Q6AYS4,Q80WL1                                                  |
| 10863 | 1,6,7,19,2 2,3,4,5,8,1<br>0,23,25,26 8,21,22,24 | 5  | P12020,P15399,P83121,Q6AYS4,Q80WL1                                                  |
| 10864 | 1,6,7,19,2 2,3,4,5,8,1<br>0,24,25,26 8,21,22,23 | 3  | P34901,Q6AYS4,Q80WL1                                                                |
| 10865 | 1,6,7,19,2 2,3,4,5,8,1<br>1,22,23,24 8,20,25,26 | 4  | P00774,P13432,P15399,Q6AYS4                                                         |
| 10866 | 1,6,7,19,2 2,3,4,5,8,1<br>1,22,23,25 8,20,24,26 | 7  | P06911,P12020,P15399,P47967,P97840,Q5GRG2,Q9QZK9                                    |
| 10867 | 1,6,7,19,2 2,3,4,5,8,1<br>1,22,23,26 8,20,24,25 | 1  | P15399                                                                              |
| 10868 | 1,6,7,19,2 2,3,4,5,8,1<br>1,22,24,25 8,20,23,26 | 12 | P12785,P13432,P19218,P22006,P35467,P47967,P97840,Q4FZU2,Q64194,Q6AY61,Q6IG02,Q6TMA8 |
| 10869 | 1,6,7,19,2 2,3,4,5,8,1<br>1,22,24,26 8,20,23,25 | 3  | P13432,Q6AYS4,Q6TMA8                                                                |
| 10870 | 1,6,7,19,2 2,3,4,5,8,1<br>1,22,25,26 8,20,23,24 | 4  | P22006,P34901,P97840,Q9QZK9                                                         |
| 10871 | 1,6,7,19,2 2,3,4,5,8,1<br>1,23,24,25 8,20,22,26 | 7  | P12020,P15399,P19629,P20766,P22006,P97840,Q62997                                    |
| 10872 | 1,6,7,19,2 2,3,4,5,8,1<br>1,23,24,26 8,20,22,25 | 2  | P15399,Q6AYS4                                                                       |

|       |                                                 |   |                                                                |
|-------|-------------------------------------------------|---|----------------------------------------------------------------|
| 10873 | 1,6,7,19,2 2,3,4,5,8,1<br>1,23,25,26 8,20,22,24 | 5 | P15399,P22006,P83121,P97840,Q9QZK9                             |
| 10874 | 1,6,7,19,2 2,3,4,5,8,1<br>1,24,25,26 8,20,22,23 | 4 | P22006,P97840,Q62997,Q9QZK9                                    |
| 10875 | 1,6,7,19,2 2,3,4,5,8,1<br>2,23,24,25 8,20,21,26 | 6 | P06911,P12020,P15399,P19629,P62804,Q5GRG2                      |
| 10876 | 1,6,7,19,2 2,3,4,5,8,1<br>2,23,24,26 8,20,21,25 | 5 | P00731,P15399,P31430,P98089,Q6AYS4                             |
| 10877 | 1,6,7,19,2 2,3,4,5,8,1<br>2,23,25,26 8,20,21,24 | 5 | P06911,P12020,P15399,Q5GRG2,Q9QZK9                             |
| 10878 | 1,6,7,19,2 2,3,4,5,8,1<br>2,24,25,26 8,20,21,23 | 4 | Q5XI22,Q6AYS4,Q6TMA8,Q9QZK9                                    |
| 10879 | 1,6,7,19,2 2,3,4,5,8,1<br>3,24,25,26 8,20,21,22 | 5 | P12020,P15399,Q6AYS4,Q7TPB1,Q80WL1                             |
| 10880 | 1,6,7,20,2 2,3,4,5,8,1<br>1,22,23,24 8,19,25,26 | 3 | P00774,P13432,Q6AYS4                                           |
| 10881 | 1,6,7,20,2 2,3,4,5,8,1<br>1,22,23,25 8,19,24,26 | 3 | P06911,P09605,P25809,P12020                                    |
| 10882 | 1,6,7,20,2 2,3,4,5,8,1<br>1,22,23,26 8,19,24,25 | 0 |                                                                |
| 10883 | 1,6,7,20,2 2,3,4,5,8,1<br>1,22,24,25 8,19,23,26 | 8 | P09605,P25809,P12785,P13432,P35467,Q03191,Q5XFX0,Q64194,Q6AY61 |
| 10884 | 1,6,7,20,2 2,3,4,5,8,1<br>1,22,24,26 8,19,23,25 | 6 | P02803,P13432,Q03191,Q64194,Q6AYS4,Q99MH3                      |
| 10885 | 1,6,7,20,2 2,3,4,5,8,1<br>1,22,25,26 8,19,23,24 | 3 | P09605,P25809,Q03191,Q5XI22                                    |
| 10886 | 1,6,7,20,2 2,3,4,5,8,1<br>1,23,24,25 8,19,22,26 | 6 | P13432,P19629,P20766,P22006,P63036,Q6P6R2                      |
| 10887 | 1,6,7,20,2 2,3,4,5,8,1<br>1,23,24,26 8,19,22,25 | 4 | P13432,P20766,Q6AYS4,Q6IFV1                                    |
| 10888 | 1,6,7,20,2 2,3,4,5,8,1<br>1,23,25,26 8,19,22,24 | 1 | P83121                                                         |
| 10889 | 1,6,7,20,2 2,3,4,5,8,1<br>1,24,25,26 8,19,22,23 | 5 | P13432,P20766,P22006,Q03191,Q64194                             |
| 10890 | 1,6,7,20,2 2,3,4,5,8,1<br>2,23,24,25 8,19,21,26 | 5 | P06911,P12020,P19629,Q5GRG2,Q80WL1                             |
| 10891 | 1,6,7,20,2 2,3,4,5,8,1<br>2,23,24,26 8,19,21,25 | 5 | P00731,P02803,P31430,P98089,Q6AYS4                             |
| 10892 | 1,6,7,20,2 2,3,4,5,8,1<br>2,23,25,26 8,19,21,24 | 3 | P06911,P12020,P83121                                           |
| 10893 | 1,6,7,20,2 2,3,4,5,8,1<br>2,24,25,26 8,19,21,23 | 7 | P00731,P02803,Q03191,Q5XI22,Q64194,Q6AYS4,Q99MH3               |
| 10894 | 1,6,7,20,2 2,3,4,5,8,1<br>3,24,25,26 8,19,21,22 | 3 | Q6AYS4,Q7TPB1,Q80WL1                                           |
| 10895 | 1,6,7,21,2 2,3,4,5,8,1<br>2,23,24,25 8,19,20,26 | 6 | P06911,P12020,P13432,P19629,P22006,Q63355                      |

|       |                          |                           |   |                                                                |
|-------|--------------------------|---------------------------|---|----------------------------------------------------------------|
| 10896 | 1,6,7,21,2<br>2,23,24,26 | 2,3,4,5,8,1<br>8,19,20,25 | 3 | P00731,P13432,P22006                                           |
| 10897 | 1,6,7,21,2<br>2,23,25,26 | 2,3,4,5,8,1<br>8,19,20,24 | 6 | P06911,P12020,P19629,P22006,P83121,Q9QZK9                      |
| 10898 | 1,6,7,21,2<br>2,24,25,26 | 2,3,4,5,8,1<br>8,19,20,23 | 8 | P13432,P19629,P22006,P35467,Q498D9,Q5XI22,Q64194,Q9QZK9        |
| 10899 | 1,6,7,21,2<br>3,24,25,26 | 2,3,4,5,8,1<br>8,19,20,22 | 7 | P19629,P22006,P83121,Q62997,Q6P6R2,Q7TPB1,Q9QZK9               |
| 10900 | 1,6,7,22,2<br>3,24,25,26 | 2,3,4,5,8,1<br>8,19,20,21 | 6 | P00731,P06911,P12020,P19629,P62804,Q7TPB1                      |
| 10901 | 1,6,8,18,1<br>9,20,21,22 | 2,3,4,5,7,2<br>3,24,25,26 | 9 | O35547,P02782,P08723,P13432,P34901,P35281,P36376,Q62902,Q63751 |
| 10902 | 1,6,8,18,1<br>9,20,21,23 | 2,3,4,5,7,2<br>2,24,25,26 | 5 | O35547,P02782,P08723,P35281,Q8CJD3                             |
| 10903 | 1,6,8,18,1<br>9,20,21,24 | 2,3,4,5,7,2<br>2,23,25,26 | 5 | P02782,P05539,P13432,P35281,P36376                             |
| 10904 | 1,6,8,18,1<br>9,20,21,25 | 2,3,4,5,7,2<br>2,23,24,26 | 7 | O35547,P08723,P30120,P34901,P35281,P36376,Q8K4G9               |
| 10905 | 1,6,8,18,1<br>9,20,21,26 | 2,3,4,5,7,2<br>2,23,24,25 | 6 | P02782,P34901,P35281,P36374,Q63751,Q8K4G9                      |
| 10906 | 1,6,8,18,1<br>9,20,22,23 | 2,3,4,5,7,2<br>1,24,25,26 | 3 | P01836,P22006,Q8CJD3                                           |
| 10907 | 1,6,8,18,1<br>9,20,22,24 | 2,3,4,5,7,2<br>1,23,25,26 | 1 | P36376                                                         |
| 10908 | 1,6,8,18,1<br>9,20,22,25 | 2,3,4,5,7,2<br>1,23,24,26 | 2 | P01836,P34901                                                  |
| 10909 | 1,6,8,18,1<br>9,20,22,26 | 2,3,4,5,7,2<br>1,23,24,25 | 3 | P34901,Q63751,Q8K4G9                                           |
| 10910 | 1,6,8,18,1<br>9,20,23,24 | 2,3,4,5,7,2<br>1,22,25,26 | 0 |                                                                |
| 10911 | 1,6,8,18,1<br>9,20,23,25 | 2,3,4,5,7,2<br>1,22,24,26 | 3 | P01836,P63036,Q8CJD3                                           |
| 10912 | 1,6,8,18,1<br>9,20,23,26 | 2,3,4,5,7,2<br>1,22,24,25 | 4 | P35467,Q6IFV1,Q6IG02,Q6P6Q2                                    |
| 10913 | 1,6,8,18,1<br>9,20,24,25 | 2,3,4,5,7,2<br>1,22,23,26 | 2 | P34901,P36376                                                  |
| 10914 | 1,6,8,18,1<br>9,20,24,26 | 2,3,4,5,7,2<br>1,22,23,25 | 1 | P34901                                                         |
| 10915 | 1,6,8,18,1<br>9,20,25,26 | 2,3,4,5,7,2<br>1,22,23,24 | 3 | P34901,P35280,Q8K4G9                                           |
| 10916 | 1,6,8,18,1<br>9,21,22,23 | 2,3,4,5,7,2<br>0,24,25,26 | 5 | O35547,P02782,P08723,P35281,Q8CJD3                             |
| 10917 | 1,6,8,18,1<br>9,21,22,24 | 2,3,4,5,7,2<br>0,23,25,26 | 6 | O35547,P02782,P08723,P13432,P35281,P36376                      |
| 10918 | 1,6,8,18,1<br>9,21,22,25 | 2,3,4,5,7,2<br>0,23,24,26 | 7 | O35547,P02782,P08723,P34901,P35281,P36376,P97840               |

|       |                                                 |    |                                                                       |
|-------|-------------------------------------------------|----|-----------------------------------------------------------------------|
| 10919 | 1,6,8,18,1 2,3,4,5,7,2<br>9,21,22,26 0,23,24,25 | 7  | O35547,P02782,P08723,P34901,P35281,P36374,Q63751                      |
| 10920 | 1,6,8,18,1 2,3,4,5,7,2<br>9,21,23,24 0,22,25,26 | 6  | O35547,P02782,P05539,P13432,P35281,Q62997                             |
| 10921 | 1,6,8,18,1 2,3,4,5,7,2<br>9,21,23,25 0,22,24,26 | 10 | O35547,P01836,P07150,P08010,P08723,P14669,P35281,Q62997,Q6P6R2,Q9WTT6 |
| 10922 | 1,6,8,18,1 2,3,4,5,7,2<br>9,21,23,26 0,22,24,25 | 4  | P02782,P35281,Q6IFV1,Q6P6Q2                                           |
| 10923 | 1,6,8,18,1 2,3,4,5,7,2<br>9,21,24,25 0,22,23,26 | 4  | P05539,P35281,P36376,Q62997                                           |
| 10924 | 1,6,8,18,1 2,3,4,5,7,2<br>9,21,24,26 0,22,23,25 | 4  | P02782,P13432,P35281,Q62997                                           |
| 10925 | 1,6,8,18,1 2,3,4,5,7,2<br>9,21,25,26 0,22,23,24 | 5  | P34901,P35281,Q62997,Q9QZK9,Q9WTT6                                    |
| 10926 | 1,6,8,18,1 2,3,4,5,7,2<br>9,22,23,24 0,21,25,26 | 1  | P01836                                                                |
| 10927 | 1,6,8,18,1 2,3,4,5,7,2<br>9,22,23,25 0,21,24,26 | 3  | P01836,P06911,Q8CJD3                                                  |
| 10928 | 1,6,8,18,1 2,3,4,5,7,2<br>9,22,23,26 0,21,24,25 | 1  | Q6P6Q2                                                                |
| 10929 | 1,6,8,18,1 2,3,4,5,7,2<br>9,22,24,25 0,21,23,26 | 1  | P01836                                                                |
| 10930 | 1,6,8,18,1 2,3,4,5,7,2<br>9,22,24,26 0,21,23,25 | 0  |                                                                       |
| 10931 | 1,6,8,18,1 2,3,4,5,7,2<br>9,22,25,26 0,21,23,24 | 1  | P34901                                                                |
| 10932 | 1,6,8,18,1 2,3,4,5,7,2<br>9,23,24,25 0,21,22,26 | 2  | P01836,P63036                                                         |
| 10933 | 1,6,8,18,1 2,3,4,5,7,2<br>9,23,24,26 0,21,22,25 | 3  | Q6IFU7,Q6IFV1,Q6P6Q2                                                  |
| 10934 | 1,6,8,18,1 2,3,4,5,7,2<br>9,23,25,26 0,21,22,24 | 2  | P01836,Q6P6Q2                                                         |
| 10935 | 1,6,8,18,1 2,3,4,5,7,2<br>9,24,25,26 0,21,22,23 | 2  | P34901,Q7TPB1                                                         |
| 10936 | 1,6,8,18,2 2,3,4,5,7,1<br>0,21,22,23 9,24,25,26 | 4  | O35547,P02782,P08723,P13432                                           |
| 10937 | 1,6,8,18,2 2,3,4,5,7,1<br>0,21,22,24 9,23,25,26 | 4  | P02782,P08723,P13432,P36376                                           |
| 10938 | 1,6,8,18,2 2,3,4,5,7,1<br>0,21,22,25 9,23,24,26 | 6  | O35547,P08723,P13432,P34901,P36376,P47727                             |
| 10939 | 1,6,8,18,2 2,3,4,5,7,1<br>0,21,22,26 9,23,24,25 | 4  | P02782,P13432,P34901,P36374                                           |
| 10940 | 1,6,8,18,2 2,3,4,5,7,1<br>0,21,23,24 9,22,25,26 | 2  | P02782,P13432                                                         |
| 10941 | 1,6,8,18,2 2,3,4,5,7,1<br>0,21,23,25 9,22,24,26 | 4  | P08010,P47727,Q6P6R2,Q9WTT6                                           |

|       |                          |                           |   |                                                         |
|-------|--------------------------|---------------------------|---|---------------------------------------------------------|
| 10942 | 1,6,8,18,2<br>0,21,23,26 | 2,3,4,5,7,1<br>9,22,24,25 | 6 | P02782,Q6IFU8,Q6IFV1,Q6IG02,Q6IMF3,Q6P6Q2               |
| 10943 | 1,6,8,18,2<br>0,21,24,25 | 2,3,4,5,7,1<br>9,22,23,26 | 3 | O54728,P13432,P36376                                    |
| 10944 | 1,6,8,18,2<br>0,21,24,26 | 2,3,4,5,7,1<br>9,22,23,25 | 3 | P02782,P13432,Q6AYR8                                    |
| 10945 | 1,6,8,18,2<br>0,21,25,26 | 2,3,4,5,7,1<br>9,22,23,24 | 2 | P34901,Q9WTT6                                           |
| 10946 | 1,6,8,18,2<br>0,22,23,24 | 2,3,4,5,7,1<br>9,21,25,26 | 0 |                                                         |
| 10947 | 1,6,8,18,2<br>0,22,23,25 | 2,3,4,5,7,1<br>9,21,24,26 | 1 | P06911                                                  |
| 10948 | 1,6,8,18,2<br>0,22,23,26 | 2,3,4,5,7,1<br>9,21,24,25 | 4 | Q6IFU7,Q6IFV1,Q6IG02,Q6P6Q2                             |
| 10949 | 1,6,8,18,2<br>0,22,24,25 | 2,3,4,5,7,1<br>9,21,23,26 | 0 |                                                         |
| 10950 | 1,6,8,18,2<br>0,22,24,26 | 2,3,4,5,7,1<br>9,21,23,25 | 0 |                                                         |
| 10951 | 1,6,8,18,2<br>0,22,25,26 | 2,3,4,5,7,1<br>9,21,23,24 | 1 | P34901                                                  |
| 10952 | 1,6,8,18,2<br>0,23,24,25 | 2,3,4,5,7,1<br>9,21,22,26 | 1 | P63036                                                  |
| 10953 | 1,6,8,18,2<br>0,23,24,26 | 2,3,4,5,7,1<br>9,21,22,25 | 5 | P47967,Q6IFU7,Q6IFV1,Q6IG02,Q6P6Q2                      |
| 10954 | 1,6,8,18,2<br>0,23,25,26 | 2,3,4,5,7,1<br>9,21,22,24 | 2 | Q6IG02,Q6P6Q2                                           |
| 10955 | 1,6,8,18,2<br>0,24,25,26 | 2,3,4,5,7,1<br>9,21,22,23 | 1 | P34901                                                  |
| 10956 | 1,6,8,18,2<br>1,22,23,24 | 2,3,4,5,7,1<br>9,20,25,26 | 3 | P02782,P08723,P13432                                    |
| 10957 | 1,6,8,18,2<br>1,22,23,25 | 2,3,4,5,7,1<br>9,20,24,26 | 5 | O35547,P06911,P07150,P08723,Q9WTT6                      |
| 10958 | 1,6,8,18,2<br>1,22,23,26 | 2,3,4,5,7,1<br>9,20,24,25 | 3 | P02782,Q6IFV1,Q6P6Q2                                    |
| 10959 | 1,6,8,18,2<br>1,22,24,25 | 2,3,4,5,7,1<br>9,20,23,26 | 3 | P02782,P13432,P36376                                    |
| 10960 | 1,6,8,18,2<br>1,22,24,26 | 2,3,4,5,7,1<br>9,20,23,25 | 2 | P02782,P13432                                           |
| 10961 | 1,6,8,18,2<br>1,22,25,26 | 2,3,4,5,7,1<br>9,20,23,24 | 2 | P34901,Q9WTT6                                           |
| 10962 | 1,6,8,18,2<br>1,23,24,25 | 2,3,4,5,7,1<br>9,20,22,26 | 8 | O54728,P05539,P07150,P13432,P14669,Q62997,Q6P6R2,Q9WTT6 |
| 10963 | 1,6,8,18,2<br>1,23,24,26 | 2,3,4,5,7,1<br>9,20,22,25 | 6 | P02782,P13432,Q62997,Q6IFU7,Q6IFV1,Q6P6Q2               |
| 10964 | 1,6,8,18,2<br>1,23,25,26 | 2,3,4,5,7,1<br>9,20,22,24 | 8 | P07150,P08010,P14669,Q62997,Q6IFV1,Q6P6Q2,Q6P6R2,Q9WTT6 |

|       |                          |                           |    |                                                                       |
|-------|--------------------------|---------------------------|----|-----------------------------------------------------------------------|
| 10965 | 1,6,8,18,2<br>1,24,25,26 | 2,3,4,5,7,1<br>9,20,22,23 | 3  | P13432,Q62997,Q9WTT6                                                  |
| 10966 | 1,6,8,18,2<br>2,23,24,25 | 2,3,4,5,7,1<br>9,20,21,26 | 3  | P01836,P06911,P42854                                                  |
| 10967 | 1,6,8,18,2<br>2,23,24,26 | 2,3,4,5,7,1<br>9,20,21,25 | 5  | P00731,P42854,Q6IFU7,Q6IFV1,Q6P6Q2                                    |
| 10968 | 1,6,8,18,2<br>2,23,25,26 | 2,3,4,5,7,1<br>9,20,21,24 | 1  | Q6P6Q2                                                                |
| 10969 | 1,6,8,18,2<br>2,24,25,26 | 2,3,4,5,7,1<br>9,20,21,23 | 1  | P42854                                                                |
| 10970 | 1,6,8,18,2<br>3,24,25,26 | 2,3,4,5,7,1<br>9,20,21,22 | 5  | P42854,Q6IFU7,Q6IFV1,Q6P6Q2,Q7TPB1                                    |
| 10971 | 1,6,8,19,2<br>0,21,22,23 | 2,3,4,5,7,1<br>8,24,25,26 | 8  | O35547,P00774,P02782,P08723,P35281,P55091,Q62902,Q8CJD3               |
| 10972 | 1,6,8,19,2<br>0,21,22,24 | 2,3,4,5,7,1<br>8,23,25,26 | 10 | O35956,P00714,P00774,P02782,P12785,P13432,P35281,P36376,P55091,Q99MH3 |
| 10973 | 1,6,8,19,2<br>0,21,22,25 | 2,3,4,5,7,1<br>8,23,24,26 | 10 | P00774,P02782,P08723,P12785,P30120,P34901,P35281,P36376,P47727,Q8K4G9 |
| 10974 | 1,6,8,19,2<br>0,21,22,26 | 2,3,4,5,7,1<br>8,23,24,25 | 8  | P02782,P12785,P34901,P35281,Q63751,Q8K4G9,Q99068,Q99MH3               |
| 10975 | 1,6,8,19,2<br>0,21,23,24 | 2,3,4,5,7,1<br>8,22,25,26 | 4  | P00774,P02782,P13432,P35281                                           |
| 10976 | 1,6,8,19,2<br>0,21,23,25 | 2,3,4,5,7,1<br>8,22,24,26 | 5  | P30120,P35281,P47727,Q6P6R2,Q9WTT6                                    |
| 10977 | 1,6,8,19,2<br>0,21,23,26 | 2,3,4,5,7,1<br>8,22,24,25 | 3  | P02782,P35281,Q6IFV1                                                  |
| 10978 | 1,6,8,19,2<br>0,21,24,25 | 2,3,4,5,7,1<br>8,22,23,26 | 6  | O35956,P12785,P13432,P34901,P35281,P36376                             |
| 10979 | 1,6,8,19,2<br>0,21,24,26 | 2,3,4,5,7,1<br>8,22,23,25 | 4  | P02782,P13432,P35281,Q99068                                           |
| 10980 | 1,6,8,19,2<br>0,21,25,26 | 2,3,4,5,7,1<br>8,22,23,24 | 5  | P34901,P35281,Q8K4G9,Q99068,Q9WTT6                                    |
| 10981 | 1,6,8,19,2<br>0,22,23,24 | 2,3,4,5,7,1<br>8,21,25,26 | 6  | P00774,P25031,P31430,P55091,P82995,P98089                             |
| 10982 | 1,6,8,19,2<br>0,22,23,25 | 2,3,4,5,7,1<br>8,21,24,26 | 5  | P00774,P01836,P06911,P25031,Q71MB6                                    |
| 10983 | 1,6,8,19,2<br>0,22,23,26 | 2,3,4,5,7,1<br>8,21,24,25 | 4  | P00774,P25031,P31430,P98089                                           |
| 10984 | 1,6,8,19,2<br>0,22,24,25 | 2,3,4,5,7,1<br>8,21,23,26 | 5  | P00774,P12785,P25031,P34901,Q62636                                    |
| 10985 | 1,6,8,19,2<br>0,22,24,26 | 2,3,4,5,7,1<br>8,21,23,25 | 7  | P00774,P12785,P25031,P31430,P34901,P98089,Q99MH3                      |
| 10986 | 1,6,8,19,2<br>0,22,25,26 | 2,3,4,5,7,1<br>8,21,23,24 | 5  | P12785,P25031,P34901,Q8K4G9,Q99068                                    |
| 10987 | 1,6,8,19,2<br>0,23,24,25 | 2,3,4,5,7,1<br>8,21,22,26 | 5  | P01836,P25031,P63036,P83748,Q80WL1                                    |

|       |                                                 |   |                                                  |
|-------|-------------------------------------------------|---|--------------------------------------------------|
| 10988 | 1,6,8,19,2 2,3,4,5,7,1<br>0,23,24,26 8,21,22,25 | 3 | P25031,P31430,P98089                             |
| 10989 | 1,6,8,19,2 2,3,4,5,7,1<br>0,23,25,26 8,21,22,24 | 1 | P25031                                           |
| 10990 | 1,6,8,19,2 2,3,4,5,7,1<br>0,24,25,26 8,21,22,23 | 2 | P25031,P34901                                    |
| 10991 | 1,6,8,19,2 2,3,4,5,7,1<br>1,22,23,24 8,20,25,26 | 3 | P00774,P02782,P13432                             |
| 10992 | 1,6,8,19,2 2,3,4,5,7,1<br>1,22,23,25 8,20,24,26 | 2 | P02782,P06911                                    |
| 10993 | 1,6,8,19,2 2,3,4,5,7,1<br>1,22,23,26 8,20,24,25 | 3 | P02782,P35281,Q6IFV1                             |
| 10994 | 1,6,8,19,2 2,3,4,5,7,1<br>1,22,24,25 8,20,23,26 | 6 | A2RUV9,P02782,P12785,P13432,P36376,Q4FZU2        |
| 10995 | 1,6,8,19,2 2,3,4,5,7,1<br>1,22,24,26 8,20,23,25 | 4 | P02782,P12785,P13432,Q99068                      |
| 10996 | 1,6,8,19,2 2,3,4,5,7,1<br>1,22,25,26 8,20,23,24 | 5 | A2RUV9,P12785,P34901,Q99068,Q9QZK9               |
| 10997 | 1,6,8,19,2 2,3,4,5,7,1<br>1,23,24,25 8,20,22,26 | 4 | P07150,Q62997,Q6P6R2,Q9WTT6                      |
| 10998 | 1,6,8,19,2 2,3,4,5,7,1<br>1,23,24,26 8,20,22,25 | 3 | P02782,P35281,Q6IFV1                             |
| 10999 | 1,6,8,19,2 2,3,4,5,7,1<br>1,23,25,26 8,20,22,24 | 7 | P07150,P14669,P35281,Q6IFV1,Q6P6R2,Q9QZK9,Q9WTT6 |
| 11000 | 1,6,8,19,2 2,3,4,5,7,1<br>1,24,25,26 8,20,22,23 | 2 | Q62997,Q9QZK9                                    |
| 11001 | 1,6,8,19,2 2,3,4,5,7,1<br>2,23,24,25 8,20,21,26 | 7 | P01041,P01836,P06911,P25031,P42854,Q71MB6,Q9ESW0 |
| 11002 | 1,6,8,19,2 2,3,4,5,7,1<br>2,23,24,26 8,20,21,25 | 5 | P00731,P25031,P31430,P42854,P98089               |
| 11003 | 1,6,8,19,2 2,3,4,5,7,1<br>2,23,25,26 8,20,21,24 | 4 | P01836,P06911,P25031,P42854                      |
| 11004 | 1,6,8,19,2 2,3,4,5,7,1<br>2,24,25,26 8,20,21,23 | 4 | P12785,P25031,P34901,P42854                      |
| 11005 | 1,6,8,19,2 2,3,4,5,7,1<br>3,24,25,26 8,20,21,22 | 3 | P25031,P42854,Q7TPB1                             |
| 11006 | 1,6,8,20,2 2,3,4,5,7,1<br>1,22,23,24 8,19,25,26 | 4 | P00774,P02782,P13432,P82995                      |
| 11007 | 1,6,8,20,2 2,3,4,5,7,1<br>1,22,23,25 8,19,24,26 | 4 | P06760,P06911,P47727,Q9WTT6                      |
| 11008 | 1,6,8,20,2 2,3,4,5,7,1<br>1,22,23,26 8,19,24,25 | 2 | P02782,Q6IFV1                                    |
| 11009 | 1,6,8,20,2 2,3,4,5,7,1<br>1,22,24,25 8,19,23,26 | 7 | P12785,P13432,P35467,P36376,Q03191,Q5XFX0,Q64194 |
| 11010 | 1,6,8,20,2 2,3,4,5,7,1<br>1,22,24,26 8,19,23,25 | 7 | P02782,P12785,P13432,Q03191,Q5XFX0,Q99068,Q99MH3 |

|       |                               |                           |   |                                                  |
|-------|-------------------------------|---------------------------|---|--------------------------------------------------|
| 11011 | 1,6,8,20,2<br>1,22,25,26      | 2,3,4,5,7,1<br>8,19,23,24 | 5 | P12785,P34901,Q03191,Q99068,Q9WTT6               |
| 11012 | 1,6,8,20,2<br>1,23,24,25      | 2,3,4,5,7,1<br>8,19,22,26 | 5 | P06760,P13432,P63036,Q6P6R2,Q9WTT6               |
| 11013 | 1,6,8,20,2<br>1,23,24,26      | 2,3,4,5,7,1<br>8,19,22,25 | 2 | P13432,Q6IFV1                                    |
| 11014 | 1,6,8,20,2<br>1,23,25,26      | 2,3,4,5,7,1<br>8,19,22,24 | 4 | P07150,Q6IFV1,Q6P6R2,Q9WTT6                      |
| 11015 | 1,6,8,20,2<br>1,24,25,26      | 2,3,4,5,7,1<br>8,19,22,23 | 4 | P13432,Q03191,Q99068,Q9WTT6                      |
| 11016 | 1,6,8,20,2<br>2,23,24,25      | 2,3,4,5,7,1<br>8,19,21,26 | 4 | P06911,P25031,P82995,P83748                      |
| 11017 | 1,6,8,20,2<br>2,23,24,26      | 2,3,4,5,7,1<br>8,19,21,25 | 5 | P00731,P25031,P31430,P47967,P98089               |
| 11018 | 1,6,8,20,2<br>2,23,25,26      | 2,3,4,5,7,1<br>8,19,21,24 | 2 | P06911,P25031                                    |
| 11019 | 1,6,8,20,2<br>2,24,25,26      | 2,3,4,5,7,1<br>8,19,21,23 | 5 | P00731,P12785,P25031,Q03191,Q99MH3               |
| 11020 | 1,6,8,20,2<br>3,24,25,26      | 2,3,4,5,7,1<br>8,19,21,22 | 3 | P25031,P42854,Q7TPB1                             |
| 11021 | 1,6,8,21,2<br>2,23,24,25      | 2,3,4,5,7,1<br>8,19,20,26 | 5 | P06760,P06911,P13432,Q6P6R2,Q9WTT6               |
| 11022 | 1,6,8,21,2<br>2,23,24,26      | 2,3,4,5,7,1<br>8,19,20,25 | 4 | P00731,P02782,P13432,Q6IFV1                      |
| 11023 | 1,6,8,21,2<br>2,23,25,26      | 2,3,4,5,7,1<br>8,19,20,24 | 5 | P06911,P07150,Q6IFV1,Q9QZK9,Q9WTT6               |
| 11024 | 1,6,8,21,2<br>2,24,25,26      | 2,3,4,5,7,1<br>8,19,20,23 | 5 | P12785,P13432,Q498D9,Q99068,Q9WTT6               |
| 11025 | 1,6,8,21,2<br>3,24,25,26      | 2,3,4,5,7,1<br>8,19,20,22 | 7 | P07150,P14669,Q62997,Q6IFV1,Q6P6R2,Q7TPB1,Q9WTT6 |
| 11026 | 1,6,8,22,2<br>3,24,25,26      | 2,3,4,5,7,1<br>8,19,20,21 | 5 | P00731,P06911,P25031,P42854,Q7TPB1               |
| 11027 | 1,6,18,19,<br>20,21,22,2<br>3 | 2,3,4,5,7,8<br>,24,25,26  | 3 | O35547,Q6AYS4,Q8CJD3                             |
| 11028 | 1,6,18,19,<br>20,21,22,2<br>4 | 2,3,4,5,7,8<br>,23,25,26  | 5 | P00714,P13432,P20766,P36376,Q6AYS4               |
| 11029 | 1,6,18,19,<br>20,21,22,2<br>5 | 2,3,4,5,7,8<br>,23,24,26  | 4 | P20760,P34901,P36376,P97840                      |
| 11030 | 1,6,18,19,<br>20,21,22,2<br>6 | 2,3,4,5,7,8<br>,23,24,25  | 4 | P34901,P36374,Q63751,Q6AYS4                      |



|       |                               |                          |   |                                    |
|-------|-------------------------------|--------------------------|---|------------------------------------|
| 11031 | 1,6,18,19,<br>20,21,23,2<br>4 | 2,3,4,5,7,8<br>,22,25,26 | 2 | P20766,Q6AYS4                      |
| 11032 | 1,6,18,19,<br>20,21,23,2<br>5 | 2,3,4,5,7,8<br>,22,24,26 | 3 | P08010,P20760,P20766               |
| 11033 | 1,6,18,19,<br>20,21,23,2<br>6 | 2,3,4,5,7,8<br>,22,24,25 | 5 | P20766,Q6AYS4,Q6IFU7,Q6IFV1,Q6P6Q2 |
| 11034 | 1,6,18,19,<br>20,21,24,2<br>5 | 2,3,4,5,7,8<br>,22,23,26 | 2 | P20766,P36376                      |
| 11035 | 1,6,18,19,<br>20,21,24,2<br>6 | 2,3,4,5,7,8<br>,22,23,25 | 2 | P20766,Q6AYS4                      |
| 11036 | 1,6,18,19,<br>20,21,25,2<br>6 | 2,3,4,5,7,8<br>,22,23,24 | 2 | P20766,P34901                      |
| 11037 | 1,6,18,19,<br>20,22,23,2<br>4 | 2,3,4,5,7,8<br>,21,25,26 | 3 | Q6AYS4,Q6IFU7,Q80WL1               |
| 11038 | 1,6,18,19,<br>20,22,23,2<br>5 | 2,3,4,5,7,8<br>,21,24,26 | 2 | P01836,Q8CJD3                      |
| 11039 | 1,6,18,19,<br>20,22,23,2<br>6 | 2,3,4,5,7,8<br>,21,24,25 | 2 | Q6AYS4,Q6IFU7                      |
| 11040 | 1,6,18,19,<br>20,22,24,2<br>5 | 2,3,4,5,7,8<br>,21,23,26 | 3 | P20762,Q6AYS4,Q80WL1               |
| 11041 | 1,6,18,19,<br>20,22,24,2<br>6 | 2,3,4,5,7,8<br>,21,23,25 | 5 | P20646,Q64057,Q6AYS4,Q80WL1,Q99041 |
| 11042 | 1,6,18,19,<br>20,22,25,2<br>6 | 2,3,4,5,7,8<br>,21,23,24 | 3 | P34901,Q63475,Q6AYS4               |
| 11043 | 1,6,18,19,<br>20,23,24,2<br>5 | 2,3,4,5,7,8<br>,21,22,26 | 5 | P20766,P63036,P83748,Q6AYS4,Q80WL1 |
| 11044 | 1,6,18,19,<br>20,23,24,2<br>6 | 2,3,4,5,7,8<br>,21,22,25 | 5 | P20766,Q6AYS4,Q6IFU7,Q6P6Q2,Q80WL1 |
| 11045 | 1,6,18,19,<br>20,23,25,2<br>6 | 2,3,4,5,7,8<br>,21,22,24 | 3 | Q6AYS4,Q6P6Q2,Q80WL1               |

|       |                               |                          |   |                                    |
|-------|-------------------------------|--------------------------|---|------------------------------------|
| 11046 | 1,6,18,19,<br>20,24,25,2<br>6 | 2,3,4,5,7,8<br>,21,22,23 | 4 | P20766,Q6AYS4,Q7TPB1,Q80WL1        |
| 11047 | 1,6,18,19,<br>21,22,23,2<br>4 | 2,3,4,5,7,8<br>,20,25,26 | 3 | P13432,Q6AYS4,Q6IFU7               |
| 11048 | 1,6,18,19,<br>21,22,23,2<br>5 | 2,3,4,5,7,8<br>,20,24,26 | 3 | P08010,P20760,P97840               |
| 11049 | 1,6,18,19,<br>21,22,23,2<br>6 | 2,3,4,5,7,8<br>,20,24,25 | 3 | Q6IFU7,Q6IFV1,Q6P6Q2               |
| 11050 | 1,6,18,19,<br>21,22,24,2<br>5 | 2,3,4,5,7,8<br>,20,23,26 | 4 | P13432,P20762,P36376,P97840        |
| 11051 | 1,6,18,19,<br>21,22,24,2<br>6 | 2,3,4,5,7,8<br>,20,23,25 | 4 | P13432,P36374,Q5M819,Q6AYS4        |
| 11052 | 1,6,18,19,<br>21,22,25,2<br>6 | 2,3,4,5,7,8<br>,20,23,24 | 1 | P97840                             |
| 11053 | 1,6,18,19,<br>21,23,24,2<br>5 | 2,3,4,5,7,8<br>,20,22,26 | 2 | P20766,Q62997                      |
| 11054 | 1,6,18,19,<br>21,23,24,2<br>6 | 2,3,4,5,7,8<br>,20,22,25 | 5 | P20766,Q6AYS4,Q6IFU7,Q6IFV1,Q6P6Q2 |
| 11055 | 1,6,18,19,<br>21,23,25,2<br>6 | 2,3,4,5,7,8<br>,20,22,24 | 3 | P08010,Q6IFV1,Q6P6Q2               |
| 11056 | 1,6,18,19,<br>21,24,25,2<br>6 | 2,3,4,5,7,8<br>,20,22,23 | 2 | P20766,Q62997                      |
| 11057 | 1,6,18,19,<br>22,23,24,2<br>5 | 2,3,4,5,7,8<br>,20,21,26 | 5 | P01041,P01836,P20762,P42854,P62804 |
| 11058 | 1,6,18,19,<br>22,23,24,2<br>6 | 2,3,4,5,7,8<br>,20,21,25 | 5 | P20646,P42854,Q5M819,Q6AYS4,Q6IFU7 |
| 11059 | 1,6,18,19,<br>22,23,25,2<br>6 | 2,3,4,5,7,8<br>,20,21,24 | 3 | P02761,P42854,Q6IFU7               |
| 11060 | 1,6,18,19,<br>22,24,25,2<br>6 | 2,3,4,5,7,8<br>,20,21,23 | 4 | P20762,P42854,Q6AYS4,Q7TPB1        |

|       |                               |                          |   |                                                  |
|-------|-------------------------------|--------------------------|---|--------------------------------------------------|
| 11061 | 1,6,18,19,<br>23,24,25,2<br>6 | 2,3,4,5,7,8<br>,20,21,22 | 5 | P42854,Q6AYS4,Q6IFU7,Q7TPB1,Q80WL1               |
| 11062 | 1,6,18,20,<br>21,22,23,2<br>4 | 2,3,4,5,7,8<br>,19,25,26 | 4 | P13432,P20766,Q6AYS4,Q6IFU7                      |
| 11063 | 1,6,18,20,<br>21,22,23,2<br>5 | 2,3,4,5,7,8<br>,19,24,26 | 0 |                                                  |
| 11064 | 1,6,18,20,<br>21,22,23,2<br>6 | 2,3,4,5,7,8<br>,19,24,25 | 4 | Q6IFU7,Q6IFV1,Q6P6Q2,Q9QUL6                      |
| 11065 | 1,6,18,20,<br>21,22,24,2<br>5 | 2,3,4,5,7,8<br>,19,23,26 | 3 | P13432,P36376,P55016                             |
| 11066 | 1,6,18,20,<br>21,22,24,2<br>6 | 2,3,4,5,7,8<br>,19,23,25 | 4 | P13432,P55016,Q6AYS4,Q99041                      |
| 11067 | 1,6,18,20,<br>21,22,25,2<br>6 | 2,3,4,5,7,8<br>,19,23,24 | 0 |                                                  |
| 11068 | 1,6,18,20,<br>21,23,24,2<br>5 | 2,3,4,5,7,8<br>,19,22,26 | 1 | P20766                                           |
| 11069 | 1,6,18,20,<br>21,23,24,2<br>6 | 2,3,4,5,7,8<br>,19,22,25 | 7 | P13432,P20766,Q6AYS4,Q6IFU7,Q6IFV1,Q6P6Q2,Q9QUL6 |
| 11070 | 1,6,18,20,<br>21,23,25,2<br>6 | 2,3,4,5,7,8<br>,19,22,24 | 6 | P20766,P83121,Q6IFU8,Q6IFV1,Q6IMF3,Q6P6Q2        |
| 11071 | 1,6,18,20,<br>21,24,25,2<br>6 | 2,3,4,5,7,8<br>,19,22,23 | 2 | P20766,P55016                                    |
| 11072 | 1,6,18,20,<br>22,23,24,2<br>5 | 2,3,4,5,7,8<br>,19,21,26 | 3 | P16391,Q6IFU7,Q80WL1                             |
| 11073 | 1,6,18,20,<br>22,23,24,2<br>6 | 2,3,4,5,7,8<br>,19,21,25 | 5 | P00731,Q6AYS4,Q6IFU7,Q6P6Q2,Q80WL1               |
| 11074 | 1,6,18,20,<br>22,23,25,2<br>6 | 2,3,4,5,7,8<br>,19,21,24 | 2 | Q6IFU7,Q6P6Q2                                    |
| 11075 | 1,6,18,20,<br>22,24,25,2<br>6 | 2,3,4,5,7,8<br>,19,21,23 | 3 | Q64057,Q6AYS4,Q80WL1                             |

|       |                               |                          |    |                                                                              |
|-------|-------------------------------|--------------------------|----|------------------------------------------------------------------------------|
| 11076 | 1,6,18,20,<br>23,24,25,2<br>6 | 2,3,4,5,7,8<br>,19,21,22 | 5  | P20766,Q6IFU7,Q6P6Q2,Q7TPB1,Q80WL1                                           |
| 11077 | 1,6,18,21,<br>22,23,24,2<br>5 | 2,3,4,5,7,8<br>,19,20,26 | 1  | P13432                                                                       |
| 11078 | 1,6,18,21,<br>22,23,24,2<br>6 | 2,3,4,5,7,8<br>,19,20,25 | 4  | P13432,Q6IFU7,Q6IFV1,Q6P6Q2                                                  |
| 11079 | 1,6,18,21,<br>22,23,25,2<br>6 | 2,3,4,5,7,8<br>,19,20,24 | 3  | Q6IFU7,Q6IFV1,Q6P6Q2                                                         |
| 11080 | 1,6,18,21,<br>22,24,25,2<br>6 | 2,3,4,5,7,8<br>,19,20,23 | 1  | P13432                                                                       |
| 11081 | 1,6,18,21,<br>23,24,25,2<br>6 | 2,3,4,5,7,8<br>,19,20,22 | 6  | P20766,Q62997,Q6IFU7,Q6IFV1,Q6P6Q2,Q7TPB1                                    |
| 11082 | 1,6,18,22,<br>23,24,25,2<br>6 | 2,3,4,5,7,8<br>,19,20,21 | 5  | P00731,P42854,Q6IFU7,Q6P6Q2,Q7TPB1                                           |
| 11083 | 1,6,19,20,<br>21,22,23,2<br>4 | 2,3,4,5,7,8<br>,18,25,26 | 7  | P00714,P00774,P13432,P20766,P55091,P82995,Q6AYS4                             |
| 11084 | 1,6,19,20,<br>21,22,23,2<br>5 | 2,3,4,5,7,8<br>,18,24,26 | 1  | P10959                                                                       |
| 11085 | 1,6,19,20,<br>21,22,23,2<br>6 | 2,3,4,5,7,8<br>,18,24,25 | 1  | Q6AYS4                                                                       |
| 11086 | 1,6,19,20,<br>21,22,24,2<br>5 | 2,3,4,5,7,8<br>,18,23,26 | 11 | P00774,P12785,P13432,P20762,P28648,P35467,P36376,Q05175,Q64194,Q6AY61,Q6AYS4 |
| 11087 | 1,6,19,20,<br>21,22,24,2<br>6 | 2,3,4,5,7,8<br>,18,23,25 | 8  | P00714,P13432,P55016,Q01205,Q5XI22,Q64057,Q6AYS4,Q99MH3                      |
| 11088 | 1,6,19,20,<br>21,22,25,2<br>6 | 2,3,4,5,7,8<br>,18,23,24 | 2  | P34901,Q5XI22                                                                |
| 11089 | 1,6,19,20,<br>21,23,24,2<br>5 | 2,3,4,5,7,8<br>,18,22,26 | 3  | P20766,Q6AYS4,Q80WL1                                                         |
| 11090 | 1,6,19,20,<br>21,23,24,2<br>6 | 2,3,4,5,7,8<br>,18,22,25 | 4  | P20766,Q6AYS4,Q6IFV1,Q80WL1                                                  |

|       |                               |                          |    |                                                                              |
|-------|-------------------------------|--------------------------|----|------------------------------------------------------------------------------|
| 11091 | 1,6,19,20,<br>21,23,25,2<br>6 | 2,3,4,5,7,8<br>,18,22,24 | 2  | P20766,P83121                                                                |
| 11092 | 1,6,19,20,<br>21,24,25,2<br>6 | 2,3,4,5,7,8<br>,18,22,23 | 5  | P20766,Q5XI22,Q64194,Q6AYS4,Q80WL1                                           |
| 11093 | 1,6,19,20,<br>22,23,24,2<br>5 | 2,3,4,5,7,8<br>,18,21,26 | 9  | P00774,P25031,P42854,P82995,P83748,Q64057,Q6AYS4,Q80WL1,Q9ESW0               |
| 11094 | 1,6,19,20,<br>22,23,24,2<br>6 | 2,3,4,5,7,8<br>,18,21,25 | 11 | P00731,P00774,P20646,P25031,P31430,P42854,P98089,Q64057,Q6AYS4,Q6IFU7,Q80WL1 |
| 11095 | 1,6,19,20,<br>22,23,25,2<br>6 | 2,3,4,5,7,8<br>,18,21,24 | 2  | P25031,Q6AYS4                                                                |
| 11096 | 1,6,19,20,<br>22,24,25,2<br>6 | 2,3,4,5,7,8<br>,18,21,23 | 9  | P00731,P25031,P42854,Q5XI22,Q64057,Q6AYS4,Q80WL1,Q99MH3,Q9ESW0               |
| 11097 | 1,6,19,20,<br>23,24,25,2<br>6 | 2,3,4,5,7,8<br>,18,21,22 | 5  | P25031,P42854,Q6AYS4,Q7TPB1,Q80WL1                                           |
| 11098 | 1,6,19,21,<br>22,23,24,2<br>5 | 2,3,4,5,7,8<br>,18,20,26 | 3  | P01041,P20762,Q9ESW0                                                         |
| 11099 | 1,6,19,21,<br>22,23,24,2<br>6 | 2,3,4,5,7,8<br>,18,20,25 | 3  | P00731,Q6AYS4,Q6IFV1                                                         |
| 11100 | 1,6,19,21,<br>22,23,25,2<br>6 | 2,3,4,5,7,8<br>,18,20,24 | 1  | Q9QZK9                                                                       |
| 11101 | 1,6,19,21,<br>22,24,25,2<br>6 | 2,3,4,5,7,8<br>,18,20,23 | 2  | Q498D9,Q5XI22                                                                |
| 11102 | 1,6,19,21,<br>23,24,25,2<br>6 | 2,3,4,5,7,8<br>,18,20,22 | 3  | P20766,Q62997,Q7TPB1                                                         |
| 11103 | 1,6,19,22,<br>23,24,25,2<br>6 | 2,3,4,5,7,8<br>,18,20,21 | 8  | P00731,P25031,P42854,P82471,Q64057,Q6AYS4,Q7TPB1,Q9ESW0                      |
| 11104 | 1,6,20,21,<br>22,23,24,2<br>5 | 2,3,4,5,7,8<br>,18,19,26 | 2  | P13432,P55016                                                                |
| 11105 | 1,6,20,21,<br>22,23,24,2<br>6 | 2,3,4,5,7,8<br>,18,19,25 | 7  | P00731,P02803,P13432,P55016,Q6AYS4,Q6IFU7,Q6IFV1                             |

|       |                               |                           |    |                                                                              |
|-------|-------------------------------|---------------------------|----|------------------------------------------------------------------------------|
| 11106 | 1,6,20,21,<br>22,23,25,2<br>6 | 2,3,4,5,7,8<br>,18,19,24  | 2  | P55016,P83121                                                                |
| 11107 | 1,6,20,21,<br>22,24,25,2<br>6 | 2,3,4,5,7,8<br>,18,19,23  | 11 | P02803,P13432,P28648,P35467,P55016,Q03191,Q498D9,Q5XI22,Q64057,Q64194,Q99MH3 |
| 11108 | 1,6,20,21,<br>23,24,25,2<br>6 | 2,3,4,5,7,8<br>,18,19,22  | 5  | P20766,P55016,Q6IFV1,Q7TPB1,Q80WL1                                           |
| 11109 | 1,6,20,22,<br>23,24,25,2<br>6 | 2,3,4,5,7,8<br>,18,19,21  | 9  | P00731,P02803,P25031,P42854,Q64057,Q6AYS4,Q6IFU7,Q7TPB1,Q80WL1               |
| 11110 | 1,6,21,22,<br>23,24,25,2<br>6 | 2,3,4,5,7,8<br>,18,19,20  | 3  | P00731,Q498D9,Q7TPB1                                                         |
| 11111 | 1,7,8,18,1<br>9,20,21,22      | 2,3,4,5,6,2<br>3,24,25,26 | 8  | P20760,P34901,P35281,P36374,P36376,Q62902,Q63751,Q9Z0V6                      |
| 11112 | 1,7,8,18,1<br>9,20,21,23      | 2,3,4,5,6,2<br>2,24,25,26 | 3  | P20760,P35281,Q6AYL6                                                         |
| 11113 | 1,7,8,18,1<br>9,20,21,24      | 2,3,4,5,6,2<br>2,23,25,26 | 1  | P36376                                                                       |
| 11114 | 1,7,8,18,1<br>9,20,21,25      | 2,3,4,5,6,2<br>2,23,24,26 | 5  | P10715,P20760,P34901,P36376,P47967                                           |
| 11115 | 1,7,8,18,1<br>9,20,21,26      | 2,3,4,5,6,2<br>2,23,24,25 | 6  | P34901,P35281,P36374,P82995,Q4FZU6,Q63751                                    |
| 11116 | 1,7,8,18,1<br>9,20,22,23      | 2,3,4,5,6,2<br>1,24,25,26 | 4  | P00774,P20760,Q8CJD3,Q9Z0V6                                                  |
| 11117 | 1,7,8,18,1<br>9,20,22,24      | 2,3,4,5,6,2<br>1,23,25,26 | 6  | P00774,P01835,P20646,P34901,P36376,Q9Z0V6                                    |
| 11118 | 1,7,8,18,1<br>9,20,22,25      | 2,3,4,5,6,2<br>1,23,24,26 | 5  | P01835,P10715,P20760,P20761,P34901                                           |
| 11119 | 1,7,8,18,1<br>9,20,22,26      | 2,3,4,5,6,2<br>1,23,24,25 | 5  | P01835,P34901,Q63751,Q6P6R2,Q9Z0V6                                           |
| 11120 | 1,7,8,18,1<br>9,20,23,24      | 2,3,4,5,6,2<br>1,22,25,26 | 0  |                                                                              |
| 11121 | 1,7,8,18,1<br>9,20,23,25      | 2,3,4,5,6,2<br>1,22,24,26 | 4  | P10715,P20760,P20761,P63036                                                  |
| 11122 | 1,7,8,18,1<br>9,20,23,26      | 2,3,4,5,6,2<br>1,22,24,25 | 3  | P35467,Q08849,Q4FZU6                                                         |
| 11123 | 1,7,8,18,1<br>9,20,24,25      | 2,3,4,5,6,2<br>1,22,23,26 | 5  | P01835,P10715,P20760,P34901,P36376                                           |
| 11124 | 1,7,8,18,1<br>9,20,24,26      | 2,3,4,5,6,2<br>1,22,23,25 | 3  | P01835,P34901,Q9Z0V6                                                         |
| 11125 | 1,7,8,18,1<br>9,20,25,26      | 2,3,4,5,6,2<br>1,22,23,24 | 3  | P10715,P34901,P35280                                                         |

|       |                          |                           |   |                                                  |
|-------|--------------------------|---------------------------|---|--------------------------------------------------|
| 11126 | 1,7,8,18,1<br>9,21,22,23 | 2,3,4,5,6,2<br>0,24,25,26 | 1 | P20760                                           |
| 11127 | 1,7,8,18,1<br>9,21,22,24 | 2,3,4,5,6,2<br>0,23,25,26 | 3 | P01835,P36376,Q4FZU2                             |
| 11128 | 1,7,8,18,1<br>9,21,22,25 | 2,3,4,5,6,2<br>0,23,24,26 | 6 | P20760,P34901,P36376,P47967,P97840,Q4FZU2        |
| 11129 | 1,7,8,18,1<br>9,21,22,26 | 2,3,4,5,6,2<br>0,23,24,25 | 4 | P34901,P36374,P82995,Q63751                      |
| 11130 | 1,7,8,18,1<br>9,21,23,24 | 2,3,4,5,6,2<br>0,22,25,26 | 1 | Q62997                                           |
| 11131 | 1,7,8,18,1<br>9,21,23,25 | 2,3,4,5,6,2<br>0,22,24,26 | 3 | P02803,P20760,Q99041                             |
| 11132 | 1,7,8,18,1<br>9,21,23,26 | 2,3,4,5,6,2<br>0,22,24,25 | 1 | P82995                                           |
| 11133 | 1,7,8,18,1<br>9,21,24,25 | 2,3,4,5,6,2<br>0,22,23,26 | 4 | P20760,P22006,P36376,Q62997                      |
| 11134 | 1,7,8,18,1<br>9,21,24,26 | 2,3,4,5,6,2<br>0,22,23,25 | 3 | P82995,Q62997,Q6P767                             |
| 11135 | 1,7,8,18,1<br>9,21,25,26 | 2,3,4,5,6,2<br>0,22,23,24 | 3 | P22006,P34901,P82995                             |
| 11136 | 1,7,8,18,1<br>9,22,23,24 | 2,3,4,5,6,2<br>0,21,25,26 | 2 | P01835,P20646                                    |
| 11137 | 1,7,8,18,1<br>9,22,23,25 | 2,3,4,5,6,2<br>0,21,24,26 | 3 | P01835,P19629,P20760                             |
| 11138 | 1,7,8,18,1<br>9,22,23,26 | 2,3,4,5,6,2<br>0,21,24,25 | 1 | P01835                                           |
| 11139 | 1,7,8,18,1<br>9,22,24,25 | 2,3,4,5,6,2<br>0,21,23,26 | 7 | P01835,P10715,P19629,P20760,P20762,P34901,Q4FZU2 |
| 11140 | 1,7,8,18,1<br>9,22,24,26 | 2,3,4,5,6,2<br>0,21,23,25 | 3 | P01835,P20646,Q6P6R2                             |
| 11141 | 1,7,8,18,1<br>9,22,25,26 | 2,3,4,5,6,2<br>0,21,23,24 | 3 | P01835,P34901,P82995                             |
| 11142 | 1,7,8,18,1<br>9,23,24,25 | 2,3,4,5,6,2<br>0,21,22,26 | 5 | P01835,P10715,P19629,P20760,P63036               |
| 11143 | 1,7,8,18,1<br>9,23,24,26 | 2,3,4,5,6,2<br>0,21,22,25 | 2 | P01835,P09605,P25809                             |
| 11144 | 1,7,8,18,1<br>9,23,25,26 | 2,3,4,5,6,2<br>0,21,22,24 | 2 | P01835,P82995                                    |
| 11145 | 1,7,8,18,1<br>9,24,25,26 | 2,3,4,5,6,2<br>0,21,22,23 | 5 | P01835,P10715,P34901,P82995,Q7TPB1               |
| 11146 | 1,7,8,18,2<br>0,21,22,23 | 2,3,4,5,6,1<br>9,24,25,26 | 1 | P20760                                           |
| 11147 | 1,7,8,18,2<br>0,21,22,24 | 2,3,4,5,6,1<br>9,23,25,26 | 2 | P13432,P36376                                    |
| 11148 | 1,7,8,18,2<br>0,21,22,25 | 2,3,4,5,6,1<br>9,23,24,26 | 4 | P10715,P20760,P34901,P36376                      |

|       |                          |                           |   |                                           |
|-------|--------------------------|---------------------------|---|-------------------------------------------|
| 11149 | 1,7,8,18,2<br>0,21,22,26 | 2,3,4,5,6,1<br>9,23,24,25 | 3 | P34901,P36374,Q4FZU6                      |
| 11150 | 1,7,8,18,2<br>0,21,23,24 | 2,3,4,5,6,1<br>9,22,25,26 | 1 | Q6AYL6                                    |
| 11151 | 1,7,8,18,2<br>0,21,23,25 | 2,3,4,5,6,1<br>9,22,24,26 | 3 | P10715,P20760,Q6AYL6                      |
| 11152 | 1,7,8,18,2<br>0,21,23,26 | 2,3,4,5,6,1<br>9,22,24,25 | 3 | Q4FZU6,Q6IFV1,Q6P6Q2                      |
| 11153 | 1,7,8,18,2<br>0,21,24,25 | 2,3,4,5,6,1<br>9,22,23,26 | 3 | P10715,P20760,P36376                      |
| 11154 | 1,7,8,18,2<br>0,21,24,26 | 2,3,4,5,6,1<br>9,22,23,25 | 2 | Q4FZU6,Q6AYR8                             |
| 11155 | 1,7,8,18,2<br>0,21,25,26 | 2,3,4,5,6,1<br>9,22,23,24 | 4 | P10715,P31430,P34901,P82995               |
| 11156 | 1,7,8,18,2<br>0,22,23,24 | 2,3,4,5,6,1<br>9,21,25,26 | 0 |                                           |
| 11157 | 1,7,8,18,2<br>0,22,23,25 | 2,3,4,5,6,1<br>9,21,24,26 | 3 | P10715,P19629,P20760                      |
| 11158 | 1,7,8,18,2<br>0,22,23,26 | 2,3,4,5,6,1<br>9,21,24,25 | 1 | Q4FZU6                                    |
| 11159 | 1,7,8,18,2<br>0,22,24,25 | 2,3,4,5,6,1<br>9,21,23,26 | 3 | P01835,P10715,P20760                      |
| 11160 | 1,7,8,18,2<br>0,22,24,26 | 2,3,4,5,6,1<br>9,21,23,25 | 1 | P01835                                    |
| 11161 | 1,7,8,18,2<br>0,22,25,26 | 2,3,4,5,6,1<br>9,21,23,24 | 2 | P10715,P34901                             |
| 11162 | 1,7,8,18,2<br>0,23,24,25 | 2,3,4,5,6,1<br>9,21,22,26 | 4 | P10715,P19629,P20760,P63036               |
| 11163 | 1,7,8,18,2<br>0,23,24,26 | 2,3,4,5,6,1<br>9,21,22,25 | 1 | Q4FZU6                                    |
| 11164 | 1,7,8,18,2<br>0,23,25,26 | 2,3,4,5,6,1<br>9,21,22,24 | 1 | P10715                                    |
| 11165 | 1,7,8,18,2<br>0,24,25,26 | 2,3,4,5,6,1<br>9,21,22,23 | 3 | P10715,P34901,Q7TPB1                      |
| 11166 | 1,7,8,18,2<br>1,22,23,24 | 2,3,4,5,6,1<br>9,20,25,26 | 0 |                                           |
| 11167 | 1,7,8,18,2<br>1,22,23,25 | 2,3,4,5,6,1<br>9,20,24,26 | 2 | P19629,P20760                             |
| 11168 | 1,7,8,18,2<br>1,22,23,26 | 2,3,4,5,6,1<br>9,20,24,25 | 0 |                                           |
| 11169 | 1,7,8,18,2<br>1,22,24,25 | 2,3,4,5,6,1<br>9,20,23,26 | 6 | P10715,P19629,P20760,P22006,P36376,Q4FZU2 |
| 11170 | 1,7,8,18,2<br>1,22,24,26 | 2,3,4,5,6,1<br>9,20,23,25 | 0 |                                           |
| 11171 | 1,7,8,18,2<br>1,22,25,26 | 2,3,4,5,6,1<br>9,20,23,24 | 5 | P19629,P22006,P31430,P34901,P82995        |



|       |                          |                           |    |                                                                              |
|-------|--------------------------|---------------------------|----|------------------------------------------------------------------------------|
| 11172 | 1,7,8,18,2<br>1,23,24,25 | 2,3,4,5,6,1<br>9,20,22,26 | 5  | P10715,P19629,P20760,P22006,Q62997                                           |
| 11173 | 1,7,8,18,2<br>1,23,24,26 | 2,3,4,5,6,1<br>9,20,22,25 | 2  | Q62997,Q6IFV1                                                                |
| 11174 | 1,7,8,18,2<br>1,23,25,26 | 2,3,4,5,6,1<br>9,20,22,24 | 8  | P07150,P14669,P19629,P22006,P31430,P55091,P82995,Q62997                      |
| 11175 | 1,7,8,18,2<br>1,24,25,26 | 2,3,4,5,6,1<br>9,20,22,23 | 8  | P08721,P10715,P19629,P22006,P31430,P55091,P82995,Q62997                      |
| 11176 | 1,7,8,18,2<br>2,23,24,25 | 2,3,4,5,6,1<br>9,20,21,26 | 5  | P01835,P10715,P19629,P20760,P62804                                           |
| 11177 | 1,7,8,18,2<br>2,23,24,26 | 2,3,4,5,6,1<br>9,20,21,25 | 2  | P00731,P01835                                                                |
| 11178 | 1,7,8,18,2<br>2,23,25,26 | 2,3,4,5,6,1<br>9,20,21,24 | 2  | P01835,P19629                                                                |
| 11179 | 1,7,8,18,2<br>2,24,25,26 | 2,3,4,5,6,1<br>9,20,21,23 | 4  | P01835,P10715,P19629,Q7TPB1                                                  |
| 11180 | 1,7,8,18,2<br>3,24,25,26 | 2,3,4,5,6,1<br>9,20,21,22 | 5  | P01835,P10715,P19629,P55091,Q7TPB1                                           |
| 11181 | 1,7,8,19,2<br>0,21,22,23 | 2,3,4,5,6,1<br>8,24,25,26 | 2  | P00774,Q62902                                                                |
| 11182 | 1,7,8,19,2<br>0,21,22,24 | 2,3,4,5,6,1<br>8,23,25,26 | 9  | P00774,P12785,P36376,P38444,Q4FZU2,Q6IFU8,Q6IFW6,Q6IMF3,Q6P6Q2               |
| 11183 | 1,7,8,19,2<br>0,21,22,25 | 2,3,4,5,6,1<br>8,23,24,26 | 9  | P00774,P12785,P20760,P34901,P36376,P47967,Q4FZU2,Q6IFU8,Q6IFW6               |
| 11184 | 1,7,8,19,2<br>0,21,22,26 | 2,3,4,5,6,1<br>8,23,24,25 | 6  | P00774,P12785,P34901,P36374,Q63751,Q99068                                    |
| 11185 | 1,7,8,19,2<br>0,21,23,24 | 2,3,4,5,6,1<br>8,22,25,26 | 1  | P00774                                                                       |
| 11186 | 1,7,8,19,2<br>0,21,23,25 | 2,3,4,5,6,1<br>8,22,24,26 | 2  | P20760,Q99041                                                                |
| 11187 | 1,7,8,19,2<br>0,21,23,26 | 2,3,4,5,6,1<br>8,22,24,25 | 1  | Q4FZU6                                                                       |
| 11188 | 1,7,8,19,2<br>0,21,24,25 | 2,3,4,5,6,1<br>8,22,23,26 | 10 | P00774,P10715,P12785,P20760,P22006,P34901,P36376,Q4FZU2,Q6IFU8,Q6IFW6        |
| 11189 | 1,7,8,19,2<br>0,21,24,26 | 2,3,4,5,6,1<br>8,22,23,25 | 0  |                                                                              |
| 11190 | 1,7,8,19,2<br>0,21,25,26 | 2,3,4,5,6,1<br>8,22,23,24 | 1  | P34901                                                                       |
| 11191 | 1,7,8,19,2<br>0,22,23,24 | 2,3,4,5,6,1<br>8,21,25,26 | 6  | P00774,P01835,P20646,P25031,P31430,P98089                                    |
| 11192 | 1,7,8,19,2<br>0,22,23,25 | 2,3,4,5,6,1<br>8,21,24,26 | 5  | P00774,P01835,P20760,P25031,Q08849                                           |
| 11193 | 1,7,8,19,2<br>0,22,23,26 | 2,3,4,5,6,1<br>8,21,24,25 | 7  | P00774,P01835,P20646,P25031,P31430,P98089,Q08849                             |
| 11194 | 1,7,8,19,2<br>0,22,24,25 | 2,3,4,5,6,1<br>8,21,23,26 | 11 | P00774,P01835,P10715,P12785,P25031,P34901,Q4FZU2,Q6IFU8,Q6IFW6,Q6IMF3,Q6P6Q2 |

|       |                                                 |    |                                                                                                   |
|-------|-------------------------------------------------|----|---------------------------------------------------------------------------------------------------|
| 11195 | 1,7,8,19,2 2,3,4,5,6,1<br>0,22,24,26 8,21,23,25 | 9  | P00774,P01835,P12785,P20646,P25031,P31430,P34901,P98089,Q99MH3                                    |
| 11196 | 1,7,8,19,2 2,3,4,5,6,1<br>0,22,25,26 8,21,23,24 | 4  | P00774,P01835,P12785,P34901                                                                       |
| 11197 | 1,7,8,19,2 2,3,4,5,6,1<br>0,23,24,25 8,21,22,26 | 6  | P00774,P01835,P10715,P19629,P25031,P63036                                                         |
| 11198 | 1,7,8,19,2 2,3,4,5,6,1<br>0,23,24,26 8,21,22,25 | 5  | P00774,P01835,P25031,P31430,P98089                                                                |
| 11199 | 1,7,8,19,2 2,3,4,5,6,1<br>0,23,25,26 8,21,22,24 | 1  | Q08849                                                                                            |
| 11200 | 1,7,8,19,2 2,3,4,5,6,1<br>0,24,25,26 8,21,22,23 | 4  | P01835,P10715,P25031,P34901                                                                       |
| 11201 | 1,7,8,19,2 2,3,4,5,6,1<br>1,22,23,24 8,20,25,26 | 3  | P00774,P01835,Q4FZU2                                                                              |
| 11202 | 1,7,8,19,2 2,3,4,5,6,1<br>1,22,23,25 8,20,24,26 | 4  | P19629,P20760,P97840,Q99041                                                                       |
| 11203 | 1,7,8,19,2 2,3,4,5,6,1<br>1,22,23,26 8,20,24,25 | 0  |                                                                                                   |
| 11204 | 1,7,8,19,2 2,3,4,5,6,1<br>1,22,24,25 8,20,23,26 | 14 | P00774,P01835,P12785,P19629,P20762,P22006,P36376,P97840,Q4FZU2,Q6IFU8,Q6IFW6,Q6IG02,Q6IMF3,Q6P6Q2 |
| 11205 | 1,7,8,19,2 2,3,4,5,6,1<br>1,22,24,26 8,20,23,25 | 2  | P01835,P12785                                                                                     |
| 11206 | 1,7,8,19,2 2,3,4,5,6,1<br>1,22,25,26 8,20,23,24 | 3  | P12785,P22006,P34901                                                                              |
| 11207 | 1,7,8,19,2 2,3,4,5,6,1<br>1,23,24,25 8,20,22,26 | 5  | P19629,P20760,P22006,Q62997,Q99041                                                                |
| 11208 | 1,7,8,19,2 2,3,4,5,6,1<br>1,23,24,26 8,20,22,25 | 1  | P22006                                                                                            |
| 11209 | 1,7,8,19,2 2,3,4,5,6,1<br>1,23,25,26 8,20,22,24 | 2  | P19629,P22006                                                                                     |
| 11210 | 1,7,8,19,2 2,3,4,5,6,1<br>1,24,25,26 8,20,22,23 | 3  | P19629,P22006,Q62997                                                                              |
| 11211 | 1,7,8,19,2 2,3,4,5,6,1<br>2,23,24,25 8,20,21,26 | 7  | P00774,P01835,P06911,P19629,P25031,P62804,Q4FZU2                                                  |
| 11212 | 1,7,8,19,2 2,3,4,5,6,1<br>2,23,24,26 8,20,21,25 | 7  | P00731,P00774,P01835,P20646,P25031,P31430,P98089                                                  |
| 11213 | 1,7,8,19,2 2,3,4,5,6,1<br>2,23,25,26 8,20,21,24 | 3  | P01835,P19629,P25031                                                                              |
| 11214 | 1,7,8,19,2 2,3,4,5,6,1<br>2,24,25,26 8,20,21,23 | 5  | P01835,P12785,P19629,P25031,P34901                                                                |
| 11215 | 1,7,8,19,2 2,3,4,5,6,1<br>3,24,25,26 8,20,21,22 | 4  | P01835,P19629,P25031,Q7TPB1                                                                       |
| 11216 | 1,7,8,20,2 2,3,4,5,6,1<br>1,22,23,24 8,19,25,26 | 2  | P00774,P14173                                                                                     |
| 11217 | 1,7,8,20,2 2,3,4,5,6,1<br>1,22,23,25 8,19,24,26 | 2  | P19629,P20760                                                                                     |

|       |                               |                           |    |                                                                                            |
|-------|-------------------------------|---------------------------|----|--------------------------------------------------------------------------------------------|
| 11218 | 1,7,8,20,2<br>1,22,23,26      | 2,3,4,5,6,1<br>8,19,24,25 | 2  | P14173,Q4FZU6                                                                              |
| 11219 | 1,7,8,20,2<br>1,22,24,25      | 2,3,4,5,6,1<br>8,19,23,26 | 13 | P00774,P10715,P12785,P19629,P22006,P35467,P36376,Q4FZU2,Q5XFX0,Q63942,Q64194,Q6IFU8,Q6IFW6 |
| 11220 | 1,7,8,20,2<br>1,22,24,26      | 2,3,4,5,6,1<br>8,19,23,25 | 2  | P12785,Q99MH3                                                                              |
| 11221 | 1,7,8,20,2<br>1,22,25,26      | 2,3,4,5,6,1<br>8,19,23,24 | 3  | P02625,P12785,P34901                                                                       |
| 11222 | 1,7,8,20,2<br>1,23,24,25      | 2,3,4,5,6,1<br>8,19,22,26 | 4  | P10715,P19629,P22006,P63036                                                                |
| 11223 | 1,7,8,20,2<br>1,23,24,26      | 2,3,4,5,6,1<br>8,19,22,25 | 2  | P14173,Q4FZU6                                                                              |
| 11224 | 1,7,8,20,2<br>1,23,25,26      | 2,3,4,5,6,1<br>8,19,22,24 | 2  | P19629,P22006                                                                              |
| 11225 | 1,7,8,20,2<br>1,24,25,26      | 2,3,4,5,6,1<br>8,19,22,23 | 4  | P02625,P10715,P19629,P22006                                                                |
| 11226 | 1,7,8,20,2<br>2,23,24,25      | 2,3,4,5,6,1<br>8,19,21,26 | 5  | P00774,P01835,P10715,P19629,P25031                                                         |
| 11227 | 1,7,8,20,2<br>2,23,24,26      | 2,3,4,5,6,1<br>8,19,21,25 | 8  | P00731,P00774,P01835,P14173,P20646,P25031,P98089,Q8CIZ5                                    |
| 11228 | 1,7,8,20,2<br>2,23,25,26      | 2,3,4,5,6,1<br>8,19,21,24 | 3  | P10715,P19629,Q08849                                                                       |
| 11229 | 1,7,8,20,2<br>2,24,25,26      | 2,3,4,5,6,1<br>8,19,21,23 | 7  | P00731,P01835,P10715,P12785,P19629,P25031,P34901                                           |
| 11230 | 1,7,8,20,2<br>3,24,25,26      | 2,3,4,5,6,1<br>8,19,21,22 | 4  | P10715,P19629,P25031,Q7TPB1                                                                |
| 11231 | 1,7,8,21,2<br>2,23,24,25      | 2,3,4,5,6,1<br>8,19,20,26 | 3  | P19629,P22006,Q63355                                                                       |
| 11232 | 1,7,8,21,2<br>2,23,24,26      | 2,3,4,5,6,1<br>8,19,20,25 | 3  | P00731,P14173,P22006                                                                       |
| 11233 | 1,7,8,21,2<br>2,23,25,26      | 2,3,4,5,6,1<br>8,19,20,24 | 2  | P19629,P22006                                                                              |
| 11234 | 1,7,8,21,2<br>2,24,25,26      | 2,3,4,5,6,1<br>8,19,20,23 | 3  | P12785,P19629,P22006                                                                       |
| 11235 | 1,7,8,21,2<br>3,24,25,26      | 2,3,4,5,6,1<br>8,19,20,22 | 5  | P07150,P19629,P22006,Q62997,Q7TPB1                                                         |
| 11236 | 1,7,8,22,2<br>3,24,25,26      | 2,3,4,5,6,1<br>8,19,20,21 | 5  | P00731,P01835,P19629,P25031,Q7TPB1                                                         |
| 11237 | 1,7,18,19,<br>20,21,22,2<br>3 | 2,3,4,5,6,8<br>,24,25,26  | 3  | P20760,P20761,Q9Z0V6                                                                       |
| 11238 | 1,7,18,19,<br>20,21,22,2<br>4 | 2,3,4,5,6,8<br>,23,25,26  | 8  | P00774,P20760,P20761,P20762,P36374,P36376,Q9WTT6,Q9Z0V6                                    |

|       |                               |                          |   |                                                                       |
|-------|-------------------------------|--------------------------|---|-----------------------------------------------------------------------|
| 11239 | 1,7,18,19,<br>20,21,22,2<br>5 | 2,3,4,5,6,8<br>,23,24,26 | 9 | P02793;Q7TP54,P20760,P20761,P20762,P34901,P36376,P47967,P97840,Q9Z0V6 |
| 11240 | 1,7,18,19,<br>20,21,22,2<br>6 | 2,3,4,5,6,8<br>,23,24,25 | 5 | P06760,P34901,P36374,Q63751,Q9Z0V6                                    |
| 11241 | 1,7,18,19,<br>20,21,23,2<br>4 | 2,3,4,5,6,8<br>,22,25,26 | 4 | P20760,P20761,P20766,Q9Z0V6                                           |
| 11242 | 1,7,18,19,<br>20,21,23,2<br>5 | 2,3,4,5,6,8<br>,22,24,26 | 4 | P20760,P20761,P20766,P97840                                           |
| 11243 | 1,7,18,19,<br>20,21,23,2<br>6 | 2,3,4,5,6,8<br>,22,24,25 | 4 | P20766,P36374,Q4FZU6,Q9Z0V6                                           |
| 11244 | 1,7,18,19,<br>20,21,24,2<br>5 | 2,3,4,5,6,8<br>,22,23,26 | 6 | P20760,P20761,P20762,P20766,P36376,Q9Z0V6                             |
| 11245 | 1,7,18,19,<br>20,21,24,2<br>6 | 2,3,4,5,6,8<br>,22,23,25 | 4 | P20766,P36374,Q6P767,Q9Z0V6                                           |
| 11246 | 1,7,18,19,<br>20,21,25,2<br>6 | 2,3,4,5,6,8<br>,22,23,24 | 3 | P34901,P82995,Q9Z0V6                                                  |
| 11247 | 1,7,18,19,<br>20,22,23,2<br>4 | 2,3,4,5,6,8<br>,21,25,26 | 7 | P00774,P20646,P20760,P20761,Q6AYS4,Q9WTT6,Q9Z0V6                      |
| 11248 | 1,7,18,19,<br>20,22,23,2<br>5 | 2,3,4,5,6,8<br>,21,24,26 | 4 | P20760,P20761,P20762,Q9Z0V6                                           |
| 11249 | 1,7,18,19,<br>20,22,23,2<br>6 | 2,3,4,5,6,8<br>,21,24,25 | 4 | P06760,P20646,Q9WTT6,Q9Z0V6                                           |
| 11250 | 1,7,18,19,<br>20,22,24,2<br>5 | 2,3,4,5,6,8<br>,21,23,26 | 5 | P01835,P20760,P20761,P20762,Q9Z0V6                                    |
| 11251 | 1,7,18,19,<br>20,22,24,2<br>6 | 2,3,4,5,6,8<br>,21,23,25 | 8 | P01835,P06760,P20646,Q63751,Q6AYS4,Q6P6R2,Q9WTT6,Q9Z0V6               |
| 11252 | 1,7,18,19,<br>20,22,25,2<br>6 | 2,3,4,5,6,8<br>,21,23,24 | 3 | P20762,P34901,Q9Z0V6                                                  |
| 11253 | 1,7,18,19,<br>20,23,24,2<br>5 | 2,3,4,5,6,8<br>,21,22,26 | 7 | P20760,P20761,P20762,P20766,P63036,Q80WL1,Q9Z0V6                      |

|       |                               |                          |   |                                                         |
|-------|-------------------------------|--------------------------|---|---------------------------------------------------------|
| 11254 | 1,7,18,19,<br>20,23,24,2<br>6 | 2,3,4,5,6,8<br>,21,22,25 | 6 | P06760,P20646,P20766,Q6AYS4,Q9WTT6,Q9Z0V6               |
| 11255 | 1,7,18,19,<br>20,23,25,2<br>6 | 2,3,4,5,6,8<br>,21,22,24 | 0 |                                                         |
| 11256 | 1,7,18,19,<br>20,24,25,2<br>6 | 2,3,4,5,6,8<br>,21,22,23 | 4 | P20762,P34901,Q7TPB1,Q9Z0V6                             |
| 11257 | 1,7,18,19,<br>21,22,23,2<br>4 | 2,3,4,5,6,8<br>,20,25,26 | 4 | P20760,P20761,P20762,Q9Z0V6                             |
| 11258 | 1,7,18,19,<br>21,22,23,2<br>5 | 2,3,4,5,6,8<br>,20,24,26 | 5 | P20760,P20761,P20762,P47967,P97840                      |
| 11259 | 1,7,18,19,<br>21,22,23,2<br>6 | 2,3,4,5,6,8<br>,20,24,25 | 2 | P36374,Q9Z0V6                                           |
| 11260 | 1,7,18,19,<br>21,22,24,2<br>5 | 2,3,4,5,6,8<br>,20,23,26 | 8 | P20760,P20761,P20762,P22006,P36376,P97840,Q4FZU2,Q9Z0V6 |
| 11261 | 1,7,18,19,<br>21,22,24,2<br>6 | 2,3,4,5,6,8<br>,20,23,25 | 3 | P20762,P36374,Q9Z0V6                                    |
| 11262 | 1,7,18,19,<br>21,22,25,2<br>6 | 2,3,4,5,6,8<br>,20,23,24 | 6 | P20762,P22006,P34901,P36374,P82995,P97840               |
| 11263 | 1,7,18,19,<br>21,23,24,2<br>5 | 2,3,4,5,6,8<br>,20,22,26 | 7 | P20760,P20761,P20762,P20766,P22006,P97840,Q62997        |
| 11264 | 1,7,18,19,<br>21,23,24,2<br>6 | 2,3,4,5,6,8<br>,20,22,25 | 3 | D3ZUC6,P20766,Q9Z0V6                                    |
| 11265 | 1,7,18,19,<br>21,23,25,2<br>6 | 2,3,4,5,6,8<br>,20,22,24 | 2 | P22006,P82995                                           |
| 11266 | 1,7,18,19,<br>21,24,25,2<br>6 | 2,3,4,5,6,8<br>,20,22,23 | 5 | P20762,P22006,P82995,Q62997,Q7TPB1                      |
| 11267 | 1,7,18,19,<br>22,23,24,2<br>5 | 2,3,4,5,6,8<br>,20,21,26 | 7 | P01835,P20760,P20761,P20762,P62804,Q00715,Q9Z0V6        |
| 11268 | 1,7,18,19,<br>22,23,24,2<br>6 | 2,3,4,5,6,8<br>,20,21,25 | 7 | P00731,P01835,P06760,P20646,P62804,Q9WTT6,Q9Z0V6        |

|       |                               |                          |   |                                           |
|-------|-------------------------------|--------------------------|---|-------------------------------------------|
| 11269 | 1,7,18,19,<br>22,23,25,2<br>6 | 2,3,4,5,6,8<br>,20,21,24 | 2 | P01835,P20762                             |
| 11270 | 1,7,18,19,<br>22,24,25,2<br>6 | 2,3,4,5,6,8<br>,20,21,23 | 5 | P01835,P20762,P62804,Q7TPB1,Q9Z0V6        |
| 11271 | 1,7,18,19,<br>23,24,25,2<br>6 | 2,3,4,5,6,8<br>,20,21,22 | 4 | P01835,P20762,P62804,Q7TPB1               |
| 11272 | 1,7,18,20,<br>21,22,23,2<br>4 | 2,3,4,5,6,8<br>,19,25,26 | 2 | P20760,Q9Z0V6                             |
| 11273 | 1,7,18,20,<br>21,22,23,2<br>5 | 2,3,4,5,6,8<br>,19,24,26 | 2 | P20760,P20761                             |
| 11274 | 1,7,18,20,<br>21,22,23,2<br>6 | 2,3,4,5,6,8<br>,19,24,25 | 3 | P36374,Q4FZU6,Q9Z0V6                      |
| 11275 | 1,7,18,20,<br>21,22,24,2<br>5 | 2,3,4,5,6,8<br>,19,23,26 | 5 | P20760,P20761,P20762,P36376,Q9Z0V6        |
| 11276 | 1,7,18,20,<br>21,22,24,2<br>6 | 2,3,4,5,6,8<br>,19,23,25 | 3 | P36374,P50280,Q9Z0V6                      |
| 11277 | 1,7,18,20,<br>21,22,25,2<br>6 | 2,3,4,5,6,8<br>,19,23,24 | 1 | P36374                                    |
| 11278 | 1,7,18,20,<br>21,23,24,2<br>5 | 2,3,4,5,6,8<br>,19,22,26 | 4 | P20760,P20761,P20766,P22006               |
| 11279 | 1,7,18,20,<br>21,23,24,2<br>6 | 2,3,4,5,6,8<br>,19,22,25 | 3 | P20766,Q4FZU6,Q9Z0V6                      |
| 11280 | 1,7,18,20,<br>21,23,25,2<br>6 | 2,3,4,5,6,8<br>,19,22,24 | 0 |                                           |
| 11281 | 1,7,18,20,<br>21,24,25,2<br>6 | 2,3,4,5,6,8<br>,19,22,23 | 2 | P20766,P22006                             |
| 11282 | 1,7,18,20,<br>22,23,24,2<br>5 | 2,3,4,5,6,8<br>,19,21,26 | 4 | P20760,P20761,P20762,Q9Z0V6               |
| 11283 | 1,7,18,20,<br>22,23,24,2<br>6 | 2,3,4,5,6,8<br>,19,21,25 | 6 | P00731,P06760,P20646,Q8CIZ5,Q9WTT6,Q9Z0V6 |

|       |                               |                          |    |                                                                                                                                                                  |
|-------|-------------------------------|--------------------------|----|------------------------------------------------------------------------------------------------------------------------------------------------------------------|
| 11284 | 1,7,18,20,<br>22,23,25,2<br>6 | 2,3,4,5,6,8<br>,19,21,24 | 0  |                                                                                                                                                                  |
| 11285 | 1,7,18,20,<br>22,24,25,2<br>6 | 2,3,4,5,6,8<br>,19,21,23 | 3  | P00731,P20762,Q9Z0V6                                                                                                                                             |
| 11286 | 1,7,18,20,<br>23,24,25,2<br>6 | 2,3,4,5,6,8<br>,19,21,22 | 1  | Q7TPB1                                                                                                                                                           |
| 11287 | 1,7,18,21,<br>22,23,24,2<br>5 | 2,3,4,5,6,8<br>,19,20,26 | 5  | P20760,P20761,P20762,P22006,P62804                                                                                                                               |
| 11288 | 1,7,18,21,<br>22,23,24,2<br>6 | 2,3,4,5,6,8<br>,19,20,25 | 1  | P00731                                                                                                                                                           |
| 11289 | 1,7,18,21,<br>22,23,25,2<br>6 | 2,3,4,5,6,8<br>,19,20,24 | 2  | P22006,P82995                                                                                                                                                    |
| 11290 | 1,7,18,21,<br>22,24,25,2<br>6 | 2,3,4,5,6,8<br>,19,20,23 | 3  | P20762,P22006,P82995                                                                                                                                             |
| 11291 | 1,7,18,21,<br>23,24,25,2<br>6 | 2,3,4,5,6,8<br>,19,20,22 | 4  | P22006,P55091,Q62997,Q7TPB1                                                                                                                                      |
| 11292 | 1,7,18,22,<br>23,24,25,2<br>6 | 2,3,4,5,6,8<br>,19,20,21 | 5  | P00731,P01835,P20762,P62804,Q7TPB1                                                                                                                               |
| 11293 | 1,7,19,20,<br>21,22,23,2<br>4 | 2,3,4,5,6,8<br>,18,25,26 | 3  | P00774,Q6AYS4,Q9Z0V6                                                                                                                                             |
| 11294 | 1,7,19,20,<br>21,22,23,2<br>5 | 2,3,4,5,6,8<br>,18,24,26 | 6  | P00774,P10959,P20760,P20761,P97840,Q63942                                                                                                                        |
| 11295 | 1,7,19,20,<br>21,22,23,2<br>6 | 2,3,4,5,6,8<br>,18,24,25 | 2  | P00774,Q9Z0V6                                                                                                                                                    |
| 11296 | 1,7,19,20,<br>21,22,24,2<br>5 | 2,3,4,5,6,8<br>,18,23,26 | 22 | P00774,P02793,Q7TP54,P12785,P20760,P20761,P20762,P22006,P28648,P35467,P36376,P97840,Q4FZU2,Q5XI22,Q63942,Q64194,Q6AY61,Q6IFU8,Q6IFW6,Q6IG02,Q6IMF3,Q6P6Q2,Q9Z0V6 |
| 11297 | 1,7,19,20,<br>21,22,24,2<br>6 | 2,3,4,5,6,8<br>,18,23,25 | 8  | P00774,P38444,Q01205,Q5XI22,Q63598,Q6AYS4,Q99MH3,Q9Z0V6                                                                                                          |
| 11298 | 1,7,19,20,<br>21,22,25,2<br>6 | 2,3,4,5,6,8<br>,18,23,24 | 2  | P34901,Q5XI22                                                                                                                                                    |

|       |                               |                          |    |                                                                       |
|-------|-------------------------------|--------------------------|----|-----------------------------------------------------------------------|
| 11299 | 1,7,19,20,<br>21,23,24,2<br>5 | 2,3,4,5,6,8<br>,18,22,26 | 7  | P00774,P20760,P20761,P20762,P20766,P22006,Q63942                      |
| 11300 | 1,7,19,20,<br>21,23,24,2<br>6 | 2,3,4,5,6,8<br>,18,22,25 | 3  | P20766,Q6AYS4,Q9Z0V6                                                  |
| 11301 | 1,7,19,20,<br>21,23,25,2<br>6 | 2,3,4,5,6,8<br>,18,22,24 | 1  | P22006                                                                |
| 11302 | 1,7,19,20,<br>21,24,25,2<br>6 | 2,3,4,5,6,8<br>,18,22,23 | 4  | P20762,P20766,P22006,Q5XI22                                           |
| 11303 | 1,7,19,20,<br>22,23,24,2<br>5 | 2,3,4,5,6,8<br>,18,21,26 | 7  | P00774,P01835,P20760,P20761,P20762,P25031,Q9Z0V6                      |
| 11304 | 1,7,19,20,<br>22,23,24,2<br>6 | 2,3,4,5,6,8<br>,18,21,25 | 10 | P00731,P00774,P01835,P20646,P25031,P31430,P98089,Q6AYS4,Q9WTT6,Q9Z0V6 |
| 11305 | 1,7,19,20,<br>22,23,25,2<br>6 | 2,3,4,5,6,8<br>,18,21,24 | 0  |                                                                       |
| 11306 | 1,7,19,20,<br>22,24,25,2<br>6 | 2,3,4,5,6,8<br>,18,21,23 | 8  | P00731,P00774,P01835,P20762,P25031,Q5XI22,Q6AYS4,Q9Z0V6               |
| 11307 | 1,7,19,20,<br>23,24,25,2<br>6 | 2,3,4,5,6,8<br>,18,21,22 | 4  | P25031,Q6AYS4,Q7TPB1,Q80WL1                                           |
| 11308 | 1,7,19,21,<br>22,23,24,2<br>5 | 2,3,4,5,6,8<br>,18,20,26 | 9  | P00774,P20760,P20761,P20762,P22006,P62804,P97840,Q4FZU2,Q63355        |
| 11309 | 1,7,19,21,<br>22,23,24,2<br>6 | 2,3,4,5,6,8<br>,18,20,25 | 2  | P00731,P22006                                                         |
| 11310 | 1,7,19,21,<br>22,23,25,2<br>6 | 2,3,4,5,6,8<br>,18,20,24 | 2  | P22006,P97840                                                         |
| 11311 | 1,7,19,21,<br>22,24,25,2<br>6 | 2,3,4,5,6,8<br>,18,20,23 | 6  | P20762,P22006,P97840,Q498D9,Q5XI22,Q6TMA8                             |
| 11312 | 1,7,19,21,<br>23,24,25,2<br>6 | 2,3,4,5,6,8<br>,18,20,22 | 2  | P22006,Q7TPB1                                                         |
| 11313 | 1,7,19,22,<br>23,24,25,2<br>6 | 2,3,4,5,6,8<br>,18,20,21 | 7  | P00731,P01835,P20646,P20762,P25031,P62804,Q7TPB1                      |



|       |                               |                          |   |                                                         |
|-------|-------------------------------|--------------------------|---|---------------------------------------------------------|
| 11314 | 1,7,20,21,<br>22,23,24,2<br>5 | 2,3,4,5,6,8<br>,18,19,26 | 5 | P00774,P20760,P22006,Q63355,Q63942                      |
| 11315 | 1,7,20,21,<br>22,23,24,2<br>6 | 2,3,4,5,6,8<br>,18,19,25 | 3 | P00731,P02803,P14173                                    |
| 11316 | 1,7,20,21,<br>22,23,25,2<br>6 | 2,3,4,5,6,8<br>,18,19,24 | 1 | P22006                                                  |
| 11317 | 1,7,20,21,<br>22,24,25,2<br>6 | 2,3,4,5,6,8<br>,18,19,23 | 8 | P00731,P02625,P22006,P35467,Q03191,Q498D9,Q5XI22,Q64194 |
| 11318 | 1,7,20,21,<br>23,24,25,2<br>6 | 2,3,4,5,6,8<br>,18,19,22 | 3 | P20766,P22006,Q7TPB1                                    |
| 11319 | 1,7,20,22,<br>23,24,25,2<br>6 | 2,3,4,5,6,8<br>,18,19,21 | 4 | P00731,P02803,P25031,Q7TPB1                             |
| 11320 | 1,7,21,22,<br>23,24,25,2<br>6 | 2,3,4,5,6,8<br>,18,19,20 | 3 | P00731,P22006,Q7TPB1                                    |
| 11321 | 1,8,18,19,<br>20,21,22,2<br>3 | 2,3,4,5,6,7<br>,24,25,26 | 6 | P20760,P20761,P35281,P36376,P83748,Q8CJD3               |
| 11322 | 1,8,18,19,<br>20,21,22,2<br>4 | 2,3,4,5,6,7<br>,23,25,26 | 8 | P00774,P20760,P20761,P20762,P36376,P83748,Q63751,Q9Z0V6 |
| 11323 | 1,8,18,19,<br>20,21,22,2<br>5 | 2,3,4,5,6,7<br>,23,24,26 | 7 | P20760,P20761,P20762,P34901,P36376,P83748,Q8K4G9        |
| 11324 | 1,8,18,19,<br>20,21,22,2<br>6 | 2,3,4,5,6,7<br>,23,24,25 | 5 | P34901,P36374,P36376,Q63751,Q8K4G9                      |
| 11325 | 1,8,18,19,<br>20,21,23,2<br>4 | 2,3,4,5,6,7<br>,22,25,26 | 6 | P05539,P20760,P20761,P35281,P36376,P83748               |
| 11326 | 1,8,18,19,<br>20,21,23,2<br>5 | 2,3,4,5,6,7<br>,22,24,26 | 5 | P08010,P20760,P20761,P36376,P83748                      |
| 11327 | 1,8,18,19,<br>20,21,23,2<br>6 | 2,3,4,5,6,7<br>,22,24,25 | 4 | P35281,Q6IFV1,Q6P6Q2,Q8K4G9                             |
| 11328 | 1,8,18,19,<br>20,21,24,2<br>5 | 2,3,4,5,6,7<br>,22,23,26 | 7 | P05539,P20760,P20761,P20762,P34901,P36376,P83748        |

|       |                               |                          |   |                                                                |
|-------|-------------------------------|--------------------------|---|----------------------------------------------------------------|
| 11329 | 1,8,18,19,<br>20,21,24,2<br>6 | 2,3,4,5,6,7<br>,22,23,25 | 8 | G3V686,P06911,P12020,P36374,P36376,Q63751,Q6P767,Q8K4G9        |
| 11330 | 1,8,18,19,<br>20,21,25,2<br>6 | 2,3,4,5,6,7<br>,22,23,24 | 4 | P34901,P36376,Q63751,Q8K4G9                                    |
| 11331 | 1,8,18,19,<br>20,22,23,2<br>4 | 2,3,4,5,6,7<br>,21,25,26 | 7 | P00774,P20646,P20760,P20761,P61206;P84079;P84082,P83748,Q9Z0V6 |
| 11332 | 1,8,18,19,<br>20,22,23,2<br>5 | 2,3,4,5,6,7<br>,21,24,26 | 6 | P01836,P20760,P20761,P20762,P83748,Q08849                      |
| 11333 | 1,8,18,19,<br>20,22,23,2<br>6 | 2,3,4,5,6,7<br>,21,24,25 | 3 | P09605;P25809,P20646,Q08849                                    |
| 11334 | 1,8,18,19,<br>20,22,24,2<br>5 | 2,3,4,5,6,7<br>,21,23,26 | 7 | P01835,P20760,P20761,P20762,P34901,P36376,P83748               |
| 11335 | 1,8,18,19,<br>20,22,24,2<br>6 | 2,3,4,5,6,7<br>,21,23,25 | 6 | P01835,P20646,P34901,Q63751,Q6P6R2,Q9Z0V6                      |
| 11336 | 1,8,18,19,<br>20,22,25,2<br>6 | 2,3,4,5,6,7<br>,21,23,24 | 4 | P20762,P34901,Q63751,Q8K4G9                                    |
| 11337 | 1,8,18,19,<br>20,23,24,2<br>5 | 2,3,4,5,6,7<br>,21,22,26 | 5 | P20760,P20761,P20762,P63036,P83748                             |
| 11338 | 1,8,18,19,<br>20,23,24,2<br>6 | 2,3,4,5,6,7<br>,21,22,25 | 2 | P09605;P25809,P20646                                           |
| 11339 | 1,8,18,19,<br>20,23,25,2<br>6 | 2,3,4,5,6,7<br>,21,22,24 | 2 | Q08849,Q8K4G9                                                  |
| 11340 | 1,8,18,19,<br>20,24,25,2<br>6 | 2,3,4,5,6,7<br>,21,22,23 | 5 | P20762,P34901,P36376,Q7TPB1,Q8K4G9                             |
| 11341 | 1,8,18,19,<br>21,22,23,2<br>4 | 2,3,4,5,6,7<br>,20,25,26 | 7 | P05539,P20760,P20761,P20762,P36376,P61206;P84079;P84082,P83748 |
| 11342 | 1,8,18,19,<br>21,22,23,2<br>5 | 2,3,4,5,6,7<br>,20,24,26 | 6 | P08010,P20760,P20761,P20762,P36376,P83748                      |
| 11343 | 1,8,18,19,<br>21,22,23,2<br>6 | 2,3,4,5,6,7<br>,20,24,25 | 2 | P36374,Q6IFV1                                                  |

|       |                               |                          |   |                                                  |
|-------|-------------------------------|--------------------------|---|--------------------------------------------------|
| 11344 | 1,8,18,19,<br>21,22,24,2<br>5 | 2,3,4,5,6,7<br>,20,23,26 | 7 | P05539,P20760,P20761,P20762,P36376,P83748,Q4FZU2 |
| 11345 | 1,8,18,19,<br>21,22,24,2<br>6 | 2,3,4,5,6,7<br>,20,23,25 | 4 | P20762,P36374,P36376,Q63751                      |
| 11346 | 1,8,18,19,<br>21,22,25,2<br>6 | 2,3,4,5,6,7<br>,20,23,24 | 4 | P20762,P34901,P36374,P36376                      |
| 11347 | 1,8,18,19,<br>21,23,24,2<br>5 | 2,3,4,5,6,7<br>,20,22,26 | 7 | P05539,P20760,P20761,P20762,P36376,P83748,Q62997 |
| 11348 | 1,8,18,19,<br>21,23,24,2<br>6 | 2,3,4,5,6,7<br>,20,22,25 | 1 | Q6IFV1                                           |
| 11349 | 1,8,18,19,<br>21,23,25,2<br>6 | 2,3,4,5,6,7<br>,20,22,24 | 1 | P08010                                           |
| 11350 | 1,8,18,19,<br>21,24,25,2<br>6 | 2,3,4,5,6,7<br>,20,22,23 | 3 | P20762,P36376,Q62997                             |
| 11351 | 1,8,18,19,<br>22,23,24,2<br>5 | 2,3,4,5,6,7<br>,20,21,26 | 7 | P01835,P01836,P20760,P20761,P20762,P42854,P83748 |
| 11352 | 1,8,18,19,<br>22,23,24,2<br>6 | 2,3,4,5,6,7<br>,20,21,25 | 5 | P00731,P01835,P09605,P25809,P20646,P42854        |
| 11353 | 1,8,18,19,<br>22,23,25,2<br>6 | 2,3,4,5,6,7<br>,20,21,24 | 3 | P01835,P20762,P42854                             |
| 11354 | 1,8,18,19,<br>22,24,25,2<br>6 | 2,3,4,5,6,7<br>,20,21,23 | 5 | P01835,P20762,P34901,P42854,Q7TPB1               |
| 11355 | 1,8,18,19,<br>23,24,25,2<br>6 | 2,3,4,5,6,7<br>,20,21,22 | 4 | P01835,P20762,P42854,Q7TPB1                      |
| 11356 | 1,8,18,20,<br>21,22,23,2<br>4 | 2,3,4,5,6,7<br>,19,25,26 | 4 | P20760,P20761,P36376,P83748                      |
| 11357 | 1,8,18,20,<br>21,22,23,2<br>5 | 2,3,4,5,6,7<br>,19,24,26 | 5 | P20760,P20761,P83748,Q63532,Q6IE51               |
| 11358 | 1,8,18,20,<br>21,22,23,2<br>6 | 2,3,4,5,6,7<br>,19,24,25 | 4 | Q63532,Q6IE51,Q6IFV1,Q6P6Q2                      |

|       |                               |                          |   |                                                  |
|-------|-------------------------------|--------------------------|---|--------------------------------------------------|
| 11359 | 1,8,18,20,<br>21,22,24,2<br>5 | 2,3,4,5,6,7<br>,19,23,26 | 7 | P20760,P20761,P20762,P36376,P83748,Q63532,Q6IE51 |
| 11360 | 1,8,18,20,<br>21,22,24,2<br>6 | 2,3,4,5,6,7<br>,19,23,25 | 7 | P02631,P16086,P36374,P36376,Q63532,Q6IE51,Q99041 |
| 11361 | 1,8,18,20,<br>21,22,25,2<br>6 | 2,3,4,5,6,7<br>,19,23,24 | 7 | P02631,P16086,P34901,P36376,Q63532,Q6IE51,Q8K4G9 |
| 11362 | 1,8,18,20,<br>21,23,24,2<br>5 | 2,3,4,5,6,7<br>,19,22,26 | 5 | P05539,P20760,P20761,P36376,P83748               |
| 11363 | 1,8,18,20,<br>21,23,24,2<br>6 | 2,3,4,5,6,7<br>,19,22,25 | 3 | Q6IFV1,Q6P6Q2,Q9QZQ5                             |
| 11364 | 1,8,18,20,<br>21,23,25,2<br>6 | 2,3,4,5,6,7<br>,19,22,24 | 4 | P08010,Q63532,Q6IFV1,Q6P6Q2                      |
| 11365 | 1,8,18,20,<br>21,24,25,2<br>6 | 2,3,4,5,6,7<br>,19,22,23 | 6 | P02625,P02631,P16086,P36376,Q63532,Q6IE51        |
| 11366 | 1,8,18,20,<br>22,23,24,2<br>5 | 2,3,4,5,6,7<br>,19,21,26 | 4 | P20760,P20761,P20762,P83748                      |
| 11367 | 1,8,18,20,<br>22,23,24,2<br>6 | 2,3,4,5,6,7<br>,19,21,25 | 4 | P00731,P20646,P47967,P97840                      |
| 11368 | 1,8,18,20,<br>22,23,25,2<br>6 | 2,3,4,5,6,7<br>,19,21,24 | 2 | Q63532,Q6IE51                                    |
| 11369 | 1,8,18,20,<br>22,24,25,2<br>6 | 2,3,4,5,6,7<br>,19,21,23 | 6 | P00731,P02631,P16086,P20762,Q63532,Q6IE51        |
| 11370 | 1,8,18,20,<br>23,24,25,2<br>6 | 2,3,4,5,6,7<br>,19,21,22 | 2 | P16086,Q7TPB1                                    |
| 11371 | 1,8,18,21,<br>22,23,24,2<br>5 | 2,3,4,5,6,7<br>,19,20,26 | 5 | P20760,P20761,P20762,P36376,P83748               |
| 11372 | 1,8,18,21,<br>22,23,24,2<br>6 | 2,3,4,5,6,7<br>,19,20,25 | 3 | P00731,Q6IFV1,Q9QZQ5                             |
| 11373 | 1,8,18,21,<br>22,23,25,2<br>6 | 2,3,4,5,6,7<br>,19,20,24 | 3 | P02631,Q63532,Q6IE51                             |

|       |                               |                          |    |                                                                                            |
|-------|-------------------------------|--------------------------|----|--------------------------------------------------------------------------------------------|
| 11374 | 1,8,18,21,<br>22,24,25,2<br>6 | 2,3,4,5,6,7<br>,19,20,23 | 6  | P02631,P16086,P20762,P36376,Q63532,Q6IE51                                                  |
| 11375 | 1,8,18,21,<br>23,24,25,2<br>6 | 2,3,4,5,6,7<br>,19,20,22 | 6  | P07150,Q62997,Q6IFV1,Q6P6Q2,Q7TPB1,Q9QZQ5                                                  |
| 11376 | 1,8,18,22,<br>23,24,25,2<br>6 | 2,3,4,5,6,7<br>,19,20,21 | 6  | P00731,P01835,P16086,P20762,P42854,Q7TPB1                                                  |
| 11377 | 1,8,19,20,<br>21,22,23,2<br>4 | 2,3,4,5,6,7<br>,18,25,26 | 8  | P00774,P20760,P20761,P25031,P36376,P55091,P61206;P84079;P84082,P83748                      |
| 11378 | 1,8,19,20,<br>21,22,23,2<br>5 | 2,3,4,5,6,7<br>,18,24,26 | 5  | P00774,P20760,P20761,P25031,P83748                                                         |
| 11379 | 1,8,19,20,<br>21,22,23,2<br>6 | 2,3,4,5,6,7<br>,18,24,25 | 2  | P00774,P61206;P84079;P84082                                                                |
| 11380 | 1,8,19,20,<br>21,22,24,2<br>5 | 2,3,4,5,6,7<br>,18,23,26 | 13 | O35956,P00774,P12785,P20760,P20761,P20762,P25031,P28648,P36376,P83748,Q4FZU2,Q6IFU8,Q6IFW6 |
| 11381 | 1,8,19,20,<br>21,22,24,2<br>6 | 2,3,4,5,6,7<br>,18,23,25 | 11 | P00774,P02631,P12785,P25031,P28648,P36376,P38444,P61206;P84079;P84082,Q63751,Q99068,Q99MH3 |
| 11382 | 1,8,19,20,<br>21,22,25,2<br>6 | 2,3,4,5,6,7<br>,18,23,24 | 7  | P02631,P12785,P28648,P34901,Q6IE51,Q8K4G9,Q99068                                           |
| 11383 | 1,8,19,20,<br>21,23,24,2<br>5 | 2,3,4,5,6,7<br>,18,22,26 | 7  | P00774,P20760,P20761,P20762,P25031,P36376,P83748                                           |
| 11384 | 1,8,19,20,<br>21,23,24,2<br>6 | 2,3,4,5,6,7<br>,18,22,25 | 2  | P25031,P61206;P84079;P84082                                                                |
| 11385 | 1,8,19,20,<br>21,23,25,2<br>6 | 2,3,4,5,6,7<br>,18,22,24 | 1  | Q8K4G9                                                                                     |
| 11386 | 1,8,19,20,<br>21,24,25,2<br>6 | 2,3,4,5,6,7<br>,18,22,23 | 7  | P02625,P02631,P20762,P28648,P34901,P36376,Q8K4G9                                           |
| 11387 | 1,8,19,20,<br>22,23,24,2<br>5 | 2,3,4,5,6,7<br>,18,21,26 | 9  | P00774,P01835,P20760,P20761,P20762,P25031,P42854,P61206;P84079;P84082,P83748               |
| 11388 | 1,8,19,20,<br>22,23,24,2<br>6 | 2,3,4,5,6,7<br>,18,21,25 | 9  | P00731,P00774,P01835,P20646,P25031,P31430,P42854,P61206;P84079;P84082,P98089               |

|       |                               |                          |    |                                                                                                   |
|-------|-------------------------------|--------------------------|----|---------------------------------------------------------------------------------------------------|
| 11389 | 1,8,19,20,<br>22,23,25,2<br>6 | 2,3,4,5,6,7<br>,18,21,24 | 2  | P25031,Q08849                                                                                     |
| 11390 | 1,8,19,20,<br>22,24,25,2<br>6 | 2,3,4,5,6,7<br>,18,21,23 | 9  | P00731,P00774,P01835,P02631,P12785,P20762,P25031,P34901,P42854                                    |
| 11391 | 1,8,19,20,<br>23,24,25,2<br>6 | 2,3,4,5,6,7<br>,18,21,22 | 3  | P25031,P42854,Q7TPB1                                                                              |
| 11392 | 1,8,19,21,<br>22,23,24,2<br>5 | 2,3,4,5,6,7<br>,18,20,26 | 6  | P20760,P20761,P20762,P25031,P61206;P84079;P84082,P83748                                           |
| 11393 | 1,8,19,21,<br>22,23,24,2<br>6 | 2,3,4,5,6,7<br>,18,20,25 | 3  | P00731,P25031,P61206;P84079;P84082                                                                |
| 11394 | 1,8,19,21,<br>22,23,25,2<br>6 | 2,3,4,5,6,7<br>,18,20,24 | 0  |                                                                                                   |
| 11395 | 1,8,19,21,<br>22,24,25,2<br>6 | 2,3,4,5,6,7<br>,18,20,23 | 6  | P02631,P12785,P20762,P25031,P28648,P36376                                                         |
| 11396 | 1,8,19,21,<br>23,24,25,2<br>6 | 2,3,4,5,6,7<br>,18,20,22 | 4  | P22006,P25031,Q7TPB1,Q9QZQ5                                                                       |
| 11397 | 1,8,19,22,<br>23,24,25,2<br>6 | 2,3,4,5,6,7<br>,18,20,21 | 8  | P00731,P01835,P20646,P20762,P25031,P42854,P61206;P84079;P84082,Q7TPB1                             |
| 11398 | 1,8,20,21,<br>22,23,24,2<br>5 | 2,3,4,5,6,7<br>,18,19,26 | 7  | P00774,P20760,P20761,P25031,P83748,Q63532,Q6IE51                                                  |
| 11399 | 1,8,20,21,<br>22,23,24,2<br>6 | 2,3,4,5,6,7<br>,18,19,25 | 9  | P00731,P02631,P14173,P25031,P61206;P84079;P84082,Q63532,Q6IE51,Q6IFV1,Q9QZQ5                      |
| 11400 | 1,8,20,21,<br>22,23,25,2<br>6 | 2,3,4,5,6,7<br>,18,19,24 | 4  | P02631,Q63532,Q6IE51,Q9QZQ5                                                                       |
| 11401 | 1,8,20,21,<br>22,24,25,2<br>6 | 2,3,4,5,6,7<br>,18,19,23 | 14 | P00731,P02625,P02631,P12785,P16086,P28648,P55016,Q03191,Q498D9,Q5XFX0,Q5XI22,Q63532,Q6IE51,Q99068 |
| 11402 | 1,8,20,21,<br>23,24,25,2<br>6 | 2,3,4,5,6,7<br>,18,19,22 | 5  | P02631,Q63532,Q6IE51,Q7TPB1,Q9QZQ5                                                                |
| 11403 | 1,8,20,22,<br>23,24,25,2<br>6 | 2,3,4,5,6,7<br>,18,19,21 | 8  | P00731,P02631,P16086,P25031,P42854,Q6IE51,Q7TPB1,Q9QZQ5                                           |

|       |                                |                          |    |                                                                                     |
|-------|--------------------------------|--------------------------|----|-------------------------------------------------------------------------------------|
| 11404 | 1,8,21,22,<br>23,24,25,2<br>6  | 2,3,4,5,6,7<br>,18,19,20 | 7  | P00731,P02631,P22006,P25031,Q6IE51,Q7TPB1,Q9QZQ5                                    |
| 11405 | 1,18,19,20<br>,21,22,23,<br>24 | 2,3,4,5,6,7<br>,8,25,26  | 10 | P20760,P20761,P20762,P20766,P36376,P61206,P84079;P84082,P83748,Q6AYQ8,Q6AYS4,Q9Z0V6 |
| 11406 | 1,18,19,20<br>,21,22,23,<br>25 | 2,3,4,5,6,7<br>,8,24,26  | 8  | D3ZHA0,P08010,P20760,P20761,P20762,P83748,Q6AYQ8,Q9Z0V6                             |
| 11407 | 1,18,19,20<br>,21,22,23,<br>26 | 2,3,4,5,6,7<br>,8,24,25  | 5  | P02631,P20762,P36374,Q8N7M5,Q9Z0V6                                                  |
| 11408 | 1,18,19,20<br>,21,22,24,<br>25 | 2,3,4,5,6,7<br>,8,23,26  | 11 | P02631,P20760,P20761,P20762,P20766,P28648,P36376,P55016,P83748,Q6AYQ8,Q9Z0V6        |
| 11409 | 1,18,19,20<br>,21,22,24,<br>26 | 2,3,4,5,6,7<br>,8,23,25  | 11 | O70377,P02631,P12020,P20762,P36374,P36376,P55016,Q63751,Q6AYS4,Q99041,Q9Z0V6        |
| 11410 | 1,18,19,20<br>,21,22,25,<br>26 | 2,3,4,5,6,7<br>,8,23,24  | 10 | P02631,P20762,P34901,P36374,P36376,P55016,P97605,Q63475,Q63751,Q9Z0V6               |
| 11411 | 1,18,19,20<br>,21,23,24,<br>25 | 2,3,4,5,6,7<br>,8,22,26  | 6  | P20760,P20761,P20762,P20766,P36376,P83748                                           |
| 11412 | 1,18,19,20<br>,21,23,24,<br>26 | 2,3,4,5,6,7<br>,8,22,25  | 7  | P06911,P12020,P20762,P20766,Q6AYS4,Q9QZQ5,Q9Z0V6                                    |
| 11413 | 1,18,19,20<br>,21,23,25,<br>26 | 2,3,4,5,6,7<br>,8,22,24  | 6  | P02631,P08010,P20762,P20766,P97605,Q8N7M5                                           |
| 11414 | 1,18,19,20<br>,21,24,25,<br>26 | 2,3,4,5,6,7<br>,8,22,23  | 8  | P02631,P16086,P20762,P20766,P36376,P55016,P97605,Q9Z0V6                             |
| 11415 | 1,18,19,20<br>,22,23,24,<br>25 | 2,3,4,5,6,7<br>,8,21,26  | 7  | P20646,P20760,P20761,P20762,P42854,P83748,Q9Z0V6                                    |
| 11416 | 1,18,19,20<br>,22,23,24,<br>26 | 2,3,4,5,6,7<br>,8,21,25  | 8  | P00731,P02631,P20646,P20762,Q6AYS4,Q6IFU7,Q9WTT6,Q9Z0V6                             |
| 11417 | 1,18,19,20<br>,22,23,25,<br>26 | 2,3,4,5,6,7<br>,8,21,24  | 5  | D3ZHA0,P02631,P20762,Q63475,Q9Z0V6                                                  |
| 11418 | 1,18,19,20<br>,22,24,25,<br>26 | 2,3,4,5,6,7<br>,8,21,23  | 9  | P00731,P02631,P16086,P20646,P20762,Q63475,Q64057,Q6AYS4,Q9Z0V6                      |

|       |                                |                         |    |                                                                                                   |
|-------|--------------------------------|-------------------------|----|---------------------------------------------------------------------------------------------------|
| 11419 | 1,18,19,20<br>,23,24,25,<br>26 | 2,3,4,5,6,7<br>,8,21,22 | 6  | P20762,P20766,P42854,Q6AYS4,Q7TPB1,Q80WL1                                                         |
| 11420 | 1,18,19,21<br>,22,23,24,<br>25 | 2,3,4,5,6,7<br>,8,20,26 | 7  | P20760,P20761,P20762,P36376,P62804,P83748,Q6AYQ8                                                  |
| 11421 | 1,18,19,21<br>,22,23,24,<br>26 | 2,3,4,5,6,7<br>,8,20,25 | 5  | P00731,P02631,P20762,Q9QZQ5,Q9Z0V6                                                                |
| 11422 | 1,18,19,21<br>,22,23,25,<br>26 | 2,3,4,5,6,7<br>,8,20,24 | 6  | O55006,P02631,P08010,P20762,Q63475,Q9QZQ5                                                         |
| 11423 | 1,18,19,21<br>,22,24,25,<br>26 | 2,3,4,5,6,7<br>,8,20,23 | 4  | P02631,P20762,P36376,Q63475                                                                       |
| 11424 | 1,18,19,21<br>,23,24,25,<br>26 | 2,3,4,5,6,7<br>,8,20,22 | 6  | P02631,P20762,P20766,Q62997,Q7TPB1,Q9QZQ5                                                         |
| 11425 | 1,18,19,22<br>,23,24,25,<br>26 | 2,3,4,5,6,7<br>,8,20,21 | 10 | P00731,P01835,P02631,P20646,P20762,P42854,P62804,Q63475,Q7TPB1,Q9QZQ5                             |
| 11426 | 1,18,20,21<br>,22,23,24,<br>25 | 2,3,4,5,6,7<br>,8,19,26 | 6  | P02631,P20760,P20761,P20762,P55016,P83748                                                         |
| 11427 | 1,18,20,21<br>,22,23,24,<br>26 | 2,3,4,5,6,7<br>,8,19,25 | 10 | P00731,P02631,P12020,P20762,P55016,Q6IFU7,Q6IFV1,Q8N7M5,Q9QZQ5,Q9Z0V6                             |
| 11428 | 1,18,20,21<br>,22,23,25,<br>26 | 2,3,4,5,6,7<br>,8,19,24 | 7  | O55006,P02631,P20762,P55016,Q63532,Q8N7M5,Q9QZQ5                                                  |
| 11429 | 1,18,20,21<br>,22,24,25,<br>26 | 2,3,4,5,6,7<br>,8,19,23 | 7  | P02631,P16086,P20762,P28648,P55016,Q63532,Q99041                                                  |
| 11430 | 1,18,20,21<br>,23,24,25,<br>26 | 2,3,4,5,6,7<br>,8,19,22 | 9  | P02631,P16086,P20762,P20766,P55016,Q63532,Q7TPB1,Q8N7M5,Q9QZQ5                                    |
| 11431 | 1,18,20,22<br>,23,24,25,<br>26 | 2,3,4,5,6,7<br>,8,19,21 | 9  | P00731,P02631,P16086,P20762,P42854,Q6IFU7,Q7TPB1,Q8N7M5,Q9QZQ5                                    |
| 11432 | 1,18,21,22<br>,23,24,25,<br>26 | 2,3,4,5,6,7<br>,8,19,20 | 7  | O55006,P00731,P02631,P16086,P20762,Q7TPB1,Q9QZQ5                                                  |
| 11433 | 1,19,20,21<br>,22,23,24,<br>25 | 2,3,4,5,6,7<br>,8,18,26 | 12 | P00774,P02631,P10959,P20760,P20761,P20762,P25031,P55016,P61206,P84079,P84082,P83748,Q63942,Q6AYQ8 |



|       |                                |                                   |    |                                                                                                                 |
|-------|--------------------------------|-----------------------------------|----|-----------------------------------------------------------------------------------------------------------------|
| 11434 | 1,19,20,21<br>,22,23,24,<br>26 | 2,3,4,5,6,7<br>,8,18,25           | 12 | O70377,P00731,P00774,P02631,P20762,P25031,P55016,P61206;P84079;P84082,P98089,Q6AYS4,Q9QZQ5,Q9Z0V6               |
| 11435 | 1,19,20,21<br>,22,23,25,<br>26 | 2,3,4,5,6,7<br>,8,18,24           | 6  | O55006,P02631,P20762,P55016,Q63475,Q9QZQ5                                                                       |
| 11436 | 1,19,20,21<br>,22,24,25,<br>26 | 2,3,4,5,6,7<br>,8,18,23           | 11 | P00731,P02631,P16086,P20762,P28648,P55016,Q01205,Q498D9,Q5XI22,Q63475,Q64057                                    |
| 11437 | 1,19,20,21<br>,23,24,25,<br>26 | 2,3,4,5,6,7<br>,8,18,22           | 6  | P02631,P20762,P20766,P55016,Q7TPB1,Q9QZQ5                                                                       |
| 11438 | 1,19,20,22<br>,23,24,25,<br>26 | 2,3,4,5,6,7<br>,8,18,21           | 14 | P00731,P00774,P02631,P20646,P20762,P25031,P42854,P61206;P84079;P84082,Q63475,Q64057,Q6AYS4,Q7TPB1,Q80WL1,Q9QZQ5 |
| 11439 | 1,19,21,22<br>,23,24,25,<br>26 | 2,3,4,5,6,7<br>,8,18,20           | 9  | O55006,P00731,P02631,P20762,P22006,P25031,Q63475,Q7TPB1,Q9QZQ5                                                  |
| 11440 | 1,20,21,22<br>,23,24,25,<br>26 | 2,3,4,5,6,7<br>,8,18,19           | 10 | O55006,P00731,P02631,P02803,P16086,P20762,P55016,Q63532,Q7TPB1,Q9QZQ5                                           |
| 11441 | 2,3,4,5,6,7<br>,8,18           | 1,19,20,21<br>,22,23,24,<br>25,26 | 13 | O55006,P00731,P02631,P16086,P20762,P25031,P52590,P55016,P61206;P84079;P84082,Q63475,Q64057,Q6AYS4,Q9QZQ5        |
| 11442 | 2,3,4,5,6,7<br>,8,19           | 1,18,20,21<br>,22,23,24,<br>25,26 | 13 | O55006,P00731,P02631,P16086,P20762,P20766,P52590,P55016,Q63475,Q63532,Q6IE51,Q8N7M5,Q9QZQ5                      |
| 11443 | 2,3,4,5,6,7<br>,8,20           | 1,18,19,21<br>,22,23,24,<br>25,26 | 8  | O55006,P00731,P02631,P20762,P52590,Q63475,Q7TPB1,Q9QZQ5                                                         |
| 11444 | 2,3,4,5,6,7<br>,8,21           | 1,18,19,20<br>,22,23,24,<br>25,26 | 14 | P00731,P02631,P16086,P20646,P20762,P42854,P52590,Q63475,Q64057,Q6AYS4,Q7TPB1,Q80WL1,Q9QZQ5,Q9Z0V6               |
| 11445 | 2,3,4,5,6,7<br>,8,22           | 1,18,19,20<br>,21,23,24,<br>25,26 | 10 | P02631,P16086,P20762,P20766,P52590,P55016,P97605,Q7TPB1,Q8N7M5,Q9QZQ5                                           |
| 11446 | 2,3,4,5,6,7<br>,8,23           | 1,18,19,20<br>,21,22,24,<br>25,26 | 14 | P02631,P16086,P20762,P20766,P28648,P34901,P36374,P36376,P52590,P55016,P97605,Q63475,Q99041,Q9Z0V6               |
| 11447 | 2,3,4,5,6,7<br>,8,24           | 1,18,19,20<br>,21,22,23,<br>25,26 | 13 | D3ZHA0,O55006,P02631,P08010,P20762,P36374,P52590,P55016,P97605,Q63475,Q8N7M5,Q9QZQ5,Q9Z0V6                      |
| 11448 | 2,3,4,5,6,7<br>,8,25           | 1,18,19,20<br>,21,22,23,<br>24,26 | 13 | P00731,P02631,P12020,P20762,P20766,P36374,P52590,P55016,P61206;P84079;P84082,Q63475,Q6AYS4,Q9QZQ5,Q9Z0V6        |

|       |                       |                                   |    |                                                                                     |
|-------|-----------------------|-----------------------------------|----|-------------------------------------------------------------------------------------|
| 11449 | 2,3,4,5,6,7<br>,8,26  | 1,18,19,20<br>,21,22,23,<br>24,25 | 12 | P02631,P10959,P20760,P20761,P20762,P20766,P36376,P52590,P55016,P83748,Q6AYQ8,Q9Z0V6 |
| 11450 | 2,3,4,5,6,7<br>,18,19 | 1,8,20,21,<br>22,23,24,2<br>5,26  | 9  | P00731,P02631,P16086,P17559,P25031,P55016,Q63532,Q6IE51,Q9QZQ5                      |
| 11451 | 2,3,4,5,6,7<br>,18,20 | 1,8,19,21,<br>22,23,24,2<br>5,26  | 6  | P00731,P02631,P20762,P25031,P61206;P84079;P84082,Q9QZQ5                             |
| 11452 | 2,3,4,5,6,7<br>,18,21 | 1,8,19,20,<br>22,23,24,2<br>5,26  | 10 | P00731,P00774,P01835,P02631,P20646,P20762,P25031,P42854,P52590,P61206;P84079;P84082 |
| 11453 | 2,3,4,5,6,7<br>,18,22 | 1,8,19,20,<br>21,23,24,2<br>5,26  | 4  | P02631,P20762,P25031,Q9QZQ5                                                         |
| 11454 | 2,3,4,5,6,7<br>,18,23 | 1,8,19,20,<br>21,22,24,2<br>5,26  | 12 | P02631,P12785,P16086,P20762,P25031,P28648,P34901,P36376,Q5XI22,Q6IE51,Q8K4G9,Q99068 |
| 11455 | 2,3,4,5,6,7<br>,18,24 | 1,8,19,20,<br>21,22,23,2<br>5,26  | 4  | P02631,P25031,Q6IE51,Q8K4G9                                                         |
| 11456 | 2,3,4,5,6,7<br>,18,25 | 1,8,19,20,<br>21,22,23,2<br>4,26  | 6  | P00731,P00774,P02631,P25031,P61206;P84079;P84082,P98089                             |
| 11457 | 2,3,4,5,6,7<br>,18,26 | 1,8,19,20,<br>21,22,23,2<br>4,25  | 10 | P00774,P02631,P20760,P20761,P20762,P25031,P36376,P61206;P84079;P84082,P83748,Q4FZU2 |
| 11458 | 2,3,4,5,6,7<br>,19,20 | 1,8,18,21,<br>22,23,24,2<br>5,26  | 8  | P00731,P02631,P16086,P20762,Q63532,Q6IE51,Q7TPB1,Q9QZQ5                             |
| 11459 | 2,3,4,5,6,7<br>,19,21 | 1,8,18,20,<br>22,23,24,2<br>5,26  | 10 | P00731,P02631,P16086,P17559,P20762,P42854,P52590,Q63532,Q6IE51,Q7TPB1               |
| 11460 | 2,3,4,5,6,7<br>,19,22 | 1,8,18,20,<br>21,23,24,2<br>5,26  | 6  | P02631,P16086,Q63532,Q6IE51,Q7TPB1,Q9QZQ5                                           |
| 11461 | 2,3,4,5,6,7<br>,19,23 | 1,8,18,20,<br>21,22,24,2<br>5,26  | 8  | P02631,P16086,P20762,P28648,P34901,P36376,Q63532,Q6IE51                             |
| 11462 | 2,3,4,5,6,7<br>,19,24 | 1,8,18,20,<br>21,22,23,2<br>5,26  | 4  | P02631,P16086,Q63532,Q6IE51                                                         |
| 11463 | 2,3,4,5,6,7<br>,19,25 | 1,8,18,20,<br>21,22,23,2<br>4,26  | 7  | P00731,P02631,P16086,Q63532,Q6IE51,Q6IFV1,Q9QZQ5                                    |

|       |                       |                                  |   |                                                                              |
|-------|-----------------------|----------------------------------|---|------------------------------------------------------------------------------|
| 11464 | 2,3,4,5,6,7<br>,19,26 | 1,8,18,20,<br>21,22,23,2<br>4,25 | 9 | P02631,P20760,P20761,P20762,P36376,P83748,Q5FVI6,Q63532,Q6IE51               |
| 11465 | 2,3,4,5,6,7<br>,20,21 | 1,8,18,19,<br>22,23,24,2<br>5,26 | 9 | P00731,P01835,P01836,P02631,P20646,P20762,P42854,P52590,Q7TPB1               |
| 11466 | 2,3,4,5,6,7<br>,20,22 | 1,8,18,19,<br>21,23,24,2<br>5,26 | 5 | P02631,P08010,P20762,Q62997,Q7TPB1                                           |
| 11467 | 2,3,4,5,6,7<br>,20,23 | 1,8,18,19,<br>21,22,24,2<br>5,26 | 5 | P02631,P16086,P20762,P34901,P36376                                           |
| 11468 | 2,3,4,5,6,7<br>,20,24 | 1,8,18,19,<br>21,22,23,2<br>5,26 | 3 | P02631,P08010,P20762                                                         |
| 11469 | 2,3,4,5,6,7<br>,20,25 | 1,8,18,19,<br>21,22,23,2<br>4,26 | 3 | P02631,P20762,P61206;P84079;P84082                                           |
| 11470 | 2,3,4,5,6,7<br>,20,26 | 1,8,18,19,<br>21,22,23,2<br>4,25 | 7 | P01836,P05539,P20760,P20761,P20762,P36376,P83748                             |
| 11471 | 2,3,4,5,6,7<br>,21,22 | 1,8,18,19,<br>20,23,24,2<br>5,26 | 4 | P20762,P42854,P52590,Q7TPB1                                                  |
| 11472 | 2,3,4,5,6,7<br>,21,23 | 1,8,18,19,<br>20,22,24,2<br>5,26 | 8 | P01835,P02631,P16086,P20646,P20762,P34901,P36376,P52590                      |
| 11473 | 2,3,4,5,6,7<br>,21,24 | 1,8,18,19,<br>20,22,23,2<br>5,26 | 5 | P02631,P20762,P52590,Q08849,Q63475                                           |
| 11474 | 2,3,4,5,6,7<br>,21,25 | 1,8,18,19,<br>20,22,23,2<br>4,26 | 8 | P00731,P01835,P02631,P09605;P25809,P20646,P52590,P61206;P84079;P84082,Q9Z0V6 |
| 11475 | 2,3,4,5,6,7<br>,21,26 | 1,8,18,19,<br>20,22,23,2<br>4,25 | 9 | P01835,P01836,P20760,P20761,P20762,P36376,P42854,P52590,P83748               |
| 11476 | 2,3,4,5,6,7<br>,22,23 | 1,8,18,19,<br>20,21,24,2<br>5,26 | 7 | G3V686,P02631,P16086,P20762,P34901,P36376,Q8K4G9                             |
| 11477 | 2,3,4,5,6,7<br>,22,24 | 1,8,18,19,<br>20,21,23,2<br>5,26 | 3 | P02631,P08010,Q8K4G9                                                         |
| 11478 | 2,3,4,5,6,7<br>,22,25 | 1,8,18,19,<br>20,21,23,2<br>4,26 | 3 | P12020,P36376,Q6IFV1                                                         |

|       |                       |                                  |    |                                                                              |
|-------|-----------------------|----------------------------------|----|------------------------------------------------------------------------------|
| 11479 | 2,3,4,5,6,7<br>,22,26 | 1,8,18,19,<br>20,21,23,2<br>4,25 | 7  | P05539,P08010,P20760,P20761,P20762,P36376,P83748                             |
| 11480 | 2,3,4,5,6,7<br>,23,24 | 1,8,18,19,<br>20,21,22,2<br>5,26 | 8  | P02631,P20762,P34901,P36374,P36376,Q6IE51,Q8K4G9                             |
| 11481 | 2,3,4,5,6,7<br>,23,25 | 1,8,18,19,<br>20,21,22,2<br>4,26 | 10 | P02631,P12020,P20762,P34901,P36374,P36376,P38444,Q63751,Q8K4G9,Q9Z0V6        |
| 11482 | 2,3,4,5,6,7<br>,23,26 | 1,8,18,19,<br>20,21,22,2<br>4,25 | 10 | P02631,P05539,P20760,P20761,P20762,P28648,P34901,P36376,P83748,Q4FZU2        |
| 11483 | 2,3,4,5,6,7<br>,24,25 | 1,8,18,19,<br>20,21,22,2<br>3,26 | 3  | P02631,P36374,Q8K4G9                                                         |
| 11484 | 2,3,4,5,6,7<br>,24,26 | 1,8,18,19,<br>20,21,22,2<br>3,25 | 7  | P08010,P20760,P20761,P20762,P36376,P83748,Q8CJD3                             |
| 11485 | 2,3,4,5,6,7<br>,25,26 | 1,8,18,19,<br>20,21,22,2<br>3,24 | 9  | P00774,P05539,P20760,P20761,P20762,P36376,P61206,P84079,P84082,P83748,Q9Z0V6 |
| 11486 | 2,3,4,5,6,8<br>,18,19 | 1,7,20,21,<br>22,23,24,2<br>5,26 | 2  | P00731,P22006                                                                |
| 11487 | 2,3,4,5,6,8<br>,18,20 | 1,7,19,21,<br>22,23,24,2<br>5,26 | 4  | P00731,P20762,P22006,P62804                                                  |
| 11488 | 2,3,4,5,6,8<br>,18,21 | 1,7,19,20,<br>22,23,24,2<br>5,26 | 9  | P00731,P00774,P01835,P20646,P20762,P25031,Q6AYS4,Q7TPB1,Q9Z0V6               |
| 11489 | 2,3,4,5,6,8<br>,18,22 | 1,7,19,20,<br>21,23,24,2<br>5,26 | 3  | P20762,P20766,P22006                                                         |
| 11490 | 2,3,4,5,6,8<br>,18,23 | 1,7,19,20,<br>21,22,24,2<br>5,26 | 9  | P12785,P20762,P22006,P28648,P34901,P35467,Q5XI22,Q64194,Q9Z0V6               |
| 11491 | 2,3,4,5,6,8<br>,18,24 | 1,7,19,20,<br>21,22,23,2<br>5,26 | 0  |                                                                              |
| 11492 | 2,3,4,5,6,8<br>,18,25 | 1,7,19,20,<br>21,22,23,2<br>4,26 | 5  | P00731,P00774,P98089,Q6AYS4,Q9Z0V6                                           |
| 11493 | 2,3,4,5,6,8<br>,18,26 | 1,7,19,20,<br>21,22,23,2<br>4,25 | 9  | P00774,P10959,P20760,P20761,P20762,P83748,Q4FZU2,Q63942,Q9Z0V6               |

|       |                       |                                  |   |                                                  |
|-------|-----------------------|----------------------------------|---|--------------------------------------------------|
| 11494 | 2,3,4,5,6,8<br>,19,20 | 1,7,18,21,<br>22,23,24,2<br>5,26 | 5 | P00731,P20762,P22006,P62804,Q7TPB1               |
| 11495 | 2,3,4,5,6,8<br>,19,21 | 1,7,18,20,<br>22,23,24,2<br>5,26 | 4 | P00731,P20762,Q7TPB1,Q9Z0V6                      |
| 11496 | 2,3,4,5,6,8<br>,19,22 | 1,7,18,20,<br>21,23,24,2<br>5,26 | 3 | P20766,P22006,Q7TPB1                             |
| 11497 | 2,3,4,5,6,8<br>,19,23 | 1,7,18,20,<br>21,22,24,2<br>5,26 | 3 | P20762,P22006,Q9Z0V6                             |
| 11498 | 2,3,4,5,6,8<br>,19,24 | 1,7,18,20,<br>21,22,23,2<br>5,26 | 0 |                                                  |
| 11499 | 2,3,4,5,6,8<br>,19,25 | 1,7,18,20,<br>21,22,23,2<br>4,26 | 2 | P00731,Q9Z0V6                                    |
| 11500 | 2,3,4,5,6,8<br>,19,26 | 1,7,18,20,<br>21,22,23,2<br>4,25 | 5 | P10959,P20760,P20761,P20762,Q9Z0V6               |
| 11501 | 2,3,4,5,6,8<br>,20,21 | 1,7,18,19,<br>22,23,24,2<br>5,26 | 7 | P00731,P01835,P20646,P20762,P62804,Q7TPB1,Q9Z0V6 |
| 11502 | 2,3,4,5,6,8<br>,20,22 | 1,7,18,19,<br>21,23,24,2<br>5,26 | 5 | P20762,P20766,P22006,Q62997,Q7TPB1               |
| 11503 | 2,3,4,5,6,8<br>,20,23 | 1,7,18,19,<br>21,22,24,2<br>5,26 | 4 | P20762,P22006,P97840,Q9Z0V6                      |
| 11504 | 2,3,4,5,6,8<br>,20,24 | 1,7,18,19,<br>21,22,23,2<br>5,26 | 2 | P20762,P97840                                    |
| 11505 | 2,3,4,5,6,8<br>,20,25 | 1,7,18,19,<br>21,22,23,2<br>4,26 | 3 | P20762,P36374,Q9Z0V6                             |
| 11506 | 2,3,4,5,6,8<br>,20,26 | 1,7,18,19,<br>21,22,23,2<br>4,25 | 7 | P20760,P20761,P20762,P22006,P62804,P97840,Q9Z0V6 |
| 11507 | 2,3,4,5,6,8<br>,21,22 | 1,7,18,19,<br>20,23,24,2<br>5,26 | 5 | P20762,P20766,Q7TPB1,Q80WL1,Q9Z0V6               |
| 11508 | 2,3,4,5,6,8<br>,21,23 | 1,7,18,19,<br>20,22,24,2<br>5,26 | 4 | P01835,P20762,P34901,Q9Z0V6                      |

|       |                        |                                  |    |                                                                                            |
|-------|------------------------|----------------------------------|----|--------------------------------------------------------------------------------------------|
| 11509 | 2,3,4,5,6,8<br>,21,24  | 1,7,18,19,<br>20,22,23,2<br>5,26 | 2  | P20762,Q9Z0V6                                                                              |
| 11510 | 2,3,4,5,6,8<br>,21,25  | 1,7,18,19,<br>20,22,23,2<br>4,26 | 8  | P00731,P01835,P06760,P20646,Q6AYS4,Q6P6R2,Q9WTT6,Q9Z0V6                                    |
| 11511 | 2,3,4,5,6,8<br>,21,26  | 1,7,18,19,<br>20,22,23,2<br>4,25 | 9  | P01835,P11883,P20760,P20761,P20762,P83748,Q00715,Q5QE79,Q9Z0V6                             |
| 11512 | 2,3,4,5,6,8<br>,22,23  | 1,7,18,19,<br>20,21,24,2<br>5,26 | 5  | P20762,P20766,P22006,P34901,Q9Z0V6                                                         |
| 11513 | 2,3,4,5,6,8<br>,22,24  | 1,7,18,19,<br>20,21,23,2<br>5,26 | 1  | P20766                                                                                     |
| 11514 | 2,3,4,5,6,8<br>,22,25  | 1,7,18,19,<br>20,21,23,2<br>4,26 | 4  | P20766,Q4FZU6,Q6AYS4,Q9Z0V6                                                                |
| 11515 | 2,3,4,5,6,8<br>,22,26  | 1,7,18,19,<br>20,21,23,2<br>4,25 | 6  | P20760,P20761,P20762,P20766,P63036,Q9Z0V6                                                  |
| 11516 | 2,3,4,5,6,8<br>,23,24  | 1,7,18,19,<br>20,21,22,2<br>5,26 | 6  | P20762,P34901,P36374,P97840,Q63751,Q9Z0V6                                                  |
| 11517 | 2,3,4,5,6,8<br>,23,25  | 1,7,18,19,<br>20,21,22,2<br>4,26 | 8  | P06760,P20762,P36374,Q63751,Q6AYS4,Q6P6R2,Q9WTT6,Q9Z0V6                                    |
| 11518 | 2,3,4,5,6,8<br>,23,26  | 1,7,18,19,<br>20,21,22,2<br>4,25 | 12 | D4A5U3,P02793;Q7TP54,P10959,P20760,P20761,P20762,P28648,P34901,P36376,P97840,Q4FZU2,Q9Z0V6 |
| 11519 | 2,3,4,5,6,8<br>,24,25  | 1,7,18,19,<br>20,21,22,2<br>3,26 | 3  | P36374,Q4FZU6,Q9Z0V6                                                                       |
| 11520 | 2,3,4,5,6,8<br>,24,26  | 1,7,18,19,<br>20,21,22,2<br>3,25 | 6  | P10959,P20760,P20761,P20762,P97840,Q9Z0V6                                                  |
| 11521 | 2,3,4,5,6,8<br>,25,26  | 1,7,18,19,<br>20,21,22,2<br>3,24 | 8  | P00774,P20760,P20761,P20762,P20766,Q66HD0,Q9WTT6,Q9Z0V6                                    |
| 11522 | 2,3,4,5,6,1<br>8,19,20 | 1,7,8,21,2<br>2,23,24,25<br>,26  | 4  | P00731,P19629,P22006,Q63355                                                                |
| 11523 | 2,3,4,5,6,1<br>8,19,21 | 1,7,8,20,2<br>2,23,24,25<br>,26  | 4  | P00731,P01835,P14173,P25031                                                                |

|       |                        |                                 |   |                                                         |
|-------|------------------------|---------------------------------|---|---------------------------------------------------------|
| 11524 | 2,3,4,5,6,1<br>8,19,22 | 1,7,8,20,2<br>1,23,24,25<br>,26 | 1 | P22006                                                  |
| 11525 | 2,3,4,5,6,1<br>8,19,23 | 1,7,8,20,2<br>1,22,24,25<br>,26 | 6 | P02625,P12785,P22006,P34901,Q03191,Q5XI22               |
| 11526 | 2,3,4,5,6,1<br>8,19,24 | 1,7,8,20,2<br>1,22,23,25<br>,26 | 0 |                                                         |
| 11527 | 2,3,4,5,6,1<br>8,19,25 | 1,7,8,20,2<br>1,22,23,24<br>,26 | 4 | P00731,P14173,P98089,Q4FZU6                             |
| 11528 | 2,3,4,5,6,1<br>8,19,26 | 1,7,8,20,2<br>1,22,23,24<br>,25 | 5 | P00774,P20760,Q4FZU2,Q63355,Q63942                      |
| 11529 | 2,3,4,5,6,1<br>8,20,21 | 1,7,8,19,2<br>2,23,24,25<br>,26 | 4 | P00731,P01835,P25031,Q7TPB1                             |
| 11530 | 2,3,4,5,6,1<br>8,20,22 | 1,7,8,19,2<br>1,23,24,25<br>,26 | 3 | P22006,Q62997,Q7TPB1                                    |
| 11531 | 2,3,4,5,6,1<br>8,20,23 | 1,7,8,19,2<br>1,22,24,25<br>,26 | 7 | P01835,P12785,P20762,P22006,P34901,Q4FZU2,Q5XI22        |
| 11532 | 2,3,4,5,6,1<br>8,20,24 | 1,7,8,19,2<br>1,22,23,25<br>,26 | 1 | P22006                                                  |
| 11533 | 2,3,4,5,6,1<br>8,20,25 | 1,7,8,19,2<br>1,22,23,24<br>,26 | 2 | P01835,P98089                                           |
| 11534 | 2,3,4,5,6,1<br>8,20,26 | 1,7,8,19,2<br>1,22,23,24<br>,25 | 8 | P00774,P01835,P20760,P20761,P20762,P22006,Q4FZU2,Q63355 |
| 11535 | 2,3,4,5,6,1<br>8,21,22 | 1,7,8,19,2<br>0,23,24,25<br>,26 | 3 | P01835,P25031,Q7TPB1                                    |
| 11536 | 2,3,4,5,6,1<br>8,21,23 | 1,7,8,19,2<br>0,22,24,25<br>,26 | 7 | P00774,P01835,P12785,P25031,P34901,Q4FZU2,Q5XI22        |
| 11537 | 2,3,4,5,6,1<br>8,21,24 | 1,7,8,19,2<br>0,22,23,25<br>,26 | 4 | P00774,P01835,P25031,Q08849                             |
| 11538 | 2,3,4,5,6,1<br>8,21,25 | 1,7,8,19,2<br>0,22,23,24<br>,26 | 7 | P00731,P00774,P01835,P20646,P25031,P31430,P98089        |

|       |                        |                                 |    |                                                                                                                                      |
|-------|------------------------|---------------------------------|----|--------------------------------------------------------------------------------------------------------------------------------------|
| 11539 | 2,3,4,5,6,1<br>8,21,26 | 1,7,8,19,2<br>0,22,23,24<br>,25 | 7  | P00774,P01835,P20760,P20761,P25031,P83748,Q4FZU2                                                                                     |
| 11540 | 2,3,4,5,6,1<br>8,22,23 | 1,7,8,19,2<br>0,21,24,25<br>,26 | 4  | P02625,P12785,P22006,P34901                                                                                                          |
| 11541 | 2,3,4,5,6,1<br>8,22,24 | 1,7,8,19,2<br>0,21,23,25<br>,26 | 0  |                                                                                                                                      |
| 11542 | 2,3,4,5,6,1<br>8,22,25 | 1,7,8,19,2<br>0,21,23,24<br>,26 | 2  | P98089,Q4FZU6                                                                                                                        |
| 11543 | 2,3,4,5,6,1<br>8,22,26 | 1,7,8,19,2<br>0,21,23,24<br>,25 | 4  | P00774,P20760,P20761,P63036                                                                                                          |
| 11544 | 2,3,4,5,6,1<br>8,23,24 | 1,7,8,19,2<br>0,21,22,25<br>,26 | 3  | P12785,P34901,Q99068                                                                                                                 |
| 11545 | 2,3,4,5,6,1<br>8,23,25 | 1,7,8,19,2<br>0,21,22,24<br>,26 | 7  | P00774,P12785,P34901,P38444,P98089,Q99068,Q99MH3                                                                                     |
| 11546 | 2,3,4,5,6,1<br>8,23,26 | 1,7,8,19,2<br>0,21,22,24<br>,25 | 19 | P00774,P01835,P12785,P20760,P20761,P20762,P28648,P34901,P35467,P36376,Q4FZU2,Q63942,Q64194,Q6AY61,Q6IFU8,Q6IFW6,Q6IG02,Q6IMF3,Q6P6Q2 |
| 11547 | 2,3,4,5,6,1<br>8,24,25 | 1,7,8,19,2<br>0,21,22,23<br>,26 | 3  | P00774,P98089,Q4FZU6                                                                                                                 |
| 11548 | 2,3,4,5,6,1<br>8,24,26 | 1,7,8,19,2<br>0,21,22,23<br>,25 | 4  | P00774,P20760,P20761,Q4FZU2                                                                                                          |
| 11549 | 2,3,4,5,6,1<br>8,25,26 | 1,7,8,19,2<br>0,21,22,23<br>,24 | 4  | P00774,P20760,P98089,Q4FZU2                                                                                                          |
| 11550 | 2,3,4,5,6,1<br>9,20,21 | 1,7,8,18,2<br>2,23,24,25<br>,26 | 3  | P00731,P01835,Q7TPB1                                                                                                                 |
| 11551 | 2,3,4,5,6,1<br>9,20,22 | 1,7,8,18,2<br>1,23,24,25<br>,26 | 4  | P22006,P55091,Q62997,Q7TPB1                                                                                                          |
| 11552 | 2,3,4,5,6,1<br>9,20,23 | 1,7,8,18,2<br>1,22,24,25<br>,26 | 4  | P22006,P34901,P55091,P82995                                                                                                          |
| 11553 | 2,3,4,5,6,1<br>9,20,24 | 1,7,8,18,2<br>1,22,23,25<br>,26 | 2  | P22006,P82995                                                                                                                        |



|       |                        |                                 |   |                                           |
|-------|------------------------|---------------------------------|---|-------------------------------------------|
| 11554 | 2,3,4,5,6,1<br>9,20,25 | 1,7,8,18,2<br>1,22,23,24<br>,26 | 0 |                                           |
| 11555 | 2,3,4,5,6,1<br>9,20,26 | 1,7,8,18,2<br>1,22,23,24<br>,25 | 4 | P19629,P20760,P20761,P22006               |
| 11556 | 2,3,4,5,6,1<br>9,21,22 | 1,7,8,18,2<br>0,23,24,25<br>,26 | 2 | P10715,Q7TPB1                             |
| 11557 | 2,3,4,5,6,1<br>9,21,23 | 1,7,8,18,2<br>0,22,24,25<br>,26 | 3 | P01835,P10715,P34901                      |
| 11558 | 2,3,4,5,6,1<br>9,21,24 | 1,7,8,18,2<br>0,22,23,25<br>,26 | 1 | Q08849                                    |
| 11559 | 2,3,4,5,6,1<br>9,21,25 | 1,7,8,18,2<br>0,22,23,24<br>,26 | 5 | P00731,P01835,P14173,P20646,Q4FZU6        |
| 11560 | 2,3,4,5,6,1<br>9,21,26 | 1,7,8,18,2<br>0,22,23,24<br>,25 | 5 | P01835,P10715,P20760,P20761,P83748        |
| 11561 | 2,3,4,5,6,1<br>9,22,23 | 1,7,8,18,2<br>0,21,24,25<br>,26 | 4 | P02625,P10715,P22006,P34901               |
| 11562 | 2,3,4,5,6,1<br>9,22,24 | 1,7,8,18,2<br>0,21,23,25<br>,26 | 0 |                                           |
| 11563 | 2,3,4,5,6,1<br>9,22,25 | 1,7,8,18,2<br>0,21,23,24<br>,26 | 1 | Q4FZU6                                    |
| 11564 | 2,3,4,5,6,1<br>9,22,26 | 1,7,8,18,2<br>0,21,23,24<br>,25 | 3 | P20760,P20761,P63036                      |
| 11565 | 2,3,4,5,6,1<br>9,23,24 | 1,7,8,18,2<br>0,21,22,25<br>,26 | 2 | P34901,P82995                             |
| 11566 | 2,3,4,5,6,1<br>9,23,25 | 1,7,8,18,2<br>0,21,22,24<br>,26 | 3 | P34901,P36374,Q4FZU6                      |
| 11567 | 2,3,4,5,6,1<br>9,23,26 | 1,7,8,18,2<br>0,21,22,24<br>,25 | 6 | P10715,P20760,P20761,P34901,P36376,Q4FZU2 |
| 11568 | 2,3,4,5,6,1<br>9,24,25 | 1,7,8,18,2<br>0,21,22,23<br>,26 | 2 | P36374,Q4FZU6                             |

|       |                        |                                 |   |                                                         |
|-------|------------------------|---------------------------------|---|---------------------------------------------------------|
| 11569 | 2,3,4,5,6,1<br>9,24,26 | 1,7,8,18,2<br>0,21,22,23<br>,25 | 2 | P20760,P20761                                           |
| 11570 | 2,3,4,5,6,1<br>9,25,26 | 1,7,8,18,2<br>0,21,22,23<br>,24 | 1 | P20760                                                  |
| 11571 | 2,3,4,5,6,2<br>0,21,22 | 1,7,8,18,1<br>9,23,24,25<br>,26 | 2 | P01835,Q7TPB1                                           |
| 11572 | 2,3,4,5,6,2<br>0,21,23 | 1,7,8,18,1<br>9,22,24,25<br>,26 | 3 | P01835,P20762,P34901                                    |
| 11573 | 2,3,4,5,6,2<br>0,21,24 | 1,7,8,18,1<br>9,22,23,25<br>,26 | 1 | P01835                                                  |
| 11574 | 2,3,4,5,6,2<br>0,21,25 | 1,7,8,18,1<br>9,22,23,24<br>,26 | 2 | P01835,P20646                                           |
| 11575 | 2,3,4,5,6,2<br>0,21,26 | 1,7,8,18,1<br>9,22,23,24<br>,25 | 6 | P01835,P20760,P20761,P20762,P62804,Q4FZU2               |
| 11576 | 2,3,4,5,6,2<br>0,22,23 | 1,7,8,18,1<br>9,21,24,25<br>,26 | 5 | P22006,P34901,P36376,P82995,Q62997                      |
| 11577 | 2,3,4,5,6,2<br>0,22,24 | 1,7,8,18,1<br>9,21,23,25<br>,26 | 1 | P82995                                                  |
| 11578 | 2,3,4,5,6,2<br>0,22,25 | 1,7,8,18,1<br>9,21,23,24<br>,26 | 1 | Q62997                                                  |
| 11579 | 2,3,4,5,6,2<br>0,22,26 | 1,7,8,18,1<br>9,21,23,24<br>,25 | 6 | P05539,P20760,P20761,P22006,P36376,Q62997               |
| 11580 | 2,3,4,5,6,2<br>0,23,24 | 1,7,8,18,1<br>9,21,22,25<br>,26 | 3 | P34901,P36374,P82995                                    |
| 11581 | 2,3,4,5,6,2<br>0,23,25 | 1,7,8,18,1<br>9,21,22,24<br>,26 | 4 | P01835,P34901,P36374,P36376                             |
| 11582 | 2,3,4,5,6,2<br>0,23,26 | 1,7,8,18,1<br>9,21,22,24<br>,25 | 8 | P01835,P20760,P20761,P20762,P34901,P36376,P97840,Q4FZU2 |
| 11583 | 2,3,4,5,6,2<br>0,24,25 | 1,7,8,18,1<br>9,21,22,23<br>,26 | 1 | P36374                                                  |

|       |                        |                                 |    |                                                                       |
|-------|------------------------|---------------------------------|----|-----------------------------------------------------------------------|
| 11584 | 2,3,4,5,6,2<br>0,24,26 | 1,7,8,18,1<br>9,21,22,23<br>,25 | 3  | P20760,P20761,P97840                                                  |
| 11585 | 2,3,4,5,6,2<br>0,25,26 | 1,7,8,18,1<br>9,21,22,23<br>,24 | 4  | P01835,P20760,P20761,P36376                                           |
| 11586 | 2,3,4,5,6,2<br>1,22,23 | 1,7,8,18,1<br>9,20,24,25<br>,26 | 3  | P01835,P10715,P34901                                                  |
| 11587 | 2,3,4,5,6,2<br>1,22,24 | 1,7,8,18,1<br>9,20,23,25<br>,26 | 2  | P34901,Q08849                                                         |
| 11588 | 2,3,4,5,6,2<br>1,22,25 | 1,7,8,18,1<br>9,20,23,24<br>,26 | 3  | P01835,P20646,Q4FZU6                                                  |
| 11589 | 2,3,4,5,6,2<br>1,22,26 | 1,7,8,18,1<br>9,20,23,24<br>,25 | 5  | P01835,P20760,P20761,P63036,P83748                                    |
| 11590 | 2,3,4,5,6,2<br>1,23,24 | 1,7,8,18,1<br>9,20,22,25<br>,26 | 2  | P01835,P34901                                                         |
| 11591 | 2,3,4,5,6,2<br>1,23,25 | 1,7,8,18,1<br>9,20,22,24<br>,26 | 7  | P01835,P06760,P20646,P34901,Q63751,Q6P6R2,Q9Z0V6                      |
| 11592 | 2,3,4,5,6,2<br>1,23,26 | 1,7,8,18,1<br>9,20,22,24<br>,25 | 10 | P01835,P10715,P20760,P20761,P20762,P25236,P34901,P36376,Q4FZU2,Q9Z0V6 |
| 11593 | 2,3,4,5,6,2<br>1,24,25 | 1,7,8,18,1<br>9,20,22,23<br>,26 | 5  | P01835,P20646,Q08849,Q4FZU6,Q9Z0V6                                    |
| 11594 | 2,3,4,5,6,2<br>1,24,26 | 1,7,8,18,1<br>9,20,22,23<br>,25 | 5  | P01835,P20760,P20761,Q08849,Q8CJD3                                    |
| 11595 | 2,3,4,5,6,2<br>1,25,26 | 1,7,8,18,1<br>9,20,22,23<br>,24 | 8  | P00774,P01835,P11883,P20646,P20760,P20761,Q66HD0,Q9Z0V6               |
| 11596 | 2,3,4,5,6,2<br>2,23,24 | 1,7,8,18,1<br>9,20,21,25<br>,26 | 3  | P34901,P36376,P82995                                                  |
| 11597 | 2,3,4,5,6,2<br>2,23,25 | 1,7,8,18,1<br>9,20,21,24<br>,26 | 8  | G3V686,P34901,P36374,P36376,Q4FZU6,Q63751,Q6P767,Q9Z0V6               |
| 11598 | 2,3,4,5,6,2<br>2,23,26 | 1,7,8,18,1<br>9,20,21,24<br>,25 | 5  | P20760,P20761,P34901,P36376,Q4FZU2                                    |

|       |                        |                                  |    |                                                                                                   |
|-------|------------------------|----------------------------------|----|---------------------------------------------------------------------------------------------------|
| 11599 | 2,3,4,5,6,2<br>2,24,25 | 1,7,8,18,1<br>9,20,21,23<br>,26  | 1  | Q4FZU6                                                                                            |
| 11600 | 2,3,4,5,6,2<br>2,24,26 | 1,7,8,18,1<br>9,20,21,23<br>,25  | 3  | P08010,P20760,P20761                                                                              |
| 11601 | 2,3,4,5,6,2<br>2,25,26 | 1,7,8,18,1<br>9,20,21,23<br>,24  | 3  | P20760,P20761,P36376                                                                              |
| 11602 | 2,3,4,5,6,2<br>3,24,25 | 1,7,8,18,1<br>9,20,21,22<br>,26  | 6  | P34901,P36374,P36376,Q4FZU6,Q63751,Q9Z0V6                                                         |
| 11603 | 2,3,4,5,6,2<br>3,24,26 | 1,7,8,18,1<br>9,20,21,22<br>,25  | 7  | P20760,P20761,P34901,P36376,P47967,P97840,Q4FZU2                                                  |
| 11604 | 2,3,4,5,6,2<br>3,25,26 | 1,7,8,18,1<br>9,20,21,22<br>,24  | 8  | P00774,P20760,P20761,P34901,P36374,P36376,Q4FZU2,Q9Z0V6                                           |
| 11605 | 2,3,4,5,6,2<br>4,25,26 | 1,7,8,18,1<br>9,20,21,22<br>,23  | 5  | P20760,P20761,Q62902,Q8CJD3,Q9Z0V6                                                                |
| 11606 | 2,3,4,5,7,8<br>,18,19  | 1,6,20,21,<br>22,23,24,2<br>5,26 | 5  | P00731,P02803,P55016,Q64057,Q6AYS4                                                                |
| 11607 | 2,3,4,5,7,8<br>,18,20  | 1,6,19,21,<br>22,23,24,2<br>5,26 | 5  | P00731,P20762,Q63475,Q6AYS4,Q9ESW0                                                                |
| 11608 | 2,3,4,5,7,8<br>,18,21  | 1,6,19,20,<br>22,23,24,2<br>5,26 | 9  | P00731,P25031,P42854,P52590,Q63475,Q64057,Q6AYS4,Q80WL1,Q9ESW0                                    |
| 11609 | 2,3,4,5,7,8<br>,18,22  | 1,6,19,20,<br>21,23,24,2<br>5,26 | 3  | P20766,Q6AYS4,Q80WL1                                                                              |
| 11610 | 2,3,4,5,7,8<br>,18,23  | 1,6,19,20,<br>21,22,24,2<br>5,26 | 14 | P12785,P20762,P28648,P34901,P35467,P55016,Q01205,Q498D9,Q5XI22,Q63475,Q64057,Q64194,Q6AYS4,Q99MH3 |
| 11611 | 2,3,4,5,7,8<br>,18,24  | 1,6,19,20,<br>21,22,23,2<br>5,26 | 2  | Q63475,Q6AYS4                                                                                     |
| 11612 | 2,3,4,5,7,8<br>,18,25  | 1,6,19,20,<br>21,22,23,2<br>4,26 | 6  | P00714,P00731,P20766,P55016,Q64057,Q6AYS4                                                         |
| 11613 | 2,3,4,5,7,8<br>,18,26  | 1,6,19,20,<br>21,22,23,2<br>4,25 | 12 | P00774,P10959,P20760,P20761,P20762,P20766,P82995,P83748,Q64057,Q6AYQ8,Q6AYS4,Q9ESW0               |

|       |                       |                                  |    |                                                                              |
|-------|-----------------------|----------------------------------|----|------------------------------------------------------------------------------|
| 11614 | 2,3,4,5,7,8<br>,19,20 | 1,6,18,21,<br>22,23,24,2<br>5,26 | 3  | P00731,Q6IFU7,Q6IFV1                                                         |
| 11615 | 2,3,4,5,7,8<br>,19,21 | 1,6,18,20,<br>22,23,24,2<br>5,26 | 9  | P00731,P42854,P52590,Q63475,Q64057,Q6AYS4,Q6IFU7,Q7TPB1,Q80WL1               |
| 11616 | 2,3,4,5,7,8<br>,19,22 | 1,6,18,20,<br>21,23,24,2<br>5,26 | 5  | P20766,P55016,Q6IFU7,Q6IFV1,Q80WL1                                           |
| 11617 | 2,3,4,5,7,8<br>,19,23 | 1,6,18,20,<br>21,22,24,2<br>5,26 | 6  | P13432,P36970,P55016,Q63532,Q64057,Q99041                                    |
| 11618 | 2,3,4,5,7,8<br>,19,24 | 1,6,18,20,<br>21,22,23,2<br>5,26 | 2  | Q63532,Q6IFV1                                                                |
| 11619 | 2,3,4,5,7,8<br>,19,25 | 1,6,18,20,<br>21,22,23,2<br>4,26 | 7  | P13432,P20766,P55016,Q6AYS4,Q6IFU7,Q6IFV1,Q9QUL6                             |
| 11620 | 2,3,4,5,7,8<br>,19,26 | 1,6,18,20,<br>21,22,23,2<br>4,25 | 6  | P10959,P13432,P20760,P20761,P20766,P83748                                    |
| 11621 | 2,3,4,5,7,8<br>,20,21 | 1,6,18,19,<br>22,23,24,2<br>5,26 | 11 | P00731,P01836,P02761,P20762,P42854,P52590,P62804,Q63475,Q6AYS4,Q6IFU7,Q7TPB1 |
| 11622 | 2,3,4,5,7,8<br>,20,22 | 1,6,18,19,<br>21,23,24,2<br>5,26 | 4  | P20766,Q62997,Q6IFV1,Q7TPB1                                                  |
| 11623 | 2,3,4,5,7,8<br>,20,23 | 1,6,18,19,<br>21,22,24,2<br>5,26 | 2  | P20762,Q63475                                                                |
| 11624 | 2,3,4,5,7,8<br>,20,24 | 1,6,18,19,<br>21,22,23,2<br>5,26 | 2  | P08010,Q63475                                                                |
| 11625 | 2,3,4,5,7,8<br>,20,25 | 1,6,18,19,<br>21,22,23,2<br>4,26 | 5  | Q5M819,Q63475,Q6AYS4,Q6IFU7,Q6IFV1                                           |
| 11626 | 2,3,4,5,7,8<br>,20,26 | 1,6,18,19,<br>21,22,23,2<br>4,25 | 5  | P01041,P01836,P20760,P20761,P20762                                           |
| 11627 | 2,3,4,5,7,8<br>,21,22 | 1,6,18,19,<br>20,23,24,2<br>5,26 | 7  | P20766,P42854,P52590,Q6AYS4,Q6IFU7,Q7TPB1,Q80WL1                             |
| 11628 | 2,3,4,5,7,8<br>,21,23 | 1,6,18,19,<br>20,22,24,2<br>5,26 | 8  | P20762,P34901,P42854,P52590,Q63475,Q64057,Q6AYS4,Q80WL1                      |

|       |                        |                                  |    |                                                                       |
|-------|------------------------|----------------------------------|----|-----------------------------------------------------------------------|
| 11629 | 2,3,4,5,7,8<br>,21,24  | 1,6,18,19,<br>20,22,23,2<br>5,26 | 3  | P52590,Q63475,Q6AYS4                                                  |
| 11630 | 2,3,4,5,7,8<br>,21,25  | 1,6,18,19,<br>20,22,23,2<br>4,26 | 8  | P20646,P42854,P52590,Q63475,Q64057,Q6AYS4,Q6IFU7,Q80WL1               |
| 11631 | 2,3,4,5,7,8<br>,21,26  | 1,6,18,19,<br>20,22,23,2<br>4,25 | 10 | P01836,P20760,P20761,P20762,P42854,P52590,P83748,Q64057,Q6AYS4,Q80WL1 |
| 11632 | 2,3,4,5,7,8<br>,22,23  | 1,6,18,19,<br>20,21,24,2<br>5,26 | 4  | P20766,P34901,Q6AYS4,Q80WL1                                           |
| 11633 | 2,3,4,5,7,8<br>,22,24  | 1,6,18,19,<br>20,21,23,2<br>5,26 | 2  | P08010,P20766                                                         |
| 11634 | 2,3,4,5,7,8<br>,22,25  | 1,6,18,19,<br>20,21,23,2<br>4,26 | 5  | P20766,Q6AYS4,Q6IFU7,Q6IFV1,Q80WL1                                    |
| 11635 | 2,3,4,5,7,8<br>,22,26  | 1,6,18,19,<br>20,21,23,2<br>4,25 | 8  | P08010,P20760,P20761,P20766,P63036,P83748,Q6AYS4,Q80WL1               |
| 11636 | 2,3,4,5,7,8<br>,23,24  | 1,6,18,19,<br>20,21,22,2<br>5,26 | 4  | P34901,P36374,P36970,Q63475                                           |
| 11637 | 2,3,4,5,7,8<br>,23,25  | 1,6,18,19,<br>20,21,22,2<br>4,26 | 8  | P13432,P20766,P36374,P55016,Q63475,Q63751,Q6AYS4,Q99041               |
| 11638 | 2,3,4,5,7,8<br>,23,26  | 1,6,18,19,<br>20,21,22,2<br>4,25 | 9  | P10959,P20760,P20761,P20762,P20766,P28648,P34901,P36376,Q6AYS4        |
| 11639 | 2,3,4,5,7,8<br>,24,25  | 1,6,18,19,<br>20,21,22,2<br>3,26 | 4  | P36374,Q63475,Q6AYS4,Q6IFV1                                           |
| 11640 | 2,3,4,5,7,8<br>,24,26  | 1,6,18,19,<br>20,21,22,2<br>3,25 | 5  | P08010,P10959,P20760,P20761,Q8CJD3                                    |
| 11641 | 2,3,4,5,7,8<br>,25,26  | 1,6,18,19,<br>20,21,22,2<br>3,24 | 4  | P13432,P20761,P20766,Q6AYS4                                           |
| 11642 | 2,3,4,5,7,1<br>8,19,20 | 1,6,8,21,2<br>2,23,24,25<br>,26  | 4  | P00731,P07150,Q6IFV1,Q9WTT6                                           |
| 11643 | 2,3,4,5,7,1<br>8,19,21 | 1,6,8,20,2<br>2,23,24,25<br>,26  | 3  | P00731,P25031,P42854                                                  |

|       |                        |                                 |    |                                                                                     |
|-------|------------------------|---------------------------------|----|-------------------------------------------------------------------------------------|
| 11644 | 2,3,4,5,7,1<br>8,19,22 | 1,6,8,20,2<br>1,23,24,25<br>,26 | 3  | P07150,Q6IFV1,Q9WTT6                                                                |
| 11645 | 2,3,4,5,7,1<br>8,19,23 | 1,6,8,20,2<br>1,22,24,25<br>,26 | 12 | P12785,P13432,P28648,P34901,Q03191,Q498D9,Q5XFX0,Q63532,Q64194,Q6IE51,Q99068,Q99MH3 |
| 11646 | 2,3,4,5,7,1<br>8,19,24 | 1,6,8,20,2<br>1,22,23,25<br>,26 | 3  | Q63532,Q6IE51,Q9WTT6                                                                |
| 11647 | 2,3,4,5,7,1<br>8,19,25 | 1,6,8,20,2<br>1,22,23,24<br>,26 | 4  | P00731,P02782,P13432,Q6IFV1                                                         |
| 11648 | 2,3,4,5,7,1<br>8,19,26 | 1,6,8,20,2<br>1,22,23,24<br>,25 | 3  | P13432,P16636,P83748                                                                |
| 11649 | 2,3,4,5,7,1<br>8,20,21 | 1,6,8,19,2<br>2,23,24,25<br>,26 | 6  | P00731,P01836,P25031,P42854,Q7TPB1,Q9ESW0                                           |
| 11650 | 2,3,4,5,7,1<br>8,20,22 | 1,6,8,19,2<br>1,23,24,25<br>,26 | 3  | P07150,Q62997,Q9WTT6                                                                |
| 11651 | 2,3,4,5,7,1<br>8,20,23 | 1,6,8,19,2<br>1,22,24,25<br>,26 | 5  | A2RUV9,P12785,P34901,Q498D9,Q99068                                                  |
| 11652 | 2,3,4,5,7,1<br>8,20,24 | 1,6,8,19,2<br>1,22,23,25<br>,26 | 1  | Q9QZK9                                                                              |
| 11653 | 2,3,4,5,7,1<br>8,20,25 | 1,6,8,19,2<br>1,22,23,24<br>,26 | 2  | P02782,Q6IFV1                                                                       |
| 11654 | 2,3,4,5,7,1<br>8,20,26 | 1,6,8,19,2<br>1,22,23,24<br>,25 | 3  | P01041,P01836,P25031                                                                |
| 11655 | 2,3,4,5,7,1<br>8,21,22 | 1,6,8,19,2<br>0,23,24,25<br>,26 | 4  | P25031,P42854,Q7TPB1,Q80WL1                                                         |
| 11656 | 2,3,4,5,7,1<br>8,21,23 | 1,6,8,19,2<br>0,22,24,25<br>,26 | 8  | P12785,P25031,P34901,P42854,Q62636,Q99068,Q99MH3,Q9ESW0                             |
| 11657 | 2,3,4,5,7,1<br>8,21,24 | 1,6,8,19,2<br>0,22,23,25<br>,26 | 2  | P01836,P25031                                                                       |
| 11658 | 2,3,4,5,7,1<br>8,21,25 | 1,6,8,19,2<br>0,22,23,24<br>,26 | 7  | P00731,P00774,P20646,P25031,P31430,P42854,P98089                                    |

|       |                        |                                 |    |                                                                              |
|-------|------------------------|---------------------------------|----|------------------------------------------------------------------------------|
| 11659 | 2,3,4,5,7,1<br>8,21,26 | 1,6,8,19,2<br>0,22,23,24<br>,25 | 8  | P00774,P01836,P25031,P42854,P82995,P83748,Q71MB6,Q9ESW0                      |
| 11660 | 2,3,4,5,7,1<br>8,22,23 | 1,6,8,19,2<br>0,21,24,25<br>,26 | 4  | P12785,P34901,Q8K4G9,Q99068                                                  |
| 11661 | 2,3,4,5,7,1<br>8,22,24 | 1,6,8,19,2<br>0,21,23,25<br>,26 | 3  | P08010,Q8K4G9,Q9WTT6                                                         |
| 11662 | 2,3,4,5,7,1<br>8,22,25 | 1,6,8,19,2<br>0,21,23,24<br>,26 | 1  | Q6IFV1                                                                       |
| 11663 | 2,3,4,5,7,1<br>8,22,26 | 1,6,8,19,2<br>0,21,23,24<br>,25 | 2  | P63036,P83748                                                                |
| 11664 | 2,3,4,5,7,1<br>8,23,24 | 1,6,8,19,2<br>0,21,22,25<br>,26 | 4  | P12785,P34901,Q8K4G9,Q99068                                                  |
| 11665 | 2,3,4,5,7,1<br>8,23,25 | 1,6,8,19,2<br>0,21,22,24<br>,26 | 8  | P00714,P00774,P02782,P12785,P13432,P34901,Q99068,Q99MH3                      |
| 11666 | 2,3,4,5,7,1<br>8,23,26 | 1,6,8,19,2<br>0,21,22,24<br>,25 | 11 | O35956,P00774,P12785,P13432,P28648,P34901,P35467,P36376,Q4FZU2,Q64194,Q6AY61 |
| 11667 | 2,3,4,5,7,1<br>8,24,25 | 1,6,8,19,2<br>0,21,22,23<br>,26 | 2  | P02782,Q6IFV1                                                                |
| 11668 | 2,3,4,5,7,1<br>8,24,26 | 1,6,8,19,2<br>0,21,22,23<br>,25 | 7  | P00774,P01836,P16636,P20760,P30120,P47727,Q8CJD3                             |
| 11669 | 2,3,4,5,7,1<br>8,25,26 | 1,6,8,19,2<br>0,21,22,23<br>,24 | 8  | P00714,P00774,P02782,P13432,P25031,P55091,P61206;P84079;P84082,P82995        |
| 11670 | 2,3,4,5,7,1<br>9,20,21 | 1,6,8,18,2<br>2,23,24,25<br>,26 | 5  | P00731,P01836,P42854,Q6IFU7,Q7TPB1                                           |
| 11671 | 2,3,4,5,7,1<br>9,20,22 | 1,6,8,18,2<br>1,23,24,25<br>,26 | 7  | P07150,P14669,Q62997,Q6IFV1,Q6P6Q2,Q7TPB1,Q9WTT6                             |
| 11672 | 2,3,4,5,7,1<br>9,20,23 | 1,6,8,18,2<br>1,22,24,25<br>,26 | 1  | P13432                                                                       |
| 11673 | 2,3,4,5,7,1<br>9,20,24 | 1,6,8,18,2<br>1,22,23,25<br>,26 | 4  | P07150,P14669,Q6IFV1,Q9WTT6                                                  |



|       |                        |                                 |   |                                           |
|-------|------------------------|---------------------------------|---|-------------------------------------------|
| 11674 | 2,3,4,5,7,1<br>9,20,25 | 1,6,8,18,2<br>1,22,23,24<br>,26 | 4 | P02782,P13432,Q6IFU7,Q6IFV1               |
| 11675 | 2,3,4,5,7,1<br>9,20,26 | 1,6,8,18,2<br>1,22,23,24<br>,25 | 2 | P01836,P13432                             |
| 11676 | 2,3,4,5,7,1<br>9,21,22 | 1,6,8,18,2<br>0,23,24,25<br>,26 | 1 | Q7TPB1                                    |
| 11677 | 2,3,4,5,7,1<br>9,21,23 | 1,6,8,18,2<br>0,22,24,25<br>,26 | 1 | P34901                                    |
| 11678 | 2,3,4,5,7,1<br>9,21,24 | 1,6,8,18,2<br>0,22,23,25<br>,26 | 0 |                                           |
| 11679 | 2,3,4,5,7,1<br>9,21,25 | 1,6,8,18,2<br>0,22,23,24<br>,26 | 4 | P00731,P47967,Q6IFU7,Q6IFV1               |
| 11680 | 2,3,4,5,7,1<br>9,21,26 | 1,6,8,18,2<br>0,22,23,24<br>,25 | 2 | P01836,P83748                             |
| 11681 | 2,3,4,5,7,1<br>9,22,23 | 1,6,8,18,2<br>0,21,24,25<br>,26 | 1 | P34901                                    |
| 11682 | 2,3,4,5,7,1<br>9,22,24 | 1,6,8,18,2<br>0,21,23,25<br>,26 | 6 | P07150,P08010,P14669,Q6IFV1,Q6P6Q2,Q9WTT6 |
| 11683 | 2,3,4,5,7,1<br>9,22,25 | 1,6,8,18,2<br>0,21,23,24<br>,26 | 2 | Q6IFV1,Q6P6Q2                             |
| 11684 | 2,3,4,5,7,1<br>9,22,26 | 1,6,8,18,2<br>0,21,23,24<br>,25 | 3 | O54728,P05539,P63036                      |
| 11685 | 2,3,4,5,7,1<br>9,23,24 | 1,6,8,18,2<br>0,21,22,25<br>,26 | 3 | P34901,Q63532,Q6IE51                      |
| 11686 | 2,3,4,5,7,1<br>9,23,25 | 1,6,8,18,2<br>0,21,22,24<br>,26 | 2 | P02782,P13432                             |
| 11687 | 2,3,4,5,7,1<br>9,23,26 | 1,6,8,18,2<br>0,21,22,24<br>,25 | 3 | P13432,P34901,P36376                      |
| 11688 | 2,3,4,5,7,1<br>9,24,25 | 1,6,8,18,2<br>0,21,22,23<br>,26 | 3 | P02782,Q6IFV1,Q6P6Q2                      |

|       |                        |                                 |   |                                                  |
|-------|------------------------|---------------------------------|---|--------------------------------------------------|
| 11689 | 2,3,4,5,7,1<br>9,24,26 | 1,6,8,18,2<br>0,21,22,23<br>,25 | 3 | P08723,P20760,P47727                             |
| 11690 | 2,3,4,5,7,1<br>9,25,26 | 1,6,8,18,2<br>0,21,22,23<br>,24 | 2 | P02782,P13432                                    |
| 11691 | 2,3,4,5,7,2<br>0,21,22 | 1,6,8,18,1<br>9,23,24,25<br>,26 | 3 | P01836,P42854,Q7TPB1                             |
| 11692 | 2,3,4,5,7,2<br>0,21,23 | 1,6,8,18,1<br>9,22,24,25<br>,26 | 3 | P01836,P34901,P42854                             |
| 11693 | 2,3,4,5,7,2<br>0,21,24 | 1,6,8,18,1<br>9,22,23,25<br>,26 | 2 | P01836,P42854                                    |
| 11694 | 2,3,4,5,7,2<br>0,21,25 | 1,6,8,18,1<br>9,22,23,24<br>,26 | 4 | P01836,P20646,P42854,Q6IFU7                      |
| 11695 | 2,3,4,5,7,2<br>0,21,26 | 1,6,8,18,1<br>9,22,23,24<br>,25 | 4 | P01041,P01836,P42854,P83748                      |
| 11696 | 2,3,4,5,7,2<br>0,22,23 | 1,6,8,18,1<br>9,21,24,25<br>,26 | 3 | P34901,P36376,Q62997                             |
| 11697 | 2,3,4,5,7,2<br>0,22,24 | 1,6,8,18,1<br>9,21,23,25<br>,26 | 7 | P01836,P07150,P08010,P14669,Q62997,Q6IFV1,Q9WTT6 |
| 11698 | 2,3,4,5,7,2<br>0,22,25 | 1,6,8,18,1<br>9,21,23,24<br>,26 | 3 | P02782,Q62997,Q6IFV1                             |
| 11699 | 2,3,4,5,7,2<br>0,22,26 | 1,6,8,18,1<br>9,21,23,24<br>,25 | 5 | P01836,P05539,P08010,P36376,Q62997               |
| 11700 | 2,3,4,5,7,2<br>0,23,24 | 1,6,8,18,1<br>9,21,22,25<br>,26 | 1 | P34901                                           |
| 11701 | 2,3,4,5,7,2<br>0,23,25 | 1,6,8,18,1<br>9,21,22,24<br>,26 | 5 | P02782,P13432,P34901,P36374,P36376               |
| 11702 | 2,3,4,5,7,2<br>0,23,26 | 1,6,8,18,1<br>9,21,22,24<br>,25 | 6 | P01836,P02782,P05539,P13432,P34901,P36376        |
| 11703 | 2,3,4,5,7,2<br>0,24,25 | 1,6,8,18,1<br>9,21,22,23<br>,26 | 3 | O35547,P02782,Q6IFV1                             |

|       |                        |                                 |   |                                                  |
|-------|------------------------|---------------------------------|---|--------------------------------------------------|
| 11704 | 2,3,4,5,7,2<br>0,24,26 | 1,6,8,18,1<br>9,21,22,23<br>,25 | 6 | O35547,P01836,P08010,P08723,P20760,Q8CJD3        |
| 11705 | 2,3,4,5,7,2<br>0,25,26 | 1,6,8,18,1<br>9,21,22,23<br>,24 | 7 | O35547,P01836,P02782,P05539,P08723,P13432,P36376 |
| 11706 | 2,3,4,5,7,2<br>1,22,23 | 1,6,8,18,1<br>9,20,24,25<br>,26 | 1 | P34901                                           |
| 11707 | 2,3,4,5,7,2<br>1,22,24 | 1,6,8,18,1<br>9,20,23,25<br>,26 | 1 | P01836                                           |
| 11708 | 2,3,4,5,7,2<br>1,22,25 | 1,6,8,18,1<br>9,20,23,24<br>,26 | 1 | Q6IFV1                                           |
| 11709 | 2,3,4,5,7,2<br>1,22,26 | 1,6,8,18,1<br>9,20,23,24<br>,25 | 4 | P01836,P63036,P83748,Q80WL1                      |
| 11710 | 2,3,4,5,7,2<br>1,23,24 | 1,6,8,18,1<br>9,20,22,25<br>,26 | 2 | P34901,Q8K4G9                                    |
| 11711 | 2,3,4,5,7,2<br>1,23,25 | 1,6,8,18,1<br>9,20,22,24<br>,26 | 2 | P34901,Q63751                                    |
| 11712 | 2,3,4,5,7,2<br>1,23,26 | 1,6,8,18,1<br>9,20,22,24<br>,25 | 4 | P01836,P34901,P36376,P83748                      |
| 11713 | 2,3,4,5,7,2<br>1,24,25 | 1,6,8,18,1<br>9,20,22,23<br>,26 | 1 | P01836                                           |
| 11714 | 2,3,4,5,7,2<br>1,24,26 | 1,6,8,18,1<br>9,20,22,23<br>,25 | 4 | P01836,P20760,P83748,Q8CJD3                      |
| 11715 | 2,3,4,5,7,2<br>1,25,26 | 1,6,8,18,1<br>9,20,22,23<br>,24 | 2 | P01836,P83748                                    |
| 11716 | 2,3,4,5,7,2<br>2,23,24 | 1,6,8,18,1<br>9,20,21,25<br>,26 | 3 | P34901,P36376,Q8K4G9                             |
| 11717 | 2,3,4,5,7,2<br>2,23,25 | 1,6,8,18,1<br>9,20,21,24<br>,26 | 3 | P02782,P34901,P36376                             |
| 11718 | 2,3,4,5,7,2<br>2,23,26 | 1,6,8,18,1<br>9,20,21,24<br>,25 | 3 | P05539,P34901,P36376                             |

|       |                        |                                 |    |                                                                       |
|-------|------------------------|---------------------------------|----|-----------------------------------------------------------------------|
| 11719 | 2,3,4,5,7,2<br>2,24,25 | 1,6,8,18,1<br>9,20,21,23<br>,26 | 4  | P02782,P35281,Q6IFV1,Q6P6Q2                                           |
| 11720 | 2,3,4,5,7,2<br>2,24,26 | 1,6,8,18,1<br>9,20,21,23<br>,25 | 7  | O35547,P01836,P08010,P20760,P35281,P47727,Q8CJD3                      |
| 11721 | 2,3,4,5,7,2<br>2,25,26 | 1,6,8,18,1<br>9,20,21,23<br>,24 | 4  | P02782,P05539,P35281,P36376                                           |
| 11722 | 2,3,4,5,7,2<br>3,24,25 | 1,6,8,18,1<br>9,20,21,22<br>,26 | 6  | P02782,P34901,P36374,P36376,Q63751,Q8K4G9                             |
| 11723 | 2,3,4,5,7,2<br>3,24,26 | 1,6,8,18,1<br>9,20,21,22<br>,25 | 6  | O35547,P08723,P20760,P34901,P36376,Q8K4G9                             |
| 11724 | 2,3,4,5,7,2<br>3,25,26 | 1,6,8,18,1<br>9,20,21,22<br>,24 | 6  | O35547,P02782,P08723,P13432,P34901,P36376                             |
| 11725 | 2,3,4,5,7,2<br>4,25,26 | 1,6,8,18,1<br>9,20,21,22<br>,23 | 6  | O35547,P02782,P08723,P35281,Q62902,Q8CJD3                             |
| 11726 | 2,3,4,5,8,1<br>8,19,20 | 1,6,7,21,2<br>2,23,24,25<br>,26 | 3  | P00731,P22006,P83121                                                  |
| 11727 | 2,3,4,5,8,1<br>8,19,21 | 1,6,7,20,2<br>2,23,24,25<br>,26 | 3  | P00731,Q6AYS4,Q80WL1                                                  |
| 11728 | 2,3,4,5,8,1<br>8,19,22 | 1,6,7,20,2<br>1,23,24,25<br>,26 | 3  | P20766,P22006,P83121                                                  |
| 11729 | 2,3,4,5,8,1<br>8,19,23 | 1,6,7,20,2<br>1,22,24,25<br>,26 | 10 | P12785,P13432,P22006,P35467,Q03191,Q498D9,Q5XI22,Q64194,Q6AY61,Q99MH3 |
| 11730 | 2,3,4,5,8,1<br>8,19,24 | 1,6,7,20,2<br>1,22,23,25<br>,26 | 1  | P83121                                                                |
| 11731 | 2,3,4,5,8,1<br>8,19,25 | 1,6,7,20,2<br>1,22,23,24<br>,26 | 3  | P00731,P13432,Q6AYS4                                                  |
| 11732 | 2,3,4,5,8,1<br>8,19,26 | 1,6,7,20,2<br>1,22,23,24<br>,25 | 3  | P10959,P13432,Q63942                                                  |
| 11733 | 2,3,4,5,8,1<br>8,20,21 | 1,6,7,19,2<br>2,23,24,25<br>,26 | 5  | P00731,P06911,P62804,Q6AYS4,Q7TPB1                                    |

|       |                        |                                 |   |                                                                |
|-------|------------------------|---------------------------------|---|----------------------------------------------------------------|
| 11734 | 2,3,4,5,8,1<br>8,20,22 | 1,6,7,19,2<br>1,23,24,25<br>,26 | 5 | P20766,P22006,P83121,Q62997,Q9QZK9                             |
| 11735 | 2,3,4,5,8,1<br>8,20,23 | 1,6,7,19,2<br>1,22,24,25<br>,26 | 9 | P12785,P22006,P35467,P97840,Q498D9,Q5XI22,Q64194,Q6TMA8,Q9QZK9 |
| 11736 | 2,3,4,5,8,1<br>8,20,24 | 1,6,7,19,2<br>1,22,23,25<br>,26 | 4 | P22006,P83121,P97840,Q9QZK9                                    |
| 11737 | 2,3,4,5,8,1<br>8,20,25 | 1,6,7,19,2<br>1,22,23,24<br>,26 | 1 | Q6AYS4                                                         |
| 11738 | 2,3,4,5,8,1<br>8,20,26 | 1,6,7,19,2<br>1,22,23,24<br>,25 | 4 | P06911,P10959,P22006,P97840                                    |
| 11739 | 2,3,4,5,8,1<br>8,21,22 | 1,6,7,19,2<br>0,23,24,25<br>,26 | 4 | P63036,Q6AYS4,Q7TPB1,Q80WL1                                    |
| 11740 | 2,3,4,5,8,1<br>8,21,23 | 1,6,7,19,2<br>0,22,24,25<br>,26 | 8 | P12785,P34901,Q5XI22,Q64194,Q6AY61,Q6AYS4,Q80WL1,Q99MH3        |
| 11741 | 2,3,4,5,8,1<br>8,21,24 | 1,6,7,19,2<br>0,22,23,25<br>,26 | 1 | Q6AYS4                                                         |
| 11742 | 2,3,4,5,8,1<br>8,21,25 | 1,6,7,19,2<br>0,22,23,24<br>,26 | 7 | P00731,P00774,P20646,P31430,P98089,Q6AYS4,Q80WL1               |
| 11743 | 2,3,4,5,8,1<br>8,21,26 | 1,6,7,19,2<br>0,22,23,24<br>,25 | 5 | P00774,P06911,P25031,Q6AYS4,Q80WL1                             |
| 11744 | 2,3,4,5,8,1<br>8,22,23 | 1,6,7,19,2<br>0,21,24,25<br>,26 | 6 | P20766,P22006,P34901,Q5XI22,Q64194,Q6AYS4                      |
| 11745 | 2,3,4,5,8,1<br>8,22,24 | 1,6,7,19,2<br>0,21,23,25<br>,26 | 2 | P20766,P83121                                                  |
| 11746 | 2,3,4,5,8,1<br>8,22,25 | 1,6,7,19,2<br>0,21,23,24<br>,26 | 2 | P20766,Q6AYS4                                                  |
| 11747 | 2,3,4,5,8,1<br>8,22,26 | 1,6,7,19,2<br>0,21,23,24<br>,25 | 4 | P20766,P63036,Q6AYS4,Q80WL1                                    |
| 11748 | 2,3,4,5,8,1<br>8,23,24 | 1,6,7,19,2<br>0,21,22,25<br>,26 | 4 | P12785,P34901,P97840,Q5XI22                                    |

|       |                        |                                 |    |                                                                                                                               |
|-------|------------------------|---------------------------------|----|-------------------------------------------------------------------------------------------------------------------------------|
| 11749 | 2,3,4,5,8,1<br>8,23,25 | 1,6,7,19,2<br>0,21,22,24<br>,26 | 8  | P00714,P00774,P12785,P13432,Q5XI22,Q63598,Q6AYS4,Q99MH3                                                                       |
| 11750 | 2,3,4,5,8,1<br>8,23,26 | 1,6,7,19,2<br>0,21,22,24<br>,25 | 18 | P00774,P10959,P12785,P13432,P28648,P34901,P35467,P47967,P97840,Q4FZU2,Q63942,Q64194,Q6AY61,Q6AYS4,Q6IFU8,Q6IFW6,Q6IG02,Q6P6Q2 |
| 11751 | 2,3,4,5,8,1<br>8,24,25 | 1,6,7,19,2<br>0,21,22,23<br>,26 | 1  | Q6AYS4                                                                                                                        |
| 11752 | 2,3,4,5,8,1<br>8,24,26 | 1,6,7,19,2<br>0,21,22,23<br>,25 | 4  | P00774,P10959,P47967,P97840                                                                                                   |
| 11753 | 2,3,4,5,8,1<br>8,25,26 | 1,6,7,19,2<br>0,21,22,23<br>,24 | 6  | P00714,P00774,P13432,P20766,P55091,Q6AYS4                                                                                     |
| 11754 | 2,3,4,5,8,1<br>9,20,21 | 1,6,7,18,2<br>2,23,24,25<br>,26 | 3  | P00731,P62804,Q7TPB1                                                                                                          |
| 11755 | 2,3,4,5,8,1<br>9,20,22 | 1,6,7,18,2<br>1,23,24,25<br>,26 | 5  | P20766,P22006,P83121,Q62997,Q7TPB1                                                                                            |
| 11756 | 2,3,4,5,8,1<br>9,20,23 | 1,6,7,18,2<br>1,22,24,25<br>,26 | 2  | P13432,P22006                                                                                                                 |
| 11757 | 2,3,4,5,8,1<br>9,20,24 | 1,6,7,18,2<br>1,22,23,25<br>,26 | 1  | P83121                                                                                                                        |
| 11758 | 2,3,4,5,8,1<br>9,20,25 | 1,6,7,18,2<br>1,22,23,24<br>,26 | 3  | P13432,Q6IFV1,Q9QUL6                                                                                                          |
| 11759 | 2,3,4,5,8,1<br>9,20,26 | 1,6,7,18,2<br>1,22,23,24<br>,25 | 3  | P13432,P22006,P62804                                                                                                          |
| 11760 | 2,3,4,5,8,1<br>9,21,22 | 1,6,7,18,2<br>0,23,24,25<br>,26 | 4  | P20766,P63036,Q7TPB1,Q80WL1                                                                                                   |
| 11761 | 2,3,4,5,8,1<br>9,21,23 | 1,6,7,18,2<br>0,22,24,25<br>,26 | 1  | P34901                                                                                                                        |
| 11762 | 2,3,4,5,8,1<br>9,21,24 | 1,6,7,18,2<br>0,22,23,25<br>,26 | 0  |                                                                                                                               |
| 11763 | 2,3,4,5,8,1<br>9,21,25 | 1,6,7,18,2<br>0,22,23,24<br>,26 | 2  | Q6AYS4,Q6IFU7                                                                                                                 |

|       |                        |                                 |   |                                    |
|-------|------------------------|---------------------------------|---|------------------------------------|
| 11764 | 2,3,4,5,8,1<br>9,21,26 | 1,6,7,18,2<br>0,22,23,24<br>,25 | 1 | Q80WL1                             |
| 11765 | 2,3,4,5,8,1<br>9,22,23 | 1,6,7,18,2<br>0,21,24,25<br>,26 | 2 | P20766,P22006                      |
| 11766 | 2,3,4,5,8,1<br>9,22,24 | 1,6,7,18,2<br>0,21,23,25<br>,26 | 2 | P20766,P83121                      |
| 11767 | 2,3,4,5,8,1<br>9,22,25 | 1,6,7,18,2<br>0,21,23,24<br>,26 | 5 | P13432,P20766,Q6AYS4,Q6IFV1,Q9QUL6 |
| 11768 | 2,3,4,5,8,1<br>9,22,26 | 1,6,7,18,2<br>0,21,23,24<br>,25 | 3 | P20766,P63036,Q6AYL6               |
| 11769 | 2,3,4,5,8,1<br>9,23,24 | 1,6,7,18,2<br>0,21,22,25<br>,26 | 1 | P34901                             |
| 11770 | 2,3,4,5,8,1<br>9,23,25 | 1,6,7,18,2<br>0,21,22,24<br>,26 | 3 | P13432,P36374,Q6AYS4               |
| 11771 | 2,3,4,5,8,1<br>9,23,26 | 1,6,7,18,2<br>0,21,22,24<br>,25 | 3 | P13432,P35467,Q6AY61               |
| 11772 | 2,3,4,5,8,1<br>9,24,25 | 1,6,7,18,2<br>0,21,22,23<br>,26 | 2 | Q6IFV1,Q9QUL6                      |
| 11773 | 2,3,4,5,8,1<br>9,24,26 | 1,6,7,18,2<br>0,21,22,23<br>,25 | 1 | P10959                             |
| 11774 | 2,3,4,5,8,1<br>9,25,26 | 1,6,7,18,2<br>0,21,22,23<br>,24 | 2 | P13432,P20766                      |
| 11775 | 2,3,4,5,8,2<br>0,21,22 | 1,6,7,18,1<br>9,23,24,25<br>,26 | 2 | Q7TPB1,Q80WL1                      |
| 11776 | 2,3,4,5,8,2<br>0,21,23 | 1,6,7,18,1<br>9,22,24,25<br>,26 | 1 | P34901                             |
| 11777 | 2,3,4,5,8,2<br>0,21,24 | 1,6,7,18,1<br>9,22,23,25<br>,26 | 1 | P02761                             |
| 11778 | 2,3,4,5,8,2<br>0,21,25 | 1,6,7,18,1<br>9,22,23,24<br>,26 | 3 | Q5M819,Q6AYS4,Q6IFU7               |

|       |                        |                                 |   |                                    |
|-------|------------------------|---------------------------------|---|------------------------------------|
| 11779 | 2,3,4,5,8,2<br>0,21,26 | 1,6,7,18,1<br>9,22,23,24<br>,25 | 4 | P02761,P06911,P62804,P97840        |
| 11780 | 2,3,4,5,8,2<br>0,22,23 | 1,6,7,18,1<br>9,21,24,25<br>,26 | 5 | P20766,P22006,P34901,P97840,Q62997 |
| 11781 | 2,3,4,5,8,2<br>0,22,24 | 1,6,7,18,1<br>9,21,23,25<br>,26 | 4 | P83121,P97840,Q62997,Q9QZK9        |
| 11782 | 2,3,4,5,8,2<br>0,22,25 | 1,6,7,18,1<br>9,21,23,24<br>,26 | 3 | P20766,Q62997,Q6AYS4               |
| 11783 | 2,3,4,5,8,2<br>0,22,26 | 1,6,7,18,1<br>9,21,23,24<br>,25 | 4 | P20766,P22006,P97840,Q62997        |
| 11784 | 2,3,4,5,8,2<br>0,23,24 | 1,6,7,18,1<br>9,21,22,25<br>,26 | 4 | P34901,P47967,P97840,Q9QZK9        |
| 11785 | 2,3,4,5,8,2<br>0,23,25 | 1,6,7,18,1<br>9,21,22,24<br>,26 | 4 | P13432,P36374,Q5M819,Q6AYS4        |
| 11786 | 2,3,4,5,8,2<br>0,23,26 | 1,6,7,18,1<br>9,21,22,24<br>,25 | 4 | P13432,P19218,P47967,P97840        |
| 11787 | 2,3,4,5,8,2<br>0,24,25 | 1,6,7,18,1<br>9,21,22,23<br>,26 | 1 | P36374                             |
| 11788 | 2,3,4,5,8,2<br>0,24,26 | 1,6,7,18,1<br>9,21,22,23<br>,25 | 3 | P47967,P97840,Q8CJD3               |
| 11789 | 2,3,4,5,8,2<br>0,25,26 | 1,6,7,18,1<br>9,21,22,23<br>,24 | 1 | P13432                             |
| 11790 | 2,3,4,5,8,2<br>1,22,23 | 1,6,7,18,1<br>9,20,24,25<br>,26 | 4 | P20766,P34901,Q6AYS4,Q80WL1        |
| 11791 | 2,3,4,5,8,2<br>1,22,24 | 1,6,7,18,1<br>9,20,23,25<br>,26 | 1 | Q80WL1                             |
| 11792 | 2,3,4,5,8,2<br>1,22,25 | 1,6,7,18,1<br>9,20,23,24<br>,26 | 3 | P20766,Q6AYS4,Q80WL1               |
| 11793 | 2,3,4,5,8,2<br>1,22,26 | 1,6,7,18,1<br>9,20,23,24<br>,25 | 4 | P20766,P63036,Q6AYS4,Q80WL1        |



|       |                        |                                 |   |                                                         |
|-------|------------------------|---------------------------------|---|---------------------------------------------------------|
| 11794 | 2,3,4,5,8,2<br>1,23,24 | 1,6,7,18,1<br>9,20,22,25<br>,26 | 1 | P34901                                                  |
| 11795 | 2,3,4,5,8,2<br>1,23,25 | 1,6,7,18,1<br>9,20,22,24<br>,26 | 3 | P06760,P34901,Q6AYS4                                    |
| 11796 | 2,3,4,5,8,2<br>1,23,26 | 1,6,7,18,1<br>9,20,22,24<br>,25 | 4 | P34901,Q6AY61,Q6AYS4,Q80WL1                             |
| 11797 | 2,3,4,5,8,2<br>1,24,25 | 1,6,7,18,1<br>9,20,22,23<br>,26 | 1 | Q6AYS4                                                  |
| 11798 | 2,3,4,5,8,2<br>1,24,26 | 1,6,7,18,1<br>9,20,22,23<br>,25 | 1 | Q8CJD3                                                  |
| 11799 | 2,3,4,5,8,2<br>1,25,26 | 1,6,7,18,1<br>9,20,22,23<br>,24 | 2 | Q6AYS4,Q80WL1                                           |
| 11800 | 2,3,4,5,8,2<br>2,23,24 | 1,6,7,18,1<br>9,20,21,25<br>,26 | 4 | P20766,P34901,P47967,P97840                             |
| 11801 | 2,3,4,5,8,2<br>2,23,25 | 1,6,7,18,1<br>9,20,21,24<br>,26 | 3 | P20766,P34901,Q6AYS4                                    |
| 11802 | 2,3,4,5,8,2<br>2,23,26 | 1,6,7,18,1<br>9,20,21,24<br>,25 | 6 | P20766,P34901,P36376,P47967,P97840,Q6AYL6               |
| 11803 | 2,3,4,5,8,2<br>2,24,25 | 1,6,7,18,1<br>9,20,21,23<br>,26 | 2 | P20766,Q6AYS4                                           |
| 11804 | 2,3,4,5,8,2<br>2,24,26 | 1,6,7,18,1<br>9,20,21,23<br>,25 | 8 | P08010,P15399,P20760,P20766,P47967,P63036,P97840,Q6AYL6 |
| 11805 | 2,3,4,5,8,2<br>2,25,26 | 1,6,7,18,1<br>9,20,21,23<br>,24 | 3 | P20766,Q6AYL6,Q6AYS4                                    |
| 11806 | 2,3,4,5,8,2<br>3,24,25 | 1,6,7,18,1<br>9,20,21,22<br>,26 | 4 | P34901,P36374,Q63751,Q6AYS4                             |
| 11807 | 2,3,4,5,8,2<br>3,24,26 | 1,6,7,18,1<br>9,20,21,22<br>,25 | 4 | P10959,P34901,P47967,P97840                             |
| 11808 | 2,3,4,5,8,2<br>3,25,26 | 1,6,7,18,1<br>9,20,21,22<br>,24 | 4 | P13432,P20766,P36376,Q6AYS4                             |

|       |                         |                                 |   |                                                                |
|-------|-------------------------|---------------------------------|---|----------------------------------------------------------------|
| 11809 | 2,3,4,5,8,2<br>4,25,26  | 1,6,7,18,1<br>9,20,21,22<br>,23 | 3 | P08723,Q62902,Q8CJD3                                           |
| 11810 | 2,3,4,5,18,<br>19,20,21 | 1,6,7,8,22,<br>23,24,25,2<br>6  | 5 | P00731,P06911,P12020,P19629,Q5GRG2                             |
| 11811 | 2,3,4,5,18,<br>19,20,22 | 1,6,7,8,21,<br>23,24,25,2<br>6  | 9 | P07150,P14669,P19629,P22006,P83121,Q62997,Q6P6R2,Q9QZK9,Q9WTT6 |
| 11812 | 2,3,4,5,18,<br>19,20,23 | 1,6,7,8,21,<br>22,24,25,2<br>6  | 7 | P12785,P13432,P19629,P22006,P34901,Q498D9,Q9QZK9               |
| 11813 | 2,3,4,5,18,<br>19,20,24 | 1,6,7,8,21,<br>22,23,25,2<br>6  | 9 | P06911,P07150,P12020,P19629,P22006,P83121,Q5GRG2,Q9QZK9,Q9WTT6 |
| 11814 | 2,3,4,5,18,<br>19,20,25 | 1,6,7,8,21,<br>22,23,24,2<br>6  | 3 | P02782,P13432,Q6IFV1                                           |
| 11815 | 2,3,4,5,18,<br>19,20,26 | 1,6,7,8,21,<br>22,23,24,2<br>5  | 7 | P06911,P12020,P13432,P19629,P22006,Q5GRG2,Q63355               |
| 11816 | 2,3,4,5,18,<br>19,21,22 | 1,6,7,8,20,<br>23,24,25,2<br>6  | 3 | P10715,P19629,P63036                                           |
| 11817 | 2,3,4,5,18,<br>19,21,23 | 1,6,7,8,20,<br>22,24,25,2<br>6  | 6 | P10715,P12785,P19629,P34901,Q03191,Q99MH3                      |
| 11818 | 2,3,4,5,18,<br>19,21,24 | 1,6,7,8,20,<br>22,23,25,2<br>6  | 4 | P06911,P12020,P19629,Q5GRG2                                    |
| 11819 | 2,3,4,5,18,<br>19,21,25 | 1,6,7,8,20,<br>22,23,24,2<br>6  | 3 | P00731,P31430,P98089                                           |
| 11820 | 2,3,4,5,18,<br>19,21,26 | 1,6,7,8,20,<br>22,23,24,2<br>5  | 8 | P00774,P06911,P10715,P12020,P19629,P25031,P63036,Q5GRG2        |
| 11821 | 2,3,4,5,18,<br>19,22,23 | 1,6,7,8,20,<br>21,24,25,2<br>6  | 8 | P10715,P12785,P13432,P19629,P22006,P34901,Q64194,Q9WTT6        |
| 11822 | 2,3,4,5,18,<br>19,22,24 | 1,6,7,8,20,<br>21,23,25,2<br>6  | 6 | P07150,P19629,P47727,P83121,Q6P6R2,Q9WTT6                      |
| 11823 | 2,3,4,5,18,<br>19,22,25 | 1,6,7,8,20,<br>21,23,24,2<br>6  | 2 | P13432,Q6IFV1                                                  |

|       |                         |                                |    |                                                                       |
|-------|-------------------------|--------------------------------|----|-----------------------------------------------------------------------|
| 11824 | 2,3,4,5,18,<br>19,22,26 | 1,6,7,8,20,<br>21,23,24,2<br>5 | 7  | P13432,P19629,P47727,P63036,Q6AYL6,Q6P6R2,Q9WTT6                      |
| 11825 | 2,3,4,5,18,<br>19,23,24 | 1,6,7,8,20,<br>21,22,25,2<br>6 | 5  | P12785,P19629,P34901,Q03191,Q99068                                    |
| 11826 | 2,3,4,5,18,<br>19,23,25 | 1,6,7,8,20,<br>21,22,24,2<br>6 | 7  | P02782,P12785,P13432,P34901,Q03191,Q99068,Q99MH3                      |
| 11827 | 2,3,4,5,18,<br>19,23,26 | 1,6,7,8,20,<br>21,22,24,2<br>5 | 10 | P12785,P13432,P19629,P34901,P35467,Q03191,Q4FZU2,Q5XFX0,Q64194,Q6AY61 |
| 11828 | 2,3,4,5,18,<br>19,24,25 | 1,6,7,8,20,<br>21,22,23,2<br>6 | 0  |                                                                       |
| 11829 | 2,3,4,5,18,<br>19,24,26 | 1,6,7,8,20,<br>21,22,23,2<br>5 | 7  | P06911,P08723,P12020,P19629,P47727,Q5GRG2,Q62902                      |
| 11830 | 2,3,4,5,18,<br>19,25,26 | 1,6,7,8,20,<br>21,22,23,2<br>4 | 3  | P00774,P02782,P13432                                                  |
| 11831 | 2,3,4,5,18,<br>20,21,22 | 1,6,7,8,19,<br>23,24,25,2<br>6 | 3  | P12020,P19629,Q7TPB1                                                  |
| 11832 | 2,3,4,5,18,<br>20,21,23 | 1,6,7,8,19,<br>22,24,25,2<br>6 | 7  | P01835,P06911,P12020,P12785,P19629,P34901,Q9QZK9                      |
| 11833 | 2,3,4,5,18,<br>20,21,24 | 1,6,7,8,19,<br>22,23,25,2<br>6 | 5  | P06911,P12020,P19629,Q5GRG2,Q9QZK9                                    |
| 11834 | 2,3,4,5,18,<br>20,21,25 | 1,6,7,8,19,<br>22,23,24,2<br>6 | 3  | P25031,P31430,P98089                                                  |
| 11835 | 2,3,4,5,18,<br>20,21,26 | 1,6,7,8,19,<br>22,23,24,2<br>5 | 7  | P00774,P01835,P06911,P12020,P19629,P25031,Q5GRG2                      |
| 11836 | 2,3,4,5,18,<br>20,22,23 | 1,6,7,8,19,<br>21,24,25,2<br>6 | 6  | P12785,P19629,P22006,P34901,Q62997,Q9QZK9                             |
| 11837 | 2,3,4,5,18,<br>20,22,24 | 1,6,7,8,19,<br>21,23,25,2<br>6 | 10 | P07150,P12020,P14669,P19629,P22006,P83121,Q6P9T8,Q99041,Q9QZK9,Q9WTT6 |
| 11838 | 2,3,4,5,18,<br>20,22,25 | 1,6,7,8,19,<br>21,23,24,2<br>6 | 1  | Q62997                                                                |

|       |                         |                                |    |                                                                                                                                   |
|-------|-------------------------|--------------------------------|----|-----------------------------------------------------------------------------------------------------------------------------------|
| 11839 | 2,3,4,5,18,<br>20,22,26 | 1,6,7,8,19,<br>21,23,24,2<br>5 | 7  | P12020,P19629,P22006,P63036,Q62997,Q6P6R2,Q99041                                                                                  |
| 11840 | 2,3,4,5,18,<br>20,23,24 | 1,6,7,8,19,<br>21,22,25,2<br>6 | 6  | P12785,P19629,P34901,P97840,Q99068,Q9QZK9                                                                                         |
| 11841 | 2,3,4,5,18,<br>20,23,25 | 1,6,7,8,19,<br>21,22,24,2<br>6 | 5  | P02782,P12785,P13432,P34901,Q99068                                                                                                |
| 11842 | 2,3,4,5,18,<br>20,23,26 | 1,6,7,8,19,<br>21,22,24,2<br>5 | 18 | P06911,P12785,P13432,P19218,P19629,P22006,P34901,P35467,P97840,Q4FZU2,Q64194,Q6AY61,Q6IFU8,Q6IFW6,Q6IG02,Q6P6Q2,Q9J<br>J50,Q9QZK9 |
| 11843 | 2,3,4,5,18,<br>20,24,25 | 1,6,7,8,19,<br>21,22,23,2<br>6 | 2  | P02782,P22282                                                                                                                     |
| 11844 | 2,3,4,5,18,<br>20,24,26 | 1,6,7,8,19,<br>21,22,23,2<br>5 | 8  | P06911,P08723,P12020,P19629,P97840,Q5GRG2,Q99041,Q9QZK9                                                                           |
| 11845 | 2,3,4,5,18,<br>20,25,26 | 1,6,7,8,19,<br>21,22,23,2<br>4 | 4  | P00774,P02782,P08723,P13432                                                                                                       |
| 11846 | 2,3,4,5,18,<br>21,22,23 | 1,6,7,8,19,<br>20,24,25,2<br>6 | 4  | P10715,P12785,P19629,P34901                                                                                                       |
| 11847 | 2,3,4,5,18,<br>21,22,24 | 1,6,7,8,19,<br>20,23,25,2<br>6 | 3  | P12020,P19629,P34901                                                                                                              |
| 11848 | 2,3,4,5,18,<br>21,22,25 | 1,6,7,8,19,<br>20,23,24,2<br>6 | 2  | P31430,P98089                                                                                                                     |
| 11849 | 2,3,4,5,18,<br>21,22,26 | 1,6,7,8,19,<br>20,23,24,2<br>5 | 5  | P00774,P12020,P19629,P25031,P63036                                                                                                |
| 11850 | 2,3,4,5,18,<br>21,23,24 | 1,6,7,8,19,<br>20,22,25,2<br>6 | 4  | P12020,P12785,P19629,P34901                                                                                                       |
| 11851 | 2,3,4,5,18,<br>21,23,25 | 1,6,7,8,19,<br>20,22,24,2<br>6 | 6  | P00774,P12785,P31430,P34901,P98089,Q99MH3                                                                                         |
| 11852 | 2,3,4,5,18,<br>21,23,26 | 1,6,7,8,19,<br>20,22,24,2<br>5 | 12 | P00774,P06911,P12020,P12785,P19629,P25031,P34901,Q4FZU2,Q62636,Q6AY61,Q6IFU8,Q6P6Q2                                               |
| 11853 | 2,3,4,5,18,<br>21,24,25 | 1,6,7,8,19,<br>20,22,23,2<br>6 | 3  | P00774,P31430,P98089                                                                                                              |

|       |                         |                                |    |                                                                                                          |
|-------|-------------------------|--------------------------------|----|----------------------------------------------------------------------------------------------------------|
| 11854 | 2,3,4,5,18,<br>21,24,26 | 1,6,7,8,19,<br>20,22,23,2<br>5 | 7  | P00774,P06911,P12020,P19629,P47727,Q5GRG2,Q8CJD3                                                         |
| 11855 | 2,3,4,5,18,<br>21,25,26 | 1,6,7,8,19,<br>20,22,23,2<br>4 | 5  | P00774,P25031,P31430,P55091,P98089                                                                       |
| 11856 | 2,3,4,5,18,<br>22,23,24 | 1,6,7,8,19,<br>20,21,25,2<br>6 | 5  | P12785,P19629,P34901,Q99068,Q9QZK9                                                                       |
| 11857 | 2,3,4,5,18,<br>22,23,25 | 1,6,7,8,19,<br>20,21,24,2<br>6 | 5  | P12785,P13432,P34901,Q99068,Q99MH3                                                                       |
| 11858 | 2,3,4,5,18,<br>22,23,26 | 1,6,7,8,19,<br>20,21,24,2<br>5 | 9  | P12785,P13432,P19629,P19939,P34901,P36376,Q4FZU2,Q64194,Q6AY61                                           |
| 11859 | 2,3,4,5,18,<br>22,24,25 | 1,6,7,8,19,<br>20,21,23,2<br>6 | 0  |                                                                                                          |
| 11860 | 2,3,4,5,18,<br>22,24,26 | 1,6,7,8,19,<br>20,21,23,2<br>5 | 8  | P12020,P15399,P19629,P30120,P47727,P63036,Q6AYL6,Q99041                                                  |
| 11861 | 2,3,4,5,18,<br>22,25,26 | 1,6,7,8,19,<br>20,21,23,2<br>4 | 3  | P00774,P13432,Q6AYL6                                                                                     |
| 11862 | 2,3,4,5,18,<br>23,24,25 | 1,6,7,8,19,<br>20,21,22,2<br>6 | 5  | P02782,P12785,P34901,Q99068,Q99MH3                                                                       |
| 11863 | 2,3,4,5,18,<br>23,24,26 | 1,6,7,8,19,<br>20,21,22,2<br>5 | 12 | P00774,P08723,P12020,P12785,P19629,P30120,P34901,P47727,P47967,P97840,Q4FZU2,Q62902                      |
| 11864 | 2,3,4,5,18,<br>23,25,26 | 1,6,7,8,19,<br>20,21,22,2<br>4 | 15 | P00714,P00774,P02782,P08723,P12785,P13432,P34901,P35467,P36376,Q4FZU2,Q62902,Q6AY61,Q6IFU8,Q6P6Q2,Q99MH3 |
| 11865 | 2,3,4,5,18,<br>24,25,26 | 1,6,7,8,19,<br>20,21,22,2<br>3 | 6  | P00774,P02782,P08723,P55091,Q62902,Q8CJD3                                                                |
| 11866 | 2,3,4,5,19,<br>20,21,22 | 1,6,7,8,18,<br>23,24,25,2<br>6 | 4  | P10715,P19629,Q62997,Q7TPB1                                                                              |
| 11867 | 2,3,4,5,19,<br>20,21,23 | 1,6,7,8,18,<br>22,24,25,2<br>6 | 3  | P10715,P19629,P34901                                                                                     |
| 11868 | 2,3,4,5,19,<br>20,21,24 | 1,6,7,8,18,<br>22,23,25,2<br>6 | 4  | P06911,P12020,P19629,Q5GRG2                                                                              |

|       |                         |                                |   |                                                                |
|-------|-------------------------|--------------------------------|---|----------------------------------------------------------------|
| 11869 | 2,3,4,5,19,<br>20,21,25 | 1,6,7,8,18,<br>22,23,24,2<br>6 | 1 | Q8VD89                                                         |
| 11870 | 2,3,4,5,19,<br>20,21,26 | 1,6,7,8,18,<br>22,23,24,2<br>5 | 4 | P06911,P12020,P19629,Q5GRG2                                    |
| 11871 | 2,3,4,5,19,<br>20,22,23 | 1,6,7,8,18,<br>21,24,25,2<br>6 | 7 | P10715,P13432,P19629,P22006,P34901,P55091,Q62997               |
| 11872 | 2,3,4,5,19,<br>20,22,24 | 1,6,7,8,18,<br>21,23,25,2<br>6 | 9 | P07150,P14669,P19629,P83121,Q62997,Q6IFV1,Q6P9T8,Q9QZK9,Q9WTT6 |
| 11873 | 2,3,4,5,19,<br>20,22,25 | 1,6,7,8,18,<br>21,23,24,2<br>6 | 3 | P13432,Q62997,Q6IFV1                                           |
| 11874 | 2,3,4,5,19,<br>20,22,26 | 1,6,7,8,18,<br>21,23,24,2<br>5 | 9 | O54728,P07150,P13432,P19629,P22006,P63036,Q62997,Q6AYL6,Q6P6R2 |
| 11875 | 2,3,4,5,19,<br>20,23,24 | 1,6,7,8,18,<br>21,22,25,2<br>6 | 5 | P08723,P11598,P19629,P34901,Q9QZK9                             |
| 11876 | 2,3,4,5,19,<br>20,23,25 | 1,6,7,8,18,<br>21,22,24,2<br>6 | 2 | P02782,P13432                                                  |
| 11877 | 2,3,4,5,19,<br>20,23,26 | 1,6,7,8,18,<br>21,22,24,2<br>5 | 4 | P08723,P13432,P19218,P19629                                    |
| 11878 | 2,3,4,5,19,<br>20,24,25 | 1,6,7,8,18,<br>21,22,23,2<br>6 | 6 | P02782,P08723,P11598,P22283,Q6IFV1,Q8CJ52                      |
| 11879 | 2,3,4,5,19,<br>20,24,26 | 1,6,7,8,18,<br>21,22,23,2<br>5 | 6 | P06911,P08723,P12020,P19629,P47727,Q5GRG2                      |
| 11880 | 2,3,4,5,19,<br>20,25,26 | 1,6,7,8,18,<br>21,22,23,2<br>4 | 3 | P02782,P08723,P13432                                           |
| 11881 | 2,3,4,5,19,<br>21,22,23 | 1,6,7,8,18,<br>20,24,25,2<br>6 | 3 | P10715,P19629,P34901                                           |
| 11882 | 2,3,4,5,19,<br>21,22,24 | 1,6,7,8,18,<br>20,23,25,2<br>6 | 2 | P10715,P19629                                                  |
| 11883 | 2,3,4,5,19,<br>21,22,25 | 1,6,7,8,18,<br>20,23,24,2<br>6 | 0 |                                                                |

|       |                         |                                |   |                                                  |
|-------|-------------------------|--------------------------------|---|--------------------------------------------------|
| 11884 | 2,3,4,5,19,<br>21,22,26 | 1,6,7,8,18,<br>20,23,24,2<br>5 | 3 | P10715,P19629,P63036                             |
| 11885 | 2,3,4,5,19,<br>21,23,24 | 1,6,7,8,18,<br>20,22,25,2<br>6 | 3 | P10715,P19629,P34901                             |
| 11886 | 2,3,4,5,19,<br>21,23,25 | 1,6,7,8,18,<br>20,22,24,2<br>6 | 1 | P34901                                           |
| 11887 | 2,3,4,5,19,<br>21,23,26 | 1,6,7,8,18,<br>20,22,24,2<br>5 | 3 | P10715,P19629,P34901                             |
| 11888 | 2,3,4,5,19,<br>21,24,25 | 1,6,7,8,18,<br>20,22,23,2<br>6 | 0 |                                                  |
| 11889 | 2,3,4,5,19,<br>21,24,26 | 1,6,7,8,18,<br>20,22,23,2<br>5 | 7 | P06911,P10715,P12020,P19629,P47727,Q5GRG2,Q8CJD3 |
| 11890 | 2,3,4,5,19,<br>21,25,26 | 1,6,7,8,18,<br>20,22,23,2<br>4 | 0 |                                                  |
| 11891 | 2,3,4,5,19,<br>22,23,24 | 1,6,7,8,18,<br>20,21,25,2<br>6 | 5 | P10715,P19629,P34901,Q6AYR8,Q9WTT6               |
| 11892 | 2,3,4,5,19,<br>22,23,25 | 1,6,7,8,18,<br>20,21,24,2<br>6 | 3 | P13432,P34901,Q6AYR8                             |
| 11893 | 2,3,4,5,19,<br>22,23,26 | 1,6,7,8,18,<br>20,21,24,2<br>5 | 7 | O54728,P10715,P13432,P19629,P34901,P36376,Q6AYL6 |
| 11894 | 2,3,4,5,19,<br>22,24,25 | 1,6,7,8,18,<br>20,21,23,2<br>6 | 3 | Q6AYR8,Q6IFV1,Q6P6Q2                             |
| 11895 | 2,3,4,5,19,<br>22,24,26 | 1,6,7,8,18,<br>20,21,23,2<br>5 | 7 | P08723,P10715,P19629,P47727,P63036,Q6AYL6,Q9WTT6 |
| 11896 | 2,3,4,5,19,<br>22,25,26 | 1,6,7,8,18,<br>20,21,23,2<br>4 | 3 | P13432,Q6AYL6,Q6AYR8                             |
| 11897 | 2,3,4,5,19,<br>23,24,25 | 1,6,7,8,18,<br>20,21,22,2<br>6 | 6 | P02782,P08723,P11598,P13432,P34901,P36374        |
| 11898 | 2,3,4,5,19,<br>23,24,26 | 1,6,7,8,18,<br>20,21,22,2<br>5 | 6 | P08723,P10715,P13432,P19629,P34901,P47727        |

|       |                         |                                |   |                                                                |
|-------|-------------------------|--------------------------------|---|----------------------------------------------------------------|
| 11899 | 2,3,4,5,19,<br>23,25,26 | 1,6,7,8,18,<br>20,21,22,2<br>4 | 4 | P02782,P08723,P13432,P36376                                    |
| 11900 | 2,3,4,5,19,<br>24,25,26 | 1,6,7,8,18,<br>20,21,22,2<br>3 | 7 | P02782,P08723,P13432,P22283,Q62902,Q8CJD3,Q9JI85               |
| 11901 | 2,3,4,5,20,<br>21,22,23 | 1,6,7,8,18,<br>19,24,25,2<br>6 | 4 | P10715,P19629,P34901,Q62997                                    |
| 11902 | 2,3,4,5,20,<br>21,22,24 | 1,6,7,8,18,<br>19,23,25,2<br>6 | 1 | P19629                                                         |
| 11903 | 2,3,4,5,20,<br>21,22,25 | 1,6,7,8,18,<br>19,23,24,2<br>6 | 0 |                                                                |
| 11904 | 2,3,4,5,20,<br>21,22,26 | 1,6,7,8,18,<br>19,23,24,2<br>5 | 3 | P12020,P19629,P63036                                           |
| 11905 | 2,3,4,5,20,<br>21,23,24 | 1,6,7,8,18,<br>19,22,25,2<br>6 | 2 | P19629,P34901                                                  |
| 11906 | 2,3,4,5,20,<br>21,23,25 | 1,6,7,8,18,<br>19,22,24,2<br>6 | 1 | P34901                                                         |
| 11907 | 2,3,4,5,20,<br>21,23,26 | 1,6,7,8,18,<br>19,22,24,2<br>5 | 5 | P01835,P06911,P19629,P34901,Q4FZU2                             |
| 11908 | 2,3,4,5,20,<br>21,24,25 | 1,6,7,8,18,<br>19,22,23,2<br>6 | 0 |                                                                |
| 11909 | 2,3,4,5,20,<br>21,24,26 | 1,6,7,8,18,<br>19,22,23,2<br>5 | 6 | P01836,P06911,P12020,P19629,Q5GRG2,Q8CJD3                      |
| 11910 | 2,3,4,5,20,<br>21,25,26 | 1,6,7,8,18,<br>19,22,23,2<br>4 | 0 |                                                                |
| 11911 | 2,3,4,5,20,<br>22,23,24 | 1,6,7,8,18,<br>19,21,25,2<br>6 | 6 | P19629,P34901,P82995,P97840,Q62997,Q9QZK9                      |
| 11912 | 2,3,4,5,20,<br>22,23,25 | 1,6,7,8,18,<br>19,21,24,2<br>6 | 3 | P13432,P34901,Q62997                                           |
| 11913 | 2,3,4,5,20,<br>22,23,26 | 1,6,7,8,18,<br>19,21,24,2<br>5 | 9 | O54728,P13432,P19629,P34901,P36376,P47967,P97840,Q62997,Q6AYL6 |



|       |                         |                                |    |                                                                              |
|-------|-------------------------|--------------------------------|----|------------------------------------------------------------------------------|
| 11914 | 2,3,4,5,20,<br>22,24,25 | 1,6,7,8,18,<br>19,21,23,2<br>6 | 1  | Q6IFV1                                                                       |
| 11915 | 2,3,4,5,20,<br>22,24,26 | 1,6,7,8,18,<br>19,21,23,2<br>5 | 11 | P02803,P08010,P08723,P15399,P19629,P47967,P97840,Q62997,Q6AYL6,Q8CJD3,Q99041 |
| 11916 | 2,3,4,5,20,<br>22,25,26 | 1,6,7,8,18,<br>19,21,23,2<br>4 | 5  | P02782,P08723,P13432,Q62997,Q6AYL6                                           |
| 11917 | 2,3,4,5,20,<br>23,24,25 | 1,6,7,8,18,<br>19,21,22,2<br>6 | 6  | P02782,P08723,P11598,P22283,P34901,P36374                                    |
| 11918 | 2,3,4,5,20,<br>23,24,26 | 1,6,7,8,18,<br>19,21,22,2<br>5 | 8  | D4A1J4,P08723,P19218,P19629,P34901,P36376,P47967,P97840                      |
| 11919 | 2,3,4,5,20,<br>23,25,26 | 1,6,7,8,18,<br>19,21,22,2<br>4 | 6  | P02782,P08723,P13432,P19218,P34901,P36376                                    |
| 11920 | 2,3,4,5,20,<br>24,25,26 | 1,6,7,8,18,<br>19,21,22,2<br>3 | 6  | O35547,P02782,P08723,P22283,Q62902,Q8CJD3                                    |
| 11921 | 2,3,4,5,21,<br>22,23,24 | 1,6,7,8,18,<br>19,20,25,2<br>6 | 3  | P10715,P34901,P35280                                                         |
| 11922 | 2,3,4,5,21,<br>22,23,25 | 1,6,7,8,18,<br>19,20,24,2<br>6 | 2  | P34901,P35280                                                                |
| 11923 | 2,3,4,5,21,<br>22,23,26 | 1,6,7,8,18,<br>19,20,24,2<br>5 | 4  | P10715,P19629,P34901,P63036                                                  |
| 11924 | 2,3,4,5,21,<br>22,24,25 | 1,6,7,8,18,<br>19,20,23,2<br>6 | 1  | P35280                                                                       |
| 11925 | 2,3,4,5,21,<br>22,24,26 | 1,6,7,8,18,<br>19,20,23,2<br>5 | 5  | P10715,P12020,P19629,P63036,Q8CJD3                                           |
| 11926 | 2,3,4,5,21,<br>22,25,26 | 1,6,7,8,18,<br>19,20,23,2<br>4 | 1  | P63036                                                                       |
| 11927 | 2,3,4,5,21,<br>23,24,25 | 1,6,7,8,18,<br>19,20,22,2<br>6 | 3  | P34901,P35280,Q63751                                                         |
| 11928 | 2,3,4,5,21,<br>23,24,26 | 1,6,7,8,18,<br>19,20,22,2<br>5 | 3  | P10715,P19629,P34901                                                         |

|       |                         |                                  |    |                                                                                                          |
|-------|-------------------------|----------------------------------|----|----------------------------------------------------------------------------------------------------------|
| 11929 | 2,3,4,5,21,<br>23,25,26 | 1,6,7,8,18,<br>19,20,22,2<br>4   | 2  | P00774,P34901                                                                                            |
| 11930 | 2,3,4,5,21,<br>24,25,26 | 1,6,7,8,18,<br>19,20,22,2<br>3   | 2  | Q62902,Q8CJD3                                                                                            |
| 11931 | 2,3,4,5,22,<br>23,24,25 | 1,6,7,8,18,<br>19,20,21,2<br>6   | 7  | P11598,P34901,P35280,P35281,P36374,Q63751,Q6AYR8                                                         |
| 11932 | 2,3,4,5,22,<br>23,24,26 | 1,6,7,8,18,<br>19,20,21,2<br>5   | 10 | P00731,P08723,P30120,P34901,P35281,P36376,P47727,P47967,P97840,Q6AYL6                                    |
| 11933 | 2,3,4,5,22,<br>23,25,26 | 1,6,7,8,18,<br>19,20,21,2<br>4   | 8  | P02782,P08723,P13432,P34901,P35281,P36376,Q6AYL6,Q6AYR8                                                  |
| 11934 | 2,3,4,5,22,<br>24,25,26 | 1,6,7,8,18,<br>19,20,21,2<br>3   | 6  | P08723,P35281,Q62902,Q6AYL6,Q8CJD3,Q9JI85                                                                |
| 11935 | 2,3,4,5,23,<br>24,25,26 | 1,6,7,8,18,<br>19,20,21,2<br>2   | 9  | O35547,P02782,P08723,P13432,P34901,P35281,P36376,Q62902,Q9JI85                                           |
| 11936 | 2,3,4,6,7,8<br>,18,19   | 1,5,20,21,<br>22,23,24,2<br>5,26 | 9  | P00731,P02631,P16086,P20762,P20766,P35280,Q63532,Q64057,Q9QQZQ5                                          |
| 11937 | 2,3,4,6,7,8<br>,18,20   | 1,5,19,21,<br>22,23,24,2<br>5,26 | 9  | P00731,P02631,P16086,P20762,P35280,P42854,Q63617,Q64057,Q9QQZQ5                                          |
| 11938 | 2,3,4,6,7,8<br>,18,21   | 1,5,19,20,<br>22,23,24,2<br>5,26 | 13 | O54800;Q5DWV2,P00731,P00774,P02631,P02761,P16086,P20762,P25031,P42854,P98089,Q64057,Q80WL1,Q9QQZQ5       |
| 11939 | 2,3,4,6,7,8<br>,18,22   | 1,5,19,20,<br>21,23,24,2<br>5,26 | 6  | P02631,P16086,P20762,P20766,Q80WL1,Q9QQZQ5                                                               |
| 11940 | 2,3,4,6,7,8<br>,18,23   | 1,5,19,20,<br>21,22,24,2<br>5,26 | 9  | P02631,P12785,P16086,P20762,P20766,P35467,Q498D9,Q5XI22,Q64057                                           |
| 11941 | 2,3,4,6,7,8<br>,18,24   | 1,5,19,20,<br>21,22,23,2<br>5,26 | 4  | P02631,P16086,P20762,Q9QQZQ5                                                                             |
| 11942 | 2,3,4,6,7,8<br>,18,25   | 1,5,19,20,<br>21,22,23,2<br>4,26 | 11 | P00714,P00731,P00774,P02631,P12020,P16086,P20766,P35280,P98089,Q64057,Q9QQZQ5                            |
| 11943 | 2,3,4,6,7,8<br>,18,26   | 1,5,19,20,<br>21,22,23,2<br>4,25 | 15 | P00774,P01041,P02631,P10959,P16086,P20760,P20761,P20762,P20766,P25031,P35280,P83748,Q5QE79,Q64057,Q6AYQ8 |

|       |                       |                                  |    |                                                                                     |
|-------|-----------------------|----------------------------------|----|-------------------------------------------------------------------------------------|
| 11944 | 2,3,4,6,7,8<br>,19,20 | 1,5,18,21,<br>22,23,24,2<br>5,26 | 9  | P00731,P02631,P16086,P20762,P35280,Q63532,Q63617,Q7TPB1,Q9QZQ5                      |
| 11945 | 2,3,4,6,7,8<br>,19,21 | 1,5,18,20,<br>22,23,24,2<br>5,26 | 11 | P00731,P02631,P02761,P16086,P20762,P42854,Q63532,Q64057,Q7TPB1,Q80WL1,Q9QZQ5        |
| 11946 | 2,3,4,6,7,8<br>,19,22 | 1,5,18,20,<br>21,23,24,2<br>5,26 | 7  | P02631,P16086,P20766,Q63532,Q7TPB1,Q80WL1,Q9QZQ5                                    |
| 11947 | 2,3,4,6,7,8<br>,19,23 | 1,5,18,20,<br>21,22,24,2<br>5,26 | 9  | P02631,P16086,P20762,P20766,P50280,Q5XI22,Q63532,Q64057,Q99041                      |
| 11948 | 2,3,4,6,7,8<br>,19,24 | 1,5,18,20,<br>21,22,23,2<br>5,26 | 4  | P02631,P16086,Q63532,Q9QZQ5                                                         |
| 11949 | 2,3,4,6,7,8<br>,19,25 | 1,5,18,20,<br>21,22,23,2<br>4,26 | 12 | P00731,P02631,P12020,P16086,P20766,P35280,P47967,Q4FZU6,Q63532,Q6IFU7,Q9QUL6,Q9QZQ5 |
| 11950 | 2,3,4,6,7,8<br>,19,26 | 1,5,18,20,<br>21,22,23,2<br>4,25 | 10 | P02631,P16086,P20760,P20761,P20762,P20766,P35280,P83748,Q5FVI6,Q63532               |
| 11951 | 2,3,4,6,7,8<br>,20,21 | 1,5,18,19,<br>22,23,24,2<br>5,26 | 11 | P00731,P01836,P02631,P02761,P16086,P20762,P42854,P62804,Q64057,Q7TPB1,Q9QZQ5        |
| 11952 | 2,3,4,6,7,8<br>,20,22 | 1,5,18,19,<br>21,23,24,2<br>5,26 | 8  | D3ZUK3,P02631,P16086,P20762,P20766,Q63617,Q7TPB1,Q9QZQ5                             |
| 11953 | 2,3,4,6,7,8<br>,20,23 | 1,5,18,19,<br>21,22,24,2<br>5,26 | 6  | D3ZUK3,P02631,P16086,P20762,Q5XI22,Q63617                                           |
| 11954 | 2,3,4,6,7,8<br>,20,24 | 1,5,18,19,<br>21,22,23,2<br>5,26 | 5  | P02631,P16086,P20762,Q63617,Q9QZQ5                                                  |
| 11955 | 2,3,4,6,7,8<br>,20,25 | 1,5,18,19,<br>21,22,23,2<br>4,26 | 8  | P02631,P12020,P16086,P20762,P20766,P35280,Q63617,Q9QZQ5                             |
| 11956 | 2,3,4,6,7,8<br>,20,26 | 1,5,18,19,<br>21,22,23,2<br>4,25 | 12 | P01041,P01836,P02631,P20760,P20761,P20762,P20766,P35280,P62804,P83748,Q5QE79,Q6AYQ8 |
| 11957 | 2,3,4,6,7,8<br>,21,22 | 1,5,18,19,<br>20,23,24,2<br>5,26 | 10 | D3ZUK3,O54800;Q5DWV2,P01836,P02631,P16086,P20762,P20766,P42854,Q7TPB1,Q80WL1        |
| 11958 | 2,3,4,6,7,8<br>,21,23 | 1,5,18,19,<br>20,22,24,2<br>5,26 | 9  | P02631,P16086,P20762,P25236,P42854,Q5XI22,Q64057,Q80WL1,Q99041                      |

|       |                        |                                  |    |                                                                                                                                             |
|-------|------------------------|----------------------------------|----|---------------------------------------------------------------------------------------------------------------------------------------------|
| 11959 | 2,3,4,6,7,8<br>,21,24  | 1,5,18,19,<br>20,22,23,2<br>5,26 | 6  | D3ZHA0,P01836,P02631,P02761,P16086,P20762                                                                                                   |
| 11960 | 2,3,4,6,7,8<br>,21,25  | 1,5,18,19,<br>20,22,23,2<br>4,26 | 16 | O54800;Q5DWV2,P00731,P02631,P09605;P25809,P12020,P16086,P20646,P20762,P42854,P47967,Q64057,Q6IFU7,Q6P6R2,Q80WL1,Q9WTT6,Q9Z0V6               |
| 11961 | 2,3,4,6,7,8<br>,21,26  | 1,5,18,19,<br>20,22,23,2<br>4,25 | 19 | O54800;Q5DWV2,P01041,P01836,P02631,P02761,P11883,P16086,P19223,P20760,P20761,P20762,P20766,P25236,P42854,P83748,Q00715,Q5QE79,Q64057,Q80WL1 |
| 11962 | 2,3,4,6,7,8<br>,22,23  | 1,5,18,19,<br>20,21,24,2<br>5,26 | 7  | D3ZUK3,P02631,P16086,P20762,P20766,Q63617,Q80WL1                                                                                            |
| 11963 | 2,3,4,6,7,8<br>,22,24  | 1,5,18,19,<br>20,21,23,2<br>5,26 | 4  | P02631,P08010,P16086,P20766                                                                                                                 |
| 11964 | 2,3,4,6,7,8<br>,22,25  | 1,5,18,19,<br>20,21,23,2<br>4,26 | 10 | D3ZUK3,P02631,P06911,P12020,P16086,P20766,Q4FZU6,Q5GRG2,Q80WL1,Q9QZQ5                                                                       |
| 11965 | 2,3,4,6,7,8<br>,22,26  | 1,5,18,19,<br>20,21,23,2<br>4,25 | 8  | D3ZUK3,P20760,P20761,P20762,P20766,P83748,Q5QE79,Q80WL1                                                                                     |
| 11966 | 2,3,4,6,7,8<br>,23,24  | 1,5,18,19,<br>20,21,22,2<br>5,26 | 6  | P02631,P16086,P20762,Q5XI22,Q63617,Q63751                                                                                                   |
| 11967 | 2,3,4,6,7,8<br>,23,25  | 1,5,18,19,<br>20,21,22,2<br>4,26 | 14 | P02631,P06911,P12020,P16086,P20762,P20766,P36374,P50280,Q5GRG2,Q63751,Q64057,Q6P6R2,Q99041,Q9Z0V6                                           |
| 11968 | 2,3,4,6,7,8<br>,23,26  | 1,5,18,19,<br>20,21,22,2<br>4,25 | 10 | D3ZUK3,P02631,P10959,P16086,P20760,P20761,P20762,P20766,Q5QE79,Q6AYQ8                                                                       |
| 11969 | 2,3,4,6,7,8<br>,24,25  | 1,5,18,19,<br>20,21,22,2<br>3,26 | 4  | P02631,P12020,P20766,Q4FZU6                                                                                                                 |
| 11970 | 2,3,4,6,7,8<br>,24,26  | 1,5,18,19,<br>20,21,22,2<br>3,25 | 9  | D3ZHA0,P01836,P02631,P10959,P20760,P20761,P20762,P20766,Q6AYQ8                                                                              |
| 11971 | 2,3,4,6,7,8<br>,25,26  | 1,5,18,19,<br>20,21,22,2<br>3,24 | 12 | P00774,P02631,P12020,P19223,P20761,P20762,P20766,P35280,P83748,Q5QE79,Q6AYQ8,Q9Z0V6                                                         |
| 11972 | 2,3,4,6,7,1<br>8,19,20 | 1,5,8,21,2<br>2,23,24,25<br>,26  | 7  | P00731,P02631,P16086,P35280,Q63532,Q6IE51,Q9QZQ5                                                                                            |
| 11973 | 2,3,4,6,7,1<br>8,19,21 | 1,5,8,20,2<br>2,23,24,25<br>,26  | 8  | P00731,P02631,P05964,P16086,P25031,P42854,Q63532,Q9QZQ5                                                                                     |

|       |                        |                                 |    |                                                                                     |
|-------|------------------------|---------------------------------|----|-------------------------------------------------------------------------------------|
| 11974 | 2,3,4,6,7,1<br>8,19,22 | 1,5,8,20,2<br>1,23,24,25<br>,26 | 5  | P02625,P02631,P16086,Q63532,Q9QZQ5                                                  |
| 11975 | 2,3,4,6,7,1<br>8,19,23 | 1,5,8,20,2<br>1,22,24,25<br>,26 | 10 | P02625,P02631,P05964,P12785,P16086,Q498D9,Q5XI22,Q63532,Q6IE51,Q99MH3               |
| 11976 | 2,3,4,6,7,1<br>8,19,24 | 1,5,8,20,2<br>1,22,23,25<br>,26 | 5  | P02631,P16086,Q63532,Q6IE51,Q9QZQ5                                                  |
| 11977 | 2,3,4,6,7,1<br>8,19,25 | 1,5,8,20,2<br>1,22,23,24<br>,26 | 11 | P00731,P02631,P14173,P16086,P35280,P47967,P98089,Q4FZU6,Q63532,Q6IE51,Q9QZQ5        |
| 11978 | 2,3,4,6,7,1<br>8,19,26 | 1,5,8,20,2<br>1,22,23,24<br>,25 | 12 | P00774,P02631,P06760,P16086,P20761,P25031,P35280,P83748,Q5FVI6,Q63532,Q6IE51,Q99PP0 |
| 11979 | 2,3,4,6,7,1<br>8,20,21 | 1,5,8,19,2<br>2,23,24,25<br>,26 | 8  | P00731,P01835,P01836,P02631,P16086,P25031,P42854,Q7TPB1                             |
| 11980 | 2,3,4,6,7,1<br>8,20,22 | 1,5,8,19,2<br>1,23,24,25<br>,26 | 3  | P02631,P16086,Q9QZQ5                                                                |
| 11981 | 2,3,4,6,7,1<br>8,20,23 | 1,5,8,19,2<br>1,22,24,25<br>,26 | 7  | A2RUV9,P02631,P12785,P16086,P20762,Q498D9,Q5XI22                                    |
| 11982 | 2,3,4,6,7,1<br>8,20,24 | 1,5,8,19,2<br>1,22,23,25<br>,26 | 2  | P01836,P02631                                                                       |
| 11983 | 2,3,4,6,7,1<br>8,20,25 | 1,5,8,19,2<br>1,22,23,24<br>,26 | 4  | P02631,P25031,P35280,P98089                                                         |
| 11984 | 2,3,4,6,7,1<br>8,20,26 | 1,5,8,19,2<br>1,22,23,24<br>,25 | 9  | P00774,P01041,P01836,P06760,P20761,P20762,P25031,P35280,P83748                      |
| 11985 | 2,3,4,6,7,1<br>8,21,22 | 1,5,8,19,2<br>0,23,24,25<br>,26 | 6  | P01836,P16086,P25031,P42854,Q7TPB1,Q80WL1                                           |
| 11986 | 2,3,4,6,7,1<br>8,21,23 | 1,5,8,19,2<br>0,22,24,25<br>,26 | 8  | P00774,P02631,P12785,P16086,P25031,P25236,P42854,Q5XI22                             |
| 11987 | 2,3,4,6,7,1<br>8,21,24 | 1,5,8,19,2<br>0,22,23,25<br>,26 | 6  | P00774,P01836,P02631,P16086,P25031,P42854                                           |
| 11988 | 2,3,4,6,7,1<br>8,21,25 | 1,5,8,19,2<br>0,22,23,24<br>,26 | 11 | O54728,P00731,P00774,P02631,P09605,P25809,P16086,P25031,P31430,P42854,P47967,P98089 |

|       |                        |                                 |    |                                                                              |
|-------|------------------------|---------------------------------|----|------------------------------------------------------------------------------|
| 11989 | 2,3,4,6,7,1<br>8,21,26 | 1,5,8,19,2<br>0,22,23,24<br>,25 | 9  | O54800;Q5DWV2,P00774,P01041,P01836,P20761,P25031,P25236,P42854,P83748        |
| 11990 | 2,3,4,6,7,1<br>8,22,23 | 1,5,8,19,2<br>0,21,24,25<br>,26 | 6  | G3V686,P02625,P02631,P12785,P16086,Q5XI22                                    |
| 11991 | 2,3,4,6,7,1<br>8,22,24 | 1,5,8,19,2<br>0,21,23,25<br>,26 | 1  | P02631                                                                       |
| 11992 | 2,3,4,6,7,1<br>8,22,25 | 1,5,8,19,2<br>0,21,23,24<br>,26 | 2  | P98089,Q4FZU6                                                                |
| 11993 | 2,3,4,6,7,1<br>8,22,26 | 1,5,8,19,2<br>0,21,23,24<br>,25 | 5  | P00774,P01836,P06760,P20761,P83748                                           |
| 11994 | 2,3,4,6,7,1<br>8,23,24 | 1,5,8,19,2<br>0,21,22,25<br>,26 | 5  | P02631,P12785,P16086,P34901,Q5XI22                                           |
| 11995 | 2,3,4,6,7,1<br>8,23,25 | 1,5,8,19,2<br>0,21,22,24<br>,26 | 10 | P00714,P00774,P02631,P12020,P12785,P16086,P98089,Q5XI22,Q63751,Q99MH3        |
| 11996 | 2,3,4,6,7,1<br>8,23,26 | 1,5,8,19,2<br>0,21,22,24<br>,25 | 11 | A2RUV9,P00774,P02631,P12785,P16086,P20761,P20762,P25031,P35467,Q4FZU2,Q5XI22 |
| 11997 | 2,3,4,6,7,1<br>8,24,25 | 1,5,8,19,2<br>0,21,22,23<br>,26 | 4  | P00774,P02631,P98089,Q4FZU6                                                  |
| 11998 | 2,3,4,6,7,1<br>8,24,26 | 1,5,8,19,2<br>0,21,22,23<br>,25 | 5  | P00774,P01836,P20760,P20761,P83748                                           |
| 11999 | 2,3,4,6,7,1<br>8,25,26 | 1,5,8,19,2<br>0,21,22,23<br>,24 | 8  | P00714,P00774,P20761,P25031,P35280,P55091,P83748,P98089                      |
| 12000 | 2,3,4,6,7,1<br>9,20,21 | 1,5,8,18,2<br>2,23,24,25<br>,26 | 7  | P00731,P01836,P02631,P16086,P42854,Q63532,Q7TPB1                             |
| 12001 | 2,3,4,6,7,1<br>9,20,22 | 1,5,8,18,2<br>1,23,24,25<br>,26 | 8  | P02631,P16086,Q62997,Q63532,Q6IFV1,Q6P6Q2,Q7TPB1,Q9QZQ5                      |
| 12002 | 2,3,4,6,7,1<br>9,20,23 | 1,5,8,18,2<br>1,22,24,25<br>,26 | 4  | P02631,P16086,Q63532,Q6IE51                                                  |
| 12003 | 2,3,4,6,7,1<br>9,20,24 | 1,5,8,18,2<br>1,22,23,25<br>,26 | 4  | P02631,P16086,Q63532,Q6P6Q2                                                  |

|       |                        |                                 |    |                                                                                     |
|-------|------------------------|---------------------------------|----|-------------------------------------------------------------------------------------|
| 12004 | 2,3,4,6,7,1<br>9,20,25 | 1,5,8,18,2<br>1,22,23,24<br>,26 | 7  | P02631,P16086,P35280,P47967,Q63532,Q6IFV1,Q9QZQ5                                    |
| 12005 | 2,3,4,6,7,1<br>9,20,26 | 1,5,8,18,2<br>1,22,23,24<br>,25 | 7  | P01836,P16086,P20761,P35280,Q5FVI6,Q63532,Q99PP0                                    |
| 12006 | 2,3,4,6,7,1<br>9,21,22 | 1,5,8,18,2<br>0,23,24,25<br>,26 | 7  | P02631,P16086,P42854,Q63532,Q6IG02,Q6P6Q2,Q7TPB1                                    |
| 12007 | 2,3,4,6,7,1<br>9,21,23 | 1,5,8,18,2<br>0,22,24,25<br>,26 | 5  | P02631,P16086,P25236,Q63532,Q6IE51                                                  |
| 12008 | 2,3,4,6,7,1<br>9,21,24 | 1,5,8,18,2<br>0,22,23,25<br>,26 | 5  | P01836,P02631,P16086,Q63532,Q6IG02                                                  |
| 12009 | 2,3,4,6,7,1<br>9,21,25 | 1,5,8,18,2<br>0,22,23,24<br>,26 | 10 | P00731,P02631,P09605,P25809,P16086,P47967,P97840,Q4FZU6,Q63532,Q6IG02,Q8CIZ5        |
| 12010 | 2,3,4,6,7,1<br>9,21,26 | 1,5,8,18,2<br>0,22,23,24<br>,25 | 7  | P01836,P16086,P20761,P25236,P83748,Q5FVI6,Q63532                                    |
| 12011 | 2,3,4,6,7,1<br>9,22,23 | 1,5,8,18,2<br>0,21,24,25<br>,26 | 4  | P02625,P02631,P16086,Q63532                                                         |
| 12012 | 2,3,4,6,7,1<br>9,22,24 | 1,5,8,18,2<br>0,21,23,25<br>,26 | 5  | P02631,P16086,Q63532,Q6IG02,Q6P6Q2                                                  |
| 12013 | 2,3,4,6,7,1<br>9,22,25 | 1,5,8,18,2<br>0,21,23,24<br>,26 | 12 | P02631,P06911,P12020,P16086,P47967,P97840,Q4FZU6,Q63532,Q6IFV1,Q6IG02,Q6P6Q2,Q9QZQ5 |
| 12014 | 2,3,4,6,7,1<br>9,22,26 | 1,5,8,18,2<br>0,21,23,24<br>,25 | 4  | P16086,P20761,P83748,Q63532                                                         |
| 12015 | 2,3,4,6,7,1<br>9,23,24 | 1,5,8,18,2<br>0,21,22,25<br>,26 | 4  | P02631,P16086,Q63532,Q6IE51                                                         |
| 12016 | 2,3,4,6,7,1<br>9,23,25 | 1,5,8,18,2<br>0,21,22,24<br>,26 | 8  | P02631,P12020,P16086,P50280,Q4FZU6,Q63532,Q6IE51,Q99041                             |
| 12017 | 2,3,4,6,7,1<br>9,23,26 | 1,5,8,18,2<br>0,21,22,24<br>,25 | 6  | P02631,P16086,P20761,Q5FVI6,Q63532,Q6IE51                                           |
| 12018 | 2,3,4,6,7,1<br>9,24,25 | 1,5,8,18,2<br>0,21,22,23<br>,26 | 7  | P02631,P16086,Q4FZU6,Q63532,Q6IFV1,Q6IG02,Q6P6Q2                                    |

|       |                        |                                 |   |                                                         |
|-------|------------------------|---------------------------------|---|---------------------------------------------------------|
| 12019 | 2,3,4,6,7,1<br>9,24,26 | 1,5,8,18,2<br>0,21,22,23<br>,25 | 6 | P01836,P02631,P14480,P20760,P20761,Q63532               |
| 12020 | 2,3,4,6,7,1<br>9,25,26 | 1,5,8,18,2<br>0,21,22,23<br>,24 | 6 | P14480,P16086,P20761,P35280,Q5FVI6,Q63532               |
| 12021 | 2,3,4,6,7,2<br>0,21,22 | 1,5,8,18,1<br>9,23,24,25<br>,26 | 5 | P01836,P09605,P25809,P16086,P42854,Q7TPB1               |
| 12022 | 2,3,4,6,7,2<br>0,21,23 | 1,5,8,18,1<br>9,22,24,25<br>,26 | 7 | P01835,P01836,P02631,P16086,P20762,P25236,P42854        |
| 12023 | 2,3,4,6,7,2<br>0,21,24 | 1,5,8,18,1<br>9,22,23,25<br>,26 | 2 | P01836,P42854                                           |
| 12024 | 2,3,4,6,7,2<br>0,21,25 | 1,5,8,18,1<br>9,22,23,24<br>,26 | 4 | P01836,P09605,P25809,P42854,P47967                      |
| 12025 | 2,3,4,6,7,2<br>0,21,26 | 1,5,8,18,1<br>9,22,23,24<br>,25 | 8 | P01041,P01835,P01836,P20761,P20762,P25236,P42854,P83748 |
| 12026 | 2,3,4,6,7,2<br>0,22,23 | 1,5,8,18,1<br>9,21,24,25<br>,26 | 4 | G3V686,P02631,P16086,Q62997                             |
| 12027 | 2,3,4,6,7,2<br>0,22,24 | 1,5,8,18,1<br>9,21,23,25<br>,26 | 3 | P01836,P08010,Q6P6Q2                                    |
| 12028 | 2,3,4,6,7,2<br>0,22,25 | 1,5,8,18,1<br>9,21,23,24<br>,26 | 3 | P12020,Q03191,Q6IFV1                                    |
| 12029 | 2,3,4,6,7,2<br>0,22,26 | 1,5,8,18,1<br>9,21,23,24<br>,25 | 6 | P01041,P01836,P05539,P20760,P20761,Q62997               |
| 12030 | 2,3,4,6,7,2<br>0,23,24 | 1,5,8,18,1<br>9,21,22,25<br>,26 | 2 | P02631,P16086                                           |
| 12031 | 2,3,4,6,7,2<br>0,23,25 | 1,5,8,18,1<br>9,21,22,24<br>,26 | 3 | P02631,P12020,P16086                                    |
| 12032 | 2,3,4,6,7,2<br>0,23,26 | 1,5,8,18,1<br>9,21,22,24<br>,25 | 7 | A2RUV9,P01836,P16086,P20760,P20761,P20762,P36376        |
| 12033 | 2,3,4,6,7,2<br>0,24,25 | 1,5,8,18,1<br>9,21,22,23<br>,26 | 1 | P01836                                                  |



|       |                        |                                 |    |                                                                                     |
|-------|------------------------|---------------------------------|----|-------------------------------------------------------------------------------------|
| 12034 | 2,3,4,6,7,2<br>0,24,26 | 1,5,8,18,1<br>9,21,22,23<br>,25 | 4  | P01041,P01836,P20760,P20761                                                         |
| 12035 | 2,3,4,6,7,2<br>0,25,26 | 1,5,8,18,1<br>9,21,22,23<br>,24 | 3  | P01836,P20761,P35280                                                                |
| 12036 | 2,3,4,6,7,2<br>1,22,23 | 1,5,8,18,1<br>9,20,24,25<br>,26 | 3  | P01836,P16086,P25236                                                                |
| 12037 | 2,3,4,6,7,2<br>1,22,24 | 1,5,8,18,1<br>9,20,23,25<br>,26 | 3  | P01836,P16086,Q6IG02                                                                |
| 12038 | 2,3,4,6,7,2<br>1,22,25 | 1,5,8,18,1<br>9,20,23,24<br>,26 | 7  | P01836,P09605,P25809,P12020,P16086,P47967,Q4FZU6,Q6IG02                             |
| 12039 | 2,3,4,6,7,2<br>1,22,26 | 1,5,8,18,1<br>9,20,23,24<br>,25 | 6  | P01836,P20761,P25236,P63036,P83748,Q80WL1                                           |
| 12040 | 2,3,4,6,7,2<br>1,23,24 | 1,5,8,18,1<br>9,20,22,25<br>,26 | 6  | P01836,P02631,P16086,P25236,P34901,Q63751                                           |
| 12041 | 2,3,4,6,7,2<br>1,23,25 | 1,5,8,18,1<br>9,20,22,24<br>,26 | 7  | P02631,P09605,P25809,P12020,P16086,P25236,Q63751,Q6P6R2                             |
| 12042 | 2,3,4,6,7,2<br>1,23,26 | 1,5,8,18,1<br>9,20,22,24<br>,25 | 6  | P01836,P16086,P20761,P20762,P25236,P83748                                           |
| 12043 | 2,3,4,6,7,2<br>1,24,25 | 1,5,8,18,1<br>9,20,22,23<br>,26 | 5  | P01836,P09605,P25809,Q4FZU6,Q6IG02,Q6P6R2                                           |
| 12044 | 2,3,4,6,7,2<br>1,24,26 | 1,5,8,18,1<br>9,20,22,23<br>,25 | 5  | P01836,P20760,P20761,P25236,P83748                                                  |
| 12045 | 2,3,4,6,7,2<br>1,25,26 | 1,5,8,18,1<br>9,20,22,23<br>,24 | 10 | O54800;Q5DWV2,P00774,P01836,P09605;P25809,P11883,P19223,P20761,P25236,P83748,Q9QZK9 |
| 12046 | 2,3,4,6,7,2<br>2,23,24 | 1,5,8,18,1<br>9,20,21,25<br>,26 | 4  | G3V686,P02631,P16086,P34901                                                         |
| 12047 | 2,3,4,6,7,2<br>2,23,25 | 1,5,8,18,1<br>9,20,21,24<br>,26 | 7  | G3V686,P06911,P12020,P16086,Q4FZU6,Q5GRG2,Q63751                                    |
| 12048 | 2,3,4,6,7,2<br>2,23,26 | 1,5,8,18,1<br>9,20,21,24<br>,25 | 6  | G3V686,P16086,P20760,P20761,P20762,P36376                                           |

|       |                        |                                 |   |                                                                |
|-------|------------------------|---------------------------------|---|----------------------------------------------------------------|
| 12049 | 2,3,4,6,7,2<br>2,24,25 | 1,5,8,18,1<br>9,20,21,23<br>,26 | 5 | P12020,Q4FZU6,Q6IFV1,Q6IG02,Q6P6Q2                             |
| 12050 | 2,3,4,6,7,2<br>2,24,26 | 1,5,8,18,1<br>9,20,21,23<br>,25 | 4 | P01836,P08010,P20760,P20761                                    |
| 12051 | 2,3,4,6,7,2<br>2,25,26 | 1,5,8,18,1<br>9,20,21,23<br>,24 | 4 | P01836,P12020,P20761,P20766                                    |
| 12052 | 2,3,4,6,7,2<br>3,24,25 | 1,5,8,18,1<br>9,20,21,22<br>,26 | 6 | P02631,P12020,P36374,Q4FZU6,Q63751,Q6P6R2                      |
| 12053 | 2,3,4,6,7,2<br>3,24,26 | 1,5,8,18,1<br>9,20,21,22<br>,25 | 3 | P01836,P20760,P20761                                           |
| 12054 | 2,3,4,6,7,2<br>3,25,26 | 1,5,8,18,1<br>9,20,21,22<br>,24 | 5 | P00774,P12020,P20761,P36376,P83121                             |
| 12055 | 2,3,4,6,7,2<br>4,25,26 | 1,5,8,18,1<br>9,20,21,22<br>,23 | 4 | P01836,P14480,P20760,P20761                                    |
| 12056 | 2,3,4,6,8,1<br>8,19,20 | 1,5,7,21,2<br>2,23,24,25<br>,26 | 5 | P00731,P22006,P35280,P62804,Q63355                             |
| 12057 | 2,3,4,6,8,1<br>8,19,21 | 1,5,7,20,2<br>2,23,24,25<br>,26 | 2 | P00731,Q80WL1                                                  |
| 12058 | 2,3,4,6,8,1<br>8,19,22 | 1,5,7,20,2<br>1,23,24,25<br>,26 | 3 | P02625,P20766,P22006                                           |
| 12059 | 2,3,4,6,8,1<br>8,19,23 | 1,5,7,20,2<br>1,22,24,25<br>,26 | 9 | P02625,P12785,P22006,P35467,Q498D9,Q5BJY9,Q5XI22,Q6AY61,Q99MH3 |
| 12060 | 2,3,4,6,8,1<br>8,19,24 | 1,5,7,20,2<br>1,22,23,25<br>,26 | 0 |                                                                |
| 12061 | 2,3,4,6,8,1<br>8,19,25 | 1,5,7,20,2<br>1,22,23,24<br>,26 | 6 | P00731,P14173,P35280,P98089,Q4FZU6,Q62635                      |
| 12062 | 2,3,4,6,8,1<br>8,19,26 | 1,5,7,20,2<br>1,22,23,24<br>,25 | 7 | P00774,P10959,P20761,P20766,P35280,Q63355,Q63942               |
| 12063 | 2,3,4,6,8,1<br>8,20,21 | 1,5,7,19,2<br>2,23,24,25<br>,26 | 9 | P00731,P01835,P02761,P17046,P25031,P25236,P62804,Q00715,Q7TPB1 |

|       |                        |                                 |    |                                                                                     |
|-------|------------------------|---------------------------------|----|-------------------------------------------------------------------------------------|
| 12064 | 2,3,4,6,8,1<br>8,20,22 | 1,5,7,19,2<br>1,23,24,25<br>,26 | 2  | P20766,P22006                                                                       |
| 12065 | 2,3,4,6,8,1<br>8,20,23 | 1,5,7,19,2<br>1,22,24,25<br>,26 | 8  | P12785,P17046,P20762,P22006,P35467,Q498D9,Q5XI22,Q6TMA8                             |
| 12066 | 2,3,4,6,8,1<br>8,20,24 | 1,5,7,19,2<br>1,22,23,25<br>,26 | 1  | P17046                                                                              |
| 12067 | 2,3,4,6,8,1<br>8,20,25 | 1,5,7,19,2<br>1,22,23,24<br>,26 | 2  | P35280,P98089                                                                       |
| 12068 | 2,3,4,6,8,1<br>8,20,26 | 1,5,7,19,2<br>1,22,23,24<br>,25 | 8  | P00774,P17046,P20761,P20762,P35280,P62804,Q5QE79,Q63355                             |
| 12069 | 2,3,4,6,8,1<br>8,21,22 | 1,5,7,19,2<br>0,23,24,25<br>,26 | 3  | P20766,Q7TPB1,Q80WL1                                                                |
| 12070 | 2,3,4,6,8,1<br>8,21,23 | 1,5,7,19,2<br>0,22,24,25<br>,26 | 7  | P00774,P12785,P25236,Q5XI22,Q6AY61,Q6TMA8,Q80WL1                                    |
| 12071 | 2,3,4,6,8,1<br>8,21,24 | 1,5,7,19,2<br>0,22,23,25<br>,26 | 3  | P00774,P02761,P98089                                                                |
| 12072 | 2,3,4,6,8,1<br>8,21,25 | 1,5,7,19,2<br>0,22,23,24<br>,26 | 12 | O54728,P00731,P00774,P25031,P25236,P31430,P98089,Q4FZU6,Q6P6R2,Q80WL1,Q9WTT6,Q9Z0V6 |
| 12073 | 2,3,4,6,8,1<br>8,21,26 | 1,5,7,19,2<br>0,22,23,24<br>,25 | 10 | P00774,P02761,P17046,P20761,P25031,P25236,P98089,Q00715,Q5QE79,Q80WL1               |
| 12074 | 2,3,4,6,8,1<br>8,22,23 | 1,5,7,19,2<br>0,21,24,25<br>,26 | 4  | P02625,P20766,P22006,Q5XI22                                                         |
| 12075 | 2,3,4,6,8,1<br>8,22,24 | 1,5,7,19,2<br>0,21,23,25<br>,26 | 1  | P20766                                                                              |
| 12076 | 2,3,4,6,8,1<br>8,22,25 | 1,5,7,19,2<br>0,21,23,24<br>,26 | 3  | P20766,P98089,Q4FZU6                                                                |
| 12077 | 2,3,4,6,8,1<br>8,22,26 | 1,5,7,19,2<br>0,21,23,24<br>,25 | 5  | P00774,P20761,P20766,Q5QE79,Q80WL1                                                  |
| 12078 | 2,3,4,6,8,1<br>8,23,24 | 1,5,7,19,2<br>0,21,22,25<br>,26 | 2  | P12785,Q5XI22                                                                       |

|       |                        |                                 |    |                                                                                                          |
|-------|------------------------|---------------------------------|----|----------------------------------------------------------------------------------------------------------|
| 12079 | 2,3,4,6,8,1<br>8,23,25 | 1,5,7,19,2<br>0,21,22,24<br>,26 | 10 | P00714,P00774,P12785,P20766,P98089,Q4FZU6,Q5XI22,Q6P6R2,Q99MH3,Q9Z0V6                                    |
| 12080 | 2,3,4,6,8,1<br>8,23,26 | 1,5,7,19,2<br>0,21,22,24<br>,25 | 15 | P00774,P10959,P12785,P17046,P20761,P20762,P20766,P35467,Q4FZU2,Q5QE79,Q5XI22,Q63942,Q6AY61,Q6IFU8,Q6P6Q2 |
| 12081 | 2,3,4,6,8,1<br>8,24,25 | 1,5,7,19,2<br>0,21,22,23<br>,26 | 3  | P00774,P98089,Q4FZU6                                                                                     |
| 12082 | 2,3,4,6,8,1<br>8,24,26 | 1,5,7,19,2<br>0,21,22,23<br>,25 | 5  | P00774,P10959,P17046,P20761,Q5QE79                                                                       |
| 12083 | 2,3,4,6,8,1<br>8,25,26 | 1,5,7,19,2<br>0,21,22,23<br>,24 | 8  | P00714,P00774,P20761,P20766,P35280,P55091,P98089,Q5QE79                                                  |
| 12084 | 2,3,4,6,8,1<br>9,20,21 | 1,5,7,18,2<br>2,23,24,25<br>,26 | 6  | P00731,P02761,P25236,P62804,Q00715,Q7TPB1                                                                |
| 12085 | 2,3,4,6,8,1<br>9,20,22 | 1,5,7,18,2<br>1,23,24,25<br>,26 | 4  | P20766,P22006,Q62997,Q7TPB1                                                                              |
| 12086 | 2,3,4,6,8,1<br>9,20,23 | 1,5,7,18,2<br>1,22,24,25<br>,26 | 2  | P22006,Q5XI22                                                                                            |
| 12087 | 2,3,4,6,8,1<br>9,20,24 | 1,5,7,18,2<br>1,22,23,25<br>,26 | 0  |                                                                                                          |
| 12088 | 2,3,4,6,8,1<br>9,20,25 | 1,5,7,18,2<br>1,22,23,24<br>,26 | 2  | P35280,Q9QUL6                                                                                            |
| 12089 | 2,3,4,6,8,1<br>9,20,26 | 1,5,7,18,2<br>1,22,23,24<br>,25 | 4  | P20761,P35280,P62804,Q63355                                                                              |
| 12090 | 2,3,4,6,8,1<br>9,21,22 | 1,5,7,18,2<br>0,23,24,25<br>,26 | 3  | P20766,Q7TPB1,Q80WL1                                                                                     |
| 12091 | 2,3,4,6,8,1<br>9,21,23 | 1,5,7,18,2<br>0,22,24,25<br>,26 | 3  | P00762,P25236,Q5XI22                                                                                     |
| 12092 | 2,3,4,6,8,1<br>9,21,24 | 1,5,7,18,2<br>0,22,23,25<br>,26 | 1  | P02761                                                                                                   |
| 12093 | 2,3,4,6,8,1<br>9,21,25 | 1,5,7,18,2<br>0,22,23,24<br>,26 | 9  | P00731,P25236,P47967,Q4FZU6,Q6P6R2,Q8CIZ5,Q9QUL6,Q9WTT6,Q9Z0V6                                           |

|       |                        |                                 |   |                                                  |
|-------|------------------------|---------------------------------|---|--------------------------------------------------|
| 12094 | 2,3,4,6,8,1<br>9,21,26 | 1,5,7,18,2<br>0,22,23,24<br>,25 | 6 | P02761,P20761,P25236,Q00715,Q5QE79,Q80WL1        |
| 12095 | 2,3,4,6,8,1<br>9,22,23 | 1,5,7,18,2<br>0,21,24,25<br>,26 | 3 | P02625,P20766,P50280                             |
| 12096 | 2,3,4,6,8,1<br>9,22,24 | 1,5,7,18,2<br>0,21,23,25<br>,26 | 1 | P20766                                           |
| 12097 | 2,3,4,6,8,1<br>9,22,25 | 1,5,7,18,2<br>0,21,23,24<br>,26 | 3 | P20766,Q4FZU6,Q9QUL6                             |
| 12098 | 2,3,4,6,8,1<br>9,22,26 | 1,5,7,18,2<br>0,21,23,24<br>,25 | 2 | P20761,P20766                                    |
| 12099 | 2,3,4,6,8,1<br>9,23,24 | 1,5,7,18,2<br>0,21,22,25<br>,26 | 0 |                                                  |
| 12100 | 2,3,4,6,8,1<br>9,23,25 | 1,5,7,18,2<br>0,21,22,24<br>,26 | 7 | P20766,P50280,Q4FZU6,Q6P6R2,Q99041,Q9QUL6,Q9Z0V6 |
| 12101 | 2,3,4,6,8,1<br>9,23,26 | 1,5,7,18,2<br>0,21,22,24<br>,25 | 3 | P20761,P20766,P35467                             |
| 12102 | 2,3,4,6,8,1<br>9,24,25 | 1,5,7,18,2<br>0,21,22,23<br>,26 | 2 | Q4FZU6,Q9QUL6                                    |
| 12103 | 2,3,4,6,8,1<br>9,24,26 | 1,5,7,18,2<br>0,21,22,23<br>,25 | 1 | P20761                                           |
| 12104 | 2,3,4,6,8,1<br>9,25,26 | 1,5,7,18,2<br>0,21,22,23<br>,24 | 4 | P20761,P20766,P35280,Q4FZU6                      |
| 12105 | 2,3,4,6,8,2<br>0,21,22 | 1,5,7,18,1<br>9,23,24,25<br>,26 | 4 | P62804,Q03191,Q7TPB1,Q80WL1                      |
| 12106 | 2,3,4,6,8,2<br>0,21,23 | 1,5,7,18,1<br>9,22,24,25<br>,26 | 6 | P01835,P20762,P25236,P62804,Q5XI22,Q6TMA8        |
| 12107 | 2,3,4,6,8,2<br>0,21,24 | 1,5,7,18,1<br>9,22,23,25<br>,26 | 2 | P02761,P62804                                    |
| 12108 | 2,3,4,6,8,2<br>0,21,25 | 1,5,7,18,1<br>9,22,23,24<br>,26 | 5 | P25236,P62804,Q6P6R2,Q9WTT6,Q9Z0V6               |

|       |                        |                                 |   |                                                                |
|-------|------------------------|---------------------------------|---|----------------------------------------------------------------|
| 12109 | 2,3,4,6,8,2<br>0,21,26 | 1,5,7,18,1<br>9,22,23,24<br>,25 | 9 | P01835,P02761,P17046,P20761,P20762,P25236,P62804,Q00715,Q5QE79 |
| 12110 | 2,3,4,6,8,2<br>0,22,23 | 1,5,7,18,1<br>9,21,24,25<br>,26 | 3 | P20766,P22006,Q62997                                           |
| 12111 | 2,3,4,6,8,2<br>0,22,24 | 1,5,7,18,1<br>9,21,23,25<br>,26 | 1 | P20766                                                         |
| 12112 | 2,3,4,6,8,2<br>0,22,25 | 1,5,7,18,1<br>9,21,23,24<br>,26 | 2 | P20766,Q03191                                                  |
| 12113 | 2,3,4,6,8,2<br>0,22,26 | 1,5,7,18,1<br>9,21,23,24<br>,25 | 5 | P20761,P20762,P20766,Q5QE79,Q62997                             |
| 12114 | 2,3,4,6,8,2<br>0,23,24 | 1,5,7,18,1<br>9,21,22,25<br>,26 | 2 | P82995,P97840                                                  |
| 12115 | 2,3,4,6,8,2<br>0,23,25 | 1,5,7,18,1<br>9,21,22,24<br>,26 | 2 | Q6P6R2,Q9Z0V6                                                  |
| 12116 | 2,3,4,6,8,2<br>0,23,26 | 1,5,7,18,1<br>9,21,22,24<br>,25 | 7 | P17046,P19218,P20761,P20762,P97840,Q5QE79,Q6TMA8               |
| 12117 | 2,3,4,6,8,2<br>0,24,25 | 1,5,7,18,1<br>9,21,22,23<br>,26 | 1 | Q4FZU6                                                         |
| 12118 | 2,3,4,6,8,2<br>0,24,26 | 1,5,7,18,1<br>9,21,22,23<br>,25 | 5 | P17046,P20760,P20761,P97840,Q5QE79                             |
| 12119 | 2,3,4,6,8,2<br>0,25,26 | 1,5,7,18,1<br>9,21,22,23<br>,24 | 4 | P20761,P20766,P35280,Q5QE79                                    |
| 12120 | 2,3,4,6,8,2<br>1,22,23 | 1,5,7,18,1<br>9,20,24,25<br>,26 | 3 | P20766,P25236,Q80WL1                                           |
| 12121 | 2,3,4,6,8,2<br>1,22,24 | 1,5,7,18,1<br>9,20,23,25<br>,26 | 1 | Q80WL1                                                         |
| 12122 | 2,3,4,6,8,2<br>1,22,25 | 1,5,7,18,1<br>9,20,23,24<br>,26 | 6 | P09605,P25809,P20766,Q4FZU6,Q80WL1,Q9WTT6,Q9Z0V6               |
| 12123 | 2,3,4,6,8,2<br>1,22,26 | 1,5,7,18,1<br>9,20,23,24<br>,25 | 7 | P20761,P20766,P25236,P63036,Q00715,Q5QE79,Q80WL1               |

|       |                        |                                 |    |                                                                                     |
|-------|------------------------|---------------------------------|----|-------------------------------------------------------------------------------------|
| 12124 | 2,3,4,6,8,2<br>1,23,24 | 1,5,7,18,1<br>9,20,22,25<br>,26 | 1  | P25236                                                                              |
| 12125 | 2,3,4,6,8,2<br>1,23,25 | 1,5,7,18,1<br>9,20,22,24<br>,26 | 8  | P07150,P25236,P50280,Q4FZU6,Q63751,Q6P6R2,Q9WTT6,Q9Z0V6                             |
| 12126 | 2,3,4,6,8,2<br>1,23,26 | 1,5,7,18,1<br>9,20,22,24<br>,25 | 9  | D4A5U3,P00762,P20761,P20762,P25236,Q00715,Q5QE79,Q80WL1,Q9Z0V6                      |
| 12127 | 2,3,4,6,8,2<br>1,24,25 | 1,5,7,18,1<br>9,20,22,23<br>,26 | 4  | Q4FZU6,Q6P6R2,Q9WTT6,Q9Z0V6                                                         |
| 12128 | 2,3,4,6,8,2<br>1,24,26 | 1,5,7,18,1<br>9,20,22,23<br>,25 | 6  | P02761,P11883,P20761,P25236,Q5QE79,Q9EQV9                                           |
| 12129 | 2,3,4,6,8,2<br>1,25,26 | 1,5,7,18,1<br>9,20,22,23<br>,24 | 12 | P00774,P11883,P19223,P20761,P25236,Q00715,Q5QE79,Q66HD0,Q6P6R2,Q80WL1,Q9WTT6,Q9Z0V6 |
| 12130 | 2,3,4,6,8,2<br>2,23,24 | 1,5,7,18,1<br>9,20,21,25<br>,26 | 1  | P20766                                                                              |
| 12131 | 2,3,4,6,8,2<br>2,23,25 | 1,5,7,18,1<br>9,20,21,24<br>,26 | 5  | P06911,P20766,P50280,Q4FZU6,Q9Z0V6                                                  |
| 12132 | 2,3,4,6,8,2<br>2,23,26 | 1,5,7,18,1<br>9,20,21,24<br>,25 | 5  | D4A5U3,P20761,P20762,P20766,Q5QE79                                                  |
| 12133 | 2,3,4,6,8,2<br>2,24,25 | 1,5,7,18,1<br>9,20,21,23<br>,26 | 3  | P20766,Q4FZU6,Q9QUL6                                                                |
| 12134 | 2,3,4,6,8,2<br>2,24,26 | 1,5,7,18,1<br>9,20,21,23<br>,25 | 4  | P20760,P20761,P20766,Q5QE79                                                         |
| 12135 | 2,3,4,6,8,2<br>2,25,26 | 1,5,7,18,1<br>9,20,21,23<br>,24 | 5  | P20761,P20766,Q4FZU6,Q5QE79,Q9Z0V6                                                  |
| 12136 | 2,3,4,6,8,2<br>3,24,25 | 1,5,7,18,1<br>9,20,21,22<br>,26 | 6  | P36374,P50280,Q4FZU6,Q63751,Q6P6R2,Q9Z0V6                                           |
| 12137 | 2,3,4,6,8,2<br>3,24,26 | 1,5,7,18,1<br>9,20,21,22<br>,25 | 4  | P20760,P20761,P97840,Q5QE79                                                         |
| 12138 | 2,3,4,6,8,2<br>3,25,26 | 1,5,7,18,1<br>9,20,21,22<br>,24 | 8  | D4A5U3,P00774,P20761,P20766,Q5QE79,Q6P6R2,Q9WTT6,Q9Z0V6                             |

|       |                         |                                 |    |                                                                              |
|-------|-------------------------|---------------------------------|----|------------------------------------------------------------------------------|
| 12139 | 2,3,4,6,8,2<br>4,25,26  | 1,5,7,18,1<br>9,20,21,22<br>,23 | 5  | P20761,P20766,Q4FZU6,Q5QE79,Q9Z0V6                                           |
| 12140 | 2,3,4,6,18,<br>19,20,21 | 1,5,7,8,22,<br>23,24,25,2<br>6  | 4  | P00731,P01835,P25031,P25236                                                  |
| 12141 | 2,3,4,6,18,<br>19,20,22 | 1,5,7,8,21,<br>23,24,25,2<br>6  | 2  | P22006,Q62997                                                                |
| 12142 | 2,3,4,6,18,<br>19,20,23 | 1,5,7,8,21,<br>22,24,25,2<br>6  | 5  | P02625,P12785,P22006,Q498D9,Q5XI22                                           |
| 12143 | 2,3,4,6,18,<br>19,20,24 | 1,5,7,8,21,<br>22,23,25,2<br>6  | 0  |                                                                              |
| 12144 | 2,3,4,6,18,<br>19,20,25 | 1,5,7,8,21,<br>22,23,24,2<br>6  | 3  | P35280,P98089,Q4FZU6                                                         |
| 12145 | 2,3,4,6,18,<br>19,20,26 | 1,5,7,8,21,<br>22,23,24,2<br>5  | 3  | P19629,P35280,Q63355                                                         |
| 12146 | 2,3,4,6,18,<br>19,21,22 | 1,5,7,8,20,<br>23,24,25,2<br>6  | 2  | P02625,P10715                                                                |
| 12147 | 2,3,4,6,18,<br>19,21,23 | 1,5,7,8,20,<br>22,24,25,2<br>6  | 7  | P00762,P02625,P10715,P12785,P25236,Q5XI22,Q99MH3                             |
| 12148 | 2,3,4,6,18,<br>19,21,24 | 1,5,7,8,20,<br>22,23,25,2<br>6  | 0  |                                                                              |
| 12149 | 2,3,4,6,18,<br>19,21,25 | 1,5,7,8,20,<br>22,23,24,2<br>6  | 11 | P00731,P00774,P14173,P25031,P25236,P31430,P47967,P98089,Q4FZU6,Q62635,Q8CIZ5 |
| 12150 | 2,3,4,6,18,<br>19,21,26 | 1,5,7,8,20,<br>22,23,24,2<br>5  | 3  | P00774,P25031,P25236                                                         |
| 12151 | 2,3,4,6,18,<br>19,22,23 | 1,5,7,8,20,<br>21,24,25,2<br>6  | 5  | P02625,P10715,P12785,P22006,Q5XI22                                           |
| 12152 | 2,3,4,6,18,<br>19,22,24 | 1,5,7,8,20,<br>21,23,25,2<br>6  | 1  | P02625                                                                       |
| 12153 | 2,3,4,6,18,<br>19,22,25 | 1,5,7,8,20,<br>21,23,24,2<br>6  | 3  | P14173,P98089,Q4FZU6                                                         |



|       |                         |                                |   |                      |
|-------|-------------------------|--------------------------------|---|----------------------|
| 12154 | 2,3,4,6,18,<br>19,22,26 | 1,5,7,8,20,<br>21,23,24,2<br>5 | 1 | P02625               |
| 12155 | 2,3,4,6,18,<br>19,23,24 | 1,5,7,8,20,<br>21,22,25,2<br>6 | 3 | P02625,P12785,Q5XI22 |

#### Day 14

| Random allocation | Group1           | Group2                     | Numbers of differential urinary proteins | Differential protein ID                                                                                                                                                                                                                                     |
|-------------------|------------------|----------------------------|------------------------------------------|-------------------------------------------------------------------------------------------------------------------------------------------------------------------------------------------------------------------------------------------------------------|
| 1                 | 1,2,3,4,5,6,7,8  | 27,28,29,30,31,32,33,34,35 | 36                                       | D3ZUK3,O35568,O54728,O88267,P01681,P02454,P02631,P05539,P07171,P08010,P08753,P16086,P20762,P35446,P36374,P42854,P52590,P60905,P83748,P97605,Q08464,Q09030,Q30KJ2,Q3T1K5,Q498R7,Q4V885,Q63317,Q63514,Q63942,Q6IE51,Q7TP52,Q80WY6,Q8CJD3,Q8N7M5,Q9QZQ5,Q9Z0V6 |
| 2                 | 1,2,3,4,5,6,7,27 | 8,28,29,30,31,32,33,34,35  | 26                                       | G3V686,O35568,O54728,P00507,P01681,P02631,P05539,P08290,P08649,P13596,P13852,P16086,P20762,P52590,P83748,Q09030,Q30KJ2,Q498R7,Q63514,Q63532,Q6IE51,Q7TP52,Q80WY6,Q8CHN8,Q99068,Q9QZQ5                                                                       |
| 3                 | 1,2,3,4,5,6,7,28 | 8,27,29,30,31,32,33,34,35  | 18                                       | O54728,P01681,P01836,P02631,P05539,P16086,P52590,P83748,P97605,Q09030,Q30KJ2,Q498R7,Q63942,Q6IE51,Q6P777,Q7TP52,Q80WY6,Q9QZQ5                                                                                                                               |
| 4                 | 1,2,3,4,5,6,7,29 | 8,27,28,30,31,32,33,34,35  | 19                                       | G3V686,O54728,P01681,P01836,P02631,P05539,P16086,P20762,P52590,P83748,Q09030,Q3T1K5,Q498R7,Q63467,Q63514,Q6IE51,Q7TP52,Q8CJD3,Q9QZQ5                                                                                                                        |
| 5                 | 1,2,3,4,5,6,7,30 | 8,27,28,29,31,32,33,34,35  | 23                                       | O54728,O88267,P00507,P01681,P01836,P02631,P08010,P16086,P19218,P20762,P35446,P42854,P52590,P83748,P97605,Q09030,Q498R7,Q4V885,Q63514,Q6IE51,Q7TP52,Q80WY6,Q9QZQ5                                                                                            |
| 6                 | 1,2,3,4,5,6,7,31 | 8,27,28,29,30,32,33,34,35  | 26                                       | G3V686,O54728,O88267,P00507,P01836,P02625,P02631,P05539,P08010,P16086,P20762,P42854,P52590,P60905,P83748,P97605,Q09030,Q30KJ2,Q498R7,Q62997,Q63317,Q6IE51,Q7TP52,Q80WY6,Q8CJD3,Q9QZQ5                                                                       |
| 7                 | 1,2,3,4,5,6,7,32 | 8,27,28,29,30,31,33,34,35  | 24                                       | G3V686,O54728,O88267,P01681,P01836,P02631,P05539,P16086,P20762,P36376,P52590,P55314,P83748,P97580,P97605,Q09030,Q30KJ2,Q63317,Q63532,Q6IE51,Q7TP52,Q80WY6,Q8CJD3,Q9QZQ5                                                                                     |
| 8                 | 1,2,3,4,5,6,7,33 | 8,27,28,29,30,31,32,34,35  | 28                                       | G3V686,O35568,O54728,P00507,P02631,P05539,P08010,P13852,P15399,P16086,P20762,P35446,P52590,P60905,P83748,P97580,P97605,Q09030,Q30KJ2,Q498R7,Q63317,Q63514,Q6AYR9,Q6IE51,Q7TP52,Q80WY6,Q8CJD3,Q9QZQ5                                                         |
| 9                 | 1,2,3,4,5,6,7,34 | 8,27,28,29,30,31,32,33,35  | 29                                       | G3V686,O54728,O88267,P01836,P02631,P02781,P05539,P08010,P08753,P0C0K7,P14408,P16086,P17559,P36374,P49744,P52590,P60905,P83748,P97605,Q08464,Q09030,Q63467,Q63514,Q63532,Q6IE51,Q6IRE4,Q7TP52,Q9JJ22,Q9QZQ5                                                  |
| 10                | 1,2,3,4,5,6,7,35 | 8,27,28,29,30,31,32,33,34  | 27                                       | O54728,O88267,P01681,P02631,P02770,P02781,P08010,P14480,P15399,P16086,P20761,P20762,P52590,P60905,P83748,P97580,P97584,P97605,Q09030,Q30KJ2,Q498R7,Q63514,Q6AYR9,Q6IE51,Q7TP52,Q80WY6,Q9QZQ5                                                                |
| 11                | 1,2,3,4,5,6,8,27 | 7,28,29,30,31,32,33,34,35  | 9                                        | P01681,P07171,P14669,P20762,Q63514,Q63942,Q6IE51,Q7TP52,Q9Z0V6                                                                                                                                                                                              |

|    |                       |                                   |    |                                                                                                                               |
|----|-----------------------|-----------------------------------|----|-------------------------------------------------------------------------------------------------------------------------------|
| 12 | 1,2,3,4,5,6<br>,8,28  | 7,27,29,30<br>,31,32,33,<br>34,35 | 6  | O54728,P01681,Q63514,Q63942,Q6P777,Q7TP52                                                                                     |
| 13 | 1,2,3,4,5,6<br>,8,29  | 7,27,28,30<br>,31,32,33,<br>34,35 | 7  | P01681,P20762,Q3T1K5,Q63514,Q63942,Q7TP52,Q8CJD3                                                                              |
| 14 | 1,2,3,4,5,6<br>,8,30  | 7,27,28,29<br>,31,32,33,<br>34,35 | 6  | P01681,P20762,Q63514,Q63942,Q7TP52,Q9Z0V6                                                                                     |
| 15 | 1,2,3,4,5,6<br>,8,31  | 7,27,28,29<br>,30,32,33,<br>34,35 | 11 | O54728,P01681,P02625,P20762,P52590,Q62997,Q63514,Q63942,Q7TP52,Q8CJD3,Q9Z0V6                                                  |
| 16 | 1,2,3,4,5,6<br>,8,32  | 7,27,28,29<br>,30,31,33,<br>34,35 | 13 | P01681,P08753,P20762,P29288,P97605,Q5I0D1,Q63317,Q63514,Q63942,Q6P777,Q7TP52,Q8CJD3,Q9Z0V6                                    |
| 17 | 1,2,3,4,5,6<br>,8,33  | 7,27,28,29<br>,30,31,32,<br>34,35 | 8  | P01681,P20762,P60905,P97605,Q63514,Q63942,Q7TP52,Q8CJD3                                                                       |
| 18 | 1,2,3,4,5,6<br>,8,34  | 7,27,28,29<br>,30,31,32,<br>33,35 | 18 | G3V686,O54728,P01681,P04762,P08010,P08753,P36374,P52303,P60905,Q62894,Q63514,Q63942,Q64361,Q6IRE4,Q7TP52,Q9JJ22,Q9WTT6,Q9Z0V6 |
| 19 | 1,2,3,4,5,6<br>,8,35  | 7,27,28,29<br>,30,31,32,<br>33,34 | 14 | P01681,P02770,P08010,P08753,P10959,P20762,P60905,Q06000,Q30KJ2,Q63514,Q63942,Q6AYR9,Q7TP52,Q9Z0V6                             |
| 20 | 1,2,3,4,5,6<br>,27,28 | 7,8,29,30,<br>31,32,33,3<br>4,35  | 7  | O54728,P01681,Q4FZU2,Q63942,Q6IE51,Q6P777,Q7TP52                                                                              |
| 21 | 1,2,3,4,5,6<br>,27,29 | 7,8,28,30,<br>31,32,33,3<br>4,35  | 5  | G3V686,P01681,Q63942,Q6IE51,Q7TP52                                                                                            |
| 22 | 1,2,3,4,5,6<br>,27,30 | 7,8,28,29,<br>31,32,33,3<br>4,35  | 4  | P01681,P01835,Q6IE51,Q7TP52                                                                                                   |
| 23 | 1,2,3,4,5,6<br>,27,31 | 7,8,28,29,<br>30,32,33,3<br>4,35  | 5  | G3V686,P01681,P02625,Q6IE51,Q7TP52                                                                                            |
| 24 | 1,2,3,4,5,6<br>,27,32 | 7,8,28,29,<br>30,31,33,3<br>4,35  | 9  | G3V686,P01681,P05539,P55314,Q4FZU2,Q6IE51,Q6IFW6,Q7TP52,Q99068                                                                |
| 25 | 1,2,3,4,5,6<br>,27,33 | 7,8,28,29,<br>30,31,32,3<br>4,35  | 6  | G3V686,P01681,Q4FZU2,Q6IE51,Q6IFW6,Q7TP52                                                                                     |
| 26 | 1,2,3,4,5,6<br>,27,34 | 7,8,28,29,<br>30,31,32,3<br>3,35  | 10 | G3V686,P01681,P34901,P49744,P70709,Q03191,Q4FZU2,Q4FZU6,Q6IE51,Q7TP52                                                         |

|    |                       |                                  |    |                                                                                            |
|----|-----------------------|----------------------------------|----|--------------------------------------------------------------------------------------------|
| 27 | 1,2,3,4,5,6<br>,27,35 | 7,8,28,29,<br>30,31,32,3<br>3,34 | 6  | P01681,P60905,Q30KJ2,Q4FZU2,Q6IE51,Q7TP52                                                  |
| 28 | 1,2,3,4,5,6<br>,28,29 | 7,8,27,30,<br>31,32,33,3<br>4,35 | 6  | O54728,P01681,Q63942,Q6P777,Q7TP52,Q9QW07                                                  |
| 29 | 1,2,3,4,5,6<br>,28,30 | 7,8,27,29,<br>31,32,33,3<br>4,35 | 6  | O54728,P01681,P01835,Q63942,Q6P777,Q7TP52                                                  |
| 30 | 1,2,3,4,5,6<br>,28,31 | 7,8,27,29,<br>30,32,33,3<br>4,35 | 5  | O54728,P01681,Q63942,Q6P777,Q7TP52                                                         |
| 31 | 1,2,3,4,5,6<br>,28,32 | 7,8,27,29,<br>30,31,33,3<br>4,35 | 5  | O54728,P01681,Q63942,Q6P777,Q7TP52                                                         |
| 32 | 1,2,3,4,5,6<br>,28,33 | 7,8,27,29,<br>30,31,32,3<br>4,35 | 5  | O54728,P01681,Q63942,Q6P777,Q7TP52                                                         |
| 33 | 1,2,3,4,5,6<br>,28,34 | 7,8,27,29,<br>30,31,32,3<br>3,35 | 13 | G3V686,O54728,P01681,P52303,P97615,Q4FZU6,Q5HZV9,Q63942,Q6IRE4,Q6P777,Q7TP52,Q9JJ22,Q9QW07 |
| 34 | 1,2,3,4,5,6<br>,28,35 | 7,8,27,29,<br>30,31,32,3<br>3,34 | 6  | O54728,P01681,Q30KJ2,Q63942,Q6P777,Q7TP52                                                  |
| 35 | 1,2,3,4,5,6<br>,29,30 | 7,8,27,28,<br>31,32,33,3<br>4,35 | 3  | P01681,P01835,Q7TP52                                                                       |
| 36 | 1,2,3,4,5,6<br>,29,31 | 7,8,27,28,<br>30,32,33,3<br>4,35 | 4  | P01681,P02625,P25236,Q7TP52                                                                |
| 37 | 1,2,3,4,5,6<br>,29,32 | 7,8,27,28,<br>30,31,33,3<br>4,35 | 4  | P01681,Q6P777,Q7TP52,Q8CJD3                                                                |
| 38 | 1,2,3,4,5,6<br>,29,33 | 7,8,27,28,<br>30,31,32,3<br>4,35 | 3  | P01681,Q7TP52,Q8CJD3                                                                       |
| 39 | 1,2,3,4,5,6<br>,29,34 | 7,8,27,28,<br>30,31,32,3<br>3,35 | 6  | G3V686,P01681,Q6IRE4,Q7TP52,Q9JJ22,Q9QW07                                                  |
| 40 | 1,2,3,4,5,6<br>,29,35 | 7,8,27,28,<br>30,31,32,3<br>3,34 | 3  | P01681,P14480,Q7TP52                                                                       |
| 41 | 1,2,3,4,5,6<br>,30,31 | 7,8,27,28,<br>29,32,33,3<br>4,35 | 4  | P01681,P02625,Q62997,Q7TP52                                                                |

|    |                       |                                   |    |                                                                                                                                      |
|----|-----------------------|-----------------------------------|----|--------------------------------------------------------------------------------------------------------------------------------------|
| 42 | 1,2,3,4,5,6<br>,30,32 | 7,8,27,28,<br>29,31,33,3<br>4,35  | 3  | P01681,P55314,Q7TP52                                                                                                                 |
| 43 | 1,2,3,4,5,6<br>,30,33 | 7,8,27,28,<br>29,31,32,3<br>4,35  | 3  | P01681,P35446,Q7TP52                                                                                                                 |
| 44 | 1,2,3,4,5,6<br>,30,34 | 7,8,27,28,<br>29,31,32,3<br>3,35  | 7  | G3V686,P01681,P34901,P35280,Q6IRE4,Q7TP52,Q9JJ22                                                                                     |
| 45 | 1,2,3,4,5,6<br>,30,35 | 7,8,27,28,<br>29,31,32,3<br>3,34  | 5  | P01681,P01835,P14480,P82471,Q7TP52                                                                                                   |
| 46 | 1,2,3,4,5,6<br>,31,32 | 7,8,27,28,<br>29,30,33,3<br>4,35  | 7  | P01681,P02625,P05539,P97605,Q62997,Q7TP52,Q8CJD3                                                                                     |
| 47 | 1,2,3,4,5,6<br>,31,33 | 7,8,27,28,<br>29,30,32,3<br>4,35  | 6  | P02625,P60905,Q62997,Q63355,Q7TP52,Q8CJD3                                                                                            |
| 48 | 1,2,3,4,5,6<br>,31,34 | 7,8,27,28,<br>29,30,32,3<br>3,35  | 13 | G3V686,O54728,P02625,P02781,P08010,P34901,P36374,P60905,P82471,Q62997,Q63355,Q6IRE4,Q7TP52                                           |
| 49 | 1,2,3,4,5,6<br>,31,35 | 7,8,27,28,<br>29,30,32,3<br>3,34  | 10 | P01681,P02781,P08010,P52590,P60905,P82471,Q30KJ2,Q62997,Q63355,Q7TP52                                                                |
| 50 | 1,2,3,4,5,6<br>,32,33 | 7,8,27,28,<br>29,30,31,3<br>4,35  | 7  | P55314,P97580,P97605,Q30KJ2,Q4FZU2,Q7TP52,Q8CJD3                                                                                     |
| 51 | 1,2,3,4,5,6<br>,32,34 | 7,8,27,28,<br>29,30,31,3<br>3,35  | 15 | G3V686,P01681,P02781,P05539,P08753,P34901,P36374,P38444,P55314,P82471,P97605,Q63661,Q6IRE4,Q6P777,Q7TP52                             |
| 52 | 1,2,3,4,5,6<br>,32,35 | 7,8,27,28,<br>29,30,31,3<br>3,34  | 10 | P01681,P02781,P08753,P55314,P82471,P97580,P97605,Q30KJ2,Q6AYR9,Q7TP52                                                                |
| 53 | 1,2,3,4,5,6<br>,33,34 | 7,8,27,28,<br>29,30,31,3<br>2,35  | 12 | G3V686,P02781,P08010,P34901,P60905,P82471,Q4FZU2,Q63355,Q63661,Q6IRE4,Q7TP52,Q9JJ22                                                  |
| 54 | 1,2,3,4,5,6<br>,33,35 | 7,8,27,28,<br>29,30,31,3<br>2,34  | 12 | P01681,P02781,P08010,P0DMW0,P0DMW1,P15399,P60905,P82471,P97580,Q30KJ2,Q63355,Q6AYR9,Q7TP52                                           |
| 55 | 1,2,3,4,5,6<br>,34,35 | 7,8,27,28,<br>29,30,31,3<br>2,33  | 19 | G3V686,P01681,P02781,P08010,P08753,P24368,P36374,P47727,P60905,P82471,Q62902,Q63355,Q63514,Q63661,Q6IRE4,Q6PCU2,Q7TP52,Q8CJ52,Q9JJ22 |
| 56 | 1,2,3,4,5,7<br>,8,27  | 6,28,29,30<br>,31,32,33,<br>34,35 | 16 | D3ZUK3,O54728,P00507,P07171,P08721,P36970,P52590,P60905,Q03191,Q08464,Q09030,Q4V885,Q6IE51,Q7TP52,Q8CHN8,Q9QZQ5                      |

|    |                       |                                   |    |                                                                                                                                                                                                            |
|----|-----------------------|-----------------------------------|----|------------------------------------------------------------------------------------------------------------------------------------------------------------------------------------------------------------|
| 57 | 1,2,3,4,5,7<br>,8,28  | 6,27,29,30<br>,31,32,33,<br>34,35 | 14 | O54728,P01681,P01836,P07171,P52590,P97605,Q08464,Q09030,Q498R7,Q4V885,Q63317,Q63942,Q6IE51,Q6P777                                                                                                          |
| 58 | 1,2,3,4,5,7<br>,8,29  | 6,27,28,30<br>,31,32,33,<br>34,35 | 12 | O54728,P01836,P07171,P36970,P52590,Q08464,Q09030,Q63467,Q63514,Q6IE51,Q8CJD3,Q9QZQ5                                                                                                                        |
| 59 | 1,2,3,4,5,7<br>,8,30  | 6,27,28,29<br>,31,32,33,<br>34,35 | 21 | O54728,O88267,P00507,P01836,P07171,P35446,P36970,P42854,P47727,P52590,P60905,P97584,P97605,Q08464,Q09030,Q498R7,Q4V885,Q63514,Q64057,Q6IE51,Q7TP52                                                         |
| 60 | 1,2,3,4,5,7<br>,8,31  | 6,27,28,29<br>,30,32,33,<br>34,35 | 21 | O54728,P00507,P01836,P07171,P08010,P20766,P36970,P42854,P52590,P60905,P97584,P97605,Q08464,Q09030,Q4V885,Q62997,Q63317,Q6IE51,Q6IFU7,Q7TP52,Q8CJD3                                                         |
| 61 | 1,2,3,4,5,7<br>,8,32  | 6,27,28,29<br>,30,31,33,<br>34,35 | 17 | O54728,O88267,P00507,P01041,P01836,P05539,P08753,P52590,P60905,P97605,Q08464,Q09030,Q63317,Q6AYR9,Q6IE51,Q7TP52,Q8CJD3                                                                                     |
| 62 | 1,2,3,4,5,7<br>,8,33  | 6,27,28,29<br>,30,31,32,<br>34,35 | 17 | O54728,P00507,P08010,P35446,P36970,P52590,P60905,P97605,Q08464,Q09030,Q63317,Q6AYR9,Q6IE51,Q7TP52,Q8CJD3,Q9QUL6,Q9QZQ5                                                                                     |
| 63 | 1,2,3,4,5,7<br>,8,34  | 6,27,28,29<br>,30,31,32,<br>33,35 | 29 | D3ZUK3,G3V686,O54728,P01041,P01836,P02781,P07171,P08010,P08753,P20766,P36374,P36970,P47727,P52590,P60905,P97605,Q08464,Q09030,Q5ZQU0,Q62894,Q63467,Q63514,Q6IE51,Q6IRE4,Q7TP52,Q9ESW0,Q9JHB9,Q9JJ22,Q9QZQ5 |
| 64 | 1,2,3,4,5,7<br>,8,35  | 6,27,28,29<br>,30,31,32,<br>33,34 | 21 | O54728,O88267,P02770,P02781,P08010,P08753,P10959,P47727,P52590,P60905,P97584,P97605,Q08464,Q09030,Q63514,Q6AYR9,Q6IE51,Q6IE52,Q7TP52,Q9JHB9,Q9QX79                                                         |
| 65 | 1,2,3,4,5,7<br>,27,28 | 6,8,29,30,<br>31,32,33,3<br>4,35  | 8  | O54728,P01836,P52590,Q09030,Q498R7,Q6IE51,Q7TP52,Q8CHN8                                                                                                                                                    |
| 66 | 1,2,3,4,5,7<br>,27,29 | 6,8,28,30,<br>31,32,33,3<br>4,35  | 11 | O54728,P00507,P01836,P05539,P52590,Q09030,Q63467,Q6IE51,Q7TP52,Q8CHN8,Q99068                                                                                                                               |
| 67 | 1,2,3,4,5,7<br>,27,30 | 6,8,28,29,<br>31,32,33,3<br>4,35  | 11 | O54728,P00507,P01836,P47727,P52590,Q09030,Q498R7,Q6IE51,Q7TP52,Q8CHN8,Q99068                                                                                                                               |
| 68 | 1,2,3,4,5,7<br>,27,31 | 6,8,28,29,<br>30,32,33,3<br>4,35  | 13 | O54728,P00507,P01836,P05539,P42854,P52590,P60905,Q09030,Q62997,Q6IE51,Q7TP52,Q8CHN8,Q99068                                                                                                                 |
| 69 | 1,2,3,4,5,7<br>,27,32 | 6,8,28,29,<br>30,31,33,3<br>4,35  | 13 | G3V686,O54728,P00507,P01836,P05539,P52590,P55314,Q09030,Q63532,Q6IE51,Q7TP52,Q8CHN8,Q99068                                                                                                                 |
| 70 | 1,2,3,4,5,7<br>,27,33 | 6,8,28,29,<br>30,31,32,3<br>4,35  | 11 | O54728,P00507,P05539,P13852,P52590,P60905,Q09030,Q6IE51,Q7TP52,Q8CHN8,Q99068                                                                                                                               |
| 71 | 1,2,3,4,5,7<br>,27,34 | 6,8,28,29,<br>30,31,32,3<br>3,35  | 20 | G3V686,O54728,P01836,P05539,P11762,P14408,P34901,P47727,P49744,P52590,P60905,P85971,Q03191,Q08464,Q09030,Q63467,Q63532,Q6IE51,Q7TP52,Q8CHN8                                                                |

|    |                       |                                  |    |                                                                                                          |
|----|-----------------------|----------------------------------|----|----------------------------------------------------------------------------------------------------------|
| 72 | 1,2,3,4,5,7<br>,27,35 | 6,8,28,29,<br>30,31,32,3<br>3,34 | 10 | O54728,P01946,P16636,P47727,P52590,P60905,Q09030,Q6IE51,Q7TP52,Q8CHN8                                    |
| 73 | 1,2,3,4,5,7<br>,28,29 | 6,8,27,30,<br>31,32,33,3<br>4,35 | 9  | O54728,P01681,P01836,P52590,Q09030,Q63942,Q6IE51,Q6P777,Q9QW07                                           |
| 74 | 1,2,3,4,5,7<br>,28,30 | 6,8,27,29,<br>31,32,33,3<br>4,35 | 9  | O54728,P01681,P01836,P42854,P52590,P97584,Q09030,Q498R7,Q6IE51                                           |
| 75 | 1,2,3,4,5,7<br>,28,31 | 6,8,27,29,<br>30,32,33,3<br>4,35 | 9  | O54728,P01836,P42854,P52590,Q09030,Q498R7,Q62997,Q6IE51,Q7TP52                                           |
| 76 | 1,2,3,4,5,7<br>,28,32 | 6,8,27,29,<br>30,31,33,3<br>4,35 | 8  | O54728,P01836,P05539,P52590,P97605,Q09030,Q6IE51,Q6P777                                                  |
| 77 | 1,2,3,4,5,7<br>,28,33 | 6,8,27,29,<br>30,31,32,3<br>4,35 | 6  | O54728,P01836,P52590,Q09030,Q6IE51,Q6P777                                                                |
| 78 | 1,2,3,4,5,7<br>,28,34 | 6,8,27,29,<br>30,31,32,3<br>3,35 | 15 | G3V686,O54728,P01836,P14408,P52590,P97615,Q08464,Q09030,Q6IE51,Q6IRE4,Q6P777,Q7TP52,Q9ESW0,Q9JJ22,Q9QW07 |
| 79 | 1,2,3,4,5,7<br>,28,35 | 6,8,27,29,<br>30,31,32,3<br>3,34 | 9  | O54728,P01681,P01836,P06760,P08010,P52590,P97584,Q09030,Q6IE51                                           |
| 80 | 1,2,3,4,5,7<br>,29,30 | 6,8,27,28,<br>31,32,33,3<br>4,35 | 6  | O54728,P01836,P52590,P97584,Q09030,Q6IE51                                                                |
| 81 | 1,2,3,4,5,7<br>,29,31 | 6,8,27,28,<br>30,32,33,3<br>4,35 | 11 | O54728,P00507,P01836,P42854,P52590,P97584,Q09030,Q62997,Q63467,Q6IE51,Q7TP52                             |
| 82 | 1,2,3,4,5,7<br>,29,32 | 6,8,27,28,<br>30,31,33,3<br>4,35 | 9  | O54728,P01836,P05539,P52590,P97605,Q09030,Q63467,Q6IE51,Q8CJD3                                           |
| 83 | 1,2,3,4,5,7<br>,29,33 | 6,8,27,28,<br>30,31,32,3<br>4,35 | 7  | O54728,P00507,P01836,P52590,Q09030,Q6IE51,Q8CJD3                                                         |
| 84 | 1,2,3,4,5,7<br>,29,34 | 6,8,27,28,<br>30,31,32,3<br>3,35 | 12 | G3V686,O54728,P01836,P14408,P52590,Q08464,Q09030,Q63467,Q6IE51,Q6IRE4,Q9JJ22,Q9QW07                      |
| 85 | 1,2,3,4,5,7<br>,29,35 | 6,8,27,28,<br>30,31,32,3<br>3,34 | 8  | O54728,P01836,P01946,P02091,P52590,P97584,Q09030,Q6IE51                                                  |
| 86 | 1,2,3,4,5,7<br>,30,31 | 6,8,27,28,<br>29,32,33,3<br>4,35 | 15 | O54728,P00507,P01836,P08010,P35446,P42854,P47727,P52590,P60905,P97584,Q09030,Q498R7,Q62997,Q6IE51,Q7TP52 |

|     |                       |                                  |    |                                                                                                                                                                                                     |
|-----|-----------------------|----------------------------------|----|-----------------------------------------------------------------------------------------------------------------------------------------------------------------------------------------------------|
| 87  | 1,2,3,4,5,7<br>,30,32 | 6,8,27,28,<br>29,31,33,3<br>4,35 | 13 | O54728,P00507,P01836,P02782,P05539,P35446,P42854,P52590,P97584,P97605,Q09030,Q6IE51,Q7TP52                                                                                                          |
| 88  | 1,2,3,4,5,7<br>,30,33 | 6,8,27,28,<br>29,31,32,3<br>4,35 | 12 | O54728,P00507,P01836,P02782,P35446,P42854,P52590,P60905,P97584,P97605,Q09030,Q6IE51                                                                                                                 |
| 89  | 1,2,3,4,5,7<br>,30,34 | 6,8,27,28,<br>29,31,32,3<br>3,35 | 22 | G3V686,O54728,P01836,P02781,P02782,P06911,P08010,P34901,P35280,P42854,P47727,P47967,P52590,P60905,Q08464,Q09030,Q6IE51,Q6IRE4,Q7TP52,Q9ESW0,Q9JHB9,Q9JJ22                                           |
| 90  | 1,2,3,4,5,7<br>,30,35 | 6,8,27,28,<br>29,31,32,3<br>3,34 | 14 | O54728,P01836,P02781,P02782,P06911,P08010,P42854,P47727,P52590,P60905,P97584,Q09030,Q6IE51,Q9JHB9                                                                                                   |
| 91  | 1,2,3,4,5,7<br>,31,32 | 6,8,27,28,<br>29,30,33,3<br>4,35 | 19 | O54728,P00507,P01836,P02781,P02782,P05539,P08010,P42854,P52590,P60905,P97584,P97605,Q09030,Q62997,Q63317,Q6IE51,Q7TP52,Q8CJD3,Q99068                                                                |
| 92  | 1,2,3,4,5,7<br>,31,33 | 6,8,27,28,<br>29,30,32,3<br>4,35 | 15 | O54728,P00507,P01836,P02782,P08010,P35446,P42854,P52590,P60905,P97605,Q09030,Q62997,Q6AYR9,Q6IE51,Q7TP52                                                                                            |
| 93  | 1,2,3,4,5,7<br>,31,34 | 6,8,27,28,<br>29,30,32,3<br>3,35 | 23 | G3V686,O54728,P01836,P02781,P02782,P05539,P08010,P08644,P08723,P0C0A9,P14408,P42854,P47727,P52590,P60905,Q08464,Q09030,Q62997,Q63467,Q6IE51,Q6IRE4,Q7TP52,Q9JHB9                                    |
| 94  | 1,2,3,4,5,7<br>,31,35 | 6,8,27,28,<br>29,30,32,3<br>3,34 | 19 | O54728,P01836,P02781,P02782,P08010,P24368,P42854,P47727,P52590,P60905,P82471,P97584,P97605,Q09030,Q62997,Q6AYR9,Q6IE51,Q7TP52,Q9JHB9                                                                |
| 95  | 1,2,3,4,5,7<br>,32,33 | 6,8,27,28,<br>29,30,31,3<br>4,35 | 14 | O54728,P00507,P01836,P02782,P05539,P52590,P55314,P60905,P97605,Q09030,Q63317,Q6AYR9,Q6IE51,Q8CJD3                                                                                                   |
| 96  | 1,2,3,4,5,7<br>,32,34 | 6,8,27,28,<br>29,30,31,3<br>3,35 | 24 | G3V686,O54728,P01041,P01836,P02781,P02782,P05539,P08010,P08753,P34901,P36374,P52590,P55314,P60905,P97605,Q08464,Q09030,Q63467,Q63532,Q63661,Q6IE51,Q6IRE4,Q7TP52,Q9ESW0                             |
| 97  | 1,2,3,4,5,7<br>,32,35 | 6,8,27,28,<br>29,30,31,3<br>3,34 | 14 | O54728,P01836,P02781,P02782,P08010,P52590,P60905,P82471,P97584,P97605,Q09030,Q6AYR9,Q6IE51,Q7TP52                                                                                                   |
| 98  | 1,2,3,4,5,7<br>,33,34 | 6,8,27,28,<br>29,30,31,3<br>2,35 | 23 | G3V686,O54728,P01836,P02781,P02782,P08010,P11762,P14408,P34901,P52590,P60905,P97605,Q08464,Q09030,Q62894,Q63661,Q6AYR9,Q6IE51,Q6IRE4,Q7TP52,Q9ESW0,Q9JHB9,Q9JJ22                                    |
| 99  | 1,2,3,4,5,7<br>,33,35 | 6,8,27,28,<br>29,30,31,3<br>2,34 | 14 | O54728,P02781,P02782,P08010,P52590,P60905,P82471,P97584,P97605,Q09030,Q6AYR9,Q6IE51,Q9JHB9,Q9WTT6                                                                                                   |
| 100 | 1,2,3,4,5,7<br>,34,35 | 6,8,27,28,<br>29,30,31,3<br>2,33 | 28 | O54728,P01836,P02780,P02781,P02782,P06911,P08010,P08723,P08753,P0C0A9,P14408,P24368,P36374,P47727,P52590,P60905,P82471,Q08464,Q09030,Q62902,Q63661,Q6AYR9,Q6IE51,Q6IRE4,Q7TP52,Q9ESW0,Q9JHB9,Q9JJ22 |
| 101 | 1,2,3,4,5,8<br>,27,28 | 6,7,29,30,<br>31,32,33,3<br>4,35 | 4  | O54728,P01681,Q63942,Q6P777                                                                                                                                                                         |

|     |                       |                                  |    |                                                                                            |
|-----|-----------------------|----------------------------------|----|--------------------------------------------------------------------------------------------|
| 102 | 1,2,3,4,5,8<br>,27,29 | 6,7,28,30,<br>31,32,33,3<br>4,35 | 1  | P36970                                                                                     |
| 103 | 1,2,3,4,5,8<br>,27,30 | 6,7,28,29,<br>31,32,33,3<br>4,35 | 2  | P36970,Q7TP52                                                                              |
| 104 | 1,2,3,4,5,8<br>,27,31 | 6,7,28,29,<br>30,32,33,3<br>4,35 | 5  | O54728,P36970,P60905,Q62997,Q7TP52                                                         |
| 105 | 1,2,3,4,5,8<br>,27,32 | 6,7,28,29,<br>30,31,33,3<br>4,35 | 3  | P29288,Q5I0D1,Q7TP52                                                                       |
| 106 | 1,2,3,4,5,8<br>,27,33 | 6,7,28,29,<br>30,31,32,3<br>4,35 | 2  | P36970,P60905                                                                              |
| 107 | 1,2,3,4,5,8<br>,27,34 | 6,7,28,29,<br>30,31,32,3<br>3,35 | 13 | G3V686,O54728,P04762,P08753,P34901,P36970,P47727,P49744,P60905,P83121,Q03191,Q62894,Q7TP52 |
| 108 | 1,2,3,4,5,8<br>,27,35 | 6,7,28,29,<br>30,31,32,3<br>3,34 | 7  | P02770,P06911,P10959,P47727,P60905,Q7TP52,Q9QX79                                           |
| 109 | 1,2,3,4,5,8<br>,28,29 | 6,7,27,30,<br>31,32,33,3<br>4,35 | 5  | O54728,P01681,Q63942,Q6P777,Q9QW07                                                         |
| 110 | 1,2,3,4,5,8<br>,28,30 | 6,7,27,29,<br>31,32,33,3<br>4,35 | 3  | O54728,P01681,Q63942                                                                       |
| 111 | 1,2,3,4,5,8<br>,28,31 | 6,7,27,29,<br>30,32,33,3<br>4,35 | 3  | O54728,Q62997,Q63942                                                                       |
| 112 | 1,2,3,4,5,8<br>,28,32 | 6,7,27,29,<br>30,31,33,3<br>4,35 | 4  | O54728,P01681,Q63942,Q6P777                                                                |
| 113 | 1,2,3,4,5,8<br>,28,33 | 6,7,27,29,<br>30,31,32,3<br>4,35 | 3  | O54728,Q63942,Q6P777                                                                       |
| 114 | 1,2,3,4,5,8<br>,28,34 | 6,7,27,29,<br>30,31,32,3<br>3,35 | 11 | O54728,P04762,P52303,Q62894,Q63942,Q6AY61,Q6IRE4,Q6P777,Q9ESW0,Q9JJ22,Q9QW07               |
| 115 | 1,2,3,4,5,8<br>,28,35 | 6,7,27,29,<br>30,31,32,3<br>3,34 | 5  | O54728,P01681,P02770,P10959,Q63942                                                         |
| 116 | 1,2,3,4,5,8<br>,29,30 | 6,7,27,28,<br>31,32,33,3<br>4,35 | 1  | P36970                                                                                     |



|     |                       |                                  |    |                                                                                            |
|-----|-----------------------|----------------------------------|----|--------------------------------------------------------------------------------------------|
| 117 | 1,2,3,4,5,8<br>,29,31 | 6,7,27,28,<br>30,32,33,3<br>4,35 | 3  | O54728,P36970,Q62997                                                                       |
| 118 | 1,2,3,4,5,8<br>,29,32 | 6,7,27,28,<br>30,31,33,3<br>4,35 | 1  | Q8CJD3                                                                                     |
| 119 | 1,2,3,4,5,8<br>,29,33 | 6,7,27,28,<br>30,31,32,3<br>4,35 | 2  | P36970,Q8CJD3                                                                              |
| 120 | 1,2,3,4,5,8<br>,29,34 | 6,7,27,28,<br>30,31,32,3<br>3,35 | 5  | O54728,Q62894,Q6IRE4,Q9JJ22,Q9QW07                                                         |
| 121 | 1,2,3,4,5,8<br>,29,35 | 6,7,27,28,<br>30,31,32,3<br>3,34 | 4  | P01681,P01946,P97840,Q06000                                                                |
| 122 | 1,2,3,4,5,8<br>,30,31 | 6,7,27,28,<br>29,32,33,3<br>4,35 | 4  | O54728,P36970,Q62997,Q80WL1                                                                |
| 123 | 1,2,3,4,5,8<br>,30,32 | 6,7,27,28,<br>29,31,33,3<br>4,35 | 0  |                                                                                            |
| 124 | 1,2,3,4,5,8<br>,30,33 | 6,7,27,28,<br>29,31,32,3<br>4,35 | 3  | P36970,P60905,Q9QUL6                                                                       |
| 125 | 1,2,3,4,5,8<br>,30,34 | 6,7,27,28,<br>29,31,32,3<br>3,35 | 8  | O54728,P04762,P06911,P35280,P47727,P60905,Q62894,Q9JJ22                                    |
| 126 | 1,2,3,4,5,8<br>,30,35 | 6,7,27,28,<br>29,31,32,3<br>3,34 | 11 | P01681,P02770,P06911,P09456,P47727,P60905,P97584,Q06000,Q62902,Q6PCU2,Q9JHB9               |
| 127 | 1,2,3,4,5,8<br>,31,32 | 6,7,27,28,<br>29,30,33,3<br>4,35 | 6  | O54728,P20766,P60905,Q62997,Q63317,Q8CJD3                                                  |
| 128 | 1,2,3,4,5,8<br>,31,33 | 6,7,27,28,<br>29,30,32,3<br>4,35 | 6  | O54728,P36970,P60905,Q62997,Q8CJD3,Q9QUL6                                                  |
| 129 | 1,2,3,4,5,8<br>,31,34 | 6,7,27,28,<br>29,30,32,3<br>3,35 | 12 | O54728,P08010,P08753,P09456,P20766,P36970,P47727,P60905,Q62894,Q62997,Q7TP52,Q9JHB9        |
| 130 | 1,2,3,4,5,8<br>,31,35 | 6,7,27,28,<br>29,30,32,3<br>3,34 | 13 | O54728,P02770,P02781,P08010,P09456,P10959,P47727,P52590,P60905,Q06000,Q62997,Q6IE52,Q9JHB9 |
| 131 | 1,2,3,4,5,8<br>,32,33 | 6,7,27,28,<br>29,30,31,3<br>4,35 | 7  | P29288,P55314,P60905,P97605,Q6AYR9,Q8CJD3,Q9QUL6                                           |

|     |                        |                                  |    |                                                                                                                                                    |
|-----|------------------------|----------------------------------|----|----------------------------------------------------------------------------------------------------------------------------------------------------|
| 132 | 1,2,3,4,5,8<br>,32,34  | 6,7,27,28,<br>29,30,31,3<br>3,35 | 11 | O54728,P08753,P20766,P34901,P36374,P52303,P60905,P83121,Q62894,Q63661,Q6AYS4                                                                       |
| 133 | 1,2,3,4,5,8<br>,32,35  | 6,7,27,28,<br>29,30,31,3<br>3,34 | 4  | P02781,P08753,P60905,Q6AYR9                                                                                                                        |
| 134 | 1,2,3,4,5,8<br>,33,34  | 6,7,27,28,<br>29,30,31,3<br>2,35 | 10 | O54728,P04762,P08010,P08753,P34901,P36970,P60905,Q62894,Q9JHB9,Q9JJ22                                                                              |
| 135 | 1,2,3,4,5,8<br>,33,35  | 6,7,27,28,<br>29,30,31,3<br>2,34 | 8  | P02770,P06911,P08010,P10959,P60905,P97840,Q6AYR9,Q9JHB9                                                                                            |
| 136 | 1,2,3,4,5,8<br>,34,35  | 6,7,27,28,<br>29,30,31,3<br>2,33 | 21 | O54728,P02770,P02781,P06911,P08010,P08723,P08753,P09006,P09456,P36374,P47727,P60905,P82471,P83121,Q5GRG2,Q62894,Q62902,Q6PCU2,Q9ESW0,Q9JHB9,Q9JJ22 |
| 137 | 1,2,3,4,5,2<br>7,28,29 | 6,7,8,30,3<br>1,32,33,34<br>,35  | 5  | O54728,P01681,Q63942,Q6P777,Q9QW07                                                                                                                 |
| 138 | 1,2,3,4,5,2<br>7,28,30 | 6,7,8,29,3<br>1,32,33,34<br>,35  | 3  | O54728,P01681,Q6AYQ8                                                                                                                               |
| 139 | 1,2,3,4,5,2<br>7,28,31 | 6,7,8,29,3<br>0,32,33,34<br>,35  | 1  | O54728                                                                                                                                             |
| 140 | 1,2,3,4,5,2<br>7,28,32 | 6,7,8,29,3<br>0,31,33,34<br>,35  | 4  | O54728,P01681,Q6P777,Q99068                                                                                                                        |
| 141 | 1,2,3,4,5,2<br>7,28,33 | 6,7,8,29,3<br>0,31,32,34<br>,35  | 3  | O54728,Q4FZU2,Q6P777                                                                                                                               |
| 142 | 1,2,3,4,5,2<br>7,28,34 | 6,7,8,29,3<br>0,31,32,33<br>,35  | 9  | G3V686,O54728,P04182,P14408,P34901,Q03191,Q6IRE4,Q6P777,Q9QW07                                                                                     |
| 143 | 1,2,3,4,5,2<br>7,28,35 | 6,7,8,29,3<br>0,31,32,33<br>,34  | 2  | O54728,P01681                                                                                                                                      |
| 144 | 1,2,3,4,5,2<br>7,29,30 | 6,7,8,28,3<br>1,32,33,34<br>,35  | 0  |                                                                                                                                                    |
| 145 | 1,2,3,4,5,2<br>7,29,31 | 6,7,8,28,3<br>0,32,33,34<br>,35  | 0  |                                                                                                                                                    |
| 146 | 1,2,3,4,5,2<br>7,29,32 | 6,7,8,28,3<br>0,31,33,34<br>,35  | 1  | Q99068                                                                                                                                             |

|     |                        |                                 |    |                                                                       |
|-----|------------------------|---------------------------------|----|-----------------------------------------------------------------------|
| 147 | 1,2,3,4,5,2<br>7,29,33 | 6,7,8,28,3<br>0,31,32,34<br>,35 | 1  | Q4FZU2                                                                |
| 148 | 1,2,3,4,5,2<br>7,29,34 | 6,7,8,28,3<br>0,31,32,33<br>,35 | 6  | G3V686,P14408,P34901,Q03191,Q9JJ22,Q9QW07                             |
| 149 | 1,2,3,4,5,2<br>7,29,35 | 6,7,8,28,3<br>0,31,32,33<br>,34 | 2  | P01681,P01946                                                         |
| 150 | 1,2,3,4,5,2<br>7,30,31 | 6,7,8,28,2<br>9,32,33,34<br>,35 | 2  | P02625,Q7TP52                                                         |
| 151 | 1,2,3,4,5,2<br>7,30,32 | 6,7,8,28,2<br>9,31,33,34<br>,35 | 1  | Q99068                                                                |
| 152 | 1,2,3,4,5,2<br>7,30,33 | 6,7,8,28,2<br>9,31,32,34<br>,35 | 0  |                                                                       |
| 153 | 1,2,3,4,5,2<br>7,30,34 | 6,7,8,28,2<br>9,31,32,33<br>,35 | 7  | G3V686,P06911,P34901,P35280,P47727,P83121,Q7TP52                      |
| 154 | 1,2,3,4,5,2<br>7,30,35 | 6,7,8,28,2<br>9,31,32,33<br>,34 | 3  | P06911,P47727,P60905                                                  |
| 155 | 1,2,3,4,5,2<br>7,31,32 | 6,7,8,28,2<br>9,30,33,34<br>,35 | 3  | P05539,Q7TP52,Q99068                                                  |
| 156 | 1,2,3,4,5,2<br>7,31,33 | 6,7,8,28,2<br>9,30,32,34<br>,35 | 4  | P60905,Q4FZU2,Q7TP52,Q99068                                           |
| 157 | 1,2,3,4,5,2<br>7,31,34 | 6,7,8,28,2<br>9,30,32,33<br>,35 | 10 | A2RUV9,G3V686,O54728,P14408,P34901,P47727,P60905,Q03191,Q62997,Q7TP52 |
| 158 | 1,2,3,4,5,2<br>7,31,35 | 6,7,8,28,2<br>9,30,32,33<br>,34 | 3  | P47727,P60905,Q7TP52                                                  |
| 159 | 1,2,3,4,5,2<br>7,32,33 | 6,7,8,28,2<br>9,30,31,34<br>,35 | 6  | P55314,Q4FZU2,Q6IFW6,Q6IG02,Q6P6Q2,Q99068                             |
| 160 | 1,2,3,4,5,2<br>7,32,34 | 6,7,8,28,2<br>9,30,31,33<br>,35 | 9  | G3V686,P34901,P55314,P83121,Q03191,Q10758,Q4FZU2,Q63661,Q7TP52        |
| 161 | 1,2,3,4,5,2<br>7,32,35 | 6,7,8,28,2<br>9,30,31,33<br>,34 | 2  | P60905,Q9QZK9                                                         |

|     |                        |                                 |    |                                                                                                                 |
|-----|------------------------|---------------------------------|----|-----------------------------------------------------------------------------------------------------------------|
| 162 | 1,2,3,4,5,2<br>7,33,34 | 6,7,8,28,2<br>9,30,31,32<br>,35 | 10 | G3V686,P06911,P14408,P34901,P60905,Q03191,Q4FZU2,Q62894,Q63661,Q7TP52                                           |
| 163 | 1,2,3,4,5,2<br>7,33,35 | 6,7,8,28,2<br>9,30,31,32<br>,34 | 4  | P06911,P60905,P63322,Q4FZU2                                                                                     |
| 164 | 1,2,3,4,5,2<br>7,34,35 | 6,7,8,28,2<br>9,30,31,32<br>,33 | 16 | G3V686,P02780,P06911,P12785,P14408,P34901,P47727,P60905,P82471,P83121,Q03191,Q62902,Q63556,Q63661,Q7TP52,Q9QZK9 |
| 165 | 1,2,3,4,5,2<br>8,29,30 | 6,7,8,27,3<br>1,32,33,34<br>,35 | 6  | O54728,P01681,P01836,Q63942,Q6P777,Q9QW07                                                                       |
| 166 | 1,2,3,4,5,2<br>8,29,31 | 6,7,8,27,3<br>0,32,33,34<br>,35 | 6  | O54728,P01681,P01836,Q63942,Q6P777,Q9QW07                                                                       |
| 167 | 1,2,3,4,5,2<br>8,29,32 | 6,7,8,27,3<br>0,31,33,34<br>,35 | 6  | O54728,P01681,P01836,Q63942,Q6P777,Q9QW07                                                                       |
| 168 | 1,2,3,4,5,2<br>8,29,33 | 6,7,8,27,3<br>0,31,32,34<br>,35 | 4  | O54728,P01681,Q63942,Q6P777                                                                                     |
| 169 | 1,2,3,4,5,2<br>8,29,34 | 6,7,8,27,3<br>0,31,32,33<br>,35 | 10 | O54728,P01681,P01836,P27791,P52303,Q63942,Q6IRE4,Q6P777,Q9JJ22,Q9QW07                                           |
| 170 | 1,2,3,4,5,2<br>8,29,35 | 6,7,8,27,3<br>0,31,32,33<br>,34 | 5  | O54728,P01681,P01946,Q63942,Q9QW07                                                                              |
| 171 | 1,2,3,4,5,2<br>8,30,31 | 6,7,8,27,2<br>9,32,33,34<br>,35 | 3  | O54728,P01681,P01836                                                                                            |
| 172 | 1,2,3,4,5,2<br>8,30,32 | 6,7,8,27,2<br>9,31,33,34<br>,35 | 4  | O54728,P01681,P01836,Q6P777                                                                                     |
| 173 | 1,2,3,4,5,2<br>8,30,33 | 6,7,8,27,2<br>9,31,32,34<br>,35 | 1  | O54728                                                                                                          |
| 174 | 1,2,3,4,5,2<br>8,30,34 | 6,7,8,27,2<br>9,31,32,33<br>,35 | 10 | O54728,P01681,P01836,P34901,P35280,P52303,Q62894,Q6IRE4,Q920G2,Q9ESW0                                           |
| 175 | 1,2,3,4,5,2<br>8,30,35 | 6,7,8,27,2<br>9,31,32,33<br>,34 | 2  | O54728,P01681                                                                                                   |
| 176 | 1,2,3,4,5,2<br>8,31,32 | 6,7,8,27,2<br>9,30,33,34<br>,35 | 3  | O54728,P01836,Q6P777                                                                                            |

|     |                        |                                 |    |                                                                       |
|-----|------------------------|---------------------------------|----|-----------------------------------------------------------------------|
| 177 | 1,2,3,4,5,2<br>8,31,33 | 6,7,8,27,2<br>9,30,32,34<br>,35 | 1  | O54728                                                                |
| 178 | 1,2,3,4,5,2<br>8,31,34 | 6,7,8,27,2<br>9,30,32,33<br>,35 | 6  | O54728,P01836,P34901,Q62997,Q6IRE4,Q9QW07                             |
| 179 | 1,2,3,4,5,2<br>8,31,35 | 6,7,8,27,2<br>9,30,32,33<br>,34 | 2  | O54728,P01681                                                         |
| 180 | 1,2,3,4,5,2<br>8,32,33 | 6,7,8,27,2<br>9,30,31,34<br>,35 | 3  | O54728,P55314,Q6P777                                                  |
| 181 | 1,2,3,4,5,2<br>8,32,34 | 6,7,8,27,2<br>9,30,31,33<br>,35 | 9  | O54728,P01836,P34901,P52303,Q62894,Q63661,Q6IRE4,Q6P777,Q9QW07        |
| 182 | 1,2,3,4,5,2<br>8,32,35 | 6,7,8,27,2<br>9,30,31,33<br>,34 | 4  | O54728,P01681,P11598,Q6P777                                           |
| 183 | 1,2,3,4,5,2<br>8,33,34 | 6,7,8,27,2<br>9,30,31,32<br>,35 | 6  | O54728,P34901,Q62894,Q6IRE4,Q6P777,Q9JJ22                             |
| 184 | 1,2,3,4,5,2<br>8,33,35 | 6,7,8,27,2<br>9,30,31,32<br>,34 | 3  | O54728,P01681,Q6AYR9                                                  |
| 185 | 1,2,3,4,5,2<br>8,34,35 | 6,7,8,27,2<br>9,30,31,32<br>,33 | 10 | O54728,P01681,P12785,P52303,Q62902,Q6AY61,Q6IRE4,Q9ESW0,Q9JJ22,Q9QW07 |
| 186 | 1,2,3,4,5,2<br>9,30,31 | 6,7,8,27,2<br>8,32,33,34<br>,35 | 1  | P01836                                                                |
| 187 | 1,2,3,4,5,2<br>9,30,32 | 6,7,8,27,2<br>8,31,33,34<br>,35 | 1  | P01836                                                                |
| 188 | 1,2,3,4,5,2<br>9,30,33 | 6,7,8,27,2<br>8,31,32,34<br>,35 | 0  |                                                                       |
| 189 | 1,2,3,4,5,2<br>9,30,34 | 6,7,8,27,2<br>8,31,32,33<br>,35 | 6  | P01836,P34901,P35280,Q6IRE4,Q9JJ22,Q9QW07                             |
| 190 | 1,2,3,4,5,2<br>9,30,35 | 6,7,8,27,2<br>8,31,32,33<br>,34 | 3  | P01681,P14480,P97584                                                  |
| 191 | 1,2,3,4,5,2<br>9,31,32 | 6,7,8,27,2<br>8,30,33,34<br>,35 | 2  | P01836,Q8CJD3                                                         |

|     |                        |                                 |    |                                                                                     |
|-----|------------------------|---------------------------------|----|-------------------------------------------------------------------------------------|
| 192 | 1,2,3,4,5,2<br>9,31,33 | 6,7,8,27,2<br>8,30,32,34<br>,35 | 0  |                                                                                     |
| 193 | 1,2,3,4,5,2<br>9,31,34 | 6,7,8,27,2<br>8,30,32,33<br>,35 | 6  | O54728,P01836,Q62997,Q6IRE4,Q9JJ22,Q9QW07                                           |
| 194 | 1,2,3,4,5,2<br>9,31,35 | 6,7,8,27,2<br>8,30,32,33<br>,34 | 1  | P97584                                                                              |
| 195 | 1,2,3,4,5,2<br>9,32,33 | 6,7,8,27,2<br>8,30,31,34<br>,35 | 2  | P55314,Q8CJD3                                                                       |
| 196 | 1,2,3,4,5,2<br>9,32,34 | 6,7,8,27,2<br>8,30,31,33<br>,35 | 7  | G3V686,P01836,P34901,Q63661,Q6IRE4,Q9JJ22,Q9QW07                                    |
| 197 | 1,2,3,4,5,2<br>9,32,35 | 6,7,8,27,2<br>8,30,31,33<br>,34 | 1  | P01681                                                                              |
| 198 | 1,2,3,4,5,2<br>9,33,34 | 6,7,8,27,2<br>8,30,31,32<br>,35 | 4  | P34901,Q63661,Q6IRE4,Q9JJ22                                                         |
| 199 | 1,2,3,4,5,2<br>9,33,35 | 6,7,8,27,2<br>8,30,31,32<br>,34 | 2  | P97840,Q9WTT6                                                                       |
| 200 | 1,2,3,4,5,2<br>9,34,35 | 6,7,8,27,2<br>8,30,31,32<br>,33 | 8  | P01946,P12020,P31044,P47727,Q63661,Q6IRE4,Q9JJ22,Q9QW07                             |
| 201 | 1,2,3,4,5,3<br>0,31,32 | 6,7,8,27,2<br>8,29,33,34<br>,35 | 2  | P01836,Q62997                                                                       |
| 202 | 1,2,3,4,5,3<br>0,31,33 | 6,7,8,27,2<br>8,29,32,34<br>,35 | 3  | P51907,P60905,Q62997                                                                |
| 203 | 1,2,3,4,5,3<br>0,31,34 | 6,7,8,27,2<br>8,29,32,33<br>,35 | 11 | O54728,P01836,P08723,P34901,P35280,P47727,P60905,P82471,Q62997,Q6IRE4,Q9JHB9        |
| 204 | 1,2,3,4,5,3<br>0,31,35 | 6,7,8,27,2<br>8,29,32,33<br>,34 | 12 | P02781,P08010,P08723,P09456,P24368,P47727,P60905,P82471,P97584,Q62902,Q62997,Q9JHB9 |
| 205 | 1,2,3,4,5,3<br>0,32,33 | 6,7,8,27,2<br>8,29,31,34<br>,35 | 2  | P02782,P55314                                                                       |
| 206 | 1,2,3,4,5,3<br>0,32,34 | 6,7,8,27,2<br>8,29,31,33<br>,35 | 7  | P01836,P02782,P34901,P35280,P55314,P82471,Q63661                                    |

|     |                        |                                   |    |                                                                                                                                                                                       |
|-----|------------------------|-----------------------------------|----|---------------------------------------------------------------------------------------------------------------------------------------------------------------------------------------|
| 207 | 1,2,3,4,5,3<br>0,32,35 | 6,7,8,27,2<br>8,29,31,33<br>,34   | 4  | P02781,P02782,P82471,Q62902                                                                                                                                                           |
| 208 | 1,2,3,4,5,3<br>0,33,34 | 6,7,8,27,2<br>8,29,31,32<br>,35   | 12 | P02782,P06911,P22985,P34901,P35280,P60905,P82471,Q62894,Q62902,Q63661,Q9JHB9,Q9JJ22                                                                                                   |
| 209 | 1,2,3,4,5,3<br>0,33,35 | 6,7,8,27,2<br>8,29,31,32<br>,34   | 8  | P02782,P06911,P24368,P47727,P60905,P82471,Q62902,Q9JHB9                                                                                                                               |
| 210 | 1,2,3,4,5,3<br>0,34,35 | 6,7,8,27,2<br>8,29,31,32<br>,33   | 25 | P02781,P02782,P02793,Q7TP54,P06911,P08010,P08723,P09456,P12020,P22283,P22985,P24368,P35280,P47727,P60905,P82471,P83121,Q5GRG2,Q62902,Q63661,Q6PCU2,Q8CJ52,Q920G2,Q9ESW0,Q9JHB9,Q9JJ22 |
| 211 | 1,2,3,4,5,3<br>1,32,33 | 6,7,8,27,2<br>8,29,30,34<br>,35   | 5  | P02782,P55314,P60905,Q62997,Q8CJD3                                                                                                                                                    |
| 212 | 1,2,3,4,5,3<br>1,32,34 | 6,7,8,27,2<br>8,29,30,33<br>,35   | 12 | G3V686,O54728,P01836,P02781,P02782,P08723,P0C0A9,P34901,P60905,P82471,Q62997,Q63661                                                                                                   |
| 213 | 1,2,3,4,5,3<br>1,32,35 | 6,7,8,27,2<br>8,29,30,33<br>,34   | 8  | P02781,P02782,P30120,P60905,P82471,Q62997,Q6AYR9,Q9JHB9                                                                                                                               |
| 214 | 1,2,3,4,5,3<br>1,33,34 | 6,7,8,27,2<br>8,29,30,32<br>,35   | 11 | O54728,P02781,P02782,P08010,P0C0A9,P34901,P60905,P82471,Q62997,Q63355,Q9JHB9                                                                                                          |
| 215 | 1,2,3,4,5,3<br>1,33,35 | 6,7,8,27,2<br>8,29,30,32<br>,34   | 13 | P02781,P02782,P08010,P24368,P30120,P52590,P60905,P82471,Q62997,Q63355,Q6AYR9,Q9JHB9,Q9WTT6                                                                                            |
| 216 | 1,2,3,4,5,3<br>1,34,35 | 6,7,8,27,2<br>8,29,30,32<br>,33   | 18 | O54728,P02781,P02782,P08010,P08723,P09456,P0C0A9,P22283,P24368,P30120,P47727,P60905,P82471,Q62902,Q62997,Q63355,Q8CJ52,Q9JHB9                                                         |
| 217 | 1,2,3,4,5,3<br>2,33,34 | 6,7,8,27,2<br>8,29,30,31<br>,35   | 9  | G3V686,P02781,P02782,P34901,P55314,P60905,P82471,Q62894,Q63661                                                                                                                        |
| 218 | 1,2,3,4,5,3<br>2,33,35 | 6,7,8,27,2<br>8,29,30,31<br>,34   | 8  | P02781,P02782,P55314,P60905,P82471,Q62902,Q6AYR9,Q9WTT6                                                                                                                               |
| 219 | 1,2,3,4,5,3<br>2,34,35 | 6,7,8,27,2<br>8,29,30,31<br>,33   | 21 | P02781,P02782,P06911,P08010,P08723,P08753,P0C0A9,P19629,P22283,P30120,P34901,P60905,P82471,P83121,Q5GRG2,Q62902,Q63661,Q6AYR9,Q8CJ52,Q9JHB9,Q9QZK9                                    |
| 220 | 1,2,3,4,5,3<br>3,34,35 | 6,7,8,27,2<br>8,29,30,31<br>,32   | 22 | P02781,P02782,P06911,P08010,P08723,P0C0A9,P12020,P24368,P30120,P34901,P47727,P60905,P82471,Q5GRG2,Q62894,Q62902,Q63355,Q63661,Q6AYR9,Q8CJ52,Q9JHB9,Q9JJ22                             |
| 221 | 1,2,3,4,6,7<br>,8,27   | 5,28,29,30<br>,31,32,33,<br>34,35 | 19 | D3ZUK3,G3V686,P01041,P02631,P07171,P08649,P14669,P16086,P18418,P20762,Q09030,Q30KJ2,Q63532,Q64057,Q6IE51,Q7TP52,Q8CJD3,Q9QZQ5,Q9R0T3                                                  |

|     |                       |                                   |    |                                                                                                                                                    |
|-----|-----------------------|-----------------------------------|----|----------------------------------------------------------------------------------------------------------------------------------------------------|
| 222 | 1,2,3,4,6,7<br>,8,28  | 5,27,29,30<br>,31,32,33,<br>34,35 | 17 | D3ZUK3,P01681,P01836,P02631,P07171,P12020,P16086,P18418,P42854,Q09030,Q30KJ2,Q498R7,Q63942,Q6IE51,Q7TP52,Q9QZQ5,Q9R0T3                             |
| 223 | 1,2,3,4,6,7<br>,8,29  | 5,27,28,30<br>,31,32,33,<br>34,35 | 14 | D3ZUK3,P01041,P01836,P02631,P16086,P20762,P25236,Q30KJ2,Q63514,Q63617,Q6IE51,Q7TP52,Q8CJD3,Q9QZQ5                                                  |
| 224 | 1,2,3,4,6,7<br>,8,30  | 5,27,28,29<br>,31,32,33,<br>34,35 | 19 | D3ZUK3,O88267,P01041,P01836,P02631,P16086,P20762,P35446,P42854,P47967,Q09030,Q30KJ2,Q498R7,Q4V885,Q63514,Q64057,Q6IE51,Q7TP52,Q9QZQ5               |
| 225 | 1,2,3,4,6,7<br>,8,31  | 5,27,28,29<br>,30,32,33,<br>34,35 | 17 | D3ZUK3,P01836,P02625,P02631,P08010,P12020,P16086,P20762,P20766,P25236,P42854,Q09030,Q30KJ2,Q6IE51,Q7TP52,Q8CJD3,Q9QZQ5                             |
| 226 | 1,2,3,4,6,7<br>,8,32  | 5,27,28,29<br>,30,31,33,<br>34,35 | 19 | D3ZUK3,O88267,P01041,P01836,P02631,P12020,P16086,P20762,P20766,P42854,P97580,Q09030,Q30KJ2,Q63317,Q63532,Q6IE51,Q7TP52,Q8CJD3,Q9QZQ5               |
| 227 | 1,2,3,4,6,7<br>,8,33  | 5,27,28,29<br>,30,31,32,<br>34,35 | 16 | D3ZUK3,P02631,P15399,P16086,P18418,P20762,P97580,Q09030,Q30KJ2,Q63617,Q6IE51,Q7TP52,Q8CJD3,Q99041,Q9QUL6,Q9QZQ5                                    |
| 228 | 1,2,3,4,6,7<br>,8,34  | 5,27,28,29<br>,30,31,32,<br>33,35 | 21 | D3ZUK3,G3V686,P01041,P01836,P02631,P08010,P16086,P17559,P20766,P36374,P47967,Q08464,Q09030,Q30KJ2,Q63514,Q63532,Q6IE51,Q6P6R2,Q7TP52,Q9JJ22,Q9QZQ5 |
| 229 | 1,2,3,4,6,7<br>,8,35  | 5,27,28,29<br>,30,31,32,<br>33,34 | 21 | D3ZUK3,O88267,P01041,P02631,P02770,P05369,P08010,P14480,P15399,P16086,P20761,P20762,P97580,Q09030,Q30KJ2,Q63514,Q64057,Q6IE51,Q6IE52,Q7TP52,Q9QZQ5 |
| 230 | 1,2,3,4,6,7<br>,27,28 | 5,8,29,30,<br>31,32,33,3<br>4,35  | 14 | G3V686,P01681,P01836,P02631,P08649,P12020,P16086,P18418,Q09030,Q30KJ2,Q498R7,Q6IE51,Q7TP52,Q9QZQ5                                                  |
| 231 | 1,2,3,4,6,7<br>,27,29 | 5,8,28,30,<br>31,32,33,3<br>4,35  | 13 | G3V686,P01836,P02631,P08649,P13596,P13852,P16086,P25236,Q63532,Q6IE51,Q7TP52,Q8CJD3,Q9QZQ5                                                         |
| 232 | 1,2,3,4,6,7<br>,27,30 | 5,8,28,29,<br>31,32,33,3<br>4,35  | 16 | D3ZUK3,G3V686,P01836,P02631,P08649,P16086,P42854,P47967,Q09030,Q30KJ2,Q498R7,Q63532,Q6AYQ8,Q6IE51,Q7TP52,Q9QZQ5                                    |
| 233 | 1,2,3,4,6,7<br>,27,31 | 5,8,28,29,<br>30,32,33,3<br>4,35  | 16 | G3V686,P01836,P02625,P02631,P08649,P12020,P16086,P25236,P42854,Q09030,Q30KJ2,Q63532,Q6IE51,Q7TP52,Q8CJD3,Q9QZQ5                                    |
| 234 | 1,2,3,4,6,7<br>,27,32 | 5,8,28,29,<br>30,31,33,3<br>4,35  | 18 | G3V686,P01041,P01836,P02631,P05539,P08649,P13596,P13852,P16086,P97580,Q09030,Q30KJ2,Q63532,Q6IE51,Q7TP52,Q8CJD3,Q99068,Q9QZQ5                      |
| 235 | 1,2,3,4,6,7<br>,27,33 | 5,8,28,29,<br>30,31,32,3<br>4,35  | 15 | D3ZUK3,G3V686,P02631,P08649,P13852,P15399,P16086,P97580,Q09030,Q30KJ2,Q63532,Q6IE51,Q7TP52,Q8CJD3,Q9QZQ5                                           |
| 236 | 1,2,3,4,6,7<br>,27,34 | 5,8,28,29,<br>30,31,32,3<br>3,35  | 20 | D3ZUK3,G3V686,P01041,P01836,P02631,P05964,P08649,P16086,P17559,P47967,P70709,P85971,P97840,Q09030,Q30KJ2,Q4FZU6,Q63532,Q6IE51,Q7TP52,Q9QZQ5        |



|     |                       |                                  |    |                                                                                                                               |
|-----|-----------------------|----------------------------------|----|-------------------------------------------------------------------------------------------------------------------------------|
| 237 | 1,2,3,4,6,7<br>,27,35 | 5,8,28,29,<br>30,31,32,3<br>3,34 | 15 | G3V686,P01946,P02631,P02770,P08649,P14480,P15399,P16086,P97580,Q09030,Q30KJ2,Q63532,Q6IE51,Q7TP52,Q9QZQ5                      |
| 238 | 1,2,3,4,6,7<br>,28,29 | 5,8,27,30,<br>31,32,33,3<br>4,35 | 11 | P01681,P01836,P02631,P15399,P16086,Q30KJ2,Q498R7,Q63942,Q6IE51,Q7TP52,Q9QZQ5                                                  |
| 239 | 1,2,3,4,6,7<br>,28,30 | 5,8,27,29,<br>31,32,33,3<br>4,35 | 12 | P01681,P01836,P02631,P16086,P42854,P47967,Q09030,Q30KJ2,Q498R7,Q6AYQ8,Q6IE51,Q7TP52                                           |
| 240 | 1,2,3,4,6,7<br>,28,31 | 5,8,27,29,<br>30,32,33,3<br>4,35 | 13 | P01836,P02625,P02631,P06760,P12020,P15399,P16086,P42854,Q30KJ2,Q498R7,Q5GRG2,Q6IE51,Q7TP52                                    |
| 241 | 1,2,3,4,6,7<br>,28,32 | 5,8,27,29,<br>30,31,33,3<br>4,35 | 12 | P01041,P01836,P02631,P12020,P15399,P16086,P97580,Q09030,Q30KJ2,Q63532,Q6IE51,Q7TP52                                           |
| 242 | 1,2,3,4,6,7<br>,28,33 | 5,8,27,29,<br>30,31,32,3<br>4,35 | 10 | P01836,P02631,P06760,P15399,P16086,P97580,Q30KJ2,Q498R7,Q6IE51,Q7TP52                                                         |
| 243 | 1,2,3,4,6,7<br>,28,34 | 5,8,27,29,<br>30,31,32,3<br>3,35 | 18 | G3V686,P01041,P01836,P02631,P16086,P17559,P27791,P47967,P97615,P97840,Q09030,Q30KJ2,Q4FZU6,Q5HZV9,Q63532,Q6IE51,Q7TP52,Q9QZQ5 |
| 244 | 1,2,3,4,6,7<br>,28,35 | 5,8,27,29,<br>30,31,32,3<br>3,34 | 14 | P01681,P01836,P02631,P02770,P06760,P14480,P15399,P16086,P20761,P97580,Q30KJ2,Q498R7,Q6IE51,Q7TP52                             |
| 245 | 1,2,3,4,6,7<br>,29,30 | 5,8,27,28,<br>31,32,33,3<br>4,35 | 11 | P01041,P01836,P02631,P14480,P16086,P25236,P42854,Q498R7,Q6IE51,Q7TP52,Q9QZQ5                                                  |
| 246 | 1,2,3,4,6,7<br>,29,31 | 5,8,27,28,<br>30,32,33,3<br>4,35 | 12 | P01836,P02625,P02631,P15399,P16086,P25236,P42854,Q30KJ2,Q6IE51,Q7TP52,Q8CJD3,Q9QZQ5                                           |
| 247 | 1,2,3,4,6,7<br>,29,32 | 5,8,27,28,<br>30,31,33,3<br>4,35 | 16 | G3V686,P01041,P01836,P02631,P05539,P15399,P16086,P25236,P55053,P97580,Q30KJ2,Q63532,Q6IE51,Q7TP52,Q8CJD3,Q9QZQ5               |
| 248 | 1,2,3,4,6,7<br>,29,33 | 5,8,27,28,<br>30,31,32,3<br>4,35 | 10 | P01836,P02631,P15399,P16086,P97580,Q30KJ2,Q6IE51,Q7TP52,Q8CJD3,Q9QZQ5                                                         |
| 249 | 1,2,3,4,6,7<br>,29,34 | 5,8,27,28,<br>30,31,32,3<br>3,35 | 15 | G3V686,P01041,P01836,P02631,P05964,P09605,P25809,P16086,P25236,P83748,Q63467,Q63532,Q6IE51,Q7TP52,Q9JJ22,Q9QZQ5               |
| 250 | 1,2,3,4,6,7<br>,29,35 | 5,8,27,28,<br>30,31,32,3<br>3,34 | 15 | P01681,P01836,P01946,P02091,P02631,P02770,P14480,P15399,P16086,P20762,P25236,P97580,Q30KJ2,Q6IE51,Q7TP52                      |
| 251 | 1,2,3,4,6,7<br>,30,31 | 5,8,27,28,<br>29,32,33,3<br>4,35 | 12 | P01836,P02625,P02631,P16086,P25236,P35446,P42854,P47967,Q30KJ2,Q498R7,Q6IE51,Q7TP52                                           |

|     |                       |                                  |    |                                                                                                                                                    |
|-----|-----------------------|----------------------------------|----|----------------------------------------------------------------------------------------------------------------------------------------------------|
| 252 | 1,2,3,4,6,7<br>,30,32 | 5,8,27,28,<br>29,31,33,3<br>4,35 | 12 | P01041,P01836,P02631,P16086,P42854,P97580,Q09030,Q30KJ2,Q63532,Q6IE51,Q7TP52,Q9QZQ5                                                                |
| 253 | 1,2,3,4,6,7<br>,30,33 | 5,8,27,28,<br>29,31,32,3<br>4,35 | 12 | P01836,P02631,P15399,P16086,P35446,P42854,P97580,Q30KJ2,Q498R7,Q6IE51,Q7TP52,Q9QZQ5                                                                |
| 254 | 1,2,3,4,6,7<br>,30,34 | 5,8,27,28,<br>29,31,32,3<br>3,35 | 18 | D3ZUK3,G3V686,P01041,P01836,P02631,P05964,P09605;P25809,P16086,P17559,P42854,P47967,P97840,Q09030,Q63532,Q6IE51,Q7TP52,Q9JJ22,Q9QZQ5               |
| 255 | 1,2,3,4,6,7<br>,30,35 | 5,8,27,28,<br>29,31,32,3<br>3,34 | 15 | P01836,P02631,P02770,P08010,P14480,P15399,P16086,P20761,P42854,P97580,P97584,Q30KJ2,Q498R7,Q6IE51,Q7TP52                                           |
| 256 | 1,2,3,4,6,7<br>,31,32 | 5,8,27,28,<br>29,30,33,3<br>4,35 | 18 | G3V686,P01041,P01836,P02625,P02631,P05539,P12020,P15399,P16086,P25236,P42854,P97580,Q09030,Q30KJ2,Q63532,Q6IE51,Q7TP52,Q8CJD3                      |
| 257 | 1,2,3,4,6,7<br>,31,33 | 5,8,27,28,<br>29,30,32,3<br>4,35 | 12 | P01836,P02625,P02631,P15399,P16086,P42854,P97580,Q30KJ2,Q6IE51,Q7TP52,Q8CJD3,Q9QZQ5                                                                |
| 258 | 1,2,3,4,6,7<br>,31,34 | 5,8,27,28,<br>29,30,32,3<br>3,35 | 20 | G3V686,P01836,P02625,P02631,P08010,P09605;P25809,P16086,P17559,P25236,P42854,P47967,P70709,P83748,Q09030,Q30KJ2,Q62997,Q63532,Q6IE51,Q7TP52,Q9QZQ5 |
| 259 | 1,2,3,4,6,7<br>,31,35 | 5,8,27,28,<br>29,30,32,3<br>3,34 | 18 | P01836,P02625,P02631,P02770,P02781,P05369,P06760,P08010,P14480,P15399,P16086,P20761,P25236,P42854,P97580,Q30KJ2,Q6IE51,Q7TP52                      |
| 260 | 1,2,3,4,6,7<br>,32,33 | 5,8,27,28,<br>29,30,31,3<br>4,35 | 18 | G3V686,O35783,P01041,P01836,P02631,P02793;Q7TP54,P05539,P15399,P16086,P55314,P97580,Q09030,Q30KJ2,Q63532,Q6IE51,Q7TP52,Q8CJD3,Q9QZQ5               |
| 261 | 1,2,3,4,6,7<br>,32,34 | 5,8,27,28,<br>29,30,31,3<br>3,35 | 20 | G3V686,O35783,P01041,P01836,P02631,P05539,P09605;P25809,P16086,P17559,P47967,P55314,P70709,P97580,Q09030,Q30KJ2,Q63532,Q63661,Q6IE51,Q7TP52,Q9QZQ5 |
| 262 | 1,2,3,4,6,7<br>,32,35 | 5,8,27,28,<br>29,30,31,3<br>3,34 | 15 | P01041,P01836,P02631,P02770,P02781,P08010,P14480,P15399,P16086,P97580,Q09030,Q30KJ2,Q63532,Q6IE51,Q7TP52                                           |
| 263 | 1,2,3,4,6,7<br>,33,34 | 5,8,27,28,<br>29,30,31,3<br>2,35 | 19 | D3ZUK3,G3V686,O35783,P01836,P02631,P08010,P08649,P15399,P16086,P17559,P47967,P97580,Q09030,Q30KJ2,Q63532,Q6IE51,Q7TP52,Q9JJ22,Q9QZQ5               |
| 264 | 1,2,3,4,6,7<br>,33,35 | 5,8,27,28,<br>29,30,31,3<br>2,34 | 12 | P02631,P02770,P06760,P08010,P14480,P15399,P16086,P20761,P97580,Q30KJ2,Q6IE51,Q7TP52                                                                |
| 265 | 1,2,3,4,6,7<br>,34,35 | 5,8,27,28,<br>29,30,31,3<br>2,33 | 19 | G3V686,P01041,P01836,P02631,P02770,P02781,P08010,P14480,P15399,P16086,P82471,P97580,Q09030,Q30KJ2,Q63532,Q63661,Q6IE51,Q7TP52,Q9JJ22               |
| 266 | 1,2,3,4,6,8<br>,27,28 | 5,7,29,30,<br>31,32,33,3<br>4,35 | 4  | P01681,Q5XI22,Q63942,Q7TP52                                                                                                                        |

|     |                       |                                  |    |                                                                                            |
|-----|-----------------------|----------------------------------|----|--------------------------------------------------------------------------------------------|
| 267 | 1,2,3,4,6,8<br>.27,29 | 5,7,28,30,<br>31,32,33,3<br>4,35 | 4  | P14669,P25236,Q7TP52,Q8CJD3                                                                |
| 268 | 1,2,3,4,6,8<br>.27,30 | 5,7,28,29,<br>31,32,33,3<br>4,35 | 3  | P14669,Q6AYQ8,Q7TP52                                                                       |
| 269 | 1,2,3,4,6,8<br>.27,31 | 5,7,28,29,<br>30,32,33,3<br>4,35 | 4  | P02625,P25236,Q7TP52,Q8CJD3                                                                |
| 270 | 1,2,3,4,6,8<br>.27,32 | 5,7,28,29,<br>30,31,33,3<br>4,35 | 3  | P14669,Q7TP52,Q8CJD3                                                                       |
| 271 | 1,2,3,4,6,8<br>.27,33 | 5,7,28,29,<br>30,31,32,3<br>4,35 | 6  | D3ZUK3,P14669,Q4FZU2,Q63355,Q7TP52,Q8CJD3                                                  |
| 272 | 1,2,3,4,6,8<br>.27,34 | 5,7,28,29,<br>30,31,32,3<br>3,35 | 10 | D3ZUK3,G3V686,P70709,Q4FZU6,Q5QE79,Q63355,Q64361,Q6P6R2,Q7TP52,Q9WTT6                      |
| 273 | 1,2,3,4,6,8<br>.27,35 | 5,7,28,29,<br>30,31,32,3<br>3,34 | 5  | B0BNN3,P02770,Q30KJ2,Q63355,Q7TP52                                                         |
| 274 | 1,2,3,4,6,8<br>.28,29 | 5,7,27,30,<br>31,32,33,3<br>4,35 | 4  | O35547,P01681,Q5QE79,Q63942                                                                |
| 275 | 1,2,3,4,6,8<br>.28,30 | 5,7,27,29,<br>31,32,33,3<br>4,35 | 3  | P01681,Q63942,Q6AYQ8                                                                       |
| 276 | 1,2,3,4,6,8<br>.28,31 | 5,7,27,29,<br>30,32,33,3<br>4,35 | 5  | P01681,P02625,P20766,Q63942,Q7TP52                                                         |
| 277 | 1,2,3,4,6,8<br>.28,32 | 5,7,27,29,<br>30,31,33,3<br>4,35 | 3  | P01681,P01836,Q63942                                                                       |
| 278 | 1,2,3,4,6,8<br>.28,33 | 5,7,27,29,<br>30,31,32,3<br>4,35 | 1  | Q63942                                                                                     |
| 279 | 1,2,3,4,6,8<br>.28,34 | 5,7,27,29,<br>30,31,32,3<br>3,35 | 13 | P01681,P20766,P52303,Q4FZU6,Q5HZV9,Q5QE79,Q62894,Q63942,Q6AY61,Q6P6R2,Q7TP52,Q9JJ22,Q9WTT6 |
| 280 | 1,2,3,4,6,8<br>.28,35 | 5,7,27,29,<br>30,31,32,3<br>3,34 | 6  | B0BNN3,P01681,P02770,Q30KJ2,Q5XI22,Q63942                                                  |
| 281 | 1,2,3,4,6,8<br>.29,30 | 5,7,27,28,<br>31,32,33,3<br>4,35 | 3  | B0BNN3,P01681,P25236                                                                       |

|     |                       |                                  |    |                                                                              |
|-----|-----------------------|----------------------------------|----|------------------------------------------------------------------------------|
| 282 | 1,2,3,4,6,8<br>,29,31 | 5,7,27,28,<br>30,32,33,3<br>4,35 | 4  | P02625,P25236,Q7TP52,Q8CJD3                                                  |
| 283 | 1,2,3,4,6,8<br>,29,32 | 5,7,27,28,<br>30,31,33,3<br>4,35 | 3  | P25236,Q6TMA8,Q8CJD3                                                         |
| 284 | 1,2,3,4,6,8<br>,29,33 | 5,7,27,28,<br>30,31,32,3<br>4,35 | 2  | Q8CJD3,Q9QUL6                                                                |
| 285 | 1,2,3,4,6,8<br>,29,34 | 5,7,27,28,<br>30,31,32,3<br>3,35 | 6  | G3V686,P25236,Q5QE79,Q7TP52,Q9JJ22,Q9WTT6                                    |
| 286 | 1,2,3,4,6,8<br>,29,35 | 5,7,27,28,<br>30,31,32,3<br>3,34 | 8  | B0BNN3,P01681,P02770,P14480,P20762,P25236,Q30KJ2,Q6IE52                      |
| 287 | 1,2,3,4,6,8<br>,30,31 | 5,7,27,28,<br>29,32,33,3<br>4,35 | 4  | P02625,P25236,Q7TP52,Q80WL1                                                  |
| 288 | 1,2,3,4,6,8<br>,30,32 | 5,7,27,28,<br>29,31,33,3<br>4,35 | 2  | P01836,Q7TP52                                                                |
| 289 | 1,2,3,4,6,8<br>,30,33 | 5,7,27,28,<br>29,31,32,3<br>4,35 | 3  | B0BNN3,Q7TP52,Q9QUL6                                                         |
| 290 | 1,2,3,4,6,8<br>,30,34 | 5,7,27,28,<br>29,31,32,3<br>3,35 | 7  | B0BNN3,P47967,Q62894,Q6P6R2,Q7TP52,Q9JJ22,Q9WTT6                             |
| 291 | 1,2,3,4,6,8<br>,30,35 | 5,7,27,28,<br>29,31,32,3<br>3,34 | 7  | B0BNN3,P01681,P02770,P14480,P20761,Q30KJ2,Q7TP52                             |
| 292 | 1,2,3,4,6,8<br>,31,32 | 5,7,27,28,<br>29,30,33,3<br>4,35 | 5  | P02625,P20766,P25236,Q7TP52,Q8CJD3                                           |
| 293 | 1,2,3,4,6,8<br>,31,33 | 5,7,27,28,<br>29,30,32,3<br>4,35 | 6  | P02625,Q30KJ2,Q63355,Q7TP52,Q8CJD3,Q9QUL6                                    |
| 294 | 1,2,3,4,6,8<br>,31,34 | 5,7,27,28,<br>29,30,32,3<br>3,35 | 8  | G3V686,P02625,P20766,P25236,P70709,Q62997,Q63355,Q7TP52                      |
| 295 | 1,2,3,4,6,8<br>,31,35 | 5,7,27,28,<br>29,30,32,3<br>3,34 | 11 | B0BNN3,P02625,P02770,P05369,P10959,P20766,P25236,Q30KJ2,Q63355,Q6IE52,Q7TP52 |
| 296 | 1,2,3,4,6,8<br>,32,33 | 5,7,27,28,<br>29,30,31,3<br>4,35 | 6  | P55314,P97580,Q30KJ2,Q7TP52,Q8CJD3,Q9QUL6                                    |

|     |                        |                                  |    |                                                                                                                 |
|-----|------------------------|----------------------------------|----|-----------------------------------------------------------------------------------------------------------------|
| 297 | 1,2,3,4,6,8<br>,32,34  | 5,7,27,28,<br>29,30,31,3<br>3,35 | 12 | G3V686,P08753,P20766,P36374,P52303,P70709,Q4FZU6,Q5QE79,Q62894,Q63661,Q6P6R2,Q7TP52                             |
| 298 | 1,2,3,4,6,8<br>,32,35  | 5,7,27,28,<br>29,30,31,3<br>3,34 | 4  | P02770,P97580,Q30KJ2,Q7TP52                                                                                     |
| 299 | 1,2,3,4,6,8<br>,33,34  | 5,7,27,28,<br>29,30,31,3<br>2,35 | 8  | B0BNN3,D3ZUK3,G3V686,Q4FZU6,Q62894,Q63355,Q7TP52,Q9JJ22                                                         |
| 300 | 1,2,3,4,6,8<br>,33,35  | 5,7,27,28,<br>29,30,31,3<br>2,34 | 9  | B0BNN3,P02770,P15399,P20761,P97580,Q30KJ2,Q63355,Q6IE52,Q7TP52                                                  |
| 301 | 1,2,3,4,6,8<br>,34,35  | 5,7,27,28,<br>29,30,31,3<br>2,33 | 16 | B0BNN3,P02770,P08010,P08753,P09006,P14480,P17475,P20766,P36374,P82471,Q30KJ2,Q5QE79,Q63355,Q6PCU2,Q7TP52,Q9JJ22 |
| 302 | 1,2,3,4,6,2<br>7,28,29 | 5,7,8,30,3<br>1,32,33,34<br>,35  | 5  | O35547,P01681,P08723,Q63942,Q9JI85                                                                              |
| 303 | 1,2,3,4,6,2<br>7,28,30 | 5,7,8,29,3<br>1,32,33,34<br>,35  | 4  | P01681,P01835,Q6AYQ8,Q7TP52                                                                                     |
| 304 | 1,2,3,4,6,2<br>7,28,31 | 5,7,8,29,3<br>0,32,33,34<br>,35  | 2  | P02625,Q7TP52                                                                                                   |
| 305 | 1,2,3,4,6,2<br>7,28,32 | 5,7,8,29,3<br>0,31,33,34<br>,35  | 3  | P01681,P01836,Q7TP52                                                                                            |
| 306 | 1,2,3,4,6,2<br>7,28,33 | 5,7,8,29,3<br>0,31,32,34<br>,35  | 2  | Q4FZU2,Q7TP52                                                                                                   |
| 307 | 1,2,3,4,6,2<br>7,28,34 | 5,7,8,29,3<br>0,31,32,33<br>,35  | 7  | G3V686,P04182,P70709,P97615,Q4FZU6,Q5HZV9,Q7TP52                                                                |
| 308 | 1,2,3,4,6,2<br>7,28,35 | 5,7,8,29,3<br>0,31,32,33<br>,34  | 3  | P01681,Q30KJ2,Q7TP52                                                                                            |
| 309 | 1,2,3,4,6,2<br>7,29,30 | 5,7,8,28,3<br>1,32,33,34<br>,35  | 3  | P01835,P25236,Q7TP52                                                                                            |
| 310 | 1,2,3,4,6,2<br>7,29,31 | 5,7,8,28,3<br>0,32,33,34<br>,35  | 4  | P02625,P25236,Q7TP52,Q8CJD3                                                                                     |
| 311 | 1,2,3,4,6,2<br>7,29,32 | 5,7,8,28,3<br>0,31,33,34<br>,35  | 4  | G3V686,P25236,Q7TP52,Q8CJD3                                                                                     |

|     |                        |                                 |    |                                                                              |
|-----|------------------------|---------------------------------|----|------------------------------------------------------------------------------|
| 312 | 1,2,3,4,6,2<br>7,29,33 | 5,7,8,28,3<br>0,31,32,34<br>,35 | 3  | Q4FZU2,Q7TP52,Q8CJD3                                                         |
| 313 | 1,2,3,4,6,2<br>7,29,34 | 5,7,8,28,3<br>0,31,32,33<br>,35 | 6  | G3V686,P05964,P25236,P70709,Q4FZU6,Q7TP52                                    |
| 314 | 1,2,3,4,6,2<br>7,29,35 | 5,7,8,28,3<br>0,31,32,33<br>,34 | 6  | B0BNN3,P01681,P01946,P14480,P25236,Q7TP52                                    |
| 315 | 1,2,3,4,6,2<br>7,30,31 | 5,7,8,28,2<br>9,32,33,34<br>,35 | 3  | P02625,P25236,Q7TP52                                                         |
| 316 | 1,2,3,4,6,2<br>7,30,32 | 5,7,8,28,2<br>9,31,33,34<br>,35 | 2  | P01836,Q7TP52                                                                |
| 317 | 1,2,3,4,6,2<br>7,30,33 | 5,7,8,28,2<br>9,31,32,34<br>,35 | 1  | Q7TP52                                                                       |
| 318 | 1,2,3,4,6,2<br>7,30,34 | 5,7,8,28,2<br>9,31,32,33<br>,35 | 6  | G3V686,P47967,P70709,P85971,Q4FZU6,Q7TP52                                    |
| 319 | 1,2,3,4,6,2<br>7,30,35 | 5,7,8,28,2<br>9,31,32,33<br>,34 | 7  | B0BNN3,P01681,P02770,P14480,Q30KJ2,Q6AYQ8,Q7TP52                             |
| 320 | 1,2,3,4,6,2<br>7,31,32 | 5,7,8,28,2<br>9,30,33,34<br>,35 | 5  | G3V686,P02625,P25236,Q7TP52,Q8CJD3                                           |
| 321 | 1,2,3,4,6,2<br>7,31,33 | 5,7,8,28,2<br>9,30,32,34<br>,35 | 6  | P02625,Q30KJ2,Q4FZU2,Q63355,Q7TP52,Q8CJD3                                    |
| 322 | 1,2,3,4,6,2<br>7,31,34 | 5,7,8,28,2<br>9,30,32,33<br>,35 | 9  | A2RUV9,G3V686,P02625,P25236,P70709,Q4FZU6,Q62997,Q63355,Q7TP52               |
| 323 | 1,2,3,4,6,2<br>7,31,35 | 5,7,8,28,2<br>9,30,32,33<br>,34 | 5  | P02625,P25236,Q30KJ2,Q63355,Q7TP52                                           |
| 324 | 1,2,3,4,6,2<br>7,32,33 | 5,7,8,28,2<br>9,30,31,34<br>,35 | 9  | G3V686,P55314,P97580,Q30KJ2,Q4FZU2,Q6IFW6,Q6P6Q2,Q7TP52,Q8CJD3               |
| 325 | 1,2,3,4,6,2<br>7,32,34 | 5,7,8,28,2<br>9,30,31,33<br>,35 | 11 | G3V686,P01836,P34901,P55314,P70709,Q10758,Q4FZU2,Q4FZU6,Q63532,Q63661,Q7TP52 |
| 326 | 1,2,3,4,6,2<br>7,32,35 | 5,7,8,28,2<br>9,30,31,33<br>,34 | 3  | P97580,Q30KJ2,Q7TP52                                                         |

|     |                        |                                 |    |                                                                              |
|-----|------------------------|---------------------------------|----|------------------------------------------------------------------------------|
| 327 | 1,2,3,4,6,2<br>7,33,34 | 5,7,8,28,2<br>9,30,31,32<br>,35 | 8  | G3V686,P34901,P70709,Q4FZU2,Q4FZU6,Q63355,Q63661,Q7TP52                      |
| 328 | 1,2,3,4,6,2<br>7,33,35 | 5,7,8,28,2<br>9,30,31,32<br>,34 | 7  | B0BNN3,P15399,P97580,Q30KJ2,Q4FZU2,Q63355,Q7TP52                             |
| 329 | 1,2,3,4,6,2<br>7,34,35 | 5,7,8,28,2<br>9,30,31,32<br>,33 | 11 | B0BNN3,G3V686,P09006,P12785,P14480,P82471,Q30KJ2,Q4FZU6,Q63355,Q63661,Q7TP52 |
| 330 | 1,2,3,4,6,2<br>8,29,30 | 5,7,8,27,3<br>1,32,33,34<br>,35 | 4  | P01681,P01835,P01836,Q63942                                                  |
| 331 | 1,2,3,4,6,2<br>8,29,31 | 5,7,8,27,3<br>0,32,33,34<br>,35 | 5  | P01681,P01836,P06911,P25236,Q63942                                           |
| 332 | 1,2,3,4,6,2<br>8,29,32 | 5,7,8,27,3<br>0,31,33,34<br>,35 | 4  | P01681,P01836,Q63942,Q6P777                                                  |
| 333 | 1,2,3,4,6,2<br>8,29,33 | 5,7,8,27,3<br>0,31,32,34<br>,35 | 3  | P01681,P15399,Q63942                                                         |
| 334 | 1,2,3,4,6,2<br>8,29,34 | 5,7,8,27,3<br>0,31,32,33<br>,35 | 8  | G3V686,P01681,P01836,P27791,Q4FZU6,Q5HZV9,Q63942,Q9JJ22                      |
| 335 | 1,2,3,4,6,2<br>8,29,35 | 5,7,8,27,3<br>0,31,32,33<br>,34 | 6  | P01681,P14480,P15399,P25236,Q30KJ2,Q63942                                    |
| 336 | 1,2,3,4,6,2<br>8,30,31 | 5,7,8,27,2<br>9,32,33,34<br>,35 | 4  | P01681,P01836,P02625,P25236                                                  |
| 337 | 1,2,3,4,6,2<br>8,30,32 | 5,7,8,27,2<br>9,31,33,34<br>,35 | 2  | P01681,P01836                                                                |
| 338 | 1,2,3,4,6,2<br>8,30,33 | 5,7,8,27,2<br>9,31,32,34<br>,35 | 1  | P01681                                                                       |
| 339 | 1,2,3,4,6,2<br>8,30,34 | 5,7,8,27,2<br>9,31,32,33<br>,35 | 6  | P01681,P01836,P27791,P47967,Q4FZU6,Q5HZV9                                    |
| 340 | 1,2,3,4,6,2<br>8,30,35 | 5,7,8,27,2<br>9,31,32,33<br>,34 | 6  | B0BNN3,P01681,P02770,P14480,Q30KJ2,Q6AYQ8                                    |
| 341 | 1,2,3,4,6,2<br>8,31,32 | 5,7,8,27,2<br>9,30,33,34<br>,35 | 4  | P01836,P06911,P25236,Q7TP52                                                  |

|     |                        |                                 |    |                                                                       |
|-----|------------------------|---------------------------------|----|-----------------------------------------------------------------------|
| 342 | 1,2,3,4,6,2<br>8,31,33 | 5,7,8,27,2<br>9,30,32,34<br>,35 | 3  | P02625,P06760,Q30KJ2                                                  |
| 343 | 1,2,3,4,6,2<br>8,31,34 | 5,7,8,27,2<br>9,30,32,33<br>,35 | 8  | G3V686,P01836,P02625,P27791,Q4FZU6,Q5HZV9,Q62997,Q7TP52               |
| 344 | 1,2,3,4,6,2<br>8,31,35 | 5,7,8,27,2<br>9,30,32,33<br>,34 | 7  | P01681,P02770,P06760,P15399,P25236,Q30KJ2,Q7TP52                      |
| 345 | 1,2,3,4,6,2<br>8,32,33 | 5,7,8,27,2<br>9,30,31,34<br>,35 | 3  | P55314,P97580,Q30KJ2                                                  |
| 346 | 1,2,3,4,6,2<br>8,32,34 | 5,7,8,27,2<br>9,30,31,33<br>,35 | 7  | G3V686,P01836,P52303,Q4FZU6,Q5HZV9,Q63661,Q6P6R2                      |
| 347 | 1,2,3,4,6,2<br>8,32,35 | 5,7,8,27,2<br>9,30,31,33<br>,34 | 5  | P01681,P15399,P97580,Q30KJ2,Q5HZV9                                    |
| 348 | 1,2,3,4,6,2<br>8,33,34 | 5,7,8,27,2<br>9,30,31,32<br>,35 | 5  | G3V686,P27791,Q4FZU6,Q5HZV9,Q9JJ22                                    |
| 349 | 1,2,3,4,6,2<br>8,33,35 | 5,7,8,27,2<br>9,30,31,32<br>,34 | 6  | B0BNN3,P01681,P06760,P15399,P97580,Q30KJ2                             |
| 350 | 1,2,3,4,6,2<br>8,34,35 | 5,7,8,27,2<br>9,30,31,32<br>,33 | 10 | B0BNN3,P00507,P01681,P09006,P12785,P14480,Q30KJ2,Q4FZU6,Q5HZV9,Q6AY61 |
| 351 | 1,2,3,4,6,2<br>9,30,31 | 5,7,8,27,2<br>8,32,33,34<br>,35 | 3  | P01836,P02625,P25236                                                  |
| 352 | 1,2,3,4,6,2<br>9,30,32 | 5,7,8,27,2<br>8,31,33,34<br>,35 | 2  | P01836,P25236                                                         |
| 353 | 1,2,3,4,6,2<br>9,30,33 | 5,7,8,27,2<br>8,31,32,34<br>,35 | 1  | B0BNN3                                                                |
| 354 | 1,2,3,4,6,2<br>9,30,34 | 5,7,8,27,2<br>8,31,32,33<br>,35 | 6  | B0BNN3,G3V686,P01836,P09605,P25809,P25236,Q9JJ22                      |
| 355 | 1,2,3,4,6,2<br>9,30,35 | 5,7,8,27,2<br>8,31,32,33<br>,34 | 4  | B0BNN3,P01681,P14480,P25236                                           |
| 356 | 1,2,3,4,6,2<br>9,31,32 | 5,7,8,27,2<br>8,30,33,34<br>,35 | 3  | P01836,P25236,Q8CJD3                                                  |



|     |                        |                                 |   |                                                                       |
|-----|------------------------|---------------------------------|---|-----------------------------------------------------------------------|
| 357 | 1,2,3,4,6,2<br>9,31,33 | 5,7,8,27,2<br>8,30,32,34<br>,35 | 3 | P02625,P25236,Q8CJD3                                                  |
| 358 | 1,2,3,4,6,2<br>9,31,34 | 5,7,8,27,2<br>8,30,32,33<br>,35 | 8 | G3V686,P01836,P02625,P25236,P70709,Q62997,Q7TP52,Q9JJ22               |
| 359 | 1,2,3,4,6,2<br>9,31,35 | 5,7,8,27,2<br>8,30,32,33<br>,34 | 5 | B0BNN3,P14480,P15399,P25236,Q30KJ2                                    |
| 360 | 1,2,3,4,6,2<br>9,32,33 | 5,7,8,27,2<br>8,30,31,34<br>,35 | 4 | P15399,P55314,P97580,Q8CJD3                                           |
| 361 | 1,2,3,4,6,2<br>9,32,34 | 5,7,8,27,2<br>8,30,31,33<br>,35 | 7 | G3V686,P01836,P25236,P70709,Q4FZU6,Q63661,Q6TMA8                      |
| 362 | 1,2,3,4,6,2<br>9,32,35 | 5,7,8,27,2<br>8,30,31,33<br>,34 | 6 | P01681,P14480,P15399,P25236,P97580,Q30KJ2                             |
| 363 | 1,2,3,4,6,2<br>9,33,34 | 5,7,8,27,2<br>8,30,31,32<br>,35 | 4 | G3V686,Q4FZU6,Q63661,Q9JJ22                                           |
| 364 | 1,2,3,4,6,2<br>9,33,35 | 5,7,8,27,2<br>8,30,31,32<br>,34 | 6 | B0BNN3,P14480,P15399,P25236,P97580,Q30KJ2                             |
| 365 | 1,2,3,4,6,2<br>9,34,35 | 5,7,8,27,2<br>8,30,31,32<br>,33 | 6 | B0BNN3,P09006,P14480,P25236,Q63661,Q9JJ22                             |
| 366 | 1,2,3,4,6,3<br>0,31,32 | 5,7,8,27,2<br>8,29,33,34<br>,35 | 4 | P01836,P02625,P25236,Q7TP52                                           |
| 367 | 1,2,3,4,6,3<br>0,31,33 | 5,7,8,27,2<br>8,29,32,34<br>,35 | 3 | P02625,P25236,Q7TP52                                                  |
| 368 | 1,2,3,4,6,3<br>0,31,34 | 5,7,8,27,2<br>8,29,32,33<br>,35 | 9 | G3V686,P01836,P02625,P09605,P25809,P25236,P47967,P82471,Q62997,Q7TP52 |
| 369 | 1,2,3,4,6,3<br>0,31,35 | 5,7,8,27,2<br>8,29,32,33<br>,34 | 9 | B0BNN3,P02625,P02770,P14480,P25236,P27590,P82471,Q30KJ2,Q7TP52        |
| 370 | 1,2,3,4,6,3<br>0,32,33 | 5,7,8,27,2<br>8,29,31,34<br>,35 | 4 | P01836,P55314,P97580,Q30KJ2                                           |
| 371 | 1,2,3,4,6,3<br>0,32,34 | 5,7,8,27,2<br>8,29,31,33<br>,35 | 6 | G3V686,P01836,P47967,P82471,Q63661,Q7TP52                             |

|     |                        |                                  |    |                                                                                     |
|-----|------------------------|----------------------------------|----|-------------------------------------------------------------------------------------|
| 372 | 1,2,3,4,6,3<br>0,32,35 | 5,7,8,27,2<br>8,29,31,33<br>,34  | 5  | P01836,P14480,P82471,P97580,Q30KJ2                                                  |
| 373 | 1,2,3,4,6,3<br>0,33,34 | 5,7,8,27,2<br>8,29,31,32<br>,35  | 6  | B0BNN3,G3V686,P82471,Q63661,Q7TP52,Q9JJ22                                           |
| 374 | 1,2,3,4,6,3<br>0,33,35 | 5,7,8,27,2<br>8,29,31,32<br>,34  | 6  | B0BNN3,P14480,P15399,P82471,P97580,Q30KJ2                                           |
| 375 | 1,2,3,4,6,3<br>0,34,35 | 5,7,8,27,2<br>8,29,31,32<br>,33  | 7  | B0BNN3,P02793,Q7TP54,P14480,P82471,Q63661,Q7TP52,Q9JJ22                             |
| 376 | 1,2,3,4,6,3<br>1,32,33 | 5,7,8,27,2<br>8,29,30,34<br>,35  | 7  | P02625,P25236,P55314,P97580,Q30KJ2,Q7TP52,Q8CJD3                                    |
| 377 | 1,2,3,4,6,3<br>1,32,34 | 5,7,8,27,2<br>8,29,30,33<br>,35  | 8  | G3V686,P01836,P02625,P25236,P70709,P82471,Q62997,Q7TP52                             |
| 378 | 1,2,3,4,6,3<br>1,32,35 | 5,7,8,27,2<br>8,29,30,33<br>,34  | 6  | P15399,P25236,P82471,P97580,Q30KJ2,Q7TP52                                           |
| 379 | 1,2,3,4,6,3<br>1,33,34 | 5,7,8,27,2<br>8,29,30,32<br>,35  | 6  | G3V686,P02625,P82471,Q62997,Q63355,Q7TP52                                           |
| 380 | 1,2,3,4,6,3<br>1,33,35 | 5,7,8,27,2<br>8,29,30,32<br>,34  | 9  | B0BNN3,P02625,P15399,P25236,P82471,P97580,Q30KJ2,Q63355,Q7TP52                      |
| 381 | 1,2,3,4,6,3<br>1,34,35 | 5,7,8,27,2<br>8,29,30,32<br>,33  | 11 | B0BNN3,P02625,P02781,P08010,P09006,P25236,P82471,Q30KJ2,Q62997,Q63355,Q7TP52        |
| 382 | 1,2,3,4,6,3<br>2,33,34 | 5,7,8,27,2<br>8,29,30,31<br>,35  | 9  | G3V686,P34901,P55314,P82471,P97580,Q30KJ2,Q4FZU6,Q63661,Q7TP52                      |
| 383 | 1,2,3,4,6,3<br>2,33,35 | 5,7,8,27,2<br>8,29,30,31<br>,34  | 5  | P15399,P55314,P82471,P97580,Q30KJ2                                                  |
| 384 | 1,2,3,4,6,3<br>2,34,35 | 5,7,8,27,2<br>8,29,30,31<br>,33  | 9  | G3V686,P02781,P08753,P82471,P97580,Q30KJ2,Q63661,Q7TP52,Q8CJ52                      |
| 385 | 1,2,3,4,6,3<br>3,34,35 | 5,7,8,27,2<br>8,29,30,31<br>,32  | 12 | B0BNN3,P02781,P08010,P09006,P15399,P82471,P97580,Q30KJ2,Q63355,Q63661,Q7TP52,Q9JJ22 |
| 386 | 1,2,3,4,7,8<br>,27,28  | 5,6,29,30,<br>31,32,33,3<br>4,35 | 9  | D3ZUK3,P01836,P18418,P36970,Q09030,Q64057,Q6IE51,Q99MH3,Q9R0T3                      |

|     |                       |                                  |    |                                                                                                          |
|-----|-----------------------|----------------------------------|----|----------------------------------------------------------------------------------------------------------|
| 387 | 1,2,3,4,7,8<br>,27,29 | 5,6,28,30,<br>31,32,33,3<br>4,35 | 9  | D3ZUK3,P01041,P01836,P36970,Q09030,Q63617,Q6IE51,Q8CJD3,Q9R0T3                                           |
| 388 | 1,2,3,4,7,8<br>,27,30 | 5,6,28,29,<br>31,32,33,3<br>4,35 | 13 | D3ZUK3,P01041,P01836,P08721,P15978,P16086,P36970,P42854,Q09030,Q64057,Q6AYQ8,Q6IE51,Q80WL1               |
| 389 | 1,2,3,4,7,8<br>,27,31 | 5,6,28,29,<br>30,32,33,3<br>4,35 | 12 | D3ZUK3,P01836,P02625,P08721,P20766,P36970,P42854,Q09030,Q64057,Q6IE51,Q7TP52,Q8CJD3                      |
| 390 | 1,2,3,4,7,8<br>,27,32 | 5,6,28,29,<br>30,31,33,3<br>4,35 | 11 | D3ZUK3,P00714,P01041,P01836,P08649,P16086,Q08849,Q09030,Q63532,Q6IE51,Q8CJD3                             |
| 391 | 1,2,3,4,7,8<br>,27,33 | 5,6,28,29,<br>30,31,32,3<br>4,35 | 9  | D3ZUK3,P08649,P08721,P36970,Q09030,Q6IE51,Q8CJD3,Q99MH3,Q9QUL6                                           |
| 392 | 1,2,3,4,7,8<br>,27,34 | 5,6,28,29,<br>30,31,32,3<br>3,35 | 15 | D3ZUK3,G3V686,P01041,P01836,P05964,P08649,P16086,P36970,P47967,P85971,Q03191,Q09030,Q62894,Q63532,Q6IE51 |
| 393 | 1,2,3,4,7,8<br>,27,35 | 5,6,28,29,<br>30,31,32,3<br>3,34 | 8  | D3ZUK3,P01946,P02770,P36970,Q09030,Q64057,Q6IE51,Q9QX79                                                  |
| 394 | 1,2,3,4,7,8<br>,28,29 | 5,6,27,30,<br>31,32,33,3<br>4,35 | 6  | P01041,P01836,P36970,Q63617,Q63942,Q9R0T3                                                                |
| 395 | 1,2,3,4,7,8<br>,28,30 | 5,6,27,29,<br>31,32,33,3<br>4,35 | 8  | P01041,P01836,P42854,Q09030,Q498R7,Q64057,Q6AYQ8,Q80WL1                                                  |
| 396 | 1,2,3,4,7,8<br>,28,31 | 5,6,27,29,<br>30,32,33,3<br>4,35 | 7  | O54728,P01836,P06760,P20766,P36970,P42854,Q09030                                                         |
| 397 | 1,2,3,4,7,8<br>,28,32 | 5,6,27,29,<br>30,31,33,3<br>4,35 | 4  | P01041,P01836,P20766,Q09030                                                                              |
| 398 | 1,2,3,4,7,8<br>,28,33 | 5,6,27,29,<br>30,31,32,3<br>4,35 | 7  | D3ZUK3,P01836,P06760,P18418,P36970,Q09030,Q9QUL6                                                         |
| 399 | 1,2,3,4,7,8<br>,28,34 | 5,6,27,29,<br>30,31,32,3<br>3,35 | 12 | D3ZUK3,O54728,P01041,P01836,P20766,P47967,P52303,P97615,Q09030,Q62894,Q6AY61,Q9JJ22                      |
| 400 | 1,2,3,4,7,8<br>,28,35 | 5,6,27,29,<br>30,31,32,3<br>3,34 | 7  | P01836,P02770,P06760,Q09030,Q64057,Q6IE52,Q9QX79                                                         |
| 401 | 1,2,3,4,7,8<br>,29,30 | 5,6,27,28,<br>31,32,33,3<br>4,35 | 7  | P01041,P01836,P36970,P42854,Q09030,Q64057,Q80WL1                                                         |

|     |                       |                                  |    |                                                                                                                                      |
|-----|-----------------------|----------------------------------|----|--------------------------------------------------------------------------------------------------------------------------------------|
| 402 | 1,2,3,4,7,8<br>,29,31 | 5,6,27,28,<br>30,32,33,3<br>4,35 | 7  | P01836,P20766,P25236,P36970,P42854,Q6IFU7,Q8CJD3                                                                                     |
| 403 | 1,2,3,4,7,8<br>,29,32 | 5,6,27,28,<br>30,31,33,3<br>4,35 | 5  | P01041,P01836,Q09030,Q63617,Q8CJD3                                                                                                   |
| 404 | 1,2,3,4,7,8<br>,29,33 | 5,6,27,28,<br>30,31,32,3<br>4,35 | 5  | P01836,P36970,Q63617,Q8CJD3,Q9QUL6                                                                                                   |
| 405 | 1,2,3,4,7,8<br>,29,34 | 5,6,27,28,<br>30,31,32,3<br>3,35 | 9  | D3ZUK3,P01041,P01836,P05964,P20766,P36970,Q09030,Q63467,Q9JJ22                                                                       |
| 406 | 1,2,3,4,7,8<br>,29,35 | 5,6,27,28,<br>30,31,32,3<br>3,34 | 11 | P01041,P01836,P01946,P02091,P02770,P14480,P36970,P97584,Q63617,Q6IE52,Q6IFU7                                                         |
| 407 | 1,2,3,4,7,8<br>,30,31 | 5,6,27,28,<br>29,32,33,3<br>4,35 | 9  | P01836,P20766,P36970,P42854,P97584,Q09030,Q64057,Q6IFU7,Q80WL1                                                                       |
| 408 | 1,2,3,4,7,8<br>,30,32 | 5,6,27,28,<br>29,31,33,3<br>4,35 | 8  | D3ZUK3,P01041,P01836,P16086,P42854,Q09030,Q64057,Q80WL1                                                                              |
| 409 | 1,2,3,4,7,8<br>,30,33 | 5,6,27,28,<br>29,31,32,3<br>4,35 | 7  | D3ZUK3,P01836,P35446,P36970,P42854,Q09030,Q9QUL6                                                                                     |
| 410 | 1,2,3,4,7,8<br>,30,34 | 5,6,27,28,<br>29,31,32,3<br>3,35 | 14 | D3ZUK3,P01041,P01836,P05964,P16086,P20766,P36970,P42854,P47967,Q09030,Q62894,Q64057,Q80WL1,Q9JJ22                                    |
| 411 | 1,2,3,4,7,8<br>,30,35 | 5,6,27,28,<br>29,31,32,3<br>3,34 | 12 | D3ZUK3,P01041,P01836,P02770,P08010,P14480,P15978,P42854,P97584,Q09030,Q64057,Q80WL1                                                  |
| 412 | 1,2,3,4,7,8<br>,31,32 | 5,6,27,28,<br>29,30,33,3<br>4,35 | 6  | P01041,P01836,P20766,P42854,Q09030,Q8CJD3                                                                                            |
| 413 | 1,2,3,4,7,8<br>,31,33 | 5,6,27,28,<br>29,30,32,3<br>4,35 | 10 | D3ZUK3,P01835,P01836,P20766,P36970,P42854,P60905,Q09030,Q8CJD3,Q9QUL6                                                                |
| 414 | 1,2,3,4,7,8<br>,31,34 | 5,6,27,28,<br>29,30,32,3<br>3,35 | 14 | D3ZUK3,P01041,P01835,P01836,P08010,P20766,P36970,P42854,P47967,P60905,Q09030,Q62894,Q62997,Q80WL1                                    |
| 415 | 1,2,3,4,7,8<br>,31,35 | 5,6,27,28,<br>29,30,32,3<br>3,34 | 19 | P01836,P02770,P05369,P06760,P08010,P10959,P16296,P20766,P21743,P36970,P42854,P60905,P97584,Q09030,Q64057,Q6IE52,Q6IFU7,Q80WL1,Q9JHB9 |
| 416 | 1,2,3,4,7,8<br>,32,33 | 5,6,27,28,<br>29,30,31,3<br>4,35 | 8  | D3ZUK3,O35783,P01041,P01836,P55314,Q09030,Q8CJD3,Q9QUL6                                                                              |

|     |                        |                                  |    |                                                                                                                                                    |
|-----|------------------------|----------------------------------|----|----------------------------------------------------------------------------------------------------------------------------------------------------|
| 417 | 1,2,3,4,7,8<br>,32,34  | 5,6,27,28,<br>29,30,31,3<br>3,35 | 11 | D3ZUK3,G3V686,P01041,P01836,P16086,P20766,Q08464,Q09030,Q62894,Q63532,Q63661                                                                       |
| 418 | 1,2,3,4,7,8<br>,32,35  | 5,6,27,28,<br>29,30,31,3<br>3,34 | 7  | P01041,P01836,P02770,P20766,Q09030,Q6IE52,Q9QX79                                                                                                   |
| 419 | 1,2,3,4,7,8<br>,33,34  | 5,6,27,28,<br>29,30,31,3<br>2,35 | 13 | D3ZUK3,P01041,P01835,P01836,P08010,P20766,P36970,P60905,Q08464,Q09030,Q62894,Q9JJ22,Q9QUL6                                                         |
| 420 | 1,2,3,4,7,8<br>,33,35  | 5,6,27,28,<br>29,30,31,3<br>2,34 | 9  | D3ZUK3,P02770,P08010,P36970,P60905,Q09030,Q6AYR9,Q6IE52,Q9QX79                                                                                     |
| 421 | 1,2,3,4,7,8<br>,34,35  | 5,6,27,28,<br>29,30,31,3<br>2,33 | 21 | D3ZUK3,P01026,P01041,P01836,P02770,P02781,P08010,P09006,P16296,P17475,P20766,P47727,P60905,P82471,Q08464,Q09030,Q62894,Q6IE52,Q6PCU2,Q9JHB9,Q9JJ22 |
| 422 | 1,2,3,4,7,2<br>7,28,29 | 5,6,8,30,3<br>1,32,33,34<br>,35  | 4  | P01836,P02793;Q7TP54,Q6IE51,Q9JI85                                                                                                                 |
| 423 | 1,2,3,4,7,2<br>7,28,30 | 5,6,8,29,3<br>1,32,33,34<br>,35  | 7  | D3ZUC6,P01836,P47967,Q09030,Q498R7,Q6AYQ8,Q6IE51                                                                                                   |
| 424 | 1,2,3,4,7,2<br>7,28,31 | 5,6,8,29,3<br>0,32,33,34<br>,35  | 4  | P01836,Q09030,Q5GRG2,Q6IE51                                                                                                                        |
| 425 | 1,2,3,4,7,2<br>7,28,32 | 5,6,8,29,3<br>0,31,33,34<br>,35  | 5  | P01836,P02793;Q7TP54,Q09030,Q6IE51,Q99068                                                                                                          |
| 426 | 1,2,3,4,7,2<br>7,28,33 | 5,6,8,29,3<br>0,31,32,34<br>,35  | 4  | P01836,P02793;Q7TP54,Q09030,Q6IE51                                                                                                                 |
| 427 | 1,2,3,4,7,2<br>7,28,34 | 5,6,8,29,3<br>0,31,32,33<br>,35  | 11 | A2RUV9,G3V686,P01836,P04182,P05964,P47967,P85971,P97615,Q09030,Q63532,Q6IE51                                                                       |
| 428 | 1,2,3,4,7,2<br>7,28,35 | 5,6,8,29,3<br>0,31,32,33<br>,34  | 5  | P01836,P01946,P02770,Q09030,Q6IE51                                                                                                                 |
| 429 | 1,2,3,4,7,2<br>7,29,30 | 5,6,8,28,3<br>1,32,33,34<br>,35  | 4  | D3ZUC6,P01836,Q09030,Q6IE51                                                                                                                        |
| 430 | 1,2,3,4,7,2<br>7,29,31 | 5,6,8,28,3<br>0,32,33,34<br>,35  | 4  | P01836,P25236,P36970,Q6IE51                                                                                                                        |
| 431 | 1,2,3,4,7,2<br>7,29,32 | 5,6,8,28,3<br>0,31,33,34<br>,35  | 9  | P01041,P01836,P02793;Q7TP54,P08649,P13596,Q09030,Q6IE51,Q8CJD3,Q99068                                                                              |

|     |                        |                                 |    |                                                                                     |
|-----|------------------------|---------------------------------|----|-------------------------------------------------------------------------------------|
| 432 | 1,2,3,4,7,2<br>7,29,33 | 5,6,8,28,3<br>0,31,32,34<br>,35 | 6  | P01836,P02793,Q7TP54,P08649,P13852,Q6IE51,Q8CJD3                                    |
| 433 | 1,2,3,4,7,2<br>7,29,34 | 5,6,8,28,3<br>0,31,32,33<br>,35 | 10 | G3V686,P01041,P01836,P05964,P08649,Q09030,Q63467,Q63532,Q6IE51,Q9JJ22               |
| 434 | 1,2,3,4,7,2<br>7,29,35 | 5,6,8,28,3<br>0,31,32,33<br>,34 | 5  | P01836,P01946,P02091,P14480,Q6IE51                                                  |
| 435 | 1,2,3,4,7,2<br>7,30,31 | 5,6,8,28,2<br>9,32,33,34<br>,35 | 6  | D3ZUC6,P01836,P02625,P42854,Q09030,Q6IE51                                           |
| 436 | 1,2,3,4,7,2<br>7,30,32 | 5,6,8,28,2<br>9,31,33,34<br>,35 | 9  | P01041,P01836,P08649,P16086,Q09030,Q63532,Q6AYQ8,Q6IE51,Q99068                      |
| 437 | 1,2,3,4,7,2<br>7,30,33 | 5,6,8,28,2<br>9,31,32,34<br>,35 | 4  | P01836,P08649,Q09030,Q6IE51                                                         |
| 438 | 1,2,3,4,7,2<br>7,30,34 | 5,6,8,28,2<br>9,31,32,33<br>,35 | 12 | G3V686,P01041,P01836,P05964,P08649,P16086,P47967,P85971,P97840,Q09030,Q63532,Q6IE51 |
| 439 | 1,2,3,4,7,2<br>7,30,35 | 5,6,8,28,2<br>9,31,32,33<br>,34 | 9  | D3ZUC6,P01836,P01946,P02770,P14480,Q09030,Q64057,Q6AYQ8,Q6IE51                      |
| 440 | 1,2,3,4,7,2<br>7,31,32 | 5,6,8,28,2<br>9,30,33,34<br>,35 | 7  | P01836,P05539,P42854,Q09030,Q6IE51,Q8CJD3,Q99068                                    |
| 441 | 1,2,3,4,7,2<br>7,31,33 | 5,6,8,28,2<br>9,30,32,34<br>,35 | 8  | P01836,P02625,P08649,P36970,P51907,Q09030,Q6IE51,Q8CJD3                             |
| 442 | 1,2,3,4,7,2<br>7,31,34 | 5,6,8,28,2<br>9,30,32,33<br>,35 | 11 | A2RUV9,G3V686,P01836,P02625,P47967,P85971,Q09030,Q62997,Q63532,Q6IE51,Q7TP52        |
| 443 | 1,2,3,4,7,2<br>7,31,35 | 5,6,8,28,2<br>9,30,32,33<br>,34 | 6  | P01836,P01946,P02770,P60905,Q09030,Q6IE51                                           |
| 444 | 1,2,3,4,7,2<br>7,32,33 | 5,6,8,28,2<br>9,30,31,34<br>,35 | 11 | P01836,P02793,Q7TP54,P08649,P13852,P55314,Q08849,Q09030,Q63532,Q6IE51,Q8CJD3,Q99068 |
| 445 | 1,2,3,4,7,2<br>7,32,34 | 5,6,8,28,2<br>9,30,31,33<br>,35 | 12 | A2RUV9,G3V686,P01041,P01836,P05539,P08649,P34901,P85971,Q09030,Q63532,Q63661,Q6IE51 |
| 446 | 1,2,3,4,7,2<br>7,32,35 | 5,6,8,28,2<br>9,30,31,33<br>,34 | 5  | P01836,P01946,Q09030,Q63532,Q6IE51                                                  |

|     |                        |                                 |    |                                                                                                          |
|-----|------------------------|---------------------------------|----|----------------------------------------------------------------------------------------------------------|
| 447 | 1,2,3,4,7,2<br>7,33,34 | 5,6,8,28,2<br>9,30,31,32<br>,35 | 10 | D3ZUK3,G3V686,P01836,P08649,P34901,P85971,Q09030,Q63532,Q63661,Q6IE51                                    |
| 448 | 1,2,3,4,7,2<br>7,33,35 | 5,6,8,28,2<br>9,30,31,32<br>,34 | 4  | P01946,P60905,Q09030,Q6IE51                                                                              |
| 449 | 1,2,3,4,7,2<br>7,34,35 | 5,6,8,28,2<br>9,30,31,32<br>,33 | 15 | A2RUV9,G3V686,P01836,P01946,P02770,P12785,P47727,P55159,P60905,P82471,P85971,Q09030,Q63532,Q63661,Q6IE51 |
| 450 | 1,2,3,4,7,2<br>8,29,30 | 5,6,8,27,3<br>1,32,33,34<br>,35 | 3  | P01836,P06760,Q498R7                                                                                     |
| 451 | 1,2,3,4,7,2<br>8,29,31 | 5,6,8,27,3<br>0,32,33,34<br>,35 | 3  | P01836,P06760,Q5GRG2                                                                                     |
| 452 | 1,2,3,4,7,2<br>8,29,32 | 5,6,8,27,3<br>0,31,33,34<br>,35 | 3  | P01041,P01836,P02793;Q7TP54                                                                              |
| 453 | 1,2,3,4,7,2<br>8,29,33 | 5,6,8,27,3<br>0,31,32,34<br>,35 | 3  | P01836,P02793;Q7TP54,P06760                                                                              |
| 454 | 1,2,3,4,7,2<br>8,29,34 | 5,6,8,27,3<br>0,31,32,33<br>,35 | 6  | P01041,P01836,P05964,P06760,P27791,Q9JJ22                                                                |
| 455 | 1,2,3,4,7,2<br>8,29,35 | 5,6,8,27,3<br>0,31,32,33<br>,34 | 6  | P01836,P01946,P02091,P02770,P06760,P14480                                                                |
| 456 | 1,2,3,4,7,2<br>8,30,31 | 5,6,8,27,2<br>9,32,33,34<br>,35 | 4  | P01836,P06760,P42854,Q498R7                                                                              |
| 457 | 1,2,3,4,7,2<br>8,30,32 | 5,6,8,27,2<br>9,31,33,34<br>,35 | 5  | P01041,P01836,P42854,Q09030,Q6AYQ8                                                                       |
| 458 | 1,2,3,4,7,2<br>8,30,33 | 5,6,8,27,2<br>9,31,32,34<br>,35 | 4  | P01836,P06760,P42854,P51907                                                                              |
| 459 | 1,2,3,4,7,2<br>8,30,34 | 5,6,8,27,2<br>9,31,32,33<br>,35 | 9  | P01041,P01836,P05964,P06760,P42854,P47967,P97615,P97840,Q09030                                           |
| 460 | 1,2,3,4,7,2<br>8,30,35 | 5,6,8,27,2<br>9,31,32,33<br>,34 | 8  | P01836,P02770,P06760,P06866,P14480,P97584,Q498R7,Q6AYQ8                                                  |
| 461 | 1,2,3,4,7,2<br>8,31,32 | 5,6,8,27,2<br>9,30,33,34<br>,35 | 2  | P01836,P42854                                                                                            |

|     |                        |                                 |   |                                                         |
|-----|------------------------|---------------------------------|---|---------------------------------------------------------|
| 462 | 1,2,3,4,7,2<br>8,31,33 | 5,6,8,27,2<br>9,30,32,34<br>,35 | 4 | P01836,P06760,P42854,P51907                             |
| 463 | 1,2,3,4,7,2<br>8,31,34 | 5,6,8,27,2<br>9,30,32,33<br>,35 | 8 | A2RUV9,O54728,P01836,P06760,P42854,P47967,Q09030,Q62997 |
| 464 | 1,2,3,4,7,2<br>8,31,35 | 5,6,8,27,2<br>9,30,32,33<br>,34 | 4 | P01836,P02770,P06760,P42854                             |
| 465 | 1,2,3,4,7,2<br>8,32,33 | 5,6,8,27,2<br>9,30,31,34<br>,35 | 3 | P01836,P02793;Q7TP54,P55314                             |
| 466 | 1,2,3,4,7,2<br>8,32,34 | 5,6,8,27,2<br>9,30,31,33<br>,35 | 7 | G3V686,P01041,P01836,P97615,Q09030,Q63532,Q63661        |
| 467 | 1,2,3,4,7,2<br>8,32,35 | 5,6,8,27,2<br>9,30,31,33<br>,34 | 2 | P01836,P06760                                           |
| 468 | 1,2,3,4,7,2<br>8,33,34 | 5,6,8,27,2<br>9,30,31,32<br>,35 | 5 | P01836,P06760,P27791,Q62894,Q9JJ22                      |
| 469 | 1,2,3,4,7,2<br>8,33,35 | 5,6,8,27,2<br>9,30,31,32<br>,34 | 5 | P01836,P02770,P06760,Q30KJ2,Q6IE51                      |
| 470 | 1,2,3,4,7,2<br>8,34,35 | 5,6,8,27,2<br>9,30,31,32<br>,33 | 6 | P01836,P02770,P06760,P06866,P12785,Q6AY61               |
| 471 | 1,2,3,4,7,2<br>9,30,31 | 5,6,8,27,2<br>8,32,33,34<br>,35 | 5 | P01836,P06760,P25236,P42854,P97584                      |
| 472 | 1,2,3,4,7,2<br>9,30,32 | 5,6,8,27,2<br>8,31,33,34<br>,35 | 3 | P01041,P01836,Q09030                                    |
| 473 | 1,2,3,4,7,2<br>9,30,33 | 5,6,8,27,2<br>8,31,32,34<br>,35 | 2 | P01836,P06760                                           |
| 474 | 1,2,3,4,7,2<br>9,30,34 | 5,6,8,27,2<br>8,31,32,33<br>,35 | 6 | P01041,P01836,P05964,P47967,Q09030,Q9JJ22               |
| 475 | 1,2,3,4,7,2<br>9,30,35 | 5,6,8,27,2<br>8,31,32,33<br>,34 | 7 | P01836,P01946,P02091,P02770,P06760,P14480,P97584        |
| 476 | 1,2,3,4,7,2<br>9,31,32 | 5,6,8,27,2<br>8,30,33,34<br>,35 | 5 | P01041,P01836,P25236,P42854,Q8CJD3                      |



|     |                        |                                 |    |                                                                       |
|-----|------------------------|---------------------------------|----|-----------------------------------------------------------------------|
| 477 | 1,2,3,4,7,2<br>9,31,33 | 5,6,8,27,2<br>8,30,32,34<br>,35 | 4  | P01836,P06760,Q8CJD3,Q9WTT6                                           |
| 478 | 1,2,3,4,7,2<br>9,31,34 | 5,6,8,27,2<br>8,30,32,33<br>,35 | 6  | P01836,P06760,P25236,Q62997,Q63467,Q9JJ22                             |
| 479 | 1,2,3,4,7,2<br>9,31,35 | 5,6,8,27,2<br>8,30,32,33<br>,34 | 9  | P01836,P01946,P02091,P02770,P06760,P25236,P97584,Q6IFU7,Q9WTT6        |
| 480 | 1,2,3,4,7,2<br>9,32,33 | 5,6,8,27,2<br>8,30,31,34<br>,35 | 7  | O35783,P01041,P01836,P02793,Q7TP54,P55314,Q8CJD3,Q9WTT6               |
| 481 | 1,2,3,4,7,2<br>9,32,34 | 5,6,8,27,2<br>8,30,31,33<br>,35 | 7  | G3V686,P01041,P01836,Q09030,Q63467,Q63532,Q63661                      |
| 482 | 1,2,3,4,7,2<br>9,32,35 | 5,6,8,27,2<br>8,30,31,33<br>,34 | 5  | P01041,P01836,P01946,P02091,Q9WTT6                                    |
| 483 | 1,2,3,4,7,2<br>9,33,34 | 5,6,8,27,2<br>8,30,31,32<br>,35 | 5  | P01836,P06760,P48037,Q63661,Q9JJ22                                    |
| 484 | 1,2,3,4,7,2<br>9,33,35 | 5,6,8,27,2<br>8,30,31,32<br>,34 | 5  | P01836,P01946,P02091,P06760,Q9WTT6                                    |
| 485 | 1,2,3,4,7,2<br>9,34,35 | 5,6,8,27,2<br>8,30,31,32<br>,33 | 8  | P01041,P01836,P01946,P02091,P06760,P14480,Q63661,Q9JJ22               |
| 486 | 1,2,3,4,7,3<br>0,31,32 | 5,6,8,27,2<br>8,29,33,34<br>,35 | 6  | P01041,P01836,P42854,P97584,Q09030,Q80WL1                             |
| 487 | 1,2,3,4,7,3<br>0,31,33 | 5,6,8,27,2<br>8,29,32,34<br>,35 | 6  | P01836,P06760,P35446,P42854,P51907,Q9WTT6                             |
| 488 | 1,2,3,4,7,3<br>0,31,34 | 5,6,8,27,2<br>8,29,32,33<br>,35 | 9  | P01836,P06760,P08010,P42854,P47967,P97840,Q09030,Q62997,Q80WL1        |
| 489 | 1,2,3,4,7,3<br>0,31,35 | 5,6,8,27,2<br>8,29,32,33<br>,34 | 10 | P01836,P02770,P06760,P08010,P42854,P47727,P82471,P97584,Q80WL1,Q9JHB9 |
| 490 | 1,2,3,4,7,3<br>0,32,33 | 5,6,8,27,2<br>8,29,31,34<br>,35 | 7  | O35783,P01041,P01836,P35446,P42854,P55314,Q09030                      |
| 491 | 1,2,3,4,7,3<br>0,32,34 | 5,6,8,27,2<br>8,29,31,33<br>,35 | 10 | G3V686,P01041,P01836,P02782,P16086,P42854,P47967,Q09030,Q63532,Q63661 |

|     |                        |                                 |    |                                                                                                                               |
|-----|------------------------|---------------------------------|----|-------------------------------------------------------------------------------------------------------------------------------|
| 492 | 1,2,3,4,7,3<br>0,32,35 | 5,6,8,27,2<br>8,29,31,33<br>,34 | 7  | P01041,P01836,P14480,P42854,P82471,P97584,Q09030                                                                              |
| 493 | 1,2,3,4,7,3<br>0,33,34 | 5,6,8,27,2<br>8,29,31,32<br>,35 | 9  | P01041,P01836,P02782,P06760,P42854,P47967,Q09030,Q63661,Q9JJ22                                                                |
| 494 | 1,2,3,4,7,3<br>0,33,35 | 5,6,8,27,2<br>8,29,31,32<br>,34 | 8  | P01836,P02770,P02782,P06760,P08010,P82471,P97584,Q9WTT6                                                                       |
| 495 | 1,2,3,4,7,3<br>0,34,35 | 5,6,8,27,2<br>8,29,31,32<br>,33 | 18 | P01041,P01836,P02770,P02781,P02782,P06760,P06866,P06911,P08010,P14480,P47727,P47967,P60905,P82471,Q09030,Q63661,Q9JHB9,Q9JJ22 |
| 496 | 1,2,3,4,7,3<br>1,32,33 | 5,6,8,27,2<br>8,29,30,34<br>,35 | 5  | P01836,P42854,P55314,Q8CJD3,Q9WTT6                                                                                            |
| 497 | 1,2,3,4,7,3<br>1,32,34 | 5,6,8,27,2<br>8,29,30,33<br>,35 | 10 | G3V686,P01041,P01836,P02781,P02782,P42854,P82471,Q09030,Q62997,Q63532                                                         |
| 498 | 1,2,3,4,7,3<br>1,32,35 | 5,6,8,27,2<br>8,29,30,33<br>,34 | 7  | P01836,P02781,P08010,P42854,P82471,P97584,Q9WTT6                                                                              |
| 499 | 1,2,3,4,7,3<br>1,33,34 | 5,6,8,27,2<br>8,29,30,32<br>,35 | 9  | P01835,P01836,P02782,P06760,P08010,P42854,P60905,P82471,Q62997                                                                |
| 500 | 1,2,3,4,7,3<br>1,33,35 | 5,6,8,27,2<br>8,29,30,32<br>,34 | 13 | P01836,P02770,P02781,P02782,P06760,P08010,P60905,P82471,P97580,P97584,Q30KJ2,Q9JHB9,Q9WTT6                                    |
| 501 | 1,2,3,4,7,3<br>1,34,35 | 5,6,8,27,2<br>8,29,30,32<br>,33 | 13 | P01836,P02770,P02781,P02782,P06760,P08010,P0C0A9,P24368,P47727,P60905,P82471,Q62997,Q9JHB9                                    |
| 502 | 1,2,3,4,7,3<br>2,33,34 | 5,6,8,27,2<br>8,29,30,31<br>,35 | 11 | G3V686,O35783,P01041,P01836,P02782,P34901,P55314,P82471,Q09030,Q63532,Q63661                                                  |
| 503 | 1,2,3,4,7,3<br>2,33,35 | 5,6,8,27,2<br>8,29,30,31<br>,34 | 10 | P01836,P02781,P02782,P55314,P60905,P82471,P97580,Q30KJ2,Q6AYR9,Q9WTT6                                                         |
| 504 | 1,2,3,4,7,3<br>2,34,35 | 5,6,8,27,2<br>8,29,30,31<br>,33 | 11 | P01041,P01836,P02781,P02782,P08010,P60905,P82471,Q09030,Q63532,Q63661,Q9JHB9                                                  |
| 505 | 1,2,3,4,7,3<br>3,34,35 | 5,6,8,27,2<br>8,29,30,31<br>,32 | 10 | P01836,P02781,P02782,P06760,P08010,P60905,P82471,Q63661,Q9JHB9,Q9JJ22                                                         |
| 506 | 1,2,3,4,8,2<br>7,28,29 | 5,6,7,30,3<br>1,32,33,34<br>,35 | 1  | Q63942                                                                                                                        |

|     |                        |                                 |   |                             |
|-----|------------------------|---------------------------------|---|-----------------------------|
| 507 | 1,2,3,4,8,2<br>7,28,30 | 5,6,7,29,3<br>1,32,33,34<br>,35 | 1 | Q6AYQ8                      |
| 508 | 1,2,3,4,8,2<br>7,28,31 | 5,6,7,29,3<br>0,32,33,34<br>,35 | 1 | P36970                      |
| 509 | 1,2,3,4,8,2<br>7,28,32 | 5,6,7,29,3<br>0,31,33,34<br>,35 | 1 | P01836                      |
| 510 | 1,2,3,4,8,2<br>7,28,33 | 5,6,7,29,3<br>0,31,32,34<br>,35 | 1 | P36970                      |
| 511 | 1,2,3,4,8,2<br>7,28,34 | 5,6,7,29,3<br>0,31,32,33<br>,35 | 4 | P04182,Q5QE79,Q62894,Q6AY61 |
| 512 | 1,2,3,4,8,2<br>7,28,35 | 5,6,7,29,3<br>0,31,32,33<br>,34 | 2 | P02770,Q5XI22               |
| 513 | 1,2,3,4,8,2<br>7,29,30 | 5,6,7,28,3<br>1,32,33,34<br>,35 | 1 | P36970                      |
| 514 | 1,2,3,4,8,2<br>7,29,31 | 5,6,7,28,3<br>0,32,33,34<br>,35 | 2 | P25236,P36970               |
| 515 | 1,2,3,4,8,2<br>7,29,32 | 5,6,7,28,3<br>0,31,33,34<br>,35 | 1 | Q8CJD3                      |
| 516 | 1,2,3,4,8,2<br>7,29,33 | 5,6,7,28,3<br>0,31,32,34<br>,35 | 3 | P36970,Q8CJD3,Q9QUL6        |
| 517 | 1,2,3,4,8,2<br>7,29,34 | 5,6,7,28,3<br>0,31,32,33<br>,35 | 3 | P36970,Q5QE79,Q9JJ22        |
| 518 | 1,2,3,4,8,2<br>7,29,35 | 5,6,7,28,3<br>0,31,32,33<br>,34 | 2 | P01946,P02770               |
| 519 | 1,2,3,4,8,2<br>7,30,31 | 5,6,7,28,2<br>9,32,33,34<br>,35 | 4 | P02625,P36970,Q64057,Q80WL1 |
| 520 | 1,2,3,4,8,2<br>7,30,32 | 5,6,7,28,2<br>9,31,33,34<br>,35 | 2 | P01836,Q6AYQ8               |
| 521 | 1,2,3,4,8,2<br>7,30,33 | 5,6,7,28,2<br>9,31,32,34<br>,35 | 2 | P36970,Q9QUL6               |

|     |                        |                                 |   |                                                                |
|-----|------------------------|---------------------------------|---|----------------------------------------------------------------|
| 522 | 1,2,3,4,8,2<br>7,30,34 | 5,6,7,28,2<br>9,31,32,33<br>,35 | 4 | P36970,P47967,P83121,Q62894                                    |
| 523 | 1,2,3,4,8,2<br>7,30,35 | 5,6,7,28,2<br>9,31,32,33<br>,34 | 4 | B0BNN3,P02770,Q64057,Q6AYQ8                                    |
| 524 | 1,2,3,4,8,2<br>7,31,32 | 5,6,7,28,2<br>9,30,33,34<br>,35 | 2 | Q08849,Q8CJD3                                                  |
| 525 | 1,2,3,4,8,2<br>7,31,33 | 5,6,7,28,2<br>9,30,32,34<br>,35 | 5 | P02625,P36970,Q63355,Q8CJD3,Q9QUL6                             |
| 526 | 1,2,3,4,8,2<br>7,31,34 | 5,6,7,28,2<br>9,30,32,33<br>,35 | 6 | A2RUV9,P02625,P20766,P36970,Q62894,Q62997                      |
| 527 | 1,2,3,4,8,2<br>7,31,35 | 5,6,7,28,2<br>9,30,32,33<br>,34 | 3 | P02770,P10959,P36970                                           |
| 528 | 1,2,3,4,8,2<br>7,32,33 | 5,6,7,28,2<br>9,30,31,34<br>,35 | 4 | P55314,Q08849,Q8CJD3,Q9QUL6                                    |
| 529 | 1,2,3,4,8,2<br>7,32,34 | 5,6,7,28,2<br>9,30,31,33<br>,35 | 6 | G3V686,P01836,P83121,Q08849,Q62894,Q63661                      |
| 530 | 1,2,3,4,8,2<br>7,32,35 | 5,6,7,28,2<br>9,30,31,33<br>,34 | 2 | P02770,Q08849                                                  |
| 531 | 1,2,3,4,8,2<br>7,33,34 | 5,6,7,28,2<br>9,30,31,32<br>,35 | 3 | P36970,Q62894,Q63355                                           |
| 532 | 1,2,3,4,8,2<br>7,33,35 | 5,6,7,28,2<br>9,30,31,32<br>,34 | 4 | B0BNN3,P02770,P36970,Q63355                                    |
| 533 | 1,2,3,4,8,2<br>7,34,35 | 5,6,7,28,2<br>9,30,31,32<br>,33 | 9 | B0BNN3,P02770,P09006,P17475,P83121,Q561R9,Q62894,Q63355,Q63556 |
| 534 | 1,2,3,4,8,2<br>8,29,30 | 5,6,7,27,3<br>1,32,33,34<br>,35 | 1 | P01836                                                         |
| 535 | 1,2,3,4,8,2<br>8,29,31 | 5,6,7,27,3<br>0,32,33,34<br>,35 | 2 | P01836,P36970                                                  |
| 536 | 1,2,3,4,8,2<br>8,29,32 | 5,6,7,27,3<br>0,31,33,34<br>,35 | 3 | P01836,Q5QE79,Q63942                                           |

|     |                        |                                 |   |                                                  |
|-----|------------------------|---------------------------------|---|--------------------------------------------------|
| 537 | 1,2,3,4,8,2<br>8,29,33 | 5,6,7,27,3<br>0,31,32,34<br>,35 | 0 |                                                  |
| 538 | 1,2,3,4,8,2<br>8,29,34 | 5,6,7,27,3<br>0,31,32,33<br>,35 | 7 | P01836,P27791,P52303,Q5QE79,Q62894,Q6AY61,Q9JJ22 |
| 539 | 1,2,3,4,8,2<br>8,29,35 | 5,6,7,27,3<br>0,31,32,33<br>,34 | 2 | P01681,P02770                                    |
| 540 | 1,2,3,4,8,2<br>8,30,31 | 5,6,7,27,2<br>9,32,33,34<br>,35 | 3 | P01836,P02761,Q80WL1                             |
| 541 | 1,2,3,4,8,2<br>8,30,32 | 5,6,7,27,2<br>9,31,33,34<br>,35 | 2 | P01836,Q6AYQ8                                    |
| 542 | 1,2,3,4,8,2<br>8,30,33 | 5,6,7,27,2<br>9,31,32,34<br>,35 | 2 | P02761,Q9QUL6                                    |
| 543 | 1,2,3,4,8,2<br>8,30,34 | 5,6,7,27,2<br>9,31,32,33<br>,35 | 6 | P01836,P47967,P52303,Q5QE79,Q62894,Q6AY61        |
| 544 | 1,2,3,4,8,2<br>8,30,35 | 5,6,7,27,2<br>9,31,32,33<br>,34 | 4 | P02761,P02770,P06866,Q6AYQ8                      |
| 545 | 1,2,3,4,8,2<br>8,31,32 | 5,6,7,27,2<br>9,30,33,34<br>,35 | 2 | P01836,P20766                                    |
| 546 | 1,2,3,4,8,2<br>8,31,33 | 5,6,7,27,2<br>9,30,32,34<br>,35 | 2 | P36970,Q9QUL6                                    |
| 547 | 1,2,3,4,8,2<br>8,31,34 | 5,6,7,27,2<br>9,30,32,33<br>,35 | 5 | P01836,P20766,Q62894,Q62997,Q6AY61               |
| 548 | 1,2,3,4,8,2<br>8,31,35 | 5,6,7,27,2<br>9,30,32,33<br>,34 | 6 | P02761,P02770,P06760,P10959,P20766,Q6IE52        |
| 549 | 1,2,3,4,8,2<br>8,32,33 | 5,6,7,27,2<br>9,30,31,34<br>,35 | 2 | P55314,Q9QUL6                                    |
| 550 | 1,2,3,4,8,2<br>8,32,34 | 5,6,7,27,2<br>9,30,31,33<br>,35 | 6 | P01836,P20766,P52303,Q5QE79,Q62894,Q6AY61        |
| 551 | 1,2,3,4,8,2<br>8,32,35 | 5,6,7,27,2<br>9,30,31,33<br>,34 | 1 | P02770                                           |

|     |                        |                                 |   |                                                                |
|-----|------------------------|---------------------------------|---|----------------------------------------------------------------|
| 552 | 1,2,3,4,8,2<br>8,33,34 | 5,6,7,27,2<br>9,30,31,32<br>,35 | 4 | Q5QE79,Q62894,Q6AY61,Q9JJ22                                    |
| 553 | 1,2,3,4,8,2<br>8,33,35 | 5,6,7,27,2<br>9,30,31,32<br>,34 | 2 | P02770,P06760                                                  |
| 554 | 1,2,3,4,8,2<br>8,34,35 | 5,6,7,27,2<br>9,30,31,32<br>,33 | 9 | P00507,P02770,P09006,P17475,P52303,Q5QE79,Q62894,Q6AY61,Q9JJ22 |
| 555 | 1,2,3,4,8,2<br>9,30,31 | 5,6,7,27,2<br>8,32,33,34<br>,35 | 4 | P01836,P25236,P36970,Q80WL1                                    |
| 556 | 1,2,3,4,8,2<br>9,30,32 | 5,6,7,27,2<br>8,31,33,34<br>,35 | 2 | P01836,Q6TMA8                                                  |
| 557 | 1,2,3,4,8,2<br>9,30,33 | 5,6,7,27,2<br>8,31,32,34<br>,35 | 2 | P36970,Q9QUL6                                                  |
| 558 | 1,2,3,4,8,2<br>9,30,34 | 5,6,7,27,2<br>8,31,32,33<br>,35 | 2 | P01836,Q9JJ22                                                  |
| 559 | 1,2,3,4,8,2<br>9,30,35 | 5,6,7,27,2<br>8,31,32,33<br>,34 | 3 | B0BNN3,P02770,P14480                                           |
| 560 | 1,2,3,4,8,2<br>9,31,32 | 5,6,7,27,2<br>8,30,33,34<br>,35 | 4 | P01836,P20766,P25236,Q8CJD3                                    |
| 561 | 1,2,3,4,8,2<br>9,31,33 | 5,6,7,27,2<br>8,30,32,34<br>,35 | 3 | P36970,Q8CJD3,Q9QUL6                                           |
| 562 | 1,2,3,4,8,2<br>9,31,34 | 5,6,7,27,2<br>8,30,32,33<br>,35 | 6 | P01836,P20766,P25236,P36970,Q62997,Q9JJ22                      |
| 563 | 1,2,3,4,8,2<br>9,31,35 | 5,6,7,27,2<br>8,30,32,33<br>,34 | 6 | P02770,P10959,P25236,P36970,Q6IE52,Q6IFU7                      |
| 564 | 1,2,3,4,8,2<br>9,32,33 | 5,6,7,27,2<br>8,30,31,34<br>,35 | 4 | P55314,Q6TMA8,Q8CJD3,Q9QUL6                                    |
| 565 | 1,2,3,4,8,2<br>9,32,34 | 5,6,7,27,2<br>8,30,31,33<br>,35 | 6 | P01836,P20766,Q5QE79,Q63661,Q6TMA8,Q9JJ22                      |
| 566 | 1,2,3,4,8,2<br>9,32,35 | 5,6,7,27,2<br>8,30,31,33<br>,34 | 2 | P02770,Q6TMA8                                                  |

|     |                        |                                 |    |                                                                                                                 |
|-----|------------------------|---------------------------------|----|-----------------------------------------------------------------------------------------------------------------|
| 567 | 1,2,3,4,8,2<br>9,33,34 | 5,6,7,27,2<br>8,30,31,32<br>,35 | 3  | P36970,Q62894,Q9JJ22                                                                                            |
| 568 | 1,2,3,4,8,2<br>9,33,35 | 5,6,7,27,2<br>8,30,31,32<br>,34 | 3  | B0BNN3,P02770,P97840                                                                                            |
| 569 | 1,2,3,4,8,2<br>9,34,35 | 5,6,7,27,2<br>8,30,31,32<br>,33 | 7  | B0BNN3,P02770,P09006,P17475,Q5QE79,Q6PCU2,Q9JJ22                                                                |
| 570 | 1,2,3,4,8,3<br>0,31,32 | 5,6,7,27,2<br>8,29,33,34<br>,35 | 3  | P01836,P20766,Q80WL1                                                                                            |
| 571 | 1,2,3,4,8,3<br>0,31,33 | 5,6,7,27,2<br>8,29,32,34<br>,35 | 3  | P36970,Q80WL1,Q9QUL6                                                                                            |
| 572 | 1,2,3,4,8,3<br>0,31,34 | 5,6,7,27,2<br>8,29,32,33<br>,35 | 6  | P01836,P20766,P36970,Q62894,Q62997,Q80WL1                                                                       |
| 573 | 1,2,3,4,8,3<br>0,31,35 | 5,6,7,27,2<br>8,29,32,33<br>,34 | 4  | B0BNN3,P02770,P10959,Q80WL1                                                                                     |
| 574 | 1,2,3,4,8,3<br>0,32,33 | 5,6,7,27,2<br>8,29,31,34<br>,35 | 3  | P01836,P55314,Q9QUL6                                                                                            |
| 575 | 1,2,3,4,8,3<br>0,32,34 | 5,6,7,27,2<br>8,29,31,33<br>,35 | 4  | P01836,P20766,Q62894,Q63661                                                                                     |
| 576 | 1,2,3,4,8,3<br>0,32,35 | 5,6,7,27,2<br>8,29,31,33<br>,34 | 2  | P01836,P02770                                                                                                   |
| 577 | 1,2,3,4,8,3<br>0,33,34 | 5,6,7,27,2<br>8,29,31,32<br>,35 | 5  | B0BNN3,P36970,Q62894,Q9JJ22,Q9QUL6                                                                              |
| 578 | 1,2,3,4,8,3<br>0,33,35 | 5,6,7,27,2<br>8,29,31,32<br>,34 | 3  | B0BNN3,P02770,Q64268                                                                                            |
| 579 | 1,2,3,4,8,3<br>0,34,35 | 5,6,7,27,2<br>8,29,31,32<br>,33 | 15 | B0BNN3,P02770,P02793,Q7TP54,P06911,P09006,P17475,P47727,P82471,P83121,Q62894,Q6AY61,Q6PCU2,Q80WL1,Q9JHB9,Q9JJ22 |
| 580 | 1,2,3,4,8,3<br>1,32,33 | 5,6,7,27,2<br>8,29,30,34<br>,35 | 5  | P05712,P20766,P55314,Q8CJD3,Q9QUL6                                                                              |
| 581 | 1,2,3,4,8,3<br>1,32,34 | 5,6,7,27,2<br>8,29,30,33<br>,35 | 4  | P01836,P20766,Q62894,Q62997                                                                                     |

|     |                         |                                 |    |                                                                                                                 |
|-----|-------------------------|---------------------------------|----|-----------------------------------------------------------------------------------------------------------------|
| 582 | 1,2,3,4,8,3<br>1,32,35  | 5,6,7,27,2<br>8,29,30,33<br>,34 | 3  | P02770,P20766,Q6IE52                                                                                            |
| 583 | 1,2,3,4,8,3<br>1,33,34  | 5,6,7,27,2<br>8,29,30,32<br>,35 | 7  | P01835,P20766,P36970,Q62894,Q62997,Q63355,Q9QUL6                                                                |
| 584 | 1,2,3,4,8,3<br>1,33,35  | 5,6,7,27,2<br>8,29,30,32<br>,34 | 7  | B0BNN3,P02770,P10959,P36970,P60905,Q63355,Q6IE52                                                                |
| 585 | 1,2,3,4,8,3<br>1,34,35  | 5,6,7,27,2<br>8,29,30,32<br>,33 | 16 | B0BNN3,P02770,P02781,P08010,P09006,P10959,P17475,P20766,P47727,P60905,P82471,Q62894,Q62997,Q63355,Q6IE52,Q9JHB9 |
| 586 | 1,2,3,4,8,3<br>2,33,34  | 5,6,7,27,2<br>8,29,30,31<br>,35 | 6  | P20766,P34901,P55314,Q62894,Q63661,Q9QUL6                                                                       |
| 587 | 1,2,3,4,8,3<br>2,33,35  | 5,6,7,27,2<br>8,29,30,31<br>,34 | 3  | P02770,P05712,P55314                                                                                            |
| 588 | 1,2,3,4,8,3<br>2,34,35  | 5,6,7,27,2<br>8,29,30,31<br>,33 | 11 | P02770,P02781,P08753,P09006,P17475,P20766,P35467,P82471,P83121,Q62894,Q63661                                    |
| 589 | 1,2,3,4,8,3<br>3,34,35  | 5,6,7,27,2<br>8,29,30,31<br>,32 | 12 | B0BNN3,P02770,P08010,P09006,P17475,P60905,P82471,Q62894,Q63355,Q63661,Q9JHB9,Q9JJ22                             |
| 590 | 1,2,3,4,27,<br>28,29,30 | 5,6,7,8,31,<br>32,33,34,3<br>5  | 2  | D3ZUC6,P01836                                                                                                   |
| 591 | 1,2,3,4,27,<br>28,29,31 | 5,6,7,8,30,<br>32,33,34,3<br>5  | 1  | P01836                                                                                                          |
| 592 | 1,2,3,4,27,<br>28,29,32 | 5,6,7,8,30,<br>31,33,34,3<br>5  | 2  | P01836,P02793;Q7TP54                                                                                            |
| 593 | 1,2,3,4,27,<br>28,29,33 | 5,6,7,8,30,<br>31,32,34,3<br>5  | 1  | P02793;Q7TP54                                                                                                   |
| 594 | 1,2,3,4,27,<br>28,29,34 | 5,6,7,8,30,<br>31,32,33,3<br>5  | 2  | P01836,P04182                                                                                                   |
| 595 | 1,2,3,4,27,<br>28,29,35 | 5,6,7,8,30,<br>31,32,33,3<br>4  | 1  | P01946                                                                                                          |
| 596 | 1,2,3,4,27,<br>28,30,31 | 5,6,7,8,29,<br>32,33,34,3<br>5  | 3  | D3ZUC6,P01836,Q6AYQ8                                                                                            |



|     |                         |                                |   |                                                  |
|-----|-------------------------|--------------------------------|---|--------------------------------------------------|
| 597 | 1,2,3,4,27,<br>28,30,32 | 5,6,7,8,29,<br>31,33,34,3<br>5 | 2 | P01836,Q6AYQ8                                    |
| 598 | 1,2,3,4,27,<br>28,30,33 | 5,6,7,8,29,<br>31,32,34,3<br>5 | 2 | P51907,Q6AYQ8                                    |
| 599 | 1,2,3,4,27,<br>28,30,34 | 5,6,7,8,29,<br>31,32,33,3<br>5 | 4 | P01836,P04182,P47967,Q6AYQ8                      |
| 600 | 1,2,3,4,27,<br>28,30,35 | 5,6,7,8,29,<br>31,32,33,3<br>4 | 3 | D3ZUC6,P06866,Q6AYQ8                             |
| 601 | 1,2,3,4,27,<br>28,31,32 | 5,6,7,8,29,<br>30,33,34,3<br>5 | 1 | P01836                                           |
| 602 | 1,2,3,4,27,<br>28,31,33 | 5,6,7,8,29,<br>30,32,34,3<br>5 | 1 | P51907                                           |
| 603 | 1,2,3,4,27,<br>28,31,34 | 5,6,7,8,29,<br>30,32,33,3<br>5 | 3 | A2RUV9,P01836,P04182                             |
| 604 | 1,2,3,4,27,<br>28,31,35 | 5,6,7,8,29,<br>30,32,33,3<br>4 | 0 |                                                  |
| 605 | 1,2,3,4,27,<br>28,32,33 | 5,6,7,8,29,<br>30,31,34,3<br>5 | 4 | P02793;Q7TP54,P55314,Q06000,Q4FZU2               |
| 606 | 1,2,3,4,27,<br>28,32,34 | 5,6,7,8,29,<br>30,31,33,3<br>5 | 6 | G3V686,P01836,P04182,P34901,Q10758,Q63661        |
| 607 | 1,2,3,4,27,<br>28,32,35 | 5,6,7,8,29,<br>30,31,33,3<br>4 | 0 |                                                  |
| 608 | 1,2,3,4,27,<br>28,33,34 | 5,6,7,8,29,<br>30,31,32,3<br>5 | 2 | P04182,P34901                                    |
| 609 | 1,2,3,4,27,<br>28,33,35 | 5,6,7,8,29,<br>30,31,32,3<br>4 | 0 |                                                  |
| 610 | 1,2,3,4,27,<br>28,34,35 | 5,6,7,8,29,<br>30,31,32,3<br>3 | 7 | P04182,P06866,P09006,P12785,P53792,P83121,Q6AY61 |
| 611 | 1,2,3,4,27,<br>29,30,31 | 5,6,7,8,28,<br>32,33,34,3<br>5 | 3 | P01836,P02625,P25236                             |

|     |                         |                                |   |                                    |
|-----|-------------------------|--------------------------------|---|------------------------------------|
| 612 | 1,2,3,4,27,<br>29,30,32 | 5,6,7,8,28,<br>31,33,34,3<br>5 | 1 | P01836                             |
| 613 | 1,2,3,4,27,<br>29,30,33 | 5,6,7,8,28,<br>31,32,34,3<br>5 | 0 |                                    |
| 614 | 1,2,3,4,27,<br>29,30,34 | 5,6,7,8,28,<br>31,32,33,3<br>5 | 2 | P01836,P05964                      |
| 615 | 1,2,3,4,27,<br>29,30,35 | 5,6,7,8,28,<br>31,32,33,3<br>4 | 3 | D3ZUC6,P01946,P14480               |
| 616 | 1,2,3,4,27,<br>29,31,32 | 5,6,7,8,28,<br>30,33,34,3<br>5 | 4 | P01836,P25236,Q8CJD3,Q99068        |
| 617 | 1,2,3,4,27,<br>29,31,33 | 5,6,7,8,28,<br>30,32,34,3<br>5 | 0 |                                    |
| 618 | 1,2,3,4,27,<br>29,31,34 | 5,6,7,8,28,<br>30,32,33,3<br>5 | 3 | A2RUV9,P01836,P25236               |
| 619 | 1,2,3,4,27,<br>29,31,35 | 5,6,7,8,28,<br>30,32,33,3<br>4 | 2 | P01946,P25236                      |
| 620 | 1,2,3,4,27,<br>29,32,33 | 5,6,7,8,28,<br>30,31,34,3<br>5 | 3 | P02793;Q7TP54,P55314,Q8CJD3        |
| 621 | 1,2,3,4,27,<br>29,32,34 | 5,6,7,8,28,<br>30,31,33,3<br>5 | 4 | G3V686,P01836,P34901,Q63661        |
| 622 | 1,2,3,4,27,<br>29,32,35 | 5,6,7,8,28,<br>30,31,33,3<br>4 | 1 | P01946                             |
| 623 | 1,2,3,4,27,<br>29,33,34 | 5,6,7,8,28,<br>30,31,32,3<br>5 | 4 | G3V686,P34901,Q63661,Q9JJ22        |
| 624 | 1,2,3,4,27,<br>29,33,35 | 5,6,7,8,28,<br>30,31,32,3<br>4 | 1 | P01946                             |
| 625 | 1,2,3,4,27,<br>29,34,35 | 5,6,7,8,28,<br>30,31,32,3<br>3 | 5 | P01946,P12785,P14480,Q63661,Q9JJ22 |
| 626 | 1,2,3,4,27,<br>30,31,32 | 5,6,7,8,28,<br>29,33,34,3<br>5 | 2 | P01836,P10758                      |

|     |                         |                                |   |                                                         |
|-----|-------------------------|--------------------------------|---|---------------------------------------------------------|
| 627 | 1,2,3,4,27,<br>30,31,33 | 5,6,7,8,28,<br>29,32,34,3<br>5 | 2 | P02625,P51907                                           |
| 628 | 1,2,3,4,27,<br>30,31,34 | 5,6,7,8,28,<br>29,32,33,3<br>5 | 5 | A2RUV9,P01836,P02625,P47967,Q62997                      |
| 629 | 1,2,3,4,27,<br>30,31,35 | 5,6,7,8,28,<br>29,32,33,3<br>4 | 1 | D3ZUC6                                                  |
| 630 | 1,2,3,4,27,<br>30,32,33 | 5,6,7,8,28,<br>29,31,34,3<br>5 | 2 | P01836,P55314                                           |
| 631 | 1,2,3,4,27,<br>30,32,34 | 5,6,7,8,28,<br>29,31,33,3<br>5 | 5 | G3V686,P01836,P34901,P83121,Q63661                      |
| 632 | 1,2,3,4,27,<br>30,32,35 | 5,6,7,8,28,<br>29,31,33,3<br>4 | 2 | P01836,Q6AYQ8                                           |
| 633 | 1,2,3,4,27,<br>30,33,34 | 5,6,7,8,28,<br>29,31,32,3<br>5 | 2 | P34901,Q63661                                           |
| 634 | 1,2,3,4,27,<br>30,33,35 | 5,6,7,8,28,<br>29,31,32,3<br>4 | 1 | B0BNN3                                                  |
| 635 | 1,2,3,4,27,<br>30,34,35 | 5,6,7,8,28,<br>29,31,32,3<br>3 | 8 | B0BNN3,P06866,P06911,P14480,P47727,P82471,P83121,Q63661 |
| 636 | 1,2,3,4,27,<br>31,32,33 | 5,6,7,8,28,<br>29,30,34,3<br>5 | 3 | P55314,Q8CJD3,Q99068                                    |
| 637 | 1,2,3,4,27,<br>31,32,34 | 5,6,7,8,28,<br>29,30,33,3<br>5 | 6 | A2RUV9,G3V686,P01836,P34901,Q62997,Q63661               |
| 638 | 1,2,3,4,27,<br>31,32,35 | 5,6,7,8,28,<br>29,30,33,3<br>4 | 0 |                                                         |
| 639 | 1,2,3,4,27,<br>31,33,34 | 5,6,7,8,28,<br>29,30,32,3<br>5 | 6 | A2RUV9,G3V686,P02625,P34901,Q62997,Q63355               |
| 640 | 1,2,3,4,27,<br>31,33,35 | 5,6,7,8,28,<br>29,30,32,3<br>4 | 2 | P63322,Q63355                                           |
| 641 | 1,2,3,4,27,<br>31,34,35 | 5,6,7,8,28,<br>29,30,32,3<br>3 | 7 | A2RUV9,P12785,P17475,P47727,P82471,Q62997,Q63355        |

|     |                         |                                |   |                                                  |
|-----|-------------------------|--------------------------------|---|--------------------------------------------------|
| 642 | 1,2,3,4,27,<br>32,33,34 | 5,6,7,8,28,<br>29,30,31,3<br>5 | 5 | G3V686,P34901,P55314,Q4FZU2,Q63661               |
| 643 | 1,2,3,4,27,<br>32,33,35 | 5,6,7,8,28,<br>29,30,31,3<br>4 | 1 | P55314                                           |
| 644 | 1,2,3,4,27,<br>32,34,35 | 5,6,7,8,28,<br>29,30,31,3<br>3 | 6 | P12785,P34901,P82471,P83121,Q63661,Q9QZK9        |
| 645 | 1,2,3,4,27,<br>33,34,35 | 5,6,7,8,28,<br>29,30,31,3<br>2 | 7 | B0BNN3,P06911,P12785,P60905,P82471,Q63355,Q63661 |
| 646 | 1,2,3,4,28,<br>29,30,31 | 5,6,7,8,27,<br>32,33,34,3<br>5 | 2 | P01836,P06760                                    |
| 647 | 1,2,3,4,28,<br>29,30,32 | 5,6,7,8,27,<br>31,33,34,3<br>5 | 1 | P01836                                           |
| 648 | 1,2,3,4,28,<br>29,30,33 | 5,6,7,8,27,<br>31,32,34,3<br>5 | 2 | P01836,P06760                                    |
| 649 | 1,2,3,4,28,<br>29,30,34 | 5,6,7,8,27,<br>31,32,33,3<br>5 | 3 | P01836,P27791,Q9JJ22                             |
| 650 | 1,2,3,4,28,<br>29,30,35 | 5,6,7,8,27,<br>31,32,33,3<br>4 | 5 | P01681,P01836,P06760,P06866,P14480               |
| 651 | 1,2,3,4,28,<br>29,31,32 | 5,6,7,8,27,<br>30,33,34,3<br>5 | 2 | P01836,P06911                                    |
| 652 | 1,2,3,4,28,<br>29,31,33 | 5,6,7,8,27,<br>30,32,34,3<br>5 | 2 | P01836,P06760                                    |
| 653 | 1,2,3,4,28,<br>29,31,34 | 5,6,7,8,27,<br>30,32,33,3<br>5 | 5 | P01836,P06760,P27791,Q62997,Q9QW07               |
| 654 | 1,2,3,4,28,<br>29,31,35 | 5,6,7,8,27,<br>30,32,33,3<br>4 | 2 | P01836,P06760                                    |
| 655 | 1,2,3,4,28,<br>29,32,33 | 5,6,7,8,27,<br>30,31,34,3<br>5 | 3 | P01836,P02793;Q7TP54,P55314                      |
| 656 | 1,2,3,4,28,<br>29,32,34 | 5,6,7,8,27,<br>30,31,33,3<br>5 | 4 | P01836,P27791,P52303,Q63661                      |

|     |                         |                                |   |                                                                |
|-----|-------------------------|--------------------------------|---|----------------------------------------------------------------|
| 657 | 1,2,3,4,28,<br>29,32,35 | 5,6,7,8,27,<br>30,31,33,3<br>4 | 2 | P01836,P19218                                                  |
| 658 | 1,2,3,4,28,<br>29,33,34 | 5,6,7,8,27,<br>30,31,32,3<br>5 | 4 | P01836,P06760,P27791,Q9JJ22                                    |
| 659 | 1,2,3,4,28,<br>29,33,35 | 5,6,7,8,27,<br>30,31,32,3<br>4 | 1 | P06760                                                         |
| 660 | 1,2,3,4,28,<br>29,34,35 | 5,6,7,8,27,<br>30,31,32,3<br>3 | 7 | P00507,P01836,P06760,P09006,P12785,Q6AY61,Q9JJ22               |
| 661 | 1,2,3,4,28,<br>30,31,32 | 5,6,7,8,27,<br>29,33,34,3<br>5 | 1 | P01836                                                         |
| 662 | 1,2,3,4,28,<br>30,31,33 | 5,6,7,8,27,<br>29,32,34,3<br>5 | 3 | P01836,P06760,P51907                                           |
| 663 | 1,2,3,4,28,<br>30,31,34 | 5,6,7,8,27,<br>29,32,33,3<br>5 | 4 | P01836,P06760,P47967,Q62997                                    |
| 664 | 1,2,3,4,28,<br>30,31,35 | 5,6,7,8,27,<br>29,32,33,3<br>4 | 4 | P01836,P02761,P06760,P06866                                    |
| 665 | 1,2,3,4,28,<br>30,32,33 | 5,6,7,8,27,<br>29,31,34,3<br>5 | 2 | P01836,P55314                                                  |
| 666 | 1,2,3,4,28,<br>30,32,34 | 5,6,7,8,27,<br>29,31,33,3<br>5 | 4 | P01836,P34901,P52303,Q63661                                    |
| 667 | 1,2,3,4,28,<br>30,32,35 | 5,6,7,8,27,<br>29,31,33,3<br>4 | 2 | P01836,Q6AYQ8                                                  |
| 668 | 1,2,3,4,28,<br>30,33,34 | 5,6,7,8,27,<br>29,31,32,3<br>5 | 4 | P01836,P06760,Q62894,Q9JJ22                                    |
| 669 | 1,2,3,4,28,<br>30,33,35 | 5,6,7,8,27,<br>29,31,32,3<br>4 | 3 | B0BNN3,P06760,P06866                                           |
| 670 | 1,2,3,4,28,<br>30,34,35 | 5,6,7,8,27,<br>29,31,32,3<br>3 | 9 | B0BNN3,P01836,P06760,P06866,P09006,P12785,Q6AY61,Q8CJD3,Q920G2 |
| 671 | 1,2,3,4,28,<br>31,32,33 | 5,6,7,8,27,<br>29,30,34,3<br>5 | 2 | P01836,P55314                                                  |

|     |                         |                                |   |                                                  |
|-----|-------------------------|--------------------------------|---|--------------------------------------------------|
| 672 | 1,2,3,4,28,<br>31,32,34 | 5,6,7,8,27,<br>29,30,33,3<br>5 | 2 | P01836,Q62997                                    |
| 673 | 1,2,3,4,28,<br>31,32,35 | 5,6,7,8,27,<br>29,30,33,3<br>4 | 1 | P01836                                           |
| 674 | 1,2,3,4,28,<br>31,33,34 | 5,6,7,8,27,<br>29,30,32,3<br>5 | 4 | P01836,P06760,P27791,Q62997                      |
| 675 | 1,2,3,4,28,<br>31,33,35 | 5,6,7,8,27,<br>29,30,32,3<br>4 | 2 | P06760,Q9WTT6                                    |
| 676 | 1,2,3,4,28,<br>31,34,35 | 5,6,7,8,27,<br>29,30,32,3<br>3 | 7 | P01836,P06760,P09006,P12785,P53792,Q62997,Q6AY61 |
| 677 | 1,2,3,4,28,<br>32,33,34 | 5,6,7,8,27,<br>29,30,31,3<br>5 | 5 | P01836,P34901,P55314,Q62894,Q63661               |
| 678 | 1,2,3,4,28,<br>32,33,35 | 5,6,7,8,27,<br>29,30,31,3<br>4 | 2 | P55314,Q9WTT6                                    |
| 679 | 1,2,3,4,28,<br>32,34,35 | 5,6,7,8,27,<br>29,30,31,3<br>3 | 5 | P01836,P12785,P52303,Q63661,Q6AY61               |
| 680 | 1,2,3,4,28,<br>33,34,35 | 5,6,7,8,27,<br>29,30,31,3<br>2 | 6 | P06760,P09006,P12785,Q63661,Q6AY61,Q9JJ22        |
| 681 | 1,2,3,4,29,<br>30,31,32 | 5,6,7,8,27,<br>28,33,34,3<br>5 | 2 | P01836,P25236                                    |
| 682 | 1,2,3,4,29,<br>30,31,33 | 5,6,7,8,27,<br>28,32,34,3<br>5 | 2 | P01836,P06760                                    |
| 683 | 1,2,3,4,29,<br>30,31,34 | 5,6,7,8,27,<br>28,32,33,3<br>5 | 4 | P01836,P25236,Q62997,Q9JJ22                      |
| 684 | 1,2,3,4,29,<br>30,31,35 | 5,6,7,8,27,<br>28,32,33,3<br>4 | 6 | B0BNN3,P01836,P06760,P14480,P25236,P97584        |
| 685 | 1,2,3,4,29,<br>30,32,33 | 5,6,7,8,27,<br>28,31,34,3<br>5 | 2 | P01836,P55314                                    |
| 686 | 1,2,3,4,29,<br>30,32,34 | 5,6,7,8,27,<br>28,31,33,3<br>5 | 3 | P01836,Q63661,Q6TMA8                             |

|     |                         |                                |   |                                           |
|-----|-------------------------|--------------------------------|---|-------------------------------------------|
| 687 | 1,2,3,4,29,<br>30,32,35 | 5,6,7,8,27,<br>28,31,33,3<br>4 | 2 | P01836,P14480                             |
| 688 | 1,2,3,4,29,<br>30,33,34 | 5,6,7,8,27,<br>28,31,32,3<br>5 | 3 | P01836,Q63661,Q9JJ22                      |
| 689 | 1,2,3,4,29,<br>30,33,35 | 5,6,7,8,27,<br>28,31,32,3<br>4 | 4 | B0BNN3,P06760,P14480,Q9WTT6               |
| 690 | 1,2,3,4,29,<br>30,34,35 | 5,6,7,8,27,<br>28,31,32,3<br>3 | 6 | B0BNN3,P01836,P06866,P14480,Q63661,Q9JJ22 |
| 691 | 1,2,3,4,29,<br>31,32,33 | 5,6,7,8,27,<br>28,30,34,3<br>5 | 4 | P01836,P55314,Q8CJD3,Q9WTT6               |
| 692 | 1,2,3,4,29,<br>31,32,34 | 5,6,7,8,27,<br>28,30,33,3<br>5 | 4 | P01836,P25236,Q62997,Q63661               |
| 693 | 1,2,3,4,29,<br>31,32,35 | 5,6,7,8,27,<br>28,30,33,3<br>4 | 3 | P01836,P25236,Q9WTT6                      |
| 694 | 1,2,3,4,29,<br>31,33,34 | 5,6,7,8,27,<br>28,30,32,3<br>5 | 3 | P01836,Q62997,Q9JJ22                      |
| 695 | 1,2,3,4,29,<br>31,33,35 | 5,6,7,8,27,<br>28,30,32,3<br>4 | 3 | B0BNN3,P06760,Q9WTT6                      |
| 696 | 1,2,3,4,29,<br>31,34,35 | 5,6,7,8,27,<br>28,30,32,3<br>3 | 6 | P01836,P06760,P12785,P25236,Q62997,Q9JJ22 |
| 697 | 1,2,3,4,29,<br>32,33,34 | 5,6,7,8,27,<br>28,30,31,3<br>5 | 6 | P01836,P34901,P55314,Q63661,Q6TMA8,Q9JJ22 |
| 698 | 1,2,3,4,29,<br>32,33,35 | 5,6,7,8,27,<br>28,30,31,3<br>4 | 2 | P55314,Q9WTT6                             |
| 699 | 1,2,3,4,29,<br>32,34,35 | 5,6,7,8,27,<br>28,30,31,3<br>3 | 3 | P01836,Q63661,Q6TMA8                      |
| 700 | 1,2,3,4,29,<br>33,34,35 | 5,6,7,8,27,<br>28,30,31,3<br>2 | 4 | B0BNN3,P06760,Q63661,Q9JJ22               |
| 701 | 1,2,3,4,30,<br>31,32,33 | 5,6,7,8,27,<br>28,29,34,3<br>5 | 4 | P01836,P10758,P55314,Q9WTT6               |

|     |                         |                                   |    |                                                                                                   |
|-----|-------------------------|-----------------------------------|----|---------------------------------------------------------------------------------------------------|
| 702 | 1,2,3,4,30,<br>31,32,34 | 5,6,7,8,27,<br>28,29,33,3<br>5    | 5  | P01836,P34901,P82471,Q62997,Q63661                                                                |
| 703 | 1,2,3,4,30,<br>31,32,35 | 5,6,7,8,27,<br>28,29,33,3<br>4    | 3  | P01836,P82471,Q9WTT6                                                                              |
| 704 | 1,2,3,4,30,<br>31,33,34 | 5,6,7,8,27,<br>28,29,32,3<br>5    | 5  | P01836,P34901,P51907,P82471,Q62997                                                                |
| 705 | 1,2,3,4,30,<br>31,33,35 | 5,6,7,8,27,<br>28,29,32,3<br>4    | 5  | B0BNN3,P06760,P36953,P82471,Q9WTT6                                                                |
| 706 | 1,2,3,4,30,<br>31,34,35 | 5,6,7,8,27,<br>28,29,32,3<br>3    | 13 | B0BNN3,P01836,P02793,Q7TP54,P06760,P06866,P08010,P17475,P24368,P47727,P82471,Q62997,Q80WL1,Q9JHB9 |
| 707 | 1,2,3,4,30,<br>32,33,34 | 5,6,7,8,27,<br>28,29,31,3<br>5    | 5  | P01836,P34901,P55314,P82471,Q63661                                                                |
| 708 | 1,2,3,4,30,<br>32,33,35 | 5,6,7,8,27,<br>28,29,31,3<br>4    | 3  | P55314,P82471,Q9WTT6                                                                              |
| 709 | 1,2,3,4,30,<br>32,34,35 | 5,6,7,8,27,<br>28,29,31,3<br>3    | 6  | P01836,P02782,P82471,P83121,Q62902,Q63661                                                         |
| 710 | 1,2,3,4,30,<br>33,34,35 | 5,6,7,8,27,<br>28,29,31,3<br>2    | 10 | B0BNN3,P02782,P06760,P06866,P06911,P82471,Q62902,Q63661,Q9JHB9,Q9JJ22                             |
| 711 | 1,2,3,4,31,<br>32,33,34 | 5,6,7,8,27,<br>28,29,30,3<br>5    | 6  | P01836,P34901,P55314,P82471,Q62997,Q63661                                                         |
| 712 | 1,2,3,4,31,<br>32,33,35 | 5,6,7,8,27,<br>28,29,30,3<br>4    | 3  | P55314,P82471,Q9WTT6                                                                              |
| 713 | 1,2,3,4,31,<br>32,34,35 | 5,6,7,8,27,<br>28,29,30,3<br>3    | 8  | P01836,P02781,P02782,P82471,Q62997,Q63661,Q8CJ52,Q9JHB9                                           |
| 714 | 1,2,3,4,31,<br>33,34,35 | 5,6,7,8,27,<br>28,29,30,3<br>2    | 11 | B0BNN3,P02781,P02782,P06760,P08010,P24368,P60905,P82471,Q62997,Q63355,Q9JHB9                      |
| 715 | 1,2,3,4,32,<br>33,34,35 | 5,6,7,8,27,<br>28,29,30,3<br>1    | 6  | P02781,P02782,P34901,P55314,P82471,Q63661                                                         |
| 716 | 1,2,3,5,6,7,<br>8,27    | 4,28,29,30<br>,31,32,33,<br>34,35 | 14 | P00507,P02631,P07171,P08753,P16086,P24388,P52590,P53792,Q03191,Q09030,Q63942,Q6IE51,Q8CHN8,Q9QZQ5 |



|     |                       |                                   |    |                                                                                                                               |
|-----|-----------------------|-----------------------------------|----|-------------------------------------------------------------------------------------------------------------------------------|
| 717 | 1,2,3,5,6,7<br>,8,28  | 4,27,29,30<br>,31,32,33,<br>34,35 | 9  | O54728,P02631,P16086,P52590,Q09030,Q561R9,Q63942,Q6IE51,Q9QZQ5                                                                |
| 718 | 1,2,3,5,6,7<br>,8,29  | 4,27,28,30<br>,31,32,33,<br>34,35 | 11 | P02631,P16086,P52590,P53792,P83748,Q09030,Q63467,Q63942,Q6IE51,Q8CJD3,Q9QZQ5                                                  |
| 719 | 1,2,3,5,6,7<br>,8,30  | 4,27,28,29<br>,31,32,33,<br>34,35 | 15 | O88267,P00507,P02631,P08753,P16086,P19218,P35446,P52590,P53792,P97605,Q09030,Q561R9,Q6IE51,Q8N7M5,Q9QZQ5                      |
| 720 | 1,2,3,5,6,7<br>,8,31  | 4,27,28,29<br>,30,32,33,<br>34,35 | 15 | O54728,O88267,P00507,P02631,P08753,P16086,P19218,P52590,P53792,P83748,P97605,Q09030,Q561R9,Q8CJD3,Q9QZQ5                      |
| 721 | 1,2,3,5,6,7<br>,8,32  | 4,27,28,29<br>,30,31,33,<br>34,35 | 17 | O88267,P02631,P08753,P16086,P24388,P36374,P52590,P53792,P97605,Q09030,Q561R9,Q63942,Q6AYR9,Q6IE51,Q8CJD3,Q8N7M5,Q9QZQ5        |
| 722 | 1,2,3,5,6,7<br>,8,33  | 4,27,28,29<br>,30,31,32,<br>34,35 | 13 | P00507,P02631,P08753,P16086,P52590,P53792,P97605,Q09030,Q6AYR9,Q6IE51,Q8CJD3,Q8N7M5,Q9QZQ5                                    |
| 723 | 1,2,3,5,6,7<br>,8,34  | 4,27,28,29<br>,30,31,32,<br>33,35 | 18 | O88267,P02631,P08010,P08753,P16086,P36374,P52590,P83748,P97605,Q09030,Q63467,Q63532,Q63942,Q6IE51,Q6IRE4,Q8N7M5,Q9EQV6,Q9QZQ5 |
| 724 | 1,2,3,5,6,7<br>,8,35  | 4,27,28,29<br>,30,31,32,<br>33,34 | 14 | O88267,P02631,P02770,P02781,P08010,P08753,P16086,P36374,P52590,P97605,Q09030,Q30KJ2,Q6AYR9,Q6IE51                             |
| 725 | 1,2,3,5,6,7<br>,27,28 | 4,8,29,30,<br>31,32,33,3<br>4,35  | 8  | P02631,P16086,P24388,P52590,Q09030,Q63942,Q6IE51,Q8CHN8                                                                       |
| 726 | 1,2,3,5,6,7<br>,27,29 | 4,8,28,30,<br>31,32,33,3<br>4,35  | 9  | P00507,P02631,P16086,P52590,P53792,Q09030,Q63467,Q6IE51,Q8CHN8                                                                |
| 727 | 1,2,3,5,6,7<br>,27,30 | 4,8,28,29,<br>31,32,33,3<br>4,35  | 10 | P00507,P02631,P02803,P16086,P19218,P52590,P53792,Q09030,Q6IE51,Q8CHN8                                                         |
| 728 | 1,2,3,5,6,7<br>,27,31 | 4,8,28,29,<br>30,32,33,3<br>4,35  | 9  | P00507,P02631,P16086,P19218,P52590,P83748,Q09030,Q6IE51,Q8CHN8                                                                |
| 729 | 1,2,3,5,6,7<br>,27,32 | 4,8,28,29,<br>30,31,33,3<br>4,35  | 14 | P00507,P02631,P02803,P08753,P16086,P24388,P52590,P53792,P55314,Q09030,Q561R9,Q63532,Q6IE51,Q8CHN8                             |
| 730 | 1,2,3,5,6,7<br>,27,33 | 4,8,28,29,<br>30,31,32,3<br>4,35  | 8  | P00507,P02631,P16086,P52590,P53792,Q09030,Q6IE51,Q8CHN8                                                                       |
| 731 | 1,2,3,5,6,7<br>,27,34 | 4,8,28,29,<br>30,31,32,3<br>3,35  | 16 | G3V686,P02631,P02780,P08753,P16086,P52590,P83748,P97840,Q03191,Q09030,Q4FZU6,Q63467,Q63532,Q6IE51,Q6IRE4,Q8CHN8               |

|     |                       |                                  |    |                                                                              |
|-----|-----------------------|----------------------------------|----|------------------------------------------------------------------------------|
| 732 | 1,2,3,5,6,7<br>,27,35 | 4,8,28,29,<br>30,31,32,3<br>3,34 | 11 | P01946,P02631,P02780,P08753,P16086,P16636,P52590,Q09030,Q30KJ2,Q6IE51,Q8CHN8 |
| 733 | 1,2,3,5,6,7<br>,28,29 | 4,8,27,30,<br>31,32,33,3<br>4,35 | 7  | P01681,P02631,P52590,P83748,Q561R9,Q63942,Q6IE51                             |
| 734 | 1,2,3,5,6,7<br>,28,30 | 4,8,27,29,<br>31,32,33,3<br>4,35 | 7  | P02631,P16086,P52590,Q09030,Q561R9,Q63942,Q6IE51                             |
| 735 | 1,2,3,5,6,7<br>,28,31 | 4,8,27,29,<br>30,32,33,3<br>4,35 | 6  | O54728,P52590,P83748,Q561R9,Q63942,Q6IE51                                    |
| 736 | 1,2,3,5,6,7<br>,28,32 | 4,8,27,29,<br>30,31,33,3<br>4,35 | 7  | P02631,P16086,P52590,Q09030,Q561R9,Q63942,Q6IE51                             |
| 737 | 1,2,3,5,6,7<br>,28,33 | 4,8,27,29,<br>30,31,32,3<br>4,35 | 5  | P02631,P52590,Q561R9,Q63942,Q6IE51                                           |
| 738 | 1,2,3,5,6,7<br>,28,34 | 4,8,27,29,<br>30,31,32,3<br>3,35 | 11 | O54728,P02631,P16086,P52590,P83748,P97615,P97840,Q09030,Q63942,Q6IE51,Q6IRE4 |
| 739 | 1,2,3,5,6,7<br>,28,35 | 4,8,27,29,<br>30,31,32,3<br>3,34 | 8  | P01681,P02631,P10758,P52590,P83748,Q30KJ2,Q63942,Q6IE51                      |
| 740 | 1,2,3,5,6,7<br>,29,30 | 4,8,27,28,<br>31,32,33,3<br>4,35 | 6  | P02631,P16086,P52590,P53792,Q561R9,Q6IE51                                    |
| 741 | 1,2,3,5,6,7<br>,29,31 | 4,8,27,28,<br>30,32,33,3<br>4,35 | 9  | P00714,P02631,P16086,P52590,P53792,P83748,Q561R9,Q63467,Q6IE51               |
| 742 | 1,2,3,5,6,7<br>,29,32 | 4,8,27,28,<br>30,31,33,3<br>4,35 | 8  | P02631,P16086,P52590,P53792,Q561R9,Q63467,Q6IE51,Q8CJD3                      |
| 743 | 1,2,3,5,6,7<br>,29,33 | 4,8,27,28,<br>30,31,32,3<br>4,35 | 5  | P02631,P52590,P53792,Q6IE51,Q8CJD3                                           |
| 744 | 1,2,3,5,6,7<br>,29,34 | 4,8,27,28,<br>30,31,32,3<br>3,35 | 8  | P02631,P16086,P52590,P83748,Q63467,Q6IE51,Q6IRE4,Q9JJ22                      |
| 745 | 1,2,3,5,6,7<br>,29,35 | 4,8,27,28,<br>30,31,32,3<br>3,34 | 8  | P01946,P02091,P02631,P10758,P52590,P83748,Q30KJ2,Q6IE51                      |
| 746 | 1,2,3,5,6,7<br>,30,31 | 4,8,27,28,<br>29,32,33,3<br>4,35 | 8  | P00507,P16086,P19218,P42854,P52590,P53792,Q09030,Q561R9                      |

|     |                       |                                  |    |                                                                                                                                                    |
|-----|-----------------------|----------------------------------|----|----------------------------------------------------------------------------------------------------------------------------------------------------|
| 747 | 1,2,3,5,6,7<br>,30,32 | 4,8,27,28,<br>29,31,33,3<br>4,35 | 11 | O88267,P00507,P02631,P16086,P52590,P53792,P97605,Q09030,Q561R9,Q6IE51,Q8N7M5                                                                       |
| 748 | 1,2,3,5,6,7<br>,30,33 | 4,8,27,28,<br>29,31,32,3<br>4,35 | 10 | P00507,P16086,P19218,P35446,P52590,P53792,Q09030,Q561R9,Q6IE51,Q8N7M5                                                                              |
| 749 | 1,2,3,5,6,7<br>,30,34 | 4,8,27,28,<br>29,31,32,3<br>3,35 | 14 | P02631,P08753,P16086,P17559,P19218,P36374,P47967,P52590,P83748,P97840,Q09030,Q63532,Q6IRE4,Q8N7M5                                                  |
| 750 | 1,2,3,5,6,7<br>,30,35 | 4,8,27,28,<br>29,31,32,3<br>3,34 | 8  | O88267,P02781,P16086,P24368,P52590,Q09030,Q30KJ2,Q6IE51                                                                                            |
| 751 | 1,2,3,5,6,7<br>,31,32 | 4,8,27,28,<br>29,30,33,3<br>4,35 | 11 | P00507,P08753,P16086,P52590,P53792,P83748,P97605,Q09030,Q561R9,Q6IE51,Q8CJD3                                                                       |
| 752 | 1,2,3,5,6,7<br>,31,33 | 4,8,27,28,<br>29,30,32,3<br>4,35 | 12 | P00507,P00714,P52590,P53792,P83748,P97580,P97605,Q30KJ2,Q561R9,Q6AYR9,Q6IE51,Q8CJD3                                                                |
| 753 | 1,2,3,5,6,7<br>,31,34 | 4,8,27,28,<br>29,30,32,3<br>3,35 | 14 | P00714,P02781,P08010,P08753,P0C0A9,P16086,P19218,P36374,P52590,P83748,Q09030,Q62997,Q63467,Q6IRE4                                                  |
| 754 | 1,2,3,5,6,7<br>,31,35 | 4,8,27,28,<br>29,30,32,3<br>3,34 | 11 | P00714,P02781,P08010,P08753,P24368,P52590,P60905,P83748,Q30KJ2,Q6AYR9,Q6IE51                                                                       |
| 755 | 1,2,3,5,6,7<br>,32,33 | 4,8,27,28,<br>29,30,31,3<br>4,35 | 15 | P00507,P02631,P08753,P16086,P52590,P53792,P55314,P97580,P97605,Q09030,Q30KJ2,Q561R9,Q6AYR9,Q6IE51,Q8CJD3                                           |
| 756 | 1,2,3,5,6,7<br>,32,34 | 4,8,27,28,<br>29,30,31,3<br>3,35 | 20 | G3V686,P02631,P02781,P08753,P0C0A9,P16086,P17046,P36374,P52590,P55314,P83748,P97605,Q09030,Q561R9,Q63467,Q63532,Q63661,Q6IE51,Q6IRE4,Q8N7M5        |
| 757 | 1,2,3,5,6,7<br>,32,35 | 4,8,27,28,<br>29,30,31,3<br>3,34 | 11 | P02781,P08753,P16086,P52590,P97580,P97605,Q09030,Q30KJ2,Q561R9,Q6AYR9,Q6IE51                                                                       |
| 758 | 1,2,3,5,6,7<br>,33,34 | 4,8,27,28,<br>29,30,31,3<br>2,35 | 14 | P02631,P02781,P08010,P08753,P0C0A9,P16086,P36374,P52590,P83748,Q09030,Q63532,Q6AYR9,Q6IE51,Q6IRE4                                                  |
| 759 | 1,2,3,5,6,7<br>,33,35 | 4,8,27,28,<br>29,30,31,3<br>2,34 | 12 | P00714,P02781,P08010,P08753,P15399,P52590,P60905,P97580,P97605,Q30KJ2,Q6AYR9,Q6IE51                                                                |
| 760 | 1,2,3,5,6,7<br>,34,35 | 4,8,27,28,<br>29,30,31,3<br>2,33 | 21 | P02780,P02781,P02782,P08010,P08753,P0C0A9,P10758,P16086,P24368,P36374,P47727,P52590,P60905,P82471,P83748,Q09030,Q30KJ2,Q63532,Q6AYR9,Q6IE51,Q6IRE4 |
| 761 | 1,2,3,5,6,8<br>,27,28 | 4,7,29,30,<br>31,32,33,3<br>4,35 | 3  | Q63942,Q6P777,Q9Z1F2                                                                                                                               |

|     |                       |                                  |   |                                                         |
|-----|-----------------------|----------------------------------|---|---------------------------------------------------------|
| 762 | 1,2,3,5,6,8<br>.27,29 | 4,7,28,30,<br>31,32,33,3<br>4,35 | 2 | Q63942,Q9Z1F2                                           |
| 763 | 1,2,3,5,6,8<br>.27,30 | 4,7,28,29,<br>31,32,33,3<br>4,35 | 1 | Q63942                                                  |
| 764 | 1,2,3,5,6,8<br>.27,31 | 4,7,28,29,<br>30,32,33,3<br>4,35 | 3 | P08753,Q63942,Q9Z1F2                                    |
| 765 | 1,2,3,5,6,8<br>.27,32 | 4,7,28,29,<br>30,31,33,3<br>4,35 | 6 | P06760,P08753,Q561R9,Q5I0D1,Q63942,Q9Z1F2               |
| 766 | 1,2,3,5,6,8<br>.27,33 | 4,7,28,29,<br>30,31,32,3<br>4,35 | 3 | P08753,Q63942,Q9Z1F2                                    |
| 767 | 1,2,3,5,6,8<br>.27,34 | 4,7,28,29,<br>30,31,32,3<br>3,35 | 8 | P08753,P83121,Q03191,Q4FZU6,Q63942,Q6IRE4,Q9WTT6,Q9Z1F2 |
| 768 | 1,2,3,5,6,8<br>.27,35 | 4,7,28,29,<br>30,31,32,3<br>3,34 | 2 | P08753,Q63942                                           |
| 769 | 1,2,3,5,6,8<br>.28,29 | 4,7,27,30,<br>31,32,33,3<br>4,35 | 5 | O35547,P01681,Q63942,Q6P777,Q9QW07                      |
| 770 | 1,2,3,5,6,8<br>.28,30 | 4,7,27,29,<br>31,32,33,3<br>4,35 | 3 | P01681,Q561R9,Q63942                                    |
| 771 | 1,2,3,5,6,8<br>.28,31 | 4,7,27,29,<br>30,32,33,3<br>4,35 | 3 | O54728,Q561R9,Q63942                                    |
| 772 | 1,2,3,5,6,8<br>.28,32 | 4,7,27,29,<br>30,31,33,3<br>4,35 | 4 | Q561R9,Q63942,Q6P777,Q9Z1F2                             |
| 773 | 1,2,3,5,6,8<br>.28,33 | 4,7,27,29,<br>30,31,32,3<br>4,35 | 2 | Q63942,Q6P777                                           |
| 774 | 1,2,3,5,6,8<br>.28,34 | 4,7,27,29,<br>30,31,32,3<br>3,35 | 6 | P97615,Q4FZU6,Q63942,Q6IRE4,Q6P777,Q9WTT6               |
| 775 | 1,2,3,5,6,8<br>.28,35 | 4,7,27,29,<br>30,31,32,3<br>3,34 | 2 | P01681,Q63942                                           |
| 776 | 1,2,3,5,6,8<br>.29,30 | 4,7,27,28,<br>31,32,33,3<br>4,35 | 2 | P53792,Q63942                                           |

|     |                       |                                  |   |                                                         |
|-----|-----------------------|----------------------------------|---|---------------------------------------------------------|
| 777 | 1,2,3,5,6,8<br>,29,31 | 4,7,27,28,<br>30,32,33,3<br>4,35 | 1 | Q63942                                                  |
| 778 | 1,2,3,5,6,8<br>,29,32 | 4,7,27,28,<br>30,31,33,3<br>4,35 | 6 | P51907,P53792,Q561R9,Q63942,Q8CJD3,Q9Z1F2               |
| 779 | 1,2,3,5,6,8<br>,29,33 | 4,7,27,28,<br>30,31,32,3<br>4,35 | 3 | P53792,Q63942,Q8CJD3                                    |
| 780 | 1,2,3,5,6,8<br>,29,34 | 4,7,27,28,<br>30,31,32,3<br>3,35 | 4 | Q63942,Q6IRE4,Q9JJ22,Q9QW07                             |
| 781 | 1,2,3,5,6,8<br>,29,35 | 4,7,27,28,<br>30,31,32,3<br>3,34 | 4 | P01681,P01946,P51907,Q63942                             |
| 782 | 1,2,3,5,6,8<br>,30,31 | 4,7,27,28,<br>29,32,33,3<br>4,35 | 2 | P19218,Q561R9                                           |
| 783 | 1,2,3,5,6,8<br>,30,32 | 4,7,27,28,<br>29,31,33,3<br>4,35 | 3 | P08753,P53792,Q561R9                                    |
| 784 | 1,2,3,5,6,8<br>,30,33 | 4,7,27,28,<br>29,31,32,3<br>4,35 | 1 | P53792                                                  |
| 785 | 1,2,3,5,6,8<br>,30,34 | 4,7,27,28,<br>29,31,32,3<br>3,35 | 4 | P08753,P36374,Q6IRE4,Q9WTT6                             |
| 786 | 1,2,3,5,6,8<br>,30,35 | 4,7,27,28,<br>29,31,32,3<br>3,34 | 3 | P02770,P08753,Q06000                                    |
| 787 | 1,2,3,5,6,8<br>,31,32 | 4,7,27,28,<br>29,30,33,3<br>4,35 | 5 | P08753,Q561R9,Q5FVI6,Q8CJD3,Q9Z1F2                      |
| 788 | 1,2,3,5,6,8<br>,31,33 | 4,7,27,28,<br>29,30,32,3<br>4,35 | 2 | P08753,Q8CJD3                                           |
| 789 | 1,2,3,5,6,8<br>,31,34 | 4,7,27,28,<br>29,30,32,3<br>3,35 | 5 | P08753,P20766,P36374,Q62997,Q6IRE4                      |
| 790 | 1,2,3,5,6,8<br>,31,35 | 4,7,27,28,<br>29,30,32,3<br>3,34 | 2 | P08753,Q06000                                           |
| 791 | 1,2,3,5,6,8<br>,32,33 | 4,7,27,28,<br>29,30,31,3<br>4,35 | 8 | P08753,P53792,P55314,P97605,Q561R9,Q6AYR9,Q8CJD3,Q9Z1F2 |

|     |                        |                                  |   |                                                                |
|-----|------------------------|----------------------------------|---|----------------------------------------------------------------|
| 792 | 1,2,3,5,6,8<br>,32,34  | 4,7,27,28,<br>29,30,31,3<br>3,35 | 7 | P08753,P36374,P55314,Q561R9,Q63942,Q6IRE4,Q9Z1F2               |
| 793 | 1,2,3,5,6,8<br>,32,35  | 4,7,27,28,<br>29,30,31,3<br>3,34 | 4 | P08753,P36374,P51907,Q6AYR9                                    |
| 794 | 1,2,3,5,6,8<br>,33,34  | 4,7,27,28,<br>29,30,31,3<br>2,35 | 4 | P08753,P36374,Q62894,Q6IRE4                                    |
| 795 | 1,2,3,5,6,8<br>,33,35  | 4,7,27,28,<br>29,30,31,3<br>2,34 | 2 | P08753,Q6AYR9                                                  |
| 796 | 1,2,3,5,6,8<br>,34,35  | 4,7,27,28,<br>29,30,31,3<br>2,33 | 9 | P02781,P08010,P08753,P24368,P36374,P82471,P83121,Q6IRE4,Q6PCU2 |
| 797 | 1,2,3,5,6,2<br>7,28,29 | 4,7,8,30,3<br>1,32,33,34<br>,35  | 5 | O35547,P01681,Q63942,Q6P777,Q9QW07                             |
| 798 | 1,2,3,5,6,2<br>7,28,30 | 4,7,8,29,3<br>1,32,33,34<br>,35  | 2 | P01681,Q63942                                                  |
| 799 | 1,2,3,5,6,2<br>7,28,31 | 4,7,8,29,3<br>0,32,33,34<br>,35  | 1 | Q63942                                                         |
| 800 | 1,2,3,5,6,2<br>7,28,32 | 4,7,8,29,3<br>0,31,33,34<br>,35  | 4 | Q561R9,Q63942,Q6P777,Q9Z1F2                                    |
| 801 | 1,2,3,5,6,2<br>7,28,33 | 4,7,8,29,3<br>0,31,32,34<br>,35  | 3 | Q4FZU2,Q63942,Q80WL1                                           |
| 802 | 1,2,3,5,6,2<br>7,28,34 | 4,7,8,29,3<br>0,31,32,33<br>,35  | 7 | P04182,P97615,Q4FZU6,Q63942,Q6IRE4,Q6P777,Q9QW07               |
| 803 | 1,2,3,5,6,2<br>7,28,35 | 4,7,8,29,3<br>0,31,32,33<br>,34  | 2 | P01681,Q63942                                                  |
| 804 | 1,2,3,5,6,2<br>7,29,30 | 4,7,8,28,3<br>1,32,33,34<br>,35  | 0 |                                                                |
| 805 | 1,2,3,5,6,2<br>7,29,31 | 4,7,8,28,3<br>0,32,33,34<br>,35  | 0 |                                                                |
| 806 | 1,2,3,5,6,2<br>7,29,32 | 4,7,8,28,3<br>0,31,33,34<br>,35  | 2 | Q561R9,Q9Z1F2                                                  |

|     |                        |                                 |    |                                                                       |
|-----|------------------------|---------------------------------|----|-----------------------------------------------------------------------|
| 807 | 1,2,3,5,6,2<br>7,29,33 | 4,7,8,28,3<br>0,31,32,34<br>,35 | 1  | Q80WL1                                                                |
| 808 | 1,2,3,5,6,2<br>7,29,34 | 4,7,8,28,3<br>0,31,32,33<br>,35 | 3  | Q4FZU6,Q6IRE4,Q9QW07                                                  |
| 809 | 1,2,3,5,6,2<br>7,29,35 | 4,7,8,28,3<br>0,31,32,33<br>,34 | 1  | P01946                                                                |
| 810 | 1,2,3,5,6,2<br>7,30,31 | 4,7,8,28,2<br>9,32,33,34<br>,35 | 1  | P19218                                                                |
| 811 | 1,2,3,5,6,2<br>7,30,32 | 4,7,8,28,2<br>9,31,33,34<br>,35 | 3  | P02803,P55314,Q561R9                                                  |
| 812 | 1,2,3,5,6,2<br>7,30,33 | 4,7,8,28,2<br>9,31,32,34<br>,35 | 0  |                                                                       |
| 813 | 1,2,3,5,6,2<br>7,30,34 | 4,7,8,28,2<br>9,31,32,33<br>,35 | 6  | P02803,P35280,P83121,Q4FZU6,Q63617,Q6IRE4                             |
| 814 | 1,2,3,5,6,2<br>7,30,35 | 4,7,8,28,2<br>9,31,32,33<br>,34 | 0  |                                                                       |
| 815 | 1,2,3,5,6,2<br>7,31,32 | 4,7,8,28,2<br>9,30,33,34<br>,35 | 1  | Q561R9                                                                |
| 816 | 1,2,3,5,6,2<br>7,31,33 | 4,7,8,28,2<br>9,30,32,34<br>,35 | 0  |                                                                       |
| 817 | 1,2,3,5,6,2<br>7,31,34 | 4,7,8,28,2<br>9,30,32,33<br>,35 | 3  | P02780,P08753,Q6IRE4                                                  |
| 818 | 1,2,3,5,6,2<br>7,31,35 | 4,7,8,28,2<br>9,30,32,33<br>,34 | 1  | P02780                                                                |
| 819 | 1,2,3,5,6,2<br>7,32,33 | 4,7,8,28,2<br>9,30,31,34<br>,35 | 6  | P55314,Q4FZU2,Q561R9,Q6P6Q2,Q80WL1,Q9Z1F2                             |
| 820 | 1,2,3,5,6,2<br>7,32,34 | 4,7,8,28,2<br>9,30,31,33<br>,35 | 10 | G3V686,P02803,P08753,P55314,P83121,Q10758,Q4FZU6,Q63661,Q6IRE4,Q9Z1F2 |
| 821 | 1,2,3,5,6,2<br>7,32,35 | 4,7,8,28,2<br>9,30,31,33<br>,34 | 1  | P08753                                                                |

|     |                        |                                 |   |                                                  |
|-----|------------------------|---------------------------------|---|--------------------------------------------------|
| 822 | 1,2,3,5,6,2<br>7,33,34 | 4,7,8,28,2<br>9,30,31,32<br>,35 | 4 | P08753,Q4FZU2,Q4FZU6,Q6IRE4                      |
| 823 | 1,2,3,5,6,2<br>7,33,35 | 4,7,8,28,2<br>9,30,31,32<br>,34 | 1 | Q4FZU2                                           |
| 824 | 1,2,3,5,6,2<br>7,34,35 | 4,7,8,28,2<br>9,30,31,32<br>,33 | 6 | P02780,P06911,P08753,P83121,Q4FZU6,Q6IRE4        |
| 825 | 1,2,3,5,6,2<br>8,29,30 | 4,7,8,27,3<br>1,32,33,34<br>,35 | 3 | P01681,Q561R9,Q63942                             |
| 826 | 1,2,3,5,6,2<br>8,29,31 | 4,7,8,27,3<br>0,32,33,34<br>,35 | 4 | P00714,Q561R9,Q63942,Q9QW07                      |
| 827 | 1,2,3,5,6,2<br>8,29,32 | 4,7,8,27,3<br>0,31,33,34<br>,35 | 4 | P01681,Q561R9,Q63942,Q6P777                      |
| 828 | 1,2,3,5,6,2<br>8,29,33 | 4,7,8,27,3<br>0,31,32,34<br>,35 | 5 | P00714,Q561R9,Q63942,Q6P777,Q80WL1               |
| 829 | 1,2,3,5,6,2<br>8,29,34 | 4,7,8,27,3<br>0,31,32,33<br>,35 | 7 | P00714,P01681,Q4FZU6,Q63942,Q6IRE4,Q6P777,Q9QW07 |
| 830 | 1,2,3,5,6,2<br>8,29,35 | 4,7,8,27,3<br>0,31,32,33<br>,34 | 5 | P00714,P01681,P01946,Q63942,Q9QW07               |
| 831 | 1,2,3,5,6,2<br>8,30,31 | 4,7,8,27,2<br>9,32,33,34<br>,35 | 4 | P00714,Q561R9,Q63617,Q63942                      |
| 832 | 1,2,3,5,6,2<br>8,30,32 | 4,7,8,27,2<br>9,31,33,34<br>,35 | 2 | Q561R9,Q63942                                    |
| 833 | 1,2,3,5,6,2<br>8,30,33 | 4,7,8,27,2<br>9,31,32,34<br>,35 | 3 | P00714,Q561R9,Q63942                             |
| 834 | 1,2,3,5,6,2<br>8,30,34 | 4,7,8,27,2<br>9,31,32,33<br>,35 | 3 | Q63617,Q63942,Q6IRE4                             |
| 835 | 1,2,3,5,6,2<br>8,30,35 | 4,7,8,27,2<br>9,31,32,33<br>,34 | 3 | P00714,P01681,Q63942                             |
| 836 | 1,2,3,5,6,2<br>8,31,32 | 4,7,8,27,2<br>9,30,33,34<br>,35 | 2 | Q561R9,Q63942                                    |



|     |                        |                                 |   |                                                         |
|-----|------------------------|---------------------------------|---|---------------------------------------------------------|
| 837 | 1,2,3,5,6,2<br>8,31,33 | 4,7,8,27,2<br>9,30,32,34<br>,35 | 3 | P00714,Q561R9,Q63942                                    |
| 838 | 1,2,3,5,6,2<br>8,31,34 | 4,7,8,27,2<br>9,30,32,33<br>,35 | 5 | P00714,Q63617,Q63942,Q6IRE4,Q9QW07                      |
| 839 | 1,2,3,5,6,2<br>8,31,35 | 4,7,8,27,2<br>9,30,32,33<br>,34 | 3 | P00714,P01681,Q63942                                    |
| 840 | 1,2,3,5,6,2<br>8,32,33 | 4,7,8,27,2<br>9,30,31,34<br>,35 | 5 | P55314,Q561R9,Q63942,Q6P777,Q80WL1                      |
| 841 | 1,2,3,5,6,2<br>8,32,34 | 4,7,8,27,2<br>9,30,31,33<br>,35 | 8 | P55314,P97615,Q4FZU6,Q561R9,Q5HZV9,Q63942,Q6IRE4,Q6P777 |
| 842 | 1,2,3,5,6,2<br>8,32,35 | 4,7,8,27,2<br>9,30,31,33<br>,34 | 3 | P01681,Q561R9,Q63942                                    |
| 843 | 1,2,3,5,6,2<br>8,33,34 | 4,7,8,27,2<br>9,30,31,32<br>,35 | 5 | P00714,Q4FZU6,Q63942,Q6IRE4,Q6P777                      |
| 844 | 1,2,3,5,6,2<br>8,33,35 | 4,7,8,27,2<br>9,30,31,32<br>,34 | 3 | P00714,Q63942,Q6AYR9                                    |
| 845 | 1,2,3,5,6,2<br>8,34,35 | 4,7,8,27,2<br>9,30,31,32<br>,33 | 7 | P00714,P01681,Q4FZU6,Q5HZV9,Q63942,Q6IRE4,Q9QW07        |
| 846 | 1,2,3,5,6,2<br>9,30,31 | 4,7,8,27,2<br>8,32,33,34<br>,35 | 2 | P00714,Q561R9                                           |
| 847 | 1,2,3,5,6,2<br>9,30,32 | 4,7,8,27,2<br>8,31,33,34<br>,35 | 2 | P53792,Q561R9                                           |
| 848 | 1,2,3,5,6,2<br>9,30,33 | 4,7,8,27,2<br>8,31,32,34<br>,35 | 2 | P00714,P53792                                           |
| 849 | 1,2,3,5,6,2<br>9,30,34 | 4,7,8,27,2<br>8,31,32,33<br>,35 | 3 | P00714,Q6IRE4,Q9JJ22                                    |
| 850 | 1,2,3,5,6,2<br>9,30,35 | 4,7,8,27,2<br>8,31,32,33<br>,34 | 3 | P00714,P01681,Q99041                                    |
| 851 | 1,2,3,5,6,2<br>9,31,32 | 4,7,8,27,2<br>8,30,33,34<br>,35 | 2 | Q561R9,Q8CJD3                                           |

|     |                        |                                 |   |                                           |
|-----|------------------------|---------------------------------|---|-------------------------------------------|
| 852 | 1,2,3,5,6,2<br>9,31,33 | 4,7,8,27,2<br>8,30,32,34<br>,35 | 2 | P00714,P53792                             |
| 853 | 1,2,3,5,6,2<br>9,31,34 | 4,7,8,27,2<br>8,30,32,33<br>,35 | 3 | P00714,Q6IRE4,Q9QW07                      |
| 854 | 1,2,3,5,6,2<br>9,31,35 | 4,7,8,27,2<br>8,30,32,33<br>,34 | 1 | P00714                                    |
| 855 | 1,2,3,5,6,2<br>9,32,33 | 4,7,8,27,2<br>8,30,31,34<br>,35 | 5 | P53792,P55314,Q561R9,Q80WL1,Q8CJD3        |
| 856 | 1,2,3,5,6,2<br>9,32,34 | 4,7,8,27,2<br>8,30,31,33<br>,35 | 4 | P55314,Q561R9,Q63661,Q6IRE4               |
| 857 | 1,2,3,5,6,2<br>9,32,35 | 4,7,8,27,2<br>8,30,31,33<br>,34 | 1 | P51907                                    |
| 858 | 1,2,3,5,6,2<br>9,33,34 | 4,7,8,27,2<br>8,30,31,32<br>,35 | 3 | P00714,Q6IRE4,Q9JJ22                      |
| 859 | 1,2,3,5,6,2<br>9,33,35 | 4,7,8,27,2<br>8,30,31,32<br>,34 | 1 | P00714                                    |
| 860 | 1,2,3,5,6,2<br>9,34,35 | 4,7,8,27,2<br>8,30,31,32<br>,33 | 5 | P00714,P01946,Q6IRE4,Q9JJ22,Q9QW07        |
| 861 | 1,2,3,5,6,3<br>0,31,32 | 4,7,8,27,2<br>8,29,33,34<br>,35 | 2 | Q561R9,Q63617                             |
| 862 | 1,2,3,5,6,3<br>0,31,33 | 4,7,8,27,2<br>8,29,32,34<br>,35 | 2 | P00714,Q561R9                             |
| 863 | 1,2,3,5,6,3<br>0,31,34 | 4,7,8,27,2<br>8,29,32,33<br>,35 | 4 | P00714,P24368,Q63617,Q6IRE4               |
| 864 | 1,2,3,5,6,3<br>0,31,35 | 4,7,8,27,2<br>8,29,32,33<br>,34 | 4 | P00714,P24368,Q63617,Q99041               |
| 865 | 1,2,3,5,6,3<br>0,32,33 | 4,7,8,27,2<br>8,29,31,34<br>,35 | 3 | P53792,P55314,Q561R9                      |
| 866 | 1,2,3,5,6,3<br>0,32,34 | 4,7,8,27,2<br>8,29,31,33<br>,35 | 6 | P08753,P55314,Q561R9,Q63617,Q63661,Q6IRE4 |

|     |                        |                                  |    |                                                                                                          |
|-----|------------------------|----------------------------------|----|----------------------------------------------------------------------------------------------------------|
| 867 | 1,2,3,5,6,3<br>0,32,35 | 4,7,8,27,2<br>8,29,31,33<br>,34  | 3  | P08753,Q561R9,Q99041                                                                                     |
| 868 | 1,2,3,5,6,3<br>0,33,34 | 4,7,8,27,2<br>8,29,31,32<br>,35  | 2  | P00714,Q6IRE4                                                                                            |
| 869 | 1,2,3,5,6,3<br>0,33,35 | 4,7,8,27,2<br>8,29,31,32<br>,34  | 2  | P00714,P24368                                                                                            |
| 870 | 1,2,3,5,6,3<br>0,34,35 | 4,7,8,27,2<br>8,29,31,32<br>,33  | 12 | P00714,P02781,P02793,Q7TP54,P06911,P08753,P24368,P47727,P82471,Q62902,Q63617,Q6IRE4,Q8CJ52               |
| 871 | 1,2,3,5,6,3<br>1,32,33 | 4,7,8,27,2<br>8,29,30,34<br>,35  | 3  | P55314,Q561R9,Q8CJD3                                                                                     |
| 872 | 1,2,3,5,6,3<br>1,32,34 | 4,7,8,27,2<br>8,29,30,33<br>,35  | 9  | P02781,P08753,P0C0A9,P36374,P55314,Q561R9,Q63617,Q6IRE4,Q8CJ52                                           |
| 873 | 1,2,3,5,6,3<br>1,32,35 | 4,7,8,27,2<br>8,29,30,33<br>,34  | 5  | P02781,P08753,Q561R9,Q6AYR9,Q8CJ52                                                                       |
| 874 | 1,2,3,5,6,3<br>1,33,34 | 4,7,8,27,2<br>8,29,30,32<br>,35  | 5  | P00714,P08753,P0C0A9,Q63355,Q6IRE4                                                                       |
| 875 | 1,2,3,5,6,3<br>1,33,35 | 4,7,8,27,2<br>8,29,30,32<br>,34  | 7  | P00714,P02781,P24368,P82471,Q30KJ2,Q63355,Q6AYR9                                                         |
| 876 | 1,2,3,5,6,3<br>1,34,35 | 4,7,8,27,2<br>8,29,30,32<br>,33  | 15 | P00714,P02780,P02781,P08010,P08723,P08753,P0C0A9,P24368,P36374,P60905,P82471,Q63355,Q63617,Q6IRE4,Q8CJ52 |
| 877 | 1,2,3,5,6,3<br>2,33,34 | 4,7,8,27,2<br>8,29,30,31<br>,35  | 6  | P08753,P34901,P55314,Q561R9,Q63661,Q6IRE4                                                                |
| 878 | 1,2,3,5,6,3<br>2,33,35 | 4,7,8,27,2<br>8,29,30,31<br>,34  | 6  | P02781,P08753,P55314,P97580,Q30KJ2,Q6AYR9                                                                |
| 879 | 1,2,3,5,6,3<br>2,34,35 | 4,7,8,27,2<br>8,29,30,31<br>,33  | 11 | P02781,P08753,P0C0A9,P36374,P55314,P82471,P83121,Q63661,Q6AYR9,Q6IRE4,Q8CJ52                             |
| 880 | 1,2,3,5,6,3<br>3,34,35 | 4,7,8,27,2<br>8,29,30,31<br>,32  | 14 | P00714,P02781,P06911,P08753,P0C0A9,P24368,P60905,P82471,Q62902,Q63355,Q63661,Q6AYR9,Q6IRE4,Q8CJ52        |
| 881 | 1,2,3,5,7,8<br>,27,28  | 4,6,29,30,<br>31,32,33,3<br>4,35 | 8  | O54728,P24388,P52590,Q03191,Q09030,Q63942,Q6IE51,Q8CHN8                                                  |

|     |                       |                                  |    |                                                                              |
|-----|-----------------------|----------------------------------|----|------------------------------------------------------------------------------|
| 882 | 1,2,3,5,7,8<br>,27,29 | 4,6,28,30,<br>31,32,33,3<br>4,35 | 8  | P00507,P00762,P52590,Q03191,Q09030,Q5HZV9,Q63467,Q6IE51                      |
| 883 | 1,2,3,5,7,8<br>,27,30 | 4,6,28,29,<br>31,32,33,3<br>4,35 | 3  | P00507,P52590,Q09030                                                         |
| 884 | 1,2,3,5,7,8<br>,27,31 | 4,6,28,29,<br>30,32,33,3<br>4,35 | 6  | O54728,P00507,P00762,P52590,Q03191,Q09030                                    |
| 885 | 1,2,3,5,7,8<br>,27,32 | 4,6,28,29,<br>30,31,33,3<br>4,35 | 9  | P00507,P00762,P08753,P24388,P52590,Q03191,Q08849,Q09030,Q6IE51               |
| 886 | 1,2,3,5,7,8<br>,27,33 | 4,6,28,29,<br>30,31,32,3<br>4,35 | 8  | P00507,P00762,P52590,Q03191,Q08849,Q09030,Q5HZV9,Q6IE51                      |
| 887 | 1,2,3,5,7,8<br>,27,34 | 4,6,28,29,<br>30,31,32,3<br>3,35 | 9  | P00762,P08753,P52590,P83121,Q03191,Q09030,Q63467,Q6IRE4,Q8CHN8               |
| 888 | 1,2,3,5,7,8<br>,27,35 | 4,6,28,29,<br>30,31,32,3<br>3,34 | 11 | P01946,P02770,P08753,P16636,P52590,P60905,Q03191,Q09030,Q6IE51,Q8CHN8,Q9QX79 |
| 889 | 1,2,3,5,7,8<br>,28,29 | 4,6,27,30,<br>31,32,33,3<br>4,35 | 5  | O54728,P52590,Q09030,Q63942,Q9QW07                                           |
| 890 | 1,2,3,5,7,8<br>,28,30 | 4,6,27,29,<br>31,32,33,3<br>4,35 | 4  | O54728,P52590,Q09030,Q63942                                                  |
| 891 | 1,2,3,5,7,8<br>,28,31 | 4,6,27,29,<br>30,32,33,3<br>4,35 | 4  | O54728,P52590,Q09030,Q63942                                                  |
| 892 | 1,2,3,5,7,8<br>,28,32 | 4,6,27,29,<br>30,31,33,3<br>4,35 | 6  | O54728,P24388,P52590,Q09030,Q561R9,Q63942                                    |
| 893 | 1,2,3,5,7,8<br>,28,33 | 4,6,27,29,<br>30,31,32,3<br>4,35 | 5  | O54728,P52590,Q09030,Q63942,Q6AYR9                                           |
| 894 | 1,2,3,5,7,8<br>,28,34 | 4,6,27,29,<br>30,31,32,3<br>3,35 | 7  | O54728,P52590,P97615,Q09030,Q62894,Q63942,Q6IRE4                             |
| 895 | 1,2,3,5,7,8<br>,28,35 | 4,6,27,29,<br>30,31,32,3<br>3,34 | 6  | O54728,P02770,P52590,Q09030,Q63942,Q6AYR9                                    |
| 896 | 1,2,3,5,7,8<br>,29,30 | 4,6,27,28,<br>31,32,33,3<br>4,35 | 4  | P52590,P53792,Q09030,Q5HZV9                                                  |

|     |                       |                                  |    |                                                                                                                 |
|-----|-----------------------|----------------------------------|----|-----------------------------------------------------------------------------------------------------------------|
| 897 | 1,2,3,5,7,8<br>,29,31 | 4,6,27,28,<br>30,32,33,3<br>4,35 | 6  | O54728,P00507,P52590,Q5HZV9,Q63467,Q6IFU7                                                                       |
| 898 | 1,2,3,5,7,8<br>,29,32 | 4,6,27,28,<br>30,31,33,3<br>4,35 | 5  | P52590,P53792,Q09030,Q63467,Q8CJD3                                                                              |
| 899 | 1,2,3,5,7,8<br>,29,33 | 4,6,27,28,<br>30,31,32,3<br>4,35 | 5  | P00507,P52590,P53792,Q5HZV9,Q8CJD3                                                                              |
| 900 | 1,2,3,5,7,8<br>,29,34 | 4,6,27,28,<br>30,31,32,3<br>3,35 | 6  | P52590,Q09030,Q63467,Q6IRE4,Q9JJ22,Q9QW07                                                                       |
| 901 | 1,2,3,5,7,8<br>,29,35 | 4,6,27,28,<br>30,31,32,3<br>3,34 | 4  | P01946,P02091,P52590,Q6IFU7                                                                                     |
| 902 | 1,2,3,5,7,8<br>,30,31 | 4,6,27,28,<br>29,32,33,3<br>4,35 | 7  | O54728,P00507,P19218,P42854,P52590,Q09030,Q6IFU7                                                                |
| 903 | 1,2,3,5,7,8<br>,30,32 | 4,6,27,28,<br>29,31,33,3<br>4,35 | 6  | P00507,P08753,P52590,P53792,P97605,Q09030                                                                       |
| 904 | 1,2,3,5,7,8<br>,30,33 | 4,6,27,28,<br>29,31,32,3<br>4,35 | 6  | P00507,P35446,P52590,P53792,Q09030,Q5HZV9                                                                       |
| 905 | 1,2,3,5,7,8<br>,30,34 | 4,6,27,28,<br>29,31,32,3<br>3,35 | 8  | P06911,P08753,P0C0A9,P47727,P52590,Q09030,Q62894,Q6IRE4                                                         |
| 906 | 1,2,3,5,7,8<br>,30,35 | 4,6,27,28,<br>29,31,32,3<br>3,34 | 9  | P02770,P06911,P08753,P47727,P52590,P60905,P97584,Q09030,Q9JHB9                                                  |
| 907 | 1,2,3,5,7,8<br>,31,32 | 4,6,27,28,<br>29,30,33,3<br>4,35 | 11 | O54728,P00507,P08753,P0C0A9,P20766,P52590,P97605,Q08849,Q09030,Q6AYR9,Q8CJD3                                    |
| 908 | 1,2,3,5,7,8<br>,31,33 | 4,6,27,28,<br>29,30,32,3<br>4,35 | 8  | O54728,P00507,P01835,P52590,P60905,Q09030,Q5HZV9,Q6AYR9                                                         |
| 909 | 1,2,3,5,7,8<br>,31,34 | 4,6,27,28,<br>29,30,32,3<br>3,35 | 15 | O54728,P01835,P02781,P08010,P08753,P0C0A9,P20766,P36374,P52590,P60905,Q09030,Q62997,Q63467,Q6IRE4,Q9JHB9        |
| 910 | 1,2,3,5,7,8<br>,31,35 | 4,6,27,28,<br>29,30,32,3<br>3,34 | 16 | O08815,O54728,P02770,P02781,P08010,P08753,P0C0A9,P24368,P47727,P52590,P60905,P97584,Q09030,Q6AYR9,Q6IFU7,Q9JHB9 |
| 911 | 1,2,3,5,7,8<br>,32,33 | 4,6,27,28,<br>29,30,31,3<br>4,35 | 10 | P00507,P08753,P52590,P53792,P55314,P97605,Q08849,Q09030,Q6AYR9,Q8CJD3                                           |

|     |                        |                                  |    |                                                                                                                                                                         |
|-----|------------------------|----------------------------------|----|-------------------------------------------------------------------------------------------------------------------------------------------------------------------------|
| 912 | 1,2,3,5,7,8<br>,32,34  | 4,6,27,28,<br>29,30,31,3<br>3,35 | 14 | P02781,P08753,P0C0A9,P20766,P36374,P52590,P83121,P97605,Q09030,Q62894,Q63467,Q63532,Q6AYR9,Q6IRE4                                                                       |
| 913 | 1,2,3,5,7,8<br>,32,35  | 4,6,27,28,<br>29,30,31,3<br>3,34 | 8  | P02781,P08753,P0C0A9,P52590,P60905,P97605,Q09030,Q6AYR9                                                                                                                 |
| 914 | 1,2,3,5,7,8<br>,33,34  | 4,6,27,28,<br>29,30,31,3<br>2,35 | 11 | P01835,P08753,P0C0A9,P36374,P52590,P60905,Q09030,Q62894,Q6AYR9,Q6IRE4,Q9JHB9                                                                                            |
| 915 | 1,2,3,5,7,8<br>,33,35  | 4,6,27,28,<br>29,30,31,3<br>2,34 | 9  | P02781,P08010,P08753,P0C0A9,P52590,P60905,Q09030,Q6AYR9,Q9JHB9                                                                                                          |
| 916 | 1,2,3,5,7,8<br>,34,35  | 4,6,27,28,<br>29,30,31,3<br>2,33 | 24 | O08815,P02770,P02780,P02781,P04905,P06911,P08010,P08723,P08753,P0C0A9,P16296,P24368,P36374,P47727,P52590,P60905,P82471,P83121,Q08464,Q09030,Q6AYR9,Q6IRE4,Q6PCU2,Q9JHB9 |
| 917 | 1,2,3,5,7,2<br>7,28,29 | 4,6,8,30,3<br>1,32,33,34<br>,35  | 4  | Q63942,Q6IE51,Q8CHN8,Q9QW07                                                                                                                                             |
| 918 | 1,2,3,5,7,2<br>7,28,30 | 4,6,8,29,3<br>1,32,33,34<br>,35  | 4  | P52590,Q09030,Q6IE51,Q8CHN8                                                                                                                                             |
| 919 | 1,2,3,5,7,2<br>7,28,31 | 4,6,8,29,3<br>0,32,33,34<br>,35  | 4  | O54728,P52590,Q09030,Q6IE51                                                                                                                                             |
| 920 | 1,2,3,5,7,2<br>7,28,32 | 4,6,8,29,3<br>0,31,33,34<br>,35  | 5  | P02793;Q7TP54,P24388,Q09030,Q6IE51,Q8CHN8                                                                                                                               |
| 921 | 1,2,3,5,7,2<br>7,28,33 | 4,6,8,29,3<br>0,31,32,34<br>,35  | 5  | P02793;Q7TP54,P52590,Q09030,Q6IE51,Q8CHN8                                                                                                                               |
| 922 | 1,2,3,5,7,2<br>7,28,34 | 4,6,8,29,3<br>0,31,32,33<br>,35  | 8  | O54728,P04182,P97615,Q03191,Q09030,Q6IE51,Q6IRE4,Q8CHN8                                                                                                                 |
| 923 | 1,2,3,5,7,2<br>7,28,35 | 4,6,8,29,3<br>0,31,32,33<br>,34  | 5  | P01946,P52590,Q09030,Q6IE51,Q8CHN8                                                                                                                                      |
| 924 | 1,2,3,5,7,2<br>7,29,30 | 4,6,8,28,3<br>1,32,33,34<br>,35  | 5  | P00507,P52590,Q09030,Q5HZV9,Q8CHN8                                                                                                                                      |
| 925 | 1,2,3,5,7,2<br>7,29,31 | 4,6,8,28,3<br>0,32,33,34<br>,35  | 4  | P00507,P52590,Q5HZV9,Q63467                                                                                                                                             |
| 926 | 1,2,3,5,7,2<br>7,29,32 | 4,6,8,28,3<br>0,31,33,34<br>,35  | 5  | P00507,P02793;Q7TP54,Q09030,Q63467,Q6IE51                                                                                                                               |

|     |                        |                                 |    |                                                                                     |
|-----|------------------------|---------------------------------|----|-------------------------------------------------------------------------------------|
| 927 | 1,2,3,5,7,2<br>7,29,33 | 4,6,8,28,3<br>0,31,32,34<br>,35 | 6  | P00507,P02793;Q7TP54,P52590,Q5HZV9,Q6IE51,Q8CHN8                                    |
| 928 | 1,2,3,5,7,2<br>7,29,34 | 4,6,8,28,3<br>0,31,32,33<br>,35 | 6  | Q03191,Q09030,Q63467,Q6IRE4,Q8CHN8,Q9QW07                                           |
| 929 | 1,2,3,5,7,2<br>7,29,35 | 4,6,8,28,3<br>0,31,32,33<br>,34 | 5  | P01946,P02091,P52590,Q6IE51,Q8CHN8                                                  |
| 930 | 1,2,3,5,7,2<br>7,30,31 | 4,6,8,28,2<br>9,32,33,34<br>,35 | 3  | P00507,P52590,Q09030                                                                |
| 931 | 1,2,3,5,7,2<br>7,30,32 | 4,6,8,28,2<br>9,31,33,34<br>,35 | 3  | P00507,Q09030,Q6IE51                                                                |
| 932 | 1,2,3,5,7,2<br>7,30,33 | 4,6,8,28,2<br>9,31,32,34<br>,35 | 5  | P00507,P52590,Q09030,Q6IE51,Q8CHN8                                                  |
| 933 | 1,2,3,5,7,2<br>7,30,34 | 4,6,8,28,2<br>9,31,32,33<br>,35 | 12 | P02780,P04905,P06911,P35280,P47727,P47967,P83121,P97840,Q03191,Q09030,Q6IRE4,Q8CHN8 |
| 934 | 1,2,3,5,7,2<br>7,30,35 | 4,6,8,28,2<br>9,31,32,33<br>,34 | 8  | P01946,P02780,P06911,P47727,P52590,Q09030,Q6IE51,Q8CHN8                             |
| 935 | 1,2,3,5,7,2<br>7,31,32 | 4,6,8,28,2<br>9,30,33,34<br>,35 | 4  | P00507,P52590,Q08849,Q09030                                                         |
| 936 | 1,2,3,5,7,2<br>7,31,33 | 4,6,8,28,2<br>9,30,32,34<br>,35 | 4  | P00507,P52590,Q09030,Q6IE51                                                         |
| 937 | 1,2,3,5,7,2<br>7,31,34 | 4,6,8,28,2<br>9,30,32,33<br>,35 | 9  | A2RUV9,P02780,P04905,P52590,P60905,Q03191,Q09030,Q63467,Q6IRE4                      |
| 938 | 1,2,3,5,7,2<br>7,31,35 | 4,6,8,28,2<br>9,30,32,33<br>,34 | 6  | P01946,P02780,P52590,P60905,Q09030,Q6IE51                                           |
| 939 | 1,2,3,5,7,2<br>7,32,33 | 4,6,8,28,2<br>9,30,31,34<br>,35 | 8  | P00507,P02793;Q7TP54,P52590,P55314,Q08849,Q09030,Q6IE51,Q6NX65                      |
| 940 | 1,2,3,5,7,2<br>7,32,34 | 4,6,8,28,2<br>9,30,31,33<br>,35 | 11 | P02780,P08753,P17046,P55314,P83121,Q03191,Q09030,Q63467,Q63532,Q63661,Q6IRE4        |
| 941 | 1,2,3,5,7,2<br>7,32,35 | 4,6,8,28,2<br>9,30,31,33<br>,34 | 10 | P01946,P02780,P08753,P52590,P83121,Q08849,Q09030,Q6AYR9,Q6IE51,Q8CHN8               |

|     |                        |                                 |    |                                                                                                                        |
|-----|------------------------|---------------------------------|----|------------------------------------------------------------------------------------------------------------------------|
| 942 | 1,2,3,5,7,2<br>7,33,34 | 4,6,8,28,2<br>9,30,31,32<br>,35 | 9  | P02780,P11762,P52590,P60905,Q03191,Q09030,Q6IE51,Q6IRE4,Q8CHN8                                                         |
| 943 | 1,2,3,5,7,2<br>7,33,35 | 4,6,8,28,2<br>9,30,31,32<br>,34 | 11 | P01946,P02780,P06911,P16636,P52590,P60905,Q09030,Q62975,Q6AYR9,Q6IE51,Q8CHN8                                           |
| 944 | 1,2,3,5,7,2<br>7,34,35 | 4,6,8,28,2<br>9,30,31,32<br>,33 | 17 | P01946,P02780,P02782,P04905,P06911,P08753,P16636,P47727,P52590,P60905,P83121,Q03191,Q09030,Q62975,Q6IE51,Q6IRE4,Q8CHN8 |
| 945 | 1,2,3,5,7,2<br>8,29,30 | 4,6,8,27,3<br>1,32,33,34<br>,35 | 1  | P52590                                                                                                                 |
| 946 | 1,2,3,5,7,2<br>8,29,31 | 4,6,8,27,3<br>0,32,33,34<br>,35 | 3  | O54728,P52590,Q9QW07                                                                                                   |
| 947 | 1,2,3,5,7,2<br>8,29,32 | 4,6,8,27,3<br>0,31,33,34<br>,35 | 3  | P02793;Q7TP54,P52590,Q561R9                                                                                            |
| 948 | 1,2,3,5,7,2<br>8,29,33 | 4,6,8,27,3<br>0,31,32,34<br>,35 | 2  | P02793;Q7TP54,P52590                                                                                                   |
| 949 | 1,2,3,5,7,2<br>8,29,34 | 4,6,8,27,3<br>0,31,32,33<br>,35 | 4  | O54728,P52590,Q6IRE4,Q9QW07                                                                                            |
| 950 | 1,2,3,5,7,2<br>8,29,35 | 4,6,8,27,3<br>0,31,32,33<br>,34 | 5  | P01946,P02091,P06760,P52590,Q9QW07                                                                                     |
| 951 | 1,2,3,5,7,2<br>8,30,31 | 4,6,8,27,2<br>9,32,33,34<br>,35 | 3  | O54728,P52590,Q09030                                                                                                   |
| 952 | 1,2,3,5,7,2<br>8,30,32 | 4,6,8,27,2<br>9,31,33,34<br>,35 | 3  | P52590,Q09030,Q561R9                                                                                                   |
| 953 | 1,2,3,5,7,2<br>8,30,33 | 4,6,8,27,2<br>9,31,32,34<br>,35 | 2  | P52590,Q09030                                                                                                          |
| 954 | 1,2,3,5,7,2<br>8,30,34 | 4,6,8,27,2<br>9,31,32,33<br>,35 | 7  | O54728,P47967,P52590,P97615,P97840,Q09030,Q6IRE4                                                                       |
| 955 | 1,2,3,5,7,2<br>8,30,35 | 4,6,8,27,2<br>9,31,32,33<br>,34 | 4  | P06760,P52590,P97584,Q09030                                                                                            |
| 956 | 1,2,3,5,7,2<br>8,31,32 | 4,6,8,27,2<br>9,30,33,34<br>,35 | 4  | O54728,P52590,Q09030,Q561R9                                                                                            |



|     |                        |                                 |   |                                                  |
|-----|------------------------|---------------------------------|---|--------------------------------------------------|
| 957 | 1,2,3,5,7,2<br>8,31,33 | 4,6,8,27,2<br>9,30,32,34<br>,35 | 3 | O54728,P06760,P52590                             |
| 958 | 1,2,3,5,7,2<br>8,31,34 | 4,6,8,27,2<br>9,30,32,33<br>,35 | 5 | O54728,P52590,Q09030,Q6IRE4,Q9QW07               |
| 959 | 1,2,3,5,7,2<br>8,31,35 | 4,6,8,27,2<br>9,30,32,33<br>,34 | 4 | O54728,P06760,P07150,P52590                      |
| 960 | 1,2,3,5,7,2<br>8,32,33 | 4,6,8,27,2<br>9,30,31,34<br>,35 | 6 | P02793;Q7TP54,P52590,P55314,Q09030,Q561R9,Q6AYR9 |
| 961 | 1,2,3,5,7,2<br>8,32,34 | 4,6,8,27,2<br>9,30,31,33<br>,35 | 6 | O54728,P17046,P52590,P97615,Q09030,Q6IRE4        |
| 962 | 1,2,3,5,7,2<br>8,32,35 | 4,6,8,27,2<br>9,30,31,33<br>,34 | 3 | P52590,Q09030,Q6AYR9                             |
| 963 | 1,2,3,5,7,2<br>8,33,34 | 4,6,8,27,2<br>9,30,31,32<br>,35 | 4 | O54728,P52590,Q09030,Q6IRE4                      |
| 964 | 1,2,3,5,7,2<br>8,33,35 | 4,6,8,27,2<br>9,30,31,32<br>,34 | 4 | P06760,P52590,Q6AYR9,Q9WTT6                      |
| 965 | 1,2,3,5,7,2<br>8,34,35 | 4,6,8,27,2<br>9,30,31,32<br>,33 | 5 | O54728,P52590,Q09030,Q6IRE4,Q9QW07               |
| 966 | 1,2,3,5,7,2<br>9,30,31 | 4,6,8,27,2<br>8,32,33,34<br>,35 | 4 | P00507,P52590,P97584,Q5HZV9                      |
| 967 | 1,2,3,5,7,2<br>9,30,32 | 4,6,8,27,2<br>8,31,33,34<br>,35 | 5 | P00507,P52590,P53792,Q09030,Q561R9               |
| 968 | 1,2,3,5,7,2<br>9,30,33 | 4,6,8,27,2<br>8,31,32,34<br>,35 | 4 | P00507,P52590,P53792,Q5HZV9                      |
| 969 | 1,2,3,5,7,2<br>9,30,34 | 4,6,8,27,2<br>8,31,32,33<br>,35 | 5 | P52590,Q09030,Q63467,Q6IRE4,Q9JJ22               |
| 970 | 1,2,3,5,7,2<br>9,30,35 | 4,6,8,27,2<br>8,31,32,33<br>,34 | 4 | P01946,P02091,P52590,P97584                      |
| 971 | 1,2,3,5,7,2<br>9,31,32 | 4,6,8,27,2<br>8,30,33,34<br>,35 | 4 | P00507,P52590,Q561R9,Q63467                      |

|     |                        |                                 |    |                                                                                                          |
|-----|------------------------|---------------------------------|----|----------------------------------------------------------------------------------------------------------|
| 972 | 1,2,3,5,7,2<br>9,31,33 | 4,6,8,27,2<br>8,30,32,34<br>,35 | 6  | P00507,P00714,P52590,P53792,Q5HZV9,Q9WTT6                                                                |
| 973 | 1,2,3,5,7,2<br>9,31,34 | 4,6,8,27,2<br>8,30,32,33<br>,35 | 5  | P00714,P52590,Q63467,Q6IRE4,Q9QW07                                                                       |
| 974 | 1,2,3,5,7,2<br>9,31,35 | 4,6,8,27,2<br>8,30,32,33<br>,34 | 7  | P00714,P01946,P02091,P52590,P97584,Q6IFU7,Q9WTT6                                                         |
| 975 | 1,2,3,5,7,2<br>9,32,33 | 4,6,8,27,2<br>8,30,31,34<br>,35 | 7  | P00507,P02793;Q7TP54,P52590,P53792,P55314,Q8CJD3,Q9WTT6                                                  |
| 976 | 1,2,3,5,7,2<br>9,32,34 | 4,6,8,27,2<br>8,30,31,33<br>,35 | 6  | P17046,P52590,Q09030,Q63467,Q63661,Q6IRE4                                                                |
| 977 | 1,2,3,5,7,2<br>9,32,35 | 4,6,8,27,2<br>8,30,31,33<br>,34 | 4  | P01946,P02091,P52590,Q9WTT6                                                                              |
| 978 | 1,2,3,5,7,2<br>9,33,34 | 4,6,8,27,2<br>8,30,31,32<br>,35 | 5  | P00714,P52590,Q63467,Q6IRE4,Q9JJ22                                                                       |
| 979 | 1,2,3,5,7,2<br>9,33,35 | 4,6,8,27,2<br>8,30,31,32<br>,34 | 5  | P00714,P01946,P02091,P52590,Q9WTT6                                                                       |
| 980 | 1,2,3,5,7,2<br>9,34,35 | 4,6,8,27,2<br>8,30,31,32<br>,33 | 8  | P00714,P01946,P02091,P52590,Q63467,Q6IRE4,Q9JJ22,Q9QW07                                                  |
| 981 | 1,2,3,5,7,3<br>0,31,32 | 4,6,8,27,2<br>8,29,33,34<br>,35 | 5  | P00507,P0C0A9,P52590,Q09030,Q561R9                                                                       |
| 982 | 1,2,3,5,7,3<br>0,31,33 | 4,6,8,27,2<br>8,29,32,34<br>,35 | 6  | P00507,P00714,P0C0A9,P35446,P52590,Q9WTT6                                                                |
| 983 | 1,2,3,5,7,3<br>0,31,34 | 4,6,8,27,2<br>8,29,32,33<br>,35 | 15 | P00714,P02781,P02782,P04905,P08644,P08723,P0C0A9,P24368,P47727,P52590,P97840,Q09030,Q62997,Q6IRE4,Q9JHB9 |
| 984 | 1,2,3,5,7,3<br>0,31,35 | 4,6,8,27,2<br>8,29,32,33<br>,34 | 12 | P00714,P02781,P08010,P08723,P0C0A9,P24368,P47727,P52590,P60905,P97584,Q9JHB9,Q9WTT6                      |
| 985 | 1,2,3,5,7,3<br>0,32,33 | 4,6,8,27,2<br>8,29,31,34<br>,35 | 9  | P00507,P02782,P0C0A9,P52590,P53792,P55314,Q09030,Q561R9,Q9WTT6                                           |
| 986 | 1,2,3,5,7,3<br>0,32,34 | 4,6,8,27,2<br>8,29,31,33<br>,35 | 12 | P02781,P02782,P08644,P08723,P08753,P0C0A9,P17046,P52590,Q09030,Q63532,Q63661,Q6IRE4                      |

|      |                        |                                 |    |                                                                                                                                                           |
|------|------------------------|---------------------------------|----|-----------------------------------------------------------------------------------------------------------------------------------------------------------|
| 987  | 1,2,3,5,7,3<br>0,32,35 | 4,6,8,27,2<br>8,29,31,33<br>,34 | 6  | P02781,P02782,P0C0A9,P52590,P97584,Q09030                                                                                                                 |
| 988  | 1,2,3,5,7,3<br>0,33,34 | 4,6,8,27,2<br>8,29,31,32<br>,35 | 8  | P02782,P06911,P08644,P0C0A9,P52590,Q09030,Q6IRE4,Q9JHB9                                                                                                   |
| 989  | 1,2,3,5,7,3<br>0,33,35 | 4,6,8,27,2<br>8,29,31,32<br>,34 | 10 | P02781,P02782,P06911,P0C0A9,P24368,P52590,P60905,P97584,Q9JHB9,Q9WTT6                                                                                     |
| 990  | 1,2,3,5,7,3<br>0,34,35 | 4,6,8,27,2<br>8,29,31,32<br>,33 | 20 | P02780,P02781,P02782,P04905,P06911,P07647,P08010,P08723,P08753,P0C0A9,P24368,P47727,P52590,P60905,P82471,P83121,Q09030,Q62902,Q6IRE4,Q9JHB9               |
| 991  | 1,2,3,5,7,3<br>1,32,33 | 4,6,8,27,2<br>8,29,30,34<br>,35 | 11 | P00507,P02782,P08644,P0C0A9,P52590,P55314,P97605,Q561R9,Q6AYR9,Q8CJD3,Q9WTT6                                                                              |
| 992  | 1,2,3,5,7,3<br>1,32,34 | 4,6,8,27,2<br>8,29,30,33<br>,35 | 11 | P02781,P02782,P08644,P08723,P08753,P0C0A9,P17046,P52590,Q09030,Q62997,Q6IRE4                                                                              |
| 993  | 1,2,3,5,7,3<br>1,32,35 | 4,6,8,27,2<br>8,29,30,33<br>,34 | 12 | P02781,P02782,P08723,P08753,P0C0A9,P30120,P52590,P60905,P97584,Q6AYR9,Q9JHB9,Q9WTT6                                                                       |
| 994  | 1,2,3,5,7,3<br>1,33,34 | 4,6,8,27,2<br>8,29,30,32<br>,35 | 14 | P00714,P01835,P02781,P02782,P08010,P08644,P08723,P0C0A9,P24368,P52590,P60905,Q62997,Q6IRE4,Q9JHB9                                                         |
| 995  | 1,2,3,5,7,3<br>1,33,35 | 4,6,8,27,2<br>8,29,30,32<br>,34 | 14 | P00714,P02781,P02782,P06760,P08010,P08723,P0C0A9,P24368,P30120,P52590,P60905,Q6AYR9,Q9JHB9,Q9WTT6                                                         |
| 996  | 1,2,3,5,7,3<br>1,34,35 | 4,6,8,27,2<br>8,29,30,32<br>,33 | 21 | O08815,P00714,P02780,P02781,P02782,P04905,P07150,P07647,P08010,P08723,P08753,P0C0A9,P24368,P30120,P47727,P52590,P60905,P82471,Q6AYR9,Q6IRE4,Q9JHB9        |
| 997  | 1,2,3,5,7,3<br>2,33,34 | 4,6,8,27,2<br>8,29,30,31<br>,35 | 15 | P02781,P02782,P08644,P08753,P0C0A9,P17046,P34901,P52590,P55314,P60905,Q09030,Q63532,Q63661,Q6AYR9,Q6IRE4                                                  |
| 998  | 1,2,3,5,7,3<br>2,33,35 | 4,6,8,27,2<br>8,29,30,31<br>,34 | 12 | P02781,P02782,P08753,P0C0A9,P30120,P52590,P55314,P60905,P97605,Q6AYR9,Q6NX65,Q9WTT6                                                                       |
| 999  | 1,2,3,5,7,3<br>2,34,35 | 4,6,8,27,2<br>8,29,30,31<br>,33 | 22 | P02780,P02781,P02782,P07647,P08010,P08723,P08753,P0C0A9,P17046,P24368,P30120,P36374,P52590,P60905,P82471,P83121,Q09030,Q63661,Q6AYR9,Q6IRE4,Q8CJ52,Q9JHB9 |
| 1000 | 1,2,3,5,7,3<br>3,34,35 | 4,6,8,27,2<br>8,29,30,31<br>,32 | 21 | P00714,P02780,P02781,P02782,P06911,P08010,P08723,P08753,P0C0A9,P24368,P30120,P47727,P52590,P60905,P82471,Q62902,Q62975,Q63661,Q6AYR9,Q6IRE4,Q9JHB9        |
| 1001 | 1,2,3,5,8,2<br>7,28,29 | 4,6,7,30,3<br>1,32,33,34<br>,35 | 2  | Q63942,Q9QW07                                                                                                                                             |

|      |                        |                                 |   |                                                  |
|------|------------------------|---------------------------------|---|--------------------------------------------------|
| 1002 | 1,2,3,5,8,2<br>7,28,30 | 4,6,7,29,3<br>1,32,33,34<br>,35 | 2 | P83121,Q63942                                    |
| 1003 | 1,2,3,5,8,2<br>7,28,31 | 4,6,7,29,3<br>0,32,33,34<br>,35 | 2 | O54728,Q63942                                    |
| 1004 | 1,2,3,5,8,2<br>7,28,32 | 4,6,7,29,3<br>0,31,33,34<br>,35 | 3 | P09605;P25809,P83121,Q63942                      |
| 1005 | 1,2,3,5,8,2<br>7,28,33 | 4,6,7,29,3<br>0,31,32,34<br>,35 | 2 | P09605;P25809,Q63942                             |
| 1006 | 1,2,3,5,8,2<br>7,28,34 | 4,6,7,29,3<br>0,31,32,33<br>,35 | 7 | P04182,P83121,Q03191,Q62894,Q63942,Q6IRE4,Q9QW07 |
| 1007 | 1,2,3,5,8,2<br>7,28,35 | 4,6,7,29,3<br>0,31,32,33<br>,34 | 3 | P09605;P25809,P83121,Q63942                      |
| 1008 | 1,2,3,5,8,2<br>7,29,30 | 4,6,7,28,3<br>1,32,33,34<br>,35 | 1 | Q5HZV9                                           |
| 1009 | 1,2,3,5,8,2<br>7,29,31 | 4,6,7,28,3<br>0,32,33,34<br>,35 | 1 | Q5HZV9                                           |
| 1010 | 1,2,3,5,8,2<br>7,29,32 | 4,6,7,28,3<br>0,31,33,34<br>,35 | 1 | Q9Z1F2                                           |
| 1011 | 1,2,3,5,8,2<br>7,29,33 | 4,6,7,28,3<br>0,31,32,34<br>,35 | 1 | Q5HZV9                                           |
| 1012 | 1,2,3,5,8,2<br>7,29,34 | 4,6,7,28,3<br>0,31,32,33<br>,35 | 4 | P83121,Q03191,Q6IRE4,Q9QW07                      |
| 1013 | 1,2,3,5,8,2<br>7,29,35 | 4,6,7,28,3<br>0,31,32,33<br>,34 | 1 | P01946                                           |
| 1014 | 1,2,3,5,8,2<br>7,30,31 | 4,6,7,28,2<br>9,32,33,34<br>,35 | 0 |                                                  |
| 1015 | 1,2,3,5,8,2<br>7,30,32 | 4,6,7,28,2<br>9,31,33,34<br>,35 | 1 | P83121                                           |
| 1016 | 1,2,3,5,8,2<br>7,30,33 | 4,6,7,28,2<br>9,31,32,34<br>,35 | 1 | Q5HZV9                                           |

|      |                        |                                 |    |                                                                              |
|------|------------------------|---------------------------------|----|------------------------------------------------------------------------------|
| 1017 | 1,2,3,5,8,2<br>7,30,34 | 4,6,7,28,2<br>9,31,32,33<br>,35 | 6  | P06911,P08753,P35280,P83121,Q03191,Q62894                                    |
| 1018 | 1,2,3,5,8,2<br>7,30,35 | 4,6,7,28,2<br>9,31,32,33<br>,34 | 3  | P06911,P47727,P83121                                                         |
| 1019 | 1,2,3,5,8,2<br>7,31,32 | 4,6,7,28,2<br>9,30,33,34<br>,35 | 3  | P08753,Q08849,Q5FVI6                                                         |
| 1020 | 1,2,3,5,8,2<br>7,31,33 | 4,6,7,28,2<br>9,30,32,34<br>,35 | 0  |                                                                              |
| 1021 | 1,2,3,5,8,2<br>7,31,34 | 4,6,7,28,2<br>9,30,32,33<br>,35 | 3  | P08753,P83121,Q03191                                                         |
| 1022 | 1,2,3,5,8,2<br>7,31,35 | 4,6,7,28,2<br>9,30,32,33<br>,34 | 2  | P08753,P09456                                                                |
| 1023 | 1,2,3,5,8,2<br>7,32,33 | 4,6,7,28,2<br>9,30,31,34<br>,35 | 3  | P08753,P55314,Q08849                                                         |
| 1024 | 1,2,3,5,8,2<br>7,32,34 | 4,6,7,28,2<br>9,30,31,33<br>,35 | 6  | P08753,P83121,Q03191,Q08849,Q62894,Q9Z1F2                                    |
| 1025 | 1,2,3,5,8,2<br>7,32,35 | 4,6,7,28,2<br>9,30,31,33<br>,34 | 4  | P08753,P83121,Q08849,Q9QZK9                                                  |
| 1026 | 1,2,3,5,8,2<br>7,33,34 | 4,6,7,28,2<br>9,30,31,32<br>,35 | 5  | P06911,P08753,P83121,Q03191,Q62894                                           |
| 1027 | 1,2,3,5,8,2<br>7,33,35 | 4,6,7,28,2<br>9,30,31,32<br>,34 | 5  | P06911,P08753,P09605;P25809,P60905,Q6AYR9                                    |
| 1028 | 1,2,3,5,8,2<br>7,34,35 | 4,6,7,28,2<br>9,30,31,32<br>,33 | 11 | P02780,P04905,P06911,P08753,P09456,P47727,P60905,P83121,Q03191,Q63556,Q9QZK9 |
| 1029 | 1,2,3,5,8,2<br>8,29,30 | 4,6,7,27,3<br>1,32,33,34<br>,35 | 1  | Q63942                                                                       |
| 1030 | 1,2,3,5,8,2<br>8,29,31 | 4,6,7,27,3<br>0,32,33,34<br>,35 | 3  | O54728,Q63942,Q9QW07                                                         |
| 1031 | 1,2,3,5,8,2<br>8,29,32 | 4,6,7,27,3<br>0,31,33,34<br>,35 | 4  | Q5FVI6,Q63942,Q6P777,Q9QW07                                                  |

|      |                        |                                 |   |                                           |
|------|------------------------|---------------------------------|---|-------------------------------------------|
| 1032 | 1,2,3,5,8,2<br>8,29,33 | 4,6,7,27,3<br>0,31,32,34<br>,35 | 1 | Q63942                                    |
| 1033 | 1,2,3,5,8,2<br>8,29,34 | 4,6,7,27,3<br>0,31,32,33<br>,35 | 4 | Q63942,Q6IRE4,Q9JJ22,Q9QW07               |
| 1034 | 1,2,3,5,8,2<br>8,29,35 | 4,6,7,27,3<br>0,31,32,33<br>,34 | 3 | P01946,Q63942,Q9QW07                      |
| 1035 | 1,2,3,5,8,2<br>8,30,31 | 4,6,7,27,2<br>9,32,33,34<br>,35 | 2 | O54728,Q63942                             |
| 1036 | 1,2,3,5,8,2<br>8,30,32 | 4,6,7,27,2<br>9,31,33,34<br>,35 | 4 | P83121,Q561R9,Q5FVI6,Q63942               |
| 1037 | 1,2,3,5,8,2<br>8,30,33 | 4,6,7,27,2<br>9,31,32,34<br>,35 | 1 | Q63942                                    |
| 1038 | 1,2,3,5,8,2<br>8,30,34 | 4,6,7,27,2<br>9,31,32,33<br>,35 | 4 | P83121,Q62894,Q63942,Q6IRE4               |
| 1039 | 1,2,3,5,8,2<br>8,30,35 | 4,6,7,27,2<br>9,31,32,33<br>,34 | 2 | P83121,Q63942                             |
| 1040 | 1,2,3,5,8,2<br>8,31,32 | 4,6,7,27,2<br>9,30,33,34<br>,35 | 4 | O54728,Q561R9,Q5FVI6,Q63942               |
| 1041 | 1,2,3,5,8,2<br>8,31,33 | 4,6,7,27,2<br>9,30,32,34<br>,35 | 2 | O54728,Q63942                             |
| 1042 | 1,2,3,5,8,2<br>8,31,34 | 4,6,7,27,2<br>9,30,32,33<br>,35 | 6 | O54728,P20766,Q62894,Q63942,Q6IRE4,Q9QW07 |
| 1043 | 1,2,3,5,8,2<br>8,31,35 | 4,6,7,27,2<br>9,30,32,33<br>,34 | 2 | O54728,Q63942                             |
| 1044 | 1,2,3,5,8,2<br>8,32,33 | 4,6,7,27,2<br>9,30,31,34<br>,35 | 5 | P09605;P25809,P55314,Q5FVI6,Q63942,Q6AYR9 |
| 1045 | 1,2,3,5,8,2<br>8,32,34 | 4,6,7,27,2<br>9,30,31,33<br>,35 | 5 | P83121,Q62894,Q63942,Q6IRE4,Q6P777        |
| 1046 | 1,2,3,5,8,2<br>8,32,35 | 4,6,7,27,2<br>9,30,31,33<br>,34 | 4 | P09605;P25809,P83121,Q63942,Q6AYR9        |

|      |                        |                                 |   |                                    |
|------|------------------------|---------------------------------|---|------------------------------------|
| 1047 | 1,2,3,5,8,2<br>8,33,34 | 4,6,7,27,2<br>9,30,31,32<br>,35 | 4 | P04762,Q62894,Q63942,Q6IRE4        |
| 1048 | 1,2,3,5,8,2<br>8,33,35 | 4,6,7,27,2<br>9,30,31,32<br>,34 | 3 | P09605;P25809,Q63942,Q6AYR9        |
| 1049 | 1,2,3,5,8,2<br>8,34,35 | 4,6,7,27,2<br>9,30,31,32<br>,33 | 5 | P83121,Q62894,Q63942,Q6IRE4,Q9QW07 |
| 1050 | 1,2,3,5,8,2<br>9,30,31 | 4,6,7,27,2<br>8,32,33,34<br>,35 | 1 | Q5HZV9                             |
| 1051 | 1,2,3,5,8,2<br>9,30,32 | 4,6,7,27,2<br>8,31,33,34<br>,35 | 1 | Q5FVI6                             |
| 1052 | 1,2,3,5,8,2<br>9,30,33 | 4,6,7,27,2<br>8,31,32,34<br>,35 | 1 | Q5HZV9                             |
| 1053 | 1,2,3,5,8,2<br>9,30,34 | 4,6,7,27,2<br>8,31,32,33<br>,35 | 2 | Q6IRE4,Q9JJ22                      |
| 1054 | 1,2,3,5,8,2<br>9,30,35 | 4,6,7,27,2<br>8,31,32,33<br>,34 | 2 | P01946,Q06000                      |
| 1055 | 1,2,3,5,8,2<br>9,31,32 | 4,6,7,27,2<br>8,30,33,34<br>,35 | 2 | Q5FVI6,Q8CJD3                      |
| 1056 | 1,2,3,5,8,2<br>9,31,33 | 4,6,7,27,2<br>8,30,32,34<br>,35 | 1 | Q5HZV9                             |
| 1057 | 1,2,3,5,8,2<br>9,31,34 | 4,6,7,27,2<br>8,30,32,33<br>,35 | 2 | Q6IRE4,Q9QW07                      |
| 1058 | 1,2,3,5,8,2<br>9,31,35 | 4,6,7,27,2<br>8,30,32,33<br>,34 | 2 | P00714,P01946                      |
| 1059 | 1,2,3,5,8,2<br>9,32,33 | 4,6,7,27,2<br>8,30,31,34<br>,35 | 4 | P47967,P55314,Q5FVI6,Q8CJD3        |
| 1060 | 1,2,3,5,8,2<br>9,32,34 | 4,6,7,27,2<br>8,30,31,33<br>,35 | 3 | P83121,Q6IRE4,Q9QW07               |
| 1061 | 1,2,3,5,8,2<br>9,32,35 | 4,6,7,27,2<br>8,30,31,33<br>,34 | 2 | P47967,P51907                      |

|      |                        |                                 |    |                                                                                                                                                    |
|------|------------------------|---------------------------------|----|----------------------------------------------------------------------------------------------------------------------------------------------------|
| 1062 | 1,2,3,5,8,2<br>9,33,34 | 4,6,7,27,2<br>8,30,31,32<br>,35 | 2  | Q6IRE4,Q9JJ22                                                                                                                                      |
| 1063 | 1,2,3,5,8,2<br>9,33,35 | 4,6,7,27,2<br>8,30,31,32<br>,34 | 3  | P01946,P47967,P97840                                                                                                                               |
| 1064 | 1,2,3,5,8,2<br>9,34,35 | 4,6,7,27,2<br>8,30,31,32<br>,33 | 8  | P01946,P12020,P83121,Q63556,Q6IRE4,Q6PCU2,Q9JJ22,Q9QW07                                                                                            |
| 1065 | 1,2,3,5,8,3<br>0,31,32 | 4,6,7,27,2<br>8,29,33,34<br>,35 | 2  | Q561R9,Q5FVI6                                                                                                                                      |
| 1066 | 1,2,3,5,8,3<br>0,31,33 | 4,6,7,27,2<br>8,29,32,34<br>,35 | 2  | Q5HZV9,Q5M819                                                                                                                                      |
| 1067 | 1,2,3,5,8,3<br>0,31,34 | 4,6,7,27,2<br>8,29,32,33<br>,35 | 5  | P08753,P0C0A9,P47727,Q6IRE4,Q9JHB9                                                                                                                 |
| 1068 | 1,2,3,5,8,3<br>0,31,35 | 4,6,7,27,2<br>8,29,32,33<br>,34 | 5  | P09456,P24368,P47727,Q06000,Q9JHB9                                                                                                                 |
| 1069 | 1,2,3,5,8,3<br>0,32,33 | 4,6,7,27,2<br>8,29,31,34<br>,35 | 2  | P55314,Q5FVI6                                                                                                                                      |
| 1070 | 1,2,3,5,8,3<br>0,32,34 | 4,6,7,27,2<br>8,29,31,33<br>,35 | 4  | P08753,P83121,Q62894,Q6IRE4                                                                                                                        |
| 1071 | 1,2,3,5,8,3<br>0,32,35 | 4,6,7,27,2<br>8,29,31,33<br>,34 | 2  | P08753,P83121                                                                                                                                      |
| 1072 | 1,2,3,5,8,3<br>0,33,34 | 4,6,7,27,2<br>8,29,31,32<br>,35 | 4  | P06911,P08753,Q62894,Q6IRE4                                                                                                                        |
| 1073 | 1,2,3,5,8,3<br>0,33,35 | 4,6,7,27,2<br>8,29,31,32<br>,34 | 2  | P06911,P24368                                                                                                                                      |
| 1074 | 1,2,3,5,8,3<br>0,34,35 | 4,6,7,27,2<br>8,29,31,32<br>,33 | 20 | P02781,P02793,Q7TP54,P04905,P06911,P08723,P08753,P09456,P0C0A9,P12020,P19132,P24368,P47727,P82471,P83121,Q5GRG2,Q62894,Q62902,Q6IRE4,Q6PCU2,Q9JHB9 |
| 1075 | 1,2,3,5,8,3<br>1,32,33 | 4,6,7,27,2<br>8,29,30,34<br>,35 | 6  | P08753,P55314,Q08849,Q5FVI6,Q6AYR9,Q8CJD3                                                                                                          |
| 1076 | 1,2,3,5,8,3<br>1,32,34 | 4,6,7,27,2<br>8,29,30,33<br>,35 | 7  | P08753,P0C0A9,P20766,P36374,Q5FVI6,Q62997,Q6IRE4                                                                                                   |



|      |                         |                                 |    |                                                                                                                                                           |
|------|-------------------------|---------------------------------|----|-----------------------------------------------------------------------------------------------------------------------------------------------------------|
| 1077 | 1,2,3,5,8,3<br>1,32,35  | 4,6,7,27,2<br>8,29,30,33<br>,34 | 4  | P08753,P0C0A9,Q5FVI6,Q6AYR9                                                                                                                               |
| 1078 | 1,2,3,5,8,3<br>1,33,34  | 4,6,7,27,2<br>8,29,30,32<br>,35 | 9  | P00714,P01835,P08753,P0C0A9,P60905,Q62894,Q62997,Q6IRE4,Q9JHB9                                                                                            |
| 1079 | 1,2,3,5,8,3<br>1,33,35  | 4,6,7,27,2<br>8,29,30,32<br>,34 | 8  | P00714,P08753,P09456,P0C0A9,P24368,P60905,Q6AYR9,Q9JHB9                                                                                                   |
| 1080 | 1,2,3,5,8,3<br>1,34,35  | 4,6,7,27,2<br>8,29,30,32<br>,33 | 21 | O08815,P00714,P02781,P02793,Q7TP54,P04905,P08010,P08723,P08753,P09456,P0C0A9,P20766,P24368,P30120,P36374,P47727,P60905,P82471,P83121,Q6IRE4,Q9JHB9,Q9JI85 |
| 1081 | 1,2,3,5,8,3<br>2,33,34  | 4,6,7,27,2<br>8,29,30,31<br>,35 | 7  | P08753,P0C0A9,P55314,Q62894,Q63661,Q6AYR9,Q6IRE4                                                                                                          |
| 1082 | 1,2,3,5,8,3<br>2,33,35  | 4,6,7,27,2<br>8,29,30,31<br>,34 | 5  | P08753,P0C0A9,P47967,P55314,Q6AYR9                                                                                                                        |
| 1083 | 1,2,3,5,8,3<br>2,34,35  | 4,6,7,27,2<br>8,29,30,31<br>,33 | 17 | P02781,P06911,P07647,P08723,P08753,P0C0A9,P36374,P60905,P82471,P83121,Q62894,Q62902,Q63661,Q6AYR9,Q6IRE4,Q9JHB9,Q9QZK9                                    |
| 1084 | 1,2,3,5,8,3<br>3,34,35  | 4,6,7,27,2<br>8,29,30,31<br>,32 | 19 | O08815,P02781,P06911,P08723,P08753,P09456,P0C0A9,P12020,P24368,P30120,P60905,P82471,P83121,Q5GRG2,Q62894,Q62902,Q6AYR9,Q6IRE4,Q9JHB9                      |
| 1085 | 1,2,3,5,27,<br>28,29,30 | 4,6,7,8,31,<br>32,33,34,3<br>5  | 2  | Q63942,Q99041                                                                                                                                             |
| 1086 | 1,2,3,5,27,<br>28,29,31 | 4,6,7,8,30,<br>32,33,34,3<br>5  | 3  | Q63942,Q99041,Q9QW07                                                                                                                                      |
| 1087 | 1,2,3,5,27,<br>28,29,32 | 4,6,7,8,30,<br>31,33,34,3<br>5  | 4  | Q63942,Q6P777,Q99041,Q9QW07                                                                                                                               |
| 1088 | 1,2,3,5,27,<br>28,29,33 | 4,6,7,8,30,<br>31,32,34,3<br>5  | 1  | Q63942                                                                                                                                                    |
| 1089 | 1,2,3,5,27,<br>28,29,34 | 4,6,7,8,30,<br>31,32,33,3<br>5  | 4  | P04182,Q63942,Q6IRE4,Q9QW07                                                                                                                               |
| 1090 | 1,2,3,5,27,<br>28,29,35 | 4,6,7,8,30,<br>31,32,33,3<br>4  | 5  | P01946,P02091,Q63942,Q99041,Q9QW07                                                                                                                        |
| 1091 | 1,2,3,5,27,<br>28,30,31 | 4,6,7,8,29,<br>32,33,34,3<br>5  | 2  | Q63617,Q99041                                                                                                                                             |

|      |                         |                                |   |                                           |
|------|-------------------------|--------------------------------|---|-------------------------------------------|
| 1092 | 1,2,3,5,27,<br>28,30,32 | 4,6,7,8,29,<br>31,33,34,3<br>5 | 3 | P83121,Q63617,Q99041                      |
| 1093 | 1,2,3,5,27,<br>28,30,33 | 4,6,7,8,29,<br>31,32,34,3<br>5 | 0 |                                           |
| 1094 | 1,2,3,5,27,<br>28,30,34 | 4,6,7,8,29,<br>31,32,33,3<br>5 | 6 | P04182,P35280,P83121,Q63617,Q6IRE4,Q8CJD3 |
| 1095 | 1,2,3,5,27,<br>28,30,35 | 4,6,7,8,29,<br>31,32,33,3<br>4 | 3 | P83121,Q63617,Q99041                      |
| 1096 | 1,2,3,5,27,<br>28,31,32 | 4,6,7,8,29,<br>30,33,34,3<br>5 | 2 | Q63617,Q99041                             |
| 1097 | 1,2,3,5,27,<br>28,31,33 | 4,6,7,8,29,<br>30,32,34,3<br>5 | 0 |                                           |
| 1098 | 1,2,3,5,27,<br>28,31,34 | 4,6,7,8,29,<br>30,32,33,3<br>5 | 5 | A2RUV9,P04182,Q63617,Q6IRE4,Q9QW07        |
| 1099 | 1,2,3,5,27,<br>28,31,35 | 4,6,7,8,29,<br>30,32,33,3<br>4 | 2 | Q63617,Q99041                             |
| 1100 | 1,2,3,5,27,<br>28,32,33 | 4,6,7,8,29,<br>30,31,34,3<br>5 | 3 | P09605;P25809,P55314,Q6IG02               |
| 1101 | 1,2,3,5,27,<br>28,32,34 | 4,6,7,8,29,<br>30,31,33,3<br>5 | 6 | P04182,P34901,P83121,Q10758,Q63617,Q6IRE4 |
| 1102 | 1,2,3,5,27,<br>28,32,35 | 4,6,7,8,29,<br>30,31,33,3<br>4 | 4 | P09605;P25809,P83121,Q63617,Q99041        |
| 1103 | 1,2,3,5,27,<br>28,33,34 | 4,6,7,8,29,<br>30,31,32,3<br>5 | 2 | P04182,Q6IRE4                             |
| 1104 | 1,2,3,5,27,<br>28,33,35 | 4,6,7,8,29,<br>30,31,32,3<br>4 | 1 | P09605;P25809                             |
| 1105 | 1,2,3,5,27,<br>28,34,35 | 4,6,7,8,29,<br>30,31,32,3<br>3 | 6 | P04182,P83121,Q63617,Q6IRE4,Q99041,Q9QW07 |
| 1106 | 1,2,3,5,27,<br>29,30,31 | 4,6,7,8,28,<br>32,33,34,3<br>5 | 1 | Q99041                                    |

|      |                         |                                |   |                                                         |
|------|-------------------------|--------------------------------|---|---------------------------------------------------------|
| 1107 | 1,2,3,5,27,<br>29,30,32 | 4,6,7,8,28,<br>31,33,34,3<br>5 | 1 | Q99041                                                  |
| 1108 | 1,2,3,5,27,<br>29,30,33 | 4,6,7,8,28,<br>31,32,34,3<br>5 | 1 | Q5HZV9                                                  |
| 1109 | 1,2,3,5,27,<br>29,30,34 | 4,6,7,8,28,<br>31,32,33,3<br>5 | 3 | P35280,P83121,Q6IRE4                                    |
| 1110 | 1,2,3,5,27,<br>29,30,35 | 4,6,7,8,28,<br>31,32,33,3<br>4 | 3 | P01946,P12020,Q99041                                    |
| 1111 | 1,2,3,5,27,<br>29,31,32 | 4,6,7,8,28,<br>30,33,34,3<br>5 | 1 | Q99041                                                  |
| 1112 | 1,2,3,5,27,<br>29,31,33 | 4,6,7,8,28,<br>30,32,34,3<br>5 | 1 | Q5HZV9                                                  |
| 1113 | 1,2,3,5,27,<br>29,31,34 | 4,6,7,8,28,<br>30,32,33,3<br>5 | 2 | Q6IRE4,Q9QW07                                           |
| 1114 | 1,2,3,5,27,<br>29,31,35 | 4,6,7,8,28,<br>30,32,33,3<br>4 | 2 | P01946,Q99041                                           |
| 1115 | 1,2,3,5,27,<br>29,32,33 | 4,6,7,8,28,<br>30,31,34,3<br>5 | 2 | P02793;Q7TP54,P55314                                    |
| 1116 | 1,2,3,5,27,<br>29,32,34 | 4,6,7,8,28,<br>30,31,33,3<br>5 | 4 | P83121,Q63661,Q6IRE4,Q9QW07                             |
| 1117 | 1,2,3,5,27,<br>29,32,35 | 4,6,7,8,28,<br>30,31,33,3<br>4 | 2 | P01946,Q99041                                           |
| 1118 | 1,2,3,5,27,<br>29,33,34 | 4,6,7,8,28,<br>30,31,32,3<br>5 | 1 | Q6IRE4                                                  |
| 1119 | 1,2,3,5,27,<br>29,33,35 | 4,6,7,8,28,<br>30,31,32,3<br>4 | 1 | P01946                                                  |
| 1120 | 1,2,3,5,27,<br>29,34,35 | 4,6,7,8,28,<br>30,31,32,3<br>3 | 8 | P01946,P02091,P12020,P83121,Q63556,Q6IRE4,Q99041,Q9QW07 |
| 1121 | 1,2,3,5,27,<br>30,31,32 | 4,6,7,8,28,<br>29,33,34,3<br>5 | 2 | Q63617,Q99041                                           |

|      |                         |                                |    |                                                                                                          |
|------|-------------------------|--------------------------------|----|----------------------------------------------------------------------------------------------------------|
| 1122 | 1,2,3,5,27,<br>30,31,33 | 4,6,7,8,28,<br>29,32,34,3<br>5 | 1  | Q63617                                                                                                   |
| 1123 | 1,2,3,5,27,<br>30,31,34 | 4,6,7,8,28,<br>29,32,33,3<br>5 | 5  | P35280,P83121,Q63617,Q6IRE4,Q99041                                                                       |
| 1124 | 1,2,3,5,27,<br>30,31,35 | 4,6,7,8,28,<br>29,32,33,3<br>4 | 4  | P02780,P47727,Q63617,Q99041                                                                              |
| 1125 | 1,2,3,5,27,<br>30,32,33 | 4,6,7,8,28,<br>29,31,34,3<br>5 | 1  | P55314                                                                                                   |
| 1126 | 1,2,3,5,27,<br>30,32,34 | 4,6,7,8,28,<br>29,31,33,3<br>5 | 6  | P34901,P35280,P55314,P83121,Q63617,Q63661                                                                |
| 1127 | 1,2,3,5,27,<br>30,32,35 | 4,6,7,8,28,<br>29,31,33,3<br>4 | 5  | P06911,P83121,Q63617,Q99041,Q9QZK9                                                                       |
| 1128 | 1,2,3,5,27,<br>30,33,34 | 4,6,7,8,28,<br>29,31,32,3<br>5 | 5  | P06911,P34901,P35280,P83121,Q63617                                                                       |
| 1129 | 1,2,3,5,27,<br>30,33,35 | 4,6,7,8,28,<br>29,31,32,3<br>4 | 2  | P06911,P12020                                                                                            |
| 1130 | 1,2,3,5,27,<br>30,34,35 | 4,6,7,8,28,<br>29,31,32,3<br>3 | 13 | P02780,P04905,P06911,P12020,P35280,P47727,P82471,P83121,Q5GRG2,Q62902,Q63617,Q99041,Q9QZK9               |
| 1131 | 1,2,3,5,27,<br>31,32,33 | 4,6,7,8,28,<br>29,30,34,3<br>5 | 2  | P55314,Q08849                                                                                            |
| 1132 | 1,2,3,5,27,<br>31,32,34 | 4,6,7,8,28,<br>29,30,33,3<br>5 | 5  | P02780,P08753,P34901,P83121,Q63617                                                                       |
| 1133 | 1,2,3,5,27,<br>31,32,35 | 4,6,7,8,28,<br>29,30,33,3<br>4 | 3  | P02780,Q63617,Q99041                                                                                     |
| 1134 | 1,2,3,5,27,<br>31,33,34 | 4,6,7,8,28,<br>29,30,32,3<br>5 | 2  | P34901,Q63617                                                                                            |
| 1135 | 1,2,3,5,27,<br>31,33,35 | 4,6,7,8,28,<br>29,30,32,3<br>4 | 3  | P00714,P02780,P60905                                                                                     |
| 1136 | 1,2,3,5,27,<br>31,34,35 | 4,6,7,8,28,<br>29,30,32,3<br>3 | 15 | P00714,P02780,P04905,P08723,P08753,P09456,P0C0A9,P24368,P47727,P60905,P82471,P83121,Q63617,Q8CJ52,Q99041 |

|      |                         |                                |    |                                                                                     |
|------|-------------------------|--------------------------------|----|-------------------------------------------------------------------------------------|
| 1137 | 1,2,3,5,27,<br>32,33,34 | 4,6,7,8,28,<br>29,30,31,3<br>5 | 6  | P08753,P34901,P55314,P83121,Q08849,Q63661                                           |
| 1138 | 1,2,3,5,27,<br>32,33,35 | 4,6,7,8,28,<br>29,30,31,3<br>4 | 4  | P55314,Q08849,Q6AYR9,Q6IG02                                                         |
| 1139 | 1,2,3,5,27,<br>32,34,35 | 4,6,7,8,28,<br>29,30,31,3<br>3 | 12 | P02780,P06911,P08753,P82471,P83121,Q62902,Q63556,Q63617,Q63661,Q8CJ52,Q99041,Q9QZK9 |
| 1140 | 1,2,3,5,27,<br>33,34,35 | 4,6,7,8,28,<br>29,30,31,3<br>2 | 12 | P02780,P06911,P08753,P12020,P60905,P82471,P83121,Q5GRG2,Q62902,Q62975,Q63617,Q63661 |
| 1141 | 1,2,3,5,28,<br>29,30,31 | 4,6,7,8,27,<br>32,33,34,3<br>5 | 3  | P00714,Q99041,Q9QW07                                                                |
| 1142 | 1,2,3,5,28,<br>29,30,32 | 4,6,7,8,27,<br>31,33,34,3<br>5 | 2  | Q561R9,Q99041                                                                       |
| 1143 | 1,2,3,5,28,<br>29,30,33 | 4,6,7,8,27,<br>31,32,34,3<br>5 | 1  | P00714                                                                              |
| 1144 | 1,2,3,5,28,<br>29,30,34 | 4,6,7,8,27,<br>31,32,33,3<br>5 | 4  | P00714,Q6IRE4,Q99041,Q9QW07                                                         |
| 1145 | 1,2,3,5,28,<br>29,30,35 | 4,6,7,8,27,<br>31,32,33,3<br>4 | 4  | P00714,P01946,Q99041,Q9QW07                                                         |
| 1146 | 1,2,3,5,28,<br>29,31,32 | 4,6,7,8,27,<br>30,33,34,3<br>5 | 4  | Q561R9,Q5FVI6,Q99041,Q9QW07                                                         |
| 1147 | 1,2,3,5,28,<br>29,31,33 | 4,6,7,8,27,<br>30,32,34,3<br>5 | 2  | P00714,Q9QW07                                                                       |
| 1148 | 1,2,3,5,28,<br>29,31,34 | 4,6,7,8,27,<br>30,32,33,3<br>5 | 3  | P00714,Q6IRE4,Q9QW07                                                                |
| 1149 | 1,2,3,5,28,<br>29,31,35 | 4,6,7,8,27,<br>30,32,33,3<br>4 | 5  | P00714,P01946,P07150,Q99041,Q9QW07                                                  |
| 1150 | 1,2,3,5,28,<br>29,32,33 | 4,6,7,8,27,<br>30,31,34,3<br>5 | 3  | P02793;Q7TP54,P55314,Q6P777                                                         |
| 1151 | 1,2,3,5,28,<br>29,32,34 | 4,6,7,8,27,<br>30,31,33,3<br>5 | 3  | Q6IRE4,Q6P777,Q9QW07                                                                |

|      |                         |                                |   |                                                                |
|------|-------------------------|--------------------------------|---|----------------------------------------------------------------|
| 1152 | 1,2,3,5,28,<br>29,32,35 | 4,6,7,8,27,<br>30,31,33,3<br>4 | 3 | P47967,Q99041,Q9QW07                                           |
| 1153 | 1,2,3,5,28,<br>29,33,34 | 4,6,7,8,27,<br>30,31,32,3<br>5 | 4 | P00714,Q6IRE4,Q9JJ22,Q9QW07                                    |
| 1154 | 1,2,3,5,28,<br>29,33,35 | 4,6,7,8,27,<br>30,31,32,3<br>4 | 3 | P00714,P01946,P47967                                           |
| 1155 | 1,2,3,5,28,<br>29,34,35 | 4,6,7,8,27,<br>30,31,32,3<br>3 | 5 | P00714,P01946,Q6IRE4,Q99041,Q9QW07                             |
| 1156 | 1,2,3,5,28,<br>30,31,32 | 4,6,7,8,27,<br>29,33,34,3<br>5 | 5 | P11598,Q561R9,Q5FVI6,Q63617,Q99041                             |
| 1157 | 1,2,3,5,28,<br>30,31,33 | 4,6,7,8,27,<br>29,32,34,3<br>5 | 3 | P00714,P11598,Q63617                                           |
| 1158 | 1,2,3,5,28,<br>30,31,34 | 4,6,7,8,27,<br>29,32,33,3<br>5 | 8 | O54728,P00714,P11598,P14669,Q63617,Q6IRE4,Q99041,Q9QW07        |
| 1159 | 1,2,3,5,28,<br>30,31,35 | 4,6,7,8,27,<br>29,32,33,3<br>4 | 4 | P00714,P11598,Q63617,Q99041                                    |
| 1160 | 1,2,3,5,28,<br>30,32,33 | 4,6,7,8,27,<br>29,31,34,3<br>5 | 4 | P11598,P55314,Q561R9,Q63617                                    |
| 1161 | 1,2,3,5,28,<br>30,32,34 | 4,6,7,8,27,<br>29,31,33,3<br>5 | 5 | P11598,P83121,Q63617,Q6IRE4,Q99041                             |
| 1162 | 1,2,3,5,28,<br>30,32,35 | 4,6,7,8,27,<br>29,31,33,3<br>4 | 4 | P11598,P83121,Q63617,Q99041                                    |
| 1163 | 1,2,3,5,28,<br>30,33,34 | 4,6,7,8,27,<br>29,31,32,3<br>5 | 4 | P00714,P11598,Q63617,Q6IRE4                                    |
| 1164 | 1,2,3,5,28,<br>30,33,35 | 4,6,7,8,27,<br>29,31,32,3<br>4 | 3 | P00714,P11598,Q63617                                           |
| 1165 | 1,2,3,5,28,<br>30,34,35 | 4,6,7,8,27,<br>29,31,32,3<br>3 | 9 | P00714,P11598,P14669,P83121,Q63617,Q6IRE4,Q8CJD3,Q99041,Q9QW07 |
| 1166 | 1,2,3,5,28,<br>31,32,33 | 4,6,7,8,27,<br>29,30,34,3<br>5 | 4 | P11598,P55314,Q561R9,Q5FVI6                                    |

|      |                         |                                |   |                                                         |
|------|-------------------------|--------------------------------|---|---------------------------------------------------------|
| 1167 | 1,2,3,5,28,<br>31,32,34 | 4,6,7,8,27,<br>29,30,33,3<br>5 | 4 | P11598,Q63617,Q6IRE4,Q9QW07                             |
| 1168 | 1,2,3,5,28,<br>31,32,35 | 4,6,7,8,27,<br>29,30,33,3<br>4 | 3 | P11598,Q63617,Q99041                                    |
| 1169 | 1,2,3,5,28,<br>31,33,34 | 4,6,7,8,27,<br>29,30,32,3<br>5 | 6 | P00714,P11598,P14669,Q63617,Q6IRE4,Q9QW07               |
| 1170 | 1,2,3,5,28,<br>31,33,35 | 4,6,7,8,27,<br>29,30,32,3<br>4 | 7 | P00714,P06760,P07150,P11598,P14669,Q6AYR9,Q9WTT6        |
| 1171 | 1,2,3,5,28,<br>31,34,35 | 4,6,7,8,27,<br>29,30,32,3<br>3 | 8 | P00714,P07150,P11598,P14669,Q63617,Q6IRE4,Q99041,Q9QW07 |
| 1172 | 1,2,3,5,28,<br>32,33,34 | 4,6,7,8,27,<br>29,30,31,3<br>5 | 6 | P11598,P34901,P55314,Q63617,Q63661,Q6IRE4               |
| 1173 | 1,2,3,5,28,<br>32,33,35 | 4,6,7,8,27,<br>29,30,31,3<br>4 | 5 | P09605,P25809,P11598,P55314,Q6AYR9,Q9WTT6               |
| 1174 | 1,2,3,5,28,<br>32,34,35 | 4,6,7,8,27,<br>29,30,31,3<br>3 | 7 | P11598,P83121,Q63617,Q63661,Q6IRE4,Q99041,Q9QW07        |
| 1175 | 1,2,3,5,28,<br>33,34,35 | 4,6,7,8,27,<br>29,30,31,3<br>2 | 6 | P00714,P11598,P14669,Q63617,Q6AYR9,Q6IRE4               |
| 1176 | 1,2,3,5,29,<br>30,31,32 | 4,6,7,8,27,<br>28,33,34,3<br>5 | 3 | Q561R9,Q5FVI6,Q99041                                    |
| 1177 | 1,2,3,5,29,<br>30,31,33 | 4,6,7,8,27,<br>28,32,34,3<br>5 | 3 | P00714,Q5HZV9,Q9WTT6                                    |
| 1178 | 1,2,3,5,29,<br>30,31,34 | 4,6,7,8,27,<br>28,32,33,3<br>5 | 5 | P00714,Q63617,Q6IRE4,Q99041,Q9QW07                      |
| 1179 | 1,2,3,5,29,<br>30,31,35 | 4,6,7,8,27,<br>28,32,33,3<br>4 | 2 | P00714,Q99041                                           |
| 1180 | 1,2,3,5,29,<br>30,32,33 | 4,6,7,8,27,<br>28,31,34,3<br>5 | 1 | P55314                                                  |
| 1181 | 1,2,3,5,29,<br>30,32,34 | 4,6,7,8,27,<br>28,31,33,3<br>5 | 3 | Q63661,Q6IRE4,Q99041                                    |

|      |                         |                                |    |                                                                                     |
|------|-------------------------|--------------------------------|----|-------------------------------------------------------------------------------------|
| 1182 | 1,2,3,5,29,<br>30,32,35 | 4,6,7,8,27,<br>28,31,33,3<br>4 | 1  | Q99041                                                                              |
| 1183 | 1,2,3,5,29,<br>30,33,34 | 4,6,7,8,27,<br>28,31,32,3<br>5 | 4  | P00714,P12020,Q6IRE4,Q9JJ22                                                         |
| 1184 | 1,2,3,5,29,<br>30,33,35 | 4,6,7,8,27,<br>28,31,32,3<br>4 | 4  | P00714,P12020,Q99041,Q9WTT6                                                         |
| 1185 | 1,2,3,5,29,<br>30,34,35 | 4,6,7,8,27,<br>28,31,32,3<br>3 | 12 | P00714,P01946,P06911,P12020,P47727,P83121,Q5GRG2,Q63617,Q6IRE4,Q99041,Q9JJ22,Q9QW07 |
| 1186 | 1,2,3,5,29,<br>31,32,33 | 4,6,7,8,27,<br>28,30,34,3<br>5 | 4  | P47967,P55314,Q5FVI6,Q9WTT6                                                         |
| 1187 | 1,2,3,5,29,<br>31,32,34 | 4,6,7,8,27,<br>28,30,33,3<br>5 | 3  | Q6IRE4,Q99041,Q9QW07                                                                |
| 1188 | 1,2,3,5,29,<br>31,32,35 | 4,6,7,8,27,<br>28,30,33,3<br>4 | 3  | P47967,Q99041,Q9WTT6                                                                |
| 1189 | 1,2,3,5,29,<br>31,33,34 | 4,6,7,8,27,<br>28,30,32,3<br>5 | 3  | P00714,Q6IRE4,Q9QW07                                                                |
| 1190 | 1,2,3,5,29,<br>31,33,35 | 4,6,7,8,27,<br>28,30,32,3<br>4 | 3  | P00714,P47967,Q9WTT6                                                                |
| 1191 | 1,2,3,5,29,<br>31,34,35 | 4,6,7,8,27,<br>28,30,32,3<br>3 | 5  | P00714,P07150,Q6IRE4,Q99041,Q9QW07                                                  |
| 1192 | 1,2,3,5,29,<br>32,33,34 | 4,6,7,8,27,<br>28,30,31,3<br>5 | 4  | P34901,P55314,Q63661,Q6IRE4                                                         |
| 1193 | 1,2,3,5,29,<br>32,33,35 | 4,6,7,8,27,<br>28,30,31,3<br>4 | 3  | P47967,P55314,Q9WTT6                                                                |
| 1194 | 1,2,3,5,29,<br>32,34,35 | 4,6,7,8,27,<br>28,30,31,3<br>3 | 5  | P83121,Q63661,Q6IRE4,Q99041,Q9QW07                                                  |
| 1195 | 1,2,3,5,29,<br>33,34,35 | 4,6,7,8,27,<br>28,30,31,3<br>2 | 6  | P00714,P12020,Q5GRG2,Q63661,Q6IRE4,Q9JJ22                                           |
| 1196 | 1,2,3,5,30,<br>31,32,33 | 4,6,7,8,27,<br>28,29,34,3<br>5 | 7  | P0C0A9,P11598,P55314,Q561R9,Q5FVI6,Q63617,Q9WTT6                                    |



|      |                         |                                  |    |                                                                                                                                                                                                            |
|------|-------------------------|----------------------------------|----|------------------------------------------------------------------------------------------------------------------------------------------------------------------------------------------------------------|
| 1197 | 1,2,3,5,30,<br>31,32,34 | 4,6,7,8,27,<br>28,29,33,3<br>5   | 13 | P06761,P07647,P08723,P08753,P0C0A9,P11598,P22282,P22283,P82471,Q63617,Q6IRE4,Q99041,Q9R0T3                                                                                                                 |
| 1198 | 1,2,3,5,30,<br>31,32,35 | 4,6,7,8,27,<br>28,29,33,3<br>4   | 12 | P06761,P08723,P0C0A9,P11598,P22283,P24368,P82471,Q63617,Q99041,Q9JI85,Q9R0T3,Q9WTT6                                                                                                                        |
| 1199 | 1,2,3,5,30,<br>31,33,34 | 4,6,7,8,27,<br>28,29,32,3<br>5   | 12 | P00714,P06761,P08723,P0C0A9,P22282,P22283,P24368,P82471,Q63617,Q6IRE4,Q9JHB9,Q9R0T3                                                                                                                        |
| 1200 | 1,2,3,5,30,<br>31,33,35 | 4,6,7,8,27,<br>28,29,32,3<br>4   | 12 | P00714,P06761,P08723,P0C0A9,P11598,P24368,P60905,P82471,Q63617,Q99041,Q9JHB9,Q9WTT6                                                                                                                        |
| 1201 | 1,2,3,5,30,<br>31,34,35 | 4,6,7,8,27,<br>28,29,32,3<br>3   | 28 | P00714,P02780,P02781,P02782,P02793,Q7TP54,P04905,P06761,P07647,P08723,P09456,P0C0A9,P11598,P14669,P22282,P22283,P24368,P46462,P47727,P60905,P82471,Q62902,Q63617,Q6IRE4,Q8CJ52,Q99041,Q9JHB9,Q9JI85,Q9R0T3 |
| 1202 | 1,2,3,5,30,<br>32,33,34 | 4,6,7,8,27,<br>28,29,31,3<br>5   | 12 | P02782,P0C0A9,P11598,P22282,P22283,P34901,P55314,P82471,Q63617,Q63661,Q6IRE4,Q9R0T3                                                                                                                        |
| 1203 | 1,2,3,5,30,<br>32,33,35 | 4,6,7,8,27,<br>28,29,31,3<br>4   | 12 | P02782,P06761,P06911,P0C0A9,P11598,P22283,P55314,P82471,Q62902,Q63617,Q99041,Q9WTT6                                                                                                                        |
| 1204 | 1,2,3,5,30,<br>32,34,35 | 4,6,7,8,27,<br>28,29,31,3<br>3   | 26 | P02781,P02782,P06761,P06911,P07647,P08723,P08753,P0C0A9,P11598,P12020,P22282,P22283,P24368,P82471,P83121,Q5GRG2,Q62902,Q63617,Q63661,Q6IRE4,Q8CJ52,Q99041,Q9JHB9,Q9JI85,Q9QZK9,Q9R0T3                      |
| 1205 | 1,2,3,5,30,<br>33,34,35 | 4,6,7,8,27,<br>28,29,31,3<br>2   | 24 | P00714,P02781,P02782,P06761,P06911,P08723,P0C0A9,P11598,P12020,P14669,P22282,P22283,P24368,P47727,P60905,P82471,Q5GRG2,Q62902,Q63617,Q63661,Q6IRE4,Q8CJ52,Q9JHB9,Q9R0T3                                    |
| 1206 | 1,2,3,5,31,<br>32,33,34 | 4,6,7,8,27,<br>28,29,30,3<br>5   | 14 | P02781,P02782,P08723,P08753,P0C0A9,P11598,P22282,P22283,P34901,P55314,P82471,Q63617,Q63661,Q6IRE4                                                                                                          |
| 1207 | 1,2,3,5,31,<br>32,33,35 | 4,6,7,8,27,<br>28,29,30,3<br>4   | 15 | P02781,P02782,P06761,P08723,P0C0A9,P11598,P22283,P24368,P30120,P47967,P55314,P60905,P82471,Q6AYR9,Q9WTT6                                                                                                   |
| 1208 | 1,2,3,5,31,<br>32,34,35 | 4,6,7,8,27,<br>28,29,30,3<br>3   | 26 | P02780,P02781,P02782,P06761,P07647,P08723,P08753,P0C0A9,P11598,P22282,P22283,P24368,P30120,P60905,P82471,P83121,Q62902,Q63617,Q63661,Q6AYR9,Q6IRE4,Q8CJ52,Q99041,Q9JHB9,Q9JI85,Q9R0T3                      |
| 1209 | 1,2,3,5,31,<br>33,34,35 | 4,6,7,8,27,<br>28,29,30,3<br>2   | 26 | P00714,P02780,P02781,P02782,P06761,P07150,P08010,P08723,P08753,P0C0A9,P11598,P14669,P22282,P22283,P24368,P30120,P60905,P82471,Q62902,Q63355,Q63617,Q6AYR9,Q6IRE4,Q8CJ52,Q9JHB9,Q9JI85                      |
| 1210 | 1,2,3,5,32,<br>33,34,35 | 4,6,7,8,27,<br>28,29,30,3<br>1   | 25 | P02781,P02782,P06761,P06911,P07647,P08723,P08753,P0C0A9,P11598,P22282,P22283,P24368,P30120,P55314,P60905,P82471,P83121,Q5GRG2,Q62902,Q63617,Q63661,Q6AYR9,Q6IRE4,Q8CJ52,Q9JHB9                             |
| 1211 | 1,2,3,6,7,8<br>,27,28   | 4,5,29,30,<br>31,32,33,3<br>4,35 | 6  | P02631,P12020,P16086,Q09030,Q63942,Q6IE51                                                                                                                                                                  |

|      |                       |                                  |    |                                                                                                                 |
|------|-----------------------|----------------------------------|----|-----------------------------------------------------------------------------------------------------------------|
| 1212 | 1,2,3,6,7,8<br>,27,29 | 4,5,28,30,<br>31,32,33,3<br>4,35 | 6  | P02631,P14669,P16086,Q6IE51,Q8CJD3,Q9QZQ5                                                                       |
| 1213 | 1,2,3,6,7,8<br>,27,30 | 4,5,28,29,<br>31,32,33,3<br>4,35 | 4  | P02631,P16086,Q09030,Q6IE51                                                                                     |
| 1214 | 1,2,3,6,7,8<br>,27,31 | 4,5,28,29,<br>30,32,33,3<br>4,35 | 5  | P02631,P12020,P16086,Q6IE51,Q8CJD3                                                                              |
| 1215 | 1,2,3,6,7,8<br>,27,32 | 4,5,28,29,<br>30,31,33,3<br>4,35 | 9  | P02631,P08649,P14669,P16086,Q09030,Q63532,Q6IE51,Q8CJD3,Q9Z1F2                                                  |
| 1216 | 1,2,3,6,7,8<br>,27,33 | 4,5,28,29,<br>30,31,32,3<br>4,35 | 6  | D3ZUK3,P02631,P08649,P16086,Q6IE51,Q8CJD3                                                                       |
| 1217 | 1,2,3,6,7,8<br>,27,34 | 4,5,28,29,<br>30,31,32,3<br>3,35 | 16 | D3ZUK3,G3V686,P02631,P08649,P08753,P16086,P47967,P85971,P97840,Q09030,Q4FZU6,Q63532,Q6IE51,Q6P6R2,Q9QZQ5,Q9WTT6 |
| 1218 | 1,2,3,6,7,8<br>,27,35 | 4,5,28,29,<br>30,31,32,3<br>3,34 | 6  | P01946,P02631,P02770,P16086,Q30KJ2,Q6IE51                                                                       |
| 1219 | 1,2,3,6,7,8<br>,28,29 | 4,5,27,30,<br>31,32,33,3<br>4,35 | 3  | P02631,P16086,Q63942                                                                                            |
| 1220 | 1,2,3,6,7,8<br>,28,30 | 4,5,27,29,<br>31,32,33,3<br>4,35 | 3  | P02631,P16086,Q63942                                                                                            |
| 1221 | 1,2,3,6,7,8<br>,28,31 | 4,5,27,29,<br>30,32,33,3<br>4,35 | 6  | P02631,P12020,P16086,P20766,Q5GRG2,Q63942                                                                       |
| 1222 | 1,2,3,6,7,8<br>,28,32 | 4,5,27,29,<br>30,31,33,3<br>4,35 | 5  | P02631,P12020,P16086,Q561R9,Q63942                                                                              |
| 1223 | 1,2,3,6,7,8<br>,28,33 | 4,5,27,29,<br>30,31,32,3<br>4,35 | 4  | P02631,P16086,Q30KJ2,Q63942                                                                                     |
| 1224 | 1,2,3,6,7,8<br>,28,34 | 4,5,27,29,<br>30,31,32,3<br>3,35 | 9  | P02631,P16086,P20766,P47967,P97615,P97840,Q4FZU6,Q63942,Q6P6R2                                                  |
| 1225 | 1,2,3,6,7,8<br>,28,35 | 4,5,27,29,<br>30,31,32,3<br>3,34 | 5  | P02631,P02770,P16086,Q30KJ2,Q63942                                                                              |
| 1226 | 1,2,3,6,7,8<br>,29,30 | 4,5,27,28,<br>31,32,33,3<br>4,35 | 3  | P02631,P16086,P53792                                                                                            |

|      |                       |                                  |   |                                                         |
|------|-----------------------|----------------------------------|---|---------------------------------------------------------|
| 1227 | 1,2,3,6,7,8<br>,29,31 | 4,5,27,28,<br>30,32,33,3<br>4,35 | 3 | P02631,P16086,Q8CJD3                                    |
| 1228 | 1,2,3,6,7,8<br>,29,32 | 4,5,27,28,<br>30,31,33,3<br>4,35 | 6 | P01041,P02631,P16086,P51907,P53792,Q8CJD3               |
| 1229 | 1,2,3,6,7,8<br>,29,33 | 4,5,27,28,<br>30,31,32,3<br>4,35 | 4 | P02631,P16086,P53792,Q8CJD3                             |
| 1230 | 1,2,3,6,7,8<br>,29,34 | 4,5,27,28,<br>30,31,32,3<br>3,35 | 4 | P02631,P16086,Q63467,Q9JJ22                             |
| 1231 | 1,2,3,6,7,8<br>,29,35 | 4,5,27,28,<br>30,31,32,3<br>3,34 | 8 | P01946,P02091,P02631,P02770,P15399,P16086,P51907,Q30KJ2 |
| 1232 | 1,2,3,6,7,8<br>,30,31 | 4,5,27,28,<br>29,32,33,3<br>4,35 | 3 | P16086,P19218,P42854                                    |
| 1233 | 1,2,3,6,7,8<br>,30,32 | 4,5,27,28,<br>29,31,33,3<br>4,35 | 4 | P01041,P02631,P16086,Q09030                             |
| 1234 | 1,2,3,6,7,8<br>,30,33 | 4,5,27,28,<br>29,31,32,3<br>4,35 | 2 | P02631,P16086                                           |
| 1235 | 1,2,3,6,7,8<br>,30,34 | 4,5,27,28,<br>29,31,32,3<br>3,35 | 7 | D3ZUK3,P02631,P16086,P47967,P97840,Q09030,Q63532        |
| 1236 | 1,2,3,6,7,8<br>,30,35 | 4,5,27,28,<br>29,31,32,3<br>3,34 | 4 | P02631,P02770,P16086,Q30KJ2                             |
| 1237 | 1,2,3,6,7,8<br>,31,32 | 4,5,27,28,<br>29,30,33,3<br>4,35 | 5 | P02631,P12020,P16086,P20766,Q8CJD3                      |
| 1238 | 1,2,3,6,7,8<br>,31,33 | 4,5,27,28,<br>29,30,32,3<br>4,35 | 5 | P02631,P16086,P97580,Q30KJ2,Q8CJD3                      |
| 1239 | 1,2,3,6,7,8<br>,31,34 | 4,5,27,28,<br>29,30,32,3<br>3,35 | 6 | P02631,P08753,P16086,P20766,P36374,P47967               |
| 1240 | 1,2,3,6,7,8<br>,31,35 | 4,5,27,28,<br>29,30,32,3<br>3,34 | 6 | P02770,P05369,P16086,P20766,Q30KJ2,Q6IE52               |
| 1241 | 1,2,3,6,7,8<br>,32,33 | 4,5,27,28,<br>29,30,31,3<br>4,35 | 7 | P02631,P16086,P53792,P55314,P97580,Q30KJ2,Q8CJD3        |

|      |                        |                                  |    |                                                                                     |
|------|------------------------|----------------------------------|----|-------------------------------------------------------------------------------------|
| 1242 | 1,2,3,6,7,8<br>,32,34  | 4,5,27,28,<br>29,30,31,3<br>3,35 | 9  | P01041,P02631,P08753,P16086,P20766,P36374,Q09030,Q63532,Q6P6R2                      |
| 1243 | 1,2,3,6,7,8<br>,32,35  | 4,5,27,28,<br>29,30,31,3<br>3,34 | 7  | P02631,P02770,P08753,P16086,P51907,P97580,Q30KJ2                                    |
| 1244 | 1,2,3,6,7,8<br>,33,34  | 4,5,27,28,<br>29,30,31,3<br>2,35 | 5  | D3ZUK3,P02631,P08753,P16086,Q63532                                                  |
| 1245 | 1,2,3,6,7,8<br>,33,35  | 4,5,27,28,<br>29,30,31,3<br>2,34 | 7  | P02631,P02770,P15399,P16086,P97580,Q30KJ2,Q6AYR9                                    |
| 1246 | 1,2,3,6,7,8<br>,34,35  | 4,5,27,28,<br>29,30,31,3<br>2,33 | 12 | P02631,P02770,P02781,P08010,P08753,P09006,P16086,P16296,P20766,P36374,Q30KJ2,Q63532 |
| 1247 | 1,2,3,6,7,2<br>7,28,29 | 4,5,8,30,3<br>1,32,33,34<br>,35  | 7  | P02631,P08723,P16086,Q63942,Q6AYS4,Q6IE51,Q9JI85                                    |
| 1248 | 1,2,3,6,7,2<br>7,28,30 | 4,5,8,29,3<br>1,32,33,34<br>,35  | 6  | P02631,P16086,P47967,P97840,Q6AYS4,Q6IE51                                           |
| 1249 | 1,2,3,6,7,2<br>7,28,31 | 4,5,8,29,3<br>0,32,33,34<br>,35  | 5  | P02631,P12020,P16086,Q5GRG2,Q6IE51                                                  |
| 1250 | 1,2,3,6,7,2<br>7,28,32 | 4,5,8,29,3<br>0,31,33,34<br>,35  | 6  | P02631,P02793,Q7TP54,P12020,P16086,Q63532,Q6IE51                                    |
| 1251 | 1,2,3,6,7,2<br>7,28,33 | 4,5,8,29,3<br>0,31,32,34<br>,35  | 5  | P02631,P02793,Q7TP54,P16086,Q6AYS4,Q6IE51                                           |
| 1252 | 1,2,3,6,7,2<br>7,28,34 | 4,5,8,29,3<br>0,31,32,33<br>,35  | 9  | P02631,P04182,P16086,P47967,P97615,P97840,Q4FZU6,Q63532,Q6IE51                      |
| 1253 | 1,2,3,6,7,2<br>7,28,35 | 4,5,8,29,3<br>0,31,32,33<br>,34  | 7  | P01946,P02631,P15399,P16086,Q30KJ2,Q6AYS4,Q6IE51                                    |
| 1254 | 1,2,3,6,7,2<br>7,29,30 | 4,5,8,28,3<br>1,32,33,34<br>,35  | 4  | P02631,P16086,Q6AYS4,Q6IE51                                                         |
| 1255 | 1,2,3,6,7,2<br>7,29,31 | 4,5,8,28,3<br>0,32,33,34<br>,35  | 3  | P02631,P16086,Q6IE51                                                                |
| 1256 | 1,2,3,6,7,2<br>7,29,32 | 4,5,8,28,3<br>0,31,33,34<br>,35  | 8  | P02631,P02793,Q7TP54,P08649,P16086,Q63532,Q6IE51,Q8CJD3,Q91ZS3                      |

|      |                        |                                 |    |                                                                                            |
|------|------------------------|---------------------------------|----|--------------------------------------------------------------------------------------------|
| 1257 | 1,2,3,6,7,2<br>7,29,33 | 4,5,8,28,3<br>0,31,32,34<br>,35 | 7  | P02631,P02793,Q7TP54,P08649,P16086,Q6AYS4,Q6IE51,Q8CJD3                                    |
| 1258 | 1,2,3,6,7,2<br>7,29,34 | 4,5,8,28,3<br>0,31,32,33<br>,35 | 9  | G3V686,P02631,P08649,P16086,P97840,Q4FZU6,Q63467,Q63532,Q6IE51                             |
| 1259 | 1,2,3,6,7,2<br>7,29,35 | 4,5,8,28,3<br>0,31,32,33<br>,34 | 8  | P01946,P02091,P02631,P15399,P16086,Q30KJ2,Q6AYS4,Q6IE51                                    |
| 1260 | 1,2,3,6,7,2<br>7,30,31 | 4,5,8,28,2<br>9,32,33,34<br>,35 | 5  | P16086,P19218,P97840,Q6AYS4,Q6IE51                                                         |
| 1261 | 1,2,3,6,7,2<br>7,30,32 | 4,5,8,28,2<br>9,31,33,34<br>,35 | 7  | P02631,P02803,P08649,P16086,Q09030,Q63532,Q6IE51                                           |
| 1262 | 1,2,3,6,7,2<br>7,30,33 | 4,5,8,28,2<br>9,31,32,34<br>,35 | 5  | P02631,P08649,P16086,Q6AYS4,Q6IE51                                                         |
| 1263 | 1,2,3,6,7,2<br>7,30,34 | 4,5,8,28,2<br>9,31,32,33<br>,35 | 11 | P02631,P02803,P08649,P16086,P47967,P85971,P97840,Q09030,Q4FZU6,Q63532,Q6IE51               |
| 1264 | 1,2,3,6,7,2<br>7,30,35 | 4,5,8,28,2<br>9,31,32,33<br>,34 | 8  | P01946,P02631,P02770,P14480,P16086,Q30KJ2,Q6AYS4,Q6IE51                                    |
| 1265 | 1,2,3,6,7,2<br>7,31,32 | 4,5,8,28,2<br>9,30,33,34<br>,35 | 6  | P02631,P12020,P16086,Q63532,Q6IE51,Q8CJD3                                                  |
| 1266 | 1,2,3,6,7,2<br>7,31,33 | 4,5,8,28,2<br>9,30,32,34<br>,35 | 7  | P02631,P08649,P16086,Q30KJ2,Q6AYS4,Q6IE51,Q8CJD3                                           |
| 1267 | 1,2,3,6,7,2<br>7,31,34 | 4,5,8,28,2<br>9,30,32,33<br>,35 | 8  | A2RUV9,G3V686,P02631,P16086,P47967,P97840,Q4FZU6,Q63532                                    |
| 1268 | 1,2,3,6,7,2<br>7,31,35 | 4,5,8,28,2<br>9,30,32,33<br>,34 | 5  | P01946,P16086,Q30KJ2,Q6AYS4,Q6IE51                                                         |
| 1269 | 1,2,3,6,7,2<br>7,32,33 | 4,5,8,28,2<br>9,30,31,34<br>,35 | 10 | P02631,P02793,Q7TP54,P08649,P16086,P55314,P97580,Q30KJ2,Q63532,Q6IE51,Q8CJD3               |
| 1270 | 1,2,3,6,7,2<br>7,32,34 | 4,5,8,28,2<br>9,30,31,33<br>,35 | 13 | G3V686,P02631,P02803,P08649,P16086,P47967,P55314,P85971,P97840,Q09030,Q4FZU6,Q63532,Q6IE51 |
| 1271 | 1,2,3,6,7,2<br>7,32,35 | 4,5,8,28,2<br>9,30,31,33<br>,34 | 9  | P01946,P02631,P15399,P16086,P97580,Q30KJ2,Q63532,Q6AYS4,Q6IE51                             |

|      |                        |                                 |    |                                                                              |
|------|------------------------|---------------------------------|----|------------------------------------------------------------------------------|
| 1272 | 1,2,3,6,7,2<br>7,33,34 | 4,5,8,28,2<br>9,30,31,32<br>,35 | 9  | G3V686,P02631,P08649,P16086,P85971,P97840,Q4FZU6,Q63532,Q6IE51               |
| 1273 | 1,2,3,6,7,2<br>7,33,35 | 4,5,8,28,2<br>9,30,31,32<br>,34 | 9  | P01946,P02631,P15399,P16086,P97580,Q30KJ2,Q62975,Q6AYS4,Q6IE51               |
| 1274 | 1,2,3,6,7,2<br>7,34,35 | 4,5,8,28,2<br>9,30,31,32<br>,33 | 11 | P01946,P02631,P02780,P16086,P85971,P97840,Q30KJ2,Q4FZU6,Q62975,Q63532,Q6IE51 |
| 1275 | 1,2,3,6,7,2<br>8,29,30 | 4,5,8,27,3<br>1,32,33,34<br>,35 | 3  | P02631,P16086,Q6AYS4                                                         |
| 1276 | 1,2,3,6,7,2<br>8,29,31 | 4,5,8,27,3<br>0,32,33,34<br>,35 | 5  | P06760,P06911,P12020,Q5GRG2,Q6AYS4                                           |
| 1277 | 1,2,3,6,7,2<br>8,29,32 | 4,5,8,27,3<br>0,31,33,34<br>,35 | 5  | P02631,P02793;Q7TP54,P12020,P16086,Q561R9                                    |
| 1278 | 1,2,3,6,7,2<br>8,29,33 | 4,5,8,27,3<br>0,31,32,34<br>,35 | 5  | P02631,P02793;Q7TP54,P06760,P15399,Q6AYS4                                    |
| 1279 | 1,2,3,6,7,2<br>8,29,34 | 4,5,8,27,3<br>0,31,32,33<br>,35 | 4  | P02631,P16086,P97840,Q4FZU6                                                  |
| 1280 | 1,2,3,6,7,2<br>8,29,35 | 4,5,8,27,3<br>0,31,32,33<br>,34 | 7  | P01946,P02091,P02631,P06760,P15399,Q30KJ2,Q6AYS4                             |
| 1281 | 1,2,3,6,7,2<br>8,30,31 | 4,5,8,27,2<br>9,32,33,34<br>,35 | 6  | P06760,P12020,P16086,P97840,Q5GRG2,Q6AYS4                                    |
| 1282 | 1,2,3,6,7,2<br>8,30,32 | 4,5,8,27,2<br>9,31,33,34<br>,35 | 3  | P16086,Q561R9,Q6AYS4                                                         |
| 1283 | 1,2,3,6,7,2<br>8,30,33 | 4,5,8,27,2<br>9,31,32,34<br>,35 | 3  | P06760,P16086,Q6AYS4                                                         |
| 1284 | 1,2,3,6,7,2<br>8,30,34 | 4,5,8,27,2<br>9,31,32,33<br>,35 | 4  | P16086,P47967,P97615,P97840                                                  |
| 1285 | 1,2,3,6,7,2<br>8,30,35 | 4,5,8,27,2<br>9,31,32,33<br>,34 | 6  | P02770,P06760,P15399,P16086,Q30KJ2,Q6AYS4                                    |
| 1286 | 1,2,3,6,7,2<br>8,31,32 | 4,5,8,27,2<br>9,30,33,34<br>,35 | 5  | P06911,P12020,P16086,Q561R9,Q5GRG2                                           |

|      |                        |                                 |   |                                                                       |
|------|------------------------|---------------------------------|---|-----------------------------------------------------------------------|
| 1287 | 1,2,3,6,7,2<br>8,31,33 | 4,5,8,27,2<br>9,30,32,34<br>,35 | 7 | P06760,P12020,P15399,P97580,Q30KJ2,Q5GRG2,Q6AYS4                      |
| 1288 | 1,2,3,6,7,2<br>8,31,34 | 4,5,8,27,2<br>9,30,32,33<br>,35 | 4 | P06760,P16086,P47967,P97840                                           |
| 1289 | 1,2,3,6,7,2<br>8,31,35 | 4,5,8,27,2<br>9,30,32,33<br>,34 | 4 | P06760,P15399,Q30KJ2,Q6AYS4                                           |
| 1290 | 1,2,3,6,7,2<br>8,32,33 | 4,5,8,27,2<br>9,30,31,34<br>,35 | 9 | P02631,P02793;Q7TP54,P12020,P15399,P16086,P55314,P97580,Q30KJ2,Q561R9 |
| 1291 | 1,2,3,6,7,2<br>8,32,34 | 4,5,8,27,2<br>9,30,31,33<br>,35 | 8 | P02631,P16086,P97615,P97840,Q4FZU6,Q5HZV9,Q63532,Q6P6R2               |
| 1292 | 1,2,3,6,7,2<br>8,32,35 | 4,5,8,27,2<br>9,30,31,33<br>,34 | 5 | P15399,P16086,P97580,Q30KJ2,Q6AYS4                                    |
| 1293 | 1,2,3,6,7,2<br>8,33,34 | 4,5,8,27,2<br>9,30,31,32<br>,35 | 4 | P02631,P16086,P97840,Q4FZU6                                           |
| 1294 | 1,2,3,6,7,2<br>8,33,35 | 4,5,8,27,2<br>9,30,31,32<br>,34 | 5 | P06760,P15399,P97580,Q30KJ2,Q6AYS4                                    |
| 1295 | 1,2,3,6,7,2<br>8,34,35 | 4,5,8,27,2<br>9,30,31,32<br>,33 | 8 | P06760,P15399,P16086,P97615,P97840,Q30KJ2,Q4FZU6,Q5HZV9               |
| 1296 | 1,2,3,6,7,2<br>9,30,31 | 4,5,8,27,2<br>8,32,33,34<br>,35 | 2 | P16086,Q6AYS4                                                         |
| 1297 | 1,2,3,6,7,2<br>9,30,32 | 4,5,8,27,2<br>8,31,33,34<br>,35 | 4 | P02631,P16086,P53792,Q561R9                                           |
| 1298 | 1,2,3,6,7,2<br>9,30,33 | 4,5,8,27,2<br>8,31,32,34<br>,35 | 3 | P16086,P53792,Q6AYS4                                                  |
| 1299 | 1,2,3,6,7,2<br>9,30,34 | 4,5,8,27,2<br>8,31,32,33<br>,35 | 5 | P02631,P09605,P25809,P16086,P47967,P97840                             |
| 1300 | 1,2,3,6,7,2<br>9,30,35 | 4,5,8,27,2<br>8,31,32,33<br>,34 | 6 | P01946,P02091,P14480,P15399,P16086,Q6AYS4                             |
| 1301 | 1,2,3,6,7,2<br>9,31,32 | 4,5,8,27,2<br>8,30,33,34<br>,35 | 4 | P12020,P16086,Q561R9,Q8CJD3                                           |

|      |                        |                                 |   |                                                                       |
|------|------------------------|---------------------------------|---|-----------------------------------------------------------------------|
| 1302 | 1,2,3,6,7,2<br>9,31,33 | 4,5,8,27,2<br>8,30,32,34<br>,35 | 5 | P00714,P15399,Q30KJ2,Q6AYS4,Q8CJD3                                    |
| 1303 | 1,2,3,6,7,2<br>9,31,34 | 4,5,8,27,2<br>8,30,32,33<br>,35 | 3 | P00714,P16086,Q63467                                                  |
| 1304 | 1,2,3,6,7,2<br>9,31,35 | 4,5,8,27,2<br>8,30,32,33<br>,34 | 7 | P00714,P01946,P02091,P06760,P15399,Q30KJ2,Q6AYS4                      |
| 1305 | 1,2,3,6,7,2<br>9,32,33 | 4,5,8,27,2<br>8,30,31,34<br>,35 | 9 | P02631,P02793;Q7TP54,P15399,P16086,P53792,P55314,P97580,Q30KJ2,Q8CJD3 |
| 1306 | 1,2,3,6,7,2<br>9,32,34 | 4,5,8,27,2<br>8,30,31,33<br>,35 | 5 | P01041,P02631,P16086,Q63467,Q63532                                    |
| 1307 | 1,2,3,6,7,2<br>9,32,35 | 4,5,8,27,2<br>8,30,31,33<br>,34 | 8 | P01946,P02091,P15399,P16086,P51907,P97580,Q30KJ2,Q6AYS4               |
| 1308 | 1,2,3,6,7,2<br>9,33,34 | 4,5,8,27,2<br>8,30,31,32<br>,35 | 3 | P02631,P16086,Q9JJ22                                                  |
| 1309 | 1,2,3,6,7,2<br>9,33,35 | 4,5,8,27,2<br>8,30,31,32<br>,34 | 7 | P01946,P02091,P06760,P15399,P97580,Q30KJ2,Q6AYS4                      |
| 1310 | 1,2,3,6,7,2<br>9,34,35 | 4,5,8,27,2<br>8,30,31,32<br>,33 | 7 | P01946,P02091,P02631,P14480,P15399,P16086,Q9JJ22                      |
| 1311 | 1,2,3,6,7,3<br>0,31,32 | 4,5,8,27,2<br>8,29,33,34<br>,35 | 3 | P16086,P42854,Q561R9                                                  |
| 1312 | 1,2,3,6,7,3<br>0,31,33 | 4,5,8,27,2<br>8,29,32,34<br>,35 | 3 | P16086,Q30KJ2,Q6AYS4                                                  |
| 1313 | 1,2,3,6,7,3<br>0,31,34 | 4,5,8,27,2<br>8,29,32,33<br>,35 | 5 | P09605;P25809,P16086,P19218,P47967,P97840                             |
| 1314 | 1,2,3,6,7,3<br>0,31,35 | 4,5,8,27,2<br>8,29,32,33<br>,34 | 5 | P02770,P06760,P16086,Q30KJ2,Q6AYS4                                    |
| 1315 | 1,2,3,6,7,3<br>0,32,33 | 4,5,8,27,2<br>8,29,31,34<br>,35 | 7 | P16086,P53792,P55314,P97580,Q30KJ2,Q561R9,Q6AYS4                      |
| 1316 | 1,2,3,6,7,3<br>0,32,34 | 4,5,8,27,2<br>8,29,31,33<br>,35 | 6 | P01041,P16086,P47967,P97840,Q09030,Q63532                             |



|      |                        |                                 |    |                                                                       |
|------|------------------------|---------------------------------|----|-----------------------------------------------------------------------|
| 1317 | 1,2,3,6,7,3<br>0,32,35 | 4,5,8,27,2<br>8,29,31,33<br>,34 | 5  | P15399,P16086,P97580,Q30KJ2,Q6AYS4                                    |
| 1318 | 1,2,3,6,7,3<br>0,33,34 | 4,5,8,27,2<br>8,29,31,32<br>,35 | 4  | P16086,P47967,P97840,Q63532                                           |
| 1319 | 1,2,3,6,7,3<br>0,33,35 | 4,5,8,27,2<br>8,29,31,32<br>,34 | 6  | P06760,P15399,P16086,P97580,Q30KJ2,Q6AYS4                             |
| 1320 | 1,2,3,6,7,3<br>0,34,35 | 4,5,8,27,2<br>8,29,31,32<br>,33 | 8  | P02781,P14480,P16086,P47967,P82471,P97840,Q30KJ2,Q63532               |
| 1321 | 1,2,3,6,7,3<br>1,32,33 | 4,5,8,27,2<br>8,29,30,34<br>,35 | 7  | P12020,P15399,P16086,P55314,P97580,Q30KJ2,Q8CJD3                      |
| 1322 | 1,2,3,6,7,3<br>1,32,34 | 4,5,8,27,2<br>8,29,30,33<br>,35 | 3  | P16086,P97840,Q63532                                                  |
| 1323 | 1,2,3,6,7,3<br>1,32,35 | 4,5,8,27,2<br>8,29,30,33<br>,34 | 5  | P15399,P16086,P97580,Q30KJ2,Q6AYS4                                    |
| 1324 | 1,2,3,6,7,3<br>1,33,34 | 4,5,8,27,2<br>8,29,30,32<br>,35 | 5  | P00714,P16086,P97580,P97840,Q30KJ2                                    |
| 1325 | 1,2,3,6,7,3<br>1,33,35 | 4,5,8,27,2<br>8,29,30,32<br>,34 | 6  | P00714,P06760,P15399,P97580,Q30KJ2,Q6AYS4                             |
| 1326 | 1,2,3,6,7,3<br>1,34,35 | 4,5,8,27,2<br>8,29,30,32<br>,33 | 8  | P00714,P02781,P08010,P0C0A9,P16086,P24368,P82471,Q30KJ2               |
| 1327 | 1,2,3,6,7,3<br>2,33,34 | 4,5,8,27,2<br>8,29,30,31<br>,35 | 8  | O35783,P16086,P55314,P97580,Q30KJ2,Q4FZU6,Q63532,Q63661               |
| 1328 | 1,2,3,6,7,3<br>2,33,35 | 4,5,8,27,2<br>8,29,30,31<br>,34 | 7  | P15399,P16086,P55314,P97580,Q30KJ2,Q6AYR9,Q6AYS4                      |
| 1329 | 1,2,3,6,7,3<br>2,34,35 | 4,5,8,27,2<br>8,29,30,31<br>,33 | 10 | P02781,P08753,P0C0A9,P16086,P36374,P82471,P97580,Q30KJ2,Q63532,Q63661 |
| 1330 | 1,2,3,6,7,3<br>3,34,35 | 4,5,8,27,2<br>8,29,30,31<br>,32 | 10 | P00714,P02781,P08010,P15399,P16086,P82471,P97580,Q30KJ2,Q62975,Q63532 |
| 1331 | 1,2,3,6,8,2<br>7,28,29 | 4,5,7,30,3<br>1,32,33,34<br>,35 | 5  | O35547,P02782,P08723,Q63942,Q9JHB9                                    |

|      |                        |                                 |   |                                           |
|------|------------------------|---------------------------------|---|-------------------------------------------|
| 1332 | 1,2,3,6,8,2<br>7,28,30 | 4,5,7,29,3<br>1,32,33,34<br>,35 | 1 | Q63942                                    |
| 1333 | 1,2,3,6,8,2<br>7,28,31 | 4,5,7,29,3<br>0,32,33,34<br>,35 | 2 | Q5GRG2,Q63942                             |
| 1334 | 1,2,3,6,8,2<br>7,28,32 | 4,5,7,29,3<br>0,31,33,34<br>,35 | 2 | Q63942,Q9Z1F2                             |
| 1335 | 1,2,3,6,8,2<br>7,28,33 | 4,5,7,29,3<br>0,31,32,34<br>,35 | 1 | Q63942                                    |
| 1336 | 1,2,3,6,8,2<br>7,28,34 | 4,5,7,29,3<br>0,31,32,33<br>,35 | 6 | P04182,P97615,Q4FZU6,Q63942,Q6P6R2,Q9WTT6 |
| 1337 | 1,2,3,6,8,2<br>7,28,35 | 4,5,7,29,3<br>0,31,32,33<br>,34 | 2 | P02770,Q63942                             |
| 1338 | 1,2,3,6,8,2<br>7,29,30 | 4,5,7,28,3<br>1,32,33,34<br>,35 | 0 |                                           |
| 1339 | 1,2,3,6,8,2<br>7,29,31 | 4,5,7,28,3<br>0,32,33,34<br>,35 | 1 | Q8CJD3                                    |
| 1340 | 1,2,3,6,8,2<br>7,29,32 | 4,5,7,28,3<br>0,31,33,34<br>,35 | 4 | P51907,Q66H69,Q8CJD3,Q9Z1F2               |
| 1341 | 1,2,3,6,8,2<br>7,29,33 | 4,5,7,28,3<br>0,31,32,34<br>,35 | 1 | Q8CJD3                                    |
| 1342 | 1,2,3,6,8,2<br>7,29,34 | 4,5,7,28,3<br>0,31,32,33<br>,35 | 4 | Q00715,Q4FZU6,Q9WTT6,Q9Z1F2               |
| 1343 | 1,2,3,6,8,2<br>7,29,35 | 4,5,7,28,3<br>0,31,32,33<br>,34 | 3 | P01946,P02770,P51907                      |
| 1344 | 1,2,3,6,8,2<br>7,30,31 | 4,5,7,28,2<br>9,32,33,34<br>,35 | 0 |                                           |
| 1345 | 1,2,3,6,8,2<br>7,30,32 | 4,5,7,28,2<br>9,31,33,34<br>,35 | 0 |                                           |
| 1346 | 1,2,3,6,8,2<br>7,30,33 | 4,5,7,28,2<br>9,31,32,34<br>,35 | 0 |                                           |

|      |                        |                                 |   |                                                  |
|------|------------------------|---------------------------------|---|--------------------------------------------------|
| 1347 | 1,2,3,6,8,2<br>7,30,34 | 4,5,7,28,2<br>9,31,32,33<br>,35 | 4 | P47967,Q00715,Q4FZU6,Q9WTT6                      |
| 1348 | 1,2,3,6,8,2<br>7,30,35 | 4,5,7,28,2<br>9,31,32,33<br>,34 | 1 | P02770                                           |
| 1349 | 1,2,3,6,8,2<br>7,31,32 | 4,5,7,28,2<br>9,30,33,34<br>,35 | 2 | Q8CJD3,Q9Z1F2                                    |
| 1350 | 1,2,3,6,8,2<br>7,31,33 | 4,5,7,28,2<br>9,30,32,34<br>,35 | 1 | Q8CJD3                                           |
| 1351 | 1,2,3,6,8,2<br>7,31,34 | 4,5,7,28,2<br>9,30,32,33<br>,35 | 2 | Q4FZU6,Q9WTT6                                    |
| 1352 | 1,2,3,6,8,2<br>7,31,35 | 4,5,7,28,2<br>9,30,32,33<br>,34 | 1 | P02770                                           |
| 1353 | 1,2,3,6,8,2<br>7,32,33 | 4,5,7,28,2<br>9,30,31,34<br>,35 | 3 | P55314,Q8CJD3,Q9Z1F2                             |
| 1354 | 1,2,3,6,8,2<br>7,32,34 | 4,5,7,28,2<br>9,30,31,33<br>,35 | 7 | P08753,P83121,Q00715,Q4FZU6,Q6P6R2,Q9WTT6,Q9Z1F2 |
| 1355 | 1,2,3,6,8,2<br>7,32,35 | 4,5,7,28,2<br>9,30,31,33<br>,34 | 3 | P02770,P08753,P51907                             |
| 1356 | 1,2,3,6,8,2<br>7,33,34 | 4,5,7,28,2<br>9,30,31,32<br>,35 | 2 | Q4FZU6,Q63355                                    |
| 1357 | 1,2,3,6,8,2<br>7,33,35 | 4,5,7,28,2<br>9,30,31,32<br>,34 | 2 | P02770,Q63355                                    |
| 1358 | 1,2,3,6,8,2<br>7,34,35 | 4,5,7,28,2<br>9,30,31,32<br>,33 | 6 | P02770,P08753,P09006,P17475,P83121,Q4FZU6        |
| 1359 | 1,2,3,6,8,2<br>8,29,30 | 4,5,7,27,3<br>1,32,33,34<br>,35 | 1 | Q63942                                           |
| 1360 | 1,2,3,6,8,2<br>8,29,31 | 4,5,7,27,3<br>0,32,33,34<br>,35 | 4 | O35547,P06911,Q5GRG2,Q63942                      |
| 1361 | 1,2,3,6,8,2<br>8,29,32 | 4,5,7,27,3<br>0,31,33,34<br>,35 | 2 | P51907,Q63942                                    |

|      |                        |                                 |   |                                           |
|------|------------------------|---------------------------------|---|-------------------------------------------|
| 1362 | 1,2,3,6,8,2<br>8,29,33 | 4,5,7,27,3<br>0,31,32,34<br>,35 | 2 | O35547,Q63942                             |
| 1363 | 1,2,3,6,8,2<br>8,29,34 | 4,5,7,27,3<br>0,31,32,33<br>,35 | 4 | Q4FZU6,Q5QE79,Q63942,Q9WTT6               |
| 1364 | 1,2,3,6,8,2<br>8,29,35 | 4,5,7,27,3<br>0,31,32,33<br>,34 | 3 | P02770,P51907,Q63942                      |
| 1365 | 1,2,3,6,8,2<br>8,30,31 | 4,5,7,27,2<br>9,32,33,34<br>,35 | 1 | Q63942                                    |
| 1366 | 1,2,3,6,8,2<br>8,30,32 | 4,5,7,27,2<br>9,31,33,34<br>,35 | 2 | Q561R9,Q63942                             |
| 1367 | 1,2,3,6,8,2<br>8,30,33 | 4,5,7,27,2<br>9,31,32,34<br>,35 | 1 | Q63942                                    |
| 1368 | 1,2,3,6,8,2<br>8,30,34 | 4,5,7,27,2<br>9,31,32,33<br>,35 | 5 | P47967,Q4FZU6,Q63942,Q6P6R2,Q9WTT6        |
| 1369 | 1,2,3,6,8,2<br>8,30,35 | 4,5,7,27,2<br>9,31,32,33<br>,34 | 2 | P02770,Q63942                             |
| 1370 | 1,2,3,6,8,2<br>8,31,32 | 4,5,7,27,2<br>9,30,33,34<br>,35 | 5 | P06911,P20766,Q561R9,Q5GRG2,Q63942        |
| 1371 | 1,2,3,6,8,2<br>8,31,33 | 4,5,7,27,2<br>9,30,32,34<br>,35 | 1 | Q63942                                    |
| 1372 | 1,2,3,6,8,2<br>8,31,34 | 4,5,7,27,2<br>9,30,32,33<br>,35 | 3 | P20766,Q4FZU6,Q63942                      |
| 1373 | 1,2,3,6,8,2<br>8,31,35 | 4,5,7,27,2<br>9,30,32,33<br>,34 | 2 | P02770,Q63942                             |
| 1374 | 1,2,3,6,8,2<br>8,32,33 | 4,5,7,27,2<br>9,30,31,34<br>,35 | 2 | P55314,Q63942                             |
| 1375 | 1,2,3,6,8,2<br>8,32,34 | 4,5,7,27,2<br>9,30,31,33<br>,35 | 6 | Q4FZU6,Q5HZV9,Q5QE79,Q63942,Q6P6R2,Q9Z1F2 |
| 1376 | 1,2,3,6,8,2<br>8,32,35 | 4,5,7,27,2<br>9,30,31,33<br>,34 | 3 | P02770,P51907,Q63942                      |

|      |                        |                                 |   |                                                  |
|------|------------------------|---------------------------------|---|--------------------------------------------------|
| 1377 | 1,2,3,6,8,2<br>8,33,34 | 4,5,7,27,2<br>9,30,31,32<br>,35 | 3 | Q4FZU6,Q62894,Q63942                             |
| 1378 | 1,2,3,6,8,2<br>8,33,35 | 4,5,7,27,2<br>9,30,31,32<br>,34 | 2 | P02770,Q63942                                    |
| 1379 | 1,2,3,6,8,2<br>8,34,35 | 4,5,7,27,2<br>9,30,31,32<br>,33 | 7 | P00507,P02770,P09006,P17475,Q4FZU6,Q5HZV9,Q63942 |
| 1380 | 1,2,3,6,8,2<br>9,30,31 | 4,5,7,27,2<br>8,32,33,34<br>,35 | 0 |                                                  |
| 1381 | 1,2,3,6,8,2<br>9,30,32 | 4,5,7,27,2<br>8,31,33,34<br>,35 | 1 | P51907                                           |
| 1382 | 1,2,3,6,8,2<br>9,30,33 | 4,5,7,27,2<br>8,31,32,34<br>,35 | 0 |                                                  |
| 1383 | 1,2,3,6,8,2<br>9,30,34 | 4,5,7,27,2<br>8,31,32,33<br>,35 | 1 | Q9JJ22                                           |
| 1384 | 1,2,3,6,8,2<br>9,30,35 | 4,5,7,27,2<br>8,31,32,33<br>,34 | 2 | P02770,P51907                                    |
| 1385 | 1,2,3,6,8,2<br>9,31,32 | 4,5,7,27,2<br>8,30,33,34<br>,35 | 2 | P51907,Q8CJD3                                    |
| 1386 | 1,2,3,6,8,2<br>9,31,33 | 4,5,7,27,2<br>8,30,32,34<br>,35 | 1 | Q8CJD3                                           |
| 1387 | 1,2,3,6,8,2<br>9,31,34 | 4,5,7,27,2<br>8,30,32,33<br>,35 | 1 | P20766                                           |
| 1388 | 1,2,3,6,8,2<br>9,31,35 | 4,5,7,27,2<br>8,30,32,33<br>,34 | 2 | P02770,P51907                                    |
| 1389 | 1,2,3,6,8,2<br>9,32,33 | 4,5,7,27,2<br>8,30,31,34<br>,35 | 4 | P51907,P55314,Q66H69,Q8CJD3                      |
| 1390 | 1,2,3,6,8,2<br>9,32,34 | 4,5,7,27,2<br>8,30,31,33<br>,35 | 3 | P51907,Q4FZU6,Q9Z1F2                             |
| 1391 | 1,2,3,6,8,2<br>9,32,35 | 4,5,7,27,2<br>8,30,31,33<br>,34 | 2 | P51907,Q66H69                                    |

|      |                        |                                 |   |                                                         |
|------|------------------------|---------------------------------|---|---------------------------------------------------------|
| 1392 | 1,2,3,6,8,2<br>9,33,34 | 4,5,7,27,2<br>8,30,31,32<br>,35 | 2 | Q4FZU6,Q9JJ22                                           |
| 1393 | 1,2,3,6,8,2<br>9,33,35 | 4,5,7,27,2<br>8,30,31,32<br>,34 | 1 | P02770                                                  |
| 1394 | 1,2,3,6,8,2<br>9,34,35 | 4,5,7,27,2<br>8,30,31,32<br>,33 | 5 | P02770,P09006,P51907,Q4FZU6,Q9JJ22                      |
| 1395 | 1,2,3,6,8,3<br>0,31,32 | 4,5,7,27,2<br>8,29,33,34<br>,35 | 1 | Q561R9                                                  |
| 1396 | 1,2,3,6,8,3<br>0,31,33 | 4,5,7,27,2<br>8,29,32,34<br>,35 | 0 |                                                         |
| 1397 | 1,2,3,6,8,3<br>0,31,34 | 4,5,7,27,2<br>8,29,32,33<br>,35 | 2 | P20766,P47967                                           |
| 1398 | 1,2,3,6,8,3<br>0,31,35 | 4,5,7,27,2<br>8,29,32,33<br>,34 | 1 | P02770                                                  |
| 1399 | 1,2,3,6,8,3<br>0,32,33 | 4,5,7,27,2<br>8,29,31,34<br>,35 | 2 | P14408,P55314                                           |
| 1400 | 1,2,3,6,8,3<br>0,32,34 | 4,5,7,27,2<br>8,29,31,33<br>,35 | 2 | P08753,Q6P6R2                                           |
| 1401 | 1,2,3,6,8,3<br>0,32,35 | 4,5,7,27,2<br>8,29,31,33<br>,34 | 2 | P02770,P51907                                           |
| 1402 | 1,2,3,6,8,3<br>0,33,34 | 4,5,7,27,2<br>8,29,31,32<br>,35 | 0 |                                                         |
| 1403 | 1,2,3,6,8,3<br>0,33,35 | 4,5,7,27,2<br>8,29,31,32<br>,34 | 1 | P02770                                                  |
| 1404 | 1,2,3,6,8,3<br>0,34,35 | 4,5,7,27,2<br>8,29,31,32<br>,33 | 7 | P02770,P02793;Q7TP54,P08753,P09006,P17475,P82471,Q6PCU2 |
| 1405 | 1,2,3,6,8,3<br>1,32,33 | 4,5,7,27,2<br>8,29,30,34<br>,35 | 2 | P55314,Q8CJD3                                           |
| 1406 | 1,2,3,6,8,3<br>1,32,34 | 4,5,7,27,2<br>8,29,30,33<br>,35 | 2 | P08753,P20766                                           |

|      |                         |                                 |   |                                                                |
|------|-------------------------|---------------------------------|---|----------------------------------------------------------------|
| 1407 | 1,2,3,6,8,3<br>1,32,35  | 4,5,7,27,2<br>8,29,30,33<br>,34 | 4 | P02770,P08753,P20766,P51907                                    |
| 1408 | 1,2,3,6,8,3<br>1,33,34  | 4,5,7,27,2<br>8,29,30,32<br>,35 | 2 | P20766,Q63355                                                  |
| 1409 | 1,2,3,6,8,3<br>1,33,35  | 4,5,7,27,2<br>8,29,30,32<br>,34 | 4 | P00714,P02770,Q30KJ2,Q63355                                    |
| 1410 | 1,2,3,6,8,3<br>1,34,35  | 4,5,7,27,2<br>8,29,30,32<br>,33 | 7 | P02770,P08753,P09006,P17475,P20766,P82471,Q63355               |
| 1411 | 1,2,3,6,8,3<br>2,33,34  | 4,5,7,27,2<br>8,29,30,31<br>,35 | 5 | P08753,P55314,Q4FZU6,Q63661,Q9Z1F2                             |
| 1412 | 1,2,3,6,8,3<br>2,33,35  | 4,5,7,27,2<br>8,29,30,31<br>,34 | 4 | P08753,P55314,P97580,Q30KJ2                                    |
| 1413 | 1,2,3,6,8,3<br>2,34,35  | 4,5,7,27,2<br>8,29,30,31<br>,33 | 9 | P02770,P08753,P20766,P36374,P51907,P82471,P83121,Q4FZU6,Q63661 |
| 1414 | 1,2,3,6,8,3<br>3,34,35  | 4,5,7,27,2<br>8,29,30,31<br>,32 | 7 | P02770,P08753,P09006,P17475,P82471,Q4FZU6,Q63355               |
| 1415 | 1,2,3,6,27,<br>28,29,30 | 4,5,7,8,31,<br>32,33,34,3<br>5  | 5 | O35547,P08723,Q63942,Q6AYS4,Q9JHB9                             |
| 1416 | 1,2,3,6,27,<br>28,29,31 | 4,5,7,8,30,<br>32,33,34,3<br>5  | 4 | O35547,P06911,Q5GRG2,Q63942                                    |
| 1417 | 1,2,3,6,27,<br>28,29,32 | 4,5,7,8,30,<br>31,33,34,3<br>5  | 5 | O35547,P08723,Q63942,Q91ZS3,Q9JHB9                             |
| 1418 | 1,2,3,6,27,<br>28,29,33 | 4,5,7,8,30,<br>31,32,34,3<br>5  | 5 | O35547,P08723,Q63942,Q6AYS4,Q9JHB9                             |
| 1419 | 1,2,3,6,27,<br>28,29,34 | 4,5,7,8,30,<br>31,32,33,3<br>5  | 3 | P04182,Q4FZU6,Q63942                                           |
| 1420 | 1,2,3,6,27,<br>28,29,35 | 4,5,7,8,30,<br>31,32,33,3<br>4  | 2 | P01946,Q6AYS4                                                  |
| 1421 | 1,2,3,6,27,<br>28,30,31 | 4,5,7,8,29,<br>32,33,34,3<br>5  | 1 | Q6AYS4                                                         |

|      |                         |                                |   |                                                  |
|------|-------------------------|--------------------------------|---|--------------------------------------------------|
| 1422 | 1,2,3,6,27,<br>28,30,32 | 4,5,7,8,29,<br>31,33,34,3<br>5 | 0 |                                                  |
| 1423 | 1,2,3,6,27,<br>28,30,33 | 4,5,7,8,29,<br>31,32,34,3<br>5 | 1 | Q6AYS4                                           |
| 1424 | 1,2,3,6,27,<br>28,30,34 | 4,5,7,8,29,<br>31,32,33,3<br>5 | 4 | P04182,P47967,P97840,Q4FZU6                      |
| 1425 | 1,2,3,6,27,<br>28,30,35 | 4,5,7,8,29,<br>31,32,33,3<br>4 | 2 | Q6AYS4,Q99041                                    |
| 1426 | 1,2,3,6,27,<br>28,31,32 | 4,5,7,8,29,<br>30,33,34,3<br>5 | 1 | Q5GRG2                                           |
| 1427 | 1,2,3,6,27,<br>28,31,33 | 4,5,7,8,29,<br>30,32,34,3<br>5 | 1 | Q6AYS4                                           |
| 1428 | 1,2,3,6,27,<br>28,31,34 | 4,5,7,8,29,<br>30,32,33,3<br>5 | 3 | A2RUV9,P04182,Q4FZU6                             |
| 1429 | 1,2,3,6,27,<br>28,31,35 | 4,5,7,8,29,<br>30,32,33,3<br>4 | 1 | Q6AYS4                                           |
| 1430 | 1,2,3,6,27,<br>28,32,33 | 4,5,7,8,29,<br>30,31,34,3<br>5 | 4 | P02793;Q7TP54,P55314,Q06000,Q6IFU7               |
| 1431 | 1,2,3,6,27,<br>28,32,34 | 4,5,7,8,29,<br>30,31,33,3<br>5 | 7 | P04182,P97615,Q10758,Q4FZU6,Q5HZV9,Q6IFU7,Q6P6R2 |
| 1432 | 1,2,3,6,27,<br>28,32,35 | 4,5,7,8,29,<br>30,31,33,3<br>4 | 1 | Q6AYS4                                           |
| 1433 | 1,2,3,6,27,<br>28,33,34 | 4,5,7,8,29,<br>30,31,32,3<br>5 | 2 | P04182,Q4FZU6                                    |
| 1434 | 1,2,3,6,27,<br>28,33,35 | 4,5,7,8,29,<br>30,31,32,3<br>4 | 1 | Q6AYS4                                           |
| 1435 | 1,2,3,6,27,<br>28,34,35 | 4,5,7,8,29,<br>30,31,32,3<br>3 | 4 | P04182,Q4FZU6,Q5HZV9,Q5M819                      |
| 1436 | 1,2,3,6,27,<br>29,30,31 | 4,5,7,8,28,<br>32,33,34,3<br>5 | 1 | Q6AYS4                                           |



|      |                         |                                |   |                             |
|------|-------------------------|--------------------------------|---|-----------------------------|
| 1437 | 1,2,3,6,27,<br>29,30,32 | 4,5,7,8,28,<br>31,33,34,3<br>5 | 1 | P02803                      |
| 1438 | 1,2,3,6,27,<br>29,30,33 | 4,5,7,8,28,<br>31,32,34,3<br>5 | 1 | Q6AYS4                      |
| 1439 | 1,2,3,6,27,<br>29,30,34 | 4,5,7,8,28,<br>31,32,33,3<br>5 | 1 | Q4FZU6                      |
| 1440 | 1,2,3,6,27,<br>29,30,35 | 4,5,7,8,28,<br>31,32,33,3<br>4 | 4 | P01946,P14480,Q6AYS4,Q99041 |
| 1441 | 1,2,3,6,27,<br>29,31,32 | 4,5,7,8,28,<br>30,33,34,3<br>5 | 1 | Q8CJD3                      |
| 1442 | 1,2,3,6,27,<br>29,31,33 | 4,5,7,8,28,<br>30,32,34,3<br>5 | 0 |                             |
| 1443 | 1,2,3,6,27,<br>29,31,34 | 4,5,7,8,28,<br>30,32,33,3<br>5 | 1 | Q4FZU6                      |
| 1444 | 1,2,3,6,27,<br>29,31,35 | 4,5,7,8,28,<br>30,32,33,3<br>4 | 3 | P01946,Q6AYS4,Q99041        |
| 1445 | 1,2,3,6,27,<br>29,32,33 | 4,5,7,8,28,<br>30,31,34,3<br>5 | 3 | P02793;Q7TP54,P55314,Q8CJD3 |
| 1446 | 1,2,3,6,27,<br>29,32,34 | 4,5,7,8,28,<br>30,31,33,3<br>5 | 4 | Q4FZU6,Q63661,Q91ZS3,Q9Z1F2 |
| 1447 | 1,2,3,6,27,<br>29,32,35 | 4,5,7,8,28,<br>30,31,33,3<br>4 | 3 | P01946,P51907,Q6AYS4        |
| 1448 | 1,2,3,6,27,<br>29,33,34 | 4,5,7,8,28,<br>30,31,32,3<br>5 | 1 | Q4FZU6                      |
| 1449 | 1,2,3,6,27,<br>29,33,35 | 4,5,7,8,28,<br>30,31,32,3<br>4 | 2 | P01946,Q6AYS4               |
| 1450 | 1,2,3,6,27,<br>29,34,35 | 4,5,7,8,28,<br>30,31,32,3<br>3 | 2 | P01946,Q4FZU6               |
| 1451 | 1,2,3,6,27,<br>30,31,32 | 4,5,7,8,28,<br>29,33,34,3<br>5 | 0 |                             |

|      |                         |                                |   |                                    |
|------|-------------------------|--------------------------------|---|------------------------------------|
| 1452 | 1,2,3,6,27,<br>30,31,33 | 4,5,7,8,28,<br>29,32,34,3<br>5 | 1 | Q6AYS4                             |
| 1453 | 1,2,3,6,27,<br>30,31,34 | 4,5,7,8,28,<br>29,32,33,3<br>5 | 3 | P47967,P97840,Q63617               |
| 1454 | 1,2,3,6,27,<br>30,31,35 | 4,5,7,8,28,<br>29,32,33,3<br>4 | 2 | Q6AYS4,Q99041                      |
| 1455 | 1,2,3,6,27,<br>30,32,33 | 4,5,7,8,28,<br>29,31,34,3<br>5 | 1 | P55314                             |
| 1456 | 1,2,3,6,27,<br>30,32,34 | 4,5,7,8,28,<br>29,31,33,3<br>5 | 3 | P02803,Q4FZU6,Q63661               |
| 1457 | 1,2,3,6,27,<br>30,32,35 | 4,5,7,8,28,<br>29,31,33,3<br>4 | 2 | Q6AYS4,Q99041                      |
| 1458 | 1,2,3,6,27,<br>30,33,34 | 4,5,7,8,28,<br>29,31,32,3<br>5 | 1 | Q4FZU6                             |
| 1459 | 1,2,3,6,27,<br>30,33,35 | 4,5,7,8,28,<br>29,31,32,3<br>4 | 1 | Q6AYS4                             |
| 1460 | 1,2,3,6,27,<br>30,34,35 | 4,5,7,8,28,<br>29,31,32,3<br>3 | 2 | P83121,Q4FZU6                      |
| 1461 | 1,2,3,6,27,<br>31,32,33 | 4,5,7,8,28,<br>29,30,34,3<br>5 | 2 | P55314,Q8CJD3                      |
| 1462 | 1,2,3,6,27,<br>31,32,34 | 4,5,7,8,28,<br>29,30,33,3<br>5 | 2 | A2RUV9,Q4FZU6                      |
| 1463 | 1,2,3,6,27,<br>31,32,35 | 4,5,7,8,28,<br>29,30,33,3<br>4 | 1 | Q6AYS4                             |
| 1464 | 1,2,3,6,27,<br>31,33,34 | 4,5,7,8,28,<br>29,30,32,3<br>5 | 2 | Q4FZU6,Q63355                      |
| 1465 | 1,2,3,6,27,<br>31,33,35 | 4,5,7,8,28,<br>29,30,32,3<br>4 | 3 | Q30KJ2,Q63355,Q6AYS4               |
| 1466 | 1,2,3,6,27,<br>31,34,35 | 4,5,7,8,28,<br>29,30,32,3<br>3 | 5 | A2RUV9,P02780,P82471,Q4FZU6,Q63355 |

|      |                         |                                |   |                                    |
|------|-------------------------|--------------------------------|---|------------------------------------|
| 1467 | 1,2,3,6,27,<br>32,33,34 | 4,5,7,8,28,<br>29,30,31,3<br>5 | 5 | P55314,Q10758,Q4FZU2,Q4FZU6,Q63661 |
| 1468 | 1,2,3,6,27,<br>32,33,35 | 4,5,7,8,28,<br>29,30,31,3<br>4 | 4 | P55314,P97580,Q30KJ2,Q6AYS4        |
| 1469 | 1,2,3,6,27,<br>32,34,35 | 4,5,7,8,28,<br>29,30,31,3<br>3 | 5 | P08753,P82471,P83121,Q4FZU6,Q63661 |
| 1470 | 1,2,3,6,27,<br>33,34,35 | 4,5,7,8,28,<br>29,30,31,3<br>2 | 5 | P82471,Q4FZU6,Q62975,Q63355,Q63661 |
| 1471 | 1,2,3,6,28,<br>29,30,31 | 4,5,7,8,27,<br>32,33,34,3<br>5 | 2 | P00714,Q6AYS4                      |
| 1472 | 1,2,3,6,28,<br>29,30,32 | 4,5,7,8,27,<br>31,33,34,3<br>5 | 2 | Q561R9,Q6AYS4                      |
| 1473 | 1,2,3,6,28,<br>29,30,33 | 4,5,7,8,27,<br>31,32,34,3<br>5 | 1 | Q6AYS4                             |
| 1474 | 1,2,3,6,28,<br>29,30,34 | 4,5,7,8,27,<br>31,32,33,3<br>5 | 1 | Q4FZU6                             |
| 1475 | 1,2,3,6,28,<br>29,30,35 | 4,5,7,8,27,<br>31,32,33,3<br>4 | 2 | Q6AYS4,Q99041                      |
| 1476 | 1,2,3,6,28,<br>29,31,32 | 4,5,7,8,27,<br>30,33,34,3<br>5 | 3 | P06911,Q561R9,Q5GRG2               |
| 1477 | 1,2,3,6,28,<br>29,31,33 | 4,5,7,8,27,<br>30,32,34,3<br>5 | 4 | P00714,P06760,P06911,Q6AYS4        |
| 1478 | 1,2,3,6,28,<br>29,31,34 | 4,5,7,8,27,<br>30,32,33,3<br>5 | 3 | P00714,P27791,Q4FZU6               |
| 1479 | 1,2,3,6,28,<br>29,31,35 | 4,5,7,8,27,<br>30,32,33,3<br>4 | 4 | P00714,P06760,Q6AYS4,Q99041        |
| 1480 | 1,2,3,6,28,<br>29,32,33 | 4,5,7,8,27,<br>30,31,34,3<br>5 | 3 | P02793;Q7TP54,P47727,P55314        |
| 1481 | 1,2,3,6,28,<br>29,32,34 | 4,5,7,8,27,<br>30,31,33,3<br>5 | 1 | Q4FZU6                             |

|      |                         |                                |   |                                    |
|------|-------------------------|--------------------------------|---|------------------------------------|
| 1482 | 1,2,3,6,28,<br>29,32,35 | 4,5,7,8,27,<br>30,31,33,3<br>4 | 3 | P51907,Q6AYS4,Q99041               |
| 1483 | 1,2,3,6,28,<br>29,33,34 | 4,5,7,8,27,<br>30,31,32,3<br>5 | 4 | P00714,P27791,Q4FZU6,Q9JJ22        |
| 1484 | 1,2,3,6,28,<br>29,33,35 | 4,5,7,8,27,<br>30,31,32,3<br>4 | 4 | P00714,P06760,P15399,Q6AYS4        |
| 1485 | 1,2,3,6,28,<br>29,34,35 | 4,5,7,8,27,<br>30,31,32,3<br>3 | 4 | P00507,P00714,Q4FZU6,Q5HZV9        |
| 1486 | 1,2,3,6,28,<br>30,31,32 | 4,5,7,8,27,<br>29,33,34,3<br>5 | 1 | Q561R9                             |
| 1487 | 1,2,3,6,28,<br>30,31,33 | 4,5,7,8,27,<br>29,32,34,3<br>5 | 3 | P00714,P06760,Q6AYS4               |
| 1488 | 1,2,3,6,28,<br>30,31,34 | 4,5,7,8,27,<br>29,32,33,3<br>5 | 4 | P00714,P47967,P97840,Q63617        |
| 1489 | 1,2,3,6,28,<br>30,31,35 | 4,5,7,8,27,<br>29,32,33,3<br>4 | 4 | P00714,P06760,Q6AYS4,Q99041        |
| 1490 | 1,2,3,6,28,<br>30,32,33 | 4,5,7,8,27,<br>29,31,34,3<br>5 | 3 | P55314,Q561R9,Q6AYS4               |
| 1491 | 1,2,3,6,28,<br>30,32,34 | 4,5,7,8,27,<br>29,31,33,3<br>5 | 4 | P97840,Q4FZU6,Q5HZV9,Q63617        |
| 1492 | 1,2,3,6,28,<br>30,32,35 | 4,5,7,8,27,<br>29,31,33,3<br>4 | 2 | Q6AYS4,Q99041                      |
| 1493 | 1,2,3,6,28,<br>30,33,34 | 4,5,7,8,27,<br>29,31,32,3<br>5 | 3 | P00714,P97840,Q4FZU6               |
| 1494 | 1,2,3,6,28,<br>30,33,35 | 4,5,7,8,27,<br>29,31,32,3<br>4 | 3 | P00714,P06760,Q6AYS4               |
| 1495 | 1,2,3,6,28,<br>30,34,35 | 4,5,7,8,27,<br>29,31,32,3<br>3 | 5 | P00714,Q4FZU6,Q5HZV9,Q63617,Q8CJD3 |
| 1496 | 1,2,3,6,28,<br>31,32,33 | 4,5,7,8,27,<br>29,30,34,3<br>5 | 2 | P55314,Q561R9                      |

|      |                         |                                |   |                                    |
|------|-------------------------|--------------------------------|---|------------------------------------|
| 1497 | 1,2,3,6,28,<br>31,32,34 | 4,5,7,8,27,<br>29,30,33,3<br>5 | 2 | Q4FZU6,Q5HZV9                      |
| 1498 | 1,2,3,6,28,<br>31,32,35 | 4,5,7,8,27,<br>29,30,33,3<br>4 | 2 | Q6AYS4,Q99041                      |
| 1499 | 1,2,3,6,28,<br>31,33,34 | 4,5,7,8,27,<br>29,30,32,3<br>5 | 3 | P00714,P27791,Q4FZU6               |
| 1500 | 1,2,3,6,28,<br>31,33,35 | 4,5,7,8,27,<br>29,30,32,3<br>4 | 5 | P00714,P06760,P15399,Q30KJ2,Q6AYS4 |
| 1501 | 1,2,3,6,28,<br>31,34,35 | 4,5,7,8,27,<br>29,30,32,3<br>3 | 4 | P00714,P06760,Q4FZU6,Q5HZV9        |
| 1502 | 1,2,3,6,28,<br>32,33,34 | 4,5,7,8,27,<br>29,30,31,3<br>5 | 4 | P55314,Q4FZU6,Q5HZV9,Q63661        |
| 1503 | 1,2,3,6,28,<br>32,33,35 | 4,5,7,8,27,<br>29,30,31,3<br>4 | 5 | P15399,P55314,P97580,Q30KJ2,Q6AYS4 |
| 1504 | 1,2,3,6,28,<br>32,34,35 | 4,5,7,8,27,<br>29,30,31,3<br>3 | 4 | P00507,Q4FZU6,Q5HZV9,Q63661        |
| 1505 | 1,2,3,6,28,<br>33,34,35 | 4,5,7,8,27,<br>29,30,31,3<br>2 | 3 | P00714,Q4FZU6,Q5HZV9               |
| 1506 | 1,2,3,6,29,<br>30,31,32 | 4,5,7,8,27,<br>28,33,34,3<br>5 | 2 | Q561R9,Q99041                      |
| 1507 | 1,2,3,6,29,<br>30,31,33 | 4,5,7,8,27,<br>28,32,34,3<br>5 | 2 | P00714,Q6AYS4                      |
| 1508 | 1,2,3,6,29,<br>30,31,34 | 4,5,7,8,27,<br>28,32,33,3<br>5 | 1 | P00714                             |
| 1509 | 1,2,3,6,29,<br>30,31,35 | 4,5,7,8,27,<br>28,32,33,3<br>4 | 3 | P00714,Q6AYS4,Q99041               |
| 1510 | 1,2,3,6,29,<br>30,32,33 | 4,5,7,8,27,<br>28,31,34,3<br>5 | 2 | P55314,Q6AYS4                      |
| 1511 | 1,2,3,6,29,<br>30,32,34 | 4,5,7,8,27,<br>28,31,33,3<br>5 | 1 | Q63661                             |

|      |                         |                                |   |                                    |
|------|-------------------------|--------------------------------|---|------------------------------------|
| 1512 | 1,2,3,6,29,<br>30,32,35 | 4,5,7,8,27,<br>28,31,33,3<br>4 | 3 | P51907,Q6AYS4,Q99041               |
| 1513 | 1,2,3,6,29,<br>30,33,34 | 4,5,7,8,27,<br>28,31,32,3<br>5 | 2 | P00714,Q9JJ22                      |
| 1514 | 1,2,3,6,29,<br>30,33,35 | 4,5,7,8,27,<br>28,31,32,3<br>4 | 2 | P00714,Q6AYS4                      |
| 1515 | 1,2,3,6,29,<br>30,34,35 | 4,5,7,8,27,<br>28,31,32,3<br>3 | 3 | P00714,P14480,Q99041               |
| 1516 | 1,2,3,6,29,<br>31,32,33 | 4,5,7,8,27,<br>28,30,34,3<br>5 | 2 | P55314,Q8CJD3                      |
| 1517 | 1,2,3,6,29,<br>31,32,34 | 4,5,7,8,27,<br>28,30,33,3<br>5 | 0 |                                    |
| 1518 | 1,2,3,6,29,<br>31,32,35 | 4,5,7,8,27,<br>28,30,33,3<br>4 | 3 | P51907,Q6AYS4,Q99041               |
| 1519 | 1,2,3,6,29,<br>31,33,34 | 4,5,7,8,27,<br>28,30,32,3<br>5 | 1 | P00714                             |
| 1520 | 1,2,3,6,29,<br>31,33,35 | 4,5,7,8,27,<br>28,30,32,3<br>4 | 3 | P00714,P15399,Q6AYS4               |
| 1521 | 1,2,3,6,29,<br>31,34,35 | 4,5,7,8,27,<br>28,30,32,3<br>3 | 1 | P00714                             |
| 1522 | 1,2,3,6,29,<br>32,33,34 | 4,5,7,8,27,<br>28,30,31,3<br>5 | 3 | P55314,Q4FZU6,Q63661               |
| 1523 | 1,2,3,6,29,<br>32,33,35 | 4,5,7,8,27,<br>28,30,31,3<br>4 | 5 | P15399,P55314,P97580,Q30KJ2,Q6AYS4 |
| 1524 | 1,2,3,6,29,<br>32,34,35 | 4,5,7,8,27,<br>28,30,31,3<br>3 | 3 | P51907,Q4FZU6,Q63661               |
| 1525 | 1,2,3,6,29,<br>33,34,35 | 4,5,7,8,27,<br>28,30,31,3<br>2 | 4 | P00714,Q4FZU6,Q63661,Q9JJ22        |
| 1526 | 1,2,3,6,30,<br>31,32,33 | 4,5,7,8,27,<br>28,29,34,3<br>5 | 2 | P55314,Q561R9                      |

|      |                         |                                 |    |                                                                       |
|------|-------------------------|---------------------------------|----|-----------------------------------------------------------------------|
| 1527 | 1,2,3,6,30,<br>31,32,34 | 4,5,7,8,27,<br>28,29,33,3<br>5  | 1  | Q63617                                                                |
| 1528 | 1,2,3,6,30,<br>31,32,35 | 4,5,7,8,27,<br>28,29,33,3<br>4  | 2  | Q6AYS4,Q99041                                                         |
| 1529 | 1,2,3,6,30,<br>31,33,34 | 4,5,7,8,27,<br>28,29,32,3<br>5  | 1  | P00714                                                                |
| 1530 | 1,2,3,6,30,<br>31,33,35 | 4,5,7,8,27,<br>28,29,32,3<br>4  | 4  | P00714,P82471,Q30KJ2,Q6AYS4                                           |
| 1531 | 1,2,3,6,30,<br>31,34,35 | 4,5,7,8,27,<br>28,29,32,3<br>3  | 6  | P00714,P02793;Q7TP54,P24368,P82471,Q63617,Q99041                      |
| 1532 | 1,2,3,6,30,<br>32,33,34 | 4,5,7,8,27,<br>28,29,31,3<br>5  | 2  | P55314,Q63661                                                         |
| 1533 | 1,2,3,6,30,<br>32,33,35 | 4,5,7,8,27,<br>28,29,31,3<br>4  | 5  | P07171,P55314,P97580,Q30KJ2,Q6AYS4                                    |
| 1534 | 1,2,3,6,30,<br>32,34,35 | 4,5,7,8,27,<br>28,29,31,3<br>3  | 5  | P08753,P82471,Q63617,Q63661,Q99041                                    |
| 1535 | 1,2,3,6,30,<br>33,34,35 | 4,5,7,8,27,<br>28,29,31,3<br>2  | 4  | P00714,P24368,P82471,Q63661                                           |
| 1536 | 1,2,3,6,31,<br>32,33,34 | 4,5,7,8,27,<br>28,29,30,3<br>5  | 2  | P55314,P82471                                                         |
| 1537 | 1,2,3,6,31,<br>32,33,35 | 4,5,7,8,27,<br>28,29,30,3<br>4  | 6  | P15399,P55314,P82471,P97580,Q30KJ2,Q6AYS4                             |
| 1538 | 1,2,3,6,31,<br>32,34,35 | 4,5,7,8,27,<br>28,29,30,3<br>3  | 5  | P02781,P08753,P0C0A9,P82471,Q8CJ52                                    |
| 1539 | 1,2,3,6,31,<br>33,34,35 | 4,5,7,8,27,<br>28,29,30,3<br>2  | 7  | P00714,P02781,P0C0A9,P24368,P82471,Q30KJ2,Q63355                      |
| 1540 | 1,2,3,6,32,<br>33,34,35 | 4,5,7,8,27,<br>28,29,30,3<br>1  | 10 | P02781,P07171,P08753,P55314,P82471,P97580,Q30KJ2,Q4FZU6,Q63661,Q8CJ52 |
| 1541 | 1,2,3,7,8,2<br>7,28,29  | 4,5,6,30,3<br>1,32,33,34<br>,35 | 2  | Q63942,Q9JI85                                                         |

|      |                        |                                 |   |                                           |
|------|------------------------|---------------------------------|---|-------------------------------------------|
| 1542 | 1,2,3,7,8,2<br>7,28,30 | 4,5,6,29,3<br>1,32,33,34<br>,35 | 2 | Q09030,Q6AYQ8                             |
| 1543 | 1,2,3,7,8,2<br>7,28,31 | 4,5,6,29,3<br>0,32,33,34<br>,35 | 3 | P10715,P31044,Q5GRG2                      |
| 1544 | 1,2,3,7,8,2<br>7,28,32 | 4,5,6,29,3<br>0,31,33,34<br>,35 | 3 | P02793;Q7TP54,Q08849,Q09030               |
| 1545 | 1,2,3,7,8,2<br>7,28,33 | 4,5,6,29,3<br>0,31,32,34<br>,35 | 1 | P02793;Q7TP54                             |
| 1546 | 1,2,3,7,8,2<br>7,28,34 | 4,5,6,29,3<br>0,31,32,33<br>,35 | 4 | P04182,P47967,P97615,Q09030               |
| 1547 | 1,2,3,7,8,2<br>7,28,35 | 4,5,6,29,3<br>0,31,32,33<br>,34 | 2 | P01946,P02770                             |
| 1548 | 1,2,3,7,8,2<br>7,29,30 | 4,5,6,28,3<br>1,32,33,34<br>,35 | 1 | Q5HZV9                                    |
| 1549 | 1,2,3,7,8,2<br>7,29,31 | 4,5,6,28,3<br>0,32,33,34<br>,35 | 2 | P36970,Q5HZV9                             |
| 1550 | 1,2,3,7,8,2<br>7,29,32 | 4,5,6,28,3<br>0,31,33,34<br>,35 | 5 | P02793;Q7TP54,P20760,Q08849,Q09030,Q8CJD3 |
| 1551 | 1,2,3,7,8,2<br>7,29,33 | 4,5,6,28,3<br>0,31,32,34<br>,35 | 3 | P02793;Q7TP54,Q5HZV9,Q8CJD3               |
| 1552 | 1,2,3,7,8,2<br>7,29,34 | 4,5,6,28,3<br>0,31,32,33<br>,35 | 3 | P20760,Q09030,Q63467                      |
| 1553 | 1,2,3,7,8,2<br>7,29,35 | 4,5,6,28,3<br>0,31,32,33<br>,34 | 3 | P01946,P02091,P02770                      |
| 1554 | 1,2,3,7,8,2<br>7,30,31 | 4,5,6,28,2<br>9,32,33,34<br>,35 | 1 | Q09030                                    |
| 1555 | 1,2,3,7,8,2<br>7,30,32 | 4,5,6,28,2<br>9,31,33,34<br>,35 | 4 | P16086,P20760,Q08849,Q09030               |
| 1556 | 1,2,3,7,8,2<br>7,30,33 | 4,5,6,28,2<br>9,31,32,34<br>,35 | 2 | Q09030,Q5HZV9                             |



|      |                        |                                 |   |                                                         |
|------|------------------------|---------------------------------|---|---------------------------------------------------------|
| 1557 | 1,2,3,7,8,2<br>7,30,34 | 4,5,6,28,2<br>9,31,32,33<br>,35 | 7 | P16086,P20760,P47967,P83121,P85971,P97840,Q09030        |
| 1558 | 1,2,3,7,8,2<br>7,30,35 | 4,5,6,28,2<br>9,31,32,33<br>,34 | 3 | P01946,P02770,Q09030                                    |
| 1559 | 1,2,3,7,8,2<br>7,31,32 | 4,5,6,28,2<br>9,30,33,34<br>,35 | 4 | P01835,Q08849,Q09030,Q8CJD3                             |
| 1560 | 1,2,3,7,8,2<br>7,31,33 | 4,5,6,28,2<br>9,30,32,34<br>,35 | 5 | P01835,P36970,Q08849,Q5HZV9,Q8CJD3                      |
| 1561 | 1,2,3,7,8,2<br>7,31,34 | 4,5,6,28,2<br>9,30,32,33<br>,35 | 6 | A2RUV9,P01835,P20760,P20766,Q08849,Q09030               |
| 1562 | 1,2,3,7,8,2<br>7,31,35 | 4,5,6,28,2<br>9,30,32,33<br>,34 | 3 | P01946,P02770,Q08849                                    |
| 1563 | 1,2,3,7,8,2<br>7,32,33 | 4,5,6,28,2<br>9,30,31,34<br>,35 | 6 | P01835,P02793;Q7TP54,P55314,Q08849,Q09030,Q8CJD3        |
| 1564 | 1,2,3,7,8,2<br>7,32,34 | 4,5,6,28,2<br>9,30,31,33<br>,35 | 8 | P01041,P01835,P08753,P20760,P83121,Q08849,Q09030,Q63532 |
| 1565 | 1,2,3,7,8,2<br>7,32,35 | 4,5,6,28,2<br>9,30,31,33<br>,34 | 4 | P01946,P02770,Q08849,Q09030                             |
| 1566 | 1,2,3,7,8,2<br>7,33,34 | 4,5,6,28,2<br>9,30,31,32<br>,35 | 4 | P01835,P85971,Q08849,Q09030                             |
| 1567 | 1,2,3,7,8,2<br>7,33,35 | 4,5,6,28,2<br>9,30,31,32<br>,34 | 4 | P01946,P02770,Q08849,Q62975                             |
| 1568 | 1,2,3,7,8,2<br>7,34,35 | 4,5,6,28,2<br>9,30,31,32<br>,33 | 8 | P01946,P02770,P08753,P16296,P83121,Q08849,Q09030,Q62975 |
| 1569 | 1,2,3,7,8,2<br>8,29,30 | 4,5,6,27,3<br>1,32,33,34<br>,35 | 0 |                                                         |
| 1570 | 1,2,3,7,8,2<br>8,29,31 | 4,5,6,27,3<br>0,32,33,34<br>,35 | 3 | P06760,P10715,Q5GRG2                                    |
| 1571 | 1,2,3,7,8,2<br>8,29,32 | 4,5,6,27,3<br>0,31,33,34<br>,35 | 1 | P02793;Q7TP54                                           |

|      |                        |                                 |   |                                    |
|------|------------------------|---------------------------------|---|------------------------------------|
| 1572 | 1,2,3,7,8,2<br>8,29,33 | 4,5,6,27,3<br>0,31,32,34<br>,35 | 1 | P02793;Q7TP54                      |
| 1573 | 1,2,3,7,8,2<br>8,29,34 | 4,5,6,27,3<br>0,31,32,33<br>,35 | 0 |                                    |
| 1574 | 1,2,3,7,8,2<br>8,29,35 | 4,5,6,27,3<br>0,31,32,33<br>,34 | 4 | P01946,P02091,P02770,P06760        |
| 1575 | 1,2,3,7,8,2<br>8,30,31 | 4,5,6,27,2<br>9,32,33,34<br>,35 | 3 | P06760,P10715,P42854               |
| 1576 | 1,2,3,7,8,2<br>8,30,32 | 4,5,6,27,2<br>9,31,33,34<br>,35 | 1 | Q09030                             |
| 1577 | 1,2,3,7,8,2<br>8,30,33 | 4,5,6,27,2<br>9,31,32,34<br>,35 | 0 |                                    |
| 1578 | 1,2,3,7,8,2<br>8,30,34 | 4,5,6,27,2<br>9,31,32,33<br>,35 | 5 | P47967,P97615,P97840,Q09030,Q62894 |
| 1579 | 1,2,3,7,8,2<br>8,30,35 | 4,5,6,27,2<br>9,31,32,33<br>,34 | 2 | P02770,P06760                      |
| 1580 | 1,2,3,7,8,2<br>8,31,32 | 4,5,6,27,2<br>9,30,33,34<br>,35 | 5 | P01835,P10715,P20766,P31044,Q5GRG2 |
| 1581 | 1,2,3,7,8,2<br>8,31,33 | 4,5,6,27,2<br>9,30,32,34<br>,35 | 3 | P01835,P06760,P10715               |
| 1582 | 1,2,3,7,8,2<br>8,31,34 | 4,5,6,27,2<br>9,30,32,33<br>,35 | 2 | P01835,P20766                      |
| 1583 | 1,2,3,7,8,2<br>8,31,35 | 4,5,6,27,2<br>9,30,32,33<br>,34 | 4 | P02770,P06760,P10715,P20766        |
| 1584 | 1,2,3,7,8,2<br>8,32,33 | 4,5,6,27,2<br>9,30,31,34<br>,35 | 4 | P01835,P02793;Q7TP54,P55314,Q08849 |
| 1585 | 1,2,3,7,8,2<br>8,32,34 | 4,5,6,27,2<br>9,30,31,33<br>,35 | 4 | P01835,P20766,P97615,Q09030        |
| 1586 | 1,2,3,7,8,2<br>8,32,35 | 4,5,6,27,2<br>9,30,31,33<br>,34 | 1 | P02770                             |

|      |                        |                                 |   |                                    |
|------|------------------------|---------------------------------|---|------------------------------------|
| 1587 | 1,2,3,7,8,2<br>8,33,34 | 4,5,6,27,2<br>9,30,31,32<br>,35 | 2 | P01835,Q62894                      |
| 1588 | 1,2,3,7,8,2<br>8,33,35 | 4,5,6,27,2<br>9,30,31,32<br>,34 | 2 | P02770,P06760                      |
| 1589 | 1,2,3,7,8,2<br>8,34,35 | 4,5,6,27,2<br>9,30,31,32<br>,33 | 4 | P02770,P06760,P09006,P16296        |
| 1590 | 1,2,3,7,8,2<br>9,30,31 | 4,5,6,27,2<br>8,32,33,34<br>,35 | 2 | Q5HZV9,Q6IFU7                      |
| 1591 | 1,2,3,7,8,2<br>9,30,32 | 4,5,6,27,2<br>8,31,33,34<br>,35 | 1 | P01041                             |
| 1592 | 1,2,3,7,8,2<br>9,30,33 | 4,5,6,27,2<br>8,31,32,34<br>,35 | 1 | Q5HZV9                             |
| 1593 | 1,2,3,7,8,2<br>9,30,34 | 4,5,6,27,2<br>8,31,32,33<br>,35 | 2 | P01041,Q9JJ22                      |
| 1594 | 1,2,3,7,8,2<br>9,30,35 | 4,5,6,27,2<br>8,31,32,33<br>,34 | 4 | P01946,P02091,P02770,Q6IFU7        |
| 1595 | 1,2,3,7,8,2<br>9,31,32 | 4,5,6,27,2<br>8,30,33,34<br>,35 | 3 | P01835,P20766,Q8CJD3               |
| 1596 | 1,2,3,7,8,2<br>9,31,33 | 4,5,6,27,2<br>8,30,32,34<br>,35 | 4 | P01835,Q5HZV9,Q6IFU7,Q8CJD3        |
| 1597 | 1,2,3,7,8,2<br>9,31,34 | 4,5,6,27,2<br>8,30,32,33<br>,35 | 4 | P01835,P20766,Q63467,Q6IFU7        |
| 1598 | 1,2,3,7,8,2<br>9,31,35 | 4,5,6,27,2<br>8,30,32,33<br>,34 | 5 | P01946,P02091,P02770,P06760,Q6IFU7 |
| 1599 | 1,2,3,7,8,2<br>9,32,33 | 4,5,6,27,2<br>8,30,31,34<br>,35 | 4 | P01835,P02793,Q7TP54,P55314,Q8CJD3 |
| 1600 | 1,2,3,7,8,2<br>9,32,34 | 4,5,6,27,2<br>8,30,31,33<br>,35 | 5 | P01041,P01835,P20760,P20766,Q63467 |
| 1601 | 1,2,3,7,8,2<br>9,32,35 | 4,5,6,27,2<br>8,30,31,33<br>,34 | 4 | P01946,P02091,P02770,P51907        |

|      |                        |                                 |   |                                                         |
|------|------------------------|---------------------------------|---|---------------------------------------------------------|
| 1602 | 1,2,3,7,8,2<br>9,33,34 | 4,5,6,27,2<br>8,30,31,32<br>,35 | 2 | P01835,Q9JJ22                                           |
| 1603 | 1,2,3,7,8,2<br>9,33,35 | 4,5,6,27,2<br>8,30,31,32<br>,34 | 3 | P01946,P02091,P02770                                    |
| 1604 | 1,2,3,7,8,2<br>9,34,35 | 4,5,6,27,2<br>8,30,31,32<br>,33 | 6 | P01946,P02091,P02770,P09006,P16296,Q9JJ22               |
| 1605 | 1,2,3,7,8,3<br>0,31,32 | 4,5,6,27,2<br>8,29,33,34<br>,35 | 3 | P20766,P42854,Q09030                                    |
| 1606 | 1,2,3,7,8,3<br>0,31,33 | 4,5,6,27,2<br>8,29,32,34<br>,35 | 1 | Q5HZV9                                                  |
| 1607 | 1,2,3,7,8,3<br>0,31,34 | 4,5,6,27,2<br>8,29,32,33<br>,35 | 5 | P20766,P47967,P97840,Q09030,Q80WL1                      |
| 1608 | 1,2,3,7,8,3<br>0,31,35 | 4,5,6,27,2<br>8,29,32,33<br>,34 | 4 | P02770,P06760,P97584,Q6IFU7                             |
| 1609 | 1,2,3,7,8,3<br>0,32,33 | 4,5,6,27,2<br>8,29,31,34<br>,35 | 2 | P55314,Q09030                                           |
| 1610 | 1,2,3,7,8,3<br>0,32,34 | 4,5,6,27,2<br>8,29,31,33<br>,35 | 7 | P01041,P16086,P20760,P20766,P47967,Q09030,Q63532        |
| 1611 | 1,2,3,7,8,3<br>0,32,35 | 4,5,6,27,2<br>8,29,31,33<br>,34 | 2 | P02770,Q09030                                           |
| 1612 | 1,2,3,7,8,3<br>0,33,34 | 4,5,6,27,2<br>8,29,31,32<br>,35 | 3 | P47967,Q09030,Q62894                                    |
| 1613 | 1,2,3,7,8,3<br>0,33,35 | 4,5,6,27,2<br>8,29,31,32<br>,34 | 1 | P02770                                                  |
| 1614 | 1,2,3,7,8,3<br>0,34,35 | 4,5,6,27,2<br>8,29,31,32<br>,33 | 8 | P02770,P06911,P47727,P82471,P83121,Q09030,Q6PCU2,Q9JHB9 |
| 1615 | 1,2,3,7,8,3<br>1,32,33 | 4,5,6,27,2<br>8,29,30,34<br>,35 | 5 | P01835,P20766,P55314,Q08849,Q8CJD3                      |
| 1616 | 1,2,3,7,8,3<br>1,32,34 | 4,5,6,27,2<br>8,29,30,33<br>,35 | 7 | P01835,P08753,P0C0A9,P20760,P20766,Q08849,Q09030        |

|      |                         |                                 |    |                                                                                            |
|------|-------------------------|---------------------------------|----|--------------------------------------------------------------------------------------------|
| 1617 | 1,2,3,7,8,3<br>1,32,35  | 4,5,6,27,2<br>8,29,30,33<br>,34 | 4  | P01835,P02770,P20766,Q08849                                                                |
| 1618 | 1,2,3,7,8,3<br>1,33,34  | 4,5,6,27,2<br>8,29,30,32<br>,35 | 3  | P01835,P0C0A9,P20766                                                                       |
| 1619 | 1,2,3,7,8,3<br>1,33,35  | 4,5,6,27,2<br>8,29,30,32<br>,34 | 4  | P01835,P02770,P06760,Q6IFU7                                                                |
| 1620 | 1,2,3,7,8,3<br>1,34,35  | 4,5,6,27,2<br>8,29,30,32<br>,33 | 13 | O08815,P01835,P02770,P02781,P08010,P08753,P09006,P0C0A9,P16296,P20766,P24368,P82471,Q9JHB9 |
| 1621 | 1,2,3,7,8,3<br>2,33,34  | 4,5,6,27,2<br>8,29,30,31<br>,35 | 11 | O35783,P01835,P08753,P0C0A9,P20766,P55314,Q08849,Q09030,Q62894,Q63532,Q63661               |
| 1622 | 1,2,3,7,8,3<br>2,33,35  | 4,5,6,27,2<br>8,29,30,31<br>,34 | 5  | P01835,P02770,P55314,Q08849,Q6AYR9                                                         |
| 1623 | 1,2,3,7,8,3<br>2,34,35  | 4,5,6,27,2<br>8,29,30,31<br>,33 | 12 | P01835,P02770,P02781,P08753,P0C0A9,P16296,P20766,P82471,P83121,Q08849,Q09030,Q63661        |
| 1624 | 1,2,3,7,8,3<br>3,34,35  | 4,5,6,27,2<br>8,29,30,31<br>,32 | 10 | P01835,P02770,P02781,P08010,P08753,P0C0A9,P82471,Q62894,Q62975,Q9JHB9                      |
| 1625 | 1,2,3,7,27,<br>28,29,30 | 4,5,6,8,31,<br>32,33,34,3<br>5  | 0  |                                                                                            |
| 1626 | 1,2,3,7,27,<br>28,29,31 | 4,5,6,8,30,<br>32,33,34,3<br>5  | 2  | Q5GRG2,Q9Z0V6                                                                              |
| 1627 | 1,2,3,7,27,<br>28,29,32 | 4,5,6,8,30,<br>31,33,34,3<br>5  | 1  | P02793;Q7TP54                                                                              |
| 1628 | 1,2,3,7,27,<br>28,29,33 | 4,5,6,8,30,<br>31,32,34,3<br>5  | 2  | P02793;Q7TP54,Q9Z0V6                                                                       |
| 1629 | 1,2,3,7,27,<br>28,29,34 | 4,5,6,8,30,<br>31,32,33,3<br>5  | 1  | P04182                                                                                     |
| 1630 | 1,2,3,7,27,<br>28,29,35 | 4,5,6,8,30,<br>31,32,33,3<br>4  | 3  | P01946,P02091,Q6AYS4                                                                       |
| 1631 | 1,2,3,7,27,<br>28,30,31 | 4,5,6,8,29,<br>32,33,34,3<br>5  | 0  |                                                                                            |

|      |                         |                                |   |                                    |
|------|-------------------------|--------------------------------|---|------------------------------------|
| 1632 | 1,2,3,7,27,<br>28,30,32 | 4,5,6,8,29,<br>31,33,34,3<br>5 | 1 | Q09030                             |
| 1633 | 1,2,3,7,27,<br>28,30,33 | 4,5,6,8,29,<br>31,32,34,3<br>5 | 0 |                                    |
| 1634 | 1,2,3,7,27,<br>28,30,34 | 4,5,6,8,29,<br>31,32,33,3<br>5 | 5 | P04182,P47967,P97615,P97840,Q09030 |
| 1635 | 1,2,3,7,27,<br>28,30,35 | 4,5,6,8,29,<br>31,32,33,3<br>4 | 4 | D3ZUC6,P01946,Q6AYQ8,Q6AYS4        |
| 1636 | 1,2,3,7,27,<br>28,31,32 | 4,5,6,8,29,<br>30,33,34,3<br>5 | 2 | P10715,Q5GRG2                      |
| 1637 | 1,2,3,7,27,<br>28,31,33 | 4,5,6,8,29,<br>30,32,34,3<br>5 | 1 | P10715                             |
| 1638 | 1,2,3,7,27,<br>28,31,34 | 4,5,6,8,29,<br>30,32,33,3<br>5 | 3 | A2RUV9,P04182,P47967               |
| 1639 | 1,2,3,7,27,<br>28,31,35 | 4,5,6,8,29,<br>30,32,33,3<br>4 | 3 | P01946,P06760,Q6AYS4               |
| 1640 | 1,2,3,7,27,<br>28,32,33 | 4,5,6,8,29,<br>30,31,34,3<br>5 | 4 | P02793;Q7TP54,P55314,Q06000,Q08849 |
| 1641 | 1,2,3,7,27,<br>28,32,34 | 4,5,6,8,29,<br>30,31,33,3<br>5 | 5 | A2RUV9,P04182,P97615,Q09030,Q63532 |
| 1642 | 1,2,3,7,27,<br>28,32,35 | 4,5,6,8,29,<br>30,31,33,3<br>4 | 1 | P01946                             |
| 1643 | 1,2,3,7,27,<br>28,33,34 | 4,5,6,8,29,<br>30,31,32,3<br>5 | 1 | P04182                             |
| 1644 | 1,2,3,7,27,<br>28,33,35 | 4,5,6,8,29,<br>30,31,32,3<br>4 | 4 | P01946,P06760,Q62975,Q6AYS4        |
| 1645 | 1,2,3,7,27,<br>28,34,35 | 4,5,6,8,29,<br>30,31,32,3<br>3 | 5 | A2RUV9,P01946,P04182,P83121,Q62975 |
| 1646 | 1,2,3,7,27,<br>29,30,31 | 4,5,6,8,28,<br>32,33,34,3<br>5 | 1 | Q5HZV9                             |

|      |                         |                                |   |                             |
|------|-------------------------|--------------------------------|---|-----------------------------|
| 1647 | 1,2,3,7,27,<br>29,30,32 | 4,5,6,8,28,<br>31,33,34,3<br>5 | 0 |                             |
| 1648 | 1,2,3,7,27,<br>29,30,33 | 4,5,6,8,28,<br>31,32,34,3<br>5 | 1 | Q5HZV9                      |
| 1649 | 1,2,3,7,27,<br>29,30,34 | 4,5,6,8,28,<br>31,32,33,3<br>5 | 3 | P20760,P47967,P97840        |
| 1650 | 1,2,3,7,27,<br>29,30,35 | 4,5,6,8,28,<br>31,32,33,3<br>4 | 3 | P01946,P02091,Q6AYS4        |
| 1651 | 1,2,3,7,27,<br>29,31,32 | 4,5,6,8,28,<br>30,33,34,3<br>5 | 1 | P02793;Q7TP54               |
| 1652 | 1,2,3,7,27,<br>29,31,33 | 4,5,6,8,28,<br>30,32,34,3<br>5 | 3 | P02793;Q7TP54,Q5HZV9,Q9Z0V6 |
| 1653 | 1,2,3,7,27,<br>29,31,34 | 4,5,6,8,28,<br>30,32,33,3<br>5 | 3 | A2RUV9,P20760,Q63467        |
| 1654 | 1,2,3,7,27,<br>29,31,35 | 4,5,6,8,28,<br>30,32,33,3<br>4 | 2 | P01946,P02091               |
| 1655 | 1,2,3,7,27,<br>29,32,33 | 4,5,6,8,28,<br>30,31,34,3<br>5 | 3 | P02793;Q7TP54,P55314,Q8CJD3 |
| 1656 | 1,2,3,7,27,<br>29,32,34 | 4,5,6,8,28,<br>30,31,33,3<br>5 | 4 | P20760,Q63467,Q63532,Q63661 |
| 1657 | 1,2,3,7,27,<br>29,32,35 | 4,5,6,8,28,<br>30,31,33,3<br>4 | 2 | P01946,P02091               |
| 1658 | 1,2,3,7,27,<br>29,33,34 | 4,5,6,8,28,<br>30,31,32,3<br>5 | 0 |                             |
| 1659 | 1,2,3,7,27,<br>29,33,35 | 4,5,6,8,28,<br>30,31,32,3<br>4 | 4 | P01946,P02091,Q6AYS4,Q9WTT6 |
| 1660 | 1,2,3,7,27,<br>29,34,35 | 4,5,6,8,28,<br>30,31,32,3<br>3 | 3 | P01946,P02091,P55159        |
| 1661 | 1,2,3,7,27,<br>30,31,32 | 4,5,6,8,28,<br>29,33,34,3<br>5 | 1 | Q09030                      |

|      |                         |                                |    |                                                                       |
|------|-------------------------|--------------------------------|----|-----------------------------------------------------------------------|
| 1662 | 1,2,3,7,27,<br>30,31,33 | 4,5,6,8,28,<br>29,32,34,3<br>5 | 0  |                                                                       |
| 1663 | 1,2,3,7,27,<br>30,31,34 | 4,5,6,8,28,<br>29,32,33,3<br>5 | 5  | A2RUV9,P20760,P47967,P97840,Q09030                                    |
| 1664 | 1,2,3,7,27,<br>30,31,35 | 4,5,6,8,28,<br>29,32,33,3<br>4 | 2  | P01946,Q6AYS4                                                         |
| 1665 | 1,2,3,7,27,<br>30,32,33 | 4,5,6,8,28,<br>29,31,34,3<br>5 | 2  | P55314,Q09030                                                         |
| 1666 | 1,2,3,7,27,<br>30,32,34 | 4,5,6,8,28,<br>29,31,33,3<br>5 | 9  | P02803,P20760,P47967,P83121,P85971,P97840,Q09030,Q63532,Q63661        |
| 1667 | 1,2,3,7,27,<br>30,32,35 | 4,5,6,8,28,<br>29,31,33,3<br>4 | 1  | P01946                                                                |
| 1668 | 1,2,3,7,27,<br>30,33,34 | 4,5,6,8,28,<br>29,31,32,3<br>5 | 4  | P47967,P85971,P97840,Q09030                                           |
| 1669 | 1,2,3,7,27,<br>30,33,35 | 4,5,6,8,28,<br>29,31,32,3<br>4 | 3  | P01946,Q62975,Q6AYS4                                                  |
| 1670 | 1,2,3,7,27,<br>30,34,35 | 4,5,6,8,28,<br>29,31,32,3<br>3 | 10 | P01946,P02780,P06911,P47727,P47967,P83121,P85971,P97840,Q09030,Q62975 |
| 1671 | 1,2,3,7,27,<br>31,32,33 | 4,5,6,8,28,<br>29,30,34,3<br>5 | 5  | P01835,P02793,Q7TP54,P55314,Q08849,Q8CJD3                             |
| 1672 | 1,2,3,7,27,<br>31,32,34 | 4,5,6,8,28,<br>29,30,33,3<br>5 | 6  | A2RUV9,P01835,P20760,Q08849,Q09030,Q63532                             |
| 1673 | 1,2,3,7,27,<br>31,32,35 | 4,5,6,8,28,<br>29,30,33,3<br>4 | 2  | P01946,Q08849                                                         |
| 1674 | 1,2,3,7,27,<br>31,33,34 | 4,5,6,8,28,<br>29,30,32,3<br>5 | 2  | A2RUV9,P01835                                                         |
| 1675 | 1,2,3,7,27,<br>31,33,35 | 4,5,6,8,28,<br>29,30,32,3<br>4 | 4  | P01946,Q62975,Q6AYS4,Q9WTT6                                           |
| 1676 | 1,2,3,7,27,<br>31,34,35 | 4,5,6,8,28,<br>29,30,32,3<br>3 | 4  | A2RUV9,P01946,P02780,Q62975                                           |



|      |                         |                                |   |                                                  |
|------|-------------------------|--------------------------------|---|--------------------------------------------------|
| 1677 | 1,2,3,7,27,<br>32,33,34 | 4,5,6,8,28,<br>29,30,31,3<br>5 | 7 | P01835,P08649,P55314,Q08849,Q09030,Q63532,Q63661 |
| 1678 | 1,2,3,7,27,<br>32,33,35 | 4,5,6,8,28,<br>29,30,31,3<br>4 | 5 | P01946,P55314,Q08849,Q6NX65,Q9WTT6               |
| 1679 | 1,2,3,7,27,<br>32,34,35 | 4,5,6,8,28,<br>29,30,31,3<br>3 | 7 | P01946,P02780,P83121,Q08849,Q09030,Q63532,Q63661 |
| 1680 | 1,2,3,7,27,<br>33,34,35 | 4,5,6,8,28,<br>29,30,31,3<br>2 | 5 | P01946,P02780,P85971,Q62975,Q63661               |
| 1681 | 1,2,3,7,28,<br>29,30,31 | 4,5,6,8,27,<br>32,33,34,3<br>5 | 1 | P06760                                           |
| 1682 | 1,2,3,7,28,<br>29,30,32 | 4,5,6,8,27,<br>31,33,34,3<br>5 | 1 | P01836                                           |
| 1683 | 1,2,3,7,28,<br>29,30,33 | 4,5,6,8,27,<br>31,32,34,3<br>5 | 2 | P06760,Q9Z0V6                                    |
| 1684 | 1,2,3,7,28,<br>29,30,34 | 4,5,6,8,27,<br>31,32,33,3<br>5 | 3 | P06760,P47967,P97840                             |
| 1685 | 1,2,3,7,28,<br>29,30,35 | 4,5,6,8,27,<br>31,32,33,3<br>4 | 4 | P01946,P02091,P06760,Q6AYS4                      |
| 1686 | 1,2,3,7,28,<br>29,31,32 | 4,5,6,8,27,<br>30,33,34,3<br>5 | 4 | P02793;Q7TP54,P06911,Q5GRG2,Q9Z0V6               |
| 1687 | 1,2,3,7,28,<br>29,31,33 | 4,5,6,8,27,<br>30,32,34,3<br>5 | 5 | P02793;Q7TP54,P06760,P19629,Q9WTT6,Q9Z0V6        |
| 1688 | 1,2,3,7,28,<br>29,31,34 | 4,5,6,8,27,<br>30,32,33,3<br>5 | 1 | P06760                                           |
| 1689 | 1,2,3,7,28,<br>29,31,35 | 4,5,6,8,27,<br>30,32,33,3<br>4 | 5 | P01946,P02091,P06760,Q6AYS4,Q9WTT6               |
| 1690 | 1,2,3,7,28,<br>29,32,33 | 4,5,6,8,27,<br>30,31,34,3<br>5 | 4 | P02793;Q7TP54,P55314,Q9WTT6,Q9Z0V6               |
| 1691 | 1,2,3,7,28,<br>29,32,34 | 4,5,6,8,27,<br>30,31,33,3<br>5 | 1 | P01836                                           |

|      |                         |                                |   |                                                  |
|------|-------------------------|--------------------------------|---|--------------------------------------------------|
| 1692 | 1,2,3,7,28,<br>29,32,35 | 4,5,6,8,27,<br>30,31,33,3<br>4 | 4 | P01946,P02091,P06760,Q9WTT6                      |
| 1693 | 1,2,3,7,28,<br>29,33,34 | 4,5,6,8,27,<br>30,31,32,3<br>5 | 3 | P06760,Q9JJ22,Q9Z0V6                             |
| 1694 | 1,2,3,7,28,<br>29,33,35 | 4,5,6,8,27,<br>30,31,32,3<br>4 | 6 | P01946,P02091,P06760,Q6AYS4,Q9WTT6,Q9Z0V6        |
| 1695 | 1,2,3,7,28,<br>29,34,35 | 4,5,6,8,27,<br>30,31,32,3<br>3 | 3 | P01946,P02091,P06760                             |
| 1696 | 1,2,3,7,28,<br>30,31,32 | 4,5,6,8,27,<br>29,33,34,3<br>5 | 1 | P01836                                           |
| 1697 | 1,2,3,7,28,<br>30,31,33 | 4,5,6,8,27,<br>29,32,34,3<br>5 | 2 | P06760,P19629                                    |
| 1698 | 1,2,3,7,28,<br>30,31,34 | 4,5,6,8,27,<br>29,32,33,3<br>5 | 3 | P06760,P47967,P97840                             |
| 1699 | 1,2,3,7,28,<br>30,31,35 | 4,5,6,8,27,<br>29,32,33,3<br>4 | 2 | P06760,Q6AYS4                                    |
| 1700 | 1,2,3,7,28,<br>30,32,33 | 4,5,6,8,27,<br>29,31,34,3<br>5 | 1 | P55314                                           |
| 1701 | 1,2,3,7,28,<br>30,32,34 | 4,5,6,8,27,<br>29,31,33,3<br>5 | 5 | P01836,P14668,P47967,P97615,P97840               |
| 1702 | 1,2,3,7,28,<br>30,32,35 | 4,5,6,8,27,<br>29,31,33,3<br>4 | 2 | P06760,Q6AYS4                                    |
| 1703 | 1,2,3,7,28,<br>30,33,34 | 4,5,6,8,27,<br>29,31,32,3<br>5 | 3 | P06760,P47967,P97840                             |
| 1704 | 1,2,3,7,28,<br>30,33,35 | 4,5,6,8,27,<br>29,31,32,3<br>4 | 3 | P06760,Q6AYS4,Q9WTT6                             |
| 1705 | 1,2,3,7,28,<br>30,34,35 | 4,5,6,8,27,<br>29,31,32,3<br>3 | 5 | P06760,P14668,P47967,P97840,Q8CJD3               |
| 1706 | 1,2,3,7,28,<br>31,32,33 | 4,5,6,8,27,<br>29,30,34,3<br>5 | 6 | P01835,P02793,Q7TP54,P06760,P10715,P55314,Q9WTT6 |

|      |                         |                                |   |                                                         |
|------|-------------------------|--------------------------------|---|---------------------------------------------------------|
| 1707 | 1,2,3,7,28,<br>31,32,34 | 4,5,6,8,27,<br>29,30,33,3<br>5 | 1 | P01835                                                  |
| 1708 | 1,2,3,7,28,<br>31,32,35 | 4,5,6,8,27,<br>29,30,33,3<br>4 | 2 | P06760,Q9WTT6                                           |
| 1709 | 1,2,3,7,28,<br>31,33,34 | 4,5,6,8,27,<br>29,30,32,3<br>5 | 3 | P01835,P06760,P14669                                    |
| 1710 | 1,2,3,7,28,<br>31,33,35 | 4,5,6,8,27,<br>29,30,32,3<br>4 | 3 | P06760,Q6AYS4,Q9WTT6                                    |
| 1711 | 1,2,3,7,28,<br>31,34,35 | 4,5,6,8,27,<br>29,30,32,3<br>3 | 3 | P06760,P07150,P14669                                    |
| 1712 | 1,2,3,7,28,<br>32,33,34 | 4,5,6,8,27,<br>29,30,31,3<br>5 | 3 | P01835,P55314,Q63661                                    |
| 1713 | 1,2,3,7,28,<br>32,33,35 | 4,5,6,8,27,<br>29,30,31,3<br>4 | 4 | P06760,P55314,Q6AYS4,Q9WTT6                             |
| 1714 | 1,2,3,7,28,<br>32,34,35 | 4,5,6,8,27,<br>29,30,31,3<br>3 | 1 | Q63661                                                  |
| 1715 | 1,2,3,7,28,<br>33,34,35 | 4,5,6,8,27,<br>29,30,31,3<br>2 | 3 | P06760,P14669,Q62975                                    |
| 1716 | 1,2,3,7,29,<br>30,31,32 | 4,5,6,8,27,<br>28,33,34,3<br>5 | 2 | P01836,Q9WTT6                                           |
| 1717 | 1,2,3,7,29,<br>30,31,33 | 4,5,6,8,27,<br>28,32,34,3<br>5 | 4 | P00714,P06760,Q5HZV9,Q9WTT6                             |
| 1718 | 1,2,3,7,29,<br>30,31,34 | 4,5,6,8,27,<br>28,32,33,3<br>5 | 3 | P00714,P06760,P97840                                    |
| 1719 | 1,2,3,7,29,<br>30,31,35 | 4,5,6,8,27,<br>28,32,33,3<br>4 | 8 | P00714,P01946,P02091,P06760,P97584,Q6AYS4,Q6IFU7,Q9WTT6 |
| 1720 | 1,2,3,7,29,<br>30,32,33 | 4,5,6,8,27,<br>28,31,34,3<br>5 | 4 | P02793;Q7TP54,P14668,P55314,Q9WTT6                      |
| 1721 | 1,2,3,7,29,<br>30,32,34 | 4,5,6,8,27,<br>28,31,33,3<br>5 | 4 | P01041,P01836,P14668,Q63661                             |

|      |                         |                                |   |                                                  |
|------|-------------------------|--------------------------------|---|--------------------------------------------------|
| 1722 | 1,2,3,7,29,<br>30,32,35 | 4,5,6,8,27,<br>28,31,33,3<br>4 | 4 | P01946,P14668,Q6AYS4,Q9WTT6                      |
| 1723 | 1,2,3,7,29,<br>30,33,34 | 4,5,6,8,27,<br>28,31,32,3<br>5 | 3 | P06760,P14668,Q9JJ22                             |
| 1724 | 1,2,3,7,29,<br>30,33,35 | 4,5,6,8,27,<br>28,31,32,3<br>4 | 6 | P01946,P02091,P06760,P14668,Q6AYS4,Q9WTT6        |
| 1725 | 1,2,3,7,29,<br>30,34,35 | 4,5,6,8,27,<br>28,31,32,3<br>3 | 4 | P01946,P02091,P06760,P14668                      |
| 1726 | 1,2,3,7,29,<br>31,32,33 | 4,5,6,8,27,<br>28,30,34,3<br>5 | 5 | P01835,P02793;Q7TP54,P55314,Q8CJD3,Q9WTT6        |
| 1727 | 1,2,3,7,29,<br>31,32,34 | 4,5,6,8,27,<br>28,30,33,3<br>5 | 1 | P01835                                           |
| 1728 | 1,2,3,7,29,<br>31,32,35 | 4,5,6,8,27,<br>28,30,33,3<br>4 | 3 | P01946,P02091,Q9WTT6                             |
| 1729 | 1,2,3,7,29,<br>31,33,34 | 4,5,6,8,27,<br>28,30,32,3<br>5 | 3 | P00714,P01835,P06760                             |
| 1730 | 1,2,3,7,29,<br>31,33,35 | 4,5,6,8,27,<br>28,30,32,3<br>4 | 6 | P00714,P01946,P02091,P06760,Q6AYS4,Q9WTT6        |
| 1731 | 1,2,3,7,29,<br>31,34,35 | 4,5,6,8,27,<br>28,30,32,3<br>3 | 4 | P00714,P01946,P02091,P06760                      |
| 1732 | 1,2,3,7,29,<br>32,33,34 | 4,5,6,8,27,<br>28,30,31,3<br>5 | 5 | O35783,P01835,P14668,P55314,Q63661               |
| 1733 | 1,2,3,7,29,<br>32,33,35 | 4,5,6,8,27,<br>28,30,31,3<br>4 | 4 | P01946,P02091,P55314,Q9WTT6                      |
| 1734 | 1,2,3,7,29,<br>32,34,35 | 4,5,6,8,27,<br>28,30,31,3<br>3 | 4 | P01946,P02091,P14668,Q63661                      |
| 1735 | 1,2,3,7,29,<br>33,34,35 | 4,5,6,8,27,<br>28,30,31,3<br>2 | 7 | P00714,P01946,P02091,P06760,P14668,Q63661,Q9JJ22 |
| 1736 | 1,2,3,7,30,<br>31,32,33 | 4,5,6,8,27,<br>28,29,34,3<br>5 | 2 | P55314,Q9WTT6                                    |

|      |                         |                                |    |                                                                                                   |
|------|-------------------------|--------------------------------|----|---------------------------------------------------------------------------------------------------|
| 1737 | 1,2,3,7,30,<br>31,32,34 | 4,5,6,8,27,<br>28,29,33,3<br>5 | 4  | P01836,P0C0A9,P47967,P97840                                                                       |
| 1738 | 1,2,3,7,30,<br>31,32,35 | 4,5,6,8,27,<br>28,29,33,3<br>4 | 3  | P0C0A9,P97584,Q9WTT6                                                                              |
| 1739 | 1,2,3,7,30,<br>31,33,34 | 4,5,6,8,27,<br>28,29,32,3<br>5 | 5  | P00714,P06760,P0C0A9,P47967,P97840                                                                |
| 1740 | 1,2,3,7,30,<br>31,33,35 | 4,5,6,8,27,<br>28,29,32,3<br>4 | 6  | P00714,P06760,P0C0A9,P24368,Q6AYS4,Q9WTT6                                                         |
| 1741 | 1,2,3,7,30,<br>31,34,35 | 4,5,6,8,27,<br>28,29,32,3<br>3 | 9  | P00714,P02781,P06760,P08723,P0C0A9,P24368,P47727,P82471,Q9JHB9                                    |
| 1742 | 1,2,3,7,30,<br>32,33,34 | 4,5,6,8,27,<br>28,29,31,3<br>5 | 7  | O35783,P02782,P0C0A9,P14668,P55314,Q63532,Q63661                                                  |
| 1743 | 1,2,3,7,30,<br>32,33,35 | 4,5,6,8,27,<br>28,29,31,3<br>4 | 5  | P0C0A9,P14668,P55314,Q6AYS4,Q9WTT6                                                                |
| 1744 | 1,2,3,7,30,<br>32,34,35 | 4,5,6,8,27,<br>28,29,31,3<br>3 | 8  | P02781,P02782,P07647,P0C0A9,P14668,P82471,P83121,Q63661                                           |
| 1745 | 1,2,3,7,30,<br>33,34,35 | 4,5,6,8,27,<br>28,29,31,3<br>2 | 11 | P02781,P02782,P06760,P06911,P0C0A9,P14668,P24368,P82471,Q62975,Q63661,Q9JHB9                      |
| 1746 | 1,2,3,7,31,<br>32,33,34 | 4,5,6,8,27,<br>28,29,30,3<br>5 | 5  | P01835,P02782,P0C0A9,P55314,Q08849                                                                |
| 1747 | 1,2,3,7,31,<br>32,33,35 | 4,5,6,8,27,<br>28,29,30,3<br>4 | 8  | P01835,P02781,P06760,P0C0A9,P55314,Q08849,Q6AYR9,Q9WTT6                                           |
| 1748 | 1,2,3,7,31,<br>32,34,35 | 4,5,6,8,27,<br>28,29,30,3<br>3 | 8  | P01835,P02781,P02782,P07647,P0C0A9,P30120,P82471,Q9JHB9                                           |
| 1749 | 1,2,3,7,31,<br>33,34,35 | 4,5,6,8,27,<br>28,29,30,3<br>2 | 14 | P00714,P01835,P02781,P02782,P06760,P08010,P0C0A9,P14669,P24368,P30120,P60905,P82471,Q62975,Q9JHB9 |
| 1750 | 1,2,3,7,32,<br>33,34,35 | 4,5,6,8,27,<br>28,29,30,3<br>1 | 10 | P01835,P02781,P02782,P0C0A9,P14668,P30120,P55314,P82471,Q63661,Q6AYR9                             |
| 1751 | 1,2,3,8,27,<br>28,29,30 | 4,5,6,7,31,<br>32,33,34,3<br>5 | 0  |                                                                                                   |

|      |                         |                                |   |                             |
|------|-------------------------|--------------------------------|---|-----------------------------|
| 1752 | 1,2,3,8,27,<br>28,29,31 | 4,5,6,7,30,<br>32,33,34,3<br>5 | 0 |                             |
| 1753 | 1,2,3,8,27,<br>28,29,32 | 4,5,6,7,30,<br>31,33,34,3<br>5 | 1 | Q63942                      |
| 1754 | 1,2,3,8,27,<br>28,29,33 | 4,5,6,7,30,<br>31,32,34,3<br>5 | 0 |                             |
| 1755 | 1,2,3,8,27,<br>28,29,34 | 4,5,6,7,30,<br>31,32,33,3<br>5 | 1 | P04182                      |
| 1756 | 1,2,3,8,27,<br>28,29,35 | 4,5,6,7,30,<br>31,32,33,3<br>4 | 1 | P01946                      |
| 1757 | 1,2,3,8,27,<br>28,30,31 | 4,5,6,7,29,<br>32,33,34,3<br>5 | 0 |                             |
| 1758 | 1,2,3,8,27,<br>28,30,32 | 4,5,6,7,29,<br>31,33,34,3<br>5 | 1 | P83121                      |
| 1759 | 1,2,3,8,27,<br>28,30,33 | 4,5,6,7,29,<br>31,32,34,3<br>5 | 0 |                             |
| 1760 | 1,2,3,8,27,<br>28,30,34 | 4,5,6,7,29,<br>31,32,33,3<br>5 | 3 | P04182,P47967,P83121        |
| 1761 | 1,2,3,8,27,<br>28,30,35 | 4,5,6,7,29,<br>31,32,33,3<br>4 | 2 | P02770,P83121               |
| 1762 | 1,2,3,8,27,<br>28,31,32 | 4,5,6,7,29,<br>30,33,34,3<br>5 | 2 | Q08849,Q5FVI6               |
| 1763 | 1,2,3,8,27,<br>28,31,33 | 4,5,6,7,29,<br>30,32,34,3<br>5 | 0 |                             |
| 1764 | 1,2,3,8,27,<br>28,31,34 | 4,5,6,7,29,<br>30,32,33,3<br>5 | 2 | A2RUV9,P04182               |
| 1765 | 1,2,3,8,27,<br>28,31,35 | 4,5,6,7,29,<br>30,32,33,3<br>4 | 1 | P02770                      |
| 1766 | 1,2,3,8,27,<br>28,32,33 | 4,5,6,7,29,<br>30,31,34,3<br>5 | 3 | P02793;Q7TP54,P55314,Q08849 |

|      |                         |                                |   |                                    |
|------|-------------------------|--------------------------------|---|------------------------------------|
| 1767 | 1,2,3,8,27,<br>28,32,34 | 4,5,6,7,29,<br>30,31,33,3<br>5 | 3 | P04182,P83121,Q08849               |
| 1768 | 1,2,3,8,27,<br>28,32,35 | 4,5,6,7,29,<br>30,31,33,3<br>4 | 2 | P83121,Q08849                      |
| 1769 | 1,2,3,8,27,<br>28,33,34 | 4,5,6,7,29,<br>30,31,32,3<br>5 | 2 | P04182,Q62894                      |
| 1770 | 1,2,3,8,27,<br>28,33,35 | 4,5,6,7,29,<br>30,31,32,3<br>4 | 1 | P09605;P25809                      |
| 1771 | 1,2,3,8,27,<br>28,34,35 | 4,5,6,7,29,<br>30,31,32,3<br>3 | 4 | P04182,P09006,P17475,P83121        |
| 1772 | 1,2,3,8,27,<br>29,30,31 | 4,5,6,7,28,<br>32,33,34,3<br>5 | 1 | Q5HZV9                             |
| 1773 | 1,2,3,8,27,<br>29,30,32 | 4,5,6,7,28,<br>31,33,34,3<br>5 | 2 | P20760,P62804                      |
| 1774 | 1,2,3,8,27,<br>29,30,33 | 4,5,6,7,28,<br>31,32,34,3<br>5 | 1 | Q5HZV9                             |
| 1775 | 1,2,3,8,27,<br>29,30,34 | 4,5,6,7,28,<br>31,32,33,3<br>5 | 3 | P20760,P83121,Q00715               |
| 1776 | 1,2,3,8,27,<br>29,30,35 | 4,5,6,7,28,<br>31,32,33,3<br>4 | 1 | P01946                             |
| 1777 | 1,2,3,8,27,<br>29,31,32 | 4,5,6,7,28,<br>30,33,34,3<br>5 | 3 | P20760,Q08849,Q8CJD3               |
| 1778 | 1,2,3,8,27,<br>29,31,33 | 4,5,6,7,28,<br>30,32,34,3<br>5 | 1 | Q5HZV9                             |
| 1779 | 1,2,3,8,27,<br>29,31,34 | 4,5,6,7,28,<br>30,32,33,3<br>5 | 2 | A2RUV9,P20760                      |
| 1780 | 1,2,3,8,27,<br>29,31,35 | 4,5,6,7,28,<br>30,32,33,3<br>4 | 1 | P01946                             |
| 1781 | 1,2,3,8,27,<br>29,32,33 | 4,5,6,7,28,<br>30,31,34,3<br>5 | 4 | P02793;Q7TP54,P55314,Q08849,Q8CJD3 |

|      |                         |                                |   |                                    |
|------|-------------------------|--------------------------------|---|------------------------------------|
| 1782 | 1,2,3,8,27,<br>29,32,34 | 4,5,6,7,28,<br>30,31,33,3<br>5 | 5 | P20760,P83121,Q00715,Q08849,Q8VD89 |
| 1783 | 1,2,3,8,27,<br>29,32,35 | 4,5,6,7,28,<br>30,31,33,3<br>4 | 3 | P01946,P51907,Q08849               |
| 1784 | 1,2,3,8,27,<br>29,33,34 | 4,5,6,7,28,<br>30,31,32,3<br>5 | 0 |                                    |
| 1785 | 1,2,3,8,27,<br>29,33,35 | 4,5,6,7,28,<br>30,31,32,3<br>4 | 1 | P01946                             |
| 1786 | 1,2,3,8,27,<br>29,34,35 | 4,5,6,7,28,<br>30,31,32,3<br>3 | 4 | P01946,P09006,P83121,Q63556        |
| 1787 | 1,2,3,8,27,<br>30,31,32 | 4,5,6,7,28,<br>29,33,34,3<br>5 | 1 | P20760                             |
| 1788 | 1,2,3,8,27,<br>30,31,33 | 4,5,6,7,28,<br>29,32,34,3<br>5 | 1 | Q5HZV9                             |
| 1789 | 1,2,3,8,27,<br>30,31,34 | 4,5,6,7,28,<br>29,32,33,3<br>5 | 1 | P20760                             |
| 1790 | 1,2,3,8,27,<br>30,31,35 | 4,5,6,7,28,<br>29,32,33,3<br>4 | 1 | P02770                             |
| 1791 | 1,2,3,8,27,<br>30,32,33 | 4,5,6,7,28,<br>29,31,34,3<br>5 | 2 | P55314,Q08849                      |
| 1792 | 1,2,3,8,27,<br>30,32,34 | 4,5,6,7,28,<br>29,31,33,3<br>5 | 3 | P20760,P83121,Q00715               |
| 1793 | 1,2,3,8,27,<br>30,32,35 | 4,5,6,7,28,<br>29,31,33,3<br>4 | 1 | P83121                             |
| 1794 | 1,2,3,8,27,<br>30,33,34 | 4,5,6,7,28,<br>29,31,32,3<br>5 | 2 | P20760,Q62894                      |
| 1795 | 1,2,3,8,27,<br>30,33,35 | 4,5,6,7,28,<br>29,31,32,3<br>4 | 0 |                                    |
| 1796 | 1,2,3,8,27,<br>30,34,35 | 4,5,6,7,28,<br>29,31,32,3<br>3 | 5 | P02770,P06911,P09006,P17475,P83121 |



|      |                         |                                |   |                                                  |
|------|-------------------------|--------------------------------|---|--------------------------------------------------|
| 1797 | 1,2,3,8,27,<br>31,32,33 | 4,5,6,7,28,<br>29,30,34,3<br>5 | 4 | P01835,P55314,Q08849,Q8CJD3                      |
| 1798 | 1,2,3,8,27,<br>31,32,34 | 4,5,6,7,28,<br>29,30,33,3<br>5 | 6 | A2RUV9,P01835,P20760,P20766,P83121,Q08849        |
| 1799 | 1,2,3,8,27,<br>31,32,35 | 4,5,6,7,28,<br>29,30,33,3<br>4 | 1 | Q08849                                           |
| 1800 | 1,2,3,8,27,<br>31,33,34 | 4,5,6,7,28,<br>29,30,32,3<br>5 | 2 | P01835,Q08849                                    |
| 1801 | 1,2,3,8,27,<br>31,33,35 | 4,5,6,7,28,<br>29,30,32,3<br>4 | 1 | Q08849                                           |
| 1802 | 1,2,3,8,27,<br>31,34,35 | 4,5,6,7,28,<br>29,30,32,3<br>3 | 5 | A2RUV9,P09006,P17475,P83121,Q08849               |
| 1803 | 1,2,3,8,27,<br>32,33,34 | 4,5,6,7,28,<br>29,30,31,3<br>5 | 7 | P01835,P20760,P55314,P83121,Q08849,Q62894,Q63661 |
| 1804 | 1,2,3,8,27,<br>32,33,35 | 4,5,6,7,28,<br>29,30,31,3<br>4 | 2 | P55314,Q08849                                    |
| 1805 | 1,2,3,8,27,<br>32,34,35 | 4,5,6,7,28,<br>29,30,31,3<br>3 | 7 | P08753,P35467,P83121,Q08849,Q63556,Q63661,Q9QZK9 |
| 1806 | 1,2,3,8,27,<br>33,34,35 | 4,5,6,7,28,<br>29,30,31,3<br>2 | 7 | P06911,P09006,P17475,P83121,Q08849,Q62975,Q63355 |
| 1807 | 1,2,3,8,28,<br>29,30,31 | 4,5,6,7,27,<br>32,33,34,3<br>5 | 0 |                                                  |
| 1808 | 1,2,3,8,28,<br>29,30,32 | 4,5,6,7,27,<br>31,33,34,3<br>5 | 0 |                                                  |
| 1809 | 1,2,3,8,28,<br>29,30,33 | 4,5,6,7,27,<br>31,32,34,3<br>5 | 0 |                                                  |
| 1810 | 1,2,3,8,28,<br>29,30,34 | 4,5,6,7,27,<br>31,32,33,3<br>5 | 0 |                                                  |
| 1811 | 1,2,3,8,28,<br>29,30,35 | 4,5,6,7,27,<br>31,32,33,3<br>4 | 2 | P02770,P05539                                    |

|      |                         |                                |   |                      |
|------|-------------------------|--------------------------------|---|----------------------|
| 1812 | 1,2,3,8,28,<br>29,31,32 | 4,5,6,7,27,<br>30,33,34,3<br>5 | 2 | P06911,Q5FVI6        |
| 1813 | 1,2,3,8,28,<br>29,31,33 | 4,5,6,7,27,<br>30,32,34,3<br>5 | 0 |                      |
| 1814 | 1,2,3,8,28,<br>29,31,34 | 4,5,6,7,27,<br>30,32,33,3<br>5 | 2 | P20766,Q9QW07        |
| 1815 | 1,2,3,8,28,<br>29,31,35 | 4,5,6,7,27,<br>30,32,33,3<br>4 | 1 | P06760               |
| 1816 | 1,2,3,8,28,<br>29,32,33 | 4,5,6,7,27,<br>30,31,34,3<br>5 | 1 | P02793;Q7TP54        |
| 1817 | 1,2,3,8,28,<br>29,32,34 | 4,5,6,7,27,<br>30,31,33,3<br>5 | 1 | Q5QE79               |
| 1818 | 1,2,3,8,28,<br>29,32,35 | 4,5,6,7,27,<br>30,31,33,3<br>4 | 2 | P19218,P51907        |
| 1819 | 1,2,3,8,28,<br>29,33,34 | 4,5,6,7,27,<br>30,31,32,3<br>5 | 1 | Q9JJ22               |
| 1820 | 1,2,3,8,28,<br>29,33,35 | 4,5,6,7,27,<br>30,31,32,3<br>4 | 1 | P05539               |
| 1821 | 1,2,3,8,28,<br>29,34,35 | 4,5,6,7,27,<br>30,31,32,3<br>3 | 2 | P00507,P09006        |
| 1822 | 1,2,3,8,28,<br>30,31,32 | 4,5,6,7,27,<br>29,33,34,3<br>5 | 1 | Q5FVI6               |
| 1823 | 1,2,3,8,28,<br>30,31,33 | 4,5,6,7,27,<br>29,32,34,3<br>5 | 0 |                      |
| 1824 | 1,2,3,8,28,<br>30,31,34 | 4,5,6,7,27,<br>29,32,33,3<br>5 | 0 |                      |
| 1825 | 1,2,3,8,28,<br>30,31,35 | 4,5,6,7,27,<br>29,32,33,3<br>4 | 3 | P02770,P05539,P06760 |
| 1826 | 1,2,3,8,28,<br>30,32,33 | 4,5,6,7,27,<br>29,31,34,3<br>5 | 0 |                      |

|      |                         |                                |   |                                                                |
|------|-------------------------|--------------------------------|---|----------------------------------------------------------------|
| 1827 | 1,2,3,8,28,<br>30,32,34 | 4,5,6,7,27,<br>29,31,33,3<br>5 | 2 | P83121,Q62894                                                  |
| 1828 | 1,2,3,8,28,<br>30,32,35 | 4,5,6,7,27,<br>29,31,33,3<br>4 | 1 | P83121                                                         |
| 1829 | 1,2,3,8,28,<br>30,33,34 | 4,5,6,7,27,<br>29,31,32,3<br>5 | 1 | Q62894                                                         |
| 1830 | 1,2,3,8,28,<br>30,33,35 | 4,5,6,7,27,<br>29,31,32,3<br>4 | 2 | P02770,P05539                                                  |
| 1831 | 1,2,3,8,28,<br>30,34,35 | 4,5,6,7,27,<br>29,31,32,3<br>3 | 9 | P02770,P05539,P09006,P17475,P19132,P83121,Q62894,Q6AY61,Q8CJD3 |
| 1832 | 1,2,3,8,28,<br>31,32,33 | 4,5,6,7,27,<br>29,30,34,3<br>5 | 2 | P01835,Q5FVI6                                                  |
| 1833 | 1,2,3,8,28,<br>31,32,34 | 4,5,6,7,27,<br>29,30,33,3<br>5 | 2 | P01835,P20766                                                  |
| 1834 | 1,2,3,8,28,<br>31,32,35 | 4,5,6,7,27,<br>29,30,33,3<br>4 | 1 | P20766                                                         |
| 1835 | 1,2,3,8,28,<br>31,33,34 | 4,5,6,7,27,<br>29,30,32,3<br>5 | 3 | P01835,P20766,Q62894                                           |
| 1836 | 1,2,3,8,28,<br>31,33,35 | 4,5,6,7,27,<br>29,30,32,3<br>4 | 1 | P06760                                                         |
| 1837 | 1,2,3,8,28,<br>31,34,35 | 4,5,6,7,27,<br>29,30,32,3<br>3 | 4 | P02770,P09006,P17475,P20766                                    |
| 1838 | 1,2,3,8,28,<br>32,33,34 | 4,5,6,7,27,<br>29,30,31,3<br>5 | 3 | P01835,P55314,Q62894                                           |
| 1839 | 1,2,3,8,28,<br>32,33,35 | 4,5,6,7,27,<br>29,30,31,3<br>4 | 0 |                                                                |
| 1840 | 1,2,3,8,28,<br>32,34,35 | 4,5,6,7,27,<br>29,30,31,3<br>3 | 1 | P83121                                                         |
| 1841 | 1,2,3,8,28,<br>33,34,35 | 4,5,6,7,27,<br>29,30,31,3<br>2 | 4 | O55145,P09006,P17475,Q62894                                    |

|      |                         |                                |   |                             |
|------|-------------------------|--------------------------------|---|-----------------------------|
| 1842 | 1,2,3,8,29,<br>30,31,32 | 4,5,6,7,27,<br>28,33,34,3<br>5 | 1 | Q5FVI6                      |
| 1843 | 1,2,3,8,29,<br>30,31,33 | 4,5,6,7,27,<br>28,32,34,3<br>5 | 1 | Q5HZV9                      |
| 1844 | 1,2,3,8,29,<br>30,31,34 | 4,5,6,7,27,<br>28,32,33,3<br>5 | 1 | P20760                      |
| 1845 | 1,2,3,8,29,<br>30,31,35 | 4,5,6,7,27,<br>28,32,33,3<br>4 | 4 | F1M3L7,P02770,P05539,Q99041 |
| 1846 | 1,2,3,8,29,<br>30,32,33 | 4,5,6,7,27,<br>28,31,34,3<br>5 | 0 |                             |
| 1847 | 1,2,3,8,29,<br>30,32,34 | 4,5,6,7,27,<br>28,31,33,3<br>5 | 1 | P20760                      |
| 1848 | 1,2,3,8,29,<br>30,32,35 | 4,5,6,7,27,<br>28,31,33,3<br>4 | 1 | P51907                      |
| 1849 | 1,2,3,8,29,<br>30,33,34 | 4,5,6,7,27,<br>28,31,32,3<br>5 | 1 | Q9JJ22                      |
| 1850 | 1,2,3,8,29,<br>30,33,35 | 4,5,6,7,27,<br>28,31,32,3<br>4 | 2 | F1M3L7,P05539               |
| 1851 | 1,2,3,8,29,<br>30,34,35 | 4,5,6,7,27,<br>28,31,32,3<br>3 | 4 | P05539,P09006,Q6PCU2,Q9JJ22 |
| 1852 | 1,2,3,8,29,<br>31,32,33 | 4,5,6,7,27,<br>28,30,34,3<br>5 | 3 | P01835,Q5FVI6,Q8CJD3        |
| 1853 | 1,2,3,8,29,<br>31,32,34 | 4,5,6,7,27,<br>28,30,33,3<br>5 | 3 | P01835,P20760,P20766        |
| 1854 | 1,2,3,8,29,<br>31,32,35 | 4,5,6,7,27,<br>28,30,33,3<br>4 | 1 | P51907                      |
| 1855 | 1,2,3,8,29,<br>31,33,34 | 4,5,6,7,27,<br>28,30,32,3<br>5 | 2 | P00714,P01835               |
| 1856 | 1,2,3,8,29,<br>31,33,35 | 4,5,6,7,27,<br>28,30,32,3<br>4 | 2 | F1M3L7,P00714               |

|      |                         |                                |   |                                                                |
|------|-------------------------|--------------------------------|---|----------------------------------------------------------------|
| 1857 | 1,2,3,8,29,<br>31,34,35 | 4,5,6,7,27,<br>28,30,32,3<br>3 | 3 | P00714,P09006,P20766                                           |
| 1858 | 1,2,3,8,29,<br>32,33,34 | 4,5,6,7,27,<br>28,30,31,3<br>5 | 3 | P01835,P55314,Q63661                                           |
| 1859 | 1,2,3,8,29,<br>32,33,35 | 4,5,6,7,27,<br>28,30,31,3<br>4 | 1 | P47967                                                         |
| 1860 | 1,2,3,8,29,<br>32,34,35 | 4,5,6,7,27,<br>28,30,31,3<br>3 | 3 | P51907,P83121,Q63661                                           |
| 1861 | 1,2,3,8,29,<br>33,34,35 | 4,5,6,7,27,<br>28,30,31,3<br>2 | 3 | O55145,P09006,Q9JJ22                                           |
| 1862 | 1,2,3,8,30,<br>31,32,33 | 4,5,6,7,27,<br>28,29,34,3<br>5 | 1 | Q5FVI6                                                         |
| 1863 | 1,2,3,8,30,<br>31,32,34 | 4,5,6,7,27,<br>28,29,33,3<br>5 | 2 | P20760,P20766                                                  |
| 1864 | 1,2,3,8,30,<br>31,32,35 | 4,5,6,7,27,<br>28,29,33,3<br>4 | 0 |                                                                |
| 1865 | 1,2,3,8,30,<br>31,33,34 | 4,5,6,7,27,<br>28,29,32,3<br>5 | 0 |                                                                |
| 1866 | 1,2,3,8,30,<br>31,33,35 | 4,5,6,7,27,<br>28,29,32,3<br>4 | 4 | F1M3L7,P02770,P05539,P36953                                    |
| 1867 | 1,2,3,8,30,<br>31,34,35 | 4,5,6,7,27,<br>28,29,32,3<br>3 | 8 | P02770,P02793;Q7TP54,P09006,P0C0A9,P17475,P24368,P82471,Q9JHB9 |
| 1868 | 1,2,3,8,30,<br>32,33,34 | 4,5,6,7,27,<br>28,29,31,3<br>5 | 3 | P55314,Q62894,Q63661                                           |
| 1869 | 1,2,3,8,30,<br>32,33,35 | 4,5,6,7,27,<br>28,29,31,3<br>4 | 1 | P55314                                                         |
| 1870 | 1,2,3,8,30,<br>32,34,35 | 4,5,6,7,27,<br>28,29,31,3<br>3 | 4 | P08753,P82471,P83121,Q63661                                    |
| 1871 | 1,2,3,8,30,<br>33,34,35 | 4,5,6,7,27,<br>28,29,31,3<br>2 | 7 | P05539,P06911,P09006,P17475,P82471,Q62894,Q9JHB9               |

|      |                          |                                |    |                                                                       |
|------|--------------------------|--------------------------------|----|-----------------------------------------------------------------------|
| 1872 | 1,2,3,8,31,<br>32,33,34  | 4,5,6,7,27,<br>28,29,30,3<br>5 | 5  | P01835,P0C0A9,P20766,P55314,Q08849                                    |
| 1873 | 1,2,3,8,31,<br>32,33,35  | 4,5,6,7,27,<br>28,29,30,3<br>4 | 2  | P01835,Q08849                                                         |
| 1874 | 1,2,3,8,31,<br>32,34,35  | 4,5,6,7,27,<br>28,29,30,3<br>3 | 7  | P01835,P08753,P0C0A9,P20766,P82471,P83121,Q08849                      |
| 1875 | 1,2,3,8,31,<br>33,34,35  | 4,5,6,7,27,<br>28,29,30,3<br>2 | 10 | P00714,P01835,P09006,P0C0A9,P17475,P20766,P24368,P82471,Q63355,Q9JHB9 |
| 1876 | 1,2,3,8,32,<br>33,34,35  | 4,5,6,7,27,<br>28,29,30,3<br>1 | 9  | P01835,P08753,P0C0A9,P55314,P82471,P83121,Q08849,Q62894,Q63661        |
| 1877 | 1,2,3,27,2<br>8,29,30,31 | 4,5,6,7,8,3<br>2,33,34,35      | 1  | Q99041                                                                |
| 1878 | 1,2,3,27,2<br>8,29,30,32 | 4,5,6,7,8,3<br>1,33,34,35      | 1  | Q99041                                                                |
| 1879 | 1,2,3,27,2<br>8,29,30,33 | 4,5,6,7,8,3<br>1,32,34,35      | 0  |                                                                       |
| 1880 | 1,2,3,27,2<br>8,29,30,34 | 4,5,6,7,8,3<br>1,32,33,35      | 2  | P04182,Q99041                                                         |
| 1881 | 1,2,3,27,2<br>8,29,30,35 | 4,5,6,7,8,3<br>1,32,33,34      | 3  | P01946,Q6AYS4,Q99041                                                  |
| 1882 | 1,2,3,27,2<br>8,29,31,32 | 4,5,6,7,8,3<br>0,33,34,35      | 2  | P06911,Q99041                                                         |
| 1883 | 1,2,3,27,2<br>8,29,31,33 | 4,5,6,7,8,3<br>0,32,34,35      | 1  | Q9Z0V6                                                                |
| 1884 | 1,2,3,27,2<br>8,29,31,34 | 4,5,6,7,8,3<br>0,32,33,35      | 4  | A2RUV9,P04182,Q99041,Q9QW07                                           |
| 1885 | 1,2,3,27,2<br>8,29,31,35 | 4,5,6,7,8,3<br>0,32,33,34      | 3  | P01946,Q6AYS4,Q99041                                                  |
| 1886 | 1,2,3,27,2<br>8,29,32,33 | 4,5,6,7,8,3<br>0,31,34,35      | 4  | P02793,Q7TP54,P55314,Q06000,Q9Z0V6                                    |
| 1887 | 1,2,3,27,2<br>8,29,32,34 | 4,5,6,7,8,3<br>0,31,33,35      | 1  | P04182                                                                |
| 1888 | 1,2,3,27,2<br>8,29,32,35 | 4,5,6,7,8,3<br>0,31,33,34      | 3  | P01946,P19218,Q99041                                                  |
| 1889 | 1,2,3,27,2<br>8,29,33,34 | 4,5,6,7,8,3<br>0,31,32,35      | 1  | P04182                                                                |
| 1890 | 1,2,3,27,2<br>8,29,33,35 | 4,5,6,7,8,3<br>0,31,32,34      | 2  | P01946,Q6AYS4                                                         |
| 1891 | 1,2,3,27,2<br>8,29,34,35 | 4,5,6,7,8,3<br>0,31,32,33      | 4  | P01946,P04182,P83121,Q99041                                           |

|      |                          |                           |   |                                           |
|------|--------------------------|---------------------------|---|-------------------------------------------|
| 1892 | 1,2,3,27,2<br>8,30,31,32 | 4,5,6,7,8,2<br>9,33,34,35 | 2 | Q63617,Q99041                             |
| 1893 | 1,2,3,27,2<br>8,30,31,33 | 4,5,6,7,8,2<br>9,32,34,35 | 0 |                                           |
| 1894 | 1,2,3,27,2<br>8,30,31,34 | 4,5,6,7,8,2<br>9,32,33,35 | 5 | A2RUV9,P04182,P47967,Q63617,Q99041        |
| 1895 | 1,2,3,27,2<br>8,30,31,35 | 4,5,6,7,8,2<br>9,32,33,34 | 3 | Q63617,Q6AYS4,Q99041                      |
| 1896 | 1,2,3,27,2<br>8,30,32,33 | 4,5,6,7,8,2<br>9,31,34,35 | 2 | P55314,Q06000                             |
| 1897 | 1,2,3,27,2<br>8,30,32,34 | 4,5,6,7,8,2<br>9,31,33,35 | 4 | P04182,P83121,Q63617,Q99041               |
| 1898 | 1,2,3,27,2<br>8,30,32,35 | 4,5,6,7,8,2<br>9,31,33,34 | 4 | P83121,Q63617,Q6AYS4,Q99041               |
| 1899 | 1,2,3,27,2<br>8,30,33,34 | 4,5,6,7,8,2<br>9,31,32,35 | 2 | P04182,Q63617                             |
| 1900 | 1,2,3,27,2<br>8,30,33,35 | 4,5,6,7,8,2<br>9,31,32,34 | 2 | Q6AYS4,Q99041                             |
| 1901 | 1,2,3,27,2<br>8,30,34,35 | 4,5,6,7,8,2<br>9,31,32,33 | 5 | P04182,P83121,Q63617,Q8CJD3,Q99041        |
| 1902 | 1,2,3,27,2<br>8,31,32,33 | 4,5,6,7,8,2<br>9,30,34,35 | 3 | P55314,Q06000,Q08849                      |
| 1903 | 1,2,3,27,2<br>8,31,32,34 | 4,5,6,7,8,2<br>9,30,33,35 | 4 | A2RUV9,P04182,Q63617,Q99041               |
| 1904 | 1,2,3,27,2<br>8,31,32,35 | 4,5,6,7,8,2<br>9,30,33,34 | 2 | Q63617,Q99041                             |
| 1905 | 1,2,3,27,2<br>8,31,33,34 | 4,5,6,7,8,2<br>9,30,32,35 | 2 | A2RUV9,P04182                             |
| 1906 | 1,2,3,27,2<br>8,31,33,35 | 4,5,6,7,8,2<br>9,30,32,34 | 1 | Q6AYS4                                    |
| 1907 | 1,2,3,27,2<br>8,31,34,35 | 4,5,6,7,8,2<br>9,30,32,33 | 4 | A2RUV9,P04182,Q63617,Q99041               |
| 1908 | 1,2,3,27,2<br>8,32,33,34 | 4,5,6,7,8,2<br>9,30,31,35 | 5 | P04182,P55314,Q06000,Q10758,Q63661        |
| 1909 | 1,2,3,27,2<br>8,32,33,35 | 4,5,6,7,8,2<br>9,30,31,34 | 2 | P09605;P25809,P55314                      |
| 1910 | 1,2,3,27,2<br>8,32,34,35 | 4,5,6,7,8,2<br>9,30,31,33 | 6 | P04182,P83121,Q63617,Q63661,Q99041,Q9QZK9 |
| 1911 | 1,2,3,27,2<br>8,33,34,35 | 4,5,6,7,8,2<br>9,30,31,32 | 3 | O55145,P04182,Q62975                      |
| 1912 | 1,2,3,27,2<br>9,30,31,32 | 4,5,6,7,8,2<br>8,33,34,35 | 2 | P20760,Q99041                             |
| 1913 | 1,2,3,27,2<br>9,30,31,33 | 4,5,6,7,8,2<br>8,32,34,35 | 1 | Q5HZV9                                    |
| 1914 | 1,2,3,27,2<br>9,30,31,34 | 4,5,6,7,8,2<br>8,32,33,35 | 3 | A2RUV9,P20760,Q99041                      |

|      |                          |                           |   |                                           |
|------|--------------------------|---------------------------|---|-------------------------------------------|
| 1915 | 1,2,3,27,2<br>9,30,31,35 | 4,5,6,7,8,2<br>8,32,33,34 | 3 | P01946,Q6AYS4,Q99041                      |
| 1916 | 1,2,3,27,2<br>9,30,32,33 | 4,5,6,7,8,2<br>8,31,34,35 | 1 | P55314                                    |
| 1917 | 1,2,3,27,2<br>9,30,32,34 | 4,5,6,7,8,2<br>8,31,33,35 | 4 | P20760,P83121,Q63661,Q99041               |
| 1918 | 1,2,3,27,2<br>9,30,32,35 | 4,5,6,7,8,2<br>8,31,33,34 | 2 | P01946,Q99041                             |
| 1919 | 1,2,3,27,2<br>9,30,33,34 | 4,5,6,7,8,2<br>8,31,32,35 | 0 |                                           |
| 1920 | 1,2,3,27,2<br>9,30,33,35 | 4,5,6,7,8,2<br>8,31,32,34 | 3 | P01946,Q6AYS4,Q99041                      |
| 1921 | 1,2,3,27,2<br>9,30,34,35 | 4,5,6,7,8,2<br>8,31,32,33 | 4 | P01946,P12020,P83121,Q99041               |
| 1922 | 1,2,3,27,2<br>9,31,32,33 | 4,5,6,7,8,2<br>8,30,34,35 | 2 | P02793,Q7TP54,P55314                      |
| 1923 | 1,2,3,27,2<br>9,31,32,34 | 4,5,6,7,8,2<br>8,30,33,35 | 3 | A2RUV9,P20760,Q99041                      |
| 1924 | 1,2,3,27,2<br>9,31,32,35 | 4,5,6,7,8,2<br>8,30,33,34 | 2 | P01946,Q99041                             |
| 1925 | 1,2,3,27,2<br>9,31,33,34 | 4,5,6,7,8,2<br>8,30,32,35 | 1 | A2RUV9                                    |
| 1926 | 1,2,3,27,2<br>9,31,33,35 | 4,5,6,7,8,2<br>8,30,32,34 | 5 | P00714,P01946,Q6AYS4,Q99041,Q9WTT6        |
| 1927 | 1,2,3,27,2<br>9,31,34,35 | 4,5,6,7,8,2<br>8,30,32,33 | 3 | A2RUV9,P01946,Q99041                      |
| 1928 | 1,2,3,27,2<br>9,32,33,34 | 4,5,6,7,8,2<br>8,30,31,35 | 2 | P55314,Q63661                             |
| 1929 | 1,2,3,27,2<br>9,32,33,35 | 4,5,6,7,8,2<br>8,30,31,34 | 3 | P01946,P55314,Q9WTT6                      |
| 1930 | 1,2,3,27,2<br>9,32,34,35 | 4,5,6,7,8,2<br>8,30,31,33 | 5 | P01946,P83121,Q63556,Q63661,Q99041        |
| 1931 | 1,2,3,27,2<br>9,33,34,35 | 4,5,6,7,8,2<br>8,30,31,32 | 2 | P01946,Q63661                             |
| 1932 | 1,2,3,27,3<br>0,31,32,33 | 4,5,6,7,8,2<br>8,29,34,35 | 1 | P55314                                    |
| 1933 | 1,2,3,27,3<br>0,31,32,34 | 4,5,6,7,8,2<br>8,29,33,35 | 4 | A2RUV9,P20760,Q63617,Q99041               |
| 1934 | 1,2,3,27,3<br>0,31,32,35 | 4,5,6,7,8,2<br>8,29,33,34 | 2 | Q63617,Q99041                             |
| 1935 | 1,2,3,27,3<br>0,31,33,34 | 4,5,6,7,8,2<br>8,29,32,35 | 1 | Q63617                                    |
| 1936 | 1,2,3,27,3<br>0,31,33,35 | 4,5,6,7,8,2<br>8,29,32,34 | 3 | P36953,Q6AYS4,Q99041                      |
| 1937 | 1,2,3,27,3<br>0,31,34,35 | 4,5,6,7,8,2<br>8,29,32,33 | 6 | A2RUV9,P02780,P82471,P83121,Q63617,Q99041 |



|      |                          |                           |   |                                                         |
|------|--------------------------|---------------------------|---|---------------------------------------------------------|
| 1938 | 1,2,3,27,3<br>0,32,33,34 | 4,5,6,7,8,2<br>8,29,31,35 | 4 | P20760,P55314,Q63617,Q63661                             |
| 1939 | 1,2,3,27,3<br>0,32,33,35 | 4,5,6,7,8,2<br>8,29,31,34 | 4 | P07171,P55314,Q6AYS4,Q99041                             |
| 1940 | 1,2,3,27,3<br>0,32,34,35 | 4,5,6,7,8,2<br>8,29,31,33 | 7 | P07171,P82471,P83121,Q63617,Q63661,Q99041,Q9QZK9        |
| 1941 | 1,2,3,27,3<br>0,33,34,35 | 4,5,6,7,8,2<br>8,29,31,32 | 8 | P06911,P07171,P12020,P82471,P83121,Q62975,Q63617,Q63661 |
| 1942 | 1,2,3,27,3<br>1,32,33,34 | 4,5,6,7,8,2<br>8,29,30,35 | 4 | A2RUV9,P01835,P55314,Q08849                             |
| 1943 | 1,2,3,27,3<br>1,32,33,35 | 4,5,6,7,8,2<br>8,29,30,34 | 3 | P55314,Q08849,Q9WTT6                                    |
| 1944 | 1,2,3,27,3<br>1,32,34,35 | 4,5,6,7,8,2<br>8,29,30,33 | 7 | A2RUV9,P02780,P82471,P83121,Q08849,Q63617,Q99041        |
| 1945 | 1,2,3,27,3<br>1,33,34,35 | 4,5,6,7,8,2<br>8,29,30,32 | 6 | A2RUV9,P00714,P02780,P82471,Q62975,Q63355               |
| 1946 | 1,2,3,27,3<br>2,33,34,35 | 4,5,6,7,8,2<br>8,29,30,31 | 6 | P07171,P55314,P82471,P83121,Q08849,Q63661               |
| 1947 | 1,2,3,28,2<br>9,30,31,32 | 4,5,6,7,8,2<br>7,33,34,35 | 1 | Q99041                                                  |
| 1948 | 1,2,3,28,2<br>9,30,31,33 | 4,5,6,7,8,2<br>7,32,34,35 | 4 | P00714,P06760,P20646,Q9Z0V6                             |
| 1949 | 1,2,3,28,2<br>9,30,31,34 | 4,5,6,7,8,2<br>7,32,33,35 | 3 | P00714,P06760,Q99041                                    |
| 1950 | 1,2,3,28,2<br>9,30,31,35 | 4,5,6,7,8,2<br>7,32,33,34 | 6 | P00714,P05539,P06760,Q07116,Q6AYS4,Q99041               |
| 1951 | 1,2,3,28,2<br>9,30,32,33 | 4,5,6,7,8,2<br>7,31,34,35 | 1 | P07171                                                  |
| 1952 | 1,2,3,28,2<br>9,30,32,34 | 4,5,6,7,8,2<br>7,31,33,35 | 1 | Q99041                                                  |
| 1953 | 1,2,3,28,2<br>9,30,32,35 | 4,5,6,7,8,2<br>7,31,33,34 | 3 | P07171,Q6AYS4,Q99041                                    |
| 1954 | 1,2,3,28,2<br>9,30,33,34 | 4,5,6,7,8,2<br>7,31,32,35 | 2 | P00714,P06760                                           |
| 1955 | 1,2,3,28,2<br>9,30,33,35 | 4,5,6,7,8,2<br>7,31,32,34 | 8 | P00714,P05539,P06760,P07171,P20646,Q6AYS4,Q99041,Q9WTT6 |
| 1956 | 1,2,3,28,2<br>9,30,34,35 | 4,5,6,7,8,2<br>7,31,32,33 | 7 | P00507,P00714,P05539,P06760,P07171,Q8CJD3,Q99041        |
| 1957 | 1,2,3,28,2<br>9,31,32,33 | 4,5,6,7,8,2<br>7,30,34,35 | 4 | P02793;Q7TP54,P06911,Q9WTT6,Q9Z0V6                      |
| 1958 | 1,2,3,28,2<br>9,31,32,34 | 4,5,6,7,8,2<br>7,30,33,35 | 1 | Q99041                                                  |
| 1959 | 1,2,3,28,2<br>9,31,32,35 | 4,5,6,7,8,2<br>7,30,33,34 | 2 | Q99041,Q9WTT6                                           |
| 1960 | 1,2,3,28,2<br>9,31,33,34 | 4,5,6,7,8,2<br>7,30,32,35 | 5 | P00714,P06760,P14669,P27791,Q9Z0V6                      |

|      |                          |                           |    |                                                                       |
|------|--------------------------|---------------------------|----|-----------------------------------------------------------------------|
| 1961 | 1,2,3,28,2<br>9,31,33,35 | 4,5,6,7,8,2<br>7,30,32,34 | 8  | P00714,P06760,P14669,P20646,Q6AYS4,Q99041,Q9WTT6,Q9Z0V6               |
| 1962 | 1,2,3,28,2<br>9,31,34,35 | 4,5,6,7,8,2<br>7,30,32,33 | 6  | P00714,P06760,P07150,P14669,Q99041,Q9QW07                             |
| 1963 | 1,2,3,28,2<br>9,32,33,34 | 4,5,6,7,8,2<br>7,30,31,35 | 3  | P07171,P55314,Q63661                                                  |
| 1964 | 1,2,3,28,2<br>9,32,33,35 | 4,5,6,7,8,2<br>7,30,31,34 | 5  | P07171,P19218,Q6AYS4,Q99041,Q9WTT6                                    |
| 1965 | 1,2,3,28,2<br>9,32,34,35 | 4,5,6,7,8,2<br>7,30,31,33 | 5  | P00507,P07171,P19218,Q63661,Q99041                                    |
| 1966 | 1,2,3,28,2<br>9,33,34,35 | 4,5,6,7,8,2<br>7,30,31,32 | 6  | O55145,P00714,P06760,P07171,P14669,Q9JJ22                             |
| 1967 | 1,2,3,28,3<br>0,31,32,33 | 4,5,6,7,8,2<br>7,29,34,35 | 2  | P07171,Q9WTT6                                                         |
| 1968 | 1,2,3,28,3<br>0,31,32,34 | 4,5,6,7,8,2<br>7,29,33,35 | 3  | P07171,Q63617,Q99041                                                  |
| 1969 | 1,2,3,28,3<br>0,31,32,35 | 4,5,6,7,8,2<br>7,29,33,34 | 4  | P07171,Q63617,Q6AYS4,Q99041                                           |
| 1970 | 1,2,3,28,3<br>0,31,33,34 | 4,5,6,7,8,2<br>7,29,32,35 | 5  | P00714,P06760,P07171,P14669,Q63617                                    |
| 1971 | 1,2,3,28,3<br>0,31,33,35 | 4,5,6,7,8,2<br>7,29,32,34 | 10 | P00714,P05539,P06760,P07171,P14669,P20646,Q63617,Q6AYS4,Q99041,Q9WTT6 |
| 1972 | 1,2,3,28,3<br>0,31,34,35 | 4,5,6,7,8,2<br>7,29,32,33 | 7  | P00714,P06760,P07171,P14669,Q63617,Q8CJD3,Q99041                      |
| 1973 | 1,2,3,28,3<br>0,32,33,34 | 4,5,6,7,8,2<br>7,29,31,35 | 4  | P07171,P55314,Q63617,Q63661                                           |
| 1974 | 1,2,3,28,3<br>0,32,33,35 | 4,5,6,7,8,2<br>7,29,31,34 | 4  | P07171,Q6AYS4,Q99041,Q9WTT6                                           |
| 1975 | 1,2,3,28,3<br>0,32,34,35 | 4,5,6,7,8,2<br>7,29,31,33 | 6  | P07171,P83121,Q63617,Q63661,Q8CJD3,Q99041                             |
| 1976 | 1,2,3,28,3<br>0,33,34,35 | 4,5,6,7,8,2<br>7,29,31,32 | 7  | P00714,P05539,P06760,P07171,P14669,Q63617,Q8CJD3                      |
| 1977 | 1,2,3,28,3<br>1,32,33,34 | 4,5,6,7,8,2<br>7,29,30,35 | 5  | P01835,P07171,P14669,P55314,Q63617                                    |
| 1978 | 1,2,3,28,3<br>1,32,33,35 | 4,5,6,7,8,2<br>7,29,30,34 | 5  | P06760,P07171,P14669,Q99041,Q9WTT6                                    |
| 1979 | 1,2,3,28,3<br>1,32,34,35 | 4,5,6,7,8,2<br>7,29,30,33 | 4  | P07171,P14669,Q63617,Q99041                                           |
| 1980 | 1,2,3,28,3<br>1,33,34,35 | 4,5,6,7,8,2<br>7,29,30,32 | 6  | P00714,P06760,P07150,P07171,P14669,Q63617                             |
| 1981 | 1,2,3,28,3<br>2,33,34,35 | 4,5,6,7,8,2<br>7,29,30,31 | 5  | O55145,P07171,P14669,P55314,Q63661                                    |
| 1982 | 1,2,3,29,3<br>0,31,32,33 | 4,5,6,7,8,2<br>7,28,34,35 | 3  | P07171,Q99041,Q9WTT6                                                  |
| 1983 | 1,2,3,29,3<br>0,31,32,34 | 4,5,6,7,8,2<br>7,28,33,35 | 3  | P07171,P20760,Q99041                                                  |

|      |                          |                                   |    |                                                                                                                                                                         |
|------|--------------------------|-----------------------------------|----|-------------------------------------------------------------------------------------------------------------------------------------------------------------------------|
| 1984 | 1,2,3,29,3<br>0,31,32,35 | 4,5,6,7,8,2<br>7,28,33,34         | 3  | P07171,Q99041,Q9WTT6                                                                                                                                                    |
| 1985 | 1,2,3,29,3<br>0,31,33,34 | 4,5,6,7,8,2<br>7,28,32,35         | 2  | P00714,P07171                                                                                                                                                           |
| 1986 | 1,2,3,29,3<br>0,31,33,35 | 4,5,6,7,8,2<br>7,28,32,34         | 7  | P00714,P06760,P07171,P20646,Q6AYS4,Q99041,Q9WTT6                                                                                                                        |
| 1987 | 1,2,3,29,3<br>0,31,34,35 | 4,5,6,7,8,2<br>7,28,32,33         | 5  | P00714,P06760,P07171,P14669,Q99041                                                                                                                                      |
| 1988 | 1,2,3,29,3<br>0,32,33,34 | 4,5,6,7,8,2<br>7,28,31,35         | 3  | P07171,P55314,Q63661                                                                                                                                                    |
| 1989 | 1,2,3,29,3<br>0,32,33,35 | 4,5,6,7,8,2<br>7,28,31,34         | 4  | P07171,Q6AYS4,Q99041,Q9WTT6                                                                                                                                             |
| 1990 | 1,2,3,29,3<br>0,32,34,35 | 4,5,6,7,8,2<br>7,28,31,33         | 5  | P07171,P14668,P83121,Q63661,Q99041                                                                                                                                      |
| 1991 | 1,2,3,29,3<br>0,33,34,35 | 4,5,6,7,8,2<br>7,28,31,32         | 7  | P00714,P06760,P07171,P12020,Q63661,Q99041,Q9JJ22                                                                                                                        |
| 1992 | 1,2,3,29,3<br>1,32,33,34 | 4,5,6,7,8,2<br>7,28,30,35         | 3  | P01835,P07171,P55314                                                                                                                                                    |
| 1993 | 1,2,3,29,3<br>1,32,33,35 | 4,5,6,7,8,2<br>7,28,30,34         | 4  | P07171,P47967,Q99041,Q9WTT6                                                                                                                                             |
| 1994 | 1,2,3,29,3<br>1,32,34,35 | 4,5,6,7,8,2<br>7,28,30,33         | 2  | P07171,Q99041                                                                                                                                                           |
| 1995 | 1,2,3,29,3<br>1,33,34,35 | 4,5,6,7,8,2<br>7,28,30,32         | 4  | P00714,P06760,P07171,P14669                                                                                                                                             |
| 1996 | 1,2,3,29,3<br>2,33,34,35 | 4,5,6,7,8,2<br>7,28,30,31         | 4  | O55145,P07171,P55314,Q63661                                                                                                                                             |
| 1997 | 1,2,3,30,3<br>1,32,33,34 | 4,5,6,7,8,2<br>7,28,29,35         | 5  | P07171,P0C0A9,P55314,P82471,Q63617                                                                                                                                      |
| 1998 | 1,2,3,30,3<br>1,32,33,35 | 4,5,6,7,8,2<br>7,28,29,34         | 9  | P06761,P07171,P0C0A9,P36953,P82471,Q63617,Q6AYS4,Q99041,Q9WTT6                                                                                                          |
| 1999 | 1,2,3,30,3<br>1,32,34,35 | 4,5,6,7,8,2<br>7,28,29,33         | 13 | P06761,P07171,P07647,P08723,P0C0A9,P14669,P22283,P24368,P82471,Q63617,Q8CJ52,Q99041,Q9R0T3                                                                              |
| 2000 | 1,2,3,30,3<br>1,33,34,35 | 4,5,6,7,8,2<br>7,28,29,32         | 15 | P00714,P06760,P06761,P07171,P0C0A9,P14669,P22282,P22283,P24368,P36953,P82471,Q63617,Q99041,Q9JHB9,Q9R0T3                                                                |
| 2001 | 1,2,3,30,3<br>2,33,34,35 | 4,5,6,7,8,2<br>7,28,29,31         | 12 | P02782,P06761,P07171,P0C0A9,P14668,P22282,P22283,P55314,P82471,Q63617,Q63661,Q9R0T3                                                                                     |
| 2002 | 1,2,3,31,3<br>2,33,34,35 | 4,5,6,7,8,2<br>7,28,29,30         | 14 | P01835,P02781,P02782,P06761,P07171,P0C0A9,P14669,P22283,P30120,P55314,P82471,Q63617,Q63661,Q8CJ52                                                                       |
| 2003 | 1,2,4,5,6,7<br>,8,27     | 3,28,29,30<br>,31,32,33,<br>34,35 | 24 | G3V686,O55145,O88267,P02631,P05539,P07171,P14669,P16636,P18418,P20762,P52590,P83748,Q03191,Q09030,Q63467,Q63514,Q63532,Q63617,Q63942,Q6IE51,Q7TP52,Q8CHN8,Q99041,Q9QZQ5 |
| 2004 | 1,2,4,5,6,7<br>,8,28     | 3,27,29,30<br>,31,32,33,<br>34,35 | 16 | O55145,P02631,P07171,P12020,P18418,P20762,P52590,P83748,Q09030,Q63514,Q63942,Q6IE51,Q7TP52,Q99041,Q9QZQ5,Q9R0T3                                                         |

|      |                       |                                   |    |                                                                                                                                                                                |
|------|-----------------------|-----------------------------------|----|--------------------------------------------------------------------------------------------------------------------------------------------------------------------------------|
| 2005 | 1,2,4,5,6,7<br>,8,29  | 3,27,28,30<br>,31,32,33,<br>34,35 | 16 | O55145,O88267,P02631,P07171,P20762,P52590,P83748,Q3T1K5,Q63467,Q63514,Q63617,Q63942,Q6IE51,Q7TP52,Q8CJD3,Q9QZQ5                                                                |
| 2006 | 1,2,4,5,6,7<br>,8,30  | 3,27,28,29<br>,31,32,33,<br>34,35 | 16 | O55145,O88267,P02631,P07171,P19218,P20762,P35446,P52590,P83748,Q09030,Q63514,Q64057,Q6IE51,Q7TP52,Q9QZQ5,Q9Z0V6                                                                |
| 2007 | 1,2,4,5,6,7<br>,8,31  | 3,27,28,29<br>,30,32,33,<br>34,35 | 17 | O55145,O88267,P02631,P04182,P07171,P12020,P19218,P20762,P42854,P52590,P83748,Q62997,Q63514,Q6IE51,Q7TP52,Q8CJD3,Q9QZQ5                                                         |
| 2008 | 1,2,4,5,6,7<br>,8,32  | 3,27,28,29<br>,30,31,33,<br>34,35 | 19 | O55145,O88267,P02631,P05539,P07171,P12020,P20762,P52590,P83748,P97605,Q09030,Q63514,Q63532,Q63942,Q6IE51,Q7TP52,Q8CJD3,Q9QZQ5,Q9Z0V6                                           |
| 2009 | 1,2,4,5,6,7<br>,8,33  | 3,27,28,29<br>,30,31,32,<br>34,35 | 16 | P02631,P07171,P18418,P20762,P52590,P83748,P97580,P97605,Q30KJ2,Q63514,Q63617,Q6IE51,Q7TP52,Q8CJD3,Q99041,Q9QZQ5                                                                |
| 2010 | 1,2,4,5,6,7<br>,8,34  | 3,27,28,29<br>,30,31,32,<br>33,35 | 25 | G3V686,O88267,P02631,P07171,P08753,P0C0K7,P14408,P17559,P18418,P20762,P36374,P52590,P83748,Q08464,Q09030,Q63467,Q63514,Q63532,Q64361,Q6IE51,Q7TP52,Q99041,Q9QZQ5,Q9WTT6,Q9Z0V6 |
| 2011 | 1,2,4,5,6,7<br>,8,35  | 3,27,28,29<br>,30,31,32,<br>33,34 | 17 | O88267,P02631,P04182,P07171,P14480,P16636,P20762,P52590,P83748,P97580,Q06000,Q30KJ2,Q63514,Q6IE51,Q7TP52,Q9QZQ5,Q9Z0V6                                                         |
| 2012 | 1,2,4,5,6,7<br>,27,28 | 3,8,29,30,<br>31,32,33,3<br>4,35  | 13 | G3V686,O55145,P02631,P05539,P18418,P52590,P61206,P84079,P84082,P83748,Q63942,Q6IE51,Q7TP52,Q8CHN8,Q9QZQ5                                                                       |
| 2013 | 1,2,4,5,6,7<br>,27,29 | 3,8,28,30,<br>31,32,33,3<br>4,35  | 12 | G3V686,O55145,P02631,P05539,P20762,P52590,P83748,Q63467,Q6IE51,Q7TP52,Q8CHN8,Q9QZQ5                                                                                            |
| 2014 | 1,2,4,5,6,7<br>,27,30 | 3,8,28,29,<br>31,32,33,3<br>4,35  | 13 | G3V686,O55145,P02631,P05539,P19218,P52590,P83748,Q09030,Q6AYQ8,Q6IE51,Q7TP52,Q8CHN8,Q9QZQ5                                                                                     |
| 2015 | 1,2,4,5,6,7<br>,27,31 | 3,8,28,29,<br>30,32,33,3<br>4,35  | 10 | G3V686,O55145,P02631,P05539,P52590,P83748,Q6IE51,Q7TP52,Q8CHN8,Q9QZQ5                                                                                                          |
| 2016 | 1,2,4,5,6,7<br>,27,32 | 3,8,28,29,<br>30,31,33,3<br>4,35  | 13 | G3V686,O55145,P02631,P05539,P52590,P83748,Q09030,Q63532,Q6IE51,Q7TP52,Q8CHN8,Q8CJD3,Q9QZQ5                                                                                     |
| 2017 | 1,2,4,5,6,7<br>,27,33 | 3,8,28,29,<br>30,31,32,3<br>4,35  | 16 | G3V686,P02631,P05539,P08649,P13852,P16636,P18418,P52590,P83748,P97580,Q30KJ2,Q63532,Q6IE51,Q7TP52,Q8CHN8,Q9QZQ5                                                                |
| 2018 | 1,2,4,5,6,7<br>,27,34 | 3,8,28,29,<br>30,31,32,3<br>3,35  | 20 | G3V686,P02631,P05539,P14408,P16636,P17559,P18418,P47967,P52590,P70709,P83748,P97840,Q03191,Q09030,Q63467,Q63532,Q6IE51,Q7TP52,Q8CHN8,Q9QZQ5                                    |
| 2019 | 1,2,4,5,6,7<br>,27,35 | 3,8,28,29,<br>30,31,32,3<br>3,34  | 11 | P02631,P14480,P16636,P52590,P83748,P97580,Q30KJ2,Q6IE51,Q7TP52,Q8CHN8,Q9QZQ5                                                                                                   |

|      |                       |                                  |    |                                                                                                                                      |
|------|-----------------------|----------------------------------|----|--------------------------------------------------------------------------------------------------------------------------------------|
| 2020 | 1,2,4,5,6,7<br>,28,29 | 3,8,27,30,<br>31,32,33,3<br>4,35 | 8  | P02631,P52590,P61206;P84079;P84082,P83748,Q63942,Q6IE51,Q7TP52,Q9QZQ5                                                                |
| 2021 | 1,2,4,5,6,7<br>,28,30 | 3,8,27,29,<br>31,32,33,3<br>4,35 | 9  | O55145,P02631,P52590,P61206;P84079;P84082,P83748,Q63942,Q6AYQ8,Q6IE51,Q7TP52                                                         |
| 2022 | 1,2,4,5,6,7<br>,28,31 | 3,8,27,29,<br>30,32,33,3<br>4,35 | 10 | O55145,P02631,P05539,P12020,P52590,P83748,Q5GRG2,Q63942,Q6IE51,Q7TP52                                                                |
| 2023 | 1,2,4,5,6,7<br>,28,32 | 3,8,27,29,<br>30,31,33,3<br>4,35 | 9  | O55145,P02631,P05539,P12020,P52590,P83748,Q63942,Q6IE51,Q7TP52                                                                       |
| 2024 | 1,2,4,5,6,7<br>,28,33 | 3,8,27,29,<br>30,31,32,3<br>4,35 | 11 | P02631,P15399,P18418,P52590,P83748,P97580,Q30KJ2,Q63942,Q6IE51,Q7TP52,Q9QZQ5                                                         |
| 2025 | 1,2,4,5,6,7<br>,28,34 | 3,8,27,29,<br>30,31,32,3<br>3,35 | 17 | G3V686,P02631,P05539,P0C0K7,P14408,P17559,P18418,P52590,P61206;P84079;P84082,P83748,P97840,Q5HZV9,Q63532,Q63942,Q6IE51,Q7TP52,Q9QZQ5 |
| 2026 | 1,2,4,5,6,7<br>,28,35 | 3,8,27,29,<br>30,31,32,3<br>3,34 | 11 | P02631,P14480,P15399,P20760,P52590,P83748,P97580,Q30KJ2,Q63942,Q6IE51,Q7TP52                                                         |
| 2027 | 1,2,4,5,6,7<br>,29,30 | 3,8,27,28,<br>31,32,33,3<br>4,35 | 8  | O55145,P02631,P20762,P52590,P83748,Q6IE51,Q7TP52,Q9QZQ5                                                                              |
| 2028 | 1,2,4,5,6,7<br>,29,31 | 3,8,27,28,<br>30,32,33,3<br>4,35 | 13 | O55145,P02631,P04182,P05539,P20762,P25236,P52590,P83748,Q63467,Q6IE51,Q7TP52,Q8CJD3,Q9QZQ5                                           |
| 2029 | 1,2,4,5,6,7<br>,29,32 | 3,8,27,28,<br>30,31,33,3<br>4,35 | 12 | O55145,P02631,P05539,P20762,P52590,P83748,Q63467,Q63532,Q6IE51,Q7TP52,Q8CJD3,Q9QZQ5                                                  |
| 2030 | 1,2,4,5,6,7<br>,29,33 | 3,8,27,28,<br>30,31,32,3<br>4,35 | 11 | P02631,P15399,P20762,P52590,P83748,Q30KJ2,Q63467,Q6IE51,Q7TP52,Q8CJD3,Q9QZQ5                                                         |
| 2031 | 1,2,4,5,6,7<br>,29,34 | 3,8,27,28,<br>30,31,32,3<br>3,35 | 14 | G3V686,P02631,P05539,P14408,P17559,P52590,P83748,Q63467,Q63514,Q63532,Q6IE51,Q7TP52,Q9JJ22,Q9QZQ5                                    |
| 2032 | 1,2,4,5,6,7<br>,29,35 | 3,8,27,28,<br>30,31,32,3<br>3,34 | 13 | P02631,P04182,P14480,P15399,P20762,P25236,P52590,P83748,Q30KJ2,Q63514,Q6IE51,Q7TP52,Q9QZQ5                                           |
| 2033 | 1,2,4,5,6,7<br>,30,31 | 3,8,27,28,<br>29,32,33,3<br>4,35 | 11 | O55145,O88267,P19218,P25236,P35446,P42854,P52590,P83748,Q6IE51,Q7TP52,Q9QZQ5                                                         |
| 2034 | 1,2,4,5,6,7<br>,30,32 | 3,8,27,28,<br>29,31,33,3<br>4,35 | 12 | O55145,O88267,P02631,P05539,P20762,P52590,P83748,Q09030,Q63532,Q6IE51,Q7TP52,Q9QZQ5                                                  |

|      |                       |                                  |    |                                                                                                                               |
|------|-----------------------|----------------------------------|----|-------------------------------------------------------------------------------------------------------------------------------|
| 2035 | 1,2,4,5,6,7<br>,30,33 | 3,8,27,28,<br>29,31,32,3<br>4,35 | 10 | P02631,P19218,P35446,P52590,P83748,P97580,Q30KJ2,Q6IE51,Q7TP52,Q9QZQ5                                                         |
| 2036 | 1,2,4,5,6,7<br>,30,34 | 3,8,27,28,<br>29,31,32,3<br>3,35 | 17 | G3V686,O88267,P02631,P09605,P25809,P14408,P17559,P19218,P47967,P52590,P83748,P97840,Q09030,Q63514,Q63532,Q6IE51,Q7TP52,Q9QZQ5 |
| 2037 | 1,2,4,5,6,7<br>,30,35 | 3,8,27,28,<br>29,31,32,3<br>3,34 | 11 | O88267,P02631,P14480,P20762,P52590,P83748,P97584,Q30KJ2,Q63514,Q6IE51,Q7TP52                                                  |
| 2038 | 1,2,4,5,6,7<br>,31,32 | 3,8,27,28,<br>29,30,33,3<br>4,35 | 15 | O55145,P02631,P04182,P05539,P12020,P52590,P83748,P97580,P97605,Q30KJ2,Q62997,Q63532,Q6IE51,Q7TP52,Q8CJD3                      |
| 2039 | 1,2,4,5,6,7<br>,31,33 | 3,8,27,28,<br>29,30,32,3<br>4,35 | 13 | P02631,P04182,P05539,P15399,P52590,P83748,P97580,Q30KJ2,Q62997,Q6IE51,Q7TP52,Q8CJD3,Q9QZQ5                                    |
| 2040 | 1,2,4,5,6,7<br>,31,34 | 3,8,27,28,<br>29,30,32,3<br>3,35 | 15 | G3V686,P02631,P05539,P0C0K7,P14408,P17559,P52590,P70709,P83748,Q62997,Q63467,Q63532,Q6IE51,Q7TP52,Q9QZQ5                      |
| 2041 | 1,2,4,5,6,7<br>,31,35 | 3,8,27,28,<br>29,30,32,3<br>3,34 | 11 | P04182,P08010,P15399,P25236,P52590,P83748,P97580,P97584,Q30KJ2,Q6IE51,Q7TP52                                                  |
| 2042 | 1,2,4,5,6,7<br>,32,33 | 3,8,27,28,<br>29,30,31,3<br>4,35 | 14 | P02631,P05539,P15399,P52590,P55314,P83748,P97580,P97605,Q30KJ2,Q63532,Q6IE51,Q7TP52,Q8CJD3,Q9QZQ5                             |
| 2043 | 1,2,4,5,6,7<br>,32,34 | 3,8,27,28,<br>29,30,31,3<br>3,35 | 16 | G3V686,O88267,P02631,P05539,P14408,P17559,P52590,P70709,P83748,P97605,Q09030,Q63467,Q63532,Q6IE51,Q7TP52,Q9QZQ5               |
| 2044 | 1,2,4,5,6,7<br>,32,35 | 3,8,27,28,<br>29,30,31,3<br>3,34 | 14 | O88267,P02631,P04182,P05539,P15399,P20762,P52590,P83748,P97580,P97605,Q30KJ2,Q63532,Q6IE51,Q7TP52                             |
| 2045 | 1,2,4,5,6,7<br>,33,34 | 3,8,27,28,<br>29,30,31,3<br>2,35 | 13 | G3V686,P02631,P05539,P14408,P17559,P52590,P83748,P97580,Q30KJ2,Q63532,Q6IE51,Q7TP52,Q9QZQ5                                    |
| 2046 | 1,2,4,5,6,7<br>,33,35 | 3,8,27,28,<br>29,30,31,3<br>2,34 | 10 | P02631,P04182,P15399,P16636,P52590,P83748,P97580,Q30KJ2,Q6IE51,Q7TP52                                                         |
| 2047 | 1,2,4,5,6,7<br>,34,35 | 3,8,27,28,<br>29,30,31,3<br>2,33 | 18 | G3V686,P02631,P02781,P08010,P14408,P14480,P16636,P17559,P52590,P82471,P83748,P97580,Q30KJ2,Q63514,Q63532,Q6IE51,Q7TP52,Q9QZQ5 |
| 2048 | 1,2,4,5,6,8<br>,27,28 | 3,7,29,30,<br>31,32,33,3<br>4,35 | 4  | P07171,P14669,Q63942,Q7TP52                                                                                                   |
| 2049 | 1,2,4,5,6,8<br>,27,29 | 3,7,28,30,<br>31,32,33,3<br>4,35 | 7  | O55145,P07171,P14669,P20762,Q63514,Q63942,Q7TP52                                                                              |

|      |                       |                                  |    |                                                                       |
|------|-----------------------|----------------------------------|----|-----------------------------------------------------------------------|
| 2050 | 1,2,4,5,6,8<br>,27,30 | 3,7,28,29,<br>31,32,33,3<br>4,35 | 8  | O55145,P07171,P14669,Q63514,Q63942,Q6AYQ8,Q7TP52,Q9Z0V6               |
| 2051 | 1,2,4,5,6,8<br>,27,31 | 3,7,28,29,<br>30,32,33,3<br>4,35 | 5  | O55145,P07171,P14669,Q63942,Q7TP52                                    |
| 2052 | 1,2,4,5,6,8<br>,27,32 | 3,7,28,29,<br>30,31,33,3<br>4,35 | 7  | O55145,P06760,P14669,Q63942,Q7TP52,Q8CJD3,Q9Z0V6                      |
| 2053 | 1,2,4,5,6,8<br>,27,33 | 3,7,28,29,<br>30,31,32,3<br>4,35 | 4  | P14669,Q63514,Q63942,Q7TP52                                           |
| 2054 | 1,2,4,5,6,8<br>,27,34 | 3,7,28,29,<br>30,31,32,3<br>3,35 | 10 | G3V686,P14669,P70709,Q03191,Q63514,Q63942,Q64361,Q7TP52,Q9WTT6,Q9Z0V6 |
| 2055 | 1,2,4,5,6,8<br>,27,35 | 3,7,28,29,<br>30,31,32,3<br>3,34 | 5  | P14669,Q63514,Q63942,Q7TP52,Q9Z0V6                                    |
| 2056 | 1,2,4,5,6,8<br>,28,29 | 3,7,27,30,<br>31,32,33,3<br>4,35 | 6  | A2RUV9,O35547,P01681,Q62975,Q63942,Q7TP52                             |
| 2057 | 1,2,4,5,6,8<br>,28,30 | 3,7,27,29,<br>31,32,33,3<br>4,35 | 4  | A2RUV9,Q63942,Q6AYQ8,Q7TP52                                           |
| 2058 | 1,2,4,5,6,8<br>,28,31 | 3,7,27,29,<br>30,32,33,3<br>4,35 | 4  | O55145,P02803,Q63942,Q7TP52                                           |
| 2059 | 1,2,4,5,6,8<br>,28,32 | 3,7,27,29,<br>30,31,33,3<br>4,35 | 2  | Q63942,Q7TP52                                                         |
| 2060 | 1,2,4,5,6,8<br>,28,33 | 3,7,27,29,<br>30,31,32,3<br>4,35 | 3  | A2RUV9,Q63942,Q7TP52                                                  |
| 2061 | 1,2,4,5,6,8<br>,28,34 | 3,7,27,29,<br>30,31,32,3<br>3,35 | 7  | P52303,Q5HZV9,Q63514,Q63942,Q6P6R2,Q7TP52,Q9WTT6                      |
| 2062 | 1,2,4,5,6,8<br>,28,35 | 3,7,27,29,<br>30,31,32,3<br>3,34 | 6  | A2RUV9,P01681,P02803,Q63514,Q63942,Q7TP52                             |
| 2063 | 1,2,4,5,6,8<br>,29,30 | 3,7,27,28,<br>31,32,33,3<br>4,35 | 7  | A2RUV9,O55145,P20762,P25236,Q63514,Q63942,Q7TP52                      |
| 2064 | 1,2,4,5,6,8<br>,29,31 | 3,7,27,28,<br>30,32,33,3<br>4,35 | 7  | O55145,P20762,P25236,Q63514,Q63942,Q7TP52,Q8CJD3                      |

|      |                       |                                  |   |                                                         |
|------|-----------------------|----------------------------------|---|---------------------------------------------------------|
| 2065 | 1,2,4,5,6,8<br>,29,32 | 3,7,27,28,<br>30,31,33,3<br>4,35 | 7 | A2RUV9,P20762,P50280,Q62975,Q63942,Q7TP52,Q8CJD3        |
| 2066 | 1,2,4,5,6,8<br>,29,33 | 3,7,27,28,<br>30,31,32,3<br>4,35 | 6 | A2RUV9,P20762,Q63514,Q63942,Q7TP52,Q8CJD3               |
| 2067 | 1,2,4,5,6,8<br>,29,34 | 3,7,27,28,<br>30,31,32,3<br>3,35 | 6 | G3V686,Q63514,Q63942,Q7TP52,Q9JJ22,Q9WTT6               |
| 2068 | 1,2,4,5,6,8<br>,29,35 | 3,7,27,28,<br>30,31,32,3<br>3,34 | 8 | A2RUV9,P14480,P20762,P25236,Q06000,Q63514,Q63942,Q7TP52 |
| 2069 | 1,2,4,5,6,8<br>,30,31 | 3,7,27,28,<br>29,32,33,3<br>4,35 | 7 | O55145,P19218,P25236,Q63514,Q7TP52,Q80WL1,Q9Z0V6        |
| 2070 | 1,2,4,5,6,8<br>,30,32 | 3,7,27,28,<br>29,31,33,3<br>4,35 | 5 | A2RUV9,O55145,P20762,Q7TP52,Q9Z0V6                      |
| 2071 | 1,2,4,5,6,8<br>,30,33 | 3,7,27,28,<br>29,31,32,3<br>4,35 | 3 | A2RUV9,Q63514,Q7TP52                                    |
| 2072 | 1,2,4,5,6,8<br>,30,34 | 3,7,27,28,<br>29,31,32,3<br>3,35 | 4 | Q63514,Q7TP52,Q9WTT6,Q9Z0V6                             |
| 2073 | 1,2,4,5,6,8<br>,30,35 | 3,7,27,28,<br>29,31,32,3<br>3,34 | 7 | A2RUV9,P14480,P20762,Q06000,Q63514,Q7TP52,Q9Z0V6        |
| 2074 | 1,2,4,5,6,8<br>,31,32 | 3,7,27,28,<br>29,30,33,3<br>4,35 | 6 | O55145,P04182,P25236,Q62997,Q7TP52,Q8CJD3               |
| 2075 | 1,2,4,5,6,8<br>,31,33 | 3,7,27,28,<br>29,30,32,3<br>4,35 | 3 | Q62997,Q7TP52,Q8CJD3                                    |
| 2076 | 1,2,4,5,6,8<br>,31,34 | 3,7,27,28,<br>29,30,32,3<br>3,35 | 7 | G3V686,P70709,Q62997,Q63514,Q7TP52,Q9WTT6,Q9Z0V6        |
| 2077 | 1,2,4,5,6,8<br>,31,35 | 3,7,27,28,<br>29,30,32,3<br>3,34 | 7 | P02803,P04182,P25236,Q06000,Q63514,Q7TP52,Q9Z0V6        |
| 2078 | 1,2,4,5,6,8<br>,32,33 | 3,7,27,28,<br>29,30,31,3<br>4,35 | 3 | A2RUV9,Q7TP52,Q8CJD3                                    |
| 2079 | 1,2,4,5,6,8<br>,32,34 | 3,7,27,28,<br>29,30,31,3<br>3,35 | 8 | G3V686,P08753,P52303,P70709,Q6P6R2,Q7TP52,Q9WTT6,Q9Z0V6 |



|      |                        |                                  |   |                                                                       |
|------|------------------------|----------------------------------|---|-----------------------------------------------------------------------|
| 2080 | 1,2,4,5,6,8<br>,32,35  | 3,7,27,28,<br>29,30,31,3<br>3,34 | 6 | A2RUV9,P04182,P08753,P20762,Q7TP52,Q9Z0V6                             |
| 2081 | 1,2,4,5,6,8<br>,33,34  | 3,7,27,28,<br>29,30,31,3<br>2,35 | 4 | G3V686,Q63355,Q63514,Q7TP52                                           |
| 2082 | 1,2,4,5,6,8<br>,33,35  | 3,7,27,28,<br>29,30,31,3<br>2,34 | 6 | A2RUV9,P20171,Q30KJ2,Q63355,Q63514,Q7TP52                             |
| 2083 | 1,2,4,5,6,8<br>,34,35  | 3,7,27,28,<br>29,30,31,3<br>2,33 | 9 | P02793;Q7TP54,P08753,P09006,Q06000,Q63514,Q6PCU2,Q7TP52,Q9WTT6,Q9Z0V6 |
| 2084 | 1,2,4,5,6,2<br>7,28,29 | 3,7,8,30,3<br>1,32,33,34<br>,35  | 6 | O35547,P0C0A9,Q63942,Q7TP52,Q9JHB9,Q9JI85                             |
| 2085 | 1,2,4,5,6,2<br>7,28,30 | 3,7,8,29,3<br>1,32,33,34<br>,35  | 4 | O55145,Q63942,Q6AYQ8,Q7TP52                                           |
| 2086 | 1,2,4,5,6,2<br>7,28,31 | 3,7,8,29,3<br>0,32,33,34<br>,35  | 3 | O55145,Q63942,Q7TP52                                                  |
| 2087 | 1,2,4,5,6,2<br>7,28,32 | 3,7,8,29,3<br>0,31,33,34<br>,35  | 5 | O55145,P05539,Q63942,Q6IFU7,Q7TP52                                    |
| 2088 | 1,2,4,5,6,2<br>7,28,33 | 3,7,8,29,3<br>0,31,32,34<br>,35  | 2 | Q63942,Q7TP52                                                         |
| 2089 | 1,2,4,5,6,2<br>7,28,34 | 3,7,8,29,3<br>0,31,32,33<br>,35  | 7 | G3V686,P14408,P70709,Q10758,Q5HZV9,Q63942,Q7TP52                      |
| 2090 | 1,2,4,5,6,2<br>7,28,35 | 3,7,8,29,3<br>0,31,32,33<br>,34  | 3 | P01681,Q63942,Q7TP52                                                  |
| 2091 | 1,2,4,5,6,2<br>7,29,30 | 3,7,8,28,3<br>1,32,33,34<br>,35  | 2 | O55145,Q7TP52                                                         |
| 2092 | 1,2,4,5,6,2<br>7,29,31 | 3,7,8,28,3<br>0,32,33,34<br>,35  | 3 | O55145,P25236,Q7TP52                                                  |
| 2093 | 1,2,4,5,6,2<br>7,29,32 | 3,7,8,28,3<br>0,31,33,34<br>,35  | 4 | G3V686,O55145,P05539,Q7TP52                                           |
| 2094 | 1,2,4,5,6,2<br>7,29,33 | 3,7,8,28,3<br>0,31,32,34<br>,35  | 1 | Q7TP52                                                                |

|      |                        |                                 |   |                                                         |
|------|------------------------|---------------------------------|---|---------------------------------------------------------|
| 2095 | 1,2,4,5,6,2<br>7,29,34 | 3,7,8,28,3<br>0,31,32,33<br>,35 | 4 | G3V686,P14408,P70709,Q7TP52                             |
| 2096 | 1,2,4,5,6,2<br>7,29,35 | 3,7,8,28,3<br>0,31,32,33<br>,34 | 3 | P14480,P25236,Q7TP52                                    |
| 2097 | 1,2,4,5,6,2<br>7,30,31 | 3,7,8,28,2<br>9,32,33,34<br>,35 | 3 | O55145,P25236,Q7TP52                                    |
| 2098 | 1,2,4,5,6,2<br>7,30,32 | 3,7,8,28,2<br>9,31,33,34<br>,35 | 2 | O55145,Q7TP52                                           |
| 2099 | 1,2,4,5,6,2<br>7,30,33 | 3,7,8,28,2<br>9,31,32,34<br>,35 | 1 | Q7TP52                                                  |
| 2100 | 1,2,4,5,6,2<br>7,30,34 | 3,7,8,28,2<br>9,31,32,33<br>,35 | 3 | G3V686,P70709,Q7TP52                                    |
| 2101 | 1,2,4,5,6,2<br>7,30,35 | 3,7,8,28,2<br>9,31,32,33<br>,34 | 2 | P14480,Q7TP52                                           |
| 2102 | 1,2,4,5,6,2<br>7,31,32 | 3,7,8,28,2<br>9,30,33,34<br>,35 | 4 | G3V686,O55145,P05539,Q7TP52                             |
| 2103 | 1,2,4,5,6,2<br>7,31,33 | 3,7,8,28,2<br>9,30,32,34<br>,35 | 1 | Q7TP52                                                  |
| 2104 | 1,2,4,5,6,2<br>7,31,34 | 3,7,8,28,2<br>9,30,32,33<br>,35 | 5 | G3V686,P14408,P70709,Q62997,Q7TP52                      |
| 2105 | 1,2,4,5,6,2<br>7,31,35 | 3,7,8,28,2<br>9,30,32,33<br>,34 | 2 | P25236,Q7TP52                                           |
| 2106 | 1,2,4,5,6,2<br>7,32,33 | 3,7,8,28,2<br>9,30,31,34<br>,35 | 7 | G3V686,P05539,P55314,Q61FW6,Q6P6Q2,Q7TP52,Q8CJD3        |
| 2107 | 1,2,4,5,6,2<br>7,32,34 | 3,7,8,28,2<br>9,30,31,33<br>,35 | 8 | G3V686,P05539,P06760,P70709,Q03191,Q10758,Q63532,Q7TP52 |
| 2108 | 1,2,4,5,6,2<br>7,32,35 | 3,7,8,28,2<br>9,30,31,33<br>,34 | 1 | Q7TP52                                                  |
| 2109 | 1,2,4,5,6,2<br>7,33,34 | 3,7,8,28,2<br>9,30,31,32<br>,35 | 4 | G3V686,P14408,P70709,Q7TP52                             |

|      |                        |                                 |   |                                                  |
|------|------------------------|---------------------------------|---|--------------------------------------------------|
| 2110 | 1,2,4,5,6,2<br>7,33,35 | 3,7,8,28,2<br>9,30,31,32<br>,34 | 2 | Q30KJ2,Q7TP52                                    |
| 2111 | 1,2,4,5,6,2<br>7,34,35 | 3,7,8,28,2<br>9,30,31,32<br>,33 | 4 | G3V686,P14408,P14480,Q7TP52                      |
| 2112 | 1,2,4,5,6,2<br>8,29,30 | 3,7,8,27,3<br>1,32,33,34<br>,35 | 7 | A2RUV9,P01681,P01835,Q08849,Q62975,Q63942,Q7TP52 |
| 2113 | 1,2,4,5,6,2<br>8,29,31 | 3,7,8,27,3<br>0,32,33,34<br>,35 | 6 | O35547,P06911,P25236,Q62975,Q63942,Q7TP52        |
| 2114 | 1,2,4,5,6,2<br>8,29,32 | 3,7,8,27,3<br>0,31,33,34<br>,35 | 3 | Q62975,Q63942,Q7TP52                             |
| 2115 | 1,2,4,5,6,2<br>8,29,33 | 3,7,8,27,3<br>0,31,32,34<br>,35 | 3 | A2RUV9,O35547,Q63942                             |
| 2116 | 1,2,4,5,6,2<br>8,29,34 | 3,7,8,27,3<br>0,31,32,33<br>,35 | 6 | P27791,P52303,Q5HZV9,Q63942,Q7TP52,Q9JJ22        |
| 2117 | 1,2,4,5,6,2<br>8,29,35 | 3,7,8,27,3<br>0,31,32,33<br>,34 | 4 | P01681,P14480,Q63942,Q7TP52                      |
| 2118 | 1,2,4,5,6,2<br>8,30,31 | 3,7,8,27,2<br>9,32,33,34<br>,35 | 3 | O55145,Q63942,Q7TP52                             |
| 2119 | 1,2,4,5,6,2<br>8,30,32 | 3,7,8,27,2<br>9,31,33,34<br>,35 | 3 | O55145,Q63942,Q7TP52                             |
| 2120 | 1,2,4,5,6,2<br>8,30,33 | 3,7,8,27,2<br>9,31,32,34<br>,35 | 3 | A2RUV9,Q63942,Q7TP52                             |
| 2121 | 1,2,4,5,6,2<br>8,30,34 | 3,7,8,27,2<br>9,31,32,33<br>,35 | 4 | P52303,Q5HZV9,Q63942,Q7TP52                      |
| 2122 | 1,2,4,5,6,2<br>8,30,35 | 3,7,8,27,2<br>9,31,32,33<br>,34 | 4 | P01681,P14480,Q63942,Q7TP52                      |
| 2123 | 1,2,4,5,6,2<br>8,31,32 | 3,7,8,27,2<br>9,30,33,34<br>,35 | 3 | O55145,Q63942,Q7TP52                             |
| 2124 | 1,2,4,5,6,2<br>8,31,33 | 3,7,8,27,2<br>9,30,32,34<br>,35 | 2 | Q63942,Q7TP52                                    |

|      |                        |                                 |   |                                                  |
|------|------------------------|---------------------------------|---|--------------------------------------------------|
| 2125 | 1,2,4,5,6,2<br>8,31,34 | 3,7,8,27,2<br>9,30,32,33<br>,35 | 7 | G3V686,P14408,P27791,Q5HZV9,Q62997,Q63942,Q7TP52 |
| 2126 | 1,2,4,5,6,2<br>8,31,35 | 3,7,8,27,2<br>9,30,32,33<br>,34 | 4 | P02803,P20760,Q63942,Q7TP52                      |
| 2127 | 1,2,4,5,6,2<br>8,32,33 | 3,7,8,27,2<br>9,30,31,34<br>,35 | 2 | Q63942,Q7TP52                                    |
| 2128 | 1,2,4,5,6,2<br>8,32,34 | 3,7,8,27,2<br>9,30,31,33<br>,35 | 5 | G3V686,P52303,Q5HZV9,Q63942,Q7TP52               |
| 2129 | 1,2,4,5,6,2<br>8,32,35 | 3,7,8,27,2<br>9,30,31,33<br>,34 | 2 | Q63942,Q7TP52                                    |
| 2130 | 1,2,4,5,6,2<br>8,33,34 | 3,7,8,27,2<br>9,30,31,32<br>,35 | 5 | G3V686,P27791,Q5HZV9,Q63942,Q7TP52               |
| 2131 | 1,2,4,5,6,2<br>8,33,35 | 3,7,8,27,2<br>9,30,31,32<br>,34 | 6 | A2RUV9,P15399,P20760,Q30KJ2,Q63942,Q7TP52        |
| 2132 | 1,2,4,5,6,2<br>8,34,35 | 3,7,8,27,2<br>9,30,31,32<br>,33 | 4 | P52303,Q5HZV9,Q63942,Q7TP52                      |
| 2133 | 1,2,4,5,6,2<br>9,30,31 | 3,7,8,27,2<br>8,32,33,34<br>,35 | 3 | O55145,P25236,Q7TP52                             |
| 2134 | 1,2,4,5,6,2<br>9,30,32 | 3,7,8,27,2<br>8,31,33,34<br>,35 | 5 | A2RUV9,O55145,P25236,Q62975,Q7TP52               |
| 2135 | 1,2,4,5,6,2<br>9,30,33 | 3,7,8,27,2<br>8,31,32,34<br>,35 | 2 | A2RUV9,Q7TP52                                    |
| 2136 | 1,2,4,5,6,2<br>9,30,34 | 3,7,8,27,2<br>8,31,32,33<br>,35 | 4 | P25236,Q08849,Q7TP52,Q9JJ22                      |
| 2137 | 1,2,4,5,6,2<br>9,30,35 | 3,7,8,27,2<br>8,31,32,33<br>,34 | 5 | A2RUV9,P14480,P25236,Q08849,Q7TP52               |
| 2138 | 1,2,4,5,6,2<br>9,31,32 | 3,7,8,27,2<br>8,30,33,34<br>,35 | 6 | O55145,P04182,P25236,Q62975,Q7TP52,Q8CJD3        |
| 2139 | 1,2,4,5,6,2<br>9,31,33 | 3,7,8,27,2<br>8,30,32,34<br>,35 | 4 | P04182,P25236,Q7TP52,Q8CJD3                      |

|      |                        |                                 |   |                                           |
|------|------------------------|---------------------------------|---|-------------------------------------------|
| 2140 | 1,2,4,5,6,2<br>9,31,34 | 3,7,8,27,2<br>8,30,32,33<br>,35 | 6 | G3V686,P14408,P25236,P70709,Q62997,Q7TP52 |
| 2141 | 1,2,4,5,6,2<br>9,31,35 | 3,7,8,27,2<br>8,30,32,33<br>,34 | 3 | P04182,P25236,Q7TP52                      |
| 2142 | 1,2,4,5,6,2<br>9,32,33 | 3,7,8,27,2<br>8,30,31,34<br>,35 | 3 | A2RUV9,Q7TP52,Q8CJD3                      |
| 2143 | 1,2,4,5,6,2<br>9,32,34 | 3,7,8,27,2<br>8,30,31,33<br>,35 | 3 | G3V686,P70709,Q7TP52                      |
| 2144 | 1,2,4,5,6,2<br>9,32,35 | 3,7,8,27,2<br>8,30,31,33<br>,34 | 4 | P04182,P14480,P25236,Q7TP52               |
| 2145 | 1,2,4,5,6,2<br>9,33,34 | 3,7,8,27,2<br>8,30,31,32<br>,35 | 3 | G3V686,Q7TP52,Q9JJ22                      |
| 2146 | 1,2,4,5,6,2<br>9,33,35 | 3,7,8,27,2<br>8,30,31,32<br>,34 | 5 | A2RUV9,P04182,P15399,Q30KJ2,Q7TP52        |
| 2147 | 1,2,4,5,6,2<br>9,34,35 | 3,7,8,27,2<br>8,30,31,32<br>,33 | 4 | P14480,P25236,Q7TP52,Q9JJ22               |
| 2148 | 1,2,4,5,6,3<br>0,31,32 | 3,7,8,27,2<br>8,29,33,34<br>,35 | 3 | O55145,P25236,Q7TP52                      |
| 2149 | 1,2,4,5,6,3<br>0,31,33 | 3,7,8,27,2<br>8,29,32,34<br>,35 | 2 | P51907,Q7TP52                             |
| 2150 | 1,2,4,5,6,3<br>0,31,34 | 3,7,8,27,2<br>8,29,32,33<br>,35 | 4 | G3V686,P25236,Q62997,Q7TP52               |
| 2151 | 1,2,4,5,6,3<br>0,31,35 | 3,7,8,27,2<br>8,29,32,33<br>,34 | 4 | P04182,P14480,P25236,Q7TP52               |
| 2152 | 1,2,4,5,6,3<br>0,32,33 | 3,7,8,27,2<br>8,29,31,34<br>,35 | 3 | A2RUV9,P55314,Q7TP52                      |
| 2153 | 1,2,4,5,6,3<br>0,32,34 | 3,7,8,27,2<br>8,29,31,33<br>,35 | 2 | G3V686,Q7TP52                             |
| 2154 | 1,2,4,5,6,3<br>0,32,35 | 3,7,8,27,2<br>8,29,31,33<br>,34 | 3 | A2RUV9,P14480,Q7TP52                      |

|      |                        |                                  |    |                                                                              |
|------|------------------------|----------------------------------|----|------------------------------------------------------------------------------|
| 2155 | 1,2,4,5,6,3<br>0,33,34 | 3,7,8,27,2<br>8,29,31,32<br>,35  | 2  | G3V686,Q7TP52                                                                |
| 2156 | 1,2,4,5,6,3<br>0,33,35 | 3,7,8,27,2<br>8,29,31,32<br>,34  | 3  | A2RUV9,Q30KJ2,Q7TP52                                                         |
| 2157 | 1,2,4,5,6,3<br>0,34,35 | 3,7,8,27,2<br>8,29,31,32<br>,33  | 5  | P02793;Q7TP54,P14480,P82471,Q7TP52,Q920G2                                    |
| 2158 | 1,2,4,5,6,3<br>1,32,33 | 3,7,8,27,2<br>8,29,30,34<br>,35  | 4  | P04182,P97580,Q7TP52,Q8CJD3                                                  |
| 2159 | 1,2,4,5,6,3<br>1,32,34 | 3,7,8,27,2<br>8,29,30,33<br>,35  | 6  | G3V686,P05539,P25236,P70709,Q62997,Q7TP52                                    |
| 2160 | 1,2,4,5,6,3<br>1,32,35 | 3,7,8,27,2<br>8,29,30,33<br>,34  | 4  | P04182,P25236,Q30KJ2,Q7TP52                                                  |
| 2161 | 1,2,4,5,6,3<br>1,33,34 | 3,7,8,27,2<br>8,29,30,32<br>,35  | 4  | G3V686,Q62997,Q63355,Q7TP52                                                  |
| 2162 | 1,2,4,5,6,3<br>1,33,35 | 3,7,8,27,2<br>8,29,30,32<br>,34  | 6  | P04182,P15399,P97580,Q30KJ2,Q63355,Q7TP52                                    |
| 2163 | 1,2,4,5,6,3<br>1,34,35 | 3,7,8,27,2<br>8,29,30,32<br>,33  | 8  | P02781,P02793;Q7TP54,P14408,P25236,P82471,Q62997,Q63355,Q7TP52               |
| 2164 | 1,2,4,5,6,3<br>2,33,34 | 3,7,8,27,2<br>8,29,30,31<br>,35  | 4  | G3V686,P55314,Q63661,Q7TP52                                                  |
| 2165 | 1,2,4,5,6,3<br>2,33,35 | 3,7,8,27,2<br>8,29,30,31<br>,34  | 6  | A2RUV9,P04182,P15399,P97580,Q30KJ2,Q7TP52                                    |
| 2166 | 1,2,4,5,6,3<br>2,34,35 | 3,7,8,27,2<br>8,29,30,31<br>,33  | 6  | G3V686,P02781,P08753,P82471,Q63661,Q7TP52                                    |
| 2167 | 1,2,4,5,6,3<br>3,34,35 | 3,7,8,27,2<br>8,29,30,31<br>,32  | 5  | P02781,P82471,Q30KJ2,Q63355,Q7TP52                                           |
| 2168 | 1,2,4,5,7,8<br>,27,28  | 3,6,29,30,<br>31,32,33,3<br>4,35 | 11 | P07171,P18418,P52590,Q03191,Q09030,Q63942,Q6IE51,Q7TP52,Q8CHN8,Q99MH3,Q9R0T3 |
| 2169 | 1,2,4,5,7,8<br>,27,29  | 3,6,28,30,<br>31,32,33,3<br>4,35 | 8  | P07171,P52590,Q03191,Q09030,Q63467,Q63617,Q6IE51,Q7TP52                      |

|      |                       |                                  |    |                                                                                            |
|------|-----------------------|----------------------------------|----|--------------------------------------------------------------------------------------------|
| 2170 | 1,2,4,5,7,8<br>,27,30 | 3,6,28,29,<br>31,32,33,3<br>4,35 | 10 | O55145,P07171,P52590,Q03191,Q09030,Q64057,Q6AYQ8,Q6IE51,Q7TP52,Q99MH3                      |
| 2171 | 1,2,4,5,7,8<br>,27,31 | 3,6,28,29,<br>30,32,33,3<br>4,35 | 10 | O55145,P00507,P00762,P07171,P52590,Q03191,Q09030,Q6IE51,Q7TP52,Q99MH3                      |
| 2172 | 1,2,4,5,7,8<br>,27,32 | 3,6,28,29,<br>30,31,33,3<br>4,35 | 10 | O55145,P00714,P05539,P07171,P52590,Q03191,Q09030,Q6IE51,Q7TP52,Q99MH3                      |
| 2173 | 1,2,4,5,7,8<br>,27,33 | 3,6,28,29,<br>30,31,32,3<br>4,35 | 12 | P00507,P07171,P16636,P18418,P52590,P80204,Q03191,Q09030,Q6IE51,Q7TP52,Q99041,Q99MH3        |
| 2174 | 1,2,4,5,7,8<br>,27,34 | 3,6,28,29,<br>30,31,32,3<br>3,35 | 13 | G3V686,P07171,P14408,P16636,P18418,P52590,Q01205,Q03191,Q09030,Q63467,Q63532,Q6IE51,Q7TP52 |
| 2175 | 1,2,4,5,7,8<br>,27,35 | 3,6,28,29,<br>30,31,32,3<br>3,34 | 9  | P07171,P16636,P52590,Q03191,Q09030,Q6IE51,Q7TP52,Q8CHN8,Q99MH3                             |
| 2176 | 1,2,4,5,7,8<br>,28,29 | 3,6,27,30,<br>31,32,33,3<br>4,35 | 5  | P07171,P52590,Q63617,Q63942,Q9R0T3                                                         |
| 2177 | 1,2,4,5,7,8<br>,28,30 | 3,6,27,29,<br>31,32,33,3<br>4,35 | 6  | P07171,P52590,Q09030,Q63942,Q64057,Q6AYQ8                                                  |
| 2178 | 1,2,4,5,7,8<br>,28,31 | 3,6,27,29,<br>30,32,33,3<br>4,35 | 4  | P02803,P07171,P52590,Q63942                                                                |
| 2179 | 1,2,4,5,7,8<br>,28,32 | 3,6,27,29,<br>30,31,33,3<br>4,35 | 4  | P07171,P52590,Q09030,Q63942                                                                |
| 2180 | 1,2,4,5,7,8<br>,28,33 | 3,6,27,29,<br>30,31,32,3<br>4,35 | 6  | P02803,P07171,P18418,P52590,Q63942,Q99041                                                  |
| 2181 | 1,2,4,5,7,8<br>,28,34 | 3,6,27,29,<br>30,31,32,3<br>3,35 | 7  | P07171,P14408,P18418,P52303,P52590,Q09030,Q63942                                           |
| 2182 | 1,2,4,5,7,8<br>,28,35 | 3,6,27,29,<br>30,31,32,3<br>3,34 | 4  | P02803,P07171,P52590,Q63942                                                                |
| 2183 | 1,2,4,5,7,8<br>,29,30 | 3,6,27,28,<br>31,32,33,3<br>4,35 | 4  | P07171,P52590,P97584,Q63467                                                                |
| 2184 | 1,2,4,5,7,8<br>,29,31 | 3,6,27,28,<br>30,32,33,3<br>4,35 | 7  | O55145,P04182,P07171,P52590,Q63467,Q63617,Q8CJD3                                           |

|      |                       |                                  |    |                                                                                     |
|------|-----------------------|----------------------------------|----|-------------------------------------------------------------------------------------|
| 2185 | 1,2,4,5,7,8<br>,29,32 | 3,6,27,28,<br>30,31,33,3<br>4,35 | 5  | P07171,P52590,Q63467,Q63617,Q8CJD3                                                  |
| 2186 | 1,2,4,5,7,8<br>,29,33 | 3,6,27,28,<br>30,31,32,3<br>4,35 | 5  | P07171,P52590,Q63467,Q63617,Q8CJD3                                                  |
| 2187 | 1,2,4,5,7,8<br>,29,34 | 3,6,27,28,<br>30,31,32,3<br>3,35 | 6  | P07171,P14408,P52590,P83748,Q63467,Q9JJ22                                           |
| 2188 | 1,2,4,5,7,8<br>,29,35 | 3,6,27,28,<br>30,31,32,3<br>3,34 | 5  | P04182,P52590,P97584,Q06000,Q63617                                                  |
| 2189 | 1,2,4,5,7,8<br>,30,31 | 3,6,27,28,<br>29,32,33,3<br>4,35 | 12 | O55145,P07171,P19218,P42854,P52590,P97584,Q09030,Q62997,Q63751,Q64057,Q7TP52,Q80WL1 |
| 2190 | 1,2,4,5,7,8<br>,30,32 | 3,6,27,28,<br>29,31,33,3<br>4,35 | 4  | O55145,O88267,P52590,Q09030                                                         |
| 2191 | 1,2,4,5,7,8<br>,30,33 | 3,6,27,28,<br>29,31,32,3<br>4,35 | 3  | P35446,P52590,Q09030                                                                |
| 2192 | 1,2,4,5,7,8<br>,30,34 | 3,6,27,28,<br>29,31,32,3<br>3,35 | 7  | P47967,P52590,Q09030,Q63514,Q64057,Q7TP52,Q80WL1                                    |
| 2193 | 1,2,4,5,7,8<br>,30,35 | 3,6,27,28,<br>29,31,32,3<br>3,34 | 7  | O88267,P52590,P97584,Q06000,Q09030,Q64057,Q80WL1                                    |
| 2194 | 1,2,4,5,7,8<br>,31,32 | 3,6,27,28,<br>29,30,33,3<br>4,35 | 9  | O55145,P04182,P05539,P52590,P97605,Q09030,Q62997,Q7TP52,Q8CJD3                      |
| 2195 | 1,2,4,5,7,8<br>,31,33 | 3,6,27,28,<br>29,30,32,3<br>4,35 | 7  | P01835,P02803,P07171,P52590,Q62997,Q7TP52,Q8CJD3                                    |
| 2196 | 1,2,4,5,7,8<br>,31,34 | 3,6,27,28,<br>29,30,32,3<br>3,35 | 9  | P01835,P07171,P14408,P52590,P83748,Q09030,Q62997,Q63467,Q7TP52                      |
| 2197 | 1,2,4,5,7,8<br>,31,35 | 3,6,27,28,<br>29,30,32,3<br>3,34 | 7  | P02803,P04182,P52590,P97584,Q06000,Q62997,Q7TP52                                    |
| 2198 | 1,2,4,5,7,8<br>,32,33 | 3,6,27,28,<br>29,30,31,3<br>4,35 | 4  | P52590,P97605,Q09030,Q8CJD3                                                         |
| 2199 | 1,2,4,5,7,8<br>,32,34 | 3,6,27,28,<br>29,30,31,3<br>3,35 | 12 | G3V686,P05539,P08753,P14408,P52590,Q08464,Q09030,Q5ZQU0,Q63467,Q63532,Q6AYS4,Q7TP52 |



|      |                        |                                  |    |                                                                                                          |
|------|------------------------|----------------------------------|----|----------------------------------------------------------------------------------------------------------|
| 2200 | 1,2,4,5,7,8<br>,32,35  | 3,6,27,28,<br>29,30,31,3<br>3,34 | 4  | P04182,P52590,P97605,Q09030                                                                              |
| 2201 | 1,2,4,5,7,8<br>,33,34  | 3,6,27,28,<br>29,30,31,3<br>2,35 | 8  | P01835,P14408,P52590,Q08464,Q09030,Q63467,Q7TP52,Q99041                                                  |
| 2202 | 1,2,4,5,7,8<br>,33,35  | 3,6,27,28,<br>29,30,31,3<br>2,34 | 4  | P02803,P16636,P52590,Q6AYR9                                                                              |
| 2203 | 1,2,4,5,7,8<br>,34,35  | 3,6,27,28,<br>29,30,31,3<br>2,33 | 15 | O08815,P02781,P08010,P08753,P14408,P16296,P16636,P47727,P52590,Q08464,Q09030,Q63514,Q6PCU2,Q7TP52,Q9JHB9 |
| 2204 | 1,2,4,5,7,2<br>7,28,29 | 3,6,8,30,3<br>1,32,33,34<br>,35  | 7  | P14408,P52590,P82995,Q63942,Q6IE51,Q8CHN8,Q9JI85                                                         |
| 2205 | 1,2,4,5,7,2<br>7,28,30 | 3,6,8,29,3<br>1,32,33,34<br>,35  | 9  | D3ZUC6,O55145,P51907,P52590,Q09030,Q6AYQ8,Q6IE51,Q8CHN8,Q99MH3                                           |
| 2206 | 1,2,4,5,7,2<br>7,28,31 | 3,6,8,29,3<br>0,32,33,34<br>,35  | 7  | O55145,P14408,P51907,P52590,Q6IE51,Q7TP52,Q99MH3                                                         |
| 2207 | 1,2,4,5,7,2<br>7,28,32 | 3,6,8,29,3<br>0,31,33,34<br>,35  | 5  | P05539,P52590,Q09030,Q6IE51,Q8CHN8                                                                       |
| 2208 | 1,2,4,5,7,2<br>7,28,33 | 3,6,8,29,3<br>0,31,32,34<br>,35  | 6  | P18418,P51907,P52590,Q6IE51,Q8CHN8,Q99MH3                                                                |
| 2209 | 1,2,4,5,7,2<br>7,28,34 | 3,6,8,29,3<br>0,31,32,33<br>,35  | 9  | G3V686,P14408,P18418,P51907,Q03191,Q09030,Q6IE51,Q7TP52,Q8CHN8                                           |
| 2210 | 1,2,4,5,7,2<br>7,28,35 | 3,6,8,29,3<br>0,31,32,33<br>,34  | 6  | P14408,P16636,P52590,Q6IE51,Q8CHN8,Q99MH3                                                                |
| 2211 | 1,2,4,5,7,2<br>7,29,30 | 3,6,8,28,3<br>1,32,33,34<br>,35  | 4  | D3ZUC6,O55145,P52590,Q6IE51                                                                              |
| 2212 | 1,2,4,5,7,2<br>7,29,31 | 3,6,8,28,3<br>0,32,33,34<br>,35  | 7  | O55145,P05539,P14408,P52590,Q63467,Q6IE51,Q7TP52                                                         |
| 2213 | 1,2,4,5,7,2<br>7,29,32 | 3,6,8,28,3<br>0,31,33,34<br>,35  | 5  | P02793;Q7TP54,P05539,Q63467,Q6IE51,Q99068                                                                |
| 2214 | 1,2,4,5,7,2<br>7,29,33 | 3,6,8,28,3<br>0,31,32,34<br>,35  | 6  | P02793;Q7TP54,P52590,P80204,Q63467,Q6IE51,Q8CHN8                                                         |

|      |                        |                                 |    |                                                                                     |
|------|------------------------|---------------------------------|----|-------------------------------------------------------------------------------------|
| 2215 | 1,2,4,5,7,2<br>7,29,34 | 3,6,8,28,3<br>0,31,32,33<br>,35 | 9  | G3V686,P05539,P14408,Q03191,Q63467,Q63532,Q6IE51,Q7TP52,Q8CHN8                      |
| 2216 | 1,2,4,5,7,2<br>7,29,35 | 3,6,8,28,3<br>0,31,32,33<br>,34 | 7  | P01946,P14408,P14480,P16636,P52590,Q6IE51,Q8CHN8                                    |
| 2217 | 1,2,4,5,7,2<br>7,30,31 | 3,6,8,28,2<br>9,32,33,34<br>,35 | 8  | D3ZUC6,O55145,P00507,P51907,P52590,Q09030,Q6IE51,Q7TP52                             |
| 2218 | 1,2,4,5,7,2<br>7,30,32 | 3,6,8,28,2<br>9,31,33,34<br>,35 | 8  | O55145,P00507,P05539,P52590,Q09030,Q6AYQ8,Q6IE51,Q7TP52                             |
| 2219 | 1,2,4,5,7,2<br>7,30,33 | 3,6,8,28,2<br>9,31,32,34<br>,35 | 7  | P00507,P51907,P52590,Q09030,Q6IE51,Q7TP52,Q99MH3                                    |
| 2220 | 1,2,4,5,7,2<br>7,30,34 | 3,6,8,28,2<br>9,31,32,33<br>,35 | 11 | G3V686,P14408,P47967,P51907,P52590,P97840,Q03191,Q09030,Q63532,Q6IE51,Q7TP52        |
| 2221 | 1,2,4,5,7,2<br>7,30,35 | 3,6,8,28,2<br>9,31,32,33<br>,34 | 9  | D3ZUC6,P14480,P16636,P52590,Q09030,Q6AYQ8,Q6IE51,Q7TP52,Q8CHN8                      |
| 2222 | 1,2,4,5,7,2<br>7,31,32 | 3,6,8,28,2<br>9,30,33,34<br>,35 | 8  | O55145,P00507,P05539,P52590,Q09030,Q6IE51,Q7TP52,Q99068                             |
| 2223 | 1,2,4,5,7,2<br>7,31,33 | 3,6,8,28,2<br>9,30,32,34<br>,35 | 7  | P00507,P05539,P51907,P52590,Q6IE51,Q7TP52,Q99MH3                                    |
| 2224 | 1,2,4,5,7,2<br>7,31,34 | 3,6,8,28,2<br>9,30,32,33<br>,35 | 12 | G3V686,P05539,P14408,P51907,P52590,Q03191,Q09030,Q62997,Q63467,Q63532,Q6IE51,Q7TP52 |
| 2225 | 1,2,4,5,7,2<br>7,31,35 | 3,6,8,28,2<br>9,30,32,33<br>,34 | 6  | P14408,P16636,P52590,Q6IE51,Q7TP52,Q99MH3                                           |
| 2226 | 1,2,4,5,7,2<br>7,32,33 | 3,6,8,28,2<br>9,30,31,34<br>,35 | 9  | P00507,P02793,Q7TP54,P05539,P52590,P55314,Q09030,Q6IE51,Q7TP52,Q99068               |
| 2227 | 1,2,4,5,7,2<br>7,32,34 | 3,6,8,28,2<br>9,30,31,33<br>,35 | 10 | G3V686,P05539,P14408,P28648,Q03191,Q09030,Q63467,Q63532,Q6IE51,Q7TP52               |
| 2228 | 1,2,4,5,7,2<br>7,32,35 | 3,6,8,28,2<br>9,30,31,33<br>,34 | 7  | P05539,P16636,P52590,Q09030,Q6IE51,Q7TP52,Q8CHN8                                    |
| 2229 | 1,2,4,5,7,2<br>7,33,34 | 3,6,8,28,2<br>9,30,31,32<br>,35 | 12 | G3V686,P05539,P14408,P16636,P51907,P52590,Q03191,Q09030,Q63532,Q6IE51,Q7TP52,Q8CHN8 |

|      |                        |                                 |    |                                                                                     |
|------|------------------------|---------------------------------|----|-------------------------------------------------------------------------------------|
| 2230 | 1,2,4,5,7,2<br>7,33,35 | 3,6,8,28,2<br>9,30,31,32<br>,34 | 6  | P16636,P52590,Q6IE51,Q7TP52,Q8CHN8,Q99MH3                                           |
| 2231 | 1,2,4,5,7,2<br>7,34,35 | 3,6,8,28,2<br>9,30,31,32<br>,33 | 12 | G3V686,P06911,P14408,P16636,P47727,P52590,Q03191,Q09030,Q63532,Q6IE51,Q7TP52,Q8CHN8 |
| 2232 | 1,2,4,5,7,2<br>8,29,30 | 3,6,8,27,3<br>1,32,33,34<br>,35 | 2  | P35467,P52590                                                                       |
| 2233 | 1,2,4,5,7,2<br>8,29,31 | 3,6,8,27,3<br>0,32,33,34<br>,35 | 3  | P35467,P52590,Q5GRG2                                                                |
| 2234 | 1,2,4,5,7,2<br>8,29,32 | 3,6,8,27,3<br>0,31,33,34<br>,35 | 2  | P01836,P52590                                                                       |
| 2235 | 1,2,4,5,7,2<br>8,29,33 | 3,6,8,27,3<br>0,31,32,34<br>,35 | 2  | P35467,P52590                                                                       |
| 2236 | 1,2,4,5,7,2<br>8,29,34 | 3,6,8,27,3<br>0,31,32,33<br>,35 | 5  | P14408,P52590,P83748,Q63467,Q9JJ22                                                  |
| 2237 | 1,2,4,5,7,2<br>8,29,35 | 3,6,8,27,3<br>0,31,32,33<br>,34 | 1  | P52590                                                                              |
| 2238 | 1,2,4,5,7,2<br>8,30,31 | 3,6,8,27,2<br>9,32,33,34<br>,35 | 4  | O55145,P42854,P51907,P52590                                                         |
| 2239 | 1,2,4,5,7,2<br>8,30,32 | 3,6,8,27,2<br>9,31,33,34<br>,35 | 4  | P01836,P52590,Q09030,Q6AYQ8                                                         |
| 2240 | 1,2,4,5,7,2<br>8,30,33 | 3,6,8,27,2<br>9,31,32,34<br>,35 | 2  | P51907,P52590                                                                       |
| 2241 | 1,2,4,5,7,2<br>8,30,34 | 3,6,8,27,2<br>9,31,32,33<br>,35 | 6  | P14408,P47967,P51907,P52590,P97840,Q09030                                           |
| 2242 | 1,2,4,5,7,2<br>8,30,35 | 3,6,8,27,2<br>9,31,32,33<br>,34 | 3  | P52590,P97584,Q6AYQ8                                                                |
| 2243 | 1,2,4,5,7,2<br>8,31,32 | 3,6,8,27,2<br>9,30,33,34<br>,35 | 3  | O55145,P05539,P52590                                                                |
| 2244 | 1,2,4,5,7,2<br>8,31,33 | 3,6,8,27,2<br>9,30,32,34<br>,35 | 3  | P02803,P51907,P52590                                                                |

|      |                        |                                 |   |                                                  |
|------|------------------------|---------------------------------|---|--------------------------------------------------|
| 2245 | 1,2,4,5,7,2<br>8,31,34 | 3,6,8,27,2<br>9,30,32,33<br>,35 | 6 | P14408,P51907,P52590,P83748,Q62997,Q7TP52        |
| 2246 | 1,2,4,5,7,2<br>8,31,35 | 3,6,8,27,2<br>9,30,32,33<br>,34 | 3 | P02803,P52590,P97584                             |
| 2247 | 1,2,4,5,7,2<br>8,32,33 | 3,6,8,27,2<br>9,30,31,34<br>,35 | 2 | P02793;Q7TP54,P52590                             |
| 2248 | 1,2,4,5,7,2<br>8,32,34 | 3,6,8,27,2<br>9,30,31,33<br>,35 | 7 | P01836,P05539,P14408,P52303,P52590,Q09030,Q63532 |
| 2249 | 1,2,4,5,7,2<br>8,32,35 | 3,6,8,27,2<br>9,30,31,33<br>,34 | 1 | P52590                                           |
| 2250 | 1,2,4,5,7,2<br>8,33,34 | 3,6,8,27,2<br>9,30,31,32<br>,35 | 3 | P14408,P51907,P52590                             |
| 2251 | 1,2,4,5,7,2<br>8,33,35 | 3,6,8,27,2<br>9,30,31,32<br>,34 | 5 | P02803,P10719,P16636,P52590,Q6IE51               |
| 2252 | 1,2,4,5,7,2<br>8,34,35 | 3,6,8,27,2<br>9,30,31,32<br>,33 | 2 | P14408,P52590                                    |
| 2253 | 1,2,4,5,7,2<br>9,30,31 | 3,6,8,27,2<br>8,32,33,34<br>,35 | 3 | O55145,P52590,P97584                             |
| 2254 | 1,2,4,5,7,2<br>9,30,32 | 3,6,8,27,2<br>8,31,33,34<br>,35 | 3 | O55145,P01836,P52590                             |
| 2255 | 1,2,4,5,7,2<br>9,30,33 | 3,6,8,27,2<br>8,31,32,34<br>,35 | 1 | P52590                                           |
| 2256 | 1,2,4,5,7,2<br>9,30,34 | 3,6,8,27,2<br>8,31,32,33<br>,35 | 4 | P14408,P52590,Q63467,Q9JJ22                      |
| 2257 | 1,2,4,5,7,2<br>9,30,35 | 3,6,8,27,2<br>8,31,32,33<br>,34 | 3 | P14480,P52590,P97584                             |
| 2258 | 1,2,4,5,7,2<br>9,31,32 | 3,6,8,27,2<br>8,30,33,34<br>,35 | 6 | O55145,P04182,P05539,P52590,Q63467,Q8CJD3        |
| 2259 | 1,2,4,5,7,2<br>9,31,33 | 3,6,8,27,2<br>8,30,32,34<br>,35 | 3 | P04182,P52590,Q8CJD3                             |

|      |                        |                                 |   |                                                         |
|------|------------------------|---------------------------------|---|---------------------------------------------------------|
| 2260 | 1,2,4,5,7,2<br>9,31,34 | 3,6,8,27,2<br>8,30,32,33<br>,35 | 5 | P14408,P52590,P83748,Q62997,Q63467                      |
| 2261 | 1,2,4,5,7,2<br>9,31,35 | 3,6,8,27,2<br>8,30,32,33<br>,34 | 4 | P02803,P04182,P52590,P97584                             |
| 2262 | 1,2,4,5,7,2<br>9,32,33 | 3,6,8,27,2<br>8,30,31,34<br>,35 | 4 | P02793;Q7TP54,P05539,P52590,Q8CJD3                      |
| 2263 | 1,2,4,5,7,2<br>9,32,34 | 3,6,8,27,2<br>8,30,31,33<br>,35 | 7 | G3V686,P01836,P05539,P14408,P52590,Q63467,Q63532        |
| 2264 | 1,2,4,5,7,2<br>9,32,35 | 3,6,8,27,2<br>8,30,31,33<br>,34 | 3 | P04182,P52590,P97584                                    |
| 2265 | 1,2,4,5,7,2<br>9,33,34 | 3,6,8,27,2<br>8,30,31,32<br>,35 | 4 | P14408,P52590,Q63467,Q9JJ22                             |
| 2266 | 1,2,4,5,7,2<br>9,33,35 | 3,6,8,27,2<br>8,30,31,32<br>,34 | 3 | P04182,P16636,P52590                                    |
| 2267 | 1,2,4,5,7,2<br>9,34,35 | 3,6,8,27,2<br>8,30,31,32<br>,33 | 6 | P14408,P14480,P52590,P83748,Q63467,Q9JJ22               |
| 2268 | 1,2,4,5,7,3<br>0,31,32 | 3,6,8,27,2<br>8,29,33,34<br>,35 | 7 | O55145,P01836,P05539,P42854,P52590,P97584,Q7TP52        |
| 2269 | 1,2,4,5,7,3<br>0,31,33 | 3,6,8,27,2<br>8,29,32,34<br>,35 | 6 | P00507,P35446,P42854,P51907,P52590,P97584               |
| 2270 | 1,2,4,5,7,3<br>0,31,34 | 3,6,8,27,2<br>8,29,32,33<br>,35 | 8 | P14408,P42854,P47967,P51907,P52590,P97840,Q62997,Q7TP52 |
| 2271 | 1,2,4,5,7,3<br>0,31,35 | 3,6,8,27,2<br>8,29,32,33<br>,34 | 5 | P04182,P52590,P97584,Q63618,Q7TP52                      |
| 2272 | 1,2,4,5,7,3<br>0,32,33 | 3,6,8,27,2<br>8,29,31,34<br>,35 | 1 | P52590                                                  |
| 2273 | 1,2,4,5,7,3<br>0,32,34 | 3,6,8,27,2<br>8,29,31,33<br>,35 | 5 | P01836,P02782,P52590,Q09030,Q63532                      |
| 2274 | 1,2,4,5,7,3<br>0,32,35 | 3,6,8,27,2<br>8,29,31,33<br>,34 | 3 | P02782,P52590,P97584                                    |

|      |                        |                                 |    |                                                                                     |
|------|------------------------|---------------------------------|----|-------------------------------------------------------------------------------------|
| 2275 | 1,2,4,5,7,3<br>0,33,34 | 3,6,8,27,2<br>8,29,31,32<br>,35 | 4  | P02782,P14408,P51907,P52590                                                         |
| 2276 | 1,2,4,5,7,3<br>0,33,35 | 3,6,8,27,2<br>8,29,31,32<br>,34 | 4  | P02782,P51907,P52590,P97584                                                         |
| 2277 | 1,2,4,5,7,3<br>0,34,35 | 3,6,8,27,2<br>8,29,31,32<br>,33 | 11 | P02781,P02782,P06911,P08723,P14408,P14480,P47727,P52590,P82471,Q920G2,Q9JHB9        |
| 2278 | 1,2,4,5,7,3<br>1,32,33 | 3,6,8,27,2<br>8,29,30,34<br>,35 | 6  | P00507,P04182,P05539,P52590,Q7TP52,Q8CJD3                                           |
| 2279 | 1,2,4,5,7,3<br>1,32,34 | 3,6,8,27,2<br>8,29,30,33<br>,35 | 10 | G3V686,P02782,P05539,P14408,P52590,Q09030,Q62997,Q63467,Q63532,Q7TP52               |
| 2280 | 1,2,4,5,7,3<br>1,32,35 | 3,6,8,27,2<br>8,29,30,33<br>,34 | 6  | P02781,P02782,P04182,P52590,P97584,Q7TP52                                           |
| 2281 | 1,2,4,5,7,3<br>1,33,34 | 3,6,8,27,2<br>8,29,30,32<br>,35 | 8  | P01835,P02782,P14408,P51907,P52590,P83748,Q62997,Q7TP52                             |
| 2282 | 1,2,4,5,7,3<br>1,33,35 | 3,6,8,27,2<br>8,29,30,32<br>,34 | 9  | P02782,P02803,P04182,P10719,P16636,P51907,P52590,P97584,Q9WTT6                      |
| 2283 | 1,2,4,5,7,3<br>1,34,35 | 3,6,8,27,2<br>8,29,30,32<br>,33 | 12 | P02781,P02782,P08010,P08723,P14408,P47727,P52590,P82471,P83748,Q62997,Q7TP52,Q9JHB9 |
| 2284 | 1,2,4,5,7,3<br>2,33,34 | 3,6,8,27,2<br>8,29,30,31<br>,35 | 9  | G3V686,P02782,P05539,P14408,P52590,P55314,Q09030,Q63532,Q63661                      |
| 2285 | 1,2,4,5,7,3<br>2,33,35 | 3,6,8,27,2<br>8,29,30,31<br>,34 | 8  | P02782,P04182,P10719,P16636,P52590,P97580,Q6AYR9,Q9WTT6                             |
| 2286 | 1,2,4,5,7,3<br>2,34,35 | 3,6,8,27,2<br>8,29,30,31<br>,33 | 8  | P02781,P02782,P14408,P52590,P82471,Q09030,Q63532,Q63661                             |
| 2287 | 1,2,4,5,7,3<br>3,34,35 | 3,6,8,27,2<br>8,29,30,31<br>,32 | 10 | P02781,P02782,P06911,P08010,P14408,P16636,P52590,P60905,P82471,Q9JHB9               |
| 2288 | 1,2,4,5,8,2<br>7,28,29 | 3,6,7,30,3<br>1,32,33,34<br>,35 | 3  | O35547,Q5M8C6,Q63942                                                                |
| 2289 | 1,2,4,5,8,2<br>7,28,30 | 3,6,7,29,3<br>1,32,33,34<br>,35 | 3  | Q63942,Q6AYQ8,Q99MH3                                                                |

|      |                        |                                 |   |                      |
|------|------------------------|---------------------------------|---|----------------------|
| 2290 | 1,2,4,5,8,2<br>7,28,31 | 3,6,7,29,3<br>0,32,33,34<br>,35 | 2 | Q63942,Q99MH3        |
| 2291 | 1,2,4,5,8,2<br>7,28,32 | 3,6,7,29,3<br>0,31,33,34<br>,35 | 2 | P00714,Q63942        |
| 2292 | 1,2,4,5,8,2<br>7,28,33 | 3,6,7,29,3<br>0,31,32,34<br>,35 | 2 | Q63942,Q99MH3        |
| 2293 | 1,2,4,5,8,2<br>7,28,34 | 3,6,7,29,3<br>0,31,32,33<br>,35 | 3 | P14408,Q03191,Q63942 |
| 2294 | 1,2,4,5,8,2<br>7,28,35 | 3,6,7,29,3<br>0,31,32,33<br>,34 | 2 | Q63942,Q99MH3        |
| 2295 | 1,2,4,5,8,2<br>7,29,30 | 3,6,7,28,3<br>1,32,33,34<br>,35 | 0 |                      |
| 2296 | 1,2,4,5,8,2<br>7,29,31 | 3,6,7,28,3<br>0,32,33,34<br>,35 | 0 |                      |
| 2297 | 1,2,4,5,8,2<br>7,29,32 | 3,6,7,28,3<br>0,31,33,34<br>,35 | 1 | P06760               |
| 2298 | 1,2,4,5,8,2<br>7,29,33 | 3,6,7,28,3<br>0,31,32,34<br>,35 | 0 |                      |
| 2299 | 1,2,4,5,8,2<br>7,29,34 | 3,6,7,28,3<br>0,31,32,33<br>,35 | 2 | P14408,Q03191        |
| 2300 | 1,2,4,5,8,2<br>7,29,35 | 3,6,7,28,3<br>0,31,32,33<br>,34 | 0 |                      |
| 2301 | 1,2,4,5,8,2<br>7,30,31 | 3,6,7,28,2<br>9,32,33,34<br>,35 | 3 | O55145,Q7TP52,Q80WL1 |
| 2302 | 1,2,4,5,8,2<br>7,30,32 | 3,6,7,28,2<br>9,31,33,34<br>,35 | 3 | O55145,P06760,Q6AYQ8 |
| 2303 | 1,2,4,5,8,2<br>7,30,33 | 3,6,7,28,2<br>9,31,32,34<br>,35 | 1 | Q99MH3               |
| 2304 | 1,2,4,5,8,2<br>7,30,34 | 3,6,7,28,2<br>9,31,32,33<br>,35 | 1 | Q03191               |

|      |                        |                                 |   |                                    |
|------|------------------------|---------------------------------|---|------------------------------------|
| 2305 | 1,2,4,5,8,2<br>7,30,35 | 3,6,7,28,2<br>9,31,32,33<br>,34 | 3 | P06911,Q6AYQ8,Q99MH3               |
| 2306 | 1,2,4,5,8,2<br>7,31,32 | 3,6,7,28,2<br>9,30,33,34<br>,35 | 2 | O55145,Q7TP52                      |
| 2307 | 1,2,4,5,8,2<br>7,31,33 | 3,6,7,28,2<br>9,30,32,34<br>,35 | 1 | Q99MH3                             |
| 2308 | 1,2,4,5,8,2<br>7,31,34 | 3,6,7,28,2<br>9,30,32,33<br>,35 | 5 | P14408,Q03191,Q62997,Q6AYS4,Q7TP52 |
| 2309 | 1,2,4,5,8,2<br>7,31,35 | 3,6,7,28,2<br>9,30,32,33<br>,34 | 2 | Q7TP52,Q99MH3                      |
| 2310 | 1,2,4,5,8,2<br>7,32,33 | 3,6,7,28,2<br>9,30,31,34<br>,35 | 1 | Q8CJD3                             |
| 2311 | 1,2,4,5,8,2<br>7,32,34 | 3,6,7,28,2<br>9,30,31,33<br>,35 | 5 | G3V686,P06760,P83121,Q03191,Q6AYS4 |
| 2312 | 1,2,4,5,8,2<br>7,32,35 | 3,6,7,28,2<br>9,30,31,33<br>,34 | 0 |                                    |
| 2313 | 1,2,4,5,8,2<br>7,33,34 | 3,6,7,28,2<br>9,30,31,32<br>,35 | 2 | P14408,Q03191                      |
| 2314 | 1,2,4,5,8,2<br>7,33,35 | 3,6,7,28,2<br>9,30,31,32<br>,34 | 1 | Q99MH3                             |
| 2315 | 1,2,4,5,8,2<br>7,34,35 | 3,6,7,28,2<br>9,30,31,32<br>,33 | 5 | P06911,P09006,P14408,P83121,Q03191 |
| 2316 | 1,2,4,5,8,2<br>8,29,30 | 3,6,7,27,3<br>1,32,33,34<br>,35 | 1 | Q63942                             |
| 2317 | 1,2,4,5,8,2<br>8,29,31 | 3,6,7,27,3<br>0,32,33,34<br>,35 | 2 | P02803,Q63942                      |
| 2318 | 1,2,4,5,8,2<br>8,29,32 | 3,6,7,27,3<br>0,31,33,34<br>,35 | 2 | Q62975,Q63942                      |
| 2319 | 1,2,4,5,8,2<br>8,29,33 | 3,6,7,27,3<br>0,31,32,34<br>,35 | 2 | P02803,Q63942                      |



|      |                        |                                 |   |                             |
|------|------------------------|---------------------------------|---|-----------------------------|
| 2320 | 1,2,4,5,8,2<br>8,29,34 | 3,6,7,27,3<br>0,31,32,33<br>,35 | 3 | P52303,Q63942,Q9JJ22        |
| 2321 | 1,2,4,5,8,2<br>8,29,35 | 3,6,7,27,3<br>0,31,32,33<br>,34 | 2 | P02803,Q63942               |
| 2322 | 1,2,4,5,8,2<br>8,30,31 | 3,6,7,27,2<br>9,32,33,34<br>,35 | 4 | P02803,Q63751,Q63942,Q80WL1 |
| 2323 | 1,2,4,5,8,2<br>8,30,32 | 3,6,7,27,2<br>9,31,33,34<br>,35 | 2 | Q63942,Q6AYQ8               |
| 2324 | 1,2,4,5,8,2<br>8,30,33 | 3,6,7,27,2<br>9,31,32,34<br>,35 | 3 | A2RUV9,P02803,Q63942        |
| 2325 | 1,2,4,5,8,2<br>8,30,34 | 3,6,7,27,2<br>9,31,32,33<br>,35 | 2 | P52303,Q63942               |
| 2326 | 1,2,4,5,8,2<br>8,30,35 | 3,6,7,27,2<br>9,31,32,33<br>,34 | 3 | P02803,Q63942,Q6AYQ8        |
| 2327 | 1,2,4,5,8,2<br>8,31,32 | 3,6,7,27,2<br>9,30,33,34<br>,35 | 2 | P02803,Q63942               |
| 2328 | 1,2,4,5,8,2<br>8,31,33 | 3,6,7,27,2<br>9,30,32,34<br>,35 | 2 | P02803,Q63942               |
| 2329 | 1,2,4,5,8,2<br>8,31,34 | 3,6,7,27,2<br>9,30,32,33<br>,35 | 3 | P02803,Q62997,Q63942        |
| 2330 | 1,2,4,5,8,2<br>8,31,35 | 3,6,7,27,2<br>9,30,32,33<br>,34 | 2 | P02803,Q63942               |
| 2331 | 1,2,4,5,8,2<br>8,32,33 | 3,6,7,27,2<br>9,30,31,34<br>,35 | 2 | P02803,Q63942               |
| 2332 | 1,2,4,5,8,2<br>8,32,34 | 3,6,7,27,2<br>9,30,31,33<br>,35 | 3 | P52303,Q63942,Q6AYS4        |
| 2333 | 1,2,4,5,8,2<br>8,32,35 | 3,6,7,27,2<br>9,30,31,33<br>,34 | 2 | P02803,Q63942               |
| 2334 | 1,2,4,5,8,2<br>8,33,34 | 3,6,7,27,2<br>9,30,31,32<br>,35 | 2 | P02803,Q63942               |

|      |                        |                                 |   |                                    |
|------|------------------------|---------------------------------|---|------------------------------------|
| 2335 | 1,2,4,5,8,2<br>8,33,35 | 3,6,7,27,2<br>9,30,31,32<br>,34 | 2 | P02803,Q63942                      |
| 2336 | 1,2,4,5,8,2<br>8,34,35 | 3,6,7,27,2<br>9,30,31,32<br>,33 | 5 | P02803,P09006,P52303,Q63942,Q6AY61 |
| 2337 | 1,2,4,5,8,2<br>9,30,31 | 3,6,7,27,2<br>8,32,33,34<br>,35 | 1 | Q80WL1                             |
| 2338 | 1,2,4,5,8,2<br>9,30,32 | 3,6,7,27,2<br>8,31,33,34<br>,35 | 2 | A2RUV9,Q62975                      |
| 2339 | 1,2,4,5,8,2<br>9,30,33 | 3,6,7,27,2<br>8,31,32,34<br>,35 | 1 | A2RUV9                             |
| 2340 | 1,2,4,5,8,2<br>9,30,34 | 3,6,7,27,2<br>8,31,32,33<br>,35 | 1 | Q9JJ22                             |
| 2341 | 1,2,4,5,8,2<br>9,30,35 | 3,6,7,27,2<br>8,31,32,33<br>,34 | 2 | A2RUV9,Q06000                      |
| 2342 | 1,2,4,5,8,2<br>9,31,32 | 3,6,7,27,2<br>8,30,33,34<br>,35 | 3 | P04182,Q62975,Q8CJD3               |
| 2343 | 1,2,4,5,8,2<br>9,31,33 | 3,6,7,27,2<br>8,30,32,34<br>,35 | 2 | P02803,Q8CJD3                      |
| 2344 | 1,2,4,5,8,2<br>9,31,34 | 3,6,7,27,2<br>8,30,32,33<br>,35 | 2 | Q62997,Q6AYS4                      |
| 2345 | 1,2,4,5,8,2<br>9,31,35 | 3,6,7,27,2<br>8,30,32,33<br>,34 | 4 | P02803,P04182,P25236,Q06000        |
| 2346 | 1,2,4,5,8,2<br>9,32,33 | 3,6,7,27,2<br>8,30,31,34<br>,35 | 2 | A2RUV9,Q8CJD3                      |
| 2347 | 1,2,4,5,8,2<br>9,32,34 | 3,6,7,27,2<br>8,30,31,33<br>,35 | 3 | P52303,Q6AYS4,Q6TMA8               |
| 2348 | 1,2,4,5,8,2<br>9,32,35 | 3,6,7,27,2<br>8,30,31,33<br>,34 | 1 | P04182                             |
| 2349 | 1,2,4,5,8,2<br>9,33,34 | 3,6,7,27,2<br>8,30,31,32<br>,35 | 1 | Q9JJ22                             |

|      |                        |                                 |   |                                                                |
|------|------------------------|---------------------------------|---|----------------------------------------------------------------|
| 2350 | 1,2,4,5,8,2<br>9,33,35 | 3,6,7,27,2<br>8,30,31,32<br>,34 | 3 | A2RUV9,P02803,P97840                                           |
| 2351 | 1,2,4,5,8,2<br>9,34,35 | 3,6,7,27,2<br>8,30,31,32<br>,33 | 4 | P09006,Q06000,Q6PCU2,Q9JJ22                                    |
| 2352 | 1,2,4,5,8,3<br>0,31,32 | 3,6,7,27,2<br>8,29,33,34<br>,35 | 2 | O55145,Q80WL1                                                  |
| 2353 | 1,2,4,5,8,3<br>0,31,33 | 3,6,7,27,2<br>8,29,32,34<br>,35 | 2 | P02803,P51907                                                  |
| 2354 | 1,2,4,5,8,3<br>0,31,34 | 3,6,7,27,2<br>8,29,32,33<br>,35 | 2 | Q62997,Q80WL1                                                  |
| 2355 | 1,2,4,5,8,3<br>0,31,35 | 3,6,7,27,2<br>8,29,32,33<br>,34 | 4 | P02803,Q06000,Q63751,Q80WL1                                    |
| 2356 | 1,2,4,5,8,3<br>0,32,33 | 3,6,7,27,2<br>8,29,31,34<br>,35 | 1 | A2RUV9                                                         |
| 2357 | 1,2,4,5,8,3<br>0,32,34 | 3,6,7,27,2<br>8,29,31,33<br>,35 | 2 | P52303,Q6AYS4                                                  |
| 2358 | 1,2,4,5,8,3<br>0,32,35 | 3,6,7,27,2<br>8,29,31,33<br>,34 | 1 | A2RUV9                                                         |
| 2359 | 1,2,4,5,8,3<br>0,33,34 | 3,6,7,27,2<br>8,29,31,32<br>,35 | 0 |                                                                |
| 2360 | 1,2,4,5,8,3<br>0,33,35 | 3,6,7,27,2<br>8,29,31,32<br>,34 | 2 | A2RUV9,P02803                                                  |
| 2361 | 1,2,4,5,8,3<br>0,34,35 | 3,6,7,27,2<br>8,29,31,32<br>,33 | 8 | P02793;Q7TP54,P06911,P19132,P47727,P82471,Q06000,Q6PCU2,Q920G2 |
| 2362 | 1,2,4,5,8,3<br>1,32,33 | 3,6,7,27,2<br>8,29,30,34<br>,35 | 2 | P02803,Q8CJD3                                                  |
| 2363 | 1,2,4,5,8,3<br>1,32,34 | 3,6,7,27,2<br>8,29,30,33<br>,35 | 2 | Q62997,Q6AYS4                                                  |
| 2364 | 1,2,4,5,8,3<br>1,32,35 | 3,6,7,27,2<br>8,29,30,33<br>,34 | 2 | P02803,P04182                                                  |

|      |                         |                                 |   |                                                                |
|------|-------------------------|---------------------------------|---|----------------------------------------------------------------|
| 2365 | 1,2,4,5,8,3<br>1,33,34  | 3,6,7,27,2<br>8,29,30,32<br>,35 | 3 | P01835,P02803,Q62997                                           |
| 2366 | 1,2,4,5,8,3<br>1,33,35  | 3,6,7,27,2<br>8,29,30,32<br>,34 | 2 | P02803,P04182                                                  |
| 2367 | 1,2,4,5,8,3<br>1,34,35  | 3,6,7,27,2<br>8,29,30,32<br>,33 | 8 | O08815,P02793;Q7TP54,P02803,P09006,P82471,Q06000,Q62997,Q9JHB9 |
| 2368 | 1,2,4,5,8,3<br>2,33,34  | 3,6,7,27,2<br>8,29,30,31<br>,35 | 1 | Q6AYS4                                                         |
| 2369 | 1,2,4,5,8,3<br>2,33,35  | 3,6,7,27,2<br>8,29,30,31<br>,34 | 2 | A2RUV9,P02803                                                  |
| 2370 | 1,2,4,5,8,3<br>2,34,35  | 3,6,7,27,2<br>8,29,30,31<br>,33 | 4 | P08753,P52303,P82471,Q63661                                    |
| 2371 | 1,2,4,5,8,3<br>3,34,35  | 3,6,7,27,2<br>8,29,30,31<br>,32 | 6 | P02803,P06911,P09006,P82471,Q63355,Q9JJ22                      |
| 2372 | 1,2,4,5,27,<br>28,29,30 | 3,6,7,8,31,<br>32,33,34,3<br>5  | 1 | D3ZUC6                                                         |
| 2373 | 1,2,4,5,27,<br>28,29,31 | 3,6,7,8,30,<br>32,33,34,3<br>5  | 1 | Q63942                                                         |
| 2374 | 1,2,4,5,27,<br>28,29,32 | 3,6,7,8,30,<br>31,33,34,3<br>5  | 1 | Q63942                                                         |
| 2375 | 1,2,4,5,27,<br>28,29,33 | 3,6,7,8,30,<br>31,32,34,3<br>5  | 1 | Q63942                                                         |
| 2376 | 1,2,4,5,27,<br>28,29,34 | 3,6,7,8,30,<br>31,32,33,3<br>5  | 2 | P14408,Q63942                                                  |
| 2377 | 1,2,4,5,27,<br>28,29,35 | 3,6,7,8,30,<br>31,32,33,3<br>4  | 0 |                                                                |
| 2378 | 1,2,4,5,27,<br>28,30,31 | 3,6,7,8,29,<br>32,33,34,3<br>5  | 4 | D3ZUC6,O55145,P51907,Q6AYQ8                                    |
| 2379 | 1,2,4,5,27,<br>28,30,32 | 3,6,7,8,29,<br>31,33,34,3<br>5  | 1 | Q6AYQ8                                                         |

|      |                         |                                |   |                                    |
|------|-------------------------|--------------------------------|---|------------------------------------|
| 2380 | 1,2,4,5,27,<br>28,30,33 | 3,6,7,8,29,<br>31,32,34,3<br>5 | 2 | P51907,Q6AYQ8                      |
| 2381 | 1,2,4,5,27,<br>28,30,34 | 3,6,7,8,29,<br>31,32,33,3<br>5 | 3 | P14408,P51907,Q6AYQ8               |
| 2382 | 1,2,4,5,27,<br>28,30,35 | 3,6,7,8,29,<br>31,32,33,3<br>4 | 2 | D3ZUC6,Q6AYQ8                      |
| 2383 | 1,2,4,5,27,<br>28,31,32 | 3,6,7,8,29,<br>30,33,34,3<br>5 | 0 |                                    |
| 2384 | 1,2,4,5,27,<br>28,31,33 | 3,6,7,8,29,<br>30,32,34,3<br>5 | 2 | P51907,Q99MH3                      |
| 2385 | 1,2,4,5,27,<br>28,31,34 | 3,6,7,8,29,<br>30,32,33,3<br>5 | 3 | P14408,P51907,Q62997               |
| 2386 | 1,2,4,5,27,<br>28,31,35 | 3,6,7,8,29,<br>30,32,33,3<br>4 | 0 |                                    |
| 2387 | 1,2,4,5,27,<br>28,32,33 | 3,6,7,8,29,<br>30,31,34,3<br>5 | 2 | Q6IFU7,Q6P6Q2                      |
| 2388 | 1,2,4,5,27,<br>28,32,34 | 3,6,7,8,29,<br>30,31,33,3<br>5 | 5 | G3V686,P14408,Q03191,Q10758,Q6IFU7 |
| 2389 | 1,2,4,5,27,<br>28,32,35 | 3,6,7,8,29,<br>30,31,33,3<br>4 | 0 |                                    |
| 2390 | 1,2,4,5,27,<br>28,33,34 | 3,6,7,8,29,<br>30,31,32,3<br>5 | 2 | P14408,P51907                      |
| 2391 | 1,2,4,5,27,<br>28,33,35 | 3,6,7,8,29,<br>30,31,32,3<br>4 | 1 | Q99MH3                             |
| 2392 | 1,2,4,5,27,<br>28,34,35 | 3,6,7,8,29,<br>30,31,32,3<br>3 | 1 | P14408                             |
| 2393 | 1,2,4,5,27,<br>29,30,31 | 3,6,7,8,28,<br>32,33,34,3<br>5 | 1 | O55145                             |
| 2394 | 1,2,4,5,27,<br>29,30,32 | 3,6,7,8,28,<br>31,33,34,3<br>5 | 0 |                                    |

|      |                         |                                |   |                                    |
|------|-------------------------|--------------------------------|---|------------------------------------|
| 2395 | 1,2,4,5,27,<br>29,30,33 | 3,6,7,8,28,<br>31,32,34,3<br>5 | 0 |                                    |
| 2396 | 1,2,4,5,27,<br>29,30,34 | 3,6,7,8,28,<br>31,32,33,3<br>5 | 1 | P14408                             |
| 2397 | 1,2,4,5,27,<br>29,30,35 | 3,6,7,8,28,<br>31,32,33,3<br>4 | 2 | D3ZUC6,P14480                      |
| 2398 | 1,2,4,5,27,<br>29,31,32 | 3,6,7,8,28,<br>30,33,34,3<br>5 | 1 | O55145                             |
| 2399 | 1,2,4,5,27,<br>29,31,33 | 3,6,7,8,28,<br>30,32,34,3<br>5 | 0 |                                    |
| 2400 | 1,2,4,5,27,<br>29,31,34 | 3,6,7,8,28,<br>30,32,33,3<br>5 | 2 | P14408,Q62997                      |
| 2401 | 1,2,4,5,27,<br>29,31,35 | 3,6,7,8,28,<br>30,32,33,3<br>4 | 0 |                                    |
| 2402 | 1,2,4,5,27,<br>29,32,33 | 3,6,7,8,28,<br>30,31,34,3<br>5 | 0 |                                    |
| 2403 | 1,2,4,5,27,<br>29,32,34 | 3,6,7,8,28,<br>30,31,33,3<br>5 | 5 | G3V686,P14408,Q03191,Q10758,Q63661 |
| 2404 | 1,2,4,5,27,<br>29,32,35 | 3,6,7,8,28,<br>30,31,33,3<br>4 | 0 |                                    |
| 2405 | 1,2,4,5,27,<br>29,33,34 | 3,6,7,8,28,<br>30,31,32,3<br>5 | 1 | P14408                             |
| 2406 | 1,2,4,5,27,<br>29,33,35 | 3,6,7,8,28,<br>30,31,32,3<br>4 | 0 |                                    |
| 2407 | 1,2,4,5,27,<br>29,34,35 | 3,6,7,8,28,<br>30,31,32,3<br>3 | 1 | P14408                             |
| 2408 | 1,2,4,5,27,<br>30,31,32 | 3,6,7,8,28,<br>29,33,34,3<br>5 | 1 | O55145                             |
| 2409 | 1,2,4,5,27,<br>30,31,33 | 3,6,7,8,28,<br>29,32,34,3<br>5 | 1 | P51907                             |

|      |                         |                                |   |                                                         |
|------|-------------------------|--------------------------------|---|---------------------------------------------------------|
| 2410 | 1,2,4,5,27,<br>30,31,34 | 3,6,7,8,28,<br>29,32,33,3<br>5 | 4 | P14408,P51907,Q62997,Q7TP52                             |
| 2411 | 1,2,4,5,27,<br>30,31,35 | 3,6,7,8,28,<br>29,32,33,3<br>4 | 1 | D3ZUC6                                                  |
| 2412 | 1,2,4,5,27,<br>30,32,33 | 3,6,7,8,28,<br>29,31,34,3<br>5 | 0 |                                                         |
| 2413 | 1,2,4,5,27,<br>30,32,34 | 3,6,7,8,28,<br>29,31,33,3<br>5 | 3 | G3V686,Q10758,Q63661                                    |
| 2414 | 1,2,4,5,27,<br>30,32,35 | 3,6,7,8,28,<br>29,31,33,3<br>4 | 0 |                                                         |
| 2415 | 1,2,4,5,27,<br>30,33,34 | 3,6,7,8,28,<br>29,31,32,3<br>5 | 2 | P06911,P51907                                           |
| 2416 | 1,2,4,5,27,<br>30,33,35 | 3,6,7,8,28,<br>29,31,32,3<br>4 | 2 | P06911,P51907                                           |
| 2417 | 1,2,4,5,27,<br>30,34,35 | 3,6,7,8,28,<br>29,31,32,3<br>3 | 4 | P06911,P14408,P47727,P83121                             |
| 2418 | 1,2,4,5,27,<br>31,32,33 | 3,6,7,8,28,<br>29,30,34,3<br>5 | 0 |                                                         |
| 2419 | 1,2,4,5,27,<br>31,32,34 | 3,6,7,8,28,<br>29,30,33,3<br>5 | 6 | G3V686,P14408,Q03191,Q10758,Q62997,Q7TP52               |
| 2420 | 1,2,4,5,27,<br>31,32,35 | 3,6,7,8,28,<br>29,30,33,3<br>4 | 0 |                                                         |
| 2421 | 1,2,4,5,27,<br>31,33,34 | 3,6,7,8,28,<br>29,30,32,3<br>5 | 4 | P14408,P51907,Q62997,Q7TP52                             |
| 2422 | 1,2,4,5,27,<br>31,33,35 | 3,6,7,8,28,<br>29,30,32,3<br>4 | 1 | P51907                                                  |
| 2423 | 1,2,4,5,27,<br>31,34,35 | 3,6,7,8,28,<br>29,30,32,3<br>3 | 3 | P14408,Q62997,Q7TP52                                    |
| 2424 | 1,2,4,5,27,<br>32,33,34 | 3,6,7,8,28,<br>29,30,31,3<br>5 | 8 | G3V686,P14408,P34901,P55314,Q03191,Q10758,Q63661,Q6P6Q2 |

|      |                         |                                |   |                                           |
|------|-------------------------|--------------------------------|---|-------------------------------------------|
| 2425 | 1,2,4,5,27,<br>32,33,35 | 3,6,7,8,28,<br>29,30,31,3<br>4 | 0 |                                           |
| 2426 | 1,2,4,5,27,<br>32,34,35 | 3,6,7,8,28,<br>29,30,31,3<br>3 | 6 | P14408,P83121,Q03191,Q10758,Q63661,Q9QZK9 |
| 2427 | 1,2,4,5,27,<br>33,34,35 | 3,6,7,8,28,<br>29,30,31,3<br>2 | 4 | P06911,P14408,Q63355,Q63661               |
| 2428 | 1,2,4,5,28,<br>29,30,31 | 3,6,7,8,27,<br>32,33,34,3<br>5 | 1 | P35467                                    |
| 2429 | 1,2,4,5,28,<br>29,30,32 | 3,6,7,8,27,<br>31,33,34,3<br>5 | 1 | Q62975                                    |
| 2430 | 1,2,4,5,28,<br>29,30,33 | 3,6,7,8,27,<br>31,32,34,3<br>5 | 1 | P35467                                    |
| 2431 | 1,2,4,5,28,<br>29,30,34 | 3,6,7,8,27,<br>31,32,33,3<br>5 | 0 |                                           |
| 2432 | 1,2,4,5,28,<br>29,30,35 | 3,6,7,8,27,<br>31,32,33,3<br>4 | 0 |                                           |
| 2433 | 1,2,4,5,28,<br>29,31,32 | 3,6,7,8,27,<br>30,33,34,3<br>5 | 1 | Q62975                                    |
| 2434 | 1,2,4,5,28,<br>29,31,33 | 3,6,7,8,27,<br>30,32,34,3<br>5 | 2 | P02803,P35467                             |
| 2435 | 1,2,4,5,28,<br>29,31,34 | 3,6,7,8,27,<br>30,32,33,3<br>5 | 4 | P02803,P14408,P27791,Q62997               |
| 2436 | 1,2,4,5,28,<br>29,31,35 | 3,6,7,8,27,<br>30,32,33,3<br>4 | 1 | P02803                                    |
| 2437 | 1,2,4,5,28,<br>29,32,33 | 3,6,7,8,27,<br>30,31,34,3<br>5 | 0 |                                           |
| 2438 | 1,2,4,5,28,<br>29,32,34 | 3,6,7,8,27,<br>30,31,33,3<br>5 | 1 | P52303                                    |
| 2439 | 1,2,4,5,28,<br>29,32,35 | 3,6,7,8,27,<br>30,31,33,3<br>4 | 0 |                                           |



|      |                         |                                |   |                                    |
|------|-------------------------|--------------------------------|---|------------------------------------|
| 2440 | 1,2,4,5,28,<br>29,33,34 | 3,6,7,8,27,<br>30,31,32,3<br>5 | 3 | P14408,P27791,Q9JJ22               |
| 2441 | 1,2,4,5,28,<br>29,33,35 | 3,6,7,8,27,<br>30,31,32,3<br>4 | 1 | P02803                             |
| 2442 | 1,2,4,5,28,<br>29,34,35 | 3,6,7,8,27,<br>30,31,32,3<br>3 | 3 | P02803,P14408,Q9JJ22               |
| 2443 | 1,2,4,5,28,<br>30,31,32 | 3,6,7,8,27,<br>29,33,34,3<br>5 | 0 |                                    |
| 2444 | 1,2,4,5,28,<br>30,31,33 | 3,6,7,8,27,<br>29,32,34,3<br>5 | 2 | P02803,P51907                      |
| 2445 | 1,2,4,5,28,<br>30,31,34 | 3,6,7,8,27,<br>29,32,33,3<br>5 | 2 | P51907,Q62997                      |
| 2446 | 1,2,4,5,28,<br>30,31,35 | 3,6,7,8,27,<br>29,32,33,3<br>4 | 1 | P02803                             |
| 2447 | 1,2,4,5,28,<br>30,32,33 | 3,6,7,8,27,<br>29,31,34,3<br>5 | 0 |                                    |
| 2448 | 1,2,4,5,28,<br>30,32,34 | 3,6,7,8,27,<br>29,31,33,3<br>5 | 1 | P52303                             |
| 2449 | 1,2,4,5,28,<br>30,32,35 | 3,6,7,8,27,<br>29,31,33,3<br>4 | 0 |                                    |
| 2450 | 1,2,4,5,28,<br>30,33,34 | 3,6,7,8,27,<br>29,31,32,3<br>5 | 1 | P51907                             |
| 2451 | 1,2,4,5,28,<br>30,33,35 | 3,6,7,8,27,<br>29,31,32,3<br>4 | 2 | P02803,P51907                      |
| 2452 | 1,2,4,5,28,<br>30,34,35 | 3,6,7,8,27,<br>29,31,32,3<br>3 | 4 | P02793,Q7TP54,P06866,Q8CJD3,Q920G2 |
| 2453 | 1,2,4,5,28,<br>31,32,33 | 3,6,7,8,27,<br>29,30,34,3<br>5 | 1 | P02803                             |
| 2454 | 1,2,4,5,28,<br>31,32,34 | 3,6,7,8,27,<br>29,30,33,3<br>5 | 2 | P14408,Q62997                      |

|      |                         |                                |   |                                    |
|------|-------------------------|--------------------------------|---|------------------------------------|
| 2455 | 1,2,4,5,28,<br>31,32,35 | 3,6,7,8,27,<br>29,30,33,3<br>4 | 1 | P02803                             |
| 2456 | 1,2,4,5,28,<br>31,33,34 | 3,6,7,8,27,<br>29,30,32,3<br>5 | 5 | P02803,P14408,P27791,P51907,Q62997 |
| 2457 | 1,2,4,5,28,<br>31,33,35 | 3,6,7,8,27,<br>29,30,32,3<br>4 | 2 | P02803,P51907                      |
| 2458 | 1,2,4,5,28,<br>31,34,35 | 3,6,7,8,27,<br>29,30,32,3<br>3 | 3 | P02803,P14408,Q62997               |
| 2459 | 1,2,4,5,28,<br>32,33,34 | 3,6,7,8,27,<br>29,30,31,3<br>5 | 1 | Q63661                             |
| 2460 | 1,2,4,5,28,<br>32,33,35 | 3,6,7,8,27,<br>29,30,31,3<br>4 | 1 | P02803                             |
| 2461 | 1,2,4,5,28,<br>32,34,35 | 3,6,7,8,27,<br>29,30,31,3<br>3 | 2 | P52303,Q63661                      |
| 2462 | 1,2,4,5,28,<br>33,34,35 | 3,6,7,8,27,<br>29,30,31,3<br>2 | 2 | P02803,P14408                      |
| 2463 | 1,2,4,5,29,<br>30,31,32 | 3,6,7,8,27,<br>28,33,34,3<br>5 | 3 | O55145,P25236,Q62975               |
| 2464 | 1,2,4,5,29,<br>30,31,33 | 3,6,7,8,27,<br>28,32,34,3<br>5 | 1 | P51907                             |
| 2465 | 1,2,4,5,29,<br>30,31,34 | 3,6,7,8,27,<br>28,32,33,3<br>5 | 1 | Q62997                             |
| 2466 | 1,2,4,5,29,<br>30,31,35 | 3,6,7,8,27,<br>28,32,33,3<br>4 | 3 | P04182,P25236,P97584               |
| 2467 | 1,2,4,5,29,<br>30,32,33 | 3,6,7,8,27,<br>28,31,34,3<br>5 | 1 | A2RUV9                             |
| 2468 | 1,2,4,5,29,<br>30,32,34 | 3,6,7,8,27,<br>28,31,33,3<br>5 | 1 | Q63661                             |
| 2469 | 1,2,4,5,29,<br>30,32,35 | 3,6,7,8,27,<br>28,31,33,3<br>4 | 0 |                                    |

|      |                         |                                |   |                             |
|------|-------------------------|--------------------------------|---|-----------------------------|
| 2470 | 1,2,4,5,29,<br>30,33,34 | 3,6,7,8,27,<br>28,31,32,3<br>5 | 1 | Q9JJ22                      |
| 2471 | 1,2,4,5,29,<br>30,33,35 | 3,6,7,8,27,<br>28,31,32,3<br>4 | 1 | A2RUV9                      |
| 2472 | 1,2,4,5,29,<br>30,34,35 | 3,6,7,8,27,<br>28,31,32,3<br>3 | 2 | P14480,Q9JJ22               |
| 2473 | 1,2,4,5,29,<br>31,32,33 | 3,6,7,8,27,<br>28,30,34,3<br>5 | 2 | P04182,Q8CJD3               |
| 2474 | 1,2,4,5,29,<br>31,32,34 | 3,6,7,8,27,<br>28,30,33,3<br>5 | 1 | Q62997                      |
| 2475 | 1,2,4,5,29,<br>31,32,35 | 3,6,7,8,27,<br>28,30,33,3<br>4 | 2 | P04182,P25236               |
| 2476 | 1,2,4,5,29,<br>31,33,34 | 3,6,7,8,27,<br>28,30,32,3<br>5 | 2 | P14408,Q62997               |
| 2477 | 1,2,4,5,29,<br>31,33,35 | 3,6,7,8,27,<br>28,30,32,3<br>4 | 3 | P02803,P04182,Q9WTT6        |
| 2478 | 1,2,4,5,29,<br>31,34,35 | 3,6,7,8,27,<br>28,30,32,3<br>3 | 4 | P02803,P14408,P25236,Q62997 |
| 2479 | 1,2,4,5,29,<br>32,33,34 | 3,6,7,8,27,<br>28,30,31,3<br>5 | 1 | Q63661                      |
| 2480 | 1,2,4,5,29,<br>32,33,35 | 3,6,7,8,27,<br>28,30,31,3<br>4 | 3 | P04182,P47967,Q9WTT6        |
| 2481 | 1,2,4,5,29,<br>32,34,35 | 3,6,7,8,27,<br>28,30,31,3<br>3 | 1 | Q63661                      |
| 2482 | 1,2,4,5,29,<br>33,34,35 | 3,6,7,8,27,<br>28,30,31,3<br>2 | 2 | P14408,Q9JJ22               |
| 2483 | 1,2,4,5,30,<br>31,32,33 | 3,6,7,8,27,<br>28,29,34,3<br>5 | 1 | P51907                      |
| 2484 | 1,2,4,5,30,<br>31,32,34 | 3,6,7,8,27,<br>28,29,33,3<br>5 | 1 | Q62997                      |

|      |                         |                                  |    |                                                                                                                 |
|------|-------------------------|----------------------------------|----|-----------------------------------------------------------------------------------------------------------------|
| 2485 | 1,2,4,5,30,<br>31,32,35 | 3,6,7,8,27,<br>28,29,33,3<br>4   | 1  | P04182                                                                                                          |
| 2486 | 1,2,4,5,30,<br>31,33,34 | 3,6,7,8,27,<br>28,29,32,3<br>5   | 2  | P51907,Q62997                                                                                                   |
| 2487 | 1,2,4,5,30,<br>31,33,35 | 3,6,7,8,27,<br>28,29,32,3<br>4   | 2  | P02803,P51907                                                                                                   |
| 2488 | 1,2,4,5,30,<br>31,34,35 | 3,6,7,8,27,<br>28,29,32,3<br>3   | 7  | P02793;Q7TP54,P08723,P24368,P47727,P82471,Q62997,Q9JHB9                                                         |
| 2489 | 1,2,4,5,30,<br>32,33,34 | 3,6,7,8,27,<br>28,29,31,3<br>5   | 3  | P02782,P55314,Q63661                                                                                            |
| 2490 | 1,2,4,5,30,<br>32,33,35 | 3,6,7,8,27,<br>28,29,31,3<br>4   | 1  | A2RUV9                                                                                                          |
| 2491 | 1,2,4,5,30,<br>32,34,35 | 3,6,7,8,27,<br>28,29,31,3<br>3   | 6  | P02782,P06911,P08723,P82471,Q62902,Q63661                                                                       |
| 2492 | 1,2,4,5,30,<br>33,34,35 | 3,6,7,8,27,<br>28,29,31,3<br>2   | 5  | P02782,P06911,P82471,Q5GRG2,Q62902                                                                              |
| 2493 | 1,2,4,5,31,<br>32,33,34 | 3,6,7,8,27,<br>28,29,30,3<br>5   | 2  | P02782,Q62997                                                                                                   |
| 2494 | 1,2,4,5,31,<br>32,33,35 | 3,6,7,8,27,<br>28,29,30,3<br>4   | 3  | P02803,P04182,Q9WTT6                                                                                            |
| 2495 | 1,2,4,5,31,<br>32,34,35 | 3,6,7,8,27,<br>28,29,30,3<br>3   | 5  | P02781,P02782,P08723,P82471,Q62997                                                                              |
| 2496 | 1,2,4,5,31,<br>33,34,35 | 3,6,7,8,27,<br>28,29,30,3<br>2   | 11 | P02781,P02782,P02803,P08723,P14408,P24368,P51907,P82471,Q62997,Q63355,Q9JHB9                                    |
| 2497 | 1,2,4,5,32,<br>33,34,35 | 3,6,7,8,27,<br>28,29,30,3<br>1   | 5  | P02781,P02782,P82471,Q62902,Q63661                                                                              |
| 2498 | 1,2,4,6,7,8<br>,27,28   | 3,5,29,30,<br>31,32,33,3<br>4,35 | 16 | D3ZUK3,P02631,P07171,P08723,P12020,P14669,P18418,Q5GRG2,Q63617,Q63942,Q6IE51,Q7TP52,Q99MH3,Q9JI85,Q9QZQ5,Q9R0T3 |
| 2499 | 1,2,4,6,7,8<br>,27,29   | 3,5,28,30,<br>31,32,33,3<br>4,35 | 16 | P02631,P07171,P11598,P14669,P18418,P20762,P25236,P50280,Q63467,Q63617,Q6IE51,Q7TP52,Q8CJD3,Q9JI85,Q9QZQ5,Q9R0T3 |

|      |                       |                                  |    |                                                                                                                               |
|------|-----------------------|----------------------------------|----|-------------------------------------------------------------------------------------------------------------------------------|
| 2500 | 1,2,4,6,7,8<br>,27,30 | 3,5,28,29,<br>31,32,33,3<br>4,35 | 12 | D3ZUK3,P02631,P07171,P14669,P16086,P18418,P47967,Q64057,Q6AYQ8,Q6IE51,Q7TP52,Q9QZQ5                                           |
| 2501 | 1,2,4,6,7,8<br>,27,31 | 3,5,28,29,<br>30,32,33,3<br>4,35 | 13 | D3ZUK3,P02631,P07171,P12020,P14669,P18418,P25236,Q63617,Q6IE51,Q7TP52,Q8CJD3,Q9QZQ5,Q9R0T3                                    |
| 2502 | 1,2,4,6,7,8<br>,27,32 | 3,5,28,29,<br>30,31,33,3<br>4,35 | 18 | D3ZUK3,G3V686,P00714,P02631,P05539,P07171,P08649,P12020,P14669,P18418,Q09030,Q63532,Q63617,Q6IE51,Q7TP52,Q8CJD3,Q9QZQ5,Q9R0T3 |
| 2503 | 1,2,4,6,7,8<br>,27,33 | 3,5,28,29,<br>30,31,32,3<br>4,35 | 16 | D3ZUK3,P02631,P07171,P08649,P14669,P18418,P97580,Q30KJ2,Q63617,Q6IE51,Q7TP52,Q8CJD3,Q99041,Q99MH3,Q9QZQ5,Q9R0T3               |
| 2504 | 1,2,4,6,7,8<br>,27,34 | 3,5,28,29,<br>30,31,32,3<br>3,35 | 18 | D3ZUK3,G3V686,P02631,P07171,P08649,P14669,P18418,P47967,P70709,P97840,Q09030,Q63532,Q6IE51,Q6P6R2,Q7TP52,Q99041,Q9QZQ5,Q9WTT6 |
| 2505 | 1,2,4,6,7,8<br>,27,35 | 3,5,28,29,<br>30,31,32,3<br>3,34 | 14 | D3ZUK3,P02631,P07171,P14480,P14669,P15399,P18418,P20762,Q30KJ2,Q63617,Q64057,Q6IE51,Q7TP52,Q9QZQ5                             |
| 2506 | 1,2,4,6,7,8<br>,28,29 | 3,5,27,30,<br>31,32,33,3<br>4,35 | 16 | O55004,P02631,P07171,P08723,P12020,P18418,P22282,P50280,Q5GRG2,Q63617,Q63942,Q6IE51,Q8CJ52,Q9JI85,Q9QZQ5,Q9R0T3               |
| 2507 | 1,2,4,6,7,8<br>,28,30 | 3,5,27,29,<br>31,32,33,3<br>4,35 | 10 | O55004,P02631,P12020,P18418,P47967,Q63942,Q64057,Q6AYQ8,Q7TP52,Q9QZQ5                                                         |
| 2508 | 1,2,4,6,7,8<br>,28,31 | 3,5,27,29,<br>30,32,33,3<br>4,35 | 14 | O55004,P02631,P06911,P07171,P12020,P18418,P25236,P31044,Q30KJ2,Q5GRG2,Q63942,Q7TP52,Q9QZQ5,Q9R0T3                             |
| 2509 | 1,2,4,6,7,8<br>,28,32 | 3,5,27,29,<br>30,31,33,3<br>4,35 | 11 | P02631,P12020,P18418,Q30KJ2,Q5GRG2,Q63617,Q63942,Q6IE51,Q7TP52,Q9QZQ5,Q9R0T3                                                  |
| 2510 | 1,2,4,6,7,8<br>,28,33 | 3,5,27,29,<br>30,31,32,3<br>4,35 | 13 | P02631,P12020,P15399,P18418,P97580,Q30KJ2,Q63617,Q63942,Q6IE51,Q7TP52,Q99041,Q9QZQ5,Q9R0T3                                    |
| 2511 | 1,2,4,6,7,8<br>,28,34 | 3,5,27,29,<br>30,31,32,3<br>3,35 | 16 | D3ZUK3,G3V686,P02631,P12020,P18418,P47967,P83748,P97840,Q5HZV9,Q63532,Q63942,Q6P6R2,Q7TP52,Q99041,Q9QZQ5,Q9WTT6               |
| 2512 | 1,2,4,6,7,8<br>,28,35 | 3,5,27,29,<br>30,31,32,3<br>3,34 | 13 | O55004,P02631,P12020,P14480,P15399,P18418,P97580,Q30KJ2,Q63617,Q63942,Q6IE51,Q7TP52,Q9QZQ5                                    |
| 2513 | 1,2,4,6,7,8<br>,29,30 | 3,5,27,28,<br>31,32,33,3<br>4,35 | 8  | O55004,P02631,P20762,P25236,P50280,Q63617,Q7TP52,Q9QZQ5                                                                       |
| 2514 | 1,2,4,6,7,8<br>,29,31 | 3,5,27,28,<br>30,32,33,3<br>4,35 | 10 | O55004,P02631,P12020,P20762,P25236,P50280,Q63617,Q7TP52,Q8CJD3,Q9QZQ5                                                         |

|      |                       |                                  |    |                                                                                                                 |
|------|-----------------------|----------------------------------|----|-----------------------------------------------------------------------------------------------------------------|
| 2515 | 1,2,4,6,7,8<br>,29,32 | 3,5,27,28,<br>30,31,33,3<br>4,35 | 11 | P01041,P02631,P12020,P20762,P25236,P50280,Q63532,Q63617,Q7TP52,Q8CJD3,Q9QZQ5                                    |
| 2516 | 1,2,4,6,7,8<br>,29,33 | 3,5,27,28,<br>30,31,32,3<br>4,35 | 13 | P02631,P15399,P18418,P20762,P50280,Q30KJ2,Q63617,Q6IE51,Q7TP52,Q8CJD3,Q99041,Q9QZQ5,Q9R0T3                      |
| 2517 | 1,2,4,6,7,8<br>,29,34 | 3,5,27,28,<br>30,31,32,3<br>3,35 | 15 | G3V686,P02631,P09605;P25809,P25236,P50280,P70709,P83748,Q63467,Q63532,Q63617,Q6P6R2,Q7TP52,Q9JJ22,Q9QZQ5,Q9WTT6 |
| 2518 | 1,2,4,6,7,8<br>,29,35 | 3,5,27,28,<br>30,31,32,3<br>3,34 | 10 | P02631,P14480,P15399,P20762,P25236,Q30KJ2,Q63617,Q6IE51,Q7TP52,Q9QZQ5                                           |
| 2519 | 1,2,4,6,7,8<br>,30,31 | 3,5,27,28,<br>29,32,33,3<br>4,35 | 11 | O55004,P02631,P12020,P19218,P25236,P42854,P47967,Q64057,Q7TP52,Q80WL1,Q9QZQ5                                    |
| 2520 | 1,2,4,6,7,8<br>,30,32 | 3,5,27,28,<br>29,31,33,3<br>4,35 | 9  | P01041,P02631,P12020,P16086,P20762,Q63532,Q64057,Q7TP52,Q9QZQ5                                                  |
| 2521 | 1,2,4,6,7,8<br>,30,33 | 3,5,27,28,<br>29,31,32,3<br>4,35 | 10 | D3ZUK3,P02631,P18418,P35446,P97580,Q30KJ2,Q63617,Q7TP52,Q99041,Q9QZQ5                                           |
| 2522 | 1,2,4,6,7,8<br>,30,34 | 3,5,27,28,<br>29,31,32,3<br>3,35 | 15 | D3ZUK3,G3V686,P02631,P09605;P25809,P16086,P17559,P47967,P97840,Q63532,Q64057,Q6P6R2,Q7TP52,Q80WL1,Q9QZQ5,Q9WTT6 |
| 2523 | 1,2,4,6,7,8<br>,30,35 | 3,5,27,28,<br>29,31,32,3<br>3,34 | 9  | P02631,P14480,P15399,P20762,Q30KJ2,Q64057,Q7TP52,Q80WL1,Q9QZQ5                                                  |
| 2524 | 1,2,4,6,7,8<br>,31,32 | 3,5,27,28,<br>29,30,33,3<br>4,35 | 10 | P02631,P12020,P25236,P42854,P97580,Q30KJ2,Q63532,Q7TP52,Q8CJD3,Q9QZQ5                                           |
| 2525 | 1,2,4,6,7,8<br>,31,33 | 3,5,27,28,<br>29,30,32,3<br>4,35 | 11 | P02631,P12020,P15399,P25236,P97580,Q30KJ2,Q63617,Q7TP52,Q8CJD3,Q99041,Q9QZQ5                                    |
| 2526 | 1,2,4,6,7,8<br>,31,34 | 3,5,27,28,<br>29,30,32,3<br>3,35 | 14 | D3ZUK3,G3V686,P02631,P12020,P20766,P25236,P47967,P70709,P83748,Q62997,Q63532,Q6P6R2,Q7TP52,Q9QZQ5               |
| 2527 | 1,2,4,6,7,8<br>,31,35 | 3,5,27,28,<br>29,30,32,3<br>3,34 | 11 | P02631,P04182,P12020,P14480,P15399,P20762,P25236,P97580,Q30KJ2,Q7TP52,Q9QZQ5                                    |
| 2528 | 1,2,4,6,7,8<br>,32,33 | 3,5,27,28,<br>29,30,31,3<br>4,35 | 12 | P02631,P12020,P15399,P97580,Q30KJ2,Q63532,Q63617,Q6IE51,Q7TP52,Q8CJD3,Q99041,Q9QZQ5                             |
| 2529 | 1,2,4,6,7,8<br>,32,34 | 3,5,27,28,<br>29,30,31,3<br>3,35 | 12 | D3ZUK3,G3V686,P01041,P02631,P12020,P47967,P70709,Q63532,Q6P6R2,Q7TP52,Q99041,Q9QZQ5                             |

|      |                        |                                  |    |                                                                                                                 |
|------|------------------------|----------------------------------|----|-----------------------------------------------------------------------------------------------------------------|
| 2530 | 1,2,4,6,7,8<br>,32,35  | 3,5,27,28,<br>29,30,31,3<br>3,34 | 11 | P02631,P14480,P15399,P20762,P97580,Q30KJ2,Q63532,Q6IE51,Q7TP52,Q8CJD3,Q9QZQ5                                    |
| 2531 | 1,2,4,6,7,8<br>,33,34  | 3,5,27,28,<br>29,30,31,3<br>2,35 | 13 | D3ZUK3,G3V686,P02631,P18418,P47967,P97580,Q30KJ2,Q63532,Q63617,Q6P6R2,Q7TP52,Q99041,Q9QZQ5                      |
| 2532 | 1,2,4,6,7,8<br>,33,35  | 3,5,27,28,<br>29,30,31,3<br>2,34 | 12 | P02631,P14480,P15399,P18418,P20762,P97580,Q30KJ2,Q63617,Q6IE51,Q7TP52,Q99041,Q9QZQ5                             |
| 2533 | 1,2,4,6,7,8<br>,34,35  | 3,5,27,28,<br>29,30,31,3<br>2,33 | 12 | D3ZUK3,P02631,P09006,P14480,P16296,P83748,P97580,Q30KJ2,Q63514,Q63532,Q7TP52,Q9QZQ5                             |
| 2534 | 1,2,4,6,7,2<br>7,28,29 | 3,5,8,30,3<br>1,32,33,34<br>,35  | 16 | O54861,P02631,P07647,P08723,P0C0A9,P12020,P18418,P24368,P30120,Q5GRG2,Q63942,Q6IE51,Q7TP52,Q9JHB9,Q9JI85,Q9R0T3 |
| 2535 | 1,2,4,6,7,2<br>7,28,30 | 3,5,8,29,3<br>1,32,33,34<br>,35  | 10 | D3ZUC6,P02631,P12020,P18418,P47967,P97840,Q6AYQ8,Q6IE51,Q7TP52,Q9JI85                                           |
| 2536 | 1,2,4,6,7,2<br>7,28,31 | 3,5,8,29,3<br>0,32,33,34<br>,35  | 6  | P02631,P06911,P12020,Q5GRG2,Q6IE51,Q7TP52                                                                       |
| 2537 | 1,2,4,6,7,2<br>7,28,32 | 3,5,8,29,3<br>0,31,33,34<br>,35  | 11 | G3V686,P02631,P05539,P12020,P18418,Q30KJ2,Q5GRG2,Q63532,Q6IE51,Q7TP52,Q9JI85                                    |
| 2538 | 1,2,4,6,7,2<br>7,28,33 | 3,5,8,29,3<br>0,31,32,34<br>,35  | 11 | P02631,P08649,P12020,P15399,P18418,P97580,Q30KJ2,Q6IE51,Q7TP52,Q9JI85,Q9R0T3                                    |
| 2539 | 1,2,4,6,7,2<br>7,28,34 | 3,5,8,29,3<br>0,31,32,33<br>,35  | 12 | G3V686,P02631,P05964,P18418,P47967,P70709,P97840,Q5HZV9,Q63532,Q6IE51,Q6P6R2,Q7TP52                             |
| 2540 | 1,2,4,6,7,2<br>7,28,35 | 3,5,8,29,3<br>0,31,32,33<br>,34  | 9  | D3ZUC6,P02631,P14480,P15399,P18418,Q30KJ2,Q5M819,Q6IE51,Q7TP52                                                  |
| 2541 | 1,2,4,6,7,2<br>7,29,30 | 3,5,8,28,3<br>1,32,33,34<br>,35  | 7  | D3ZUC6,O54861,P02631,P14480,P25236,Q6IE51,Q7TP52                                                                |
| 2542 | 1,2,4,6,7,2<br>7,29,31 | 3,5,8,28,3<br>0,32,33,34<br>,35  | 6  | P02631,P12020,P25236,Q6IE51,Q7TP52,Q8CJD3                                                                       |
| 2543 | 1,2,4,6,7,2<br>7,29,32 | 3,5,8,28,3<br>0,31,33,34<br>,35  | 11 | G3V686,P02631,P02793,Q7TP54,P05539,P08649,P12020,P25236,Q63532,Q6IE51,Q7TP52,Q8CJD3                             |
| 2544 | 1,2,4,6,7,2<br>7,29,33 | 3,5,8,28,3<br>0,31,32,34<br>,35  | 10 | P02631,P02793,Q7TP54,P08649,P15399,Q30KJ2,Q6IE51,Q7TP52,Q8CJD3,Q9JI85,Q9QZQ5                                    |

|      |                        |                                 |    |                                                                                                   |
|------|------------------------|---------------------------------|----|---------------------------------------------------------------------------------------------------|
| 2545 | 1,2,4,6,7,2<br>7,29,34 | 3,5,8,28,3<br>0,31,32,33<br>,35 | 14 | G3V686,P02631,P05964,P08649,P25236,P47967,P70709,P83748,P97840,Q63467,Q63532,Q6IE51,Q7TP52,Q9QZQ5 |
| 2546 | 1,2,4,6,7,2<br>7,29,35 | 3,5,8,28,3<br>0,31,32,33<br>,34 | 9  | O54861,P01946,P02631,P14480,P15399,P25236,Q30KJ2,Q6IE51,Q7TP52                                    |
| 2547 | 1,2,4,6,7,2<br>7,30,31 | 3,5,8,28,2<br>9,32,33,34<br>,35 | 10 | D3ZUC6,O55145,P02631,P05942,P12020,P25236,P47967,P97840,Q6IE51,Q7TP52                             |
| 2548 | 1,2,4,6,7,2<br>7,30,32 | 3,5,8,28,2<br>9,31,33,34<br>,35 | 7  | G3V686,P02631,P08649,Q63532,Q6AYQ8,Q6IE51,Q7TP52                                                  |
| 2549 | 1,2,4,6,7,2<br>7,30,33 | 3,5,8,28,2<br>9,31,32,34<br>,35 | 7  | P02631,P08649,P15399,P51907,Q30KJ2,Q6IE51,Q7TP52                                                  |
| 2550 | 1,2,4,6,7,2<br>7,30,34 | 3,5,8,28,2<br>9,31,32,33<br>,35 | 12 | G3V686,P02631,P05964,P08649,P09605,P25809,P47967,P70709,P97840,Q63532,Q6IE51,Q7TP52,Q9QZQ5        |
| 2551 | 1,2,4,6,7,2<br>7,30,35 | 3,5,8,28,2<br>9,31,32,33<br>,34 | 8  | D3ZUC6,P02631,P14480,P15399,Q30KJ2,Q6AYQ8,Q6IE51,Q7TP52                                           |
| 2552 | 1,2,4,6,7,2<br>7,31,32 | 3,5,8,28,2<br>9,30,33,34<br>,35 | 12 | G3V686,P02631,P05539,P08649,P12020,P25236,P97580,Q30KJ2,Q63532,Q6IE51,Q7TP52,Q8CJD3               |
| 2553 | 1,2,4,6,7,2<br>7,31,33 | 3,5,8,28,2<br>9,30,32,34<br>,35 | 10 | P02631,P08649,P12020,P15399,P51907,P97580,Q30KJ2,Q6IE51,Q7TP52,Q8CJD3                             |
| 2554 | 1,2,4,6,7,2<br>7,31,34 | 3,5,8,28,2<br>9,30,32,33<br>,35 | 12 | G3V686,P02631,P08649,P25236,P47967,P70709,P83748,P97840,Q62997,Q63532,Q6IE51,Q7TP52               |
| 2555 | 1,2,4,6,7,2<br>7,31,35 | 3,5,8,28,2<br>9,30,32,33<br>,34 | 8  | P02631,P14480,P15399,P25236,P97580,Q30KJ2,Q6IE51,Q7TP52                                           |
| 2556 | 1,2,4,6,7,2<br>7,32,33 | 3,5,8,28,2<br>9,30,31,34<br>,35 | 13 | G3V686,P02631,P02793,Q7TP54,P05539,P08649,P12020,P15399,P97580,Q30KJ2,Q63532,Q6IE51,Q7TP52,Q8CJD3 |
| 2557 | 1,2,4,6,7,2<br>7,32,34 | 3,5,8,28,2<br>9,30,31,33<br>,35 | 11 | G3V686,P02631,P05539,P08649,P47967,P70709,P97840,Q63532,Q6IE51,Q6P6R2,Q7TP52                      |
| 2558 | 1,2,4,6,7,2<br>7,32,35 | 3,5,8,28,2<br>9,30,31,33<br>,34 | 8  | P02631,P14480,P15399,P97580,Q30KJ2,Q63532,Q6IE51,Q7TP52                                           |
| 2559 | 1,2,4,6,7,2<br>7,33,34 | 3,5,8,28,2<br>9,30,31,32<br>,35 | 13 | G3V686,P02631,P08649,P18418,P47967,P70709,P97580,P97840,Q30KJ2,Q63532,Q6IE51,Q7TP52,Q9QZQ5        |



|      |                        |                                 |    |                                                                                                   |
|------|------------------------|---------------------------------|----|---------------------------------------------------------------------------------------------------|
| 2560 | 1,2,4,6,7,2<br>7,33,35 | 3,5,8,28,2<br>9,30,31,32<br>,34 | 7  | P02631,P14480,P15399,P97580,Q30KJ2,Q6IE51,Q7TP52                                                  |
| 2561 | 1,2,4,6,7,2<br>7,34,35 | 3,5,8,28,2<br>9,30,31,32<br>,33 | 14 | G3V686,P02631,P14480,P15399,P47967,P70709,P97580,P97840,Q30KJ2,Q5FVI6,Q5M819,Q63532,Q6IE51,Q7TP52 |
| 2562 | 1,2,4,6,7,2<br>8,29,30 | 3,5,8,27,3<br>1,32,33,34<br>,35 | 8  | O54861,O55004,P02631,P25236,P30120,P35467,Q08849,Q9JI85                                           |
| 2563 | 1,2,4,6,7,2<br>8,29,31 | 3,5,8,27,3<br>0,32,33,34<br>,35 | 10 | O55004,P02631,P06911,P12020,P15399,P25236,P35467,P83121,Q5GRG2,Q7TP52                             |
| 2564 | 1,2,4,6,7,2<br>8,29,32 | 3,5,8,27,3<br>0,31,33,34<br>,35 | 13 | P01836,P02631,P02793;Q7TP54,P04905,P06911,P09456,P12020,P15399,P25236,P50280,Q5GRG2,Q62975,Q6IE51 |
| 2565 | 1,2,4,6,7,2<br>8,29,33 | 3,5,8,27,3<br>0,31,32,34<br>,35 | 12 | O54861,P02631,P02793;Q7TP54,P08723,P12020,P15399,P18418,P35467,P83121,Q30KJ2,Q6IE51,Q9JI85        |
| 2566 | 1,2,4,6,7,2<br>8,29,34 | 3,5,8,27,3<br>0,31,32,33<br>,35 | 7  | G3V686,P02631,P05964,P27791,P83748,P97840,Q63532                                                  |
| 2567 | 1,2,4,6,7,2<br>8,29,35 | 3,5,8,27,3<br>0,31,32,33<br>,34 | 7  | O54861,P02631,P14480,P15399,P25236,Q30KJ2,Q6IE51                                                  |
| 2568 | 1,2,4,6,7,2<br>8,30,31 | 3,5,8,27,2<br>9,32,33,34<br>,35 | 8  | O55004,P12020,P25236,P42854,P47967,P97840,Q5GRG2,Q7TP52                                           |
| 2569 | 1,2,4,6,7,2<br>8,30,32 | 3,5,8,27,2<br>9,31,33,34<br>,35 | 5  | P01836,P02631,P12020,Q6AYQ8,Q6IE51                                                                |
| 2570 | 1,2,4,6,7,2<br>8,30,33 | 3,5,8,27,2<br>9,31,32,34<br>,35 | 7  | P02631,P15399,P18418,P51907,P97580,Q30KJ2,Q6IE51                                                  |
| 2571 | 1,2,4,6,7,2<br>8,30,34 | 3,5,8,27,2<br>9,31,32,33<br>,35 | 10 | G3V686,P02631,P09605;P25809,P17559,P47967,P97840,Q5HZV9,Q63532,Q6P6R2,Q7TP52                      |
| 2572 | 1,2,4,6,7,2<br>8,30,35 | 3,5,8,27,2<br>9,31,32,33<br>,34 | 6  | P06866,P14480,P15399,Q30KJ2,Q6AYQ8,Q6IE51                                                         |
| 2573 | 1,2,4,6,7,2<br>8,31,32 | 3,5,8,27,2<br>9,30,33,34<br>,35 | 10 | P01836,P02631,P06911,P12020,P15399,P25236,P97580,Q30KJ2,Q5GRG2,Q7TP52                             |
| 2574 | 1,2,4,6,7,2<br>8,31,33 | 3,5,8,27,2<br>9,30,32,34<br>,35 | 10 | P06911,P12020,P15399,P51907,P83121,P97580,Q30KJ2,Q5GRG2,Q6IE51,Q7TP52                             |

|      |                        |                                 |    |                                                                                            |
|------|------------------------|---------------------------------|----|--------------------------------------------------------------------------------------------|
| 2575 | 1,2,4,6,7,2<br>8,31,34 | 3,5,8,27,2<br>9,30,32,33<br>,35 | 13 | G3V686,P02631,P12020,P25236,P27791,P47967,P83748,P97840,Q5GRG2,Q5HZV9,Q62997,Q63532,Q7TP52 |
| 2576 | 1,2,4,6,7,2<br>8,31,35 | 3,5,8,27,2<br>9,30,32,33<br>,34 | 10 | P06760,P12020,P14480,P15399,P25236,P97580,Q30KJ2,Q5GRG2,Q6IE51,Q7TP52                      |
| 2577 | 1,2,4,6,7,2<br>8,32,33 | 3,5,8,27,2<br>9,30,31,34<br>,35 | 7  | P02631,P02793,Q7TP54,P12020,P15399,P97580,Q30KJ2,Q6IE51                                    |
| 2578 | 1,2,4,6,7,2<br>8,32,34 | 3,5,8,27,2<br>9,30,31,33<br>,35 | 10 | G3V686,P01836,P02631,P12020,P47967,P97840,Q5HZV9,Q63532,Q6P6R2,Q7TP52                      |
| 2579 | 1,2,4,6,7,2<br>8,32,35 | 3,5,8,27,2<br>9,30,31,33<br>,34 | 8  | P02631,P12020,P14480,P15399,P97580,Q30KJ2,Q6IE51,Q7TP52                                    |
| 2580 | 1,2,4,6,7,2<br>8,33,34 | 3,5,8,27,2<br>9,30,31,32<br>,35 | 13 | G3V686,P02631,P15399,P18418,P27791,P47967,P97580,P97840,Q30KJ2,Q5HZV9,Q63532,Q6IE51,Q7TP52 |
| 2581 | 1,2,4,6,7,2<br>8,33,35 | 3,5,8,27,2<br>9,30,31,32<br>,34 | 7  | P02631,P06760,P14480,P15399,P97580,Q30KJ2,Q6IE51                                           |
| 2582 | 1,2,4,6,7,2<br>8,34,35 | 3,5,8,27,2<br>9,30,31,32<br>,33 | 12 | P02631,P14480,P15399,P83748,P97580,P97840,Q30KJ2,Q5HZV9,Q5M819,Q63532,Q6IE51,Q7TP52        |
| 2583 | 1,2,4,6,7,2<br>9,30,31 | 3,5,8,27,2<br>8,32,33,34<br>,35 | 3  | P25236,P83121,Q7TP52                                                                       |
| 2584 | 1,2,4,6,7,2<br>9,30,32 | 3,5,8,27,2<br>8,31,33,34<br>,35 | 3  | P01836,P02631,P25236                                                                       |
| 2585 | 1,2,4,6,7,2<br>9,30,33 | 3,5,8,27,2<br>8,31,32,34<br>,35 | 5  | P02631,P15399,P25236,P83121,Q30KJ2                                                         |
| 2586 | 1,2,4,6,7,2<br>9,30,34 | 3,5,8,27,2<br>8,31,32,33<br>,35 | 11 | G3V686,P02631,P05964,P09605,P25809,P14480,P25236,P47967,P97840,Q63532,Q7TP52,Q9JJ22        |
| 2587 | 1,2,4,6,7,2<br>9,30,35 | 3,5,8,27,2<br>8,31,32,33<br>,34 | 6  | O54861,P02631,P14480,P15399,P25236,Q30KJ2                                                  |
| 2588 | 1,2,4,6,7,2<br>9,31,32 | 3,5,8,27,2<br>8,30,33,34<br>,35 | 10 | P01836,P02631,P04182,P05539,P12020,P15399,P25236,Q30KJ2,Q7TP52,Q8CJD3                      |
| 2589 | 1,2,4,6,7,2<br>9,31,33 | 3,5,8,27,2<br>8,30,32,34<br>,35 | 9  | P02631,P12020,P15399,P25236,P83121,P97580,Q30KJ2,Q7TP52,Q8CJD3                             |

|      |                        |                                 |    |                                                                                     |
|------|------------------------|---------------------------------|----|-------------------------------------------------------------------------------------|
| 2590 | 1,2,4,6,7,2<br>9,31,34 | 3,5,8,27,2<br>8,30,32,33<br>,35 | 10 | G3V686,P02631,P09605;P25809,P25236,P70709,P83748,Q62997,Q63467,Q63532,Q7TP52        |
| 2591 | 1,2,4,6,7,2<br>9,31,35 | 3,5,8,27,2<br>8,30,32,33<br>,34 | 7  | P04182,P14480,P15399,P25236,P97580,Q30KJ2,Q7TP52                                    |
| 2592 | 1,2,4,6,7,2<br>9,32,33 | 3,5,8,27,2<br>8,30,31,34<br>,35 | 10 | P02631,P02793;Q7TP54,P12020,P15399,P25236,P97580,Q30KJ2,Q63532,Q6IE51,Q8CJD3        |
| 2593 | 1,2,4,6,7,2<br>9,32,34 | 3,5,8,27,2<br>8,30,31,33<br>,35 | 11 | G3V686,P01041,P01836,P02631,P09605;P25809,P25236,P70709,P83748,Q63467,Q63532,Q7TP52 |
| 2594 | 1,2,4,6,7,2<br>9,32,35 | 3,5,8,27,2<br>8,30,31,33<br>,34 | 8  | P02631,P04182,P14480,P15399,P25236,P97580,Q30KJ2,Q6IE51                             |
| 2595 | 1,2,4,6,7,2<br>9,33,34 | 3,5,8,27,2<br>8,30,31,32<br>,35 | 8  | G3V686,P02631,P15399,P83748,Q30KJ2,Q63532,Q7TP52,Q9JJ22                             |
| 2596 | 1,2,4,6,7,2<br>9,33,35 | 3,5,8,27,2<br>8,30,31,32<br>,34 | 7  | P02631,P14480,P15399,P25236,P97580,Q30KJ2,Q6IE51                                    |
| 2597 | 1,2,4,6,7,2<br>9,34,35 | 3,5,8,27,2<br>8,30,31,32<br>,33 | 10 | G3V686,P02631,P14480,P15399,P25236,P83748,Q30KJ2,Q63532,Q7TP52,Q9JJ22               |
| 2598 | 1,2,4,6,7,3<br>0,31,32 | 3,5,8,27,2<br>8,29,33,34<br>,35 | 6  | P01836,P12020,P25236,P42854,Q30KJ2,Q7TP52                                           |
| 2599 | 1,2,4,6,7,3<br>0,31,33 | 3,5,8,27,2<br>8,29,32,34<br>,35 | 9  | P15399,P25236,P35446,P42854,P51907,P83121,P97580,Q30KJ2,Q7TP52                      |
| 2600 | 1,2,4,6,7,3<br>0,31,34 | 3,5,8,27,2<br>8,29,32,33<br>,35 | 11 | G3V686,P09605;P25809,P17559,P25236,P42854,P47967,P70709,P97840,Q62997,Q63532,Q7TP52 |
| 2601 | 1,2,4,6,7,3<br>0,31,35 | 3,5,8,27,2<br>8,29,32,33<br>,34 | 8  | P14480,P15399,P25236,P42854,P97580,P97584,Q30KJ2,Q7TP52                             |
| 2602 | 1,2,4,6,7,3<br>0,32,33 | 3,5,8,27,2<br>8,29,31,34<br>,35 | 7  | P02631,P15399,P97580,Q30KJ2,Q63532,Q6IE51,Q7TP52                                    |
| 2603 | 1,2,4,6,7,3<br>0,32,34 | 3,5,8,27,2<br>8,29,31,33<br>,35 | 11 | G3V686,P01041,P01836,P02631,P09605;P25809,P47967,P70709,P97840,Q63532,Q6P6R2,Q7TP52 |
| 2604 | 1,2,4,6,7,3<br>0,32,35 | 3,5,8,27,2<br>8,29,31,33<br>,34 | 7  | P14480,P15399,P97580,Q30KJ2,Q63532,Q6IE51,Q7TP52                                    |

|      |                        |                                 |    |                                                                                                                 |
|------|------------------------|---------------------------------|----|-----------------------------------------------------------------------------------------------------------------|
| 2605 | 1,2,4,6,7,3<br>0,33,34 | 3,5,8,27,2<br>8,29,31,32<br>,35 | 10 | G3V686,P02631,P09605;P25809,P17559,P47967,P97580,P97840,Q30KJ2,Q63532,Q7TP52                                    |
| 2606 | 1,2,4,6,7,3<br>0,33,35 | 3,5,8,27,2<br>8,29,31,32<br>,34 | 6  | P14480,P15399,P97580,Q30KJ2,Q6IE51,Q7TP52                                                                       |
| 2607 | 1,2,4,6,7,3<br>0,34,35 | 3,5,8,27,2<br>8,29,31,32<br>,33 | 10 | P06866,P09605;P25809,P14480,P15399,P47967,P82471,P97840,Q30KJ2,Q63532,Q7TP52                                    |
| 2608 | 1,2,4,6,7,3<br>1,32,33 | 3,5,8,27,2<br>8,29,30,34<br>,35 | 9  | P05539,P12020,P15399,P25236,P97580,Q30KJ2,Q63532,Q7TP52,Q8CJD3                                                  |
| 2609 | 1,2,4,6,7,3<br>1,32,34 | 3,5,8,27,2<br>8,29,30,33<br>,35 | 15 | G3V686,P01836,P05539,P09605;P25809,P12020,P25236,P47967,P70709,P83748,P97580,P97840,Q30KJ2,Q62997,Q63532,Q7TP52 |
| 2610 | 1,2,4,6,7,3<br>1,32,35 | 3,5,8,27,2<br>8,29,30,33<br>,34 | 7  | P04182,P12020,P15399,P25236,P97580,Q30KJ2,Q7TP52                                                                |
| 2611 | 1,2,4,6,7,3<br>1,33,34 | 3,5,8,27,2<br>8,29,30,32<br>,35 | 12 | G3V686,P15399,P25236,P47967,P70709,P83748,P97580,P97840,Q30KJ2,Q62997,Q63532,Q7TP52                             |
| 2612 | 1,2,4,6,7,3<br>1,33,35 | 3,5,8,27,2<br>8,29,30,32<br>,34 | 7  | P04182,P15399,P25236,P97580,Q30KJ2,Q6IE51,Q7TP52                                                                |
| 2613 | 1,2,4,6,7,3<br>1,34,35 | 3,5,8,27,2<br>8,29,30,32<br>,33 | 11 | G3V686,P14480,P15399,P25236,P82471,P83748,P97580,Q30KJ2,Q62997,Q63532,Q7TP52                                    |
| 2614 | 1,2,4,6,7,3<br>2,33,34 | 3,5,8,27,2<br>8,29,30,31<br>,35 | 10 | G3V686,P02631,P15399,P55314,P70709,P97580,Q30KJ2,Q63532,Q63661,Q7TP52                                           |
| 2615 | 1,2,4,6,7,3<br>2,33,35 | 3,5,8,27,2<br>8,29,30,31<br>,34 | 7  | P15399,P97580,Q30KJ2,Q63532,Q6IE51,Q7TP52,Q8CJD3                                                                |
| 2616 | 1,2,4,6,7,3<br>2,34,35 | 3,5,8,27,2<br>8,29,30,31<br>,33 | 10 | G3V686,P02631,P14480,P15399,P82471,P97580,Q30KJ2,Q63532,Q63661,Q7TP52                                           |
| 2617 | 1,2,4,6,7,3<br>3,34,35 | 3,5,8,27,2<br>8,29,30,31<br>,32 | 11 | G3V686,P02631,P14480,P15399,P82471,P83748,P97580,Q30KJ2,Q63532,Q6IE51,Q7TP52                                    |
| 2618 | 1,2,4,6,8,2<br>7,28,29 | 3,5,7,30,3<br>1,32,33,34<br>,35 | 15 | O35547,P02781,P02782,P07647,P08723,P0C0A9,P14669,P24368,P30120,P50280,Q5M8C6,Q63942,Q9JHB9,Q9JI85,Q9R0T3        |
| 2619 | 1,2,4,6,8,2<br>7,28,30 | 3,5,7,29,3<br>1,32,33,34<br>,35 | 5  | P02782,P08723,P14669,Q63942,Q6AYQ8                                                                              |

|      |                        |                                 |   |                                                         |
|------|------------------------|---------------------------------|---|---------------------------------------------------------|
| 2620 | 1,2,4,6,8,2<br>7,28,31 | 3,5,7,29,3<br>0,32,33,34<br>,35 | 5 | P02782,P25236,Q5GRG2,Q63942,Q7TP52                      |
| 2621 | 1,2,4,6,8,2<br>7,28,32 | 3,5,7,29,3<br>0,31,33,34<br>,35 | 5 | P00714,P08723,P14669,Q63942,Q7TP52                      |
| 2622 | 1,2,4,6,8,2<br>7,28,33 | 3,5,7,29,3<br>0,31,32,34<br>,35 | 3 | P08723,Q63942,Q9R0T3                                    |
| 2623 | 1,2,4,6,8,2<br>7,28,34 | 3,5,7,29,3<br>0,31,32,33<br>,35 | 8 | G3V686,P70709,Q4FZU6,Q5HZV9,Q63942,Q6P6R2,Q7TP52,Q9WTT6 |
| 2624 | 1,2,4,6,8,2<br>7,28,35 | 3,5,7,29,3<br>0,31,32,33<br>,34 | 2 | Q63942,Q7TP52                                           |
| 2625 | 1,2,4,6,8,2<br>7,29,30 | 3,5,7,28,3<br>1,32,33,34<br>,35 | 4 | P14669,P25236,P30120,Q6AYR9                             |
| 2626 | 1,2,4,6,8,2<br>7,29,31 | 3,5,7,28,3<br>0,32,33,34<br>,35 | 4 | P14669,P25236,Q7TP52,Q8CJD3                             |
| 2627 | 1,2,4,6,8,2<br>7,29,32 | 3,5,7,28,3<br>0,31,33,34<br>,35 | 4 | P14669,P25236,P50280,Q8CJD3                             |
| 2628 | 1,2,4,6,8,2<br>7,29,33 | 3,5,7,28,3<br>0,31,32,34<br>,35 | 2 | P14669,Q8CJD3                                           |
| 2629 | 1,2,4,6,8,2<br>7,29,34 | 3,5,7,28,3<br>0,31,32,33<br>,35 | 8 | G3V686,P14669,P25236,P70709,Q00715,Q6P6R2,Q7TP52,Q9WTT6 |
| 2630 | 1,2,4,6,8,2<br>7,29,35 | 3,5,7,28,3<br>0,31,32,33<br>,34 | 3 | P14480,P14669,P25236                                    |
| 2631 | 1,2,4,6,8,2<br>7,30,31 | 3,5,7,28,2<br>9,32,33,34<br>,35 | 4 | P14669,P25236,Q7TP52,Q80WL1                             |
| 2632 | 1,2,4,6,8,2<br>7,30,32 | 3,5,7,28,2<br>9,31,33,34<br>,35 | 3 | P14669,Q6AYQ8,Q7TP52                                    |
| 2633 | 1,2,4,6,8,2<br>7,30,33 | 3,5,7,28,2<br>9,31,32,34<br>,35 | 2 | P14669,Q7TP52                                           |
| 2634 | 1,2,4,6,8,2<br>7,30,34 | 3,5,7,28,2<br>9,31,32,33<br>,35 | 7 | G3V686,P47967,P70709,Q00715,Q6P6R2,Q7TP52,Q9WTT6        |

|      |                        |                                 |    |                                                                       |
|------|------------------------|---------------------------------|----|-----------------------------------------------------------------------|
| 2635 | 1,2,4,6,8,2<br>7,30,35 | 3,5,7,28,2<br>9,31,32,33<br>,34 | 4  | P14480,P14669,Q6AYQ8,Q7TP52                                           |
| 2636 | 1,2,4,6,8,2<br>7,31,32 | 3,5,7,28,2<br>9,30,33,34<br>,35 | 4  | P14669,P25236,Q7TP52,Q8CJD3                                           |
| 2637 | 1,2,4,6,8,2<br>7,31,33 | 3,5,7,28,2<br>9,30,32,34<br>,35 | 4  | P25236,Q63355,Q7TP52,Q8CJD3                                           |
| 2638 | 1,2,4,6,8,2<br>7,31,34 | 3,5,7,28,2<br>9,30,32,33<br>,35 | 8  | G3V686,P25236,P70709,Q62997,Q63355,Q6P6R2,Q7TP52,Q9WTT6               |
| 2639 | 1,2,4,6,8,2<br>7,31,35 | 3,5,7,28,2<br>9,30,32,33<br>,34 | 3  | P25236,Q63355,Q7TP52                                                  |
| 2640 | 1,2,4,6,8,2<br>7,32,33 | 3,5,7,28,2<br>9,30,31,34<br>,35 | 3  | P14669,Q7TP52,Q8CJD3                                                  |
| 2641 | 1,2,4,6,8,2<br>7,32,34 | 3,5,7,28,2<br>9,30,31,33<br>,35 | 8  | G3V686,P14669,P70709,Q00715,Q63532,Q6P6R2,Q7TP52,Q9WTT6               |
| 2642 | 1,2,4,6,8,2<br>7,32,35 | 3,5,7,28,2<br>9,30,31,33<br>,34 | 2  | P14669,Q7TP52                                                         |
| 2643 | 1,2,4,6,8,2<br>7,33,34 | 3,5,7,28,2<br>9,30,31,32<br>,35 | 6  | G3V686,P70709,Q63355,Q6P6R2,Q7TP52,Q9WTT6                             |
| 2644 | 1,2,4,6,8,2<br>7,33,35 | 3,5,7,28,2<br>9,30,31,32<br>,34 | 3  | Q30KJ2,Q63355,Q7TP52                                                  |
| 2645 | 1,2,4,6,8,2<br>7,34,35 | 3,5,7,28,2<br>9,30,31,32<br>,33 | 7  | G3V686,P09006,P14480,Q561R9,Q63355,Q7TP52,Q9WTT6                      |
| 2646 | 1,2,4,6,8,2<br>8,29,30 | 3,5,7,27,3<br>1,32,33,34<br>,35 | 9  | O35547,P02782,P08723,P0C0A9,P25236,P30120,P50280,Q62975,Q63942        |
| 2647 | 1,2,4,6,8,2<br>8,29,31 | 3,5,7,27,3<br>0,32,33,34<br>,35 | 10 | O35547,P02782,P02803,P06911,P08723,P25236,P50280,Q5GRG2,Q62975,Q63942 |
| 2648 | 1,2,4,6,8,2<br>8,29,32 | 3,5,7,27,3<br>0,31,33,34<br>,35 | 10 | O35547,P04905,P06911,P08723,P24368,P25236,P47727,P50280,Q62975,Q63942 |
| 2649 | 1,2,4,6,8,2<br>8,29,33 | 3,5,7,27,3<br>0,31,32,34<br>,35 | 6  | O35547,P04905,P07647,P08723,P50280,Q63942                             |

|      |                        |                                 |   |                                                                |
|------|------------------------|---------------------------------|---|----------------------------------------------------------------|
| 2650 | 1,2,4,6,8,2<br>8,29,34 | 3,5,7,27,3<br>0,31,32,33<br>,35 | 9 | P25236,P27791,P50280,P52303,Q5QE79,Q63942,Q6P6R2,Q9JJ22,Q9WTT6 |
| 2651 | 1,2,4,6,8,2<br>8,29,35 | 3,5,7,27,3<br>0,31,32,33<br>,34 | 4 | P02803,P14480,P25236,Q63942                                    |
| 2652 | 1,2,4,6,8,2<br>8,30,31 | 3,5,7,27,2<br>9,32,33,34<br>,35 | 5 | P25236,Q5GRG2,Q63942,Q64335,Q80WL1                             |
| 2653 | 1,2,4,6,8,2<br>8,30,32 | 3,5,7,27,2<br>9,31,33,34<br>,35 | 2 | Q63942,Q6AYQ8                                                  |
| 2654 | 1,2,4,6,8,2<br>8,30,33 | 3,5,7,27,2<br>9,31,32,34<br>,35 | 1 | Q63942                                                         |
| 2655 | 1,2,4,6,8,2<br>8,30,34 | 3,5,7,27,2<br>9,31,32,33<br>,35 | 6 | P47967,P52303,Q5HZV9,Q63942,Q6P6R2,Q9WTT6                      |
| 2656 | 1,2,4,6,8,2<br>8,30,35 | 3,5,7,27,2<br>9,31,32,33<br>,34 | 5 | P02761,P14480,Q63942,Q64335,Q6AYQ8                             |
| 2657 | 1,2,4,6,8,2<br>8,31,32 | 3,5,7,27,2<br>9,30,33,34<br>,35 | 6 | P06911,P12020,P25236,Q5GRG2,Q62975,Q63942                      |
| 2658 | 1,2,4,6,8,2<br>8,31,33 | 3,5,7,27,2<br>9,30,32,34<br>,35 | 3 | P02803,Q5GRG2,Q63942                                           |
| 2659 | 1,2,4,6,8,2<br>8,31,34 | 3,5,7,27,2<br>9,30,32,33<br>,35 | 7 | P25236,Q5HZV9,Q62997,Q63942,Q6P6R2,Q7TP52,Q9WTT6               |
| 2660 | 1,2,4,6,8,2<br>8,31,35 | 3,5,7,27,2<br>9,30,32,33<br>,34 | 3 | P02803,P25236,Q63942                                           |
| 2661 | 1,2,4,6,8,2<br>8,32,33 | 3,5,7,27,2<br>9,30,31,34<br>,35 | 1 | Q63942                                                         |
| 2662 | 1,2,4,6,8,2<br>8,32,34 | 3,5,7,27,2<br>9,30,31,33<br>,35 | 5 | P52303,Q5HZV9,Q63942,Q6P6R2,Q9WTT6                             |
| 2663 | 1,2,4,6,8,2<br>8,32,35 | 3,5,7,27,2<br>9,30,31,33<br>,34 | 2 | Q30KJ2,Q63942                                                  |
| 2664 | 1,2,4,6,8,2<br>8,33,34 | 3,5,7,27,2<br>9,30,31,32<br>,35 | 4 | P27791,Q63942,Q6P6R2,Q9WTT6                                    |

|      |                        |                                 |   |                                                  |
|------|------------------------|---------------------------------|---|--------------------------------------------------|
| 2665 | 1,2,4,6,8,2<br>8,33,35 | 3,5,7,27,2<br>9,30,31,32<br>,34 | 4 | P02803,P15399,Q30KJ2,Q63942                      |
| 2666 | 1,2,4,6,8,2<br>8,34,35 | 3,5,7,27,2<br>9,30,31,32<br>,33 | 7 | P00507,P09006,P52303,Q5HZV9,Q63942,Q6P6R2,Q9WTT6 |
| 2667 | 1,2,4,6,8,2<br>9,30,31 | 3,5,7,27,2<br>8,32,33,34<br>,35 | 3 | P25236,Q62975,Q80WL1                             |
| 2668 | 1,2,4,6,8,2<br>9,30,32 | 3,5,7,27,2<br>8,31,33,34<br>,35 | 4 | P25236,P50280,Q62975,Q6TMA8                      |
| 2669 | 1,2,4,6,8,2<br>9,30,33 | 3,5,7,27,2<br>8,31,32,34<br>,35 | 2 | A2RUV9,P25236                                    |
| 2670 | 1,2,4,6,8,2<br>9,30,34 | 3,5,7,27,2<br>8,31,32,33<br>,35 | 3 | P25236,Q9JJ22,Q9WTT6                             |
| 2671 | 1,2,4,6,8,2<br>9,30,35 | 3,5,7,27,2<br>8,31,32,33<br>,34 | 3 | P02680,P14480,P25236                             |
| 2672 | 1,2,4,6,8,2<br>9,31,32 | 3,5,7,27,2<br>8,30,33,34<br>,35 | 4 | P25236,P50280,Q62975,Q8CJD3                      |
| 2673 | 1,2,4,6,8,2<br>9,31,33 | 3,5,7,27,2<br>8,30,32,34<br>,35 | 4 | P02803,P25236,P83121,Q8CJD3                      |
| 2674 | 1,2,4,6,8,2<br>9,31,34 | 3,5,7,27,2<br>8,30,32,33<br>,35 | 4 | P25236,P70709,Q62997,Q7TP52                      |
| 2675 | 1,2,4,6,8,2<br>9,31,35 | 3,5,7,27,2<br>8,30,32,33<br>,34 | 4 | P02803,P04182,P14480,P25236                      |
| 2676 | 1,2,4,6,8,2<br>9,32,33 | 3,5,7,27,2<br>8,30,31,34<br>,35 | 5 | P25236,P50280,Q62975,Q6TMA8,Q8CJD3               |
| 2677 | 1,2,4,6,8,2<br>9,32,34 | 3,5,7,27,2<br>8,30,31,33<br>,35 | 7 | G3V686,P25236,P50280,P70709,Q6P6R2,Q6TMA8,Q9WTT6 |
| 2678 | 1,2,4,6,8,2<br>9,32,35 | 3,5,7,27,2<br>8,30,31,33<br>,34 | 5 | P14480,P25236,P50280,Q6TMA8,Q8CJD3               |
| 2679 | 1,2,4,6,8,2<br>9,33,34 | 3,5,7,27,2<br>8,30,31,32<br>,35 | 3 | P25236,P50280,Q9JJ22                             |



|      |                        |                                 |   |                                                  |
|------|------------------------|---------------------------------|---|--------------------------------------------------|
| 2680 | 1,2,4,6,8,2<br>9,33,35 | 3,5,7,27,2<br>8,30,31,32<br>,34 | 5 | P02803,P14480,P15399,P25236,Q30KJ2               |
| 2681 | 1,2,4,6,8,2<br>9,34,35 | 3,5,7,27,2<br>8,30,31,32<br>,33 | 4 | P09006,P14480,P25236,Q9JJ22                      |
| 2682 | 1,2,4,6,8,3<br>0,31,32 | 3,5,7,27,2<br>8,29,33,34<br>,35 | 3 | P25236,Q7TP52,Q80WL1                             |
| 2683 | 1,2,4,6,8,3<br>0,31,33 | 3,5,7,27,2<br>8,29,32,34<br>,35 | 2 | P25236,Q7TP52                                    |
| 2684 | 1,2,4,6,8,3<br>0,31,34 | 3,5,7,27,2<br>8,29,32,33<br>,35 | 7 | P25236,P47967,P70709,Q62997,Q7TP52,Q80WL1,Q9WTT6 |
| 2685 | 1,2,4,6,8,3<br>0,31,35 | 3,5,7,27,2<br>8,29,32,33<br>,34 | 4 | P14480,P25236,Q7TP52,Q80WL1                      |
| 2686 | 1,2,4,6,8,3<br>0,32,33 | 3,5,7,27,2<br>8,29,31,34<br>,35 | 1 | A2RUV9                                           |
| 2687 | 1,2,4,6,8,3<br>0,32,34 | 3,5,7,27,2<br>8,29,31,33<br>,35 | 2 | Q6P6R2,Q9WTT6                                    |
| 2688 | 1,2,4,6,8,3<br>0,32,35 | 3,5,7,27,2<br>8,29,31,33<br>,34 | 1 | P14480                                           |
| 2689 | 1,2,4,6,8,3<br>0,33,34 | 3,5,7,27,2<br>8,29,31,32<br>,35 | 0 |                                                  |
| 2690 | 1,2,4,6,8,3<br>0,33,35 | 3,5,7,27,2<br>8,29,31,32<br>,34 | 4 | A2RUV9,B0BNN3,P14480,Q30KJ2                      |
| 2691 | 1,2,4,6,8,3<br>0,34,35 | 3,5,7,27,2<br>8,29,31,32<br>,33 | 4 | P02793;Q7TP54,P09006,P14480,Q6PCU2               |
| 2692 | 1,2,4,6,8,3<br>1,32,33 | 3,5,7,27,2<br>8,29,30,34<br>,35 | 4 | P25236,P97580,Q7TP52,Q8CJD3                      |
| 2693 | 1,2,4,6,8,3<br>1,32,34 | 3,5,7,27,2<br>8,29,30,33<br>,35 | 6 | G3V686,P25236,P70709,Q62997,Q6P6R2,Q7TP52        |
| 2694 | 1,2,4,6,8,3<br>1,32,35 | 3,5,7,27,2<br>8,29,30,33<br>,34 | 4 | P04182,P25236,Q30KJ2,Q7TP52                      |

|      |                         |                                 |    |                                                                                                   |
|------|-------------------------|---------------------------------|----|---------------------------------------------------------------------------------------------------|
| 2695 | 1,2,4,6,8,3<br>1,33,34  | 3,5,7,27,2<br>8,29,30,32<br>,35 | 5  | P25236,P70709,Q62997,Q63355,Q7TP52                                                                |
| 2696 | 1,2,4,6,8,3<br>1,33,35  | 3,5,7,27,2<br>8,29,30,32<br>,34 | 7  | P02803,P15399,P25236,P97580,Q30KJ2,Q63355,Q7TP52                                                  |
| 2697 | 1,2,4,6,8,3<br>1,34,35  | 3,5,7,27,2<br>8,29,30,32<br>,33 | 6  | P02793;Q7TP54,P09006,P25236,Q62997,Q63355,Q7TP52                                                  |
| 2698 | 1,2,4,6,8,3<br>2,33,34  | 3,5,7,27,2<br>8,29,30,31<br>,35 | 3  | G3V686,P70709,Q6P6R2                                                                              |
| 2699 | 1,2,4,6,8,3<br>2,33,35  | 3,5,7,27,2<br>8,29,30,31<br>,34 | 4  | P15399,P97580,Q30KJ2,Q8CJD3                                                                       |
| 2700 | 1,2,4,6,8,3<br>2,34,35  | 3,5,7,27,2<br>8,29,30,31<br>,33 | 3  | P09006,Q6P6R2,Q7TP52                                                                              |
| 2701 | 1,2,4,6,8,3<br>3,34,35  | 3,5,7,27,2<br>8,29,30,31<br>,32 | 3  | P09006,Q30KJ2,Q63355                                                                              |
| 2702 | 1,2,4,6,27,<br>28,29,30 | 3,5,7,8,31,<br>32,33,34,3<br>5  | 14 | D3ZUC6,O08815,O35547,P02781,P08723,P08753,P0C0A9,P24368,P25236,P30120,Q6AYQ8,Q6AYR9,Q9JHB9,Q9JI85 |
| 2703 | 1,2,4,6,27,<br>28,29,31 | 3,5,7,8,30,<br>32,33,34,3<br>5  | 8  | O35547,P06911,P08723,P0C0A9,P25236,Q5GRG2,Q9JHB9,Q9JI85                                           |
| 2704 | 1,2,4,6,27,<br>28,29,32 | 3,5,7,8,30,<br>31,33,34,3<br>5  | 13 | O08815,O35547,P04905,P08723,P0C0A9,P24368,P25236,P30120,P47727,Q62975,Q63942,Q9JHB9,Q9JI85        |
| 2705 | 1,2,4,6,27,<br>28,29,33 | 3,5,7,8,30,<br>31,32,34,3<br>5  | 8  | O35547,P07647,P08723,P0C0A9,P24368,P30120,Q9JHB9,Q9JI85                                           |
| 2706 | 1,2,4,6,27,<br>28,29,34 | 3,5,7,8,30,<br>31,32,33,3<br>5  | 11 | G3V686,O35547,P08723,P0C0A9,P27791,P70709,Q4FZU6,Q5HZV9,Q63942,Q9JHB9,Q9JI85                      |
| 2707 | 1,2,4,6,27,<br>28,29,35 | 3,5,7,8,30,<br>31,32,33,3<br>4  | 7  | P08723,P0C0A9,P14480,P25236,Q5M819,Q9JHB9,Q9JI85                                                  |
| 2708 | 1,2,4,6,27,<br>28,30,31 | 3,5,7,8,29,<br>32,33,34,3<br>5  | 6  | D3ZUC6,P25236,Q5GRG2,Q64335,Q6AYQ8,Q7TP52                                                         |
| 2709 | 1,2,4,6,27,<br>28,30,32 | 3,5,7,8,29,<br>31,33,34,3<br>5  | 2  | Q6AYQ8,Q6IFU7                                                                                     |

|      |                         |                                |   |                                                         |
|------|-------------------------|--------------------------------|---|---------------------------------------------------------|
| 2710 | 1,2,4,6,27,<br>28,30,33 | 3,5,7,8,29,<br>31,32,34,3<br>5 | 2 | P51907,Q6AYQ8                                           |
| 2711 | 1,2,4,6,27,<br>28,30,34 | 3,5,7,8,29,<br>31,32,33,3<br>5 | 7 | G3V686,P47967,P97840,Q5HZV9,Q6AYQ8,Q6P6R2,Q7TP52        |
| 2712 | 1,2,4,6,27,<br>28,30,35 | 3,5,7,8,29,<br>31,32,33,3<br>4 | 5 | D3ZUC6,P06866,P14480,Q64335,Q6AYQ8                      |
| 2713 | 1,2,4,6,27,<br>28,31,32 | 3,5,7,8,29,<br>30,33,34,3<br>5 | 5 | P06911,P12020,P25236,Q5GRG2,Q7TP52                      |
| 2714 | 1,2,4,6,27,<br>28,31,33 | 3,5,7,8,29,<br>30,32,34,3<br>5 | 3 | P51907,Q5GRG2,Q7TP52                                    |
| 2715 | 1,2,4,6,27,<br>28,31,34 | 3,5,7,8,29,<br>30,32,33,3<br>5 | 5 | G3V686,P25236,P70709,Q5HZV9,Q7TP52                      |
| 2716 | 1,2,4,6,27,<br>28,31,35 | 3,5,7,8,29,<br>30,32,33,3<br>4 | 2 | P25236,Q7TP52                                           |
| 2717 | 1,2,4,6,27,<br>28,32,33 | 3,5,7,8,29,<br>30,31,34,3<br>5 | 1 | Q6IFU7                                                  |
| 2718 | 1,2,4,6,27,<br>28,32,34 | 3,5,7,8,29,<br>30,31,33,3<br>5 | 8 | G3V686,P70709,Q10758,Q4FZU6,Q5HZV9,Q6IFU7,Q6P6R2,Q7TP52 |
| 2719 | 1,2,4,6,27,<br>28,32,35 | 3,5,7,8,29,<br>30,31,33,3<br>4 | 2 | Q5M819,Q6IFU7                                           |
| 2720 | 1,2,4,6,27,<br>28,33,34 | 3,5,7,8,29,<br>30,31,32,3<br>5 | 5 | G3V686,P70709,Q10758,Q4FZU6,Q5HZV9                      |
| 2721 | 1,2,4,6,27,<br>28,33,35 | 3,5,7,8,29,<br>30,31,32,3<br>4 | 2 | P15399,Q30KJ2                                           |
| 2722 | 1,2,4,6,27,<br>28,34,35 | 3,5,7,8,29,<br>30,31,32,3<br>3 | 6 | P00507,P14480,Q4FZU6,Q5HZV9,Q5M819,Q7TP52               |
| 2723 | 1,2,4,6,27,<br>29,30,31 | 3,5,7,8,28,<br>32,33,34,3<br>5 | 4 | P05942,P25236,Q6AYR9,Q7TP52                             |
| 2724 | 1,2,4,6,27,<br>29,30,32 | 3,5,7,8,28,<br>31,33,34,3<br>5 | 1 | P25236                                                  |

|      |                         |                                |   |                                    |
|------|-------------------------|--------------------------------|---|------------------------------------|
| 2725 | 1,2,4,6,27,<br>29,30,33 | 3,5,7,8,28,<br>31,32,34,3<br>5 | 1 | P25236                             |
| 2726 | 1,2,4,6,27,<br>29,30,34 | 3,5,7,8,28,<br>31,32,33,3<br>5 | 5 | G3V686,P05964,P25236,P70709,Q6AYR9 |
| 2727 | 1,2,4,6,27,<br>29,30,35 | 3,5,7,8,28,<br>31,32,33,3<br>4 | 3 | D3ZUC6,P14480,P25236               |
| 2728 | 1,2,4,6,27,<br>29,31,32 | 3,5,7,8,28,<br>30,33,34,3<br>5 | 3 | P25236,Q7TP52,Q8CJD3               |
| 2729 | 1,2,4,6,27,<br>29,31,33 | 3,5,7,8,28,<br>30,32,34,3<br>5 | 3 | P25236,Q7TP52,Q8CJD3               |
| 2730 | 1,2,4,6,27,<br>29,31,34 | 3,5,7,8,28,<br>30,32,33,3<br>5 | 4 | G3V686,P25236,P70709,Q7TP52        |
| 2731 | 1,2,4,6,27,<br>29,31,35 | 3,5,7,8,28,<br>30,32,33,3<br>4 | 3 | P14480,P25236,Q7TP52               |
| 2732 | 1,2,4,6,27,<br>29,32,33 | 3,5,7,8,28,<br>30,31,34,3<br>5 | 3 | P02793,Q7TP54,P25236,Q8CJD3        |
| 2733 | 1,2,4,6,27,<br>29,32,34 | 3,5,7,8,28,<br>30,31,33,3<br>5 | 5 | G3V686,P25236,P70709,Q00715,Q10758 |
| 2734 | 1,2,4,6,27,<br>29,32,35 | 3,5,7,8,28,<br>30,31,33,3<br>4 | 2 | P14480,P25236                      |
| 2735 | 1,2,4,6,27,<br>29,33,34 | 3,5,7,8,28,<br>30,31,32,3<br>5 | 2 | G3V686,P70709                      |
| 2736 | 1,2,4,6,27,<br>29,33,35 | 3,5,7,8,28,<br>30,31,32,3<br>4 | 4 | P14480,P15399,P25236,Q30KJ2        |
| 2737 | 1,2,4,6,27,<br>29,34,35 | 3,5,7,8,28,<br>30,31,32,3<br>3 | 5 | G3V686,P14480,P25236,P70709,Q5M819 |
| 2738 | 1,2,4,6,27,<br>30,31,32 | 3,5,7,8,28,<br>29,33,34,3<br>5 | 2 | P25236,Q7TP52                      |
| 2739 | 1,2,4,6,27,<br>30,31,33 | 3,5,7,8,28,<br>29,32,34,3<br>5 | 3 | P25236,P51907,Q7TP52               |

|      |                         |                                |   |                                                                |
|------|-------------------------|--------------------------------|---|----------------------------------------------------------------|
| 2740 | 1,2,4,6,27,<br>30,31,34 | 3,5,7,8,28,<br>29,32,33,3<br>5 | 6 | G3V686,P25236,P47967,P70709,P97840,Q7TP52                      |
| 2741 | 1,2,4,6,27,<br>30,31,35 | 3,5,7,8,28,<br>29,32,33,3<br>4 | 5 | D3ZUC6,P05942,P14480,P25236,Q7TP52                             |
| 2742 | 1,2,4,6,27,<br>30,32,33 | 3,5,7,8,28,<br>29,31,34,3<br>5 | 0 |                                                                |
| 2743 | 1,2,4,6,27,<br>30,32,34 | 3,5,7,8,28,<br>29,31,33,3<br>5 | 8 | G3V686,P47967,P70709,P97840,Q10758,Q63532,Q6P6R2,Q7TP52        |
| 2744 | 1,2,4,6,27,<br>30,32,35 | 3,5,7,8,28,<br>29,31,33,3<br>4 | 3 | P14480,Q6AYQ8,Q7TP52                                           |
| 2745 | 1,2,4,6,27,<br>30,33,34 | 3,5,7,8,28,<br>29,31,32,3<br>5 | 4 | G3V686,P47967,P70709,Q7TP52                                    |
| 2746 | 1,2,4,6,27,<br>30,33,35 | 3,5,7,8,28,<br>29,31,32,3<br>4 | 2 | P14480,Q30KJ2                                                  |
| 2747 | 1,2,4,6,27,<br>30,34,35 | 3,5,7,8,28,<br>29,31,32,3<br>3 | 3 | P06866,P14480,Q7TP52                                           |
| 2748 | 1,2,4,6,27,<br>31,32,33 | 3,5,7,8,28,<br>29,30,34,3<br>5 | 3 | P25236,Q7TP52,Q8CJD3                                           |
| 2749 | 1,2,4,6,27,<br>31,32,34 | 3,5,7,8,28,<br>29,30,33,3<br>5 | 5 | G3V686,P25236,P70709,Q10758,Q7TP52                             |
| 2750 | 1,2,4,6,27,<br>31,32,35 | 3,5,7,8,28,<br>29,30,33,3<br>4 | 3 | P25236,Q30KJ2,Q7TP52                                           |
| 2751 | 1,2,4,6,27,<br>31,33,34 | 3,5,7,8,28,<br>29,30,32,3<br>5 | 5 | G3V686,P25236,P70709,Q63355,Q7TP52                             |
| 2752 | 1,2,4,6,27,<br>31,33,35 | 3,5,7,8,28,<br>29,30,32,3<br>4 | 6 | P15399,P25236,P97580,Q30KJ2,Q63355,Q7TP52                      |
| 2753 | 1,2,4,6,27,<br>31,34,35 | 3,5,7,8,28,<br>29,30,32,3<br>3 | 6 | G3V686,P14480,P25236,P70709,Q63355,Q7TP52                      |
| 2754 | 1,2,4,6,27,<br>32,33,34 | 3,5,7,8,28,<br>29,30,31,3<br>5 | 9 | G3V686,P55314,P70709,Q10758,Q63532,Q63661,Q6IFU7,Q6P6Q2,Q7TP52 |

|      |                         |                                |   |                                                         |
|------|-------------------------|--------------------------------|---|---------------------------------------------------------|
| 2755 | 1,2,4,6,27,<br>32,33,35 | 3,5,7,8,28,<br>29,30,31,3<br>4 | 4 | P15399,P97580,Q30KJ2,Q7TP52                             |
| 2756 | 1,2,4,6,27,<br>32,34,35 | 3,5,7,8,28,<br>29,30,31,3<br>3 | 8 | G3V686,P14480,P70709,Q10758,Q5M819,Q63532,Q63661,Q7TP52 |
| 2757 | 1,2,4,6,27,<br>33,34,35 | 3,5,7,8,28,<br>29,30,31,3<br>2 | 4 | G3V686,Q30KJ2,Q63355,Q7TP52                             |
| 2758 | 1,2,4,6,28,<br>29,30,31 | 3,5,7,8,27,<br>32,33,34,3<br>5 | 7 | P06911,P25236,P35467,Q08849,Q5GRG2,Q62975,Q6AYR9        |
| 2759 | 1,2,4,6,28,<br>29,30,32 | 3,5,7,8,27,<br>31,33,34,3<br>5 | 3 | P04905,P25236,Q62975                                    |
| 2760 | 1,2,4,6,28,<br>29,30,33 | 3,5,7,8,27,<br>31,32,34,3<br>5 | 4 | O35547,P08723,P08753,P35467                             |
| 2761 | 1,2,4,6,28,<br>29,30,34 | 3,5,7,8,27,<br>31,32,33,3<br>5 | 4 | P25236,P27791,Q08849,Q6AYR9                             |
| 2762 | 1,2,4,6,28,<br>29,30,35 | 3,5,7,8,27,<br>31,32,33,3<br>4 | 4 | P06866,P14480,P25236,Q08849                             |
| 2763 | 1,2,4,6,28,<br>29,31,32 | 3,5,7,8,27,<br>30,33,34,3<br>5 | 5 | P04905,P06911,P25236,Q5GRG2,Q62975                      |
| 2764 | 1,2,4,6,28,<br>29,31,33 | 3,5,7,8,27,<br>30,32,34,3<br>5 | 8 | O35547,P02803,P06911,P15399,P25236,P35467,P83121,Q5GRG2 |
| 2765 | 1,2,4,6,28,<br>29,31,34 | 3,5,7,8,27,<br>30,32,33,3<br>5 | 5 | P06911,P25236,P27791,P70709,Q5HZV9                      |
| 2766 | 1,2,4,6,28,<br>29,31,35 | 3,5,7,8,27,<br>30,32,33,3<br>4 | 5 | P02803,P06911,P14480,P15399,P25236                      |
| 2767 | 1,2,4,6,28,<br>29,32,33 | 3,5,7,8,27,<br>30,31,34,3<br>5 | 5 | P04905,P08723,P15399,P47727,Q62975                      |
| 2768 | 1,2,4,6,28,<br>29,32,34 | 3,5,7,8,27,<br>30,31,33,3<br>5 | 5 | P25236,P27791,P70709,Q5HZV9,Q62975                      |
| 2769 | 1,2,4,6,28,<br>29,32,35 | 3,5,7,8,27,<br>30,31,33,3<br>4 | 3 | P14480,P15399,P25236                                    |

|      |                         |                                |   |                                           |
|------|-------------------------|--------------------------------|---|-------------------------------------------|
| 2770 | 1,2,4,6,28,<br>29,33,34 | 3,5,7,8,27,<br>30,31,32,3<br>5 | 2 | P27791,Q9JJ22                             |
| 2771 | 1,2,4,6,28,<br>29,33,35 | 3,5,7,8,27,<br>30,31,32,3<br>4 | 4 | P02803,P14480,P15399,Q30KJ2               |
| 2772 | 1,2,4,6,28,<br>29,34,35 | 3,5,7,8,27,<br>30,31,32,3<br>3 | 5 | P00507,P14480,P25236,Q5HZV9,Q5M819        |
| 2773 | 1,2,4,6,28,<br>30,31,32 | 3,5,7,8,27,<br>29,33,34,3<br>5 | 4 | P06911,P25236,Q5GRG2,Q64335               |
| 2774 | 1,2,4,6,28,<br>30,31,33 | 3,5,7,8,27,<br>29,32,34,3<br>5 | 1 | P51907                                    |
| 2775 | 1,2,4,6,28,<br>30,31,34 | 3,5,7,8,27,<br>29,32,33,3<br>5 | 5 | P25236,P27791,P47967,P97840,Q5HZV9        |
| 2776 | 1,2,4,6,28,<br>30,31,35 | 3,5,7,8,27,<br>29,32,33,3<br>4 | 5 | P06866,P14480,P25236,P27590,Q64335        |
| 2777 | 1,2,4,6,28,<br>30,32,33 | 3,5,7,8,27,<br>29,31,34,3<br>5 | 0 |                                           |
| 2778 | 1,2,4,6,28,<br>30,32,34 | 3,5,7,8,27,<br>29,31,33,3<br>5 | 4 | P47967,P97840,Q5HZV9,Q6P6R2               |
| 2779 | 1,2,4,6,28,<br>30,32,35 | 3,5,7,8,27,<br>29,31,33,3<br>4 | 3 | P14480,Q64335,Q6AYQ8                      |
| 2780 | 1,2,4,6,28,<br>30,33,34 | 3,5,7,8,27,<br>29,31,32,3<br>5 | 5 | P27791,P47967,P51907,P97840,Q5HZV9        |
| 2781 | 1,2,4,6,28,<br>30,33,35 | 3,5,7,8,27,<br>29,31,32,3<br>4 | 4 | P06866,P14480,P15399,Q30KJ2               |
| 2782 | 1,2,4,6,28,<br>30,34,35 | 3,5,7,8,27,<br>29,31,32,3<br>3 | 6 | P00507,P06866,P14480,P80020,Q5HZV9,Q920G2 |
| 2783 | 1,2,4,6,28,<br>31,32,33 | 3,5,7,8,27,<br>29,30,34,3<br>5 | 3 | P06911,P97580,Q5GRG2                      |
| 2784 | 1,2,4,6,28,<br>31,32,34 | 3,5,7,8,27,<br>29,30,33,3<br>5 | 4 | P25236,P27791,P70709,Q5HZV9               |

|      |                         |                                |   |                             |
|------|-------------------------|--------------------------------|---|-----------------------------|
| 2785 | 1,2,4,6,28,<br>31,32,35 | 3,5,7,8,27,<br>29,30,33,3<br>4 | 4 | P15399,P25236,Q30KJ2,Q64335 |
| 2786 | 1,2,4,6,28,<br>31,33,34 | 3,5,7,8,27,<br>29,30,32,3<br>5 | 3 | P27791,P51907,Q5HZV9        |
| 2787 | 1,2,4,6,28,<br>31,33,35 | 3,5,7,8,27,<br>29,30,32,3<br>4 | 4 | P02803,P15399,P97580,Q30KJ2 |
| 2788 | 1,2,4,6,28,<br>31,34,35 | 3,5,7,8,27,<br>29,30,32,3<br>3 | 3 | P00507,P25236,Q5HZV9        |
| 2789 | 1,2,4,6,28,<br>32,33,34 | 3,5,7,8,27,<br>29,30,31,3<br>5 | 4 | G3V686,P27791,Q5HZV9,Q6IFU7 |
| 2790 | 1,2,4,6,28,<br>32,33,35 | 3,5,7,8,27,<br>29,30,31,3<br>4 | 3 | P15399,P97580,Q30KJ2        |
| 2791 | 1,2,4,6,28,<br>32,34,35 | 3,5,7,8,27,<br>29,30,31,3<br>3 | 3 | P00507,Q5HZV9,Q5M819        |
| 2792 | 1,2,4,6,28,<br>33,34,35 | 3,5,7,8,27,<br>29,30,31,3<br>2 | 4 | P00507,P15399,Q30KJ2,Q5HZV9 |
| 2793 | 1,2,4,6,29,<br>30,31,32 | 3,5,7,8,27,<br>28,33,34,3<br>5 | 2 | P25236,Q62975               |
| 2794 | 1,2,4,6,29,<br>30,31,33 | 3,5,7,8,27,<br>28,32,34,3<br>5 | 2 | P25236,P83121               |
| 2795 | 1,2,4,6,29,<br>30,31,34 | 3,5,7,8,27,<br>28,32,33,3<br>5 | 3 | P09605,P25809,P25236,P70709 |
| 2796 | 1,2,4,6,29,<br>30,31,35 | 3,5,7,8,27,<br>28,32,33,3<br>4 | 2 | P14480,P25236               |
| 2797 | 1,2,4,6,29,<br>30,32,33 | 3,5,7,8,27,<br>28,31,34,3<br>5 | 1 | P25236                      |
| 2798 | 1,2,4,6,29,<br>30,32,34 | 3,5,7,8,27,<br>28,31,33,3<br>5 | 3 | P25236,P70709,Q6TMA8        |
| 2799 | 1,2,4,6,29,<br>30,32,35 | 3,5,7,8,27,<br>28,31,33,3<br>4 | 2 | P14480,P25236               |



|      |                         |                                |   |                                           |
|------|-------------------------|--------------------------------|---|-------------------------------------------|
| 2800 | 1,2,4,6,29,<br>30,33,34 | 3,5,7,8,27,<br>28,31,32,3<br>5 | 2 | P25236,Q9JJ22                             |
| 2801 | 1,2,4,6,29,<br>30,33,35 | 3,5,7,8,27,<br>28,31,32,3<br>4 | 4 | P14480,P15399,P25236,Q30KJ2               |
| 2802 | 1,2,4,6,29,<br>30,34,35 | 3,5,7,8,27,<br>28,31,32,3<br>3 | 4 | P14480,P25236,P80020,Q9JJ22               |
| 2803 | 1,2,4,6,29,<br>31,32,33 | 3,5,7,8,27,<br>28,30,34,3<br>5 | 4 | P15399,P25236,P83121,Q8CJD3               |
| 2804 | 1,2,4,6,29,<br>31,32,34 | 3,5,7,8,27,<br>28,30,33,3<br>5 | 3 | G3V686,P25236,P70709                      |
| 2805 | 1,2,4,6,29,<br>31,32,35 | 3,5,7,8,27,<br>28,30,33,3<br>4 | 5 | P04182,P14480,P15399,P25236,Q30KJ2        |
| 2806 | 1,2,4,6,29,<br>31,33,34 | 3,5,7,8,27,<br>28,30,32,3<br>5 | 2 | P25236,P70709                             |
| 2807 | 1,2,4,6,29,<br>31,33,35 | 3,5,7,8,27,<br>28,30,32,3<br>4 | 6 | P02803,P04182,P15399,P25236,P97580,Q30KJ2 |
| 2808 | 1,2,4,6,29,<br>31,34,35 | 3,5,7,8,27,<br>28,30,32,3<br>3 | 2 | P14480,P25236                             |
| 2809 | 1,2,4,6,29,<br>32,33,34 | 3,5,7,8,27,<br>28,30,31,3<br>5 | 5 | G3V686,P25236,P70709,Q63661,Q6TMA8        |
| 2810 | 1,2,4,6,29,<br>32,33,35 | 3,5,7,8,27,<br>28,30,31,3<br>4 | 4 | P15399,P25236,P97580,Q30KJ2               |
| 2811 | 1,2,4,6,29,<br>32,34,35 | 3,5,7,8,27,<br>28,30,31,3<br>3 | 4 | P14480,P25236,Q63661,Q6TMA8               |
| 2812 | 1,2,4,6,29,<br>33,34,35 | 3,5,7,8,27,<br>28,30,31,3<br>2 | 5 | P14480,P15399,P25236,Q30KJ2,Q9JJ22        |
| 2813 | 1,2,4,6,30,<br>31,32,33 | 3,5,7,8,27,<br>28,29,34,3<br>5 | 1 | P25236                                    |
| 2814 | 1,2,4,6,30,<br>31,32,34 | 3,5,7,8,27,<br>28,29,33,3<br>5 | 4 | P25236,P70709,Q62997,Q7TP52               |

|      |                         |                                 |    |                                                                              |
|------|-------------------------|---------------------------------|----|------------------------------------------------------------------------------|
| 2815 | 1,2,4,6,30,<br>31,32,35 | 3,5,7,8,27,<br>28,29,33,3<br>4  | 3  | P14480,P25236,Q30KJ2                                                         |
| 2816 | 1,2,4,6,30,<br>31,33,34 | 3,5,7,8,27,<br>28,29,32,3<br>5  | 4  | P25236,P51907,Q62997,Q7TP52                                                  |
| 2817 | 1,2,4,6,30,<br>31,33,35 | 3,5,7,8,27,<br>28,29,32,3<br>4  | 4  | P15399,P25236,P97580,Q30KJ2                                                  |
| 2818 | 1,2,4,6,30,<br>31,34,35 | 3,5,7,8,27,<br>28,29,32,3<br>3  | 6  | P02793;Q7TP54,P14480,P25236,P82471,Q62997,Q7TP52                             |
| 2819 | 1,2,4,6,30,<br>32,33,34 | 3,5,7,8,27,<br>28,29,31,3<br>5  | 2  | G3V686,Q63661                                                                |
| 2820 | 1,2,4,6,30,<br>32,33,35 | 3,5,7,8,27,<br>28,29,31,3<br>4  | 4  | P14480,P15399,P97580,Q30KJ2                                                  |
| 2821 | 1,2,4,6,30,<br>32,34,35 | 3,5,7,8,27,<br>28,29,31,3<br>3  | 3  | P14480,P82471,Q63661                                                         |
| 2822 | 1,2,4,6,30,<br>33,34,35 | 3,5,7,8,27,<br>28,29,31,3<br>2  | 4  | B0BNN3,P14480,P82471,Q30KJ2                                                  |
| 2823 | 1,2,4,6,31,<br>32,33,34 | 3,5,7,8,27,<br>28,29,30,3<br>5  | 6  | G3V686,P25236,P70709,P97580,Q62997,Q7TP52                                    |
| 2824 | 1,2,4,6,31,<br>32,33,35 | 3,5,7,8,27,<br>28,29,30,3<br>4  | 5  | P04182,P15399,P25236,P97580,Q30KJ2                                           |
| 2825 | 1,2,4,6,31,<br>32,34,35 | 3,5,7,8,27,<br>28,29,30,3<br>3  | 5  | P25236,P82471,Q30KJ2,Q62997,Q7TP52                                           |
| 2826 | 1,2,4,6,31,<br>33,34,35 | 3,5,7,8,27,<br>28,29,30,3<br>2  | 8  | P15399,P25236,P82471,P97580,Q30KJ2,Q62997,Q63355,Q7TP52                      |
| 2827 | 1,2,4,6,32,<br>33,34,35 | 3,5,7,8,27,<br>28,29,30,3<br>1  | 5  | P15399,P82471,P97580,Q30KJ2,Q63661                                           |
| 2828 | 1,2,4,7,8,2<br>7,28,29  | 3,5,6,30,3<br>1,32,33,34<br>,35 | 11 | P07171,P08723,P0C0A9,P18418,P24368,P82995,Q63617,Q8CJ52,Q99MH3,Q9JI85,Q9R0T3 |
| 2829 | 1,2,4,7,8,2<br>7,28,30  | 3,5,6,29,3<br>1,32,33,34<br>,35 | 7  | D3ZUC6,P18418,P47967,Q64057,Q6AYQ8,Q80WL1,Q99MH3                             |

|      |                        |                                 |   |                                                         |
|------|------------------------|---------------------------------|---|---------------------------------------------------------|
| 2830 | 1,2,4,7,8,2<br>7,28,31 | 3,5,6,29,3<br>0,32,33,34<br>,35 | 6 | P10715,P18418,P31044,Q5GRG2,Q99MH3,Q9R0T3               |
| 2831 | 1,2,4,7,8,2<br>7,28,32 | 3,5,6,29,3<br>0,31,33,34<br>,35 | 4 | P00714,P18418,Q99MH3,Q9R0T3                             |
| 2832 | 1,2,4,7,8,2<br>7,28,33 | 3,5,6,29,3<br>0,31,32,34<br>,35 | 5 | P18418,Q63617,Q6IE51,Q99MH3,Q9R0T3                      |
| 2833 | 1,2,4,7,8,2<br>7,28,34 | 3,5,6,29,3<br>0,31,32,33<br>,35 | 2 | P18418,P47967                                           |
| 2834 | 1,2,4,7,8,2<br>7,28,35 | 3,5,6,29,3<br>0,31,32,33<br>,34 | 7 | D3ZUC6,P18418,Q561R9,Q64057,Q6IE51,Q99MH3,Q9R0T3        |
| 2835 | 1,2,4,7,8,2<br>7,29,30 | 3,5,6,28,3<br>1,32,33,34<br>,35 | 4 | D3ZUC6,P82995,Q63617,Q64057                             |
| 2836 | 1,2,4,7,8,2<br>7,29,31 | 3,5,6,28,3<br>0,32,33,34<br>,35 | 5 | P25236,P36970,Q63617,Q8CJD3,Q9R0T3                      |
| 2837 | 1,2,4,7,8,2<br>7,29,32 | 3,5,6,28,3<br>0,31,33,34<br>,35 | 6 | P00714,P02793;Q7TP54,P14669,Q63617,Q8CJD3,Q9R0T3        |
| 2838 | 1,2,4,7,8,2<br>7,29,33 | 3,5,6,28,3<br>0,31,32,34<br>,35 | 7 | P02793;Q7TP54,P18418,P80204,Q63617,Q8CJD3,Q99MH3,Q9R0T3 |
| 2839 | 1,2,4,7,8,2<br>7,29,34 | 3,5,6,28,3<br>0,31,32,33<br>,35 | 5 | P05964,Q561R9,Q63467,Q63532,Q63617                      |
| 2840 | 1,2,4,7,8,2<br>7,29,35 | 3,5,6,28,3<br>0,31,32,33<br>,34 | 4 | P01946,P14480,Q561R9,Q63617                             |
| 2841 | 1,2,4,7,8,2<br>7,30,31 | 3,5,6,28,2<br>9,32,33,34<br>,35 | 6 | D3ZUC6,P42854,Q64057,Q6AYQ8,Q80WL1,Q99MH3               |
| 2842 | 1,2,4,7,8,2<br>7,30,32 | 3,5,6,28,2<br>9,31,33,34<br>,35 | 6 | D3ZUC6,P00714,Q09030,Q64057,Q6AYQ8,Q80WL1               |
| 2843 | 1,2,4,7,8,2<br>7,30,33 | 3,5,6,28,2<br>9,31,32,34<br>,35 | 3 | P18418,P51907,Q99MH3                                    |
| 2844 | 1,2,4,7,8,2<br>7,30,34 | 3,5,6,28,2<br>9,31,32,33<br>,35 | 8 | D3ZUK3,P05964,P47967,P97840,Q09030,Q63532,Q64057,Q80WL1 |

|      |                        |                                 |   |                                                  |
|------|------------------------|---------------------------------|---|--------------------------------------------------|
| 2845 | 1,2,4,7,8,2<br>7,30,35 | 3,5,6,28,2<br>9,31,32,33<br>,34 | 7 | D3ZUC6,P14480,Q561R9,Q64057,Q6AYQ8,Q80WL1,Q99MH3 |
| 2846 | 1,2,4,7,8,2<br>7,31,32 | 3,5,6,28,2<br>9,30,33,34<br>,35 | 2 | P00714,Q8CJD3                                    |
| 2847 | 1,2,4,7,8,2<br>7,31,33 | 3,5,6,28,2<br>9,30,32,34<br>,35 | 5 | P01835,P36970,P51907,Q8CJD3,Q99MH3               |
| 2848 | 1,2,4,7,8,2<br>7,31,34 | 3,5,6,28,2<br>9,30,32,33<br>,35 | 5 | G3V686,P01835,P47967,Q62997,Q80WL1               |
| 2849 | 1,2,4,7,8,2<br>7,31,35 | 3,5,6,28,2<br>9,30,32,33<br>,34 | 4 | Q561R9,Q64057,Q80WL1,Q99MH3                      |
| 2850 | 1,2,4,7,8,2<br>7,32,33 | 3,5,6,28,2<br>9,30,31,34<br>,35 | 5 | P00714,P02793;Q7TP54,Q63617,Q8CJD3,Q99MH3        |
| 2851 | 1,2,4,7,8,2<br>7,32,34 | 3,5,6,28,2<br>9,30,31,33<br>,35 | 6 | G3V686,P00714,P01041,Q03191,Q09030,Q63532        |
| 2852 | 1,2,4,7,8,2<br>7,32,35 | 3,5,6,28,2<br>9,30,31,33<br>,34 | 2 | P00714,Q99MH3                                    |
| 2853 | 1,2,4,7,8,2<br>7,33,34 | 3,5,6,28,2<br>9,30,31,32<br>,35 | 7 | D3ZUK3,G3V686,P01835,P18418,Q561R9,Q63532,Q99041 |
| 2854 | 1,2,4,7,8,2<br>7,33,35 | 3,5,6,28,2<br>9,30,31,32<br>,34 | 3 | Q561R9,Q6IE51,Q99MH3                             |
| 2855 | 1,2,4,7,8,2<br>7,34,35 | 3,5,6,28,2<br>9,30,31,32<br>,33 | 5 | P01026,P09006,P16296,Q561R9,Q63532               |
| 2856 | 1,2,4,7,8,2<br>8,29,30 | 3,5,6,27,3<br>1,32,33,34<br>,35 | 2 | Q63617,Q8CJ52                                    |
| 2857 | 1,2,4,7,8,2<br>8,29,31 | 3,5,6,27,3<br>0,32,33,34<br>,35 | 7 | P02803,P06911,P10715,Q5GRG2,Q63617,Q8CJ52,Q9R0T3 |
| 2858 | 1,2,4,7,8,2<br>8,29,32 | 3,5,6,27,3<br>0,31,33,34<br>,35 | 5 | P01836,P02793;Q7TP54,P24368,Q63617,Q9R0T3        |
| 2859 | 1,2,4,7,8,2<br>8,29,33 | 3,5,6,27,3<br>0,31,32,34<br>,35 | 6 | P02793;Q7TP54,P02803,P18418,Q63617,Q8CJ52,Q9R0T3 |

|      |                        |                                 |   |                                                         |
|------|------------------------|---------------------------------|---|---------------------------------------------------------|
| 2860 | 1,2,4,7,8,2<br>8,29,34 | 3,5,6,27,3<br>0,31,32,33<br>,35 | 3 | Q63617,Q9JJ22,Q9QZA6                                    |
| 2861 | 1,2,4,7,8,2<br>8,29,35 | 3,5,6,27,3<br>0,31,32,33<br>,34 | 2 | P02803,Q63617                                           |
| 2862 | 1,2,4,7,8,2<br>8,30,31 | 3,5,6,27,2<br>9,32,33,34<br>,35 | 8 | P02761,P02803,P31044,P42854,Q5GRG2,Q64057,Q6AYQ8,Q80WL1 |
| 2863 | 1,2,4,7,8,2<br>8,30,32 | 3,5,6,27,2<br>9,31,33,34<br>,35 | 4 | P01836,Q64057,Q6AYQ8,Q80WL1                             |
| 2864 | 1,2,4,7,8,2<br>8,30,33 | 3,5,6,27,2<br>9,31,32,34<br>,35 | 2 | P18418,P51907                                           |
| 2865 | 1,2,4,7,8,2<br>8,30,34 | 3,5,6,27,2<br>9,31,32,33<br>,35 | 5 | P01836,P47967,P97840,Q64057,Q80WL1                      |
| 2866 | 1,2,4,7,8,2<br>8,30,35 | 3,5,6,27,2<br>9,31,32,33<br>,34 | 7 | P02761,P02803,P06866,P14480,Q64057,Q6AYQ8,Q80WL1        |
| 2867 | 1,2,4,7,8,2<br>8,31,32 | 3,5,6,27,2<br>9,30,33,34<br>,35 | 7 | P01836,P02803,P06911,P10715,P12020,P31044,Q5GRG2        |
| 2868 | 1,2,4,7,8,2<br>8,31,33 | 3,5,6,27,2<br>9,30,32,34<br>,35 | 6 | P01835,P02803,P10715,P31044,P51907,Q5GRG2               |
| 2869 | 1,2,4,7,8,2<br>8,31,34 | 3,5,6,27,2<br>9,30,32,33<br>,35 | 5 | P01835,P02803,P47967,Q62997,Q80WL1                      |
| 2870 | 1,2,4,7,8,2<br>8,31,35 | 3,5,6,27,2<br>9,30,32,33<br>,34 | 3 | P02803,P06760,Q80WL1                                    |
| 2871 | 1,2,4,7,8,2<br>8,32,33 | 3,5,6,27,2<br>9,30,31,34<br>,35 | 1 | P02793;Q7TP54                                           |
| 2872 | 1,2,4,7,8,2<br>8,32,34 | 3,5,6,27,2<br>9,30,31,33<br>,35 | 3 | P01836,P52303,Q63532                                    |
| 2873 | 1,2,4,7,8,2<br>8,32,35 | 3,5,6,27,2<br>9,30,31,33<br>,34 | 1 | P02803                                                  |
| 2874 | 1,2,4,7,8,2<br>8,33,34 | 3,5,6,27,2<br>9,30,31,32<br>,35 | 4 | P01835,P02803,P18418,Q99041                             |

|      |                        |                                 |   |                                    |
|------|------------------------|---------------------------------|---|------------------------------------|
| 2875 | 1,2,4,7,8,2<br>8,33,35 | 3,5,6,27,2<br>9,30,31,32<br>,34 | 3 | P02803,P10719,P18418               |
| 2876 | 1,2,4,7,8,2<br>8,34,35 | 3,5,6,27,2<br>9,30,31,32<br>,33 | 5 | P02803,P06866,P09006,P16296,Q561R9 |
| 2877 | 1,2,4,7,8,2<br>9,30,31 | 3,5,6,27,2<br>8,32,33,34<br>,35 | 5 | P25236,P42854,Q4FZU2,Q64057,Q80WL1 |
| 2878 | 1,2,4,7,8,2<br>9,30,32 | 3,5,6,27,2<br>8,31,33,34<br>,35 | 4 | P01041,P01836,Q63617,Q80WL1        |
| 2879 | 1,2,4,7,8,2<br>9,30,33 | 3,5,6,27,2<br>8,31,32,34<br>,35 | 1 | Q63617                             |
| 2880 | 1,2,4,7,8,2<br>9,30,34 | 3,5,6,27,2<br>8,31,32,33<br>,35 | 5 | P01041,P05964,P47967,Q80WL1,Q9JJ22 |
| 2881 | 1,2,4,7,8,2<br>9,30,35 | 3,5,6,27,2<br>8,31,32,33<br>,34 | 4 | P14480,P97584,Q64057,Q80WL1        |
| 2882 | 1,2,4,7,8,2<br>9,31,32 | 3,5,6,27,2<br>8,30,33,34<br>,35 | 4 | P01836,P25236,Q63617,Q8CJD3        |
| 2883 | 1,2,4,7,8,2<br>9,31,33 | 3,5,6,27,2<br>8,30,32,34<br>,35 | 4 | P01835,P02803,Q63617,Q8CJD3        |
| 2884 | 1,2,4,7,8,2<br>9,31,34 | 3,5,6,27,2<br>8,30,32,33<br>,35 | 5 | P01835,P25236,Q62997,Q63467,Q80WL1 |
| 2885 | 1,2,4,7,8,2<br>9,31,35 | 3,5,6,27,2<br>8,30,32,33<br>,34 | 5 | P02803,P04182,P25236,Q63617,Q6IFU7 |
| 2886 | 1,2,4,7,8,2<br>9,32,33 | 3,5,6,27,2<br>8,30,31,34<br>,35 | 3 | P02793;Q7TP54,Q63617,Q8CJD3        |
| 2887 | 1,2,4,7,8,2<br>9,32,34 | 3,5,6,27,2<br>8,30,31,33<br>,35 | 5 | P01041,P01836,Q63467,Q63532,Q63617 |
| 2888 | 1,2,4,7,8,2<br>9,32,35 | 3,5,6,27,2<br>8,30,31,33<br>,34 | 1 | Q63617                             |
| 2889 | 1,2,4,7,8,2<br>9,33,34 | 3,5,6,27,2<br>8,30,31,32<br>,35 | 3 | P01835,Q63617,Q9JJ22               |

|      |                        |                                 |   |                                                                |
|------|------------------------|---------------------------------|---|----------------------------------------------------------------|
| 2890 | 1,2,4,7,8,2<br>9,33,35 | 3,5,6,27,2<br>8,30,31,32<br>,34 | 2 | P02803,Q63617                                                  |
| 2891 | 1,2,4,7,8,2<br>9,34,35 | 3,5,6,27,2<br>8,30,31,32<br>,33 | 5 | P09006,P14480,P16296,Q561R9,Q9JJ22                             |
| 2892 | 1,2,4,7,8,3<br>0,31,32 | 3,5,6,27,2<br>8,29,33,34<br>,35 | 4 | P01836,P42854,Q64057,Q80WL1                                    |
| 2893 | 1,2,4,7,8,3<br>0,31,33 | 3,5,6,27,2<br>8,29,32,34<br>,35 | 3 | P42854,P51907,Q80WL1                                           |
| 2894 | 1,2,4,7,8,3<br>0,31,34 | 3,5,6,27,2<br>8,29,32,33<br>,35 | 6 | P42854,P47967,P97840,Q62997,Q64057,Q80WL1                      |
| 2895 | 1,2,4,7,8,3<br>0,31,35 | 3,5,6,27,2<br>8,29,32,33<br>,34 | 5 | P02803,P42854,P97584,Q64057,Q80WL1                             |
| 2896 | 1,2,4,7,8,3<br>0,32,33 | 3,5,6,27,2<br>8,29,31,34<br>,35 | 0 |                                                                |
| 2897 | 1,2,4,7,8,3<br>0,32,34 | 3,5,6,27,2<br>8,29,31,33<br>,35 | 6 | P01041,P01836,P47967,Q09030,Q63532,Q80WL1                      |
| 2898 | 1,2,4,7,8,3<br>0,32,35 | 3,5,6,27,2<br>8,29,31,33<br>,34 | 2 | Q64057,Q80WL1                                                  |
| 2899 | 1,2,4,7,8,3<br>0,33,34 | 3,5,6,27,2<br>8,29,31,32<br>,35 | 1 | P47967                                                         |
| 2900 | 1,2,4,7,8,3<br>0,33,35 | 3,5,6,27,2<br>8,29,31,32<br>,34 | 0 |                                                                |
| 2901 | 1,2,4,7,8,3<br>0,34,35 | 3,5,6,27,2<br>8,29,31,32<br>,33 | 9 | P01026,P06866,P09006,P14480,P47967,Q561R9,Q64057,Q6PCU2,Q80WL1 |
| 2902 | 1,2,4,7,8,3<br>1,32,33 | 3,5,6,27,2<br>8,29,30,34<br>,35 | 2 | P01835,Q8CJD3                                                  |
| 2903 | 1,2,4,7,8,3<br>1,32,34 | 3,5,6,27,2<br>8,29,30,33<br>,35 | 6 | P01835,P01836,P20766,Q62997,Q63532,Q80WL1                      |
| 2904 | 1,2,4,7,8,3<br>1,32,35 | 3,5,6,27,2<br>8,29,30,33<br>,34 | 4 | P01835,P02803,P04182,Q80WL1                                    |

|      |                         |                                 |    |                                                                       |
|------|-------------------------|---------------------------------|----|-----------------------------------------------------------------------|
| 2905 | 1,2,4,7,8,3<br>1,33,34  | 3,5,6,27,2<br>8,29,30,32<br>,35 | 3  | P01835,P02803,Q62997                                                  |
| 2906 | 1,2,4,7,8,3<br>1,33,35  | 3,5,6,27,2<br>8,29,30,32<br>,34 | 3  | P01835,P02803,P04182                                                  |
| 2907 | 1,2,4,7,8,3<br>1,34,35  | 3,5,6,27,2<br>8,29,30,32<br>,33 | 7  | P01835,P02803,P09006,P16296,Q561R9,Q62997,Q80WL1                      |
| 2908 | 1,2,4,7,8,3<br>2,33,34  | 3,5,6,27,2<br>8,29,30,31<br>,35 | 3  | P01835,Q63532,Q99041                                                  |
| 2909 | 1,2,4,7,8,3<br>2,33,35  | 3,5,6,27,2<br>8,29,30,31<br>,34 | 3  | P01835,P97580,Q8CJD3                                                  |
| 2910 | 1,2,4,7,8,3<br>2,34,35  | 3,5,6,27,2<br>8,29,30,31<br>,33 | 2  | P01835,Q63532                                                         |
| 2911 | 1,2,4,7,8,3<br>3,34,35  | 3,5,6,27,2<br>8,29,30,31<br>,32 | 4  | P01835,P02803,P09006,Q561R9                                           |
| 2912 | 1,2,4,7,27,<br>28,29,30 | 3,5,6,8,31,<br>32,33,34,3<br>5  | 10 | D3ZUC6,O54861,P01836,P08723,P08753,P36374,P82995,Q6AYQ8,Q6AYR9,Q9JI85 |
| 2913 | 1,2,4,7,27,<br>28,29,31 | 3,5,6,8,30,<br>32,33,34,3<br>5  | 6  | D3ZUC6,P06911,P08753,P82995,Q5GRG2,Q9JI85                             |
| 2914 | 1,2,4,7,27,<br>28,29,32 | 3,5,6,8,30,<br>31,33,34,3<br>5  | 8  | D3ZUC6,P01836,P02793,Q7TP54,P08723,P24368,P82995,Q9JHB9,Q9JI85        |
| 2915 | 1,2,4,7,27,<br>28,29,33 | 3,5,6,8,30,<br>31,32,34,3<br>5  | 8  | P02793,Q7TP54,P08723,P08753,P24368,P82995,Q6IE51,Q9JI85,Q9R0T3        |
| 2916 | 1,2,4,7,27,<br>28,29,34 | 3,5,6,8,30,<br>31,32,33,3<br>5  | 3  | P05964,P14408,Q9JI85                                                  |
| 2917 | 1,2,4,7,27,<br>28,29,35 | 3,5,6,8,30,<br>31,32,33,3<br>4  | 5  | D3ZUC6,P01946,P14480,Q6IE51,Q9JI85                                    |
| 2918 | 1,2,4,7,27,<br>28,30,31 | 3,5,6,8,29,<br>32,33,34,3<br>5  | 6  | D3ZUC6,O70594,P47967,P51907,Q5GRG2,Q6AYQ8                             |
| 2919 | 1,2,4,7,27,<br>28,30,32 | 3,5,6,8,29,<br>31,33,34,3<br>5  | 4  | D3ZUC6,P00714,P01836,Q6AYQ8                                           |



|      |                         |                                |   |                                                  |
|------|-------------------------|--------------------------------|---|--------------------------------------------------|
| 2920 | 1,2,4,7,27,<br>28,30,33 | 3,5,6,8,29,<br>31,32,34,3<br>5 | 4 | D3ZUC6,P51907,Q6AYQ8,Q99MH3                      |
| 2921 | 1,2,4,7,27,<br>28,30,34 | 3,5,6,8,29,<br>31,32,33,3<br>5 | 7 | D3ZUC6,P01836,P05964,P47967,P51907,P97840,Q6AYQ8 |
| 2922 | 1,2,4,7,27,<br>28,30,35 | 3,5,6,8,29,<br>31,32,33,3<br>4 | 6 | D3ZUC6,P06866,P14480,Q6AYQ8,Q6IE51,Q99MH3        |
| 2923 | 1,2,4,7,27,<br>28,31,32 | 3,5,6,8,29,<br>30,33,34,3<br>5 | 4 | D3ZUC6,P01836,P31044,Q5GRG2                      |
| 2924 | 1,2,4,7,27,<br>28,31,33 | 3,5,6,8,29,<br>30,32,34,3<br>5 | 4 | D3ZUC6,P51907,Q5GRG2,Q99MH3                      |
| 2925 | 1,2,4,7,27,<br>28,31,34 | 3,5,6,8,29,<br>30,32,33,3<br>5 | 4 | D3ZUC6,P14408,P47967,P51907                      |
| 2926 | 1,2,4,7,27,<br>28,31,35 | 3,5,6,8,29,<br>30,32,33,3<br>4 | 2 | D3ZUC6,Q99MH3                                    |
| 2927 | 1,2,4,7,27,<br>28,32,33 | 3,5,6,8,29,<br>30,31,34,3<br>5 | 4 | P02793;Q7TP54,Q06000,Q6IE51,Q99MH3               |
| 2928 | 1,2,4,7,27,<br>28,32,34 | 3,5,6,8,29,<br>30,31,33,3<br>5 | 4 | G3V686,P01836,P47967,Q63532                      |
| 2929 | 1,2,4,7,27,<br>28,32,35 | 3,5,6,8,29,<br>30,31,33,3<br>4 | 2 | D3ZUC6,Q6IE51                                    |
| 2930 | 1,2,4,7,27,<br>28,33,34 | 3,5,6,8,29,<br>30,31,32,3<br>5 | 3 | P18418,P47967,P51907                             |
| 2931 | 1,2,4,7,27,<br>28,33,35 | 3,5,6,8,29,<br>30,31,32,3<br>4 | 4 | D3ZUC6,Q561R9,Q6IE51,Q99MH3                      |
| 2932 | 1,2,4,7,27,<br>28,34,35 | 3,5,6,8,29,<br>30,31,32,3<br>3 | 5 | D3ZUC6,P06866,P14408,Q561R9,Q5M819               |
| 2933 | 1,2,4,7,27,<br>29,30,31 | 3,5,6,8,28,<br>32,33,34,3<br>5 | 2 | D3ZUC6,P25236                                    |
| 2934 | 1,2,4,7,27,<br>29,30,32 | 3,5,6,8,28,<br>31,33,34,3<br>5 | 2 | D3ZUC6,P01836                                    |

|      |                         |                                |   |                                    |
|------|-------------------------|--------------------------------|---|------------------------------------|
| 2935 | 1,2,4,7,27,<br>29,30,33 | 3,5,6,8,28,<br>31,32,34,3<br>5 | 2 | D3ZUC6,P51907                      |
| 2936 | 1,2,4,7,27,<br>29,30,34 | 3,5,6,8,28,<br>31,32,33,3<br>5 | 4 | D3ZUC6,P05964,P47967,P97840        |
| 2937 | 1,2,4,7,27,<br>29,30,35 | 3,5,6,8,28,<br>31,32,33,3<br>4 | 5 | D3ZUC6,P01946,P06866,P14480,Q561R9 |
| 2938 | 1,2,4,7,27,<br>29,31,32 | 3,5,6,8,28,<br>30,33,34,3<br>5 | 4 | P01836,P02793;Q7TP54,P25236,Q8CJD3 |
| 2939 | 1,2,4,7,27,<br>29,31,33 | 3,5,6,8,28,<br>30,32,34,3<br>5 | 3 | P02793;Q7TP54,P51907,Q8CJD3        |
| 2940 | 1,2,4,7,27,<br>29,31,34 | 3,5,6,8,28,<br>30,32,33,3<br>5 | 5 | G3V686,P05964,P14408,P25236,Q63467 |
| 2941 | 1,2,4,7,27,<br>29,31,35 | 3,5,6,8,28,<br>30,32,33,3<br>4 | 5 | D3ZUC6,P01946,P14480,P25236,Q561R9 |
| 2942 | 1,2,4,7,27,<br>29,32,33 | 3,5,6,8,28,<br>30,31,34,3<br>5 | 2 | P02793;Q7TP54,Q8CJD3               |
| 2943 | 1,2,4,7,27,<br>29,32,34 | 3,5,6,8,28,<br>30,31,33,3<br>5 | 4 | G3V686,P01836,Q63467,Q63532        |
| 2944 | 1,2,4,7,27,<br>29,32,35 | 3,5,6,8,28,<br>30,31,33,3<br>4 | 3 | D3ZUC6,P01946,P14480               |
| 2945 | 1,2,4,7,27,<br>29,33,34 | 3,5,6,8,28,<br>30,31,32,3<br>5 | 3 | G3V686,Q561R9,Q63532               |
| 2946 | 1,2,4,7,27,<br>29,33,35 | 3,5,6,8,28,<br>30,31,32,3<br>4 | 3 | P01946,Q561R9,Q6IE51               |
| 2947 | 1,2,4,7,27,<br>29,34,35 | 3,5,6,8,28,<br>30,31,32,3<br>3 | 4 | P01946,P14408,P14480,Q561R9        |
| 2948 | 1,2,4,7,27,<br>30,31,32 | 3,5,6,8,28,<br>29,33,34,3<br>5 | 2 | D3ZUC6,P01836                      |
| 2949 | 1,2,4,7,27,<br>30,31,33 | 3,5,6,8,28,<br>29,32,34,3<br>5 | 2 | D3ZUC6,P51907                      |

|      |                         |                                |   |                                                  |
|------|-------------------------|--------------------------------|---|--------------------------------------------------|
| 2950 | 1,2,4,7,27,<br>30,31,34 | 3,5,6,8,28,<br>29,32,33,3<br>5 | 5 | D3ZUC6,P47967,P51907,P97840,Q80WL1               |
| 2951 | 1,2,4,7,27,<br>30,31,35 | 3,5,6,8,28,<br>29,32,33,3<br>4 | 5 | D3ZUC6,P06866,P14480,Q6AYQ8,Q80WL1               |
| 2952 | 1,2,4,7,27,<br>30,32,33 | 3,5,6,8,28,<br>29,31,34,3<br>5 | 1 | D3ZUC6                                           |
| 2953 | 1,2,4,7,27,<br>30,32,34 | 3,5,6,8,28,<br>29,31,33,3<br>5 | 7 | D3ZUC6,G3V686,P01836,P47967,P97840,Q09030,Q63532 |
| 2954 | 1,2,4,7,27,<br>30,32,35 | 3,5,6,8,28,<br>29,31,33,3<br>4 | 3 | D3ZUC6,P14480,Q6AYQ8                             |
| 2955 | 1,2,4,7,27,<br>30,33,34 | 3,5,6,8,28,<br>29,31,32,3<br>5 | 5 | D3ZUC6,P47967,P51907,P97840,Q63532               |
| 2956 | 1,2,4,7,27,<br>30,33,35 | 3,5,6,8,28,<br>29,31,32,3<br>4 | 6 | D3ZUC6,P06866,P14480,P51907,Q561R9,Q99MH3        |
| 2957 | 1,2,4,7,27,<br>30,34,35 | 3,5,6,8,28,<br>29,31,32,3<br>3 | 7 | D3ZUC6,P06866,P14480,P47967,P97840,Q561R9,Q63532 |
| 2958 | 1,2,4,7,27,<br>31,32,33 | 3,5,6,8,28,<br>29,30,34,3<br>5 | 2 | P02793;Q7TP54,Q8CJD3                             |
| 2959 | 1,2,4,7,27,<br>31,32,34 | 3,5,6,8,28,<br>29,30,33,3<br>5 | 4 | G3V686,P01836,P05539,Q63532                      |
| 2960 | 1,2,4,7,27,<br>31,32,35 | 3,5,6,8,28,<br>29,30,33,3<br>4 | 1 | D3ZUC6                                           |
| 2961 | 1,2,4,7,27,<br>31,33,34 | 3,5,6,8,28,<br>29,30,32,3<br>5 | 3 | G3V686,P01835,P51907                             |
| 2962 | 1,2,4,7,27,<br>31,33,35 | 3,5,6,8,28,<br>29,30,32,3<br>4 | 4 | D3ZUC6,P51907,Q561R9,Q99MH3                      |
| 2963 | 1,2,4,7,27,<br>31,34,35 | 3,5,6,8,28,<br>29,30,32,3<br>3 | 3 | D3ZUC6,P14408,Q561R9                             |
| 2964 | 1,2,4,7,27,<br>32,33,34 | 3,5,6,8,28,<br>29,30,31,3<br>5 | 4 | G3V686,P08649,Q63532,Q63661                      |

|      |                         |                                |   |                                                         |
|------|-------------------------|--------------------------------|---|---------------------------------------------------------|
| 2965 | 1,2,4,7,27,<br>32,33,35 | 3,5,6,8,28,<br>29,30,31,3<br>4 | 2 | P97580,Q6IE51                                           |
| 2966 | 1,2,4,7,27,<br>32,34,35 | 3,5,6,8,28,<br>29,30,31,3<br>3 | 3 | G3V686,Q63532,Q63661                                    |
| 2967 | 1,2,4,7,27,<br>33,34,35 | 3,5,6,8,28,<br>29,30,31,3<br>2 | 2 | Q561R9,Q63532                                           |
| 2968 | 1,2,4,7,28,<br>29,30,31 | 3,5,6,8,27,<br>32,33,34,3<br>5 | 6 | P01836,P06760,P08753,P25236,P35467,Q5GRG2               |
| 2969 | 1,2,4,7,28,<br>29,30,32 | 3,5,6,8,27,<br>31,33,34,3<br>5 | 1 | P01836                                                  |
| 2970 | 1,2,4,7,28,<br>29,30,33 | 3,5,6,8,27,<br>31,32,34,3<br>5 | 4 | P06760,P08753,P35467,P51907                             |
| 2971 | 1,2,4,7,28,<br>29,30,34 | 3,5,6,8,27,<br>31,32,33,3<br>5 | 5 | P01836,P05964,P27791,P47967,P97840                      |
| 2972 | 1,2,4,7,28,<br>29,30,35 | 3,5,6,8,27,<br>31,32,33,3<br>4 | 4 | O54861,P06760,P06866,P14480                             |
| 2973 | 1,2,4,7,28,<br>29,31,32 | 3,5,6,8,27,<br>30,33,34,3<br>5 | 3 | P01836,P06911,Q5GRG2                                    |
| 2974 | 1,2,4,7,28,<br>29,31,33 | 3,5,6,8,27,<br>30,32,34,3<br>5 | 8 | P02803,P06760,P06911,P08753,P35467,P51907,P83121,Q5GRG2 |
| 2975 | 1,2,4,7,28,<br>29,31,34 | 3,5,6,8,27,<br>30,32,33,3<br>5 | 3 | P01836,P06760,P27791                                    |
| 2976 | 1,2,4,7,28,<br>29,31,35 | 3,5,6,8,27,<br>30,32,33,3<br>4 | 3 | P02803,P06760,P25236                                    |
| 2977 | 1,2,4,7,28,<br>29,32,33 | 3,5,6,8,27,<br>30,31,34,3<br>5 | 2 | P01836,P02793,Q7TP54                                    |
| 2978 | 1,2,4,7,28,<br>29,32,34 | 3,5,6,8,27,<br>30,31,33,3<br>5 | 1 | P01836                                                  |
| 2979 | 1,2,4,7,28,<br>29,32,35 | 3,5,6,8,27,<br>30,31,33,3<br>4 | 1 | P01836                                                  |

|      |                         |                                |   |                                                  |
|------|-------------------------|--------------------------------|---|--------------------------------------------------|
| 2980 | 1,2,4,7,28,<br>29,33,34 | 3,5,6,8,27,<br>30,31,32,3<br>5 | 3 | P06760,P27791,Q9JJ22                             |
| 2981 | 1,2,4,7,28,<br>29,33,35 | 3,5,6,8,27,<br>30,31,32,3<br>4 | 2 | P02803,P06760                                    |
| 2982 | 1,2,4,7,28,<br>29,34,35 | 3,5,6,8,27,<br>30,31,32,3<br>3 | 4 | P06760,P06866,P14480,Q561R9                      |
| 2983 | 1,2,4,7,28,<br>30,31,32 | 3,5,6,8,27,<br>29,33,34,3<br>5 | 3 | P01836,P42854,Q5GRG2                             |
| 2984 | 1,2,4,7,28,<br>30,31,33 | 3,5,6,8,27,<br>29,32,34,3<br>5 | 4 | P06760,P35467,P42854,P51907                      |
| 2985 | 1,2,4,7,28,<br>30,31,34 | 3,5,6,8,27,<br>29,32,33,3<br>5 | 7 | P01836,P06760,P42854,P47967,P51907,P97840,Q80WL1 |
| 2986 | 1,2,4,7,28,<br>30,31,35 | 3,5,6,8,27,<br>29,32,33,3<br>4 | 7 | D3ZUC6,P02803,P06760,P06866,P97584,Q6AYQ8,Q80WL1 |
| 2987 | 1,2,4,7,28,<br>30,32,33 | 3,5,6,8,27,<br>29,31,34,3<br>5 | 2 | P01836,P51907                                    |
| 2988 | 1,2,4,7,28,<br>30,32,34 | 3,5,6,8,27,<br>29,31,33,3<br>5 | 4 | P01836,P47967,P97840,Q63532                      |
| 2989 | 1,2,4,7,28,<br>30,32,35 | 3,5,6,8,27,<br>29,31,33,3<br>4 | 2 | P01836,Q6AYQ8                                    |
| 2990 | 1,2,4,7,28,<br>30,33,34 | 3,5,6,8,27,<br>29,31,32,3<br>5 | 4 | P06760,P47967,P51907,P97840                      |
| 2991 | 1,2,4,7,28,<br>30,33,35 | 3,5,6,8,27,<br>29,31,32,3<br>4 | 3 | P06760,P06866,P51907                             |
| 2992 | 1,2,4,7,28,<br>30,34,35 | 3,5,6,8,27,<br>29,31,32,3<br>3 | 5 | P06760,P06866,P14480,P47967,P97840               |
| 2993 | 1,2,4,7,28,<br>31,32,33 | 3,5,6,8,27,<br>29,30,34,3<br>5 | 5 | P01836,P02793;Q7TP54,P06911,P51907,Q5GRG2        |
| 2994 | 1,2,4,7,28,<br>31,32,34 | 3,5,6,8,27,<br>29,30,33,3<br>5 | 2 | P01836,Q62997                                    |

|      |                         |                                |   |                                           |
|------|-------------------------|--------------------------------|---|-------------------------------------------|
| 2995 | 1,2,4,7,28,<br>31,32,35 | 3,5,6,8,27,<br>29,30,33,3<br>4 | 1 | P02803                                    |
| 2996 | 1,2,4,7,28,<br>31,33,34 | 3,5,6,8,27,<br>29,30,32,3<br>5 | 6 | P01835,P02803,P06760,P27791,P51907,Q62997 |
| 2997 | 1,2,4,7,28,<br>31,33,35 | 3,5,6,8,27,<br>29,30,32,3<br>4 | 5 | P02803,P06760,P10719,P51907,Q9WTT6        |
| 2998 | 1,2,4,7,28,<br>31,34,35 | 3,5,6,8,27,<br>29,30,32,3<br>3 | 3 | P02803,P06760,P06866                      |
| 2999 | 1,2,4,7,28,<br>32,33,34 | 3,5,6,8,27,<br>29,30,31,3<br>5 | 2 | P01836,Q63532                             |
| 3000 | 1,2,4,7,28,<br>32,33,35 | 3,5,6,8,27,<br>29,30,31,3<br>4 | 2 | P10719,P97580                             |
| 3001 | 1,2,4,7,28,<br>32,34,35 | 3,5,6,8,27,<br>29,30,31,3<br>3 | 2 | P01836,Q63532                             |
| 3002 | 1,2,4,7,28,<br>33,34,35 | 3,5,6,8,27,<br>29,30,31,3<br>2 | 4 | P02803,P06760,P06866,Q561R9               |
| 3003 | 1,2,4,7,29,<br>30,31,32 | 3,5,6,8,27,<br>28,33,34,3<br>5 | 2 | P01836,P25236                             |
| 3004 | 1,2,4,7,29,<br>30,31,33 | 3,5,6,8,27,<br>28,32,34,3<br>5 | 5 | P06760,P25236,P35467,P51907,P83121        |
| 3005 | 1,2,4,7,29,<br>30,31,34 | 3,5,6,8,27,<br>28,32,33,3<br>5 | 6 | P01836,P25236,P47967,P97840,Q6IG02,Q80WL1 |
| 3006 | 1,2,4,7,29,<br>30,31,35 | 3,5,6,8,27,<br>28,32,33,3<br>4 | 6 | P06760,P06866,P14480,P25236,P97584,Q80WL1 |
| 3007 | 1,2,4,7,29,<br>30,32,33 | 3,5,6,8,27,<br>28,31,34,3<br>5 | 1 | P01836                                    |
| 3008 | 1,2,4,7,29,<br>30,32,34 | 3,5,6,8,27,<br>28,31,33,3<br>5 | 3 | P01041,P01836,Q63532                      |
| 3009 | 1,2,4,7,29,<br>30,32,35 | 3,5,6,8,27,<br>28,31,33,3<br>4 | 3 | P01836,P14480,P97584                      |

|      |                         |                                |   |                                                  |
|------|-------------------------|--------------------------------|---|--------------------------------------------------|
| 3010 | 1,2,4,7,29,<br>30,33,34 | 3,5,6,8,27,<br>28,31,32,3<br>5 | 1 | Q9JJ22                                           |
| 3011 | 1,2,4,7,29,<br>30,33,35 | 3,5,6,8,27,<br>28,31,32,3<br>4 | 4 | P06760,P06866,P14480,Q9WTT6                      |
| 3012 | 1,2,4,7,29,<br>30,34,35 | 3,5,6,8,27,<br>28,31,32,3<br>3 | 4 | P06866,P14480,Q561R9,Q9JJ22                      |
| 3013 | 1,2,4,7,29,<br>31,32,33 | 3,5,6,8,27,<br>28,30,34,3<br>5 | 3 | P02793;Q7TP54,Q8CJD3,Q9WTT6                      |
| 3014 | 1,2,4,7,29,<br>31,32,34 | 3,5,6,8,27,<br>28,30,33,3<br>5 | 5 | P01836,P25236,Q62997,Q63467,Q63532               |
| 3015 | 1,2,4,7,29,<br>31,32,35 | 3,5,6,8,27,<br>28,30,33,3<br>4 | 3 | P04182,P25236,Q9WTT6                             |
| 3016 | 1,2,4,7,29,<br>31,33,34 | 3,5,6,8,27,<br>28,30,32,3<br>5 | 2 | P01835,Q62997                                    |
| 3017 | 1,2,4,7,29,<br>31,33,35 | 3,5,6,8,27,<br>28,30,32,3<br>4 | 5 | P02803,P04182,P06760,P25236,Q9WTT6               |
| 3018 | 1,2,4,7,29,<br>31,34,35 | 3,5,6,8,27,<br>28,30,32,3<br>3 | 4 | P06760,P14480,P25236,Q561R9                      |
| 3019 | 1,2,4,7,29,<br>32,33,34 | 3,5,6,8,27,<br>28,30,31,3<br>5 | 3 | P01836,Q63532,Q63661                             |
| 3020 | 1,2,4,7,29,<br>32,33,35 | 3,5,6,8,27,<br>28,30,31,3<br>4 | 1 | Q9WTT6                                           |
| 3021 | 1,2,4,7,29,<br>32,34,35 | 3,5,6,8,27,<br>28,30,31,3<br>3 | 4 | P01836,P14480,Q63532,Q63661                      |
| 3022 | 1,2,4,7,29,<br>33,34,35 | 3,5,6,8,27,<br>28,30,31,3<br>2 | 4 | P06760,P14480,Q561R9,Q9JJ22                      |
| 3023 | 1,2,4,7,30,<br>31,32,33 | 3,5,6,8,27,<br>28,29,34,3<br>5 | 4 | P01836,P42854,P51907,Q9WTT6                      |
| 3024 | 1,2,4,7,30,<br>31,32,34 | 3,5,6,8,27,<br>28,29,33,3<br>5 | 7 | P01836,P42854,P47967,P97840,Q62997,Q63532,Q80WL1 |

|      |                         |                                |   |                                                                |
|------|-------------------------|--------------------------------|---|----------------------------------------------------------------|
| 3025 | 1,2,4,7,30,<br>31,32,35 | 3,5,6,8,27,<br>28,29,33,3<br>4 | 3 | P01836,P97584,Q80WL1                                           |
| 3026 | 1,2,4,7,30,<br>31,33,34 | 3,5,6,8,27,<br>28,29,32,3<br>5 | 4 | P47967,P51907,P97840,Q62997                                    |
| 3027 | 1,2,4,7,30,<br>31,33,35 | 3,5,6,8,27,<br>28,29,32,3<br>4 | 4 | P06760,P51907,P97584,Q9WTT6                                    |
| 3028 | 1,2,4,7,30,<br>31,34,35 | 3,5,6,8,27,<br>28,29,32,3<br>3 | 8 | P06760,P06866,P14480,P47967,P82471,P97840,Q62997,Q80WL1        |
| 3029 | 1,2,4,7,30,<br>32,33,34 | 3,5,6,8,27,<br>28,29,31,3<br>5 | 4 | P01836,P47967,Q63532,Q63661                                    |
| 3030 | 1,2,4,7,30,<br>32,33,35 | 3,5,6,8,27,<br>28,29,31,3<br>4 | 1 | Q9WTT6                                                         |
| 3031 | 1,2,4,7,30,<br>32,34,35 | 3,5,6,8,27,<br>28,29,31,3<br>3 | 5 | P01836,P14480,P82471,Q63532,Q63661                             |
| 3032 | 1,2,4,7,30,<br>33,34,35 | 3,5,6,8,27,<br>28,29,31,3<br>2 | 7 | P02782,P06760,P06866,P14480,P51907,P82471,Q561R9               |
| 3033 | 1,2,4,7,31,<br>32,33,34 | 3,5,6,8,27,<br>28,29,30,3<br>5 | 3 | P01835,Q62997,Q63532                                           |
| 3034 | 1,2,4,7,31,<br>32,33,35 | 3,5,6,8,27,<br>28,29,30,3<br>4 | 5 | P01835,P04182,P97580,Q30KJ2,Q9WTT6                             |
| 3035 | 1,2,4,7,31,<br>32,34,35 | 3,5,6,8,27,<br>28,29,30,3<br>3 | 4 | P01835,P82471,Q62997,Q63532                                    |
| 3036 | 1,2,4,7,31,<br>33,34,35 | 3,5,6,8,27,<br>28,29,30,3<br>2 | 7 | P01835,P02803,P06760,P51907,P82471,Q561R9,Q62997               |
| 3037 | 1,2,4,7,32,<br>33,34,35 | 3,5,6,8,27,<br>28,29,30,3<br>1 | 6 | P01835,P02782,P82471,P97580,Q63532,Q63661                      |
| 3038 | 1,2,4,8,27,<br>28,29,30 | 3,5,6,7,31,<br>32,33,34,3<br>5 | 9 | D3ZUC6,P02781,P02782,P08723,P0C0A9,P24368,Q6AYQ8,Q6AYR9,Q8CJ52 |
| 3039 | 1,2,4,8,27,<br>28,29,31 | 3,5,6,7,30,<br>32,33,34,3<br>5 | 6 | O35547,P02782,P06911,P08723,P0C0A9,Q5GRG2                      |



|      |                         |                                |   |                                                  |
|------|-------------------------|--------------------------------|---|--------------------------------------------------|
| 3040 | 1,2,4,8,27,<br>28,29,32 | 3,5,6,7,30,<br>31,33,34,3<br>5 | 5 | P00714,P08723,P0C0A9,P24368,Q9JHB9               |
| 3041 | 1,2,4,8,27,<br>28,29,33 | 3,5,6,7,30,<br>31,32,34,3<br>5 | 7 | O35547,P08723,P0C0A9,P24368,Q8CJ52,Q9JI85,Q9R0T3 |
| 3042 | 1,2,4,8,27,<br>28,29,34 | 3,5,6,7,30,<br>31,32,33,3<br>5 | 2 | Q5M8C6,Q9QZA6                                    |
| 3043 | 1,2,4,8,27,<br>28,29,35 | 3,5,6,7,30,<br>31,32,33,3<br>4 | 1 | Q561R9                                           |
| 3044 | 1,2,4,8,27,<br>28,30,31 | 3,5,6,7,29,<br>32,33,34,3<br>5 | 6 | D3ZUC6,P02761,Q5GRG2,Q6AYQ8,Q80WL1,Q99MH3        |
| 3045 | 1,2,4,8,27,<br>28,30,32 | 3,5,6,7,29,<br>31,33,34,3<br>5 | 3 | D3ZUC6,P00714,Q6AYQ8                             |
| 3046 | 1,2,4,8,27,<br>28,30,33 | 3,5,6,7,29,<br>31,32,34,3<br>5 | 3 | P51907,Q6AYQ8,Q99MH3                             |
| 3047 | 1,2,4,8,27,<br>28,30,34 | 3,5,6,7,29,<br>31,32,33,3<br>5 | 2 | P47967,Q6AYQ8                                    |
| 3048 | 1,2,4,8,27,<br>28,30,35 | 3,5,6,7,29,<br>31,32,33,3<br>4 | 5 | D3ZUC6,P02761,P06866,Q6AYQ8,Q99MH3               |
| 3049 | 1,2,4,8,27,<br>28,31,32 | 3,5,6,7,29,<br>30,33,34,3<br>5 | 1 | Q5GRG2                                           |
| 3050 | 1,2,4,8,27,<br>28,31,33 | 3,5,6,7,29,<br>30,32,34,3<br>5 | 3 | P51907,Q5GRG2,Q99MH3                             |
| 3051 | 1,2,4,8,27,<br>28,31,34 | 3,5,6,7,29,<br>30,32,33,3<br>5 | 0 |                                                  |
| 3052 | 1,2,4,8,27,<br>28,31,35 | 3,5,6,7,29,<br>30,32,33,3<br>4 | 2 | P02803,Q99MH3                                    |
| 3053 | 1,2,4,8,27,<br>28,32,33 | 3,5,6,7,29,<br>30,31,34,3<br>5 | 2 | P00714,Q99MH3                                    |
| 3054 | 1,2,4,8,27,<br>28,32,34 | 3,5,6,7,29,<br>30,31,33,3<br>5 | 1 | P00714                                           |

|      |                         |                                |   |                                    |
|------|-------------------------|--------------------------------|---|------------------------------------|
| 3055 | 1,2,4,8,27,<br>28,32,35 | 3,5,6,7,29,<br>30,31,33,3<br>4 | 1 | Q99MH3                             |
| 3056 | 1,2,4,8,27,<br>28,33,34 | 3,5,6,7,29,<br>30,31,32,3<br>5 | 0 |                                    |
| 3057 | 1,2,4,8,27,<br>28,33,35 | 3,5,6,7,29,<br>30,31,32,3<br>4 | 2 | Q561R9,Q99MH3                      |
| 3058 | 1,2,4,8,27,<br>28,34,35 | 3,5,6,7,29,<br>30,31,32,3<br>3 | 5 | P00507,P06866,P09006,P53792,Q561R9 |
| 3059 | 1,2,4,8,27,<br>29,30,31 | 3,5,6,7,28,<br>32,33,34,3<br>5 | 4 | D3ZUC6,P25236,Q6AYR9,Q80WL1        |
| 3060 | 1,2,4,8,27,<br>29,30,32 | 3,5,6,7,28,<br>31,33,34,3<br>5 | 0 |                                    |
| 3061 | 1,2,4,8,27,<br>29,30,33 | 3,5,6,7,28,<br>31,32,34,3<br>5 | 0 |                                    |
| 3062 | 1,2,4,8,27,<br>29,30,34 | 3,5,6,7,28,<br>31,32,33,3<br>5 | 3 | Q00715,Q561R9,Q6AYR9               |
| 3063 | 1,2,4,8,27,<br>29,30,35 | 3,5,6,7,28,<br>31,32,33,3<br>4 | 3 | D3ZUC6,P14480,Q561R9               |
| 3064 | 1,2,4,8,27,<br>29,31,32 | 3,5,6,7,28,<br>30,33,34,3<br>5 | 2 | P25236,Q8CJD3                      |
| 3065 | 1,2,4,8,27,<br>29,31,33 | 3,5,6,7,28,<br>30,32,34,3<br>5 | 1 | Q8CJD3                             |
| 3066 | 1,2,4,8,27,<br>29,31,34 | 3,5,6,7,28,<br>30,32,33,3<br>5 | 2 | P25236,Q561R9                      |
| 3067 | 1,2,4,8,27,<br>29,31,35 | 3,5,6,7,28,<br>30,32,33,3<br>4 | 2 | P25236,Q561R9                      |
| 3068 | 1,2,4,8,27,<br>29,32,33 | 3,5,6,7,28,<br>30,31,34,3<br>5 | 2 | P02793;Q7TP54,Q8CJD3               |
| 3069 | 1,2,4,8,27,<br>29,32,34 | 3,5,6,7,28,<br>30,31,33,3<br>5 | 1 | Q00715                             |

|      |                         |                                |   |                             |
|------|-------------------------|--------------------------------|---|-----------------------------|
| 3070 | 1,2,4,8,27,<br>29,32,35 | 3,5,6,7,28,<br>30,31,33,3<br>4 | 0 |                             |
| 3071 | 1,2,4,8,27,<br>29,33,34 | 3,5,6,7,28,<br>30,31,32,3<br>5 | 2 | Q00715,Q561R9               |
| 3072 | 1,2,4,8,27,<br>29,33,35 | 3,5,6,7,28,<br>30,31,32,3<br>4 | 1 | Q561R9                      |
| 3073 | 1,2,4,8,27,<br>29,34,35 | 3,5,6,7,28,<br>30,31,32,3<br>3 | 2 | P09006,Q561R9               |
| 3074 | 1,2,4,8,27,<br>30,31,32 | 3,5,6,7,28,<br>29,33,34,3<br>5 | 2 | P10758,Q80WL1               |
| 3075 | 1,2,4,8,27,<br>30,31,33 | 3,5,6,7,28,<br>29,32,34,3<br>5 | 3 | P51907,Q80WL1,Q99MH3        |
| 3076 | 1,2,4,8,27,<br>30,31,34 | 3,5,6,7,28,<br>29,32,33,3<br>5 | 2 | P47967,Q80WL1               |
| 3077 | 1,2,4,8,27,<br>30,31,35 | 3,5,6,7,28,<br>29,32,33,3<br>4 | 3 | D3ZUC6,Q561R9,Q80WL1        |
| 3078 | 1,2,4,8,27,<br>30,32,33 | 3,5,6,7,28,<br>29,31,34,3<br>5 | 0 |                             |
| 3079 | 1,2,4,8,27,<br>30,32,34 | 3,5,6,7,28,<br>29,31,33,3<br>5 | 1 | Q00715                      |
| 3080 | 1,2,4,8,27,<br>30,32,35 | 3,5,6,7,28,<br>29,31,33,3<br>4 | 2 | D3ZUC6,Q6AYQ8               |
| 3081 | 1,2,4,8,27,<br>30,33,34 | 3,5,6,7,28,<br>29,31,32,3<br>5 | 1 | Q561R9                      |
| 3082 | 1,2,4,8,27,<br>30,33,35 | 3,5,6,7,28,<br>29,31,32,3<br>4 | 3 | D3ZUC6,Q561R9,Q99MH3        |
| 3083 | 1,2,4,8,27,<br>30,34,35 | 3,5,6,7,28,<br>29,31,32,3<br>3 | 4 | P06866,P09006,Q561R9,Q80WL1 |
| 3084 | 1,2,4,8,27,<br>31,32,33 | 3,5,6,7,28,<br>29,30,34,3<br>5 | 1 | Q8CJD3                      |

|      |                         |                                |   |                                           |
|------|-------------------------|--------------------------------|---|-------------------------------------------|
| 3085 | 1,2,4,8,27,<br>31,32,34 | 3,5,6,7,28,<br>29,30,33,3<br>5 | 0 |                                           |
| 3086 | 1,2,4,8,27,<br>31,32,35 | 3,5,6,7,28,<br>29,30,33,3<br>4 | 0 |                                           |
| 3087 | 1,2,4,8,27,<br>31,33,34 | 3,5,6,7,28,<br>29,30,32,3<br>5 | 3 | P01835,Q561R9,Q63355                      |
| 3088 | 1,2,4,8,27,<br>31,33,35 | 3,5,6,7,28,<br>29,30,32,3<br>4 | 3 | Q561R9,Q63355,Q99MH3                      |
| 3089 | 1,2,4,8,27,<br>31,34,35 | 3,5,6,7,28,<br>29,30,32,3<br>3 | 3 | P09006,Q561R9,Q63355                      |
| 3090 | 1,2,4,8,27,<br>32,33,34 | 3,5,6,7,28,<br>29,30,31,3<br>5 | 1 | Q00715                                    |
| 3091 | 1,2,4,8,27,<br>32,33,35 | 3,5,6,7,28,<br>29,30,31,3<br>4 | 1 | Q99MH3                                    |
| 3092 | 1,2,4,8,27,<br>32,34,35 | 3,5,6,7,28,<br>29,30,31,3<br>3 | 4 | P09006,P83121,Q561R9,Q9QZK9               |
| 3093 | 1,2,4,8,27,<br>33,34,35 | 3,5,6,7,28,<br>29,30,31,3<br>2 | 3 | P09006,Q561R9,Q63355                      |
| 3094 | 1,2,4,8,28,<br>29,30,31 | 3,5,6,7,27,<br>32,33,34,3<br>5 | 6 | P02761,P02803,P25236,Q5GRG2,Q62975,Q80WL1 |
| 3095 | 1,2,4,8,28,<br>29,30,32 | 3,5,6,7,27,<br>31,33,34,3<br>5 | 1 | Q62975                                    |
| 3096 | 1,2,4,8,28,<br>29,30,33 | 3,5,6,7,27,<br>31,32,34,3<br>5 | 1 | P02803                                    |
| 3097 | 1,2,4,8,28,<br>29,30,34 | 3,5,6,7,27,<br>31,32,33,3<br>5 | 1 | Q9QZA6                                    |
| 3098 | 1,2,4,8,28,<br>29,30,35 | 3,5,6,7,27,<br>31,32,33,3<br>4 | 4 | P02761,P02803,P06866,P14480               |
| 3099 | 1,2,4,8,28,<br>29,31,32 | 3,5,6,7,27,<br>30,33,34,3<br>5 | 5 | P02803,P06911,P25236,Q5GRG2,Q62975        |

|      |                         |                                |   |                                                  |
|------|-------------------------|--------------------------------|---|--------------------------------------------------|
| 3100 | 1,2,4,8,28,<br>29,31,33 | 3,5,6,7,27,<br>30,32,34,3<br>5 | 3 | P02803,P06911,Q5GRG2                             |
| 3101 | 1,2,4,8,28,<br>29,31,34 | 3,5,6,7,27,<br>30,32,33,3<br>5 | 2 | P02803,P27791                                    |
| 3102 | 1,2,4,8,28,<br>29,31,35 | 3,5,6,7,27,<br>30,32,33,3<br>4 | 2 | P02803,P25236                                    |
| 3103 | 1,2,4,8,28,<br>29,32,33 | 3,5,6,7,27,<br>30,31,34,3<br>5 | 4 | P02803,P24368,P35281,Q62975                      |
| 3104 | 1,2,4,8,28,<br>29,32,34 | 3,5,6,7,27,<br>30,31,33,3<br>5 | 1 | P52303                                           |
| 3105 | 1,2,4,8,28,<br>29,32,35 | 3,5,6,7,27,<br>30,31,33,3<br>4 | 2 | P02803,P19218                                    |
| 3106 | 1,2,4,8,28,<br>29,33,34 | 3,5,6,7,27,<br>30,31,32,3<br>5 | 4 | P02803,P27791,Q9JJ22,Q9QZA6                      |
| 3107 | 1,2,4,8,28,<br>29,33,35 | 3,5,6,7,27,<br>30,31,32,3<br>4 | 1 | P02803                                           |
| 3108 | 1,2,4,8,28,<br>29,34,35 | 3,5,6,7,27,<br>30,31,32,3<br>3 | 7 | P00507,P02803,P06866,P09006,Q561R9,Q6AY61,Q9JJ22 |
| 3109 | 1,2,4,8,28,<br>30,31,32 | 3,5,6,7,27,<br>29,33,34,3<br>5 | 1 | Q80WL1                                           |
| 3110 | 1,2,4,8,28,<br>30,31,33 | 3,5,6,7,27,<br>29,32,34,3<br>5 | 4 | P02761,P02803,P51907,Q80WL1                      |
| 3111 | 1,2,4,8,28,<br>30,31,34 | 3,5,6,7,27,<br>29,32,33,3<br>5 | 3 | P02803,P47967,Q80WL1                             |
| 3112 | 1,2,4,8,28,<br>30,31,35 | 3,5,6,7,27,<br>29,32,33,3<br>4 | 7 | P02761,P02803,P06866,Q64335,Q6AYQ8,Q80WL1,Q9EQV9 |
| 3113 | 1,2,4,8,28,<br>30,32,33 | 3,5,6,7,27,<br>29,31,34,3<br>5 | 0 |                                                  |
| 3114 | 1,2,4,8,28,<br>30,32,34 | 3,5,6,7,27,<br>29,31,33,3<br>5 | 1 | P52303                                           |

|      |                         |                                |   |                                                                       |
|------|-------------------------|--------------------------------|---|-----------------------------------------------------------------------|
| 3115 | 1,2,4,8,28,<br>30,32,35 | 3,5,6,7,27,<br>29,31,33,3<br>4 | 1 | Q6AYQ8                                                                |
| 3116 | 1,2,4,8,28,<br>30,33,34 | 3,5,6,7,27,<br>29,31,32,3<br>5 | 1 | P51907                                                                |
| 3117 | 1,2,4,8,28,<br>30,33,35 | 3,5,6,7,27,<br>29,31,32,3<br>4 | 4 | P02761,P02803,P06866,Q9EQV9                                           |
| 3118 | 1,2,4,8,28,<br>30,34,35 | 3,5,6,7,27,<br>29,31,32,3<br>3 | 9 | P00507,P02793,Q7TP54,P02803,P06866,P09006,Q561R9,Q6AY61,Q80WL1,Q920G2 |
| 3119 | 1,2,4,8,28,<br>31,32,33 | 3,5,6,7,27,<br>29,30,34,3<br>5 | 1 | P02803                                                                |
| 3120 | 1,2,4,8,28,<br>31,32,34 | 3,5,6,7,27,<br>29,30,33,3<br>5 | 2 | P02803,Q62997                                                         |
| 3121 | 1,2,4,8,28,<br>31,32,35 | 3,5,6,7,27,<br>29,30,33,3<br>4 | 1 | P02803                                                                |
| 3122 | 1,2,4,8,28,<br>31,33,34 | 3,5,6,7,27,<br>29,30,32,3<br>5 | 4 | P01835,P02803,P51907,Q62997                                           |
| 3123 | 1,2,4,8,28,<br>31,33,35 | 3,5,6,7,27,<br>29,30,32,3<br>4 | 2 | P02761,P02803                                                         |
| 3124 | 1,2,4,8,28,<br>31,34,35 | 3,5,6,7,27,<br>29,30,32,3<br>3 | 5 | P00507,P02803,P09006,P53792,Q561R9                                    |
| 3125 | 1,2,4,8,28,<br>32,33,34 | 3,5,6,7,27,<br>29,30,31,3<br>5 | 0 |                                                                       |
| 3126 | 1,2,4,8,28,<br>32,33,35 | 3,5,6,7,27,<br>29,30,31,3<br>4 | 1 | P02803                                                                |
| 3127 | 1,2,4,8,28,<br>32,34,35 | 3,5,6,7,27,<br>29,30,31,3<br>3 | 4 | P00507,P02803,P09006,P52303                                           |
| 3128 | 1,2,4,8,28,<br>33,34,35 | 3,5,6,7,27,<br>29,30,31,3<br>2 | 4 | P00507,P02803,P09006,Q561R9                                           |
| 3129 | 1,2,4,8,29,<br>30,31,32 | 3,5,6,7,27,<br>28,33,34,3<br>5 | 3 | P25236,Q62975,Q80WL1                                                  |

|      |                         |                                |   |                                                  |
|------|-------------------------|--------------------------------|---|--------------------------------------------------|
| 3130 | 1,2,4,8,29,<br>30,31,33 | 3,5,6,7,27,<br>28,32,34,3<br>5 | 3 | P02803,P25236,Q80WL1                             |
| 3131 | 1,2,4,8,29,<br>30,31,34 | 3,5,6,7,27,<br>28,32,33,3<br>5 | 2 | P25236,Q80WL1                                    |
| 3132 | 1,2,4,8,29,<br>30,31,35 | 3,5,6,7,27,<br>28,32,33,3<br>4 | 3 | P02803,P25236,Q80WL1                             |
| 3133 | 1,2,4,8,29,<br>30,32,33 | 3,5,6,7,27,<br>28,31,34,3<br>5 | 1 | Q6TMA8                                           |
| 3134 | 1,2,4,8,29,<br>30,32,34 | 3,5,6,7,27,<br>28,31,33,3<br>5 | 1 | Q6TMA8                                           |
| 3135 | 1,2,4,8,29,<br>30,32,35 | 3,5,6,7,27,<br>28,31,33,3<br>4 | 2 | P14480,Q6TMA8                                    |
| 3136 | 1,2,4,8,29,<br>30,33,34 | 3,5,6,7,27,<br>28,31,32,3<br>5 | 1 | Q9JJ22                                           |
| 3137 | 1,2,4,8,29,<br>30,33,35 | 3,5,6,7,27,<br>28,31,32,3<br>4 | 1 | P02803                                           |
| 3138 | 1,2,4,8,29,<br>30,34,35 | 3,5,6,7,27,<br>28,31,32,3<br>3 | 7 | P06866,P09006,P14480,Q561R9,Q6PCU2,Q80WL1,Q9JJ22 |
| 3139 | 1,2,4,8,29,<br>31,32,33 | 3,5,6,7,27,<br>28,30,34,3<br>5 | 3 | P02803,P25236,Q8CJD3                             |
| 3140 | 1,2,4,8,29,<br>31,32,34 | 3,5,6,7,27,<br>28,30,33,3<br>5 | 3 | P25236,Q62997,Q6TMA8                             |
| 3141 | 1,2,4,8,29,<br>31,32,35 | 3,5,6,7,27,<br>28,30,33,3<br>4 | 3 | P02803,P04182,P25236                             |
| 3142 | 1,2,4,8,29,<br>31,33,34 | 3,5,6,7,27,<br>28,30,32,3<br>5 | 3 | P01835,P02803,Q62997                             |
| 3143 | 1,2,4,8,29,<br>31,33,35 | 3,5,6,7,27,<br>28,30,32,3<br>4 | 4 | P02803,P04182,P17046,P25236                      |
| 3144 | 1,2,4,8,29,<br>31,34,35 | 3,5,6,7,27,<br>28,30,32,3<br>3 | 4 | P02803,P09006,P25236,Q561R9                      |

|      |                         |                                |   |                                                                |
|------|-------------------------|--------------------------------|---|----------------------------------------------------------------|
| 3145 | 1,2,4,8,29,<br>32,33,34 | 3,5,6,7,27,<br>28,30,31,3<br>5 | 1 | Q6TMA8                                                         |
| 3146 | 1,2,4,8,29,<br>32,33,35 | 3,5,6,7,27,<br>28,30,31,3<br>4 | 2 | P02803,Q6TMA8                                                  |
| 3147 | 1,2,4,8,29,<br>32,34,35 | 3,5,6,7,27,<br>28,30,31,3<br>3 | 2 | P09006,Q6TMA8                                                  |
| 3148 | 1,2,4,8,29,<br>33,34,35 | 3,5,6,7,27,<br>28,30,31,3<br>2 | 4 | P02803,P09006,Q561R9,Q9JJ22                                    |
| 3149 | 1,2,4,8,30,<br>31,32,33 | 3,5,6,7,27,<br>28,29,34,3<br>5 | 2 | P10758,Q80WL1                                                  |
| 3150 | 1,2,4,8,30,<br>31,32,34 | 3,5,6,7,27,<br>28,29,33,3<br>5 | 2 | Q62997,Q80WL1                                                  |
| 3151 | 1,2,4,8,30,<br>31,32,35 | 3,5,6,7,27,<br>28,29,33,3<br>4 | 1 | Q80WL1                                                         |
| 3152 | 1,2,4,8,30,<br>31,33,34 | 3,5,6,7,27,<br>28,29,32,3<br>5 | 3 | P51907,Q62997,Q80WL1                                           |
| 3153 | 1,2,4,8,30,<br>31,33,35 | 3,5,6,7,27,<br>28,29,32,3<br>4 | 2 | P02803,Q80WL1                                                  |
| 3154 | 1,2,4,8,30,<br>31,34,35 | 3,5,6,7,27,<br>28,29,32,3<br>3 | 8 | P02793,Q7TP54,P02803,P06866,P09006,P82471,Q561R9,Q62997,Q80WL1 |
| 3155 | 1,2,4,8,30,<br>32,33,34 | 3,5,6,7,27,<br>28,29,31,3<br>5 | 0 |                                                                |
| 3156 | 1,2,4,8,30,<br>32,33,35 | 3,5,6,7,27,<br>28,29,31,3<br>4 | 0 |                                                                |
| 3157 | 1,2,4,8,30,<br>32,34,35 | 3,5,6,7,27,<br>28,29,31,3<br>3 | 3 | P09006,P82471,Q80WL1                                           |
| 3158 | 1,2,4,8,30,<br>33,34,35 | 3,5,6,7,27,<br>28,29,31,3<br>2 | 4 | P06866,P09006,P82471,Q561R9                                    |
| 3159 | 1,2,4,8,31,<br>32,33,34 | 3,5,6,7,27,<br>28,29,30,3<br>5 | 2 | P01835,Q62997                                                  |



|      |                          |                                |    |                                                                       |
|------|--------------------------|--------------------------------|----|-----------------------------------------------------------------------|
| 3160 | 1,2,4,8,31,<br>32,33,35  | 3,5,6,7,27,<br>28,29,30,3<br>4 | 3  | P01835,P02803,P04182                                                  |
| 3161 | 1,2,4,8,31,<br>32,34,35  | 3,5,6,7,27,<br>28,29,30,3<br>3 | 5  | P01835,P02803,P09006,P82471,Q62997                                    |
| 3162 | 1,2,4,8,31,<br>33,34,35  | 3,5,6,7,27,<br>28,29,30,3<br>2 | 7  | P01835,P02803,P09006,P82471,Q561R9,Q62997,Q63355                      |
| 3163 | 1,2,4,8,32,<br>33,34,35  | 3,5,6,7,27,<br>28,29,30,3<br>1 | 4  | P01835,P09006,P82471,Q63661                                           |
| 3164 | 1,2,4,27,2<br>8,29,30,31 | 3,5,6,7,8,3<br>2,33,34,35      | 6  | D3ZUC6,P08753,P25236,P36374,Q5GRG2,Q6AYR9                             |
| 3165 | 1,2,4,27,2<br>8,29,30,32 | 3,5,6,7,8,3<br>1,33,34,35      | 10 | D3ZUC6,O08815,P05369,P08723,P0C0A9,P24368,P36374,Q6AYQ8,Q6AYR9,Q9JHB9 |
| 3166 | 1,2,4,27,2<br>8,29,30,33 | 3,5,6,7,8,3<br>1,32,34,35      | 6  | D3ZUC6,P08723,P08753,P0C0A9,P36374,P51907                             |
| 3167 | 1,2,4,27,2<br>8,29,30,34 | 3,5,6,7,8,3<br>1,32,33,35      | 3  | D3ZUC6,P05369,Q6AYR9                                                  |
| 3168 | 1,2,4,27,2<br>8,29,30,35 | 3,5,6,7,8,3<br>1,32,33,34      | 5  | D3ZUC6,P06866,P14480,P36374,Q6AYQ8                                    |
| 3169 | 1,2,4,27,2<br>8,29,31,32 | 3,5,6,7,8,3<br>0,33,34,35      | 3  | P06911,P24368,Q5GRG2                                                  |
| 3170 | 1,2,4,27,2<br>8,29,31,33 | 3,5,6,7,8,3<br>0,32,34,35      | 4  | P08753,P36374,P51907,Q5GRG2                                           |
| 3171 | 1,2,4,27,2<br>8,29,31,34 | 3,5,6,7,8,3<br>0,32,33,35      | 1  | P27791                                                                |
| 3172 | 1,2,4,27,2<br>8,29,31,35 | 3,5,6,7,8,3<br>0,32,33,34      | 2  | D3ZUC6,P25236                                                         |
| 3173 | 1,2,4,27,2<br>8,29,32,33 | 3,5,6,7,8,3<br>0,31,34,35      | 5  | P02793;Q7TP54,P08723,P24368,P36374,Q9JHB9                             |
| 3174 | 1,2,4,27,2<br>8,29,32,34 | 3,5,6,7,8,3<br>0,31,33,35      | 3  | P05369,P24368,Q10758                                                  |
| 3175 | 1,2,4,27,2<br>8,29,32,35 | 3,5,6,7,8,3<br>0,31,33,34      | 2  | D3ZUC6,P19218                                                         |
| 3176 | 1,2,4,27,2<br>8,29,33,34 | 3,5,6,7,8,3<br>0,31,32,35      | 1  | P27791                                                                |
| 3177 | 1,2,4,27,2<br>8,29,33,35 | 3,5,6,7,8,3<br>0,31,32,34      | 3  | D3ZUC6,P36374,Q561R9                                                  |
| 3178 | 1,2,4,27,2<br>8,29,34,35 | 3,5,6,7,8,3<br>0,31,32,33      | 5  | P00507,P06866,P53792,Q561R9,Q5M819                                    |
| 3179 | 1,2,4,27,2<br>8,30,31,32 | 3,5,6,7,8,2<br>9,33,34,35      | 3  | D3ZUC6,P10758,Q6AYQ8                                                  |
| 3180 | 1,2,4,27,2<br>8,30,31,33 | 3,5,6,7,8,2<br>9,32,34,35      | 3  | D3ZUC6,P51907,Q6AYQ8                                                  |

|      |                                                 |   |                                                  |
|------|-------------------------------------------------|---|--------------------------------------------------|
| 3181 | 1,2,4,27,2 3,5,6,7,8,2<br>8,30,31,34 9,32,33,35 | 4 | D3ZUC6,P47967,P51907,Q6AYQ8                      |
| 3182 | 1,2,4,27,2 3,5,6,7,8,2<br>8,30,31,35 9,32,33,34 | 4 | D3ZUC6,P06866,Q64335,Q6AYQ8                      |
| 3183 | 1,2,4,27,2 3,5,6,7,8,2<br>8,30,32,33 9,31,34,35 | 4 | D3ZUC6,P51907,Q6AYQ8,Q6IFU7                      |
| 3184 | 1,2,4,27,2 3,5,6,7,8,2<br>8,30,32,34 9,31,33,35 | 4 | D3ZUC6,Q10758,Q6AYQ8,Q6IFU7                      |
| 3185 | 1,2,4,27,2 3,5,6,7,8,2<br>8,30,32,35 9,31,33,34 | 2 | D3ZUC6,Q6AYQ8                                    |
| 3186 | 1,2,4,27,2 3,5,6,7,8,2<br>8,30,33,34 9,31,32,35 | 2 | D3ZUC6,P51907                                    |
| 3187 | 1,2,4,27,2 3,5,6,7,8,2<br>8,30,33,35 9,31,32,34 | 5 | D3ZUC6,P06866,P51907,Q6AYQ8,Q99MH3               |
| 3188 | 1,2,4,27,2 3,5,6,7,8,2<br>8,30,34,35 9,31,32,33 | 7 | D3ZUC6,P00507,P06866,P53792,Q561R9,Q6AYQ8,Q8CJD3 |
| 3189 | 1,2,4,27,2 3,5,6,7,8,2<br>8,31,32,33 9,30,34,35 | 1 | P51907                                           |
| 3190 | 1,2,4,27,2 3,5,6,7,8,2<br>8,31,32,34 9,30,33,35 | 1 | Q10758                                           |
| 3191 | 1,2,4,27,2 3,5,6,7,8,2<br>8,31,32,35 9,30,33,34 | 1 | D3ZUC6                                           |
| 3192 | 1,2,4,27,2 3,5,6,7,8,2<br>8,31,33,34 9,30,32,35 | 1 | P51907                                           |
| 3193 | 1,2,4,27,2 3,5,6,7,8,2<br>8,31,33,35 9,30,32,34 | 4 | D3ZUC6,P02803,P51907,Q99MH3                      |
| 3194 | 1,2,4,27,2 3,5,6,7,8,2<br>8,31,34,35 9,30,32,33 | 4 | D3ZUC6,P06866,P53792,Q561R9                      |
| 3195 | 1,2,4,27,2 3,5,6,7,8,2<br>8,32,33,34 9,30,31,35 | 3 | Q06000,Q10758,Q6IFU7                             |
| 3196 | 1,2,4,27,2 3,5,6,7,8,2<br>8,32,33,35 9,30,31,34 | 0 |                                                  |
| 3197 | 1,2,4,27,2 3,5,6,7,8,2<br>8,32,34,35 9,30,31,33 | 5 | P00507,P53792,Q10758,Q5M819,Q63661               |
| 3198 | 1,2,4,27,2 3,5,6,7,8,2<br>8,33,34,35 9,30,31,32 | 3 | P06866,P53792,Q561R9                             |
| 3199 | 1,2,4,27,2 3,5,6,7,8,2<br>9,30,31,32 8,33,34,35 | 3 | D3ZUC6,P10758,P25236                             |
| 3200 | 1,2,4,27,2 3,5,6,7,8,2<br>9,30,31,33 8,32,34,35 | 3 | D3ZUC6,P25236,P51907                             |
| 3201 | 1,2,4,27,2 3,5,6,7,8,2<br>9,30,31,34 8,32,33,35 | 3 | D3ZUC6,P25236,Q6AYR9                             |
| 3202 | 1,2,4,27,2 3,5,6,7,8,2<br>9,30,31,35 8,32,33,34 | 5 | D3ZUC6,P06866,P14480,P25236,Q561R9               |
| 3203 | 1,2,4,27,2 3,5,6,7,8,2<br>9,30,32,33 8,31,34,35 | 0 |                                                  |

|      |                                                 |   |                                           |
|------|-------------------------------------------------|---|-------------------------------------------|
| 3204 | 1,2,4,27,2 3,5,6,7,8,2<br>9,30,32,34 8,31,33,35 | 0 |                                           |
| 3205 | 1,2,4,27,2 3,5,6,7,8,2<br>9,30,32,35 8,31,33,34 | 2 | D3ZUC6,P14480                             |
| 3206 | 1,2,4,27,2 3,5,6,7,8,2<br>9,30,33,34 8,31,32,35 | 0 |                                           |
| 3207 | 1,2,4,27,2 3,5,6,7,8,2<br>9,30,33,35 8,31,32,34 | 4 | D3ZUC6,P06866,P14480,Q561R9               |
| 3208 | 1,2,4,27,2 3,5,6,7,8,2<br>9,30,34,35 8,31,32,33 | 4 | D3ZUC6,P06866,P14480,Q561R9               |
| 3209 | 1,2,4,27,2 3,5,6,7,8,2<br>9,31,32,33 8,30,34,35 | 1 | Q8CJD3                                    |
| 3210 | 1,2,4,27,2 3,5,6,7,8,2<br>9,31,32,34 8,30,33,35 | 1 | P25236                                    |
| 3211 | 1,2,4,27,2 3,5,6,7,8,2<br>9,31,32,35 8,30,33,34 | 1 | P25236                                    |
| 3212 | 1,2,4,27,2 3,5,6,7,8,2<br>9,31,33,34 8,30,32,35 | 0 |                                           |
| 3213 | 1,2,4,27,2 3,5,6,7,8,2<br>9,31,33,35 8,30,32,34 | 2 | P25236,Q561R9                             |
| 3214 | 1,2,4,27,2 3,5,6,7,8,2<br>9,31,34,35 8,30,32,33 | 2 | P25236,Q561R9                             |
| 3215 | 1,2,4,27,2 3,5,6,7,8,2<br>9,32,33,34 8,30,31,35 | 1 | Q63661                                    |
| 3216 | 1,2,4,27,2 3,5,6,7,8,2<br>9,32,33,35 8,30,31,34 | 0 |                                           |
| 3217 | 1,2,4,27,2 3,5,6,7,8,2<br>9,32,34,35 8,30,31,33 | 1 | Q63661                                    |
| 3218 | 1,2,4,27,2 3,5,6,7,8,2<br>9,33,34,35 8,30,31,32 | 1 | Q561R9                                    |
| 3219 | 1,2,4,27,3 3,5,6,7,8,2<br>0,31,32,33 8,29,34,35 | 2 | P10758,P51907                             |
| 3220 | 1,2,4,27,3 3,5,6,7,8,2<br>0,31,32,34 8,29,33,35 | 0 |                                           |
| 3221 | 1,2,4,27,3 3,5,6,7,8,2<br>0,31,32,35 8,29,33,34 | 1 | D3ZUC6                                    |
| 3222 | 1,2,4,27,3 3,5,6,7,8,2<br>0,31,33,34 8,29,32,35 | 1 | P51907                                    |
| 3223 | 1,2,4,27,3 3,5,6,7,8,2<br>0,31,33,35 8,29,32,34 | 3 | D3ZUC6,P51907,Q561R9                      |
| 3224 | 1,2,4,27,3 3,5,6,7,8,2<br>0,31,34,35 8,29,32,33 | 5 | D3ZUC6,P02793;Q7TP54,P06866,Q561R9,Q80WL1 |
| 3225 | 1,2,4,27,3 3,5,6,7,8,2<br>0,32,33,34 8,29,31,35 | 1 | Q63661                                    |
| 3226 | 1,2,4,27,3 3,5,6,7,8,2<br>0,32,33,35 8,29,31,34 | 1 | D3ZUC6                                    |

|      |                                                 |   |                                           |
|------|-------------------------------------------------|---|-------------------------------------------|
| 3227 | 1,2,4,27,3 3,5,6,7,8,2<br>0,32,34,35 8,29,31,33 | 3 | D3ZUC6,Q63661,Q9QZK9                      |
| 3228 | 1,2,4,27,3 3,5,6,7,8,2<br>0,33,34,35 8,29,31,32 | 5 | D3ZUC6,P06866,P06911,P51907,Q561R9        |
| 3229 | 1,2,4,27,3 3,5,6,7,8,2<br>1,32,33,34 8,29,30,35 | 0 |                                           |
| 3230 | 1,2,4,27,3 3,5,6,7,8,2<br>1,32,33,35 8,29,30,34 | 0 |                                           |
| 3231 | 1,2,4,27,3 3,5,6,7,8,2<br>1,32,34,35 8,29,30,33 | 0 |                                           |
| 3232 | 1,2,4,27,3 3,5,6,7,8,2<br>1,33,34,35 8,29,30,32 | 3 | P51907,Q561R9,Q63355                      |
| 3233 | 1,2,4,27,3 3,5,6,7,8,2<br>2,33,34,35 8,29,30,31 | 2 | Q561R9,Q63661                             |
| 3234 | 1,2,4,28,2 3,5,6,7,8,2<br>9,30,31,32 7,33,34,35 | 4 | P01836,P06911,P25236,Q62975               |
| 3235 | 1,2,4,28,2 3,5,6,7,8,2<br>9,30,31,33 7,32,34,35 | 5 | P02803,P06760,P08753,P35467,P51907        |
| 3236 | 1,2,4,28,2 3,5,6,7,8,2<br>9,30,31,34 7,32,33,35 | 3 | P25236,P27791,Q6AYR9                      |
| 3237 | 1,2,4,28,2 3,5,6,7,8,2<br>9,30,31,35 7,32,33,34 | 6 | P01015,P02803,P06760,P06866,P25236,Q07116 |
| 3238 | 1,2,4,28,2 3,5,6,7,8,2<br>9,30,32,33 7,31,34,35 | 0 |                                           |
| 3239 | 1,2,4,28,2 3,5,6,7,8,2<br>9,30,32,34 7,31,33,35 | 1 | P01836                                    |
| 3240 | 1,2,4,28,2 3,5,6,7,8,2<br>9,30,32,35 7,31,33,34 | 1 | Q07116                                    |
| 3241 | 1,2,4,28,2 3,5,6,7,8,2<br>9,30,33,34 7,31,32,35 | 2 | P27791,Q9JJ22                             |
| 3242 | 1,2,4,28,2 3,5,6,7,8,2<br>9,30,33,35 7,31,32,34 | 3 | P02803,P06760,P06866                      |
| 3243 | 1,2,4,28,2 3,5,6,7,8,2<br>9,30,34,35 7,31,32,33 | 5 | P00507,P06866,P14480,P80020,Q8CJD3        |
| 3244 | 1,2,4,28,2 3,5,6,7,8,2<br>9,31,32,33 7,30,34,35 | 3 | P02803,P06911,Q5GRG2                      |
| 3245 | 1,2,4,28,2 3,5,6,7,8,2<br>9,31,32,34 7,30,33,35 | 3 | P06911,P25236,P27791                      |
| 3246 | 1,2,4,28,2 3,5,6,7,8,2<br>9,31,32,35 7,30,33,34 | 3 | P02803,P25236,Q07116                      |
| 3247 | 1,2,4,28,2 3,5,6,7,8,2<br>9,31,33,34 7,30,32,35 | 3 | P02803,P27791,P51907                      |
| 3248 | 1,2,4,28,2 3,5,6,7,8,2<br>9,31,33,35 7,30,32,34 | 4 | P02803,P06760,Q07116,Q9WTT6               |
| 3249 | 1,2,4,28,2 3,5,6,7,8,2<br>9,31,34,35 7,30,32,33 | 5 | P00507,P02803,P06760,P06866,P25236        |

|      |                          |                           |   |                                                                       |
|------|--------------------------|---------------------------|---|-----------------------------------------------------------------------|
| 3250 | 1,2,4,28,2<br>9,32,33,34 | 3,5,6,7,8,2<br>7,30,31,35 | 1 | P27791                                                                |
| 3251 | 1,2,4,28,2<br>9,32,33,35 | 3,5,6,7,8,2<br>7,30,31,34 | 2 | P02803,P19218                                                         |
| 3252 | 1,2,4,28,2<br>9,32,34,35 | 3,5,6,7,8,2<br>7,30,31,33 | 2 | P00507,P19218                                                         |
| 3253 | 1,2,4,28,2<br>9,33,34,35 | 3,5,6,7,8,2<br>7,30,31,32 | 6 | P00507,P02803,P06760,P06866,Q561R9,Q9JJ22                             |
| 3254 | 1,2,4,28,3<br>0,31,32,33 | 3,5,6,7,8,2<br>7,29,34,35 | 2 | P10758,P51907                                                         |
| 3255 | 1,2,4,28,3<br>0,31,32,34 | 3,5,6,7,8,2<br>7,29,33,35 | 1 | P01836                                                                |
| 3256 | 1,2,4,28,3<br>0,31,32,35 | 3,5,6,7,8,2<br>7,29,33,34 | 1 | Q64335                                                                |
| 3257 | 1,2,4,28,3<br>0,31,33,34 | 3,5,6,7,8,2<br>7,29,32,35 | 2 | P27791,P51907                                                         |
| 3258 | 1,2,4,28,3<br>0,31,33,35 | 3,5,6,7,8,2<br>7,29,32,34 | 4 | P02803,P06760,P06866,P51907                                           |
| 3259 | 1,2,4,28,3<br>0,31,34,35 | 3,5,6,7,8,2<br>7,29,32,33 | 9 | P00507,P02793;Q7TP54,P02803,P06760,P06866,P53792,P80020,Q80WL1,Q8CJD3 |
| 3260 | 1,2,4,28,3<br>0,32,33,34 | 3,5,6,7,8,2<br>7,29,31,35 | 0 |                                                                       |
| 3261 | 1,2,4,28,3<br>0,32,33,35 | 3,5,6,7,8,2<br>7,29,31,34 | 0 |                                                                       |
| 3262 | 1,2,4,28,3<br>0,32,34,35 | 3,5,6,7,8,2<br>7,29,31,33 | 2 | P00507,P06866                                                         |
| 3263 | 1,2,4,28,3<br>0,33,34,35 | 3,5,6,7,8,2<br>7,29,31,32 | 4 | P00507,P06760,P06866,P51907                                           |
| 3264 | 1,2,4,28,3<br>1,32,33,34 | 3,5,6,7,8,2<br>7,29,30,35 | 1 | P27791                                                                |
| 3265 | 1,2,4,28,3<br>1,32,33,35 | 3,5,6,7,8,2<br>7,29,30,34 | 2 | P02803,Q9WTT6                                                         |
| 3266 | 1,2,4,28,3<br>1,32,34,35 | 3,5,6,7,8,2<br>7,29,30,33 | 3 | P00507,P02803,P53792                                                  |
| 3267 | 1,2,4,28,3<br>1,33,34,35 | 3,5,6,7,8,2<br>7,29,30,32 | 6 | P00507,P02803,P06760,P06866,P51907,P53792                             |
| 3268 | 1,2,4,28,3<br>2,33,34,35 | 3,5,6,7,8,2<br>7,29,30,31 | 2 | P00507,Q63661                                                         |
| 3269 | 1,2,4,29,3<br>0,31,32,33 | 3,5,6,7,8,2<br>7,28,34,35 | 2 | P10758,P25236                                                         |
| 3270 | 1,2,4,29,3<br>0,31,32,34 | 3,5,6,7,8,2<br>7,28,33,35 | 2 | P01836,P25236                                                         |
| 3271 | 1,2,4,29,3<br>0,31,32,35 | 3,5,6,7,8,2<br>7,28,33,34 | 2 | P25236,Q07116                                                         |
| 3272 | 1,2,4,29,3<br>0,31,33,34 | 3,5,6,7,8,2<br>7,28,32,35 | 2 | P25236,P51907                                                         |

|      |                          |                                     |    |                                                                       |
|------|--------------------------|-------------------------------------|----|-----------------------------------------------------------------------|
| 3273 | 1,2,4,29,3<br>0,31,33,35 | 3,5,6,7,8,2<br>7,28,32,34           | 5  | P02803,P06760,P25236,Q07116,Q9WTT6                                    |
| 3274 | 1,2,4,29,3<br>0,31,34,35 | 3,5,6,7,8,2<br>7,28,32,33           | 6  | P06866,P14480,P25236,P80020,Q561R9,Q80WL1                             |
| 3275 | 1,2,4,29,3<br>0,32,33,34 | 3,5,6,7,8,2<br>7,28,31,35           | 2  | Q63661,Q6TMA8                                                         |
| 3276 | 1,2,4,29,3<br>0,32,33,35 | 3,5,6,7,8,2<br>7,28,31,34           | 1  | Q9WTT6                                                                |
| 3277 | 1,2,4,29,3<br>0,32,34,35 | 3,5,6,7,8,2<br>7,28,31,33           | 3  | P14480,Q63661,Q6TMA8                                                  |
| 3278 | 1,2,4,29,3<br>0,33,34,35 | 3,5,6,7,8,2<br>7,28,31,32           | 4  | P06866,P14480,Q561R9,Q9JJ22                                           |
| 3279 | 1,2,4,29,3<br>1,32,33,34 | 3,5,6,7,8,2<br>7,28,30,35           | 1  | P25236                                                                |
| 3280 | 1,2,4,29,3<br>1,32,33,35 | 3,5,6,7,8,2<br>7,28,30,34           | 4  | P02803,P04182,P25236,Q9WTT6                                           |
| 3281 | 1,2,4,29,3<br>1,32,34,35 | 3,5,6,7,8,2<br>7,28,30,33           | 1  | P25236                                                                |
| 3282 | 1,2,4,29,3<br>1,33,34,35 | 3,5,6,7,8,2<br>7,28,30,32           | 3  | P02803,P25236,Q561R9                                                  |
| 3283 | 1,2,4,29,3<br>2,33,34,35 | 3,5,6,7,8,2<br>7,28,30,31           | 2  | Q63661,Q6TMA8                                                         |
| 3284 | 1,2,4,30,3<br>1,32,33,34 | 3,5,6,7,8,2<br>7,28,29,35           | 2  | P51907,Q62997                                                         |
| 3285 | 1,2,4,30,3<br>1,32,33,35 | 3,5,6,7,8,2<br>7,28,29,34           | 1  | Q9WTT6                                                                |
| 3286 | 1,2,4,30,3<br>1,32,34,35 | 3,5,6,7,8,2<br>7,28,29,33           | 2  | P82471,Q80WL1                                                         |
| 3287 | 1,2,4,30,3<br>1,33,34,35 | 3,5,6,7,8,2<br>7,28,29,32           | 4  | P06866,P51907,P82471,Q561R9                                           |
| 3288 | 1,2,4,30,3<br>2,33,34,35 | 3,5,6,7,8,2<br>7,28,29,31           | 2  | P82471,Q63661                                                         |
| 3289 | 1,2,4,31,3<br>2,33,34,35 | 3,5,6,7,8,2<br>7,28,29,30           | 4  | P01835,P82471,Q62997,Q63661                                           |
| 3290 | 1,2,5,6,7,8<br>,27,28    | 3,4,28,29,30,<br>31,32,33,3<br>4,35 | 6  | P02631,P07171,P24388,Q63942,Q6IE51,Q8CHN8                             |
| 3291 | 1,2,5,6,7,8<br>,27,29    | 3,4,28,29,30,<br>31,32,33,3<br>4,35 | 10 | P02631,P07171,P14669,P53792,P83748,Q63467,Q63942,Q6IE51,Q8CHN8,Q9QZQ5 |
| 3292 | 1,2,5,6,7,8<br>,27,30    | 3,4,28,29,<br>31,32,33,3<br>4,35    | 8  | O55145,P02631,P14669,P19218,P52590,Q09030,Q6IE51,Q9QZQ5               |
| 3293 | 1,2,5,6,7,8<br>,27,31    | 3,4,28,29,<br>30,32,33,3<br>4,35    | 8  | O55145,P00762,P02631,P07171,P19218,P52590,P83748,Q6IE51               |

|      |                       |                                  |    |                                                                                                   |
|------|-----------------------|----------------------------------|----|---------------------------------------------------------------------------------------------------|
| 3294 | 1,2,5,6,7,8<br>,27,32 | 3,4,28,29,<br>30,31,33,3<br>4,35 | 14 | O55145,P02631,P06760,P08753,P14669,P24388,P53792,Q03191,Q09030,Q63532,Q63942,Q6IE51,Q8CJD3,Q9Z1F2 |
| 3295 | 1,2,5,6,7,8<br>,27,33 | 3,4,28,29,<br>30,31,32,3<br>4,35 | 7  | P02631,P16636,P52590,P53792,Q6IE51,Q8CHN8,Q9QZQ5                                                  |
| 3296 | 1,2,5,6,7,8<br>,27,34 | 3,4,28,29,<br>30,31,32,3<br>3,35 | 13 | P02631,P08753,P16636,P83748,P97840,Q03191,Q09030,Q63467,Q63532,Q6IE51,Q8CHN8,Q9QZQ5,Q9WTT6        |
| 3297 | 1,2,5,6,7,8<br>,27,35 | 3,4,28,29,<br>30,31,32,3<br>3,34 | 7  | P02631,P08753,P16636,P52590,Q03191,Q6IE51,Q8CHN8                                                  |
| 3298 | 1,2,5,6,7,8<br>,28,29 | 3,4,27,30,<br>31,32,33,3<br>4,35 | 4  | P02631,P52590,P83748,Q63942                                                                       |
| 3299 | 1,2,5,6,7,8<br>,28,30 | 3,4,27,29,<br>31,32,33,3<br>4,35 | 3  | P02631,P52590,Q63942                                                                              |
| 3300 | 1,2,5,6,7,8<br>,28,31 | 3,4,27,29,<br>30,32,33,3<br>4,35 | 6  | P02631,P12020,P52590,P83748,Q5GRG2,Q63942                                                         |
| 3301 | 1,2,5,6,7,8<br>,28,32 | 3,4,27,29,<br>30,31,33,3<br>4,35 | 6  | B0BNN3,P02631,P12020,P52590,Q561R9,Q63942                                                         |
| 3302 | 1,2,5,6,7,8<br>,28,33 | 3,4,27,29,<br>30,31,32,3<br>4,35 | 4  | P02631,P52590,P83748,Q63942                                                                       |
| 3303 | 1,2,5,6,7,8<br>,28,34 | 3,4,27,29,<br>30,31,32,3<br>3,35 | 6  | P02631,P52590,P83748,P97840,Q63942,Q9WTT6                                                         |
| 3304 | 1,2,5,6,7,8<br>,28,35 | 3,4,27,29,<br>30,31,32,3<br>3,34 | 4  | P02631,P52590,P83748,Q63942                                                                       |
| 3305 | 1,2,5,6,7,8<br>,29,30 | 3,4,27,28,<br>31,32,33,3<br>4,35 | 5  | A2RUV9,P02631,P52590,P53792,Q63942                                                                |
| 3306 | 1,2,5,6,7,8<br>,29,31 | 3,4,27,28,<br>30,32,33,3<br>4,35 | 9  | O55145,P02631,P04182,P52590,P53792,P83748,Q63467,Q63942,Q8CJD3                                    |
| 3307 | 1,2,5,6,7,8<br>,29,32 | 3,4,27,28,<br>30,31,33,3<br>4,35 | 8  | P02631,P04182,P52590,P53792,P83748,Q63467,Q63942,Q8CJD3                                           |
| 3308 | 1,2,5,6,7,8<br>,29,33 | 3,4,27,28,<br>30,31,32,3<br>4,35 | 10 | A2RUV9,P02631,P04182,P52590,P53792,P83748,Q63467,Q63617,Q63942,Q8CJD3                             |

|      |                       |                                  |   |                                                                |
|------|-----------------------|----------------------------------|---|----------------------------------------------------------------|
| 3309 | 1,2,5,6,7,8<br>,29,34 | 3,4,27,28,<br>30,31,32,3<br>3,35 | 6 | P02631,P52590,P83748,Q63467,Q63942,Q9QZQ5                      |
| 3310 | 1,2,5,6,7,8<br>,29,35 | 3,4,27,28,<br>30,31,32,3<br>3,34 | 7 | P02631,P04182,P16636,P52590,P83748,Q06000,Q63942               |
| 3311 | 1,2,5,6,7,8<br>,30,31 | 3,4,27,28,<br>29,32,33,3<br>4,35 | 5 | O55145,O88267,P04182,P19218,P52590                             |
| 3312 | 1,2,5,6,7,8<br>,30,32 | 3,4,27,28,<br>29,31,33,3<br>4,35 | 6 | O55145,O88267,P02631,P52590,P53792,Q561R9                      |
| 3313 | 1,2,5,6,7,8<br>,30,33 | 3,4,27,28,<br>29,31,32,3<br>4,35 | 5 | A2RUV9,P02631,P19218,P52590,P53792                             |
| 3314 | 1,2,5,6,7,8<br>,30,34 | 3,4,27,28,<br>29,31,32,3<br>3,35 | 9 | O88267,P02631,P08753,P19218,P47967,P52590,P83748,P97840,Q9WTT6 |
| 3315 | 1,2,5,6,7,8<br>,30,35 | 3,4,27,28,<br>29,31,32,3<br>3,34 | 4 | O88267,P04182,P52590,Q06000                                    |
| 3316 | 1,2,5,6,7,8<br>,31,32 | 3,4,27,28,<br>29,30,33,3<br>4,35 | 8 | O55145,P04182,P08753,P12020,P52590,P53792,P83748,Q8CJD3        |
| 3317 | 1,2,5,6,7,8<br>,31,33 | 3,4,27,28,<br>29,30,32,3<br>4,35 | 6 | P04182,P19218,P52590,P53792,P83748,Q8CJD3                      |
| 3318 | 1,2,5,6,7,8<br>,31,34 | 3,4,27,28,<br>29,30,32,3<br>3,35 | 5 | P08753,P19218,P52590,P83748,Q63467                             |
| 3319 | 1,2,5,6,7,8<br>,31,35 | 3,4,27,28,<br>29,30,32,3<br>3,34 | 5 | P04182,P08753,P52590,P83748,Q06000                             |
| 3320 | 1,2,5,6,7,8<br>,32,33 | 3,4,27,28,<br>29,30,31,3<br>4,35 | 7 | P02631,P04182,P08753,P52590,P53792,P97605,Q8CJD3               |
| 3321 | 1,2,5,6,7,8<br>,32,34 | 3,4,27,28,<br>29,30,31,3<br>3,35 | 8 | O88267,P02631,P08753,P36374,P52590,P83748,Q63467,Q63532        |
| 3322 | 1,2,5,6,7,8<br>,32,35 | 3,4,27,28,<br>29,30,31,3<br>3,34 | 6 | O88267,P02631,P04182,P08753,P52590,Q30KJ2                      |
| 3323 | 1,2,5,6,7,8<br>,33,34 | 3,4,27,28,<br>29,30,31,3<br>2,35 | 4 | P02631,P08753,P52590,P83748                                    |



|      |                        |                                  |    |                                                                       |
|------|------------------------|----------------------------------|----|-----------------------------------------------------------------------|
| 3324 | 1,2,5,6,7,8<br>,33,35  | 3,4,27,28,<br>29,30,31,3<br>2,34 | 9  | P04182,P08753,P15399,P16636,P52590,P83748,P97580,Q30KJ2,Q6AYR9        |
| 3325 | 1,2,5,6,7,8<br>,34,35  | 3,4,27,28,<br>29,30,31,3<br>2,33 | 8  | O88267,P02631,P08753,P10758,P16636,P36374,P52590,P83748               |
| 3326 | 1,2,5,6,7,2<br>7,28,29 | 3,4,8,30,3<br>1,32,33,34<br>,35  | 9  | O35547,P02631,P83748,Q63942,Q6IE51,Q8CHN8,Q9JHB9,Q9JI85,Q9QUL6        |
| 3327 | 1,2,5,6,7,2<br>7,28,30 | 3,4,8,29,3<br>1,32,33,34<br>,35  | 6  | O55145,P02631,P97840,Q63942,Q6IE51,Q8CHN8                             |
| 3328 | 1,2,5,6,7,2<br>7,28,31 | 3,4,8,29,3<br>0,32,33,34<br>,35  | 10 | O55145,P02631,P12020,P52590,P83748,Q5GRG2,Q63942,Q6IE51,Q6TMA8,Q8CHN8 |
| 3329 | 1,2,5,6,7,2<br>7,28,32 | 3,4,8,29,3<br>0,31,33,34<br>,35  | 7  | B0BNN3,P02631,P12020,P24388,Q63942,Q6IE51,Q8CHN8                      |
| 3330 | 1,2,5,6,7,2<br>7,28,33 | 3,4,8,29,3<br>0,31,32,34<br>,35  | 4  | P02631,Q63942,Q6IE51,Q8CHN8                                           |
| 3331 | 1,2,5,6,7,2<br>7,28,34 | 3,4,8,29,3<br>0,31,32,33<br>,35  | 9  | P02631,P83748,P97840,Q03191,Q63532,Q63942,Q6IE51,Q8CHN8,Q9QUL6        |
| 3332 | 1,2,5,6,7,2<br>7,28,35 | 3,4,8,29,3<br>0,31,32,33<br>,34  | 7  | P02631,P16636,P52590,Q63942,Q6IE51,Q8CHN8,Q9QUL6                      |
| 3333 | 1,2,5,6,7,2<br>7,29,30 | 3,4,8,28,3<br>1,32,33,34<br>,35  | 5  | O55145,P02631,P53792,Q6IE51,Q8CHN8                                    |
| 3334 | 1,2,5,6,7,2<br>7,29,31 | 3,4,8,28,3<br>0,32,33,34<br>,35  | 7  | O55145,P02631,P04355,P52590,P83748,Q63467,Q6IE51                      |
| 3335 | 1,2,5,6,7,2<br>7,29,32 | 3,4,8,28,3<br>0,31,33,34<br>,35  | 7  | B0BNN3,O55145,P02631,P53792,Q63467,Q6IE51,Q8CHN8                      |
| 3336 | 1,2,5,6,7,2<br>7,29,33 | 3,4,8,28,3<br>0,31,32,34<br>,35  | 5  | P02631,P53792,Q63467,Q6IE51,Q8CHN8                                    |
| 3337 | 1,2,5,6,7,2<br>7,29,34 | 3,4,8,28,3<br>0,31,32,33<br>,35  | 10 | G3V686,P02631,P83748,P97840,Q03191,Q63467,Q63532,Q6IE51,Q8CHN8,Q9QUL6 |
| 3338 | 1,2,5,6,7,2<br>7,29,35 | 3,4,8,28,3<br>0,31,32,33<br>,34  | 8  | P01946,P02631,P16636,P52590,P83748,Q6IE51,Q8CHN8,Q9QUL6               |

|      |                        |                                 |    |                                                                              |
|------|------------------------|---------------------------------|----|------------------------------------------------------------------------------|
| 3339 | 1,2,5,6,7,2<br>7,30,31 | 3,4,8,28,2<br>9,32,33,34<br>,35 | 6  | O55145,P00507,P19218,P52590,P97840,Q6IE51                                    |
| 3340 | 1,2,5,6,7,2<br>7,30,32 | 3,4,8,28,2<br>9,31,33,34<br>,35 | 5  | O55145,P02631,P53792,Q63532,Q6IE51                                           |
| 3341 | 1,2,5,6,7,2<br>7,30,33 | 3,4,8,28,2<br>9,31,32,34<br>,35 | 6  | P00507,P02631,P19218,P53792,Q6IE51,Q8CHN8                                    |
| 3342 | 1,2,5,6,7,2<br>7,30,34 | 3,4,8,28,2<br>9,31,32,33<br>,35 | 9  | P02631,P19218,P47967,P83748,P97840,Q03191,Q63532,Q6IE51,Q8CHN8               |
| 3343 | 1,2,5,6,7,2<br>7,30,35 | 3,4,8,28,2<br>9,31,32,33<br>,34 | 5  | P16636,P52590,Q6IE51,Q8CHN8,Q9QUL6                                           |
| 3344 | 1,2,5,6,7,2<br>7,31,32 | 3,4,8,28,2<br>9,30,33,34<br>,35 | 7  | B0BNN3,O55145,P00507,P12020,P52590,P83748,Q6IE51                             |
| 3345 | 1,2,5,6,7,2<br>7,31,33 | 3,4,8,28,2<br>9,30,32,34<br>,35 | 4  | P00507,P52590,P83748,Q6IE51                                                  |
| 3346 | 1,2,5,6,7,2<br>7,31,34 | 3,4,8,28,2<br>9,30,32,33<br>,35 | 8  | G3V686,P19218,P52590,P83748,P97840,Q03191,Q63467,Q63532                      |
| 3347 | 1,2,5,6,7,2<br>7,31,35 | 3,4,8,28,2<br>9,30,32,33<br>,34 | 6  | P16636,P52590,P83748,Q6IE51,Q8CHN8,Q9QUL6                                    |
| 3348 | 1,2,5,6,7,2<br>7,32,33 | 3,4,8,28,2<br>9,30,31,34<br>,35 | 8  | P00507,P02631,P02793,Q7TP54,P53792,P55314,Q63532,Q6IE51,Q8CHN8               |
| 3349 | 1,2,5,6,7,2<br>7,32,34 | 3,4,8,28,2<br>9,30,31,33<br>,35 | 10 | G3V686,P02631,P08753,P83748,P97840,Q03191,Q63467,Q63532,Q6IE51,Q8CHN8        |
| 3350 | 1,2,5,6,7,2<br>7,32,35 | 3,4,8,28,2<br>9,30,31,33<br>,34 | 6  | P02631,P16636,Q63532,Q6IE51,Q8CHN8,Q9QUL6                                    |
| 3351 | 1,2,5,6,7,2<br>7,33,34 | 3,4,8,28,2<br>9,30,31,32<br>,35 | 9  | G3V686,P02631,P16636,P83748,P97840,Q03191,Q63532,Q6IE51,Q8CHN8               |
| 3352 | 1,2,5,6,7,2<br>7,33,35 | 3,4,8,28,2<br>9,30,31,32<br>,34 | 8  | P02631,P15399,P16636,P52590,P97580,Q30KJ2,Q6IE51,Q8CHN8                      |
| 3353 | 1,2,5,6,7,2<br>7,34,35 | 3,4,8,28,2<br>9,30,31,32<br>,33 | 11 | P02631,P08753,P10758,P16636,P83748,P97840,Q03191,Q63532,Q6IE51,Q8CHN8,Q9QUL6 |

|      |                        |                                 |   |                                                         |
|------|------------------------|---------------------------------|---|---------------------------------------------------------|
| 3354 | 1,2,5,6,7,2<br>8,29,30 | 3,4,8,27,3<br>1,32,33,34<br>,35 | 2 | P35467,Q63942                                           |
| 3355 | 1,2,5,6,7,2<br>8,29,31 | 3,4,8,27,3<br>0,32,33,34<br>,35 | 7 | P06911,P12020,P35467,P52590,P83748,Q5GRG2,Q63942        |
| 3356 | 1,2,5,6,7,2<br>8,29,32 | 3,4,8,27,3<br>0,31,33,34<br>,35 | 6 | B0BNN3,P02631,P12020,P83748,Q561R9,Q63942               |
| 3357 | 1,2,5,6,7,2<br>8,29,33 | 3,4,8,27,3<br>0,31,32,34<br>,35 | 4 | P02631,P35467,P83748,Q63942                             |
| 3358 | 1,2,5,6,7,2<br>8,29,34 | 3,4,8,27,3<br>0,31,32,33<br>,35 | 5 | P02631,P83748,P97840,Q63942,Q9QUL6                      |
| 3359 | 1,2,5,6,7,2<br>8,29,35 | 3,4,8,27,3<br>0,31,32,33<br>,34 | 5 | P15399,P52590,P83748,Q63942,Q9QUL6                      |
| 3360 | 1,2,5,6,7,2<br>8,30,31 | 3,4,8,27,2<br>9,32,33,34<br>,35 | 7 | O55145,P19218,P35467,P52590,P97840,Q5GRG2,Q63942        |
| 3361 | 1,2,5,6,7,2<br>8,30,32 | 3,4,8,27,2<br>9,31,33,34<br>,35 | 2 | Q561R9,Q63942                                           |
| 3362 | 1,2,5,6,7,2<br>8,30,33 | 3,4,8,27,2<br>9,31,32,34<br>,35 | 2 | P35467,Q63942                                           |
| 3363 | 1,2,5,6,7,2<br>8,30,34 | 3,4,8,27,2<br>9,31,32,33<br>,35 | 5 | P25031,P47967,P83748,P97840,Q63942                      |
| 3364 | 1,2,5,6,7,2<br>8,30,35 | 3,4,8,27,2<br>9,31,32,33<br>,34 | 2 | P52590,Q9QUL6                                           |
| 3365 | 1,2,5,6,7,2<br>8,31,32 | 3,4,8,27,2<br>9,30,33,34<br>,35 | 8 | B0BNN3,O55145,P12020,P52590,P83748,Q561R9,Q5GRG2,Q63942 |
| 3366 | 1,2,5,6,7,2<br>8,31,33 | 3,4,8,27,2<br>9,30,32,34<br>,35 | 6 | P12020,P35467,P52590,P83748,Q5GRG2,Q63942               |
| 3367 | 1,2,5,6,7,2<br>8,31,34 | 3,4,8,27,2<br>9,30,32,33<br>,35 | 4 | P52590,P83748,P97840,Q63942                             |
| 3368 | 1,2,5,6,7,2<br>8,31,35 | 3,4,8,27,2<br>9,30,32,33<br>,34 | 3 | P52590,P83748,Q9QUL6                                    |

|      |                        |                                 |   |                                                                |
|------|------------------------|---------------------------------|---|----------------------------------------------------------------|
| 3369 | 1,2,5,6,7,2<br>8,32,33 | 3,4,8,27,2<br>9,30,31,34<br>,35 | 3 | P12020,Q561R9,Q63942                                           |
| 3370 | 1,2,5,6,7,2<br>8,32,34 | 3,4,8,27,2<br>9,30,31,33<br>,35 | 5 | B0BNN3,P83748,P97840,Q63532,Q63942                             |
| 3371 | 1,2,5,6,7,2<br>8,32,35 | 3,4,8,27,2<br>9,30,31,33<br>,34 | 5 | P52590,P83748,Q30KJ2,Q63942,Q9QUL6                             |
| 3372 | 1,2,5,6,7,2<br>8,33,34 | 3,4,8,27,2<br>9,30,31,32<br>,35 | 3 | P83748,P97840,Q63942                                           |
| 3373 | 1,2,5,6,7,2<br>8,33,35 | 3,4,8,27,2<br>9,30,31,32<br>,34 | 6 | P15399,P16636,P52590,P83748,P97580,Q30KJ2                      |
| 3374 | 1,2,5,6,7,2<br>8,34,35 | 3,4,8,27,2<br>9,30,31,32<br>,33 | 7 | P10758,P52590,P83748,P97840,Q5HZV9,Q63942,Q9QUL6               |
| 3375 | 1,2,5,6,7,2<br>9,30,31 | 3,4,8,27,2<br>8,32,33,34<br>,35 | 6 | O55145,P04182,P35467,P52590,P53792,P83748                      |
| 3376 | 1,2,5,6,7,2<br>9,30,32 | 3,4,8,27,2<br>8,31,33,34<br>,35 | 3 | O55145,P53792,Q561R9                                           |
| 3377 | 1,2,5,6,7,2<br>9,30,33 | 3,4,8,27,2<br>8,31,32,34<br>,35 | 3 | A2RUV9,P35467,P53792                                           |
| 3378 | 1,2,5,6,7,2<br>9,30,34 | 3,4,8,27,2<br>8,31,32,33<br>,35 | 3 | P83748,P97840,Q63467                                           |
| 3379 | 1,2,5,6,7,2<br>9,30,35 | 3,4,8,27,2<br>8,31,32,33<br>,34 | 4 | P04182,P14480,P52590,Q9QUL6                                    |
| 3380 | 1,2,5,6,7,2<br>9,31,32 | 3,4,8,27,2<br>8,30,33,34<br>,35 | 9 | O55145,P04182,P12020,P52590,P53792,P83748,Q561R9,Q63467,Q8CJD3 |
| 3381 | 1,2,5,6,7,2<br>9,31,33 | 3,4,8,27,2<br>8,30,32,34<br>,35 | 7 | P00714,P04182,P35467,P52590,P53792,P83748,Q8CJD3               |
| 3382 | 1,2,5,6,7,2<br>9,31,34 | 3,4,8,27,2<br>8,30,32,33<br>,35 | 3 | P52590,P83748,Q63467                                           |
| 3383 | 1,2,5,6,7,2<br>9,31,35 | 3,4,8,27,2<br>8,30,32,33<br>,34 | 5 | P00714,P04182,P52590,P83748,Q9QUL6                             |

|      |                        |                                 |   |                                           |
|------|------------------------|---------------------------------|---|-------------------------------------------|
| 3384 | 1,2,5,6,7,2<br>9,32,33 | 3,4,8,27,2<br>8,30,31,34<br>,35 | 4 | P02793;Q7TP54,P04182,P53792,Q8CJD3        |
| 3385 | 1,2,5,6,7,2<br>9,32,34 | 3,4,8,27,2<br>8,30,31,33<br>,35 | 4 | P02631,P83748,Q63467,Q63532               |
| 3386 | 1,2,5,6,7,2<br>9,32,35 | 3,4,8,27,2<br>8,30,31,33<br>,34 | 4 | P04182,P52590,P83748,Q9QUL6               |
| 3387 | 1,2,5,6,7,2<br>9,33,34 | 3,4,8,27,2<br>8,30,31,32<br>,35 | 3 | P02631,P83748,Q63467                      |
| 3388 | 1,2,5,6,7,2<br>9,33,35 | 3,4,8,27,2<br>8,30,31,32<br>,34 | 6 | P04182,P15399,P16636,P52590,P83748,Q30KJ2 |
| 3389 | 1,2,5,6,7,2<br>9,34,35 | 3,4,8,27,2<br>8,30,31,32<br>,33 | 5 | P10758,P52590,P83748,Q63467,Q9QUL6        |
| 3390 | 1,2,5,6,7,3<br>0,31,32 | 3,4,8,27,2<br>8,29,33,34<br>,35 | 5 | O55145,P04182,P52590,P53792,Q561R9        |
| 3391 | 1,2,5,6,7,3<br>0,31,33 | 3,4,8,27,2<br>8,29,32,34<br>,35 | 5 | P04182,P19218,P35467,P52590,P53792        |
| 3392 | 1,2,5,6,7,3<br>0,31,34 | 3,4,8,27,2<br>8,29,32,33<br>,35 | 5 | P19218,P47967,P52590,P83748,P97840        |
| 3393 | 1,2,5,6,7,3<br>0,31,35 | 3,4,8,27,2<br>8,29,32,33<br>,34 | 2 | P04182,P52590                             |
| 3394 | 1,2,5,6,7,3<br>0,32,33 | 3,4,8,27,2<br>8,29,31,34<br>,35 | 2 | P53792,Q561R9                             |
| 3395 | 1,2,5,6,7,3<br>0,32,34 | 3,4,8,27,2<br>8,29,31,33<br>,35 | 3 | P83748,P97840,Q63532                      |
| 3396 | 1,2,5,6,7,3<br>0,32,35 | 3,4,8,27,2<br>8,29,31,33<br>,34 | 2 | P04182,P52590                             |
| 3397 | 1,2,5,6,7,3<br>0,33,34 | 3,4,8,27,2<br>8,29,31,32<br>,35 | 3 | P19218,P83748,P97840                      |
| 3398 | 1,2,5,6,7,3<br>0,33,35 | 3,4,8,27,2<br>8,29,31,32<br>,34 | 5 | P04182,P15399,P52590,P97580,Q30KJ2        |

|      |                        |                                 |   |                                                                |
|------|------------------------|---------------------------------|---|----------------------------------------------------------------|
| 3399 | 1,2,5,6,7,3<br>0,34,35 | 3,4,8,27,2<br>8,29,31,32<br>,33 | 4 | P52590,P83748,P97840,Q9QUL6                                    |
| 3400 | 1,2,5,6,7,3<br>1,32,33 | 3,4,8,27,2<br>8,29,30,34<br>,35 | 8 | P04182,P12020,P52590,P53792,P83748,P97580,Q561R9,Q8CJD3        |
| 3401 | 1,2,5,6,7,3<br>1,32,34 | 3,4,8,27,2<br>8,29,30,33<br>,35 | 6 | P08753,P52590,P83748,P97840,Q63467,Q63532                      |
| 3402 | 1,2,5,6,7,3<br>1,32,35 | 3,4,8,27,2<br>8,29,30,33<br>,34 | 5 | P04182,P52590,P83748,P97580,Q30KJ2                             |
| 3403 | 1,2,5,6,7,3<br>1,33,34 | 3,4,8,27,2<br>8,29,30,32<br>,35 | 4 | P00714,P52590,P83748,P97840                                    |
| 3404 | 1,2,5,6,7,3<br>1,33,35 | 3,4,8,27,2<br>8,29,30,32<br>,34 | 8 | P00714,P04182,P15399,P16636,P52590,P83748,P97580,Q30KJ2        |
| 3405 | 1,2,5,6,7,3<br>1,34,35 | 3,4,8,27,2<br>8,29,30,32<br>,33 | 7 | P00714,P02781,P08753,P24368,P52590,P83748,Q9QUL6               |
| 3406 | 1,2,5,6,7,3<br>2,33,34 | 3,4,8,27,2<br>8,29,30,31<br>,35 | 5 | P08753,P55314,P83748,P97580,Q63532                             |
| 3407 | 1,2,5,6,7,3<br>2,33,35 | 3,4,8,27,2<br>8,29,30,31<br>,34 | 7 | P04182,P15399,P16636,P52590,P97580,Q30KJ2,Q6AYR9               |
| 3408 | 1,2,5,6,7,3<br>2,34,35 | 3,4,8,27,2<br>8,29,30,31<br>,33 | 6 | P02781,P08753,P52590,P83748,Q63532,Q9QUL6                      |
| 3409 | 1,2,5,6,7,3<br>3,34,35 | 3,4,8,27,2<br>8,29,30,31<br>,32 | 9 | P02781,P08753,P10758,P15399,P16636,P52590,P83748,P97580,Q30KJ2 |
| 3410 | 1,2,5,6,8,2<br>7,28,29 | 3,4,7,30,3<br>1,32,33,34<br>,35 | 7 | O35547,P02782,P08723,Q5M8C6,Q63942,Q9JHB9,Q9Z1F2               |
| 3411 | 1,2,5,6,8,2<br>7,28,30 | 3,4,7,29,3<br>1,32,33,34<br>,35 | 1 | Q63942                                                         |
| 3412 | 1,2,5,6,8,2<br>7,28,31 | 3,4,7,29,3<br>0,32,33,34<br>,35 | 2 | Q5GRG2,Q63942                                                  |
| 3413 | 1,2,5,6,8,2<br>7,28,32 | 3,4,7,29,3<br>0,31,33,34<br>,35 | 3 | P06760,Q63942,Q9Z1F2                                           |

|      |                        |                                 |   |                                    |
|------|------------------------|---------------------------------|---|------------------------------------|
| 3414 | 1,2,5,6,8,2<br>7,28,33 | 3,4,7,29,3<br>0,31,32,34<br>,35 | 1 | Q63942                             |
| 3415 | 1,2,5,6,8,2<br>7,28,34 | 3,4,7,29,3<br>0,31,32,33<br>,35 | 5 | Q03191,Q4FZU6,Q63942,Q9WTT6,Q9Z1F2 |
| 3416 | 1,2,5,6,8,2<br>7,28,35 | 3,4,7,29,3<br>0,31,32,33<br>,34 | 1 | Q63942                             |
| 3417 | 1,2,5,6,8,2<br>7,29,30 | 3,4,7,28,3<br>1,32,33,34<br>,35 | 2 | P14669,Q63942                      |
| 3418 | 1,2,5,6,8,2<br>7,29,31 | 3,4,7,28,3<br>0,32,33,34<br>,35 | 2 | O55145,Q63942                      |
| 3419 | 1,2,5,6,8,2<br>7,29,32 | 3,4,7,28,3<br>0,31,33,34<br>,35 | 5 | P06760,P14669,P62804,Q63942,Q9Z1F2 |
| 3420 | 1,2,5,6,8,2<br>7,29,33 | 3,4,7,28,3<br>0,31,32,34<br>,35 | 2 | Q63942,Q9Z1F2                      |
| 3421 | 1,2,5,6,8,2<br>7,29,34 | 3,4,7,28,3<br>0,31,32,33<br>,35 | 4 | Q03191,Q63942,Q9WTT6,Q9Z1F2        |
| 3422 | 1,2,5,6,8,2<br>7,29,35 | 3,4,7,28,3<br>0,31,32,33<br>,34 | 1 | Q63942                             |
| 3423 | 1,2,5,6,8,2<br>7,30,31 | 3,4,7,28,2<br>9,32,33,34<br>,35 | 2 | O55145,P19218                      |
| 3424 | 1,2,5,6,8,2<br>7,30,32 | 3,4,7,28,2<br>9,31,33,34<br>,35 | 3 | O55145,P06760,P14669               |
| 3425 | 1,2,5,6,8,2<br>7,30,33 | 3,4,7,28,2<br>9,31,32,34<br>,35 | 0 |                                    |
| 3426 | 1,2,5,6,8,2<br>7,30,34 | 3,4,7,28,2<br>9,31,32,33<br>,35 | 1 | Q9WTT6                             |
| 3427 | 1,2,5,6,8,2<br>7,30,35 | 3,4,7,28,2<br>9,31,32,33<br>,34 | 0 |                                    |
| 3428 | 1,2,5,6,8,2<br>7,31,32 | 3,4,7,28,2<br>9,30,33,34<br>,35 | 3 | O55145,P06760,Q9Z1F2               |

|      |                        |                                 |   |                                    |
|------|------------------------|---------------------------------|---|------------------------------------|
| 3429 | 1,2,5,6,8,2<br>7,31,33 | 3,4,7,28,2<br>9,30,32,34<br>,35 | 0 |                                    |
| 3430 | 1,2,5,6,8,2<br>7,31,34 | 3,4,7,28,2<br>9,30,32,33<br>,35 | 4 | P08753,Q03191,Q9WTT6,Q9Z1F2        |
| 3431 | 1,2,5,6,8,2<br>7,31,35 | 3,4,7,28,2<br>9,30,32,33<br>,34 | 0 |                                    |
| 3432 | 1,2,5,6,8,2<br>7,32,33 | 3,4,7,28,2<br>9,30,31,34<br>,35 | 3 | P06760,Q8CJD3,Q9Z1F2               |
| 3433 | 1,2,5,6,8,2<br>7,32,34 | 3,4,7,28,2<br>9,30,31,33<br>,35 | 5 | P06760,P08753,Q03191,Q9WTT6,Q9Z1F2 |
| 3434 | 1,2,5,6,8,2<br>7,32,35 | 3,4,7,28,2<br>9,30,31,33<br>,34 | 2 | P06760,P08753                      |
| 3435 | 1,2,5,6,8,2<br>7,33,34 | 3,4,7,28,2<br>9,30,31,32<br>,35 | 4 | P08753,Q03191,Q9WTT6,Q9Z1F2        |
| 3436 | 1,2,5,6,8,2<br>7,33,35 | 3,4,7,28,2<br>9,30,31,32<br>,34 | 0 |                                    |
| 3437 | 1,2,5,6,8,2<br>7,34,35 | 3,4,7,28,2<br>9,30,31,32<br>,33 | 4 | P08753,P83121,Q03191,Q9WTT6        |
| 3438 | 1,2,5,6,8,2<br>8,29,30 | 3,4,7,27,3<br>1,32,33,34<br>,35 | 3 | A2RUV9,O35547,Q63942               |
| 3439 | 1,2,5,6,8,2<br>8,29,31 | 3,4,7,27,3<br>0,32,33,34<br>,35 | 4 | O35547,P06911,Q5GRG2,Q63942        |
| 3440 | 1,2,5,6,8,2<br>8,29,32 | 3,4,7,27,3<br>0,31,33,34<br>,35 | 5 | A2RUV9,O35547,Q62975,Q63942,Q9Z1F2 |
| 3441 | 1,2,5,6,8,2<br>8,29,33 | 3,4,7,27,3<br>0,31,32,34<br>,35 | 3 | A2RUV9,O35547,Q63942               |
| 3442 | 1,2,5,6,8,2<br>8,29,34 | 3,4,7,27,3<br>0,31,32,33<br>,35 | 3 | O35547,Q63942,Q9WTT6               |
| 3443 | 1,2,5,6,8,2<br>8,29,35 | 3,4,7,27,3<br>0,31,32,33<br>,34 | 2 | A2RUV9,Q63942                      |



|      |                        |                                 |   |                             |
|------|------------------------|---------------------------------|---|-----------------------------|
| 3444 | 1,2,5,6,8,2<br>8,30,31 | 3,4,7,27,2<br>9,32,33,34<br>,35 | 2 | Q63751,Q63942               |
| 3445 | 1,2,5,6,8,2<br>8,30,32 | 3,4,7,27,2<br>9,31,33,34<br>,35 | 3 | A2RUV9,Q561R9,Q63942        |
| 3446 | 1,2,5,6,8,2<br>8,30,33 | 3,4,7,27,2<br>9,31,32,34<br>,35 | 2 | A2RUV9,Q63942               |
| 3447 | 1,2,5,6,8,2<br>8,30,34 | 3,4,7,27,2<br>9,31,32,33<br>,35 | 2 | Q63942,Q9WTT6               |
| 3448 | 1,2,5,6,8,2<br>8,30,35 | 3,4,7,27,2<br>9,31,32,33<br>,34 | 2 | A2RUV9,Q63942               |
| 3449 | 1,2,5,6,8,2<br>8,31,32 | 3,4,7,27,2<br>9,30,33,34<br>,35 | 4 | Q561R9,Q5FVI6,Q5GRG2,Q63942 |
| 3450 | 1,2,5,6,8,2<br>8,31,33 | 3,4,7,27,2<br>9,30,32,34<br>,35 | 2 | P02803,Q63942               |
| 3451 | 1,2,5,6,8,2<br>8,31,34 | 3,4,7,27,2<br>9,30,32,33<br>,35 | 2 | Q63942,Q9WTT6               |
| 3452 | 1,2,5,6,8,2<br>8,31,35 | 3,4,7,27,2<br>9,30,32,33<br>,34 | 2 | P02803,Q63942               |
| 3453 | 1,2,5,6,8,2<br>8,32,33 | 3,4,7,27,2<br>9,30,31,34<br>,35 | 3 | A2RUV9,Q63942,Q9Z1F2        |
| 3454 | 1,2,5,6,8,2<br>8,32,34 | 3,4,7,27,2<br>9,30,31,33<br>,35 | 4 | Q63942,Q6P6R2,Q9WTT6,Q9Z1F2 |
| 3455 | 1,2,5,6,8,2<br>8,32,35 | 3,4,7,27,2<br>9,30,31,33<br>,34 | 2 | A2RUV9,Q63942               |
| 3456 | 1,2,5,6,8,2<br>8,33,34 | 3,4,7,27,2<br>9,30,31,32<br>,35 | 1 | Q63942                      |
| 3457 | 1,2,5,6,8,2<br>8,33,35 | 3,4,7,27,2<br>9,30,31,32<br>,34 | 3 | A2RUV9,P02803,Q63942        |
| 3458 | 1,2,5,6,8,2<br>8,34,35 | 3,4,7,27,2<br>9,30,31,32<br>,33 | 3 | Q5HZV9,Q63942,Q9WTT6        |

|      |                        |                                 |   |                                           |
|------|------------------------|---------------------------------|---|-------------------------------------------|
| 3459 | 1,2,5,6,8,2<br>9,30,31 | 3,4,7,27,2<br>8,32,33,34<br>,35 | 3 | O55145,P04182,Q63942                      |
| 3460 | 1,2,5,6,8,2<br>9,30,32 | 3,4,7,27,2<br>8,31,33,34<br>,35 | 4 | A2RUV9,P53792,P62804,Q63942               |
| 3461 | 1,2,5,6,8,2<br>9,30,33 | 3,4,7,27,2<br>8,31,32,34<br>,35 | 3 | A2RUV9,P53792,Q63942                      |
| 3462 | 1,2,5,6,8,2<br>9,30,34 | 3,4,7,27,2<br>8,31,32,33<br>,35 | 2 | Q63942,Q9WTT6                             |
| 3463 | 1,2,5,6,8,2<br>9,30,35 | 3,4,7,27,2<br>8,31,32,33<br>,34 | 2 | A2RUV9,Q06000                             |
| 3464 | 1,2,5,6,8,2<br>9,31,32 | 3,4,7,27,2<br>8,30,33,34<br>,35 | 6 | P04182,Q5FVI6,Q5RLM2,Q63942,Q8CJD3,Q9Z1F2 |
| 3465 | 1,2,5,6,8,2<br>9,31,33 | 3,4,7,27,2<br>8,30,32,34<br>,35 | 3 | P04182,Q63942,Q8CJD3                      |
| 3466 | 1,2,5,6,8,2<br>9,31,34 | 3,4,7,27,2<br>8,30,32,33<br>,35 | 2 | Q5RLM2,Q63942                             |
| 3467 | 1,2,5,6,8,2<br>9,31,35 | 3,4,7,27,2<br>8,30,32,33<br>,34 | 2 | P04182,Q06000                             |
| 3468 | 1,2,5,6,8,2<br>9,32,33 | 3,4,7,27,2<br>8,30,31,34<br>,35 | 6 | A2RUV9,P04182,P53792,Q63942,Q8CJD3,Q9Z1F2 |
| 3469 | 1,2,5,6,8,2<br>9,32,34 | 3,4,7,27,2<br>8,30,31,33<br>,35 | 2 | Q63942,Q9Z1F2                             |
| 3470 | 1,2,5,6,8,2<br>9,32,35 | 3,4,7,27,2<br>8,30,31,33<br>,34 | 4 | A2RUV9,P04182,P51907,Q63942               |
| 3471 | 1,2,5,6,8,2<br>9,33,34 | 3,4,7,27,2<br>8,30,31,32<br>,35 | 1 | Q63942                                    |
| 3472 | 1,2,5,6,8,2<br>9,33,35 | 3,4,7,27,2<br>8,30,31,32<br>,34 | 2 | A2RUV9,P04182                             |
| 3473 | 1,2,5,6,8,2<br>9,34,35 | 3,4,7,27,2<br>8,30,31,32<br>,33 | 2 | Q06000,Q63942                             |

|      |                        |                                 |   |                                           |
|------|------------------------|---------------------------------|---|-------------------------------------------|
| 3474 | 1,2,5,6,8,3<br>0,31,32 | 3,4,7,27,2<br>8,29,33,34<br>,35 | 4 | O55145,P04182,Q561R9,Q5FVI6               |
| 3475 | 1,2,5,6,8,3<br>0,31,33 | 3,4,7,27,2<br>8,29,32,34<br>,35 | 1 | P19218                                    |
| 3476 | 1,2,5,6,8,3<br>0,31,34 | 3,4,7,27,2<br>8,29,32,33<br>,35 | 1 | P19218                                    |
| 3477 | 1,2,5,6,8,3<br>0,31,35 | 3,4,7,27,2<br>8,29,32,33<br>,34 | 2 | P04182,Q06000                             |
| 3478 | 1,2,5,6,8,3<br>0,32,33 | 3,4,7,27,2<br>8,29,31,34<br>,35 | 3 | A2RUV9,P12785,P53792                      |
| 3479 | 1,2,5,6,8,3<br>0,32,34 | 3,4,7,27,2<br>8,29,31,33<br>,35 | 2 | P08753,Q9WTT6                             |
| 3480 | 1,2,5,6,8,3<br>0,32,35 | 3,4,7,27,2<br>8,29,31,33<br>,34 | 3 | A2RUV9,P04182,P08753                      |
| 3481 | 1,2,5,6,8,3<br>0,33,34 | 3,4,7,27,2<br>8,29,31,32<br>,35 | 0 |                                           |
| 3482 | 1,2,5,6,8,3<br>0,33,35 | 3,4,7,27,2<br>8,29,31,32<br>,34 | 1 | A2RUV9                                    |
| 3483 | 1,2,5,6,8,3<br>0,34,35 | 3,4,7,27,2<br>8,29,31,32<br>,33 | 5 | P02793,Q7TP54,P08753,P19132,Q06000,Q6PCU2 |
| 3484 | 1,2,5,6,8,3<br>1,32,33 | 3,4,7,27,2<br>8,29,30,34<br>,35 | 3 | P04182,Q5FVI6,Q8CJD3                      |
| 3485 | 1,2,5,6,8,3<br>1,32,34 | 3,4,7,27,2<br>8,29,30,33<br>,35 | 2 | P08753,Q9Z1F2                             |
| 3486 | 1,2,5,6,8,3<br>1,32,35 | 3,4,7,27,2<br>8,29,30,33<br>,34 | 2 | P04182,P08753                             |
| 3487 | 1,2,5,6,8,3<br>1,33,34 | 3,4,7,27,2<br>8,29,30,32<br>,35 | 1 | P08753                                    |
| 3488 | 1,2,5,6,8,3<br>1,33,35 | 3,4,7,27,2<br>8,29,30,32<br>,34 | 2 | P02803,P04182                             |

|      |                         |                                 |   |                                    |
|------|-------------------------|---------------------------------|---|------------------------------------|
| 3489 | 1,2,5,6,8,3<br>1,34,35  | 3,4,7,27,2<br>8,29,30,32<br>,33 | 3 | P02793;Q7TP54,P08753,Q06000        |
| 3490 | 1,2,5,6,8,3<br>2,33,34  | 3,4,7,27,2<br>8,29,30,31<br>,35 | 3 | P08753,P55314,Q9Z1F2               |
| 3491 | 1,2,5,6,8,3<br>2,33,35  | 3,4,7,27,2<br>8,29,30,31<br>,34 | 3 | A2RUV9,P04182,P08753               |
| 3492 | 1,2,5,6,8,3<br>2,34,35  | 3,4,7,27,2<br>8,29,30,31<br>,33 | 1 | P08753                             |
| 3493 | 1,2,5,6,8,3<br>3,34,35  | 3,4,7,27,2<br>8,29,30,31<br>,32 | 1 | P08753                             |
| 3494 | 1,2,5,6,27,<br>28,29,30 | 3,4,7,8,31,<br>32,33,34,3<br>5  | 5 | O35547,P30120,Q63942,Q9JHB9,Q9QUL6 |
| 3495 | 1,2,5,6,27,<br>28,29,31 | 3,4,7,8,30,<br>32,33,34,3<br>5  | 5 | O35547,Q5GRG2,Q63942,Q9JHB9,Q9QUL6 |
| 3496 | 1,2,5,6,27,<br>28,29,32 | 3,4,7,8,30,<br>31,33,34,3<br>5  | 5 | O35547,Q63942,Q9JHB9,Q9QUL6,Q9Z1F2 |
| 3497 | 1,2,5,6,27,<br>28,29,33 | 3,4,7,8,30,<br>31,32,34,3<br>5  | 4 | O35547,Q63942,Q80WL1,Q9JHB9        |
| 3498 | 1,2,5,6,27,<br>28,29,34 | 3,4,7,8,30,<br>31,32,33,3<br>5  | 4 | O35547,Q4FZU6,Q63942,Q9QUL6        |
| 3499 | 1,2,5,6,27,<br>28,29,35 | 3,4,7,8,30,<br>31,32,33,3<br>4  | 3 | O35547,Q63942,Q9QUL6               |
| 3500 | 1,2,5,6,27,<br>28,30,31 | 3,4,7,8,29,<br>32,33,34,3<br>5  | 2 | O55145,Q63942                      |
| 3501 | 1,2,5,6,27,<br>28,30,32 | 3,4,7,8,29,<br>31,33,34,3<br>5  | 2 | Q63942,Q6IFU7                      |
| 3502 | 1,2,5,6,27,<br>28,30,33 | 3,4,7,8,29,<br>31,32,34,3<br>5  | 1 | Q63942                             |
| 3503 | 1,2,5,6,27,<br>28,30,34 | 3,4,7,8,29,<br>31,32,33,3<br>5  | 3 | P97840,Q63942,Q9QUL6               |

|      |                         |                                |   |                                                  |
|------|-------------------------|--------------------------------|---|--------------------------------------------------|
| 3504 | 1,2,5,6,27,<br>28,30,35 | 3,4,7,8,29,<br>31,32,33,3<br>4 | 2 | Q63942,Q9QUL6                                    |
| 3505 | 1,2,5,6,27,<br>28,31,32 | 3,4,7,8,29,<br>30,33,34,3<br>5 | 2 | Q5GRG2,Q63942                                    |
| 3506 | 1,2,5,6,27,<br>28,31,33 | 3,4,7,8,29,<br>30,32,34,3<br>5 | 1 | Q63942                                           |
| 3507 | 1,2,5,6,27,<br>28,31,34 | 3,4,7,8,29,<br>30,32,33,3<br>5 | 2 | Q63942,Q9QUL6                                    |
| 3508 | 1,2,5,6,27,<br>28,31,35 | 3,4,7,8,29,<br>30,32,33,3<br>4 | 2 | Q63942,Q9QUL6                                    |
| 3509 | 1,2,5,6,27,<br>28,32,33 | 3,4,7,8,29,<br>30,31,34,3<br>5 | 4 | Q63942,Q6IFU7,Q6P6Q2,Q80WL1                      |
| 3510 | 1,2,5,6,27,<br>28,32,34 | 3,4,7,8,29,<br>30,31,33,3<br>5 | 7 | Q10758,Q4FZU6,Q5HZV9,Q63942,Q6IFU7,Q9QUL6,Q9Z1F2 |
| 3511 | 1,2,5,6,27,<br>28,32,35 | 3,4,7,8,29,<br>30,31,33,3<br>4 | 3 | Q63942,Q6IFU7,Q9QUL6                             |
| 3512 | 1,2,5,6,27,<br>28,33,34 | 3,4,7,8,29,<br>30,31,32,3<br>5 | 3 | Q10758,Q4FZU6,Q63942                             |
| 3513 | 1,2,5,6,27,<br>28,33,35 | 3,4,7,8,29,<br>30,31,32,3<br>4 | 2 | Q63942,Q80WL1                                    |
| 3514 | 1,2,5,6,27,<br>28,34,35 | 3,4,7,8,29,<br>30,31,32,3<br>3 | 3 | Q5HZV9,Q63942,Q9QUL6                             |
| 3515 | 1,2,5,6,27,<br>29,30,31 | 3,4,7,8,28,<br>32,33,34,3<br>5 | 2 | O55145,P05942                                    |
| 3516 | 1,2,5,6,27,<br>29,30,32 | 3,4,7,8,28,<br>31,33,34,3<br>5 | 0 |                                                  |
| 3517 | 1,2,5,6,27,<br>29,30,33 | 3,4,7,8,28,<br>31,32,34,3<br>5 | 0 |                                                  |
| 3518 | 1,2,5,6,27,<br>29,30,34 | 3,4,7,8,28,<br>31,32,33,3<br>5 | 1 | Q9QUL6                                           |

|      |                         |                                |   |                             |
|------|-------------------------|--------------------------------|---|-----------------------------|
| 3519 | 1,2,5,6,27,<br>29,30,35 | 3,4,7,8,28,<br>31,32,33,3<br>4 | 1 | Q9QUL6                      |
| 3520 | 1,2,5,6,27,<br>29,31,32 | 3,4,7,8,28,<br>30,33,34,3<br>5 | 1 | O55145                      |
| 3521 | 1,2,5,6,27,<br>29,31,33 | 3,4,7,8,28,<br>30,32,34,3<br>5 | 0 |                             |
| 3522 | 1,2,5,6,27,<br>29,31,34 | 3,4,7,8,28,<br>30,32,33,3<br>5 | 1 | Q9QUL6                      |
| 3523 | 1,2,5,6,27,<br>29,31,35 | 3,4,7,8,28,<br>30,32,33,3<br>4 | 1 | Q9QUL6                      |
| 3524 | 1,2,5,6,27,<br>29,32,33 | 3,4,7,8,28,<br>30,31,34,3<br>5 | 2 | Q80WL1,Q9Z1F2               |
| 3525 | 1,2,5,6,27,<br>29,32,34 | 3,4,7,8,28,<br>30,31,33,3<br>5 | 4 | P06760,Q10758,Q9QUL6,Q9Z1F2 |
| 3526 | 1,2,5,6,27,<br>29,32,35 | 3,4,7,8,28,<br>30,31,33,3<br>4 | 1 | Q9QUL6                      |
| 3527 | 1,2,5,6,27,<br>29,33,34 | 3,4,7,8,28,<br>30,31,32,3<br>5 | 0 |                             |
| 3528 | 1,2,5,6,27,<br>29,33,35 | 3,4,7,8,28,<br>30,31,32,3<br>4 | 1 | Q80WL1                      |
| 3529 | 1,2,5,6,27,<br>29,34,35 | 3,4,7,8,28,<br>30,31,32,3<br>3 | 1 | Q9QUL6                      |
| 3530 | 1,2,5,6,27,<br>30,31,32 | 3,4,7,8,28,<br>29,33,34,3<br>5 | 1 | O55145                      |
| 3531 | 1,2,5,6,27,<br>30,31,33 | 3,4,7,8,28,<br>29,32,34,3<br>5 | 0 |                             |
| 3532 | 1,2,5,6,27,<br>30,31,34 | 3,4,7,8,28,<br>29,32,33,3<br>5 | 1 | P97840                      |
| 3533 | 1,2,5,6,27,<br>30,31,35 | 3,4,7,8,28,<br>29,32,33,3<br>4 | 1 | Q9QUL6                      |

|      |                         |                                |   |                                           |
|------|-------------------------|--------------------------------|---|-------------------------------------------|
| 3534 | 1,2,5,6,27,<br>30,32,33 | 3,4,7,8,28,<br>29,31,34,3<br>5 | 1 | P55314                                    |
| 3535 | 1,2,5,6,27,<br>30,32,34 | 3,4,7,8,28,<br>29,31,33,3<br>5 | 3 | P06760,P97840,Q10758                      |
| 3536 | 1,2,5,6,27,<br>30,32,35 | 3,4,7,8,28,<br>29,31,33,3<br>4 | 1 | Q9QUL6                                    |
| 3537 | 1,2,5,6,27,<br>30,33,34 | 3,4,7,8,28,<br>29,31,32,3<br>5 | 0 |                                           |
| 3538 | 1,2,5,6,27,<br>30,33,35 | 3,4,7,8,28,<br>29,31,32,3<br>4 | 0 |                                           |
| 3539 | 1,2,5,6,27,<br>30,34,35 | 3,4,7,8,28,<br>29,31,32,3<br>3 | 3 | P02793;Q7TP54,P06911,Q9QUL6               |
| 3540 | 1,2,5,6,27,<br>31,32,33 | 3,4,7,8,28,<br>29,30,34,3<br>5 | 0 |                                           |
| 3541 | 1,2,5,6,27,<br>31,32,34 | 3,4,7,8,28,<br>29,30,33,3<br>5 | 2 | Q10758,Q9Z1F2                             |
| 3542 | 1,2,5,6,27,<br>31,32,35 | 3,4,7,8,28,<br>29,30,33,3<br>4 | 1 | Q9QUL6                                    |
| 3543 | 1,2,5,6,27,<br>31,33,34 | 3,4,7,8,28,<br>29,30,32,3<br>5 | 0 |                                           |
| 3544 | 1,2,5,6,27,<br>31,33,35 | 3,4,7,8,28,<br>29,30,32,3<br>4 | 0 |                                           |
| 3545 | 1,2,5,6,27,<br>31,34,35 | 3,4,7,8,28,<br>29,30,32,3<br>3 | 1 | Q9QUL6                                    |
| 3546 | 1,2,5,6,27,<br>32,33,34 | 3,4,7,8,28,<br>29,30,31,3<br>5 | 7 | P06760,P55314,Q10758,Q6IFU7,Q6P6Q2,Q9Z1F2 |
| 3547 | 1,2,5,6,27,<br>32,33,35 | 3,4,7,8,28,<br>29,30,31,3<br>4 | 0 |                                           |
| 3548 | 1,2,5,6,27,<br>32,34,35 | 3,4,7,8,28,<br>29,30,31,3<br>3 | 4 | P08753,P83121,Q10758,Q9QUL6               |

|      |                         |                                |   |                                           |
|------|-------------------------|--------------------------------|---|-------------------------------------------|
| 3549 | 1,2,5,6,27,<br>33,34,35 | 3,4,7,8,28,<br>29,30,31,3<br>2 | 0 |                                           |
| 3550 | 1,2,5,6,28,<br>29,30,31 | 3,4,7,8,27,<br>32,33,34,3<br>5 | 4 | O35547,P00714,P35467,Q63942               |
| 3551 | 1,2,5,6,28,<br>29,30,32 | 3,4,7,8,27,<br>31,33,34,3<br>5 | 3 | A2RUV9,Q561R9,Q63942                      |
| 3552 | 1,2,5,6,28,<br>29,30,33 | 3,4,7,8,27,<br>31,32,34,3<br>5 | 5 | A2RUV9,O35547,O70417,P35467,Q63942        |
| 3553 | 1,2,5,6,28,<br>29,30,34 | 3,4,7,8,27,<br>31,32,33,3<br>5 | 2 | Q63942,Q9QUL6                             |
| 3554 | 1,2,5,6,28,<br>29,30,35 | 3,4,7,8,27,<br>31,32,33,3<br>4 | 3 | A2RUV9,Q63942,Q9QUL6                      |
| 3555 | 1,2,5,6,28,<br>29,31,32 | 3,4,7,8,27,<br>30,33,34,3<br>5 | 5 | O35547,P06911,Q561R9,Q5GRG2,Q63942        |
| 3556 | 1,2,5,6,28,<br>29,31,33 | 3,4,7,8,27,<br>30,32,34,3<br>5 | 4 | O35547,P00714,P35467,Q63942               |
| 3557 | 1,2,5,6,28,<br>29,31,34 | 3,4,7,8,27,<br>30,32,33,3<br>5 | 4 | P00714,P27791,Q63942,Q9QUL6               |
| 3558 | 1,2,5,6,28,<br>29,31,35 | 3,4,7,8,27,<br>30,32,33,3<br>4 | 3 | P00714,Q63942,Q9QUL6                      |
| 3559 | 1,2,5,6,28,<br>29,32,33 | 3,4,7,8,27,<br>30,31,34,3<br>5 | 6 | A2RUV9,O35547,P47727,Q561R9,Q63942,Q80WL1 |
| 3560 | 1,2,5,6,28,<br>29,32,34 | 3,4,7,8,27,<br>30,31,33,3<br>5 | 2 | Q63942,Q9QUL6                             |
| 3561 | 1,2,5,6,28,<br>29,32,35 | 3,4,7,8,27,<br>30,31,33,3<br>4 | 3 | P02625,Q63942,Q9QUL6                      |
| 3562 | 1,2,5,6,28,<br>29,33,34 | 3,4,7,8,27,<br>30,31,32,3<br>5 | 4 | O70417,P00714,P27791,Q63942               |
| 3563 | 1,2,5,6,28,<br>29,33,35 | 3,4,7,8,27,<br>30,31,32,3<br>4 | 4 | A2RUV9,P00714,Q63942,Q80WL1               |



|      |                         |                                |   |                                           |
|------|-------------------------|--------------------------------|---|-------------------------------------------|
| 3564 | 1,2,5,6,28,<br>29,34,35 | 3,4,7,8,27,<br>30,31,32,3<br>3 | 3 | P00714,Q63942,Q9QUL6                      |
| 3565 | 1,2,5,6,28,<br>30,31,32 | 3,4,7,8,27,<br>29,33,34,3<br>5 | 3 | O55145,Q561R9,Q63942                      |
| 3566 | 1,2,5,6,28,<br>30,31,33 | 3,4,7,8,27,<br>29,32,34,3<br>5 | 2 | P00714,P35467                             |
| 3567 | 1,2,5,6,28,<br>30,31,34 | 3,4,7,8,27,<br>29,32,33,3<br>5 | 3 | P00714,P97840,Q63617                      |
| 3568 | 1,2,5,6,28,<br>30,31,35 | 3,4,7,8,27,<br>29,32,33,3<br>4 | 4 | P00714,Q64335,Q99041,Q9QUL6               |
| 3569 | 1,2,5,6,28,<br>30,32,33 | 3,4,7,8,27,<br>29,31,34,3<br>5 | 3 | A2RUV9,Q561R9,Q63942                      |
| 3570 | 1,2,5,6,28,<br>30,32,34 | 3,4,7,8,27,<br>29,31,33,3<br>5 | 2 | P97840,Q63942                             |
| 3571 | 1,2,5,6,28,<br>30,32,35 | 3,4,7,8,27,<br>29,31,33,3<br>4 | 2 | A2RUV9,Q9QUL6                             |
| 3572 | 1,2,5,6,28,<br>30,33,34 | 3,4,7,8,27,<br>29,31,32,3<br>5 | 1 | P97840                                    |
| 3573 | 1,2,5,6,28,<br>30,33,35 | 3,4,7,8,27,<br>29,31,32,3<br>4 | 2 | A2RUV9,P00714                             |
| 3574 | 1,2,5,6,28,<br>30,34,35 | 3,4,7,8,27,<br>29,31,32,3<br>3 | 5 | P02793;Q7TP54,Q5HZV9,Q63617,Q8CJD3,Q9QUL6 |
| 3575 | 1,2,5,6,28,<br>31,32,33 | 3,4,7,8,27,<br>29,30,34,3<br>5 | 2 | Q561R9,Q63942                             |
| 3576 | 1,2,5,6,28,<br>31,32,34 | 3,4,7,8,27,<br>29,30,33,3<br>5 | 2 | Q5HZV9,Q63942                             |
| 3577 | 1,2,5,6,28,<br>31,32,35 | 3,4,7,8,27,<br>29,30,33,3<br>4 | 1 | Q9QUL6                                    |
| 3578 | 1,2,5,6,28,<br>31,33,34 | 3,4,7,8,27,<br>29,30,32,3<br>5 | 1 | P00714                                    |

|      |                         |                                |   |                             |
|------|-------------------------|--------------------------------|---|-----------------------------|
| 3579 | 1,2,5,6,28,<br>31,33,35 | 3,4,7,8,27,<br>29,30,32,3<br>4 | 2 | P00714,P02803               |
| 3580 | 1,2,5,6,28,<br>31,34,35 | 3,4,7,8,27,<br>29,30,32,3<br>3 | 3 | P00714,Q5HZV9,Q9QUL6        |
| 3581 | 1,2,5,6,28,<br>32,33,34 | 3,4,7,8,27,<br>29,30,31,3<br>5 | 3 | P55314,Q63942,Q6IFU7        |
| 3582 | 1,2,5,6,28,<br>32,33,35 | 3,4,7,8,27,<br>29,30,31,3<br>4 | 1 | A2RUV9                      |
| 3583 | 1,2,5,6,28,<br>32,34,35 | 3,4,7,8,27,<br>29,30,31,3<br>3 | 3 | Q5HZV9,Q63942,Q9QUL6        |
| 3584 | 1,2,5,6,28,<br>33,34,35 | 3,4,7,8,27,<br>29,30,31,3<br>2 | 2 | P00714,Q5HZV9               |
| 3585 | 1,2,5,6,29,<br>30,31,32 | 3,4,7,8,27,<br>28,33,34,3<br>5 | 3 | O55145,P04182,Q561R9        |
| 3586 | 1,2,5,6,29,<br>30,31,33 | 3,4,7,8,27,<br>28,32,34,3<br>5 | 3 | P00714,P04182,P35467        |
| 3587 | 1,2,5,6,29,<br>30,31,34 | 3,4,7,8,27,<br>28,32,33,3<br>5 | 1 | P00714                      |
| 3588 | 1,2,5,6,29,<br>30,31,35 | 3,4,7,8,27,<br>28,32,33,3<br>4 | 4 | P00714,P04182,Q99041,Q9QUL6 |
| 3589 | 1,2,5,6,29,<br>30,32,33 | 3,4,7,8,27,<br>28,31,34,3<br>5 | 2 | A2RUV9,P53792               |
| 3590 | 1,2,5,6,29,<br>30,32,34 | 3,4,7,8,27,<br>28,31,33,3<br>5 | 0 |                             |
| 3591 | 1,2,5,6,29,<br>30,32,35 | 3,4,7,8,27,<br>28,31,33,3<br>4 | 4 | A2RUV9,P04182,Q99041,Q9QUL6 |
| 3592 | 1,2,5,6,29,<br>30,33,34 | 3,4,7,8,27,<br>28,31,32,3<br>5 | 1 | P00714                      |
| 3593 | 1,2,5,6,29,<br>30,33,35 | 3,4,7,8,27,<br>28,31,32,3<br>4 | 3 | A2RUV9,P00714,P04182        |

|      |                         |                                |   |                             |
|------|-------------------------|--------------------------------|---|-----------------------------|
| 3594 | 1,2,5,6,29,<br>30,34,35 | 3,4,7,8,27,<br>28,31,32,3<br>3 | 3 | P00714,P02793;Q7TP54,Q9QUL6 |
| 3595 | 1,2,5,6,29,<br>31,32,33 | 3,4,7,8,27,<br>28,30,34,3<br>5 | 2 | P04182,Q8CJD3               |
| 3596 | 1,2,5,6,29,<br>31,32,34 | 3,4,7,8,27,<br>28,30,33,3<br>5 | 1 | Q5RLM2                      |
| 3597 | 1,2,5,6,29,<br>31,32,35 | 3,4,7,8,27,<br>28,30,33,3<br>4 | 2 | P04182,Q9QUL6               |
| 3598 | 1,2,5,6,29,<br>31,33,34 | 3,4,7,8,27,<br>28,30,32,3<br>5 | 1 | P00714                      |
| 3599 | 1,2,5,6,29,<br>31,33,35 | 3,4,7,8,27,<br>28,30,32,3<br>4 | 2 | P00714,P04182               |
| 3600 | 1,2,5,6,29,<br>31,34,35 | 3,4,7,8,27,<br>28,30,32,3<br>3 | 2 | P00714,Q9QUL6               |
| 3601 | 1,2,5,6,29,<br>32,33,34 | 3,4,7,8,27,<br>28,30,31,3<br>5 | 1 | P55314                      |
| 3602 | 1,2,5,6,29,<br>32,33,35 | 3,4,7,8,27,<br>28,30,31,3<br>4 | 3 | A2RUV9,P04182,P47967        |
| 3603 | 1,2,5,6,29,<br>32,34,35 | 3,4,7,8,27,<br>28,30,31,3<br>3 | 1 | Q9QUL6                      |
| 3604 | 1,2,5,6,29,<br>33,34,35 | 3,4,7,8,27,<br>28,30,31,3<br>2 | 1 | P00714                      |
| 3605 | 1,2,5,6,30,<br>31,32,33 | 3,4,7,8,27,<br>28,29,34,3<br>5 | 2 | P04182,Q561R9               |
| 3606 | 1,2,5,6,30,<br>31,32,34 | 3,4,7,8,27,<br>28,29,33,3<br>5 | 1 | Q63617                      |
| 3607 | 1,2,5,6,30,<br>31,32,35 | 3,4,7,8,27,<br>28,29,33,3<br>4 | 2 | P04182,Q99041               |
| 3608 | 1,2,5,6,30,<br>31,33,34 | 3,4,7,8,27,<br>28,29,32,3<br>5 | 1 | P00714                      |

|      |                         |                                 |   |                                                  |
|------|-------------------------|---------------------------------|---|--------------------------------------------------|
| 3609 | 1,2,5,6,30,<br>31,33,35 | 3,4,7,8,27,<br>28,29,32,3<br>4  | 2 | P00714,P04182                                    |
| 3610 | 1,2,5,6,30,<br>31,34,35 | 3,4,7,8,27,<br>28,29,32,3<br>3  | 6 | P00714,P02793;Q7TP54,P24368,P82471,Q63617,Q9QUL6 |
| 3611 | 1,2,5,6,30,<br>32,33,34 | 3,4,7,8,27,<br>28,29,31,3<br>5  | 1 | P55314                                           |
| 3612 | 1,2,5,6,30,<br>32,33,35 | 3,4,7,8,27,<br>28,29,31,3<br>4  | 2 | A2RUV9,P04182                                    |
| 3613 | 1,2,5,6,30,<br>32,34,35 | 3,4,7,8,27,<br>28,29,31,3<br>3  | 4 | P08753,P82471,Q63617,Q9QUL6                      |
| 3614 | 1,2,5,6,30,<br>33,34,35 | 3,4,7,8,27,<br>28,29,31,3<br>2  | 3 | P00714,P06911,P82471                             |
| 3615 | 1,2,5,6,31,<br>32,33,34 | 3,4,7,8,27,<br>28,29,30,3<br>5  | 1 | P55314                                           |
| 3616 | 1,2,5,6,31,<br>32,33,35 | 3,4,7,8,27,<br>28,29,30,3<br>4  | 2 | P04182,P97580                                    |
| 3617 | 1,2,5,6,31,<br>32,34,35 | 3,4,7,8,27,<br>28,29,30,3<br>3  | 4 | P02781,P08753,P82471,Q9QUL6                      |
| 3618 | 1,2,5,6,31,<br>33,34,35 | 3,4,7,8,27,<br>28,29,30,3<br>2  | 4 | P00714,P24368,P82471,Q63355                      |
| 3619 | 1,2,5,6,32,<br>33,34,35 | 3,4,7,8,27,<br>28,29,30,3<br>1  | 4 | P08753,P55314,P82471,Q63661                      |
| 3620 | 1,2,5,7,8,2<br>7,28,29  | 3,4,6,30,3<br>1,32,33,34<br>,35 | 4 | P00762,P82995,Q63942,Q9JI85                      |
| 3621 | 1,2,5,7,8,2<br>7,28,30  | 3,4,6,29,3<br>1,32,33,34<br>,35 | 3 | Q09030,Q63942,Q6AYQ8                             |
| 3622 | 1,2,5,7,8,2<br>7,28,31  | 3,4,6,29,3<br>0,32,33,34<br>,35 | 7 | P00762,P10715,P31044,P52590,Q5GRG2,Q63942,Q99MH3 |
| 3623 | 1,2,5,7,8,2<br>7,28,32  | 3,4,6,29,3<br>0,31,33,34<br>,35 | 6 | B0BNN3,P00762,P24388,Q03191,Q09030,Q63942        |

|      |                        |                                 |   |                                                         |
|------|------------------------|---------------------------------|---|---------------------------------------------------------|
| 3624 | 1,2,5,7,8,2<br>7,28,33 | 3,4,6,29,3<br>0,31,32,34<br>,35 | 2 | Q63942,Q99MH3                                           |
| 3625 | 1,2,5,7,8,2<br>7,28,34 | 3,4,6,29,3<br>0,31,32,33<br>,35 | 4 | P00762,Q03191,Q09030,Q63942                             |
| 3626 | 1,2,5,7,8,2<br>7,28,35 | 3,4,6,29,3<br>0,31,32,33<br>,34 | 4 | P16636,P52590,Q63942,Q99MH3                             |
| 3627 | 1,2,5,7,8,2<br>7,29,30 | 3,4,6,28,3<br>1,32,33,34<br>,35 | 1 | Q5HZV9                                                  |
| 3628 | 1,2,5,7,8,2<br>7,29,31 | 3,4,6,28,3<br>0,32,33,34<br>,35 | 4 | P00762,P52590,Q5HZV9,Q63467                             |
| 3629 | 1,2,5,7,8,2<br>7,29,32 | 3,4,6,28,3<br>0,31,33,34<br>,35 | 5 | B0BNN3,P00762,Q03191,Q5HZV9,Q63467                      |
| 3630 | 1,2,5,7,8,2<br>7,29,33 | 3,4,6,28,3<br>0,31,32,34<br>,35 | 3 | P00762,Q5HZV9,Q63467                                    |
| 3631 | 1,2,5,7,8,2<br>7,29,34 | 3,4,6,28,3<br>0,31,32,33<br>,35 | 3 | P00762,Q03191,Q63467                                    |
| 3632 | 1,2,5,7,8,2<br>7,29,35 | 3,4,6,28,3<br>0,31,32,33<br>,34 | 3 | P01946,P16636,P52590                                    |
| 3633 | 1,2,5,7,8,2<br>7,30,31 | 3,4,6,28,2<br>9,32,33,34<br>,35 | 6 | O55145,P00507,P00762,P19218,P52590,Q5HZV9               |
| 3634 | 1,2,5,7,8,2<br>7,30,32 | 3,4,6,28,2<br>9,31,33,34<br>,35 | 3 | B0BNN3,P00507,Q09030                                    |
| 3635 | 1,2,5,7,8,2<br>7,30,33 | 3,4,6,28,2<br>9,31,32,34<br>,35 | 2 | P00507,Q5HZV9                                           |
| 3636 | 1,2,5,7,8,2<br>7,30,34 | 3,4,6,28,2<br>9,31,32,33<br>,35 | 4 | P47967,P97840,Q03191,Q09030                             |
| 3637 | 1,2,5,7,8,2<br>7,30,35 | 3,4,6,28,2<br>9,31,32,33<br>,34 | 2 | P16636,P52590                                           |
| 3638 | 1,2,5,7,8,2<br>7,31,32 | 3,4,6,28,2<br>9,30,33,34<br>,35 | 8 | B0BNN3,O55145,P00507,P00762,P01835,P52590,Q03191,Q08849 |

|      |                        |                                 |   |                                                                |
|------|------------------------|---------------------------------|---|----------------------------------------------------------------|
| 3639 | 1,2,5,7,8,2<br>7,31,33 | 3,4,6,28,2<br>9,30,32,34<br>,35 | 6 | P00507,P00762,P01835,P52590,Q5HZV9,Q99MH3                      |
| 3640 | 1,2,5,7,8,2<br>7,31,34 | 3,4,6,28,2<br>9,30,32,33<br>,35 | 5 | P00762,P01835,P52590,Q03191,Q63467                             |
| 3641 | 1,2,5,7,8,2<br>7,31,35 | 3,4,6,28,2<br>9,30,32,33<br>,34 | 4 | P00762,P01835,P16636,P52590                                    |
| 3642 | 1,2,5,7,8,2<br>7,32,33 | 3,4,6,28,2<br>9,30,31,34<br>,35 | 7 | B0BNN3,P00507,P00762,P01835,P02793;Q7TP54,Q03191,Q08849        |
| 3643 | 1,2,5,7,8,2<br>7,32,34 | 3,4,6,28,2<br>9,30,31,33<br>,35 | 9 | B0BNN3,P00762,P01835,P08753,P83121,Q03191,Q09030,Q63467,Q63532 |
| 3644 | 1,2,5,7,8,2<br>7,32,35 | 3,4,6,28,2<br>9,30,31,33<br>,34 | 4 | P08753,P16636,P52590,Q03191                                    |
| 3645 | 1,2,5,7,8,2<br>7,33,34 | 3,4,6,28,2<br>9,30,31,32<br>,35 | 4 | P00762,P01835,P16636,Q03191                                    |
| 3646 | 1,2,5,7,8,2<br>7,33,35 | 3,4,6,28,2<br>9,30,31,32<br>,34 | 4 | P01835,P16636,P52590,Q99MH3                                    |
| 3647 | 1,2,5,7,8,2<br>7,34,35 | 3,4,6,28,2<br>9,30,31,32<br>,33 | 7 | P01835,P06911,P08753,P16636,P52590,P83121,Q03191               |
| 3648 | 1,2,5,7,8,2<br>8,29,30 | 3,4,6,27,3<br>1,32,33,34<br>,35 | 2 | Q4FZU2,Q63942                                                  |
| 3649 | 1,2,5,7,8,2<br>8,29,31 | 3,4,6,27,3<br>0,32,33,34<br>,35 | 5 | P02803,P10715,P52590,Q5GRG2,Q63942                             |
| 3650 | 1,2,5,7,8,2<br>8,29,32 | 3,4,6,27,3<br>0,31,33,34<br>,35 | 3 | B0BNN3,P02625,Q63942                                           |
| 3651 | 1,2,5,7,8,2<br>8,29,33 | 3,4,6,27,3<br>0,31,32,34<br>,35 | 3 | P02625,P02803,Q63942                                           |
| 3652 | 1,2,5,7,8,2<br>8,29,34 | 3,4,6,27,3<br>0,31,32,33<br>,35 | 3 | P02625,Q63467,Q63942                                           |
| 3653 | 1,2,5,7,8,2<br>8,29,35 | 3,4,6,27,3<br>0,31,32,33<br>,34 | 4 | P02625,P02803,P52590,Q63942                                    |

|      |                        |                                 |   |                                                  |
|------|------------------------|---------------------------------|---|--------------------------------------------------|
| 3654 | 1,2,5,7,8,2<br>8,30,31 | 3,4,6,27,2<br>9,32,33,34<br>,35 | 4 | P10715,P52590,Q4FZU2,Q63751                      |
| 3655 | 1,2,5,7,8,2<br>8,30,32 | 3,4,6,27,2<br>9,31,33,34<br>,35 | 2 | B0BNN3,Q63942                                    |
| 3656 | 1,2,5,7,8,2<br>8,30,33 | 3,4,6,27,2<br>9,31,32,34<br>,35 | 0 |                                                  |
| 3657 | 1,2,5,7,8,2<br>8,30,34 | 3,4,6,27,2<br>9,31,32,33<br>,35 | 2 | P47967,P97840                                    |
| 3658 | 1,2,5,7,8,2<br>8,30,35 | 3,4,6,27,2<br>9,31,32,33<br>,34 | 2 | P02625,P52590                                    |
| 3659 | 1,2,5,7,8,2<br>8,31,32 | 3,4,6,27,2<br>9,30,33,34<br>,35 | 7 | B0BNN3,P01835,P10715,P31044,P52590,Q5GRG2,Q63942 |
| 3660 | 1,2,5,7,8,2<br>8,31,33 | 3,4,6,27,2<br>9,30,32,34<br>,35 | 4 | P01835,P02803,P10715,P52590                      |
| 3661 | 1,2,5,7,8,2<br>8,31,34 | 3,4,6,27,2<br>9,30,32,33<br>,35 | 2 | P01835,P52590                                    |
| 3662 | 1,2,5,7,8,2<br>8,31,35 | 3,4,6,27,2<br>9,30,32,33<br>,34 | 3 | P02803,P10715,P52590                             |
| 3663 | 1,2,5,7,8,2<br>8,32,33 | 3,4,6,27,2<br>9,30,31,34<br>,35 | 4 | B0BNN3,P01835,P02625,Q63942                      |
| 3664 | 1,2,5,7,8,2<br>8,32,34 | 3,4,6,27,2<br>9,30,31,33<br>,35 | 4 | B0BNN3,P01835,P02625,Q63942                      |
| 3665 | 1,2,5,7,8,2<br>8,32,35 | 3,4,6,27,2<br>9,30,31,33<br>,34 | 2 | P02625,P52590                                    |
| 3666 | 1,2,5,7,8,2<br>8,33,34 | 3,4,6,27,2<br>9,30,31,32<br>,35 | 1 | P01835                                           |
| 3667 | 1,2,5,7,8,2<br>8,33,35 | 3,4,6,27,2<br>9,30,31,32<br>,34 | 5 | P02625,P02803,P10719,P16636,P52590               |
| 3668 | 1,2,5,7,8,2<br>8,34,35 | 3,4,6,27,2<br>9,30,31,32<br>,33 | 2 | P02625,P52590                                    |

|      |                        |                                 |   |                                                         |
|------|------------------------|---------------------------------|---|---------------------------------------------------------|
| 3669 | 1,2,5,7,8,2<br>9,30,31 | 3,4,6,27,2<br>8,32,33,34<br>,35 | 4 | P04182,P52590,Q4FZU2,Q5HZV9                             |
| 3670 | 1,2,5,7,8,2<br>9,30,32 | 3,4,6,27,2<br>8,31,33,34<br>,35 | 2 | P53792,Q5HZV9                                           |
| 3671 | 1,2,5,7,8,2<br>9,30,33 | 3,4,6,27,2<br>8,31,32,34<br>,35 | 2 | P53792,Q5HZV9                                           |
| 3672 | 1,2,5,7,8,2<br>9,30,34 | 3,4,6,27,2<br>8,31,32,33<br>,35 | 1 | Q63467                                                  |
| 3673 | 1,2,5,7,8,2<br>9,30,35 | 3,4,6,27,2<br>8,31,32,33<br>,34 | 6 | P02625,P04182,P52590,P97584,Q06000,Q4FZU2               |
| 3674 | 1,2,5,7,8,2<br>9,31,32 | 3,4,6,27,2<br>8,30,33,34<br>,35 | 8 | B0BNN3,P00762,P01835,P04182,P52590,Q5HZV9,Q63467,Q8CJD3 |
| 3675 | 1,2,5,7,8,2<br>9,31,33 | 3,4,6,27,2<br>8,30,32,34<br>,35 | 7 | P00762,P01835,P02803,P04182,P52590,Q5HZV9,Q8CJD3        |
| 3676 | 1,2,5,7,8,2<br>9,31,34 | 3,4,6,27,2<br>8,30,32,33<br>,35 | 4 | P00762,P01835,P52590,Q63467                             |
| 3677 | 1,2,5,7,8,2<br>9,31,35 | 3,4,6,27,2<br>8,30,32,33<br>,34 | 5 | P02803,P04182,P52590,Q06000,Q6IFU7                      |
| 3678 | 1,2,5,7,8,2<br>9,32,33 | 3,4,6,27,2<br>8,30,31,34<br>,35 | 7 | P01835,P02625,P02793;Q7TP54,P04182,P53792,Q5HZV9,Q8CJD3 |
| 3679 | 1,2,5,7,8,2<br>9,32,34 | 3,4,6,27,2<br>8,30,31,33<br>,35 | 4 | P00762,P01835,P02625,Q63467                             |
| 3680 | 1,2,5,7,8,2<br>9,32,35 | 3,4,6,27,2<br>8,30,31,33<br>,34 | 3 | P02625,P04182,P52590                                    |
| 3681 | 1,2,5,7,8,2<br>9,33,34 | 3,4,6,27,2<br>8,30,31,32<br>,35 | 2 | P01835,Q63467                                           |
| 3682 | 1,2,5,7,8,2<br>9,33,35 | 3,4,6,27,2<br>8,30,31,32<br>,34 | 5 | P02625,P02803,P04182,P16636,P52590                      |
| 3683 | 1,2,5,7,8,2<br>9,34,35 | 3,4,6,27,2<br>8,30,31,32<br>,33 | 3 | P02625,P52590,Q63467                                    |



|      |                        |                                 |   |                                           |
|------|------------------------|---------------------------------|---|-------------------------------------------|
| 3684 | 1,2,5,7,8,3<br>0,31,32 | 3,4,6,27,2<br>8,29,33,34<br>,35 | 3 | O55145,P04182,P52590                      |
| 3685 | 1,2,5,7,8,3<br>0,31,33 | 3,4,6,27,2<br>8,29,32,34<br>,35 | 4 | P00507,P19218,P52590,Q5HZV9               |
| 3686 | 1,2,5,7,8,3<br>0,31,34 | 3,4,6,27,2<br>8,29,32,33<br>,35 | 3 | P19218,P52590,P97840                      |
| 3687 | 1,2,5,7,8,3<br>0,31,35 | 3,4,6,27,2<br>8,29,32,33<br>,34 | 6 | P04182,P52590,P97584,Q06000,Q4FZU2,Q63751 |
| 3688 | 1,2,5,7,8,3<br>0,32,33 | 3,4,6,27,2<br>8,29,31,34<br>,35 | 1 | P53792                                    |
| 3689 | 1,2,5,7,8,3<br>0,32,34 | 3,4,6,27,2<br>8,29,31,33<br>,35 | 2 | P08753,Q09030                             |
| 3690 | 1,2,5,7,8,3<br>0,32,35 | 3,4,6,27,2<br>8,29,31,33<br>,34 | 3 | P02625,P04182,P52590                      |
| 3691 | 1,2,5,7,8,3<br>0,33,34 | 3,4,6,27,2<br>8,29,31,32<br>,35 | 0 |                                           |
| 3692 | 1,2,5,7,8,3<br>0,33,35 | 3,4,6,27,2<br>8,29,31,32<br>,34 | 1 | P52590                                    |
| 3693 | 1,2,5,7,8,3<br>0,34,35 | 3,4,6,27,2<br>8,29,31,32<br>,33 | 4 | P06911,P08753,P47727,P52590               |
| 3694 | 1,2,5,7,8,3<br>1,32,33 | 3,4,6,27,2<br>8,29,30,34<br>,35 | 6 | P00507,P00762,P01835,P04182,P52590,Q8CJD3 |
| 3695 | 1,2,5,7,8,3<br>1,32,34 | 3,4,6,27,2<br>8,29,30,33<br>,35 | 6 | B0BNN3,P00762,P01835,P08753,P52590,Q63467 |
| 3696 | 1,2,5,7,8,3<br>1,32,35 | 3,4,6,27,2<br>8,29,30,33<br>,34 | 4 | P01835,P04182,P08753,P52590               |
| 3697 | 1,2,5,7,8,3<br>1,33,34 | 3,4,6,27,2<br>8,29,30,32<br>,35 | 2 | P01835,P52590                             |
| 3698 | 1,2,5,7,8,3<br>1,33,35 | 3,4,6,27,2<br>8,29,30,32<br>,34 | 6 | O08815,P01835,P02803,P04182,P16636,P52590 |

|      |                         |                                 |   |                                                  |
|------|-------------------------|---------------------------------|---|--------------------------------------------------|
| 3699 | 1,2,5,7,8,3<br>1,34,35  | 3,4,6,27,2<br>8,29,30,32<br>,33 | 7 | O08815,P01835,P02781,P08753,P0C0A9,P52590,Q9JHB9 |
| 3700 | 1,2,5,7,8,3<br>2,33,34  | 3,4,6,27,2<br>8,29,30,31<br>,35 | 2 | P01835,P08753                                    |
| 3701 | 1,2,5,7,8,3<br>2,33,35  | 3,4,6,27,2<br>8,29,30,31<br>,34 | 7 | P01835,P02625,P04182,P08753,P16636,P52590,Q6AYR9 |
| 3702 | 1,2,5,7,8,3<br>2,34,35  | 3,4,6,27,2<br>8,29,30,31<br>,33 | 6 | P01835,P02625,P02781,P08753,P0C0A9,P52590        |
| 3703 | 1,2,5,7,8,3<br>3,34,35  | 3,4,6,27,2<br>8,29,30,31<br>,32 | 7 | O08815,P01835,P02625,P08753,P0C0A9,P16636,P52590 |
| 3704 | 1,2,5,7,27,<br>28,29,30 | 3,4,6,8,31,<br>32,33,34,3<br>5  | 1 | P82995                                           |
| 3705 | 1,2,5,7,27,<br>28,29,31 | 3,4,6,8,30,<br>32,33,34,3<br>5  | 3 | B0BNN3,P52590,Q5GRG2                             |
| 3706 | 1,2,5,7,27,<br>28,29,32 | 3,4,6,8,30,<br>31,33,34,3<br>5  | 2 | B0BNN3,P02793;Q7TP54                             |
| 3707 | 1,2,5,7,27,<br>28,29,33 | 3,4,6,8,30,<br>31,32,34,3<br>5  | 2 | P02793;Q7TP54,Q8CHN8                             |
| 3708 | 1,2,5,7,27,<br>28,29,34 | 3,4,6,8,30,<br>31,32,33,3<br>5  | 3 | Q03191,Q8CHN8,Q9QUL6                             |
| 3709 | 1,2,5,7,27,<br>28,29,35 | 3,4,6,8,30,<br>31,32,33,3<br>4  | 5 | P01946,P02625,P16636,Q8CHN8,Q9QUL6               |
| 3710 | 1,2,5,7,27,<br>28,30,31 | 3,4,6,8,29,<br>32,33,34,3<br>5  | 2 | O55145,P52590                                    |
| 3711 | 1,2,5,7,27,<br>28,30,32 | 3,4,6,8,29,<br>31,33,34,3<br>5  | 1 | B0BNN3                                           |
| 3712 | 1,2,5,7,27,<br>28,30,33 | 3,4,6,8,29,<br>31,32,34,3<br>5  | 0 |                                                  |
| 3713 | 1,2,5,7,27,<br>28,30,34 | 3,4,6,8,29,<br>31,32,33,3<br>5  | 3 | P47967,P97840,Q8CJD3                             |

|      |                         |                                |   |                             |
|------|-------------------------|--------------------------------|---|-----------------------------|
| 3714 | 1,2,5,7,27,<br>28,30,35 | 3,4,6,8,29,<br>31,32,33,3<br>4 | 2 | D3ZUC6,Q9QUL6               |
| 3715 | 1,2,5,7,27,<br>28,31,32 | 3,4,6,8,29,<br>30,33,34,3<br>5 | 3 | B0BNN3,P10715,Q5GRG2        |
| 3716 | 1,2,5,7,27,<br>28,31,33 | 3,4,6,8,29,<br>30,32,34,3<br>5 | 2 | P10715,P52590               |
| 3717 | 1,2,5,7,27,<br>28,31,34 | 3,4,6,8,29,<br>30,32,33,3<br>5 | 1 | Q03191                      |
| 3718 | 1,2,5,7,27,<br>28,31,35 | 3,4,6,8,29,<br>30,32,33,3<br>4 | 2 | P52590,Q9QUL6               |
| 3719 | 1,2,5,7,27,<br>28,32,33 | 3,4,6,8,29,<br>30,31,34,3<br>5 | 2 | B0BNN3,P02793,Q7TP54        |
| 3720 | 1,2,5,7,27,<br>28,32,34 | 3,4,6,8,29,<br>30,31,33,3<br>5 | 3 | B0BNN3,Q03191,Q63532        |
| 3721 | 1,2,5,7,27,<br>28,32,35 | 3,4,6,8,29,<br>30,31,33,3<br>4 | 4 | B0BNN3,P02625,P16636,Q9QUL6 |
| 3722 | 1,2,5,7,27,<br>28,33,34 | 3,4,6,8,29,<br>30,31,32,3<br>5 | 2 | Q03191,Q8CHN8               |
| 3723 | 1,2,5,7,27,<br>28,33,35 | 3,4,6,8,29,<br>30,31,32,3<br>4 | 3 | P16636,Q8CHN8,Q99MH3        |
| 3724 | 1,2,5,7,27,<br>28,34,35 | 3,4,6,8,29,<br>30,31,32,3<br>3 | 4 | P16636,Q03191,Q8CHN8,Q9QUL6 |
| 3725 | 1,2,5,7,27,<br>29,30,31 | 3,4,6,8,28,<br>32,33,34,3<br>5 | 4 | O55145,P00507,P52590,Q5HZV9 |
| 3726 | 1,2,5,7,27,<br>29,30,32 | 3,4,6,8,28,<br>31,33,34,3<br>5 | 1 | B0BNN3                      |
| 3727 | 1,2,5,7,27,<br>29,30,33 | 3,4,6,8,28,<br>31,32,34,3<br>5 | 2 | P00507,Q5HZV9               |
| 3728 | 1,2,5,7,27,<br>29,30,34 | 3,4,6,8,28,<br>31,32,33,3<br>5 | 3 | P97840,Q03191,Q63467        |

|      |                         |                                |   |                                           |
|------|-------------------------|--------------------------------|---|-------------------------------------------|
| 3729 | 1,2,5,7,27,<br>29,30,35 | 3,4,6,8,28,<br>31,32,33,3<br>4 | 2 | P01946,Q9QUL6                             |
| 3730 | 1,2,5,7,27,<br>29,31,32 | 3,4,6,8,28,<br>30,33,34,3<br>5 | 2 | B0BNN3,Q63467                             |
| 3731 | 1,2,5,7,27,<br>29,31,33 | 3,4,6,8,28,<br>30,32,34,3<br>5 | 3 | P00507,P52590,Q5HZV9                      |
| 3732 | 1,2,5,7,27,<br>29,31,34 | 3,4,6,8,28,<br>30,32,33,3<br>5 | 2 | Q03191,Q63467                             |
| 3733 | 1,2,5,7,27,<br>29,31,35 | 3,4,6,8,28,<br>30,32,33,3<br>4 | 4 | P01946,P16636,P52590,Q9QUL6               |
| 3734 | 1,2,5,7,27,<br>29,32,33 | 3,4,6,8,28,<br>30,31,34,3<br>5 | 3 | B0BNN3,P00507,P02793;Q7TP54               |
| 3735 | 1,2,5,7,27,<br>29,32,34 | 3,4,6,8,28,<br>30,31,33,3<br>5 | 4 | B0BNN3,Q03191,Q63467,Q63532               |
| 3736 | 1,2,5,7,27,<br>29,32,35 | 3,4,6,8,28,<br>30,31,33,3<br>4 | 4 | P01946,P02625,P16636,Q9QUL6               |
| 3737 | 1,2,5,7,27,<br>29,33,34 | 3,4,6,8,28,<br>30,31,32,3<br>5 | 2 | Q03191,Q63467                             |
| 3738 | 1,2,5,7,27,<br>29,33,35 | 3,4,6,8,28,<br>30,31,32,3<br>4 | 3 | P01946,P16636,Q8CHN8                      |
| 3739 | 1,2,5,7,27,<br>29,34,35 | 3,4,6,8,28,<br>30,31,32,3<br>3 | 6 | P01946,P16636,Q03191,Q63467,Q8CHN8,Q9QUL6 |
| 3740 | 1,2,5,7,27,<br>30,31,32 | 3,4,6,8,28,<br>29,33,34,3<br>5 | 4 | B0BNN3,O55145,P00507,P52590               |
| 3741 | 1,2,5,7,27,<br>30,31,33 | 3,4,6,8,28,<br>29,32,34,3<br>5 | 4 | P00507,P51907,P52590,Q5HZV9               |
| 3742 | 1,2,5,7,27,<br>30,31,34 | 3,4,6,8,28,<br>29,32,33,3<br>5 | 3 | P47967,P52590,P97840                      |
| 3743 | 1,2,5,7,27,<br>30,31,35 | 3,4,6,8,28,<br>29,32,33,3<br>4 | 1 | P52590                                    |

|      |                         |                                |   |                                                  |
|------|-------------------------|--------------------------------|---|--------------------------------------------------|
| 3744 | 1,2,5,7,27,<br>30,32,33 | 3,4,6,8,28,<br>29,31,34,3<br>5 | 1 | P00507                                           |
| 3745 | 1,2,5,7,27,<br>30,32,34 | 3,4,6,8,28,<br>29,31,33,3<br>5 | 5 | B0BNN3,P97840,Q03191,Q09030,Q63532               |
| 3746 | 1,2,5,7,27,<br>30,32,35 | 3,4,6,8,28,<br>29,31,33,3<br>4 | 0 |                                                  |
| 3747 | 1,2,5,7,27,<br>30,33,34 | 3,4,6,8,28,<br>29,31,32,3<br>5 | 1 | P97840                                           |
| 3748 | 1,2,5,7,27,<br>30,33,35 | 3,4,6,8,28,<br>29,31,32,3<br>4 | 1 | P16636                                           |
| 3749 | 1,2,5,7,27,<br>30,34,35 | 3,4,6,8,28,<br>29,31,32,3<br>3 | 7 | P06911,P16636,P47727,P83121,P97840,Q03191,Q9QUL6 |
| 3750 | 1,2,5,7,27,<br>31,32,33 | 3,4,6,8,28,<br>29,30,34,3<br>5 | 4 | B0BNN3,P00507,P01835,P52590                      |
| 3751 | 1,2,5,7,27,<br>31,32,34 | 3,4,6,8,28,<br>29,30,33,3<br>5 | 5 | B0BNN3,P01835,Q03191,Q63467,Q63532               |
| 3752 | 1,2,5,7,27,<br>31,32,35 | 3,4,6,8,28,<br>29,30,33,3<br>4 | 1 | P52590                                           |
| 3753 | 1,2,5,7,27,<br>31,33,34 | 3,4,6,8,28,<br>29,30,32,3<br>5 | 3 | P01835,P52590,Q03191                             |
| 3754 | 1,2,5,7,27,<br>31,33,35 | 3,4,6,8,28,<br>29,30,32,3<br>4 | 3 | P01835,P16636,P52590                             |
| 3755 | 1,2,5,7,27,<br>31,34,35 | 3,4,6,8,28,<br>29,30,32,3<br>3 | 6 | P01835,P02780,P16636,P52590,Q03191,Q9QUL6        |
| 3756 | 1,2,5,7,27,<br>32,33,34 | 3,4,6,8,28,<br>29,30,31,3<br>5 | 5 | B0BNN3,P01835,P55314,Q03191,Q63532               |
| 3757 | 1,2,5,7,27,<br>32,33,35 | 3,4,6,8,28,<br>29,30,31,3<br>4 | 2 | P16636,Q6NX65                                    |
| 3758 | 1,2,5,7,27,<br>32,34,35 | 3,4,6,8,28,<br>29,30,31,3<br>3 | 6 | P08753,P16636,P83121,Q03191,Q63532,Q9QUL6        |

|      |                         |                                |   |                                    |
|------|-------------------------|--------------------------------|---|------------------------------------|
| 3759 | 1,2,5,7,27,<br>33,34,35 | 3,4,6,8,28,<br>29,30,31,3<br>2 | 5 | P01835,P06911,P16636,Q03191,Q8CHN8 |
| 3760 | 1,2,5,7,28,<br>29,30,31 | 3,4,6,8,27,<br>32,33,34,3<br>5 | 2 | P35467,P52590                      |
| 3761 | 1,2,5,7,28,<br>29,30,32 | 3,4,6,8,27,<br>31,33,34,3<br>5 | 4 | B0BNN3,O70417,P02625,Q63355        |
| 3762 | 1,2,5,7,28,<br>29,30,33 | 3,4,6,8,27,<br>31,32,34,3<br>5 | 2 | O70417,P35467                      |
| 3763 | 1,2,5,7,28,<br>29,30,34 | 3,4,6,8,27,<br>31,32,33,3<br>5 | 2 | O70417,P97840                      |
| 3764 | 1,2,5,7,28,<br>29,30,35 | 3,4,6,8,27,<br>31,32,33,3<br>4 | 2 | P02625,Q9QUL6                      |
| 3765 | 1,2,5,7,28,<br>29,31,32 | 3,4,6,8,27,<br>30,33,34,3<br>5 | 4 | B0BNN3,P06911,P52590,Q5GRG2        |
| 3766 | 1,2,5,7,28,<br>29,31,33 | 3,4,6,8,27,<br>30,32,34,3<br>5 | 4 | O70417,P02803,P35467,P52590        |
| 3767 | 1,2,5,7,28,<br>29,31,34 | 3,4,6,8,27,<br>30,32,33,3<br>5 | 1 | P52590                             |
| 3768 | 1,2,5,7,28,<br>29,31,35 | 3,4,6,8,27,<br>30,32,33,3<br>4 | 3 | P02803,P52590,Q9QUL6               |
| 3769 | 1,2,5,7,28,<br>29,32,33 | 3,4,6,8,27,<br>30,31,34,3<br>5 | 4 | B0BNN3,O70417,P02625,P02793;Q7TP54 |
| 3770 | 1,2,5,7,28,<br>29,32,34 | 3,4,6,8,27,<br>30,31,33,3<br>5 | 3 | B0BNN3,O70417,P02625               |
| 3771 | 1,2,5,7,28,<br>29,32,35 | 3,4,6,8,27,<br>30,31,33,3<br>4 | 2 | P02625,Q9QUL6                      |
| 3772 | 1,2,5,7,28,<br>29,33,34 | 3,4,6,8,27,<br>30,31,32,3<br>5 | 2 | O70417,P02625                      |
| 3773 | 1,2,5,7,28,<br>29,33,35 | 3,4,6,8,27,<br>30,31,32,3<br>4 | 3 | O70417,P02625,P02803               |

|      |                         |                                |   |                             |
|------|-------------------------|--------------------------------|---|-----------------------------|
| 3774 | 1,2,5,7,28,<br>29,34,35 | 3,4,6,8,27,<br>30,31,32,3<br>3 | 2 | P02625,Q9QUL6               |
| 3775 | 1,2,5,7,28,<br>30,31,32 | 3,4,6,8,27,<br>29,33,34,3<br>5 | 2 | B0BNN3,P52590               |
| 3776 | 1,2,5,7,28,<br>30,31,33 | 3,4,6,8,27,<br>29,32,34,3<br>5 | 3 | P35467,P51907,P52590        |
| 3777 | 1,2,5,7,28,<br>30,31,34 | 3,4,6,8,27,<br>29,32,33,3<br>5 | 3 | P47967,P52590,P97840        |
| 3778 | 1,2,5,7,28,<br>30,31,35 | 3,4,6,8,27,<br>29,32,33,3<br>4 | 1 | P52590                      |
| 3779 | 1,2,5,7,28,<br>30,32,33 | 3,4,6,8,27,<br>29,31,34,3<br>5 | 2 | B0BNN3,O70417               |
| 3780 | 1,2,5,7,28,<br>30,32,34 | 3,4,6,8,27,<br>29,31,33,3<br>5 | 2 | B0BNN3,P97840               |
| 3781 | 1,2,5,7,28,<br>30,32,35 | 3,4,6,8,27,<br>29,31,33,3<br>4 | 1 | P02625                      |
| 3782 | 1,2,5,7,28,<br>30,33,34 | 3,4,6,8,27,<br>29,31,32,3<br>5 | 2 | O70417,P97840               |
| 3783 | 1,2,5,7,28,<br>30,33,35 | 3,4,6,8,27,<br>29,31,32,3<br>4 | 2 | P02625,P52590               |
| 3784 | 1,2,5,7,28,<br>30,34,35 | 3,4,6,8,27,<br>29,31,32,3<br>3 | 4 | P02625,P97840,Q8CJD3,Q9QUL6 |
| 3785 | 1,2,5,7,28,<br>31,32,33 | 3,4,6,8,27,<br>29,30,34,3<br>5 | 4 | B0BNN3,P01835,P10715,P52590 |
| 3786 | 1,2,5,7,28,<br>31,32,34 | 3,4,6,8,27,<br>29,30,33,3<br>5 | 3 | B0BNN3,P01835,P52590        |
| 3787 | 1,2,5,7,28,<br>31,32,35 | 3,4,6,8,27,<br>29,30,33,3<br>4 | 1 | P52590                      |
| 3788 | 1,2,5,7,28,<br>31,33,34 | 3,4,6,8,27,<br>29,30,32,3<br>5 | 2 | P01835,P52590               |

|      |                         |                                |   |                                           |
|------|-------------------------|--------------------------------|---|-------------------------------------------|
| 3789 | 1,2,5,7,28,<br>31,33,35 | 3,4,6,8,27,<br>29,30,32,3<br>4 | 5 | P02803,P06760,P10719,P52590,Q9WTT6        |
| 3790 | 1,2,5,7,28,<br>31,34,35 | 3,4,6,8,27,<br>29,30,32,3<br>3 | 3 | P14669,P52590,Q9QUL6                      |
| 3791 | 1,2,5,7,28,<br>32,33,34 | 3,4,6,8,27,<br>29,30,31,3<br>5 | 4 | B0BNN3,O70417,P01835,P02625               |
| 3792 | 1,2,5,7,28,<br>32,33,35 | 3,4,6,8,27,<br>29,30,31,3<br>4 | 3 | P02625,P10719,Q9WTT6                      |
| 3793 | 1,2,5,7,28,<br>32,34,35 | 3,4,6,8,27,<br>29,30,31,3<br>3 | 2 | P02625,Q9QUL6                             |
| 3794 | 1,2,5,7,28,<br>33,34,35 | 3,4,6,8,27,<br>29,30,31,3<br>2 | 2 | P02625,P16636                             |
| 3795 | 1,2,5,7,29,<br>30,31,32 | 3,4,6,8,27,<br>28,33,34,3<br>5 | 4 | B0BNN3,O55145,P04182,P52590               |
| 3796 | 1,2,5,7,29,<br>30,31,33 | 3,4,6,8,27,<br>28,32,34,3<br>5 | 6 | O70417,P04182,P35467,P52590,Q5HZV9,Q9WTT6 |
| 3797 | 1,2,5,7,29,<br>30,31,34 | 3,4,6,8,27,<br>28,32,33,3<br>5 | 3 | P52590,P97840,Q63467                      |
| 3798 | 1,2,5,7,29,<br>30,31,35 | 3,4,6,8,27,<br>28,32,33,3<br>4 | 4 | P04182,P52590,P97584,Q4FZU2               |
| 3799 | 1,2,5,7,29,<br>30,32,33 | 3,4,6,8,27,<br>28,31,34,3<br>5 | 3 | O70417,P53792,Q5HZV9                      |
| 3800 | 1,2,5,7,29,<br>30,32,34 | 3,4,6,8,27,<br>28,31,33,3<br>5 | 1 | Q63467                                    |
| 3801 | 1,2,5,7,29,<br>30,32,35 | 3,4,6,8,27,<br>28,31,33,3<br>4 | 2 | P02625,P04182                             |
| 3802 | 1,2,5,7,29,<br>30,33,34 | 3,4,6,8,27,<br>28,31,32,3<br>5 | 1 | O70417                                    |
| 3803 | 1,2,5,7,29,<br>30,33,35 | 3,4,6,8,27,<br>28,31,32,3<br>4 | 4 | P02625,P04182,P52590,Q9WTT6               |



|      |                         |                                |   |                                                         |
|------|-------------------------|--------------------------------|---|---------------------------------------------------------|
| 3804 | 1,2,5,7,29,<br>30,34,35 | 3,4,6,8,27,<br>28,31,32,3<br>3 | 2 | P02625,Q9QUL6                                           |
| 3805 | 1,2,5,7,29,<br>31,32,33 | 3,4,6,8,27,<br>28,30,34,3<br>5 | 7 | B0BNN3,P01835,P02793;Q7TP54,P04182,P52590,Q8CJD3,Q9WTT6 |
| 3806 | 1,2,5,7,29,<br>31,32,34 | 3,4,6,8,27,<br>28,30,33,3<br>5 | 4 | B0BNN3,P01835,P52590,Q63467                             |
| 3807 | 1,2,5,7,29,<br>31,32,35 | 3,4,6,8,27,<br>28,30,33,3<br>4 | 3 | P04182,P52590,Q9WTT6                                    |
| 3808 | 1,2,5,7,29,<br>31,33,34 | 3,4,6,8,27,<br>28,30,32,3<br>5 | 5 | O70417,P00714,P01835,P52590,Q63467                      |
| 3809 | 1,2,5,7,29,<br>31,33,35 | 3,4,6,8,27,<br>28,30,32,3<br>4 | 5 | P00714,P02803,P04182,P52590,Q9WTT6                      |
| 3810 | 1,2,5,7,29,<br>31,34,35 | 3,4,6,8,27,<br>28,30,32,3<br>3 | 4 | P00714,P52590,Q63467,Q9QUL6                             |
| 3811 | 1,2,5,7,29,<br>32,33,34 | 3,4,6,8,27,<br>28,30,31,3<br>5 | 4 | O70417,P01835,P02625,Q63467                             |
| 3812 | 1,2,5,7,29,<br>32,33,35 | 3,4,6,8,27,<br>28,30,31,3<br>4 | 3 | P02625,P04182,Q9WTT6                                    |
| 3813 | 1,2,5,7,29,<br>32,34,35 | 3,4,6,8,27,<br>28,30,31,3<br>3 | 3 | P02625,Q63467,Q9QUL6                                    |
| 3814 | 1,2,5,7,29,<br>33,34,35 | 3,4,6,8,27,<br>28,30,31,3<br>2 | 3 | P00714,P02625,P16636                                    |
| 3815 | 1,2,5,7,30,<br>31,32,33 | 3,4,6,8,27,<br>28,29,34,3<br>5 | 4 | P00507,P04182,P52590,Q9WTT6                             |
| 3816 | 1,2,5,7,30,<br>31,32,34 | 3,4,6,8,27,<br>28,29,33,3<br>5 | 3 | P0C0A9,P52590,P97840                                    |
| 3817 | 1,2,5,7,30,<br>31,32,35 | 3,4,6,8,27,<br>28,29,33,3<br>4 | 4 | P04182,P52590,P97584,Q9WTT6                             |
| 3818 | 1,2,5,7,30,<br>31,33,34 | 3,4,6,8,27,<br>28,29,32,3<br>5 | 5 | P00714,P0C0A9,P51907,P52590,P97840                      |

|      |                         |                                |    |                                                                              |
|------|-------------------------|--------------------------------|----|------------------------------------------------------------------------------|
| 3819 | 1,2,5,7,30,<br>31,33,35 | 3,4,6,8,27,<br>28,29,32,3<br>4 | 6  | P00714,P04182,P24368,P52590,P97584,Q9WTT6                                    |
| 3820 | 1,2,5,7,30,<br>31,34,35 | 3,4,6,8,27,<br>28,29,32,3<br>3 | 10 | P00714,P02781,P08723,P0C0A9,P24368,P47727,P52590,P82471,P97840,Q9JHB9        |
| 3821 | 1,2,5,7,30,<br>32,33,34 | 3,4,6,8,27,<br>28,29,31,3<br>5 | 1  | P02782                                                                       |
| 3822 | 1,2,5,7,30,<br>32,33,35 | 3,4,6,8,27,<br>28,29,31,3<br>4 | 4  | P02625,P02782,P04182,Q9WTT6                                                  |
| 3823 | 1,2,5,7,30,<br>32,34,35 | 3,4,6,8,27,<br>28,29,31,3<br>3 | 6  | P02625,P02781,P02782,P08723,P0C0A9,P82471                                    |
| 3824 | 1,2,5,7,30,<br>33,34,35 | 3,4,6,8,27,<br>28,29,31,3<br>2 | 6  | P02782,P06911,P08723,P0C0A9,P24368,P82471                                    |
| 3825 | 1,2,5,7,31,<br>32,33,34 | 3,4,6,8,27,<br>28,29,30,3<br>5 | 5  | P01835,P02782,P08644,P0C0A9,P52590                                           |
| 3826 | 1,2,5,7,31,<br>32,33,35 | 3,4,6,8,27,<br>28,29,30,3<br>4 | 7  | P01835,P02782,P04182,P0C0A9,P52590,Q6AYR9,Q9WTT6                             |
| 3827 | 1,2,5,7,31,<br>32,34,35 | 3,4,6,8,27,<br>28,29,30,3<br>3 | 8  | P01835,P02781,P02782,P08723,P08753,P0C0A9,P52590,P82471                      |
| 3828 | 1,2,5,7,31,<br>33,34,35 | 3,4,6,8,27,<br>28,29,30,3<br>2 | 10 | P00714,P01835,P02781,P02782,P08723,P0C0A9,P24368,P52590,P82471,Q9JHB9        |
| 3829 | 1,2,5,7,32,<br>33,34,35 | 3,4,6,8,27,<br>28,29,30,3<br>1 | 11 | P01835,P02625,P02781,P02782,P08723,P08753,P0C0A9,P16636,P82471,Q63661,Q6AYR9 |
| 3830 | 1,2,5,8,27,<br>28,29,30 | 3,4,6,7,31,<br>32,33,34,3<br>5 | 2  | O35547,Q63942                                                                |
| 3831 | 1,2,5,8,27,<br>28,29,31 | 3,4,6,7,30,<br>32,33,34,3<br>5 | 2  | O35547,Q63942                                                                |
| 3832 | 1,2,5,8,27,<br>28,29,32 | 3,4,6,7,30,<br>31,33,34,3<br>5 | 4  | O35547,P02625,P09605,P25809,Q63942                                           |
| 3833 | 1,2,5,8,27,<br>28,29,33 | 3,4,6,7,30,<br>31,32,34,3<br>5 | 3  | O35547,P09605,P25809,Q63942                                                  |

|      |                         |                                |   |                                    |
|------|-------------------------|--------------------------------|---|------------------------------------|
| 3834 | 1,2,5,8,27,<br>28,29,34 | 3,4,6,7,30,<br>31,32,33,3<br>5 | 2 | Q03191,Q63942                      |
| 3835 | 1,2,5,8,27,<br>28,29,35 | 3,4,6,7,30,<br>31,32,33,3<br>4 | 3 | P02625,P09605,P25809,Q63942        |
| 3836 | 1,2,5,8,27,<br>28,30,31 | 3,4,6,7,29,<br>32,33,34,3<br>5 | 1 | Q63942                             |
| 3837 | 1,2,5,8,27,<br>28,30,32 | 3,4,6,7,29,<br>31,33,34,3<br>5 | 2 | P83121,Q63942                      |
| 3838 | 1,2,5,8,27,<br>28,30,33 | 3,4,6,7,29,<br>31,32,34,3<br>5 | 1 | Q63942                             |
| 3839 | 1,2,5,8,27,<br>28,30,34 | 3,4,6,7,29,<br>31,32,33,3<br>5 | 2 | P83121,Q63942                      |
| 3840 | 1,2,5,8,27,<br>28,30,35 | 3,4,6,7,29,<br>31,32,33,3<br>4 | 2 | P83121,Q63942                      |
| 3841 | 1,2,5,8,27,<br>28,31,32 | 3,4,6,7,29,<br>30,33,34,3<br>5 | 3 | P09605,P25809,Q5FVI6,Q63942        |
| 3842 | 1,2,5,8,27,<br>28,31,33 | 3,4,6,7,29,<br>30,32,34,3<br>5 | 2 | P09605,P25809,Q63942               |
| 3843 | 1,2,5,8,27,<br>28,31,34 | 3,4,6,7,29,<br>30,32,33,3<br>5 | 2 | Q03191,Q63942                      |
| 3844 | 1,2,5,8,27,<br>28,31,35 | 3,4,6,7,29,<br>30,32,33,3<br>4 | 2 | P09605,P25809,Q63942               |
| 3845 | 1,2,5,8,27,<br>28,32,33 | 3,4,6,7,29,<br>30,31,34,3<br>5 | 2 | P09605,P25809,Q63942               |
| 3846 | 1,2,5,8,27,<br>28,32,34 | 3,4,6,7,29,<br>30,31,33,3<br>5 | 3 | P83121,Q03191,Q63942               |
| 3847 | 1,2,5,8,27,<br>28,32,35 | 3,4,6,7,29,<br>30,31,33,3<br>4 | 4 | P02625,P09605,P25809,P83121,Q63942 |
| 3848 | 1,2,5,8,27,<br>28,33,34 | 3,4,6,7,29,<br>30,31,32,3<br>5 | 2 | Q03191,Q63942                      |

|      |                         |                                |   |                                    |
|------|-------------------------|--------------------------------|---|------------------------------------|
| 3849 | 1,2,5,8,27,<br>28,33,35 | 3,4,6,7,29,<br>30,31,32,3<br>4 | 3 | P09605;P25809,Q63942,Q99MH3        |
| 3850 | 1,2,5,8,27,<br>28,34,35 | 3,4,6,7,29,<br>30,31,32,3<br>3 | 3 | P83121,Q03191,Q63942               |
| 3851 | 1,2,5,8,27,<br>29,30,31 | 3,4,6,7,28,<br>32,33,34,3<br>5 | 1 | Q5HZV9                             |
| 3852 | 1,2,5,8,27,<br>29,30,32 | 3,4,6,7,28,<br>31,33,34,3<br>5 | 2 | P06760,P62804                      |
| 3853 | 1,2,5,8,27,<br>29,30,33 | 3,4,6,7,28,<br>31,32,34,3<br>5 | 1 | Q5HZV9                             |
| 3854 | 1,2,5,8,27,<br>29,30,34 | 3,4,6,7,28,<br>31,32,33,3<br>5 | 0 |                                    |
| 3855 | 1,2,5,8,27,<br>29,30,35 | 3,4,6,7,28,<br>31,32,33,3<br>4 | 0 |                                    |
| 3856 | 1,2,5,8,27,<br>29,31,32 | 3,4,6,7,28,<br>30,33,34,3<br>5 | 1 | Q5FVI6                             |
| 3857 | 1,2,5,8,27,<br>29,31,33 | 3,4,6,7,28,<br>30,32,34,3<br>5 | 1 | Q5HZV9                             |
| 3858 | 1,2,5,8,27,<br>29,31,34 | 3,4,6,7,28,<br>30,32,33,3<br>5 | 1 | Q03191                             |
| 3859 | 1,2,5,8,27,<br>29,31,35 | 3,4,6,7,28,<br>30,32,33,3<br>4 | 0 |                                    |
| 3860 | 1,2,5,8,27,<br>29,32,33 | 3,4,6,7,28,<br>30,31,34,3<br>5 | 1 | Q5HZV9                             |
| 3861 | 1,2,5,8,27,<br>29,32,34 | 3,4,6,7,28,<br>30,31,33,3<br>5 | 5 | P06760,Q00715,Q03191,Q8VD89,Q9Z1F2 |
| 3862 | 1,2,5,8,27,<br>29,32,35 | 3,4,6,7,28,<br>30,31,33,3<br>4 | 2 | P02625,P47967                      |
| 3863 | 1,2,5,8,27,<br>29,33,34 | 3,4,6,7,28,<br>30,31,32,3<br>5 | 1 | Q03191                             |

|      |                         |                                |   |                                    |
|------|-------------------------|--------------------------------|---|------------------------------------|
| 3864 | 1,2,5,8,27,<br>29,33,35 | 3,4,6,7,28,<br>30,31,32,3<br>4 | 2 | P09605;P25809,P47967               |
| 3865 | 1,2,5,8,27,<br>29,34,35 | 3,4,6,7,28,<br>30,31,32,3<br>3 | 2 | P83121,Q03191                      |
| 3866 | 1,2,5,8,27,<br>30,31,32 | 3,4,6,7,28,<br>29,33,34,3<br>5 | 2 | O55145,Q5FVI6                      |
| 3867 | 1,2,5,8,27,<br>30,31,33 | 3,4,6,7,28,<br>29,32,34,3<br>5 | 1 | Q5HZV9                             |
| 3868 | 1,2,5,8,27,<br>30,31,34 | 3,4,6,7,28,<br>29,32,33,3<br>5 | 0 |                                    |
| 3869 | 1,2,5,8,27,<br>30,31,35 | 3,4,6,7,28,<br>29,32,33,3<br>4 | 0 |                                    |
| 3870 | 1,2,5,8,27,<br>30,32,33 | 3,4,6,7,28,<br>29,31,34,3<br>5 | 0 |                                    |
| 3871 | 1,2,5,8,27,<br>30,32,34 | 3,4,6,7,28,<br>29,31,33,3<br>5 | 3 | P06760,P83121,Q03191               |
| 3872 | 1,2,5,8,27,<br>30,32,35 | 3,4,6,7,28,<br>29,31,33,3<br>4 | 1 | P83121                             |
| 3873 | 1,2,5,8,27,<br>30,33,34 | 3,4,6,7,28,<br>29,31,32,3<br>5 | 0 |                                    |
| 3874 | 1,2,5,8,27,<br>30,33,35 | 3,4,6,7,28,<br>29,31,32,3<br>4 | 1 | P06911                             |
| 3875 | 1,2,5,8,27,<br>30,34,35 | 3,4,6,7,28,<br>29,31,32,3<br>3 | 4 | P02793;Q7TP54,P06911,P83121,Q03191 |
| 3876 | 1,2,5,8,27,<br>31,32,33 | 3,4,6,7,28,<br>29,30,34,3<br>5 | 3 | P01835,Q08849,Q5FVI6               |
| 3877 | 1,2,5,8,27,<br>31,32,34 | 3,4,6,7,28,<br>29,30,33,3<br>5 | 3 | P01835,P08753,Q03191               |
| 3878 | 1,2,5,8,27,<br>31,32,35 | 3,4,6,7,28,<br>29,30,33,3<br>4 | 0 |                                    |

|      |                         |                                |   |                                    |
|------|-------------------------|--------------------------------|---|------------------------------------|
| 3879 | 1,2,5,8,27,<br>31,33,34 | 3,4,6,7,28,<br>29,30,32,3<br>5 | 2 | P01835,Q03191                      |
| 3880 | 1,2,5,8,27,<br>31,33,35 | 3,4,6,7,28,<br>29,30,32,3<br>4 | 2 | P01835,P09605,P25809               |
| 3881 | 1,2,5,8,27,<br>31,34,35 | 3,4,6,7,28,<br>29,30,32,3<br>3 | 4 | P01835,P08753,P83121,Q03191        |
| 3882 | 1,2,5,8,27,<br>32,33,34 | 3,4,6,7,28,<br>29,30,31,3<br>5 | 4 | P01835,P06760,P08753,Q03191        |
| 3883 | 1,2,5,8,27,<br>32,33,35 | 3,4,6,7,28,<br>29,30,31,3<br>4 | 1 | P09605,P25809                      |
| 3884 | 1,2,5,8,27,<br>32,34,35 | 3,4,6,7,28,<br>29,30,31,3<br>3 | 4 | P08753,P83121,Q03191,Q9QZK9        |
| 3885 | 1,2,5,8,27,<br>33,34,35 | 3,4,6,7,28,<br>29,30,31,3<br>2 | 5 | P01835,P06911,P08753,P83121,Q03191 |
| 3886 | 1,2,5,8,28,<br>29,30,31 | 3,4,6,7,27,<br>32,33,34,3<br>5 | 2 | P02803,Q63942                      |
| 3887 | 1,2,5,8,28,<br>29,30,32 | 3,4,6,7,27,<br>31,33,34,3<br>5 | 4 | A2RUV9,P02625,Q5FVI6,Q63942        |
| 3888 | 1,2,5,8,28,<br>29,30,33 | 3,4,6,7,27,<br>31,32,34,3<br>5 | 3 | A2RUV9,P02625,Q63942               |
| 3889 | 1,2,5,8,28,<br>29,30,34 | 3,4,6,7,27,<br>31,32,33,3<br>5 | 1 | Q63942                             |
| 3890 | 1,2,5,8,28,<br>29,30,35 | 3,4,6,7,27,<br>31,32,33,3<br>4 | 5 | A2RUV9,P02625,P02803,P08649,Q63942 |
| 3891 | 1,2,5,8,28,<br>29,31,32 | 3,4,6,7,27,<br>30,33,34,3<br>5 | 3 | P02803,Q5FVI6,Q63942               |
| 3892 | 1,2,5,8,28,<br>29,31,33 | 3,4,6,7,27,<br>30,32,34,3<br>5 | 2 | P02803,Q63942                      |
| 3893 | 1,2,5,8,28,<br>29,31,34 | 3,4,6,7,27,<br>30,32,33,3<br>5 | 2 | P02803,Q63942                      |

|      |                         |                                |   |                                                  |
|------|-------------------------|--------------------------------|---|--------------------------------------------------|
| 3894 | 1,2,5,8,28,<br>29,31,35 | 3,4,6,7,27,<br>30,32,33,3<br>4 | 3 | P02803,P08649,Q63942                             |
| 3895 | 1,2,5,8,28,<br>29,32,33 | 3,4,6,7,27,<br>30,31,34,3<br>5 | 4 | A2RUV9,P02625,Q5FVI6,Q63942                      |
| 3896 | 1,2,5,8,28,<br>29,32,34 | 3,4,6,7,27,<br>30,31,33,3<br>5 | 2 | P02625,Q63942                                    |
| 3897 | 1,2,5,8,28,<br>29,32,35 | 3,4,6,7,27,<br>30,31,33,3<br>4 | 4 | P02625,P02803,P47967,Q63942                      |
| 3898 | 1,2,5,8,28,<br>29,33,34 | 3,4,6,7,27,<br>30,31,32,3<br>5 | 3 | P02625,P02803,Q63942                             |
| 3899 | 1,2,5,8,28,<br>29,33,35 | 3,4,6,7,27,<br>30,31,32,3<br>4 | 6 | A2RUV9,P02625,P02803,P09605;P25809,P47967,Q63942 |
| 3900 | 1,2,5,8,28,<br>29,34,35 | 3,4,6,7,27,<br>30,31,32,3<br>3 | 3 | P02625,P02803,Q63942                             |
| 3901 | 1,2,5,8,28,<br>30,31,32 | 3,4,6,7,27,<br>29,33,34,3<br>5 | 1 | Q5FVI6                                           |
| 3902 | 1,2,5,8,28,<br>30,31,33 | 3,4,6,7,27,<br>29,32,34,3<br>5 | 1 | P02803                                           |
| 3903 | 1,2,5,8,28,<br>30,31,34 | 3,4,6,7,27,<br>29,32,33,3<br>5 | 0 |                                                  |
| 3904 | 1,2,5,8,28,<br>30,31,35 | 3,4,6,7,27,<br>29,32,33,3<br>4 | 3 | P02803,P08649,Q63751                             |
| 3905 | 1,2,5,8,28,<br>30,32,33 | 3,4,6,7,27,<br>29,31,34,3<br>5 | 3 | A2RUV9,P02625,Q5FVI6                             |
| 3906 | 1,2,5,8,28,<br>30,32,34 | 3,4,6,7,27,<br>29,31,33,3<br>5 | 1 | P83121                                           |
| 3907 | 1,2,5,8,28,<br>30,32,35 | 3,4,6,7,27,<br>29,31,33,3<br>4 | 2 | A2RUV9,P02625                                    |
| 3908 | 1,2,5,8,28,<br>30,33,34 | 3,4,6,7,27,<br>29,31,32,3<br>5 | 0 |                                                  |

|      |                         |                                |   |                                           |
|------|-------------------------|--------------------------------|---|-------------------------------------------|
| 3909 | 1,2,5,8,28,<br>30,33,35 | 3,4,6,7,27,<br>29,31,32,3<br>4 | 3 | A2RUV9,P02625,P02803                      |
| 3910 | 1,2,5,8,28,<br>30,34,35 | 3,4,6,7,27,<br>29,31,32,3<br>3 | 5 | P02625,P02793;Q7TP54,P19132,P83121,Q8CJD3 |
| 3911 | 1,2,5,8,28,<br>31,32,33 | 3,4,6,7,27,<br>29,30,34,3<br>5 | 5 | P01835,P02803,P09605;P25809,P14480,Q5FVI6 |
| 3912 | 1,2,5,8,28,<br>31,32,34 | 3,4,6,7,27,<br>29,30,33,3<br>5 | 2 | P01835,Q5FVI6                             |
| 3913 | 1,2,5,8,28,<br>31,32,35 | 3,4,6,7,27,<br>29,30,33,3<br>4 | 4 | P02803,P08649,P09605;P25809,Q5FVI6        |
| 3914 | 1,2,5,8,28,<br>31,33,34 | 3,4,6,7,27,<br>29,30,32,3<br>5 | 2 | P01835,P02803                             |
| 3915 | 1,2,5,8,28,<br>31,33,35 | 3,4,6,7,27,<br>29,30,32,3<br>4 | 2 | P02803,P09605;P25809                      |
| 3916 | 1,2,5,8,28,<br>31,34,35 | 3,4,6,7,27,<br>29,30,32,3<br>3 | 1 | P02803                                    |
| 3917 | 1,2,5,8,28,<br>32,33,34 | 3,4,6,7,27,<br>29,30,31,3<br>5 | 2 | P01835,P02625                             |
| 3918 | 1,2,5,8,28,<br>32,33,35 | 3,4,6,7,27,<br>29,30,31,3<br>4 | 4 | A2RUV9,P02625,P02803,P09605;P25809        |
| 3919 | 1,2,5,8,28,<br>32,34,35 | 3,4,6,7,27,<br>29,30,31,3<br>3 | 2 | P02625,P83121                             |
| 3920 | 1,2,5,8,28,<br>33,34,35 | 3,4,6,7,27,<br>29,30,31,3<br>2 | 2 | P02625,P02803                             |
| 3921 | 1,2,5,8,29,<br>30,31,32 | 3,4,6,7,27,<br>28,33,34,3<br>5 | 2 | P04182,Q5FVI6                             |
| 3922 | 1,2,5,8,29,<br>30,31,33 | 3,4,6,7,27,<br>28,32,34,3<br>5 | 1 | Q5HZV9                                    |
| 3923 | 1,2,5,8,29,<br>30,31,34 | 3,4,6,7,27,<br>28,32,33,3<br>5 | 0 |                                           |



|      |                         |                                |   |                                           |
|------|-------------------------|--------------------------------|---|-------------------------------------------|
| 3924 | 1,2,5,8,29,<br>30,31,35 | 3,4,6,7,27,<br>28,32,33,3<br>4 | 3 | P02803,P04182,Q06000                      |
| 3925 | 1,2,5,8,29,<br>30,32,33 | 3,4,6,7,27,<br>28,31,34,3<br>5 | 3 | A2RUV9,Q5FVI6,Q5HZV9                      |
| 3926 | 1,2,5,8,29,<br>30,32,34 | 3,4,6,7,27,<br>28,31,33,3<br>5 | 0 |                                           |
| 3927 | 1,2,5,8,29,<br>30,32,35 | 3,4,6,7,27,<br>28,31,33,3<br>4 | 3 | A2RUV9,P02625,P04182                      |
| 3928 | 1,2,5,8,29,<br>30,33,34 | 3,4,6,7,27,<br>28,31,32,3<br>5 | 0 |                                           |
| 3929 | 1,2,5,8,29,<br>30,33,35 | 3,4,6,7,27,<br>28,31,32,3<br>4 | 2 | A2RUV9,P02625                             |
| 3930 | 1,2,5,8,29,<br>30,34,35 | 3,4,6,7,27,<br>28,31,32,3<br>3 | 4 | P02625,P02793,Q7TP54,Q06000,Q6PCU2        |
| 3931 | 1,2,5,8,29,<br>31,32,33 | 3,4,6,7,27,<br>28,30,34,3<br>5 | 6 | P01835,P04182,P47967,Q5FVI6,Q5HZV9,Q8CJD3 |
| 3932 | 1,2,5,8,29,<br>31,32,34 | 3,4,6,7,27,<br>28,30,33,3<br>5 | 2 | P01835,Q5FVI6                             |
| 3933 | 1,2,5,8,29,<br>31,32,35 | 3,4,6,7,27,<br>28,30,33,3<br>4 | 4 | P02803,P04182,P47967,Q5FVI6               |
| 3934 | 1,2,5,8,29,<br>31,33,34 | 3,4,6,7,27,<br>28,30,32,3<br>5 | 2 | P01835,P02803                             |
| 3935 | 1,2,5,8,29,<br>31,33,35 | 3,4,6,7,27,<br>28,30,32,3<br>4 | 3 | P02803,P04182,P47967                      |
| 3936 | 1,2,5,8,29,<br>31,34,35 | 3,4,6,7,27,<br>28,30,32,3<br>3 | 2 | P02803,Q06000                             |
| 3937 | 1,2,5,8,29,<br>32,33,34 | 3,4,6,7,27,<br>28,30,31,3<br>5 | 2 | P01835,P02625                             |
| 3938 | 1,2,5,8,29,<br>32,33,35 | 3,4,6,7,27,<br>28,30,31,3<br>4 | 4 | A2RUV9,P02625,P04182,P47967               |

|      |                         |                                |   |                                           |
|------|-------------------------|--------------------------------|---|-------------------------------------------|
| 3939 | 1,2,5,8,29,<br>32,34,35 | 3,4,6,7,27,<br>28,30,31,3<br>3 | 1 | P02625                                    |
| 3940 | 1,2,5,8,29,<br>33,34,35 | 3,4,6,7,27,<br>28,30,31,3<br>2 | 2 | P02625,P02803                             |
| 3941 | 1,2,5,8,30,<br>31,32,33 | 3,4,6,7,27,<br>28,29,34,3<br>5 | 1 | Q5FVI6                                    |
| 3942 | 1,2,5,8,30,<br>31,32,34 | 3,4,6,7,27,<br>28,29,33,3<br>5 | 1 | Q5FVI6                                    |
| 3943 | 1,2,5,8,30,<br>31,32,35 | 3,4,6,7,27,<br>28,29,33,3<br>4 | 2 | P04182,Q5FVI6                             |
| 3944 | 1,2,5,8,30,<br>31,33,34 | 3,4,6,7,27,<br>28,29,32,3<br>5 | 0 |                                           |
| 3945 | 1,2,5,8,30,<br>31,33,35 | 3,4,6,7,27,<br>28,29,32,3<br>4 | 2 | P02803,P04182                             |
| 3946 | 1,2,5,8,30,<br>31,34,35 | 3,4,6,7,27,<br>28,29,32,3<br>3 | 5 | P02793;Q7TP54,P08723,P19132,P24368,Q06000 |
| 3947 | 1,2,5,8,30,<br>32,33,34 | 3,4,6,7,27,<br>28,29,31,3<br>5 | 0 |                                           |
| 3948 | 1,2,5,8,30,<br>32,33,35 | 3,4,6,7,27,<br>28,29,31,3<br>4 | 2 | A2RUV9,P02625                             |
| 3949 | 1,2,5,8,30,<br>32,34,35 | 3,4,6,7,27,<br>28,29,31,3<br>3 | 4 | P02625,P06911,P08753,P83121               |
| 3950 | 1,2,5,8,30,<br>33,34,35 | 3,4,6,7,27,<br>28,29,31,3<br>2 | 1 | P06911                                    |
| 3951 | 1,2,5,8,31,<br>32,33,34 | 3,4,6,7,27,<br>28,29,30,3<br>5 | 2 | P01835,P08753                             |
| 3952 | 1,2,5,8,31,<br>32,33,35 | 3,4,6,7,27,<br>28,29,30,3<br>4 | 5 | P01835,P02803,P04182,P47967,Q5FVI6        |
| 3953 | 1,2,5,8,31,<br>32,34,35 | 3,4,6,7,27,<br>28,29,30,3<br>3 | 4 | P01835,P08723,P08753,P0C0A9               |

|      |                          |                                |   |                                                         |
|------|--------------------------|--------------------------------|---|---------------------------------------------------------|
| 3954 | 1,2,5,8,31,<br>33,34,35  | 3,4,6,7,27,<br>28,29,30,3<br>2 | 8 | O08815,P00714,P01835,P02803,P08753,P0C0A9,P24368,P82471 |
| 3955 | 1,2,5,8,32,<br>33,34,35  | 3,4,6,7,27,<br>28,29,30,3<br>1 | 3 | P01835,P02625,P08753                                    |
| 3956 | 1,2,5,27,2<br>8,29,30,31 | 3,4,6,7,8,3<br>2,33,34,35      | 2 | P05369,Q99041                                           |
| 3957 | 1,2,5,27,2<br>8,29,30,32 | 3,4,6,7,8,3<br>1,33,34,35      | 2 | P05369,Q99041                                           |
| 3958 | 1,2,5,27,2<br>8,29,30,33 | 3,4,6,7,8,3<br>1,32,34,35      | 2 | P05369,P36374                                           |
| 3959 | 1,2,5,27,2<br>8,29,30,34 | 3,4,6,7,8,3<br>1,32,33,35      | 3 | P05369,Q8CJD3,Q9QUL6                                    |
| 3960 | 1,2,5,27,2<br>8,29,30,35 | 3,4,6,7,8,3<br>1,32,33,34      | 2 | Q99041,Q9QUL6                                           |
| 3961 | 1,2,5,27,2<br>8,29,31,32 | 3,4,6,7,8,3<br>0,33,34,35      | 1 | Q99041                                                  |
| 3962 | 1,2,5,27,2<br>8,29,31,33 | 3,4,6,7,8,3<br>0,32,34,35      | 1 | O35547                                                  |
| 3963 | 1,2,5,27,2<br>8,29,31,34 | 3,4,6,7,8,3<br>0,32,33,35      | 1 | Q9QUL6                                                  |
| 3964 | 1,2,5,27,2<br>8,29,31,35 | 3,4,6,7,8,3<br>0,32,33,34      | 2 | Q99041,Q9QUL6                                           |
| 3965 | 1,2,5,27,2<br>8,29,32,33 | 3,4,6,7,8,3<br>0,31,34,35      | 5 | P02625,P02793;Q7TP54,P05369,P09605;P25809,Q80WL1        |
| 3966 | 1,2,5,27,2<br>8,29,32,34 | 3,4,6,7,8,3<br>0,31,33,35      | 4 | P02625,P05369,Q10758,Q9QUL6                             |
| 3967 | 1,2,5,27,2<br>8,29,32,35 | 3,4,6,7,8,3<br>0,31,33,34      | 4 | P02625,P09605;P25809,Q99041,Q9QUL6                      |
| 3968 | 1,2,5,27,2<br>8,29,33,34 | 3,4,6,7,8,3<br>0,31,32,35      | 1 | P05369                                                  |
| 3969 | 1,2,5,27,2<br>8,29,33,35 | 3,4,6,7,8,3<br>0,31,32,34      | 2 | P02625,P09605;P25809                                    |
| 3970 | 1,2,5,27,2<br>8,29,34,35 | 3,4,6,7,8,3<br>0,31,32,33      | 3 | P02625,Q99041,Q9QUL6                                    |
| 3971 | 1,2,5,27,2<br>8,30,31,32 | 3,4,6,7,8,2<br>9,33,34,35      | 2 | Q63617,Q99041                                           |
| 3972 | 1,2,5,27,2<br>8,30,31,33 | 3,4,6,7,8,2<br>9,32,34,35      | 1 | P51907                                                  |
| 3973 | 1,2,5,27,2<br>8,30,31,34 | 3,4,6,7,8,2<br>9,32,33,35      | 2 | Q63617,Q8CJD3                                           |
| 3974 | 1,2,5,27,2<br>8,30,31,35 | 3,4,6,7,8,2<br>9,32,33,34      | 3 | Q63617,Q99041,Q9QUL6                                    |
| 3975 | 1,2,5,27,2<br>8,30,32,33 | 3,4,6,7,8,2<br>9,31,34,35      | 1 | Q6IFU7                                                  |

|      |                                                 |   |                                                  |
|------|-------------------------------------------------|---|--------------------------------------------------|
| 3976 | 1,2,5,27,2 3,4,6,7,8,2<br>8,30,32,34 9,31,33,35 | 4 | P83121,Q10758,Q63617,Q6IFU7                      |
| 3977 | 1,2,5,27,2 3,4,6,7,8,2<br>8,30,32,35 9,31,33,34 | 5 | P02625,P83121,Q63617,Q99041,Q9QUL6               |
| 3978 | 1,2,5,27,2 3,4,6,7,8,2<br>8,30,33,34 9,31,32,35 | 1 | Q8CJD3                                           |
| 3979 | 1,2,5,27,2 3,4,6,7,8,2<br>8,30,33,35 9,31,32,34 | 0 |                                                  |
| 3980 | 1,2,5,27,2 3,4,6,7,8,2<br>8,30,34,35 9,31,32,33 | 5 | P83121,Q63617,Q8CJD3,Q99041,Q9QUL6               |
| 3981 | 1,2,5,27,2 3,4,6,7,8,2<br>8,31,32,33 9,30,34,35 | 1 | P09605;P25809                                    |
| 3982 | 1,2,5,27,2 3,4,6,7,8,2<br>8,31,32,34 9,30,33,35 | 2 | Q10758,Q63617                                    |
| 3983 | 1,2,5,27,2 3,4,6,7,8,2<br>8,31,32,35 9,30,33,34 | 3 | P09605;P25809,Q99041,Q9QUL6                      |
| 3984 | 1,2,5,27,2 3,4,6,7,8,2<br>8,31,33,34 9,30,32,35 | 0 |                                                  |
| 3985 | 1,2,5,27,2 3,4,6,7,8,2<br>8,31,33,35 9,30,32,34 | 1 | P09605;P25809                                    |
| 3986 | 1,2,5,27,2 3,4,6,7,8,2<br>8,31,34,35 9,30,32,33 | 3 | Q63617,Q99041,Q9QUL6                             |
| 3987 | 1,2,5,27,2 3,4,6,7,8,2<br>8,32,33,34 9,30,31,35 | 2 | Q10758,Q6IFU7                                    |
| 3988 | 1,2,5,27,2 3,4,6,7,8,2<br>8,32,33,35 9,30,31,34 | 2 | P02625,P09605;P25809                             |
| 3989 | 1,2,5,27,2 3,4,6,7,8,2<br>8,32,34,35 9,30,31,33 | 7 | P02625,P83121,Q10758,Q63617,Q99041,Q9QUL6,Q9QZK9 |
| 3990 | 1,2,5,27,2 3,4,6,7,8,2<br>8,33,34,35 9,30,31,32 | 0 |                                                  |
| 3991 | 1,2,5,27,2 3,4,6,7,8,2<br>9,30,31,32 8,33,34,35 | 1 | Q99041                                           |
| 3992 | 1,2,5,27,2 3,4,6,7,8,2<br>9,30,31,33 8,32,34,35 | 1 | Q5HZV9                                           |
| 3993 | 1,2,5,27,2 3,4,6,7,8,2<br>9,30,31,34 8,32,33,35 | 1 | Q99041                                           |
| 3994 | 1,2,5,27,2 3,4,6,7,8,2<br>9,30,31,35 8,32,33,34 | 2 | Q99041,Q9QUL6                                    |
| 3995 | 1,2,5,27,2 3,4,6,7,8,2<br>9,30,32,33 8,31,34,35 | 0 |                                                  |
| 3996 | 1,2,5,27,2 3,4,6,7,8,2<br>9,30,32,34 8,31,33,35 | 1 | Q8VD89                                           |
| 3997 | 1,2,5,27,2 3,4,6,7,8,2<br>9,30,32,35 8,31,33,34 | 2 | Q99041,Q9QUL6                                    |
| 3998 | 1,2,5,27,2 3,4,6,7,8,2<br>9,30,33,34 8,31,32,35 | 0 |                                                  |

|      |                                                 |   |                                                  |
|------|-------------------------------------------------|---|--------------------------------------------------|
| 3999 | 1,2,5,27,2 3,4,6,7,8,2<br>9,30,33,35 8,31,32,34 | 0 |                                                  |
| 4000 | 1,2,5,27,2 3,4,6,7,8,2<br>9,30,34,35 8,31,32,33 | 4 | P12020,P83121,Q99041,Q9QUL6                      |
| 4001 | 1,2,5,27,2 3,4,6,7,8,2<br>9,31,32,33 8,30,34,35 | 0 |                                                  |
| 4002 | 1,2,5,27,2 3,4,6,7,8,2<br>9,31,32,34 8,30,33,35 | 0 |                                                  |
| 4003 | 1,2,5,27,2 3,4,6,7,8,2<br>9,31,32,35 8,30,33,34 | 3 | P47967,Q99041,Q9QUL6                             |
| 4004 | 1,2,5,27,2 3,4,6,7,8,2<br>9,31,33,34 8,30,32,35 | 0 |                                                  |
| 4005 | 1,2,5,27,2 3,4,6,7,8,2<br>9,31,33,35 8,30,32,34 | 1 | P47967                                           |
| 4006 | 1,2,5,27,2 3,4,6,7,8,2<br>9,31,34,35 8,30,32,33 | 2 | Q99041,Q9QUL6                                    |
| 4007 | 1,2,5,27,2 3,4,6,7,8,2<br>9,32,33,34 8,30,31,35 | 0 |                                                  |
| 4008 | 1,2,5,27,2 3,4,6,7,8,2<br>9,32,33,35 8,30,31,34 | 2 | P02625,P47967                                    |
| 4009 | 1,2,5,27,2 3,4,6,7,8,2<br>9,32,34,35 8,30,31,33 | 5 | P02625,P83121,Q63661,Q99041,Q9QUL6               |
| 4010 | 1,2,5,27,2 3,4,6,7,8,2<br>9,33,34,35 8,30,31,32 | 0 |                                                  |
| 4011 | 1,2,5,27,3 3,4,6,7,8,2<br>0,31,32,33 8,29,34,35 | 0 |                                                  |
| 4012 | 1,2,5,27,3 3,4,6,7,8,2<br>0,31,32,34 8,29,33,35 | 1 | Q63617                                           |
| 4013 | 1,2,5,27,3 3,4,6,7,8,2<br>0,31,32,35 8,29,33,34 | 2 | Q63617,Q99041                                    |
| 4014 | 1,2,5,27,3 3,4,6,7,8,2<br>0,31,33,34 8,29,32,35 | 2 | P51907,Q63617                                    |
| 4015 | 1,2,5,27,3 3,4,6,7,8,2<br>0,31,33,35 8,29,32,34 | 0 |                                                  |
| 4016 | 1,2,5,27,3 3,4,6,7,8,2<br>0,31,34,35 8,29,32,33 | 4 | P02793;Q7TP54,Q63617,Q99041,Q9QUL6               |
| 4017 | 1,2,5,27,3 3,4,6,7,8,2<br>0,32,33,34 8,29,31,35 | 1 | P55314                                           |
| 4018 | 1,2,5,27,3 3,4,6,7,8,2<br>0,32,33,35 8,29,31,34 | 0 |                                                  |
| 4019 | 1,2,5,27,3 3,4,6,7,8,2<br>0,32,34,35 8,29,31,33 | 7 | P06911,P83121,Q63617,Q63661,Q99041,Q9QUL6,Q9QZK9 |
| 4020 | 1,2,5,27,3 3,4,6,7,8,2<br>0,33,34,35 8,29,31,32 | 3 | P06911,P12020,Q63617                             |
| 4021 | 1,2,5,27,3 3,4,6,7,8,2<br>1,32,33,34 8,29,30,35 | 1 | P01835                                           |

|      |                                                 |   |                                                  |
|------|-------------------------------------------------|---|--------------------------------------------------|
| 4022 | 1,2,5,27,3 3,4,6,7,8,2<br>1,32,33,35 8,29,30,34 | 0 |                                                  |
| 4023 | 1,2,5,27,3 3,4,6,7,8,2<br>1,32,34,35 8,29,30,33 | 5 | P83121,Q63617,Q99041,Q9QUL6,Q9QZK9               |
| 4024 | 1,2,5,27,3 3,4,6,7,8,2<br>1,33,34,35 8,29,30,32 | 1 | P01835                                           |
| 4025 | 1,2,5,27,3 3,4,6,7,8,2<br>2,33,34,35 8,29,30,31 | 2 | P83121,Q63661                                    |
| 4026 | 1,2,5,28,2 3,4,6,7,8,2<br>9,30,31,32 7,33,34,35 | 2 | Q5FVI6,Q99041                                    |
| 4027 | 1,2,5,28,2 3,4,6,7,8,2<br>9,30,31,33 7,32,34,35 | 3 | O70417,P00714,P35467                             |
| 4028 | 1,2,5,28,2 3,4,6,7,8,2<br>9,30,31,34 7,32,33,35 | 3 | O70417,P00714,Q99041                             |
| 4029 | 1,2,5,28,2 3,4,6,7,8,2<br>9,30,31,35 7,32,33,34 | 7 | P00714,P02803,P08649,P26772,Q07116,Q99041,Q9QUL6 |
| 4030 | 1,2,5,28,2 3,4,6,7,8,2<br>9,30,32,33 7,31,34,35 | 3 | A2RUV9,O70417,P02625                             |
| 4031 | 1,2,5,28,2 3,4,6,7,8,2<br>9,30,32,34 7,31,33,35 | 3 | O70417,P02625,Q99041                             |
| 4032 | 1,2,5,28,2 3,4,6,7,8,2<br>9,30,32,35 7,31,33,34 | 3 | P02625,Q99041,Q9QUL6                             |
| 4033 | 1,2,5,28,2 3,4,6,7,8,2<br>9,30,33,34 7,31,32,35 | 3 | O70417,P00714,P02625                             |
| 4034 | 1,2,5,28,2 3,4,6,7,8,2<br>9,30,33,35 7,31,32,34 | 4 | A2RUV9,O70417,P00714,P02625                      |
| 4035 | 1,2,5,28,2 3,4,6,7,8,2<br>9,30,34,35 7,31,32,33 | 5 | P00714,P02625,Q8CJD3,Q99041,Q9QUL6               |
| 4036 | 1,2,5,28,2 3,4,6,7,8,2<br>9,31,32,33 7,30,34,35 | 2 | O70417,Q5FVI6                                    |
| 4037 | 1,2,5,28,2 3,4,6,7,8,2<br>9,31,32,34 7,30,33,35 | 0 |                                                  |
| 4038 | 1,2,5,28,2 3,4,6,7,8,2<br>9,31,32,35 7,30,33,34 | 4 | P02803,P47967,Q99041,Q9QUL6                      |
| 4039 | 1,2,5,28,2 3,4,6,7,8,2<br>9,31,33,34 7,30,32,35 | 3 | O70417,P00714,P02803                             |
| 4040 | 1,2,5,28,2 3,4,6,7,8,2<br>9,31,33,35 7,30,32,34 | 6 | P00714,P02803,P16086,P26772,P47967,Q9WTT6        |
| 4041 | 1,2,5,28,2 3,4,6,7,8,2<br>9,31,34,35 7,30,32,33 | 5 | P00714,P02803,P14669,Q99041,Q9QUL6               |
| 4042 | 1,2,5,28,2 3,4,6,7,8,2<br>9,32,33,34 7,30,31,35 | 2 | O70417,P02625                                    |
| 4043 | 1,2,5,28,2 3,4,6,7,8,2<br>9,32,33,35 7,30,31,34 | 5 | O70417,P02625,P09605,P25809,P47967,Q9WTT6        |
| 4044 | 1,2,5,28,2 3,4,6,7,8,2<br>9,32,34,35 7,30,31,33 | 3 | P02625,Q99041,Q9QUL6                             |

|      |                                                 |   |                                                         |
|------|-------------------------------------------------|---|---------------------------------------------------------|
| 4045 | 1,2,5,28,2 3,4,6,7,8,2<br>9,33,34,35 7,30,31,32 | 4 | O70417,P00714,P02625,P02803                             |
| 4046 | 1,2,5,28,3 3,4,6,7,8,2<br>0,31,32,33 7,29,34,35 | 1 | Q5FVI6                                                  |
| 4047 | 1,2,5,28,3 3,4,6,7,8,2<br>0,31,32,34 7,29,33,35 | 2 | Q63617,Q99041                                           |
| 4048 | 1,2,5,28,3 3,4,6,7,8,2<br>0,31,32,35 7,29,33,34 | 3 | P11598,Q63617,Q99041                                    |
| 4049 | 1,2,5,28,3 3,4,6,7,8,2<br>0,31,33,34 7,29,32,35 | 4 | P00714,P14669,P51907,Q63617                             |
| 4050 | 1,2,5,28,3 3,4,6,7,8,2<br>0,31,33,35 7,29,32,34 | 6 | P00714,P02803,P14669,P26772,Q63617,Q99041               |
| 4051 | 1,2,5,28,3 3,4,6,7,8,2<br>0,31,34,35 7,29,32,33 | 7 | P00714,P02793;Q7TP54,P14669,Q63617,Q8CJD3,Q99041,Q9QUL6 |
| 4052 | 1,2,5,28,3 3,4,6,7,8,2<br>0,32,33,34 7,29,31,35 | 3 | O70417,P02625,Q63617                                    |
| 4053 | 1,2,5,28,3 3,4,6,7,8,2<br>0,32,33,35 7,29,31,34 | 3 | A2RUV9,P02625,P11598                                    |
| 4054 | 1,2,5,28,3 3,4,6,7,8,2<br>0,32,34,35 7,29,31,33 | 7 | P02625,P11598,P83121,Q63617,Q8CJD3,Q99041,Q9QUL6        |
| 4055 | 1,2,5,28,3 3,4,6,7,8,2<br>0,33,34,35 7,29,31,32 | 5 | P00714,P02625,P14669,Q63617,Q8CJD3                      |
| 4056 | 1,2,5,28,3 3,4,6,7,8,2<br>1,32,33,34 7,29,30,35 | 1 | P01835                                                  |
| 4057 | 1,2,5,28,3 3,4,6,7,8,2<br>1,32,33,35 7,29,30,34 | 3 | P02803,P09605;P25809,Q9WTT6                             |
| 4058 | 1,2,5,28,3 3,4,6,7,8,2<br>1,32,34,35 7,29,30,33 | 4 | P14669,Q63617,Q99041,Q9QUL6                             |
| 4059 | 1,2,5,28,3 3,4,6,7,8,2<br>1,33,34,35 7,29,30,32 | 4 | P00714,P02803,P14669,Q63617                             |
| 4060 | 1,2,5,28,3 3,4,6,7,8,2<br>2,33,34,35 7,29,30,31 | 1 | P02625                                                  |
| 4061 | 1,2,5,29,3 3,4,6,7,8,2<br>0,31,32,33 7,28,34,35 | 4 | O70417,P04182,Q5FVI6,Q9WTT6                             |
| 4062 | 1,2,5,29,3 3,4,6,7,8,2<br>0,31,32,34 7,28,33,35 | 1 | Q99041                                                  |
| 4063 | 1,2,5,29,3 3,4,6,7,8,2<br>0,31,32,35 7,28,33,34 | 2 | P04182,Q99041                                           |
| 4064 | 1,2,5,29,3 3,4,6,7,8,2<br>0,31,33,34 7,28,32,35 | 2 | O70417,P00714                                           |
| 4065 | 1,2,5,29,3 3,4,6,7,8,2<br>0,31,33,35 7,28,32,34 | 4 | P00714,P04182,Q99041,Q9WTT6                             |
| 4066 | 1,2,5,29,3 3,4,6,7,8,2<br>0,31,34,35 7,28,32,33 | 4 | P00714,P02793;Q7TP54,Q99041,Q9QUL6                      |
| 4067 | 1,2,5,29,3 3,4,6,7,8,2<br>0,32,33,34 7,28,31,35 | 1 | O70417                                                  |

|      |                                                     |    |                                                                                                                 |
|------|-----------------------------------------------------|----|-----------------------------------------------------------------------------------------------------------------|
| 4068 | 1,2,5,29,3 3,4,6,7,8,2<br>0,32,33,35 7,28,31,34     | 5  | A2RUV9,P02625,P04182,Q99041,Q9WTT6                                                                              |
| 4069 | 1,2,5,29,3 3,4,6,7,8,2<br>0,32,34,35 7,28,31,33     | 3  | P02625,Q99041,Q9QUL6                                                                                            |
| 4070 | 1,2,5,29,3 3,4,6,7,8,2<br>0,33,34,35 7,28,31,32     | 3  | P00714,P02625,P12020                                                                                            |
| 4071 | 1,2,5,29,3 3,4,6,7,8,2<br>1,32,33,34 7,28,30,35     | 2  | O70417,P01835                                                                                                   |
| 4072 | 1,2,5,29,3 3,4,6,7,8,2<br>1,32,33,35 7,28,30,34     | 3  | P04182,P47967,Q9WTT6                                                                                            |
| 4073 | 1,2,5,29,3 3,4,6,7,8,2<br>1,32,34,35 7,28,30,33     | 2  | Q99041,Q9QUL6                                                                                                   |
| 4074 | 1,2,5,29,3 3,4,6,7,8,2<br>1,33,34,35 7,28,30,32     | 3  | P00714,P02803,P14669                                                                                            |
| 4075 | 1,2,5,29,3 3,4,6,7,8,2<br>2,33,34,35 7,28,30,31     | 2  | P02625,Q63661                                                                                                   |
| 4076 | 1,2,5,30,3 3,4,6,7,8,2<br>1,32,33,34 7,28,29,35     | 3  | P0C0A9,Q63617,Q9R0T3                                                                                            |
| 4077 | 1,2,5,30,3 3,4,6,7,8,2<br>1,32,33,35 7,28,29,34     | 4  | P04182,Q63617,Q99041,Q9WTT6                                                                                     |
| 4078 | 1,2,5,30,3 3,4,6,7,8,2<br>1,32,34,35 7,28,29,33     | 9  | P06761,P08723,P0C0A9,P22283,P24368,P82471,Q63617,Q99041,Q9R0T3                                                  |
| 4079 | 1,2,5,30,3 3,4,6,7,8,2<br>1,33,34,35 7,28,29,32     | 9  | P00714,P08723,P0C0A9,P14669,P22283,P24368,P82471,Q63617,Q9R0T3                                                  |
| 4080 | 1,2,5,30,3 3,4,6,7,8,2<br>2,33,34,35 7,28,29,31     | 11 | P02625,P02782,P06911,P08723,P0C0A9,P22283,P82471,Q62902,Q63617,Q63661,Q9R0T3                                    |
| 4081 | 1,2,5,31,3 3,4,6,7,8,2<br>2,33,34,35 7,28,29,30     | 9  | P01835,P02781,P02782,P08723,P0C0A9,P14669,P22283,P82471,Q63617                                                  |
| 4082 | 1,2,6,7,8,2 3,4,5,30,3<br>7,28,29 1,32,33,34<br>,35 | 16 | O35547,P02631,P02782,P08723,P0C0A9,P12020,P22283,P24368,P30120,Q5GRG2,Q62902,Q63942,Q8CJ52,Q9JHB9,Q9JI85,Q9R0T3 |
| 4083 | 1,2,6,7,8,2 3,4,5,29,3<br>7,28,30 1,32,33,34<br>,35 | 6  | P02631,P12020,P47967,P97840,Q63942,Q6AYQ8                                                                       |
| 4084 | 1,2,6,7,8,2 3,4,5,29,3<br>7,28,31 0,32,33,34<br>,35 | 8  | P02631,P06911,P10715,P12020,P19629,P31044,Q5GRG2,Q63942                                                         |
| 4085 | 1,2,6,7,8,2 3,4,5,29,3<br>7,28,32 0,31,33,34<br>,35 | 5  | P02631,P12020,P31044,Q5GRG2,Q63942                                                                              |
| 4086 | 1,2,6,7,8,2 3,4,5,29,3<br>7,28,33 0,31,32,34<br>,35 | 5  | P02631,P08723,P12020,Q63942,Q9JI85                                                                              |
| 4087 | 1,2,6,7,8,2 3,4,5,29,3<br>7,28,34 0,31,32,33<br>,35 | 8  | P02631,P47967,P97840,Q4FZU6,Q63532,Q63942,Q6P6R2,Q9WTT6                                                         |



|      |                        |                                 |   |                                                  |
|------|------------------------|---------------------------------|---|--------------------------------------------------|
| 4088 | 1,2,6,7,8,2<br>7,28,35 | 3,4,5,29,3<br>0,31,32,33<br>,34 | 2 | P02631,Q63942                                    |
| 4089 | 1,2,6,7,8,2<br>7,29,30 | 3,4,5,28,3<br>1,32,33,34<br>,35 | 2 | P02631,P14669                                    |
| 4090 | 1,2,6,7,8,2<br>7,29,31 | 3,4,5,28,3<br>0,32,33,34<br>,35 | 3 | P02631,P12020,Q8CJD3                             |
| 4091 | 1,2,6,7,8,2<br>7,29,32 | 3,4,5,28,3<br>0,31,33,34<br>,35 | 5 | P02631,P12020,P14669,Q8CJD3,Q9Z1F2               |
| 4092 | 1,2,6,7,8,2<br>7,29,33 | 3,4,5,28,3<br>0,31,32,34<br>,35 | 6 | P02631,P11598,P14669,Q63617,Q8CJD3,Q9JI85        |
| 4093 | 1,2,6,7,8,2<br>7,29,34 | 3,4,5,28,3<br>0,31,32,33<br>,35 | 7 | P02631,P11598,P97840,Q00715,Q63467,Q63532,Q9WTT6 |
| 4094 | 1,2,6,7,8,2<br>7,29,35 | 3,4,5,28,3<br>0,31,32,33<br>,34 | 2 | P01946,P02631                                    |
| 4095 | 1,2,6,7,8,2<br>7,30,31 | 3,4,5,28,2<br>9,32,33,34<br>,35 | 4 | P02631,P12020,P19218,P97840                      |
| 4096 | 1,2,6,7,8,2<br>7,30,32 | 3,4,5,28,2<br>9,31,33,34<br>,35 | 4 | P02631,P12020,P14669,Q63532                      |
| 4097 | 1,2,6,7,8,2<br>7,30,33 | 3,4,5,28,2<br>9,31,32,34<br>,35 | 1 | P02631                                           |
| 4098 | 1,2,6,7,8,2<br>7,30,34 | 3,4,5,28,2<br>9,31,32,33<br>,35 | 6 | P02631,P47967,P97840,Q63532,Q6P6R2,Q9WTT6        |
| 4099 | 1,2,6,7,8,2<br>7,30,35 | 3,4,5,28,2<br>9,31,32,33<br>,34 | 1 | P02631                                           |
| 4100 | 1,2,6,7,8,2<br>7,31,32 | 3,4,5,28,2<br>9,30,33,34<br>,35 | 3 | P02631,P12020,Q8CJD3                             |
| 4101 | 1,2,6,7,8,2<br>7,31,33 | 3,4,5,28,2<br>9,30,32,34<br>,35 | 3 | P02631,P12020,Q8CJD3                             |
| 4102 | 1,2,6,7,8,2<br>7,31,34 | 3,4,5,28,2<br>9,30,32,33<br>,35 | 5 | P02631,P47967,P97840,Q63532,Q9WTT6               |

|      |                        |                                 |   |                                                                |
|------|------------------------|---------------------------------|---|----------------------------------------------------------------|
| 4103 | 1,2,6,7,8,2<br>7,31,35 | 3,4,5,28,2<br>9,30,32,33<br>,34 | 1 | Q30KJ2                                                         |
| 4104 | 1,2,6,7,8,2<br>7,32,33 | 3,4,5,28,2<br>9,30,31,34<br>,35 | 6 | P02631,P02793;Q7TP54,P12020,P14669,Q63532,Q8CJD3               |
| 4105 | 1,2,6,7,8,2<br>7,32,34 | 3,4,5,28,2<br>9,30,31,33<br>,35 | 7 | P02631,P97840,Q00715,Q63532,Q6P6R2,Q9WTT6,Q9Z1F2               |
| 4106 | 1,2,6,7,8,2<br>7,32,35 | 3,4,5,28,2<br>9,30,31,33<br>,34 | 3 | P02631,Q30KJ2,Q63532                                           |
| 4107 | 1,2,6,7,8,2<br>7,33,34 | 3,4,5,28,2<br>9,30,31,32<br>,35 | 3 | P02631,P97840,Q63532                                           |
| 4108 | 1,2,6,7,8,2<br>7,33,35 | 3,4,5,28,2<br>9,30,31,32<br>,34 | 4 | P02631,P15399,P97580,Q30KJ2                                    |
| 4109 | 1,2,6,7,8,2<br>7,34,35 | 3,4,5,28,2<br>9,30,31,32<br>,33 | 4 | P02631,P97840,Q63532,Q9WTT6                                    |
| 4110 | 1,2,6,7,8,2<br>8,29,30 | 3,4,5,27,3<br>1,32,33,34<br>,35 | 5 | P02631,P08723,P30120,Q63942,Q8CJ52                             |
| 4111 | 1,2,6,7,8,2<br>8,29,31 | 3,4,5,27,3<br>0,32,33,34<br>,35 | 9 | P02631,P06911,P10715,P12020,P19629,P31044,P68370,Q5GRG2,Q63942 |
| 4112 | 1,2,6,7,8,2<br>8,29,32 | 3,4,5,27,3<br>0,31,33,34<br>,35 | 7 | P02631,P06911,P08723,P12020,P47727,Q5GRG2,Q63942               |
| 4113 | 1,2,6,7,8,2<br>8,29,33 | 3,4,5,27,3<br>0,31,32,34<br>,35 | 8 | O35547,P02631,P08723,P12020,Q63617,Q63942,Q8CJ52,Q9JI85        |
| 4114 | 1,2,6,7,8,2<br>8,29,34 | 3,4,5,27,3<br>0,31,32,33<br>,35 | 5 | P02631,P97840,Q63942,Q6P6R2,Q9WTT6                             |
| 4115 | 1,2,6,7,8,2<br>8,29,35 | 3,4,5,27,3<br>0,31,32,33<br>,34 | 3 | P02631,P15399,Q63942                                           |
| 4116 | 1,2,6,7,8,2<br>8,30,31 | 3,4,5,27,2<br>9,32,33,34<br>,35 | 8 | P10715,P12020,P19629,P31044,P68370,P97840,Q4FZU2,Q5GRG2        |
| 4117 | 1,2,6,7,8,2<br>8,30,32 | 3,4,5,27,2<br>9,31,33,34<br>,35 | 1 | P12020                                                         |

|      |                        |                                 |   |                                                  |
|------|------------------------|---------------------------------|---|--------------------------------------------------|
| 4118 | 1,2,6,7,8,2<br>8,30,33 | 3,4,5,27,2<br>9,31,32,34<br>,35 | 0 |                                                  |
| 4119 | 1,2,6,7,8,2<br>8,30,34 | 3,4,5,27,2<br>9,31,32,33<br>,35 | 5 | P02631,P47967,P97840,Q6P6R2,Q9WTT6               |
| 4120 | 1,2,6,7,8,2<br>8,30,35 | 3,4,5,27,2<br>9,31,32,33<br>,34 | 0 |                                                  |
| 4121 | 1,2,6,7,8,2<br>8,31,32 | 3,4,5,27,2<br>9,30,33,34<br>,35 | 6 | P06911,P10715,P12020,P31044,P68370,Q5GRG2        |
| 4122 | 1,2,6,7,8,2<br>8,31,33 | 3,4,5,27,2<br>9,30,32,34<br>,35 | 7 | P06911,P10715,P12020,P19629,P31044,P68370,Q5GRG2 |
| 4123 | 1,2,6,7,8,2<br>8,31,34 | 3,4,5,27,2<br>9,30,32,33<br>,35 | 5 | P12020,P47967,P97840,Q5GRG2,Q6P6R2               |
| 4124 | 1,2,6,7,8,2<br>8,31,35 | 3,4,5,27,2<br>9,30,32,33<br>,34 | 5 | P02803,P10715,P12020,Q30KJ2,Q5GRG2               |
| 4125 | 1,2,6,7,8,2<br>8,32,33 | 3,4,5,27,2<br>9,30,31,34<br>,35 | 3 | P02631,P02793;Q7TP54,P12020                      |
| 4126 | 1,2,6,7,8,2<br>8,32,34 | 3,4,5,27,2<br>9,30,31,33<br>,35 | 6 | P02631,P12020,P97840,Q63532,Q63942,Q6P6R2        |
| 4127 | 1,2,6,7,8,2<br>8,32,35 | 3,4,5,27,2<br>9,30,31,33<br>,34 | 3 | P12020,P15399,Q30KJ2                             |
| 4128 | 1,2,6,7,8,2<br>8,33,34 | 3,4,5,27,2<br>9,30,31,32<br>,35 | 3 | P02631,P97840,Q6P6R2                             |
| 4129 | 1,2,6,7,8,2<br>8,33,35 | 3,4,5,27,2<br>9,30,31,32<br>,34 | 3 | P15399,P97580,Q30KJ2                             |
| 4130 | 1,2,6,7,8,2<br>8,34,35 | 3,4,5,27,2<br>9,30,31,32<br>,33 | 3 | P97840,Q5HZV9,Q6P6R2                             |
| 4131 | 1,2,6,7,8,2<br>9,30,31 | 3,4,5,27,2<br>8,32,33,34<br>,35 | 2 | Q4FZU2,Q6IG02                                    |
| 4132 | 1,2,6,7,8,2<br>9,30,32 | 3,4,5,27,2<br>8,31,33,34<br>,35 | 1 | P02631                                           |

|      |                        |                                 |   |                                                  |
|------|------------------------|---------------------------------|---|--------------------------------------------------|
| 4133 | 1,2,6,7,8,2<br>9,30,33 | 3,4,5,27,2<br>8,31,32,34<br>,35 | 2 | P02631,P53792                                    |
| 4134 | 1,2,6,7,8,2<br>9,30,34 | 3,4,5,27,2<br>8,31,32,33<br>,35 | 4 | P02631,P47967,P97840,Q6IG02                      |
| 4135 | 1,2,6,7,8,2<br>9,30,35 | 3,4,5,27,2<br>8,31,32,33<br>,34 | 2 | P14480,Q4FZU2                                    |
| 4136 | 1,2,6,7,8,2<br>9,31,32 | 3,4,5,27,2<br>8,30,33,34<br>,35 | 3 | P04182,P12020,Q8CJD3                             |
| 4137 | 1,2,6,7,8,2<br>9,31,33 | 3,4,5,27,2<br>8,30,32,34<br>,35 | 4 | P04182,P12020,Q63617,Q8CJD3                      |
| 4138 | 1,2,6,7,8,2<br>9,31,34 | 3,4,5,27,2<br>8,30,32,33<br>,35 | 2 | P02631,Q63467                                    |
| 4139 | 1,2,6,7,8,2<br>9,31,35 | 3,4,5,27,2<br>8,30,32,33<br>,34 | 2 | P04182,P15399                                    |
| 4140 | 1,2,6,7,8,2<br>9,32,33 | 3,4,5,27,2<br>8,30,31,34<br>,35 | 6 | P02631,P02793;Q7TP54,P12020,P53792,Q63617,Q8CJD3 |
| 4141 | 1,2,6,7,8,2<br>9,32,34 | 3,4,5,27,2<br>8,30,31,33<br>,35 | 4 | P02631,Q63467,Q63532,Q6P6R2                      |
| 4142 | 1,2,6,7,8,2<br>9,32,35 | 3,4,5,27,2<br>8,30,31,33<br>,34 | 4 | P02631,P04182,P15399,P51907                      |
| 4143 | 1,2,6,7,8,2<br>9,33,34 | 3,4,5,27,2<br>8,30,31,32<br>,35 | 1 | P02631                                           |
| 4144 | 1,2,6,7,8,2<br>9,33,35 | 3,4,5,27,2<br>8,30,31,32<br>,34 | 5 | P02631,P04182,P15399,Q30KJ2,Q63617               |
| 4145 | 1,2,6,7,8,2<br>9,34,35 | 3,4,5,27,2<br>8,30,31,32<br>,33 | 2 | P02631,P14480                                    |
| 4146 | 1,2,6,7,8,3<br>0,31,32 | 3,4,5,27,2<br>8,29,33,34<br>,35 | 1 | P12020                                           |
| 4147 | 1,2,6,7,8,3<br>0,31,33 | 3,4,5,27,2<br>8,29,32,34<br>,35 | 2 | P12020,P19218                                    |

|      |                        |                                 |   |                                           |
|------|------------------------|---------------------------------|---|-------------------------------------------|
| 4148 | 1,2,6,7,8,3<br>0,31,34 | 3,4,5,27,2<br>8,29,32,33<br>,35 | 3 | P19218,P47967,P97840                      |
| 4149 | 1,2,6,7,8,3<br>0,31,35 | 3,4,5,27,2<br>8,29,32,33<br>,34 | 2 | P04182,Q4FZU2                             |
| 4150 | 1,2,6,7,8,3<br>0,32,33 | 3,4,5,27,2<br>8,29,31,34<br>,35 | 1 | P12785                                    |
| 4151 | 1,2,6,7,8,3<br>0,32,34 | 3,4,5,27,2<br>8,29,31,33<br>,35 | 4 | P47967,P97840,Q63532,Q6P6R2               |
| 4152 | 1,2,6,7,8,3<br>0,32,35 | 3,4,5,27,2<br>8,29,31,33<br>,34 | 0 |                                           |
| 4153 | 1,2,6,7,8,3<br>0,33,34 | 3,4,5,27,2<br>8,29,31,32<br>,35 | 2 | P47967,P97840                             |
| 4154 | 1,2,6,7,8,3<br>0,33,35 | 3,4,5,27,2<br>8,29,31,32<br>,34 | 3 | P15399,P97580,Q30KJ2                      |
| 4155 | 1,2,6,7,8,3<br>0,34,35 | 3,4,5,27,2<br>8,29,31,32<br>,33 | 3 | P14480,P47967,P97840                      |
| 4156 | 1,2,6,7,8,3<br>1,32,33 | 3,4,5,27,2<br>8,29,30,34<br>,35 | 6 | P01835,P04182,P12020,P97580,Q30KJ2,Q8CJD3 |
| 4157 | 1,2,6,7,8,3<br>1,32,34 | 3,4,5,27,2<br>8,29,30,33<br>,35 | 5 | P01835,P12020,P97840,Q63532,Q6P6R2        |
| 4158 | 1,2,6,7,8,3<br>1,32,35 | 3,4,5,27,2<br>8,29,30,33<br>,34 | 4 | P04182,P12020,P97580,Q30KJ2               |
| 4159 | 1,2,6,7,8,3<br>1,33,34 | 3,4,5,27,2<br>8,29,30,32<br>,35 | 2 | P01835,P97840                             |
| 4160 | 1,2,6,7,8,3<br>1,33,35 | 3,4,5,27,2<br>8,29,30,32<br>,34 | 5 | P01835,P04182,P15399,P97580,Q30KJ2        |
| 4161 | 1,2,6,7,8,3<br>1,34,35 | 3,4,5,27,2<br>8,29,30,32<br>,33 | 1 | P01835                                    |
| 4162 | 1,2,6,7,8,3<br>2,33,34 | 3,4,5,27,2<br>8,29,30,31<br>,35 | 4 | P01835,P02631,Q63532,Q6P6R2               |

|      |                         |                                 |    |                                                                                            |
|------|-------------------------|---------------------------------|----|--------------------------------------------------------------------------------------------|
| 4163 | 1,2,6,7,8,3<br>2,33,35  | 3,4,5,27,2<br>8,29,30,31<br>,34 | 5  | P04182,P15399,P97580,Q30KJ2,Q8CJD3                                                         |
| 4164 | 1,2,6,7,8,3<br>2,34,35  | 3,4,5,27,2<br>8,29,30,31<br>,33 | 3  | P08753,Q63532,Q6P6R2                                                                       |
| 4165 | 1,2,6,7,8,3<br>3,34,35  | 3,4,5,27,2<br>8,29,30,31<br>,32 | 4  | P01835,P15399,P97580,Q30KJ2                                                                |
| 4166 | 1,2,6,7,27,<br>28,29,30 | 3,4,5,8,31,<br>32,33,34,3<br>5  | 11 | O54861,P02631,P08723,P09456,P30120,P97840,Q6AYR9,Q6AYS4,Q91ZS3,Q9JHB9,Q9JI85               |
| 4167 | 1,2,6,7,27,<br>28,29,31 | 3,4,5,8,30,<br>32,33,34,3<br>5  | 11 | O35547,P02631,P06911,P08723,P12020,P19629,Q5GRG2,Q62902,Q6AYL6,Q9JHB9,Q9JI85               |
| 4168 | 1,2,6,7,27,<br>28,29,32 | 3,4,5,8,30,<br>31,33,34,3<br>5  | 12 | P02631,P02793;Q7TP54,P06911,P08723,P09456,P12020,P24368,P47727,Q5GRG2,Q91ZS3,Q9JHB9,Q9JI85 |
| 4169 | 1,2,6,7,27,<br>28,29,33 | 3,4,5,8,30,<br>31,32,34,3<br>5  | 10 | O35547,O54861,P02631,P02793;Q7TP54,P08723,P09456,P15399,Q6AYS4,Q9JHB9,Q9JI85               |
| 4170 | 1,2,6,7,27,<br>28,29,34 | 3,4,5,8,30,<br>31,32,33,3<br>5  | 6  | P02631,P97840,Q4FZU6,Q91ZS3,Q9JHB9,Q9JI85                                                  |
| 4171 | 1,2,6,7,27,<br>28,29,35 | 3,4,5,8,30,<br>31,32,33,3<br>4  | 10 | O54861,P01946,P02631,P08723,P15399,Q5M819,Q6AYS4,Q9JHB9,Q9JI85,Q9QUL6                      |
| 4172 | 1,2,6,7,27,<br>28,30,31 | 3,4,5,8,29,<br>32,33,34,3<br>5  | 6  | P12020,P19629,P47967,P97840,Q5GRG2,Q6AYS4                                                  |
| 4173 | 1,2,6,7,27,<br>28,30,32 | 3,4,5,8,29,<br>31,33,34,3<br>5  | 4  | P02631,P12020,P97840,Q6AYQ8                                                                |
| 4174 | 1,2,6,7,27,<br>28,30,33 | 3,4,5,8,29,<br>31,32,34,3<br>5  | 2  | P97840,Q6AYS4                                                                              |
| 4175 | 1,2,6,7,27,<br>28,30,34 | 3,4,5,8,29,<br>31,32,33,3<br>5  | 4  | P02631,P47967,P97840,Q63532                                                                |
| 4176 | 1,2,6,7,27,<br>28,30,35 | 3,4,5,8,29,<br>31,32,33,3<br>4  | 4  | D3ZUC6,P97840,Q6AYQ8,Q6AYS4                                                                |
| 4177 | 1,2,6,7,27,<br>28,31,32 | 3,4,5,8,29,<br>30,33,34,3<br>5  | 5  | P06911,P10715,P12020,P31044,Q5GRG2                                                         |

|      |                         |                                |   |                                                  |
|------|-------------------------|--------------------------------|---|--------------------------------------------------|
| 4178 | 1,2,6,7,27,<br>28,31,33 | 3,4,5,8,29,<br>30,32,34,3<br>5 | 4 | P10715,P12020,P19629,Q5GRG2                      |
| 4179 | 1,2,6,7,27,<br>28,31,34 | 3,4,5,8,29,<br>30,32,33,3<br>5 | 4 | P12020,P47967,P97840,Q5GRG2                      |
| 4180 | 1,2,6,7,27,<br>28,31,35 | 3,4,5,8,29,<br>30,32,33,3<br>4 | 5 | P12020,P15399,Q30KJ2,Q5GRG2,Q6AYS4               |
| 4181 | 1,2,6,7,27,<br>28,32,33 | 3,4,5,8,29,<br>30,31,34,3<br>5 | 4 | P02631,P02793;Q7TP54,P12020,Q06000               |
| 4182 | 1,2,6,7,27,<br>28,32,34 | 3,4,5,8,29,<br>30,31,33,3<br>5 | 7 | P02631,P12020,P47967,P97840,Q4FZU6,Q63532,Q6P6R2 |
| 4183 | 1,2,6,7,27,<br>28,32,35 | 3,4,5,8,29,<br>30,31,33,3<br>4 | 4 | P12020,P15399,Q30KJ2,Q6AYS4                      |
| 4184 | 1,2,6,7,27,<br>28,33,34 | 3,4,5,8,29,<br>30,31,32,3<br>5 | 5 | P02631,P47967,P97840,Q4FZU6,Q63532               |
| 4185 | 1,2,6,7,27,<br>28,33,35 | 3,4,5,8,29,<br>30,31,32,3<br>4 | 4 | P15399,P97580,Q30KJ2,Q6AYS4                      |
| 4186 | 1,2,6,7,27,<br>28,34,35 | 3,4,5,8,29,<br>30,31,32,3<br>3 | 6 | P02631,P97840,Q5HZV9,Q5M819,Q63532,Q9QUL6        |
| 4187 | 1,2,6,7,27,<br>29,30,31 | 3,4,5,8,28,<br>32,33,34,3<br>5 | 2 | P05942,P97840                                    |
| 4188 | 1,2,6,7,27,<br>29,30,32 | 3,4,5,8,28,<br>31,33,34,3<br>5 | 2 | P02631,Q91ZS3                                    |
| 4189 | 1,2,6,7,27,<br>29,30,33 | 3,4,5,8,28,<br>31,32,34,3<br>5 | 3 | O54861,P02631,Q6AYS4                             |
| 4190 | 1,2,6,7,27,<br>29,30,34 | 3,4,5,8,28,<br>31,32,33,3<br>5 | 5 | P02631,P47967,P97840,Q63532,Q91ZS3               |
| 4191 | 1,2,6,7,27,<br>29,30,35 | 3,4,5,8,28,<br>31,32,33,3<br>4 | 5 | O54861,P01946,P05942,P14480,Q6AYS4               |
| 4192 | 1,2,6,7,27,<br>29,31,32 | 3,4,5,8,28,<br>30,33,34,3<br>5 | 2 | P12020,Q8CJD3                                    |

|      |                         |                                |   |                                                  |
|------|-------------------------|--------------------------------|---|--------------------------------------------------|
| 4193 | 1,2,6,7,27,<br>29,31,33 | 3,4,5,8,28,<br>30,32,34,3<br>5 | 1 | Q8CJD3                                           |
| 4194 | 1,2,6,7,27,<br>29,31,34 | 3,4,5,8,28,<br>30,32,33,3<br>5 | 4 | P02631,P97840,Q63467,Q63532                      |
| 4195 | 1,2,6,7,27,<br>29,31,35 | 3,4,5,8,28,<br>30,32,33,3<br>4 | 3 | P01946,P15399,Q6AYS4                             |
| 4196 | 1,2,6,7,27,<br>29,32,33 | 3,4,5,8,28,<br>30,31,34,3<br>5 | 4 | P02631,P02793;Q7TP54,P15399,Q8CJD3               |
| 4197 | 1,2,6,7,27,<br>29,32,34 | 3,4,5,8,28,<br>30,31,33,3<br>5 | 6 | G3V686,P02631,P97840,Q63467,Q63532,Q91ZS3        |
| 4198 | 1,2,6,7,27,<br>29,32,35 | 3,4,5,8,28,<br>30,31,33,3<br>4 | 4 | P01946,P02631,P15399,Q6AYS4                      |
| 4199 | 1,2,6,7,27,<br>29,33,34 | 3,4,5,8,28,<br>30,31,32,3<br>5 | 4 | P02631,P08649,P97840,Q63532                      |
| 4200 | 1,2,6,7,27,<br>29,33,35 | 3,4,5,8,28,<br>30,31,32,3<br>4 | 5 | P01946,P02631,P15399,Q30KJ2,Q6AYS4               |
| 4201 | 1,2,6,7,27,<br>29,34,35 | 3,4,5,8,28,<br>30,31,32,3<br>3 | 7 | P01946,P02631,P14480,P97840,Q5M819,Q63532,Q9QUL6 |
| 4202 | 1,2,6,7,27,<br>30,31,32 | 3,4,5,8,28,<br>29,33,34,3<br>5 | 2 | P12020,P97840                                    |
| 4203 | 1,2,6,7,27,<br>30,31,33 | 3,4,5,8,28,<br>29,32,34,3<br>5 | 2 | P97840,Q6AYS4                                    |
| 4204 | 1,2,6,7,27,<br>30,31,34 | 3,4,5,8,28,<br>29,32,33,3<br>5 | 4 | P19218,P47967,P97840,Q63532                      |
| 4205 | 1,2,6,7,27,<br>30,31,35 | 3,4,5,8,28,<br>29,32,33,3<br>4 | 3 | P05942,P97840,Q6AYS4                             |
| 4206 | 1,2,6,7,27,<br>30,32,33 | 3,4,5,8,28,<br>29,31,34,3<br>5 | 1 | Q63532                                           |
| 4207 | 1,2,6,7,27,<br>30,32,34 | 3,4,5,8,28,<br>29,31,33,3<br>5 | 3 | P47967,P97840,Q63532                             |



|      |                         |                                |   |                                                  |
|------|-------------------------|--------------------------------|---|--------------------------------------------------|
| 4208 | 1,2,6,7,27,<br>30,32,35 | 3,4,5,8,28,<br>29,31,33,3<br>4 | 2 | Q63532,Q6AYS4                                    |
| 4209 | 1,2,6,7,27,<br>30,33,34 | 3,4,5,8,28,<br>29,31,32,3<br>5 | 3 | P47967,P97840,Q63532                             |
| 4210 | 1,2,6,7,27,<br>30,33,35 | 3,4,5,8,28,<br>29,31,32,3<br>4 | 3 | P15399,Q30KJ2,Q6AYS4                             |
| 4211 | 1,2,6,7,27,<br>30,34,35 | 3,4,5,8,28,<br>29,31,32,3<br>3 | 4 | P14480,P47967,P97840,Q63532                      |
| 4212 | 1,2,6,7,27,<br>31,32,33 | 3,4,5,8,28,<br>29,30,34,3<br>5 | 5 | P02793;Q7TP54,P12020,P97580,Q6AY61,Q8CJD3        |
| 4213 | 1,2,6,7,27,<br>31,32,34 | 3,4,5,8,28,<br>29,30,33,3<br>5 | 4 | G3V686,P12020,P97840,Q63532                      |
| 4214 | 1,2,6,7,27,<br>31,32,35 | 3,4,5,8,28,<br>29,30,33,3<br>4 | 5 | P12020,P15399,P97580,Q30KJ2,Q6AYS4               |
| 4215 | 1,2,6,7,27,<br>31,33,34 | 3,4,5,8,28,<br>29,30,32,3<br>5 | 2 | P97840,Q63532                                    |
| 4216 | 1,2,6,7,27,<br>31,33,35 | 3,4,5,8,28,<br>29,30,32,3<br>4 | 4 | P15399,P97580,Q30KJ2,Q6AYS4                      |
| 4217 | 1,2,6,7,27,<br>31,34,35 | 3,4,5,8,28,<br>29,30,32,3<br>3 | 2 | P97840,Q63532                                    |
| 4218 | 1,2,6,7,27,<br>32,33,34 | 3,4,5,8,28,<br>29,30,31,3<br>5 | 6 | G3V686,P02631,P08649,P55314,P97840,Q63532        |
| 4219 | 1,2,6,7,27,<br>32,33,35 | 3,4,5,8,28,<br>29,30,31,3<br>4 | 6 | P15399,P97580,Q30KJ2,Q63532,Q6AYS4,Q6NX65        |
| 4220 | 1,2,6,7,27,<br>32,34,35 | 3,4,5,8,28,<br>29,30,31,3<br>3 | 3 | P97840,Q5M819,Q63532                             |
| 4221 | 1,2,6,7,27,<br>33,34,35 | 3,4,5,8,28,<br>29,30,31,3<br>2 | 5 | P15399,P97580,P97840,Q30KJ2,Q63532               |
| 4222 | 1,2,6,7,28,<br>29,30,31 | 3,4,5,8,27,<br>32,33,34,3<br>5 | 7 | P06911,P12020,P19629,P35467,P97840,Q5GRG2,Q6AYS4 |

|      |                         |                                |   |                                                         |
|------|-------------------------|--------------------------------|---|---------------------------------------------------------|
| 4223 | 1,2,6,7,28,<br>29,30,32 | 3,4,5,8,27,<br>31,33,34,3<br>5 | 3 | P09456,P12020,Q91ZS3                                    |
| 4224 | 1,2,6,7,28,<br>29,30,33 | 3,4,5,8,27,<br>31,32,34,3<br>5 | 5 | O54861,P09456,P15399,P35467,Q6AYS4                      |
| 4225 | 1,2,6,7,28,<br>29,30,34 | 3,4,5,8,27,<br>31,32,33,3<br>5 | 2 | P47967,P97840                                           |
| 4226 | 1,2,6,7,28,<br>29,30,35 | 3,4,5,8,27,<br>31,32,33,3<br>4 | 4 | O54861,P14480,P15399,Q6AYS4                             |
| 4227 | 1,2,6,7,28,<br>29,31,32 | 3,4,5,8,27,<br>30,33,34,3<br>5 | 6 | P06911,P12020,P22985,P47727,Q5GRG2,Q6AYL6               |
| 4228 | 1,2,6,7,28,<br>29,31,33 | 3,4,5,8,27,<br>30,32,34,3<br>5 | 8 | P06911,P12020,P15399,P19629,P35467,P83121,Q5GRG2,Q6AYS4 |
| 4229 | 1,2,6,7,28,<br>29,31,34 | 3,4,5,8,27,<br>30,32,33,3<br>5 | 5 | P06911,P12020,P27791,P97840,Q5GRG2                      |
| 4230 | 1,2,6,7,28,<br>29,31,35 | 3,4,5,8,27,<br>30,32,33,3<br>4 | 5 | P06760,P06911,P15399,Q5GRG2,Q6AYS4                      |
| 4231 | 1,2,6,7,28,<br>29,32,33 | 3,4,5,8,27,<br>30,31,34,3<br>5 | 7 | P02793;Q7TP54,P04905,P06911,P09456,P12020,P15399,P47727 |
| 4232 | 1,2,6,7,28,<br>29,32,34 | 3,4,5,8,27,<br>30,31,33,3<br>5 | 3 | P97840,Q63532,Q91ZS3                                    |
| 4233 | 1,2,6,7,28,<br>29,32,35 | 3,4,5,8,27,<br>30,31,33,3<br>4 | 2 | P15399,Q6AYS4                                           |
| 4234 | 1,2,6,7,28,<br>29,33,34 | 3,4,5,8,27,<br>30,31,32,3<br>5 | 3 | P15399,P27791,P97840                                    |
| 4235 | 1,2,6,7,28,<br>29,33,35 | 3,4,5,8,27,<br>30,31,32,3<br>4 | 5 | O54861,P06760,P15399,Q30KJ2,Q6AYS4                      |
| 4236 | 1,2,6,7,28,<br>29,34,35 | 3,4,5,8,27,<br>30,31,32,3<br>3 | 4 | P15399,P97840,Q5M819,Q9QUL6                             |
| 4237 | 1,2,6,7,28,<br>30,31,32 | 3,4,5,8,27,<br>29,33,34,3<br>5 | 4 | P06911,P12020,P97840,Q5GRG2                             |

|      |                         |                                |   |                                                         |
|------|-------------------------|--------------------------------|---|---------------------------------------------------------|
| 4238 | 1,2,6,7,28,<br>30,31,33 | 3,4,5,8,27,<br>29,32,34,3<br>5 | 6 | P12020,P19629,P35467,P97840,Q5GRG2,Q6AYS4               |
| 4239 | 1,2,6,7,28,<br>30,31,34 | 3,4,5,8,27,<br>29,32,33,3<br>5 | 2 | P47967,P97840                                           |
| 4240 | 1,2,6,7,28,<br>30,31,35 | 3,4,5,8,27,<br>29,32,33,3<br>4 | 4 | P06760,P15399,P97840,Q6AYS4                             |
| 4241 | 1,2,6,7,28,<br>30,32,33 | 3,4,5,8,27,<br>29,31,34,3<br>5 | 3 | P12020,P97840,Q6AYS4                                    |
| 4242 | 1,2,6,7,28,<br>30,32,34 | 3,4,5,8,27,<br>29,31,33,3<br>5 | 4 | P47967,P97840,Q63532,Q6P6R2                             |
| 4243 | 1,2,6,7,28,<br>30,32,35 | 3,4,5,8,27,<br>29,31,33,3<br>4 | 2 | P15399,Q6AYS4                                           |
| 4244 | 1,2,6,7,28,<br>30,33,34 | 3,4,5,8,27,<br>29,31,32,3<br>5 | 2 | P47967,P97840                                           |
| 4245 | 1,2,6,7,28,<br>30,33,35 | 3,4,5,8,27,<br>29,31,32,3<br>4 | 5 | P06760,P15399,P97580,Q30KJ2,Q6AYS4                      |
| 4246 | 1,2,6,7,28,<br>30,34,35 | 3,4,5,8,27,<br>29,31,32,3<br>3 | 4 | P14480,P47967,P97840,Q5HZV9                             |
| 4247 | 1,2,6,7,28,<br>31,32,33 | 3,4,5,8,27,<br>29,30,34,3<br>5 | 8 | P06911,P10715,P12020,P15399,P19629,P97580,Q30KJ2,Q5GRG2 |
| 4248 | 1,2,6,7,28,<br>31,32,34 | 3,4,5,8,27,<br>29,30,33,3<br>5 | 6 | P06911,P12020,P13432,P97840,Q5GRG2,Q63532               |
| 4249 | 1,2,6,7,28,<br>31,32,35 | 3,4,5,8,27,<br>29,30,33,3<br>4 | 6 | P12020,P15399,P97580,Q30KJ2,Q5GRG2,Q6AYS4               |
| 4250 | 1,2,6,7,28,<br>31,33,34 | 3,4,5,8,27,<br>29,30,32,3<br>5 | 4 | P12020,P13432,P97840,Q5GRG2                             |
| 4251 | 1,2,6,7,28,<br>31,33,35 | 3,4,5,8,27,<br>29,30,32,3<br>4 | 7 | P02803,P06760,P12020,P15399,P97580,Q30KJ2,Q6AYS4        |
| 4252 | 1,2,6,7,28,<br>31,34,35 | 3,4,5,8,27,<br>29,30,32,3<br>3 | 4 | P15399,P97840,Q5HZV9,Q9QUL6                             |

|      |                         |                                |   |                                                  |
|------|-------------------------|--------------------------------|---|--------------------------------------------------|
| 4253 | 1,2,6,7,28,<br>32,33,34 | 3,4,5,8,27,<br>29,30,31,3<br>5 | 2 | P97840,Q63532                                    |
| 4254 | 1,2,6,7,28,<br>32,33,35 | 3,4,5,8,27,<br>29,30,31,3<br>4 | 4 | P15399,P97580,Q30KJ2,Q6AYS4                      |
| 4255 | 1,2,6,7,28,<br>32,34,35 | 3,4,5,8,27,<br>29,30,31,3<br>3 | 5 | P15399,P97840,Q5HZV9,Q5M819,Q63532               |
| 4256 | 1,2,6,7,28,<br>33,34,35 | 3,4,5,8,27,<br>29,30,31,3<br>2 | 5 | P15399,P97580,P97840,Q30KJ2,Q5HZV9               |
| 4257 | 1,2,6,7,29,<br>30,31,32 | 3,4,5,8,27,<br>28,33,34,3<br>5 | 2 | P04182,P12020                                    |
| 4258 | 1,2,6,7,29,<br>30,31,33 | 3,4,5,8,27,<br>28,32,34,3<br>5 | 3 | P35467,P83121,Q6AYS4                             |
| 4259 | 1,2,6,7,29,<br>30,31,34 | 3,4,5,8,27,<br>28,32,33,3<br>5 | 4 | P09605,P25809,P47967,P97840,Q6IG02               |
| 4260 | 1,2,6,7,29,<br>30,31,35 | 3,4,5,8,27,<br>28,32,33,3<br>4 | 4 | P04182,P14480,P15399,Q6AYS4                      |
| 4261 | 1,2,6,7,29,<br>30,32,33 | 3,4,5,8,27,<br>28,31,34,3<br>5 | 2 | P15399,P53792                                    |
| 4262 | 1,2,6,7,29,<br>30,32,34 | 3,4,5,8,27,<br>28,31,33,3<br>5 | 3 | P09605,P25809,P97840,Q63532                      |
| 4263 | 1,2,6,7,29,<br>30,32,35 | 3,4,5,8,27,<br>28,31,33,3<br>4 | 4 | P04182,P14480,P15399,Q6AYS4                      |
| 4264 | 1,2,6,7,29,<br>30,33,34 | 3,4,5,8,27,<br>28,31,32,3<br>5 | 1 | P97840                                           |
| 4265 | 1,2,6,7,29,<br>30,33,35 | 3,4,5,8,27,<br>28,31,32,3<br>4 | 4 | P14480,P15399,Q30KJ2,Q6AYS4                      |
| 4266 | 1,2,6,7,29,<br>30,34,35 | 3,4,5,8,27,<br>28,31,32,3<br>3 | 2 | P14480,P97840                                    |
| 4267 | 1,2,6,7,29,<br>31,32,33 | 3,4,5,8,27,<br>28,30,34,3<br>5 | 6 | P02793;Q7TP54,P04182,P12020,P15399,P97580,Q8CJD3 |

|      |                         |                                |   |                                           |
|------|-------------------------|--------------------------------|---|-------------------------------------------|
| 4268 | 1,2,6,7,29,<br>31,32,34 | 3,4,5,8,27,<br>28,30,33,3<br>5 | 4 | P12020,P97840,Q63467,Q63532               |
| 4269 | 1,2,6,7,29,<br>31,32,35 | 3,4,5,8,27,<br>28,30,33,3<br>4 | 4 | P04182,P15399,Q30KJ2,Q6AYS4               |
| 4270 | 1,2,6,7,29,<br>31,33,34 | 3,4,5,8,27,<br>28,30,32,3<br>5 | 2 | P00714,P97840                             |
| 4271 | 1,2,6,7,29,<br>31,33,35 | 3,4,5,8,27,<br>28,30,32,3<br>4 | 6 | P00714,P04182,P15399,P97580,Q30KJ2,Q6AYS4 |
| 4272 | 1,2,6,7,29,<br>31,34,35 | 3,4,5,8,27,<br>28,30,32,3<br>3 | 2 | P00714,P15399                             |
| 4273 | 1,2,6,7,29,<br>32,33,34 | 3,4,5,8,27,<br>28,30,31,3<br>5 | 1 | Q63532                                    |
| 4274 | 1,2,6,7,29,<br>32,33,35 | 3,4,5,8,27,<br>28,30,31,3<br>4 | 5 | P04182,P15399,P97580,Q30KJ2,Q6AYS4        |
| 4275 | 1,2,6,7,29,<br>32,34,35 | 3,4,5,8,27,<br>28,30,31,3<br>3 | 2 | P15399,Q63532                             |
| 4276 | 1,2,6,7,29,<br>33,34,35 | 3,4,5,8,27,<br>28,30,31,3<br>2 | 2 | P15399,Q30KJ2                             |
| 4277 | 1,2,6,7,30,<br>31,32,33 | 3,4,5,8,27,<br>28,29,34,3<br>5 | 2 | P12020,P97580                             |
| 4278 | 1,2,6,7,30,<br>31,32,34 | 3,4,5,8,27,<br>28,29,33,3<br>5 | 4 | P09605,P25809,P47967,P97840,Q63532        |
| 4279 | 1,2,6,7,30,<br>31,32,35 | 3,4,5,8,27,<br>28,29,33,3<br>4 | 4 | P04182,P15399,Q30KJ2,Q6AYS4               |
| 4280 | 1,2,6,7,30,<br>31,33,34 | 3,4,5,8,27,<br>28,29,32,3<br>5 | 2 | P47967,P97840                             |
| 4281 | 1,2,6,7,30,<br>31,33,35 | 3,4,5,8,27,<br>28,29,32,3<br>4 | 5 | P04182,P15399,P97580,Q30KJ2,Q6AYS4        |
| 4282 | 1,2,6,7,30,<br>31,34,35 | 3,4,5,8,27,<br>28,29,32,3<br>3 | 2 | P47967,P97840                             |

|      |                         |                                |    |                                                                                     |
|------|-------------------------|--------------------------------|----|-------------------------------------------------------------------------------------|
| 4283 | 1,2,6,7,30,<br>32,33,34 | 3,4,5,8,27,<br>28,29,31,3<br>5 | 3  | P47967,P97840,Q63532                                                                |
| 4284 | 1,2,6,7,30,<br>32,33,35 | 3,4,5,8,27,<br>28,29,31,3<br>4 | 4  | P15399,P97580,Q30KJ2,Q6AYS4                                                         |
| 4285 | 1,2,6,7,30,<br>32,34,35 | 3,4,5,8,27,<br>28,29,31,3<br>3 | 3  | P14668,P97840,Q63532                                                                |
| 4286 | 1,2,6,7,30,<br>33,34,35 | 3,4,5,8,27,<br>28,29,31,3<br>2 | 4  | P15399,P97580,P97840,Q30KJ2                                                         |
| 4287 | 1,2,6,7,31,<br>32,33,34 | 3,4,5,8,27,<br>28,29,30,3<br>5 | 6  | P01835,P12020,P13432,P97580,P97840,Q63532                                           |
| 4288 | 1,2,6,7,31,<br>32,33,35 | 3,4,5,8,27,<br>28,29,30,3<br>4 | 5  | P04182,P15399,P97580,Q30KJ2,Q6AYS4                                                  |
| 4289 | 1,2,6,7,31,<br>32,34,35 | 3,4,5,8,27,<br>28,29,30,3<br>3 | 4  | P97580,P97840,Q30KJ2,Q63532                                                         |
| 4290 | 1,2,6,7,31,<br>33,34,35 | 3,4,5,8,27,<br>28,29,30,3<br>2 | 7  | P00714,P01835,P15399,P82471,P97580,P97840,Q30KJ2                                    |
| 4291 | 1,2,6,7,32,<br>33,34,35 | 3,4,5,8,27,<br>28,29,30,3<br>1 | 5  | P15399,P97580,Q30KJ2,Q63532,Q63661                                                  |
| 4292 | 1,2,6,8,27,<br>28,29,30 | 3,4,5,7,31,<br>32,33,34,3<br>5 | 12 | O35547,P02781,P02782,P08723,P0C0A9,P24368,P30120,Q63942,Q6AYR9,Q8CJ52,Q9JHB9,Q9JI85 |
| 4293 | 1,2,6,8,27,<br>28,29,31 | 3,4,5,7,30,<br>32,33,34,3<br>5 | 10 | O35547,P02781,P02782,P06911,P08723,P30120,Q5GRG2,Q63942,Q9JHB9,Q9JI85               |
| 4294 | 1,2,6,8,27,<br>28,29,32 | 3,4,5,7,30,<br>31,33,34,3<br>5 | 12 | O35547,P02781,P02782,P08723,P0C0A9,P24368,P30120,P47727,Q63942,Q9JHB9,Q9JI85,Q9Z1F2 |
| 4295 | 1,2,6,8,27,<br>28,29,33 | 3,4,5,7,30,<br>31,32,34,3<br>5 | 12 | O35547,P02781,P02782,P07647,P08723,P0C0A9,P24368,P30120,P47727,Q63942,Q9JHB9,Q9JI85 |
| 4296 | 1,2,6,8,27,<br>28,29,34 | 3,4,5,7,30,<br>31,32,33,3<br>5 | 10 | O35547,P02782,P08723,P30120,Q4FZU6,Q5M8C6,Q63942,Q6P6R2,Q9JHB9,Q9WTT6               |
| 4297 | 1,2,6,8,27,<br>28,29,35 | 3,4,5,7,30,<br>31,32,33,3<br>4 | 5  | O35547,P02782,P08723,Q63942,Q9JHB9                                                  |

|      |                         |                                |   |                                                  |
|------|-------------------------|--------------------------------|---|--------------------------------------------------|
| 4298 | 1,2,6,8,27,<br>28,30,31 | 3,4,5,7,29,<br>32,33,34,3<br>5 | 3 | P02782,Q5GRG2,Q63942                             |
| 4299 | 1,2,6,8,27,<br>28,30,32 | 3,4,5,7,29,<br>31,33,34,3<br>5 | 4 | P02782,Q63942,Q6AYQ8,Q6IFV1                      |
| 4300 | 1,2,6,8,27,<br>28,30,33 | 3,4,5,7,29,<br>31,32,34,3<br>5 | 2 | P02782,Q63942                                    |
| 4301 | 1,2,6,8,27,<br>28,30,34 | 3,4,5,7,29,<br>31,32,33,3<br>5 | 6 | P47967,P97840,Q4FZU6,Q63942,Q6P6R2,Q9WTT6        |
| 4302 | 1,2,6,8,27,<br>28,30,35 | 3,4,5,7,29,<br>31,32,33,3<br>4 | 2 | Q63942,Q6AYQ8                                    |
| 4303 | 1,2,6,8,27,<br>28,31,32 | 3,4,5,7,29,<br>30,33,34,3<br>5 | 7 | P02782,P06911,P12020,P31044,Q5GRG2,Q63942,Q9Z1F2 |
| 4304 | 1,2,6,8,27,<br>28,31,33 | 3,4,5,7,29,<br>30,32,34,3<br>5 | 3 | P02782,Q5GRG2,Q63942                             |
| 4305 | 1,2,6,8,27,<br>28,31,34 | 3,4,5,7,29,<br>30,32,33,3<br>5 | 5 | Q4FZU6,Q5GRG2,Q63942,Q6P6R2,Q9WTT6               |
| 4306 | 1,2,6,8,27,<br>28,31,35 | 3,4,5,7,29,<br>30,32,33,3<br>4 | 1 | Q63942                                           |
| 4307 | 1,2,6,8,27,<br>28,32,33 | 3,4,5,7,29,<br>30,31,34,3<br>5 | 4 | P47727,Q63942,Q6IFU7,Q9Z1F2                      |
| 4308 | 1,2,6,8,27,<br>28,32,34 | 3,4,5,7,29,<br>30,31,33,3<br>5 | 7 | P97584,Q4FZU6,Q63942,Q6IFU7,Q6P6R2,Q9WTT6,Q9Z1F2 |
| 4309 | 1,2,6,8,27,<br>28,32,35 | 3,4,5,7,29,<br>30,31,33,3<br>4 | 1 | Q63942                                           |
| 4310 | 1,2,6,8,27,<br>28,33,34 | 3,4,5,7,29,<br>30,31,32,3<br>5 | 5 | P97584,Q4FZU6,Q63942,Q6P6R2,Q9WTT6               |
| 4311 | 1,2,6,8,27,<br>28,33,35 | 3,4,5,7,29,<br>30,31,32,3<br>4 | 1 | Q63942                                           |
| 4312 | 1,2,6,8,27,<br>28,34,35 | 3,4,5,7,29,<br>30,31,32,3<br>3 | 7 | P00507,P09006,Q4FZU6,Q5HZV9,Q63942,Q6P6R2,Q9WTT6 |

|      |                         |                                |   |                                                  |
|------|-------------------------|--------------------------------|---|--------------------------------------------------|
| 4313 | 1,2,6,8,27,<br>29,30,31 | 3,4,5,7,28,<br>32,33,34,3<br>5 | 3 | P02782,P05942,Q6AYR9                             |
| 4314 | 1,2,6,8,27,<br>29,30,32 | 3,4,5,7,28,<br>31,33,34,3<br>5 | 2 | P14669,P62804                                    |
| 4315 | 1,2,6,8,27,<br>29,30,33 | 3,4,5,7,28,<br>31,32,34,3<br>5 | 0 |                                                  |
| 4316 | 1,2,6,8,27,<br>29,30,34 | 3,4,5,7,28,<br>31,32,33,3<br>5 | 3 | Q00715,Q6AYR9,Q9WTT6                             |
| 4317 | 1,2,6,8,27,<br>29,30,35 | 3,4,5,7,28,<br>31,32,33,3<br>4 | 1 | P14480                                           |
| 4318 | 1,2,6,8,27,<br>29,31,32 | 3,4,5,7,28,<br>30,33,34,3<br>5 | 3 | P62804,Q8CJD3,Q9Z1F2                             |
| 4319 | 1,2,6,8,27,<br>29,31,33 | 3,4,5,7,28,<br>30,32,34,3<br>5 | 2 | Q8CJD3,Q8K4G9                                    |
| 4320 | 1,2,6,8,27,<br>29,31,34 | 3,4,5,7,28,<br>30,32,33,3<br>5 | 2 | Q8K4G9,Q9WTT6                                    |
| 4321 | 1,2,6,8,27,<br>29,31,35 | 3,4,5,7,28,<br>30,32,33,3<br>4 | 1 | Q8K4G9                                           |
| 4322 | 1,2,6,8,27,<br>29,32,33 | 3,4,5,7,28,<br>30,31,34,3<br>5 | 3 | P62804,Q8CJD3,Q9Z1F2                             |
| 4323 | 1,2,6,8,27,<br>29,32,34 | 3,4,5,7,28,<br>30,31,33,3<br>5 | 7 | P62804,Q00715,Q4FZU6,Q6P6R2,Q8VD89,Q9WTT6,Q9Z1F2 |
| 4324 | 1,2,6,8,27,<br>29,32,35 | 3,4,5,7,28,<br>30,31,33,3<br>4 | 1 | P51907                                           |
| 4325 | 1,2,6,8,27,<br>29,33,34 | 3,4,5,7,28,<br>30,31,32,3<br>5 | 3 | Q00715,Q4FZU6,Q9WTT6                             |
| 4326 | 1,2,6,8,27,<br>29,33,35 | 3,4,5,7,28,<br>30,31,32,3<br>4 | 0 |                                                  |
| 4327 | 1,2,6,8,27,<br>29,34,35 | 3,4,5,7,28,<br>30,31,32,3<br>3 | 2 | P09006,Q9WTT6                                    |



|      |                         |                                |   |                             |
|------|-------------------------|--------------------------------|---|-----------------------------|
| 4328 | 1,2,6,8,27,<br>30,31,32 | 3,4,5,7,28,<br>29,33,34,3<br>5 | 0 |                             |
| 4329 | 1,2,6,8,27,<br>30,31,33 | 3,4,5,7,28,<br>29,32,34,3<br>5 | 0 |                             |
| 4330 | 1,2,6,8,27,<br>30,31,34 | 3,4,5,7,28,<br>29,32,33,3<br>5 | 3 | P47967,P97840,Q9WTT6        |
| 4331 | 1,2,6,8,27,<br>30,31,35 | 3,4,5,7,28,<br>29,32,33,3<br>4 | 0 |                             |
| 4332 | 1,2,6,8,27,<br>30,32,33 | 3,4,5,7,28,<br>29,31,34,3<br>5 | 1 | Q6IFV1                      |
| 4333 | 1,2,6,8,27,<br>30,32,34 | 3,4,5,7,28,<br>29,31,33,3<br>5 | 4 | P97840,Q00715,Q6P6R2,Q9WTT6 |
| 4334 | 1,2,6,8,27,<br>30,32,35 | 3,4,5,7,28,<br>29,31,33,3<br>4 | 0 |                             |
| 4335 | 1,2,6,8,27,<br>30,33,34 | 3,4,5,7,28,<br>29,31,32,3<br>5 | 2 | Q00715,Q9WTT6               |
| 4336 | 1,2,6,8,27,<br>30,33,35 | 3,4,5,7,28,<br>29,31,32,3<br>4 | 0 |                             |
| 4337 | 1,2,6,8,27,<br>30,34,35 | 3,4,5,7,28,<br>29,31,32,3<br>3 | 2 | P02793,Q7TP54,Q9WTT6        |
| 4338 | 1,2,6,8,27,<br>31,32,33 | 3,4,5,7,28,<br>29,30,34,3<br>5 | 2 | Q8CJD3,Q9Z1F2               |
| 4339 | 1,2,6,8,27,<br>31,32,34 | 3,4,5,7,28,<br>29,30,33,3<br>5 | 3 | Q6P6R2,Q9WTT6,Q9Z1F2        |
| 4340 | 1,2,6,8,27,<br>31,32,35 | 3,4,5,7,28,<br>29,30,33,3<br>4 | 0 |                             |
| 4341 | 1,2,6,8,27,<br>31,33,34 | 3,4,5,7,28,<br>29,30,32,3<br>5 | 1 | Q63355                      |
| 4342 | 1,2,6,8,27,<br>31,33,35 | 3,4,5,7,28,<br>29,30,32,3<br>4 | 1 | Q63355                      |

|      |                         |                                |   |                                                                |
|------|-------------------------|--------------------------------|---|----------------------------------------------------------------|
| 4343 | 1,2,6,8,27,<br>31,34,35 | 3,4,5,7,28,<br>29,30,32,3<br>3 | 2 | P09006,Q63355                                                  |
| 4344 | 1,2,6,8,27,<br>32,33,34 | 3,4,5,7,28,<br>29,30,31,3<br>5 | 5 | P97584,Q00715,Q4FZU6,Q6P6R2,Q9Z1F2                             |
| 4345 | 1,2,6,8,27,<br>32,33,35 | 3,4,5,7,28,<br>29,30,31,3<br>4 | 0 |                                                                |
| 4346 | 1,2,6,8,27,<br>32,34,35 | 3,4,5,7,28,<br>29,30,31,3<br>3 | 3 | P08753,P83121,Q6P6R2                                           |
| 4347 | 1,2,6,8,27,<br>33,34,35 | 3,4,5,7,28,<br>29,30,31,3<br>2 | 1 | Q63355                                                         |
| 4348 | 1,2,6,8,28,<br>29,30,31 | 3,4,5,7,27,<br>32,33,34,3<br>5 | 7 | O35547,P02782,P06911,P19629,Q5GRG2,Q63942,Q8K4G9               |
| 4349 | 1,2,6,8,28,<br>29,30,32 | 3,4,5,7,27,<br>31,33,34,3<br>5 | 7 | O35547,P02782,P08723,P30120,P47727,Q62975,Q63942               |
| 4350 | 1,2,6,8,28,<br>29,30,33 | 3,4,5,7,27,<br>31,32,34,3<br>5 | 5 | A2RUV9,O35547,P02782,P08723,Q63942                             |
| 4351 | 1,2,6,8,28,<br>29,30,34 | 3,4,5,7,27,<br>31,32,33,3<br>5 | 2 | Q63942,Q9WTT6                                                  |
| 4352 | 1,2,6,8,28,<br>29,30,35 | 3,4,5,7,27,<br>31,32,33,3<br>4 | 2 | P05539,Q63942                                                  |
| 4353 | 1,2,6,8,28,<br>29,31,32 | 3,4,5,7,27,<br>30,33,34,3<br>5 | 8 | O35547,P02782,P06911,P22985,P47727,Q5GRG2,Q62975,Q63942        |
| 4354 | 1,2,6,8,28,<br>29,31,33 | 3,4,5,7,27,<br>30,32,34,3<br>5 | 9 | O35547,P02782,P02803,P06911,P08723,P19629,Q5GRG2,Q63942,Q8K4G9 |
| 4355 | 1,2,6,8,28,<br>29,31,34 | 3,4,5,7,27,<br>30,32,33,3<br>5 | 5 | O35547,P06911,Q5GRG2,Q63942,Q8K4G9                             |
| 4356 | 1,2,6,8,28,<br>29,31,35 | 3,4,5,7,27,<br>30,32,33,3<br>4 | 4 | P02803,P06911,Q63942,Q8K4G9                                    |
| 4357 | 1,2,6,8,28,<br>29,32,33 | 3,4,5,7,27,<br>30,31,34,3<br>5 | 6 | O35547,P04905,P08723,P35281,P47727,Q63942                      |

|      |                         |                                |   |                                    |
|------|-------------------------|--------------------------------|---|------------------------------------|
| 4358 | 1,2,6,8,28,<br>29,32,34 | 3,4,5,7,27,<br>30,31,33,3<br>5 | 5 | Q4FZU6,Q63942,Q6P6R2,Q9WTT6,Q9Z1F2 |
| 4359 | 1,2,6,8,28,<br>29,32,35 | 3,4,5,7,27,<br>30,31,33,3<br>4 | 2 | P51907,Q63942                      |
| 4360 | 1,2,6,8,28,<br>29,33,34 | 3,4,5,7,27,<br>30,31,32,3<br>5 | 4 | O35547,P27791,Q4FZU6,Q63942        |
| 4361 | 1,2,6,8,28,<br>29,33,35 | 3,4,5,7,27,<br>30,31,32,3<br>4 | 3 | P02803,Q63942,Q8K4G9               |
| 4362 | 1,2,6,8,28,<br>29,34,35 | 3,4,5,7,27,<br>30,31,32,3<br>3 | 4 | P00507,P09006,Q63942,Q8K4G9        |
| 4363 | 1,2,6,8,28,<br>30,31,32 | 3,4,5,7,27,<br>29,33,34,3<br>5 | 2 | P06911,Q5GRG2                      |
| 4364 | 1,2,6,8,28,<br>30,31,33 | 3,4,5,7,27,<br>29,32,34,3<br>5 | 2 | P19629,Q5GRG2                      |
| 4365 | 1,2,6,8,28,<br>30,31,34 | 3,4,5,7,27,<br>29,32,33,3<br>5 | 3 | P47967,P97840,Q9WTT6               |
| 4366 | 1,2,6,8,28,<br>30,31,35 | 3,4,5,7,27,<br>29,32,33,3<br>4 | 1 | Q64335                             |
| 4367 | 1,2,6,8,28,<br>30,32,33 | 3,4,5,7,27,<br>29,31,34,3<br>5 | 1 | A2RUV9                             |
| 4368 | 1,2,6,8,28,<br>30,32,34 | 3,4,5,7,27,<br>29,31,33,3<br>5 | 3 | P97840,Q6P6R2,Q9WTT6               |
| 4369 | 1,2,6,8,28,<br>30,32,35 | 3,4,5,7,27,<br>29,31,33,3<br>4 | 0 |                                    |
| 4370 | 1,2,6,8,28,<br>30,33,34 | 3,4,5,7,27,<br>29,31,32,3<br>5 | 1 | P97840                             |
| 4371 | 1,2,6,8,28,<br>30,33,35 | 3,4,5,7,27,<br>29,31,32,3<br>4 | 2 | A2RUV9,P05539                      |
| 4372 | 1,2,6,8,28,<br>30,34,35 | 3,4,5,7,27,<br>29,31,32,3<br>3 | 4 | P00507,P02793,Q7TP54,P09006,Q5HZV9 |

|      |                         |                                |   |                             |
|------|-------------------------|--------------------------------|---|-----------------------------|
| 4373 | 1,2,6,8,28,<br>31,32,33 | 3,4,5,7,27,<br>29,30,34,3<br>5 | 3 | P06911,P47727,Q5GRG2        |
| 4374 | 1,2,6,8,28,<br>31,32,34 | 3,4,5,7,27,<br>29,30,33,3<br>5 | 2 | P13432,Q6P6R2               |
| 4375 | 1,2,6,8,28,<br>31,32,35 | 3,4,5,7,27,<br>29,30,33,3<br>4 | 0 |                             |
| 4376 | 1,2,6,8,28,<br>31,33,34 | 3,4,5,7,27,<br>29,30,32,3<br>5 | 1 | P13432                      |
| 4377 | 1,2,6,8,28,<br>31,33,35 | 3,4,5,7,27,<br>29,30,32,3<br>4 | 1 | P02803                      |
| 4378 | 1,2,6,8,28,<br>31,34,35 | 3,4,5,7,27,<br>29,30,32,3<br>3 | 4 | P00507,P02803,P09006,Q5HZV9 |
| 4379 | 1,2,6,8,28,<br>32,33,34 | 3,4,5,7,27,<br>29,30,31,3<br>5 | 2 | Q4FZU6,Q6P6R2               |
| 4380 | 1,2,6,8,28,<br>32,33,35 | 3,4,5,7,27,<br>29,30,31,3<br>4 | 0 |                             |
| 4381 | 1,2,6,8,28,<br>32,34,35 | 3,4,5,7,27,<br>29,30,31,3<br>3 | 3 | P00507,Q5HZV9,Q6P6R2        |
| 4382 | 1,2,6,8,28,<br>33,34,35 | 3,4,5,7,27,<br>29,30,31,3<br>2 | 2 | P00507,P09006               |
| 4383 | 1,2,6,8,29,<br>30,31,32 | 3,4,5,7,27,<br>28,33,34,3<br>5 | 1 | P62804                      |
| 4384 | 1,2,6,8,29,<br>30,31,33 | 3,4,5,7,27,<br>28,32,34,3<br>5 | 1 | Q8K4G9                      |
| 4385 | 1,2,6,8,29,<br>30,31,34 | 3,4,5,7,27,<br>28,32,33,3<br>5 | 1 | Q8K4G9                      |
| 4386 | 1,2,6,8,29,<br>30,31,35 | 3,4,5,7,27,<br>28,32,33,3<br>4 | 3 | P04182,Q07116,Q8K4G9        |
| 4387 | 1,2,6,8,29,<br>30,32,33 | 3,4,5,7,27,<br>28,31,34,3<br>5 | 2 | A2RUV9,P62804               |

|      |                         |                                |   |                      |
|------|-------------------------|--------------------------------|---|----------------------|
| 4388 | 1,2,6,8,29,<br>30,32,34 | 3,4,5,7,27,<br>28,31,33,3<br>5 | 2 | P62804,Q00715        |
| 4389 | 1,2,6,8,29,<br>30,32,35 | 3,4,5,7,27,<br>28,31,33,3<br>4 | 2 | A2RUV9,P51907        |
| 4390 | 1,2,6,8,29,<br>30,33,34 | 3,4,5,7,27,<br>28,31,32,3<br>5 | 0 |                      |
| 4391 | 1,2,6,8,29,<br>30,33,35 | 3,4,5,7,27,<br>28,31,32,3<br>4 | 2 | A2RUV9,Q8K4G9        |
| 4392 | 1,2,6,8,29,<br>30,34,35 | 3,4,5,7,27,<br>28,31,32,3<br>3 | 2 | P09006,P14480        |
| 4393 | 1,2,6,8,29,<br>31,32,33 | 3,4,5,7,27,<br>28,30,34,3<br>5 | 2 | P04182,Q8CJD3        |
| 4394 | 1,2,6,8,29,<br>31,32,34 | 3,4,5,7,27,<br>28,30,33,3<br>5 | 0 |                      |
| 4395 | 1,2,6,8,29,<br>31,32,35 | 3,4,5,7,27,<br>28,30,33,3<br>4 | 3 | P04182,P51907,Q8K4G9 |
| 4396 | 1,2,6,8,29,<br>31,33,34 | 3,4,5,7,27,<br>28,30,32,3<br>5 | 1 | Q8K4G9               |
| 4397 | 1,2,6,8,29,<br>31,33,35 | 3,4,5,7,27,<br>28,30,32,3<br>4 | 3 | P02803,P04182,Q8K4G9 |
| 4398 | 1,2,6,8,29,<br>31,34,35 | 3,4,5,7,27,<br>28,30,32,3<br>3 | 2 | P09006,Q8K4G9        |
| 4399 | 1,2,6,8,29,<br>32,33,34 | 3,4,5,7,27,<br>28,30,31,3<br>5 | 2 | Q00715,Q9Z1F2        |
| 4400 | 1,2,6,8,29,<br>32,33,35 | 3,4,5,7,27,<br>28,30,31,3<br>4 | 2 | A2RUV9,P04182        |
| 4401 | 1,2,6,8,29,<br>32,34,35 | 3,4,5,7,27,<br>28,30,31,3<br>3 | 1 | P51907               |
| 4402 | 1,2,6,8,29,<br>33,34,35 | 3,4,5,7,27,<br>28,30,31,3<br>2 | 2 | P09006,Q8K4G9        |

|      |                         |                                |   |                             |
|------|-------------------------|--------------------------------|---|-----------------------------|
| 4403 | 1,2,6,8,30,<br>31,32,33 | 3,4,5,7,27,<br>28,29,34,3<br>5 | 0 |                             |
| 4404 | 1,2,6,8,30,<br>31,32,34 | 3,4,5,7,27,<br>28,29,33,3<br>5 | 0 |                             |
| 4405 | 1,2,6,8,30,<br>31,32,35 | 3,4,5,7,27,<br>28,29,33,3<br>4 | 1 | P04182                      |
| 4406 | 1,2,6,8,30,<br>31,33,34 | 3,4,5,7,27,<br>28,29,32,3<br>5 | 0 |                             |
| 4407 | 1,2,6,8,30,<br>31,33,35 | 3,4,5,7,27,<br>28,29,32,3<br>4 | 0 |                             |
| 4408 | 1,2,6,8,30,<br>31,34,35 | 3,4,5,7,27,<br>28,29,32,3<br>3 | 1 | P02793;Q7TP54               |
| 4409 | 1,2,6,8,30,<br>32,33,34 | 3,4,5,7,27,<br>28,29,31,3<br>5 | 1 | Q00715                      |
| 4410 | 1,2,6,8,30,<br>32,33,35 | 3,4,5,7,27,<br>28,29,31,3<br>4 | 1 | A2RUV9                      |
| 4411 | 1,2,6,8,30,<br>32,34,35 | 3,4,5,7,27,<br>28,29,31,3<br>3 | 0 |                             |
| 4412 | 1,2,6,8,30,<br>33,34,35 | 3,4,5,7,27,<br>28,29,31,3<br>2 | 0 |                             |
| 4413 | 1,2,6,8,31,<br>32,33,34 | 3,4,5,7,27,<br>28,29,30,3<br>5 | 2 | P01835,P13432               |
| 4414 | 1,2,6,8,31,<br>32,33,35 | 3,4,5,7,27,<br>28,29,30,3<br>4 | 2 | P04182,P97580               |
| 4415 | 1,2,6,8,31,<br>32,34,35 | 3,4,5,7,27,<br>28,29,30,3<br>3 | 1 | P08753                      |
| 4416 | 1,2,6,8,31,<br>33,34,35 | 3,4,5,7,27,<br>28,29,30,3<br>2 | 4 | P01835,P09006,Q63355,Q8K4G9 |
| 4417 | 1,2,6,8,32,<br>33,34,35 | 3,4,5,7,27,<br>28,29,30,3<br>1 | 1 | P08753                      |

|      |                                                 |    |                                                                                            |
|------|-------------------------------------------------|----|--------------------------------------------------------------------------------------------|
| 4418 | 1,2,6,27,2 3,4,5,7,8,3<br>8,29,30,31 2,33,34,35 | 11 | O35547,P02781,P02782,P06911,P08723,P30120,P36374,Q5GRG2,Q6AYR9,Q6AYS4,Q9JHB9               |
| 4419 | 1,2,6,27,2 3,4,5,7,8,3<br>8,29,30,32 1,33,34,35 | 12 | O08815,O35547,P02781,P05369,P08723,P24368,P30120,P47727,Q6AYR9,Q91ZS3,Q9JHB9,Q9JI85        |
| 4420 | 1,2,6,27,2 3,4,5,7,8,3<br>8,29,30,33 1,32,34,35 | 9  | O08815,O35547,P02781,P08723,P30120,P36374,Q6AYS4,Q9JHB9,Q9JI85                             |
| 4421 | 1,2,6,27,2 3,4,5,7,8,3<br>8,29,30,34 1,32,33,35 | 8  | O35547,P05369,P30120,P97840,Q4FZU6,Q6AYR9,Q91ZS3,Q9JHB9                                    |
| 4422 | 1,2,6,27,2 3,4,5,7,8,3<br>8,29,30,35 1,32,33,34 | 4  | Q6AYS4,Q99041,Q9JHB9,Q9QUL6                                                                |
| 4423 | 1,2,6,27,2 3,4,5,7,8,3<br>8,29,31,32 0,33,34,35 | 7  | O35547,P06911,P08723,P22985,P47727,Q5GRG2,Q9JHB9                                           |
| 4424 | 1,2,6,27,2 3,4,5,7,8,3<br>8,29,31,33 0,32,34,35 | 7  | O35547,P06911,P08723,P19629,Q5GRG2,Q9JHB9,Q9JI85                                           |
| 4425 | 1,2,6,27,2 3,4,5,7,8,3<br>8,29,31,34 0,32,33,35 | 5  | O35547,P06911,Q4FZU6,Q5GRG2,Q9JHB9                                                         |
| 4426 | 1,2,6,27,2 3,4,5,7,8,3<br>8,29,31,35 0,32,33,34 | 5  | O35547,Q5GRG2,Q5M819,Q6AYS4,Q9QUL6                                                         |
| 4427 | 1,2,6,27,2 3,4,5,7,8,3<br>8,29,32,33 0,31,34,35 | 12 | O08815,O35547,P02793,Q7TP54,P04905,P08723,P24368,P47727,Q6IFU7,Q80WL1,Q91ZS3,Q9JHB9,Q9JI85 |
| 4428 | 1,2,6,27,2 3,4,5,7,8,3<br>8,29,32,34 0,31,33,35 | 7  | O35547,P05369,Q10758,Q4FZU6,Q6IFU7,Q91ZS3,Q9JHB9                                           |
| 4429 | 1,2,6,27,2 3,4,5,7,8,3<br>8,29,32,35 0,31,33,34 | 4  | Q5M819,Q6AYS4,Q9JHB9,Q9QUL6                                                                |
| 4430 | 1,2,6,27,2 3,4,5,7,8,3<br>8,29,33,34 0,31,32,35 | 4  | O35547,P97584,Q4FZU6,Q9JHB9                                                                |
| 4431 | 1,2,6,27,2 3,4,5,7,8,3<br>8,29,33,35 0,31,32,34 | 6  | O35547,P08723,P15399,Q5M819,Q6AYS4,Q9JHB9                                                  |
| 4432 | 1,2,6,27,2 3,4,5,7,8,3<br>8,29,34,35 0,31,32,33 | 4  | P00507,Q4FZU6,Q5M819,Q9QUL6                                                                |
| 4433 | 1,2,6,27,2 3,4,5,7,8,2<br>8,30,31,32 9,33,34,35 | 1  | Q5GRG2                                                                                     |
| 4434 | 1,2,6,27,2 3,4,5,7,8,2<br>8,30,31,33 9,32,34,35 | 3  | P19629,Q5GRG2,Q6AYS4                                                                       |
| 4435 | 1,2,6,27,2 3,4,5,7,8,2<br>8,30,31,34 9,32,33,35 | 2  | P47967,P97840                                                                              |
| 4436 | 1,2,6,27,2 3,4,5,7,8,2<br>8,30,31,35 9,32,33,34 | 3  | Q64335,Q6AYS4,Q99041                                                                       |
| 4437 | 1,2,6,27,2 3,4,5,7,8,2<br>8,30,32,33 9,31,34,35 | 2  | Q6IFU7,Q6IFV1                                                                              |
| 4438 | 1,2,6,27,2 3,4,5,7,8,2<br>8,30,32,34 9,31,33,35 | 7  | P47967,P97840,Q10758,Q4FZU6,Q5HZV9,Q6IFU7,Q6P6R2                                           |
| 4439 | 1,2,6,27,2 3,4,5,7,8,2<br>8,30,32,35 9,31,33,34 | 4  | Q6AYQ8,Q6AYS4,Q6IFU7,Q99041                                                                |
| 4440 | 1,2,6,27,2 3,4,5,7,8,2<br>8,30,33,34 9,31,32,35 | 2  | P97840,Q4FZU6                                                                              |

|      |                                                 |   |                                                  |
|------|-------------------------------------------------|---|--------------------------------------------------|
| 4441 | 1,2,6,27,2 3,4,5,7,8,2<br>8,30,33,35 9,31,32,34 | 1 | Q6AYS4                                           |
| 4442 | 1,2,6,27,2 3,4,5,7,8,2<br>8,30,34,35 9,31,32,33 | 5 | P00507,P97840,Q5HZV9,Q8CJD3,Q9QUL6               |
| 4443 | 1,2,6,27,2 3,4,5,7,8,2<br>8,31,32,33 9,30,34,35 | 4 | P06911,P47727,Q5GRG2,Q6IFU7                      |
| 4444 | 1,2,6,27,2 3,4,5,7,8,2<br>8,31,32,34 9,30,33,35 | 5 | P13432,Q10758,Q4FZU6,Q5HZV9,Q6IFU7               |
| 4445 | 1,2,6,27,2 3,4,5,7,8,2<br>8,31,32,35 9,30,33,34 | 1 | Q6AYS4                                           |
| 4446 | 1,2,6,27,2 3,4,5,7,8,2<br>8,31,33,34 9,30,32,35 | 2 | P13432,Q4FZU6                                    |
| 4447 | 1,2,6,27,2 3,4,5,7,8,2<br>8,31,33,35 9,30,32,34 | 1 | Q6AYS4                                           |
| 4448 | 1,2,6,27,2 3,4,5,7,8,2<br>8,31,34,35 9,30,32,33 | 4 | P00507,Q5HZV9,Q5M819,Q9QUL6                      |
| 4449 | 1,2,6,27,2 3,4,5,7,8,2<br>8,32,33,34 9,30,31,35 | 5 | P97584,Q06000,Q10758,Q4FZU6,Q6IFU7               |
| 4450 | 1,2,6,27,2 3,4,5,7,8,2<br>8,32,33,35 9,30,31,34 | 2 | Q6AYS4,Q6IFU7                                    |
| 4451 | 1,2,6,27,2 3,4,5,7,8,2<br>8,32,34,35 9,30,31,33 | 7 | P00507,Q10758,Q4FZU6,Q5HZV9,Q5M819,Q6IFU7,Q9QUL6 |
| 4452 | 1,2,6,27,2 3,4,5,7,8,2<br>8,33,34,35 9,30,31,32 | 4 | P00507,Q4FZU6,Q5HZV9,Q5M819                      |
| 4453 | 1,2,6,27,2 3,4,5,7,8,2<br>9,30,31,32 8,33,34,35 | 0 |                                                  |
| 4454 | 1,2,6,27,2 3,4,5,7,8,2<br>9,30,31,33 8,32,34,35 | 1 | Q6AYS4                                           |
| 4455 | 1,2,6,27,2 3,4,5,7,8,2<br>9,30,31,34 8,32,33,35 | 2 | P97840,Q6AYR9                                    |
| 4456 | 1,2,6,27,2 3,4,5,7,8,2<br>9,30,31,35 8,32,33,34 | 3 | P05942,Q6AYS4,Q99041                             |
| 4457 | 1,2,6,27,2 3,4,5,7,8,2<br>9,30,32,33 8,31,34,35 | 0 |                                                  |
| 4458 | 1,2,6,27,2 3,4,5,7,8,2<br>9,30,32,34 8,31,33,35 | 4 | P62804,P97840,Q00715,Q91ZS3                      |
| 4459 | 1,2,6,27,2 3,4,5,7,8,2<br>9,30,32,35 8,31,33,34 | 2 | Q6AYS4,Q99041                                    |
| 4460 | 1,2,6,27,2 3,4,5,7,8,2<br>9,30,33,34 8,31,32,35 | 1 | Q00715                                           |
| 4461 | 1,2,6,27,2 3,4,5,7,8,2<br>9,30,33,35 8,31,32,34 | 1 | Q6AYS4                                           |
| 4462 | 1,2,6,27,2 3,4,5,7,8,2<br>9,30,34,35 8,31,32,33 | 2 | P14480,Q9QUL6                                    |
| 4463 | 1,2,6,27,2 3,4,5,7,8,2<br>9,31,32,33 8,30,34,35 | 1 | Q8CJD3                                           |



|      |                                                 |   |                      |
|------|-------------------------------------------------|---|----------------------|
| 4464 | 1,2,6,27,2 3,4,5,7,8,2<br>9,31,32,34 8,30,33,35 | 0 |                      |
| 4465 | 1,2,6,27,2 3,4,5,7,8,2<br>9,31,32,35 8,30,33,34 | 1 | Q6AYS4               |
| 4466 | 1,2,6,27,2 3,4,5,7,8,2<br>9,31,33,34 8,30,32,35 | 0 |                      |
| 4467 | 1,2,6,27,2 3,4,5,7,8,2<br>9,31,33,35 8,30,32,34 | 1 | Q6AYS4               |
| 4468 | 1,2,6,27,2 3,4,5,7,8,2<br>9,31,34,35 8,30,32,33 | 2 | Q5M819,Q9QUL6        |
| 4469 | 1,2,6,27,2 3,4,5,7,8,2<br>9,32,33,34 8,30,31,35 | 2 | Q00715,Q4FZU6        |
| 4470 | 1,2,6,27,2 3,4,5,7,8,2<br>9,32,33,35 8,30,31,34 | 1 | Q6AYS4               |
| 4471 | 1,2,6,27,2 3,4,5,7,8,2<br>9,32,34,35 8,30,31,33 | 2 | Q5M819,Q9QUL6        |
| 4472 | 1,2,6,27,2 3,4,5,7,8,2<br>9,33,34,35 8,30,31,32 | 1 | Q5M819               |
| 4473 | 1,2,6,27,3 3,4,5,7,8,2<br>0,31,32,33 8,29,34,35 | 0 |                      |
| 4474 | 1,2,6,27,3 3,4,5,7,8,2<br>0,31,32,34 8,29,33,35 | 1 | P97840               |
| 4475 | 1,2,6,27,3 3,4,5,7,8,2<br>0,31,32,35 8,29,33,34 | 2 | Q6AYS4,Q99041        |
| 4476 | 1,2,6,27,3 3,4,5,7,8,2<br>0,31,33,34 8,29,32,35 | 1 | P97840               |
| 4477 | 1,2,6,27,3 3,4,5,7,8,2<br>0,31,33,35 8,29,32,34 | 1 | Q6AYS4               |
| 4478 | 1,2,6,27,3 3,4,5,7,8,2<br>0,31,34,35 8,29,32,33 | 2 | P02793;Q7TP54,P97840 |
| 4479 | 1,2,6,27,3 3,4,5,7,8,2<br>0,32,33,34 8,29,31,35 | 3 | P97840,Q00715,Q6IFU7 |
| 4480 | 1,2,6,27,3 3,4,5,7,8,2<br>0,32,33,35 8,29,31,34 | 1 | Q6AYS4               |
| 4481 | 1,2,6,27,3 3,4,5,7,8,2<br>0,32,34,35 8,29,31,33 | 0 |                      |
| 4482 | 1,2,6,27,3 3,4,5,7,8,2<br>0,33,34,35 8,29,31,32 | 0 |                      |
| 4483 | 1,2,6,27,3 3,4,5,7,8,2<br>1,32,33,34 8,29,30,35 | 1 | P13432               |
| 4484 | 1,2,6,27,3 3,4,5,7,8,2<br>1,32,33,35 8,29,30,34 | 1 | Q6AYS4               |
| 4485 | 1,2,6,27,3 3,4,5,7,8,2<br>1,32,34,35 8,29,30,33 | 0 |                      |
| 4486 | 1,2,6,27,3 3,4,5,7,8,2<br>1,33,34,35 8,29,30,32 | 1 | Q63355               |

|      |                                                 |   |                                                  |
|------|-------------------------------------------------|---|--------------------------------------------------|
| 4487 | 1,2,6,27,3 3,4,5,7,8,2<br>2,33,34,35 8,29,30,31 | 1 | Q63661                                           |
| 4488 | 1,2,6,28,2 3,4,5,7,8,2<br>9,30,31,32 7,33,34,35 | 4 | P06911,P47727,Q5GRG2,Q62975                      |
| 4489 | 1,2,6,28,2 3,4,5,7,8,2<br>9,30,31,33 7,32,34,35 | 7 | O35547,P00714,P06911,P19629,P35467,Q5GRG2,Q6AYS4 |
| 4490 | 1,2,6,28,2 3,4,5,7,8,2<br>9,30,31,34 7,32,33,35 | 4 | P00714,P27791,P97840,Q6AYR9                      |
| 4491 | 1,2,6,28,2 3,4,5,7,8,2<br>9,30,31,35 7,32,33,34 | 4 | P00714,Q07116,Q6AYS4,Q99041                      |
| 4492 | 1,2,6,28,2 3,4,5,7,8,2<br>9,30,32,33 7,31,34,35 | 2 | P04905,P47727                                    |
| 4493 | 1,2,6,28,2 3,4,5,7,8,2<br>9,30,32,34 7,31,33,35 | 2 | P97840,Q91ZS3                                    |
| 4494 | 1,2,6,28,2 3,4,5,7,8,2<br>9,30,32,35 7,31,33,34 | 3 | Q07116,Q6AYS4,Q99041                             |
| 4495 | 1,2,6,28,2 3,4,5,7,8,2<br>9,30,33,34 7,31,32,35 | 2 | P27791,P97840                                    |
| 4496 | 1,2,6,28,2 3,4,5,7,8,2<br>9,30,33,35 7,31,32,34 | 4 | P15399,P49744,Q07116,Q6AYS4                      |
| 4497 | 1,2,6,28,2 3,4,5,7,8,2<br>9,30,34,35 7,31,32,33 | 3 | P00507,P14480,Q9QUL6                             |
| 4498 | 1,2,6,28,2 3,4,5,7,8,2<br>9,31,32,33 7,30,34,35 | 5 | O35547,P04905,P06911,P47727,Q5GRG2               |
| 4499 | 1,2,6,28,2 3,4,5,7,8,2<br>9,31,32,34 7,30,33,35 | 1 | P06911                                           |
| 4500 | 1,2,6,28,2 3,4,5,7,8,2<br>9,31,32,35 7,30,33,34 | 4 | P06911,Q07116,Q6AYS4,Q99041                      |
| 4501 | 1,2,6,28,2 3,4,5,7,8,2<br>9,31,33,34 7,30,32,35 | 3 | P00714,P06911,P27791                             |
| 4502 | 1,2,6,28,2 3,4,5,7,8,2<br>9,31,33,35 7,30,32,34 | 6 | P00714,P02803,P15399,P49744,Q07116,Q6AYS4        |
| 4503 | 1,2,6,28,2 3,4,5,7,8,2<br>9,31,34,35 7,30,32,33 | 4 | P00507,P00714,Q5M819,Q9QUL6                      |
| 4504 | 1,2,6,28,2 3,4,5,7,8,2<br>9,32,33,34 7,30,31,35 | 3 | P27791,P47727,Q4FZU6                             |
| 4505 | 1,2,6,28,2 3,4,5,7,8,2<br>9,32,33,35 7,30,31,34 | 4 | P15399,P47727,P49744,Q6AYS4                      |
| 4506 | 1,2,6,28,2 3,4,5,7,8,2<br>9,32,34,35 7,30,31,33 | 4 | P00507,Q5HZV9,Q5M819,Q9QUL6                      |
| 4507 | 1,2,6,28,2 3,4,5,7,8,2<br>9,33,34,35 7,30,31,32 | 3 | P00507,P00714,Q5M819                             |
| 4508 | 1,2,6,28,3 3,4,5,7,8,2<br>0,31,32,33 7,29,34,35 | 1 | Q5GRG2                                           |
| 4509 | 1,2,6,28,3 3,4,5,7,8,2<br>0,31,32,34 7,29,33,35 | 2 | P13432,P97840                                    |

|      |                                                 |   |                                                         |
|------|-------------------------------------------------|---|---------------------------------------------------------|
| 4510 | 1,2,6,28,3 3,4,5,7,8,2<br>0,31,32,35 7,29,33,34 | 4 | P55016,Q64335,Q6AYS4,Q99041                             |
| 4511 | 1,2,6,28,3 3,4,5,7,8,2<br>0,31,33,34 7,29,32,35 | 3 | P00714,P13432,P97840                                    |
| 4512 | 1,2,6,28,3 3,4,5,7,8,2<br>0,31,33,35 7,29,32,34 | 2 | P00714,Q6AYS4                                           |
| 4513 | 1,2,6,28,3 3,4,5,7,8,2<br>0,31,34,35 7,29,32,33 | 7 | P00507,P00714,P02793;Q7TP54,P97840,Q5HZV9,Q64335,Q8CJD3 |
| 4514 | 1,2,6,28,3 3,4,5,7,8,2<br>0,32,33,34 7,29,31,35 | 2 | P97840,Q6IFU7                                           |
| 4515 | 1,2,6,28,3 3,4,5,7,8,2<br>0,32,33,35 7,29,31,34 | 1 | Q6AYS4                                                  |
| 4516 | 1,2,6,28,3 3,4,5,7,8,2<br>0,32,34,35 7,29,31,33 | 3 | P00507,P97840,Q5HZV9                                    |
| 4517 | 1,2,6,28,3 3,4,5,7,8,2<br>0,33,34,35 7,29,31,32 | 4 | P00507,P00714,P97840,Q5HZV9                             |
| 4518 | 1,2,6,28,3 3,4,5,7,8,2<br>1,32,33,34 7,29,30,35 | 1 | P13432                                                  |
| 4519 | 1,2,6,28,3 3,4,5,7,8,2<br>1,32,33,35 7,29,30,34 | 5 | P15399,P55016,P97580,Q30KJ2,Q6AYS4                      |
| 4520 | 1,2,6,28,3 3,4,5,7,8,2<br>1,32,34,35 7,29,30,33 | 3 | P00507,P55016,Q5HZV9                                    |
| 4521 | 1,2,6,28,3 3,4,5,7,8,2<br>1,33,34,35 7,29,30,32 | 4 | P00507,P00714,P02803,Q5HZV9                             |
| 4522 | 1,2,6,28,3 3,4,5,7,8,2<br>2,33,34,35 7,29,30,31 | 2 | P00507,Q5HZV9                                           |
| 4523 | 1,2,6,29,3 3,4,5,7,8,2<br>0,31,32,33 7,28,34,35 | 0 |                                                         |
| 4524 | 1,2,6,29,3 3,4,5,7,8,2<br>0,31,32,34 7,28,33,35 | 0 |                                                         |
| 4525 | 1,2,6,29,3 3,4,5,7,8,2<br>0,31,32,35 7,28,33,34 | 4 | P04182,Q07116,Q6AYS4,Q99041                             |
| 4526 | 1,2,6,29,3 3,4,5,7,8,2<br>0,31,33,34 7,28,32,35 | 1 | P00714                                                  |
| 4527 | 1,2,6,29,3 3,4,5,7,8,2<br>0,31,33,35 7,28,32,34 | 4 | P00714,P04182,Q07116,Q6AYS4                             |
| 4528 | 1,2,6,29,3 3,4,5,7,8,2<br>0,31,34,35 7,28,32,33 | 3 | P00714,P02793;Q7TP54,Q99041                             |
| 4529 | 1,2,6,29,3 3,4,5,7,8,2<br>0,32,33,34 7,28,31,35 | 0 |                                                         |
| 4530 | 1,2,6,29,3 3,4,5,7,8,2<br>0,32,33,35 7,28,31,34 | 2 | A2RUV9,Q6AYS4                                           |
| 4531 | 1,2,6,29,3 3,4,5,7,8,2<br>0,32,34,35 7,28,31,33 | 1 | Q99041                                                  |
| 4532 | 1,2,6,29,3 3,4,5,7,8,2<br>0,33,34,35 7,28,31,32 | 1 | P00714                                                  |

|      |                          |                            |   |                                                                |
|------|--------------------------|----------------------------|---|----------------------------------------------------------------|
| 4533 | 1,2,6,29,3<br>1,32,33,34 | 3,4,5,7,8,2<br>7,28,30,35  | 0 |                                                                |
| 4534 | 1,2,6,29,3<br>1,32,33,35 | 3,4,5,7,8,2<br>7,28,30,34  | 3 | P04182,P15399,Q6AYS4                                           |
| 4535 | 1,2,6,29,3<br>1,32,34,35 | 3,4,5,7,8,2<br>7,28,30,33  | 0 |                                                                |
| 4536 | 1,2,6,29,3<br>1,33,34,35 | 3,4,5,7,8,2<br>7,28,30,32  | 1 | P00714                                                         |
| 4537 | 1,2,6,29,3<br>2,33,34,35 | 3,4,5,7,8,2<br>7,28,30,31  | 1 | Q63661                                                         |
| 4538 | 1,2,6,30,3<br>1,32,33,34 | 3,4,5,7,8,2<br>7,28,29,35  | 2 | P13432,P97840                                                  |
| 4539 | 1,2,6,30,3<br>1,32,33,35 | 3,4,5,7,8,2<br>7,28,29,34  | 3 | P04182,P07171,Q6AYS4                                           |
| 4540 | 1,2,6,30,3<br>1,32,34,35 | 3,4,5,7,8,2<br>7,28,29,33  | 3 | P82471,Q63617,Q99041                                           |
| 4541 | 1,2,6,30,3<br>1,33,34,35 | 3,4,5,7,8,2<br>7,28,29,32  | 2 | P00714,P82471                                                  |
| 4542 | 1,2,6,30,3<br>2,33,34,35 | 3,4,5,7,8,2<br>7,28,29,31  | 3 | P07171,P82471,Q63661                                           |
| 4543 | 1,2,6,31,3<br>2,33,34,35 | 3,4,5,7,8,2<br>7,28,29,30  | 3 | P07171,P82471,P97580                                           |
| 4544 | 1,2,7,8,27,<br>28,29,30  | 3,4,5,6,31,<br>32,33,34,35 | 7 | D3ZUC6,P02781,P08723,P10715,P82995,Q8CJ52,Q9JI85               |
| 4545 | 1,2,7,8,27,<br>28,29,31  | 3,4,5,6,30,<br>32,33,34,35 | 9 | P06911,P08723,P10715,P19629,P31044,P82995,Q5GRG2,Q8CJ52,Q9JI85 |
| 4546 | 1,2,7,8,27,<br>28,29,32  | 3,4,5,6,30,<br>31,33,34,35 | 8 | P02793;Q7TP54,P08723,P10715,P24368,P82995,Q8CJ52,Q9JHB9,Q9JI85 |
| 4547 | 1,2,7,8,27,<br>28,29,33  | 3,4,5,6,30,<br>31,32,34,35 | 7 | P02793;Q7TP54,P08723,P10715,P24368,P82995,Q8CJ52,Q9JI85        |
| 4548 | 1,2,7,8,27,<br>28,29,34  | 3,4,5,6,30,<br>31,32,33,35 | 1 | Q9JI85                                                         |
| 4549 | 1,2,7,8,27,<br>28,29,35  | 3,4,5,6,30,<br>31,32,33,34 | 2 | P01946,Q9JI85                                                  |
| 4550 | 1,2,7,8,27,<br>28,30,31  | 3,4,5,6,29,<br>32,33,34,35 | 5 | D3ZUC6,P10715,P19629,P31044,Q5GRG2                             |
| 4551 | 1,2,7,8,27,<br>28,30,32  | 3,4,5,6,29,<br>31,33,34,35 | 3 | P10715,P31044,Q6AYQ8                                           |

|      |                         |                                |   |                                           |
|------|-------------------------|--------------------------------|---|-------------------------------------------|
| 4552 | 1,2,7,8,27,<br>28,30,33 | 3,4,5,6,29,<br>31,32,34,3<br>5 | 2 | P10715,Q99MH3                             |
| 4553 | 1,2,7,8,27,<br>28,30,34 | 3,4,5,6,29,<br>31,32,33,3<br>5 | 2 | P47967,P97840                             |
| 4554 | 1,2,7,8,27,<br>28,30,35 | 3,4,5,6,29,<br>31,32,33,3<br>4 | 3 | D3ZUC6,Q6AYQ8,Q99MH3                      |
| 4555 | 1,2,7,8,27,<br>28,31,32 | 3,4,5,6,29,<br>30,33,34,3<br>5 | 5 | B0BNN3,P01835,P10715,P31044,Q5GRG2        |
| 4556 | 1,2,7,8,27,<br>28,31,33 | 3,4,5,6,29,<br>30,32,34,3<br>5 | 6 | P01835,P10715,P19629,P31044,Q5GRG2,Q99MH3 |
| 4557 | 1,2,7,8,27,<br>28,31,34 | 3,4,5,6,29,<br>30,32,33,3<br>5 | 5 | P01835,P10715,P31044,P47967,Q5GRG2        |
| 4558 | 1,2,7,8,27,<br>28,31,35 | 3,4,5,6,29,<br>30,32,33,3<br>4 | 5 | P01835,P10715,P31044,Q5GRG2,Q99MH3        |
| 4559 | 1,2,7,8,27,<br>28,32,33 | 3,4,5,6,29,<br>30,31,34,3<br>5 | 4 | P01835,P02793;Q7TP54,P10715,Q08849        |
| 4560 | 1,2,7,8,27,<br>28,32,34 | 3,4,5,6,29,<br>30,31,33,3<br>5 | 2 | P01835,Q63532                             |
| 4561 | 1,2,7,8,27,<br>28,32,35 | 3,4,5,6,29,<br>30,31,33,3<br>4 | 1 | P10715                                    |
| 4562 | 1,2,7,8,27,<br>28,33,34 | 3,4,5,6,29,<br>30,31,32,3<br>5 | 2 | P01835,P10715                             |
| 4563 | 1,2,7,8,27,<br>28,33,35 | 3,4,5,6,29,<br>30,31,32,3<br>4 | 3 | P01835,P10715,Q99MH3                      |
| 4564 | 1,2,7,8,27,<br>28,34,35 | 3,4,5,6,29,<br>30,31,32,3<br>3 | 1 | P01835                                    |
| 4565 | 1,2,7,8,27,<br>29,30,31 | 3,4,5,6,28,<br>32,33,34,3<br>5 | 1 | Q5HZV9                                    |
| 4566 | 1,2,7,8,27,<br>29,30,32 | 3,4,5,6,28,<br>31,33,34,3<br>5 | 1 | Q5HZV9                                    |

|      |                         |                                |   |                                    |
|------|-------------------------|--------------------------------|---|------------------------------------|
| 4567 | 1,2,7,8,27,<br>29,30,33 | 3,4,5,6,28,<br>31,32,34,3<br>5 | 1 | Q5HZV9                             |
| 4568 | 1,2,7,8,27,<br>29,30,34 | 3,4,5,6,28,<br>31,32,33,3<br>5 | 4 | P20760,P47967,P97840,Q00715        |
| 4569 | 1,2,7,8,27,<br>29,30,35 | 3,4,5,6,28,<br>31,32,33,3<br>4 | 2 | D3ZUC6,P01946                      |
| 4570 | 1,2,7,8,27,<br>29,31,32 | 3,4,5,6,28,<br>30,33,34,3<br>5 | 3 | P01835,Q5HZV9,Q8CJD3               |
| 4571 | 1,2,7,8,27,<br>29,31,33 | 3,4,5,6,28,<br>30,32,34,3<br>5 | 3 | P01835,Q5HZV9,Q8CJD3               |
| 4572 | 1,2,7,8,27,<br>29,31,34 | 3,4,5,6,28,<br>30,32,33,3<br>5 | 2 | P01835,Q63467                      |
| 4573 | 1,2,7,8,27,<br>29,31,35 | 3,4,5,6,28,<br>30,32,33,3<br>4 | 2 | P01835,P01946                      |
| 4574 | 1,2,7,8,27,<br>29,32,33 | 3,4,5,6,28,<br>30,31,34,3<br>5 | 4 | P01835,P02793;Q7TP54,Q5HZV9,Q8CJD3 |
| 4575 | 1,2,7,8,27,<br>29,32,34 | 3,4,5,6,28,<br>30,31,33,3<br>5 | 5 | P01835,P20760,Q00715,Q63467,Q63532 |
| 4576 | 1,2,7,8,27,<br>29,32,35 | 3,4,5,6,28,<br>30,31,33,3<br>4 | 1 | P01946                             |
| 4577 | 1,2,7,8,27,<br>29,33,34 | 3,4,5,6,28,<br>30,31,32,3<br>5 | 1 | P01835                             |
| 4578 | 1,2,7,8,27,<br>29,33,35 | 3,4,5,6,28,<br>30,31,32,3<br>4 | 2 | P01835,P01946                      |
| 4579 | 1,2,7,8,27,<br>29,34,35 | 3,4,5,6,28,<br>30,31,32,3<br>3 | 2 | P01835,P01946                      |
| 4580 | 1,2,7,8,27,<br>30,31,32 | 3,4,5,6,28,<br>29,33,34,3<br>5 | 0 |                                    |
| 4581 | 1,2,7,8,27,<br>30,31,33 | 3,4,5,6,28,<br>29,32,34,3<br>5 | 2 | P01835,Q5HZV9                      |

|      |                         |                                |   |                                    |
|------|-------------------------|--------------------------------|---|------------------------------------|
| 4582 | 1,2,7,8,27,<br>30,31,34 | 3,4,5,6,28,<br>29,32,33,3<br>5 | 3 | P01835,P47967,P97840               |
| 4583 | 1,2,7,8,27,<br>30,31,35 | 3,4,5,6,28,<br>29,32,33,3<br>4 | 1 | D3ZUC6                             |
| 4584 | 1,2,7,8,27,<br>30,32,33 | 3,4,5,6,28,<br>29,31,34,3<br>5 | 0 |                                    |
| 4585 | 1,2,7,8,27,<br>30,32,34 | 3,4,5,6,28,<br>29,31,33,3<br>5 | 5 | P20760,P47967,P97840,Q00715,Q63532 |
| 4586 | 1,2,7,8,27,<br>30,32,35 | 3,4,5,6,28,<br>29,31,33,3<br>4 | 0 |                                    |
| 4587 | 1,2,7,8,27,<br>30,33,34 | 3,4,5,6,28,<br>29,31,32,3<br>5 | 3 | P01835,P47967,P97840               |
| 4588 | 1,2,7,8,27,<br>30,33,35 | 3,4,5,6,28,<br>29,31,32,3<br>4 | 1 | Q99MH3                             |
| 4589 | 1,2,7,8,27,<br>30,34,35 | 3,4,5,6,28,<br>29,31,32,3<br>3 | 3 | P47967,P83121,P97840               |
| 4590 | 1,2,7,8,27,<br>31,32,33 | 3,4,5,6,28,<br>29,30,34,3<br>5 | 4 | P01835,P02793,Q7TP54,Q08849,Q8CJD3 |
| 4591 | 1,2,7,8,27,<br>31,32,34 | 3,4,5,6,28,<br>29,30,33,3<br>5 | 4 | P01835,P20760,Q08849,Q63532        |
| 4592 | 1,2,7,8,27,<br>31,32,35 | 3,4,5,6,28,<br>29,30,33,3<br>4 | 2 | P01835,Q08849                      |
| 4593 | 1,2,7,8,27,<br>31,33,34 | 3,4,5,6,28,<br>29,30,32,3<br>5 | 1 | P01835                             |
| 4594 | 1,2,7,8,27,<br>31,33,35 | 3,4,5,6,28,<br>29,30,32,3<br>4 | 2 | P01835,Q99MH3                      |
| 4595 | 1,2,7,8,27,<br>31,34,35 | 3,4,5,6,28,<br>29,30,32,3<br>3 | 1 | P01835                             |
| 4596 | 1,2,7,8,27,<br>32,33,34 | 3,4,5,6,28,<br>29,30,31,3<br>5 | 3 | P01835,Q08849,Q63532               |

|      |                         |                                |   |                                                         |
|------|-------------------------|--------------------------------|---|---------------------------------------------------------|
| 4597 | 1,2,7,8,27,<br>32,33,35 | 3,4,5,6,28,<br>29,30,31,3<br>4 | 2 | P01835,Q08849                                           |
| 4598 | 1,2,7,8,27,<br>32,34,35 | 3,4,5,6,28,<br>29,30,31,3<br>3 | 4 | P01835,P83121,Q08849,Q63532                             |
| 4599 | 1,2,7,8,27,<br>33,34,35 | 3,4,5,6,28,<br>29,30,31,3<br>2 | 1 | P01835                                                  |
| 4600 | 1,2,7,8,28,<br>29,30,31 | 3,4,5,6,27,<br>32,33,34,3<br>5 | 6 | P10715,P19629,P31044,Q4FZU2,Q5GRG2,Q8CJ52               |
| 4601 | 1,2,7,8,28,<br>29,30,32 | 3,4,5,6,27,<br>31,33,34,3<br>5 | 3 | P10715,Q4FZU2,Q63355                                    |
| 4602 | 1,2,7,8,28,<br>29,30,33 | 3,4,5,6,27,<br>31,32,34,3<br>5 | 2 | P10715,Q8CJ52                                           |
| 4603 | 1,2,7,8,28,<br>29,30,34 | 3,4,5,6,27,<br>31,32,33,3<br>5 | 4 | P47967,P97840,Q4FZU2,Q9QZA6                             |
| 4604 | 1,2,7,8,28,<br>29,30,35 | 3,4,5,6,27,<br>31,32,33,3<br>4 | 2 | P02625,Q4FZU2                                           |
| 4605 | 1,2,7,8,28,<br>29,31,32 | 3,4,5,6,27,<br>30,33,34,3<br>5 | 8 | P01835,P06911,P10715,P19629,P31044,Q4FZU2,Q5GRG2,Q6AYL6 |
| 4606 | 1,2,7,8,28,<br>29,31,33 | 3,4,5,6,27,<br>30,32,34,3<br>5 | 8 | P01835,P02803,P06911,P10715,P19629,P31044,Q5GRG2,Q8CJ52 |
| 4607 | 1,2,7,8,28,<br>29,31,34 | 3,4,5,6,27,<br>30,32,33,3<br>5 | 4 | P01835,P10715,Q4FZU2,Q5GRG2                             |
| 4608 | 1,2,7,8,28,<br>29,31,35 | 3,4,5,6,27,<br>30,32,33,3<br>4 | 6 | P01835,P02803,P06760,P10715,Q4FZU2,Q5GRG2               |
| 4609 | 1,2,7,8,28,<br>29,32,33 | 3,4,5,6,27,<br>30,31,34,3<br>5 | 5 | P01835,P02625,P02793,Q7TP54,P10715,P47727               |
| 4610 | 1,2,7,8,28,<br>29,32,34 | 3,4,5,6,27,<br>30,31,33,3<br>5 | 2 | P01835,P02625                                           |
| 4611 | 1,2,7,8,28,<br>29,32,35 | 3,4,5,6,27,<br>30,31,33,3<br>4 | 1 | P02625                                                  |



|      |                         |                                |   |                                                  |
|------|-------------------------|--------------------------------|---|--------------------------------------------------|
| 4612 | 1,2,7,8,28,<br>29,33,34 | 3,4,5,6,27,<br>30,31,32,3<br>5 | 2 | P01835,Q9QZA6                                    |
| 4613 | 1,2,7,8,28,<br>29,33,35 | 3,4,5,6,27,<br>30,31,32,3<br>4 | 4 | P01835,P02625,P02803,P10715                      |
| 4614 | 1,2,7,8,28,<br>29,34,35 | 3,4,5,6,27,<br>30,31,32,3<br>3 | 2 | P01835,P02625                                    |
| 4615 | 1,2,7,8,28,<br>30,31,32 | 3,4,5,6,27,<br>29,33,34,3<br>5 | 5 | P10715,P19629,P31044,Q4FZU2,Q5GRG2               |
| 4616 | 1,2,7,8,28,<br>30,31,33 | 3,4,5,6,27,<br>29,32,34,3<br>5 | 6 | P01835,P02803,P10715,P19629,P31044,Q5GRG2        |
| 4617 | 1,2,7,8,28,<br>30,31,34 | 3,4,5,6,27,<br>29,32,33,3<br>5 | 5 | P01835,P10715,P47967,P97840,Q4FZU2               |
| 4618 | 1,2,7,8,28,<br>30,31,35 | 3,4,5,6,27,<br>29,32,33,3<br>4 | 5 | P02803,P06760,P10715,Q4FZU2,Q63751               |
| 4619 | 1,2,7,8,28,<br>30,32,33 | 3,4,5,6,27,<br>29,31,34,3<br>5 | 1 | P10715                                           |
| 4620 | 1,2,7,8,28,<br>30,32,34 | 3,4,5,6,27,<br>29,31,33,3<br>5 | 2 | P47967,P97840                                    |
| 4621 | 1,2,7,8,28,<br>30,32,35 | 3,4,5,6,27,<br>29,31,33,3<br>4 | 2 | P02625,Q4FZU2                                    |
| 4622 | 1,2,7,8,28,<br>30,33,34 | 3,4,5,6,27,<br>29,31,32,3<br>5 | 3 | P01835,P47967,P97840                             |
| 4623 | 1,2,7,8,28,<br>30,33,35 | 3,4,5,6,27,<br>29,31,32,3<br>4 | 1 | P02803                                           |
| 4624 | 1,2,7,8,28,<br>30,34,35 | 3,4,5,6,27,<br>29,31,32,3<br>3 | 3 | P47967,P97840,Q4FZU2                             |
| 4625 | 1,2,7,8,28,<br>31,32,33 | 3,4,5,6,27,<br>29,30,34,3<br>5 | 7 | P01835,P02803,P06911,P10715,P19629,P31044,Q5GRG2 |
| 4626 | 1,2,7,8,28,<br>31,32,34 | 3,4,5,6,27,<br>29,30,33,3<br>5 | 3 | P01835,P10715,P31044                             |

|      |                         |                                |   |                                    |
|------|-------------------------|--------------------------------|---|------------------------------------|
| 4627 | 1,2,7,8,28,<br>31,32,35 | 3,4,5,6,27,<br>29,30,33,3<br>4 | 4 | P01835,P02803,P10715,P31044        |
| 4628 | 1,2,7,8,28,<br>31,33,34 | 3,4,5,6,27,<br>29,30,32,3<br>5 | 4 | P01835,P02803,P10715,P19629        |
| 4629 | 1,2,7,8,28,<br>31,33,35 | 3,4,5,6,27,<br>29,30,32,3<br>4 | 5 | P01835,P02803,P06760,P10715,P19629 |
| 4630 | 1,2,7,8,28,<br>31,34,35 | 3,4,5,6,27,<br>29,30,32,3<br>3 | 3 | P01835,P02803,P10715               |
| 4631 | 1,2,7,8,28,<br>32,33,34 | 3,4,5,6,27,<br>29,30,31,3<br>5 | 2 | P01835,P10715                      |
| 4632 | 1,2,7,8,28,<br>32,33,35 | 3,4,5,6,27,<br>29,30,31,3<br>4 | 4 | P01835,P02625,P02803,P10715        |
| 4633 | 1,2,7,8,28,<br>32,34,35 | 3,4,5,6,27,<br>29,30,31,3<br>3 | 2 | P01835,P02625                      |
| 4634 | 1,2,7,8,28,<br>33,34,35 | 3,4,5,6,27,<br>29,30,31,3<br>2 | 3 | P01835,P02625,P02803               |
| 4635 | 1,2,7,8,29,<br>30,31,32 | 3,4,5,6,27,<br>28,33,34,3<br>5 | 2 | Q4FZU2,Q5HZV9                      |
| 4636 | 1,2,7,8,29,<br>30,31,33 | 3,4,5,6,27,<br>28,32,34,3<br>5 | 3 | P01835,Q4FZU2,Q5HZV9               |
| 4637 | 1,2,7,8,29,<br>30,31,34 | 3,4,5,6,27,<br>28,32,33,3<br>5 | 5 | P01835,P97840,Q4FZU2,Q6IFW6,Q6IG02 |
| 4638 | 1,2,7,8,29,<br>30,31,35 | 3,4,5,6,27,<br>28,32,33,3<br>4 | 5 | F1M3L7,P04182,Q4FZU2,Q6IFU7,Q6IFW6 |
| 4639 | 1,2,7,8,29,<br>30,32,33 | 3,4,5,6,27,<br>28,31,34,3<br>5 | 1 | Q5HZV9                             |
| 4640 | 1,2,7,8,29,<br>30,32,34 | 3,4,5,6,27,<br>28,31,33,3<br>5 | 1 | Q4FZU2                             |
| 4641 | 1,2,7,8,29,<br>30,32,35 | 3,4,5,6,27,<br>28,31,33,3<br>4 | 2 | P02625,Q4FZU2                      |

|      |                         |                                |   |                                           |
|------|-------------------------|--------------------------------|---|-------------------------------------------|
| 4642 | 1,2,7,8,29,<br>30,33,34 | 3,4,5,6,27,<br>28,31,32,3<br>5 | 1 | P01835                                    |
| 4643 | 1,2,7,8,29,<br>30,33,35 | 3,4,5,6,27,<br>28,31,32,3<br>4 | 0 |                                           |
| 4644 | 1,2,7,8,29,<br>30,34,35 | 3,4,5,6,27,<br>28,31,32,3<br>3 | 1 | Q4FZU2                                    |
| 4645 | 1,2,7,8,29,<br>31,32,33 | 3,4,5,6,27,<br>28,30,34,3<br>5 | 5 | P01835,P02793;Q7TP54,P04182,Q5HZV9,Q8CJD3 |
| 4646 | 1,2,7,8,29,<br>31,32,34 | 3,4,5,6,27,<br>28,30,33,3<br>5 | 2 | P01835,Q63467                             |
| 4647 | 1,2,7,8,29,<br>31,32,35 | 3,4,5,6,27,<br>28,30,33,3<br>4 | 3 | P01835,P04182,Q4FZU2                      |
| 4648 | 1,2,7,8,29,<br>31,33,34 | 3,4,5,6,27,<br>28,30,32,3<br>5 | 1 | P01835                                    |
| 4649 | 1,2,7,8,29,<br>31,33,35 | 3,4,5,6,27,<br>28,30,32,3<br>4 | 4 | F1M3L7,P01835,P02803,P04182               |
| 4650 | 1,2,7,8,29,<br>31,34,35 | 3,4,5,6,27,<br>28,30,32,3<br>3 | 2 | P01835,Q4FZU2                             |
| 4651 | 1,2,7,8,29,<br>32,33,34 | 3,4,5,6,27,<br>28,30,31,3<br>5 | 1 | P01835                                    |
| 4652 | 1,2,7,8,29,<br>32,33,35 | 3,4,5,6,27,<br>28,30,31,3<br>4 | 3 | P01835,P02625,P04182                      |
| 4653 | 1,2,7,8,29,<br>32,34,35 | 3,4,5,6,27,<br>28,30,31,3<br>3 | 2 | P01835,P02625                             |
| 4654 | 1,2,7,8,29,<br>33,34,35 | 3,4,5,6,27,<br>28,30,31,3<br>2 | 2 | P01835,P02625                             |
| 4655 | 1,2,7,8,30,<br>31,32,33 | 3,4,5,6,27,<br>28,29,34,3<br>5 | 1 | P01835                                    |
| 4656 | 1,2,7,8,30,<br>31,32,34 | 3,4,5,6,27,<br>28,29,33,3<br>5 | 5 | P01835,P47967,P97840,Q4FZU2,Q80WL1        |

|      |                          |                                |   |                                                                |
|------|--------------------------|--------------------------------|---|----------------------------------------------------------------|
| 4657 | 1,2,7,8,30,<br>31,32,35  | 3,4,5,6,27,<br>28,29,33,3<br>4 | 2 | P04182,Q4FZU2                                                  |
| 4658 | 1,2,7,8,30,<br>31,33,34  | 3,4,5,6,27,<br>28,29,32,3<br>5 | 3 | P01835,P47967,P97840                                           |
| 4659 | 1,2,7,8,30,<br>31,33,35  | 3,4,5,6,27,<br>28,29,32,3<br>4 | 3 | P01835,P02803,P04182                                           |
| 4660 | 1,2,7,8,30,<br>31,34,35  | 3,4,5,6,27,<br>28,29,32,3<br>3 | 3 | P01835,Q4FZU2,Q80WL1                                           |
| 4661 | 1,2,7,8,30,<br>32,33,34  | 3,4,5,6,27,<br>28,29,31,3<br>5 | 1 | P01835                                                         |
| 4662 | 1,2,7,8,30,<br>32,33,35  | 3,4,5,6,27,<br>28,29,31,3<br>4 | 0 |                                                                |
| 4663 | 1,2,7,8,30,<br>32,34,35  | 3,4,5,6,27,<br>28,29,31,3<br>3 | 0 |                                                                |
| 4664 | 1,2,7,8,30,<br>33,34,35  | 3,4,5,6,27,<br>28,29,31,3<br>2 | 1 | P01835                                                         |
| 4665 | 1,2,7,8,31,<br>32,33,34  | 3,4,5,6,27,<br>28,29,30,3<br>5 | 2 | P01681,P01835                                                  |
| 4666 | 1,2,7,8,31,<br>32,33,35  | 3,4,5,6,27,<br>28,29,30,3<br>4 | 4 | P01835,P02803,P04182,Q08849                                    |
| 4667 | 1,2,7,8,31,<br>32,34,35  | 3,4,5,6,27,<br>28,29,30,3<br>3 | 1 | P01835                                                         |
| 4668 | 1,2,7,8,31,<br>33,34,35  | 3,4,5,6,27,<br>28,29,30,3<br>2 | 2 | P01835,P02803                                                  |
| 4669 | 1,2,7,8,32,<br>33,34,35  | 3,4,5,6,27,<br>28,29,30,3<br>1 | 2 | P01835,P02625                                                  |
| 4670 | 1,2,7,27,2<br>8,29,30,31 | 3,4,5,6,8,3<br>2,33,34,35      | 9 | D3ZUC6,P08753,P10715,P19629,P36374,P82995,Q5GRG2,Q6AYR9,Q9Z0V6 |
| 4671 | 1,2,7,27,2<br>8,29,30,32 | 3,4,5,6,8,3<br>1,33,34,35      | 8 | D3ZUC6,P05369,P09456,P24368,P82995,Q63355,Q9JHB9,Q9JI85        |
| 4672 | 1,2,7,27,2<br>8,29,30,33 | 3,4,5,6,8,3<br>1,32,34,35      | 7 | D3ZUC6,O54861,P08753,P36374,P82995,Q9JI85,Q9Z0V6               |

|      |                                                 |   |                                                                       |
|------|-------------------------------------------------|---|-----------------------------------------------------------------------|
| 4673 | 1,2,7,27,2 3,4,5,6,8,3<br>8,29,30,34 1,32,33,35 | 5 | D3ZUC6,P05369,P47967,P97840,Q6AYR9                                    |
| 4674 | 1,2,7,27,2 3,4,5,6,8,3<br>8,29,30,35 1,32,33,34 | 4 | D3ZUC6,Q54861,P01946,Q6AYS4                                           |
| 4675 | 1,2,7,27,2 3,4,5,6,8,3<br>8,29,31,32 0,33,34,35 | 7 | B0BNN3,P02793;Q7TP54,P06911,P10715,Q5GRG2,Q6AYL6,Q9Z0V6               |
| 4676 | 1,2,7,27,2 3,4,5,6,8,3<br>8,29,31,33 0,32,34,35 | 8 | P02793;Q7TP54,P06911,P10715,P19629,P36374,Q5GRG2,Q9JI85,Q9Z0V6        |
| 4677 | 1,2,7,27,2 3,4,5,6,8,3<br>8,29,31,34 0,32,33,35 | 3 | P97840,Q5GRG2,Q9Z0V6                                                  |
| 4678 | 1,2,7,27,2 3,4,5,6,8,3<br>8,29,31,35 0,32,33,34 | 5 | D3ZUC6,P01946,P10715,Q5GRG2,Q9Z0V6                                    |
| 4679 | 1,2,7,27,2 3,4,5,6,8,3<br>8,29,32,33 0,31,34,35 | 9 | P02793;Q7TP54,P08723,P09456,P24368,P47727,Q06000,Q9JHB9,Q9JI85,Q9Z0V6 |
| 4680 | 1,2,7,27,2 3,4,5,6,8,3<br>8,29,32,34 0,31,33,35 | 1 | P05369                                                                |
| 4681 | 1,2,7,27,2 3,4,5,6,8,3<br>8,29,32,35 0,31,33,34 | 2 | P01946,P02625                                                         |
| 4682 | 1,2,7,27,2 3,4,5,6,8,3<br>8,29,33,34 0,31,32,35 | 2 | Q9JI85,Q9Z0V6                                                         |
| 4683 | 1,2,7,27,2 3,4,5,6,8,3<br>8,29,33,35 0,31,32,34 | 3 | P01946,Q6AYS4,Q9Z0V6                                                  |
| 4684 | 1,2,7,27,2 3,4,5,6,8,3<br>8,29,34,35 0,31,32,33 | 3 | P01946,Q5M819,Q9QUL6                                                  |
| 4685 | 1,2,7,27,2 3,4,5,6,8,2<br>8,30,31,32 9,33,34,35 | 4 | D3ZUC6,P10715,P31044,Q5GRG2                                           |
| 4686 | 1,2,7,27,2 3,4,5,6,8,2<br>8,30,31,33 9,32,34,35 | 5 | D3ZUC6,P10715,P19629,P51907,Q5GRG2                                    |
| 4687 | 1,2,7,27,2 3,4,5,6,8,2<br>8,30,31,34 9,32,33,35 | 3 | D3ZUC6,P47967,P97840                                                  |
| 4688 | 1,2,7,27,2 3,4,5,6,8,2<br>8,30,31,35 9,32,33,34 | 2 | D3ZUC6,Q6AYS4                                                         |
| 4689 | 1,2,7,27,2 3,4,5,6,8,2<br>8,30,32,33 9,31,34,35 | 1 | P02793;Q7TP54                                                         |
| 4690 | 1,2,7,27,2 3,4,5,6,8,2<br>8,30,32,34 9,31,33,35 | 3 | P47967,P97840,Q63532                                                  |
| 4691 | 1,2,7,27,2 3,4,5,6,8,2<br>8,30,32,35 9,31,33,34 | 2 | D3ZUC6,Q6AYQ8                                                         |
| 4692 | 1,2,7,27,2 3,4,5,6,8,2<br>8,30,33,34 9,31,32,35 | 2 | P47967,P97840                                                         |
| 4693 | 1,2,7,27,2 3,4,5,6,8,2<br>8,30,33,35 9,31,32,34 | 2 | D3ZUC6,Q6AYS4                                                         |
| 4694 | 1,2,7,27,2 3,4,5,6,8,2<br>8,30,34,35 9,31,32,33 | 5 | D3ZUC6,P06866,P47967,P97840,Q8CJD3                                    |
| 4695 | 1,2,7,27,2 3,4,5,6,8,2<br>8,31,32,33 9,30,34,35 | 8 | P01835,P02793;Q7TP54,P10715,P19629,P31044,Q06000,Q5GRG2,Q9Z0V6        |

|      |                                                 |   |                                    |
|------|-------------------------------------------------|---|------------------------------------|
| 4696 | 1,2,7,27,2 3,4,5,6,8,2<br>8,31,32,34 9,30,33,35 | 5 | B0BNN3,P01835,P10715,P97840,Q5GRG2 |
| 4697 | 1,2,7,27,2 3,4,5,6,8,2<br>8,31,32,35 9,30,33,34 | 1 | P10715                             |
| 4698 | 1,2,7,27,2 3,4,5,6,8,2<br>8,31,33,34 9,30,32,35 | 3 | P01835,P10715,P97840               |
| 4699 | 1,2,7,27,2 3,4,5,6,8,2<br>8,31,33,35 9,30,32,34 | 3 | P01835,P10715,Q6AYS4               |
| 4700 | 1,2,7,27,2 3,4,5,6,8,2<br>8,31,34,35 9,30,32,33 | 2 | P01835,Q9QUL6                      |
| 4701 | 1,2,7,27,2 3,4,5,6,8,2<br>8,32,33,34 9,30,31,35 | 3 | P01835,Q06000,Q63532               |
| 4702 | 1,2,7,27,2 3,4,5,6,8,2<br>8,32,33,35 9,30,31,34 | 0 |                                    |
| 4703 | 1,2,7,27,2 3,4,5,6,8,2<br>8,32,34,35 9,30,31,33 | 1 | Q5M819                             |
| 4704 | 1,2,7,27,2 3,4,5,6,8,2<br>8,33,34,35 9,30,31,32 | 1 | P01835                             |
| 4705 | 1,2,7,27,2 3,4,5,6,8,2<br>9,30,31,32 8,33,34,35 | 1 | D3ZUC6                             |
| 4706 | 1,2,7,27,2 3,4,5,6,8,2<br>9,30,31,33 8,32,34,35 | 2 | Q5HZV9,Q9Z0V6                      |
| 4707 | 1,2,7,27,2 3,4,5,6,8,2<br>9,30,31,34 8,32,33,35 | 2 | P47967,P97840                      |
| 4708 | 1,2,7,27,2 3,4,5,6,8,2<br>9,30,31,35 8,32,33,34 | 3 | D3ZUC6,P01946,Q6AYS4               |
| 4709 | 1,2,7,27,2 3,4,5,6,8,2<br>9,30,32,33 8,31,34,35 | 2 | P02793;Q7TP54,Q5HZV9               |
| 4710 | 1,2,7,27,2 3,4,5,6,8,2<br>9,30,32,34 8,31,33,35 | 3 | P20760,P97840,Q63532               |
| 4711 | 1,2,7,27,2 3,4,5,6,8,2<br>9,30,32,35 8,31,33,34 | 2 | D3ZUC6,P01946                      |
| 4712 | 1,2,7,27,2 3,4,5,6,8,2<br>9,30,33,34 8,31,32,35 | 1 | P97840                             |
| 4713 | 1,2,7,27,2 3,4,5,6,8,2<br>9,30,33,35 8,31,32,34 | 3 | D3ZUC6,P01946,Q6AYS4               |
| 4714 | 1,2,7,27,2 3,4,5,6,8,2<br>9,30,34,35 8,31,32,33 | 4 | D3ZUC6,P01946,P14480,P97840        |
| 4715 | 1,2,7,27,2 3,4,5,6,8,2<br>9,31,32,33 8,30,34,35 | 4 | P01835,P02793;Q7TP54,Q8CJD3,Q9Z0V6 |
| 4716 | 1,2,7,27,2 3,4,5,6,8,2<br>9,31,32,34 8,30,33,35 | 2 | P01835,Q63467                      |
| 4717 | 1,2,7,27,2 3,4,5,6,8,2<br>9,31,32,35 8,30,33,34 | 1 | P01946                             |
| 4718 | 1,2,7,27,2 3,4,5,6,8,2<br>9,31,33,34 8,30,32,35 | 1 | P01835                             |

|      |                                                 |   |                                                  |
|------|-------------------------------------------------|---|--------------------------------------------------|
| 4719 | 1,2,7,27,2 3,4,5,6,8,2<br>9,31,33,35 8,30,32,34 | 4 | P01835,P01946,Q9WTT6,Q9Z0V6                      |
| 4720 | 1,2,7,27,2 3,4,5,6,8,2<br>9,31,34,35 8,30,32,33 | 2 | P01835,P01946                                    |
| 4721 | 1,2,7,27,2 3,4,5,6,8,2<br>9,32,33,34 8,30,31,35 | 2 | P01835,Q63532                                    |
| 4722 | 1,2,7,27,2 3,4,5,6,8,2<br>9,32,33,35 8,30,31,34 | 2 | P01946,Q9WTT6                                    |
| 4723 | 1,2,7,27,2 3,4,5,6,8,2<br>9,32,34,35 8,30,31,33 | 2 | P01946,Q63532                                    |
| 4724 | 1,2,7,27,2 3,4,5,6,8,2<br>9,33,34,35 8,30,31,32 | 2 | P01835,P01946                                    |
| 4725 | 1,2,7,27,3 3,4,5,6,8,2<br>0,31,32,33 8,29,34,35 | 0 |                                                  |
| 4726 | 1,2,7,27,3 3,4,5,6,8,2<br>0,31,32,34 8,29,33,35 | 4 | P20760,P47967,P97840,Q63532                      |
| 4727 | 1,2,7,27,3 3,4,5,6,8,2<br>0,31,32,35 8,29,33,34 | 1 | D3ZUC6                                           |
| 4728 | 1,2,7,27,3 3,4,5,6,8,2<br>0,31,33,34 8,29,32,35 | 4 | P01835,P47967,P51907,P97840                      |
| 4729 | 1,2,7,27,3 3,4,5,6,8,2<br>0,31,33,35 8,29,32,34 | 2 | D3ZUC6,Q6AYS4                                    |
| 4730 | 1,2,7,27,3 3,4,5,6,8,2<br>0,31,34,35 8,29,32,33 | 3 | D3ZUC6,P47967,P97840                             |
| 4731 | 1,2,7,27,3 3,4,5,6,8,2<br>0,32,33,34 8,29,31,35 | 3 | P14668,P97840,Q63532                             |
| 4732 | 1,2,7,27,3 3,4,5,6,8,2<br>0,32,33,35 8,29,31,34 | 0 |                                                  |
| 4733 | 1,2,7,27,3 3,4,5,6,8,2<br>0,32,34,35 8,29,31,33 | 4 | P14668,P83121,P97840,Q63532                      |
| 4734 | 1,2,7,27,3 3,4,5,6,8,2<br>0,33,34,35 8,29,31,32 | 2 | P14668,P97840                                    |
| 4735 | 1,2,7,27,3 3,4,5,6,8,2<br>1,32,33,34 8,29,30,35 | 4 | P01681,P01835,Q08849,Q63532                      |
| 4736 | 1,2,7,27,3 3,4,5,6,8,2<br>1,32,33,35 8,29,30,34 | 4 | P01835,Q08849,Q6NX65,Q9WTT6                      |
| 4737 | 1,2,7,27,3 3,4,5,6,8,2<br>1,32,34,35 8,29,30,33 | 2 | P01835,Q63532                                    |
| 4738 | 1,2,7,27,3 3,4,5,6,8,2<br>1,33,34,35 8,29,30,32 | 1 | P01835                                           |
| 4739 | 1,2,7,27,3 3,4,5,6,8,2<br>2,33,34,35 8,29,30,31 | 3 | P01835,Q63532,Q63661                             |
| 4740 | 1,2,7,28,2 3,4,5,6,8,2<br>9,30,31,32 7,33,34,35 | 6 | P06911,P10715,P19629,Q4FZU2,Q5GRG2,Q9Z0V6        |
| 4741 | 1,2,7,28,2 3,4,5,6,8,2<br>9,30,31,33 7,32,34,35 | 7 | P06760,P08753,P10715,P19629,P35467,Q5GRG2,Q9Z0V6 |

|      |                                                 |   |                                                                |
|------|-------------------------------------------------|---|----------------------------------------------------------------|
| 4742 | 1,2,7,28,2 3,4,5,6,8,2<br>9,30,31,34 7,32,33,35 | 5 | P06760,P47967,P97840,Q4FZU2,Q6IG02                             |
| 4743 | 1,2,7,28,2 3,4,5,6,8,2<br>9,30,31,35 7,32,33,34 | 6 | P06760,P19629,Q07116,Q4FZU2,Q6AYS4,Q9Z0V6                      |
| 4744 | 1,2,7,28,2 3,4,5,6,8,2<br>9,30,32,33 7,31,34,35 | 4 | P02625,P02793;Q7TP54,P09456,Q9Z0V6                             |
| 4745 | 1,2,7,28,2 3,4,5,6,8,2<br>9,30,32,34 7,31,33,35 | 1 | P97840                                                         |
| 4746 | 1,2,7,28,2 3,4,5,6,8,2<br>9,30,32,35 7,31,33,34 | 1 | P02625                                                         |
| 4747 | 1,2,7,28,2 3,4,5,6,8,2<br>9,30,33,34 7,31,32,35 | 3 | P06760,P97840,Q9Z0V6                                           |
| 4748 | 1,2,7,28,2 3,4,5,6,8,2<br>9,30,33,35 7,31,32,34 | 5 | P02625,P06760,Q6AYS4,Q9WTT6,Q9Z0V6                             |
| 4749 | 1,2,7,28,2 3,4,5,6,8,2<br>9,30,34,35 7,31,32,33 | 6 | P02625,P06760,P06866,P97840,Q4FZU2,Q8CJD3                      |
| 4750 | 1,2,7,28,2 3,4,5,6,8,2<br>9,31,32,33 7,30,34,35 | 8 | P01835,P02793;Q7TP54,P06911,P10715,P19629,Q5GRG2,Q9WTT6,Q9Z0V6 |
| 4751 | 1,2,7,28,2 3,4,5,6,8,2<br>9,31,32,34 7,30,33,35 | 3 | P01835,P06911,Q5GRG2                                           |
| 4752 | 1,2,7,28,2 3,4,5,6,8,2<br>9,31,32,35 7,30,33,34 | 4 | P06911,P10715,Q9WTT6,Q9Z0V6                                    |
| 4753 | 1,2,7,28,2 3,4,5,6,8,2<br>9,31,33,34 7,30,32,35 | 6 | P01835,P06760,P10715,P19629,P27791,Q9Z0V6                      |
| 4754 | 1,2,7,28,2 3,4,5,6,8,2<br>9,31,33,35 7,30,32,34 | 9 | P01835,P02803,P06760,P10715,P19629,P49744,Q6AYS4,Q9WTT6,Q9Z0V6 |
| 4755 | 1,2,7,28,2 3,4,5,6,8,2<br>9,31,34,35 7,30,32,33 | 3 | P01835,P02803,P06760                                           |
| 4756 | 1,2,7,28,2 3,4,5,6,8,2<br>9,32,33,34 7,30,31,35 | 3 | P01835,P02625,Q9Z0V6                                           |
| 4757 | 1,2,7,28,2 3,4,5,6,8,2<br>9,32,33,35 7,30,31,34 | 3 | P02625,Q9WTT6,Q9Z0V6                                           |
| 4758 | 1,2,7,28,2 3,4,5,6,8,2<br>9,32,34,35 7,30,31,33 | 1 | P02625                                                         |
| 4759 | 1,2,7,28,2 3,4,5,6,8,2<br>9,33,34,35 7,30,31,32 | 4 | P01835,P02625,P06760,Q9Z0V6                                    |
| 4760 | 1,2,7,28,3 3,4,5,6,8,2<br>0,31,32,33 7,29,34,35 | 4 | P10715,P19629,Q5GRG2,Q9WTT6                                    |
| 4761 | 1,2,7,28,3 3,4,5,6,8,2<br>0,31,32,34 7,29,33,35 | 2 | P47967,P97840                                                  |
| 4762 | 1,2,7,28,3 3,4,5,6,8,2<br>0,31,32,35 7,29,33,34 | 1 | Q4FZU2                                                         |
| 4763 | 1,2,7,28,3 3,4,5,6,8,2<br>0,31,33,34 7,29,32,35 | 6 | P01835,P06760,P19629,P47967,P51907,P97840                      |
| 4764 | 1,2,7,28,3 3,4,5,6,8,2<br>0,31,33,35 7,29,32,34 | 5 | P02803,P06760,P19629,Q6AYS4,Q9WTT6                             |



|      |                                                 |   |                                                  |
|------|-------------------------------------------------|---|--------------------------------------------------|
| 4765 | 1,2,7,28,3 3,4,5,6,8,2<br>0,31,34,35 7,29,32,33 | 7 | P06760,P06866,P14669,P47967,P97840,Q4FZU2,Q8CJD3 |
| 4766 | 1,2,7,28,3 3,4,5,6,8,2<br>0,32,33,34 7,29,31,35 | 2 | P14668,P97840                                    |
| 4767 | 1,2,7,28,3 3,4,5,6,8,2<br>0,32,33,35 7,29,31,34 | 3 | P02625,Q6AYS4,Q9WTT6                             |
| 4768 | 1,2,7,28,3 3,4,5,6,8,2<br>0,32,34,35 7,29,31,33 | 3 | P02625,P14668,P97840                             |
| 4769 | 1,2,7,28,3 3,4,5,6,8,2<br>0,33,34,35 7,29,31,32 | 5 | P06760,P06866,P14668,P97840,Q8CJD3               |
| 4770 | 1,2,7,28,3 3,4,5,6,8,2<br>1,32,33,34 7,29,30,35 | 2 | P01835,P10715                                    |
| 4771 | 1,2,7,28,3 3,4,5,6,8,2<br>1,32,33,35 7,29,30,34 | 5 | P01835,P02803,P06760,P10715,Q9WTT6               |
| 4772 | 1,2,7,28,3 3,4,5,6,8,2<br>1,32,34,35 7,29,30,33 | 1 | P01835                                           |
| 4773 | 1,2,7,28,3 3,4,5,6,8,2<br>1,33,34,35 7,29,30,32 | 4 | P01835,P02803,P06760,P14669                      |
| 4774 | 1,2,7,28,3 3,4,5,6,8,2<br>2,33,34,35 7,29,30,31 | 3 | P01835,P02625,P14668                             |
| 4775 | 1,2,7,29,3 3,4,5,6,8,2<br>0,31,32,33 7,28,34,35 | 4 | P04182,Q5HZV9,Q9WTT6,Q9Z0V6                      |
| 4776 | 1,2,7,29,3 3,4,5,6,8,2<br>0,31,32,34 7,28,33,35 | 2 | P97840,Q4FZU2                                    |
| 4777 | 1,2,7,29,3 3,4,5,6,8,2<br>0,31,32,35 7,28,33,34 | 3 | P04182,Q4FZU2,Q9WTT6                             |
| 4778 | 1,2,7,29,3 3,4,5,6,8,2<br>0,31,33,34 7,28,32,35 | 2 | P01835,P97840                                    |
| 4779 | 1,2,7,29,3 3,4,5,6,8,2<br>0,31,33,35 7,28,32,34 | 5 | P00714,P04182,P06760,Q6AYS4,Q9WTT6               |
| 4780 | 1,2,7,29,3 3,4,5,6,8,2<br>0,31,34,35 7,28,32,33 | 5 | P00714,P06760,P97840,Q4FZU2,Q6IG02               |
| 4781 | 1,2,7,29,3 3,4,5,6,8,2<br>0,32,33,34 7,28,31,35 | 1 | P14668                                           |
| 4782 | 1,2,7,29,3 3,4,5,6,8,2<br>0,32,33,35 7,28,31,34 | 3 | P02625,P14668,Q9WTT6                             |
| 4783 | 1,2,7,29,3 3,4,5,6,8,2<br>0,32,34,35 7,28,31,33 | 2 | P02625,P14668                                    |
| 4784 | 1,2,7,29,3 3,4,5,6,8,2<br>0,33,34,35 7,28,31,32 | 1 | P14668                                           |
| 4785 | 1,2,7,29,3 3,4,5,6,8,2<br>1,32,33,34 7,28,30,35 | 1 | P01835                                           |
| 4786 | 1,2,7,29,3 3,4,5,6,8,2<br>1,32,33,35 7,28,30,34 | 4 | P01835,P04182,Q9WTT6,Q9Z0V6                      |
| 4787 | 1,2,7,29,3 3,4,5,6,8,2<br>1,32,34,35 7,28,30,33 | 1 | P01835                                           |

|      |                                                 |   |                                                                |
|------|-------------------------------------------------|---|----------------------------------------------------------------|
| 4788 | 1,2,7,29,3 3,4,5,6,8,2<br>1,33,34,35 7,28,30,32 | 3 | P00714,P01835,P06760                                           |
| 4789 | 1,2,7,29,3 3,4,5,6,8,2<br>2,33,34,35 7,28,30,31 | 4 | P01835,P02625,P14668,Q63661                                    |
| 4790 | 1,2,7,30,3 3,4,5,6,8,2<br>1,32,33,34 7,28,29,35 | 2 | P01835,P97840                                                  |
| 4791 | 1,2,7,30,3 3,4,5,6,8,2<br>1,32,33,35 7,28,29,34 | 2 | P04182,Q9WTT6                                                  |
| 4792 | 1,2,7,30,3 3,4,5,6,8,2<br>1,32,34,35 7,28,29,33 | 3 | P0C0A9,P82471,P97840                                           |
| 4793 | 1,2,7,30,3 3,4,5,6,8,2<br>1,33,34,35 7,28,29,32 | 6 | P00714,P01835,P06760,P0C0A9,P82471,P97840                      |
| 4794 | 1,2,7,30,3 3,4,5,6,8,2<br>2,33,34,35 7,28,29,31 | 3 | P14668,P82471,Q63661                                           |
| 4795 | 1,2,7,31,3 3,4,5,6,8,2<br>2,33,34,35 7,28,29,30 | 3 | P01835,P0C0A9,P82471                                           |
| 4796 | 1,2,8,27,2 3,4,5,6,7,3<br>8,29,30,31 2,33,34,35 | 7 | O35547,P02781,P02782,P19629,P36374,Q5GRG2,Q6AYR9               |
| 4797 | 1,2,8,27,2 3,4,5,6,7,3<br>8,29,30,32 1,33,34,35 | 7 | P02781,P02782,P05369,P08010,P08723,P24368,Q9JHB9               |
| 4798 | 1,2,8,27,2 3,4,5,6,7,3<br>8,29,30,33 1,32,34,35 | 7 | O35547,P02781,P02782,P08723,P36374,Q8CJ52,Q9JHB9               |
| 4799 | 1,2,8,27,2 3,4,5,6,7,3<br>8,29,30,34 1,32,33,35 | 3 | P05369,Q6AYR9,Q9QZA6                                           |
| 4800 | 1,2,8,27,2 3,4,5,6,7,3<br>8,29,30,35 1,32,33,34 | 2 | D3ZUC6,P05539                                                  |
| 4801 | 1,2,8,27,2 3,4,5,6,7,3<br>8,29,31,32 0,33,34,35 | 9 | O35547,P02782,P06911,P08723,P10715,P24368,Q5FVI6,Q5GRG2,Q9JHB9 |
| 4802 | 1,2,8,27,2 3,4,5,6,7,3<br>8,29,31,33 0,32,34,35 | 9 | O35547,P02781,P02782,P08723,P10715,P19629,P36374,Q5GRG2,Q8K4G9 |
| 4803 | 1,2,8,27,2 3,4,5,6,7,3<br>8,29,31,34 0,32,33,35 | 1 | Q8K4G9                                                         |
| 4804 | 1,2,8,27,2 3,4,5,6,7,3<br>8,29,31,35 0,32,33,34 | 1 | Q8K4G9                                                         |
| 4805 | 1,2,8,27,2 3,4,5,6,7,3<br>8,29,32,33 0,31,34,35 | 7 | O35547,P02793,Q7TP54,P08723,P24368,P35281,P47727,Q9JHB9        |
| 4806 | 1,2,8,27,2 3,4,5,6,7,3<br>8,29,32,34 0,31,33,35 | 2 | P05369,P24368                                                  |
| 4807 | 1,2,8,27,2 3,4,5,6,7,3<br>8,29,32,35 0,31,33,34 | 2 | P02625,P19218                                                  |
| 4808 | 1,2,8,27,2 3,4,5,6,7,3<br>8,29,33,34 0,31,32,35 | 0 |                                                                |
| 4809 | 1,2,8,27,2 3,4,5,6,7,3<br>8,29,33,35 0,31,32,34 | 2 | P02625,P09605,P25809                                           |
| 4810 | 1,2,8,27,2 3,4,5,6,7,3<br>8,29,34,35 0,31,32,33 | 2 | P00507,P09006                                                  |

|      |                                                 |   |                                    |
|------|-------------------------------------------------|---|------------------------------------|
| 4811 | 1,2,8,27,2 3,4,5,6,7,2<br>8,30,31,32 9,33,34,35 | 3 | P31044,Q5FVI6,Q5GRG2               |
| 4812 | 1,2,8,27,2 3,4,5,6,7,2<br>8,30,31,33 9,32,34,35 | 1 | P19629                             |
| 4813 | 1,2,8,27,2 3,4,5,6,7,2<br>8,30,31,34 9,32,33,35 | 0 |                                    |
| 4814 | 1,2,8,27,2 3,4,5,6,7,2<br>8,30,31,35 9,32,33,34 | 2 | D3ZUC6,P05539                      |
| 4815 | 1,2,8,27,2 3,4,5,6,7,2<br>8,30,32,33 9,31,34,35 | 0 |                                    |
| 4816 | 1,2,8,27,2 3,4,5,6,7,2<br>8,30,32,34 9,31,33,35 | 1 | P83121                             |
| 4817 | 1,2,8,27,2 3,4,5,6,7,2<br>8,30,32,35 9,31,33,34 | 2 | P83121,Q6AYQ8                      |
| 4818 | 1,2,8,27,2 3,4,5,6,7,2<br>8,30,33,34 9,31,32,35 | 0 |                                    |
| 4819 | 1,2,8,27,2 3,4,5,6,7,2<br>8,30,33,35 9,31,32,34 | 1 | P05539                             |
| 4820 | 1,2,8,27,2 3,4,5,6,7,2<br>8,30,34,35 9,31,32,33 | 5 | P00507,P05539,P09006,P83121,Q8CJD3 |
| 4821 | 1,2,8,27,2 3,4,5,6,7,2<br>8,31,32,33 9,30,34,35 | 4 | P01835,P10715,P31044,Q5GRG2        |
| 4822 | 1,2,8,27,2 3,4,5,6,7,2<br>8,31,32,34 9,30,33,35 | 1 | P01835                             |
| 4823 | 1,2,8,27,2 3,4,5,6,7,2<br>8,31,32,35 9,30,33,34 | 0 |                                    |
| 4824 | 1,2,8,27,2 3,4,5,6,7,2<br>8,31,33,34 9,30,32,35 | 1 | P01835                             |
| 4825 | 1,2,8,27,2 3,4,5,6,7,2<br>8,31,33,35 9,30,32,34 | 4 | P01835,P02803,P09605;P25809,Q99MH3 |
| 4826 | 1,2,8,27,2 3,4,5,6,7,2<br>8,31,34,35 9,30,32,33 | 2 | P01835,P09006                      |
| 4827 | 1,2,8,27,2 3,4,5,6,7,2<br>8,32,33,34 9,30,31,35 | 2 | P01835,P97584                      |
| 4828 | 1,2,8,27,2 3,4,5,6,7,2<br>8,32,33,35 9,30,31,34 | 2 | P02625,P09605;P25809               |
| 4829 | 1,2,8,27,2 3,4,5,6,7,2<br>8,32,34,35 9,30,31,33 | 2 | P00507,P83121                      |
| 4830 | 1,2,8,27,2 3,4,5,6,7,2<br>8,33,34,35 9,30,31,32 | 2 | P01835,P09006                      |
| 4831 | 1,2,8,27,2 3,4,5,6,7,2<br>9,30,31,32 8,33,34,35 | 1 | P62804                             |
| 4832 | 1,2,8,27,2 3,4,5,6,7,2<br>9,30,31,33 8,32,34,35 | 1 | Q5HZV9                             |
| 4833 | 1,2,8,27,2 3,4,5,6,7,2<br>9,30,31,34 8,32,33,35 | 2 | P20760,Q6AYR9                      |

|      |                                                 |   |                             |
|------|-------------------------------------------------|---|-----------------------------|
| 4834 | 1,2,8,27,2 3,4,5,6,7,2<br>9,30,31,35 8,32,33,34 | 1 | Q8K4G9                      |
| 4835 | 1,2,8,27,2 3,4,5,6,7,2<br>9,30,32,33 8,31,34,35 | 2 | P62804,Q5HZV9               |
| 4836 | 1,2,8,27,2 3,4,5,6,7,2<br>9,30,32,34 8,31,33,35 | 4 | P20760,P62804,Q00715,Q8VD89 |
| 4837 | 1,2,8,27,2 3,4,5,6,7,2<br>9,30,32,35 8,31,33,34 | 0 |                             |
| 4838 | 1,2,8,27,2 3,4,5,6,7,2<br>9,30,33,34 8,31,32,35 | 1 | Q00715                      |
| 4839 | 1,2,8,27,2 3,4,5,6,7,2<br>9,30,33,35 8,31,32,34 | 1 | P05539                      |
| 4840 | 1,2,8,27,2 3,4,5,6,7,2<br>9,30,34,35 8,31,32,33 | 0 |                             |
| 4841 | 1,2,8,27,2 3,4,5,6,7,2<br>9,31,32,33 8,30,34,35 | 3 | P01835,Q5HZV9,Q8CJD3        |
| 4842 | 1,2,8,27,2 3,4,5,6,7,2<br>9,31,32,34 8,30,33,35 | 2 | P01835,P20760               |
| 4843 | 1,2,8,27,2 3,4,5,6,7,2<br>9,31,32,35 8,30,33,34 | 0 |                             |
| 4844 | 1,2,8,27,2 3,4,5,6,7,2<br>9,31,33,34 8,30,32,35 | 2 | P01835,Q8K4G9               |
| 4845 | 1,2,8,27,2 3,4,5,6,7,2<br>9,31,33,35 8,30,32,34 | 2 | P01835,Q8K4G9               |
| 4846 | 1,2,8,27,2 3,4,5,6,7,2<br>9,31,34,35 8,30,32,33 | 2 | P01835,Q8K4G9               |
| 4847 | 1,2,8,27,2 3,4,5,6,7,2<br>9,32,33,34 8,30,31,35 | 3 | P01835,P62804,Q00715        |
| 4848 | 1,2,8,27,2 3,4,5,6,7,2<br>9,32,33,35 8,30,31,34 | 1 | P02625                      |
| 4849 | 1,2,8,27,2 3,4,5,6,7,2<br>9,32,34,35 8,30,31,33 | 2 | P83121,Q8VD89               |
| 4850 | 1,2,8,27,2 3,4,5,6,7,2<br>9,33,34,35 8,30,31,32 | 2 | P01835,Q8K4G9               |
| 4851 | 1,2,8,27,3 3,4,5,6,7,2<br>0,31,32,33 8,29,34,35 | 0 |                             |
| 4852 | 1,2,8,27,3 3,4,5,6,7,2<br>0,31,32,34 8,29,33,35 | 1 | P20760                      |
| 4853 | 1,2,8,27,3 3,4,5,6,7,2<br>0,31,32,35 8,29,33,34 | 0 |                             |
| 4854 | 1,2,8,27,3 3,4,5,6,7,2<br>0,31,33,34 8,29,32,35 | 1 | P01835                      |
| 4855 | 1,2,8,27,3 3,4,5,6,7,2<br>0,31,33,35 8,29,32,34 | 0 |                             |
| 4856 | 1,2,8,27,3 3,4,5,6,7,2<br>0,31,34,35 8,29,32,33 | 1 | P02793;Q7TP54               |

|      |                                                 |   |                                                         |
|------|-------------------------------------------------|---|---------------------------------------------------------|
| 4857 | 1,2,8,27,3 3,4,5,6,7,2<br>0,32,33,34 8,29,31,35 | 1 | Q00715                                                  |
| 4858 | 1,2,8,27,3 3,4,5,6,7,2<br>0,32,33,35 8,29,31,34 | 0 |                                                         |
| 4859 | 1,2,8,27,3 3,4,5,6,7,2<br>0,32,34,35 8,29,31,33 | 1 | P83121                                                  |
| 4860 | 1,2,8,27,3 3,4,5,6,7,2<br>0,33,34,35 8,29,31,32 | 1 | P06911                                                  |
| 4861 | 1,2,8,27,3 3,4,5,6,7,2<br>1,32,33,34 8,29,30,35 | 2 | P01835,Q08849                                           |
| 4862 | 1,2,8,27,3 3,4,5,6,7,2<br>1,32,33,35 8,29,30,34 | 2 | P01835,Q08849                                           |
| 4863 | 1,2,8,27,3 3,4,5,6,7,2<br>1,32,34,35 8,29,30,33 | 3 | P01835,P83121,Q08849                                    |
| 4864 | 1,2,8,27,3 3,4,5,6,7,2<br>1,33,34,35 8,29,30,32 | 2 | P01835,Q63355                                           |
| 4865 | 1,2,8,27,3 3,4,5,6,7,2<br>2,33,34,35 8,29,30,31 | 3 | P01835,P83121,Q08849                                    |
| 4866 | 1,2,8,28,2 3,4,5,6,7,2<br>9,30,31,32 7,33,34,35 | 4 | P06911,Q4FZU2,Q5FVI6,Q5GRG2                             |
| 4867 | 1,2,8,28,2 3,4,5,6,7,2<br>9,30,31,33 7,32,34,35 | 4 | P02803,P05539,P19629,Q8K4G9                             |
| 4868 | 1,2,8,28,2 3,4,5,6,7,2<br>9,30,31,34 7,32,33,35 | 2 | Q4FZU2,Q8K4G9                                           |
| 4869 | 1,2,8,28,2 3,4,5,6,7,2<br>9,30,31,35 7,32,33,34 | 5 | P02803,P05539,Q07116,Q4FZU2,Q8K4G9                      |
| 4870 | 1,2,8,28,2 3,4,5,6,7,2<br>9,30,32,33 7,31,34,35 | 2 | P02625,P35281                                           |
| 4871 | 1,2,8,28,2 3,4,5,6,7,2<br>9,30,32,34 7,31,33,35 | 1 | P02625                                                  |
| 4872 | 1,2,8,28,2 3,4,5,6,7,2<br>9,30,32,35 7,31,33,34 | 2 | P02625,Q07116                                           |
| 4873 | 1,2,8,28,2 3,4,5,6,7,2<br>9,30,33,34 7,31,32,35 | 2 | P05539,Q9QZA6                                           |
| 4874 | 1,2,8,28,2 3,4,5,6,7,2<br>9,30,33,35 7,31,32,34 | 6 | P02625,P02803,P05539,P49744,Q07116,Q8K4G9               |
| 4875 | 1,2,8,28,2 3,4,5,6,7,2<br>9,30,34,35 7,31,32,33 | 5 | P00507,P02625,P05539,P09006,Q8CJD3                      |
| 4876 | 1,2,8,28,2 3,4,5,6,7,2<br>9,31,32,33 7,30,34,35 | 8 | P01835,P02803,P06911,P10715,P47727,P49744,Q5FVI6,Q5GRG2 |
| 4877 | 1,2,8,28,2 3,4,5,6,7,2<br>9,31,32,34 7,30,33,35 | 2 | P01835,P06911                                           |
| 4878 | 1,2,8,28,2 3,4,5,6,7,2<br>9,31,32,35 7,30,33,34 | 3 | P02803,Q07116,Q8K4G9                                    |
| 4879 | 1,2,8,28,2 3,4,5,6,7,2<br>9,31,33,34 7,30,32,35 | 3 | P01835,P02803,Q8K4G9                                    |

|      |                                                 |   |                                                         |
|------|-------------------------------------------------|---|---------------------------------------------------------|
| 4880 | 1,2,8,28,2 3,4,5,6,7,2<br>9,31,33,35 7,30,32,34 | 6 | P01835,P02803,P05539,P49744,Q07116,Q8K4G9               |
| 4881 | 1,2,8,28,2 3,4,5,6,7,2<br>9,31,34,35 7,30,32,33 | 5 | P00507,P01835,P02803,P09006,Q8K4G9                      |
| 4882 | 1,2,8,28,2 3,4,5,6,7,2<br>9,32,33,34 7,30,31,35 | 3 | P01835,P02625,P35281                                    |
| 4883 | 1,2,8,28,2 3,4,5,6,7,2<br>9,32,33,35 7,30,31,34 | 4 | P02625,P02803,P19218,P49744                             |
| 4884 | 1,2,8,28,2 3,4,5,6,7,2<br>9,32,34,35 7,30,31,33 | 3 | P00507,P02625,P19218                                    |
| 4885 | 1,2,8,28,2 3,4,5,6,7,2<br>9,33,34,35 7,30,31,32 | 7 | P00507,P01835,P02625,P02803,P05539,P09006,Q8K4G9        |
| 4886 | 1,2,8,28,3 3,4,5,6,7,2<br>0,31,32,33 7,29,34,35 | 1 | Q5FVI6                                                  |
| 4887 | 1,2,8,28,3 3,4,5,6,7,2<br>0,31,32,34 7,29,33,35 | 0 |                                                         |
| 4888 | 1,2,8,28,3 3,4,5,6,7,2<br>0,31,32,35 7,29,33,34 | 1 | P02803                                                  |
| 4889 | 1,2,8,28,3 3,4,5,6,7,2<br>0,31,33,34 7,29,32,35 | 2 | P01835,P02803                                           |
| 4890 | 1,2,8,28,3 3,4,5,6,7,2<br>0,31,33,35 7,29,32,34 | 2 | P02803,P05539                                           |
| 4891 | 1,2,8,28,3 3,4,5,6,7,2<br>0,31,34,35 7,29,32,33 | 7 | P00507,P02793;Q7TP54,P02803,P05539,P09006,P13852,Q8CJD3 |
| 4892 | 1,2,8,28,3 3,4,5,6,7,2<br>0,32,33,34 7,29,31,35 | 0 |                                                         |
| 4893 | 1,2,8,28,3 3,4,5,6,7,2<br>0,32,33,35 7,29,31,34 | 1 | P02625                                                  |
| 4894 | 1,2,8,28,3 3,4,5,6,7,2<br>0,32,34,35 7,29,31,33 | 3 | P00507,P02625,P83121                                    |
| 4895 | 1,2,8,28,3 3,4,5,6,7,2<br>0,33,34,35 7,29,31,32 | 4 | P00507,P02803,P05539,P09006                             |
| 4896 | 1,2,8,28,3 3,4,5,6,7,2<br>1,32,33,34 7,29,30,35 | 2 | P01835,P02803                                           |
| 4897 | 1,2,8,28,3 3,4,5,6,7,2<br>1,32,33,35 7,29,30,34 | 3 | P01835,P02803,P49744                                    |
| 4898 | 1,2,8,28,3 3,4,5,6,7,2<br>1,32,34,35 7,29,30,33 | 3 | P00507,P01835,P02803                                    |
| 4899 | 1,2,8,28,3 3,4,5,6,7,2<br>1,33,34,35 7,29,30,32 | 5 | P00507,P01835,P02803,P09006,Q8K4G9                      |
| 4900 | 1,2,8,28,3 3,4,5,6,7,2<br>2,33,34,35 7,29,30,31 | 4 | P00507,P01835,P02625,P02803                             |
| 4901 | 1,2,8,29,3 3,4,5,6,7,2<br>0,31,32,33 7,28,34,35 | 2 | Q5FVI6,Q5HZV9                                           |
| 4902 | 1,2,8,29,3 3,4,5,6,7,2<br>0,31,32,34 7,28,33,35 | 1 | P62804                                                  |

|      |                               |                           |   |                                                         |
|------|-------------------------------|---------------------------|---|---------------------------------------------------------|
| 4903 | 1,2,8,29,3<br>0,31,32,35      | 3,4,5,6,7,2<br>7,28,33,34 | 3 | P04182,Q07116,Q4FZU2                                    |
| 4904 | 1,2,8,29,3<br>0,31,33,34      | 3,4,5,6,7,2<br>7,28,32,35 | 2 | P01835,Q8K4G9                                           |
| 4905 | 1,2,8,29,3<br>0,31,33,35      | 3,4,5,6,7,2<br>7,28,32,34 | 6 | F1M3L7,P02803,P04182,P05539,Q07116,Q8K4G9               |
| 4906 | 1,2,8,29,3<br>0,31,34,35      | 3,4,5,6,7,2<br>7,28,32,33 | 4 | P02793;Q7TP54,P05539,Q4FZU2,Q8K4G9                      |
| 4907 | 1,2,8,29,3<br>0,32,33,34      | 3,4,5,6,7,2<br>7,28,31,35 | 2 | P62804,Q00715                                           |
| 4908 | 1,2,8,29,3<br>0,32,33,35      | 3,4,5,6,7,2<br>7,28,31,34 | 2 | A2RUV9,P02625                                           |
| 4909 | 1,2,8,29,3<br>0,32,34,35      | 3,4,5,6,7,2<br>7,28,31,33 | 1 | P02625                                                  |
| 4910 | 1,2,8,29,3<br>0,33,34,35      | 3,4,5,6,7,2<br>7,28,31,32 | 2 | P05539,Q8K4G9                                           |
| 4911 | 1,2,8,29,3<br>1,32,33,34      | 3,4,5,6,7,2<br>7,28,30,35 | 1 | P01835                                                  |
| 4912 | 1,2,8,29,3<br>1,32,33,35      | 3,4,5,6,7,2<br>7,28,30,34 | 5 | P01835,P02803,P04182,P47967,Q8K4G9                      |
| 4913 | 1,2,8,29,3<br>1,32,34,35      | 3,4,5,6,7,2<br>7,28,30,33 | 2 | P01835,Q8K4G9                                           |
| 4914 | 1,2,8,29,3<br>1,33,34,35      | 3,4,5,6,7,2<br>7,28,30,32 | 4 | P00714,P01835,P02803,Q8K4G9                             |
| 4915 | 1,2,8,29,3<br>2,33,34,35      | 3,4,5,6,7,2<br>7,28,30,31 | 2 | P01835,P02625                                           |
| 4916 | 1,2,8,30,3<br>1,32,33,34      | 3,4,5,6,7,2<br>7,28,29,35 | 1 | P01835                                                  |
| 4917 | 1,2,8,30,3<br>1,32,33,35      | 3,4,5,6,7,2<br>7,28,29,34 | 1 | P04182                                                  |
| 4918 | 1,2,8,30,3<br>1,32,34,35      | 3,4,5,6,7,2<br>7,28,29,33 | 0 |                                                         |
| 4919 | 1,2,8,30,3<br>1,33,34,35      | 3,4,5,6,7,2<br>7,28,29,32 | 4 | P01835,P02803,P05539,P82471                             |
| 4920 | 1,2,8,30,3<br>2,33,34,35      | 3,4,5,6,7,2<br>7,28,29,31 | 0 |                                                         |
| 4921 | 1,2,8,31,3<br>2,33,34,35      | 3,4,5,6,7,2<br>7,28,29,30 | 3 | P01835,P02803,P82471                                    |
| 4922 | 1,2,27,28,<br>29,30,31,3<br>2 | 3,4,5,6,7,8<br>,33,34,35  | 8 | D3ZUC6,P05369,P06911,P36374,Q5GRG2,Q6AYR9,Q99041,Q9JHB9 |
| 4923 | 1,2,27,28,<br>29,30,31,3<br>3 | 3,4,5,6,7,8<br>,32,34,35  | 7 | P02781,P05369,P08753,P19629,P36374,P97605,Q9Z0V6        |

|      |                               |                          |   |                                                         |
|------|-------------------------------|--------------------------|---|---------------------------------------------------------|
| 4924 | 1,2,27,28,<br>29,30,31,3<br>4 | 3,4,5,6,7,8<br>,32,33,35 | 4 | P05369,P97605,Q6AYR9,Q99041                             |
| 4925 | 1,2,27,28,<br>29,30,31,3<br>5 | 3,4,5,6,7,8<br>,32,33,34 | 6 | D3ZUC6,O70377,P36374,P97605,Q6AYS4,Q99041               |
| 4926 | 1,2,27,28,<br>29,30,32,3<br>3 | 3,4,5,6,7,8<br>,31,34,35 | 7 | P02781,P05369,P08010,P36374,Q812E4,Q9JHB9,Q9Z0V6        |
| 4927 | 1,2,27,28,<br>29,30,32,3<br>4 | 3,4,5,6,7,8<br>,31,33,35 | 3 | P05369,Q6AYR9,Q99041                                    |
| 4928 | 1,2,27,28,<br>29,30,32,3<br>5 | 3,4,5,6,7,8<br>,31,33,34 | 5 | D3ZUC6,P02625,P05369,P36374,Q99041                      |
| 4929 | 1,2,27,28,<br>29,30,33,3<br>4 | 3,4,5,6,7,8<br>,31,32,35 | 2 | P05369,P97605                                           |
| 4930 | 1,2,27,28,<br>29,30,33,3<br>5 | 3,4,5,6,7,8<br>,31,32,34 | 6 | D3ZUC6,P36374,P97605,Q6AYS4,Q99041,Q9Z0V6               |
| 4931 | 1,2,27,28,<br>29,30,34,3<br>5 | 3,4,5,6,7,8<br>,31,32,33 | 8 | D3ZUC6,P00507,P05369,P06866,P97605,Q8CJD3,Q99041,Q9QUL6 |
| 4932 | 1,2,27,28,<br>29,31,32,3<br>3 | 3,4,5,6,7,8<br>,30,34,35 | 7 | P02793;Q7TP54,P06911,P36374,P47727,Q5GRG2,Q9JHB9,Q9Z0V6 |
| 4933 | 1,2,27,28,<br>29,31,32,3<br>4 | 3,4,5,6,7,8<br>,30,33,35 | 2 | P05369,Q99041                                           |
| 4934 | 1,2,27,28,<br>29,31,32,3<br>5 | 3,4,5,6,7,8<br>,30,33,34 | 1 | Q99041                                                  |
| 4935 | 1,2,27,28,<br>29,31,33,3<br>4 | 3,4,5,6,7,8<br>,30,32,35 | 1 | Q9Z0V6                                                  |
| 4936 | 1,2,27,28,<br>29,31,33,3<br>5 | 3,4,5,6,7,8<br>,30,32,34 | 4 | P36374,P49744,Q6AYS4,Q9Z0V6                             |
| 4937 | 1,2,27,28,<br>29,31,34,3<br>5 | 3,4,5,6,7,8<br>,30,32,33 | 5 | P00507,P97605,Q5M819,Q99041,Q9QUL6                      |
| 4938 | 1,2,27,28,<br>29,32,33,3<br>4 | 3,4,5,6,7,8<br>,30,31,35 | 4 | P05369,Q06000,Q6IFU7,Q9Z0V6                             |



|      |                               |                          |   |                                           |
|------|-------------------------------|--------------------------|---|-------------------------------------------|
| 4939 | 1,2,27,28,<br>29,32,33,3<br>5 | 3,4,5,6,7,8<br>,30,31,34 | 4 | P02625,P19218,P36374,Q9Z0V6               |
| 4940 | 1,2,27,28,<br>29,32,34,3<br>5 | 3,4,5,6,7,8<br>,30,31,33 | 6 | P00507,P02625,P19218,Q5M819,Q99041,Q9QUL6 |
| 4941 | 1,2,27,28,<br>29,33,34,3<br>5 | 3,4,5,6,7,8<br>,30,31,32 | 3 | P00507,P02625,Q5M819                      |
| 4942 | 1,2,27,28,<br>30,31,32,3<br>3 | 3,4,5,6,7,8<br>,29,34,35 | 0 |                                           |
| 4943 | 1,2,27,28,<br>30,31,32,3<br>4 | 3,4,5,6,7,8<br>,29,33,35 | 2 | Q63617,Q99041                             |
| 4944 | 1,2,27,28,<br>30,31,32,3<br>5 | 3,4,5,6,7,8<br>,29,33,34 | 3 | D3ZUC6,Q63617,Q99041                      |
| 4945 | 1,2,27,28,<br>30,31,33,3<br>4 | 3,4,5,6,7,8<br>,29,32,35 | 1 | P51907                                    |
| 4946 | 1,2,27,28,<br>30,31,33,3<br>5 | 3,4,5,6,7,8<br>,29,32,34 | 3 | D3ZUC6,Q6AYS4,Q99041                      |
| 4947 | 1,2,27,28,<br>30,31,34,3<br>5 | 3,4,5,6,7,8<br>,29,32,33 | 5 | D3ZUC6,P06866,Q63617,Q8CJD3,Q99041        |
| 4948 | 1,2,27,28,<br>30,32,33,3<br>4 | 3,4,5,6,7,8<br>,29,31,35 | 1 | Q6IFU7                                    |
| 4949 | 1,2,27,28,<br>30,32,33,3<br>5 | 3,4,5,6,7,8<br>,29,31,34 | 2 | D3ZUC6,Q6AYS4                             |
| 4950 | 1,2,27,28,<br>30,32,34,3<br>5 | 3,4,5,6,7,8<br>,29,31,33 | 4 | P83121,Q63617,Q8CJD3,Q99041               |
| 4951 | 1,2,27,28,<br>30,33,34,3<br>5 | 3,4,5,6,7,8<br>,29,31,32 | 2 | P06866,Q8CJD3                             |
| 4952 | 1,2,27,28,<br>31,32,33,3<br>4 | 3,4,5,6,7,8<br>,29,30,35 | 2 | P01835,Q06000                             |
| 4953 | 1,2,27,28,<br>31,32,33,3<br>5 | 3,4,5,6,7,8<br>,29,30,34 | 1 | P09605;P25809                             |

|      |                               |                          |   |               |
|------|-------------------------------|--------------------------|---|---------------|
| 4954 | 1,2,27,28,<br>31,32,34,3<br>5 | 3,4,5,6,7,8<br>,29,30,33 | 2 | Q63617,Q99041 |
| 4955 | 1,2,27,28,<br>31,33,34,3<br>5 | 3,4,5,6,7,8<br>,29,30,32 | 1 | P01835        |
| 4956 | 1,2,27,28,<br>32,33,34,3<br>5 | 3,4,5,6,7,8<br>,29,30,31 | 2 | P02625,Q6IFU7 |
| 4957 | 1,2,27,29,<br>30,31,32,3<br>3 | 3,4,5,6,7,8<br>,28,34,35 | 0 |               |
| 4958 | 1,2,27,29,<br>30,31,32,3<br>4 | 3,4,5,6,7,8<br>,28,33,35 | 2 | P20760,Q99041 |
| 4959 | 1,2,27,29,<br>30,31,32,3<br>5 | 3,4,5,6,7,8<br>,28,33,34 | 2 | D3ZUC6,Q99041 |
| 4960 | 1,2,27,29,<br>30,31,33,3<br>4 | 3,4,5,6,7,8<br>,28,32,35 | 0 |               |
| 4961 | 1,2,27,29,<br>30,31,33,3<br>5 | 3,4,5,6,7,8<br>,28,32,34 | 2 | Q6AYS4,Q99041 |
| 4962 | 1,2,27,29,<br>30,31,34,3<br>5 | 3,4,5,6,7,8<br>,28,32,33 | 1 | Q99041        |
| 4963 | 1,2,27,29,<br>30,32,33,3<br>4 | 3,4,5,6,7,8<br>,28,31,35 | 1 | Q00715        |
| 4964 | 1,2,27,29,<br>30,32,33,3<br>5 | 3,4,5,6,7,8<br>,28,31,34 | 2 | P07171,Q99041 |
| 4965 | 1,2,27,29,<br>30,32,34,3<br>5 | 3,4,5,6,7,8<br>,28,31,33 | 2 | P07171,Q99041 |
| 4966 | 1,2,27,29,<br>30,33,34,3<br>5 | 3,4,5,6,7,8<br>,28,31,32 | 1 | P07171        |
| 4967 | 1,2,27,29,<br>31,32,33,3<br>4 | 3,4,5,6,7,8<br>,28,30,35 | 1 | P01835        |
| 4968 | 1,2,27,29,<br>31,32,33,3<br>5 | 3,4,5,6,7,8<br>,28,30,34 | 1 | Q9WTT6        |

|      |                               |                          |    |                                                                                                   |
|------|-------------------------------|--------------------------|----|---------------------------------------------------------------------------------------------------|
| 4969 | 1,2,27,29,<br>31,32,34,3<br>5 | 3,4,5,6,7,8<br>,28,30,33 | 1  | Q99041                                                                                            |
| 4970 | 1,2,27,29,<br>31,33,34,3<br>5 | 3,4,5,6,7,8<br>,28,30,32 | 1  | P01835                                                                                            |
| 4971 | 1,2,27,29,<br>32,33,34,3<br>5 | 3,4,5,6,7,8<br>,28,30,31 | 3  | P02625,P07171,Q63661                                                                              |
| 4972 | 1,2,27,30,<br>31,32,33,3<br>4 | 3,4,5,6,7,8<br>,28,29,35 | 0  |                                                                                                   |
| 4973 | 1,2,27,30,<br>31,32,33,3<br>5 | 3,4,5,6,7,8<br>,28,29,34 | 2  | P07171,Q99041                                                                                     |
| 4974 | 1,2,27,30,<br>31,32,34,3<br>5 | 3,4,5,6,7,8<br>,28,29,33 | 3  | P07171,Q63617,Q99041                                                                              |
| 4975 | 1,2,27,30,<br>31,33,34,3<br>5 | 3,4,5,6,7,8<br>,28,29,32 | 2  | P07171,Q63617                                                                                     |
| 4976 | 1,2,27,30,<br>32,33,34,3<br>5 | 3,4,5,6,7,8<br>,28,29,31 | 2  | P07171,Q63661                                                                                     |
| 4977 | 1,2,27,31,<br>32,33,34,3<br>5 | 3,4,5,6,7,8<br>,28,29,30 | 2  | P01835,P07171                                                                                     |
| 4978 | 1,2,28,29,<br>30,31,32,3<br>3 | 3,4,5,6,7,8<br>,27,34,35 | 6  | P06911,P07171,P19629,P49744,Q07116,Q9Z0V6                                                         |
| 4979 | 1,2,28,29,<br>30,31,32,3<br>4 | 3,4,5,6,7,8<br>,27,33,35 | 1  | Q99041                                                                                            |
| 4980 | 1,2,28,29,<br>30,31,32,3<br>5 | 3,4,5,6,7,8<br>,27,33,34 | 4  | P07171,P55016,Q07116,Q99041                                                                       |
| 4981 | 1,2,28,29,<br>30,31,33,3<br>4 | 3,4,5,6,7,8<br>,27,32,35 | 4  | P00714,P14669,P27791,Q9Z0V6                                                                       |
| 4982 | 1,2,28,29,<br>30,31,33,3<br>5 | 3,4,5,6,7,8<br>,27,32,34 | 14 | P00714,P02803,P05539,P06760,P07171,P20646,P26772,P49744,P55016,Q07116,Q6AYS4,Q99041,Q9WTT6,Q9Z0V6 |
| 4983 | 1,2,28,29,<br>30,31,34,3<br>5 | 3,4,5,6,7,8<br>,27,32,33 | 11 | P00507,P00714,P05539,P06760,P06866,P07171,P13852,P14669,P55016,Q8CJD3,Q99041                      |

|      |                               |                          |   |                                                                |
|------|-------------------------------|--------------------------|---|----------------------------------------------------------------|
| 4984 | 1,2,28,29,<br>30,32,33,3<br>4 | 3,4,5,6,7,8<br>,27,31,35 | 2 | P02625,P07171                                                  |
| 4985 | 1,2,28,29,<br>30,32,33,3<br>5 | 3,4,5,6,7,8<br>,27,31,34 | 8 | P02625,P07171,P49744,Q07116,Q6AYS4,Q99041,Q9WTT6,Q9Z0V6        |
| 4986 | 1,2,28,29,<br>30,32,34,3<br>5 | 3,4,5,6,7,8<br>,27,31,33 | 4 | P00507,P02625,P07171,Q99041                                    |
| 4987 | 1,2,28,29,<br>30,33,34,3<br>5 | 3,4,5,6,7,8<br>,27,31,32 | 9 | P00507,P00714,P02625,P05539,P06760,P06866,P07171,P14669,Q8CJD3 |
| 4988 | 1,2,28,29,<br>31,32,33,3<br>4 | 3,4,5,6,7,8<br>,27,30,35 | 3 | P01835,P07171,Q9Z0V6                                           |
| 4989 | 1,2,28,29,<br>31,32,33,3<br>5 | 3,4,5,6,7,8<br>,27,30,34 | 8 | P02803,P07171,P49744,P55016,Q07116,Q99041,Q9WTT6,Q9Z0V6        |
| 4990 | 1,2,28,29,<br>31,32,34,3<br>5 | 3,4,5,6,7,8<br>,27,30,33 | 5 | P00507,P07171,P14669,P55016,Q99041                             |
| 4991 | 1,2,28,29,<br>31,33,34,3<br>5 | 3,4,5,6,7,8<br>,27,30,32 | 9 | P00507,P00714,P01835,P02803,P06760,P07171,P14669,P55016,Q9Z0V6 |
| 4992 | 1,2,28,29,<br>32,33,34,3<br>5 | 3,4,5,6,7,8<br>,27,30,31 | 4 | P00507,P02625,P07171,P19218                                    |
| 4993 | 1,2,28,30,<br>31,32,33,3<br>4 | 3,4,5,6,7,8<br>,27,29,35 | 3 | P07171,P14669,Q63617                                           |
| 4994 | 1,2,28,30,<br>31,32,33,3<br>5 | 3,4,5,6,7,8<br>,27,29,34 | 8 | P02803,P07171,P49744,P55016,Q6AYS4,Q99041,Q9QZQ5,Q9WTT6        |
| 4995 | 1,2,28,30,<br>31,32,34,3<br>5 | 3,4,5,6,7,8<br>,27,29,33 | 8 | P00507,P07171,P13852,P14669,P55016,Q63617,Q8CJD3,Q99041        |
| 4996 | 1,2,28,30,<br>31,33,34,3<br>5 | 3,4,5,6,7,8<br>,27,29,32 | 9 | P00714,P02803,P05539,P06760,P07171,P14669,P55016,Q63617,Q8CJD3 |
| 4997 | 1,2,28,30,<br>32,33,34,3<br>5 | 3,4,5,6,7,8<br>,27,29,31 | 4 | P00507,P02625,P07171,P14669                                    |
| 4998 | 1,2,28,31,<br>32,33,34,3<br>5 | 3,4,5,6,7,8<br>,27,29,30 | 5 | P01835,P02803,P07171,P14669,P55016                             |

|      |                               |                                   |    |                                                                                                                               |
|------|-------------------------------|-----------------------------------|----|-------------------------------------------------------------------------------------------------------------------------------|
| 4999 | 1,2,29,30,<br>31,32,33,3<br>4 | 3,4,5,6,7,8<br>,27,28,35          | 1  | P07171                                                                                                                        |
| 5000 | 1,2,29,30,<br>31,32,33,3<br>5 | 3,4,5,6,7,8<br>,27,28,34          | 5  | P04182,P07171,Q07116,Q99041,Q9WTT6                                                                                            |
| 5001 | 1,2,29,30,<br>31,32,34,3<br>5 | 3,4,5,6,7,8<br>,27,28,33          | 2  | P07171,Q99041                                                                                                                 |
| 5002 | 1,2,29,30,<br>31,33,34,3<br>5 | 3,4,5,6,7,8<br>,27,28,32          | 4  | P00714,P07171,P14669,Q99041                                                                                                   |
| 5003 | 1,2,29,30,<br>32,33,34,3<br>5 | 3,4,5,6,7,8<br>,27,28,31          | 4  | P02625,P07171,P14668,Q63661                                                                                                   |
| 5004 | 1,2,29,31,<br>32,33,34,3<br>5 | 3,4,5,6,7,8<br>,27,28,30          | 2  | P01835,P07171                                                                                                                 |
| 5005 | 1,2,30,31,<br>32,33,34,3<br>5 | 3,4,5,6,7,8<br>,27,28,29          | 7  | P07171,P0C0A9,P14669,P82471,Q63617,Q99041,Q9ROT3                                                                              |
| 5006 | 1,3,4,5,6,7<br>,8,27          | 2,28,29,30<br>,31,32,33,<br>34,35 | 15 | O54728,P00507,P01681,P05539,P07171,P14669,P16086,P18418,P24388,Q09030,Q4AEF8,Q63617,Q6IE51,Q99041,Q9QZQ5                      |
| 5007 | 1,3,4,5,6,7<br>,8,28          | 2,27,29,30<br>,31,32,33,<br>34,35 | 7  | O54728,P01681,P07171,P18418,Q63942,Q6P777,Q99041                                                                              |
| 5008 | 1,3,4,5,6,7<br>,8,29          | 2,27,28,30<br>,31,32,33,<br>34,35 | 9  | O54728,P01681,P07171,Q3T1K5,Q4AEF8,Q63617,Q8CJD3,Q99041,Q9QZQ5                                                                |
| 5009 | 1,3,4,5,6,7<br>,8,30          | 2,27,28,29<br>,31,32,33,<br>34,35 | 9  | O54728,P01681,P07171,P16086,P19218,P35446,Q09030,Q4AEF8,Q99041                                                                |
| 5010 | 1,3,4,5,6,7<br>,8,31          | 2,27,28,29<br>,30,32,33,<br>34,35 | 10 | O54728,P01681,P02625,P05539,P07171,P19218,P52590,Q4AEF8,Q8CJD3,Q99041                                                         |
| 5011 | 1,3,4,5,6,7<br>,8,32          | 2,27,28,29<br>,30,31,33,<br>34,35 | 10 | O54728,P01681,P05539,P07171,P16086,Q09030,Q4AEF8,Q5I0D1,Q8CJD3,Q99041                                                         |
| 5012 | 1,3,4,5,6,7<br>,8,33          | 2,27,28,29<br>,30,31,32,<br>34,35 | 11 | O54728,P01681,P07171,P35446,P52590,Q4AEF8,Q63617,Q8CJD3,Q99041,Q9QUL6,Q9QZQ5                                                  |
| 5013 | 1,3,4,5,6,7<br>,8,34          | 2,27,28,29<br>,30,31,32,<br>33,35 | 18 | O54728,P01681,P05539,P07171,P08753,P16086,P36374,P49744,Q08464,Q09030,Q4AEF8,Q62894,Q63514,Q6IRE4,Q99041,Q9ESW0,Q9QZQ5,Q9WTT6 |

|      |                       |                                   |    |                                                                              |
|------|-----------------------|-----------------------------------|----|------------------------------------------------------------------------------|
| 5014 | 1,3,4,5,6,7<br>,8,35  | 2,27,28,29<br>,30,31,32,<br>33,34 | 9  | O54728,P01681,P02770,P07171,P08010,P20761,P52590,Q63514,Q9QX79               |
| 5015 | 1,3,4,5,6,7<br>,27,28 | 2,8,29,30,<br>31,32,33,3<br>4,35  | 8  | O54728,P01681,P05539,P18418,P24388,Q4FZU2,Q6IE51,Q6P777                      |
| 5016 | 1,3,4,5,6,7<br>,27,29 | 2,8,28,30,<br>31,32,33,3<br>4,35  | 5  | O54728,P01681,P05539,Q3T1K5,Q6IE51                                           |
| 5017 | 1,3,4,5,6,7<br>,27,30 | 2,8,28,29,<br>31,32,33,3<br>4,35  | 11 | O54728,P00507,P01681,P01835,P02803,P05539,P16086,P19218,Q09030,Q6IE51,Q8K4G9 |
| 5018 | 1,3,4,5,6,7<br>,27,31 | 2,8,28,29,<br>30,32,33,3<br>4,35  | 8  | O54728,P00507,P01681,P02625,P05539,P19218,P52590,Q6IE51                      |
| 5019 | 1,3,4,5,6,7<br>,27,32 | 2,8,28,29,<br>30,31,33,3<br>4,35  | 11 | O54728,P00507,P01681,P02803,P05539,P16086,P24388,Q09030,Q4FZU2,Q6IE51,Q8K4G9 |
| 5020 | 1,3,4,5,6,7<br>,27,33 | 2,8,28,29,<br>30,31,32,3<br>4,35  | 8  | O54728,P00507,P01681,P05539,P13852,Q4FZU2,Q6IE51,Q99041                      |
| 5021 | 1,3,4,5,6,7<br>,27,34 | 2,8,28,29,<br>30,31,32,3<br>3,35  | 10 | O54728,P01681,P05539,P49744,Q07116,Q09030,Q4FZU2,Q5FVI6,Q6IE51,Q6IRE4        |
| 5022 | 1,3,4,5,6,7<br>,27,35 | 2,8,28,29,<br>30,31,32,3<br>3,34  | 5  | O54728,P01681,P05539,Q4FZU2,Q6IE51                                           |
| 5023 | 1,3,4,5,6,7<br>,28,29 | 2,8,27,30,<br>31,32,33,3<br>4,35  | 5  | O54728,P01681,P05539,Q6P777,Q9QW07                                           |
| 5024 | 1,3,4,5,6,7<br>,28,30 | 2,8,27,29,<br>31,32,33,3<br>4,35  | 4  | O54728,P01681,P01835,P61206,P84079,P84082                                    |
| 5025 | 1,3,4,5,6,7<br>,28,31 | 2,8,27,29,<br>30,32,33,3<br>4,35  | 6  | O54728,P01681,P05539,P52590,P62804,Q00715                                    |
| 5026 | 1,3,4,5,6,7<br>,28,32 | 2,8,27,29,<br>30,31,33,3<br>4,35  | 4  | O54728,P01681,P05539,Q6P777                                                  |
| 5027 | 1,3,4,5,6,7<br>,28,33 | 2,8,27,29,<br>30,31,32,3<br>4,35  | 5  | O54728,P01681,P05539,P62804,Q6P777                                           |
| 5028 | 1,3,4,5,6,7<br>,28,34 | 2,8,27,29,<br>30,31,32,3<br>3,35  | 8  | O54728,P01681,P05539,P62804,Q6IRE4,Q6P777,Q9ESW0,Q9QW07                      |

|      |                       |                                  |   |                                                                |
|------|-----------------------|----------------------------------|---|----------------------------------------------------------------|
| 5029 | 1,3,4,5,6,7<br>,28,35 | 2,8,27,29,<br>30,31,32,3<br>3,34 | 4 | O54728,P01681,P62804,Q00715                                    |
| 5030 | 1,3,4,5,6,7<br>,29,30 | 2,8,27,28,<br>31,32,33,3<br>4,35 | 4 | O54728,P01681,P01835,P35446                                    |
| 5031 | 1,3,4,5,6,7<br>,29,31 | 2,8,27,28,<br>30,32,33,3<br>4,35 | 5 | O54728,P01681,P02625,P05539,P52590                             |
| 5032 | 1,3,4,5,6,7<br>,29,32 | 2,8,27,28,<br>30,31,33,3<br>4,35 | 4 | O54728,P01681,P05539,Q8CJD3                                    |
| 5033 | 1,3,4,5,6,7<br>,29,33 | 2,8,27,28,<br>30,31,32,3<br>4,35 | 4 | O54728,P01681,P05539,Q8CJD3                                    |
| 5034 | 1,3,4,5,6,7<br>,29,34 | 2,8,27,28,<br>30,31,32,3<br>3,35 | 5 | O54728,P01681,P05539,Q6IRE4,Q9QW07                             |
| 5035 | 1,3,4,5,6,7<br>,29,35 | 2,8,27,28,<br>30,31,32,3<br>3,34 | 4 | O54728,P01681,P01946,P02091                                    |
| 5036 | 1,3,4,5,6,7<br>,30,31 | 2,8,27,28,<br>29,32,33,3<br>4,35 | 9 | O54728,P00507,P01681,P02625,P05539,P19218,P35446,P42854,P52590 |
| 5037 | 1,3,4,5,6,7<br>,30,32 | 2,8,27,28,<br>29,31,33,3<br>4,35 | 6 | O54728,P01681,P05539,P16086,P35446,Q8K4G9                      |
| 5038 | 1,3,4,5,6,7<br>,30,33 | 2,8,27,28,<br>29,31,32,3<br>4,35 | 5 | O54728,P00507,P01681,P19218,P35446                             |
| 5039 | 1,3,4,5,6,7<br>,30,34 | 2,8,27,28,<br>29,31,32,3<br>3,35 | 8 | O54728,P01681,P05539,P16086,P19218,P47967,P49744,Q6IRE4        |
| 5040 | 1,3,4,5,6,7<br>,30,35 | 2,8,27,28,<br>29,31,32,3<br>3,34 | 4 | O54728,P01681,P01835,P97584                                    |
| 5041 | 1,3,4,5,6,7<br>,31,32 | 2,8,27,28,<br>29,30,33,3<br>4,35 | 4 | O54728,P05539,P52590,Q8CJD3                                    |
| 5042 | 1,3,4,5,6,7<br>,31,33 | 2,8,27,28,<br>29,30,32,3<br>4,35 | 8 | O54728,P00507,P02625,P05539,P19218,P35446,P52590,Q8VD89        |
| 5043 | 1,3,4,5,6,7<br>,31,34 | 2,8,27,28,<br>29,30,32,3<br>3,35 | 9 | O54728,P02625,P05539,P08010,P19218,P52590,P83748,Q62997,Q6IRE4 |

|      |                       |                                  |    |                                                                              |
|------|-----------------------|----------------------------------|----|------------------------------------------------------------------------------|
| 5044 | 1,3,4,5,6,7<br>,31,35 | 2,8,27,28,<br>29,30,32,3<br>3,34 | 8  | O54728,P01681,P08010,P52590,P60905,P62804,Q00715,Q30KJ2                      |
| 5045 | 1,3,4,5,6,7<br>,32,33 | 2,8,27,28,<br>29,30,31,3<br>4,35 | 7  | O54728,P00507,P05539,P55314,P97580,Q4FZU2,Q8CJD3                             |
| 5046 | 1,3,4,5,6,7<br>,32,34 | 2,8,27,28,<br>29,30,31,3<br>3,35 | 6  | O54728,P05539,P16086,P17046,P49744,Q6IRE4                                    |
| 5047 | 1,3,4,5,6,7<br>,32,35 | 2,8,27,28,<br>29,30,31,3<br>3,34 | 6  | O54728,P01681,P05539,P97580,Q30KJ2,Q6AYR9                                    |
| 5048 | 1,3,4,5,6,7<br>,33,34 | 2,8,27,28,<br>29,30,31,3<br>2,35 | 4  | O54728,P05539,Q6IRE4,Q99041                                                  |
| 5049 | 1,3,4,5,6,7<br>,33,35 | 2,8,27,28,<br>29,30,31,3<br>2,34 | 10 | O54728,P01681,P08010,P15399,P52590,P60905,P62804,P97580,Q30KJ2,Q6AYR9        |
| 5050 | 1,3,4,5,6,7<br>,34,35 | 2,8,27,28,<br>29,30,31,3<br>2,33 | 11 | O54728,P01681,P02781,P08010,P47727,P60905,P62804,P82471,Q5FVI6,Q6IRE4,Q9ESW0 |
| 5051 | 1,3,4,5,6,8<br>,27,28 | 2,7,29,30,<br>31,32,33,3<br>4,35 | 6  | O54728,P01681,P07171,Q4FZU2,Q63942,Q6P777                                    |
| 5052 | 1,3,4,5,6,8<br>,27,29 | 2,7,28,30,<br>31,32,33,3<br>4,35 | 2  | P01681,P14669                                                                |
| 5053 | 1,3,4,5,6,8<br>,27,30 | 2,7,28,29,<br>31,32,33,3<br>4,35 | 4  | P01681,P01835,P14669,Q9Z0V6                                                  |
| 5054 | 1,3,4,5,6,8<br>,27,31 | 2,7,28,29,<br>30,32,33,3<br>4,35 | 3  | O54728,P01681,P02625                                                         |
| 5055 | 1,3,4,5,6,8<br>,27,32 | 2,7,28,29,<br>30,31,33,3<br>4,35 | 7  | P01681,P05539,P06760,P14669,Q4FZU2,Q5I0D1,Q6IFW6                             |
| 5056 | 1,3,4,5,6,8<br>,27,33 | 2,7,28,29,<br>30,31,32,3<br>4,35 | 4  | P01681,Q4FZU2,Q6IFW6,Q6IG02                                                  |
| 5057 | 1,3,4,5,6,8<br>,27,34 | 2,7,28,29,<br>30,31,32,3<br>3,35 | 8  | O54728,P01681,P49744,Q4FZU2,Q62894,Q6IRE4,Q9WTT6,Q9Z0V6                      |
| 5058 | 1,3,4,5,6,8<br>,27,35 | 2,7,28,29,<br>30,31,32,3<br>3,34 | 3  | P01681,Q4FZU2,Q9Z0V6                                                         |



|      |                       |                                  |    |                                                                       |
|------|-----------------------|----------------------------------|----|-----------------------------------------------------------------------|
| 5059 | 1,3,4,5,6,8<br>,28,29 | 2,7,27,30,<br>31,32,33,3<br>4,35 | 6  | O35547,O54728,P01681,Q63942,Q6P777,Q9QW07                             |
| 5060 | 1,3,4,5,6,8<br>,28,30 | 2,7,27,29,<br>31,32,33,3<br>4,35 | 3  | O54728,P01681,P01835                                                  |
| 5061 | 1,3,4,5,6,8<br>,28,31 | 2,7,27,29,<br>30,32,33,3<br>4,35 | 2  | O54728,P01681                                                         |
| 5062 | 1,3,4,5,6,8<br>,28,32 | 2,7,27,29,<br>30,31,33,3<br>4,35 | 5  | O54728,P01681,Q5I0D1,Q63942,Q6P777                                    |
| 5063 | 1,3,4,5,6,8<br>,28,33 | 2,7,27,29,<br>30,31,32,3<br>4,35 | 3  | O54728,P01681,Q6P777                                                  |
| 5064 | 1,3,4,5,6,8<br>,28,34 | 2,7,27,29,<br>30,31,32,3<br>3,35 | 10 | O54728,P01681,P04762,P52303,Q62894,Q63942,Q6IRE4,Q6P777,Q9QW07,Q9WTT6 |
| 5065 | 1,3,4,5,6,8<br>,28,35 | 2,7,27,29,<br>30,31,32,3<br>3,34 | 2  | O54728,P01681                                                         |
| 5066 | 1,3,4,5,6,8<br>,29,30 | 2,7,27,28,<br>31,32,33,3<br>4,35 | 2  | P01681,P01835                                                         |
| 5067 | 1,3,4,5,6,8<br>,29,31 | 2,7,27,28,<br>30,32,33,3<br>4,35 | 2  | O54728,P01681                                                         |
| 5068 | 1,3,4,5,6,8<br>,29,32 | 2,7,27,28,<br>30,31,33,3<br>4,35 | 3  | P01681,Q5I0D1,Q8CJD3                                                  |
| 5069 | 1,3,4,5,6,8<br>,29,33 | 2,7,27,28,<br>30,31,32,3<br>4,35 | 2  | P01681,Q8CJD3                                                         |
| 5070 | 1,3,4,5,6,8<br>,29,34 | 2,7,27,28,<br>30,31,32,3<br>3,35 | 6  | O54728,P01681,Q4AEF8,Q6IRE4,Q9QW07,Q9WTT6                             |
| 5071 | 1,3,4,5,6,8<br>,29,35 | 2,7,27,28,<br>30,31,32,3<br>3,34 | 3  | P01681,P97840,Q06000                                                  |
| 5072 | 1,3,4,5,6,8<br>,30,31 | 2,7,27,28,<br>29,32,33,3<br>4,35 | 4  | O54728,P01681,P02625,P19218                                           |
| 5073 | 1,3,4,5,6,8<br>,30,32 | 2,7,27,28,<br>29,31,33,3<br>4,35 | 3  | P01681,Q5I0D1,Q9Z0V6                                                  |

|      |                        |                                  |   |                                                                       |
|------|------------------------|----------------------------------|---|-----------------------------------------------------------------------|
| 5074 | 1,3,4,5,6,8<br>,30,33  | 2,7,27,28,<br>29,31,32,3<br>4,35 | 2 | P01681,Q9QUL6                                                         |
| 5075 | 1,3,4,5,6,8<br>,30,34  | 2,7,27,28,<br>29,31,32,3<br>3,35 | 6 | O54728,P01681,Q62894,Q6IRE4,Q9WTT6,Q9Z0V6                             |
| 5076 | 1,3,4,5,6,8<br>,30,35  | 2,7,27,28,<br>29,31,32,3<br>3,34 | 5 | B0BNN3,P01681,P01835,Q06000,Q9Z0V6                                    |
| 5077 | 1,3,4,5,6,8<br>,31,32  | 2,7,27,28,<br>29,30,33,3<br>4,35 | 4 | O54728,P01681,Q5I0D1,Q8CJD3                                           |
| 5078 | 1,3,4,5,6,8<br>,31,33  | 2,7,27,28,<br>29,30,32,3<br>4,35 | 5 | O54728,P01681,P02625,Q8CJD3,Q9QUL6                                    |
| 5079 | 1,3,4,5,6,8<br>,31,34  | 2,7,27,28,<br>29,30,32,3<br>3,35 | 5 | O54728,P01681,P02625,Q62997,Q6IRE4                                    |
| 5080 | 1,3,4,5,6,8<br>,31,35  | 2,7,27,28,<br>29,30,32,3<br>3,34 | 3 | O54728,P01681,Q06000                                                  |
| 5081 | 1,3,4,5,6,8<br>,32,33  | 2,7,27,28,<br>29,30,31,3<br>4,35 | 6 | P01681,P55314,Q4FZU2,Q5I0D1,Q8CJD3,Q9QUL6                             |
| 5082 | 1,3,4,5,6,8<br>,32,34  | 2,7,27,28,<br>29,30,31,3<br>3,35 | 8 | O54728,P01681,P08753,Q5I0D1,Q62894,Q6IRE4,Q9WTT6,Q9Z0V6               |
| 5083 | 1,3,4,5,6,8<br>,32,35  | 2,7,27,28,<br>29,30,31,3<br>3,34 | 4 | P01681,P08753,Q5I0D1,Q9Z0V6                                           |
| 5084 | 1,3,4,5,6,8<br>,33,34  | 2,7,27,28,<br>29,30,31,3<br>2,35 | 5 | O54728,P01681,Q4FZU2,Q62894,Q6IRE4                                    |
| 5085 | 1,3,4,5,6,8<br>,33,35  | 2,7,27,28,<br>29,30,31,3<br>2,34 | 4 | B0BNN3,P01681,P97840,Q6AYR9                                           |
| 5086 | 1,3,4,5,6,8<br>,34,35  | 2,7,27,28,<br>29,30,31,3<br>2,33 | 9 | B0BNN3,O54728,P01681,P02793,Q7TP54,P08753,P09006,Q62894,Q6IRE4,Q9Z0V6 |
| 5087 | 1,3,4,5,6,2<br>7,28,29 | 2,7,8,30,3<br>1,32,33,34<br>,35  | 7 | O35547,O54728,P01681,P01835,Q4FZU2,Q6P777,Q9QW07                      |
| 5088 | 1,3,4,5,6,2<br>7,28,30 | 2,7,8,29,3<br>1,32,33,34<br>,35  | 4 | O54728,P01681,P01835,Q4FZU2                                           |

|      |                        |                                 |   |                                                                |
|------|------------------------|---------------------------------|---|----------------------------------------------------------------|
| 5089 | 1,3,4,5,6,2<br>7,28,31 | 2,7,8,29,3<br>0,32,33,34<br>,35 | 4 | O54728,P01681,P02625,Q4FZU2                                    |
| 5090 | 1,3,4,5,6,2<br>7,28,32 | 2,7,8,29,3<br>0,31,33,34<br>,35 | 8 | O54728,P01681,P01835,P05539,Q4FZU2,Q6IFW6,Q6IG02,Q6P777        |
| 5091 | 1,3,4,5,6,2<br>7,28,33 | 2,7,8,29,3<br>0,31,32,34<br>,35 | 7 | O54728,P01681,Q4FZU2,Q6IFW6,Q6IG02,Q6P777,Q80WL1               |
| 5092 | 1,3,4,5,6,2<br>7,28,34 | 2,7,8,29,3<br>0,31,32,33<br>,35 | 9 | O54728,P01681,P04182,Q10758,Q4FZU2,Q5HZV9,Q6IRE4,Q6P777,Q9QW07 |
| 5093 | 1,3,4,5,6,2<br>7,28,35 | 2,7,8,29,3<br>0,31,32,33<br>,34 | 5 | O54728,P01681,P01835,P62804,Q4FZU2                             |
| 5094 | 1,3,4,5,6,2<br>7,29,30 | 2,7,8,28,3<br>1,32,33,34<br>,35 | 2 | P01681,P01835                                                  |
| 5095 | 1,3,4,5,6,2<br>7,29,31 | 2,7,8,28,3<br>0,32,33,34<br>,35 | 2 | P01681,P02625                                                  |
| 5096 | 1,3,4,5,6,2<br>7,29,32 | 2,7,8,28,3<br>0,31,33,34<br>,35 | 4 | P01681,P01835,P05539,Q4FZU2                                    |
| 5097 | 1,3,4,5,6,2<br>7,29,33 | 2,7,8,28,3<br>0,31,32,34<br>,35 | 3 | P01681,Q4FZU2,Q80WL1                                           |
| 5098 | 1,3,4,5,6,2<br>7,29,34 | 2,7,8,28,3<br>0,31,32,33<br>,35 | 4 | P01681,Q4FZU2,Q6IRE4,Q9QW07                                    |
| 5099 | 1,3,4,5,6,2<br>7,29,35 | 2,7,8,28,3<br>0,31,32,33<br>,34 | 4 | P01681,P01835,P01946,Q4FZU2                                    |
| 5100 | 1,3,4,5,6,2<br>7,30,31 | 2,7,8,28,2<br>9,32,33,34<br>,35 | 4 | P01681,P01835,P02625,P19218                                    |
| 5101 | 1,3,4,5,6,2<br>7,30,32 | 2,7,8,28,2<br>9,31,33,34<br>,35 | 5 | P01681,P01835,P02803,P05539,Q4FZU2                             |
| 5102 | 1,3,4,5,6,2<br>7,30,33 | 2,7,8,28,2<br>9,31,32,34<br>,35 | 3 | P01681,P01835,Q4FZU2                                           |
| 5103 | 1,3,4,5,6,2<br>7,30,34 | 2,7,8,28,2<br>9,31,32,33<br>,35 | 7 | P01681,P01835,P02803,P35280,P49744,Q4FZU2,Q6IRE4               |

|      |                        |                                 |    |                                                                              |
|------|------------------------|---------------------------------|----|------------------------------------------------------------------------------|
| 5104 | 1,3,4,5,6,2<br>7,30,35 | 2,7,8,28,2<br>9,31,32,33<br>,34 | 2  | P01681,P01835                                                                |
| 5105 | 1,3,4,5,6,2<br>7,31,32 | 2,7,8,28,2<br>9,30,33,34<br>,35 | 5  | P01681,P02625,P05539,Q4FZU2,Q6IFW6                                           |
| 5106 | 1,3,4,5,6,2<br>7,31,33 | 2,7,8,28,2<br>9,30,32,34<br>,35 | 3  | P02625,Q4FZU2,Q6IFW6                                                         |
| 5107 | 1,3,4,5,6,2<br>7,31,34 | 2,7,8,28,2<br>9,30,32,33<br>,35 | 6  | O54728,P01681,P02625,P05539,Q4FZU2,Q6IRE4                                    |
| 5108 | 1,3,4,5,6,2<br>7,31,35 | 2,7,8,28,2<br>9,30,32,33<br>,34 | 3  | P01681,P02625,Q4FZU2                                                         |
| 5109 | 1,3,4,5,6,2<br>7,32,33 | 2,7,8,28,2<br>9,30,31,34<br>,35 | 9  | P01681,P05539,P55314,Q4FZU2,Q6IFW6,Q6IG02,Q6IMF3,Q6P6Q2,Q80WL1               |
| 5110 | 1,3,4,5,6,2<br>7,32,34 | 2,7,8,28,2<br>9,30,31,33<br>,35 | 11 | P01681,P02803,P05539,P06760,P49744,P55314,Q10758,Q4FZU2,Q6IFW6,Q6IRE4,Q6P6Q2 |
| 5111 | 1,3,4,5,6,2<br>7,32,35 | 2,7,8,28,2<br>9,30,31,33<br>,34 | 4  | P01681,Q4FZU2,Q6IFW6,Q6IG02                                                  |
| 5112 | 1,3,4,5,6,2<br>7,33,34 | 2,7,8,28,2<br>9,30,31,32<br>,35 | 3  | Q4FZU2,Q6IFW6,Q6IRE4                                                         |
| 5113 | 1,3,4,5,6,2<br>7,33,35 | 2,7,8,28,2<br>9,30,31,32<br>,34 | 4  | P01681,Q4FZU2,Q6IFW6,Q6IG02                                                  |
| 5114 | 1,3,4,5,6,2<br>7,34,35 | 2,7,8,28,2<br>9,30,31,32<br>,33 | 4  | P01681,P12785,Q4FZU2,Q6IRE4                                                  |
| 5115 | 1,3,4,5,6,2<br>8,29,30 | 2,7,8,27,3<br>1,32,33,34<br>,35 | 6  | O54728,P01681,P01835,Q08849,Q6P777,Q9QW07                                    |
| 5116 | 1,3,4,5,6,2<br>8,29,31 | 2,7,8,27,3<br>0,32,33,34<br>,35 | 4  | O54728,P01681,Q6P777,Q9QW07                                                  |
| 5117 | 1,3,4,5,6,2<br>8,29,32 | 2,7,8,27,3<br>0,31,33,34<br>,35 | 5  | O54728,P01681,P01835,Q6P777,Q9QW07                                           |
| 5118 | 1,3,4,5,6,2<br>8,29,33 | 2,7,8,27,3<br>0,31,32,34<br>,35 | 5  | O35547,O54728,P01681,Q6P777,Q80WL1                                           |

|      |                        |                                 |   |                                                         |
|------|------------------------|---------------------------------|---|---------------------------------------------------------|
| 5119 | 1,3,4,5,6,2<br>8,29,34 | 2,7,8,27,3<br>0,31,32,33<br>,35 | 6 | O54728,P01681,P27791,Q6IRE4,Q6P777,Q9QW07               |
| 5120 | 1,3,4,5,6,2<br>8,29,35 | 2,7,8,27,3<br>0,31,32,33<br>,34 | 4 | O54728,P01681,P01835,Q9QW07                             |
| 5121 | 1,3,4,5,6,2<br>8,30,31 | 2,7,8,27,2<br>9,32,33,34<br>,35 | 4 | O54728,P01681,P01835,P02625                             |
| 5122 | 1,3,4,5,6,2<br>8,30,32 | 2,7,8,27,2<br>9,31,33,34<br>,35 | 4 | O54728,P01681,P01835,Q6P777                             |
| 5123 | 1,3,4,5,6,2<br>8,30,33 | 2,7,8,27,2<br>9,31,32,34<br>,35 | 3 | O54728,P01681,P01835                                    |
| 5124 | 1,3,4,5,6,2<br>8,30,34 | 2,7,8,27,2<br>9,31,32,33<br>,35 | 7 | O54728,P01681,P01835,Q5HZV9,Q6IRE4,Q920G2,Q9QW07        |
| 5125 | 1,3,4,5,6,2<br>8,30,35 | 2,7,8,27,2<br>9,31,32,33<br>,34 | 4 | O54728,P01681,P01835,P62804                             |
| 5126 | 1,3,4,5,6,2<br>8,31,32 | 2,7,8,27,2<br>9,30,33,34<br>,35 | 4 | O54728,P01681,P05539,Q6P777                             |
| 5127 | 1,3,4,5,6,2<br>8,31,33 | 2,7,8,27,2<br>9,30,32,34<br>,35 | 2 | O54728,P01681                                           |
| 5128 | 1,3,4,5,6,2<br>8,31,34 | 2,7,8,27,2<br>9,30,32,33<br>,35 | 7 | O54728,P01681,Q5HZV9,Q62997,Q6IRE4,Q6P777,Q9QW07        |
| 5129 | 1,3,4,5,6,2<br>8,31,35 | 2,7,8,27,2<br>9,30,32,33<br>,34 | 4 | O54728,P01681,P62804,Q00715                             |
| 5130 | 1,3,4,5,6,2<br>8,32,33 | 2,7,8,27,2<br>9,30,31,34<br>,35 | 7 | O54728,P01681,P55314,Q4FZU2,Q6IFW6,Q6P777,Q80WL1        |
| 5131 | 1,3,4,5,6,2<br>8,32,34 | 2,7,8,27,2<br>9,30,31,33<br>,35 | 8 | O54728,P01681,P52303,Q4FZU2,Q5HZV9,Q6IRE4,Q6P777,Q9QW07 |
| 5132 | 1,3,4,5,6,2<br>8,32,35 | 2,7,8,27,2<br>9,30,31,33<br>,34 | 3 | O54728,P01681,Q6P777                                    |
| 5133 | 1,3,4,5,6,2<br>8,33,34 | 2,7,8,27,2<br>9,30,31,32<br>,35 | 5 | O54728,P01681,Q4FZU2,Q6IRE4,Q6P777                      |

|      |                        |                                 |   |                                                  |
|------|------------------------|---------------------------------|---|--------------------------------------------------|
| 5134 | 1,3,4,5,6,2<br>8,33,35 | 2,7,8,27,2<br>9,30,31,32<br>,34 | 5 | O54728,P01681,P62804,Q00715,Q4FZU2               |
| 5135 | 1,3,4,5,6,2<br>8,34,35 | 2,7,8,27,2<br>9,30,31,32<br>,33 | 7 | O54728,P01681,P12785,P62804,Q5HZV9,Q6IRE4,Q9QW07 |
| 5136 | 1,3,4,5,6,2<br>9,30,31 | 2,7,8,27,2<br>8,32,33,34<br>,35 | 3 | P01681,P01835,P02625                             |
| 5137 | 1,3,4,5,6,2<br>9,30,32 | 2,7,8,27,2<br>8,31,33,34<br>,35 | 2 | P01681,P01835                                    |
| 5138 | 1,3,4,5,6,2<br>9,30,33 | 2,7,8,27,2<br>8,31,32,34<br>,35 | 2 | P01681,P01835                                    |
| 5139 | 1,3,4,5,6,2<br>9,30,34 | 2,7,8,27,2<br>8,31,32,33<br>,35 | 5 | P01681,P01835,Q6IRE4,Q99MH3,Q9QW07               |
| 5140 | 1,3,4,5,6,2<br>9,30,35 | 2,7,8,27,2<br>8,31,32,33<br>,34 | 3 | B0BNN3,P01681,P01835                             |
| 5141 | 1,3,4,5,6,2<br>9,31,32 | 2,7,8,27,2<br>8,30,33,34<br>,35 | 3 | P01681,P05539,Q8CJD3                             |
| 5142 | 1,3,4,5,6,2<br>9,31,33 | 2,7,8,27,2<br>8,30,32,34<br>,35 | 1 | P01681                                           |
| 5143 | 1,3,4,5,6,2<br>9,31,34 | 2,7,8,27,2<br>8,30,32,33<br>,35 | 5 | O54728,P01681,Q6IRE4,Q99MH3,Q9QW07               |
| 5144 | 1,3,4,5,6,2<br>9,31,35 | 2,7,8,27,2<br>8,30,32,33<br>,34 | 1 | P01681                                           |
| 5145 | 1,3,4,5,6,2<br>9,32,33 | 2,7,8,27,2<br>8,30,31,34<br>,35 | 5 | P01681,P55314,Q4FZU2,Q80WL1,Q8CJD3               |
| 5146 | 1,3,4,5,6,2<br>9,32,34 | 2,7,8,27,2<br>8,30,31,33<br>,35 | 5 | P01681,P05539,Q6IRE4,Q99MH3,Q9QW07               |
| 5147 | 1,3,4,5,6,2<br>9,32,35 | 2,7,8,27,2<br>8,30,31,33<br>,34 | 1 | P01681                                           |
| 5148 | 1,3,4,5,6,2<br>9,33,34 | 2,7,8,27,2<br>8,30,31,32<br>,35 | 3 | P01681,Q4FZU2,Q6IRE4                             |

|      |                        |                                 |    |                                                                                                   |
|------|------------------------|---------------------------------|----|---------------------------------------------------------------------------------------------------|
| 5149 | 1,3,4,5,6,2<br>9,33,35 | 2,7,8,27,2<br>8,30,31,32<br>,34 | 3  | P01681,P47967,P97840                                                                              |
| 5150 | 1,3,4,5,6,2<br>9,34,35 | 2,7,8,27,2<br>8,30,31,32<br>,33 | 3  | P01681,Q6IRE4,Q9QW07                                                                              |
| 5151 | 1,3,4,5,6,3<br>0,31,32 | 2,7,8,27,2<br>8,29,33,34<br>,35 | 2  | P01681,P02625                                                                                     |
| 5152 | 1,3,4,5,6,3<br>0,31,33 | 2,7,8,27,2<br>8,29,32,34<br>,35 | 2  | P01681,P02625                                                                                     |
| 5153 | 1,3,4,5,6,3<br>0,31,34 | 2,7,8,27,2<br>8,29,32,33<br>,35 | 6  | O54728,P01681,P02625,P19218,Q62997,Q6IRE4                                                         |
| 5154 | 1,3,4,5,6,3<br>0,31,35 | 2,7,8,27,2<br>8,29,32,33<br>,34 | 3  | P01681,P01835,P24368                                                                              |
| 5155 | 1,3,4,5,6,3<br>0,32,33 | 2,7,8,27,2<br>8,29,31,34<br>,35 | 3  | P01681,P55314,Q4FZU2                                                                              |
| 5156 | 1,3,4,5,6,3<br>0,32,34 | 2,7,8,27,2<br>8,29,31,33<br>,35 | 2  | P01681,Q6IRE4                                                                                     |
| 5157 | 1,3,4,5,6,3<br>0,32,35 | 2,7,8,27,2<br>8,29,31,33<br>,34 | 2  | P01681,P01835                                                                                     |
| 5158 | 1,3,4,5,6,3<br>0,33,34 | 2,7,8,27,2<br>8,29,31,32<br>,35 | 2  | P01681,Q6IRE4                                                                                     |
| 5159 | 1,3,4,5,6,3<br>0,33,35 | 2,7,8,27,2<br>8,29,31,32<br>,34 | 3  | B0BNN3,P01681,P01835                                                                              |
| 5160 | 1,3,4,5,6,3<br>0,34,35 | 2,7,8,27,2<br>8,29,31,32<br>,33 | 13 | B0BNN3,P01681,P01835,P02793;Q7TP54,P06911,P22985,P24368,P47727,P82471,P82995,Q5GRG2,Q6IRE4,Q920G2 |
| 5161 | 1,3,4,5,6,3<br>1,32,33 | 2,7,8,27,2<br>8,29,30,34<br>,35 | 4  | P05539,P55314,Q4FZU2,Q8CJD3                                                                       |
| 5162 | 1,3,4,5,6,3<br>1,32,34 | 2,7,8,27,2<br>8,29,30,33<br>,35 | 4  | O54728,P05539,Q62997,Q6IRE4                                                                       |
| 5163 | 1,3,4,5,6,3<br>1,32,35 | 2,7,8,27,2<br>8,29,30,33<br>,34 | 2  | P01681,P82995                                                                                     |

|      |                        |                                  |    |                                                                              |
|------|------------------------|----------------------------------|----|------------------------------------------------------------------------------|
| 5164 | 1,3,4,5,6,3<br>1,33,34 | 2,7,8,27,2<br>8,29,30,32<br>,35  | 5  | O54728,P02625,Q4FZU2,Q62997,Q6IRE4                                           |
| 5165 | 1,3,4,5,6,3<br>1,33,35 | 2,7,8,27,2<br>8,29,30,32<br>,34  | 3  | P01681,P82995,Q00715                                                         |
| 5166 | 1,3,4,5,6,3<br>1,34,35 | 2,7,8,27,2<br>8,29,30,32<br>,33  | 10 | O54728,P01681,P02781,P02793;Q7TP54,P08010,P24368,P82471,P82995,Q62997,Q6IRE4 |
| 5167 | 1,3,4,5,6,3<br>2,33,34 | 2,7,8,27,2<br>8,29,30,31<br>,35  | 4  | P05539,P55314,Q4FZU2,Q6IRE4                                                  |
| 5168 | 1,3,4,5,6,3<br>2,33,35 | 2,7,8,27,2<br>8,29,30,31<br>,34  | 5  | P01681,P55314,P82995,Q4FZU2,Q6AYR9                                           |
| 5169 | 1,3,4,5,6,3<br>2,34,35 | 2,7,8,27,2<br>8,29,30,31<br>,33  | 6  | P01681,P02781,P08753,P82471,P82995,Q6IRE4                                    |
| 5170 | 1,3,4,5,6,3<br>3,34,35 | 2,7,8,27,2<br>8,29,30,31<br>,32  | 8  | B0BNN3,P01681,P60905,P82471,P82995,Q4FZU2,Q5GRG2,Q6IRE4                      |
| 5171 | 1,3,4,5,7,8<br>,27,28  | 2,6,29,30,<br>31,32,33,3<br>4,35 | 6  | O54728,P01681,P07171,P18418,P24388,Q09030                                    |
| 5172 | 1,3,4,5,7,8<br>,27,29  | 2,6,28,30,<br>31,32,33,3<br>4,35 | 5  | O54728,P00507,P07171,Q5HZV9,Q63617                                           |
| 5173 | 1,3,4,5,7,8<br>,27,30  | 2,6,28,29,<br>31,32,33,3<br>4,35 | 5  | O54728,P00507,P07171,P08721,Q09030                                           |
| 5174 | 1,3,4,5,7,8<br>,27,31  | 2,6,28,29,<br>30,32,33,3<br>4,35 | 7  | O54728,P00507,P05539,P07171,P36970,P52590,Q09030                             |
| 5175 | 1,3,4,5,7,8<br>,27,32  | 2,6,28,29,<br>30,31,33,3<br>4,35 | 8  | O54728,P00507,P00714,P05539,P07171,P24388,Q09030,Q5I0D1                      |
| 5176 | 1,3,4,5,7,8<br>,27,33  | 2,6,28,29,<br>30,31,32,3<br>4,35 | 6  | O54728,P00507,P07171,Q09030,Q99041,Q9QUL6                                    |
| 5177 | 1,3,4,5,7,8<br>,27,34  | 2,6,28,29,<br>30,31,32,3<br>3,35 | 8  | O54728,P05539,P07171,P49744,Q09030,Q62894,Q6IRE4,Q9ESW0                      |
| 5178 | 1,3,4,5,7,8<br>,27,35  | 2,6,28,29,<br>30,31,32,3<br>3,34 | 6  | O54728,P01946,P07171,P60905,Q09030,Q9QX79                                    |



|      |                       |                                  |   |                                                  |
|------|-----------------------|----------------------------------|---|--------------------------------------------------|
| 5179 | 1,3,4,5,7,8<br>,28,29 | 2,6,27,30,<br>31,32,33,3<br>4,35 | 5 | O54728,P01681,P07171,Q63617,Q9QW07               |
| 5180 | 1,3,4,5,7,8<br>,28,30 | 2,6,27,29,<br>31,32,33,3<br>4,35 | 3 | O54728,P01681,Q09030                             |
| 5181 | 1,3,4,5,7,8<br>,28,31 | 2,6,27,29,<br>30,32,33,3<br>4,35 | 3 | O54728,P07171,P52590                             |
| 5182 | 1,3,4,5,7,8<br>,28,32 | 2,6,27,29,<br>30,31,33,3<br>4,35 | 6 | O54728,P01681,P05539,P24388,Q09030,Q6P777        |
| 5183 | 1,3,4,5,7,8<br>,28,33 | 2,6,27,29,<br>30,31,32,3<br>4,35 | 3 | O54728,Q99041,Q9QUL6                             |
| 5184 | 1,3,4,5,7,8<br>,28,34 | 2,6,27,29,<br>30,31,32,3<br>3,35 | 6 | O54728,Q09030,Q62894,Q6IRE4,Q9ESW0,Q9QW07        |
| 5185 | 1,3,4,5,7,8<br>,28,35 | 2,6,27,29,<br>30,31,32,3<br>3,34 | 6 | O54728,P01681,P52590,P62804,Q00715,Q9QX79        |
| 5186 | 1,3,4,5,7,8<br>,29,30 | 2,6,27,28,<br>31,32,33,3<br>4,35 | 3 | O54728,Q4FZU6,Q5HZV9                             |
| 5187 | 1,3,4,5,7,8<br>,29,31 | 2,6,27,28,<br>30,32,33,3<br>4,35 | 5 | O54728,P52590,Q4FZU6,Q5HZV9,Q6IFU7               |
| 5188 | 1,3,4,5,7,8<br>,29,32 | 2,6,27,28,<br>30,31,33,3<br>4,35 | 4 | O54728,P05539,Q63617,Q8CJD3                      |
| 5189 | 1,3,4,5,7,8<br>,29,33 | 2,6,27,28,<br>30,31,32,3<br>4,35 | 6 | O54728,Q5HZV9,Q63617,Q8CJD3,Q99041,Q9QUL6        |
| 5190 | 1,3,4,5,7,8<br>,29,34 | 2,6,27,28,<br>30,31,32,3<br>3,35 | 3 | O54728,Q6IRE4,Q9QW07                             |
| 5191 | 1,3,4,5,7,8<br>,29,35 | 2,6,27,28,<br>30,31,32,3<br>3,34 | 7 | O54728,P01681,P01946,P02091,Q63617,Q6IFU7,Q9QX79 |
| 5192 | 1,3,4,5,7,8<br>,30,31 | 2,6,27,28,<br>29,32,33,3<br>4,35 | 7 | O54728,P00507,P19218,P42854,P52590,P97584,Q4FZU6 |
| 5193 | 1,3,4,5,7,8<br>,30,32 | 2,6,27,28,<br>29,31,33,3<br>4,35 | 4 | O54728,P00507,Q09030,Q4FZU6                      |

|      |                        |                                  |    |                                                                                            |
|------|------------------------|----------------------------------|----|--------------------------------------------------------------------------------------------|
| 5194 | 1,3,4,5,7,8<br>,30,33  | 2,6,27,28,<br>29,31,32,3<br>4,35 | 6  | O54728,P00507,P35446,Q4FZU6,Q99041,Q9QUL6                                                  |
| 5195 | 1,3,4,5,7,8<br>,30,34  | 2,6,27,28,<br>29,31,32,3<br>3,35 | 8  | O54728,P47727,P49744,Q08464,Q09030,Q62894,Q6IRE4,Q9ESW0                                    |
| 5196 | 1,3,4,5,7,8<br>,30,35  | 2,6,27,28,<br>29,31,32,3<br>3,34 | 9  | O54728,P02770,P47727,P52590,P60905,P97584,Q4FZU6,Q9JHB9,Q9QX79                             |
| 5197 | 1,3,4,5,7,8<br>,31,32  | 2,6,27,28,<br>29,30,33,3<br>4,35 | 6  | O54728,P00507,P05539,P52590,Q4FZU6,Q8CJD3                                                  |
| 5198 | 1,3,4,5,7,8<br>,31,33  | 2,6,27,28,<br>29,30,32,3<br>4,35 | 9  | O54728,P00507,P36970,P52590,P60905,Q4FZU6,Q8VD89,Q99041,Q9QUL6                             |
| 5199 | 1,3,4,5,7,8<br>,31,34  | 2,6,27,28,<br>29,30,32,3<br>3,35 | 9  | O54728,P08010,P52590,P60905,Q62894,Q62997,Q6IRE4,Q9ESW0,Q9JHB9                             |
| 5200 | 1,3,4,5,7,8<br>,31,35  | 2,6,27,28,<br>29,30,32,3<br>3,34 | 9  | O54728,P08010,P52590,P60905,P97584,Q00715,Q4FZU6,Q6IFU7,Q9JHB9                             |
| 5201 | 1,3,4,5,7,8<br>,32,33  | 2,6,27,28,<br>29,30,31,3<br>4,35 | 8  | O54728,P00507,P05539,P55314,Q6AYR9,Q8CJD3,Q99041,Q9QUL6                                    |
| 5202 | 1,3,4,5,7,8<br>,32,34  | 2,6,27,28,<br>29,30,31,3<br>3,35 | 10 | O54728,P05539,P08753,P49744,Q08464,Q09030,Q62894,Q6AYS4,Q6IRE4,Q9ESW0                      |
| 5203 | 1,3,4,5,7,8<br>,32,35  | 2,6,27,28,<br>29,30,31,3<br>3,34 | 4  | O54728,P60905,Q6AYR9,Q9QX79                                                                |
| 5204 | 1,3,4,5,7,8<br>,33,34  | 2,6,27,28,<br>29,30,31,3<br>2,35 | 8  | O54728,P60905,Q08464,Q62894,Q6IRE4,Q99041,Q9ESW0,Q9QUL6                                    |
| 5205 | 1,3,4,5,7,8<br>,33,35  | 2,6,27,28,<br>29,30,31,3<br>2,34 | 7  | O54728,P08010,P52590,P60905,Q6AYR9,Q9JHB9,Q9QX79                                           |
| 5206 | 1,3,4,5,7,8<br>,34,35  | 2,6,27,28,<br>29,30,31,3<br>2,33 | 13 | O54728,P01026,P02781,P06911,P08010,P08753,P47727,P60905,Q08464,Q62894,Q6IRE4,Q9ESW0,Q9JHB9 |
| 5207 | 1,3,4,5,7,2<br>7,28,29 | 2,6,8,30,3<br>1,32,33,34<br>,35  | 3  | O54728,P01681,Q9QW07                                                                       |
| 5208 | 1,3,4,5,7,2<br>7,28,30 | 2,6,8,29,3<br>1,32,33,34<br>,35  | 3  | O54728,P01681,Q8K4G9                                                                       |

|      |                        |                                 |   |                                                         |
|------|------------------------|---------------------------------|---|---------------------------------------------------------|
| 5209 | 1,3,4,5,7,2<br>7,28,31 | 2,6,8,29,3<br>0,32,33,34<br>,35 | 3 | O54728,P05539,P62804                                    |
| 5210 | 1,3,4,5,7,2<br>7,28,32 | 2,6,8,29,3<br>0,31,33,34<br>,35 | 5 | O54728,P05539,P24388,Q09030,Q8K4G9                      |
| 5211 | 1,3,4,5,7,2<br>7,28,33 | 2,6,8,29,3<br>0,31,32,34<br>,35 | 2 | O54728,Q4FZU2                                           |
| 5212 | 1,3,4,5,7,2<br>7,28,34 | 2,6,8,29,3<br>0,31,32,33<br>,35 | 8 | O54728,P04182,P05539,P14408,Q09030,Q6IRE4,Q9ESW0,Q9QW07 |
| 5213 | 1,3,4,5,7,2<br>7,28,35 | 2,6,8,29,3<br>0,31,32,33<br>,34 | 4 | O54728,P01681,P01946,P62804                             |
| 5214 | 1,3,4,5,7,2<br>7,29,30 | 2,6,8,28,3<br>1,32,33,34<br>,35 | 2 | O54728,P00507                                           |
| 5215 | 1,3,4,5,7,2<br>7,29,31 | 2,6,8,28,3<br>0,32,33,34<br>,35 | 3 | O54728,P00507,P05539                                    |
| 5216 | 1,3,4,5,7,2<br>7,29,32 | 2,6,8,28,3<br>0,31,33,34<br>,35 | 4 | O54728,P00507,P05539,Q99068                             |
| 5217 | 1,3,4,5,7,2<br>7,29,33 | 2,6,8,28,3<br>0,31,32,34<br>,35 | 3 | O54728,P00507,P05539                                    |
| 5218 | 1,3,4,5,7,2<br>7,29,34 | 2,6,8,28,3<br>0,31,32,33<br>,35 | 5 | O54728,P05539,P14408,Q6IRE4,Q9QW07                      |
| 5219 | 1,3,4,5,7,2<br>7,29,35 | 2,6,8,28,3<br>0,31,32,33<br>,34 | 4 | O54728,P01681,P01946,P02091                             |
| 5220 | 1,3,4,5,7,2<br>7,30,31 | 2,6,8,28,2<br>9,32,33,34<br>,35 | 4 | O54728,P00507,P02625,P19218                             |
| 5221 | 1,3,4,5,7,2<br>7,30,32 | 2,6,8,28,2<br>9,31,33,34<br>,35 | 5 | O54728,P00507,P05539,Q09030,Q8K4G9                      |
| 5222 | 1,3,4,5,7,2<br>7,30,33 | 2,6,8,28,2<br>9,31,32,34<br>,35 | 2 | O54728,P00507                                           |
| 5223 | 1,3,4,5,7,2<br>7,30,34 | 2,6,8,28,2<br>9,31,32,33<br>,35 | 7 | O54728,P06911,P35280,P47727,P49744,Q09030,Q6IRE4        |

|      |                        |                                 |    |                                                                              |
|------|------------------------|---------------------------------|----|------------------------------------------------------------------------------|
| 5224 | 1,3,4,5,7,2<br>7,30,35 | 2,6,8,28,2<br>9,31,32,33<br>,34 | 3  | O54728,P06911,P47727                                                         |
| 5225 | 1,3,4,5,7,2<br>7,31,32 | 2,6,8,28,2<br>9,30,33,34<br>,35 | 4  | O54728,P00507,P05539,Q99068                                                  |
| 5226 | 1,3,4,5,7,2<br>7,31,33 | 2,6,8,28,2<br>9,30,32,34<br>,35 | 3  | O54728,P00507,P05539                                                         |
| 5227 | 1,3,4,5,7,2<br>7,31,34 | 2,6,8,28,2<br>9,30,32,33<br>,35 | 6  | A2RUV9,O54728,P05539,P14408,Q62997,Q6IRE4                                    |
| 5228 | 1,3,4,5,7,2<br>7,31,35 | 2,6,8,28,2<br>9,30,32,33<br>,34 | 5  | O54728,P52590,P60905,P62804,Q00715                                           |
| 5229 | 1,3,4,5,7,2<br>7,32,33 | 2,6,8,28,2<br>9,30,31,34<br>,35 | 10 | O54728,P00507,P02793;Q7TP54,P05539,P55314,Q4FZU2,Q6IG02,Q6NX65,Q8K4G9,Q99068 |
| 5230 | 1,3,4,5,7,2<br>7,32,34 | 2,6,8,28,2<br>9,30,31,33<br>,35 | 7  | O54728,P05539,P17046,P49744,Q09030,Q6IRE4,Q8K4G9                             |
| 5231 | 1,3,4,5,7,2<br>7,32,35 | 2,6,8,28,2<br>9,30,31,33<br>,34 | 2  | O54728,P05539                                                                |
| 5232 | 1,3,4,5,7,2<br>7,33,34 | 2,6,8,28,2<br>9,30,31,32<br>,35 | 6  | O54728,P05539,P14408,P60905,Q4FZU2,Q6IRE4                                    |
| 5233 | 1,3,4,5,7,2<br>7,33,35 | 2,6,8,28,2<br>9,30,31,32<br>,34 | 4  | O54728,P60905,P62804,Q4FZU2                                                  |
| 5234 | 1,3,4,5,7,2<br>7,34,35 | 2,6,8,28,2<br>9,30,31,32<br>,33 | 11 | O54728,P02780,P02782,P06911,P12785,P14408,P47727,P60905,P62804,Q6IRE4,Q9ESW0 |
| 5235 | 1,3,4,5,7,2<br>8,29,30 | 2,6,8,27,3<br>1,32,33,34<br>,35 | 3  | O54728,P01681,Q9QW07                                                         |
| 5236 | 1,3,4,5,7,2<br>8,29,31 | 2,6,8,27,3<br>0,32,33,34<br>,35 | 4  | O54728,P01681,Q00715,Q9QW07                                                  |
| 5237 | 1,3,4,5,7,2<br>8,29,32 | 2,6,8,27,3<br>0,31,33,34<br>,35 | 5  | O54728,P01681,P05539,Q6P777,Q9QW07                                           |
| 5238 | 1,3,4,5,7,2<br>8,29,33 | 2,6,8,27,3<br>0,31,32,34<br>,35 | 2  | O54728,P01681                                                                |

|      |                        |                                 |   |                                                  |
|------|------------------------|---------------------------------|---|--------------------------------------------------|
| 5239 | 1,3,4,5,7,2<br>8,29,34 | 2,6,8,27,3<br>0,31,32,33<br>,35 | 5 | O54728,P01681,Q6IRE4,Q9ESW0,Q9QW07               |
| 5240 | 1,3,4,5,7,2<br>8,29,35 | 2,6,8,27,3<br>0,31,32,33<br>,34 | 7 | O54728,P01681,P01946,P02091,P62804,Q00715,Q9QW07 |
| 5241 | 1,3,4,5,7,2<br>8,30,31 | 2,6,8,27,2<br>9,32,33,34<br>,35 | 3 | O54728,Q00715,Q4FZU6                             |
| 5242 | 1,3,4,5,7,2<br>8,30,32 | 2,6,8,27,2<br>9,31,33,34<br>,35 | 3 | O54728,P01681,Q8K4G9                             |
| 5243 | 1,3,4,5,7,2<br>8,30,33 | 2,6,8,27,2<br>9,31,32,34<br>,35 | 1 | O54728                                           |
| 5244 | 1,3,4,5,7,2<br>8,30,34 | 2,6,8,27,2<br>9,31,32,33<br>,35 | 4 | O54728,Q6IRE4,Q9ESW0,Q9QW07                      |
| 5245 | 1,3,4,5,7,2<br>8,30,35 | 2,6,8,27,2<br>9,31,32,33<br>,34 | 5 | O54728,P01681,P62804,P97584,Q00715               |
| 5246 | 1,3,4,5,7,2<br>8,31,32 | 2,6,8,27,2<br>9,30,33,34<br>,35 | 3 | O54728,P05539,Q00715                             |
| 5247 | 1,3,4,5,7,2<br>8,31,33 | 2,6,8,27,2<br>9,30,32,34<br>,35 | 5 | O54728,P52590,P62804,Q00715,Q8VD89               |
| 5248 | 1,3,4,5,7,2<br>8,31,34 | 2,6,8,27,2<br>9,30,32,33<br>,35 | 7 | O54728,P14408,P62804,Q62997,Q6IRE4,Q9ESW0,Q9QW07 |
| 5249 | 1,3,4,5,7,2<br>8,31,35 | 2,6,8,27,2<br>9,30,32,33<br>,34 | 6 | O54728,P01681,P06760,P52590,P62804,Q00715        |
| 5250 | 1,3,4,5,7,2<br>8,32,33 | 2,6,8,27,2<br>9,30,31,34<br>,35 | 3 | O54728,P05539,P55314                             |
| 5251 | 1,3,4,5,7,2<br>8,32,34 | 2,6,8,27,2<br>9,30,31,33<br>,35 | 7 | O54728,P05539,P17046,Q6IRE4,Q6P777,Q9ESW0,Q9QW07 |
| 5252 | 1,3,4,5,7,2<br>8,32,35 | 2,6,8,27,2<br>9,30,31,33<br>,34 | 4 | O54728,P01681,P62804,Q00715                      |
| 5253 | 1,3,4,5,7,2<br>8,33,34 | 2,6,8,27,2<br>9,30,31,32<br>,35 | 5 | O54728,P62804,Q62894,Q6IRE4,Q9ESW0               |

|      |                        |                                 |   |                                                                |
|------|------------------------|---------------------------------|---|----------------------------------------------------------------|
| 5254 | 1,3,4,5,7,2<br>8,33,35 | 2,6,8,27,2<br>9,30,31,32<br>,34 | 5 | O54728,P01681,P62804,Q00715,Q6AYR9                             |
| 5255 | 1,3,4,5,7,2<br>8,34,35 | 2,6,8,27,2<br>9,30,31,32<br>,33 | 7 | O54728,P01681,P12785,P62804,Q6IRE4,Q9ESW0,Q9QW07               |
| 5256 | 1,3,4,5,7,2<br>9,30,31 | 2,6,8,27,2<br>8,32,33,34<br>,35 | 3 | O54728,P97584,Q4FZU6                                           |
| 5257 | 1,3,4,5,7,2<br>9,30,32 | 2,6,8,27,2<br>8,31,33,34<br>,35 | 3 | O54728,P05539,Q4FZU6                                           |
| 5258 | 1,3,4,5,7,2<br>9,30,33 | 2,6,8,27,2<br>8,31,32,34<br>,35 | 5 | O54728,P00507,P35446,Q4FZU6,Q5HZV9                             |
| 5259 | 1,3,4,5,7,2<br>9,30,34 | 2,6,8,27,2<br>8,31,32,33<br>,35 | 3 | O54728,Q6IRE4,Q9QW07                                           |
| 5260 | 1,3,4,5,7,2<br>9,30,35 | 2,6,8,27,2<br>8,31,32,33<br>,34 | 6 | O54728,P01681,P01946,P02091,P97584,Q4FZU6                      |
| 5261 | 1,3,4,5,7,2<br>9,31,32 | 2,6,8,27,2<br>8,30,33,34<br>,35 | 3 | O54728,P05539,Q4FZU6                                           |
| 5262 | 1,3,4,5,7,2<br>9,31,33 | 2,6,8,27,2<br>8,30,32,34<br>,35 | 6 | O54728,P00507,P52590,Q4FZU6,Q6P6R2,Q9WTT6                      |
| 5263 | 1,3,4,5,7,2<br>9,31,34 | 2,6,8,27,2<br>8,30,32,33<br>,35 | 5 | O54728,P14408,Q62997,Q6IRE4,Q9QW07                             |
| 5264 | 1,3,4,5,7,2<br>9,31,35 | 2,6,8,27,2<br>8,30,32,33<br>,34 | 9 | O54728,P01946,P02091,P52590,P97584,Q00715,Q4FZU6,Q6P6R2,Q9WTT6 |
| 5265 | 1,3,4,5,7,2<br>9,32,33 | 2,6,8,27,2<br>8,30,31,34<br>,35 | 6 | O54728,P00507,P02793,Q7TP54,P05539,P55314,Q8CJD3               |
| 5266 | 1,3,4,5,7,2<br>9,32,34 | 2,6,8,27,2<br>8,30,31,33<br>,35 | 5 | O54728,P05539,P17046,Q6IRE4,Q9QW07                             |
| 5267 | 1,3,4,5,7,2<br>9,32,35 | 2,6,8,27,2<br>8,30,31,33<br>,34 | 3 | O54728,P01946,P02091                                           |
| 5268 | 1,3,4,5,7,2<br>9,33,34 | 2,6,8,27,2<br>8,30,31,32<br>,35 | 2 | O54728,Q6IRE4                                                  |

|      |                        |                                 |    |                                                                                                          |
|------|------------------------|---------------------------------|----|----------------------------------------------------------------------------------------------------------|
| 5269 | 1,3,4,5,7,2<br>9,33,35 | 2,6,8,27,2<br>8,30,31,32<br>,34 | 5  | O54728,P01946,P02091,Q6P6R2,Q9WTT6                                                                       |
| 5270 | 1,3,4,5,7,2<br>9,34,35 | 2,6,8,27,2<br>8,30,31,32<br>,33 | 6  | O54728,P01946,P02091,Q6IRE4,Q9ESW0,Q9QW07                                                                |
| 5271 | 1,3,4,5,7,3<br>0,31,32 | 2,6,8,27,2<br>8,29,33,34<br>,35 | 4  | O54728,P00507,P05539,Q4FZU6                                                                              |
| 5272 | 1,3,4,5,7,3<br>0,31,33 | 2,6,8,27,2<br>8,29,32,34<br>,35 | 6  | O54728,P00507,P35446,P52590,Q4FZU6,Q8VD89                                                                |
| 5273 | 1,3,4,5,7,3<br>0,31,34 | 2,6,8,27,2<br>8,29,32,33<br>,35 | 7  | O54728,P02782,P19218,P47727,Q62997,Q6IRE4,Q9JHB9                                                         |
| 5274 | 1,3,4,5,7,3<br>0,31,35 | 2,6,8,27,2<br>8,29,32,33<br>,34 | 10 | O54728,P24368,P47727,P52590,P60905,P62804,P97584,Q00715,Q4FZU6,Q9JHB9                                    |
| 5275 | 1,3,4,5,7,3<br>0,32,33 | 2,6,8,27,2<br>8,29,31,34<br>,35 | 7  | O54728,P00507,P02782,P05539,P35446,P55314,Q8K4G9                                                         |
| 5276 | 1,3,4,5,7,3<br>0,32,34 | 2,6,8,27,2<br>8,29,31,33<br>,35 | 8  | O54728,P02782,P05539,P17046,Q09030,Q6IRE4,Q8K4G9,Q9ESW0                                                  |
| 5277 | 1,3,4,5,7,3<br>0,32,35 | 2,6,8,27,2<br>8,29,31,33<br>,34 | 4  | O54728,P02782,P97584,Q4FZU6                                                                              |
| 5278 | 1,3,4,5,7,3<br>0,33,34 | 2,6,8,27,2<br>8,29,31,32<br>,35 | 7  | O54728,P02782,P35446,Q62894,Q6IRE4,Q9ESW0,Q9JHB9                                                         |
| 5279 | 1,3,4,5,7,3<br>0,33,35 | 2,6,8,27,2<br>8,29,31,32<br>,34 | 10 | O54728,P02782,P06911,P35446,P60905,P62804,P97584,Q4FZU6,Q9JHB9,Q9WTT6                                    |
| 5280 | 1,3,4,5,7,3<br>0,34,35 | 2,6,8,27,2<br>8,29,31,32<br>,33 | 15 | O54728,P02781,P02782,P06911,P08010,P08723,P22985,P24368,P47727,P60905,P82471,Q6IRE4,Q920G2,Q9ESW0,Q9JHB9 |
| 5281 | 1,3,4,5,7,3<br>1,32,33 | 2,6,8,27,2<br>8,29,30,34<br>,35 | 9  | O54728,P00507,P02782,P05539,P52590,P55314,Q4FZU6,Q8CJD3,Q9WTT6                                           |
| 5282 | 1,3,4,5,7,3<br>1,32,34 | 2,6,8,27,2<br>8,29,30,33<br>,35 | 5  | O54728,P02782,P05539,Q62997,Q6IRE4                                                                       |
| 5283 | 1,3,4,5,7,3<br>1,32,35 | 2,6,8,27,2<br>8,29,30,33<br>,34 | 10 | O54728,P02782,P05539,P52590,P60905,P97584,Q00715,Q4FZU6,Q6AYR9,Q9WTT6                                    |

|      |                        |                                 |    |                                                                                                                        |
|------|------------------------|---------------------------------|----|------------------------------------------------------------------------------------------------------------------------|
| 5284 | 1,3,4,5,7,3<br>1,33,34 | 2,6,8,27,2<br>8,29,30,32<br>,35 | 8  | O54728,P02782,P08010,P52590,P60905,Q62997,Q6IRE4,Q9JHB9                                                                |
| 5285 | 1,3,4,5,7,3<br>1,33,35 | 2,6,8,27,2<br>8,29,30,32<br>,34 | 15 | O54728,P02782,P08010,P24368,P52590,P60905,P62804,P97584,Q00715,Q4FZU6,Q6AYR9,Q6P6R2,Q8VD89,Q9JHB9,Q9WTT6               |
| 5286 | 1,3,4,5,7,3<br>1,34,35 | 2,6,8,27,2<br>8,29,30,32<br>,33 | 17 | O54728,P02781,P02782,P08010,P08723,P0C0A9,P14408,P24368,P47727,P52590,P60905,P62804,P82471,Q62997,Q6IRE4,Q9ESW0,Q9JHB9 |
| 5287 | 1,3,4,5,7,3<br>2,33,34 | 2,6,8,27,2<br>8,29,30,31<br>,35 | 8  | O54728,P02782,P05539,P17046,P55314,P60905,Q6IRE4,Q9ESW0                                                                |
| 5288 | 1,3,4,5,7,3<br>2,33,35 | 2,6,8,27,2<br>8,29,30,31<br>,34 | 6  | O54728,P02782,P55314,P60905,Q6AYR9,Q9WTT6                                                                              |
| 5289 | 1,3,4,5,7,3<br>2,34,35 | 2,6,8,27,2<br>8,29,30,31<br>,33 | 13 | O54728,P02781,P02782,P05539,P08010,P08723,P17046,P60905,P82471,Q6AYR9,Q6IRE4,Q9ESW0,Q9JHB9                             |
| 5290 | 1,3,4,5,7,3<br>3,34,35 | 2,6,8,27,2<br>8,29,30,31<br>,32 | 14 | O54728,P02781,P02782,P06911,P08010,P24368,P47727,P60905,P62804,P82471,Q6AYR9,Q6IRE4,Q9ESW0,Q9JHB9                      |
| 5291 | 1,3,4,5,8,2<br>7,28,29 | 2,6,7,30,3<br>1,32,33,34<br>,35 | 5  | O54728,P01681,P97840,Q6P777,Q9QW07                                                                                     |
| 5292 | 1,3,4,5,8,2<br>7,28,30 | 2,6,7,29,3<br>1,32,33,34<br>,35 | 2  | O54728,P01681                                                                                                          |
| 5293 | 1,3,4,5,8,2<br>7,28,31 | 2,6,7,29,3<br>0,32,33,34<br>,35 | 2  | O54728,P01681                                                                                                          |
| 5294 | 1,3,4,5,8,2<br>7,28,32 | 2,6,7,29,3<br>0,31,33,34<br>,35 | 5  | O54728,P00714,P01681,Q6IG02,Q6P777                                                                                     |
| 5295 | 1,3,4,5,8,2<br>7,28,33 | 2,6,7,29,3<br>0,31,32,34<br>,35 | 6  | O54728,P01681,P09605,P25809,Q4FZU2,Q6IG02,Q6P777                                                                       |
| 5296 | 1,3,4,5,8,2<br>7,28,34 | 2,6,7,29,3<br>0,31,32,33<br>,35 | 8  | O54728,P01681,P04182,P04762,Q62894,Q6IRE4,Q6P777,Q9QW07                                                                |
| 5297 | 1,3,4,5,8,2<br>7,28,35 | 2,6,7,29,3<br>0,31,32,33<br>,34 | 4  | O54728,P01681,P09605,P25809,P97840                                                                                     |
| 5298 | 1,3,4,5,8,2<br>7,29,30 | 2,6,7,28,3<br>1,32,33,34<br>,35 | 1  | P01681                                                                                                                 |



|      |                        |                                 |   |                                                         |
|------|------------------------|---------------------------------|---|---------------------------------------------------------|
| 5299 | 1,3,4,5,8,2<br>7,29,31 | 2,6,7,28,3<br>0,32,33,34<br>,35 | 2 | O54728,P97840                                           |
| 5300 | 1,3,4,5,8,2<br>7,29,32 | 2,6,7,28,3<br>0,31,33,34<br>,35 | 1 | P97840                                                  |
| 5301 | 1,3,4,5,8,2<br>7,29,33 | 2,6,7,28,3<br>0,31,32,34<br>,35 | 3 | P97840,Q4FZU2,Q5HZV9                                    |
| 5302 | 1,3,4,5,8,2<br>7,29,34 | 2,6,7,28,3<br>0,31,32,33<br>,35 | 3 | O54728,Q6IRE4,Q9QW07                                    |
| 5303 | 1,3,4,5,8,2<br>7,29,35 | 2,6,7,28,3<br>0,31,32,33<br>,34 | 3 | P01681,P01946,P97840                                    |
| 5304 | 1,3,4,5,8,2<br>7,30,31 | 2,6,7,28,2<br>9,32,33,34<br>,35 | 1 | O54728                                                  |
| 5305 | 1,3,4,5,8,2<br>7,30,32 | 2,6,7,28,2<br>9,31,33,34<br>,35 | 0 |                                                         |
| 5306 | 1,3,4,5,8,2<br>7,30,33 | 2,6,7,28,2<br>9,31,32,34<br>,35 | 1 | Q9QUL6                                                  |
| 5307 | 1,3,4,5,8,2<br>7,30,34 | 2,6,7,28,2<br>9,31,32,33<br>,35 | 6 | O54728,P04762,P06911,P35280,P49744,Q62894               |
| 5308 | 1,3,4,5,8,2<br>7,30,35 | 2,6,7,28,2<br>9,31,32,33<br>,34 | 2 | P01681,P06911                                           |
| 5309 | 1,3,4,5,8,2<br>7,31,32 | 2,6,7,28,2<br>9,30,33,34<br>,35 | 2 | O54728,P97840                                           |
| 5310 | 1,3,4,5,8,2<br>7,31,33 | 2,6,7,28,2<br>9,30,32,34<br>,35 | 3 | O54728,P97840,Q9QUL6                                    |
| 5311 | 1,3,4,5,8,2<br>7,31,34 | 2,6,7,28,2<br>9,30,32,33<br>,35 | 4 | O54728,Q62894,Q62997,Q6AYS4                             |
| 5312 | 1,3,4,5,8,2<br>7,31,35 | 2,6,7,28,2<br>9,30,32,33<br>,34 | 2 | O54728,P97840                                           |
| 5313 | 1,3,4,5,8,2<br>7,32,33 | 2,6,7,28,2<br>9,30,31,34<br>,35 | 8 | P55314,P97840,Q4FZU2,Q5I0D1,Q6IFW6,Q6IG02,Q6P6Q2,Q9QUL6 |

|      |                        |                                 |   |                                                                |
|------|------------------------|---------------------------------|---|----------------------------------------------------------------|
| 5314 | 1,3,4,5,8,2<br>7,32,34 | 2,6,7,28,2<br>9,30,31,33<br>,35 | 7 | O54728,P06760,P49744,P83121,Q4FZU2,Q62894,Q6AYS4               |
| 5315 | 1,3,4,5,8,2<br>7,32,35 | 2,6,7,28,2<br>9,30,31,33<br>,34 | 2 | P97840,Q6IG02                                                  |
| 5316 | 1,3,4,5,8,2<br>7,33,34 | 2,6,7,28,2<br>9,30,31,32<br>,35 | 5 | O54728,P04762,Q4FZU2,Q62894,Q6IG02                             |
| 5317 | 1,3,4,5,8,2<br>7,33,35 | 2,6,7,28,2<br>9,30,31,32<br>,34 | 4 | P60905,P97840,Q4FZU2,Q6IG02                                    |
| 5318 | 1,3,4,5,8,2<br>7,34,35 | 2,6,7,28,2<br>9,30,31,32<br>,33 | 7 | O54728,P06911,P35467,P47727,P60905,P83121,Q62894               |
| 5319 | 1,3,4,5,8,2<br>8,29,30 | 2,6,7,27,3<br>1,32,33,34<br>,35 | 3 | O54728,P01681,Q9QW07                                           |
| 5320 | 1,3,4,5,8,2<br>8,29,31 | 2,6,7,27,3<br>0,32,33,34<br>,35 | 4 | O54728,P01681,P97840,Q9QW07                                    |
| 5321 | 1,3,4,5,8,2<br>8,29,32 | 2,6,7,27,3<br>0,31,33,34<br>,35 | 5 | O54728,P01681,P97840,Q6P777,Q9QW07                             |
| 5322 | 1,3,4,5,8,2<br>8,29,33 | 2,6,7,27,3<br>0,31,32,34<br>,35 | 5 | O54728,P01681,P97840,Q6P777,Q9QW07                             |
| 5323 | 1,3,4,5,8,2<br>8,29,34 | 2,6,7,27,3<br>0,31,32,33<br>,35 | 6 | O54728,P01681,Q62894,Q6IRE4,Q6P777,Q9QW07                      |
| 5324 | 1,3,4,5,8,2<br>8,29,35 | 2,6,7,27,3<br>0,31,32,33<br>,34 | 4 | O54728,P01681,P97840,Q9QW07                                    |
| 5325 | 1,3,4,5,8,2<br>8,30,31 | 2,6,7,27,2<br>9,32,33,34<br>,35 | 2 | O54728,P01681                                                  |
| 5326 | 1,3,4,5,8,2<br>8,30,32 | 2,6,7,27,2<br>9,31,33,34<br>,35 | 2 | O54728,P01681                                                  |
| 5327 | 1,3,4,5,8,2<br>8,30,33 | 2,6,7,27,2<br>9,31,32,34<br>,35 | 3 | O54728,P01681,Q9QUL6                                           |
| 5328 | 1,3,4,5,8,2<br>8,30,34 | 2,6,7,27,2<br>9,31,32,33<br>,35 | 9 | O54728,P01681,P04762,P52303,Q62894,Q6IRE4,Q920G2,Q9ESW0,Q9QW07 |

|      |                        |                                 |   |                                                                |
|------|------------------------|---------------------------------|---|----------------------------------------------------------------|
| 5329 | 1,3,4,5,8,2<br>8,30,35 | 2,6,7,27,2<br>9,31,32,33<br>,34 | 2 | O54728,P01681                                                  |
| 5330 | 1,3,4,5,8,2<br>8,31,32 | 2,6,7,27,2<br>9,30,33,34<br>,35 | 1 | O54728                                                         |
| 5331 | 1,3,4,5,8,2<br>8,31,33 | 2,6,7,27,2<br>9,30,32,34<br>,35 | 4 | O54728,P14480,P97840,Q9QUL6                                    |
| 5332 | 1,3,4,5,8,2<br>8,31,34 | 2,6,7,27,2<br>9,30,32,33<br>,35 | 5 | O54728,Q62894,Q62997,Q6IRE4,Q9QW07                             |
| 5333 | 1,3,4,5,8,2<br>8,31,35 | 2,6,7,27,2<br>9,30,32,33<br>,34 | 5 | O54728,P01681,P62804,P97840,Q00715                             |
| 5334 | 1,3,4,5,8,2<br>8,32,33 | 2,6,7,27,2<br>9,30,31,34<br>,35 | 6 | O54728,P14480,P55314,P97840,Q6P777,Q9QUL6                      |
| 5335 | 1,3,4,5,8,2<br>8,32,34 | 2,6,7,27,2<br>9,30,31,33<br>,35 | 9 | O54728,P01681,P52303,Q62894,Q6AYS4,Q6IRE4,Q6P777,Q9ESW0,Q9QW07 |
| 5336 | 1,3,4,5,8,2<br>8,32,35 | 2,6,7,27,2<br>9,30,31,33<br>,34 | 3 | O54728,P01681,P97840                                           |
| 5337 | 1,3,4,5,8,2<br>8,33,34 | 2,6,7,27,2<br>9,30,31,32<br>,35 | 6 | O54728,P04762,Q62894,Q6IRE4,Q6P777,Q9ESW0                      |
| 5338 | 1,3,4,5,8,2<br>8,33,35 | 2,6,7,27,2<br>9,30,31,32<br>,34 | 4 | O54728,P01681,P62804,P97840                                    |
| 5339 | 1,3,4,5,8,2<br>8,34,35 | 2,6,7,27,2<br>9,30,31,32<br>,33 | 9 | O54728,P01681,P09006,P52303,Q62894,Q6AY61,Q6IRE4,Q9ESW0,Q9QW07 |
| 5340 | 1,3,4,5,8,2<br>9,30,31 | 2,6,7,27,2<br>8,32,33,34<br>,35 | 2 | O54728,Q4FZU6                                                  |
| 5341 | 1,3,4,5,8,2<br>9,30,32 | 2,6,7,27,2<br>8,31,33,34<br>,35 | 1 | P01681                                                         |
| 5342 | 1,3,4,5,8,2<br>9,30,33 | 2,6,7,27,2<br>8,31,32,34<br>,35 | 2 | Q5HZV9,Q9QUL6                                                  |
| 5343 | 1,3,4,5,8,2<br>9,30,34 | 2,6,7,27,2<br>8,31,32,33<br>,35 | 4 | O54728,Q62894,Q6IRE4,Q9QW07                                    |

|      |                        |                                 |   |                                           |
|------|------------------------|---------------------------------|---|-------------------------------------------|
| 5344 | 1,3,4,5,8,2<br>9,30,35 | 2,6,7,27,2<br>8,31,32,33<br>,34 | 3 | P01681,P97840,Q06000                      |
| 5345 | 1,3,4,5,8,2<br>9,31,32 | 2,6,7,27,2<br>8,30,33,34<br>,35 | 2 | O54728,P97840                             |
| 5346 | 1,3,4,5,8,2<br>9,31,33 | 2,6,7,27,2<br>8,30,32,34<br>,35 | 4 | O54728,P97840,Q5HZV9,Q9QUL6               |
| 5347 | 1,3,4,5,8,2<br>9,31,34 | 2,6,7,27,2<br>8,30,32,33<br>,35 | 4 | O54728,Q62997,Q6IRE4,Q9QW07               |
| 5348 | 1,3,4,5,8,2<br>9,31,35 | 2,6,7,27,2<br>8,30,32,33<br>,34 | 6 | O54728,P01681,P47967,P97840,Q4FZU6,Q9QW07 |
| 5349 | 1,3,4,5,8,2<br>9,32,33 | 2,6,7,27,2<br>8,30,31,34<br>,35 | 5 | P47967,P55314,P97840,Q8CJD3,Q9QUL6        |
| 5350 | 1,3,4,5,8,2<br>9,32,34 | 2,6,7,27,2<br>8,30,31,33<br>,35 | 5 | O54728,Q62894,Q6AYS4,Q6IRE4,Q9QW07        |
| 5351 | 1,3,4,5,8,2<br>9,32,35 | 2,6,7,27,2<br>8,30,31,33<br>,34 | 3 | P01681,P47967,P97840                      |
| 5352 | 1,3,4,5,8,2<br>9,33,34 | 2,6,7,27,2<br>8,30,31,32<br>,35 | 4 | O54728,Q62894,Q6IRE4,Q9QW07               |
| 5353 | 1,3,4,5,8,2<br>9,33,35 | 2,6,7,27,2<br>8,30,31,32<br>,34 | 3 | P01681,P47967,P97840                      |
| 5354 | 1,3,4,5,8,2<br>9,34,35 | 2,6,7,27,2<br>8,30,31,32<br>,33 | 6 | O54728,P01681,P09006,P12020,Q6IRE4,Q9QW07 |
| 5355 | 1,3,4,5,8,3<br>0,31,32 | 2,6,7,27,2<br>8,29,33,34<br>,35 | 2 | O54728,Q4FZU6                             |
| 5356 | 1,3,4,5,8,3<br>0,31,33 | 2,6,7,27,2<br>8,29,32,34<br>,35 | 4 | O54728,Q4FZU6,Q5M819,Q9QUL6               |
| 5357 | 1,3,4,5,8,3<br>0,31,34 | 2,6,7,27,2<br>8,29,32,33<br>,35 | 4 | O54728,Q62894,Q62997,Q6IRE4               |
| 5358 | 1,3,4,5,8,3<br>0,31,35 | 2,6,7,27,2<br>8,29,32,33<br>,34 | 6 | O54728,P24368,P47727,Q06000,Q4FZU6,Q9JHB9 |

|      |                        |                                 |    |                                                                                                                        |
|------|------------------------|---------------------------------|----|------------------------------------------------------------------------------------------------------------------------|
| 5359 | 1,3,4,5,8,3<br>0,32,33 | 2,6,7,27,2<br>8,29,31,34<br>,35 | 2  | P55314,Q9QUL6                                                                                                          |
| 5360 | 1,3,4,5,8,3<br>0,32,34 | 2,6,7,27,2<br>8,29,31,33<br>,35 | 3  | O54728,Q62894,Q6IRE4                                                                                                   |
| 5361 | 1,3,4,5,8,3<br>0,32,35 | 2,6,7,27,2<br>8,29,31,33<br>,34 | 1  | P01681                                                                                                                 |
| 5362 | 1,3,4,5,8,3<br>0,33,34 | 2,6,7,27,2<br>8,29,31,32<br>,35 | 7  | O54728,P04762,P06911,P22985,Q62894,Q6IRE4,Q9QUL6                                                                       |
| 5363 | 1,3,4,5,8,3<br>0,33,35 | 2,6,7,27,2<br>8,29,31,32<br>,34 | 2  | B0BNN3,P06911                                                                                                          |
| 5364 | 1,3,4,5,8,3<br>0,34,35 | 2,6,7,27,2<br>8,29,31,32<br>,33 | 16 | O54728,P02793;Q7TP54,P06911,P12020,P19132,P22985,P24368,P47727,P82471,Q5GRG2,Q62894,Q62902,Q6IRE4,Q920G2,Q9ESW0,Q9JHB9 |
| 5365 | 1,3,4,5,8,3<br>1,32,33 | 2,6,7,27,2<br>8,29,30,34<br>,35 | 6  | O54728,P14480,P55314,P97840,Q8CJD3,Q9QUL6                                                                              |
| 5366 | 1,3,4,5,8,3<br>1,32,34 | 2,6,7,27,2<br>8,29,30,33<br>,35 | 6  | O54728,P08753,Q62894,Q62997,Q6AYS4,Q6IRE4                                                                              |
| 5367 | 1,3,4,5,8,3<br>1,32,35 | 2,6,7,27,2<br>8,29,30,33<br>,34 | 2  | O54728,P97840                                                                                                          |
| 5368 | 1,3,4,5,8,3<br>1,33,34 | 2,6,7,27,2<br>8,29,30,32<br>,35 | 7  | O54728,P60905,Q62894,Q62997,Q6IRE4,Q9JHB9,Q9QUL6                                                                       |
| 5369 | 1,3,4,5,8,3<br>1,33,35 | 2,6,7,27,2<br>8,29,30,32<br>,34 | 5  | O54728,P60905,P97840,Q6AYR9,Q9JHB9                                                                                     |
| 5370 | 1,3,4,5,8,3<br>1,34,35 | 2,6,7,27,2<br>8,29,30,32<br>,33 | 12 | O54728,P02793;Q7TP54,P08010,P09456,P24368,P47727,P60905,P82471,Q62894,Q62997,Q6IRE4,Q9JHB9                             |
| 5371 | 1,3,4,5,8,3<br>2,33,34 | 2,6,7,27,2<br>8,29,30,31<br>,35 | 7  | O54728,P08753,P55314,Q62894,Q6AYS4,Q6IRE4,Q9QUL6                                                                       |
| 5372 | 1,3,4,5,8,3<br>2,33,35 | 2,6,7,27,2<br>8,29,30,31<br>,34 | 4  | P47967,P55314,P97840,Q6AYR9                                                                                            |
| 5373 | 1,3,4,5,8,3<br>2,34,35 | 2,6,7,27,2<br>8,29,30,31<br>,33 | 9  | O54728,P08753,P35467,P82471,Q5GRG2,Q62894,Q6IRE4,Q9ESW0,Q9JHB9                                                         |

|      |                         |                                 |    |                                                                              |
|------|-------------------------|---------------------------------|----|------------------------------------------------------------------------------|
| 5374 | 1,3,4,5,8,3<br>3,34,35  | 2,6,7,27,2<br>8,29,30,31<br>,32 | 11 | O54728,P06911,P12020,P60905,P82471,Q5GRG2,Q62894,Q6AYR9,Q6IRE4,Q9ESW0,Q9JHB9 |
| 5375 | 1,3,4,5,27,<br>28,29,30 | 2,6,7,8,31,<br>32,33,34,3<br>5  | 4  | O54728,P01681,P01835,Q9QW07                                                  |
| 5376 | 1,3,4,5,27,<br>28,29,31 | 2,6,7,8,30,<br>32,33,34,3<br>5  | 3  | O54728,P01681,Q9QW07                                                         |
| 5377 | 1,3,4,5,27,<br>28,29,32 | 2,6,7,8,30,<br>31,33,34,3<br>5  | 4  | O54728,P01681,Q6P777,Q9QW07                                                  |
| 5378 | 1,3,4,5,27,<br>28,29,33 | 2,6,7,8,30,<br>31,32,34,3<br>5  | 5  | O54728,P01681,Q4FZU2,Q6P777,Q9QW07                                           |
| 5379 | 1,3,4,5,27,<br>28,29,34 | 2,6,7,8,30,<br>31,32,33,3<br>5  | 6  | O54728,P01681,P04182,Q6IRE4,Q6P777,Q9QW07                                    |
| 5380 | 1,3,4,5,27,<br>28,29,35 | 2,6,7,8,30,<br>31,32,33,3<br>4  | 5  | O54728,P01681,P01946,P97840,Q9QW07                                           |
| 5381 | 1,3,4,5,27,<br>28,30,31 | 2,6,7,8,29,<br>32,33,34,3<br>5  | 2  | O54728,P01681                                                                |
| 5382 | 1,3,4,5,27,<br>28,30,32 | 2,6,7,8,29,<br>31,33,34,3<br>5  | 2  | O54728,P01681                                                                |
| 5383 | 1,3,4,5,27,<br>28,30,33 | 2,6,7,8,29,<br>31,32,34,3<br>5  | 3  | O54728,P01681,Q4FZU2                                                         |
| 5384 | 1,3,4,5,27,<br>28,30,34 | 2,6,7,8,29,<br>31,32,33,3<br>5  | 7  | O54728,P01681,P04182,P35280,Q6IRE4,Q8CJD3,Q9QW07                             |
| 5385 | 1,3,4,5,27,<br>28,30,35 | 2,6,7,8,29,<br>31,32,33,3<br>4  | 3  | O54728,P01681,P01835                                                         |
| 5386 | 1,3,4,5,27,<br>28,31,32 | 2,6,7,8,29,<br>30,33,34,3<br>5  | 1  | O54728                                                                       |
| 5387 | 1,3,4,5,27,<br>28,31,33 | 2,6,7,8,29,<br>30,32,34,3<br>5  | 3  | O54728,Q4FZU2,Q6IG02                                                         |
| 5388 | 1,3,4,5,27,<br>28,31,34 | 2,6,7,8,29,<br>30,32,33,3<br>5  | 5  | A2RUV9,O54728,P04182,Q6IRE4,Q9QW07                                           |

|      |                         |                                |   |                                                         |
|------|-------------------------|--------------------------------|---|---------------------------------------------------------|
| 5389 | 1,3,4,5,27,<br>28,31,35 | 2,6,7,8,29,<br>30,32,33,3<br>4 | 4 | O54728,P01681,P62804,Q00715                             |
| 5390 | 1,3,4,5,27,<br>28,32,33 | 2,6,7,8,29,<br>30,31,34,3<br>5 | 7 | O54728,P55314,Q4FZU2,Q6IFW6,Q6IG02,Q6P6Q2,Q6P777        |
| 5391 | 1,3,4,5,27,<br>28,32,34 | 2,6,7,8,29,<br>30,31,33,3<br>5 | 7 | O54728,P04182,Q10758,Q4FZU2,Q6IRE4,Q6P777,Q9QW07        |
| 5392 | 1,3,4,5,27,<br>28,32,35 | 2,6,7,8,29,<br>30,31,33,3<br>4 | 4 | O54728,P01681,Q4FZU2,Q6IG02                             |
| 5393 | 1,3,4,5,27,<br>28,33,34 | 2,6,7,8,29,<br>30,31,32,3<br>5 | 8 | O54728,P04182,Q4FZU2,Q62894,Q6IG02,Q6IRE4,Q6P777,Q9QW07 |
| 5394 | 1,3,4,5,27,<br>28,33,35 | 2,6,7,8,29,<br>30,31,32,3<br>4 | 7 | O54728,P01681,P09605,P25809,P62804,P97840,Q4FZU2,Q6IG02 |
| 5395 | 1,3,4,5,27,<br>28,34,35 | 2,6,7,8,29,<br>30,31,32,3<br>3 | 8 | O54728,P01681,P04182,P12785,P62804,Q4FZU2,Q6IRE4,Q9QW07 |
| 5396 | 1,3,4,5,27,<br>29,30,31 | 2,6,7,8,28,<br>32,33,34,3<br>5 | 0 |                                                         |
| 5397 | 1,3,4,5,27,<br>29,30,32 | 2,6,7,8,28,<br>31,33,34,3<br>5 | 0 |                                                         |
| 5398 | 1,3,4,5,27,<br>29,30,33 | 2,6,7,8,28,<br>31,32,34,3<br>5 | 0 |                                                         |
| 5399 | 1,3,4,5,27,<br>29,30,34 | 2,6,7,8,28,<br>31,32,33,3<br>5 | 4 | P12020,P35280,Q6IRE4,Q9QW07                             |
| 5400 | 1,3,4,5,27,<br>29,30,35 | 2,6,7,8,28,<br>31,32,33,3<br>4 | 4 | P01681,P01835,P01946,P12020                             |
| 5401 | 1,3,4,5,27,<br>29,31,32 | 2,6,7,8,28,<br>30,33,34,3<br>5 | 1 | P97840                                                  |
| 5402 | 1,3,4,5,27,<br>29,31,33 | 2,6,7,8,28,<br>30,32,34,3<br>5 | 3 | P97840,Q4FZU2,Q6P6R2                                    |
| 5403 | 1,3,4,5,27,<br>29,31,34 | 2,6,7,8,28,<br>30,32,33,3<br>5 | 3 | O54728,Q6IRE4,Q9QW07                                    |

|      |                         |                                |   |                                           |
|------|-------------------------|--------------------------------|---|-------------------------------------------|
| 5404 | 1,3,4,5,27,<br>29,31,35 | 2,6,7,8,28,<br>30,32,33,3<br>4 | 5 | P01681,P01946,P97840,Q6P6R2,Q9QW07        |
| 5405 | 1,3,4,5,27,<br>29,32,33 | 2,6,7,8,28,<br>30,31,34,3<br>5 | 6 | P55314,P97840,Q4FZU2,Q6IFW6,Q6IG02,Q6P6Q2 |
| 5406 | 1,3,4,5,27,<br>29,32,34 | 2,6,7,8,28,<br>30,31,33,3<br>5 | 3 | Q4FZU2,Q6IRE4,Q9QW07                      |
| 5407 | 1,3,4,5,27,<br>29,32,35 | 2,6,7,8,28,<br>30,31,33,3<br>4 | 4 | P01681,P01946,P47967,P97840               |
| 5408 | 1,3,4,5,27,<br>29,33,34 | 2,6,7,8,28,<br>30,31,32,3<br>5 | 3 | Q4FZU2,Q6IRE4,Q9QW07                      |
| 5409 | 1,3,4,5,27,<br>29,33,35 | 2,6,7,8,28,<br>30,31,32,3<br>4 | 5 | P01946,P47967,P97840,Q4FZU2,Q6P6R2        |
| 5410 | 1,3,4,5,27,<br>29,34,35 | 2,6,7,8,28,<br>30,31,32,3<br>3 | 6 | P01681,P01946,P12020,P12785,Q6IRE4,Q9QW07 |
| 5411 | 1,3,4,5,27,<br>30,31,32 | 2,6,7,8,28,<br>29,33,34,3<br>5 | 1 | P10758                                    |
| 5412 | 1,3,4,5,27,<br>30,31,33 | 2,6,7,8,28,<br>29,32,34,3<br>5 | 0 |                                           |
| 5413 | 1,3,4,5,27,<br>30,31,34 | 2,6,7,8,28,<br>29,32,33,3<br>5 | 2 | O54728,P35280                             |
| 5414 | 1,3,4,5,27,<br>30,31,35 | 2,6,7,8,28,<br>29,32,33,3<br>4 | 0 |                                           |
| 5415 | 1,3,4,5,27,<br>30,32,33 | 2,6,7,8,28,<br>29,31,34,3<br>5 | 3 | P55314,Q4FZU2,Q6IG02                      |
| 5416 | 1,3,4,5,27,<br>30,32,34 | 2,6,7,8,28,<br>29,31,33,3<br>5 | 2 | P34901,P35280                             |
| 5417 | 1,3,4,5,27,<br>30,32,35 | 2,6,7,8,28,<br>29,31,33,3<br>4 | 1 | P01681                                    |
| 5418 | 1,3,4,5,27,<br>30,33,34 | 2,6,7,8,28,<br>29,31,32,3<br>5 | 6 | P06911,P12020,P22985,P35280,Q4FZU2,Q62894 |



|      |                         |                                |   |                                                                |
|------|-------------------------|--------------------------------|---|----------------------------------------------------------------|
| 5419 | 1,3,4,5,27,<br>30,33,35 | 2,6,7,8,28,<br>29,31,32,3<br>4 | 3 | P06911,P12020,Q4FZU2                                           |
| 5420 | 1,3,4,5,27,<br>30,34,35 | 2,6,7,8,28,<br>29,31,32,3<br>3 | 8 | P02793;Q7TP54,P06911,P12020,P22985,P35280,P47727,P83121,Q5GRG2 |
| 5421 | 1,3,4,5,27,<br>31,32,33 | 2,6,7,8,28,<br>29,30,34,3<br>5 | 5 | P55314,Q4FZU2,Q6IFW6,Q6IG02,Q6P6Q2                             |
| 5422 | 1,3,4,5,27,<br>31,32,34 | 2,6,7,8,28,<br>29,30,33,3<br>5 | 5 | A2RUV9,O54728,P05539,Q10758,Q4FZU2                             |
| 5423 | 1,3,4,5,27,<br>31,32,35 | 2,6,7,8,28,<br>29,30,33,3<br>4 | 1 | P97840                                                         |
| 5424 | 1,3,4,5,27,<br>31,33,34 | 2,6,7,8,28,<br>29,30,32,3<br>5 | 2 | O54728,Q4FZU2                                                  |
| 5425 | 1,3,4,5,27,<br>31,33,35 | 2,6,7,8,28,<br>29,30,32,3<br>4 | 5 | P60905,P97840,Q4FZU2,Q6IG02,Q6P6R2                             |
| 5426 | 1,3,4,5,27,<br>31,34,35 | 2,6,7,8,28,<br>29,30,32,3<br>3 | 4 | O54728,P12785,P47727,P60905                                    |
| 5427 | 1,3,4,5,27,<br>32,33,34 | 2,6,7,8,28,<br>29,30,31,3<br>5 | 8 | P34901,P55314,Q10758,Q4FZU2,Q6IFU8,Q6IFW6,Q6IG02,Q6P6Q2        |
| 5428 | 1,3,4,5,27,<br>32,33,35 | 2,6,7,8,28,<br>29,30,31,3<br>4 | 6 | P55314,P97840,Q4FZU2,Q6IFW6,Q6IG02,Q6P6Q2                      |
| 5429 | 1,3,4,5,27,<br>32,34,35 | 2,6,7,8,28,<br>29,30,31,3<br>3 | 4 | P83121,Q4FZU2,Q5GRG2,Q9QZK9                                    |
| 5430 | 1,3,4,5,27,<br>33,34,35 | 2,6,7,8,28,<br>29,30,31,3<br>2 | 8 | P06911,P12020,P12785,P60905,P82471,Q4FZU2,Q5GRG2,Q6IG02        |
| 5431 | 1,3,4,5,28,<br>29,30,31 | 2,6,7,8,27,<br>32,33,34,3<br>5 | 3 | O54728,P01681,Q9QW07                                           |
| 5432 | 1,3,4,5,28,<br>29,30,32 | 2,6,7,8,27,<br>31,33,34,3<br>5 | 3 | O54728,P01681,Q9QW07                                           |
| 5433 | 1,3,4,5,28,<br>29,30,33 | 2,6,7,8,27,<br>31,32,34,3<br>5 | 2 | O54728,P01681                                                  |

|      |                         |                                |   |                                           |
|------|-------------------------|--------------------------------|---|-------------------------------------------|
| 5434 | 1,3,4,5,28,<br>29,30,34 | 2,6,7,8,27,<br>31,32,33,3<br>5 | 4 | O54728,P01681,Q6IRE4,Q9QW07               |
| 5435 | 1,3,4,5,28,<br>29,30,35 | 2,6,7,8,27,<br>31,32,33,3<br>4 | 4 | O54728,P01681,P01835,Q9QW07               |
| 5436 | 1,3,4,5,28,<br>29,31,32 | 2,6,7,8,27,<br>30,33,34,3<br>5 | 3 | O54728,P01681,Q9QW07                      |
| 5437 | 1,3,4,5,28,<br>29,31,33 | 2,6,7,8,27,<br>30,32,34,3<br>5 | 4 | O54728,P01681,P97840,Q9QW07               |
| 5438 | 1,3,4,5,28,<br>29,31,34 | 2,6,7,8,27,<br>30,32,33,3<br>5 | 4 | O54728,P01681,Q6IRE4,Q9QW07               |
| 5439 | 1,3,4,5,28,<br>29,31,35 | 2,6,7,8,27,<br>30,32,33,3<br>4 | 5 | O54728,P01681,P97840,Q00715,Q9QW07        |
| 5440 | 1,3,4,5,28,<br>29,32,33 | 2,6,7,8,27,<br>30,31,34,3<br>5 | 6 | O54728,P01681,P47967,P55314,P97840,Q6P777 |
| 5441 | 1,3,4,5,28,<br>29,32,34 | 2,6,7,8,27,<br>30,31,33,3<br>5 | 5 | O54728,P01681,Q6IRE4,Q6P777,Q9QW07        |
| 5442 | 1,3,4,5,28,<br>29,32,35 | 2,6,7,8,27,<br>30,31,33,3<br>4 | 5 | O54728,P01681,P47967,P97840,Q9QW07        |
| 5443 | 1,3,4,5,28,<br>29,33,34 | 2,6,7,8,27,<br>30,31,32,3<br>5 | 6 | O54728,P01681,P27791,Q6IRE4,Q6P777,Q9QW07 |
| 5444 | 1,3,4,5,28,<br>29,33,35 | 2,6,7,8,27,<br>30,31,32,3<br>4 | 5 | O54728,P01681,P47967,P97840,Q9QW07        |
| 5445 | 1,3,4,5,28,<br>29,34,35 | 2,6,7,8,27,<br>30,31,32,3<br>3 | 5 | O54728,P01681,P12785,Q6IRE4,Q9QW07        |
| 5446 | 1,3,4,5,28,<br>30,31,32 | 2,6,7,8,27,<br>29,33,34,3<br>5 | 2 | O54728,P01681                             |
| 5447 | 1,3,4,5,28,<br>30,31,33 | 2,6,7,8,27,<br>29,32,34,3<br>5 | 1 | O54728                                    |
| 5448 | 1,3,4,5,28,<br>30,31,34 | 2,6,7,8,27,<br>29,32,33,3<br>5 | 3 | O54728,Q6IRE4,Q9QW07                      |

|      |                         |                                |    |                                                                              |
|------|-------------------------|--------------------------------|----|------------------------------------------------------------------------------|
| 5449 | 1,3,4,5,28,<br>30,31,35 | 2,6,7,8,27,<br>29,32,33,3<br>4 | 4  | O54728,P01681,P62804,Q00715                                                  |
| 5450 | 1,3,4,5,28,<br>30,32,33 | 2,6,7,8,27,<br>29,31,34,3<br>5 | 3  | O54728,P01681,P55314                                                         |
| 5451 | 1,3,4,5,28,<br>30,32,34 | 2,6,7,8,27,<br>29,31,33,3<br>5 | 5  | O54728,P01681,Q6IRE4,Q9ESW0,Q9QW07                                           |
| 5452 | 1,3,4,5,28,<br>30,32,35 | 2,6,7,8,27,<br>29,31,33,3<br>4 | 2  | O54728,P01681                                                                |
| 5453 | 1,3,4,5,28,<br>30,33,34 | 2,6,7,8,27,<br>29,31,32,3<br>5 | 4  | O54728,Q62894,Q6IRE4,Q9ESW0                                                  |
| 5454 | 1,3,4,5,28,<br>30,33,35 | 2,6,7,8,27,<br>29,31,32,3<br>4 | 4  | O54728,P01681,P62804,Q00715                                                  |
| 5455 | 1,3,4,5,28,<br>30,34,35 | 2,6,7,8,27,<br>29,31,32,3<br>3 | 10 | O54728,P01681,P02793;Q7TP54,P22985,P62804,Q6IRE4,Q8CJD3,Q920G2,Q9ESW0,Q9QW07 |
| 5456 | 1,3,4,5,28,<br>31,32,33 | 2,6,7,8,27,<br>29,30,34,3<br>5 | 3  | O54728,P14480,P55314                                                         |
| 5457 | 1,3,4,5,28,<br>31,32,34 | 2,6,7,8,27,<br>29,30,33,3<br>5 | 3  | O54728,Q6IRE4,Q9QW07                                                         |
| 5458 | 1,3,4,5,28,<br>31,32,35 | 2,6,7,8,27,<br>29,30,33,3<br>4 | 5  | O54728,P01681,P62804,P97840,Q00715                                           |
| 5459 | 1,3,4,5,28,<br>31,33,34 | 2,6,7,8,27,<br>29,30,32,3<br>5 | 4  | O54728,Q62894,Q6IRE4,Q9QW07                                                  |
| 5460 | 1,3,4,5,28,<br>31,33,35 | 2,6,7,8,27,<br>29,30,32,3<br>4 | 6  | O54728,P01681,P62804,P97840,Q00715,Q9WTT6                                    |
| 5461 | 1,3,4,5,28,<br>31,34,35 | 2,6,7,8,27,<br>29,30,32,3<br>3 | 6  | O54728,P01681,P12785,P62804,Q6IRE4,Q9QW07                                    |
| 5462 | 1,3,4,5,28,<br>32,33,34 | 2,6,7,8,27,<br>29,30,31,3<br>5 | 7  | O54728,P05942,P55314,Q4FZU2,Q62894,Q6IRE4,Q6P777                             |
| 5463 | 1,3,4,5,28,<br>32,33,35 | 2,6,7,8,27,<br>29,30,31,3<br>4 | 5  | O54728,P01681,P47967,P55314,P97840                                           |

|      |                         |                                |    |                                                                              |
|------|-------------------------|--------------------------------|----|------------------------------------------------------------------------------|
| 5464 | 1,3,4,5,28,<br>32,34,35 | 2,6,7,8,27,<br>29,30,31,3<br>3 | 6  | O54728,P01681,P12785,Q6IRE4,Q9ESW0,Q9QW07                                    |
| 5465 | 1,3,4,5,28,<br>33,34,35 | 2,6,7,8,27,<br>29,30,31,3<br>2 | 8  | O54728,P01681,P12785,P62804,Q62894,Q6IRE4,Q9ESW0,Q9QW07                      |
| 5466 | 1,3,4,5,29,<br>30,31,32 | 2,6,7,8,27,<br>28,33,34,3<br>5 | 1  | Q4FZU6                                                                       |
| 5467 | 1,3,4,5,29,<br>30,31,33 | 2,6,7,8,27,<br>28,32,34,3<br>5 | 2  | Q4FZU6,Q6P6R2                                                                |
| 5468 | 1,3,4,5,29,<br>30,31,34 | 2,6,7,8,27,<br>28,32,33,3<br>5 | 3  | O54728,Q6IRE4,Q9QW07                                                         |
| 5469 | 1,3,4,5,29,<br>30,31,35 | 2,6,7,8,27,<br>28,32,33,3<br>4 | 3  | P01681,Q4FZU6,Q6P6R2                                                         |
| 5470 | 1,3,4,5,29,<br>30,32,33 | 2,6,7,8,27,<br>28,31,34,3<br>5 | 1  | P55314                                                                       |
| 5471 | 1,3,4,5,29,<br>30,32,34 | 2,6,7,8,27,<br>28,31,33,3<br>5 | 2  | Q6IRE4,Q9QW07                                                                |
| 5472 | 1,3,4,5,29,<br>30,32,35 | 2,6,7,8,27,<br>28,31,33,3<br>4 | 1  | P01681                                                                       |
| 5473 | 1,3,4,5,29,<br>30,33,34 | 2,6,7,8,27,<br>28,31,32,3<br>5 | 2  | P12020,Q6IRE4                                                                |
| 5474 | 1,3,4,5,29,<br>30,33,35 | 2,6,7,8,27,<br>28,31,32,3<br>4 | 4  | P01681,P12020,Q6P6R2,Q9WTT6                                                  |
| 5475 | 1,3,4,5,29,<br>30,34,35 | 2,6,7,8,27,<br>28,31,32,3<br>3 | 10 | P01681,P02793,Q7TP54,P06911,P12020,P31044,P47727,Q5GRG2,Q6IRE4,Q920G2,Q9QW07 |
| 5476 | 1,3,4,5,29,<br>31,32,33 | 2,6,7,8,27,<br>28,30,34,3<br>5 | 4  | P47967,P55314,P97840,Q9WTT6                                                  |
| 5477 | 1,3,4,5,29,<br>31,32,34 | 2,6,7,8,27,<br>28,30,33,3<br>5 | 3  | O54728,Q6IRE4,Q9QW07                                                         |
| 5478 | 1,3,4,5,29,<br>31,32,35 | 2,6,7,8,27,<br>28,30,33,3<br>4 | 3  | P47967,P97840,Q9WTT6                                                         |

|      |                         |                                |    |                                                                                                   |
|------|-------------------------|--------------------------------|----|---------------------------------------------------------------------------------------------------|
| 5479 | 1,3,4,5,29,<br>31,33,34 | 2,6,7,8,27,<br>28,30,32,3<br>5 | 4  | O54728,Q6AYQ8,Q6IRE4,Q9QW07                                                                       |
| 5480 | 1,3,4,5,29,<br>31,33,35 | 2,6,7,8,27,<br>28,30,32,3<br>4 | 5  | P47967,P97840,Q00715,Q6P6R2,Q9WTT6                                                                |
| 5481 | 1,3,4,5,29,<br>31,34,35 | 2,6,7,8,27,<br>28,30,32,3<br>3 | 3  | O54728,Q6IRE4,Q9QW07                                                                              |
| 5482 | 1,3,4,5,29,<br>32,33,34 | 2,6,7,8,27,<br>28,30,31,3<br>5 | 2  | P55314,Q6IRE4                                                                                     |
| 5483 | 1,3,4,5,29,<br>32,33,35 | 2,6,7,8,27,<br>28,30,31,3<br>4 | 4  | P47967,P55314,P97840,Q9WTT6                                                                       |
| 5484 | 1,3,4,5,29,<br>32,34,35 | 2,6,7,8,27,<br>28,30,31,3<br>3 | 2  | Q6IRE4,Q9QW07                                                                                     |
| 5485 | 1,3,4,5,29,<br>33,34,35 | 2,6,7,8,27,<br>28,30,31,3<br>2 | 5  | P12020,P31044,Q5GRG2,Q6IRE4,Q9QW07                                                                |
| 5486 | 1,3,4,5,30,<br>31,32,33 | 2,6,7,8,27,<br>28,29,34,3<br>5 | 3  | P10758,P55314,Q4FZU6                                                                              |
| 5487 | 1,3,4,5,30,<br>31,32,34 | 2,6,7,8,27,<br>28,29,33,3<br>5 | 3  | O54728,Q62997,Q6IRE4                                                                              |
| 5488 | 1,3,4,5,30,<br>31,32,35 | 2,6,7,8,27,<br>28,29,33,3<br>4 | 1  | Q4FZU6                                                                                            |
| 5489 | 1,3,4,5,30,<br>31,33,34 | 2,6,7,8,27,<br>28,29,32,3<br>5 | 4  | O54728,Q62997,Q6IRE4,Q9JHB9                                                                       |
| 5490 | 1,3,4,5,30,<br>31,33,35 | 2,6,7,8,27,<br>28,29,32,3<br>4 | 6  | P24368,Q00715,Q4FZU6,Q6P6R2,Q9JHB9,Q9WTT6                                                         |
| 5491 | 1,3,4,5,30,<br>31,34,35 | 2,6,7,8,27,<br>28,29,32,3<br>3 | 13 | O54728,P02782,P02793,Q7TP54,P08723,P24368,P47727,P60905,P82471,Q62902,Q62997,Q6IRE4,Q9JHB9,Q9JI85 |
| 5492 | 1,3,4,5,30,<br>32,33,34 | 2,6,7,8,27,<br>28,29,31,3<br>5 | 5  | P02782,P34901,P55314,Q62894,Q6IRE4                                                                |
| 5493 | 1,3,4,5,30,<br>32,33,35 | 2,6,7,8,27,<br>28,29,31,3<br>4 | 3  | P02782,P55314,Q9WTT6                                                                              |

|      |                         |                                  |    |                                                                                                                 |
|------|-------------------------|----------------------------------|----|-----------------------------------------------------------------------------------------------------------------|
| 5494 | 1,3,4,5,30,<br>32,34,35 | 2,6,7,8,27,<br>28,29,31,3<br>3   | 10 | P02782,P06911,P08723,P12020,P82471,Q5GRG2,Q62902,Q6IRE4,Q920G2,Q9JHB9                                           |
| 5495 | 1,3,4,5,30,<br>33,34,35 | 2,6,7,8,27,<br>28,29,31,3<br>2   | 16 | B0BNN3,P02782,P06911,P08723,P12020,P22985,P24368,P47727,P60905,P82471,Q5GRG2,Q62894,Q62902,Q6IRE4,Q920G2,Q9JHB9 |
| 5496 | 1,3,4,5,31,<br>32,33,34 | 2,6,7,8,27,<br>28,29,30,3<br>5   | 6  | O54728,P02782,P34901,P55314,Q62997,Q6IRE4                                                                       |
| 5497 | 1,3,4,5,31,<br>32,33,35 | 2,6,7,8,27,<br>28,29,30,3<br>4   | 8  | P02782,P47967,P55314,P60905,P82471,P97840,Q6AYR9,Q9WTT6                                                         |
| 5498 | 1,3,4,5,31,<br>32,34,35 | 2,6,7,8,27,<br>28,29,30,3<br>3   | 13 | O54728,P02781,P02782,P08723,P0C0A9,P24368,P30120,P60905,P82471,Q62997,Q6IRE4,Q9JHB9,Q9JI85                      |
| 5499 | 1,3,4,5,31,<br>33,34,35 | 2,6,7,8,27,<br>28,29,30,3<br>2   | 12 | O54728,P02781,P02782,P08723,P24368,P30120,P60905,P62804,P82471,Q62997,Q6IRE4,Q9JHB9                             |
| 5500 | 1,3,4,5,32,<br>33,34,35 | 2,6,7,8,27,<br>28,29,30,3<br>1   | 11 | P02781,P02782,P55314,P60905,P82471,Q4FZU2,Q5GRG2,Q62902,Q6AYR9,Q6IRE4,Q9JHB9                                    |
| 5501 | 1,3,4,6,7,8<br>,27,28   | 2,5,29,30,<br>31,32,33,3<br>4,35 | 8  | P01681,P07171,P14669,P16086,P18418,Q63617,Q99041,Q9R0T3                                                         |
| 5502 | 1,3,4,6,7,8<br>,27,29   | 2,5,28,30,<br>31,32,33,3<br>4,35 | 8  | P07171,P11598,P14669,P16086,Q63617,Q8CJD3,Q99041,Q9R0T3                                                         |
| 5503 | 1,3,4,6,7,8<br>,27,30   | 2,5,28,29,<br>31,32,33,3<br>4,35 | 2  | P14669,P16086                                                                                                   |
| 5504 | 1,3,4,6,7,8<br>,27,31   | 2,5,28,29,<br>30,32,33,3<br>4,35 | 8  | O70417,P02625,P07171,P14669,P16086,Q63617,Q8CJD3,Q99041                                                         |
| 5505 | 1,3,4,6,7,8<br>,27,32   | 2,5,28,29,<br>30,31,33,3<br>4,35 | 8  | P00714,P05539,P08649,P14669,P16086,Q63617,Q8CJD3,Q99041                                                         |
| 5506 | 1,3,4,6,7,8<br>,27,33   | 2,5,28,29,<br>30,31,32,3<br>4,35 | 8  | P08649,P14669,P16086,P18418,Q63617,Q8CJD3,Q99041,Q9QUL6                                                         |
| 5507 | 1,3,4,6,7,8<br>,27,34   | 2,5,28,29,<br>30,31,32,3<br>3,35 | 7  | P08649,P16086,P18418,P47967,Q5FVI6,Q99041,Q9WTT6                                                                |
| 5508 | 1,3,4,6,7,8<br>,27,35   | 2,5,28,29,<br>30,31,32,3<br>3,34 | 5  | O70417,P02770,P14669,P16086,Q63617                                                                              |

|      |                       |                                  |   |                                                  |
|------|-----------------------|----------------------------------|---|--------------------------------------------------|
| 5509 | 1,3,4,6,7,8<br>,28,29 | 2,5,27,30,<br>31,32,33,3<br>4,35 | 4 | P01681,P08723,Q63617,Q9R0T3                      |
| 5510 | 1,3,4,6,7,8<br>,28,30 | 2,5,27,29,<br>31,32,33,3<br>4,35 | 2 | P01681,P16086                                    |
| 5511 | 1,3,4,6,7,8<br>,28,31 | 2,5,27,29,<br>30,32,33,3<br>4,35 | 4 | O54728,P02625,P12020,Q5GRG2                      |
| 5512 | 1,3,4,6,7,8<br>,28,32 | 2,5,27,29,<br>30,31,33,3<br>4,35 | 5 | P01681,P12020,P16086,Q63617,Q99041               |
| 5513 | 1,3,4,6,7,8<br>,28,33 | 2,5,27,29,<br>30,31,32,3<br>4,35 | 4 | P18418,Q63617,Q99041,Q9QUL6                      |
| 5514 | 1,3,4,6,7,8<br>,28,34 | 2,5,27,29,<br>30,31,32,3<br>3,35 | 7 | O54728,P16086,P18418,P47967,Q62894,Q99041,Q9WTT6 |
| 5515 | 1,3,4,6,7,8<br>,28,35 | 2,5,27,29,<br>30,31,32,3<br>3,34 | 5 | P01681,P02770,P62804,Q30KJ2,Q63617               |
| 5516 | 1,3,4,6,7,8<br>,29,30 | 2,5,27,28,<br>31,32,33,3<br>4,35 | 2 | P16086,Q63617                                    |
| 5517 | 1,3,4,6,7,8<br>,29,31 | 2,5,27,28,<br>30,32,33,3<br>4,35 | 3 | P02625,Q63617,Q8CJD3                             |
| 5518 | 1,3,4,6,7,8<br>,29,32 | 2,5,27,28,<br>30,31,33,3<br>4,35 | 3 | P16086,Q63617,Q8CJD3                             |
| 5519 | 1,3,4,6,7,8<br>,29,33 | 2,5,27,28,<br>30,31,32,3<br>4,35 | 4 | Q63617,Q8CJD3,Q99041,Q9QUL6                      |
| 5520 | 1,3,4,6,7,8<br>,29,34 | 2,5,27,28,<br>30,31,32,3<br>3,35 | 3 | P16086,Q63617,Q99041                             |
| 5521 | 1,3,4,6,7,8<br>,29,35 | 2,5,27,28,<br>30,31,32,3<br>3,34 | 4 | P01681,P02091,P02770,Q63617                      |
| 5522 | 1,3,4,6,7,8<br>,30,31 | 2,5,27,28,<br>29,32,33,3<br>4,35 | 4 | P02625,P16086,P19218,P42854                      |
| 5523 | 1,3,4,6,7,8<br>,30,32 | 2,5,27,28,<br>29,31,33,3<br>4,35 | 1 | P16086                                           |

|      |                        |                                  |   |                                                         |
|------|------------------------|----------------------------------|---|---------------------------------------------------------|
| 5524 | 1,3,4,6,7,8<br>,30,33  | 2,5,27,28,<br>29,31,32,3<br>4,35 | 5 | P16086,P35446,Q63617,Q99041,Q9QUL6                      |
| 5525 | 1,3,4,6,7,8<br>,30,34  | 2,5,27,28,<br>29,31,32,3<br>3,35 | 4 | P09605;P25809,P16086,P47967,Q99041                      |
| 5526 | 1,3,4,6,7,8<br>,30,35  | 2,5,27,28,<br>29,31,32,3<br>3,34 | 4 | P01681,P02770,P16086,P20761                             |
| 5527 | 1,3,4,6,7,8<br>,31,32  | 2,5,27,28,<br>29,30,33,3<br>4,35 | 5 | P02625,P05539,P12020,P16086,Q8CJD3                      |
| 5528 | 1,3,4,6,7,8<br>,31,33  | 2,5,27,28,<br>29,30,32,3<br>4,35 | 6 | P02625,Q63617,Q8CJD3,Q8VD89,Q99041,Q9QUL6               |
| 5529 | 1,3,4,6,7,8<br>,31,34  | 2,5,27,28,<br>29,30,32,3<br>3,35 | 4 | P02625,P16086,Q62997,Q99041                             |
| 5530 | 1,3,4,6,7,8<br>,31,35  | 2,5,27,28,<br>29,30,32,3<br>3,34 | 5 | P02625,P02770,P05369,P20761,Q30KJ2                      |
| 5531 | 1,3,4,6,7,8<br>,32,33  | 2,5,27,28,<br>29,30,31,3<br>4,35 | 7 | P16086,P55314,P97580,Q63617,Q8CJD3,Q99041,Q9QUL6        |
| 5532 | 1,3,4,6,7,8<br>,32,34  | 2,5,27,28,<br>29,30,31,3<br>3,35 | 3 | P05539,P16086,Q99041                                    |
| 5533 | 1,3,4,6,7,8<br>,32,35  | 2,5,27,28,<br>29,30,31,3<br>3,34 | 4 | P02770,P16086,P97580,Q30KJ2                             |
| 5534 | 1,3,4,6,7,8<br>,33,34  | 2,5,27,28,<br>29,30,31,3<br>2,35 | 5 | P16086,Q62894,Q63617,Q99041,Q9QUL6                      |
| 5535 | 1,3,4,6,7,8<br>,33,35  | 2,5,27,28,<br>29,30,31,3<br>2,34 | 8 | P02770,P15399,P20761,P97580,Q30KJ2,Q63617,Q99041,Q9QUL6 |
| 5536 | 1,3,4,6,7,8<br>,34,35  | 2,5,27,28,<br>29,30,31,3<br>2,33 | 5 | P02770,P08010,P09006,P16086,Q5FVI6                      |
| 5537 | 1,3,4,6,7,2<br>7,28,29 | 2,5,8,30,3<br>1,32,33,34<br>,35  | 5 | O08815,P01681,P08723,P0C0A9,Q9JI85                      |
| 5538 | 1,3,4,6,7,2<br>7,28,30 | 2,5,8,29,3<br>1,32,33,34<br>,35  | 3 | P01681,P01835,P16086                                    |



|      |                        |                                 |   |                                           |
|------|------------------------|---------------------------------|---|-------------------------------------------|
| 5539 | 1,3,4,6,7,2<br>7,28,31 | 2,5,8,29,3<br>0,32,33,34<br>,35 | 3 | P02625,P12020,Q5GRG2                      |
| 5540 | 1,3,4,6,7,2<br>7,28,32 | 2,5,8,29,3<br>0,31,33,34<br>,35 | 5 | P00714,P01681,P05539,P12020,P16086        |
| 5541 | 1,3,4,6,7,2<br>7,28,33 | 2,5,8,29,3<br>0,31,32,34<br>,35 | 3 | P08649,P18418,Q4FZU2                      |
| 5542 | 1,3,4,6,7,2<br>7,28,34 | 2,5,8,29,3<br>0,31,32,33<br>,35 | 3 | P04182,P47967,Q5FVI6                      |
| 5543 | 1,3,4,6,7,2<br>7,28,35 | 2,5,8,29,3<br>0,31,32,33<br>,34 | 3 | P01681,P62804,Q5FVI6                      |
| 5544 | 1,3,4,6,7,2<br>7,29,30 | 2,5,8,28,3<br>1,32,33,34<br>,35 | 2 | P01835,P16086                             |
| 5545 | 1,3,4,6,7,2<br>7,29,31 | 2,5,8,28,3<br>0,32,33,34<br>,35 | 1 | P02625                                    |
| 5546 | 1,3,4,6,7,2<br>7,29,32 | 2,5,8,28,3<br>0,31,33,34<br>,35 | 4 | P05539,P08649,P16086,Q8CJD3               |
| 5547 | 1,3,4,6,7,2<br>7,29,33 | 2,5,8,28,3<br>0,31,32,34<br>,35 | 2 | P08649,Q8CJD3                             |
| 5548 | 1,3,4,6,7,2<br>7,29,34 | 2,5,8,28,3<br>0,31,32,33<br>,35 | 3 | P08649,P16086,Q5FVI6                      |
| 5549 | 1,3,4,6,7,2<br>7,29,35 | 2,5,8,28,3<br>0,31,32,33<br>,34 | 4 | P01681,P01946,P02091,Q5FVI6               |
| 5550 | 1,3,4,6,7,2<br>7,30,31 | 2,5,8,28,2<br>9,32,33,34<br>,35 | 3 | P02625,P16086,P19218                      |
| 5551 | 1,3,4,6,7,2<br>7,30,32 | 2,5,8,28,2<br>9,31,33,34<br>,35 | 4 | P02803,P05539,P08649,P16086               |
| 5552 | 1,3,4,6,7,2<br>7,30,33 | 2,5,8,28,2<br>9,31,32,34<br>,35 | 2 | P08649,P16086                             |
| 5553 | 1,3,4,6,7,2<br>7,30,34 | 2,5,8,28,2<br>9,31,32,33<br>,35 | 6 | P02803,P08649,P16086,P47967,P97840,Q5FVI6 |

|      |                        |                                 |   |                                                                |
|------|------------------------|---------------------------------|---|----------------------------------------------------------------|
| 5554 | 1,3,4,6,7,2<br>7,30,35 | 2,5,8,28,2<br>9,31,32,33<br>,34 | 2 | P16086,Q5FVI6                                                  |
| 5555 | 1,3,4,6,7,2<br>7,31,32 | 2,5,8,28,2<br>9,30,33,34<br>,35 | 6 | P02625,P05539,P08649,P12020,P16086,Q8CJD3                      |
| 5556 | 1,3,4,6,7,2<br>7,31,33 | 2,5,8,28,2<br>9,30,32,34<br>,35 | 2 | P02625,P08649                                                  |
| 5557 | 1,3,4,6,7,2<br>7,31,34 | 2,5,8,28,2<br>9,30,32,33<br>,35 | 6 | A2RUV9,P02625,P05539,P08649,P47967,Q5FVI6                      |
| 5558 | 1,3,4,6,7,2<br>7,31,35 | 2,5,8,28,2<br>9,30,32,33<br>,34 | 2 | P02625,Q30KJ2                                                  |
| 5559 | 1,3,4,6,7,2<br>7,32,33 | 2,5,8,28,2<br>9,30,31,34<br>,35 | 8 | P02793;Q7TP54,P05539,P08649,P16086,P55314,P97580,Q4FZU2,Q8CJD3 |
| 5560 | 1,3,4,6,7,2<br>7,32,34 | 2,5,8,28,2<br>9,30,31,33<br>,35 | 5 | P02803,P05539,P08649,P16086,Q4FZU2                             |
| 5561 | 1,3,4,6,7,2<br>7,32,35 | 2,5,8,28,2<br>9,30,31,33<br>,34 | 3 | P05539,P16086,Q30KJ2                                           |
| 5562 | 1,3,4,6,7,2<br>7,33,34 | 2,5,8,28,2<br>9,30,31,32<br>,35 | 4 | P08649,Q4FZU2,Q5FVI6,Q99041                                    |
| 5563 | 1,3,4,6,7,2<br>7,33,35 | 2,5,8,28,2<br>9,30,31,32<br>,34 | 5 | P15399,P97580,Q30KJ2,Q4FZU2,Q5FVI6                             |
| 5564 | 1,3,4,6,7,2<br>7,34,35 | 2,5,8,28,2<br>9,30,31,32<br>,33 | 2 | P12785,Q5FVI6                                                  |
| 5565 | 1,3,4,6,7,2<br>8,29,30 | 2,5,8,27,3<br>1,32,33,34<br>,35 | 2 | P01681,P01835                                                  |
| 5566 | 1,3,4,6,7,2<br>8,29,31 | 2,5,8,27,3<br>0,32,33,34<br>,35 | 6 | P01681,P06760,P06911,P12020,P83121,Q5GRG2                      |
| 5567 | 1,3,4,6,7,2<br>8,29,32 | 2,5,8,27,3<br>0,31,33,34<br>,35 | 3 | P01681,P04905,P12020                                           |
| 5568 | 1,3,4,6,7,2<br>8,29,33 | 2,5,8,27,3<br>0,31,32,34<br>,35 | 3 | P01681,P15399,P83121                                           |

|      |                        |                                 |   |                                                  |
|------|------------------------|---------------------------------|---|--------------------------------------------------|
| 5569 | 1,3,4,6,7,2<br>8,29,34 | 2,5,8,27,3<br>0,31,32,33<br>,35 | 3 | P01681,P27791,Q5FVI6                             |
| 5570 | 1,3,4,6,7,2<br>8,29,35 | 2,5,8,27,3<br>0,31,32,33<br>,34 | 4 | P01681,P02091,P06760,P15399                      |
| 5571 | 1,3,4,6,7,2<br>8,30,31 | 2,5,8,27,2<br>9,32,33,34<br>,35 | 4 | P01681,P02625,P06760,P42854                      |
| 5572 | 1,3,4,6,7,2<br>8,30,32 | 2,5,8,27,2<br>9,31,33,34<br>,35 | 2 | P01681,P16086                                    |
| 5573 | 1,3,4,6,7,2<br>8,30,33 | 2,5,8,27,2<br>9,31,32,34<br>,35 | 0 |                                                  |
| 5574 | 1,3,4,6,7,2<br>8,30,34 | 2,5,8,27,2<br>9,31,32,33<br>,35 | 5 | P01681,P16086,P47967,P97840,Q5FVI6               |
| 5575 | 1,3,4,6,7,2<br>8,30,35 | 2,5,8,27,2<br>9,31,32,33<br>,34 | 3 | P01681,P06760,P62804                             |
| 5576 | 1,3,4,6,7,2<br>8,31,32 | 2,5,8,27,2<br>9,30,33,34<br>,35 | 4 | P05539,P06911,P12020,Q5GRG2                      |
| 5577 | 1,3,4,6,7,2<br>8,31,33 | 2,5,8,27,2<br>9,30,32,34<br>,35 | 7 | P02625,P06760,P12020,P15399,P62804,P83121,Q8VD89 |
| 5578 | 1,3,4,6,7,2<br>8,31,34 | 2,5,8,27,2<br>9,30,32,33<br>,35 | 3 | O54728,P02625,P47967                             |
| 5579 | 1,3,4,6,7,2<br>8,31,35 | 2,5,8,27,2<br>9,30,32,33<br>,34 | 6 | P01681,P06760,P15399,P62804,Q00715,Q30KJ2        |
| 5580 | 1,3,4,6,7,2<br>8,32,33 | 2,5,8,27,2<br>9,30,31,34<br>,35 | 5 | P02793,Q7TP54,P12020,P15399,P55314,P97580        |
| 5581 | 1,3,4,6,7,2<br>8,32,34 | 2,5,8,27,2<br>9,30,31,33<br>,35 | 2 | P05539,Q5HZV9                                    |
| 5582 | 1,3,4,6,7,2<br>8,32,35 | 2,5,8,27,2<br>9,30,31,33<br>,34 | 5 | P01681,P15399,P62804,P97580,Q30KJ2               |
| 5583 | 1,3,4,6,7,2<br>8,33,34 | 2,5,8,27,2<br>9,30,31,32<br>,35 | 1 | Q5FVI6                                           |

|      |                        |                                 |   |                                           |
|------|------------------------|---------------------------------|---|-------------------------------------------|
| 5584 | 1,3,4,6,7,2<br>8,33,35 | 2,5,8,27,2<br>9,30,31,32<br>,34 | 6 | P01681,P06760,P15399,P62804,P97580,Q30KJ2 |
| 5585 | 1,3,4,6,7,2<br>8,34,35 | 2,5,8,27,2<br>9,30,31,32<br>,33 | 5 | P01681,P12785,P62804,Q5FVI6,Q5HZV9        |
| 5586 | 1,3,4,6,7,2<br>9,30,31 | 2,5,8,27,2<br>8,32,33,34<br>,35 | 2 | P02625,P83121                             |
| 5587 | 1,3,4,6,7,2<br>9,30,32 | 2,5,8,27,2<br>8,31,33,34<br>,35 | 1 | P16086                                    |
| 5588 | 1,3,4,6,7,2<br>9,30,33 | 2,5,8,27,2<br>8,31,32,34<br>,35 | 1 | P35446                                    |
| 5589 | 1,3,4,6,7,2<br>9,30,34 | 2,5,8,27,2<br>8,31,32,33<br>,35 | 4 | P09605;P25809,P16086,P47967,Q5FVI6        |
| 5590 | 1,3,4,6,7,2<br>9,30,35 | 2,5,8,27,2<br>8,31,32,33<br>,34 | 3 | P01681,P02091,P14480                      |
| 5591 | 1,3,4,6,7,2<br>9,31,32 | 2,5,8,27,2<br>8,30,33,34<br>,35 | 3 | P05539,P12020,Q8CJD3                      |
| 5592 | 1,3,4,6,7,2<br>9,31,33 | 2,5,8,27,2<br>8,30,32,34<br>,35 | 4 | P02625,P15399,P83121,Q8CJD3               |
| 5593 | 1,3,4,6,7,2<br>9,31,34 | 2,5,8,27,2<br>8,30,32,33<br>,35 | 2 | P02625,P09605;P25809                      |
| 5594 | 1,3,4,6,7,2<br>9,31,35 | 2,5,8,27,2<br>8,30,32,33<br>,34 | 3 | P02091,P15399,Q30KJ2                      |
| 5595 | 1,3,4,6,7,2<br>9,32,33 | 2,5,8,27,2<br>8,30,31,34<br>,35 | 5 | P02793;Q7TP54,P05539,P15399,P55314,Q8CJD3 |
| 5596 | 1,3,4,6,7,2<br>9,32,34 | 2,5,8,27,2<br>8,30,31,33<br>,35 | 3 | P05539,P16086,Q99MH3                      |
| 5597 | 1,3,4,6,7,2<br>9,32,35 | 2,5,8,27,2<br>8,30,31,33<br>,34 | 4 | P01681,P02091,P15399,Q30KJ2               |
| 5598 | 1,3,4,6,7,2<br>9,33,34 | 2,5,8,27,2<br>8,30,31,32<br>,35 | 1 | Q5FVI6                                    |

|      |                        |                                 |   |                                                         |
|------|------------------------|---------------------------------|---|---------------------------------------------------------|
| 5599 | 1,3,4,6,7,2<br>9,33,35 | 2,5,8,27,2<br>8,30,31,32<br>,34 | 4 | P02091,P15399,P97580,Q30KJ2                             |
| 5600 | 1,3,4,6,7,2<br>9,34,35 | 2,5,8,27,2<br>8,30,31,32<br>,33 | 2 | P02091,Q5FVI6                                           |
| 5601 | 1,3,4,6,7,3<br>0,31,32 | 2,5,8,27,2<br>8,29,33,34<br>,35 | 3 | P02625,P16086,P42854                                    |
| 5602 | 1,3,4,6,7,3<br>0,31,33 | 2,5,8,27,2<br>8,29,32,34<br>,35 | 5 | P02625,P19218,P35446,P83121,Q8VD89                      |
| 5603 | 1,3,4,6,7,3<br>0,31,34 | 2,5,8,27,2<br>8,29,32,33<br>,35 | 6 | P02625,P09605,P25809,P16086,P19218,P47967,P97840        |
| 5604 | 1,3,4,6,7,3<br>0,31,35 | 2,5,8,27,2<br>8,29,32,33<br>,34 | 2 | P02625,Q30KJ2                                           |
| 5605 | 1,3,4,6,7,3<br>0,32,33 | 2,5,8,27,2<br>8,29,31,34<br>,35 | 4 | P16086,P35446,P55314,P97580                             |
| 5606 | 1,3,4,6,7,3<br>0,32,34 | 2,5,8,27,2<br>8,29,31,33<br>,35 | 3 | P09605,P25809,P16086,P47967                             |
| 5607 | 1,3,4,6,7,3<br>0,32,35 | 2,5,8,27,2<br>8,29,31,33<br>,34 | 2 | P16086,Q30KJ2                                           |
| 5608 | 1,3,4,6,7,3<br>0,33,34 | 2,5,8,27,2<br>8,29,31,32<br>,35 | 4 | P09605,P25809,P16086,P47967,Q5FVI6                      |
| 5609 | 1,3,4,6,7,3<br>0,33,35 | 2,5,8,27,2<br>8,29,31,32<br>,34 | 4 | B0BNN3,P15399,P97580,Q30KJ2                             |
| 5610 | 1,3,4,6,7,3<br>0,34,35 | 2,5,8,27,2<br>8,29,31,32<br>,33 | 5 | P09605,P25809,P16086,P47967,P82471,Q5FVI6               |
| 5611 | 1,3,4,6,7,3<br>1,32,33 | 2,5,8,27,2<br>8,29,30,34<br>,35 | 8 | P02625,P05539,P12020,P15399,P55314,P97580,Q30KJ2,Q8CJD3 |
| 5612 | 1,3,4,6,7,3<br>1,32,34 | 2,5,8,27,2<br>8,29,30,33<br>,35 | 3 | P02625,P05539,P16086                                    |
| 5613 | 1,3,4,6,7,3<br>1,32,35 | 2,5,8,27,2<br>8,29,30,33<br>,34 | 3 | P15399,P97580,Q30KJ2                                    |

|      |                        |                                 |    |                                                                              |
|------|------------------------|---------------------------------|----|------------------------------------------------------------------------------|
| 5614 | 1,3,4,6,7,3<br>1,33,34 | 2,5,8,27,2<br>8,29,30,32<br>,35 | 1  | P02625                                                                       |
| 5615 | 1,3,4,6,7,3<br>1,33,35 | 2,5,8,27,2<br>8,29,30,32<br>,34 | 6  | P06760,P15399,P62804,P97580,Q30KJ2,Q8VD89                                    |
| 5616 | 1,3,4,6,7,3<br>1,34,35 | 2,5,8,27,2<br>8,29,30,32<br>,33 | 6  | P02625,P08010,P62804,P82471,Q30KJ2,Q5FVI6                                    |
| 5617 | 1,3,4,6,7,3<br>2,33,34 | 2,5,8,27,2<br>8,29,30,31<br>,35 | 4  | P05539,P16086,P55314,P97580                                                  |
| 5618 | 1,3,4,6,7,3<br>2,33,35 | 2,5,8,27,2<br>8,29,30,31<br>,34 | 4  | P15399,P55314,P97580,Q30KJ2                                                  |
| 5619 | 1,3,4,6,7,3<br>2,34,35 | 2,5,8,27,2<br>8,29,30,31<br>,33 | 3  | P82471,P97580,Q30KJ2                                                         |
| 5620 | 1,3,4,6,7,3<br>3,34,35 | 2,5,8,27,2<br>8,29,30,31<br>,32 | 7  | P08010,P15399,P62804,P82471,P97580,Q30KJ2,Q5FVI6                             |
| 5621 | 1,3,4,6,8,2<br>7,28,29 | 2,5,7,30,3<br>1,32,33,34<br>,35 | 11 | O35547,P01681,P02781,P02782,P08723,P0C0A9,P24368,P30120,Q5M8C6,Q9JHB9,Q9JI85 |
| 5622 | 1,3,4,6,8,2<br>7,28,30 | 2,5,7,29,3<br>1,32,33,34<br>,35 | 2  | P01681,P01835                                                                |
| 5623 | 1,3,4,6,8,2<br>7,28,31 | 2,5,7,29,3<br>0,32,33,34<br>,35 | 3  | P01681,P02625,Q5GRG2                                                         |
| 5624 | 1,3,4,6,8,2<br>7,28,32 | 2,5,7,29,3<br>0,31,33,34<br>,35 | 2  | P00714,P01681                                                                |
| 5625 | 1,3,4,6,8,2<br>7,28,33 | 2,5,7,29,3<br>0,31,32,34<br>,35 | 4  | P01681,P08723,Q4FZU2,Q9QUL6                                                  |
| 5626 | 1,3,4,6,8,2<br>7,28,34 | 2,5,7,29,3<br>0,31,32,33<br>,35 | 4  | P01681,P04182,Q62894,Q9WTT6                                                  |
| 5627 | 1,3,4,6,8,2<br>7,28,35 | 2,5,7,29,3<br>0,31,32,33<br>,34 | 4  | B0BNN3,O70417,P01681,P02770                                                  |
| 5628 | 1,3,4,6,8,2<br>7,29,30 | 2,5,7,28,3<br>1,32,33,34<br>,35 | 3  | P01681,P01835,P14669                                                         |

|      |                        |                                 |   |                                                         |
|------|------------------------|---------------------------------|---|---------------------------------------------------------|
| 5629 | 1,3,4,6,8,2<br>7,29,31 | 2,5,7,28,3<br>0,32,33,34<br>,35 | 1 | P02625                                                  |
| 5630 | 1,3,4,6,8,2<br>7,29,32 | 2,5,7,28,3<br>0,31,33,34<br>,35 | 2 | P14669,Q8CJD3                                           |
| 5631 | 1,3,4,6,8,2<br>7,29,33 | 2,5,7,28,3<br>0,31,32,34<br>,35 | 4 | P14669,Q4FZU2,Q8CJD3,Q9QUL6                             |
| 5632 | 1,3,4,6,8,2<br>7,29,34 | 2,5,7,28,3<br>0,31,32,33<br>,35 | 1 | Q9WTT6                                                  |
| 5633 | 1,3,4,6,8,2<br>7,29,35 | 2,5,7,28,3<br>0,31,32,33<br>,34 | 4 | B0BNN3,P01681,P01946,P02770                             |
| 5634 | 1,3,4,6,8,2<br>7,30,31 | 2,5,7,28,2<br>9,32,33,34<br>,35 | 1 | P02625                                                  |
| 5635 | 1,3,4,6,8,2<br>7,30,32 | 2,5,7,28,2<br>9,31,33,34<br>,35 | 1 | P14669                                                  |
| 5636 | 1,3,4,6,8,2<br>7,30,33 | 2,5,7,28,2<br>9,31,32,34<br>,35 | 2 | B0BNN3,Q9QUL6                                           |
| 5637 | 1,3,4,6,8,2<br>7,30,34 | 2,5,7,28,2<br>9,31,32,33<br>,35 | 3 | B0BNN3,P47967,Q9WTT6                                    |
| 5638 | 1,3,4,6,8,2<br>7,30,35 | 2,5,7,28,2<br>9,31,32,33<br>,34 | 4 | B0BNN3,O70417,P01681,P02770                             |
| 5639 | 1,3,4,6,8,2<br>7,31,32 | 2,5,7,28,2<br>9,30,33,34<br>,35 | 3 | O70417,P02625,Q8CJD3                                    |
| 5640 | 1,3,4,6,8,2<br>7,31,33 | 2,5,7,28,2<br>9,30,32,34<br>,35 | 4 | P02625,Q4FZU2,Q8CJD3,Q9QUL6                             |
| 5641 | 1,3,4,6,8,2<br>7,31,34 | 2,5,7,28,2<br>9,30,32,33<br>,35 | 3 | O70417,P02625,Q9WTT6                                    |
| 5642 | 1,3,4,6,8,2<br>7,31,35 | 2,5,7,28,2<br>9,30,32,33<br>,34 | 4 | B0BNN3,O70417,P02625,P02770                             |
| 5643 | 1,3,4,6,8,2<br>7,32,33 | 2,5,7,28,2<br>9,30,31,34<br>,35 | 8 | P14669,P55314,Q4FZU2,Q6IFW6,Q6IG02,Q6P6Q2,Q8CJD3,Q9QUL6 |

|      |                        |                                 |   |                                           |
|------|------------------------|---------------------------------|---|-------------------------------------------|
| 5644 | 1,3,4,6,8,2<br>7,32,34 | 2,5,7,28,2<br>9,30,31,33<br>,35 | 2 | Q4FZU2,Q9WTT6                             |
| 5645 | 1,3,4,6,8,2<br>7,32,35 | 2,5,7,28,2<br>9,30,31,33<br>,34 | 2 | O70417,P01681                             |
| 5646 | 1,3,4,6,8,2<br>7,33,34 | 2,5,7,28,2<br>9,30,31,32<br>,35 | 5 | B0BNN3,Q4FZU2,Q62894,Q9QUL6,Q9WTT6        |
| 5647 | 1,3,4,6,8,2<br>7,33,35 | 2,5,7,28,2<br>9,30,31,32<br>,34 | 3 | B0BNN3,P02770,Q4FZU2                      |
| 5648 | 1,3,4,6,8,2<br>7,34,35 | 2,5,7,28,2<br>9,30,31,32<br>,33 | 6 | B0BNN3,O70417,P02770,P09006,P35467,Q9WTT6 |
| 5649 | 1,3,4,6,8,2<br>8,29,30 | 2,5,7,27,3<br>1,32,33,34<br>,35 | 4 | O35547,P01681,P01835,P08723               |
| 5650 | 1,3,4,6,8,2<br>8,29,31 | 2,5,7,27,3<br>0,32,33,34<br>,35 | 5 | O35547,P01681,P06911,P08723,Q5GRG2        |
| 5651 | 1,3,4,6,8,2<br>8,29,32 | 2,5,7,27,3<br>0,31,33,34<br>,35 | 4 | O35547,P01681,P04905,P08723               |
| 5652 | 1,3,4,6,8,2<br>8,29,33 | 2,5,7,27,3<br>0,31,32,34<br>,35 | 5 | O35547,P01681,P04905,P08723,Q9QUL6        |
| 5653 | 1,3,4,6,8,2<br>8,29,34 | 2,5,7,27,3<br>0,31,32,33<br>,35 | 2 | P01681,Q9WTT6                             |
| 5654 | 1,3,4,6,8,2<br>8,29,35 | 2,5,7,27,3<br>0,31,32,33<br>,34 | 3 | B0BNN3,P01681,P02770                      |
| 5655 | 1,3,4,6,8,2<br>8,30,31 | 2,5,7,27,2<br>9,32,33,34<br>,35 | 2 | P01681,P02625                             |
| 5656 | 1,3,4,6,8,2<br>8,30,32 | 2,5,7,27,2<br>9,31,33,34<br>,35 | 1 | P01681                                    |
| 5657 | 1,3,4,6,8,2<br>8,30,33 | 2,5,7,27,2<br>9,31,32,34<br>,35 | 3 | B0BNN3,P01681,Q9QUL6                      |
| 5658 | 1,3,4,6,8,2<br>8,30,34 | 2,5,7,27,2<br>9,31,32,33<br>,35 | 4 | B0BNN3,P01681,Q62894,Q9WTT6               |



|      |                        |                                 |   |                                                         |
|------|------------------------|---------------------------------|---|---------------------------------------------------------|
| 5659 | 1,3,4,6,8,2<br>8,30,35 | 2,5,7,27,2<br>9,31,32,33<br>,34 | 3 | B0BNN3,P01681,P02770                                    |
| 5660 | 1,3,4,6,8,2<br>8,31,32 | 2,5,7,27,2<br>9,30,33,34<br>,35 | 2 | P01681,P06911                                           |
| 5661 | 1,3,4,6,8,2<br>8,31,33 | 2,5,7,27,2<br>9,30,32,34<br>,35 | 2 | P02625,Q9QUL6                                           |
| 5662 | 1,3,4,6,8,2<br>8,31,34 | 2,5,7,27,2<br>9,30,32,33<br>,35 | 2 | P02625,Q9WTT6                                           |
| 5663 | 1,3,4,6,8,2<br>8,31,35 | 2,5,7,27,2<br>9,30,32,33<br>,34 | 3 | B0BNN3,P01681,P02770                                    |
| 5664 | 1,3,4,6,8,2<br>8,32,33 | 2,5,7,27,2<br>9,30,31,34<br>,35 | 3 | P01681,P55314,Q9QUL6                                    |
| 5665 | 1,3,4,6,8,2<br>8,32,34 | 2,5,7,27,2<br>9,30,31,33<br>,35 | 5 | P01681,P52303,Q5HZV9,Q62894,Q9WTT6                      |
| 5666 | 1,3,4,6,8,2<br>8,32,35 | 2,5,7,27,2<br>9,30,31,33<br>,34 | 1 | P01681                                                  |
| 5667 | 1,3,4,6,8,2<br>8,33,34 | 2,5,7,27,2<br>9,30,31,32<br>,35 | 2 | B0BNN3,Q62894                                           |
| 5668 | 1,3,4,6,8,2<br>8,33,35 | 2,5,7,27,2<br>9,30,31,32<br>,34 | 3 | B0BNN3,P01681,P02770                                    |
| 5669 | 1,3,4,6,8,2<br>8,34,35 | 2,5,7,27,2<br>9,30,31,32<br>,33 | 8 | B0BNN3,P00507,P01681,P02770,P09006,Q5HZV9,Q62894,Q6AY61 |
| 5670 | 1,3,4,6,8,2<br>9,30,31 | 2,5,7,27,2<br>8,32,33,34<br>,35 | 2 | B0BNN3,P02625                                           |
| 5671 | 1,3,4,6,8,2<br>9,30,32 | 2,5,7,27,2<br>8,31,33,34<br>,35 | 1 | P01681                                                  |
| 5672 | 1,3,4,6,8,2<br>9,30,33 | 2,5,7,27,2<br>8,31,32,34<br>,35 | 2 | B0BNN3,Q9QUL6                                           |
| 5673 | 1,3,4,6,8,2<br>9,30,34 | 2,5,7,27,2<br>8,31,32,33<br>,35 | 1 | B0BNN3                                                  |

|      |                        |                                 |   |                                    |
|------|------------------------|---------------------------------|---|------------------------------------|
| 5674 | 1,3,4,6,8,2<br>9,30,35 | 2,5,7,27,2<br>8,31,32,33<br>,34 | 3 | B0BNN3,P01681,P02770               |
| 5675 | 1,3,4,6,8,2<br>9,31,32 | 2,5,7,27,2<br>8,30,33,34<br>,35 | 1 | Q8CJD3                             |
| 5676 | 1,3,4,6,8,2<br>9,31,33 | 2,5,7,27,2<br>8,30,32,34<br>,35 | 5 | B0BNN3,P02625,P83121,Q8CJD3,Q9QUL6 |
| 5677 | 1,3,4,6,8,2<br>9,31,34 | 2,5,7,27,2<br>8,30,32,33<br>,35 | 1 | P02625                             |
| 5678 | 1,3,4,6,8,2<br>9,31,35 | 2,5,7,27,2<br>8,30,32,33<br>,34 | 3 | B0BNN3,P01681,P02770               |
| 5679 | 1,3,4,6,8,2<br>9,32,33 | 2,5,7,27,2<br>8,30,31,34<br>,35 | 3 | P55314,Q8CJD3,Q9QUL6               |
| 5680 | 1,3,4,6,8,2<br>9,32,34 | 2,5,7,27,2<br>8,30,31,33<br>,35 | 0 |                                    |
| 5681 | 1,3,4,6,8,2<br>9,32,35 | 2,5,7,27,2<br>8,30,31,33<br>,34 | 2 | P01681,P51907                      |
| 5682 | 1,3,4,6,8,2<br>9,33,34 | 2,5,7,27,2<br>8,30,31,32<br>,35 | 2 | B0BNN3,Q9QUL6                      |
| 5683 | 1,3,4,6,8,2<br>9,33,35 | 2,5,7,27,2<br>8,30,31,32<br>,34 | 3 | B0BNN3,P01681,P97840               |
| 5684 | 1,3,4,6,8,2<br>9,34,35 | 2,5,7,27,2<br>8,30,31,32<br>,33 | 4 | B0BNN3,P01681,P02770,P09006        |
| 5685 | 1,3,4,6,8,3<br>0,31,32 | 2,5,7,27,2<br>8,29,33,34<br>,35 | 1 | P02625                             |
| 5686 | 1,3,4,6,8,3<br>0,31,33 | 2,5,7,27,2<br>8,29,32,34<br>,35 | 3 | B0BNN3,P02625,Q9QUL6               |
| 5687 | 1,3,4,6,8,3<br>0,31,34 | 2,5,7,27,2<br>8,29,32,33<br>,35 | 2 | B0BNN3,P02625                      |
| 5688 | 1,3,4,6,8,3<br>0,31,35 | 2,5,7,27,2<br>8,29,32,33<br>,34 | 3 | B0BNN3,P02625,P02770               |

|      |                        |                                 |   |                                                  |
|------|------------------------|---------------------------------|---|--------------------------------------------------|
| 5689 | 1,3,4,6,8,3<br>0,32,33 | 2,5,7,27,2<br>8,29,31,34<br>,35 | 2 | P55314,Q9QUL6                                    |
| 5690 | 1,3,4,6,8,3<br>0,32,34 | 2,5,7,27,2<br>8,29,31,33<br>,35 | 0 |                                                  |
| 5691 | 1,3,4,6,8,3<br>0,32,35 | 2,5,7,27,2<br>8,29,31,33<br>,34 | 3 | B0BNN3,P01681,P02770                             |
| 5692 | 1,3,4,6,8,3<br>0,33,34 | 2,5,7,27,2<br>8,29,31,32<br>,35 | 3 | B0BNN3,Q62894,Q9QUL6                             |
| 5693 | 1,3,4,6,8,3<br>0,33,35 | 2,5,7,27,2<br>8,29,31,32<br>,34 | 4 | B0BNN3,P02770,Q64268,Q9QUL6                      |
| 5694 | 1,3,4,6,8,3<br>0,34,35 | 2,5,7,27,2<br>8,29,31,32<br>,33 | 5 | B0BNN3,P01681,P02770,P02793;Q7TP54,P09006        |
| 5695 | 1,3,4,6,8,3<br>1,32,33 | 2,5,7,27,2<br>8,29,30,34<br>,35 | 4 | P02625,P55314,Q8CJD3,Q9QUL6                      |
| 5696 | 1,3,4,6,8,3<br>1,32,34 | 2,5,7,27,2<br>8,29,30,33<br>,35 | 1 | P02625                                           |
| 5697 | 1,3,4,6,8,3<br>1,32,35 | 2,5,7,27,2<br>8,29,30,33<br>,34 | 0 |                                                  |
| 5698 | 1,3,4,6,8,3<br>1,33,34 | 2,5,7,27,2<br>8,29,30,32<br>,35 | 5 | B0BNN3,P02625,Q62894,Q63355,Q9QUL6               |
| 5699 | 1,3,4,6,8,3<br>1,33,35 | 2,5,7,27,2<br>8,29,30,32<br>,34 | 4 | B0BNN3,P02770,Q63355,Q9QUL6                      |
| 5700 | 1,3,4,6,8,3<br>1,34,35 | 2,5,7,27,2<br>8,29,30,32<br>,33 | 6 | B0BNN3,P02770,P02793;Q7TP54,P09006,P82471,Q63355 |
| 5701 | 1,3,4,6,8,3<br>2,33,34 | 2,5,7,27,2<br>8,29,30,31<br>,35 | 3 | P55314,Q62894,Q9QUL6                             |
| 5702 | 1,3,4,6,8,3<br>2,33,35 | 2,5,7,27,2<br>8,29,30,31<br>,34 | 3 | B0BNN3,P55314,Q9QUL6                             |
| 5703 | 1,3,4,6,8,3<br>2,34,35 | 2,5,7,27,2<br>8,29,30,31<br>,33 | 4 | P08753,P09006,P35467,P82471                      |

|      |                         |                                 |    |                                                                              |
|------|-------------------------|---------------------------------|----|------------------------------------------------------------------------------|
| 5704 | 1,3,4,6,8,3<br>3,34,35  | 2,5,7,27,2<br>8,29,30,31<br>,32 | 7  | B0BNN3,O55145,P02770,P09006,P82471,Q62894,Q63355                             |
| 5705 | 1,3,4,6,27,<br>28,29,30 | 2,5,7,8,31,<br>32,33,34,3<br>5  | 11 | O08815,O35547,P01681,P01835,P02781,P08723,P0C0A9,P30120,Q6AYR9,Q812E4,Q9JHB9 |
| 5706 | 1,3,4,6,27,<br>28,29,31 | 2,5,7,8,30,<br>32,33,34,3<br>5  | 8  | O08815,O35547,P01681,P02625,P06911,P08723,P0C0A9,Q5GRG2                      |
| 5707 | 1,3,4,6,27,<br>28,29,32 | 2,5,7,8,30,<br>31,33,34,3<br>5  | 10 | O08815,O35547,P01681,P04905,P08723,P0C0A9,P24368,Q4FZU2,Q812E4,Q9JHB9        |
| 5708 | 1,3,4,6,27,<br>28,29,33 | 2,5,7,8,30,<br>31,32,34,3<br>5  | 9  | O08815,O35547,P01681,P08723,P0C0A9,Q4FZU2,Q812E4,Q9JHB9,Q9JI85               |
| 5709 | 1,3,4,6,27,<br>28,29,34 | 2,5,7,8,30,<br>31,32,33,3<br>5  | 4  | O08815,O35547,P01681,P04182                                                  |
| 5710 | 1,3,4,6,27,<br>28,29,35 | 2,5,7,8,30,<br>31,32,33,3<br>4  | 4  | P01681,P01835,P01946,P08723                                                  |
| 5711 | 1,3,4,6,27,<br>28,30,31 | 2,5,7,8,29,<br>32,33,34,3<br>5  | 3  | P01681,P01835,P02625                                                         |
| 5712 | 1,3,4,6,27,<br>28,30,32 | 2,5,7,8,29,<br>31,33,34,3<br>5  | 2  | P01681,P01835                                                                |
| 5713 | 1,3,4,6,27,<br>28,30,33 | 2,5,7,8,29,<br>31,32,34,3<br>5  | 3  | P01681,P01835,Q4FZU2                                                         |
| 5714 | 1,3,4,6,27,<br>28,30,34 | 2,5,7,8,29,<br>31,32,33,3<br>5  | 5  | P01681,P01835,P04182,P47967,Q5HZV9                                           |
| 5715 | 1,3,4,6,27,<br>28,30,35 | 2,5,7,8,29,<br>31,32,33,3<br>4  | 3  | B0BNN3,P01681,P01835                                                         |
| 5716 | 1,3,4,6,27,<br>28,31,32 | 2,5,7,8,29,<br>30,33,34,3<br>5  | 3  | P02625,P06911,Q4FZU2                                                         |
| 5717 | 1,3,4,6,27,<br>28,31,33 | 2,5,7,8,29,<br>30,32,34,3<br>5  | 2  | P02625,Q4FZU2                                                                |
| 5718 | 1,3,4,6,27,<br>28,31,34 | 2,5,7,8,29,<br>30,32,33,3<br>5  | 4  | A2RUV9,P02625,P04182,Q5HZV9                                                  |

|      |                         |                                |   |                                                         |
|------|-------------------------|--------------------------------|---|---------------------------------------------------------|
| 5719 | 1,3,4,6,27,<br>28,31,35 | 2,5,7,8,29,<br>30,32,33,3<br>4 | 2 | P01681,P02625                                           |
| 5720 | 1,3,4,6,27,<br>28,32,33 | 2,5,7,8,29,<br>30,31,34,3<br>5 | 8 | P55314,Q06000,Q4FZU2,Q6IFU7,Q6IFW6,Q6IG02,Q6IMF3,Q6P6Q2 |
| 5721 | 1,3,4,6,27,<br>28,32,34 | 2,5,7,8,29,<br>30,31,33,3<br>5 | 6 | P01681,P04182,Q10758,Q4FZU2,Q5HZV9,Q6IFU7               |
| 5722 | 1,3,4,6,27,<br>28,32,35 | 2,5,7,8,29,<br>30,31,33,3<br>4 | 2 | P01681,Q4FZU2                                           |
| 5723 | 1,3,4,6,27,<br>28,33,34 | 2,5,7,8,29,<br>30,31,32,3<br>5 | 2 | P04182,Q4FZU2                                           |
| 5724 | 1,3,4,6,27,<br>28,33,35 | 2,5,7,8,29,<br>30,31,32,3<br>4 | 4 | B0BNN3,P01681,Q4FZU2,Q6IG02                             |
| 5725 | 1,3,4,6,27,<br>28,34,35 | 2,5,7,8,29,<br>30,31,32,3<br>3 | 7 | B0BNN3,P01681,P04182,P12785,Q4FZU2,Q5HZV9,Q5M819        |
| 5726 | 1,3,4,6,27,<br>29,30,31 | 2,5,7,8,28,<br>32,33,34,3<br>5 | 2 | P01835,P02625                                           |
| 5727 | 1,3,4,6,27,<br>29,30,32 | 2,5,7,8,28,<br>31,33,34,3<br>5 | 3 | P01681,P01835,P02803                                    |
| 5728 | 1,3,4,6,27,<br>29,30,33 | 2,5,7,8,28,<br>31,32,34,3<br>5 | 2 | B0BNN3,P01835                                           |
| 5729 | 1,3,4,6,27,<br>29,30,34 | 2,5,7,8,28,<br>31,32,33,3<br>5 | 1 | P01835                                                  |
| 5730 | 1,3,4,6,27,<br>29,30,35 | 2,5,7,8,28,<br>31,32,33,3<br>4 | 4 | B0BNN3,P01681,P01835,P01946                             |
| 5731 | 1,3,4,6,27,<br>29,31,32 | 2,5,7,8,28,<br>30,33,34,3<br>5 | 2 | P02625,Q8CJD3                                           |
| 5732 | 1,3,4,6,27,<br>29,31,33 | 2,5,7,8,28,<br>30,32,34,3<br>5 | 2 | P02625,Q4FZU2                                           |
| 5733 | 1,3,4,6,27,<br>29,31,34 | 2,5,7,8,28,<br>30,32,33,3<br>5 | 2 | A2RUV9,P02625                                           |

|      |                         |                                |   |                             |
|------|-------------------------|--------------------------------|---|-----------------------------|
| 5734 | 1,3,4,6,27,<br>29,31,35 | 2,5,7,8,28,<br>30,32,33,3<br>4 | 4 | B0BNN3,P01681,P01946,P02625 |
| 5735 | 1,3,4,6,27,<br>29,32,33 | 2,5,7,8,28,<br>30,31,34,3<br>5 | 4 | P55314,Q4FZU2,Q6P6Q2,Q8CJD3 |
| 5736 | 1,3,4,6,27,<br>29,32,34 | 2,5,7,8,28,<br>30,31,33,3<br>5 | 2 | Q10758,Q4FZU2               |
| 5737 | 1,3,4,6,27,<br>29,32,35 | 2,5,7,8,28,<br>30,31,33,3<br>4 | 2 | P01681,P01946               |
| 5738 | 1,3,4,6,27,<br>29,33,34 | 2,5,7,8,28,<br>30,31,32,3<br>5 | 1 | Q4FZU2                      |
| 5739 | 1,3,4,6,27,<br>29,33,35 | 2,5,7,8,28,<br>30,31,32,3<br>4 | 4 | B0BNN3,P01681,P01946,Q4FZU2 |
| 5740 | 1,3,4,6,27,<br>29,34,35 | 2,5,7,8,28,<br>30,31,32,3<br>3 | 4 | B0BNN3,P01681,P01946,P12785 |
| 5741 | 1,3,4,6,27,<br>30,31,32 | 2,5,7,8,28,<br>29,33,34,3<br>5 | 1 | P02625                      |
| 5742 | 1,3,4,6,27,<br>30,31,33 | 2,5,7,8,28,<br>29,32,34,3<br>5 | 1 | P02625                      |
| 5743 | 1,3,4,6,27,<br>30,31,34 | 2,5,7,8,28,<br>29,32,33,3<br>5 | 2 | P02625,P47967               |
| 5744 | 1,3,4,6,27,<br>30,31,35 | 2,5,7,8,28,<br>29,32,33,3<br>4 | 2 | B0BNN3,P02625               |
| 5745 | 1,3,4,6,27,<br>30,32,33 | 2,5,7,8,28,<br>29,31,34,3<br>5 | 2 | P55314,Q4FZU2               |
| 5746 | 1,3,4,6,27,<br>30,32,34 | 2,5,7,8,28,<br>29,31,33,3<br>5 | 2 | P02803,Q10758               |
| 5747 | 1,3,4,6,27,<br>30,32,35 | 2,5,7,8,28,<br>29,31,33,3<br>4 | 2 | P01681,P01835               |
| 5748 | 1,3,4,6,27,<br>30,33,34 | 2,5,7,8,28,<br>29,31,32,3<br>5 | 2 | B0BNN3,Q4FZU2               |

|      |                         |                                |   |                                                  |
|------|-------------------------|--------------------------------|---|--------------------------------------------------|
| 5749 | 1,3,4,6,27,<br>30,33,35 | 2,5,7,8,28,<br>29,31,32,3<br>4 | 2 | B0BNN3,Q4FZU2                                    |
| 5750 | 1,3,4,6,27,<br>30,34,35 | 2,5,7,8,28,<br>29,31,32,3<br>3 | 2 | B0BNN3,P02793,Q7TP54                             |
| 5751 | 1,3,4,6,27,<br>31,32,33 | 2,5,7,8,28,<br>29,30,34,3<br>5 | 7 | P02625,P55314,Q4FZU2,Q6IFW6,Q6IG02,Q6P6Q2,Q8CJD3 |
| 5752 | 1,3,4,6,27,<br>31,32,34 | 2,5,7,8,28,<br>29,30,33,3<br>5 | 4 | A2RUV9,P02625,Q10758,Q4FZU2                      |
| 5753 | 1,3,4,6,27,<br>31,32,35 | 2,5,7,8,28,<br>29,30,33,3<br>4 | 1 | P02625                                           |
| 5754 | 1,3,4,6,27,<br>31,33,34 | 2,5,7,8,28,<br>29,30,32,3<br>5 | 3 | P02625,Q4FZU2,Q63355                             |
| 5755 | 1,3,4,6,27,<br>31,33,35 | 2,5,7,8,28,<br>29,30,32,3<br>4 | 4 | B0BNN3,P02625,Q4FZU2,Q63355                      |
| 5756 | 1,3,4,6,27,<br>31,34,35 | 2,5,7,8,28,<br>29,30,32,3<br>3 | 5 | A2RUV9,B0BNN3,P02625,P12785,Q63355               |
| 5757 | 1,3,4,6,27,<br>32,33,34 | 2,5,7,8,28,<br>29,30,31,3<br>5 | 7 | P55314,Q10758,Q4FZU2,Q6IFU8,Q6IFW6,Q6IG02,Q6P6Q2 |
| 5758 | 1,3,4,6,27,<br>32,33,35 | 2,5,7,8,28,<br>29,30,31,3<br>4 | 5 | P55314,Q4FZU2,Q6IFW6,Q6IG02,Q6P6Q2               |
| 5759 | 1,3,4,6,27,<br>32,34,35 | 2,5,7,8,28,<br>29,30,31,3<br>3 | 2 | Q10758,Q4FZU2                                    |
| 5760 | 1,3,4,6,27,<br>33,34,35 | 2,5,7,8,28,<br>29,30,31,3<br>2 | 3 | B0BNN3,Q4FZU2,Q63355                             |
| 5761 | 1,3,4,6,28,<br>29,30,31 | 2,5,7,8,27,<br>32,33,34,3<br>5 | 4 | P01681,P01835,P02625,P06911                      |
| 5762 | 1,3,4,6,28,<br>29,30,32 | 2,5,7,8,27,<br>31,33,34,3<br>5 | 4 | O08815,P01681,P01835,P04905                      |
| 5763 | 1,3,4,6,28,<br>29,30,33 | 2,5,7,8,27,<br>31,32,34,3<br>5 | 3 | O08815,P01681,P01835                             |

|      |                         |                                |   |                                           |
|------|-------------------------|--------------------------------|---|-------------------------------------------|
| 5764 | 1,3,4,6,28,<br>29,30,34 | 2,5,7,8,27,<br>31,32,33,3<br>5 | 3 | P01681,P01835,P27791                      |
| 5765 | 1,3,4,6,28,<br>29,30,35 | 2,5,7,8,27,<br>31,32,33,3<br>4 | 3 | B0BNN3,P01681,P01835                      |
| 5766 | 1,3,4,6,28,<br>29,31,32 | 2,5,7,8,27,<br>30,33,34,3<br>5 | 3 | P01681,P04905,P06911                      |
| 5767 | 1,3,4,6,28,<br>29,31,33 | 2,5,7,8,27,<br>30,32,34,3<br>5 | 4 | O35547,P01681,P06911,P83121               |
| 5768 | 1,3,4,6,28,<br>29,31,34 | 2,5,7,8,27,<br>30,32,33,3<br>5 | 3 | P01681,P27791,Q9QW07                      |
| 5769 | 1,3,4,6,28,<br>29,31,35 | 2,5,7,8,27,<br>30,32,33,3<br>4 | 3 | B0BNN3,P01681,P06760                      |
| 5770 | 1,3,4,6,28,<br>29,32,33 | 2,5,7,8,27,<br>30,31,34,3<br>5 | 4 | P01681,P04905,P47727,P55314               |
| 5771 | 1,3,4,6,28,<br>29,32,34 | 2,5,7,8,27,<br>30,31,33,3<br>5 | 4 | P01681,P27791,Q5HZV9,Q99MH3               |
| 5772 | 1,3,4,6,28,<br>29,32,35 | 2,5,7,8,27,<br>30,31,33,3<br>4 | 1 | P01681                                    |
| 5773 | 1,3,4,6,28,<br>29,33,34 | 2,5,7,8,27,<br>30,31,32,3<br>5 | 2 | P01681,P27791                             |
| 5774 | 1,3,4,6,28,<br>29,33,35 | 2,5,7,8,27,<br>30,31,32,3<br>4 | 3 | B0BNN3,P01681,P15399                      |
| 5775 | 1,3,4,6,28,<br>29,34,35 | 2,5,7,8,27,<br>30,31,32,3<br>3 | 6 | B0BNN3,P00507,P01681,P12785,Q5HZV9,Q9QW07 |
| 5776 | 1,3,4,6,28,<br>30,31,32 | 2,5,7,8,27,<br>29,33,34,3<br>5 | 2 | P01681,P02625                             |
| 5777 | 1,3,4,6,28,<br>30,31,33 | 2,5,7,8,27,<br>29,32,34,3<br>5 | 1 | P02625                                    |
| 5778 | 1,3,4,6,28,<br>30,31,34 | 2,5,7,8,27,<br>29,32,33,3<br>5 | 2 | P02625,Q5HZV9                             |



|      |                         |                                |   |                                                         |
|------|-------------------------|--------------------------------|---|---------------------------------------------------------|
| 5779 | 1,3,4,6,28,<br>30,31,35 | 2,5,7,8,27,<br>29,32,33,3<br>4 | 4 | B0BNN3,P01681,P06760,P27590                             |
| 5780 | 1,3,4,6,28,<br>30,32,33 | 2,5,7,8,27,<br>29,31,34,3<br>5 | 2 | P01681,P55314                                           |
| 5781 | 1,3,4,6,28,<br>30,32,34 | 2,5,7,8,27,<br>29,31,33,3<br>5 | 2 | P01681,Q5HZV9                                           |
| 5782 | 1,3,4,6,28,<br>30,32,35 | 2,5,7,8,27,<br>29,31,33,3<br>4 | 2 | P01681,P01835                                           |
| 5783 | 1,3,4,6,28,<br>30,33,34 | 2,5,7,8,27,<br>29,31,32,3<br>5 | 1 | B0BNN3                                                  |
| 5784 | 1,3,4,6,28,<br>30,33,35 | 2,5,7,8,27,<br>29,31,32,3<br>4 | 2 | B0BNN3,P01681                                           |
| 5785 | 1,3,4,6,28,<br>30,34,35 | 2,5,7,8,27,<br>29,31,32,3<br>3 | 7 | B0BNN3,P00507,P01681,P02793;Q7TP54,Q5HZV9,Q8CJD3,Q920G2 |
| 5786 | 1,3,4,6,28,<br>31,32,33 | 2,5,7,8,27,<br>29,30,34,3<br>5 | 2 | P06911,P55314                                           |
| 5787 | 1,3,4,6,28,<br>31,32,34 | 2,5,7,8,27,<br>29,30,33,3<br>5 | 1 | Q5HZV9                                                  |
| 5788 | 1,3,4,6,28,<br>31,32,35 | 2,5,7,8,27,<br>29,30,33,3<br>4 | 1 | P01681                                                  |
| 5789 | 1,3,4,6,28,<br>31,33,34 | 2,5,7,8,27,<br>29,30,32,3<br>5 | 2 | P02625,P27791                                           |
| 5790 | 1,3,4,6,28,<br>31,33,35 | 2,5,7,8,27,<br>29,30,32,3<br>4 | 6 | B0BNN3,P01681,P06760,P15399,P62804,Q00715               |
| 5791 | 1,3,4,6,28,<br>31,34,35 | 2,5,7,8,27,<br>29,30,32,3<br>3 | 6 | B0BNN3,P00507,P01681,P12785,P62804,Q5HZV9               |
| 5792 | 1,3,4,6,28,<br>32,33,34 | 2,5,7,8,27,<br>29,30,31,3<br>5 | 3 | P55314,Q4FZU2,Q5HZV9                                    |
| 5793 | 1,3,4,6,28,<br>32,33,35 | 2,5,7,8,27,<br>29,30,31,3<br>4 | 3 | P01681,P15399,P55314                                    |

|      |                         |                                |   |                                                  |
|------|-------------------------|--------------------------------|---|--------------------------------------------------|
| 5794 | 1,3,4,6,28,<br>32,34,35 | 2,5,7,8,27,<br>29,30,31,3<br>3 | 4 | P00507,P01681,P12785,Q5HZV9                      |
| 5795 | 1,3,4,6,28,<br>33,34,35 | 2,5,7,8,27,<br>29,30,31,3<br>2 | 7 | B0BNN3,O55145,P00507,P01681,P12785,P62804,Q5HZV9 |
| 5796 | 1,3,4,6,29,<br>30,31,32 | 2,5,7,8,27,<br>28,33,34,3<br>5 | 1 | P02625                                           |
| 5797 | 1,3,4,6,29,<br>30,31,33 | 2,5,7,8,27,<br>28,32,34,3<br>5 | 3 | B0BNN3,P02625,P83121                             |
| 5798 | 1,3,4,6,29,<br>30,31,34 | 2,5,7,8,27,<br>28,32,33,3<br>5 | 3 | B0BNN3,P02625,Q99MH3                             |
| 5799 | 1,3,4,6,29,<br>30,31,35 | 2,5,7,8,27,<br>28,32,33,3<br>4 | 2 | B0BNN3,P01681                                    |
| 5800 | 1,3,4,6,29,<br>30,32,33 | 2,5,7,8,27,<br>28,31,34,3<br>5 | 1 | P55314                                           |
| 5801 | 1,3,4,6,29,<br>30,32,34 | 2,5,7,8,27,<br>28,31,33,3<br>5 | 1 | Q99MH3                                           |
| 5802 | 1,3,4,6,29,<br>30,32,35 | 2,5,7,8,27,<br>28,31,33,3<br>4 | 2 | P01681,P01835                                    |
| 5803 | 1,3,4,6,29,<br>30,33,34 | 2,5,7,8,27,<br>28,31,32,3<br>5 | 1 | B0BNN3                                           |
| 5804 | 1,3,4,6,29,<br>30,33,35 | 2,5,7,8,27,<br>28,31,32,3<br>4 | 2 | B0BNN3,P01681                                    |
| 5805 | 1,3,4,6,29,<br>30,34,35 | 2,5,7,8,27,<br>28,31,32,3<br>3 | 5 | B0BNN3,P01681,P02793,Q7TP54,P14480,Q99MH3        |
| 5806 | 1,3,4,6,29,<br>31,32,33 | 2,5,7,8,27,<br>28,30,34,3<br>5 | 2 | P55314,Q8CJD3                                    |
| 5807 | 1,3,4,6,29,<br>31,32,34 | 2,5,7,8,27,<br>28,30,33,3<br>5 | 1 | Q99MH3                                           |
| 5808 | 1,3,4,6,29,<br>31,32,35 | 2,5,7,8,27,<br>28,30,33,3<br>4 | 0 |                                                  |

|      |                         |                                |   |                                                  |
|------|-------------------------|--------------------------------|---|--------------------------------------------------|
| 5809 | 1,3,4,6,29,<br>31,33,34 | 2,5,7,8,27,<br>28,30,32,3<br>5 | 2 | B0BNN3,P02625                                    |
| 5810 | 1,3,4,6,29,<br>31,33,35 | 2,5,7,8,27,<br>28,30,32,3<br>4 | 2 | B0BNN3,P15399                                    |
| 5811 | 1,3,4,6,29,<br>31,34,35 | 2,5,7,8,27,<br>28,30,32,3<br>3 | 1 | B0BNN3                                           |
| 5812 | 1,3,4,6,29,<br>32,33,34 | 2,5,7,8,27,<br>28,30,31,3<br>5 | 2 | P55314,Q99MH3                                    |
| 5813 | 1,3,4,6,29,<br>32,33,35 | 2,5,7,8,27,<br>28,30,31,3<br>4 | 2 | P15399,P55314                                    |
| 5814 | 1,3,4,6,29,<br>32,34,35 | 2,5,7,8,27,<br>28,30,31,3<br>3 | 2 | P01681,Q99MH3                                    |
| 5815 | 1,3,4,6,29,<br>33,34,35 | 2,5,7,8,27,<br>28,30,31,3<br>2 | 2 | B0BNN3,O55145                                    |
| 5816 | 1,3,4,6,30,<br>31,32,33 | 2,5,7,8,27,<br>28,29,34,3<br>5 | 2 | P02625,P55314                                    |
| 5817 | 1,3,4,6,30,<br>31,32,34 | 2,5,7,8,27,<br>28,29,33,3<br>5 | 1 | P02625                                           |
| 5818 | 1,3,4,6,30,<br>31,32,35 | 2,5,7,8,27,<br>28,29,33,3<br>4 | 0 |                                                  |
| 5819 | 1,3,4,6,30,<br>31,33,34 | 2,5,7,8,27,<br>28,29,32,3<br>5 | 2 | B0BNN3,P02625                                    |
| 5820 | 1,3,4,6,30,<br>31,33,35 | 2,5,7,8,27,<br>28,29,32,3<br>4 | 2 | B0BNN3,P02625                                    |
| 5821 | 1,3,4,6,30,<br>31,34,35 | 2,5,7,8,27,<br>28,29,32,3<br>3 | 6 | B0BNN3,P02625,P02793,Q7TP54,P24368,P82471,P82995 |
| 5822 | 1,3,4,6,30,<br>32,33,34 | 2,5,7,8,27,<br>28,29,31,3<br>5 | 1 | P55314                                           |
| 5823 | 1,3,4,6,30,<br>32,33,35 | 2,5,7,8,27,<br>28,29,31,3<br>4 | 2 | B0BNN3,P55314                                    |

|      |                         |                                 |   |                                    |
|------|-------------------------|---------------------------------|---|------------------------------------|
| 5824 | 1,3,4,6,30,<br>32,34,35 | 2,5,7,8,27,<br>28,29,31,3<br>3  | 3 | B0BNN3,P82471,P82995               |
| 5825 | 1,3,4,6,30,<br>33,34,35 | 2,5,7,8,27,<br>28,29,31,3<br>2  | 3 | B0BNN3,P82471,P82995               |
| 5826 | 1,3,4,6,31,<br>32,33,34 | 2,5,7,8,27,<br>28,29,30,3<br>5  | 2 | P02625,P55314                      |
| 5827 | 1,3,4,6,31,<br>32,33,35 | 2,5,7,8,27,<br>28,29,30,3<br>4  | 5 | P15399,P55314,P82995,P97580,Q30KJ2 |
| 5828 | 1,3,4,6,31,<br>32,34,35 | 2,5,7,8,27,<br>28,29,30,3<br>3  | 2 | P82471,P82995                      |
| 5829 | 1,3,4,6,31,<br>33,34,35 | 2,5,7,8,27,<br>28,29,30,3<br>2  | 4 | B0BNN3,P82471,P82995,Q63355        |
| 5830 | 1,3,4,6,32,<br>33,34,35 | 2,5,7,8,27,<br>28,29,30,3<br>1  | 5 | B0BNN3,P55314,P82471,P82995,Q4FZU2 |
| 5831 | 1,3,4,7,8,2<br>7,28,29  | 2,5,6,30,3<br>1,32,33,34<br>,35 | 5 | P08723,Q63617,Q8CJ52,Q9JI85,Q9ROT3 |
| 5832 | 1,3,4,7,8,2<br>7,28,30  | 2,5,6,29,3<br>1,32,33,34<br>,35 | 0 |                                    |
| 5833 | 1,3,4,7,8,2<br>7,28,31  | 2,5,6,29,3<br>0,32,33,34<br>,35 | 4 | O54728,P10715,P31044,Q5GRG2        |
| 5834 | 1,3,4,7,8,2<br>7,28,32  | 2,5,6,29,3<br>0,31,33,34<br>,35 | 1 | P00714                             |
| 5835 | 1,3,4,7,8,2<br>7,28,33  | 2,5,6,29,3<br>0,31,32,34<br>,35 | 5 | P18418,Q63617,Q99041,Q9QUL6,Q9ROT3 |
| 5836 | 1,3,4,7,8,2<br>7,28,34  | 2,5,6,29,3<br>0,31,32,33<br>,35 | 4 | O54728,P04182,P18418,Q62894        |
| 5837 | 1,3,4,7,8,2<br>7,28,35  | 2,5,6,29,3<br>0,31,32,33<br>,34 | 1 | P02770                             |
| 5838 | 1,3,4,7,8,2<br>7,29,30  | 2,5,6,28,3<br>1,32,33,34<br>,35 | 2 | Q5HZV9,Q63617                      |

|      |                        |                                 |   |                                                                |
|------|------------------------|---------------------------------|---|----------------------------------------------------------------|
| 5839 | 1,3,4,7,8,2<br>7,29,31 | 2,5,6,28,3<br>0,32,33,34<br>,35 | 3 | P36970,Q5HZV9,Q63617                                           |
| 5840 | 1,3,4,7,8,2<br>7,29,32 | 2,5,6,28,3<br>0,31,33,34<br>,35 | 3 | P00714,Q63617,Q8CJD3                                           |
| 5841 | 1,3,4,7,8,2<br>7,29,33 | 2,5,6,28,3<br>0,31,32,34<br>,35 | 6 | P36970,Q5HZV9,Q63617,Q8CJD3,Q99041,Q9QUL6                      |
| 5842 | 1,3,4,7,8,2<br>7,29,34 | 2,5,6,28,3<br>0,31,32,33<br>,35 | 1 | Q63617                                                         |
| 5843 | 1,3,4,7,8,2<br>7,29,35 | 2,5,6,28,3<br>0,31,32,33<br>,34 | 4 | P01946,P02091,P02770,Q63617                                    |
| 5844 | 1,3,4,7,8,2<br>7,30,31 | 2,5,6,28,2<br>9,32,33,34<br>,35 | 2 | P02625,P36970                                                  |
| 5845 | 1,3,4,7,8,2<br>7,30,32 | 2,5,6,28,2<br>9,31,33,34<br>,35 | 2 | P00714,Q09030                                                  |
| 5846 | 1,3,4,7,8,2<br>7,30,33 | 2,5,6,28,2<br>9,31,32,34<br>,35 | 1 | Q9QUL6                                                         |
| 5847 | 1,3,4,7,8,2<br>7,30,34 | 2,5,6,28,2<br>9,31,32,33<br>,35 | 3 | P47967,Q09030,Q62894                                           |
| 5848 | 1,3,4,7,8,2<br>7,30,35 | 2,5,6,28,2<br>9,31,32,33<br>,34 | 1 | P02770                                                         |
| 5849 | 1,3,4,7,8,2<br>7,31,32 | 2,5,6,28,2<br>9,30,33,34<br>,35 | 3 | P00714,Q08849,Q8CJD3                                           |
| 5850 | 1,3,4,7,8,2<br>7,31,33 | 2,5,6,28,2<br>9,30,32,34<br>,35 | 4 | P02625,P36970,Q99041,Q9QUL6                                    |
| 5851 | 1,3,4,7,8,2<br>7,31,34 | 2,5,6,28,2<br>9,30,32,33<br>,35 | 2 | A2RUV9,P02625                                                  |
| 5852 | 1,3,4,7,8,2<br>7,31,35 | 2,5,6,28,2<br>9,30,32,33<br>,34 | 2 | O70417,P02770                                                  |
| 5853 | 1,3,4,7,8,2<br>7,32,33 | 2,5,6,28,2<br>9,30,31,34<br>,35 | 8 | P00714,P02793,Q7TP54,P55314,Q08849,Q63617,Q8CJD3,Q99041,Q9QUL6 |

|      |                        |                                 |   |                                           |
|------|------------------------|---------------------------------|---|-------------------------------------------|
| 5854 | 1,3,4,7,8,2<br>7,32,34 | 2,5,6,28,2<br>9,30,31,33<br>,35 | 4 | P00714,Q08849,Q09030,Q62894               |
| 5855 | 1,3,4,7,8,2<br>7,32,35 | 2,5,6,28,2<br>9,30,31,33<br>,34 | 4 | P00714,P02770,Q08849,Q9QX79               |
| 5856 | 1,3,4,7,8,2<br>7,33,34 | 2,5,6,28,2<br>9,30,31,32<br>,35 | 3 | Q62894,Q99041,Q9QUL6                      |
| 5857 | 1,3,4,7,8,2<br>7,33,35 | 2,5,6,28,2<br>9,30,31,32<br>,34 | 1 | P02770                                    |
| 5858 | 1,3,4,7,8,2<br>7,34,35 | 2,5,6,28,2<br>9,30,31,32<br>,33 | 6 | P01026,P02770,P09006,P35467,Q561R9,Q62894 |
| 5859 | 1,3,4,7,8,2<br>8,29,30 | 2,5,6,27,3<br>1,32,33,34<br>,35 | 2 | Q63617,Q8CJ52                             |
| 5860 | 1,3,4,7,8,2<br>8,29,31 | 2,5,6,27,3<br>0,32,33,34<br>,35 | 4 | O54728,P06911,Q5GRG2,Q63617               |
| 5861 | 1,3,4,7,8,2<br>8,29,32 | 2,5,6,27,3<br>0,31,33,34<br>,35 | 1 | Q63617                                    |
| 5862 | 1,3,4,7,8,2<br>8,29,33 | 2,5,6,27,3<br>0,31,32,34<br>,35 | 3 | Q63617,Q99041,Q9QUL6                      |
| 5863 | 1,3,4,7,8,2<br>8,29,34 | 2,5,6,27,3<br>0,31,32,33<br>,35 | 2 | O54728,Q63617                             |
| 5864 | 1,3,4,7,8,2<br>8,29,35 | 2,5,6,27,3<br>0,31,32,33<br>,34 | 3 | P02091,P02770,Q63617                      |
| 5865 | 1,3,4,7,8,2<br>8,30,31 | 2,5,6,27,2<br>9,32,33,34<br>,35 | 2 | O54728,P42854                             |
| 5866 | 1,3,4,7,8,2<br>8,30,32 | 2,5,6,27,2<br>9,31,33,34<br>,35 | 1 | P00714                                    |
| 5867 | 1,3,4,7,8,2<br>8,30,33 | 2,5,6,27,2<br>9,31,32,34<br>,35 | 1 | Q9QUL6                                    |
| 5868 | 1,3,4,7,8,2<br>8,30,34 | 2,5,6,27,2<br>9,31,32,33<br>,35 | 3 | O54728,P47967,Q62894                      |

|      |                        |                                 |   |                                           |
|------|------------------------|---------------------------------|---|-------------------------------------------|
| 5869 | 1,3,4,7,8,2<br>8,30,35 | 2,5,6,27,2<br>9,31,32,33<br>,34 | 1 | P02770                                    |
| 5870 | 1,3,4,7,8,2<br>8,31,32 | 2,5,6,27,2<br>9,30,33,34<br>,35 | 3 | O54728,P10715,P31044                      |
| 5871 | 1,3,4,7,8,2<br>8,31,33 | 2,5,6,27,2<br>9,30,32,34<br>,35 | 5 | O54728,P06760,P10715,Q8VD89,Q9QUL6        |
| 5872 | 1,3,4,7,8,2<br>8,31,34 | 2,5,6,27,2<br>9,30,32,33<br>,35 | 2 | O54728,Q62894                             |
| 5873 | 1,3,4,7,8,2<br>8,31,35 | 2,5,6,27,2<br>9,30,32,33<br>,34 | 5 | O54728,P02770,P06760,P62804,Q00715        |
| 5874 | 1,3,4,7,8,2<br>8,32,33 | 2,5,6,27,2<br>9,30,31,34<br>,35 | 2 | Q99041,Q9QUL6                             |
| 5875 | 1,3,4,7,8,2<br>8,32,34 | 2,5,6,27,2<br>9,30,31,33<br>,35 | 2 | O54728,Q62894                             |
| 5876 | 1,3,4,7,8,2<br>8,32,35 | 2,5,6,27,2<br>9,30,31,33<br>,34 | 1 | P02770                                    |
| 5877 | 1,3,4,7,8,2<br>8,33,34 | 2,5,6,27,2<br>9,30,31,32<br>,35 | 4 | O54728,Q62894,Q99041,Q9QUL6               |
| 5878 | 1,3,4,7,8,2<br>8,33,35 | 2,5,6,27,2<br>9,30,31,32<br>,34 | 3 | P02770,P06760,P62804                      |
| 5879 | 1,3,4,7,8,2<br>8,34,35 | 2,5,6,27,2<br>9,30,31,32<br>,33 | 6 | O54728,P02770,P09006,P62804,Q62894,Q6AY61 |
| 5880 | 1,3,4,7,8,2<br>9,30,31 | 2,5,6,27,2<br>8,32,33,34<br>,35 | 3 | Q4FZU6,Q5HZV9,Q6IFU7                      |
| 5881 | 1,3,4,7,8,2<br>9,30,32 | 2,5,6,27,2<br>8,31,33,34<br>,35 | 1 | Q63617                                    |
| 5882 | 1,3,4,7,8,2<br>9,30,33 | 2,5,6,27,2<br>8,31,32,34<br>,35 | 3 | Q5HZV9,Q63617,Q9QUL6                      |
| 5883 | 1,3,4,7,8,2<br>9,30,34 | 2,5,6,27,2<br>8,31,32,33<br>,35 | 0 |                                           |

|      |                        |                                 |   |                                           |
|------|------------------------|---------------------------------|---|-------------------------------------------|
| 5884 | 1,3,4,7,8,2<br>9,30,35 | 2,5,6,27,2<br>8,31,32,33<br>,34 | 2 | P02770,Q6IFU7                             |
| 5885 | 1,3,4,7,8,2<br>9,31,32 | 2,5,6,27,2<br>8,30,33,34<br>,35 | 2 | Q63617,Q8CJD3                             |
| 5886 | 1,3,4,7,8,2<br>9,31,33 | 2,5,6,27,2<br>8,30,32,34<br>,35 | 6 | P36970,Q5HZV9,Q63617,Q6IFU7,Q8CJD3,Q9QUL6 |
| 5887 | 1,3,4,7,8,2<br>9,31,34 | 2,5,6,27,2<br>8,30,32,33<br>,35 | 1 | Q6IFU7                                    |
| 5888 | 1,3,4,7,8,2<br>9,31,35 | 2,5,6,27,2<br>8,30,32,33<br>,34 | 4 | P02091,P02770,Q63617,Q6IFU7               |
| 5889 | 1,3,4,7,8,2<br>9,32,33 | 2,5,6,27,2<br>8,30,31,34<br>,35 | 4 | P02793;Q7TP54,Q63617,Q8CJD3,Q9QUL6        |
| 5890 | 1,3,4,7,8,2<br>9,32,34 | 2,5,6,27,2<br>8,30,31,33<br>,35 | 1 | Q63617                                    |
| 5891 | 1,3,4,7,8,2<br>9,32,35 | 2,5,6,27,2<br>8,30,31,33<br>,34 | 1 | Q63617                                    |
| 5892 | 1,3,4,7,8,2<br>9,33,34 | 2,5,6,27,2<br>8,30,31,32<br>,35 | 4 | Q62894,Q63617,Q99041,Q9QUL6               |
| 5893 | 1,3,4,7,8,2<br>9,33,35 | 2,5,6,27,2<br>8,30,31,32<br>,34 | 4 | P02091,P02770,Q63617,Q9QUL6               |
| 5894 | 1,3,4,7,8,2<br>9,34,35 | 2,5,6,27,2<br>8,30,31,32<br>,33 | 3 | P02091,P02770,P09006                      |
| 5895 | 1,3,4,7,8,3<br>0,31,32 | 2,5,6,27,2<br>8,29,33,34<br>,35 | 2 | P42854,Q4FZU6                             |
| 5896 | 1,3,4,7,8,3<br>0,31,33 | 2,5,6,27,2<br>8,29,32,34<br>,35 | 4 | P36970,Q4FZU6,Q8VD89,Q9QUL6               |
| 5897 | 1,3,4,7,8,3<br>0,31,34 | 2,5,6,27,2<br>8,29,32,33<br>,35 | 3 | P47967,Q62894,Q80WL1                      |
| 5898 | 1,3,4,7,8,3<br>0,31,35 | 2,5,6,27,2<br>8,29,32,33<br>,34 | 5 | P02770,P97584,Q4FZU6,Q6IFU7,Q80WL1        |



|      |                        |                                 |   |                                           |
|------|------------------------|---------------------------------|---|-------------------------------------------|
| 5899 | 1,3,4,7,8,3<br>0,32,33 | 2,5,6,27,2<br>8,29,31,34<br>,35 | 1 | Q9QUL6                                    |
| 5900 | 1,3,4,7,8,3<br>0,32,34 | 2,5,6,27,2<br>8,29,31,33<br>,35 | 1 | Q62894                                    |
| 5901 | 1,3,4,7,8,3<br>0,32,35 | 2,5,6,27,2<br>8,29,31,33<br>,34 | 1 | P02770                                    |
| 5902 | 1,3,4,7,8,3<br>0,33,34 | 2,5,6,27,2<br>8,29,31,32<br>,35 | 3 | Q62894,Q99041,Q9QUL6                      |
| 5903 | 1,3,4,7,8,3<br>0,33,35 | 2,5,6,27,2<br>8,29,31,32<br>,34 | 3 | P02770,Q64268,Q9QUL6                      |
| 5904 | 1,3,4,7,8,3<br>0,34,35 | 2,5,6,27,2<br>8,29,31,32<br>,33 | 6 | P01026,P02770,P09006,P47727,Q62894,Q9JHB9 |
| 5905 | 1,3,4,7,8,3<br>1,32,33 | 2,5,6,27,2<br>8,29,30,34<br>,35 | 2 | Q8CJD3,Q9QUL6                             |
| 5906 | 1,3,4,7,8,3<br>1,32,34 | 2,5,6,27,2<br>8,29,30,33<br>,35 | 0 |                                           |
| 5907 | 1,3,4,7,8,3<br>1,32,35 | 2,5,6,27,2<br>8,29,30,33<br>,34 | 1 | P02770                                    |
| 5908 | 1,3,4,7,8,3<br>1,33,34 | 2,5,6,27,2<br>8,29,30,32<br>,35 | 4 | P01835,Q62894,Q99041,Q9QUL6               |
| 5909 | 1,3,4,7,8,3<br>1,33,35 | 2,5,6,27,2<br>8,29,30,32<br>,34 | 3 | P02770,Q8VD89,Q9QUL6                      |
| 5910 | 1,3,4,7,8,3<br>1,34,35 | 2,5,6,27,2<br>8,29,30,32<br>,33 | 4 | P02770,P08010,P09006,Q9JHB9               |
| 5911 | 1,3,4,7,8,3<br>2,33,34 | 2,5,6,27,2<br>8,29,30,31<br>,35 | 4 | P55314,Q62894,Q99041,Q9QUL6               |
| 5912 | 1,3,4,7,8,3<br>2,33,35 | 2,5,6,27,2<br>8,29,30,31<br>,34 | 1 | Q9QUL6                                    |
| 5913 | 1,3,4,7,8,3<br>2,34,35 | 2,5,6,27,2<br>8,29,30,31<br>,33 | 3 | P02770,P35467,Q62894                      |

|      |                         |                                 |   |                                    |
|------|-------------------------|---------------------------------|---|------------------------------------|
| 5914 | 1,3,4,7,8,3<br>3,34,35  | 2,5,6,27,2<br>8,29,30,31<br>,32 | 5 | O55145,P02770,P09006,Q62894,Q9JHB9 |
| 5915 | 1,3,4,7,27,<br>28,29,30 | 2,5,6,8,31,<br>32,33,34,3<br>5  | 3 | O08815,P08753,Q9JI85               |
| 5916 | 1,3,4,7,27,<br>28,29,31 | 2,5,6,8,30,<br>32,33,34,3<br>5  | 2 | P08753,Q5GRG2                      |
| 5917 | 1,3,4,7,27,<br>28,29,32 | 2,5,6,8,30,<br>31,33,34,3<br>5  | 4 | O08815,P02793;Q7TP54,P24368,Q9JI85 |
| 5918 | 1,3,4,7,27,<br>28,29,33 | 2,5,6,8,30,<br>31,32,34,3<br>5  | 4 | P02793;Q7TP54,P08723,P08753,Q9JI85 |
| 5919 | 1,3,4,7,27,<br>28,29,34 | 2,5,6,8,30,<br>31,32,33,3<br>5  | 2 | A2RUV9,P04182                      |
| 5920 | 1,3,4,7,27,<br>28,29,35 | 2,5,6,8,30,<br>31,32,33,3<br>4  | 2 | P01946,P02091                      |
| 5921 | 1,3,4,7,27,<br>28,30,31 | 2,5,6,8,29,<br>32,33,34,3<br>5  | 0 |                                    |
| 5922 | 1,3,4,7,27,<br>28,30,32 | 2,5,6,8,29,<br>31,33,34,3<br>5  | 1 | P00714                             |
| 5923 | 1,3,4,7,27,<br>28,30,33 | 2,5,6,8,29,<br>31,32,34,3<br>5  | 0 |                                    |
| 5924 | 1,3,4,7,27,<br>28,30,34 | 2,5,6,8,29,<br>31,32,33,3<br>5  | 2 | P04182,P47967                      |
| 5925 | 1,3,4,7,27,<br>28,30,35 | 2,5,6,8,29,<br>31,32,33,3<br>4  | 2 | P62804,Q5RLM2                      |
| 5926 | 1,3,4,7,27,<br>28,31,32 | 2,5,6,8,29,<br>30,33,34,3<br>5  | 1 | P05539                             |
| 5927 | 1,3,4,7,27,<br>28,31,33 | 2,5,6,8,29,<br>30,32,34,3<br>5  | 0 |                                    |
| 5928 | 1,3,4,7,27,<br>28,31,34 | 2,5,6,8,29,<br>30,32,33,3<br>5  | 3 | A2RUV9,O54728,P04182               |

|      |                         |                                |   |                                    |
|------|-------------------------|--------------------------------|---|------------------------------------|
| 5929 | 1,3,4,7,27,<br>28,31,35 | 2,5,6,8,29,<br>30,32,33,3<br>4 | 2 | P62804,Q00715                      |
| 5930 | 1,3,4,7,27,<br>28,32,33 | 2,5,6,8,29,<br>30,31,34,3<br>5 | 4 | P02793;Q7TP54,P55314,Q06000,Q6IG02 |
| 5931 | 1,3,4,7,27,<br>28,32,34 | 2,5,6,8,29,<br>30,31,33,3<br>5 | 2 | A2RUV9,P04182                      |
| 5932 | 1,3,4,7,27,<br>28,32,35 | 2,5,6,8,29,<br>30,31,33,3<br>4 | 0 |                                    |
| 5933 | 1,3,4,7,27,<br>28,33,34 | 2,5,6,8,29,<br>30,31,32,3<br>5 | 2 | P04182,Q5FVI6                      |
| 5934 | 1,3,4,7,27,<br>28,33,35 | 2,5,6,8,29,<br>30,31,32,3<br>4 | 1 | P62804                             |
| 5935 | 1,3,4,7,27,<br>28,34,35 | 2,5,6,8,29,<br>30,31,32,3<br>3 | 5 | A2RUV9,P04182,P12785,P62804,Q5FVI6 |
| 5936 | 1,3,4,7,27,<br>29,30,31 | 2,5,6,8,28,<br>32,33,34,3<br>5 | 0 |                                    |
| 5937 | 1,3,4,7,27,<br>29,30,32 | 2,5,6,8,28,<br>31,33,34,3<br>5 | 0 |                                    |
| 5938 | 1,3,4,7,27,<br>29,30,33 | 2,5,6,8,28,<br>31,32,34,3<br>5 | 0 |                                    |
| 5939 | 1,3,4,7,27,<br>29,30,34 | 2,5,6,8,28,<br>31,32,33,3<br>5 | 0 |                                    |
| 5940 | 1,3,4,7,27,<br>29,30,35 | 2,5,6,8,28,<br>31,32,33,3<br>4 | 2 | P01946,P02091                      |
| 5941 | 1,3,4,7,27,<br>29,31,32 | 2,5,6,8,28,<br>30,33,34,3<br>5 | 1 | P05539                             |
| 5942 | 1,3,4,7,27,<br>29,31,33 | 2,5,6,8,28,<br>30,32,34,3<br>5 | 0 |                                    |
| 5943 | 1,3,4,7,27,<br>29,31,34 | 2,5,6,8,28,<br>30,32,33,3<br>5 | 1 | A2RUV9                             |

|      |                         |                                |   |                                    |
|------|-------------------------|--------------------------------|---|------------------------------------|
| 5944 | 1,3,4,7,27,<br>29,31,35 | 2,5,6,8,28,<br>30,32,33,3<br>4 | 2 | P01946,P02091                      |
| 5945 | 1,3,4,7,27,<br>29,32,33 | 2,5,6,8,28,<br>30,31,34,3<br>5 | 3 | P02793;Q7TP54,P55314,Q8CJD3        |
| 5946 | 1,3,4,7,27,<br>29,32,34 | 2,5,6,8,28,<br>30,31,33,3<br>5 | 1 | P05539                             |
| 5947 | 1,3,4,7,27,<br>29,32,35 | 2,5,6,8,28,<br>30,31,33,3<br>4 | 2 | P01946,P02091                      |
| 5948 | 1,3,4,7,27,<br>29,33,34 | 2,5,6,8,28,<br>30,31,32,3<br>5 | 1 | Q5FVI6                             |
| 5949 | 1,3,4,7,27,<br>29,33,35 | 2,5,6,8,28,<br>30,31,32,3<br>4 | 2 | P01946,P02091                      |
| 5950 | 1,3,4,7,27,<br>29,34,35 | 2,5,6,8,28,<br>30,31,32,3<br>3 | 5 | P01946,P02091,P12785,Q561R9,Q5FVI6 |
| 5951 | 1,3,4,7,27,<br>30,31,32 | 2,5,6,8,28,<br>29,33,34,3<br>5 | 0 |                                    |
| 5952 | 1,3,4,7,27,<br>30,31,33 | 2,5,6,8,28,<br>29,32,34,3<br>5 | 2 | P02625,P51907                      |
| 5953 | 1,3,4,7,27,<br>30,31,34 | 2,5,6,8,28,<br>29,32,33,3<br>5 | 3 | A2RUV9,P02625,P47967               |
| 5954 | 1,3,4,7,27,<br>30,31,35 | 2,5,6,8,28,<br>29,32,33,3<br>4 | 0 |                                    |
| 5955 | 1,3,4,7,27,<br>30,32,33 | 2,5,6,8,28,<br>29,31,34,3<br>5 | 1 | P55314                             |
| 5956 | 1,3,4,7,27,<br>30,32,34 | 2,5,6,8,28,<br>29,31,33,3<br>5 | 2 | P02803,P47967                      |
| 5957 | 1,3,4,7,27,<br>30,32,35 | 2,5,6,8,28,<br>29,31,33,3<br>4 | 0 |                                    |
| 5958 | 1,3,4,7,27,<br>30,33,34 | 2,5,6,8,28,<br>29,31,32,3<br>5 | 2 | P47967,Q5FVI6                      |

|      |                         |                                |   |                             |
|------|-------------------------|--------------------------------|---|-----------------------------|
| 5959 | 1,3,4,7,27,<br>30,33,35 | 2,5,6,8,28,<br>29,31,32,3<br>4 | 0 |                             |
| 5960 | 1,3,4,7,27,<br>30,34,35 | 2,5,6,8,28,<br>29,31,32,3<br>3 | 4 | P06911,P47727,Q561R9,Q5FVI6 |
| 5961 | 1,3,4,7,27,<br>31,32,33 | 2,5,6,8,28,<br>29,30,34,3<br>5 | 3 | P05539,P55314,Q8CJD3        |
| 5962 | 1,3,4,7,27,<br>31,32,34 | 2,5,6,8,28,<br>29,30,33,3<br>5 | 2 | A2RUV9,P05539               |
| 5963 | 1,3,4,7,27,<br>31,32,35 | 2,5,6,8,28,<br>29,30,33,3<br>4 | 0 |                             |
| 5964 | 1,3,4,7,27,<br>31,33,34 | 2,5,6,8,28,<br>29,30,32,3<br>5 | 2 | A2RUV9,P02625               |
| 5965 | 1,3,4,7,27,<br>31,33,35 | 2,5,6,8,28,<br>29,30,32,3<br>4 | 2 | P62804,Q9WTT6               |
| 5966 | 1,3,4,7,27,<br>31,34,35 | 2,5,6,8,28,<br>29,30,32,3<br>3 | 3 | A2RUV9,P12785,Q561R9        |
| 5967 | 1,3,4,7,27,<br>32,33,34 | 2,5,6,8,28,<br>29,30,31,3<br>5 | 4 | P05539,P08649,P55314,Q4FZU2 |
| 5968 | 1,3,4,7,27,<br>32,33,35 | 2,5,6,8,28,<br>29,30,31,3<br>4 | 3 | P55314,Q6IG02,Q6NX65        |
| 5969 | 1,3,4,7,27,<br>32,34,35 | 2,5,6,8,28,<br>29,30,31,3<br>3 | 1 | A2RUV9                      |
| 5970 | 1,3,4,7,27,<br>33,34,35 | 2,5,6,8,28,<br>29,30,31,3<br>2 | 4 | P12785,Q561R9,Q5FVI6,Q62975 |
| 5971 | 1,3,4,7,28,<br>29,30,31 | 2,5,6,8,27,<br>32,33,34,3<br>5 | 2 | P06760,P08753               |
| 5972 | 1,3,4,7,28,<br>29,30,32 | 2,5,6,8,27,<br>31,33,34,3<br>5 | 2 | P01836,Q63355               |
| 5973 | 1,3,4,7,28,<br>29,30,33 | 2,5,6,8,27,<br>31,32,34,3<br>5 | 2 | P06760,P08753               |

|      |                         |                                |   |                             |
|------|-------------------------|--------------------------------|---|-----------------------------|
| 5974 | 1,3,4,7,28,<br>29,30,34 | 2,5,6,8,27,<br>31,32,33,3<br>5 | 2 | P01836,P06760               |
| 5975 | 1,3,4,7,28,<br>29,30,35 | 2,5,6,8,27,<br>31,32,33,3<br>4 | 4 | P01681,P02091,P06760,Q9Z1F2 |
| 5976 | 1,3,4,7,28,<br>29,31,32 | 2,5,6,8,27,<br>30,33,34,3<br>5 | 3 | P01836,P06911,Q5GRG2        |
| 5977 | 1,3,4,7,28,<br>29,31,33 | 2,5,6,8,27,<br>30,32,34,3<br>5 | 3 | P06760,P08753,P83121        |
| 5978 | 1,3,4,7,28,<br>29,31,34 | 2,5,6,8,27,<br>30,32,33,3<br>5 | 4 | O54728,P06760,P27791,Q9QW07 |
| 5979 | 1,3,4,7,28,<br>29,31,35 | 2,5,6,8,27,<br>30,32,33,3<br>4 | 4 | P02091,P06760,P62804,Q00715 |
| 5980 | 1,3,4,7,28,<br>29,32,33 | 2,5,6,8,27,<br>30,31,34,3<br>5 | 1 | P02793;Q7TP54               |
| 5981 | 1,3,4,7,28,<br>29,32,34 | 2,5,6,8,27,<br>30,31,33,3<br>5 | 1 | P01836                      |
| 5982 | 1,3,4,7,28,<br>29,32,35 | 2,5,6,8,27,<br>30,31,33,3<br>4 | 1 | P02091                      |
| 5983 | 1,3,4,7,28,<br>29,33,34 | 2,5,6,8,27,<br>30,31,32,3<br>5 | 2 | P06760,P27791               |
| 5984 | 1,3,4,7,28,<br>29,33,35 | 2,5,6,8,27,<br>30,31,32,3<br>4 | 4 | P02091,P06760,P62804,Q9WTT6 |
| 5985 | 1,3,4,7,28,<br>29,34,35 | 2,5,6,8,27,<br>30,31,32,3<br>3 | 4 | P02091,P06760,P12785,Q9QW07 |
| 5986 | 1,3,4,7,28,<br>30,31,32 | 2,5,6,8,27,<br>29,33,34,3<br>5 | 1 | P01836                      |
| 5987 | 1,3,4,7,28,<br>30,31,33 | 2,5,6,8,27,<br>29,32,34,3<br>5 | 3 | P06760,P51907,Q8VD89        |
| 5988 | 1,3,4,7,28,<br>30,31,34 | 2,5,6,8,27,<br>29,32,33,3<br>5 | 4 | O54728,P01836,P06760,P47967 |

|      |                         |                                |   |                                    |
|------|-------------------------|--------------------------------|---|------------------------------------|
| 5989 | 1,3,4,7,28,<br>30,31,35 | 2,5,6,8,27,<br>29,32,33,3<br>4 | 4 | P06760,P62804,Q00715,Q9Z1F2        |
| 5990 | 1,3,4,7,28,<br>30,32,33 | 2,5,6,8,27,<br>29,31,34,3<br>5 | 0 |                                    |
| 5991 | 1,3,4,7,28,<br>30,32,34 | 2,5,6,8,27,<br>29,31,33,3<br>5 | 2 | P01836,P47967                      |
| 5992 | 1,3,4,7,28,<br>30,32,35 | 2,5,6,8,27,<br>29,31,33,3<br>4 | 0 |                                    |
| 5993 | 1,3,4,7,28,<br>30,33,34 | 2,5,6,8,27,<br>29,31,32,3<br>5 | 2 | P06760,P47967                      |
| 5994 | 1,3,4,7,28,<br>30,33,35 | 2,5,6,8,27,<br>29,31,32,3<br>4 | 4 | P06760,P62804,Q9WTT6,Q9Z1F2        |
| 5995 | 1,3,4,7,28,<br>30,34,35 | 2,5,6,8,27,<br>29,31,32,3<br>3 | 5 | P06760,P62804,Q8CJD3,Q920G2,Q9Z1F2 |
| 5996 | 1,3,4,7,28,<br>31,32,33 | 2,5,6,8,27,<br>29,30,34,3<br>5 | 1 | Q9WTT6                             |
| 5997 | 1,3,4,7,28,<br>31,32,34 | 2,5,6,8,27,<br>29,30,33,3<br>5 | 3 | A2RUV9,O54728,P01836               |
| 5998 | 1,3,4,7,28,<br>31,32,35 | 2,5,6,8,27,<br>29,30,33,3<br>4 | 4 | P06760,P62804,Q00715,Q9WTT6        |
| 5999 | 1,3,4,7,28,<br>31,33,34 | 2,5,6,8,27,<br>29,30,32,3<br>5 | 3 | O54728,P06760,P62804               |
| 6000 | 1,3,4,7,28,<br>31,33,35 | 2,5,6,8,27,<br>29,30,32,3<br>4 | 5 | P06760,P62804,Q00715,Q8VD89,Q9WTT6 |
| 6001 | 1,3,4,7,28,<br>31,34,35 | 2,5,6,8,27,<br>29,30,32,3<br>3 | 4 | O54728,P06760,P12785,P62804        |
| 6002 | 1,3,4,7,28,<br>32,33,34 | 2,5,6,8,27,<br>29,30,31,3<br>5 | 1 | P55314                             |
| 6003 | 1,3,4,7,28,<br>32,33,35 | 2,5,6,8,27,<br>29,30,31,3<br>4 | 2 | P62804,Q9WTT6                      |

|      |                         |                                |   |                                           |
|------|-------------------------|--------------------------------|---|-------------------------------------------|
| 6004 | 1,3,4,7,28,<br>32,34,35 | 2,5,6,8,27,<br>29,30,31,3<br>3 | 2 | P12785,P62804                             |
| 6005 | 1,3,4,7,28,<br>33,34,35 | 2,5,6,8,27,<br>29,30,31,3<br>2 | 5 | O55145,P06760,P12785,P62804,Q5FVI6        |
| 6006 | 1,3,4,7,29,<br>30,31,32 | 2,5,6,8,27,<br>28,33,34,3<br>5 | 2 | P01836,Q4FZU6                             |
| 6007 | 1,3,4,7,29,<br>30,31,33 | 2,5,6,8,27,<br>28,32,34,3<br>5 | 4 | P06760,Q4FZU6,Q5HZV9,Q9WTT6               |
| 6008 | 1,3,4,7,29,<br>30,31,34 | 2,5,6,8,27,<br>28,32,33,3<br>5 | 0 |                                           |
| 6009 | 1,3,4,7,29,<br>30,31,35 | 2,5,6,8,27,<br>28,32,33,3<br>4 | 6 | P02091,P06760,P97584,Q4FZU6,Q9WTT6,Q9Z1F2 |
| 6010 | 1,3,4,7,29,<br>30,32,33 | 2,5,6,8,27,<br>28,31,34,3<br>5 | 1 | Q9WTT6                                    |
| 6011 | 1,3,4,7,29,<br>30,32,34 | 2,5,6,8,27,<br>28,31,33,3<br>5 | 1 | P01836                                    |
| 6012 | 1,3,4,7,29,<br>30,32,35 | 2,5,6,8,27,<br>28,31,33,3<br>4 | 1 | Q9WTT6                                    |
| 6013 | 1,3,4,7,29,<br>30,33,34 | 2,5,6,8,27,<br>28,31,32,3<br>5 | 0 |                                           |
| 6014 | 1,3,4,7,29,<br>30,33,35 | 2,5,6,8,27,<br>28,31,32,3<br>4 | 3 | P06760,Q9WTT6,Q9Z1F2                      |
| 6015 | 1,3,4,7,29,<br>30,34,35 | 2,5,6,8,27,<br>28,31,32,3<br>3 | 2 | P02091,P06760                             |
| 6016 | 1,3,4,7,29,<br>31,32,33 | 2,5,6,8,27,<br>28,30,34,3<br>5 | 3 | P02793,Q7TP54,Q8CJD3,Q9WTT6               |
| 6017 | 1,3,4,7,29,<br>31,32,34 | 2,5,6,8,27,<br>28,30,33,3<br>5 | 1 | P01836                                    |
| 6018 | 1,3,4,7,29,<br>31,32,35 | 2,5,6,8,27,<br>28,30,33,3<br>4 | 1 | Q9WTT6                                    |



|      |                         |                                |   |                                                  |
|------|-------------------------|--------------------------------|---|--------------------------------------------------|
| 6019 | 1,3,4,7,29,<br>31,33,34 | 2,5,6,8,27,<br>28,30,32,3<br>5 | 1 | P06760                                           |
| 6020 | 1,3,4,7,29,<br>31,33,35 | 2,5,6,8,27,<br>28,30,32,3<br>4 | 3 | P02091,P06760,Q9WTT6                             |
| 6021 | 1,3,4,7,29,<br>31,34,35 | 2,5,6,8,27,<br>28,30,32,3<br>3 | 2 | P02091,P06760                                    |
| 6022 | 1,3,4,7,29,<br>32,33,34 | 2,5,6,8,27,<br>28,30,31,3<br>5 | 1 | P55314                                           |
| 6023 | 1,3,4,7,29,<br>32,33,35 | 2,5,6,8,27,<br>28,30,31,3<br>4 | 1 | Q9WTT6                                           |
| 6024 | 1,3,4,7,29,<br>32,34,35 | 2,5,6,8,27,<br>28,30,31,3<br>3 | 1 | P02091                                           |
| 6025 | 1,3,4,7,29,<br>33,34,35 | 2,5,6,8,27,<br>28,30,31,3<br>2 | 4 | O55145,P02091,P06760,Q5FVI6                      |
| 6026 | 1,3,4,7,30,<br>31,32,33 | 2,5,6,8,27,<br>28,29,34,3<br>5 | 3 | Q4FZU6,Q9QUL6,Q9WTT6                             |
| 6027 | 1,3,4,7,30,<br>31,32,34 | 2,5,6,8,27,<br>28,29,33,3<br>5 | 1 | P01836                                           |
| 6028 | 1,3,4,7,30,<br>31,32,35 | 2,5,6,8,27,<br>28,29,33,3<br>4 | 3 | P97584,Q4FZU6,Q9WTT6                             |
| 6029 | 1,3,4,7,30,<br>31,33,34 | 2,5,6,8,27,<br>28,29,32,3<br>5 | 2 | P06760,P51907                                    |
| 6030 | 1,3,4,7,30,<br>31,33,35 | 2,5,6,8,27,<br>28,29,32,3<br>4 | 7 | P06760,P62804,P97584,Q4FZU6,Q8VD89,Q9WTT6,Q9Z1F2 |
| 6031 | 1,3,4,7,30,<br>31,34,35 | 2,5,6,8,27,<br>28,29,32,3<br>3 | 6 | P06760,P24368,P47727,P82471,Q9JHB9,Q9Z1F2        |
| 6032 | 1,3,4,7,30,<br>32,33,34 | 2,5,6,8,27,<br>28,29,31,3<br>5 | 2 | P02782,P55314                                    |
| 6033 | 1,3,4,7,30,<br>32,33,35 | 2,5,6,8,27,<br>28,29,31,3<br>4 | 1 | Q9WTT6                                           |

|      |                         |                                |   |                                                  |
|------|-------------------------|--------------------------------|---|--------------------------------------------------|
| 6034 | 1,3,4,7,30,<br>32,34,35 | 2,5,6,8,27,<br>28,29,31,3<br>3 | 2 | P02782,P82471                                    |
| 6035 | 1,3,4,7,30,<br>33,34,35 | 2,5,6,8,27,<br>28,29,31,3<br>2 | 7 | P02782,P06760,P06911,P82471,Q5FVI6,Q9JHB9,Q9Z1F2 |
| 6036 | 1,3,4,7,31,<br>32,33,34 | 2,5,6,8,27,<br>28,29,30,3<br>5 | 2 | P02782,P55314                                    |
| 6037 | 1,3,4,7,31,<br>32,33,35 | 2,5,6,8,27,<br>28,29,30,3<br>4 | 1 | Q9WTT6                                           |
| 6038 | 1,3,4,7,31,<br>32,34,35 | 2,5,6,8,27,<br>28,29,30,3<br>3 | 3 | P02782,P82471,Q9JHB9                             |
| 6039 | 1,3,4,7,31,<br>33,34,35 | 2,5,6,8,27,<br>28,29,30,3<br>2 | 7 | P02782,P06760,P08010,P60905,P62804,P82471,Q9JHB9 |
| 6040 | 1,3,4,7,32,<br>33,34,35 | 2,5,6,8,27,<br>28,29,30,3<br>1 | 4 | O55145,P02782,P55314,P82471                      |
| 6041 | 1,3,4,8,27,<br>28,29,30 | 2,5,6,7,31,<br>32,33,34,3<br>5 | 4 | P02781,P08723,P0C0A9,P83748                      |
| 6042 | 1,3,4,8,27,<br>28,29,31 | 2,5,6,7,30,<br>32,33,34,3<br>5 | 1 | P08723                                           |
| 6043 | 1,3,4,8,27,<br>28,29,32 | 2,5,6,7,30,<br>31,33,34,3<br>5 | 3 | P00714,P08723,P24368                             |
| 6044 | 1,3,4,8,27,<br>28,29,33 | 2,5,6,7,30,<br>31,32,34,3<br>5 | 5 | O35547,P02781,P08723,Q812E4,Q9QUL6               |
| 6045 | 1,3,4,8,27,<br>28,29,34 | 2,5,6,7,30,<br>31,32,33,3<br>5 | 1 | P04182                                           |
| 6046 | 1,3,4,8,27,<br>28,29,35 | 2,5,6,7,30,<br>31,32,33,3<br>4 | 3 | P01681,P01946,P97840                             |
| 6047 | 1,3,4,8,27,<br>28,30,31 | 2,5,6,7,29,<br>32,33,34,3<br>5 | 1 | P83748                                           |
| 6048 | 1,3,4,8,27,<br>28,30,32 | 2,5,6,7,29,<br>31,33,34,3<br>5 | 2 | P00714,P83748                                    |

|      |                         |                                |   |                                                  |
|------|-------------------------|--------------------------------|---|--------------------------------------------------|
| 6049 | 1,3,4,8,27,<br>28,30,33 | 2,5,6,7,29,<br>31,32,34,3<br>5 | 2 | P83748,Q9QUL6                                    |
| 6050 | 1,3,4,8,27,<br>28,30,34 | 2,5,6,7,29,<br>31,32,33,3<br>5 | 2 | P04182,Q62894                                    |
| 6051 | 1,3,4,8,27,<br>28,30,35 | 2,5,6,7,29,<br>31,32,33,3<br>4 | 2 | P01681,P83748                                    |
| 6052 | 1,3,4,8,27,<br>28,31,32 | 2,5,6,7,29,<br>30,33,34,3<br>5 | 0 |                                                  |
| 6053 | 1,3,4,8,27,<br>28,31,33 | 2,5,6,7,29,<br>30,32,34,3<br>5 | 1 | Q9QUL6                                           |
| 6054 | 1,3,4,8,27,<br>28,31,34 | 2,5,6,7,29,<br>30,32,33,3<br>5 | 3 | A2RUV9,P04182,Q62894                             |
| 6055 | 1,3,4,8,27,<br>28,31,35 | 2,5,6,7,29,<br>30,32,33,3<br>4 | 0 |                                                  |
| 6056 | 1,3,4,8,27,<br>28,32,33 | 2,5,6,7,29,<br>30,31,34,3<br>5 | 7 | P00714,P55314,P83748,Q4FZU2,Q6IG02,Q6P6Q2,Q9QUL6 |
| 6057 | 1,3,4,8,27,<br>28,32,34 | 2,5,6,7,29,<br>30,31,33,3<br>5 | 3 | P00714,P04182,Q62894                             |
| 6058 | 1,3,4,8,27,<br>28,32,35 | 2,5,6,7,29,<br>30,31,33,3<br>4 | 1 | P00714                                           |
| 6059 | 1,3,4,8,27,<br>28,33,34 | 2,5,6,7,29,<br>30,31,32,3<br>5 | 2 | P04182,Q62894                                    |
| 6060 | 1,3,4,8,27,<br>28,33,35 | 2,5,6,7,29,<br>30,31,32,3<br>4 | 2 | P97840,Q6IG02                                    |
| 6061 | 1,3,4,8,27,<br>28,34,35 | 2,5,6,7,29,<br>30,31,32,3<br>3 | 7 | P04182,P09006,P12785,P53792,Q561R9,Q62894,Q6AY61 |
| 6062 | 1,3,4,8,27,<br>29,30,31 | 2,5,6,7,28,<br>32,33,34,3<br>5 | 0 |                                                  |
| 6063 | 1,3,4,8,27,<br>29,30,32 | 2,5,6,7,28,<br>31,33,34,3<br>5 | 1 | P83748                                           |

|      |                         |                                |   |                                    |
|------|-------------------------|--------------------------------|---|------------------------------------|
| 6064 | 1,3,4,8,27,<br>29,30,33 | 2,5,6,7,28,<br>31,32,34,3<br>5 | 3 | P83748,Q5HZV9,Q9QUL6               |
| 6065 | 1,3,4,8,27,<br>29,30,34 | 2,5,6,7,28,<br>31,32,33,3<br>5 | 0 |                                    |
| 6066 | 1,3,4,8,27,<br>29,30,35 | 2,5,6,7,28,<br>31,32,33,3<br>4 | 3 | B0BNN3,P01946,P83748               |
| 6067 | 1,3,4,8,27,<br>29,31,32 | 2,5,6,7,28,<br>30,33,34,3<br>5 | 2 | P97840,Q8CJD3                      |
| 6068 | 1,3,4,8,27,<br>29,31,33 | 2,5,6,7,28,<br>30,32,34,3<br>5 | 4 | P36970,P97840,Q5HZV9,Q9QUL6        |
| 6069 | 1,3,4,8,27,<br>29,31,34 | 2,5,6,7,28,<br>30,32,33,3<br>5 | 1 | A2RUV9                             |
| 6070 | 1,3,4,8,27,<br>29,31,35 | 2,5,6,7,28,<br>30,32,33,3<br>4 | 2 | P01946,P97840                      |
| 6071 | 1,3,4,8,27,<br>29,32,33 | 2,5,6,7,28,<br>30,31,34,3<br>5 | 5 | P55314,P97840,Q6IG02,Q8CJD3,Q9QUL6 |
| 6072 | 1,3,4,8,27,<br>29,32,34 | 2,5,6,7,28,<br>30,31,33,3<br>5 | 0 |                                    |
| 6073 | 1,3,4,8,27,<br>29,32,35 | 2,5,6,7,28,<br>30,31,33,3<br>4 | 2 | P01946,P97840                      |
| 6074 | 1,3,4,8,27,<br>29,33,34 | 2,5,6,7,28,<br>30,31,32,3<br>5 | 1 | Q9QUL6                             |
| 6075 | 1,3,4,8,27,<br>29,33,35 | 2,5,6,7,28,<br>30,31,32,3<br>4 | 3 | B0BNN3,P01946,P97840               |
| 6076 | 1,3,4,8,27,<br>29,34,35 | 2,5,6,7,28,<br>30,31,32,3<br>3 | 4 | B0BNN3,P01946,P09006,Q561R9        |
| 6077 | 1,3,4,8,27,<br>30,31,32 | 2,5,6,7,28,<br>29,33,34,3<br>5 | 2 | P10758,P83748                      |
| 6078 | 1,3,4,8,27,<br>30,31,33 | 2,5,6,7,28,<br>29,32,34,3<br>5 | 4 | P02625,P10758,P83748,Q9QUL6        |

|      |                         |                                |   |                                                         |
|------|-------------------------|--------------------------------|---|---------------------------------------------------------|
| 6079 | 1,3,4,8,27,<br>30,31,34 | 2,5,6,7,28,<br>29,32,33,3<br>5 | 2 | A2RUV9,P02625                                           |
| 6080 | 1,3,4,8,27,<br>30,31,35 | 2,5,6,7,28,<br>29,32,33,3<br>4 | 1 | B0BNN3                                                  |
| 6081 | 1,3,4,8,27,<br>30,32,33 | 2,5,6,7,28,<br>29,31,34,3<br>5 | 3 | P55314,P83748,Q9QUL6                                    |
| 6082 | 1,3,4,8,27,<br>30,32,34 | 2,5,6,7,28,<br>29,31,33,3<br>5 | 1 | Q62894                                                  |
| 6083 | 1,3,4,8,27,<br>30,32,35 | 2,5,6,7,28,<br>29,31,33,3<br>4 | 1 | P83748                                                  |
| 6084 | 1,3,4,8,27,<br>30,33,34 | 2,5,6,7,28,<br>29,31,32,3<br>5 | 3 | B0BNN3,Q62894,Q9QUL6                                    |
| 6085 | 1,3,4,8,27,<br>30,33,35 | 2,5,6,7,28,<br>29,31,32,3<br>4 | 4 | B0BNN3,P83748,Q64268,Q9QUL6                             |
| 6086 | 1,3,4,8,27,<br>30,34,35 | 2,5,6,7,28,<br>29,31,32,3<br>3 | 7 | B0BNN3,P02793,Q7TP54,P06911,P09006,P35467,Q561R9,Q62894 |
| 6087 | 1,3,4,8,27,<br>31,32,33 | 2,5,6,7,28,<br>29,30,34,3<br>5 | 5 | P55314,Q08849,Q6IG02,Q8CJD3,Q9QUL6                      |
| 6088 | 1,3,4,8,27,<br>31,32,34 | 2,5,6,7,28,<br>29,30,33,3<br>5 | 2 | A2RUV9,Q08849                                           |
| 6089 | 1,3,4,8,27,<br>31,32,35 | 2,5,6,7,28,<br>29,30,33,3<br>4 | 3 | O70417,P97840,Q08849                                    |
| 6090 | 1,3,4,8,27,<br>31,33,34 | 2,5,6,7,28,<br>29,30,32,3<br>5 | 3 | A2RUV9,Q62894,Q9QUL6                                    |
| 6091 | 1,3,4,8,27,<br>31,33,35 | 2,5,6,7,28,<br>29,30,32,3<br>4 | 2 | B0BNN3,P97840                                           |
| 6092 | 1,3,4,8,27,<br>31,34,35 | 2,5,6,7,28,<br>29,30,32,3<br>3 | 5 | A2RUV9,B0BNN3,P09006,P35467,Q561R9                      |
| 6093 | 1,3,4,8,27,<br>32,33,34 | 2,5,6,7,28,<br>29,30,31,3<br>5 | 7 | P55314,Q08849,Q4FZU2,Q62894,Q6IG02,Q6P6Q2,Q9QUL6        |

|      |                         |                                |   |                                           |
|------|-------------------------|--------------------------------|---|-------------------------------------------|
| 6094 | 1,3,4,8,27,<br>32,33,35 | 2,5,6,7,28,<br>29,30,31,3<br>4 | 6 | P55314,P83748,P97840,Q08849,Q6IG02,Q9QUL6 |
| 6095 | 1,3,4,8,27,<br>32,34,35 | 2,5,6,7,28,<br>29,30,31,3<br>3 | 4 | P09006,P35467,P83121,Q62894               |
| 6096 | 1,3,4,8,27,<br>33,34,35 | 2,5,6,7,28,<br>29,30,31,3<br>2 | 6 | B0BNN3,O55145,P09006,P35467,Q561R9,Q62894 |
| 6097 | 1,3,4,8,28,<br>29,30,31 | 2,5,6,7,27,<br>32,33,34,3<br>5 | 0 |                                           |
| 6098 | 1,3,4,8,28,<br>29,30,32 | 2,5,6,7,27,<br>31,33,34,3<br>5 | 1 | P83748                                    |
| 6099 | 1,3,4,8,28,<br>29,30,33 | 2,5,6,7,27,<br>31,32,34,3<br>5 | 3 | P83748,Q9JID2,Q9QUL6                      |
| 6100 | 1,3,4,8,28,<br>29,30,34 | 2,5,6,7,27,<br>31,32,33,3<br>5 | 0 |                                           |
| 6101 | 1,3,4,8,28,<br>29,30,35 | 2,5,6,7,27,<br>31,32,33,3<br>4 | 2 | B0BNN3,P01681                             |
| 6102 | 1,3,4,8,28,<br>29,31,32 | 2,5,6,7,27,<br>30,33,34,3<br>5 | 1 | P06911                                    |
| 6103 | 1,3,4,8,28,<br>29,31,33 | 2,5,6,7,27,<br>30,32,34,3<br>5 | 2 | P97840,Q9QUL6                             |
| 6104 | 1,3,4,8,28,<br>29,31,34 | 2,5,6,7,27,<br>30,32,33,3<br>5 | 1 | Q9QW07                                    |
| 6105 | 1,3,4,8,28,<br>29,31,35 | 2,5,6,7,27,<br>30,32,33,3<br>4 | 1 | P97840                                    |
| 6106 | 1,3,4,8,28,<br>29,32,33 | 2,5,6,7,27,<br>30,31,34,3<br>5 | 3 | P35281,P97840,Q9QUL6                      |
| 6107 | 1,3,4,8,28,<br>29,32,34 | 2,5,6,7,27,<br>30,31,33,3<br>5 | 0 |                                           |
| 6108 | 1,3,4,8,28,<br>29,32,35 | 2,5,6,7,27,<br>30,31,33,3<br>4 | 3 | P01681,P19218,P97840                      |

|      |                         |                                |   |                                                                       |
|------|-------------------------|--------------------------------|---|-----------------------------------------------------------------------|
| 6109 | 1,3,4,8,28,<br>29,33,34 | 2,5,6,7,27,<br>30,31,32,3<br>5 | 2 | Q62894,Q9QUL6                                                         |
| 6110 | 1,3,4,8,28,<br>29,33,35 | 2,5,6,7,27,<br>30,31,32,3<br>4 | 2 | B0BNN3,P97840                                                         |
| 6111 | 1,3,4,8,28,<br>29,34,35 | 2,5,6,7,27,<br>30,31,32,3<br>3 | 5 | B0BNN3,P00507,P09006,Q6AY61,Q9QW07                                    |
| 6112 | 1,3,4,8,28,<br>30,31,32 | 2,5,6,7,27,<br>29,33,34,3<br>5 | 2 | P10758,P83748                                                         |
| 6113 | 1,3,4,8,28,<br>30,31,33 | 2,5,6,7,27,<br>29,32,34,3<br>5 | 1 | Q9QUL6                                                                |
| 6114 | 1,3,4,8,28,<br>30,31,34 | 2,5,6,7,27,<br>29,32,33,3<br>5 | 1 | Q62894                                                                |
| 6115 | 1,3,4,8,28,<br>30,31,35 | 2,5,6,7,27,<br>29,32,33,3<br>4 | 1 | B0BNN3                                                                |
| 6116 | 1,3,4,8,28,<br>30,32,33 | 2,5,6,7,27,<br>29,31,34,3<br>5 | 2 | P83748,Q9QUL6                                                         |
| 6117 | 1,3,4,8,28,<br>30,32,34 | 2,5,6,7,27,<br>29,31,33,3<br>5 | 1 | Q62894                                                                |
| 6118 | 1,3,4,8,28,<br>30,32,35 | 2,5,6,7,27,<br>29,31,33,3<br>4 | 1 | P83748                                                                |
| 6119 | 1,3,4,8,28,<br>30,33,34 | 2,5,6,7,27,<br>29,31,32,3<br>5 | 2 | Q62894,Q9QUL6                                                         |
| 6120 | 1,3,4,8,28,<br>30,33,35 | 2,5,6,7,27,<br>29,31,32,3<br>4 | 4 | B0BNN3,P83748,Q64268,Q9QUL6                                           |
| 6121 | 1,3,4,8,28,<br>30,34,35 | 2,5,6,7,27,<br>29,31,32,3<br>3 | 9 | B0BNN3,P00507,P02793,Q7TP54,P09006,P19132,Q62894,Q6AY61,Q8CJD3,Q920G2 |
| 6122 | 1,3,4,8,28,<br>31,32,33 | 2,5,6,7,27,<br>29,30,34,3<br>5 | 2 | P14480,Q9QUL6                                                         |
| 6123 | 1,3,4,8,28,<br>31,32,34 | 2,5,6,7,27,<br>29,30,33,3<br>5 | 1 | Q62894                                                                |

|      |                         |                                |   |                                    |
|------|-------------------------|--------------------------------|---|------------------------------------|
| 6124 | 1,3,4,8,28,<br>31,32,35 | 2,5,6,7,27,<br>29,30,33,3<br>4 | 1 | P97840                             |
| 6125 | 1,3,4,8,28,<br>31,33,34 | 2,5,6,7,27,<br>29,30,32,3<br>5 | 2 | Q62894,Q9QUL6                      |
| 6126 | 1,3,4,8,28,<br>31,33,35 | 2,5,6,7,27,<br>29,30,32,3<br>4 | 3 | B0BNN3,P06760,P97840               |
| 6127 | 1,3,4,8,28,<br>31,34,35 | 2,5,6,7,27,<br>29,30,32,3<br>3 | 4 | P00507,P09006,Q62894,Q6AY61        |
| 6128 | 1,3,4,8,28,<br>32,33,34 | 2,5,6,7,27,<br>29,30,31,3<br>5 | 4 | P05942,P55314,Q62894,Q9QUL6        |
| 6129 | 1,3,4,8,28,<br>32,33,35 | 2,5,6,7,27,<br>29,30,31,3<br>4 | 2 | P97840,Q9QUL6                      |
| 6130 | 1,3,4,8,28,<br>32,34,35 | 2,5,6,7,27,<br>29,30,31,3<br>3 | 5 | P00507,P09006,P35467,Q62894,Q6AY61 |
| 6131 | 1,3,4,8,28,<br>33,34,35 | 2,5,6,7,27,<br>29,30,31,3<br>2 | 5 | B0BNN3,O55145,P09006,Q62894,Q6AY61 |
| 6132 | 1,3,4,8,29,<br>30,31,32 | 2,5,6,7,27,<br>28,33,34,3<br>5 | 1 | P10758                             |
| 6133 | 1,3,4,8,29,<br>30,31,33 | 2,5,6,7,27,<br>28,32,34,3<br>5 | 2 | Q5HZV9,Q9QUL6                      |
| 6134 | 1,3,4,8,29,<br>30,31,34 | 2,5,6,7,27,<br>28,32,33,3<br>5 | 0 |                                    |
| 6135 | 1,3,4,8,29,<br>30,31,35 | 2,5,6,7,27,<br>28,32,33,3<br>4 | 2 | B0BNN3,Q4FZU6                      |
| 6136 | 1,3,4,8,29,<br>30,32,33 | 2,5,6,7,27,<br>28,31,34,3<br>5 | 2 | P83748,Q9QUL6                      |
| 6137 | 1,3,4,8,29,<br>30,32,34 | 2,5,6,7,27,<br>28,31,33,3<br>5 | 0 |                                    |
| 6138 | 1,3,4,8,29,<br>30,32,35 | 2,5,6,7,27,<br>28,31,33,3<br>4 | 1 | P83748                             |



|      |                         |                                |   |                             |
|------|-------------------------|--------------------------------|---|-----------------------------|
| 6139 | 1,3,4,8,29,<br>30,33,34 | 2,5,6,7,27,<br>28,31,32,3<br>5 | 3 | B0BNN3,Q62894,Q9QUL6        |
| 6140 | 1,3,4,8,29,<br>30,33,35 | 2,5,6,7,27,<br>28,31,32,3<br>4 | 3 | B0BNN3,Q64268,Q9QUL6        |
| 6141 | 1,3,4,8,29,<br>30,34,35 | 2,5,6,7,27,<br>28,31,32,3<br>3 | 3 | B0BNN3,P02793;Q7TP54,P09006 |
| 6142 | 1,3,4,8,29,<br>31,32,33 | 2,5,6,7,27,<br>28,30,34,3<br>5 | 3 | P97840,Q8CJD3,Q9QUL6        |
| 6143 | 1,3,4,8,29,<br>31,32,34 | 2,5,6,7,27,<br>28,30,33,3<br>5 | 0 |                             |
| 6144 | 1,3,4,8,29,<br>31,32,35 | 2,5,6,7,27,<br>28,30,33,3<br>4 | 1 | P97840                      |
| 6145 | 1,3,4,8,29,<br>31,33,34 | 2,5,6,7,27,<br>28,30,32,3<br>5 | 1 | Q9QUL6                      |
| 6146 | 1,3,4,8,29,<br>31,33,35 | 2,5,6,7,27,<br>28,30,32,3<br>4 | 3 | B0BNN3,P97840,Q9QUL6        |
| 6147 | 1,3,4,8,29,<br>31,34,35 | 2,5,6,7,27,<br>28,30,32,3<br>3 | 2 | B0BNN3,P09006               |
| 6148 | 1,3,4,8,29,<br>32,33,34 | 2,5,6,7,27,<br>28,30,31,3<br>5 | 3 | P55314,Q62894,Q9QUL6        |
| 6149 | 1,3,4,8,29,<br>32,33,35 | 2,5,6,7,27,<br>28,30,31,3<br>4 | 3 | P47967,P97840,Q9QUL6        |
| 6150 | 1,3,4,8,29,<br>32,34,35 | 2,5,6,7,27,<br>28,30,31,3<br>3 | 2 | P09006,P35467               |
| 6151 | 1,3,4,8,29,<br>33,34,35 | 2,5,6,7,27,<br>28,30,31,3<br>2 | 3 | B0BNN3,O55145,P09006        |
| 6152 | 1,3,4,8,30,<br>31,32,33 | 2,5,6,7,27,<br>28,29,34,3<br>5 | 3 | P10758,P83748,Q9QUL6        |
| 6153 | 1,3,4,8,30,<br>31,32,34 | 2,5,6,7,27,<br>28,29,33,3<br>5 | 2 | P10758,Q62894               |

|      |                          |                                |   |                                                         |
|------|--------------------------|--------------------------------|---|---------------------------------------------------------|
| 6154 | 1,3,4,8,30,<br>31,32,35  | 2,5,6,7,27,<br>28,29,33,3<br>4 | 0 |                                                         |
| 6155 | 1,3,4,8,30,<br>31,33,34  | 2,5,6,7,27,<br>28,29,32,3<br>5 | 3 | B0BNN3,Q62894,Q9QUL6                                    |
| 6156 | 1,3,4,8,30,<br>31,33,35  | 2,5,6,7,27,<br>28,29,32,3<br>4 | 3 | B0BNN3,Q64268,Q9QUL6                                    |
| 6157 | 1,3,4,8,30,<br>31,34,35  | 2,5,6,7,27,<br>28,29,32,3<br>3 | 5 | B0BNN3,P02793,Q7TP54,P09006,P82471,Q9JHB9               |
| 6158 | 1,3,4,8,30,<br>32,33,34  | 2,5,6,7,27,<br>28,29,31,3<br>5 | 3 | P55314,Q62894,Q9QUL6                                    |
| 6159 | 1,3,4,8,30,<br>32,33,35  | 2,5,6,7,27,<br>28,29,31,3<br>4 | 3 | P05712,P83748,Q9QUL6                                    |
| 6160 | 1,3,4,8,30,<br>32,34,35  | 2,5,6,7,27,<br>28,29,31,3<br>3 | 3 | P35467,P82471,Q62894                                    |
| 6161 | 1,3,4,8,30,<br>33,34,35  | 2,5,6,7,27,<br>28,29,31,3<br>2 | 8 | B0BNN3,O55145,P06911,P09006,P82471,Q62894,Q9JHB9,Q9QUL6 |
| 6162 | 1,3,4,8,31,<br>32,33,34  | 2,5,6,7,27,<br>28,29,30,3<br>5 | 3 | P55314,Q62894,Q9QUL6                                    |
| 6163 | 1,3,4,8,31,<br>32,33,35  | 2,5,6,7,27,<br>28,29,30,3<br>4 | 3 | P05712,P97840,Q9QUL6                                    |
| 6164 | 1,3,4,8,31,<br>32,34,35  | 2,5,6,7,27,<br>28,29,30,3<br>3 | 3 | P09006,P35467,P82471                                    |
| 6165 | 1,3,4,8,31,<br>33,34,35  | 2,5,6,7,27,<br>28,29,30,3<br>2 | 7 | B0BNN3,O55145,P09006,P82471,Q62894,Q63355,Q9JHB9        |
| 6166 | 1,3,4,8,32,<br>33,34,35  | 2,5,6,7,27,<br>28,29,30,3<br>1 | 7 | O55145,P09006,P35467,P55314,P82471,Q62894,Q9QUL6        |
| 6167 | 1,3,4,27,2<br>8,29,30,31 | 2,5,6,7,8,3<br>2,33,34,35      | 5 | O08815,P08753,P36374,P97605,Q6AYR9                      |
| 6168 | 1,3,4,27,2<br>8,29,30,32 | 2,5,6,7,8,3<br>1,33,34,35      | 4 | O08815,P36374,P83748,Q812E4                             |
| 6169 | 1,3,4,27,2<br>8,29,30,33 | 2,5,6,7,8,3<br>1,32,34,35      | 7 | O08815,P02781,P08723,P08753,P36374,P83748,Q812E4        |

|      |                                                 |   |                                                                       |
|------|-------------------------------------------------|---|-----------------------------------------------------------------------|
| 6170 | 1,3,4,27,2 2,5,6,7,8,3<br>8,29,30,34 1,32,33,35 | 3 | P04182,P97605,Q6AYR9                                                  |
| 6171 | 1,3,4,27,2 2,5,6,7,8,3<br>8,29,30,35 1,32,33,34 | 5 | P01681,P01946,P36374,P83748,P97605                                    |
| 6172 | 1,3,4,27,2 2,5,6,7,8,3<br>8,29,31,32 0,33,34,35 | 1 | P06911                                                                |
| 6173 | 1,3,4,27,2 2,5,6,7,8,3<br>8,29,31,33 0,32,34,35 | 2 | P08753,P36374                                                         |
| 6174 | 1,3,4,27,2 2,5,6,7,8,3<br>8,29,31,34 0,32,33,35 | 3 | A2RUV9,P04182,Q9QW07                                                  |
| 6175 | 1,3,4,27,2 2,5,6,7,8,3<br>8,29,31,35 0,32,33,34 | 1 | P01946                                                                |
| 6176 | 1,3,4,27,2 2,5,6,7,8,3<br>8,29,32,33 0,31,34,35 | 9 | O08815,P02793;Q7TP54,P08723,P36374,P55314,Q06000,Q4FZU2,Q6IG02,Q812E4 |
| 6177 | 1,3,4,27,2 2,5,6,7,8,3<br>8,29,32,34 0,31,33,35 | 2 | P04182,Q10758                                                         |
| 6178 | 1,3,4,27,2 2,5,6,7,8,3<br>8,29,32,35 0,31,33,34 | 3 | P01681,P01946,P19218                                                  |
| 6179 | 1,3,4,27,2 2,5,6,7,8,3<br>8,29,33,34 0,31,32,35 | 2 | P04182,Q4FZU2                                                         |
| 6180 | 1,3,4,27,2 2,5,6,7,8,3<br>8,29,33,35 0,31,32,34 | 2 | P01946,P36374                                                         |
| 6181 | 1,3,4,27,2 2,5,6,7,8,3<br>8,29,34,35 0,31,32,33 | 5 | P01946,P04182,P12785,Q561R9,Q9QW07                                    |
| 6182 | 1,3,4,27,2 2,5,6,7,8,2<br>8,30,31,32 9,33,34,35 | 2 | P10758,P83748                                                         |
| 6183 | 1,3,4,27,2 2,5,6,7,8,2<br>8,30,31,33 9,32,34,35 | 3 | P10758,P51907,P83748                                                  |
| 6184 | 1,3,4,27,2 2,5,6,7,8,2<br>8,30,31,34 9,32,33,35 | 2 | A2RUV9,P04182                                                         |
| 6185 | 1,3,4,27,2 2,5,6,7,8,2<br>8,30,31,35 9,32,33,34 | 0 |                                                                       |
| 6186 | 1,3,4,27,2 2,5,6,7,8,2<br>8,30,32,33 9,31,34,35 | 4 | P55314,P83748,Q06000,Q6IG02                                           |
| 6187 | 1,3,4,27,2 2,5,6,7,8,2<br>8,30,32,34 9,31,33,35 | 2 | P04182,Q10758                                                         |
| 6188 | 1,3,4,27,2 2,5,6,7,8,2<br>8,30,32,35 9,31,33,34 | 2 | P83748,Q5RLM2                                                         |
| 6189 | 1,3,4,27,2 2,5,6,7,8,2<br>8,30,33,34 9,31,32,35 | 1 | P04182                                                                |
| 6190 | 1,3,4,27,2 2,5,6,7,8,2<br>8,30,33,35 9,31,32,34 | 3 | B0BNN3,P83748,Q5RLM2                                                  |
| 6191 | 1,3,4,27,2 2,5,6,7,8,2<br>8,30,34,35 9,31,32,33 | 4 | P04182,P12785,P53792,Q8CJD3                                           |
| 6192 | 1,3,4,27,2 2,5,6,7,8,2<br>8,31,32,33 9,30,34,35 | 4 | P55314,Q06000,Q4FZU2,Q6IG02                                           |

|      |                                                 |   |                                                  |
|------|-------------------------------------------------|---|--------------------------------------------------|
| 6193 | 1,3,4,27,2 2,5,6,7,8,2<br>8,31,32,34 9,30,33,35 | 3 | A2RUV9,P04182,Q10758                             |
| 6194 | 1,3,4,27,2 2,5,6,7,8,2<br>8,31,32,35 9,30,33,34 | 0 |                                                  |
| 6195 | 1,3,4,27,2 2,5,6,7,8,2<br>8,31,33,34 9,30,32,35 | 3 | A2RUV9,P04182,Q4FZU2                             |
| 6196 | 1,3,4,27,2 2,5,6,7,8,2<br>8,31,33,35 9,30,32,34 | 1 | P62804                                           |
| 6197 | 1,3,4,27,2 2,5,6,7,8,2<br>8,31,34,35 9,30,32,33 | 5 | A2RUV9,P04182,P12785,P53792,P62804               |
| 6198 | 1,3,4,27,2 2,5,6,7,8,2<br>8,32,33,34 9,30,31,35 | 7 | P04182,P55314,Q06000,Q10758,Q4FZU2,Q6IG02,Q6P6Q2 |
| 6199 | 1,3,4,27,2 2,5,6,7,8,2<br>8,32,33,35 9,30,31,34 | 4 | P55314,P83748,Q4FZU2,Q6IG02                      |
| 6200 | 1,3,4,27,2 2,5,6,7,8,2<br>8,32,34,35 9,30,31,33 | 3 | P04182,P12785,Q10758                             |
| 6201 | 1,3,4,27,2 2,5,6,7,8,2<br>8,33,34,35 9,30,31,32 | 6 | O55145,P04182,P12785,P62804,Q4FZU2,Q561R9        |
| 6202 | 1,3,4,27,2 2,5,6,7,8,2<br>9,30,31,32 8,33,34,35 | 2 | P10758,P83748                                    |
| 6203 | 1,3,4,27,2 2,5,6,7,8,2<br>9,30,31,33 8,32,34,35 | 1 | P10758                                           |
| 6204 | 1,3,4,27,2 2,5,6,7,8,2<br>9,30,31,34 8,32,33,35 | 1 | A2RUV9                                           |
| 6205 | 1,3,4,27,2 2,5,6,7,8,2<br>9,30,31,35 8,32,33,34 | 2 | B0BNN3,P01946                                    |
| 6206 | 1,3,4,27,2 2,5,6,7,8,2<br>9,30,32,33 8,31,34,35 | 2 | P55314,P83748                                    |
| 6207 | 1,3,4,27,2 2,5,6,7,8,2<br>9,30,32,34 8,31,33,35 | 0 |                                                  |
| 6208 | 1,3,4,27,2 2,5,6,7,8,2<br>9,30,32,35 8,31,33,34 | 2 | P01946,P83748                                    |
| 6209 | 1,3,4,27,2 2,5,6,7,8,2<br>9,30,33,34 8,31,32,35 | 0 |                                                  |
| 6210 | 1,3,4,27,2 2,5,6,7,8,2<br>9,30,33,35 8,31,32,34 | 3 | B0BNN3,P01946,P83748                             |
| 6211 | 1,3,4,27,2 2,5,6,7,8,2<br>9,30,34,35 8,31,32,33 | 4 | B0BNN3,P01946,P12020,Q561R9                      |
| 6212 | 1,3,4,27,2 2,5,6,7,8,2<br>9,31,32,33 8,30,34,35 | 1 | P55314                                           |
| 6213 | 1,3,4,27,2 2,5,6,7,8,2<br>9,31,32,34 8,30,33,35 | 1 | A2RUV9                                           |
| 6214 | 1,3,4,27,2 2,5,6,7,8,2<br>9,31,32,35 8,30,33,34 | 2 | P01946,P97840                                    |
| 6215 | 1,3,4,27,2 2,5,6,7,8,2<br>9,31,33,34 8,30,32,35 | 1 | A2RUV9                                           |

|      |                                                 |   |                                           |
|------|-------------------------------------------------|---|-------------------------------------------|
| 6216 | 1,3,4,27,2 2,5,6,7,8,2<br>9,31,33,35 8,30,32,34 | 3 | P01946,P97840,Q6P6R2                      |
| 6217 | 1,3,4,27,2 2,5,6,7,8,2<br>9,31,34,35 8,30,32,33 | 4 | A2RUV9,P01946,P12785,Q561R9               |
| 6218 | 1,3,4,27,2 2,5,6,7,8,2<br>9,32,33,34 8,30,31,35 | 3 | P55314,Q4FZU2,Q6P6Q2                      |
| 6219 | 1,3,4,27,2 2,5,6,7,8,2<br>9,32,33,35 8,30,31,34 | 5 | P01946,P55314,P97840,Q4FZU2,Q6IG02        |
| 6220 | 1,3,4,27,2 2,5,6,7,8,2<br>9,32,34,35 8,30,31,33 | 2 | P01946,P12785                             |
| 6221 | 1,3,4,27,2 2,5,6,7,8,2<br>9,33,34,35 8,30,31,32 | 5 | B0BNN3,O55145,P01946,P12785,Q561R9        |
| 6222 | 1,3,4,27,3 2,5,6,7,8,2<br>0,31,32,33 8,29,34,35 | 3 | P10758,P55314,P83748                      |
| 6223 | 1,3,4,27,3 2,5,6,7,8,2<br>0,31,32,34 8,29,33,35 | 2 | A2RUV9,P10758                             |
| 6224 | 1,3,4,27,3 2,5,6,7,8,2<br>0,31,32,35 8,29,33,34 | 1 | P83748                                    |
| 6225 | 1,3,4,27,3 2,5,6,7,8,2<br>0,31,33,34 8,29,32,35 | 3 | A2RUV9,P02625,P51907                      |
| 6226 | 1,3,4,27,3 2,5,6,7,8,2<br>0,31,33,35 8,29,32,34 | 2 | B0BNN3,P83748                             |
| 6227 | 1,3,4,27,3 2,5,6,7,8,2<br>0,31,34,35 8,29,32,33 | 3 | A2RUV9,B0BNN3,P02793;Q7TP54               |
| 6228 | 1,3,4,27,3 2,5,6,7,8,2<br>0,32,33,34 8,29,31,35 | 2 | P55314,Q4FZU2                             |
| 6229 | 1,3,4,27,3 2,5,6,7,8,2<br>0,32,33,35 8,29,31,34 | 3 | P55314,P83748,Q6IG02                      |
| 6230 | 1,3,4,27,3 2,5,6,7,8,2<br>0,32,34,35 8,29,31,33 | 0 |                                           |
| 6231 | 1,3,4,27,3 2,5,6,7,8,2<br>0,33,34,35 8,29,31,32 | 5 | B0BNN3,P06911,P12020,P82471,Q561R9        |
| 6232 | 1,3,4,27,3 2,5,6,7,8,2<br>1,32,33,34 8,29,30,35 | 4 | A2RUV9,P55314,Q4FZU2,Q6P6Q2               |
| 6233 | 1,3,4,27,3 2,5,6,7,8,2<br>1,32,33,35 8,29,30,34 | 5 | P55314,P97840,Q4FZU2,Q6IG02,Q9WTT6        |
| 6234 | 1,3,4,27,3 2,5,6,7,8,2<br>1,32,34,35 8,29,30,33 | 3 | A2RUV9,P12785,P82471                      |
| 6235 | 1,3,4,27,3 2,5,6,7,8,2<br>1,33,34,35 8,29,30,32 | 6 | A2RUV9,B0BNN3,P12785,P82471,Q561R9,Q63355 |
| 6236 | 1,3,4,27,3 2,5,6,7,8,2<br>2,33,34,35 8,29,30,31 | 6 | O55145,P55314,P82471,Q4FZU2,Q6IG02,Q6P6Q2 |
| 6237 | 1,3,4,28,2 2,5,6,7,8,2<br>9,30,31,32 7,33,34,35 | 1 | P10758                                    |
| 6238 | 1,3,4,28,2 2,5,6,7,8,2<br>9,30,31,33 7,32,34,35 | 2 | P06760,P08753                             |

|      |                          |                           |   |                                           |
|------|--------------------------|---------------------------|---|-------------------------------------------|
| 6239 | 1,3,4,28,2<br>9,30,31,34 | 2,5,6,7,8,2<br>7,32,33,35 | 1 | Q9QW07                                    |
| 6240 | 1,3,4,28,2<br>9,30,31,35 | 2,5,6,7,8,2<br>7,32,33,34 | 1 | P06760                                    |
| 6241 | 1,3,4,28,2<br>9,30,32,33 | 2,5,6,7,8,2<br>7,31,34,35 | 1 | P83748                                    |
| 6242 | 1,3,4,28,2<br>9,30,32,34 | 2,5,6,7,8,2<br>7,31,33,35 | 0 |                                           |
| 6243 | 1,3,4,28,2<br>9,30,32,35 | 2,5,6,7,8,2<br>7,31,33,34 | 2 | P01681,P83748                             |
| 6244 | 1,3,4,28,2<br>9,30,33,34 | 2,5,6,7,8,2<br>7,31,32,35 | 1 | P27791                                    |
| 6245 | 1,3,4,28,2<br>9,30,33,35 | 2,5,6,7,8,2<br>7,31,32,34 | 3 | B0BNN3,P06760,Q9WTT6                      |
| 6246 | 1,3,4,28,2<br>9,30,34,35 | 2,5,6,7,8,2<br>7,31,32,33 | 6 | B0BNN3,P00507,P01681,P06760,P12785,Q8CJD3 |
| 6247 | 1,3,4,28,2<br>9,31,32,33 | 2,5,6,7,8,2<br>7,30,34,35 | 2 | P06911,Q9WTT6                             |
| 6248 | 1,3,4,28,2<br>9,31,32,34 | 2,5,6,7,8,2<br>7,30,33,35 | 1 | Q9QW07                                    |
| 6249 | 1,3,4,28,2<br>9,31,32,35 | 2,5,6,7,8,2<br>7,30,33,34 | 0 |                                           |
| 6250 | 1,3,4,28,2<br>9,31,33,34 | 2,5,6,7,8,2<br>7,30,32,35 | 2 | P06760,P27791                             |
| 6251 | 1,3,4,28,2<br>9,31,33,35 | 2,5,6,7,8,2<br>7,30,32,34 | 4 | P06760,P97840,Q00715,Q9WTT6               |
| 6252 | 1,3,4,28,2<br>9,31,34,35 | 2,5,6,7,8,2<br>7,30,32,33 | 4 | P00507,P06760,P12785,Q9QW07               |
| 6253 | 1,3,4,28,2<br>9,32,33,34 | 2,5,6,7,8,2<br>7,30,31,35 | 2 | P27791,P55314                             |
| 6254 | 1,3,4,28,2<br>9,32,33,35 | 2,5,6,7,8,2<br>7,30,31,34 | 4 | P19218,P47967,P97840,Q9WTT6               |
| 6255 | 1,3,4,28,2<br>9,32,34,35 | 2,5,6,7,8,2<br>7,30,31,33 | 4 | P00507,P12785,P19218,Q9QW07               |
| 6256 | 1,3,4,28,2<br>9,33,34,35 | 2,5,6,7,8,2<br>7,30,31,32 | 5 | B0BNN3,O55145,P00507,P06760,P12785        |
| 6257 | 1,3,4,28,3<br>0,31,32,33 | 2,5,6,7,8,2<br>7,29,34,35 | 2 | P10758,P83748                             |
| 6258 | 1,3,4,28,3<br>0,31,32,34 | 2,5,6,7,8,2<br>7,29,33,35 | 0 |                                           |
| 6259 | 1,3,4,28,3<br>0,31,32,35 | 2,5,6,7,8,2<br>7,29,33,34 | 0 |                                           |
| 6260 | 1,3,4,28,3<br>0,31,33,34 | 2,5,6,7,8,2<br>7,29,32,35 | 2 | P06760,P51907                             |
| 6261 | 1,3,4,28,3<br>0,31,33,35 | 2,5,6,7,8,2<br>7,29,32,34 | 5 | B0BNN3,P06760,P62804,Q00715,Q9WTT6        |

|      |                          |                           |   |                                                                |
|------|--------------------------|---------------------------|---|----------------------------------------------------------------|
| 6262 | 1,3,4,28,3<br>0,31,34,35 | 2,5,6,7,8,2<br>7,29,32,33 | 8 | B0BNN3,P02793;Q7TP54,P06760,P12785,P14669,P53792,P62804,Q8CJD3 |
| 6263 | 1,3,4,28,3<br>0,32,33,34 | 2,5,6,7,8,2<br>7,29,31,35 | 2 | P55314,Q62894                                                  |
| 6264 | 1,3,4,28,3<br>0,32,33,35 | 2,5,6,7,8,2<br>7,29,31,34 | 2 | P83748,Q9WTT6                                                  |
| 6265 | 1,3,4,28,3<br>0,32,34,35 | 2,5,6,7,8,2<br>7,29,31,33 | 2 | Q8CJD3,Q920G2                                                  |
| 6266 | 1,3,4,28,3<br>0,33,34,35 | 2,5,6,7,8,2<br>7,29,31,32 | 5 | B0BNN3,O55145,P06760,P62804,Q8CJD3                             |
| 6267 | 1,3,4,28,3<br>1,32,33,34 | 2,5,6,7,8,2<br>7,29,30,35 | 1 | P55314                                                         |
| 6268 | 1,3,4,28,3<br>1,32,33,35 | 2,5,6,7,8,2<br>7,29,30,34 | 1 | Q9WTT6                                                         |
| 6269 | 1,3,4,28,3<br>1,32,34,35 | 2,5,6,7,8,2<br>7,29,30,33 | 1 | P12785                                                         |
| 6270 | 1,3,4,28,3<br>1,33,34,35 | 2,5,6,7,8,2<br>7,29,30,32 | 6 | B0BNN3,O55145,P06760,P12785,P14669,P62804                      |
| 6271 | 1,3,4,28,3<br>2,33,34,35 | 2,5,6,7,8,2<br>7,29,30,31 | 3 | O55145,P12785,P55314                                           |
| 6272 | 1,3,4,29,3<br>0,31,32,33 | 2,5,6,7,8,2<br>7,28,34,35 | 2 | P10758,Q9WTT6                                                  |
| 6273 | 1,3,4,29,3<br>0,31,32,34 | 2,5,6,7,8,2<br>7,28,33,35 | 1 | Q99MH3                                                         |
| 6274 | 1,3,4,29,3<br>0,31,32,35 | 2,5,6,7,8,2<br>7,28,33,34 | 1 | Q9WTT6                                                         |
| 6275 | 1,3,4,29,3<br>0,31,33,34 | 2,5,6,7,8,2<br>7,28,32,35 | 0 |                                                                |
| 6276 | 1,3,4,29,3<br>0,31,33,35 | 2,5,6,7,8,2<br>7,28,32,34 | 4 | B0BNN3,P06760,Q6P6R2,Q9WTT6                                    |
| 6277 | 1,3,4,29,3<br>0,31,34,35 | 2,5,6,7,8,2<br>7,28,32,33 | 2 | B0BNN3,P02793;Q7TP54                                           |
| 6278 | 1,3,4,29,3<br>0,32,33,34 | 2,5,6,7,8,2<br>7,28,31,35 | 1 | P55314                                                         |
| 6279 | 1,3,4,29,3<br>0,32,33,35 | 2,5,6,7,8,2<br>7,28,31,34 | 2 | P83748,Q9WTT6                                                  |
| 6280 | 1,3,4,29,3<br>0,32,34,35 | 2,5,6,7,8,2<br>7,28,31,33 | 0 |                                                                |
| 6281 | 1,3,4,29,3<br>0,33,34,35 | 2,5,6,7,8,2<br>7,28,31,32 | 3 | B0BNN3,O55145,P12020                                           |
| 6282 | 1,3,4,29,3<br>1,32,33,34 | 2,5,6,7,8,2<br>7,28,30,35 | 1 | P55314                                                         |
| 6283 | 1,3,4,29,3<br>1,32,33,35 | 2,5,6,7,8,2<br>7,28,30,34 | 3 | P47967,P97840,Q9WTT6                                           |
| 6284 | 1,3,4,29,3<br>1,32,34,35 | 2,5,6,7,8,2<br>7,28,30,33 | 0 |                                                                |

|      |                          |                                  |   |                                                  |
|------|--------------------------|----------------------------------|---|--------------------------------------------------|
| 6285 | 1,3,4,29,3<br>1,33,34,35 | 2,5,6,7,8,2<br>7,28,30,32        | 3 | B0BNN3,O55145,P06760                             |
| 6286 | 1,3,4,29,3<br>2,33,34,35 | 2,5,6,7,8,2<br>7,28,30,31        | 2 | O55145,P55314                                    |
| 6287 | 1,3,4,30,3<br>1,32,33,34 | 2,5,6,7,8,2<br>7,28,29,35        | 2 | P10758,P55314                                    |
| 6288 | 1,3,4,30,3<br>1,32,33,35 | 2,5,6,7,8,2<br>7,28,29,34        | 3 | P82471,P83748,Q9WTT6                             |
| 6289 | 1,3,4,30,3<br>1,32,34,35 | 2,5,6,7,8,2<br>7,28,29,33        | 1 | P82471                                           |
| 6290 | 1,3,4,30,3<br>1,33,34,35 | 2,5,6,7,8,2<br>7,28,29,32        | 5 | B0BNN3,P06760,P24368,P82471,Q9JHB9               |
| 6291 | 1,3,4,30,3<br>2,33,34,35 | 2,5,6,7,8,2<br>7,28,29,31        | 5 | O55145,P02782,P55314,P82471,Q5GRG2               |
| 6292 | 1,3,4,31,3<br>2,33,34,35 | 2,5,6,7,8,2<br>7,28,29,30        | 4 | O55145,P02782,P55314,P82471                      |
| 6293 | 1,3,5,6,7,8<br>,27,28    | 2,4,29,30,<br>31,32,33,3<br>4,35 | 4 | O54728,P24388,Q63942,Q6TMA8                      |
| 6294 | 1,3,5,6,7,8<br>,27,29    | 2,4,28,30,<br>31,32,33,3<br>4,35 | 1 | P53792                                           |
| 6295 | 1,3,5,6,7,8<br>,27,30    | 2,4,28,29,<br>31,32,33,3<br>4,35 | 4 | P00507,P16086,P19218,P53792                      |
| 6296 | 1,3,5,6,7,8<br>,27,31    | 2,4,28,29,<br>30,32,33,3<br>4,35 | 4 | O54728,P00507,P19218,Q6TMA8                      |
| 6297 | 1,3,5,6,7,8<br>,27,32    | 2,4,28,29,<br>30,31,33,3<br>4,35 | 7 | P00507,P06760,P08753,P16086,P24388,P53792,Q5I0D1 |
| 6298 | 1,3,5,6,7,8<br>,27,33    | 2,4,28,29,<br>30,31,32,3<br>4,35 | 3 | P00507,P24388,P53792                             |
| 6299 | 1,3,5,6,7,8<br>,27,34    | 2,4,28,29,<br>30,31,32,3<br>3,35 | 3 | P08753,Q6IRE4,Q9WTT6                             |
| 6300 | 1,3,5,6,7,8<br>,27,35    | 2,4,28,29,<br>30,31,32,3<br>3,34 | 1 | P08753                                           |
| 6301 | 1,3,5,6,7,8<br>,28,29    | 2,4,27,30,<br>31,32,33,3<br>4,35 | 4 | O54728,P01681,Q63942,Q9QW07                      |
| 6302 | 1,3,5,6,7,8<br>,28,30    | 2,4,27,29,<br>31,32,33,3<br>4,35 | 2 | O54728,P01681                                    |



|      |                       |                                  |   |                             |
|------|-----------------------|----------------------------------|---|-----------------------------|
| 6303 | 1,3,5,6,7,8<br>,28,31 | 2,4,27,29,<br>30,32,33,3<br>4,35 | 2 | O54728,Q6TMA8               |
| 6304 | 1,3,5,6,7,8<br>,28,32 | 2,4,27,29,<br>30,31,33,3<br>4,35 | 3 | O54728,P24388,Q561R9        |
| 6305 | 1,3,5,6,7,8<br>,28,33 | 2,4,27,29,<br>30,31,32,3<br>4,35 | 1 | O54728                      |
| 6306 | 1,3,5,6,7,8<br>,28,34 | 2,4,27,29,<br>30,31,32,3<br>3,35 | 4 | O54728,Q6IRE4,Q9QW07,Q9WTT6 |
| 6307 | 1,3,5,6,7,8<br>,28,35 | 2,4,27,29,<br>30,31,32,3<br>3,34 | 2 | O54728,P01681               |
| 6308 | 1,3,5,6,7,8<br>,29,30 | 2,4,27,28,<br>31,32,33,3<br>4,35 | 1 | P53792                      |
| 6309 | 1,3,5,6,7,8<br>,29,31 | 2,4,27,28,<br>30,32,33,3<br>4,35 | 2 | O54728,P53792               |
| 6310 | 1,3,5,6,7,8<br>,29,32 | 2,4,27,28,<br>30,31,33,3<br>4,35 | 4 | P51907,P53792,Q561R9,Q8CJD3 |
| 6311 | 1,3,5,6,7,8<br>,29,33 | 2,4,27,28,<br>30,31,32,3<br>4,35 | 4 | P53792,Q63617,Q6AYQ8,Q8CJD3 |
| 6312 | 1,3,5,6,7,8<br>,29,34 | 2,4,27,28,<br>30,31,32,3<br>3,35 | 3 | P51907,Q6IRE4,Q9QW07        |
| 6313 | 1,3,5,6,7,8<br>,29,35 | 2,4,27,28,<br>30,31,32,3<br>3,34 | 3 | P01946,P02091,P51907        |
| 6314 | 1,3,5,6,7,8<br>,30,31 | 2,4,27,28,<br>29,32,33,3<br>4,35 | 4 | O54728,P00507,P19218,P53792 |
| 6315 | 1,3,5,6,7,8<br>,30,32 | 2,4,27,28,<br>29,31,33,3<br>4,35 | 3 | P16086,P53792,Q561R9        |
| 6316 | 1,3,5,6,7,8<br>,30,33 | 2,4,27,28,<br>29,31,32,3<br>4,35 | 4 | P00507,P19218,P35446,P53792 |
| 6317 | 1,3,5,6,7,8<br>,30,34 | 2,4,27,28,<br>29,31,32,3<br>3,35 | 4 | P08753,P16086,P19218,Q6IRE4 |

|      |                        |                                  |   |                                                         |
|------|------------------------|----------------------------------|---|---------------------------------------------------------|
| 6318 | 1,3,5,6,7,8<br>,30,35  | 2,4,27,28,<br>29,31,32,3<br>3,34 | 0 |                                                         |
| 6319 | 1,3,5,6,7,8<br>,31,32  | 2,4,27,28,<br>29,30,33,3<br>4,35 | 6 | O54728,P00507,P08753,P53792,Q561R9,Q8CJD3               |
| 6320 | 1,3,5,6,7,8<br>,31,33  | 2,4,27,28,<br>29,30,32,3<br>4,35 | 5 | O54728,P00507,P19218,P52590,P53792                      |
| 6321 | 1,3,5,6,7,8<br>,31,34  | 2,4,27,28,<br>29,30,32,3<br>3,35 | 4 | O54728,P08753,P19218,Q6IRE4                             |
| 6322 | 1,3,5,6,7,8<br>,31,35  | 2,4,27,28,<br>29,30,32,3<br>3,34 | 3 | O54728,P08753,P52590                                    |
| 6323 | 1,3,5,6,7,8<br>,32,33  | 2,4,27,28,<br>29,30,31,3<br>4,35 | 8 | D3ZUC6,P00507,P08753,P53792,P55314,Q561R9,Q6AYR9,Q8CJD3 |
| 6324 | 1,3,5,6,7,8<br>,32,34  | 2,4,27,28,<br>29,30,31,3<br>3,35 | 7 | D3ZUC6,P08753,P16086,P17046,P36374,P51907,Q6IRE4        |
| 6325 | 1,3,5,6,7,8<br>,32,35  | 2,4,27,28,<br>29,30,31,3<br>3,34 | 3 | P08753,P51907,Q6AYR9                                    |
| 6326 | 1,3,5,6,7,8<br>,33,34  | 2,4,27,28,<br>29,30,31,3<br>2,35 | 4 | D3ZUC6,P08753,Q6IRE4,Q99041                             |
| 6327 | 1,3,5,6,7,8<br>,33,35  | 2,4,27,28,<br>29,30,31,3<br>2,34 | 2 | P08753,Q6AYR9                                           |
| 6328 | 1,3,5,6,7,8<br>,34,35  | 2,4,27,28,<br>29,30,31,3<br>2,33 | 3 | P08753,P36374,Q6IRE4                                    |
| 6329 | 1,3,5,6,7,2<br>7,28,29 | 2,4,8,30,3<br>1,32,33,34<br>,35  | 3 | P01681,Q80WL1,Q9QW07                                    |
| 6330 | 1,3,5,6,7,2<br>7,28,30 | 2,4,8,29,3<br>1,32,33,34<br>,35  | 2 | P01681,Q6TMA8                                           |
| 6331 | 1,3,5,6,7,2<br>7,28,31 | 2,4,8,29,3<br>0,32,33,34<br>,35  | 2 | O54728,Q6TMA8                                           |
| 6332 | 1,3,5,6,7,2<br>7,28,32 | 2,4,8,29,3<br>0,31,33,34<br>,35  | 5 | P17046,P24388,Q561R9,Q6TMA8,Q80WL1                      |

|      |                        |                                 |   |                                                  |
|------|------------------------|---------------------------------|---|--------------------------------------------------|
| 6333 | 1,3,5,6,7,2<br>7,28,33 | 2,4,8,29,3<br>0,31,32,34<br>,35 | 3 | P24388,Q6TMA8,Q80WL1                             |
| 6334 | 1,3,5,6,7,2<br>7,28,34 | 2,4,8,29,3<br>0,31,32,33<br>,35 | 7 | O54728,P04182,P17046,Q6IRE4,Q6TMA8,Q80WL1,Q9QW07 |
| 6335 | 1,3,5,6,7,2<br>7,28,35 | 2,4,8,29,3<br>0,31,32,33<br>,34 | 4 | P01681,P62804,Q6TMA8,Q80WL1                      |
| 6336 | 1,3,5,6,7,2<br>7,29,30 | 2,4,8,28,3<br>1,32,33,34<br>,35 | 3 | P00507,P02803,P53792                             |
| 6337 | 1,3,5,6,7,2<br>7,29,31 | 2,4,8,28,3<br>0,32,33,34<br>,35 | 2 | P00507,P53792                                    |
| 6338 | 1,3,5,6,7,2<br>7,29,32 | 2,4,8,28,3<br>0,31,33,34<br>,35 | 6 | P00507,P02803,P17046,P51907,P53792,Q80WL1        |
| 6339 | 1,3,5,6,7,2<br>7,29,33 | 2,4,8,28,3<br>0,31,32,34<br>,35 | 3 | P00507,P53792,Q80WL1                             |
| 6340 | 1,3,5,6,7,2<br>7,29,34 | 2,4,8,28,3<br>0,31,32,33<br>,35 | 6 | P02761,P02803,P17046,Q6IRE4,Q80WL1,Q9QW07        |
| 6341 | 1,3,5,6,7,2<br>7,29,35 | 2,4,8,28,3<br>0,31,32,33<br>,34 | 3 | P01946,P02091,Q80WL1                             |
| 6342 | 1,3,5,6,7,2<br>7,30,31 | 2,4,8,28,2<br>9,32,33,34<br>,35 | 3 | P00507,P19218,Q6TMA8                             |
| 6343 | 1,3,5,6,7,2<br>7,30,32 | 2,4,8,28,2<br>9,31,33,34<br>,35 | 6 | P00507,P02803,P16086,P17046,P53792,Q561R9        |
| 6344 | 1,3,5,6,7,2<br>7,30,33 | 2,4,8,28,2<br>9,31,32,34<br>,35 | 4 | P00507,P19218,P53792,Q6TMA8                      |
| 6345 | 1,3,5,6,7,2<br>7,30,34 | 2,4,8,28,2<br>9,31,32,33<br>,35 | 7 | P02803,P17046,P19218,P35280,P47967,P97840,Q6IRE4 |
| 6346 | 1,3,5,6,7,2<br>7,30,35 | 2,4,8,28,2<br>9,31,32,33<br>,34 | 1 | Q6TMA8                                           |
| 6347 | 1,3,5,6,7,2<br>7,31,32 | 2,4,8,28,2<br>9,30,33,34<br>,35 | 2 | P00507,Q561R9                                    |

|      |                        |                                 |   |                                                                |
|------|------------------------|---------------------------------|---|----------------------------------------------------------------|
| 6348 | 1,3,5,6,7,2<br>7,31,33 | 2,4,8,28,2<br>9,30,32,34<br>,35 | 3 | P00507,P19218,Q6TMA8                                           |
| 6349 | 1,3,5,6,7,2<br>7,31,34 | 2,4,8,28,2<br>9,30,32,33<br>,35 | 5 | A2RUV9,P17046,P19218,Q6IRE4,Q6TMA8                             |
| 6350 | 1,3,5,6,7,2<br>7,31,35 | 2,4,8,28,2<br>9,30,32,33<br>,34 | 1 | Q6TMA8                                                         |
| 6351 | 1,3,5,6,7,2<br>7,32,33 | 2,4,8,28,2<br>9,30,31,34<br>,35 | 9 | P00507,P17046,P24388,P53792,P55314,Q4FZU2,Q6IG02,Q6NX65,Q80WL1 |
| 6352 | 1,3,5,6,7,2<br>7,32,34 | 2,4,8,28,2<br>9,30,31,33<br>,35 | 7 | P01015,P02761,P02803,P08753,P17046,Q6IRE4,Q80WL1               |
| 6353 | 1,3,5,6,7,2<br>7,32,35 | 2,4,8,28,2<br>9,30,31,33<br>,34 | 2 | P17046,Q80WL1                                                  |
| 6354 | 1,3,5,6,7,2<br>7,33,34 | 2,4,8,28,2<br>9,30,31,32<br>,35 | 4 | P17046,Q4FZU2,Q6IRE4,Q80WL1                                    |
| 6355 | 1,3,5,6,7,2<br>7,33,35 | 2,4,8,28,2<br>9,30,31,32<br>,34 | 3 | Q62975,Q6TMA8,Q80WL1                                           |
| 6356 | 1,3,5,6,7,2<br>7,34,35 | 2,4,8,28,2<br>9,30,31,32<br>,33 | 5 | P02780,P08753,P17046,Q62975,Q6IRE4                             |
| 6357 | 1,3,5,6,7,2<br>8,29,30 | 2,4,8,27,3<br>1,32,33,34<br>,35 | 1 | P01681                                                         |
| 6358 | 1,3,5,6,7,2<br>8,29,31 | 2,4,8,27,3<br>0,32,33,34<br>,35 | 2 | O54728,Q9QW07                                                  |
| 6359 | 1,3,5,6,7,2<br>8,29,32 | 2,4,8,27,3<br>0,31,33,34<br>,35 | 4 | P01681,Q561R9,Q80WL1,Q9QW07                                    |
| 6360 | 1,3,5,6,7,2<br>8,29,33 | 2,4,8,27,3<br>0,31,32,34<br>,35 | 1 | Q80WL1                                                         |
| 6361 | 1,3,5,6,7,2<br>8,29,34 | 2,4,8,27,3<br>0,31,32,33<br>,35 | 5 | O54728,P17046,Q6IRE4,Q80WL1,Q9QW07                             |
| 6362 | 1,3,5,6,7,2<br>8,29,35 | 2,4,8,27,3<br>0,31,32,33<br>,34 | 5 | P01681,P01946,P02091,Q80WL1,Q9QW07                             |

|      |                        |                                 |   |                                           |
|------|------------------------|---------------------------------|---|-------------------------------------------|
| 6363 | 1,3,5,6,7,2<br>8,30,31 | 2,4,8,27,2<br>9,32,33,34<br>,35 | 4 | O54728,P19218,Q561R9,Q6TMA8               |
| 6364 | 1,3,5,6,7,2<br>8,30,32 | 2,4,8,27,2<br>9,31,33,34<br>,35 | 2 | P17046,Q561R9                             |
| 6365 | 1,3,5,6,7,2<br>8,30,33 | 2,4,8,27,2<br>9,31,32,34<br>,35 | 1 | Q6TMA8                                    |
| 6366 | 1,3,5,6,7,2<br>8,30,34 | 2,4,8,27,2<br>9,31,32,33<br>,35 | 4 | O54728,P17046,P97840,Q6IRE4               |
| 6367 | 1,3,5,6,7,2<br>8,30,35 | 2,4,8,27,2<br>9,31,32,33<br>,34 | 4 | P01681,P62804,Q00715,Q6TMA8               |
| 6368 | 1,3,5,6,7,2<br>8,31,32 | 2,4,8,27,2<br>9,30,33,34<br>,35 | 3 | O54728,P12020,Q561R9                      |
| 6369 | 1,3,5,6,7,2<br>8,31,33 | 2,4,8,27,2<br>9,30,32,34<br>,35 | 4 | O54728,Q6TMA8,Q80WL1,Q8VD89               |
| 6370 | 1,3,5,6,7,2<br>8,31,34 | 2,4,8,27,2<br>9,30,32,33<br>,35 | 4 | O54728,Q6IRE4,Q6TMA8,Q9QW07               |
| 6371 | 1,3,5,6,7,2<br>8,31,35 | 2,4,8,27,2<br>9,30,32,33<br>,34 | 4 | O54728,P62804,Q00715,Q6TMA8               |
| 6372 | 1,3,5,6,7,2<br>8,32,33 | 2,4,8,27,2<br>9,30,31,34<br>,35 | 3 | P55314,Q561R9,Q80WL1                      |
| 6373 | 1,3,5,6,7,2<br>8,32,34 | 2,4,8,27,2<br>9,30,31,33<br>,35 | 5 | O54728,P17046,Q561R9,Q6IRE4,Q80WL1        |
| 6374 | 1,3,5,6,7,2<br>8,32,35 | 2,4,8,27,2<br>9,30,31,33<br>,34 | 2 | P01681,Q80WL1                             |
| 6375 | 1,3,5,6,7,2<br>8,33,34 | 2,4,8,27,2<br>9,30,31,32<br>,35 | 4 | O54728,P17046,Q6IRE4,Q80WL1               |
| 6376 | 1,3,5,6,7,2<br>8,33,35 | 2,4,8,27,2<br>9,30,31,32<br>,34 | 6 | P62804,Q00715,Q6AYR9,Q6TMA8,Q80WL1,Q9QXQ0 |
| 6377 | 1,3,5,6,7,2<br>8,34,35 | 2,4,8,27,2<br>9,30,31,32<br>,33 | 5 | O54728,P17046,P62804,Q6IRE4,Q9QW07        |

|      |                        |                                 |   |                                                         |
|------|------------------------|---------------------------------|---|---------------------------------------------------------|
| 6378 | 1,3,5,6,7,2<br>9,30,31 | 2,4,8,27,2<br>8,32,33,34<br>,35 | 1 | P53792                                                  |
| 6379 | 1,3,5,6,7,2<br>9,30,32 | 2,4,8,27,2<br>8,31,33,34<br>,35 | 3 | P53792,Q561R9,Q99MH3                                    |
| 6380 | 1,3,5,6,7,2<br>9,30,33 | 2,4,8,27,2<br>8,31,32,34<br>,35 | 1 | P53792                                                  |
| 6381 | 1,3,5,6,7,2<br>9,30,34 | 2,4,8,27,2<br>8,31,32,33<br>,35 | 3 | P17046,Q6IRE4,Q99MH3                                    |
| 6382 | 1,3,5,6,7,2<br>9,30,35 | 2,4,8,27,2<br>8,31,32,33<br>,34 | 3 | P01681,P01946,P02091                                    |
| 6383 | 1,3,5,6,7,2<br>9,31,32 | 2,4,8,27,2<br>8,30,33,34<br>,35 | 2 | P53792,Q561R9                                           |
| 6384 | 1,3,5,6,7,2<br>9,31,33 | 2,4,8,27,2<br>8,30,32,34<br>,35 | 4 | P00507,P53792,Q6AYQ8,Q80WL1                             |
| 6385 | 1,3,5,6,7,2<br>9,31,34 | 2,4,8,27,2<br>8,30,32,33<br>,35 | 4 | Q6AYQ8,Q6IRE4,Q99MH3,Q9QW07                             |
| 6386 | 1,3,5,6,7,2<br>9,31,35 | 2,4,8,27,2<br>8,30,32,33<br>,34 | 2 | P01946,P02091                                           |
| 6387 | 1,3,5,6,7,2<br>9,32,33 | 2,4,8,27,2<br>8,30,31,34<br>,35 | 6 | P53792,P55314,Q561R9,Q6AYQ8,Q80WL1,Q8CJD3               |
| 6388 | 1,3,5,6,7,2<br>9,32,34 | 2,4,8,27,2<br>8,30,31,33<br>,35 | 8 | P02761,P17046,P51907,Q6AYQ8,Q6IRE4,Q80WL1,Q99MH3,Q9QW07 |
| 6389 | 1,3,5,6,7,2<br>9,32,35 | 2,4,8,27,2<br>8,30,31,33<br>,34 | 4 | P01946,P02091,P51907,Q80WL1                             |
| 6390 | 1,3,5,6,7,2<br>9,33,34 | 2,4,8,27,2<br>8,30,31,32<br>,35 | 4 | P17046,Q6AYQ8,Q6IRE4,Q80WL1                             |
| 6391 | 1,3,5,6,7,2<br>9,33,35 | 2,4,8,27,2<br>8,30,31,32<br>,34 | 4 | P01946,P02091,Q6AYQ8,Q80WL1                             |
| 6392 | 1,3,5,6,7,2<br>9,34,35 | 2,4,8,27,2<br>8,30,31,32<br>,33 | 8 | P01946,P02091,P17046,Q6AYQ8,Q6IRE4,Q80WL1,Q99MH3,Q9QW07 |

|      |                        |                                 |   |                                           |
|------|------------------------|---------------------------------|---|-------------------------------------------|
| 6393 | 1,3,5,6,7,3<br>0,31,32 | 2,4,8,27,2<br>8,29,33,34<br>,35 | 3 | P00507,P53792,Q561R9                      |
| 6394 | 1,3,5,6,7,3<br>0,31,33 | 2,4,8,27,2<br>8,29,32,34<br>,35 | 4 | P00507,P19218,P35446,P53792               |
| 6395 | 1,3,5,6,7,3<br>0,31,34 | 2,4,8,27,2<br>8,29,32,33<br>,35 | 3 | P19218,P97840,Q6IRE4                      |
| 6396 | 1,3,5,6,7,3<br>0,31,35 | 2,4,8,27,2<br>8,29,32,33<br>,34 | 2 | P24368,Q00715                             |
| 6397 | 1,3,5,6,7,3<br>0,32,33 | 2,4,8,27,2<br>8,29,31,34<br>,35 | 4 | P00507,P53792,P55314,Q561R9               |
| 6398 | 1,3,5,6,7,3<br>0,32,34 | 2,4,8,27,2<br>8,29,31,33<br>,35 | 5 | P16086,P17046,Q561R9,Q6IRE4,Q99MH3        |
| 6399 | 1,3,5,6,7,3<br>0,32,35 | 2,4,8,27,2<br>8,29,31,33<br>,34 | 0 |                                           |
| 6400 | 1,3,5,6,7,3<br>0,33,34 | 2,4,8,27,2<br>8,29,31,32<br>,35 | 3 | P17046,P19218,Q6IRE4                      |
| 6401 | 1,3,5,6,7,3<br>0,33,35 | 2,4,8,27,2<br>8,29,31,32<br>,34 | 1 | P24368                                    |
| 6402 | 1,3,5,6,7,3<br>0,34,35 | 2,4,8,27,2<br>8,29,31,32<br>,33 | 5 | P02793,Q7TP54,P06911,P17046,P24368,Q6IRE4 |
| 6403 | 1,3,5,6,7,3<br>1,32,33 | 2,4,8,27,2<br>8,29,30,34<br>,35 | 5 | P00507,P53792,P55314,Q561R9,Q8CJD3        |
| 6404 | 1,3,5,6,7,3<br>1,32,34 | 2,4,8,27,2<br>8,29,30,33<br>,35 | 6 | P02761,P08753,P17046,Q561R9,Q6IRE4,Q99MH3 |
| 6405 | 1,3,5,6,7,3<br>1,32,35 | 2,4,8,27,2<br>8,29,30,33<br>,34 | 1 | Q6AYR9                                    |
| 6406 | 1,3,5,6,7,3<br>1,33,34 | 2,4,8,27,2<br>8,29,30,32<br>,35 | 3 | P19218,Q6AYQ8,Q6IRE4                      |
| 6407 | 1,3,5,6,7,3<br>1,33,35 | 2,4,8,27,2<br>8,29,30,32<br>,34 | 6 | P00714,P24368,P52590,Q00715,Q6AYR9,Q8VD89 |

|      |                        |                                 |    |                                                                       |
|------|------------------------|---------------------------------|----|-----------------------------------------------------------------------|
| 6408 | 1,3,5,6,7,3<br>1,34,35 | 2,4,8,27,2<br>8,29,30,32<br>,33 | 8  | P00714,P02781,P08010,P08753,P0C0A9,P24368,P82471,Q6IRE4               |
| 6409 | 1,3,5,6,7,3<br>2,33,34 | 2,4,8,27,2<br>8,29,30,31<br>,35 | 6  | P02761,P08753,P17046,P55314,Q6IRE4,Q80WL1                             |
| 6410 | 1,3,5,6,7,3<br>2,33,35 | 2,4,8,27,2<br>8,29,30,31<br>,34 | 5  | P55314,P97580,Q6AYR9,Q6NX65,Q80WL1                                    |
| 6411 | 1,3,5,6,7,3<br>2,34,35 | 2,4,8,27,2<br>8,29,30,31<br>,33 | 7  | P02781,P08753,P0C0A9,P17046,P82471,Q6AYR9,Q6IRE4                      |
| 6412 | 1,3,5,6,7,3<br>3,34,35 | 2,4,8,27,2<br>8,29,30,31<br>,32 | 10 | P02781,P08753,P0C0A9,P17046,P24368,P82471,Q62975,Q6AYR9,Q6IRE4,Q80WL1 |
| 6413 | 1,3,5,6,8,2<br>7,28,29 | 2,4,7,30,3<br>1,32,33,34<br>,35 | 7  | F1LM93,O35547,P01681,P02782,P08723,Q63942,Q9QW07                      |
| 6414 | 1,3,5,6,8,2<br>7,28,30 | 2,4,7,29,3<br>1,32,33,34<br>,35 | 2  | P01681,Q6TMA8                                                         |
| 6415 | 1,3,5,6,8,2<br>7,28,31 | 2,4,7,29,3<br>0,32,33,34<br>,35 | 2  | O54728,Q6TMA8                                                         |
| 6416 | 1,3,5,6,8,2<br>7,28,32 | 2,4,7,29,3<br>0,31,33,34<br>,35 | 5  | P01681,P06760,Q561R9,Q63942,Q9Z1F2                                    |
| 6417 | 1,3,5,6,8,2<br>7,28,33 | 2,4,7,29,3<br>0,31,32,34<br>,35 | 3  | Q4FZU2,Q6IG02,Q80WL1                                                  |
| 6418 | 1,3,5,6,8,2<br>7,28,34 | 2,4,7,29,3<br>0,31,32,33<br>,35 | 5  | P04182,Q63942,Q6IRE4,Q9QW07,Q9WTT6                                    |
| 6419 | 1,3,5,6,8,2<br>7,28,35 | 2,4,7,29,3<br>0,31,32,33<br>,34 | 2  | P01681,Q6TMA8                                                         |
| 6420 | 1,3,5,6,8,2<br>7,29,30 | 2,4,7,28,3<br>1,32,33,34<br>,35 | 0  |                                                                       |
| 6421 | 1,3,5,6,8,2<br>7,29,31 | 2,4,7,28,3<br>0,32,33,34<br>,35 | 0  |                                                                       |
| 6422 | 1,3,5,6,8,2<br>7,29,32 | 2,4,7,28,3<br>0,31,33,34<br>,35 | 3  | P06760,P51907,Q9Z1F2                                                  |



|      |                        |                                 |    |                                                                       |
|------|------------------------|---------------------------------|----|-----------------------------------------------------------------------|
| 6423 | 1,3,5,6,8,2<br>7,29,33 | 2,4,7,28,3<br>0,31,32,34<br>,35 | 2  | P53792,Q80WL1                                                         |
| 6424 | 1,3,5,6,8,2<br>7,29,34 | 2,4,7,28,3<br>0,31,32,33<br>,35 | 4  | P51907,Q6IRE4,Q9QW07,Q9WTT6                                           |
| 6425 | 1,3,5,6,8,2<br>7,29,35 | 2,4,7,28,3<br>0,31,32,33<br>,34 | 3  | P01681,P01946,P51907                                                  |
| 6426 | 1,3,5,6,8,2<br>7,30,31 | 2,4,7,28,2<br>9,32,33,34<br>,35 | 1  | P19218                                                                |
| 6427 | 1,3,5,6,8,2<br>7,30,32 | 2,4,7,28,2<br>9,31,33,34<br>,35 | 2  | P02803,P06760                                                         |
| 6428 | 1,3,5,6,8,2<br>7,30,33 | 2,4,7,28,2<br>9,31,32,34<br>,35 | 0  |                                                                       |
| 6429 | 1,3,5,6,8,2<br>7,30,34 | 2,4,7,28,2<br>9,31,32,33<br>,35 | 3  | P35280,Q6IRE4,Q9WTT6                                                  |
| 6430 | 1,3,5,6,8,2<br>7,30,35 | 2,4,7,28,2<br>9,31,32,33<br>,34 | 0  |                                                                       |
| 6431 | 1,3,5,6,8,2<br>7,31,32 | 2,4,7,28,2<br>9,30,33,34<br>,35 | 3  | P06760,P14480,Q9Z1F2                                                  |
| 6432 | 1,3,5,6,8,2<br>7,31,33 | 2,4,7,28,2<br>9,30,32,34<br>,35 | 1  | P14480                                                                |
| 6433 | 1,3,5,6,8,2<br>7,31,34 | 2,4,7,28,2<br>9,30,32,33<br>,35 | 3  | P08753,Q6IRE4,Q9WTT6                                                  |
| 6434 | 1,3,5,6,8,2<br>7,31,35 | 2,4,7,28,2<br>9,30,32,33<br>,34 | 0  |                                                                       |
| 6435 | 1,3,5,6,8,2<br>7,32,33 | 2,4,7,28,2<br>9,30,31,34<br>,35 | 10 | P06760,P14480,P55314,Q4FZU2,Q5I0D1,Q6IFW6,Q6IG02,Q6P6Q2,Q80WL1,Q9Z1F2 |
| 6436 | 1,3,5,6,8,2<br>7,32,34 | 2,4,7,28,2<br>9,30,31,33<br>,35 | 7  | P01015,P06760,P08753,P51907,Q6IRE4,Q9WTT6,Q9Z1F2                      |
| 6437 | 1,3,5,6,8,2<br>7,32,35 | 2,4,7,28,2<br>9,30,31,33<br>,34 | 3  | P06760,P08753,P51907                                                  |

|      |                        |                                 |   |                                                  |
|------|------------------------|---------------------------------|---|--------------------------------------------------|
| 6438 | 1,3,5,6,8,2<br>7,33,34 | 2,4,7,28,2<br>9,30,31,32<br>,35 | 5 | P08753,Q4FZU2,Q6IRE4,Q80WL1,Q9WTT6               |
| 6439 | 1,3,5,6,8,2<br>7,33,35 | 2,4,7,28,2<br>9,30,31,32<br>,34 | 3 | P01836,Q6IG02,Q80WL1                             |
| 6440 | 1,3,5,6,8,2<br>7,34,35 | 2,4,7,28,2<br>9,30,31,32<br>,33 | 4 | P08753,P83121,Q6IRE4,Q9WTT6                      |
| 6441 | 1,3,5,6,8,2<br>8,29,30 | 2,4,7,27,3<br>1,32,33,34<br>,35 | 5 | F1LM93,O35547,P01681,Q63942,Q9QW07               |
| 6442 | 1,3,5,6,8,2<br>8,29,31 | 2,4,7,27,3<br>0,32,33,34<br>,35 | 5 | O35547,O54728,P01681,Q63942,Q9QW07               |
| 6443 | 1,3,5,6,8,2<br>8,29,32 | 2,4,7,27,3<br>0,31,33,34<br>,35 | 7 | O35547,P01681,P51907,Q561R9,Q63942,Q6P777,Q9QW07 |
| 6444 | 1,3,5,6,8,2<br>8,29,33 | 2,4,7,27,3<br>0,31,32,34<br>,35 | 4 | O35547,P01681,Q63942,Q80WL1                      |
| 6445 | 1,3,5,6,8,2<br>8,29,34 | 2,4,7,27,3<br>0,31,32,33<br>,35 | 7 | O35547,P01681,Q63942,Q6IRE4,Q6P777,Q9QW07,Q9WTT6 |
| 6446 | 1,3,5,6,8,2<br>8,29,35 | 2,4,7,27,3<br>0,31,32,33<br>,34 | 4 | P01681,P51907,Q63942,Q9QW07                      |
| 6447 | 1,3,5,6,8,2<br>8,30,31 | 2,4,7,27,2<br>9,32,33,34<br>,35 | 2 | O54728,P01681                                    |
| 6448 | 1,3,5,6,8,2<br>8,30,32 | 2,4,7,27,2<br>9,31,33,34<br>,35 | 2 | P01681,Q561R9                                    |
| 6449 | 1,3,5,6,8,2<br>8,30,33 | 2,4,7,27,2<br>9,31,32,34<br>,35 | 0 |                                                  |
| 6450 | 1,3,5,6,8,2<br>8,30,34 | 2,4,7,27,2<br>9,31,32,33<br>,35 | 3 | P01681,Q6IRE4,Q9WTT6                             |
| 6451 | 1,3,5,6,8,2<br>8,30,35 | 2,4,7,27,2<br>9,31,32,33<br>,34 | 1 | P01681                                           |
| 6452 | 1,3,5,6,8,2<br>8,31,32 | 2,4,7,27,2<br>9,30,33,34<br>,35 | 3 | O54728,P14480,Q561R9                             |

|      |                        |                                 |   |                                                  |
|------|------------------------|---------------------------------|---|--------------------------------------------------|
| 6453 | 1,3,5,6,8,2<br>8,31,33 | 2,4,7,27,2<br>9,30,32,34<br>,35 | 2 | O54728,P14480                                    |
| 6454 | 1,3,5,6,8,2<br>8,31,34 | 2,4,7,27,2<br>9,30,32,33<br>,35 | 3 | O54728,Q6IRE4,Q9QW07                             |
| 6455 | 1,3,5,6,8,2<br>8,31,35 | 2,4,7,27,2<br>9,30,32,33<br>,34 | 2 | O54728,P01681                                    |
| 6456 | 1,3,5,6,8,2<br>8,32,33 | 2,4,7,27,2<br>9,30,31,34<br>,35 | 5 | D3ZUC6,P14480,P55314,Q561R9,Q80WL1               |
| 6457 | 1,3,5,6,8,2<br>8,32,34 | 2,4,7,27,2<br>9,30,31,33<br>,35 | 7 | D3ZUC6,P51907,Q561R9,Q6IRE4,Q6P777,Q9QW07,Q9WTT6 |
| 6458 | 1,3,5,6,8,2<br>8,32,35 | 2,4,7,27,2<br>9,30,31,33<br>,34 | 3 | P01681,P04218,P51907                             |
| 6459 | 1,3,5,6,8,2<br>8,33,34 | 2,4,7,27,2<br>9,30,31,32<br>,35 | 4 | D3ZUC6,Q62894,Q6IRE4,Q80WL1                      |
| 6460 | 1,3,5,6,8,2<br>8,33,35 | 2,4,7,27,2<br>9,30,31,32<br>,34 | 2 | P01681,Q80WL1                                    |
| 6461 | 1,3,5,6,8,2<br>8,34,35 | 2,4,7,27,2<br>9,30,31,32<br>,33 | 3 | P01681,Q6IRE4,Q9QW07                             |
| 6462 | 1,3,5,6,8,2<br>9,30,31 | 2,4,7,27,2<br>8,32,33,34<br>,35 | 0 |                                                  |
| 6463 | 1,3,5,6,8,2<br>9,30,32 | 2,4,7,27,2<br>8,31,33,34<br>,35 | 3 | P51907,P53792,Q561R9                             |
| 6464 | 1,3,5,6,8,2<br>9,30,33 | 2,4,7,27,2<br>8,31,32,34<br>,35 | 1 | P53792                                           |
| 6465 | 1,3,5,6,8,2<br>9,30,34 | 2,4,7,27,2<br>8,31,32,33<br>,35 | 3 | Q6IRE4,Q99MH3,Q9QW07                             |
| 6466 | 1,3,5,6,8,2<br>9,30,35 | 2,4,7,27,2<br>8,31,32,33<br>,34 | 3 | P01681,P51907,Q06000                             |
| 6467 | 1,3,5,6,8,2<br>9,31,32 | 2,4,7,27,2<br>8,30,33,34<br>,35 | 5 | P51907,P53792,Q561R9,Q6AYQ8,Q8CJD3               |

|      |                        |                                 |   |                                                                |
|------|------------------------|---------------------------------|---|----------------------------------------------------------------|
| 6468 | 1,3,5,6,8,2<br>9,31,33 | 2,4,7,27,2<br>8,30,32,34<br>,35 | 3 | D3ZUC6,P53792,Q6AYQ8                                           |
| 6469 | 1,3,5,6,8,2<br>9,31,34 | 2,4,7,27,2<br>8,30,32,33<br>,35 | 5 | D3ZUC6,Q6AYQ8,Q6IRE4,Q99MH3,Q9QW07                             |
| 6470 | 1,3,5,6,8,2<br>9,31,35 | 2,4,7,27,2<br>8,30,32,33<br>,34 | 1 | P51907                                                         |
| 6471 | 1,3,5,6,8,2<br>9,32,33 | 2,4,7,27,2<br>8,30,31,34<br>,35 | 9 | D3ZUC6,P47967,P51907,P53792,P55314,Q561R9,Q6AYQ8,Q80WL1,Q8CJD3 |
| 6472 | 1,3,5,6,8,2<br>9,32,34 | 2,4,7,27,2<br>8,30,31,33<br>,35 | 6 | D3ZUC6,P51907,Q6AYQ8,Q6IRE4,Q99MH3,Q9QW07                      |
| 6473 | 1,3,5,6,8,2<br>9,32,35 | 2,4,7,27,2<br>8,30,31,33<br>,34 | 3 | P01681,P47967,P51907                                           |
| 6474 | 1,3,5,6,8,2<br>9,33,34 | 2,4,7,27,2<br>8,30,31,32<br>,35 | 4 | D3ZUC6,Q6AYQ8,Q6IRE4,Q80WL1                                    |
| 6475 | 1,3,5,6,8,2<br>9,33,35 | 2,4,7,27,2<br>8,30,31,32<br>,34 | 5 | P47967,P51907,P97840,Q6AYQ8,Q80WL1                             |
| 6476 | 1,3,5,6,8,2<br>9,34,35 | 2,4,7,27,2<br>8,30,31,32<br>,33 | 4 | P51907,Q6AYQ8,Q6IRE4,Q9QW07                                    |
| 6477 | 1,3,5,6,8,3<br>0,31,32 | 2,4,7,27,2<br>8,29,33,34<br>,35 | 1 | Q561R9                                                         |
| 6478 | 1,3,5,6,8,3<br>0,31,33 | 2,4,7,27,2<br>8,29,32,34<br>,35 | 1 | P19218                                                         |
| 6479 | 1,3,5,6,8,3<br>0,31,34 | 2,4,7,27,2<br>8,29,32,33<br>,35 | 2 | P19218,Q6IRE4                                                  |
| 6480 | 1,3,5,6,8,3<br>0,31,35 | 2,4,7,27,2<br>8,29,32,33<br>,34 | 2 | P24368,Q06000                                                  |
| 6481 | 1,3,5,6,8,3<br>0,32,33 | 2,4,7,27,2<br>8,29,31,34<br>,35 | 3 | P53792,P55314,Q561R9                                           |
| 6482 | 1,3,5,6,8,3<br>0,32,34 | 2,4,7,27,2<br>8,29,31,33<br>,35 | 3 | P08753,Q6IRE4,Q99MH3                                           |

|      |                         |                                 |   |                                                         |
|------|-------------------------|---------------------------------|---|---------------------------------------------------------|
| 6483 | 1,3,5,6,8,3<br>0,32,35  | 2,4,7,27,2<br>8,29,31,33<br>,34 | 3 | P04218,P08753,P51907                                    |
| 6484 | 1,3,5,6,8,3<br>0,33,34  | 2,4,7,27,2<br>8,29,31,32<br>,35 | 2 | Q62894,Q6IRE4                                           |
| 6485 | 1,3,5,6,8,3<br>0,33,35  | 2,4,7,27,2<br>8,29,31,32<br>,34 | 0 |                                                         |
| 6486 | 1,3,5,6,8,3<br>0,34,35  | 2,4,7,27,2<br>8,29,31,32<br>,33 | 7 | P02793;Q7TP54,P06911,P08753,P19132,P24368,P82995,Q6IRE4 |
| 6487 | 1,3,5,6,8,3<br>1,32,33  | 2,4,7,27,2<br>8,29,30,34<br>,35 | 5 | D3ZUC6,P14480,P55314,Q561R9,Q8CJD3                      |
| 6488 | 1,3,5,6,8,3<br>1,32,34  | 2,4,7,27,2<br>8,29,30,33<br>,35 | 3 | D3ZUC6,P08753,Q6IRE4                                    |
| 6489 | 1,3,5,6,8,3<br>1,32,35  | 2,4,7,27,2<br>8,29,30,33<br>,34 | 4 | P04218,P08753,P51907,P82995                             |
| 6490 | 1,3,5,6,8,3<br>1,33,34  | 2,4,7,27,2<br>8,29,30,32<br>,35 | 5 | D3ZUC6,P08753,P14480,Q6AYQ8,Q6IRE4                      |
| 6491 | 1,3,5,6,8,3<br>1,33,35  | 2,4,7,27,2<br>8,29,30,32<br>,34 | 1 | P82995                                                  |
| 6492 | 1,3,5,6,8,3<br>1,34,35  | 2,4,7,27,2<br>8,29,30,32<br>,33 | 5 | P02793;Q7TP54,P08753,P24368,P82995,Q6IRE4               |
| 6493 | 1,3,5,6,8,3<br>2,33,34  | 2,4,7,27,2<br>8,29,30,31<br>,35 | 6 | D3ZUC6,O70594,P08753,P55314,Q62894,Q6IRE4               |
| 6494 | 1,3,5,6,8,3<br>2,33,35  | 2,4,7,27,2<br>8,29,30,31<br>,34 | 8 | P04218,P08753,P47967,P51907,P55314,P82995,Q6AYR9,Q80WL1 |
| 6495 | 1,3,5,6,8,3<br>2,34,35  | 2,4,7,27,2<br>8,29,30,31<br>,33 | 7 | D3ZUC6,P08753,P35467,P36374,P51907,P82995,Q6IRE4        |
| 6496 | 1,3,5,6,8,3<br>3,34,35  | 2,4,7,27,2<br>8,29,30,31<br>,32 | 5 | D3ZUC6,P08753,P82995,Q6AYR9,Q6IRE4                      |
| 6497 | 1,3,5,6,27,<br>28,29,30 | 2,4,7,8,31,<br>32,33,34,3<br>5  | 6 | F1LM93,O08815,O35547,P01681,P01835,Q9QW07               |

|      |                         |                                |    |                                                                       |
|------|-------------------------|--------------------------------|----|-----------------------------------------------------------------------|
| 6498 | 1,3,5,6,27,<br>28,29,31 | 2,4,7,8,30,<br>32,33,34,3<br>5 | 4  | O35547,P01681,Q80WL1,Q9QW07                                           |
| 6499 | 1,3,5,6,27,<br>28,29,32 | 2,4,7,8,30,<br>31,33,34,3<br>5 | 9  | F1LM93,O08815,O35547,P01681,Q561R9,Q6P777,Q80WL1,Q9JHB9,Q9QW07        |
| 6500 | 1,3,5,6,27,<br>28,29,33 | 2,4,7,8,30,<br>31,32,34,3<br>5 | 4  | O35547,P01681,Q4FZU2,Q80WL1                                           |
| 6501 | 1,3,5,6,27,<br>28,29,34 | 2,4,7,8,30,<br>31,32,33,3<br>5 | 6  | O35547,P01681,P04182,Q6IRE4,Q80WL1,Q9QW07                             |
| 6502 | 1,3,5,6,27,<br>28,29,35 | 2,4,7,8,30,<br>31,32,33,3<br>4 | 5  | P01681,P01946,P02091,Q80WL1,Q9QW07                                    |
| 6503 | 1,3,5,6,27,<br>28,30,31 | 2,4,7,8,29,<br>32,33,34,3<br>5 | 1  | Q6TMA8                                                                |
| 6504 | 1,3,5,6,27,<br>28,30,32 | 2,4,7,8,29,<br>31,33,34,3<br>5 | 3  | P01681,P01835,Q561R9                                                  |
| 6505 | 1,3,5,6,27,<br>28,30,33 | 2,4,7,8,29,<br>31,32,34,3<br>5 | 2  | Q6TMA8,Q80WL1                                                         |
| 6506 | 1,3,5,6,27,<br>28,30,34 | 2,4,7,8,29,<br>31,32,33,3<br>5 | 4  | P04182,P35280,Q6IRE4,Q8CJD3                                           |
| 6507 | 1,3,5,6,27,<br>28,30,35 | 2,4,7,8,29,<br>31,32,33,3<br>4 | 3  | P01681,P01835,Q6TMA8                                                  |
| 6508 | 1,3,5,6,27,<br>28,31,32 | 2,4,7,8,29,<br>30,33,34,3<br>5 | 3  | P14480,Q561R9,Q80WL1                                                  |
| 6509 | 1,3,5,6,27,<br>28,31,33 | 2,4,7,8,29,<br>30,32,34,3<br>5 | 5  | P14480,Q4FZU2,Q6TMA8,Q80WL1,Q920P0                                    |
| 6510 | 1,3,5,6,27,<br>28,31,34 | 2,4,7,8,29,<br>30,32,33,3<br>5 | 4  | P04182,Q6IRE4,Q6TMA8,Q9QW07                                           |
| 6511 | 1,3,5,6,27,<br>28,31,35 | 2,4,7,8,29,<br>30,32,33,3<br>4 | 2  | P01681,Q6TMA8                                                         |
| 6512 | 1,3,5,6,27,<br>28,32,33 | 2,4,7,8,29,<br>30,31,34,3<br>5 | 10 | P14480,P55314,Q4FZU2,Q561R9,Q6IFU7,Q6IFW6,Q6IG02,Q6IMF3,Q6P6Q2,Q80WL1 |

|      |                         |                                |   |                                                                |
|------|-------------------------|--------------------------------|---|----------------------------------------------------------------|
| 6513 | 1,3,5,6,27,<br>28,32,34 | 2,4,7,8,29,<br>30,31,33,3<br>5 | 9 | P04182,P17046,Q10758,Q4FZU2,Q6IFU7,Q6IRE4,Q6P777,Q80WL1,Q9QW07 |
| 6514 | 1,3,5,6,27,<br>28,32,35 | 2,4,7,8,29,<br>30,31,33,3<br>4 | 3 | P01681,Q6IG02,Q80WL1                                           |
| 6515 | 1,3,5,6,27,<br>28,33,34 | 2,4,7,8,29,<br>30,31,32,3<br>5 | 4 | P04182,Q4FZU2,Q6IRE4,Q80WL1                                    |
| 6516 | 1,3,5,6,27,<br>28,33,35 | 2,4,7,8,29,<br>30,31,32,3<br>4 | 5 | P01681,Q4FZU2,Q6IG02,Q6TMA8,Q80WL1                             |
| 6517 | 1,3,5,6,27,<br>28,34,35 | 2,4,7,8,29,<br>30,31,32,3<br>3 | 6 | P01681,P04182,Q5HZV9,Q6IRE4,Q80WL1,Q9QW07                      |
| 6518 | 1,3,5,6,27,<br>29,30,31 | 2,4,7,8,28,<br>32,33,34,3<br>5 | 0 |                                                                |
| 6519 | 1,3,5,6,27,<br>29,30,32 | 2,4,7,8,28,<br>31,33,34,3<br>5 | 3 | P01835,P02803,Q561R9                                           |
| 6520 | 1,3,5,6,27,<br>29,30,33 | 2,4,7,8,28,<br>31,32,34,3<br>5 | 2 | P20766,Q80WL1                                                  |
| 6521 | 1,3,5,6,27,<br>29,30,34 | 2,4,7,8,28,<br>31,32,33,3<br>5 | 4 | P02803,P35280,Q6IRE4,Q9QW07                                    |
| 6522 | 1,3,5,6,27,<br>29,30,35 | 2,4,7,8,28,<br>31,32,33,3<br>4 | 3 | P01681,P01835,P01946                                           |
| 6523 | 1,3,5,6,27,<br>29,31,32 | 2,4,7,8,28,<br>30,33,34,3<br>5 | 2 | Q561R9,Q80WL1                                                  |
| 6524 | 1,3,5,6,27,<br>29,31,33 | 2,4,7,8,28,<br>30,32,34,3<br>5 | 1 | Q80WL1                                                         |
| 6525 | 1,3,5,6,27,<br>29,31,34 | 2,4,7,8,28,<br>30,32,33,3<br>5 | 2 | Q6IRE4,Q9QW07                                                  |
| 6526 | 1,3,5,6,27,<br>29,31,35 | 2,4,7,8,28,<br>30,32,33,3<br>4 | 1 | P01946                                                         |
| 6527 | 1,3,5,6,27,<br>29,32,33 | 2,4,7,8,28,<br>30,31,34,3<br>5 | 6 | P53792,P55314,Q4FZU2,Q6IG02,Q6P6Q2,Q80WL1                      |

|      |                         |                                |   |                                                                |
|------|-------------------------|--------------------------------|---|----------------------------------------------------------------|
| 6528 | 1,3,5,6,27,<br>29,32,34 | 2,4,7,8,28,<br>30,31,33,3<br>5 | 9 | P02761,P02803,P06760,P17046,P51907,Q10758,Q6IRE4,Q80WL1,Q9QW07 |
| 6529 | 1,3,5,6,27,<br>29,32,35 | 2,4,7,8,28,<br>30,31,33,3<br>4 | 4 | P01946,P47967,P51907,Q80WL1                                    |
| 6530 | 1,3,5,6,27,<br>29,33,34 | 2,4,7,8,28,<br>30,31,32,3<br>5 | 3 | Q4FZU2,Q6IRE4,Q80WL1                                           |
| 6531 | 1,3,5,6,27,<br>29,33,35 | 2,4,7,8,28,<br>30,31,32,3<br>4 | 4 | P01946,P47967,Q4FZU2,Q80WL1                                    |
| 6532 | 1,3,5,6,27,<br>29,34,35 | 2,4,7,8,28,<br>30,31,32,3<br>3 | 5 | P01946,P02091,Q6IRE4,Q80WL1,Q9QW07                             |
| 6533 | 1,3,5,6,27,<br>30,31,32 | 2,4,7,8,28,<br>29,33,34,3<br>5 | 1 | Q561R9                                                         |
| 6534 | 1,3,5,6,27,<br>30,31,33 | 2,4,7,8,28,<br>29,32,34,3<br>5 | 2 | P19218,Q6TMA8                                                  |
| 6535 | 1,3,5,6,27,<br>30,31,34 | 2,4,7,8,28,<br>29,32,33,3<br>5 | 3 | P19218,P35280,Q6IRE4                                           |
| 6536 | 1,3,5,6,27,<br>30,31,35 | 2,4,7,8,28,<br>29,32,33,3<br>4 | 1 | Q6TMA8                                                         |
| 6537 | 1,3,5,6,27,<br>30,32,33 | 2,4,7,8,28,<br>29,31,34,3<br>5 | 5 | P02803,P55314,Q4FZU2,Q6IG02,Q80WL1                             |
| 6538 | 1,3,5,6,27,<br>30,32,34 | 2,4,7,8,28,<br>29,31,33,3<br>5 | 6 | P02803,P06760,P17046,P35280,Q10758,Q6IRE4                      |
| 6539 | 1,3,5,6,27,<br>30,32,35 | 2,4,7,8,28,<br>29,31,33,3<br>4 | 1 | P01835                                                         |
| 6540 | 1,3,5,6,27,<br>30,33,34 | 2,4,7,8,28,<br>29,31,32,3<br>5 | 3 | P35280,Q4FZU2,Q6IRE4                                           |
| 6541 | 1,3,5,6,27,<br>30,33,35 | 2,4,7,8,28,<br>29,31,32,3<br>4 | 0 |                                                                |
| 6542 | 1,3,5,6,27,<br>30,34,35 | 2,4,7,8,28,<br>29,31,32,3<br>3 | 4 | P02793;Q7TP54,P06911,P35280,Q6IRE4                             |



|      |                         |                                |    |                                                                              |
|------|-------------------------|--------------------------------|----|------------------------------------------------------------------------------|
| 6543 | 1,3,5,6,27,<br>31,32,33 | 2,4,7,8,28,<br>29,30,34,3<br>5 | 6  | P14480,P55314,Q4FZU2,Q6IG02,Q6P6Q2,Q80WL1                                    |
| 6544 | 1,3,5,6,27,<br>31,32,34 | 2,4,7,8,28,<br>29,30,33,3<br>5 | 3  | P17046,Q10758,Q6IRE4                                                         |
| 6545 | 1,3,5,6,27,<br>31,32,35 | 2,4,7,8,28,<br>29,30,33,3<br>4 | 1  | Q9QZA6                                                                       |
| 6546 | 1,3,5,6,27,<br>31,33,34 | 2,4,7,8,28,<br>29,30,32,3<br>5 | 3  | Q4FZU2,Q6IRE4,Q80WL1                                                         |
| 6547 | 1,3,5,6,27,<br>31,33,35 | 2,4,7,8,28,<br>29,30,32,3<br>4 | 2  | Q4FZU2,Q80WL1                                                                |
| 6548 | 1,3,5,6,27,<br>31,34,35 | 2,4,7,8,28,<br>29,30,32,3<br>3 | 2  | P02780,Q6IRE4                                                                |
| 6549 | 1,3,5,6,27,<br>32,33,34 | 2,4,7,8,28,<br>29,30,31,3<br>5 | 11 | P02761,P17046,P55314,Q10758,Q4FZU2,Q6IFU8,Q6IFW6,Q6IG02,Q6IRE4,Q6P6Q2,Q80WL1 |
| 6550 | 1,3,5,6,27,<br>32,33,35 | 2,4,7,8,28,<br>29,30,31,3<br>4 | 7  | P55314,Q4FZU2,Q6IFW6,Q6IG02,Q6NX65,Q6P6Q2,Q80WL1                             |
| 6551 | 1,3,5,6,27,<br>32,34,35 | 2,4,7,8,28,<br>29,30,31,3<br>3 | 7  | P08753,P17046,P83121,Q10758,Q4FZU2,Q6IRE4,Q80WL1                             |
| 6552 | 1,3,5,6,27,<br>33,34,35 | 2,4,7,8,28,<br>29,30,31,3<br>2 | 4  | Q4FZU2,Q62975,Q6IRE4,Q80WL1                                                  |
| 6553 | 1,3,5,6,28,<br>29,30,31 | 2,4,7,8,27,<br>32,33,34,3<br>5 | 3  | P01681,Q561R9,Q9QW07                                                         |
| 6554 | 1,3,5,6,28,<br>29,30,32 | 2,4,7,8,27,<br>31,33,34,3<br>5 | 5  | F1LM93,P01681,P01835,Q561R9,Q99MH3                                           |
| 6555 | 1,3,5,6,28,<br>29,30,33 | 2,4,7,8,27,<br>31,32,34,3<br>5 | 3  | O35547,P01681,Q80WL1                                                         |
| 6556 | 1,3,5,6,28,<br>29,30,34 | 2,4,7,8,27,<br>31,32,33,3<br>5 | 4  | P01681,Q6IRE4,Q99MH3,Q9QW07                                                  |
| 6557 | 1,3,5,6,28,<br>29,30,35 | 2,4,7,8,27,<br>31,32,33,3<br>4 | 3  | P01681,P01835,Q9QW07                                                         |

|      |                         |                                |   |                                                                |
|------|-------------------------|--------------------------------|---|----------------------------------------------------------------|
| 6558 | 1,3,5,6,28,<br>29,31,32 | 2,4,7,8,27,<br>30,33,34,3<br>5 | 6 | P01681,P06911,Q561R9,Q80WL1,Q99MH3,Q9QW07                      |
| 6559 | 1,3,5,6,28,<br>29,31,33 | 2,4,7,8,27,<br>30,32,34,3<br>5 | 4 | O35547,P00714,Q80WL1,Q9QW07                                    |
| 6560 | 1,3,5,6,28,<br>29,31,34 | 2,4,7,8,27,<br>30,32,33,3<br>5 | 4 | P00714,Q6IRE4,Q99MH3,Q9QW07                                    |
| 6561 | 1,3,5,6,28,<br>29,31,35 | 2,4,7,8,27,<br>30,32,33,3<br>4 | 4 | P00714,P01681,Q00715,Q9QW07                                    |
| 6562 | 1,3,5,6,28,<br>29,32,33 | 2,4,7,8,27,<br>30,31,34,3<br>5 | 6 | P47967,P55314,Q561R9,Q64057,Q6P777,Q80WL1                      |
| 6563 | 1,3,5,6,28,<br>29,32,34 | 2,4,7,8,27,<br>30,31,33,3<br>5 | 9 | P01681,P17046,P51907,Q561R9,Q6IRE4,Q6P777,Q80WL1,Q99MH3,Q9QW07 |
| 6564 | 1,3,5,6,28,<br>29,32,35 | 2,4,7,8,27,<br>30,31,33,3<br>4 | 5 | P01681,P47967,P51907,Q80WL1,Q9QW07                             |
| 6565 | 1,3,5,6,28,<br>29,33,34 | 2,4,7,8,27,<br>30,31,32,3<br>5 | 5 | Q64057,Q6IRE4,Q80WL1,Q99MH3,Q9QW07                             |
| 6566 | 1,3,5,6,28,<br>29,33,35 | 2,4,7,8,27,<br>30,31,32,3<br>4 | 5 | P00714,P01681,P47967,Q80WL1,Q9QW07                             |
| 6567 | 1,3,5,6,28,<br>29,34,35 | 2,4,7,8,27,<br>30,31,32,3<br>3 | 6 | P00714,P01681,Q6IRE4,Q80WL1,Q99MH3,Q9QW07                      |
| 6568 | 1,3,5,6,28,<br>30,31,32 | 2,4,7,8,27,<br>29,33,34,3<br>5 | 1 | Q561R9                                                         |
| 6569 | 1,3,5,6,28,<br>30,31,33 | 2,4,7,8,27,<br>29,32,34,3<br>5 | 2 | P00714,Q561R9                                                  |
| 6570 | 1,3,5,6,28,<br>30,31,34 | 2,4,7,8,27,<br>29,32,33,3<br>5 | 4 | P23739,Q63617,Q6IRE4,Q9QW07                                    |
| 6571 | 1,3,5,6,28,<br>30,31,35 | 2,4,7,8,27,<br>29,32,33,3<br>4 | 4 | P00714,P01681,Q00715,Q6TMA8                                    |
| 6572 | 1,3,5,6,28,<br>30,32,33 | 2,4,7,8,27,<br>29,31,34,3<br>5 | 3 | P55314,Q561R9,Q80WL1                                           |

|      |                         |                                |   |                                                         |
|------|-------------------------|--------------------------------|---|---------------------------------------------------------|
| 6573 | 1,3,5,6,28,<br>30,32,34 | 2,4,7,8,27,<br>29,31,33,3<br>5 | 4 | P17046,Q561R9,Q6IRE4,Q99MH3                             |
| 6574 | 1,3,5,6,28,<br>30,32,35 | 2,4,7,8,27,<br>29,31,33,3<br>4 | 4 | P01681,P01835,P04218,Q561R9                             |
| 6575 | 1,3,5,6,28,<br>30,33,34 | 2,4,7,8,27,<br>29,31,32,3<br>5 | 1 | Q6IRE4                                                  |
| 6576 | 1,3,5,6,28,<br>30,33,35 | 2,4,7,8,27,<br>29,31,32,3<br>4 | 1 | P01681                                                  |
| 6577 | 1,3,5,6,28,<br>30,34,35 | 2,4,7,8,27,<br>29,31,32,3<br>3 | 6 | P01681,P02793;Q7TP54,Q63617,Q6IRE4,Q8CJD3,Q9QW07        |
| 6578 | 1,3,5,6,28,<br>31,32,33 | 2,4,7,8,27,<br>29,30,34,3<br>5 | 4 | P14480,P55314,Q561R9,Q80WL1                             |
| 6579 | 1,3,5,6,28,<br>31,32,34 | 2,4,7,8,27,<br>29,30,33,3<br>5 | 4 | Q561R9,Q6IRE4,Q99MH3,Q9QW07                             |
| 6580 | 1,3,5,6,28,<br>31,32,35 | 2,4,7,8,27,<br>29,30,33,3<br>4 | 4 | P01681,P04218,Q00715,Q561R9                             |
| 6581 | 1,3,5,6,28,<br>31,33,34 | 2,4,7,8,27,<br>29,30,32,3<br>5 | 5 | P00714,P14480,Q6IRE4,Q80WL1,Q9QW07                      |
| 6582 | 1,3,5,6,28,<br>31,33,35 | 2,4,7,8,27,<br>29,30,32,3<br>4 | 4 | P00714,P62804,Q00715,Q80WL1                             |
| 6583 | 1,3,5,6,28,<br>31,34,35 | 2,4,7,8,27,<br>29,30,32,3<br>3 | 6 | P00714,P62804,P82995,Q5HZV9,Q6IRE4,Q9QW07               |
| 6584 | 1,3,5,6,28,<br>32,33,34 | 2,4,7,8,27,<br>29,30,31,3<br>5 | 8 | P14480,P17046,P55314,Q561R9,Q64057,Q6IRE4,Q6P777,Q80WL1 |
| 6585 | 1,3,5,6,28,<br>32,33,35 | 2,4,7,8,27,<br>29,30,31,3<br>4 | 4 | P01681,P47967,P55314,Q80WL1                             |
| 6586 | 1,3,5,6,28,<br>32,34,35 | 2,4,7,8,27,<br>29,30,31,3<br>3 | 7 | P01681,P17046,P82995,Q5HZV9,Q6IRE4,Q80WL1,Q9QW07        |
| 6587 | 1,3,5,6,28,<br>33,34,35 | 2,4,7,8,27,<br>29,30,31,3<br>2 | 4 | P00714,P82995,Q6IRE4,Q80WL1                             |

|      |                         |                                |   |                                                         |
|------|-------------------------|--------------------------------|---|---------------------------------------------------------|
| 6588 | 1,3,5,6,29,<br>30,31,32 | 2,4,7,8,27,<br>28,33,34,3<br>5 | 2 | Q561R9,Q99MH3                                           |
| 6589 | 1,3,5,6,29,<br>30,31,33 | 2,4,7,8,27,<br>28,32,34,3<br>5 | 2 | P00714,P53792                                           |
| 6590 | 1,3,5,6,29,<br>30,31,34 | 2,4,7,8,27,<br>28,32,33,3<br>5 | 4 | P00714,Q6IRE4,Q99MH3,Q9QW07                             |
| 6591 | 1,3,5,6,29,<br>30,31,35 | 2,4,7,8,27,<br>28,32,33,3<br>4 | 1 | P00714                                                  |
| 6592 | 1,3,5,6,29,<br>30,32,33 | 2,4,7,8,27,<br>28,31,34,3<br>5 | 5 | P53792,P55314,Q561R9,Q80WL1,Q99MH3                      |
| 6593 | 1,3,5,6,29,<br>30,32,34 | 2,4,7,8,27,<br>28,31,33,3<br>5 | 3 | P17046,Q6IRE4,Q99MH3                                    |
| 6594 | 1,3,5,6,29,<br>30,32,35 | 2,4,7,8,27,<br>28,31,33,3<br>4 | 4 | P01681,P01835,P51907,Q99MH3                             |
| 6595 | 1,3,5,6,29,<br>30,33,34 | 2,4,7,8,27,<br>28,31,32,3<br>5 | 3 | P00714,Q6IRE4,Q99MH3                                    |
| 6596 | 1,3,5,6,29,<br>30,33,35 | 2,4,7,8,27,<br>28,31,32,3<br>4 | 1 | P00714                                                  |
| 6597 | 1,3,5,6,29,<br>30,34,35 | 2,4,7,8,27,<br>28,31,32,3<br>3 | 5 | P00714,P02793,Q7TP54,Q6IRE4,Q99MH3,Q9QW07               |
| 6598 | 1,3,5,6,29,<br>31,32,33 | 2,4,7,8,27,<br>28,30,34,3<br>5 | 8 | P47967,P53792,P55314,Q561R9,Q64057,Q6AYQ8,Q80WL1,Q99MH3 |
| 6599 | 1,3,5,6,29,<br>31,32,34 | 2,4,7,8,27,<br>28,30,33,3<br>5 | 4 | Q6AYQ8,Q6IRE4,Q99MH3,Q9QW07                             |
| 6600 | 1,3,5,6,29,<br>31,32,35 | 2,4,7,8,27,<br>28,30,33,3<br>4 | 4 | P47967,P51907,Q6AYQ8,Q99MH3                             |
| 6601 | 1,3,5,6,29,<br>31,33,34 | 2,4,7,8,27,<br>28,30,32,3<br>5 | 7 | P00714,Q64057,Q6AYQ8,Q6IRE4,Q80WL1,Q99MH3,Q9QW07        |
| 6602 | 1,3,5,6,29,<br>31,33,35 | 2,4,7,8,27,<br>28,30,32,3<br>4 | 4 | P00714,P47967,Q6AYQ8,Q80WL1                             |

|      |                         |                                |   |                                                                       |
|------|-------------------------|--------------------------------|---|-----------------------------------------------------------------------|
| 6603 | 1,3,5,6,29,<br>31,34,35 | 2,4,7,8,27,<br>28,30,32,3<br>3 | 5 | P00714,Q6AYQ8,Q6IRE4,Q99MH3,Q9QW07                                    |
| 6604 | 1,3,5,6,29,<br>32,33,34 | 2,4,7,8,27,<br>28,30,31,3<br>5 | 9 | D3ZUC6,P02761,P17046,P55314,Q64057,Q6AYQ8,Q6IRE4,Q80WL1,Q99MH3        |
| 6605 | 1,3,5,6,29,<br>32,33,35 | 2,4,7,8,27,<br>28,30,31,3<br>4 | 5 | P47967,P51907,P55314,Q6AYQ8,Q80WL1                                    |
| 6606 | 1,3,5,6,29,<br>32,34,35 | 2,4,7,8,27,<br>28,30,31,3<br>3 | 7 | P17046,P51907,Q6AYQ8,Q6IRE4,Q80WL1,Q99MH3,Q9QW07                      |
| 6607 | 1,3,5,6,29,<br>33,34,35 | 2,4,7,8,27,<br>28,30,31,3<br>2 | 6 | P00714,Q6AYQ8,Q6IRE4,Q80WL1,Q99MH3,Q9QW07                             |
| 6608 | 1,3,5,6,30,<br>31,32,33 | 2,4,7,8,27,<br>28,29,34,3<br>5 | 2 | P55314,Q561R9                                                         |
| 6609 | 1,3,5,6,30,<br>31,32,34 | 2,4,7,8,27,<br>28,29,33,3<br>5 | 6 | P82995,Q561R9,Q63617,Q6IRE4,Q99MH3,Q9R0T3                             |
| 6610 | 1,3,5,6,30,<br>31,32,35 | 2,4,7,8,27,<br>28,29,33,3<br>4 | 2 | P04218,P82995                                                         |
| 6611 | 1,3,5,6,30,<br>31,33,34 | 2,4,7,8,27,<br>28,29,32,3<br>5 | 5 | P00714,P19218,P24368,P82995,Q6IRE4                                    |
| 6612 | 1,3,5,6,30,<br>31,33,35 | 2,4,7,8,27,<br>28,29,32,3<br>4 | 3 | P00714,P24368,P82995                                                  |
| 6613 | 1,3,5,6,30,<br>31,34,35 | 2,4,7,8,27,<br>28,29,32,3<br>3 | 9 | P00714,P02793;Q7TP54,P24368,P82471,P82995,Q63617,Q6IRE4,Q99MH3,Q9R0T3 |
| 6614 | 1,3,5,6,30,<br>32,33,34 | 2,4,7,8,27,<br>28,29,31,3<br>5 | 4 | P17046,P55314,Q6IRE4,Q99MH3                                           |
| 6615 | 1,3,5,6,30,<br>32,33,35 | 2,4,7,8,27,<br>28,29,31,3<br>4 | 2 | P55314,P82995                                                         |
| 6616 | 1,3,5,6,30,<br>32,34,35 | 2,4,7,8,27,<br>28,29,31,3<br>3 | 9 | P02793;Q7TP54,P08753,P17046,P82471,P82995,Q63617,Q6IRE4,Q99MH3,Q9R0T3 |
| 6617 | 1,3,5,6,30,<br>33,34,35 | 2,4,7,8,27,<br>28,29,31,3<br>2 | 9 | P00714,P02793;Q7TP54,P06911,P24368,P82471,P82995,Q5GRG2,Q6IRE4,Q9R0T3 |

|      |                         |                                 |   |                                                                |
|------|-------------------------|---------------------------------|---|----------------------------------------------------------------|
| 6618 | 1,3,5,6,31,<br>32,33,34 | 2,4,7,8,27,<br>28,29,30,3<br>5  | 8 | D3ZUC6,P14480,P55314,P82995,Q6AYQ8,Q6IRE4,Q80WL1,Q99MH3        |
| 6619 | 1,3,5,6,31,<br>32,33,35 | 2,4,7,8,27,<br>28,29,30,3<br>4  | 5 | P47967,P55314,P82995,Q6AYR9,Q80WL1                             |
| 6620 | 1,3,5,6,31,<br>32,34,35 | 2,4,7,8,27,<br>28,29,30,3<br>3  | 9 | P08753,P0C0A9,P24368,P82471,P82995,Q6IRE4,Q8CJ52,Q99MH3,Q9R0T3 |
| 6621 | 1,3,5,6,31,<br>33,34,35 | 2,4,7,8,27,<br>28,29,30,3<br>2  | 7 | P00714,P0C0A9,P24368,P82471,P82995,Q6AYQ8,Q6IRE4               |
| 6622 | 1,3,5,6,32,<br>33,34,35 | 2,4,7,8,27,<br>28,29,30,3<br>1  | 8 | P08753,P17046,P55314,P82471,P82995,Q6AYR9,Q6IRE4,Q80WL1        |
| 6623 | 1,3,5,7,8,2<br>7,28,29  | 2,4,6,30,3<br>1,32,33,34<br>,35 | 2 | O54728,Q9QW07                                                  |
| 6624 | 1,3,5,7,8,2<br>7,28,30  | 2,4,6,29,3<br>1,32,33,34<br>,35 | 3 | O54728,P25236,Q6TMA8                                           |
| 6625 | 1,3,5,7,8,2<br>7,28,31  | 2,4,6,29,3<br>0,32,33,34<br>,35 | 4 | O54728,P10715,P14480,Q6TMA8                                    |
| 6626 | 1,3,5,7,8,2<br>7,28,32  | 2,4,6,29,3<br>0,31,33,34<br>,35 | 4 | O54728,P14480,P24388,P25236                                    |
| 6627 | 1,3,5,7,8,2<br>7,28,33  | 2,4,6,29,3<br>0,31,32,34<br>,35 | 5 | O54728,P14480,P24388,P25236,Q6TMA8                             |
| 6628 | 1,3,5,7,8,2<br>7,28,34  | 2,4,6,29,3<br>0,31,32,33<br>,35 | 7 | O54728,P04182,P25236,Q62894,Q6IRE4,Q6TMA8,Q9QW07               |
| 6629 | 1,3,5,7,8,2<br>7,28,35  | 2,4,6,29,3<br>0,31,32,33<br>,34 | 4 | O54728,P01946,P25236,Q6TMA8                                    |
| 6630 | 1,3,5,7,8,2<br>7,29,30  | 2,4,6,28,3<br>1,32,33,34<br>,35 | 2 | P00507,Q5HZV9                                                  |
| 6631 | 1,3,5,7,8,2<br>7,29,31  | 2,4,6,28,3<br>0,32,33,34<br>,35 | 3 | O54728,P00507,Q5HZV9                                           |
| 6632 | 1,3,5,7,8,2<br>7,29,32  | 2,4,6,28,3<br>0,31,33,34<br>,35 | 3 | P00507,P51907,Q5HZV9                                           |

|      |                        |                                 |   |                                                                |
|------|------------------------|---------------------------------|---|----------------------------------------------------------------|
| 6633 | 1,3,5,7,8,2<br>7,29,33 | 2,4,6,28,3<br>0,31,32,34<br>,35 | 4 | P00507,P53792,Q5HZV9,Q64335                                    |
| 6634 | 1,3,5,7,8,2<br>7,29,34 | 2,4,6,28,3<br>0,31,32,33<br>,35 | 2 | Q6IRE4,Q9QW07                                                  |
| 6635 | 1,3,5,7,8,2<br>7,29,35 | 2,4,6,28,3<br>0,31,32,33<br>,34 | 3 | P01946,P02091,Q5HZV9                                           |
| 6636 | 1,3,5,7,8,2<br>7,30,31 | 2,4,6,28,2<br>9,32,33,34<br>,35 | 5 | O54728,P00507,P19218,Q5HZV9,Q6TMA8                             |
| 6637 | 1,3,5,7,8,2<br>7,30,32 | 2,4,6,28,2<br>9,31,33,34<br>,35 | 4 | P00507,P25236,Q09030,Q5HZV9                                    |
| 6638 | 1,3,5,7,8,2<br>7,30,33 | 2,4,6,28,2<br>9,31,32,34<br>,35 | 3 | P00507,P25236,Q5HZV9                                           |
| 6639 | 1,3,5,7,8,2<br>7,30,34 | 2,4,6,28,2<br>9,31,32,33<br>,35 | 4 | P25236,P35280,Q09030,Q6IRE4                                    |
| 6640 | 1,3,5,7,8,2<br>7,30,35 | 2,4,6,28,2<br>9,31,32,33<br>,34 | 1 | P06911                                                         |
| 6641 | 1,3,5,7,8,2<br>7,31,32 | 2,4,6,28,2<br>9,30,33,34<br>,35 | 4 | O54728,P00507,P14480,Q08849                                    |
| 6642 | 1,3,5,7,8,2<br>7,31,33 | 2,4,6,28,2<br>9,30,32,34<br>,35 | 6 | O54728,P00507,P14480,Q08849,Q5HZV9,Q6TMA8                      |
| 6643 | 1,3,5,7,8,2<br>7,31,34 | 2,4,6,28,2<br>9,30,32,33<br>,35 | 3 | A2RUV9,O54728,Q6IRE4                                           |
| 6644 | 1,3,5,7,8,2<br>7,31,35 | 2,4,6,28,2<br>9,30,32,33<br>,34 | 2 | O54728,Q6TMA8                                                  |
| 6645 | 1,3,5,7,8,2<br>7,32,33 | 2,4,6,28,2<br>9,30,31,34<br>,35 | 9 | P00507,P14480,P24388,P25236,P55314,Q08849,Q5HZV9,Q6IG02,Q6NX65 |
| 6646 | 1,3,5,7,8,2<br>7,32,34 | 2,4,6,28,2<br>9,30,31,33<br>,35 | 8 | P01015,P08753,P17046,P25236,P83121,Q08849,Q09030,Q6IRE4        |
| 6647 | 1,3,5,7,8,2<br>7,32,35 | 2,4,6,28,2<br>9,30,31,33<br>,34 | 2 | P08753,Q08849                                                  |

|      |                        |                                 |   |                                                                |
|------|------------------------|---------------------------------|---|----------------------------------------------------------------|
| 6648 | 1,3,5,7,8,2<br>7,33,34 | 2,4,6,28,2<br>9,30,31,32<br>,35 | 3 | P25236,Q62894,Q6IRE4                                           |
| 6649 | 1,3,5,7,8,2<br>7,33,35 | 2,4,6,28,2<br>9,30,31,32<br>,34 | 3 | P25236,Q62975,Q6AYR9                                           |
| 6650 | 1,3,5,7,8,2<br>7,34,35 | 2,4,6,28,2<br>9,30,31,32<br>,33 | 9 | P01946,P02780,P06911,P08753,P25236,P47727,P83121,Q62975,Q6IRE4 |
| 6651 | 1,3,5,7,8,2<br>8,29,30 | 2,4,6,27,3<br>1,32,33,34<br>,35 | 2 | O54728,Q9QW07                                                  |
| 6652 | 1,3,5,7,8,2<br>8,29,31 | 2,4,6,27,3<br>0,32,33,34<br>,35 | 3 | O54728,P10715,Q9QW07                                           |
| 6653 | 1,3,5,7,8,2<br>8,29,32 | 2,4,6,27,3<br>0,31,33,34<br>,35 | 2 | O54728,Q9QW07                                                  |
| 6654 | 1,3,5,7,8,2<br>8,29,33 | 2,4,6,27,3<br>0,31,32,34<br>,35 | 2 | O54728,P25236                                                  |
| 6655 | 1,3,5,7,8,2<br>8,29,34 | 2,4,6,27,3<br>0,31,32,33<br>,35 | 4 | O54728,Q6IRE4,Q9ET32,Q9QW07                                    |
| 6656 | 1,3,5,7,8,2<br>8,29,35 | 2,4,6,27,3<br>0,31,32,33<br>,34 | 4 | O54728,P01946,P02091,Q9QW07                                    |
| 6657 | 1,3,5,7,8,2<br>8,30,31 | 2,4,6,27,2<br>9,32,33,34<br>,35 | 2 | O54728,Q6TMA8                                                  |
| 6658 | 1,3,5,7,8,2<br>8,30,32 | 2,4,6,27,2<br>9,31,33,34<br>,35 | 3 | O54728,P25236,Q63355                                           |
| 6659 | 1,3,5,7,8,2<br>8,30,33 | 2,4,6,27,2<br>9,31,32,34<br>,35 | 2 | O54728,P25236                                                  |
| 6660 | 1,3,5,7,8,2<br>8,30,34 | 2,4,6,27,2<br>9,31,32,33<br>,35 | 4 | O54728,P25236,Q62894,Q6IRE4                                    |
| 6661 | 1,3,5,7,8,2<br>8,30,35 | 2,4,6,27,2<br>9,31,32,33<br>,34 | 2 | O54728,P25236                                                  |
| 6662 | 1,3,5,7,8,2<br>8,31,32 | 2,4,6,27,2<br>9,30,33,34<br>,35 | 3 | O54728,P10715,P14480                                           |



|      |                        |                                 |   |                                                  |
|------|------------------------|---------------------------------|---|--------------------------------------------------|
| 6663 | 1,3,5,7,8,2<br>8,31,33 | 2,4,6,27,2<br>9,30,32,34<br>,35 | 5 | O54728,P10715,P14480,Q6TMA8,Q8VD89               |
| 6664 | 1,3,5,7,8,2<br>8,31,34 | 2,4,6,27,2<br>9,30,32,33<br>,35 | 4 | O54728,P14480,Q6IRE4,Q9QW07                      |
| 6665 | 1,3,5,7,8,2<br>8,31,35 | 2,4,6,27,2<br>9,30,32,33<br>,34 | 4 | O54728,P62804,Q00715,Q6TMA8                      |
| 6666 | 1,3,5,7,8,2<br>8,32,33 | 2,4,6,27,2<br>9,30,31,34<br>,35 | 4 | O54728,P14480,P24388,P25236                      |
| 6667 | 1,3,5,7,8,2<br>8,32,34 | 2,4,6,27,2<br>9,30,31,33<br>,35 | 7 | O54728,P14480,P17046,P25236,Q62894,Q6IRE4,Q9QW07 |
| 6668 | 1,3,5,7,8,2<br>8,32,35 | 2,4,6,27,2<br>9,30,31,33<br>,34 | 4 | O54728,P04218,P25236,Q6AYR9                      |
| 6669 | 1,3,5,7,8,2<br>8,33,34 | 2,4,6,27,2<br>9,30,31,32<br>,35 | 5 | O54728,P14480,P25236,Q62894,Q6IRE4               |
| 6670 | 1,3,5,7,8,2<br>8,33,35 | 2,4,6,27,2<br>9,30,31,32<br>,34 | 4 | O54728,P25236,P62804,Q6AYR9                      |
| 6671 | 1,3,5,7,8,2<br>8,34,35 | 2,4,6,27,2<br>9,30,31,32<br>,33 | 5 | O54728,P25236,Q62894,Q6IRE4,Q9QW07               |
| 6672 | 1,3,5,7,8,2<br>9,30,31 | 2,4,6,27,2<br>8,32,33,34<br>,35 | 5 | O54728,P00507,Q4FZU6,Q5HZV9,Q6IFU7               |
| 6673 | 1,3,5,7,8,2<br>9,30,32 | 2,4,6,27,2<br>8,31,33,34<br>,35 | 2 | P53792,Q5HZV9                                    |
| 6674 | 1,3,5,7,8,2<br>9,30,33 | 2,4,6,27,2<br>8,31,32,34<br>,35 | 3 | P00507,P53792,Q5HZV9                             |
| 6675 | 1,3,5,7,8,2<br>9,30,34 | 2,4,6,27,2<br>8,31,32,33<br>,35 | 2 | Q6IRE4,Q9QW07                                    |
| 6676 | 1,3,5,7,8,2<br>9,30,35 | 2,4,6,27,2<br>8,31,32,33<br>,34 | 5 | P01946,P02091,Q4FZU6,Q5HZV9,Q6IFU7               |
| 6677 | 1,3,5,7,8,2<br>9,31,32 | 2,4,6,27,2<br>8,30,33,34<br>,35 | 3 | O54728,P53792,Q5HZV9                             |

|      |                        |                                 |   |                                                  |
|------|------------------------|---------------------------------|---|--------------------------------------------------|
| 6678 | 1,3,5,7,8,2<br>9,31,33 | 2,4,6,27,2<br>8,30,32,34<br>,35 | 7 | O54728,P00507,P14480,P53792,Q5HZV9,Q6AYQ8,Q6IFU7 |
| 6679 | 1,3,5,7,8,2<br>9,31,34 | 2,4,6,27,2<br>8,30,32,33<br>,35 | 5 | O54728,Q6AYQ8,Q6IFU7,Q6IRE4,Q9QW07               |
| 6680 | 1,3,5,7,8,2<br>9,31,35 | 2,4,6,27,2<br>8,30,32,33<br>,34 | 6 | O54728,P01946,P02091,Q4FZU6,Q5HZV9,Q6IFU7        |
| 6681 | 1,3,5,7,8,2<br>9,32,33 | 2,4,6,27,2<br>8,30,31,34<br>,35 | 6 | P00507,P53792,Q5HZV9,Q64335,Q6AYQ8,Q8CJD3        |
| 6682 | 1,3,5,7,8,2<br>9,32,34 | 2,4,6,27,2<br>8,30,31,33<br>,35 | 4 | P17046,P51907,Q6IRE4,Q9QW07                      |
| 6683 | 1,3,5,7,8,2<br>9,32,35 | 2,4,6,27,2<br>8,30,31,33<br>,34 | 3 | P01946,P02091,P51907                             |
| 6684 | 1,3,5,7,8,2<br>9,33,34 | 2,4,6,27,2<br>8,30,31,32<br>,35 | 3 | Q64335,Q6AYQ8,Q6IRE4                             |
| 6685 | 1,3,5,7,8,2<br>9,33,35 | 2,4,6,27,2<br>8,30,31,32<br>,34 | 3 | P01946,P02091,Q5HZV9                             |
| 6686 | 1,3,5,7,8,2<br>9,34,35 | 2,4,6,27,2<br>8,30,31,32<br>,33 | 4 | P01946,P02091,Q6IRE4,Q9QW07                      |
| 6687 | 1,3,5,7,8,3<br>0,31,32 | 2,4,6,27,2<br>8,29,33,34<br>,35 | 4 | O54728,P00507,Q4FZU6,Q5HZV9                      |
| 6688 | 1,3,5,7,8,3<br>0,31,33 | 2,4,6,27,2<br>8,29,32,34<br>,35 | 6 | O54728,P00507,P19218,Q4FZU6,Q5HZV9,Q5M819        |
| 6689 | 1,3,5,7,8,3<br>0,31,34 | 2,4,6,27,2<br>8,29,32,33<br>,35 | 3 | O54728,P19218,Q6IRE4                             |
| 6690 | 1,3,5,7,8,3<br>0,31,35 | 2,4,6,27,2<br>8,29,32,33<br>,34 | 7 | O54728,P24368,P52590,P97584,Q4FZU6,Q6IFU7,Q9JHB9 |
| 6691 | 1,3,5,7,8,3<br>0,32,33 | 2,4,6,27,2<br>8,29,31,34<br>,35 | 5 | P00507,P25236,P53792,P55314,Q5HZV9               |
| 6692 | 1,3,5,7,8,3<br>0,32,34 | 2,4,6,27,2<br>8,29,31,33<br>,35 | 4 | P08753,P17046,Q62894,Q6IRE4                      |

|      |                         |                                 |    |                                                                              |
|------|-------------------------|---------------------------------|----|------------------------------------------------------------------------------|
| 6693 | 1,3,5,7,8,3<br>0,32,35  | 2,4,6,27,2<br>8,29,31,33<br>,34 | 1  | P04218                                                                       |
| 6694 | 1,3,5,7,8,3<br>0,33,34  | 2,4,6,27,2<br>8,29,31,32<br>,35 | 3  | P25236,Q62894,Q6IRE4                                                         |
| 6695 | 1,3,5,7,8,3<br>0,33,35  | 2,4,6,27,2<br>8,29,31,32<br>,34 | 2  | P06911,P25236                                                                |
| 6696 | 1,3,5,7,8,3<br>0,34,35  | 2,4,6,27,2<br>8,29,31,32<br>,33 | 8  | P02793;Q7TP54,P06911,P08753,P0C0A9,P24368,P47727,Q6IRE4,Q9JHB9               |
| 6697 | 1,3,5,7,8,3<br>1,32,33  | 2,4,6,27,2<br>8,29,30,34<br>,35 | 8  | O54728,P00507,P14480,P55314,Q08849,Q5HZV9,Q6AYR9,Q8CJD3                      |
| 6698 | 1,3,5,7,8,3<br>1,32,34  | 2,4,6,27,2<br>8,29,30,33<br>,35 | 5  | O54728,P08753,P0C0A9,P14480,Q6IRE4                                           |
| 6699 | 1,3,5,7,8,3<br>1,32,35  | 2,4,6,27,2<br>8,29,30,33<br>,34 | 5  | O54728,P08753,P0C0A9,Q4FZU6,Q6AYR9                                           |
| 6700 | 1,3,5,7,8,3<br>1,33,34  | 2,4,6,27,2<br>8,29,30,32<br>,35 | 7  | O54728,P01835,P0C0A9,P14480,Q62894,Q6IRE4,Q9JHB9                             |
| 6701 | 1,3,5,7,8,3<br>1,33,35  | 2,4,6,27,2<br>8,29,30,32<br>,34 | 7  | O54728,P24368,P52590,P60905,Q4FZU6,Q6AYR9,Q9JHB9                             |
| 6702 | 1,3,5,7,8,3<br>1,34,35  | 2,4,6,27,2<br>8,29,30,32<br>,33 | 9  | O54728,P08723,P08753,P0C0A9,P24368,P47727,P60905,Q6IRE4,Q9JHB9               |
| 6703 | 1,3,5,7,8,3<br>2,33,34  | 2,4,6,27,2<br>8,29,30,31<br>,35 | 10 | P08753,P0C0A9,P14480,P17046,P25236,P55314,Q08849,Q62894,Q6AYR9,Q6IRE4        |
| 6704 | 1,3,5,7,8,3<br>2,33,35  | 2,4,6,27,2<br>8,29,30,31<br>,34 | 6  | P08753,P25236,P55314,Q08849,Q6AYR9,Q6NX65                                    |
| 6705 | 1,3,5,7,8,3<br>2,34,35  | 2,4,6,27,2<br>8,29,30,31<br>,33 | 6  | P08753,P0C0A9,P17046,Q6AYR9,Q6IRE4,Q9JHB9                                    |
| 6706 | 1,3,5,7,8,3<br>3,34,35  | 2,4,6,27,2<br>8,29,30,31<br>,32 | 11 | P06911,P08753,P0C0A9,P24368,P25236,P60905,Q62894,Q62975,Q6AYR9,Q6IRE4,Q9JHB9 |
| 6707 | 1,3,5,7,27,<br>28,29,30 | 2,4,6,8,31,<br>32,33,34,3<br>5  | 1  | Q9QW07                                                                       |

|      |                         |                                |   |                                                                       |
|------|-------------------------|--------------------------------|---|-----------------------------------------------------------------------|
| 6708 | 1,3,5,7,27,<br>28,29,31 | 2,4,6,8,30,<br>32,33,34,3<br>5 | 2 | O54728,Q9QW07                                                         |
| 6709 | 1,3,5,7,27,<br>28,29,32 | 2,4,6,8,30,<br>31,33,34,3<br>5 | 4 | P02793;Q7TP54,P17046,Q80WL1,Q9QW07                                    |
| 6710 | 1,3,5,7,27,<br>28,29,33 | 2,4,6,8,30,<br>31,32,34,3<br>5 | 4 | P02793;Q7TP54,P18427,P25236,Q80WL1                                    |
| 6711 | 1,3,5,7,27,<br>28,29,34 | 2,4,6,8,30,<br>31,32,33,3<br>5 | 6 | O54728,P04182,P17046,Q6IRE4,Q80WL1,Q9QW07                             |
| 6712 | 1,3,5,7,27,<br>28,29,35 | 2,4,6,8,30,<br>31,32,33,3<br>4 | 4 | P01946,P02091,Q80WL1,Q9QW07                                           |
| 6713 | 1,3,5,7,27,<br>28,30,31 | 2,4,6,8,29,<br>32,33,34,3<br>5 | 2 | O54728,Q6TMA8                                                         |
| 6714 | 1,3,5,7,27,<br>28,30,32 | 2,4,6,8,29,<br>31,33,34,3<br>5 | 4 | P17046,P25236,Q63355,Q6TMA8                                           |
| 6715 | 1,3,5,7,27,<br>28,30,33 | 2,4,6,8,29,<br>31,32,34,3<br>5 | 3 | P18427,P25236,Q6TMA8                                                  |
| 6716 | 1,3,5,7,27,<br>28,30,34 | 2,4,6,8,29,<br>31,32,33,3<br>5 | 8 | O54728,P04182,P17046,P25236,P35280,Q6IRE4,Q6TMA8,Q8CJD3               |
| 6717 | 1,3,5,7,27,<br>28,30,35 | 2,4,6,8,29,<br>31,32,33,3<br>4 | 2 | P25236,Q6TMA8                                                         |
| 6718 | 1,3,5,7,27,<br>28,31,32 | 2,4,6,8,29,<br>30,33,34,3<br>5 | 3 | O54728,P14480,Q6TMA8                                                  |
| 6719 | 1,3,5,7,27,<br>28,31,33 | 2,4,6,8,29,<br>30,32,34,3<br>5 | 3 | O54728,P14480,Q6TMA8                                                  |
| 6720 | 1,3,5,7,27,<br>28,31,34 | 2,4,6,8,29,<br>30,32,33,3<br>5 | 6 | A2RUV9,O54728,P04182,Q6IRE4,Q6TMA8,Q9QW07                             |
| 6721 | 1,3,5,7,27,<br>28,31,35 | 2,4,6,8,29,<br>30,32,33,3<br>4 | 4 | O54728,P62804,Q00715,Q6TMA8                                           |
| 6722 | 1,3,5,7,27,<br>28,32,33 | 2,4,6,8,29,<br>30,31,34,3<br>5 | 9 | P02793;Q7TP54,P14480,P17046,P18427,P24388,P25236,P55314,Q6IG02,Q80WL1 |

|      |                         |                                |    |                                                                       |
|------|-------------------------|--------------------------------|----|-----------------------------------------------------------------------|
| 6723 | 1,3,5,7,27,<br>28,32,34 | 2,4,6,8,29,<br>30,31,33,3<br>5 | 6  | O54728,P04182,P17046,P25236,Q6IRE4,Q9QW07                             |
| 6724 | 1,3,5,7,27,<br>28,32,35 | 2,4,6,8,29,<br>30,31,33,3<br>4 | 3  | P17046,P25236,Q80WL1                                                  |
| 6725 | 1,3,5,7,27,<br>28,33,34 | 2,4,6,8,29,<br>30,31,32,3<br>5 | 7  | O54728,P04182,P17046,P25236,Q6IRE4,Q6TMA8,Q80WL1                      |
| 6726 | 1,3,5,7,27,<br>28,33,35 | 2,4,6,8,29,<br>30,31,32,3<br>4 | 5  | P25236,P62804,Q62975,Q6TMA8,Q80WL1                                    |
| 6727 | 1,3,5,7,27,<br>28,34,35 | 2,4,6,8,29,<br>30,31,32,3<br>3 | 10 | O54728,P01946,P04182,P17046,P25236,P62804,Q62975,Q6IRE4,Q6TMA8,Q9QW07 |
| 6728 | 1,3,5,7,27,<br>29,30,31 | 2,4,6,8,28,<br>32,33,34,3<br>5 | 2  | P00507,Q5HZV9                                                         |
| 6729 | 1,3,5,7,27,<br>29,30,32 | 2,4,6,8,28,<br>31,33,34,3<br>5 | 3  | P00507,P02803,Q5HZV9                                                  |
| 6730 | 1,3,5,7,27,<br>29,30,33 | 2,4,6,8,28,<br>31,32,34,3<br>5 | 2  | P00507,Q5HZV9                                                         |
| 6731 | 1,3,5,7,27,<br>29,30,34 | 2,4,6,8,28,<br>31,32,33,3<br>5 | 4  | P17046,P35280,Q6IRE4,Q9QW07                                           |
| 6732 | 1,3,5,7,27,<br>29,30,35 | 2,4,6,8,28,<br>31,32,33,3<br>4 | 2  | P01946,P02091                                                         |
| 6733 | 1,3,5,7,27,<br>29,31,32 | 2,4,6,8,28,<br>30,33,34,3<br>5 | 2  | P00507,Q5HZV9                                                         |
| 6734 | 1,3,5,7,27,<br>29,31,33 | 2,4,6,8,28,<br>30,32,34,3<br>5 | 3  | P00507,Q5HZV9,Q6P6R2                                                  |
| 6735 | 1,3,5,7,27,<br>29,31,34 | 2,4,6,8,28,<br>30,32,33,3<br>5 | 3  | A2RUV9,Q6IRE4,Q9QW07                                                  |
| 6736 | 1,3,5,7,27,<br>29,31,35 | 2,4,6,8,28,<br>30,32,33,3<br>4 | 3  | P01946,P02091,Q6P6R2                                                  |
| 6737 | 1,3,5,7,27,<br>29,32,33 | 2,4,6,8,28,<br>30,31,34,3<br>5 | 8  | P00507,P02793,Q7TP54,P53792,P55314,Q5HZV9,Q64335,Q6NX65,Q80WL1        |

|      |                         |                                |   |                                                         |
|------|-------------------------|--------------------------------|---|---------------------------------------------------------|
| 6738 | 1,3,5,7,27,<br>29,32,34 | 2,4,6,8,28,<br>30,31,33,3<br>5 | 4 | P02761,P17046,Q6IRE4,Q9QW07                             |
| 6739 | 1,3,5,7,27,<br>29,32,35 | 2,4,6,8,28,<br>30,31,33,3<br>4 | 3 | P01946,P02091,Q80WL1                                    |
| 6740 | 1,3,5,7,27,<br>29,33,34 | 2,4,6,8,28,<br>30,31,32,3<br>5 | 4 | P17046,Q64335,Q6IRE4,Q80WL1                             |
| 6741 | 1,3,5,7,27,<br>29,33,35 | 2,4,6,8,28,<br>30,31,32,3<br>4 | 4 | P01946,P02091,Q6P6R2,Q80WL1                             |
| 6742 | 1,3,5,7,27,<br>29,34,35 | 2,4,6,8,28,<br>30,31,32,3<br>3 | 5 | P01946,P02091,P17046,Q6IRE4,Q9QW07                      |
| 6743 | 1,3,5,7,27,<br>30,31,32 | 2,4,6,8,28,<br>29,33,34,3<br>5 | 1 | P00507                                                  |
| 6744 | 1,3,5,7,27,<br>30,31,33 | 2,4,6,8,28,<br>29,32,34,3<br>5 | 4 | P00507,P19218,Q5HZV9,Q6TMA8                             |
| 6745 | 1,3,5,7,27,<br>30,31,34 | 2,4,6,8,28,<br>29,32,33,3<br>5 | 5 | A2RUV9,P19218,P35280,Q6IRE4,Q6TMA8                      |
| 6746 | 1,3,5,7,27,<br>30,31,35 | 2,4,6,8,28,<br>29,32,33,3<br>4 | 1 | Q6TMA8                                                  |
| 6747 | 1,3,5,7,27,<br>30,32,33 | 2,4,6,8,28,<br>29,31,34,3<br>5 | 4 | P00507,P25236,P55314,Q6NX65                             |
| 6748 | 1,3,5,7,27,<br>30,32,34 | 2,4,6,8,28,<br>29,31,33,3<br>5 | 5 | P02803,P17046,P25236,P35280,Q6IRE4                      |
| 6749 | 1,3,5,7,27,<br>30,32,35 | 2,4,6,8,28,<br>29,31,33,3<br>4 | 0 |                                                         |
| 6750 | 1,3,5,7,27,<br>30,33,34 | 2,4,6,8,28,<br>29,31,32,3<br>5 | 5 | P06911,P17046,P25236,P35280,Q6IRE4                      |
| 6751 | 1,3,5,7,27,<br>30,33,35 | 2,4,6,8,28,<br>29,31,32,3<br>4 | 4 | P06911,P25236,Q62975,Q6TMA8                             |
| 6752 | 1,3,5,7,27,<br>30,34,35 | 2,4,6,8,28,<br>29,31,32,3<br>3 | 8 | P02780,P06911,P17046,P35280,P47727,P83121,Q62975,Q6IRE4 |

|      |                         |                                |    |                                                                       |
|------|-------------------------|--------------------------------|----|-----------------------------------------------------------------------|
| 6753 | 1,3,5,7,27,<br>31,32,33 | 2,4,6,8,28,<br>29,30,34,3<br>5 | 5  | P00507,P14480,P55314,Q08849,Q6NX65                                    |
| 6754 | 1,3,5,7,27,<br>31,32,34 | 2,4,6,8,28,<br>29,30,33,3<br>5 | 4  | A2RUV9,P14480,P17046,Q6IRE4                                           |
| 6755 | 1,3,5,7,27,<br>31,32,35 | 2,4,6,8,28,<br>29,30,33,3<br>4 | 0  |                                                                       |
| 6756 | 1,3,5,7,27,<br>31,33,34 | 2,4,6,8,28,<br>29,30,32,3<br>5 | 4  | A2RUV9,P14480,Q6IRE4,Q6TMA8                                           |
| 6757 | 1,3,5,7,27,<br>31,33,35 | 2,4,6,8,28,<br>29,30,32,3<br>4 | 4  | Q62975,Q6P6R2,Q6TMA8,Q9WTT6                                           |
| 6758 | 1,3,5,7,27,<br>31,34,35 | 2,4,6,8,28,<br>29,30,32,3<br>3 | 7  | A2RUV9,P02780,P24368,P47727,Q62975,Q6IRE4,Q6TMA8                      |
| 6759 | 1,3,5,7,27,<br>32,33,34 | 2,4,6,8,28,<br>29,30,31,3<br>5 | 10 | P01015,P02680,P02761,P14480,P17046,P25236,P55314,Q08849,Q6IRE4,Q80WL1 |
| 6760 | 1,3,5,7,27,<br>32,33,35 | 2,4,6,8,28,<br>29,30,31,3<br>4 | 8  | P25236,P55314,Q08849,Q6AYR9,Q6IG02,Q6NX65,Q80WL1,Q9WTT6               |
| 6761 | 1,3,5,7,27,<br>32,34,35 | 2,4,6,8,28,<br>29,30,31,3<br>3 | 7  | P02780,P02782,P08753,P17046,P25236,P83121,Q6IRE4                      |
| 6762 | 1,3,5,7,27,<br>33,34,35 | 2,4,6,8,28,<br>29,30,31,3<br>2 | 8  | P02780,P02782,P06911,P17046,P25236,Q62975,Q6IRE4,Q80WL1               |
| 6763 | 1,3,5,7,28,<br>29,30,31 | 2,4,6,8,27,<br>32,33,34,3<br>5 | 2  | O54728,Q9QW07                                                         |
| 6764 | 1,3,5,7,28,<br>29,30,32 | 2,4,6,8,27,<br>31,33,34,3<br>5 | 1  | Q63355                                                                |
| 6765 | 1,3,5,7,28,<br>29,30,33 | 2,4,6,8,27,<br>31,32,34,3<br>5 | 0  |                                                                       |
| 6766 | 1,3,5,7,28,<br>29,30,34 | 2,4,6,8,27,<br>31,32,33,3<br>5 | 4  | O54728,P17046,Q6IRE4,Q9QW07                                           |
| 6767 | 1,3,5,7,28,<br>29,30,35 | 2,4,6,8,27,<br>31,32,33,3<br>4 | 3  | P01946,P02091,Q9QW07                                                  |

|      |                         |                                |   |                                                         |
|------|-------------------------|--------------------------------|---|---------------------------------------------------------|
| 6768 | 1,3,5,7,28,<br>29,31,32 | 2,4,6,8,27,<br>30,33,34,3<br>5 | 2 | O54728,Q9QW07                                           |
| 6769 | 1,3,5,7,28,<br>29,31,33 | 2,4,6,8,27,<br>30,32,34,3<br>5 | 6 | O54728,P14480,Q6P6R2,Q9QW07,Q9WTT6,Q9Z0V6               |
| 6770 | 1,3,5,7,28,<br>29,31,34 | 2,4,6,8,27,<br>30,32,33,3<br>5 | 3 | O54728,Q6IRE4,Q9QW07                                    |
| 6771 | 1,3,5,7,28,<br>29,31,35 | 2,4,6,8,27,<br>30,32,33,3<br>4 | 8 | O54728,P01946,P02091,P06760,Q00715,Q6P6R2,Q9QW07,Q9WTT6 |
| 6772 | 1,3,5,7,28,<br>29,32,33 | 2,4,6,8,27,<br>30,31,34,3<br>5 | 2 | P02793;Q7TP54,Q80WL1                                    |
| 6773 | 1,3,5,7,28,<br>29,32,34 | 2,4,6,8,27,<br>30,31,33,3<br>5 | 5 | O54728,P17046,Q6IRE4,Q9ET32,Q9QW07                      |
| 6774 | 1,3,5,7,28,<br>29,32,35 | 2,4,6,8,27,<br>30,31,33,3<br>4 | 4 | P01946,P02091,Q80WL1,Q9QW07                             |
| 6775 | 1,3,5,7,28,<br>29,33,34 | 2,4,6,8,27,<br>30,31,32,3<br>5 | 6 | O54728,P17046,P25236,Q6IRE4,Q80WL1,Q9QW07               |
| 6776 | 1,3,5,7,28,<br>29,33,35 | 2,4,6,8,27,<br>30,31,32,3<br>4 | 7 | P01946,P02091,Q00715,Q6P6R2,Q80WL1,Q9QW07,Q9WTT6        |
| 6777 | 1,3,5,7,28,<br>29,34,35 | 2,4,6,8,27,<br>30,31,32,3<br>3 | 6 | O54728,P01946,P02091,P17046,Q6IRE4,Q9QW07               |
| 6778 | 1,3,5,7,28,<br>30,31,32 | 2,4,6,8,27,<br>29,33,34,3<br>5 | 2 | O54728,Q561R9                                           |
| 6779 | 1,3,5,7,28,<br>30,31,33 | 2,4,6,8,27,<br>29,32,34,3<br>5 | 4 | O54728,Q00715,Q6TMA8,Q8VD89                             |
| 6780 | 1,3,5,7,28,<br>30,31,34 | 2,4,6,8,27,<br>29,32,33,3<br>5 | 4 | O54728,Q6IRE4,Q6TMA8,Q9QW07                             |
| 6781 | 1,3,5,7,28,<br>30,31,35 | 2,4,6,8,27,<br>29,32,33,3<br>4 | 6 | O54728,P06760,P62804,Q00715,Q4FZU6,Q6TMA8               |
| 6782 | 1,3,5,7,28,<br>30,32,33 | 2,4,6,8,27,<br>29,31,34,3<br>5 | 2 | P25236,P55314                                           |



|      |                         |                                |   |                                                                |
|------|-------------------------|--------------------------------|---|----------------------------------------------------------------|
| 6783 | 1,3,5,7,28,<br>30,32,34 | 2,4,6,8,27,<br>29,31,33,3<br>5 | 4 | O54728,P17046,P25236,Q6IRE4                                    |
| 6784 | 1,3,5,7,28,<br>30,32,35 | 2,4,6,8,27,<br>29,31,33,3<br>4 | 2 | P04218,P25236                                                  |
| 6785 | 1,3,5,7,28,<br>30,33,34 | 2,4,6,8,27,<br>29,31,32,3<br>5 | 4 | O54728,P17046,P25236,Q6IRE4                                    |
| 6786 | 1,3,5,7,28,<br>30,33,35 | 2,4,6,8,27,<br>29,31,32,3<br>4 | 5 | P25236,P62804,Q00715,Q6TMA8,Q9WTT6                             |
| 6787 | 1,3,5,7,28,<br>30,34,35 | 2,4,6,8,27,<br>29,31,32,3<br>3 | 7 | O54728,P17046,P25236,P62804,Q6IRE4,Q8CJD3,Q9QW07               |
| 6788 | 1,3,5,7,28,<br>31,32,33 | 2,4,6,8,27,<br>29,30,34,3<br>5 | 3 | O54728,P14480,Q9WTT6                                           |
| 6789 | 1,3,5,7,28,<br>31,32,34 | 2,4,6,8,27,<br>29,30,33,3<br>5 | 5 | O54728,P14480,P17046,Q6IRE4,Q9QW07                             |
| 6790 | 1,3,5,7,28,<br>31,32,35 | 2,4,6,8,27,<br>29,30,33,3<br>4 | 4 | O54728,P62804,Q00715,Q9WTT6                                    |
| 6791 | 1,3,5,7,28,<br>31,33,34 | 2,4,6,8,27,<br>29,30,32,3<br>5 | 5 | O54728,P14480,P14669,Q6IRE4,Q9QW07                             |
| 6792 | 1,3,5,7,28,<br>31,33,35 | 2,4,6,8,27,<br>29,30,32,3<br>4 | 9 | O54728,P06760,P14669,P62804,Q00715,Q6P6R2,Q6TMA8,Q8VD89,Q9WTT6 |
| 6793 | 1,3,5,7,28,<br>31,34,35 | 2,4,6,8,27,<br>29,30,32,3<br>3 | 6 | O54728,P14669,P62804,Q6IRE4,Q6TMA8,Q9QW07                      |
| 6794 | 1,3,5,7,28,<br>32,33,34 | 2,4,6,8,27,<br>29,30,31,3<br>5 | 8 | O54728,P02680,P14480,P17046,P25236,P55314,Q6IRE4,Q80WL1        |
| 6795 | 1,3,5,7,28,<br>32,33,35 | 2,4,6,8,27,<br>29,30,31,3<br>4 | 6 | P25236,P62804,Q00715,Q6AYR9,Q80WL1,Q9WTT6                      |
| 6796 | 1,3,5,7,28,<br>32,34,35 | 2,4,6,8,27,<br>29,30,31,3<br>3 | 5 | O54728,P17046,P25236,Q6IRE4,Q9QW07                             |
| 6797 | 1,3,5,7,28,<br>33,34,35 | 2,4,6,8,27,<br>29,30,31,3<br>2 | 8 | O54728,P14669,P17046,P25236,P62804,Q62975,Q6IRE4,Q80WL1        |

|      |                         |                                |   |                                                                |
|------|-------------------------|--------------------------------|---|----------------------------------------------------------------|
| 6798 | 1,3,5,7,29,<br>30,31,32 | 2,4,6,8,27,<br>28,33,34,3<br>5 | 3 | P00507,Q4FZU6,Q5HZV9                                           |
| 6799 | 1,3,5,7,29,<br>30,31,33 | 2,4,6,8,27,<br>28,32,34,3<br>5 | 6 | P00507,P53792,Q4FZU6,Q5HZV9,Q6P6R2,Q9WTT6                      |
| 6800 | 1,3,5,7,29,<br>30,31,34 | 2,4,6,8,27,<br>28,32,33,3<br>5 | 2 | Q6IRE4,Q9QW07                                                  |
| 6801 | 1,3,5,7,29,<br>30,31,35 | 2,4,6,8,27,<br>28,32,33,3<br>4 | 6 | P01946,P02091,P97584,Q4FZU6,Q6P6R2,Q9WTT6                      |
| 6802 | 1,3,5,7,29,<br>30,32,33 | 2,4,6,8,27,<br>28,31,34,3<br>5 | 5 | P00507,P53792,P55314,Q5HZV9,Q9WTT6                             |
| 6803 | 1,3,5,7,29,<br>30,32,34 | 2,4,6,8,27,<br>28,31,33,3<br>5 | 3 | P17046,Q6IRE4,Q99MH3                                           |
| 6804 | 1,3,5,7,29,<br>30,32,35 | 2,4,6,8,27,<br>28,31,33,3<br>4 | 3 | P01946,P02091,Q9WTT6                                           |
| 6805 | 1,3,5,7,29,<br>30,33,34 | 2,4,6,8,27,<br>28,31,32,3<br>5 | 2 | P17046,Q6IRE4                                                  |
| 6806 | 1,3,5,7,29,<br>30,33,35 | 2,4,6,8,27,<br>28,31,32,3<br>4 | 6 | P01946,P02091,Q4FZU6,Q5HZV9,Q6P6R2,Q9WTT6                      |
| 6807 | 1,3,5,7,29,<br>30,34,35 | 2,4,6,8,27,<br>28,31,32,3<br>3 | 4 | P01946,P02091,Q6IRE4,Q9QW07                                    |
| 6808 | 1,3,5,7,29,<br>31,32,33 | 2,4,6,8,27,<br>28,30,34,3<br>5 | 7 | P00507,P14480,P53792,Q5HZV9,Q6AYQ8,Q6P6R2,Q9WTT6               |
| 6809 | 1,3,5,7,29,<br>31,32,34 | 2,4,6,8,27,<br>28,30,33,3<br>5 | 5 | P17046,Q6AYQ8,Q6IRE4,Q99MH3,Q9QW07                             |
| 6810 | 1,3,5,7,29,<br>31,32,35 | 2,4,6,8,27,<br>28,30,33,3<br>4 | 5 | P01946,P02091,Q4FZU6,Q6P6R2,Q9WTT6                             |
| 6811 | 1,3,5,7,29,<br>31,33,34 | 2,4,6,8,27,<br>28,30,32,3<br>5 | 4 | P00714,Q6AYQ8,Q6IRE4,Q9QW07                                    |
| 6812 | 1,3,5,7,29,<br>31,33,35 | 2,4,6,8,27,<br>28,30,32,3<br>4 | 9 | P00714,P01946,P02091,Q00715,Q4FZU6,Q5HZV9,Q6AYQ8,Q6P6R2,Q9WTT6 |

|      |                         |                                |    |                                                                                     |
|------|-------------------------|--------------------------------|----|-------------------------------------------------------------------------------------|
| 6813 | 1,3,5,7,29,<br>31,34,35 | 2,4,6,8,27,<br>28,30,32,3<br>3 | 6  | P00714,P01946,P02091,Q6AYQ8,Q6IRE4,Q9QW07                                           |
| 6814 | 1,3,5,7,29,<br>32,33,34 | 2,4,6,8,27,<br>28,30,31,3<br>5 | 6  | P17046,P55314,Q64335,Q6AYQ8,Q6IRE4,Q80WL1                                           |
| 6815 | 1,3,5,7,29,<br>32,33,35 | 2,4,6,8,27,<br>28,30,31,3<br>4 | 8  | P01946,P02091,P47967,Q6AYQ8,Q6NX65,Q6P6R2,Q80WL1,Q9WTT6                             |
| 6816 | 1,3,5,7,29,<br>32,34,35 | 2,4,6,8,27,<br>28,30,31,3<br>3 | 6  | P01946,P02091,P17046,Q6AYQ8,Q6IRE4,Q9QW07                                           |
| 6817 | 1,3,5,7,29,<br>33,34,35 | 2,4,6,8,27,<br>28,30,31,3<br>2 | 6  | P01946,P02091,Q6AYQ8,Q6IRE4,Q80WL1,Q9QW07                                           |
| 6818 | 1,3,5,7,30,<br>31,32,33 | 2,4,6,8,27,<br>28,29,34,3<br>5 | 5  | P00507,P14480,P55314,Q4FZU6,Q9WTT6                                                  |
| 6819 | 1,3,5,7,30,<br>31,32,34 | 2,4,6,8,27,<br>28,29,33,3<br>5 | 4  | P02782,P0C0A9,P17046,Q6IRE4                                                         |
| 6820 | 1,3,5,7,30,<br>31,32,35 | 2,4,6,8,27,<br>28,29,33,3<br>4 | 5  | P0C0A9,P24368,P97584,Q4FZU6,Q9WTT6                                                  |
| 6821 | 1,3,5,7,30,<br>31,33,34 | 2,4,6,8,27,<br>28,29,32,3<br>5 | 6  | P02782,P0C0A9,P19218,P24368,Q6IRE4,Q9JHB9                                           |
| 6822 | 1,3,5,7,30,<br>31,33,35 | 2,4,6,8,27,<br>28,29,32,3<br>4 | 7  | P0C0A9,P24368,Q00715,Q4FZU6,Q6P6R2,Q9JHB9,Q9WTT6                                    |
| 6823 | 1,3,5,7,30,<br>31,34,35 | 2,4,6,8,27,<br>28,29,32,3<br>3 | 11 | P02782,P02793;Q7TP54,P07647,P08723,P0C0A9,P14669,P24368,P47727,P82471,Q6IRE4,Q9JHB9 |
| 6824 | 1,3,5,7,30,<br>32,33,34 | 2,4,6,8,27,<br>28,29,31,3<br>5 | 6  | P02782,P0C0A9,P17046,P25236,P55314,Q6IRE4                                           |
| 6825 | 1,3,5,7,30,<br>32,33,35 | 2,4,6,8,27,<br>28,29,31,3<br>4 | 5  | P02782,P0C0A9,P25236,P55314,Q9WTT6                                                  |
| 6826 | 1,3,5,7,30,<br>32,34,35 | 2,4,6,8,27,<br>28,29,31,3<br>3 | 10 | P02782,P06911,P07647,P08723,P0C0A9,P17046,P24368,P82471,Q6IRE4,Q9JHB9               |
| 6827 | 1,3,5,7,30,<br>33,34,35 | 2,4,6,8,27,<br>28,29,31,3<br>2 | 12 | P02782,P06911,P08723,P0C0A9,P24368,P25236,P47727,P82471,Q5GRG2,Q62975,Q6IRE4,Q9JHB9 |

|      |                         |                                |    |                                                                                                                 |
|------|-------------------------|--------------------------------|----|-----------------------------------------------------------------------------------------------------------------|
| 6828 | 1,3,5,7,31,<br>32,33,34 | 2,4,6,8,27,<br>28,29,30,3<br>5 | 9  | P02680,P02782,P08644,P0C0A9,P14480,P17046,P55314,Q6AYQ8,Q6IRE4                                                  |
| 6829 | 1,3,5,7,31,<br>32,33,35 | 2,4,6,8,27,<br>28,29,30,3<br>4 | 9  | P02782,P0C0A9,P30120,P55314,Q00715,Q6AYR9,Q6NX65,Q6P6R2,Q9WTT6                                                  |
| 6830 | 1,3,5,7,31,<br>32,34,35 | 2,4,6,8,27,<br>28,29,30,3<br>3 | 12 | P02781,P02782,P07647,P08723,P08753,P0C0A9,P17046,P24368,P30120,P82471,Q6IRE4,Q9JHB9                             |
| 6831 | 1,3,5,7,31,<br>33,34,35 | 2,4,6,8,27,<br>28,29,30,3<br>2 | 16 | P00714,P02781,P02782,P08723,P0C0A9,P14669,P24368,P30120,P60905,P62804,P82471,Q62975,Q6AYQ8,Q6AYR9,Q6IRE4,Q9JHB9 |
| 6832 | 1,3,5,7,32,<br>33,34,35 | 2,4,6,8,27,<br>28,29,30,3<br>1 | 14 | P02781,P02782,P08723,P08753,P0C0A9,P17046,P25236,P30120,P55314,P82471,Q6AYR9,Q6IRE4,Q80WL1,Q9JHB9               |
| 6833 | 1,3,5,8,27,<br>28,29,30 | 2,4,6,7,31,<br>32,33,34,3<br>5 | 2  | F1LM93,Q9QW07                                                                                                   |
| 6834 | 1,3,5,8,27,<br>28,29,31 | 2,4,6,7,30,<br>32,33,34,3<br>5 | 5  | O35547,O54728,P09605,P25809,P14480,Q9QW07                                                                       |
| 6835 | 1,3,5,8,27,<br>28,29,32 | 2,4,6,7,30,<br>31,33,34,3<br>5 | 3  | P09605,P25809,P14480,Q9QW07                                                                                     |
| 6836 | 1,3,5,8,27,<br>28,29,33 | 2,4,6,7,30,<br>31,32,34,3<br>5 | 5  | O35547,P09605,P25809,P14480,P25236,Q80WL1                                                                       |
| 6837 | 1,3,5,8,27,<br>28,29,34 | 2,4,6,7,30,<br>31,32,33,3<br>5 | 3  | P04182,Q6IRE4,Q9QW07                                                                                            |
| 6838 | 1,3,5,8,27,<br>28,29,35 | 2,4,6,7,30,<br>31,32,33,3<br>4 | 4  | P01946,P09605,P25809,P97840,Q9QW07                                                                              |
| 6839 | 1,3,5,8,27,<br>28,30,31 | 2,4,6,7,29,<br>32,33,34,3<br>5 | 3  | O54728,P14480,Q6TMA8                                                                                            |
| 6840 | 1,3,5,8,27,<br>28,30,32 | 2,4,6,7,29,<br>31,33,34,3<br>5 | 3  | P14480,P25236,P83121                                                                                            |
| 6841 | 1,3,5,8,27,<br>28,30,33 | 2,4,6,7,29,<br>31,32,34,3<br>5 | 3  | P09605,P25809,P14480,P25236                                                                                     |
| 6842 | 1,3,5,8,27,<br>28,30,34 | 2,4,6,7,29,<br>31,32,33,3<br>5 | 8  | P04182,P25236,P35280,P83121,Q62894,Q6IRE4,Q8CJD3,Q9QW07                                                         |

|      |                         |                                |   |                                                                |
|------|-------------------------|--------------------------------|---|----------------------------------------------------------------|
| 6843 | 1,3,5,8,27,<br>28,30,35 | 2,4,6,7,29,<br>31,32,33,3<br>4 | 3 | P09605;P25809,P25236,P83121                                    |
| 6844 | 1,3,5,8,27,<br>28,31,32 | 2,4,6,7,29,<br>30,33,34,3<br>5 | 3 | O54728,P09605;P25809,P14480                                    |
| 6845 | 1,3,5,8,27,<br>28,31,33 | 2,4,6,7,29,<br>30,32,34,3<br>5 | 5 | O54728,P09605;P25809,P14480,Q6TMA8,Q920P0                      |
| 6846 | 1,3,5,8,27,<br>28,31,34 | 2,4,6,7,29,<br>30,32,33,3<br>5 | 5 | O54728,P04182,P14480,Q6IRE4,Q9QW07                             |
| 6847 | 1,3,5,8,27,<br>28,31,35 | 2,4,6,7,29,<br>30,32,33,3<br>4 | 3 | O54728,P09605;P25809,Q6TMA8                                    |
| 6848 | 1,3,5,8,27,<br>28,32,33 | 2,4,6,7,29,<br>30,31,34,3<br>5 | 8 | P09605;P25809,P14480,P25236,P55314,Q08849,Q6IG02,Q6P6Q2,Q80WL1 |
| 6849 | 1,3,5,8,27,<br>28,32,34 | 2,4,6,7,29,<br>30,31,33,3<br>5 | 7 | P04182,P14480,P25236,P83121,Q62894,Q6IRE4,Q9QW07               |
| 6850 | 1,3,5,8,27,<br>28,32,35 | 2,4,6,7,29,<br>30,31,33,3<br>4 | 4 | P09605;P25809,P25236,P83121,Q6IG02                             |
| 6851 | 1,3,5,8,27,<br>28,33,34 | 2,4,6,7,29,<br>30,31,32,3<br>5 | 6 | P04182,P14480,P25236,Q62894,Q6IG02,Q6IRE4                      |
| 6852 | 1,3,5,8,27,<br>28,33,35 | 2,4,6,7,29,<br>30,31,32,3<br>4 | 4 | P09605;P25809,P25236,P97840,Q6IG02                             |
| 6853 | 1,3,5,8,27,<br>28,34,35 | 2,4,6,7,29,<br>30,31,32,3<br>3 | 6 | P04182,P25236,P83121,Q62894,Q6IRE4,Q9QW07                      |
| 6854 | 1,3,5,8,27,<br>29,30,31 | 2,4,6,7,28,<br>32,33,34,3<br>5 | 1 | Q5HZV9                                                         |
| 6855 | 1,3,5,8,27,<br>29,30,32 | 2,4,6,7,28,<br>31,33,34,3<br>5 | 1 | Q5HZV9                                                         |
| 6856 | 1,3,5,8,27,<br>29,30,33 | 2,4,6,7,28,<br>31,32,34,3<br>5 | 1 | Q5HZV9                                                         |
| 6857 | 1,3,5,8,27,<br>29,30,34 | 2,4,6,7,28,<br>31,32,33,3<br>5 | 4 | P12020,P35280,Q6IRE4,Q9QW07                                    |

|      |                         |                                |   |                                                                |
|------|-------------------------|--------------------------------|---|----------------------------------------------------------------|
| 6858 | 1,3,5,8,27,<br>29,30,35 | 2,4,6,7,28,<br>31,32,33,3<br>4 | 2 | P01946,P12020                                                  |
| 6859 | 1,3,5,8,27,<br>29,31,32 | 2,4,6,7,28,<br>30,33,34,3<br>5 | 3 | P14480,P97840,Q5HZV9                                           |
| 6860 | 1,3,5,8,27,<br>29,31,33 | 2,4,6,7,28,<br>30,32,34,3<br>5 | 3 | P14480,P97840,Q5HZV9                                           |
| 6861 | 1,3,5,8,27,<br>29,31,34 | 2,4,6,7,28,<br>30,32,33,3<br>5 | 2 | Q6IRE4,Q9QW07                                                  |
| 6862 | 1,3,5,8,27,<br>29,31,35 | 2,4,6,7,28,<br>30,32,33,3<br>4 | 3 | P01946,P47967,P97840                                           |
| 6863 | 1,3,5,8,27,<br>29,32,33 | 2,4,6,7,28,<br>30,31,34,3<br>5 | 8 | P09605;P25809,P14480,P47967,P55314,P97840,Q5HZV9,Q6IG02,Q80WL1 |
| 6864 | 1,3,5,8,27,<br>29,32,34 | 2,4,6,7,28,<br>30,31,33,3<br>5 | 6 | P06760,P20760,P51907,P83121,Q6IRE4,Q9QW07                      |
| 6865 | 1,3,5,8,27,<br>29,32,35 | 2,4,6,7,28,<br>30,31,33,3<br>4 | 5 | P01946,P09605;P25809,P47967,P51907,P97840                      |
| 6866 | 1,3,5,8,27,<br>29,33,34 | 2,4,6,7,28,<br>30,31,32,3<br>5 | 1 | Q6IRE4                                                         |
| 6867 | 1,3,5,8,27,<br>29,33,35 | 2,4,6,7,28,<br>30,31,32,3<br>4 | 5 | P01946,P09605;P25809,P47967,P97840,Q5HZV9                      |
| 6868 | 1,3,5,8,27,<br>29,34,35 | 2,4,6,7,28,<br>30,31,32,3<br>3 | 5 | P01946,P12020,P83121,Q6IRE4,Q9QW07                             |
| 6869 | 1,3,5,8,27,<br>30,31,32 | 2,4,6,7,28,<br>29,33,34,3<br>5 | 1 | P14480                                                         |
| 6870 | 1,3,5,8,27,<br>30,31,33 | 2,4,6,7,28,<br>29,32,34,3<br>5 | 2 | P14480,Q5HZV9                                                  |
| 6871 | 1,3,5,8,27,<br>30,31,34 | 2,4,6,7,28,<br>29,32,33,3<br>5 | 2 | P35280,Q6IRE4                                                  |
| 6872 | 1,3,5,8,27,<br>30,31,35 | 2,4,6,7,28,<br>29,32,33,3<br>4 | 0 |                                                                |

|      |                         |                                |    |                                                                       |
|------|-------------------------|--------------------------------|----|-----------------------------------------------------------------------|
| 6873 | 1,3,5,8,27,<br>30,32,33 | 2,4,6,7,28,<br>29,31,34,3<br>5 | 5  | P14480,P25236,P55314,Q5HZV9,Q6IG02                                    |
| 6874 | 1,3,5,8,27,<br>30,32,34 | 2,4,6,7,28,<br>29,31,33,3<br>5 | 5  | P06760,P20760,P35280,P83121,Q6IRE4                                    |
| 6875 | 1,3,5,8,27,<br>30,32,35 | 2,4,6,7,28,<br>29,31,33,3<br>4 | 1  | P83121                                                                |
| 6876 | 1,3,5,8,27,<br>30,33,34 | 2,4,6,7,28,<br>29,31,32,3<br>5 | 5  | P06911,P25236,P35280,Q62894,Q6IRE4                                    |
| 6877 | 1,3,5,8,27,<br>30,33,35 | 2,4,6,7,28,<br>29,31,32,3<br>4 | 3  | P06911,P12020,P25236                                                  |
| 6878 | 1,3,5,8,27,<br>30,34,35 | 2,4,6,7,28,<br>29,31,32,3<br>3 | 8  | P02793;Q7TP54,P06911,P12020,P35280,P47727,P83121,Q5GRG2,Q6IRE4        |
| 6879 | 1,3,5,8,27,<br>31,32,33 | 2,4,6,7,28,<br>29,30,34,3<br>5 | 6  | P09605;P25809,P14480,P55314,Q08849,Q5HZV9,Q6IG02                      |
| 6880 | 1,3,5,8,27,<br>31,32,34 | 2,4,6,7,28,<br>29,30,33,3<br>5 | 4  | P08753,P14480,Q08849,Q6IRE4                                           |
| 6881 | 1,3,5,8,27,<br>31,32,35 | 2,4,6,7,28,<br>29,30,33,3<br>4 | 3  | P09605;P25809,P97840,Q08849                                           |
| 6882 | 1,3,5,8,27,<br>31,33,34 | 2,4,6,7,28,<br>29,30,32,3<br>5 | 2  | P14480,Q6IRE4                                                         |
| 6883 | 1,3,5,8,27,<br>31,33,35 | 2,4,6,7,28,<br>29,30,32,3<br>4 | 2  | P09605;P25809,P97840                                                  |
| 6884 | 1,3,5,8,27,<br>31,34,35 | 2,4,6,7,28,<br>29,30,32,3<br>3 | 3  | P08753,P83121,Q6IRE4                                                  |
| 6885 | 1,3,5,8,27,<br>32,33,34 | 2,4,6,7,28,<br>29,30,31,3<br>5 | 10 | P06760,P08753,P14480,P25236,P55314,Q08849,Q62894,Q6IG02,Q6IRE4,Q6P6Q2 |
| 6886 | 1,3,5,8,27,<br>32,33,35 | 2,4,6,7,28,<br>29,30,31,3<br>4 | 8  | P09605;P25809,P25236,P47967,P55314,P97840,Q08849,Q6IG02,Q6NX65        |
| 6887 | 1,3,5,8,27,<br>32,34,35 | 2,4,6,7,28,<br>29,30,31,3<br>3 | 5  | P08753,P35467,P83121,Q08849,Q6IRE4                                    |

|      |                         |                                |    |                                                                       |
|------|-------------------------|--------------------------------|----|-----------------------------------------------------------------------|
| 6888 | 1,3,5,8,27,<br>33,34,35 | 2,4,6,7,28,<br>29,30,31,3<br>2 | 10 | P06911,P08753,P12020,P25236,P83121,Q5GRG2,Q62894,Q62975,Q6IG02,Q6IRE4 |
| 6889 | 1,3,5,8,28,<br>29,30,31 | 2,4,6,7,27,<br>32,33,34,3<br>5 | 4  | G3V686,O54728,Q63532,Q9QW07                                           |
| 6890 | 1,3,5,8,28,<br>29,30,32 | 2,4,6,7,27,<br>31,33,34,3<br>5 | 1  | Q9QW07                                                                |
| 6891 | 1,3,5,8,28,<br>29,30,33 | 2,4,6,7,27,<br>31,32,34,3<br>5 | 2  | G3V686,Q63532                                                         |
| 6892 | 1,3,5,8,28,<br>29,30,34 | 2,4,6,7,27,<br>31,32,33,3<br>5 | 2  | Q6IRE4,Q9QW07                                                         |
| 6893 | 1,3,5,8,28,<br>29,30,35 | 2,4,6,7,27,<br>31,32,33,3<br>4 | 5  | G3V686,P01681,P08649,Q63532,Q9QW07                                    |
| 6894 | 1,3,5,8,28,<br>29,31,32 | 2,4,6,7,27,<br>30,33,34,3<br>5 | 4  | O54728,P14480,P47967,Q9QW07                                           |
| 6895 | 1,3,5,8,28,<br>29,31,33 | 2,4,6,7,27,<br>30,32,34,3<br>5 | 6  | O54728,P14480,P47967,P97840,Q63532,Q9QW07                             |
| 6896 | 1,3,5,8,28,<br>29,31,34 | 2,4,6,7,27,<br>30,32,33,3<br>5 | 4  | O54728,P14480,Q6IRE4,Q9QW07                                           |
| 6897 | 1,3,5,8,28,<br>29,31,35 | 2,4,6,7,27,<br>30,32,33,3<br>4 | 7  | G3V686,O54728,P08649,P47967,P97840,Q63532,Q9QW07                      |
| 6898 | 1,3,5,8,28,<br>29,32,33 | 2,4,6,7,27,<br>30,31,34,3<br>5 | 5  | P09605;P25809,P14480,P47967,P97840,Q80WL1                             |
| 6899 | 1,3,5,8,28,<br>29,32,34 | 2,4,6,7,27,<br>30,31,33,3<br>5 | 4  | P14480,P51907,Q6IRE4,Q9QW07                                           |
| 6900 | 1,3,5,8,28,<br>29,32,35 | 2,4,6,7,27,<br>30,31,33,3<br>4 | 5  | P09605;P25809,P47967,P51907,P97840,Q9QW07                             |
| 6901 | 1,3,5,8,28,<br>29,33,34 | 2,4,6,7,27,<br>30,31,32,3<br>5 | 4  | P14480,Q62894,Q6IRE4,Q9QW07                                           |
| 6902 | 1,3,5,8,28,<br>29,33,35 | 2,4,6,7,27,<br>30,31,32,3<br>4 | 6  | G3V686,P09605;P25809,P47967,P97840,Q63532,Q9QW07                      |



|      |                         |                                |   |                                                                |
|------|-------------------------|--------------------------------|---|----------------------------------------------------------------|
| 6903 | 1,3,5,8,28,<br>29,34,35 | 2,4,6,7,27,<br>30,31,32,3<br>3 | 2 | Q6IRE4,Q9QW07                                                  |
| 6904 | 1,3,5,8,28,<br>30,31,32 | 2,4,6,7,27,<br>29,33,34,3<br>5 | 2 | O54728,P14480                                                  |
| 6905 | 1,3,5,8,28,<br>30,31,33 | 2,4,6,7,27,<br>29,32,34,3<br>5 | 4 | G3V686,O54728,P14480,Q63532                                    |
| 6906 | 1,3,5,8,28,<br>30,31,34 | 2,4,6,7,27,<br>29,32,33,3<br>5 | 5 | O54728,P14480,Q62894,Q6IRE4,Q9QW07                             |
| 6907 | 1,3,5,8,28,<br>30,31,35 | 2,4,6,7,27,<br>29,32,33,3<br>4 | 4 | G3V686,O54728,P08649,Q63532                                    |
| 6908 | 1,3,5,8,28,<br>30,32,33 | 2,4,6,7,27,<br>29,31,34,3<br>5 | 2 | P14480,P25236                                                  |
| 6909 | 1,3,5,8,28,<br>30,32,34 | 2,4,6,7,27,<br>29,31,33,3<br>5 | 4 | P25236,P83121,Q62894,Q6IRE4                                    |
| 6910 | 1,3,5,8,28,<br>30,32,35 | 2,4,6,7,27,<br>29,31,33,3<br>4 | 3 | G3V686,P04218,P25236                                           |
| 6911 | 1,3,5,8,28,<br>30,33,34 | 2,4,6,7,27,<br>29,31,32,3<br>5 | 4 | P14480,P25236,Q62894,Q6IRE4                                    |
| 6912 | 1,3,5,8,28,<br>30,33,35 | 2,4,6,7,27,<br>29,31,32,3<br>4 | 4 | G3V686,P09605;P25809,P25236,Q63532                             |
| 6913 | 1,3,5,8,28,<br>30,34,35 | 2,4,6,7,27,<br>29,31,32,3<br>3 | 8 | P02793;Q7TP54,P19132,P25236,P83121,Q62894,Q6IRE4,Q8CJD3,Q9QW07 |
| 6914 | 1,3,5,8,28,<br>31,32,33 | 2,4,6,7,27,<br>29,30,34,3<br>5 | 3 | O54728,P09605;P25809,P14480                                    |
| 6915 | 1,3,5,8,28,<br>31,32,34 | 2,4,6,7,27,<br>29,30,33,3<br>5 | 4 | O54728,P14480,Q6IRE4,Q9QW07                                    |
| 6916 | 1,3,5,8,28,<br>31,32,35 | 2,4,6,7,27,<br>29,30,33,3<br>4 | 6 | O54728,P04218,P08649,P09605;P25809,P47967,P97840               |
| 6917 | 1,3,5,8,28,<br>31,33,34 | 2,4,6,7,27,<br>29,30,32,3<br>5 | 5 | O54728,P14480,Q62894,Q6IRE4,Q9QW07                             |

|      |                         |                                |   |                                                         |
|------|-------------------------|--------------------------------|---|---------------------------------------------------------|
| 6918 | 1,3,5,8,28,<br>31,33,35 | 2,4,6,7,27,<br>29,30,32,3<br>4 | 7 | G3V686,O54728,P09605,P25809,P47967,P97840,Q00715,Q63532 |
| 6919 | 1,3,5,8,28,<br>31,34,35 | 2,4,6,7,27,<br>29,30,32,3<br>3 | 4 | O54728,P08649,Q6IRE4,Q9QW07                             |
| 6920 | 1,3,5,8,28,<br>32,33,34 | 2,4,6,7,27,<br>29,30,31,3<br>5 | 6 | P05942,P14480,P25236,P55314,Q62894,Q6IRE4               |
| 6921 | 1,3,5,8,28,<br>32,33,35 | 2,4,6,7,27,<br>29,30,31,3<br>4 | 6 | P04218,P09605,P25809,P25236,P47967,P97840,Q6AYR9        |
| 6922 | 1,3,5,8,28,<br>32,34,35 | 2,4,6,7,27,<br>29,30,31,3<br>3 | 6 | P04218,P25236,P83121,Q62894,Q6IRE4,Q9QW07               |
| 6923 | 1,3,5,8,28,<br>33,34,35 | 2,4,6,7,27,<br>29,30,31,3<br>2 | 5 | O55145,P25236,Q62894,Q6IRE4,Q9QW07                      |
| 6924 | 1,3,5,8,29,<br>30,31,32 | 2,4,6,7,27,<br>28,33,34,3<br>5 | 1 | Q5HZV9                                                  |
| 6925 | 1,3,5,8,29,<br>30,31,33 | 2,4,6,7,27,<br>28,32,34,3<br>5 | 2 | Q5HZV9,Q63532                                           |
| 6926 | 1,3,5,8,29,<br>30,31,34 | 2,4,6,7,27,<br>28,32,33,3<br>5 | 2 | Q6IRE4,Q9QW07                                           |
| 6927 | 1,3,5,8,29,<br>30,31,35 | 2,4,6,7,27,<br>28,32,33,3<br>4 | 6 | G3V686,P08649,Q06000,Q4FZU6,Q5HZV9,Q63532               |
| 6928 | 1,3,5,8,29,<br>30,32,33 | 2,4,6,7,27,<br>28,31,34,3<br>5 | 1 | Q5HZV9                                                  |
| 6929 | 1,3,5,8,29,<br>30,32,34 | 2,4,6,7,27,<br>28,31,33,3<br>5 | 3 | Q6IRE4,Q99MH3,Q9QW07                                    |
| 6930 | 1,3,5,8,29,<br>30,32,35 | 2,4,6,7,27,<br>28,31,33,3<br>4 | 1 | P51907                                                  |
| 6931 | 1,3,5,8,29,<br>30,33,34 | 2,4,6,7,27,<br>28,31,32,3<br>5 | 2 | P12020,Q6IRE4                                           |
| 6932 | 1,3,5,8,29,<br>30,33,35 | 2,4,6,7,27,<br>28,31,32,3<br>4 | 5 | G3V686,P12020,P47967,Q5HZV9,Q63532                      |

|      |                         |                                |   |                                                  |
|------|-------------------------|--------------------------------|---|--------------------------------------------------|
| 6933 | 1,3,5,8,29,<br>30,34,35 | 2,4,6,7,27,<br>28,31,32,3<br>3 | 6 | P02793;Q7TP54,P06911,P12020,Q5GRG2,Q6IRE4,Q9QW07 |
| 6934 | 1,3,5,8,29,<br>31,32,33 | 2,4,6,7,27,<br>28,30,34,3<br>5 | 5 | P14480,P47967,P97840,Q5HZV9,Q6AYQ8               |
| 6935 | 1,3,5,8,29,<br>31,32,34 | 2,4,6,7,27,<br>28,30,33,3<br>5 | 4 | P14480,Q6AYQ8,Q6IRE4,Q9QW07                      |
| 6936 | 1,3,5,8,29,<br>31,32,35 | 2,4,6,7,27,<br>28,30,33,3<br>4 | 3 | P47967,P51907,P97840                             |
| 6937 | 1,3,5,8,29,<br>31,33,34 | 2,4,6,7,27,<br>28,30,32,3<br>5 | 4 | P14480,Q6AYQ8,Q6IRE4,Q9QW07                      |
| 6938 | 1,3,5,8,29,<br>31,33,35 | 2,4,6,7,27,<br>28,30,32,3<br>4 | 7 | G3V686,P47967,P97840,Q5HZV9,Q63532,Q6AYQ8,Q6P6R2 |
| 6939 | 1,3,5,8,29,<br>31,34,35 | 2,4,6,7,27,<br>28,30,32,3<br>3 | 3 | Q6AYQ8,Q6IRE4,Q9QW07                             |
| 6940 | 1,3,5,8,29,<br>32,33,34 | 2,4,6,7,27,<br>28,30,31,3<br>5 | 5 | D3ZUC6,P14480,P55314,Q6AYQ8,Q6IRE4               |
| 6941 | 1,3,5,8,29,<br>32,33,35 | 2,4,6,7,27,<br>28,30,31,3<br>4 | 4 | P47967,P51907,P97840,Q6AYQ8                      |
| 6942 | 1,3,5,8,29,<br>32,34,35 | 2,4,6,7,27,<br>28,30,31,3<br>3 | 4 | P51907,Q6AYQ8,Q6IRE4,Q9QW07                      |
| 6943 | 1,3,5,8,29,<br>33,34,35 | 2,4,6,7,27,<br>28,30,31,3<br>2 | 5 | P12020,Q5GRG2,Q6AYQ8,Q6IRE4,Q9QW07               |
| 6944 | 1,3,5,8,30,<br>31,32,33 | 2,4,6,7,27,<br>28,29,34,3<br>5 | 3 | P14480,Q5HZV9,Q5M819                             |
| 6945 | 1,3,5,8,30,<br>31,32,34 | 2,4,6,7,27,<br>28,29,33,3<br>5 | 3 | P08753,P14480,Q6IRE4                             |
| 6946 | 1,3,5,8,30,<br>31,32,35 | 2,4,6,7,27,<br>28,29,33,3<br>4 | 2 | P04218,Q4FZU6                                    |
| 6947 | 1,3,5,8,30,<br>31,33,34 | 2,4,6,7,27,<br>28,29,32,3<br>5 | 3 | P14480,Q62894,Q6IRE4                             |

|      |                          |                                |    |                                                                                     |
|------|--------------------------|--------------------------------|----|-------------------------------------------------------------------------------------|
| 6948 | 1,3,5,8,30,<br>31,33,35  | 2,4,6,7,27,<br>28,29,32,3<br>4 | 4  | G3V686,P24368,Q4FZU6,Q63532                                                         |
| 6949 | 1,3,5,8,30,<br>31,34,35  | 2,4,6,7,27,<br>28,29,32,3<br>3 | 11 | P02793;Q7TP54,P08723,P09456,P0C0A9,P19132,P24368,P47727,P82471,Q6IRE4,Q9JHB9,Q9JI85 |
| 6950 | 1,3,5,8,30,<br>32,33,34  | 2,4,6,7,27,<br>28,29,31,3<br>5 | 6  | P08753,P14480,P25236,P55314,Q62894,Q6IRE4                                           |
| 6951 | 1,3,5,8,30,<br>32,33,35  | 2,4,6,7,27,<br>28,29,31,3<br>4 | 2  | P04218,P25236                                                                       |
| 6952 | 1,3,5,8,30,<br>32,34,35  | 2,4,6,7,27,<br>28,29,31,3<br>3 | 10 | P02793;Q7TP54,P04218,P06911,P07647,P08753,P12020,P83121,Q5GRG2,Q6IRE4,Q9JI85        |
| 6953 | 1,3,5,8,30,<br>33,34,35  | 2,4,6,7,27,<br>28,29,31,3<br>2 | 10 | P02793;Q7TP54,P06911,P12020,P24368,P25236,P82471,Q5GRG2,Q62894,Q6IRE4,Q9JHB9        |
| 6954 | 1,3,5,8,31,<br>32,33,34  | 2,4,6,7,27,<br>28,29,30,3<br>5 | 8  | D3ZUC6,P08753,P0C0A9,P14480,P55314,Q62894,Q6AYQ8,Q6IRE4                             |
| 6955 | 1,3,5,8,31,<br>32,33,35  | 2,4,6,7,27,<br>28,29,30,3<br>4 | 5  | P04218,P09605;P25809,P47967,P97840,Q6AYR9                                           |
| 6956 | 1,3,5,8,31,<br>32,34,35  | 2,4,6,7,27,<br>28,29,30,3<br>3 | 9  | P07647,P08723,P08753,P0C0A9,P24368,P82471,Q6IRE4,Q9JHB9,Q9JI85                      |
| 6957 | 1,3,5,8,31,<br>33,34,35  | 2,4,6,7,27,<br>28,29,30,3<br>2 | 10 | P08723,P08753,P0C0A9,P24368,P60905,P82471,Q62894,Q6AYQ8,Q6IRE4,Q9JHB9               |
| 6958 | 1,3,5,8,32,<br>33,34,35  | 2,4,6,7,27,<br>28,29,30,3<br>1 | 12 | O70594,P08753,P0C0A9,P25236,P35467,P55314,P82471,Q5GRG2,Q62894,Q6AYR9,Q6IRE4,Q9JHB9 |
| 6959 | 1,3,5,27,2<br>8,29,30,31 | 2,4,6,7,8,3<br>2,33,34,35      | 2  | Q99041,Q9QW07                                                                       |
| 6960 | 1,3,5,27,2<br>8,29,30,32 | 2,4,6,7,8,3<br>1,33,34,35      | 4  | F1LM93,P05369,P18427,Q9QW07                                                         |
| 6961 | 1,3,5,27,2<br>8,29,30,33 | 2,4,6,7,8,3<br>1,32,34,35      | 2  | P18427,P20766                                                                       |
| 6962 | 1,3,5,27,2<br>8,29,30,34 | 2,4,6,7,8,3<br>1,32,33,35      | 7  | P04182,P05369,P18427,P35280,Q6IRE4,Q8CJD3,Q9QW07                                    |
| 6963 | 1,3,5,27,2<br>8,29,30,35 | 2,4,6,7,8,3<br>1,32,33,34      | 5  | P01946,P20766,Q99041,Q9QW07,Q9QZQ5                                                  |
| 6964 | 1,3,5,27,2<br>8,29,31,32 | 2,4,6,7,8,3<br>0,33,34,35      | 2  | P14480,Q9QW07                                                                       |

|      |                                                 |    |                                                                              |
|------|-------------------------------------------------|----|------------------------------------------------------------------------------|
| 6965 | 1,3,5,27,2 2,4,6,7,8,3<br>8,29,31,33 0,32,34,35 | 5  | P09605;P25809,P14480,Q6P6R2,Q80WL1,Q9QW07                                    |
| 6966 | 1,3,5,27,2 2,4,6,7,8,3<br>8,29,31,34 0,32,33,35 | 3  | P04182,Q6IRE4,Q9QW07                                                         |
| 6967 | 1,3,5,27,2 2,4,6,7,8,3<br>8,29,31,35 0,32,33,34 | 6  | P01946,P09605;P25809,Q6P6R2,Q99041,Q9QW07,Q9QZQ5                             |
| 6968 | 1,3,5,27,2 2,4,6,7,8,3<br>8,29,32,33 0,31,34,35 | 9  | P02793;Q7TP54,P09605;P25809,P14480,P18427,P47967,P55314,Q6IG02,Q6P6Q2,Q80WL1 |
| 6969 | 1,3,5,27,2 2,4,6,7,8,3<br>8,29,32,34 0,31,33,35 | 8  | P04182,P05369,P17046,P18427,Q10758,Q6IRE4,Q80WL1,Q9QW07                      |
| 6970 | 1,3,5,27,2 2,4,6,7,8,3<br>8,29,32,35 0,31,33,34 | 7  | P01946,P09605;P25809,P47967,Q80WL1,Q99041,Q9QW07,Q9QZQ5                      |
| 6971 | 1,3,5,27,2 2,4,6,7,8,3<br>8,29,33,34 0,31,32,35 | 6  | P04182,P18427,P25236,Q6IRE4,Q80WL1,Q9QW07                                    |
| 6972 | 1,3,5,27,2 2,4,6,7,8,3<br>8,29,33,35 0,31,32,34 | 7  | P01946,P09605;P25809,P20766,P47967,Q6P6R2,Q80WL1,Q9QW07                      |
| 6973 | 1,3,5,27,2 2,4,6,7,8,3<br>8,29,34,35 0,31,32,33 | 6  | P01946,P02091,P04182,Q6IRE4,Q80WL1,Q9QW07                                    |
| 6974 | 1,3,5,27,2 2,4,6,7,8,2<br>8,30,31,32 9,33,34,35 | 3  | P14480,Q63617,Q9QZQ5                                                         |
| 6975 | 1,3,5,27,2 2,4,6,7,8,2<br>8,30,31,33 9,32,34,35 | 2  | P14480,Q6TMA8                                                                |
| 6976 | 1,3,5,27,2 2,4,6,7,8,2<br>8,30,31,34 9,32,33,35 | 8  | O54728,P04182,P35280,Q63617,Q6IRE4,Q6TMA8,Q8CJD3,Q9QW07                      |
| 6977 | 1,3,5,27,2 2,4,6,7,8,2<br>8,30,31,35 9,32,33,34 | 4  | Q63617,Q6TMA8,Q99041,Q9QZQ5                                                  |
| 6978 | 1,3,5,27,2 2,4,6,7,8,2<br>8,30,32,33 9,31,34,35 | 5  | P14480,P18427,P25236,P55314,Q6IG02                                           |
| 6979 | 1,3,5,27,2 2,4,6,7,8,2<br>8,30,32,34 9,31,33,35 | 9  | P04182,P17046,P25236,P35280,P83121,Q10758,Q63617,Q6IRE4,Q8CJD3               |
| 6980 | 1,3,5,27,2 2,4,6,7,8,2<br>8,30,32,35 9,31,33,34 | 5  | P25236,P83121,Q63617,Q99041,Q9QZQ5                                           |
| 6981 | 1,3,5,27,2 2,4,6,7,8,2<br>8,30,33,34 9,31,32,35 | 6  | P04182,P18427,P25236,P35280,Q6IRE4,Q8CJD3                                    |
| 6982 | 1,3,5,27,2 2,4,6,7,8,2<br>8,30,33,35 9,31,32,34 | 5  | P09605;P25809,P20766,P25236,Q6TMA8,Q9QZQ5                                    |
| 6983 | 1,3,5,27,2 2,4,6,7,8,2<br>8,30,34,35 9,31,32,33 | 10 | P04182,P12020,P25236,P35280,P83121,Q63617,Q6IRE4,Q8CJD3,Q9QW07,Q9QZQ5        |
| 6984 | 1,3,5,27,2 2,4,6,7,8,2<br>8,31,32,33 9,30,34,35 | 7  | P09605;P25809,P14480,P55314,Q6IG02,Q6P6Q2,Q80WL1,Q9QZQ5                      |
| 6985 | 1,3,5,27,2 2,4,6,7,8,2<br>8,31,32,34 9,30,33,35 | 8  | A2RUV9,P04182,P14480,P17046,Q10758,Q63617,Q6IRE4,Q9QW07                      |
| 6986 | 1,3,5,27,2 2,4,6,7,8,2<br>8,31,32,35 9,30,33,34 | 3  | P09605;P25809,Q99041,Q9QZQ5                                                  |
| 6987 | 1,3,5,27,2 2,4,6,7,8,2<br>8,31,33,34 9,30,32,35 | 6  | P04182,P14480,P20762,Q6IRE4,Q6TMA8,Q9QW07                                    |

|      |                                                 |    |                                                                                            |
|------|-------------------------------------------------|----|--------------------------------------------------------------------------------------------|
| 6988 | 1,3,5,27,2 2,4,6,7,8,2<br>8,31,33,35 9,30,32,34 | 7  | P09605;P25809,P62804,Q00715,Q6IG02,Q6P6R2,Q6TMA8,Q9QZQ5                                    |
| 6989 | 1,3,5,27,2 2,4,6,7,8,2<br>8,31,34,35 9,30,32,33 | 6  | P04182,Q63617,Q6IRE4,Q6TMA8,Q9QW07,Q9QZQ5                                                  |
| 6990 | 1,3,5,27,2 2,4,6,7,8,2<br>8,32,33,34 9,30,31,35 | 13 | P02680,P04182,P14480,P17046,P18427,P25236,P55314,Q10758,Q4FZU2,Q6IG02,Q6IRE4,Q6P6Q2,Q80WL1 |
| 6991 | 1,3,5,27,2 2,4,6,7,8,2<br>8,32,33,35 9,30,31,34 | 9  | P09605;P25809,P25236,P47967,P55314,Q4FZU2,Q6IG02,Q6P6Q2,Q80WL1,Q9QZQ5                      |
| 6992 | 1,3,5,27,2 2,4,6,7,8,2<br>8,32,34,35 9,30,31,33 | 10 | P04182,P17046,P25236,P83121,Q10758,Q63617,Q6IRE4,Q80WL1,Q9QW07,Q9QZQ5                      |
| 6993 | 1,3,5,27,2 2,4,6,7,8,2<br>8,33,34,35 9,30,31,32 | 7  | P04182,P25236,Q62975,Q6IG02,Q6IRE4,Q80WL1,Q9QW07                                           |
| 6994 | 1,3,5,27,2 2,4,6,7,8,2<br>9,30,31,32 8,33,34,35 | 2  | Q5HZV9,Q99041                                                                              |
| 6995 | 1,3,5,27,2 2,4,6,7,8,2<br>9,30,31,33 8,32,34,35 | 2  | Q5HZV9,Q6P6R2                                                                              |
| 6996 | 1,3,5,27,2 2,4,6,7,8,2<br>9,30,31,34 8,32,33,35 | 3  | P35280,Q6IRE4,Q9QW07                                                                       |
| 6997 | 1,3,5,27,2 2,4,6,7,8,2<br>9,30,31,35 8,32,33,34 | 3  | P01946,Q6P6R2,Q99041                                                                       |
| 6998 | 1,3,5,27,2 2,4,6,7,8,2<br>9,30,32,33 8,31,34,35 | 3  | P18427,P55314,Q5HZV9                                                                       |
| 6999 | 1,3,5,27,2 2,4,6,7,8,2<br>9,30,32,34 8,31,33,35 | 6  | P02803,P17046,P35280,Q02253,Q6IRE4,Q9QW07                                                  |
| 7000 | 1,3,5,27,2 2,4,6,7,8,2<br>9,30,32,35 8,31,33,34 | 2  | P01946,Q99041                                                                              |
| 7001 | 1,3,5,27,2 2,4,6,7,8,2<br>9,30,33,34 8,31,32,35 | 4  | P12020,P18427,P35280,Q6IRE4                                                                |
| 7002 | 1,3,5,27,2 2,4,6,7,8,2<br>9,30,33,35 8,31,32,34 | 4  | P01946,P12020,P20766,Q6P6R2                                                                |
| 7003 | 1,3,5,27,2 2,4,6,7,8,2<br>9,30,34,35 8,31,32,33 | 9  | P01946,P06911,P12020,P35280,P83121,Q5GRG2,Q6IRE4,Q99041,Q9QW07                             |
| 7004 | 1,3,5,27,2 2,4,6,7,8,2<br>9,31,32,33 8,30,34,35 | 6  | P14480,P47967,P55314,Q5HZV9,Q6P6R2,Q80WL1                                                  |
| 7005 | 1,3,5,27,2 2,4,6,7,8,2<br>9,31,32,34 8,30,33,35 | 2  | Q6IRE4,Q9QW07                                                                              |
| 7006 | 1,3,5,27,2 2,4,6,7,8,2<br>9,31,32,35 8,30,33,34 | 6  | P01946,P47967,P97840,Q6P6R2,Q99041,Q9QZQ5                                                  |
| 7007 | 1,3,5,27,2 2,4,6,7,8,2<br>9,31,33,34 8,30,32,35 | 4  | P14480,Q6AYQ8,Q6IRE4,Q9QW07                                                                |
| 7008 | 1,3,5,27,2 2,4,6,7,8,2<br>9,31,33,35 8,30,32,34 | 5  | P01946,P47967,P97840,Q6P6R2,Q9WTT6                                                         |
| 7009 | 1,3,5,27,2 2,4,6,7,8,2<br>9,31,34,35 8,30,32,33 | 3  | P01946,Q6IRE4,Q9QW07                                                                       |
| 7010 | 1,3,5,27,2 2,4,6,7,8,2<br>9,32,33,34 8,30,31,35 | 9  | O55004,P14480,P17046,P18427,P55314,Q4FZU2,Q6IRE4,Q6P6Q2,Q80WL1                             |

|      |                                                 |    |                                                                                     |
|------|-------------------------------------------------|----|-------------------------------------------------------------------------------------|
| 7011 | 1,3,5,27,2 2,4,6,7,8,2<br>9,32,33,35 8,30,31,34 | 9  | P01946,P09605,P25809,P47967,P55314,P97840,Q6IG02,Q6NX65,Q6P6R2,Q80WL1               |
| 7012 | 1,3,5,27,2 2,4,6,7,8,2<br>9,32,34,35 8,30,31,33 | 7  | P01946,P12020,P17046,P83121,Q6IRE4,Q80WL1,Q9QW07                                    |
| 7013 | 1,3,5,27,2 2,4,6,7,8,2<br>9,33,34,35 8,30,31,32 | 6  | P01946,P12020,Q5GRG2,Q6IRE4,Q80WL1,Q9QW07                                           |
| 7014 | 1,3,5,27,3 2,4,6,7,8,2<br>0,31,32,33 8,29,34,35 | 2  | P14480,P55314                                                                       |
| 7015 | 1,3,5,27,3 2,4,6,7,8,2<br>0,31,32,34 8,29,33,35 | 4  | P35280,Q63617,Q6IRE4,Q9R0T3                                                         |
| 7016 | 1,3,5,27,3 2,4,6,7,8,2<br>0,31,32,35 8,29,33,34 | 3  | Q63617,Q99041,Q9QZQ5                                                                |
| 7017 | 1,3,5,27,3 2,4,6,7,8,2<br>0,31,33,34 8,29,32,35 | 4  | P14480,P35280,Q63617,Q6IRE4                                                         |
| 7018 | 1,3,5,27,3 2,4,6,7,8,2<br>0,31,33,35 8,29,32,34 | 3  | P50280,Q6P6R2,Q9QZQ5                                                                |
| 7019 | 1,3,5,27,3 2,4,6,7,8,2<br>0,31,34,35 8,29,32,33 | 11 | P02780,P02793,Q7TP54,P12020,P24368,P35280,P47727,P50280,Q63617,Q6IRE4,Q99041,Q9R0T3 |
| 7020 | 1,3,5,27,3 2,4,6,7,8,2<br>0,32,33,34 8,29,31,35 | 6  | P17046,P18427,P25236,P35280,P55314,Q6IRE4                                           |
| 7021 | 1,3,5,27,3 2,4,6,7,8,2<br>0,32,33,35 8,29,31,34 | 3  | P25236,P55314,Q6IG02                                                                |
| 7022 | 1,3,5,27,3 2,4,6,7,8,2<br>0,32,34,35 8,29,31,33 | 10 | P06911,P12020,P17046,P35280,P83121,Q5GRG2,Q63617,Q6IRE4,Q99041,Q9R0T3               |
| 7023 | 1,3,5,27,3 2,4,6,7,8,2<br>0,33,34,35 8,29,31,32 | 9  | P06911,P12020,P25236,P35280,P50280,Q5GRG2,Q62975,Q63617,Q6IRE4                      |
| 7024 | 1,3,5,27,3 2,4,6,7,8,2<br>1,32,33,34 8,29,30,35 | 7  | P02680,P14480,P55314,Q4FZU2,Q6IG02,Q6IRE4,Q6P6Q2                                    |
| 7025 | 1,3,5,27,3 2,4,6,7,8,2<br>1,32,33,35 8,29,30,34 | 10 | P09605,P25809,P47967,P55314,P97840,Q08849,Q6IG02,Q6NX65,Q6P6R2,Q9QZQ5,Q9WTT6        |
| 7026 | 1,3,5,27,3 2,4,6,7,8,2<br>1,32,34,35 8,29,30,33 | 5  | P02780,P83121,Q63617,Q6IRE4,Q9QZQ5                                                  |
| 7027 | 1,3,5,27,3 2,4,6,7,8,2<br>1,33,34,35 8,29,30,32 | 5  | P02780,P24368,P50280,Q62975,Q6IRE4                                                  |
| 7028 | 1,3,5,27,3 2,4,6,7,8,2<br>2,33,34,35 8,29,30,31 | 12 | O55004,P12020,P17046,P25236,P55314,P83121,Q4FZU2,Q5GRG2,Q6IG02,Q6IRE4,Q6P6Q2,Q80WL1 |
| 7029 | 1,3,5,28,2 2,4,6,7,8,2<br>9,30,31,32 7,33,34,35 | 5  | D3ZUK3,Q561R9,Q99041,Q9QW07,Q9QZQ5                                                  |
| 7030 | 1,3,5,28,2 2,4,6,7,8,2<br>9,30,31,33 7,32,34,35 | 5  | P00714,Q63532,Q6P6R2,Q9QW07,Q9QZQ5                                                  |
| 7031 | 1,3,5,28,2 2,4,6,7,8,2<br>9,30,31,34 7,32,33,35 | 5  | P00714,P14669,Q6IRE4,Q8CJD3,Q9QW07                                                  |
| 7032 | 1,3,5,28,2 2,4,6,7,8,2<br>9,30,31,35 7,32,33,34 | 11 | D3ZUK3,G3V686,P00714,P02631,P08649,Q00715,Q63532,Q6P6R2,Q99041,Q9QW07,Q9QZQ5        |
| 7033 | 1,3,5,28,2 2,4,6,7,8,2<br>9,30,32,33 7,31,34,35 | 1  | P18427                                                                              |

|      |                          |                           |    |                                                                                            |
|------|--------------------------|---------------------------|----|--------------------------------------------------------------------------------------------|
| 7034 | 1,3,5,28,2<br>9,30,32,34 | 2,4,6,7,8,2<br>7,31,33,35 | 4  | P17046,Q6IRE4,Q99MH3,Q9QW07                                                                |
| 7035 | 1,3,5,28,2<br>9,30,32,35 | 2,4,6,7,8,2<br>7,31,33,34 | 5  | D3ZUK3,G3V686,Q99041,Q9QW07,Q9QZQ5                                                         |
| 7036 | 1,3,5,28,2<br>9,30,33,34 | 2,4,6,7,8,2<br>7,31,32,35 | 3  | P18427,Q6IRE4,Q9QW07                                                                       |
| 7037 | 1,3,5,28,2<br>9,30,33,35 | 2,4,6,7,8,2<br>7,31,32,34 | 5  | G3V686,Q63532,Q6P6R2,Q9QZQ5,Q9WTT6                                                         |
| 7038 | 1,3,5,28,2<br>9,30,34,35 | 2,4,6,7,8,2<br>7,31,32,33 | 7  | P12020,P14669,Q6IRE4,Q8CJD3,Q99041,Q9QW07,Q9QZQ5                                           |
| 7039 | 1,3,5,28,2<br>9,31,32,33 | 2,4,6,7,8,2<br>7,30,34,35 | 7  | P14480,P47967,Q64057,Q80WL1,Q9QW07,Q9QZQ5,Q9WTT6                                           |
| 7040 | 1,3,5,28,2<br>9,31,32,34 | 2,4,6,7,8,2<br>7,30,33,35 | 5  | P14480,Q6IRE4,Q99MH3,Q9QW07,Q9QZQ5                                                         |
| 7041 | 1,3,5,28,2<br>9,31,32,35 | 2,4,6,7,8,2<br>7,30,33,34 | 7  | D3ZUK3,P47967,Q00715,Q99041,Q9QW07,Q9QZQ5,Q9WTT6                                           |
| 7042 | 1,3,5,28,2<br>9,31,33,34 | 2,4,6,7,8,2<br>7,30,32,35 | 6  | P00714,P14480,P14669,Q6AYQ8,Q6IRE4,Q9QW07                                                  |
| 7043 | 1,3,5,28,2<br>9,31,33,35 | 2,4,6,7,8,2<br>7,30,32,34 | 12 | G3V686,P00714,P09605,P25809,P14669,P47967,P97840,Q00715,Q63532,Q6P6R2,Q9QW07,Q9QZQ5,Q9WTT6 |
| 7044 | 1,3,5,28,2<br>9,31,34,35 | 2,4,6,7,8,2<br>7,30,32,33 | 6  | P00714,P14669,Q6IRE4,Q99041,Q9QW07,Q9QZQ5                                                  |
| 7045 | 1,3,5,28,2<br>9,32,33,34 | 2,4,6,7,8,2<br>7,30,31,35 | 8  | P14480,P17046,P18427,P55314,Q64057,Q6IRE4,Q80WL1,Q9QW07                                    |
| 7046 | 1,3,5,28,2<br>9,32,33,35 | 2,4,6,7,8,2<br>7,30,31,34 | 7  | P09605,P25809,P47967,P97840,Q80WL1,Q9QW07,Q9QZQ5,Q9WTT6                                    |
| 7047 | 1,3,5,28,2<br>9,32,34,35 | 2,4,6,7,8,2<br>7,30,31,33 | 5  | P17046,Q6IRE4,Q80WL1,Q9QW07,Q9QZQ5                                                         |
| 7048 | 1,3,5,28,2<br>9,33,34,35 | 2,4,6,7,8,2<br>7,30,31,32 | 8  | O55145,P00714,P12020,P14669,Q6IRE4,Q80WL1,Q9QW07,Q9QZQ5                                    |
| 7049 | 1,3,5,28,3<br>0,31,32,33 | 2,4,6,7,8,2<br>7,29,34,35 | 4  | P02631,P11598,P14480,Q9QZQ5                                                                |
| 7050 | 1,3,5,28,3<br>0,31,32,34 | 2,4,6,7,8,2<br>7,29,33,35 | 9  | P02631,P11598,P14480,P14669,Q63617,Q6IRE4,Q9QW07,Q9QZQ5,Q9R0T3                             |
| 7051 | 1,3,5,28,3<br>0,31,32,35 | 2,4,6,7,8,2<br>7,29,33,34 | 8  | P02631,P04218,P08649,P11598,Q00715,Q63617,Q99041,Q9QZQ5                                    |
| 7052 | 1,3,5,28,3<br>0,31,33,34 | 2,4,6,7,8,2<br>7,29,32,35 | 8  | P00714,P02631,P14480,P14669,Q63617,Q6IRE4,Q9QW07,Q9QZQ5                                    |
| 7053 | 1,3,5,28,3<br>0,31,33,35 | 2,4,6,7,8,2<br>7,29,32,34 | 11 | G3V686,P00714,P02631,P11598,P14669,Q00715,Q63532,Q63617,Q6P6R2,Q9QZQ5,Q9WTT6               |
| 7054 | 1,3,5,28,3<br>0,31,34,35 | 2,4,6,7,8,2<br>7,29,32,33 | 12 | P00714,P02631,P02793,Q7TP54,P11598,P14669,Q63617,Q6IRE4,Q8CJD3,Q99041,Q9QW07,Q9QZQ5,Q9R0T3 |
| 7055 | 1,3,5,28,3<br>0,32,33,34 | 2,4,6,7,8,2<br>7,29,31,35 | 8  | P11598,P14480,P17046,P18427,P25236,P55314,Q63617,Q6IRE4                                    |
| 7056 | 1,3,5,28,3<br>0,32,33,35 | 2,4,6,7,8,2<br>7,29,31,34 | 5  | P04218,P11598,P25236,Q9QZQ5,Q9WTT6                                                         |



|      |                          |                           |    |                                                                                     |
|------|--------------------------|---------------------------|----|-------------------------------------------------------------------------------------|
| 7057 | 1,3,5,28,3<br>0,32,34,35 | 2,4,6,7,8,2<br>7,29,31,33 | 12 | P11598,P14669,P17046,P25236,P83121,Q63617,Q6IRE4,Q8CJD3,Q99041,Q9QW07,Q9QZQ5,Q9R0T3 |
| 7058 | 1,3,5,28,3<br>0,33,34,35 | 2,4,6,7,8,2<br>7,29,31,32 | 9  | P00714,P11598,P12020,P14669,P25236,Q63617,Q6IRE4,Q8CJD3,Q9QZQ5                      |
| 7059 | 1,3,5,28,3<br>1,32,33,34 | 2,4,6,7,8,2<br>7,29,30,35 | 8  | P02680,P11598,P14480,P14669,P55314,Q6IRE4,Q9QW07,Q9QZQ5                             |
| 7060 | 1,3,5,28,3<br>1,32,33,35 | 2,4,6,7,8,2<br>7,29,30,34 | 9  | P02631,P04218,P09605,P25809,P11598,P14669,P47967,Q00715,Q9QZQ5,Q9WTT6               |
| 7061 | 1,3,5,28,3<br>1,32,34,35 | 2,4,6,7,8,2<br>7,29,30,33 | 8  | P02631,P11598,P14669,Q63617,Q6IRE4,Q99041,Q9QW07,Q9QZQ5                             |
| 7062 | 1,3,5,28,3<br>1,33,34,35 | 2,4,6,7,8,2<br>7,29,30,32 | 9  | P00714,P02631,P11598,P14669,P62804,Q63617,Q6IRE4,Q9QW07,Q9QZQ5                      |
| 7063 | 1,3,5,28,3<br>2,33,34,35 | 2,4,6,7,8,2<br>7,29,30,31 | 8  | P11598,P14669,P17046,P25236,P55314,Q6IRE4,Q80WL1,Q9QZQ5                             |
| 7064 | 1,3,5,29,3<br>0,31,32,33 | 2,4,6,7,8,2<br>7,28,34,35 | 4  | P14480,Q5HZV9,Q6P6R2,Q9WTT6                                                         |
| 7065 | 1,3,5,29,3<br>0,31,32,34 | 2,4,6,7,8,2<br>7,28,33,35 | 4  | Q6IRE4,Q99MH3,Q9QW07,Q9R0T3                                                         |
| 7066 | 1,3,5,29,3<br>0,31,32,35 | 2,4,6,7,8,2<br>7,28,33,34 | 7  | P02631,Q4FZU6,Q6P6R2,Q99041,Q9QZQ5,Q9R0T3,Q9WTT6                                    |
| 7067 | 1,3,5,29,3<br>0,31,33,34 | 2,4,6,7,8,2<br>7,28,32,35 | 3  | P00714,Q6IRE4,Q9QW07                                                                |
| 7068 | 1,3,5,29,3<br>0,31,33,35 | 2,4,6,7,8,2<br>7,28,32,34 | 9  | G3V686,P00714,P02631,P47967,Q4FZU6,Q63532,Q6P6R2,Q9QZQ5,Q9WTT6                      |
| 7069 | 1,3,5,29,3<br>0,31,34,35 | 2,4,6,7,8,2<br>7,28,32,33 | 11 | P00714,P02631,P02793;Q7TP54,P12020,P14669,Q6IRE4,Q99041,Q99MH3,Q9QW07,Q9QZQ5,Q9R0T3 |
| 7070 | 1,3,5,29,3<br>0,32,33,34 | 2,4,6,7,8,2<br>7,28,31,35 | 4  | P17046,P55314,Q6IRE4,Q99MH3                                                         |
| 7071 | 1,3,5,29,3<br>0,32,33,35 | 2,4,6,7,8,2<br>7,28,31,34 | 4  | P47967,Q6P6R2,Q9QZQ5,Q9WTT6                                                         |
| 7072 | 1,3,5,29,3<br>0,32,34,35 | 2,4,6,7,8,2<br>7,28,31,33 | 8  | P12020,P17046,Q5GRG2,Q6IRE4,Q99041,Q99MH3,Q9QW07,Q9R0T3                             |
| 7073 | 1,3,5,29,3<br>0,33,34,35 | 2,4,6,7,8,2<br>7,28,31,32 | 6  | P00714,P06911,P12020,Q5GRG2,Q6IRE4,Q9R0T3                                           |
| 7074 | 1,3,5,29,3<br>1,32,33,34 | 2,4,6,7,8,2<br>7,28,30,35 | 7  | P14480,P55314,Q64057,Q6AYQ8,Q6IRE4,Q99MH3,Q9QW07                                    |
| 7075 | 1,3,5,29,3<br>1,32,33,35 | 2,4,6,7,8,2<br>7,28,30,34 | 7  | P02631,P47967,P97840,Q6AYQ8,Q6P6R2,Q9QZQ5,Q9WTT6                                    |
| 7076 | 1,3,5,29,3<br>1,32,34,35 | 2,4,6,7,8,2<br>7,28,30,33 | 7  | Q6AYQ8,Q6IRE4,Q99041,Q99MH3,Q9QW07,Q9QZQ5,Q9R0T3                                    |
| 7077 | 1,3,5,29,3<br>1,33,34,35 | 2,4,6,7,8,2<br>7,28,30,32 | 6  | P00714,P12020,P14669,Q6AYQ8,Q6IRE4,Q9QW07                                           |
| 7078 | 1,3,5,29,3<br>2,33,34,35 | 2,4,6,7,8,2<br>7,28,30,31 | 8  | P12020,P55314,Q5GRG2,Q64057,Q6AYQ8,Q6IRE4,Q80WL1,Q9QW07                             |
| 7079 | 1,3,5,30,3<br>1,32,33,34 | 2,4,6,7,8,2<br>7,28,29,35 | 8  | P02631,P0C0A9,P14480,P14669,P55314,Q63617,Q6IRE4,Q9R0T3                             |

|      |                          |                             |    |                                                                                                                                                                                |
|------|--------------------------|-----------------------------|----|--------------------------------------------------------------------------------------------------------------------------------------------------------------------------------|
| 7080 | 1,3,5,30,3<br>1,32,33,35 | 2,4,6,7,8,2<br>7,28,29,34   | 11 | P02631,P04218,P0C0A9,P11598,P24368,Q4FZU6,Q63617,Q6P6R2,Q9QZQ5,Q9R0T3,Q9WTT6                                                                                                   |
| 7081 | 1,3,5,30,3<br>1,32,34,35 | 2,4,6,7,8,2<br>7,28,29,33   | 19 | P02631,P02782,P02793;Q7TP54,P06761,P07647,P08723,P0C0A9,P11598,P14669,P22283,P24368,P82471,Q63617,Q6IRE4,Q99041,Q9JHB9,Q9JI85,Q9QZQ5,Q9R0T3                                    |
| 7082 | 1,3,5,30,3<br>1,33,34,35 | 2,4,6,7,8,2<br>7,28,29,32   | 20 | P00714,P02631,P02782,P02793;Q7TP54,P06761,P08723,P0C0A9,P12020,P14669,P22282,P22283,P24368,P50280,P82471,Q63617,Q6IRE4,Q9JHB9,Q9JI85,Q9QZQ5,Q9R0T3                             |
| 7083 | 1,3,5,30,3<br>2,33,34,35 | 2,4,6,7,8,2<br>7,28,29,31   | 25 | P02631,P02782,P06911,P07171,P07647,P08723,P0C0A9,P11598,P12020,P14669,P17046,P22282,P22283,P24368,P25236,P55314,P82471,Q5GRG2,Q62902,Q63617,Q6IRE4,Q9JHB9,Q9JI85,Q9QZQ5,Q9R0T3 |
| 7084 | 1,3,5,31,3<br>2,33,34,35 | 2,4,6,7,8,2<br>7,28,29,30   | 25 | P02631,P02781,P02782,P06761,P07647,P08723,P08753,P0C0A9,P11598,P14669,P22283,P24368,P30120,P55314,P82471,P82995,Q63617,Q6AYQ8,Q6AYR9,Q6IRE4,Q8CJ52,Q9JHB9,Q9JI85,Q9QZQ5,Q9R0T3 |
| 7085 | 1,3,6,7,8,2<br>7,28,29   | 2,4,5,30,3<br>1,32,33,34,35 | 8  | O35547,P02782,P08723,P22283,Q62902,Q8CJ52,Q9JHB9,Q9JI85                                                                                                                        |
| 7086 | 1,3,6,7,8,2<br>7,28,30   | 2,4,5,29,3<br>1,32,33,34,35 | 2  | P16086,Q6TMA8                                                                                                                                                                  |
| 7087 | 1,3,6,7,8,2<br>7,28,31   | 2,4,5,29,3<br>0,32,33,34,35 | 5  | P10715,P12020,P31044,Q5GRG2,Q6TMA8                                                                                                                                             |
| 7088 | 1,3,6,7,8,2<br>7,28,32   | 2,4,5,29,3<br>0,31,33,34,35 | 2  | P12020,P16086                                                                                                                                                                  |
| 7089 | 1,3,6,7,8,2<br>7,28,33   | 2,4,5,29,3<br>0,31,32,34,35 | 0  |                                                                                                                                                                                |
| 7090 | 1,3,6,7,8,2<br>7,28,34   | 2,4,5,29,3<br>0,31,32,33,35 | 3  | P04182,P47967,Q9WTT6                                                                                                                                                           |
| 7091 | 1,3,6,7,8,2<br>7,28,35   | 2,4,5,29,3<br>0,31,32,33,34 | 2  | P02770,Q6TMA8                                                                                                                                                                  |
| 7092 | 1,3,6,7,8,2<br>7,29,30   | 2,4,5,28,3<br>1,32,33,34,35 | 1  | P16086                                                                                                                                                                         |
| 7093 | 1,3,6,7,8,2<br>7,29,31   | 2,4,5,28,3<br>0,32,33,34,35 | 0  |                                                                                                                                                                                |
| 7094 | 1,3,6,7,8,2<br>7,29,32   | 2,4,5,28,3<br>0,31,33,34,35 | 4  | P14669,P16086,P51907,Q8CJD3                                                                                                                                                    |
| 7095 | 1,3,6,7,8,2<br>7,29,33   | 2,4,5,28,3<br>0,31,32,34,35 | 2  | Q63617,Q8CJD3                                                                                                                                                                  |
| 7096 | 1,3,6,7,8,2<br>7,29,34   | 2,4,5,28,3<br>0,31,32,33,35 | 2  | P16086,Q9WTT6                                                                                                                                                                  |

|      |                        |                                 |   |                                    |
|------|------------------------|---------------------------------|---|------------------------------------|
| 7097 | 1,3,6,7,8,2<br>7,29,35 | 2,4,5,28,3<br>0,31,32,33<br>,34 | 4 | P01946,P02091,P02770,P51907        |
| 7098 | 1,3,6,7,8,2<br>7,30,31 | 2,4,5,28,2<br>9,32,33,34<br>,35 | 2 | P16086,P19218                      |
| 7099 | 1,3,6,7,8,2<br>7,30,32 | 2,4,5,28,2<br>9,31,33,34<br>,35 | 2 | P02803,P16086                      |
| 7100 | 1,3,6,7,8,2<br>7,30,33 | 2,4,5,28,2<br>9,31,32,34<br>,35 | 1 | P16086                             |
| 7101 | 1,3,6,7,8,2<br>7,30,34 | 2,4,5,28,2<br>9,31,32,33<br>,35 | 5 | P02803,P16086,P47967,P97840,Q9WTT6 |
| 7102 | 1,3,6,7,8,2<br>7,30,35 | 2,4,5,28,2<br>9,31,32,33<br>,34 | 2 | P02770,P16086                      |
| 7103 | 1,3,6,7,8,2<br>7,31,32 | 2,4,5,28,2<br>9,30,33,34<br>,35 | 3 | P12020,P16086,Q8CJD3               |
| 7104 | 1,3,6,7,8,2<br>7,31,33 | 2,4,5,28,2<br>9,30,32,34<br>,35 | 0 |                                    |
| 7105 | 1,3,6,7,8,2<br>7,31,34 | 2,4,5,28,2<br>9,30,32,33<br>,35 | 1 | A2RUV9                             |
| 7106 | 1,3,6,7,8,2<br>7,31,35 | 2,4,5,28,2<br>9,30,32,33<br>,34 | 1 | P02770                             |
| 7107 | 1,3,6,7,8,2<br>7,32,33 | 2,4,5,28,2<br>9,30,31,34<br>,35 | 3 | P16086,P55314,Q8CJD3               |
| 7108 | 1,3,6,7,8,2<br>7,32,34 | 2,4,5,28,2<br>9,30,31,33<br>,35 | 3 | P02803,P16086,Q9WTT6               |
| 7109 | 1,3,6,7,8,2<br>7,32,35 | 2,4,5,28,2<br>9,30,31,33<br>,34 | 2 | P16086,P51907                      |
| 7110 | 1,3,6,7,8,2<br>7,33,34 | 2,4,5,28,2<br>9,30,31,32<br>,35 | 0 |                                    |
| 7111 | 1,3,6,7,8,2<br>7,33,35 | 2,4,5,28,2<br>9,30,31,32<br>,34 | 1 | P02770                             |

|      |                        |                                 |   |                                    |
|------|------------------------|---------------------------------|---|------------------------------------|
| 7112 | 1,3,6,7,8,2<br>7,34,35 | 2,4,5,28,2<br>9,30,31,32<br>,33 | 1 | P02770                             |
| 7113 | 1,3,6,7,8,2<br>8,29,30 | 2,4,5,27,3<br>1,32,33,34<br>,35 | 1 | P08723                             |
| 7114 | 1,3,6,7,8,2<br>8,29,31 | 2,4,5,27,3<br>0,32,33,34<br>,35 | 5 | P06911,P10715,P12020,P19629,Q5GRG2 |
| 7115 | 1,3,6,7,8,2<br>8,29,32 | 2,4,5,27,3<br>0,31,33,34<br>,35 | 3 | P08723,P12020,P51907               |
| 7116 | 1,3,6,7,8,2<br>8,29,33 | 2,4,5,27,3<br>0,31,32,34<br>,35 | 2 | P08723,Q63617                      |
| 7117 | 1,3,6,7,8,2<br>8,29,34 | 2,4,5,27,3<br>0,31,32,33<br>,35 | 1 | Q6IRE4                             |
| 7118 | 1,3,6,7,8,2<br>8,29,35 | 2,4,5,27,3<br>0,31,32,33<br>,34 | 3 | P02091,P02770,P51907               |
| 7119 | 1,3,6,7,8,2<br>8,30,31 | 2,4,5,27,2<br>9,32,33,34<br>,35 | 2 | P19629,Q5GRG2                      |
| 7120 | 1,3,6,7,8,2<br>8,30,32 | 2,4,5,27,2<br>9,31,33,34<br>,35 | 1 | P16086                             |
| 7121 | 1,3,6,7,8,2<br>8,30,33 | 2,4,5,27,2<br>9,31,32,34<br>,35 | 0 |                                    |
| 7122 | 1,3,6,7,8,2<br>8,30,34 | 2,4,5,27,2<br>9,31,32,33<br>,35 | 4 | P16086,P47967,P97840,Q6IRE4        |
| 7123 | 1,3,6,7,8,2<br>8,30,35 | 2,4,5,27,2<br>9,31,32,33<br>,34 | 1 | P02770                             |
| 7124 | 1,3,6,7,8,2<br>8,31,32 | 2,4,5,27,2<br>9,30,33,34<br>,35 | 5 | P06911,P10715,P12020,P31044,Q5GRG2 |
| 7125 | 1,3,6,7,8,2<br>8,31,33 | 2,4,5,27,2<br>9,30,32,34<br>,35 | 5 | P10715,P12020,P19629,Q5GRG2,Q8VD89 |
| 7126 | 1,3,6,7,8,2<br>8,31,34 | 2,4,5,27,2<br>9,30,32,33<br>,35 | 1 | Q6IRE4                             |

|      |                        |                                 |   |                      |
|------|------------------------|---------------------------------|---|----------------------|
| 7127 | 1,3,6,7,8,2<br>8,31,35 | 2,4,5,27,2<br>9,30,32,33<br>,34 | 1 | P02770               |
| 7128 | 1,3,6,7,8,2<br>8,32,33 | 2,4,5,27,2<br>9,30,31,34<br>,35 | 1 | P12020               |
| 7129 | 1,3,6,7,8,2<br>8,32,34 | 2,4,5,27,2<br>9,30,31,33<br>,35 | 0 |                      |
| 7130 | 1,3,6,7,8,2<br>8,32,35 | 2,4,5,27,2<br>9,30,31,33<br>,34 | 2 | P04218,P51907        |
| 7131 | 1,3,6,7,8,2<br>8,33,34 | 2,4,5,27,2<br>9,30,31,32<br>,35 | 0 |                      |
| 7132 | 1,3,6,7,8,2<br>8,33,35 | 2,4,5,27,2<br>9,30,31,32<br>,34 | 1 | P02770               |
| 7133 | 1,3,6,7,8,2<br>8,34,35 | 2,4,5,27,2<br>9,30,31,32<br>,33 | 1 | P02770               |
| 7134 | 1,3,6,7,8,2<br>9,30,31 | 2,4,5,27,2<br>8,32,33,34<br>,35 | 0 |                      |
| 7135 | 1,3,6,7,8,2<br>9,30,32 | 2,4,5,27,2<br>8,31,33,34<br>,35 | 3 | P16086,P51907,P53792 |
| 7136 | 1,3,6,7,8,2<br>9,30,33 | 2,4,5,27,2<br>8,31,32,34<br>,35 | 1 | P53792               |
| 7137 | 1,3,6,7,8,2<br>9,30,34 | 2,4,5,27,2<br>8,31,32,33<br>,35 | 1 | P16086               |
| 7138 | 1,3,6,7,8,2<br>9,30,35 | 2,4,5,27,2<br>8,31,32,33<br>,34 | 3 | P02091,P02770,P51907 |
| 7139 | 1,3,6,7,8,2<br>9,31,32 | 2,4,5,27,2<br>8,30,33,34<br>,35 | 3 | P12020,P51907,Q8CJD3 |
| 7140 | 1,3,6,7,8,2<br>9,31,33 | 2,4,5,27,2<br>8,30,32,34<br>,35 | 3 | Q63617,Q6AYQ8,Q8CJD3 |
| 7141 | 1,3,6,7,8,2<br>9,31,34 | 2,4,5,27,2<br>8,30,32,33<br>,35 | 1 | Q6AYQ8               |

|      |                        |                                 |   |                                           |
|------|------------------------|---------------------------------|---|-------------------------------------------|
| 7142 | 1,3,6,7,8,2<br>9,31,35 | 2,4,5,27,2<br>8,30,32,33<br>,34 | 4 | P02091,P02770,P51907,Q6IFU7               |
| 7143 | 1,3,6,7,8,2<br>9,32,33 | 2,4,5,27,2<br>8,30,31,34<br>,35 | 5 | P02793;Q7TP54,P51907,P53792,Q63617,Q8CJD3 |
| 7144 | 1,3,6,7,8,2<br>9,32,34 | 2,4,5,27,2<br>8,30,31,33<br>,35 | 3 | P16086,P51907,Q99MH3                      |
| 7145 | 1,3,6,7,8,2<br>9,32,35 | 2,4,5,27,2<br>8,30,31,33<br>,34 | 2 | P02091,P51907                             |
| 7146 | 1,3,6,7,8,2<br>9,33,34 | 2,4,5,27,2<br>8,30,31,32<br>,35 | 1 | Q6AYQ8                                    |
| 7147 | 1,3,6,7,8,2<br>9,33,35 | 2,4,5,27,2<br>8,30,31,32<br>,34 | 4 | P02091,P15399,P51907,Q63617               |
| 7148 | 1,3,6,7,8,2<br>9,34,35 | 2,4,5,27,2<br>8,30,31,32<br>,33 | 2 | P02091,P51907                             |
| 7149 | 1,3,6,7,8,3<br>0,31,32 | 2,4,5,27,2<br>8,29,33,34<br>,35 | 1 | P16086                                    |
| 7150 | 1,3,6,7,8,3<br>0,31,33 | 2,4,5,27,2<br>8,29,32,34<br>,35 | 1 | P19218                                    |
| 7151 | 1,3,6,7,8,3<br>0,31,34 | 2,4,5,27,2<br>8,29,32,33<br>,35 | 4 | P16086,P19218,P47967,P97840               |
| 7152 | 1,3,6,7,8,3<br>0,31,35 | 2,4,5,27,2<br>8,29,32,33<br>,34 | 1 | P02770                                    |
| 7153 | 1,3,6,7,8,3<br>0,32,33 | 2,4,5,27,2<br>8,29,31,34<br>,35 | 3 | P16086,P53792,P55314                      |
| 7154 | 1,3,6,7,8,3<br>0,32,34 | 2,4,5,27,2<br>8,29,31,33<br>,35 | 2 | P16086,P47967                             |
| 7155 | 1,3,6,7,8,3<br>0,32,35 | 2,4,5,27,2<br>8,29,31,33<br>,34 | 3 | P04218,P16086,P51907                      |
| 7156 | 1,3,6,7,8,3<br>0,33,34 | 2,4,5,27,2<br>8,29,31,32<br>,35 | 1 | P16086                                    |

|      |                         |                                 |   |                                                                |
|------|-------------------------|---------------------------------|---|----------------------------------------------------------------|
| 7157 | 1,3,6,7,8,3<br>0,33,35  | 2,4,5,27,2<br>8,29,31,32<br>,34 | 1 | P02770                                                         |
| 7158 | 1,3,6,7,8,3<br>0,34,35  | 2,4,5,27,2<br>8,29,31,32<br>,33 | 2 | P02770,P16086                                                  |
| 7159 | 1,3,6,7,8,3<br>1,32,33  | 2,4,5,27,2<br>8,29,30,34<br>,35 | 2 | P12020,Q8CJD3                                                  |
| 7160 | 1,3,6,7,8,3<br>1,32,34  | 2,4,5,27,2<br>8,29,30,33<br>,35 | 1 | P16086                                                         |
| 7161 | 1,3,6,7,8,3<br>1,32,35  | 2,4,5,27,2<br>8,29,30,33<br>,34 | 2 | P04218,P51907                                                  |
| 7162 | 1,3,6,7,8,3<br>1,33,34  | 2,4,5,27,2<br>8,29,30,32<br>,35 | 0 |                                                                |
| 7163 | 1,3,6,7,8,3<br>1,33,35  | 2,4,5,27,2<br>8,29,30,32<br>,34 | 1 | P02770                                                         |
| 7164 | 1,3,6,7,8,3<br>1,34,35  | 2,4,5,27,2<br>8,29,30,32<br>,33 | 1 | P02770                                                         |
| 7165 | 1,3,6,7,8,3<br>2,33,34  | 2,4,5,27,2<br>8,29,30,31<br>,35 | 2 | P16086,P55314                                                  |
| 7166 | 1,3,6,7,8,3<br>2,33,35  | 2,4,5,27,2<br>8,29,30,31<br>,34 | 3 | P51907,P97580,Q30KJ2                                           |
| 7167 | 1,3,6,7,8,3<br>2,34,35  | 2,4,5,27,2<br>8,29,30,31<br>,33 | 3 | P08753,P35467,P51907                                           |
| 7168 | 1,3,6,7,8,3<br>3,34,35  | 2,4,5,27,2<br>8,29,30,31<br>,32 | 1 | O55145                                                         |
| 7169 | 1,3,6,7,27,<br>28,29,30 | 2,4,5,8,31,<br>32,33,34,3<br>5  | 7 | O08815,P08723,P30120,Q62997,Q6AYS4,Q9JHB9,Q9JI85               |
| 7170 | 1,3,6,7,27,<br>28,29,31 | 2,4,5,8,30,<br>32,33,34,3<br>5  | 6 | O35547,P06911,P08723,Q5GRG2,Q62902,Q9JI85                      |
| 7171 | 1,3,6,7,27,<br>28,29,32 | 2,4,5,8,30,<br>31,33,34,3<br>5  | 8 | O08815,P02793;Q7TP54,P08723,P09456,Q62997,Q80WL1,Q9JHB9,Q9JI85 |

|      |                         |                                |   |                                                                       |
|------|-------------------------|--------------------------------|---|-----------------------------------------------------------------------|
| 7172 | 1,3,6,7,27,<br>28,29,33 | 2,4,5,8,30,<br>31,32,34,3<br>5 | 9 | O08815,O35547,P02793;Q7TP54,P08723,Q62997,Q6AYS4,Q80WL1,Q9JHB9,Q9JI85 |
| 7173 | 1,3,6,7,27,<br>28,29,34 | 2,4,5,8,30,<br>31,32,33,3<br>5 | 3 | P04182,Q80WL1,Q9JI85                                                  |
| 7174 | 1,3,6,7,27,<br>28,29,35 | 2,4,5,8,30,<br>31,32,33,3<br>4 | 5 | P01946,P02091,Q62997,Q6AYS4,Q80WL1                                    |
| 7175 | 1,3,6,7,27,<br>28,30,31 | 2,4,5,8,29,<br>32,33,34,3<br>5 | 3 | Q5GRG2,Q6AYS4,Q6TMA8                                                  |
| 7176 | 1,3,6,7,27,<br>28,30,32 | 2,4,5,8,29,<br>31,33,34,3<br>5 | 2 | P02803,P16086                                                         |
| 7177 | 1,3,6,7,27,<br>28,30,33 | 2,4,5,8,29,<br>31,32,34,3<br>5 | 2 | Q6AYS4,Q6TMA8                                                         |
| 7178 | 1,3,6,7,27,<br>28,30,34 | 2,4,5,8,29,<br>31,32,33,3<br>5 | 5 | P02803,P04182,P47967,P97840,Q6TMA8                                    |
| 7179 | 1,3,6,7,27,<br>28,30,35 | 2,4,5,8,29,<br>31,32,33,3<br>4 | 2 | Q6AYS4,Q6TMA8                                                         |
| 7180 | 1,3,6,7,27,<br>28,31,32 | 2,4,5,8,29,<br>30,33,34,3<br>5 | 3 | P06911,P12020,Q5GRG2                                                  |
| 7181 | 1,3,6,7,27,<br>28,31,33 | 2,4,5,8,29,<br>30,32,34,3<br>5 | 3 | P19629,Q5GRG2,Q6TMA8                                                  |
| 7182 | 1,3,6,7,27,<br>28,31,34 | 2,4,5,8,29,<br>30,32,33,3<br>5 | 3 | A2RUV9,P04182,Q6TMA8                                                  |
| 7183 | 1,3,6,7,27,<br>28,31,35 | 2,4,5,8,29,<br>30,32,33,3<br>4 | 3 | P62804,Q6AYS4,Q6TMA8                                                  |
| 7184 | 1,3,6,7,27,<br>28,32,33 | 2,4,5,8,29,<br>30,31,34,3<br>5 | 4 | P02793;Q7TP54,P55314,Q06000,Q80WL1                                    |
| 7185 | 1,3,6,7,27,<br>28,32,34 | 2,4,5,8,29,<br>30,31,33,3<br>5 | 3 | P02803,P04182,P17046                                                  |
| 7186 | 1,3,6,7,27,<br>28,32,35 | 2,4,5,8,29,<br>30,31,33,3<br>4 | 2 | Q6AYS4,Q80WL1                                                         |



|      |                         |                                |   |                                    |
|------|-------------------------|--------------------------------|---|------------------------------------|
| 7187 | 1,3,6,7,27,<br>28,33,34 | 2,4,5,8,29,<br>30,31,32,3<br>5 | 2 | P04182,Q80WL1                      |
| 7188 | 1,3,6,7,27,<br>28,33,35 | 2,4,5,8,29,<br>30,31,32,3<br>4 | 4 | P15399,Q6AYS4,Q6TMA8,Q80WL1        |
| 7189 | 1,3,6,7,27,<br>28,34,35 | 2,4,5,8,29,<br>30,31,32,3<br>3 | 3 | P04182,Q5M819,Q6TMA8               |
| 7190 | 1,3,6,7,27,<br>29,30,31 | 2,4,5,8,28,<br>32,33,34,3<br>5 | 0 |                                    |
| 7191 | 1,3,6,7,27,<br>29,30,32 | 2,4,5,8,28,<br>31,33,34,3<br>5 | 2 | P02803,P16086                      |
| 7192 | 1,3,6,7,27,<br>29,30,33 | 2,4,5,8,28,<br>31,32,34,3<br>5 | 1 | Q6AYS4                             |
| 7193 | 1,3,6,7,27,<br>29,30,34 | 2,4,5,8,28,<br>31,32,33,3<br>5 | 4 | P02803,P16086,P47967,P97840        |
| 7194 | 1,3,6,7,27,<br>29,30,35 | 2,4,5,8,28,<br>31,32,33,3<br>4 | 4 | P01946,P02091,Q62997,Q6AYS4        |
| 7195 | 1,3,6,7,27,<br>29,31,32 | 2,4,5,8,28,<br>30,33,34,3<br>5 | 0 |                                    |
| 7196 | 1,3,6,7,27,<br>29,31,33 | 2,4,5,8,28,<br>30,32,34,3<br>5 | 0 |                                    |
| 7197 | 1,3,6,7,27,<br>29,31,34 | 2,4,5,8,28,<br>30,32,33,3<br>5 | 1 | A2RUV9                             |
| 7198 | 1,3,6,7,27,<br>29,31,35 | 2,4,5,8,28,<br>30,32,33,3<br>4 | 3 | P01946,P02091,Q6AYS4               |
| 7199 | 1,3,6,7,27,<br>29,32,33 | 2,4,5,8,28,<br>30,31,34,3<br>5 | 4 | P02793,Q7TP54,P55314,Q80WL1,Q8CJD3 |
| 7200 | 1,3,6,7,27,<br>29,32,34 | 2,4,5,8,28,<br>30,31,33,3<br>5 | 1 | P02803                             |
| 7201 | 1,3,6,7,27,<br>29,32,35 | 2,4,5,8,28,<br>30,31,33,3<br>4 | 5 | P01946,P02091,P51907,Q6AYS4,Q80WL1 |

|      |                         |                                |   |                                    |
|------|-------------------------|--------------------------------|---|------------------------------------|
| 7202 | 1,3,6,7,27,<br>29,33,34 | 2,4,5,8,28,<br>30,31,32,3<br>5 | 1 | Q80WL1                             |
| 7203 | 1,3,6,7,27,<br>29,33,35 | 2,4,5,8,28,<br>30,31,32,3<br>4 | 5 | P01946,P02091,P15399,Q6AYS4,Q80WL1 |
| 7204 | 1,3,6,7,27,<br>29,34,35 | 2,4,5,8,28,<br>30,31,32,3<br>3 | 2 | P01946,P02091                      |
| 7205 | 1,3,6,7,27,<br>30,31,32 | 2,4,5,8,28,<br>29,33,34,3<br>5 | 2 | P02803,P16086                      |
| 7206 | 1,3,6,7,27,<br>30,31,33 | 2,4,5,8,28,<br>29,32,34,3<br>5 | 3 | P19218,Q6AYS4,Q6TMA8               |
| 7207 | 1,3,6,7,27,<br>30,31,34 | 2,4,5,8,28,<br>29,32,33,3<br>5 | 4 | A2RUV9,P19218,P47967,P97840        |
| 7208 | 1,3,6,7,27,<br>30,31,35 | 2,4,5,8,28,<br>29,32,33,3<br>4 | 2 | Q6AYS4,Q6TMA8                      |
| 7209 | 1,3,6,7,27,<br>30,32,33 | 2,4,5,8,28,<br>29,31,34,3<br>5 | 3 | P02803,P16086,P55314               |
| 7210 | 1,3,6,7,27,<br>30,32,34 | 2,4,5,8,28,<br>29,31,33,3<br>5 | 5 | P02803,P16086,P17046,P47967,P97840 |
| 7211 | 1,3,6,7,27,<br>30,32,35 | 2,4,5,8,28,<br>29,31,33,3<br>4 | 3 | P02803,P16086,Q6AYS4               |
| 7212 | 1,3,6,7,27,<br>30,33,34 | 2,4,5,8,28,<br>29,31,32,3<br>5 | 3 | P02803,P47967,P97840               |
| 7213 | 1,3,6,7,27,<br>30,33,35 | 2,4,5,8,28,<br>29,31,32,3<br>4 | 2 | Q62975,Q6AYS4                      |
| 7214 | 1,3,6,7,27,<br>30,34,35 | 2,4,5,8,28,<br>29,31,32,3<br>3 | 3 | P47967,P97840,Q62975               |
| 7215 | 1,3,6,7,27,<br>31,32,33 | 2,4,5,8,28,<br>29,30,34,3<br>5 | 3 | P55314,Q6NX65,Q8CJD3               |
| 7216 | 1,3,6,7,27,<br>31,32,34 | 2,4,5,8,28,<br>29,30,33,3<br>5 | 2 | A2RUV9,P02803                      |

|      |                         |                                |   |                                           |
|------|-------------------------|--------------------------------|---|-------------------------------------------|
| 7217 | 1,3,6,7,27,<br>31,32,35 | 2,4,5,8,28,<br>29,30,33,3<br>4 | 1 | Q6AYS4                                    |
| 7218 | 1,3,6,7,27,<br>31,33,34 | 2,4,5,8,28,<br>29,30,32,3<br>5 | 1 | A2RUV9                                    |
| 7219 | 1,3,6,7,27,<br>31,33,35 | 2,4,5,8,28,<br>29,30,32,3<br>4 | 3 | P15399,Q6AYS4,Q6TMA8                      |
| 7220 | 1,3,6,7,27,<br>31,34,35 | 2,4,5,8,28,<br>29,30,32,3<br>3 | 2 | A2RUV9,Q62975                             |
| 7221 | 1,3,6,7,27,<br>32,33,34 | 2,4,5,8,28,<br>29,30,31,3<br>5 | 5 | P02803,P08649,P17046,P55314,Q80WL1        |
| 7222 | 1,3,6,7,27,<br>32,33,35 | 2,4,5,8,28,<br>29,30,31,3<br>4 | 6 | P15399,P55314,P97580,Q6AYS4,Q6NX65,Q80WL1 |
| 7223 | 1,3,6,7,27,<br>32,34,35 | 2,4,5,8,28,<br>29,30,31,3<br>3 | 1 | P02803                                    |
| 7224 | 1,3,6,7,27,<br>33,34,35 | 2,4,5,8,28,<br>29,30,31,3<br>2 | 2 | Q62975,Q80WL1                             |
| 7225 | 1,3,6,7,28,<br>29,30,31 | 2,4,5,8,27,<br>32,33,34,3<br>5 | 4 | P06911,P19629,Q5GRG2,Q6AYS4               |
| 7226 | 1,3,6,7,28,<br>29,30,32 | 2,4,5,8,27,<br>31,33,34,3<br>5 | 1 | Q63355                                    |
| 7227 | 1,3,6,7,28,<br>29,30,33 | 2,4,5,8,27,<br>31,32,34,3<br>5 | 1 | Q6AYS4                                    |
| 7228 | 1,3,6,7,28,<br>29,30,34 | 2,4,5,8,27,<br>31,32,33,3<br>5 | 3 | P97840,Q6IRE4,Q99MH3                      |
| 7229 | 1,3,6,7,28,<br>29,30,35 | 2,4,5,8,27,<br>31,32,33,3<br>4 | 3 | P02091,P06760,Q6AYS4                      |
| 7230 | 1,3,6,7,28,<br>29,31,32 | 2,4,5,8,27,<br>30,33,34,3<br>5 | 3 | P06911,P12020,Q5GRG2                      |
| 7231 | 1,3,6,7,28,<br>29,31,33 | 2,4,5,8,27,<br>30,32,34,3<br>5 | 6 | P06760,P06911,P19629,P83121,Q5GRG2,Q6AYS4 |

|      |                         |                                |   |                                           |
|------|-------------------------|--------------------------------|---|-------------------------------------------|
| 7232 | 1,3,6,7,28,<br>29,31,34 | 2,4,5,8,27,<br>30,32,33,3<br>5 | 4 | P06911,Q6IRE4,Q99MH3,Q9QW07               |
| 7233 | 1,3,6,7,28,<br>29,31,35 | 2,4,5,8,27,<br>30,32,33,3<br>4 | 3 | P02091,P06760,Q6AYS4                      |
| 7234 | 1,3,6,7,28,<br>29,32,33 | 2,4,5,8,27,<br>30,31,34,3<br>5 | 5 | P02793;Q7TP54,P04905,P09456,P47727,Q80WL1 |
| 7235 | 1,3,6,7,28,<br>29,32,34 | 2,4,5,8,27,<br>30,31,33,3<br>5 | 4 | Q6IRE4,Q80WL1,Q99MH3,Q9ET32               |
| 7236 | 1,3,6,7,28,<br>29,32,35 | 2,4,5,8,27,<br>30,31,33,3<br>4 | 4 | P02091,P51907,Q6AYS4,Q80WL1               |
| 7237 | 1,3,6,7,28,<br>29,33,34 | 2,4,5,8,27,<br>30,31,32,3<br>5 | 2 | Q6IRE4,Q80WL1                             |
| 7238 | 1,3,6,7,28,<br>29,33,35 | 2,4,5,8,27,<br>30,31,32,3<br>4 | 5 | P02091,P06760,P15399,Q6AYS4,Q80WL1        |
| 7239 | 1,3,6,7,28,<br>29,34,35 | 2,4,5,8,27,<br>30,31,32,3<br>3 | 2 | P02091,Q6IRE4                             |
| 7240 | 1,3,6,7,28,<br>30,31,32 | 2,4,5,8,27,<br>29,33,34,3<br>5 | 3 | P12020,Q561R9,Q5GRG2                      |
| 7241 | 1,3,6,7,28,<br>30,31,33 | 2,4,5,8,27,<br>29,32,34,3<br>5 | 5 | P06760,P19629,Q6AYS4,Q6TMA8,Q8VD89        |
| 7242 | 1,3,6,7,28,<br>30,31,34 | 2,4,5,8,27,<br>29,32,33,3<br>5 | 3 | P47967,P97840,Q6IRE4                      |
| 7243 | 1,3,6,7,28,<br>30,31,35 | 2,4,5,8,27,<br>29,32,33,3<br>4 | 4 | P06760,Q00715,Q6AYS4,Q6TMA8               |
| 7244 | 1,3,6,7,28,<br>30,32,33 | 2,4,5,8,27,<br>29,31,34,3<br>5 | 1 | Q6AYS4                                    |
| 7245 | 1,3,6,7,28,<br>30,32,34 | 2,4,5,8,27,<br>29,31,33,3<br>5 | 3 | P47967,P97840,Q6IRE4                      |
| 7246 | 1,3,6,7,28,<br>30,32,35 | 2,4,5,8,27,<br>29,31,33,3<br>4 | 2 | P04218,Q6AYS4                             |

|      |                         |                                |   |                                                         |
|------|-------------------------|--------------------------------|---|---------------------------------------------------------|
| 7247 | 1,3,6,7,28,<br>30,33,34 | 2,4,5,8,27,<br>29,31,32,3<br>5 | 3 | P47967,P97840,Q6IRE4                                    |
| 7248 | 1,3,6,7,28,<br>30,33,35 | 2,4,5,8,27,<br>29,31,32,3<br>4 | 3 | P06760,P15399,Q6AYS4                                    |
| 7249 | 1,3,6,7,28,<br>30,34,35 | 2,4,5,8,27,<br>29,31,32,3<br>3 | 3 | P97840,Q6IRE4,Q8CJD3                                    |
| 7250 | 1,3,6,7,28,<br>31,32,33 | 2,4,5,8,27,<br>29,30,34,3<br>5 | 3 | P06911,P12020,Q5GRG2                                    |
| 7251 | 1,3,6,7,28,<br>31,32,34 | 2,4,5,8,27,<br>29,30,33,3<br>5 | 3 | P12020,P13432,Q6IRE4                                    |
| 7252 | 1,3,6,7,28,<br>31,32,35 | 2,4,5,8,27,<br>29,30,33,3<br>4 | 1 | Q6AYS4                                                  |
| 7253 | 1,3,6,7,28,<br>31,33,34 | 2,4,5,8,27,<br>29,30,32,3<br>5 | 2 | P13432,Q6IRE4                                           |
| 7254 | 1,3,6,7,28,<br>31,33,35 | 2,4,5,8,27,<br>29,30,32,3<br>4 | 8 | P06760,P15399,P62804,Q00715,Q6AYS4,Q6TMA8,Q8VD89,Q9QXQ0 |
| 7255 | 1,3,6,7,28,<br>31,34,35 | 2,4,5,8,27,<br>29,30,32,3<br>3 | 3 | P06760,P62804,Q6IRE4                                    |
| 7256 | 1,3,6,7,28,<br>32,33,34 | 2,4,5,8,27,<br>29,30,31,3<br>5 | 2 | P55314,Q80WL1                                           |
| 7257 | 1,3,6,7,28,<br>32,33,35 | 2,4,5,8,27,<br>29,30,31,3<br>4 | 5 | P15399,P97580,Q30KJ2,Q6AYS4,Q80WL1                      |
| 7258 | 1,3,6,7,28,<br>32,34,35 | 2,4,5,8,27,<br>29,30,31,3<br>3 | 1 | Q5HZV9                                                  |
| 7259 | 1,3,6,7,28,<br>33,34,35 | 2,4,5,8,27,<br>29,30,31,3<br>2 | 4 | O55145,P15399,P62804,Q80WL1                             |
| 7260 | 1,3,6,7,29,<br>30,31,32 | 2,4,5,8,27,<br>28,33,34,3<br>5 | 1 | Q99MH3                                                  |
| 7261 | 1,3,6,7,29,<br>30,31,33 | 2,4,5,8,27,<br>28,32,34,3<br>5 | 2 | P83121,Q6AYS4                                           |

|      |                         |                                |   |                                           |
|------|-------------------------|--------------------------------|---|-------------------------------------------|
| 7262 | 1,3,6,7,29,<br>30,31,34 | 2,4,5,8,27,<br>28,32,33,3<br>5 | 3 | P09605;P25809,P97840,Q99MH3               |
| 7263 | 1,3,6,7,29,<br>30,31,35 | 2,4,5,8,27,<br>28,32,33,3<br>4 | 2 | P02091,Q6AYS4                             |
| 7264 | 1,3,6,7,29,<br>30,32,33 | 2,4,5,8,27,<br>28,31,34,3<br>5 | 1 | P53792                                    |
| 7265 | 1,3,6,7,29,<br>30,32,34 | 2,4,5,8,27,<br>28,31,33,3<br>5 | 2 | P16086,Q99MH3                             |
| 7266 | 1,3,6,7,29,<br>30,32,35 | 2,4,5,8,27,<br>28,31,33,3<br>4 | 2 | P51907,Q6AYS4                             |
| 7267 | 1,3,6,7,29,<br>30,33,34 | 2,4,5,8,27,<br>28,31,32,3<br>5 | 1 | Q99MH3                                    |
| 7268 | 1,3,6,7,29,<br>30,33,35 | 2,4,5,8,27,<br>28,31,32,3<br>4 | 3 | P02091,P15399,Q6AYS4                      |
| 7269 | 1,3,6,7,29,<br>30,34,35 | 2,4,5,8,27,<br>28,31,32,3<br>3 | 2 | P02091,Q99MH3                             |
| 7270 | 1,3,6,7,29,<br>31,32,33 | 2,4,5,8,27,<br>28,30,34,3<br>5 | 3 | P53792,Q6AYQ8,Q8CJD3                      |
| 7271 | 1,3,6,7,29,<br>31,32,34 | 2,4,5,8,27,<br>28,30,33,3<br>5 | 2 | Q6AYQ8,Q99MH3                             |
| 7272 | 1,3,6,7,29,<br>31,32,35 | 2,4,5,8,27,<br>28,30,33,3<br>4 | 3 | P02091,P51907,Q6AYS4                      |
| 7273 | 1,3,6,7,29,<br>31,33,34 | 2,4,5,8,27,<br>28,30,32,3<br>5 | 2 | Q6AYQ8,Q99MH3                             |
| 7274 | 1,3,6,7,29,<br>31,33,35 | 2,4,5,8,27,<br>28,30,32,3<br>4 | 6 | P00714,P02091,P06760,P15399,Q6AYQ8,Q6AYS4 |
| 7275 | 1,3,6,7,29,<br>31,34,35 | 2,4,5,8,27,<br>28,30,32,3<br>3 | 3 | P02091,Q6AYQ8,Q99MH3                      |
| 7276 | 1,3,6,7,29,<br>32,33,34 | 2,4,5,8,27,<br>28,30,31,3<br>5 | 4 | P55314,Q6AYQ8,Q80WL1,Q99MH3               |

|      |                         |                                |   |                                    |
|------|-------------------------|--------------------------------|---|------------------------------------|
| 7277 | 1,3,6,7,29,<br>32,33,35 | 2,4,5,8,27,<br>28,30,31,3<br>4 | 5 | P02091,P15399,P51907,Q6AYS4,Q80WL1 |
| 7278 | 1,3,6,7,29,<br>32,34,35 | 2,4,5,8,27,<br>28,30,31,3<br>3 | 3 | P02091,P51907,Q99MH3               |
| 7279 | 1,3,6,7,29,<br>33,34,35 | 2,4,5,8,27,<br>28,30,31,3<br>2 | 5 | O55145,P02091,P15399,Q6AYQ8,Q80WL1 |
| 7280 | 1,3,6,7,30,<br>31,32,33 | 2,4,5,8,27,<br>28,29,34,3<br>5 | 0 |                                    |
| 7281 | 1,3,6,7,30,<br>31,32,34 | 2,4,5,8,27,<br>28,29,33,3<br>5 | 4 | P16086,P47967,P97840,Q99MH3        |
| 7282 | 1,3,6,7,30,<br>31,32,35 | 2,4,5,8,27,<br>28,29,33,3<br>4 | 1 | Q6AYS4                             |
| 7283 | 1,3,6,7,30,<br>31,33,34 | 2,4,5,8,27,<br>28,29,32,3<br>5 | 2 | P19218,P97840                      |
| 7284 | 1,3,6,7,30,<br>31,33,35 | 2,4,5,8,27,<br>28,29,32,3<br>4 | 2 | P06760,Q6AYS4                      |
| 7285 | 1,3,6,7,30,<br>31,34,35 | 2,4,5,8,27,<br>28,29,32,3<br>3 | 4 | P02793;Q7TP54,P24368,P82471,P97840 |
| 7286 | 1,3,6,7,30,<br>32,33,34 | 2,4,5,8,27,<br>28,29,31,3<br>5 | 2 | P16086,P55314                      |
| 7287 | 1,3,6,7,30,<br>32,33,35 | 2,4,5,8,27,<br>28,29,31,3<br>4 | 4 | P15399,P55314,P97580,Q6AYS4        |
| 7288 | 1,3,6,7,30,<br>32,34,35 | 2,4,5,8,27,<br>28,29,31,3<br>3 | 1 | P82471                             |
| 7289 | 1,3,6,7,30,<br>33,34,35 | 2,4,5,8,27,<br>28,29,31,3<br>2 | 2 | P82471,Q62975                      |
| 7290 | 1,3,6,7,31,<br>32,33,34 | 2,4,5,8,27,<br>28,29,30,3<br>5 | 2 | P13432,P55314                      |
| 7291 | 1,3,6,7,31,<br>32,33,35 | 2,4,5,8,27,<br>28,29,30,3<br>4 | 4 | P15399,P97580,Q30KJ2,Q6AYS4        |

|      |                         |                                |    |                                                                                     |
|------|-------------------------|--------------------------------|----|-------------------------------------------------------------------------------------|
| 7292 | 1,3,6,7,31,<br>32,34,35 | 2,4,5,8,27,<br>28,29,30,3<br>3 | 1  | P82471                                                                              |
| 7293 | 1,3,6,7,31,<br>33,34,35 | 2,4,5,8,27,<br>28,29,30,3<br>2 | 3  | P00714,P24368,P82471                                                                |
| 7294 | 1,3,6,7,32,<br>33,34,35 | 2,4,5,8,27,<br>28,29,30,3<br>1 | 5  | O55145,P55314,P82471,P97580,Q80WL1                                                  |
| 7295 | 1,3,6,8,27,<br>28,29,30 | 2,4,5,7,31,<br>32,33,34,3<br>5 | 11 | F1LM93,O08815,O35547,P02781,P02782,P08723,P0C0A9,P30120,Q62997,Q812E4,Q9JHB9        |
| 7296 | 1,3,6,8,27,<br>28,29,31 | 2,4,5,7,30,<br>32,33,34,3<br>5 | 7  | O35547,P02781,P02782,P06911,P08723,Q5GRG2,Q9JHB9                                    |
| 7297 | 1,3,6,8,27,<br>28,29,32 | 2,4,5,7,30,<br>31,33,34,3<br>5 | 12 | F1LM93,O08815,O35547,P02781,P02782,P08723,P24368,P47727,P51907,Q62997,Q812E4,Q9JHB9 |
| 7298 | 1,3,6,8,27,<br>28,29,33 | 2,4,5,7,30,<br>31,32,34,3<br>5 | 9  | O35547,P02781,P02782,P08723,Q62997,Q80WL1,Q812E4,Q9JHB9,Q9JI85                      |
| 7299 | 1,3,6,8,27,<br>28,29,34 | 2,4,5,7,30,<br>31,32,33,3<br>5 | 6  | O35547,P02782,P04182,P08723,P97584,Q9WTT6                                           |
| 7300 | 1,3,6,8,27,<br>28,29,35 | 2,4,5,7,30,<br>31,32,33,3<br>4 | 6  | O35547,P01946,P02782,P08723,P51907,Q62997                                           |
| 7301 | 1,3,6,8,27,<br>28,30,31 | 2,4,5,7,29,<br>32,33,34,3<br>5 | 1  | P02782                                                                              |
| 7302 | 1,3,6,8,27,<br>28,30,32 | 2,4,5,7,29,<br>31,33,34,3<br>5 | 0  |                                                                                     |
| 7303 | 1,3,6,8,27,<br>28,30,33 | 2,4,5,7,29,<br>31,32,34,3<br>5 | 0  |                                                                                     |
| 7304 | 1,3,6,8,27,<br>28,30,34 | 2,4,5,7,29,<br>31,32,33,3<br>5 | 2  | P04182,Q9WTT6                                                                       |
| 7305 | 1,3,6,8,27,<br>28,30,35 | 2,4,5,7,29,<br>31,32,33,3<br>4 | 0  |                                                                                     |
| 7306 | 1,3,6,8,27,<br>28,31,32 | 2,4,5,7,29,<br>30,33,34,3<br>5 | 2  | P06911,Q5GRG2                                                                       |



|      |                         |                                |   |                                    |
|------|-------------------------|--------------------------------|---|------------------------------------|
| 7307 | 1,3,6,8,27,<br>28,31,33 | 2,4,5,7,29,<br>30,32,34,3<br>5 | 1 | P14480                             |
| 7308 | 1,3,6,8,27,<br>28,31,34 | 2,4,5,7,29,<br>30,32,33,3<br>5 | 2 | P04182,Q9WTT6                      |
| 7309 | 1,3,6,8,27,<br>28,31,35 | 2,4,5,7,29,<br>30,32,33,3<br>4 | 0 |                                    |
| 7310 | 1,3,6,8,27,<br>28,32,33 | 2,4,5,7,29,<br>30,31,34,3<br>5 | 5 | P55314,Q6IG02,Q6P6Q2,Q80WL1,Q9WTW7 |
| 7311 | 1,3,6,8,27,<br>28,32,34 | 2,4,5,7,29,<br>30,31,33,3<br>5 | 3 | P04182,P97584,Q9WTT6               |
| 7312 | 1,3,6,8,27,<br>28,32,35 | 2,4,5,7,29,<br>30,31,33,3<br>4 | 1 | P51907                             |
| 7313 | 1,3,6,8,27,<br>28,33,34 | 2,4,5,7,29,<br>30,31,32,3<br>5 | 3 | P04182,P97584,Q9WTT6               |
| 7314 | 1,3,6,8,27,<br>28,33,35 | 2,4,5,7,29,<br>30,31,32,3<br>4 | 0 |                                    |
| 7315 | 1,3,6,8,27,<br>28,34,35 | 2,4,5,7,29,<br>30,31,32,3<br>3 | 3 | P04182,P09006,Q9WTT6               |
| 7316 | 1,3,6,8,27,<br>29,30,31 | 2,4,5,7,28,<br>32,33,34,3<br>5 | 0 |                                    |
| 7317 | 1,3,6,8,27,<br>29,30,32 | 2,4,5,7,28,<br>31,33,34,3<br>5 | 1 | P51907                             |
| 7318 | 1,3,6,8,27,<br>29,30,33 | 2,4,5,7,28,<br>31,32,34,3<br>5 | 0 |                                    |
| 7319 | 1,3,6,8,27,<br>29,30,34 | 2,4,5,7,28,<br>31,32,33,3<br>5 | 1 | Q9WTT6                             |
| 7320 | 1,3,6,8,27,<br>29,30,35 | 2,4,5,7,28,<br>31,32,33,3<br>4 | 3 | P01946,P51907,Q62997               |
| 7321 | 1,3,6,8,27,<br>29,31,32 | 2,4,5,7,28,<br>30,33,34,3<br>5 | 2 | P51907,Q8CJD3                      |

|      |                         |                                |   |                                    |
|------|-------------------------|--------------------------------|---|------------------------------------|
| 7322 | 1,3,6,8,27,<br>29,31,33 | 2,4,5,7,28,<br>30,32,34,3<br>5 | 0 |                                    |
| 7323 | 1,3,6,8,27,<br>29,31,34 | 2,4,5,7,28,<br>30,32,33,3<br>5 | 0 |                                    |
| 7324 | 1,3,6,8,27,<br>29,31,35 | 2,4,5,7,28,<br>30,32,33,3<br>4 | 2 | P01946,P51907                      |
| 7325 | 1,3,6,8,27,<br>29,32,33 | 2,4,5,7,28,<br>30,31,34,3<br>5 | 5 | P51907,P55314,Q62687,Q80WL1,Q8CJD3 |
| 7326 | 1,3,6,8,27,<br>29,32,34 | 2,4,5,7,28,<br>30,31,33,3<br>5 | 3 | P51907,Q9WTT6,Q9Z1F2               |
| 7327 | 1,3,6,8,27,<br>29,32,35 | 2,4,5,7,28,<br>30,31,33,3<br>4 | 2 | P01946,P51907                      |
| 7328 | 1,3,6,8,27,<br>29,33,34 | 2,4,5,7,28,<br>30,31,32,3<br>5 | 1 | P97584                             |
| 7329 | 1,3,6,8,27,<br>29,33,35 | 2,4,5,7,28,<br>30,31,32,3<br>4 | 2 | P01946,P51907                      |
| 7330 | 1,3,6,8,27,<br>29,34,35 | 2,4,5,7,28,<br>30,31,32,3<br>3 | 3 | P01946,P09006,P51907               |
| 7331 | 1,3,6,8,27,<br>30,31,32 | 2,4,5,7,28,<br>29,33,34,3<br>5 | 0 |                                    |
| 7332 | 1,3,6,8,27,<br>30,31,33 | 2,4,5,7,28,<br>29,32,34,3<br>5 | 0 |                                    |
| 7333 | 1,3,6,8,27,<br>30,31,34 | 2,4,5,7,28,<br>29,32,33,3<br>5 | 1 | Q9WTT6                             |
| 7334 | 1,3,6,8,27,<br>30,31,35 | 2,4,5,7,28,<br>29,32,33,3<br>4 | 0 |                                    |
| 7335 | 1,3,6,8,27,<br>30,32,33 | 2,4,5,7,28,<br>29,31,34,3<br>5 | 2 | P14408,P55314                      |
| 7336 | 1,3,6,8,27,<br>30,32,34 | 2,4,5,7,28,<br>29,31,33,3<br>5 | 3 | P02803,P20760,Q9WTT6               |

|      |                         |                                |   |                                    |
|------|-------------------------|--------------------------------|---|------------------------------------|
| 7337 | 1,3,6,8,27,<br>30,32,35 | 2,4,5,7,28,<br>29,31,33,3<br>4 | 1 | P51907                             |
| 7338 | 1,3,6,8,27,<br>30,33,34 | 2,4,5,7,28,<br>29,31,32,3<br>5 | 0 |                                    |
| 7339 | 1,3,6,8,27,<br>30,33,35 | 2,4,5,7,28,<br>29,31,32,3<br>4 | 0 |                                    |
| 7340 | 1,3,6,8,27,<br>30,34,35 | 2,4,5,7,28,<br>29,31,32,3<br>3 | 1 | P02793;Q7TP54                      |
| 7341 | 1,3,6,8,27,<br>31,32,33 | 2,4,5,7,28,<br>29,30,34,3<br>5 | 3 | P14480,P55314,Q8CJD3               |
| 7342 | 1,3,6,8,27,<br>31,32,34 | 2,4,5,7,28,<br>29,30,33,3<br>5 | 0 |                                    |
| 7343 | 1,3,6,8,27,<br>31,32,35 | 2,4,5,7,28,<br>29,30,33,3<br>4 | 1 | P51907                             |
| 7344 | 1,3,6,8,27,<br>31,33,34 | 2,4,5,7,28,<br>29,30,32,3<br>5 | 0 |                                    |
| 7345 | 1,3,6,8,27,<br>31,33,35 | 2,4,5,7,28,<br>29,30,32,3<br>4 | 0 |                                    |
| 7346 | 1,3,6,8,27,<br>31,34,35 | 2,4,5,7,28,<br>29,30,32,3<br>3 | 0 |                                    |
| 7347 | 1,3,6,8,27,<br>32,33,34 | 2,4,5,7,28,<br>29,30,31,3<br>5 | 5 | P55314,P97584,Q4FZU2,Q6IG02,Q6P6Q2 |
| 7348 | 1,3,6,8,27,<br>32,33,35 | 2,4,5,7,28,<br>29,30,31,3<br>4 | 3 | P51907,P55314,Q6IG02               |
| 7349 | 1,3,6,8,27,<br>32,34,35 | 2,4,5,7,28,<br>29,30,31,3<br>3 | 4 | P08753,P35467,P51907,P83121        |
| 7350 | 1,3,6,8,27,<br>33,34,35 | 2,4,5,7,28,<br>29,30,31,3<br>2 | 1 | O55145                             |
| 7351 | 1,3,6,8,28,<br>29,30,31 | 2,4,5,7,27,<br>32,33,34,3<br>5 | 3 | O35547,P02782,P06911               |

|      |                         |                                |   |                                                         |
|------|-------------------------|--------------------------------|---|---------------------------------------------------------|
| 7352 | 1,3,6,8,28,<br>29,30,32 | 2,4,5,7,27,<br>31,33,34,3<br>5 | 5 | F1LM93,O35547,P08723,P14408,P51907                      |
| 7353 | 1,3,6,8,28,<br>29,30,33 | 2,4,5,7,27,<br>31,32,34,3<br>5 | 3 | O35547,P08723,P14408                                    |
| 7354 | 1,3,6,8,28,<br>29,30,34 | 2,4,5,7,27,<br>31,32,33,3<br>5 | 1 | Q99MH3                                                  |
| 7355 | 1,3,6,8,28,<br>29,30,35 | 2,4,5,7,27,<br>31,32,33,3<br>4 | 2 | P01681,P51907                                           |
| 7356 | 1,3,6,8,28,<br>29,31,32 | 2,4,5,7,27,<br>30,33,34,3<br>5 | 5 | O35547,P06911,P47727,P51907,Q5GRG2                      |
| 7357 | 1,3,6,8,28,<br>29,31,33 | 2,4,5,7,27,<br>30,32,34,3<br>5 | 2 | O35547,P06911                                           |
| 7358 | 1,3,6,8,28,<br>29,31,34 | 2,4,5,7,27,<br>30,32,33,3<br>5 | 2 | O35547,Q9QW07                                           |
| 7359 | 1,3,6,8,28,<br>29,31,35 | 2,4,5,7,27,<br>30,32,33,3<br>4 | 1 | P51907                                                  |
| 7360 | 1,3,6,8,28,<br>29,32,33 | 2,4,5,7,27,<br>30,31,34,3<br>5 | 8 | O35547,P04905,P08723,P14408,P35281,P47727,P51907,Q80WL1 |
| 7361 | 1,3,6,8,28,<br>29,32,34 | 2,4,5,7,27,<br>30,31,33,3<br>5 | 3 | P35281,P51907,Q99MH3                                    |
| 7362 | 1,3,6,8,28,<br>29,32,35 | 2,4,5,7,27,<br>30,31,33,3<br>4 | 1 | P51907                                                  |
| 7363 | 1,3,6,8,28,<br>29,33,34 | 2,4,5,7,27,<br>30,31,32,3<br>5 | 1 | O35547                                                  |
| 7364 | 1,3,6,8,28,<br>29,33,35 | 2,4,5,7,27,<br>30,31,32,3<br>4 | 1 | P51907                                                  |
| 7365 | 1,3,6,8,28,<br>29,34,35 | 2,4,5,7,27,<br>30,31,32,3<br>3 | 3 | P00507,P09006,P51907                                    |
| 7366 | 1,3,6,8,28,<br>30,31,32 | 2,4,5,7,27,<br>29,33,34,3<br>5 | 2 | P04218,P14408                                           |

|      |                         |                                |   |                                           |
|------|-------------------------|--------------------------------|---|-------------------------------------------|
| 7367 | 1,3,6,8,28,<br>30,31,33 | 2,4,5,7,27,<br>29,32,34,3<br>5 | 1 | P14408                                    |
| 7368 | 1,3,6,8,28,<br>30,31,34 | 2,4,5,7,27,<br>29,32,33,3<br>5 | 0 |                                           |
| 7369 | 1,3,6,8,28,<br>30,31,35 | 2,4,5,7,27,<br>29,32,33,3<br>4 | 0 |                                           |
| 7370 | 1,3,6,8,28,<br>30,32,33 | 2,4,5,7,27,<br>29,31,34,3<br>5 | 1 | P14408                                    |
| 7371 | 1,3,6,8,28,<br>30,32,34 | 2,4,5,7,27,<br>29,31,33,3<br>5 | 0 |                                           |
| 7372 | 1,3,6,8,28,<br>30,32,35 | 2,4,5,7,27,<br>29,31,33,3<br>4 | 3 | P04218,P14408,P51907                      |
| 7373 | 1,3,6,8,28,<br>30,33,34 | 2,4,5,7,27,<br>29,31,32,3<br>5 | 0 |                                           |
| 7374 | 1,3,6,8,28,<br>30,33,35 | 2,4,5,7,27,<br>29,31,32,3<br>4 | 1 | P14408                                    |
| 7375 | 1,3,6,8,28,<br>30,34,35 | 2,4,5,7,27,<br>29,31,32,3<br>3 | 5 | P00507,P02793;Q7TP54,P09006,P19132,Q8CJD3 |
| 7376 | 1,3,6,8,28,<br>31,32,33 | 2,4,5,7,27,<br>29,30,34,3<br>5 | 2 | P06911,P14480                             |
| 7377 | 1,3,6,8,28,<br>31,32,34 | 2,4,5,7,27,<br>29,30,33,3<br>5 | 1 | P13432                                    |
| 7378 | 1,3,6,8,28,<br>31,32,35 | 2,4,5,7,27,<br>29,30,33,3<br>4 | 2 | P04218,P51907                             |
| 7379 | 1,3,6,8,28,<br>31,33,34 | 2,4,5,7,27,<br>29,30,32,3<br>5 | 1 | P13432                                    |
| 7380 | 1,3,6,8,28,<br>31,33,35 | 2,4,5,7,27,<br>29,30,32,3<br>4 | 0 |                                           |
| 7381 | 1,3,6,8,28,<br>31,34,35 | 2,4,5,7,27,<br>29,30,32,3<br>3 | 2 | P00507,P09006                             |

|      |                         |                                |   |                                    |
|------|-------------------------|--------------------------------|---|------------------------------------|
| 7382 | 1,3,6,8,28,<br>32,33,34 | 2,4,5,7,27,<br>29,30,31,3<br>5 | 1 | P55314                             |
| 7383 | 1,3,6,8,28,<br>32,33,35 | 2,4,5,7,27,<br>29,30,31,3<br>4 | 3 | P04218,P14408,P51907               |
| 7384 | 1,3,6,8,28,<br>32,34,35 | 2,4,5,7,27,<br>29,30,31,3<br>3 | 4 | P00507,P04218,P51907,Q5HZV9        |
| 7385 | 1,3,6,8,28,<br>33,34,35 | 2,4,5,7,27,<br>29,30,31,3<br>2 | 3 | O55145,P00507,P09006               |
| 7386 | 1,3,6,8,29,<br>30,31,32 | 2,4,5,7,27,<br>28,33,34,3<br>5 | 3 | P14408,P51907,Q99MH3               |
| 7387 | 1,3,6,8,29,<br>30,31,33 | 2,4,5,7,27,<br>28,32,34,3<br>5 | 1 | P14408                             |
| 7388 | 1,3,6,8,29,<br>30,31,34 | 2,4,5,7,27,<br>28,32,33,3<br>5 | 1 | Q99MH3                             |
| 7389 | 1,3,6,8,29,<br>30,31,35 | 2,4,5,7,27,<br>28,32,33,3<br>4 | 1 | P51907                             |
| 7390 | 1,3,6,8,29,<br>30,32,33 | 2,4,5,7,27,<br>28,31,34,3<br>5 | 2 | P14408,P51907                      |
| 7391 | 1,3,6,8,29,<br>30,32,34 | 2,4,5,7,27,<br>28,31,33,3<br>5 | 2 | P51907,Q99MH3                      |
| 7392 | 1,3,6,8,29,<br>30,32,35 | 2,4,5,7,27,<br>28,31,33,3<br>4 | 2 | P14408,P51907                      |
| 7393 | 1,3,6,8,29,<br>30,33,34 | 2,4,5,7,27,<br>28,31,32,3<br>5 | 1 | Q99MH3                             |
| 7394 | 1,3,6,8,29,<br>30,33,35 | 2,4,5,7,27,<br>28,31,32,3<br>4 | 1 | P14408                             |
| 7395 | 1,3,6,8,29,<br>30,34,35 | 2,4,5,7,27,<br>28,31,32,3<br>3 | 4 | P02793;Q7TP54,P09006,P51907,Q99MH3 |
| 7396 | 1,3,6,8,29,<br>31,32,33 | 2,4,5,7,27,<br>28,30,34,3<br>5 | 3 | P51907,Q6AYQ8,Q8CJD3               |

|      |                         |                                |   |                             |
|------|-------------------------|--------------------------------|---|-----------------------------|
| 7397 | 1,3,6,8,29,<br>31,32,34 | 2,4,5,7,27,<br>28,30,33,3<br>5 | 3 | P51907,Q6AYQ8,Q99MH3        |
| 7398 | 1,3,6,8,29,<br>31,32,35 | 2,4,5,7,27,<br>28,30,33,3<br>4 | 1 | P51907                      |
| 7399 | 1,3,6,8,29,<br>31,33,34 | 2,4,5,7,27,<br>28,30,32,3<br>5 | 1 | Q6AYQ8                      |
| 7400 | 1,3,6,8,29,<br>31,33,35 | 2,4,5,7,27,<br>28,30,32,3<br>4 | 1 | Q6AYQ8                      |
| 7401 | 1,3,6,8,29,<br>31,34,35 | 2,4,5,7,27,<br>28,30,32,3<br>3 | 4 | P09006,P51907,Q6AYQ8,Q99MH3 |
| 7402 | 1,3,6,8,29,<br>32,33,34 | 2,4,5,7,27,<br>28,30,31,3<br>5 | 4 | P51907,P55314,Q6AYQ8,Q99MH3 |
| 7403 | 1,3,6,8,29,<br>32,33,35 | 2,4,5,7,27,<br>28,30,31,3<br>4 | 3 | P14408,P47967,P51907        |
| 7404 | 1,3,6,8,29,<br>32,34,35 | 2,4,5,7,27,<br>28,30,31,3<br>3 | 2 | P51907,Q99MH3               |
| 7405 | 1,3,6,8,29,<br>33,34,35 | 2,4,5,7,27,<br>28,30,31,3<br>2 | 4 | O55145,P09006,P51907,Q6AYQ8 |
| 7406 | 1,3,6,8,30,<br>31,32,33 | 2,4,5,7,27,<br>28,29,34,3<br>5 | 1 | P14408                      |
| 7407 | 1,3,6,8,30,<br>31,32,34 | 2,4,5,7,27,<br>28,29,33,3<br>5 | 1 | Q99MH3                      |
| 7408 | 1,3,6,8,30,<br>31,32,35 | 2,4,5,7,27,<br>28,29,33,3<br>4 | 3 | P04218,P14408,P51907        |
| 7409 | 1,3,6,8,30,<br>31,33,34 | 2,4,5,7,27,<br>28,29,32,3<br>5 | 0 |                             |
| 7410 | 1,3,6,8,30,<br>31,33,35 | 2,4,5,7,27,<br>28,29,32,3<br>4 | 1 | P14408                      |
| 7411 | 1,3,6,8,30,<br>31,34,35 | 2,4,5,7,27,<br>28,29,32,3<br>3 | 2 | P02793;Q7TP54,P82995        |

|      |                          |                                |    |                                                                                            |
|------|--------------------------|--------------------------------|----|--------------------------------------------------------------------------------------------|
| 7412 | 1,3,6,8,30,<br>32,33,34  | 2,4,5,7,27,<br>28,29,31,3<br>5 | 1  | P55314                                                                                     |
| 7413 | 1,3,6,8,30,<br>32,33,35  | 2,4,5,7,27,<br>28,29,31,3<br>4 | 2  | P04218,P14408                                                                              |
| 7414 | 1,3,6,8,30,<br>32,34,35  | 2,4,5,7,27,<br>28,29,31,3<br>3 | 5  | P02793;Q7TP54,P04218,P08753,P35467,P51907                                                  |
| 7415 | 1,3,6,8,30,<br>33,34,35  | 2,4,5,7,27,<br>28,29,31,3<br>2 | 2  | O55145,P02793;Q7TP54                                                                       |
| 7416 | 1,3,6,8,31,<br>32,33,34  | 2,4,5,7,27,<br>28,29,30,3<br>5 | 2  | P14480,P55314                                                                              |
| 7417 | 1,3,6,8,31,<br>32,33,35  | 2,4,5,7,27,<br>28,29,30,3<br>4 | 2  | P04218,P82995                                                                              |
| 7418 | 1,3,6,8,31,<br>32,34,35  | 2,4,5,7,27,<br>28,29,30,3<br>3 | 4  | P08753,P35467,P51907,P82995                                                                |
| 7419 | 1,3,6,8,31,<br>33,34,35  | 2,4,5,7,27,<br>28,29,30,3<br>2 | 3  | O55145,P82995,Q63355                                                                       |
| 7420 | 1,3,6,8,32,<br>33,34,35  | 2,4,5,7,27,<br>28,29,30,3<br>1 | 6  | O55145,P08753,P35467,P51907,P55314,P82995                                                  |
| 7421 | 1,3,6,27,2<br>8,29,30,31 | 2,4,5,7,8,3<br>2,33,34,35      | 9  | O08815,O35547,P02781,P02782,P08723,P97605,Q6AYR9,Q6AYS4,Q9JHB9                             |
| 7422 | 1,3,6,27,2<br>8,29,30,32 | 2,4,5,7,8,3<br>1,33,34,35      | 9  | F1LM93,O08815,O35547,P01835,P02781,P08723,Q62997,Q812E4,Q9JHB9                             |
| 7423 | 1,3,6,27,2<br>8,29,30,33 | 2,4,5,7,8,3<br>1,32,34,35      | 13 | O08815,O35547,P02781,P08723,P20766,P36374,P97605,Q05175,Q62997,Q6AYS4,Q80WL1,Q812E4,Q9JHB9 |
| 7424 | 1,3,6,27,2<br>8,29,30,34 | 2,4,5,7,8,3<br>1,32,33,35      | 5  | O08815,O35547,P04182,P97605,Q6AYR9                                                         |
| 7425 | 1,3,6,27,2<br>8,29,30,35 | 2,4,5,7,8,3<br>1,32,33,34      | 7  | O08815,P01681,P01835,P01946,P97605,Q62997,Q6AYS4                                           |
| 7426 | 1,3,6,27,2<br>8,29,31,32 | 2,4,5,7,8,3<br>0,33,34,35      | 7  | O08815,O35547,P06911,P08723,P47727,Q5GRG2,Q9JHB9                                           |
| 7427 | 1,3,6,27,2<br>8,29,31,33 | 2,4,5,7,8,3<br>0,32,34,35      | 5  | O08815,O35547,P06911,P08723,Q80WL1                                                         |
| 7428 | 1,3,6,27,2<br>8,29,31,34 | 2,4,5,7,8,3<br>0,32,33,35      | 5  | A2RUV9,O35547,P04182,P97605,Q9QW07                                                         |
| 7429 | 1,3,6,27,2<br>8,29,31,35 | 2,4,5,7,8,3<br>0,32,33,34      | 3  | P01946,P97605,Q6AYS4                                                                       |



|      |                                                 |    |                                                                                            |
|------|-------------------------------------------------|----|--------------------------------------------------------------------------------------------|
| 7430 | 1,3,6,27,2 2,4,5,7,8,3<br>8,29,32,33 0,31,34,35 | 12 | O08815,O35547,P02793,Q7TP54,P04905,P08723,P47727,P55314,Q06000,Q62997,Q80WL1,Q812E4,Q9JHB9 |
| 7431 | 1,3,6,27,2 2,4,5,7,8,3<br>8,29,32,34 0,31,33,35 | 5  | O08815,P04182,P97584,Q10758,Q80WL1                                                         |
| 7432 | 1,3,6,27,2 2,4,5,7,8,3<br>8,29,32,35 0,31,33,34 | 5  | P01946,P51907,Q62997,Q6AYS4,Q80WL1                                                         |
| 7433 | 1,3,6,27,2 2,4,5,7,8,3<br>8,29,33,34 0,31,32,35 | 5  | O35547,P04182,P97584,Q05175,Q80WL1                                                         |
| 7434 | 1,3,6,27,2 2,4,5,7,8,3<br>8,29,33,35 0,31,32,34 | 5  | O35547,P01946,Q62997,Q6AYS4,Q80WL1                                                         |
| 7435 | 1,3,6,27,2 2,4,5,7,8,3<br>8,29,34,35 0,31,32,33 | 6  | P00507,P01946,P04182,P97605,Q5M819,Q80WL1                                                  |
| 7436 | 1,3,6,27,2 2,4,5,7,8,2<br>8,30,31,32 9,33,34,35 | 0  |                                                                                            |
| 7437 | 1,3,6,27,2 2,4,5,7,8,2<br>8,30,31,33 9,32,34,35 | 2  | Q6AYS4,Q6TMA8                                                                              |
| 7438 | 1,3,6,27,2 2,4,5,7,8,2<br>8,30,31,34 9,32,33,35 | 1  | P04182                                                                                     |
| 7439 | 1,3,6,27,2 2,4,5,7,8,2<br>8,30,31,35 9,32,33,34 | 2  | Q6AYS4,Q6TMA8                                                                              |
| 7440 | 1,3,6,27,2 2,4,5,7,8,2<br>8,30,32,33 9,31,34,35 | 4  | P55314,Q06000,Q62997,Q6IFU7                                                                |
| 7441 | 1,3,6,27,2 2,4,5,7,8,2<br>8,30,32,34 9,31,33,35 | 4  | P02803,P04182,Q10758,Q6IFU7                                                                |
| 7442 | 1,3,6,27,2 2,4,5,7,8,2<br>8,30,32,35 9,31,33,34 | 2  | Q62997,Q6AYS4                                                                              |
| 7443 | 1,3,6,27,2 2,4,5,7,8,2<br>8,30,33,34 9,31,32,35 | 2  | P04182,Q05175                                                                              |
| 7444 | 1,3,6,27,2 2,4,5,7,8,2<br>8,30,33,35 9,31,32,34 | 2  | Q62997,Q6AYS4                                                                              |
| 7445 | 1,3,6,27,2 2,4,5,7,8,2<br>8,30,34,35 9,31,32,33 | 2  | P04182,Q8CJD3                                                                              |
| 7446 | 1,3,6,27,2 2,4,5,7,8,2<br>8,31,32,33 9,30,34,35 | 6  | P06911,P14480,P55314,Q06000,Q6IG02,Q80WL1                                                  |
| 7447 | 1,3,6,27,2 2,4,5,7,8,2<br>8,31,32,34 9,30,33,35 | 3  | A2RUV9,P04182,Q10758                                                                       |
| 7448 | 1,3,6,27,2 2,4,5,7,8,2<br>8,31,32,35 9,30,33,34 | 1  | Q6AYS4                                                                                     |
| 7449 | 1,3,6,27,2 2,4,5,7,8,2<br>8,31,33,34 9,30,32,35 | 2  | P04182,P97584                                                                              |
| 7450 | 1,3,6,27,2 2,4,5,7,8,2<br>8,31,33,35 9,30,32,34 | 2  | Q6AYS4,Q6TMA8                                                                              |
| 7451 | 1,3,6,27,2 2,4,5,7,8,2<br>8,31,34,35 9,30,32,33 | 3  | A2RUV9,P04182,Q5HZV9                                                                       |
| 7452 | 1,3,6,27,2 2,4,5,7,8,2<br>8,32,33,34 9,30,31,35 | 10 | P04182,P55314,P97584,Q06000,Q10758,Q4FZU2,Q6IFU7,Q6IG02,Q6P6Q2,Q80WL1                      |

|      |                                                 |   |                                           |
|------|-------------------------------------------------|---|-------------------------------------------|
| 7453 | 1,3,6,27,2 2,4,5,7,8,2<br>8,32,33,35 9,30,31,34 | 6 | P55314,Q4FZU2,Q62997,Q6AYS4,Q6IG02,Q80WL1 |
| 7454 | 1,3,6,27,2 2,4,5,7,8,2<br>8,32,34,35 9,30,31,33 | 5 | P04182,Q10758,Q5HZV9,Q5M819,Q80WL1        |
| 7455 | 1,3,6,27,2 2,4,5,7,8,2<br>8,33,34,35 9,30,31,32 | 4 | O55145,P04182,Q4FZU2,Q80WL1               |
| 7456 | 1,3,6,27,2 2,4,5,7,8,2<br>9,30,31,32 8,33,34,35 | 0 |                                           |
| 7457 | 1,3,6,27,2 2,4,5,7,8,2<br>9,30,31,33 8,32,34,35 | 1 | Q6AYS4                                    |
| 7458 | 1,3,6,27,2 2,4,5,7,8,2<br>9,30,31,34 8,32,33,35 | 1 | P97605                                    |
| 7459 | 1,3,6,27,2 2,4,5,7,8,2<br>9,30,31,35 8,32,33,34 | 2 | P01946,Q6AYS4                             |
| 7460 | 1,3,6,27,2 2,4,5,7,8,2<br>9,30,32,33 8,31,34,35 | 3 | P02803,P55314,Q62997                      |
| 7461 | 1,3,6,27,2 2,4,5,7,8,2<br>9,30,32,34 8,31,33,35 | 2 | P02803,Q02253                             |
| 7462 | 1,3,6,27,2 2,4,5,7,8,2<br>9,30,32,35 8,31,33,34 | 4 | P01946,P51907,Q62997,Q6AYS4               |
| 7463 | 1,3,6,27,2 2,4,5,7,8,2<br>9,30,33,34 8,31,32,35 | 0 |                                           |
| 7464 | 1,3,6,27,2 2,4,5,7,8,2<br>9,30,33,35 8,31,32,34 | 4 | P01946,P20766,Q62997,Q6AYS4               |
| 7465 | 1,3,6,27,2 2,4,5,7,8,2<br>9,30,34,35 8,31,32,33 | 2 | P01946,P97605                             |
| 7466 | 1,3,6,27,2 2,4,5,7,8,2<br>9,31,32,33 8,30,34,35 | 2 | P55314,Q80WL1                             |
| 7467 | 1,3,6,27,2 2,4,5,7,8,2<br>9,31,32,34 8,30,33,35 | 1 | A2RUV9                                    |
| 7468 | 1,3,6,27,2 2,4,5,7,8,2<br>9,31,32,35 8,30,33,34 | 3 | P01946,P51907,Q6AYS4                      |
| 7469 | 1,3,6,27,2 2,4,5,7,8,2<br>9,31,33,34 8,30,32,35 | 1 | Q6AYQ8                                    |
| 7470 | 1,3,6,27,2 2,4,5,7,8,2<br>9,31,33,35 8,30,32,34 | 2 | P01946,Q6AYS4                             |
| 7471 | 1,3,6,27,2 2,4,5,7,8,2<br>9,31,34,35 8,30,32,33 | 1 | P01946                                    |
| 7472 | 1,3,6,27,2 2,4,5,7,8,2<br>9,32,33,34 8,30,31,35 | 5 | P55314,P97584,Q4FZU2,Q6P6Q2,Q80WL1        |
| 7473 | 1,3,6,27,2 2,4,5,7,8,2<br>9,32,33,35 8,30,31,34 | 6 | P01946,P51907,P55314,Q62997,Q6AYS4,Q80WL1 |
| 7474 | 1,3,6,27,2 2,4,5,7,8,2<br>9,32,34,35 8,30,31,33 | 3 | P01946,P51907,Q80WL1                      |
| 7475 | 1,3,6,27,2 2,4,5,7,8,2<br>9,33,34,35 8,30,31,32 | 3 | O55145,P01946,Q80WL1                      |

|      |                          |                           |   |                                           |
|------|--------------------------|---------------------------|---|-------------------------------------------|
| 7476 | 1,3,6,27,3<br>0,31,32,33 | 2,4,5,7,8,2<br>8,29,34,35 | 1 | P55314                                    |
| 7477 | 1,3,6,27,3<br>0,31,32,34 | 2,4,5,7,8,2<br>8,29,33,35 | 1 | P02803                                    |
| 7478 | 1,3,6,27,3<br>0,31,32,35 | 2,4,5,7,8,2<br>8,29,33,34 | 1 | Q6AYS4                                    |
| 7479 | 1,3,6,27,3<br>0,31,33,34 | 2,4,5,7,8,2<br>8,29,32,35 | 0 |                                           |
| 7480 | 1,3,6,27,3<br>0,31,33,35 | 2,4,5,7,8,2<br>8,29,32,34 | 1 | Q6AYS4                                    |
| 7481 | 1,3,6,27,3<br>0,31,34,35 | 2,4,5,7,8,2<br>8,29,32,33 | 1 | P02793;Q7TP54                             |
| 7482 | 1,3,6,27,3<br>0,32,33,34 | 2,4,5,7,8,2<br>8,29,31,35 | 2 | P02803,P55314                             |
| 7483 | 1,3,6,27,3<br>0,32,33,35 | 2,4,5,7,8,2<br>8,29,31,34 | 2 | P55314,Q6AYS4                             |
| 7484 | 1,3,6,27,3<br>0,32,34,35 | 2,4,5,7,8,2<br>8,29,31,33 | 1 | P02803                                    |
| 7485 | 1,3,6,27,3<br>0,33,34,35 | 2,4,5,7,8,2<br>8,29,31,32 | 0 |                                           |
| 7486 | 1,3,6,27,3<br>1,32,33,34 | 2,4,5,7,8,2<br>8,29,30,35 | 3 | P55314,Q4FZU2,Q6P6Q2                      |
| 7487 | 1,3,6,27,3<br>1,32,33,35 | 2,4,5,7,8,2<br>8,29,30,34 | 3 | P55314,Q6AYS4,Q6IG02                      |
| 7488 | 1,3,6,27,3<br>1,32,34,35 | 2,4,5,7,8,2<br>8,29,30,33 | 1 | A2RUV9                                    |
| 7489 | 1,3,6,27,3<br>1,33,34,35 | 2,4,5,7,8,2<br>8,29,30,32 | 1 | Q63355                                    |
| 7490 | 1,3,6,27,3<br>2,33,34,35 | 2,4,5,7,8,2<br>8,29,30,31 | 6 | O55145,P55314,Q4FZU2,Q6IG02,Q6P6Q2,Q80WL1 |
| 7491 | 1,3,6,28,2<br>9,30,31,32 | 2,4,5,7,8,2<br>7,33,34,35 | 3 | P06911,Q561R9,Q99MH3                      |
| 7492 | 1,3,6,28,2<br>9,30,31,33 | 2,4,5,7,8,2<br>7,32,34,35 | 4 | O35547,P00714,P19629,Q6AYS4               |
| 7493 | 1,3,6,28,2<br>9,30,31,34 | 2,4,5,7,8,2<br>7,32,33,35 | 2 | Q6IRE4,Q99MH3                             |
| 7494 | 1,3,6,28,2<br>9,30,31,35 | 2,4,5,7,8,2<br>7,32,33,34 | 4 | P00714,Q01205,Q6AYS4,Q99041               |
| 7495 | 1,3,6,28,2<br>9,30,32,33 | 2,4,5,7,8,2<br>7,31,34,35 | 6 | O08815,P04905,P14408,P47727,Q62997,Q6AYS4 |
| 7496 | 1,3,6,28,2<br>9,30,32,34 | 2,4,5,7,8,2<br>7,31,33,35 | 1 | Q99MH3                                    |
| 7497 | 1,3,6,28,2<br>9,30,32,35 | 2,4,5,7,8,2<br>7,31,33,34 | 3 | P51907,Q62997,Q6AYS4                      |
| 7498 | 1,3,6,28,2<br>9,30,33,34 | 2,4,5,7,8,2<br>7,31,32,35 | 1 | Q99MH3                                    |

|      |                          |                           |   |                                           |
|------|--------------------------|---------------------------|---|-------------------------------------------|
| 7499 | 1,3,6,28,2<br>9,30,33,35 | 2,4,5,7,8,2<br>7,31,32,34 | 3 | Q01205,Q62997,Q6AYS4                      |
| 7500 | 1,3,6,28,2<br>9,30,34,35 | 2,4,5,7,8,2<br>7,31,32,33 | 3 | P00507,Q8CJD3,Q99MH3                      |
| 7501 | 1,3,6,28,2<br>9,31,32,33 | 2,4,5,7,8,2<br>7,30,34,35 | 4 | P04905,P06911,P47727,Q80WL1               |
| 7502 | 1,3,6,28,2<br>9,31,32,34 | 2,4,5,7,8,2<br>7,30,33,35 | 3 | P06911,Q99MH3,Q9QW07                      |
| 7503 | 1,3,6,28,2<br>9,31,32,35 | 2,4,5,7,8,2<br>7,30,33,34 | 3 | P06911,P51907,Q6AYS4                      |
| 7504 | 1,3,6,28,2<br>9,31,33,34 | 2,4,5,7,8,2<br>7,30,32,35 | 4 | P00714,P27791,Q6AYQ8,Q99MH3               |
| 7505 | 1,3,6,28,2<br>9,31,33,35 | 2,4,5,7,8,2<br>7,30,32,34 | 5 | P00714,P06760,Q01205,Q6AYS4,Q80WL1        |
| 7506 | 1,3,6,28,2<br>9,31,34,35 | 2,4,5,7,8,2<br>7,30,32,33 | 4 | P00507,P00714,Q99MH3,Q9QW07               |
| 7507 | 1,3,6,28,2<br>9,32,33,34 | 2,4,5,7,8,2<br>7,30,31,35 | 5 | P35281,P55314,Q64057,Q80WL1,Q99MH3        |
| 7508 | 1,3,6,28,2<br>9,32,33,35 | 2,4,5,7,8,2<br>7,30,31,34 | 5 | P47967,P51907,Q62997,Q6AYS4,Q80WL1        |
| 7509 | 1,3,6,28,2<br>9,32,34,35 | 2,4,5,7,8,2<br>7,30,31,33 | 5 | P00507,P51907,Q5HZV9,Q80WL1,Q99MH3        |
| 7510 | 1,3,6,28,2<br>9,33,34,35 | 2,4,5,7,8,2<br>7,30,31,32 | 4 | O55145,P00507,P00714,Q80WL1               |
| 7511 | 1,3,6,28,3<br>0,31,32,33 | 2,4,5,7,8,2<br>7,29,34,35 | 0 |                                           |
| 7512 | 1,3,6,28,3<br>0,31,32,34 | 2,4,5,7,8,2<br>7,29,33,35 | 2 | P13432,Q99MH3                             |
| 7513 | 1,3,6,28,3<br>0,31,32,35 | 2,4,5,7,8,2<br>7,29,33,34 | 3 | P04218,Q6AYS4,Q99041                      |
| 7514 | 1,3,6,28,3<br>0,31,33,34 | 2,4,5,7,8,2<br>7,29,32,35 | 2 | P00714,P13432                             |
| 7515 | 1,3,6,28,3<br>0,31,33,35 | 2,4,5,7,8,2<br>7,29,32,34 | 3 | P00714,P06760,Q6AYS4                      |
| 7516 | 1,3,6,28,3<br>0,31,34,35 | 2,4,5,7,8,2<br>7,29,32,33 | 3 | P00714,P02793,Q7TP54,Q8CJD3               |
| 7517 | 1,3,6,28,3<br>0,32,33,34 | 2,4,5,7,8,2<br>7,29,31,35 | 2 | P55314,Q99MH3                             |
| 7518 | 1,3,6,28,3<br>0,32,33,35 | 2,4,5,7,8,2<br>7,29,31,34 | 4 | P04218,P07171,P14408,Q6AYS4               |
| 7519 | 1,3,6,28,3<br>0,32,34,35 | 2,4,5,7,8,2<br>7,29,31,33 | 6 | P00507,P04218,P07171,Q5HZV9,Q8CJD3,Q99MH3 |
| 7520 | 1,3,6,28,3<br>0,33,34,35 | 2,4,5,7,8,2<br>7,29,31,32 | 3 | O55145,P07171,Q8CJD3                      |
| 7521 | 1,3,6,28,3<br>1,32,33,34 | 2,4,5,7,8,2<br>7,29,30,35 | 3 | P13432,P14480,P55314                      |

|      |                          |                           |   |                                                         |
|------|--------------------------|---------------------------|---|---------------------------------------------------------|
| 7522 | 1,3,6,28,3<br>1,32,33,35 | 2,4,5,7,8,2<br>7,29,30,34 | 3 | P04218,P16391,Q6AYS4                                    |
| 7523 | 1,3,6,28,3<br>1,32,34,35 | 2,4,5,7,8,2<br>7,29,30,33 | 2 | P82995,Q5HZV9                                           |
| 7524 | 1,3,6,28,3<br>1,33,34,35 | 2,4,5,7,8,2<br>7,29,30,32 | 3 | O55145,P00714,P82995                                    |
| 7525 | 1,3,6,28,3<br>2,33,34,35 | 2,4,5,7,8,2<br>7,29,30,31 | 6 | O55145,P07171,P55314,P82995,Q5HZV9,Q80WL1               |
| 7526 | 1,3,6,29,3<br>0,31,32,33 | 2,4,5,7,8,2<br>7,28,34,35 | 1 | Q99MH3                                                  |
| 7527 | 1,3,6,29,3<br>0,31,32,34 | 2,4,5,7,8,2<br>7,28,33,35 | 1 | Q99MH3                                                  |
| 7528 | 1,3,6,29,3<br>0,31,32,35 | 2,4,5,7,8,2<br>7,28,33,34 | 5 | P07171,P51907,Q6AYS4,Q99041,Q99MH3                      |
| 7529 | 1,3,6,29,3<br>0,31,33,34 | 2,4,5,7,8,2<br>7,28,32,35 | 2 | P00714,Q99MH3                                           |
| 7530 | 1,3,6,29,3<br>0,31,33,35 | 2,4,5,7,8,2<br>7,28,32,34 | 3 | P00714,P07171,Q6AYS4                                    |
| 7531 | 1,3,6,29,3<br>0,31,34,35 | 2,4,5,7,8,2<br>7,28,32,33 | 4 | P00714,P02793;Q7TP54,P07171,Q99MH3                      |
| 7532 | 1,3,6,29,3<br>0,32,33,34 | 2,4,5,7,8,2<br>7,28,31,35 | 3 | P07171,P55314,Q99MH3                                    |
| 7533 | 1,3,6,29,3<br>0,32,33,35 | 2,4,5,7,8,2<br>7,28,31,34 | 3 | P07171,P14408,Q6AYS4                                    |
| 7534 | 1,3,6,29,3<br>0,32,34,35 | 2,4,5,7,8,2<br>7,28,31,33 | 3 | P07171,P51907,Q99MH3                                    |
| 7535 | 1,3,6,29,3<br>0,33,34,35 | 2,4,5,7,8,2<br>7,28,31,32 | 4 | O55145,P00714,P07171,Q99MH3                             |
| 7536 | 1,3,6,29,3<br>1,32,33,34 | 2,4,5,7,8,2<br>7,28,30,35 | 4 | P55314,Q64057,Q6AYQ8,Q99MH3                             |
| 7537 | 1,3,6,29,3<br>1,32,33,35 | 2,4,5,7,8,2<br>7,28,30,34 | 4 | P07171,P47967,Q6AYQ8,Q6AYS4                             |
| 7538 | 1,3,6,29,3<br>1,32,34,35 | 2,4,5,7,8,2<br>7,28,30,33 | 4 | P07171,P51907,Q6AYQ8,Q99MH3                             |
| 7539 | 1,3,6,29,3<br>1,33,34,35 | 2,4,5,7,8,2<br>7,28,30,32 | 5 | O55145,P00714,P07171,Q6AYQ8,Q99MH3                      |
| 7540 | 1,3,6,29,3<br>2,33,34,35 | 2,4,5,7,8,2<br>7,28,30,31 | 7 | O55145,P07171,P51907,P55314,Q6AYQ8,Q80WL1,Q99MH3        |
| 7541 | 1,3,6,30,3<br>1,32,33,34 | 2,4,5,7,8,2<br>7,28,29,35 | 4 | P07171,P13432,P55314,Q99MH3                             |
| 7542 | 1,3,6,30,3<br>1,32,33,35 | 2,4,5,7,8,2<br>7,28,29,34 | 5 | P04218,P07171,P82995,Q6AYS4,Q71UF4                      |
| 7543 | 1,3,6,30,3<br>1,32,34,35 | 2,4,5,7,8,2<br>7,28,29,33 | 7 | P02793;Q7TP54,P07171,P82471,P82995,Q63617,Q99MH3,Q9R0T3 |
| 7544 | 1,3,6,30,3<br>1,33,34,35 | 2,4,5,7,8,2<br>7,28,29,32 | 6 | P00714,P02793;Q7TP54,P07171,P24368,P82471,P82995        |

|      |                          |                                |   |                                                  |
|------|--------------------------|--------------------------------|---|--------------------------------------------------|
| 7545 | 1,3,6,30,3<br>2,33,34,35 | 2,4,5,7,8,2<br>7,28,29,31      | 6 | O55145,P07171,P55314,P82471,P82995,Q99MH3        |
| 7546 | 1,3,6,31,3<br>2,33,34,35 | 2,4,5,7,8,2<br>7,28,29,30      | 4 | P07171,P55314,P82471,P82995                      |
| 7547 | 1,3,7,8,27,<br>28,29,30  | 2,4,5,6,31,<br>32,33,34,3<br>5 | 4 | P02781,P08723,Q62997,Q8CJ52                      |
| 7548 | 1,3,7,8,27,<br>28,29,31  | 2,4,5,6,30,<br>32,33,34,3<br>5 | 4 | P10715,P19629,P31044,Q5GRG2                      |
| 7549 | 1,3,7,8,27,<br>28,29,32  | 2,4,5,6,30,<br>31,33,34,3<br>5 | 5 | P02793;Q7TP54,P08723,P10715,P24368,Q62997        |
| 7550 | 1,3,7,8,27,<br>28,29,33  | 2,4,5,6,30,<br>31,32,34,3<br>5 | 6 | P02793;Q7TP54,P08723,P10715,Q62997,Q8CJ52,Q9JI85 |
| 7551 | 1,3,7,8,27,<br>28,29,34  | 2,4,5,6,30,<br>31,32,33,3<br>5 | 1 | P04182                                           |
| 7552 | 1,3,7,8,27,<br>28,29,35  | 2,4,5,6,30,<br>31,32,33,3<br>4 | 3 | P01946,P02091,Q62997                             |
| 7553 | 1,3,7,8,27,<br>28,30,31  | 2,4,5,6,29,<br>32,33,34,3<br>5 | 4 | P10715,P19629,P31044,Q6TMA8                      |
| 7554 | 1,3,7,8,27,<br>28,30,32  | 2,4,5,6,29,<br>31,33,34,3<br>5 | 0 |                                                  |
| 7555 | 1,3,7,8,27,<br>28,30,33  | 2,4,5,6,29,<br>31,32,34,3<br>5 | 2 | P10715,P25236                                    |
| 7556 | 1,3,7,8,27,<br>28,30,34  | 2,4,5,6,29,<br>31,32,33,3<br>5 | 2 | P04182,P47967                                    |
| 7557 | 1,3,7,8,27,<br>28,30,35  | 2,4,5,6,29,<br>31,32,33,3<br>4 | 0 |                                                  |
| 7558 | 1,3,7,8,27,<br>28,31,32  | 2,4,5,6,29,<br>30,33,34,3<br>5 | 5 | P10715,P14480,P31044,Q08849,Q5GRG2               |
| 7559 | 1,3,7,8,27,<br>28,31,33  | 2,4,5,6,29,<br>30,32,34,3<br>5 | 5 | P10715,P14480,P19629,P31044,Q6TMA8               |
| 7560 | 1,3,7,8,27,<br>28,31,34  | 2,4,5,6,29,<br>30,32,33,3<br>5 | 3 | A2RUV9,P04182,P10715                             |

|      |                         |                                |   |                                           |
|------|-------------------------|--------------------------------|---|-------------------------------------------|
| 7561 | 1,3,7,8,27,<br>28,31,35 | 2,4,5,6,29,<br>30,32,33,3<br>4 | 2 | P10715,Q6TMA8                             |
| 7562 | 1,3,7,8,27,<br>28,32,33 | 2,4,5,6,29,<br>30,31,34,3<br>5 | 5 | P02793;Q7TP54,P10715,P14480,P25236,Q08849 |
| 7563 | 1,3,7,8,27,<br>28,32,34 | 2,4,5,6,29,<br>30,31,33,3<br>5 | 4 | P04182,P20760,P25236,Q08849               |
| 7564 | 1,3,7,8,27,<br>28,32,35 | 2,4,5,6,29,<br>30,31,33,3<br>4 | 1 | Q08849                                    |
| 7565 | 1,3,7,8,27,<br>28,33,34 | 2,4,5,6,29,<br>30,31,32,3<br>5 | 3 | P04182,P25236,Q62894                      |
| 7566 | 1,3,7,8,27,<br>28,33,35 | 2,4,5,6,29,<br>30,31,32,3<br>4 | 2 | P10715,P25236                             |
| 7567 | 1,3,7,8,27,<br>28,34,35 | 2,4,5,6,29,<br>30,31,32,3<br>3 | 2 | P04182,Q62975                             |
| 7568 | 1,3,7,8,27,<br>29,30,31 | 2,4,5,6,28,<br>32,33,34,3<br>5 | 2 | P20760,Q5HZV9                             |
| 7569 | 1,3,7,8,27,<br>29,30,32 | 2,4,5,6,28,<br>31,33,34,3<br>5 | 2 | P20760,Q5HZV9                             |
| 7570 | 1,3,7,8,27,<br>29,30,33 | 2,4,5,6,28,<br>31,32,34,3<br>5 | 1 | Q5HZV9                                    |
| 7571 | 1,3,7,8,27,<br>29,30,34 | 2,4,5,6,28,<br>31,32,33,3<br>5 | 1 | P20760                                    |
| 7572 | 1,3,7,8,27,<br>29,30,35 | 2,4,5,6,28,<br>31,32,33,3<br>4 | 3 | P01946,P02091,Q5HZV9                      |
| 7573 | 1,3,7,8,27,<br>29,31,32 | 2,4,5,6,28,<br>30,33,34,3<br>5 | 3 | P20760,Q08849,Q5HZV9                      |
| 7574 | 1,3,7,8,27,<br>29,31,33 | 2,4,5,6,28,<br>30,32,34,3<br>5 | 1 | Q5HZV9                                    |
| 7575 | 1,3,7,8,27,<br>29,31,34 | 2,4,5,6,28,<br>30,32,33,3<br>5 | 2 | A2RUV9,P20760                             |

|      |                         |                                |   |                                    |
|------|-------------------------|--------------------------------|---|------------------------------------|
| 7576 | 1,3,7,8,27,<br>29,31,35 | 2,4,5,6,28,<br>30,32,33,3<br>4 | 3 | P01946,P02091,Q5HZV9               |
| 7577 | 1,3,7,8,27,<br>29,32,33 | 2,4,5,6,28,<br>30,31,34,3<br>5 | 4 | P02793;Q7TP54,Q08849,Q5HZV9,Q8CJD3 |
| 7578 | 1,3,7,8,27,<br>29,32,34 | 2,4,5,6,28,<br>30,31,33,3<br>5 | 2 | P20760,Q08849                      |
| 7579 | 1,3,7,8,27,<br>29,32,35 | 2,4,5,6,28,<br>30,31,33,3<br>4 | 4 | P01946,P02091,P51907,Q08849        |
| 7580 | 1,3,7,8,27,<br>29,33,34 | 2,4,5,6,28,<br>30,31,32,3<br>5 | 2 | P20760,Q64335                      |
| 7581 | 1,3,7,8,27,<br>29,33,35 | 2,4,5,6,28,<br>30,31,32,3<br>4 | 3 | P01946,P02091,Q5HZV9               |
| 7582 | 1,3,7,8,27,<br>29,34,35 | 2,4,5,6,28,<br>30,31,32,3<br>3 | 2 | P01946,P02091                      |
| 7583 | 1,3,7,8,27,<br>30,31,32 | 2,4,5,6,28,<br>29,33,34,3<br>5 | 3 | P20760,Q08849,Q5HZV9               |
| 7584 | 1,3,7,8,27,<br>30,31,33 | 2,4,5,6,28,<br>29,32,34,3<br>5 | 1 | Q5HZV9                             |
| 7585 | 1,3,7,8,27,<br>30,31,34 | 2,4,5,6,28,<br>29,32,33,3<br>5 | 3 | A2RUV9,P20760,P47967               |
| 7586 | 1,3,7,8,27,<br>30,31,35 | 2,4,5,6,28,<br>29,32,33,3<br>4 | 0 |                                    |
| 7587 | 1,3,7,8,27,<br>30,32,33 | 2,4,5,6,28,<br>29,31,34,3<br>5 | 2 | Q08849,Q5HZV9                      |
| 7588 | 1,3,7,8,27,<br>30,32,34 | 2,4,5,6,28,<br>29,31,33,3<br>5 | 1 | P20760                             |
| 7589 | 1,3,7,8,27,<br>30,32,35 | 2,4,5,6,28,<br>29,31,33,3<br>4 | 0 |                                    |
| 7590 | 1,3,7,8,27,<br>30,33,34 | 2,4,5,6,28,<br>29,31,32,3<br>5 | 1 | P20760                             |



|      |                         |                                |   |                                    |
|------|-------------------------|--------------------------------|---|------------------------------------|
| 7591 | 1,3,7,8,27,<br>30,33,35 | 2,4,5,6,28,<br>29,31,32,3<br>4 | 1 | Q62975                             |
| 7592 | 1,3,7,8,27,<br>30,34,35 | 2,4,5,6,28,<br>29,31,32,3<br>3 | 3 | P06911,P83121,Q62975               |
| 7593 | 1,3,7,8,27,<br>31,32,33 | 2,4,5,6,28,<br>29,30,34,3<br>5 | 5 | P01835,P14480,Q08849,Q5HZV9,Q8CJD3 |
| 7594 | 1,3,7,8,27,<br>31,32,34 | 2,4,5,6,28,<br>29,30,33,3<br>5 | 4 | A2RUV9,P01835,P20760,Q08849        |
| 7595 | 1,3,7,8,27,<br>31,32,35 | 2,4,5,6,28,<br>29,30,33,3<br>4 | 1 | Q08849                             |
| 7596 | 1,3,7,8,27,<br>31,33,34 | 2,4,5,6,28,<br>29,30,32,3<br>5 | 3 | A2RUV9,P01835,Q08849               |
| 7597 | 1,3,7,8,27,<br>31,33,35 | 2,4,5,6,28,<br>29,30,32,3<br>4 | 2 | Q08849,Q62975                      |
| 7598 | 1,3,7,8,27,<br>31,34,35 | 2,4,5,6,28,<br>29,30,32,3<br>3 | 3 | A2RUV9,Q08849,Q62975               |
| 7599 | 1,3,7,8,27,<br>32,33,34 | 2,4,5,6,28,<br>29,30,31,3<br>5 | 5 | P01835,P20760,P25236,P55314,Q08849 |
| 7600 | 1,3,7,8,27,<br>32,33,35 | 2,4,5,6,28,<br>29,30,31,3<br>4 | 2 | Q08849,Q6NX65                      |
| 7601 | 1,3,7,8,27,<br>32,34,35 | 2,4,5,6,28,<br>29,30,31,3<br>3 | 3 | P35467,P83121,Q08849               |
| 7602 | 1,3,7,8,27,<br>33,34,35 | 2,4,5,6,28,<br>29,30,31,3<br>2 | 3 | O55145,Q08849,Q62975               |
| 7603 | 1,3,7,8,28,<br>29,30,31 | 2,4,5,6,27,<br>32,33,34,3<br>5 | 2 | P10715,P19629                      |
| 7604 | 1,3,7,8,28,<br>29,30,32 | 2,4,5,6,27,<br>31,33,34,3<br>5 | 1 | Q63355                             |
| 7605 | 1,3,7,8,28,<br>29,30,33 | 2,4,5,6,27,<br>31,32,34,3<br>5 | 0 |                                    |

|      |                         |                                |   |                             |
|------|-------------------------|--------------------------------|---|-----------------------------|
| 7606 | 1,3,7,8,28,<br>29,30,34 | 2,4,5,6,27,<br>31,32,33,3<br>5 | 1 | Q6IRE4                      |
| 7607 | 1,3,7,8,28,<br>29,30,35 | 2,4,5,6,27,<br>31,32,33,3<br>4 | 2 | G3V686,P02091               |
| 7608 | 1,3,7,8,28,<br>29,31,32 | 2,4,5,6,27,<br>30,33,34,3<br>5 | 4 | P06911,P10715,P31044,Q5GRG2 |
| 7609 | 1,3,7,8,28,<br>29,31,33 | 2,4,5,6,27,<br>30,32,34,3<br>5 | 3 | P06760,P10715,P19629        |
| 7610 | 1,3,7,8,28,<br>29,31,34 | 2,4,5,6,27,<br>30,32,33,3<br>5 | 2 | P10715,Q9QW07               |
| 7611 | 1,3,7,8,28,<br>29,31,35 | 2,4,5,6,27,<br>30,32,33,3<br>4 | 4 | G3V686,P02091,P06760,P10715 |
| 7612 | 1,3,7,8,28,<br>29,32,33 | 2,4,5,6,27,<br>30,31,34,3<br>5 | 2 | P02793,Q7TP54,P10715        |
| 7613 | 1,3,7,8,28,<br>29,32,34 | 2,4,5,6,27,<br>30,31,33,3<br>5 | 1 | Q9ET32                      |
| 7614 | 1,3,7,8,28,<br>29,32,35 | 2,4,5,6,27,<br>30,31,33,3<br>4 | 2 | P02091,P51907               |
| 7615 | 1,3,7,8,28,<br>29,33,34 | 2,4,5,6,27,<br>30,31,32,3<br>5 | 0 |                             |
| 7616 | 1,3,7,8,28,<br>29,33,35 | 2,4,5,6,27,<br>30,31,32,3<br>4 | 3 | G3V686,P02091,P06760        |
| 7617 | 1,3,7,8,28,<br>29,34,35 | 2,4,5,6,27,<br>30,31,32,3<br>3 | 1 | P02091                      |
| 7618 | 1,3,7,8,28,<br>30,31,32 | 2,4,5,6,27,<br>29,33,34,3<br>5 | 2 | P10715,P31044               |
| 7619 | 1,3,7,8,28,<br>30,31,33 | 2,4,5,6,27,<br>29,32,34,3<br>5 | 3 | P06760,P10715,P19629        |
| 7620 | 1,3,7,8,28,<br>30,31,34 | 2,4,5,6,27,<br>29,32,33,3<br>5 | 2 | P10715,P47967               |

|      |                         |                                |   |                                    |
|------|-------------------------|--------------------------------|---|------------------------------------|
| 7621 | 1,3,7,8,28,<br>30,31,35 | 2,4,5,6,27,<br>29,32,33,3<br>4 | 3 | G3V686,P06760,P10715               |
| 7622 | 1,3,7,8,28,<br>30,32,33 | 2,4,5,6,27,<br>29,31,34,3<br>5 | 2 | P10715,P25236                      |
| 7623 | 1,3,7,8,28,<br>30,32,34 | 2,4,5,6,27,<br>29,31,33,3<br>5 | 0 |                                    |
| 7624 | 1,3,7,8,28,<br>30,32,35 | 2,4,5,6,27,<br>29,31,33,3<br>4 | 1 | P04218                             |
| 7625 | 1,3,7,8,28,<br>30,33,34 | 2,4,5,6,27,<br>29,31,32,3<br>5 | 2 | P25236,Q62894                      |
| 7626 | 1,3,7,8,28,<br>30,33,35 | 2,4,5,6,27,<br>29,31,32,3<br>4 | 3 | G3V686,P06760,P25236               |
| 7627 | 1,3,7,8,28,<br>30,34,35 | 2,4,5,6,27,<br>29,31,32,3<br>3 | 1 | Q8CJD3                             |
| 7628 | 1,3,7,8,28,<br>31,32,33 | 2,4,5,6,27,<br>29,30,34,3<br>5 | 5 | P01835,P10715,P14480,P31044,Q08849 |
| 7629 | 1,3,7,8,28,<br>31,32,34 | 2,4,5,6,27,<br>29,30,33,3<br>5 | 3 | P01835,P10715,P14480               |
| 7630 | 1,3,7,8,28,<br>31,32,35 | 2,4,5,6,27,<br>29,30,33,3<br>4 | 2 | P04218,P10715                      |
| 7631 | 1,3,7,8,28,<br>31,33,34 | 2,4,5,6,27,<br>29,30,32,3<br>5 | 3 | P01835,P10715,P14480               |
| 7632 | 1,3,7,8,28,<br>31,33,35 | 2,4,5,6,27,<br>29,30,32,3<br>4 | 4 | P06760,P10715,P62804,Q8VD89        |
| 7633 | 1,3,7,8,28,<br>31,34,35 | 2,4,5,6,27,<br>29,30,32,3<br>3 | 2 | P06760,P10715                      |
| 7634 | 1,3,7,8,28,<br>32,33,34 | 2,4,5,6,27,<br>29,30,31,3<br>5 | 4 | P01835,P14480,P25236,Q62894        |
| 7635 | 1,3,7,8,28,<br>32,33,35 | 2,4,5,6,27,<br>29,30,31,3<br>4 | 3 | P04218,P10715,P25236               |

|      |                         |                                |   |                                    |
|------|-------------------------|--------------------------------|---|------------------------------------|
| 7636 | 1,3,7,8,28,<br>32,34,35 | 2,4,5,6,27,<br>29,30,31,3<br>3 | 0 |                                    |
| 7637 | 1,3,7,8,28,<br>33,34,35 | 2,4,5,6,27,<br>29,30,31,3<br>2 | 3 | O55145,P25236,Q62894               |
| 7638 | 1,3,7,8,29,<br>30,31,32 | 2,4,5,6,27,<br>28,33,34,3<br>5 | 1 | Q5HZV9                             |
| 7639 | 1,3,7,8,29,<br>30,31,33 | 2,4,5,6,27,<br>28,32,34,3<br>5 | 2 | Q5HZV9,Q6IFU7                      |
| 7640 | 1,3,7,8,29,<br>30,31,34 | 2,4,5,6,27,<br>28,32,33,3<br>5 | 2 | P20760,Q6IFU7                      |
| 7641 | 1,3,7,8,29,<br>30,31,35 | 2,4,5,6,27,<br>28,32,33,3<br>4 | 5 | G3V686,P02091,Q4FZU6,Q5HZV9,Q6IFU7 |
| 7642 | 1,3,7,8,29,<br>30,32,33 | 2,4,5,6,27,<br>28,31,34,3<br>5 | 1 | Q5HZV9                             |
| 7643 | 1,3,7,8,29,<br>30,32,34 | 2,4,5,6,27,<br>28,31,33,3<br>5 | 1 | P20760                             |
| 7644 | 1,3,7,8,29,<br>30,32,35 | 2,4,5,6,27,<br>28,31,33,3<br>4 | 1 | P51907                             |
| 7645 | 1,3,7,8,29,<br>30,33,34 | 2,4,5,6,27,<br>28,31,32,3<br>5 | 0 |                                    |
| 7646 | 1,3,7,8,29,<br>30,33,35 | 2,4,5,6,27,<br>28,31,32,3<br>4 | 2 | G3V686,Q5HZV9                      |
| 7647 | 1,3,7,8,29,<br>30,34,35 | 2,4,5,6,27,<br>28,31,32,3<br>3 | 1 | P02091                             |
| 7648 | 1,3,7,8,29,<br>31,32,33 | 2,4,5,6,27,<br>28,30,34,3<br>5 | 4 | P01835,Q5HZV9,Q6AYQ8,Q8CJD3        |
| 7649 | 1,3,7,8,29,<br>31,32,34 | 2,4,5,6,27,<br>28,30,33,3<br>5 | 3 | P01835,P20760,Q6AYQ8               |
| 7650 | 1,3,7,8,29,<br>31,32,35 | 2,4,5,6,27,<br>28,30,33,3<br>4 | 1 | P51907                             |

|      |                         |                                |   |                             |
|------|-------------------------|--------------------------------|---|-----------------------------|
| 7651 | 1,3,7,8,29,<br>31,33,34 | 2,4,5,6,27,<br>28,30,32,3<br>5 | 2 | P01835,Q6AYQ8               |
| 7652 | 1,3,7,8,29,<br>31,33,35 | 2,4,5,6,27,<br>28,30,32,3<br>4 | 4 | P02091,Q5HZV9,Q6AYQ8,Q6IFU7 |
| 7653 | 1,3,7,8,29,<br>31,34,35 | 2,4,5,6,27,<br>28,30,32,3<br>3 | 2 | P02091,Q6IFU7               |
| 7654 | 1,3,7,8,29,<br>32,33,34 | 2,4,5,6,27,<br>28,30,31,3<br>5 | 3 | P01835,Q64335,Q6AYQ8        |
| 7655 | 1,3,7,8,29,<br>32,33,35 | 2,4,5,6,27,<br>28,30,31,3<br>4 | 1 | P51907                      |
| 7656 | 1,3,7,8,29,<br>32,34,35 | 2,4,5,6,27,<br>28,30,31,3<br>3 | 2 | P02091,P51907               |
| 7657 | 1,3,7,8,29,<br>33,34,35 | 2,4,5,6,27,<br>28,30,31,3<br>2 | 3 | O55145,P02091,Q6AYQ8        |
| 7658 | 1,3,7,8,30,<br>31,32,33 | 2,4,5,6,27,<br>28,29,34,3<br>5 | 1 | Q5HZV9                      |
| 7659 | 1,3,7,8,30,<br>31,32,34 | 2,4,5,6,27,<br>28,29,33,3<br>5 | 1 | P20760                      |
| 7660 | 1,3,7,8,30,<br>31,32,35 | 2,4,5,6,27,<br>28,29,33,3<br>4 | 2 | P04218,Q4FZU6               |
| 7661 | 1,3,7,8,30,<br>31,33,34 | 2,4,5,6,27,<br>28,29,32,3<br>5 | 0 |                             |
| 7662 | 1,3,7,8,30,<br>31,33,35 | 2,4,5,6,27,<br>28,29,32,3<br>4 | 1 | Q4FZU6                      |
| 7663 | 1,3,7,8,30,<br>31,34,35 | 2,4,5,6,27,<br>28,29,32,3<br>3 | 3 | P02793,Q7TP54,P24368,Q9JHB9 |
| 7664 | 1,3,7,8,30,<br>32,33,34 | 2,4,5,6,27,<br>28,29,31,3<br>5 | 1 | Q62894                      |
| 7665 | 1,3,7,8,30,<br>32,33,35 | 2,4,5,6,27,<br>28,29,31,3<br>4 | 1 | P04218                      |

|      |                          |                                |   |                                                  |
|------|--------------------------|--------------------------------|---|--------------------------------------------------|
| 7666 | 1,3,7,8,30,<br>32,34,35  | 2,4,5,6,27,<br>28,29,31,3<br>3 | 0 |                                                  |
| 7667 | 1,3,7,8,30,<br>33,34,35  | 2,4,5,6,27,<br>28,29,31,3<br>2 | 2 | O55145,Q62975                                    |
| 7668 | 1,3,7,8,31,<br>32,33,34  | 2,4,5,6,27,<br>28,29,30,3<br>5 | 3 | P01835,P14480,Q08849                             |
| 7669 | 1,3,7,8,31,<br>32,33,35  | 2,4,5,6,27,<br>28,29,30,3<br>4 | 3 | P01835,P04218,Q08849                             |
| 7670 | 1,3,7,8,31,<br>32,34,35  | 2,4,5,6,27,<br>28,29,30,3<br>3 | 3 | P01835,P0C0A9,Q08849                             |
| 7671 | 1,3,7,8,31,<br>33,34,35  | 2,4,5,6,27,<br>28,29,30,3<br>2 | 5 | O55145,P01835,P0C0A9,Q62975,Q9JHB9               |
| 7672 | 1,3,7,8,32,<br>33,34,35  | 2,4,5,6,27,<br>28,29,30,3<br>1 | 4 | O55145,P01835,P0C0A9,Q08849                      |
| 7673 | 1,3,7,27,2<br>8,29,30,31 | 2,4,5,6,8,3<br>2,33,34,35      | 4 | P08753,P19629,P36374,Q9Z0V6                      |
| 7674 | 1,3,7,27,2<br>8,29,30,32 | 2,4,5,6,8,3<br>1,33,34,35      | 5 | O08815,Q62997,Q63355,Q812E4,Q9Z0V6               |
| 7675 | 1,3,7,27,2<br>8,29,30,33 | 2,4,5,6,8,3<br>1,32,34,35      | 6 | O08815,P08753,P36374,Q62997,Q812E4,Q9Z0V6        |
| 7676 | 1,3,7,27,2<br>8,29,30,34 | 2,4,5,6,8,3<br>1,32,33,35      | 1 | P04182                                           |
| 7677 | 1,3,7,27,2<br>8,29,30,35 | 2,4,5,6,8,3<br>1,32,33,34      | 5 | P01946,P02091,Q62997,Q6AYS4,Q9Z0V6               |
| 7678 | 1,3,7,27,2<br>8,29,31,32 | 2,4,5,6,8,3<br>0,33,34,35      | 6 | P02793;Q7TP54,P06911,P10715,Q5GRG2,Q63514,Q9Z0V6 |
| 7679 | 1,3,7,27,2<br>8,29,31,33 | 2,4,5,6,8,3<br>0,32,34,35      | 4 | P02793;Q7TP54,P10715,P19629,Q9Z0V6               |
| 7680 | 1,3,7,27,2<br>8,29,31,34 | 2,4,5,6,8,3<br>0,32,33,35      | 4 | A2RUV9,P04182,Q9QW07,Q9Z0V6                      |
| 7681 | 1,3,7,27,2<br>8,29,31,35 | 2,4,5,6,8,3<br>0,32,33,34      | 3 | P01946,P02091,Q9Z0V6                             |
| 7682 | 1,3,7,27,2<br>8,29,32,33 | 2,4,5,6,8,3<br>0,31,34,35      | 6 | P02793;Q7TP54,Q06000,Q62997,Q80WL1,Q812E4,Q9Z0V6 |
| 7683 | 1,3,7,27,2<br>8,29,32,34 | 2,4,5,6,8,3<br>0,31,33,35      | 1 | P04182                                           |
| 7684 | 1,3,7,27,2<br>8,29,32,35 | 2,4,5,6,8,3<br>0,31,33,34      | 4 | P01946,P02091,Q62997,Q9Z0V6                      |

|      |                                                 |   |                                                         |
|------|-------------------------------------------------|---|---------------------------------------------------------|
| 7685 | 1,3,7,27,2 2,4,5,6,8,3<br>8,29,33,34 0,31,32,35 | 3 | P04182,Q80WL1,Q9Z0V6                                    |
| 7686 | 1,3,7,27,2 2,4,5,6,8,3<br>8,29,33,35 0,31,32,34 | 6 | P01946,P02091,Q62997,Q6AYS4,Q80WL1,Q9Z0V6               |
| 7687 | 1,3,7,27,2 2,4,5,6,8,3<br>8,29,34,35 0,31,32,33 | 3 | P01946,P02091,P04182                                    |
| 7688 | 1,3,7,27,2 2,4,5,6,8,2<br>8,30,31,32 9,33,34,35 | 2 | P10715,Q63514                                           |
| 7689 | 1,3,7,27,2 2,4,5,6,8,2<br>8,30,31,33 9,32,34,35 | 4 | P10715,P19629,Q6TMA8,Q9Z0V6                             |
| 7690 | 1,3,7,27,2 2,4,5,6,8,2<br>8,30,31,34 9,32,33,35 | 5 | A2RUV9,P04182,P47967,P97840,Q6TMA8                      |
| 7691 | 1,3,7,27,2 2,4,5,6,8,2<br>8,30,31,35 9,32,33,34 | 2 | Q6AYS4,Q6TMA8                                           |
| 7692 | 1,3,7,27,2 2,4,5,6,8,2<br>8,30,32,33 9,31,34,35 | 2 | P25236,Q06000                                           |
| 7693 | 1,3,7,27,2 2,4,5,6,8,2<br>8,30,32,34 9,31,33,35 | 3 | P04182,P17046,P47967                                    |
| 7694 | 1,3,7,27,2 2,4,5,6,8,2<br>8,30,32,35 9,31,33,34 | 1 | Q62997                                                  |
| 7695 | 1,3,7,27,2 2,4,5,6,8,2<br>8,30,33,34 9,31,32,35 | 2 | P04182,P25236                                           |
| 7696 | 1,3,7,27,2 2,4,5,6,8,2<br>8,30,33,35 9,31,32,34 | 6 | P25236,Q5RLM2,Q62975,Q62997,Q6AYS4,Q6TMA8               |
| 7697 | 1,3,7,27,2 2,4,5,6,8,2<br>8,30,34,35 9,31,32,33 | 3 | P04182,Q62975,Q8CJD3                                    |
| 7698 | 1,3,7,27,2 2,4,5,6,8,2<br>8,31,32,33 9,30,34,35 | 7 | P02793;Q7TP54,P10715,P14480,Q06000,Q08849,Q63514,Q9Z0V6 |
| 7699 | 1,3,7,27,2 2,4,5,6,8,2<br>8,31,32,34 9,30,33,35 | 2 | A2RUV9,P04182                                           |
| 7700 | 1,3,7,27,2 2,4,5,6,8,2<br>8,31,32,35 9,30,33,34 | 1 | P10715                                                  |
| 7701 | 1,3,7,27,2 2,4,5,6,8,2<br>8,31,33,34 9,30,32,35 | 6 | A2RUV9,P04182,P14480,P20762,Q6TMA8,Q9Z0V6               |
| 7702 | 1,3,7,27,2 2,4,5,6,8,2<br>8,31,33,35 9,30,32,34 | 7 | P06760,P10715,P62804,Q6AYS4,Q6TMA8,Q9WTT6,Q9Z0V6        |
| 7703 | 1,3,7,27,2 2,4,5,6,8,2<br>8,31,34,35 9,30,32,33 | 5 | A2RUV9,P04182,P62804,Q62975,Q6TMA8                      |
| 7704 | 1,3,7,27,2 2,4,5,6,8,2<br>8,32,33,34 9,30,31,35 | 5 | P04182,P25236,P55314,Q06000,Q80WL1                      |
| 7705 | 1,3,7,27,2 2,4,5,6,8,2<br>8,32,33,35 9,30,31,34 | 5 | P25236,Q08849,Q62997,Q6IG02,Q80WL1                      |
| 7706 | 1,3,7,27,2 2,4,5,6,8,2<br>8,32,34,35 9,30,31,33 | 2 | A2RUV9,P04182                                           |
| 7707 | 1,3,7,27,2 2,4,5,6,8,2<br>8,33,34,35 9,30,31,32 | 5 | O55145,P04182,P25236,P62804,Q62975                      |

|      |                                                 |   |                                                  |
|------|-------------------------------------------------|---|--------------------------------------------------|
| 7708 | 1,3,7,27,2 2,4,5,6,8,2<br>9,30,31,32 8,33,34,35 | 2 | P20760,Q5HZV9                                    |
| 7709 | 1,3,7,27,2 2,4,5,6,8,2<br>9,30,31,33 8,32,34,35 | 2 | Q5HZV9,Q9Z0V6                                    |
| 7710 | 1,3,7,27,2 2,4,5,6,8,2<br>9,30,31,34 8,32,33,35 | 2 | A2RUV9,P20760                                    |
| 7711 | 1,3,7,27,2 2,4,5,6,8,2<br>9,30,31,35 8,32,33,34 | 3 | P01946,P02091,Q6AYS4                             |
| 7712 | 1,3,7,27,2 2,4,5,6,8,2<br>9,30,32,33 8,31,34,35 | 4 | P02793;Q7TP54,Q5HZV9,Q62997,Q9Z0V6               |
| 7713 | 1,3,7,27,2 2,4,5,6,8,2<br>9,30,32,34 8,31,33,35 | 2 | P02803,P20760                                    |
| 7714 | 1,3,7,27,2 2,4,5,6,8,2<br>9,30,32,35 8,31,33,34 | 3 | P01946,P02091,Q62997                             |
| 7715 | 1,3,7,27,2 2,4,5,6,8,2<br>9,30,33,34 8,31,32,35 | 0 |                                                  |
| 7716 | 1,3,7,27,2 2,4,5,6,8,2<br>9,30,33,35 8,31,32,34 | 6 | P01946,P02091,Q5HZV9,Q62997,Q6AYS4,Q9WTT6        |
| 7717 | 1,3,7,27,2 2,4,5,6,8,2<br>9,30,34,35 8,31,32,33 | 2 | P01946,P02091                                    |
| 7718 | 1,3,7,27,2 2,4,5,6,8,2<br>9,31,32,33 8,30,34,35 | 4 | P02793;Q7TP54,Q5HZV9,Q9WTT6,Q9Z0V6               |
| 7719 | 1,3,7,27,2 2,4,5,6,8,2<br>9,31,32,34 8,30,33,35 | 2 | A2RUV9,P20760                                    |
| 7720 | 1,3,7,27,2 2,4,5,6,8,2<br>9,31,32,35 8,30,33,34 | 3 | P01946,P02091,Q9WTT6                             |
| 7721 | 1,3,7,27,2 2,4,5,6,8,2<br>9,31,33,34 8,30,32,35 | 2 | A2RUV9,Q9Z0V6                                    |
| 7722 | 1,3,7,27,2 2,4,5,6,8,2<br>9,31,33,35 8,30,32,34 | 5 | P01946,P02091,Q6P6R2,Q9WTT6,Q9Z0V6               |
| 7723 | 1,3,7,27,2 2,4,5,6,8,2<br>9,31,34,35 8,30,32,33 | 3 | A2RUV9,P01946,P02091                             |
| 7724 | 1,3,7,27,2 2,4,5,6,8,2<br>9,32,33,34 8,30,31,35 | 4 | P20760,P55314,Q64335,Q80WL1                      |
| 7725 | 1,3,7,27,2 2,4,5,6,8,2<br>9,32,33,35 8,30,31,34 | 7 | P01946,P02091,Q62997,Q6NX65,Q80WL1,Q9WTT6,Q9Z0V6 |
| 7726 | 1,3,7,27,2 2,4,5,6,8,2<br>9,32,34,35 8,30,31,33 | 2 | P01946,P02091                                    |
| 7727 | 1,3,7,27,2 2,4,5,6,8,2<br>9,33,34,35 8,30,31,32 | 4 | O55145,P01946,P02091,Q62975                      |
| 7728 | 1,3,7,27,3 2,4,5,6,8,2<br>0,31,32,33 8,29,34,35 | 0 |                                                  |
| 7729 | 1,3,7,27,3 2,4,5,6,8,2<br>0,31,32,34 8,29,33,35 | 2 | A2RUV9,P20760                                    |
| 7730 | 1,3,7,27,3 2,4,5,6,8,2<br>0,31,32,35 8,29,33,34 | 0 |                                                  |



|      |                                                 |   |                                                                |
|------|-------------------------------------------------|---|----------------------------------------------------------------|
| 7731 | 1,3,7,27,3 2,4,5,6,8,2<br>0,31,33,34 8,29,32,35 | 1 | A2RUV9                                                         |
| 7732 | 1,3,7,27,3 2,4,5,6,8,2<br>0,31,33,35 8,29,32,34 | 3 | Q62975,Q6AYS4,Q9WTT6                                           |
| 7733 | 1,3,7,27,3 2,4,5,6,8,2<br>0,31,34,35 8,29,32,33 | 2 | A2RUV9,Q62975                                                  |
| 7734 | 1,3,7,27,3 2,4,5,6,8,2<br>0,32,33,34 8,29,31,35 | 3 | P02803,P20760,P55314                                           |
| 7735 | 1,3,7,27,3 2,4,5,6,8,2<br>0,32,33,35 8,29,31,34 | 2 | Q6NX65,Q9WTT6                                                  |
| 7736 | 1,3,7,27,3 2,4,5,6,8,2<br>0,32,34,35 8,29,31,33 | 1 | P83121                                                         |
| 7737 | 1,3,7,27,3 2,4,5,6,8,2<br>0,33,34,35 8,29,31,32 | 3 | O55145,P06911,Q62975                                           |
| 7738 | 1,3,7,27,3 2,4,5,6,8,2<br>1,32,33,34 8,29,30,35 | 6 | A2RUV9,P01835,P14480,P20760,P55314,Q08849                      |
| 7739 | 1,3,7,27,3 2,4,5,6,8,2<br>1,32,33,35 8,29,30,34 | 3 | Q08849,Q6NX65,Q9WTT6                                           |
| 7740 | 1,3,7,27,3 2,4,5,6,8,2<br>1,32,34,35 8,29,30,33 | 2 | A2RUV9,Q08849                                                  |
| 7741 | 1,3,7,27,3 2,4,5,6,8,2<br>1,33,34,35 8,29,30,32 | 2 | A2RUV9,Q62975                                                  |
| 7742 | 1,3,7,27,3 2,4,5,6,8,2<br>2,33,34,35 8,29,30,31 | 4 | O55145,P55314,Q08849,Q62975                                    |
| 7743 | 1,3,7,28,2 2,4,5,6,8,2<br>9,30,31,32 7,33,34,35 | 3 | P06911,Q63355,Q9Z0V6                                           |
| 7744 | 1,3,7,28,2 2,4,5,6,8,2<br>9,30,31,33 7,32,34,35 | 6 | P06760,P08753,P10715,P19629,Q9WTT6,Q9Z0V6                      |
| 7745 | 1,3,7,28,2 2,4,5,6,8,2<br>9,30,31,34 7,32,33,35 | 3 | P06760,Q6IRE4,Q9Z0V6                                           |
| 7746 | 1,3,7,28,2 2,4,5,6,8,2<br>9,30,31,35 7,32,33,34 | 7 | G3V686,P02091,P06760,Q00715,Q6AYS4,Q9WTT6,Q9Z0V6               |
| 7747 | 1,3,7,28,2 2,4,5,6,8,2<br>9,30,32,33 7,31,34,35 | 4 | P02793,Q7TP54,Q63355,Q9WTT6,Q9Z0V6                             |
| 7748 | 1,3,7,28,2 2,4,5,6,8,2<br>9,30,32,34 7,31,33,35 | 2 | Q63355,Q6IRE4                                                  |
| 7749 | 1,3,7,28,2 2,4,5,6,8,2<br>9,30,32,35 7,31,33,34 | 4 | P02091,Q62997,Q63355,Q9WTT6                                    |
| 7750 | 1,3,7,28,2 2,4,5,6,8,2<br>9,30,33,34 7,31,32,35 | 3 | P06760,Q6IRE4,Q9Z0V6                                           |
| 7751 | 1,3,7,28,2 2,4,5,6,8,2<br>9,30,33,35 7,31,32,34 | 7 | G3V686,P02091,P06760,Q62997,Q6AYS4,Q9WTT6,Q9Z0V6               |
| 7752 | 1,3,7,28,2 2,4,5,6,8,2<br>9,30,34,35 7,31,32,33 | 4 | P02091,P06760,Q6IRE4,Q8CJD3                                    |
| 7753 | 1,3,7,28,2 2,4,5,6,8,2<br>9,31,32,33 7,30,34,35 | 8 | P02793,Q7TP54,P06911,P10715,P14480,P19629,Q63514,Q9WTT6,Q9Z0V6 |

|      |                          |                           |    |                                                                       |
|------|--------------------------|---------------------------|----|-----------------------------------------------------------------------|
| 7754 | 1,3,7,28,2<br>9,31,32,34 | 2,4,5,6,8,2<br>7,30,33,35 | 2  | Q6IRE4,Q9Z0V6                                                         |
| 7755 | 1,3,7,28,2<br>9,31,32,35 | 2,4,5,6,8,2<br>7,30,33,34 | 4  | P02091,P06760,Q9WTT6,Q9Z0V6                                           |
| 7756 | 1,3,7,28,2<br>9,31,33,34 | 2,4,5,6,8,2<br>7,30,32,35 | 4  | P06760,P14669,Q6IRE4,Q9Z0V6                                           |
| 7757 | 1,3,7,28,2<br>9,31,33,35 | 2,4,5,6,8,2<br>7,30,32,34 | 7  | P02091,P06760,P19629,Q00715,Q6AYS4,Q9WTT6,Q9Z0V6                      |
| 7758 | 1,3,7,28,2<br>9,31,34,35 | 2,4,5,6,8,2<br>7,30,32,33 | 5  | P02091,P06760,P14669,Q9QW07,Q9Z0V6                                    |
| 7759 | 1,3,7,28,2<br>9,32,33,34 | 2,4,5,6,8,2<br>7,30,31,35 | 2  | Q80WL1,Q9Z0V6                                                         |
| 7760 | 1,3,7,28,2<br>9,32,33,35 | 2,4,5,6,8,2<br>7,30,31,34 | 4  | P02091,Q80WL1,Q9WTT6,Q9Z0V6                                           |
| 7761 | 1,3,7,28,2<br>9,32,34,35 | 2,4,5,6,8,2<br>7,30,31,33 | 1  | P02091                                                                |
| 7762 | 1,3,7,28,2<br>9,33,34,35 | 2,4,5,6,8,2<br>7,30,31,32 | 5  | O55145,P02091,P06760,P14669,Q9Z0V6                                    |
| 7763 | 1,3,7,28,3<br>0,31,32,33 | 2,4,5,6,8,2<br>7,29,34,35 | 5  | P10715,P19629,Q63514,Q9WTT6,Q9Z0V6                                    |
| 7764 | 1,3,7,28,3<br>0,31,32,34 | 2,4,5,6,8,2<br>7,29,33,35 | 0  |                                                                       |
| 7765 | 1,3,7,28,3<br>0,31,32,35 | 2,4,5,6,8,2<br>7,29,33,34 | 3  | P04218,P06760,Q9WTT6                                                  |
| 7766 | 1,3,7,28,3<br>0,31,33,34 | 2,4,5,6,8,2<br>7,29,32,35 | 2  | P06760,P14669                                                         |
| 7767 | 1,3,7,28,3<br>0,31,33,35 | 2,4,5,6,8,2<br>7,29,32,34 | 10 | G3V686,P06760,P14669,P19629,P62804,Q00715,Q6AYS4,Q8VD89,Q9WTT6,Q9Z0V6 |
| 7768 | 1,3,7,28,3<br>0,31,34,35 | 2,4,5,6,8,2<br>7,29,32,33 | 4  | P06760,P14669,P62804,Q8CJD3                                           |
| 7769 | 1,3,7,28,3<br>0,32,33,34 | 2,4,5,6,8,2<br>7,29,31,35 | 1  | P25236                                                                |
| 7770 | 1,3,7,28,3<br>0,32,33,35 | 2,4,5,6,8,2<br>7,29,31,34 | 4  | P04218,P25236,Q6AYS4,Q9WTT6                                           |
| 7771 | 1,3,7,28,3<br>0,32,34,35 | 2,4,5,6,8,2<br>7,29,31,33 | 1  | Q8CJD3                                                                |
| 7772 | 1,3,7,28,3<br>0,33,34,35 | 2,4,5,6,8,2<br>7,29,31,32 | 7  | O55145,P06760,P14669,P25236,P62804,Q62975,Q8CJD3                      |
| 7773 | 1,3,7,28,3<br>1,32,33,34 | 2,4,5,6,8,2<br>7,29,30,35 | 4  | P01835,P14480,P14669,Q9Z0V6                                           |
| 7774 | 1,3,7,28,3<br>1,32,33,35 | 2,4,5,6,8,2<br>7,29,30,34 | 5  | P06760,P10715,Q00715,Q9WTT6,Q9Z0V6                                    |
| 7775 | 1,3,7,28,3<br>1,32,34,35 | 2,4,5,6,8,2<br>7,29,30,33 | 1  | P14669                                                                |
| 7776 | 1,3,7,28,3<br>1,33,34,35 | 2,4,5,6,8,2<br>7,29,30,32 | 5  | O55145,P06760,P14669,P62804,Q62975                                    |

|      |                          |                           |   |                                                                |
|------|--------------------------|---------------------------|---|----------------------------------------------------------------|
| 7777 | 1,3,7,28,3<br>2,33,34,35 | 2,4,5,6,8,2<br>7,29,30,31 | 3 | O55145,P14669,P25236                                           |
| 7778 | 1,3,7,29,3<br>0,31,32,33 | 2,4,5,6,8,2<br>7,28,34,35 | 3 | Q5HZV9,Q9WTT6,Q9Z0V6                                           |
| 7779 | 1,3,7,29,3<br>0,31,32,34 | 2,4,5,6,8,2<br>7,28,33,35 | 2 | P20760,Q99MH3                                                  |
| 7780 | 1,3,7,29,3<br>0,31,32,35 | 2,4,5,6,8,2<br>7,28,33,34 | 2 | Q4FZU6,Q9WTT6                                                  |
| 7781 | 1,3,7,29,3<br>0,31,33,34 | 2,4,5,6,8,2<br>7,28,32,35 | 2 | P06760,Q9Z0V6                                                  |
| 7782 | 1,3,7,29,3<br>0,31,33,35 | 2,4,5,6,8,2<br>7,28,32,34 | 8 | P02091,P06760,Q4FZU6,Q5HZV9,Q6AYS4,Q6P6R2,Q9WTT6,Q9Z0V6        |
| 7783 | 1,3,7,29,3<br>0,31,34,35 | 2,4,5,6,8,2<br>7,28,32,33 | 2 | P02091,P06760                                                  |
| 7784 | 1,3,7,29,3<br>0,32,33,34 | 2,4,5,6,8,2<br>7,28,31,35 | 1 | P14668                                                         |
| 7785 | 1,3,7,29,3<br>0,32,33,35 | 2,4,5,6,8,2<br>7,28,31,34 | 2 | Q6AYS4,Q9WTT6                                                  |
| 7786 | 1,3,7,29,3<br>0,32,34,35 | 2,4,5,6,8,2<br>7,28,31,33 | 3 | P02091,P14668,Q99MH3                                           |
| 7787 | 1,3,7,29,3<br>0,33,34,35 | 2,4,5,6,8,2<br>7,28,31,32 | 4 | O55145,P02091,P06760,P14668                                    |
| 7788 | 1,3,7,29,3<br>1,32,33,34 | 2,4,5,6,8,2<br>7,28,30,35 | 3 | P01835,Q6AYQ8,Q9Z0V6                                           |
| 7789 | 1,3,7,29,3<br>1,32,33,35 | 2,4,5,6,8,2<br>7,28,30,34 | 3 | Q6AYQ8,Q9WTT6,Q9Z0V6                                           |
| 7790 | 1,3,7,29,3<br>1,32,34,35 | 2,4,5,6,8,2<br>7,28,30,33 | 2 | P02091,Q6AYQ8                                                  |
| 7791 | 1,3,7,29,3<br>1,33,34,35 | 2,4,5,6,8,2<br>7,28,30,32 | 7 | O55145,P00714,P02091,P06760,P14669,Q6AYQ8,Q9Z0V6               |
| 7792 | 1,3,7,29,3<br>2,33,34,35 | 2,4,5,6,8,2<br>7,28,30,31 | 3 | O55145,P02091,Q6AYQ8                                           |
| 7793 | 1,3,7,30,3<br>1,32,33,34 | 2,4,5,6,8,2<br>7,28,29,35 | 1 | P0C0A9                                                         |
| 7794 | 1,3,7,30,3<br>1,32,33,35 | 2,4,5,6,8,2<br>7,28,29,34 | 2 | Q63942,Q9WTT6                                                  |
| 7795 | 1,3,7,30,3<br>1,32,34,35 | 2,4,5,6,8,2<br>7,28,29,33 | 4 | P07647,P0C0A9,P82471,Q63942                                    |
| 7796 | 1,3,7,30,3<br>1,33,34,35 | 2,4,5,6,8,2<br>7,28,29,32 | 9 | P00714,P06760,P0C0A9,P14669,P24368,P82471,Q62975,Q63942,Q9JHB9 |
| 7797 | 1,3,7,30,3<br>2,33,34,35 | 2,4,5,6,8,2<br>7,28,29,31 | 7 | O55145,P02782,P0C0A9,P14668,P55314,P82471,Q63942               |
| 7798 | 1,3,7,31,3<br>2,33,34,35 | 2,4,5,6,8,2<br>7,28,29,30 | 7 | O55145,P01835,P02782,P0C0A9,P14669,P82471,Q63942               |
| 7799 | 1,3,8,27,2<br>8,29,30,31 | 2,4,5,6,7,3<br>2,33,34,35 | 4 | P02781,P02782,P83748,P97605                                    |

|      |                                                 |    |                                                                                     |
|------|-------------------------------------------------|----|-------------------------------------------------------------------------------------|
| 7800 | 1,3,8,27,2 2,4,5,6,7,3<br>8,29,30,32 1,33,34,35 | 6  | F1LM93,P02781,P08723,P83748,Q62997,Q812E4                                           |
| 7801 | 1,3,8,27,2 2,4,5,6,7,3<br>8,29,30,33 1,32,34,35 | 8  | O35547,P02781,P08723,P36374,P83748,P97605,Q62997,Q812E4                             |
| 7802 | 1,3,8,27,2 2,4,5,6,7,3<br>8,29,30,34 1,32,33,35 | 3  | P04182,P83748,P97605                                                                |
| 7803 | 1,3,8,27,2 2,4,5,6,7,3<br>8,29,30,35 1,32,33,34 | 5  | G3V686,P01946,P83748,P97605,Q62997                                                  |
| 7804 | 1,3,8,27,2 2,4,5,6,7,3<br>8,29,31,32 0,33,34,35 | 4  | P06911,P10715,P14480,P83748                                                         |
| 7805 | 1,3,8,27,2 2,4,5,6,7,3<br>8,29,31,33 0,32,34,35 | 6  | O35547,P02781,P08723,P10715,P14480,P83748                                           |
| 7806 | 1,3,8,27,2 2,4,5,6,7,3<br>8,29,31,34 0,32,33,35 | 4  | A2RUV9,P04182,P97605,Q9QW07                                                         |
| 7807 | 1,3,8,27,2 2,4,5,6,7,3<br>8,29,31,35 0,32,33,34 | 4  | P01946,P83748,P97605,Q63532                                                         |
| 7808 | 1,3,8,27,2 2,4,5,6,7,3<br>8,29,32,33 0,31,34,35 | 10 | P02781,P02793,Q7TP54,P08723,P09605,P25809,P14480,P35281,P83748,Q62997,Q6IG02,Q812E4 |
| 7809 | 1,3,8,27,2 2,4,5,6,7,3<br>8,29,32,34 0,31,33,35 | 2  | P04182,P20760                                                                       |
| 7810 | 1,3,8,27,2 2,4,5,6,7,3<br>8,29,32,35 0,31,33,34 | 5  | P01946,P09605,P25809,P51907,P83748,Q62997                                           |
| 7811 | 1,3,8,27,2 2,4,5,6,7,3<br>8,29,33,34 0,31,32,35 | 2  | P04182,P97605                                                                       |
| 7812 | 1,3,8,27,2 2,4,5,6,7,3<br>8,29,33,35 0,31,32,34 | 4  | P01946,P09605,P25809,P83748,Q62997                                                  |
| 7813 | 1,3,8,27,2 2,4,5,6,7,3<br>8,29,34,35 0,31,32,33 | 5  | P01946,P04182,P09006,P97605,Q9QW07                                                  |
| 7814 | 1,3,8,27,2 2,4,5,6,7,2<br>8,30,31,32 9,33,34,35 | 2  | P14480,P83748                                                                       |
| 7815 | 1,3,8,27,2 2,4,5,6,7,2<br>8,30,31,33 9,32,34,35 | 2  | P14480,P83748                                                                       |
| 7816 | 1,3,8,27,2 2,4,5,6,7,2<br>8,30,31,34 9,32,33,35 | 3  | A2RUV9,P04182,P83748                                                                |
| 7817 | 1,3,8,27,2 2,4,5,6,7,2<br>8,30,31,35 9,32,33,34 | 2  | G3V686,P83748                                                                       |
| 7818 | 1,3,8,27,2 2,4,5,6,7,2<br>8,30,32,33 9,31,34,35 | 4  | P14480,P25236,P83748,Q62997                                                         |
| 7819 | 1,3,8,27,2 2,4,5,6,7,2<br>8,30,32,34 9,31,33,35 | 4  | P04182,P20760,P83121,P83748                                                         |
| 7820 | 1,3,8,27,2 2,4,5,6,7,2<br>8,30,32,35 9,31,33,34 | 3  | P83121,P83748,Q62997                                                                |
| 7821 | 1,3,8,27,2 2,4,5,6,7,2<br>8,30,33,34 9,31,32,35 | 4  | P04182,P25236,P83748,Q62894                                                         |
| 7822 | 1,3,8,27,2 2,4,5,6,7,2<br>8,30,33,35 9,31,32,34 | 5  | G3V686,P09605,P25809,P25236,P83748,Q62997                                           |

|      |                                                 |   |                                                                |
|------|-------------------------------------------------|---|----------------------------------------------------------------|
| 7823 | 1,3,8,27,2 2,4,5,6,7,2<br>8,30,34,35 9,31,32,33 | 4 | P04182,P83121,P83748,Q8CJD3                                    |
| 7824 | 1,3,8,27,2 2,4,5,6,7,2<br>8,31,32,33 9,30,34,35 | 6 | P09605;P25809,P10715,P14480,P83748,Q08849,Q6IG02               |
| 7825 | 1,3,8,27,2 2,4,5,6,7,2<br>8,31,32,34 9,30,33,35 | 5 | A2RUV9,P04182,P14480,P20760,Q08849                             |
| 7826 | 1,3,8,27,2 2,4,5,6,7,2<br>8,31,32,35 9,30,33,34 | 4 | P09605;P25809,P83748,Q08849,Q9QZQ5                             |
| 7827 | 1,3,8,27,2 2,4,5,6,7,2<br>8,31,33,34 9,30,32,35 | 3 | A2RUV9,P04182,P14480                                           |
| 7828 | 1,3,8,27,2 2,4,5,6,7,2<br>8,31,33,35 9,30,32,34 | 2 | P09605;P25809,P83748                                           |
| 7829 | 1,3,8,27,2 2,4,5,6,7,2<br>8,31,34,35 9,30,32,33 | 3 | A2RUV9,P04182,P09006                                           |
| 7830 | 1,3,8,27,2 2,4,5,6,7,2<br>8,32,33,34 9,30,31,35 | 9 | P04182,P14480,P25236,P55314,P83748,P97584,Q08849,Q62894,Q6IG02 |
| 7831 | 1,3,8,27,2 2,4,5,6,7,2<br>8,32,33,35 9,30,31,34 | 6 | P09605;P25809,P25236,P83748,Q08849,Q62997,Q6IG02               |
| 7832 | 1,3,8,27,2 2,4,5,6,7,2<br>8,32,34,35 9,30,31,33 | 5 | P04182,P35467,P83121,P83748,Q08849                             |
| 7833 | 1,3,8,27,2 2,4,5,6,7,2<br>8,33,34,35 9,30,31,32 | 5 | O55145,P04182,P09006,P25236,Q62894                             |
| 7834 | 1,3,8,27,2 2,4,5,6,7,2<br>9,30,31,32 8,33,34,35 | 3 | P20760,P83748,Q5HZV9                                           |
| 7835 | 1,3,8,27,2 2,4,5,6,7,2<br>9,30,31,33 8,32,34,35 | 2 | P83748,Q5HZV9                                                  |
| 7836 | 1,3,8,27,2 2,4,5,6,7,2<br>9,30,31,34 8,32,33,35 | 2 | P20760,P97605                                                  |
| 7837 | 1,3,8,27,2 2,4,5,6,7,2<br>9,30,31,35 8,32,33,34 | 3 | P01946,P83748,P97605                                           |
| 7838 | 1,3,8,27,2 2,4,5,6,7,2<br>9,30,32,33 8,31,34,35 | 3 | P83748,Q5HZV9,Q62997                                           |
| 7839 | 1,3,8,27,2 2,4,5,6,7,2<br>9,30,32,34 8,31,33,35 | 2 | P20760,P83748                                                  |
| 7840 | 1,3,8,27,2 2,4,5,6,7,2<br>9,30,32,35 8,31,33,34 | 4 | P01946,P51907,P83748,Q62997                                    |
| 7841 | 1,3,8,27,2 2,4,5,6,7,2<br>9,30,33,34 8,31,32,35 | 2 | P20760,P83748                                                  |
| 7842 | 1,3,8,27,2 2,4,5,6,7,2<br>9,30,33,35 8,31,32,34 | 4 | P01946,P83748,Q5HZV9,Q62997                                    |
| 7843 | 1,3,8,27,2 2,4,5,6,7,2<br>9,30,34,35 8,31,32,33 | 4 | P01946,P12020,P83748,P97605                                    |
| 7844 | 1,3,8,27,2 2,4,5,6,7,2<br>9,31,32,33 8,30,34,35 | 4 | P14480,P83748,Q08849,Q5HZV9                                    |
| 7845 | 1,3,8,27,2 2,4,5,6,7,2<br>9,31,32,34 8,30,33,35 | 3 | A2RUV9,P20760,Q08849                                           |

|      |                                                 |   |                                                                |
|------|-------------------------------------------------|---|----------------------------------------------------------------|
| 7846 | 1,3,8,27,2 2,4,5,6,7,2<br>9,31,32,35 8,30,33,34 | 5 | P01946,P51907,P83748,P97840,Q08849                             |
| 7847 | 1,3,8,27,2 2,4,5,6,7,2<br>9,31,33,34 8,30,32,35 | 1 | P20760                                                         |
| 7848 | 1,3,8,27,2 2,4,5,6,7,2<br>9,31,33,35 8,30,32,34 | 4 | P01946,P83748,P97840,Q5HZV9                                    |
| 7849 | 1,3,8,27,2 2,4,5,6,7,2<br>9,31,34,35 8,30,32,33 | 1 | P01946                                                         |
| 7850 | 1,3,8,27,2 2,4,5,6,7,2<br>9,32,33,34 8,30,31,35 | 4 | P20760,P55314,P83748,Q08849                                    |
| 7851 | 1,3,8,27,2 2,4,5,6,7,2<br>9,32,33,35 8,30,31,34 | 9 | P01946,P25031,P47967,P51907,P83748,P97840,Q08849,Q62997,Q6IG02 |
| 7852 | 1,3,8,27,2 2,4,5,6,7,2<br>9,32,34,35 8,30,31,33 | 4 | P01946,P35467,P51907,P83121                                    |
| 7853 | 1,3,8,27,2 2,4,5,6,7,2<br>9,33,34,35 8,30,31,32 | 2 | O55145,P01946                                                  |
| 7854 | 1,3,8,27,3 2,4,5,6,7,2<br>0,31,32,33 8,29,34,35 | 4 | P14480,P83748,Q08849,Q5HZV9                                    |
| 7855 | 1,3,8,27,3 2,4,5,6,7,2<br>0,31,32,34 8,29,33,35 | 2 | P20760,P83748                                                  |
| 7856 | 1,3,8,27,3 2,4,5,6,7,2<br>0,31,32,35 8,29,33,34 | 1 | P83748                                                         |
| 7857 | 1,3,8,27,3 2,4,5,6,7,2<br>0,31,33,34 8,29,32,35 | 2 | P20760,P83748                                                  |
| 7858 | 1,3,8,27,3 2,4,5,6,7,2<br>0,31,33,35 8,29,32,34 | 1 | P83748                                                         |
| 7859 | 1,3,8,27,3 2,4,5,6,7,2<br>0,31,34,35 8,29,32,33 | 2 | P02793;Q7TP54,P83748                                           |
| 7860 | 1,3,8,27,3 2,4,5,6,7,2<br>0,32,33,34 8,29,31,35 | 3 | P20760,P55314,P83748                                           |
| 7861 | 1,3,8,27,3 2,4,5,6,7,2<br>0,32,33,35 8,29,31,34 | 2 | P83748,Q08849                                                  |
| 7862 | 1,3,8,27,3 2,4,5,6,7,2<br>0,32,34,35 8,29,31,33 | 3 | P35467,P83121,P83748                                           |
| 7863 | 1,3,8,27,3 2,4,5,6,7,2<br>0,33,34,35 8,29,31,32 | 5 | O55145,P06911,P12020,P83748,Q62975                             |
| 7864 | 1,3,8,27,3 2,4,5,6,7,2<br>1,32,33,34 8,29,30,35 | 5 | P01835,P14480,P20760,P55314,Q08849                             |
| 7865 | 1,3,8,27,3 2,4,5,6,7,2<br>1,32,33,35 8,29,30,34 | 5 | P09605;P25809,P83748,P97840,Q08849,Q6IG02                      |
| 7866 | 1,3,8,27,3 2,4,5,6,7,2<br>1,32,34,35 8,29,30,33 | 4 | A2RUV9,P35467,P83121,Q08849                                    |
| 7867 | 1,3,8,27,3 2,4,5,6,7,2<br>1,33,34,35 8,29,30,32 | 3 | O55145,Q08849,Q62975                                           |
| 7868 | 1,3,8,27,3 2,4,5,6,7,2<br>2,33,34,35 8,29,30,31 | 7 | O55145,P35467,P55314,P83121,P83748,Q08849,Q6IG02               |

|      |                          |                           |   |                                                         |
|------|--------------------------|---------------------------|---|---------------------------------------------------------|
| 7869 | 1,3,8,28,2<br>9,30,31,32 | 2,4,5,6,7,2<br>7,33,34,35 | 2 | G3V686,P83748                                           |
| 7870 | 1,3,8,28,2<br>9,30,31,33 | 2,4,5,6,7,2<br>7,32,34,35 | 5 | G3V686,P19629,P36376,P83748,Q63532                      |
| 7871 | 1,3,8,28,2<br>9,30,31,34 | 2,4,5,6,7,2<br>7,32,33,35 | 2 | Q6IE51,Q9QW07                                           |
| 7872 | 1,3,8,28,2<br>9,30,31,35 | 2,4,5,6,7,2<br>7,32,33,34 | 5 | G3V686,P05539,P83748,Q63532,Q9QZQ5                      |
| 7873 | 1,3,8,28,2<br>9,30,32,33 | 2,4,5,6,7,2<br>7,31,34,35 | 4 | G3V686,P14408,P35281,P83748                             |
| 7874 | 1,3,8,28,2<br>9,30,32,34 | 2,4,5,6,7,2<br>7,31,33,35 | 1 | P83748                                                  |
| 7875 | 1,3,8,28,2<br>9,30,32,35 | 2,4,5,6,7,2<br>7,31,33,34 | 6 | G3V686,P04218,P51907,P83748,Q62997,Q9QZQ5               |
| 7876 | 1,3,8,28,2<br>9,30,33,34 | 2,4,5,6,7,2<br>7,31,32,35 | 2 | P36376,P83748                                           |
| 7877 | 1,3,8,28,2<br>9,30,33,35 | 2,4,5,6,7,2<br>7,31,32,34 | 7 | G3V686,P05539,P36376,P38444,P83748,Q62997,Q63532        |
| 7878 | 1,3,8,28,2<br>9,30,34,35 | 2,4,5,6,7,2<br>7,31,32,33 | 4 | P00507,P05539,P09006,Q8CJD3                             |
| 7879 | 1,3,8,28,2<br>9,31,32,33 | 2,4,5,6,7,2<br>7,30,34,35 | 4 | P06911,P10715,P14480,P83748                             |
| 7880 | 1,3,8,28,2<br>9,31,32,34 | 2,4,5,6,7,2<br>7,30,33,35 | 3 | P14480,Q6IE51,Q9QW07                                    |
| 7881 | 1,3,8,28,2<br>9,31,32,35 | 2,4,5,6,7,2<br>7,30,33,34 | 6 | G3V686,P47967,P51907,P83748,P97840,Q9QZQ5               |
| 7882 | 1,3,8,28,2<br>9,31,33,34 | 2,4,5,6,7,2<br>7,30,32,35 | 1 | P14480                                                  |
| 7883 | 1,3,8,28,2<br>9,31,33,35 | 2,4,5,6,7,2<br>7,30,32,34 | 6 | G3V686,P06760,P47967,P97840,Q63532,Q9QZQ5               |
| 7884 | 1,3,8,28,2<br>9,31,34,35 | 2,4,5,6,7,2<br>7,30,32,33 | 3 | P00507,P09006,Q9QW07                                    |
| 7885 | 1,3,8,28,2<br>9,32,33,34 | 2,4,5,6,7,2<br>7,30,31,35 | 2 | P14480,P35281                                           |
| 7886 | 1,3,8,28,2<br>9,32,33,35 | 2,4,5,6,7,2<br>7,30,31,34 | 7 | G3V686,P09605,P25809,P19218,P47967,P51907,P83748,P97840 |
| 7887 | 1,3,8,28,2<br>9,32,34,35 | 2,4,5,6,7,2<br>7,30,31,33 | 3 | P00507,P19218,P51907                                    |
| 7888 | 1,3,8,28,2<br>9,33,34,35 | 2,4,5,6,7,2<br>7,30,31,32 | 3 | O55145,P00507,P09006                                    |
| 7889 | 1,3,8,28,3<br>0,31,32,33 | 2,4,5,6,7,2<br>7,29,34,35 | 4 | G3V686,P14408,P14480,P83748                             |
| 7890 | 1,3,8,28,3<br>0,31,32,34 | 2,4,5,6,7,2<br>7,29,33,35 | 3 | P14480,P83748,Q6IE51                                    |
| 7891 | 1,3,8,28,3<br>0,31,32,35 | 2,4,5,6,7,2<br>7,29,33,34 | 5 | G3V686,P02631,P04218,P83748,Q9QZQ5                      |

|      |                          |                           |   |                                                                |
|------|--------------------------|---------------------------|---|----------------------------------------------------------------|
| 7892 | 1,3,8,28,3<br>0,31,33,34 | 2,4,5,6,7,2<br>7,29,32,35 | 5 | P14480,P36376,P83748,Q62894,Q6IE51                             |
| 7893 | 1,3,8,28,3<br>0,31,33,35 | 2,4,5,6,7,2<br>7,29,32,34 | 8 | G3V686,P02631,P05539,P06760,P36376,P83748,Q63532,Q9QZQ5        |
| 7894 | 1,3,8,28,3<br>0,31,34,35 | 2,4,5,6,7,2<br>7,29,32,33 | 8 | P02793;Q7TP54,P05539,P09006,P13852,P19132,Q6IE51,Q8CJD3,Q9QZQ5 |
| 7895 | 1,3,8,28,3<br>0,32,33,34 | 2,4,5,6,7,2<br>7,29,31,35 | 4 | P14480,P25236,P83748,Q62894                                    |
| 7896 | 1,3,8,28,3<br>0,32,33,35 | 2,4,5,6,7,2<br>7,29,31,34 | 5 | G3V686,P04218,P14408,P83748,Q9QZQ5                             |
| 7897 | 1,3,8,28,3<br>0,32,34,35 | 2,4,5,6,7,2<br>7,29,31,33 | 5 | P04218,P83121,P83748,Q8CJD3,Q9QZQ5                             |
| 7898 | 1,3,8,28,3<br>0,33,34,35 | 2,4,5,6,7,2<br>7,29,31,32 | 7 | O55145,P05539,P25236,P36376,P83748,Q62894,Q8CJD3               |
| 7899 | 1,3,8,28,3<br>1,32,33,34 | 2,4,5,6,7,2<br>7,29,30,35 | 3 | P01835,P14480,Q62894                                           |
| 7900 | 1,3,8,28,3<br>1,32,33,35 | 2,4,5,6,7,2<br>7,29,30,34 | 5 | G3V686,P04218,P09605;P25809,P83748,Q9QZQ5                      |
| 7901 | 1,3,8,28,3<br>1,32,34,35 | 2,4,5,6,7,2<br>7,29,30,33 | 2 | P04218,Q9QZQ5                                                  |
| 7902 | 1,3,8,28,3<br>1,33,34,35 | 2,4,5,6,7,2<br>7,29,30,32 | 3 | O55145,P09006,Q9QZQ5                                           |
| 7903 | 1,3,8,28,3<br>2,33,34,35 | 2,4,5,6,7,2<br>7,29,30,31 | 4 | O55145,P04218,P25236,Q62894                                    |
| 7904 | 1,3,8,29,3<br>0,31,32,33 | 2,4,5,6,7,2<br>7,28,34,35 | 3 | P14408,P83748,Q5HZV9                                           |
| 7905 | 1,3,8,29,3<br>0,31,32,34 | 2,4,5,6,7,2<br>7,28,33,35 | 3 | P20760,Q6IE51,Q99MH3                                           |
| 7906 | 1,3,8,29,3<br>0,31,32,35 | 2,4,5,6,7,2<br>7,28,33,34 | 3 | G3V686,P51907,P83748                                           |
| 7907 | 1,3,8,29,3<br>0,31,33,34 | 2,4,5,6,7,2<br>7,28,32,35 | 1 | Q6IE51                                                         |
| 7908 | 1,3,8,29,3<br>0,31,33,35 | 2,4,5,6,7,2<br>7,28,32,34 | 5 | G3V686,P05539,P83748,Q5HZV9,Q63532                             |
| 7909 | 1,3,8,29,3<br>0,31,34,35 | 2,4,5,6,7,2<br>7,28,32,33 | 2 | P02793;Q7TP54,Q6IE51                                           |
| 7910 | 1,3,8,29,3<br>0,32,33,34 | 2,4,5,6,7,2<br>7,28,31,35 | 2 | P20760,P83748                                                  |
| 7911 | 1,3,8,29,3<br>0,32,33,35 | 2,4,5,6,7,2<br>7,28,31,34 | 3 | G3V686,P14408,P83748                                           |
| 7912 | 1,3,8,29,3<br>0,32,34,35 | 2,4,5,6,7,2<br>7,28,31,33 | 2 | P51907,P83748                                                  |
| 7913 | 1,3,8,29,3<br>0,33,34,35 | 2,4,5,6,7,2<br>7,28,31,32 | 4 | O55145,P05539,P12020,P83748                                    |
| 7914 | 1,3,8,29,3<br>1,32,33,34 | 2,4,5,6,7,2<br>7,28,30,35 | 4 | P01835,P14480,Q6AYQ8,Q6IE51                                    |



|      |                               |                           |    |                                                                                     |
|------|-------------------------------|---------------------------|----|-------------------------------------------------------------------------------------|
| 7915 | 1,3,8,29,3<br>1,32,33,35      | 2,4,5,6,7,2<br>7,28,30,34 | 5  | G3V686,P47967,P83748,P97840,Q6AYQ8                                                  |
| 7916 | 1,3,8,29,3<br>1,32,34,35      | 2,4,5,6,7,2<br>7,28,30,33 | 3  | P51907,Q6AYQ8,Q6IE51                                                                |
| 7917 | 1,3,8,29,3<br>1,33,34,35      | 2,4,5,6,7,2<br>7,28,30,32 | 2  | O55145,Q6AYQ8                                                                       |
| 7918 | 1,3,8,29,3<br>2,33,34,35      | 2,4,5,6,7,2<br>7,28,30,31 | 3  | O55145,P51907,Q6AYQ8                                                                |
| 7919 | 1,3,8,30,3<br>1,32,33,34      | 2,4,5,6,7,2<br>7,28,29,35 | 3  | P14480,P83748,Q6IE51                                                                |
| 7920 | 1,3,8,30,3<br>1,32,33,35      | 2,4,5,6,7,2<br>7,28,29,34 | 7  | G3V686,P02631,P04218,P14408,P83748,Q71UF4,Q9QZQ5                                    |
| 7921 | 1,3,8,30,3<br>1,32,34,35      | 2,4,5,6,7,2<br>7,28,29,33 | 6  | P02631,P02793,Q7TP54,P04218,P82471,P83748,Q6IE51                                    |
| 7922 | 1,3,8,30,3<br>1,33,34,35      | 2,4,5,6,7,2<br>7,28,29,32 | 7  | O55145,P02631,P02793,Q7TP54,P24368,P82471,Q6IE51,Q9JHB9                             |
| 7923 | 1,3,8,30,3<br>2,33,34,35      | 2,4,5,6,7,2<br>7,28,29,31 | 5  | O55145,P04218,P82471,P83748,Q62894                                                  |
| 7924 | 1,3,8,31,3<br>2,33,34,35      | 2,4,5,6,7,2<br>7,28,29,30 | 5  | O55145,P01835,P0C0A9,P82471,Q08849                                                  |
| 7925 | 1,3,27,28,<br>29,30,31,3<br>2 | 2,4,5,6,7,8<br>,33,34,35  | 10 | O08815,P05369,P36374,P83748,P97605,Q63514,Q812E4,Q99041,Q9QZQ5,Q9Z0V6               |
| 7926 | 1,3,27,28,<br>29,30,31,3<br>3 | 2,4,5,6,7,8<br>,32,34,35  | 11 | P02781,P08753,P19629,P20762,P36374,P83748,P97605,Q63514,Q812E4,Q9QZQ5,Q9Z0V6        |
| 7927 | 1,3,27,28,<br>29,30,31,3<br>4 | 2,4,5,6,7,8<br>,32,33,35  | 9  | A2RUV9,P04182,P05369,P20762,P97605,Q6AYR9,Q8CJD3,Q9QW07,Q9QZQ5                      |
| 7928 | 1,3,27,28,<br>29,30,31,3<br>5 | 2,4,5,6,7,8<br>,32,33,34  | 10 | G3V686,P01946,P36374,P83748,P97605,Q63532,Q6AYS4,Q99041,Q9QZQ5,Q9Z0V6               |
| 7929 | 1,3,27,28,<br>29,30,32,3<br>3 | 2,4,5,6,7,8<br>,31,34,35  | 12 | O08815,P02781,P05369,P36374,P83748,P97605,Q06000,Q62997,Q63514,Q812E4,Q9QZQ5,Q9Z0V6 |
| 7930 | 1,3,27,28,<br>29,30,32,3<br>4 | 2,4,5,6,7,8<br>,31,33,35  | 9  | O08815,P04182,P05369,P20760,P20762,P83748,P97605,Q63514,Q9QZQ5                      |
| 7931 | 1,3,27,28,<br>29,30,32,3<br>5 | 2,4,5,6,7,8<br>,31,33,34  | 8  | P01946,P36374,P83748,P97605,Q62997,Q63514,Q99041,Q9QZQ5                             |
| 7932 | 1,3,27,28,<br>29,30,33,3<br>4 | 2,4,5,6,7,8<br>,31,32,35  | 8  | P04182,P05369,P20762,P83748,P97605,Q05175,Q9QZQ5,Q9Z0V6                             |

|      |                               |                          |    |                                                                                                   |
|------|-------------------------------|--------------------------|----|---------------------------------------------------------------------------------------------------|
| 7933 | 1,3,27,28,<br>29,30,33,3<br>5 | 2,4,5,6,7,8<br>,31,32,34 | 10 | P01946,P20766,P36374,P38444,P83748,P97605,Q62997,Q6AYS4,Q9QZQ5,Q9Z0V6                             |
| 7934 | 1,3,27,28,<br>29,30,34,3<br>5 | 2,4,5,6,7,8<br>,31,32,33 | 7  | P01946,P04182,P83748,P97605,Q8CJD3,Q99041,Q9QZQ5                                                  |
| 7935 | 1,3,27,28,<br>29,31,32,3<br>3 | 2,4,5,6,7,8<br>,30,34,35 | 11 | P02793;Q7TP54,P06911,P14480,P20762,P36374,P83748,Q06000,Q63514,Q812E4,Q9QZQ5,Q9Z0V6               |
| 7936 | 1,3,27,28,<br>29,31,32,3<br>4 | 2,4,5,6,7,8<br>,30,33,35 | 8  | A2RUV9,P04182,P20762,P97605,Q63514,Q9QW07,Q9QZQ5,Q9Z0V6                                           |
| 7937 | 1,3,27,28,<br>29,31,32,3<br>5 | 2,4,5,6,7,8<br>,30,33,34 | 8  | P01946,P17559,P83748,P97605,Q63514,Q99041,Q9QZQ5,Q9Z0V6                                           |
| 7938 | 1,3,27,28,<br>29,31,33,3<br>4 | 2,4,5,6,7,8<br>,30,32,35 | 6  | A2RUV9,P04182,P20762,P97605,Q9QZQ5,Q9Z0V6                                                         |
| 7939 | 1,3,27,28,<br>29,31,33,3<br>5 | 2,4,5,6,7,8<br>,30,32,34 | 8  | P01946,P36374,P83748,P97605,Q63532,Q6AYS4,Q9QZQ5,Q9Z0V6                                           |
| 7940 | 1,3,27,28,<br>29,31,34,3<br>5 | 2,4,5,6,7,8<br>,30,32,33 | 8  | A2RUV9,P01946,P04182,P20762,P97605,Q99041,Q9QW07,Q9QZQ5                                           |
| 7941 | 1,3,27,28,<br>29,32,33,3<br>4 | 2,4,5,6,7,8<br>,30,31,35 | 11 | P04182,P05369,P20762,P55314,P83748,P97584,Q06000,Q63514,Q80WL1,Q9QZQ5,Q9Z0V6                      |
| 7942 | 1,3,27,28,<br>29,32,33,3<br>5 | 2,4,5,6,7,8<br>,30,31,34 | 13 | P01946,P09605,P25809,P0C0K7,P17559,P19218,P47967,P83748,Q62997,Q63514,Q6IG02,Q80WL1,Q9QZQ5,Q9Z0V6 |
| 7943 | 1,3,27,28,<br>29,32,34,3<br>5 | 2,4,5,6,7,8<br>,30,31,33 | 6  | P01946,P04182,P19218,P97605,Q99041,Q9QZQ5                                                         |
| 7944 | 1,3,27,28,<br>29,33,34,3<br>5 | 2,4,5,6,7,8<br>,30,31,32 | 8  | O55145,P01946,P04182,P20762,P97605,Q80WL1,Q9QZQ5,Q9Z0V6                                           |
| 7945 | 1,3,27,28,<br>30,31,32,3<br>3 | 2,4,5,6,7,8<br>,29,34,35 | 6  | P14480,P20762,P83748,Q06000,Q63514,Q9QZQ5                                                         |
| 7946 | 1,3,27,28,<br>30,31,32,3<br>4 | 2,4,5,6,7,8<br>,29,33,35 | 8  | A2RUV9,P04182,P20760,P20762,P83748,Q63514,Q63617,Q9QZQ5                                           |
| 7947 | 1,3,27,28,<br>30,31,32,3<br>5 | 2,4,5,6,7,8<br>,29,33,34 | 5  | P83748,Q63514,Q63617,Q99041,Q9QZQ5                                                                |

|      |                               |                          |    |                                                                              |
|------|-------------------------------|--------------------------|----|------------------------------------------------------------------------------|
| 7948 | 1,3,27,28,<br>30,31,33,3<br>4 | 2,4,5,6,7,8<br>,29,32,35 | 6  | A2RUV9,P04182,P20762,P83748,P97605,Q9QZQ5                                    |
| 7949 | 1,3,27,28,<br>30,31,33,3<br>5 | 2,4,5,6,7,8<br>,29,32,34 | 6  | P02631,P20762,P83748,P97605,Q6AYS4,Q9QZQ5                                    |
| 7950 | 1,3,27,28,<br>30,31,34,3<br>5 | 2,4,5,6,7,8<br>,29,32,33 | 9  | A2RUV9,P04182,P20762,P83748,P97605,Q63617,Q8CJD3,Q99041,Q9QZQ5               |
| 7951 | 1,3,27,28,<br>30,32,33,3<br>4 | 2,4,5,6,7,8<br>,29,31,35 | 9  | P04182,P07171,P20762,P25236,P55314,P83748,Q06000,Q63514,Q9QZQ5               |
| 7952 | 1,3,27,28,<br>30,32,33,3<br>5 | 2,4,5,6,7,8<br>,29,31,34 | 9  | P07171,P25236,P83748,Q5RLM2,Q62997,Q63514,Q6AYS4,Q6IG02,Q9QZQ5               |
| 7953 | 1,3,27,28,<br>30,32,34,3<br>5 | 2,4,5,6,7,8<br>,29,31,33 | 9  | P04182,P07171,P20762,P83121,P83748,Q63617,Q8CJD3,Q99041,Q9QZQ5               |
| 7954 | 1,3,27,28,<br>30,33,34,3<br>5 | 2,4,5,6,7,8<br>,29,31,32 | 10 | O55145,P04182,P07171,P20762,P25236,P83748,P97605,Q62975,Q8CJD3,Q9QZQ5        |
| 7955 | 1,3,27,28,<br>31,32,33,3<br>4 | 2,4,5,6,7,8<br>,29,30,35 | 8  | A2RUV9,P04182,P14480,P20762,P55314,Q06000,Q63514,Q9QZQ5                      |
| 7956 | 1,3,27,28,<br>31,32,33,3<br>5 | 2,4,5,6,7,8<br>,29,30,34 | 8  | P07171,P09605,P25809,P20762,P83748,Q63514,Q6IG02,Q9QZQ5,Q9WTT6               |
| 7957 | 1,3,27,28,<br>31,32,34,3<br>5 | 2,4,5,6,7,8<br>,29,30,33 | 7  | A2RUV9,P04182,P20762,Q63514,Q63617,Q99041,Q9QZQ5                             |
| 7958 | 1,3,27,28,<br>31,33,34,3<br>5 | 2,4,5,6,7,8<br>,29,30,32 | 5  | A2RUV9,O55145,P04182,P20762,Q9QZQ5                                           |
| 7959 | 1,3,27,28,<br>32,33,34,3<br>5 | 2,4,5,6,7,8<br>,29,30,31 | 11 | O55145,P04182,P07171,P20762,P25236,P55314,P83748,Q63514,Q6IG02,Q80WL1,Q9QZQ5 |
| 7960 | 1,3,27,29,<br>30,31,32,3<br>3 | 2,4,5,6,7,8<br>,28,34,35 | 6  | P07171,P83748,Q5HZV9,Q63514,Q9QZQ5,Q9Z0V6                                    |
| 7961 | 1,3,27,29,<br>30,31,32,3<br>4 | 2,4,5,6,7,8<br>,28,33,35 | 6  | A2RUV9,P20760,P83748,P97605,Q99041,Q9QZQ5                                    |
| 7962 | 1,3,27,29,<br>30,31,32,3<br>5 | 2,4,5,6,7,8<br>,28,33,34 | 5  | P01946,P07171,P83748,Q99041,Q9QZQ5                                           |

|      |                               |                          |   |                                                                |
|------|-------------------------------|--------------------------|---|----------------------------------------------------------------|
| 7963 | 1,3,27,29,<br>30,31,33,3<br>4 | 2,4,5,6,7,8<br>,28,32,35 | 4 | P20760,P83748,P97605,Q9QZQ5                                    |
| 7964 | 1,3,27,29,<br>30,31,33,3<br>5 | 2,4,5,6,7,8<br>,28,32,34 | 9 | P01946,P07171,P83748,P97605,Q6AYS4,Q6P6R2,Q9QZQ5,Q9WTT6,Q9Z0V6 |
| 7965 | 1,3,27,29,<br>30,31,34,3<br>5 | 2,4,5,6,7,8<br>,28,32,33 | 6 | A2RUV9,P01946,P07171,P97605,Q99041,Q9QZQ5                      |
| 7966 | 1,3,27,29,<br>30,32,33,3<br>4 | 2,4,5,6,7,8<br>,28,31,35 | 5 | P07171,P20760,P55314,P83748,Q02253                             |
| 7967 | 1,3,27,29,<br>30,32,33,3<br>5 | 2,4,5,6,7,8<br>,28,31,34 | 7 | P01946,P07171,P0C0K7,P83748,Q62997,Q9QZQ5,Q9WTT6               |
| 7968 | 1,3,27,29,<br>30,32,34,3<br>5 | 2,4,5,6,7,8<br>,28,31,33 | 6 | P01946,P07171,P83748,P97605,Q99041,Q9QZQ5                      |
| 7969 | 1,3,27,29,<br>30,33,34,3<br>5 | 2,4,5,6,7,8<br>,28,31,32 | 7 | O55145,P01946,P07171,P12020,P83748,P97605,Q9QZQ5               |
| 7970 | 1,3,27,29,<br>31,32,33,3<br>4 | 2,4,5,6,7,8<br>,28,30,35 | 8 | A2RUV9,P07171,P14480,P20760,P55314,Q63514,Q6AYQ8,Q9QZQ5        |
| 7971 | 1,3,27,29,<br>31,32,33,3<br>5 | 2,4,5,6,7,8<br>,28,30,34 | 9 | P07171,P0C0K7,P17559,P47967,P83748,Q63514,Q9QZQ5,Q9WTT6,Q9Z0V6 |
| 7972 | 1,3,27,29,<br>31,32,34,3<br>5 | 2,4,5,6,7,8<br>,28,30,33 | 5 | A2RUV9,P01946,P07171,Q99041,Q9QZQ5                             |
| 7973 | 1,3,27,29,<br>31,33,34,3<br>5 | 2,4,5,6,7,8<br>,28,30,32 | 5 | O55145,P01946,P07171,P97605,Q9QZQ5                             |
| 7974 | 1,3,27,29,<br>32,33,34,3<br>5 | 2,4,5,6,7,8<br>,28,30,31 | 7 | O55145,P01946,P07171,P55314,P83748,Q80WL1,Q9QZQ5               |
| 7975 | 1,3,27,30,<br>31,32,33,3<br>4 | 2,4,5,6,7,8<br>,28,29,35 | 7 | P07171,P20760,P20762,P55314,P83748,Q63514,Q9QZQ5               |
| 7976 | 1,3,27,30,<br>31,32,33,3<br>5 | 2,4,5,6,7,8<br>,28,29,34 | 6 | P02631,P07171,P83748,Q63514,Q9QZQ5,Q9WTT6                      |
| 7977 | 1,3,27,30,<br>31,32,34,3<br>5 | 2,4,5,6,7,8<br>,28,29,33 | 8 | A2RUV9,P02631,P07171,P83748,Q63617,Q99041,Q9QZQ5,Q9R0T3        |

|      |                               |                          |    |                                                                                                                                             |
|------|-------------------------------|--------------------------|----|---------------------------------------------------------------------------------------------------------------------------------------------|
| 7978 | 1,3,27,30,<br>31,33,34,3<br>5 | 2,4,5,6,7,8<br>,28,29,32 | 7  | P02631,P07171,P20762,P83748,Q62975,Q63617,Q9QZQ5                                                                                            |
| 7979 | 1,3,27,30,<br>32,33,34,3<br>5 | 2,4,5,6,7,8<br>,28,29,31 | 5  | O55145,P07171,P55314,P83748,Q9QZQ5                                                                                                          |
| 7980 | 1,3,27,31,<br>32,33,34,3<br>5 | 2,4,5,6,7,8<br>,28,29,30 | 8  | A2RUV9,O55145,P07171,P20762,P55314,Q08849,Q6IG02,Q9QZQ5                                                                                     |
| 7981 | 1,3,28,29,<br>30,31,32,3<br>3 | 2,4,5,6,7,8<br>,27,34,35 | 8  | P02631,P07171,P83748,Q01205,Q63514,Q9QZQ5,Q9WTT6,Q9Z0V6                                                                                     |
| 7982 | 1,3,28,29,<br>30,31,32,3<br>4 | 2,4,5,6,7,8<br>,27,33,35 | 8  | P07171,P16636,P20762,Q63514,Q6IE51,Q99041,Q99MH3,Q9QZQ5                                                                                     |
| 7983 | 1,3,28,29,<br>30,31,32,3<br>5 | 2,4,5,6,7,8<br>,27,33,34 | 11 | G3V686,P02631,P07171,P83748,Q01205,Q07116,Q63514,Q99041,Q9QZQ5,Q9WTT6,Q9Z0V6                                                                |
| 7984 | 1,3,28,29,<br>30,31,33,3<br>4 | 2,4,5,6,7,8<br>,27,32,35 | 9  | P00714,P02631,P06760,P07171,P14669,P20762,P97605,Q9QZQ5,Q9Z0V6                                                                              |
| 7985 | 1,3,28,29,<br>30,31,33,3<br>5 | 2,4,5,6,7,8<br>,27,32,34 | 20 | G3V686,P00714,P02631,P05539,P06760,P07171,P14669,P20646,P38444,P83748,P97605,Q01205,Q07116,Q63532,Q6AYS4,Q6P6R2,Q99041,Q9QZQ5,Q9WTT6,Q9Z0V6 |
| 7986 | 1,3,28,29,<br>30,31,34,3<br>5 | 2,4,5,6,7,8<br>,27,32,33 | 10 | P00714,P02631,P06760,P07171,P14669,P97605,Q8CJD3,Q99041,Q9QW07,Q9QZQ5                                                                       |
| 7987 | 1,3,28,29,<br>30,32,33,3<br>4 | 2,4,5,6,7,8<br>,27,31,35 | 7  | P07171,P20762,P83748,Q63514,Q99MH3,Q9QZQ5,Q9Z0V6                                                                                            |
| 7988 | 1,3,28,29,<br>30,32,33,3<br>5 | 2,4,5,6,7,8<br>,27,31,34 | 11 | G3V686,P07171,P20646,P83748,Q01205,Q62997,Q63514,Q6AYS4,Q9QZQ5,Q9WTT6,Q9Z0V6                                                                |
| 7989 | 1,3,28,29,<br>30,32,34,3<br>5 | 2,4,5,6,7,8<br>,27,31,33 | 7  | P00507,P07171,P83748,Q8CJD3,Q99041,Q99MH3,Q9QZQ5                                                                                            |
| 7990 | 1,3,28,29,<br>30,33,34,3<br>5 | 2,4,5,6,7,8<br>,27,31,32 | 11 | O55145,P00714,P05539,P06760,P07171,P14669,P83748,P97605,Q8CJD3,Q9QZQ5,Q9Z0V6                                                                |
| 7991 | 1,3,28,29,<br>31,32,33,3<br>4 | 2,4,5,6,7,8<br>,27,30,35 | 9  | P07171,P14480,P14669,P20762,Q63514,Q64057,Q6AYQ8,Q9QZQ5,Q9Z0V6                                                                              |
| 7992 | 1,3,28,29,<br>31,32,33,3<br>5 | 2,4,5,6,7,8<br>,27,30,34 | 12 | G3V686,P02631,P07171,P14669,P20646,P47967,P83748,Q01205,Q63514,Q9QZQ5,Q9WTT6,Q9Z0V6                                                         |

|      |                               |                          |    |                                                                                     |
|------|-------------------------------|--------------------------|----|-------------------------------------------------------------------------------------|
| 7993 | 1,3,28,29,<br>31,32,34,3<br>5 | 2,4,5,6,7,8<br>,27,30,33 | 9  | P00507,P02631,P07171,P14669,Q63514,Q99041,Q99MH3,Q9QW07,Q9QZQ5                      |
| 7994 | 1,3,28,29,<br>31,33,34,3<br>5 | 2,4,5,6,7,8<br>,27,30,32 | 10 | O55145,P00714,P02631,P06760,P07171,P14669,P20762,Q9QW07,Q9QZQ5,Q9Z0V6               |
| 7995 | 1,3,28,29,<br>32,33,34,3<br>5 | 2,4,5,6,7,8<br>,27,30,31 | 7  | O55145,P07171,P14669,P19218,Q80WL1,Q9QZQ5,Q9Z0V6                                    |
| 7996 | 1,3,28,30,<br>31,32,33,3<br>4 | 2,4,5,6,7,8<br>,27,29,35 | 9  | P02631,P07171,P14480,P14669,P20762,P83748,Q63514,Q63617,Q9QZQ5                      |
| 7997 | 1,3,28,30,<br>31,32,33,3<br>5 | 2,4,5,6,7,8<br>,27,29,34 | 12 | G3V686,P02631,P04218,P07171,P14669,P20646,P83748,Q63514,Q6AYS4,Q99041,Q9QZQ5,Q9WTT6 |
| 7998 | 1,3,28,30,<br>31,32,34,3<br>5 | 2,4,5,6,7,8<br>,27,29,33 | 12 | P02631,P04218,P07171,P14669,P20762,P83748,Q63514,Q63617,Q8CJD3,Q99041,Q9QZQ5,Q9R0T3 |
| 7999 | 1,3,28,30,<br>31,33,34,3<br>5 | 2,4,5,6,7,8<br>,27,29,32 | 10 | O55145,P00714,P02631,P06760,P07171,P14669,P20762,Q63617,Q8CJD3,Q9QZQ5               |
| 8000 | 1,3,28,30,<br>32,33,34,3<br>5 | 2,4,5,6,7,8<br>,27,29,31 | 9  | O55145,P02631,P04218,P07171,P14669,P20762,P83748,Q8CJD3,Q9QZQ5                      |
| 8001 | 1,3,28,31,<br>32,33,34,3<br>5 | 2,4,5,6,7,8<br>,27,29,30 | 7  | O55145,P02631,P07171,P14669,P20762,Q63514,Q9QZQ5                                    |
| 8002 | 1,3,29,30,<br>31,32,33,3<br>4 | 2,4,5,6,7,8<br>,27,28,35 | 6  | P02631,P07171,P83748,Q6IE51,Q99MH3,Q9QZQ5                                           |
| 8003 | 1,3,29,30,<br>31,32,33,3<br>5 | 2,4,5,6,7,8<br>,27,28,34 | 10 | G3V686,P02631,P07171,P20646,P83748,Q6P6R2,Q71UF4,Q99041,Q9QZQ5,Q9WTT6               |
| 8004 | 1,3,29,30,<br>31,32,34,3<br>5 | 2,4,5,6,7,8<br>,27,28,33 | 8  | P02631,P07171,P14669,Q6IE51,Q99041,Q99MH3,Q9QZQ5,Q9R0T3                             |
| 8005 | 1,3,29,30,<br>31,33,34,3<br>5 | 2,4,5,6,7,8<br>,27,28,32 | 8  | O55145,P00714,P02631,P06760,P07171,P14669,Q9QZQ5,Q9R0T3                             |
| 8006 | 1,3,29,30,<br>32,33,34,3<br>5 | 2,4,5,6,7,8<br>,27,28,31 | 8  | O55145,P02631,P07171,P12020,P83748,Q99MH3,Q9QZQ5,Q9R0T3                             |
| 8007 | 1,3,29,31,<br>32,33,34,3<br>5 | 2,4,5,6,7,8<br>,27,28,30 | 7  | O55145,P02631,P07171,P14669,Q6AYQ8,Q99MH3,Q9QZQ5                                    |

|      |                               |                                  |    |                                                                                     |
|------|-------------------------------|----------------------------------|----|-------------------------------------------------------------------------------------|
| 8008 | 1,3,30,31,<br>32,33,34,3<br>5 | 2,4,5,6,7,8<br>,27,28,29         | 12 | O55145,P02631,P07171,P0C0A9,P14669,P24368,P82471,P83748,Q63617,Q63942,Q9QZQ5,Q9ROT3 |
| 8009 | 1,4,5,6,7,8<br>,27,28         | 2,3,29,30,<br>31,32,33,3<br>4,35 | 9  | P05539,P07171,P14669,P18418,P24388,Q63617,Q63942,Q99041,Q9ROT3                      |
| 8010 | 1,4,5,6,7,8<br>,27,29         | 2,3,28,30,<br>31,32,33,3<br>4,35 | 8  | P05539,P06761,P07171,P14669,P18418,Q63617,Q99041,Q9ROT3                             |
| 8011 | 1,4,5,6,7,8<br>,27,30         | 2,3,28,29,<br>31,32,33,3<br>4,35 | 5  | P07171,P14669,P18418,P19218,Q99041                                                  |
| 8012 | 1,4,5,6,7,8<br>,27,31         | 2,3,28,29,<br>30,32,33,3<br>4,35 | 7  | O55145,P05539,P07171,P14669,P19218,Q63617,Q99041                                    |
| 8013 | 1,4,5,6,7,8<br>,27,32         | 2,3,28,29,<br>30,31,33,3<br>4,35 | 8  | P00714,P05539,P06760,P07171,P14669,P24388,Q63617,Q99041                             |
| 8014 | 1,4,5,6,7,8<br>,27,33         | 2,3,28,29,<br>30,31,32,3<br>4,35 | 6  | P05539,P07171,P14669,P18418,Q63617,Q99041                                           |
| 8015 | 1,4,5,6,7,8<br>,27,34         | 2,3,28,29,<br>30,31,32,3<br>3,35 | 8  | P05539,P07171,P14408,P14669,P18418,P20646,Q99041,Q9WTT6                             |
| 8016 | 1,4,5,6,7,8<br>,27,35         | 2,3,28,29,<br>30,31,32,3<br>3,34 | 5  | P07171,P14669,P18418,Q63617,Q99041                                                  |
| 8017 | 1,4,5,6,7,8<br>,28,29         | 2,3,27,30,<br>31,32,33,3<br>4,35 | 11 | F1LM93,O35547,P06761,P07171,P18418,P22282,Q63617,Q63942,Q8CJ52,Q99041,Q9ROT3        |
| 8018 | 1,4,5,6,7,8<br>,28,30         | 2,3,27,29,<br>31,32,33,3<br>4,35 | 3  | P07171,P18418,Q99041                                                                |
| 8019 | 1,4,5,6,7,8<br>,28,31         | 2,3,27,29,<br>30,32,33,3<br>4,35 | 4  | P07171,P12020,Q5GRG2,Q99041                                                         |
| 8020 | 1,4,5,6,7,8<br>,28,32         | 2,3,27,29,<br>30,31,33,3<br>4,35 | 6  | P00714,P05539,P07171,P12020,Q63617,Q99041                                           |
| 8021 | 1,4,5,6,7,8<br>,28,33         | 2,3,27,29,<br>30,31,32,3<br>4,35 | 4  | P07171,P18418,Q63617,Q99041                                                         |
| 8022 | 1,4,5,6,7,8<br>,28,34         | 2,3,27,29,<br>30,31,32,3<br>3,35 | 4  | P07171,P18418,Q99041,Q9WTT6                                                         |

|      |                       |                                  |   |                                                         |
|------|-----------------------|----------------------------------|---|---------------------------------------------------------|
| 8023 | 1,4,5,6,7,8<br>,28,35 | 2,3,27,29,<br>30,31,32,3<br>3,34 | 4 | P01681,P07171,P18418,Q63617                             |
| 8024 | 1,4,5,6,7,8<br>,29,30 | 2,3,27,28,<br>31,32,33,3<br>4,35 | 3 | P07171,Q63617,Q99041                                    |
| 8025 | 1,4,5,6,7,8<br>,29,31 | 2,3,27,28,<br>30,32,33,3<br>4,35 | 6 | P04182,P07171,P83121,Q63617,Q8CJD3,Q99041               |
| 8026 | 1,4,5,6,7,8<br>,29,32 | 2,3,27,28,<br>30,31,33,3<br>4,35 | 5 | P05539,P07171,Q63617,Q8CJD3,Q99041                      |
| 8027 | 1,4,5,6,7,8<br>,29,33 | 2,3,27,28,<br>30,31,32,3<br>4,35 | 5 | P07171,P83121,Q63617,Q8CJD3,Q99041                      |
| 8028 | 1,4,5,6,7,8<br>,29,34 | 2,3,27,28,<br>30,31,32,3<br>3,35 | 5 | P07171,P83748,Q63617,Q99041,Q9WTT6                      |
| 8029 | 1,4,5,6,7,8<br>,29,35 | 2,3,27,28,<br>30,31,32,3<br>3,34 | 4 | P04182,P07171,Q06000,Q63617                             |
| 8030 | 1,4,5,6,7,8<br>,30,31 | 2,3,27,28,<br>29,32,33,3<br>4,35 | 3 | O55145,P07171,P19218                                    |
| 8031 | 1,4,5,6,7,8<br>,30,32 | 2,3,27,28,<br>29,31,33,3<br>4,35 | 3 | P05539,P07171,Q99041                                    |
| 8032 | 1,4,5,6,7,8<br>,30,33 | 2,3,27,28,<br>29,31,32,3<br>4,35 | 6 | A2RUV9,P07171,P19218,P35446,Q63617,Q99041               |
| 8033 | 1,4,5,6,7,8<br>,30,34 | 2,3,27,28,<br>29,31,32,3<br>3,35 | 5 | P07171,P19218,P47967,Q99041,Q9WTT6                      |
| 8034 | 1,4,5,6,7,8<br>,30,35 | 2,3,27,28,<br>29,31,32,3<br>3,34 | 1 | Q06000                                                  |
| 8035 | 1,4,5,6,7,8<br>,31,32 | 2,3,27,28,<br>29,30,33,3<br>4,35 | 6 | P04182,P05539,P07171,P12020,Q8CJD3,Q99041               |
| 8036 | 1,4,5,6,7,8<br>,31,33 | 2,3,27,28,<br>29,30,32,3<br>4,35 | 8 | P07171,P19218,P52590,P83121,Q63617,Q8CJD3,Q8VD89,Q99041 |
| 8037 | 1,4,5,6,7,8<br>,31,34 | 2,3,27,28,<br>29,30,32,3<br>3,35 | 6 | P05539,P07171,P19218,P83748,Q62997,Q99041               |



|      |                        |                                  |    |                                                                                            |
|------|------------------------|----------------------------------|----|--------------------------------------------------------------------------------------------|
| 8038 | 1,4,5,6,7,8<br>,31,35  | 2,3,27,28,<br>29,30,32,3<br>3,34 | 4  | P04182,P07171,P52590,Q06000                                                                |
| 8039 | 1,4,5,6,7,8<br>,32,33  | 2,3,27,28,<br>29,30,31,3<br>4,35 | 5  | P05539,P07171,Q63617,Q8CJD3,Q99041                                                         |
| 8040 | 1,4,5,6,7,8<br>,32,34  | 2,3,27,28,<br>29,30,31,3<br>3,35 | 4  | P05539,P07171,Q99041,Q9WTT6                                                                |
| 8041 | 1,4,5,6,7,8<br>,32,35  | 2,3,27,28,<br>29,30,31,3<br>3,34 | 3  | P04182,P05539,Q63617                                                                       |
| 8042 | 1,4,5,6,7,8<br>,33,34  | 2,3,27,28,<br>29,30,31,3<br>2,35 | 4  | P07171,P18418,Q63617,Q99041                                                                |
| 8043 | 1,4,5,6,7,8<br>,33,35  | 2,3,27,28,<br>29,30,31,3<br>2,34 | 3  | Q30KJ2,Q63617,Q99041                                                                       |
| 8044 | 1,4,5,6,7,8<br>,34,35  | 2,3,27,28,<br>29,30,31,3<br>2,33 | 2  | P83748,Q99041                                                                              |
| 8045 | 1,4,5,6,7,2<br>7,28,29 | 2,3,8,30,3<br>1,32,33,34<br>,35  | 11 | F1LM93,O35547,P05539,P08723,P0C0A9,P18418,P20766,P30120,P61206;P84079;P84082,Q9JHB9,Q9JI85 |
| 8046 | 1,4,5,6,7,2<br>7,28,30 | 2,3,8,29,3<br>1,32,33,34<br>,35  | 4  | P05539,P18418,P20766,P61206;P84079;P84082                                                  |
| 8047 | 1,4,5,6,7,2<br>7,28,31 | 2,3,8,29,3<br>0,32,33,34<br>,35  | 3  | P05539,P12020,Q5GRG2                                                                       |
| 8048 | 1,4,5,6,7,2<br>7,28,32 | 2,3,8,29,3<br>0,31,33,34<br>,35  | 3  | P00714,P05539,P12020                                                                       |
| 8049 | 1,4,5,6,7,2<br>7,28,33 | 2,3,8,29,3<br>0,31,32,34<br>,35  | 4  | P05539,P18418,P20766,Q99041                                                                |
| 8050 | 1,4,5,6,7,2<br>7,28,34 | 2,3,8,29,3<br>0,31,32,33<br>,35  | 5  | P05539,P14408,P18418,P61206;P84079;P84082,Q5FVI6                                           |
| 8051 | 1,4,5,6,7,2<br>7,28,35 | 2,3,8,29,3<br>0,31,32,33<br>,34  | 1  | P62804                                                                                     |
| 8052 | 1,4,5,6,7,2<br>7,29,30 | 2,3,8,28,3<br>1,32,33,34<br>,35  | 2  | P05539,P20766                                                                              |

|      |                        |                                 |   |                                    |
|------|------------------------|---------------------------------|---|------------------------------------|
| 8053 | 1,4,5,6,7,2<br>7,29,31 | 2,3,8,28,3<br>0,32,33,34<br>,35 | 1 | P05539                             |
| 8054 | 1,4,5,6,7,2<br>7,29,32 | 2,3,8,28,3<br>0,31,33,34<br>,35 | 1 | P05539                             |
| 8055 | 1,4,5,6,7,2<br>7,29,33 | 2,3,8,28,3<br>0,31,32,34<br>,35 | 3 | P05539,P20766,Q99041               |
| 8056 | 1,4,5,6,7,2<br>7,29,34 | 2,3,8,28,3<br>0,31,32,33<br>,35 | 3 | P05539,P14408,Q5FVI6               |
| 8057 | 1,4,5,6,7,2<br>7,29,35 | 2,3,8,28,3<br>0,31,32,33<br>,34 | 1 | P20766                             |
| 8058 | 1,4,5,6,7,2<br>7,30,31 | 2,3,8,28,2<br>9,32,33,34<br>,35 | 3 | O55145,P05539,P19218               |
| 8059 | 1,4,5,6,7,2<br>7,30,32 | 2,3,8,28,2<br>9,31,33,34<br>,35 | 2 | O55145,P05539                      |
| 8060 | 1,4,5,6,7,2<br>7,30,33 | 2,3,8,28,2<br>9,31,32,34<br>,35 | 3 | P05539,P19218,P20766               |
| 8061 | 1,4,5,6,7,2<br>7,30,34 | 2,3,8,28,2<br>9,31,32,33<br>,35 | 5 | P05539,P19218,P47967,P97840,Q5FVI6 |
| 8062 | 1,4,5,6,7,2<br>7,30,35 | 2,3,8,28,2<br>9,31,32,33<br>,34 | 1 | P20766                             |
| 8063 | 1,4,5,6,7,2<br>7,31,32 | 2,3,8,28,2<br>9,30,33,34<br>,35 | 3 | O55145,P05539,P12020               |
| 8064 | 1,4,5,6,7,2<br>7,31,33 | 2,3,8,28,2<br>9,30,32,34<br>,35 | 2 | P05539,P19218                      |
| 8065 | 1,4,5,6,7,2<br>7,31,34 | 2,3,8,28,2<br>9,30,32,33<br>,35 | 4 | P05539,P14408,P19218,P83748        |
| 8066 | 1,4,5,6,7,2<br>7,31,35 | 2,3,8,28,2<br>9,30,32,33<br>,34 | 1 | P05539                             |
| 8067 | 1,4,5,6,7,2<br>7,32,33 | 2,3,8,28,2<br>9,30,31,34<br>,35 | 3 | P05539,Q6P6Q2,Q99041               |

|      |                        |                                 |   |                                                  |
|------|------------------------|---------------------------------|---|--------------------------------------------------|
| 8068 | 1,4,5,6,7,2<br>7,32,34 | 2,3,8,28,2<br>9,30,31,33<br>,35 | 4 | P05539,P06760,P14408,Q10758                      |
| 8069 | 1,4,5,6,7,2<br>7,32,35 | 2,3,8,28,2<br>9,30,31,33<br>,34 | 1 | P05539                                           |
| 8070 | 1,4,5,6,7,2<br>7,33,34 | 2,3,8,28,2<br>9,30,31,32<br>,35 | 5 | P05539,P14408,P18418,Q5FVI6,Q99041               |
| 8071 | 1,4,5,6,7,2<br>7,33,35 | 2,3,8,28,2<br>9,30,31,32<br>,34 | 2 | P20766,Q30KJ2                                    |
| 8072 | 1,4,5,6,7,2<br>7,34,35 | 2,3,8,28,2<br>9,30,31,32<br>,33 | 3 | P05539,P14408,Q5FVI6                             |
| 8073 | 1,4,5,6,7,2<br>8,29,30 | 2,3,8,27,3<br>1,32,33,34<br>,35 | 5 | F1LM93,P01681,P01835,P61206;P84079;P84082,Q08849 |
| 8074 | 1,4,5,6,7,2<br>8,29,31 | 2,3,8,27,3<br>0,32,33,34<br>,35 | 5 | P05539,P06911,P12020,P83121,Q5GRG2               |
| 8075 | 1,4,5,6,7,2<br>8,29,32 | 2,3,8,27,3<br>0,31,33,34<br>,35 | 4 | F1LM93,P04905,P05539,Q62975                      |
| 8076 | 1,4,5,6,7,2<br>8,29,33 | 2,3,8,27,3<br>0,31,32,34<br>,35 | 1 | P83121                                           |
| 8077 | 1,4,5,6,7,2<br>8,29,34 | 2,3,8,27,3<br>0,31,32,33<br>,35 | 4 | P05539,P14408,P61206;P84079;P84082,P83748        |
| 8078 | 1,4,5,6,7,2<br>8,29,35 | 2,3,8,27,3<br>0,31,32,33<br>,34 | 1 | P01681                                           |
| 8079 | 1,4,5,6,7,2<br>8,30,31 | 2,3,8,27,2<br>9,32,33,34<br>,35 | 2 | P19218,P61206;P84079;P84082                      |
| 8080 | 1,4,5,6,7,2<br>8,30,32 | 2,3,8,27,2<br>9,31,33,34<br>,35 | 1 | P05539                                           |
| 8081 | 1,4,5,6,7,2<br>8,30,33 | 2,3,8,27,2<br>9,31,32,34<br>,35 | 1 | P61206;P84079;P84082                             |
| 8082 | 1,4,5,6,7,2<br>8,30,34 | 2,3,8,27,2<br>9,31,32,33<br>,35 | 3 | P47967,P61206;P84079;P84082,P97840               |

|      |                        |                                 |   |                                           |
|------|------------------------|---------------------------------|---|-------------------------------------------|
| 8083 | 1,4,5,6,7,2<br>8,30,35 | 2,3,8,27,2<br>9,31,32,33<br>,34 | 3 | P01681,P61206,P84079;P84082,P62804        |
| 8084 | 1,4,5,6,7,2<br>8,31,32 | 2,3,8,27,2<br>9,30,33,34<br>,35 | 4 | P05539,P06911,P12020,Q5GRG2               |
| 8085 | 1,4,5,6,7,2<br>8,31,33 | 2,3,8,27,2<br>9,30,32,34<br>,35 | 4 | P05539,P12020,P83121,Q8VD89               |
| 8086 | 1,4,5,6,7,2<br>8,31,34 | 2,3,8,27,2<br>9,30,32,33<br>,35 | 3 | P05539,P14408,P83748                      |
| 8087 | 1,4,5,6,7,2<br>8,31,35 | 2,3,8,27,2<br>9,30,32,33<br>,34 | 2 | P62804,Q00715                             |
| 8088 | 1,4,5,6,7,2<br>8,32,33 | 2,3,8,27,2<br>9,30,31,34<br>,35 | 1 | P05539                                    |
| 8089 | 1,4,5,6,7,2<br>8,32,34 | 2,3,8,27,2<br>9,30,31,33<br>,35 | 2 | P05539,Q5HZV9                             |
| 8090 | 1,4,5,6,7,2<br>8,32,35 | 2,3,8,27,2<br>9,30,31,33<br>,34 | 1 | P05539                                    |
| 8091 | 1,4,5,6,7,2<br>8,33,34 | 2,3,8,27,2<br>9,30,31,32<br>,35 | 3 | P05539,P18418,Q99041                      |
| 8092 | 1,4,5,6,7,2<br>8,33,35 | 2,3,8,27,2<br>9,30,31,32<br>,34 | 6 | P10719,P15399,P20760,P62804,Q00715,Q30KJ2 |
| 8093 | 1,4,5,6,7,2<br>8,34,35 | 2,3,8,27,2<br>9,30,31,32<br>,33 | 5 | P14408,P62804,P83748,Q5FVI6,Q5HZV9        |
| 8094 | 1,4,5,6,7,2<br>9,30,31 | 2,3,8,27,2<br>8,32,33,34<br>,35 | 1 | P83121                                    |
| 8095 | 1,4,5,6,7,2<br>9,30,32 | 2,3,8,27,2<br>8,31,33,34<br>,35 | 1 | P05539                                    |
| 8096 | 1,4,5,6,7,2<br>9,30,33 | 2,3,8,27,2<br>8,31,32,34<br>,35 | 2 | P20766,P83121                             |
| 8097 | 1,4,5,6,7,2<br>9,30,34 | 2,3,8,27,2<br>8,31,32,33<br>,35 | 2 | P09605;P25809,Q08849                      |

|      |                        |                                 |   |                                    |
|------|------------------------|---------------------------------|---|------------------------------------|
| 8098 | 1,4,5,6,7,2<br>9,30,35 | 2,3,8,27,2<br>8,31,32,33<br>,34 | 1 | P14480                             |
| 8099 | 1,4,5,6,7,2<br>9,31,32 | 2,3,8,27,2<br>8,30,33,34<br>,35 | 5 | P04182,P05539,P12020,P83121,Q8CJD3 |
| 8100 | 1,4,5,6,7,2<br>9,31,33 | 2,3,8,27,2<br>8,30,32,34<br>,35 | 4 | P04182,P05539,P83121,Q8CJD3        |
| 8101 | 1,4,5,6,7,2<br>9,31,34 | 2,3,8,27,2<br>8,30,32,33<br>,35 | 3 | P05539,P14408,P83748               |
| 8102 | 1,4,5,6,7,2<br>9,31,35 | 2,3,8,27,2<br>8,30,32,33<br>,34 | 1 | P04182                             |
| 8103 | 1,4,5,6,7,2<br>9,32,33 | 2,3,8,27,2<br>8,30,31,34<br>,35 | 3 | P05539,P83121,Q8CJD3               |
| 8104 | 1,4,5,6,7,2<br>9,32,34 | 2,3,8,27,2<br>8,30,31,33<br>,35 | 1 | P05539                             |
| 8105 | 1,4,5,6,7,2<br>9,32,35 | 2,3,8,27,2<br>8,30,31,33<br>,34 | 2 | P04182,P05539                      |
| 8106 | 1,4,5,6,7,2<br>9,33,34 | 2,3,8,27,2<br>8,30,31,32<br>,35 | 3 | P05539,P83748,Q99041               |
| 8107 | 1,4,5,6,7,2<br>9,33,35 | 2,3,8,27,2<br>8,30,31,32<br>,34 | 2 | P04182,P15399                      |
| 8108 | 1,4,5,6,7,2<br>9,34,35 | 2,3,8,27,2<br>8,30,31,32<br>,33 | 3 | P14408,P83748,Q5FVI6               |
| 8109 | 1,4,5,6,7,3<br>0,31,32 | 2,3,8,27,2<br>8,29,33,34<br>,35 | 2 | O55145,P05539                      |
| 8110 | 1,4,5,6,7,3<br>0,31,33 | 2,3,8,27,2<br>8,29,32,34<br>,35 | 4 | P19218,P35446,P83121,Q8VD89        |
| 8111 | 1,4,5,6,7,3<br>0,31,34 | 2,3,8,27,2<br>8,29,32,33<br>,35 | 4 | P05539,P19218,P47967,P97840        |
| 8112 | 1,4,5,6,7,3<br>0,31,35 | 2,3,8,27,2<br>8,29,32,33<br>,34 | 2 | P04182,P52590                      |

|      |                        |                                 |   |                                           |
|------|------------------------|---------------------------------|---|-------------------------------------------|
| 8113 | 1,4,5,6,7,3<br>0,32,33 | 2,3,8,27,2<br>8,29,31,34<br>,35 | 2 | P05539,P35446                             |
| 8114 | 1,4,5,6,7,3<br>0,32,34 | 2,3,8,27,2<br>8,29,31,33<br>,35 | 1 | P05539                                    |
| 8115 | 1,4,5,6,7,3<br>0,32,35 | 2,3,8,27,2<br>8,29,31,33<br>,34 | 0 |                                           |
| 8116 | 1,4,5,6,7,3<br>0,33,34 | 2,3,8,27,2<br>8,29,31,32<br>,35 | 1 | P19218                                    |
| 8117 | 1,4,5,6,7,3<br>0,33,35 | 2,3,8,27,2<br>8,29,31,32<br>,34 | 0 |                                           |
| 8118 | 1,4,5,6,7,3<br>0,34,35 | 2,3,8,27,2<br>8,29,31,32<br>,33 | 3 | P02793;Q7TP54,Q5FVI6,Q920G2               |
| 8119 | 1,4,5,6,7,3<br>1,32,33 | 2,3,8,27,2<br>8,29,30,34<br>,35 | 5 | P04182,P05539,P12020,P83121,Q8CJD3        |
| 8120 | 1,4,5,6,7,3<br>1,32,34 | 2,3,8,27,2<br>8,29,30,33<br>,35 | 3 | P05539,P83748,Q62997                      |
| 8121 | 1,4,5,6,7,3<br>1,32,35 | 2,3,8,27,2<br>8,29,30,33<br>,34 | 2 | P04182,P05539                             |
| 8122 | 1,4,5,6,7,3<br>1,33,34 | 2,3,8,27,2<br>8,29,30,32<br>,35 | 6 | P05539,P14408,P19218,P83748,Q62997,Q99041 |
| 8123 | 1,4,5,6,7,3<br>1,33,35 | 2,3,8,27,2<br>8,29,30,32<br>,34 | 6 | P04182,P15399,P52590,Q00715,Q30KJ2,Q8VD89 |
| 8124 | 1,4,5,6,7,3<br>1,34,35 | 2,3,8,27,2<br>8,29,30,32<br>,33 | 2 | P14408,P83748                             |
| 8125 | 1,4,5,6,7,3<br>2,33,34 | 2,3,8,27,2<br>8,29,30,31<br>,35 | 2 | P05539,Q99041                             |
| 8126 | 1,4,5,6,7,3<br>2,33,35 | 2,3,8,27,2<br>8,29,30,31<br>,34 | 5 | P04182,P05539,P15399,P97580,Q30KJ2        |
| 8127 | 1,4,5,6,7,3<br>2,34,35 | 2,3,8,27,2<br>8,29,30,31<br>,33 | 1 | P05539                                    |

|      |                        |                                 |    |                                                                                                                            |
|------|------------------------|---------------------------------|----|----------------------------------------------------------------------------------------------------------------------------|
| 8128 | 1,4,5,6,7,3<br>3,34,35 | 2,3,8,27,2<br>8,29,30,31<br>,32 | 1  | Q5FVI6                                                                                                                     |
| 8129 | 1,4,5,6,8,2<br>7,28,29 | 2,3,7,30,3<br>1,32,33,34<br>,35 | 17 | F1LM93,O35547,P01681,P02781,P02782,P07171,P07647,P08723,P0C0A9,P14669,P24368,P30120,Q5M8C6,Q63942,Q8CJ52,Q9JHB9,Q9J<br>I85 |
| 8130 | 1,4,5,6,8,2<br>7,28,30 | 2,3,7,29,3<br>1,32,33,34<br>,35 | 2  | P01681,P14669                                                                                                              |
| 8131 | 1,4,5,6,8,2<br>7,28,31 | 2,3,7,29,3<br>0,32,33,34<br>,35 | 2  | P07171,P14668                                                                                                              |
| 8132 | 1,4,5,6,8,2<br>7,28,32 | 2,3,7,29,3<br>0,31,33,34<br>,35 | 4  | P00714,P06760,P14669,Q63942                                                                                                |
| 8133 | 1,4,5,6,8,2<br>7,28,33 | 2,3,7,29,3<br>0,31,32,34<br>,35 | 0  |                                                                                                                            |
| 8134 | 1,4,5,6,8,2<br>7,28,34 | 2,3,7,29,3<br>0,31,32,33<br>,35 | 1  | Q9WTT6                                                                                                                     |
| 8135 | 1,4,5,6,8,2<br>7,28,35 | 2,3,7,29,3<br>0,31,32,33<br>,34 | 1  | P01681                                                                                                                     |
| 8136 | 1,4,5,6,8,2<br>7,29,30 | 2,3,7,28,3<br>1,32,33,34<br>,35 | 1  | P14669                                                                                                                     |
| 8137 | 1,4,5,6,8,2<br>7,29,31 | 2,3,7,28,3<br>0,32,33,34<br>,35 | 1  | P14669                                                                                                                     |
| 8138 | 1,4,5,6,8,2<br>7,29,32 | 2,3,7,28,3<br>0,31,33,34<br>,35 | 2  | P06760,P14669                                                                                                              |
| 8139 | 1,4,5,6,8,2<br>7,29,33 | 2,3,7,28,3<br>0,31,32,34<br>,35 | 1  | P14669                                                                                                                     |
| 8140 | 1,4,5,6,8,2<br>7,29,34 | 2,3,7,28,3<br>0,31,32,33<br>,35 | 3  | P06760,P14669,Q9WTT6                                                                                                       |
| 8141 | 1,4,5,6,8,2<br>7,29,35 | 2,3,7,28,3<br>0,31,32,33<br>,34 | 1  | P14669                                                                                                                     |
| 8142 | 1,4,5,6,8,2<br>7,30,31 | 2,3,7,28,2<br>9,32,33,34<br>,35 | 2  | P14669,P19218                                                                                                              |

|      |                        |                                 |    |                                                                       |
|------|------------------------|---------------------------------|----|-----------------------------------------------------------------------|
| 8143 | 1,4,5,6,8,2<br>7,30,32 | 2,3,7,28,2<br>9,31,33,34<br>,35 | 2  | P06760,P14669                                                         |
| 8144 | 1,4,5,6,8,2<br>7,30,33 | 2,3,7,28,2<br>9,31,32,34<br>,35 | 1  | P14669                                                                |
| 8145 | 1,4,5,6,8,2<br>7,30,34 | 2,3,7,28,2<br>9,31,32,33<br>,35 | 3  | P06760,Q9WTT6,Q9Z0V6                                                  |
| 8146 | 1,4,5,6,8,2<br>7,30,35 | 2,3,7,28,2<br>9,31,32,33<br>,34 | 0  |                                                                       |
| 8147 | 1,4,5,6,8,2<br>7,31,32 | 2,3,7,28,2<br>9,30,33,34<br>,35 | 3  | P05539,P06760,P14669                                                  |
| 8148 | 1,4,5,6,8,2<br>7,31,33 | 2,3,7,28,2<br>9,30,32,34<br>,35 | 0  |                                                                       |
| 8149 | 1,4,5,6,8,2<br>7,31,34 | 2,3,7,28,2<br>9,30,32,33<br>,35 | 1  | Q9WTT6                                                                |
| 8150 | 1,4,5,6,8,2<br>7,31,35 | 2,3,7,28,2<br>9,30,32,33<br>,34 | 0  |                                                                       |
| 8151 | 1,4,5,6,8,2<br>7,32,33 | 2,3,7,28,2<br>9,30,31,34<br>,35 | 5  | P06760,P14669,Q6IFW6,Q6IG02,Q6P6Q2                                    |
| 8152 | 1,4,5,6,8,2<br>7,32,34 | 2,3,7,28,2<br>9,30,31,33<br>,35 | 5  | P05539,P06760,P14669,Q10758,Q9WTT6                                    |
| 8153 | 1,4,5,6,8,2<br>7,32,35 | 2,3,7,28,2<br>9,30,31,33<br>,34 | 2  | P06760,P14669                                                         |
| 8154 | 1,4,5,6,8,2<br>7,33,34 | 2,3,7,28,2<br>9,30,31,32<br>,35 | 3  | P06760,Q99041,Q9WTT6                                                  |
| 8155 | 1,4,5,6,8,2<br>7,33,35 | 2,3,7,28,2<br>9,30,31,32<br>,34 | 0  |                                                                       |
| 8156 | 1,4,5,6,8,2<br>7,34,35 | 2,3,7,28,2<br>9,30,31,32<br>,33 | 2  | Q9WTT6,Q9Z0V6                                                         |
| 8157 | 1,4,5,6,8,2<br>8,29,30 | 2,3,7,27,3<br>1,32,33,34<br>,35 | 10 | A2RUV9,F1LM93,O35547,P01681,P01835,P0C0A9,P30120,Q08849,Q62975,Q63942 |



|      |                        |                                 |   |                                                  |
|------|------------------------|---------------------------------|---|--------------------------------------------------|
| 8158 | 1,4,5,6,8,2<br>8,29,31 | 2,3,7,27,3<br>0,32,33,34<br>,35 | 5 | O35547,P06911,Q5GRG2,Q62975,Q63942               |
| 8159 | 1,4,5,6,8,2<br>8,29,32 | 2,3,7,27,3<br>0,31,33,34<br>,35 | 7 | A2RUV9,F1LM93,O35547,P01681,P04905,Q62975,Q63942 |
| 8160 | 1,4,5,6,8,2<br>8,29,33 | 2,3,7,27,3<br>0,31,32,34<br>,35 | 5 | A2RUV9,F1LM93,O35547,P04905,Q63942               |
| 8161 | 1,4,5,6,8,2<br>8,29,34 | 2,3,7,27,3<br>0,31,32,33<br>,35 | 3 | O35547,Q63942,Q9WTT6                             |
| 8162 | 1,4,5,6,8,2<br>8,29,35 | 2,3,7,27,3<br>0,31,32,33<br>,34 | 3 | A2RUV9,P01681,Q63942                             |
| 8163 | 1,4,5,6,8,2<br>8,30,31 | 2,3,7,27,2<br>9,32,33,34<br>,35 | 0 |                                                  |
| 8164 | 1,4,5,6,8,2<br>8,30,32 | 2,3,7,27,2<br>9,31,33,34<br>,35 | 1 | A2RUV9                                           |
| 8165 | 1,4,5,6,8,2<br>8,30,33 | 2,3,7,27,2<br>9,31,32,34<br>,35 | 1 | A2RUV9                                           |
| 8166 | 1,4,5,6,8,2<br>8,30,34 | 2,3,7,27,2<br>9,31,32,33<br>,35 | 1 | Q9WTT6                                           |
| 8167 | 1,4,5,6,8,2<br>8,30,35 | 2,3,7,27,2<br>9,31,32,33<br>,34 | 2 | A2RUV9,P01681                                    |
| 8168 | 1,4,5,6,8,2<br>8,31,32 | 2,3,7,27,2<br>9,30,33,34<br>,35 | 2 | P06911,Q62975                                    |
| 8169 | 1,4,5,6,8,2<br>8,31,33 | 2,3,7,27,2<br>9,30,32,34<br>,35 | 1 | P02803                                           |
| 8170 | 1,4,5,6,8,2<br>8,31,34 | 2,3,7,27,2<br>9,30,32,33<br>,35 | 1 | Q9WTT6                                           |
| 8171 | 1,4,5,6,8,2<br>8,31,35 | 2,3,7,27,2<br>9,30,32,33<br>,34 | 1 | P02803                                           |
| 8172 | 1,4,5,6,8,2<br>8,32,33 | 2,3,7,27,2<br>9,30,31,34<br>,35 | 1 | A2RUV9                                           |

|      |                        |                                 |   |                                    |
|------|------------------------|---------------------------------|---|------------------------------------|
| 8173 | 1,4,5,6,8,2<br>8,32,34 | 2,3,7,27,2<br>9,30,31,33<br>,35 | 3 | P52303,Q5HZV9,Q9WTT6               |
| 8174 | 1,4,5,6,8,2<br>8,32,35 | 2,3,7,27,2<br>9,30,31,33<br>,34 | 2 | A2RUV9,P01681                      |
| 8175 | 1,4,5,6,8,2<br>8,33,34 | 2,3,7,27,2<br>9,30,31,32<br>,35 | 1 | Q9WTT6                             |
| 8176 | 1,4,5,6,8,2<br>8,33,35 | 2,3,7,27,2<br>9,30,31,32<br>,34 | 3 | A2RUV9,P02803,P20760               |
| 8177 | 1,4,5,6,8,2<br>8,34,35 | 2,3,7,27,2<br>9,30,31,32<br>,33 | 4 | P01681,P02793;Q7TP54,Q5HZV9,Q9WTT6 |
| 8178 | 1,4,5,6,8,2<br>9,30,31 | 2,3,7,27,2<br>8,32,33,34<br>,35 | 1 | Q62975                             |
| 8179 | 1,4,5,6,8,2<br>9,30,32 | 2,3,7,27,2<br>8,31,33,34<br>,35 | 2 | A2RUV9,Q62975                      |
| 8180 | 1,4,5,6,8,2<br>9,30,33 | 2,3,7,27,2<br>8,31,32,34<br>,35 | 1 | A2RUV9                             |
| 8181 | 1,4,5,6,8,2<br>9,30,34 | 2,3,7,27,2<br>8,31,32,33<br>,35 | 1 | Q9WTT6                             |
| 8182 | 1,4,5,6,8,2<br>9,30,35 | 2,3,7,27,2<br>8,31,32,33<br>,34 | 3 | A2RUV9,P01681,Q06000               |
| 8183 | 1,4,5,6,8,2<br>9,31,32 | 2,3,7,27,2<br>8,30,33,34<br>,35 | 3 | P04182,Q62975,Q8CJD3               |
| 8184 | 1,4,5,6,8,2<br>9,31,33 | 2,3,7,27,2<br>8,30,32,34<br>,35 | 2 | P83121,Q8CJD3                      |
| 8185 | 1,4,5,6,8,2<br>9,31,34 | 2,3,7,27,2<br>8,30,32,33<br>,35 | 1 | Q9WTT6                             |
| 8186 | 1,4,5,6,8,2<br>9,31,35 | 2,3,7,27,2<br>8,30,32,33<br>,34 | 2 | P04182,Q06000                      |
| 8187 | 1,4,5,6,8,2<br>9,32,33 | 2,3,7,27,2<br>8,30,31,34<br>,35 | 3 | A2RUV9,Q62975,Q8CJD3               |

|      |                        |                                 |   |                                           |
|------|------------------------|---------------------------------|---|-------------------------------------------|
| 8188 | 1,4,5,6,8,2<br>9,32,34 | 2,3,7,27,2<br>8,30,31,33<br>,35 | 2 | P06760,Q9WTT6                             |
| 8189 | 1,4,5,6,8,2<br>9,32,35 | 2,3,7,27,2<br>8,30,31,33<br>,34 | 3 | A2RUV9,P04182,P47967                      |
| 8190 | 1,4,5,6,8,2<br>9,33,34 | 2,3,7,27,2<br>8,30,31,32<br>,35 | 0 |                                           |
| 8191 | 1,4,5,6,8,2<br>9,33,35 | 2,3,7,27,2<br>8,30,31,32<br>,34 | 3 | A2RUV9,P47967,P97840                      |
| 8192 | 1,4,5,6,8,2<br>9,34,35 | 2,3,7,27,2<br>8,30,31,32<br>,33 | 1 | Q06000                                    |
| 8193 | 1,4,5,6,8,3<br>0,31,32 | 2,3,7,27,2<br>8,29,33,34<br>,35 | 0 |                                           |
| 8194 | 1,4,5,6,8,3<br>0,31,33 | 2,3,7,27,2<br>8,29,32,34<br>,35 | 1 | P19218                                    |
| 8195 | 1,4,5,6,8,3<br>0,31,34 | 2,3,7,27,2<br>8,29,32,33<br>,35 | 2 | P19218,Q9WTT6                             |
| 8196 | 1,4,5,6,8,3<br>0,31,35 | 2,3,7,27,2<br>8,29,32,33<br>,34 | 1 | Q06000                                    |
| 8197 | 1,4,5,6,8,3<br>0,32,33 | 2,3,7,27,2<br>8,29,31,34<br>,35 | 1 | A2RUV9                                    |
| 8198 | 1,4,5,6,8,3<br>0,32,34 | 2,3,7,27,2<br>8,29,31,33<br>,35 | 3 | P06760,Q9WTT6,Q9Z0V6                      |
| 8199 | 1,4,5,6,8,3<br>0,32,35 | 2,3,7,27,2<br>8,29,31,33<br>,34 | 1 | A2RUV9                                    |
| 8200 | 1,4,5,6,8,3<br>0,33,34 | 2,3,7,27,2<br>8,29,31,32<br>,35 | 0 |                                           |
| 8201 | 1,4,5,6,8,3<br>0,33,35 | 2,3,7,27,2<br>8,29,31,32<br>,34 | 1 | A2RUV9                                    |
| 8202 | 1,4,5,6,8,3<br>0,34,35 | 2,3,7,27,2<br>8,29,31,32<br>,33 | 5 | P02793;Q7TP54,P19132,Q06000,Q920G2,Q9Z0V6 |

|      |                         |                                 |    |                                                                                            |
|------|-------------------------|---------------------------------|----|--------------------------------------------------------------------------------------------|
| 8203 | 1,4,5,6,8,3<br>1,32,33  | 2,3,7,27,2<br>8,29,30,34<br>,35 | 1  | Q8CJD3                                                                                     |
| 8204 | 1,4,5,6,8,3<br>1,32,34  | 2,3,7,27,2<br>8,29,30,33<br>,35 | 1  | Q62997                                                                                     |
| 8205 | 1,4,5,6,8,3<br>1,32,35  | 2,3,7,27,2<br>8,29,30,33<br>,34 | 1  | P04182                                                                                     |
| 8206 | 1,4,5,6,8,3<br>1,33,34  | 2,3,7,27,2<br>8,29,30,32<br>,35 | 1  | Q62997                                                                                     |
| 8207 | 1,4,5,6,8,3<br>1,33,35  | 2,3,7,27,2<br>8,29,30,32<br>,34 | 2  | P02803,P04182                                                                              |
| 8208 | 1,4,5,6,8,3<br>1,34,35  | 2,3,7,27,2<br>8,29,30,32<br>,33 | 2  | P02793;Q7TP54,Q06000                                                                       |
| 8209 | 1,4,5,6,8,3<br>2,33,34  | 2,3,7,27,2<br>8,29,30,31<br>,35 | 1  | P06760                                                                                     |
| 8210 | 1,4,5,6,8,3<br>2,33,35  | 2,3,7,27,2<br>8,29,30,31<br>,34 | 1  | A2RUV9                                                                                     |
| 8211 | 1,4,5,6,8,3<br>2,34,35  | 2,3,7,27,2<br>8,29,30,31<br>,33 | 2  | P08753,Q9Z0V6                                                                              |
| 8212 | 1,4,5,6,8,3<br>3,34,35  | 2,3,7,27,2<br>8,29,30,31<br>,32 | 0  |                                                                                            |
| 8213 | 1,4,5,6,27,<br>28,29,30 | 2,3,7,8,31,<br>32,33,34,3<br>5  | 13 | F1LM93,O08815,O35547,P01681,P01835,P02781,P08723,P0C0A9,P20766,P30120,Q08849,Q6AYR9,Q9JHB9 |
| 8214 | 1,4,5,6,27,<br>28,29,31 | 2,3,7,8,30,<br>32,33,34,3<br>5  | 6  | O35547,P06911,P08723,P0C0A9,Q5GRG2,Q9JHB9                                                  |
| 8215 | 1,4,5,6,27,<br>28,29,32 | 2,3,7,8,30,<br>31,33,34,3<br>5  | 13 | F1LM93,O08815,O35547,P01681,P04905,P05539,P08723,P0C0A9,P20766,P24368,Q62975,Q6IFU7,Q9JHB9 |
| 8216 | 1,4,5,6,27,<br>28,29,33 | 2,3,7,8,30,<br>31,32,34,3<br>5  | 11 | F1LM93,O08815,O35547,P04905,P07647,P08723,P0C0A9,P20766,Q80WL1,Q9JHB9,Q9JI85               |
| 8217 | 1,4,5,6,27,<br>28,29,34 | 2,3,7,8,30,<br>31,32,33,3<br>5  | 4  | O35547,P0C0A9,Q10758,Q5M8C6                                                                |

|      |                         |                                |   |                                                         |
|------|-------------------------|--------------------------------|---|---------------------------------------------------------|
| 8218 | 1,4,5,6,27,<br>28,29,35 | 2,3,7,8,30,<br>31,32,33,3<br>4 | 4 | O35547,P01681,P0C0A9,P20766                             |
| 8219 | 1,4,5,6,27,<br>28,30,31 | 2,3,7,8,29,<br>32,33,34,3<br>5 | 0 |                                                         |
| 8220 | 1,4,5,6,27,<br>28,30,32 | 2,3,7,8,29,<br>31,33,34,3<br>5 | 3 | P01835,P20766,Q6IFU7                                    |
| 8221 | 1,4,5,6,27,<br>28,30,33 | 2,3,7,8,29,<br>31,32,34,3<br>5 | 1 | P20766                                                  |
| 8222 | 1,4,5,6,27,<br>28,30,34 | 2,3,7,8,29,<br>31,32,33,3<br>5 | 1 | Q10758                                                  |
| 8223 | 1,4,5,6,27,<br>28,30,35 | 2,3,7,8,29,<br>31,32,33,3<br>4 | 3 | P01681,P01835,P20766                                    |
| 8224 | 1,4,5,6,27,<br>28,31,32 | 2,3,7,8,29,<br>30,33,34,3<br>5 | 2 | P05539,P06911                                           |
| 8225 | 1,4,5,6,27,<br>28,31,33 | 2,3,7,8,29,<br>30,32,34,3<br>5 | 0 |                                                         |
| 8226 | 1,4,5,6,27,<br>28,31,34 | 2,3,7,8,29,<br>30,32,33,3<br>5 | 1 | Q10758                                                  |
| 8227 | 1,4,5,6,27,<br>28,31,35 | 2,3,7,8,29,<br>30,32,33,3<br>4 | 0 |                                                         |
| 8228 | 1,4,5,6,27,<br>28,32,33 | 2,3,7,8,29,<br>30,31,34,3<br>5 | 8 | P05539,P20766,Q6IFU7,Q6IFW6,Q6IG02,Q6IMF3,Q6P6Q2,Q80WL1 |
| 8229 | 1,4,5,6,27,<br>28,32,34 | 2,3,7,8,29,<br>30,31,33,3<br>5 | 5 | P05539,P06760,Q10758,Q5HZV9,Q6IFU7                      |
| 8230 | 1,4,5,6,27,<br>28,32,35 | 2,3,7,8,29,<br>30,31,33,3<br>4 | 2 | P01681,Q6IFU7                                           |
| 8231 | 1,4,5,6,27,<br>28,33,34 | 2,3,7,8,29,<br>30,31,32,3<br>5 | 1 | Q10758                                                  |
| 8232 | 1,4,5,6,27,<br>28,33,35 | 2,3,7,8,29,<br>30,31,32,3<br>4 | 1 | P20766                                                  |

|      |                         |                                |   |                                    |
|------|-------------------------|--------------------------------|---|------------------------------------|
| 8233 | 1,4,5,6,27,<br>28,34,35 | 2,3,7,8,29,<br>30,31,32,3<br>3 | 2 | Q10758,Q5HZV9                      |
| 8234 | 1,4,5,6,27,<br>29,30,31 | 2,3,7,8,28,<br>32,33,34,3<br>5 | 1 | P20766                             |
| 8235 | 1,4,5,6,27,<br>29,30,32 | 2,3,7,8,28,<br>31,33,34,3<br>5 | 3 | P01835,P06760,P20766               |
| 8236 | 1,4,5,6,27,<br>29,30,33 | 2,3,7,8,28,<br>31,32,34,3<br>5 | 1 | P20766                             |
| 8237 | 1,4,5,6,27,<br>29,30,34 | 2,3,7,8,28,<br>31,32,33,3<br>5 | 1 | P20766                             |
| 8238 | 1,4,5,6,27,<br>29,30,35 | 2,3,7,8,28,<br>31,32,33,3<br>4 | 2 | P01835,P20766                      |
| 8239 | 1,4,5,6,27,<br>29,31,32 | 2,3,7,8,28,<br>30,33,34,3<br>5 | 1 | P05539                             |
| 8240 | 1,4,5,6,27,<br>29,31,33 | 2,3,7,8,28,<br>30,32,34,3<br>5 | 0 |                                    |
| 8241 | 1,4,5,6,27,<br>29,31,34 | 2,3,7,8,28,<br>30,32,33,3<br>5 | 0 |                                    |
| 8242 | 1,4,5,6,27,<br>29,31,35 | 2,3,7,8,28,<br>30,32,33,3<br>4 | 0 |                                    |
| 8243 | 1,4,5,6,27,<br>29,32,33 | 2,3,7,8,28,<br>30,31,34,3<br>5 | 5 | P05539,P06760,P20766,Q6P6Q2,Q80WL1 |
| 8244 | 1,4,5,6,27,<br>29,32,34 | 2,3,7,8,28,<br>30,31,33,3<br>5 | 3 | P05539,P06760,Q10758               |
| 8245 | 1,4,5,6,27,<br>29,32,35 | 2,3,7,8,28,<br>30,31,33,3<br>4 | 1 | P20766                             |
| 8246 | 1,4,5,6,27,<br>29,33,34 | 2,3,7,8,28,<br>30,31,32,3<br>5 | 1 | P20766                             |
| 8247 | 1,4,5,6,27,<br>29,33,35 | 2,3,7,8,28,<br>30,31,32,3<br>4 | 1 | P20766                             |

|      |                         |                                |   |                             |
|------|-------------------------|--------------------------------|---|-----------------------------|
| 8248 | 1,4,5,6,27,<br>29,34,35 | 2,3,7,8,28,<br>30,31,32,3<br>3 | 0 |                             |
| 8249 | 1,4,5,6,27,<br>30,31,32 | 2,3,7,8,28,<br>29,33,34,3<br>5 | 2 | O55145,P05539               |
| 8250 | 1,4,5,6,27,<br>30,31,33 | 2,3,7,8,28,<br>29,32,34,3<br>5 | 1 | P20766                      |
| 8251 | 1,4,5,6,27,<br>30,31,34 | 2,3,7,8,28,<br>29,32,33,3<br>5 | 1 | P19218                      |
| 8252 | 1,4,5,6,27,<br>30,31,35 | 2,3,7,8,28,<br>29,32,33,3<br>4 | 0 |                             |
| 8253 | 1,4,5,6,27,<br>30,32,33 | 2,3,7,8,28,<br>29,31,34,3<br>5 | 3 | P06760,P20766,Q6P6Q2        |
| 8254 | 1,4,5,6,27,<br>30,32,34 | 2,3,7,8,28,<br>29,31,33,3<br>5 | 4 | P05539,P06760,Q10758,Q6IFU7 |
| 8255 | 1,4,5,6,27,<br>30,32,35 | 2,3,7,8,28,<br>29,31,33,3<br>4 | 2 | P01835,P20766               |
| 8256 | 1,4,5,6,27,<br>30,33,34 | 2,3,7,8,28,<br>29,31,32,3<br>5 | 1 | P20766                      |
| 8257 | 1,4,5,6,27,<br>30,33,35 | 2,3,7,8,28,<br>29,31,32,3<br>4 | 1 | P20766                      |
| 8258 | 1,4,5,6,27,<br>30,34,35 | 2,3,7,8,28,<br>29,31,32,3<br>3 | 1 | P02793;Q7TP54               |
| 8259 | 1,4,5,6,27,<br>31,32,33 | 2,3,7,8,28,<br>29,30,34,3<br>5 | 4 | P05539,Q6IFW6,Q6IMF3,Q6P6Q2 |
| 8260 | 1,4,5,6,27,<br>31,32,34 | 2,3,7,8,28,<br>29,30,33,3<br>5 | 3 | P05539,P06760,Q10758        |
| 8261 | 1,4,5,6,27,<br>31,32,35 | 2,3,7,8,28,<br>29,30,33,3<br>4 | 0 |                             |
| 8262 | 1,4,5,6,27,<br>31,33,34 | 2,3,7,8,28,<br>29,30,32,3<br>5 | 0 |                             |

|      |                         |                                |   |                                                                |
|------|-------------------------|--------------------------------|---|----------------------------------------------------------------|
| 8263 | 1,4,5,6,27,<br>31,33,35 | 2,3,7,8,28,<br>29,30,32,3<br>4 | 0 |                                                                |
| 8264 | 1,4,5,6,27,<br>31,34,35 | 2,3,7,8,28,<br>29,30,32,3<br>3 | 1 | P02793;Q7TP54                                                  |
| 8265 | 1,4,5,6,27,<br>32,33,34 | 2,3,7,8,28,<br>29,30,31,3<br>5 | 9 | P05539,P06760,P55314,Q10758,Q6IFU7,Q6IFU8,Q6IFW6,Q6IMF3,Q6P6Q2 |
| 8266 | 1,4,5,6,27,<br>32,33,35 | 2,3,7,8,28,<br>29,30,31,3<br>4 | 5 | P20766,Q6IFW6,Q6IG02,Q6IMF3,Q6P6Q2                             |
| 8267 | 1,4,5,6,27,<br>32,34,35 | 2,3,7,8,28,<br>29,30,31,3<br>3 | 2 | P06760,Q10758                                                  |
| 8268 | 1,4,5,6,27,<br>33,34,35 | 2,3,7,8,28,<br>29,30,31,3<br>2 | 0 |                                                                |
| 8269 | 1,4,5,6,28,<br>29,30,31 | 2,3,7,8,27,<br>32,33,34,3<br>5 | 5 | O35547,P01681,P01835,Q08849,Q62975                             |
| 8270 | 1,4,5,6,28,<br>29,30,32 | 2,3,7,8,27,<br>31,33,34,3<br>5 | 7 | A2RUV9,F1LM93,P01681,P01835,P04905,P20766,Q62975               |
| 8271 | 1,4,5,6,28,<br>29,30,33 | 2,3,7,8,27,<br>31,32,34,3<br>5 | 6 | A2RUV9,F1LM93,O35547,P01835,P20766,Q08849                      |
| 8272 | 1,4,5,6,28,<br>29,30,34 | 2,3,7,8,27,<br>31,32,33,3<br>5 | 3 | P01681,P01835,Q08849                                           |
| 8273 | 1,4,5,6,28,<br>29,30,35 | 2,3,7,8,27,<br>31,32,33,3<br>4 | 5 | A2RUV9,P01681,P01835,P20766,Q08849                             |
| 8274 | 1,4,5,6,28,<br>29,31,32 | 2,3,7,8,27,<br>30,33,34,3<br>5 | 4 | O35547,P04905,P06911,Q62975                                    |
| 8275 | 1,4,5,6,28,<br>29,31,33 | 2,3,7,8,27,<br>30,32,34,3<br>5 | 4 | O35547,P04905,P06911,P83121                                    |
| 8276 | 1,4,5,6,28,<br>29,31,34 | 2,3,7,8,27,<br>30,32,33,3<br>5 | 1 | P27791                                                         |
| 8277 | 1,4,5,6,28,<br>29,31,35 | 2,3,7,8,27,<br>30,32,33,3<br>4 | 2 | P01681,Q00715                                                  |



|      |                         |                                |   |                                                  |
|------|-------------------------|--------------------------------|---|--------------------------------------------------|
| 8278 | 1,4,5,6,28,<br>29,32,33 | 2,3,7,8,27,<br>30,31,34,3<br>5 | 7 | A2RUV9,F1LM93,O35547,P04905,P47727,Q62975,Q80WL1 |
| 8279 | 1,4,5,6,28,<br>29,32,34 | 2,3,7,8,27,<br>30,31,33,3<br>5 | 1 | Q62975                                           |
| 8280 | 1,4,5,6,28,<br>29,32,35 | 2,3,7,8,27,<br>30,31,33,3<br>4 | 1 | P01681                                           |
| 8281 | 1,4,5,6,28,<br>29,33,34 | 2,3,7,8,27,<br>30,31,32,3<br>5 | 2 | O35547,P27791                                    |
| 8282 | 1,4,5,6,28,<br>29,33,35 | 2,3,7,8,27,<br>30,31,32,3<br>4 | 4 | A2RUV9,P01681,P20760,P20766                      |
| 8283 | 1,4,5,6,28,<br>29,34,35 | 2,3,7,8,27,<br>30,31,32,3<br>3 | 2 | P01681,Q5HZV9                                    |
| 8284 | 1,4,5,6,28,<br>30,31,32 | 2,3,7,8,27,<br>29,33,34,3<br>5 | 0 |                                                  |
| 8285 | 1,4,5,6,28,<br>30,31,33 | 2,3,7,8,27,<br>29,32,34,3<br>5 | 0 |                                                  |
| 8286 | 1,4,5,6,28,<br>30,31,34 | 2,3,7,8,27,<br>29,32,33,3<br>5 | 1 | Q08849                                           |
| 8287 | 1,4,5,6,28,<br>30,31,35 | 2,3,7,8,27,<br>29,32,33,3<br>4 | 2 | P01681,Q00715                                    |
| 8288 | 1,4,5,6,28,<br>30,32,33 | 2,3,7,8,27,<br>29,31,34,3<br>5 | 1 | A2RUV9                                           |
| 8289 | 1,4,5,6,28,<br>30,32,34 | 2,3,7,8,27,<br>29,31,33,3<br>5 | 1 | Q5HZV9                                           |
| 8290 | 1,4,5,6,28,<br>30,32,35 | 2,3,7,8,27,<br>29,31,33,3<br>4 | 2 | P01681,P01835                                    |
| 8291 | 1,4,5,6,28,<br>30,33,34 | 2,3,7,8,27,<br>29,31,32,3<br>5 | 0 |                                                  |
| 8292 | 1,4,5,6,28,<br>30,33,35 | 2,3,7,8,27,<br>29,31,32,3<br>4 | 4 | A2RUV9,P01681,P20760,P20766                      |

|      |                         |                                |   |                                                  |
|------|-------------------------|--------------------------------|---|--------------------------------------------------|
| 8293 | 1,4,5,6,28,<br>30,34,35 | 2,3,7,8,27,<br>29,31,32,3<br>3 | 6 | P01681,P02793;Q7TP54,Q08849,Q5HZV9,Q8CJD3,Q920G2 |
| 8294 | 1,4,5,6,28,<br>31,32,33 | 2,3,7,8,27,<br>29,30,34,3<br>5 | 1 | P06911                                           |
| 8295 | 1,4,5,6,28,<br>31,32,34 | 2,3,7,8,27,<br>29,30,33,3<br>5 | 1 | Q5HZV9                                           |
| 8296 | 1,4,5,6,28,<br>31,32,35 | 2,3,7,8,27,<br>29,30,33,3<br>4 | 1 | Q00715                                           |
| 8297 | 1,4,5,6,28,<br>31,33,34 | 2,3,7,8,27,<br>29,30,32,3<br>5 | 0 |                                                  |
| 8298 | 1,4,5,6,28,<br>31,33,35 | 2,3,7,8,27,<br>29,30,32,3<br>4 | 4 | P02803,P20760,P62804,Q00715                      |
| 8299 | 1,4,5,6,28,<br>31,34,35 | 2,3,7,8,27,<br>29,30,32,3<br>3 | 3 | P02793;Q7TP54,P62804,Q5HZV9                      |
| 8300 | 1,4,5,6,28,<br>32,33,34 | 2,3,7,8,27,<br>29,30,31,3<br>5 | 3 | Q10758,Q5HZV9,Q6IFU7                             |
| 8301 | 1,4,5,6,28,<br>32,33,35 | 2,3,7,8,27,<br>29,30,31,3<br>4 | 1 | P20760                                           |
| 8302 | 1,4,5,6,28,<br>32,34,35 | 2,3,7,8,27,<br>29,30,31,3<br>3 | 1 | Q5HZV9                                           |
| 8303 | 1,4,5,6,28,<br>33,34,35 | 2,3,7,8,27,<br>29,30,31,3<br>2 | 2 | P62804,Q5HZV9                                    |
| 8304 | 1,4,5,6,29,<br>30,31,32 | 2,3,7,8,27,<br>28,33,34,3<br>5 | 1 | Q62975                                           |
| 8305 | 1,4,5,6,29,<br>30,31,33 | 2,3,7,8,27,<br>28,32,34,3<br>5 | 1 | P83121                                           |
| 8306 | 1,4,5,6,29,<br>30,31,34 | 2,3,7,8,27,<br>28,32,33,3<br>5 | 1 | Q08849                                           |
| 8307 | 1,4,5,6,29,<br>30,31,35 | 2,3,7,8,27,<br>28,32,33,3<br>4 | 2 | P04182,Q08849                                    |

|      |                         |                                |   |                      |
|------|-------------------------|--------------------------------|---|----------------------|
| 8308 | 1,4,5,6,29,<br>30,32,33 | 2,3,7,8,27,<br>28,31,34,3<br>5 | 2 | A2RUV9,P20766        |
| 8309 | 1,4,5,6,29,<br>30,32,34 | 2,3,7,8,27,<br>28,31,33,3<br>5 | 0 |                      |
| 8310 | 1,4,5,6,29,<br>30,32,35 | 2,3,7,8,27,<br>28,31,33,3<br>4 | 2 | A2RUV9,P01835        |
| 8311 | 1,4,5,6,29,<br>30,33,34 | 2,3,7,8,27,<br>28,31,32,3<br>5 | 1 | Q08849               |
| 8312 | 1,4,5,6,29,<br>30,33,35 | 2,3,7,8,27,<br>28,31,32,3<br>4 | 2 | A2RUV9,P20766        |
| 8313 | 1,4,5,6,29,<br>30,34,35 | 2,3,7,8,27,<br>28,31,32,3<br>3 | 2 | P02793;Q7TP54,Q08849 |
| 8314 | 1,4,5,6,29,<br>31,32,33 | 2,3,7,8,27,<br>28,30,34,3<br>5 | 3 | P04182,P83121,Q8CJD3 |
| 8315 | 1,4,5,6,29,<br>31,32,34 | 2,3,7,8,27,<br>28,30,33,3<br>5 | 1 | P05539               |
| 8316 | 1,4,5,6,29,<br>31,32,35 | 2,3,7,8,27,<br>28,30,33,3<br>4 | 2 | P04182,P47967        |
| 8317 | 1,4,5,6,29,<br>31,33,34 | 2,3,7,8,27,<br>28,30,32,3<br>5 | 0 |                      |
| 8318 | 1,4,5,6,29,<br>31,33,35 | 2,3,7,8,27,<br>28,30,32,3<br>4 | 3 | P04182,P47967,P83121 |
| 8319 | 1,4,5,6,29,<br>31,34,35 | 2,3,7,8,27,<br>28,30,32,3<br>3 | 0 |                      |
| 8320 | 1,4,5,6,29,<br>32,33,34 | 2,3,7,8,27,<br>28,30,31,3<br>5 | 0 |                      |
| 8321 | 1,4,5,6,29,<br>32,33,35 | 2,3,7,8,27,<br>28,30,31,3<br>4 | 3 | A2RUV9,P04182,P47967 |
| 8322 | 1,4,5,6,29,<br>32,34,35 | 2,3,7,8,27,<br>28,30,31,3<br>3 | 0 |                      |

|      |                         |                                |   |               |
|------|-------------------------|--------------------------------|---|---------------|
| 8323 | 1,4,5,6,29,<br>33,34,35 | 2,3,7,8,27,<br>28,30,31,3<br>2 | 0 |               |
| 8324 | 1,4,5,6,30,<br>31,32,33 | 2,3,7,8,27,<br>28,29,34,3<br>5 | 0 |               |
| 8325 | 1,4,5,6,30,<br>31,32,34 | 2,3,7,8,27,<br>28,29,33,3<br>5 | 0 |               |
| 8326 | 1,4,5,6,30,<br>31,32,35 | 2,3,7,8,27,<br>28,29,33,3<br>4 | 1 | P04182        |
| 8327 | 1,4,5,6,30,<br>31,33,34 | 2,3,7,8,27,<br>28,29,32,3<br>5 | 0 |               |
| 8328 | 1,4,5,6,30,<br>31,33,35 | 2,3,7,8,27,<br>28,29,32,3<br>4 | 0 |               |
| 8329 | 1,4,5,6,30,<br>31,34,35 | 2,3,7,8,27,<br>28,29,32,3<br>3 | 1 | P02793;Q7TP54 |
| 8330 | 1,4,5,6,30,<br>32,33,34 | 2,3,7,8,27,<br>28,29,31,3<br>5 | 0 |               |
| 8331 | 1,4,5,6,30,<br>32,33,35 | 2,3,7,8,27,<br>28,29,31,3<br>4 | 1 | A2RUV9        |
| 8332 | 1,4,5,6,30,<br>32,34,35 | 2,3,7,8,27,<br>28,29,31,3<br>3 | 1 | P02793;Q7TP54 |
| 8333 | 1,4,5,6,30,<br>33,34,35 | 2,3,7,8,27,<br>28,29,31,3<br>2 | 1 | P02793;Q7TP54 |
| 8334 | 1,4,5,6,31,<br>32,33,34 | 2,3,7,8,27,<br>28,29,30,3<br>5 | 1 | P05539        |
| 8335 | 1,4,5,6,31,<br>32,33,35 | 2,3,7,8,27,<br>28,29,30,3<br>4 | 1 | P04182        |
| 8336 | 1,4,5,6,31,<br>32,34,35 | 2,3,7,8,27,<br>28,29,30,3<br>3 | 0 |               |
| 8337 | 1,4,5,6,31,<br>33,34,35 | 2,3,7,8,27,<br>28,29,30,3<br>2 | 2 | P82471,Q63355 |

|      |                         |                                 |   |                                                         |
|------|-------------------------|---------------------------------|---|---------------------------------------------------------|
| 8338 | 1,4,5,6,32,<br>33,34,35 | 2,3,7,8,27,<br>28,29,30,3<br>1  | 0 |                                                         |
| 8339 | 1,4,5,7,8,2<br>7,28,29  | 2,3,6,30,3<br>1,32,33,34<br>,35 | 8 | F1LM93,P07171,P0C0A9,P18418,Q63617,Q8CJ52,Q9JI85,Q9R0T3 |
| 8340 | 1,4,5,7,8,2<br>7,28,30  | 2,3,6,29,3<br>1,32,33,34<br>,35 | 2 | P07171,P18418                                           |
| 8341 | 1,4,5,7,8,2<br>7,28,31  | 2,3,6,29,3<br>0,32,33,34<br>,35 | 4 | P07171,P10715,P31044,Q5GRG2                             |
| 8342 | 1,4,5,7,8,2<br>7,28,32  | 2,3,6,29,3<br>0,31,33,34<br>,35 | 4 | P00714,P05539,P07171,P24388                             |
| 8343 | 1,4,5,7,8,2<br>7,28,33  | 2,3,6,29,3<br>0,31,32,34<br>,35 | 5 | P07171,P18418,Q63617,Q99041,Q9R0T3                      |
| 8344 | 1,4,5,7,8,2<br>7,28,34  | 2,3,6,29,3<br>0,31,32,33<br>,35 | 4 | P07171,P14408,P18418,Q99041                             |
| 8345 | 1,4,5,7,8,2<br>7,28,35  | 2,3,6,29,3<br>0,31,32,33<br>,34 | 2 | P07171,P18418                                           |
| 8346 | 1,4,5,7,8,2<br>7,29,30  | 2,3,6,28,3<br>1,32,33,34<br>,35 | 4 | P07171,Q4FZU6,Q5HZV9,Q63617                             |
| 8347 | 1,4,5,7,8,2<br>7,29,31  | 2,3,6,28,3<br>0,32,33,34<br>,35 | 4 | P07171,Q4FZU6,Q5HZV9,Q63617                             |
| 8348 | 1,4,5,7,8,2<br>7,29,32  | 2,3,6,28,3<br>0,31,33,34<br>,35 | 4 | P00714,P05539,P07171,Q63617                             |
| 8349 | 1,4,5,7,8,2<br>7,29,33  | 2,3,6,28,3<br>0,31,32,34<br>,35 | 4 | P07171,Q5HZV9,Q63617,Q99041                             |
| 8350 | 1,4,5,7,8,2<br>7,29,34  | 2,3,6,28,3<br>0,31,32,33<br>,35 | 4 | P07171,P14408,Q63617,Q6AYS4                             |
| 8351 | 1,4,5,7,8,2<br>7,29,35  | 2,3,6,28,3<br>0,31,32,33<br>,34 | 3 | P07171,Q4FZU6,Q63617                                    |
| 8352 | 1,4,5,7,8,2<br>7,30,31  | 2,3,6,28,2<br>9,32,33,34<br>,35 | 5 | P00507,P07171,P11883,P19218,Q4FZU6                      |

|      |                        |                                 |   |                                    |
|------|------------------------|---------------------------------|---|------------------------------------|
| 8353 | 1,4,5,7,8,2<br>7,30,32 | 2,3,6,28,2<br>9,31,33,34<br>,35 | 3 | P00714,P05539,Q4FZU6               |
| 8354 | 1,4,5,7,8,2<br>7,30,33 | 2,3,6,28,2<br>9,31,32,34<br>,35 | 5 | P00507,P07171,Q4FZU6,Q5HZV9,Q99041 |
| 8355 | 1,4,5,7,8,2<br>7,30,34 | 2,3,6,28,2<br>9,31,32,33<br>,35 | 1 | P07171                             |
| 8356 | 1,4,5,7,8,2<br>7,30,35 | 2,3,6,28,2<br>9,31,32,33<br>,34 | 1 | Q4FZU6                             |
| 8357 | 1,4,5,7,8,2<br>7,31,32 | 2,3,6,28,2<br>9,30,33,34<br>,35 | 4 | P00714,P05539,P07171,Q4FZU6        |
| 8358 | 1,4,5,7,8,2<br>7,31,33 | 2,3,6,28,2<br>9,30,32,34<br>,35 | 5 | P00507,P07171,Q4FZU6,Q5HZV9,Q99041 |
| 8359 | 1,4,5,7,8,2<br>7,31,34 | 2,3,6,28,2<br>9,30,32,33<br>,35 | 3 | P07171,P14408,Q6AYS4               |
| 8360 | 1,4,5,7,8,2<br>7,31,35 | 2,3,6,28,2<br>9,30,32,33<br>,34 | 2 | P07171,Q4FZU6                      |
| 8361 | 1,4,5,7,8,2<br>7,32,33 | 2,3,6,28,2<br>9,30,31,34<br>,35 | 5 | P00507,P00714,P05539,Q63617,Q99041 |
| 8362 | 1,4,5,7,8,2<br>7,32,34 | 2,3,6,28,2<br>9,30,31,33<br>,35 | 5 | P00714,P05539,P06760,Q6AYS4,Q99041 |
| 8363 | 1,4,5,7,8,2<br>7,32,35 | 2,3,6,28,2<br>9,30,31,33<br>,34 | 2 | P00714,Q4FZU6                      |
| 8364 | 1,4,5,7,8,2<br>7,33,34 | 2,3,6,28,2<br>9,30,31,32<br>,35 | 3 | P14408,P18418,Q99041               |
| 8365 | 1,4,5,7,8,2<br>7,33,35 | 2,3,6,28,2<br>9,30,31,32<br>,34 | 3 | Q4FZU6,Q63617,Q99041               |
| 8366 | 1,4,5,7,8,2<br>7,34,35 | 2,3,6,28,2<br>9,30,31,32<br>,33 | 2 | P14408,Q561R9                      |
| 8367 | 1,4,5,7,8,2<br>8,29,30 | 2,3,6,27,3<br>1,32,33,34<br>,35 | 4 | F1LM93,Q4FZU6,Q63617,Q8CJ52        |

|      |                        |                                 |   |                                           |
|------|------------------------|---------------------------------|---|-------------------------------------------|
| 8368 | 1,4,5,7,8,2<br>8,29,31 | 2,3,6,27,3<br>0,32,33,34<br>,35 | 6 | P02803,P07171,Q4FZU6,Q5GRG2,Q63617,Q8CJ52 |
| 8369 | 1,4,5,7,8,2<br>8,29,32 | 2,3,6,27,3<br>0,31,33,34<br>,35 | 4 | F1LM93,P00714,Q63617,Q8CJ52               |
| 8370 | 1,4,5,7,8,2<br>8,29,33 | 2,3,6,27,3<br>0,31,32,34<br>,35 | 4 | P02803,Q63617,Q8CJ52,Q99041               |
| 8371 | 1,4,5,7,8,2<br>8,29,34 | 2,3,6,27,3<br>0,31,32,33<br>,35 | 2 | P14408,Q63617                             |
| 8372 | 1,4,5,7,8,2<br>8,29,35 | 2,3,6,27,3<br>0,31,32,33<br>,34 | 3 | P02803,Q4FZU6,Q63617                      |
| 8373 | 1,4,5,7,8,2<br>8,30,31 | 2,3,6,27,2<br>9,32,33,34<br>,35 | 1 | Q4FZU6                                    |
| 8374 | 1,4,5,7,8,2<br>8,30,32 | 2,3,6,27,2<br>9,31,33,34<br>,35 | 2 | P00714,Q4FZU6                             |
| 8375 | 1,4,5,7,8,2<br>8,30,33 | 2,3,6,27,2<br>9,31,32,34<br>,35 | 2 | Q4FZU6,Q99041                             |
| 8376 | 1,4,5,7,8,2<br>8,30,34 | 2,3,6,27,2<br>9,31,32,33<br>,35 | 0 |                                           |
| 8377 | 1,4,5,7,8,2<br>8,30,35 | 2,3,6,27,2<br>9,31,32,33<br>,34 | 1 | Q4FZU6                                    |
| 8378 | 1,4,5,7,8,2<br>8,31,32 | 2,3,6,27,2<br>9,30,33,34<br>,35 | 3 | P10715,P31044,Q4FZU6                      |
| 8379 | 1,4,5,7,8,2<br>8,31,33 | 2,3,6,27,2<br>9,30,32,34<br>,35 | 5 | P02803,P10715,Q4FZU6,Q8VD89,Q99041        |
| 8380 | 1,4,5,7,8,2<br>8,31,34 | 2,3,6,27,2<br>9,30,32,33<br>,35 | 2 | O54728,P14408                             |
| 8381 | 1,4,5,7,8,2<br>8,31,35 | 2,3,6,27,2<br>9,30,32,33<br>,34 | 5 | P02803,P52590,P62804,Q00715,Q4FZU6        |
| 8382 | 1,4,5,7,8,2<br>8,32,33 | 2,3,6,27,2<br>9,30,31,34<br>,35 | 1 | Q99041                                    |

|      |                        |                                 |   |                                           |
|------|------------------------|---------------------------------|---|-------------------------------------------|
| 8383 | 1,4,5,7,8,2<br>8,32,34 | 2,3,6,27,2<br>9,30,31,33<br>,35 | 1 | Q6AYS4                                    |
| 8384 | 1,4,5,7,8,2<br>8,32,35 | 2,3,6,27,2<br>9,30,31,33<br>,34 | 1 | Q4FZU6                                    |
| 8385 | 1,4,5,7,8,2<br>8,33,34 | 2,3,6,27,2<br>9,30,31,32<br>,35 | 2 | P18418,Q99041                             |
| 8386 | 1,4,5,7,8,2<br>8,33,35 | 2,3,6,27,2<br>9,30,31,32<br>,34 | 4 | P02803,P10719,P62804,Q4FZU6               |
| 8387 | 1,4,5,7,8,2<br>8,34,35 | 2,3,6,27,2<br>9,30,31,32<br>,33 | 3 | P14408,P62804,Q9ESW0                      |
| 8388 | 1,4,5,7,8,2<br>9,30,31 | 2,3,6,27,2<br>8,32,33,34<br>,35 | 2 | Q4FZU6,Q5HZV9                             |
| 8389 | 1,4,5,7,8,2<br>9,30,32 | 2,3,6,27,2<br>8,31,33,34<br>,35 | 2 | Q4FZU6,Q63617                             |
| 8390 | 1,4,5,7,8,2<br>9,30,33 | 2,3,6,27,2<br>8,31,32,34<br>,35 | 4 | Q4FZU6,Q5HZV9,Q63617,Q99041               |
| 8391 | 1,4,5,7,8,2<br>9,30,34 | 2,3,6,27,2<br>8,31,32,33<br>,35 | 0 |                                           |
| 8392 | 1,4,5,7,8,2<br>9,30,35 | 2,3,6,27,2<br>8,31,32,33<br>,34 | 4 | P97584,Q06000,Q4FZU6,Q63617               |
| 8393 | 1,4,5,7,8,2<br>9,31,32 | 2,3,6,27,2<br>8,30,33,34<br>,35 | 5 | P04182,P05539,Q4FZU6,Q63617,Q8CJD3        |
| 8394 | 1,4,5,7,8,2<br>9,31,33 | 2,3,6,27,2<br>8,30,32,34<br>,35 | 6 | P02803,P83121,Q4FZU6,Q5HZV9,Q63617,Q99041 |
| 8395 | 1,4,5,7,8,2<br>9,31,34 | 2,3,6,27,2<br>8,30,32,33<br>,35 | 2 | P14408,Q6AYS4                             |
| 8396 | 1,4,5,7,8,2<br>9,31,35 | 2,3,6,27,2<br>8,30,32,33<br>,34 | 6 | P02803,P04182,P52590,Q06000,Q4FZU6,Q63617 |
| 8397 | 1,4,5,7,8,2<br>9,32,33 | 2,3,6,27,2<br>8,30,31,34<br>,35 | 4 | Q4FZU6,Q63617,Q8CJD3,Q99041               |



|      |                        |                                 |   |                                           |
|------|------------------------|---------------------------------|---|-------------------------------------------|
| 8398 | 1,4,5,7,8,2<br>9,32,34 | 2,3,6,27,2<br>8,30,31,33<br>,35 | 3 | P05539,Q63617,Q6AYS4                      |
| 8399 | 1,4,5,7,8,2<br>9,32,35 | 2,3,6,27,2<br>8,30,31,33<br>,34 | 3 | P04182,Q4FZU6,Q63617                      |
| 8400 | 1,4,5,7,8,2<br>9,33,34 | 2,3,6,27,2<br>8,30,31,32<br>,35 | 2 | Q63617,Q99041                             |
| 8401 | 1,4,5,7,8,2<br>9,33,35 | 2,3,6,27,2<br>8,30,31,32<br>,34 | 3 | P02803,Q4FZU6,Q63617                      |
| 8402 | 1,4,5,7,8,2<br>9,34,35 | 2,3,6,27,2<br>8,30,31,32<br>,33 | 0 |                                           |
| 8403 | 1,4,5,7,8,3<br>0,31,32 | 2,3,6,27,2<br>8,29,33,34<br>,35 | 1 | Q4FZU6                                    |
| 8404 | 1,4,5,7,8,3<br>0,31,33 | 2,3,6,27,2<br>8,29,32,34<br>,35 | 5 | P19218,Q4FZU6,Q5HZV9,Q8VD89,Q99041        |
| 8405 | 1,4,5,7,8,3<br>0,31,34 | 2,3,6,27,2<br>8,29,32,33<br>,35 | 2 | P19218,Q62997                             |
| 8406 | 1,4,5,7,8,3<br>0,31,35 | 2,3,6,27,2<br>8,29,32,33<br>,34 | 4 | P52590,P97584,Q06000,Q4FZU6               |
| 8407 | 1,4,5,7,8,3<br>0,32,33 | 2,3,6,27,2<br>8,29,31,34<br>,35 | 2 | Q4FZU6,Q99041                             |
| 8408 | 1,4,5,7,8,3<br>0,32,34 | 2,3,6,27,2<br>8,29,31,33<br>,35 | 1 | Q6AYS4                                    |
| 8409 | 1,4,5,7,8,3<br>0,32,35 | 2,3,6,27,2<br>8,29,31,33<br>,34 | 1 | Q4FZU6                                    |
| 8410 | 1,4,5,7,8,3<br>0,33,34 | 2,3,6,27,2<br>8,29,31,32<br>,35 | 1 | Q99041                                    |
| 8411 | 1,4,5,7,8,3<br>0,33,35 | 2,3,6,27,2<br>8,29,31,32<br>,34 | 1 | Q4FZU6                                    |
| 8412 | 1,4,5,7,8,3<br>0,34,35 | 2,3,6,27,2<br>8,29,31,32<br>,33 | 5 | P02793;Q7TP54,P06911,P47727,Q06000,Q920G2 |

|      |                         |                                 |   |                                                  |
|------|-------------------------|---------------------------------|---|--------------------------------------------------|
| 8413 | 1,4,5,7,8,3<br>1,32,33  | 2,3,6,27,2<br>8,29,30,34<br>,35 | 5 | P04182,P05539,Q4FZU6,Q8CJD3,Q99041               |
| 8414 | 1,4,5,7,8,3<br>1,32,34  | 2,3,6,27,2<br>8,29,30,33<br>,35 | 3 | P05539,Q62997,Q6AYS4                             |
| 8415 | 1,4,5,7,8,3<br>1,32,35  | 2,3,6,27,2<br>8,29,30,33<br>,34 | 2 | P04182,Q4FZU6                                    |
| 8416 | 1,4,5,7,8,3<br>1,33,34  | 2,3,6,27,2<br>8,29,30,32<br>,35 | 3 | P01835,Q62997,Q99041                             |
| 8417 | 1,4,5,7,8,3<br>1,33,35  | 2,3,6,27,2<br>8,29,30,32<br>,34 | 5 | P02803,P04182,P52590,Q4FZU6,Q8VD89               |
| 8418 | 1,4,5,7,8,3<br>1,34,35  | 2,3,6,27,2<br>8,29,30,32<br>,33 | 3 | P14408,Q62997,Q9JHB9                             |
| 8419 | 1,4,5,7,8,3<br>2,33,34  | 2,3,6,27,2<br>8,29,30,31<br>,35 | 3 | P05539,Q6AYS4,Q99041                             |
| 8420 | 1,4,5,7,8,3<br>2,33,35  | 2,3,6,27,2<br>8,29,30,31<br>,34 | 2 | P04182,Q4FZU6                                    |
| 8421 | 1,4,5,7,8,3<br>2,34,35  | 2,3,6,27,2<br>8,29,30,31<br>,33 | 0 |                                                  |
| 8422 | 1,4,5,7,8,3<br>3,34,35  | 2,3,6,27,2<br>8,29,30,31<br>,32 | 1 | Q99041                                           |
| 8423 | 1,4,5,7,27,<br>28,29,30 | 2,3,6,8,31,<br>32,33,34,3<br>5  | 6 | F1LM93,P08753,P11883,P20766,P36374,Q9JI85        |
| 8424 | 1,4,5,7,27,<br>28,29,31 | 2,3,6,8,30,<br>32,33,34,3<br>5  | 1 | Q5GRG2                                           |
| 8425 | 1,4,5,7,27,<br>28,29,32 | 2,3,6,8,30,<br>31,33,34,3<br>5  | 6 | F1LM93,P00714,P02793;Q7TP54,P05539,P24368,Q9JI85 |
| 8426 | 1,4,5,7,27,<br>28,29,33 | 2,3,6,8,30,<br>31,32,34,3<br>5  | 4 | P02793;Q7TP54,P20766,P36374,Q9JI85               |
| 8427 | 1,4,5,7,27,<br>28,29,34 | 2,3,6,8,30,<br>31,32,33,3<br>5  | 1 | P14408                                           |

|      |                         |                                |   |                             |
|------|-------------------------|--------------------------------|---|-----------------------------|
| 8428 | 1,4,5,7,27,<br>28,29,35 | 2,3,6,8,30,<br>31,32,33,3<br>4 | 1 | P20766                      |
| 8429 | 1,4,5,7,27,<br>28,30,31 | 2,3,6,8,29,<br>32,33,34,3<br>5 | 3 | P11883,P51907,Q4FZU6        |
| 8430 | 1,4,5,7,27,<br>28,30,32 | 2,3,6,8,29,<br>31,33,34,3<br>5 | 2 | P00714,P05539               |
| 8431 | 1,4,5,7,27,<br>28,30,33 | 2,3,6,8,29,<br>31,32,34,3<br>5 | 3 | P11883,P20766,P51907        |
| 8432 | 1,4,5,7,27,<br>28,30,34 | 2,3,6,8,29,<br>31,32,33,3<br>5 | 4 | P14408,P47967,P51907,Q8CJD3 |
| 8433 | 1,4,5,7,27,<br>28,30,35 | 2,3,6,8,29,<br>31,32,33,3<br>4 | 1 | P20766                      |
| 8434 | 1,4,5,7,27,<br>28,31,32 | 2,3,6,8,29,<br>30,33,34,3<br>5 | 1 | P05539                      |
| 8435 | 1,4,5,7,27,<br>28,31,33 | 2,3,6,8,29,<br>30,32,34,3<br>5 | 1 | P51907                      |
| 8436 | 1,4,5,7,27,<br>28,31,34 | 2,3,6,8,29,<br>30,32,33,3<br>5 | 3 | P05539,P14408,P51907        |
| 8437 | 1,4,5,7,27,<br>28,31,35 | 2,3,6,8,29,<br>30,32,33,3<br>4 | 3 | P62804,Q00715,Q4FZU6        |
| 8438 | 1,4,5,7,27,<br>28,32,33 | 2,3,6,8,29,<br>30,31,34,3<br>5 | 2 | P02793;Q7TP54,P05539        |
| 8439 | 1,4,5,7,27,<br>28,32,34 | 2,3,6,8,29,<br>30,31,33,3<br>5 | 3 | P00714,P05539,P14408        |
| 8440 | 1,4,5,7,27,<br>28,32,35 | 2,3,6,8,29,<br>30,31,33,3<br>4 | 0 |                             |
| 8441 | 1,4,5,7,27,<br>28,33,34 | 2,3,6,8,29,<br>30,31,32,3<br>5 | 3 | P14408,P18418,P51907        |
| 8442 | 1,4,5,7,27,<br>28,33,35 | 2,3,6,8,29,<br>30,31,32,3<br>4 | 2 | P20766,P62804               |

|      |                         |                                |   |                             |
|------|-------------------------|--------------------------------|---|-----------------------------|
| 8443 | 1,4,5,7,27,<br>28,34,35 | 2,3,6,8,29,<br>30,31,32,3<br>3 | 2 | P14408,P62804               |
| 8444 | 1,4,5,7,27,<br>29,30,31 | 2,3,6,8,28,<br>32,33,34,3<br>5 | 3 | P11883,Q4FZU6,Q5HZV9        |
| 8445 | 1,4,5,7,27,<br>29,30,32 | 2,3,6,8,28,<br>31,33,34,3<br>5 | 3 | P05539,P20766,Q4FZU6        |
| 8446 | 1,4,5,7,27,<br>29,30,33 | 2,3,6,8,28,<br>31,32,34,3<br>5 | 4 | P11883,P20766,Q4FZU6,Q5HZV9 |
| 8447 | 1,4,5,7,27,<br>29,30,34 | 2,3,6,8,28,<br>31,32,33,3<br>5 | 1 | P14408                      |
| 8448 | 1,4,5,7,27,<br>29,30,35 | 2,3,6,8,28,<br>31,32,33,3<br>4 | 2 | P20766,Q4FZU6               |
| 8449 | 1,4,5,7,27,<br>29,31,32 | 2,3,6,8,28,<br>30,33,34,3<br>5 | 2 | P05539,Q4FZU6               |
| 8450 | 1,4,5,7,27,<br>29,31,33 | 2,3,6,8,28,<br>30,32,34,3<br>5 | 3 | P05539,Q4FZU6,Q5HZV9        |
| 8451 | 1,4,5,7,27,<br>29,31,34 | 2,3,6,8,28,<br>30,32,33,3<br>5 | 2 | P05539,P14408               |
| 8452 | 1,4,5,7,27,<br>29,31,35 | 2,3,6,8,28,<br>30,32,33,3<br>4 | 1 | Q4FZU6                      |
| 8453 | 1,4,5,7,27,<br>29,32,33 | 2,3,6,8,28,<br>30,31,34,3<br>5 | 3 | P02793;Q7TP54,P05539,P20766 |
| 8454 | 1,4,5,7,27,<br>29,32,34 | 2,3,6,8,28,<br>30,31,33,3<br>5 | 2 | P05539,P14408               |
| 8455 | 1,4,5,7,27,<br>29,32,35 | 2,3,6,8,28,<br>30,31,33,3<br>4 | 2 | P05539,Q4FZU6               |
| 8456 | 1,4,5,7,27,<br>29,33,34 | 2,3,6,8,28,<br>30,31,32,3<br>5 | 1 | P14408                      |
| 8457 | 1,4,5,7,27,<br>29,33,35 | 2,3,6,8,28,<br>30,31,32,3<br>4 | 2 | P20766,Q4FZU6               |

|      |                         |                                |   |                             |
|------|-------------------------|--------------------------------|---|-----------------------------|
| 8458 | 1,4,5,7,27,<br>29,34,35 | 2,3,6,8,28,<br>30,31,32,3<br>3 | 2 | P14408,Q561R9               |
| 8459 | 1,4,5,7,27,<br>30,31,32 | 2,3,6,8,28,<br>29,33,34,3<br>5 | 3 | P00507,P05539,Q4FZU6        |
| 8460 | 1,4,5,7,27,<br>30,31,33 | 2,3,6,8,28,<br>29,32,34,3<br>5 | 4 | P00507,P11883,P51907,Q4FZU6 |
| 8461 | 1,4,5,7,27,<br>30,31,34 | 2,3,6,8,28,<br>29,32,33,3<br>5 | 3 | P14408,P19218,P51907        |
| 8462 | 1,4,5,7,27,<br>30,31,35 | 2,3,6,8,28,<br>29,32,33,3<br>4 | 1 | Q4FZU6                      |
| 8463 | 1,4,5,7,27,<br>30,32,33 | 2,3,6,8,28,<br>29,31,34,3<br>5 | 4 | P00507,P05539,P20766,Q4FZU6 |
| 8464 | 1,4,5,7,27,<br>30,32,34 | 2,3,6,8,28,<br>29,31,33,3<br>5 | 1 | P05539                      |
| 8465 | 1,4,5,7,27,<br>30,32,35 | 2,3,6,8,28,<br>29,31,33,3<br>4 | 1 | Q4FZU6                      |
| 8466 | 1,4,5,7,27,<br>30,33,34 | 2,3,6,8,28,<br>29,31,32,3<br>5 | 2 | P14408,P51907               |
| 8467 | 1,4,5,7,27,<br>30,33,35 | 2,3,6,8,28,<br>29,31,32,3<br>4 | 2 | P20766,Q4FZU6               |
| 8468 | 1,4,5,7,27,<br>30,34,35 | 2,3,6,8,28,<br>29,31,32,3<br>3 | 3 | P06911,P14408,P47727        |
| 8469 | 1,4,5,7,27,<br>31,32,33 | 2,3,6,8,28,<br>29,30,34,3<br>5 | 3 | P00507,P05539,Q4FZU6        |
| 8470 | 1,4,5,7,27,<br>31,32,34 | 2,3,6,8,28,<br>29,30,33,3<br>5 | 2 | P05539,P14408               |
| 8471 | 1,4,5,7,27,<br>31,32,35 | 2,3,6,8,28,<br>29,30,33,3<br>4 | 2 | P05539,Q4FZU6               |
| 8472 | 1,4,5,7,27,<br>31,33,34 | 2,3,6,8,28,<br>29,30,32,3<br>5 | 3 | P05539,P14408,P51907        |

|      |                         |                                |   |                                    |
|------|-------------------------|--------------------------------|---|------------------------------------|
| 8473 | 1,4,5,7,27,<br>31,33,35 | 2,3,6,8,28,<br>29,30,32,3<br>4 | 1 | Q4FZU6                             |
| 8474 | 1,4,5,7,27,<br>31,34,35 | 2,3,6,8,28,<br>29,30,32,3<br>3 | 2 | P14408,Q561R9                      |
| 8475 | 1,4,5,7,27,<br>32,33,34 | 2,3,6,8,28,<br>29,30,31,3<br>5 | 2 | P05539,P14408                      |
| 8476 | 1,4,5,7,27,<br>32,33,35 | 2,3,6,8,28,<br>29,30,31,3<br>4 | 2 | P05539,Q6NX65                      |
| 8477 | 1,4,5,7,27,<br>32,34,35 | 2,3,6,8,28,<br>29,30,31,3<br>3 | 2 | P05539,P14408                      |
| 8478 | 1,4,5,7,27,<br>33,34,35 | 2,3,6,8,28,<br>29,30,31,3<br>2 | 3 | P14408,Q561R9,Q5FVI6               |
| 8479 | 1,4,5,7,28,<br>29,30,31 | 2,3,6,8,27,<br>32,33,34,3<br>5 | 2 | P08753,Q4FZU6                      |
| 8480 | 1,4,5,7,28,<br>29,30,32 | 2,3,6,8,27,<br>31,33,34,3<br>5 | 3 | F1LM93,Q4FZU6,Q63355               |
| 8481 | 1,4,5,7,28,<br>29,30,33 | 2,3,6,8,27,<br>31,32,34,3<br>5 | 5 | F1LM93,P08753,P20766,Q4FZU6,Q9JID2 |
| 8482 | 1,4,5,7,28,<br>29,30,34 | 2,3,6,8,27,<br>31,32,33,3<br>5 | 0 |                                    |
| 8483 | 1,4,5,7,28,<br>29,30,35 | 2,3,6,8,27,<br>31,32,33,3<br>4 | 2 | P20766,Q4FZU6                      |
| 8484 | 1,4,5,7,28,<br>29,31,32 | 2,3,6,8,27,<br>30,33,34,3<br>5 | 4 | P05539,P06911,Q4FZU6,Q5GRG2        |
| 8485 | 1,4,5,7,28,<br>29,31,33 | 2,3,6,8,27,<br>30,32,34,3<br>5 | 3 | P02803,P83121,Q4FZU6               |
| 8486 | 1,4,5,7,28,<br>29,31,34 | 2,3,6,8,27,<br>30,32,33,3<br>5 | 1 | P14408                             |
| 8487 | 1,4,5,7,28,<br>29,31,35 | 2,3,6,8,27,<br>30,32,33,3<br>4 | 3 | P02803,Q00715,Q4FZU6               |

|      |                         |                                |   |                                    |
|------|-------------------------|--------------------------------|---|------------------------------------|
| 8488 | 1,4,5,7,28,<br>29,32,33 | 2,3,6,8,27,<br>30,31,34,3<br>5 | 1 | P02793;Q7TP54                      |
| 8489 | 1,4,5,7,28,<br>29,32,34 | 2,3,6,8,27,<br>30,31,33,3<br>5 | 2 | P05539,P14408                      |
| 8490 | 1,4,5,7,28,<br>29,32,35 | 2,3,6,8,27,<br>30,31,33,3<br>4 | 1 | Q4FZU6                             |
| 8491 | 1,4,5,7,28,<br>29,33,34 | 2,3,6,8,27,<br>30,31,32,3<br>5 | 1 | P14408                             |
| 8492 | 1,4,5,7,28,<br>29,33,35 | 2,3,6,8,27,<br>30,31,32,3<br>4 | 3 | P02803,Q00715,Q4FZU6               |
| 8493 | 1,4,5,7,28,<br>29,34,35 | 2,3,6,8,27,<br>30,31,32,3<br>3 | 1 | P14408                             |
| 8494 | 1,4,5,7,28,<br>30,31,32 | 2,3,6,8,27,<br>29,33,34,3<br>5 | 1 | Q4FZU6                             |
| 8495 | 1,4,5,7,28,<br>30,31,33 | 2,3,6,8,27,<br>29,32,34,3<br>5 | 3 | P51907,Q4FZU6,Q8VD89               |
| 8496 | 1,4,5,7,28,<br>30,31,34 | 2,3,6,8,27,<br>29,32,33,3<br>5 | 2 | P14408,P51907                      |
| 8497 | 1,4,5,7,28,<br>30,31,35 | 2,3,6,8,27,<br>29,32,33,3<br>4 | 5 | P62804,P97584,Q00715,Q4FZU6,Q9Z1F2 |
| 8498 | 1,4,5,7,28,<br>30,32,33 | 2,3,6,8,27,<br>29,31,34,3<br>5 | 1 | Q4FZU6                             |
| 8499 | 1,4,5,7,28,<br>30,32,34 | 2,3,6,8,27,<br>29,31,33,3<br>5 | 0 |                                    |
| 8500 | 1,4,5,7,28,<br>30,32,35 | 2,3,6,8,27,<br>29,31,33,3<br>4 | 1 | Q4FZU6                             |
| 8501 | 1,4,5,7,28,<br>30,33,34 | 2,3,6,8,27,<br>29,31,32,3<br>5 | 1 | P51907                             |
| 8502 | 1,4,5,7,28,<br>30,33,35 | 2,3,6,8,27,<br>29,31,32,3<br>4 | 4 | P20766,P62804,Q00715,Q4FZU6        |

|      |                         |                                |   |                                           |
|------|-------------------------|--------------------------------|---|-------------------------------------------|
| 8503 | 1,4,5,7,28,<br>30,34,35 | 2,3,6,8,27,<br>29,31,32,3<br>3 | 4 | P62804,Q8CJD3,Q920G2,Q9ESW0               |
| 8504 | 1,4,5,7,28,<br>31,32,33 | 2,3,6,8,27,<br>29,30,34,3<br>5 | 2 | P05539,Q4FZU6                             |
| 8505 | 1,4,5,7,28,<br>31,32,34 | 2,3,6,8,27,<br>29,30,33,3<br>5 | 2 | P05539,P14408                             |
| 8506 | 1,4,5,7,28,<br>31,32,35 | 2,3,6,8,27,<br>29,30,33,3<br>4 | 3 | P62804,Q00715,Q4FZU6                      |
| 8507 | 1,4,5,7,28,<br>31,33,34 | 2,3,6,8,27,<br>29,30,32,3<br>5 | 2 | P14408,P51907                             |
| 8508 | 1,4,5,7,28,<br>31,33,35 | 2,3,6,8,27,<br>29,30,32,3<br>4 | 6 | P02803,P10719,P62804,Q00715,Q4FZU6,Q8VD89 |
| 8509 | 1,4,5,7,28,<br>31,34,35 | 2,3,6,8,27,<br>29,30,32,3<br>3 | 2 | P14408,P62804                             |
| 8510 | 1,4,5,7,28,<br>32,33,34 | 2,3,6,8,27,<br>29,30,31,3<br>5 | 1 | P05539                                    |
| 8511 | 1,4,5,7,28,<br>32,33,35 | 2,3,6,8,27,<br>29,30,31,3<br>4 | 3 | P10719,P62804,Q4FZU6                      |
| 8512 | 1,4,5,7,28,<br>32,34,35 | 2,3,6,8,27,<br>29,30,31,3<br>3 | 1 | P14408                                    |
| 8513 | 1,4,5,7,28,<br>33,34,35 | 2,3,6,8,27,<br>29,30,31,3<br>2 | 2 | P14408,P62804                             |
| 8514 | 1,4,5,7,29,<br>30,31,32 | 2,3,6,8,27,<br>28,33,34,3<br>5 | 1 | Q4FZU6                                    |
| 8515 | 1,4,5,7,29,<br>30,31,33 | 2,3,6,8,27,<br>28,32,34,3<br>5 | 5 | P11883,P83121,Q4FZU6,Q5HZV9,Q6P6R2        |
| 8516 | 1,4,5,7,29,<br>30,31,34 | 2,3,6,8,27,<br>28,32,33,3<br>5 | 1 | P14408                                    |
| 8517 | 1,4,5,7,29,<br>30,31,35 | 2,3,6,8,27,<br>28,32,33,3<br>4 | 4 | P04182,P97584,Q4FZU6,Q6P6R2               |



|      |                         |                                |   |                                           |
|------|-------------------------|--------------------------------|---|-------------------------------------------|
| 8518 | 1,4,5,7,29,<br>30,32,33 | 2,3,6,8,27,<br>28,31,34,3<br>5 | 1 | Q4FZU6                                    |
| 8519 | 1,4,5,7,29,<br>30,32,34 | 2,3,6,8,27,<br>28,31,33,3<br>5 | 0 |                                           |
| 8520 | 1,4,5,7,29,<br>30,32,35 | 2,3,6,8,27,<br>28,31,33,3<br>4 | 2 | P97584,Q4FZU6                             |
| 8521 | 1,4,5,7,29,<br>30,33,34 | 2,3,6,8,27,<br>28,31,32,3<br>5 | 0 |                                           |
| 8522 | 1,4,5,7,29,<br>30,33,35 | 2,3,6,8,27,<br>28,31,32,3<br>4 | 4 | P20766,Q4FZU6,Q6P6R2,Q9WTT6               |
| 8523 | 1,4,5,7,29,<br>30,34,35 | 2,3,6,8,27,<br>28,31,32,3<br>3 | 0 |                                           |
| 8524 | 1,4,5,7,29,<br>31,32,33 | 2,3,6,8,27,<br>28,30,34,3<br>5 | 6 | P04182,P05539,P83121,Q4FZU6,Q8CJD3,Q9WTT6 |
| 8525 | 1,4,5,7,29,<br>31,32,34 | 2,3,6,8,27,<br>28,30,33,3<br>5 | 2 | P05539,P14408                             |
| 8526 | 1,4,5,7,29,<br>31,32,35 | 2,3,6,8,27,<br>28,30,33,3<br>4 | 3 | P04182,Q4FZU6,Q9WTT6                      |
| 8527 | 1,4,5,7,29,<br>31,33,34 | 2,3,6,8,27,<br>28,30,32,3<br>5 | 1 | P14408                                    |
| 8528 | 1,4,5,7,29,<br>31,33,35 | 2,3,6,8,27,<br>28,30,32,3<br>4 | 6 | P02803,P04182,Q00715,Q4FZU6,Q6P6R2,Q9WTT6 |
| 8529 | 1,4,5,7,29,<br>31,34,35 | 2,3,6,8,27,<br>28,30,32,3<br>3 | 1 | P14408                                    |
| 8530 | 1,4,5,7,29,<br>32,33,34 | 2,3,6,8,27,<br>28,30,31,3<br>5 | 1 | P05539                                    |
| 8531 | 1,4,5,7,29,<br>32,33,35 | 2,3,6,8,27,<br>28,30,31,3<br>4 | 3 | P04182,Q4FZU6,Q9WTT6                      |
| 8532 | 1,4,5,7,29,<br>32,34,35 | 2,3,6,8,27,<br>28,30,31,3<br>3 | 1 | P14408                                    |

|      |                         |                                |   |                                                         |
|------|-------------------------|--------------------------------|---|---------------------------------------------------------|
| 8533 | 1,4,5,7,29,<br>33,34,35 | 2,3,6,8,27,<br>28,30,31,3<br>2 | 1 | P14408                                                  |
| 8534 | 1,4,5,7,30,<br>31,32,33 | 2,3,6,8,27,<br>28,29,34,3<br>5 | 2 | P00507,Q4FZU6                                           |
| 8535 | 1,4,5,7,30,<br>31,32,34 | 2,3,6,8,27,<br>28,29,33,3<br>5 | 1 | P05539                                                  |
| 8536 | 1,4,5,7,30,<br>31,32,35 | 2,3,6,8,27,<br>28,29,33,3<br>4 | 3 | P04182,P97584,Q4FZU6                                    |
| 8537 | 1,4,5,7,30,<br>31,33,34 | 2,3,6,8,27,<br>28,29,32,3<br>5 | 1 | P51907                                                  |
| 8538 | 1,4,5,7,30,<br>31,33,35 | 2,3,6,8,27,<br>28,29,32,3<br>4 | 8 | P51907,P97584,Q00715,Q4FZU6,Q6P6R2,Q8VD89,Q9WTT6,Q9Z1F2 |
| 8539 | 1,4,5,7,30,<br>31,34,35 | 2,3,6,8,27,<br>28,29,32,3<br>3 | 5 | P02793,Q7TP54,P14408,P24368,P47727,Q9JHB9               |
| 8540 | 1,4,5,7,30,<br>32,33,34 | 2,3,6,8,27,<br>28,29,31,3<br>5 | 1 | P02782                                                  |
| 8541 | 1,4,5,7,30,<br>32,33,35 | 2,3,6,8,27,<br>28,29,31,3<br>4 | 3 | P02782,Q4FZU6,Q9WTT6                                    |
| 8542 | 1,4,5,7,30,<br>32,34,35 | 2,3,6,8,27,<br>28,29,31,3<br>3 | 1 | P02782                                                  |
| 8543 | 1,4,5,7,30,<br>33,34,35 | 2,3,6,8,27,<br>28,29,31,3<br>2 | 2 | P02782,P06911                                           |
| 8544 | 1,4,5,7,31,<br>32,33,34 | 2,3,6,8,27,<br>28,29,30,3<br>5 | 2 | P02782,P05539                                           |
| 8545 | 1,4,5,7,31,<br>32,33,35 | 2,3,6,8,27,<br>28,29,30,3<br>4 | 6 | P02782,P04182,P10719,Q00715,Q4FZU6,Q9WTT6               |
| 8546 | 1,4,5,7,31,<br>32,34,35 | 2,3,6,8,27,<br>28,29,30,3<br>3 | 3 | P02782,P05539,P14408                                    |
| 8547 | 1,4,5,7,31,<br>33,34,35 | 2,3,6,8,27,<br>28,29,30,3<br>2 | 4 | P02782,P14408,P62804,Q9JHB9                             |

|      |                         |                                |   |                                           |
|------|-------------------------|--------------------------------|---|-------------------------------------------|
| 8548 | 1,4,5,7,32,<br>33,34,35 | 2,3,6,8,27,<br>28,29,30,3<br>1 | 1 | P02782                                    |
| 8549 | 1,4,5,8,27,<br>28,29,30 | 2,3,6,7,31,<br>32,33,34,3<br>5 | 6 | F1LM93,O35547,P02781,P0C0A9,P36374,Q8CJ52 |
| 8550 | 1,4,5,8,27,<br>28,29,31 | 2,3,6,7,30,<br>32,33,34,3<br>5 | 3 | O35547,P02781,P0C0A9                      |
| 8551 | 1,4,5,8,27,<br>28,29,32 | 2,3,6,7,30,<br>31,33,34,3<br>5 | 6 | F1LM93,O35547,P00714,P02781,P0C0A9,P24368 |
| 8552 | 1,4,5,8,27,<br>28,29,33 | 2,3,6,7,30,<br>31,32,34,3<br>5 | 6 | F1LM93,O35547,P02781,P08723,P0C0A9,Q8CJ52 |
| 8553 | 1,4,5,8,27,<br>28,29,34 | 2,3,6,7,30,<br>31,32,33,3<br>5 | 2 | Q5M8C6,Q6AYS4                             |
| 8554 | 1,4,5,8,27,<br>28,29,35 | 2,3,6,7,30,<br>31,32,33,3<br>4 | 1 | P97840                                    |
| 8555 | 1,4,5,8,27,<br>28,30,31 | 2,3,6,7,29,<br>32,33,34,3<br>5 | 0 |                                           |
| 8556 | 1,4,5,8,27,<br>28,30,32 | 2,3,6,7,29,<br>31,33,34,3<br>5 | 1 | P00714                                    |
| 8557 | 1,4,5,8,27,<br>28,30,33 | 2,3,6,7,29,<br>31,32,34,3<br>5 | 0 |                                           |
| 8558 | 1,4,5,8,27,<br>28,30,34 | 2,3,6,7,29,<br>31,32,33,3<br>5 | 0 |                                           |
| 8559 | 1,4,5,8,27,<br>28,30,35 | 2,3,6,7,29,<br>31,32,33,3<br>4 | 0 |                                           |
| 8560 | 1,4,5,8,27,<br>28,31,32 | 2,3,6,7,29,<br>30,33,34,3<br>5 | 1 | P00714                                    |
| 8561 | 1,4,5,8,27,<br>28,31,33 | 2,3,6,7,29,<br>30,32,34,3<br>5 | 1 | P09605;P25809                             |
| 8562 | 1,4,5,8,27,<br>28,31,34 | 2,3,6,7,29,<br>30,32,33,3<br>5 | 1 | Q6AYS4                                    |

|      |                         |                                |   |                                    |
|------|-------------------------|--------------------------------|---|------------------------------------|
| 8563 | 1,4,5,8,27,<br>28,31,35 | 2,3,6,7,29,<br>30,32,33,3<br>4 | 1 | P09605;P25809                      |
| 8564 | 1,4,5,8,27,<br>28,32,33 | 2,3,6,7,29,<br>30,31,34,3<br>5 | 4 | P00714,P09605;P25809,Q6IG02,Q6P6Q2 |
| 8565 | 1,4,5,8,27,<br>28,32,34 | 2,3,6,7,29,<br>30,31,33,3<br>5 | 4 | P00714,P06760,Q10758,Q6AYS4        |
| 8566 | 1,4,5,8,27,<br>28,32,35 | 2,3,6,7,29,<br>30,31,33,3<br>4 | 2 | P00714,P09605;P25809               |
| 8567 | 1,4,5,8,27,<br>28,33,34 | 2,3,6,7,29,<br>30,31,32,3<br>5 | 0 |                                    |
| 8568 | 1,4,5,8,27,<br>28,33,35 | 2,3,6,7,29,<br>30,31,32,3<br>4 | 1 | P09605;P25809                      |
| 8569 | 1,4,5,8,27,<br>28,34,35 | 2,3,6,7,29,<br>30,31,32,3<br>3 | 1 | Q561R9                             |
| 8570 | 1,4,5,8,27,<br>29,30,31 | 2,3,6,7,28,<br>32,33,34,3<br>5 | 3 | P11883,Q4FZU6,Q5HZV9               |
| 8571 | 1,4,5,8,27,<br>29,30,32 | 2,3,6,7,28,<br>31,33,34,3<br>5 | 1 | P06760                             |
| 8572 | 1,4,5,8,27,<br>29,30,33 | 2,3,6,7,28,<br>31,32,34,3<br>5 | 2 | P11883,Q5HZV9                      |
| 8573 | 1,4,5,8,27,<br>29,30,34 | 2,3,6,7,28,<br>31,32,33,3<br>5 | 0 |                                    |
| 8574 | 1,4,5,8,27,<br>29,30,35 | 2,3,6,7,28,<br>31,32,33,3<br>4 | 1 | Q4FZU6                             |
| 8575 | 1,4,5,8,27,<br>29,31,32 | 2,3,6,7,28,<br>30,33,34,3<br>5 | 1 | P97840                             |
| 8576 | 1,4,5,8,27,<br>29,31,33 | 2,3,6,7,28,<br>30,32,34,3<br>5 | 2 | P97840,Q5HZV9                      |
| 8577 | 1,4,5,8,27,<br>29,31,34 | 2,3,6,7,28,<br>30,32,33,3<br>5 | 1 | Q6AYS4                             |

|      |                         |                                |   |                             |
|------|-------------------------|--------------------------------|---|-----------------------------|
| 8578 | 1,4,5,8,27,<br>29,31,35 | 2,3,6,7,28,<br>30,32,33,3<br>4 | 2 | P97840,Q4FZU6               |
| 8579 | 1,4,5,8,27,<br>29,32,33 | 2,3,6,7,28,<br>30,31,34,3<br>5 | 4 | P06760,P47967,P97840,Q6P6Q2 |
| 8580 | 1,4,5,8,27,<br>29,32,34 | 2,3,6,7,28,<br>30,31,33,3<br>5 | 2 | P06760,Q6AYS4               |
| 8581 | 1,4,5,8,27,<br>29,32,35 | 2,3,6,7,28,<br>30,31,33,3<br>4 | 2 | P47967,P97840               |
| 8582 | 1,4,5,8,27,<br>29,33,34 | 2,3,6,7,28,<br>30,31,32,3<br>5 | 0 |                             |
| 8583 | 1,4,5,8,27,<br>29,33,35 | 2,3,6,7,28,<br>30,31,32,3<br>4 | 2 | P47967,P97840               |
| 8584 | 1,4,5,8,27,<br>29,34,35 | 2,3,6,7,28,<br>30,31,32,3<br>3 | 1 | Q561R9                      |
| 8585 | 1,4,5,8,27,<br>30,31,32 | 2,3,6,7,28,<br>29,33,34,3<br>5 | 2 | P10758,Q4FZU6               |
| 8586 | 1,4,5,8,27,<br>30,31,33 | 2,3,6,7,28,<br>29,32,34,3<br>5 | 2 | P11883,Q4FZU6               |
| 8587 | 1,4,5,8,27,<br>30,31,34 | 2,3,6,7,28,<br>29,32,33,3<br>5 | 0 |                             |
| 8588 | 1,4,5,8,27,<br>30,31,35 | 2,3,6,7,28,<br>29,32,33,3<br>4 | 1 | Q4FZU6                      |
| 8589 | 1,4,5,8,27,<br>30,32,33 | 2,3,6,7,28,<br>29,31,34,3<br>5 | 1 | P06760                      |
| 8590 | 1,4,5,8,27,<br>30,32,34 | 2,3,6,7,28,<br>29,31,33,3<br>5 | 2 | P06760,Q6AYS4               |
| 8591 | 1,4,5,8,27,<br>30,32,35 | 2,3,6,7,28,<br>29,31,33,3<br>4 | 1 | Q4FZU6                      |
| 8592 | 1,4,5,8,27,<br>30,33,34 | 2,3,6,7,28,<br>29,31,32,3<br>5 | 0 |                             |

|      |                         |                                |   |                                           |
|------|-------------------------|--------------------------------|---|-------------------------------------------|
| 8593 | 1,4,5,8,27,<br>30,33,35 | 2,3,6,7,28,<br>29,31,32,3<br>4 | 1 | Q4FZU6                                    |
| 8594 | 1,4,5,8,27,<br>30,34,35 | 2,3,6,7,28,<br>29,31,32,3<br>3 | 3 | P02793;Q7TP54,P06911,Q561R9               |
| 8595 | 1,4,5,8,27,<br>31,32,33 | 2,3,6,7,28,<br>29,30,34,3<br>5 | 2 | P14480,Q6P6Q2                             |
| 8596 | 1,4,5,8,27,<br>31,32,34 | 2,3,6,7,28,<br>29,30,33,3<br>5 | 2 | P06760,Q6AYS4                             |
| 8597 | 1,4,5,8,27,<br>31,32,35 | 2,3,6,7,28,<br>29,30,33,3<br>4 | 2 | P97840,Q4FZU6                             |
| 8598 | 1,4,5,8,27,<br>31,33,34 | 2,3,6,7,28,<br>29,30,32,3<br>5 | 1 | Q6AYS4                                    |
| 8599 | 1,4,5,8,27,<br>31,33,35 | 2,3,6,7,28,<br>29,30,32,3<br>4 | 2 | P97840,Q4FZU6                             |
| 8600 | 1,4,5,8,27,<br>31,34,35 | 2,3,6,7,28,<br>29,30,32,3<br>3 | 2 | P02793;Q7TP54,Q561R9                      |
| 8601 | 1,4,5,8,27,<br>32,33,34 | 2,3,6,7,28,<br>29,30,31,3<br>5 | 3 | P06760,Q6AYS4,Q6P6Q2                      |
| 8602 | 1,4,5,8,27,<br>32,33,35 | 2,3,6,7,28,<br>29,30,31,3<br>4 | 5 | P09605;P25809,P47967,P97840,Q6IG02,Q6P6Q2 |
| 8603 | 1,4,5,8,27,<br>32,34,35 | 2,3,6,7,28,<br>29,30,31,3<br>3 | 1 | P06760                                    |
| 8604 | 1,4,5,8,27,<br>33,34,35 | 2,3,6,7,28,<br>29,30,31,3<br>2 | 1 | Q561R9                                    |
| 8605 | 1,4,5,8,28,<br>29,30,31 | 2,3,6,7,27,<br>32,33,34,3<br>5 | 4 | P02803,Q4FZU6,Q62975,Q63532               |
| 8606 | 1,4,5,8,28,<br>29,30,32 | 2,3,6,7,27,<br>31,33,34,3<br>5 | 2 | F1LM93,Q62975                             |
| 8607 | 1,4,5,8,28,<br>29,30,33 | 2,3,6,7,27,<br>31,32,34,3<br>5 | 4 | A2RUV9,F1LM93,Q8CJ52,Q9JID2               |

|      |                         |                                |   |                                           |
|------|-------------------------|--------------------------------|---|-------------------------------------------|
| 8608 | 1,4,5,8,28,<br>29,30,34 | 2,3,6,7,27,<br>31,32,33,3<br>5 | 0 |                                           |
| 8609 | 1,4,5,8,28,<br>29,30,35 | 2,3,6,7,27,<br>31,32,33,3<br>4 | 4 | A2RUV9,P02803,P08649,Q4FZU6               |
| 8610 | 1,4,5,8,28,<br>29,31,32 | 2,3,6,7,27,<br>30,33,34,3<br>5 | 4 | P02803,P06911,Q4FZU6,Q62975               |
| 8611 | 1,4,5,8,28,<br>29,31,33 | 2,3,6,7,27,<br>30,32,34,3<br>5 | 5 | P02803,P16086,P97840,Q4FZU6,Q63532        |
| 8612 | 1,4,5,8,28,<br>29,31,34 | 2,3,6,7,27,<br>30,32,33,3<br>5 | 2 | P02803,Q6AYS4                             |
| 8613 | 1,4,5,8,28,<br>29,31,35 | 2,3,6,7,27,<br>30,32,33,3<br>4 | 6 | P02803,P08649,P16086,P97840,Q4FZU6,Q63532 |
| 8614 | 1,4,5,8,28,<br>29,32,33 | 2,3,6,7,27,<br>30,31,34,3<br>5 | 5 | F1LM93,P35281,P47967,P97840,Q62975        |
| 8615 | 1,4,5,8,28,<br>29,32,34 | 2,3,6,7,27,<br>30,31,33,3<br>5 | 2 | P52303,Q6AYS4                             |
| 8616 | 1,4,5,8,28,<br>29,32,35 | 2,3,6,7,27,<br>30,31,33,3<br>4 | 3 | P02803,P47967,P97840                      |
| 8617 | 1,4,5,8,28,<br>29,33,34 | 2,3,6,7,27,<br>30,31,32,3<br>5 | 1 | P02803                                    |
| 8618 | 1,4,5,8,28,<br>29,33,35 | 2,3,6,7,27,<br>30,31,32,3<br>4 | 5 | A2RUV9,P02803,P16086,P47967,P97840        |
| 8619 | 1,4,5,8,28,<br>29,34,35 | 2,3,6,7,27,<br>30,31,32,3<br>3 | 1 | P02803                                    |
| 8620 | 1,4,5,8,28,<br>30,31,32 | 2,3,6,7,27,<br>29,33,34,3<br>5 | 1 | Q4FZU6                                    |
| 8621 | 1,4,5,8,28,<br>30,31,33 | 2,3,6,7,27,<br>29,32,34,3<br>5 | 2 | P02803,Q4FZU6                             |
| 8622 | 1,4,5,8,28,<br>30,31,34 | 2,3,6,7,27,<br>29,32,33,3<br>5 | 0 |                                           |

|      |                         |                                |   |                                    |
|------|-------------------------|--------------------------------|---|------------------------------------|
| 8623 | 1,4,5,8,28,<br>30,31,35 | 2,3,6,7,27,<br>29,32,33,3<br>4 | 3 | P02803,P08649,Q4FZU6               |
| 8624 | 1,4,5,8,28,<br>30,32,33 | 2,3,6,7,27,<br>29,31,34,3<br>5 | 1 | A2RUV9                             |
| 8625 | 1,4,5,8,28,<br>30,32,34 | 2,3,6,7,27,<br>29,31,33,3<br>5 | 2 | P52303,Q6AYS4                      |
| 8626 | 1,4,5,8,28,<br>30,32,35 | 2,3,6,7,27,<br>29,31,33,3<br>4 | 1 | Q4FZU6                             |
| 8627 | 1,4,5,8,28,<br>30,33,34 | 2,3,6,7,27,<br>29,31,32,3<br>5 | 0 |                                    |
| 8628 | 1,4,5,8,28,<br>30,33,35 | 2,3,6,7,27,<br>29,31,32,3<br>4 | 3 | A2RUV9,P02803,Q4FZU6               |
| 8629 | 1,4,5,8,28,<br>30,34,35 | 2,3,6,7,27,<br>29,31,32,3<br>3 | 4 | P02793;Q7TP54,P19132,Q8CJD3,Q920G2 |
| 8630 | 1,4,5,8,28,<br>31,32,33 | 2,3,6,7,27,<br>29,30,34,3<br>5 | 2 | P02803,P14480                      |
| 8631 | 1,4,5,8,28,<br>31,32,34 | 2,3,6,7,27,<br>29,30,33,3<br>5 | 1 | Q6AYS4                             |
| 8632 | 1,4,5,8,28,<br>31,32,35 | 2,3,6,7,27,<br>29,30,33,3<br>4 | 3 | P02803,P97840,Q4FZU6               |
| 8633 | 1,4,5,8,28,<br>31,33,34 | 2,3,6,7,27,<br>29,30,32,3<br>5 | 1 | P02803                             |
| 8634 | 1,4,5,8,28,<br>31,33,35 | 2,3,6,7,27,<br>29,30,32,3<br>4 | 5 | P02803,P16086,P97840,Q00715,Q4FZU6 |
| 8635 | 1,4,5,8,28,<br>31,34,35 | 2,3,6,7,27,<br>29,30,32,3<br>3 | 2 | P02793;Q7TP54,P02803               |
| 8636 | 1,4,5,8,28,<br>32,33,34 | 2,3,6,7,27,<br>29,30,31,3<br>5 | 1 | Q6AYS4                             |
| 8637 | 1,4,5,8,28,<br>32,33,35 | 2,3,6,7,27,<br>29,30,31,3<br>4 | 4 | P02803,P09605;P25809,P47967,P97840 |



|      |                         |                                |   |                                    |
|------|-------------------------|--------------------------------|---|------------------------------------|
| 8638 | 1,4,5,8,28,<br>32,34,35 | 2,3,6,7,27,<br>29,30,31,3<br>3 | 1 | P52303                             |
| 8639 | 1,4,5,8,28,<br>33,34,35 | 2,3,6,7,27,<br>29,30,31,3<br>2 | 1 | P02803                             |
| 8640 | 1,4,5,8,29,<br>30,31,32 | 2,3,6,7,27,<br>28,33,34,3<br>5 | 2 | Q4FZU6,Q62975                      |
| 8641 | 1,4,5,8,29,<br>30,31,33 | 2,3,6,7,27,<br>28,32,34,3<br>5 | 2 | Q4FZU6,Q5HZV9                      |
| 8642 | 1,4,5,8,29,<br>30,31,34 | 2,3,6,7,27,<br>28,32,33,3<br>5 | 0 |                                    |
| 8643 | 1,4,5,8,29,<br>30,31,35 | 2,3,6,7,27,<br>28,32,33,3<br>4 | 3 | P02803,Q06000,Q4FZU6               |
| 8644 | 1,4,5,8,29,<br>30,32,33 | 2,3,6,7,27,<br>28,31,34,3<br>5 | 2 | A2RUV9,Q4FZU6                      |
| 8645 | 1,4,5,8,29,<br>30,32,34 | 2,3,6,7,27,<br>28,31,33,3<br>5 | 1 | Q6AYS4                             |
| 8646 | 1,4,5,8,29,<br>30,32,35 | 2,3,6,7,27,<br>28,31,33,3<br>4 | 2 | A2RUV9,Q4FZU6                      |
| 8647 | 1,4,5,8,29,<br>30,33,34 | 2,3,6,7,27,<br>28,31,32,3<br>5 | 0 |                                    |
| 8648 | 1,4,5,8,29,<br>30,33,35 | 2,3,6,7,27,<br>28,31,32,3<br>4 | 2 | A2RUV9,Q4FZU6                      |
| 8649 | 1,4,5,8,29,<br>30,34,35 | 2,3,6,7,27,<br>28,31,32,3<br>3 | 3 | P02793;Q7TP54,P12020,Q06000        |
| 8650 | 1,4,5,8,29,<br>31,32,33 | 2,3,6,7,27,<br>28,30,34,3<br>5 | 4 | P47967,P97840,Q4FZU6,Q8CJD3        |
| 8651 | 1,4,5,8,29,<br>31,32,34 | 2,3,6,7,27,<br>28,30,33,3<br>5 | 1 | Q6AYS4                             |
| 8652 | 1,4,5,8,29,<br>31,32,35 | 2,3,6,7,27,<br>28,30,33,3<br>4 | 5 | P02803,P04182,P47967,P97840,Q4FZU6 |

|      |                         |                                |   |                                                  |
|------|-------------------------|--------------------------------|---|--------------------------------------------------|
| 8653 | 1,4,5,8,29,<br>31,33,34 | 2,3,6,7,27,<br>28,30,32,3<br>5 | 2 | P02803,Q6AYS4                                    |
| 8654 | 1,4,5,8,29,<br>31,33,35 | 2,3,6,7,27,<br>28,30,32,3<br>4 | 7 | P02803,P04182,P16086,P47967,P97615,P97840,Q4FZU6 |
| 8655 | 1,4,5,8,29,<br>31,34,35 | 2,3,6,7,27,<br>28,30,32,3<br>3 | 2 | P02803,Q06000                                    |
| 8656 | 1,4,5,8,29,<br>32,33,34 | 2,3,6,7,27,<br>28,30,31,3<br>5 | 1 | Q6AYS4                                           |
| 8657 | 1,4,5,8,29,<br>32,33,35 | 2,3,6,7,27,<br>28,30,31,3<br>4 | 4 | A2RUV9,P47967,P97840,Q4FZU6                      |
| 8658 | 1,4,5,8,29,<br>32,34,35 | 2,3,6,7,27,<br>28,30,31,3<br>3 | 0 |                                                  |
| 8659 | 1,4,5,8,29,<br>33,34,35 | 2,3,6,7,27,<br>28,30,31,3<br>2 | 1 | P02803                                           |
| 8660 | 1,4,5,8,30,<br>31,32,33 | 2,3,6,7,27,<br>28,29,34,3<br>5 | 2 | P10758,Q4FZU6                                    |
| 8661 | 1,4,5,8,30,<br>31,32,34 | 2,3,6,7,27,<br>28,29,33,3<br>5 | 1 | Q6AYS4                                           |
| 8662 | 1,4,5,8,30,<br>31,32,35 | 2,3,6,7,27,<br>28,29,33,3<br>4 | 1 | Q4FZU6                                           |
| 8663 | 1,4,5,8,30,<br>31,33,34 | 2,3,6,7,27,<br>28,29,32,3<br>5 | 0 |                                                  |
| 8664 | 1,4,5,8,30,<br>31,33,35 | 2,3,6,7,27,<br>28,29,32,3<br>4 | 2 | P02803,Q4FZU6                                    |
| 8665 | 1,4,5,8,30,<br>31,34,35 | 2,3,6,7,27,<br>28,29,32,3<br>3 | 3 | P02793,Q7TP54,P19132,Q06000                      |
| 8666 | 1,4,5,8,30,<br>32,33,34 | 2,3,6,7,27,<br>28,29,31,3<br>5 | 0 |                                                  |
| 8667 | 1,4,5,8,30,<br>32,33,35 | 2,3,6,7,27,<br>28,29,31,3<br>4 | 2 | A2RUV9,Q4FZU6                                    |

|      |                          |                                |   |                                                                |
|------|--------------------------|--------------------------------|---|----------------------------------------------------------------|
| 8668 | 1,4,5,8,30,<br>32,34,35  | 2,3,6,7,27,<br>28,29,31,3<br>3 | 1 | P02793;Q7TP54                                                  |
| 8669 | 1,4,5,8,30,<br>33,34,35  | 2,3,6,7,27,<br>28,29,31,3<br>2 | 3 | P02793;Q7TP54,P06911,P12020                                    |
| 8670 | 1,4,5,8,31,<br>32,33,34  | 2,3,6,7,27,<br>28,29,30,3<br>5 | 1 | Q6AYS4                                                         |
| 8671 | 1,4,5,8,31,<br>32,33,35  | 2,3,6,7,27,<br>28,29,30,3<br>4 | 5 | P02803,P04182,P47967,P97840,Q4FZU6                             |
| 8672 | 1,4,5,8,31,<br>32,34,35  | 2,3,6,7,27,<br>28,29,30,3<br>3 | 0 |                                                                |
| 8673 | 1,4,5,8,31,<br>33,34,35  | 2,3,6,7,27,<br>28,29,30,3<br>2 | 1 | P02803                                                         |
| 8674 | 1,4,5,8,32,<br>33,34,35  | 2,3,6,7,27,<br>28,29,30,3<br>1 | 0 |                                                                |
| 8675 | 1,4,5,27,2<br>8,29,30,31 | 2,3,6,7,8,3<br>2,33,34,35      | 6 | P02781,P08753,P11883,P20766,P36374,Q6AYR9                      |
| 8676 | 1,4,5,27,2<br>8,29,30,32 | 2,3,6,7,8,3<br>1,33,34,35      | 7 | F1LM93,O08815,P02781,P05369,P0C0A9,P20766,P36374               |
| 8677 | 1,4,5,27,2<br>8,29,30,33 | 2,3,6,7,8,3<br>1,32,34,35      | 9 | F1LM93,O08815,P02781,P05369,P08753,P0C0A9,P11883,P20766,P36374 |
| 8678 | 1,4,5,27,2<br>8,29,30,34 | 2,3,6,7,8,3<br>1,32,33,35      | 4 | P05369,P20766,Q6AYR9,Q8CJD3                                    |
| 8679 | 1,4,5,27,2<br>8,29,30,35 | 2,3,6,7,8,3<br>1,32,33,34      | 2 | P20766,P36374                                                  |
| 8680 | 1,4,5,27,2<br>8,29,31,32 | 2,3,6,7,8,3<br>0,33,34,35      | 2 | P06911,P36374                                                  |
| 8681 | 1,4,5,27,2<br>8,29,31,33 | 2,3,6,7,8,3<br>0,32,34,35      | 5 | O35547,P08753,P16086,P20766,P36374                             |
| 8682 | 1,4,5,27,2<br>8,29,31,34 | 2,3,6,7,8,3<br>0,32,33,35      | 1 | P14408                                                         |
| 8683 | 1,4,5,27,2<br>8,29,31,35 | 2,3,6,7,8,3<br>0,32,33,34      | 2 | P16086,P36374                                                  |
| 8684 | 1,4,5,27,2<br>8,29,32,33 | 2,3,6,7,8,3<br>0,31,34,35      | 6 | F1LM93,P02793;Q7TP54,P05369,P20766,P36374,Q6P6Q2               |
| 8685 | 1,4,5,27,2<br>8,29,32,34 | 2,3,6,7,8,3<br>0,31,33,35      | 2 | P05369,Q10758                                                  |
| 8686 | 1,4,5,27,2<br>8,29,32,35 | 2,3,6,7,8,3<br>0,31,33,34      | 2 | P20766,P47967                                                  |

|      |                                                 |   |                                           |
|------|-------------------------------------------------|---|-------------------------------------------|
| 8687 | 1,4,5,27,2 2,3,6,7,8,3<br>8,29,33,34 0,31,32,35 | 3 | P05369,P14408,P20766                      |
| 8688 | 1,4,5,27,2 2,3,6,7,8,3<br>8,29,33,35 0,31,32,34 | 5 | P09605;P25809,P16086,P20766,P36374,P47967 |
| 8689 | 1,4,5,27,2 2,3,6,7,8,3<br>8,29,34,35 0,31,32,33 | 2 | P14408,Q561R9                             |
| 8690 | 1,4,5,27,2 2,3,6,7,8,2<br>8,30,31,32 9,33,34,35 | 1 | P10758                                    |
| 8691 | 1,4,5,27,2 2,3,6,7,8,2<br>8,30,31,33 9,32,34,35 | 3 | P11883,P20766,P51907                      |
| 8692 | 1,4,5,27,2 2,3,6,7,8,2<br>8,30,31,34 9,32,33,35 | 2 | P51907,Q8CJD3                             |
| 8693 | 1,4,5,27,2 2,3,6,7,8,2<br>8,30,31,35 9,32,33,34 | 1 | Q4FZU6                                    |
| 8694 | 1,4,5,27,2 2,3,6,7,8,2<br>8,30,32,33 9,31,34,35 | 2 | P20766,Q6IFU7                             |
| 8695 | 1,4,5,27,2 2,3,6,7,8,2<br>8,30,32,34 9,31,33,35 | 2 | Q10758,Q6IFU7                             |
| 8696 | 1,4,5,27,2 2,3,6,7,8,2<br>8,30,32,35 9,31,33,34 | 1 | P20766                                    |
| 8697 | 1,4,5,27,2 2,3,6,7,8,2<br>8,30,33,34 9,31,32,35 | 3 | P20766,P51907,Q8CJD3                      |
| 8698 | 1,4,5,27,2 2,3,6,7,8,2<br>8,30,33,35 9,31,32,34 | 1 | P20766                                    |
| 8699 | 1,4,5,27,2 2,3,6,7,8,2<br>8,30,34,35 9,31,32,33 | 2 | Q8CJD3,Q920G2                             |
| 8700 | 1,4,5,27,2 2,3,6,7,8,2<br>8,31,32,33 9,30,34,35 | 2 | P14480,Q6P6Q2                             |
| 8701 | 1,4,5,27,2 2,3,6,7,8,2<br>8,31,32,34 9,30,33,35 | 1 | Q10758                                    |
| 8702 | 1,4,5,27,2 2,3,6,7,8,2<br>8,31,32,35 9,30,33,34 | 0 |                                           |
| 8703 | 1,4,5,27,2 2,3,6,7,8,2<br>8,31,33,34 9,30,32,35 | 3 | P14408,P16086,P51907                      |
| 8704 | 1,4,5,27,2 2,3,6,7,8,2<br>8,31,33,35 9,30,32,34 | 3 | P09605;P25809,P16086,P62804               |
| 8705 | 1,4,5,27,2 2,3,6,7,8,2<br>8,31,34,35 9,30,32,33 | 2 | P14408,P16086                             |
| 8706 | 1,4,5,27,2 2,3,6,7,8,2<br>8,32,33,34 9,30,31,35 | 4 | Q10758,Q6IFU7,Q6IG02,Q6P6Q2               |
| 8707 | 1,4,5,27,2 2,3,6,7,8,2<br>8,32,33,35 9,30,31,34 | 5 | P09605;P25809,P20766,Q6IFU7,Q6IG02,Q6P6Q2 |
| 8708 | 1,4,5,27,2 2,3,6,7,8,2<br>8,32,34,35 9,30,31,33 | 2 | Q10758,Q6IFU7                             |
| 8709 | 1,4,5,27,2 2,3,6,7,8,2<br>8,33,34,35 9,30,31,32 | 3 | P14408,P16086,Q561R9                      |

|      |                                                 |   |                                                  |
|------|-------------------------------------------------|---|--------------------------------------------------|
| 8710 | 1,4,5,27,2 2,3,6,7,8,2<br>9,30,31,32 8,33,34,35 | 2 | P10758,Q4FZU6                                    |
| 8711 | 1,4,5,27,2 2,3,6,7,8,2<br>9,30,31,33 8,32,34,35 | 5 | P11883,P20766,Q4FZU6,Q5HZV9,Q6P6R2               |
| 8712 | 1,4,5,27,2 2,3,6,7,8,2<br>9,30,31,34 8,32,33,35 | 0 |                                                  |
| 8713 | 1,4,5,27,2 2,3,6,7,8,2<br>9,30,31,35 8,32,33,34 | 3 | P20766,Q4FZU6,Q6P6R2                             |
| 8714 | 1,4,5,27,2 2,3,6,7,8,2<br>9,30,32,33 8,31,34,35 | 1 | P20766                                           |
| 8715 | 1,4,5,27,2 2,3,6,7,8,2<br>9,30,32,34 8,31,33,35 | 0 |                                                  |
| 8716 | 1,4,5,27,2 2,3,6,7,8,2<br>9,30,32,35 8,31,33,34 | 2 | P20766,Q4FZU6                                    |
| 8717 | 1,4,5,27,2 2,3,6,7,8,2<br>9,30,33,34 8,31,32,35 | 1 | P20766                                           |
| 8718 | 1,4,5,27,2 2,3,6,7,8,2<br>9,30,33,35 8,31,32,34 | 3 | P20766,Q4FZU6,Q6P6R2                             |
| 8719 | 1,4,5,27,2 2,3,6,7,8,2<br>9,30,34,35 8,31,32,33 | 3 | P12020,P20766,Q561R9                             |
| 8720 | 1,4,5,27,2 2,3,6,7,8,2<br>9,31,32,33 8,30,34,35 | 1 | P47967                                           |
| 8721 | 1,4,5,27,2 2,3,6,7,8,2<br>9,31,32,34 8,30,33,35 | 0 |                                                  |
| 8722 | 1,4,5,27,2 2,3,6,7,8,2<br>9,31,32,35 8,30,33,34 | 3 | P47967,P97840,Q4FZU6                             |
| 8723 | 1,4,5,27,2 2,3,6,7,8,2<br>9,31,33,34 8,30,32,35 | 1 | P14408                                           |
| 8724 | 1,4,5,27,2 2,3,6,7,8,2<br>9,31,33,35 8,30,32,34 | 7 | P16086,P20766,P47967,P97615,P97840,Q4FZU6,Q6P6R2 |
| 8725 | 1,4,5,27,2 2,3,6,7,8,2<br>9,31,34,35 8,30,32,33 | 2 | P14408,Q561R9                                    |
| 8726 | 1,4,5,27,2 2,3,6,7,8,2<br>9,32,33,34 8,30,31,35 | 2 | Q10758,Q6P6Q2                                    |
| 8727 | 1,4,5,27,2 2,3,6,7,8,2<br>9,32,33,35 8,30,31,34 | 3 | P20766,P47967,P97840                             |
| 8728 | 1,4,5,27,2 2,3,6,7,8,2<br>9,32,34,35 8,30,31,33 | 0 |                                                  |
| 8729 | 1,4,5,27,2 2,3,6,7,8,2<br>9,33,34,35 8,30,31,32 | 4 | P12020,P14408,P20766,Q561R9                      |
| 8730 | 1,4,5,27,3 2,3,6,7,8,2<br>0,31,32,33 8,29,34,35 | 3 | P10758,P11883,Q4FZU6                             |
| 8731 | 1,4,5,27,3 2,3,6,7,8,2<br>0,31,32,34 8,29,33,35 | 0 |                                                  |
| 8732 | 1,4,5,27,3 2,3,6,7,8,2<br>0,31,32,35 8,29,33,34 | 1 | Q4FZU6                                           |

|      |                          |                           |   |                                                  |
|------|--------------------------|---------------------------|---|--------------------------------------------------|
| 8733 | 1,4,5,27,3<br>0,31,33,34 | 2,3,6,7,8,2<br>8,29,32,35 | 1 | P51907                                           |
| 8734 | 1,4,5,27,3<br>0,31,33,35 | 2,3,6,7,8,2<br>8,29,32,34 | 4 | P20766,P51907,Q4FZU6,Q6P6R2                      |
| 8735 | 1,4,5,27,3<br>0,31,34,35 | 2,3,6,7,8,2<br>8,29,32,33 | 1 | P02793;Q7TP54                                    |
| 8736 | 1,4,5,27,3<br>0,32,33,34 | 2,3,6,7,8,2<br>8,29,31,35 | 1 | Q10758                                           |
| 8737 | 1,4,5,27,3<br>0,32,33,35 | 2,3,6,7,8,2<br>8,29,31,34 | 2 | P20766,Q4FZU6                                    |
| 8738 | 1,4,5,27,3<br>0,32,34,35 | 2,3,6,7,8,2<br>8,29,31,33 | 0 |                                                  |
| 8739 | 1,4,5,27,3<br>0,33,34,35 | 2,3,6,7,8,2<br>8,29,31,32 | 4 | P06911,P12020,P20766,Q561R9                      |
| 8740 | 1,4,5,27,3<br>1,32,33,34 | 2,3,6,7,8,2<br>8,29,30,35 | 2 | Q10758,Q6P6Q2                                    |
| 8741 | 1,4,5,27,3<br>1,32,33,35 | 2,3,6,7,8,2<br>8,29,30,34 | 2 | P47967,Q4FZU6                                    |
| 8742 | 1,4,5,27,3<br>1,32,34,35 | 2,3,6,7,8,2<br>8,29,30,33 | 0 |                                                  |
| 8743 | 1,4,5,27,3<br>1,33,34,35 | 2,3,6,7,8,2<br>8,29,30,32 | 3 | P14408,P16086,Q561R9                             |
| 8744 | 1,4,5,27,3<br>2,33,34,35 | 2,3,6,7,8,2<br>8,29,30,31 | 3 | Q10758,Q6IG02,Q6P6Q2                             |
| 8745 | 1,4,5,28,2<br>9,30,31,32 | 2,3,6,7,8,2<br>7,33,34,35 | 2 | Q4FZU6,Q62975                                    |
| 8746 | 1,4,5,28,2<br>9,30,31,33 | 2,3,6,7,8,2<br>7,32,34,35 | 5 | P08753,P11883,P16086,Q4FZU6,Q63532               |
| 8747 | 1,4,5,28,2<br>9,30,31,34 | 2,3,6,7,8,2<br>7,32,33,35 | 0 |                                                  |
| 8748 | 1,4,5,28,2<br>9,30,31,35 | 2,3,6,7,8,2<br>7,32,33,34 | 7 | P02803,P08649,P16086,Q00715,Q07116,Q4FZU6,Q63532 |
| 8749 | 1,4,5,28,2<br>9,30,32,33 | 2,3,6,7,8,2<br>7,31,34,35 | 2 | F1LM93,P20766                                    |
| 8750 | 1,4,5,28,2<br>9,30,32,34 | 2,3,6,7,8,2<br>7,31,33,35 | 0 |                                                  |
| 8751 | 1,4,5,28,2<br>9,30,32,35 | 2,3,6,7,8,2<br>7,31,33,34 | 2 | P20766,Q4FZU6                                    |
| 8752 | 1,4,5,28,2<br>9,30,33,34 | 2,3,6,7,8,2<br>7,31,32,35 | 1 | P20766                                           |
| 8753 | 1,4,5,28,2<br>9,30,33,35 | 2,3,6,7,8,2<br>7,31,32,34 | 4 | A2RUV9,P16086,P20766,Q4FZU6                      |
| 8754 | 1,4,5,28,2<br>9,30,34,35 | 2,3,6,7,8,2<br>7,31,32,33 | 2 | Q8CJD3,Q920G2                                    |
| 8755 | 1,4,5,28,2<br>9,31,32,33 | 2,3,6,7,8,2<br>7,30,34,35 | 3 | P06911,P16086,P47967                             |

|      |                          |                           |   |                                                         |
|------|--------------------------|---------------------------|---|---------------------------------------------------------|
| 8756 | 1,4,5,28,2<br>9,31,32,34 | 2,3,6,7,8,2<br>7,30,33,35 | 0 |                                                         |
| 8757 | 1,4,5,28,2<br>9,31,32,35 | 2,3,6,7,8,2<br>7,30,33,34 | 4 | P02803,P16086,P47967,Q4FZU6                             |
| 8758 | 1,4,5,28,2<br>9,31,33,34 | 2,3,6,7,8,2<br>7,30,32,35 | 3 | P02803,P16086,P27791                                    |
| 8759 | 1,4,5,28,2<br>9,31,33,35 | 2,3,6,7,8,2<br>7,30,32,34 | 8 | P02803,P16086,P47967,P97840,Q00715,Q4FZU6,Q63532,Q6P6R2 |
| 8760 | 1,4,5,28,2<br>9,31,34,35 | 2,3,6,7,8,2<br>7,30,32,33 | 2 | P02803,P16086                                           |
| 8761 | 1,4,5,28,2<br>9,32,33,34 | 2,3,6,7,8,2<br>7,30,31,35 | 0 |                                                         |
| 8762 | 1,4,5,28,2<br>9,32,33,35 | 2,3,6,7,8,2<br>7,30,31,34 | 4 | P16086,P20766,P47967,P97840                             |
| 8763 | 1,4,5,28,2<br>9,32,34,35 | 2,3,6,7,8,2<br>7,30,31,33 | 0 |                                                         |
| 8764 | 1,4,5,28,2<br>9,33,34,35 | 2,3,6,7,8,2<br>7,30,31,32 | 2 | P02803,P16086                                           |
| 8765 | 1,4,5,28,3<br>0,31,32,33 | 2,3,6,7,8,2<br>7,29,34,35 | 2 | P10758,Q4FZU6                                           |
| 8766 | 1,4,5,28,3<br>0,31,32,34 | 2,3,6,7,8,2<br>7,29,33,35 | 0 |                                                         |
| 8767 | 1,4,5,28,3<br>0,31,32,35 | 2,3,6,7,8,2<br>7,29,33,34 | 3 | P02631,Q00715,Q4FZU6                                    |
| 8768 | 1,4,5,28,3<br>0,31,33,34 | 2,3,6,7,8,2<br>7,29,32,35 | 1 | P51907                                                  |
| 8769 | 1,4,5,28,3<br>0,31,33,35 | 2,3,6,7,8,2<br>7,29,32,34 | 6 | P02631,P02803,P16086,P51907,Q00715,Q4FZU6               |
| 8770 | 1,4,5,28,3<br>0,31,34,35 | 2,3,6,7,8,2<br>7,29,32,33 | 2 | P02793,Q7TP54,Q8CJD3                                    |
| 8771 | 1,4,5,28,3<br>0,32,33,34 | 2,3,6,7,8,2<br>7,29,31,35 | 0 |                                                         |
| 8772 | 1,4,5,28,3<br>0,32,33,35 | 2,3,6,7,8,2<br>7,29,31,34 | 2 | P20766,Q4FZU6                                           |
| 8773 | 1,4,5,28,3<br>0,32,34,35 | 2,3,6,7,8,2<br>7,29,31,33 | 2 | Q8CJD3,Q920G2                                           |
| 8774 | 1,4,5,28,3<br>0,33,34,35 | 2,3,6,7,8,2<br>7,29,31,32 | 2 | Q8CJD3,Q920G2                                           |
| 8775 | 1,4,5,28,3<br>1,32,33,34 | 2,3,6,7,8,2<br>7,29,30,35 | 0 |                                                         |
| 8776 | 1,4,5,28,3<br>1,32,33,35 | 2,3,6,7,8,2<br>7,29,30,34 | 6 | P02803,P16086,P47967,Q00715,Q4FZU6,Q9WTT6               |
| 8777 | 1,4,5,28,3<br>1,32,34,35 | 2,3,6,7,8,2<br>7,29,30,33 | 1 | P16086                                                  |
| 8778 | 1,4,5,28,3<br>1,33,34,35 | 2,3,6,7,8,2<br>7,29,30,32 | 4 | P02803,P14669,P16086,P62804                             |

|      |                          |                           |   |                                                         |
|------|--------------------------|---------------------------|---|---------------------------------------------------------|
| 8779 | 1,4,5,28,3<br>2,33,34,35 | 2,3,6,7,8,2<br>7,29,30,31 | 1 | P16086                                                  |
| 8780 | 1,4,5,29,3<br>0,31,32,33 | 2,3,6,7,8,2<br>7,28,34,35 | 2 | P10758,Q4FZU6                                           |
| 8781 | 1,4,5,29,3<br>0,31,32,34 | 2,3,6,7,8,2<br>7,28,33,35 | 0 |                                                         |
| 8782 | 1,4,5,29,3<br>0,31,32,35 | 2,3,6,7,8,2<br>7,28,33,34 | 2 | P04182,Q4FZU6                                           |
| 8783 | 1,4,5,29,3<br>0,31,33,34 | 2,3,6,7,8,2<br>7,28,32,35 | 0 |                                                         |
| 8784 | 1,4,5,29,3<br>0,31,33,35 | 2,3,6,7,8,2<br>7,28,32,34 | 5 | P16086,P97615,Q4FZU6,Q6P6R2,Q9WTT6                      |
| 8785 | 1,4,5,29,3<br>0,31,34,35 | 2,3,6,7,8,2<br>7,28,32,33 | 1 | P02793;Q7TP54                                           |
| 8786 | 1,4,5,29,3<br>0,32,33,34 | 2,3,6,7,8,2<br>7,28,31,35 | 0 |                                                         |
| 8787 | 1,4,5,29,3<br>0,32,33,35 | 2,3,6,7,8,2<br>7,28,31,34 | 5 | A2RUV9,P20766,P47967,Q4FZU6,Q9WTT6                      |
| 8788 | 1,4,5,29,3<br>0,32,34,35 | 2,3,6,7,8,2<br>7,28,31,33 | 0 |                                                         |
| 8789 | 1,4,5,29,3<br>0,33,34,35 | 2,3,6,7,8,2<br>7,28,31,32 | 2 | P12020,P20766                                           |
| 8790 | 1,4,5,29,3<br>1,32,33,34 | 2,3,6,7,8,2<br>7,28,30,35 | 0 |                                                         |
| 8791 | 1,4,5,29,3<br>1,32,33,35 | 2,3,6,7,8,2<br>7,28,30,34 | 8 | P04182,P16086,P47967,P97615,P97840,Q4FZU6,Q6P6R2,Q9WTT6 |
| 8792 | 1,4,5,29,3<br>1,32,34,35 | 2,3,6,7,8,2<br>7,28,30,33 | 0 |                                                         |
| 8793 | 1,4,5,29,3<br>1,33,34,35 | 2,3,6,7,8,2<br>7,28,30,32 | 2 | P02803,P16086                                           |
| 8794 | 1,4,5,29,3<br>2,33,34,35 | 2,3,6,7,8,2<br>7,28,30,31 | 0 |                                                         |
| 8795 | 1,4,5,30,3<br>1,32,33,34 | 2,3,6,7,8,2<br>7,28,29,35 | 0 |                                                         |
| 8796 | 1,4,5,30,3<br>1,32,33,35 | 2,3,6,7,8,2<br>7,28,29,34 | 3 | P02631,Q4FZU6,Q9WTT6                                    |
| 8797 | 1,4,5,30,3<br>1,32,34,35 | 2,3,6,7,8,2<br>7,28,29,33 | 3 | P02631,P02793;Q7TP54,P82471                             |
| 8798 | 1,4,5,30,3<br>1,33,34,35 | 2,3,6,7,8,2<br>7,28,29,32 | 5 | P02631,P02793;Q7TP54,P24368,P51907,P82471               |
| 8799 | 1,4,5,30,3<br>2,33,34,35 | 2,3,6,7,8,2<br>7,28,29,31 | 3 | P02782,P82471,Q5GRG2                                    |
| 8800 | 1,4,5,31,3<br>2,33,34,35 | 2,3,6,7,8,2<br>7,28,29,30 | 2 | P02782,P82471                                           |



|      |                        |                                 |    |                                                                                                                                                                                                     |
|------|------------------------|---------------------------------|----|-----------------------------------------------------------------------------------------------------------------------------------------------------------------------------------------------------|
| 8801 | 1,4,6,7,8,2<br>7,28,29 | 2,3,5,30,3<br>1,32,33,34<br>,35 | 28 | F1LM93,O35547,P02781,P02782,P06761,P07171,P07647,P08723,P09456,POC0A9,P11598,P12020,P14669,P18418,P22282,P22283,P24368,P30120,P46462,P82471,Q5GRG2,Q62902,Q63617,Q8CJ52,Q99041,Q9JHB9,Q9JI85,Q9R0T3 |
| 8802 | 1,4,6,7,8,2<br>7,28,30 | 2,3,5,29,3<br>1,32,33,34<br>,35 | 13 | P07171,P08723,POC0A9,P12020,P14669,P18418,P22282,P22283,Q63617,Q6AYQ8,Q99041,Q9JI85,Q9R0T3                                                                                                          |
| 8803 | 1,4,6,7,8,2<br>7,28,31 | 2,3,5,29,3<br>0,32,33,34<br>,35 | 14 | P06911,P07171,P08723,P10715,P12020,P18418,P22282,P22283,P31044,Q5GRG2,Q63617,Q99041,Q9JI85,Q9R0T3                                                                                                   |
| 8804 | 1,4,6,7,8,2<br>7,28,32 | 2,3,5,29,3<br>0,31,33,34<br>,35 | 13 | P00714,P07171,P08723,P12020,P14669,P18418,P22282,P22283,Q5GRG2,Q63617,Q99041,Q9JI85,Q9R0T3                                                                                                          |
| 8805 | 1,4,6,7,8,2<br>7,28,33 | 2,3,5,29,3<br>0,31,32,34<br>,35 | 12 | P06761,P07171,P08723,P12020,P14669,P18418,P22282,P22283,Q63617,Q99041,Q9JI85,Q9R0T3                                                                                                                 |
| 8806 | 1,4,6,7,8,2<br>7,28,34 | 2,3,5,29,3<br>0,31,32,33<br>,35 | 6  | P07171,P18418,P47967,Q63617,Q99041,Q9WTT6                                                                                                                                                           |
| 8807 | 1,4,6,7,8,2<br>7,28,35 | 2,3,5,29,3<br>0,31,32,33<br>,34 | 4  | P18418,P22282,Q63617,Q9R0T3                                                                                                                                                                         |
| 8808 | 1,4,6,7,8,2<br>7,29,30 | 2,3,5,28,3<br>1,32,33,34<br>,35 | 7  | P06761,P11598,P14669,P30120,Q63617,Q6AYR9,Q9JI85                                                                                                                                                    |
| 8809 | 1,4,6,7,8,2<br>7,29,31 | 2,3,5,28,3<br>0,32,33,34<br>,35 | 11 | P06761,P07171,P11598,P12020,P14669,P22282,Q62902,Q63617,Q8CJD3,Q99041,Q9R0T3                                                                                                                        |
| 8810 | 1,4,6,7,8,2<br>7,29,32 | 2,3,5,28,3<br>0,31,33,34<br>,35 | 12 | P00714,P05539,P06761,P11598,P12020,P14669,P22282,Q63617,Q8CJD3,Q99041,Q9JI85,Q9R0T3                                                                                                                 |
| 8811 | 1,4,6,7,8,2<br>7,29,33 | 2,3,5,28,3<br>0,31,32,34<br>,35 | 9  | P06761,P11598,P14669,P18418,Q63617,Q8CJD3,Q99041,Q9JI85,Q9R0T3                                                                                                                                      |
| 8812 | 1,4,6,7,8,2<br>7,29,34 | 2,3,5,28,3<br>0,31,32,33<br>,35 | 7  | P11598,P14669,P18418,Q5FVI6,Q63617,Q99041,Q9WTT6                                                                                                                                                    |
| 8813 | 1,4,6,7,8,2<br>7,29,35 | 2,3,5,28,3<br>0,31,32,33<br>,34 | 4  | P11598,P14669,Q63617,Q9R0T3                                                                                                                                                                         |
| 8814 | 1,4,6,7,8,2<br>7,30,31 | 2,3,5,28,2<br>9,32,33,34<br>,35 | 4  | P11598,P12020,P14669,P19218                                                                                                                                                                         |
| 8815 | 1,4,6,7,8,2<br>7,30,32 | 2,3,5,28,2<br>9,31,33,34<br>,35 | 4  | P00714,P14669,Q63617,Q99041                                                                                                                                                                         |

|      |                        |                                 |    |                                                                                                                        |
|------|------------------------|---------------------------------|----|------------------------------------------------------------------------------------------------------------------------|
| 8816 | 1,4,6,7,8,2<br>7,30,33 | 2,3,5,28,2<br>9,31,32,34<br>,35 | 5  | P11598,P14669,P18418,Q63617,Q99041                                                                                     |
| 8817 | 1,4,6,7,8,2<br>7,30,34 | 2,3,5,28,2<br>9,31,32,33<br>,35 | 8  | P11598,P14669,P18418,P47967,P97840,Q5FVI6,Q99041,Q9WTT6                                                                |
| 8818 | 1,4,6,7,8,2<br>7,30,35 | 2,3,5,28,2<br>9,31,32,33<br>,34 | 2  | P14669,Q63617                                                                                                          |
| 8819 | 1,4,6,7,8,2<br>7,31,32 | 2,3,5,28,2<br>9,30,33,34<br>,35 | 7  | P00714,P05539,P12020,P14669,Q63617,Q8CJD3,Q99041                                                                       |
| 8820 | 1,4,6,7,8,2<br>7,31,33 | 2,3,5,28,2<br>9,30,32,34<br>,35 | 6  | P11598,P12020,P14669,Q63617,Q8CJD3,Q99041                                                                              |
| 8821 | 1,4,6,7,8,2<br>7,31,34 | 2,3,5,28,2<br>9,30,32,33<br>,35 | 5  | P11598,P13432,P47967,Q99041,Q9WTT6                                                                                     |
| 8822 | 1,4,6,7,8,2<br>7,31,35 | 2,3,5,28,2<br>9,30,32,33<br>,34 | 1  | Q63617                                                                                                                 |
| 8823 | 1,4,6,7,8,2<br>7,32,33 | 2,3,5,28,2<br>9,30,31,34<br>,35 | 8  | P00714,P05539,P12020,P14669,P18418,Q63617,Q8CJD3,Q99041                                                                |
| 8824 | 1,4,6,7,8,2<br>7,32,34 | 2,3,5,28,2<br>9,30,31,33<br>,35 | 6  | P00714,P05539,P14669,Q63617,Q99041,Q9WTT6                                                                              |
| 8825 | 1,4,6,7,8,2<br>7,32,35 | 2,3,5,28,2<br>9,30,31,33<br>,34 | 3  | P00714,P14669,Q63617                                                                                                   |
| 8826 | 1,4,6,7,8,2<br>7,33,34 | 2,3,5,28,2<br>9,30,31,32<br>,35 | 7  | P08649,P11598,P18418,Q5FVI6,Q63617,Q99041,Q9WTT6                                                                       |
| 8827 | 1,4,6,7,8,2<br>7,33,35 | 2,3,5,28,2<br>9,30,31,32<br>,34 | 6  | P14669,P15399,P18418,Q30KJ2,Q63617,Q99041                                                                              |
| 8828 | 1,4,6,7,8,2<br>7,34,35 | 2,3,5,28,2<br>9,30,31,32<br>,33 | 7  | P09006,P18418,Q561R9,Q5FVI6,Q63617,Q99041,Q9WTT6                                                                       |
| 8829 | 1,4,6,7,8,2<br>8,29,30 | 2,3,5,27,3<br>1,32,33,34<br>,35 | 13 | F1LM93,P02780,P02782,P06761,P08723,P0C0A9,P22282,P22283,P30120,Q63357,Q63617,Q8CJ52,Q9JI85                             |
| 8830 | 1,4,6,7,8,2<br>8,29,31 | 2,3,5,27,3<br>0,32,33,34<br>,35 | 17 | O35547,P02782,P04905,P06761,P06911,P08723,P12020,P22282,P22283,P31044,P83121,Q5GRG2,Q62902,Q63617,Q8CJ52,Q9JI85,Q9R0T3 |

|      |                        |                                 |    |                                                                                                                                                                             |
|------|------------------------|---------------------------------|----|-----------------------------------------------------------------------------------------------------------------------------------------------------------------------------|
| 8831 | 1,4,6,7,8,2<br>8,29,32 | 2,3,5,27,3<br>0,31,33,34<br>,35 | 24 | F1LM93,P00714,P02780,P04905,P06761,P06911,P08723,P09456,P0C0A9,P12020,P22282,P22283,P24368,P30120,P46462,P47727,Q5GR<br>G2,Q62902,Q62975,Q63617,Q8CJ52,Q99041,Q9JI85,Q9R0T3 |
| 8832 | 1,4,6,7,8,2<br>8,29,33 | 2,3,5,27,3<br>0,31,32,34<br>,35 | 19 | F1LM93,O35547,P02780,P04905,P06761,P07647,P08723,P09456,P0C0A9,P12020,P18418,P22282,P22283,P83121,Q63617,Q8CJ52,Q990<br>41,Q9JI85,Q9R0T3                                    |
| 8833 | 1,4,6,7,8,2<br>8,29,34 | 2,3,5,27,3<br>0,31,32,33<br>,35 | 6  | P08723,P18418,Q63617,Q8CJ52,Q99041,Q9WTT6                                                                                                                                   |
| 8834 | 1,4,6,7,8,2<br>8,29,35 | 2,3,5,27,3<br>0,31,32,33<br>,34 | 5  | P08723,P22282,Q63617,Q8CJ52,Q9R0T3                                                                                                                                          |
| 8835 | 1,4,6,7,8,2<br>8,30,31 | 2,3,5,27,2<br>9,32,33,34<br>,35 | 4  | P12020,P13432,P31044,Q5GRG2                                                                                                                                                 |
| 8836 | 1,4,6,7,8,2<br>8,30,32 | 2,3,5,27,2<br>9,31,33,34<br>,35 | 3  | P00714,P12020,Q63617                                                                                                                                                        |
| 8837 | 1,4,6,7,8,2<br>8,30,33 | 2,3,5,27,2<br>9,31,32,34<br>,35 | 3  | P18418,Q63617,Q99041                                                                                                                                                        |
| 8838 | 1,4,6,7,8,2<br>8,30,34 | 2,3,5,27,2<br>9,31,32,33<br>,35 | 5  | P18418,P47967,P97840,Q99041,Q9WTT6                                                                                                                                          |
| 8839 | 1,4,6,7,8,2<br>8,30,35 | 2,3,5,27,2<br>9,31,32,33<br>,34 | 0  |                                                                                                                                                                             |
| 8840 | 1,4,6,7,8,2<br>8,31,32 | 2,3,5,27,2<br>9,30,33,34<br>,35 | 7  | P06911,P10715,P12020,P13432,P31044,Q5GRG2,Q63617                                                                                                                            |
| 8841 | 1,4,6,7,8,2<br>8,31,33 | 2,3,5,27,2<br>9,30,32,34<br>,35 | 12 | P06911,P10715,P12020,P13432,P18418,P19629,P31044,P83121,Q5GRG2,Q63617,Q8VD89,Q99041                                                                                         |
| 8842 | 1,4,6,7,8,2<br>8,31,34 | 2,3,5,27,2<br>9,30,32,33<br>,35 | 6  | P12020,P13432,P47967,Q5GRG2,Q99041,Q9WTT6                                                                                                                                   |
| 8843 | 1,4,6,7,8,2<br>8,31,35 | 2,3,5,27,2<br>9,30,32,33<br>,34 | 4  | P02803,P12020,Q5GRG2,Q63617                                                                                                                                                 |
| 8844 | 1,4,6,7,8,2<br>8,32,33 | 2,3,5,27,2<br>9,30,31,34<br>,35 | 5  | P00714,P12020,P18418,Q63617,Q99041                                                                                                                                          |
| 8845 | 1,4,6,7,8,2<br>8,32,34 | 2,3,5,27,2<br>9,30,31,33<br>,35 | 6  | P00714,P12020,P13432,Q6P6R2,Q99041,Q9WTT6                                                                                                                                   |

|      |                        |                                 |   |                                           |
|------|------------------------|---------------------------------|---|-------------------------------------------|
| 8846 | 1,4,6,7,8,2<br>8,32,35 | 2,3,5,27,2<br>9,30,31,33<br>,34 | 2 | P12020,Q63617                             |
| 8847 | 1,4,6,7,8,2<br>8,33,34 | 2,3,5,27,2<br>9,30,31,32<br>,35 | 4 | P13432,P18418,Q63617,Q99041               |
| 8848 | 1,4,6,7,8,2<br>8,33,35 | 2,3,5,27,2<br>9,30,31,32<br>,34 | 5 | P15399,P18418,Q30KJ2,Q63617,Q99041        |
| 8849 | 1,4,6,7,8,2<br>8,34,35 | 2,3,5,27,2<br>9,30,31,32<br>,33 | 5 | P09006,P18418,Q5FVI6,Q5HZV9,Q99041        |
| 8850 | 1,4,6,7,8,2<br>9,30,31 | 2,3,5,27,2<br>8,32,33,34<br>,35 | 2 | P83121,Q63617                             |
| 8851 | 1,4,6,7,8,2<br>9,30,32 | 2,3,5,27,2<br>8,31,33,34<br>,35 | 1 | Q63617                                    |
| 8852 | 1,4,6,7,8,2<br>9,30,33 | 2,3,5,27,2<br>8,31,32,34<br>,35 | 4 | P11598,P83121,Q63617,Q99041               |
| 8853 | 1,4,6,7,8,2<br>9,30,34 | 2,3,5,27,2<br>8,31,32,33<br>,35 | 5 | P09605,P25809,P11598,P47967,Q63617,Q99041 |
| 8854 | 1,4,6,7,8,2<br>9,30,35 | 2,3,5,27,2<br>8,31,32,33<br>,34 | 2 | P14480,Q63617                             |
| 8855 | 1,4,6,7,8,2<br>9,31,32 | 2,3,5,27,2<br>8,30,33,34<br>,35 | 5 | P12020,P83121,Q62975,Q63617,Q8CJD3        |
| 8856 | 1,4,6,7,8,2<br>9,31,33 | 2,3,5,27,2<br>8,30,32,34<br>,35 | 6 | P11598,P12020,P83121,Q63617,Q8CJD3,Q99041 |
| 8857 | 1,4,6,7,8,2<br>9,31,34 | 2,3,5,27,2<br>8,30,32,33<br>,35 | 3 | P11598,Q63617,Q99041                      |
| 8858 | 1,4,6,7,8,2<br>9,31,35 | 2,3,5,27,2<br>8,30,32,33<br>,34 | 2 | P04182,Q63617                             |
| 8859 | 1,4,6,7,8,2<br>9,32,33 | 2,3,5,27,2<br>8,30,31,34<br>,35 | 5 | P12020,P83121,Q63617,Q8CJD3,Q99041        |
| 8860 | 1,4,6,7,8,2<br>9,32,34 | 2,3,5,27,2<br>8,30,31,33<br>,35 | 2 | Q63617,Q99041                             |

|      |                        |                                 |   |                                                  |
|------|------------------------|---------------------------------|---|--------------------------------------------------|
| 8861 | 1,4,6,7,8,2<br>9,32,35 | 2,3,5,27,2<br>8,30,31,33<br>,34 | 1 | Q63617                                           |
| 8862 | 1,4,6,7,8,2<br>9,33,34 | 2,3,5,27,2<br>8,30,31,32<br>,35 | 3 | P11598,Q63617,Q99041                             |
| 8863 | 1,4,6,7,8,2<br>9,33,35 | 2,3,5,27,2<br>8,30,31,32<br>,34 | 4 | P15399,Q30KJ2,Q63617,Q99041                      |
| 8864 | 1,4,6,7,8,2<br>9,34,35 | 2,3,5,27,2<br>8,30,31,32<br>,33 | 3 | P09006,Q5FVI6,Q63617                             |
| 8865 | 1,4,6,7,8,3<br>0,31,32 | 2,3,5,27,2<br>8,29,33,34<br>,35 | 1 | P12020                                           |
| 8866 | 1,4,6,7,8,3<br>0,31,33 | 2,3,5,27,2<br>8,29,32,34<br>,35 | 5 | P19218,P83121,Q63617,Q8VD89,Q99041               |
| 8867 | 1,4,6,7,8,3<br>0,31,34 | 2,3,5,27,2<br>8,29,32,33<br>,35 | 6 | P09605;P25809,P13432,P19218,P47967,P97840,Q99041 |
| 8868 | 1,4,6,7,8,3<br>0,31,35 | 2,3,5,27,2<br>8,29,32,33<br>,34 | 0 |                                                  |
| 8869 | 1,4,6,7,8,3<br>0,32,33 | 2,3,5,27,2<br>8,29,31,34<br>,35 | 2 | Q63617,Q99041                                    |
| 8870 | 1,4,6,7,8,3<br>0,32,34 | 2,3,5,27,2<br>8,29,31,33<br>,35 | 2 | P47967,Q99041                                    |
| 8871 | 1,4,6,7,8,3<br>0,32,35 | 2,3,5,27,2<br>8,29,31,33<br>,34 | 0 |                                                  |
| 8872 | 1,4,6,7,8,3<br>0,33,34 | 2,3,5,27,2<br>8,29,31,32<br>,35 | 3 | P47967,Q63617,Q99041                             |
| 8873 | 1,4,6,7,8,3<br>0,33,35 | 2,3,5,27,2<br>8,29,31,32<br>,34 | 4 | P15399,Q30KJ2,Q63617,Q99041                      |
| 8874 | 1,4,6,7,8,3<br>0,34,35 | 2,3,5,27,2<br>8,29,31,32<br>,33 | 4 | P02793;Q7TP54,P09006,P47967,Q5FVI6               |
| 8875 | 1,4,6,7,8,3<br>1,32,33 | 2,3,5,27,2<br>8,29,30,34<br>,35 | 6 | P12020,P13432,P83121,Q63617,Q8CJD3,Q99041        |

|      |                         |                                 |    |                                                                                                                                                                                |
|------|-------------------------|---------------------------------|----|--------------------------------------------------------------------------------------------------------------------------------------------------------------------------------|
| 8876 | 1,4,6,7,8,3<br>1,32,34  | 2,3,5,27,2<br>8,29,30,33<br>,35 | 3  | P12020,P13432,Q99041                                                                                                                                                           |
| 8877 | 1,4,6,7,8,3<br>1,32,35  | 2,3,5,27,2<br>8,29,30,33<br>,34 | 4  | P04182,P12020,Q30KJ2,Q63617                                                                                                                                                    |
| 8878 | 1,4,6,7,8,3<br>1,33,34  | 2,3,5,27,2<br>8,29,30,32<br>,35 | 3  | P13432,Q63617,Q99041                                                                                                                                                           |
| 8879 | 1,4,6,7,8,3<br>1,33,35  | 2,3,5,27,2<br>8,29,30,32<br>,34 | 7  | P04182,P15399,P83121,Q30KJ2,Q63617,Q8VD89,Q99041                                                                                                                               |
| 8880 | 1,4,6,7,8,3<br>1,34,35  | 2,3,5,27,2<br>8,29,30,32<br>,33 | 1  | P09006                                                                                                                                                                         |
| 8881 | 1,4,6,7,8,3<br>2,33,34  | 2,3,5,27,2<br>8,29,30,31<br>,35 | 3  | P13432,Q63617,Q99041                                                                                                                                                           |
| 8882 | 1,4,6,7,8,3<br>2,33,35  | 2,3,5,27,2<br>8,29,30,31<br>,34 | 6  | P15399,P97580,Q30KJ2,Q63617,Q8CJD3,Q99041                                                                                                                                      |
| 8883 | 1,4,6,7,8,3<br>2,34,35  | 2,3,5,27,2<br>8,29,30,31<br>,33 | 0  |                                                                                                                                                                                |
| 8884 | 1,4,6,7,8,3<br>3,34,35  | 2,3,5,27,2<br>8,29,30,31<br>,32 | 5  | P09006,Q30KJ2,Q5FVI6,Q63617,Q99041                                                                                                                                             |
| 8885 | 1,4,6,7,27,<br>28,29,30 | 2,3,5,8,31,<br>32,33,34,3<br>5  | 21 | F1LM93,O08815,O35547,P02781,P07647,P08723,P08753,P09456,P0C0A9,P20766,P22283,P24368,P30120,P36374,Q62902,Q63357,Q6AYR9,Q812E4,Q8CJ52,Q9JHB9,Q9JI85                             |
| 8886 | 1,4,6,7,27,<br>28,29,31 | 2,3,5,8,30,<br>32,33,34,3<br>5  | 21 | O08815,O35547,P02781,P06911,P07647,P08723,P08753,P09456,P0C0A9,P12020,P22282,P22283,P30120,P36374,P83121,Q5GRG2,Q62902,Q6AYL6,Q8CJ52,Q9JHB9,Q9JI85                             |
| 8887 | 1,4,6,7,27,<br>28,29,32 | 2,3,5,8,30,<br>31,33,34,3<br>5  | 23 | F1LM93,O08815,O35547,P00714,P02781,P02793,Q7TP54,P04905,P05539,P06911,P08723,P09456,P0C0A9,P12020,P22282,P24368,P30120,P46462,P47727,Q5GRG2,Q62902,Q812E4,Q9JHB9,Q9JI85        |
| 8888 | 1,4,6,7,27,<br>28,29,33 | 2,3,5,8,30,<br>31,32,34,3<br>5  | 24 | F1LM93,O08815,O35547,P02781,P02793,Q7TP54,P04905,P07647,P08723,P08753,P09456,P0C0A9,P18418,P20766,P22283,P24368,P30120,P36374,P83121,Q62902,Q812E4,Q8CJ52,Q9JHB9,Q9JI85,Q9R0T3 |
| 8889 | 1,4,6,7,27,<br>28,29,34 | 2,3,5,8,30,<br>31,32,33,3<br>5  | 8  | P08723,P09456,P0C0A9,P18418,P30120,Q5FVI6,Q9JHB9,Q9JI85                                                                                                                        |
| 8890 | 1,4,6,7,27,<br>28,29,35 | 2,3,5,8,30,<br>31,32,33,3<br>4  | 7  | P08723,P0C0A9,P15399,Q5FVI6,Q5M819,Q9JHB9,Q9JI85                                                                                                                               |

|      |                         |                                |   |                                                                       |
|------|-------------------------|--------------------------------|---|-----------------------------------------------------------------------|
| 8891 | 1,4,6,7,27,<br>28,30,31 | 2,3,5,8,29,<br>32,33,34,3<br>5 | 2 | P12020,Q5GRG2                                                         |
| 8892 | 1,4,6,7,27,<br>28,30,32 | 2,3,5,8,29,<br>31,33,34,3<br>5 | 3 | P00714,P08723,P12020                                                  |
| 8893 | 1,4,6,7,27,<br>28,30,33 | 2,3,5,8,29,<br>31,32,34,3<br>5 | 4 | P08723,P18418,P20766,Q9JI85                                           |
| 8894 | 1,4,6,7,27,<br>28,30,34 | 2,3,5,8,29,<br>31,32,33,3<br>5 | 4 | P18418,P47967,P97840,Q5FVI6                                           |
| 8895 | 1,4,6,7,27,<br>28,30,35 | 2,3,5,8,29,<br>31,32,33,3<br>4 | 2 | Q5FVI6,Q6AYQ8                                                         |
| 8896 | 1,4,6,7,27,<br>28,31,32 | 2,3,5,8,29,<br>30,33,34,3<br>5 | 7 | P05539,P06911,P08723,P12020,P13432,P31044,Q5GRG2                      |
| 8897 | 1,4,6,7,27,<br>28,31,33 | 2,3,5,8,29,<br>30,32,34,3<br>5 | 8 | P06911,P08723,P12020,P13432,P22006,P83121,Q5GRG2,Q9JI85               |
| 8898 | 1,4,6,7,27,<br>28,31,34 | 2,3,5,8,29,<br>30,32,33,3<br>5 | 5 | P12020,P13432,P47967,Q5FVI6,Q5GRG2                                    |
| 8899 | 1,4,6,7,27,<br>28,31,35 | 2,3,5,8,29,<br>30,32,33,3<br>4 | 3 | P12020,P62804,Q5GRG2                                                  |
| 8900 | 1,4,6,7,27,<br>28,32,33 | 2,3,5,8,29,<br>30,31,34,3<br>5 | 9 | P00714,P02793,Q7TP54,P05539,P08723,P12020,P47727,Q06000,Q6IFU7,Q9JI85 |
| 8901 | 1,4,6,7,27,<br>28,32,34 | 2,3,5,8,29,<br>30,31,33,3<br>5 | 7 | P00714,P05539,P12020,P13432,Q10758,Q5HZV9,Q6IFU7                      |
| 8902 | 1,4,6,7,27,<br>28,32,35 | 2,3,5,8,29,<br>30,31,33,3<br>4 | 1 | P00714                                                                |
| 8903 | 1,4,6,7,27,<br>28,33,34 | 2,3,5,8,29,<br>30,31,32,3<br>5 | 3 | P18418,Q5FVI6,Q99041                                                  |
| 8904 | 1,4,6,7,27,<br>28,33,35 | 2,3,5,8,29,<br>30,31,32,3<br>4 | 4 | P15399,P18418,Q30KJ2,Q5FVI6                                           |
| 8905 | 1,4,6,7,27,<br>28,34,35 | 2,3,5,8,29,<br>30,31,32,3<br>3 | 3 | Q5FVI6,Q5HZV9,Q5M819                                                  |

|      |                         |                                |   |                                           |
|------|-------------------------|--------------------------------|---|-------------------------------------------|
| 8906 | 1,4,6,7,27,<br>29,30,31 | 2,3,5,8,28,<br>32,33,34,3<br>5 | 2 | P83121,Q6AYR9                             |
| 8907 | 1,4,6,7,27,<br>29,30,32 | 2,3,5,8,28,<br>31,33,34,3<br>5 | 0 |                                           |
| 8908 | 1,4,6,7,27,<br>29,30,33 | 2,3,5,8,28,<br>31,32,34,3<br>5 | 3 | P20766,P83121,Q9JI85                      |
| 8909 | 1,4,6,7,27,<br>29,30,34 | 2,3,5,8,28,<br>31,32,33,3<br>5 | 5 | P09605;P25809,P47967,P97840,Q5FVI6,Q6AYR9 |
| 8910 | 1,4,6,7,27,<br>29,30,35 | 2,3,5,8,28,<br>31,32,33,3<br>4 | 3 | P14480,P20766,Q5FVI6                      |
| 8911 | 1,4,6,7,27,<br>29,31,32 | 2,3,5,8,28,<br>30,33,34,3<br>5 | 3 | P05539,P12020,Q8CJD3                      |
| 8912 | 1,4,6,7,27,<br>29,31,33 | 2,3,5,8,28,<br>30,32,34,3<br>5 | 2 | P83121,Q8CJD3                             |
| 8913 | 1,4,6,7,27,<br>29,31,34 | 2,3,5,8,28,<br>30,32,33,3<br>5 | 1 | Q5FVI6                                    |
| 8914 | 1,4,6,7,27,<br>29,31,35 | 2,3,5,8,28,<br>30,32,33,3<br>4 | 0 |                                           |
| 8915 | 1,4,6,7,27,<br>29,32,33 | 2,3,5,8,28,<br>30,31,34,3<br>5 | 5 | P02793;Q7TP54,P05539,P08649,Q8CJD3,Q9JI85 |
| 8916 | 1,4,6,7,27,<br>29,32,34 | 2,3,5,8,28,<br>30,31,33,3<br>5 | 1 | P05539                                    |
| 8917 | 1,4,6,7,27,<br>29,32,35 | 2,3,5,8,28,<br>30,31,33,3<br>4 | 0 |                                           |
| 8918 | 1,4,6,7,27,<br>29,33,34 | 2,3,5,8,28,<br>30,31,32,3<br>5 | 3 | P08649,Q5FVI6,Q99041                      |
| 8919 | 1,4,6,7,27,<br>29,33,35 | 2,3,5,8,28,<br>30,31,32,3<br>4 | 3 | P15399,P20766,Q5FVI6                      |
| 8920 | 1,4,6,7,27,<br>29,34,35 | 2,3,5,8,28,<br>30,31,32,3<br>3 | 4 | P14480,Q561R9,Q5FVI6,Q5M819               |



|      |                         |                                |   |                                                  |
|------|-------------------------|--------------------------------|---|--------------------------------------------------|
| 8921 | 1,4,6,7,27,<br>30,31,32 | 2,3,5,8,28,<br>29,33,34,3<br>5 | 2 | P05539,P12020                                    |
| 8922 | 1,4,6,7,27,<br>30,31,33 | 2,3,5,8,28,<br>29,32,34,3<br>5 | 3 | P19218,P51907,P83121                             |
| 8923 | 1,4,6,7,27,<br>30,31,34 | 2,3,5,8,28,<br>29,32,33,3<br>5 | 6 | P09605;P25809,P13432,P19218,P47967,P97840,Q5FVI6 |
| 8924 | 1,4,6,7,27,<br>30,31,35 | 2,3,5,8,28,<br>29,32,33,3<br>4 | 0 |                                                  |
| 8925 | 1,4,6,7,27,<br>30,32,33 | 2,3,5,8,28,<br>29,31,34,3<br>5 | 1 | P08649                                           |
| 8926 | 1,4,6,7,27,<br>30,32,34 | 2,3,5,8,28,<br>29,31,33,3<br>5 | 3 | P05539,P47967,P97840                             |
| 8927 | 1,4,6,7,27,<br>30,32,35 | 2,3,5,8,28,<br>29,31,33,3<br>4 | 0 |                                                  |
| 8928 | 1,4,6,7,27,<br>30,33,34 | 2,3,5,8,28,<br>29,31,32,3<br>5 | 4 | P08649,P47967,P97840,Q5FVI6                      |
| 8929 | 1,4,6,7,27,<br>30,33,35 | 2,3,5,8,28,<br>29,31,32,3<br>4 | 4 | P15399,P20766,Q30KJ2,Q5FVI6                      |
| 8930 | 1,4,6,7,27,<br>30,34,35 | 2,3,5,8,28,<br>29,31,32,3<br>3 | 5 | P14480,P47967,P97840,Q561R9,Q5FVI6               |
| 8931 | 1,4,6,7,27,<br>31,32,33 | 2,3,5,8,28,<br>29,30,34,3<br>5 | 4 | P05539,P12020,P13432,Q8CJD3                      |
| 8932 | 1,4,6,7,27,<br>31,32,34 | 2,3,5,8,28,<br>29,30,33,3<br>5 | 3 | P05539,P12020,P13432                             |
| 8933 | 1,4,6,7,27,<br>31,32,35 | 2,3,5,8,28,<br>29,30,33,3<br>4 | 1 | P05539                                           |
| 8934 | 1,4,6,7,27,<br>31,33,34 | 2,3,5,8,28,<br>29,30,32,3<br>5 | 3 | P13432,Q5FVI6,Q99041                             |
| 8935 | 1,4,6,7,27,<br>31,33,35 | 2,3,5,8,28,<br>29,30,32,3<br>4 | 2 | P15399,Q30KJ2                                    |

|      |                         |                                |    |                                                                                            |
|------|-------------------------|--------------------------------|----|--------------------------------------------------------------------------------------------|
| 8936 | 1,4,6,7,27,<br>31,34,35 | 2,3,5,8,28,<br>29,30,32,3<br>3 | 2  | Q561R9,Q5FVI6                                                                              |
| 8937 | 1,4,6,7,27,<br>32,33,34 | 2,3,5,8,28,<br>29,30,31,3<br>5 | 3  | P05539,P08649,Q99041                                                                       |
| 8938 | 1,4,6,7,27,<br>32,33,35 | 2,3,5,8,28,<br>29,30,31,3<br>4 | 3  | P15399,P97580,Q30KJ2                                                                       |
| 8939 | 1,4,6,7,27,<br>32,34,35 | 2,3,5,8,28,<br>29,30,31,3<br>3 | 1  | Q5FVI6                                                                                     |
| 8940 | 1,4,6,7,27,<br>33,34,35 | 2,3,5,8,28,<br>29,30,31,3<br>2 | 4  | P15399,Q30KJ2,Q561R9,Q5FVI6                                                                |
| 8941 | 1,4,6,7,28,<br>29,30,31 | 2,3,5,8,27,<br>32,33,34,3<br>5 | 11 | P06911,P08723,P08753,P12020,P19629,P30120,P83121,Q08849,Q5GRG2,Q63357,Q6AYR9               |
| 8942 | 1,4,6,7,28,<br>29,30,32 | 2,3,5,8,27,<br>31,33,34,3<br>5 | 8  | F1LM93,O08815,P04905,P08723,P09456,P12020,P30120,Q62975                                    |
| 8943 | 1,4,6,7,28,<br>29,30,33 | 2,3,5,8,27,<br>31,32,34,3<br>5 | 11 | F1LM93,P04905,P08723,P08753,P09456,P20766,P30120,P83121,Q63357,Q8CJ52,Q9JI85               |
| 8944 | 1,4,6,7,28,<br>29,30,34 | 2,3,5,8,27,<br>31,32,33,3<br>5 | 5  | P47967,P97840,Q08849,Q5FVI6,Q6AYR9                                                         |
| 8945 | 1,4,6,7,28,<br>29,30,35 | 2,3,5,8,27,<br>31,32,33,3<br>4 | 5  | P08753,P14480,P15399,Q08849,Q9QWJ9                                                         |
| 8946 | 1,4,6,7,28,<br>29,31,32 | 2,3,5,8,27,<br>30,33,34,3<br>5 | 11 | P04905,P06911,P08723,P09456,P12020,P47727,P83121,Q5GRG2,Q62902,Q62975,Q6AYL6               |
| 8947 | 1,4,6,7,28,<br>29,31,33 | 2,3,5,8,27,<br>30,32,34,3<br>5 | 12 | P04905,P06911,P08723,P08753,P09456,P12020,P15399,P19629,P22006,P83121,Q5GRG2,Q9JI85        |
| 8948 | 1,4,6,7,28,<br>29,31,34 | 2,3,5,8,27,<br>30,32,33,3<br>5 | 5  | P06911,P12020,P27791,P83121,Q5GRG2                                                         |
| 8949 | 1,4,6,7,28,<br>29,31,35 | 2,3,5,8,27,<br>30,32,33,3<br>4 | 4  | P06911,P15399,P83121,Q5GRG2                                                                |
| 8950 | 1,4,6,7,28,<br>29,32,33 | 2,3,5,8,27,<br>30,31,34,3<br>5 | 12 | F1LM93,P02793;Q7TP54,P04905,P06911,P08723,P09456,P12020,P15399,P24368,P47727,P83121,Q9JI85 |

|      |                         |                                |   |                                                  |
|------|-------------------------|--------------------------------|---|--------------------------------------------------|
| 8951 | 1,4,6,7,28,<br>29,32,34 | 2,3,5,8,27,<br>30,31,33,3<br>5 | 1 | P09456                                           |
| 8952 | 1,4,6,7,28,<br>29,32,35 | 2,3,5,8,27,<br>30,31,33,3<br>4 | 2 | P04905,P15399                                    |
| 8953 | 1,4,6,7,28,<br>29,33,34 | 2,3,5,8,27,<br>30,31,32,3<br>5 | 4 | P09456,P27791,P83121,Q5FVI6                      |
| 8954 | 1,4,6,7,28,<br>29,33,35 | 2,3,5,8,27,<br>30,31,32,3<br>4 | 4 | P04905,P15399,P83121,Q30KJ2                      |
| 8955 | 1,4,6,7,28,<br>29,34,35 | 2,3,5,8,27,<br>30,31,32,3<br>3 | 3 | Q5FVI6,Q5HZV9,Q5M819                             |
| 8956 | 1,4,6,7,28,<br>30,31,32 | 2,3,5,8,27,<br>29,33,34,3<br>5 | 4 | P06911,P12020,P13432,Q5GRG2                      |
| 8957 | 1,4,6,7,28,<br>30,31,33 | 2,3,5,8,27,<br>29,32,34,3<br>5 | 7 | P12020,P13432,P19629,P51907,P83121,Q5GRG2,Q8VD89 |
| 8958 | 1,4,6,7,28,<br>30,31,34 | 2,3,5,8,27,<br>29,32,33,3<br>5 | 3 | P13432,P47967,P97840                             |
| 8959 | 1,4,6,7,28,<br>30,31,35 | 2,3,5,8,27,<br>29,32,33,3<br>4 | 0 |                                                  |
| 8960 | 1,4,6,7,28,<br>30,32,33 | 2,3,5,8,27,<br>29,31,34,3<br>5 | 1 | P12020                                           |
| 8961 | 1,4,6,7,28,<br>30,32,34 | 2,3,5,8,27,<br>29,31,33,3<br>5 | 4 | P13432,P47967,P97840,Q5HZV9                      |
| 8962 | 1,4,6,7,28,<br>30,32,35 | 2,3,5,8,27,<br>29,31,33,3<br>4 | 0 |                                                  |
| 8963 | 1,4,6,7,28,<br>30,33,34 | 2,3,5,8,27,<br>29,31,32,3<br>5 | 4 | P13432,P47967,P97840,Q5FVI6                      |
| 8964 | 1,4,6,7,28,<br>30,33,35 | 2,3,5,8,27,<br>29,31,32,3<br>4 | 2 | P15399,Q30KJ2                                    |
| 8965 | 1,4,6,7,28,<br>30,34,35 | 2,3,5,8,27,<br>29,31,32,3<br>3 | 4 | P47967,P97840,Q5FVI6,Q5HZV9                      |

|      |                         |                                |   |                                                                |
|------|-------------------------|--------------------------------|---|----------------------------------------------------------------|
| 8966 | 1,4,6,7,28,<br>31,32,33 | 2,3,5,8,27,<br>29,30,34,3<br>5 | 6 | P06911,P12020,P13432,P15399,P83121,Q5GRG2                      |
| 8967 | 1,4,6,7,28,<br>31,32,34 | 2,3,5,8,27,<br>29,30,33,3<br>5 | 6 | P05539,P06911,P12020,P13432,Q5GRG2,Q5HZV9                      |
| 8968 | 1,4,6,7,28,<br>31,32,35 | 2,3,5,8,27,<br>29,30,33,3<br>4 | 5 | P06911,P12020,P15399,Q30KJ2,Q5GRG2                             |
| 8969 | 1,4,6,7,28,<br>31,33,34 | 2,3,5,8,27,<br>29,30,32,3<br>5 | 3 | P12020,P13432,P83121                                           |
| 8970 | 1,4,6,7,28,<br>31,33,35 | 2,3,5,8,27,<br>29,30,32,3<br>4 | 9 | P02803,P06760,P15399,P22006,P62804,P83121,Q00715,Q30KJ2,Q8VD89 |
| 8971 | 1,4,6,7,28,<br>31,34,35 | 2,3,5,8,27,<br>29,30,32,3<br>3 | 3 | P62804,Q5FVI6,Q5HZV9                                           |
| 8972 | 1,4,6,7,28,<br>32,33,34 | 2,3,5,8,27,<br>29,30,31,3<br>5 | 2 | P13432,Q5HZV9                                                  |
| 8973 | 1,4,6,7,28,<br>32,33,35 | 2,3,5,8,27,<br>29,30,31,3<br>4 | 3 | P15399,P97580,Q30KJ2                                           |
| 8974 | 1,4,6,7,28,<br>32,34,35 | 2,3,5,8,27,<br>29,30,31,3<br>3 | 2 | Q5HZV9,Q5M819                                                  |
| 8975 | 1,4,6,7,28,<br>33,34,35 | 2,3,5,8,27,<br>29,30,31,3<br>2 | 5 | P15399,P62804,Q30KJ2,Q5FVI6,Q5HZV9                             |
| 8976 | 1,4,6,7,29,<br>30,31,32 | 2,3,5,8,27,<br>28,33,34,3<br>5 | 2 | P12020,P83121                                                  |
| 8977 | 1,4,6,7,29,<br>30,31,33 | 2,3,5,8,27,<br>28,32,34,3<br>5 | 1 | P83121                                                         |
| 8978 | 1,4,6,7,29,<br>30,31,34 | 2,3,5,8,27,<br>28,32,33,3<br>5 | 3 | P09605,P25809,P47967,P97840                                    |
| 8979 | 1,4,6,7,29,<br>30,31,35 | 2,3,5,8,27,<br>28,32,33,3<br>4 | 2 | P14480,P83121                                                  |
| 8980 | 1,4,6,7,29,<br>30,32,33 | 2,3,5,8,27,<br>28,31,34,3<br>5 | 1 | P83121                                                         |

|      |                         |                                |   |                             |
|------|-------------------------|--------------------------------|---|-----------------------------|
| 8981 | 1,4,6,7,29,<br>30,32,34 | 2,3,5,8,27,<br>28,31,33,3<br>5 | 1 | P09605;P25809               |
| 8982 | 1,4,6,7,29,<br>30,32,35 | 2,3,5,8,27,<br>28,31,33,3<br>4 | 1 | P14480                      |
| 8983 | 1,4,6,7,29,<br>30,33,34 | 2,3,5,8,27,<br>28,31,32,3<br>5 | 2 | P09605;P25809,Q5FVI6        |
| 8984 | 1,4,6,7,29,<br>30,33,35 | 2,3,5,8,27,<br>28,31,32,3<br>4 | 2 | P15399,P83121               |
| 8985 | 1,4,6,7,29,<br>30,34,35 | 2,3,5,8,27,<br>28,31,32,3<br>3 | 3 | P09605;P25809,P14480,Q5FVI6 |
| 8986 | 1,4,6,7,29,<br>31,32,33 | 2,3,5,8,27,<br>28,30,34,3<br>5 | 4 | P12020,P15399,P83121,Q8CJD3 |
| 8987 | 1,4,6,7,29,<br>31,32,34 | 2,3,5,8,27,<br>28,30,33,3<br>5 | 1 | P05539                      |
| 8988 | 1,4,6,7,29,<br>31,32,35 | 2,3,5,8,27,<br>28,30,33,3<br>4 | 2 | P04182,P15399               |
| 8989 | 1,4,6,7,29,<br>31,33,34 | 2,3,5,8,27,<br>28,30,32,3<br>5 | 1 | P83121                      |
| 8990 | 1,4,6,7,29,<br>31,33,35 | 2,3,5,8,27,<br>28,30,32,3<br>4 | 4 | P04182,P15399,P83121,Q30KJ2 |
| 8991 | 1,4,6,7,29,<br>31,34,35 | 2,3,5,8,27,<br>28,30,32,3<br>3 | 1 | Q5FVI6                      |
| 8992 | 1,4,6,7,29,<br>32,33,34 | 2,3,5,8,27,<br>28,30,31,3<br>5 | 0 |                             |
| 8993 | 1,4,6,7,29,<br>32,33,35 | 2,3,5,8,27,<br>28,30,31,3<br>4 | 3 | P15399,P97580,Q30KJ2        |
| 8994 | 1,4,6,7,29,<br>32,34,35 | 2,3,5,8,27,<br>28,30,31,3<br>3 | 0 |                             |
| 8995 | 1,4,6,7,29,<br>33,34,35 | 2,3,5,8,27,<br>28,30,31,3<br>2 | 2 | P15399,Q5FVI6               |

|      |                         |                                |   |                                                  |
|------|-------------------------|--------------------------------|---|--------------------------------------------------|
| 8996 | 1,4,6,7,30,<br>31,32,33 | 2,3,5,8,27,<br>28,29,34,3<br>5 | 3 | P12020,P13432,P83121                             |
| 8997 | 1,4,6,7,30,<br>31,32,34 | 2,3,5,8,27,<br>28,29,33,3<br>5 | 4 | P09605;P25809,P13432,P47967,P97840               |
| 8998 | 1,4,6,7,30,<br>31,32,35 | 2,3,5,8,27,<br>28,29,33,3<br>4 | 0 |                                                  |
| 8999 | 1,4,6,7,30,<br>31,33,34 | 2,3,5,8,27,<br>28,29,32,3<br>5 | 5 | P09605;P25809,P13432,P47967,P51907,P97840        |
| 9000 | 1,4,6,7,30,<br>31,33,35 | 2,3,5,8,27,<br>28,29,32,3<br>4 | 4 | P15399,P83121,Q30KJ2,Q8VD89                      |
| 9001 | 1,4,6,7,30,<br>31,34,35 | 2,3,5,8,27,<br>28,29,32,3<br>3 | 5 | P02793;Q7TP54,P09605;P25809,P47967,P97840,Q5FVI6 |
| 9002 | 1,4,6,7,30,<br>32,33,34 | 2,3,5,8,27,<br>28,29,31,3<br>5 | 1 | P13432                                           |
| 9003 | 1,4,6,7,30,<br>32,33,35 | 2,3,5,8,27,<br>28,29,31,3<br>4 | 3 | P15399,P97580,Q30KJ2                             |
| 9004 | 1,4,6,7,30,<br>32,34,35 | 2,3,5,8,27,<br>28,29,31,3<br>3 | 0 |                                                  |
| 9005 | 1,4,6,7,30,<br>33,34,35 | 2,3,5,8,27,<br>28,29,31,3<br>2 | 2 | P15399,Q5FVI6                                    |
| 9006 | 1,4,6,7,31,<br>32,33,34 | 2,3,5,8,27,<br>28,29,30,3<br>5 | 2 | P05539,P13432                                    |
| 9007 | 1,4,6,7,31,<br>32,33,35 | 2,3,5,8,27,<br>28,29,30,3<br>4 | 5 | P04182,P15399,P83121,P97580,Q30KJ2               |
| 9008 | 1,4,6,7,31,<br>32,34,35 | 2,3,5,8,27,<br>28,29,30,3<br>3 | 0 |                                                  |
| 9009 | 1,4,6,7,31,<br>33,34,35 | 2,3,5,8,27,<br>28,29,30,3<br>2 | 3 | P15399,Q30KJ2,Q5FVI6                             |
| 9010 | 1,4,6,7,32,<br>33,34,35 | 2,3,5,8,27,<br>28,29,30,3<br>1 | 3 | P15399,P97580,Q30KJ2                             |

|      |                         |                                |    |                                                                                                                                                                  |
|------|-------------------------|--------------------------------|----|------------------------------------------------------------------------------------------------------------------------------------------------------------------|
| 9011 | 1,4,6,8,27,<br>28,29,30 | 2,3,5,7,31,<br>32,33,34,3<br>5 | 22 | F1LM93,O08815,O35547,P02781,P02782,P04905,P07647,P08644,P08723,P0C0A9,P14669,P22283,P24368,P30120,P36374,P97605,Q63357,Q6AYR9,Q812E4,Q8CJ52,Q9JHB9,Q9JI85        |
| 9012 | 1,4,6,8,27,<br>28,29,31 | 2,3,5,7,30,<br>32,33,34,3<br>5 | 17 | O35547,P02781,P02782,P04905,P06911,P07647,P08723,P0C0A9,P22282,P22283,P24368,P30120,Q5GRG2,Q62902,Q8CJ52,Q9JHB9,Q9JI85                                           |
| 9013 | 1,4,6,8,27,<br>28,29,32 | 2,3,5,7,30,<br>31,33,34,3<br>5 | 23 | F1LM93,O08815,O35547,P00714,P02781,P02782,P04905,P06911,P07647,P08723,P0C0A9,P14669,P22282,P22283,P24368,P30120,P35281,P47727,Q62975,Q812E4,Q8CJ52,Q9JHB9,Q9JI85 |
| 9014 | 1,4,6,8,27,<br>28,29,33 | 2,3,5,7,30,<br>31,32,34,3<br>5 | 20 | F1LM93,O08815,O35547,P02781,P02782,P04905,P07647,P08723,P0C0A9,P22283,P24368,P30120,P36374,P47727,Q63617,Q812E4,Q8CJ52,Q9JHB9,Q9JI85,Q9R0T3                      |
| 9015 | 1,4,6,8,27,<br>28,29,34 | 2,3,5,7,30,<br>31,32,33,3<br>5 | 12 | O35547,P02781,P02782,P08723,P0C0A9,P24368,P30120,P97605,Q5M8C6,Q9JHB9,Q9JI85,Q9WTT6                                                                              |
| 9016 | 1,4,6,8,27,<br>28,29,35 | 2,3,5,7,30,<br>31,32,33,3<br>4 | 9  | O35547,P02781,P02782,P08644,P08723,P0C0A9,P30120,Q9JHB9,Q9JI85                                                                                                   |
| 9017 | 1,4,6,8,27,<br>28,30,31 | 2,3,5,7,29,<br>32,33,34,3<br>5 | 4  | P02782,P08723,P0C0A9,Q5GRG2                                                                                                                                      |
| 9018 | 1,4,6,8,27,<br>28,30,32 | 2,3,5,7,29,<br>31,33,34,3<br>5 | 5  | P00714,P02782,P08723,P0C0A9,P14669                                                                                                                               |
| 9019 | 1,4,6,8,27,<br>28,30,33 | 2,3,5,7,29,<br>31,32,34,3<br>5 | 3  | P02782,P08723,P0C0A9                                                                                                                                             |
| 9020 | 1,4,6,8,27,<br>28,30,34 | 2,3,5,7,29,<br>31,32,33,3<br>5 | 2  | P47967,Q9WTT6                                                                                                                                                    |
| 9021 | 1,4,6,8,27,<br>28,30,35 | 2,3,5,7,29,<br>31,32,33,3<br>4 | 1  | Q6AYQ8                                                                                                                                                           |
| 9022 | 1,4,6,8,27,<br>28,31,32 | 2,3,5,7,29,<br>30,33,34,3<br>5 | 8  | P00714,P02782,P06911,P08723,P12020,P13432,P31044,Q5GRG2                                                                                                          |
| 9023 | 1,4,6,8,27,<br>28,31,33 | 2,3,5,7,29,<br>30,32,34,3<br>5 | 5  | P02782,P06911,P08723,P13432,Q5GRG2                                                                                                                               |
| 9024 | 1,4,6,8,27,<br>28,31,34 | 2,3,5,7,29,<br>30,32,33,3<br>5 | 2  | P13432,Q9WTT6                                                                                                                                                    |
| 9025 | 1,4,6,8,27,<br>28,31,35 | 2,3,5,7,29,<br>30,32,33,3<br>4 | 0  |                                                                                                                                                                  |

|      |                         |                                |   |                                                         |
|------|-------------------------|--------------------------------|---|---------------------------------------------------------|
| 9026 | 1,4,6,8,27,<br>28,32,33 | 2,3,5,7,29,<br>30,31,34,3<br>5 | 5 | P00714,P08723,P47727,Q6IFU7,Q6P6Q2                      |
| 9027 | 1,4,6,8,27,<br>28,32,34 | 2,3,5,7,29,<br>30,31,33,3<br>5 | 8 | P00714,P13432,P97584,Q10758,Q5HZV9,Q6IFU7,Q6P6R2,Q9WTT6 |
| 9028 | 1,4,6,8,27,<br>28,32,35 | 2,3,5,7,29,<br>30,31,33,3<br>4 | 1 | P00714                                                  |
| 9029 | 1,4,6,8,27,<br>28,33,34 | 2,3,5,7,29,<br>30,31,32,3<br>5 | 2 | P97584,Q9WTT6                                           |
| 9030 | 1,4,6,8,27,<br>28,33,35 | 2,3,5,7,29,<br>30,31,32,3<br>4 | 0 |                                                         |
| 9031 | 1,4,6,8,27,<br>28,34,35 | 2,3,5,7,29,<br>30,31,32,3<br>3 | 5 | P00507,P09006,Q561R9,Q5HZV9,Q9WTT6                      |
| 9032 | 1,4,6,8,27,<br>29,30,31 | 2,3,5,7,28,<br>32,33,34,3<br>5 | 4 | P02782,P14669,P30120,Q6AYR9                             |
| 9033 | 1,4,6,8,27,<br>29,30,32 | 2,3,5,7,28,<br>31,33,34,3<br>5 | 5 | P0C0A9,P14669,P30120,Q62975,Q6AYR9                      |
| 9034 | 1,4,6,8,27,<br>29,30,33 | 2,3,5,7,28,<br>31,32,34,3<br>5 | 3 | P0C0A9,P14669,P30120                                    |
| 9035 | 1,4,6,8,27,<br>29,30,34 | 2,3,5,7,28,<br>31,32,33,3<br>5 | 3 | P30120,Q6AYR9,Q9WTT6                                    |
| 9036 | 1,4,6,8,27,<br>29,30,35 | 2,3,5,7,28,<br>31,32,33,3<br>4 | 1 | P14669                                                  |
| 9037 | 1,4,6,8,27,<br>29,31,32 | 2,3,5,7,28,<br>30,33,34,3<br>5 | 3 | P14669,Q62975,Q8CJD3                                    |
| 9038 | 1,4,6,8,27,<br>29,31,33 | 2,3,5,7,28,<br>30,32,34,3<br>5 | 2 | P83121,Q8CJD3                                           |
| 9039 | 1,4,6,8,27,<br>29,31,34 | 2,3,5,7,28,<br>30,32,33,3<br>5 | 1 | Q9WTT6                                                  |
| 9040 | 1,4,6,8,27,<br>29,31,35 | 2,3,5,7,28,<br>30,32,33,3<br>4 | 0 |                                                         |



|      |                         |                                |   |                      |
|------|-------------------------|--------------------------------|---|----------------------|
| 9041 | 1,4,6,8,27,<br>29,32,33 | 2,3,5,7,28,<br>30,31,34,3<br>5 | 2 | P14669,Q8CJD3        |
| 9042 | 1,4,6,8,27,<br>29,32,34 | 2,3,5,7,28,<br>30,31,33,3<br>5 | 3 | P06760,P14669,Q9WTT6 |
| 9043 | 1,4,6,8,27,<br>29,32,35 | 2,3,5,7,28,<br>30,31,33,3<br>4 | 1 | P14669               |
| 9044 | 1,4,6,8,27,<br>29,33,34 | 2,3,5,7,28,<br>30,31,32,3<br>5 | 1 | Q9WTT6               |
| 9045 | 1,4,6,8,27,<br>29,33,35 | 2,3,5,7,28,<br>30,31,32,3<br>4 | 0 |                      |
| 9046 | 1,4,6,8,27,<br>29,34,35 | 2,3,5,7,28,<br>30,31,32,3<br>3 | 3 | P09006,Q561R9,Q9WTT6 |
| 9047 | 1,4,6,8,27,<br>30,31,32 | 2,3,5,7,28,<br>29,33,34,3<br>5 | 2 | P10758,P14669        |
| 9048 | 1,4,6,8,27,<br>30,31,33 | 2,3,5,7,28,<br>29,32,34,3<br>5 | 0 |                      |
| 9049 | 1,4,6,8,27,<br>30,31,34 | 2,3,5,7,28,<br>29,32,33,3<br>5 | 3 | P13432,P47967,Q9WTT6 |
| 9050 | 1,4,6,8,27,<br>30,31,35 | 2,3,5,7,28,<br>29,32,33,3<br>4 | 0 |                      |
| 9051 | 1,4,6,8,27,<br>30,32,33 | 2,3,5,7,28,<br>29,31,34,3<br>5 | 1 | P14669               |
| 9052 | 1,4,6,8,27,<br>30,32,34 | 2,3,5,7,28,<br>29,31,33,3<br>5 | 2 | P06760,Q9WTT6        |
| 9053 | 1,4,6,8,27,<br>30,32,35 | 2,3,5,7,28,<br>29,31,33,3<br>4 | 1 | P14669               |
| 9054 | 1,4,6,8,27,<br>30,33,34 | 2,3,5,7,28,<br>29,31,32,3<br>5 | 1 | Q9WTT6               |
| 9055 | 1,4,6,8,27,<br>30,33,35 | 2,3,5,7,28,<br>29,31,32,3<br>4 | 0 |                      |

|      |                         |                                |    |                                                                                            |
|------|-------------------------|--------------------------------|----|--------------------------------------------------------------------------------------------|
| 9056 | 1,4,6,8,27,<br>30,34,35 | 2,3,5,7,28,<br>29,31,32,3<br>3 | 4  | P02793;Q7TP54,P09006,Q561R9,Q9WTT6                                                         |
| 9057 | 1,4,6,8,27,<br>31,32,33 | 2,3,5,7,28,<br>29,30,34,3<br>5 | 2  | P13432,Q8CJD3                                                                              |
| 9058 | 1,4,6,8,27,<br>31,32,34 | 2,3,5,7,28,<br>29,30,33,3<br>5 | 2  | P13432,Q9WTT6                                                                              |
| 9059 | 1,4,6,8,27,<br>31,32,35 | 2,3,5,7,28,<br>29,30,33,3<br>4 | 0  |                                                                                            |
| 9060 | 1,4,6,8,27,<br>31,33,34 | 2,3,5,7,28,<br>29,30,32,3<br>5 | 2  | P13432,Q9WTT6                                                                              |
| 9061 | 1,4,6,8,27,<br>31,33,35 | 2,3,5,7,28,<br>29,30,32,3<br>4 | 0  |                                                                                            |
| 9062 | 1,4,6,8,27,<br>31,34,35 | 2,3,5,7,28,<br>29,30,32,3<br>3 | 4  | P02793;Q7TP54,P09006,Q561R9,Q9WTT6                                                         |
| 9063 | 1,4,6,8,27,<br>32,33,34 | 2,3,5,7,28,<br>29,30,31,3<br>5 | 5  | P06760,P97584,Q10758,Q6P6Q2,Q9WTT6                                                         |
| 9064 | 1,4,6,8,27,<br>32,33,35 | 2,3,5,7,28,<br>29,30,31,3<br>4 | 0  |                                                                                            |
| 9065 | 1,4,6,8,27,<br>32,34,35 | 2,3,5,7,28,<br>29,30,31,3<br>3 | 1  | Q9WTT6                                                                                     |
| 9066 | 1,4,6,8,27,<br>33,34,35 | 2,3,5,7,28,<br>29,30,31,3<br>2 | 3  | P09006,Q561R9,Q63355                                                                       |
| 9067 | 1,4,6,8,28,<br>29,30,31 | 2,3,5,7,27,<br>32,33,34,3<br>5 | 13 | O35547,P02780,P02782,P04905,P06911,P08723,P0C0A9,P30120,Q5GRG2,Q62975,Q63357,Q6AYR9,Q8CJ52 |
| 9068 | 1,4,6,8,28,<br>29,30,32 | 2,3,5,7,27,<br>31,33,34,3<br>5 | 13 | F1LM93,O35547,P02780,P02782,P04905,P08723,P0C0A9,P24368,P30120,P35281,P47727,Q62975,Q8CJ52 |
| 9069 | 1,4,6,8,28,<br>29,30,33 | 2,3,5,7,27,<br>31,32,34,3<br>5 | 12 | A2RUV9,F1LM93,O35547,P02780,P02782,P04905,P07647,P08723,P0C0A9,P30120,Q63357,Q8CJ52        |
| 9070 | 1,4,6,8,28,<br>29,30,34 | 2,3,5,7,27,<br>31,32,33,3<br>5 | 5  | O35547,P0C0A9,P30120,Q6AYR9,Q9WTT6                                                         |

|      |                         |                                |    |                                                                                     |
|------|-------------------------|--------------------------------|----|-------------------------------------------------------------------------------------|
| 9071 | 1,4,6,8,28,<br>29,30,35 | 2,3,5,7,27,<br>31,32,33,3<br>4 | 3  | P02782,P08723,P0C0A9                                                                |
| 9072 | 1,4,6,8,28,<br>29,31,32 | 2,3,5,7,27,<br>30,33,34,3<br>5 | 10 | O35547,P02780,P02782,P04905,P06911,P08723,P0C0A9,P47727,Q5GRG2,Q62975               |
| 9073 | 1,4,6,8,28,<br>29,31,33 | 2,3,5,7,27,<br>30,32,34,3<br>5 | 12 | O35547,P02780,P02782,P02803,P04905,P06911,P07647,P08723,P0C0A9,P83121,Q5GRG2,Q8CJ52 |
| 9074 | 1,4,6,8,28,<br>29,31,34 | 2,3,5,7,27,<br>30,32,33,3<br>5 | 4  | O35547,P06911,P27791,Q9WTT6                                                         |
| 9075 | 1,4,6,8,28,<br>29,31,35 | 2,3,5,7,27,<br>30,32,33,3<br>4 | 3  | P02782,P02803,P06911                                                                |
| 9076 | 1,4,6,8,28,<br>29,32,33 | 2,3,5,7,27,<br>30,31,34,3<br>5 | 11 | F1LM93,O35547,P02780,P04905,P06911,P08723,P0C0A9,P24368,P35281,P47727,Q62975        |
| 9077 | 1,4,6,8,28,<br>29,32,34 | 2,3,5,7,27,<br>30,31,33,3<br>5 | 6  | O35547,P04905,P08723,P35281,Q62975,Q9WTT6                                           |
| 9078 | 1,4,6,8,28,<br>29,32,35 | 2,3,5,7,27,<br>30,31,33,3<br>4 | 2  | P04905,P08723                                                                       |
| 9079 | 1,4,6,8,28,<br>29,33,34 | 2,3,5,7,27,<br>30,31,32,3<br>5 | 3  | O35547,P08723,P27791                                                                |
| 9080 | 1,4,6,8,28,<br>29,33,35 | 2,3,5,7,27,<br>30,31,32,3<br>4 | 4  | O35547,P02803,P04905,P08723                                                         |
| 9081 | 1,4,6,8,28,<br>29,34,35 | 2,3,5,7,27,<br>30,31,32,3<br>3 | 3  | P00507,P09006,Q5HZV9                                                                |
| 9082 | 1,4,6,8,28,<br>30,31,32 | 2,3,5,7,27,<br>29,33,34,3<br>5 | 4  | P06911,P13432,Q5GRG2,Q62975                                                         |
| 9083 | 1,4,6,8,28,<br>30,31,33 | 2,3,5,7,27,<br>29,32,34,3<br>5 | 2  | P13432,Q5GRG2                                                                       |
| 9084 | 1,4,6,8,28,<br>30,31,34 | 2,3,5,7,27,<br>29,32,33,3<br>5 | 2  | P13432,Q9WTT6                                                                       |
| 9085 | 1,4,6,8,28,<br>30,31,35 | 2,3,5,7,27,<br>29,32,33,3<br>4 | 1  | Q64335                                                                              |

|      |                         |                                |   |                                                  |
|------|-------------------------|--------------------------------|---|--------------------------------------------------|
| 9086 | 1,4,6,8,28,<br>30,32,33 | 2,3,5,7,27,<br>29,31,34,3<br>5 | 0 |                                                  |
| 9087 | 1,4,6,8,28,<br>30,32,34 | 2,3,5,7,27,<br>29,31,33,3<br>5 | 3 | P13432,Q5HZV9,Q9WTT6                             |
| 9088 | 1,4,6,8,28,<br>30,32,35 | 2,3,5,7,27,<br>29,31,33,3<br>4 | 0 |                                                  |
| 9089 | 1,4,6,8,28,<br>30,33,34 | 2,3,5,7,27,<br>29,31,32,3<br>5 | 1 | P13432                                           |
| 9090 | 1,4,6,8,28,<br>30,33,35 | 2,3,5,7,27,<br>29,31,32,3<br>4 | 1 | A2RUV9                                           |
| 9091 | 1,4,6,8,28,<br>30,34,35 | 2,3,5,7,27,<br>29,31,32,3<br>3 | 6 | P00507,P02793;Q7TP54,P09006,Q5HZV9,Q920G2,Q9WTT6 |
| 9092 | 1,4,6,8,28,<br>31,32,33 | 2,3,5,7,27,<br>29,30,34,3<br>5 | 4 | P06911,P13432,P47727,Q5GRG2                      |
| 9093 | 1,4,6,8,28,<br>31,32,34 | 2,3,5,7,27,<br>29,30,33,3<br>5 | 4 | P06911,P13432,Q5HZV9,Q9WTT6                      |
| 9094 | 1,4,6,8,28,<br>31,32,35 | 2,3,5,7,27,<br>29,30,33,3<br>4 | 1 | P06911                                           |
| 9095 | 1,4,6,8,28,<br>31,33,34 | 2,3,5,7,27,<br>29,30,32,3<br>5 | 1 | P13432                                           |
| 9096 | 1,4,6,8,28,<br>31,33,35 | 2,3,5,7,27,<br>29,30,32,3<br>4 | 1 | P02803                                           |
| 9097 | 1,4,6,8,28,<br>31,34,35 | 2,3,5,7,27,<br>29,30,32,3<br>3 | 5 | P00507,P02793;Q7TP54,P02803,P09006,Q5HZV9        |
| 9098 | 1,4,6,8,28,<br>32,33,34 | 2,3,5,7,27,<br>29,30,31,3<br>5 | 2 | P13432,P35281                                    |
| 9099 | 1,4,6,8,28,<br>32,33,35 | 2,3,5,7,27,<br>29,30,31,3<br>4 | 0 |                                                  |
| 9100 | 1,4,6,8,28,<br>32,34,35 | 2,3,5,7,27,<br>29,30,31,3<br>3 | 3 | P00507,P09006,Q5HZV9                             |

|      |                         |                                |   |                             |
|------|-------------------------|--------------------------------|---|-----------------------------|
| 9101 | 1,4,6,8,28,<br>33,34,35 | 2,3,5,7,27,<br>29,30,31,3<br>2 | 3 | P00507,P09006,Q5HZV9        |
| 9102 | 1,4,6,8,29,<br>30,31,32 | 2,3,5,7,27,<br>28,33,34,3<br>5 | 1 | Q62975                      |
| 9103 | 1,4,6,8,29,<br>30,31,33 | 2,3,5,7,27,<br>28,32,34,3<br>5 | 1 | P83121                      |
| 9104 | 1,4,6,8,29,<br>30,31,34 | 2,3,5,7,27,<br>28,32,33,3<br>5 | 1 | Q6AYR9                      |
| 9105 | 1,4,6,8,29,<br>30,31,35 | 2,3,5,7,27,<br>28,32,33,3<br>4 | 1 | P25236                      |
| 9106 | 1,4,6,8,29,<br>30,32,33 | 2,3,5,7,27,<br>28,31,34,3<br>5 | 2 | A2RUV9,Q62975               |
| 9107 | 1,4,6,8,29,<br>30,32,34 | 2,3,5,7,27,<br>28,31,33,3<br>5 | 1 | Q62975                      |
| 9108 | 1,4,6,8,29,<br>30,32,35 | 2,3,5,7,27,<br>28,31,33,3<br>4 | 0 |                             |
| 9109 | 1,4,6,8,29,<br>30,33,34 | 2,3,5,7,27,<br>28,31,32,3<br>5 | 0 |                             |
| 9110 | 1,4,6,8,29,<br>30,33,35 | 2,3,5,7,27,<br>28,31,32,3<br>4 | 2 | A2RUV9,B0BNN3               |
| 9111 | 1,4,6,8,29,<br>30,34,35 | 2,3,5,7,27,<br>28,31,32,3<br>3 | 3 | B0BNN3,P02793;Q7TP54,P09006 |
| 9112 | 1,4,6,8,29,<br>31,32,33 | 2,3,5,7,27,<br>28,30,34,3<br>5 | 3 | P83121,Q62975,Q8CJD3        |
| 9113 | 1,4,6,8,29,<br>31,32,34 | 2,3,5,7,27,<br>28,30,33,3<br>5 | 1 | Q62975                      |
| 9114 | 1,4,6,8,29,<br>31,32,35 | 2,3,5,7,27,<br>28,30,33,3<br>4 | 2 | P04182,P11762               |
| 9115 | 1,4,6,8,29,<br>31,33,34 | 2,3,5,7,27,<br>28,30,32,3<br>5 | 0 |                             |

|      |                         |                                |   |                      |
|------|-------------------------|--------------------------------|---|----------------------|
| 9116 | 1,4,6,8,29,<br>31,33,35 | 2,3,5,7,27,<br>28,30,32,3<br>4 | 3 | P02803,P83121,P97615 |
| 9117 | 1,4,6,8,29,<br>31,34,35 | 2,3,5,7,27,<br>28,30,32,3<br>3 | 1 | P09006               |
| 9118 | 1,4,6,8,29,<br>32,33,34 | 2,3,5,7,27,<br>28,30,31,3<br>5 | 0 |                      |
| 9119 | 1,4,6,8,29,<br>32,33,35 | 2,3,5,7,27,<br>28,30,31,3<br>4 | 0 |                      |
| 9120 | 1,4,6,8,29,<br>32,34,35 | 2,3,5,7,27,<br>28,30,31,3<br>3 | 0 |                      |
| 9121 | 1,4,6,8,29,<br>33,34,35 | 2,3,5,7,27,<br>28,30,31,3<br>2 | 2 | B0BNN3,P09006        |
| 9122 | 1,4,6,8,30,<br>31,32,33 | 2,3,5,7,27,<br>28,29,34,3<br>5 | 2 | P10758,P13432        |
| 9123 | 1,4,6,8,30,<br>31,32,34 | 2,3,5,7,27,<br>28,29,33,3<br>5 | 1 | P13432               |
| 9124 | 1,4,6,8,30,<br>31,32,35 | 2,3,5,7,27,<br>28,29,33,3<br>4 | 0 |                      |
| 9125 | 1,4,6,8,30,<br>31,33,34 | 2,3,5,7,27,<br>28,29,32,3<br>5 | 1 | P13432               |
| 9126 | 1,4,6,8,30,<br>31,33,35 | 2,3,5,7,27,<br>28,29,32,3<br>4 | 1 | B0BNN3               |
| 9127 | 1,4,6,8,30,<br>31,34,35 | 2,3,5,7,27,<br>28,29,32,3<br>3 | 2 | P02793;Q7TP54,P09006 |
| 9128 | 1,4,6,8,30,<br>32,33,34 | 2,3,5,7,27,<br>28,29,31,3<br>5 | 1 | P13432               |
| 9129 | 1,4,6,8,30,<br>32,33,35 | 2,3,5,7,27,<br>28,29,31,3<br>4 | 1 | A2RUV9               |
| 9130 | 1,4,6,8,30,<br>32,34,35 | 2,3,5,7,27,<br>28,29,31,3<br>3 | 1 | P02793;Q7TP54        |

|      |                          |                                |    |                                                                                                                                                                  |
|------|--------------------------|--------------------------------|----|------------------------------------------------------------------------------------------------------------------------------------------------------------------|
| 9131 | 1,4,6,8,30,<br>33,34,35  | 2,3,5,7,27,<br>28,29,31,3<br>2 | 3  | B0BNN3,P02793;Q7TP54,P09006                                                                                                                                      |
| 9132 | 1,4,6,8,31,<br>32,33,34  | 2,3,5,7,27,<br>28,29,30,3<br>5 | 1  | P13432                                                                                                                                                           |
| 9133 | 1,4,6,8,31,<br>32,33,35  | 2,3,5,7,27,<br>28,29,30,3<br>4 | 1  | P04182                                                                                                                                                           |
| 9134 | 1,4,6,8,31,<br>32,34,35  | 2,3,5,7,27,<br>28,29,30,3<br>3 | 0  |                                                                                                                                                                  |
| 9135 | 1,4,6,8,31,<br>33,34,35  | 2,3,5,7,27,<br>28,29,30,3<br>2 | 2  | P09006,Q63355                                                                                                                                                    |
| 9136 | 1,4,6,8,32,<br>33,34,35  | 2,3,5,7,27,<br>28,29,30,3<br>1 | 0  |                                                                                                                                                                  |
| 9137 | 1,4,6,27,2<br>8,29,30,31 | 2,3,5,7,8,3<br>2,33,34,35      | 17 | O08815,O35547,P02781,P02782,P06911,P08723,P08753,P0C0A9,P30120,P36374,P97605,Q5GRG2,Q63357,Q6AYR9,Q812E4,Q9JHB9,Q9JI85                                           |
| 9138 | 1,4,6,27,2<br>8,29,30,32 | 2,3,5,7,8,3<br>1,33,34,35      | 23 | F1LM93,O08815,O35547,P01835,P02781,P04905,P05369,P08010,P08723,P08753,P0C0A9,P20766,P24368,P30120,P36374,P47727,P97605,Q62975,Q6AYR9,Q6IFU7,Q812E4,Q9JHB9,Q9JI85 |
| 9139 | 1,4,6,27,2<br>8,29,30,33 | 2,3,5,7,8,3<br>1,32,34,35      | 19 | F1LM93,O08815,O35547,P02781,P04905,P07647,P08723,P08753,P0C0A9,P20766,P24368,P30120,P36374,P97605,Q63357,Q6AYR9,Q812E4,Q9JHB9,Q9JI85                             |
| 9140 | 1,4,6,27,2<br>8,29,30,34 | 2,3,5,7,8,3<br>1,32,33,35      | 10 | O08815,O35547,P02781,P05369,P08723,P0C0A9,P30120,P97605,Q6AYR9,Q9JHB9                                                                                            |
| 9141 | 1,4,6,27,2<br>8,29,30,35 | 2,3,5,7,8,3<br>1,32,33,34      | 14 | O08815,O35547,P01835,P02781,P08644,P08723,P08753,P0C0A9,P20766,P30120,P36374,P97605,Q6AYR9,Q9JHB9                                                                |
| 9142 | 1,4,6,27,2<br>8,29,31,32 | 2,3,5,7,8,3<br>0,33,34,35      | 16 | O08815,O35547,P02781,P04905,P06911,P08723,P0C0A9,P24368,P30120,P36374,P47727,Q5GRG2,Q62975,Q812E4,Q9JHB9,Q9JI85                                                  |
| 9143 | 1,4,6,27,2<br>8,29,31,33 | 2,3,5,7,8,3<br>0,32,34,35      | 18 | O08815,O35547,P02781,P04905,P06911,P07647,P08723,P08753,P0C0A9,P30120,P36374,P47727,P83121,P97605,Q5GRG2,Q812E4,Q9JHB9,Q9JI85                                    |
| 9144 | 1,4,6,27,2<br>8,29,31,34 | 2,3,5,7,8,3<br>0,32,33,35      | 6  | O35547,P06911,P08723,P0C0A9,P97605,Q9JHB9                                                                                                                        |
| 9145 | 1,4,6,27,2<br>8,29,31,35 | 2,3,5,7,8,3<br>0,32,33,34      | 9  | O35547,P06911,P08723,P08753,P0C0A9,P36374,P97605,Q5M819,Q9JHB9                                                                                                   |
| 9146 | 1,4,6,27,2<br>8,29,32,33 | 2,3,5,7,8,3<br>0,31,34,35      | 22 | F1LM93,O08815,O35547,P02781,P02793;Q7TP54,P04905,P06911,P07647,P08723,P09456,P0C0A9,P20766,P24368,P30120,P35281,P36374,P47727,Q6IFU7,Q6P6Q2,Q812E4,Q9JHB9,Q9JI85 |
| 9147 | 1,4,6,27,2<br>8,29,32,34 | 2,3,5,7,8,3<br>0,31,33,35      | 9  | O08815,O35547,P08723,P0C0A9,P24368,P30120,Q10758,Q6IFU7,Q9JHB9                                                                                                   |
| 9148 | 1,4,6,27,2<br>8,29,32,35 | 2,3,5,7,8,3<br>0,31,33,34      | 7  | O08815,P04905,P08644,P08723,P0C0A9,Q5M819,Q9JHB9                                                                                                                 |
| 9149 | 1,4,6,27,2<br>8,29,33,34 | 2,3,5,7,8,3<br>0,31,32,35      | 9  | O08815,O35547,P08723,P0C0A9,P30120,P97584,P97605,Q9JHB9,Q9JI85                                                                                                   |
| 9150 | 1,4,6,27,2<br>8,29,33,35 | 2,3,5,7,8,3<br>0,31,32,34      | 11 | O35547,P04905,P08723,P08753,P0C0A9,P20766,P36374,P97605,Q5M819,Q9JHB9,Q9JI85                                                                                     |

|      |                                                 |   |                                                  |
|------|-------------------------------------------------|---|--------------------------------------------------|
| 9151 | 1,4,6,27,2 2,3,5,7,8,3<br>8,29,34,35 0,31,32,33 | 6 | P00507,P0C0A9,P97605,Q561R9,Q5HZV9,Q5M819        |
| 9152 | 1,4,6,27,2 2,3,5,7,8,2<br>8,30,31,32 9,33,34,35 | 4 | P06911,P10758,P13432,Q5GRG2                      |
| 9153 | 1,4,6,27,2 2,3,5,7,8,2<br>8,30,31,33 9,32,34,35 | 4 | P08723,P13432,P51907,Q5GRG2                      |
| 9154 | 1,4,6,27,2 2,3,5,7,8,2<br>8,30,31,34 9,32,33,35 | 3 | P13432,P47967,P97605                             |
| 9155 | 1,4,6,27,2 2,3,5,7,8,2<br>8,30,31,35 9,32,33,34 | 2 | P97605,Q64335                                    |
| 9156 | 1,4,6,27,2 2,3,5,7,8,2<br>8,30,32,33 9,31,34,35 | 3 | P08723,P20766,Q6IFU7                             |
| 9157 | 1,4,6,27,2 2,3,5,7,8,2<br>8,30,32,34 9,31,33,35 | 4 | P13432,Q10758,Q5HZV9,Q6IFU7                      |
| 9158 | 1,4,6,27,2 2,3,5,7,8,2<br>8,30,32,35 9,31,33,34 | 2 | P01835,Q6IFU7                                    |
| 9159 | 1,4,6,27,2 2,3,5,7,8,2<br>8,30,33,34 9,31,32,35 | 0 |                                                  |
| 9160 | 1,4,6,27,2 2,3,5,7,8,2<br>8,30,33,35 9,31,32,34 | 1 | P20766                                           |
| 9161 | 1,4,6,27,2 2,3,5,7,8,2<br>8,30,34,35 9,31,32,33 | 4 | P00507,P97605,Q5HZV9,Q8CJD3                      |
| 9162 | 1,4,6,27,2 2,3,5,7,8,2<br>8,31,32,33 9,30,34,35 | 7 | P06911,P08723,P13432,P47727,Q5GRG2,Q6IFU7,Q6P6Q2 |
| 9163 | 1,4,6,27,2 2,3,5,7,8,2<br>8,31,32,34 9,30,33,35 | 5 | P06911,P13432,Q10758,Q5HZV9,Q6IFU7               |
| 9164 | 1,4,6,27,2 2,3,5,7,8,2<br>8,31,32,35 9,30,33,34 | 1 | P06911                                           |
| 9165 | 1,4,6,27,2 2,3,5,7,8,2<br>8,31,33,34 9,30,32,35 | 1 | P13432                                           |
| 9166 | 1,4,6,27,2 2,3,5,7,8,2<br>8,31,33,35 9,30,32,34 | 0 |                                                  |
| 9167 | 1,4,6,27,2 2,3,5,7,8,2<br>8,31,34,35 9,30,32,33 | 4 | P00507,P53792,Q5HZV9,Q5M819                      |
| 9168 | 1,4,6,27,2 2,3,5,7,8,2<br>8,32,33,34 9,30,31,35 | 7 | P13432,P97584,Q06000,Q10758,Q5HZV9,Q6IFU7,Q6P6Q2 |
| 9169 | 1,4,6,27,2 2,3,5,7,8,2<br>8,32,33,35 9,30,31,34 | 2 | Q6IFU7,Q6P6Q2                                    |
| 9170 | 1,4,6,27,2 2,3,5,7,8,2<br>8,32,34,35 9,30,31,33 | 5 | P00507,Q10758,Q5HZV9,Q5M819,Q6IFU7               |
| 9171 | 1,4,6,27,2 2,3,5,7,8,2<br>8,33,34,35 9,30,31,32 | 4 | P00507,Q561R9,Q5HZV9,Q5M819                      |
| 9172 | 1,4,6,27,2 2,3,5,7,8,2<br>9,30,31,32 8,33,34,35 | 2 | P10758,Q6AYR9                                    |
| 9173 | 1,4,6,27,2 2,3,5,7,8,2<br>9,30,31,33 8,32,34,35 | 4 | P20766,P83121,P97605,Q6AYR9                      |



|      |                                                 |   |                             |
|------|-------------------------------------------------|---|-----------------------------|
| 9174 | 1,4,6,27,2 2,3,5,7,8,2<br>9,30,31,34 8,32,33,35 | 2 | P97605,Q6AYR9               |
| 9175 | 1,4,6,27,2 2,3,5,7,8,2<br>9,30,31,35 8,32,33,34 | 2 | P97605,Q6AYR9               |
| 9176 | 1,4,6,27,2 2,3,5,7,8,2<br>9,30,32,33 8,31,34,35 | 1 | P20766                      |
| 9177 | 1,4,6,27,2 2,3,5,7,8,2<br>9,30,32,34 8,31,33,35 | 2 | Q10758,Q6AYR9               |
| 9178 | 1,4,6,27,2 2,3,5,7,8,2<br>9,30,32,35 8,31,33,34 | 2 | P01835,P20766               |
| 9179 | 1,4,6,27,2 2,3,5,7,8,2<br>9,30,33,34 8,31,32,35 | 3 | P20766,P97605,Q6AYR9        |
| 9180 | 1,4,6,27,2 2,3,5,7,8,2<br>9,30,33,35 8,31,32,34 | 2 | P20766,P97605               |
| 9181 | 1,4,6,27,2 2,3,5,7,8,2<br>9,30,34,35 8,31,32,33 | 4 | P14480,P97605,Q561R9,Q6AYR9 |
| 9182 | 1,4,6,27,2 2,3,5,7,8,2<br>9,31,32,33 8,30,34,35 | 2 | P83121,Q8CJD3               |
| 9183 | 1,4,6,27,2 2,3,5,7,8,2<br>9,31,32,34 8,30,33,35 | 1 | Q10758                      |
| 9184 | 1,4,6,27,2 2,3,5,7,8,2<br>9,31,32,35 8,30,33,34 | 0 |                             |
| 9185 | 1,4,6,27,2 2,3,5,7,8,2<br>9,31,33,34 8,30,32,35 | 0 |                             |
| 9186 | 1,4,6,27,2 2,3,5,7,8,2<br>9,31,33,35 8,30,32,34 | 0 |                             |
| 9187 | 1,4,6,27,2 2,3,5,7,8,2<br>9,31,34,35 8,30,32,33 | 3 | P97605,Q561R9,Q5M819        |
| 9188 | 1,4,6,27,2 2,3,5,7,8,2<br>9,32,33,34 8,30,31,35 | 2 | Q10758,Q6P6Q2               |
| 9189 | 1,4,6,27,2 2,3,5,7,8,2<br>9,32,33,35 8,30,31,34 | 1 | P20766                      |
| 9190 | 1,4,6,27,2 2,3,5,7,8,2<br>9,32,34,35 8,30,31,33 | 2 | Q10758,Q5M819               |
| 9191 | 1,4,6,27,2 2,3,5,7,8,2<br>9,33,34,35 8,30,31,32 | 2 | Q561R9,Q5M819               |
| 9192 | 1,4,6,27,3 2,3,5,7,8,2<br>0,31,32,33 8,29,34,35 | 2 | P10758,P13432               |
| 9193 | 1,4,6,27,3 2,3,5,7,8,2<br>0,31,32,34 8,29,33,35 | 2 | P13432,Q10758               |
| 9194 | 1,4,6,27,3 2,3,5,7,8,2<br>0,31,32,35 8,29,33,34 | 0 |                             |
| 9195 | 1,4,6,27,3 2,3,5,7,8,2<br>0,31,33,34 8,29,32,35 | 2 | P13432,P51907               |
| 9196 | 1,4,6,27,3 2,3,5,7,8,2<br>0,31,33,35 8,29,32,34 | 0 |                             |

|      |                                                 |    |                                                                                                   |
|------|-------------------------------------------------|----|---------------------------------------------------------------------------------------------------|
| 9197 | 1,4,6,27,3 2,3,5,7,8,2<br>0,31,34,35 8,29,32,33 | 1  | P02793;Q7TP54                                                                                     |
| 9198 | 1,4,6,27,3 2,3,5,7,8,2<br>0,32,33,34 8,29,31,35 | 2  | Q10758,Q6IFU7                                                                                     |
| 9199 | 1,4,6,27,3 2,3,5,7,8,2<br>0,32,33,35 8,29,31,34 | 1  | P20766                                                                                            |
| 9200 | 1,4,6,27,3 2,3,5,7,8,2<br>0,32,34,35 8,29,31,33 | 1  | Q10758                                                                                            |
| 9201 | 1,4,6,27,3 2,3,5,7,8,2<br>0,33,34,35 8,29,31,32 | 1  | Q561R9                                                                                            |
| 9202 | 1,4,6,27,3 2,3,5,7,8,2<br>1,32,33,34 8,29,30,35 | 3  | P13432,Q10758,Q6P6Q2                                                                              |
| 9203 | 1,4,6,27,3 2,3,5,7,8,2<br>1,32,33,35 8,29,30,34 | 0  |                                                                                                   |
| 9204 | 1,4,6,27,3 2,3,5,7,8,2<br>1,32,34,35 8,29,30,33 | 1  | Q10758                                                                                            |
| 9205 | 1,4,6,27,3 2,3,5,7,8,2<br>1,33,34,35 8,29,30,32 | 2  | Q561R9,Q63355                                                                                     |
| 9206 | 1,4,6,27,3 2,3,5,7,8,2<br>2,33,34,35 8,29,30,31 | 3  | Q10758,Q6IFU7,Q6P6Q2                                                                              |
| 9207 | 1,4,6,28,2 2,3,5,7,8,2<br>9,30,31,32 7,33,34,35 | 10 | O08815,P04905,P06911,P08723,P08753,P47727,Q5GRG2,Q62975,Q63357,Q6AYR9                             |
| 9208 | 1,4,6,28,2 2,3,5,7,8,2<br>9,30,31,33 7,32,34,35 | 9  | O35547,P02780,P04905,P06911,P08723,P08753,P83121,Q5GRG2,Q63357                                    |
| 9209 | 1,4,6,28,2 2,3,5,7,8,2<br>9,30,31,34 7,32,33,35 | 4  | P27791,P97605,Q08849,Q6AYR9                                                                       |
| 9210 | 1,4,6,28,2 2,3,5,7,8,2<br>9,30,31,35 7,32,33,34 | 3  | P08753,Q07116,Q08849                                                                              |
| 9211 | 1,4,6,28,2 2,3,5,7,8,2<br>9,30,32,33 7,31,34,35 | 14 | F1LM93,O08815,O35547,P02780,P04905,P08723,P08753,P0C0A9,P20766,P35281,P47727,Q62975,Q63357,Q812E4 |
| 9212 | 1,4,6,28,2 2,3,5,7,8,2<br>9,30,32,34 7,31,33,35 | 3  | O08815,Q62975,Q6AYR9                                                                              |
| 9213 | 1,4,6,28,2 2,3,5,7,8,2<br>9,30,32,35 7,31,33,34 | 2  | P01835,P04905                                                                                     |
| 9214 | 1,4,6,28,2 2,3,5,7,8,2<br>9,30,33,34 7,31,32,35 | 2  | P27791,Q08849                                                                                     |
| 9215 | 1,4,6,28,2 2,3,5,7,8,2<br>9,30,33,35 7,31,32,34 | 4  | P04905,P08753,P20766,Q08849                                                                       |
| 9216 | 1,4,6,28,2 2,3,5,7,8,2<br>9,30,34,35 7,31,32,33 | 5  | P00507,P97605,Q08849,Q5HZV9,Q8CJD3                                                                |
| 9217 | 1,4,6,28,2 2,3,5,7,8,2<br>9,31,32,33 7,30,34,35 | 8  | O35547,P04905,P06911,P08723,P47727,P83121,Q5GRG2,Q62975                                           |
| 9218 | 1,4,6,28,2 2,3,5,7,8,2<br>9,31,32,34 7,30,33,35 | 3  | P06911,P27791,Q62975                                                                              |
| 9219 | 1,4,6,28,2 2,3,5,7,8,2<br>9,31,32,35 7,30,33,34 | 2  | P04905,P06911                                                                                     |

|      |                          |                           |   |                                           |
|------|--------------------------|---------------------------|---|-------------------------------------------|
| 9220 | 1,4,6,28,2<br>9,31,33,34 | 2,3,5,7,8,2<br>7,30,32,35 | 4 | O35547,P06911,P27791,P83121               |
| 9221 | 1,4,6,28,2<br>9,31,33,35 | 2,3,5,7,8,2<br>7,30,32,34 | 6 | P02803,P04905,P06911,P15399,P83121,Q09030 |
| 9222 | 1,4,6,28,2<br>9,31,34,35 | 2,3,5,7,8,2<br>7,30,32,33 | 3 | P00507,Q5HZV9,Q5M819                      |
| 9223 | 1,4,6,28,2<br>9,32,33,34 | 2,3,5,7,8,2<br>7,30,31,35 | 4 | P04905,P27791,P35281,P47727               |
| 9224 | 1,4,6,28,2<br>9,32,33,35 | 2,3,5,7,8,2<br>7,30,31,34 | 3 | P04905,P15399,P47727                      |
| 9225 | 1,4,6,28,2<br>9,32,34,35 | 2,3,5,7,8,2<br>7,30,31,33 | 3 | P00507,Q5HZV9,Q5M819                      |
| 9226 | 1,4,6,28,2<br>9,33,34,35 | 2,3,5,7,8,2<br>7,30,31,32 | 3 | P00507,Q5HZV9,Q5M819                      |
| 9227 | 1,4,6,28,3<br>0,31,32,33 | 2,3,5,7,8,2<br>7,29,34,35 | 3 | P06911,P10758,P13432                      |
| 9228 | 1,4,6,28,3<br>0,31,32,34 | 2,3,5,7,8,2<br>7,29,33,35 | 2 | P13432,Q5HZV9                             |
| 9229 | 1,4,6,28,3<br>0,31,32,35 | 2,3,5,7,8,2<br>7,29,33,34 | 1 | Q64335                                    |
| 9230 | 1,4,6,28,3<br>0,31,33,34 | 2,3,5,7,8,2<br>7,29,32,35 | 2 | P13432,P51907                             |
| 9231 | 1,4,6,28,3<br>0,31,33,35 | 2,3,5,7,8,2<br>7,29,32,34 | 0 |                                           |
| 9232 | 1,4,6,28,3<br>0,31,34,35 | 2,3,5,7,8,2<br>7,29,32,33 | 4 | P00507,P02793;Q7TP54,Q5HZV9,Q8CJD3        |
| 9233 | 1,4,6,28,3<br>0,32,33,34 | 2,3,5,7,8,2<br>7,29,31,35 | 3 | P13432,Q5HZV9,Q6IFU7                      |
| 9234 | 1,4,6,28,3<br>0,32,33,35 | 2,3,5,7,8,2<br>7,29,31,34 | 0 |                                           |
| 9235 | 1,4,6,28,3<br>0,32,34,35 | 2,3,5,7,8,2<br>7,29,31,33 | 2 | P00507,Q5HZV9                             |
| 9236 | 1,4,6,28,3<br>0,33,34,35 | 2,3,5,7,8,2<br>7,29,31,32 | 2 | P00507,Q5HZV9                             |
| 9237 | 1,4,6,28,3<br>1,32,33,34 | 2,3,5,7,8,2<br>7,29,30,35 | 3 | P06911,P13432,Q5HZV9                      |
| 9238 | 1,4,6,28,3<br>1,32,33,35 | 2,3,5,7,8,2<br>7,29,30,34 | 2 | P06911,P15399                             |
| 9239 | 1,4,6,28,3<br>1,32,34,35 | 2,3,5,7,8,2<br>7,29,30,33 | 2 | P00507,Q5HZV9                             |
| 9240 | 1,4,6,28,3<br>1,33,34,35 | 2,3,5,7,8,2<br>7,29,30,32 | 3 | P00507,P02803,Q5HZV9                      |
| 9241 | 1,4,6,28,3<br>2,33,34,35 | 2,3,5,7,8,2<br>7,29,30,31 | 2 | P00507,Q5HZV9                             |
| 9242 | 1,4,6,29,3<br>0,31,32,33 | 2,3,5,7,8,2<br>7,28,34,35 | 3 | P10758,P83121,Q62975                      |

|      |                          |                            |    |                                                                                                                 |
|------|--------------------------|----------------------------|----|-----------------------------------------------------------------------------------------------------------------|
| 9243 | 1,4,6,29,3<br>0,31,32,34 | 2,3,5,7,8,2<br>7,28,33,35  | 1  | Q99MH3                                                                                                          |
| 9244 | 1,4,6,29,3<br>0,31,32,35 | 2,3,5,7,8,2<br>7,28,33,34  | 1  | P25236                                                                                                          |
| 9245 | 1,4,6,29,3<br>0,31,33,34 | 2,3,5,7,8,2<br>7,28,32,35  | 0  |                                                                                                                 |
| 9246 | 1,4,6,29,3<br>0,31,33,35 | 2,3,5,7,8,2<br>7,28,32,34  | 2  | P83121,P97615                                                                                                   |
| 9247 | 1,4,6,29,3<br>0,31,34,35 | 2,3,5,7,8,2<br>7,28,32,33  | 1  | P02793;Q7TP54                                                                                                   |
| 9248 | 1,4,6,29,3<br>0,32,33,34 | 2,3,5,7,8,2<br>7,28,31,35  | 0  |                                                                                                                 |
| 9249 | 1,4,6,29,3<br>0,32,33,35 | 2,3,5,7,8,2<br>7,28,31,34  | 1  | P20766                                                                                                          |
| 9250 | 1,4,6,29,3<br>0,32,34,35 | 2,3,5,7,8,2<br>7,28,31,33  | 0  |                                                                                                                 |
| 9251 | 1,4,6,29,3<br>0,33,34,35 | 2,3,5,7,8,2<br>7,28,31,32  | 1  | B0BNN3                                                                                                          |
| 9252 | 1,4,6,29,3<br>1,32,33,34 | 2,3,5,7,8,2<br>7,28,30,35  | 0  |                                                                                                                 |
| 9253 | 1,4,6,29,3<br>1,32,33,35 | 2,3,5,7,8,2<br>7,28,30,34  | 4  | P04182,P15399,P83121,P97615                                                                                     |
| 9254 | 1,4,6,29,3<br>1,32,34,35 | 2,3,5,7,8,2<br>7,28,30,33  | 0  |                                                                                                                 |
| 9255 | 1,4,6,29,3<br>1,33,34,35 | 2,3,5,7,8,2<br>7,28,30,32  | 0  |                                                                                                                 |
| 9256 | 1,4,6,29,3<br>2,33,34,35 | 2,3,5,7,8,2<br>7,28,30,31  | 0  |                                                                                                                 |
| 9257 | 1,4,6,30,3<br>1,32,33,34 | 2,3,5,7,8,2<br>7,28,29,35  | 1  | P13432                                                                                                          |
| 9258 | 1,4,6,30,3<br>1,32,33,35 | 2,3,5,7,8,2<br>7,28,29,34  | 0  |                                                                                                                 |
| 9259 | 1,4,6,30,3<br>1,32,34,35 | 2,3,5,7,8,2<br>7,28,29,33  | 1  | P02793;Q7TP54                                                                                                   |
| 9260 | 1,4,6,30,3<br>1,33,34,35 | 2,3,5,7,8,2<br>7,28,29,32  | 3  | B0BNN3,P02793;Q7TP54,P82471                                                                                     |
| 9261 | 1,4,6,30,3<br>2,33,34,35 | 2,3,5,7,8,2<br>7,28,29,31  | 0  |                                                                                                                 |
| 9262 | 1,4,6,31,3<br>2,33,34,35 | 2,3,5,7,8,2<br>7,28,29,30  | 1  | P82471                                                                                                          |
| 9263 | 1,4,7,8,27,<br>28,29,30  | 2,3,5,6,31,<br>32,33,34,35 | 15 | F1LM93,P02781,P08723,P08753,P0C0A9,P22283,P24368,P30120,P36374,P82995,Q63617,Q6AYR9,Q8CJ52,Q9JI85,Q9R0T3        |
| 9264 | 1,4,7,8,27,<br>28,29,31  | 2,3,5,6,30,<br>32,33,34,35 | 16 | P02781,P06911,P08723,P08753,P0C0A9,P10715,P22283,P24368,P31044,P36374,Q5GRG2,Q62902,Q63617,Q8CJ52,Q9JI85,Q9R0T3 |

|      |                         |                                |    |                                                                                                                               |
|------|-------------------------|--------------------------------|----|-------------------------------------------------------------------------------------------------------------------------------|
| 9265 | 1,4,7,8,27,<br>28,29,32 | 2,3,5,6,30,<br>31,33,34,3<br>5 | 15 | F1LM93,P00714,P02781,P02793;Q7TP54,P08723,P09456,P0C0A9,P10715,P22283,P24368,Q63617,Q8CJ52,Q9JHB9,Q9JI85,Q9R0T3               |
| 9266 | 1,4,7,8,27,<br>28,29,33 | 2,3,5,6,30,<br>31,32,34,3<br>5 | 17 | F1LM93,P02781,P02793;Q7TP54,P07647,P08723,P08753,P0C0A9,P10715,P18418,P22283,P24368,P36374,Q63617,Q8CJ52,Q99041,Q9JI85,Q9R0T3 |
| 9267 | 1,4,7,8,27,<br>28,29,34 | 2,3,5,6,30,<br>31,32,33,3<br>5 | 8  | P08723,P18418,P24368,Q561R9,Q63617,Q8CJ52,Q9JI85,Q9QZA6                                                                       |
| 9268 | 1,4,7,8,27,<br>28,29,35 | 2,3,5,6,30,<br>31,32,33,3<br>4 | 7  | P08723,P0C0A9,Q561R9,Q63617,Q8CJ52,Q9JI85,Q9R0T3                                                                              |
| 9269 | 1,4,7,8,27,<br>28,30,31 | 2,3,5,6,29,<br>32,33,34,3<br>5 | 4  | P10715,P11883,P31044,Q5GRG2                                                                                                   |
| 9270 | 1,4,7,8,27,<br>28,30,32 | 2,3,5,6,29,<br>31,33,34,3<br>5 | 2  | P00714,Q6AYQ8                                                                                                                 |
| 9271 | 1,4,7,8,27,<br>28,30,33 | 2,3,5,6,29,<br>31,32,34,3<br>5 | 3  | P11883,P18418,Q99041                                                                                                          |
| 9272 | 1,4,7,8,27,<br>28,30,34 | 2,3,5,6,29,<br>31,32,33,3<br>5 | 2  | P18418,P47967                                                                                                                 |
| 9273 | 1,4,7,8,27,<br>28,30,35 | 2,3,5,6,29,<br>31,32,33,3<br>4 | 2  | Q561R9,Q6AYQ8                                                                                                                 |
| 9274 | 1,4,7,8,27,<br>28,31,32 | 2,3,5,6,29,<br>30,33,34,3<br>5 | 5  | P00714,P06911,P10715,P31044,Q5GRG2                                                                                            |
| 9275 | 1,4,7,8,27,<br>28,31,33 | 2,3,5,6,29,<br>30,32,34,3<br>5 | 9  | P10715,P18418,P19629,P22006,P31044,Q5GRG2,Q63617,Q99041,Q9R0T3                                                                |
| 9276 | 1,4,7,8,27,<br>28,31,34 | 2,3,5,6,29,<br>30,32,33,3<br>5 | 1  | P10715                                                                                                                        |
| 9277 | 1,4,7,8,27,<br>28,31,35 | 2,3,5,6,29,<br>30,32,33,3<br>4 | 3  | P10715,P31044,Q561R9                                                                                                          |
| 9278 | 1,4,7,8,27,<br>28,32,33 | 2,3,5,6,29,<br>30,31,34,3<br>5 | 7  | P00714,P02793;Q7TP54,P10715,P18418,Q63617,Q99041,Q9R0T3                                                                       |
| 9279 | 1,4,7,8,27,<br>28,32,34 | 2,3,5,6,29,<br>30,31,33,3<br>5 | 1  | P00714                                                                                                                        |

|      |                         |                                |   |                                           |
|------|-------------------------|--------------------------------|---|-------------------------------------------|
| 9280 | 1,4,7,8,27,<br>28,32,35 | 2,3,5,6,29,<br>30,31,33,3<br>4 | 1 | P00714                                    |
| 9281 | 1,4,7,8,27,<br>28,33,34 | 2,3,5,6,29,<br>30,31,32,3<br>5 | 3 | P18418,Q561R9,Q99041                      |
| 9282 | 1,4,7,8,27,<br>28,33,35 | 2,3,5,6,29,<br>30,31,32,3<br>4 | 3 | P18418,Q561R9,Q63617                      |
| 9283 | 1,4,7,8,27,<br>28,34,35 | 2,3,5,6,29,<br>30,31,32,3<br>3 | 3 | P09006,P18418,Q561R9                      |
| 9284 | 1,4,7,8,27,<br>29,30,31 | 2,3,5,6,28,<br>32,33,34,3<br>5 | 6 | P11598,P11883,Q4FZU6,Q5HZV9,Q63617,Q6AYR9 |
| 9285 | 1,4,7,8,27,<br>29,30,32 | 2,3,5,6,28,<br>31,33,34,3<br>5 | 2 | P00714,Q63617                             |
| 9286 | 1,4,7,8,27,<br>29,30,33 | 2,3,5,6,28,<br>31,32,34,3<br>5 | 4 | P11598,P11883,Q5HZV9,Q63617               |
| 9287 | 1,4,7,8,27,<br>29,30,34 | 2,3,5,6,28,<br>31,32,33,3<br>5 | 4 | P11598,Q561R9,Q63617,Q6AYR9               |
| 9288 | 1,4,7,8,27,<br>29,30,35 | 2,3,5,6,28,<br>31,32,33,3<br>4 | 3 | Q4FZU6,Q561R9,Q63617                      |
| 9289 | 1,4,7,8,27,<br>29,31,32 | 2,3,5,6,28,<br>30,33,34,3<br>5 | 3 | P00714,Q63617,Q8CJD3                      |
| 9290 | 1,4,7,8,27,<br>29,31,33 | 2,3,5,6,28,<br>30,32,34,3<br>5 | 5 | P11598,Q5HZV9,Q63617,Q8CJD3,Q99041        |
| 9291 | 1,4,7,8,27,<br>29,31,34 | 2,3,5,6,28,<br>30,32,33,3<br>5 | 3 | P11598,Q561R9,Q63617                      |
| 9292 | 1,4,7,8,27,<br>29,31,35 | 2,3,5,6,28,<br>30,32,33,3<br>4 | 3 | Q4FZU6,Q561R9,Q63617                      |
| 9293 | 1,4,7,8,27,<br>29,32,33 | 2,3,5,6,28,<br>30,31,34,3<br>5 | 5 | P00714,P02793;Q7TP54,Q63617,Q8CJD3,Q99041 |
| 9294 | 1,4,7,8,27,<br>29,32,34 | 2,3,5,6,28,<br>30,31,33,3<br>5 | 2 | P00714,Q63617                             |

|      |                         |                                |   |                             |
|------|-------------------------|--------------------------------|---|-----------------------------|
| 9295 | 1,4,7,8,27,<br>29,32,35 | 2,3,5,6,28,<br>30,31,33,3<br>4 | 2 | P00714,Q63617               |
| 9296 | 1,4,7,8,27,<br>29,33,34 | 2,3,5,6,28,<br>30,31,32,3<br>5 | 4 | P11598,Q561R9,Q63617,Q99041 |
| 9297 | 1,4,7,8,27,<br>29,33,35 | 2,3,5,6,28,<br>30,31,32,3<br>4 | 2 | Q561R9,Q63617               |
| 9298 | 1,4,7,8,27,<br>29,34,35 | 2,3,5,6,28,<br>30,31,32,3<br>3 | 2 | Q561R9,Q63617               |
| 9299 | 1,4,7,8,27,<br>30,31,32 | 2,3,5,6,28,<br>29,33,34,3<br>5 | 3 | P00714,P10758,Q4FZU6        |
| 9300 | 1,4,7,8,27,<br>30,31,33 | 2,3,5,6,28,<br>29,32,34,3<br>5 | 4 | P11883,P51907,Q4FZU6,Q5HZV9 |
| 9301 | 1,4,7,8,27,<br>30,31,34 | 2,3,5,6,28,<br>29,32,33,3<br>5 | 3 | P47967,Q561R9,Q80WL1        |
| 9302 | 1,4,7,8,27,<br>30,31,35 | 2,3,5,6,28,<br>29,32,33,3<br>4 | 3 | Q4FZU6,Q561R9,Q80WL1        |
| 9303 | 1,4,7,8,27,<br>30,32,33 | 2,3,5,6,28,<br>29,31,34,3<br>5 | 2 | P00714,Q99041               |
| 9304 | 1,4,7,8,27,<br>30,32,34 | 2,3,5,6,28,<br>29,31,33,3<br>5 | 2 | P00714,P47967               |
| 9305 | 1,4,7,8,27,<br>30,32,35 | 2,3,5,6,28,<br>29,31,33,3<br>4 | 2 | P00714,Q4FZU6               |
| 9306 | 1,4,7,8,27,<br>30,33,34 | 2,3,5,6,28,<br>29,31,32,3<br>5 | 3 | P47967,Q561R9,Q99041        |
| 9307 | 1,4,7,8,27,<br>30,33,35 | 2,3,5,6,28,<br>29,31,32,3<br>4 | 2 | Q4FZU6,Q561R9               |
| 9308 | 1,4,7,8,27,<br>30,34,35 | 2,3,5,6,28,<br>29,31,32,3<br>3 | 1 | Q561R9                      |
| 9309 | 1,4,7,8,27,<br>31,32,33 | 2,3,5,6,28,<br>29,30,34,3<br>5 | 4 | P00714,Q63617,Q8CJD3,Q99041 |

|      |                         |                                |   |                                                         |
|------|-------------------------|--------------------------------|---|---------------------------------------------------------|
| 9310 | 1,4,7,8,27,<br>31,32,34 | 2,3,5,6,28,<br>29,30,33,3<br>5 | 1 | P00714                                                  |
| 9311 | 1,4,7,8,27,<br>31,32,35 | 2,3,5,6,28,<br>29,30,33,3<br>4 | 2 | P00714,Q4FZU6                                           |
| 9312 | 1,4,7,8,27,<br>31,33,34 | 2,3,5,6,28,<br>29,30,32,3<br>5 | 3 | P01835,Q561R9,Q99041                                    |
| 9313 | 1,4,7,8,27,<br>31,33,35 | 2,3,5,6,28,<br>29,30,32,3<br>4 | 3 | Q4FZU6,Q561R9,Q63617                                    |
| 9314 | 1,4,7,8,27,<br>31,34,35 | 2,3,5,6,28,<br>29,30,32,3<br>3 | 1 | Q561R9                                                  |
| 9315 | 1,4,7,8,27,<br>32,33,34 | 2,3,5,6,28,<br>29,30,31,3<br>5 | 2 | P00714,Q99041                                           |
| 9316 | 1,4,7,8,27,<br>32,33,35 | 2,3,5,6,28,<br>29,30,31,3<br>4 | 2 | P00714,Q63617                                           |
| 9317 | 1,4,7,8,27,<br>32,34,35 | 2,3,5,6,28,<br>29,30,31,3<br>3 | 2 | P00714,Q561R9                                           |
| 9318 | 1,4,7,8,27,<br>33,34,35 | 2,3,5,6,28,<br>29,30,31,3<br>2 | 2 | Q561R9,Q99041                                           |
| 9319 | 1,4,7,8,28,<br>29,30,31 | 2,3,5,6,27,<br>32,33,34,3<br>5 | 8 | P06911,P08753,P10715,P19629,Q4FZU6,Q5GRG2,Q63617,Q8CJ52 |
| 9320 | 1,4,7,8,28,<br>29,30,32 | 2,3,5,6,27,<br>31,33,34,3<br>5 | 6 | F1LM93,P00714,P02780,Q63355,Q63617,Q8CJ52               |
| 9321 | 1,4,7,8,28,<br>29,30,33 | 2,3,5,6,27,<br>31,32,34,3<br>5 | 7 | F1LM93,P02780,P08723,P08753,Q63617,Q8CJ52,Q9JID2        |
| 9322 | 1,4,7,8,28,<br>29,30,34 | 2,3,5,6,27,<br>31,32,33,3<br>5 | 2 | Q8CJ52,Q9QZA6                                           |
| 9323 | 1,4,7,8,28,<br>29,30,35 | 2,3,5,6,27,<br>31,32,33,3<br>4 | 3 | Q4FZU6,Q63617,Q8CJ52                                    |
| 9324 | 1,4,7,8,28,<br>29,31,32 | 2,3,5,6,27,<br>30,33,34,3<br>5 | 8 | P06911,P10715,P31044,Q5GRG2,Q62975,Q63617,Q6AYL6,Q8CJ52 |



|      |                         |                                |    |                                                                                            |
|------|-------------------------|--------------------------------|----|--------------------------------------------------------------------------------------------|
| 9325 | 1,4,7,8,28,<br>29,31,33 | 2,3,5,6,27,<br>30,32,34,3<br>5 | 10 | P02803,P06911,P08753,P10715,P19629,P22006,P83121,Q5GRG2,Q63617,Q8CJ52                      |
| 9326 | 1,4,7,8,28,<br>29,31,34 | 2,3,5,6,27,<br>30,32,33,3<br>5 | 4  | P02803,P10715,Q5GRG2,Q63617                                                                |
| 9327 | 1,4,7,8,28,<br>29,31,35 | 2,3,5,6,27,<br>30,32,33,3<br>4 | 4  | P02803,P10715,Q4FZU6,Q63617                                                                |
| 9328 | 1,4,7,8,28,<br>29,32,33 | 2,3,5,6,27,<br>30,31,34,3<br>5 | 12 | P02780,P02793,Q7TP54,P04905,P08723,P09456,P10715,P24368,P35281,P47727,Q63617,Q8CJ52,Q99041 |
| 9329 | 1,4,7,8,28,<br>29,32,34 | 2,3,5,6,27,<br>30,31,33,3<br>5 | 1  | Q63617                                                                                     |
| 9330 | 1,4,7,8,28,<br>29,32,35 | 2,3,5,6,27,<br>30,31,33,3<br>4 | 1  | Q63617                                                                                     |
| 9331 | 1,4,7,8,28,<br>29,33,34 | 2,3,5,6,27,<br>30,31,32,3<br>5 | 4  | Q63617,Q8CJ52,Q99041,Q9QZA6                                                                |
| 9332 | 1,4,7,8,28,<br>29,33,35 | 2,3,5,6,27,<br>30,31,32,3<br>4 | 3  | P02803,Q63617,Q8CJ52                                                                       |
| 9333 | 1,4,7,8,28,<br>29,34,35 | 2,3,5,6,27,<br>30,31,32,3<br>3 | 4  | P02803,P09006,Q561R9,Q63617                                                                |
| 9334 | 1,4,7,8,28,<br>30,31,32 | 2,3,5,6,27,<br>29,33,34,3<br>5 | 4  | P10715,P31044,Q4FZU6,Q5GRG2                                                                |
| 9335 | 1,4,7,8,28,<br>30,31,33 | 2,3,5,6,27,<br>29,32,34,3<br>5 | 8  | P02803,P10715,P19629,P31044,P51907,Q4FZU6,Q5GRG2,Q8VD89                                    |
| 9336 | 1,4,7,8,28,<br>30,31,34 | 2,3,5,6,27,<br>29,32,33,3<br>5 | 2  | P47967,Q80WL1                                                                              |
| 9337 | 1,4,7,8,28,<br>30,31,35 | 2,3,5,6,27,<br>29,32,33,3<br>4 | 2  | P02803,Q4FZU6                                                                              |
| 9338 | 1,4,7,8,28,<br>30,32,33 | 2,3,5,6,27,<br>29,31,34,3<br>5 | 1  | P00714                                                                                     |
| 9339 | 1,4,7,8,28,<br>30,32,34 | 2,3,5,6,27,<br>29,31,33,3<br>5 | 2  | P00714,P47967                                                                              |

|      |                         |                                |   |                                                  |
|------|-------------------------|--------------------------------|---|--------------------------------------------------|
| 9340 | 1,4,7,8,28,<br>30,32,35 | 2,3,5,6,27,<br>29,31,33,3<br>4 | 2 | P00714,Q4FZU6                                    |
| 9341 | 1,4,7,8,28,<br>30,33,34 | 2,3,5,6,27,<br>29,31,32,3<br>5 | 1 | Q99041                                           |
| 9342 | 1,4,7,8,28,<br>30,33,35 | 2,3,5,6,27,<br>29,31,32,3<br>4 | 2 | P02803,Q4FZU6                                    |
| 9343 | 1,4,7,8,28,<br>30,34,35 | 2,3,5,6,27,<br>29,31,32,3<br>3 | 3 | P09006,Q561R9,Q920G2                             |
| 9344 | 1,4,7,8,28,<br>31,32,33 | 2,3,5,6,27,<br>29,30,34,3<br>5 | 7 | P02803,P06911,P10715,P31044,Q5GRG2,Q63617,Q99041 |
| 9345 | 1,4,7,8,28,<br>31,32,34 | 2,3,5,6,27,<br>29,30,33,3<br>5 | 2 | P10715,P31044                                    |
| 9346 | 1,4,7,8,28,<br>31,32,35 | 2,3,5,6,27,<br>29,30,33,3<br>4 | 4 | P02803,P10715,P31044,Q4FZU6                      |
| 9347 | 1,4,7,8,28,<br>31,33,34 | 2,3,5,6,27,<br>29,30,32,3<br>5 | 4 | P01835,P02803,P10715,Q99041                      |
| 9348 | 1,4,7,8,28,<br>31,33,35 | 2,3,5,6,27,<br>29,30,32,3<br>4 | 6 | P02803,P10715,P22006,P62804,Q4FZU6,Q8VD89        |
| 9349 | 1,4,7,8,28,<br>31,34,35 | 2,3,5,6,27,<br>29,30,32,3<br>3 | 3 | P02803,P09006,Q561R9                             |
| 9350 | 1,4,7,8,28,<br>32,33,34 | 2,3,5,6,27,<br>29,30,31,3<br>5 | 1 | Q99041                                           |
| 9351 | 1,4,7,8,28,<br>32,33,35 | 2,3,5,6,27,<br>29,30,31,3<br>4 | 2 | P02803,Q63617                                    |
| 9352 | 1,4,7,8,28,<br>32,34,35 | 2,3,5,6,27,<br>29,30,31,3<br>3 | 0 |                                                  |
| 9353 | 1,4,7,8,28,<br>33,34,35 | 2,3,5,6,27,<br>29,30,31,3<br>2 | 4 | P02803,P09006,Q561R9,Q99041                      |
| 9354 | 1,4,7,8,29,<br>30,31,32 | 2,3,5,6,27,<br>28,33,34,3<br>5 | 2 | Q4FZU6,Q63617                                    |

|      |                         |                                |   |                                    |
|------|-------------------------|--------------------------------|---|------------------------------------|
| 9355 | 1,4,7,8,29,<br>30,31,33 | 2,3,5,6,27,<br>28,32,34,3<br>5 | 4 | P83121,Q4FZU6,Q5HZV9,Q63617        |
| 9356 | 1,4,7,8,29,<br>30,31,34 | 2,3,5,6,27,<br>28,32,33,3<br>5 | 1 | Q80WL1                             |
| 9357 | 1,4,7,8,29,<br>30,31,35 | 2,3,5,6,27,<br>28,32,33,3<br>4 | 2 | Q4FZU6,Q63617                      |
| 9358 | 1,4,7,8,29,<br>30,32,33 | 2,3,5,6,27,<br>28,31,34,3<br>5 | 2 | Q4FZU6,Q63617                      |
| 9359 | 1,4,7,8,29,<br>30,32,34 | 2,3,5,6,27,<br>28,31,33,3<br>5 | 0 |                                    |
| 9360 | 1,4,7,8,29,<br>30,32,35 | 2,3,5,6,27,<br>28,31,33,3<br>4 | 2 | Q4FZU6,Q63617                      |
| 9361 | 1,4,7,8,29,<br>30,33,34 | 2,3,5,6,27,<br>28,31,32,3<br>5 | 2 | Q63617,Q99041                      |
| 9362 | 1,4,7,8,29,<br>30,33,35 | 2,3,5,6,27,<br>28,31,32,3<br>4 | 3 | Q4FZU6,Q561R9,Q63617               |
| 9363 | 1,4,7,8,29,<br>30,34,35 | 2,3,5,6,27,<br>28,31,32,3<br>3 | 1 | Q561R9                             |
| 9364 | 1,4,7,8,29,<br>31,32,33 | 2,3,5,6,27,<br>28,30,34,3<br>5 | 4 | P83121,Q4FZU6,Q63617,Q8CJD3        |
| 9365 | 1,4,7,8,29,<br>31,32,34 | 2,3,5,6,27,<br>28,30,33,3<br>5 | 1 | Q63617                             |
| 9366 | 1,4,7,8,29,<br>31,32,35 | 2,3,5,6,27,<br>28,30,33,3<br>4 | 3 | P04182,Q4FZU6,Q63617               |
| 9367 | 1,4,7,8,29,<br>31,33,34 | 2,3,5,6,27,<br>28,30,32,3<br>5 | 3 | P01835,Q63617,Q99041               |
| 9368 | 1,4,7,8,29,<br>31,33,35 | 2,3,5,6,27,<br>28,30,32,3<br>4 | 5 | P02803,P04182,Q4FZU6,Q561R9,Q63617 |
| 9369 | 1,4,7,8,29,<br>31,34,35 | 2,3,5,6,27,<br>28,30,32,3<br>3 | 4 | P02803,P09006,Q561R9,Q63617        |

|      |                         |                                |   |                             |
|------|-------------------------|--------------------------------|---|-----------------------------|
| 9370 | 1,4,7,8,29,<br>32,33,34 | 2,3,5,6,27,<br>28,30,31,3<br>5 | 2 | Q63617,Q99041               |
| 9371 | 1,4,7,8,29,<br>32,33,35 | 2,3,5,6,27,<br>28,30,31,3<br>4 | 2 | Q4FZU6,Q63617               |
| 9372 | 1,4,7,8,29,<br>32,34,35 | 2,3,5,6,27,<br>28,30,31,3<br>3 | 1 | Q63617                      |
| 9373 | 1,4,7,8,29,<br>33,34,35 | 2,3,5,6,27,<br>28,30,31,3<br>2 | 3 | P09006,Q561R9,Q63617        |
| 9374 | 1,4,7,8,30,<br>31,32,33 | 2,3,5,6,27,<br>28,29,34,3<br>5 | 3 | P10758,Q4FZU6,Q9QUL6        |
| 9375 | 1,4,7,8,30,<br>31,32,34 | 2,3,5,6,27,<br>28,29,33,3<br>5 | 1 | Q80WL1                      |
| 9376 | 1,4,7,8,30,<br>31,32,35 | 2,3,5,6,27,<br>28,29,33,3<br>4 | 2 | Q4FZU6,Q80WL1               |
| 9377 | 1,4,7,8,30,<br>31,33,34 | 2,3,5,6,27,<br>28,29,32,3<br>5 | 2 | P51907,Q99041               |
| 9378 | 1,4,7,8,30,<br>31,33,35 | 2,3,5,6,27,<br>28,29,32,3<br>4 | 3 | P02803,Q4FZU6,Q8VD89        |
| 9379 | 1,4,7,8,30,<br>31,34,35 | 2,3,5,6,27,<br>28,29,32,3<br>3 | 3 | P02793,Q7TP54,Q561R9,Q80WL1 |
| 9380 | 1,4,7,8,30,<br>32,33,34 | 2,3,5,6,27,<br>28,29,31,3<br>5 | 1 | Q99041                      |
| 9381 | 1,4,7,8,30,<br>32,33,35 | 2,3,5,6,27,<br>28,29,31,3<br>4 | 1 | Q4FZU6                      |
| 9382 | 1,4,7,8,30,<br>32,34,35 | 2,3,5,6,27,<br>28,29,31,3<br>3 | 0 |                             |
| 9383 | 1,4,7,8,30,<br>33,34,35 | 2,3,5,6,27,<br>28,29,31,3<br>2 | 1 | Q561R9                      |
| 9384 | 1,4,7,8,31,<br>32,33,34 | 2,3,5,6,27,<br>28,29,30,3<br>5 | 2 | P01835,Q99041               |

|      |                          |                                |    |                                                                                                                        |
|------|--------------------------|--------------------------------|----|------------------------------------------------------------------------------------------------------------------------|
| 9385 | 1,4,7,8,31,<br>32,33,35  | 2,3,5,6,27,<br>28,29,30,3<br>4 | 4  | P01835,P02803,P04182,Q4FZU6                                                                                            |
| 9386 | 1,4,7,8,31,<br>32,34,35  | 2,3,5,6,27,<br>28,29,30,3<br>3 | 1  | P01835                                                                                                                 |
| 9387 | 1,4,7,8,31,<br>33,34,35  | 2,3,5,6,27,<br>28,29,30,3<br>2 | 3  | P01835,P02803,Q561R9                                                                                                   |
| 9388 | 1,4,7,8,32,<br>33,34,35  | 2,3,5,6,27,<br>28,29,30,3<br>1 | 1  | P01835                                                                                                                 |
| 9389 | 1,4,7,27,2<br>8,29,30,31 | 2,3,5,6,8,3<br>2,33,34,35      | 12 | P02781,P08723,P08753,P0C0A9,P11883,P19629,P36374,P97605,Q5GRG2,Q6AYR9,Q8CJ52,Q9JI85                                    |
| 9390 | 1,4,7,27,2<br>8,29,30,32 | 2,3,5,6,8,3<br>1,33,34,35      | 17 | F1LM93,O08815,P00714,P02781,P05369,P08723,P08753,P09456,P0C0A9,P24368,P36374,Q63355,Q6AYR9,Q812E4,Q8CJ52,Q9JHB9,Q9JI85 |
| 9391 | 1,4,7,27,2<br>8,29,30,33 | 2,3,5,6,8,3<br>1,32,34,35      | 13 | F1LM93,O08815,P02781,P08723,P08753,P09456,P0C0A9,P11883,P20766,P36374,Q812E4,Q8CJ52,Q9JI85                             |
| 9392 | 1,4,7,27,2<br>8,29,30,34 | 2,3,5,6,8,3<br>1,32,33,35      | 7  | P05369,P08753,P36374,P47967,P97605,Q6AYR9,Q9JI85                                                                       |
| 9393 | 1,4,7,27,2<br>8,29,30,35 | 2,3,5,6,8,3<br>1,32,33,34      | 6  | P08753,P20766,P36374,P97605,Q561R9,Q9JI85                                                                              |
| 9394 | 1,4,7,27,2<br>8,29,31,32 | 2,3,5,6,8,3<br>0,33,34,35      | 12 | P02793;Q7TP54,P06911,P08723,P08753,P09456,P10715,P24368,P36374,Q5GRG2,Q6AYL6,Q9JHB9,Q9JI85                             |
| 9395 | 1,4,7,27,2<br>8,29,31,33 | 2,3,5,6,8,3<br>0,32,34,35      | 14 | P02781,P02793;Q7TP54,P06911,P08723,P08753,P09456,P10715,P19629,P22006,P36374,P83121,Q5GRG2,Q8CJ52,Q9JI85               |
| 9396 | 1,4,7,27,2<br>8,29,31,34 | 2,3,5,6,8,3<br>0,32,33,35      | 2  | P08753,Q5GRG2                                                                                                          |
| 9397 | 1,4,7,27,2<br>8,29,31,35 | 2,3,5,6,8,3<br>0,32,33,34      | 3  | P08753,P36374,Q561R9                                                                                                   |
| 9398 | 1,4,7,27,2<br>8,29,32,33 | 2,3,5,6,8,3<br>0,31,34,35      | 15 | F1LM93,O08815,P02781,P02793;Q7TP54,P04905,P08723,P08753,P09456,P24368,P36374,P47727,Q06000,Q812E4,Q9JHB9,Q9JI85        |
| 9399 | 1,4,7,27,2<br>8,29,32,34 | 2,3,5,6,8,3<br>0,31,33,35      | 5  | P00714,P05369,P09456,P24368,Q9JI85                                                                                     |
| 9400 | 1,4,7,27,2<br>8,29,32,35 | 2,3,5,6,8,3<br>0,31,33,34      | 2  | P36374,Q9JI85                                                                                                          |
| 9401 | 1,4,7,27,2<br>8,29,33,34 | 2,3,5,6,8,3<br>0,31,32,35      | 4  | P08753,P09456,Q561R9,Q9JI85                                                                                            |
| 9402 | 1,4,7,27,2<br>8,29,33,35 | 2,3,5,6,8,3<br>0,31,32,34      | 5  | P08753,P20766,P36374,Q561R9,Q9JI85                                                                                     |
| 9403 | 1,4,7,27,2<br>8,29,34,35 | 2,3,5,6,8,3<br>0,31,32,33      | 3  | Q561R9,Q5FVI6,Q5M819                                                                                                   |
| 9404 | 1,4,7,27,2<br>8,30,31,32 | 2,3,5,6,8,2<br>9,33,34,35      | 3  | P10758,P31044,Q5GRG2                                                                                                   |
| 9405 | 1,4,7,27,2<br>8,30,31,33 | 2,3,5,6,8,2<br>9,32,34,35      | 4  | P11883,P19629,P51907,Q5GRG2                                                                                            |

|      |                                                 |   |                                                  |
|------|-------------------------------------------------|---|--------------------------------------------------|
| 9406 | 1,4,7,27,2 2,3,5,6,8,2<br>8,30,31,34 9,32,33,35 | 3 | P47967,P51907,P97840                             |
| 9407 | 1,4,7,27,2 2,3,5,6,8,2<br>8,30,31,35 9,32,33,34 | 2 | D3ZUC6,Q4FZU6                                    |
| 9408 | 1,4,7,27,2 2,3,5,6,8,2<br>8,30,32,33 9,31,34,35 | 1 | P00714                                           |
| 9409 | 1,4,7,27,2 2,3,5,6,8,2<br>8,30,32,34 9,31,33,35 | 2 | P00714,P47967                                    |
| 9410 | 1,4,7,27,2 2,3,5,6,8,2<br>8,30,32,35 9,31,33,34 | 2 | P00714,Q6AYQ8                                    |
| 9411 | 1,4,7,27,2 2,3,5,6,8,2<br>8,30,33,34 9,31,32,35 | 2 | P47967,P51907                                    |
| 9412 | 1,4,7,27,2 2,3,5,6,8,2<br>8,30,33,35 9,31,32,34 | 4 | P20766,P51907,Q561R9,Q5RLM2                      |
| 9413 | 1,4,7,27,2 2,3,5,6,8,2<br>8,30,34,35 9,31,32,33 | 4 | P47967,Q561R9,Q5FVI6,Q8CJD3                      |
| 9414 | 1,4,7,27,2 2,3,5,6,8,2<br>8,31,32,33 9,30,34,35 | 6 | P02793;Q7TP54,P06911,P10715,P31044,Q06000,Q5GRG2 |
| 9415 | 1,4,7,27,2 2,3,5,6,8,2<br>8,31,32,34 9,30,33,35 | 0 |                                                  |
| 9416 | 1,4,7,27,2 2,3,5,6,8,2<br>8,31,32,35 9,30,33,34 | 0 |                                                  |
| 9417 | 1,4,7,27,2 2,3,5,6,8,2<br>8,31,33,34 9,30,32,35 | 1 | P51907                                           |
| 9418 | 1,4,7,27,2 2,3,5,6,8,2<br>8,31,33,35 9,30,32,34 | 4 | P22006,P51907,P62804,Q561R9                      |
| 9419 | 1,4,7,27,2 2,3,5,6,8,2<br>8,31,34,35 9,30,32,33 | 3 | P53792,P62804,Q561R9                             |
| 9420 | 1,4,7,27,2 2,3,5,6,8,2<br>8,32,33,34 9,30,31,35 | 1 | Q06000                                           |
| 9421 | 1,4,7,27,2 2,3,5,6,8,2<br>8,32,33,35 9,30,31,34 | 0 |                                                  |
| 9422 | 1,4,7,27,2 2,3,5,6,8,2<br>8,32,34,35 9,30,31,33 | 0 |                                                  |
| 9423 | 1,4,7,27,2 2,3,5,6,8,2<br>8,33,34,35 9,30,31,32 | 3 | P62804,Q561R9,Q5FVI6                             |
| 9424 | 1,4,7,27,2 2,3,5,6,8,2<br>9,30,31,32 8,33,34,35 | 3 | P10758,P11883,Q4FZU6                             |
| 9425 | 1,4,7,27,2 2,3,5,6,8,2<br>9,30,31,33 8,32,34,35 | 5 | P11883,P51907,P83121,Q4FZU6,Q5HZV9               |
| 9426 | 1,4,7,27,2 2,3,5,6,8,2<br>9,30,31,34 8,32,33,35 | 2 | Q561R9,Q6AYR9                                    |
| 9427 | 1,4,7,27,2 2,3,5,6,8,2<br>9,30,31,35 8,32,33,34 | 2 | Q4FZU6,Q561R9                                    |
| 9428 | 1,4,7,27,2 2,3,5,6,8,2<br>9,30,32,33 8,31,34,35 | 1 | P20766                                           |

|      |                                                 |   |                             |
|------|-------------------------------------------------|---|-----------------------------|
| 9429 | 1,4,7,27,2 2,3,5,6,8,2<br>9,30,32,34 8,31,33,35 | 0 |                             |
| 9430 | 1,4,7,27,2 2,3,5,6,8,2<br>9,30,32,35 8,31,33,34 | 1 | Q4FZU6                      |
| 9431 | 1,4,7,27,2 2,3,5,6,8,2<br>9,30,33,34 8,31,32,35 | 2 | Q561R9,Q5FVI6               |
| 9432 | 1,4,7,27,2 2,3,5,6,8,2<br>9,30,33,35 8,31,32,34 | 3 | P20766,Q4FZU6,Q561R9        |
| 9433 | 1,4,7,27,2 2,3,5,6,8,2<br>9,30,34,35 8,31,32,33 | 2 | Q561R9,Q5FVI6               |
| 9434 | 1,4,7,27,2 2,3,5,6,8,2<br>9,31,32,33 8,30,34,35 | 2 | P02793;Q7TP54,Q8CJD3        |
| 9435 | 1,4,7,27,2 2,3,5,6,8,2<br>9,31,32,34 8,30,33,35 | 1 | P05539                      |
| 9436 | 1,4,7,27,2 2,3,5,6,8,2<br>9,31,32,35 8,30,33,34 | 1 | Q4FZU6                      |
| 9437 | 1,4,7,27,2 2,3,5,6,8,2<br>9,31,33,34 8,30,32,35 | 1 | Q561R9                      |
| 9438 | 1,4,7,27,2 2,3,5,6,8,2<br>9,31,33,35 8,30,32,34 | 2 | Q4FZU6,Q561R9               |
| 9439 | 1,4,7,27,2 2,3,5,6,8,2<br>9,31,34,35 8,30,32,33 | 1 | Q561R9                      |
| 9440 | 1,4,7,27,2 2,3,5,6,8,2<br>9,32,33,34 8,30,31,35 | 0 |                             |
| 9441 | 1,4,7,27,2 2,3,5,6,8,2<br>9,32,33,35 8,30,31,34 | 0 |                             |
| 9442 | 1,4,7,27,2 2,3,5,6,8,2<br>9,32,34,35 8,30,31,33 | 1 | Q561R9                      |
| 9443 | 1,4,7,27,2 2,3,5,6,8,2<br>9,33,34,35 8,30,31,32 | 2 | Q561R9,Q5FVI6               |
| 9444 | 1,4,7,27,3 2,3,5,6,8,2<br>0,31,32,33 8,29,34,35 | 4 | P10758,P11883,P51907,Q4FZU6 |
| 9445 | 1,4,7,27,3 2,3,5,6,8,2<br>0,31,32,34 8,29,33,35 | 1 | P47967                      |
| 9446 | 1,4,7,27,3 2,3,5,6,8,2<br>0,31,32,35 8,29,33,34 | 1 | Q4FZU6                      |
| 9447 | 1,4,7,27,3 2,3,5,6,8,2<br>0,31,33,34 8,29,32,35 | 3 | P47967,P51907,Q561R9        |
| 9448 | 1,4,7,27,3 2,3,5,6,8,2<br>0,31,33,35 8,29,32,34 | 3 | P51907,Q4FZU6,Q561R9        |
| 9449 | 1,4,7,27,3 2,3,5,6,8,2<br>0,31,34,35 8,29,32,33 | 1 | Q561R9                      |
| 9450 | 1,4,7,27,3 2,3,5,6,8,2<br>0,32,33,34 8,29,31,35 | 0 |                             |
| 9451 | 1,4,7,27,3 2,3,5,6,8,2<br>0,32,33,35 8,29,31,34 | 0 |                             |

|      |                          |                           |    |                                                                       |
|------|--------------------------|---------------------------|----|-----------------------------------------------------------------------|
| 9452 | 1,4,7,27,3<br>0,32,34,35 | 2,3,5,6,8,2<br>8,29,31,33 | 1  | Q561R9                                                                |
| 9453 | 1,4,7,27,3<br>0,33,34,35 | 2,3,5,6,8,2<br>8,29,31,32 | 2  | Q561R9,Q5FVI6                                                         |
| 9454 | 1,4,7,27,3<br>1,32,33,34 | 2,3,5,6,8,2<br>8,29,30,35 | 1  | P05539                                                                |
| 9455 | 1,4,7,27,3<br>1,32,33,35 | 2,3,5,6,8,2<br>8,29,30,34 | 2  | Q4FZU6,Q9WTT6                                                         |
| 9456 | 1,4,7,27,3<br>1,32,34,35 | 2,3,5,6,8,2<br>8,29,30,33 | 1  | Q561R9                                                                |
| 9457 | 1,4,7,27,3<br>1,33,34,35 | 2,3,5,6,8,2<br>8,29,30,32 | 2  | Q561R9,Q5FVI6                                                         |
| 9458 | 1,4,7,27,3<br>2,33,34,35 | 2,3,5,6,8,2<br>8,29,30,31 | 1  | Q561R9                                                                |
| 9459 | 1,4,7,28,2<br>9,30,31,32 | 2,3,5,6,8,2<br>7,33,34,35 | 4  | P06911,P08753,Q4FZU6,Q5GRG2                                           |
| 9460 | 1,4,7,28,2<br>9,30,31,33 | 2,3,5,6,8,2<br>7,32,34,35 | 10 | P06760,P08753,P11883,P19629,P35467,P51907,P83121,Q4FZU6,Q5GRG2,Q9JID2 |
| 9461 | 1,4,7,28,2<br>9,30,31,34 | 2,3,5,6,8,2<br>7,32,33,35 | 2  | P08753,Q6AYR9                                                         |
| 9462 | 1,4,7,28,2<br>9,30,31,35 | 2,3,5,6,8,2<br>7,32,33,34 | 5  | P06760,P08753,Q07116,Q4FZU6,Q9Z1F2                                    |
| 9463 | 1,4,7,28,2<br>9,30,32,33 | 2,3,5,6,8,2<br>7,31,34,35 | 4  | F1LM93,P04905,P08753,P09456                                           |
| 9464 | 1,4,7,28,2<br>9,30,32,34 | 2,3,5,6,8,2<br>7,31,33,35 | 0  |                                                                       |
| 9465 | 1,4,7,28,2<br>9,30,32,35 | 2,3,5,6,8,2<br>7,31,33,34 | 1  | Q4FZU6                                                                |
| 9466 | 1,4,7,28,2<br>9,30,33,34 | 2,3,5,6,8,2<br>7,31,32,35 | 1  | P08753                                                                |
| 9467 | 1,4,7,28,2<br>9,30,33,35 | 2,3,5,6,8,2<br>7,31,32,34 | 6  | P06760,P08753,P20766,Q4FZU6,Q9JID2,Q9Z1F2                             |
| 9468 | 1,4,7,28,2<br>9,30,34,35 | 2,3,5,6,8,2<br>7,31,32,33 | 4  | P06760,Q561R9,Q8CJD3,Q9Z1F2                                           |
| 9469 | 1,4,7,28,2<br>9,31,32,33 | 2,3,5,6,8,2<br>7,30,34,35 | 9  | P02793;Q7TP54,P04905,P06911,P08753,P09456,P10715,P47727,P83121,Q5GRG2 |
| 9470 | 1,4,7,28,2<br>9,31,32,34 | 2,3,5,6,8,2<br>7,30,33,35 | 1  | P06911                                                                |
| 9471 | 1,4,7,28,2<br>9,31,32,35 | 2,3,5,6,8,2<br>7,30,33,34 | 2  | P06911,Q4FZU6                                                         |
| 9472 | 1,4,7,28,2<br>9,31,33,34 | 2,3,5,6,8,2<br>7,30,32,35 | 3  | P06760,P08753,P27791                                                  |
| 9473 | 1,4,7,28,2<br>9,31,33,35 | 2,3,5,6,8,2<br>7,30,32,34 | 8  | P02803,P06760,P08753,P22006,P83121,Q00715,Q4FZU6,Q9WTT6               |
| 9474 | 1,4,7,28,2<br>9,31,34,35 | 2,3,5,6,8,2<br>7,30,32,33 | 3  | P02803,P06760,Q561R9                                                  |



|      |                          |                           |   |                                                                |
|------|--------------------------|---------------------------|---|----------------------------------------------------------------|
| 9475 | 1,4,7,28,2<br>9,32,33,34 | 2,3,5,6,8,2<br>7,30,31,35 | 1 | P09456                                                         |
| 9476 | 1,4,7,28,2<br>9,32,33,35 | 2,3,5,6,8,2<br>7,30,31,34 | 1 | Q9WTT6                                                         |
| 9477 | 1,4,7,28,2<br>9,32,34,35 | 2,3,5,6,8,2<br>7,30,31,33 | 0 |                                                                |
| 9478 | 1,4,7,28,2<br>9,33,34,35 | 2,3,5,6,8,2<br>7,30,31,32 | 3 | P06760,Q561R9,Q5FVI6                                           |
| 9479 | 1,4,7,28,3<br>0,31,32,33 | 2,3,5,6,8,2<br>7,29,34,35 | 3 | P10758,P51907,Q4FZU6                                           |
| 9480 | 1,4,7,28,3<br>0,31,32,34 | 2,3,5,6,8,2<br>7,29,33,35 | 1 | P47967                                                         |
| 9481 | 1,4,7,28,3<br>0,31,32,35 | 2,3,5,6,8,2<br>7,29,33,34 | 1 | Q4FZU6                                                         |
| 9482 | 1,4,7,28,3<br>0,31,33,34 | 2,3,5,6,8,2<br>7,29,32,35 | 2 | P06760,P51907                                                  |
| 9483 | 1,4,7,28,3<br>0,31,33,35 | 2,3,5,6,8,2<br>7,29,32,34 | 9 | P02803,P06760,P51907,P62804,Q00715,Q4FZU6,Q8VD89,Q9WTT6,Q9Z1F2 |
| 9484 | 1,4,7,28,3<br>0,31,34,35 | 2,3,5,6,8,2<br>7,29,32,33 | 5 | P06760,P62804,Q561R9,Q8CJD3,Q9Z1F2                             |
| 9485 | 1,4,7,28,3<br>0,32,33,34 | 2,3,5,6,8,2<br>7,29,31,35 | 0 |                                                                |
| 9486 | 1,4,7,28,3<br>0,32,33,35 | 2,3,5,6,8,2<br>7,29,31,34 | 2 | Q4FZU6,Q9WTT6                                                  |
| 9487 | 1,4,7,28,3<br>0,32,34,35 | 2,3,5,6,8,2<br>7,29,31,33 | 0 |                                                                |
| 9488 | 1,4,7,28,3<br>0,33,34,35 | 2,3,5,6,8,2<br>7,29,31,32 | 6 | P06760,P62804,Q561R9,Q5FVI6,Q8CJD3,Q9Z1F2                      |
| 9489 | 1,4,7,28,3<br>1,32,33,34 | 2,3,5,6,8,2<br>7,29,30,35 | 0 |                                                                |
| 9490 | 1,4,7,28,3<br>1,32,33,35 | 2,3,5,6,8,2<br>7,29,30,34 | 5 | P02803,P10719,Q00715,Q4FZU6,Q9WTT6                             |
| 9491 | 1,4,7,28,3<br>1,32,34,35 | 2,3,5,6,8,2<br>7,29,30,33 | 0 |                                                                |
| 9492 | 1,4,7,28,3<br>1,33,34,35 | 2,3,5,6,8,2<br>7,29,30,32 | 4 | P02803,P06760,P62804,Q561R9                                    |
| 9493 | 1,4,7,28,3<br>2,33,34,35 | 2,3,5,6,8,2<br>7,29,30,31 | 0 |                                                                |
| 9494 | 1,4,7,29,3<br>0,31,32,33 | 2,3,5,6,8,2<br>7,28,34,35 | 4 | P10758,P83121,Q4FZU6,Q9WTT6                                    |
| 9495 | 1,4,7,29,3<br>0,31,32,34 | 2,3,5,6,8,2<br>7,28,33,35 | 0 |                                                                |
| 9496 | 1,4,7,29,3<br>0,31,32,35 | 2,3,5,6,8,2<br>7,28,33,34 | 2 | Q4FZU6,Q9WTT6                                                  |
| 9497 | 1,4,7,29,3<br>0,31,33,34 | 2,3,5,6,8,2<br>7,28,32,35 | 1 | P51907                                                         |

|      |                          |                           |    |                                                                                                                                             |
|------|--------------------------|---------------------------|----|---------------------------------------------------------------------------------------------------------------------------------------------|
| 9498 | 1,4,7,29,3<br>0,31,33,35 | 2,3,5,6,8,2<br>7,28,32,34 | 5  | P06760,P83121,Q4FZU6,Q9WTT6,Q9Z1F2                                                                                                          |
| 9499 | 1,4,7,29,3<br>0,31,34,35 | 2,3,5,6,8,2<br>7,28,32,33 | 2  | Q561R9,Q9Z1F2                                                                                                                               |
| 9500 | 1,4,7,29,3<br>0,32,33,34 | 2,3,5,6,8,2<br>7,28,31,35 | 0  |                                                                                                                                             |
| 9501 | 1,4,7,29,3<br>0,32,33,35 | 2,3,5,6,8,2<br>7,28,31,34 | 2  | Q4FZU6,Q9WTT6                                                                                                                               |
| 9502 | 1,4,7,29,3<br>0,32,34,35 | 2,3,5,6,8,2<br>7,28,31,33 | 0  |                                                                                                                                             |
| 9503 | 1,4,7,29,3<br>0,33,34,35 | 2,3,5,6,8,2<br>7,28,31,32 | 3  | Q561R9,Q5FVI6,Q9Z1F2                                                                                                                        |
| 9504 | 1,4,7,29,3<br>1,32,33,34 | 2,3,5,6,8,2<br>7,28,30,35 | 0  |                                                                                                                                             |
| 9505 | 1,4,7,29,3<br>1,32,33,35 | 2,3,5,6,8,2<br>7,28,30,34 | 3  | P04182,Q4FZU6,Q9WTT6                                                                                                                        |
| 9506 | 1,4,7,29,3<br>1,32,34,35 | 2,3,5,6,8,2<br>7,28,30,33 | 0  |                                                                                                                                             |
| 9507 | 1,4,7,29,3<br>1,33,34,35 | 2,3,5,6,8,2<br>7,28,30,32 | 2  | P06760,Q561R9                                                                                                                               |
| 9508 | 1,4,7,29,3<br>2,33,34,35 | 2,3,5,6,8,2<br>7,28,30,31 | 0  |                                                                                                                                             |
| 9509 | 1,4,7,30,3<br>1,32,33,34 | 2,3,5,6,8,2<br>7,28,29,35 | 1  | Q63942                                                                                                                                      |
| 9510 | 1,4,7,30,3<br>1,32,33,35 | 2,3,5,6,8,2<br>7,28,29,34 | 3  | Q4FZU6,Q63942,Q9WTT6                                                                                                                        |
| 9511 | 1,4,7,30,3<br>1,32,34,35 | 2,3,5,6,8,2<br>7,28,29,33 | 1  | Q63942                                                                                                                                      |
| 9512 | 1,4,7,30,3<br>1,33,34,35 | 2,3,5,6,8,2<br>7,28,29,32 | 5  | P06760,P51907,Q561R9,Q63942,Q9Z1F2                                                                                                          |
| 9513 | 1,4,7,30,3<br>2,33,34,35 | 2,3,5,6,8,2<br>7,28,29,31 | 1  | Q63942                                                                                                                                      |
| 9514 | 1,4,7,31,3<br>2,33,34,35 | 2,3,5,6,8,2<br>7,28,29,30 | 3  | P01835,P82471,Q63942                                                                                                                        |
| 9515 | 1,4,8,27,2<br>8,29,30,31 | 2,3,5,6,7,3<br>2,33,34,35 | 12 | O35547,P02781,P02782,P08723,P08753,P0C0A9,P11883,P36374,P97605,Q5GRG2,Q6AYR9,Q8CJ52                                                         |
| 9516 | 1,4,8,27,2<br>8,29,30,32 | 2,3,5,6,7,3<br>1,33,34,35 | 20 | F1LM93,O08815,P00714,P02781,P02782,P05369,P08010,P08723,P0C0A9,P24368,P30120,P35281,P36374,P83748,P97605,Q62975,Q6AYR9,Q812E4,Q8CJ52,Q9JHB9 |
| 9517 | 1,4,8,27,2<br>8,29,30,33 | 2,3,5,6,7,3<br>1,32,34,35 | 19 | F1LM93,O08815,O35547,P02781,P02782,P08723,P08753,P0C0A9,P11883,P24368,P30120,P36374,P83748,P97605,Q6AYR9,Q812E4,Q8CJ52,Q9JHB9,Q9JI85        |
| 9518 | 1,4,8,27,2<br>8,29,30,34 | 2,3,5,6,7,3<br>1,32,33,35 | 9  | P02781,P05369,P08723,P0C0A9,P97605,Q561R9,Q6AYR9,Q8CJ52,Q9QZA6                                                                              |
| 9519 | 1,4,8,27,2<br>8,29,30,35 | 2,3,5,6,7,3<br>1,32,33,34 | 8  | P02781,P08723,P0C0A9,P36374,P97605,Q561R9,Q6AYR9,Q8CJ52                                                                                     |
| 9520 | 1,4,8,27,2<br>8,29,31,32 | 2,3,5,6,7,3<br>0,33,34,35 | 13 | O35547,P00714,P02781,P02782,P06911,P08723,P0C0A9,P24368,P36374,Q5GRG2,Q62975,Q8CJ52,Q9JHB9                                                  |

|      |                                                 |    |                                                                                                                        |
|------|-------------------------------------------------|----|------------------------------------------------------------------------------------------------------------------------|
| 9521 | 1,4,8,27,2 2,3,5,6,7,3<br>8,29,31,33 0,32,34,35 | 12 | O35547,P02781,P02782,P06911,P08723,P08753,P0C0A9,P36374,P97605,Q5GRG2,Q8CJ52,Q9JI85                                    |
| 9522 | 1,4,8,27,2 2,3,5,6,7,3<br>8,29,31,34 0,32,33,35 | 3  | P02781,P97605,Q561R9                                                                                                   |
| 9523 | 1,4,8,27,2 2,3,5,6,7,3<br>8,29,31,35 0,32,33,34 | 4  | P0C0A9,P36374,P97605,Q561R9                                                                                            |
| 9524 | 1,4,8,27,2 2,3,5,6,7,3<br>8,29,32,33 0,31,34,35 | 16 | F1LM93,O35547,P00714,P02781,P02793;Q7TP54,P04905,P08723,P0C0A9,P24368,P35281,P36374,P47727,Q812E4,Q8CJ52,Q9JHB9,Q9JI85 |
| 9525 | 1,4,8,27,2 2,3,5,6,7,3<br>8,29,32,34 0,31,33,35 | 6  | P00714,P02781,P05369,P08723,P24368,P35281                                                                              |
| 9526 | 1,4,8,27,2 2,3,5,6,7,3<br>8,29,32,35 0,31,33,34 | 6  | P00714,P08723,P0C0A9,P19218,P24368,P36374                                                                              |
| 9527 | 1,4,8,27,2 2,3,5,6,7,3<br>8,29,33,34 0,31,32,35 | 7  | O35547,P02781,P08723,P0C0A9,P97605,Q561R9,Q9QZA6                                                                       |
| 9528 | 1,4,8,27,2 2,3,5,6,7,3<br>8,29,33,35 0,31,32,34 | 6  | P02781,P08723,P0C0A9,P36374,P97605,Q561R9                                                                              |
| 9529 | 1,4,8,27,2 2,3,5,6,7,3<br>8,29,34,35 0,31,32,33 | 4  | P00507,P09006,P97605,Q561R9                                                                                            |
| 9530 | 1,4,8,27,2 2,3,5,6,7,2<br>8,30,31,32 9,33,34,35 | 4  | P00714,P10758,P83748,Q5GRG2                                                                                            |
| 9531 | 1,4,8,27,2 2,3,5,6,7,2<br>8,30,31,33 9,32,34,35 | 3  | P10758,P11883,P51907                                                                                                   |
| 9532 | 1,4,8,27,2 2,3,5,6,7,2<br>8,30,31,34 9,32,33,35 | 1  | P97605                                                                                                                 |
| 9533 | 1,4,8,27,2 2,3,5,6,7,2<br>8,30,31,35 9,32,33,34 | 2  | P97605,Q561R9                                                                                                          |
| 9534 | 1,4,8,27,2 2,3,5,6,7,2<br>8,30,32,33 9,31,34,35 | 2  | P00714,P83748                                                                                                          |
| 9535 | 1,4,8,27,2 2,3,5,6,7,2<br>8,30,32,34 9,31,33,35 | 1  | P00714                                                                                                                 |
| 9536 | 1,4,8,27,2 2,3,5,6,7,2<br>8,30,32,35 9,31,33,34 | 3  | P00714,P83748,Q6AYQ8                                                                                                   |
| 9537 | 1,4,8,27,2 2,3,5,6,7,2<br>8,30,33,34 9,31,32,35 | 1  | Q561R9                                                                                                                 |
| 9538 | 1,4,8,27,2 2,3,5,6,7,2<br>8,30,33,35 9,31,32,34 | 2  | P83748,Q561R9                                                                                                          |
| 9539 | 1,4,8,27,2 2,3,5,6,7,2<br>8,30,34,35 9,31,32,33 | 6  | P00507,P09006,P53792,P97605,Q561R9,Q8CJD3                                                                              |
| 9540 | 1,4,8,27,2 2,3,5,6,7,2<br>8,31,32,33 9,30,34,35 | 3  | P06911,P10758,Q5GRG2                                                                                                   |
| 9541 | 1,4,8,27,2 2,3,5,6,7,2<br>8,31,32,34 9,30,33,35 | 1  | P00714                                                                                                                 |
| 9542 | 1,4,8,27,2 2,3,5,6,7,2<br>8,31,32,35 9,30,33,34 | 0  |                                                                                                                        |
| 9543 | 1,4,8,27,2 2,3,5,6,7,2<br>8,31,33,34 9,30,32,35 | 1  | Q561R9                                                                                                                 |

|      |                          |                           |   |                                    |
|------|--------------------------|---------------------------|---|------------------------------------|
| 9544 | 1,4,8,27,2<br>8,31,33,35 | 2,3,5,6,7,2<br>9,30,32,34 | 2 | P02803,Q561R9                      |
| 9545 | 1,4,8,27,2<br>8,31,34,35 | 2,3,5,6,7,2<br>9,30,32,33 | 4 | P00507,P09006,P53792,Q561R9        |
| 9546 | 1,4,8,27,2<br>8,32,33,34 | 2,3,5,6,7,2<br>9,30,31,35 | 4 | P00714,P35281,Q6IFU7,Q6P6Q2        |
| 9547 | 1,4,8,27,2<br>8,32,33,35 | 2,3,5,6,7,2<br>9,30,31,34 | 3 | P00714,P09605,P25809,Q6IG02        |
| 9548 | 1,4,8,27,2<br>8,32,34,35 | 2,3,5,6,7,2<br>9,30,31,33 | 4 | P00507,P00714,P53792,Q561R9        |
| 9549 | 1,4,8,27,2<br>8,33,34,35 | 2,3,5,6,7,2<br>9,30,31,32 | 4 | P00507,P09006,P53792,Q561R9        |
| 9550 | 1,4,8,27,2<br>9,30,31,32 | 2,3,5,6,7,2<br>8,33,34,35 | 2 | P10758,Q6AYR9                      |
| 9551 | 1,4,8,27,2<br>9,30,31,33 | 2,3,5,6,7,2<br>8,32,34,35 | 5 | P10758,P11883,P97605,Q5HZV9,Q6AYR9 |
| 9552 | 1,4,8,27,2<br>9,30,31,34 | 2,3,5,6,7,2<br>8,32,33,35 | 3 | P97605,Q561R9,Q6AYR9               |
| 9553 | 1,4,8,27,2<br>9,30,31,35 | 2,3,5,6,7,2<br>8,32,33,34 | 3 | P97605,Q4FZU6,Q561R9               |
| 9554 | 1,4,8,27,2<br>9,30,32,33 | 2,3,5,6,7,2<br>8,31,34,35 | 1 | P83748                             |
| 9555 | 1,4,8,27,2<br>9,30,32,34 | 2,3,5,6,7,2<br>8,31,33,35 | 1 | Q6AYR9                             |
| 9556 | 1,4,8,27,2<br>9,30,32,35 | 2,3,5,6,7,2<br>8,31,33,34 | 1 | P83748                             |
| 9557 | 1,4,8,27,2<br>9,30,33,34 | 2,3,5,6,7,2<br>8,31,32,35 | 3 | P97605,Q561R9,Q6AYR9               |
| 9558 | 1,4,8,27,2<br>9,30,33,35 | 2,3,5,6,7,2<br>8,31,32,34 | 3 | P83748,P97605,Q561R9               |
| 9559 | 1,4,8,27,2<br>9,30,34,35 | 2,3,5,6,7,2<br>8,31,32,33 | 3 | P09006,P97605,Q561R9               |
| 9560 | 1,4,8,27,2<br>9,31,32,33 | 2,3,5,6,7,2<br>8,30,34,35 | 2 | P10758,Q8CJD3                      |
| 9561 | 1,4,8,27,2<br>9,31,32,34 | 2,3,5,6,7,2<br>8,30,33,35 | 0 |                                    |
| 9562 | 1,4,8,27,2<br>9,31,32,35 | 2,3,5,6,7,2<br>8,30,33,34 | 1 | P97840                             |
| 9563 | 1,4,8,27,2<br>9,31,33,34 | 2,3,5,6,7,2<br>8,30,32,35 | 1 | Q561R9                             |
| 9564 | 1,4,8,27,2<br>9,31,33,35 | 2,3,5,6,7,2<br>8,30,32,34 | 3 | P97615,P97840,Q561R9               |
| 9565 | 1,4,8,27,2<br>9,31,34,35 | 2,3,5,6,7,2<br>8,30,32,33 | 3 | P09006,P97605,Q561R9               |
| 9566 | 1,4,8,27,2<br>9,32,33,34 | 2,3,5,6,7,2<br>8,30,31,35 | 0 |                                    |

|      |                                                 |   |                                                         |
|------|-------------------------------------------------|---|---------------------------------------------------------|
| 9567 | 1,4,8,27,2 2,3,5,6,7,2<br>9,32,33,35 8,30,31,34 | 2 | P47967,P97840                                           |
| 9568 | 1,4,8,27,2 2,3,5,6,7,2<br>9,32,34,35 8,30,31,33 | 1 | Q561R9                                                  |
| 9569 | 1,4,8,27,2 2,3,5,6,7,2<br>9,33,34,35 8,30,31,32 | 2 | P09006,Q561R9                                           |
| 9570 | 1,4,8,27,3 2,3,5,6,7,2<br>0,31,32,33 8,29,34,35 | 2 | P10758,P83748                                           |
| 9571 | 1,4,8,27,3 2,3,5,6,7,2<br>0,31,32,34 8,29,33,35 | 1 | P10758                                                  |
| 9572 | 1,4,8,27,3 2,3,5,6,7,2<br>0,31,32,35 8,29,33,34 | 2 | P10758,Q4FZU6                                           |
| 9573 | 1,4,8,27,3 2,3,5,6,7,2<br>0,31,33,34 8,29,32,35 | 2 | P51907,Q561R9                                           |
| 9574 | 1,4,8,27,3 2,3,5,6,7,2<br>0,31,33,35 8,29,32,34 | 2 | Q4FZU6,Q561R9                                           |
| 9575 | 1,4,8,27,3 2,3,5,6,7,2<br>0,31,34,35 8,29,32,33 | 3 | P02793;Q7TP54,P09006,Q561R9                             |
| 9576 | 1,4,8,27,3 2,3,5,6,7,2<br>0,32,33,34 8,29,31,35 | 0 |                                                         |
| 9577 | 1,4,8,27,3 2,3,5,6,7,2<br>0,32,33,35 8,29,31,34 | 1 | P83748                                                  |
| 9578 | 1,4,8,27,3 2,3,5,6,7,2<br>0,32,34,35 8,29,31,33 | 1 | Q561R9                                                  |
| 9579 | 1,4,8,27,3 2,3,5,6,7,2<br>0,33,34,35 8,29,31,32 | 2 | P09006,Q561R9                                           |
| 9580 | 1,4,8,27,3 2,3,5,6,7,2<br>1,32,33,34 8,29,30,35 | 0 |                                                         |
| 9581 | 1,4,8,27,3 2,3,5,6,7,2<br>1,32,33,35 8,29,30,34 | 0 |                                                         |
| 9582 | 1,4,8,27,3 2,3,5,6,7,2<br>1,32,34,35 8,29,30,33 | 1 | Q561R9                                                  |
| 9583 | 1,4,8,27,3 2,3,5,6,7,2<br>1,33,34,35 8,29,30,32 | 2 | P09006,Q561R9                                           |
| 9584 | 1,4,8,27,3 2,3,5,6,7,2<br>2,33,34,35 8,29,30,31 | 1 | Q561R9                                                  |
| 9585 | 1,4,8,28,2 2,3,5,6,7,2<br>9,30,31,32 7,33,34,35 | 6 | P02780,P06911,P10758,Q4FZU6,Q5GRG2,Q62975               |
| 9586 | 1,4,8,28,2 2,3,5,6,7,2<br>9,30,31,33 7,32,34,35 | 8 | P02780,P02803,P08753,P19629,Q4FZU6,Q63532,Q8CJ52,Q9JID2 |
| 9587 | 1,4,8,28,2 2,3,5,6,7,2<br>9,30,31,34 7,32,33,35 | 2 | P97605,Q6AYR9                                           |
| 9588 | 1,4,8,28,2 2,3,5,6,7,2<br>9,30,31,35 7,32,33,34 | 5 | P02803,P97605,Q07116,Q4FZU6,Q63532                      |
| 9589 | 1,4,8,28,2 2,3,5,6,7,2<br>9,30,32,33 7,31,34,35 | 8 | F1LM93,P02780,P04905,P08723,P35281,P83748,Q62975,Q8CJ52 |

|      |                          |                           |   |                                                         |
|------|--------------------------|---------------------------|---|---------------------------------------------------------|
| 9590 | 1,4,8,28,2<br>9,30,32,34 | 2,3,5,6,7,2<br>7,31,33,35 | 2 | P35281,Q62975                                           |
| 9591 | 1,4,8,28,2<br>9,30,32,35 | 2,3,5,6,7,2<br>7,31,33,34 | 0 |                                                         |
| 9592 | 1,4,8,28,2<br>9,30,33,34 | 2,3,5,6,7,2<br>7,31,32,35 | 1 | Q9QZA6                                                  |
| 9593 | 1,4,8,28,2<br>9,30,33,35 | 2,3,5,6,7,2<br>7,31,32,34 | 2 | P02803,Q9JID2                                           |
| 9594 | 1,4,8,28,2<br>9,30,34,35 | 2,3,5,6,7,2<br>7,31,32,33 | 6 | P00507,P09006,P80201,P97605,Q561R9,Q8CJD3               |
| 9595 | 1,4,8,28,2<br>9,31,32,33 | 2,3,5,6,7,2<br>7,30,34,35 | 8 | P02780,P02803,P04905,P06911,P35281,P47727,Q5GRG2,Q62975 |
| 9596 | 1,4,8,28,2<br>9,31,32,34 | 2,3,5,6,7,2<br>7,30,33,35 | 3 | P06911,P35281,Q62975                                    |
| 9597 | 1,4,8,28,2<br>9,31,32,35 | 2,3,5,6,7,2<br>7,30,33,34 | 2 | P02803,P06911                                           |
| 9598 | 1,4,8,28,2<br>9,31,33,34 | 2,3,5,6,7,2<br>7,30,32,35 | 2 | P02803,P27791                                           |
| 9599 | 1,4,8,28,2<br>9,31,33,35 | 2,3,5,6,7,2<br>7,30,32,34 | 4 | P02803,P16086,P97840,Q63532                             |
| 9600 | 1,4,8,28,2<br>9,31,34,35 | 2,3,5,6,7,2<br>7,30,32,33 | 4 | P00507,P02803,P09006,Q561R9                             |
| 9601 | 1,4,8,28,2<br>9,32,33,34 | 2,3,5,6,7,2<br>7,30,31,35 | 1 | P35281                                                  |
| 9602 | 1,4,8,28,2<br>9,32,33,35 | 2,3,5,6,7,2<br>7,30,31,34 | 6 | P02803,P04905,P19218,P35281,P47967,P97840               |
| 9603 | 1,4,8,28,2<br>9,32,34,35 | 2,3,5,6,7,2<br>7,30,31,33 | 3 | P00507,P19218,P35281                                    |
| 9604 | 1,4,8,28,2<br>9,33,34,35 | 2,3,5,6,7,2<br>7,30,31,32 | 4 | P00507,P02803,P09006,Q561R9                             |
| 9605 | 1,4,8,28,3<br>0,31,32,33 | 2,3,5,6,7,2<br>7,29,34,35 | 1 | P10758                                                  |
| 9606 | 1,4,8,28,3<br>0,31,32,34 | 2,3,5,6,7,2<br>7,29,33,35 | 1 | P10758                                                  |
| 9607 | 1,4,8,28,3<br>0,31,32,35 | 2,3,5,6,7,2<br>7,29,33,34 | 2 | P02803,Q4FZU6                                           |
| 9608 | 1,4,8,28,3<br>0,31,33,34 | 2,3,5,6,7,2<br>7,29,32,35 | 2 | P02803,P51907                                           |
| 9609 | 1,4,8,28,3<br>0,31,33,35 | 2,3,5,6,7,2<br>7,29,32,34 | 3 | P02803,Q4FZU6,Q63532                                    |
| 9610 | 1,4,8,28,3<br>0,31,34,35 | 2,3,5,6,7,2<br>7,29,32,33 | 7 | P00507,P02793;Q7TP54,P02803,P09006,P53792,Q561R9,Q8CJD3 |
| 9611 | 1,4,8,28,3<br>0,32,33,34 | 2,3,5,6,7,2<br>7,29,31,35 | 1 | P35281                                                  |
| 9612 | 1,4,8,28,3<br>0,32,33,35 | 2,3,5,6,7,2<br>7,29,31,34 | 1 | P83748                                                  |

|      |                          |                           |   |                                           |
|------|--------------------------|---------------------------|---|-------------------------------------------|
| 9613 | 1,4,8,28,3<br>0,32,34,35 | 2,3,5,6,7,2<br>7,29,31,33 | 1 | P00507                                    |
| 9614 | 1,4,8,28,3<br>0,33,34,35 | 2,3,5,6,7,2<br>7,29,31,32 | 4 | P00507,P02803,P09006,Q561R9               |
| 9615 | 1,4,8,28,3<br>1,32,33,34 | 2,3,5,6,7,2<br>7,29,30,35 | 1 | P02803                                    |
| 9616 | 1,4,8,28,3<br>1,32,33,35 | 2,3,5,6,7,2<br>7,29,30,34 | 1 | P02803                                    |
| 9617 | 1,4,8,28,3<br>1,32,34,35 | 2,3,5,6,7,2<br>7,29,30,33 | 3 | P00507,P02803,P53792                      |
| 9618 | 1,4,8,28,3<br>1,33,34,35 | 2,3,5,6,7,2<br>7,29,30,32 | 5 | P00507,P02803,P09006,P53792,Q561R9        |
| 9619 | 1,4,8,28,3<br>2,33,34,35 | 2,3,5,6,7,2<br>7,29,30,31 | 2 | P00507,P02803                             |
| 9620 | 1,4,8,29,3<br>0,31,32,33 | 2,3,5,6,7,2<br>7,28,34,35 | 3 | P10758,P97615,Q4FZU6                      |
| 9621 | 1,4,8,29,3<br>0,31,32,34 | 2,3,5,6,7,2<br>7,28,33,35 | 1 | P10758                                    |
| 9622 | 1,4,8,29,3<br>0,31,32,35 | 2,3,5,6,7,2<br>7,28,33,34 | 1 | Q4FZU6                                    |
| 9623 | 1,4,8,29,3<br>0,31,33,34 | 2,3,5,6,7,2<br>7,28,32,35 | 0 |                                           |
| 9624 | 1,4,8,29,3<br>0,31,33,35 | 2,3,5,6,7,2<br>7,28,32,34 | 3 | P02803,P97615,Q4FZU6                      |
| 9625 | 1,4,8,29,3<br>0,31,34,35 | 2,3,5,6,7,2<br>7,28,32,33 | 3 | P02793;Q7TP54,P09006,Q561R9               |
| 9626 | 1,4,8,29,3<br>0,32,33,34 | 2,3,5,6,7,2<br>7,28,31,35 | 0 |                                           |
| 9627 | 1,4,8,29,3<br>0,32,33,35 | 2,3,5,6,7,2<br>7,28,31,34 | 1 | Q4FZU6                                    |
| 9628 | 1,4,8,29,3<br>0,32,34,35 | 2,3,5,6,7,2<br>7,28,31,33 | 0 |                                           |
| 9629 | 1,4,8,29,3<br>0,33,34,35 | 2,3,5,6,7,2<br>7,28,31,32 | 2 | P09006,Q561R9                             |
| 9630 | 1,4,8,29,3<br>1,32,33,34 | 2,3,5,6,7,2<br>7,28,30,35 | 0 |                                           |
| 9631 | 1,4,8,29,3<br>1,32,33,35 | 2,3,5,6,7,2<br>7,28,30,34 | 6 | P02803,P04182,P47967,P97615,P97840,Q4FZU6 |
| 9632 | 1,4,8,29,3<br>1,32,34,35 | 2,3,5,6,7,2<br>7,28,30,33 | 0 |                                           |
| 9633 | 1,4,8,29,3<br>1,33,34,35 | 2,3,5,6,7,2<br>7,28,30,32 | 3 | P02803,P09006,Q561R9                      |
| 9634 | 1,4,8,29,3<br>2,33,34,35 | 2,3,5,6,7,2<br>7,28,30,31 | 0 |                                           |
| 9635 | 1,4,8,30,3<br>1,32,33,34 | 2,3,5,6,7,2<br>7,28,29,35 | 1 | P10758                                    |

|      |                               |                           |    |                                                                                                                                      |
|------|-------------------------------|---------------------------|----|--------------------------------------------------------------------------------------------------------------------------------------|
| 9636 | 1,4,8,30,3<br>1,32,33,35      | 2,3,5,6,7,2<br>7,28,29,34 | 2  | P10758,Q4FZU6                                                                                                                        |
| 9637 | 1,4,8,30,3<br>1,32,34,35      | 2,3,5,6,7,2<br>7,28,29,33 | 1  | P02793;Q7TP54                                                                                                                        |
| 9638 | 1,4,8,30,3<br>1,33,34,35      | 2,3,5,6,7,2<br>7,28,29,32 | 4  | P02793;Q7TP54,P02803,P09006,Q561R9                                                                                                   |
| 9639 | 1,4,8,30,3<br>2,33,34,35      | 2,3,5,6,7,2<br>7,28,29,31 | 0  |                                                                                                                                      |
| 9640 | 1,4,8,31,3<br>2,33,34,35      | 2,3,5,6,7,2<br>7,28,29,30 | 2  | P01835,P02803                                                                                                                        |
| 9641 | 1,4,27,28,<br>29,30,31,3<br>2 | 2,3,5,6,7,8<br>,33,34,35  | 14 | O08815,P02781,P05369,P06911,P08723,P08753,P0C0A9,P10758,P36374,P97605,Q5GRG2,Q6AYR9,Q812E4,Q9JHB9                                    |
| 9642 | 1,4,27,28,<br>29,30,31,3<br>3 | 2,3,5,6,7,8<br>,32,34,35  | 13 | O08815,P02781,P08723,P08753,P0C0A9,P10758,P11883,P20766,P36374,P51907,P97605,Q6AYR9,Q812E4                                           |
| 9643 | 1,4,27,28,<br>29,30,31,3<br>4 | 2,3,5,6,7,8<br>,32,33,35  | 6  | P02781,P05369,P08753,P36374,P97605,Q6AYR9                                                                                            |
| 9644 | 1,4,27,28,<br>29,30,31,3<br>5 | 2,3,5,6,7,8<br>,32,33,34  | 6  | P08753,P36374,P97605,Q561R9,Q6AYR9,Q8N7M5                                                                                            |
| 9645 | 1,4,27,28,<br>29,30,32,3<br>3 | 2,3,5,6,7,8<br>,31,34,35  | 19 | F1LM93,O08815,P02781,P04905,P05369,P08010,P08723,P08753,P0C0A9,P20766,P24368,P35281,P36374,P47727,P83748,P97605,Q6AYR9,Q812E4,Q9JHB9 |
| 9646 | 1,4,27,28,<br>29,30,32,3<br>4 | 2,3,5,6,7,8<br>,31,33,35  | 6  | O08815,P02781,P05369,P36374,P97605,Q6AYR9                                                                                            |
| 9647 | 1,4,27,28,<br>29,30,32,3<br>5 | 2,3,5,6,7,8<br>,31,33,34  | 7  | O08815,P08753,P0C0A9,P20766,P36374,P83748,P97605                                                                                     |
| 9648 | 1,4,27,28,<br>29,30,33,3<br>4 | 2,3,5,6,7,8<br>,31,32,35  | 9  | O08815,P02781,P05369,P08753,P20766,P36374,P97605,Q561R9,Q6AYR9                                                                       |
| 9649 | 1,4,27,28,<br>29,30,33,3<br>5 | 2,3,5,6,7,8<br>,31,32,34  | 7  | P02781,P08753,P0C0A9,P20766,P36374,P97605,Q561R9                                                                                     |
| 9650 | 1,4,27,28,<br>29,30,34,3<br>5 | 2,3,5,6,7,8<br>,31,32,33  | 8  | P00507,P20766,P36374,P53792,P97605,Q561R9,Q6AYR9,Q8CJD3                                                                              |
| 9651 | 1,4,27,28,<br>29,31,32,3<br>3 | 2,3,5,6,7,8<br>,30,34,35  | 13 | O08815,P02781,P04905,P06911,P08723,P08753,P24368,P36374,P47727,P97605,Q5GRG2,Q812E4,Q9JHB9                                           |
| 9652 | 1,4,27,28,<br>29,31,32,3<br>4 | 2,3,5,6,7,8<br>,30,33,35  | 4  | P05369,P06911,P97605,Q10758                                                                                                          |



|      |                               |                          |   |                                                                |
|------|-------------------------------|--------------------------|---|----------------------------------------------------------------|
| 9653 | 1,4,27,28,<br>29,31,32,3<br>5 | 2,3,5,6,7,8<br>,30,33,34 | 4 | P06911,P36374,P97605,Q8N7M5                                    |
| 9654 | 1,4,27,28,<br>29,31,33,3<br>4 | 2,3,5,6,7,8<br>,30,32,35 | 4 | P08753,P36374,P97605,Q561R9                                    |
| 9655 | 1,4,27,28,<br>29,31,33,3<br>5 | 2,3,5,6,7,8<br>,30,32,34 | 6 | P08753,P16086,P36374,P97605,Q561R9,Q8N7M5                      |
| 9656 | 1,4,27,28,<br>29,31,34,3<br>5 | 2,3,5,6,7,8<br>,30,32,33 | 7 | P00507,P16086,P53792,P97605,Q561R9,Q5M819,Q8N7M5               |
| 9657 | 1,4,27,28,<br>29,32,33,3<br>4 | 2,3,5,6,7,8<br>,30,31,35 | 9 | O08815,P05369,P24368,P35281,P36374,P97605,Q06000,Q10758,Q6IFU7 |
| 9658 | 1,4,27,28,<br>29,32,33,3<br>5 | 2,3,5,6,7,8<br>,30,31,34 | 4 | P19218,P20766,P36374,P97605                                    |
| 9659 | 1,4,27,28,<br>29,32,34,3<br>5 | 2,3,5,6,7,8<br>,30,31,33 | 5 | P00507,P19218,P97605,Q561R9,Q5M819                             |
| 9660 | 1,4,27,28,<br>29,33,34,3<br>5 | 2,3,5,6,7,8<br>,30,31,32 | 6 | P00507,P16086,P36374,P97605,Q561R9,Q5M819                      |
| 9661 | 1,4,27,28,<br>30,31,32,3<br>3 | 2,3,5,6,7,8<br>,29,34,35 | 4 | P10758,P11883,P51907,P83748                                    |
| 9662 | 1,4,27,28,<br>30,31,32,3<br>4 | 2,3,5,6,7,8<br>,29,33,35 | 3 | P10758,P97605,Q10758                                           |
| 9663 | 1,4,27,28,<br>30,31,32,3<br>5 | 2,3,5,6,7,8<br>,29,33,34 | 2 | P97605,Q9QZQ5                                                  |
| 9664 | 1,4,27,28,<br>30,31,33,3<br>4 | 2,3,5,6,7,8<br>,29,32,35 | 2 | P51907,P97605                                                  |
| 9665 | 1,4,27,28,<br>30,31,33,3<br>5 | 2,3,5,6,7,8<br>,29,32,34 | 3 | P51907,P97605,Q561R9                                           |
| 9666 | 1,4,27,28,<br>30,31,34,3<br>5 | 2,3,5,6,7,8<br>,29,32,33 | 5 | P02793;Q7TP54,P53792,P97605,Q561R9,Q8CJD3                      |
| 9667 | 1,4,27,28,<br>30,32,33,3<br>4 | 2,3,5,6,7,8<br>,29,31,35 | 2 | Q10758,Q6IFU7                                                  |

|      |                               |                          |   |                                           |
|------|-------------------------------|--------------------------|---|-------------------------------------------|
| 9668 | 1,4,27,28,<br>30,32,33,3<br>5 | 2,3,5,6,7,8<br>,29,31,34 | 4 | P20766,P83748,Q5RLM2,Q6IFU7               |
| 9669 | 1,4,27,28,<br>30,32,34,3<br>5 | 2,3,5,6,7,8<br>,29,31,33 | 6 | P00507,P53792,P97605,Q10758,Q6IFU7,Q8CJD3 |
| 9670 | 1,4,27,28,<br>30,33,34,3<br>5 | 2,3,5,6,7,8<br>,29,31,32 | 5 | P20766,P53792,P97605,Q561R9,Q8CJD3        |
| 9671 | 1,4,27,28,<br>31,32,33,3<br>4 | 2,3,5,6,7,8<br>,29,30,35 | 3 | Q06000,Q10758,Q6IFU7                      |
| 9672 | 1,4,27,28,<br>31,32,33,3<br>5 | 2,3,5,6,7,8<br>,29,30,34 | 2 | P16086,Q9QZQ5                             |
| 9673 | 1,4,27,28,<br>31,32,34,3<br>5 | 2,3,5,6,7,8<br>,29,30,33 | 3 | P00507,P53792,Q10758                      |
| 9674 | 1,4,27,28,<br>31,33,34,3<br>5 | 2,3,5,6,7,8<br>,29,30,32 | 4 | P16086,P53792,P97605,Q561R9               |
| 9675 | 1,4,27,28,<br>32,33,34,3<br>5 | 2,3,5,6,7,8<br>,29,30,31 | 4 | P53792,Q10758,Q561R9,Q6IFU7               |
| 9676 | 1,4,27,29,<br>30,31,32,3<br>3 | 2,3,5,6,7,8<br>,28,34,35 | 3 | P10758,P11883,P97605                      |
| 9677 | 1,4,27,29,<br>30,31,32,3<br>4 | 2,3,5,6,7,8<br>,28,33,35 | 3 | P10758,P97605,Q6AYR9                      |
| 9678 | 1,4,27,29,<br>30,31,32,3<br>5 | 2,3,5,6,7,8<br>,28,33,34 | 2 | P97605,Q4FZU6                             |
| 9679 | 1,4,27,29,<br>30,31,33,3<br>4 | 2,3,5,6,7,8<br>,28,32,35 | 4 | P51907,P97605,Q561R9,Q6AYR9               |
| 9680 | 1,4,27,29,<br>30,31,33,3<br>5 | 2,3,5,6,7,8<br>,28,32,34 | 5 | P20766,P97605,P97615,Q4FZU6,Q561R9        |
| 9681 | 1,4,27,29,<br>30,31,34,3<br>5 | 2,3,5,6,7,8<br>,28,32,33 | 3 | P97605,Q561R9,Q6AYR9                      |
| 9682 | 1,4,27,29,<br>30,32,33,3<br>4 | 2,3,5,6,7,8<br>,28,31,35 | 1 | P97605                                    |

|      |                               |                          |   |                                           |
|------|-------------------------------|--------------------------|---|-------------------------------------------|
| 9683 | 1,4,27,29,<br>30,32,33,3<br>5 | 2,3,5,6,7,8<br>,28,31,34 | 3 | P20766,P83748,P97605                      |
| 9684 | 1,4,27,29,<br>30,32,34,3<br>5 | 2,3,5,6,7,8<br>,28,31,33 | 2 | P97605,Q561R9                             |
| 9685 | 1,4,27,29,<br>30,33,34,3<br>5 | 2,3,5,6,7,8<br>,28,31,32 | 3 | P20766,P97605,Q561R9                      |
| 9686 | 1,4,27,29,<br>31,32,33,3<br>4 | 2,3,5,6,7,8<br>,28,30,35 | 0 |                                           |
| 9687 | 1,4,27,29,<br>31,32,33,3<br>5 | 2,3,5,6,7,8<br>,28,30,34 | 2 | P47967,P97615                             |
| 9688 | 1,4,27,29,<br>31,32,34,3<br>5 | 2,3,5,6,7,8<br>,28,30,33 | 2 | P97605,Q561R9                             |
| 9689 | 1,4,27,29,<br>31,33,34,3<br>5 | 2,3,5,6,7,8<br>,28,30,32 | 2 | P97605,Q561R9                             |
| 9690 | 1,4,27,29,<br>32,33,34,3<br>5 | 2,3,5,6,7,8<br>,28,30,31 | 1 | Q561R9                                    |
| 9691 | 1,4,27,30,<br>31,32,33,3<br>4 | 2,3,5,6,7,8<br>,28,29,35 | 2 | P10758,P51907                             |
| 9692 | 1,4,27,30,<br>31,32,33,3<br>5 | 2,3,5,6,7,8<br>,28,29,34 | 3 | P10758,P83748,Q4FZU6                      |
| 9693 | 1,4,27,30,<br>31,32,34,3<br>5 | 2,3,5,6,7,8<br>,28,29,33 | 0 |                                           |
| 9694 | 1,4,27,30,<br>31,33,34,3<br>5 | 2,3,5,6,7,8<br>,28,29,32 | 4 | P51907,P97605,Q561R9,Q63942               |
| 9695 | 1,4,27,30,<br>32,33,34,3<br>5 | 2,3,5,6,7,8<br>,28,29,31 | 1 | Q561R9                                    |
| 9696 | 1,4,27,31,<br>32,33,34,3<br>5 | 2,3,5,6,7,8<br>,28,29,30 | 1 | Q561R9                                    |
| 9697 | 1,4,28,29,<br>30,31,32,3<br>3 | 2,3,5,6,7,8<br>,27,34,35 | 6 | P02780,P04905,P06911,P08753,P10758,Q62975 |

|      |                               |                          |    |                                                                                            |
|------|-------------------------------|--------------------------|----|--------------------------------------------------------------------------------------------|
| 9698 | 1,4,28,29,<br>30,31,32,3<br>4 | 2,3,5,6,7,8<br>,27,33,35 | 2  | P97605,Q6AYR9                                                                              |
| 9699 | 1,4,28,29,<br>30,31,32,3<br>5 | 2,3,5,6,7,8<br>,27,33,34 | 4  | P08753,Q07116,Q4FZU6,Q9QZQ5                                                                |
| 9700 | 1,4,28,29,<br>30,31,33,3<br>4 | 2,3,5,6,7,8<br>,27,32,35 | 5  | P08753,P27791,P51907,P97605,Q6AYR9                                                         |
| 9701 | 1,4,28,29,<br>30,31,33,3<br>5 | 2,3,5,6,7,8<br>,27,32,34 | 13 | P02631,P02803,P06760,P08753,P16086,P97605,Q07116,Q09030,Q4FZU6,Q63532,Q9JID2,Q9QZQ5,Q9WTT6 |
| 9702 | 1,4,28,29,<br>30,31,34,3<br>5 | 2,3,5,6,7,8<br>,27,32,33 | 5  | P00507,P97605,Q561R9,Q8CJD3,Q9QZQ5                                                         |
| 9703 | 1,4,28,29,<br>30,32,33,3<br>4 | 2,3,5,6,7,8<br>,27,31,35 | 1  | P35281                                                                                     |
| 9704 | 1,4,28,29,<br>30,32,33,3<br>5 | 2,3,5,6,7,8<br>,27,31,34 | 3  | P08753,P20766,Q9WTT6                                                                       |
| 9705 | 1,4,28,29,<br>30,32,34,3<br>5 | 2,3,5,6,7,8<br>,27,31,33 | 3  | P00507,P97605,Q8CJD3                                                                       |
| 9706 | 1,4,28,29,<br>30,33,34,3<br>5 | 2,3,5,6,7,8<br>,27,31,32 | 4  | P00507,P97605,Q561R9,Q8CJD3                                                                |
| 9707 | 1,4,28,29,<br>31,32,33,3<br>4 | 2,3,5,6,7,8<br>,27,30,35 | 3  | P06911,P27791,P35281                                                                       |
| 9708 | 1,4,28,29,<br>31,32,33,3<br>5 | 2,3,5,6,7,8<br>,27,30,34 | 7  | P02803,P06911,P16086,P47967,Q07116,Q9QZQ5,Q9WTT6                                           |
| 9709 | 1,4,28,29,<br>31,32,34,3<br>5 | 2,3,5,6,7,8<br>,27,30,33 | 2  | P00507,Q9QZQ5                                                                              |
| 9710 | 1,4,28,29,<br>31,33,34,3<br>5 | 2,3,5,6,7,8<br>,27,30,32 | 6  | P00507,P02803,P06760,P16086,P97605,Q561R9                                                  |
| 9711 | 1,4,28,29,<br>32,33,34,3<br>5 | 2,3,5,6,7,8<br>,27,30,31 | 3  | P00507,P19218,P35281                                                                       |
| 9712 | 1,4,28,30,<br>31,32,33,3<br>4 | 2,3,5,6,7,8<br>,27,29,35 | 2  | P10758,P51907                                                                              |

|      |                               |                                 |    |                                                                                                   |
|------|-------------------------------|---------------------------------|----|---------------------------------------------------------------------------------------------------|
| 9713 | 1,4,28,30,<br>31,32,33,3<br>5 | 2,3,5,6,7,8<br>,27,29,34        | 5  | P02631,P02803,Q4FZU6,Q9QZQ5,Q9WTT6                                                                |
| 9714 | 1,4,28,30,<br>31,32,34,3<br>5 | 2,3,5,6,7,8<br>,27,29,33        | 5  | P00507,P02631,P53792,Q8CJD3,Q9QZQ5                                                                |
| 9715 | 1,4,28,30,<br>31,33,34,3<br>5 | 2,3,5,6,7,8<br>,27,29,32        | 10 | P00507,P02631,P02803,P06760,P14669,P51907,P53792,Q561R9,Q8CJD3,Q9QZQ5                             |
| 9716 | 1,4,28,30,<br>32,33,34,3<br>5 | 2,3,5,6,7,8<br>,27,29,31        | 1  | P00507                                                                                            |
| 9717 | 1,4,28,31,<br>32,33,34,3<br>5 | 2,3,5,6,7,8<br>,27,29,30        | 5  | P00507,P02631,P02803,P16086,Q9QZQ5                                                                |
| 9718 | 1,4,29,30,<br>31,32,33,3<br>4 | 2,3,5,6,7,8<br>,27,28,35        | 1  | P10758                                                                                            |
| 9719 | 1,4,29,30,<br>31,32,33,3<br>5 | 2,3,5,6,7,8<br>,27,28,34        | 5  | P02631,P97615,Q07116,Q4FZU6,Q9WTT6                                                                |
| 9720 | 1,4,29,30,<br>31,32,34,3<br>5 | 2,3,5,6,7,8<br>,27,28,33        | 1  | P02631                                                                                            |
| 9721 | 1,4,29,30,<br>31,33,34,3<br>5 | 2,3,5,6,7,8<br>,27,28,32        | 2  | P02631,Q561R9                                                                                     |
| 9722 | 1,4,29,30,<br>32,33,34,3<br>5 | 2,3,5,6,7,8<br>,27,28,31        | 0  |                                                                                                   |
| 9723 | 1,4,29,31,<br>32,33,34,3<br>5 | 2,3,5,6,7,8<br>,27,28,30        | 0  |                                                                                                   |
| 9724 | 1,4,30,31,<br>32,33,34,3<br>5 | 2,3,5,6,7,8<br>,27,28,29        | 3  | P02631,P82471,Q63942                                                                              |
| 9725 | 1,5,6,7,8,2<br>7,28,29        | 2,3,4,30,3<br>1,32,33,34<br>,35 | 14 | F1LM93,O35547,P02781,P02782,P07171,P08723,P0C0A9,P22283,P30120,P82471,Q63942,Q8CJ52,Q9JHB9,Q9JI85 |
| 9726 | 1,5,6,7,8,2<br>7,28,30        | 2,3,4,29,3<br>1,32,33,34<br>,35 | 1  | Q6TMA8                                                                                            |
| 9727 | 1,5,6,7,8,2<br>7,28,31        | 2,3,4,29,3<br>0,32,33,34<br>,35 | 6  | P07171,P10715,P12020,P31044,Q5GRG2,Q6TMA8                                                         |

|      |                        |                                 |   |                             |
|------|------------------------|---------------------------------|---|-----------------------------|
| 9728 | 1,5,6,7,8,2<br>7,28,32 | 2,3,4,29,3<br>0,31,33,34<br>,35 | 4 | B0BNN3,P06760,P12020,P24388 |
| 9729 | 1,5,6,7,8,2<br>7,28,33 | 2,3,4,29,3<br>0,31,32,34<br>,35 | 3 | P24388,Q6TMA8,Q99041        |
| 9730 | 1,5,6,7,8,2<br>7,28,34 | 2,3,4,29,3<br>0,31,32,33<br>,35 | 2 | Q6TMA8,Q9WTT6               |
| 9731 | 1,5,6,7,8,2<br>7,28,35 | 2,3,4,29,3<br>0,31,32,33<br>,34 | 1 | Q6TMA8                      |
| 9732 | 1,5,6,7,8,2<br>7,29,30 | 2,3,4,28,3<br>1,32,33,34<br>,35 | 2 | P14669,P53792               |
| 9733 | 1,5,6,7,8,2<br>7,29,31 | 2,3,4,28,3<br>0,32,33,34<br>,35 | 0 |                             |
| 9734 | 1,5,6,7,8,2<br>7,29,32 | 2,3,4,28,3<br>0,31,33,34<br>,35 | 3 | P06760,P14669,P53792        |
| 9735 | 1,5,6,7,8,2<br>7,29,33 | 2,3,4,28,3<br>0,31,32,34<br>,35 | 2 | P53792,Q63617               |
| 9736 | 1,5,6,7,8,2<br>7,29,34 | 2,3,4,28,3<br>0,31,32,33<br>,35 | 1 | Q9WTT6                      |
| 9737 | 1,5,6,7,8,2<br>7,29,35 | 2,3,4,28,3<br>0,31,32,33<br>,34 | 0 |                             |
| 9738 | 1,5,6,7,8,2<br>7,30,31 | 2,3,4,28,2<br>9,32,33,34<br>,35 | 2 | P19218,Q6TMA8               |
| 9739 | 1,5,6,7,8,2<br>7,30,32 | 2,3,4,28,2<br>9,31,33,34<br>,35 | 3 | P06760,P14669,P53792        |
| 9740 | 1,5,6,7,8,2<br>7,30,33 | 2,3,4,28,2<br>9,31,32,34<br>,35 | 2 | P19218,P53792               |
| 9741 | 1,5,6,7,8,2<br>7,30,34 | 2,3,4,28,2<br>9,31,32,33<br>,35 | 3 | P19218,P97840,Q9WTT6        |
| 9742 | 1,5,6,7,8,2<br>7,30,35 | 2,3,4,28,2<br>9,31,32,33<br>,34 | 0 |                             |

|      |                        |                                 |   |                                                  |
|------|------------------------|---------------------------------|---|--------------------------------------------------|
| 9743 | 1,5,6,7,8,2<br>7,31,32 | 2,3,4,28,2<br>9,30,33,34<br>,35 | 2 | P06760,P12020                                    |
| 9744 | 1,5,6,7,8,2<br>7,31,33 | 2,3,4,28,2<br>9,30,32,34<br>,35 | 3 | P00507,P19218,Q6TMA8                             |
| 9745 | 1,5,6,7,8,2<br>7,31,34 | 2,3,4,28,2<br>9,30,32,33<br>,35 | 2 | P19218,Q9WTT6                                    |
| 9746 | 1,5,6,7,8,2<br>7,31,35 | 2,3,4,28,2<br>9,30,32,33<br>,34 | 1 | Q6TMA8                                           |
| 9747 | 1,5,6,7,8,2<br>7,32,33 | 2,3,4,28,2<br>9,30,31,34<br>,35 | 4 | P06760,P24388,P53792,Q6NX65                      |
| 9748 | 1,5,6,7,8,2<br>7,32,34 | 2,3,4,28,2<br>9,30,31,33<br>,35 | 3 | P06760,P08753,Q9WTT6                             |
| 9749 | 1,5,6,7,8,2<br>7,32,35 | 2,3,4,28,2<br>9,30,31,33<br>,34 | 1 | P06760                                           |
| 9750 | 1,5,6,7,8,2<br>7,33,34 | 2,3,4,28,2<br>9,30,31,32<br>,35 | 2 | Q99041,Q9WTT6                                    |
| 9751 | 1,5,6,7,8,2<br>7,33,35 | 2,3,4,28,2<br>9,30,31,32<br>,34 | 1 | P01836                                           |
| 9752 | 1,5,6,7,8,2<br>7,34,35 | 2,3,4,28,2<br>9,30,31,32<br>,33 | 2 | P08753,Q9WTT6                                    |
| 9753 | 1,5,6,7,8,2<br>8,29,30 | 2,3,4,27,3<br>1,32,33,34<br>,35 | 2 | F1LM93,Q8CJ52                                    |
| 9754 | 1,5,6,7,8,2<br>8,29,31 | 2,3,4,27,3<br>0,32,33,34<br>,35 | 7 | O35547,P06911,P10715,P12020,P19629,Q5GRG2,Q8CJ52 |
| 9755 | 1,5,6,7,8,2<br>8,29,32 | 2,3,4,27,3<br>0,31,33,34<br>,35 | 2 | F1LM93,Q63942                                    |
| 9756 | 1,5,6,7,8,2<br>8,29,33 | 2,3,4,27,3<br>0,31,32,34<br>,35 | 5 | F1LM93,O35547,Q63617,Q80WL1,Q8CJ52               |
| 9757 | 1,5,6,7,8,2<br>8,29,34 | 2,3,4,27,3<br>0,31,32,33<br>,35 | 3 | Q63942,Q9ET32,Q9WTT6                             |

|      |                        |                                 |   |                                           |
|------|------------------------|---------------------------------|---|-------------------------------------------|
| 9758 | 1,5,6,7,8,2<br>8,29,35 | 2,3,4,27,3<br>0,31,32,33<br>,34 | 0 |                                           |
| 9759 | 1,5,6,7,8,2<br>8,30,31 | 2,3,4,27,2<br>9,32,33,34<br>,35 | 4 | P19218,P19629,Q5GRG2,Q6TMA8               |
| 9760 | 1,5,6,7,8,2<br>8,30,32 | 2,3,4,27,2<br>9,31,33,34<br>,35 | 0 |                                           |
| 9761 | 1,5,6,7,8,2<br>8,30,33 | 2,3,4,27,2<br>9,31,32,34<br>,35 | 1 | A2RUV9                                    |
| 9762 | 1,5,6,7,8,2<br>8,30,34 | 2,3,4,27,2<br>9,31,32,33<br>,35 | 2 | P97840,Q9WTT6                             |
| 9763 | 1,5,6,7,8,2<br>8,30,35 | 2,3,4,27,2<br>9,31,32,33<br>,34 | 0 |                                           |
| 9764 | 1,5,6,7,8,2<br>8,31,32 | 2,3,4,27,2<br>9,30,33,34<br>,35 | 5 | P06911,P10715,P12020,P31044,Q5GRG2        |
| 9765 | 1,5,6,7,8,2<br>8,31,33 | 2,3,4,27,2<br>9,30,32,34<br>,35 | 6 | P10715,P12020,P19629,Q5GRG2,Q6TMA8,Q8VD89 |
| 9766 | 1,5,6,7,8,2<br>8,31,34 | 2,3,4,27,2<br>9,30,32,33<br>,35 | 1 | P13432                                    |
| 9767 | 1,5,6,7,8,2<br>8,31,35 | 2,3,4,27,2<br>9,30,32,33<br>,34 | 1 | Q6TMA8                                    |
| 9768 | 1,5,6,7,8,2<br>8,32,33 | 2,3,4,27,2<br>9,30,31,34<br>,35 | 1 | P12020                                    |
| 9769 | 1,5,6,7,8,2<br>8,32,34 | 2,3,4,27,2<br>9,30,31,33<br>,35 | 1 | Q9WTT6                                    |
| 9770 | 1,5,6,7,8,2<br>8,32,35 | 2,3,4,27,2<br>9,30,31,33<br>,34 | 0 |                                           |
| 9771 | 1,5,6,7,8,2<br>8,33,34 | 2,3,4,27,2<br>9,30,31,32<br>,35 | 1 | Q99041                                    |
| 9772 | 1,5,6,7,8,2<br>8,33,35 | 2,3,4,27,2<br>9,30,31,32<br>,34 | 0 |                                           |



|      |                        |                                 |   |                                           |
|------|------------------------|---------------------------------|---|-------------------------------------------|
| 9773 | 1,5,6,7,8,2<br>8,34,35 | 2,3,4,27,2<br>9,30,31,32<br>,33 | 0 |                                           |
| 9774 | 1,5,6,7,8,2<br>9,30,31 | 2,3,4,27,2<br>8,32,33,34<br>,35 | 2 | P04182,P53792                             |
| 9775 | 1,5,6,7,8,2<br>9,30,32 | 2,3,4,27,2<br>8,31,33,34<br>,35 | 1 | P53792                                    |
| 9776 | 1,5,6,7,8,2<br>9,30,33 | 2,3,4,27,2<br>8,31,32,34<br>,35 | 2 | A2RUV9,P53792                             |
| 9777 | 1,5,6,7,8,2<br>9,30,34 | 2,3,4,27,2<br>8,31,32,33<br>,35 | 0 |                                           |
| 9778 | 1,5,6,7,8,2<br>9,30,35 | 2,3,4,27,2<br>8,31,32,33<br>,34 | 3 | A2RUV9,P04182,Q06000                      |
| 9779 | 1,5,6,7,8,2<br>9,31,32 | 2,3,4,27,2<br>8,30,33,34<br>,35 | 4 | P04182,P12020,P53792,Q8CJD3               |
| 9780 | 1,5,6,7,8,2<br>9,31,33 | 2,3,4,27,2<br>8,30,32,34<br>,35 | 6 | P04182,P53792,P83121,Q63617,Q6AYQ8,Q8CJD3 |
| 9781 | 1,5,6,7,8,2<br>9,31,34 | 2,3,4,27,2<br>8,30,32,33<br>,35 | 1 | Q6AYQ8                                    |
| 9782 | 1,5,6,7,8,2<br>9,31,35 | 2,3,4,27,2<br>8,30,32,33<br>,34 | 2 | P04182,Q06000                             |
| 9783 | 1,5,6,7,8,2<br>9,32,33 | 2,3,4,27,2<br>8,30,31,34<br>,35 | 5 | A2RUV9,P04182,P53792,Q63617,Q8CJD3        |
| 9784 | 1,5,6,7,8,2<br>9,32,34 | 2,3,4,27,2<br>8,30,31,33<br>,35 | 1 | P51907                                    |
| 9785 | 1,5,6,7,8,2<br>9,32,35 | 2,3,4,27,2<br>8,30,31,33<br>,34 | 2 | P04182,P51907                             |
| 9786 | 1,5,6,7,8,2<br>9,33,34 | 2,3,4,27,2<br>8,30,31,32<br>,35 | 2 | Q6AYQ8,Q99041                             |
| 9787 | 1,5,6,7,8,2<br>9,33,35 | 2,3,4,27,2<br>8,30,31,32<br>,34 | 3 | A2RUV9,P04182,Q63617                      |

|      |                        |                                 |   |                                    |
|------|------------------------|---------------------------------|---|------------------------------------|
| 9788 | 1,5,6,7,8,2<br>9,34,35 | 2,3,4,27,2<br>8,30,31,32<br>,33 | 0 |                                    |
| 9789 | 1,5,6,7,8,3<br>0,31,32 | 2,3,4,27,2<br>8,29,33,34<br>,35 | 2 | P04182,P53792                      |
| 9790 | 1,5,6,7,8,3<br>0,31,33 | 2,3,4,27,2<br>8,29,32,34<br>,35 | 2 | P19218,P53792                      |
| 9791 | 1,5,6,7,8,3<br>0,31,34 | 2,3,4,27,2<br>8,29,32,33<br>,35 | 2 | P19218,P97840                      |
| 9792 | 1,5,6,7,8,3<br>0,31,35 | 2,3,4,27,2<br>8,29,32,33<br>,34 | 2 | P04182,Q06000                      |
| 9793 | 1,5,6,7,8,3<br>0,32,33 | 2,3,4,27,2<br>8,29,31,34<br>,35 | 3 | A2RUV9,P12785,P53792               |
| 9794 | 1,5,6,7,8,3<br>0,32,34 | 2,3,4,27,2<br>8,29,31,33<br>,35 | 0 |                                    |
| 9795 | 1,5,6,7,8,3<br>0,32,35 | 2,3,4,27,2<br>8,29,31,33<br>,34 | 1 | P04182                             |
| 9796 | 1,5,6,7,8,3<br>0,33,34 | 2,3,4,27,2<br>8,29,31,32<br>,35 | 1 | P19218                             |
| 9797 | 1,5,6,7,8,3<br>0,33,35 | 2,3,4,27,2<br>8,29,31,32<br>,34 | 1 | A2RUV9                             |
| 9798 | 1,5,6,7,8,3<br>0,34,35 | 2,3,4,27,2<br>8,29,31,32<br>,33 | 1 | P02793;Q7TP54                      |
| 9799 | 1,5,6,7,8,3<br>1,32,33 | 2,3,4,27,2<br>8,29,30,34<br>,35 | 5 | P04182,P12020,P14480,P53792,Q8CJD3 |
| 9800 | 1,5,6,7,8,3<br>1,32,34 | 2,3,4,27,2<br>8,29,30,33<br>,35 | 2 | P08753,P13432                      |
| 9801 | 1,5,6,7,8,3<br>1,32,35 | 2,3,4,27,2<br>8,29,30,33<br>,34 | 1 | P04182                             |
| 9802 | 1,5,6,7,8,3<br>1,33,34 | 2,3,4,27,2<br>8,29,30,32<br>,35 | 2 | P19218,Q99041                      |

|      |                         |                                 |   |                                                                |
|------|-------------------------|---------------------------------|---|----------------------------------------------------------------|
| 9803 | 1,5,6,7,8,3<br>1,33,35  | 2,3,4,27,2<br>8,29,30,32<br>,34 | 2 | P01836,P04182                                                  |
| 9804 | 1,5,6,7,8,3<br>1,34,35  | 2,3,4,27,2<br>8,29,30,32<br>,33 | 1 | P08753                                                         |
| 9805 | 1,5,6,7,8,3<br>2,33,34  | 2,3,4,27,2<br>8,29,30,31<br>,35 | 2 | P08753,Q99041                                                  |
| 9806 | 1,5,6,7,8,3<br>2,33,35  | 2,3,4,27,2<br>8,29,30,31<br>,34 | 1 | P04182                                                         |
| 9807 | 1,5,6,7,8,3<br>2,34,35  | 2,3,4,27,2<br>8,29,30,31<br>,33 | 1 | P08753                                                         |
| 9808 | 1,5,6,7,8,3<br>3,34,35  | 2,3,4,27,2<br>8,29,30,31<br>,32 | 1 | P08753                                                         |
| 9809 | 1,5,6,7,27,<br>28,29,30 | 2,3,4,8,31,<br>32,33,34,3<br>5  | 9 | F1LM93,O08815,O35547,P02781,P08723,P20766,P30120,Q9JHB9,Q9JI85 |
| 9810 | 1,5,6,7,27,<br>28,29,31 | 2,3,4,8,30,<br>32,33,34,3<br>5  | 6 | O35547,P06911,P08723,Q5GRG2,Q9JHB9,Q9JI85                      |
| 9811 | 1,5,6,7,27,<br>28,29,32 | 2,3,4,8,30,<br>31,33,34,3<br>5  | 9 | B0BNN3,F1LM93,O35547,P08723,P09456,P20766,Q80WL1,Q9JHB9,Q9JI85 |
| 9812 | 1,5,6,7,27,<br>28,29,33 | 2,3,4,8,30,<br>31,32,34,3<br>5  | 7 | F1LM93,O35547,P08723,P20766,Q80WL1,Q9JHB9,Q9JI85               |
| 9813 | 1,5,6,7,27,<br>28,29,34 | 2,3,4,8,30,<br>31,32,33,3<br>5  | 4 | P05712,Q80WL1,Q9JI85,Q9QUL6                                    |
| 9814 | 1,5,6,7,27,<br>28,29,35 | 2,3,4,8,30,<br>31,32,33,3<br>4  | 3 | P20766,Q80WL1,Q9QUL6                                           |
| 9815 | 1,5,6,7,27,<br>28,30,31 | 2,3,4,8,29,<br>32,33,34,3<br>5  | 3 | P19218,Q5GRG2,Q6TMA8                                           |
| 9816 | 1,5,6,7,27,<br>28,30,32 | 2,3,4,8,29,<br>31,33,34,3<br>5  | 2 | P20766,Q6TMA8                                                  |
| 9817 | 1,5,6,7,27,<br>28,30,33 | 2,3,4,8,29,<br>31,32,34,3<br>5  | 2 | P20766,Q6TMA8                                                  |

|      |                         |                                |   |                                           |
|------|-------------------------|--------------------------------|---|-------------------------------------------|
| 9818 | 1,5,6,7,27,<br>28,30,34 | 2,3,4,8,29,<br>31,32,33,3<br>5 | 4 | P47967,P97840,Q6TMA8,Q8CJD3               |
| 9819 | 1,5,6,7,27,<br>28,30,35 | 2,3,4,8,29,<br>31,32,33,3<br>4 | 3 | P20766,Q6TMA8,Q9QUL6                      |
| 9820 | 1,5,6,7,27,<br>28,31,32 | 2,3,4,8,29,<br>30,33,34,3<br>5 | 5 | B0BNN3,P06911,P12020,Q5GRG2,Q6TMA8        |
| 9821 | 1,5,6,7,27,<br>28,31,33 | 2,3,4,8,29,<br>30,32,34,3<br>5 | 4 | P19629,Q5GRG2,Q6TMA8,Q80WL1               |
| 9822 | 1,5,6,7,27,<br>28,31,34 | 2,3,4,8,29,<br>30,32,33,3<br>5 | 2 | P97840,Q6TMA8                             |
| 9823 | 1,5,6,7,27,<br>28,31,35 | 2,3,4,8,29,<br>30,32,33,3<br>4 | 2 | Q6TMA8,Q9QUL6                             |
| 9824 | 1,5,6,7,27,<br>28,32,33 | 2,3,4,8,29,<br>30,31,34,3<br>5 | 5 | P02793,Q7TP54,P20766,Q6IFU7,Q6TMA8,Q80WL1 |
| 9825 | 1,5,6,7,27,<br>28,32,34 | 2,3,4,8,29,<br>30,31,33,3<br>5 | 5 | B0BNN3,P17046,Q10758,Q6IFU7,Q80WL1        |
| 9826 | 1,5,6,7,27,<br>28,32,35 | 2,3,4,8,29,<br>30,31,33,3<br>4 | 3 | Q6TMA8,Q80WL1,Q9QUL6                      |
| 9827 | 1,5,6,7,27,<br>28,33,34 | 2,3,4,8,29,<br>30,31,32,3<br>5 | 2 | Q6TMA8,Q80WL1                             |
| 9828 | 1,5,6,7,27,<br>28,33,35 | 2,3,4,8,29,<br>30,31,32,3<br>4 | 3 | P20766,Q6TMA8,Q80WL1                      |
| 9829 | 1,5,6,7,27,<br>28,34,35 | 2,3,4,8,29,<br>30,31,32,3<br>3 | 3 | Q6TMA8,Q80WL1,Q9QUL6                      |
| 9830 | 1,5,6,7,27,<br>29,30,31 | 2,3,4,8,28,<br>32,33,34,3<br>5 | 2 | P20766,Q6AY61                             |
| 9831 | 1,5,6,7,27,<br>29,30,32 | 2,3,4,8,28,<br>31,33,34,3<br>5 | 3 | P20766,P53792,Q6AY61                      |
| 9832 | 1,5,6,7,27,<br>29,30,33 | 2,3,4,8,28,<br>31,32,34,3<br>5 | 3 | P20766,P53792,Q6AY61                      |

|      |                         |                                |   |                                           |
|------|-------------------------|--------------------------------|---|-------------------------------------------|
| 9833 | 1,5,6,7,27,<br>29,30,34 | 2,3,4,8,28,<br>31,32,33,3<br>5 | 2 | P20766,P97840                             |
| 9834 | 1,5,6,7,27,<br>29,30,35 | 2,3,4,8,28,<br>31,32,33,3<br>4 | 2 | P20766,Q9QUL6                             |
| 9835 | 1,5,6,7,27,<br>29,31,32 | 2,3,4,8,28,<br>30,33,34,3<br>5 | 2 | B0BNN3,Q6AY61                             |
| 9836 | 1,5,6,7,27,<br>29,31,33 | 2,3,4,8,28,<br>30,32,34,3<br>5 | 3 | P53792,Q6AY61,Q80WL1                      |
| 9837 | 1,5,6,7,27,<br>29,31,34 | 2,3,4,8,28,<br>30,32,33,3<br>5 | 0 |                                           |
| 9838 | 1,5,6,7,27,<br>29,31,35 | 2,3,4,8,28,<br>30,32,33,3<br>4 | 1 | Q9QUL6                                    |
| 9839 | 1,5,6,7,27,<br>29,32,33 | 2,3,4,8,28,<br>30,31,34,3<br>5 | 5 | P02793,Q7TP54,P20766,P53792,Q6AY61,Q80WL1 |
| 9840 | 1,5,6,7,27,<br>29,32,34 | 2,3,4,8,28,<br>30,31,33,3<br>5 | 4 | P02761,P06760,P17046,Q80WL1               |
| 9841 | 1,5,6,7,27,<br>29,32,35 | 2,3,4,8,28,<br>30,31,33,3<br>4 | 3 | P20766,Q80WL1,Q9QUL6                      |
| 9842 | 1,5,6,7,27,<br>29,33,34 | 2,3,4,8,28,<br>30,31,32,3<br>5 | 3 | P02761,P20766,Q80WL1                      |
| 9843 | 1,5,6,7,27,<br>29,33,35 | 2,3,4,8,28,<br>30,31,32,3<br>4 | 2 | P20766,Q80WL1                             |
| 9844 | 1,5,6,7,27,<br>29,34,35 | 2,3,4,8,28,<br>30,31,32,3<br>3 | 2 | Q80WL1,Q9QUL6                             |
| 9845 | 1,5,6,7,27,<br>30,31,32 | 2,3,4,8,28,<br>29,33,34,3<br>5 | 2 | P00507,Q6AY61                             |
| 9846 | 1,5,6,7,27,<br>30,31,33 | 2,3,4,8,28,<br>29,32,34,3<br>5 | 6 | P00507,P19218,P20766,Q5QE79,Q6AY61,Q6TMA8 |
| 9847 | 1,5,6,7,27,<br>30,31,34 | 2,3,4,8,28,<br>29,32,33,3<br>5 | 3 | P19218,P97840,Q6TMA8                      |

|      |                         |                                |   |                             |
|------|-------------------------|--------------------------------|---|-----------------------------|
| 9848 | 1,5,6,7,27,<br>30,31,35 | 2,3,4,8,28,<br>29,32,33,3<br>4 | 2 | Q5QE79,Q6TMA8               |
| 9849 | 1,5,6,7,27,<br>30,32,33 | 2,3,4,8,28,<br>29,31,34,3<br>5 | 4 | P00507,P20766,P53792,Q6AY61 |
| 9850 | 1,5,6,7,27,<br>30,32,34 | 2,3,4,8,28,<br>29,31,33,3<br>5 | 3 | P06760,P17046,P97840        |
| 9851 | 1,5,6,7,27,<br>30,32,35 | 2,3,4,8,28,<br>29,31,33,3<br>4 | 1 | P20766                      |
| 9852 | 1,5,6,7,27,<br>30,33,34 | 2,3,4,8,28,<br>29,31,32,3<br>5 | 3 | P19218,P20766,P97840        |
| 9853 | 1,5,6,7,27,<br>30,33,35 | 2,3,4,8,28,<br>29,31,32,3<br>4 | 2 | P20766,Q6TMA8               |
| 9854 | 1,5,6,7,27,<br>30,34,35 | 2,3,4,8,28,<br>29,31,32,3<br>3 | 2 | P97840,Q9QUL6               |
| 9855 | 1,5,6,7,27,<br>31,32,33 | 2,3,4,8,28,<br>29,30,34,3<br>5 | 4 | P00507,Q6AY61,Q6NX65,Q80WL1 |
| 9856 | 1,5,6,7,27,<br>31,32,34 | 2,3,4,8,28,<br>29,30,33,3<br>5 | 1 | P02761                      |
| 9857 | 1,5,6,7,27,<br>31,32,35 | 2,3,4,8,28,<br>29,30,33,3<br>4 | 0 |                             |
| 9858 | 1,5,6,7,27,<br>31,33,34 | 2,3,4,8,28,<br>29,30,32,3<br>5 | 2 | P19218,Q6TMA8               |
| 9859 | 1,5,6,7,27,<br>31,33,35 | 2,3,4,8,28,<br>29,30,32,3<br>4 | 3 | P01836,Q5QE79,Q6TMA8        |
| 9860 | 1,5,6,7,27,<br>31,34,35 | 2,3,4,8,28,<br>29,30,32,3<br>3 | 2 | Q6TMA8,Q9QUL6               |
| 9861 | 1,5,6,7,27,<br>32,33,34 | 2,3,4,8,28,<br>29,30,31,3<br>5 | 3 | P02761,P17046,Q80WL1        |
| 9862 | 1,5,6,7,27,<br>32,33,35 | 2,3,4,8,28,<br>29,30,31,3<br>4 | 3 | P20766,Q6NX65,Q80WL1        |

|      |                         |                                |   |                                                  |
|------|-------------------------|--------------------------------|---|--------------------------------------------------|
| 9863 | 1,5,6,7,27,<br>32,34,35 | 2,3,4,8,28,<br>29,30,31,3<br>3 | 3 | P02761,P17046,Q9QUL6                             |
| 9864 | 1,5,6,7,27,<br>33,34,35 | 2,3,4,8,28,<br>29,30,31,3<br>2 | 1 | Q80WL1                                           |
| 9865 | 1,5,6,7,28,<br>29,30,31 | 2,3,4,8,27,<br>32,33,34,3<br>5 | 3 | P19629,P35467,Q5GRG2                             |
| 9866 | 1,5,6,7,28,<br>29,30,32 | 2,3,4,8,27,<br>31,33,34,3<br>5 | 3 | F1LM93,P20766,Q63355                             |
| 9867 | 1,5,6,7,28,<br>29,30,33 | 2,3,4,8,27,<br>31,32,34,3<br>5 | 3 | F1LM93,P20766,P35467                             |
| 9868 | 1,5,6,7,28,<br>29,30,34 | 2,3,4,8,27,<br>31,32,33,3<br>5 | 2 | P05712,P97840                                    |
| 9869 | 1,5,6,7,28,<br>29,30,35 | 2,3,4,8,27,<br>31,32,33,3<br>4 | 2 | P20766,Q9QUL6                                    |
| 9870 | 1,5,6,7,28,<br>29,31,32 | 2,3,4,8,27,<br>30,33,34,3<br>5 | 4 | B0BNN3,P06911,P12020,Q5GRG2                      |
| 9871 | 1,5,6,7,28,<br>29,31,33 | 2,3,4,8,27,<br>30,32,34,3<br>5 | 6 | P06911,P19629,P35467,P83121,Q5GRG2,Q80WL1        |
| 9872 | 1,5,6,7,28,<br>29,31,34 | 2,3,4,8,27,<br>30,32,33,3<br>5 | 0 |                                                  |
| 9873 | 1,5,6,7,28,<br>29,31,35 | 2,3,4,8,27,<br>30,32,33,3<br>4 | 2 | Q00715,Q9QUL6                                    |
| 9874 | 1,5,6,7,28,<br>29,32,33 | 2,3,4,8,27,<br>30,31,34,3<br>5 | 6 | F1LM93,P02793;Q7TP54,P04905,P09456,P47727,Q80WL1 |
| 9875 | 1,5,6,7,28,<br>29,32,34 | 2,3,4,8,27,<br>30,31,33,3<br>5 | 3 | P17046,Q80WL1,Q9ET32                             |
| 9876 | 1,5,6,7,28,<br>29,32,35 | 2,3,4,8,27,<br>30,31,33,3<br>4 | 3 | P02625,Q80WL1,Q9QUL6                             |
| 9877 | 1,5,6,7,28,<br>29,33,34 | 2,3,4,8,27,<br>30,31,32,3<br>5 | 1 | Q80WL1                                           |

|      |                         |                                |   |                                           |
|------|-------------------------|--------------------------------|---|-------------------------------------------|
| 9878 | 1,5,6,7,28,<br>29,33,35 | 2,3,4,8,27,<br>30,31,32,3<br>4 | 3 | P15399,P20766,Q80WL1                      |
| 9879 | 1,5,6,7,28,<br>29,34,35 | 2,3,4,8,27,<br>30,31,32,3<br>3 | 2 | Q80WL1,Q9QUL6                             |
| 9880 | 1,5,6,7,28,<br>30,31,32 | 2,3,4,8,27,<br>29,33,34,3<br>5 | 3 | P12020,Q561R9,Q5GRG2                      |
| 9881 | 1,5,6,7,28,<br>30,31,33 | 2,3,4,8,27,<br>29,32,34,3<br>5 | 5 | P19218,P19629,P35467,Q6TMA8,Q8VD89        |
| 9882 | 1,5,6,7,28,<br>30,31,34 | 2,3,4,8,27,<br>29,32,33,3<br>5 | 4 | P13432,P19218,P97840,Q6TMA8               |
| 9883 | 1,5,6,7,28,<br>30,31,35 | 2,3,4,8,27,<br>29,32,33,3<br>4 | 2 | Q00715,Q6TMA8                             |
| 9884 | 1,5,6,7,28,<br>30,32,33 | 2,3,4,8,27,<br>29,31,34,3<br>5 | 0 |                                           |
| 9885 | 1,5,6,7,28,<br>30,32,34 | 2,3,4,8,27,<br>29,31,33,3<br>5 | 2 | P17046,P97840                             |
| 9886 | 1,5,6,7,28,<br>30,32,35 | 2,3,4,8,27,<br>29,31,33,3<br>4 | 1 | P36970                                    |
| 9887 | 1,5,6,7,28,<br>30,33,34 | 2,3,4,8,27,<br>29,31,32,3<br>5 | 1 | P97840                                    |
| 9888 | 1,5,6,7,28,<br>30,33,35 | 2,3,4,8,27,<br>29,31,32,3<br>4 | 2 | P20766,Q6TMA8                             |
| 9889 | 1,5,6,7,28,<br>30,34,35 | 2,3,4,8,27,<br>29,31,32,3<br>3 | 3 | P97840,Q8CJD3,Q9QUL6                      |
| 9890 | 1,5,6,7,28,<br>31,32,33 | 2,3,4,8,27,<br>29,30,34,3<br>5 | 6 | P06911,P12020,P13432,P14480,Q5GRG2,Q80WL1 |
| 9891 | 1,5,6,7,28,<br>31,32,34 | 2,3,4,8,27,<br>29,30,33,3<br>5 | 1 | P13432                                    |
| 9892 | 1,5,6,7,28,<br>31,32,35 | 2,3,4,8,27,<br>29,30,33,3<br>4 | 1 | Q00715                                    |



|      |                         |                                |   |                                    |
|------|-------------------------|--------------------------------|---|------------------------------------|
| 9893 | 1,5,6,7,28,<br>31,33,34 | 2,3,4,8,27,<br>29,30,32,3<br>5 | 2 | P13432,Q6TMA8                      |
| 9894 | 1,5,6,7,28,<br>31,33,35 | 2,3,4,8,27,<br>29,30,32,3<br>4 | 4 | P62804,Q00715,Q6TMA8,Q8VD89        |
| 9895 | 1,5,6,7,28,<br>31,34,35 | 2,3,4,8,27,<br>29,30,32,3<br>3 | 3 | P62804,Q6TMA8,Q9QUL6               |
| 9896 | 1,5,6,7,28,<br>32,33,34 | 2,3,4,8,27,<br>29,30,31,3<br>5 | 2 | P17046,Q80WL1                      |
| 9897 | 1,5,6,7,28,<br>32,33,35 | 2,3,4,8,27,<br>29,30,31,3<br>4 | 1 | Q80WL1                             |
| 9898 | 1,5,6,7,28,<br>32,34,35 | 2,3,4,8,27,<br>29,30,31,3<br>3 | 5 | P17046,P36970,Q5HZV9,Q80WL1,Q9QUL6 |
| 9899 | 1,5,6,7,28,<br>33,34,35 | 2,3,4,8,27,<br>29,30,31,3<br>2 | 2 | P62804,Q80WL1                      |
| 9900 | 1,5,6,7,29,<br>30,31,32 | 2,3,4,8,27,<br>28,33,34,3<br>5 | 3 | P04182,P53792,Q6AY61               |
| 9901 | 1,5,6,7,29,<br>30,31,33 | 2,3,4,8,27,<br>28,32,34,3<br>5 | 5 | P04182,P35467,P53792,P83121,Q6AY61 |
| 9902 | 1,5,6,7,29,<br>30,31,34 | 2,3,4,8,27,<br>28,32,33,3<br>5 | 1 | P97840                             |
| 9903 | 1,5,6,7,29,<br>30,31,35 | 2,3,4,8,27,<br>28,32,33,3<br>4 | 1 | P04182                             |
| 9904 | 1,5,6,7,29,<br>30,32,33 | 2,3,4,8,27,<br>28,31,34,3<br>5 | 3 | P20766,P53792,Q6AY61               |
| 9905 | 1,5,6,7,29,<br>30,32,34 | 2,3,4,8,27,<br>28,31,33,3<br>5 | 1 | Q99MH3                             |
| 9906 | 1,5,6,7,29,<br>30,32,35 | 2,3,4,8,27,<br>28,31,33,3<br>4 | 2 | P04182,P20766                      |
| 9907 | 1,5,6,7,29,<br>30,33,34 | 2,3,4,8,27,<br>28,31,32,3<br>5 | 0 |                                    |

|      |                         |                                |   |                                           |
|------|-------------------------|--------------------------------|---|-------------------------------------------|
| 9908 | 1,5,6,7,29,<br>30,33,35 | 2,3,4,8,27,<br>28,31,32,3<br>4 | 3 | A2RUV9,P04182,P20766                      |
| 9909 | 1,5,6,7,29,<br>30,34,35 | 2,3,4,8,27,<br>28,31,32,3<br>3 | 1 | Q9QUL6                                    |
| 9910 | 1,5,6,7,29,<br>31,32,33 | 2,3,4,8,27,<br>28,30,34,3<br>5 | 7 | P04182,P53792,P83121,Q6AYQ8,Q80WL1,Q8CJD3 |
| 9911 | 1,5,6,7,29,<br>31,32,34 | 2,3,4,8,27,<br>28,30,33,3<br>5 | 3 | P02761,Q6AYQ8,Q99MH3                      |
| 9912 | 1,5,6,7,29,<br>31,32,35 | 2,3,4,8,27,<br>28,30,33,3<br>4 | 1 | P04182                                    |
| 9913 | 1,5,6,7,29,<br>31,33,34 | 2,3,4,8,27,<br>28,30,32,3<br>5 | 1 | Q6AYQ8                                    |
| 9914 | 1,5,6,7,29,<br>31,33,35 | 2,3,4,8,27,<br>28,30,32,3<br>4 | 2 | P04182,Q6AYQ8                             |
| 9915 | 1,5,6,7,29,<br>31,34,35 | 2,3,4,8,27,<br>28,30,32,3<br>3 | 2 | Q6AYQ8,Q9QUL6                             |
| 9916 | 1,5,6,7,29,<br>32,33,34 | 2,3,4,8,27,<br>28,30,31,3<br>5 | 3 | P02761,Q6AYQ8,Q80WL1                      |
| 9917 | 1,5,6,7,29,<br>32,33,35 | 2,3,4,8,27,<br>28,30,31,3<br>4 | 2 | P04182,Q80WL1                             |
| 9918 | 1,5,6,7,29,<br>32,34,35 | 2,3,4,8,27,<br>28,30,31,3<br>3 | 3 | P02761,Q80WL1,Q9QUL6                      |
| 9919 | 1,5,6,7,29,<br>33,34,35 | 2,3,4,8,27,<br>28,30,31,3<br>2 | 2 | Q6AYQ8,Q80WL1                             |
| 9920 | 1,5,6,7,30,<br>31,32,33 | 2,3,4,8,27,<br>28,29,34,3<br>5 | 4 | P04182,P53792,Q5QE79,Q6AY61               |
| 9921 | 1,5,6,7,30,<br>31,32,34 | 2,3,4,8,27,<br>28,29,33,3<br>5 | 2 | P13432,P97840                             |
| 9922 | 1,5,6,7,30,<br>31,32,35 | 2,3,4,8,27,<br>28,29,33,3<br>4 | 1 | P04182                                    |

|      |                         |                                |    |                                                                                                          |
|------|-------------------------|--------------------------------|----|----------------------------------------------------------------------------------------------------------|
| 9923 | 1,5,6,7,30,<br>31,33,34 | 2,3,4,8,27,<br>28,29,32,3<br>5 | 3  | P13432,P19218,P97840                                                                                     |
| 9924 | 1,5,6,7,30,<br>31,33,35 | 2,3,4,8,27,<br>28,29,32,3<br>4 | 2  | P04182,Q5QE79                                                                                            |
| 9925 | 1,5,6,7,30,<br>31,34,35 | 2,3,4,8,27,<br>28,29,32,3<br>3 | 3  | P02793;Q7TP54,P24368,P97840                                                                              |
| 9926 | 1,5,6,7,30,<br>32,33,34 | 2,3,4,8,27,<br>28,29,31,3<br>5 | 1  | P17046                                                                                                   |
| 9927 | 1,5,6,7,30,<br>32,33,35 | 2,3,4,8,27,<br>28,29,31,3<br>4 | 1  | P04182                                                                                                   |
| 9928 | 1,5,6,7,30,<br>32,34,35 | 2,3,4,8,27,<br>28,29,31,3<br>3 | 0  |                                                                                                          |
| 9929 | 1,5,6,7,30,<br>33,34,35 | 2,3,4,8,27,<br>28,29,31,3<br>2 | 0  |                                                                                                          |
| 9930 | 1,5,6,7,31,<br>32,33,34 | 2,3,4,8,27,<br>28,29,30,3<br>5 | 2  | P02761,P13432                                                                                            |
| 9931 | 1,5,6,7,31,<br>32,33,35 | 2,3,4,8,27,<br>28,29,30,3<br>4 | 2  | P04182,Q6NX65                                                                                            |
| 9932 | 1,5,6,7,31,<br>32,34,35 | 2,3,4,8,27,<br>28,29,30,3<br>3 | 0  |                                                                                                          |
| 9933 | 1,5,6,7,31,<br>33,34,35 | 2,3,4,8,27,<br>28,29,30,3<br>2 | 2  | P00714,P24368                                                                                            |
| 9934 | 1,5,6,7,32,<br>33,34,35 | 2,3,4,8,27,<br>28,29,30,3<br>1 | 1  | Q80WL1                                                                                                   |
| 9935 | 1,5,6,8,27,<br>28,29,30 | 2,3,4,7,31,<br>32,33,34,3<br>5 | 11 | F1LM93,O35547,P02781,P02782,P08723,P0C0A9,P30120,P82471,Q63942,Q8CJ52,Q9JHB9                             |
| 9936 | 1,5,6,8,27,<br>28,29,31 | 2,3,4,7,30,<br>32,33,34,3<br>5 | 9  | F1LM93,O35547,P02781,P02782,P06911,P08723,Q5GRG2,Q63942,Q9JHB9                                           |
| 9937 | 1,5,6,8,27,<br>28,29,32 | 2,3,4,7,30,<br>31,33,34,3<br>5 | 15 | F1LM93,O35547,P02781,P02782,P06760,P08723,P0C0A9,P24368,P30120,P47727,P82471,Q63942,Q80WL1,Q9JHB9,Q9Z1F2 |

|      |                         |                                |    |                                                                                     |
|------|-------------------------|--------------------------------|----|-------------------------------------------------------------------------------------|
| 9938 | 1,5,6,8,27,<br>28,29,33 | 2,3,4,7,30,<br>31,32,34,3<br>5 | 12 | F1LM93,O35547,P01836,P02781,P02782,P08723,P0C0A9,Q63942,Q80WL1,Q8CJ52,Q9JHB9,Q9JI85 |
| 9939 | 1,5,6,8,27,<br>28,29,34 | 2,3,4,7,30,<br>31,32,33,3<br>5 | 7  | F1LM93,O35547,P02782,Q5M8C6,Q63942,Q9JHB9,Q9WTT6                                    |
| 9940 | 1,5,6,8,27,<br>28,29,35 | 2,3,4,7,30,<br>31,32,33,3<br>4 | 6  | F1LM93,O35547,P01836,P02782,Q62997,Q63942                                           |
| 9941 | 1,5,6,8,27,<br>28,30,31 | 2,3,4,7,29,<br>32,33,34,3<br>5 | 2  | P02782,Q6TMA8                                                                       |
| 9942 | 1,5,6,8,27,<br>28,30,32 | 2,3,4,7,29,<br>31,33,34,3<br>5 | 2  | P06760,Q6IFV1                                                                       |
| 9943 | 1,5,6,8,27,<br>28,30,33 | 2,3,4,7,29,<br>31,32,34,3<br>5 | 1  | P01836                                                                              |
| 9944 | 1,5,6,8,27,<br>28,30,34 | 2,3,4,7,29,<br>31,32,33,3<br>5 | 1  | Q9WTT6                                                                              |
| 9945 | 1,5,6,8,27,<br>28,30,35 | 2,3,4,7,29,<br>31,32,33,3<br>4 | 2  | P01836,Q6TMA8                                                                       |
| 9946 | 1,5,6,8,27,<br>28,31,32 | 2,3,4,7,29,<br>30,33,34,3<br>5 | 4  | P06760,P06911,P14480,Q5GRG2                                                         |
| 9947 | 1,5,6,8,27,<br>28,31,33 | 2,3,4,7,29,<br>30,32,34,3<br>5 | 3  | P01836,P14480,Q6TMA8                                                                |
| 9948 | 1,5,6,8,27,<br>28,31,34 | 2,3,4,7,29,<br>30,32,33,3<br>5 | 1  | Q9WTT6                                                                              |
| 9949 | 1,5,6,8,27,<br>28,31,35 | 2,3,4,7,29,<br>30,32,33,3<br>4 | 2  | P01836,Q6TMA8                                                                       |
| 9950 | 1,5,6,8,27,<br>28,32,33 | 2,3,4,7,29,<br>30,31,34,3<br>5 | 9  | P01836,P06760,P14480,Q6IFU7,Q6IFV1,Q6IG02,Q6P6Q2,Q80WL1,Q9Z1F2                      |
| 9951 | 1,5,6,8,27,<br>28,32,34 | 2,3,4,7,29,<br>30,31,33,3<br>5 | 6  | P06760,P97584,Q10758,Q6IFU7,Q9WTT6,Q9Z1F2                                           |
| 9952 | 1,5,6,8,27,<br>28,32,35 | 2,3,4,7,29,<br>30,31,33,3<br>4 | 2  | P01836,P06760                                                                       |

|      |                         |                                |   |                                    |
|------|-------------------------|--------------------------------|---|------------------------------------|
| 9953 | 1,5,6,8,27,<br>28,33,34 | 2,3,4,7,29,<br>30,31,32,3<br>5 | 4 | P01836,P97584,Q80WL1,Q9WTT6        |
| 9954 | 1,5,6,8,27,<br>28,33,35 | 2,3,4,7,29,<br>30,31,32,3<br>4 | 2 | P01836,Q80WL1                      |
| 9955 | 1,5,6,8,27,<br>28,34,35 | 2,3,4,7,29,<br>30,31,32,3<br>3 | 2 | P01836,Q9WTT6                      |
| 9956 | 1,5,6,8,27,<br>29,30,31 | 2,3,4,7,28,<br>32,33,34,3<br>5 | 0 |                                    |
| 9957 | 1,5,6,8,27,<br>29,30,32 | 2,3,4,7,28,<br>31,33,34,3<br>5 | 2 | P06760,P14669                      |
| 9958 | 1,5,6,8,27,<br>29,30,33 | 2,3,4,7,28,<br>31,32,34,3<br>5 | 1 | P01836                             |
| 9959 | 1,5,6,8,27,<br>29,30,34 | 2,3,4,7,28,<br>31,32,33,3<br>5 | 2 | P06760,Q9WTT6                      |
| 9960 | 1,5,6,8,27,<br>29,30,35 | 2,3,4,7,28,<br>31,32,33,3<br>4 | 1 | P01836                             |
| 9961 | 1,5,6,8,27,<br>29,31,32 | 2,3,4,7,28,<br>30,33,34,3<br>5 | 2 | P06760,Q9Z1F2                      |
| 9962 | 1,5,6,8,27,<br>29,31,33 | 2,3,4,7,28,<br>30,32,34,3<br>5 | 1 | P01836                             |
| 9963 | 1,5,6,8,27,<br>29,31,34 | 2,3,4,7,28,<br>30,32,33,3<br>5 | 1 | Q9WTT6                             |
| 9964 | 1,5,6,8,27,<br>29,31,35 | 2,3,4,7,28,<br>30,32,33,3<br>4 | 1 | P01836                             |
| 9965 | 1,5,6,8,27,<br>29,32,33 | 2,3,4,7,28,<br>30,31,34,3<br>5 | 5 | P01836,P06760,Q6P6Q2,Q80WL1,Q9Z1F2 |
| 9966 | 1,5,6,8,27,<br>29,32,34 | 2,3,4,7,28,<br>30,31,33,3<br>5 | 4 | P06760,P51907,Q9WTT6,Q9Z1F2        |
| 9967 | 1,5,6,8,27,<br>29,32,35 | 2,3,4,7,28,<br>30,31,33,3<br>4 | 4 | P01836,P06760,P47967,P51907        |

|      |                         |                                |   |                             |
|------|-------------------------|--------------------------------|---|-----------------------------|
| 9968 | 1,5,6,8,27,<br>29,33,34 | 2,3,4,7,28,<br>30,31,32,3<br>5 | 4 | P01836,P06760,Q80WL1,Q9WTT6 |
| 9969 | 1,5,6,8,27,<br>29,33,35 | 2,3,4,7,28,<br>30,31,32,3<br>4 | 4 | P01836,P42854,P47967,Q80WL1 |
| 9970 | 1,5,6,8,27,<br>29,34,35 | 2,3,4,7,28,<br>30,31,32,3<br>3 | 3 | P01836,P42854,Q9WTT6        |
| 9971 | 1,5,6,8,27,<br>30,31,32 | 2,3,4,7,28,<br>29,33,34,3<br>5 | 1 | P06760                      |
| 9972 | 1,5,6,8,27,<br>30,31,33 | 2,3,4,7,28,<br>29,32,34,3<br>5 | 2 | P01836,P19218               |
| 9973 | 1,5,6,8,27,<br>30,31,34 | 2,3,4,7,28,<br>29,32,33,3<br>5 | 2 | P19218,Q9WTT6               |
| 9974 | 1,5,6,8,27,<br>30,31,35 | 2,3,4,7,28,<br>29,32,33,3<br>4 | 1 | P01836                      |
| 9975 | 1,5,6,8,27,<br>30,32,33 | 2,3,4,7,28,<br>29,31,34,3<br>5 | 3 | P01836,P06760,Q6IFV1        |
| 9976 | 1,5,6,8,27,<br>30,32,34 | 2,3,4,7,28,<br>29,31,33,3<br>5 | 2 | P06760,Q9WTT6               |
| 9977 | 1,5,6,8,27,<br>30,32,35 | 2,3,4,7,28,<br>29,31,33,3<br>4 | 2 | P01836,P06760               |
| 9978 | 1,5,6,8,27,<br>30,33,34 | 2,3,4,7,28,<br>29,31,32,3<br>5 | 3 | P01836,P06760,Q9WTT6        |
| 9979 | 1,5,6,8,27,<br>30,33,35 | 2,3,4,7,28,<br>29,31,32,3<br>4 | 1 | P01836                      |
| 9980 | 1,5,6,8,27,<br>30,34,35 | 2,3,4,7,28,<br>29,31,32,3<br>3 | 3 | P01836,P02793,Q7TP54,Q9WTT6 |
| 9981 | 1,5,6,8,27,<br>31,32,33 | 2,3,4,7,28,<br>29,30,34,3<br>5 | 4 | P01836,P06760,P14480,Q6P6Q2 |
| 9982 | 1,5,6,8,27,<br>31,32,34 | 2,3,4,7,28,<br>29,30,33,3<br>5 | 3 | P06760,Q9WTT6,Q9Z1F2        |

|      |                         |                                |   |                                                         |
|------|-------------------------|--------------------------------|---|---------------------------------------------------------|
| 9983 | 1,5,6,8,27,<br>31,32,35 | 2,3,4,7,28,<br>29,30,33,3<br>4 | 2 | P01836,P06760                                           |
| 9984 | 1,5,6,8,27,<br>31,33,34 | 2,3,4,7,28,<br>29,30,32,3<br>5 | 1 | P01836                                                  |
| 9985 | 1,5,6,8,27,<br>31,33,35 | 2,3,4,7,28,<br>29,30,32,3<br>4 | 1 | P01836                                                  |
| 9986 | 1,5,6,8,27,<br>31,34,35 | 2,3,4,7,28,<br>29,30,32,3<br>3 | 2 | P01836,P02793;Q7TP54                                    |
| 9987 | 1,5,6,8,27,<br>32,33,34 | 2,3,4,7,28,<br>29,30,31,3<br>5 | 8 | P01836,P06760,P97584,Q10758,Q6P6Q2,Q80WL1,Q9WTT6,Q9Z1F2 |
| 9988 | 1,5,6,8,27,<br>32,33,35 | 2,3,4,7,28,<br>29,30,31,3<br>4 | 5 | P01836,P06760,Q6IG02,Q6P6Q2,Q80WL1                      |
| 9989 | 1,5,6,8,27,<br>32,34,35 | 2,3,4,7,28,<br>29,30,31,3<br>3 | 4 | P01836,P06760,P08753,Q9WTT6                             |
| 9990 | 1,5,6,8,27,<br>33,34,35 | 2,3,4,7,28,<br>29,30,31,3<br>2 | 1 | P01836                                                  |
| 9991 | 1,5,6,8,28,<br>29,30,31 | 2,3,4,7,27,<br>32,33,34,3<br>5 | 3 | F1LM93,O35547,P02782                                    |
| 9992 | 1,5,6,8,28,<br>29,30,32 | 2,3,4,7,27,<br>31,33,34,3<br>5 | 4 | A2RUV9,F1LM93,O35547,Q62975                             |
| 9993 | 1,5,6,8,28,<br>29,30,33 | 2,3,4,7,27,<br>31,32,34,3<br>5 | 3 | A2RUV9,F1LM93,O35547                                    |
| 9994 | 1,5,6,8,28,<br>29,30,34 | 2,3,4,7,27,<br>31,32,33,3<br>5 | 3 | F1LM93,O35547,Q9WTT6                                    |
| 9995 | 1,5,6,8,28,<br>29,30,35 | 2,3,4,7,27,<br>31,32,33,3<br>4 | 3 | A2RUV9,F1LM93,P08649                                    |
| 9996 | 1,5,6,8,28,<br>29,31,32 | 2,3,4,7,27,<br>30,33,34,3<br>5 | 5 | O35547,P06911,P47727,Q5GRG2,Q62975                      |
| 9997 | 1,5,6,8,28,<br>29,31,33 | 2,3,4,7,27,<br>30,32,34,3<br>5 | 3 | O35547,P01836,P06911                                    |

|       |                         |                                |   |                                                         |
|-------|-------------------------|--------------------------------|---|---------------------------------------------------------|
| 9998  | 1,5,6,8,28,<br>29,31,34 | 2,3,4,7,27,<br>30,32,33,3<br>5 | 2 | O35547,Q9WTT6                                           |
| 9999  | 1,5,6,8,28,<br>29,31,35 | 2,3,4,7,27,<br>30,32,33,3<br>4 | 4 | O35547,P01836,P02803,P08649                             |
| 10000 | 1,5,6,8,28,<br>29,32,33 | 2,3,4,7,27,<br>30,31,34,3<br>5 | 8 | A2RUV9,F1LM93,O35547,P04905,P35281,P47727,P47967,Q80WL1 |
| 10001 | 1,5,6,8,28,<br>29,32,34 | 2,3,4,7,27,<br>30,31,33,3<br>5 | 5 | F1LM93,O35547,P35281,Q63942,Q9WTT6                      |
| 10002 | 1,5,6,8,28,<br>29,32,35 | 2,3,4,7,27,<br>30,31,33,3<br>4 | 4 | A2RUV9,P02625,P47967,P51907                             |
| 10003 | 1,5,6,8,28,<br>29,33,34 | 2,3,4,7,27,<br>30,31,32,3<br>5 | 2 | O35547,Q80WL1                                           |
| 10004 | 1,5,6,8,28,<br>29,33,35 | 2,3,4,7,27,<br>30,31,32,3<br>4 | 5 | A2RUV9,O35547,P01836,P47967,Q80WL1                      |
| 10005 | 1,5,6,8,28,<br>29,34,35 | 2,3,4,7,27,<br>30,31,32,3<br>3 | 0 |                                                         |
| 10006 | 1,5,6,8,28,<br>30,31,32 | 2,3,4,7,27,<br>29,33,34,3<br>5 | 0 |                                                         |
| 10007 | 1,5,6,8,28,<br>30,31,33 | 2,3,4,7,27,<br>29,32,34,3<br>5 | 0 |                                                         |
| 10008 | 1,5,6,8,28,<br>30,31,34 | 2,3,4,7,27,<br>29,32,33,3<br>5 | 2 | P13432,Q9WTT6                                           |
| 10009 | 1,5,6,8,28,<br>30,31,35 | 2,3,4,7,27,<br>29,32,33,3<br>4 | 1 | P08649                                                  |
| 10010 | 1,5,6,8,28,<br>30,32,33 | 2,3,4,7,27,<br>29,31,34,3<br>5 | 1 | A2RUV9                                                  |
| 10011 | 1,5,6,8,28,<br>30,32,34 | 2,3,4,7,27,<br>29,31,33,3<br>5 | 1 | Q9WTT6                                                  |
| 10012 | 1,5,6,8,28,<br>30,32,35 | 2,3,4,7,27,<br>29,31,33,3<br>4 | 2 | A2RUV9,P04218                                           |



|       |                         |                                |   |                                    |
|-------|-------------------------|--------------------------------|---|------------------------------------|
| 10013 | 1,5,6,8,28,<br>30,33,34 | 2,3,4,7,27,<br>29,31,32,3<br>5 | 0 |                                    |
| 10014 | 1,5,6,8,28,<br>30,33,35 | 2,3,4,7,27,<br>29,31,32,3<br>4 | 2 | A2RUV9,P01836                      |
| 10015 | 1,5,6,8,28,<br>30,34,35 | 2,3,4,7,27,<br>29,31,32,3<br>3 | 4 | P02793;Q7TP54,P19132,Q8CJD3,Q99068 |
| 10016 | 1,5,6,8,28,<br>31,32,33 | 2,3,4,7,27,<br>29,30,34,3<br>5 | 2 | P06911,P14480                      |
| 10017 | 1,5,6,8,28,<br>31,32,34 | 2,3,4,7,27,<br>29,30,33,3<br>5 | 2 | P13432,P14480                      |
| 10018 | 1,5,6,8,28,<br>31,32,35 | 2,3,4,7,27,<br>29,30,33,3<br>4 | 1 | P04218                             |
| 10019 | 1,5,6,8,28,<br>31,33,34 | 2,3,4,7,27,<br>29,30,32,3<br>5 | 2 | P13432,P14480                      |
| 10020 | 1,5,6,8,28,<br>31,33,35 | 2,3,4,7,27,<br>29,30,32,3<br>4 | 2 | P01836,P02803                      |
| 10021 | 1,5,6,8,28,<br>31,34,35 | 2,3,4,7,27,<br>29,30,32,3<br>3 | 2 | P01836,P02793;Q7TP54               |
| 10022 | 1,5,6,8,28,<br>32,33,34 | 2,3,4,7,27,<br>29,30,31,3<br>5 | 2 | P14480,Q80WL1                      |
| 10023 | 1,5,6,8,28,<br>32,33,35 | 2,3,4,7,27,<br>29,30,31,3<br>4 | 4 | A2RUV9,P01836,P47967,Q80WL1        |
| 10024 | 1,5,6,8,28,<br>32,34,35 | 2,3,4,7,27,<br>29,30,31,3<br>3 | 1 | Q5HZV9                             |
| 10025 | 1,5,6,8,28,<br>33,34,35 | 2,3,4,7,27,<br>29,30,31,3<br>2 | 1 | P01836                             |
| 10026 | 1,5,6,8,29,<br>30,31,32 | 2,3,4,7,27,<br>28,33,34,3<br>5 | 1 | P04182                             |
| 10027 | 1,5,6,8,29,<br>30,31,33 | 2,3,4,7,27,<br>28,32,34,3<br>5 | 0 |                                    |

|       |                         |                                |   |                                    |
|-------|-------------------------|--------------------------------|---|------------------------------------|
| 10028 | 1,5,6,8,29,<br>30,31,34 | 2,3,4,7,27,<br>28,32,33,3<br>5 | 0 |                                    |
| 10029 | 1,5,6,8,29,<br>30,31,35 | 2,3,4,7,27,<br>28,32,33,3<br>4 | 2 | P04182,Q06000                      |
| 10030 | 1,5,6,8,29,<br>30,32,33 | 2,3,4,7,27,<br>28,31,34,3<br>5 | 2 | A2RUV9,P53792                      |
| 10031 | 1,5,6,8,29,<br>30,32,34 | 2,3,4,7,27,<br>28,31,33,3<br>5 | 2 | P06760,Q99MH3                      |
| 10032 | 1,5,6,8,29,<br>30,32,35 | 2,3,4,7,27,<br>28,31,33,3<br>4 | 3 | A2RUV9,P04182,P51907               |
| 10033 | 1,5,6,8,29,<br>30,33,34 | 2,3,4,7,27,<br>28,31,32,3<br>5 | 0 |                                    |
| 10034 | 1,5,6,8,29,<br>30,33,35 | 2,3,4,7,27,<br>28,31,32,3<br>4 | 2 | A2RUV9,P01836                      |
| 10035 | 1,5,6,8,29,<br>30,34,35 | 2,3,4,7,27,<br>28,31,32,3<br>3 | 2 | P02793;Q7TP54,Q06000               |
| 10036 | 1,5,6,8,29,<br>31,32,33 | 2,3,4,7,27,<br>28,30,34,3<br>5 | 5 | P04182,P47967,P53792,Q6AYQ8,Q8CJD3 |
| 10037 | 1,5,6,8,29,<br>31,32,34 | 2,3,4,7,27,<br>28,30,33,3<br>5 | 1 | Q6AYQ8                             |
| 10038 | 1,5,6,8,29,<br>31,32,35 | 2,3,4,7,27,<br>28,30,33,3<br>4 | 3 | P04182,P47967,P51907               |
| 10039 | 1,5,6,8,29,<br>31,33,34 | 2,3,4,7,27,<br>28,30,32,3<br>5 | 2 | P01836,Q6AYQ8                      |
| 10040 | 1,5,6,8,29,<br>31,33,35 | 2,3,4,7,27,<br>28,30,32,3<br>4 | 4 | P01836,P04182,P47967,Q6AYQ8        |
| 10041 | 1,5,6,8,29,<br>31,34,35 | 2,3,4,7,27,<br>28,30,32,3<br>3 | 3 | P01836,P02793;Q7TP54,Q6AYQ8        |
| 10042 | 1,5,6,8,29,<br>32,33,34 | 2,3,4,7,27,<br>28,30,31,3<br>5 | 4 | D3ZUC6,P06760,Q6AYQ8,Q80WL1        |

|       |                         |                                |   |                                           |
|-------|-------------------------|--------------------------------|---|-------------------------------------------|
| 10043 | 1,5,6,8,29,<br>32,33,35 | 2,3,4,7,27,<br>28,30,31,3<br>4 | 6 | A2RUV9,P01836,P04182,P47967,P51907,Q80WL1 |
| 10044 | 1,5,6,8,29,<br>32,34,35 | 2,3,4,7,27,<br>28,30,31,3<br>3 | 1 | P51907                                    |
| 10045 | 1,5,6,8,29,<br>33,34,35 | 2,3,4,7,27,<br>28,30,31,3<br>2 | 2 | P01836,Q6AYQ8                             |
| 10046 | 1,5,6,8,30,<br>31,32,33 | 2,3,4,7,27,<br>28,29,34,3<br>5 | 0 |                                           |
| 10047 | 1,5,6,8,30,<br>31,32,34 | 2,3,4,7,27,<br>28,29,33,3<br>5 | 1 | P13432                                    |
| 10048 | 1,5,6,8,30,<br>31,32,35 | 2,3,4,7,27,<br>28,29,33,3<br>4 | 2 | P04182,P04218                             |
| 10049 | 1,5,6,8,30,<br>31,33,34 | 2,3,4,7,27,<br>28,29,32,3<br>5 | 1 | P19218                                    |
| 10050 | 1,5,6,8,30,<br>31,33,35 | 2,3,4,7,27,<br>28,29,32,3<br>4 | 2 | P01836,P04182                             |
| 10051 | 1,5,6,8,30,<br>31,34,35 | 2,3,4,7,27,<br>28,29,32,3<br>3 | 3 | P02793;Q7TP54,P19132,Q06000               |
| 10052 | 1,5,6,8,30,<br>32,33,34 | 2,3,4,7,27,<br>28,29,31,3<br>5 | 1 | P06760                                    |
| 10053 | 1,5,6,8,30,<br>32,33,35 | 2,3,4,7,27,<br>28,29,31,3<br>4 | 2 | A2RUV9,P01836                             |
| 10054 | 1,5,6,8,30,<br>32,34,35 | 2,3,4,7,27,<br>28,29,31,3<br>3 | 2 | P02793;Q7TP54,P08753                      |
| 10055 | 1,5,6,8,30,<br>33,34,35 | 2,3,4,7,27,<br>28,29,31,3<br>2 | 2 | P01836,P02793;Q7TP54                      |
| 10056 | 1,5,6,8,31,<br>32,33,34 | 2,3,4,7,27,<br>28,29,30,3<br>5 | 2 | P13432,P14480                             |
| 10057 | 1,5,6,8,31,<br>32,33,35 | 2,3,4,7,27,<br>28,29,30,3<br>4 | 3 | P01836,P04182,P47967                      |

|       |                          |                                |    |                                                                                                          |
|-------|--------------------------|--------------------------------|----|----------------------------------------------------------------------------------------------------------|
| 10058 | 1,5,6,8,31,<br>32,34,35  | 2,3,4,7,27,<br>28,29,30,3<br>3 | 1  | P08753                                                                                                   |
| 10059 | 1,5,6,8,31,<br>33,34,35  | 2,3,4,7,27,<br>28,29,30,3<br>2 | 1  | P01836                                                                                                   |
| 10060 | 1,5,6,8,32,<br>33,34,35  | 2,3,4,7,27,<br>28,29,30,3<br>1 | 2  | P01836,P08753                                                                                            |
| 10061 | 1,5,6,27,2<br>8,29,30,31 | 2,3,4,7,8,3<br>2,33,34,35      | 9  | F1LM93,O35547,P02781,P08723,P20766,P30120,P36374,Q6AYR9,Q9JHB9                                           |
| 10062 | 1,5,6,27,2<br>8,29,30,32 | 2,3,4,7,8,3<br>1,33,34,35      | 13 | F1LM93,O08815,O35547,P01835,P02781,P05369,P08010,P08723,P20766,P30120,Q62997,Q6IFU7,Q9JHB9               |
| 10063 | 1,5,6,27,2<br>8,29,30,33 | 2,3,4,7,8,3<br>1,32,34,35      | 12 | F1LM93,O08815,O35547,P02781,P05369,P08723,P20766,P30120,P36374,Q62997,Q80WL1,Q9JHB9                      |
| 10064 | 1,5,6,27,2<br>8,29,30,34 | 2,3,4,7,8,3<br>1,32,33,35      | 8  | F1LM93,O35547,P05369,P20766,Q6AYR9,Q8CJD3,Q9JHB9,Q9QUL6                                                  |
| 10065 | 1,5,6,27,2<br>8,29,30,35 | 2,3,4,7,8,3<br>1,32,33,34      | 6  | F1LM93,O35547,P01835,P20766,Q62997,Q9QUL6                                                                |
| 10066 | 1,5,6,27,2<br>8,29,31,32 | 2,3,4,7,8,3<br>0,33,34,35      | 7  | O35547,P06911,P08723,P47727,Q5GRG2,Q80WL1,Q9JHB9                                                         |
| 10067 | 1,5,6,27,2<br>8,29,31,33 | 2,3,4,7,8,3<br>0,32,34,35      | 7  | O35547,P06911,P08723,P20766,P36374,Q80WL1,Q9JHB9                                                         |
| 10068 | 1,5,6,27,2<br>8,29,31,34 | 2,3,4,7,8,3<br>0,32,33,35      | 2  | O35547,Q9QUL6                                                                                            |
| 10069 | 1,5,6,27,2<br>8,29,31,35 | 2,3,4,7,8,3<br>0,32,33,34      | 5  | D3ZUK3,O35547,P01836,P20766,Q9QUL6                                                                       |
| 10070 | 1,5,6,27,2<br>8,29,32,33 | 2,3,4,7,8,3<br>0,31,34,35      | 15 | F1LM93,O08815,O35547,P04905,P05369,P08010,P08723,P20766,P47727,Q62997,Q64057,Q6IFU7,Q6P6Q2,Q80WL1,Q9JHB9 |
| 10071 | 1,5,6,27,2<br>8,29,32,34 | 2,3,4,7,8,3<br>0,31,33,35      | 10 | F1LM93,O35547,P05369,P06760,P97584,Q10758,Q6IFU7,Q80WL1,Q9JHB9,Q9QUL6                                    |
| 10072 | 1,5,6,27,2<br>8,29,32,35 | 2,3,4,7,8,3<br>0,31,33,34      | 10 | F1LM93,O35547,P20766,P36970,P42854,P47967,Q62997,Q80WL1,Q9JHB9,Q9QUL6                                    |
| 10073 | 1,5,6,27,2<br>8,29,33,34 | 2,3,4,7,8,3<br>0,31,32,35      | 7  | O35547,P05369,P20766,P42854,P97584,Q64057,Q80WL1                                                         |
| 10074 | 1,5,6,27,2<br>8,29,33,35 | 2,3,4,7,8,3<br>0,31,32,34      | 7  | O35547,P01836,P20766,P42854,P47967,Q62997,Q80WL1                                                         |
| 10075 | 1,5,6,27,2<br>8,29,34,35 | 2,3,4,7,8,3<br>0,31,32,33      | 5  | P20766,P42854,Q5M819,Q80WL1,Q9QUL6                                                                       |
| 10076 | 1,5,6,27,2<br>8,30,31,32 | 2,3,4,7,8,2<br>9,33,34,35      | 1  | Q6IFU7                                                                                                   |
| 10077 | 1,5,6,27,2<br>8,30,31,33 | 2,3,4,7,8,2<br>9,32,34,35      | 2  | P20766,Q6TMA8                                                                                            |
| 10078 | 1,5,6,27,2<br>8,30,31,34 | 2,3,4,7,8,2<br>9,32,33,35      | 3  | P23739,Q6TMA8,Q8CJD3                                                                                     |

|       |                          |                           |   |                                           |
|-------|--------------------------|---------------------------|---|-------------------------------------------|
| 10079 | 1,5,6,27,2<br>8,30,31,35 | 2,3,4,7,8,2<br>9,32,33,34 | 3 | P20766,Q6TMA8,Q9QUL6                      |
| 10080 | 1,5,6,27,2<br>8,30,32,33 | 2,3,4,7,8,2<br>9,31,34,35 | 5 | P16296,P20766,Q6IFU7,Q6IFV1,Q80WL1        |
| 10081 | 1,5,6,27,2<br>8,30,32,34 | 2,3,4,7,8,2<br>9,31,33,35 | 3 | P06760,Q10758,Q6IFU7                      |
| 10082 | 1,5,6,27,2<br>8,30,32,35 | 2,3,4,7,8,2<br>9,31,33,34 | 4 | P20766,P36970,Q6IFU7,Q9QUL6               |
| 10083 | 1,5,6,27,2<br>8,30,33,34 | 2,3,4,7,8,2<br>9,31,32,35 | 3 | P20766,Q6IFU7,Q8CJD3                      |
| 10084 | 1,5,6,27,2<br>8,30,33,35 | 2,3,4,7,8,2<br>9,31,32,34 | 4 | P01836,P20766,Q6TMA8,Q80WL1               |
| 10085 | 1,5,6,27,2<br>8,30,34,35 | 2,3,4,7,8,2<br>9,31,32,33 | 4 | P02793;Q7TP54,P20766,Q8CJD3,Q9QUL6        |
| 10086 | 1,5,6,27,2<br>8,31,32,33 | 2,3,4,7,8,2<br>9,30,34,35 | 4 | P14480,Q6IFU7,Q6P6Q2,Q80WL1               |
| 10087 | 1,5,6,27,2<br>8,31,32,34 | 2,3,4,7,8,2<br>9,30,33,35 | 3 | P13432,Q10758,Q6IFU7                      |
| 10088 | 1,5,6,27,2<br>8,31,32,35 | 2,3,4,7,8,2<br>9,30,33,34 | 1 | Q9QUL6                                    |
| 10089 | 1,5,6,27,2<br>8,31,33,34 | 2,3,4,7,8,2<br>9,30,32,35 | 3 | P13432,Q6TMA8,Q80WL1                      |
| 10090 | 1,5,6,27,2<br>8,31,33,35 | 2,3,4,7,8,2<br>9,30,32,34 | 5 | P01041,P01836,P20766,Q6TMA8,Q80WL1        |
| 10091 | 1,5,6,27,2<br>8,31,34,35 | 2,3,4,7,8,2<br>9,30,32,33 | 2 | Q6TMA8,Q9QUL6                             |
| 10092 | 1,5,6,27,2<br>8,32,33,34 | 2,3,4,7,8,2<br>9,30,31,35 | 6 | P97584,Q10758,Q64057,Q6IFU7,Q6P6Q2,Q80WL1 |
| 10093 | 1,5,6,27,2<br>8,32,33,35 | 2,3,4,7,8,2<br>9,30,31,34 | 6 | P01836,P20766,Q6IFU7,Q6IG02,Q6P6Q2,Q80WL1 |
| 10094 | 1,5,6,27,2<br>8,32,34,35 | 2,3,4,7,8,2<br>9,30,31,33 | 6 | P36970,Q10758,Q5HZV9,Q6IFU7,Q80WL1,Q9QUL6 |
| 10095 | 1,5,6,27,2<br>8,33,34,35 | 2,3,4,7,8,2<br>9,30,31,32 | 4 | P01836,P20766,P42854,Q80WL1               |
| 10096 | 1,5,6,27,2<br>9,30,31,32 | 2,3,4,7,8,2<br>8,33,34,35 | 2 | P20766,Q6AY61                             |
| 10097 | 1,5,6,27,2<br>9,30,31,33 | 2,3,4,7,8,2<br>8,32,34,35 | 1 | P20766                                    |
| 10098 | 1,5,6,27,2<br>9,30,31,34 | 2,3,4,7,8,2<br>8,32,33,35 | 0 |                                           |
| 10099 | 1,5,6,27,2<br>9,30,31,35 | 2,3,4,7,8,2<br>8,32,33,34 | 2 | P20766,Q9QUL6                             |
| 10100 | 1,5,6,27,2<br>9,30,32,33 | 2,3,4,7,8,2<br>8,31,34,35 | 5 | P06760,P16296,P20766,Q6AY61,Q80WL1        |
| 10101 | 1,5,6,27,2<br>9,30,32,34 | 2,3,4,7,8,2<br>8,31,33,35 | 3 | P06760,P20766,Q10758                      |

|       |                          |                           |   |                                                         |
|-------|--------------------------|---------------------------|---|---------------------------------------------------------|
| 10102 | 1,5,6,27,2<br>9,30,32,35 | 2,3,4,7,8,2<br>8,31,33,34 | 2 | P20766,Q62997                                           |
| 10103 | 1,5,6,27,2<br>9,30,33,34 | 2,3,4,7,8,2<br>8,31,32,35 | 1 | P20766                                                  |
| 10104 | 1,5,6,27,2<br>9,30,33,35 | 2,3,4,7,8,2<br>8,31,32,34 | 4 | P01836,P20766,Q62997,Q80WL1                             |
| 10105 | 1,5,6,27,2<br>9,30,34,35 | 2,3,4,7,8,2<br>8,31,32,33 | 2 | P20766,Q9QUL6                                           |
| 10106 | 1,5,6,27,2<br>9,31,32,33 | 2,3,4,7,8,2<br>8,30,34,35 | 4 | P20766,Q64057,Q6AY61,Q80WL1                             |
| 10107 | 1,5,6,27,2<br>9,31,32,34 | 2,3,4,7,8,2<br>8,30,33,35 | 3 | P02761,P06760,Q10758                                    |
| 10108 | 1,5,6,27,2<br>9,31,32,35 | 2,3,4,7,8,2<br>8,30,33,34 | 2 | P47967,Q9QUL6                                           |
| 10109 | 1,5,6,27,2<br>9,31,33,34 | 2,3,4,7,8,2<br>8,30,32,35 | 4 | P01836,Q64057,Q6AYQ8,Q80WL1                             |
| 10110 | 1,5,6,27,2<br>9,31,33,35 | 2,3,4,7,8,2<br>8,30,32,34 | 4 | P01836,P20766,P47967,Q80WL1                             |
| 10111 | 1,5,6,27,2<br>9,31,34,35 | 2,3,4,7,8,2<br>8,30,32,33 | 2 | P01836,Q9QUL6                                           |
| 10112 | 1,5,6,27,2<br>9,32,33,34 | 2,3,4,7,8,2<br>8,30,31,35 | 8 | P02761,P06760,P20766,P42854,Q10758,Q64057,Q6P6Q2,Q80WL1 |
| 10113 | 1,5,6,27,2<br>9,32,33,35 | 2,3,4,7,8,2<br>8,30,31,34 | 5 | P01836,P20766,P42854,P47967,Q80WL1                      |
| 10114 | 1,5,6,27,2<br>9,32,34,35 | 2,3,4,7,8,2<br>8,30,31,33 | 4 | P06760,P42854,Q80WL1,Q9QUL6                             |
| 10115 | 1,5,6,27,2<br>9,33,34,35 | 2,3,4,7,8,2<br>8,30,31,32 | 4 | P01836,P20766,P42854,Q80WL1                             |
| 10116 | 1,5,6,27,3<br>0,31,32,33 | 2,3,4,7,8,2<br>8,29,34,35 | 2 | P20766,Q6AY61                                           |
| 10117 | 1,5,6,27,3<br>0,31,32,34 | 2,3,4,7,8,2<br>8,29,33,35 | 2 | P06760,Q10758                                           |
| 10118 | 1,5,6,27,3<br>0,31,32,35 | 2,3,4,7,8,2<br>8,29,33,34 | 0 |                                                         |
| 10119 | 1,5,6,27,3<br>0,31,33,34 | 2,3,4,7,8,2<br>8,29,32,35 | 1 | P19218                                                  |
| 10120 | 1,5,6,27,3<br>0,31,33,35 | 2,3,4,7,8,2<br>8,29,32,34 | 2 | P01836,P20766                                           |
| 10121 | 1,5,6,27,3<br>0,31,34,35 | 2,3,4,7,8,2<br>8,29,32,33 | 2 | P02793;Q7TP54,Q9QUL6                                    |
| 10122 | 1,5,6,27,3<br>0,32,33,34 | 2,3,4,7,8,2<br>8,29,31,35 | 4 | P06760,P20766,Q10758,Q6IFU7                             |
| 10123 | 1,5,6,27,3<br>0,32,33,35 | 2,3,4,7,8,2<br>8,29,31,34 | 2 | P01836,P20766                                           |
| 10124 | 1,5,6,27,3<br>0,32,34,35 | 2,3,4,7,8,2<br>8,29,31,33 | 3 | P06760,Q10758,Q9QUL6                                    |

|       |                          |                           |   |                                                                |
|-------|--------------------------|---------------------------|---|----------------------------------------------------------------|
| 10125 | 1,5,6,27,3<br>0,33,34,35 | 2,3,4,7,8,2<br>8,29,31,32 | 2 | P01836,P20766                                                  |
| 10126 | 1,5,6,27,3<br>1,32,33,34 | 2,3,4,7,8,2<br>8,29,30,35 | 6 | P06760,P13432,P14480,Q10758,Q6P6Q2,Q80WL1                      |
| 10127 | 1,5,6,27,3<br>1,32,33,35 | 2,3,4,7,8,2<br>8,29,30,34 | 2 | P01836,Q80WL1                                                  |
| 10128 | 1,5,6,27,3<br>1,32,34,35 | 2,3,4,7,8,2<br>8,29,30,33 | 2 | Q10758,Q9QUL6                                                  |
| 10129 | 1,5,6,27,3<br>1,33,34,35 | 2,3,4,7,8,2<br>8,29,30,32 | 1 | P01836                                                         |
| 10130 | 1,5,6,27,3<br>2,33,34,35 | 2,3,4,7,8,2<br>8,29,30,31 | 5 | P01836,Q10758,Q6IFU7,Q6P6Q2,Q80WL1                             |
| 10131 | 1,5,6,28,2<br>9,30,31,32 | 2,3,4,7,8,2<br>7,33,34,35 | 5 | D3ZUK3,O35547,P06911,Q561R9,Q62975                             |
| 10132 | 1,5,6,28,2<br>9,30,31,33 | 2,3,4,7,8,2<br>7,32,34,35 | 5 | D3ZUK3,O35547,P19629,P20766,P35467                             |
| 10133 | 1,5,6,28,2<br>9,30,31,34 | 2,3,4,7,8,2<br>7,32,33,35 | 1 | Q08849                                                         |
| 10134 | 1,5,6,28,2<br>9,30,31,35 | 2,3,4,7,8,2<br>7,32,33,34 | 5 | D3ZUK3,P08649,P20766,Q07116,Q9QUL6                             |
| 10135 | 1,5,6,28,2<br>9,30,32,33 | 2,3,4,7,8,2<br>7,31,34,35 | 9 | A2RUV9,D3ZUK3,F1LM93,O35547,P04905,P16296,P20766,P47727,Q80WL1 |
| 10136 | 1,5,6,28,2<br>9,30,32,34 | 2,3,4,7,8,2<br>7,31,33,35 | 3 | F1LM93,P36970,Q99MH3                                           |
| 10137 | 1,5,6,28,2<br>9,30,32,35 | 2,3,4,7,8,2<br>7,31,33,34 | 5 | A2RUV9,D3ZUK3,F1LM93,P20766,P36970                             |
| 10138 | 1,5,6,28,2<br>9,30,33,34 | 2,3,4,7,8,2<br>7,31,32,35 | 3 | O35547,P20766,Q80WL1                                           |
| 10139 | 1,5,6,28,2<br>9,30,33,35 | 2,3,4,7,8,2<br>7,31,32,34 | 4 | A2RUV9,D3ZUK3,P20766,Q80WL1                                    |
| 10140 | 1,5,6,28,2<br>9,30,34,35 | 2,3,4,7,8,2<br>7,31,32,33 | 5 | P02793,Q7TP54,P20766,Q08849,Q8CJD3,Q9QUL6                      |
| 10141 | 1,5,6,28,2<br>9,31,32,33 | 2,3,4,7,8,2<br>7,30,34,35 | 8 | D3ZUK3,O35547,P04905,P06911,P47727,P47967,Q64057,Q80WL1        |
| 10142 | 1,5,6,28,2<br>9,31,32,34 | 2,3,4,7,8,2<br>7,30,33,35 | 2 | P06911,Q99MH3                                                  |
| 10143 | 1,5,6,28,2<br>9,31,32,35 | 2,3,4,7,8,2<br>7,30,33,34 | 4 | D3ZUK3,P06911,P47967,Q9QUL6                                    |
| 10144 | 1,5,6,28,2<br>9,31,33,34 | 2,3,4,7,8,2<br>7,30,32,35 | 5 | O35547,P00714,Q64057,Q6AYQ8,Q80WL1                             |
| 10145 | 1,5,6,28,2<br>9,31,33,35 | 2,3,4,7,8,2<br>7,30,32,34 | 9 | D3ZUK3,P00714,P01041,P01836,P02803,P26772,P47967,Q09030,Q80WL1 |
| 10146 | 1,5,6,28,2<br>9,31,34,35 | 2,3,4,7,8,2<br>7,30,32,33 | 2 | P00714,Q9QUL6                                                  |
| 10147 | 1,5,6,28,2<br>9,32,33,34 | 2,3,4,7,8,2<br>7,30,31,35 | 2 | Q64057,Q80WL1                                                  |

|       |                          |                           |   |                                                         |
|-------|--------------------------|---------------------------|---|---------------------------------------------------------|
| 10148 | 1,5,6,28,2<br>9,32,33,35 | 2,3,4,7,8,2<br>7,30,31,34 | 8 | A2RUV9,D3ZUK3,P02625,P20766,P36970,P47967,Q64057,Q80WL1 |
| 10149 | 1,5,6,28,2<br>9,32,34,35 | 2,3,4,7,8,2<br>7,30,31,33 | 4 | P02625,P36970,Q80WL1,Q9QUL6                             |
| 10150 | 1,5,6,28,2<br>9,33,34,35 | 2,3,4,7,8,2<br>7,30,31,32 | 5 | P00714,P20766,P42854,Q64057,Q80WL1                      |
| 10151 | 1,5,6,28,3<br>0,31,32,33 | 2,3,4,7,8,2<br>7,29,34,35 | 2 | P13432,Q561R9                                           |
| 10152 | 1,5,6,28,3<br>0,31,32,34 | 2,3,4,7,8,2<br>7,29,33,35 | 1 | P13432                                                  |
| 10153 | 1,5,6,28,3<br>0,31,32,35 | 2,3,4,7,8,2<br>7,29,33,34 | 2 | D3ZUK3,P36970                                           |
| 10154 | 1,5,6,28,3<br>0,31,33,34 | 2,3,4,7,8,2<br>7,29,32,35 | 1 | P13432                                                  |
| 10155 | 1,5,6,28,3<br>0,31,33,35 | 2,3,4,7,8,2<br>7,29,32,34 | 3 | P00714,P01041,P20766                                    |
| 10156 | 1,5,6,28,3<br>0,31,34,35 | 2,3,4,7,8,2<br>7,29,32,33 | 4 | P00714,P02793,Q7TP54,Q8CJD3,Q9QUL6                      |
| 10157 | 1,5,6,28,3<br>0,32,33,34 | 2,3,4,7,8,2<br>7,29,31,35 | 1 | Q6IFU7                                                  |
| 10158 | 1,5,6,28,3<br>0,32,33,35 | 2,3,4,7,8,2<br>7,29,31,34 | 3 | A2RUV9,P20766,P36970                                    |
| 10159 | 1,5,6,28,3<br>0,32,34,35 | 2,3,4,7,8,2<br>7,29,31,33 | 4 | P36970,Q5HZV9,Q8CJD3,Q9QUL6                             |
| 10160 | 1,5,6,28,3<br>0,33,34,35 | 2,3,4,7,8,2<br>7,29,31,32 | 2 | P20766,Q8CJD3                                           |
| 10161 | 1,5,6,28,3<br>1,32,33,34 | 2,3,4,7,8,2<br>7,29,30,35 | 4 | P13432,P14480,Q64057,Q80WL1                             |
| 10162 | 1,5,6,28,3<br>1,32,33,35 | 2,3,4,7,8,2<br>7,29,30,34 | 2 | P47967,Q80WL1                                           |
| 10163 | 1,5,6,28,3<br>1,32,34,35 | 2,3,4,7,8,2<br>7,29,30,33 | 3 | P36970,Q5HZV9,Q9QUL6                                    |
| 10164 | 1,5,6,28,3<br>1,33,34,35 | 2,3,4,7,8,2<br>7,29,30,32 | 2 | P00714,P01836                                           |
| 10165 | 1,5,6,28,3<br>2,33,34,35 | 2,3,4,7,8,2<br>7,29,30,31 | 4 | P36970,Q5HZV9,Q64057,Q80WL1                             |
| 10166 | 1,5,6,29,3<br>0,31,32,33 | 2,3,4,7,8,2<br>7,28,34,35 | 2 | P04182,Q6AY61                                           |
| 10167 | 1,5,6,29,3<br>0,31,32,34 | 2,3,4,7,8,2<br>7,28,33,35 | 1 | Q99MH3                                                  |
| 10168 | 1,5,6,29,3<br>0,31,32,35 | 2,3,4,7,8,2<br>7,28,33,34 | 2 | D3ZUK3,P04182                                           |
| 10169 | 1,5,6,29,3<br>0,31,33,34 | 2,3,4,7,8,2<br>7,28,32,35 | 1 | P00714                                                  |
| 10170 | 1,5,6,29,3<br>0,31,33,35 | 2,3,4,7,8,2<br>7,28,32,34 | 5 | P00714,P01836,P04182,P20766,P97615                      |



|       |                          |                            |   |                                                         |
|-------|--------------------------|----------------------------|---|---------------------------------------------------------|
| 10171 | 1,5,6,29,3<br>0,31,34,35 | 2,3,4,7,8,2<br>7,28,32,33  | 4 | P00714,P02793;Q7TP54,Q99MH3,Q9QUL6                      |
| 10172 | 1,5,6,29,3<br>0,32,33,34 | 2,3,4,7,8,2<br>7,28,31,35  | 2 | P20766,Q99MH3                                           |
| 10173 | 1,5,6,29,3<br>0,32,33,35 | 2,3,4,7,8,2<br>7,28,31,34  | 5 | A2RUV9,P04182,P20766,P47967,Q80WL1                      |
| 10174 | 1,5,6,29,3<br>0,32,34,35 | 2,3,4,7,8,2<br>7,28,31,33  | 2 | P36970,Q99MH3                                           |
| 10175 | 1,5,6,29,3<br>0,33,34,35 | 2,3,4,7,8,2<br>7,28,31,32  | 2 | P00714,P20766                                           |
| 10176 | 1,5,6,29,3<br>1,32,33,34 | 2,3,4,7,8,2<br>7,28,30,35  | 5 | Q5XI22,Q64057,Q6AYQ8,Q80WL1,Q99MH3                      |
| 10177 | 1,5,6,29,3<br>1,32,33,35 | 2,3,4,7,8,2<br>7,28,30,34  | 6 | D3ZUK3,P04182,P47967,Q64057,Q6AYQ8,Q80WL1               |
| 10178 | 1,5,6,29,3<br>1,32,34,35 | 2,3,4,7,8,2<br>7,28,30,33  | 3 | Q6AYQ8,Q99MH3,Q9QUL6                                    |
| 10179 | 1,5,6,29,3<br>1,33,34,35 | 2,3,4,7,8,2<br>7,28,30,32  | 4 | P00714,P01836,Q64057,Q6AYQ8                             |
| 10180 | 1,5,6,29,3<br>2,33,34,35 | 2,3,4,7,8,2<br>7,28,30,31  | 4 | P42854,Q64057,Q6AYQ8,Q80WL1                             |
| 10181 | 1,5,6,30,3<br>1,32,33,34 | 2,3,4,7,8,2<br>7,28,29,35  | 1 | P13432                                                  |
| 10182 | 1,5,6,30,3<br>1,32,33,35 | 2,3,4,7,8,2<br>7,28,29,34  | 1 | P04182                                                  |
| 10183 | 1,5,6,30,3<br>1,32,34,35 | 2,3,4,7,8,2<br>7,28,29,33  | 2 | P02793;Q7TP54,Q9R0T3                                    |
| 10184 | 1,5,6,30,3<br>1,33,34,35 | 2,3,4,7,8,2<br>7,28,29,32  | 4 | P00714,P02793;Q7TP54,P24368,Q9R0T3                      |
| 10185 | 1,5,6,30,3<br>2,33,34,35 | 2,3,4,7,8,2<br>7,28,29,31  | 1 | Q9R0T3                                                  |
| 10186 | 1,5,6,31,3<br>2,33,34,35 | 2,3,4,7,8,2<br>7,28,29,30  | 1 | P82995                                                  |
| 10187 | 1,5,7,8,27,<br>28,29,30  | 2,3,4,6,31,<br>32,33,34,35 | 5 | F1LM93,P02781,P82471,Q63355,Q8CJ52                      |
| 10188 | 1,5,7,8,27,<br>28,29,31  | 2,3,4,6,30,<br>32,33,34,35 | 6 | P10715,P19629,P31044,P82471,Q5GRG2,Q8CJ52               |
| 10189 | 1,5,7,8,27,<br>28,29,32  | 2,3,4,6,30,<br>31,33,34,35 | 8 | B0BNN3,F1LM93,P02625,P10715,P24368,P82471,Q63355,Q8CJ52 |
| 10190 | 1,5,7,8,27,<br>28,29,33  | 2,3,4,6,30,<br>31,32,34,35 | 5 | F1LM93,P10715,P82471,Q8CJ52,Q9JI85                      |

|       |                         |                                |   |                                                                |
|-------|-------------------------|--------------------------------|---|----------------------------------------------------------------|
| 10191 | 1,5,7,8,27,<br>28,29,34 | 2,3,4,6,30,<br>31,32,33,3<br>5 | 0 |                                                                |
| 10192 | 1,5,7,8,27,<br>28,29,35 | 2,3,4,6,30,<br>31,32,33,3<br>4 | 1 | P02625                                                         |
| 10193 | 1,5,7,8,27,<br>28,30,31 | 2,3,4,6,29,<br>32,33,34,3<br>5 | 4 | P10715,P19629,P31044,Q6TMA8                                    |
| 10194 | 1,5,7,8,27,<br>28,30,32 | 2,3,4,6,29,<br>31,33,34,3<br>5 | 3 | B0BNN3,P25236,Q63355                                           |
| 10195 | 1,5,7,8,27,<br>28,30,33 | 2,3,4,6,29,<br>31,32,34,3<br>5 | 3 | P10715,P25236,Q6TMA8                                           |
| 10196 | 1,5,7,8,27,<br>28,30,34 | 2,3,4,6,29,<br>31,32,33,3<br>5 | 3 | P25236,Q6TMA8,Q8CJD3                                           |
| 10197 | 1,5,7,8,27,<br>28,30,35 | 2,3,4,6,29,<br>31,32,33,3<br>4 | 2 | P25236,Q6TMA8                                                  |
| 10198 | 1,5,7,8,27,<br>28,31,32 | 2,3,4,6,29,<br>30,33,34,3<br>5 | 5 | B0BNN3,P10715,P14480,P31044,Q5GRG2                             |
| 10199 | 1,5,7,8,27,<br>28,31,33 | 2,3,4,6,29,<br>30,32,34,3<br>5 | 5 | P10715,P14480,P19629,P31044,Q6TMA8                             |
| 10200 | 1,5,7,8,27,<br>28,31,34 | 2,3,4,6,29,<br>30,32,33,3<br>5 | 3 | P10715,P14480,Q6TMA8                                           |
| 10201 | 1,5,7,8,27,<br>28,31,35 | 2,3,4,6,29,<br>30,32,33,3<br>4 | 2 | P10715,Q6TMA8                                                  |
| 10202 | 1,5,7,8,27,<br>28,32,33 | 2,3,4,6,29,<br>30,31,34,3<br>5 | 7 | B0BNN3,P02793;Q7TP54,P09605;P25809,P10715,P14480,P24388,P25236 |
| 10203 | 1,5,7,8,27,<br>28,32,34 | 2,3,4,6,29,<br>30,31,33,3<br>5 | 3 | B0BNN3,P14480,P25236                                           |
| 10204 | 1,5,7,8,27,<br>28,32,35 | 2,3,4,6,29,<br>30,31,33,3<br>4 | 3 | P02625,P09605;P25809,P25236                                    |
| 10205 | 1,5,7,8,27,<br>28,33,34 | 2,3,4,6,29,<br>30,31,32,3<br>5 | 2 | P14480,P25236                                                  |

|       |                         |                                |   |                                    |
|-------|-------------------------|--------------------------------|---|------------------------------------|
| 10206 | 1,5,7,8,27,<br>28,33,35 | 2,3,4,6,29,<br>30,31,32,3<br>4 | 4 | P09605;P25809,P10715,P25236,Q6TMA8 |
| 10207 | 1,5,7,8,27,<br>28,34,35 | 2,3,4,6,29,<br>30,31,32,3<br>3 | 2 | P25236,Q6TMA8                      |
| 10208 | 1,5,7,8,27,<br>29,30,31 | 2,3,4,6,28,<br>32,33,34,3<br>5 | 3 | P11883,Q4FZU6,Q5HZV9               |
| 10209 | 1,5,7,8,27,<br>29,30,32 | 2,3,4,6,28,<br>31,33,34,3<br>5 | 1 | Q5HZV9                             |
| 10210 | 1,5,7,8,27,<br>29,30,33 | 2,3,4,6,28,<br>31,32,34,3<br>5 | 2 | P11883,Q5HZV9                      |
| 10211 | 1,5,7,8,27,<br>29,30,34 | 2,3,4,6,28,<br>31,32,33,3<br>5 | 0 |                                    |
| 10212 | 1,5,7,8,27,<br>29,30,35 | 2,3,4,6,28,<br>31,32,33,3<br>4 | 2 | Q4FZU6,Q5HZV9                      |
| 10213 | 1,5,7,8,27,<br>29,31,32 | 2,3,4,6,28,<br>30,33,34,3<br>5 | 3 | B0BNN3,Q4FZU6,Q5HZV9               |
| 10214 | 1,5,7,8,27,<br>29,31,33 | 2,3,4,6,28,<br>30,32,34,3<br>5 | 2 | Q4FZU6,Q5HZV9                      |
| 10215 | 1,5,7,8,27,<br>29,31,34 | 2,3,4,6,28,<br>30,32,33,3<br>5 | 0 |                                    |
| 10216 | 1,5,7,8,27,<br>29,31,35 | 2,3,4,6,28,<br>30,32,33,3<br>4 | 2 | Q4FZU6,Q5HZV9                      |
| 10217 | 1,5,7,8,27,<br>29,32,33 | 2,3,4,6,28,<br>30,31,34,3<br>5 | 2 | P02793;Q7TP54,Q5HZV9               |
| 10218 | 1,5,7,8,27,<br>29,32,34 | 2,3,4,6,28,<br>30,31,33,3<br>5 | 1 | P06760                             |
| 10219 | 1,5,7,8,27,<br>29,32,35 | 2,3,4,6,28,<br>30,31,33,3<br>4 | 1 | P02625                             |
| 10220 | 1,5,7,8,27,<br>29,33,34 | 2,3,4,6,28,<br>30,31,32,3<br>5 | 0 |                                    |

|       |                         |                                |   |                                                  |
|-------|-------------------------|--------------------------------|---|--------------------------------------------------|
| 10221 | 1,5,7,8,27,<br>29,33,35 | 2,3,4,6,28,<br>30,31,32,3<br>4 | 1 | Q5HZV9                                           |
| 10222 | 1,5,7,8,27,<br>29,34,35 | 2,3,4,6,28,<br>30,31,32,3<br>3 | 0 |                                                  |
| 10223 | 1,5,7,8,27,<br>30,31,32 | 2,3,4,6,28,<br>29,33,34,3<br>5 | 3 | P00507,Q4FZU6,Q5HZV9                             |
| 10224 | 1,5,7,8,27,<br>30,31,33 | 2,3,4,6,28,<br>29,32,34,3<br>5 | 6 | P00507,P11883,P19218,Q4FZU6,Q5HZV9,Q6TMA8        |
| 10225 | 1,5,7,8,27,<br>30,31,34 | 2,3,4,6,28,<br>29,32,33,3<br>5 | 1 | P19218                                           |
| 10226 | 1,5,7,8,27,<br>30,31,35 | 2,3,4,6,28,<br>29,32,33,3<br>4 | 2 | Q4FZU6,Q6TMA8                                    |
| 10227 | 1,5,7,8,27,<br>30,32,33 | 2,3,4,6,28,<br>29,31,34,3<br>5 | 3 | P00507,P25236,Q5HZV9                             |
| 10228 | 1,5,7,8,27,<br>30,32,34 | 2,3,4,6,28,<br>29,31,33,3<br>5 | 1 | P06760                                           |
| 10229 | 1,5,7,8,27,<br>30,32,35 | 2,3,4,6,28,<br>29,31,33,3<br>4 | 2 | P27791,Q4FZU6                                    |
| 10230 | 1,5,7,8,27,<br>30,33,34 | 2,3,4,6,28,<br>29,31,32,3<br>5 | 1 | P25236                                           |
| 10231 | 1,5,7,8,27,<br>30,33,35 | 2,3,4,6,28,<br>29,31,32,3<br>4 | 3 | P25236,Q4FZU6,Q5HZV9                             |
| 10232 | 1,5,7,8,27,<br>30,34,35 | 2,3,4,6,28,<br>29,31,32,3<br>3 | 1 | P06911                                           |
| 10233 | 1,5,7,8,27,<br>31,32,33 | 2,3,4,6,28,<br>29,30,34,3<br>5 | 7 | B0BNN3,P00507,P01835,P14480,Q08849,Q5HZV9,Q6NX65 |
| 10234 | 1,5,7,8,27,<br>31,32,34 | 2,3,4,6,28,<br>29,30,33,3<br>5 | 3 | B0BNN3,P01835,P14480                             |
| 10235 | 1,5,7,8,27,<br>31,32,35 | 2,3,4,6,28,<br>29,30,33,3<br>4 | 1 | Q4FZU6                                           |

|       |                         |                                |   |                                                  |
|-------|-------------------------|--------------------------------|---|--------------------------------------------------|
| 10236 | 1,5,7,8,27,<br>31,33,34 | 2,3,4,6,28,<br>29,30,32,3<br>5 | 2 | P01835,P14480                                    |
| 10237 | 1,5,7,8,27,<br>31,33,35 | 2,3,4,6,28,<br>29,30,32,3<br>4 | 5 | P01835,P01836,Q4FZU6,Q5HZV9,Q6TMA8               |
| 10238 | 1,5,7,8,27,<br>31,34,35 | 2,3,4,6,28,<br>29,30,32,3<br>3 | 1 | P01835                                           |
| 10239 | 1,5,7,8,27,<br>32,33,34 | 2,3,4,6,28,<br>29,30,31,3<br>5 | 5 | P01835,P06760,P14480,P25236,Q08849               |
| 10240 | 1,5,7,8,27,<br>32,33,35 | 2,3,4,6,28,<br>29,30,31,3<br>4 | 3 | P25236,Q08849,Q6NX65                             |
| 10241 | 1,5,7,8,27,<br>32,34,35 | 2,3,4,6,28,<br>29,30,31,3<br>3 | 1 | P08753                                           |
| 10242 | 1,5,7,8,27,<br>33,34,35 | 2,3,4,6,28,<br>29,30,31,3<br>2 | 2 | P01835,P25236                                    |
| 10243 | 1,5,7,8,28,<br>29,30,31 | 2,3,4,6,27,<br>32,33,34,3<br>5 | 5 | P10715,P19629,Q4FZU2,Q4FZU6,Q8CJ52               |
| 10244 | 1,5,7,8,28,<br>29,30,32 | 2,3,4,6,27,<br>31,33,34,3<br>5 | 5 | F1LM93,P02625,Q4FZU6,Q63355,Q8CJ52               |
| 10245 | 1,5,7,8,28,<br>29,30,33 | 2,3,4,6,27,<br>31,32,34,3<br>5 | 4 | F1LM93,P02625,Q4FZU6,Q8CJ52                      |
| 10246 | 1,5,7,8,28,<br>29,30,34 | 2,3,4,6,27,<br>31,32,33,3<br>5 | 0 |                                                  |
| 10247 | 1,5,7,8,28,<br>29,30,35 | 2,3,4,6,27,<br>31,32,33,3<br>4 | 3 | G3V686,P02625,Q4FZU6                             |
| 10248 | 1,5,7,8,28,<br>29,31,32 | 2,3,4,6,27,<br>30,33,34,3<br>5 | 7 | B0BNN3,P06911,P10715,P14480,P31044,Q4FZU6,Q5GRG2 |
| 10249 | 1,5,7,8,28,<br>29,31,33 | 2,3,4,6,27,<br>30,32,34,3<br>5 | 6 | P02803,P10715,P14480,P19629,Q4FZU6,Q8CJ52        |
| 10250 | 1,5,7,8,28,<br>29,31,34 | 2,3,4,6,27,<br>30,32,33,3<br>5 | 1 | P10715                                           |

|       |                         |                                |   |                                                  |
|-------|-------------------------|--------------------------------|---|--------------------------------------------------|
| 10251 | 1,5,7,8,28,<br>29,31,35 | 2,3,4,6,27,<br>30,32,33,3<br>4 | 4 | G3V686,P02803,P10715,Q4FZU6                      |
| 10252 | 1,5,7,8,28,<br>29,32,33 | 2,3,4,6,27,<br>30,31,34,3<br>5 | 6 | B0BNN3,F1LM93,P02625,P02793;Q7TP54,P10715,P14480 |
| 10253 | 1,5,7,8,28,<br>29,32,34 | 2,3,4,6,27,<br>30,31,33,3<br>5 | 3 | B0BNN3,P02625,Q9ET32                             |
| 10254 | 1,5,7,8,28,<br>29,32,35 | 2,3,4,6,27,<br>30,31,33,3<br>4 | 1 | P02625                                           |
| 10255 | 1,5,7,8,28,<br>29,33,34 | 2,3,4,6,27,<br>30,31,32,3<br>5 | 1 | P02625                                           |
| 10256 | 1,5,7,8,28,<br>29,33,35 | 2,3,4,6,27,<br>30,31,32,3<br>4 | 3 | G3V686,P02625,P02803                             |
| 10257 | 1,5,7,8,28,<br>29,34,35 | 2,3,4,6,27,<br>30,31,32,3<br>3 | 1 | P02625                                           |
| 10258 | 1,5,7,8,28,<br>30,31,32 | 2,3,4,6,27,<br>29,33,34,3<br>5 | 4 | B0BNN3,P10715,P31044,Q4FZU6                      |
| 10259 | 1,5,7,8,28,<br>30,31,33 | 2,3,4,6,27,<br>29,32,34,3<br>5 | 5 | P10715,P14480,P19629,Q4FZU6,Q6TMA8               |
| 10260 | 1,5,7,8,28,<br>30,31,34 | 2,3,4,6,27,<br>29,32,33,3<br>5 | 1 | P10715                                           |
| 10261 | 1,5,7,8,28,<br>30,31,35 | 2,3,4,6,27,<br>29,32,33,3<br>4 | 5 | G3V686,P02803,P10715,Q4FZU6,Q6TMA8               |
| 10262 | 1,5,7,8,28,<br>30,32,33 | 2,3,4,6,27,<br>29,31,34,3<br>5 | 4 | P02625,P10715,P14480,P25236                      |
| 10263 | 1,5,7,8,28,<br>30,32,34 | 2,3,4,6,27,<br>29,31,33,3<br>5 | 1 | P25236                                           |
| 10264 | 1,5,7,8,28,<br>30,32,35 | 2,3,4,6,27,<br>29,31,33,3<br>4 | 4 | G3V686,P02625,P04218,Q4FZU6                      |
| 10265 | 1,5,7,8,28,<br>30,33,34 | 2,3,4,6,27,<br>29,31,32,3<br>5 | 1 | P25236                                           |

|       |                         |                                |   |                                                  |
|-------|-------------------------|--------------------------------|---|--------------------------------------------------|
| 10266 | 1,5,7,8,28,<br>30,33,35 | 2,3,4,6,27,<br>29,31,32,3<br>4 | 4 | G3V686,P02625,P25236,Q4FZU6                      |
| 10267 | 1,5,7,8,28,<br>30,34,35 | 2,3,4,6,27,<br>29,31,32,3<br>3 | 3 | P02625,P25236,Q8CJD3                             |
| 10268 | 1,5,7,8,28,<br>31,32,33 | 2,3,4,6,27,<br>29,30,34,3<br>5 | 6 | B0BNN3,P01835,P10715,P14480,P31044,Q4FZU6        |
| 10269 | 1,5,7,8,28,<br>31,32,34 | 2,3,4,6,27,<br>29,30,33,3<br>5 | 4 | B0BNN3,P01835,P10715,P14480                      |
| 10270 | 1,5,7,8,28,<br>31,32,35 | 2,3,4,6,27,<br>29,30,33,3<br>4 | 2 | P10715,Q4FZU6                                    |
| 10271 | 1,5,7,8,28,<br>31,33,34 | 2,3,4,6,27,<br>29,30,32,3<br>5 | 3 | P01835,P10715,P14480                             |
| 10272 | 1,5,7,8,28,<br>31,33,35 | 2,3,4,6,27,<br>29,30,32,3<br>4 | 7 | G3V686,P02803,P10715,Q00715,Q4FZU6,Q6TMA8,Q8VD89 |
| 10273 | 1,5,7,8,28,<br>31,34,35 | 2,3,4,6,27,<br>29,30,32,3<br>3 | 2 | P02803,P10715                                    |
| 10274 | 1,5,7,8,28,<br>32,33,34 | 2,3,4,6,27,<br>29,30,31,3<br>5 | 4 | P01835,P02625,P14480,P25236                      |
| 10275 | 1,5,7,8,28,<br>32,33,35 | 2,3,4,6,27,<br>29,30,31,3<br>4 | 3 | P02625,P10715,P25236                             |
| 10276 | 1,5,7,8,28,<br>32,34,35 | 2,3,4,6,27,<br>29,30,31,3<br>3 | 2 | P02625,P25236                                    |
| 10277 | 1,5,7,8,28,<br>33,34,35 | 2,3,4,6,27,<br>29,30,31,3<br>2 | 2 | P02625,P25236                                    |
| 10278 | 1,5,7,8,29,<br>30,31,32 | 2,3,4,6,27,<br>28,33,34,3<br>5 | 3 | P04182,Q4FZU6,Q5HZV9                             |
| 10279 | 1,5,7,8,29,<br>30,31,33 | 2,3,4,6,27,<br>28,32,34,3<br>5 | 2 | Q4FZU6,Q5HZV9                                    |
| 10280 | 1,5,7,8,29,<br>30,31,34 | 2,3,4,6,27,<br>28,32,33,3<br>5 | 0 |                                                  |

|       |                         |                                |   |                                                         |
|-------|-------------------------|--------------------------------|---|---------------------------------------------------------|
| 10281 | 1,5,7,8,29,<br>30,31,35 | 2,3,4,6,27,<br>28,32,33,3<br>4 | 6 | G3V686,P04182,Q06000,Q4FZU2,Q4FZU6,Q5HZV9               |
| 10282 | 1,5,7,8,29,<br>30,32,33 | 2,3,4,6,27,<br>28,31,34,3<br>5 | 4 | P02625,P53792,Q4FZU6,Q5HZV9                             |
| 10283 | 1,5,7,8,29,<br>30,32,34 | 2,3,4,6,27,<br>28,31,33,3<br>5 | 0 |                                                         |
| 10284 | 1,5,7,8,29,<br>30,32,35 | 2,3,4,6,27,<br>28,31,33,3<br>4 | 3 | P02625,P04182,Q4FZU6                                    |
| 10285 | 1,5,7,8,29,<br>30,33,34 | 2,3,4,6,27,<br>28,31,32,3<br>5 | 0 |                                                         |
| 10286 | 1,5,7,8,29,<br>30,33,35 | 2,3,4,6,27,<br>28,31,32,3<br>4 | 5 | A2RUV9,G3V686,P02625,Q4FZU6,Q5HZV9                      |
| 10287 | 1,5,7,8,29,<br>30,34,35 | 2,3,4,6,27,<br>28,31,32,3<br>3 | 1 | P02625                                                  |
| 10288 | 1,5,7,8,29,<br>31,32,33 | 2,3,4,6,27,<br>28,30,34,3<br>5 | 8 | P01835,P04182,P14480,P53792,Q4FZU6,Q5HZV9,Q6AYQ8,Q8CJD3 |
| 10289 | 1,5,7,8,29,<br>31,32,34 | 2,3,4,6,27,<br>28,30,33,3<br>5 | 2 | P01835,Q6AYQ8                                           |
| 10290 | 1,5,7,8,29,<br>31,32,35 | 2,3,4,6,27,<br>28,30,33,3<br>4 | 2 | P04182,Q4FZU6                                           |
| 10291 | 1,5,7,8,29,<br>31,33,34 | 2,3,4,6,27,<br>28,30,32,3<br>5 | 2 | P01835,Q6AYQ8                                           |
| 10292 | 1,5,7,8,29,<br>31,33,35 | 2,3,4,6,27,<br>28,30,32,3<br>4 | 5 | P02803,P04182,Q4FZU6,Q5HZV9,Q6AYQ8                      |
| 10293 | 1,5,7,8,29,<br>31,34,35 | 2,3,4,6,27,<br>28,30,32,3<br>3 | 1 | Q6AYQ8                                                  |
| 10294 | 1,5,7,8,29,<br>32,33,34 | 2,3,4,6,27,<br>28,30,31,3<br>5 | 3 | P01835,P02625,Q6AYQ8                                    |
| 10295 | 1,5,7,8,29,<br>32,33,35 | 2,3,4,6,27,<br>28,30,31,3<br>4 | 4 | P02625,P04182,P47967,Q4FZU6                             |



|       |                         |                                |   |                                    |
|-------|-------------------------|--------------------------------|---|------------------------------------|
| 10296 | 1,5,7,8,29,<br>32,34,35 | 2,3,4,6,27,<br>28,30,31,3<br>3 | 1 | P02625                             |
| 10297 | 1,5,7,8,29,<br>33,34,35 | 2,3,4,6,27,<br>28,30,31,3<br>2 | 2 | P02625,Q6AYQ8                      |
| 10298 | 1,5,7,8,30,<br>31,32,33 | 2,3,4,6,27,<br>28,29,34,3<br>5 | 5 | P00507,P04182,P14480,Q4FZU6,Q5HZV9 |
| 10299 | 1,5,7,8,30,<br>31,32,34 | 2,3,4,6,27,<br>28,29,33,3<br>5 | 0 |                                    |
| 10300 | 1,5,7,8,30,<br>31,32,35 | 2,3,4,6,27,<br>28,29,33,3<br>4 | 2 | P04182,Q4FZU6                      |
| 10301 | 1,5,7,8,30,<br>31,33,34 | 2,3,4,6,27,<br>28,29,32,3<br>5 | 1 | P19218                             |
| 10302 | 1,5,7,8,30,<br>31,33,35 | 2,3,4,6,27,<br>28,29,32,3<br>4 | 4 | G3V686,P04182,Q4FZU6,Q5HZV9        |
| 10303 | 1,5,7,8,30,<br>31,34,35 | 2,3,4,6,27,<br>28,29,32,3<br>3 | 2 | P02793;Q7TP54,P24368               |
| 10304 | 1,5,7,8,30,<br>32,33,34 | 2,3,4,6,27,<br>28,29,31,3<br>5 | 1 | P25236                             |
| 10305 | 1,5,7,8,30,<br>32,33,35 | 2,3,4,6,27,<br>28,29,31,3<br>4 | 3 | P02625,P04182,Q4FZU6               |
| 10306 | 1,5,7,8,30,<br>32,34,35 | 2,3,4,6,27,<br>28,29,31,3<br>3 | 1 | P02625                             |
| 10307 | 1,5,7,8,30,<br>33,34,35 | 2,3,4,6,27,<br>28,29,31,3<br>2 | 2 | P06911,P25236                      |
| 10308 | 1,5,7,8,31,<br>32,33,34 | 2,3,4,6,27,<br>28,29,30,3<br>5 | 2 | P01835,P14480                      |
| 10309 | 1,5,7,8,31,<br>32,33,35 | 2,3,4,6,27,<br>28,29,30,3<br>4 | 3 | P01835,P04182,Q4FZU6               |
| 10310 | 1,5,7,8,31,<br>32,34,35 | 2,3,4,6,27,<br>28,29,30,3<br>3 | 2 | P01835,P08753                      |

|       |                          |                                |   |                                                                       |
|-------|--------------------------|--------------------------------|---|-----------------------------------------------------------------------|
| 10311 | 1,5,7,8,31,<br>33,34,35  | 2,3,4,6,27,<br>28,29,30,3<br>2 | 2 | P01835,P02803                                                         |
| 10312 | 1,5,7,8,32,<br>33,34,35  | 2,3,4,6,27,<br>28,29,30,3<br>1 | 4 | P01835,P02625,P08753,P25236                                           |
| 10313 | 1,5,7,27,2<br>8,29,30,31 | 2,3,4,6,8,3<br>2,33,34,35      | 6 | P05369,P11883,P19629,P20766,P36374,Q4FZU6                             |
| 10314 | 1,5,7,27,2<br>8,29,30,32 | 2,3,4,6,8,3<br>1,33,34,35      | 6 | B0BNN3,F1LM93,P05369,P20766,Q62997,Q63355                             |
| 10315 | 1,5,7,27,2<br>8,29,30,33 | 2,3,4,6,8,3<br>1,32,34,35      | 6 | F1LM93,P05369,P11883,P20766,P36374,Q62997                             |
| 10316 | 1,5,7,27,2<br>8,29,30,34 | 2,3,4,6,8,3<br>1,32,33,35      | 3 | P05369,P20766,Q8CJD3                                                  |
| 10317 | 1,5,7,27,2<br>8,29,30,35 | 2,3,4,6,8,3<br>1,32,33,34      | 4 | P02625,P20766,Q62997,Q9QUL6                                           |
| 10318 | 1,5,7,27,2<br>8,29,31,32 | 2,3,4,6,8,3<br>0,33,34,35      | 4 | B0BNN3,P06911,P10715,Q5GRG2                                           |
| 10319 | 1,5,7,27,2<br>8,29,31,33 | 2,3,4,6,8,3<br>0,32,34,35      | 5 | P10715,P19629,P20766,P36374,Q9Z0V6                                    |
| 10320 | 1,5,7,27,2<br>8,29,31,34 | 2,3,4,6,8,3<br>0,32,33,35      | 0 |                                                                       |
| 10321 | 1,5,7,27,2<br>8,29,31,35 | 2,3,4,6,8,3<br>0,32,33,34      | 1 | Q9QUL6                                                                |
| 10322 | 1,5,7,27,2<br>8,29,32,33 | 2,3,4,6,8,3<br>0,31,34,35      | 9 | B0BNN3,F1LM93,P02625,P02793;Q7TP54,P05369,P20766,Q62997,Q80WL1,Q9Z0V6 |
| 10323 | 1,5,7,27,2<br>8,29,32,34 | 2,3,4,6,8,3<br>0,31,33,35      | 6 | B0BNN3,P02625,P05369,P17046,Q80WL1,Q9ET32                             |
| 10324 | 1,5,7,27,2<br>8,29,32,35 | 2,3,4,6,8,3<br>0,31,33,34      | 5 | P02625,P20766,Q62997,Q80WL1,Q9QUL6                                    |
| 10325 | 1,5,7,27,2<br>8,29,33,34 | 2,3,4,6,8,3<br>0,31,32,35      | 3 | P05369,P20766,Q80WL1                                                  |
| 10326 | 1,5,7,27,2<br>8,29,33,35 | 2,3,4,6,8,3<br>0,31,32,34      | 4 | P02625,P20766,Q62997,Q80WL1                                           |
| 10327 | 1,5,7,27,2<br>8,29,34,35 | 2,3,4,6,8,3<br>0,31,32,33      | 2 | P02625,Q9QUL6                                                         |
| 10328 | 1,5,7,27,2<br>8,30,31,32 | 2,3,4,6,8,2<br>9,33,34,35      | 3 | B0BNN3,P10715,Q6TMA8                                                  |
| 10329 | 1,5,7,27,2<br>8,30,31,33 | 2,3,4,6,8,2<br>9,32,34,35      | 5 | P10715,P11883,P19629,P20766,Q6TMA8                                    |
| 10330 | 1,5,7,27,2<br>8,30,31,34 | 2,3,4,6,8,2<br>9,32,33,35      | 3 | P97840,Q6TMA8,Q8CJD3                                                  |
| 10331 | 1,5,7,27,2<br>8,30,31,35 | 2,3,4,6,8,2<br>9,32,33,34      | 2 | Q4FZU6,Q6TMA8                                                         |
| 10332 | 1,5,7,27,2<br>8,30,32,33 | 2,3,4,6,8,2<br>9,31,34,35      | 3 | B0BNN3,P20766,P25236                                                  |

|       |                          |                           |   |                                                         |
|-------|--------------------------|---------------------------|---|---------------------------------------------------------|
| 10333 | 1,5,7,27,2<br>8,30,32,34 | 2,3,4,6,8,2<br>9,31,33,35 | 4 | B0BNN3,P17046,P25236,Q8CJD3                             |
| 10334 | 1,5,7,27,2<br>8,30,32,35 | 2,3,4,6,8,2<br>9,31,33,34 | 3 | P02625,P20766,P25236                                    |
| 10335 | 1,5,7,27,2<br>8,30,33,34 | 2,3,4,6,8,2<br>9,31,32,35 | 4 | P20766,P25236,Q6TMA8,Q8CJD3                             |
| 10336 | 1,5,7,27,2<br>8,30,33,35 | 2,3,4,6,8,2<br>9,31,32,34 | 3 | P20766,P25236,Q6TMA8                                    |
| 10337 | 1,5,7,27,2<br>8,30,34,35 | 2,3,4,6,8,2<br>9,31,32,33 | 4 | P25236,Q6TMA8,Q8CJD3,Q9QUL6                             |
| 10338 | 1,5,7,27,2<br>8,31,32,33 | 2,3,4,6,8,2<br>9,30,34,35 | 4 | B0BNN3,P10715,P14480,Q6TMA8                             |
| 10339 | 1,5,7,27,2<br>8,31,32,34 | 2,3,4,6,8,2<br>9,30,33,35 | 2 | B0BNN3,P14480                                           |
| 10340 | 1,5,7,27,2<br>8,31,32,35 | 2,3,4,6,8,2<br>9,30,33,34 | 3 | B0BNN3,P10715,Q6TMA8                                    |
| 10341 | 1,5,7,27,2<br>8,31,33,34 | 2,3,4,6,8,2<br>9,30,32,35 | 2 | P14480,Q6TMA8                                           |
| 10342 | 1,5,7,27,2<br>8,31,33,35 | 2,3,4,6,8,2<br>9,30,32,34 | 4 | P10715,P62804,Q00715,Q6TMA8                             |
| 10343 | 1,5,7,27,2<br>8,31,34,35 | 2,3,4,6,8,2<br>9,30,32,33 | 2 | Q6TMA8,Q9QUL6                                           |
| 10344 | 1,5,7,27,2<br>8,32,33,34 | 2,3,4,6,8,2<br>9,30,31,35 | 6 | B0BNN3,P02680,P14480,P17046,P25236,Q80WL1               |
| 10345 | 1,5,7,27,2<br>8,32,33,35 | 2,3,4,6,8,2<br>9,30,31,34 | 5 | P02625,P09605;P25809,P20766,P25236,Q80WL1               |
| 10346 | 1,5,7,27,2<br>8,32,34,35 | 2,3,4,6,8,2<br>9,30,31,33 | 4 | P02625,P17046,P25236,Q9QUL6                             |
| 10347 | 1,5,7,27,2<br>8,33,34,35 | 2,3,4,6,8,2<br>9,30,31,32 | 3 | P25236,Q6TMA8,Q80WL1                                    |
| 10348 | 1,5,7,27,2<br>9,30,31,32 | 2,3,4,6,8,2<br>8,33,34,35 | 4 | B0BNN3,Q4FZU6,Q5HZV9,Q6AY61                             |
| 10349 | 1,5,7,27,2<br>9,30,31,33 | 2,3,4,6,8,2<br>8,32,34,35 | 8 | P00507,P11883,P20766,Q4FZU6,Q5HZV9,Q5QE79,Q6AY61,Q6P6R2 |
| 10350 | 1,5,7,27,2<br>9,30,31,34 | 2,3,4,6,8,2<br>8,32,33,35 | 0 |                                                         |
| 10351 | 1,5,7,27,2<br>9,30,31,35 | 2,3,4,6,8,2<br>8,32,33,34 | 5 | P20766,Q4FZU6,Q5HZV9,Q5QE79,Q6P6R2                      |
| 10352 | 1,5,7,27,2<br>9,30,32,33 | 2,3,4,6,8,2<br>8,31,34,35 | 4 | P00507,P20766,Q5HZV9,Q6AY61                             |
| 10353 | 1,5,7,27,2<br>9,30,32,34 | 2,3,4,6,8,2<br>8,31,33,35 | 1 | P17046                                                  |
| 10354 | 1,5,7,27,2<br>9,30,32,35 | 2,3,4,6,8,2<br>8,31,33,34 | 2 | P20766,Q4FZU6                                           |
| 10355 | 1,5,7,27,2<br>9,30,33,34 | 2,3,4,6,8,2<br>8,31,32,35 | 1 | P20766                                                  |

|       |                          |                           |   |                                                  |
|-------|--------------------------|---------------------------|---|--------------------------------------------------|
| 10356 | 1,5,7,27,2<br>9,30,33,35 | 2,3,4,6,8,2<br>8,31,32,34 | 4 | P20766,Q4FZU6,Q5HZV9,Q6P6R2                      |
| 10357 | 1,5,7,27,2<br>9,30,34,35 | 2,3,4,6,8,2<br>8,31,32,33 | 2 | P20766,Q9QUL6                                    |
| 10358 | 1,5,7,27,2<br>9,31,32,33 | 2,3,4,6,8,2<br>8,30,34,35 | 6 | B0BNN3,P00507,P02793;Q7TP54,P14480,Q5HZV9,Q6AY61 |
| 10359 | 1,5,7,27,2<br>9,31,32,34 | 2,3,4,6,8,2<br>8,30,33,35 | 1 | B0BNN3                                           |
| 10360 | 1,5,7,27,2<br>9,31,32,35 | 2,3,4,6,8,2<br>8,30,33,34 | 1 | Q4FZU6                                           |
| 10361 | 1,5,7,27,2<br>9,31,33,34 | 2,3,4,6,8,2<br>8,30,32,35 | 0 |                                                  |
| 10362 | 1,5,7,27,2<br>9,31,33,35 | 2,3,4,6,8,2<br>8,30,32,34 | 6 | P20766,Q4FZU6,Q5HZV9,Q5QE79,Q6P6R2,Q9WTT6        |
| 10363 | 1,5,7,27,2<br>9,31,34,35 | 2,3,4,6,8,2<br>8,30,32,33 | 1 | Q9QUL6                                           |
| 10364 | 1,5,7,27,2<br>9,32,33,34 | 2,3,4,6,8,2<br>8,30,31,35 | 2 | P02761,Q80WL1                                    |
| 10365 | 1,5,7,27,2<br>9,32,33,35 | 2,3,4,6,8,2<br>8,30,31,34 | 5 | P02625,P20766,P47967,Q6NX65,Q80WL1               |
| 10366 | 1,5,7,27,2<br>9,32,34,35 | 2,3,4,6,8,2<br>8,30,31,33 | 2 | P02625,Q9QUL6                                    |
| 10367 | 1,5,7,27,2<br>9,33,34,35 | 2,3,4,6,8,2<br>8,30,31,32 | 2 | P20766,Q80WL1                                    |
| 10368 | 1,5,7,27,3<br>0,31,32,33 | 2,3,4,6,8,2<br>8,29,34,35 | 6 | P00507,P11883,Q4FZU6,Q5HZV9,Q5QE79,Q6AY61        |
| 10369 | 1,5,7,27,3<br>0,31,32,34 | 2,3,4,6,8,2<br>8,29,33,35 | 0 |                                                  |
| 10370 | 1,5,7,27,3<br>0,31,32,35 | 2,3,4,6,8,2<br>8,29,33,34 | 2 | Q4FZU6,Q5QE79                                    |
| 10371 | 1,5,7,27,3<br>0,31,33,34 | 2,3,4,6,8,2<br>8,29,32,35 | 2 | P19218,Q6TMA8                                    |
| 10372 | 1,5,7,27,3<br>0,31,33,35 | 2,3,4,6,8,2<br>8,29,32,34 | 5 | P20766,Q4FZU6,Q5QE79,Q6P6R2,Q6TMA8               |
| 10373 | 1,5,7,27,3<br>0,31,34,35 | 2,3,4,6,8,2<br>8,29,32,33 | 1 | Q6TMA8                                           |
| 10374 | 1,5,7,27,3<br>0,32,33,34 | 2,3,4,6,8,2<br>8,29,31,35 | 2 | P17046,P25236                                    |
| 10375 | 1,5,7,27,3<br>0,32,33,35 | 2,3,4,6,8,2<br>8,29,31,34 | 4 | P20766,P25236,Q4FZU6,Q6NX65                      |
| 10376 | 1,5,7,27,3<br>0,32,34,35 | 2,3,4,6,8,2<br>8,29,31,33 | 1 | P17046                                           |
| 10377 | 1,5,7,27,3<br>0,33,34,35 | 2,3,4,6,8,2<br>8,29,31,32 | 3 | P06911,P20766,P25236                             |
| 10378 | 1,5,7,27,3<br>1,32,33,34 | 2,3,4,6,8,2<br>8,29,30,35 | 3 | P01835,P02680,P14480                             |

|       |                          |                           |   |                                                                       |
|-------|--------------------------|---------------------------|---|-----------------------------------------------------------------------|
| 10379 | 1,5,7,27,3<br>1,32,33,35 | 2,3,4,6,8,2<br>8,29,30,34 | 4 | Q4FZU6,Q5QE79,Q6NX65,Q9WTT6                                           |
| 10380 | 1,5,7,27,3<br>1,32,34,35 | 2,3,4,6,8,2<br>8,29,30,33 | 0 |                                                                       |
| 10381 | 1,5,7,27,3<br>1,33,34,35 | 2,3,4,6,8,2<br>8,29,30,32 | 2 | P01835,Q6TMA8                                                         |
| 10382 | 1,5,7,27,3<br>2,33,34,35 | 2,3,4,6,8,2<br>8,29,30,31 | 2 | P25236,Q80WL1                                                         |
| 10383 | 1,5,7,28,2<br>9,30,31,32 | 2,3,4,6,8,2<br>7,33,34,35 | 3 | B0BNN3,Q4FZU6,Q63355                                                  |
| 10384 | 1,5,7,28,2<br>9,30,31,33 | 2,3,4,6,8,2<br>7,32,34,35 | 5 | P10715,P19629,P35467,Q4FZU6,Q9Z0V6                                    |
| 10385 | 1,5,7,28,2<br>9,30,31,34 | 2,3,4,6,8,2<br>7,32,33,35 | 0 |                                                                       |
| 10386 | 1,5,7,28,2<br>9,30,31,35 | 2,3,4,6,8,2<br>7,32,33,34 | 3 | G3V686,Q00715,Q4FZU6                                                  |
| 10387 | 1,5,7,28,2<br>9,30,32,33 | 2,3,4,6,8,2<br>7,31,34,35 | 5 | F1LM93,P02625,P20766,Q4FZU6,Q63355                                    |
| 10388 | 1,5,7,28,2<br>9,30,32,34 | 2,3,4,6,8,2<br>7,31,33,35 | 2 | P02625,Q63355                                                         |
| 10389 | 1,5,7,28,2<br>9,30,32,35 | 2,3,4,6,8,2<br>7,31,33,34 | 4 | P02625,P20766,Q4FZU6,Q63355                                           |
| 10390 | 1,5,7,28,2<br>9,30,33,34 | 2,3,4,6,8,2<br>7,31,32,35 | 2 | P02625,P20766                                                         |
| 10391 | 1,5,7,28,2<br>9,30,33,35 | 2,3,4,6,8,2<br>7,31,32,34 | 6 | G3V686,P02625,P20766,Q4FZU6,Q6P6R2,Q9WTT6                             |
| 10392 | 1,5,7,28,2<br>9,30,34,35 | 2,3,4,6,8,2<br>7,31,32,33 | 3 | P02625,Q8CJD3,Q9QUL6                                                  |
| 10393 | 1,5,7,28,2<br>9,31,32,33 | 2,3,4,6,8,2<br>7,30,34,35 | 9 | B0BNN3,P02793,Q7TP54,P06911,P10715,P14480,P19629,Q4FZU6,Q9WTT6,Q9Z0V6 |
| 10394 | 1,5,7,28,2<br>9,31,32,34 | 2,3,4,6,8,2<br>7,30,33,35 | 1 | B0BNN3                                                                |
| 10395 | 1,5,7,28,2<br>9,31,32,35 | 2,3,4,6,8,2<br>7,30,33,34 | 4 | P02696,Q00715,Q4FZU6,Q9WTT6                                           |
| 10396 | 1,5,7,28,2<br>9,31,33,34 | 2,3,4,6,8,2<br>7,30,32,35 | 1 | Q9Z0V6                                                                |
| 10397 | 1,5,7,28,2<br>9,31,33,35 | 2,3,4,6,8,2<br>7,30,32,34 | 6 | P02803,Q00715,Q4FZU6,Q6P6R2,Q9WTT6,Q9Z0V6                             |
| 10398 | 1,5,7,28,2<br>9,31,34,35 | 2,3,4,6,8,2<br>7,30,32,33 | 1 | Q9QUL6                                                                |
| 10399 | 1,5,7,28,2<br>9,32,33,34 | 2,3,4,6,8,2<br>7,30,31,35 | 2 | P02625,Q80WL1                                                         |
| 10400 | 1,5,7,28,2<br>9,32,33,35 | 2,3,4,6,8,2<br>7,30,31,34 | 5 | P02625,P20766,P47967,Q80WL1,Q9WTT6                                    |
| 10401 | 1,5,7,28,2<br>9,32,34,35 | 2,3,4,6,8,2<br>7,30,31,33 | 2 | P02625,Q9QUL6                                                         |

|       |                          |                           |   |                                                  |
|-------|--------------------------|---------------------------|---|--------------------------------------------------|
| 10402 | 1,5,7,28,2<br>9,33,34,35 | 2,3,4,6,8,2<br>7,30,31,32 | 2 | P02625,Q80WL1                                    |
| 10403 | 1,5,7,28,3<br>0,31,32,33 | 2,3,4,6,8,2<br>7,29,34,35 | 5 | B0BNN3,P10715,P14480,P19629,Q4FZU6               |
| 10404 | 1,5,7,28,3<br>0,31,32,34 | 2,3,4,6,8,2<br>7,29,33,35 | 1 | B0BNN3                                           |
| 10405 | 1,5,7,28,3<br>0,31,32,35 | 2,3,4,6,8,2<br>7,29,33,34 | 2 | Q00715,Q4FZU6                                    |
| 10406 | 1,5,7,28,3<br>0,31,33,34 | 2,3,4,6,8,2<br>7,29,32,35 | 1 | P14669                                           |
| 10407 | 1,5,7,28,3<br>0,31,33,35 | 2,3,4,6,8,2<br>7,29,32,34 | 7 | G3V686,P62804,Q00715,Q4FZU6,Q6TMA8,Q8VD89,Q9WTT6 |
| 10408 | 1,5,7,28,3<br>0,31,34,35 | 2,3,4,6,8,2<br>7,29,32,33 | 3 | P14669,Q6TMA8,Q8CJD3                             |
| 10409 | 1,5,7,28,3<br>0,32,33,34 | 2,3,4,6,8,2<br>7,29,31,35 | 2 | P02625,P25236                                    |
| 10410 | 1,5,7,28,3<br>0,32,33,35 | 2,3,4,6,8,2<br>7,29,31,34 | 5 | P02625,P20766,P25236,Q4FZU6,Q9WTT6               |
| 10411 | 1,5,7,28,3<br>0,32,34,35 | 2,3,4,6,8,2<br>7,29,31,33 | 2 | P02625,Q8CJD3                                    |
| 10412 | 1,5,7,28,3<br>0,33,34,35 | 2,3,4,6,8,2<br>7,29,31,32 | 4 | P02625,P14669,P25236,Q8CJD3                      |
| 10413 | 1,5,7,28,3<br>1,32,33,34 | 2,3,4,6,8,2<br>7,29,30,35 | 4 | B0BNN3,P01835,P02680,P14480                      |
| 10414 | 1,5,7,28,3<br>1,32,33,35 | 2,3,4,6,8,2<br>7,29,30,34 | 5 | P10715,P10719,Q00715,Q4FZU6,Q9WTT6               |
| 10415 | 1,5,7,28,3<br>1,32,34,35 | 2,3,4,6,8,2<br>7,29,30,33 | 1 | P14669                                           |
| 10416 | 1,5,7,28,3<br>1,33,34,35 | 2,3,4,6,8,2<br>7,29,30,32 | 3 | P02803,P14669,P62804                             |
| 10417 | 1,5,7,28,3<br>2,33,34,35 | 2,3,4,6,8,2<br>7,29,30,31 | 3 | P02625,P25236,Q80WL1                             |
| 10418 | 1,5,7,29,3<br>0,31,32,33 | 2,3,4,6,8,2<br>7,28,34,35 | 5 | P04182,Q4FZU6,Q5HZV9,Q6AY61,Q9WTT6               |
| 10419 | 1,5,7,29,3<br>0,31,32,34 | 2,3,4,6,8,2<br>7,28,33,35 | 1 | Q5XI22                                           |
| 10420 | 1,5,7,29,3<br>0,31,32,35 | 2,3,4,6,8,2<br>7,28,33,34 | 3 | P04182,Q4FZU6,Q9WTT6                             |
| 10421 | 1,5,7,29,3<br>0,31,33,34 | 2,3,4,6,8,2<br>7,28,32,35 | 0 |                                                  |
| 10422 | 1,5,7,29,3<br>0,31,33,35 | 2,3,4,6,8,2<br>7,28,32,34 | 6 | P04182,Q4FZU6,Q5HZV9,Q5QE79,Q6P6R2,Q9WTT6        |
| 10423 | 1,5,7,29,3<br>0,31,34,35 | 2,3,4,6,8,2<br>7,28,32,33 | 0 |                                                  |
| 10424 | 1,5,7,29,3<br>0,32,33,34 | 2,3,4,6,8,2<br>7,28,31,35 | 2 | P02625,Q5XI22                                    |

|       |                          |                           |   |                                                                       |
|-------|--------------------------|---------------------------|---|-----------------------------------------------------------------------|
| 10425 | 1,5,7,29,3<br>0,32,33,35 | 2,3,4,6,8,2<br>7,28,31,34 | 6 | P02625,P04182,P20766,Q4FZU6,Q6P6R2,Q9WTT6                             |
| 10426 | 1,5,7,29,3<br>0,32,34,35 | 2,3,4,6,8,2<br>7,28,31,33 | 1 | P02625                                                                |
| 10427 | 1,5,7,29,3<br>0,33,34,35 | 2,3,4,6,8,2<br>7,28,31,32 | 2 | P02625,P20766                                                         |
| 10428 | 1,5,7,29,3<br>1,32,33,34 | 2,3,4,6,8,2<br>7,28,30,35 | 3 | P01835,Q5XI22,Q6AYQ8                                                  |
| 10429 | 1,5,7,29,3<br>1,32,33,35 | 2,3,4,6,8,2<br>7,28,30,34 | 6 | P04182,P47967,Q4FZU6,Q6AYQ8,Q6P6R2,Q9WTT6                             |
| 10430 | 1,5,7,29,3<br>1,32,34,35 | 2,3,4,6,8,2<br>7,28,30,33 | 1 | Q6AYQ8                                                                |
| 10431 | 1,5,7,29,3<br>1,33,34,35 | 2,3,4,6,8,2<br>7,28,30,32 | 2 | P00714,Q6AYQ8                                                         |
| 10432 | 1,5,7,29,3<br>2,33,34,35 | 2,3,4,6,8,2<br>7,28,30,31 | 3 | P02625,Q6AYQ8,Q80WL1                                                  |
| 10433 | 1,5,7,30,3<br>1,32,33,34 | 2,3,4,6,8,2<br>7,28,29,35 | 1 | Q5XI22                                                                |
| 10434 | 1,5,7,30,3<br>1,32,33,35 | 2,3,4,6,8,2<br>7,28,29,34 | 4 | P04182,Q4FZU6,Q5QE79,Q9WTT6                                           |
| 10435 | 1,5,7,30,3<br>1,32,34,35 | 2,3,4,6,8,2<br>7,28,29,33 | 1 | P0C0A9                                                                |
| 10436 | 1,5,7,30,3<br>1,33,34,35 | 2,3,4,6,8,2<br>7,28,29,32 | 3 | P0C0A9,P14669,P24368                                                  |
| 10437 | 1,5,7,30,3<br>2,33,34,35 | 2,3,4,6,8,2<br>7,28,29,31 | 2 | P02625,P02782                                                         |
| 10438 | 1,5,7,31,3<br>2,33,34,35 | 2,3,4,6,8,2<br>7,28,29,30 | 3 | P01835,P02782,P0C0A9                                                  |
| 10439 | 1,5,8,27,2<br>8,29,30,31 | 2,3,4,6,7,3<br>2,33,34,35 | 9 | F1LM93,O35547,P02781,P02782,P05369,P11883,P36374,Q63532,Q8CJ52        |
| 10440 | 1,5,8,27,2<br>8,29,30,32 | 2,3,4,6,7,3<br>1,33,34,35 | 8 | F1LM93,O35547,P02781,P05369,P08010,Q62997,Q63355,Q9JHB9               |
| 10441 | 1,5,8,27,2<br>8,29,30,33 | 2,3,4,6,7,3<br>1,32,34,35 | 9 | F1LM93,O35547,P02781,P05369,P09605;P25809,P11883,P36374,Q62997,Q8CJ52 |
| 10442 | 1,5,8,27,2<br>8,29,30,34 | 2,3,4,6,7,3<br>1,32,33,35 | 4 | F1LM93,P02781,P05369,Q8CJD3                                           |
| 10443 | 1,5,8,27,2<br>8,29,30,35 | 2,3,4,6,7,3<br>1,32,33,34 | 6 | F1LM93,G3V686,P02625,P09605;P25809,Q62997,Q63532                      |
| 10444 | 1,5,8,27,2<br>8,29,31,32 | 2,3,4,6,7,3<br>0,33,34,35 | 7 | O35547,P02781,P05369,P06911,P09605;P25809,P10715,P14480               |
| 10445 | 1,5,8,27,2<br>8,29,31,33 | 2,3,4,6,7,3<br>0,32,34,35 | 8 | O35547,P02781,P09605;P25809,P10715,P14480,P16086,P36374,Q63532        |
| 10446 | 1,5,8,27,2<br>8,29,31,34 | 2,3,4,6,7,3<br>0,32,33,35 | 1 | O35547                                                                |
| 10447 | 1,5,8,27,2<br>8,29,31,35 | 2,3,4,6,7,3<br>0,32,33,34 | 7 | G3V686,P01836,P04073,P09605;P25809,P16086,P47967,Q63532               |

|       |                                                 |    |                                                                                                          |
|-------|-------------------------------------------------|----|----------------------------------------------------------------------------------------------------------|
| 10448 | 1,5,8,27,2 2,3,4,6,7,3<br>8,29,32,33 0,31,34,35 | 14 | F1LM93,O35547,P02625,P02781,P05369,P08010,P09605;P25809,P14480,P35281,P47727,P47967,Q62997,Q80WL1,Q9JHB9 |
| 10449 | 1,5,8,27,2 2,3,4,6,7,3<br>8,29,32,34 0,31,33,35 | 4  | F1LM93,P02625,P05369,P06760                                                                              |
| 10450 | 1,5,8,27,2 2,3,4,6,7,3<br>8,29,32,35 0,31,33,34 | 5  | P02625,P09605;P25809,P42854,P47967,Q62997                                                                |
| 10451 | 1,5,8,27,2 2,3,4,6,7,3<br>8,29,33,34 0,31,32,35 | 3  | O35547,P05369,P42854                                                                                     |
| 10452 | 1,5,8,27,2 2,3,4,6,7,3<br>8,29,33,35 0,31,32,34 | 8  | G3V686,P01836,P02625,P09605;P25809,P16086,P42854,P47967,Q62997                                           |
| 10453 | 1,5,8,27,2 2,3,4,6,7,3<br>8,29,34,35 0,31,32,33 | 2  | P02625,P42854                                                                                            |
| 10454 | 1,5,8,27,2 2,3,4,6,7,2<br>8,30,31,32 9,33,34,35 | 1  | P14480                                                                                                   |
| 10455 | 1,5,8,27,2 2,3,4,6,7,2<br>8,30,31,33 9,32,34,35 | 4  | P09605;P25809,P11883,P14480,Q6TMA8                                                                       |
| 10456 | 1,5,8,27,2 2,3,4,6,7,2<br>8,30,31,34 9,32,33,35 | 1  | Q8CJD3                                                                                                   |
| 10457 | 1,5,8,27,2 2,3,4,6,7,2<br>8,30,31,35 9,32,33,34 | 4  | G3V686,P09605;P25809,Q63532,Q6TMA8                                                                       |
| 10458 | 1,5,8,27,2 2,3,4,6,7,2<br>8,30,32,33 9,31,34,35 | 3  | P09605;P25809,P14480,P25236                                                                              |
| 10459 | 1,5,8,27,2 2,3,4,6,7,2<br>8,30,32,34 9,31,33,35 | 3  | P06760,P25236,P83121                                                                                     |
| 10460 | 1,5,8,27,2 2,3,4,6,7,2<br>8,30,32,35 9,31,33,34 | 2  | P02625,P09605;P25809                                                                                     |
| 10461 | 1,5,8,27,2 2,3,4,6,7,2<br>8,30,33,34 9,31,32,35 | 2  | P25236,Q8CJD3                                                                                            |
| 10462 | 1,5,8,27,2 2,3,4,6,7,2<br>8,30,33,35 9,31,32,34 | 4  | G3V686,P01836,P09605;P25809,P25236                                                                       |
| 10463 | 1,5,8,27,2 2,3,4,6,7,2<br>8,30,34,35 9,31,32,33 | 4  | P02793;Q7TP54,P25236,P83121,Q8CJD3                                                                       |
| 10464 | 1,5,8,27,2 2,3,4,6,7,2<br>8,31,32,33 9,30,34,35 | 3  | P09605;P25809,P10715,P14480                                                                              |
| 10465 | 1,5,8,27,2 2,3,4,6,7,2<br>8,31,32,34 9,30,33,35 | 1  | P14480                                                                                                   |
| 10466 | 1,5,8,27,2 2,3,4,6,7,2<br>8,31,32,35 9,30,33,34 | 1  | P09605;P25809                                                                                            |
| 10467 | 1,5,8,27,2 2,3,4,6,7,2<br>8,31,33,34 9,30,32,35 | 2  | P14480,P16086                                                                                            |
| 10468 | 1,5,8,27,2 2,3,4,6,7,2<br>8,31,33,35 9,30,32,34 | 6  | P01041,P01836,P09605;P25809,P16086,Q63532,Q6TMA8                                                         |
| 10469 | 1,5,8,27,2 2,3,4,6,7,2<br>8,31,34,35 9,30,32,33 | 1  | P16086                                                                                                   |
| 10470 | 1,5,8,27,2 2,3,4,6,7,2<br>8,32,33,34 9,30,31,35 | 6  | P06760,P14480,P25236,P97584,Q6IFU7,Q6P6Q2                                                                |



|       |                                                 |   |                                                         |
|-------|-------------------------------------------------|---|---------------------------------------------------------|
| 10471 | 1,5,8,27,2 2,3,4,6,7,2<br>8,32,33,35 9,30,31,34 | 6 | P01836,P02625,P09605;P25809,P25236,P47967,Q6IG02        |
| 10472 | 1,5,8,27,2 2,3,4,6,7,2<br>8,32,34,35 9,30,31,33 | 3 | P02625,P25236,P83121                                    |
| 10473 | 1,5,8,27,2 2,3,4,6,7,2<br>8,33,34,35 9,30,31,32 | 4 | P01836,P02625,P16086,P25236                             |
| 10474 | 1,5,8,27,2 2,3,4,6,7,2<br>9,30,31,32 8,33,34,35 | 3 | P06760,Q4FZU6,Q5HZV9                                    |
| 10475 | 1,5,8,27,2 2,3,4,6,7,2<br>9,30,31,33 8,32,34,35 | 3 | P11883,Q4FZU6,Q5HZV9                                    |
| 10476 | 1,5,8,27,2 2,3,4,6,7,2<br>9,30,31,34 8,32,33,35 | 0 |                                                         |
| 10477 | 1,5,8,27,2 2,3,4,6,7,2<br>9,30,31,35 8,32,33,34 | 3 | G3V686,Q4FZU6,Q5HZV9                                    |
| 10478 | 1,5,8,27,2 2,3,4,6,7,2<br>9,30,32,33 8,31,34,35 | 2 | P06760,Q5HZV9                                           |
| 10479 | 1,5,8,27,2 2,3,4,6,7,2<br>9,30,32,34 8,31,33,35 | 1 | P06760                                                  |
| 10480 | 1,5,8,27,2 2,3,4,6,7,2<br>9,30,32,35 8,31,33,34 | 1 | P02625                                                  |
| 10481 | 1,5,8,27,2 2,3,4,6,7,2<br>9,30,33,34 8,31,32,35 | 0 |                                                         |
| 10482 | 1,5,8,27,2 2,3,4,6,7,2<br>9,30,33,35 8,31,32,34 | 3 | G3V686,P01836,Q5HZV9                                    |
| 10483 | 1,5,8,27,2 2,3,4,6,7,2<br>9,30,34,35 8,31,32,33 | 1 | P12020                                                  |
| 10484 | 1,5,8,27,2 2,3,4,6,7,2<br>9,31,32,33 8,30,34,35 | 4 | P09605;P25809,P14480,P47967,Q5HZV9                      |
| 10485 | 1,5,8,27,2 2,3,4,6,7,2<br>9,31,32,34 8,30,33,35 | 2 | P06760,P14480                                           |
| 10486 | 1,5,8,27,2 2,3,4,6,7,2<br>9,31,32,35 8,30,33,34 | 3 | P09605;P25809,P47967,P97840                             |
| 10487 | 1,5,8,27,2 2,3,4,6,7,2<br>9,31,33,34 8,30,32,35 | 1 | P14480                                                  |
| 10488 | 1,5,8,27,2 2,3,4,6,7,2<br>9,31,33,35 8,30,32,34 | 7 | P01836,P09605;P25809,P16086,P47967,P97615,P97840,Q5HZV9 |
| 10489 | 1,5,8,27,2 2,3,4,6,7,2<br>9,31,34,35 8,30,32,33 | 1 | P01836                                                  |
| 10490 | 1,5,8,27,2 2,3,4,6,7,2<br>9,32,33,34 8,30,31,35 | 2 | P06760,P14480                                           |
| 10491 | 1,5,8,27,2 2,3,4,6,7,2<br>9,32,33,35 8,30,31,34 | 6 | P01836,P02625,P09605;P25809,P42854,P47967,P97840        |
| 10492 | 1,5,8,27,2 2,3,4,6,7,2<br>9,32,34,35 8,30,31,33 | 3 | P02625,P06760,P42854                                    |
| 10493 | 1,5,8,27,2 2,3,4,6,7,2<br>9,33,34,35 8,30,31,32 | 4 | P01836,P02625,P12020,P42854                             |

|       |                          |                           |   |                                                         |
|-------|--------------------------|---------------------------|---|---------------------------------------------------------|
| 10494 | 1,5,8,27,3<br>0,31,32,33 | 2,3,4,6,7,2<br>8,29,34,35 | 2 | P14480,Q5HZV9                                           |
| 10495 | 1,5,8,27,3<br>0,31,32,34 | 2,3,4,6,7,2<br>8,29,33,35 | 2 | P06760,P14480                                           |
| 10496 | 1,5,8,27,3<br>0,31,32,35 | 2,3,4,6,7,2<br>8,29,33,34 | 1 | Q4FZU6                                                  |
| 10497 | 1,5,8,27,3<br>0,31,33,34 | 2,3,4,6,7,2<br>8,29,32,35 | 1 | P14480                                                  |
| 10498 | 1,5,8,27,3<br>0,31,33,35 | 2,3,4,6,7,2<br>8,29,32,34 | 3 | P01836,Q4FZU6,Q5HZV9                                    |
| 10499 | 1,5,8,27,3<br>0,31,34,35 | 2,3,4,6,7,2<br>8,29,32,33 | 1 | P02793;Q7TP54                                           |
| 10500 | 1,5,8,27,3<br>0,32,33,34 | 2,3,4,6,7,2<br>8,29,31,35 | 3 | P06760,P14480,P25236                                    |
| 10501 | 1,5,8,27,3<br>0,32,33,35 | 2,3,4,6,7,2<br>8,29,31,34 | 2 | P01836,P09605,P25809                                    |
| 10502 | 1,5,8,27,3<br>0,32,34,35 | 2,3,4,6,7,2<br>8,29,31,33 | 2 | P06760,P83121                                           |
| 10503 | 1,5,8,27,3<br>0,33,34,35 | 2,3,4,6,7,2<br>8,29,31,32 | 4 | P01836,P06911,P12020,P25236                             |
| 10504 | 1,5,8,27,3<br>1,32,33,34 | 2,3,4,6,7,2<br>8,29,30,35 | 3 | P01835,P06760,P14480                                    |
| 10505 | 1,5,8,27,3<br>1,32,33,35 | 2,3,4,6,7,2<br>8,29,30,34 | 3 | P01836,P09605,P25809,P47967                             |
| 10506 | 1,5,8,27,3<br>1,32,34,35 | 2,3,4,6,7,2<br>8,29,30,33 | 0 |                                                         |
| 10507 | 1,5,8,27,3<br>1,33,34,35 | 2,3,4,6,7,2<br>8,29,30,32 | 3 | P01835,P01836,P16086                                    |
| 10508 | 1,5,8,27,3<br>2,33,34,35 | 2,3,4,6,7,2<br>8,29,30,31 | 4 | P01836,P02625,P06760,P25236                             |
| 10509 | 1,5,8,28,2<br>9,30,31,32 | 2,3,4,6,7,2<br>7,33,34,35 | 3 | G3V686,P08649,Q4FZU6                                    |
| 10510 | 1,5,8,28,2<br>9,30,31,33 | 2,3,4,6,7,2<br>7,32,34,35 | 6 | G3V686,P02803,P16086,P19629,Q4FZU6,Q63532               |
| 10511 | 1,5,8,28,2<br>9,30,31,34 | 2,3,4,6,7,2<br>7,32,33,35 | 2 | P08649,Q6IE51                                           |
| 10512 | 1,5,8,28,2<br>9,30,31,35 | 2,3,4,6,7,2<br>7,32,33,34 | 8 | G3V686,P02803,P08649,P16086,Q07116,Q4FZU6,Q63532,Q9QZQ5 |
| 10513 | 1,5,8,28,2<br>9,30,32,33 | 2,3,4,6,7,2<br>7,31,34,35 | 5 | A2RUV9,F1LM93,G3V686,P02625,P35281                      |
| 10514 | 1,5,8,28,2<br>9,30,32,34 | 2,3,4,6,7,2<br>7,31,33,35 | 2 | F1LM93,P02625                                           |
| 10515 | 1,5,8,28,2<br>9,30,32,35 | 2,3,4,6,7,2<br>7,31,33,34 | 4 | A2RUV9,G3V686,P02625,P08649                             |
| 10516 | 1,5,8,28,2<br>9,30,33,34 | 2,3,4,6,7,2<br>7,31,32,35 | 1 | P02625                                                  |

|       |                          |                           |    |                                                                              |
|-------|--------------------------|---------------------------|----|------------------------------------------------------------------------------|
| 10517 | 1,5,8,28,2<br>9,30,33,35 | 2,3,4,6,7,2<br>7,31,32,34 | 8  | A2RUV9,G3V686,P02625,P02803,P08649,P09605;P25809,P16086,Q63532               |
| 10518 | 1,5,8,28,2<br>9,30,34,35 | 2,3,4,6,7,2<br>7,31,32,33 | 4  | P02625,P02793;Q7TP54,P08649,Q8CJD3                                           |
| 10519 | 1,5,8,28,2<br>9,31,32,33 | 2,3,4,6,7,2<br>7,30,34,35 | 7  | P02803,P06911,P09605;P25809,P10715,P14480,P16086,P47967                      |
| 10520 | 1,5,8,28,2<br>9,31,32,34 | 2,3,4,6,7,2<br>7,30,33,35 | 2  | P14480,Q6IE51                                                                |
| 10521 | 1,5,8,28,2<br>9,31,32,35 | 2,3,4,6,7,2<br>7,30,33,34 | 9  | G3V686,P02696,P02803,P08649,P09605;P25809,P16086,P47967,P85971,Q9QZQ5        |
| 10522 | 1,5,8,28,2<br>9,31,33,34 | 2,3,4,6,7,2<br>7,30,32,35 | 3  | P02803,P14480,P16086                                                         |
| 10523 | 1,5,8,28,2<br>9,31,33,35 | 2,3,4,6,7,2<br>7,30,32,34 | 9  | G3V686,P01836,P02803,P08649,P09605;P25809,P16086,P47967,P97840,Q63532        |
| 10524 | 1,5,8,28,2<br>9,31,34,35 | 2,3,4,6,7,2<br>7,30,32,33 | 3  | P02803,P08649,P16086                                                         |
| 10525 | 1,5,8,28,2<br>9,32,33,34 | 2,3,4,6,7,2<br>7,30,31,35 | 3  | P02625,P14480,P35281                                                         |
| 10526 | 1,5,8,28,2<br>9,32,33,35 | 2,3,4,6,7,2<br>7,30,31,34 | 9  | A2RUV9,G3V686,P02625,P02803,P08649,P09605;P25809,P16086,P47967,P97840        |
| 10527 | 1,5,8,28,2<br>9,32,34,35 | 2,3,4,6,7,2<br>7,30,31,33 | 2  | P02625,P08649                                                                |
| 10528 | 1,5,8,28,2<br>9,33,34,35 | 2,3,4,6,7,2<br>7,30,31,32 | 4  | P02625,P02803,P16086,P42854                                                  |
| 10529 | 1,5,8,28,3<br>0,31,32,33 | 2,3,4,6,7,2<br>7,29,34,35 | 4  | G3V686,P02631,P14480,Q4FZU6                                                  |
| 10530 | 1,5,8,28,3<br>0,31,32,34 | 2,3,4,6,7,2<br>7,29,33,35 | 2  | P14480,Q6IE51                                                                |
| 10531 | 1,5,8,28,3<br>0,31,32,35 | 2,3,4,6,7,2<br>7,29,33,34 | 6  | G3V686,P02631,P04218,P08649,Q4FZU6,Q9QZQ5                                    |
| 10532 | 1,5,8,28,3<br>0,31,33,34 | 2,3,4,6,7,2<br>7,29,32,35 | 2  | P14480,Q6IE51                                                                |
| 10533 | 1,5,8,28,3<br>0,31,33,35 | 2,3,4,6,7,2<br>7,29,32,34 | 9  | G3V686,P02631,P02803,P08649,P09605;P25809,P16086,Q4FZU6,Q63532,Q9QZQ5        |
| 10534 | 1,5,8,28,3<br>0,31,34,35 | 2,3,4,6,7,2<br>7,29,32,33 | 10 | P02631,P02793;Q7TP54,P02803,P08649,P13596,P13852,P19132,Q6IE51,Q8CJD3,Q9QZQ5 |
| 10535 | 1,5,8,28,3<br>0,32,33,34 | 2,3,4,6,7,2<br>7,29,31,35 | 3  | P02625,P14480,P25236                                                         |
| 10536 | 1,5,8,28,3<br>0,32,33,35 | 2,3,4,6,7,2<br>7,29,31,34 | 7  | A2RUV9,G3V686,P02625,P04218,P08649,P09605;P25809,P25236                      |
| 10537 | 1,5,8,28,3<br>0,32,34,35 | 2,3,4,6,7,2<br>7,29,31,33 | 4  | P02625,P08649,P83121,Q8CJD3                                                  |
| 10538 | 1,5,8,28,3<br>0,33,34,35 | 2,3,4,6,7,2<br>7,29,31,32 | 4  | P02625,P08649,P25236,Q8CJD3                                                  |
| 10539 | 1,5,8,28,3<br>1,32,33,34 | 2,3,4,6,7,2<br>7,29,30,35 | 2  | P01835,P14480                                                                |

|       |                          |                           |    |                                                                                            |
|-------|--------------------------|---------------------------|----|--------------------------------------------------------------------------------------------|
| 10540 | 1,5,8,28,3<br>1,32,33,35 | 2,3,4,6,7,2<br>7,29,30,34 | 9  | G3V686,P02631,P02803,P04218,P08649,P09605;P25809,P16086,P47967,Q9QZQ5                      |
| 10541 | 1,5,8,28,3<br>1,32,34,35 | 2,3,4,6,7,2<br>7,29,30,33 | 4  | P08649,P13596,P16086,Q9QZQ5                                                                |
| 10542 | 1,5,8,28,3<br>1,33,34,35 | 2,3,4,6,7,2<br>7,29,30,32 | 6  | P01836,P02631,P02803,P08649,P13596,P16086                                                  |
| 10543 | 1,5,8,28,3<br>2,33,34,35 | 2,3,4,6,7,2<br>7,29,30,31 | 3  | P02625,P16086,P25236                                                                       |
| 10544 | 1,5,8,29,3<br>0,31,32,33 | 2,3,4,6,7,2<br>7,28,34,35 | 3  | P14480,Q4FZU6,Q5HZV9                                                                       |
| 10545 | 1,5,8,29,3<br>0,31,32,34 | 2,3,4,6,7,2<br>7,28,33,35 | 1  | Q6IE51                                                                                     |
| 10546 | 1,5,8,29,3<br>0,31,32,35 | 2,3,4,6,7,2<br>7,28,33,34 | 6  | G3V686,P02631,P04182,P08649,P47967,Q4FZU6                                                  |
| 10547 | 1,5,8,29,3<br>0,31,33,34 | 2,3,4,6,7,2<br>7,28,32,35 | 1  | Q6IE51                                                                                     |
| 10548 | 1,5,8,29,3<br>0,31,33,35 | 2,3,4,6,7,2<br>7,28,32,34 | 13 | G3V686,P01836,P02631,P02803,P04182,P08649,P16086,P47967,P97615,Q4FZU6,Q5HZV9,Q63532,Q6P6R2 |
| 10549 | 1,5,8,29,3<br>0,31,34,35 | 2,3,4,6,7,2<br>7,28,32,33 | 5  | P02631,P02793;Q7TP54,P08649,Q06000,Q6IE51                                                  |
| 10550 | 1,5,8,29,3<br>0,32,33,34 | 2,3,4,6,7,2<br>7,28,31,35 | 1  | P02625                                                                                     |
| 10551 | 1,5,8,29,3<br>0,32,33,35 | 2,3,4,6,7,2<br>7,28,31,34 | 5  | A2RUV9,G3V686,P02625,P47967,Q4FZU6                                                         |
| 10552 | 1,5,8,29,3<br>0,32,34,35 | 2,3,4,6,7,2<br>7,28,31,33 | 1  | P02625                                                                                     |
| 10553 | 1,5,8,29,3<br>0,33,34,35 | 2,3,4,6,7,2<br>7,28,31,32 | 2  | P02625,P12020                                                                              |
| 10554 | 1,5,8,29,3<br>1,32,33,34 | 2,3,4,6,7,2<br>7,28,30,35 | 4  | P01835,P14480,Q6AYQ8,Q6IE51                                                                |
| 10555 | 1,5,8,29,3<br>1,32,33,35 | 2,3,4,6,7,2<br>7,28,30,34 | 9  | G3V686,P02803,P04182,P16086,P47967,P97615,P97840,Q4FZU6,Q6AYQ8                             |
| 10556 | 1,5,8,29,3<br>1,32,34,35 | 2,3,4,6,7,2<br>7,28,30,33 | 3  | P08649,Q6AYQ8,Q6IE51                                                                       |
| 10557 | 1,5,8,29,3<br>1,33,34,35 | 2,3,4,6,7,2<br>7,28,30,32 | 4  | P01836,P02803,P16086,Q6AYQ8                                                                |
| 10558 | 1,5,8,29,3<br>2,33,34,35 | 2,3,4,6,7,2<br>7,28,30,31 | 3  | P02625,P47967,Q6AYQ8                                                                       |
| 10559 | 1,5,8,30,3<br>1,32,33,34 | 2,3,4,6,7,2<br>7,28,29,35 | 3  | P02631,P14480,Q6IE51                                                                       |
| 10560 | 1,5,8,30,3<br>1,32,33,35 | 2,3,4,6,7,2<br>7,28,29,34 | 5  | G3V686,P02631,P04182,P04218,Q4FZU6                                                         |
| 10561 | 1,5,8,30,3<br>1,32,34,35 | 2,3,4,6,7,2<br>7,28,29,33 | 4  | P02631,P02793;Q7TP54,P08649,Q6IE51                                                         |
| 10562 | 1,5,8,30,3<br>1,33,34,35 | 2,3,4,6,7,2<br>7,28,29,32 | 5  | P02631,P02793;Q7TP54,P13596,P24368,Q6IE51                                                  |

|       |                               |                           |    |                                                                                                                 |
|-------|-------------------------------|---------------------------|----|-----------------------------------------------------------------------------------------------------------------|
| 10563 | 1,5,8,30,3<br>2,33,34,35      | 2,3,4,6,7,2<br>7,28,29,31 | 1  | P02625                                                                                                          |
| 10564 | 1,5,8,31,3<br>2,33,34,35      | 2,3,4,6,7,2<br>7,28,29,30 | 2  | P01835,P02631                                                                                                   |
| 10565 | 1,5,27,28,<br>29,30,31,3<br>2 | 2,3,4,6,7,8<br>,33,34,35  | 7  | D3ZUK3,P02781,P05369,P08010,P20766,P36374,Q9QZQ5                                                                |
| 10566 | 1,5,27,28,<br>29,30,31,3<br>3 | 2,3,4,6,7,8<br>,32,34,35  | 12 | D3ZUK3,O35547,P02781,P05369,P08753,P11883,P16086,P20766,P36374,Q63532,Q9QZQ5,Q9Z0V6                             |
| 10567 | 1,5,27,28,<br>29,30,31,3<br>4 | 2,3,4,6,7,8<br>,32,33,35  | 6  | D3ZUK3,P05369,P97605,Q6AYR9,Q8CJD3,Q9QZQ5                                                                       |
| 10568 | 1,5,27,28,<br>29,30,31,3<br>5 | 2,3,4,6,7,8<br>,32,33,34  | 11 | D3ZUK3,G3V686,P16086,P20766,P36374,P97605,Q62753,Q63532,Q99041,Q9QUL6,Q9QZQ5                                    |
| 10569 | 1,5,27,28,<br>29,30,32,3<br>3 | 2,3,4,6,7,8<br>,31,34,35  | 13 | D3ZUK3,F1LM93,O08815,P02781,P05369,P08010,P16296,P20766,P36374,Q62997,Q80WL1,Q9JHB9,Q9QZQ5                      |
| 10570 | 1,5,27,28,<br>29,30,32,3<br>4 | 2,3,4,6,7,8<br>,31,33,35  | 6  | F1LM93,P05369,P20761,P20766,Q8CJD3,Q9QZQ5                                                                       |
| 10571 | 1,5,27,28,<br>29,30,32,3<br>5 | 2,3,4,6,7,8<br>,31,33,34  | 10 | D3ZUK3,F1LM93,P02625,P05369,P20766,P36374,Q62997,Q99041,Q9QUL6,Q9QZQ5                                           |
| 10572 | 1,5,27,28,<br>29,30,33,3<br>4 | 2,3,4,6,7,8<br>,31,32,35  | 4  | P05369,P20766,P36374,Q8CJD3                                                                                     |
| 10573 | 1,5,27,28,<br>29,30,33,3<br>5 | 2,3,4,6,7,8<br>,31,32,34  | 13 | D3ZUK3,G3V686,P02625,P05369,P09605,P25809,P16086,P20766,P36374,Q62753,Q62997,Q63532,Q6P6R2,Q9QZQ5               |
| 10574 | 1,5,27,28,<br>29,30,34,3<br>5 | 2,3,4,6,7,8<br>,31,32,33  | 7  | P02625,P05369,P20766,P97605,Q8CJD3,Q9QUL6,Q9QZQ5                                                                |
| 10575 | 1,5,27,28,<br>29,31,32,3<br>3 | 2,3,4,6,7,8<br>,30,34,35  | 15 | D3ZUK3,O35547,P05369,P06911,P09605,P25809,P14480,P16086,P20766,P36374,P47727,P47967,Q64057,Q80WL1,Q9QZQ5,Q9Z0V6 |
| 10576 | 1,5,27,28,<br>29,31,32,3<br>4 | 2,3,4,6,7,8<br>,30,33,35  | 7  | D3ZUK3,P05369,P14480,P16086,P20761,Q10758,Q9QZQ5                                                                |
| 10577 | 1,5,27,28,<br>29,31,32,3<br>5 | 2,3,4,6,7,8<br>,30,33,34  | 7  | D3ZUK3,P09605,P25809,P16086,P47967,Q99041,Q9QUL6,Q9QZQ5                                                         |
| 10578 | 1,5,27,28,<br>29,31,33,3<br>4 | 2,3,4,6,7,8<br>,30,32,35  | 5  | P05369,P14480,P16086,P20762,Q9QZQ5                                                                              |

|       |                               |                          |    |                                                                                                   |
|-------|-------------------------------|--------------------------|----|---------------------------------------------------------------------------------------------------|
| 10579 | 1,5,27,28,<br>29,31,33,3<br>5 | 2,3,4,6,7,8<br>,30,32,34 | 13 | D3ZUK3,P01041,P01836,P09605;P25809,P16086,P20766,P36374,P47967,Q63532,Q6P6R2,Q80WL1,Q9QZQ5,Q9Z0V6 |
| 10580 | 1,5,27,28,<br>29,31,34,3<br>5 | 2,3,4,6,7,8<br>,30,32,33 | 4  | D3ZUK3,P16086,Q9QUL6,Q9QZQ5                                                                       |
| 10581 | 1,5,27,28,<br>29,32,33,3<br>4 | 2,3,4,6,7,8<br>,30,31,35 | 13 | P02625,P05369,P14480,P16086,P20761,P20766,P42854,Q10758,Q64057,Q6IFU7,Q6P6Q2,Q80WL1,Q9QZQ5        |
| 10582 | 1,5,27,28,<br>29,32,33,3<br>5 | 2,3,4,6,7,8<br>,30,31,34 | 11 | D3ZUK3,P02625,P09605;P25809,P16086,P20766,P36374,P42854,P47967,Q62997,Q80WL1,Q9QZQ5               |
| 10583 | 1,5,27,28,<br>29,32,34,3<br>5 | 2,3,4,6,7,8<br>,30,31,33 | 8  | D3ZUK3,P02625,P05369,P16086,P42854,Q80WL1,Q9QUL6,Q9QZQ5                                           |
| 10584 | 1,5,27,28,<br>29,33,34,3<br>5 | 2,3,4,6,7,8<br>,30,31,32 | 6  | P02625,P16086,P20766,P42854,Q80WL1,Q9QZQ5                                                         |
| 10585 | 1,5,27,28,<br>30,31,32,3<br>3 | 2,3,4,6,7,8<br>,29,34,35 | 5  | P02631,P11883,P14480,P20766,Q9QZQ5                                                                |
| 10586 | 1,5,27,28,<br>30,31,32,3<br>4 | 2,3,4,6,7,8<br>,29,33,35 | 6  | P14480,P20762,Q10758,Q63617,Q8CJD3,Q9QZQ5                                                         |
| 10587 | 1,5,27,28,<br>30,31,32,3<br>5 | 2,3,4,6,7,8<br>,29,33,34 | 5  | D3ZUK3,P02631,Q63617,Q99041,Q9QZQ5                                                                |
| 10588 | 1,5,27,28,<br>30,31,33,3<br>4 | 2,3,4,6,7,8<br>,29,32,35 | 6  | P14480,P16086,P20762,Q6TMA8,Q8CJD3,Q9QZQ5                                                         |
| 10589 | 1,5,27,28,<br>30,31,33,3<br>5 | 2,3,4,6,7,8<br>,29,32,34 | 10 | D3ZUK3,G3V686,P01041,P02631,P09605;P25809,P16086,P20766,Q63532,Q6TMA8,Q9QZQ5                      |
| 10590 | 1,5,27,28,<br>30,31,34,3<br>5 | 2,3,4,6,7,8<br>,29,32,33 | 8  | P02631,P02793;Q7TP54,P16086,Q63617,Q6TMA8,Q8CJD3,Q9QUL6,Q9QZQ5                                    |
| 10591 | 1,5,27,28,<br>30,32,33,3<br>4 | 2,3,4,6,7,8<br>,29,31,35 | 8  | P05369,P14480,P20762,P20766,P25236,Q10758,Q6IFU7,Q9QZQ5                                           |
| 10592 | 1,5,27,28,<br>30,32,33,3<br>5 | 2,3,4,6,7,8<br>,29,31,34 | 7  | P02625,P09605;P25809,P20766,P25236,Q62997,Q6IFU7,Q9QZQ5                                           |
| 10593 | 1,5,27,28,<br>30,32,34,3<br>5 | 2,3,4,6,7,8<br>,29,31,33 | 9  | P02625,P20766,P83121,Q10758,Q63617,Q6IFU7,Q8CJD3,Q9QUL6,Q9QZQ5                                    |

|       |                               |                          |    |                                                                              |
|-------|-------------------------------|--------------------------|----|------------------------------------------------------------------------------|
| 10594 | 1,5,27,28,<br>30,33,34,3<br>5 | 2,3,4,6,7,8<br>,29,31,32 | 5  | P16086,P20766,P25236,Q8CJD3,Q9QZQ5                                           |
| 10595 | 1,5,27,28,<br>31,32,33,3<br>4 | 2,3,4,6,7,8<br>,29,30,35 | 8  | P02680,P14480,P16086,P20762,Q10758,Q6IFU7,Q6P6Q2,Q9QZQ5                      |
| 10596 | 1,5,27,28,<br>31,32,33,3<br>5 | 2,3,4,6,7,8<br>,29,30,34 | 6  | D3ZUK3,P02631,P09605,P25809,P16086,P47967,Q9QZQ5                             |
| 10597 | 1,5,27,28,<br>31,32,34,3<br>5 | 2,3,4,6,7,8<br>,29,30,33 | 6  | P16086,P20762,Q10758,Q63617,Q9QUL6,Q9QZQ5                                    |
| 10598 | 1,5,27,28,<br>31,33,34,3<br>5 | 2,3,4,6,7,8<br>,29,30,32 | 7  | P01041,P01836,P02631,P16086,P20762,Q6TMA8,Q9QZQ5                             |
| 10599 | 1,5,27,28,<br>32,33,34,3<br>5 | 2,3,4,6,7,8<br>,29,30,31 | 11 | P02625,P16086,P20762,P25236,P42854,Q10758,Q6IFU7,Q6IG02,Q6P6Q2,Q80WL1,Q9QZQ5 |
| 10600 | 1,5,27,29,<br>30,31,32,3<br>3 | 2,3,4,6,7,8<br>,28,34,35 | 8  | D3ZUK3,P11883,P16296,P20766,Q4FZU6,Q5HZV9,Q6AY61,Q9QZQ5                      |
| 10601 | 1,5,27,29,<br>30,31,32,3<br>4 | 2,3,4,6,7,8<br>,28,33,35 | 2  | P20761,Q9QZQ5                                                                |
| 10602 | 1,5,27,29,<br>30,31,32,3<br>5 | 2,3,4,6,7,8<br>,28,33,34 | 6  | D3ZUK3,P02631,P20766,Q4FZU6,Q99041,Q9QZQ5                                    |
| 10603 | 1,5,27,29,<br>30,31,33,3<br>4 | 2,3,4,6,7,8<br>,28,32,35 | 1  | P20766                                                                       |
| 10604 | 1,5,27,29,<br>30,31,33,3<br>5 | 2,3,4,6,7,8<br>,28,32,34 | 9  | D3ZUK3,P02631,P16086,P20766,P97615,Q4FZU6,Q5HZV9,Q6P6R2,Q9QZQ5               |
| 10605 | 1,5,27,29,<br>30,31,34,3<br>5 | 2,3,4,6,7,8<br>,28,32,33 | 4  | P02793,Q7TP54,Q99041,Q9QUL6,Q9QZQ5                                           |
| 10606 | 1,5,27,29,<br>30,32,33,3<br>4 | 2,3,4,6,7,8<br>,28,31,35 | 1  | P20766                                                                       |
| 10607 | 1,5,27,29,<br>30,32,33,3<br>5 | 2,3,4,6,7,8<br>,28,31,34 | 7  | D3ZUK3,P02625,P20766,P47967,Q62997,Q6P6R2,Q9QZQ5                             |
| 10608 | 1,5,27,29,<br>30,32,34,3<br>5 | 2,3,4,6,7,8<br>,28,31,33 | 6  | P02625,P12020,P20766,Q99041,Q9QUL6,Q9QZQ5                                    |

|       |                               |                          |    |                                                                       |
|-------|-------------------------------|--------------------------|----|-----------------------------------------------------------------------|
| 10609 | 1,5,27,29,<br>30,33,34,3<br>5 | 2,3,4,6,7,8<br>,28,31,32 | 3  | P12020,P20766,Q9QZQ5                                                  |
| 10610 | 1,5,27,29,<br>31,32,33,3<br>4 | 2,3,4,6,7,8<br>,28,30,35 | 6  | P14480,P16086,P20761,Q64057,Q6AYQ8,Q9QZQ5                             |
| 10611 | 1,5,27,29,<br>31,32,33,3<br>5 | 2,3,4,6,7,8<br>,28,30,34 | 9  | D3ZUK3,P09605;P25809,P16086,P20766,P47967,P97615,Q6P6R2,Q9QZQ5,Q9WTT6 |
| 10612 | 1,5,27,29,<br>31,32,34,3<br>5 | 2,3,4,6,7,8<br>,28,30,33 | 4  | D3ZUK3,P16086,Q9QUL6,Q9QZQ5                                           |
| 10613 | 1,5,27,29,<br>31,33,34,3<br>5 | 2,3,4,6,7,8<br>,28,30,32 | 4  | P01836,P16086,Q6AYQ8,Q9QZQ5                                           |
| 10614 | 1,5,27,29,<br>32,33,34,3<br>5 | 2,3,4,6,7,8<br>,28,30,31 | 7  | P02625,P16086,P20766,P42854,Q64057,Q80WL1,Q9QZQ5                      |
| 10615 | 1,5,27,30,<br>31,32,33,3<br>4 | 2,3,4,6,7,8<br>,28,29,35 | 3  | P02631,P14480,Q9QZQ5                                                  |
| 10616 | 1,5,27,30,<br>31,32,33,3<br>5 | 2,3,4,6,7,8<br>,28,29,34 | 4  | P02631,P20766,Q4FZU6,Q9QZQ5                                           |
| 10617 | 1,5,27,30,<br>31,32,34,3<br>5 | 2,3,4,6,7,8<br>,28,29,33 | 5  | P02631,Q63617,Q99041,Q9QZQ5,Q9R0T3                                    |
| 10618 | 1,5,27,30,<br>31,33,34,3<br>5 | 2,3,4,6,7,8<br>,28,29,32 | 3  | P02631,P16086,Q9QZQ5                                                  |
| 10619 | 1,5,27,30,<br>32,33,34,3<br>5 | 2,3,4,6,7,8<br>,28,29,31 | 3  | P12020,P20766,Q9QZQ5                                                  |
| 10620 | 1,5,27,31,<br>32,33,34,3<br>5 | 2,3,4,6,7,8<br>,28,29,30 | 3  | P02631,P16086,Q9QZQ5                                                  |
| 10621 | 1,5,28,29,<br>30,31,32,3<br>3 | 2,3,4,6,7,8<br>,27,34,35 | 8  | D3ZUK3,G3V686,P02631,P14480,P16086,P20766,Q4FZU6,Q9QZQ5               |
| 10622 | 1,5,28,29,<br>30,31,32,3<br>4 | 2,3,4,6,7,8<br>,27,33,35 | 4  | D3ZUK3,P02631,Q6IE51,Q9QZQ5                                           |
| 10623 | 1,5,28,29,<br>30,31,32,3<br>5 | 2,3,4,6,7,8<br>,27,33,34 | 10 | D3ZUK3,G3V686,P02631,P08649,P16086,Q07116,Q4FZU6,Q63532,Q99041,Q9QZQ5 |



|       |                               |                          |    |                                                                                                                 |
|-------|-------------------------------|--------------------------|----|-----------------------------------------------------------------------------------------------------------------|
| 10624 | 1,5,28,29,<br>30,31,33,3<br>4 | 2,3,4,6,7,8<br>,27,32,35 | 7  | D3ZUK3,P00714,P02631,P14669,P16086,Q6IE51,Q9QZQ5                                                                |
| 10625 | 1,5,28,29,<br>30,31,33,3<br>5 | 2,3,4,6,7,8<br>,27,32,34 | 16 | D3ZUK3,G3V686,P00714,P02631,P02803,P08649,P16086,P20766,P26772,Q07116,Q4FZU6,Q62753,Q63532,Q6P6R2,Q9QZQ5,Q9WTT6 |
| 10626 | 1,5,28,29,<br>30,31,34,3<br>5 | 2,3,4,6,7,8<br>,27,32,33 | 13 | D3ZUK3,P00714,P02631,P02793,Q7TP54,P08649,P13852,P14669,P16086,Q6IE51,Q8CJD3,Q99041,Q9QUL6,Q9QZQ5               |
| 10627 | 1,5,28,29,<br>30,32,33,3<br>4 | 2,3,4,6,7,8<br>,27,31,35 | 4  | D3ZUK3,P02625,P20766,Q9QZQ5                                                                                     |
| 10628 | 1,5,28,29,<br>30,32,33,3<br>5 | 2,3,4,6,7,8<br>,27,31,34 | 11 | A2RUV9,D3ZUK3,G3V686,P02625,P02631,P16086,P20766,P47967,Q62997,Q9QZQ5,Q9WTT6                                    |
| 10629 | 1,5,28,29,<br>30,32,34,3<br>5 | 2,3,4,6,7,8<br>,27,31,33 | 8  | D3ZUK3,P02625,P02631,P08649,Q8CJD3,Q99041,Q9QUL6,Q9QZQ5                                                         |
| 10630 | 1,5,28,29,<br>30,33,34,3<br>5 | 2,3,4,6,7,8<br>,27,31,32 | 9  | D3ZUK3,P02625,P02631,P12020,P14669,P16086,P20766,Q8CJD3,Q9QZQ5                                                  |
| 10631 | 1,5,28,29,<br>31,32,33,3<br>4 | 2,3,4,6,7,8<br>,27,30,35 | 7  | D3ZUK3,P02631,P14480,P16086,Q64057,Q6AYQ8,Q9QZQ5                                                                |
| 10632 | 1,5,28,29,<br>31,32,33,3<br>5 | 2,3,4,6,7,8<br>,27,30,34 | 14 | D3ZUK3,G3V686,P02631,P02803,P08649,P09605,P25809,P16086,P47967,Q64057,Q6P6R2,Q80WL1,Q9QZQ5,Q9WTT6,Q9Z0V6        |
| 10633 | 1,5,28,29,<br>31,32,34,3<br>5 | 2,3,4,6,7,8<br>,27,30,33 | 8  | D3ZUK3,P02631,P08649,P14669,P16086,Q99041,Q9QUL6,Q9QZQ5                                                         |
| 10634 | 1,5,28,29,<br>31,33,34,3<br>5 | 2,3,4,6,7,8<br>,27,30,32 | 10 | D3ZUK3,P00714,P02631,P02803,P08649,P14669,P16086,Q64057,Q6AYQ8,Q9QZQ5                                           |
| 10635 | 1,5,28,29,<br>32,33,34,3<br>5 | 2,3,4,6,7,8<br>,27,30,31 | 7  | D3ZUK3,P02625,P16086,P42854,Q64057,Q80WL1,Q9QZQ5                                                                |
| 10636 | 1,5,28,30,<br>31,32,33,3<br>4 | 2,3,4,6,7,8<br>,27,29,35 | 6  | P02631,P14480,P14669,P20762,Q63617,Q9QZQ5                                                                       |
| 10637 | 1,5,28,30,<br>31,32,33,3<br>5 | 2,3,4,6,7,8<br>,27,29,34 | 9  | D3ZUK3,G3V686,P02631,P08649,P14669,P16086,Q4FZU6,Q9QZQ5,Q9WTT6                                                  |
| 10638 | 1,5,28,30,<br>31,32,34,3<br>5 | 2,3,4,6,7,8<br>,27,29,33 | 11 | D3ZUK3,P02631,P08649,P13852,P14669,P16086,Q63617,Q8CJD3,Q99041,Q9QZQ5,Q9R0T3                                    |

|       |                               |                                |    |                                                                                                                                                                                       |
|-------|-------------------------------|--------------------------------|----|---------------------------------------------------------------------------------------------------------------------------------------------------------------------------------------|
| 10639 | 1,5,28,30,<br>31,33,34,3<br>5 | 2,3,4,6,7,8<br>,27,29,32       | 8  | P00714,P02631,P08649,P14669,P16086,Q63617,Q8CJD3,Q9QZQ5                                                                                                                               |
| 10640 | 1,5,28,30,<br>32,33,34,3<br>5 | 2,3,4,6,7,8<br>,27,29,31       | 7  | P02625,P02631,P14669,P16086,P25236,Q8CJD3,Q9QZQ5                                                                                                                                      |
| 10641 | 1,5,28,31,<br>32,33,34,3<br>5 | 2,3,4,6,7,8<br>,27,29,30       | 5  | D3ZUK3,P02631,P14669,P16086,Q9QZQ5                                                                                                                                                    |
| 10642 | 1,5,29,30,<br>31,32,33,3<br>4 | 2,3,4,6,7,8<br>,27,28,35       | 5  | D3ZUK3,P02631,Q5XI22,Q6IE51,Q9QZQ5                                                                                                                                                    |
| 10643 | 1,5,29,30,<br>31,32,33,3<br>5 | 2,3,4,6,7,8<br>,27,28,34       | 12 | D3ZUK3,G3V686,P02631,P04182,P16086,P20766,P47967,P97615,Q4FZU6,Q6P6R2,Q9QZQ5,Q9WTT6                                                                                                   |
| 10644 | 1,5,29,30,<br>31,32,34,3<br>5 | 2,3,4,6,7,8<br>,27,28,33       | 6  | D3ZUK3,P02631,Q6IE51,Q99041,Q9QZQ5,Q9R0T3                                                                                                                                             |
| 10645 | 1,5,29,30,<br>31,33,34,3<br>5 | 2,3,4,6,7,8<br>,27,28,32       | 9  | D3ZUK3,P00714,P02631,P12020,P14669,P16086,Q6IE51,Q9QZQ5,Q9R0T3                                                                                                                        |
| 10646 | 1,5,29,30,<br>32,33,34,3<br>5 | 2,3,4,6,7,8<br>,27,28,31       | 8  | D3ZUK3,P02625,P02631,P07171,P12020,P20766,Q9QZQ5,Q9R0T3                                                                                                                               |
| 10647 | 1,5,29,31,<br>32,33,34,3<br>5 | 2,3,4,6,7,8<br>,27,28,30       | 8  | D3ZUK3,P02631,P14669,P16086,P47967,Q64057,Q6AYQ8,Q9QZQ5                                                                                                                               |
| 10648 | 1,5,30,31,<br>32,33,34,3<br>5 | 2,3,4,6,7,8<br>,27,28,29       | 9  | P02631,P07171,P0C0A9,P14669,P24368,P82471,Q63617,Q9QZQ5,Q9R0T3                                                                                                                        |
| 10649 | 1,6,7,8,27,<br>28,29,30<br>5  | 2,3,4,5,31,<br>32,33,34,3<br>5 | 20 | F1LM93,O08815,O35547,P02781,P02782,P08723,P09456,P0C0A9,P22283,P24368,P30120,P82471,Q5GRG2,Q62902,Q62997,Q63357,Q6AYR9,Q8CJ52,Q9JHB9,Q9JI85                                           |
| 10650 | 1,6,7,8,27,<br>28,29,31<br>5  | 2,3,4,5,30,<br>32,33,34,3<br>5 | 21 | O35547,P02781,P02782,P06911,P08723,P0C0A9,P10715,P12020,P19629,P22282,P22283,P30120,P31044,P82471,Q5GRG2,Q62902,Q63617,Q6AYL6,Q8CJ52,Q9JHB9,Q9JI85                                    |
| 10651 | 1,6,7,8,27,<br>28,29,32<br>5  | 2,3,4,5,30,<br>31,33,34,3<br>5 | 26 | F1LM93,O35547,P02781,P02782,P04905,P06911,P08723,P09456,P0C0A9,P10715,P12020,P22282,P22283,P24368,P30120,P46462,P47727,P82471,Q5GRG2,Q62902,Q62997,Q63493,Q63617,Q8CJ52,Q9JHB9,Q9JI85 |
| 10652 | 1,6,7,8,27,<br>28,29,33<br>5  | 2,3,4,5,30,<br>31,32,34,3<br>5 | 24 | F1LM93,O35547,P02781,P02782,P06761,P07647,P08723,P09456,P0C0A9,P10715,P11598,P22283,P24368,P30120,P47727,P82471,Q5GRG2,Q62902,Q62997,Q63617,Q8CJ52,Q9JHB9,Q9JI85,Q9R0T3               |
| 10653 | 1,6,7,8,27,<br>28,29,34<br>5  | 2,3,4,5,30,<br>31,32,33,3<br>5 | 11 | O35547,P02781,P02782,P08723,P11598,P30120,Q62902,Q8CJ52,Q9JHB9,Q9JI85,Q9WTT6                                                                                                          |

|       |                         |                                |   |                                                                |
|-------|-------------------------|--------------------------------|---|----------------------------------------------------------------|
| 10654 | 1,6,7,8,27,<br>28,29,35 | 2,3,4,5,30,<br>31,32,33,3<br>4 | 9 | P02782,P08723,P0C0A9,P22283,Q62997,Q63617,Q8CJ52,Q9JHB9,Q9JI85 |
| 10655 | 1,6,7,8,27,<br>28,30,31 | 2,3,4,5,29,<br>32,33,34,3<br>5 | 9 | P02782,P08723,P10715,P12020,P13432,P19629,P31044,Q5GRG2,Q6TMA8 |
| 10656 | 1,6,7,8,27,<br>28,30,32 | 2,3,4,5,29,<br>31,33,34,3<br>5 | 5 | P08723,P10715,P12020,P31044,Q62997                             |
| 10657 | 1,6,7,8,27,<br>28,30,33 | 2,3,4,5,29,<br>31,32,34,3<br>5 | 4 | P08723,P10715,Q62997,Q9JI85                                    |
| 10658 | 1,6,7,8,27,<br>28,30,34 | 2,3,4,5,29,<br>31,32,33,3<br>5 | 4 | P13432,P47967,P97840,Q9WTT6                                    |
| 10659 | 1,6,7,8,27,<br>28,30,35 | 2,3,4,5,29,<br>31,32,33,3<br>4 | 2 | Q62997,Q6TMA8                                                  |
| 10660 | 1,6,7,8,27,<br>28,31,32 | 2,3,4,5,29,<br>30,33,34,3<br>5 | 9 | P06911,P08723,P10715,P12020,P13432,P19629,P31044,Q5GRG2,Q6P9T8 |
| 10661 | 1,6,7,8,27,<br>28,31,33 | 2,3,4,5,29,<br>30,32,34,3<br>5 | 9 | P06911,P08723,P10715,P12020,P13432,P19629,P31044,Q5GRG2,Q6TMA8 |
| 10662 | 1,6,7,8,27,<br>28,31,34 | 2,3,4,5,29,<br>30,32,33,3<br>5 | 7 | P10715,P12020,P13432,P31044,Q5GRG2,Q6TMA8,Q9WTT6               |
| 10663 | 1,6,7,8,27,<br>28,31,35 | 2,3,4,5,29,<br>30,32,33,3<br>4 | 6 | P10715,P12020,P19629,P31044,Q5GRG2,Q6TMA8                      |
| 10664 | 1,6,7,8,27,<br>28,32,33 | 2,3,4,5,29,<br>30,31,34,3<br>5 | 8 | P02793;Q7TP54,P08723,P10715,P12020,P13432,P31044,P47727,Q62997 |
| 10665 | 1,6,7,8,27,<br>28,32,34 | 2,3,4,5,29,<br>30,31,33,3<br>5 | 4 | P12020,P13432,Q6P6R2,Q9WTT6                                    |
| 10666 | 1,6,7,8,27,<br>28,32,35 | 2,3,4,5,29,<br>30,31,33,3<br>4 | 1 | Q62997                                                         |
| 10667 | 1,6,7,8,27,<br>28,33,34 | 2,3,4,5,29,<br>30,31,32,3<br>5 | 3 | P13432,Q99041,Q9WTT6                                           |
| 10668 | 1,6,7,8,27,<br>28,33,35 | 2,3,4,5,29,<br>30,31,32,3<br>4 | 2 | P10715,Q62997                                                  |

|       |                         |                                |   |                                                         |
|-------|-------------------------|--------------------------------|---|---------------------------------------------------------|
| 10669 | 1,6,7,8,27,<br>28,34,35 | 2,3,4,5,29,<br>30,31,32,3<br>3 | 1 | Q9WTT6                                                  |
| 10670 | 1,6,7,8,27,<br>29,30,31 | 2,3,4,5,28,<br>32,33,34,3<br>5 | 4 | P02782,P11598,Q62902,Q6AYR9                             |
| 10671 | 1,6,7,8,27,<br>29,30,32 | 2,3,4,5,28,<br>31,33,34,3<br>5 | 3 | P14669,P30120,Q62997                                    |
| 10672 | 1,6,7,8,27,<br>29,30,33 | 2,3,4,5,28,<br>31,32,34,3<br>5 | 3 | P11598,Q62997,Q63617                                    |
| 10673 | 1,6,7,8,27,<br>29,30,34 | 2,3,4,5,28,<br>31,32,33,3<br>5 | 4 | P11598,P97840,Q6AYR9,Q9WTT6                             |
| 10674 | 1,6,7,8,27,<br>29,30,35 | 2,3,4,5,28,<br>31,32,33,3<br>4 | 1 | Q62997                                                  |
| 10675 | 1,6,7,8,27,<br>29,31,32 | 2,3,4,5,28,<br>30,33,34,3<br>5 | 4 | P12020,Q62902,Q63617,Q8CJD3                             |
| 10676 | 1,6,7,8,27,<br>29,31,33 | 2,3,4,5,28,<br>30,32,34,3<br>5 | 5 | P11598,P83121,Q62902,Q63617,Q8CJD3                      |
| 10677 | 1,6,7,8,27,<br>29,31,34 | 2,3,4,5,28,<br>30,32,33,3<br>5 | 2 | P11598,Q9WTT6                                           |
| 10678 | 1,6,7,8,27,<br>29,31,35 | 2,3,4,5,28,<br>30,32,33,3<br>4 | 0 |                                                         |
| 10679 | 1,6,7,8,27,<br>29,32,33 | 2,3,4,5,28,<br>30,31,34,3<br>5 | 7 | P02793;Q7TP54,P11598,P14669,Q62902,Q62997,Q63617,Q8CJD3 |
| 10680 | 1,6,7,8,27,<br>29,32,34 | 2,3,4,5,28,<br>30,31,33,3<br>5 | 2 | P11598,Q9WTT6                                           |
| 10681 | 1,6,7,8,27,<br>29,32,35 | 2,3,4,5,28,<br>30,31,33,3<br>4 | 3 | P51907,Q62997,Q63617                                    |
| 10682 | 1,6,7,8,27,<br>29,33,34 | 2,3,4,5,28,<br>30,31,32,3<br>5 | 2 | P11598,Q63617                                           |
| 10683 | 1,6,7,8,27,<br>29,33,35 | 2,3,4,5,28,<br>30,31,32,3<br>4 | 3 | P11598,Q62997,Q63617                                    |

|       |                         |                                |   |                                    |
|-------|-------------------------|--------------------------------|---|------------------------------------|
| 10684 | 1,6,7,8,27,<br>29,34,35 | 2,3,4,5,28,<br>30,31,32,3<br>3 | 1 | P11598                             |
| 10685 | 1,6,7,8,27,<br>30,31,32 | 2,3,4,5,28,<br>29,33,34,3<br>5 | 2 | P12020,P13432                      |
| 10686 | 1,6,7,8,27,<br>30,31,33 | 2,3,4,5,28,<br>29,32,34,3<br>5 | 2 | P13432,P19218                      |
| 10687 | 1,6,7,8,27,<br>30,31,34 | 2,3,4,5,28,<br>29,32,33,3<br>5 | 5 | P13432,P19218,P47967,P97840,Q9WTT6 |
| 10688 | 1,6,7,8,27,<br>30,31,35 | 2,3,4,5,28,<br>29,32,33,3<br>4 | 0 |                                    |
| 10689 | 1,6,7,8,27,<br>30,32,33 | 2,3,4,5,28,<br>29,31,34,3<br>5 | 0 |                                    |
| 10690 | 1,6,7,8,27,<br>30,32,34 | 2,3,4,5,28,<br>29,31,33,3<br>5 | 4 | P13432,P47967,P97840,Q9WTT6        |
| 10691 | 1,6,7,8,27,<br>30,32,35 | 2,3,4,5,28,<br>29,31,33,3<br>4 | 0 |                                    |
| 10692 | 1,6,7,8,27,<br>30,33,34 | 2,3,4,5,28,<br>29,31,32,3<br>5 | 3 | P13432,P47967,P97840               |
| 10693 | 1,6,7,8,27,<br>30,33,35 | 2,3,4,5,28,<br>29,31,32,3<br>4 | 0 |                                    |
| 10694 | 1,6,7,8,27,<br>30,34,35 | 2,3,4,5,28,<br>29,31,32,3<br>3 | 2 | P47967,P97840                      |
| 10695 | 1,6,7,8,27,<br>31,32,33 | 2,3,4,5,28,<br>29,30,34,3<br>5 | 4 | P12020,P13432,Q6AY61,Q8CJD3        |
| 10696 | 1,6,7,8,27,<br>31,32,34 | 2,3,4,5,28,<br>29,30,33,3<br>5 | 2 | P12020,P13432                      |
| 10697 | 1,6,7,8,27,<br>31,32,35 | 2,3,4,5,28,<br>29,30,33,3<br>4 | 1 | P12020                             |
| 10698 | 1,6,7,8,27,<br>31,33,34 | 2,3,4,5,28,<br>29,30,32,3<br>5 | 1 | P13432                             |

|       |                         |                                |    |                                                                                                                 |
|-------|-------------------------|--------------------------------|----|-----------------------------------------------------------------------------------------------------------------|
| 10699 | 1,6,7,8,27,<br>31,33,35 | 2,3,4,5,28,<br>29,30,32,3<br>4 | 0  |                                                                                                                 |
| 10700 | 1,6,7,8,27,<br>31,34,35 | 2,3,4,5,28,<br>29,30,32,3<br>3 | 0  |                                                                                                                 |
| 10701 | 1,6,7,8,27,<br>32,33,34 | 2,3,4,5,28,<br>29,30,31,3<br>5 | 2  | P13432,Q99041                                                                                                   |
| 10702 | 1,6,7,8,27,<br>32,33,35 | 2,3,4,5,28,<br>29,30,31,3<br>4 | 1  | Q6NX65                                                                                                          |
| 10703 | 1,6,7,8,27,<br>32,34,35 | 2,3,4,5,28,<br>29,30,31,3<br>3 | 0  |                                                                                                                 |
| 10704 | 1,6,7,8,27,<br>33,34,35 | 2,3,4,5,28,<br>29,30,31,3<br>2 | 0  |                                                                                                                 |
| 10705 | 1,6,7,8,28,<br>29,30,31 | 2,3,4,5,27,<br>32,33,34,3<br>5 | 12 | P02782,P06911,P08723,P10715,P12020,P19629,P30120,P31044,Q5GRG2,Q62902,Q63357,Q8CJ52                             |
| 10706 | 1,6,7,8,28,<br>29,30,32 | 2,3,4,5,27,<br>31,33,34,3<br>5 | 13 | F1LM93,P02782,P04905,P06911,P08723,P09456,P12020,P30120,P47727,Q62902,Q62997,Q63355,Q8CJ52                      |
| 10707 | 1,6,7,8,28,<br>29,30,33 | 2,3,4,5,27,<br>31,32,34,3<br>5 | 12 | F1LM93,O35547,P02782,P08723,P09456,P30120,Q62902,Q62997,Q63357,Q63617,Q8CJ52,Q9QZK9                             |
| 10708 | 1,6,7,8,28,<br>29,30,34 | 2,3,4,5,27,<br>31,32,33,3<br>5 | 3  | P30120,P97840,Q8CJ52                                                                                            |
| 10709 | 1,6,7,8,28,<br>29,30,35 | 2,3,4,5,27,<br>31,32,33,3<br>4 | 3  | P34901,Q62997,Q8CJ52                                                                                            |
| 10710 | 1,6,7,8,28,<br>29,31,32 | 2,3,4,5,27,<br>30,33,34,3<br>5 | 15 | P02782,P04905,P06911,P08723,P09456,P10715,P12020,P19629,P22985,P31044,P47727,Q5GRG2,Q62902,Q6AYL6,Q8CJ52        |
| 10711 | 1,6,7,8,28,<br>29,31,33 | 2,3,4,5,27,<br>30,32,34,3<br>5 | 16 | O35547,P02782,P04905,P06911,P08723,P10715,P12020,P19629,P31044,P47727,P83121,Q5GRG2,Q62902,Q63617,Q8CJ52,Q9QZK9 |
| 10712 | 1,6,7,8,28,<br>29,31,34 | 2,3,4,5,27,<br>30,32,33,3<br>5 | 5  | P06911,P10715,P12020,P19629,Q5GRG2                                                                              |
| 10713 | 1,6,7,8,28,<br>29,31,35 | 2,3,4,5,27,<br>30,32,33,3<br>4 | 5  | P06911,P10715,P19629,P34901,Q5GRG2                                                                              |

|       |                         |                                |    |                                                                                                                        |
|-------|-------------------------|--------------------------------|----|------------------------------------------------------------------------------------------------------------------------|
| 10714 | 1,6,7,8,28,<br>29,32,33 | 2,3,4,5,27,<br>30,31,34,3<br>5 | 16 | F1LM93,O35547,P02793;Q7TP54,P04905,P06911,P08723,P09456,P10715,P12020,P24368,P35281,P47727,Q62902,Q62997,Q63617,Q8CJ52 |
| 10715 | 1,6,7,8,28,<br>29,32,34 | 2,3,4,5,27,<br>30,31,33,3<br>5 | 3  | P09456,P35281,Q9ET32                                                                                                   |
| 10716 | 1,6,7,8,28,<br>29,32,35 | 2,3,4,5,27,<br>30,31,33,3<br>4 | 2  | P51907,Q62997                                                                                                          |
| 10717 | 1,6,7,8,28,<br>29,33,34 | 2,3,4,5,27,<br>30,31,32,3<br>5 | 2  | P09456,Q63617                                                                                                          |
| 10718 | 1,6,7,8,28,<br>29,33,35 | 2,3,4,5,27,<br>30,31,32,3<br>4 | 5  | P08723,P15399,Q62997,Q63617,Q8CJ52                                                                                     |
| 10719 | 1,6,7,8,28,<br>29,34,35 | 2,3,4,5,27,<br>30,31,32,3<br>3 | 1  | Q99068                                                                                                                 |
| 10720 | 1,6,7,8,28,<br>30,31,32 | 2,3,4,5,27,<br>29,33,34,3<br>5 | 7  | P06911,P10715,P12020,P13432,P19629,P31044,Q5GRG2                                                                       |
| 10721 | 1,6,7,8,28,<br>30,31,33 | 2,3,4,5,27,<br>29,32,34,3<br>5 | 6  | P10715,P12020,P13432,P19629,P31044,Q5GRG2                                                                              |
| 10722 | 1,6,7,8,28,<br>30,31,34 | 2,3,4,5,27,<br>29,32,33,3<br>5 | 6  | P10715,P13432,P19629,P47967,P97840,Q5GRG2                                                                              |
| 10723 | 1,6,7,8,28,<br>30,31,35 | 2,3,4,5,27,<br>29,32,33,3<br>4 | 3  | P10715,P19629,P34901                                                                                                   |
| 10724 | 1,6,7,8,28,<br>30,32,33 | 2,3,4,5,27,<br>29,31,34,3<br>5 | 4  | P10715,P12020,P13432,P47727                                                                                            |
| 10725 | 1,6,7,8,28,<br>30,32,34 | 2,3,4,5,27,<br>29,31,33,3<br>5 | 3  | P13432,P47967,P97840                                                                                                   |
| 10726 | 1,6,7,8,28,<br>30,32,35 | 2,3,4,5,27,<br>29,31,33,3<br>4 | 1  | P04218                                                                                                                 |
| 10727 | 1,6,7,8,28,<br>30,33,34 | 2,3,4,5,27,<br>29,31,32,3<br>5 | 3  | P13432,P47967,P97840                                                                                                   |
| 10728 | 1,6,7,8,28,<br>30,33,35 | 2,3,4,5,27,<br>29,31,32,3<br>4 | 0  |                                                                                                                        |

|       |                         |                                |   |                                                                |
|-------|-------------------------|--------------------------------|---|----------------------------------------------------------------|
| 10729 | 1,6,7,8,28,<br>30,34,35 | 2,3,4,5,27,<br>29,31,32,3<br>3 | 2 | P97840,Q99068                                                  |
| 10730 | 1,6,7,8,28,<br>31,32,33 | 2,3,4,5,27,<br>29,30,34,3<br>5 | 9 | P06911,P10715,P12020,P13432,P19629,P31044,P47727,P69897,Q5GRG2 |
| 10731 | 1,6,7,8,28,<br>31,32,34 | 2,3,4,5,27,<br>29,30,33,3<br>5 | 6 | P06911,P10715,P12020,P13432,P31044,Q5GRG2                      |
| 10732 | 1,6,7,8,28,<br>31,32,35 | 2,3,4,5,27,<br>29,30,33,3<br>4 | 5 | P06911,P10715,P12020,P31044,Q5GRG2                             |
| 10733 | 1,6,7,8,28,<br>31,33,34 | 2,3,4,5,27,<br>29,30,32,3<br>5 | 5 | P10715,P12020,P13432,P19629,Q5GRG2                             |
| 10734 | 1,6,7,8,28,<br>31,33,35 | 2,3,4,5,27,<br>29,30,32,3<br>4 | 5 | P02803,P10715,P19629,Q5GRG2,Q8VD89                             |
| 10735 | 1,6,7,8,28,<br>31,34,35 | 2,3,4,5,27,<br>29,30,32,3<br>3 | 2 | P10715,P13432                                                  |
| 10736 | 1,6,7,8,28,<br>32,33,34 | 2,3,4,5,27,<br>29,30,31,3<br>5 | 1 | P13432                                                         |
| 10737 | 1,6,7,8,28,<br>32,33,35 | 2,3,4,5,27,<br>29,30,31,3<br>4 | 2 | P10715,P15399                                                  |
| 10738 | 1,6,7,8,28,<br>32,34,35 | 2,3,4,5,27,<br>29,30,31,3<br>3 | 0 |                                                                |
| 10739 | 1,6,7,8,28,<br>33,34,35 | 2,3,4,5,27,<br>29,30,31,3<br>2 | 1 | Q99068                                                         |
| 10740 | 1,6,7,8,29,<br>30,31,32 | 2,3,4,5,27,<br>28,33,34,3<br>5 | 1 | P12020                                                         |
| 10741 | 1,6,7,8,29,<br>30,31,33 | 2,3,4,5,27,<br>28,32,34,3<br>5 | 2 | P83121,Q9QZK9                                                  |
| 10742 | 1,6,7,8,29,<br>30,31,34 | 2,3,4,5,27,<br>28,32,33,3<br>5 | 1 | P97840                                                         |
| 10743 | 1,6,7,8,29,<br>30,31,35 | 2,3,4,5,27,<br>28,32,33,3<br>4 | 3 | P04182,P34901,Q4FZU2                                           |



|       |                         |                                |   |                                    |
|-------|-------------------------|--------------------------------|---|------------------------------------|
| 10744 | 1,6,7,8,29,<br>30,32,33 | 2,3,4,5,27,<br>28,31,34,3<br>5 | 2 | P53792,Q63617                      |
| 10745 | 1,6,7,8,29,<br>30,32,34 | 2,3,4,5,27,<br>28,31,33,3<br>5 | 0 |                                    |
| 10746 | 1,6,7,8,29,<br>30,32,35 | 2,3,4,5,27,<br>28,31,33,3<br>4 | 1 | P51907                             |
| 10747 | 1,6,7,8,29,<br>30,33,34 | 2,3,4,5,27,<br>28,31,32,3<br>5 | 0 |                                    |
| 10748 | 1,6,7,8,29,<br>30,33,35 | 2,3,4,5,27,<br>28,31,32,3<br>4 | 1 | Q63617                             |
| 10749 | 1,6,7,8,29,<br>30,34,35 | 2,3,4,5,27,<br>28,31,32,3<br>3 | 1 | Q99068                             |
| 10750 | 1,6,7,8,29,<br>31,32,33 | 2,3,4,5,27,<br>28,30,34,3<br>5 | 5 | P04182,P12020,P83121,Q63617,Q8CJD3 |
| 10751 | 1,6,7,8,29,<br>31,32,34 | 2,3,4,5,27,<br>28,30,33,3<br>5 | 0 |                                    |
| 10752 | 1,6,7,8,29,<br>31,32,35 | 2,3,4,5,27,<br>28,30,33,3<br>4 | 2 | P04182,P51907                      |
| 10753 | 1,6,7,8,29,<br>31,33,34 | 2,3,4,5,27,<br>28,30,32,3<br>5 | 1 | Q6AYQ8                             |
| 10754 | 1,6,7,8,29,<br>31,33,35 | 2,3,4,5,27,<br>28,30,32,3<br>4 | 4 | P04182,P15399,P83121,Q63617        |
| 10755 | 1,6,7,8,29,<br>31,34,35 | 2,3,4,5,27,<br>28,30,32,3<br>3 | 0 |                                    |
| 10756 | 1,6,7,8,29,<br>32,33,34 | 2,3,4,5,27,<br>28,30,31,3<br>5 | 2 | Q63617,Q6AYQ8                      |
| 10757 | 1,6,7,8,29,<br>32,33,35 | 2,3,4,5,27,<br>28,30,31,3<br>4 | 4 | P04182,P15399,P51907,Q63617        |
| 10758 | 1,6,7,8,29,<br>32,34,35 | 2,3,4,5,27,<br>28,30,31,3<br>3 | 1 | P51907                             |

|       |                         |                                |   |                      |
|-------|-------------------------|--------------------------------|---|----------------------|
| 10759 | 1,6,7,8,29,<br>33,34,35 | 2,3,4,5,27,<br>28,30,31,3<br>2 | 1 | Q63617               |
| 10760 | 1,6,7,8,30,<br>31,32,33 | 2,3,4,5,27,<br>28,29,34,3<br>5 | 2 | P12020,P13432        |
| 10761 | 1,6,7,8,30,<br>31,32,34 | 2,3,4,5,27,<br>28,29,33,3<br>5 | 2 | P13432,P97840        |
| 10762 | 1,6,7,8,30,<br>31,32,35 | 2,3,4,5,27,<br>28,29,33,3<br>4 | 1 | P04182               |
| 10763 | 1,6,7,8,30,<br>31,33,34 | 2,3,4,5,27,<br>28,29,32,3<br>5 | 3 | P13432,P19218,P97840 |
| 10764 | 1,6,7,8,30,<br>31,33,35 | 2,3,4,5,27,<br>28,29,32,3<br>4 | 1 | P04182               |
| 10765 | 1,6,7,8,30,<br>31,34,35 | 2,3,4,5,27,<br>28,29,32,3<br>3 | 2 | P02793;Q7TP54,P97840 |
| 10766 | 1,6,7,8,30,<br>32,33,34 | 2,3,4,5,27,<br>28,29,31,3<br>5 | 1 | P13432               |
| 10767 | 1,6,7,8,30,<br>32,33,35 | 2,3,4,5,27,<br>28,29,31,3<br>4 | 0 |                      |
| 10768 | 1,6,7,8,30,<br>32,34,35 | 2,3,4,5,27,<br>28,29,31,3<br>3 | 0 |                      |
| 10769 | 1,6,7,8,30,<br>33,34,35 | 2,3,4,5,27,<br>28,29,31,3<br>2 | 1 | Q99068               |
| 10770 | 1,6,7,8,31,<br>32,33,34 | 2,3,4,5,27,<br>28,29,30,3<br>5 | 2 | P01835,P13432        |
| 10771 | 1,6,7,8,31,<br>32,33,35 | 2,3,4,5,27,<br>28,29,30,3<br>4 | 1 | P04182               |
| 10772 | 1,6,7,8,31,<br>32,34,35 | 2,3,4,5,27,<br>28,29,30,3<br>3 | 1 | P13432               |
| 10773 | 1,6,7,8,31,<br>33,34,35 | 2,3,4,5,27,<br>28,29,30,3<br>2 | 1 | P01835               |

|       |                          |                                |    |                                                                                                                                                           |
|-------|--------------------------|--------------------------------|----|-----------------------------------------------------------------------------------------------------------------------------------------------------------|
| 10774 | 1,6,7,8,32,<br>33,34,35  | 2,3,4,5,27,<br>28,29,30,3<br>1 | 0  |                                                                                                                                                           |
| 10775 | 1,6,7,27,2<br>8,29,30,31 | 2,3,4,5,8,3<br>2,33,34,35      | 21 | O08815,O35547,P02781,P02782,P06911,P08723,P08753,P09456,P10715,P12020,P19629,P30120,P36374,P97605,Q5GRG2,Q62902,Q63357,Q6AYR9,Q8CJ52,Q9JHB9,Q9JI85        |
| 10776 | 1,6,7,27,2<br>8,29,30,32 | 2,3,4,5,8,3<br>1,33,34,35      | 22 | F1LM93,O08815,P02781,P04905,P05369,P08010,P08723,P09456,P0C0A9,P20766,P24368,P30120,P36374,P47727,P60905,Q62902,Q62997,Q63355,Q6AYR9,Q812E4,Q9JHB9,Q9JI85 |
| 10777 | 1,6,7,27,2<br>8,29,30,33 | 2,3,4,5,8,3<br>1,32,34,35      | 21 | F1LM93,O08815,O35547,P02781,P08723,P08753,P09456,P0C0A9,P20766,P30120,P36374,P97605,Q62902,Q62997,Q63357,Q6AYR9,Q6AYS4,Q812E4,Q8CJ52,Q9JHB9,Q9JI85        |
| 10778 | 1,6,7,27,2<br>8,29,30,34 | 2,3,4,5,8,3<br>1,32,33,35      | 13 | F1LM93,O08815,P02781,P05369,P08723,P09456,P30120,P47967,P97605,P97840,Q6AYR9,Q9JHB9,Q9JI85                                                                |
| 10779 | 1,6,7,27,2<br>8,29,30,35 | 2,3,4,5,8,3<br>1,32,33,34      | 8  | P08723,P20766,P36374,P97605,Q62997,Q6AYS4,Q9JHB9,Q9JI85                                                                                                   |
| 10780 | 1,6,7,27,2<br>8,29,31,32 | 2,3,4,5,8,3<br>0,33,34,35      | 19 | O08815,O35547,P02781,P04905,P06911,P08723,P09456,P10715,P12020,P19629,P22985,P24368,P31044,P47727,Q5GRG2,Q62902,Q6AYL6,Q9JHB9,Q9JI85                      |
| 10781 | 1,6,7,27,2<br>8,29,31,33 | 2,3,4,5,8,3<br>0,32,34,35      | 18 | O35547,P02781,P06911,P08723,P08753,P09456,P10715,P12020,P19629,P36374,P47727,P83121,Q5GRG2,Q62902,Q6AYL6,Q8CJ52,Q9JHB9,Q9JI85                             |
| 10782 | 1,6,7,27,2<br>8,29,31,34 | 2,3,4,5,8,3<br>0,32,33,35      | 11 | P06911,P08723,P09456,P19629,P97605,P97840,Q5GRG2,Q62902,Q6AYL6,Q9JHB9,Q9JI85                                                                              |
| 10783 | 1,6,7,27,2<br>8,29,31,35 | 2,3,4,5,8,3<br>0,32,33,34      | 9  | P06911,P08723,P19629,P97605,Q5GRG2,Q5M819,Q6AYS4,Q9JHB9,Q9JI85                                                                                            |
| 10784 | 1,6,7,27,2<br>8,29,32,33 | 2,3,4,5,8,3<br>0,31,34,35      | 21 | F1LM93,O08815,O35547,P02781,P02793,Q7TP54,P04905,P06911,P08723,P09456,P12020,P20766,P24368,P36374,P47727,Q06000,Q62902,Q62997,Q80WL1,Q812E4,Q9JHB9,Q9JI85 |
| 10785 | 1,6,7,27,2<br>8,29,32,34 | 2,3,4,5,8,3<br>0,31,33,35      | 9  | O08815,P05369,P08723,P09456,P24368,P47727,Q80WL1,Q9JHB9,Q9JI85                                                                                            |
| 10786 | 1,6,7,27,2<br>8,29,32,35 | 2,3,4,5,8,3<br>0,31,33,34      | 8  | P08723,P09456,Q5M819,Q62997,Q6AYS4,Q80WL1,Q9JHB9,Q9JI85                                                                                                   |
| 10787 | 1,6,7,27,2<br>8,29,33,34 | 2,3,4,5,8,3<br>0,31,32,35      | 6  | O35547,P08723,P09456,Q80WL1,Q9JHB9,Q9JI85                                                                                                                 |
| 10788 | 1,6,7,27,2<br>8,29,33,35 | 2,3,4,5,8,3<br>0,31,32,34      | 10 | P08723,P09456,P15399,P20766,P36374,Q62997,Q6AYS4,Q80WL1,Q9JHB9,Q9JI85                                                                                     |
| 10789 | 1,6,7,27,2<br>8,29,34,35 | 2,3,4,5,8,3<br>0,31,32,33      | 4  | P97605,Q5M819,Q9JI85,Q9QUL6                                                                                                                               |
| 10790 | 1,6,7,27,2<br>8,30,31,32 | 2,3,4,5,8,2<br>9,33,34,35      | 7  | P06911,P10715,P12020,P13432,P19629,P31044,Q5GRG2                                                                                                          |
| 10791 | 1,6,7,27,2<br>8,30,31,33 | 2,3,4,5,8,2<br>9,32,34,35      | 7  | P10715,P12020,P13432,P19629,Q5GRG2,Q6AYS4,Q6TMA8                                                                                                          |
| 10792 | 1,6,7,27,2<br>8,30,31,34 | 2,3,4,5,8,2<br>9,32,33,35      | 6  | P13432,P19629,P47967,P97840,Q5GRG2,Q6TMA8                                                                                                                 |
| 10793 | 1,6,7,27,2<br>8,30,31,35 | 2,3,4,5,8,2<br>9,32,33,34      | 3  | P19629,Q6AYS4,Q6TMA8                                                                                                                                      |
| 10794 | 1,6,7,27,2<br>8,30,32,33 | 2,3,4,5,8,2<br>9,31,34,35      | 6  | P08723,P13432,P20766,P47727,Q62997,Q6IFU7                                                                                                                 |
| 10795 | 1,6,7,27,2<br>8,30,32,34 | 2,3,4,5,8,2<br>9,31,33,35      | 4  | P13432,P47967,P97840,Q6IFU7                                                                                                                               |

|       |                          |                           |    |                                                                              |
|-------|--------------------------|---------------------------|----|------------------------------------------------------------------------------|
| 10796 | 1,6,7,27,2<br>8,30,32,35 | 2,3,4,5,8,2<br>9,31,33,34 | 2  | Q62997,Q6AYS4                                                                |
| 10797 | 1,6,7,27,2<br>8,30,33,34 | 2,3,4,5,8,2<br>9,31,32,35 | 3  | P13432,P47967,P97840                                                         |
| 10798 | 1,6,7,27,2<br>8,30,33,35 | 2,3,4,5,8,2<br>9,31,32,34 | 4  | P20766,Q62997,Q6AYS4,Q6TMA8                                                  |
| 10799 | 1,6,7,27,2<br>8,30,34,35 | 2,3,4,5,8,2<br>9,31,32,33 | 4  | P47967,P97840,Q6TMA8,Q8CJD3                                                  |
| 10800 | 1,6,7,27,2<br>8,31,32,33 | 2,3,4,5,8,2<br>9,30,34,35 | 10 | P02793;Q7TP54,P06911,P10715,P12020,P13432,P19629,P31044,P47727,Q06000,Q5GRG2 |
| 10801 | 1,6,7,27,2<br>8,31,32,34 | 2,3,4,5,8,2<br>9,30,33,35 | 5  | P06911,P12020,P13432,P97840,Q5GRG2                                           |
| 10802 | 1,6,7,27,2<br>8,31,32,35 | 2,3,4,5,8,2<br>9,30,33,34 | 5  | P06911,P10715,P12020,Q5GRG2,Q6AYS4                                           |
| 10803 | 1,6,7,27,2<br>8,31,33,34 | 2,3,4,5,8,2<br>9,30,32,35 | 6  | P10715,P13432,P19629,P97840,Q5GRG2,Q6TMA8                                    |
| 10804 | 1,6,7,27,2<br>8,31,33,35 | 2,3,4,5,8,2<br>9,30,32,34 | 6  | P10715,P15399,P19629,Q5GRG2,Q6AYS4,Q6TMA8                                    |
| 10805 | 1,6,7,27,2<br>8,31,34,35 | 2,3,4,5,8,2<br>9,30,32,33 | 2  | Q5M819,Q6TMA8                                                                |
| 10806 | 1,6,7,27,2<br>8,32,33,34 | 2,3,4,5,8,2<br>9,30,31,35 | 5  | P13432,P97584,Q06000,Q6IFU7,Q80WL1                                           |
| 10807 | 1,6,7,27,2<br>8,32,33,35 | 2,3,4,5,8,2<br>9,30,31,34 | 4  | P15399,Q62997,Q6AYS4,Q80WL1                                                  |
| 10808 | 1,6,7,27,2<br>8,32,34,35 | 2,3,4,5,8,2<br>9,30,31,33 | 2  | Q5HZV9,Q5M819                                                                |
| 10809 | 1,6,7,27,2<br>8,33,34,35 | 2,3,4,5,8,2<br>9,30,31,32 | 2  | Q5M819,Q80WL1                                                                |
| 10810 | 1,6,7,27,2<br>9,30,31,32 | 2,3,4,5,8,2<br>8,33,34,35 | 2  | Q6AY61,Q6AYR9                                                                |
| 10811 | 1,6,7,27,2<br>9,30,31,33 | 2,3,4,5,8,2<br>8,32,34,35 | 3  | P20766,P83121,Q6AY61                                                         |
| 10812 | 1,6,7,27,2<br>9,30,31,34 | 2,3,4,5,8,2<br>8,32,33,35 | 3  | P97605,P97840,Q6AYR9                                                         |
| 10813 | 1,6,7,27,2<br>9,30,31,35 | 2,3,4,5,8,2<br>8,32,33,34 | 1  | Q6AYS4                                                                       |
| 10814 | 1,6,7,27,2<br>9,30,32,33 | 2,3,4,5,8,2<br>8,31,34,35 | 3  | P20766,Q62997,Q6AY61                                                         |
| 10815 | 1,6,7,27,2<br>9,30,32,34 | 2,3,4,5,8,2<br>8,31,33,35 | 1  | P97840                                                                       |
| 10816 | 1,6,7,27,2<br>9,30,32,35 | 2,3,4,5,8,2<br>8,31,33,34 | 3  | P20766,Q62997,Q6AYS4                                                         |
| 10817 | 1,6,7,27,2<br>9,30,33,34 | 2,3,4,5,8,2<br>8,31,32,35 | 2  | P20766,P97840                                                                |
| 10818 | 1,6,7,27,2<br>9,30,33,35 | 2,3,4,5,8,2<br>8,31,32,34 | 3  | P20766,Q62997,Q6AYS4                                                         |

|       |                          |                           |   |                                           |
|-------|--------------------------|---------------------------|---|-------------------------------------------|
| 10819 | 1,6,7,27,2<br>9,30,34,35 | 2,3,4,5,8,2<br>8,31,32,33 | 2 | P97605,P97840                             |
| 10820 | 1,6,7,27,2<br>9,31,32,33 | 2,3,4,5,8,2<br>8,30,34,35 | 5 | P02793;Q7TP54,P12020,Q62902,Q6AY61,Q8CJD3 |
| 10821 | 1,6,7,27,2<br>9,31,32,34 | 2,3,4,5,8,2<br>8,30,33,35 | 0 |                                           |
| 10822 | 1,6,7,27,2<br>9,31,32,35 | 2,3,4,5,8,2<br>8,30,33,34 | 1 | P04762                                    |
| 10823 | 1,6,7,27,2<br>9,31,33,34 | 2,3,4,5,8,2<br>8,30,32,35 | 0 |                                           |
| 10824 | 1,6,7,27,2<br>9,31,33,35 | 2,3,4,5,8,2<br>8,30,32,34 | 2 | P15399,Q6AYS4                             |
| 10825 | 1,6,7,27,2<br>9,31,34,35 | 2,3,4,5,8,2<br>8,30,32,33 | 1 | Q5M819                                    |
| 10826 | 1,6,7,27,2<br>9,32,33,34 | 2,3,4,5,8,2<br>8,30,31,35 | 1 | Q80WL1                                    |
| 10827 | 1,6,7,27,2<br>9,32,33,35 | 2,3,4,5,8,2<br>8,30,31,34 | 6 | P15399,P20766,Q62997,Q6AYS4,Q6NX65,Q80WL1 |
| 10828 | 1,6,7,27,2<br>9,32,34,35 | 2,3,4,5,8,2<br>8,30,31,33 | 1 | Q5M819                                    |
| 10829 | 1,6,7,27,2<br>9,33,34,35 | 2,3,4,5,8,2<br>8,30,31,32 | 2 | Q5M819,Q80WL1                             |
| 10830 | 1,6,7,27,3<br>0,31,32,33 | 2,3,4,5,8,2<br>8,29,34,35 | 2 | P13432,Q6AY61                             |
| 10831 | 1,6,7,27,3<br>0,31,32,34 | 2,3,4,5,8,2<br>8,29,33,35 | 3 | P13432,P47967,P97840                      |
| 10832 | 1,6,7,27,3<br>0,31,32,35 | 2,3,4,5,8,2<br>8,29,33,34 | 1 | Q6AYS4                                    |
| 10833 | 1,6,7,27,3<br>0,31,33,34 | 2,3,4,5,8,2<br>8,29,32,35 | 4 | P13432,P19218,P47967,P97840               |
| 10834 | 1,6,7,27,3<br>0,31,33,35 | 2,3,4,5,8,2<br>8,29,32,34 | 2 | Q6AYS4,Q6TMA8                             |
| 10835 | 1,6,7,27,3<br>0,31,34,35 | 2,3,4,5,8,2<br>8,29,32,33 | 2 | P47967,P97840                             |
| 10836 | 1,6,7,27,3<br>0,32,33,34 | 2,3,4,5,8,2<br>8,29,31,35 | 2 | P13432,P97840                             |
| 10837 | 1,6,7,27,3<br>0,32,33,35 | 2,3,4,5,8,2<br>8,29,31,34 | 3 | P20766,Q62997,Q6AYS4                      |
| 10838 | 1,6,7,27,3<br>0,32,34,35 | 2,3,4,5,8,2<br>8,29,31,33 | 1 | P97840                                    |
| 10839 | 1,6,7,27,3<br>0,33,34,35 | 2,3,4,5,8,2<br>8,29,31,32 | 1 | P97840                                    |
| 10840 | 1,6,7,27,3<br>1,32,33,34 | 2,3,4,5,8,2<br>8,29,30,35 | 1 | P13432                                    |
| 10841 | 1,6,7,27,3<br>1,32,33,35 | 2,3,4,5,8,2<br>8,29,30,34 | 4 | P15399,Q6AY61,Q6AYS4,Q6NX65               |

|       |                          |                           |    |                                                                                                   |
|-------|--------------------------|---------------------------|----|---------------------------------------------------------------------------------------------------|
| 10842 | 1,6,7,27,3<br>1,32,34,35 | 2,3,4,5,8,2<br>8,29,30,33 | 0  |                                                                                                   |
| 10843 | 1,6,7,27,3<br>1,33,34,35 | 2,3,4,5,8,2<br>8,29,30,32 | 0  |                                                                                                   |
| 10844 | 1,6,7,27,3<br>2,33,34,35 | 2,3,4,5,8,2<br>8,29,30,31 | 1  | Q80WL1                                                                                            |
| 10845 | 1,6,7,28,2<br>9,30,31,32 | 2,3,4,5,8,2<br>7,33,34,35 | 13 | P04905,P06911,P08723,P09456,P10715,P12020,P19629,P47727,Q5GRG2,Q62902,Q63355,Q63357,Q6AYL6        |
| 10846 | 1,6,7,28,2<br>9,30,31,33 | 2,3,4,5,8,2<br>7,32,34,35 | 13 | P06911,P08723,P08753,P09456,P10715,P19629,P35467,P83121,Q5GRG2,Q62902,Q63357,Q6AYS4,Q9QZK9        |
| 10847 | 1,6,7,28,2<br>9,30,31,34 | 2,3,4,5,8,2<br>7,32,33,35 | 5  | P06911,P19629,P97840,Q5GRG2,Q6AYR9                                                                |
| 10848 | 1,6,7,28,2<br>9,30,31,35 | 2,3,4,5,8,2<br>7,32,33,34 | 4  | P19629,Q07116,Q5GRG2,Q6AYS4                                                                       |
| 10849 | 1,6,7,28,2<br>9,30,32,33 | 2,3,4,5,8,2<br>7,31,34,35 | 8  | F1LM93,O08815,P04905,P08723,P09456,P20766,P47727,Q62997                                           |
| 10850 | 1,6,7,28,2<br>9,30,32,34 | 2,3,4,5,8,2<br>7,31,33,35 | 2  | P09456,P97840                                                                                     |
| 10851 | 1,6,7,28,2<br>9,30,32,35 | 2,3,4,5,8,2<br>7,31,33,34 | 3  | P09456,Q62997,Q6AYS4                                                                              |
| 10852 | 1,6,7,28,2<br>9,30,33,34 | 2,3,4,5,8,2<br>7,31,32,35 | 2  | P09456,P97840                                                                                     |
| 10853 | 1,6,7,28,2<br>9,30,33,35 | 2,3,4,5,8,2<br>7,31,32,34 | 4  | P15399,P20766,Q62997,Q6AYS4                                                                       |
| 10854 | 1,6,7,28,2<br>9,30,34,35 | 2,3,4,5,8,2<br>7,31,32,33 | 2  | P97840,Q8CJD3                                                                                     |
| 10855 | 1,6,7,28,2<br>9,31,32,33 | 2,3,4,5,8,2<br>7,30,34,35 | 13 | P02793,Q7TP54,P04905,P06911,P08723,P09456,P10715,P12020,P19629,P47727,P83121,Q5GRG2,Q62902,Q6AYL6 |
| 10856 | 1,6,7,28,2<br>9,31,32,34 | 2,3,4,5,8,2<br>7,30,33,35 | 6  | P06911,P09456,P12020,P13432,Q5GRG2,Q6AYL6                                                         |
| 10857 | 1,6,7,28,2<br>9,31,32,35 | 2,3,4,5,8,2<br>7,30,33,34 | 6  | P04762,P06911,P12020,Q5GRG2,Q6AYL6,Q6AYS4                                                         |
| 10858 | 1,6,7,28,2<br>9,31,33,34 | 2,3,4,5,8,2<br>7,30,32,35 | 6  | P06911,P09456,P13432,P19629,P83121,Q5GRG2                                                         |
| 10859 | 1,6,7,28,2<br>9,31,33,35 | 2,3,4,5,8,2<br>7,30,32,34 | 8  | P06760,P06911,P10715,P15399,P19629,P83121,Q5GRG2,Q6AYS4                                           |
| 10860 | 1,6,7,28,2<br>9,31,34,35 | 2,3,4,5,8,2<br>7,30,32,33 | 1  | Q5M819                                                                                            |
| 10861 | 1,6,7,28,2<br>9,32,33,34 | 2,3,4,5,8,2<br>7,30,31,35 | 4  | P09456,P35281,P47727,Q80WL1                                                                       |
| 10862 | 1,6,7,28,2<br>9,32,33,35 | 2,3,4,5,8,2<br>7,30,31,34 | 7  | P04905,P09456,P15399,P47727,Q62997,Q6AYS4,Q80WL1                                                  |
| 10863 | 1,6,7,28,2<br>9,32,34,35 | 2,3,4,5,8,2<br>7,30,31,33 | 2  | P36970,Q5M819                                                                                     |
| 10864 | 1,6,7,28,2<br>9,33,34,35 | 2,3,4,5,8,2<br>7,30,31,32 | 3  | P15399,Q5M819,Q80WL1                                                                              |

|       |                          |                           |   |                                                  |
|-------|--------------------------|---------------------------|---|--------------------------------------------------|
| 10865 | 1,6,7,28,3<br>0,31,32,33 | 2,3,4,5,8,2<br>7,29,34,35 | 7 | P06911,P10715,P12020,P13432,P19629,P47727,Q5GRG2 |
| 10866 | 1,6,7,28,3<br>0,31,32,34 | 2,3,4,5,8,2<br>7,29,33,35 | 4 | P12020,P13432,P47967,P97840                      |
| 10867 | 1,6,7,28,3<br>0,31,32,35 | 2,3,4,5,8,2<br>7,29,33,34 | 1 | Q6AYS4                                           |
| 10868 | 1,6,7,28,3<br>0,31,33,34 | 2,3,4,5,8,2<br>7,29,32,35 | 4 | P13432,P19629,P47967,P97840                      |
| 10869 | 1,6,7,28,3<br>0,31,33,35 | 2,3,4,5,8,2<br>7,29,32,34 | 6 | P06760,P15399,P19629,Q6AYS4,Q6TMA8,Q8VD89        |
| 10870 | 1,6,7,28,3<br>0,31,34,35 | 2,3,4,5,8,2<br>7,29,32,33 | 3 | P13432,P97840,Q8CJD3                             |
| 10871 | 1,6,7,28,3<br>0,32,33,34 | 2,3,4,5,8,2<br>7,29,31,35 | 2 | P13432,P97840                                    |
| 10872 | 1,6,7,28,3<br>0,32,33,35 | 2,3,4,5,8,2<br>7,29,31,34 | 3 | P15399,Q62997,Q6AYS4                             |
| 10873 | 1,6,7,28,3<br>0,32,34,35 | 2,3,4,5,8,2<br>7,29,31,33 | 3 | P36970,P97840,Q5HZV9                             |
| 10874 | 1,6,7,28,3<br>0,33,34,35 | 2,3,4,5,8,2<br>7,29,31,32 | 2 | P97840,Q8CJD3                                    |
| 10875 | 1,6,7,28,3<br>1,32,33,34 | 2,3,4,5,8,2<br>7,29,30,35 | 4 | P06911,P10715,P12020,P13432                      |
| 10876 | 1,6,7,28,3<br>1,32,33,35 | 2,3,4,5,8,2<br>7,29,30,34 | 7 | P06911,P10715,P12020,P13432,P15399,P19629,Q6AYS4 |
| 10877 | 1,6,7,28,3<br>1,32,34,35 | 2,3,4,5,8,2<br>7,29,30,33 | 2 | P13432,Q5HZV9                                    |
| 10878 | 1,6,7,28,3<br>1,33,34,35 | 2,3,4,5,8,2<br>7,29,30,32 | 2 | P13432,P15399                                    |
| 10879 | 1,6,7,28,3<br>2,33,34,35 | 2,3,4,5,8,2<br>7,29,30,31 | 2 | P15399,Q80WL1                                    |
| 10880 | 1,6,7,29,3<br>0,31,32,33 | 2,3,4,5,8,2<br>7,28,34,35 | 2 | P83121,Q6AY61                                    |
| 10881 | 1,6,7,29,3<br>0,31,32,34 | 2,3,4,5,8,2<br>7,28,33,35 | 2 | P97840,Q99MH3                                    |
| 10882 | 1,6,7,29,3<br>0,31,32,35 | 2,3,4,5,8,2<br>7,28,33,34 | 3 | P04182,P04762,Q6AYS4                             |
| 10883 | 1,6,7,29,3<br>0,31,33,34 | 2,3,4,5,8,2<br>7,28,32,35 | 1 | P97840                                           |
| 10884 | 1,6,7,29,3<br>0,31,33,35 | 2,3,4,5,8,2<br>7,28,32,34 | 4 | P04182,P15399,P83121,Q6AYS4                      |
| 10885 | 1,6,7,29,3<br>0,31,34,35 | 2,3,4,5,8,2<br>7,28,32,33 | 1 | P97840                                           |
| 10886 | 1,6,7,29,3<br>0,32,33,34 | 2,3,4,5,8,2<br>7,28,31,35 | 0 |                                                  |
| 10887 | 1,6,7,29,3<br>0,32,33,35 | 2,3,4,5,8,2<br>7,28,31,34 | 4 | P15399,P20766,Q62997,Q6AYS4                      |

|       |                          |                           |    |                                                                                                                                                                                       |
|-------|--------------------------|---------------------------|----|---------------------------------------------------------------------------------------------------------------------------------------------------------------------------------------|
| 10888 | 1,6,7,29,3<br>0,32,34,35 | 2,3,4,5,8,2<br>7,28,31,33 | 1  | Q99MH3                                                                                                                                                                                |
| 10889 | 1,6,7,29,3<br>0,33,34,35 | 2,3,4,5,8,2<br>7,28,31,32 | 0  |                                                                                                                                                                                       |
| 10890 | 1,6,7,29,3<br>1,32,33,34 | 2,3,4,5,8,2<br>7,28,30,35 | 1  | Q6AYQ8                                                                                                                                                                                |
| 10891 | 1,6,7,29,3<br>1,32,33,35 | 2,3,4,5,8,2<br>7,28,30,34 | 6  | P04182,P04762,P15399,P83121,Q6AYQ8,Q6AYS4                                                                                                                                             |
| 10892 | 1,6,7,29,3<br>1,32,34,35 | 2,3,4,5,8,2<br>7,28,30,33 | 0  |                                                                                                                                                                                       |
| 10893 | 1,6,7,29,3<br>1,33,34,35 | 2,3,4,5,8,2<br>7,28,30,32 | 2  | P15399,Q6AYQ8                                                                                                                                                                         |
| 10894 | 1,6,7,29,3<br>2,33,34,35 | 2,3,4,5,8,2<br>7,28,30,31 | 3  | P15399,Q6AYQ8,Q80WL1                                                                                                                                                                  |
| 10895 | 1,6,7,30,3<br>1,32,33,34 | 2,3,4,5,8,2<br>7,28,29,35 | 2  | P13432,P97840                                                                                                                                                                         |
| 10896 | 1,6,7,30,3<br>1,32,33,35 | 2,3,4,5,8,2<br>7,28,29,34 | 3  | P04182,P15399,Q6AYS4                                                                                                                                                                  |
| 10897 | 1,6,7,30,3<br>1,32,34,35 | 2,3,4,5,8,2<br>7,28,29,33 | 2  | P13432,P97840                                                                                                                                                                         |
| 10898 | 1,6,7,30,3<br>1,33,34,35 | 2,3,4,5,8,2<br>7,28,29,32 | 1  | P97840                                                                                                                                                                                |
| 10899 | 1,6,7,30,3<br>2,33,34,35 | 2,3,4,5,8,2<br>7,28,29,31 | 0  |                                                                                                                                                                                       |
| 10900 | 1,6,7,31,3<br>2,33,34,35 | 2,3,4,5,8,2<br>7,28,29,30 | 1  | P13432                                                                                                                                                                                |
| 10901 | 1,6,8,27,2<br>8,29,30,31 | 2,3,4,5,7,3<br>2,33,34,35 | 20 | F1LM93,O35547,P02781,P02782,P06911,P08010,P08723,P0C0A9,P19629,P30120,P36374,P60905,P97605,Q5GRG2,Q62902,Q63357,Q6AYR9,Q8CJ52,Q9JHB9,Q9JI85                                           |
| 10902 | 1,6,8,27,2<br>8,29,30,32 | 2,3,4,5,7,3<br>1,33,34,35 | 26 | F1LM93,O08815,O35547,P02781,P02782,P04905,P05369,P08010,P08723,P0C0A9,P24368,P30120,P35281,P36374,P47727,P60905,P82471,P97605,Q62902,Q62997,Q6AYR9,Q6IFV1,Q812E4,Q8CJ52,Q9JHB9,Q9JI85 |
| 10903 | 1,6,8,27,2<br>8,29,30,33 | 2,3,4,5,7,3<br>1,32,34,35 | 24 | F1LM93,O08815,O35547,P02781,P02782,P04905,P07647,P08010,P08723,P0C0A9,P24368,P30120,P36374,P47727,P60905,P97605,Q62902,Q62997,Q63357,Q6AYR9,Q812E4,Q8CJ52,Q9JHB9,Q9JI85               |
| 10904 | 1,6,8,27,2<br>8,29,30,34 | 2,3,4,5,7,3<br>1,32,33,35 | 12 | F1LM93,O35547,P02781,P02782,P05369,P08723,P0C0A9,P30120,P97605,Q6AYR9,Q9JHB9,Q9WTT6                                                                                                   |
| 10905 | 1,6,8,27,2<br>8,29,30,35 | 2,3,4,5,7,3<br>1,32,33,34 | 13 | F1LM93,O35547,P02781,P02782,P08644,P08723,P0C0A9,P30120,P36374,P97605,Q62997,Q6AYR9,Q9JHB9                                                                                            |
| 10906 | 1,6,8,27,2<br>8,29,31,32 | 2,3,4,5,7,3<br>0,33,34,35 | 22 | F1LM93,O35547,P02781,P02782,P04905,P06911,P08010,P08723,P0C0A9,P10715,P22985,P24368,P30120,P47727,P60905,P97605,Q5GRG2,Q62902,Q6AYL6,Q8CJ52,Q9JHB9,Q9JI85                             |
| 10907 | 1,6,8,27,2<br>8,29,31,33 | 2,3,4,5,7,3<br>0,32,34,35 | 19 | O35547,P02781,P02782,P04905,P06911,P07647,P08723,P0C0A9,P10715,P19629,P30120,P36374,P47727,P97605,Q5GRG2,Q62902,Q8CJ52,Q9JHB9,Q9JI85                                                  |
| 10908 | 1,6,8,27,2<br>8,29,31,34 | 2,3,4,5,7,3<br>0,32,33,35 | 11 | O35547,P02781,P02782,P06911,P08723,P30120,P97584,P97605,Q5GRG2,Q9JHB9,Q9WTT6                                                                                                          |
| 10909 | 1,6,8,27,2<br>8,29,31,35 | 2,3,4,5,7,3<br>0,32,33,34 | 9  | O35547,P02781,P02782,P06911,P08723,P11762,P97605,Q5GRG2,Q9JHB9                                                                                                                        |
| 10910 | 1,6,8,27,2<br>8,29,32,33 | 2,3,4,5,7,3<br>0,31,34,35 | 22 | F1LM93,O08815,O35547,P02781,P02782,P04905,P06911,P08010,P08723,P0C0A9,P24368,P30120,P35281,P36374,P47727,Q62902,Q62997,Q80WL1,Q812E4,Q8CJ52,Q9JHB9,Q9JI85                             |



|       |                                                 |    |                                                                                                          |
|-------|-------------------------------------------------|----|----------------------------------------------------------------------------------------------------------|
| 10911 | 1,6,8,27,2 2,3,4,5,7,3<br>8,29,32,34 0,31,33,35 | 15 | F1LM93,O35547,P02781,P02782,P05369,P08010,P08723,P24368,P30120,P35281,P47727,P97584,P97605,Q9JHB9,Q9WTT6 |
| 10912 | 1,6,8,27,2 2,3,4,5,7,3<br>8,29,32,35 0,31,33,34 | 12 | F1LM93,O35547,P02781,P02782,P08644,P08723,P0C0A9,P47727,P51907,P97605,Q62997,Q9JHB9                      |
| 10913 | 1,6,8,27,2 2,3,4,5,7,3<br>8,29,33,34 0,31,32,35 | 10 | O35547,P02781,P02782,P08723,P30120,P97584,P97605,Q9JHB9,Q9JI85,Q9WTT6                                    |
| 10914 | 1,6,8,27,2 2,3,4,5,7,3<br>8,29,33,35 0,31,32,34 | 13 | O35547,P01836,P02781,P02782,P08644,P08723,P0C0A9,P36374,P42854,P97605,Q62997,Q9JHB9,Q9JI85               |
| 10915 | 1,6,8,27,2 2,3,4,5,7,3<br>8,29,34,35 0,31,32,33 | 8  | O35547,P00507,P02782,P08723,P42854,P97605,Q5M819,Q9WTT6                                                  |
| 10916 | 1,6,8,27,2 2,3,4,5,7,2<br>8,30,31,32 9,33,34,35 | 6  | P02782,P06911,P08723,P13432,P31044,Q5GRG2                                                                |
| 10917 | 1,6,8,27,2 2,3,4,5,7,2<br>8,30,31,33 9,32,34,35 | 6  | P02782,P08723,P13432,P19629,P97605,Q5GRG2                                                                |
| 10918 | 1,6,8,27,2 2,3,4,5,7,2<br>8,30,31,34 9,32,33,35 | 4  | P02782,P13432,P97605,Q9WTT6                                                                              |
| 10919 | 1,6,8,27,2 2,3,4,5,7,2<br>8,30,31,35 9,32,33,34 | 2  | P02782,P97605                                                                                            |
| 10920 | 1,6,8,27,2 2,3,4,5,7,2<br>8,30,32,33 9,31,34,35 | 8  | P02782,P08723,P13432,P47727,Q62997,Q6IFU7,Q6IFV1,Q9JHB9                                                  |
| 10921 | 1,6,8,27,2 2,3,4,5,7,2<br>8,30,32,34 9,31,33,35 | 5  | P13432,P97584,Q6IFU7,Q6IFV1,Q9WTT6                                                                       |
| 10922 | 1,6,8,27,2 2,3,4,5,7,2<br>8,30,32,35 9,31,33,34 | 2  | Q62997,Q6IFV1                                                                                            |
| 10923 | 1,6,8,27,2 2,3,4,5,7,2<br>8,30,33,34 9,31,32,35 | 4  | P13432,P97584,P97605,Q9WTT6                                                                              |
| 10924 | 1,6,8,27,2 2,3,4,5,7,2<br>8,30,33,35 9,31,32,34 | 3  | P01836,P97605,Q62997                                                                                     |
| 10925 | 1,6,8,27,2 2,3,4,5,7,2<br>8,30,34,35 9,31,32,33 | 5  | P00507,P02793,Q7TP54,P97605,Q8CJD3,Q9WTT6                                                                |
| 10926 | 1,6,8,27,2 2,3,4,5,7,2<br>8,31,32,33 9,30,34,35 | 9  | P02782,P06911,P08723,P10715,P13432,P14480,P31044,P47727,Q5GRG2                                           |
| 10927 | 1,6,8,27,2 2,3,4,5,7,2<br>8,31,32,34 9,30,33,35 | 5  | P06911,P13432,P97584,Q5GRG2,Q9WTT6                                                                       |
| 10928 | 1,6,8,27,2 2,3,4,5,7,2<br>8,31,32,35 9,30,33,34 | 1  | P06911                                                                                                   |
| 10929 | 1,6,8,27,2 2,3,4,5,7,2<br>8,31,33,34 9,30,32,35 | 3  | P13432,P97584,Q9WTT6                                                                                     |
| 10930 | 1,6,8,27,2 2,3,4,5,7,2<br>8,31,33,35 9,30,32,34 | 1  | P01836                                                                                                   |
| 10931 | 1,6,8,27,2 2,3,4,5,7,2<br>8,31,34,35 9,30,32,33 | 3  | P00507,P97605,Q9WTT6                                                                                     |
| 10932 | 1,6,8,27,2 2,3,4,5,7,2<br>8,32,33,34 9,30,31,35 | 9  | P13432,P35281,P47727,P97584,Q10758,Q6IFU7,Q6IFV1,Q6P6Q2,Q9WTT6                                           |
| 10933 | 1,6,8,27,2 2,3,4,5,7,2<br>8,32,33,35 9,30,31,34 | 5  | P01836,P47727,Q62997,Q6IFU7,Q6IFV1                                                                       |

|       |                                                 |   |                                    |
|-------|-------------------------------------------------|---|------------------------------------|
| 10934 | 1,6,8,27,2 2,3,4,5,7,2<br>8,32,34,35 9,30,31,33 | 5 | P00507,P97584,Q5HZV9,Q6IFU7,Q9WTT6 |
| 10935 | 1,6,8,27,2 2,3,4,5,7,2<br>8,33,34,35 9,30,31,32 | 3 | P00507,P01836,P97584               |
| 10936 | 1,6,8,27,2 2,3,4,5,7,2<br>9,30,31,32 8,33,34,35 | 2 | P02782,Q6AYR9                      |
| 10937 | 1,6,8,27,2 2,3,4,5,7,2<br>9,30,31,33 8,32,34,35 | 3 | P02782,P97605,Q6AYR9               |
| 10938 | 1,6,8,27,2 2,3,4,5,7,2<br>9,30,31,34 8,32,33,35 | 3 | P97605,Q6AYR9,Q9WTT6               |
| 10939 | 1,6,8,27,2 2,3,4,5,7,2<br>9,30,31,35 8,32,33,34 | 2 | P11762,P97605                      |
| 10940 | 1,6,8,27,2 2,3,4,5,7,2<br>9,30,32,33 8,31,34,35 | 2 | Q62997,Q9JHB9                      |
| 10941 | 1,6,8,27,2 2,3,4,5,7,2<br>9,30,32,34 8,31,33,35 | 4 | P06760,P97605,Q6AYR9,Q9WTT6        |
| 10942 | 1,6,8,27,2 2,3,4,5,7,2<br>9,30,32,35 8,31,33,34 | 2 | P51907,Q62997                      |
| 10943 | 1,6,8,27,2 2,3,4,5,7,2<br>9,30,33,34 8,31,32,35 | 2 | P97605,Q6AYR9                      |
| 10944 | 1,6,8,27,2 2,3,4,5,7,2<br>9,30,33,35 8,31,32,34 | 3 | P01836,P97605,Q62997               |
| 10945 | 1,6,8,27,2 2,3,4,5,7,2<br>9,30,34,35 8,31,32,33 | 1 | P97605                             |
| 10946 | 1,6,8,27,2 2,3,4,5,7,2<br>9,31,32,33 8,30,34,35 | 1 | Q8CJD3                             |
| 10947 | 1,6,8,27,2 2,3,4,5,7,2<br>9,31,32,34 8,30,33,35 | 0 |                                    |
| 10948 | 1,6,8,27,2 2,3,4,5,7,2<br>9,31,32,35 8,30,33,34 | 2 | P11762,P51907                      |
| 10949 | 1,6,8,27,2 2,3,4,5,7,2<br>9,31,33,34 8,30,32,35 | 2 | P97584,P97605                      |
| 10950 | 1,6,8,27,2 2,3,4,5,7,2<br>9,31,33,35 8,30,32,34 | 2 | P01836,P97605                      |
| 10951 | 1,6,8,27,2 2,3,4,5,7,2<br>9,31,34,35 8,30,32,33 | 1 | P97605                             |
| 10952 | 1,6,8,27,2 2,3,4,5,7,2<br>9,32,33,34 8,30,31,35 | 2 | P06760,P97584                      |
| 10953 | 1,6,8,27,2 2,3,4,5,7,2<br>9,32,33,35 8,30,31,34 | 4 | P01836,P42854,P51907,Q62997        |
| 10954 | 1,6,8,27,2 2,3,4,5,7,2<br>9,32,34,35 8,30,31,33 | 2 | P42854,P51907                      |
| 10955 | 1,6,8,27,2 2,3,4,5,7,2<br>9,33,34,35 8,30,31,32 | 3 | P01836,P42854,P97605               |
| 10956 | 1,6,8,27,3 2,3,4,5,7,2<br>0,31,32,33 8,29,34,35 | 1 | P13432                             |

|       |                          |                           |    |                                                                                                   |
|-------|--------------------------|---------------------------|----|---------------------------------------------------------------------------------------------------|
| 10957 | 1,6,8,27,3<br>0,31,32,34 | 2,3,4,5,7,2<br>8,29,33,35 | 2  | P13432,Q9WTT6                                                                                     |
| 10958 | 1,6,8,27,3<br>0,31,32,35 | 2,3,4,5,7,2<br>8,29,33,34 | 0  |                                                                                                   |
| 10959 | 1,6,8,27,3<br>0,31,33,34 | 2,3,4,5,7,2<br>8,29,32,35 | 1  | P13432                                                                                            |
| 10960 | 1,6,8,27,3<br>0,31,33,35 | 2,3,4,5,7,2<br>8,29,32,34 | 1  | P01836                                                                                            |
| 10961 | 1,6,8,27,3<br>0,31,34,35 | 2,3,4,5,7,2<br>8,29,32,33 | 2  | P02793;Q7TP54,P97605                                                                              |
| 10962 | 1,6,8,27,3<br>0,32,33,34 | 2,3,4,5,7,2<br>8,29,31,35 | 4  | P06760,P13432,P97584,Q6IFV1                                                                       |
| 10963 | 1,6,8,27,3<br>0,32,33,35 | 2,3,4,5,7,2<br>8,29,31,34 | 3  | P01836,Q62997,Q6IFV1                                                                              |
| 10964 | 1,6,8,27,3<br>0,32,34,35 | 2,3,4,5,7,2<br>8,29,31,33 | 0  |                                                                                                   |
| 10965 | 1,6,8,27,3<br>0,33,34,35 | 2,3,4,5,7,2<br>8,29,31,32 | 1  | P01836                                                                                            |
| 10966 | 1,6,8,27,3<br>1,32,33,34 | 2,3,4,5,7,2<br>8,29,30,35 | 2  | P13432,P97584                                                                                     |
| 10967 | 1,6,8,27,3<br>1,32,33,35 | 2,3,4,5,7,2<br>8,29,30,34 | 1  | P01836                                                                                            |
| 10968 | 1,6,8,27,3<br>1,32,34,35 | 2,3,4,5,7,2<br>8,29,30,33 | 0  |                                                                                                   |
| 10969 | 1,6,8,27,3<br>1,33,34,35 | 2,3,4,5,7,2<br>8,29,30,32 | 1  | P01836                                                                                            |
| 10970 | 1,6,8,27,3<br>2,33,34,35 | 2,3,4,5,7,2<br>8,29,30,31 | 2  | P01836,P97584                                                                                     |
| 10971 | 1,6,8,28,2<br>9,30,31,32 | 2,3,4,5,7,2<br>7,33,34,35 | 13 | F1LM93,O35547,P02782,P04905,P06911,P08723,P11762,P19629,P30120,P47727,P60905,Q5GRG2,Q62975        |
| 10972 | 1,6,8,28,2<br>9,30,31,33 | 2,3,4,5,7,2<br>7,32,34,35 | 14 | O35547,P02780,P02782,P04905,P06911,P08723,P19629,P36376,P47727,P97605,Q09030,Q5GRG2,Q63357,Q8CJ52 |
| 10973 | 1,6,8,28,2<br>9,30,31,34 | 2,3,4,5,7,2<br>7,32,33,35 | 4  | O35547,P02782,P97605,Q6AYR9                                                                       |
| 10974 | 1,6,8,28,2<br>9,30,31,35 | 2,3,4,5,7,2<br>7,32,33,34 | 7  | G3V686,P02782,P11762,P34901,P97605,Q07116,Q09030                                                  |
| 10975 | 1,6,8,28,2<br>9,30,32,33 | 2,3,4,5,7,2<br>7,31,34,35 | 14 | A2RUV9,F1LM93,O35547,P02780,P02782,P04905,P08723,P14408,P30120,P35281,P47727,P60905,Q62997,Q8CJ52 |
| 10976 | 1,6,8,28,2<br>9,30,32,34 | 2,3,4,5,7,2<br>7,31,33,35 | 4  | F1LM93,P30120,P35281,P60905                                                                       |
| 10977 | 1,6,8,28,2<br>9,30,32,35 | 2,3,4,5,7,2<br>7,31,33,34 | 6  | F1LM93,G3V686,P02782,P11762,P51907,Q62997                                                         |
| 10978 | 1,6,8,28,2<br>9,30,33,34 | 2,3,4,5,7,2<br>7,31,32,35 | 4  | O35547,P36376,P97605,Q99068                                                                       |
| 10979 | 1,6,8,28,2<br>9,30,33,35 | 2,3,4,5,7,2<br>7,31,32,34 | 11 | A2RUV9,G3V686,O35547,P02782,P05539,P08723,P36376,P38444,P97605,Q09030,Q62997                      |

|       |                          |                           |    |                                                                              |
|-------|--------------------------|---------------------------|----|------------------------------------------------------------------------------|
| 10980 | 1,6,8,28,2<br>9,30,34,35 | 2,3,4,5,7,2<br>7,31,32,33 | 4  | P00507,P97605,Q8CJD3,Q99068                                                  |
| 10981 | 1,6,8,28,2<br>9,31,32,33 | 2,3,4,5,7,2<br>7,30,34,35 | 11 | O35547,P02782,P04905,P06911,P08723,P10715,P19629,P35281,P47727,Q09030,Q5GRG2 |
| 10982 | 1,6,8,28,2<br>9,31,32,34 | 2,3,4,5,7,2<br>7,30,33,35 | 6  | O35547,P06911,P13432,P35281,P47727,Q5GRG2                                    |
| 10983 | 1,6,8,28,2<br>9,31,32,35 | 2,3,4,5,7,2<br>7,30,33,34 | 6  | P02782,P06911,P11762,P47727,P51907,Q09030                                    |
| 10984 | 1,6,8,28,2<br>9,31,33,34 | 2,3,4,5,7,2<br>7,30,32,35 | 4  | O35547,P06911,P19629,Q09030                                                  |
| 10985 | 1,6,8,28,2<br>9,31,33,35 | 2,3,4,5,7,2<br>7,30,32,34 | 9  | G3V686,O35547,P02782,P02803,P06911,P19629,P49744,Q09030,Q8K4G9               |
| 10986 | 1,6,8,28,2<br>9,31,34,35 | 2,3,4,5,7,2<br>7,30,32,33 | 4  | P00507,P97605,Q09030,Q99068                                                  |
| 10987 | 1,6,8,28,2<br>9,32,33,34 | 2,3,4,5,7,2<br>7,30,31,35 | 4  | O35547,P04905,P35281,P47727                                                  |
| 10988 | 1,6,8,28,2<br>9,32,33,35 | 2,3,4,5,7,2<br>7,30,31,34 | 8  | P04905,P08723,P35281,P47727,P47967,P51907,Q09030,Q62997                      |
| 10989 | 1,6,8,28,2<br>9,32,34,35 | 2,3,4,5,7,2<br>7,30,31,33 | 3  | P00507,P35281,P51907                                                         |
| 10990 | 1,6,8,28,2<br>9,33,34,35 | 2,3,4,5,7,2<br>7,30,31,32 | 3  | P00507,Q09030,Q99068                                                         |
| 10991 | 1,6,8,28,3<br>0,31,32,33 | 2,3,4,5,7,2<br>7,29,34,35 | 5  | P06911,P13432,P19629,P47727,Q5GRG2                                           |
| 10992 | 1,6,8,28,3<br>0,31,32,34 | 2,3,4,5,7,2<br>7,29,33,35 | 1  | P13432                                                                       |
| 10993 | 1,6,8,28,3<br>0,31,32,35 | 2,3,4,5,7,2<br>7,29,33,34 | 1  | P04218                                                                       |
| 10994 | 1,6,8,28,3<br>0,31,33,34 | 2,3,4,5,7,2<br>7,29,32,35 | 3  | P13432,P19629,P36376                                                         |
| 10995 | 1,6,8,28,3<br>0,31,33,35 | 2,3,4,5,7,2<br>7,29,32,34 | 4  | G3V686,P02803,P19629,P36376                                                  |
| 10996 | 1,6,8,28,3<br>0,31,34,35 | 2,3,4,5,7,2<br>7,29,32,33 | 6  | P00507,P02793,Q7TP54,P13432,P13852,Q8CJD3,Q99068                             |
| 10997 | 1,6,8,28,3<br>0,32,33,34 | 2,3,4,5,7,2<br>7,29,31,35 | 2  | P13432,P35281                                                                |
| 10998 | 1,6,8,28,3<br>0,32,33,35 | 2,3,4,5,7,2<br>7,29,31,34 | 4  | A2RUV9,P04218,P14408,Q62997                                                  |
| 10999 | 1,6,8,28,3<br>0,32,34,35 | 2,3,4,5,7,2<br>7,29,31,33 | 3  | P00507,P04218,Q99068                                                         |
| 11000 | 1,6,8,28,3<br>0,33,34,35 | 2,3,4,5,7,2<br>7,29,31,32 | 3  | P00507,P36376,Q99068                                                         |
| 11001 | 1,6,8,28,3<br>1,32,33,34 | 2,3,4,5,7,2<br>7,29,30,35 | 3  | P06911,P13432,P14480                                                         |
| 11002 | 1,6,8,28,3<br>1,32,33,35 | 2,3,4,5,7,2<br>7,29,30,34 | 3  | P02803,P04218,P06911                                                         |

|       |                          |                           |   |                                           |
|-------|--------------------------|---------------------------|---|-------------------------------------------|
| 11003 | 1,6,8,28,3<br>1,32,34,35 | 2,3,4,5,7,2<br>7,29,30,33 | 3 | P00507,P13432,Q5HZV9                      |
| 11004 | 1,6,8,28,3<br>1,33,34,35 | 2,3,4,5,7,2<br>7,29,30,32 | 4 | P00507,P02803,P13432,Q99068               |
| 11005 | 1,6,8,28,3<br>2,33,34,35 | 2,3,4,5,7,2<br>7,29,30,31 | 1 | P00507                                    |
| 11006 | 1,6,8,29,3<br>0,31,32,33 | 2,3,4,5,7,2<br>7,28,34,35 | 0 |                                           |
| 11007 | 1,6,8,29,3<br>0,31,32,34 | 2,3,4,5,7,2<br>7,28,33,35 | 2 | Q6IE51,Q99MH3                             |
| 11008 | 1,6,8,29,3<br>0,31,32,35 | 2,3,4,5,7,2<br>7,28,33,34 | 4 | P04182,P11762,P51907,Q71UF4               |
| 11009 | 1,6,8,29,3<br>0,31,33,34 | 2,3,4,5,7,2<br>7,28,32,35 | 0 |                                           |
| 11010 | 1,6,8,29,3<br>0,31,33,35 | 2,3,4,5,7,2<br>7,28,32,34 | 3 | G3V686,P97615,Q09030                      |
| 11011 | 1,6,8,29,3<br>0,31,34,35 | 2,3,4,5,7,2<br>7,28,32,33 | 2 | P02793;Q7TP54,Q99068                      |
| 11012 | 1,6,8,29,3<br>0,32,33,34 | 2,3,4,5,7,2<br>7,28,31,35 | 0 |                                           |
| 11013 | 1,6,8,29,3<br>0,32,33,35 | 2,3,4,5,7,2<br>7,28,31,34 | 4 | A2RUV9,P14408,Q62997,Q71UF4               |
| 11014 | 1,6,8,29,3<br>0,32,34,35 | 2,3,4,5,7,2<br>7,28,31,33 | 1 | P51907                                    |
| 11015 | 1,6,8,29,3<br>0,33,34,35 | 2,3,4,5,7,2<br>7,28,31,32 | 1 | Q99068                                    |
| 11016 | 1,6,8,29,3<br>1,32,33,34 | 2,3,4,5,7,2<br>7,28,30,35 | 1 | Q6AYQ8                                    |
| 11017 | 1,6,8,29,3<br>1,32,33,35 | 2,3,4,5,7,2<br>7,28,30,34 | 6 | P04182,P11762,P47967,P97615,Q09030,Q6AYQ8 |
| 11018 | 1,6,8,29,3<br>1,32,34,35 | 2,3,4,5,7,2<br>7,28,30,33 | 1 | P51907                                    |
| 11019 | 1,6,8,29,3<br>1,33,34,35 | 2,3,4,5,7,2<br>7,28,30,32 | 4 | Q09030,Q6AYQ8,Q8K4G9,Q99068               |
| 11020 | 1,6,8,29,3<br>2,33,34,35 | 2,3,4,5,7,2<br>7,28,30,31 | 2 | P51907,Q6AYQ8                             |
| 11021 | 1,6,8,30,3<br>1,32,33,34 | 2,3,4,5,7,2<br>7,28,29,35 | 1 | P13432                                    |
| 11022 | 1,6,8,30,3<br>1,32,33,35 | 2,3,4,5,7,2<br>7,28,29,34 | 3 | P04182,P04218,Q71UF4                      |
| 11023 | 1,6,8,30,3<br>1,32,34,35 | 2,3,4,5,7,2<br>7,28,29,33 | 1 | P02793;Q7TP54                             |
| 11024 | 1,6,8,30,3<br>1,33,34,35 | 2,3,4,5,7,2<br>7,28,29,32 | 2 | P02793;Q7TP54,Q99068                      |
| 11025 | 1,6,8,30,3<br>2,33,34,35 | 2,3,4,5,7,2<br>7,28,29,31 | 0 |                                           |

|       |                               |                           |    |                                                                                                                                                                                                     |
|-------|-------------------------------|---------------------------|----|-----------------------------------------------------------------------------------------------------------------------------------------------------------------------------------------------------|
| 11026 | 1,6,8,31,3<br>2,33,34,35      | 2,3,4,5,7,2<br>7,28,29,30 | 1  | P13432                                                                                                                                                                                              |
| 11027 | 1,6,27,28,<br>29,30,31,3<br>2 | 2,3,4,5,7,8<br>,33,34,35  | 22 | F1LM93,O08815,O35547,P02781,P02782,P04905,P05369,P06911,P08010,P08723,P0C0A9,P30120,P36374,P47727,P60905,P97605,Q08464,Q5GRG2,Q62902,Q6AYR9,Q812E4,Q9JHB9                                           |
| 11028 | 1,6,27,28,<br>29,30,31,3<br>3 | 2,3,4,5,7,8<br>,32,34,35  | 24 | O08815,O35547,P02781,P02782,P06911,P08010,P08723,P08753,P0C0A9,P19629,P20766,P30120,P36374,P47727,P97605,Q08464,Q09030,Q5GRG2,Q63357,Q6AYR9,Q6AYS4,Q812E4,Q9JHB9,Q9JI85                             |
| 11029 | 1,6,27,28,<br>29,30,31,3<br>4 | 2,3,4,5,7,8<br>,32,33,35  | 11 | O08815,O35547,P02781,P02782,P05369,P08723,P30120,P36374,P97605,Q6AYR9,Q9JHB9                                                                                                                        |
| 11030 | 1,6,27,28,<br>29,30,31,3<br>5 | 2,3,4,5,7,8<br>,32,33,34  | 13 | O35547,P02781,P02782,P08723,P08753,P20766,P36374,P97605,Q08464,Q09030,Q6AYR9,Q6AYS4,Q9JHB9                                                                                                          |
| 11031 | 1,6,27,28,<br>29,30,32,3<br>3 | 2,3,4,5,7,8<br>,31,34,35  | 28 | F1LM93,O08815,O35547,P02781,P04905,P05369,P08010,P08723,P09456,P0C0A9,P16296,P20766,P24368,P30120,P35281,P36374,P47727,P60905,P97605,Q08464,Q62997,Q6AYR9,Q6IFU7,Q6IFV1,Q80WL1,Q812E4,Q9JHB9,Q9JI85 |
| 11032 | 1,6,27,28,<br>29,30,32,3<br>4 | 2,3,4,5,7,8<br>,31,33,35  | 17 | F1LM93,O08815,O35547,P02781,P05369,P08010,P08723,P20766,P30120,P52590,P60905,P97584,P97605,Q10758,Q6AYR9,Q6IFU7,Q9JHB9                                                                              |
| 11033 | 1,6,27,28,<br>29,30,32,3<br>5 | 2,3,4,5,7,8<br>,31,33,34  | 14 | F1LM93,O08815,P02781,P08010,P08723,P20766,P36374,P36970,P60905,P97605,Q08464,Q62997,Q6AYS4,Q9JHB9                                                                                                   |
| 11034 | 1,6,27,28,<br>29,30,33,3<br>4 | 2,3,4,5,7,8<br>,31,32,35  | 14 | F1LM93,O08815,O35547,P02781,P05369,P08723,P20766,P30120,P36374,P97584,P97605,Q05175,Q6AYR9,Q9JHB9                                                                                                   |
| 11035 | 1,6,27,28,<br>29,30,33,3<br>5 | 2,3,4,5,7,8<br>,31,32,34  | 14 | O08815,O35547,P02781,P08723,P08753,P20766,P36374,P38444,P97605,Q08464,Q09030,Q62997,Q6AYS4,Q9JHB9                                                                                                   |
| 11036 | 1,6,27,28,<br>29,30,34,3<br>5 | 2,3,4,5,7,8<br>,31,32,33  | 7  | P00507,P20766,P97605,Q5M819,Q6AYR9,Q8CJD3,Q9QUL6                                                                                                                                                    |
| 11037 | 1,6,27,28,<br>29,31,32,3<br>3 | 2,3,4,5,7,8<br>,30,34,35  | 21 | O08815,O35547,P02781,P04905,P06911,P08010,P08723,P19629,P24368,P36374,P47727,P97605,Q08464,Q09030,Q5GRG2,Q62902,Q63514,Q80WL1,Q812E4,Q9JHB9,Q9JI85                                                  |
| 11038 | 1,6,27,28,<br>29,31,32,3<br>4 | 2,3,4,5,7,8<br>,30,33,35  | 11 | O08815,O35547,P05369,P06911,P08723,P47727,P97584,P97605,Q10758,Q5GRG2,Q9JHB9                                                                                                                        |
| 11039 | 1,6,27,28,<br>29,31,32,3<br>5 | 2,3,4,5,7,8<br>,30,33,34  | 11 | O35547,P06911,P08723,P11762,P36374,P47727,P97605,Q08464,Q09030,Q5M819,Q9JHB9                                                                                                                        |
| 11040 | 1,6,27,28,<br>29,31,33,3<br>4 | 2,3,4,5,7,8<br>,30,32,35  | 8  | O35547,P02781,P06911,P08723,P97584,P97605,Q09030,Q9JHB9                                                                                                                                             |

|       |                               |                          |    |                                                                                                                               |
|-------|-------------------------------|--------------------------|----|-------------------------------------------------------------------------------------------------------------------------------|
| 11041 | 1,6,27,28,<br>29,31,33,3<br>5 | 2,3,4,5,7,8<br>,30,32,34 | 11 | O35547,P06911,P08723,P20766,P36374,P97605,Q08464,Q09030,Q6AYS4,Q80WL1,Q9JHB9                                                  |
| 11042 | 1,6,27,28,<br>29,31,34,3<br>5 | 2,3,4,5,7,8<br>,30,32,33 | 5  | P00507,P97605,Q09030,Q5M819,Q9QUL6                                                                                            |
| 11043 | 1,6,27,28,<br>29,32,33,3<br>4 | 2,3,4,5,7,8<br>,30,31,35 | 18 | O08815,O35547,P02781,P05369,P08010,P08723,P35281,P42854,P47727,P52590,P97584,P97605,Q06000,Q10758,Q64057,Q6IFU7,Q80WL1,Q9JHB9 |
| 11044 | 1,6,27,28,<br>29,32,33,3<br>5 | 2,3,4,5,7,8<br>,30,31,34 | 16 | O08815,O35547,P04905,P08723,P20766,P36374,P42854,P47727,P97605,Q08464,Q09030,Q62997,Q6AYS4,Q6IFU7,Q80WL1,Q9JHB9               |
| 11045 | 1,6,27,28,<br>29,32,34,3<br>5 | 2,3,4,5,7,8<br>,30,31,33 | 10 | P00507,P36970,P42854,P97605,Q10758,Q5M819,Q6IFU7,Q80WL1,Q9JHB9,Q9QUL6                                                         |
| 11046 | 1,6,27,28,<br>29,33,34,3<br>5 | 2,3,4,5,7,8<br>,30,31,32 | 9  | O35547,P00507,P20766,P42854,P97584,P97605,Q09030,Q5M819,Q80WL1                                                                |
| 11047 | 1,6,27,28,<br>30,31,32,3<br>3 | 2,3,4,5,7,8<br>,29,34,35 | 9  | P06911,P13432,P16296,P19629,P47727,P97605,Q08464,Q5GRG2,Q6IFU7                                                                |
| 11048 | 1,6,27,28,<br>30,31,32,3<br>4 | 2,3,4,5,7,8<br>,29,33,35 | 4  | P13432,P97605,Q10758,Q6IFU7                                                                                                   |
| 11049 | 1,6,27,28,<br>30,31,32,3<br>5 | 2,3,4,5,7,8<br>,29,33,34 | 3  | P97605,Q08464,Q6AYS4                                                                                                          |
| 11050 | 1,6,27,28,<br>30,31,33,3<br>4 | 2,3,4,5,7,8<br>,29,32,35 | 2  | P13432,P97605                                                                                                                 |
| 11051 | 1,6,27,28,<br>30,31,33,3<br>5 | 2,3,4,5,7,8<br>,29,32,34 | 5  | P20766,P97605,Q08464,Q6AYS4,Q6TMA8                                                                                            |
| 11052 | 1,6,27,28,<br>30,31,34,3<br>5 | 2,3,4,5,7,8<br>,29,32,33 | 4  | P00507,P02793,Q7TP54,P97605,Q8CJD3                                                                                            |
| 11053 | 1,6,27,28,<br>30,32,33,3<br>4 | 2,3,4,5,7,8<br>,29,31,35 | 7  | P13432,P97584,P97605,Q06000,Q10758,Q6IFU7,Q6IFV1                                                                              |
| 11054 | 1,6,27,28,<br>30,32,33,3<br>5 | 2,3,4,5,7,8<br>,29,31,34 | 6  | P20766,P97605,Q62997,Q6AYS4,Q6IFU7,Q6IFV1                                                                                     |
| 11055 | 1,6,27,28,<br>30,32,34,3<br>5 | 2,3,4,5,7,8<br>,29,31,33 | 7  | P00507,P36970,P97605,Q10758,Q5HZV9,Q6IFU7,Q8CJD3                                                                              |

|       |                               |                          |   |                                                                |
|-------|-------------------------------|--------------------------|---|----------------------------------------------------------------|
| 11056 | 1,6,27,28,<br>30,33,34,3<br>5 | 2,3,4,5,7,8<br>,29,31,32 | 4 | P00507,P20766,P97605,Q8CJD3                                    |
| 11057 | 1,6,27,28,<br>31,32,33,3<br>4 | 2,3,4,5,7,8<br>,29,30,35 | 7 | P06911,P13432,P47727,P97584,Q06000,Q10758,Q6IFU7               |
| 11058 | 1,6,27,28,<br>31,32,33,3<br>5 | 2,3,4,5,7,8<br>,29,30,34 | 4 | P16391,Q08464,Q6AYS4,Q6IFU7                                    |
| 11059 | 1,6,27,28,<br>31,32,34,3<br>5 | 2,3,4,5,7,8<br>,29,30,33 | 7 | P00507,P13432,P97605,Q10758,Q5HZV9,Q5M819,Q6IFU7               |
| 11060 | 1,6,27,28,<br>31,33,34,3<br>5 | 2,3,4,5,7,8<br>,29,30,32 | 2 | P13432,P97605                                                  |
| 11061 | 1,6,27,28,<br>32,33,34,3<br>5 | 2,3,4,5,7,8<br>,29,30,31 | 9 | P00507,P36970,P42854,P97584,Q10758,Q5HZV9,Q5M819,Q6IFU7,Q80WL1 |
| 11062 | 1,6,27,29,<br>30,31,32,3<br>3 | 2,3,4,5,7,8<br>,28,34,35 | 5 | P16296,P20766,P97605,Q08464,Q6AY61                             |
| 11063 | 1,6,27,29,<br>30,31,32,3<br>4 | 2,3,4,5,7,8<br>,28,33,35 | 2 | P97605,Q6AYR9                                                  |
| 11064 | 1,6,27,29,<br>30,31,32,3<br>5 | 2,3,4,5,7,8<br>,28,33,34 | 4 | P11762,P97605,Q08464,Q6AYS4                                    |
| 11065 | 1,6,27,29,<br>30,31,33,3<br>4 | 2,3,4,5,7,8<br>,28,32,35 | 2 | P97605,Q6AYR9                                                  |
| 11066 | 1,6,27,29,<br>30,31,33,3<br>5 | 2,3,4,5,7,8<br>,28,32,34 | 6 | P20766,P97605,P97615,Q08464,Q09030,Q6AYS4                      |
| 11067 | 1,6,27,29,<br>30,31,34,3<br>5 | 2,3,4,5,7,8<br>,28,32,33 | 2 | P97605,Q6AYR9                                                  |
| 11068 | 1,6,27,29,<br>30,32,33,3<br>4 | 2,3,4,5,7,8<br>,28,31,35 | 2 | P20766,P97605                                                  |
| 11069 | 1,6,27,29,<br>30,32,33,3<br>5 | 2,3,4,5,7,8<br>,28,31,34 | 5 | P20766,P97605,Q08464,Q62997,Q6AYS4                             |
| 11070 | 1,6,27,29,<br>30,32,34,3<br>5 | 2,3,4,5,7,8<br>,28,31,33 | 2 | P20766,P97605                                                  |



|       |                               |                          |    |                                                                                     |
|-------|-------------------------------|--------------------------|----|-------------------------------------------------------------------------------------|
| 11071 | 1,6,27,29,<br>30,33,34,3<br>5 | 2,3,4,5,7,8<br>,28,31,32 | 2  | P20766,P97605                                                                       |
| 11072 | 1,6,27,29,<br>31,32,33,3<br>4 | 2,3,4,5,7,8<br>,28,30,35 | 3  | P97584,P97605,Q64057                                                                |
| 11073 | 1,6,27,29,<br>31,32,33,3<br>5 | 2,3,4,5,7,8<br>,28,30,34 | 4  | Q08464,Q09030,Q6AYS4,Q80WL1                                                         |
| 11074 | 1,6,27,29,<br>31,32,34,3<br>5 | 2,3,4,5,7,8<br>,28,30,33 | 2  | P97605,Q5M819                                                                       |
| 11075 | 1,6,27,29,<br>31,33,34,3<br>5 | 2,3,4,5,7,8<br>,28,30,32 | 2  | P97605,Q09030                                                                       |
| 11076 | 1,6,27,29,<br>32,33,34,3<br>5 | 2,3,4,5,7,8<br>,28,30,31 | 4  | P42854,P97605,Q5M819,Q80WL1                                                         |
| 11077 | 1,6,27,30,<br>31,32,33,3<br>4 | 2,3,4,5,7,8<br>,28,29,35 | 1  | P13432                                                                              |
| 11078 | 1,6,27,30,<br>31,32,33,3<br>5 | 2,3,4,5,7,8<br>,28,29,34 | 1  | Q6AYS4                                                                              |
| 11079 | 1,6,27,30,<br>31,32,34,3<br>5 | 2,3,4,5,7,8<br>,28,29,33 | 0  |                                                                                     |
| 11080 | 1,6,27,30,<br>31,33,34,3<br>5 | 2,3,4,5,7,8<br>,28,29,32 | 1  | P97605                                                                              |
| 11081 | 1,6,27,30,<br>32,33,34,3<br>5 | 2,3,4,5,7,8<br>,28,29,31 | 2  | P07171,Q6IFU7                                                                       |
| 11082 | 1,6,27,31,<br>32,33,34,3<br>5 | 2,3,4,5,7,8<br>,28,29,30 | 1  | P13432                                                                              |
| 11083 | 1,6,28,29,<br>30,31,32,3<br>3 | 2,3,4,5,7,8<br>,27,34,35 | 12 | O08815,O35547,P04905,P06911,P08723,P16296,P19629,P47727,Q08464,Q09030,Q5GRG2,Q63357 |
| 11084 | 1,6,28,29,<br>30,31,32,3<br>4 | 2,3,4,5,7,8<br>,27,33,35 | 5  | P06911,P13432,P97605,Q6AYR9,Q99MH3                                                  |
| 11085 | 1,6,28,29,<br>30,31,32,3<br>5 | 2,3,4,5,7,8<br>,27,33,34 | 11 | D3ZUK3,P06911,P11762,P55016,P97605,Q01205,Q07116,Q08464,Q09030,Q6AYS4,Q99041        |

|       |                               |                          |    |                                                                                            |
|-------|-------------------------------|--------------------------|----|--------------------------------------------------------------------------------------------|
| 11086 | 1,6,28,29,<br>30,31,33,3<br>4 | 2,3,4,5,7,8<br>,27,32,35 | 6  | O35547,P13432,P19629,P97605,Q09030,Q6AYR9                                                  |
| 11087 | 1,6,28,29,<br>30,31,33,3<br>5 | 2,3,4,5,7,8<br>,27,32,34 | 13 | G3V686,P00714,P19629,P20766,P26772,P38444,P49744,P97605,Q01205,Q07116,Q08464,Q09030,Q6AYS4 |
| 11088 | 1,6,28,29,<br>30,31,34,3<br>5 | 2,3,4,5,7,8<br>,27,32,33 | 6  | P00507,P02793;Q7TP54,P13852,P97605,Q09030,Q8CJD3                                           |
| 11089 | 1,6,28,29,<br>30,32,33,3<br>4 | 2,3,4,5,7,8<br>,27,31,35 | 4  | P35281,P47727,P97605,Q99MH3                                                                |
| 11090 | 1,6,28,29,<br>30,32,33,3<br>5 | 2,3,4,5,7,8<br>,27,31,34 | 9  | P04905,P07171,P20766,P36970,P47727,Q01205,Q09030,Q62997,Q6AYS4                             |
| 11091 | 1,6,28,29,<br>30,32,34,3<br>5 | 2,3,4,5,7,8<br>,27,31,33 | 5  | P00507,P07171,P36970,P97605,Q99MH3                                                         |
| 11092 | 1,6,28,29,<br>30,33,34,3<br>5 | 2,3,4,5,7,8<br>,27,31,32 | 6  | P00507,P07171,P20766,P97605,Q09030,Q8CJD3                                                  |
| 11093 | 1,6,28,29,<br>31,32,33,3<br>4 | 2,3,4,5,7,8<br>,27,30,35 | 6  | P06911,P13432,P35281,P47727,Q09030,Q64057                                                  |
| 11094 | 1,6,28,29,<br>31,32,33,3<br>5 | 2,3,4,5,7,8<br>,27,30,34 | 13 | P04905,P06911,P16391,P47727,P47967,P49744,P55016,Q01205,Q07116,Q09030,Q64057,Q6AYS4,Q80WL1 |
| 11095 | 1,6,28,29,<br>31,32,34,3<br>5 | 2,3,4,5,7,8<br>,27,30,33 | 8  | P00507,P06911,P36970,P55016,P97605,Q09030,Q5M819,Q99MH3                                    |
| 11096 | 1,6,28,29,<br>31,33,34,3<br>5 | 2,3,4,5,7,8<br>,27,30,32 | 4  | P00507,P00714,P97605,Q09030                                                                |
| 11097 | 1,6,28,29,<br>32,33,34,3<br>5 | 2,3,4,5,7,8<br>,27,30,31 | 9  | P00507,P07171,P35281,P36970,P42854,Q09030,Q5M819,Q64057,Q80WL1                             |
| 11098 | 1,6,28,30,<br>31,32,33,3<br>4 | 2,3,4,5,7,8<br>,27,29,35 | 1  | P13432                                                                                     |
| 11099 | 1,6,28,30,<br>31,32,33,3<br>5 | 2,3,4,5,7,8<br>,27,29,34 | 5  | P04218,P07171,P55016,Q09030,Q6AYS4                                                         |
| 11100 | 1,6,28,30,<br>31,32,34,3<br>5 | 2,3,4,5,7,8<br>,27,29,33 | 8  | P00507,P07171,P13432,P13852,P36970,P55016,Q5HZV9,Q8CJD3                                    |

|       |                               |                           |    |                                                                                                                               |
|-------|-------------------------------|---------------------------|----|-------------------------------------------------------------------------------------------------------------------------------|
| 11101 | 1,6,28,30,<br>31,33,34,3<br>5 | 2,3,4,5,7,8<br>,27,29,32  | 8  | P00507,P00714,P07171,P13432,P55016,P97605,Q09030,Q8CJD3                                                                       |
| 11102 | 1,6,28,30,<br>32,33,34,3<br>5 | 2,3,4,5,7,8<br>,27,29,31  | 4  | P00507,P07171,P36970,Q5HZV9                                                                                                   |
| 11103 | 1,6,28,31,<br>32,33,34,3<br>5 | 2,3,4,5,7,8<br>,27,29,30  | 5  | P00507,P07171,P13432,P55016,Q5HZV9                                                                                            |
| 11104 | 1,6,29,30,<br>31,32,33,3<br>4 | 2,3,4,5,7,8<br>,27,28,35  | 2  | P07171,Q99MH3                                                                                                                 |
| 11105 | 1,6,29,30,<br>31,32,33,3<br>5 | 2,3,4,5,7,8<br>,27,28,34  | 7  | P04182,P07171,P97615,Q07116,Q09030,Q6AYS4,Q71UF4                                                                              |
| 11106 | 1,6,29,30,<br>31,32,34,3<br>5 | 2,3,4,5,7,8<br>,27,28,33  | 2  | P07171,Q99MH3                                                                                                                 |
| 11107 | 1,6,29,30,<br>31,33,34,3<br>5 | 2,3,4,5,7,8<br>,27,28,32  | 4  | P00714,P07171,P97605,Q09030                                                                                                   |
| 11108 | 1,6,29,30,<br>32,33,34,3<br>5 | 2,3,4,5,7,8<br>,27,28,31  | 2  | P07171,Q99MH3                                                                                                                 |
| 11109 | 1,6,29,31,<br>32,33,34,3<br>5 | 2,3,4,5,7,8<br>,27,28,30  | 5  | P07171,Q09030,Q64057,Q6AYQ8,Q99MH3                                                                                            |
| 11110 | 1,6,30,31,<br>32,33,34,3<br>5 | 2,3,4,5,7,8<br>,27,28,29  | 2  | P07171,P13432                                                                                                                 |
| 11111 | 1,7,8,27,2<br>8,29,30,31      | 2,3,4,5,6,3<br>2,33,34,35 | 16 | P02781,P02782,P08723,P08753,P10715,P11883,P19629,P31044,P36374,P82471,P97605,Q5GRG2,Q62902,Q6AYR9,Q8CJ52,Q9JI85               |
| 11112 | 1,7,8,27,2<br>8,29,30,32      | 2,3,4,5,6,3<br>1,33,34,35 | 18 | F1LM93,P02781,P02782,P05369,P08010,P08723,P09456,P10715,P24368,P36374,P82471,Q62902,Q62997,Q63355,Q812E4,Q8CJ52,Q9JHB9,Q9JI85 |
| 11113 | 1,7,8,27,2<br>8,29,30,33      | 2,3,4,5,6,3<br>1,32,34,35 | 16 | F1LM93,P02781,P08723,P08753,P09456,P10715,P11883,P36374,P38444,P82471,P97605,Q62997,Q812E4,Q8CJ52,Q9JHB9,Q9JI85               |
| 11114 | 1,7,8,27,2<br>8,29,30,34      | 2,3,4,5,6,3<br>1,32,33,35 | 6  | P02781,P05369,P97605,Q6AYR9,Q8CJ52,Q9QZA6                                                                                     |
| 11115 | 1,7,8,27,2<br>8,29,30,35      | 2,3,4,5,6,3<br>1,32,33,34 | 8  | G3V686,P02781,P08723,P10715,P36374,P97605,Q62997,Q8CJ52                                                                       |
| 11116 | 1,7,8,27,2<br>8,29,31,32      | 2,3,4,5,6,3<br>0,33,34,35 | 16 | P02781,P02782,P06911,P08723,P10715,P19629,P24368,P31044,P47727,P82471,Q5GRG2,Q62902,Q6AYL6,Q8CJ52,Q9JHB9,Q9JI85               |
| 11117 | 1,7,8,27,2<br>8,29,31,33      | 2,3,4,5,6,3<br>0,32,34,35 | 13 | P02781,P06911,P08723,P10715,P19629,P22006,P31044,P36374,Q5GRG2,Q62902,Q8CJ52,Q9JI85,Q9Z0V6                                    |
| 11118 | 1,7,8,27,2<br>8,29,31,34      | 2,3,4,5,6,3<br>0,32,33,35 | 5  | P10715,P19629,P97605,Q5GRG2,Q8CJ52                                                                                            |

|       |                          |                           |    |                                                                                                                                      |
|-------|--------------------------|---------------------------|----|--------------------------------------------------------------------------------------------------------------------------------------|
| 11119 | 1,7,8,27,2<br>8,29,31,35 | 2,3,4,5,6,3<br>0,32,33,34 | 6  | P10715,P19629,P31044,P97605,Q5GRG2,Q8CJ52                                                                                            |
| 11120 | 1,7,8,27,2<br>8,29,32,33 | 2,3,4,5,6,3<br>0,31,34,35 | 18 | F1LM93,P02781,P02793;Q7TP54,P08723,P09456,P10715,P24368,P35281,P36374,P47727,P82471,Q62902,Q62997,Q63617,Q812E4,Q8CJ52,Q9JHB9,Q9JI85 |
| 11121 | 1,7,8,27,2<br>8,29,32,34 | 2,3,4,5,6,3<br>0,31,33,35 | 3  | P05369,P10715,P24368                                                                                                                 |
| 11122 | 1,7,8,27,2<br>8,29,32,35 | 2,3,4,5,6,3<br>0,31,33,34 | 5  | P02625,P08723,P10715,Q62997,Q8CJ52                                                                                                   |
| 11123 | 1,7,8,27,2<br>8,29,33,34 | 2,3,4,5,6,3<br>0,31,32,35 | 6  | P02781,P08723,P10715,P97605,Q8CJ52,Q9JI85                                                                                            |
| 11124 | 1,7,8,27,2<br>8,29,33,35 | 2,3,4,5,6,3<br>0,31,32,34 | 8  | P02625,P08723,P10715,P36374,P38444,Q62997,Q8CJ52,Q9JI85                                                                              |
| 11125 | 1,7,8,27,2<br>8,29,34,35 | 2,3,4,5,6,3<br>0,31,32,33 | 1  | P97605                                                                                                                               |
| 11126 | 1,7,8,27,2<br>8,30,31,32 | 2,3,4,5,6,2<br>9,33,34,35 | 4  | P10715,P19629,P31044,Q5GRG2                                                                                                          |
| 11127 | 1,7,8,27,2<br>8,30,31,33 | 2,3,4,5,6,2<br>9,32,34,35 | 6  | P10715,P11883,P19629,P31044,Q5GRG2,Q6TMA8                                                                                            |
| 11128 | 1,7,8,27,2<br>8,30,31,34 | 2,3,4,5,6,2<br>9,32,33,35 | 5  | P10715,P19629,P31044,P47967,P97840                                                                                                   |
| 11129 | 1,7,8,27,2<br>8,30,31,35 | 2,3,4,5,6,2<br>9,32,33,34 | 5  | G3V686,P10715,P19629,P31044,Q6TMA8                                                                                                   |
| 11130 | 1,7,8,27,2<br>8,30,32,33 | 2,3,4,5,6,2<br>9,31,34,35 | 4  | P10715,P25236,P31044,Q62997                                                                                                          |
| 11131 | 1,7,8,27,2<br>8,30,32,34 | 2,3,4,5,6,2<br>9,31,33,35 | 1  | P10715                                                                                                                               |
| 11132 | 1,7,8,27,2<br>8,30,32,35 | 2,3,4,5,6,2<br>9,31,33,34 | 2  | P10715,Q62997                                                                                                                        |
| 11133 | 1,7,8,27,2<br>8,30,33,34 | 2,3,4,5,6,2<br>9,31,32,35 | 2  | P10715,P25236                                                                                                                        |
| 11134 | 1,7,8,27,2<br>8,30,33,35 | 2,3,4,5,6,2<br>9,31,32,34 | 3  | P10715,P38444,Q62997                                                                                                                 |
| 11135 | 1,7,8,27,2<br>8,30,34,35 | 2,3,4,5,6,2<br>9,31,32,33 | 1  | Q8CJD3                                                                                                                               |
| 11136 | 1,7,8,27,2<br>8,31,32,33 | 2,3,4,5,6,2<br>9,30,34,35 | 9  | P01835,P02793;Q7TP54,P06911,P10715,P14480,P19629,P31044,Q08849,Q5GRG2                                                                |
| 11137 | 1,7,8,27,2<br>8,31,32,34 | 2,3,4,5,6,2<br>9,30,33,35 | 5  | P01835,P10715,P14480,P31044,Q5GRG2                                                                                                   |
| 11138 | 1,7,8,27,2<br>8,31,32,35 | 2,3,4,5,6,2<br>9,30,33,34 | 2  | P10715,P31044                                                                                                                        |
| 11139 | 1,7,8,27,2<br>8,31,33,34 | 2,3,4,5,6,2<br>9,30,32,35 | 5  | P01835,P10715,P14480,P19629,P31044                                                                                                   |
| 11140 | 1,7,8,27,2<br>8,31,33,35 | 2,3,4,5,6,2<br>9,30,32,34 | 6  | P01835,P10715,P19629,P22006,P31044,Q6TMA8                                                                                            |
| 11141 | 1,7,8,27,2<br>8,31,34,35 | 2,3,4,5,6,2<br>9,30,32,33 | 2  | P01835,P10715                                                                                                                        |

|       |                          |                           |   |                                    |
|-------|--------------------------|---------------------------|---|------------------------------------|
| 11142 | 1,7,8,27,2<br>8,32,33,34 | 2,3,4,5,6,2<br>9,30,31,35 | 4 | P01835,P10715,P14480,P25236        |
| 11143 | 1,7,8,27,2<br>8,32,33,35 | 2,3,4,5,6,2<br>9,30,31,34 | 4 | P02625,P10715,P25236,Q62997        |
| 11144 | 1,7,8,27,2<br>8,32,34,35 | 2,3,4,5,6,2<br>9,30,31,33 | 2 | P02625,P10715                      |
| 11145 | 1,7,8,27,2<br>8,33,34,35 | 2,3,4,5,6,2<br>9,30,31,32 | 3 | P01835,P10715,P25236               |
| 11146 | 1,7,8,27,2<br>9,30,31,32 | 2,3,4,5,6,2<br>8,33,34,35 | 2 | Q4FZU6,Q5HZV9                      |
| 11147 | 1,7,8,27,2<br>9,30,31,33 | 2,3,4,5,6,2<br>8,32,34,35 | 3 | P11883,Q4FZU6,Q5HZV9               |
| 11148 | 1,7,8,27,2<br>9,30,31,34 | 2,3,4,5,6,2<br>8,32,33,35 | 3 | P20760,P97605,Q6AYR9               |
| 11149 | 1,7,8,27,2<br>9,30,31,35 | 2,3,4,5,6,2<br>8,32,33,34 | 3 | P97605,Q4FZU6,Q5HZV9               |
| 11150 | 1,7,8,27,2<br>9,30,32,33 | 2,3,4,5,6,2<br>8,31,34,35 | 2 | Q5HZV9,Q62997                      |
| 11151 | 1,7,8,27,2<br>9,30,32,34 | 2,3,4,5,6,2<br>8,31,33,35 | 1 | P20760                             |
| 11152 | 1,7,8,27,2<br>9,30,32,35 | 2,3,4,5,6,2<br>8,31,33,34 | 1 | Q62997                             |
| 11153 | 1,7,8,27,2<br>9,30,33,34 | 2,3,4,5,6,2<br>8,31,32,35 | 0 |                                    |
| 11154 | 1,7,8,27,2<br>9,30,33,35 | 2,3,4,5,6,2<br>8,31,32,34 | 2 | Q5HZV9,Q62997                      |
| 11155 | 1,7,8,27,2<br>9,30,34,35 | 2,3,4,5,6,2<br>8,31,32,33 | 1 | P97605                             |
| 11156 | 1,7,8,27,2<br>9,31,32,33 | 2,3,4,5,6,2<br>8,30,34,35 | 4 | P01835,P02793,Q7TP54,Q5HZV9,Q8CJD3 |
| 11157 | 1,7,8,27,2<br>9,31,32,34 | 2,3,4,5,6,2<br>8,30,33,35 | 2 | P01835,P20760                      |
| 11158 | 1,7,8,27,2<br>9,31,32,35 | 2,3,4,5,6,2<br>8,30,33,34 | 0 |                                    |
| 11159 | 1,7,8,27,2<br>9,31,33,34 | 2,3,4,5,6,2<br>8,30,32,35 | 1 | P01835                             |
| 11160 | 1,7,8,27,2<br>9,31,33,35 | 2,3,4,5,6,2<br>8,30,32,34 | 2 | P01835,Q5HZV9                      |
| 11161 | 1,7,8,27,2<br>9,31,34,35 | 2,3,4,5,6,2<br>8,30,32,33 | 1 | P01835                             |
| 11162 | 1,7,8,27,2<br>9,32,33,34 | 2,3,4,5,6,2<br>8,30,31,35 | 1 | P01835                             |
| 11163 | 1,7,8,27,2<br>9,32,33,35 | 2,3,4,5,6,2<br>8,30,31,34 | 2 | P02625,Q62997                      |
| 11164 | 1,7,8,27,2<br>9,32,34,35 | 2,3,4,5,6,2<br>8,30,31,33 | 0 |                                    |

|       |                          |                           |    |                                                                       |
|-------|--------------------------|---------------------------|----|-----------------------------------------------------------------------|
| 11165 | 1,7,8,27,2<br>9,33,34,35 | 2,3,4,5,6,2<br>8,30,31,32 | 1  | P01835                                                                |
| 11166 | 1,7,8,27,3<br>0,31,32,33 | 2,3,4,5,6,2<br>8,29,34,35 | 1  | Q5HZV9                                                                |
| 11167 | 1,7,8,27,3<br>0,31,32,34 | 2,3,4,5,6,2<br>8,29,33,35 | 1  | P20760                                                                |
| 11168 | 1,7,8,27,3<br>0,31,32,35 | 2,3,4,5,6,2<br>8,29,33,34 | 1  | Q4FZU6                                                                |
| 11169 | 1,7,8,27,3<br>0,31,33,34 | 2,3,4,5,6,2<br>8,29,32,35 | 1  | P01835                                                                |
| 11170 | 1,7,8,27,3<br>0,31,33,35 | 2,3,4,5,6,2<br>8,29,32,34 | 2  | Q4FZU6,Q5HZV9                                                         |
| 11171 | 1,7,8,27,3<br>0,31,34,35 | 2,3,4,5,6,2<br>8,29,32,33 | 0  |                                                                       |
| 11172 | 1,7,8,27,3<br>0,32,33,34 | 2,3,4,5,6,2<br>8,29,31,35 | 0  |                                                                       |
| 11173 | 1,7,8,27,3<br>0,32,33,35 | 2,3,4,5,6,2<br>8,29,31,34 | 1  | Q62997                                                                |
| 11174 | 1,7,8,27,3<br>0,32,34,35 | 2,3,4,5,6,2<br>8,29,31,33 | 0  |                                                                       |
| 11175 | 1,7,8,27,3<br>0,33,34,35 | 2,3,4,5,6,2<br>8,29,31,32 | 0  |                                                                       |
| 11176 | 1,7,8,27,3<br>1,32,33,34 | 2,3,4,5,6,2<br>8,29,30,35 | 3  | P01835,P14480,Q08849                                                  |
| 11177 | 1,7,8,27,3<br>1,32,33,35 | 2,3,4,5,6,2<br>8,29,30,34 | 3  | P01835,Q08849,Q6NX65                                                  |
| 11178 | 1,7,8,27,3<br>1,32,34,35 | 2,3,4,5,6,2<br>8,29,30,33 | 2  | P01835,Q08849                                                         |
| 11179 | 1,7,8,27,3<br>1,33,34,35 | 2,3,4,5,6,2<br>8,29,30,32 | 1  | P01835                                                                |
| 11180 | 1,7,8,27,3<br>2,33,34,35 | 2,3,4,5,6,2<br>8,29,30,31 | 2  | P01835,Q08849                                                         |
| 11181 | 1,7,8,28,2<br>9,30,31,32 | 2,3,4,5,6,2<br>7,33,34,35 | 10 | G3V686,P06911,P10715,P19629,P31044,Q4FZU2,Q4FZU6,Q5GRG2,Q63355,Q8CJ52 |
| 11182 | 1,7,8,28,2<br>9,30,31,33 | 2,3,4,5,6,2<br>7,32,34,35 | 10 | G3V686,P08753,P10715,P19629,P31044,P36376,P38444,Q4FZU6,Q5GRG2,Q8CJ52 |
| 11183 | 1,7,8,28,2<br>9,30,31,34 | 2,3,4,5,6,2<br>7,32,33,35 | 3  | P10715,P19629,Q4FZU2                                                  |
| 11184 | 1,7,8,28,2<br>9,30,31,35 | 2,3,4,5,6,2<br>7,32,33,34 | 10 | G3V686,P02803,P10715,P19629,P34901,P38444,Q07116,Q4FZU2,Q4FZU6,Q8CJ52 |
| 11185 | 1,7,8,28,2<br>9,30,32,33 | 2,3,4,5,6,2<br>7,31,34,35 | 9  | F1LM93,P02625,P09456,P10715,P35281,P47727,Q62997,Q63355,Q8CJ52        |
| 11186 | 1,7,8,28,2<br>9,30,32,34 | 2,3,4,5,6,2<br>7,31,33,35 | 2  | P02625,Q63355                                                         |
| 11187 | 1,7,8,28,2<br>9,30,32,35 | 2,3,4,5,6,2<br>7,31,33,34 | 6  | G3V686,P02625,P10715,Q4FZU2,Q62997,Q63355                             |

|       |                          |                           |    |                                                                                            |
|-------|--------------------------|---------------------------|----|--------------------------------------------------------------------------------------------|
| 11188 | 1,7,8,28,2<br>9,30,33,34 | 2,3,4,5,6,2<br>7,31,32,35 | 3  | P36376,Q8CJ52,Q9QZA6                                                                       |
| 11189 | 1,7,8,28,2<br>9,30,33,35 | 2,3,4,5,6,2<br>7,31,32,34 | 7  | G3V686,P02625,P10715,P36376,P38444,Q62997,Q8CJ52                                           |
| 11190 | 1,7,8,28,2<br>9,30,34,35 | 2,3,4,5,6,2<br>7,31,32,33 | 4  | P02625,Q4FZU2,Q8CJD3,Q99068                                                                |
| 11191 | 1,7,8,28,2<br>9,31,32,33 | 2,3,4,5,6,2<br>7,30,34,35 | 12 | P01835,P02793;Q7TP54,P06911,P10715,P14480,P19629,P31044,P47727,Q5GRG2,Q6AYL6,Q8CJ52,Q9Z0V6 |
| 11192 | 1,7,8,28,2<br>9,31,32,34 | 2,3,4,5,6,2<br>7,30,33,35 | 5  | P01835,P06911,P10715,Q5GRG2,Q6AYL6                                                         |
| 11193 | 1,7,8,28,2<br>9,31,32,35 | 2,3,4,5,6,2<br>7,30,33,34 | 7  | G3V686,P02803,P06911,P10715,P19629,P31044,Q5GRG2                                           |
| 11194 | 1,7,8,28,2<br>9,31,33,34 | 2,3,4,5,6,2<br>7,30,32,35 | 4  | P01835,P02803,P10715,P19629                                                                |
| 11195 | 1,7,8,28,2<br>9,31,33,35 | 2,3,4,5,6,2<br>7,30,32,34 | 9  | G3V686,P01835,P02803,P10715,P19629,P22006,P38444,P49744,Q9Z0V6                             |
| 11196 | 1,7,8,28,2<br>9,31,34,35 | 2,3,4,5,6,2<br>7,30,32,33 | 3  | P01835,P02803,P10715                                                                       |
| 11197 | 1,7,8,28,2<br>9,32,33,34 | 2,3,4,5,6,2<br>7,30,31,35 | 5  | P01835,P02625,P09456,P10715,P35281                                                         |
| 11198 | 1,7,8,28,2<br>9,32,33,35 | 2,3,4,5,6,2<br>7,30,31,34 | 4  | G3V686,P02625,P10715,Q62997                                                                |
| 11199 | 1,7,8,28,2<br>9,32,34,35 | 2,3,4,5,6,2<br>7,30,31,33 | 1  | P02625                                                                                     |
| 11200 | 1,7,8,28,2<br>9,33,34,35 | 2,3,4,5,6,2<br>7,30,31,32 | 3  | P01835,P02625,P02803                                                                       |
| 11201 | 1,7,8,28,3<br>0,31,32,33 | 2,3,4,5,6,2<br>7,29,34,35 | 6  | P10715,P14480,P19629,P31044,Q4FZU6,Q5GRG2                                                  |
| 11202 | 1,7,8,28,3<br>0,31,32,34 | 2,3,4,5,6,2<br>7,29,33,35 | 2  | P10715,P31044                                                                              |
| 11203 | 1,7,8,28,3<br>0,31,32,35 | 2,3,4,5,6,2<br>7,29,33,34 | 7  | G3V686,P04218,P10715,P19629,P31044,Q4FZU2,Q4FZU6                                           |
| 11204 | 1,7,8,28,3<br>0,31,33,34 | 2,3,4,5,6,2<br>7,29,32,35 | 4  | P01835,P10715,P19629,P36376                                                                |
| 11205 | 1,7,8,28,3<br>0,31,33,35 | 2,3,4,5,6,2<br>7,29,32,34 | 7  | G3V686,P02803,P10715,P19629,P36376,P38444,Q4FZU6                                           |
| 11206 | 1,7,8,28,3<br>0,31,34,35 | 2,3,4,5,6,2<br>7,29,32,33 | 3  | P10715,Q4FZU2,Q8CJD3                                                                       |
| 11207 | 1,7,8,28,3<br>0,32,33,34 | 2,3,4,5,6,2<br>7,29,31,35 | 2  | P10715,P25236                                                                              |
| 11208 | 1,7,8,28,3<br>0,32,33,35 | 2,3,4,5,6,2<br>7,29,31,34 | 4  | G3V686,P02625,P04218,P10715                                                                |
| 11209 | 1,7,8,28,3<br>0,32,34,35 | 2,3,4,5,6,2<br>7,29,31,33 | 1  | P02625                                                                                     |
| 11210 | 1,7,8,28,3<br>0,33,34,35 | 2,3,4,5,6,2<br>7,29,31,32 | 3  | P36376,Q8CJD3,Q99068                                                                       |

|       |                          |                           |   |                                           |
|-------|--------------------------|---------------------------|---|-------------------------------------------|
| 11211 | 1,7,8,28,3<br>1,32,33,34 | 2,3,4,5,6,2<br>7,29,30,35 | 5 | P01835,P10715,P14480,P19629,P31044        |
| 11212 | 1,7,8,28,3<br>1,32,33,35 | 2,3,4,5,6,2<br>7,29,30,34 | 6 | G3V686,P01835,P02803,P10715,P19629,P31044 |
| 11213 | 1,7,8,28,3<br>1,32,34,35 | 2,3,4,5,6,2<br>7,29,30,33 | 2 | P01835,P10715                             |
| 11214 | 1,7,8,28,3<br>1,33,34,35 | 2,3,4,5,6,2<br>7,29,30,32 | 3 | P01835,P02803,P10715                      |
| 11215 | 1,7,8,28,3<br>2,33,34,35 | 2,3,4,5,6,2<br>7,29,30,31 | 4 | P01835,P02625,P10715,P25236               |
| 11216 | 1,7,8,29,3<br>0,31,32,33 | 2,3,4,5,6,2<br>7,28,34,35 | 2 | Q4FZU6,Q5HZV9                             |
| 11217 | 1,7,8,29,3<br>0,31,32,34 | 2,3,4,5,6,2<br>7,28,33,35 | 1 | Q4FZU2                                    |
| 11218 | 1,7,8,29,3<br>0,31,32,35 | 2,3,4,5,6,2<br>7,28,33,34 | 4 | G3V686,P04182,Q4FZU2,Q4FZU6               |
| 11219 | 1,7,8,29,3<br>0,31,33,34 | 2,3,4,5,6,2<br>7,28,32,35 | 1 | P01835                                    |
| 11220 | 1,7,8,29,3<br>0,31,33,35 | 2,3,4,5,6,2<br>7,28,32,34 | 4 | G3V686,P04182,Q4FZU6,Q5HZV9               |
| 11221 | 1,7,8,29,3<br>0,31,34,35 | 2,3,4,5,6,2<br>7,28,32,33 | 1 | Q4FZU2                                    |
| 11222 | 1,7,8,29,3<br>0,32,33,34 | 2,3,4,5,6,2<br>7,28,31,35 | 0 |                                           |
| 11223 | 1,7,8,29,3<br>0,32,33,35 | 2,3,4,5,6,2<br>7,28,31,34 | 5 | G3V686,P02625,Q4FZU6,Q5HZV9,Q62997        |
| 11224 | 1,7,8,29,3<br>0,32,34,35 | 2,3,4,5,6,2<br>7,28,31,33 | 1 | P02625                                    |
| 11225 | 1,7,8,29,3<br>0,33,34,35 | 2,3,4,5,6,2<br>7,28,31,32 | 0 |                                           |
| 11226 | 1,7,8,29,3<br>1,32,33,34 | 2,3,4,5,6,2<br>7,28,30,35 | 2 | P01835,Q6AYQ8                             |
| 11227 | 1,7,8,29,3<br>1,32,33,35 | 2,3,4,5,6,2<br>7,28,30,34 | 3 | P01835,P04182,Q4FZU6                      |
| 11228 | 1,7,8,29,3<br>1,32,34,35 | 2,3,4,5,6,2<br>7,28,30,33 | 1 | P01835                                    |
| 11229 | 1,7,8,29,3<br>1,33,34,35 | 2,3,4,5,6,2<br>7,28,30,32 | 3 | P01835,P02803,Q6AYQ8                      |
| 11230 | 1,7,8,29,3<br>2,33,34,35 | 2,3,4,5,6,2<br>7,28,30,31 | 2 | P01835,P02625                             |
| 11231 | 1,7,8,30,3<br>1,32,33,34 | 2,3,4,5,6,2<br>7,28,29,35 | 1 | P01835                                    |
| 11232 | 1,7,8,30,3<br>1,32,33,35 | 2,3,4,5,6,2<br>7,28,29,34 | 3 | G3V686,P04182,Q4FZU6                      |
| 11233 | 1,7,8,30,3<br>1,32,34,35 | 2,3,4,5,6,2<br>7,28,29,33 | 0 |                                           |



|       |                               |                           |    |                                                                                                                                                                                |
|-------|-------------------------------|---------------------------|----|--------------------------------------------------------------------------------------------------------------------------------------------------------------------------------|
| 11234 | 1,7,8,30,3<br>1,33,34,35      | 2,3,4,5,6,2<br>7,28,29,32 | 1  | P01835                                                                                                                                                                         |
| 11235 | 1,7,8,30,3<br>2,33,34,35      | 2,3,4,5,6,2<br>7,28,29,31 | 0  |                                                                                                                                                                                |
| 11236 | 1,7,8,31,3<br>2,33,34,35      | 2,3,4,5,6,2<br>7,28,29,30 | 1  | P01835                                                                                                                                                                         |
| 11237 | 1,7,27,28,<br>29,30,31,3<br>2 | 2,3,4,5,6,8<br>,33,34,35  | 20 | O08815,P02781,P05369,P06911,P08010,P08723,P08753,P09456,P10715,P19629,P31044,P36374,P97605,Q5GRG2,Q62902,Q63355,Q63514,Q6AYR9,Q9JHB9,Q9Z0V6                                    |
| 11238 | 1,7,27,28,<br>29,30,31,3<br>3 | 2,3,4,5,6,8<br>,32,34,35  | 17 | P02781,P08723,P08753,P09456,P10715,P11883,P19629,P20766,P36374,P38444,P97605,Q5GRG2,Q6AYR9,Q812E4,Q8CJ52,Q9JI85,Q9Z0V6                                                         |
| 11239 | 1,7,27,28,<br>29,30,31,3<br>4 | 2,3,4,5,6,8<br>,32,33,35  | 9  | P05369,P08753,P10715,P19629,P36374,P97605,P97840,Q6AYR9,Q9Z0V6                                                                                                                 |
| 11240 | 1,7,27,28,<br>29,30,31,3<br>5 | 2,3,4,5,6,8<br>,32,33,34  | 8  | P08753,P10715,P19629,P36374,P38444,P97605,Q6AYS4,Q9Z0V6                                                                                                                        |
| 11241 | 1,7,27,28,<br>29,30,32,3<br>3 | 2,3,4,5,6,8<br>,31,34,35  | 24 | F1LM93,O08815,P02781,P02793,Q7TP54,P05369,P08010,P08723,P08753,P09456,P10715,P20766,P24368,P36374,P47727,P97605,Q06000,Q62997,Q63355,Q63514,Q812E4,Q8CJ52,Q9JHB9,Q9JI85,Q9Z0V6 |
| 11242 | 1,7,27,28,<br>29,30,32,3<br>4 | 2,3,4,5,6,8<br>,31,33,35  | 7  | O08815,P05369,P09456,P97605,Q63355,Q6AYR9,Q9Z0V6                                                                                                                               |
| 11243 | 1,7,27,28,<br>29,30,32,3<br>5 | 2,3,4,5,6,8<br>,31,33,34  | 8  | P02625,P05369,P20766,P36374,P97605,Q62997,Q63355,Q9Z0V6                                                                                                                        |
| 11244 | 1,7,27,28,<br>29,30,33,3<br>4 | 2,3,4,5,6,8<br>,31,32,35  | 9  | P02781,P05369,P08753,P09456,P20766,P36374,P97605,Q6AYR9,Q9Z0V6                                                                                                                 |
| 11245 | 1,7,27,28,<br>29,30,33,3<br>5 | 2,3,4,5,6,8<br>,31,32,34  | 8  | P08753,P20766,P36374,P38444,P97605,Q62997,Q6AYS4,Q9Z0V6                                                                                                                        |
| 11246 | 1,7,27,28,<br>29,30,34,3<br>5 | 2,3,4,5,6,8<br>,31,32,33  | 3  | P20766,P97605,Q8CJD3                                                                                                                                                           |
| 11247 | 1,7,27,28,<br>29,31,32,3<br>3 | 2,3,4,5,6,8<br>,30,34,35  | 20 | P02781,P02793,Q7TP54,P06911,P08723,P08753,P09456,P10715,P19629,P31044,P36374,P47727,Q06000,Q5GRG2,Q62902,Q63514,Q6AYL6,Q812E4,Q9JHB9,Q9JI85,Q9Z0V6                             |
| 11248 | 1,7,27,28,<br>29,31,32,3<br>4 | 2,3,4,5,6,8<br>,30,33,35  | 8  | P05369,P06911,P10715,P97605,Q5GRG2,Q63514,Q6AYL6,Q9Z0V6                                                                                                                        |
| 11249 | 1,7,27,28,<br>29,31,32,3<br>5 | 2,3,4,5,6,8<br>,30,33,34  | 8  | P06911,P10715,P36374,P97605,Q5GRG2,Q63514,Q6AYL6,Q9Z0V6                                                                                                                        |

|       |                               |                          |   |                                                                |
|-------|-------------------------------|--------------------------|---|----------------------------------------------------------------|
| 11250 | 1,7,27,28,<br>29,31,33,3<br>4 | 2,3,4,5,6,8<br>,30,32,35 | 5 | P10715,P19629,P36374,P97605,Q9Z0V6                             |
| 11251 | 1,7,27,28,<br>29,31,33,3<br>5 | 2,3,4,5,6,8<br>,30,32,34 | 8 | P08753,P10715,P19629,P22006,P36374,P38444,P97605,Q9Z0V6        |
| 11252 | 1,7,27,28,<br>29,31,34,3<br>5 | 2,3,4,5,6,8<br>,30,32,33 | 4 | P10715,P97605,Q5M819,Q9Z0V6                                    |
| 11253 | 1,7,27,28,<br>29,32,33,3<br>4 | 2,3,4,5,6,8<br>,30,31,35 | 6 | P05369,P09456,Q06000,Q63514,Q80WL1,Q9Z0V6                      |
| 11254 | 1,7,27,28,<br>29,32,33,3<br>5 | 2,3,4,5,6,8<br>,30,31,34 | 9 | P02625,P09456,P10715,P20766,P36374,Q62997,Q63514,Q80WL1,Q9Z0V6 |
| 11255 | 1,7,27,28,<br>29,32,34,3<br>5 | 2,3,4,5,6,8<br>,30,31,33 | 4 | P02625,P97605,Q5M819,Q9Z0V6                                    |
| 11256 | 1,7,27,28,<br>29,33,34,3<br>5 | 2,3,4,5,6,8<br>,30,31,32 | 4 | P02625,P97605,Q5M819,Q9Z0V6                                    |
| 11257 | 1,7,27,28,<br>30,31,32,3<br>3 | 2,3,4,5,6,8<br>,29,34,35 | 7 | P10715,P11883,P19629,P31044,Q5GRG2,Q63514,Q9Z0V6               |
| 11258 | 1,7,27,28,<br>30,31,32,3<br>4 | 2,3,4,5,6,8<br>,29,33,35 | 4 | P10715,P20762,P97840,Q63514                                    |
| 11259 | 1,7,27,28,<br>30,31,32,3<br>5 | 2,3,4,5,6,8<br>,29,33,34 | 2 | P10715,Q63514                                                  |
| 11260 | 1,7,27,28,<br>30,31,33,3<br>4 | 2,3,4,5,6,8<br>,29,32,35 | 8 | P10715,P19629,P20762,P51907,P97605,P97840,Q6TMA8,Q9Z0V6        |
| 11261 | 1,7,27,28,<br>30,31,33,3<br>5 | 2,3,4,5,6,8<br>,29,32,34 | 7 | P10715,P19629,P38444,P97605,Q6AYS4,Q6TMA8,Q9Z0V6               |
| 11262 | 1,7,27,28,<br>30,31,34,3<br>5 | 2,3,4,5,6,8<br>,29,32,33 | 4 | P97605,P97840,Q6TMA8,Q8CJD3                                    |
| 11263 | 1,7,27,28,<br>30,32,33,3<br>4 | 2,3,4,5,6,8<br>,29,31,35 | 4 | P20762,P25236,Q06000,Q63514                                    |
| 11264 | 1,7,27,28,<br>30,32,33,3<br>5 | 2,3,4,5,6,8<br>,29,31,34 | 3 | P20766,Q62997,Q63514                                           |

|       |                               |                          |   |                                                         |
|-------|-------------------------------|--------------------------|---|---------------------------------------------------------|
| 11265 | 1,7,27,28,<br>30,32,34,3<br>5 | 2,3,4,5,6,8<br>,29,31,33 | 1 | Q8CJD3                                                  |
| 11266 | 1,7,27,28,<br>30,33,34,3<br>5 | 2,3,4,5,6,8<br>,29,31,32 | 3 | P20766,P97605,Q8CJD3                                    |
| 11267 | 1,7,27,28,<br>31,32,33,3<br>4 | 2,3,4,5,6,8<br>,29,30,35 | 7 | P01835,P10715,P14480,P20762,Q06000,Q63514,Q9Z0V6        |
| 11268 | 1,7,27,28,<br>31,32,33,3<br>5 | 2,3,4,5,6,8<br>,29,30,34 | 5 | P10715,P19629,Q63514,Q9WTT6,Q9Z0V6                      |
| 11269 | 1,7,27,28,<br>31,32,34,3<br>5 | 2,3,4,5,6,8<br>,29,30,33 | 2 | P10715,Q63514                                           |
| 11270 | 1,7,27,28,<br>31,33,34,3<br>5 | 2,3,4,5,6,8<br>,29,30,32 | 5 | P01835,P10715,P20762,Q6TMA8,Q9Z0V6                      |
| 11271 | 1,7,27,28,<br>32,33,34,3<br>5 | 2,3,4,5,6,8<br>,29,30,31 | 2 | P02625,P25236                                           |
| 11272 | 1,7,27,29,<br>30,31,32,3<br>3 | 2,3,4,5,6,8<br>,28,34,35 | 5 | P11883,Q5HZV9,Q63514,Q6AY61,Q9Z0V6                      |
| 11273 | 1,7,27,29,<br>30,31,32,3<br>4 | 2,3,4,5,6,8<br>,28,33,35 | 3 | P20760,P97605,Q6AYR9                                    |
| 11274 | 1,7,27,29,<br>30,31,32,3<br>5 | 2,3,4,5,6,8<br>,28,33,34 | 2 | P04762,Q4FZU6                                           |
| 11275 | 1,7,27,29,<br>30,31,33,3<br>4 | 2,3,4,5,6,8<br>,28,32,35 | 2 | P97605,Q9Z0V6                                           |
| 11276 | 1,7,27,29,<br>30,31,33,3<br>5 | 2,3,4,5,6,8<br>,28,32,34 | 8 | P20766,P97605,Q4FZU6,Q5HZV9,Q6AYS4,Q6P6R2,Q9WTT6,Q9Z0V6 |
| 11277 | 1,7,27,29,<br>30,31,34,3<br>5 | 2,3,4,5,6,8<br>,28,32,33 | 1 | P97605                                                  |
| 11278 | 1,7,27,29,<br>30,32,33,3<br>4 | 2,3,4,5,6,8<br>,28,31,35 | 0 |                                                         |
| 11279 | 1,7,27,29,<br>30,32,33,3<br>5 | 2,3,4,5,6,8<br>,28,31,34 | 4 | P20766,Q62997,Q9WTT6,Q9Z0V6                             |

|       |                               |                          |    |                                                                              |
|-------|-------------------------------|--------------------------|----|------------------------------------------------------------------------------|
| 11280 | 1,7,27,29,<br>30,32,34,3<br>5 | 2,3,4,5,6,8<br>,28,31,33 | 1  | P97605                                                                       |
| 11281 | 1,7,27,29,<br>30,33,34,3<br>5 | 2,3,4,5,6,8<br>,28,31,32 | 2  | P20766,P97605                                                                |
| 11282 | 1,7,27,29,<br>31,32,33,3<br>4 | 2,3,4,5,6,8<br>,28,30,35 | 2  | P01835,Q9Z0V6                                                                |
| 11283 | 1,7,27,29,<br>31,32,33,3<br>5 | 2,3,4,5,6,8<br>,28,30,34 | 4  | P04762,Q6NX65,Q9WTT6,Q9Z0V6                                                  |
| 11284 | 1,7,27,29,<br>31,32,34,3<br>5 | 2,3,4,5,6,8<br>,28,30,33 | 0  |                                                                              |
| 11285 | 1,7,27,29,<br>31,33,34,3<br>5 | 2,3,4,5,6,8<br>,28,30,32 | 3  | P01835,P97605,Q9Z0V6                                                         |
| 11286 | 1,7,27,29,<br>32,33,34,3<br>5 | 2,3,4,5,6,8<br>,28,30,31 | 2  | P02625,Q9Z0V6                                                                |
| 11287 | 1,7,27,30,<br>31,32,33,3<br>4 | 2,3,4,5,6,8<br>,28,29,35 | 1  | Q63942                                                                       |
| 11288 | 1,7,27,30,<br>31,32,33,3<br>5 | 2,3,4,5,6,8<br>,28,29,34 | 3  | Q4FZU6,Q63942,Q9WTT6                                                         |
| 11289 | 1,7,27,30,<br>31,32,34,3<br>5 | 2,3,4,5,6,8<br>,28,29,33 | 1  | Q63942                                                                       |
| 11290 | 1,7,27,30,<br>31,33,34,3<br>5 | 2,3,4,5,6,8<br>,28,29,32 | 1  | Q63942                                                                       |
| 11291 | 1,7,27,30,<br>32,33,34,3<br>5 | 2,3,4,5,6,8<br>,28,29,31 | 1  | Q63942                                                                       |
| 11292 | 1,7,27,31,<br>32,33,34,3<br>5 | 2,3,4,5,6,8<br>,28,29,30 | 2  | P01835,Q63942                                                                |
| 11293 | 1,7,28,29,<br>30,31,32,3<br>3 | 2,3,4,5,6,8<br>,27,34,35 | 11 | P06911,P08753,P09456,P10715,P19629,P47727,Q4FZU6,Q5GRG2,Q63514,Q9WTT6,Q9Z0V6 |
| 11294 | 1,7,28,29,<br>30,31,32,3<br>4 | 2,3,4,5,6,8<br>,27,33,35 | 5  | P10715,P19629,Q63355,Q63514,Q9Z0V6                                           |

|       |                               |                          |    |                                                                                                          |
|-------|-------------------------------|--------------------------|----|----------------------------------------------------------------------------------------------------------|
| 11295 | 1,7,28,29,<br>30,31,32,3<br>5 | 2,3,4,5,6,8<br>,27,33,34 | 9  | G3V686,P10715,P19629,Q07116,Q4FZU6,Q63355,Q63514,Q9WTT6,Q9Z0V6                                           |
| 11296 | 1,7,28,29,<br>30,31,33,3<br>4 | 2,3,4,5,6,8<br>,27,32,35 | 6  | P06760,P08753,P10715,P19629,P97605,Q9Z0V6                                                                |
| 11297 | 1,7,28,29,<br>30,31,33,3<br>5 | 2,3,4,5,6,8<br>,27,32,34 | 15 | G3V686,P02803,P06760,P08753,P10715,P19629,P38444,P49744,P97605,Q01205,Q07116,Q4FZU6,Q6AYS4,Q9WTT6,Q9Z0V6 |
| 11298 | 1,7,28,29,<br>30,31,34,3<br>5 | 2,3,4,5,6,8<br>,27,32,33 | 6  | P06760,P14669,P97605,Q4FZU2,Q8CJD3,Q9Z0V6                                                                |
| 11299 | 1,7,28,29,<br>30,32,33,3<br>4 | 2,3,4,5,6,8<br>,27,31,35 | 3  | P02625,P09456,Q9Z0V6                                                                                     |
| 11300 | 1,7,28,29,<br>30,32,33,3<br>5 | 2,3,4,5,6,8<br>,27,31,34 | 6  | G3V686,P02625,P20766,Q62997,Q9WTT6,Q9Z0V6                                                                |
| 11301 | 1,7,28,29,<br>30,32,34,3<br>5 | 2,3,4,5,6,8<br>,27,31,33 | 2  | P02625,Q8CJD3                                                                                            |
| 11302 | 1,7,28,29,<br>30,33,34,3<br>5 | 2,3,4,5,6,8<br>,27,31,32 | 5  | P02625,P06760,P97605,Q8CJD3,Q9Z0V6                                                                       |
| 11303 | 1,7,28,29,<br>31,32,33,3<br>4 | 2,3,4,5,6,8<br>,27,30,35 | 7  | P01835,P06911,P09456,P10715,P19629,Q63514,Q9Z0V6                                                         |
| 11304 | 1,7,28,29,<br>31,32,33,3<br>5 | 2,3,4,5,6,8<br>,27,30,34 | 7  | P06911,P10715,P19629,P49744,Q63514,Q9WTT6,Q9Z0V6                                                         |
| 11305 | 1,7,28,29,<br>31,32,34,3<br>5 | 2,3,4,5,6,8<br>,27,30,33 | 2  | P10715,Q9Z0V6                                                                                            |
| 11306 | 1,7,28,29,<br>31,33,34,3<br>5 | 2,3,4,5,6,8<br>,27,30,32 | 7  | P01835,P02803,P06760,P10715,P14669,P19629,Q9Z0V6                                                         |
| 11307 | 1,7,28,29,<br>32,33,34,3<br>5 | 2,3,4,5,6,8<br>,27,30,31 | 2  | P02625,Q9Z0V6                                                                                            |
| 11308 | 1,7,28,30,<br>31,32,33,3<br>4 | 2,3,4,5,6,8<br>,27,29,35 | 5  | P10715,P19629,P20762,Q63514,Q9Z0V6                                                                       |
| 11309 | 1,7,28,30,<br>31,32,33,3<br>5 | 2,3,4,5,6,8<br>,27,29,34 | 7  | G3V686,P10715,P19629,Q4FZU6,Q63514,Q9WTT6,Q9Z0V6                                                         |

|       |                               |                          |    |                                                                                                                                                    |
|-------|-------------------------------|--------------------------|----|----------------------------------------------------------------------------------------------------------------------------------------------------|
| 11310 | 1,7,28,30,<br>31,32,34,3<br>5 | 2,3,4,5,6,8<br>,27,29,33 | 2  | P14669,Q8CJD3                                                                                                                                      |
| 11311 | 1,7,28,30,<br>31,33,34,3<br>5 | 2,3,4,5,6,8<br>,27,29,32 | 5  | P06760,P14669,P19629,Q8CJD3,Q9Z0V6                                                                                                                 |
| 11312 | 1,7,28,30,<br>32,33,34,3<br>5 | 2,3,4,5,6,8<br>,27,29,31 | 1  | P02625                                                                                                                                             |
| 11313 | 1,7,28,31,<br>32,33,34,3<br>5 | 2,3,4,5,6,8<br>,27,29,30 | 5  | P01835,P10715,P14669,Q63514,Q9Z0V6                                                                                                                 |
| 11314 | 1,7,29,30,<br>31,32,33,3<br>4 | 2,3,4,5,6,8<br>,27,28,35 | 1  | Q9Z0V6                                                                                                                                             |
| 11315 | 1,7,29,30,<br>31,32,33,3<br>5 | 2,3,4,5,6,8<br>,27,28,34 | 5  | P04182,P04762,Q4FZU6,Q9WTT6,Q9Z0V6                                                                                                                 |
| 11316 | 1,7,29,30,<br>31,32,34,3<br>5 | 2,3,4,5,6,8<br>,27,28,33 | 0  |                                                                                                                                                    |
| 11317 | 1,7,29,30,<br>31,33,34,3<br>5 | 2,3,4,5,6,8<br>,27,28,32 | 2  | P06760,Q9Z0V6                                                                                                                                      |
| 11318 | 1,7,29,30,<br>32,33,34,3<br>5 | 2,3,4,5,6,8<br>,27,28,31 | 2  | P02625,P14668                                                                                                                                      |
| 11319 | 1,7,29,31,<br>32,33,34,3<br>5 | 2,3,4,5,6,8<br>,27,28,30 | 3  | P01835,Q6AYQ8,Q9Z0V6                                                                                                                               |
| 11320 | 1,7,30,31,<br>32,33,34,3<br>5 | 2,3,4,5,6,8<br>,27,28,29 | 1  | Q63942                                                                                                                                             |
| 11321 | 1,8,27,28,<br>29,30,31,3<br>2 | 2,3,4,5,6,7<br>,33,34,35 | 20 | F1LM93,O35547,P02781,P02782,P05369,P06911,P08010,P08723,P10715,P19629,P36374,P60905,P83748,P97605,Q5GRG2,Q6AYR9,Q812E4,Q8CJ52,Q9JHB9,Q9QZQ5        |
| 11322 | 1,8,27,28,<br>29,30,31,3<br>3 | 2,3,4,5,6,7<br>,32,34,35 | 21 | G3V686,O35547,P02781,P02782,P05369,P08010,P08723,P08753,P10715,P11883,P19629,P36374,P36376,P38444,P83748,P97605,Q63532,Q6AYR9,Q812E4,Q8CJ52,Q9JHB9 |
| 11323 | 1,8,27,28,<br>29,30,31,3<br>4 | 2,3,4,5,6,7<br>,32,33,35 | 7  | P02781,P02782,P05369,P36374,P97605,Q6AYR9,Q6IE51                                                                                                   |
| 11324 | 1,8,27,28,<br>29,30,31,3<br>5 | 2,3,4,5,6,7<br>,32,33,34 | 11 | G3V686,P02781,P02782,P05539,P36374,P38444,P83748,P97605,Q63532,Q6AYR9,Q9QZQ5                                                                       |

|       |                               |                          |    |                                                                                                                                                                  |
|-------|-------------------------------|--------------------------|----|------------------------------------------------------------------------------------------------------------------------------------------------------------------|
| 11325 | 1,8,27,28,<br>29,30,32,3<br>3 | 2,3,4,5,6,7<br>,31,34,35 | 18 | F1LM93,O08815,O35547,P02781,P02782,P05369,P08010,P08723,P24368,P35281,P36374,P47727,P83748,P97605,Q62997,Q812E4,Q8CJ52,Q9JHB9                                    |
| 11326 | 1,8,27,28,<br>29,30,32,3<br>4 | 2,3,4,5,6,7<br>,31,33,35 | 10 | F1LM93,P02781,P05369,P08010,P35281,P52590,P83748,P97605,Q6AYR9,Q9JHB9                                                                                            |
| 11327 | 1,8,27,28,<br>29,30,32,3<br>5 | 2,3,4,5,6,7<br>,31,33,34 | 13 | F1LM93,G3V686,P02625,P02781,P02782,P05369,P08010,P17559,P36374,P83748,P97605,Q62997,Q9QZQ5                                                                       |
| 11328 | 1,8,27,28,<br>29,30,33,3<br>4 | 2,3,4,5,6,7<br>,31,32,35 | 10 | O35547,P02781,P05369,P08010,P36374,P36376,P83748,P97605,Q6AYR9,Q9QZA6                                                                                            |
| 11329 | 1,8,27,28,<br>29,30,33,3<br>5 | 2,3,4,5,6,7<br>,31,32,34 | 14 | G3V686,P02781,P05539,P08723,P09605,P25809,P36374,P36376,P38444,P83748,P97605,Q62997,Q63532,Q8CJ52,Q9QZQ5                                                         |
| 11330 | 1,8,27,28,<br>29,30,34,3<br>5 | 2,3,4,5,6,7<br>,31,32,33 | 9  | P00507,P05369,P05539,P36376,P83748,P97605,Q6AYR9,Q8CJD3,Q9QZQ5                                                                                                   |
| 11331 | 1,8,27,28,<br>29,31,32,3<br>3 | 2,3,4,5,6,7<br>,30,34,35 | 22 | O35547,P02781,P02782,P06911,P08010,P08723,P09605,P25809,P10715,P14480,P19629,P24368,P35281,P36374,P47727,P83748,P97605,Q5GRG2,Q63514,Q812E4,Q8CJ52,Q9JHB9,Q9QZQ5 |
| 11332 | 1,8,27,28,<br>29,31,32,3<br>4 | 2,3,4,5,6,7<br>,30,33,35 | 5  | P02781,P05369,P06911,P10715,P97605                                                                                                                               |
| 11333 | 1,8,27,28,<br>29,31,32,3<br>5 | 2,3,4,5,6,7<br>,30,33,34 | 11 | G3V686,P02782,P06911,P09605,P25809,P10715,P11762,P17559,P36374,P83748,P97605,Q9QZQ5                                                                              |
| 11334 | 1,8,27,28,<br>29,31,33,3<br>4 | 2,3,4,5,6,7<br>,30,32,35 | 7  | O35547,P02781,P10715,P14480,P19629,P36374,P97605                                                                                                                 |
| 11335 | 1,8,27,28,<br>29,31,33,3<br>5 | 2,3,4,5,6,7<br>,30,32,34 | 15 | G3V686,P02781,P02803,P09605,P25809,P10715,P16086,P17559,P19629,P36374,P38444,P49744,P97605,Q09030,Q63532,Q9QZQ5                                                  |
| 11336 | 1,8,27,28,<br>29,31,34,3<br>5 | 2,3,4,5,6,7<br>,30,32,33 | 3  | P00507,P97605,Q9QZQ5                                                                                                                                             |
| 11337 | 1,8,27,28,<br>29,32,33,3<br>4 | 2,3,4,5,6,7<br>,30,31,35 | 10 | P02781,P05369,P08010,P08723,P24368,P35281,P42854,P47727,P97584,P97605                                                                                            |
| 11338 | 1,8,27,28,<br>29,32,33,3<br>5 | 2,3,4,5,6,7<br>,30,31,34 | 16 | G3V686,P02625,P02781,P08723,P09605,P25809,P17559,P19218,P35281,P36374,P42854,P47727,P47967,P83748,P97605,Q62997,Q9QZQ5                                           |
| 11339 | 1,8,27,28,<br>29,32,34,3<br>5 | 2,3,4,5,6,7<br>,30,31,33 | 7  | P00507,P02625,P05369,P19218,P42854,P97605,Q9QZQ5                                                                                                                 |

|       |                               |                          |    |                                                                                     |
|-------|-------------------------------|--------------------------|----|-------------------------------------------------------------------------------------|
| 11340 | 1,8,27,28,<br>29,33,34,3<br>5 | 2,3,4,5,6,7<br>,30,31,32 | 5  | P00507,P02625,P16086,P42854,P97605                                                  |
| 11341 | 1,8,27,28,<br>30,31,32,3<br>3 | 2,3,4,5,6,7<br>,29,34,35 | 8  | P10715,P14480,P19629,P31044,P83748,P97605,Q63514,Q9QZQ5                             |
| 11342 | 1,8,27,28,<br>30,31,32,3<br>4 | 2,3,4,5,6,7<br>,29,33,35 | 5  | P20762,P83748,P97605,Q6IE51,Q9QZQ5                                                  |
| 11343 | 1,8,27,28,<br>30,31,32,3<br>5 | 2,3,4,5,6,7<br>,29,33,34 | 5  | G3V686,P10715,P83748,P97605,Q9QZQ5                                                  |
| 11344 | 1,8,27,28,<br>30,31,33,3<br>4 | 2,3,4,5,6,7<br>,29,32,35 | 5  | P19629,P20762,P36376,P83748,P97605                                                  |
| 11345 | 1,8,27,28,<br>30,31,33,3<br>5 | 2,3,4,5,6,7<br>,29,32,34 | 11 | G3V686,P05539,P09605;P25809,P10715,P19629,P36376,P38444,P83748,P97605,Q63532,Q9QZQ5 |
| 11346 | 1,8,27,28,<br>30,31,34,3<br>5 | 2,3,4,5,6,7<br>,29,32,33 | 5  | P02793;Q7TP54,P13852,P97605,Q8CJD3,Q9QZQ5                                           |
| 11347 | 1,8,27,28,<br>30,32,33,3<br>4 | 2,3,4,5,6,7<br>,29,31,35 | 7  | P20762,P25236,P35281,P83748,P97584,P97605,Q6IFU7                                    |
| 11348 | 1,8,27,28,<br>30,32,33,3<br>5 | 2,3,4,5,6,7<br>,29,31,34 | 7  | G3V686,P09605;P25809,P36376,P83748,P97605,Q62997,Q9QZQ5                             |
| 11349 | 1,8,27,28,<br>30,32,34,3<br>5 | 2,3,4,5,6,7<br>,29,31,33 | 6  | P00507,P83121,P83748,P97605,Q8CJD3,Q9QZQ5                                           |
| 11350 | 1,8,27,28,<br>30,33,34,3<br>5 | 2,3,4,5,6,7<br>,29,31,32 | 6  | P05539,P36376,P83748,P97605,Q8CJD3,Q9QZQ5                                           |
| 11351 | 1,8,27,28,<br>31,32,33,3<br>4 | 2,3,4,5,6,7<br>,29,30,35 | 6  | P01835,P10715,P14480,P20762,P97584,Q9QZQ5                                           |
| 11352 | 1,8,27,28,<br>31,32,33,3<br>5 | 2,3,4,5,6,7<br>,29,30,34 | 6  | G3V686,P09605;P25809,P10715,P17559,P83748,Q9QZQ5                                    |
| 11353 | 1,8,27,28,<br>31,32,34,3<br>5 | 2,3,4,5,6,7<br>,29,30,33 | 3  | P00507,P97605,Q9QZQ5                                                                |
| 11354 | 1,8,27,28,<br>31,33,34,3<br>5 | 2,3,4,5,6,7<br>,29,30,32 | 5  | P01835,P16086,P20762,P97605,Q9QZQ5                                                  |



|       |                               |                          |   |                                                   |
|-------|-------------------------------|--------------------------|---|---------------------------------------------------|
| 11355 | 1,8,27,28,<br>32,33,34,3<br>5 | 2,3,4,5,6,7<br>,29,30,31 | 2 | P02625,Q9QQZQ5                                    |
| 11356 | 1,8,27,29,<br>30,31,32,3<br>3 | 2,3,4,5,6,7<br>,28,34,35 | 4 | P11883,P83748,P97605,Q5HZV9                       |
| 11357 | 1,8,27,29,<br>30,31,32,3<br>4 | 2,3,4,5,6,7<br>,28,33,35 | 4 | P20760,P97605,Q6AYR9,Q6IE51                       |
| 11358 | 1,8,27,29,<br>30,31,32,3<br>5 | 2,3,4,5,6,7<br>,28,33,34 | 6 | G3V686,P11762,P17559,P83748,P97605,Q9QQZQ5        |
| 11359 | 1,8,27,29,<br>30,31,33,3<br>4 | 2,3,4,5,6,7<br>,28,32,35 | 3 | P97605,Q6AYR9,Q6IE51                              |
| 11360 | 1,8,27,29,<br>30,31,33,3<br>5 | 2,3,4,5,6,7<br>,28,32,34 | 6 | G3V686,P83748,P97605,P97615,Q5HZV9,Q9QQZQ5        |
| 11361 | 1,8,27,29,<br>30,31,34,3<br>5 | 2,3,4,5,6,7<br>,28,32,33 | 3 | P02793,Q7TP54,P97605,Q6IE51                       |
| 11362 | 1,8,27,29,<br>30,32,33,3<br>4 | 2,3,4,5,6,7<br>,28,31,35 | 3 | P20760,P83748,P97605                              |
| 11363 | 1,8,27,29,<br>30,32,33,3<br>5 | 2,3,4,5,6,7<br>,28,31,34 | 5 | G3V686,P17559,P83748,P97605,Q62997                |
| 11364 | 1,8,27,29,<br>30,32,34,3<br>5 | 2,3,4,5,6,7<br>,28,31,33 | 2 | P83748,P97605                                     |
| 11365 | 1,8,27,29,<br>30,33,34,3<br>5 | 2,3,4,5,6,7<br>,28,31,32 | 3 | P36376,P83748,P97605                              |
| 11366 | 1,8,27,29,<br>31,32,33,3<br>4 | 2,3,4,5,6,7<br>,28,30,35 | 4 | P01835,P14480,P97605,Q498R7                       |
| 11367 | 1,8,27,29,<br>31,32,33,3<br>5 | 2,3,4,5,6,7<br>,28,30,34 | 7 | P17559,P25031,P47967,P83748,P97605,P97615,Q9QQZQ5 |
| 11368 | 1,8,27,29,<br>31,32,34,3<br>5 | 2,3,4,5,6,7<br>,28,30,33 | 3 | P97605,Q498R7,Q9QQZQ5                             |
| 11369 | 1,8,27,29,<br>31,33,34,3<br>5 | 2,3,4,5,6,7<br>,28,30,32 | 2 | P01835,P97605                                     |

|       |                               |                          |    |                                                                                                                               |
|-------|-------------------------------|--------------------------|----|-------------------------------------------------------------------------------------------------------------------------------|
| 11370 | 1,8,27,29,<br>32,33,34,3<br>5 | 2,3,4,5,6,7<br>,28,30,31 | 4  | P02625,P42854,P97605,Q498R7                                                                                                   |
| 11371 | 1,8,27,30,<br>31,32,33,3<br>4 | 2,3,4,5,6,7<br>,28,29,35 | 4  | P14480,P20760,P83748,Q6IE51                                                                                                   |
| 11372 | 1,8,27,30,<br>31,32,33,3<br>5 | 2,3,4,5,6,7<br>,28,29,34 | 4  | G3V686,P02631,P83748,Q9QZQ5                                                                                                   |
| 11373 | 1,8,27,30,<br>31,32,34,3<br>5 | 2,3,4,5,6,7<br>,28,29,33 | 4  | P83748,P97605,Q6IE51,Q9QZQ5                                                                                                   |
| 11374 | 1,8,27,30,<br>31,33,34,3<br>5 | 2,3,4,5,6,7<br>,28,29,32 | 3  | P02631,P97605,Q9QZQ5                                                                                                          |
| 11375 | 1,8,27,30,<br>32,33,34,3<br>5 | 2,3,4,5,6,7<br>,28,29,31 | 1  | P83748                                                                                                                        |
| 11376 | 1,8,27,31,<br>32,33,34,3<br>5 | 2,3,4,5,6,7<br>,28,29,30 | 4  | P01835,Q08849,Q498R7,Q9QZQ5                                                                                                   |
| 11377 | 1,8,28,29,<br>30,31,32,3<br>3 | 2,3,4,5,6,7<br>,27,34,35 | 13 | G3V686,P02780,P06911,P10715,P19629,P35281,P36376,P38444,P47727,P83748,P97605,Q6IE51,Q9QZQ5                                    |
| 11378 | 1,8,28,29,<br>30,31,32,3<br>4 | 2,3,4,5,6,7<br>,27,33,35 | 4  | P35281,P97605,Q6IE51,Q9QZQ5                                                                                                   |
| 11379 | 1,8,28,29,<br>30,31,32,3<br>5 | 2,3,4,5,6,7<br>,27,33,34 | 10 | G3V686,P02631,P08649,P11762,P83748,P97605,Q07116,Q63532,Q6IE51,Q9QZQ5                                                         |
| 11380 | 1,8,28,29,<br>30,31,33,3<br>4 | 2,3,4,5,6,7<br>,27,32,35 | 5  | P19629,P36376,P97605,Q6IE51,Q9QZQ5                                                                                            |
| 11381 | 1,8,28,29,<br>30,31,33,3<br>5 | 2,3,4,5,6,7<br>,27,32,34 | 18 | G3V686,P02631,P02803,P05539,P08649,P16086,P19629,P20646,P36376,P38444,P49744,P83748,P97605,Q07116,Q09030,Q63532,Q6IE51,Q9QZQ5 |
| 11382 | 1,8,28,29,<br>30,31,34,3<br>5 | 2,3,4,5,6,7<br>,27,32,33 | 15 | G3V686,O35568,P00507,P02631,P02793;Q7TP54,P02803,P05539,P08649,P13852,P36376,P97605,Q6IE51,Q8CJD3,Q99068,Q9QZQ5               |
| 11383 | 1,8,28,29,<br>30,32,33,3<br>4 | 2,3,4,5,6,7<br>,27,31,35 | 6  | P02625,P35281,P36376,P83748,P97605,Q6IE51                                                                                     |
| 11384 | 1,8,28,29,<br>30,32,33,3<br>5 | 2,3,4,5,6,7<br>,27,31,34 | 12 | G3V686,P02625,P35281,P36376,P38444,P49744,P83748,P97605,Q07116,Q62997,Q6IE51,Q9QZQ5                                           |

|       |                               |                          |    |                                                                                                                               |
|-------|-------------------------------|--------------------------|----|-------------------------------------------------------------------------------------------------------------------------------|
| 11385 | 1,8,28,29,<br>30,32,34,3<br>5 | 2,3,4,5,6,7<br>,27,31,33 | 7  | P00507,P02625,P35281,P97605,Q6IE51,Q8CJD3,Q9QZQ5                                                                              |
| 11386 | 1,8,28,29,<br>30,33,34,3<br>5 | 2,3,4,5,6,7<br>,27,31,32 | 10 | G3V686,P00507,P02625,P05539,P36376,P97605,Q6IE51,Q8CJD3,Q99068,Q9QZQ5                                                         |
| 11387 | 1,8,28,29,<br>31,32,33,3<br>4 | 2,3,4,5,6,7<br>,27,30,35 | 8  | P01835,P06911,P10715,P14480,P35281,P47727,Q6IE51,Q9QZQ5                                                                       |
| 11388 | 1,8,28,29,<br>31,32,33,3<br>5 | 2,3,4,5,6,7<br>,27,30,34 | 17 | G3V686,P02631,P02803,P06911,P09605,P25809,P10715,P16086,P17559,P38444,P47727,P47967,P49744,Q07116,Q09030,Q63532,Q6IE51,Q9QZQ5 |
| 11389 | 1,8,28,29,<br>31,32,34,3<br>5 | 2,3,4,5,6,7<br>,27,30,33 | 5  | P00507,P02803,P97605,Q6IE51,Q9QZQ5                                                                                            |
| 11390 | 1,8,28,29,<br>31,33,34,3<br>5 | 2,3,4,5,6,7<br>,27,30,32 | 11 | P00507,P01835,P02803,P05539,P16086,P97605,Q09030,Q6IE51,Q8K4G9,Q99068,Q9QZQ5                                                  |
| 11391 | 1,8,28,29,<br>32,33,34,3<br>5 | 2,3,4,5,6,7<br>,27,30,31 | 7  | P00507,P02625,P19218,P35281,P42854,Q6IE51,Q9QZQ5                                                                              |
| 11392 | 1,8,28,30,<br>31,32,33,3<br>4 | 2,3,4,5,6,7<br>,27,29,35 | 7  | P02631,P14480,P20762,P36376,P83748,Q6IE51,Q9QZQ5                                                                              |
| 11393 | 1,8,28,30,<br>31,32,33,3<br>5 | 2,3,4,5,6,7<br>,27,29,34 | 11 | G3V686,P02631,P02803,P04218,P10715,P36376,P38444,P83748,Q6IE51,Q71UF4,Q9QZQ5                                                  |
| 11394 | 1,8,28,30,<br>31,32,34,3<br>5 | 2,3,4,5,6,7<br>,27,29,33 | 8  | P00507,P02631,P04218,P13596,P13852,Q6IE51,Q8CJD3,Q9QZQ5                                                                       |
| 11395 | 1,8,28,30,<br>31,33,34,3<br>5 | 2,3,4,5,6,7<br>,27,29,32 | 13 | G3V686,P00507,P02631,P02803,P05539,P13596,P13852,P36376,P97605,Q6IE51,Q8CJD3,Q99068,Q9QZQ5                                    |
| 11396 | 1,8,28,30,<br>32,33,34,3<br>5 | 2,3,4,5,6,7<br>,27,29,31 | 7  | P00507,P02625,P02631,P36376,P83748,Q6IE51,Q9QZQ5                                                                              |
| 11397 | 1,8,28,31,<br>32,33,34,3<br>5 | 2,3,4,5,6,7<br>,27,29,30 | 8  | P00507,P01835,P02631,P02803,P13596,P16086,Q6IE51,Q9QZQ5                                                                       |
| 11398 | 1,8,29,30,<br>31,32,33,3<br>4 | 2,3,4,5,6,7<br>,27,28,35 | 2  | P02631,Q6IE51                                                                                                                 |
| 11399 | 1,8,29,30,<br>31,32,33,3<br>5 | 2,3,4,5,6,7<br>,27,28,34 | 10 | G3V686,P02631,P04182,P83748,P97615,Q07116,Q4FZU6,Q6IE51,Q71UF4,Q9QZQ5                                                         |

|       |                                |                          |    |                                                                                                                                                                                |
|-------|--------------------------------|--------------------------|----|--------------------------------------------------------------------------------------------------------------------------------------------------------------------------------|
| 11400 | 1,8,29,30,<br>31,32,34,3<br>5  | 2,3,4,5,6,7<br>,27,28,33 | 4  | P02631,P13852,Q6IE51,Q9QZQ5                                                                                                                                                    |
| 11401 | 1,8,29,30,<br>31,33,34,3<br>5  | 2,3,4,5,6,7<br>,27,28,32 | 7  | P02631,P05539,P36376,P97605,Q6IE51,Q99068,Q9QZQ5                                                                                                                               |
| 11402 | 1,8,29,30,<br>32,33,34,3<br>5  | 2,3,4,5,6,7<br>,27,28,31 | 4  | P02625,P83748,Q6IE51,Q9QZQ5                                                                                                                                                    |
| 11403 | 1,8,29,31,<br>32,33,34,3<br>5  | 2,3,4,5,6,7<br>,27,28,30 | 6  | P01835,P02631,Q498R7,Q6AYQ8,Q6IE51,Q9QZQ5                                                                                                                                      |
| 11404 | 1,8,30,31,<br>32,33,34,3<br>5  | 2,3,4,5,6,7<br>,27,28,29 | 4  | P02631,P13596,Q6IE51,Q9QZQ5                                                                                                                                                    |
| 11405 | 1,27,28,29<br>,30,31,32,<br>33 | 2,3,4,5,6,7<br>,8,34,35  | 25 | D3ZUK3,O08815,P02781,P05369,P06911,P08010,P08723,P08753,P11883,P16296,P19629,P20762,P20766,P36374,P38444,P47727,P83748,P97605,Q08464,Q63514,Q6AYR9,Q812E4,Q9JHB9,Q9QZQ5,Q9Z0V6 |
| 11406 | 1,27,28,29<br>,30,31,32,<br>34 | 2,3,4,5,6,7<br>,8,33,35  | 11 | P02781,P05369,P08010,P20761,P20762,P36374,P97605,Q63514,Q6AYR9,Q9QZQ5,Q9Z0V6                                                                                                   |
| 11407 | 1,27,28,29<br>,30,31,32,<br>35 | 2,3,4,5,6,7<br>,8,33,34  | 18 | D3ZUK3,G3V686,P02631,P02781,P05369,P08010,P11762,P17559,P20766,P36374,P83748,P97605,Q08464,Q63514,Q99041,Q9JLS4,Q9QZQ5,Q9Z0V6                                                  |
| 11408 | 1,27,28,29<br>,30,31,33,<br>34 | 2,3,4,5,6,7<br>,8,32,35  | 11 | P02781,P05369,P08753,P19629,P20762,P36374,P97605,Q63514,Q6AYR9,Q9QZQ5,Q9Z0V6                                                                                                   |
| 11409 | 1,27,28,29<br>,30,31,33,<br>35 | 2,3,4,5,6,7<br>,8,32,34  | 21 | D3ZUK3,G3V686,P02631,P02781,P08753,P16086,P19629,P20762,P20766,P36374,P38444,P49744,P83748,P97605,Q08464,Q09030,Q63514,Q63532,Q6AYS4,Q9QZQ5,Q9Z0V6                             |
| 11410 | 1,27,28,29<br>,30,31,34,<br>35 | 2,3,4,5,6,7<br>,8,32,33  | 12 | O35568,P00507,P02631,P05369,P20762,P36374,P97605,Q6AYR9,Q8CJD3,Q99041,Q9QZQ5,Q9Z0V6                                                                                            |
| 11411 | 1,27,28,29<br>,30,32,33,<br>34 | 2,3,4,5,6,7<br>,8,31,35  | 18 | O08815,P02781,P05369,P07171,P08010,P20762,P20766,P35281,P36374,P52590,P83748,P97605,Q06000,Q63514,Q6AYR9,Q6IFU7,Q9QZQ5,Q9Z0V6                                                  |
| 11412 | 1,27,28,29<br>,30,32,33,<br>35 | 2,3,4,5,6,7<br>,8,31,34  | 19 | G3V686,O08815,P02625,P02781,P05369,P07171,P08010,P0C0K7,P17559,P20766,P36374,P38444,P83748,P97605,Q08464,Q62997,Q63514,Q9QZQ5,Q9Z0V6                                           |
| 11413 | 1,27,28,29<br>,30,32,34,<br>35 | 2,3,4,5,6,7<br>,8,31,33  | 13 | P00507,P02625,P05369,P07171,P20762,P20766,P36374,P83748,P97605,Q63514,Q8CJD3,Q99041,Q9QZQ5                                                                                     |
| 11414 | 1,27,28,29<br>,30,33,34,<br>35 | 2,3,4,5,6,7<br>,8,31,32  | 14 | P00507,P05369,P07171,P16086,P20762,P20766,P36374,P36376,P42854,P83748,P97605,Q8CJD3,Q9QZQ5,Q9Z0V6                                                                              |

|       |                                |                         |    |                                                                                                                                                           |
|-------|--------------------------------|-------------------------|----|-----------------------------------------------------------------------------------------------------------------------------------------------------------|
| 11415 | 1,27,28,29<br>,31,32,33,<br>34 | 2,3,4,5,6,7<br>,8,30,35 | 15 | P05369,P06911,P14480,P16086,P20761,P20762,P36374,P47727,P97584,P97605,Q06000,Q63514,Q64057,Q9QZQ5,Q9Z0V6                                                  |
| 11416 | 1,27,28,29<br>,31,32,33,<br>35 | 2,3,4,5,6,7<br>,8,30,34 | 21 | D3ZUK3,P02631,P06911,P09605,P25809,P0C0K7,P16086,P17559,P20762,P36374,P38444,P47727,P47967,P49744,P83748,P97605,Q08464,Q09030,Q63514,Q8N7M5,Q9QZQ5,Q9Z0V6 |
| 11417 | 1,27,28,29<br>,31,32,34,<br>35 | 2,3,4,5,6,7<br>,8,30,33 | 11 | P00507,P05369,P16086,P20762,P97605,Q5M819,Q63514,Q8N7M5,Q99041,Q9QZQ5,Q9Z0V6                                                                              |
| 11418 | 1,27,28,29<br>,31,33,34,<br>35 | 2,3,4,5,6,7<br>,8,30,32 | 11 | O88267,P00507,P16086,P20762,P36374,P97605,Q09030,Q63514,Q8N7M5,Q9QZQ5,Q9Z0V6                                                                              |
| 11419 | 1,27,28,29<br>,32,33,34,<br>35 | 2,3,4,5,6,7<br>,8,30,31 | 17 | P00507,P02625,P05369,P07171,P16086,P19218,P20762,P20766,P36374,P42854,P97605,Q5M819,Q63514,Q6IFU7,Q80WL1,Q9QZQ5,Q9Z0V6                                    |
| 11420 | 1,27,28,30<br>,31,32,33,<br>34 | 2,3,4,5,6,7<br>,8,29,35 | 10 | P02631,P07171,P14480,P20762,P83748,P97605,Q06000,Q63514,Q6IFU7,Q9QZQ5                                                                                     |
| 11421 | 1,27,28,30<br>,31,32,33,<br>35 | 2,3,4,5,6,7<br>,8,29,34 | 12 | G3V686,P02631,P07171,P20762,P38444,P55016,P83748,P97605,Q08464,Q63514,Q9QZQ5,Q9Z0V6                                                                       |
| 11422 | 1,27,28,30<br>,31,32,34,<br>35 | 2,3,4,5,6,7<br>,8,29,33 | 11 | P02631,P07171,P20762,P55016,P83748,P97605,Q63514,Q63617,Q8CJD3,Q99041,Q9QZQ5                                                                              |
| 11423 | 1,27,28,30<br>,31,33,34,<br>35 | 2,3,4,5,6,7<br>,8,29,32 | 8  | P02631,P07171,P16086,P20762,P97605,Q63514,Q8CJD3,Q9QZQ5                                                                                                   |
| 11424 | 1,27,28,30<br>,32,33,34,<br>35 | 2,3,4,5,6,7<br>,8,29,31 | 10 | P02631,P07171,P20762,P20766,P83748,P97605,Q63514,Q6IFU7,Q8CJD3,Q9QZQ5                                                                                     |
| 11425 | 1,27,28,31<br>,32,33,34,<br>35 | 2,3,4,5,6,7<br>,8,29,30 | 8  | P02631,P07171,P16086,P20762,P55016,P97605,Q63514,Q9QZQ5                                                                                                   |
| 11426 | 1,27,29,30<br>,31,32,33,<br>34 | 2,3,4,5,6,7<br>,8,28,35 | 8  | P02631,P07171,P20762,P83748,P97605,Q63514,Q9QZQ5,Q9Z0V6                                                                                                   |
| 11427 | 1,27,29,30<br>,31,32,33,<br>35 | 2,3,4,5,6,7<br>,8,28,34 | 13 | P02631,P07171,P0C0K7,P17559,P20766,P83748,P97605,P97615,Q08464,Q63514,Q9QZQ5,Q9WTT6,Q9Z0V6                                                                |
| 11428 | 1,27,29,30<br>,31,32,34,<br>35 | 2,3,4,5,6,7<br>,8,28,33 | 6  | P02631,P07171,P97605,Q63514,Q99041,Q9QZQ5                                                                                                                 |
| 11429 | 1,27,29,30<br>,31,33,34,<br>35 | 2,3,4,5,6,7<br>,8,28,32 | 5  | P02631,P07171,P20762,P97605,Q9QZQ5                                                                                                                        |

|       |                                |                                   |    |                                                                                                                                                                  |
|-------|--------------------------------|-----------------------------------|----|------------------------------------------------------------------------------------------------------------------------------------------------------------------|
| 11430 | 1,27,29,30<br>,32,33,34,<br>35 | 2,3,4,5,6,7<br>,8,28,31           | 5  | P07171,P20766,P83748,P97605,Q9QZQ5                                                                                                                               |
| 11431 | 1,27,29,31<br>,32,33,34,<br>35 | 2,3,4,5,6,7<br>,8,28,30           | 9  | P02631,P07171,P16086,P20762,P97605,Q498R7,Q63514,Q9QZQ5,Q9Z0V6                                                                                                   |
| 11432 | 1,27,30,31<br>,32,33,34,<br>35 | 2,3,4,5,6,7<br>,8,28,29           | 8  | P02631,P07171,P20762,P83748,P97605,Q63514,Q63942,Q9QZQ5                                                                                                          |
| 11433 | 1,28,29,30<br>,31,32,33,<br>34 | 2,3,4,5,6,7<br>,8,27,35           | 11 | D3ZUK3,P02631,P07171,P14669,P20762,P35281,P97605,Q63514,Q6IE51,Q9QZQ5,Q9Z0V6                                                                                     |
| 11434 | 1,28,29,30<br>,31,32,33,<br>35 | 2,3,4,5,6,7<br>,8,27,34           | 23 | D3ZUK3,G3V686,P02631,P07171,P16086,P20646,P38444,P49744,P55016,P83748,P97605,Q01205,Q07116,Q08464,Q09030,Q63514,Q63532,Q6IE51,Q71UF4,Q99041,Q9QZQ5,Q9WTT6,Q9Z0V6 |
| 11435 | 1,28,29,30<br>,31,32,34,<br>35 | 2,3,4,5,6,7<br>,8,27,33           | 15 | D3ZUK3,O35568,P00507,P02631,P07171,P13852,P14669,P20762,P55016,P97605,Q63514,Q6IE51,Q8CJD3,Q99041,Q9QZQ5                                                         |
| 11436 | 1,28,29,30<br>,31,33,34,<br>35 | 2,3,4,5,6,7<br>,8,27,32           | 22 | D3ZUK3,O35568,P00507,P00714,P02631,P02803,P05539,P06760,P07171,P13852,P14669,P16086,P20762,P36376,P55016,P97605,Q01205,Q09030,Q6IE51,Q8CJD3,Q9QZQ5,Q9Z0V6        |
| 11437 | 1,28,29,30<br>,32,33,34,<br>35 | 2,3,4,5,6,7<br>,8,27,31           | 15 | P00507,P02625,P02631,P07171,P14669,P20762,P35281,P83748,P97605,Q09030,Q63514,Q6IE51,Q8CJD3,Q9QZQ5,Q9Z0V6                                                         |
| 11438 | 1,28,29,31<br>,32,33,34,<br>35 | 2,3,4,5,6,7<br>,8,27,30           | 15 | D3ZUK3,P00507,P02631,P07171,P14669,P16086,P20762,P55016,P97605,Q09030,Q63514,Q64057,Q6IE51,Q9QZQ5,Q9Z0V6                                                         |
| 11439 | 1,28,30,31<br>,32,33,34,<br>35 | 2,3,4,5,6,7<br>,8,27,29           | 11 | P02631,P07171,P13852,P14669,P16086,P20762,P55016,Q63514,Q6IE51,Q8CJD3,Q9QZQ5                                                                                     |
| 11440 | 1,29,30,31<br>,32,33,34,<br>35 | 2,3,4,5,6,7<br>,8,27,28           | 9  | P02631,P07171,P14669,P97605,Q09030,Q63514,Q6IE51,Q9QZQ5,Q9R0T3                                                                                                   |
| 11441 | 2,3,4,5,6,7<br>,8,27           | 1,28,29,30<br>,31,32,33,<br>34,35 | 19 | D3ZUK3,G3V686,O35568,P02631,P07171,P13852,P14669,P16086,P20762,P55016,P83748,P97605,Q01205,Q09030,Q63514,Q6IE51,Q99041,Q9QZQ5,Q9Z0V6                             |
| 11442 | 2,3,4,5,6,7<br>,8,28           | 1,27,29,30<br>,31,32,33,<br>34,35 | 14 | P02631,P07171,P16086,P20762,P83748,P97605,Q08464,Q09030,Q498R7,Q63514,Q63942,Q6IE51,Q9QZQ5,Q9Z0V6                                                                |
| 11443 | 2,3,4,5,6,7<br>,8,29           | 1,27,28,30<br>,31,32,33,<br>34,35 | 12 | P02631,P07171,P16086,P20762,P55016,P83748,P97605,Q63514,Q63617,Q6IE51,Q8CJD3,Q9QZQ5                                                                              |
| 11444 | 2,3,4,5,6,7<br>,8,30           | 1,27,28,29<br>,31,32,33,<br>34,35 | 19 | D3ZUK3,O88267,P02631,P05369,P07171,P16086,P20762,P42854,P97605,Q08464,Q09030,Q498R7,Q4V885,Q63514,Q64057,Q6IE51,Q8N7M5,Q9QZQ5,Q9Z0V6                             |

|       |                       |                                   |    |                                                                                                                                                                                                     |
|-------|-----------------------|-----------------------------------|----|-----------------------------------------------------------------------------------------------------------------------------------------------------------------------------------------------------|
| 11445 | 2,3,4,5,6,7<br>,8,31  | 1,27,28,29<br>,30,32,33,<br>34,35 | 22 | O35568,P02625,P02631,P05369,P07171,P08010,P16086,P20762,P20766,P36374,P42854,P52590,P83748,P97605,Q09030,Q62997,Q63514,Q6IE51,Q6IFU7,Q8CJD3,Q9QZQ5,Q9Z0V6                                           |
| 11446 | 2,3,4,5,6,7<br>,8,32  | 1,27,28,29<br>,30,31,33,<br>34,35 | 19 | O35568,O88267,P02631,P05369,P07171,P16086,P20762,P20766,P36374,P36376,P83748,P97605,Q08464,Q09030,Q63514,Q6IE51,Q8CJD3,Q9QZQ5,Q9Z0V6                                                                |
| 11447 | 2,3,4,5,6,7<br>,8,33  | 1,27,28,29<br>,30,31,32,<br>34,35 | 19 | D3ZUK3,O35568,P02631,P05369,P07171,P13852,P16086,P20762,P83748,P97605,Q08464,Q09030,Q63514,Q6IE51,Q8CJD3,Q99041,Q9JLS4,Q9QZQ5,Q9Z0V6                                                                |
| 11448 | 2,3,4,5,6,7<br>,8,34  | 1,27,28,29<br>,30,31,32,<br>33,35 | 28 | D3ZUK3,G3V686,P02631,P02781,P05369,P07171,P08010,P08753,P0C0K7,P16086,P17559,P20762,P20766,P36374,P38444,P49744,P83748,P97605,Q08464,Q09030,Q63514,Q63532,Q6IE51,Q99041,Q9JLS4,Q9QZQ5,Q9WTT6,Q9Z0V6 |
| 11449 | 2,3,4,5,6,7<br>,8,35  | 1,27,28,29<br>,30,31,32,<br>33,34 | 22 | O88267,P02631,P02781,P05369,P07171,P08010,P16086,P20761,P20762,P20766,P36374,P52590,P83748,P97605,Q06000,Q08464,Q09030,Q63514,Q6AYR9,Q6IE51,Q9QZQ5,Q9Z0V6                                           |
| 11450 | 2,3,4,5,6,7<br>,27,28 | 1,8,29,30,<br>31,32,33,3<br>4,35  | 7  | P02631,P16086,P83748,Q09030,Q498R7,Q6IE51,Q9QZQ5                                                                                                                                                    |
| 11451 | 2,3,4,5,6,7<br>,27,29 | 1,8,28,30,<br>31,32,33,3<br>4,35  | 11 | G3V686,P02631,P13596,P13852,P16086,P20762,P36376,P83748,Q6IE51,Q99068,Q9QZQ5                                                                                                                        |
| 11452 | 2,3,4,5,6,7<br>,27,30 | 1,8,28,29,<br>31,32,33,3<br>4,35  | 10 | P01835,P02631,P02803,P16086,P35281,P97605,Q09030,Q498R7,Q6IE51,Q9QZQ5                                                                                                                               |
| 11453 | 2,3,4,5,6,7<br>,27,31 | 1,8,28,29,<br>30,32,33,3<br>4,35  | 13 | G3V686,P02625,P02631,P05539,P16086,P35281,P36376,P83748,P97605,Q09030,Q6IE51,Q99068,Q9QZQ5                                                                                                          |
| 11454 | 2,3,4,5,6,7<br>,27,32 | 1,8,28,29,<br>30,31,33,3<br>4,35  | 15 | G3V686,O35568,P02631,P02803,P05539,P08649,P13852,P16086,P36376,P97605,Q09030,Q63532,Q6IE51,Q99068,Q9QZQ5                                                                                            |
| 11455 | 2,3,4,5,6,7<br>,27,33 | 1,8,28,29,<br>30,31,32,3<br>4,35  | 11 | G3V686,O35568,P02631,P08649,P13852,P16086,P83748,P97605,Q6IE51,Q99068,Q9QZQ5                                                                                                                        |
| 11456 | 2,3,4,5,6,7<br>,27,34 | 1,8,28,29,<br>30,31,32,3<br>3,35  | 22 | G3V686,P02631,P02803,P05539,P08649,P11762,P16086,P17559,P20646,P36376,P38444,P49744,P83748,P97605,Q07116,Q09030,Q4FZU6,Q63514,Q63532,Q6IE51,Q71UF4,Q9QZQ5                                           |
| 11457 | 2,3,4,5,6,7<br>,27,35 | 1,8,28,29,<br>30,31,32,3<br>3,34  | 9  | P02631,P20762,P35281,P36376,P83748,P97605,Q63514,Q6IE51,Q9QZQ5                                                                                                                                      |
| 11458 | 2,3,4,5,6,7<br>,28,29 | 1,8,27,30,<br>31,32,33,3<br>4,35  | 5  | P02631,P83748,P97605,Q6IE51,Q9QZQ5                                                                                                                                                                  |
| 11459 | 2,3,4,5,6,7<br>,28,30 | 1,8,27,29,<br>31,32,33,3<br>4,35  | 7  | P01835,P02631,P16086,P97605,Q498R7,Q6IE51,Q9QZQ5                                                                                                                                                    |

|       |                       |                                  |    |                                                                                                                                      |
|-------|-----------------------|----------------------------------|----|--------------------------------------------------------------------------------------------------------------------------------------|
| 11460 | 2,3,4,5,6,7<br>,28,31 | 1,8,27,29,<br>30,32,33,3<br>4,35 | 7  | P02625,P52590,P83748,P97605,Q498R7,Q6IE51,Q9QZQ5                                                                                     |
| 11461 | 2,3,4,5,6,7<br>,28,32 | 1,8,27,29,<br>30,31,33,3<br>4,35 | 7  | P02631,P05539,P16086,P83748,P97605,Q6IE51,Q9QZQ5                                                                                     |
| 11462 | 2,3,4,5,6,7<br>,28,33 | 1,8,27,29,<br>30,31,32,3<br>4,35 | 5  | P02631,P83748,P97605,Q6IE51,Q9QZQ5                                                                                                   |
| 11463 | 2,3,4,5,6,7<br>,28,34 | 1,8,27,29,<br>30,31,32,3<br>3,35 | 10 | G3V686,P02631,P17559,P83748,P97605,P97615,Q4FZU6,Q5HZV9,Q6IE51,Q9QZQ5                                                                |
| 11464 | 2,3,4,5,6,7<br>,28,35 | 1,8,27,29,<br>30,31,32,3<br>3,34 | 7  | P02631,P20760,P20761,P83748,P97605,Q6IE51,Q9QZQ5                                                                                     |
| 11465 | 2,3,4,5,6,7<br>,29,30 | 1,8,27,28,<br>31,32,33,3<br>4,35 | 8  | P01835,P02631,P16086,P20762,P97605,Q63514,Q6IE51,Q9QZQ5                                                                              |
| 11466 | 2,3,4,5,6,7<br>,29,31 | 1,8,27,28,<br>30,32,33,3<br>4,35 | 10 | P02625,P02631,P20762,P25236,P36376,P52590,P83748,P97605,Q6IE51,Q9QZQ5                                                                |
| 11467 | 2,3,4,5,6,7<br>,29,32 | 1,8,27,28,<br>30,31,33,3<br>4,35 | 10 | P02631,P05539,P16086,P20762,P36376,P83748,P97605,Q6IE51,Q8CJD3,Q9QZQ5                                                                |
| 11468 | 2,3,4,5,6,7<br>,29,33 | 1,8,27,28,<br>30,31,32,3<br>4,35 | 8  | P02631,P13852,P20762,P83748,P97605,Q6IE51,Q8CJD3,Q9QZQ5                                                                              |
| 11469 | 2,3,4,5,6,7<br>,29,34 | 1,8,27,28,<br>30,31,32,3<br>3,35 | 12 | G3V686,P02631,P09605,P25809,P16086,P17559,P36376,P38444,P83748,P97605,Q63514,Q6IE51,Q9QZQ5                                           |
| 11470 | 2,3,4,5,6,7<br>,29,35 | 1,8,27,28,<br>30,31,32,3<br>3,34 | 9  | P02631,P14480,P20761,P20762,P83748,P97605,Q63514,Q6IE51,Q9QZQ5                                                                       |
| 11471 | 2,3,4,5,6,7<br>,30,31 | 1,8,27,28,<br>29,32,33,3<br>4,35 | 10 | P02625,P16086,P35281,P42854,P52590,P83748,P97605,Q498R7,Q6IE51,Q9QZQ5                                                                |
| 11472 | 2,3,4,5,6,7<br>,30,32 | 1,8,27,28,<br>29,31,33,3<br>4,35 | 7  | P01836,P16086,P20762,P97605,Q09030,Q6IE51,Q9QZQ5                                                                                     |
| 11473 | 2,3,4,5,6,7<br>,30,33 | 1,8,27,28,<br>29,31,32,3<br>4,35 | 4  | P16086,P97605,Q6IE51,Q9QZQ5                                                                                                          |
| 11474 | 2,3,4,5,6,7<br>,30,34 | 1,8,27,28,<br>29,31,32,3<br>3,35 | 18 | G3V686,P02631,P09605,P25809,P10715,P16086,P17559,P35280,P36374,P38444,P47727,P47967,P49744,P83748,P97605,Q09030,Q63514,Q6IE51,Q9QZQ5 |



|       |                       |                                  |    |                                                                                                                                                                                       |
|-------|-----------------------|----------------------------------|----|---------------------------------------------------------------------------------------------------------------------------------------------------------------------------------------|
| 11475 | 2,3,4,5,6,7<br>,30,35 | 1,8,27,28,<br>29,31,32,3<br>3,34 | 17 | P01835,P02781,P05369,P06911,P08010,P10715,P14480,P16086,P20761,P20762,P35281,P47727,P97584,P97605,Q63514,Q6IE51,Q9QZQ5                                                                |
| 11476 | 2,3,4,5,6,7<br>,31,32 | 1,8,27,28,<br>29,30,33,3<br>4,35 | 12 | P02625,P05539,P16086,P36376,P42854,P52590,P83748,P97605,Q62997,Q6IE51,Q8CJD3,Q9QZQ5                                                                                                   |
| 11477 | 2,3,4,5,6,7<br>,31,33 | 1,8,27,28,<br>29,30,32,3<br>4,35 | 10 | O35568,P02625,P05369,P08010,P52590,P83748,P97605,Q62997,Q6IE51,Q9QZQ5                                                                                                                 |
| 11478 | 2,3,4,5,6,7<br>,31,34 | 1,8,27,28,<br>29,30,32,3<br>3,35 | 19 | F1LM93,G3V686,P02625,P02781,P05369,P08010,P08723,P09605,P25809,P16086,P17559,P35281,P36374,P36376,P38444,P52590,P83748,P97605,Q62997,Q9QZQ5                                           |
| 11479 | 2,3,4,5,6,7<br>,31,35 | 1,8,27,28,<br>29,30,32,3<br>3,34 | 13 | F1LM93,P02781,P05369,P08010,P20761,P20762,P35281,P36376,P52590,P83748,P97605,Q6IE51,Q9QZQ5                                                                                            |
| 11480 | 2,3,4,5,6,7<br>,32,33 | 1,8,27,28,<br>29,30,31,3<br>4,35 | 12 | O35568,P02631,P05539,P13852,P16086,P36376,P83748,P97605,Q6AYR9,Q6IE51,Q8CJD3,Q9QZQ5                                                                                                   |
| 11481 | 2,3,4,5,6,7<br>,32,34 | 1,8,27,28,<br>29,30,31,3<br>3,35 | 18 | G3V686,P02631,P02781,P02782,P05539,P16086,P17559,P19629,P36374,P36376,P38444,P49744,P83748,P97605,Q09030,Q63532,Q6IE51,Q9QZQ5                                                         |
| 11482 | 2,3,4,5,6,7<br>,32,35 | 1,8,27,28,<br>29,30,31,3<br>3,34 | 15 | P02781,P02782,P05369,P08010,P16086,P19629,P20761,P20762,P36374,P36376,P83748,P97605,Q6AYR9,Q6IE51,Q9QZQ5                                                                              |
| 11483 | 2,3,4,5,6,7<br>,33,34 | 1,8,27,28,<br>29,30,31,3<br>2,35 | 15 | G3V686,P02631,P02781,P02782,P08010,P11762,P17559,P36374,P38444,P83748,P97605,Q63514,Q63532,Q6IE51,Q9QZQ5                                                                              |
| 11484 | 2,3,4,5,6,7<br>,33,35 | 1,8,27,28,<br>29,30,31,3<br>2,34 | 12 | P02781,P02782,P05369,P08010,P20761,P20762,P83748,P97605,Q63514,Q6AYR9,Q6IE51,Q9QZQ5                                                                                                   |
| 11485 | 2,3,4,5,6,7<br>,34,35 | 1,8,27,28,<br>29,30,31,3<br>2,33 | 26 | F1LM93,G3V686,P02781,P02782,P05369,P06911,P08010,P08723,P10715,P11883,P14480,P17559,P19629,P35281,P36374,P38444,P47727,P83748,P97605,Q08464,Q63514,Q6IE51,Q812E4,Q8CJ52,Q9JHB9,Q9QZQ5 |
| 11486 | 2,3,4,5,6,8<br>,27,28 | 1,7,29,30,<br>31,32,33,3<br>4,35 | 3  | P07171,Q63942,Q9Z0V6                                                                                                                                                                  |
| 11487 | 2,3,4,5,6,8<br>,27,29 | 1,7,28,30,<br>31,32,33,3<br>4,35 | 5  | P07171,P14669,P20762,Q63514,Q9Z0V6                                                                                                                                                    |
| 11488 | 2,3,4,5,6,8<br>,27,30 | 1,7,28,29,<br>31,32,33,3<br>4,35 | 4  | P01835,P14669,Q63514,Q9Z0V6                                                                                                                                                           |
| 11489 | 2,3,4,5,6,8<br>,27,31 | 1,7,28,29,<br>30,32,33,3<br>4,35 | 3  | P02625,Q63514,Q9Z0V6                                                                                                                                                                  |

|       |                       |                                  |    |                                                                              |
|-------|-----------------------|----------------------------------|----|------------------------------------------------------------------------------|
| 11490 | 2,3,4,5,6,8<br>,27,32 | 1,7,28,29,<br>30,31,33,3<br>4,35 | 5  | P06760,P14669,P19629,P97605,Q9Z0V6                                           |
| 11491 | 2,3,4,5,6,8<br>,27,33 | 1,7,28,29,<br>30,31,32,3<br>4,35 | 3  | P14669,Q63514,Q9Z0V6                                                         |
| 11492 | 2,3,4,5,6,8<br>,27,34 | 1,7,28,29,<br>30,31,32,3<br>3,35 | 11 | G3V686,P10715,P19629,P38444,P49744,Q01205,Q07116,Q4FZU6,Q63514,Q9WTT6,Q9Z0V6 |
| 11493 | 2,3,4,5,6,8<br>,27,35 | 1,7,28,29,<br>30,31,32,3<br>3,34 | 5  | P10715,P19629,P20762,Q63514,Q9Z0V6                                           |
| 11494 | 2,3,4,5,6,8<br>,28,29 | 1,7,27,30,<br>31,32,33,3<br>4,35 | 2  | Q63514,Q63942                                                                |
| 11495 | 2,3,4,5,6,8<br>,28,30 | 1,7,27,29,<br>31,32,33,3<br>4,35 | 4  | P01835,Q63514,Q63942,Q9Z0V6                                                  |
| 11496 | 2,3,4,5,6,8<br>,28,31 | 1,7,27,29,<br>30,32,33,3<br>4,35 | 4  | P20766,P97605,Q63942,Q9Z0V6                                                  |
| 11497 | 2,3,4,5,6,8<br>,28,32 | 1,7,27,29,<br>30,31,33,3<br>4,35 | 3  | P97605,Q63942,Q9Z0V6                                                         |
| 11498 | 2,3,4,5,6,8<br>,28,33 | 1,7,27,29,<br>30,31,32,3<br>4,35 | 2  | P97605,Q63942                                                                |
| 11499 | 2,3,4,5,6,8<br>,28,34 | 1,7,27,29,<br>30,31,32,3<br>3,35 | 11 | P04762,P20766,P52303,Q4FZU6,Q5HZV9,Q63514,Q63942,Q6AY61,Q6P6R2,Q9WTT6,Q9Z0V6 |
| 11500 | 2,3,4,5,6,8<br>,28,35 | 1,7,27,29,<br>30,31,32,3<br>3,34 | 4  | P20761,Q63514,Q63942,Q9Z0V6                                                  |
| 11501 | 2,3,4,5,6,8<br>,29,30 | 1,7,27,28,<br>31,32,33,3<br>4,35 | 5  | P01835,P10715,P20762,Q63514,Q9Z0V6                                           |
| 11502 | 2,3,4,5,6,8<br>,29,31 | 1,7,27,28,<br>30,32,33,3<br>4,35 | 5  | P02625,P20762,P20766,P25236,Q63514                                           |
| 11503 | 2,3,4,5,6,8<br>,29,32 | 1,7,27,28,<br>30,31,33,3<br>4,35 | 5  | P20762,P97605,Q6TMA8,Q8CJD3,Q9Z0V6                                           |
| 11504 | 2,3,4,5,6,8<br>,29,33 | 1,7,27,28,<br>30,31,32,3<br>4,35 | 4  | P20762,P97605,Q63514,Q8CJD3                                                  |

|       |                       |                                  |    |                                                                                            |
|-------|-----------------------|----------------------------------|----|--------------------------------------------------------------------------------------------|
| 11505 | 2,3,4,5,6,8<br>,29,34 | 1,7,27,28,<br>30,31,32,3<br>3,35 | 5  | P10715,Q4FZU6,Q63514,Q9WTT6,Q9Z0V6                                                         |
| 11506 | 2,3,4,5,6,8<br>,29,35 | 1,7,27,28,<br>30,31,32,3<br>3,34 | 5  | P10715,P20762,Q06000,Q63514,Q9Z0V6                                                         |
| 11507 | 2,3,4,5,6,8<br>,30,31 | 1,7,27,28,<br>29,32,33,3<br>4,35 | 6  | P02625,P20766,P97605,Q63514,Q80WL1,Q9Z0V6                                                  |
| 11508 | 2,3,4,5,6,8<br>,30,32 | 1,7,27,28,<br>29,31,33,3<br>4,35 | 4  | P10715,P20762,P97605,Q9Z0V6                                                                |
| 11509 | 2,3,4,5,6,8<br>,30,33 | 1,7,27,28,<br>29,31,32,3<br>4,35 | 4  | P97605,Q5M819,Q63514,Q9Z0V6                                                                |
| 11510 | 2,3,4,5,6,8<br>,30,34 | 1,7,27,28,<br>29,31,32,3<br>3,35 | 8  | P06911,P10715,P35280,P36374,P97605,Q63514,Q9WTT6,Q9Z0V6                                    |
| 11511 | 2,3,4,5,6,8<br>,30,35 | 1,7,27,28,<br>29,31,32,3<br>3,34 | 11 | P01835,P05369,P06911,P09456,P10715,P20761,P20762,P97605,Q06000,Q63514,Q9Z0V6               |
| 11512 | 2,3,4,5,6,8<br>,31,32 | 1,7,27,28,<br>29,30,33,3<br>4,35 | 5  | P20766,P97605,Q62997,Q8CJD3,Q9Z0V6                                                         |
| 11513 | 2,3,4,5,6,8<br>,31,33 | 1,7,27,28,<br>29,30,32,3<br>4,35 | 7  | P02625,P05369,P20766,P97605,Q62997,Q8CJD3,Q9Z0V6                                           |
| 11514 | 2,3,4,5,6,8<br>,31,34 | 1,7,27,28,<br>29,30,32,3<br>3,35 | 11 | P02625,P09456,P20766,P36374,P38444,P97605,Q62997,Q63514,Q6AYS4,Q9WTT6,Q9Z0V6               |
| 11515 | 2,3,4,5,6,8<br>,31,35 | 1,7,27,28,<br>29,30,32,3<br>3,34 | 11 | O08815,P05369,P08010,P09456,P20761,P20762,P20766,P97605,Q06000,Q63514,Q9Z0V6               |
| 11516 | 2,3,4,5,6,8<br>,32,33 | 1,7,27,28,<br>29,30,31,3<br>4,35 | 3  | P97605,Q8CJD3,Q9Z0V6                                                                       |
| 11517 | 2,3,4,5,6,8<br>,32,34 | 1,7,27,28,<br>29,30,31,3<br>3,35 | 13 | G3V686,P08753,P10715,P19629,P20766,P36374,P38444,P97605,Q4FZU6,Q6AYS4,Q6P6R2,Q9WTT6,Q9Z0V6 |
| 11518 | 2,3,4,5,6,8<br>,32,35 | 1,7,27,28,<br>29,30,31,3<br>3,34 | 9  | P05369,P08753,P10715,P19629,P20762,P36374,P97605,Q6AYR9,Q9Z0V6                             |
| 11519 | 2,3,4,5,6,8<br>,33,34 | 1,7,27,28,<br>29,30,31,3<br>2,35 | 9  | G3V686,P04762,P10715,P36374,P97605,Q4FZU6,Q63355,Q63514,Q9Z0V6                             |

|       |                        |                                  |    |                                                                                                                                                                  |
|-------|------------------------|----------------------------------|----|------------------------------------------------------------------------------------------------------------------------------------------------------------------|
| 11520 | 2,3,4,5,6,8<br>,33,35  | 1,7,27,28,<br>29,30,31,3<br>2,34 | 8  | P05369,P20761,P20762,P97605,Q63355,Q63514,Q6AYR9,Q9Z0V6                                                                                                          |
| 11521 | 2,3,4,5,6,8<br>,34,35  | 1,7,27,28,<br>29,30,31,3<br>2,33 | 22 | O08815,P02781,P02793;Q7TP54,P05369,P06911,P08010,P08723,P08753,P09456,P10715,P11883,P19629,P20766,P36374,P47727,P97605,Q5GRG2,Q63355,Q63514,Q812E4,Q9JHB9,Q9Z0V6 |
| 11522 | 2,3,4,5,6,2<br>7,28,29 | 1,7,8,30,3<br>1,32,33,34<br>,35  | 1  | P01835                                                                                                                                                           |
| 11523 | 2,3,4,5,6,2<br>7,28,30 | 1,7,8,29,3<br>1,32,33,34<br>,35  | 2  | P01835,Q6AYQ8                                                                                                                                                    |
| 11524 | 2,3,4,5,6,2<br>7,28,31 | 1,7,8,29,3<br>0,32,33,34<br>,35  | 1  | P02625                                                                                                                                                           |
| 11525 | 2,3,4,5,6,2<br>7,28,32 | 1,7,8,29,3<br>0,31,33,34<br>,35  | 2  | P01835,Q99068                                                                                                                                                    |
| 11526 | 2,3,4,5,6,2<br>7,28,33 | 1,7,8,29,3<br>0,31,32,34<br>,35  | 1  | Q4FZU2                                                                                                                                                           |
| 11527 | 2,3,4,5,6,2<br>7,28,34 | 1,7,8,29,3<br>0,31,32,33<br>,35  | 5  | G3V686,P04182,P97615,Q4FZU6,Q5HZV9                                                                                                                               |
| 11528 | 2,3,4,5,6,2<br>7,28,35 | 1,7,8,29,3<br>0,31,32,33<br>,34  | 1  | P01835                                                                                                                                                           |
| 11529 | 2,3,4,5,6,2<br>7,29,30 | 1,7,8,28,3<br>1,32,33,34<br>,35  | 3  | P01835,P02803,P10715                                                                                                                                             |
| 11530 | 2,3,4,5,6,2<br>7,29,31 | 1,7,8,28,3<br>0,32,33,34<br>,35  | 2  | P02625,P25236                                                                                                                                                    |
| 11531 | 2,3,4,5,6,2<br>7,29,32 | 1,7,8,28,3<br>0,31,33,34<br>,35  | 5  | P01835,P02803,P10715,P36376,Q99068                                                                                                                               |
| 11532 | 2,3,4,5,6,2<br>7,29,33 | 1,7,8,28,3<br>0,31,32,34<br>,35  | 2  | P10715,Q4FZU2                                                                                                                                                    |
| 11533 | 2,3,4,5,6,2<br>7,29,34 | 1,7,8,28,3<br>0,31,32,33<br>,35  | 6  | G3V686,P04218,P10715,P19629,P31044,Q4FZU6                                                                                                                        |
| 11534 | 2,3,4,5,6,2<br>7,29,35 | 1,7,8,28,3<br>0,31,32,33<br>,34  | 5  | P01835,P10715,P14480,P19629,P31044                                                                                                                               |

|       |                        |                                 |    |                                                                                                   |
|-------|------------------------|---------------------------------|----|---------------------------------------------------------------------------------------------------|
| 11535 | 2,3,4,5,6,2<br>7,30,31 | 1,7,8,28,2<br>9,32,33,34<br>,35 | 3  | P01835,P02625,P35281                                                                              |
| 11536 | 2,3,4,5,6,2<br>7,30,32 | 1,7,8,28,2<br>9,31,33,34<br>,35 | 4  | P01835,P02803,P10715,Q99068                                                                       |
| 11537 | 2,3,4,5,6,2<br>7,30,33 | 1,7,8,28,2<br>9,31,32,34<br>,35 | 2  | P01835,P10715                                                                                     |
| 11538 | 2,3,4,5,6,2<br>7,30,34 | 1,7,8,28,2<br>9,31,32,33<br>,35 | 10 | G3V686,P01835,P02803,P06911,P10715,P19629,P35280,P49744,Q4FZU6,Q9Z0V6                             |
| 11539 | 2,3,4,5,6,2<br>7,30,35 | 1,7,8,28,2<br>9,31,32,33<br>,34 | 7  | P01835,P06911,P10715,P14480,P19629,P35281,Q9Z0V6                                                  |
| 11540 | 2,3,4,5,6,2<br>7,31,32 | 1,7,8,28,2<br>9,30,33,34<br>,35 | 3  | P02625,P36376,Q99068                                                                              |
| 11541 | 2,3,4,5,6,2<br>7,31,33 | 1,7,8,28,2<br>9,30,32,34<br>,35 | 1  | P02625                                                                                            |
| 11542 | 2,3,4,5,6,2<br>7,31,34 | 1,7,8,28,2<br>9,30,32,33<br>,35 | 7  | G3V686,P02625,P10715,P36376,P38444,Q4FZU6,Q62997                                                  |
| 11543 | 2,3,4,5,6,2<br>7,31,35 | 1,7,8,28,2<br>9,30,32,33<br>,34 | 2  | P02625,P35281                                                                                     |
| 11544 | 2,3,4,5,6,2<br>7,32,33 | 1,7,8,28,2<br>9,30,31,34<br>,35 | 4  | P10715,P97605,Q4FZU2,Q99068                                                                       |
| 11545 | 2,3,4,5,6,2<br>7,32,34 | 1,7,8,28,2<br>9,30,31,33<br>,35 | 14 | G3V686,P02803,P06760,P10715,P19629,P34901,P36376,P38444,P49744,Q07116,Q4FZU2,Q4FZU6,Q8CJ52,Q9Z0V6 |
| 11546 | 2,3,4,5,6,2<br>7,32,35 | 1,7,8,28,2<br>9,30,31,33<br>,34 | 4  | P10715,P19629,P36376,Q8CJ52                                                                       |
| 11547 | 2,3,4,5,6,2<br>7,33,34 | 1,7,8,28,2<br>9,30,31,32<br>,35 | 7  | G3V686,P10715,P34901,Q07116,Q4FZU2,Q4FZU6,Q63355                                                  |
| 11548 | 2,3,4,5,6,2<br>7,33,35 | 1,7,8,28,2<br>9,30,31,32<br>,34 | 3  | P10715,Q4FZU2,Q63355                                                                              |
| 11549 | 2,3,4,5,6,2<br>7,34,35 | 1,7,8,28,2<br>9,30,31,32<br>,33 | 11 | G3V686,P06911,P10715,P19629,P31044,P47727,Q4FZU6,Q5GRG2,Q63355,Q8CJ52,Q9Z0V6                      |

|       |                        |                                 |   |                             |
|-------|------------------------|---------------------------------|---|-----------------------------|
| 11550 | 2,3,4,5,6,2<br>8,29,30 | 1,7,8,27,3<br>1,32,33,34<br>,35 | 2 | P01835,Q08849               |
| 11551 | 2,3,4,5,6,2<br>8,29,31 | 1,7,8,27,3<br>0,32,33,34<br>,35 | 0 |                             |
| 11552 | 2,3,4,5,6,2<br>8,29,32 | 1,7,8,27,3<br>0,31,33,34<br>,35 | 1 | P01835                      |
| 11553 | 2,3,4,5,6,2<br>8,29,33 | 1,7,8,27,3<br>0,31,32,34<br>,35 | 0 |                             |
| 11554 | 2,3,4,5,6,2<br>8,29,34 | 1,7,8,27,3<br>0,31,32,33<br>,35 | 2 | Q4FZU6,Q5HZV9               |
| 11555 | 2,3,4,5,6,2<br>8,29,35 | 1,7,8,27,3<br>0,31,32,33<br>,34 | 3 | P01681,P01835,P20760        |
| 11556 | 2,3,4,5,6,2<br>8,30,31 | 1,7,8,27,2<br>9,32,33,34<br>,35 | 2 | P01835,P02625               |
| 11557 | 2,3,4,5,6,2<br>8,30,32 | 1,7,8,27,2<br>9,31,33,34<br>,35 | 1 | P01835                      |
| 11558 | 2,3,4,5,6,2<br>8,30,33 | 1,7,8,27,2<br>9,31,32,34<br>,35 | 1 | P01835                      |
| 11559 | 2,3,4,5,6,2<br>8,30,34 | 1,7,8,27,2<br>9,31,32,33<br>,35 | 4 | P01835,P35280,Q4FZU6,Q5HZV9 |
| 11560 | 2,3,4,5,6,2<br>8,30,35 | 1,7,8,27,2<br>9,31,32,33<br>,34 | 2 | P01835,P20760               |
| 11561 | 2,3,4,5,6,2<br>8,31,32 | 1,7,8,27,2<br>9,30,33,34<br>,35 | 1 | P97605                      |
| 11562 | 2,3,4,5,6,2<br>8,31,33 | 1,7,8,27,2<br>9,30,32,34<br>,35 | 0 |                             |
| 11563 | 2,3,4,5,6,2<br>8,31,34 | 1,7,8,27,2<br>9,30,32,33<br>,35 | 3 | Q4FZU6,Q5HZV9,Q62997        |
| 11564 | 2,3,4,5,6,2<br>8,31,35 | 1,7,8,27,2<br>9,30,32,33<br>,34 | 1 | P20760                      |

|       |                        |                                 |   |                                    |
|-------|------------------------|---------------------------------|---|------------------------------------|
| 11565 | 2,3,4,5,6,2<br>8,32,33 | 1,7,8,27,2<br>9,30,31,34<br>,35 | 1 | P97605                             |
| 11566 | 2,3,4,5,6,2<br>8,32,34 | 1,7,8,27,2<br>9,30,31,33<br>,35 | 4 | G3V686,P97605,Q4FZU6,Q5HZV9        |
| 11567 | 2,3,4,5,6,2<br>8,32,35 | 1,7,8,27,2<br>9,30,31,33<br>,34 | 2 | P97605,Q5HZV9                      |
| 11568 | 2,3,4,5,6,2<br>8,33,34 | 1,7,8,27,2<br>9,30,31,32<br>,35 | 2 | Q4FZU6,Q5HZV9                      |
| 11569 | 2,3,4,5,6,2<br>8,33,35 | 1,7,8,27,2<br>9,30,31,32<br>,34 | 1 | P20760                             |
| 11570 | 2,3,4,5,6,2<br>8,34,35 | 1,7,8,27,2<br>9,30,31,32<br>,33 | 5 | P11883,P12785,Q4FZU6,Q5HZV9,Q6AY61 |
| 11571 | 2,3,4,5,6,2<br>9,30,31 | 1,7,8,27,2<br>8,32,33,34<br>,35 | 4 | P01835,P02625,P10715,P25236        |
| 11572 | 2,3,4,5,6,2<br>9,30,32 | 1,7,8,27,2<br>8,31,33,34<br>,35 | 2 | P01835,P10715                      |
| 11573 | 2,3,4,5,6,2<br>9,30,33 | 1,7,8,27,2<br>8,31,32,34<br>,35 | 2 | P01835,P10715                      |
| 11574 | 2,3,4,5,6,2<br>9,30,34 | 1,7,8,27,2<br>8,31,32,33<br>,35 | 4 | P01835,P10715,P31044,P35280        |
| 11575 | 2,3,4,5,6,2<br>9,30,35 | 1,7,8,27,2<br>8,31,32,33<br>,34 | 4 | P01835,P10715,P14480,P31044        |
| 11576 | 2,3,4,5,6,2<br>9,31,32 | 1,7,8,27,2<br>8,30,33,34<br>,35 | 3 | P25236,P36376,Q8CJD3               |
| 11577 | 2,3,4,5,6,2<br>9,31,33 | 1,7,8,27,2<br>8,30,32,34<br>,35 | 0 |                                    |
| 11578 | 2,3,4,5,6,2<br>9,31,34 | 1,7,8,27,2<br>8,30,32,33<br>,35 | 5 | G3V686,P02625,P10715,P25236,Q62997 |
| 11579 | 2,3,4,5,6,2<br>9,31,35 | 1,7,8,27,2<br>8,30,32,33<br>,34 | 2 | P10715,P25236                      |

|       |                        |                                 |   |                                                                |
|-------|------------------------|---------------------------------|---|----------------------------------------------------------------|
| 11580 | 2,3,4,5,6,2<br>9,32,33 | 1,7,8,27,2<br>8,30,31,34<br>,35 | 3 | P10715,P97605,Q8CJD3                                           |
| 11581 | 2,3,4,5,6,2<br>9,32,34 | 1,7,8,27,2<br>8,30,31,33<br>,35 | 7 | G3V686,P10715,P19629,P31044,P38444,Q4FZU6,Q6TMA8               |
| 11582 | 2,3,4,5,6,2<br>9,32,35 | 1,7,8,27,2<br>8,30,31,33<br>,34 | 2 | P10715,P19629                                                  |
| 11583 | 2,3,4,5,6,2<br>9,33,34 | 1,7,8,27,2<br>8,30,31,32<br>,35 | 4 | G3V686,P10715,P31044,Q4FZU6                                    |
| 11584 | 2,3,4,5,6,2<br>9,33,35 | 1,7,8,27,2<br>8,30,31,32<br>,34 | 2 | P10715,P31044                                                  |
| 11585 | 2,3,4,5,6,2<br>9,34,35 | 1,7,8,27,2<br>8,30,31,32<br>,33 | 5 | P10715,P14480,P19629,P31044,Q5GRG2                             |
| 11586 | 2,3,4,5,6,3<br>0,31,32 | 1,7,8,27,2<br>8,29,33,34<br>,35 | 2 | P02625,P97605                                                  |
| 11587 | 2,3,4,5,6,3<br>0,31,33 | 1,7,8,27,2<br>8,29,32,34<br>,35 | 1 | P02625                                                         |
| 11588 | 2,3,4,5,6,3<br>0,31,34 | 1,7,8,27,2<br>8,29,32,33<br>,35 | 5 | P02625,P08723,P10715,Q62997,Q8CJ52                             |
| 11589 | 2,3,4,5,6,3<br>0,31,35 | 1,7,8,27,2<br>8,29,32,33<br>,34 | 9 | P01835,P02625,P05369,P08723,P09456,P10715,P24368,P35281,Q8CJ52 |
| 11590 | 2,3,4,5,6,3<br>0,32,33 | 1,7,8,27,2<br>8,29,31,34<br>,35 | 2 | P10715,P97605                                                  |
| 11591 | 2,3,4,5,6,3<br>0,32,34 | 1,7,8,27,2<br>8,29,31,33<br>,35 | 9 | G3V686,P10715,P19629,P35280,P36374,P38444,P97605,Q8CJ52,Q9Z0V6 |
| 11592 | 2,3,4,5,6,3<br>0,32,35 | 1,7,8,27,2<br>8,29,31,33<br>,34 | 6 | P01835,P10715,P19629,P97605,Q8CJ52,Q9Z0V6                      |
| 11593 | 2,3,4,5,6,3<br>0,33,34 | 1,7,8,27,2<br>8,29,31,32<br>,35 | 5 | P06911,P10715,P31044,Q5GRG2,Q6AYL6                             |
| 11594 | 2,3,4,5,6,3<br>0,33,35 | 1,7,8,27,2<br>8,29,31,32<br>,34 | 6 | P01835,P06911,P10715,P31044,Q5GRG2,Q6AYL6                      |



|       |                        |                                  |    |                                                                                                                                                                  |
|-------|------------------------|----------------------------------|----|------------------------------------------------------------------------------------------------------------------------------------------------------------------|
| 11595 | 2,3,4,5,6,3<br>0,34,35 | 1,7,8,27,2<br>8,29,31,32<br>,33  | 22 | P01835,P02781,P02793;Q7TP54,P06911,P08723,P09456,P10715,P14480,P19629,P22985,P24368,P31044,P35280,P36374,P47727,Q5GRG2,Q62902,Q6AYL6,Q8CJ52,Q9JHB9,Q9JI85,Q9Z0V6 |
| 11596 | 2,3,4,5,6,3<br>1,32,33 | 1,7,8,27,2<br>8,29,30,34<br>,35  | 2  | P97605,Q8CJD3                                                                                                                                                    |
| 11597 | 2,3,4,5,6,3<br>1,32,34 | 1,7,8,27,2<br>8,29,30,33<br>,35  | 10 | G3V686,P02781,P08723,P10715,P36374,P36376,P38444,P97605,Q62997,Q8CJ52                                                                                            |
| 11598 | 2,3,4,5,6,3<br>1,32,35 | 1,7,8,27,2<br>8,29,30,33<br>,34  | 6  | P02781,P05369,P36376,P97605,Q8CJ52,Q9QZA6                                                                                                                        |
| 11599 | 2,3,4,5,6,3<br>1,33,34 | 1,7,8,27,2<br>8,29,30,32<br>,35  | 8  | F1LM93,G3V686,P02625,P02781,P97605,Q62997,Q63355,Q8CJ52                                                                                                          |
| 11600 | 2,3,4,5,6,3<br>1,33,35 | 1,7,8,27,2<br>8,29,30,32<br>,34  | 6  | F1LM93,P02781,P05369,P97605,Q63355,Q8CJ52                                                                                                                        |
| 11601 | 2,3,4,5,6,3<br>1,34,35 | 1,7,8,27,2<br>8,29,30,32<br>,33  | 19 | F1LM93,P02781,P02793;Q7TP54,P05369,P08010,P08723,P09456,P10715,P24368,P35281,P36374,P47727,P82471,Q62997,Q63355,Q812E4,Q8CJ52,Q9JHB9,Q9JI85                      |
| 11602 | 2,3,4,5,6,3<br>2,33,34 | 1,7,8,27,2<br>8,29,30,31<br>,35  | 11 | G3V686,P02781,P02782,P10715,P19629,P34901,P36374,P38444,P97605,Q4FZU6,Q8CJ52                                                                                     |
| 11603 | 2,3,4,5,6,3<br>2,33,35 | 1,7,8,27,2<br>8,29,30,31<br>,34  | 6  | P02781,P10715,P19629,P97605,Q6AYR9,Q8CJ52                                                                                                                        |
| 11604 | 2,3,4,5,6,3<br>2,34,35 | 1,7,8,27,2<br>8,29,30,31<br>,33  | 17 | G3V686,P02781,P02782,P08723,P08753,P10715,P11883,P19629,P31044,P36374,P38444,P97605,Q5GRG2,Q62902,Q8CJ52,Q9JI85,Q9Z0V6                                           |
| 11605 | 2,3,4,5,6,3<br>3,34,35 | 1,7,8,27,2<br>8,29,30,31<br>,32  | 18 | F1LM93,P02781,P02782,P06911,P08010,P08723,P10715,P19629,P24368,P31044,P36374,P82471,P97605,Q5GRG2,Q62902,Q63355,Q8CJ52,Q9JHB9                                    |
| 11606 | 2,3,4,5,7,8<br>,27,28  | 1,6,29,30,<br>31,32,33,3<br>4,35 | 5  | P07171,Q09030,Q6IE51,Q99MH3,Q9QZQ5                                                                                                                               |
| 11607 | 2,3,4,5,7,8<br>,27,29  | 1,6,28,30,<br>31,32,33,3<br>4,35 | 7  | P07171,P13432,P36970,P55016,Q09030,Q6IE51,Q9QZQ5                                                                                                                 |
| 11608 | 2,3,4,5,7,8<br>,27,30  | 1,6,28,29,<br>31,32,33,3<br>4,35 | 12 | P06911,P07171,P36970,P47727,P55016,P97605,Q09030,Q64057,Q6IE51,Q80WL1,Q99MH3,Q9QZQ5                                                                              |
| 11609 | 2,3,4,5,7,8<br>,27,31  | 1,6,28,29,<br>30,32,33,3<br>4,35 | 9  | P07171,P20766,P35281,P36970,P52590,P97605,Q09030,Q99MH3,Q9QZQ5                                                                                                   |

|       |                       |                                  |    |                                                                                                                    |
|-------|-----------------------|----------------------------------|----|--------------------------------------------------------------------------------------------------------------------|
| 11610 | 2,3,4,5,7,8<br>,27,32 | 1,6,28,29,<br>30,31,33,3<br>4,35 | 7  | P00714,P07171,P97605,Q09030,Q6IE51,Q99068,Q9QZQ5                                                                   |
| 11611 | 2,3,4,5,7,8<br>,27,33 | 1,6,28,29,<br>30,31,32,3<br>4,35 | 11 | P00507,P07171,P13852,P36970,P55016,P97605,Q09030,Q6IE51,Q99041,Q99MH3,Q9QZQ5                                       |
| 11612 | 2,3,4,5,7,8<br>,27,34 | 1,6,28,29,<br>30,31,32,3<br>3,35 | 20 | D3ZUK3,G3V686,P04905,P06911,P07171,P11762,P20766,P47727,P49744,P55016,P97605,Q01205,Q03191,Q07116,Q08464,Q09030,Q6 |
| 11613 | 2,3,4,5,7,8<br>,27,35 | 1,6,28,29,<br>30,31,32,3<br>3,34 | 9  | P06911,P07171,P13432,P35281,P47727,P97605,Q09030,Q6IE51,Q99MH3                                                     |
| 11614 | 2,3,4,5,7,8<br>,28,29 | 1,6,27,30,<br>31,32,33,3<br>4,35 | 2  | P07171,P13432                                                                                                      |
| 11615 | 2,3,4,5,7,8<br>,28,30 | 1,6,27,29,<br>31,32,33,3<br>4,35 | 4  | P07171,P97605,Q09030,Q64057                                                                                        |
| 11616 | 2,3,4,5,7,8<br>,28,31 | 1,6,27,29,<br>30,32,33,3<br>4,35 | 5  | P07171,P20766,P42854,P52590,P97605                                                                                 |
| 11617 | 2,3,4,5,7,8<br>,28,32 | 1,6,27,29,<br>30,31,33,3<br>4,35 | 4  | P20766,P97605,Q08464,Q09030                                                                                        |
| 11618 | 2,3,4,5,7,8<br>,28,33 | 1,6,27,29,<br>30,31,32,3<br>4,35 | 2  | P97605,Q08464                                                                                                      |
| 11619 | 2,3,4,5,7,8<br>,28,34 | 1,6,27,29,<br>30,31,32,3<br>3,35 | 8  | P07171,P20766,P97605,P97615,Q08464,Q09030,Q6AY61,Q6AYS4                                                            |
| 11620 | 2,3,4,5,7,8<br>,28,35 | 1,6,27,29,<br>30,31,32,3<br>3,34 | 2  | P97605,Q08464                                                                                                      |
| 11621 | 2,3,4,5,7,8<br>,29,30 | 1,6,27,28,<br>31,32,33,3<br>4,35 | 5  | P13432,P97605,Q09030,Q6IFU7,Q9QZQ5                                                                                 |
| 11622 | 2,3,4,5,7,8<br>,29,31 | 1,6,27,28,<br>30,32,33,3<br>4,35 | 7  | P07171,P20766,P36970,P52590,P97605,Q6IFU7,Q6IFV1                                                                   |
| 11623 | 2,3,4,5,7,8<br>,29,32 | 1,6,27,28,<br>30,31,33,3<br>4,35 | 5  | P13432,P97605,Q09030,Q8CJD3,Q9QZQ5                                                                                 |
| 11624 | 2,3,4,5,7,8<br>,29,33 | 1,6,27,28,<br>30,31,32,3<br>4,35 | 6  | P13432,P36970,P97605,Q6IFU7,Q8CJD3,Q9QZQ5                                                                          |

|       |                       |                                  |    |                                                                                                                                             |
|-------|-----------------------|----------------------------------|----|---------------------------------------------------------------------------------------------------------------------------------------------|
| 11625 | 2,3,4,5,7,8<br>,29,34 | 1,6,27,28,<br>30,31,32,3<br>3,35 | 8  | P20766,P97605,Q08464,Q09030,Q63514,Q6AYS4,Q6IFU7,Q9QZQ5                                                                                     |
| 11626 | 2,3,4,5,7,8<br>,29,35 | 1,6,27,28,<br>30,31,32,3<br>3,34 | 6  | P13432,P97584,P97605,Q06000,Q63514,Q6IFU7                                                                                                   |
| 11627 | 2,3,4,5,7,8<br>,30,31 | 1,6,27,28,<br>29,32,33,3<br>4,35 | 14 | P20766,P36970,P42854,P47727,P52590,P97584,P97605,Q09030,Q5M819,Q62997,Q64057,Q6IFU7,Q80WL1,Q9JHB9                                           |
| 11628 | 2,3,4,5,7,8<br>,30,32 | 1,6,27,28,<br>29,31,33,3<br>4,35 | 6  | P01836,P97605,Q08464,Q09030,Q5M819,Q80WL1                                                                                                   |
| 11629 | 2,3,4,5,7,8<br>,30,33 | 1,6,27,28,<br>29,31,32,3<br>4,35 | 8  | P06911,P36970,P97605,Q08464,Q09030,Q5M819,Q9QUL6,Q9QZQ5                                                                                     |
| 11630 | 2,3,4,5,7,8<br>,30,34 | 1,6,27,28,<br>29,31,32,3<br>3,35 | 17 | P04905,P06911,P08723,P17559,P20766,P35280,P36374,P47727,P49744,P97605,Q08464,Q09030,Q63514,Q6AYS4,Q80WL1,Q9JHB9,Q9QZQ5                      |
| 11631 | 2,3,4,5,7,8<br>,30,35 | 1,6,27,28,<br>29,31,32,3<br>3,34 | 18 | O08815,O35547,P05369,P06911,P08010,P08723,P13432,P47727,P97584,P97605,Q06000,Q08464,Q09030,Q63514,Q64057,Q6IFU7,Q80WL1,Q9JHB9               |
| 11632 | 2,3,4,5,7,8<br>,31,32 | 1,6,27,28,<br>29,30,33,3<br>4,35 | 7  | P20766,P42854,P52590,P97605,Q09030,Q62997,Q8CJD3                                                                                            |
| 11633 | 2,3,4,5,7,8<br>,31,33 | 1,6,27,28,<br>29,30,32,3<br>4,35 | 11 | O08815,P05369,P20766,P36970,P52590,P97605,Q5M819,Q62997,Q6IFU7,Q9JHB9,Q9QUL6                                                                |
| 11634 | 2,3,4,5,7,8<br>,31,34 | 1,6,27,28,<br>29,30,32,3<br>3,35 | 20 | F1LM93,O08815,P02781,P04905,P08010,P08723,P20766,P36374,P36970,P47727,P52590,P60905,P97605,Q08464,Q09030,Q62997,Q6AYS4,Q6IFU7,Q80WL1,Q9JHB9 |
| 11635 | 2,3,4,5,7,8<br>,31,35 | 1,6,27,28,<br>29,30,32,3<br>3,34 | 20 | F1LM93,O08815,P02781,P05369,P08010,P08723,P20766,P30120,P35281,P47727,P52590,P60905,P97584,P97605,Q06000,Q62997,Q6AYR9,Q6IFU7,Q80WL1,Q9JHB9 |
| 11636 | 2,3,4,5,7,8<br>,32,33 | 1,6,27,28,<br>29,30,31,3<br>4,35 | 8  | P20766,P97605,Q08464,Q09030,Q6AYR9,Q8CJD3,Q9QUL6,Q9QZQ5                                                                                     |
| 11637 | 2,3,4,5,7,8<br>,32,34 | 1,6,27,28,<br>29,30,31,3<br>3,35 | 13 | P02781,P08723,P08753,P20766,P36374,P38444,P49744,P97605,Q08464,Q09030,Q6AYS4,Q9JHB9,Q9QZQ5                                                  |
| 11638 | 2,3,4,5,7,8<br>,32,35 | 1,6,27,28,<br>29,30,31,3<br>3,34 | 13 | O08815,O35547,P02781,P05369,P08010,P08723,P20766,P36374,P97605,Q08464,Q09030,Q6AYR9,Q9JHB9                                                  |
| 11639 | 2,3,4,5,7,8<br>,33,34 | 1,6,27,28,<br>29,30,31,3<br>2,35 | 19 | D3ZUK3,O08815,P02781,P02782,P06911,P08010,P08723,P11762,P20766,P36374,P47727,P60905,P97605,Q08464,Q09030,Q6AYS4,Q99041,Q9JHB9,Q9QZQ5        |

|       |                        |                                  |    |                                                                                                                                                                                       |
|-------|------------------------|----------------------------------|----|---------------------------------------------------------------------------------------------------------------------------------------------------------------------------------------|
| 11640 | 2,3,4,5,7,8<br>,33,35  | 1,6,27,28,<br>29,30,31,3<br>2,34 | 15 | O08815,P02781,P05369,P06911,P08010,P08723,P13432,P30120,P47727,P52590,P60905,P97605,Q08464,Q6AYR9,Q9JHB9                                                                              |
| 11641 | 2,3,4,5,7,8<br>,34,35  | 1,6,27,28,<br>29,30,31,3<br>2,33 | 26 | F1LM93,O08815,O35547,P02781,P02782,P04905,P05369,P06911,P08010,P08723,P08753,P16296,P19629,P20766,P30120,P36374,P47727,P60905,P97605,Q08464,Q09030,Q5GRG2,Q63514,Q6AYR9,Q812E4,Q9JHB9 |
| 11642 | 2,3,4,5,7,2<br>7,28,29 | 1,6,8,30,3<br>1,32,33,34<br>,35  | 2  | P13432,Q6IE51                                                                                                                                                                         |
| 11643 | 2,3,4,5,7,2<br>7,28,30 | 1,6,8,29,3<br>1,32,33,34<br>,35  | 3  | Q09030,Q6AYQ8,Q6IE51                                                                                                                                                                  |
| 11644 | 2,3,4,5,7,2<br>7,28,31 | 1,6,8,29,3<br>0,32,33,34<br>,35  | 2  | Q6IE51,Q99068                                                                                                                                                                         |
| 11645 | 2,3,4,5,7,2<br>7,28,32 | 1,6,8,29,3<br>0,31,33,34<br>,35  | 5  | P00714,P01836,Q09030,Q6IE51,Q99068                                                                                                                                                    |
| 11646 | 2,3,4,5,7,2<br>7,28,33 | 1,6,8,29,3<br>0,31,32,34<br>,35  | 3  | Q6IE51,Q99068,Q99MH3                                                                                                                                                                  |
| 11647 | 2,3,4,5,7,2<br>7,28,34 | 1,6,8,29,3<br>0,31,32,33<br>,35  | 8  | G3V686,P04182,P11762,P14408,P97615,Q09030,Q6IE51,Q71UF4                                                                                                                               |
| 11648 | 2,3,4,5,7,2<br>7,28,35 | 1,6,8,29,3<br>0,31,32,33<br>,34  | 3  | P13432,Q6IE51,Q99MH3                                                                                                                                                                  |
| 11649 | 2,3,4,5,7,2<br>7,29,30 | 1,6,8,28,3<br>1,32,33,34<br>,35  | 3  | P13432,Q6IE51,Q99068                                                                                                                                                                  |
| 11650 | 2,3,4,5,7,2<br>7,29,31 | 1,6,8,28,3<br>0,32,33,34<br>,35  | 2  | Q6IE51,Q99068                                                                                                                                                                         |
| 11651 | 2,3,4,5,7,2<br>7,29,32 | 1,6,8,28,3<br>0,31,33,34<br>,35  | 6  | P05539,P13432,P36376,Q09030,Q6IE51,Q99068                                                                                                                                             |
| 11652 | 2,3,4,5,7,2<br>7,29,33 | 1,6,8,28,3<br>0,31,32,34<br>,35  | 4  | P13432,P13852,Q6IE51,Q99068                                                                                                                                                           |
| 11653 | 2,3,4,5,7,2<br>7,29,34 | 1,6,8,28,3<br>0,31,32,33<br>,35  | 7  | G3V686,P04218,P13432,P14408,Q09030,Q6IE51,Q71UF4                                                                                                                                      |
| 11654 | 2,3,4,5,7,2<br>7,29,35 | 1,6,8,28,3<br>0,31,32,33<br>,34  | 3  | P01946,P13432,Q6IE51                                                                                                                                                                  |

|       |                        |                                 |    |                                                                                                                 |
|-------|------------------------|---------------------------------|----|-----------------------------------------------------------------------------------------------------------------|
| 11655 | 2,3,4,5,7,2<br>7,30,31 | 1,6,8,28,2<br>9,32,33,34<br>,35 | 7  | P00507,P02625,P35281,P42854,P47727,Q09030,Q99068                                                                |
| 11656 | 2,3,4,5,7,2<br>7,30,32 | 1,6,8,28,2<br>9,31,33,34<br>,35 | 8  | P00507,P01836,P02803,P97605,Q09030,Q6IE51,Q8K4G9,Q99068                                                         |
| 11657 | 2,3,4,5,7,2<br>7,30,33 | 1,6,8,28,2<br>9,31,32,34<br>,35 | 6  | P00507,P06911,P51907,Q09030,Q6IE51,Q99068                                                                       |
| 11658 | 2,3,4,5,7,2<br>7,30,34 | 1,6,8,28,2<br>9,31,32,33<br>,35 | 10 | G3V686,P02803,P04905,P06911,P11762,P35280,P47727,P47967,P49744,Q09030                                           |
| 11659 | 2,3,4,5,7,2<br>7,30,35 | 1,6,8,28,2<br>9,31,32,33<br>,34 | 6  | P06911,P13432,P35281,P47727,Q09030,Q6IE51                                                                       |
| 11660 | 2,3,4,5,7,2<br>7,31,32 | 1,6,8,28,2<br>9,30,33,34<br>,35 | 7  | P00507,P05539,P36376,P97605,Q09030,Q6IE51,Q99068                                                                |
| 11661 | 2,3,4,5,7,2<br>7,31,33 | 1,6,8,28,2<br>9,30,32,34<br>,35 | 6  | P00507,P35281,P51907,P97605,Q6IE51,Q99068                                                                       |
| 11662 | 2,3,4,5,7,2<br>7,31,34 | 1,6,8,28,2<br>9,30,32,33<br>,35 | 10 | A2RUV9,F1LM93,G3V686,P04905,P14408,P35281,P36376,P47727,Q09030,Q62997                                           |
| 11663 | 2,3,4,5,7,2<br>7,31,35 | 1,6,8,28,2<br>9,30,32,33<br>,34 | 5  | F1LM93,P35281,P47727,P52590,Q6IE51                                                                              |
| 11664 | 2,3,4,5,7,2<br>7,32,33 | 1,6,8,28,2<br>9,30,31,34<br>,35 | 8  | P00507,P02793,Q7TP54,P05539,P13852,P97605,Q09030,Q6IE51,Q99068                                                  |
| 11665 | 2,3,4,5,7,2<br>7,32,34 | 1,6,8,28,2<br>9,30,31,33<br>,35 | 16 | G3V686,P02782,P02803,P05539,P11762,P19629,P34901,P36376,P38444,P49744,P97605,Q07116,Q09030,Q63532,Q6IE51,Q99068 |
| 11666 | 2,3,4,5,7,2<br>7,32,35 | 1,6,8,28,2<br>9,30,31,33<br>,34 | 8  | P02782,P13432,P19629,P36376,P97605,Q09030,Q6IE51,Q99068                                                         |
| 11667 | 2,3,4,5,7,2<br>7,33,34 | 1,6,8,28,2<br>9,30,31,32<br>,35 | 9  | G3V686,P02782,P06911,P11762,P14408,P34901,Q07116,Q09030,Q6IE51                                                  |
| 11668 | 2,3,4,5,7,2<br>7,33,35 | 1,6,8,28,2<br>9,30,31,32<br>,34 | 10 | P02782,P06911,P13432,P35281,P47727,P60905,P97605,Q6AYR9,Q6IE51,Q99MH3                                           |
| 11669 | 2,3,4,5,7,2<br>7,34,35 | 1,6,8,28,2<br>9,30,31,32<br>,33 | 16 | F1LM93,G3V686,O35547,P02780,P02782,P04905,P06911,P08723,P14408,P19629,P35281,P47727,P60905,Q09030,Q5GRG2,Q6IE51 |

|       |                        |                                 |   |                                                  |
|-------|------------------------|---------------------------------|---|--------------------------------------------------|
| 11670 | 2,3,4,5,7,2<br>8,29,30 | 1,6,8,27,3<br>1,32,33,34<br>,35 | 2 | P01836,P13432                                    |
| 11671 | 2,3,4,5,7,2<br>8,29,31 | 1,6,8,27,3<br>0,32,33,34<br>,35 | 2 | P01836,Q6lFV1                                    |
| 11672 | 2,3,4,5,7,2<br>8,29,32 | 1,6,8,27,3<br>0,31,33,34<br>,35 | 2 | P01836,P97605                                    |
| 11673 | 2,3,4,5,7,2<br>8,29,33 | 1,6,8,27,3<br>0,31,32,34<br>,35 | 0 |                                                  |
| 11674 | 2,3,4,5,7,2<br>8,29,34 | 1,6,8,27,3<br>0,31,32,33<br>,35 | 1 | P01836                                           |
| 11675 | 2,3,4,5,7,2<br>8,29,35 | 1,6,8,27,3<br>0,31,32,33<br>,34 | 1 | P13432                                           |
| 11676 | 2,3,4,5,7,2<br>8,30,31 | 1,6,8,27,2<br>9,32,33,34<br>,35 | 2 | P01836,P42854                                    |
| 11677 | 2,3,4,5,7,2<br>8,30,32 | 1,6,8,27,2<br>9,31,33,34<br>,35 | 3 | P01836,P97605,Q09030                             |
| 11678 | 2,3,4,5,7,2<br>8,30,33 | 1,6,8,27,2<br>9,31,32,34<br>,35 | 2 | P51907,P97605                                    |
| 11679 | 2,3,4,5,7,2<br>8,30,34 | 1,6,8,27,2<br>9,31,32,33<br>,35 | 7 | P01836,P11762,P25031,P35280,P47967,P97615,Q09030 |
| 11680 | 2,3,4,5,7,2<br>8,30,35 | 1,6,8,27,2<br>9,31,32,33<br>,34 | 1 | P97584                                           |
| 11681 | 2,3,4,5,7,2<br>8,31,32 | 1,6,8,27,2<br>9,30,33,34<br>,35 | 2 | P01836,P97605                                    |
| 11682 | 2,3,4,5,7,2<br>8,31,33 | 1,6,8,27,2<br>9,30,32,34<br>,35 | 2 | P51907,P97605                                    |
| 11683 | 2,3,4,5,7,2<br>8,31,34 | 1,6,8,27,2<br>9,30,32,33<br>,35 | 2 | P01836,Q62997                                    |
| 11684 | 2,3,4,5,7,2<br>8,31,35 | 1,6,8,27,2<br>9,30,32,33<br>,34 | 4 | P06760,P52590,P97584,P97605                      |

|       |                        |                                 |   |                                           |
|-------|------------------------|---------------------------------|---|-------------------------------------------|
| 11685 | 2,3,4,5,7,2<br>8,32,33 | 1,6,8,27,2<br>9,30,31,34<br>,35 | 2 | P02793;Q7TP54,P97605                      |
| 11686 | 2,3,4,5,7,2<br>8,32,34 | 1,6,8,27,2<br>9,30,31,33<br>,35 | 4 | P01836,P97605,P97615,Q09030               |
| 11687 | 2,3,4,5,7,2<br>8,32,35 | 1,6,8,27,2<br>9,30,31,33<br>,34 | 2 | P97605,Q6AYR9                             |
| 11688 | 2,3,4,5,7,2<br>8,33,34 | 1,6,8,27,2<br>9,30,31,32<br>,35 | 2 | P11762,P97605                             |
| 11689 | 2,3,4,5,7,2<br>8,33,35 | 1,6,8,27,2<br>9,30,31,32<br>,34 | 2 | P97605,Q6AYR9                             |
| 11690 | 2,3,4,5,7,2<br>8,34,35 | 1,6,8,27,2<br>9,30,31,32<br>,33 | 2 | P12785,Q6AY61                             |
| 11691 | 2,3,4,5,7,2<br>9,30,31 | 1,6,8,27,2<br>8,32,33,34<br>,35 | 4 | P01836,P42854,P97584,Q6IFU7               |
| 11692 | 2,3,4,5,7,2<br>9,30,32 | 1,6,8,27,2<br>8,31,33,34<br>,35 | 3 | P01836,P13432,P97605                      |
| 11693 | 2,3,4,5,7,2<br>9,30,33 | 1,6,8,27,2<br>8,31,32,34<br>,35 | 1 | P13432                                    |
| 11694 | 2,3,4,5,7,2<br>9,30,34 | 1,6,8,27,2<br>8,31,32,33<br>,35 | 3 | P01836,P35280,P47727                      |
| 11695 | 2,3,4,5,7,2<br>9,30,35 | 1,6,8,27,2<br>8,31,32,33<br>,34 | 5 | P13432,P14480,P47727,P97584,Q6IFU7        |
| 11696 | 2,3,4,5,7,2<br>9,31,32 | 1,6,8,27,2<br>8,30,33,34<br>,35 | 4 | P01836,P36376,P97605,Q99068               |
| 11697 | 2,3,4,5,7,2<br>9,31,33 | 1,6,8,27,2<br>8,30,32,34<br>,35 | 3 | P97605,Q6IFU7,Q6IFV1                      |
| 11698 | 2,3,4,5,7,2<br>9,31,34 | 1,6,8,27,2<br>8,30,32,33<br>,35 | 4 | P01836,Q62997,Q6IFU7,Q6IFV1               |
| 11699 | 2,3,4,5,7,2<br>9,31,35 | 1,6,8,27,2<br>8,30,32,33<br>,34 | 6 | P13432,P35281,P52590,P97584,Q6IFU7,Q6IFV1 |

|       |                        |                                 |    |                                                                                                                               |
|-------|------------------------|---------------------------------|----|-------------------------------------------------------------------------------------------------------------------------------|
| 11700 | 2,3,4,5,7,2<br>9,32,33 | 1,6,8,27,2<br>8,30,31,34<br>,35 | 3  | P02793;Q7TP54,P97605,Q8CJD3                                                                                                   |
| 11701 | 2,3,4,5,7,2<br>9,32,34 | 1,6,8,27,2<br>8,30,31,33<br>,35 | 5  | G3V686,P01836,P02782,P38444,P97605                                                                                            |
| 11702 | 2,3,4,5,7,2<br>9,32,35 | 1,6,8,27,2<br>8,30,31,33<br>,34 | 3  | P02782,P13432,P97605                                                                                                          |
| 11703 | 2,3,4,5,7,2<br>9,33,34 | 1,6,8,27,2<br>8,30,31,32<br>,35 | 2  | P02782,P97605                                                                                                                 |
| 11704 | 2,3,4,5,7,2<br>9,33,35 | 1,6,8,27,2<br>8,30,31,32<br>,34 | 4  | P02782,P13432,P97605,Q9WTT6                                                                                                   |
| 11705 | 2,3,4,5,7,2<br>9,34,35 | 1,6,8,27,2<br>8,30,31,32<br>,33 | 8  | P02782,P06911,P08723,P13432,P31044,P47727,Q5GRG2,Q6IFV1                                                                       |
| 11706 | 2,3,4,5,7,3<br>0,31,32 | 1,6,8,27,2<br>8,29,33,34<br>,35 | 7  | P01836,P02782,P08723,P42854,P97584,P97605,Q09030                                                                              |
| 11707 | 2,3,4,5,7,3<br>0,31,33 | 1,6,8,27,2<br>8,29,32,34<br>,35 | 8  | P00507,P02782,P42854,P51907,P52590,P97605,Q5M819,Q9JHB9                                                                       |
| 11708 | 2,3,4,5,7,3<br>0,31,34 | 1,6,8,27,2<br>8,29,32,33<br>,35 | 18 | F1LM93,O35547,P01836,P02781,P02782,P04905,P08010,P08723,P17559,P35280,P35281,P42854,P47727,P97605,Q09030,Q62997,Q80WL1,Q9JHB9 |
| 11709 | 2,3,4,5,7,3<br>0,31,35 | 1,6,8,27,2<br>8,29,32,33<br>,34 | 18 | F1LM93,O35547,P02781,P02782,P05369,P08010,P08723,P24368,P35281,P42854,P47727,P52590,P97584,P97605,Q6IFU7,Q80WL1,Q9JHB9,Q9Z1F2 |
| 11710 | 2,3,4,5,7,3<br>0,32,33 | 1,6,8,27,2<br>8,29,31,34<br>,35 | 5  | P01836,P02782,P97605,Q09030,Q5M819                                                                                            |
| 11711 | 2,3,4,5,7,3<br>0,32,34 | 1,6,8,27,2<br>8,29,31,33<br>,35 | 11 | O35547,P01836,P02781,P02782,P06911,P08723,P35280,P38444,P97605,Q09030,Q9JHB9                                                  |
| 11712 | 2,3,4,5,7,3<br>0,32,35 | 1,6,8,27,2<br>8,29,31,33<br>,34 | 9  | O35547,P02781,P02782,P06911,P08723,P97584,P97605,Q09030,Q9JHB9                                                                |
| 11713 | 2,3,4,5,7,3<br>0,33,34 | 1,6,8,27,2<br>8,29,31,32<br>,35 | 14 | O35547,P02781,P02782,P06911,P08723,P11762,P17559,P35280,P47727,P51907,P97605,Q09030,Q5GRG2,Q9JHB9                             |
| 11714 | 2,3,4,5,7,3<br>0,33,35 | 1,6,8,27,2<br>8,29,31,32<br>,34 | 12 | O35547,P02781,P02782,P06911,P08010,P08723,P13432,P47727,P97584,P97605,Q5GRG2,Q9JHB9                                           |



|       |                        |                                 |    |                                                                                                                                                                                |
|-------|------------------------|---------------------------------|----|--------------------------------------------------------------------------------------------------------------------------------------------------------------------------------|
| 11715 | 2,3,4,5,7,3<br>0,34,35 | 1,6,8,27,2<br>8,29,31,32<br>,33 | 23 | F1LM93,O35547,P02781,P02782,P04905,P06911,P08010,P08723,P0C0A9,P22985,P24368,P30120,P35280,P35281,P47727,P97605,Q09030,Q5GRG2,Q62902,Q812E4,Q8CJ52,Q9JHB9,Q9JI85               |
| 11716 | 2,3,4,5,7,3<br>1,32,33 | 1,6,8,27,2<br>8,29,30,34<br>,35 | 6  | P02781,P02782,P97605,Q6AYR9,Q8CJD3,Q99068                                                                                                                                      |
| 11717 | 2,3,4,5,7,3<br>1,32,34 | 1,6,8,27,2<br>8,29,30,33<br>,35 | 19 | F1LM93,G3V686,O35547,P01836,P02781,P02782,P08010,P08644,P08723,P0C0A9,P30120,P36374,P36376,P38444,P97605,Q09030,Q62997,Q8CJ52,Q9JHB9                                           |
| 11718 | 2,3,4,5,7,3<br>1,32,35 | 1,6,8,27,2<br>8,29,30,33<br>,34 | 15 | F1LM93,O35547,P02781,P02782,P05369,P08010,P08723,P0C0A9,P30120,P36376,P52590,P97584,P97605,Q6AYR9,Q9JHB9                                                                       |
| 11719 | 2,3,4,5,7,3<br>1,33,34 | 1,6,8,27,2<br>8,29,30,32<br>,35 | 15 | F1LM93,P02781,P02782,P08010,P08644,P08723,P0C0A9,P11762,P30120,P47727,P51907,P60905,P97605,Q62997,Q9JHB9                                                                       |
| 11720 | 2,3,4,5,7,3<br>1,33,35 | 1,6,8,27,2<br>8,29,30,32<br>,34 | 20 | F1LM93,O08815,O35547,P02781,P02782,P05369,P08010,P08723,P0C0A9,P24368,P30120,P35281,P47727,P52590,P60905,P97584,P97605,Q6AYR9,Q9JHB9,Q9WTT6                                    |
| 11721 | 2,3,4,5,7,3<br>1,34,35 | 1,6,8,27,2<br>8,29,30,32<br>,33 | 24 | F1LM93,O08815,O35547,P02781,P02782,P04905,P05369,P08010,P08723,P0C0A9,P24368,P30120,P35281,P36374,P47727,P52590,P60905,P97605,Q62997,Q6IFV1,Q812E4,Q8CJ52,Q9JHB9,Q9JI85        |
| 11722 | 2,3,4,5,7,3<br>2,33,34 | 1,6,8,27,2<br>8,29,30,31<br>,35 | 13 | G3V686,O35547,P02781,P02782,P08644,P08723,P0C0A9,P11762,P34901,P97605,Q09030,Q6AYR9,Q9JHB9                                                                                     |
| 11723 | 2,3,4,5,7,3<br>2,33,35 | 1,6,8,27,2<br>8,29,30,31<br>,34 | 9  | O35547,P02781,P02782,P08723,P30120,P97605,Q6AYR9,Q9JHB9,Q9WTT6                                                                                                                 |
| 11724 | 2,3,4,5,7,3<br>2,34,35 | 1,6,8,27,2<br>8,29,30,31<br>,33 | 25 | F1LM93,O35547,P02781,P02782,P06911,P08010,P08723,P0C0A9,P19629,P30120,P36374,P38444,P47727,P60905,P97605,Q08464,Q09030,Q5GRG2,Q62902,Q63357,Q6AYR9,Q812E4,Q8CJ52,Q9JHB9,Q9JI85 |
| 11725 | 2,3,4,5,7,3<br>3,34,35 | 1,6,8,27,2<br>8,29,30,31<br>,32 | 23 | F1LM93,O08815,O35547,P02781,P02782,P04905,P06911,P08010,P08723,P0C0A9,P11762,P24368,P30120,P47727,P60905,P97605,Q08464,Q5GRG2,Q62902,Q6AYR9,Q812E4,Q8CJ52,Q9JHB9               |
| 11726 | 2,3,4,5,8,2<br>7,28,29 | 1,6,7,30,3<br>1,32,33,34<br>,35 | 1  | P13432                                                                                                                                                                         |
| 11727 | 2,3,4,5,8,2<br>7,28,30 | 1,6,7,29,3<br>1,32,33,34<br>,35 | 1  | Q6AYQ8                                                                                                                                                                         |
| 11728 | 2,3,4,5,8,2<br>7,28,31 | 1,6,7,29,3<br>0,32,33,34<br>,35 | 1  | Q99MH3                                                                                                                                                                         |
| 11729 | 2,3,4,5,8,2<br>7,28,32 | 1,6,7,29,3<br>0,31,33,34<br>,35 | 1  | P00714                                                                                                                                                                         |

|       |                        |                                 |    |                                                                       |
|-------|------------------------|---------------------------------|----|-----------------------------------------------------------------------|
| 11730 | 2,3,4,5,8,2<br>7,28,33 | 1,6,7,29,3<br>0,31,32,34<br>,35 | 1  | Q99MH3                                                                |
| 11731 | 2,3,4,5,8,2<br>7,28,34 | 1,6,7,29,3<br>0,31,32,33<br>,35 | 4  | P04182,P04762,Q6AY61,Q6AYS4                                           |
| 11732 | 2,3,4,5,8,2<br>7,28,35 | 1,6,7,29,3<br>0,31,32,33<br>,34 | 2  | P13432,Q99MH3                                                         |
| 11733 | 2,3,4,5,8,2<br>7,29,30 | 1,6,7,28,3<br>1,32,33,34<br>,35 | 1  | P13432                                                                |
| 11734 | 2,3,4,5,8,2<br>7,29,31 | 1,6,7,28,3<br>0,32,33,34<br>,35 | 2  | P13432,P36970                                                         |
| 11735 | 2,3,4,5,8,2<br>7,29,32 | 1,6,7,28,3<br>0,31,33,34<br>,35 | 2  | P13432,P97840                                                         |
| 11736 | 2,3,4,5,8,2<br>7,29,33 | 1,6,7,28,3<br>0,31,32,34<br>,35 | 3  | P13432,P36970,P97840                                                  |
| 11737 | 2,3,4,5,8,2<br>7,29,34 | 1,6,7,28,3<br>0,31,32,33<br>,35 | 2  | P13432,Q6AYS4                                                         |
| 11738 | 2,3,4,5,8,2<br>7,29,35 | 1,6,7,28,3<br>0,31,32,33<br>,34 | 2  | P13432,P97840                                                         |
| 11739 | 2,3,4,5,8,2<br>7,30,31 | 1,6,7,28,2<br>9,32,33,34<br>,35 | 5  | P02625,P09456,P36970,Q5M819,Q80WL1                                    |
| 11740 | 2,3,4,5,8,2<br>7,30,32 | 1,6,7,28,2<br>9,31,33,34<br>,35 | 0  |                                                                       |
| 11741 | 2,3,4,5,8,2<br>7,30,33 | 1,6,7,28,2<br>9,31,32,34<br>,35 | 4  | P06911,P36970,Q5M819,Q6AYL6                                           |
| 11742 | 2,3,4,5,8,2<br>7,30,34 | 1,6,7,28,2<br>9,31,32,33<br>,35 | 10 | P04762,P04905,P06911,P15399,P35280,P47727,P49744,Q5GRG2,Q6AYL6,Q6AYS4 |
| 11743 | 2,3,4,5,8,2<br>7,30,35 | 1,6,7,28,2<br>9,31,32,33<br>,34 | 7  | P06911,P09456,P12020,P13432,P47727,Q5GRG2,Q6AYL6                      |
| 11744 | 2,3,4,5,8,2<br>7,31,32 | 1,6,7,28,2<br>9,30,33,34<br>,35 | 1  | P20766                                                                |

|       |                        |                                 |    |                                                                       |
|-------|------------------------|---------------------------------|----|-----------------------------------------------------------------------|
| 11745 | 2,3,4,5,8,2<br>7,31,33 | 1,6,7,28,2<br>9,30,32,34<br>,35 | 2  | P36970,Q99MH3                                                         |
| 11746 | 2,3,4,5,8,2<br>7,31,34 | 1,6,7,28,2<br>9,30,32,33<br>,35 | 7  | P04905,P09456,P20766,P36970,P47727,Q62997,Q6AYS4                      |
| 11747 | 2,3,4,5,8,2<br>7,31,35 | 1,6,7,28,2<br>9,30,32,33<br>,34 | 2  | P09456,P47727                                                         |
| 11748 | 2,3,4,5,8,2<br>7,32,33 | 1,6,7,28,2<br>9,30,31,34<br>,35 | 1  | P97840                                                                |
| 11749 | 2,3,4,5,8,2<br>7,32,34 | 1,6,7,28,2<br>9,30,31,33<br>,35 | 8  | G3V686,P06760,P19629,P20766,P38444,P49744,P83121,Q6AYS4               |
| 11750 | 2,3,4,5,8,2<br>7,32,35 | 1,6,7,28,2<br>9,30,31,33<br>,34 | 3  | P13432,P19629,P97840                                                  |
| 11751 | 2,3,4,5,8,2<br>7,33,34 | 1,6,7,28,2<br>9,30,31,32<br>,35 | 5  | P04762,P06911,Q07116,Q5GRG2,Q6AYS4                                    |
| 11752 | 2,3,4,5,8,2<br>7,33,35 | 1,6,7,28,2<br>9,30,31,32<br>,34 | 6  | P06911,P09456,P13432,P97840,Q5GRG2,Q99MH3                             |
| 11753 | 2,3,4,5,8,2<br>7,34,35 | 1,6,7,28,2<br>9,30,31,32<br>,33 | 10 | P04905,P06911,P08723,P09456,P12020,P19629,P35467,P47727,P83121,Q5GRG2 |
| 11754 | 2,3,4,5,8,2<br>8,29,30 | 1,6,7,27,3<br>1,32,33,34<br>,35 | 1  | P13432                                                                |
| 11755 | 2,3,4,5,8,2<br>8,29,31 | 1,6,7,27,3<br>0,32,33,34<br>,35 | 0  |                                                                       |
| 11756 | 2,3,4,5,8,2<br>8,29,32 | 1,6,7,27,3<br>0,31,33,34<br>,35 | 1  | P97840                                                                |
| 11757 | 2,3,4,5,8,2<br>8,29,33 | 1,6,7,27,3<br>0,31,32,34<br>,35 | 2  | P13432,P97840                                                         |
| 11758 | 2,3,4,5,8,2<br>8,29,34 | 1,6,7,27,3<br>0,31,32,33<br>,35 | 2  | Q6AY61,Q6AYS4                                                         |
| 11759 | 2,3,4,5,8,2<br>8,29,35 | 1,6,7,27,3<br>0,31,32,33<br>,34 | 2  | P13432,P97840                                                         |

|       |                        |                                 |   |                             |
|-------|------------------------|---------------------------------|---|-----------------------------|
| 11760 | 2,3,4,5,8,2<br>8,30,31 | 1,6,7,27,2<br>9,32,33,34<br>,35 | 2 | Q5M819,Q80WL1               |
| 11761 | 2,3,4,5,8,2<br>8,30,32 | 1,6,7,27,2<br>9,31,33,34<br>,35 | 0 |                             |
| 11762 | 2,3,4,5,8,2<br>8,30,33 | 1,6,7,27,2<br>9,31,32,34<br>,35 | 1 | Q5M819                      |
| 11763 | 2,3,4,5,8,2<br>8,30,34 | 1,6,7,27,2<br>9,31,32,33<br>,35 | 4 | P04762,P35280,Q6AY61,Q6AYS4 |
| 11764 | 2,3,4,5,8,2<br>8,30,35 | 1,6,7,27,2<br>9,31,32,33<br>,34 | 0 |                             |
| 11765 | 2,3,4,5,8,2<br>8,31,32 | 1,6,7,27,2<br>9,30,33,34<br>,35 | 2 | P20766,P97605               |
| 11766 | 2,3,4,5,8,2<br>8,31,33 | 1,6,7,27,2<br>9,30,32,34<br>,35 | 0 |                             |
| 11767 | 2,3,4,5,8,2<br>8,31,34 | 1,6,7,27,2<br>9,30,32,33<br>,35 | 4 | P20766,Q62997,Q6AY61,Q6AYS4 |
| 11768 | 2,3,4,5,8,2<br>8,31,35 | 1,6,7,27,2<br>9,30,32,33<br>,34 | 1 | P20766                      |
| 11769 | 2,3,4,5,8,2<br>8,32,33 | 1,6,7,27,2<br>9,30,31,34<br>,35 | 2 | P97605,P97840               |
| 11770 | 2,3,4,5,8,2<br>8,32,34 | 1,6,7,27,2<br>9,30,31,33<br>,35 | 4 | P20766,P52303,Q6AY61,Q6AYS4 |
| 11771 | 2,3,4,5,8,2<br>8,32,35 | 1,6,7,27,2<br>9,30,31,33<br>,34 | 2 | P97605,P97840               |
| 11772 | 2,3,4,5,8,2<br>8,33,34 | 1,6,7,27,2<br>9,30,31,32<br>,35 | 3 | P04762,Q6AY61,Q6AYS4        |
| 11773 | 2,3,4,5,8,2<br>8,33,35 | 1,6,7,27,2<br>9,30,31,32<br>,34 | 2 | P97840,Q6AYR9               |
| 11774 | 2,3,4,5,8,2<br>8,34,35 | 1,6,7,27,2<br>9,30,31,32<br>,33 | 2 | P20766,Q6AY61               |

|       |                        |                                 |   |                                                         |
|-------|------------------------|---------------------------------|---|---------------------------------------------------------|
| 11775 | 2,3,4,5,8,2<br>9,30,31 | 1,6,7,27,2<br>8,32,33,34<br>,35 | 4 | P36970,Q5M819,Q6IFU7,Q80WL1                             |
| 11776 | 2,3,4,5,8,2<br>9,30,32 | 1,6,7,27,2<br>8,31,33,34<br>,35 | 2 | P13432,Q6TMA8                                           |
| 11777 | 2,3,4,5,8,2<br>9,30,33 | 1,6,7,27,2<br>8,31,32,34<br>,35 | 3 | P13432,Q5M819,Q9QUL6                                    |
| 11778 | 2,3,4,5,8,2<br>9,30,34 | 1,6,7,27,2<br>8,31,32,33<br>,35 | 6 | P10715,P12020,P13432,P35280,Q5GRG2,Q6AYS4               |
| 11779 | 2,3,4,5,8,2<br>9,30,35 | 1,6,7,27,2<br>8,31,32,33<br>,34 | 5 | P06911,P12020,P13432,Q06000,Q5GRG2                      |
| 11780 | 2,3,4,5,8,2<br>9,31,32 | 1,6,7,27,2<br>8,30,33,34<br>,35 | 2 | P20766,P97840                                           |
| 11781 | 2,3,4,5,8,2<br>9,31,33 | 1,6,7,27,2<br>8,30,32,34<br>,35 | 2 | P36970,P97840                                           |
| 11782 | 2,3,4,5,8,2<br>9,31,34 | 1,6,7,27,2<br>8,30,32,33<br>,35 | 3 | P20766,Q62997,Q6AYS4                                    |
| 11783 | 2,3,4,5,8,2<br>9,31,35 | 1,6,7,27,2<br>8,30,32,33<br>,34 | 4 | P13432,P97840,Q06000,Q6IFU7                             |
| 11784 | 2,3,4,5,8,2<br>9,32,33 | 1,6,7,27,2<br>8,30,31,34<br>,35 | 7 | P13432,P47967,P97605,P97840,Q6TMA8,Q8CJD3,Q9QUL6        |
| 11785 | 2,3,4,5,8,2<br>9,32,34 | 1,6,7,27,2<br>8,30,31,33<br>,35 | 4 | P19629,P20766,Q6AYS4,Q6TMA8                             |
| 11786 | 2,3,4,5,8,2<br>9,32,35 | 1,6,7,27,2<br>8,30,31,33<br>,34 | 5 | P13432,P19629,P47967,P97840,Q6TMA8                      |
| 11787 | 2,3,4,5,8,2<br>9,33,34 | 1,6,7,27,2<br>8,30,31,32<br>,35 | 3 | Q5GRG2,Q6AYS4,Q6TMA8                                    |
| 11788 | 2,3,4,5,8,2<br>9,33,35 | 1,6,7,27,2<br>8,30,31,32<br>,34 | 4 | P13432,P47967,P97840,Q5GRG2                             |
| 11789 | 2,3,4,5,8,2<br>9,34,35 | 1,6,7,27,2<br>8,30,31,32<br>,33 | 8 | P06911,P10715,P12020,P13432,P19629,P31044,P47727,Q5GRG2 |

|       |                        |                                 |    |                                                                                                                                                                                |
|-------|------------------------|---------------------------------|----|--------------------------------------------------------------------------------------------------------------------------------------------------------------------------------|
| 11790 | 2,3,4,5,8,3<br>0,31,32 | 1,6,7,27,2<br>8,29,33,34<br>,35 | 5  | P20766,P97605,Q5M819,Q80WL1,Q9JI85                                                                                                                                             |
| 11791 | 2,3,4,5,8,3<br>0,31,33 | 1,6,7,27,2<br>8,29,32,34<br>,35 | 4  | P36970,Q5M819,Q80WL1,Q9QUL6                                                                                                                                                    |
| 11792 | 2,3,4,5,8,3<br>0,31,34 | 1,6,7,27,2<br>8,29,32,33<br>,35 | 11 | P04905,P08723,P09456,P20766,P35280,P47727,Q62997,Q6AYS4,Q80WL1,Q9JHB9,Q9JI85                                                                                                   |
| 11793 | 2,3,4,5,8,3<br>0,31,35 | 1,6,7,27,2<br>8,29,32,33<br>,34 | 10 | O08815,P08723,P09456,P24368,P47727,Q06000,Q6IFU7,Q80WL1,Q9JHB9,Q9JI85                                                                                                          |
| 11794 | 2,3,4,5,8,3<br>0,32,33 | 1,6,7,27,2<br>8,29,31,34<br>,35 | 3  | P97605,Q5M819,Q9QUL6                                                                                                                                                           |
| 11795 | 2,3,4,5,8,3<br>0,32,34 | 1,6,7,27,2<br>8,29,31,33<br>,35 | 9  | P06911,P08723,P19629,P20766,P35280,P97605,Q5GRG2,Q6AYS4,Q9JI85                                                                                                                 |
| 11796 | 2,3,4,5,8,3<br>0,32,35 | 1,6,7,27,2<br>8,29,31,33<br>,34 | 9  | P06911,P08723,P09456,P13432,P19629,P97605,Q5GRG2,Q9JHB9,Q9JI85                                                                                                                 |
| 11797 | 2,3,4,5,8,3<br>0,33,34 | 1,6,7,27,2<br>8,29,31,32<br>,35 | 12 | P04762,P06911,P08723,P12020,P22985,P35280,P47727,Q5GRG2,Q5M819,Q6AYL6,Q6AYS4,Q9JHB9                                                                                            |
| 11798 | 2,3,4,5,8,3<br>0,33,35 | 1,6,7,27,2<br>8,29,31,32<br>,34 | 11 | P06911,P08723,P09456,P12020,P13432,P47727,Q5GRG2,Q62902,Q6AYL6,Q9JHB9,Q9JI85                                                                                                   |
| 11799 | 2,3,4,5,8,3<br>0,34,35 | 1,6,7,27,2<br>8,29,31,32<br>,33 | 24 | O08815,P02781,P02793,Q7TP54,P04905,P06911,P08723,P09456,P10715,P12020,P19132,P19629,P22985,P24368,P35280,P47727,Q06000,Q5GRG2,Q62902,Q6AY61,Q6AYL6,Q80WL1,Q812E4,Q9JHB9,Q9JI85 |
| 11800 | 2,3,4,5,8,3<br>1,32,33 | 1,6,7,27,2<br>8,29,30,34<br>,35 | 6  | P20766,P97605,P97840,Q5M819,Q8CJD3,Q9QUL6                                                                                                                                      |
| 11801 | 2,3,4,5,8,3<br>1,32,34 | 1,6,7,27,2<br>8,29,30,33<br>,35 | 10 | P08723,P08753,P09456,P20766,P36374,P97605,Q62997,Q6AYS4,Q9JHB9,Q9JI85                                                                                                          |
| 11802 | 2,3,4,5,8,3<br>1,32,35 | 1,6,7,27,2<br>8,29,30,33<br>,34 | 11 | O08815,P02781,P08723,P09456,P20766,P30120,P97605,P97840,Q6AYR9,Q9JHB9,Q9JI85                                                                                                   |
| 11803 | 2,3,4,5,8,3<br>1,33,34 | 1,6,7,27,2<br>8,29,30,32<br>,35 | 10 | F1LM93,O08815,P08723,P09456,P20766,Q62997,Q63355,Q6AYS4,Q9JHB9,Q9JI85                                                                                                          |
| 11804 | 2,3,4,5,8,3<br>1,33,35 | 1,6,7,27,2<br>8,29,30,32<br>,34 | 14 | F1LM93,O08815,P02781,P05369,P08723,P09456,P30120,P60905,P97605,P97840,Q63355,Q6AYR9,Q9JHB9,Q9JI85                                                                              |

|       |                         |                                 |    |                                                                                                                                                           |
|-------|-------------------------|---------------------------------|----|-----------------------------------------------------------------------------------------------------------------------------------------------------------|
| 11805 | 2,3,4,5,8,3<br>1,34,35  | 1,6,7,27,2<br>8,29,30,32<br>,33 | 21 | F1LM93,O08815,P02781,P02793,Q7TP54,P04905,P05369,P08010,P08723,P09456,P20766,P24368,P30120,P36374,P47727,P60905,Q62902,Q62997,Q812E4,Q8CJ52,Q9JHB9,Q9JI85 |
| 11806 | 2,3,4,5,8,3<br>2,33,34  | 1,6,7,27,2<br>8,29,30,31<br>,35 | 8  | P08723,P08753,P19629,P20766,P34901,P97605,Q5GRG2,Q6AYS4                                                                                                   |
| 11807 | 2,3,4,5,8,3<br>2,33,35  | 1,6,7,27,2<br>8,29,30,31<br>,34 | 10 | P02781,P08723,P19629,P30120,P97605,P97840,Q5GRG2,Q6AYR9,Q9JHB9,Q9JI85                                                                                     |
| 11808 | 2,3,4,5,8,3<br>2,34,35  | 1,6,7,27,2<br>8,29,30,31<br>,33 | 22 | O08815,P02781,P06911,P08723,P08753,P09456,P19629,P20766,P30120,P35467,P36374,P83121,P97605,Q5GRG2,Q62902,Q63357,Q6AYR9,Q6AYS4,Q812E4,Q8CJ52,Q9JHB9,Q9JI85 |
| 11809 | 2,3,4,5,8,3<br>3,34,35  | 1,6,7,27,2<br>8,29,30,31<br>,32 | 21 | F1LM93,O08815,P02781,P02782,P06911,P08010,P08723,P09456,P12020,P19629,P30120,P47727,P60905,Q5GRG2,Q62902,Q63355,Q6AYL6,Q6AYR9,Q812E4,Q9JHB9,Q9JI85        |
| 11810 | 2,3,4,5,27,<br>28,29,30 | 1,6,7,8,31,<br>32,33,34,3<br>5  | 2  | P01835,P13432                                                                                                                                             |
| 11811 | 2,3,4,5,27,<br>28,29,31 | 1,6,7,8,30,<br>32,33,34,3<br>5  | 0  |                                                                                                                                                           |
| 11812 | 2,3,4,5,27,<br>28,29,32 | 1,6,7,8,30,<br>31,33,34,3<br>5  | 2  | P13432,Q99068                                                                                                                                             |
| 11813 | 2,3,4,5,27,<br>28,29,33 | 1,6,7,8,30,<br>31,32,34,3<br>5  | 1  | P13432                                                                                                                                                    |
| 11814 | 2,3,4,5,27,<br>28,29,34 | 1,6,7,8,30,<br>31,32,33,3<br>5  | 1  | P04182                                                                                                                                                    |
| 11815 | 2,3,4,5,27,<br>28,29,35 | 1,6,7,8,30,<br>31,32,33,3<br>4  | 1  | P13432                                                                                                                                                    |
| 11816 | 2,3,4,5,27,<br>28,30,31 | 1,6,7,8,29,<br>32,33,34,3<br>5  | 1  | Q6AYQ8                                                                                                                                                    |
| 11817 | 2,3,4,5,27,<br>28,30,32 | 1,6,7,8,29,<br>31,33,34,3<br>5  | 2  | Q6AYQ8,Q99068                                                                                                                                             |
| 11818 | 2,3,4,5,27,<br>28,30,33 | 1,6,7,8,29,<br>31,32,34,3<br>5  | 1  | P51907                                                                                                                                                    |
| 11819 | 2,3,4,5,27,<br>28,30,34 | 1,6,7,8,29,<br>31,32,33,3<br>5  | 3  | P04182,P35280,Q8CJD3                                                                                                                                      |

|       |                         |                                |   |                                                  |
|-------|-------------------------|--------------------------------|---|--------------------------------------------------|
| 11820 | 2,3,4,5,27,<br>28,30,35 | 1,6,7,8,29,<br>31,32,33,3<br>4 | 3 | P01835,P13432,Q6AYQ8                             |
| 11821 | 2,3,4,5,27,<br>28,31,32 | 1,6,7,8,29,<br>30,33,34,3<br>5 | 1 | Q99068                                           |
| 11822 | 2,3,4,5,27,<br>28,31,33 | 1,6,7,8,29,<br>30,32,34,3<br>5 | 1 | P51907                                           |
| 11823 | 2,3,4,5,27,<br>28,31,34 | 1,6,7,8,29,<br>30,32,33,3<br>5 | 3 | A2RUV9,P04182,Q62997                             |
| 11824 | 2,3,4,5,27,<br>28,31,35 | 1,6,7,8,29,<br>30,32,33,3<br>4 | 0 |                                                  |
| 11825 | 2,3,4,5,27,<br>28,32,33 | 1,6,7,8,29,<br>30,31,34,3<br>5 | 1 | Q99068                                           |
| 11826 | 2,3,4,5,27,<br>28,32,34 | 1,6,7,8,29,<br>30,31,33,3<br>5 | 2 | P04182,P34901                                    |
| 11827 | 2,3,4,5,27,<br>28,32,35 | 1,6,7,8,29,<br>30,31,33,3<br>4 | 0 |                                                  |
| 11828 | 2,3,4,5,27,<br>28,33,34 | 1,6,7,8,29,<br>30,31,32,3<br>5 | 2 | P04182,P34901                                    |
| 11829 | 2,3,4,5,27,<br>28,33,35 | 1,6,7,8,29,<br>30,31,32,3<br>4 | 1 | Q99MH3                                           |
| 11830 | 2,3,4,5,27,<br>28,34,35 | 1,6,7,8,29,<br>30,31,32,3<br>3 | 3 | P04182,P12785,Q6AY61                             |
| 11831 | 2,3,4,5,27,<br>29,30,31 | 1,6,7,8,28,<br>32,33,34,3<br>5 | 0 |                                                  |
| 11832 | 2,3,4,5,27,<br>29,30,32 | 1,6,7,8,28,<br>31,33,34,3<br>5 | 2 | P13432,Q99068                                    |
| 11833 | 2,3,4,5,27,<br>29,30,33 | 1,6,7,8,28,<br>31,32,34,3<br>5 | 1 | P13432                                           |
| 11834 | 2,3,4,5,27,<br>29,30,34 | 1,6,7,8,28,<br>31,32,33,3<br>5 | 7 | P06911,P10715,P12020,P13432,P31044,P35280,Q5GRG2 |



|       |                         |                                |   |                                                                |
|-------|-------------------------|--------------------------------|---|----------------------------------------------------------------|
| 11835 | 2,3,4,5,27,<br>29,30,35 | 1,6,7,8,28,<br>31,32,33,3<br>4 | 7 | P01835,P06911,P10715,P12020,P13432,P31044,Q5GRG2               |
| 11836 | 2,3,4,5,27,<br>29,31,32 | 1,6,7,8,28,<br>30,33,34,3<br>5 | 1 | Q99068                                                         |
| 11837 | 2,3,4,5,27,<br>29,31,33 | 1,6,7,8,28,<br>30,32,34,3<br>5 | 1 | Q99068                                                         |
| 11838 | 2,3,4,5,27,<br>29,31,34 | 1,6,7,8,28,<br>30,32,33,3<br>5 | 2 | A2RUV9,Q62997                                                  |
| 11839 | 2,3,4,5,27,<br>29,31,35 | 1,6,7,8,28,<br>30,32,33,3<br>4 | 1 | P13432                                                         |
| 11840 | 2,3,4,5,27,<br>29,32,33 | 1,6,7,8,28,<br>30,31,34,3<br>5 | 3 | P13432,P97840,Q99068                                           |
| 11841 | 2,3,4,5,27,<br>29,32,34 | 1,6,7,8,28,<br>30,31,33,3<br>5 | 4 | G3V686,P10715,P19629,P34901                                    |
| 11842 | 2,3,4,5,27,<br>29,32,35 | 1,6,7,8,28,<br>30,31,33,3<br>4 | 4 | P10715,P13432,P19629,P97840                                    |
| 11843 | 2,3,4,5,27,<br>29,33,34 | 1,6,7,8,28,<br>30,31,32,3<br>5 | 6 | P04218,P10715,P12020,P31044,P34901,Q5GRG2                      |
| 11844 | 2,3,4,5,27,<br>29,33,35 | 1,6,7,8,28,<br>30,31,32,3<br>4 | 5 | P12020,P13432,P31044,P97840,Q5GRG2                             |
| 11845 | 2,3,4,5,27,<br>29,34,35 | 1,6,7,8,28,<br>30,31,32,3<br>3 | 9 | P06911,P10715,P12020,P12785,P13432,P19629,P31044,P47727,Q5GRG2 |
| 11846 | 2,3,4,5,27,<br>30,31,32 | 1,6,7,8,28,<br>29,33,34,3<br>5 | 1 | Q99068                                                         |
| 11847 | 2,3,4,5,27,<br>30,31,33 | 1,6,7,8,28,<br>29,32,34,3<br>5 | 1 | P51907                                                         |
| 11848 | 2,3,4,5,27,<br>30,31,34 | 1,6,7,8,28,<br>29,32,33,3<br>5 | 7 | P02625,P04905,P08723,P35280,P47727,Q62997,Q63617               |
| 11849 | 2,3,4,5,27,<br>30,31,35 | 1,6,7,8,28,<br>29,32,33,3<br>4 | 3 | P09456,P35281,P47727                                           |

|       |                         |                                |    |                                                                                                                                      |
|-------|-------------------------|--------------------------------|----|--------------------------------------------------------------------------------------------------------------------------------------|
| 11850 | 2,3,4,5,27,<br>30,32,33 | 1,6,7,8,28,<br>29,31,34,3<br>5 | 1  | Q99068                                                                                                                               |
| 11851 | 2,3,4,5,27,<br>30,32,34 | 1,6,7,8,28,<br>29,31,33,3<br>5 | 8  | P02803,P06911,P10715,P19629,P34901,P35280,P83121,Q5GRG2                                                                              |
| 11852 | 2,3,4,5,27,<br>30,32,35 | 1,6,7,8,28,<br>29,31,33,3<br>4 | 5  | P06911,P10715,P13432,P19629,Q5GRG2                                                                                                   |
| 11853 | 2,3,4,5,27,<br>30,33,34 | 1,6,7,8,28,<br>29,31,32,3<br>5 | 10 | P06911,P10715,P12020,P31044,P34901,P35280,P47727,P51907,Q5GRG2,Q6AYL6                                                                |
| 11854 | 2,3,4,5,27,<br>30,33,35 | 1,6,7,8,28,<br>29,31,32,3<br>4 | 7  | P06911,P10715,P12020,P13432,P47727,Q5GRG2,Q6AYL6                                                                                     |
| 11855 | 2,3,4,5,27,<br>30,34,35 | 1,6,7,8,28,<br>29,31,32,3<br>3 | 18 | P02793;Q7TP54,P04905,P06911,P08723,P09456,P10715,P12020,P19629,P22985,P31044,P35280,P47727,P69897,P83121,Q5GRG2,Q62902,Q6AYL6,Q8CJ52 |
| 11856 | 2,3,4,5,27,<br>31,32,33 | 1,6,7,8,28,<br>29,30,34,3<br>5 | 1  | Q99068                                                                                                                               |
| 11857 | 2,3,4,5,27,<br>31,32,34 | 1,6,7,8,28,<br>29,30,33,3<br>5 | 5  | A2RUV9,G3V686,P34901,Q62997,Q8CJ52                                                                                                   |
| 11858 | 2,3,4,5,27,<br>31,32,35 | 1,6,7,8,28,<br>29,30,33,3<br>4 | 1  | Q8CJ52                                                                                                                               |
| 11859 | 2,3,4,5,27,<br>31,33,34 | 1,6,7,8,28,<br>29,30,32,3<br>5 | 5  | F1LM93,P34901,P51907,Q62997,Q63355                                                                                                   |
| 11860 | 2,3,4,5,27,<br>31,33,35 | 1,6,7,8,28,<br>29,30,32,3<br>4 | 3  | F1LM93,P09456,Q63355                                                                                                                 |
| 11861 | 2,3,4,5,27,<br>31,34,35 | 1,6,7,8,28,<br>29,30,32,3<br>3 | 12 | A2RUV9,F1LM93,P02780,P04905,P08723,P09456,P12785,P30120,P35281,P47727,Q62997,Q8CJ52                                                  |
| 11862 | 2,3,4,5,27,<br>32,33,34 | 1,6,7,8,28,<br>29,30,31,3<br>5 | 6  | G3V686,P02782,P19629,P34901,Q4FZU2,Q5GRG2                                                                                            |
| 11863 | 2,3,4,5,27,<br>32,33,35 | 1,6,7,8,28,<br>29,30,31,3<br>4 | 3  | P19629,P97840,Q5GRG2                                                                                                                 |
| 11864 | 2,3,4,5,27,<br>32,34,35 | 1,6,7,8,28,<br>29,30,31,3<br>3 | 14 | P02782,P06911,P08723,P10715,P12020,P19629,P31044,P34901,P83121,Q5GRG2,Q62902,Q63357,Q8CJ52,Q9QZK9                                    |

|       |                         |                                |    |                                                                                                          |
|-------|-------------------------|--------------------------------|----|----------------------------------------------------------------------------------------------------------|
| 11865 | 2,3,4,5,27,<br>33,34,35 | 1,6,7,8,28,<br>29,30,31,3<br>2 | 15 | F1LM93,P02782,P06911,P08723,P09456,P10715,P12020,P19629,P31044,P47727,Q5GRG2,Q62902,Q63355,Q6AYL6,Q8CJ52 |
| 11866 | 2,3,4,5,28,<br>29,30,31 | 1,6,7,8,27,<br>32,33,34,3<br>5 | 0  |                                                                                                          |
| 11867 | 2,3,4,5,28,<br>29,30,32 | 1,6,7,8,27,<br>31,33,34,3<br>5 | 1  | P01836                                                                                                   |
| 11868 | 2,3,4,5,28,<br>29,30,33 | 1,6,7,8,27,<br>31,32,34,3<br>5 | 0  |                                                                                                          |
| 11869 | 2,3,4,5,28,<br>29,30,34 | 1,6,7,8,27,<br>31,32,33,3<br>5 | 1  | P35280                                                                                                   |
| 11870 | 2,3,4,5,28,<br>29,30,35 | 1,6,7,8,27,<br>31,32,33,3<br>4 | 2  | P01835,P13432                                                                                            |
| 11871 | 2,3,4,5,28,<br>29,31,32 | 1,6,7,8,27,<br>30,33,34,3<br>5 | 0  |                                                                                                          |
| 11872 | 2,3,4,5,28,<br>29,31,33 | 1,6,7,8,27,<br>30,32,34,3<br>5 | 0  |                                                                                                          |
| 11873 | 2,3,4,5,28,<br>29,31,34 | 1,6,7,8,27,<br>30,32,33,3<br>5 | 1  | Q62997                                                                                                   |
| 11874 | 2,3,4,5,28,<br>29,31,35 | 1,6,7,8,27,<br>30,32,33,3<br>4 | 1  | P13432                                                                                                   |
| 11875 | 2,3,4,5,28,<br>29,32,33 | 1,6,7,8,27,<br>30,31,34,3<br>5 | 0  |                                                                                                          |
| 11876 | 2,3,4,5,28,<br>29,32,34 | 1,6,7,8,27,<br>30,31,33,3<br>5 | 0  |                                                                                                          |
| 11877 | 2,3,4,5,28,<br>29,32,35 | 1,6,7,8,27,<br>30,31,33,3<br>4 | 4  | P13432,P19218,P47967,P97840                                                                              |
| 11878 | 2,3,4,5,28,<br>29,33,34 | 1,6,7,8,27,<br>30,31,32,3<br>5 | 0  |                                                                                                          |
| 11879 | 2,3,4,5,28,<br>29,33,35 | 1,6,7,8,27,<br>30,31,32,3<br>4 | 3  | P13432,P47967,P97840                                                                                     |

|       |                         |                                |   |                                                                       |
|-------|-------------------------|--------------------------------|---|-----------------------------------------------------------------------|
| 11880 | 2,3,4,5,28,<br>29,34,35 | 1,6,7,8,27,<br>30,31,32,3<br>3 | 4 | P12020,P12785,P13432,Q6AY61                                           |
| 11881 | 2,3,4,5,28,<br>30,31,32 | 1,6,7,8,27,<br>29,33,34,3<br>5 | 1 | P11598                                                                |
| 11882 | 2,3,4,5,28,<br>30,31,33 | 1,6,7,8,27,<br>29,32,34,3<br>5 | 1 | P51907                                                                |
| 11883 | 2,3,4,5,28,<br>30,31,34 | 1,6,7,8,27,<br>29,32,33,3<br>5 | 3 | P35280,Q62997,Q63617                                                  |
| 11884 | 2,3,4,5,28,<br>30,31,35 | 1,6,7,8,27,<br>29,32,33,3<br>4 | 0 |                                                                       |
| 11885 | 2,3,4,5,28,<br>30,32,33 | 1,6,7,8,27,<br>29,31,34,3<br>5 | 0 |                                                                       |
| 11886 | 2,3,4,5,28,<br>30,32,34 | 1,6,7,8,27,<br>29,31,33,3<br>5 | 4 | P01836,P34901,P35280,Q63617                                           |
| 11887 | 2,3,4,5,28,<br>30,32,35 | 1,6,7,8,27,<br>29,31,33,3<br>4 | 1 | P11598                                                                |
| 11888 | 2,3,4,5,28,<br>30,33,34 | 1,6,7,8,27,<br>29,31,32,3<br>5 | 2 | P35280,P51907                                                         |
| 11889 | 2,3,4,5,28,<br>30,33,35 | 1,6,7,8,27,<br>29,31,32,3<br>4 | 0 |                                                                       |
| 11890 | 2,3,4,5,28,<br>30,34,35 | 1,6,7,8,27,<br>29,31,32,3<br>3 | 9 | P02793;Q7TP54,P12020,P22985,P35280,Q62902,Q63617,Q6AY61,Q8CJD3,Q920G2 |
| 11891 | 2,3,4,5,28,<br>31,32,33 | 1,6,7,8,27,<br>29,30,34,3<br>5 | 0 |                                                                       |
| 11892 | 2,3,4,5,28,<br>31,32,34 | 1,6,7,8,27,<br>29,30,33,3<br>5 | 1 | Q62997                                                                |
| 11893 | 2,3,4,5,28,<br>31,32,35 | 1,6,7,8,27,<br>29,30,33,3<br>4 | 1 | P11598                                                                |
| 11894 | 2,3,4,5,28,<br>31,33,34 | 1,6,7,8,27,<br>29,30,32,3<br>5 | 2 | P51907,Q62997                                                         |

|       |                         |                                |   |                                           |
|-------|-------------------------|--------------------------------|---|-------------------------------------------|
| 11895 | 2,3,4,5,28,<br>31,33,35 | 1,6,7,8,27,<br>29,30,32,3<br>4 | 0 |                                           |
| 11896 | 2,3,4,5,28,<br>31,34,35 | 1,6,7,8,27,<br>29,30,32,3<br>3 | 3 | P12785,Q62997,Q6AY61                      |
| 11897 | 2,3,4,5,28,<br>32,33,34 | 1,6,7,8,27,<br>29,30,31,3<br>5 | 1 | P34901                                    |
| 11898 | 2,3,4,5,28,<br>32,33,35 | 1,6,7,8,27,<br>29,30,31,3<br>4 | 3 | P11598,P97840,Q6AYR9                      |
| 11899 | 2,3,4,5,28,<br>32,34,35 | 1,6,7,8,27,<br>29,30,31,3<br>3 | 2 | P11598,Q6AY61                             |
| 11900 | 2,3,4,5,28,<br>33,34,35 | 1,6,7,8,27,<br>29,30,31,3<br>2 | 4 | P12020,P12785,Q62902,Q6AY61               |
| 11901 | 2,3,4,5,29,<br>30,31,32 | 1,6,7,8,27,<br>28,33,34,3<br>5 | 0 |                                           |
| 11902 | 2,3,4,5,29,<br>30,31,33 | 1,6,7,8,27,<br>28,32,34,3<br>5 | 0 |                                           |
| 11903 | 2,3,4,5,29,<br>30,31,34 | 1,6,7,8,27,<br>28,32,33,3<br>5 | 2 | P35280,Q62997                             |
| 11904 | 2,3,4,5,29,<br>30,31,35 | 1,6,7,8,27,<br>28,32,33,3<br>4 | 2 | P13432,P97584                             |
| 11905 | 2,3,4,5,29,<br>30,32,33 | 1,6,7,8,27,<br>28,31,34,3<br>5 | 2 | P13432,Q6TMA8                             |
| 11906 | 2,3,4,5,29,<br>30,32,34 | 1,6,7,8,27,<br>28,31,33,3<br>5 | 6 | P10715,P19629,P31044,P35280,Q5GRG2,Q6TMA8 |
| 11907 | 2,3,4,5,29,<br>30,32,35 | 1,6,7,8,27,<br>28,31,33,3<br>4 | 5 | P10715,P13432,P19629,P31044,Q5GRG2        |
| 11908 | 2,3,4,5,29,<br>30,33,34 | 1,6,7,8,27,<br>28,31,32,3<br>5 | 6 | P06911,P10715,P12020,P31044,P35280,Q5GRG2 |
| 11909 | 2,3,4,5,29,<br>30,33,35 | 1,6,7,8,27,<br>28,31,32,3<br>4 | 6 | P06911,P10715,P12020,P13432,P31044,Q5GRG2 |

|       |                         |                                |    |                                                                                     |
|-------|-------------------------|--------------------------------|----|-------------------------------------------------------------------------------------|
| 11910 | 2,3,4,5,29,<br>30,34,35 | 1,6,7,8,27,<br>28,31,32,3<br>3 | 12 | P06911,P08723,P10715,P12020,P13432,P14480,P19629,P31044,P35280,P47727,Q5GRG2,Q6P9T8 |
| 11911 | 2,3,4,5,29,<br>31,32,33 | 1,6,7,8,27,<br>28,30,34,3<br>5 | 2  | P47967,P97840                                                                       |
| 11912 | 2,3,4,5,29,<br>31,32,34 | 1,6,7,8,27,<br>28,30,33,3<br>5 | 2  | Q62997,Q6TMA8                                                                       |
| 11913 | 2,3,4,5,29,<br>31,32,35 | 1,6,7,8,27,<br>28,30,33,3<br>4 | 3  | P13432,P47967,P97840                                                                |
| 11914 | 2,3,4,5,29,<br>31,33,34 | 1,6,7,8,27,<br>28,30,32,3<br>5 | 1  | Q62997                                                                              |
| 11915 | 2,3,4,5,29,<br>31,33,35 | 1,6,7,8,27,<br>28,30,32,3<br>4 | 4  | P13432,P47967,P97840,Q9WTT6                                                         |
| 11916 | 2,3,4,5,29,<br>31,34,35 | 1,6,7,8,27,<br>28,30,32,3<br>3 | 5  | P08723,P12020,P13432,P47727,Q62997                                                  |
| 11917 | 2,3,4,5,29,<br>32,33,34 | 1,6,7,8,27,<br>28,30,31,3<br>5 | 7  | P02782,P10715,P19629,P31044,P34901,Q5GRG2,Q6TMA8                                    |
| 11918 | 2,3,4,5,29,<br>32,33,35 | 1,6,7,8,27,<br>28,30,31,3<br>4 | 7  | P13432,P31044,P47967,P97840,Q5GRG2,Q6TMA8,Q9WTT6                                    |
| 11919 | 2,3,4,5,29,<br>32,34,35 | 1,6,7,8,27,<br>28,30,31,3<br>3 | 9  | P02782,P08723,P10715,P12020,P13432,P19629,P31044,Q5GRG2,Q6TMA8                      |
| 11920 | 2,3,4,5,29,<br>33,34,35 | 1,6,7,8,27,<br>28,30,31,3<br>2 | 9  | P02782,P06911,P08723,P10715,P12020,P13432,P19629,P31044,Q5GRG2                      |
| 11921 | 2,3,4,5,30,<br>31,32,33 | 1,6,7,8,27,<br>28,29,34,3<br>5 | 3  | P08723,Q5M819,Q9JI85                                                                |
| 11922 | 2,3,4,5,30,<br>31,32,34 | 1,6,7,8,27,<br>28,29,33,3<br>5 | 9  | P02782,P08723,P22283,P34901,Q62997,Q63617,Q8CJ52,Q9JHB9,Q9JI85                      |
| 11923 | 2,3,4,5,30,<br>31,32,35 | 1,6,7,8,27,<br>28,29,33,3<br>4 | 8  | P02781,P02782,P08723,P09456,P30120,Q8CJ52,Q9JHB9,Q9JI85                             |
| 11924 | 2,3,4,5,30,<br>31,33,34 | 1,6,7,8,27,<br>28,29,32,3<br>5 | 11 | F1LM93,P02782,P08723,P22283,P34901,P47727,P51907,Q62997,Q8CJ52,Q9JHB9,Q9JI85        |

|       |                         |                                  |    |                                                                                                                                                                                                                          |
|-------|-------------------------|----------------------------------|----|--------------------------------------------------------------------------------------------------------------------------------------------------------------------------------------------------------------------------|
| 11925 | 2,3,4,5,30,<br>31,33,35 | 1,6,7,8,27,<br>28,29,32,3<br>4   | 13 | F1LM93,P02782,P08723,P09456,P24368,P30120,P47727,Q62902,Q63493,Q9ET32,Q9JHB9,Q9JI85,Q9WTT6                                                                                                                               |
| 11926 | 2,3,4,5,30,<br>31,34,35 | 1,6,7,8,27,<br>28,29,32,3<br>3   | 30 | F1LM93,O35547,P02781,P02782,P02793;Q7TP54,P04905,P06911,P08010,P08723,P09456,P0C0A9,P10715,P12020,P22283,P24368,P30120,P35280,P35281,P46462,P47727,P82471,Q5GRG2,Q62902,Q62997,Q63617,Q80WL1,Q812E4,Q8CJ52,Q9JHB9,Q9JI85 |
| 11927 | 2,3,4,5,30,<br>32,33,34 | 1,6,7,8,27,<br>28,29,31,3<br>5   | 12 | P02782,P06911,P08723,P10715,P19629,P22283,P34901,Q5GRG2,Q6AYL6,Q8CJ52,Q9JHB9,Q9JI85                                                                                                                                      |
| 11928 | 2,3,4,5,30,<br>32,33,35 | 1,6,7,8,27,<br>28,29,31,3<br>4   | 10 | P02782,P06911,P08723,P10715,Q5GRG2,Q62902,Q6AYL6,Q8CJ52,Q9JHB9,Q9JI85                                                                                                                                                    |
| 11929 | 2,3,4,5,30,<br>32,34,35 | 1,6,7,8,27,<br>28,29,31,3<br>3   | 23 | O35547,P02781,P02782,P06911,P08723,P09456,P0C0A9,P10715,P12020,P19629,P22283,P30120,P31044,P35280,P47727,P82471,Q5GRG2,Q62902,Q63617,Q6AYL6,Q8CJ52,Q9JHB9,Q9JI85                                                         |
| 11930 | 2,3,4,5,30,<br>33,34,35 | 1,6,7,8,27,<br>28,29,31,3<br>2   | 28 | F1LM93,O35547,P02781,P02782,P04905,P06911,P08723,P09456,P10715,P12020,P19629,P22282,P22283,P22985,P24368,P30120,P31044,P35280,P46462,P47727,P82471,Q5GRG2,Q62902,Q63493,Q6AYL6,Q8CJ52,Q9JHB9,Q9JI85                      |
| 11931 | 2,3,4,5,31,<br>32,33,34 | 1,6,7,8,27,<br>28,29,30,3<br>5   | 13 | F1LM93,P02781,P02782,P08723,P0C0A9,P22283,P30120,P34901,P97605,Q62997,Q8CJ52,Q9JHB9,Q9JI85                                                                                                                               |
| 11932 | 2,3,4,5,31,<br>32,33,35 | 1,6,7,8,27,<br>28,29,30,3<br>4   | 12 | F1LM93,P02781,P02782,P08723,P30120,P97605,P97840,Q6AYR9,Q8CJ52,Q9JHB9,Q9JI85,Q9WTT6                                                                                                                                      |
| 11933 | 2,3,4,5,31,<br>32,34,35 | 1,6,7,8,27,<br>28,29,30,3<br>3   | 18 | F1LM93,O08815,O35547,P02781,P02782,P08723,P09456,P0C0A9,P22283,P24368,P30120,P82471,Q62902,Q62997,Q812E4,Q8CJ52,Q9JHB9,Q9JI85                                                                                            |
| 11934 | 2,3,4,5,31,<br>33,34,35 | 1,6,7,8,27,<br>28,29,30,3<br>2   | 24 | F1LM93,O08815,P02781,P02782,P08010,P08723,P09456,P0C0A9,P12020,P22283,P24368,P30120,P46462,P47727,P60905,P82471,Q5GRG2,Q62902,Q62997,Q63355,Q812E4,Q8CJ52,Q9JHB9,Q9JI85                                                  |
| 11935 | 2,3,4,5,32,<br>33,34,35 | 1,6,7,8,27,<br>28,29,30,3<br>1   | 24 | F1LM93,O35547,P02781,P02782,P06911,P08723,P0C0A9,P10715,P12020,P19629,P22283,P30120,P31044,P34901,P82471,P97605,Q5GRG2,Q62902,Q63357,Q63661,Q6AYR9,Q8CJ52,Q9JHB9,Q9JI85                                                  |
| 11936 | 2,3,4,6,7,8<br>,27,28   | 1,5,29,30,<br>31,32,33,3<br>4,35 | 9  | D3ZUK3,P02631,P07171,P14669,P16086,Q5XI22,Q6IE51,Q9QZQ5,Q9R0T3                                                                                                                                                           |
| 11937 | 2,3,4,6,7,8<br>,27,29   | 1,5,28,30,<br>31,32,33,3<br>4,35 | 12 | D3ZUK3,P02631,P07171,P08649,P14669,P16086,P20762,Q63617,Q6IE51,Q8CJD3,Q9QZQ5,Q9R0T3                                                                                                                                      |
| 11938 | 2,3,4,6,7,8<br>,27,30   | 1,5,28,29,<br>31,32,33,3<br>4,35 | 11 | D3ZUK3,P02631,P08649,P14669,P16086,P47967,Q09030,Q64057,Q6AYQ8,Q6IE51,Q9QZQ5                                                                                                                                             |
| 11939 | 2,3,4,6,7,8<br>,27,31   | 1,5,28,29,<br>30,32,33,3<br>4,35 | 10 | D3ZUK3,P02625,P02631,P07171,P14669,P16086,P20766,Q6IE51,Q8CJD3,Q9QZQ5                                                                                                                                                    |

|       |                       |                                  |    |                                                                                                                                      |
|-------|-----------------------|----------------------------------|----|--------------------------------------------------------------------------------------------------------------------------------------|
| 11940 | 2,3,4,6,7,8<br>,27,32 | 1,5,28,29,<br>30,31,33,3<br>4,35 | 14 | D3ZUK3,G3V686,P00714,P02631,P08649,P14669,P16086,P20766,Q09030,Q62753,Q63532,Q6IE51,Q8CJD3,Q9QZQ5                                    |
| 11941 | 2,3,4,6,7,8<br>,27,33 | 1,5,28,29,<br>30,31,32,3<br>4,35 | 11 | D3ZUK3,P02631,P08649,P13852,P14669,P16086,Q6IE51,Q8CJD3,Q99041,Q9QUL6,Q9QZQ5                                                         |
| 11942 | 2,3,4,6,7,8<br>,27,34 | 1,5,28,29,<br>30,31,32,3<br>3,35 | 19 | D3ZUK3,G3V686,P02631,P08649,P16086,P17559,P20766,P26772,P47967,Q07116,Q09030,Q4FZU6,Q63532,Q6IE51,Q6P6R2,Q99041,Q9QZQ5,Q9WTT6,Q9Z0V6 |
| 11943 | 2,3,4,6,7,8<br>,27,35 | 1,5,28,29,<br>30,31,32,3<br>3,34 | 9  | D3ZUK3,P02631,P14480,P14669,P16086,P20761,P20762,Q6IE51,Q9QZQ5                                                                       |
| 11944 | 2,3,4,6,7,8<br>,28,29 | 1,5,27,30,<br>31,32,33,3<br>4,35 | 5  | P02631,P16086,Q63617,Q9QZQ5,Q9R0T3                                                                                                   |
| 11945 | 2,3,4,6,7,8<br>,28,30 | 1,5,27,29,<br>31,32,33,3<br>4,35 | 8  | D3ZUK3,P02631,P16086,P42854,Q498R7,Q64057,Q6AYQ8,Q9QZQ5                                                                              |
| 11946 | 2,3,4,6,7,8<br>,28,31 | 1,5,27,29,<br>30,32,33,3<br>4,35 | 7  | P02625,P02631,P12020,P16086,P20766,P42854,Q9QZQ5                                                                                     |
| 11947 | 2,3,4,6,7,8<br>,28,32 | 1,5,27,29,<br>30,31,33,3<br>4,35 | 8  | D3ZUK3,P00714,P01836,P02631,P12020,P16086,P20766,Q9QZQ5                                                                              |
| 11948 | 2,3,4,6,7,8<br>,28,33 | 1,5,27,29,<br>30,31,32,3<br>4,35 | 6  | D3ZUK3,P02631,P16086,Q99041,Q9QUL6,Q9QZQ5                                                                                            |
| 11949 | 2,3,4,6,7,8<br>,28,34 | 1,5,27,29,<br>30,31,32,3<br>3,35 | 12 | D3ZUK3,P02631,P16086,P17559,P20766,P47967,P97615,Q4FZU6,Q5HZV9,Q6P6R2,Q9QZQ5,Q9WTT6                                                  |
| 11950 | 2,3,4,6,7,8<br>,28,35 | 1,5,27,29,<br>30,31,32,3<br>3,34 | 6  | P02631,P16086,P20761,P20766,Q5XI22,Q9QZQ5                                                                                            |
| 11951 | 2,3,4,6,7,8<br>,29,30 | 1,5,27,28,<br>31,32,33,3<br>4,35 | 4  | P02631,P16086,P20762,Q9QZQ5                                                                                                          |
| 11952 | 2,3,4,6,7,8<br>,29,31 | 1,5,27,28,<br>30,32,33,3<br>4,35 | 10 | P02625,P02631,P16086,P20762,P20766,P25236,Q63617,Q6IFU7,Q8CJD3,Q9QZQ5                                                                |
| 11953 | 2,3,4,6,7,8<br>,29,32 | 1,5,27,28,<br>30,31,33,3<br>4,35 | 10 | P01041,P01836,P02631,P16086,P20762,P20766,Q63617,Q6TMA8,Q8CJD3,Q9QZQ5                                                                |
| 11954 | 2,3,4,6,7,8<br>,29,33 | 1,5,27,28,<br>30,31,32,3<br>4,35 | 9  | D3ZUK3,P02631,P16086,P20762,Q63617,Q8CJD3,Q99041,Q9QUL6,Q9QZQ5                                                                       |



|       |                       |                                  |    |                                                                                                                               |
|-------|-----------------------|----------------------------------|----|-------------------------------------------------------------------------------------------------------------------------------|
| 11955 | 2,3,4,6,7,8<br>,29,34 | 1,5,27,28,<br>30,31,32,3<br>3,35 | 12 | D3ZUK3,G3V686,P01041,P02631,P09605,P25809,P16086,P17559,P20762,P20766,Q4FZU6,Q6P6R2,Q9QZQ5                                    |
| 11956 | 2,3,4,6,7,8<br>,29,35 | 1,5,27,28,<br>30,31,32,3<br>3,34 | 8  | P02631,P14480,P16086,P20761,P20762,Q63617,Q6IFU7,Q9QZQ5                                                                       |
| 11957 | 2,3,4,6,7,8<br>,30,31 | 1,5,27,28,<br>29,32,33,3<br>4,35 | 11 | D3ZUK3,P02625,P05369,P16086,P20762,P20766,P42854,Q64057,Q6IFU7,Q80WL1,Q9QZQ5                                                  |
| 11958 | 2,3,4,6,7,8<br>,30,32 | 1,5,27,28,<br>29,31,33,3<br>4,35 | 11 | D3ZUK3,P01041,P01836,P02631,P16086,P20762,P20766,P42854,Q64057,Q80WL1,Q9QZQ5                                                  |
| 11959 | 2,3,4,6,7,8<br>,30,33 | 1,5,27,28,<br>29,31,32,3<br>4,35 | 8  | D3ZUK3,P02631,P05369,P16086,P20762,Q99041,Q9QUL6,Q9QZQ5                                                                       |
| 11960 | 2,3,4,6,7,8<br>,30,34 | 1,5,27,28,<br>29,31,32,3<br>3,35 | 15 | D3ZUK3,P01041,P02631,P09605,P25809,P16086,P17559,P20766,P47967,Q63514,Q64057,Q6P6R2,Q80WL1,Q9QZQ5,Q9WTT6,Q9Z0V6               |
| 11961 | 2,3,4,6,7,8<br>,30,35 | 1,5,27,28,<br>29,31,32,3<br>3,34 | 12 | D3ZUK3,P02631,P05369,P14480,P16086,P20761,P20762,Q63514,Q64057,Q80WL1,Q9QZQ5,Q9Z0V6                                           |
| 11962 | 2,3,4,6,7,8<br>,31,32 | 1,5,27,28,<br>29,30,33,3<br>4,35 | 11 | D3ZUK3,P02625,P02631,P05369,P12020,P16086,P20766,P42854,P97605,Q8CJD3,Q9QZQ5                                                  |
| 11963 | 2,3,4,6,7,8<br>,31,33 | 1,5,27,28,<br>29,30,32,3<br>4,35 | 11 | D3ZUK3,P02625,P02631,P05369,P16086,P20766,P42854,Q8CJD3,Q99041,Q9QUL6,Q9QZQ5                                                  |
| 11964 | 2,3,4,6,7,8<br>,31,34 | 1,5,27,28,<br>29,30,32,3<br>3,35 | 17 | D3ZUK3,G3V686,P02625,P02631,P05369,P08010,P09605,P25809,P16086,P17559,P20766,P36374,P42854,P47967,Q62997,Q6P6R2,Q80WL1,Q9QZQ5 |
| 11965 | 2,3,4,6,7,8<br>,31,35 | 1,5,27,28,<br>29,30,32,3<br>3,34 | 12 | D3ZUK3,F1LM93,P02625,P05369,P08010,P16086,P20761,P20762,P20766,Q6IE52,Q6IFU7,Q9QZQ5                                           |
| 11966 | 2,3,4,6,7,8<br>,32,33 | 1,5,27,28,<br>29,30,31,3<br>4,35 | 10 | D3ZUK3,P02631,P05369,P16086,P20766,P97605,Q8CJD3,Q99041,Q9QUL6,Q9QZQ5                                                         |
| 11967 | 2,3,4,6,7,8<br>,32,34 | 1,5,27,28,<br>29,30,31,3<br>3,35 | 17 | D3ZUK3,G3V686,P01041,P01836,P02631,P09605,P25809,P16086,P17559,P20766,P36374,P97605,Q4FZU6,Q62753,Q63532,Q6P6R2,Q9QZQ5,Q9Z0V6 |
| 11968 | 2,3,4,6,7,8<br>,32,35 | 1,5,27,28,<br>29,30,31,3<br>3,34 | 9  | D3ZUK3,P02631,P05369,P16086,P20761,P20762,P20766,P97605,Q9QZQ5                                                                |
| 11969 | 2,3,4,6,7,8<br>,33,34 | 1,5,27,28,<br>29,30,31,3<br>2,35 | 13 | D3ZUK3,G3V686,P02631,P05369,P16086,P17559,P20766,P36374,Q4FZU6,Q6P6R2,Q99041,Q9QUL6,Q9QZQ5                                    |

|       |                        |                                  |    |                                                                                                                 |
|-------|------------------------|----------------------------------|----|-----------------------------------------------------------------------------------------------------------------|
| 11970 | 2,3,4,6,7,8<br>,33,35  | 1,5,27,28,<br>29,30,31,3<br>2,34 | 7  | D3ZUK3,P02631,P05369,P16086,P20761,P20762,Q9QZQ5                                                                |
| 11971 | 2,3,4,6,7,8<br>,34,35  | 1,5,27,28,<br>29,30,31,3<br>2,33 | 16 | D3ZUK3,P02631,P02781,P05369,P08010,P11883,P14480,P16086,P16296,P20761,P20766,P36374,Q63514,Q6P6R2,Q9QZQ5,Q9Z0V6 |
| 11972 | 2,3,4,6,7,2<br>7,28,29 | 1,5,8,30,3<br>1,32,33,34<br>,35  | 4  | P02631,P16086,Q6IE51,Q9QZQ5                                                                                     |
| 11973 | 2,3,4,6,7,2<br>7,28,30 | 1,5,8,29,3<br>1,32,33,34<br>,35  | 8  | P01835,P02631,P16086,P47967,Q498R7,Q6AYQ8,Q6IE51,Q9QZQ5                                                         |
| 11974 | 2,3,4,6,7,2<br>7,28,31 | 1,5,8,29,3<br>0,32,33,34<br>,35  | 4  | P02625,P02631,Q6IE51,Q9QZQ5                                                                                     |
| 11975 | 2,3,4,6,7,2<br>7,28,32 | 1,5,8,29,3<br>0,31,33,34<br>,35  | 7  | P00714,P01836,P02631,P08649,P16086,Q6IE51,Q9QZQ5                                                                |
| 11976 | 2,3,4,6,7,2<br>7,28,33 | 1,5,8,29,3<br>0,31,32,34<br>,35  | 4  | P02631,P08649,Q6IE51,Q9QZQ5                                                                                     |
| 11977 | 2,3,4,6,7,2<br>7,28,34 | 1,5,8,29,3<br>0,31,32,33<br>,35  | 14 | G3V686,P02631,P04182,P08649,P16086,P17559,P47967,P97615,Q4FZU6,Q5HZV9,Q63532,Q6IE51,Q6P6R2,Q9QZQ5               |
| 11978 | 2,3,4,6,7,2<br>7,28,35 | 1,5,8,29,3<br>0,31,32,33<br>,34  | 3  | P02631,P14480,Q6IE51                                                                                            |
| 11979 | 2,3,4,6,7,2<br>7,29,30 | 1,5,8,28,3<br>1,32,33,34<br>,35  | 8  | P01835,P02631,P02803,P08649,P13596,P16086,Q6IE51,Q9QZQ5                                                         |
| 11980 | 2,3,4,6,7,2<br>7,29,31 | 1,5,8,28,3<br>0,32,33,34<br>,35  | 6  | P02625,P02631,P16086,P25236,Q6IE51,Q9QZQ5                                                                       |
| 11981 | 2,3,4,6,7,2<br>7,29,32 | 1,5,8,28,3<br>0,31,33,34<br>,35  | 14 | G3V686,P01836,P02631,P02793,Q7TP54,P02803,P08649,P13596,P13852,P16086,Q63532,Q6IE51,Q8CJD3,Q99068,Q9QZQ5        |
| 11982 | 2,3,4,6,7,2<br>7,29,33 | 1,5,8,28,3<br>0,31,32,34<br>,35  | 9  | P02631,P02793,Q7TP54,P08649,P13596,P13852,P16086,Q6IE51,Q8CJD3,Q9QZQ5                                           |
| 11983 | 2,3,4,6,7,2<br>7,29,34 | 1,5,8,28,3<br>0,31,32,33<br>,35  | 11 | G3V686,P02631,P02803,P04218,P08649,P09605,P25809,P16086,Q4FZU6,Q63532,Q6IE51,Q9QZQ5                             |
| 11984 | 2,3,4,6,7,2<br>7,29,35 | 1,5,8,28,3<br>0,31,32,33<br>,34  | 6  | P01946,P02631,P14480,P16086,Q6IE51,Q9QZQ5                                                                       |

|       |                        |                                 |    |                                                                                                                        |
|-------|------------------------|---------------------------------|----|------------------------------------------------------------------------------------------------------------------------|
| 11985 | 2,3,4,6,7,2<br>7,30,31 | 1,5,8,28,2<br>9,32,33,34<br>,35 | 7  | P02625,P16086,P35281,P42854,P47967,Q6IE51,Q9QZQ5                                                                       |
| 11986 | 2,3,4,6,7,2<br>7,30,32 | 1,5,8,28,2<br>9,31,33,34<br>,35 | 8  | P01836,P02631,P02803,P08649,P16086,Q63532,Q6IE51,Q9QZQ5                                                                |
| 11987 | 2,3,4,6,7,2<br>7,30,33 | 1,5,8,28,2<br>9,31,32,34<br>,35 | 6  | P02631,P02803,P08649,P16086,Q6IE51,Q9QZQ5                                                                              |
| 11988 | 2,3,4,6,7,2<br>7,30,34 | 1,5,8,28,2<br>9,31,32,33<br>,35 | 16 | D3ZUK3,G3V686,P02631,P02696,P02803,P08649,P09605;P25809,P16086,P17559,P47967,P85971,P97840,Q4FZU6,Q63532,Q6IE51,Q9QZQ5 |
| 11989 | 2,3,4,6,7,2<br>7,30,35 | 1,5,8,28,2<br>9,31,32,33<br>,34 | 7  | P02631,P14480,P16086,P35281,Q6AYQ8,Q6IE51,Q9QZQ5                                                                       |
| 11990 | 2,3,4,6,7,2<br>7,31,32 | 1,5,8,28,2<br>9,30,33,34<br>,35 | 10 | G3V686,P02625,P02631,P08649,P16086,Q63532,Q6IE51,Q8CJD3,Q99068,Q9QZQ5                                                  |
| 11991 | 2,3,4,6,7,2<br>7,31,33 | 1,5,8,28,2<br>9,30,32,34<br>,35 | 7  | P02625,P02631,P08649,P16086,Q6IE51,Q8CJD3,Q9QZQ5                                                                       |
| 11992 | 2,3,4,6,7,2<br>7,31,34 | 1,5,8,28,2<br>9,30,32,33<br>,35 | 14 | A2RUV9,G3V686,P02625,P02631,P08649,P09605;P25809,P16086,P17559,P47967,Q4FZU6,Q62997,Q63532,Q6IE51,Q9QZQ5               |
| 11993 | 2,3,4,6,7,2<br>7,31,35 | 1,5,8,28,2<br>9,30,32,33<br>,34 | 3  | P02625,P35281,Q6IE51                                                                                                   |
| 11994 | 2,3,4,6,7,2<br>7,32,33 | 1,5,8,28,2<br>9,30,31,34<br>,35 | 12 | G3V686,P02631,P02793;Q7TP54,P02803,P08649,P13852,P16086,Q63532,Q6IE51,Q8CJD3,Q99068,Q9QZQ5                             |
| 11995 | 2,3,4,6,7,2<br>7,32,34 | 1,5,8,28,2<br>9,30,31,33<br>,35 | 15 | G3V686,P01836,P02631,P02803,P08649,P16086,P26772,P47967,Q07116,Q4FZU6,Q62753,Q63532,Q6IE51,Q6P6R2,Q9QZQ5               |
| 11996 | 2,3,4,6,7,2<br>7,32,35 | 1,5,8,28,2<br>9,30,31,33<br>,34 | 6  | P02631,P14480,P16086,Q63532,Q6IE51,Q9QZQ5                                                                              |
| 11997 | 2,3,4,6,7,2<br>7,33,34 | 1,5,8,28,2<br>9,30,31,32<br>,35 | 12 | D3ZUK3,G3V686,P02631,P08649,P16086,P17559,P47967,Q07116,Q4FZU6,Q63532,Q6IE51,Q9QZQ5                                    |
| 11998 | 2,3,4,6,7,2<br>7,33,35 | 1,5,8,28,2<br>9,30,31,32<br>,34 | 4  | P02631,P08649,Q6IE51,Q9QZQ5                                                                                            |
| 11999 | 2,3,4,6,7,2<br>7,34,35 | 1,5,8,28,2<br>9,30,31,32<br>,33 | 8  | G3V686,P02631,P14480,P16086,Q4FZU6,Q63532,Q6IE51,Q9QZQ5                                                                |

|       |                        |                                 |    |                                                                                            |
|-------|------------------------|---------------------------------|----|--------------------------------------------------------------------------------------------|
| 12000 | 2,3,4,6,7,2<br>8,29,30 | 1,5,8,27,3<br>1,32,33,34<br>,35 | 6  | P01835,P01836,P02631,P16086,Q498R7,Q9QZQ5                                                  |
| 12001 | 2,3,4,6,7,2<br>8,29,31 | 1,5,8,27,3<br>0,32,33,34<br>,35 | 3  | P01836,P25236,P83121                                                                       |
| 12002 | 2,3,4,6,7,2<br>8,29,32 | 1,5,8,27,3<br>0,31,33,34<br>,35 | 4  | P01836,P02631,P16086,Q9QZQ5                                                                |
| 12003 | 2,3,4,6,7,2<br>8,29,33 | 1,5,8,27,3<br>0,31,32,34<br>,35 | 3  | P02631,P83121,Q9QZQ5                                                                       |
| 12004 | 2,3,4,6,7,2<br>8,29,34 | 1,5,8,27,3<br>0,31,32,33<br>,35 | 8  | G3V686,P01836,P02631,P09605,P25809,P16086,Q4FZU6,Q5HZV9,Q9QZQ5                             |
| 12005 | 2,3,4,6,7,2<br>8,29,35 | 1,5,8,27,3<br>0,31,32,33<br>,34 | 4  | P02631,P06760,P14480,P20761                                                                |
| 12006 | 2,3,4,6,7,2<br>8,30,31 | 1,5,8,27,2<br>9,32,33,34<br>,35 | 5  | P01836,P02625,P16086,P42854,Q498R7                                                         |
| 12007 | 2,3,4,6,7,2<br>8,30,32 | 1,5,8,27,2<br>9,31,33,34<br>,35 | 2  | P01836,P16086                                                                              |
| 12008 | 2,3,4,6,7,2<br>8,30,33 | 1,5,8,27,2<br>9,31,32,34<br>,35 | 2  | P16086,Q9QZQ5                                                                              |
| 12009 | 2,3,4,6,7,2<br>8,30,34 | 1,5,8,27,2<br>9,31,32,33<br>,35 | 12 | P01836,P09605,P25809,P16086,P17559,P25031,P47967,P97615,P97840,Q4FZU6,Q5HZV9,Q6P6R2,Q9QZQ5 |
| 12010 | 2,3,4,6,7,2<br>8,30,35 | 1,5,8,27,2<br>9,31,32,33<br>,34 | 6  | P06760,P14480,P16086,P20761,Q498R7,Q6AYQ8                                                  |
| 12011 | 2,3,4,6,7,2<br>8,31,32 | 1,5,8,27,2<br>9,30,33,34<br>,35 | 3  | P01836,P12020,P16086                                                                       |
| 12012 | 2,3,4,6,7,2<br>8,31,33 | 1,5,8,27,2<br>9,30,32,34<br>,35 | 3  | P02625,P06760,P83121                                                                       |
| 12013 | 2,3,4,6,7,2<br>8,31,34 | 1,5,8,27,2<br>9,30,32,33<br>,35 | 9  | G3V686,P01836,P02625,P09605,P25809,P17559,P47967,Q4FZU6,Q5HZV9,Q62997                      |
| 12014 | 2,3,4,6,7,2<br>8,31,35 | 1,5,8,27,2<br>9,30,32,33<br>,34 | 2  | P06760,P20761                                                                              |

|       |                        |                                 |    |                                                                              |
|-------|------------------------|---------------------------------|----|------------------------------------------------------------------------------|
| 12015 | 2,3,4,6,7,2<br>8,32,33 | 1,5,8,27,2<br>9,30,31,34<br>,35 | 4  | P01836,P02631,P02793;Q7TP54,P16086                                           |
| 12016 | 2,3,4,6,7,2<br>8,32,34 | 1,5,8,27,2<br>9,30,31,33<br>,35 | 11 | G3V686,P01836,P02631,P16086,P17559,P97615,Q4FZU6,Q5HZV9,Q63532,Q6P6R2,Q9QZQ5 |
| 12017 | 2,3,4,6,7,2<br>8,32,35 | 1,5,8,27,2<br>9,30,31,33<br>,34 | 2  | P01836,P20761                                                                |
| 12018 | 2,3,4,6,7,2<br>8,33,34 | 1,5,8,27,2<br>9,30,31,32<br>,35 | 6  | G3V686,P02631,P17559,Q4FZU6,Q5HZV9,Q9QZQ5                                    |
| 12019 | 2,3,4,6,7,2<br>8,33,35 | 1,5,8,27,2<br>9,30,31,32<br>,34 | 2  | P06760,P20761                                                                |
| 12020 | 2,3,4,6,7,2<br>8,34,35 | 1,5,8,27,2<br>9,30,31,32<br>,33 | 5  | P12785,P14480,Q4FZU6,Q5HZV9,Q6AY61                                           |
| 12021 | 2,3,4,6,7,2<br>9,30,31 | 1,5,8,27,2<br>8,32,33,34<br>,35 | 7  | P01836,P02625,P16086,P25236,P42854,Q6IG02,Q9QZQ5                             |
| 12022 | 2,3,4,6,7,2<br>9,30,32 | 1,5,8,27,2<br>8,31,33,34<br>,35 | 4  | P01836,P02631,P16086,Q9QZQ5                                                  |
| 12023 | 2,3,4,6,7,2<br>9,30,33 | 1,5,8,27,2<br>8,31,32,34<br>,35 | 2  | P16086,Q9QZQ5                                                                |
| 12024 | 2,3,4,6,7,2<br>9,30,34 | 1,5,8,27,2<br>8,31,32,33<br>,35 | 9  | G3V686,P01836,P02631,P09605,P25809,P16086,P17559,P47967,Q6IG02,Q9QZQ5        |
| 12025 | 2,3,4,6,7,2<br>9,30,35 | 1,5,8,27,2<br>8,31,32,33<br>,34 | 5  | P14480,P16086,P20761,P25236,Q9QZQ5                                           |
| 12026 | 2,3,4,6,7,2<br>9,31,32 | 1,5,8,27,2<br>8,30,33,34<br>,35 | 5  | P01836,P16086,P25236,Q8CJD3,Q9QZQ5                                           |
| 12027 | 2,3,4,6,7,2<br>9,31,33 | 1,5,8,27,2<br>8,30,32,34<br>,35 | 5  | P02625,P25236,P83121,Q8CJD3,Q9QZQ5                                           |
| 12028 | 2,3,4,6,7,2<br>9,31,34 | 1,5,8,27,2<br>8,30,32,33<br>,35 | 9  | G3V686,P01836,P02625,P09605,P25809,P16086,P17559,P25236,Q62997,Q9QZQ5        |
| 12029 | 2,3,4,6,7,2<br>9,31,35 | 1,5,8,27,2<br>8,30,32,33<br>,34 | 4  | P14480,P20761,P25236,Q6IFU7                                                  |

|       |                        |                                 |    |                                                                                                   |
|-------|------------------------|---------------------------------|----|---------------------------------------------------------------------------------------------------|
| 12030 | 2,3,4,6,7,2<br>9,32,33 | 1,5,8,27,2<br>8,30,31,34<br>,35 | 6  | P01836,P02631,P02793;Q7TP54,P16086,Q8CJD3,Q9QZQ5                                                  |
| 12031 | 2,3,4,6,7,2<br>9,32,34 | 1,5,8,27,2<br>8,30,31,33<br>,35 | 10 | G3V686,P01041,P01836,P02631,P09605;P25809,P16086,Q4FZU6,Q63532,Q6TMA8,Q9QZQ5                      |
| 12032 | 2,3,4,6,7,2<br>9,32,35 | 1,5,8,27,2<br>8,30,31,33<br>,34 | 2  | P14480,P16086                                                                                     |
| 12033 | 2,3,4,6,7,2<br>9,33,34 | 1,5,8,27,2<br>8,30,31,32<br>,35 | 6  | G3V686,P02631,P09605;P25809,P16086,Q4FZU6,Q9QZQ5                                                  |
| 12034 | 2,3,4,6,7,2<br>9,33,35 | 1,5,8,27,2<br>8,30,31,32<br>,34 | 3  | P14480,P20761,Q9QZQ5                                                                              |
| 12035 | 2,3,4,6,7,2<br>9,34,35 | 1,5,8,27,2<br>8,30,31,32<br>,33 | 6  | G3V686,P02631,P09605;P25809,P14480,P16086,Q9QZQ5                                                  |
| 12036 | 2,3,4,6,7,3<br>0,31,32 | 1,5,8,27,2<br>8,29,33,34<br>,35 | 5  | P01836,P02625,P16086,P25236,P42854                                                                |
| 12037 | 2,3,4,6,7,3<br>0,31,33 | 1,5,8,27,2<br>8,29,32,34<br>,35 | 4  | P02625,P16086,P42854,Q9QZQ5                                                                       |
| 12038 | 2,3,4,6,7,3<br>0,31,34 | 1,5,8,27,2<br>8,29,32,33<br>,35 | 12 | G3V686,P01836,P02625,P09605;P25809,P16086,P17559,P42854,P47967,P97840,Q62997,Q80WL1,Q9QZQ5        |
| 12039 | 2,3,4,6,7,3<br>0,31,35 | 1,5,8,27,2<br>8,29,32,33<br>,34 | 9  | P02625,P05369,P14480,P16086,P20761,P25236,P35281,P42854,Q80WL1                                    |
| 12040 | 2,3,4,6,7,3<br>0,32,33 | 1,5,8,27,2<br>8,29,31,34<br>,35 | 3  | P01836,P16086,Q9QZQ5                                                                              |
| 12041 | 2,3,4,6,7,3<br>0,32,34 | 1,5,8,27,2<br>8,29,31,33<br>,35 | 13 | G3V686,P01041,P01836,P02803,P04073,P09605;P25809,P16086,P17559,P47967,P97840,Q63532,Q6P6R2,Q9QZQ5 |
| 12042 | 2,3,4,6,7,3<br>0,32,35 | 1,5,8,27,2<br>8,29,31,33<br>,34 | 4  | P01836,P14480,P16086,P20761                                                                       |
| 12043 | 2,3,4,6,7,3<br>0,33,34 | 1,5,8,27,2<br>8,29,31,32<br>,35 | 6  | G3V686,P09605;P25809,P16086,P17559,P47967,Q9QZQ5                                                  |
| 12044 | 2,3,4,6,7,3<br>0,33,35 | 1,5,8,27,2<br>8,29,31,32<br>,34 | 4  | P05369,P14480,P16086,P20761                                                                       |

|       |                        |                                 |    |                                                                                                          |
|-------|------------------------|---------------------------------|----|----------------------------------------------------------------------------------------------------------|
| 12045 | 2,3,4,6,7,3<br>0,34,35 | 1,5,8,27,2<br>8,29,31,32<br>,33 | 9  | P02781,P08010,P09605;P25809,P14480,P16086,P17559,P47727,P47967,Q9QZQ5                                    |
| 12046 | 2,3,4,6,7,3<br>1,32,33 | 1,5,8,27,2<br>8,29,30,34<br>,35 | 5  | P02625,P05369,P16086,Q8CJD3,Q9QZQ5                                                                       |
| 12047 | 2,3,4,6,7,3<br>1,32,34 | 1,5,8,27,2<br>8,29,30,33<br>,35 | 11 | F1LM93,G3V686,P01836,P02625,P09605;P25809,P16086,P17559,P20766,Q62997,Q63532,Q9QZQ5                      |
| 12048 | 2,3,4,6,7,3<br>1,32,35 | 1,5,8,27,2<br>8,29,30,33<br>,34 | 6  | F1LM93,P02781,P05369,P16086,P20761,P25236                                                                |
| 12049 | 2,3,4,6,7,3<br>1,33,34 | 1,5,8,27,2<br>8,29,30,32<br>,35 | 8  | F1LM93,G3V686,P02625,P05369,P09605;P25809,P17559,Q62997,Q9QZQ5                                           |
| 12050 | 2,3,4,6,7,3<br>1,33,35 | 1,5,8,27,2<br>8,29,30,32<br>,34 | 6  | F1LM93,P02625,P05369,P06760,P08010,P20761                                                                |
| 12051 | 2,3,4,6,7,3<br>1,34,35 | 1,5,8,27,2<br>8,29,30,32<br>,33 | 10 | F1LM93,G3V686,P02625,P02781,P05369,P08010,P09605;P25809,P14480,Q62997,Q9JHB9                             |
| 12052 | 2,3,4,6,7,3<br>2,33,34 | 1,5,8,27,2<br>8,29,30,31<br>,35 | 8  | G3V686,P01836,P09605;P25809,P16086,P17559,Q4FZU6,Q63532,Q9QZQ5                                           |
| 12053 | 2,3,4,6,7,3<br>2,33,35 | 1,5,8,27,2<br>8,29,30,31<br>,34 | 3  | P05369,P16086,P20761                                                                                     |
| 12054 | 2,3,4,6,7,3<br>2,34,35 | 1,5,8,27,2<br>8,29,30,31<br>,33 | 14 | F1LM93,G3V686,O35547,P02781,P05369,P08010,P09605;P25809,P11883,P14480,P16086,P36374,Q4FZU6,Q63532,Q8CJ52 |
| 12055 | 2,3,4,6,7,3<br>3,34,35 | 1,5,8,27,2<br>8,29,30,31<br>,32 | 8  | F1LM93,G3V686,P02781,P05369,P08010,P14480,Q4FZU6,Q9QZQ5                                                  |
| 12056 | 2,3,4,6,8,2<br>7,28,29 | 1,5,7,30,3<br>1,32,33,34<br>,35 | 3  | P02782,P0C0A9,P14669                                                                                     |
| 12057 | 2,3,4,6,8,2<br>7,28,30 | 1,5,7,29,3<br>1,32,33,34<br>,35 | 3  | P01835,Q5XI22,Q6AYQ8                                                                                     |
| 12058 | 2,3,4,6,8,2<br>7,28,31 | 1,5,7,29,3<br>0,32,33,34<br>,35 | 2  | P02625,P20766                                                                                            |
| 12059 | 2,3,4,6,8,2<br>7,28,32 | 1,5,7,29,3<br>0,31,33,34<br>,35 | 2  | P00714,P14669                                                                                            |

|       |                        |                                 |   |                                                         |
|-------|------------------------|---------------------------------|---|---------------------------------------------------------|
| 12060 | 2,3,4,6,8,2<br>7,28,33 | 1,5,7,29,3<br>0,31,32,34<br>,35 | 0 |                                                         |
| 12061 | 2,3,4,6,8,2<br>7,28,34 | 1,5,7,29,3<br>0,31,32,33<br>,35 | 8 | G3V686,P04182,Q4FZU6,Q5HZV9,Q5QE79,Q6AY61,Q6P6R2,Q9WTT6 |
| 12062 | 2,3,4,6,8,2<br>7,28,35 | 1,5,7,29,3<br>0,31,32,33<br>,34 | 1 | Q5XI22                                                  |
| 12063 | 2,3,4,6,8,2<br>7,29,30 | 1,5,7,28,3<br>1,32,33,34<br>,35 | 2 | P01835,P14669                                           |
| 12064 | 2,3,4,6,8,2<br>7,29,31 | 1,5,7,28,3<br>0,32,33,34<br>,35 | 2 | P02625,P25236                                           |
| 12065 | 2,3,4,6,8,2<br>7,29,32 | 1,5,7,28,3<br>0,31,33,34<br>,35 | 2 | P14669,Q8CJD3                                           |
| 12066 | 2,3,4,6,8,2<br>7,29,33 | 1,5,7,28,3<br>0,31,32,34<br>,35 | 2 | P14669,Q8CJD3                                           |
| 12067 | 2,3,4,6,8,2<br>7,29,34 | 1,5,7,28,3<br>0,31,32,33<br>,35 | 5 | G3V686,Q00715,Q4FZU6,Q6P6R2,Q9WTT6                      |
| 12068 | 2,3,4,6,8,2<br>7,29,35 | 1,5,7,28,3<br>0,31,32,33<br>,34 | 1 | P14480                                                  |
| 12069 | 2,3,4,6,8,2<br>7,30,31 | 1,5,7,28,2<br>9,32,33,34<br>,35 | 2 | P02625,Q80WL1                                           |
| 12070 | 2,3,4,6,8,2<br>7,30,32 | 1,5,7,28,2<br>9,31,33,34<br>,35 | 3 | P02803,P14669,Q9Z0V6                                    |
| 12071 | 2,3,4,6,8,2<br>7,30,33 | 1,5,7,28,2<br>9,31,32,34<br>,35 | 1 | Q9QUL6                                                  |
| 12072 | 2,3,4,6,8,2<br>7,30,34 | 1,5,7,28,2<br>9,31,32,33<br>,35 | 7 | G3V686,P47967,Q00715,Q4FZU6,Q6P6R2,Q9WTT6,Q9Z0V6        |
| 12073 | 2,3,4,6,8,2<br>7,30,35 | 1,5,7,28,2<br>9,31,32,33<br>,34 | 4 | B0BNN3,P14480,Q6AYQ8,Q9Z0V6                             |
| 12074 | 2,3,4,6,8,2<br>7,31,32 | 1,5,7,28,2<br>9,30,33,34<br>,35 | 3 | P02625,P20766,Q8CJD3                                    |



|       |                        |                                 |   |                                                                |
|-------|------------------------|---------------------------------|---|----------------------------------------------------------------|
| 12075 | 2,3,4,6,8,2<br>7,31,33 | 1,5,7,28,2<br>9,30,32,34<br>,35 | 4 | P02625,Q63355,Q8CJD3,Q9QUL6                                    |
| 12076 | 2,3,4,6,8,2<br>7,31,34 | 1,5,7,28,2<br>9,30,32,33<br>,35 | 9 | A2RUV9,G3V686,P02625,P20766,Q4FZU6,Q62997,Q63355,Q6P6R2,Q9WTT6 |
| 12077 | 2,3,4,6,8,2<br>7,31,35 | 1,5,7,28,2<br>9,30,32,33<br>,34 | 3 | P02625,P20766,Q63355                                           |
| 12078 | 2,3,4,6,8,2<br>7,32,33 | 1,5,7,28,2<br>9,30,31,34<br>,35 | 3 | P14669,Q8CJD3,Q9QUL6                                           |
| 12079 | 2,3,4,6,8,2<br>7,32,34 | 1,5,7,28,2<br>9,30,31,33<br>,35 | 8 | G3V686,P20766,Q00715,Q4FZU6,Q62753,Q6P6R2,Q9WTT6,Q9Z0V6        |
| 12080 | 2,3,4,6,8,2<br>7,32,35 | 1,5,7,28,2<br>9,30,31,33<br>,34 | 1 | Q9Z0V6                                                         |
| 12081 | 2,3,4,6,8,2<br>7,33,34 | 1,5,7,28,2<br>9,30,31,32<br>,35 | 6 | D3ZUK3,G3V686,Q4FZU6,Q63355,Q6P6R2,Q9WTT6                      |
| 12082 | 2,3,4,6,8,2<br>7,33,35 | 1,5,7,28,2<br>9,30,31,32<br>,34 | 2 | B0BNN3,Q63355                                                  |
| 12083 | 2,3,4,6,8,2<br>7,34,35 | 1,5,7,28,2<br>9,30,31,32<br>,33 | 9 | B0BNN3,P19629,P20766,P35467,Q4FZU6,Q63355,Q6P6R2,Q9WTT6,Q9Z0V6 |
| 12084 | 2,3,4,6,8,2<br>8,29,30 | 1,5,7,27,3<br>1,32,33,34<br>,35 | 1 | P01835                                                         |
| 12085 | 2,3,4,6,8,2<br>8,29,31 | 1,5,7,27,3<br>0,32,33,34<br>,35 | 2 | P20766,P25236                                                  |
| 12086 | 2,3,4,6,8,2<br>8,29,32 | 1,5,7,27,3<br>0,31,33,34<br>,35 | 1 | Q6TMA8                                                         |
| 12087 | 2,3,4,6,8,2<br>8,29,33 | 1,5,7,27,3<br>0,31,32,34<br>,35 | 0 |                                                                |
| 12088 | 2,3,4,6,8,2<br>8,29,34 | 1,5,7,27,3<br>0,31,32,33<br>,35 | 7 | P20766,Q4FZU6,Q5QE79,Q6AY61,Q6NX65,Q6P6R2,Q9WTT6               |
| 12089 | 2,3,4,6,8,2<br>8,29,35 | 1,5,7,27,3<br>0,31,32,33<br>,34 | 1 | P14480                                                         |

|       |                        |                                 |    |                                                                       |
|-------|------------------------|---------------------------------|----|-----------------------------------------------------------------------|
| 12090 | 2,3,4,6,8,2<br>8,30,31 | 1,5,7,27,2<br>9,32,33,34<br>,35 | 3  | P02625,P20766,Q80WL1                                                  |
| 12091 | 2,3,4,6,8,2<br>8,30,32 | 1,5,7,27,2<br>9,31,33,34<br>,35 | 0  |                                                                       |
| 12092 | 2,3,4,6,8,2<br>8,30,33 | 1,5,7,27,2<br>9,31,32,34<br>,35 | 1  | Q9QUL6                                                                |
| 12093 | 2,3,4,6,8,2<br>8,30,34 | 1,5,7,27,2<br>9,31,32,33<br>,35 | 9  | P20766,P47967,Q4FZU6,Q5HZV9,Q5QE79,Q6AY61,Q6NX65,Q6P6R2,Q9WTT6        |
| 12094 | 2,3,4,6,8,2<br>8,30,35 | 1,5,7,27,2<br>9,31,32,33<br>,34 | 5  | B0BNN3,P14480,P20761,Q5XI22,Q6AYQ8                                    |
| 12095 | 2,3,4,6,8,2<br>8,31,32 | 1,5,7,27,2<br>9,30,33,34<br>,35 | 1  | P20766                                                                |
| 12096 | 2,3,4,6,8,2<br>8,31,33 | 1,5,7,27,2<br>9,30,32,34<br>,35 | 3  | P02625,P20766,Q9QUL6                                                  |
| 12097 | 2,3,4,6,8,2<br>8,31,34 | 1,5,7,27,2<br>9,30,32,33<br>,35 | 8  | P02625,P20766,Q4FZU6,Q5HZV9,Q62997,Q6AY61,Q6P6R2,Q9WTT6               |
| 12098 | 2,3,4,6,8,2<br>8,31,35 | 1,5,7,27,2<br>9,30,32,33<br>,34 | 2  | P20761,P20766                                                         |
| 12099 | 2,3,4,6,8,2<br>8,32,33 | 1,5,7,27,2<br>9,30,31,34<br>,35 | 1  | Q9QUL6                                                                |
| 12100 | 2,3,4,6,8,2<br>8,32,34 | 1,5,7,27,2<br>9,30,31,33<br>,35 | 6  | P20766,Q4FZU6,Q5HZV9,Q5QE79,Q6P6R2,Q9WTT6                             |
| 12101 | 2,3,4,6,8,2<br>8,32,35 | 1,5,7,27,2<br>9,30,31,33<br>,34 | 1  | P20766                                                                |
| 12102 | 2,3,4,6,8,2<br>8,33,34 | 1,5,7,27,2<br>9,30,31,32<br>,35 | 6  | P20766,Q4FZU6,Q5HZV9,Q5QE79,Q6P6R2,Q9WTT6                             |
| 12103 | 2,3,4,6,8,2<br>8,33,35 | 1,5,7,27,2<br>9,30,31,32<br>,34 | 2  | B0BNN3,P20761                                                         |
| 12104 | 2,3,4,6,8,2<br>8,34,35 | 1,5,7,27,2<br>9,30,31,32<br>,33 | 10 | B0BNN3,P00507,P11883,P20766,Q4FZU6,Q5HZV9,Q5QE79,Q6AY61,Q6P6R2,Q9WTT6 |

|       |                        |                                 |   |                                                  |
|-------|------------------------|---------------------------------|---|--------------------------------------------------|
| 12105 | 2,3,4,6,8,2<br>9,30,31 | 1,5,7,27,2<br>8,32,33,34<br>,35 | 3 | P02625,P25236,Q80WL1                             |
| 12106 | 2,3,4,6,8,2<br>9,30,32 | 1,5,7,27,2<br>8,31,33,34<br>,35 | 2 | P25236,Q6TMA8                                    |
| 12107 | 2,3,4,6,8,2<br>9,30,33 | 1,5,7,27,2<br>8,31,32,34<br>,35 | 2 | B0BNN3,Q9QUL6                                    |
| 12108 | 2,3,4,6,8,2<br>9,30,34 | 1,5,7,27,2<br>8,31,32,33<br>,35 | 5 | P09605;P25809,P10715,Q4FZU6,Q6TMA8,Q9WTT6        |
| 12109 | 2,3,4,6,8,2<br>9,30,35 | 1,5,7,27,2<br>8,31,32,33<br>,34 | 5 | B0BNN3,P02680,P14480,P20761,P25236               |
| 12110 | 2,3,4,6,8,2<br>9,31,32 | 1,5,7,27,2<br>8,30,33,34<br>,35 | 4 | P20766,P25236,Q6TMA8,Q8CJD3                      |
| 12111 | 2,3,4,6,8,2<br>9,31,33 | 1,5,7,27,2<br>8,30,32,34<br>,35 | 4 | P02625,P25236,Q8CJD3,Q9QUL6                      |
| 12112 | 2,3,4,6,8,2<br>9,31,34 | 1,5,7,27,2<br>8,30,32,33<br>,35 | 5 | P02625,P20766,P25236,Q4FZU6,Q62997               |
| 12113 | 2,3,4,6,8,2<br>9,31,35 | 1,5,7,27,2<br>8,30,32,33<br>,34 | 4 | B0BNN3,P17046,P20766,P25236                      |
| 12114 | 2,3,4,6,8,2<br>9,32,33 | 1,5,7,27,2<br>8,30,31,34<br>,35 | 3 | Q6TMA8,Q8CJD3,Q9QUL6                             |
| 12115 | 2,3,4,6,8,2<br>9,32,34 | 1,5,7,27,2<br>8,30,31,33<br>,35 | 5 | P20766,Q4FZU6,Q5QE79,Q6P6R2,Q6TMA8               |
| 12116 | 2,3,4,6,8,2<br>9,32,35 | 1,5,7,27,2<br>8,30,31,33<br>,34 | 3 | P25236,P51907,Q6TMA8                             |
| 12117 | 2,3,4,6,8,2<br>9,33,34 | 1,5,7,27,2<br>8,30,31,32<br>,35 | 2 | Q4FZU6,Q6TMA8                                    |
| 12118 | 2,3,4,6,8,2<br>9,33,35 | 1,5,7,27,2<br>8,30,31,32<br>,34 | 2 | B0BNN3,P20761                                    |
| 12119 | 2,3,4,6,8,2<br>9,34,35 | 1,5,7,27,2<br>8,30,31,32<br>,33 | 7 | B0BNN3,P10715,P11883,P14480,P20766,Q4FZU6,Q6TMA8 |

|       |                        |                                 |   |                                                                       |
|-------|------------------------|---------------------------------|---|-----------------------------------------------------------------------|
| 12120 | 2,3,4,6,8,3<br>0,31,32 | 1,5,7,27,2<br>8,29,33,34<br>,35 | 4 | P02625,P20766,P25236,Q80WL1                                           |
| 12121 | 2,3,4,6,8,3<br>0,31,33 | 1,5,7,27,2<br>8,29,32,34<br>,35 | 3 | P02625,Q80WL1,Q9QUL6                                                  |
| 12122 | 2,3,4,6,8,3<br>0,31,34 | 1,5,7,27,2<br>8,29,32,33<br>,35 | 8 | P02625,P20766,P25236,P47967,Q62997,Q80WL1,Q9WTT6,Q9Z0V6               |
| 12123 | 2,3,4,6,8,3<br>0,31,35 | 1,5,7,27,2<br>8,29,32,33<br>,34 | 8 | B0BNN3,P02625,P05369,P20761,P20766,P25236,Q80WL1,Q9Z0V6               |
| 12124 | 2,3,4,6,8,3<br>0,32,33 | 1,5,7,27,2<br>8,29,31,34<br>,35 | 1 | Q9QUL6                                                                |
| 12125 | 2,3,4,6,8,3<br>0,32,34 | 1,5,7,27,2<br>8,29,31,33<br>,35 | 5 | P20766,Q4FZU6,Q6P6R2,Q9WTT6,Q9Z0V6                                    |
| 12126 | 2,3,4,6,8,3<br>0,32,35 | 1,5,7,27,2<br>8,29,31,33<br>,34 | 2 | P20761,Q9Z0V6                                                         |
| 12127 | 2,3,4,6,8,3<br>0,33,34 | 1,5,7,27,2<br>8,29,31,32<br>,35 | 3 | B0BNN3,Q4FZU6,Q9QUL6                                                  |
| 12128 | 2,3,4,6,8,3<br>0,33,35 | 1,5,7,27,2<br>8,29,31,32<br>,34 | 3 | B0BNN3,P05369,P20761                                                  |
| 12129 | 2,3,4,6,8,3<br>0,34,35 | 1,5,7,27,2<br>8,29,31,32<br>,33 | 9 | B0BNN3,P02793,Q7TP54,P06911,P10715,P14480,P20766,Q6AY61,Q80WL1,Q9Z0V6 |
| 12130 | 2,3,4,6,8,3<br>1,32,33 | 1,5,7,27,2<br>8,29,30,34<br>,35 | 4 | P02625,P20766,Q8CJD3,Q9QUL6                                           |
| 12131 | 2,3,4,6,8,3<br>1,32,34 | 1,5,7,27,2<br>8,29,30,33<br>,35 | 7 | P02625,P20766,P36374,Q4FZU6,Q62997,Q6P6R2,Q9Z0V6                      |
| 12132 | 2,3,4,6,8,3<br>1,32,35 | 1,5,7,27,2<br>8,29,30,33<br>,34 | 3 | P05369,P20766,P25236                                                  |
| 12133 | 2,3,4,6,8,3<br>1,33,34 | 1,5,7,27,2<br>8,29,30,32<br>,35 | 6 | P02625,P20766,Q4FZU6,Q62997,Q63355,Q9QUL6                             |
| 12134 | 2,3,4,6,8,3<br>1,33,35 | 1,5,7,27,2<br>8,29,30,32<br>,34 | 6 | B0BNN3,F1LM93,P05369,P20761,P20766,Q63355                             |

|       |                         |                                 |    |                                                                                     |
|-------|-------------------------|---------------------------------|----|-------------------------------------------------------------------------------------|
| 12135 | 2,3,4,6,8,3<br>1,34,35  | 1,5,7,27,2<br>8,29,30,32<br>,33 | 11 | B0BNN3,F1LM93,P02625,P02793;Q7TP54,P05369,P20766,P25236,P36374,Q62997,Q63355,Q9Z0V6 |
| 12136 | 2,3,4,6,8,3<br>2,33,34  | 1,5,7,27,2<br>8,29,30,31<br>,35 | 4  | P20766,Q4FZU6,Q6P6R2,Q9QUL6                                                         |
| 12137 | 2,3,4,6,8,3<br>2,33,35  | 1,5,7,27,2<br>8,29,30,31<br>,34 | 2  | P05369,P20761                                                                       |
| 12138 | 2,3,4,6,8,3<br>2,34,35  | 1,5,7,27,2<br>8,29,30,31<br>,33 | 9  | P08753,P11883,P19629,P20766,P35467,P36374,Q4FZU6,Q6P6R2,Q9Z0V6                      |
| 12139 | 2,3,4,6,8,3<br>3,34,35  | 1,5,7,27,2<br>8,29,30,31<br>,32 | 5  | B0BNN3,P05369,P20766,Q4FZU6,Q63355                                                  |
| 12140 | 2,3,4,6,27,<br>28,29,30 | 1,5,7,8,31,<br>32,33,34,3<br>5  | 2  | P01835,P0C0A9                                                                       |
| 12141 | 2,3,4,6,27,<br>28,29,31 | 1,5,7,8,30,<br>32,33,34,3<br>5  | 2  | P02625,P25236                                                                       |
| 12142 | 2,3,4,6,27,<br>28,29,32 | 1,5,7,8,30,<br>31,33,34,3<br>5  | 1  | P24368                                                                              |
| 12143 | 2,3,4,6,27,<br>28,29,33 | 1,5,7,8,30,<br>31,32,34,3<br>5  | 0  |                                                                                     |
| 12144 | 2,3,4,6,27,<br>28,29,34 | 1,5,7,8,30,<br>31,32,33,3<br>5  | 4  | G3V686,P04182,Q4FZU6,Q5HZV9                                                         |
| 12145 | 2,3,4,6,27,<br>28,29,35 | 1,5,7,8,30,<br>31,32,33,3<br>4  | 2  | P01835,P14480                                                                       |
| 12146 | 2,3,4,6,27,<br>28,30,31 | 1,5,7,8,29,<br>32,33,34,3<br>5  | 3  | P01835,P02625,Q6AYQ8                                                                |
| 12147 | 2,3,4,6,27,<br>28,30,32 | 1,5,7,8,29,<br>31,33,34,3<br>5  | 3  | P01835,P02803,Q6AYQ8                                                                |
| 12148 | 2,3,4,6,27,<br>28,30,33 | 1,5,7,8,29,<br>31,32,34,3<br>5  | 2  | P01835,Q6AYQ8                                                                       |
| 12149 | 2,3,4,6,27,<br>28,30,34 | 1,5,7,8,29,<br>31,32,33,3<br>5  | 8  | G3V686,P01835,P04182,P47967,Q4FZU6,Q5HZV9,Q6AYQ8,Q6P6R2                             |

|       |                         |                                |   |                                           |
|-------|-------------------------|--------------------------------|---|-------------------------------------------|
| 12150 | 2,3,4,6,27,<br>28,30,35 | 1,5,7,8,29,<br>31,32,33,3<br>4 | 3 | P01835,P14480,Q6AYQ8                      |
| 12151 | 2,3,4,6,27,<br>28,31,32 | 1,5,7,8,29,<br>30,33,34,3<br>5 | 1 | P02625                                    |
| 12152 | 2,3,4,6,27,<br>28,31,33 | 1,5,7,8,29,<br>30,32,34,3<br>5 | 1 | P02625                                    |
| 12153 | 2,3,4,6,27,<br>28,31,34 | 1,5,7,8,29,<br>30,32,33,3<br>5 | 6 | A2RUV9,G3V686,P02625,P04182,Q4FZU6,Q5HZV9 |
| 12154 | 2,3,4,6,27,<br>28,31,35 | 1,5,7,8,29,<br>30,32,33,3<br>4 | 1 | P02625                                    |
| 12155 | 2,3,4,6,27,<br>28,32,33 | 1,5,7,8,29,<br>30,31,34,3<br>5 | 1 | Q4FZU2                                    |

#### Day 28

| Random allocation | Group1           | Group2                     | Numbers of differential urinary proteins | Differential protein ID                                                                                                                                                                                                                                                                                                                                                                                                                                                                            |
|-------------------|------------------|----------------------------|------------------------------------------|----------------------------------------------------------------------------------------------------------------------------------------------------------------------------------------------------------------------------------------------------------------------------------------------------------------------------------------------------------------------------------------------------------------------------------------------------------------------------------------------------|
| 1                 | 1,2,3,4,5,6,7,8  | 36,37,38,39,40,41,42,43,44 | 69                                       | D3ZUK3,G3V686,O08815,O35547,O35568,O54858,O88267,P02631,P02781,P04905,P05539,P07171,P07897,P08010,P08753,P10960,P11030,P11762,P13596,P19218,P20762,P25031,P34901,P35444,P35446,P36374,P38444,P38659,P49744,P51886,P52590,P53792,P60571,P60905,P80201,P80202,P83748,P85971,P97580,P97605,Q01205,Q07116,Q09030,Q30KJ2,Q3T1K5,Q498S8,Q4AEF8,Q4V885,Q5M871,Q5ZQU0,Q62753,Q63357,Q63467,Q63475,Q63514,Q63532,Q63942,Q6IE51,Q7TP52,Q7TPB1,Q80WY6,Q80YN4,Q812E4,Q8CG08,Q8N7M5,Q9EQV6,Q9QZ76,Q9QZK9,Q9QZQ5 |
| 2                 | 1,2,3,4,5,6,7,36 | 8,37,38,39,40,41,42,43,44  | 51                                       | D3ZUK3,G3V686,O35568,P01836,P02631,P02781,P04905,P05539,P07897,P08010,P08649,P08753,P11030,P11762,P13596,P20762,P22734,P25031,P34901,P35444,P35446,P36374,P49744,P51886,P52590,P53792,P55314,P60905,P80202,P83748,P85971,P97580,P97605,Q01205,Q07116,Q09030,Q30KJ2,Q3T1K5,Q4AEF8,Q5I0D5,Q5ZQU0,Q63357,Q63467,Q63475,Q63532,Q6BEA2,Q6IE51,Q7TP52,Q80WY6,Q8CG08,Q9QZQ5                                                                                                                               |
| 3                 | 1,2,3,4,5,6,7,37 | 8,36,38,39,40,41,42,43,44  | 29                                       | G3V686,P02631,P05539,P05964,P11030,P11762,P13596,P15399,P20762,P25031,P34901,P52590,P53792,P80202,P83748,P85971,P97580,P97605,Q01205,Q09030,Q30KJ2,Q3T1K5,Q63467,Q63532,Q6IE51,Q7TP52,Q7TPB1,Q91ZS3,Q9QZQ5                                                                                                                                                                                                                                                                                         |
| 4                 | 1,2,3,4,5,6,7,38 | 8,36,37,39,40,41,42,43,44  | 38                                       | G3V686,O35547,O35568,P01836,P02631,P05539,P07897,P08010,P08753,P11762,P13596,P15399,P19218,P20762,P25031,P34901,P35444,P36374,P47727,P49744,P52590,P53792,P60905,P83748,P85971,P97580,P97605,Q01205,Q09030,Q30KJ2,Q5M871,Q63467,Q63532,Q6IE51,Q7TP52,Q7TPB1,Q8CG08,Q9QZQ5                                                                                                                                                                                                                          |
| 5                 | 1,2,3,4,5,6,7,39 | 8,36,37,38,40,41,42,43,44  | 39                                       | G3V686,O35568,O88267,P01946,P02625,P02631,P05539,P08010,P08753,P13596,P19218,P20762,P25031,P34901,P35446,P36374,P36376,P52590,P80201,P80202,P83748,P85971,P97580,P97605,Q01205,Q09030,Q30KJ2,Q3T1K5,Q5ZQU0,Q63467,Q63475,Q63532,Q6BEA2,Q6IE51,Q7TP52,Q80WY6,Q8CG08,Q9ESW0,Q9QZQ5                                                                                                                                                                                                                   |
| 6                 | 1,2,3,4,5,6,7,40 | 8,36,37,38,39,41,42,43,44  | 27                                       | G3V686,P02631,P02781,P05539,P13596,P20762,P25031,P34901,P36374,P36376,P52590,P53792,P60905,P83748,P85971,P97580,P97605,Q01205,Q09030,Q30KJ2,Q3T1K5,Q63467,Q63532,Q6IE51,Q7TP52,Q8CG08,Q9QZ76                                                                                                                                                                                                                                                                                                       |

|    |                       |                                   |    |                                                                                                                                                                                                                                                                                                                                                                                                                                                                                                                  |
|----|-----------------------|-----------------------------------|----|------------------------------------------------------------------------------------------------------------------------------------------------------------------------------------------------------------------------------------------------------------------------------------------------------------------------------------------------------------------------------------------------------------------------------------------------------------------------------------------------------------------|
| 7  | 1,2,3,4,5,6<br>,7,41  | 8,36,37,38<br>,39,40,42,<br>43,44 | 56 | G3V686,O35547,O35568,O88267,P01836,P02631,P02781,P05371,P05539,P07897,P08010,P08753,P11762,P13596,P20762,P25031,P34901,P35444,P35446,P36374,P36376,P38444,P38659,P49744,P52590,P54921,P60905,P80201,P80202,P82471,P83748,P85971,P97580,P97605,Q01205,Q09030,Q30KJ2,Q3T1K5,Q4V885,Q5M871,Q5ZQU0,Q62753,Q63317,Q63357,Q63467,Q63475,Q63532,Q6BEA2,Q6IE51,Q7TP52,Q7TPB1,Q80WY6,Q80YN4,Q812E4,Q8CG08,Q9QZQ5                                                                                                          |
| 8  | 1,2,3,4,5,6<br>,7,42  | 8,36,37,38<br>,39,40,41,<br>43,44 | 71 | F1LM93,G3V686,O08815,O35547,O35568,O35783,P01836,P02631,P02780,P02781,P02782,P04905,P05369,P05539,P07897,P08010,P08290,P08644,P08723,P08753,P0C0A9,P13596,P16086,P17046,P19629,P20762,P22283,P25031,P34901,P35444,P35446,P36374,P47727,P52590,P53792,P54921,P60905,P63322,P80201,P82471,P85971,P97554,P97580,P97605,Q01205,Q09030,Q30KJ2,Q3T1K5,Q4AEF8,Q4V885,Q5XI73,Q62753,Q62902,Q63357,Q63467,Q63514,Q63532,Q6AYR8,Q6AYR9,Q6IE51,Q7TP52,Q80WY6,Q812E4,Q8CFN2,Q8CG08,Q8CJ52,Q9JHB9,Q9JID2,Q9QZ76,Q9QZK9,Q9QZQ5 |
| 9  | 1,2,3,4,5,6<br>,7,43  | 8,36,37,38<br>,39,40,41,<br>42,44 | 42 | G3V686,O35783,P01681,P01836,P01946,P02091,P02631,P05539,P11762,P11883,P13596,P16636,P19629,P20762,P25031,P34901,P36374,P36376,P49744,P51886,P52590,P60905,P80202,P83748,P85971,P97580,P97605,Q01205,Q09030,Q30KJ2,Q3T1K5,Q63416,Q63467,Q63532,Q63661,Q63942,Q6IE51,Q7TP52,Q7TPB1,Q80WY6,Q8CG08,Q99PP0                                                                                                                                                                                                            |
| 10 | 1,2,3,4,5,6<br>,7,44  | 8,36,37,38<br>,39,40,41,<br>42,43 | 39 | G3V686,O35568,P01946,P02631,P05539,P07897,P08010,P13596,P20762,P25031,P34901,P35444,P36374,P36376,P49744,P52590,P53792,P60905,P83748,P85971,P97580,P97605,Q01205,Q09030,Q30KJ2,Q3T1K5,Q5I0D5,Q5M871,Q5ZQU0,Q63467,Q63475,Q63532,Q6BEA2,Q6IE51,Q7TP52,Q8CG08,Q99376,Q9JID2,Q9QZQ5                                                                                                                                                                                                                                 |
| 11 | 1,2,3,4,5,6<br>,8,36  | 7,37,38,39<br>,40,41,42,<br>43,44 | 29 | G3V686,P07171,P07897,P08010,P08753,P0DMW0:P0DMW1,P11030,P19629,P20762,P22006,P34901,P36374,P49744,P53792,P55314,P60571,P60905,P85971,P97605,Q01205,Q07116,Q4AEF8,Q5ZQU0,Q63357,Q63467,Q63942,Q6AYS4,Q7TP52,Q8CG08                                                                                                                                                                                                                                                                                                |
| 12 | 1,2,3,4,5,6<br>,8,37  | 7,36,38,39<br>,40,41,42,<br>43,44 | 13 | G3V686,P11030,P19629,P20762,P22006,P36374,P53792,P85971,Q01205,Q63942,Q6P777,Q7TP52,Q7TPB1                                                                                                                                                                                                                                                                                                                                                                                                                       |
| 13 | 1,2,3,4,5,6<br>,8,38  | 7,36,37,39<br>,40,41,42,<br>43,44 | 20 | G3V686,P08010,P08753,P19218,P20762,P22006,P34901,P36374,P49744,P60905,P85971,P97580,Q01205,Q30KJ2,Q62902,Q63942,Q7TP52,Q7TPB1,Q8CG08,Q9QZK9                                                                                                                                                                                                                                                                                                                                                                      |
| 14 | 1,2,3,4,5,6<br>,8,39  | 7,36,37,38<br>,40,41,42,<br>43,44 | 13 | G3V686,P02625,P08010,P08753,P20762,P34901,P36374,P85971,P97605,Q01205,Q5ZQU0,Q63942,Q7TP52                                                                                                                                                                                                                                                                                                                                                                                                                       |
| 15 | 1,2,3,4,5,6<br>,8,40  | 7,36,37,38<br>,39,41,42,<br>43,44 | 11 | G3V686,P20762,P22006,P36374,P36376,P85971,Q01205,Q3T1K5,Q63942,Q7TP52,Q9QZ76                                                                                                                                                                                                                                                                                                                                                                                                                                     |
| 16 | 1,2,3,4,5,6<br>,8,41  | 7,36,37,38<br>,39,40,42,<br>43,44 | 23 | G3V686,P08010,P08753,P11030,P20762,P36374,P38444,P49744,P54921,P60905,P82471,P85971,P97605,Q01205,Q5M871,Q5ZQU0,Q62753,Q63317,Q63357,Q63475,Q63942,Q7TP52,Q7TPB1                                                                                                                                                                                                                                                                                                                                                 |
| 17 | 1,2,3,4,5,6<br>,8,42  | 7,36,37,38<br>,39,40,41,<br>43,44 | 40 | F1LM93,G3V686,O08815,O35547,P02781,P04905,P08010,P08290,P08723,P08753,P09456,P0DMW0:P0DMW1,P19629,P20762,P22006,P36374,P47727,P54921,P60905,P63322,P85971,P97554,P97605,Q01205,Q4AEF8,Q62753,Q62902,Q63357,Q63514,Q63942,Q6AYR8,Q6AYR9,Q7TP52,Q812E4,Q8CFN2,Q8CJ52,Q9JID2,Q9QZ76,Q9QZK9,Q9Z0V6                                                                                                                                                                                                                   |
| 18 | 1,2,3,4,5,6<br>,8,43  | 7,36,37,38<br>,39,40,41,<br>42,44 | 20 | G3V686,P01681,P08753,P11883,P19629,P20762,P34901,P36374,P49744,P52590,P60905,P83748,P85971,Q01205,Q63942,Q64268,Q66H69,Q7TP52,Q7TPB1,Q9QX79                                                                                                                                                                                                                                                                                                                                                                      |
| 19 | 1,2,3,4,5,6<br>,8,44  | 7,36,37,38<br>,39,40,41,<br>42,43 | 19 | G3V686,P07171,P08010,P08753,P20762,P22006,P34901,P36374,P49744,P53792,P60905,P85971,P97605,Q01205,Q4AEF8,Q5I0D1,Q63514,Q63942,Q7TP52                                                                                                                                                                                                                                                                                                                                                                             |
| 20 | 1,2,3,4,5,6<br>,36,37 | 7,8,38,39,<br>40,41,42,4<br>3,44  | 10 | G3V686,P10715,P11030,P19629,P34901,P55314,Q01205,Q6P777,Q7TP52,Q91ZS3                                                                                                                                                                                                                                                                                                                                                                                                                                            |

|    |                       |                                  |    |                                                                                                                                                                                                                                        |
|----|-----------------------|----------------------------------|----|----------------------------------------------------------------------------------------------------------------------------------------------------------------------------------------------------------------------------------------|
| 21 | 1,2,3,4,5,6<br>,36,38 | 7,8,37,39,<br>40,41,42,4<br>3,44 | 12 | G3V686,P08010,P10715,P19629,P34901,P55314,P97580,Q01205,Q30KJ2,Q62902,Q6AYL6,Q7TP52                                                                                                                                                    |
| 22 | 1,2,3,4,5,6<br>,36,39 | 7,8,37,38,<br>40,41,42,4<br>3,44 | 8  | G3V686,O54728,P02625,P08010,P34901,P55314,Q01205,Q7TP52                                                                                                                                                                                |
| 23 | 1,2,3,4,5,6<br>,36,40 | 7,8,37,38,<br>39,41,42,4<br>3,44 | 11 | G3V686,P05539,P11030,P13596,P22006,P23593,P34901,P36374,P36376,P55314,Q7TP52                                                                                                                                                           |
| 24 | 1,2,3,4,5,6<br>,36,41 | 7,8,37,38,<br>39,40,42,4<br>3,44 | 15 | G3V686,P05539,P08010,P08753,P11030,P13596,P34901,P55314,P60905,P85971,P97605,Q01205,Q63475,Q6BEA2,Q7TP52                                                                                                                               |
| 25 | 1,2,3,4,5,6<br>,36,42 | 7,8,37,38,<br>39,40,41,4<br>3,44 | 32 | G3V686,P02781,P04905,P05539,P08010,P08290,P08753,P0DMW0,P0DMW1,P10715,P13596,P19629,P22283,P23593,P31044,P34901,P36374,P47727,P55314,P60905,P85971,P97554,Q5XI73,Q62753,Q62902,Q63357,Q6AYL6,Q6AYR8,Q6AYR9,Q7TP52,Q812E4,Q8CJ52,Q9QZK9 |
| 26 | 1,2,3,4,5,6<br>,36,43 | 7,8,37,38,<br>39,40,41,4<br>2,44 | 16 | G3V686,P01681,P05539,P10715,P19629,P20762,P31044,P34901,P55314,P60905,P83748,P85971,Q63661,Q63942,Q66H69,Q7TP52                                                                                                                        |
| 27 | 1,2,3,4,5,6<br>,36,44 | 7,8,37,38,<br>39,40,41,4<br>2,43 | 13 | G3V686,P13432,P22006,P34901,P36374,P53792,P55314,P60905,P85971,Q01205,Q63661,Q6BEA2,Q7TP52                                                                                                                                             |
| 28 | 1,2,3,4,5,6<br>,37,38 | 7,8,36,39,<br>40,41,42,4<br>3,44 | 11 | P12785,P15399,P19629,P22006,P34901,P82995,P97580,Q30KJ2,Q7TP52,Q7TPB1,Q91ZS3                                                                                                                                                           |
| 29 | 1,2,3,4,5,6<br>,37,39 | 7,8,36,38,<br>40,41,42,4<br>3,44 | 5  | G3V686,P02625,P34901,Q6P777,Q7TP52                                                                                                                                                                                                     |
| 30 | 1,2,3,4,5,6<br>,37,40 | 7,8,36,38,<br>39,41,42,4<br>3,44 | 4  | P22006,P36376,Q6P777,Q7TP52                                                                                                                                                                                                            |
| 31 | 1,2,3,4,5,6<br>,37,41 | 7,8,36,38,<br>39,40,42,4<br>3,44 | 7  | G3V686,P11030,P38444,P97605,Q7TP52,Q7TPB1,Q91ZS3                                                                                                                                                                                       |
| 32 | 1,2,3,4,5,6<br>,37,42 | 7,8,36,38,<br>39,40,41,4<br>3,44 | 8  | G3V686,P08290,P08753,P10715,P19629,P36374,Q6AYR8,Q7TP52                                                                                                                                                                                |
| 33 | 1,2,3,4,5,6<br>,37,43 | 7,8,36,38,<br>39,40,41,4<br>2,44 | 12 | G3V686,P01681,P10715,P19629,P20762,P34901,P85971,Q63661,Q63942,Q6P777,Q7TP52,Q7TPB1                                                                                                                                                    |
| 34 | 1,2,3,4,5,6<br>,37,44 | 7,8,36,38,<br>39,40,41,4<br>2,43 | 5  | G3V686,P22006,P34901,Q7TP52,Q99376                                                                                                                                                                                                     |
| 35 | 1,2,3,4,5,6<br>,38,39 | 7,8,36,37,<br>40,41,42,4<br>3,44 | 8  | P02625,P08010,P19218,P34901,P97580,Q30KJ2,Q6IE51,Q7TP52                                                                                                                                                                                |



|    |                       |                                  |    |                                                                                                                                                                                                            |
|----|-----------------------|----------------------------------|----|------------------------------------------------------------------------------------------------------------------------------------------------------------------------------------------------------------|
| 36 | 1,2,3,4,5,6<br>,38,40 | 7,8,36,37,<br>39,41,42,4<br>3,44 | 7  | P01835,P22006,P34901,P70709,P97580,Q30KJ2,Q7TP52                                                                                                                                                           |
| 37 | 1,2,3,4,5,6<br>,38,41 | 7,8,36,37,<br>39,40,42,4<br>3,44 | 13 | G3V686,P08010,P08753,P25031,P34901,P49744,P60905,P97580,P97605,Q30KJ2,Q62902,Q7TP52,Q7TPB1                                                                                                                 |
| 38 | 1,2,3,4,5,6<br>,38,42 | 7,8,36,37,<br>39,40,41,4<br>3,44 | 29 | G3V686,O35547,P02781,P04905,P08010,P08290,P08723,P08753,P10715,P12785,P19218,P19629,P22006,P22283,P25031,P34901,P36374,P47727,P60905,P97554,P97580,Q30KJ2,Q62902,Q63357,Q6AYL6,Q6AYR8,Q7TP52,Q8CJ52,Q9QZK9 |
| 39 | 1,2,3,4,5,6<br>,38,43 | 7,8,36,37,<br>39,40,41,4<br>2,44 | 16 | G3V686,P01681,P01835,P10715,P19629,P20762,P25031,P34901,P85971,P97580,Q30KJ2,Q5HZV9,Q63661,Q63942,Q7TP52,Q7TPB1                                                                                            |
| 40 | 1,2,3,4,5,6<br>,38,44 | 7,8,36,37,<br>39,40,41,4<br>2,43 | 8  | G3V686,P01835,P12785,P22006,P34901,P97580,Q30KJ2,Q7TP52                                                                                                                                                    |
| 41 | 1,2,3,4,5,6<br>,39,40 | 7,8,36,37,<br>38,41,42,4<br>3,44 | 3  | P34901,P36376,Q7TP52                                                                                                                                                                                       |
| 42 | 1,2,3,4,5,6<br>,39,41 | 7,8,36,37,<br>38,40,42,4<br>3,44 | 11 | G3V686,P02625,P08010,P34901,P38444,P82471,P97605,Q63317,Q63475,Q6BEA2,Q7TP52                                                                                                                               |
| 43 | 1,2,3,4,5,6<br>,39,42 | 7,8,36,37,<br>38,40,41,4<br>3,44 | 18 | G3V686,P02780,P02781,P04905,P08010,P08290,P08753,P09456,P22283,P34901,P36374,P47727,P60905,P82471,P97605,Q6AYR8,Q6AYR9,Q7TP52                                                                              |
| 44 | 1,2,3,4,5,6<br>,39,43 | 7,8,36,37,<br>38,40,41,4<br>2,44 | 11 | G3V686,P01681,P02625,P11883,P20762,P34901,P83748,P85971,Q63942,Q6IE51,Q7TP52                                                                                                                               |
| 45 | 1,2,3,4,5,6<br>,39,44 | 7,8,36,37,<br>38,40,41,4<br>2,43 | 4  | G3V686,P34901,Q6BEA2,Q7TP52                                                                                                                                                                                |
| 46 | 1,2,3,4,5,6<br>,40,41 | 7,8,36,37,<br>38,39,42,4<br>3,44 | 6  | G3V686,P23593,P36376,P70709,P97605,Q7TP52                                                                                                                                                                  |
| 47 | 1,2,3,4,5,6<br>,40,42 | 7,8,36,37,<br>38,39,41,4<br>3,44 | 15 | G3V686,P02780,P02781,P02782,P05539,P08753,P22006,P23593,P36374,P36376,P60905,P70709,Q6AYR8,Q7TP52,Q9QZ76                                                                                                   |
| 48 | 1,2,3,4,5,6<br>,40,43 | 7,8,36,37,<br>38,39,41,4<br>2,44 | 10 | P01681,P01835,P11883,P20762,P34901,P36376,Q5HZV9,Q63661,Q63942,Q7TP52                                                                                                                                      |
| 49 | 1,2,3,4,5,6<br>,40,44 | 7,8,36,37,<br>38,39,41,4<br>2,43 | 7  | G3V686,P22006,P34901,P36374,P36376,Q7TP52,Q99376                                                                                                                                                           |
| 50 | 1,2,3,4,5,6<br>,41,42 | 7,8,36,37,<br>38,39,40,4<br>3,44 | 28 | F1LM93,G3V686,O35547,P02781,P04905,P05539,P08010,P08290,P08753,P09456,P13596,P22283,P36374,P54921,P60905,P63095,P82471,P97605,Q62753,Q62902,Q63357,Q6AYR8,Q6AYR9,Q7TP52,Q812E4,Q8CJ52,Q9JID2,Q9QZK9        |

|    |                       |                                   |    |                                                                                                                                                                                                                                                                                                                                                                                                         |
|----|-----------------------|-----------------------------------|----|---------------------------------------------------------------------------------------------------------------------------------------------------------------------------------------------------------------------------------------------------------------------------------------------------------------------------------------------------------------------------------------------------------|
| 51 | 1,2,3,4,5,6<br>,41,43 | 7,8,36,37,<br>38,39,40,4<br>2,44  | 16 | G3V686,P01681,P11883,P20762,P34901,P54921,P60905,P82471,P83748,P85971,Q5HZV9,Q63661,Q63942,Q66H69,Q7TP52,Q7TPB1                                                                                                                                                                                                                                                                                         |
| 52 | 1,2,3,4,5,6<br>,41,44 | 7,8,36,37,<br>38,39,40,4<br>2,43  | 9  | G3V686,P08010,P34901,P38444,P60905,P97605,Q63475,Q6BEA2,Q7TP52                                                                                                                                                                                                                                                                                                                                          |
| 53 | 1,2,3,4,5,6<br>,42,43 | 7,8,36,37,<br>38,39,40,4<br>1,44  | 28 | G3V686,P01681,P02781,P08290,P08723,P08753,P10715,P11883,P19629,P20762,P24368,P31044,P34901,P35434,P36374,P47727,P54921,P60905,P82471,P85971,Q5HZV9,Q62902,Q63357,Q63942,Q6AYR8,Q6Q7Y5,Q7TP52,Q9JHB9                                                                                                                                                                                                     |
| 54 | 1,2,3,4,5,6<br>,42,44 | 7,8,36,37,<br>38,39,40,4<br>1,43  | 15 | G3V686,P08010,P08290,P08753,P22006,P34901,P36374,P60905,Q63514,Q6AYR8,Q7TP52,Q8CJ52,Q99376,Q9JID2,Q9QZK9                                                                                                                                                                                                                                                                                                |
| 55 | 1,2,3,4,5,6<br>,43,44 | 7,8,36,37,<br>38,39,40,4<br>1,42  | 11 | G3V686,P01681,P01835,P11883,P20762,P34901,P85971,Q63661,Q63942,Q66H69,Q7TP52                                                                                                                                                                                                                                                                                                                            |
| 56 | 1,2,3,4,5,7<br>,8,36  | 6,37,38,39<br>,40,41,42,<br>43,44 | 46 | D3ZUK3,G3V686,P00762,P01836,P04905,P05539,P07171,P07897,P08010,P08644,P08721,P08753,P11762,P13432,P22734,P34901,P35444,P36374,P36970,P47727,P49744,P51886,P52590,P53792,P55314,P60571,P60905,P80202,P85971,P97605,Q01205,Q07116,Q09030,Q4AEF8,Q5M871,Q5ZQU0,Q63357,Q63467,Q63475,Q63532,Q6AYS4,Q6IE51,Q7TP52,Q812E4,Q99MH3,Q9QZK9                                                                       |
| 57 | 1,2,3,4,5,7<br>,8,37  | 6,36,38,39<br>,40,41,42,<br>43,44 | 18 | D3ZUK3,P05964,P07171,P11762,P35444,P36970,P52590,P53792,P85971,P97605,Q01205,Q09030,Q5ZQU0,Q63467,Q63475,Q6IE51,Q7TPB1,Q9ESW0                                                                                                                                                                                                                                                                           |
| 58 | 1,2,3,4,5,7<br>,8,38  | 6,36,37,39<br>,40,41,42,<br>43,44 | 35 | D3ZUK3,O35547,P01836,P01946,P04905,P07171,P07897,P08010,P08753,P11762,P19218,P25031,P34901,P35444,P36374,P47727,P49744,P50116,P52590,P60905,P85971,P97580,P97605,Q01205,Q09030,Q4V885,Q5M871,Q5ZQU0,Q62902,Q63467,Q63475,Q6AYS4,Q6IE51,Q7TPB1,Q9QZK9                                                                                                                                                    |
| 59 | 1,2,3,4,5,7<br>,8,39  | 6,36,37,38<br>,40,41,42,<br>43,44 | 27 | D3ZUK3,O54728,O88267,P01946,P04905,P07171,P07897,P08010,P08753,P34901,P35444,P36374,P36970,P47727,P52590,P85971,P97605,Q01205,Q09030,Q5M871,Q5ZQU0,Q63317,Q63467,Q63475,Q6AYS4,Q6IE51,Q9ESW0                                                                                                                                                                                                            |
| 60 | 1,2,3,4,5,7<br>,8,40  | 6,36,37,38<br>,39,41,42,<br>43,44 | 22 | D3ZUK3,P02781,P02803,P07171,P07897,P35444,P36374,P36376,P36970,P52590,P60905,P85971,P97605,Q01205,Q09030,Q5M819,Q5ZQU0,Q63467,Q6AYS4,Q6IE51,Q9JHB9,Q9QZ76                                                                                                                                                                                                                                               |
| 61 | 1,2,3,4,5,7<br>,8,41  | 6,36,37,38<br>,39,40,42,<br>43,44 | 46 | D3ZUK3,G3V686,O08815,O35547,P01836,P01946,P04905,P05539,P07171,P07897,P08010,P08753,P11762,P35444,P36374,P36970,P49744,P50116,P52590,P54921,P60905,P80201,P80202,P82471,P83121,P85971,P97605,Q01205,Q08464,Q09030,Q4V885,Q5M871,Q5ZQU0,Q62753,Q63317,Q63357,Q63467,Q63475,Q63532,Q6IE51,Q7TP52,Q7TPB1,Q812E4,Q99MH3,Q9ESW0,Q9QZK9                                                                       |
| 62 | 1,2,3,4,5,7<br>,8,42  | 6,36,37,38<br>,39,40,41,<br>43,44 | 56 | F1LM93,G3V686,O08815,O35547,P01836,P02780,P02781,P02782,P04905,P05539,P07171,P07897,P08010,P08290,P08644,P08723,P08753,P09456,P0C0A9,P19629,P20759,P20762,P35444,P35446,P36374,P36970,P47727,P52590,P54921,P60905,P63322,P85971,P97605,Q01205,Q08464,Q09030,Q4AEF8,Q4V885,Q5M819,Q5XI73,Q5ZQU0,Q62753,Q62894,Q62902,Q63357,Q63467,Q6AYR8,Q6AYR9,Q6IE51,Q7TP52,Q812E4,Q8CFN2,Q9JHB9,Q9QZ76,Q9QZK9,Q9QZQ5 |
| 63 | 1,2,3,4,5,7<br>,8,43  | 6,36,37,38<br>,39,40,41,<br>42,44 | 41 | D3ZUK3,O35547,O35783,P01681,P01836,P01946,P02091,P07171,P08723,P13432,P16391,P16636,P20762,P34901,P35444,P36374,P36970,P47727,P49744,P51886,P52590,P60905,P83748,P85971,P97605,Q01205,Q03191,Q08464,Q09030,Q5M871,Q5ZQU0,Q63416,Q63467,Q63532,Q63942,Q64268,Q6IE51,Q7TP52,Q7TPB1,Q9JHB9,Q9QX79                                                                                                          |
| 64 | 1,2,3,4,5,7<br>,8,44  | 6,36,37,38<br>,39,40,41,<br>42,43 | 31 | D3ZUK3,G3V686,P01946,P07171,P07897,P08010,P08753,P13432,P34901,P35444,P36374,P36970,P49744,P52590,P53792,P60571,P60905,P85971,P97605,Q01205,Q09030,Q5M819,Q5M871,Q5ZQU0,Q63467,Q63475,Q6AYS4,Q6IE51,Q7TP52,Q9ESW0,Q9QZK9                                                                                                                                                                                |
| 65 | 1,2,3,4,5,7<br>,36,37 | 6,8,38,39,<br>40,41,42,4<br>3,44  | 20 | G3V686,P00762,P01836,P05539,P05964,P06760,P11762,P13432,P19629,P22734,P34901,P52590,P55314,P85971,Q01205,Q09030,Q63467,Q63475,Q6IE51,Q7TP52                                                                                                                                                                                                                                                             |

|    |                       |                                  |    |                                                                                                                                                                                                                                                                                                                                          |
|----|-----------------------|----------------------------------|----|------------------------------------------------------------------------------------------------------------------------------------------------------------------------------------------------------------------------------------------------------------------------------------------------------------------------------------------|
| 66 | 1,2,3,4,5,7<br>,36,38 | 6,8,37,39,<br>40,41,42,4<br>3,44 | 25 | G3V686,P01836,P01946,P05539,P08010,P11762,P13596,P25031,P34901,P35444,P47727,P49744,P52590,P55314,P60905,P85971,Q01205,Q09030,Q5ZQU0,Q62902,Q63467,Q63475,Q6AYL6,Q6IE51,Q7TP52                                                                                                                                                           |
| 67 | 1,2,3,4,5,7<br>,36,39 | 6,8,37,38,<br>40,41,42,4<br>3,44 | 25 | G3V686,O54728,P01836,P01946,P05539,P06760,P08010,P13596,P22734,P34901,P35446,P47727,P52590,P55314,P85971,P97605,Q01205,Q09030,Q5ZQU0,Q63467,Q63475,Q6IE51,Q6P6R2,Q7TP52,Q9ESW0                                                                                                                                                           |
| 68 | 1,2,3,4,5,7<br>,36,40 | 6,8,37,38,<br>39,41,42,4<br>3,44 | 17 | G3V686,P01836,P02782,P05539,P11762,P13432,P13596,P34901,P36376,P52590,P55314,P85971,Q01205,Q09030,Q63467,Q6IE51,Q7TP52                                                                                                                                                                                                                   |
| 69 | 1,2,3,4,5,7<br>,36,41 | 6,8,37,38,<br>39,40,42,4<br>3,44 | 30 | G3V686,P01836,P01946,P05539,P06760,P08010,P08644,P08649,P11762,P13596,P34901,P35444,P49744,P52590,P55314,P60905,P80201,P85971,P97605,Q01205,Q09030,Q5ZQU0,Q63357,Q63467,Q63475,Q63532,Q6IE51,Q7TP52,Q812E4,Q99MH3                                                                                                                        |
| 70 | 1,2,3,4,5,7<br>,36,42 | 6,8,37,38,<br>39,40,41,4<br>3,44 | 47 | G3V686,O35547,O54728,P00762,P01836,P02781,P02782,P04905,P05539,P08010,P08290,P08644,P08649,P08721,P08723,P08753,P0C0A9,P13596,P14408,P19629,P22283,P34901,P35444,P35446,P36374,P47727,P52590,P55314,P60905,P85971,P97554,P97605,Q01205,Q09030,Q5XI73,Q5ZQU0,Q62902,Q63357,Q63467,Q6AYL6,Q6AYR8,Q6AYR9,Q6IE51,Q7TP52,Q812E4,Q8CJ52,Q9QZK9 |
| 71 | 1,2,3,4,5,7<br>,36,43 | 6,8,37,38,<br>39,40,41,4<br>2,44 | 33 | G3V686,O89117,P01681,P01836,P01946,P02091,P02782,P05539,P06760,P11762,P13432,P16636,P19629,P20762,P22734,P34901,P47727,P51886,P52590,P55314,P60905,P83748,P85971,Q01205,Q09030,Q63416,Q63467,Q63475,Q63532,Q63661,Q6IE51,Q7TP52,Q8CHN8                                                                                                   |
| 72 | 1,2,3,4,5,7<br>,36,44 | 6,8,37,38,<br>39,40,41,4<br>2,43 | 28 | G3V686,P00762,P01836,P01946,P05539,P07897,P08010,P08644,P08721,P13432,P13596,P34901,P35444,P36374,P52590,P53792,P55314,P60905,P85971,Q01205,Q09030,Q5ZQU0,Q63467,Q63475,Q63661,Q6IE51,Q7TP52,Q99MH3                                                                                                                                      |
| 73 | 1,2,3,4,5,7<br>,37,38 | 6,8,36,39,<br>40,41,42,4<br>3,44 | 13 | P01836,P01946,P05964,P11762,P12785,P25031,P34901,P52590,P85971,P97580,Q09030,Q6IE51,Q7TPB1                                                                                                                                                                                                                                               |
| 74 | 1,2,3,4,5,7<br>,37,39 | 6,8,36,38,<br>40,41,42,4<br>3,44 | 11 | P01836,P01946,P11762,P15999,P34901,P52590,P85971,Q09030,Q63467,Q6IE51,Q9ESW0                                                                                                                                                                                                                                                             |
| 75 | 1,2,3,4,5,7<br>,37,40 | 6,8,36,38,<br>39,41,42,4<br>3,44 | 6  | P01836,P11762,P36376,P52590,Q09030,Q6IE51                                                                                                                                                                                                                                                                                                |
| 76 | 1,2,3,4,5,7<br>,37,41 | 6,8,36,38,<br>39,40,42,4<br>3,44 | 15 | G3V686,P01836,P05964,P11762,P52590,P80201,P85971,P97605,Q01205,Q09030,Q63467,Q63475,Q6IE51,Q7TPB1,Q9ESW0                                                                                                                                                                                                                                 |
| 77 | 1,2,3,4,5,7<br>,37,42 | 6,8,36,38,<br>39,40,41,4<br>3,44 | 18 | G3V686,P01836,P02781,P02782,P08290,P08644,P11762,P19629,P36374,P47727,P52590,P85971,P97605,Q09030,Q5XI73,Q6AYR8,Q6IE51,Q9QZK9                                                                                                                                                                                                            |
| 78 | 1,2,3,4,5,7<br>,37,43 | 6,8,36,38,<br>39,40,41,4<br>2,44 | 19 | O35783,P01681,P01836,P01946,P02091,P05964,P06760,P11762,P19629,P34901,P52590,P83748,P85971,Q09030,Q63416,Q63661,Q6IE51,Q7TPB1,Q9QX79                                                                                                                                                                                                     |
| 79 | 1,2,3,4,5,7<br>,37,44 | 6,8,36,38,<br>39,40,41,4<br>2,43 | 12 | G3V686,P01946,P05964,P11762,P13432,P34901,P52590,P85971,Q09030,Q63467,Q6IE51,Q9ESW0                                                                                                                                                                                                                                                      |
| 80 | 1,2,3,4,5,7<br>,38,39 | 6,8,36,37,<br>40,41,42,4<br>3,44 | 17 | O54728,P01836,P01946,P08010,P19218,P25031,P34901,P42854,P47727,P51907,P52590,P85971,P97605,Q09030,Q63467,Q6IE51,Q9ESW0                                                                                                                                                                                                                   |

|    |                       |                                  |    |                                                                                                                                                                                                                                                                                                              |
|----|-----------------------|----------------------------------|----|--------------------------------------------------------------------------------------------------------------------------------------------------------------------------------------------------------------------------------------------------------------------------------------------------------------|
| 81 | 1,2,3,4,5,7<br>,38,40 | 6,8,36,37,<br>39,41,42,4<br>3,44 | 8  | P01836,P02782,P25031,P34901,P52590,P85971,Q09030,Q6IE51                                                                                                                                                                                                                                                      |
| 82 | 1,2,3,4,5,7<br>,38,41 | 6,8,36,37,<br>39,40,42,4<br>3,44 | 26 | O35547,P01836,P01946,P08010,P11762,P13596,P25031,P34901,P35444,P49744,P52590,P60905,P80201,P85971,P97605,Q01205,Q09030,Q5M871,Q5ZQU0,Q62902,Q63317,Q63467,Q63475,Q6IE51,Q7TPB1,Q9QZK9                                                                                                                        |
| 83 | 1,2,3,4,5,7<br>,38,42 | 6,8,36,37,<br>39,40,41,4<br>3,44 | 37 | O35547,P01836,P02781,P02782,P04905,P05539,P08010,P08290,P08723,P08753,P0C0A9,P12785,P13596,P19218,P22283,P25031,P34901,P35444,P36374,P42854,P47727,P51907,P52590,P60905,P85971,P97605,Q09030,Q5XI73,Q62902,Q63357,Q6AYL6,Q6AYR8,Q6IE51,Q7TP52,Q8CJ52,Q9JHB9,Q9QZK9                                           |
| 84 | 1,2,3,4,5,7<br>,38,43 | 6,8,36,37,<br>39,40,41,4<br>2,44 | 21 | O35547,P01681,P01836,P01946,P02091,P08723,P25031,P34901,P35444,P47727,P52590,P60905,P83748,P85971,P97580,Q09030,Q63467,Q63661,Q6IE51,Q7TPB1,Q9JHB9                                                                                                                                                           |
| 85 | 1,2,3,4,5,7<br>,38,44 | 6,8,36,37,<br>39,40,41,4<br>2,43 | 13 | P01836,P01946,P12785,P25031,P34901,P35444,P51907,P52590,P60905,P85971,Q09030,Q63467,Q6IE51                                                                                                                                                                                                                   |
| 86 | 1,2,3,4,5,7<br>,39,40 | 6,8,36,37,<br>38,41,42,4<br>3,44 | 9  | P01836,P01946,P05539,P34901,P36376,P52590,Q09030,Q6IE51,Q9ESW0                                                                                                                                                                                                                                               |
| 87 | 1,2,3,4,5,7<br>,39,41 | 6,8,36,37,<br>38,40,42,4<br>3,44 | 21 | G3V686,O88267,P01836,P01946,P05539,P08010,P34901,P52590,P80201,P82471,P85971,P97605,Q01205,Q09030,Q5ZQU0,Q63317,Q63467,Q63475,Q6AYR9,Q6IE51,Q9ESW0                                                                                                                                                           |
| 88 | 1,2,3,4,5,7<br>,39,42 | 6,8,36,37,<br>38,40,41,4<br>3,44 | 37 | G3V686,O35547,O54728,P01836,P01946,P02780,P02781,P02782,P04905,P05539,P08010,P08290,P08644,P08723,P08753,P0C0A9,P13596,P22283,P34901,P35446,P36374,P47727,P51907,P52590,P60905,P85971,P97584,P97605,Q09030,Q5XI73,Q6AYR8,Q6AYR9,Q6IE51,Q99068,Q9ESW0,Q9JHB9,Q9QZK9                                           |
| 89 | 1,2,3,4,5,7<br>,39,43 | 6,8,36,37,<br>38,40,41,4<br>2,44 | 14 | O54728,P01681,P01836,P01946,P02091,P06760,P34901,P52590,P83748,P85971,Q09030,Q63467,Q6IE51,Q9ESW0                                                                                                                                                                                                            |
| 90 | 1,2,3,4,5,7<br>,39,44 | 6,8,36,37,<br>38,40,41,4<br>2,43 | 13 | P01946,P08010,P34901,P35444,P51907,P52590,P85971,P97605,Q09030,Q63467,Q63475,Q6IE51,Q9ESW0                                                                                                                                                                                                                   |
| 91 | 1,2,3,4,5,7<br>,40,41 | 6,8,36,37,<br>38,39,42,4<br>3,44 | 10 | P01836,P05539,P13596,P36376,P52590,P85971,P97605,Q09030,Q63467,Q6IE51                                                                                                                                                                                                                                        |
| 92 | 1,2,3,4,5,7<br>,40,42 | 6,8,36,37,<br>38,39,41,4<br>3,44 | 23 | P01836,P02780,P02781,P02782,P05539,P08010,P08644,P13596,P36374,P36376,P52590,P60905,P63322,P85971,P97605,Q09030,Q5XI73,Q6AYR8,Q6AYR9,Q6IE51,Q99068,Q9JHB9,Q9QZ76                                                                                                                                             |
| 93 | 1,2,3,4,5,7<br>,40,43 | 6,8,36,37,<br>38,39,41,4<br>2,44 | 16 | O35783,P01681,P01836,P01946,P02091,P02782,P05539,P34901,P36376,P52590,P83748,P85971,Q09030,Q63661,Q6IE51,Q9JHB9                                                                                                                                                                                              |
| 94 | 1,2,3,4,5,7<br>,40,44 | 6,8,36,37,<br>38,39,41,4<br>2,43 | 11 | P01946,P02782,P34901,P36374,P36376,P52590,P85971,Q09030,Q63467,Q6IE51,Q9QZ76                                                                                                                                                                                                                                 |
| 95 | 1,2,3,4,5,7<br>,41,42 | 6,8,36,37,<br>38,39,40,4<br>3,44 | 43 | F1LM93,G3V686,O08815,O35547,P01836,P02781,P02782,P04905,P05539,P08010,P08290,P08644,P08723,P08753,P0C0A9,P13596,P22283,P35444,P36374,P47727,P52590,P54921,P60905,P80201,P82471,P85971,P97605,Q09030,Q5XI73,Q62753,Q62902,Q63357,Q63467,Q6AYR8,Q6AYR9,Q6IE51,Q7TP52,Q812E4,Q8CFN2,Q8CJ52,Q99068,Q9QZK9,Q9WUD9 |

|     |                       |                                  |    |                                                                                                                                                                                                                                                                                                              |
|-----|-----------------------|----------------------------------|----|--------------------------------------------------------------------------------------------------------------------------------------------------------------------------------------------------------------------------------------------------------------------------------------------------------------|
| 96  | 1,2,3,4,5,7<br>,41,43 | 6,8,36,37,<br>38,39,40,4<br>2,44 | 30 | G3V686,O35547,P01681,P01836,P01946,P02091,P05539,P06760,P16636,P34901,P49744,P52590,P54921,P60905,P80201,P82471,P83121,P83748,P85971,P97605,Q09030,Q63467,Q63475,Q63532,Q63661,Q6IE51,Q7TP52,Q7TPB1,Q9QX79,Q9WUC4                                                                                            |
| 97  | 1,2,3,4,5,7<br>,41,44 | 6,8,36,37,<br>38,39,40,4<br>2,43 | 22 | G3V686,P01836,P01946,P05539,P08010,P13596,P34901,P35444,P49744,P52590,P60905,P80201,P85971,P97605,Q01205,Q09030,Q5ZQU0,Q63467,Q63475,Q6IE51,Q7TP52,Q9ESW0                                                                                                                                                    |
| 98  | 1,2,3,4,5,7<br>,42,43 | 6,8,36,37,<br>38,39,40,4<br>1,44 | 43 | G3V686,O35547,O35783,P01681,P01836,P01946,P02091,P02780,P02781,P02782,P04905,P05539,P06911,P08010,P08290,P08723,P08753,P0C0A9,P16636,P19629,P20762,P24368,P25031,P30120,P34901,P36374,P47727,P52590,P54921,P60905,P82471,P85971,Q09030,Q62902,Q62975,Q63357,Q6AYR8,Q6AYR9,Q6IE51,Q6Q7Y5,Q7TP52,Q9JHB9,Q9QZK9 |
| 99  | 1,2,3,4,5,7<br>,42,44 | 6,8,36,37,<br>38,39,40,4<br>1,43 | 35 | G3V686,O35547,O35783,P01836,P01946,P02781,P02782,P04905,P05539,P08010,P08290,P08644,P08723,P08753,P0C0A9,P13596,P34901,P35444,P36374,P47727,P51907,P52590,P60905,P85971,P97605,Q09030,Q5XI73,Q63467,Q6AYR8,Q6IE51,Q7TP52,Q99068,Q9JID2,Q9QZ76,Q9QZK9                                                         |
| 100 | 1,2,3,4,5,7<br>,43,44 | 6,8,36,37,<br>38,39,40,4<br>1,42 | 18 | G3V686,O35783,P01681,P01836,P01946,P02091,P13432,P34901,P35444,P52590,P60905,P83748,P85971,Q09030,Q63467,Q63661,Q6IE51,Q9WUC4                                                                                                                                                                                |
| 101 | 1,2,3,4,5,8<br>,36,37 | 6,7,38,39,<br>40,41,42,4<br>3,44 | 8  | P11030,P13432,P19629,P22734,P34901,P83121,Q01205,Q6AYS4                                                                                                                                                                                                                                                      |
| 102 | 1,2,3,4,5,8<br>,36,38 | 6,7,37,39,<br>40,41,42,4<br>3,44 | 13 | P08010,P08753,P19629,P34901,P47727,P55314,P60905,Q01205,Q62902,Q6AYL6,Q6AYS4,Q7TP52,Q9QZK9                                                                                                                                                                                                                   |
| 103 | 1,2,3,4,5,8<br>,36,39 | 6,7,37,38,<br>40,41,42,4<br>3,44 | 10 | O54728,P08010,P22734,P34901,P36970,P55314,Q01205,Q5ZQU0,Q6AYS4,Q7TP52                                                                                                                                                                                                                                        |
| 104 | 1,2,3,4,5,8<br>,36,40 | 6,7,37,38,<br>39,41,42,4<br>3,44 | 8  | P13432,P22006,P34901,P36374,P36970,P55314,Q01205,Q6AYS4                                                                                                                                                                                                                                                      |
| 105 | 1,2,3,4,5,8<br>,36,41 | 6,7,37,38,<br>39,40,42,4<br>3,44 | 14 | P08010,P08753,P34901,P36970,P60905,P83121,P97605,Q01205,Q5ZQU0,Q62902,Q63357,Q63475,Q7TP52,Q99MH3                                                                                                                                                                                                            |
| 106 | 1,2,3,4,5,8<br>,36,42 | 6,7,37,38,<br>39,40,41,4<br>3,44 | 28 | O08815,O54728,P02781,P04905,P08010,P08644,P08721,P08723,P08753,P09456,P10715,P19629,P22283,P34901,P36374,P36970,P47727,P60905,P85971,P97554,Q01205,Q62902,Q63357,Q6AYL6,Q6AYR9,Q7TP52,Q812E4,Q9QZK9                                                                                                          |
| 107 | 1,2,3,4,5,8<br>,36,43 | 6,7,37,38,<br>39,40,41,4<br>2,44 | 18 | P01681,P13432,P16391,P19629,P19939,P20762,P22734,P34901,P55314,P60905,P83121,P85971,Q01205,Q63661,Q63942,Q64268,Q7TP52,Q9QX79                                                                                                                                                                                |
| 108 | 1,2,3,4,5,8<br>,36,44 | 6,7,37,38,<br>39,40,41,4<br>2,43 | 16 | P07171,P08721,P13432,P22006,P34901,P36374,P55314,P60571,P60905,P83121,Q01205,Q5ZQU0,Q63475,Q6AYS4,Q7TP52,Q99MH3                                                                                                                                                                                              |
| 109 | 1,2,3,4,5,8<br>,37,38 | 6,7,36,39,<br>40,41,42,4<br>3,44 | 2  | P34901,Q7TPB1                                                                                                                                                                                                                                                                                                |
| 110 | 1,2,3,4,5,8<br>,37,39 | 6,7,36,38,<br>40,41,42,4<br>3,44 | 2  | P36970,Q9ESW0                                                                                                                                                                                                                                                                                                |

|     |                       |                                  |    |                                                                                                                                                                  |
|-----|-----------------------|----------------------------------|----|------------------------------------------------------------------------------------------------------------------------------------------------------------------|
| 111 | 1,2,3,4,5,8<br>,37,40 | 6,7,36,38,<br>39,41,42,4<br>3,44 | 3  | P02803,P22006,Q6P777                                                                                                                                             |
| 112 | 1,2,3,4,5,8<br>,37,41 | 6,7,36,38,<br>39,40,42,4<br>3,44 | 4  | P83121,Q01205,Q62894,Q7TPB1                                                                                                                                      |
| 113 | 1,2,3,4,5,8<br>,37,42 | 6,7,36,38,<br>39,40,41,4<br>3,44 | 5  | P08753,P19629,P36374,Q62894,Q9QZK9                                                                                                                               |
| 114 | 1,2,3,4,5,8<br>,37,43 | 6,7,36,38,<br>39,40,41,4<br>2,44 | 9  | P01681,P19629,P34901,P83121,Q62894,Q63942,Q64268,Q7TPB1,Q9QX79                                                                                                   |
| 115 | 1,2,3,4,5,8<br>,37,44 | 6,7,36,38,<br>39,40,41,4<br>2,43 | 3  | P13432,P22006,P34901                                                                                                                                             |
| 116 | 1,2,3,4,5,8<br>,38,39 | 6,7,36,37,<br>40,41,42,4<br>3,44 | 5  | P08010,P34901,P47727,Q6AYS4,Q80WL1                                                                                                                               |
| 117 | 1,2,3,4,5,8<br>,38,40 | 6,7,36,37,<br>39,41,42,4<br>3,44 | 3  | P02803,P22006,P34901                                                                                                                                             |
| 118 | 1,2,3,4,5,8<br>,38,41 | 6,7,36,37,<br>39,40,42,4<br>3,44 | 15 | O35547,P08010,P08753,P34901,P49744,P50115,P50116,P60905,P83121,P97605,Q01205,Q62894,Q62902,Q7TPB1,Q9QZK9                                                         |
| 119 | 1,2,3,4,5,8<br>,38,42 | 6,7,36,37,<br>39,40,41,4<br>3,44 | 23 | O08815,O35547,P02781,P04905,P08010,P08723,P08753,P09456,P19629,P22283,P34901,P36374,P47727,P60905,P63322,P97554,Q62894,Q62902,Q63357,Q6AYL6,Q6AYR8,Q9JHB9,Q9QZK9 |
| 120 | 1,2,3,4,5,8<br>,38,43 | 6,7,36,37,<br>39,40,41,4<br>2,44 | 12 | P01681,P16391,P19629,P34901,P47727,P52590,P85971,Q62902,Q63942,Q64268,Q7TPB1,Q9QX79                                                                              |
| 121 | 1,2,3,4,5,8<br>,38,44 | 6,7,36,37,<br>39,40,41,4<br>2,43 | 4  | P22006,P34901,Q01205,Q9QZK9                                                                                                                                      |
| 122 | 1,2,3,4,5,8<br>,39,40 | 6,7,36,37,<br>38,41,42,4<br>3,44 | 2  | P36970,Q6AYS4                                                                                                                                                    |
| 123 | 1,2,3,4,5,8<br>,39,41 | 6,7,36,37,<br>38,40,42,4<br>3,44 | 10 | P08010,P08753,P36970,P82471,P97605,Q01205,Q5ZQU0,Q63317,Q63475,Q9ESW0                                                                                            |
| 124 | 1,2,3,4,5,8<br>,39,42 | 6,7,36,37,<br>38,40,41,4<br>3,44 | 16 | O08815,O54728,P02781,P04905,P08010,P08753,P09456,P36374,P36970,P47727,P60905,P97605,Q62894,Q6AYR9,Q9JHB9,Q9QZK9                                                  |
| 125 | 1,2,3,4,5,8<br>,39,43 | 6,7,36,37,<br>38,40,41,4<br>2,44 | 8  | P01681,P01946,P34901,P36970,P97840,Q63942,Q64268,Q9QX79                                                                                                          |

|     |                        |                                  |    |                                                                                                                                                                                                                                        |
|-----|------------------------|----------------------------------|----|----------------------------------------------------------------------------------------------------------------------------------------------------------------------------------------------------------------------------------------|
| 126 | 1,2,3,4,5,8<br>,39,44  | 6,7,36,37,<br>38,40,41,4<br>2,43 | 4  | P34901,P36970,Q6AYS4,Q9ESW0                                                                                                                                                                                                            |
| 127 | 1,2,3,4,5,8<br>,40,41  | 6,7,36,37,<br>38,39,42,4<br>3,44 | 2  | P97605,P97840                                                                                                                                                                                                                          |
| 128 | 1,2,3,4,5,8<br>,40,42  | 6,7,36,37,<br>38,39,41,4<br>3,44 | 11 | P02781,P08753,P22006,P36374,P36970,P60905,P63322,Q5M819,Q9JHB9,Q9QZ76,Q9QZK9                                                                                                                                                           |
| 129 | 1,2,3,4,5,8<br>,40,43  | 6,7,36,37,<br>38,39,41,4<br>2,44 | 7  | P01681,P34901,P97840,Q5M819,Q63942,Q9JHB9,Q9QX79                                                                                                                                                                                       |
| 130 | 1,2,3,4,5,8<br>,40,44  | 6,7,36,37,<br>38,39,41,4<br>2,43 | 6  | P13432,P22006,P34901,P36374,Q5M819,Q9QZ76                                                                                                                                                                                              |
| 131 | 1,2,3,4,5,8<br>,41,42  | 6,7,36,37,<br>38,39,40,4<br>3,44 | 31 | F1LM93,O08815,O35547,P02781,P04897,P04905,P08010,P08753,P09456,P0C0A9,P22283,P36374,P36970,P47727,P54921,P60905,P63095,P63322,P82471,P83121,P97605,Q01205,Q62753,Q62894,Q62902,Q63357,Q6AYR9,Q812E4,Q8CFN2,Q8CJ52,Q9QZK9               |
| 132 | 1,2,3,4,5,8<br>,41,43  | 6,7,36,37,<br>38,39,40,4<br>2,44 | 12 | P01681,P34901,P54921,P60905,P82471,P83121,P85971,P97840,Q01205,Q62894,Q7TPB1,Q9QX79                                                                                                                                                    |
| 133 | 1,2,3,4,5,8<br>,41,44  | 6,7,36,37,<br>38,39,40,4<br>2,43 | 7  | P08010,P34901,P60905,P83121,P97605,Q01205,Q63475                                                                                                                                                                                       |
| 134 | 1,2,3,4,5,8<br>,42,43  | 6,7,36,37,<br>38,39,40,4<br>1,44 | 33 | O08815,O35547,P01681,P02781,P04897,P04905,P06911,P08723,P08753,P09456,P10715,P19629,P20762,P34901,P36374,P47727,P54921,P60905,P82471,P83121,P85971,Q5GRG2,Q62894,Q62902,Q63357,Q63942,Q64268,Q6AYR8,Q6AYR9,Q6Q7Y5,Q9JHB9,Q9QX79,Q9QZK9 |
| 135 | 1,2,3,4,5,8<br>,42,44  | 6,7,36,37,<br>38,39,40,4<br>1,43 | 17 | P04905,P08010,P08723,P08753,P09456,P22006,P34901,P36374,P47727,P60905,Q5M819,Q62902,Q6AYR8,Q6Q7Y5,Q9JID2,Q9QZ76,Q9QZK9                                                                                                                 |
| 136 | 1,2,3,4,5,8<br>,43,44  | 6,7,36,37,<br>38,39,40,4<br>1,42 | 11 | P01681,P13432,P34901,P60905,P83121,P85971,Q5M819,Q63661,Q63942,Q66H69,Q9QX79                                                                                                                                                           |
| 137 | 1,2,3,4,5,3<br>6,37,38 | 6,7,8,39,4<br>0,41,42,43<br>,44  | 6  | P12785,P19629,P34901,P55314,Q6AYL6,Q6P6R2                                                                                                                                                                                              |
| 138 | 1,2,3,4,5,3<br>6,37,39 | 6,7,8,38,4<br>0,41,42,43<br>,44  | 6  | O54728,P22734,P34901,P55314,Q6P6R2,Q6P777                                                                                                                                                                                              |
| 139 | 1,2,3,4,5,3<br>6,37,40 | 6,7,8,38,3<br>9,41,42,43<br>,44  | 3  | P34901,P55314,Q6P777                                                                                                                                                                                                                   |
| 140 | 1,2,3,4,5,3<br>6,37,41 | 6,7,8,38,3<br>9,40,42,43<br>,44  | 4  | P01836,P34901,P83121,Q63475                                                                                                                                                                                                            |

|     |                        |                                 |    |                                                                                                                                                                                    |
|-----|------------------------|---------------------------------|----|------------------------------------------------------------------------------------------------------------------------------------------------------------------------------------|
| 141 | 1,2,3,4,5,3<br>6,37,42 | 6,7,8,38,3<br>9,40,41,43<br>,44 | 11 | O54728,P06911,P10715,P12020,P19629,P22283,P31044,P34901,Q5GRG2,Q6AYL6,Q7TP52                                                                                                       |
| 142 | 1,2,3,4,5,3<br>6,37,43 | 6,7,8,38,3<br>9,40,41,42<br>,44 | 15 | P01681,P01836,P06760,P06911,P10715,P12020,P13432,P19629,P22734,P31044,P34901,P55314,P83121,Q63661,Q9QW07                                                                           |
| 143 | 1,2,3,4,5,3<br>6,37,44 | 6,7,8,38,3<br>9,40,41,42<br>,43 | 3  | P13432,P34901,P55314                                                                                                                                                               |
| 144 | 1,2,3,4,5,3<br>6,38,39 | 6,7,8,37,4<br>0,41,42,43<br>,44 | 5  | O54728,P34901,P51907,P55314,Q6P6R2                                                                                                                                                 |
| 145 | 1,2,3,4,5,3<br>6,38,40 | 6,7,8,37,3<br>9,41,42,43<br>,44 | 3  | P01836,P34901,P55314                                                                                                                                                               |
| 146 | 1,2,3,4,5,3<br>6,38,41 | 6,7,8,37,3<br>9,40,42,43<br>,44 | 7  | P01836,P08010,P34901,P55314,Q62902,Q63475,Q7TP52                                                                                                                                   |
| 147 | 1,2,3,4,5,3<br>6,38,42 | 6,7,8,37,3<br>9,40,41,43<br>,44 | 25 | O54728,P01836,P02782,P04905,P06911,P08010,P08753,P10715,P12020,P12785,P19629,P22282,P22283,P31044,P34901,P47727,P51907<br>,P55314,P60905,P97554,Q5GRG2,Q62902,Q6AYL6,Q7TP52,Q9QZK9 |
| 148 | 1,2,3,4,5,3<br>6,38,43 | 6,7,8,37,3<br>9,40,41,42<br>,44 | 14 | P01681,P01836,P06911,P10715,P12020,P19629,P31044,P34901,P55314,Q5GRG2,Q62902,Q63661,Q6P6R2,Q7TP52                                                                                  |
| 149 | 1,2,3,4,5,3<br>6,38,44 | 6,7,8,37,3<br>9,40,41,42<br>,43 | 6  | P12785,P34901,P51907,P55314,Q63661,Q7TP52                                                                                                                                          |
| 150 | 1,2,3,4,5,3<br>6,39,40 | 6,7,8,37,3<br>8,41,42,43<br>,44 | 4  | O54728,P34901,P36376,P55314                                                                                                                                                        |
| 151 | 1,2,3,4,5,3<br>6,39,41 | 6,7,8,37,3<br>8,40,42,43<br>,44 | 7  | O54728,P08010,P34901,P55314,Q63475,Q7TP52,Q9ESW0                                                                                                                                   |
| 152 | 1,2,3,4,5,3<br>6,39,42 | 6,7,8,37,3<br>8,40,41,43<br>,44 | 11 | O54728,P04905,P08010,P22283,P34901,P47727,P51907,P55314,Q62635,Q6AYR9,Q7TP52                                                                                                       |
| 153 | 1,2,3,4,5,3<br>6,39,43 | 6,7,8,37,3<br>8,40,41,42<br>,44 | 13 | O54728,O89117,P01681,P01836,P01946,P06760,P19939,P22734,P34901,P55314,Q63661,Q6P6R2,Q7TP52                                                                                         |
| 154 | 1,2,3,4,5,3<br>6,39,44 | 6,7,8,37,3<br>8,40,41,42<br>,43 | 4  | O54728,P34901,P51907,P55314                                                                                                                                                        |
| 155 | 1,2,3,4,5,3<br>6,40,41 | 6,7,8,37,3<br>8,39,42,43<br>,44 | 4  | P01836,P23593,P34901,P55314                                                                                                                                                        |



|     |                        |                                 |    |                                                                                                                                                                         |
|-----|------------------------|---------------------------------|----|-------------------------------------------------------------------------------------------------------------------------------------------------------------------------|
| 156 | 1,2,3,4,5,3<br>6,40,42 | 6,7,8,37,3<br>8,39,41,43<br>,44 | 9  | O54728,P01836,P02781,P02782,P23593,P34901,P36374,P55314,P60905                                                                                                          |
| 157 | 1,2,3,4,5,3<br>6,40,43 | 6,7,8,37,3<br>8,39,41,42<br>,44 | 6  | P01681,P01836,P13432,P34901,P55314,Q63661                                                                                                                               |
| 158 | 1,2,3,4,5,3<br>6,40,44 | 6,7,8,37,3<br>8,39,41,42<br>,43 | 5  | P13432,P22006,P34901,P55314,Q63661                                                                                                                                      |
| 159 | 1,2,3,4,5,3<br>6,41,42 | 6,7,8,37,3<br>8,39,40,43<br>,44 | 22 | G3V686,P01836,P02781,P04905,P05539,P08010,P08644,P08753,P22282,P22283,P34901,P60905,P82471,P83121,Q62902,Q63357,Q6AYL6,Q6AYR9,Q7TP52,Q812E4,Q8CJ52,Q9QZK9               |
| 160 | 1,2,3,4,5,3<br>6,41,43 | 6,7,8,37,3<br>8,39,40,42<br>,44 | 10 | P01681,P01836,P06760,P34901,P55314,P60905,P82471,P83121,Q63661,Q7TP52                                                                                                   |
| 161 | 1,2,3,4,5,3<br>6,41,44 | 6,7,8,37,3<br>8,39,40,42<br>,43 | 8  | P34901,P55314,P60905,P83121,Q63475,Q63661,Q7TP52,Q99MH3                                                                                                                 |
| 162 | 1,2,3,4,5,3<br>6,42,43 | 6,7,8,37,3<br>8,39,40,41<br>,44 | 24 | O54728,P01681,P01836,P02782,P06911,P08723,P10715,P12020,P19629,P24368,P31044,P34901,P47727,P55314,P60905,P82471,Q5GRG2,Q62635,Q62902,Q63661,Q6AYL6,Q6AYR8,Q6AYR9,Q7TP52 |
| 163 | 1,2,3,4,5,3<br>6,42,44 | 6,7,8,37,3<br>8,39,40,41<br>,43 | 14 | P02782,P08644,P13432,P22283,P34901,P36374,P47727,P51907,P55314,P60905,Q62902,Q6AYR8,Q7TP52,Q9QZK9                                                                       |
| 164 | 1,2,3,4,5,3<br>6,43,44 | 6,7,8,37,3<br>8,39,40,41<br>,42 | 9  | O89117,P01681,P13432,P34901,P55314,P83121,Q63661,Q7TP52,Q9QW07                                                                                                          |
| 165 | 1,2,3,4,5,3<br>7,38,39 | 6,7,8,36,4<br>0,41,42,43<br>,44 | 1  | P34901                                                                                                                                                                  |
| 166 | 1,2,3,4,5,3<br>7,38,40 | 6,7,8,36,3<br>9,41,42,43<br>,44 | 2  | P12785,P34901                                                                                                                                                           |
| 167 | 1,2,3,4,5,3<br>7,38,41 | 6,7,8,36,3<br>9,40,42,43<br>,44 | 2  | P34901,Q7TPB1                                                                                                                                                           |
| 168 | 1,2,3,4,5,3<br>7,38,42 | 6,7,8,36,3<br>9,40,41,43<br>,44 | 10 | P10715,P12020,P12785,P19629,P22282,P22283,P34901,Q62902,Q6AYL6,Q9QZK9                                                                                                   |
| 169 | 1,2,3,4,5,3<br>7,38,43 | 6,7,8,36,3<br>9,40,41,42<br>,44 | 7  | P01681,P12020,P19629,P34901,Q63661,Q7TPB1,Q9QW07                                                                                                                        |
| 170 | 1,2,3,4,5,3<br>7,38,44 | 6,7,8,36,3<br>9,40,41,42<br>,43 | 2  | P12785,P34901                                                                                                                                                           |

|     |                        |                                 |   |                                                                |
|-----|------------------------|---------------------------------|---|----------------------------------------------------------------|
| 171 | 1,2,3,4,5,3<br>7,39,40 | 6,7,8,36,3<br>8,41,42,43<br>,44 | 1 | Q6P777                                                         |
| 172 | 1,2,3,4,5,3<br>7,39,41 | 6,7,8,36,3<br>8,40,42,43<br>,44 | 1 | Q9ESW0                                                         |
| 173 | 1,2,3,4,5,3<br>7,39,42 | 6,7,8,36,3<br>8,40,41,43<br>,44 | 2 | O54728,P22283                                                  |
| 174 | 1,2,3,4,5,3<br>7,39,43 | 6,7,8,36,3<br>8,40,41,42<br>,44 | 4 | P01681,P34901,Q8CIZ5,Q9QW07                                    |
| 175 | 1,2,3,4,5,3<br>7,39,44 | 6,7,8,36,3<br>8,40,41,42<br>,43 | 2 | P34901,Q9ESW0                                                  |
| 176 | 1,2,3,4,5,3<br>7,40,41 | 6,7,8,36,3<br>8,39,42,43<br>,44 | 0 |                                                                |
| 177 | 1,2,3,4,5,3<br>7,40,42 | 6,7,8,36,3<br>8,39,41,43<br>,44 | 1 | P02782                                                         |
| 178 | 1,2,3,4,5,3<br>7,40,43 | 6,7,8,36,3<br>8,39,41,42<br>,44 | 6 | P01681,P34901,Q63661,Q6P777,Q8CIZ5,Q9QW07                      |
| 179 | 1,2,3,4,5,3<br>7,40,44 | 6,7,8,36,3<br>8,39,41,42<br>,43 | 3 | P22006,P34901,Q9QW07                                           |
| 180 | 1,2,3,4,5,3<br>7,41,42 | 6,7,8,36,3<br>8,39,40,43<br>,44 | 1 | P22283                                                         |
| 181 | 1,2,3,4,5,3<br>7,41,43 | 6,7,8,36,3<br>8,39,40,42<br>,44 | 4 | P01681,P34901,P83121,Q7TPB1                                    |
| 182 | 1,2,3,4,5,3<br>7,41,44 | 6,7,8,36,3<br>8,39,40,42<br>,43 | 2 | P34901,P83121                                                  |
| 183 | 1,2,3,4,5,3<br>7,42,43 | 6,7,8,36,3<br>8,39,40,41<br>,44 | 9 | P01681,P06911,P10715,P12020,P19629,P31044,P34901,Q5GRG2,Q6AYR8 |
| 184 | 1,2,3,4,5,3<br>7,42,44 | 6,7,8,36,3<br>8,39,40,41<br>,43 | 2 | P34901,Q6AYR8                                                  |
| 185 | 1,2,3,4,5,3<br>7,43,44 | 6,7,8,36,3<br>8,39,40,41<br>,42 | 5 | P01681,P13432,P34901,Q63661,Q9QW07                             |

|     |                        |                                 |    |                                                                                                                                      |
|-----|------------------------|---------------------------------|----|--------------------------------------------------------------------------------------------------------------------------------------|
| 186 | 1,2,3,4,5,3<br>8,39,40 | 6,7,8,36,3<br>7,41,42,43<br>,44 | 1  | P34901                                                                                                                               |
| 187 | 1,2,3,4,5,3<br>8,39,41 | 6,7,8,36,3<br>7,40,42,43<br>,44 | 2  | P08010,P34901                                                                                                                        |
| 188 | 1,2,3,4,5,3<br>8,39,42 | 6,7,8,36,3<br>7,40,41,43<br>,44 | 9  | O54728,P08010,P08753,P12785,P22283,P34901,P47727,P51907,Q9QZK9                                                                       |
| 189 | 1,2,3,4,5,3<br>8,39,43 | 6,7,8,36,3<br>7,40,41,42<br>,44 | 4  | P01681,P01946,P34901,Q6P6R2                                                                                                          |
| 190 | 1,2,3,4,5,3<br>8,39,44 | 6,7,8,36,3<br>7,40,41,42<br>,43 | 2  | P34901,P51907                                                                                                                        |
| 191 | 1,2,3,4,5,3<br>8,40,41 | 6,7,8,36,3<br>7,39,42,43<br>,44 | 1  | P34901                                                                                                                               |
| 192 | 1,2,3,4,5,3<br>8,40,42 | 6,7,8,36,3<br>7,39,41,43<br>,44 | 7  | P02781,P02782,P12785,P34901,Q6AYR8,Q9JHB9,Q9QZ76                                                                                     |
| 193 | 1,2,3,4,5,3<br>8,40,43 | 6,7,8,36,3<br>7,39,41,42<br>,44 | 3  | P01681,P34901,Q63661                                                                                                                 |
| 194 | 1,2,3,4,5,3<br>8,40,44 | 6,7,8,36,3<br>7,39,41,42<br>,43 | 3  | P12785,P22006,P34901                                                                                                                 |
| 195 | 1,2,3,4,5,3<br>8,41,42 | 6,7,8,36,3<br>7,39,40,43<br>,44 | 18 | O35547,P01836,P08010,P08753,P22282,P22283,P34901,P47727,P54921,P60905,P63095,P82471,Q62902,Q63357,Q6AYL6,Q6AYR8,Q8CJ52,Q9QZK9        |
| 196 | 1,2,3,4,5,3<br>8,41,43 | 6,7,8,36,3<br>7,39,40,42<br>,44 | 8  | P01681,P01836,P34901,P82471,Q62902,Q63661,Q7TPB1,Q8CJD3                                                                              |
| 197 | 1,2,3,4,5,3<br>8,41,44 | 6,7,8,36,3<br>7,39,40,42<br>,43 | 4  | P00774,P34901,P98089,Q62902                                                                                                          |
| 198 | 1,2,3,4,5,3<br>8,42,43 | 6,7,8,36,3<br>7,39,40,41<br>,44 | 19 | O35547,P01681,P01836,P06911,P08723,P10715,P12020,P12785,P19629,P31044,P34901,P47727,P60905,P82471,Q5GRG2,Q62902,Q6AYR8,Q9JHB9,Q9QZK9 |
| 199 | 1,2,3,4,5,3<br>8,42,44 | 6,7,8,36,3<br>7,39,40,41<br>,43 | 12 | P08723,P12785,P22006,P22283,P34901,P36374,P47727,P51907,P60905,Q62902,Q6AYR8,Q9QZK9                                                  |
| 200 | 1,2,3,4,5,3<br>8,43,44 | 6,7,8,36,3<br>7,39,40,41<br>,42 | 4  | P01681,P34901,Q63661,Q9QW07                                                                                                          |

|     |                        |                                 |    |                                                                              |
|-----|------------------------|---------------------------------|----|------------------------------------------------------------------------------|
| 201 | 1,2,3,4,5,3<br>9,40,41 | 6,7,8,36,3<br>7,38,42,43<br>,44 | 1  | P36376                                                                       |
| 202 | 1,2,3,4,5,3<br>9,40,42 | 6,7,8,36,3<br>7,38,41,43<br>,44 | 5  | O54728,P02780,P02782,Q6AYR9,Q9JHB9                                           |
| 203 | 1,2,3,4,5,3<br>9,40,43 | 6,7,8,36,3<br>7,38,41,42<br>,44 | 5  | P01681,P34901,P36376,Q8CIZ5,Q9QW07                                           |
| 204 | 1,2,3,4,5,3<br>9,40,44 | 6,7,8,36,3<br>7,38,41,42<br>,43 | 2  | P34901,P36376                                                                |
| 205 | 1,2,3,4,5,3<br>9,41,42 | 6,7,8,36,3<br>7,38,40,43<br>,44 | 11 | P08010,P08753,P0C0A9,P22283,P60905,P63095,P82471,P97605,Q6AYR9,Q9ESW0,Q9QZK9 |
| 206 | 1,2,3,4,5,3<br>9,41,43 | 6,7,8,36,3<br>7,38,40,42<br>,44 | 4  | P01681,P01946,P34901,P82471                                                  |
| 207 | 1,2,3,4,5,3<br>9,41,44 | 6,7,8,36,3<br>7,38,40,42<br>,43 | 3  | P34901,Q63475,Q9ESW0                                                         |
| 208 | 1,2,3,4,5,3<br>9,42,43 | 6,7,8,36,3<br>7,38,40,41<br>,44 | 10 | O54728,P01681,P08723,P34901,P47727,P82471,Q5GRG2,Q6AYR8,Q6AYR9,Q9JHB9        |
| 209 | 1,2,3,4,5,3<br>9,42,44 | 6,7,8,36,3<br>7,38,40,41<br>,43 | 6  | P08010,P22283,P34901,P51907,Q6AYR8,Q99068                                    |
| 210 | 1,2,3,4,5,3<br>9,43,44 | 6,7,8,36,3<br>7,38,40,41<br>,42 | 5  | P01681,P01946,P34901,Q63661,Q9QW07                                           |
| 211 | 1,2,3,4,5,4<br>0,41,42 | 6,7,8,36,3<br>7,38,39,43<br>,44 | 5  | P02781,P02782,P23593,P60905,Q6AYR9                                           |
| 212 | 1,2,3,4,5,4<br>0,41,43 | 6,7,8,36,3<br>7,38,39,42<br>,44 | 5  | P01681,P01836,P34901,P97840,Q63661                                           |
| 213 | 1,2,3,4,5,4<br>0,41,44 | 6,7,8,36,3<br>7,38,39,42<br>,43 | 1  | P34901                                                                       |
| 214 | 1,2,3,4,5,4<br>0,42,43 | 6,7,8,36,3<br>7,38,39,41<br>,44 | 6  | P01681,P02782,P11598,P34901,Q6AYR8,Q9JHB9                                    |
| 215 | 1,2,3,4,5,4<br>0,42,44 | 6,7,8,36,3<br>7,38,39,41<br>,43 | 7  | P02782,P22006,P34901,P36374,Q6AYR8,Q99068,Q9QZ76                             |

|     |                        |                                   |    |                                                                                                                                                                                                                                                                                                              |
|-----|------------------------|-----------------------------------|----|--------------------------------------------------------------------------------------------------------------------------------------------------------------------------------------------------------------------------------------------------------------------------------------------------------------|
| 216 | 1,2,3,4,5,4<br>0,43,44 | 6,7,8,36,3<br>7,38,39,41<br>,42   | 5  | P01681,P13432,P34901,Q63661,Q9QW07                                                                                                                                                                                                                                                                           |
| 217 | 1,2,3,4,5,4<br>1,42,43 | 6,7,8,36,3<br>7,38,39,40<br>,44   | 15 | O35547,P01681,P01836,P08723,P0C0A9,P30120,P34901,P54921,P60905,P82471,P83121,Q62902,Q63357,Q6AYR8,Q6AYR9                                                                                                                                                                                                     |
| 218 | 1,2,3,4,5,4<br>1,42,44 | 6,7,8,36,3<br>7,38,39,40<br>,43   | 13 | P08010,P08753,P0C0A9,P22283,P34901,P60905,P82471,P97605,Q62902,Q6AYR8,Q8CJ52,Q99068,Q9QZK9                                                                                                                                                                                                                   |
| 219 | 1,2,3,4,5,4<br>1,43,44 | 6,7,8,36,3<br>7,38,39,40<br>,42   | 6  | P01681,P28648,P34901,P82471,P83121,Q63661                                                                                                                                                                                                                                                                    |
| 220 | 1,2,3,4,5,4<br>2,43,44 | 6,7,8,36,3<br>7,38,39,40<br>,41   | 10 | P01681,P02782,P08723,P0C0A9,P34901,P60905,P82471,Q63661,Q6AYR8,Q6Q7Y5                                                                                                                                                                                                                                        |
| 221 | 1,2,3,4,6,7<br>,8,36   | 5,37,38,39<br>,40,41,42,<br>43,44 | 40 | B5DFC9,D3ZUK3,G3V686,O54800;Q5DWV2,O54858,P01836,P02631,P05539,P06760,P07171,P08010,P08649,P08753,P11598,P13596,P16086,P20762,P21743,P35444,P36374,P53792,P55314,P60905,P80202,P85971,P97580,Q00715,Q01205,Q07116,Q09030,Q30KJ2,Q62753,Q63467,Q63475,Q63532,Q63617,Q6IE51,Q7TP52,Q91XN4,Q9QZQ5               |
| 222 | 1,2,3,4,6,7<br>,8,37   | 5,36,38,39<br>,40,41,42,<br>43,44 | 24 | D3ZUK3,G3V686,O54800;Q5DWV2,O54858,P02631,P05964,P11598,P11762,P15399,P20762,P25236,P85971,P97580,Q01205,Q09030,Q30KJ2,Q63467,Q63532,Q63617,Q6IE51,Q7TP52,Q7TPB1,Q91ZS3,Q9QZQ5                                                                                                                               |
| 223 | 1,2,3,4,6,7<br>,8,38   | 5,36,37,39<br>,40,41,42,<br>43,44 | 31 | D3ZUK3,G3V686,O08557,O35547,O54800;Q5DWV2,O54858,P01836,P02631,P05369,P08010,P08753,P11598,P15399,P19218,P20762,P25031,P35444,P36374,P42854,P60905,P85971,P97580,Q01205,Q09030,Q30KJ2,Q63467,Q63532,Q6IE51,Q7TP52,Q7TPB1,Q9QZQ5                                                                              |
| 224 | 1,2,3,4,6,7<br>,8,39   | 5,36,37,38<br>,40,41,42,<br>43,44 | 25 | D3ZUK3,G3V686,P01946,P02625,P02631,P08010,P11598,P16086,P20762,P20766,P25236,P35444,P36374,P80202,P85971,P97580,Q01205,Q09030,Q30KJ2,Q63467,Q63475,Q63532,Q6IE51,Q7TP52,Q9QZQ5                                                                                                                               |
| 225 | 1,2,3,4,6,7<br>,8,40   | 5,36,37,38<br>,39,41,42,<br>43,44 | 24 | D3ZUK3,G3V686,P01836,P02631,P11598,P12020,P16086,P20759,P20762,P25236,P36374,P70709,P85971,P97580,Q01205,Q09030,Q30KJ2,Q3T1K5,Q63532,Q63617,Q6IE51,Q7TP52,Q9QZ76,Q9QZQ5                                                                                                                                      |
| 226 | 1,2,3,4,6,7<br>,8,41   | 5,36,37,38<br>,39,40,42,<br>43,44 | 40 | D3ZUK3,G3V686,O35547,O54800;Q5DWV2,O54858,P01836,P02631,P05371,P07171,P08010,P08753,P11598,P13596,P16086,P18418,P20762,P35444,P36374,P54921,P60905,P80202,P85971,P97580,P97605,Q01205,Q09030,Q30KJ2,Q5M871,Q62753,Q63357,Q63467,Q63475,Q63532,Q63617,Q6IE51,Q7TP52,Q7TPB1,Q91ZS3,Q99041,Q9QZQ5               |
| 227 | 1,2,3,4,6,7<br>,8,42   | 5,36,37,38<br>,39,40,41,<br>43,44 | 43 | B5DFC9,D3ZUK3,F1LM93,G3V686,O08815,O35547,O35783,P01836,P02631,P02781,P04905,P05369,P08010,P08290,P08649,P08753,P13596,P16086,P20759,P20762,P25236,P35444,P36374,P54921,P60905,P63322,P85971,P97554,P97580,Q01205,Q09030,Q30KJ2,Q4V885,Q5XI73,Q62753,Q63357,Q63532,Q6IE51,Q7TP52,Q812E4,Q9JID2,Q9QZK9,Q9QZQ5 |
| 228 | 1,2,3,4,6,7<br>,8,43   | 5,36,37,38<br>,39,40,41,<br>42,44 | 36 | D3ZUK3,G3V686,O35783,O54800;Q5DWV2,O54858,P01681,P01836,P01946,P02631,P06760,P11883,P16086,P20762,P25236,P35444,P36374,P60905,P83748,P85971,P97580,Q01205,Q09030,Q30KJ2,Q63467,Q63532,Q63617,Q63942,Q64268,Q66H69,Q6IE51,Q7TP52,Q7TPB1,Q99PP0,Q9QX79,Q9QZQ5,Q9WUW3                                           |
| 229 | 1,2,3,4,6,7<br>,8,44   | 5,36,37,38<br>,39,40,41,<br>42,43 | 27 | D3ZUK3,G3V686,O35783,P02631,P07171,P08010,P11598,P20759,P20762,P25236,P35444,P36374,P53792,P60905,P85971,P97580,Q01205,Q09030,Q30KJ2,Q62753,Q63467,Q63475,Q63532,Q63617,Q6IE51,Q7TP52,Q9QZQ5                                                                                                                 |
| 230 | 1,2,3,4,6,7<br>,36,37  | 5,8,38,39,<br>40,41,42,4<br>3,44  | 22 | D3ZUK3,G3V686,O54800;Q5DWV2,P01836,P02631,P05964,P06760,P08649,P11762,P13596,P15399,P55314,P85971,P97580,Q09030,Q30KJ2,Q63467,Q63532,Q6IE51,Q7TP52,Q91ZS3,Q9QZQ5                                                                                                                                             |

|     |                       |                                  |    |                                                                                                                                                                                                                                                             |
|-----|-----------------------|----------------------------------|----|-------------------------------------------------------------------------------------------------------------------------------------------------------------------------------------------------------------------------------------------------------------|
| 231 | 1,2,3,4,6,7<br>,36,38 | 5,8,37,39,<br>40,41,42,4<br>3,44 | 22 | D3ZUK3,G3V686,O54800;Q5DWV2,P01836,P02631,P06760,P08010,P08649,P13596,P15399,P25031,P34901,P55314,P85971,P97580,Q09030,Q30KJ2,Q63467,Q63532,Q6IE51,Q7TP52,Q91ZS3                                                                                            |
| 232 | 1,2,3,4,6,7<br>,36,39 | 5,8,37,38,<br>40,41,42,4<br>3,44 | 24 | D3ZUK3,G3V686,P01836,P01946,P02625,P02631,P05539,P06760,P08010,P08649,P13596,P16086,P55314,P80202,P85971,P97580,Q09030,Q30KJ2,Q63467,Q63475,Q63532,Q6IE51,Q7TP52,Q9QZQ5                                                                                     |
| 233 | 1,2,3,4,6,7<br>,36,40 | 5,8,37,38,<br>39,41,42,4<br>3,44 | 18 | D3ZUK3,G3V686,P00731,P01836,P02631,P05539,P08649,P13596,P15399,P16086,P55314,P85971,Q09030,Q30KJ2,Q63467,Q63532,Q6IE51,Q7TP52                                                                                                                               |
| 234 | 1,2,3,4,6,7<br>,36,41 | 5,8,37,38,<br>39,40,42,4<br>3,44 | 27 | D3ZUK3,G3V686,O54800;Q5DWV2,O54858,P01836,P02631,P05371,P05539,P06760,P08010,P08649,P13596,P16086,P55314,P60905,P80202,P85971,Q01205,Q09030,Q30KJ2,Q63467,Q63475,Q63532,Q6IE51,Q7TP52,Q91ZS3,Q9QZQ5                                                         |
| 235 | 1,2,3,4,6,7<br>,36,42 | 5,8,37,38,<br>39,40,41,4<br>3,44 | 35 | B5DFC9,D3ZUK3,G3V686,O35783,O54800;Q5DWV2,P01836,P02631,P02781,P04905,P05539,P06760,P08010,P08290,P08649,P08753,P13596,P16086,P35446,P36374,P55314,P60905,P85971,P97554,Q09030,Q30KJ2,Q5XI73,Q62740,Q62753,Q63357,Q63467,Q63532,Q6IE51,Q7TP52,Q812E4,Q9QZQ5 |
| 236 | 1,2,3,4,6,7<br>,36,43 | 5,8,37,38,<br>39,40,41,4<br>2,44 | 30 | D3ZUK3,G3V686,O35783,O54800;Q5DWV2,O54858,P01681,P01836,P01946,P02631,P05539,P06760,P08649,P13596,P16086,P20762,P25236,P34901,P55314,P83748,P85971,P97580,Q09030,Q30KJ2,Q63467,Q63532,Q63661,Q66H69,Q6IE51,Q7TP52,Q99PP0                                    |
| 237 | 1,2,3,4,6,7<br>,36,44 | 5,8,37,38,<br>39,40,41,4<br>2,43 | 23 | D3ZUK3,G3V686,O54800;Q5DWV2,P01836,P02631,P05539,P06760,P08649,P13596,P34901,P55314,P85971,P97580,Q01205,Q09030,Q30KJ2,Q63467,Q63475,Q63532,Q63661,Q6IE51,Q7TP52,Q9QZQ5                                                                                     |
| 238 | 1,2,3,4,6,7<br>,37,38 | 5,8,36,39,<br>40,41,42,4<br>3,44 | 18 | G3V686,O54800;Q5DWV2,P01836,P02631,P05964,P11762,P12785,P15399,P25031,P85971,P97580,P97840,Q30KJ2,Q63532,Q6IE51,Q7TP52,Q7TPB1,Q91ZS3                                                                                                                        |
| 239 | 1,2,3,4,6,7<br>,37,39 | 5,8,36,38,<br>40,41,42,4<br>3,44 | 15 | G3V686,P01836,P01946,P02625,P02631,P05964,P06760,P15399,P25236,P85971,P97580,Q30KJ2,Q63532,Q6IE51,Q91ZS3                                                                                                                                                    |
| 240 | 1,2,3,4,6,7<br>,37,40 | 5,8,36,38,<br>39,41,42,4<br>3,44 | 12 | G3V686,P01836,P02631,P15399,P25236,P85971,P97580,Q09030,Q30KJ2,Q63532,Q6IE51,Q91ZS3                                                                                                                                                                         |
| 241 | 1,2,3,4,6,7<br>,37,41 | 5,8,36,38,<br>39,40,42,4<br>3,44 | 20 | D3ZUK3,G3V686,P01836,P02631,P05964,P11762,P13596,P15399,P18418,P85971,P97580,Q09030,Q30KJ2,Q63475,Q63532,Q6IE51,Q7TP52,Q7TPB1,Q91ZS3,Q9QZQ5                                                                                                                 |
| 242 | 1,2,3,4,6,7<br>,37,42 | 5,8,36,38,<br>39,40,41,4<br>3,44 | 19 | G3V686,O35783,P01836,P02631,P08290,P13596,P15399,P16086,P25236,P85971,P97580,Q09030,Q30KJ2,Q5XI73,Q63532,Q6IE51,Q7TP52,Q91ZS3,Q9QZQ5                                                                                                                        |
| 243 | 1,2,3,4,6,7<br>,37,43 | 5,8,36,38,<br>39,40,41,4<br>2,44 | 25 | G3V686,O35783,O54800;Q5DWV2,P01681,P01836,P01946,P02631,P05964,P06760,P11762,P14480,P15399,P20762,P25236,P83748,P85971,P97580,Q09030,Q30KJ2,Q63532,Q6IE51,Q7TP52,Q7TPB1,Q91ZS3,Q99PP0                                                                       |
| 244 | 1,2,3,4,6,7<br>,37,44 | 5,8,36,38,<br>39,40,41,4<br>2,43 | 14 | D3ZUK3,G3V686,O35783,P02631,P05964,P15399,P25236,P85971,P97580,Q30KJ2,Q63532,Q6IE51,Q7TP52,Q91ZS3                                                                                                                                                           |
| 245 | 1,2,3,4,6,7<br>,38,39 | 5,8,36,37,<br>40,41,42,4<br>3,44 | 16 | G3V686,P01836,P01946,P02625,P02631,P08010,P15399,P19218,P25031,P42854,P85971,P97580,Q30KJ2,Q63532,Q6IE51,Q7TP52                                                                                                                                             |

|     |                       |                                  |    |                                                                                                                                                                                                                                               |
|-----|-----------------------|----------------------------------|----|-----------------------------------------------------------------------------------------------------------------------------------------------------------------------------------------------------------------------------------------------|
| 246 | 1,2,3,4,6,7<br>,38,40 | 5,8,36,37,<br>39,41,42,4<br>3,44 | 12 | P01836,P02631,P13596,P15399,P25031,P25236,P70709,P85971,P97580,Q30KJ2,Q63532,Q6IE51                                                                                                                                                           |
| 247 | 1,2,3,4,6,7<br>,38,41 | 5,8,36,37,<br>39,40,42,4<br>3,44 | 23 | D3ZUK3,G3V686,O35547,O54800;Q5DWV2,P01836,P02631,P08010,P13596,P15399,P16086,P25031,P42854,P85971,P97580,Q30KJ2,Q63467,Q63475,Q63532,Q6IE51,Q7TP52,Q7TPB1,Q8CIZ5,Q91ZS3                                                                       |
| 248 | 1,2,3,4,6,7<br>,38,42 | 5,8,36,37,<br>39,40,41,4<br>3,44 | 34 | G3V686,O35547,O35783,P01836,P02631,P02781,P05369,P08010,P08290,P08649,P08753,P12785,P13596,P15399,P16086,P19218,P25031,P25236,P36374,P42854,P47727,P60905,P85971,P97554,P97580,Q09030,Q30KJ2,Q5XI73,Q62753,Q63532,Q6IE51,Q7TP52,Q9QZK9,Q9QZQ5 |
| 249 | 1,2,3,4,6,7<br>,38,43 | 5,8,36,37,<br>39,40,41,4<br>2,44 | 26 | G3V686,O35783,O54800;Q5DWV2,P01681,P01836,P01946,P02625,P02631,P06760,P14480,P15399,P20762,P25031,P25236,P34901,P83748,P85971,P97580,Q30KJ2,Q5HZV9,Q63532,Q63661,Q6IE51,Q7TP52,Q7TPB1,Q99PP0                                                  |
| 250 | 1,2,3,4,6,7<br>,38,44 | 5,8,36,37,<br>39,40,41,4<br>2,43 | 17 | D3ZUK3,G3V686,P01836,P02631,P12785,P13596,P15399,P25031,P25236,P34901,P85971,P97580,Q30KJ2,Q63467,Q63532,Q6IE51,Q7TP52                                                                                                                        |
| 251 | 1,2,3,4,6,7<br>,39,40 | 5,8,36,37,<br>38,41,42,4<br>3,44 | 15 | G3V686,P01836,P01946,P02631,P12020,P13596,P15399,P16086,P25236,P36376,P85971,P97580,Q30KJ2,Q63532,Q6IE51                                                                                                                                      |
| 252 | 1,2,3,4,6,7<br>,39,41 | 5,8,36,37,<br>38,40,42,4<br>3,44 | 21 | D3ZUK3,G3V686,O88267,P01836,P01946,P02625,P02631,P05371,P06760,P08010,P13596,P16086,P82471,P85971,P97580,Q30KJ2,Q63467,Q63475,Q63532,Q6IE51,Q7TP52                                                                                            |
| 253 | 1,2,3,4,6,7<br>,39,42 | 5,8,36,37,<br>38,40,41,4<br>3,44 | 24 | G3V686,P01836,P01946,P02631,P02781,P05539,P08010,P08290,P08649,P08753,P13596,P16086,P25236,P36374,P42854,P85971,P97580,Q30KJ2,Q5XI73,Q62753,Q63532,Q6IE51,Q7TP52,Q9QZQ5                                                                       |
| 254 | 1,2,3,4,6,7<br>,39,43 | 5,8,36,37,<br>38,40,41,4<br>2,44 | 22 | G3V686,O35783,P01681,P01836,P01946,P02091,P02625,P02631,P06760,P11883,P14480,P16086,P20762,P25236,P83748,P85971,P97580,Q30KJ2,Q63532,Q6IE51,Q7TP52,Q99PP0                                                                                     |
| 255 | 1,2,3,4,6,7<br>,39,44 | 5,8,36,37,<br>38,40,41,4<br>2,43 | 14 | D3ZUK3,G3V686,P01946,P02625,P02631,P25236,P34901,P85971,P97580,Q30KJ2,Q63467,Q63532,Q6IE51,Q7TP52                                                                                                                                             |
| 256 | 1,2,3,4,6,7<br>,40,41 | 5,8,36,37,<br>38,39,42,4<br>3,44 | 15 | G3V686,P01836,P02631,P05371,P12020,P13596,P15399,P16086,P70709,P85971,Q09030,Q30KJ2,Q63532,Q6IE51,Q7TP52                                                                                                                                      |
| 257 | 1,2,3,4,6,7<br>,40,42 | 5,8,36,37,<br>38,39,41,4<br>3,44 | 22 | G3V686,O35783,P01836,P02781,P05539,P08290,P13596,P16086,P20759,P25236,P36374,P60905,P70709,P85971,Q09030,Q30KJ2,Q5XI73,Q63532,Q6IE51,Q7TP52,Q9QZ76,Q9QZQ5                                                                                     |
| 258 | 1,2,3,4,6,7<br>,40,43 | 5,8,36,37,<br>38,39,41,4<br>2,44 | 23 | G3V686,O35783,P01681,P01836,P01946,P02631,P11883,P15399,P16086,P20762,P25236,P70709,P83748,P85971,P97580,Q09030,Q30KJ2,Q5HZV9,Q63532,Q63661,Q6IE51,Q7TP52,Q99PP0                                                                              |
| 259 | 1,2,3,4,6,7<br>,40,44 | 5,8,36,37,<br>38,39,41,4<br>2,43 | 15 | D3ZUK3,G3V686,P01836,P02631,P12020,P13596,P15399,P25236,P36374,P85971,P97580,Q30KJ2,Q63532,Q6IE51,Q7TP52                                                                                                                                      |
| 260 | 1,2,3,4,6,7<br>,41,42 | 5,8,36,37,<br>38,39,40,4<br>3,44 | 33 | F1LM93,G3V686,O35547,O35783,P01836,P02631,P02781,P05539,P08010,P08290,P08649,P08753,P13596,P16086,P20759,P36374,P54921,P60905,P82471,P85971,P97605,Q09030,Q30KJ2,Q5XI73,Q62753,Q63357,Q63532,Q6IE51,Q7TP52,Q812E4,Q8CJ52,Q91ZS3,Q9QZQ5        |

|     |                       |                                  |    |                                                                                                                                                                                                                                        |
|-----|-----------------------|----------------------------------|----|----------------------------------------------------------------------------------------------------------------------------------------------------------------------------------------------------------------------------------------|
| 261 | 1,2,3,4,6,7<br>,41,43 | 5,8,36,37,<br>38,39,40,4<br>2,44 | 32 | D3ZUK3,G3V686,O35783,O54800;Q5DWV2,P01681,P01836,P01946,P02625,P02631,P05371,P06760,P11883,P16086,P20762,P25031,P54921,P60905,P82471,P83748,P85971,P97580,Q09030,Q30KJ2,Q5HZV9,Q63467,Q63532,Q63661,Q66H69,Q6IE51,Q7TP52,Q7TPB1,Q99PP0 |
| 262 | 1,2,3,4,6,7<br>,41,44 | 5,8,36,37,<br>38,39,40,4<br>2,43 | 18 | D3ZUK3,G3V686,P01836,P02631,P05371,P08010,P12020,P13596,P16086,P60905,P85971,P97580,Q30KJ2,Q63467,Q63475,Q63532,Q6IE51,Q7TP52                                                                                                          |
| 263 | 1,2,3,4,6,7<br>,42,43 | 5,8,36,37,<br>38,39,40,4<br>1,44 | 33 | G3V686,O35547,O35783,P01681,P01836,P01946,P02631,P02781,P05539,P06760,P08290,P11883,P13596,P16086,P20762,P25031,P25236,P35434,P36374,P54921,P60905,P82471,P83748,P85971,P97580,Q09030,Q30KJ2,Q5HZV9,Q62975,Q63532,Q6IE51,Q7TP52,Q99PP0 |
| 264 | 1,2,3,4,6,7<br>,42,44 | 5,8,36,37,<br>38,39,40,4<br>1,43 | 23 | G3V686,O35783,P01836,P02631,P08010,P08290,P08649,P13596,P16086,P20759,P25236,P36374,P60905,P85971,Q09030,Q30KJ2,Q5XI73,Q62753,Q63532,Q6IE51,Q7TP52,Q9JID2,Q9QZQ5                                                                       |
| 265 | 1,2,3,4,6,7<br>,43,44 | 5,8,36,37,<br>38,39,40,4<br>1,42 | 24 | D3ZUK3,G3V686,O35783,P01681,P01836,P01946,P02091,P02631,P06760,P11883,P20762,P25236,P34901,P83748,P85971,P97580,Q30KJ2,Q63467,Q63532,Q63661,Q66H69,Q6IE51,Q7TP52,Q9WUC4                                                                |
| 266 | 1,2,3,4,6,8<br>,36,37 | 5,7,38,39,<br>40,41,42,4<br>3,44 | 7  | D3ZUK3,G3V686,P85971,Q01205,Q7TP52,Q8CJD3,Q91ZS3                                                                                                                                                                                       |
| 267 | 1,2,3,4,6,8<br>,36,38 | 5,7,37,39,<br>40,41,42,4<br>3,44 | 9  | D3ZUK3,O08557,P34901,P85971,P97580,Q00715,Q01205,Q30KJ2,Q7TP52                                                                                                                                                                         |
| 268 | 1,2,3,4,6,8<br>,36,39 | 5,7,37,38,<br>40,41,42,4<br>3,44 | 9  | D3ZUK3,G3V686,P02625,P08010,P55314,P85971,Q01205,Q7TP52,Q8CJD3                                                                                                                                                                         |
| 269 | 1,2,3,4,6,8<br>,36,40 | 5,7,37,38,<br>39,41,42,4<br>3,44 | 7  | D3ZUK3,P25236,P55314,P85971,Q00715,Q7TP52,Q8CJD3                                                                                                                                                                                       |
| 270 | 1,2,3,4,6,8<br>,36,41 | 5,7,37,38,<br>39,40,42,4<br>3,44 | 8  | D3ZUK3,G3V686,P08010,P60905,P85971,Q01205,Q63475,Q7TP52                                                                                                                                                                                |
| 271 | 1,2,3,4,6,8<br>,36,42 | 5,7,37,38,<br>39,40,41,4<br>3,44 | 19 | G3V686,P04905,P08010,P08290,P08753,P0DMW0;P0DMW1,P10715,P19629,P20759,P25236,P36374,P60905,P85971,P97554,Q00715,Q62753,Q63357,Q7TP52,Q812E4                                                                                            |
| 272 | 1,2,3,4,6,8<br>,36,43 | 5,7,37,38,<br>39,40,41,4<br>2,44 | 18 | D3ZUK3,G3V686,O54858,P01681,P06760,P19629,P20762,P25236,P34901,P55314,P85971,Q00715,Q63661,Q63942,Q64268,Q66H69,Q7TP52,Q9QX79                                                                                                          |
| 273 | 1,2,3,4,6,8<br>,36,44 | 5,7,37,38,<br>39,40,41,4<br>2,43 | 10 | D3ZUK3,G3V686,P25236,P34901,P55314,P85971,Q00715,Q01205,Q7TP52,Q8CJD3                                                                                                                                                                  |
| 274 | 1,2,3,4,6,8<br>,37,38 | 5,7,36,39,<br>40,41,42,4<br>3,44 | 7  | P05964,P15399,P25236,P97580,Q30KJ2,Q7TPB1,Q91ZS3                                                                                                                                                                                       |
| 275 | 1,2,3,4,6,8<br>,37,39 | 5,7,36,38,<br>40,41,42,4<br>3,44 | 4  | P02625,P25236,Q8CJD3,Q91ZS3                                                                                                                                                                                                            |



|     |                       |                                  |    |                                                                                                                 |
|-----|-----------------------|----------------------------------|----|-----------------------------------------------------------------------------------------------------------------|
| 276 | 1,2,3,4,6,8<br>,37,40 | 5,7,36,38,<br>39,41,42,4<br>3,44 | 2  | P25236,Q8CJD3                                                                                                   |
| 277 | 1,2,3,4,6,8<br>,37,41 | 5,7,36,38,<br>39,40,42,4<br>3,44 | 3  | P85971,Q7TPB1,Q91ZS3                                                                                            |
| 278 | 1,2,3,4,6,8<br>,37,42 | 5,7,36,38,<br>39,40,41,4<br>3,44 | 6  | P19629,P20759,P25236,P36374,P85971,Q91ZS3                                                                       |
| 279 | 1,2,3,4,6,8<br>,37,43 | 5,7,36,38,<br>39,40,41,4<br>2,44 | 12 | P01681,P02631,P04276,P20762,P25236,P85971,Q30KJ2,Q63942,Q64268,Q66H69,Q7TPB1,Q9QX79                             |
| 280 | 1,2,3,4,6,8<br>,37,44 | 5,7,36,38,<br>39,40,41,4<br>2,43 | 4  | P05964,P25236,P85971,Q8CJD3                                                                                     |
| 281 | 1,2,3,4,6,8<br>,38,39 | 5,7,36,37,<br>40,41,42,4<br>3,44 | 5  | P02625,P25236,P97580,Q30KJ2,Q80WL1                                                                              |
| 282 | 1,2,3,4,6,8<br>,38,40 | 5,7,36,37,<br>39,41,42,4<br>3,44 | 6  | P15399,P22006,P25236,P70709,P97580,Q30KJ2                                                                       |
| 283 | 1,2,3,4,6,8<br>,38,41 | 5,7,36,37,<br>39,40,42,4<br>3,44 | 8  | P08010,P50115,P85971,P97580,Q30KJ2,Q7TP52,Q7TPB1,Q8CIZ5                                                         |
| 284 | 1,2,3,4,6,8<br>,38,42 | 5,7,36,37,<br>39,40,41,4<br>3,44 | 16 | O35547,P05369,P08010,P08290,P08753,P25236,P36374,P60905,P85971,P97554,P97580,Q30KJ2,Q62753,Q63355,Q7TP52,Q9QZK9 |
| 285 | 1,2,3,4,6,8<br>,38,43 | 5,7,36,37,<br>39,40,41,4<br>2,44 | 14 | P01681,P11883,P20762,P25236,P34901,P85971,P97580,Q30KJ2,Q5HZV9,Q63942,Q64268,Q66H69,Q7TPB1,Q9QX79               |
| 286 | 1,2,3,4,6,8<br>,38,44 | 5,7,36,37,<br>39,40,41,4<br>2,43 | 8  | O08557,P22006,P25236,P34901,P85971,P97580,Q30KJ2,Q62635                                                         |
| 287 | 1,2,3,4,6,8<br>,39,40 | 5,7,36,37,<br>38,41,42,4<br>3,44 | 3  | P20766,P25236,Q8CJD3                                                                                            |
| 288 | 1,2,3,4,6,8<br>,39,41 | 5,7,36,37,<br>38,40,42,4<br>3,44 | 3  | P02625,P08010,P85971                                                                                            |
| 289 | 1,2,3,4,6,8<br>,39,42 | 5,7,36,37,<br>38,40,41,4<br>3,44 | 7  | P08010,P08753,P25236,P36374,P85971,Q62753,Q7TP52                                                                |
| 290 | 1,2,3,4,6,8<br>,39,43 | 5,7,36,37,<br>38,40,41,4<br>2,44 | 10 | P01681,P02625,P11883,P20762,P25236,P85971,Q5QE79,Q63942,Q64268,Q66H69                                           |

|     |                        |                                  |    |                                                                                                                               |
|-----|------------------------|----------------------------------|----|-------------------------------------------------------------------------------------------------------------------------------|
| 291 | 1,2,3,4,6,8<br>,39,44  | 5,7,36,37,<br>38,40,41,4<br>2,43 | 5  | P02625,P20766,P25236,P85971,Q8CJD3                                                                                            |
| 292 | 1,2,3,4,6,8<br>,40,41  | 5,7,36,37,<br>38,39,42,4<br>3,44 | 1  | P70709                                                                                                                        |
| 293 | 1,2,3,4,6,8<br>,40,42  | 5,7,36,37,<br>38,39,41,4<br>3,44 | 7  | P02781,P20759,P25236,P36374,P70709,Q63355,Q9QZ76                                                                              |
| 294 | 1,2,3,4,6,8<br>,40,43  | 5,7,36,37,<br>38,39,41,4<br>2,44 | 8  | P01681,P11883,P20762,P25236,P70709,P85971,Q5QE79,Q66H69                                                                       |
| 295 | 1,2,3,4,6,8<br>,40,44  | 5,7,36,37,<br>38,39,41,4<br>2,43 | 3  | P22006,P25236,P36374                                                                                                          |
| 296 | 1,2,3,4,6,8<br>,41,42  | 5,7,36,37,<br>38,39,40,4<br>3,44 | 17 | G3V686,O35547,P08010,P08290,P08753,P20759,P36374,P54921,P60905,P82471,P85971,Q3MIE4,Q62753,Q63357,Q7TP52,Q812E4,Q9QZK9        |
| 297 | 1,2,3,4,6,8<br>,41,43  | 5,7,36,37,<br>38,39,40,4<br>2,44 | 15 | D3ZUK3,G3V686,P01681,P02625,P11883,P20762,P25236,P54921,P82471,P85971,Q5HZV9,Q66H69,Q7TP52,Q7TPB1,Q9QX79                      |
| 298 | 1,2,3,4,6,8<br>,41,44  | 5,7,36,37,<br>38,39,40,4<br>2,43 | 4  | D3ZUK3,G3V686,P85971,Q7TP52                                                                                                   |
| 299 | 1,2,3,4,6,8<br>,42,43  | 5,7,36,37,<br>38,39,40,4<br>1,44 | 18 | G3V686,P01681,P08753,P11883,P19629,P20762,P25236,P35434,P36374,P54921,P60905,P82471,P85971,Q63355,Q63942,Q64268,Q66H69,Q7TP52 |
| 300 | 1,2,3,4,6,8<br>,42,44  | 5,7,36,37,<br>38,39,40,4<br>1,43 | 12 | G3V686,P08010,P08753,P20759,P25236,P36374,P60905,P85971,Q62753,Q6P6R2,Q7TP52,Q9JID2                                           |
| 301 | 1,2,3,4,6,8<br>,43,44  | 5,7,36,37,<br>38,39,40,4<br>1,42 | 13 | D3ZUK3,P01681,P11883,P20762,P25236,P34901,P85971,Q63661,Q63942,Q64268,Q66H69,Q7TP52,Q9QX79                                    |
| 302 | 1,2,3,4,6,3<br>6,37,38 | 5,7,8,39,4<br>0,41,42,43<br>,44  | 9  | P01836,P05964,P12785,P15399,P34901,P97580,Q30KJ2,Q7TP52,Q91ZS3                                                                |
| 303 | 1,2,3,4,6,3<br>6,37,39 | 5,7,8,38,4<br>0,41,42,43<br>,44  | 8  | G3V686,P02625,P06760,P25236,P55314,Q7TP52,Q8CJD3,Q91ZS3                                                                       |
| 304 | 1,2,3,4,6,3<br>6,37,40 | 5,7,8,38,3<br>9,41,42,43<br>,44  | 5  | P00731,P25236,P50116,P55314,Q8CJD3                                                                                            |
| 305 | 1,2,3,4,6,3<br>6,37,41 | 5,7,8,38,3<br>9,40,42,43<br>,44  | 4  | G3V686,P01836,Q7TP52,Q91ZS3                                                                                                   |

|     |                        |                                 |    |                                                                                                          |
|-----|------------------------|---------------------------------|----|----------------------------------------------------------------------------------------------------------|
| 306 | 1,2,3,4,6,3<br>6,37,42 | 5,7,8,38,3<br>9,40,41,43<br>,44 | 7  | G3V686,P01836,P10715,P19629,P25236,Q7TP52,Q91ZS3                                                         |
| 307 | 1,2,3,4,6,3<br>6,37,43 | 5,7,8,38,3<br>9,40,41,42<br>,44 | 15 | G3V686,P01681,P01836,P06760,P10715,P14480,P19629,P25236,P34901,P55314,P85971,Q4FZU6,Q63661,Q66H69,Q7TP52 |
| 308 | 1,2,3,4,6,3<br>6,37,44 | 5,7,8,38,3<br>9,40,41,42<br>,43 | 7  | G3V686,P05964,P25236,P34901,P55314,Q7TP52,Q8CJD3                                                         |
| 309 | 1,2,3,4,6,3<br>6,38,39 | 5,7,8,37,4<br>0,41,42,43<br>,44 | 7  | P01836,P02625,P34901,P55314,P97580,Q30KJ2,Q7TP52                                                         |
| 310 | 1,2,3,4,6,3<br>6,38,40 | 5,7,8,37,3<br>9,41,42,43<br>,44 | 8  | P01836,P15399,P25236,P34901,P55314,P97580,Q30KJ2,Q7TP52                                                  |
| 311 | 1,2,3,4,6,3<br>6,38,41 | 5,7,8,37,3<br>9,40,42,43<br>,44 | 6  | G3V686,P01836,P34901,P97580,Q30KJ2,Q7TP52                                                                |
| 312 | 1,2,3,4,6,3<br>6,38,42 | 5,7,8,37,3<br>9,40,41,43<br>,44 | 13 | G3V686,P01836,P08010,P10715,P12785,P19629,P34901,P60905,P97554,P97580,Q30KJ2,Q6AYL6,Q7TP52               |
| 313 | 1,2,3,4,6,3<br>6,38,43 | 5,7,8,37,3<br>9,40,41,42<br>,44 | 15 | P01681,P01836,P06760,P10715,P25236,P34901,P55314,P85971,P97580,Q30KJ2,Q4FZU6,Q5HZV9,Q63661,Q66H69,Q7TP52 |
| 314 | 1,2,3,4,6,3<br>6,38,44 | 5,7,8,37,3<br>9,40,41,42<br>,43 | 9  | G3V686,P12785,P25236,P34901,P55314,P97580,Q30KJ2,Q63661,Q7TP52                                           |
| 315 | 1,2,3,4,6,3<br>6,39,40 | 5,7,8,37,3<br>8,41,42,43<br>,44 | 4  | P25236,P55314,Q7TP52,Q8CJD3                                                                              |
| 316 | 1,2,3,4,6,3<br>6,39,41 | 5,7,8,37,3<br>8,40,42,43<br>,44 | 8  | G3V686,P01836,P02625,P06760,P08010,P55314,Q63475,Q7TP52                                                  |
| 317 | 1,2,3,4,6,3<br>6,39,42 | 5,7,8,37,3<br>8,40,41,43<br>,44 | 5  | G3V686,P08010,P25236,P55314,Q7TP52                                                                       |
| 318 | 1,2,3,4,6,3<br>6,39,43 | 5,7,8,37,3<br>8,40,41,42<br>,44 | 12 | G3V686,P01681,P01836,P02625,P06760,P25236,P34901,P55314,P85971,Q63661,Q66H69,Q7TP52                      |
| 319 | 1,2,3,4,6,3<br>6,39,44 | 5,7,8,37,3<br>8,40,41,42<br>,43 | 7  | G3V686,P02625,P25236,P34901,P55314,Q7TP52,Q8CJD3                                                         |
| 320 | 1,2,3,4,6,3<br>6,40,41 | 5,7,8,37,3<br>8,39,42,43<br>,44 | 5  | G3V686,P01836,P23593,P55314,Q7TP52                                                                       |

|     |                        |                                 |    |                                                                                                                        |
|-----|------------------------|---------------------------------|----|------------------------------------------------------------------------------------------------------------------------|
| 321 | 1,2,3,4,6,3<br>6,40,42 | 5,7,8,37,3<br>8,39,41,43<br>,44 | 8  | G3V686,P01836,P13596,P23593,P25236,P36374,P55314,Q7TP52                                                                |
| 322 | 1,2,3,4,6,3<br>6,40,43 | 5,7,8,37,3<br>8,39,41,42<br>,44 | 8  | P01681,P01836,P25236,P34901,P55314,Q63661,Q66H69,Q7TP52                                                                |
| 323 | 1,2,3,4,6,3<br>6,40,44 | 5,7,8,37,3<br>8,39,41,42<br>,43 | 7  | G3V686,P25236,P34901,P55314,Q63661,Q7TP52,Q8CJD3                                                                       |
| 324 | 1,2,3,4,6,3<br>6,41,42 | 5,7,8,37,3<br>8,39,40,43<br>,44 | 11 | G3V686,P01836,P08010,P08753,P13596,P60905,P82471,Q62753,Q63357,Q7TP52,Q8CJ52                                           |
| 325 | 1,2,3,4,6,3<br>6,41,43 | 5,7,8,37,3<br>8,39,40,42<br>,44 | 11 | G3V686,P01681,P01836,P06760,P55314,P82471,P85971,Q5HZV9,Q63661,Q66H69,Q7TP52                                           |
| 326 | 1,2,3,4,6,3<br>6,41,44 | 5,7,8,37,3<br>8,39,40,42<br>,43 | 5  | G3V686,P34901,P55314,Q63475,Q7TP52                                                                                     |
| 327 | 1,2,3,4,6,3<br>6,42,43 | 5,7,8,37,3<br>8,39,40,41<br>,44 | 17 | G3V686,P01681,P01836,P06760,P10715,P19629,P25236,P31044,P34901,P35434,P55314,P60905,P85971,Q5HZV9,Q63661,Q66H69,Q7TP52 |
| 328 | 1,2,3,4,6,3<br>6,42,44 | 5,7,8,37,3<br>8,39,40,41<br>,43 | 8  | G3V686,P25236,P34901,P36374,P55314,P60905,P97554,Q7TP52                                                                |
| 329 | 1,2,3,4,6,3<br>6,43,44 | 5,7,8,37,3<br>8,39,40,41<br>,42 | 10 | G3V686,P01681,P06760,P25236,P34901,P55314,P85971,Q63661,Q66H69,Q7TP52                                                  |
| 330 | 1,2,3,4,6,3<br>7,38,39 | 5,7,8,36,4<br>0,41,42,43<br>,44 | 7  | P02625,P15399,P25236,P97580,Q30KJ2,Q4FZU6,Q91ZS3                                                                       |
| 331 | 1,2,3,4,6,3<br>7,38,40 | 5,7,8,36,3<br>9,41,42,43<br>,44 | 6  | P12785,P15399,P25236,P82995,P97580,Q30KJ2                                                                              |
| 332 | 1,2,3,4,6,3<br>7,38,41 | 5,7,8,36,3<br>9,40,42,43<br>,44 | 6  | P05964,P15399,P97580,Q30KJ2,Q7TPB1,Q91ZS3                                                                              |
| 333 | 1,2,3,4,6,3<br>7,38,42 | 5,7,8,36,3<br>9,40,41,43<br>,44 | 7  | P10715,P12785,P15399,P25236,P97580,Q30KJ2,Q91ZS3                                                                       |
| 334 | 1,2,3,4,6,3<br>7,38,43 | 5,7,8,36,3<br>9,40,41,42<br>,44 | 13 | P01681,P05964,P14480,P15399,P25236,P34901,P80020,P97580,Q30KJ2,Q4FZU6,Q5HZV9,Q63661,Q7TPB1                             |
| 335 | 1,2,3,4,6,3<br>7,38,44 | 5,7,8,36,3<br>9,40,41,42<br>,43 | 7  | P05964,P12785,P15399,P25236,P34901,P97580,Q30KJ2                                                                       |

|     |                        |                                 |   |                                                  |
|-----|------------------------|---------------------------------|---|--------------------------------------------------|
| 336 | 1,2,3,4,6,3<br>7,39,40 | 5,7,8,36,3<br>8,41,42,43<br>,44 | 3 | P25236,P50116,Q8CJD3                             |
| 337 | 1,2,3,4,6,3<br>7,39,41 | 5,7,8,36,3<br>8,40,42,43<br>,44 | 2 | P02625,Q91ZS3                                    |
| 338 | 1,2,3,4,6,3<br>7,39,42 | 5,7,8,36,3<br>8,40,41,43<br>,44 | 2 | P25236,Q91ZS3                                    |
| 339 | 1,2,3,4,6,3<br>7,39,43 | 5,7,8,36,3<br>8,40,41,42<br>,44 | 6 | P01681,P02625,P06760,P14480,P25236,Q4FZU6        |
| 340 | 1,2,3,4,6,3<br>7,39,44 | 5,7,8,36,3<br>8,40,41,42<br>,43 | 4 | P02625,P25236,P50116,Q8CJD3                      |
| 341 | 1,2,3,4,6,3<br>7,40,41 | 5,7,8,36,3<br>8,39,42,43<br>,44 | 2 | P25236,Q91ZS3                                    |
| 342 | 1,2,3,4,6,3<br>7,40,42 | 5,7,8,36,3<br>8,39,41,43<br>,44 | 1 | P25236                                           |
| 343 | 1,2,3,4,6,3<br>7,40,43 | 5,7,8,36,3<br>8,39,41,42<br>,44 | 3 | P01681,P25236,Q63661                             |
| 344 | 1,2,3,4,6,3<br>7,40,44 | 5,7,8,36,3<br>8,39,41,42<br>,43 | 3 | P25236,P50116,Q8CJD3                             |
| 345 | 1,2,3,4,6,3<br>7,41,42 | 5,7,8,36,3<br>8,39,40,43<br>,44 | 2 | G3V686,Q91ZS3                                    |
| 346 | 1,2,3,4,6,3<br>7,41,43 | 5,7,8,36,3<br>8,39,40,42<br>,44 | 7 | P01681,P01836,P02625,P25236,Q5HZV9,Q66H69,Q7TPB1 |
| 347 | 1,2,3,4,6,3<br>7,41,44 | 5,7,8,36,3<br>8,39,40,42<br>,43 | 3 | G3V686,P05964,Q91ZS3                             |
| 348 | 1,2,3,4,6,3<br>7,42,43 | 5,7,8,36,3<br>8,39,40,41<br>,44 | 6 | P01681,P10715,P19629,P25236,Q4FZU6,Q5HZV9        |
| 349 | 1,2,3,4,6,3<br>7,42,44 | 5,7,8,36,3<br>8,39,40,41<br>,43 | 2 | G3V686,P25236                                    |
| 350 | 1,2,3,4,6,3<br>7,43,44 | 5,7,8,36,3<br>8,39,40,41<br>,42 | 7 | P01681,P05964,P14480,P25236,P34901,Q63661,Q66H69 |

|     |                        |                                 |    |                                                                                                          |
|-----|------------------------|---------------------------------|----|----------------------------------------------------------------------------------------------------------|
| 351 | 1,2,3,4,6,3<br>8,39,40 | 5,7,8,36,3<br>7,41,42,43<br>,44 | 4  | P15399,P25236,P97580,Q30KJ2                                                                              |
| 352 | 1,2,3,4,6,3<br>8,39,41 | 5,7,8,36,3<br>7,40,42,43<br>,44 | 3  | P02625,P97580,Q30KJ2                                                                                     |
| 353 | 1,2,3,4,6,3<br>8,39,42 | 5,7,8,36,3<br>7,40,41,43<br>,44 | 4  | P08010,P25236,P97580,Q30KJ2                                                                              |
| 354 | 1,2,3,4,6,3<br>8,39,43 | 5,7,8,36,3<br>7,40,41,42<br>,44 | 10 | B0BNN3,P01681,P02625,P14480,P25236,P34901,P97580,Q30KJ2,Q4FZU6,Q5HZV9                                    |
| 355 | 1,2,3,4,6,3<br>8,39,44 | 5,7,8,36,3<br>7,40,41,42<br>,43 | 6  | P02625,P15399,P25236,P34901,P97580,Q30KJ2                                                                |
| 356 | 1,2,3,4,6,3<br>8,40,41 | 5,7,8,36,3<br>7,39,42,43<br>,44 | 5  | P01836,P15399,P70709,P97580,Q30KJ2                                                                       |
| 357 | 1,2,3,4,6,3<br>8,40,42 | 5,7,8,36,3<br>7,39,41,43<br>,44 | 6  | P12785,P25236,P70709,P97580,Q30KJ2,Q63355                                                                |
| 358 | 1,2,3,4,6,3<br>8,40,43 | 5,7,8,36,3<br>7,39,41,42<br>,44 | 11 | P01681,P01835,P01836,P15399,P25236,P34901,P70709,P97580,Q30KJ2,Q5HZV9,Q63661                             |
| 359 | 1,2,3,4,6,3<br>8,40,44 | 5,7,8,36,3<br>7,39,41,42<br>,43 | 9  | P01835,P12785,P15399,P22006,P25236,P34901,P70709,P97580,Q30KJ2                                           |
| 360 | 1,2,3,4,6,3<br>8,41,42 | 5,7,8,36,3<br>7,39,40,43<br>,44 | 13 | O35547,P01836,P08010,P08753,P54921,P60905,P82471,P97580,Q30KJ2,Q62753,Q62902,Q7TP52,Q8CIZ5               |
| 361 | 1,2,3,4,6,3<br>8,41,43 | 5,7,8,36,3<br>7,39,40,42<br>,44 | 11 | B0BNN3,P01681,P01836,P02625,P82471,P97580,Q30KJ2,Q5HZV9,Q63661,Q66H69,Q7TPB1                             |
| 362 | 1,2,3,4,6,3<br>8,41,44 | 5,7,8,36,3<br>7,39,40,42<br>,43 | 7  | P00774,P34901,P97580,P98089,Q30KJ2,Q62635,Q8CIZ5                                                         |
| 363 | 1,2,3,4,6,3<br>8,42,43 | 5,7,8,36,3<br>7,39,40,41<br>,44 | 15 | B0BNN3,P01681,P01836,P10715,P12785,P19629,P25236,P34901,P35434,P82471,P97580,Q30KJ2,Q5HZV9,Q63355,Q7TP52 |
| 364 | 1,2,3,4,6,3<br>8,42,44 | 5,7,8,36,3<br>7,39,40,41<br>,43 | 6  | P12785,P25236,P34901,P97580,Q30KJ2,Q7TP52                                                                |
| 365 | 1,2,3,4,6,3<br>8,43,44 | 5,7,8,36,3<br>7,39,40,41<br>,42 | 11 | P01681,P01835,P15399,P25236,P34901,P97580,P98089,Q30KJ2,Q5HZV9,Q63661,Q66H69                             |

|     |                        |                                 |   |                                                         |
|-----|------------------------|---------------------------------|---|---------------------------------------------------------|
| 366 | 1,2,3,4,6,3<br>9,40,41 | 5,7,8,36,3<br>7,38,42,43<br>,44 | 0 |                                                         |
| 367 | 1,2,3,4,6,3<br>9,40,42 | 5,7,8,36,3<br>7,38,41,43<br>,44 | 1 | P25236                                                  |
| 368 | 1,2,3,4,6,3<br>9,40,43 | 5,7,8,36,3<br>7,38,41,42<br>,44 | 3 | P01681,P25236,Q5HZV9                                    |
| 369 | 1,2,3,4,6,3<br>9,40,44 | 5,7,8,36,3<br>7,38,41,42<br>,43 | 2 | P25236,Q8CJD3                                           |
| 370 | 1,2,3,4,6,3<br>9,41,42 | 5,7,8,36,3<br>7,38,40,43<br>,44 | 5 | G3V686,P08010,P82471,Q62753,Q7TP52                      |
| 371 | 1,2,3,4,6,3<br>9,41,43 | 5,7,8,36,3<br>7,38,40,42<br>,44 | 8 | P01681,P01836,P02625,P06760,P25236,P82471,Q5HZV9,Q66H69 |
| 372 | 1,2,3,4,6,3<br>9,41,44 | 5,7,8,36,3<br>7,38,40,42<br>,43 | 2 | G3V686,P02625                                           |
| 373 | 1,2,3,4,6,3<br>9,42,43 | 5,7,8,36,3<br>7,38,40,41<br>,44 | 6 | P01681,P02625,P25236,P35434,P82471,Q5HZV9               |
| 374 | 1,2,3,4,6,3<br>9,42,44 | 5,7,8,36,3<br>7,38,40,41<br>,43 | 2 | G3V686,P25236                                           |
| 375 | 1,2,3,4,6,3<br>9,43,44 | 5,7,8,36,3<br>7,38,40,41<br>,42 | 6 | P01681,P02625,P25236,P34901,Q63661,Q66H69               |
| 376 | 1,2,3,4,6,4<br>0,41,42 | 5,7,8,36,3<br>7,38,39,43<br>,44 | 4 | P01836,P23593,P25236,P70709                             |
| 377 | 1,2,3,4,6,4<br>0,41,43 | 5,7,8,36,3<br>7,38,39,42<br>,44 | 7 | P01681,P01836,P25236,P70709,Q5HZV9,Q63661,Q66H69        |
| 378 | 1,2,3,4,6,4<br>0,41,44 | 5,7,8,36,3<br>7,38,39,42<br>,43 | 5 | P06911,P12020,P25236,P70709,Q5GRG2                      |
| 379 | 1,2,3,4,6,4<br>0,42,43 | 5,7,8,36,3<br>7,38,39,41<br>,44 | 6 | P01681,P01836,P25236,P70709,Q5HZV9,Q63355               |
| 380 | 1,2,3,4,6,4<br>0,42,44 | 5,7,8,36,3<br>7,38,39,41<br>,43 | 4 | P20759,P25236,P36374,P70709                             |

|     |                        |                                  |    |                                                                                                                                                                                                                                 |
|-----|------------------------|----------------------------------|----|---------------------------------------------------------------------------------------------------------------------------------------------------------------------------------------------------------------------------------|
| 381 | 1,2,3,4,6,4<br>0,43,44 | 5,7,8,36,3<br>7,38,39,41<br>,42  | 5  | P01681,P25236,P34901,Q63661,Q66H69                                                                                                                                                                                              |
| 382 | 1,2,3,4,6,4<br>1,42,43 | 5,7,8,36,3<br>7,38,39,40<br>,44  | 13 | G3V686,P01681,P01836,P11883,P25236,P35434,P54921,P60905,P82471,P85971,Q5HZV9,Q66H69,Q7TP52                                                                                                                                      |
| 383 | 1,2,3,4,6,4<br>1,42,44 | 5,7,8,36,3<br>7,38,39,40<br>,43  | 8  | G3V686,P08010,P25236,P60905,P82471,Q62753,Q6P6R2,Q7TP52                                                                                                                                                                         |
| 384 | 1,2,3,4,6,4<br>1,43,44 | 5,7,8,36,3<br>7,38,39,40<br>,42  | 9  | G3V686,P01681,P25236,P34901,P82471,Q5HZV9,Q63661,Q66H69,Q7TP52                                                                                                                                                                  |
| 385 | 1,2,3,4,6,4<br>2,43,44 | 5,7,8,36,3<br>7,38,39,40<br>,41  | 11 | G3V686,P01681,P25236,P34901,P35434,P60905,P82471,P85971,Q63661,Q66H69,Q7TP52                                                                                                                                                    |
| 386 | 1,2,3,4,7,8<br>,36,37  | 5,6,38,39,<br>40,41,42,4<br>3,44 | 15 | D3ZUK3,O54800;Q5DWV2,P01836,P05964,P06760,P11762,P15978,P36970,P85971,Q01205,Q09030,Q63467,Q63475,Q6IFU7,Q99MH3                                                                                                                 |
| 387 | 1,2,3,4,7,8<br>,36,38  | 5,6,37,39,<br>40,41,42,4<br>3,44 | 16 | D3ZUK3,O54800;Q5DWV2,P01836,P06760,P08010,P08721,P15978,P34901,P35444,P85971,Q01205,Q09030,Q63467,Q63475,Q6IE51,Q99MH3                                                                                                          |
| 388 | 1,2,3,4,7,8<br>,36,39  | 5,6,37,38,<br>40,41,42,4<br>3,44 | 15 | D3ZUK3,O54728,P01836,P01946,P06760,P08010,P20766,P35444,P36970,P85971,Q01205,Q09030,Q63467,Q63475,Q6IE51                                                                                                                        |
| 389 | 1,2,3,4,7,8<br>,36,40  | 5,6,37,38,<br>39,41,42,4<br>3,44 | 8  | D3ZUK3,P01836,P36970,P85971,Q01205,Q09030,Q63467,Q6IE51                                                                                                                                                                         |
| 390 | 1,2,3,4,7,8<br>,36,41  | 5,6,37,38,<br>39,40,42,4<br>3,44 | 22 | D3ZUK3,G3V686,O54800;Q5DWV2,O54858,P01836,P06760,P08010,P08649,P08721,P35444,P36970,P60905,P85971,Q01205,Q09030,Q5ZQU0,Q63467,Q63475,Q63532,Q6IE51,Q7TP52,Q99MH3                                                                |
| 391 | 1,2,3,4,7,8<br>,36,42  | 5,6,37,38,<br>39,40,41,4<br>3,44 | 31 | D3ZUK3,G3V686,O54800;Q5DWV2,P01836,P02781,P04905,P06760,P08010,P08290,P08649,P08721,P08753,P15978,P16086,P20759,P35444,P36374,P36970,P47727,P60905,P85971,P97554,Q01205,Q09030,Q5XI73,Q62753,Q63357,Q63467,Q7TP52,Q812E4,Q9QZK9 |
| 392 | 1,2,3,4,7,8<br>,36,43  | 5,6,37,38,<br>39,40,41,4<br>2,44 | 24 | D3ZUK3,O35783,O54800;Q5DWV2,O54858,P01836,P01946,P06760,P13432,P16391,P20762,P34901,P35444,P36970,P60905,P85971,Q01205,Q09030,Q63467,Q63532,Q63661,Q64268,Q6IE51,Q7TP52,Q9QX79                                                  |
| 393 | 1,2,3,4,7,8<br>,36,44  | 5,6,37,38,<br>39,40,41,4<br>2,43 | 18 | D3ZUK3,O54800;Q5DWV2,P01836,P07171,P08721,P13432,P34901,P35444,P36970,P55314,P60905,P85971,Q01205,Q09030,Q63467,Q63475,Q6IE51,Q99MH3                                                                                            |
| 394 | 1,2,3,4,7,8<br>,37,38  | 5,6,36,39,<br>40,41,42,4<br>3,44 | 10 | D3ZUK3,O54800;Q5DWV2,P01836,P05964,P11762,P85971,P97580,Q09030,Q6IE51,Q7TPB1                                                                                                                                                    |
| 395 | 1,2,3,4,7,8<br>,37,39  | 5,6,36,38,<br>40,41,42,4<br>3,44 | 9  | D3ZUK3,P01836,P01946,P05964,P06760,P36970,P85971,Q09030,Q6IE51                                                                                                                                                                  |



|     |                       |                                  |    |                                                                                                                                                           |
|-----|-----------------------|----------------------------------|----|-----------------------------------------------------------------------------------------------------------------------------------------------------------|
| 396 | 1,2,3,4,7,8<br>,37,40 | 5,6,36,38,<br>39,41,42,4<br>3,44 | 6  | D3ZUK3,P01836,P02803,P36970,P85971,Q09030                                                                                                                 |
| 397 | 1,2,3,4,7,8<br>,37,41 | 5,6,36,38,<br>39,40,42,4<br>3,44 | 15 | D3ZUK3,P01836,P05964,P11762,P18418,P36970,P85971,Q01205,Q09030,Q63467,Q63475,Q63617,Q68FS4,Q7TPB1,Q91ZS3                                                  |
| 398 | 1,2,3,4,7,8<br>,37,42 | 5,6,36,38,<br>39,40,41,4<br>3,44 | 6  | D3ZUK3,P01836,P20759,P36970,P85971,Q09030                                                                                                                 |
| 399 | 1,2,3,4,7,8<br>,37,43 | 5,6,36,38,<br>39,40,41,4<br>2,44 | 14 | D3ZUK3,O35783,O54800;Q5DWW2,P01836,P01946,P05964,P06760,P85971,Q09030,Q64268,Q6IE51,Q7TPB1,Q99PP0,Q9QX79                                                  |
| 400 | 1,2,3,4,7,8<br>,37,44 | 5,6,36,38,<br>39,40,41,4<br>2,43 | 7  | D3ZUK3,P05964,P35444,P85971,Q09030,Q63467,Q6IFU7                                                                                                          |
| 401 | 1,2,3,4,7,8<br>,38,39 | 5,6,36,37,<br>40,41,42,4<br>3,44 | 11 | D3ZUK3,P01836,P01946,P08010,P35444,P36970,P42854,P85971,Q09030,Q6IE51,Q80WL1                                                                              |
| 402 | 1,2,3,4,7,8<br>,38,40 | 5,6,36,37,<br>39,41,42,4<br>3,44 | 5  | D3ZUK3,P01836,P85971,Q09030,Q6IE51                                                                                                                        |
| 403 | 1,2,3,4,7,8<br>,38,41 | 5,6,36,37,<br>39,40,42,4<br>3,44 | 17 | D3ZUK3,O35547,O54800;Q5DWW2,P01836,P08010,P35444,P42854,P50115,P50116,P60905,P85971,Q01205,Q09030,Q63467,Q63475,Q6IE51,Q7TPB1                             |
| 404 | 1,2,3,4,7,8<br>,38,42 | 5,6,36,37,<br>39,40,41,4<br>3,44 | 22 | D3ZUK3,O35547,P01836,P02781,P04905,P05369,P08010,P08290,P08753,P15978,P20759,P35444,P36374,P42854,P47727,P60905,P61589,P85971,Q09030,Q80WL1,Q9JHB9,Q9QZK9 |
| 405 | 1,2,3,4,7,8<br>,38,43 | 5,6,36,37,<br>39,40,41,4<br>2,44 | 18 | D3ZUK3,O35547,O35783,O54800;Q5DWW2,P01836,P01946,P06760,P16391,P20762,P35444,P85971,P97580,Q09030,Q64268,Q6IE51,Q7TPB1,Q80WL1,Q9QX79                      |
| 406 | 1,2,3,4,7,8<br>,38,44 | 5,6,36,37,<br>39,40,41,4<br>2,43 | 8  | D3ZUK3,P01836,P34901,P35444,P85971,Q09030,Q63467,Q6IE51                                                                                                   |
| 407 | 1,2,3,4,7,8<br>,39,40 | 5,6,36,37,<br>38,41,42,4<br>3,44 | 8  | D3ZUK3,P01836,P01946,P20766,P36970,P85971,Q09030,Q6IE51                                                                                                   |
| 408 | 1,2,3,4,7,8<br>,39,41 | 5,6,36,37,<br>38,40,42,4<br>3,44 | 13 | D3ZUK3,P01836,P01946,P08010,P20766,P35444,P36970,P85971,Q09030,Q63317,Q63467,Q63475,Q6IE51                                                                |
| 409 | 1,2,3,4,7,8<br>,39,42 | 5,6,36,37,<br>38,40,41,4<br>3,44 | 21 | D3ZUK3,O35547,P01836,P01946,P04905,P08010,P08753,P16086,P20759,P20766,P35444,P36374,P36970,P42854,P47727,P60905,P85971,Q09030,Q62753,Q6IE51,Q80WL1        |
| 410 | 1,2,3,4,7,8<br>,39,43 | 5,6,36,37,<br>38,40,41,4<br>2,44 | 14 | D3ZUK3,P01836,P01946,P02091,P06760,P20766,P36970,P85971,Q09030,Q64268,Q6IE51,Q80WL1,Q99PP0,Q9QX79                                                         |

|     |                        |                                  |    |                                                                                                                                                                                                     |
|-----|------------------------|----------------------------------|----|-----------------------------------------------------------------------------------------------------------------------------------------------------------------------------------------------------|
| 411 | 1,2,3,4,7,8<br>,39,44  | 5,6,36,37,<br>38,40,41,4<br>2,43 | 10 | D3ZUK3,P01946,P20766,P35444,P36970,P85971,Q09030,Q63467,Q63475,Q6IE51                                                                                                                               |
| 412 | 1,2,3,4,7,8<br>,40,41  | 5,6,36,37,<br>38,39,42,4<br>3,44 | 7  | D3ZUK3,P01836,P36970,P85971,Q09030,Q63617,Q6IE51                                                                                                                                                    |
| 413 | 1,2,3,4,7,8<br>,40,42  | 5,6,36,37,<br>38,39,41,4<br>3,44 | 13 | D3ZUK3,P01836,P02781,P16086,P20759,P20766,P36374,P36970,P60905,P85971,Q09030,Q9JHB9,Q9QZ76                                                                                                          |
| 414 | 1,2,3,4,7,8<br>,40,43  | 5,6,36,37,<br>38,39,41,4<br>2,44 | 9  | D3ZUK3,O35783,P01836,P01946,P20762,P85971,Q09030,Q6IE51,Q9QX79                                                                                                                                      |
| 415 | 1,2,3,4,7,8<br>,40,44  | 5,6,36,37,<br>38,39,41,4<br>2,43 | 9  | D3ZUK3,P01836,P20759,P20766,P35444,P36374,P36970,P85971,Q09030                                                                                                                                      |
| 416 | 1,2,3,4,7,8<br>,41,42  | 5,6,36,37,<br>38,39,40,4<br>3,44 | 26 | D3ZUK3,F1LM93,O08815,O35547,P01836,P02781,P04905,P08010,P08290,P08649,P08753,P16086,P20759,P35444,P36374,P36970,P42854,P54921,P60905,P82471,P85971,Q09030,Q62753,Q63357,Q812E4,Q9QZK9               |
| 417 | 1,2,3,4,7,8<br>,41,43  | 5,6,36,37,<br>38,39,40,4<br>2,44 | 23 | D3ZUK3,O35547,O35783,O54800;Q5DWV2,P01836,P01946,P06760,P30836,P35444,P54921,P60905,P82471,P85971,Q09030,Q63467,Q63475,Q63532,Q64268,Q6IE51,Q7TPB1,Q9QUL6,Q9QX79,Q9WUW3                             |
| 418 | 1,2,3,4,7,8<br>,41,44  | 5,6,36,37,<br>38,39,40,4<br>2,43 | 13 | D3ZUK3,P01836,P08010,P35444,P60905,P85971,Q01205,Q09030,Q63467,Q63475,Q63617,Q6IE51,Q99MH3                                                                                                          |
| 419 | 1,2,3,4,7,8<br>,42,43  | 5,6,36,37,<br>38,39,40,4<br>1,44 | 28 | D3ZUK3,O35547,O35783,P01836,P01946,P04905,P06760,P08723,P16086,P20762,P26772,P35444,P36374,P36970,P47727,P54921,P60905,P82471,P85971,Q09030,Q62975,Q64268,Q6Q7Y5,Q80WL1,Q99PP0,Q9JHB9,Q9QX79,Q9WUW3 |
| 420 | 1,2,3,4,7,8<br>,42,44  | 5,6,36,37,<br>38,39,40,4<br>1,43 | 17 | D3ZUK3,O35547,O35783,P01836,P04905,P08010,P08753,P20759,P20766,P35444,P36374,P36970,P60905,P85971,Q09030,Q62753,Q9QZK9                                                                              |
| 421 | 1,2,3,4,7,8<br>,43,44  | 5,6,36,37,<br>38,39,40,4<br>1,42 | 18 | D3ZUK3,O35783,P01836,P01946,P02091,P13432,P20762,P34901,P35444,P85971,Q09030,Q63467,Q63661,Q64268,Q66H69,Q6IE51,Q9QX79,Q9WUW3                                                                       |
| 422 | 1,2,3,4,7,3<br>6,37,38 | 5,6,8,39,4<br>0,41,42,43<br>,44  | 10 | O54800;Q5DWV2,P01836,P05964,P06760,P11762,P12785,P34901,P85971,Q09030,Q6IE51                                                                                                                        |
| 423 | 1,2,3,4,7,3<br>6,37,39 | 5,6,8,38,4<br>0,41,42,43<br>,44  | 10 | O54728,P01836,P01946,P05964,P06760,P22734,P85971,Q09030,Q6IE51,Q8CJD3                                                                                                                               |
| 424 | 1,2,3,4,7,3<br>6,37,40 | 5,6,8,38,3<br>9,41,42,43<br>,44  | 4  | P01836,P06760,P11762,Q09030                                                                                                                                                                         |
| 425 | 1,2,3,4,7,3<br>6,37,41 | 5,6,8,38,3<br>9,40,42,43<br>,44  | 12 | G3V686,P01836,P05964,P06760,P08649,P11762,P85971,Q09030,Q63467,Q63475,Q6IE51,Q91ZS3                                                                                                                 |

|     |                        |                                 |    |                                                                                                                                             |
|-----|------------------------|---------------------------------|----|---------------------------------------------------------------------------------------------------------------------------------------------|
| 426 | 1,2,3,4,7,3<br>6,37,42 | 5,6,8,38,3<br>9,40,41,43<br>,44 | 10 | G3V686,P01836,P06760,P08649,P13596,P19629,P47967,P85971,Q09030,Q5XI73                                                                       |
| 427 | 1,2,3,4,7,3<br>6,37,43 | 5,6,8,38,3<br>9,40,41,42<br>,44 | 14 | D3ZUC6,O54800;Q5DWV2,P01836,P01946,P05964,P06760,P11762,P22734,P34901,P85971,Q09030,Q63661,Q6IE51,Q99PP0                                    |
| 428 | 1,2,3,4,7,3<br>6,37,44 | 5,6,8,38,3<br>9,40,41,42<br>,43 | 9  | P01836,P05964,P06760,P13432,P34901,P55314,P85971,Q09030,Q63467                                                                              |
| 429 | 1,2,3,4,7,3<br>6,38,39 | 5,6,8,37,4<br>0,41,42,43<br>,44 | 9  | O54728,P01836,P01946,P06760,P34901,P51907,P85971,Q63467,Q6IE51                                                                              |
| 430 | 1,2,3,4,7,3<br>6,38,40 | 5,6,8,37,3<br>9,41,42,43<br>,44 | 6  | P01836,P13596,P34901,P85971,Q09030,Q6IE51                                                                                                   |
| 431 | 1,2,3,4,7,3<br>6,38,41 | 5,6,8,37,3<br>9,40,42,43<br>,44 | 11 | O54800;Q5DWV2,P01836,P06760,P08010,P08649,P13596,P85971,Q09030,Q63467,Q63475,Q6IE51                                                         |
| 432 | 1,2,3,4,7,3<br>6,38,42 | 5,6,8,37,3<br>9,40,41,43<br>,44 | 20 | O35547,P01836,P06760,P08010,P08649,P12785,P13596,P34901,P42854,P47727,P47967,P51907,P60905,P85971,P97554,Q09030,Q5XI73,Q6AYL6,Q6IE51,Q9QZK9 |
| 433 | 1,2,3,4,7,3<br>6,38,43 | 5,6,8,37,3<br>9,40,41,42<br>,44 | 10 | O54800;Q5DWV2,P01836,P01946,P06760,P34901,P85971,Q09030,Q63467,Q63661,Q6IE51                                                                |
| 434 | 1,2,3,4,7,3<br>6,38,44 | 5,6,8,37,3<br>9,40,41,42<br>,43 | 12 | P01836,P01946,P06760,P12785,P34901,P51907,P55314,P85971,Q63467,Q63475,Q63661,Q6IE51                                                         |
| 435 | 1,2,3,4,7,3<br>6,39,40 | 5,6,8,37,3<br>8,41,42,43<br>,44 | 5  | P01836,P01946,P06760,Q09030,Q6IE51                                                                                                          |
| 436 | 1,2,3,4,7,3<br>6,39,41 | 5,6,8,37,3<br>8,40,42,43<br>,44 | 10 | P01836,P01946,P06760,P08010,P08649,P85971,Q09030,Q63467,Q63475,Q6IE51                                                                       |
| 437 | 1,2,3,4,7,3<br>6,39,42 | 5,6,8,37,3<br>8,40,41,43<br>,44 | 15 | O54728,P01836,P01946,P06760,P08010,P08649,P13596,P16086,P36970,P47727,P51907,P85971,Q09030,Q5XI73,Q6IE51                                    |
| 438 | 1,2,3,4,7,3<br>6,39,43 | 5,6,8,37,3<br>8,40,41,42<br>,44 | 16 | D3ZUC6,O54728,O89117,P01836,P01946,P02091,P06760,P22734,P34901,P55314,P85971,Q09030,Q63467,Q63661,Q6IE51,Q99PP0                             |
| 439 | 1,2,3,4,7,3<br>6,39,44 | 5,6,8,37,3<br>8,40,41,42<br>,43 | 11 | A2RUV9,P01836,P01946,P06760,P34901,P51907,P55314,P85971,Q63467,Q63475,Q6IE51                                                                |
| 440 | 1,2,3,4,7,3<br>6,40,41 | 5,6,8,37,3<br>8,39,42,43<br>,44 | 7  | P01836,P06760,P13596,P85971,Q09030,Q63467,Q6IE51                                                                                            |

|     |                        |                                 |    |                                                                                                                                                    |
|-----|------------------------|---------------------------------|----|----------------------------------------------------------------------------------------------------------------------------------------------------|
| 441 | 1,2,3,4,7,3<br>6,40,42 | 5,6,8,37,3<br>8,39,41,43<br>,44 | 11 | P01836,P02781,P02782,P05539,P08649,P13596,P16086,P36374,P85971,Q09030,Q5XI73                                                                       |
| 442 | 1,2,3,4,7,3<br>6,40,43 | 5,6,8,37,3<br>8,39,41,42<br>,44 | 8  | P01836,P01946,P06760,P34901,P85971,Q09030,Q63661,Q6IE51                                                                                            |
| 443 | 1,2,3,4,7,3<br>6,40,44 | 5,6,8,37,3<br>8,39,41,42<br>,43 | 10 | P01836,P13432,P13596,P34901,P55314,P85971,Q09030,Q63467,Q63661,Q6IE51                                                                              |
| 444 | 1,2,3,4,7,3<br>6,41,42 | 5,6,8,37,3<br>8,39,40,43<br>,44 | 21 | G3V686,O35547,P01836,P05539,P06760,P08010,P08649,P08721,P13596,P16086,P54921,P60905,P82471,P85971,Q09030,Q5XI73,Q62753,Q63357,Q63467,Q7TP52,Q812E4 |
| 445 | 1,2,3,4,7,3<br>6,41,43 | 5,6,8,37,3<br>8,39,40,42<br>,44 | 16 | D3ZUC6,G3V686,O54800;Q5DWV2,P01836,P01946,P06760,P08649,P82471,P85971,Q09030,Q63467,Q63475,Q63532,Q63661,Q6IE51,Q7TP52                             |
| 446 | 1,2,3,4,7,3<br>6,41,44 | 5,6,8,37,3<br>8,39,40,42<br>,43 | 13 | G3V686,P01836,P06760,P08649,P13596,P34901,P55314,P85971,Q09030,Q63467,Q63475,Q6IE51,Q99MH3                                                         |
| 447 | 1,2,3,4,7,3<br>6,42,43 | 5,6,8,37,3<br>8,39,40,41<br>,44 | 19 | G3V686,O35783,P01836,P01946,P02782,P06760,P08649,P16086,P19629,P34901,P47727,P60905,P85971,Q09030,Q62975,Q63661,Q6IE51,Q7TP52,Q99PP0               |
| 448 | 1,2,3,4,7,3<br>6,42,44 | 5,6,8,37,3<br>8,39,40,41<br>,43 | 17 | G3V686,P01836,P06760,P08010,P08649,P08721,P13596,P34901,P36374,P51907,P55314,P60905,P85971,Q09030,Q5XI73,Q63467,Q7TP52                             |
| 449 | 1,2,3,4,7,3<br>6,43,44 | 5,6,8,37,3<br>8,39,40,41<br>,42 | 15 | D3ZUC6,O35783,O89117,P01836,P01946,P02091,P06760,P13432,P34901,P55314,P85971,Q09030,Q63467,Q63661,Q6IE51                                           |
| 450 | 1,2,3,4,7,3<br>7,38,39 | 5,6,8,36,4<br>0,41,42,43<br>,44 | 7  | A2RUV9,P01836,P01946,P05964,P06760,P97580,Q6IE51                                                                                                   |
| 451 | 1,2,3,4,7,3<br>7,38,40 | 5,6,8,36,3<br>9,41,42,43<br>,44 | 4  | P01836,P12785,P15399,Q6IE51                                                                                                                        |
| 452 | 1,2,3,4,7,3<br>7,38,41 | 5,6,8,36,3<br>9,40,42,43<br>,44 | 8  | P01836,P05964,P11762,P85971,P97580,Q6IE51,Q7TPB1,Q91ZS3                                                                                            |
| 453 | 1,2,3,4,7,3<br>7,38,42 | 5,6,8,36,3<br>9,40,41,43<br>,44 | 6  | P01836,P12785,P42854,P85971,Q09030,Q5XI73                                                                                                          |
| 454 | 1,2,3,4,7,3<br>7,38,43 | 5,6,8,36,3<br>9,40,41,42<br>,44 | 13 | O35783,P01836,P01946,P05964,P06760,P14480,P34901,P85971,P97580,Q63661,Q6IE51,Q7TPB1,Q99PP0                                                         |
| 455 | 1,2,3,4,7,3<br>7,38,44 | 5,6,8,36,3<br>9,40,41,42<br>,43 | 7  | P01836,P05964,P12785,P34901,P85971,P97580,Q6IE51                                                                                                   |

|     |                        |                                 |    |                                                                       |
|-----|------------------------|---------------------------------|----|-----------------------------------------------------------------------|
| 456 | 1,2,3,4,7,3<br>7,39,40 | 5,6,8,36,3<br>8,41,42,43<br>,44 | 3  | P01836,P01946,Q6IE51                                                  |
| 457 | 1,2,3,4,7,3<br>7,39,41 | 5,6,8,36,3<br>8,40,42,43<br>,44 | 7  | P01836,P01946,P05964,P06760,P85971,Q63475,Q6IE51                      |
| 458 | 1,2,3,4,7,3<br>7,39,42 | 5,6,8,36,3<br>8,40,41,43<br>,44 | 5  | P01836,P01946,P06760,P85971,Q5XI73                                    |
| 459 | 1,2,3,4,7,3<br>7,39,43 | 5,6,8,36,3<br>8,40,41,42<br>,44 | 10 | A2RUV9,P01836,P01946,P02091,P05964,P06760,P14480,P85971,Q6IE51,Q99PP0 |
| 460 | 1,2,3,4,7,3<br>7,39,44 | 5,6,8,36,3<br>8,40,41,42<br>,43 | 6  | A2RUV9,P01836,P01946,P05964,P85971,Q6IE51                             |
| 461 | 1,2,3,4,7,3<br>7,40,41 | 5,6,8,36,3<br>8,39,42,43<br>,44 | 2  | P01836,Q09030                                                         |
| 462 | 1,2,3,4,7,3<br>7,40,42 | 5,6,8,36,3<br>8,39,41,43<br>,44 | 2  | P01836,Q09030                                                         |
| 463 | 1,2,3,4,7,3<br>7,40,43 | 5,6,8,36,3<br>8,39,41,42<br>,44 | 9  | O35783,P01836,P01946,P06760,P85971,Q09030,Q63661,Q6IE51,Q99PP0        |
| 464 | 1,2,3,4,7,3<br>7,40,44 | 5,6,8,36,3<br>8,39,41,42<br>,43 | 2  | P01836,P05964                                                         |
| 465 | 1,2,3,4,7,3<br>7,41,42 | 5,6,8,36,3<br>8,39,40,43<br>,44 | 4  | P01836,P85971,Q09030,Q91ZS3                                           |
| 466 | 1,2,3,4,7,3<br>7,41,43 | 5,6,8,36,3<br>8,39,40,42<br>,44 | 10 | O35783,P01836,P01946,P05964,P06760,P85971,Q09030,Q6IE51,Q7TPB1,Q99PP0 |
| 467 | 1,2,3,4,7,3<br>7,41,44 | 5,6,8,36,3<br>8,39,40,42<br>,43 | 4  | P01836,P05964,P85971,Q63475                                           |
| 468 | 1,2,3,4,7,3<br>7,42,43 | 5,6,8,36,3<br>8,39,40,41<br>,44 | 9  | O35783,P01836,P01946,P06760,P19629,P85971,Q09030,Q62975,Q99PP0        |
| 469 | 1,2,3,4,7,3<br>7,42,44 | 5,6,8,36,3<br>8,39,40,41<br>,43 | 4  | O35783,P01836,P85971,Q09030                                           |
| 470 | 1,2,3,4,7,3<br>7,43,44 | 5,6,8,36,3<br>8,39,40,41<br>,42 | 9  | O35783,P01836,P01946,P02091,P05964,P06760,P34901,P85971,Q63661        |

|     |                        |                                 |    |                                                                                                                        |
|-----|------------------------|---------------------------------|----|------------------------------------------------------------------------------------------------------------------------|
| 471 | 1,2,3,4,7,3<br>8,39,40 | 5,6,8,36,3<br>7,41,42,43<br>,44 | 3  | P01836,P01946,Q6IE51                                                                                                   |
| 472 | 1,2,3,4,7,3<br>8,39,41 | 5,6,8,36,3<br>7,40,42,43<br>,44 | 8  | P01836,P01946,P06760,P08010,P42854,P85971,Q63475,Q6IE51                                                                |
| 473 | 1,2,3,4,7,3<br>8,39,42 | 5,6,8,36,3<br>7,40,41,43<br>,44 | 11 | O35547,P01836,P01946,P08010,P42854,P47727,P51907,P85971,Q5XI73,Q6IE51,Q80WL1                                           |
| 474 | 1,2,3,4,7,3<br>8,39,43 | 5,6,8,36,3<br>7,40,41,42<br>,44 | 8  | P01836,P01946,P02091,P06760,P34901,P85971,Q6IE51,Q80WL1                                                                |
| 475 | 1,2,3,4,7,3<br>8,39,44 | 5,6,8,36,3<br>7,40,41,42<br>,43 | 7  | A2RUV9,P01836,P01946,P34901,P51907,P85971,Q6IE51                                                                       |
| 476 | 1,2,3,4,7,3<br>8,40,41 | 5,6,8,36,3<br>7,39,42,43<br>,44 | 2  | P01836,Q6IE51                                                                                                          |
| 477 | 1,2,3,4,7,3<br>8,40,42 | 5,6,8,36,3<br>7,39,41,43<br>,44 | 9  | P01836,P02782,P12785,P13596,P42854,Q09030,Q5XI73,Q6IE51,Q9JHB9                                                         |
| 478 | 1,2,3,4,7,3<br>8,40,43 | 5,6,8,36,3<br>7,39,41,42<br>,44 | 6  | P01836,P01946,P34901,P85971,Q63661,Q6IE51                                                                              |
| 479 | 1,2,3,4,7,3<br>8,40,44 | 5,6,8,36,3<br>7,39,41,42<br>,43 | 4  | P01836,P12785,P34901,Q6IE51                                                                                            |
| 480 | 1,2,3,4,7,3<br>8,41,42 | 5,6,8,36,3<br>7,39,40,43<br>,44 | 15 | O35547,P01836,P08010,P13596,P16086,P42854,P54921,P60905,P82471,P85971,Q09030,Q5XI73,Q62902,Q6IE51,Q9QZK9               |
| 481 | 1,2,3,4,7,3<br>8,41,43 | 5,6,8,36,3<br>7,39,40,42<br>,44 | 11 | O35547,O54800;Q5DWV2,P01836,P01946,P06760,P25031,P82471,P85971,Q63661,Q6IE51,Q7TPB1                                    |
| 482 | 1,2,3,4,7,3<br>8,41,44 | 5,6,8,36,3<br>7,39,40,42<br>,43 | 11 | P00774,P01836,P01946,P34901,P55091,P85971,P98089,Q05695,Q63467,Q63475,Q6IE51                                           |
| 483 | 1,2,3,4,7,3<br>8,42,43 | 5,6,8,36,3<br>7,39,40,41<br>,44 | 17 | O35547,O35783,P01041,P01836,P01946,P06760,P12785,P25031,P34901,P42854,P47727,P60905,P85971,Q62975,Q6IE51,Q80WL1,Q9JHB9 |
| 484 | 1,2,3,4,7,3<br>8,42,44 | 5,6,8,36,3<br>7,39,40,41<br>,43 | 9  | O35547,P01836,P12785,P34901,P51907,P60905,P85971,Q5XI73,Q9QZK9                                                         |
| 485 | 1,2,3,4,7,3<br>8,43,44 | 5,6,8,36,3<br>7,39,40,41<br>,42 | 9  | O35783,P01836,P01946,P02091,P06760,P34901,P85971,Q63661,Q6IE51                                                         |

|     |                        |                                 |    |                                                                                            |
|-----|------------------------|---------------------------------|----|--------------------------------------------------------------------------------------------|
| 486 | 1,2,3,4,7,3<br>9,40,41 | 5,6,8,36,3<br>7,38,42,43<br>,44 | 3  | P01836,P01946,Q6IE51                                                                       |
| 487 | 1,2,3,4,7,3<br>9,40,42 | 5,6,8,36,3<br>7,38,41,43<br>,44 | 5  | P01836,P01946,P16086,Q5XI73,Q6IE51                                                         |
| 488 | 1,2,3,4,7,3<br>9,40,43 | 5,6,8,36,3<br>7,38,41,42<br>,44 | 7  | P01836,P01946,P02091,P06760,P85971,Q6IE51,Q99PP0                                           |
| 489 | 1,2,3,4,7,3<br>9,40,44 | 5,6,8,36,3<br>7,38,41,42<br>,43 | 4  | P01836,P01946,Q6AYL6,Q6IE51                                                                |
| 490 | 1,2,3,4,7,3<br>9,41,42 | 5,6,8,36,3<br>7,38,40,43<br>,44 | 13 | O35547,P01836,P01946,P06760,P08010,P16086,P42854,P82471,P85971,Q09030,Q5XI73,Q6AYR9,Q6IE51 |
| 491 | 1,2,3,4,7,3<br>9,41,43 | 5,6,8,36,3<br>7,38,40,42<br>,44 | 10 | D3ZUC6,P01836,P01946,P02091,P06760,P22006,P82471,P85971,Q63475,Q6IE51                      |
| 492 | 1,2,3,4,7,3<br>9,41,44 | 5,6,8,36,3<br>7,38,40,42<br>,43 | 6  | P01836,P01946,P85971,Q63467,Q63475,Q6IE51                                                  |
| 493 | 1,2,3,4,7,3<br>9,42,43 | 5,6,8,36,3<br>7,38,40,41<br>,44 | 13 | O35783,P01041,P01836,P01946,P02091,P06760,P16086,P47727,P82471,P85971,Q6IE51,Q99PP0,Q9JHB9 |
| 494 | 1,2,3,4,7,3<br>9,42,44 | 5,6,8,36,3<br>7,38,40,41<br>,43 | 7  | P01836,P01946,P08010,P51907,P85971,Q5XI73,Q6IE51                                           |
| 495 | 1,2,3,4,7,3<br>9,43,44 | 5,6,8,36,3<br>7,38,40,41<br>,42 | 10 | A2RUV9,P01836,P01946,P02091,P06760,P34901,P85971,Q63661,Q64057,Q6IE51                      |
| 496 | 1,2,3,4,7,4<br>0,41,42 | 5,6,8,36,3<br>7,38,39,43<br>,44 | 6  | P01836,P02781,P13596,P16086,P60905,Q09030                                                  |
| 497 | 1,2,3,4,7,4<br>0,41,43 | 5,6,8,36,3<br>7,38,39,42<br>,44 | 8  | O35783,P01836,P01946,P06760,P85971,Q09030,Q63661,Q6IE51                                    |
| 498 | 1,2,3,4,7,4<br>0,41,44 | 5,6,8,36,3<br>7,38,39,42<br>,43 | 4  | P01836,Q09030,Q5GRG2,Q6IE51                                                                |
| 499 | 1,2,3,4,7,4<br>0,42,43 | 5,6,8,36,3<br>7,38,39,41<br>,44 | 9  | O35783,P01836,P01946,P02782,P16086,P85971,Q09030,Q99PP0,Q9JHB9                             |
| 500 | 1,2,3,4,7,4<br>0,42,44 | 5,6,8,36,3<br>7,38,39,41<br>,43 | 9  | O35783,P01836,P02782,P13596,P20759,P36374,Q09030,Q5XI73,Q9QZ76                             |

|     |                        |                                 |    |                                                                                            |
|-----|------------------------|---------------------------------|----|--------------------------------------------------------------------------------------------|
| 501 | 1,2,3,4,7,4<br>0,43,44 | 5,6,8,36,3<br>7,38,39,41<br>,42 | 8  | O35783,P01836,P01946,P02091,P34901,P85971,Q63661,Q6IE51                                    |
| 502 | 1,2,3,4,7,4<br>1,42,43 | 5,6,8,36,3<br>7,38,39,40<br>,44 | 11 | O35547,O35783,P01836,P01946,P06760,P16086,P54921,P60905,P82471,P85971,Q09030               |
| 503 | 1,2,3,4,7,4<br>1,42,44 | 5,6,8,36,3<br>7,38,39,40<br>,43 | 13 | G3V686,O35547,O35783,P01836,P08010,P13596,P16086,P60905,P82471,P85971,Q09030,Q5XI73,Q62753 |
| 504 | 1,2,3,4,7,4<br>1,43,44 | 5,6,8,36,3<br>7,38,39,40<br>,42 | 13 | O35783,P01836,P01946,P02091,P06760,P34901,P82471,P85971,Q63467,Q63475,Q63661,Q6IE51,Q9WUC4 |
| 505 | 1,2,3,4,7,4<br>2,43,44 | 5,6,8,36,3<br>7,38,39,40<br>,41 | 11 | O35783,P01836,P01946,P02091,P06760,P34901,P60905,P82471,P85971,Q62975,Q63661               |
| 506 | 1,2,3,4,8,3<br>6,37,38 | 5,6,7,39,4<br>0,41,42,43<br>,44 | 1  | P01836                                                                                     |
| 507 | 1,2,3,4,8,3<br>6,37,39 | 5,6,7,38,4<br>0,41,42,43<br>,44 | 3  | P06760,P36970,Q8CJD3                                                                       |
| 508 | 1,2,3,4,8,3<br>6,37,40 | 5,6,7,38,3<br>9,41,42,43<br>,44 | 1  | Q8CJD3                                                                                     |
| 509 | 1,2,3,4,8,3<br>6,37,41 | 5,6,7,38,3<br>9,40,42,43<br>,44 | 3  | P01836,P83121,Q99MH3                                                                       |
| 510 | 1,2,3,4,8,3<br>6,37,42 | 5,6,7,38,3<br>9,40,41,43<br>,44 | 2  | P01836,P19629                                                                              |
| 511 | 1,2,3,4,8,3<br>6,37,43 | 5,6,7,38,3<br>9,40,41,42<br>,44 | 8  | P01836,P06760,P19629,P83121,Q63661,Q64268,Q9QUL6,Q9QX79                                    |
| 512 | 1,2,3,4,8,3<br>6,37,44 | 5,6,7,38,3<br>9,40,41,42<br>,43 | 4  | P05964,P13432,P55314,Q8CJD3                                                                |
| 513 | 1,2,3,4,8,3<br>6,38,39 | 5,6,7,37,4<br>0,41,42,43<br>,44 | 3  | P01836,P34901,Q80WL1                                                                       |
| 514 | 1,2,3,4,8,3<br>6,38,40 | 5,6,7,37,3<br>9,41,42,43<br>,44 | 1  | P01836                                                                                     |
| 515 | 1,2,3,4,8,3<br>6,38,41 | 5,6,7,37,3<br>9,40,42,43<br>,44 | 2  | P01836,Q99MH3                                                                              |



|     |                        |                                 |    |                                                                                     |
|-----|------------------------|---------------------------------|----|-------------------------------------------------------------------------------------|
| 516 | 1,2,3,4,8,3<br>6,38,42 | 5,6,7,37,3<br>9,40,41,43<br>,44 | 12 | P01836,P08010,P08753,P15978,P19629,P47727,P60905,P97554,Q62902,Q6AYL6,Q80WL1,Q9QZK9 |
| 517 | 1,2,3,4,8,3<br>6,38,43 | 5,6,7,37,3<br>9,40,41,42<br>,44 | 8  | P01836,P06760,P34901,P85971,Q63661,Q64268,Q80WL1,Q9QX79                             |
| 518 | 1,2,3,4,8,3<br>6,38,44 | 5,6,7,37,3<br>9,40,41,42<br>,43 | 2  | P34901,P55314                                                                       |
| 519 | 1,2,3,4,8,3<br>6,39,40 | 5,6,7,37,3<br>8,41,42,43<br>,44 | 3  | P20766,P36970,Q8CJD3                                                                |
| 520 | 1,2,3,4,8,3<br>6,39,41 | 5,6,7,37,3<br>8,40,42,43<br>,44 | 5  | P01836,P06760,P08010,P36970,Q63475                                                  |
| 521 | 1,2,3,4,8,3<br>6,39,42 | 5,6,7,37,3<br>8,40,41,43<br>,44 | 4  | O54728,P08010,P20766,P36970                                                         |
| 522 | 1,2,3,4,8,3<br>6,39,43 | 5,6,7,37,3<br>8,40,41,42<br>,44 | 6  | P01836,P06760,P34901,P36970,Q5QE79,Q64268                                           |
| 523 | 1,2,3,4,8,3<br>6,39,44 | 5,6,7,37,3<br>8,40,41,42<br>,43 | 5  | P20766,P34901,P36970,P55314,Q8CJD3                                                  |
| 524 | 1,2,3,4,8,3<br>6,40,41 | 5,6,7,37,3<br>8,39,42,43<br>,44 | 2  | P01836,P36970                                                                       |
| 525 | 1,2,3,4,8,3<br>6,40,42 | 5,6,7,37,3<br>8,39,41,43<br>,44 | 3  | P01836,P36374,P36970                                                                |
| 526 | 1,2,3,4,8,3<br>6,40,43 | 5,6,7,37,3<br>8,39,41,42<br>,44 | 4  | P01836,Q5QE79,Q63661,Q64268                                                         |
| 527 | 1,2,3,4,8,3<br>6,40,44 | 5,6,7,37,3<br>8,39,41,42<br>,43 | 4  | P13432,P55314,P97574,Q8CJD3                                                         |
| 528 | 1,2,3,4,8,3<br>6,41,42 | 5,6,7,37,3<br>8,39,40,43<br>,44 | 12 | P01836,P08010,P08721,P08753,P36970,P60905,P82471,P83121,Q62753,Q63357,Q812E4,Q9QZK9 |
| 529 | 1,2,3,4,8,3<br>6,41,43 | 5,6,7,37,3<br>8,39,40,42<br>,44 | 9  | P01836,P06760,P83121,P85971,Q63661,Q64268,Q66H69,Q9QUL6,Q9QX79                      |
| 530 | 1,2,3,4,8,3<br>6,41,44 | 5,6,7,37,3<br>8,39,40,42<br>,43 | 4  | P55314,P83121,Q63475,Q99MH3                                                         |

|     |                        |                                 |   |                                                                |
|-----|------------------------|---------------------------------|---|----------------------------------------------------------------|
| 531 | 1,2,3,4,8,3<br>6,42,43 | 5,6,7,37,3<br>8,39,40,41<br>,44 | 9 | P01836,P06760,P10715,P19629,P35434,P60905,P85971,Q64268,Q9QUL6 |
| 532 | 1,2,3,4,8,3<br>6,42,44 | 5,6,7,37,3<br>8,39,40,41<br>,43 | 4 | P08721,P36374,P55314,P60905                                    |
| 533 | 1,2,3,4,8,3<br>6,43,44 | 5,6,7,37,3<br>8,39,40,41<br>,42 | 9 | P13432,P34901,P55314,P83121,P85971,Q63661,Q64268,Q66H69,Q9QX79 |
| 534 | 1,2,3,4,8,3<br>7,38,39 | 5,6,7,36,4<br>0,41,42,43<br>,44 | 1 | Q80WL1                                                         |
| 535 | 1,2,3,4,8,3<br>7,38,40 | 5,6,7,36,3<br>9,41,42,43<br>,44 | 1 | P02803                                                         |
| 536 | 1,2,3,4,8,3<br>7,38,41 | 5,6,7,36,3<br>9,40,42,43<br>,44 | 1 | Q7TPB1                                                         |
| 537 | 1,2,3,4,8,3<br>7,38,42 | 5,6,7,36,3<br>9,40,41,43<br>,44 | 2 | P12785,Q80WL1                                                  |
| 538 | 1,2,3,4,8,3<br>7,38,43 | 5,6,7,36,3<br>9,40,41,42<br>,44 | 5 | P01836,Q64268,Q7TPB1,Q80WL1,Q9QX79                             |
| 539 | 1,2,3,4,8,3<br>7,38,44 | 5,6,7,36,3<br>9,40,41,42<br>,43 | 1 | P05964                                                         |
| 540 | 1,2,3,4,8,3<br>7,39,40 | 5,6,7,36,3<br>8,41,42,43<br>,44 | 2 | P36970,Q8CJD3                                                  |
| 541 | 1,2,3,4,8,3<br>7,39,41 | 5,6,7,36,3<br>8,40,42,43<br>,44 | 1 | P36970                                                         |
| 542 | 1,2,3,4,8,3<br>7,39,42 | 5,6,7,36,3<br>8,40,41,43<br>,44 | 1 | P36970                                                         |
| 543 | 1,2,3,4,8,3<br>7,39,43 | 5,6,7,36,3<br>8,40,41,42<br>,44 | 3 | P06760,Q64268,Q9QX79                                           |
| 544 | 1,2,3,4,8,3<br>7,39,44 | 5,6,7,36,3<br>8,40,41,42<br>,43 | 1 | Q8CJD3                                                         |
| 545 | 1,2,3,4,8,3<br>7,40,41 | 5,6,7,36,3<br>8,39,42,43<br>,44 | 0 |                                                                |

|     |                        |                                 |   |                                           |
|-----|------------------------|---------------------------------|---|-------------------------------------------|
| 546 | 1,2,3,4,8,3<br>7,40,42 | 5,6,7,36,3<br>8,39,41,43<br>,44 | 0 |                                           |
| 547 | 1,2,3,4,8,3<br>7,40,43 | 5,6,7,36,3<br>8,39,41,42<br>,44 | 2 | Q64268,Q9QX79                             |
| 548 | 1,2,3,4,8,3<br>7,40,44 | 5,6,7,36,3<br>8,39,41,42<br>,43 | 1 | Q8CJD3                                    |
| 549 | 1,2,3,4,8,3<br>7,41,42 | 5,6,7,36,3<br>8,39,40,43<br>,44 | 1 | Q62894                                    |
| 550 | 1,2,3,4,8,3<br>7,41,43 | 5,6,7,36,3<br>8,39,40,42<br>,44 | 6 | P01836,P83121,Q64268,Q7TPB1,Q9QUL6,Q9QX79 |
| 551 | 1,2,3,4,8,3<br>7,41,44 | 5,6,7,36,3<br>8,39,40,42<br>,43 | 1 | P83121                                    |
| 552 | 1,2,3,4,8,3<br>7,42,43 | 5,6,7,36,3<br>8,39,40,41<br>,44 | 4 | P19629,Q62894,Q64268,Q9QX79               |
| 553 | 1,2,3,4,8,3<br>7,42,44 | 5,6,7,36,3<br>8,39,40,41<br>,43 | 0 |                                           |
| 554 | 1,2,3,4,8,3<br>7,43,44 | 5,6,7,36,3<br>8,39,40,41<br>,42 | 4 | Q63661,Q64268,Q66H69,Q9QX79               |
| 555 | 1,2,3,4,8,3<br>8,39,40 | 5,6,7,36,3<br>7,41,42,43<br>,44 | 0 |                                           |
| 556 | 1,2,3,4,8,3<br>8,39,41 | 5,6,7,36,3<br>7,40,42,43<br>,44 | 0 |                                           |
| 557 | 1,2,3,4,8,3<br>8,39,42 | 5,6,7,36,3<br>7,40,41,43<br>,44 | 4 | P08010,P47727,Q80WL1,Q9QZK9               |
| 558 | 1,2,3,4,8,3<br>8,39,43 | 5,6,7,36,3<br>7,40,41,42<br>,44 | 4 | B0BNN3,P34901,Q64268,Q80WL1               |
| 559 | 1,2,3,4,8,3<br>8,39,44 | 5,6,7,36,3<br>7,40,41,42<br>,43 | 2 | P34901,Q80WL1                             |
| 560 | 1,2,3,4,8,3<br>8,40,41 | 5,6,7,36,3<br>7,39,42,43<br>,44 | 1 | P01836                                    |

|     |                        |                                 |    |                                                                       |
|-----|------------------------|---------------------------------|----|-----------------------------------------------------------------------|
| 561 | 1,2,3,4,8,3<br>8,40,42 | 5,6,7,36,3<br>7,39,41,43<br>,44 | 0  |                                                                       |
| 562 | 1,2,3,4,8,3<br>8,40,43 | 5,6,7,36,3<br>7,39,41,42<br>,44 | 3  | P01681,P01836,Q64268                                                  |
| 563 | 1,2,3,4,8,3<br>8,40,44 | 5,6,7,36,3<br>7,39,41,42<br>,43 | 1  | P22006                                                                |
| 564 | 1,2,3,4,8,3<br>8,41,42 | 5,6,7,36,3<br>7,39,40,43<br>,44 | 10 | O35547,P01836,P08010,P08753,P54921,P60905,P82471,Q62894,Q62902,Q9QZK9 |
| 565 | 1,2,3,4,8,3<br>8,41,43 | 5,6,7,36,3<br>7,39,40,42<br>,44 | 6  | B0BNN3,P01836,P82471,Q64268,Q7TPB1,Q9QX79                             |
| 566 | 1,2,3,4,8,3<br>8,41,44 | 5,6,7,36,3<br>7,39,40,42<br>,43 | 5  | P00774,P55091,P98089,Q05695,Q62635                                    |
| 567 | 1,2,3,4,8,3<br>8,42,43 | 5,6,7,36,3<br>7,39,40,41<br>,44 | 9  | B0BNN3,O35547,P01836,P19629,P47727,P60905,Q64268,Q80WL1,Q9JHB9        |
| 568 | 1,2,3,4,8,3<br>8,42,44 | 5,6,7,36,3<br>7,39,40,41<br>,43 | 4  | P12785,P60905,Q80WL1,Q9QZK9                                           |
| 569 | 1,2,3,4,8,3<br>8,43,44 | 5,6,7,36,3<br>7,39,40,41<br>,42 | 7  | P01681,P34901,Q63661,Q64268,Q66H69,Q80WL1,Q9QX79                      |
| 570 | 1,2,3,4,8,3<br>9,40,41 | 5,6,7,36,3<br>7,38,42,43<br>,44 | 2  | P20766,P36970                                                         |
| 571 | 1,2,3,4,8,3<br>9,40,42 | 5,6,7,36,3<br>7,38,41,43<br>,44 | 2  | P20766,P36970                                                         |
| 572 | 1,2,3,4,8,3<br>9,40,43 | 5,6,7,36,3<br>7,38,41,42<br>,44 | 3  | P20766,P36970,Q5QE79                                                  |
| 573 | 1,2,3,4,8,3<br>9,40,44 | 5,6,7,36,3<br>7,38,41,42<br>,43 | 3  | P20766,P36970,Q8CJD3                                                  |
| 574 | 1,2,3,4,8,3<br>9,41,42 | 5,6,7,36,3<br>7,38,40,43<br>,44 | 5  | P08010,P08753,P20766,P36970,P82471                                    |
| 575 | 1,2,3,4,8,3<br>9,41,43 | 5,6,7,36,3<br>7,38,40,42<br>,44 | 5  | P01836,P06760,P82471,Q64268,Q9QX79                                    |

|     |                         |                                 |   |                                                                |
|-----|-------------------------|---------------------------------|---|----------------------------------------------------------------|
| 576 | 1,2,3,4,8,3<br>9,41,44  | 5,6,7,36,3<br>7,38,40,42<br>,43 | 3 | P20766,P36970,Q63475                                           |
| 577 | 1,2,3,4,8,3<br>9,42,43  | 5,6,7,36,3<br>7,38,40,41<br>,44 | 5 | P20766,P36970,P82471,Q64268,Q80WL1                             |
| 578 | 1,2,3,4,8,3<br>9,42,44  | 5,6,7,36,3<br>7,38,40,41<br>,43 | 2 | P20766,P36970                                                  |
| 579 | 1,2,3,4,8,3<br>9,43,44  | 5,6,7,36,3<br>7,38,40,41<br>,42 | 5 | P20766,P34901,Q64057,Q64268,Q66H69                             |
| 580 | 1,2,3,4,8,4<br>0,41,42  | 5,6,7,36,3<br>7,38,39,43<br>,44 | 2 | P01836,P36970                                                  |
| 581 | 1,2,3,4,8,4<br>0,41,43  | 5,6,7,36,3<br>7,38,39,42<br>,44 | 3 | P01836,P97840,Q9QX79                                           |
| 582 | 1,2,3,4,8,4<br>0,41,44  | 5,6,7,36,3<br>7,38,39,42<br>,43 | 0 |                                                                |
| 583 | 1,2,3,4,8,4<br>0,42,43  | 5,6,7,36,3<br>7,38,39,41<br>,44 | 4 | P01836,Q5QE79,Q6PCU2,Q9JHB9                                    |
| 584 | 1,2,3,4,8,4<br>0,42,44  | 5,6,7,36,3<br>7,38,39,41<br>,43 | 5 | P20759,P20766,P36374,Q6PCU2,Q9QZ76                             |
| 585 | 1,2,3,4,8,4<br>0,43,44  | 5,6,7,36,3<br>7,38,39,41<br>,42 | 3 | Q5QE79,Q63661,Q66H69                                           |
| 586 | 1,2,3,4,8,4<br>1,42,43  | 5,6,7,36,3<br>7,38,39,40<br>,44 | 9 | O35547,P01836,P54921,P60905,P82471,P83121,Q62894,Q9QUL6,Q9QX79 |
| 587 | 1,2,3,4,8,4<br>1,42,44  | 5,6,7,36,3<br>7,38,39,40<br>,43 | 5 | P08010,P60905,P82471,Q62753,Q9QZK9                             |
| 588 | 1,2,3,4,8,4<br>1,43,44  | 5,6,7,36,3<br>7,38,39,40<br>,42 | 5 | P82471,P83121,Q63661,Q66H69,Q9QX79                             |
| 589 | 1,2,3,4,8,4<br>2,43,44  | 5,6,7,36,3<br>7,38,39,40<br>,41 | 6 | P60905,Q63661,Q64268,Q66H69,Q6PCU2,Q6Q7Y5                      |
| 590 | 1,2,3,4,36,<br>37,38,39 | 5,6,7,8,40,<br>41,42,43,4<br>4  | 3 | P01836,P06760,P34901                                           |

|     |                         |                                |   |                                                         |
|-----|-------------------------|--------------------------------|---|---------------------------------------------------------|
| 591 | 1,2,3,4,36,<br>37,38,40 | 5,6,7,8,39,<br>41,42,43,4<br>4 | 2 | P01836,P12785                                           |
| 592 | 1,2,3,4,36,<br>37,38,41 | 5,6,7,8,39,<br>40,42,43,4<br>4 | 1 | P01836                                                  |
| 593 | 1,2,3,4,36,<br>37,38,42 | 5,6,7,8,39,<br>40,41,43,4<br>4 | 6 | P01836,P10715,P12020,P12785,P19629,Q6AYL6               |
| 594 | 1,2,3,4,36,<br>37,38,43 | 5,6,7,8,39,<br>40,41,42,4<br>4 | 7 | P01836,P06760,P19629,P34901,P80020,Q63661,Q64268        |
| 595 | 1,2,3,4,36,<br>37,38,44 | 5,6,7,8,39,<br>40,41,42,4<br>3 | 4 | P05964,P12785,P34901,P55314                             |
| 596 | 1,2,3,4,36,<br>37,39,40 | 5,6,7,8,38,<br>41,42,43,4<br>4 | 4 | P01836,P50115,P50116,Q8CJD3                             |
| 597 | 1,2,3,4,36,<br>37,39,41 | 5,6,7,8,38,<br>40,42,43,4<br>4 | 2 | P01836,P06760                                           |
| 598 | 1,2,3,4,36,<br>37,39,42 | 5,6,7,8,38,<br>40,41,43,4<br>4 | 5 | O54728,P01836,P06760,P50115,P50116                      |
| 599 | 1,2,3,4,36,<br>37,39,43 | 5,6,7,8,38,<br>40,41,42,4<br>4 | 8 | D3ZUC6,P01836,P06760,P34901,P50115,P50116,Q63661,Q8CIZ5 |
| 600 | 1,2,3,4,36,<br>37,39,44 | 5,6,7,8,38,<br>40,41,42,4<br>3 | 6 | P06760,P34901,P50115,P50116,P55314,Q8CJD3               |
| 601 | 1,2,3,4,36,<br>37,40,41 | 5,6,7,8,38,<br>39,42,43,4<br>4 | 1 | P01836                                                  |
| 602 | 1,2,3,4,36,<br>37,40,42 | 5,6,7,8,38,<br>39,41,43,4<br>4 | 3 | P01836,P50115,P50116                                    |
| 603 | 1,2,3,4,36,<br>37,40,43 | 5,6,7,8,38,<br>39,41,42,4<br>4 | 6 | P01836,P06760,P50115,P50116,Q05695,Q63661               |
| 604 | 1,2,3,4,36,<br>37,40,44 | 5,6,7,8,38,<br>39,41,42,4<br>3 | 5 | P34901,P50115,P50116,P55314,Q8CJD3                      |
| 605 | 1,2,3,4,36,<br>37,41,42 | 5,6,7,8,38,<br>39,40,43,4<br>4 | 1 | P01836                                                  |

|     |                         |                                |    |                                                                       |
|-----|-------------------------|--------------------------------|----|-----------------------------------------------------------------------|
| 606 | 1,2,3,4,36,<br>37,41,43 | 5,6,7,8,38,<br>39,40,42,4<br>4 | 6  | D3ZUC6,P01836,P06760,P83121,Q63661,Q9QUL6                             |
| 607 | 1,2,3,4,36,<br>37,41,44 | 5,6,7,8,38,<br>39,40,42,4<br>3 | 3  | P01836,P05964,P55314                                                  |
| 608 | 1,2,3,4,36,<br>37,42,43 | 5,6,7,8,38,<br>39,40,41,4<br>4 | 10 | P01836,P06760,P06911,P10715,P12020,P19629,P31044,P50115,Q5GRG2,Q63661 |
| 609 | 1,2,3,4,36,<br>37,42,44 | 5,6,7,8,38,<br>39,40,41,4<br>3 | 4  | P34901,P50115,P50116,P55314                                           |
| 610 | 1,2,3,4,36,<br>37,43,44 | 5,6,7,8,38,<br>39,40,41,4<br>2 | 8  | P01836,P05964,P06760,P13432,P34901,P50115,P55314,Q63661               |
| 611 | 1,2,3,4,36,<br>38,39,40 | 5,6,7,8,37,<br>41,42,43,4<br>4 | 2  | P01836,P34901                                                         |
| 612 | 1,2,3,4,36,<br>38,39,41 | 5,6,7,8,37,<br>40,42,43,4<br>4 | 3  | P01836,P06760,P34901                                                  |
| 613 | 1,2,3,4,36,<br>38,39,42 | 5,6,7,8,37,<br>40,41,43,4<br>4 | 5  | O54728,P01836,P12785,P34901,P51907                                    |
| 614 | 1,2,3,4,36,<br>38,39,43 | 5,6,7,8,37,<br>40,41,42,4<br>4 | 5  | P01836,P06760,P34901,Q63661,Q6P6R2                                    |
| 615 | 1,2,3,4,36,<br>38,39,44 | 5,6,7,8,37,<br>40,41,42,4<br>3 | 4  | P34901,P51907,P55314,Q9JJS8                                           |
| 616 | 1,2,3,4,36,<br>38,40,41 | 5,6,7,8,37,<br>39,42,43,4<br>4 | 1  | P01836                                                                |
| 617 | 1,2,3,4,36,<br>38,40,42 | 5,6,7,8,37,<br>39,41,43,4<br>4 | 2  | P01836,P12785                                                         |
| 618 | 1,2,3,4,36,<br>38,40,43 | 5,6,7,8,37,<br>39,41,42,4<br>4 | 3  | P01836,P34901,Q63661                                                  |
| 619 | 1,2,3,4,36,<br>38,40,44 | 5,6,7,8,37,<br>39,41,42,4<br>3 | 5  | P01836,P12785,P34901,P55314,Q63661                                    |
| 620 | 1,2,3,4,36,<br>38,41,42 | 5,6,7,8,37,<br>39,40,43,4<br>4 | 4  | P01836,P08010,Q62902,Q6AYL6                                           |

|     |                         |                                |    |                                                                                            |
|-----|-------------------------|--------------------------------|----|--------------------------------------------------------------------------------------------|
| 621 | 1,2,3,4,36,<br>38,41,43 | 5,6,7,8,37,<br>39,40,42,4<br>4 | 5  | D3ZUC6,P01836,P06760,P34901,Q63661                                                         |
| 622 | 1,2,3,4,36,<br>38,41,44 | 5,6,7,8,37,<br>39,40,42,4<br>3 | 5  | P00774,P01836,P34901,P55314,P98089                                                         |
| 623 | 1,2,3,4,36,<br>38,42,43 | 5,6,7,8,37,<br>39,40,41,4<br>4 | 13 | P01836,P06760,P06866,P06911,P10715,P12020,P12785,P19629,P31044,P34901,Q5GRG2,Q63661,Q6AYL6 |
| 624 | 1,2,3,4,36,<br>38,42,44 | 5,6,7,8,37,<br>39,40,41,4<br>3 | 5  | P01836,P12785,P34901,P51907,P55314                                                         |
| 625 | 1,2,3,4,36,<br>38,43,44 | 5,6,7,8,37,<br>39,40,41,4<br>2 | 6  | P01681,P01836,P06760,P34901,P55314,Q63661                                                  |
| 626 | 1,2,3,4,36,<br>39,40,41 | 5,6,7,8,37,<br>38,42,43,4<br>4 | 1  | P01836                                                                                     |
| 627 | 1,2,3,4,36,<br>39,40,42 | 5,6,7,8,37,<br>38,41,43,4<br>4 | 4  | O54728,P01836,P50115,P50116                                                                |
| 628 | 1,2,3,4,36,<br>39,40,43 | 5,6,7,8,37,<br>38,41,42,4<br>4 | 6  | P01836,P06760,P34901,P50115,P50116,Q63661                                                  |
| 629 | 1,2,3,4,36,<br>39,40,44 | 5,6,7,8,37,<br>38,41,42,4<br>3 | 5  | P34901,P50115,P50116,P55314,Q8CJD3                                                         |
| 630 | 1,2,3,4,36,<br>39,41,42 | 5,6,7,8,37,<br>38,40,43,4<br>4 | 4  | P01836,P06760,P08010,P82471                                                                |
| 631 | 1,2,3,4,36,<br>39,41,43 | 5,6,7,8,37,<br>38,40,42,4<br>4 | 6  | D3ZUC6,P01836,P06760,P34901,P82471,Q63661                                                  |
| 632 | 1,2,3,4,36,<br>39,41,44 | 5,6,7,8,37,<br>38,40,42,4<br>3 | 4  | P01836,P34901,P55314,Q63475                                                                |
| 633 | 1,2,3,4,36,<br>39,42,43 | 5,6,7,8,37,<br>38,40,41,4<br>4 | 5  | O54728,P01836,P06760,P34901,P50115                                                         |
| 634 | 1,2,3,4,36,<br>39,42,44 | 5,6,7,8,37,<br>38,40,41,4<br>3 | 5  | P34901,P50115,P50116,P51907,P55314                                                         |
| 635 | 1,2,3,4,36,<br>39,43,44 | 5,6,7,8,37,<br>38,40,41,4<br>2 | 8  | D3ZUC6,O89117,P01836,P06760,P34901,P50115,P55314,Q63661                                    |



|     |                         |                                |   |                                                         |
|-----|-------------------------|--------------------------------|---|---------------------------------------------------------|
| 636 | 1,2,3,4,36,<br>40,41,42 | 5,6,7,8,37,<br>38,39,43,4<br>4 | 2 | P01836,P23593                                           |
| 637 | 1,2,3,4,36,<br>40,41,43 | 5,6,7,8,37,<br>38,39,42,4<br>4 | 4 | D3ZUC6,P01836,P06760,Q63661                             |
| 638 | 1,2,3,4,36,<br>40,41,44 | 5,6,7,8,37,<br>38,39,42,4<br>3 | 2 | P01836,P55314                                           |
| 639 | 1,2,3,4,36,<br>40,42,43 | 5,6,7,8,37,<br>38,39,41,4<br>4 | 3 | P01836,P50115,Q63661                                    |
| 640 | 1,2,3,4,36,<br>40,42,44 | 5,6,7,8,37,<br>38,39,41,4<br>3 | 6 | P01836,P34901,P50115,P50116,P55314,Q7TPB1               |
| 641 | 1,2,3,4,36,<br>40,43,44 | 5,6,7,8,37,<br>38,39,41,4<br>2 | 7 | P01836,P13432,P19218,P34901,P50115,P55314,Q63661        |
| 642 | 1,2,3,4,36,<br>41,42,43 | 5,6,7,8,37,<br>38,39,40,4<br>4 | 8 | D3ZUC6,P01836,P06760,P60905,P82471,P83121,Q63661,Q9QUL6 |
| 643 | 1,2,3,4,36,<br>41,42,44 | 5,6,7,8,37,<br>38,39,40,4<br>3 | 3 | P01836,P55314,P60905                                    |
| 644 | 1,2,3,4,36,<br>41,43,44 | 5,6,7,8,37,<br>38,39,40,4<br>2 | 7 | D3ZUC6,P01836,P06760,P34901,P55314,P83121,Q63661        |
| 645 | 1,2,3,4,36,<br>42,43,44 | 5,6,7,8,37,<br>38,39,40,4<br>1 | 6 | P01836,P06760,P34901,P50115,P55314,Q63661               |
| 646 | 1,2,3,4,37,<br>38,39,40 | 5,6,7,8,36,<br>41,42,43,4<br>4 | 1 | P01836                                                  |
| 647 | 1,2,3,4,37,<br>38,39,41 | 5,6,7,8,36,<br>40,42,43,4<br>4 | 1 | P01836                                                  |
| 648 | 1,2,3,4,37,<br>38,39,42 | 5,6,7,8,36,<br>40,41,43,4<br>4 | 2 | P01836,P12785                                           |
| 649 | 1,2,3,4,37,<br>38,39,43 | 5,6,7,8,36,<br>40,41,42,4<br>4 | 6 | B0BNN3,P01836,P06760,P14480,P34901,P80020               |
| 650 | 1,2,3,4,37,<br>38,39,44 | 5,6,7,8,36,<br>40,41,42,4<br>3 | 3 | P12785,P34901,Q9JJS8                                    |

|     |                         |                                |    |                                                                       |
|-----|-------------------------|--------------------------------|----|-----------------------------------------------------------------------|
| 651 | 1,2,3,4,37,<br>38,40,41 | 5,6,7,8,36,<br>39,42,43,4<br>4 | 1  | P01836                                                                |
| 652 | 1,2,3,4,37,<br>38,40,42 | 5,6,7,8,36,<br>39,41,43,4<br>4 | 2  | P01836,P12785                                                         |
| 653 | 1,2,3,4,37,<br>38,40,43 | 5,6,7,8,36,<br>39,41,42,4<br>4 | 3  | P01836,P80020,Q63661                                                  |
| 654 | 1,2,3,4,37,<br>38,40,44 | 5,6,7,8,36,<br>39,41,42,4<br>3 | 2  | P12785,P34901                                                         |
| 655 | 1,2,3,4,37,<br>38,41,42 | 5,6,7,8,36,<br>39,40,43,4<br>4 | 2  | P01836,P12785                                                         |
| 656 | 1,2,3,4,37,<br>38,41,43 | 5,6,7,8,36,<br>39,40,42,4<br>4 | 4  | B0BNN3,P01836,P80020,Q7TPB1                                           |
| 657 | 1,2,3,4,37,<br>38,41,44 | 5,6,7,8,36,<br>39,40,42,4<br>3 | 4  | P00774,P05964,P12785,P98089                                           |
| 658 | 1,2,3,4,37,<br>38,42,43 | 5,6,7,8,36,<br>39,40,41,4<br>4 | 10 | B0BNN3,P01836,P06866,P06911,P10715,P12020,P12785,P19629,P80020,Q6P6T1 |
| 659 | 1,2,3,4,37,<br>38,42,44 | 5,6,7,8,36,<br>39,40,41,4<br>3 | 2  | P12785,P34901                                                         |
| 660 | 1,2,3,4,37,<br>38,43,44 | 5,6,7,8,36,<br>39,40,41,4<br>2 | 5  | P05964,P12785,P34901,P80020,Q63661                                    |
| 661 | 1,2,3,4,37,<br>39,40,41 | 5,6,7,8,36,<br>38,42,43,4<br>4 | 1  | P01836                                                                |
| 662 | 1,2,3,4,37,<br>39,40,42 | 5,6,7,8,36,<br>38,41,43,4<br>4 | 4  | P01836,P50115,P50116,Q05695                                           |
| 663 | 1,2,3,4,37,<br>39,40,43 | 5,6,7,8,36,<br>38,41,42,4<br>4 | 5  | P01836,P50115,P50116,Q05695,Q8CIZ5                                    |
| 664 | 1,2,3,4,37,<br>39,40,44 | 5,6,7,8,36,<br>38,41,42,4<br>3 | 3  | P50115,P50116,Q8CJD3                                                  |
| 665 | 1,2,3,4,37,<br>39,41,42 | 5,6,7,8,36,<br>38,40,43,4<br>4 | 1  | P01836                                                                |

|     |                         |                                |   |                                                  |
|-----|-------------------------|--------------------------------|---|--------------------------------------------------|
| 666 | 1,2,3,4,37,<br>39,41,43 | 5,6,7,8,36,<br>38,40,42,4<br>4 | 2 | P01836,P06760                                    |
| 667 | 1,2,3,4,37,<br>39,41,44 | 5,6,7,8,36,<br>38,40,42,4<br>3 | 0 |                                                  |
| 668 | 1,2,3,4,37,<br>39,42,43 | 5,6,7,8,36,<br>38,40,41,4<br>4 | 4 | P01836,P06760,P50115,P50116                      |
| 669 | 1,2,3,4,37,<br>39,42,44 | 5,6,7,8,36,<br>38,40,41,4<br>3 | 2 | P50115,P50116                                    |
| 670 | 1,2,3,4,37,<br>39,43,44 | 5,6,7,8,36,<br>38,40,41,4<br>2 | 7 | P06760,P34901,P50115,P50116,Q63661,Q64057,Q9JJS8 |
| 671 | 1,2,3,4,37,<br>40,41,42 | 5,6,7,8,36,<br>38,39,43,4<br>4 | 1 | P01836                                           |
| 672 | 1,2,3,4,37,<br>40,41,43 | 5,6,7,8,36,<br>38,39,42,4<br>4 | 1 | P01836                                           |
| 673 | 1,2,3,4,37,<br>40,41,44 | 5,6,7,8,36,<br>38,39,42,4<br>3 | 1 | P19218                                           |
| 674 | 1,2,3,4,37,<br>40,42,43 | 5,6,7,8,36,<br>38,39,41,4<br>4 | 4 | P01836,P50115,P50116,Q05695                      |
| 675 | 1,2,3,4,37,<br>40,42,44 | 5,6,7,8,36,<br>38,39,41,4<br>3 | 2 | P50115,P50116                                    |
| 676 | 1,2,3,4,37,<br>40,43,44 | 5,6,7,8,36,<br>38,39,41,4<br>2 | 4 | P19218,P34901,P50116,Q63661                      |
| 677 | 1,2,3,4,37,<br>41,42,43 | 5,6,7,8,36,<br>38,39,40,4<br>4 | 2 | P01836,Q9QUL6                                    |
| 678 | 1,2,3,4,37,<br>41,42,44 | 5,6,7,8,36,<br>38,39,40,4<br>3 | 0 |                                                  |
| 679 | 1,2,3,4,37,<br>41,43,44 | 5,6,7,8,36,<br>38,39,40,4<br>2 | 4 | P01836,P05964,P83121,Q63661                      |
| 680 | 1,2,3,4,37,<br>42,43,44 | 5,6,7,8,36,<br>38,39,40,4<br>1 | 3 | P34901,P50115,Q63661                             |

|     |                         |                                |   |                                    |
|-----|-------------------------|--------------------------------|---|------------------------------------|
| 681 | 1,2,3,4,38,<br>39,40,41 | 5,6,7,8,36,<br>37,42,43,4<br>4 | 1 | P01836                             |
| 682 | 1,2,3,4,38,<br>39,40,42 | 5,6,7,8,36,<br>37,41,43,4<br>4 | 1 | P01836                             |
| 683 | 1,2,3,4,38,<br>39,40,43 | 5,6,7,8,36,<br>37,41,42,4<br>4 | 3 | B0BNN3,P01836,P34901               |
| 684 | 1,2,3,4,38,<br>39,40,44 | 5,6,7,8,36,<br>37,41,42,4<br>3 | 1 | P34901                             |
| 685 | 1,2,3,4,38,<br>39,41,42 | 5,6,7,8,36,<br>37,40,43,4<br>4 | 3 | P01836,P08010,P82471               |
| 686 | 1,2,3,4,38,<br>39,41,43 | 5,6,7,8,36,<br>37,40,42,4<br>4 | 5 | B0BNN3,P01836,P06760,P34901,P82471 |
| 687 | 1,2,3,4,38,<br>39,41,44 | 5,6,7,8,36,<br>37,40,42,4<br>3 | 3 | P00774,P34901,P98089               |
| 688 | 1,2,3,4,38,<br>39,42,43 | 5,6,7,8,36,<br>37,40,41,4<br>4 | 5 | B0BNN3,P01836,P06866,P34901,Q80WL1 |
| 689 | 1,2,3,4,38,<br>39,42,44 | 5,6,7,8,36,<br>37,40,41,4<br>3 | 3 | P12785,P34901,P51907               |
| 690 | 1,2,3,4,38,<br>39,43,44 | 5,6,7,8,36,<br>37,40,41,4<br>2 | 5 | B0BNN3,P01946,P34901,Q63661,Q9JJS8 |
| 691 | 1,2,3,4,38,<br>40,41,42 | 5,6,7,8,36,<br>37,39,43,4<br>4 | 1 | P01836                             |
| 692 | 1,2,3,4,38,<br>40,41,43 | 5,6,7,8,36,<br>37,39,42,4<br>4 | 3 | B0BNN3,P01836,Q63661               |
| 693 | 1,2,3,4,38,<br>40,41,44 | 5,6,7,8,36,<br>37,39,42,4<br>3 | 3 | P00774,P01836,P98089               |
| 694 | 1,2,3,4,38,<br>40,42,43 | 5,6,7,8,36,<br>37,39,41,4<br>4 | 5 | B0BNN3,P01836,P12785,Q99041,Q9JHB9 |
| 695 | 1,2,3,4,38,<br>40,42,44 | 5,6,7,8,36,<br>37,39,41,4<br>3 | 4 | P12785,P34901,Q6TMA8,Q99041        |

|     |                         |                                |   |                                                         |
|-----|-------------------------|--------------------------------|---|---------------------------------------------------------|
| 696 | 1,2,3,4,38,<br>40,43,44 | 5,6,7,8,36,<br>37,39,41,4<br>2 | 5 | P01681,P01836,P34901,Q63661,Q99041                      |
| 697 | 1,2,3,4,38,<br>41,42,43 | 5,6,7,8,36,<br>37,39,40,4<br>4 | 8 | B0BNN3,O35547,P01836,P06866,P27213,P54921,P82471,Q8CJD3 |
| 698 | 1,2,3,4,38,<br>41,42,44 | 5,6,7,8,36,<br>37,39,40,4<br>3 | 6 | P00774,P01836,P12785,P55091,P98089,Q8CIZ5               |
| 699 | 1,2,3,4,38,<br>41,43,44 | 5,6,7,8,36,<br>37,39,40,4<br>2 | 7 | B0BNN3,P00774,P01836,P34901,P55091,P98089,Q63661        |
| 700 | 1,2,3,4,38,<br>42,43,44 | 5,6,7,8,36,<br>37,39,40,4<br>1 | 6 | B0BNN3,P01836,P12785,P34901,Q63661,Q99041               |
| 701 | 1,2,3,4,39,<br>40,41,42 | 5,6,7,8,36,<br>37,38,43,4<br>4 | 1 | P01836                                                  |
| 702 | 1,2,3,4,39,<br>40,41,43 | 5,6,7,8,36,<br>37,38,42,4<br>4 | 1 | P01836                                                  |
| 703 | 1,2,3,4,39,<br>40,41,44 | 5,6,7,8,36,<br>37,38,42,4<br>3 | 4 | P10715,P19629,Q5GRG2,Q6AYL6                             |
| 704 | 1,2,3,4,39,<br>40,42,43 | 5,6,7,8,36,<br>37,38,41,4<br>4 | 3 | P01836,P50115,P50116                                    |
| 705 | 1,2,3,4,39,<br>40,42,44 | 5,6,7,8,36,<br>37,38,41,4<br>3 | 2 | P50115,P50116                                           |
| 706 | 1,2,3,4,39,<br>40,43,44 | 5,6,7,8,36,<br>37,38,41,4<br>2 | 5 | P34901,P50115,P50116,Q63661,Q6AYL6                      |
| 707 | 1,2,3,4,39,<br>41,42,43 | 5,6,7,8,36,<br>37,38,40,4<br>4 | 3 | P01836,P06760,P82471                                    |
| 708 | 1,2,3,4,39,<br>41,42,44 | 5,6,7,8,36,<br>37,38,40,4<br>3 | 1 | P82471                                                  |
| 709 | 1,2,3,4,39,<br>41,43,44 | 5,6,7,8,36,<br>37,38,40,4<br>2 | 4 | P01836,P34901,P82471,Q63661                             |
| 710 | 1,2,3,4,39,<br>42,43,44 | 5,6,7,8,36,<br>37,38,40,4<br>1 | 3 | P34901,P50115,P82471                                    |

|     |                         |                                   |    |                                                                                                                                                                                                                                                                                                              |
|-----|-------------------------|-----------------------------------|----|--------------------------------------------------------------------------------------------------------------------------------------------------------------------------------------------------------------------------------------------------------------------------------------------------------------|
| 711 | 1,2,3,4,40,<br>41,42,43 | 5,6,7,8,36,<br>37,38,39,4<br>4    | 2  | P01836,Q6PCU2                                                                                                                                                                                                                                                                                                |
| 712 | 1,2,3,4,40,<br>41,42,44 | 5,6,7,8,36,<br>37,38,39,4<br>3    | 1  | Q6PCU2                                                                                                                                                                                                                                                                                                       |
| 713 | 1,2,3,4,40,<br>41,43,44 | 5,6,7,8,36,<br>37,38,39,4<br>2    | 3  | P01836,P19218,Q63661                                                                                                                                                                                                                                                                                         |
| 714 | 1,2,3,4,40,<br>42,43,44 | 5,6,7,8,36,<br>37,38,39,4<br>1    | 5  | P01836,P34901,Q63661,Q6PCU2,Q99041                                                                                                                                                                                                                                                                           |
| 715 | 1,2,3,4,41,<br>42,43,44 | 5,6,7,8,36,<br>37,38,39,4<br>0    | 4  | P01836,P82471,Q63661,Q6PCU2                                                                                                                                                                                                                                                                                  |
| 716 | 1,2,3,5,6,7<br>,8,36    | 4,37,38,39<br>,40,41,42,<br>43,44 | 35 | B0BNN3,D3ZUK3,O54858,P00762,P01015,P02631,P04905,P07171,P07897,P08010,P08753,P10960,P11030,P19218,P27213,P36374,P52590,P53792,P55314,P60905,P80202,P85971,P97605,Q01205,Q07116,Q09030,Q63357,Q63467,Q63532,Q63942,Q6IE51,Q812E4,Q8N7M5,Q9QZQ5,Q9Z1F2                                                         |
| 717 | 1,2,3,5,6,7<br>,8,37    | 4,36,38,39<br>,40,41,42,<br>43,44 | 21 | B0BNN3,P02631,P08753,P11762,P27213,P36374,P52590,P53792,P85971,P97605,Q01205,Q09030,Q30KJ2,Q63467,Q63532,Q63942,Q6IE51,Q7TPB1,Q91ZS3,Q9QZQ5,Q9Z1F2                                                                                                                                                           |
| 718 | 1,2,3,5,6,7<br>,8,38    | 4,36,37,39<br>,40,41,42,<br>43,44 | 26 | O35547,P01946,P02631,P08010,P08753,P19218,P25031,P27213,P36374,P50116,P52590,P53792,P60905,P85971,P97580,P97605,Q01205,Q09030,Q30KJ2,Q561R9,Q5M871,Q63467,Q63532,Q63942,Q6IE51,Q7TPB1                                                                                                                        |
| 719 | 1,2,3,5,6,7<br>,8,39    | 4,36,37,38<br>,40,41,42,<br>43,44 | 23 | O88267,P01946,P02631,P08010,P08753,P19218,P27213,P36374,P52590,P53792,P80201,P80202,P85971,P97605,Q01205,Q09030,Q30KJ2,Q63467,Q63532,Q63942,Q6IE51,Q8N7M5,Q9Z1F2                                                                                                                                             |
| 720 | 1,2,3,5,6,7<br>,8,40    | 4,36,37,38<br>,39,41,42,<br>43,44 | 18 | B0BNN3,P01015,P02631,P08753,P27213,P36374,P52590,P53792,P85971,P97605,Q01205,Q09030,Q63467,Q63532,Q6IE51,Q9JJS8,Q9QZ76,Q9Z1F2                                                                                                                                                                                |
| 721 | 1,2,3,5,6,7<br>,8,41    | 4,36,37,38<br>,39,40,42,<br>43,44 | 30 | B0BNN3,O35547,O88267,P01015,P02631,P05371,P08010,P08753,P36374,P50116,P52590,P60905,P80201,P80202,P85971,P97605,Q01205,Q09030,Q5M871,Q62753,Q63357,Q63467,Q63532,Q6IE51,Q7TPB1,Q812E4,Q8N7M5,Q91ZS3,Q9JID2,Q9Z1F2                                                                                            |
| 722 | 1,2,3,5,6,7<br>,8,42    | 4,36,37,38<br>,39,40,41,<br>43,44 | 43 | O08815,O35547,P00762,P02631,P02780,P02781,P04905,P08010,P08290,P08723,P08753,P0C0A9,P16086,P17046,P19218,P20759,P27213,P36374,P47727,P52590,P53792,P54921,P60905,P80201,P85971,P97605,Q01205,Q09030,Q62753,Q63357,Q63467,Q63532,Q63942,Q6AYR9,Q6IE51,Q6Q7Y5,Q812E4,Q8CFN2,Q8N7M5,Q9JID2,Q9QZ76,Q9QZK9,Q9QZQ5 |
| 723 | 1,2,3,5,6,7<br>,8,43    | 4,36,37,38<br>,39,40,41,<br>42,44 | 30 | P01681,P01946,P02091,P02631,P08753,P10758,P11883,P16636,P20762,P36374,P52590,P53792,P60905,P83748,P85971,P97605,Q01205,Q09030,Q30KJ2,Q5M871,Q62975,Q63467,Q63532,Q63942,Q66H69,Q6IE51,Q7TPB1,Q8N7M5,Q9QX79,Q9Z1F2                                                                                            |
| 724 | 1,2,3,5,6,7<br>,8,44    | 4,36,37,38<br>,39,40,41,<br>42,43 | 22 | B0BNN3,P01015,P01946,P02631,P07171,P08010,P08753,P27213,P36374,P52590,P53792,P60905,P85971,P97605,Q01205,Q09030,Q5M871,Q63467,Q63532,Q6IE51,Q9JID2,Q9Z1F2                                                                                                                                                    |
| 725 | 1,2,3,5,6,7<br>,36,37   | 4,8,38,39,<br>40,41,42,4<br>3,44  | 17 | B0BNN3,P00714,P00762,P02631,P11030,P11762,P27213,P52590,P53792,P55314,P85971,Q09030,Q561R9,Q63467,Q63532,Q6IE51,Q91ZS3                                                                                                                                                                                       |

|     |                       |                                  |    |                                                                                                                                                                                                                                        |
|-----|-----------------------|----------------------------------|----|----------------------------------------------------------------------------------------------------------------------------------------------------------------------------------------------------------------------------------------|
| 726 | 1,2,3,5,6,7<br>,36,38 | 4,8,37,39,<br>40,41,42,4<br>3,44 | 19 | P01946,P02631,P08010,P08753,P13596,P19218,P25031,P34901,P52590,P53792,P55314,P85971,P97580,Q09030,Q30KJ2,Q561R9,Q63467,Q63532,Q6IE51                                                                                                   |
| 727 | 1,2,3,5,6,7<br>,36,39 | 4,8,37,38,<br>40,41,42,4<br>3,44 | 16 | B0BNN3,O54728,P00714,P01946,P08010,P19218,P27213,P52590,P55314,P80202,P85971,Q09030,Q63467,Q63532,Q6IE51,Q8N7M5                                                                                                                        |
| 728 | 1,2,3,5,6,7<br>,36,40 | 4,8,37,38,<br>39,41,42,4<br>3,44 | 14 | B0BNN3,P00762,P13596,P27213,P36374,P52590,P53792,P55314,P85971,Q09030,Q63467,Q63532,Q6IE51,Q6IRE4                                                                                                                                      |
| 729 | 1,2,3,5,6,7<br>,36,41 | 4,8,37,38,<br>39,40,42,4<br>3,44 | 27 | B0BNN3,G3V686,P00714,P01015,P01946,P02631,P08010,P08649,P08753,P11030,P13596,P23785,P52590,P55314,P60905,P80201,P80202,P85971,P97605,Q01205,Q09030,Q63467,Q63532,Q6IE51,Q6IRE4,Q8N7M5,Q91ZS3                                           |
| 730 | 1,2,3,5,6,7<br>,36,42 | 4,8,37,38,<br>39,40,41,4<br>3,44 | 33 | B0BNN3,G3V686,P00762,P02781,P04905,P08010,P08290,P08644,P08649,P08753,P0C0A9,P13596,P16086,P17046,P19218,P22283,P36374,P47727,P52590,P53792,P55314,P60905,P85971,P97554,P97605,Q09030,Q63357,Q63467,Q63532,Q6AYR9,Q6IE51,Q812E4,Q8CJ52 |
| 731 | 1,2,3,5,6,7<br>,36,43 | 4,8,37,38,<br>39,40,41,4<br>2,44 | 22 | P00714,P01681,P01946,P02091,P02631,P06760,P16636,P34901,P52590,P53792,P55314,P83748,P85971,Q09030,Q561R9,Q63467,Q63532,Q63661,Q63942,Q6IE51,Q8CHN8,Q8N7M5                                                                              |
| 732 | 1,2,3,5,6,7<br>,36,44 | 4,8,37,38,<br>39,40,41,4<br>2,43 | 18 | B0BNN3,G3V686,P00762,P01015,P01946,P02631,P27213,P34901,P36374,P52590,P53792,P55314,P60905,P85971,Q09030,Q63467,Q63532,Q6IE51                                                                                                          |
| 733 | 1,2,3,5,6,7<br>,37,38 | 4,8,36,39,<br>40,41,42,4<br>3,44 | 16 | P01946,P02631,P11762,P15399,P19218,P25031,P52590,P53792,P97580,P97840,Q09030,Q30KJ2,Q561R9,Q6IE51,Q7TPB1,Q91ZS3                                                                                                                        |
| 734 | 1,2,3,5,6,7<br>,37,39 | 4,8,36,38,<br>40,41,42,4<br>3,44 | 9  | P00714,P01946,P02631,P19218,P27213,P52590,Q30KJ2,Q6IE51,Q91ZS3                                                                                                                                                                         |
| 735 | 1,2,3,5,6,7<br>,37,40 | 4,8,36,38,<br>39,41,42,4<br>3,44 | 11 | B0BNN3,P02631,P11762,P27213,P52590,P53792,Q09030,Q6IE51,Q6IRE4,Q91ZS3,Q9QUL6                                                                                                                                                           |
| 736 | 1,2,3,5,6,7<br>,37,41 | 4,8,36,38,<br>39,40,42,4<br>3,44 | 16 | B0BNN3,P00714,P02631,P11762,P52590,P80201,P85971,P97605,Q09030,Q63467,Q63532,Q6IE51,Q6IRE4,Q7TPB1,Q91ZS3,Q9Z1F2                                                                                                                        |
| 737 | 1,2,3,5,6,7<br>,37,42 | 4,8,36,38,<br>39,40,41,4<br>3,44 | 12 | P02631,P08290,P08753,P16086,P17046,P36374,P52590,P53792,P85971,Q09030,Q6IE51,Q91ZS3                                                                                                                                                    |
| 738 | 1,2,3,5,6,7<br>,37,43 | 4,8,36,38,<br>39,40,41,4<br>2,44 | 17 | P00714,P01946,P02091,P02631,P10758,P11762,P52590,P83748,P85971,Q09030,Q30KJ2,Q561R9,Q63532,Q63942,Q6IE51,Q7TPB1,Q91ZS3                                                                                                                 |
| 739 | 1,2,3,5,6,7<br>,37,44 | 4,8,36,38,<br>39,40,41,4<br>2,43 | 13 | B0BNN3,P01946,P02631,P10758,P27213,P52590,P53792,P85971,Q09030,Q63467,Q6IE51,Q91ZS3,Q9QUL6                                                                                                                                             |
| 740 | 1,2,3,5,6,7<br>,38,39 | 4,8,36,37,<br>40,41,42,4<br>3,44 | 15 | O88267,P00714,P01946,P08010,P19218,P25031,P27213,P52590,P97580,Q30KJ2,Q561R9,Q63467,Q63532,Q6IE51,Q9QUL6                                                                                                                               |

|     |                       |                                  |    |                                                                                                                                                                                                                          |
|-----|-----------------------|----------------------------------|----|--------------------------------------------------------------------------------------------------------------------------------------------------------------------------------------------------------------------------|
| 741 | 1,2,3,5,6,7<br>,38,40 | 4,8,36,37,<br>39,41,42,4<br>3,44 | 12 | P15399,P25031,P36374,P52590,P53792,P97580,Q09030,Q30KJ2,Q561R9,Q6IE51,Q6IRE4,Q9QUL6                                                                                                                                      |
| 742 | 1,2,3,5,6,7<br>,38,41 | 4,8,36,37,<br>39,40,42,4<br>3,44 | 23 | O35547,P00714,P01946,P02631,P08010,P08753,P23785,P25031,P50116,P52590,P80201,P85971,P97580,P97605,Q09030,Q30KJ2,Q561R9,Q63467,Q63532,Q6IE51,Q6IRE4,Q7TPB1,Q91ZS3                                                         |
| 743 | 1,2,3,5,6,7<br>,38,42 | 4,8,36,37,<br>39,40,41,4<br>3,44 | 28 | O35547,P02780,P02781,P04905,P08010,P08290,P08723,P08753,P0C0A9,P16086,P17046,P19218,P25031,P36374,P47727,P52590,P53792,P60905,P85971,P97580,Q09030,Q30KJ2,Q62902,Q63357,Q6AYR8,Q6IE51,Q8CJ52,Q9QZK9                      |
| 744 | 1,2,3,5,6,7<br>,38,43 | 4,8,36,37,<br>39,40,41,4<br>2,44 | 18 | P00714,P01681,P01946,P02091,P02631,P25031,P34901,P52590,P83748,P85971,P97580,Q30KJ2,Q561R9,Q63467,Q63532,Q63942,Q6IE51,Q7TPB1                                                                                            |
| 745 | 1,2,3,5,6,7<br>,38,44 | 4,8,36,37,<br>39,40,41,4<br>2,43 | 15 | P01946,P02631,P15399,P25031,P34901,P36374,P52590,P53792,P85971,P97580,Q30KJ2,Q561R9,Q63467,Q6IE51,Q9QUL6                                                                                                                 |
| 746 | 1,2,3,5,6,7<br>,39,40 | 4,8,36,37,<br>38,41,42,4<br>3,44 | 8  | P00714,P01946,P27213,P36376,P52590,Q6IE51,Q6IRE4,Q9QUL6                                                                                                                                                                  |
| 747 | 1,2,3,5,6,7<br>,39,41 | 4,8,36,37,<br>38,40,42,4<br>3,44 | 15 | O88267,P00714,P01946,P08010,P08753,P23785,P27213,P52590,P80201,P85971,P97605,Q63467,Q63532,Q6IE51,Q6IRE4                                                                                                                 |
| 748 | 1,2,3,5,6,7<br>,39,42 | 4,8,36,37,<br>38,40,41,4<br>3,44 | 22 | P01946,P02780,P02781,P04905,P08010,P08290,P08753,P0C0A9,P16086,P17046,P19218,P27213,P36374,P47727,P52590,P60905,P80201,P85971,P97605,Q09030,Q6AYR9,Q6IE51                                                                |
| 749 | 1,2,3,5,6,7<br>,39,43 | 4,8,36,37,<br>38,40,41,4<br>2,44 | 13 | O88267,P00714,P01946,P02091,P02631,P11883,P52590,P83748,P85971,Q63467,Q63532,Q63942,Q6IE51                                                                                                                               |
| 750 | 1,2,3,5,6,7<br>,39,44 | 4,8,36,37,<br>38,40,41,4<br>2,43 | 9  | O88267,P01946,P27213,P52590,P85971,P97605,Q63467,Q6IE51,Q9QUL6                                                                                                                                                           |
| 751 | 1,2,3,5,6,7<br>,40,41 | 4,8,36,37,<br>38,39,42,4<br>3,44 | 13 | P00714,P05371,P12020,P36376,P52590,P80201,P97605,Q09030,Q63467,Q6IE51,Q6IRE4,Q9JJS8,Q9Z1F2                                                                                                                               |
| 752 | 1,2,3,5,6,7<br>,40,42 | 4,8,36,37,<br>38,39,41,4<br>3,44 | 20 | P02780,P02781,P02782,P08290,P08753,P13596,P16086,P17046,P27213,P36374,P52590,P53792,P60905,Q09030,Q6AYR9,Q6IE51,Q6IRE4,Q9JJS8,Q9QUL6,Q9QZ76                                                                              |
| 753 | 1,2,3,5,6,7<br>,40,43 | 4,8,36,37,<br>38,39,41,4<br>2,44 | 13 | P01681,P01946,P02091,P02631,P10758,P11883,P36376,P52590,P83748,P85971,Q09030,Q63532,Q6IE51                                                                                                                               |
| 754 | 1,2,3,5,6,7<br>,40,44 | 4,8,36,37,<br>38,39,41,4<br>2,43 | 13 | B0BNN3,P17046,P27213,P36374,P36376,P52590,P53792,Q09030,Q63467,Q6IE51,Q6IRE4,Q6P6T1,Q9QUL6                                                                                                                               |
| 755 | 1,2,3,5,6,7<br>,41,42 | 4,8,36,37,<br>38,39,40,4<br>3,44 | 31 | G3V686,O08815,O35547,P02781,P04905,P08010,P08290,P08753,P0C0A9,P13596,P16086,P17046,P36374,P52590,P54921,P60905,P80201,P82471,P85971,P97605,Q09030,Q62753,Q63357,Q63467,Q63532,Q6AYR9,Q6IE51,Q6IRE4,Q812E4,Q8CJ52,Q9JID2 |



|     |                       |                                  |    |                                                                                                                                                                                                                                                                           |
|-----|-----------------------|----------------------------------|----|---------------------------------------------------------------------------------------------------------------------------------------------------------------------------------------------------------------------------------------------------------------------------|
| 756 | 1,2,3,5,6,7<br>,41,43 | 4,8,36,37,<br>38,39,40,4<br>2,44 | 21 | P00714,P01946,P02091,P02631,P10758,P11883,P16636,P25031,P52590,P54921,P60905,P80201,P82471,P83748,P85971,P97605,Q09030,Q63467,Q63532,Q6IE51,Q7TPB1                                                                                                                        |
| 757 | 1,2,3,5,6,7<br>,41,44 | 4,8,36,37,<br>38,39,40,4<br>2,43 | 17 | O88267,P01015,P01946,P02631,P05371,P08010,P08753,P52590,P60905,P80201,P85971,P97605,Q09030,Q63467,Q63532,Q6IE51,Q9JID2                                                                                                                                                    |
| 758 | 1,2,3,5,6,7<br>,42,43 | 4,8,36,37,<br>38,39,40,4<br>1,44 | 38 | O35547,O35783,P01946,P02091,P02631,P02780,P02781,P04905,P08290,P08723,P08753,P0C0A9,P10758,P11883,P16086,P16636,P17046,P24368,P25031,P35434,P36374,P47727,P52590,P54921,P60905,P82471,P83748,P85971,Q09030,Q62975,Q63357,Q63532,Q63942,Q6AYR8,Q6AYR9,Q6IE51,Q6Q7Y5,Q9JHB9 |
| 759 | 1,2,3,5,6,7<br>,42,44 | 4,8,36,37,<br>38,39,40,4<br>1,43 | 21 | P02781,P04905,P08010,P08290,P08723,P08753,P0C0A9,P16086,P17046,P36374,P52590,P53792,P60905,P85971,P97605,Q09030,Q63467,Q6AYR8,Q6IE51,Q8CJ52,Q9JID2                                                                                                                        |
| 760 | 1,2,3,5,6,7<br>,43,44 | 4,8,36,37,<br>38,39,40,4<br>1,42 | 15 | O35783,P01681,P01946,P02091,P02631,P10758,P11883,P34901,P52590,P83748,P85971,Q63467,Q63532,Q63661,Q6IE51                                                                                                                                                                  |
| 761 | 1,2,3,5,6,8<br>,36,37 | 4,7,38,39,<br>40,41,42,4<br>3,44 | 10 | B0BNN3,P11030,P27213,P53792,P55314,P83121,Q01205,Q63942,Q91ZS3,Q9Z1F2                                                                                                                                                                                                     |
| 762 | 1,2,3,5,6,8<br>,36,38 | 4,7,37,39,<br>40,41,42,4<br>3,44 | 9  | P08753,P19218,P22006,P53792,P55314,Q01205,Q561R9,Q63942,Q6AYL6                                                                                                                                                                                                            |
| 763 | 1,2,3,5,6,8<br>,36,39 | 4,7,37,38,<br>40,41,42,4<br>3,44 | 7  | P00714,P08010,P08753,P27213,P55314,Q63942,Q9Z1F2                                                                                                                                                                                                                          |
| 764 | 1,2,3,5,6,8<br>,36,40 | 4,7,37,38,<br>39,41,42,4<br>3,44 | 9  | B0BNN3,P22006,P23593,P27213,P36374,P53792,P55314,Q63942,Q9Z1F2                                                                                                                                                                                                            |
| 765 | 1,2,3,5,6,8<br>,36,41 | 4,7,37,38,<br>39,40,42,4<br>3,44 | 10 | P00714,P08010,P08753,P11030,P55314,P60905,P83121,Q01205,Q63942,Q9Z1F2                                                                                                                                                                                                     |
| 766 | 1,2,3,5,6,8<br>,36,42 | 4,7,37,38,<br>39,40,41,4<br>3,44 | 18 | P02781,P04905,P08010,P08290,P08753,P09456,P19629,P22283,P36374,P53792,P55314,P60905,P97554,Q63357,Q63942,Q6AYL6,Q6AYR9,Q812E4                                                                                                                                             |
| 767 | 1,2,3,5,6,8<br>,36,43 | 4,7,37,38,<br>39,40,41,4<br>2,44 | 9  | P00714,P01681,P08753,P19629,P55314,P83121,Q63942,Q66H69,Q9Z1F2                                                                                                                                                                                                            |
| 768 | 1,2,3,5,6,8<br>,36,44 | 4,7,37,38,<br>39,40,41,4<br>2,43 | 11 | B0BNN3,P01015,P08753,P22006,P36374,P53792,P55314,P83121,Q01205,Q63942,Q9Z1F2                                                                                                                                                                                              |
| 769 | 1,2,3,5,6,8<br>,37,38 | 4,7,36,39,<br>40,41,42,4<br>3,44 | 6  | P22006,P53792,Q561R9,Q63942,Q7TPB1,Q91ZS3                                                                                                                                                                                                                                 |
| 770 | 1,2,3,5,6,8<br>,37,39 | 4,7,36,38,<br>40,41,42,4<br>3,44 | 5  | P00714,P27213,Q63942,Q91ZS3,Q9Z1F2                                                                                                                                                                                                                                        |

|     |                       |                                  |    |                                                                                                                 |
|-----|-----------------------|----------------------------------|----|-----------------------------------------------------------------------------------------------------------------|
| 771 | 1,2,3,5,6,8<br>,37,40 | 4,7,36,38,<br>39,41,42,4<br>3,44 | 5  | P22006,P27213,P51907,P53792,Q9Z1F2                                                                              |
| 772 | 1,2,3,5,6,8<br>,37,41 | 4,7,36,38,<br>39,40,42,4<br>3,44 | 7  | P00714,P08753,P51907,P83121,Q7TPB1,Q91ZS3,Q9Z1F2                                                                |
| 773 | 1,2,3,5,6,8<br>,37,42 | 4,7,36,38,<br>39,40,41,4<br>3,44 | 7  | P08753,P19629,P22006,P36374,P53792,Q63942,Q91ZS3                                                                |
| 774 | 1,2,3,5,6,8<br>,37,43 | 4,7,36,38,<br>39,40,41,4<br>2,44 | 10 | P00714,P01681,P10758,P51907,P83121,Q63942,Q66H69,Q7TPB1,Q9QX79,Q9Z1F2                                           |
| 775 | 1,2,3,5,6,8<br>,37,44 | 4,7,36,38,<br>39,40,41,4<br>2,43 | 4  | P22006,P53792,Q63942,Q9Z1F2                                                                                     |
| 776 | 1,2,3,5,6,8<br>,38,39 | 4,7,36,37,<br>40,41,42,4<br>3,44 | 6  | P00714,P08753,P19218,P27213,Q561R9,Q63942                                                                       |
| 777 | 1,2,3,5,6,8<br>,38,40 | 4,7,36,37,<br>39,41,42,4<br>3,44 | 5  | P22006,P36374,P53792,Q561R9,Q63942                                                                              |
| 778 | 1,2,3,5,6,8<br>,38,41 | 4,7,36,37,<br>39,40,42,4<br>3,44 | 8  | P00714,P08010,P08753,P50115,P50116,Q561R9,Q63942,Q7TPB1                                                         |
| 779 | 1,2,3,5,6,8<br>,38,42 | 4,7,36,37,<br>39,40,41,4<br>3,44 | 16 | O35547,P02781,P04905,P08010,P08290,P08753,P19218,P22006,P36374,P47727,P60905,Q62902,Q63357,Q63942,Q6AYL6,Q9QZK9 |
| 780 | 1,2,3,5,6,8<br>,38,43 | 4,7,36,37,<br>39,40,41,4<br>2,44 | 7  | P01681,P08753,P11883,Q561R9,Q63942,Q66H69,Q7TPB1                                                                |
| 781 | 1,2,3,5,6,8<br>,38,44 | 4,7,36,37,<br>39,40,41,4<br>2,43 | 6  | P08753,P22006,P36374,P53792,Q561R9,Q63942                                                                       |
| 782 | 1,2,3,5,6,8<br>,39,40 | 4,7,36,37,<br>38,41,42,4<br>3,44 | 4  | P27213,Q63942,Q9QUL6,Q9Z1F2                                                                                     |
| 783 | 1,2,3,5,6,8<br>,39,41 | 4,7,36,37,<br>38,40,42,4<br>3,44 | 7  | P00714,P08010,P08753,P27213,P97605,Q63942,Q9Z1F2                                                                |
| 784 | 1,2,3,5,6,8<br>,39,42 | 4,7,36,37,<br>38,40,41,4<br>3,44 | 9  | P02780,P04905,P08010,P08753,P09456,P27213,P36374,Q63942,Q6AYR9                                                  |
| 785 | 1,2,3,5,6,8<br>,39,43 | 4,7,36,37,<br>38,40,41,4<br>2,44 | 6  | P00714,P01681,P11883,Q63942,Q66H69,Q9Z1F2                                                                       |

|     |                        |                                  |    |                                                                                                                                                                  |
|-----|------------------------|----------------------------------|----|------------------------------------------------------------------------------------------------------------------------------------------------------------------|
| 786 | 1,2,3,5,6,8<br>,39,44  | 4,7,36,37,<br>38,40,41,4<br>2,43 | 3  | P27213,Q63942,Q9Z1F2                                                                                                                                             |
| 787 | 1,2,3,5,6,8<br>,40,41  | 4,7,36,37,<br>38,39,42,4<br>3,44 | 4  | P08753,P51907,Q6IRE4,Q9Z1F2                                                                                                                                      |
| 788 | 1,2,3,5,6,8<br>,40,42  | 4,7,36,37,<br>38,39,41,4<br>3,44 | 10 | P02780,P02781,P08753,P20759,P22006,P23593,P36374,P60905,Q63942,Q9QZ76                                                                                            |
| 789 | 1,2,3,5,6,8<br>,40,43  | 4,7,36,37,<br>38,39,41,4<br>2,44 | 6  | P01681,P11883,P51907,Q63942,Q66H69,Q9Z1F2                                                                                                                        |
| 790 | 1,2,3,5,6,8<br>,40,44  | 4,7,36,37,<br>38,39,41,4<br>2,43 | 7  | P06866,P22006,P36374,P53792,Q6P6T1,Q9QUL6,Q9Z1F2                                                                                                                 |
| 791 | 1,2,3,5,6,8<br>,41,42  | 4,7,36,37,<br>38,39,40,4<br>3,44 | 23 | O08815,O35547,P02781,P04905,P08010,P08290,P08753,P09456,P0C0A9,P36374,P54921,P60905,P82471,P83121,P97605,Q62753,Q62902,Q63357,Q6AYR9,Q812E4,Q8CJ52,Q9JID2,Q9QZK9 |
| 792 | 1,2,3,5,6,8<br>,41,43  | 4,7,36,37,<br>38,39,40,4<br>2,44 | 14 | P00714,P01681,P02793,Q7TP54,P08753,P11883,P51907,P60905,P82471,P83121,Q63942,Q66H69,Q7TPB1,Q9QX79,Q9Z1F2                                                         |
| 793 | 1,2,3,5,6,8<br>,41,44  | 4,7,36,37,<br>38,39,40,4<br>2,43 | 6  | P08753,P60905,P83121,P97605,Q9JID2,Q9Z1F2                                                                                                                        |
| 794 | 1,2,3,5,6,8<br>,42,43  | 4,7,36,37,<br>38,39,40,4<br>1,44 | 18 | P01681,P04905,P08723,P08753,P11883,P19629,P24368,P35434,P36374,P54921,P60905,P82471,Q62975,Q63357,Q63942,Q66H69,Q6AYR9,Q6Q7Y5                                    |
| 795 | 1,2,3,5,6,8<br>,42,44  | 4,7,36,37,<br>38,39,40,4<br>1,43 | 10 | P04905,P08753,P22006,P36374,P53792,P60905,Q63942,Q6Q7Y5,Q9JID2,Q9QZK9                                                                                            |
| 796 | 1,2,3,5,6,8<br>,43,44  | 4,7,36,37,<br>38,39,40,4<br>1,42 | 8  | P01681,P10758,P11883,P36374,P83121,Q63942,Q66H69,Q9Z1F2                                                                                                          |
| 797 | 1,2,3,5,6,3<br>6,37,38 | 4,7,8,39,4<br>0,41,42,43<br>,44  | 5  | P00714,P53792,P55314,Q561R9,Q91ZS3                                                                                                                               |
| 798 | 1,2,3,5,6,3<br>6,37,39 | 4,7,8,38,4<br>0,41,42,43<br>,44  | 6  | P00714,P27213,P55314,Q05695,Q561R9,Q91ZS3                                                                                                                        |
| 799 | 1,2,3,5,6,3<br>6,37,40 | 4,7,8,38,3<br>9,41,42,43<br>,44  | 10 | B0BNN3,P00714,P11030,P27213,P53792,P55314,Q05695,Q6IRE4,Q80WL1,Q9Z1F2                                                                                            |
| 800 | 1,2,3,5,6,3<br>6,37,41 | 4,7,8,38,3<br>9,40,42,43<br>,44  | 7  | P00714,P11030,P55314,P83121,Q80WL1,Q91ZS3,Q9Z1F2                                                                                                                 |

|     |                        |                                 |    |                                                                                                   |
|-----|------------------------|---------------------------------|----|---------------------------------------------------------------------------------------------------|
| 801 | 1,2,3,5,6,3<br>6,37,42 | 4,7,8,38,3<br>9,40,41,43<br>,44 | 8  | P10715,P19629,P22283,P53792,P55314,Q6AYL6,Q91ZS3,Q920P0                                           |
| 802 | 1,2,3,5,6,3<br>6,37,43 | 4,7,8,38,3<br>9,40,41,42<br>,44 | 12 | P00714,P01681,P10715,P19629,P55314,P83121,Q05695,Q4FZU6,Q561R9,Q63661,Q63942,Q9Z1F2               |
| 803 | 1,2,3,5,6,3<br>6,37,44 | 4,7,8,38,3<br>9,40,41,42<br>,43 | 4  | B0BNN3,P34901,P53792,P55314                                                                       |
| 804 | 1,2,3,5,6,3<br>6,38,39 | 4,7,8,37,4<br>0,41,42,43<br>,44 | 7  | P00714,P19218,P27213,P34901,P55314,Q561R9,Q63942                                                  |
| 805 | 1,2,3,5,6,3<br>6,38,40 | 4,7,8,37,3<br>9,41,42,43<br>,44 | 5  | P00714,P22006,P55314,Q561R9,Q64057                                                                |
| 806 | 1,2,3,5,6,3<br>6,38,41 | 4,7,8,37,3<br>9,40,42,43<br>,44 | 4  | P00714,P23785,P55314,Q561R9                                                                       |
| 807 | 1,2,3,5,6,3<br>6,38,42 | 4,7,8,37,3<br>9,40,41,43<br>,44 | 14 | P08753,P10715,P19218,P19629,P22282,P22283,P36374,P47727,P55314,P60905,P97554,Q62902,Q6AYL6,Q8CJ52 |
| 808 | 1,2,3,5,6,3<br>6,38,43 | 4,7,8,37,3<br>9,40,41,42<br>,44 | 8  | P00714,P01681,P10715,P34901,P55314,Q561R9,Q63661,Q63942                                           |
| 809 | 1,2,3,5,6,3<br>6,38,44 | 4,7,8,37,3<br>9,40,41,42<br>,43 | 5  | P22006,P34901,P53792,P55314,Q561R9                                                                |
| 810 | 1,2,3,5,6,3<br>6,39,40 | 4,7,8,37,3<br>8,41,42,43<br>,44 | 5  | P00714,P27213,P55314,Q05695,Q9QUL6                                                                |
| 811 | 1,2,3,5,6,3<br>6,39,41 | 4,7,8,37,3<br>8,40,42,43<br>,44 | 4  | P00714,P08010,P23785,P55314                                                                       |
| 812 | 1,2,3,5,6,3<br>6,39,42 | 4,7,8,37,3<br>8,40,41,43<br>,44 | 7  | O54728,P08010,P08753,P22283,P27213,P55314,Q6AYR9                                                  |
| 813 | 1,2,3,5,6,3<br>6,39,43 | 4,7,8,37,3<br>8,40,41,42<br>,44 | 6  | P00714,P01681,P01946,P34901,P55314,Q63942                                                         |
| 814 | 1,2,3,5,6,3<br>6,39,44 | 4,7,8,37,3<br>8,40,41,42<br>,43 | 3  | P27213,P34901,P55314                                                                              |
| 815 | 1,2,3,5,6,3<br>6,40,41 | 4,7,8,37,3<br>8,39,42,43<br>,44 | 6  | P00714,P23593,P55314,Q6IRE4,Q80WL1,Q9Z1F2                                                         |

|     |                        |                                 |    |                                                                                                                 |
|-----|------------------------|---------------------------------|----|-----------------------------------------------------------------------------------------------------------------|
| 816 | 1,2,3,5,6,3<br>6,40,42 | 4,7,8,37,3<br>8,39,41,43<br>,44 | 7  | P02781,P23593,P36374,P55314,Q05695,Q64057,Q6IRE4                                                                |
| 817 | 1,2,3,5,6,3<br>6,40,43 | 4,7,8,37,3<br>8,39,41,42<br>,44 | 7  | P00714,P01681,P55314,Q05695,Q63661,Q63942,Q9Z1F2                                                                |
| 818 | 1,2,3,5,6,3<br>6,40,44 | 4,7,8,37,3<br>8,39,41,42<br>,43 | 9  | B0BNN3,P22006,P34901,P53792,P55314,Q6P6T1,Q80WL1,Q9QUL6,Q9Z1F2                                                  |
| 819 | 1,2,3,5,6,3<br>6,41,42 | 4,7,8,37,3<br>8,39,40,43<br>,44 | 11 | P08010,P08753,P22283,P23593,P55314,P60905,P82471,Q63357,Q6AYR9,Q812E4,Q8CJ52                                    |
| 820 | 1,2,3,5,6,3<br>6,41,43 | 4,7,8,37,3<br>8,39,40,42<br>,44 | 6  | P00714,P55314,P83121,Q63661,Q63942,Q9Z1F2                                                                       |
| 821 | 1,2,3,5,6,3<br>6,41,44 | 4,7,8,37,3<br>8,39,40,42<br>,43 | 5  | P23785,P55314,P83121,Q80WL1,Q9Z1F2                                                                              |
| 822 | 1,2,3,5,6,3<br>6,42,43 | 4,7,8,37,3<br>8,39,40,41<br>,44 | 16 | P01681,P06911,P08753,P10715,P19629,P24368,P31044,P35434,P36374,P55314,P60905,Q5GRG2,Q62975,Q63942,Q68FS4,Q6AYR9 |
| 823 | 1,2,3,5,6,3<br>6,42,44 | 4,7,8,37,3<br>8,39,40,41<br>,43 | 9  | P08753,P22006,P22283,P34901,P36374,P53792,P55314,P60905,Q68FS4                                                  |
| 824 | 1,2,3,5,6,3<br>6,43,44 | 4,7,8,37,3<br>8,39,40,41<br>,42 | 8  | P01681,P13432,P34901,P55314,P83121,Q63661,Q63942,Q66H69                                                         |
| 825 | 1,2,3,5,6,3<br>7,38,39 | 4,7,8,36,4<br>0,41,42,43<br>,44 | 7  | P00714,P19218,P27213,P82995,Q561R9,Q91ZS3,Q9QUL6                                                                |
| 826 | 1,2,3,5,6,3<br>7,38,40 | 4,7,8,36,3<br>9,41,42,43<br>,44 | 7  | P00714,P15399,P22006,P82995,Q561R9,Q6IRE4,Q9QUL6                                                                |
| 827 | 1,2,3,5,6,3<br>7,38,41 | 4,7,8,36,3<br>9,40,42,43<br>,44 | 4  | P00714,Q561R9,Q7TPB1,Q91ZS3                                                                                     |
| 828 | 1,2,3,5,6,3<br>7,38,42 | 4,7,8,36,3<br>9,40,41,43<br>,44 | 3  | P08753,Q6AYL6,Q91ZS3                                                                                            |
| 829 | 1,2,3,5,6,3<br>7,38,43 | 4,7,8,36,3<br>9,40,41,42<br>,44 | 8  | P00714,P01681,P82995,Q4FZU6,Q561R9,Q63942,Q6IFV1,Q7TPB1                                                         |
| 830 | 1,2,3,5,6,3<br>7,38,44 | 4,7,8,36,3<br>9,40,41,42<br>,43 | 4  | P22006,P34901,Q561R9,Q9QUL6                                                                                     |

|     |                        |                                 |   |                                                         |
|-----|------------------------|---------------------------------|---|---------------------------------------------------------|
| 831 | 1,2,3,5,6,3<br>7,39,40 | 4,7,8,36,3<br>8,41,42,43<br>,44 | 6 | P00714,P27213,P82995,Q05695,Q6IRE4,Q9QUL6               |
| 832 | 1,2,3,5,6,3<br>7,39,41 | 4,7,8,36,3<br>8,40,42,43<br>,44 | 2 | P00714,Q91ZS3                                           |
| 833 | 1,2,3,5,6,3<br>7,39,42 | 4,7,8,36,3<br>8,40,41,43<br>,44 | 2 | P27213,Q05695                                           |
| 834 | 1,2,3,5,6,3<br>7,39,43 | 4,7,8,36,3<br>8,40,41,42<br>,44 | 6 | P00714,Q05695,Q4FZU6,Q561R9,Q63942,Q9QW07               |
| 835 | 1,2,3,5,6,3<br>7,39,44 | 4,7,8,36,3<br>8,40,41,42<br>,43 | 2 | P27213,Q9QUL6                                           |
| 836 | 1,2,3,5,6,3<br>7,40,41 | 4,7,8,36,3<br>8,39,42,43<br>,44 | 5 | P00714,P51907,Q6IRE4,Q80WL1,Q9Z1F2                      |
| 837 | 1,2,3,5,6,3<br>7,40,42 | 4,7,8,36,3<br>8,39,41,43<br>,44 | 3 | P22006,Q05695,Q6IRE4                                    |
| 838 | 1,2,3,5,6,3<br>7,40,43 | 4,7,8,36,3<br>8,39,41,42<br>,44 | 8 | P00714,P01681,P51907,P82995,Q05695,Q63942,Q9QW07,Q9Z1F2 |
| 839 | 1,2,3,5,6,3<br>7,40,44 | 4,7,8,36,3<br>8,39,41,42<br>,43 | 4 | P22006,Q80WL1,Q9QUL6,Q9Z1F2                             |
| 840 | 1,2,3,5,6,3<br>7,41,42 | 4,7,8,36,3<br>8,39,40,43<br>,44 | 3 | P08753,Q6IRE4,Q91ZS3                                    |
| 841 | 1,2,3,5,6,3<br>7,41,43 | 4,7,8,36,3<br>8,39,40,42<br>,44 | 5 | P00714,P51907,P83121,Q7TPB1,Q9Z1F2                      |
| 842 | 1,2,3,5,6,3<br>7,41,44 | 4,7,8,36,3<br>8,39,40,42<br>,43 | 4 | P83121,Q80WL1,Q91ZS3,Q9Z1F2                             |
| 843 | 1,2,3,5,6,3<br>7,42,43 | 4,7,8,36,3<br>8,39,40,41<br>,44 | 7 | P01681,P10715,P19629,P31044,Q05695,Q62975,Q63942        |
| 844 | 1,2,3,5,6,3<br>7,42,44 | 4,7,8,36,3<br>8,39,40,41<br>,43 | 1 | P22006                                                  |
| 845 | 1,2,3,5,6,3<br>7,43,44 | 4,7,8,36,3<br>8,39,40,41<br>,42 | 6 | P01681,P10758,P34901,Q63661,Q63942,Q9QW07               |

|     |                        |                                 |    |                                                                                     |
|-----|------------------------|---------------------------------|----|-------------------------------------------------------------------------------------|
| 846 | 1,2,3,5,6,3<br>8,39,40 | 4,7,8,36,3<br>7,41,42,43<br>,44 | 6  | P00714,P27213,P82995,Q561R9,Q6IRE4,Q9QUL6                                           |
| 847 | 1,2,3,5,6,3<br>8,39,41 | 4,7,8,36,3<br>7,40,42,43<br>,44 | 2  | P00714,Q561R9                                                                       |
| 848 | 1,2,3,5,6,3<br>8,39,42 | 4,7,8,36,3<br>7,40,41,43<br>,44 | 7  | P02780,P08010,P08753,P19218,P22283,Q63617,Q99041                                    |
| 849 | 1,2,3,5,6,3<br>8,39,43 | 4,7,8,36,3<br>7,40,41,42<br>,44 | 7  | P00714,P01681,P01946,P34901,Q561R9,Q63942,Q6IFV1                                    |
| 850 | 1,2,3,5,6,3<br>8,39,44 | 4,7,8,36,3<br>7,40,41,42<br>,43 | 4  | P27213,P34901,Q561R9,Q9QUL6                                                         |
| 851 | 1,2,3,5,6,3<br>8,40,41 | 4,7,8,36,3<br>7,39,42,43<br>,44 | 3  | P00714,Q561R9,Q6IRE4                                                                |
| 852 | 1,2,3,5,6,3<br>8,40,42 | 4,7,8,36,3<br>7,39,41,43<br>,44 | 6  | P22006,P36374,Q5BJP3,Q6IRE4,Q99041,Q9QUL6                                           |
| 853 | 1,2,3,5,6,3<br>8,40,43 | 4,7,8,36,3<br>7,39,41,42<br>,44 | 7  | P00714,P01681,P01835,P82995,Q561R9,Q63942,Q99041                                    |
| 854 | 1,2,3,5,6,3<br>8,40,44 | 4,7,8,36,3<br>7,39,41,42<br>,43 | 5  | P22006,P34901,Q561R9,Q99041,Q9QUL6                                                  |
| 855 | 1,2,3,5,6,3<br>8,41,42 | 4,7,8,36,3<br>7,39,40,43<br>,44 | 12 | O35547,P08010,P08753,P22283,P54921,P60905,P82471,Q62902,Q6IRE4,Q8CIZ5,Q8CJ52,Q9QZK9 |
| 856 | 1,2,3,5,6,3<br>8,41,43 | 4,7,8,36,3<br>7,39,40,42<br>,44 | 8  | P00714,P01681,P82471,Q561R9,Q5HZV9,Q63942,Q7TPB1,Q8CJD3                             |
| 857 | 1,2,3,5,6,3<br>8,41,44 | 4,7,8,36,3<br>7,39,40,42<br>,43 | 5  | P00774,P98089,Q561R9,Q62635,Q8CIZ5                                                  |
| 858 | 1,2,3,5,6,3<br>8,42,43 | 4,7,8,36,3<br>7,39,40,41<br>,44 | 12 | P01681,P08723,P08753,P10715,P19629,P31044,Q5GRG2,Q62902,Q62975,Q63942,Q6AYR8,Q99041 |
| 859 | 1,2,3,5,6,3<br>8,42,44 | 4,7,8,36,3<br>7,39,40,41<br>,43 | 7  | P08753,P22006,P34901,P36374,Q6AYR8,Q99041,Q9QUL6                                    |
| 860 | 1,2,3,5,6,3<br>8,43,44 | 4,7,8,36,3<br>7,39,40,41<br>,42 | 7  | P01681,P01835,P34901,Q561R9,Q63661,Q63942,Q99041                                    |

|     |                        |                                 |    |                                                                       |
|-----|------------------------|---------------------------------|----|-----------------------------------------------------------------------|
| 861 | 1,2,3,5,6,3<br>9,40,41 | 4,7,8,36,3<br>7,38,42,43<br>,44 | 3  | P00714,Q6IRE4,Q9Z1F2                                                  |
| 862 | 1,2,3,5,6,3<br>9,40,42 | 4,7,8,36,3<br>7,38,41,43<br>,44 | 6  | P02780,P27213,Q05695,Q6AYR9,Q6IRE4,Q9QUL6                             |
| 863 | 1,2,3,5,6,3<br>9,40,43 | 4,7,8,36,3<br>7,38,41,42<br>,44 | 4  | P00714,P01681,Q05695,Q63942                                           |
| 864 | 1,2,3,5,6,3<br>9,40,44 | 4,7,8,36,3<br>7,38,41,42<br>,43 | 3  | P27213,Q6P6T1,Q9QUL6                                                  |
| 865 | 1,2,3,5,6,3<br>9,41,42 | 4,7,8,36,3<br>7,38,40,43<br>,44 | 6  | P08010,P08753,P0C0A9,P82471,Q6AYR9,Q6IRE4                             |
| 866 | 1,2,3,5,6,3<br>9,41,43 | 4,7,8,36,3<br>7,38,40,42<br>,44 | 5  | P00714,P01946,P11883,P82471,Q63942                                    |
| 867 | 1,2,3,5,6,3<br>9,41,44 | 4,7,8,36,3<br>7,38,40,42<br>,43 | 1  | P00714                                                                |
| 868 | 1,2,3,5,6,3<br>9,42,43 | 4,7,8,36,3<br>7,38,40,41<br>,44 | 10 | P02780,P08753,P0C0A9,P11883,P24368,P35434,P82471,Q05695,Q63942,Q6AYR9 |
| 869 | 1,2,3,5,6,3<br>9,42,44 | 4,7,8,36,3<br>7,38,40,41<br>,43 | 4  | P08753,P27213,Q99041,Q9QUL6                                           |
| 870 | 1,2,3,5,6,3<br>9,43,44 | 4,7,8,36,3<br>7,38,40,41<br>,42 | 5  | P01681,P01946,P34901,Q63942,Q9QW07                                    |
| 871 | 1,2,3,5,6,4<br>0,41,42 | 4,7,8,36,3<br>7,38,39,43<br>,44 | 6  | P02781,P08753,P23593,Q5BJP3,Q6AYR9,Q6IRE4                             |
| 872 | 1,2,3,5,6,4<br>0,41,43 | 4,7,8,36,3<br>7,38,39,42<br>,44 | 5  | P00714,P01681,P11883,P51907,Q9Z1F2                                    |
| 873 | 1,2,3,5,6,4<br>0,41,44 | 4,7,8,36,3<br>7,38,39,42<br>,43 | 3  | Q6IRE4,Q80WL1,Q9Z1F2                                                  |
| 874 | 1,2,3,5,6,4<br>0,42,43 | 4,7,8,36,3<br>7,38,39,41<br>,44 | 9  | P01681,P02780,P11598,P11883,P36374,Q05695,Q63942,Q99041,Q9JHB9        |
| 875 | 1,2,3,5,6,4<br>0,42,44 | 4,7,8,36,3<br>7,38,39,41<br>,43 | 4  | P22006,P36374,Q99041,Q9QUL6                                           |



|     |                        |                                  |    |                                                                                                                                                                                              |
|-----|------------------------|----------------------------------|----|----------------------------------------------------------------------------------------------------------------------------------------------------------------------------------------------|
| 876 | 1,2,3,5,6,4<br>0,43,44 | 4,7,8,36,3<br>7,38,39,41<br>,42  | 5  | P01681,P34901,Q63661,Q99041,Q9QW07                                                                                                                                                           |
| 877 | 1,2,3,5,6,4<br>1,42,43 | 4,7,8,36,3<br>7,38,39,40<br>,44  | 12 | P08753,P0C0A9,P11883,P24368,P54921,P60905,P82471,P83121,Q63357,Q63942,Q6AYR9,Q9QZA6                                                                                                          |
| 878 | 1,2,3,5,6,4<br>1,42,44 | 4,7,8,36,3<br>7,38,39,40<br>,43  | 6  | P08753,P0C0A9,P60905,P82471,Q8CJ52,Q9JID2                                                                                                                                                    |
| 879 | 1,2,3,5,6,4<br>1,43,44 | 4,7,8,36,3<br>7,38,39,40<br>,42  | 7  | P01681,P11883,P82471,P83121,Q63661,Q66H69,Q9Z1F2                                                                                                                                             |
| 880 | 1,2,3,5,6,4<br>2,43,44 | 4,7,8,36,3<br>7,38,39,40<br>,41  | 15 | P01681,P08723,P0C0A9,P11883,P34901,P35434,P36374,P60905,P82471,Q62975,Q63942,Q6AYR8,Q6Q7Y5,Q99041,Q9JID2                                                                                     |
| 881 | 1,2,3,5,7,8<br>,36,37  | 4,6,38,39,<br>40,41,42,4<br>3,44 | 12 | B0BNN3,P00762,P01946,P11762,P27213,P52590,P53792,P83121,P85971,Q01205,Q09030,Q63467                                                                                                          |
| 882 | 1,2,3,5,7,8<br>,36,38  | 4,6,37,39,<br>40,41,42,4<br>3,44 | 13 | P00762,P01946,P04905,P08010,P08753,P19218,P47727,P52590,P53792,P85971,Q01205,Q09030,Q63467                                                                                                   |
| 883 | 1,2,3,5,7,8<br>,36,39  | 4,6,37,38,<br>40,41,42,4<br>3,44 | 15 | B0BNN3,O54728,P00762,P01946,P04905,P08010,P08753,P27213,P52590,P55314,P85971,Q01205,Q09030,Q63467,Q6AYR9                                                                                     |
| 884 | 1,2,3,5,7,8<br>,36,40  | 4,6,37,38,<br>39,41,42,4<br>3,44 | 8  | B0BNN3,P00762,P27213,P36374,P52590,P53792,Q09030,Q63467                                                                                                                                      |
| 885 | 1,2,3,5,7,8<br>,36,41  | 4,6,37,38,<br>39,40,42,4<br>3,44 | 22 | B0BNN3,P00762,P01015,P01946,P04905,P08010,P08644,P08753,P23785,P52590,P60905,P80201,P83121,P85971,P97605,Q01205,Q09030,Q63357,Q63467,Q6AYR9,Q812E4,Q99MH3                                    |
| 886 | 1,2,3,5,7,8<br>,36,42  | 4,6,37,38,<br>39,40,41,4<br>3,44 | 27 | B0BNN3,O08815,P00762,P02781,P04905,P08010,P08290,P08644,P08723,P08753,P0C0A9,P22283,P36374,P47727,P52590,P53792,P60905,P85971,Q01205,Q08849,Q09030,Q63357,Q63467,Q6AYL6,Q6AYR9,Q812E4,Q9QZK9 |
| 887 | 1,2,3,5,7,8<br>,36,43  | 4,6,37,38,<br>39,40,41,4<br>2,44 | 18 | P01946,P02091,P02651,P06760,P13432,P16391,P16636,P52590,P60905,P83121,P85971,Q01205,Q03191,Q09030,Q62975,Q63467,Q63942,Q9QX79                                                                |
| 888 | 1,2,3,5,7,8<br>,36,44  | 4,6,37,38,<br>39,40,41,4<br>2,43 | 17 | B0BNN3,P00762,P01015,P01946,P08644,P13432,P36374,P52590,P53792,P55314,P60905,P83121,P85971,Q01205,Q09030,Q63467,Q99MH3                                                                       |
| 889 | 1,2,3,5,7,8<br>,37,38  | 4,6,36,39,<br>40,41,42,4<br>3,44 | 6  | P01946,P11762,P52590,P53792,Q09030,Q7TPB1                                                                                                                                                    |
| 890 | 1,2,3,5,7,8<br>,37,39  | 4,6,36,38,<br>40,41,42,4<br>3,44 | 7  | B0BNN3,P00762,P01946,P27213,P52590,Q09030,Q63467                                                                                                                                             |

|     |                       |                                  |    |                                                                                                                                                           |
|-----|-----------------------|----------------------------------|----|-----------------------------------------------------------------------------------------------------------------------------------------------------------|
| 891 | 1,2,3,5,7,8<br>,37,40 | 4,6,36,38,<br>39,41,42,4<br>3,44 | 6  | B0BNN3,P00762,P27213,P52590,P53792,Q09030                                                                                                                 |
| 892 | 1,2,3,5,7,8<br>,37,41 | 4,6,36,38,<br>39,40,42,4<br>3,44 | 11 | B0BNN3,P01946,P11762,P52590,P80201,P83121,P97605,Q01205,Q09030,Q63467,Q7TPB1                                                                              |
| 893 | 1,2,3,5,7,8<br>,37,42 | 4,6,36,38,<br>39,40,41,4<br>3,44 | 9  | P00762,P04905,P08644,P08753,P36374,P52590,P53792,P85971,Q09030                                                                                            |
| 894 | 1,2,3,5,7,8<br>,37,43 | 4,6,36,38,<br>39,40,41,4<br>2,44 | 13 | P01946,P02091,P10758,P11762,P16391,P52590,P83121,P85971,Q03191,Q09030,Q62975,Q7TPB1,Q9QX79                                                                |
| 895 | 1,2,3,5,7,8<br>,37,44 | 4,6,36,38,<br>39,40,41,4<br>2,43 | 9  | B0BNN3,P00762,P01946,P52590,P53792,P83121,Q09030,Q63467,Q6IFU7                                                                                            |
| 896 | 1,2,3,5,7,8<br>,38,39 | 4,6,36,37,<br>40,41,42,4<br>3,44 | 8  | P01946,P08010,P08753,P19218,P27213,P52590,Q09030,Q63467                                                                                                   |
| 897 | 1,2,3,5,7,8<br>,38,40 | 4,6,36,37,<br>39,41,42,4<br>3,44 | 4  | P01946,P52590,P53792,Q09030                                                                                                                               |
| 898 | 1,2,3,5,7,8<br>,38,41 | 4,6,36,37,<br>39,40,42,4<br>3,44 | 17 | O35547,P01946,P08010,P08753,P50115,P50116,P52590,P60905,P80201,P83121,P97605,Q01205,Q09030,Q5M871,Q63467,Q7TPB1,Q9QZK9                                    |
| 899 | 1,2,3,5,7,8<br>,38,42 | 4,6,36,37,<br>39,40,41,4<br>3,44 | 21 | O08815,O35547,P01946,P02781,P04905,P08010,P08290,P08723,P08753,P0C0A9,P19218,P36374,P47727,P52590,P60905,P85971,Q09030,Q62902,Q63357,Q9JHB9,Q9QZK9        |
| 900 | 1,2,3,5,7,8<br>,38,43 | 4,6,36,37,<br>39,40,41,4<br>2,44 | 13 | O35547,P01946,P02091,P16391,P50116,P52590,P85971,Q09030,Q62975,Q63467,Q63942,Q7TPB1,Q9QX79                                                                |
| 901 | 1,2,3,5,7,8<br>,38,44 | 4,6,36,37,<br>39,40,41,4<br>2,43 | 7  | P01946,P36374,P52590,P53792,P85971,Q09030,Q63467                                                                                                          |
| 902 | 1,2,3,5,7,8<br>,39,40 | 4,6,36,37,<br>38,41,42,4<br>3,44 | 4  | P01946,P27213,P52590,Q09030                                                                                                                               |
| 903 | 1,2,3,5,7,8<br>,39,41 | 4,6,36,37,<br>38,40,42,4<br>3,44 | 12 | O88267,P01946,P08010,P08753,P27213,P52590,P80201,P83121,P97605,Q09030,Q63467,Q6AYR9                                                                       |
| 904 | 1,2,3,5,7,8<br>,39,42 | 4,6,36,37,<br>38,40,41,4<br>3,44 | 22 | O08815,O54728,P00762,P01946,P02780,P02781,P04905,P08010,P08644,P08753,P0C0A9,P27213,P36374,P47727,P52590,P60905,P85971,P97605,Q09030,Q6AYR9,Q9JHB9,Q9QZK9 |
| 905 | 1,2,3,5,7,8<br>,39,43 | 4,6,36,37,<br>38,40,41,4<br>2,44 | 9  | P01946,P02091,P16636,P52590,P85971,Q09030,Q63467,Q63942,Q9QX79                                                                                            |

|     |                        |                                  |    |                                                                                                                                                                                                                          |
|-----|------------------------|----------------------------------|----|--------------------------------------------------------------------------------------------------------------------------------------------------------------------------------------------------------------------------|
| 906 | 1,2,3,5,7,8<br>,39,44  | 4,6,36,37,<br>38,40,41,4<br>2,43 | 7  | P00762,P01946,P27213,P52590,P97605,Q09030,Q63467                                                                                                                                                                         |
| 907 | 1,2,3,5,7,8<br>,40,41  | 4,6,36,37,<br>38,39,42,4<br>3,44 | 7  | B0BNN3,P52590,P97605,Q09030,Q63467,Q6IRE4,Q9JJS8                                                                                                                                                                         |
| 908 | 1,2,3,5,7,8<br>,40,42  | 4,6,36,37,<br>38,39,41,4<br>3,44 | 16 | P00762,P02780,P02781,P02782,P08753,P0C0A9,P20759,P36374,P52590,P60905,Q09030,Q5M819,Q6AYR9,Q9JHB9,Q9JJS8,Q9QZ76                                                                                                          |
| 909 | 1,2,3,5,7,8<br>,40,43  | 4,6,36,37,<br>38,39,41,4<br>2,44 | 8  | P01946,P02091,P52590,P85971,Q09030,Q5M819,Q9JHB9,Q9QX79                                                                                                                                                                  |
| 910 | 1,2,3,5,7,8<br>,40,44  | 4,6,36,37,<br>38,39,41,4<br>2,43 | 12 | B0BNN3,P00762,P01946,P27213,P36374,P52590,P53792,Q09030,Q5M819,Q63467,Q6P6T1,Q9QZ76                                                                                                                                      |
| 911 | 1,2,3,5,7,8<br>,41,42  | 4,6,36,37,<br>38,39,40,4<br>3,44 | 30 | O08815,O35547,P02781,P04905,P08010,P08290,P08644,P08753,P0C0A9,P36374,P52590,P54921,P60905,P80201,P82471,P83121,P85971,P97605,Q09030,Q62753,Q62902,Q63357,Q63467,Q64335,Q6AYR9,Q6RUV5,Q812E4,Q8CFN2,Q9JID2,Q9QZK9        |
| 912 | 1,2,3,5,7,8<br>,41,43  | 4,6,36,37,<br>38,39,40,4<br>2,44 | 19 | O35547,P01946,P02091,P08753,P16636,P50116,P52590,P54921,P60905,P82471,P83121,P85971,P97605,Q03191,Q09030,Q5M871,Q63467,Q7TPB1,Q9QX79                                                                                     |
| 913 | 1,2,3,5,7,8<br>,41,44  | 4,6,36,37,<br>38,39,40,4<br>2,43 | 16 | B0BNN3,P01015,P01946,P08010,P08753,P52590,P60905,P80201,P83121,P85971,P97605,Q01205,Q09030,Q5M871,Q63467,Q9JID2                                                                                                          |
| 914 | 1,2,3,5,7,8<br>,42,43  | 4,6,36,37,<br>38,39,40,4<br>1,44 | 31 | O08815,O35547,O35783,P01946,P02091,P02780,P02781,P04905,P06911,P08723,P08753,P0C0A9,P16391,P16636,P24368,P30120,P36374,P47727,P52590,P54921,P60905,P82471,P83121,P85971,Q09030,Q62975,Q63357,Q6AYR9,Q6Q7Y5,Q9JHB9,Q9QX79 |
| 915 | 1,2,3,5,7,8<br>,42,44  | 4,6,36,37,<br>38,39,40,4<br>1,43 | 28 | O08815,P00762,P01946,P04905,P08010,P08644,P08723,P08753,P0C0A9,P17046,P20759,P36374,P47727,P52590,P53792,P60905,P85971,P97605,Q08849,Q09030,Q5M819,Q63467,Q6AYR9,Q6Q7Y5,Q812E4,Q9JID2,Q9QZ76,Q9QZK9                      |
| 916 | 1,2,3,5,7,8<br>,43,44  | 4,6,36,37,<br>38,39,40,4<br>1,42 | 15 | P01946,P02091,P10758,P13432,P52590,P60905,P83121,P85971,Q03191,Q09030,Q5M819,Q62975,Q63467,Q63661,Q9QX79                                                                                                                 |
| 917 | 1,2,3,5,7,3<br>6,37,38 | 4,6,8,39,4<br>0,41,42,43<br>,44  | 8  | P01946,P11762,P52590,P53792,Q09030,Q561R9,Q63467,Q6P6R2                                                                                                                                                                  |
| 918 | 1,2,3,5,7,3<br>6,37,39 | 4,6,8,38,4<br>0,41,42,43<br>,44  | 13 | B0BNN3,O54728,P00714,P00762,P01946,P06760,P27213,P52590,P55314,Q09030,Q62635,Q63467,Q6P6R2                                                                                                                               |
| 919 | 1,2,3,5,7,3<br>6,37,40 | 4,6,8,38,3<br>9,41,42,43<br>,44  | 8  | B0BNN3,P00762,P11762,P27213,P52590,P53792,Q09030,Q6IRE4                                                                                                                                                                  |
| 920 | 1,2,3,5,7,3<br>6,37,41 | 4,6,8,38,3<br>9,40,42,43<br>,44  | 11 | B0BNN3,P00714,P00762,P01946,P11762,P52590,P83121,Q09030,Q63467,Q6IRE4,Q91ZS3                                                                                                                                             |

|     |                        |                                 |    |                                                                                                                                                    |
|-----|------------------------|---------------------------------|----|----------------------------------------------------------------------------------------------------------------------------------------------------|
| 921 | 1,2,3,5,7,3<br>6,37,42 | 4,6,8,38,3<br>9,40,41,43<br>,44 | 13 | B0BNN3,P00762,P02782,P06911,P08644,P17046,P22283,P52590,P53792,Q09030,Q62635,Q63467,Q6AYL6                                                         |
| 922 | 1,2,3,5,7,3<br>6,37,43 | 4,6,8,38,3<br>9,40,41,42<br>,44 | 15 | P00714,P01946,P02091,P06760,P06911,P11762,P13432,P16636,P52590,P83121,Q09030,Q62975,Q63467,Q63661,Q8CHN8                                           |
| 923 | 1,2,3,5,7,3<br>6,37,44 | 4,6,8,38,3<br>9,40,41,42<br>,43 | 11 | B0BNN3,P00762,P01946,P11762,P13432,P34901,P52590,P53792,P55314,Q09030,Q63467                                                                       |
| 924 | 1,2,3,5,7,3<br>6,38,39 | 4,6,8,37,4<br>0,41,42,43<br>,44 | 10 | O54728,P00714,P01946,P19218,P27213,P34901,P52590,P55314,Q63467,Q6P6R2                                                                              |
| 925 | 1,2,3,5,7,3<br>6,38,40 | 4,6,8,37,3<br>9,41,42,43<br>,44 | 5  | P01946,P52590,Q09030,Q63467,Q6IRE4                                                                                                                 |
| 926 | 1,2,3,5,7,3<br>6,38,41 | 4,6,8,37,3<br>9,40,42,43<br>,44 | 8  | P00714,P01946,P08010,P23785,P52590,Q09030,Q63467,Q6IRE4                                                                                            |
| 927 | 1,2,3,5,7,3<br>6,38,42 | 4,6,8,37,3<br>9,40,41,43<br>,44 | 21 | P00762,P01946,P02782,P04905,P06911,P08010,P08753,P0C0A9,P17046,P19218,P22282,P22283,P36374,P47727,P52590,P60905,Q09030,Q62902,Q63467,Q6AYL6,Q9QZK9 |
| 928 | 1,2,3,5,7,3<br>6,38,43 | 4,6,8,37,3<br>9,40,41,42<br>,44 | 14 | P01946,P02091,P06760,P06911,P16636,P34901,P52590,P85971,Q09030,Q561R9,Q63467,Q63661,Q6P6R2,Q8CHN8                                                  |
| 929 | 1,2,3,5,7,3<br>6,38,44 | 4,6,8,37,3<br>9,40,41,42<br>,43 | 7  | P01946,P34901,P52590,P53792,P55314,Q09030,Q63467                                                                                                   |
| 930 | 1,2,3,5,7,3<br>6,39,40 | 4,6,8,37,3<br>8,41,42,43<br>,44 | 10 | B0BNN3,O54728,P00762,P01946,P27213,P52590,P55314,Q09030,Q63467,Q6IRE4                                                                              |
| 931 | 1,2,3,5,7,3<br>6,39,41 | 4,6,8,37,3<br>8,40,42,43<br>,44 | 14 | B0BNN3,O54728,P00714,P01946,P06760,P08010,P23785,P27213,P52590,P55314,Q09030,Q63467,Q6AYR9,Q6IRE4                                                  |
| 932 | 1,2,3,5,7,3<br>6,39,42 | 4,6,8,37,3<br>8,40,41,43<br>,44 | 18 | O54728,P00762,P01946,P02782,P04905,P08010,P08644,P08753,P0C0A9,P22283,P27213,P47727,P52590,P55314,Q09030,Q62635,Q63467,Q6AYR9                      |
| 933 | 1,2,3,5,7,3<br>6,39,43 | 4,6,8,37,3<br>8,40,41,42<br>,44 | 14 | O54728,P00714,P01946,P02091,P06760,P16636,P34901,P52590,P55314,Q09030,Q62635,Q63467,Q6AYR9,Q6P6R2                                                  |
| 934 | 1,2,3,5,7,3<br>6,39,44 | 4,6,8,37,3<br>8,40,41,42<br>,43 | 9  | B0BNN3,O54728,P00762,P01946,P27213,P34901,P52590,P55314,Q63467                                                                                     |
| 935 | 1,2,3,5,7,3<br>6,40,41 | 4,6,8,37,3<br>8,39,42,43<br>,44 | 5  | B0BNN3,P52590,Q09030,Q63467,Q6IRE4                                                                                                                 |

|     |                        |                                 |    |                                                                                                                                                                                |
|-----|------------------------|---------------------------------|----|--------------------------------------------------------------------------------------------------------------------------------------------------------------------------------|
| 936 | 1,2,3,5,7,3<br>6,40,42 | 4,6,8,37,3<br>8,39,41,43<br>,44 | 12 | B0BNN3,P00762,P02781,P02782,P08644,P0C0A9,P17046,P36374,P52590,Q09030,Q6AYR9,Q6IRE4                                                                                            |
| 937 | 1,2,3,5,7,3<br>6,40,43 | 4,6,8,37,3<br>8,39,41,42<br>,44 | 9  | P01946,P02091,P13432,P16636,P52590,P55314,Q09030,Q63467,Q63661                                                                                                                 |
| 938 | 1,2,3,5,7,3<br>6,40,44 | 4,6,8,37,3<br>8,39,41,42<br>,43 | 11 | B0BNN3,P00762,P01946,P13432,P34901,P52590,P53792,P55314,Q09030,Q63467,Q6P6T1                                                                                                   |
| 939 | 1,2,3,5,7,3<br>6,41,42 | 4,6,8,37,3<br>8,39,40,43<br>,44 | 25 | P00762,P02781,P04905,P08010,P08644,P08649,P08753,P0C0A9,P17046,P22282,P22283,P52590,P60905,P80201,P82471,P83121,P97605,Q09030,Q62902,Q63357,Q63467,Q6AYR9,Q6IRE4,Q812E4,Q8CJ52 |
| 940 | 1,2,3,5,7,3<br>6,41,43 | 4,6,8,37,3<br>8,39,40,42<br>,44 | 11 | P00714,P01946,P02091,P06760,P16636,P52590,P83121,P85971,Q09030,Q63467,Q63661                                                                                                   |
| 941 | 1,2,3,5,7,3<br>6,41,44 | 4,6,8,37,3<br>8,39,40,42<br>,43 | 10 | B0BNN3,P00762,P01946,P08644,P23785,P52590,P55314,P83121,Q09030,Q63467                                                                                                          |
| 942 | 1,2,3,5,7,3<br>6,42,43 | 4,6,8,37,3<br>8,39,40,41<br>,44 | 23 | P01946,P02091,P02782,P04905,P06760,P06911,P08723,P0C0A9,P16636,P17046,P19629,P24368,P47727,P52590,P60905,P85971,Q09030,Q5GRG2,Q62635,Q62975,Q63467,Q6AYR9,Q8CHN8               |
| 943 | 1,2,3,5,7,3<br>6,42,44 | 4,6,8,37,3<br>8,39,40,41<br>,43 | 20 | B0BNN3,P00762,P01946,P02782,P04905,P08644,P08753,P0C0A9,P13432,P17046,P22283,P34901,P36374,P52590,P53792,P55314,P60905,Q09030,Q63467,Q6AYR9                                    |
| 944 | 1,2,3,5,7,3<br>6,43,44 | 4,6,8,37,3<br>8,39,40,41<br>,42 | 13 | P01946,P02091,P06760,P13432,P16636,P34901,P52590,P55314,P83121,P85971,Q09030,Q63467,Q63661                                                                                     |
| 945 | 1,2,3,5,7,3<br>7,38,39 | 4,6,8,36,4<br>0,41,42,43<br>,44 | 6  | P00714,P01946,P19218,P27213,P52590,Q6P6R2                                                                                                                                      |
| 946 | 1,2,3,5,7,3<br>7,38,40 | 4,6,8,36,3<br>9,41,42,43<br>,44 | 3  | P52590,Q09030,Q6IRE4                                                                                                                                                           |
| 947 | 1,2,3,5,7,3<br>7,38,41 | 4,6,8,36,3<br>9,40,42,43<br>,44 | 7  | P00714,P01946,P11762,P52590,Q09030,Q6IRE4,Q91ZS3                                                                                                                               |
| 948 | 1,2,3,5,7,3<br>7,38,42 | 4,6,8,36,3<br>9,40,41,43<br>,44 | 4  | P01946,P17046,P52590,Q09030                                                                                                                                                    |
| 949 | 1,2,3,5,7,3<br>7,38,43 | 4,6,8,36,3<br>9,40,41,42<br>,44 | 5  | P01946,P02091,P52590,Q561R9,Q7TPB1                                                                                                                                             |
| 950 | 1,2,3,5,7,3<br>7,38,44 | 4,6,8,36,3<br>9,40,41,42<br>,43 | 3  | P01946,P34901,P52590                                                                                                                                                           |

|     |                        |                                 |   |                                                         |
|-----|------------------------|---------------------------------|---|---------------------------------------------------------|
| 951 | 1,2,3,5,7,3<br>7,39,40 | 4,6,8,36,3<br>8,41,42,43<br>,44 | 6 | P01946,P27213,P52590,Q6IRE4,Q8CIZ5,Q9QUL6               |
| 952 | 1,2,3,5,7,3<br>7,39,41 | 4,6,8,36,3<br>8,40,42,43<br>,44 | 5 | P00714,P01946,P52590,P80201,Q6IRE4                      |
| 953 | 1,2,3,5,7,3<br>7,39,42 | 4,6,8,36,3<br>8,40,41,43<br>,44 | 6 | O54728,P01946,P17046,P27213,P52590,Q09030               |
| 954 | 1,2,3,5,7,3<br>7,39,43 | 4,6,8,36,3<br>8,40,41,42<br>,44 | 7 | P00714,P01946,P02091,P06760,P52590,Q8CIZ5,Q9QW07        |
| 955 | 1,2,3,5,7,3<br>7,39,44 | 4,6,8,36,3<br>8,40,41,42<br>,43 | 3 | P01946,P27213,P52590                                    |
| 956 | 1,2,3,5,7,3<br>7,40,41 | 4,6,8,36,3<br>8,39,42,43<br>,44 | 3 | P52590,Q09030,Q6IRE4                                    |
| 957 | 1,2,3,5,7,3<br>7,40,42 | 4,6,8,36,3<br>8,39,41,43<br>,44 | 5 | P02782,P17046,P52590,Q09030,Q6IRE4                      |
| 958 | 1,2,3,5,7,3<br>7,40,43 | 4,6,8,36,3<br>8,39,41,42<br>,44 | 6 | P01946,P02091,P52590,Q09030,Q8CIZ5,Q9QW07               |
| 959 | 1,2,3,5,7,3<br>7,40,44 | 4,6,8,36,3<br>8,39,41,42<br>,43 | 6 | B0BNN3,P01946,P52590,Q09030,Q6IRE4,Q9QUL6               |
| 960 | 1,2,3,5,7,3<br>7,41,42 | 4,6,8,36,3<br>8,39,40,43<br>,44 | 7 | P08644,P08753,P17046,P52590,P80201,Q09030,Q6IRE4        |
| 961 | 1,2,3,5,7,3<br>7,41,43 | 4,6,8,36,3<br>8,39,40,42<br>,44 | 8 | P00714,P01946,P02091,P11762,P52590,P83121,Q09030,Q7TPB1 |
| 962 | 1,2,3,5,7,3<br>7,41,44 | 4,6,8,36,3<br>8,39,40,42<br>,43 | 6 | B0BNN3,P01946,P52590,P83121,Q09030,Q63467               |
| 963 | 1,2,3,5,7,3<br>7,42,43 | 4,6,8,36,3<br>8,39,40,41<br>,44 | 7 | P01946,P02091,P06911,P17046,P52590,Q09030,Q62975        |
| 964 | 1,2,3,5,7,3<br>7,42,44 | 4,6,8,36,3<br>8,39,40,41<br>,43 | 5 | P01946,P08644,P17046,P52590,Q09030                      |
| 965 | 1,2,3,5,7,3<br>7,43,44 | 4,6,8,36,3<br>8,39,40,41<br>,42 | 7 | P01946,P02091,P10758,P52590,P83121,Q63661,Q9QW07        |

|     |                        |                                 |    |                                                                                                                                                    |
|-----|------------------------|---------------------------------|----|----------------------------------------------------------------------------------------------------------------------------------------------------|
| 966 | 1,2,3,5,7,3<br>8,39,40 | 4,6,8,36,3<br>7,41,42,43<br>,44 | 5  | P01946,P27213,P52590,Q6IRE4,Q9QUL6                                                                                                                 |
| 967 | 1,2,3,5,7,3<br>8,39,41 | 4,6,8,36,3<br>7,40,42,43<br>,44 | 7  | P00714,P01946,P08010,P52590,P80201,Q63467,Q6IRE4                                                                                                   |
| 968 | 1,2,3,5,7,3<br>8,39,42 | 4,6,8,36,3<br>7,40,41,43<br>,44 | 14 | O35547,O54728,P01946,P02780,P04905,P08010,P08753,P0C0A9,P17046,P19218,P22283,P27213,P47727,P52590                                                  |
| 969 | 1,2,3,5,7,3<br>8,39,43 | 4,6,8,36,3<br>7,40,41,42<br>,44 | 6  | P00714,P01946,P02091,P34901,P52590,Q6P6R2                                                                                                          |
| 970 | 1,2,3,5,7,3<br>8,39,44 | 4,6,8,36,3<br>7,40,41,42<br>,43 | 6  | P01946,P27213,P34901,P52590,Q63467,Q9QUL6                                                                                                          |
| 971 | 1,2,3,5,7,3<br>8,40,41 | 4,6,8,36,3<br>7,39,42,43<br>,44 | 4  | P01946,P52590,Q09030,Q6IRE4                                                                                                                        |
| 972 | 1,2,3,5,7,3<br>8,40,42 | 4,6,8,36,3<br>7,39,41,43<br>,44 | 10 | P02780,P02781,P02782,P0C0A9,P17046,P36374,P52590,Q09030,Q6IRE4,Q9JHB9                                                                              |
| 973 | 1,2,3,5,7,3<br>8,40,43 | 4,6,8,36,3<br>7,39,41,42<br>,44 | 3  | P01946,P02091,P52590                                                                                                                               |
| 974 | 1,2,3,5,7,3<br>8,40,44 | 4,6,8,36,3<br>7,39,41,42<br>,43 | 5  | P01946,P34901,P52590,Q6IRE4,Q9QUL6                                                                                                                 |
| 975 | 1,2,3,5,7,3<br>8,41,42 | 4,6,8,36,3<br>7,39,40,43<br>,44 | 21 | O35547,P01946,P02781,P04905,P08010,P08753,P0C0A9,P17046,P22282,P22283,P47727,P52590,P54921,P60905,P80201,P82471,Q09030,Q62902,Q63357,Q6IRE4,Q9QZK9 |
| 976 | 1,2,3,5,7,3<br>8,41,43 | 4,6,8,36,3<br>7,39,40,42<br>,44 | 9  | O35547,P00714,P01946,P02091,P25031,P52590,P83121,Q7TPB1,Q8CJD3                                                                                     |
| 977 | 1,2,3,5,7,3<br>8,41,44 | 4,6,8,36,3<br>7,39,40,42<br>,43 | 3  | P01946,P52590,Q63467                                                                                                                               |
| 978 | 1,2,3,5,7,3<br>8,42,43 | 4,6,8,36,3<br>7,39,40,41<br>,44 | 21 | O35547,P01946,P02091,P02782,P06911,P08723,P08753,P0C0A9,P16636,P17046,P24368,P25031,P47727,P52590,P60905,Q09030,Q5GRG2,Q62902,Q62975,Q6AYR8,Q9JHB9 |
| 979 | 1,2,3,5,7,3<br>8,42,44 | 4,6,8,36,3<br>7,39,40,41<br>,43 | 12 | O35547,P01946,P08723,P08753,P0C0A9,P17046,P36374,P47727,P52590,P60905,Q6AYR8,Q9QZK9                                                                |
| 980 | 1,2,3,5,7,3<br>8,43,44 | 4,6,8,36,3<br>7,39,40,41<br>,42 | 6  | P01946,P02091,P34901,P52590,Q63467,Q63661                                                                                                          |

|     |                        |                                 |    |                                                                                                                        |
|-----|------------------------|---------------------------------|----|------------------------------------------------------------------------------------------------------------------------|
| 981 | 1,2,3,5,7,3<br>9,40,41 | 4,6,8,36,3<br>7,38,42,43<br>,44 | 5  | P00714,P01946,P27213,P52590,Q6IRE4                                                                                     |
| 982 | 1,2,3,5,7,3<br>9,40,42 | 4,6,8,36,3<br>7,38,41,43<br>,44 | 13 | O54728,P01946,P02780,P02781,P02782,P0C0A9,P17046,P27213,P52590,Q09030,Q6AYR9,Q6IRE4,Q9JHB9                             |
| 983 | 1,2,3,5,7,3<br>9,40,43 | 4,6,8,36,3<br>7,38,41,42<br>,44 | 5  | P00714,P01946,P02091,P52590,Q8CIZ5                                                                                     |
| 984 | 1,2,3,5,7,3<br>9,40,44 | 4,6,8,36,3<br>7,38,41,42<br>,43 | 6  | P01946,P27213,P52590,Q6IRE4,Q6P6T1,Q9QUL6                                                                              |
| 985 | 1,2,3,5,7,3<br>9,41,42 | 4,6,8,36,3<br>7,38,40,43<br>,44 | 16 | O35547,P01946,P02780,P04905,P08010,P08644,P08753,P0C0A9,P17046,P52590,P80201,P82471,P97605,Q09030,Q6AYR9,Q6IRE4        |
| 986 | 1,2,3,5,7,3<br>9,41,43 | 4,6,8,36,3<br>7,38,40,42<br>,44 | 10 | P00714,P01946,P02091,P06760,P0C0A9,P52590,P82471,P83121,Q63467,Q6AYR9                                                  |
| 987 | 1,2,3,5,7,3<br>9,41,44 | 4,6,8,36,3<br>7,38,40,42<br>,43 | 6  | O88267,P01946,P52590,P80201,P97605,Q63467                                                                              |
| 988 | 1,2,3,5,7,3<br>9,42,43 | 4,6,8,36,3<br>7,38,40,41<br>,44 | 17 | O54728,P01946,P02091,P02780,P08723,P0C0A9,P16636,P17046,P24368,P30120,P47727,P52590,P82471,Q62635,Q62975,Q6AYR9,Q9JHB9 |
| 989 | 1,2,3,5,7,3<br>9,42,44 | 4,6,8,36,3<br>7,38,40,41<br>,43 | 9  | P01946,P02780,P08010,P08644,P0C0A9,P17046,P27213,P52590,Q6AYR9                                                         |
| 990 | 1,2,3,5,7,3<br>9,43,44 | 4,6,8,36,3<br>7,38,40,41<br>,42 | 6  | P01946,P02091,P34901,P52590,Q63467,Q9QW07                                                                              |
| 991 | 1,2,3,5,7,4<br>0,41,42 | 4,6,8,36,3<br>7,38,39,43<br>,44 | 11 | P02781,P02782,P08753,P0C0A9,P17046,P52590,P60905,Q09030,Q6AYR9,Q6IRE4,Q9JJS8                                           |
| 992 | 1,2,3,5,7,4<br>0,41,43 | 4,6,8,36,3<br>7,38,39,42<br>,44 | 4  | P01946,P02091,P52590,Q09030                                                                                            |
| 993 | 1,2,3,5,7,4<br>0,41,44 | 4,6,8,36,3<br>7,38,39,42<br>,43 | 6  | P01946,P52590,Q09030,Q63467,Q6IRE4,Q9ET32                                                                              |
| 994 | 1,2,3,5,7,4<br>0,42,43 | 4,6,8,36,3<br>7,38,39,41<br>,44 | 14 | P01946,P02091,P02780,P02782,P0C0A9,P16636,P17046,P36374,P52590,Q09030,Q62975,Q6AYR8,Q6AYR9,Q9JHB9                      |
| 995 | 1,2,3,5,7,4<br>0,42,44 | 4,6,8,36,3<br>7,38,39,41<br>,43 | 9  | P02782,P0C0A9,P17046,P36374,P52590,Q09030,Q6IRE4,Q9QUL6,Q9QZ76                                                         |



|      |                        |                                 |    |                                                                                                                                                    |
|------|------------------------|---------------------------------|----|----------------------------------------------------------------------------------------------------------------------------------------------------|
| 996  | 1,2,3,5,7,4<br>0,43,44 | 4,6,8,36,3<br>7,38,39,41<br>,42 | 5  | P01946,P02091,P52590,Q63661,Q9QW07                                                                                                                 |
| 997  | 1,2,3,5,7,4<br>1,42,43 | 4,6,8,36,3<br>7,38,39,40<br>,44 | 20 | O35547,P01946,P02091,P08723,P08753,P0C0A9,P16636,P17046,P24368,P30120,P52590,P54921,P60905,P82471,P83121,Q09030,Q62975,Q63357,Q6AYR8,Q6AYR9        |
| 998  | 1,2,3,5,7,4<br>1,42,44 | 4,6,8,36,3<br>7,38,39,40<br>,43 | 21 | O35547,P01946,P08010,P08644,P08753,P0C0A9,P17046,P35281,P52590,P60905,P80201,P82471,P97605,Q09030,Q63467,Q6AYR8,Q6AYR9,Q6IRE4,Q812E4,Q9JID2,Q9QZK9 |
| 999  | 1,2,3,5,7,4<br>1,43,44 | 4,6,8,36,3<br>7,38,39,40<br>,42 | 8  | P01946,P02091,P0C0A9,P52590,P82471,P83121,Q63467,Q63661                                                                                            |
| 1000 | 1,2,3,5,7,4<br>2,43,44 | 4,6,8,36,3<br>7,38,39,40<br>,41 | 16 | O35783,P01946,P02091,P02782,P08723,P0C0A9,P16636,P17046,P30120,P36374,P52590,P60905,Q09030,Q62975,Q6AYR8,Q6Q7Y5                                    |
| 1001 | 1,2,3,5,8,3<br>6,37,38 | 4,6,7,39,4<br>0,41,42,43<br>,44 | 2  | P83121,Q6AYL6                                                                                                                                      |
| 1002 | 1,2,3,5,8,3<br>6,37,39 | 4,6,7,38,4<br>0,41,42,43<br>,44 | 5  | O54728,P00714,P09605,P25809,P27213,P83121                                                                                                          |
| 1003 | 1,2,3,5,8,3<br>6,37,40 | 4,6,7,38,3<br>9,41,42,43<br>,44 | 5  | B0BNN3,P00762,P09605,P25809,P83121,Q9Z1F2                                                                                                          |
| 1004 | 1,2,3,5,8,3<br>6,37,41 | 4,6,7,38,3<br>9,40,42,43<br>,44 | 2  | P83121,Q9Z1F2                                                                                                                                      |
| 1005 | 1,2,3,5,8,3<br>6,37,42 | 4,6,7,38,3<br>9,40,41,43<br>,44 | 9  | P00762,P06911,P08753,P12020,P19629,P22283,P83121,Q6AYL6,Q920P0                                                                                     |
| 1006 | 1,2,3,5,8,3<br>6,37,43 | 4,6,7,38,3<br>9,40,41,42<br>,44 | 10 | P06911,P09605,P25809,P12020,P13432,P16391,P19629,P83121,Q63942,Q9QW07,Q9QX79                                                                       |
| 1007 | 1,2,3,5,8,3<br>6,37,44 | 4,6,7,38,3<br>9,40,41,42<br>,43 | 7  | B0BNN3,P00762,P09605,P25809,P13432,P53792,P55314,P83121                                                                                            |
| 1008 | 1,2,3,5,8,3<br>6,38,39 | 4,6,7,37,4<br>0,41,42,43<br>,44 | 4  | O54728,P00714,P27213,Q6P6R2                                                                                                                        |
| 1009 | 1,2,3,5,8,3<br>6,38,40 | 4,6,7,37,3<br>9,41,42,43<br>,44 | 1  | P22006                                                                                                                                             |
| 1010 | 1,2,3,5,8,3<br>6,38,41 | 4,6,7,37,3<br>9,40,42,43<br>,44 | 5  | P08753,P50115,P50116,P83121,Q62902                                                                                                                 |

|      |                        |                                 |    |                                                                                                          |
|------|------------------------|---------------------------------|----|----------------------------------------------------------------------------------------------------------|
| 1011 | 1,2,3,5,8,3<br>6,38,42 | 4,6,7,37,3<br>9,40,41,43<br>,44 | 13 | P04905,P06911,P08753,P12020,P22282,P22283,P36374,P47727,P60905,Q5GRG2,Q62902,Q6AYL6,Q9QZK9               |
| 1012 | 1,2,3,5,8,3<br>6,38,43 | 4,6,7,37,3<br>9,40,41,42<br>,44 | 7  | P06911,P12020,P16391,P34901,P83121,Q5GRG2,Q63942                                                         |
| 1013 | 1,2,3,5,8,3<br>6,38,44 | 4,6,7,37,3<br>9,40,41,42<br>,43 | 4  | P22006,P34901,P55314,P83121                                                                              |
| 1014 | 1,2,3,5,8,3<br>6,39,40 | 4,6,7,37,3<br>8,41,42,43<br>,44 | 2  | O54728,P27213                                                                                            |
| 1015 | 1,2,3,5,8,3<br>6,39,41 | 4,6,7,37,3<br>8,40,42,43<br>,44 | 4  | P00714,P08010,P83121,Q6AYR9                                                                              |
| 1016 | 1,2,3,5,8,3<br>6,39,42 | 4,6,7,37,3<br>8,40,41,43<br>,44 | 10 | O54728,P00762,P04905,P08010,P08753,P0C0A9,P22283,P27213,P47727,Q6AYR9                                    |
| 1017 | 1,2,3,5,8,3<br>6,39,43 | 4,6,7,37,3<br>8,40,41,42<br>,44 | 6  | O54728,P00714,P01946,P55314,P83121,Q63942                                                                |
| 1018 | 1,2,3,5,8,3<br>6,39,44 | 4,6,7,37,3<br>8,40,41,42<br>,43 | 4  | P27213,P34901,P55314,P83121                                                                              |
| 1019 | 1,2,3,5,8,3<br>6,40,41 | 4,6,7,37,3<br>8,39,42,43<br>,44 | 3  | P83121,Q6IRE4,Q9Z1F2                                                                                     |
| 1020 | 1,2,3,5,8,3<br>6,40,42 | 4,6,7,37,3<br>8,39,41,43<br>,44 | 5  | P00762,P08753,P23593,P36374,Q6AYR9                                                                       |
| 1021 | 1,2,3,5,8,3<br>6,40,43 | 4,6,7,37,3<br>8,39,41,42<br>,44 | 3  | P13432,P83121,Q63942                                                                                     |
| 1022 | 1,2,3,5,8,3<br>6,40,44 | 4,6,7,37,3<br>8,39,41,42<br>,43 | 7  | B0BNN3,P00762,P13432,P22006,P55314,P83121,Q6P6T1                                                         |
| 1023 | 1,2,3,5,8,3<br>6,41,42 | 4,6,7,37,3<br>8,39,40,43<br>,44 | 15 | P04905,P08010,P08644,P08753,P0C0A9,P22282,P22283,P60905,P83121,Q62902,Q63357,Q6AYL6,Q6AYR9,Q812E4,Q9QZK9 |
| 1024 | 1,2,3,5,8,3<br>6,41,43 | 4,6,7,37,3<br>8,39,40,42<br>,44 | 5  | P00714,P83121,Q63942,Q9QX79,Q9Z1F2                                                                       |
| 1025 | 1,2,3,5,8,3<br>6,41,44 | 4,6,7,37,3<br>8,39,40,42<br>,43 | 3  | P55314,P83121,Q99MH3                                                                                     |

|      |                        |                                 |    |                                                                                                                 |
|------|------------------------|---------------------------------|----|-----------------------------------------------------------------------------------------------------------------|
| 1026 | 1,2,3,5,8,3<br>6,42,43 | 4,6,7,37,3<br>8,39,40,41<br>,44 | 16 | P04905,P06911,P08723,P08753,P0C0A9,P12020,P16391,P19629,P24368,P47727,P60905,P83121,Q5GRG2,Q62975,Q63942,Q6AYR9 |
| 1027 | 1,2,3,5,8,3<br>6,42,44 | 4,6,7,37,3<br>8,39,40,41<br>,43 | 11 | P00762,P04905,P08644,P08753,P0C0A9,P13432,P36374,P55314,P60905,P83121,Q9QZK9                                    |
| 1028 | 1,2,3,5,8,3<br>6,43,44 | 4,6,7,37,3<br>8,39,40,41<br>,42 | 6  | P13432,P34901,P55314,P83121,Q63661,Q63942                                                                       |
| 1029 | 1,2,3,5,8,3<br>7,38,39 | 4,6,7,36,4<br>0,41,42,43<br>,44 | 2  | P00714,P27213                                                                                                   |
| 1030 | 1,2,3,5,8,3<br>7,38,40 | 4,6,7,36,3<br>9,41,42,43<br>,44 | 1  | P22006                                                                                                          |
| 1031 | 1,2,3,5,8,3<br>7,38,41 | 4,6,7,36,3<br>9,40,42,43<br>,44 | 3  | P50115,P50116,P83121                                                                                            |
| 1032 | 1,2,3,5,8,3<br>7,38,42 | 4,6,7,36,3<br>9,40,41,43<br>,44 | 3  | P08753,P12020,Q6AYL6                                                                                            |
| 1033 | 1,2,3,5,8,3<br>7,38,43 | 4,6,7,36,3<br>9,40,41,42<br>,44 | 6  | P12020,P83121,Q63942,Q7TPB1,Q9QW07,Q9QX79                                                                       |
| 1034 | 1,2,3,5,8,3<br>7,38,44 | 4,6,7,36,3<br>9,40,41,42<br>,43 | 1  | P22006                                                                                                          |
| 1035 | 1,2,3,5,8,3<br>7,39,40 | 4,6,7,36,3<br>8,41,42,43<br>,44 | 2  | P27213,Q8CIZ5                                                                                                   |
| 1036 | 1,2,3,5,8,3<br>7,39,41 | 4,6,7,36,3<br>8,40,42,43<br>,44 | 2  | P00714,P83121                                                                                                   |
| 1037 | 1,2,3,5,8,3<br>7,39,42 | 4,6,7,36,3<br>8,40,41,43<br>,44 | 1  | P27213                                                                                                          |
| 1038 | 1,2,3,5,8,3<br>7,39,43 | 4,6,7,36,3<br>8,40,41,42<br>,44 | 6  | P00714,P01946,P83121,Q63942,Q8CIZ5,Q9QW07                                                                       |
| 1039 | 1,2,3,5,8,3<br>7,39,44 | 4,6,7,36,3<br>8,40,41,42<br>,43 | 1  | P27213                                                                                                          |
| 1040 | 1,2,3,5,8,3<br>7,40,41 | 4,6,7,36,3<br>8,39,42,43<br>,44 | 4  | P51907,P83121,Q6IRE4,Q9Z1F2                                                                                     |

|      |                        |                                 |   |                                                  |
|------|------------------------|---------------------------------|---|--------------------------------------------------|
| 1041 | 1,2,3,5,8,3<br>7,40,42 | 4,6,7,36,3<br>8,39,41,43<br>,44 | 1 | P22006                                           |
| 1042 | 1,2,3,5,8,3<br>7,40,43 | 4,6,7,36,3<br>8,39,41,42<br>,44 | 6 | P51907,P83121,Q8CIZ5,Q9QW07,Q9QX79,Q9Z1F2        |
| 1043 | 1,2,3,5,8,3<br>7,40,44 | 4,6,7,36,3<br>8,39,41,42<br>,43 | 2 | P22006,Q9QW07                                    |
| 1044 | 1,2,3,5,8,3<br>7,41,42 | 4,6,7,36,3<br>8,39,40,43<br>,44 | 2 | P08753,P83121                                    |
| 1045 | 1,2,3,5,8,3<br>7,41,43 | 4,6,7,36,3<br>8,39,40,42<br>,44 | 6 | P00714,P51907,P83121,Q7TPB1,Q9QX79,Q9Z1F2        |
| 1046 | 1,2,3,5,8,3<br>7,41,44 | 4,6,7,36,3<br>8,39,40,42<br>,43 | 2 | P83121,Q9Z1F2                                    |
| 1047 | 1,2,3,5,8,3<br>7,42,43 | 4,6,7,36,3<br>8,39,40,41<br>,44 | 7 | P06911,P12020,P19629,P83121,Q5GRG2,Q62975,Q63942 |
| 1048 | 1,2,3,5,8,3<br>7,42,44 | 4,6,7,36,3<br>8,39,40,41<br>,43 | 2 | P22006,P83121                                    |
| 1049 | 1,2,3,5,8,3<br>7,43,44 | 4,6,7,36,3<br>8,39,40,41<br>,42 | 4 | P13432,P83121,Q9QW07,Q9QX79                      |
| 1050 | 1,2,3,5,8,3<br>8,39,40 | 4,6,7,36,3<br>7,41,42,43<br>,44 | 1 | P27213                                           |
| 1051 | 1,2,3,5,8,3<br>8,39,41 | 4,6,7,36,3<br>7,40,42,43<br>,44 | 3 | P00714,P50115,P50116                             |
| 1052 | 1,2,3,5,8,3<br>8,39,42 | 4,6,7,36,3<br>7,40,41,43<br>,44 | 7 | O54728,P04905,P08010,P08753,P0C0A9,P47727,Q9QZK9 |
| 1053 | 1,2,3,5,8,3<br>8,39,43 | 4,6,7,36,3<br>7,40,41,42<br>,44 | 3 | P00714,P01946,Q63942                             |
| 1054 | 1,2,3,5,8,3<br>8,39,44 | 4,6,7,36,3<br>7,40,41,42<br>,43 | 1 | P34901                                           |
| 1055 | 1,2,3,5,8,3<br>8,40,41 | 4,6,7,36,3<br>7,39,42,43<br>,44 | 3 | P50115,P50116,Q6IRE4                             |

|      |                        |                                 |    |                                                                                                          |
|------|------------------------|---------------------------------|----|----------------------------------------------------------------------------------------------------------|
| 1056 | 1,2,3,5,8,3<br>8,40,42 | 4,6,7,36,3<br>7,39,41,43<br>,44 | 4  | P08753,P22006,P36374,Q9JHB9                                                                              |
| 1057 | 1,2,3,5,8,3<br>8,40,43 | 4,6,7,36,3<br>7,39,41,42<br>,44 | 1  | Q63942                                                                                                   |
| 1058 | 1,2,3,5,8,3<br>8,40,44 | 4,6,7,36,3<br>7,39,41,42<br>,43 | 1  | P22006                                                                                                   |
| 1059 | 1,2,3,5,8,3<br>8,41,42 | 4,6,7,36,3<br>7,39,40,43<br>,44 | 14 | O35547,P04905,P08010,P08753,P0C0A9,P22282,P50115,P50116,P54921,P60905,P83121,Q62902,Q63357,Q9QZK9        |
| 1060 | 1,2,3,5,8,3<br>8,41,43 | 4,6,7,36,3<br>7,39,40,42<br>,44 | 8  | P00714,P50115,P50116,P83121,Q63942,Q7TPB1,Q8CJD3,Q9QX79                                                  |
| 1061 | 1,2,3,5,8,3<br>8,41,44 | 4,6,7,36,3<br>7,39,40,42<br>,43 | 4  | P50115,P50116,P83121,Q05695                                                                              |
| 1062 | 1,2,3,5,8,3<br>8,42,43 | 4,6,7,36,3<br>7,39,40,41<br>,44 | 15 | O35547,P06911,P08723,P08753,P0C0A9,P12020,P47727,P60905,P83121,Q5GRG2,Q62902,Q62975,Q63942,Q9JHB9,Q9QZK9 |
| 1063 | 1,2,3,5,8,3<br>8,42,44 | 4,6,7,36,3<br>7,39,40,41<br>,43 | 8  | P08753,P0C0A9,P22006,P36374,P60905,Q62902,Q99041,Q9QZK9                                                  |
| 1064 | 1,2,3,5,8,3<br>8,43,44 | 4,6,7,36,3<br>7,39,40,41<br>,42 | 4  | P34901,P83121,Q63661,Q63942                                                                              |
| 1065 | 1,2,3,5,8,3<br>9,40,41 | 4,6,7,36,3<br>7,38,42,43<br>,44 | 3  | P00714,P47967,Q6IRE4                                                                                     |
| 1066 | 1,2,3,5,8,3<br>9,40,42 | 4,6,7,36,3<br>7,38,41,43<br>,44 | 3  | P02780,P27213,Q6AYR9                                                                                     |
| 1067 | 1,2,3,5,8,3<br>9,40,43 | 4,6,7,36,3<br>7,38,41,42<br>,44 | 2  | Q63942,Q8CIZ5                                                                                            |
| 1068 | 1,2,3,5,8,3<br>9,40,44 | 4,6,7,36,3<br>7,38,41,42<br>,43 | 3  | P27213,Q6P6T1,Q9QUL6                                                                                     |
| 1069 | 1,2,3,5,8,3<br>9,41,42 | 4,6,7,36,3<br>7,38,40,43<br>,44 | 8  | P04905,P08010,P08753,P09456,P0C0A9,P82471,P83121,Q6AYR9                                                  |
| 1070 | 1,2,3,5,8,3<br>9,41,43 | 4,6,7,36,3<br>7,38,40,42<br>,44 | 6  | P00714,P01946,P82471,P83121,Q63942,Q9QX79                                                                |

|      |                         |                                 |    |                                                                                     |
|------|-------------------------|---------------------------------|----|-------------------------------------------------------------------------------------|
| 1071 | 1,2,3,5,8,3<br>9,41,44  | 4,6,7,36,3<br>7,38,40,42<br>,43 | 1  | P83121                                                                              |
| 1072 | 1,2,3,5,8,3<br>9,42,43  | 4,6,7,36,3<br>7,38,40,41<br>,44 | 9  | O54728,P08753,P0C0A9,P47727,P82471,P83121,Q63942,Q6AYR9,Q9JHB9                      |
| 1073 | 1,2,3,5,8,3<br>9,42,44  | 4,6,7,36,3<br>7,38,40,41<br>,43 | 3  | P08753,P0C0A9,Q6AYR9                                                                |
| 1074 | 1,2,3,5,8,3<br>9,43,44  | 4,6,7,36,3<br>7,38,40,41<br>,42 | 4  | P01946,P83121,Q63942,Q9QW07                                                         |
| 1075 | 1,2,3,5,8,4<br>0,41,42  | 4,6,7,36,3<br>7,38,39,43<br>,44 | 4  | P08753,P83121,Q6AYR9,Q6IRE4                                                         |
| 1076 | 1,2,3,5,8,4<br>0,41,43  | 4,6,7,36,3<br>7,38,39,42<br>,44 | 6  | P47967,P51907,P83121,P97840,Q9QX79,Q9Z1F2                                           |
| 1077 | 1,2,3,5,8,4<br>0,41,44  | 4,6,7,36,3<br>7,38,39,42<br>,43 | 4  | P47967,P83121,Q6IRE4,Q9Z1F2                                                         |
| 1078 | 1,2,3,5,8,4<br>0,42,43  | 4,6,7,36,3<br>7,38,39,41<br>,44 | 4  | P36374,Q5M819,Q6AYR9,Q9JHB9                                                         |
| 1079 | 1,2,3,5,8,4<br>0,42,44  | 4,6,7,36,3<br>7,38,39,41<br>,43 | 5  | P22006,P36374,Q5M819,Q6PCU2,Q9QZ76                                                  |
| 1080 | 1,2,3,5,8,4<br>0,43,44  | 4,6,7,36,3<br>7,38,39,41<br>,42 | 4  | P83121,Q5M819,Q63661,Q9QW07                                                         |
| 1081 | 1,2,3,5,8,4<br>1,42,43  | 4,6,7,36,3<br>7,38,39,40<br>,44 | 12 | O35547,P04897,P08753,P0C0A9,P54921,P60905,P82471,P83121,Q62902,Q63357,Q6AYR9,Q9QX79 |
| 1082 | 1,2,3,5,8,4<br>1,42,44  | 4,6,7,36,3<br>7,38,39,40<br>,43 | 8  | P08753,P0C0A9,P60905,P82471,P83121,Q6AYR9,Q9JID2,Q9QZK9                             |
| 1083 | 1,2,3,5,8,4<br>1,43,44  | 4,6,7,36,3<br>7,38,39,40<br>,42 | 3  | P82471,P83121,Q9QX79                                                                |
| 1084 | 1,2,3,5,8,4<br>2,43,44  | 4,6,7,36,3<br>7,38,39,40<br>,41 | 10 | P08723,P08753,P0C0A9,P36374,P60905,P83121,Q5M819,Q62975,Q6AYR8,Q6Q7Y5               |
| 1085 | 1,2,3,5,36,<br>37,38,39 | 4,6,7,8,40,<br>41,42,43,4<br>4  | 7  | O54728,P00714,P12020,P27213,Q561R9,Q63617,Q6P6R2                                    |

|      |                         |                                |    |                                                                                                   |
|------|-------------------------|--------------------------------|----|---------------------------------------------------------------------------------------------------|
| 1086 | 1,2,3,5,36,<br>37,38,40 | 4,6,7,8,39,<br>41,42,43,4<br>4 | 2  | Q6IRE4,Q9QW07                                                                                     |
| 1087 | 1,2,3,5,36,<br>37,38,41 | 4,6,7,8,39,<br>40,42,43,4<br>4 | 2  | P00714,P83121                                                                                     |
| 1088 | 1,2,3,5,36,<br>37,38,42 | 4,6,7,8,39,<br>40,41,43,4<br>4 | 11 | P06911,P10715,P11598,P12020,P19629,P22282,P22283,Q5GRG2,Q63617,Q6AYL6,Q99041                      |
| 1089 | 1,2,3,5,36,<br>37,38,43 | 4,6,7,8,39,<br>40,41,42,4<br>4 | 11 | P00714,P06911,P12020,P34901,P83121,Q561R9,Q5GRG2,Q63617,Q63661,Q6P6R2,Q9QW07                      |
| 1090 | 1,2,3,5,36,<br>37,38,44 | 4,6,7,8,39,<br>40,41,42,4<br>3 | 5  | P34901,P55314,Q63617,Q99041,Q9QW07                                                                |
| 1091 | 1,2,3,5,36,<br>37,39,40 | 4,6,7,8,38,<br>41,42,43,4<br>4 | 8  | O54728,P00714,P27213,P50115,P55091,Q05695,Q8CIZ5,Q9QW07                                           |
| 1092 | 1,2,3,5,36,<br>37,39,41 | 4,6,7,8,38,<br>40,42,43,4<br>4 | 2  | P00714,P83121                                                                                     |
| 1093 | 1,2,3,5,36,<br>37,39,42 | 4,6,7,8,38,<br>40,41,43,4<br>4 | 8  | O54728,P12020,P22283,P27213,P50115,Q05695,Q62635,Q63617                                           |
| 1094 | 1,2,3,5,36,<br>37,39,43 | 4,6,7,8,38,<br>40,41,42,4<br>4 | 14 | O54728,P00714,P01946,P06760,P12020,P50115,P55314,P83121,Q05695,Q62635,Q63617,Q6P6R2,Q8CIZ5,Q9QW07 |
| 1095 | 1,2,3,5,36,<br>37,39,44 | 4,6,7,8,38,<br>40,41,42,4<br>3 | 5  | P27213,P34901,P55314,Q63617,Q9QW07                                                                |
| 1096 | 1,2,3,5,36,<br>37,40,41 | 4,6,7,8,38,<br>39,42,43,4<br>4 | 4  | P00714,P83121,Q6IRE4,Q80WL1                                                                       |
| 1097 | 1,2,3,5,36,<br>37,40,42 | 4,6,7,8,38,<br>39,41,43,4<br>4 | 4  | P11598,Q05695,Q6IRE4,Q99041                                                                       |
| 1098 | 1,2,3,5,36,<br>37,40,43 | 4,6,7,8,38,<br>39,41,42,4<br>4 | 7  | P00714,P11598,P83121,Q05695,Q63661,Q8CIZ5,Q9QW07                                                  |
| 1099 | 1,2,3,5,36,<br>37,40,44 | 4,6,7,8,38,<br>39,41,42,4<br>3 | 5  | B0BNN3,P13432,P55314,Q80WL1,Q9QW07                                                                |
| 1100 | 1,2,3,5,36,<br>37,41,42 | 4,6,7,8,38,<br>39,40,43,4<br>4 | 4  | P11598,P22282,P22283,P83121                                                                       |

|      |                         |                                |    |                                                                                            |
|------|-------------------------|--------------------------------|----|--------------------------------------------------------------------------------------------|
| 1101 | 1,2,3,5,36,<br>37,41,43 | 4,6,7,8,38,<br>39,40,42,4<br>4 | 3  | P00714,P06760,P83121                                                                       |
| 1102 | 1,2,3,5,36,<br>37,41,44 | 4,6,7,8,38,<br>39,40,42,4<br>3 | 2  | P55314,P83121                                                                              |
| 1103 | 1,2,3,5,36,<br>37,42,43 | 4,6,7,8,38,<br>39,40,41,4<br>4 | 13 | P06911,P10715,P11598,P12020,P19629,P31044,P83121,Q05695,Q5GRG2,Q62635,Q62975,Q63617,Q99041 |
| 1104 | 1,2,3,5,36,<br>37,42,44 | 4,6,7,8,38,<br>39,40,41,4<br>3 | 5  | P22283,P55314,P83121,Q63617,Q99041                                                         |
| 1105 | 1,2,3,5,36,<br>37,43,44 | 4,6,7,8,38,<br>39,40,41,4<br>2 | 7  | P13432,P34901,P55314,P83121,Q63617,Q63661,Q9QW07                                           |
| 1106 | 1,2,3,5,36,<br>38,39,40 | 4,6,7,8,37,<br>41,42,43,4<br>4 | 6  | O54728,P00714,P27213,Q63617,Q6P6R2,Q99041                                                  |
| 1107 | 1,2,3,5,36,<br>38,39,41 | 4,6,7,8,37,<br>40,42,43,4<br>4 | 1  | P00714                                                                                     |
| 1108 | 1,2,3,5,36,<br>38,39,42 | 4,6,7,8,37,<br>40,41,43,4<br>4 | 7  | O54728,P12020,P22282,P22283,P47727,Q63617,Q99041                                           |
| 1109 | 1,2,3,5,36,<br>38,39,43 | 4,6,7,8,37,<br>40,41,42,4<br>4 | 11 | O54728,P00714,P01946,P06911,P12020,P34901,P55314,Q63617,Q6P6R2,Q99041,Q9QW07               |
| 1110 | 1,2,3,5,36,<br>38,39,44 | 4,6,7,8,37,<br>40,41,42,4<br>3 | 4  | P34901,P55314,Q63617,Q99041                                                                |
| 1111 | 1,2,3,5,36,<br>38,40,41 | 4,6,7,8,37,<br>39,42,43,4<br>4 | 2  | P00714,Q6IRE4                                                                              |
| 1112 | 1,2,3,5,36,<br>38,40,42 | 4,6,7,8,37,<br>39,41,43,4<br>4 | 4  | P11598,Q63617,Q6IRE4,Q99041                                                                |
| 1113 | 1,2,3,5,36,<br>38,40,43 | 4,6,7,8,37,<br>39,41,42,4<br>4 | 7  | P00714,P11598,P34901,Q63617,Q63661,Q99041,Q9QW07                                           |
| 1114 | 1,2,3,5,36,<br>38,40,44 | 4,6,7,8,37,<br>39,41,42,4<br>3 | 4  | P22006,P34901,P55314,Q99041                                                                |
| 1115 | 1,2,3,5,36,<br>38,41,42 | 4,6,7,8,37,<br>39,40,43,4<br>4 | 11 | P08753,P0C0A9,P11598,P22282,P22283,P60905,P83121,Q62902,Q63617,Q6AYL6,Q9QZK9               |



|      |                         |                                |    |                                                                                                   |
|------|-------------------------|--------------------------------|----|---------------------------------------------------------------------------------------------------|
| 1116 | 1,2,3,5,36,<br>38,41,43 | 4,6,7,8,37,<br>39,40,42,4<br>4 | 5  | P00714,P34901,P83121,Q63661,Q8CJD3                                                                |
| 1117 | 1,2,3,5,36,<br>38,41,44 | 4,6,7,8,37,<br>39,40,42,4<br>3 | 3  | P34901,P55314,P83121                                                                              |
| 1118 | 1,2,3,5,36,<br>38,42,43 | 4,6,7,8,37,<br>39,40,41,4<br>4 | 14 | P06911,P10715,P11598,P12020,P19629,P31044,P34901,P47727,Q5GRG2,Q62902,Q62975,Q63617,Q6AYL6,Q99041 |
| 1119 | 1,2,3,5,36,<br>38,42,44 | 4,6,7,8,37,<br>39,40,41,4<br>3 | 7  | P22282,P22283,P34901,P55314,Q62902,Q63617,Q99041                                                  |
| 1120 | 1,2,3,5,36,<br>38,43,44 | 4,6,7,8,37,<br>39,40,41,4<br>2 | 7  | P34901,P55314,P83121,Q63617,Q63661,Q99041,Q9QW07                                                  |
| 1121 | 1,2,3,5,36,<br>39,40,41 | 4,6,7,8,37,<br>38,42,43,4<br>4 | 2  | P00714,Q6IRE4                                                                                     |
| 1122 | 1,2,3,5,36,<br>39,40,42 | 4,6,7,8,37,<br>38,41,43,4<br>4 | 9  | O54728,P00774,P11598,P27213,Q05695,Q63617,Q6AYR9,Q6IRE4,Q99041                                    |
| 1123 | 1,2,3,5,36,<br>39,40,43 | 4,6,7,8,37,<br>38,41,42,4<br>4 | 8  | O54728,P00714,P55314,Q05695,Q63617,Q8CIZ5,Q99041,Q9QW07                                           |
| 1124 | 1,2,3,5,36,<br>39,40,44 | 4,6,7,8,37,<br>38,41,42,4<br>3 | 7  | P27213,P34901,P55314,Q6P6T1,Q99041,Q9QUL6,Q9QW07                                                  |
| 1125 | 1,2,3,5,36,<br>39,41,42 | 4,6,7,8,37,<br>38,40,43,4<br>4 | 8  | O54728,P08010,P08753,P0C0A9,P22282,P22283,P83121,Q6AYR9                                           |
| 1126 | 1,2,3,5,36,<br>39,41,43 | 4,6,7,8,37,<br>38,40,42,4<br>4 | 5  | P00714,P01946,P06760,P55314,P83121                                                                |
| 1127 | 1,2,3,5,36,<br>39,41,44 | 4,6,7,8,37,<br>38,40,42,4<br>3 | 2  | P55314,P83121                                                                                     |
| 1128 | 1,2,3,5,36,<br>39,42,43 | 4,6,7,8,37,<br>38,40,41,4<br>4 | 14 | O54728,P01946,P06911,P0C0A9,P11598,P12020,P24368,P55314,Q05695,Q5GRG2,Q62635,Q63617,Q6AYR9,Q99041 |
| 1129 | 1,2,3,5,36,<br>39,42,44 | 4,6,7,8,37,<br>38,40,41,4<br>3 | 8  | O54728,P0C0A9,P22283,P34901,P55314,Q63617,Q6AYR9,Q99041                                           |
| 1130 | 1,2,3,5,36,<br>39,43,44 | 4,6,7,8,37,<br>38,40,41,4<br>2 | 8  | P01946,P34901,P55314,P83121,Q63617,Q63661,Q99041,Q9QW07                                           |

|      |                         |                                |    |                                                                                     |
|------|-------------------------|--------------------------------|----|-------------------------------------------------------------------------------------|
| 1131 | 1,2,3,5,36,<br>40,41,42 | 4,6,7,8,37,<br>38,39,43,4<br>4 | 4  | P11598,P23593,Q6AYR9,Q6IRE4                                                         |
| 1132 | 1,2,3,5,36,<br>40,41,43 | 4,6,7,8,37,<br>38,39,42,4<br>4 | 4  | P00714,P11598,P83121,Q63661                                                         |
| 1133 | 1,2,3,5,36,<br>40,41,44 | 4,6,7,8,37,<br>38,39,42,4<br>3 | 4  | P55314,P83121,Q6IRE4,Q80WL1                                                         |
| 1134 | 1,2,3,5,36,<br>40,42,43 | 4,6,7,8,37,<br>38,39,41,4<br>4 | 6  | P02782,P11598,Q05695,Q63617,Q6AYR9,Q99041                                           |
| 1135 | 1,2,3,5,36,<br>40,42,44 | 4,6,7,8,37,<br>38,39,41,4<br>3 | 5  | P02782,P11598,P55314,Q7TPB1,Q99041                                                  |
| 1136 | 1,2,3,5,36,<br>40,43,44 | 4,6,7,8,37,<br>38,39,41,4<br>2 | 7  | P13432,P34901,P55314,P83121,Q63661,Q99041,Q9QW07                                    |
| 1137 | 1,2,3,5,36,<br>41,42,43 | 4,6,7,8,37,<br>38,39,40,4<br>4 | 7  | P0C0A9,P11598,P24368,P60905,P82471,P83121,Q6AYR9                                    |
| 1138 | 1,2,3,5,36,<br>41,42,44 | 4,6,7,8,37,<br>38,39,40,4<br>3 | 8  | P08644,P0C0A9,P22282,P22283,P55314,P60905,P83121,Q6AYR9                             |
| 1139 | 1,2,3,5,36,<br>41,43,44 | 4,6,7,8,37,<br>38,39,40,4<br>2 | 4  | P34901,P55314,P83121,Q63661                                                         |
| 1140 | 1,2,3,5,36,<br>42,43,44 | 4,6,7,8,37,<br>38,39,40,4<br>1 | 12 | P06911,P0C0A9,P11598,P13432,P34901,P55314,P83121,Q62975,Q63617,Q63661,Q6AYR8,Q99041 |
| 1141 | 1,2,3,5,37,<br>38,39,40 | 4,6,7,8,36,<br>41,42,43,4<br>4 | 7  | P00714,P27213,Q63617,Q6IRE4,Q99041,Q9QUL6,Q9QW07                                    |
| 1142 | 1,2,3,5,37,<br>38,39,41 | 4,6,7,8,36,<br>40,42,43,4<br>4 | 1  | P00714                                                                              |
| 1143 | 1,2,3,5,37,<br>38,39,42 | 4,6,7,8,36,<br>40,41,43,4<br>4 | 4  | P11598,P12020,Q63617,Q99041                                                         |
| 1144 | 1,2,3,5,37,<br>38,39,43 | 4,6,7,8,36,<br>40,41,42,4<br>4 | 9  | P00714,P01946,P12020,Q561R9,Q63617,Q6IFV1,Q6P6R2,Q99041,Q9QW07                      |
| 1145 | 1,2,3,5,37,<br>38,39,44 | 4,6,7,8,36,<br>40,41,42,4<br>3 | 5  | P34901,Q63617,Q99041,Q9JJS8,Q9QW07                                                  |

|      |                         |                                |    |                                                                              |
|------|-------------------------|--------------------------------|----|------------------------------------------------------------------------------|
| 1146 | 1,2,3,5,37,<br>38,40,41 | 4,6,7,8,36,<br>39,42,43,4<br>4 | 2  | P00714,Q6IRE4                                                                |
| 1147 | 1,2,3,5,37,<br>38,40,42 | 4,6,7,8,36,<br>39,41,43,4<br>4 | 4  | P11598,Q63617,Q6IRE4,Q99041                                                  |
| 1148 | 1,2,3,5,37,<br>38,40,43 | 4,6,7,8,36,<br>39,41,42,4<br>4 | 4  | P00714,P11598,Q99041,Q9QW07                                                  |
| 1149 | 1,2,3,5,37,<br>38,40,44 | 4,6,7,8,36,<br>39,41,42,4<br>3 | 4  | P22006,Q99041,Q9QUL6,Q9QW07                                                  |
| 1150 | 1,2,3,5,37,<br>38,41,42 | 4,6,7,8,36,<br>39,40,43,4<br>4 | 4  | P11598,P22282,P22283,Q6IRE4                                                  |
| 1151 | 1,2,3,5,37,<br>38,41,43 | 4,6,7,8,36,<br>39,40,42,4<br>4 | 3  | P00714,P83121,Q8CJD3                                                         |
| 1152 | 1,2,3,5,37,<br>38,41,44 | 4,6,7,8,36,<br>39,40,42,4<br>3 | 1  | P83121                                                                       |
| 1153 | 1,2,3,5,37,<br>38,42,43 | 4,6,7,8,36,<br>39,40,41,4<br>4 | 11 | P06866,P06911,P10715,P11598,P12020,P19629,P31044,Q5GRG2,Q62975,Q63617,Q99041 |
| 1154 | 1,2,3,5,37,<br>38,42,44 | 4,6,7,8,36,<br>39,40,41,4<br>3 | 2  | Q63617,Q99041                                                                |
| 1155 | 1,2,3,5,37,<br>38,43,44 | 4,6,7,8,36,<br>39,40,41,4<br>2 | 5  | P34901,Q63617,Q63661,Q99041,Q9QW07                                           |
| 1156 | 1,2,3,5,37,<br>39,40,41 | 4,6,7,8,36,<br>38,42,43,4<br>4 | 2  | P00714,Q6IRE4                                                                |
| 1157 | 1,2,3,5,37,<br>39,40,42 | 4,6,7,8,36,<br>38,41,43,4<br>4 | 5  | P11598,P27213,Q05695,Q6IRE4,Q99041                                           |
| 1158 | 1,2,3,5,37,<br>39,40,43 | 4,6,7,8,36,<br>38,41,42,4<br>4 | 5  | P00714,P11598,Q05695,Q8CIZ5,Q9QW07                                           |
| 1159 | 1,2,3,5,37,<br>39,40,44 | 4,6,7,8,36,<br>38,41,42,4<br>3 | 4  | P27213,Q99041,Q9QUL6,Q9QW07                                                  |
| 1160 | 1,2,3,5,37,<br>39,41,42 | 4,6,7,8,36,<br>38,40,43,4<br>4 | 2  | P11598,Q6IRE4                                                                |

|      |                         |                                |   |                                                                |
|------|-------------------------|--------------------------------|---|----------------------------------------------------------------|
| 1161 | 1,2,3,5,37,<br>39,41,43 | 4,6,7,8,36,<br>38,40,42,4<br>4 | 3 | P00714,P01946,P83121                                           |
| 1162 | 1,2,3,5,37,<br>39,41,44 | 4,6,7,8,36,<br>38,40,42,4<br>3 | 1 | P83121                                                         |
| 1163 | 1,2,3,5,37,<br>39,42,43 | 4,6,7,8,36,<br>38,40,41,4<br>4 | 9 | O54728,P06911,P11598,P12020,Q05695,Q5GRG2,Q62635,Q63617,Q99041 |
| 1164 | 1,2,3,5,37,<br>39,42,44 | 4,6,7,8,36,<br>38,40,41,4<br>3 | 2 | Q63617,Q99041                                                  |
| 1165 | 1,2,3,5,37,<br>39,43,44 | 4,6,7,8,36,<br>38,40,41,4<br>2 | 5 | P01946,P34901,Q63617,Q99041,Q9QW07                             |
| 1166 | 1,2,3,5,37,<br>40,41,42 | 4,6,7,8,36,<br>38,39,43,4<br>4 | 2 | P11598,Q6IRE4                                                  |
| 1167 | 1,2,3,5,37,<br>40,41,43 | 4,6,7,8,36,<br>38,39,42,4<br>4 | 4 | P00714,P11598,P51907,P83121                                    |
| 1168 | 1,2,3,5,37,<br>40,41,44 | 4,6,7,8,36,<br>38,39,42,4<br>3 | 2 | Q6IRE4,Q80WL1                                                  |
| 1169 | 1,2,3,5,37,<br>40,42,43 | 4,6,7,8,36,<br>38,39,41,4<br>4 | 3 | P11598,Q05695,Q99041                                           |
| 1170 | 1,2,3,5,37,<br>40,42,44 | 4,6,7,8,36,<br>38,39,41,4<br>3 | 4 | P11598,P22006,Q6IRE4,Q99041                                    |
| 1171 | 1,2,3,5,37,<br>40,43,44 | 4,6,7,8,36,<br>38,39,41,4<br>2 | 4 | P08649,Q63661,Q99041,Q9QW07                                    |
| 1172 | 1,2,3,5,37,<br>41,42,43 | 4,6,7,8,36,<br>38,39,40,4<br>4 | 2 | P11598,P83121                                                  |
| 1173 | 1,2,3,5,37,<br>41,42,44 | 4,6,7,8,36,<br>38,39,40,4<br>3 | 1 | P83121                                                         |
| 1174 | 1,2,3,5,37,<br>41,43,44 | 4,6,7,8,36,<br>38,39,40,4<br>2 | 3 | P83121,Q63661,Q9QW07                                           |
| 1175 | 1,2,3,5,37,<br>42,43,44 | 4,6,7,8,36,<br>38,39,40,4<br>1 | 6 | P11598,P83121,Q62975,Q63617,Q6AYR8,Q99041                      |

|      |                         |                                |    |                                                                       |
|------|-------------------------|--------------------------------|----|-----------------------------------------------------------------------|
| 1176 | 1,2,3,5,38,<br>39,40,41 | 4,6,7,8,36,<br>37,42,43,4<br>4 | 2  | P00714,Q6IRE4                                                         |
| 1177 | 1,2,3,5,38,<br>39,40,42 | 4,6,7,8,36,<br>37,41,43,4<br>4 | 6  | P02780,P11598,Q63617,Q6IRE4,Q99041,Q9QUL6                             |
| 1178 | 1,2,3,5,38,<br>39,40,43 | 4,6,7,8,36,<br>37,41,42,4<br>4 | 6  | P00714,P01946,P11598,Q63617,Q99041,Q9QW07                             |
| 1179 | 1,2,3,5,38,<br>39,40,44 | 4,6,7,8,36,<br>37,41,42,4<br>3 | 4  | P34901,Q99041,Q9QUL6,Q9QW07                                           |
| 1180 | 1,2,3,5,38,<br>39,41,42 | 4,6,7,8,36,<br>37,40,43,4<br>4 | 9  | P08010,P08753,P0C0A9,P11598,P22282,P22283,P82471,Q63617,Q6IRE4        |
| 1181 | 1,2,3,5,38,<br>39,41,43 | 4,6,7,8,36,<br>37,40,42,4<br>4 | 5  | P00714,P00731,P01946,Q63617,Q8CJD3                                    |
| 1182 | 1,2,3,5,38,<br>39,41,44 | 4,6,7,8,36,<br>37,40,42,4<br>3 | 0  |                                                                       |
| 1183 | 1,2,3,5,38,<br>39,42,43 | 4,6,7,8,36,<br>37,40,41,4<br>4 | 10 | O54728,P01946,P06911,P0C0A9,P11598,P12020,P47727,Q5GRG2,Q63617,Q99041 |
| 1184 | 1,2,3,5,38,<br>39,42,44 | 4,6,7,8,36,<br>37,40,41,4<br>3 | 4  | P0C0A9,P34901,Q63617,Q99041                                           |
| 1185 | 1,2,3,5,38,<br>39,43,44 | 4,6,7,8,36,<br>37,40,41,4<br>2 | 6  | P01946,P34901,Q63617,Q99041,Q9JJS8,Q9QW07                             |
| 1186 | 1,2,3,5,38,<br>40,41,42 | 4,6,7,8,36,<br>37,39,43,4<br>4 | 3  | P11598,Q6IRE4,Q99041                                                  |
| 1187 | 1,2,3,5,38,<br>40,41,43 | 4,6,7,8,36,<br>37,39,42,4<br>4 | 3  | P00714,P11598,Q8CJD3                                                  |
| 1188 | 1,2,3,5,38,<br>40,41,44 | 4,6,7,8,36,<br>37,39,42,4<br>3 | 2  | Q6IRE4,Q99041                                                         |
| 1189 | 1,2,3,5,38,<br>40,42,43 | 4,6,7,8,36,<br>37,39,41,4<br>4 | 4  | P11598,Q63617,Q99041,Q9JHB9                                           |
| 1190 | 1,2,3,5,38,<br>40,42,44 | 4,6,7,8,36,<br>37,39,41,4<br>3 | 5  | P11598,P22006,Q63617,Q99041,Q9QUL6                                    |

|      |                         |                                |    |                                                                              |
|------|-------------------------|--------------------------------|----|------------------------------------------------------------------------------|
| 1191 | 1,2,3,5,38,<br>40,43,44 | 4,6,7,8,36,<br>37,39,41,4<br>2 | 4  | P34901,Q63661,Q99041,Q9QW07                                                  |
| 1192 | 1,2,3,5,38,<br>41,42,43 | 4,6,7,8,36,<br>37,39,40,4<br>4 | 11 | O35547,P00731,P0C0A9,P11598,P54921,P82471,P83121,Q62902,Q63617,Q8CJD3,Q99041 |
| 1193 | 1,2,3,5,38,<br>41,42,44 | 4,6,7,8,36,<br>37,39,40,4<br>3 | 7  | P08753,P0C0A9,P22282,P22283,Q62902,Q99041,Q9QZK9                             |
| 1194 | 1,2,3,5,38,<br>41,43,44 | 4,6,7,8,36,<br>37,39,40,4<br>2 | 7  | P00774,P34901,P55091,P83121,P98089,Q63661,Q8CJD3                             |
| 1195 | 1,2,3,5,38,<br>42,43,44 | 4,6,7,8,36,<br>37,39,40,4<br>1 | 9  | P08723,P0C0A9,P11598,P34901,Q62975,Q63617,Q63661,Q6AYR8,Q99041               |
| 1196 | 1,2,3,5,39,<br>40,41,42 | 4,6,7,8,36,<br>37,38,43,4<br>4 | 3  | P11598,Q6AYR9,Q6IRE4                                                         |
| 1197 | 1,2,3,5,39,<br>40,41,43 | 4,6,7,8,36,<br>37,38,42,4<br>4 | 3  | P00714,P11598,P47967                                                         |
| 1198 | 1,2,3,5,39,<br>40,41,44 | 4,6,7,8,36,<br>37,38,42,4<br>3 | 4  | P10715,P19629,P47967,Q6IRE4                                                  |
| 1199 | 1,2,3,5,39,<br>40,42,43 | 4,6,7,8,36,<br>37,38,41,4<br>4 | 7  | P02780,P11598,Q05695,Q63617,Q6AYR9,Q99041,Q9JHB9                             |
| 1200 | 1,2,3,5,39,<br>40,42,44 | 4,6,7,8,36,<br>37,38,41,4<br>3 | 3  | P11598,Q99041,Q9QUL6                                                         |
| 1201 | 1,2,3,5,39,<br>40,43,44 | 4,6,7,8,36,<br>37,38,41,4<br>2 | 4  | P01946,P34901,Q99041,Q9QW07                                                  |
| 1202 | 1,2,3,5,39,<br>41,42,43 | 4,6,7,8,36,<br>37,38,40,4<br>4 | 7  | P00731,P01946,P0C0A9,P11598,P82471,P83121,Q6AYR9                             |
| 1203 | 1,2,3,5,39,<br>41,42,44 | 4,6,7,8,36,<br>37,38,40,4<br>3 | 3  | P0C0A9,P82471,Q6AYR9                                                         |
| 1204 | 1,2,3,5,39,<br>41,43,44 | 4,6,7,8,36,<br>37,38,40,4<br>2 | 3  | P01946,P82471,P83121                                                         |
| 1205 | 1,2,3,5,39,<br>42,43,44 | 4,6,7,8,36,<br>37,38,40,4<br>1 | 7  | P01946,P0C0A9,P11598,P34901,Q63617,Q6AYR8,Q99041                             |

|      |                         |                                  |    |                                                                                                                                                    |
|------|-------------------------|----------------------------------|----|----------------------------------------------------------------------------------------------------------------------------------------------------|
| 1206 | 1,2,3,5,40,<br>41,42,43 | 4,6,7,8,36,<br>37,38,39,4<br>4   | 3  | P11598,P83121,Q6AYR9                                                                                                                               |
| 1207 | 1,2,3,5,40,<br>41,42,44 | 4,6,7,8,36,<br>37,38,39,4<br>3   | 3  | P11598,Q6IRE4,Q99041                                                                                                                               |
| 1208 | 1,2,3,5,40,<br>41,43,44 | 4,6,7,8,36,<br>37,38,39,4<br>2   | 3  | P47967,P83121,Q63661                                                                                                                               |
| 1209 | 1,2,3,5,40,<br>42,43,44 | 4,6,7,8,36,<br>37,38,39,4<br>1   | 5  | P11598,Q63661,Q6AYR8,Q6PCU2,Q99041                                                                                                                 |
| 1210 | 1,2,3,5,41,<br>42,43,44 | 4,6,7,8,36,<br>37,38,39,4<br>0   | 7  | P0C0A9,P11598,P60905,P82471,P83121,Q6AYR8,Q99041                                                                                                   |
| 1211 | 1,2,3,6,7,8<br>,36,37   | 4,5,38,39,<br>40,41,42,4<br>3,44 | 12 | B0BNN3,D3ZUK3,O54858,P02631,P53792,P85971,Q09030,Q30KJ2,Q63467,Q63532,Q91ZS3,Q9Z1F2                                                                |
| 1212 | 1,2,3,6,7,8<br>,36,38   | 4,5,37,39,<br>40,41,42,4<br>3,44 | 15 | D3ZUK3,O54800;Q5DWV2,O54858,P02631,P15399,P19218,P53792,P85971,P97580,Q00715,Q09030,Q30KJ2,Q63467,Q63532,Q91ZS3                                    |
| 1213 | 1,2,3,6,7,8<br>,36,39   | 4,5,37,38,<br>40,41,42,4<br>3,44 | 12 | D3ZUK3,O54858,P01946,P02631,P06760,P08010,P16086,P27213,P85971,Q63467,Q63532,Q91ZS3                                                                |
| 1214 | 1,2,3,6,7,8<br>,36,40   | 4,5,37,38,<br>39,41,42,4<br>3,44 | 12 | B0BNN3,D3ZUK3,P02631,P16086,P36374,P53792,P85971,Q00715,Q09030,Q63467,Q63532,Q9Z1F2                                                                |
| 1215 | 1,2,3,6,7,8<br>,36,41   | 4,5,37,38,<br>39,40,42,4<br>3,44 | 16 | D3ZUK3,O54800;Q5DWV2,O54858,P02631,P08010,P08649,P08753,P16086,P80202,P85971,Q01205,Q09030,Q63467,Q63532,Q91ZS3,Q9Z1F2                             |
| 1216 | 1,2,3,6,7,8<br>,36,42   | 4,5,37,38,<br>39,40,41,4<br>3,44 | 21 | P02631,P02781,P04905,P08010,P08290,P08649,P08753,P16086,P20759,P36374,P53792,P60905,P85971,Q09030,Q62753,Q63357,Q63467,Q63532,Q812E4,Q91ZS3,Q9QZQ5 |
| 1217 | 1,2,3,6,7,8<br>,36,43   | 4,5,37,38,<br>39,40,41,4<br>2,44 | 16 | D3ZUK3,O54800;Q5DWV2,O54858,P01946,P02631,P02651,P06760,P16086,P85971,Q00715,Q09030,Q63467,Q63532,Q63942,Q66H69,Q9Z1F2                             |
| 1218 | 1,2,3,6,7,8<br>,36,44   | 4,5,37,38,<br>39,40,41,4<br>2,43 | 12 | B0BNN3,D3ZUK3,O54858,P02631,P11598,P36374,P53792,P55314,P85971,Q09030,Q63467,Q63532                                                                |
| 1219 | 1,2,3,6,7,8<br>,37,38   | 4,5,36,39,<br>40,41,42,4<br>3,44 | 8  | P02631,P15399,P53792,P85971,P97580,Q30KJ2,Q7TPB1,Q91ZS3                                                                                            |
| 1220 | 1,2,3,6,7,8<br>,37,39   | 4,5,36,38,<br>40,41,42,4<br>3,44 | 6  | P01946,P02631,P27213,P85971,Q30KJ2,Q91ZS3                                                                                                          |

|      |                       |                                  |    |                                                                                                                 |
|------|-----------------------|----------------------------------|----|-----------------------------------------------------------------------------------------------------------------|
| 1221 | 1,2,3,6,7,8<br>,37,40 | 4,5,36,38,<br>39,41,42,4<br>3,44 | 7  | P02631,P51907,P53792,Q09030,Q30KJ2,Q91ZS3,Q9Z1F2                                                                |
| 1222 | 1,2,3,6,7,8<br>,37,41 | 4,5,36,38,<br>39,40,42,4<br>3,44 | 9  | P02631,P51907,P85971,Q09030,Q30KJ2,Q63532,Q7TPB1,Q91ZS3,Q9Z1F2                                                  |
| 1223 | 1,2,3,6,7,8<br>,37,42 | 4,5,36,38,<br>39,40,41,4<br>3,44 | 11 | P02631,P08290,P08753,P16086,P20759,P36374,P53792,P85971,Q09030,Q91ZS3,Q9QZQ5                                    |
| 1224 | 1,2,3,6,7,8<br>,37,43 | 4,5,36,38,<br>39,40,41,4<br>2,44 | 12 | O35783,P01946,P02631,P10758,P85971,Q30KJ2,Q63532,Q66H69,Q7TPB1,Q91ZS3,Q9QX79,Q9Z1F2                             |
| 1225 | 1,2,3,6,7,8<br>,37,44 | 4,5,36,38,<br>39,40,41,4<br>2,43 | 6  | D3ZUK3,P02631,P53792,P85971,Q30KJ2,Q91ZS3                                                                       |
| 1226 | 1,2,3,6,7,8<br>,38,39 | 4,5,36,37,<br>40,41,42,4<br>3,44 | 10 | P01946,P02631,P15399,P19218,P27213,P85971,P97580,Q30KJ2,Q6IE51,Q91ZS3                                           |
| 1227 | 1,2,3,6,7,8<br>,38,40 | 4,5,36,37,<br>39,41,42,4<br>3,44 | 4  | P15399,P85971,P97580,Q30KJ2                                                                                     |
| 1228 | 1,2,3,6,7,8<br>,38,41 | 4,5,36,37,<br>39,40,42,4<br>3,44 | 15 | O35547,P02631,P08010,P08753,P16086,P50115,P50116,P85971,P97580,Q30KJ2,Q63467,Q63532,Q7TPB1,Q8CIZ5,Q91ZS3        |
| 1229 | 1,2,3,6,7,8<br>,38,42 | 4,5,36,37,<br>39,40,41,4<br>3,44 | 16 | O35547,P04905,P05369,P08010,P08290,P08753,P16086,P19218,P20759,P36374,P60905,P85971,P97580,Q30KJ2,Q62753,Q91ZS3 |
| 1230 | 1,2,3,6,7,8<br>,38,43 | 4,5,36,37,<br>39,40,41,4<br>2,44 | 12 | O54800;Q5DWV2,P01946,P02631,P11883,P15399,P85971,P97580,Q30KJ2,Q63532,Q63942,Q66H69,Q7TPB1                      |
| 1231 | 1,2,3,6,7,8<br>,38,44 | 4,5,36,37,<br>39,40,41,4<br>2,43 | 9  | D3ZUK3,P02631,P15399,P53792,P85971,P97580,Q30KJ2,Q62635,Q63467                                                  |
| 1232 | 1,2,3,6,7,8<br>,39,40 | 4,5,36,37,<br>38,41,42,4<br>3,44 | 6  | P01946,P12020,P16086,P20766,P27213,P85971                                                                       |
| 1233 | 1,2,3,6,7,8<br>,39,41 | 4,5,36,37,<br>38,40,42,4<br>3,44 | 9  | O88267,P01946,P02631,P08010,P16086,P85971,Q63467,Q63532,Q91ZS3                                                  |
| 1234 | 1,2,3,6,7,8<br>,39,42 | 4,5,36,37,<br>38,40,41,4<br>3,44 | 11 | P01946,P04905,P08010,P08290,P08753,P16086,P20759,P27213,P36374,P85971,Q62753                                    |
| 1235 | 1,2,3,6,7,8<br>,39,43 | 4,5,36,37,<br>38,40,41,4<br>2,44 | 12 | P01946,P02091,P02631,P06760,P11883,P16086,P85971,Q30KJ2,Q63532,Q63942,Q66H69,Q6IE51                             |



|      |                        |                                  |    |                                                                                                                                                                  |
|------|------------------------|----------------------------------|----|------------------------------------------------------------------------------------------------------------------------------------------------------------------|
| 1236 | 1,2,3,6,7,8<br>,39,44  | 4,5,36,37,<br>38,40,41,4<br>2,43 | 9  | D3ZUK3,P01946,P02631,P11598,P20766,P27213,P85971,Q30KJ2,Q63467                                                                                                   |
| 1237 | 1,2,3,6,7,8<br>,40,41  | 4,5,36,37,<br>38,39,42,4<br>3,44 | 8  | P02631,P12020,P16086,P51907,P85971,Q09030,Q9JJS8,Q9Z1F2                                                                                                          |
| 1238 | 1,2,3,6,7,8<br>,40,42  | 4,5,36,37,<br>38,39,41,4<br>3,44 | 10 | P02781,P08290,P08753,P16086,P20759,P36374,P85971,Q09030,Q9JJS8,Q9QZ76                                                                                            |
| 1239 | 1,2,3,6,7,8<br>,40,43  | 4,5,36,37,<br>38,39,41,4<br>2,44 | 9  | P01946,P02631,P11883,P16086,P85971,Q30KJ2,Q63532,Q66H69,Q9Z1F2                                                                                                   |
| 1240 | 1,2,3,6,7,8<br>,40,44  | 4,5,36,37,<br>38,39,41,4<br>2,43 | 6  | P02631,P12020,P20759,P36374,P53792,P85971                                                                                                                        |
| 1241 | 1,2,3,6,7,8<br>,41,42  | 4,5,36,37,<br>38,39,40,4<br>3,44 | 23 | O08815,O35547,P02631,P02781,P04905,P08010,P08290,P08649,P08753,P16086,P20759,P36374,P54921,P60905,P82471,P85971,Q09030,Q62753,Q63357,Q63532,Q812E4,Q91ZS3,Q9JID2 |
| 1242 | 1,2,3,6,7,8<br>,41,43  | 4,5,36,37,<br>38,39,40,4<br>2,44 | 15 | D3ZUK3,O54858,P01946,P02631,P11883,P16086,P54921,P82471,P85971,Q63467,Q63532,Q66H69,Q7TPB1,Q9QX79,Q9Z1F2                                                         |
| 1243 | 1,2,3,6,7,8<br>,41,44  | 4,5,36,37,<br>38,39,40,4<br>2,43 | 10 | D3ZUK3,P02631,P05371,P12020,P16086,P85971,Q63467,Q63532,Q9JID2,Q9Z1F2                                                                                            |
| 1244 | 1,2,3,6,7,8<br>,42,43  | 4,5,36,37,<br>38,39,40,4<br>1,44 | 17 | O35783,P01946,P02631,P08290,P08753,P11883,P16086,P35434,P36374,P54921,P60905,P85971,Q09030,Q62975,Q63532,Q66H69,Q6Q7Y5                                           |
| 1245 | 1,2,3,6,7,8<br>,42,44  | 4,5,36,37,<br>38,39,40,4<br>1,43 | 13 | P02631,P08010,P08290,P08753,P16086,P20759,P36374,P53792,P60905,P85971,Q62753,Q6P6R2,Q9JID2                                                                       |
| 1246 | 1,2,3,6,7,8<br>,43,44  | 4,5,36,37,<br>38,39,40,4<br>1,42 | 12 | D3ZUK3,O35783,P01946,P02091,P02631,P10758,P11883,P85971,Q30KJ2,Q63467,Q63532,Q66H69                                                                              |
| 1247 | 1,2,3,6,7,3<br>6,37,38 | 4,5,8,39,4<br>0,41,42,43<br>,44  | 10 | P02631,P06760,P15399,P53792,P97580,P97840,Q30KJ2,Q561R9,Q63532,Q91ZS3                                                                                            |
| 1248 | 1,2,3,6,7,3<br>6,37,39 | 4,5,8,38,4<br>0,41,42,43<br>,44  | 9  | P00714,P01946,P02631,P06760,P27213,P97840,Q63532,Q8CJD3,Q91ZS3                                                                                                   |
| 1249 | 1,2,3,6,7,3<br>6,37,40 | 4,5,8,38,3<br>9,41,42,43<br>,44  | 5  | B0BNN3,P02631,P15399,P53792,Q91ZS3                                                                                                                               |
| 1250 | 1,2,3,6,7,3<br>6,37,41 | 4,5,8,38,3<br>9,40,42,43<br>,44  | 9  | P00714,P02631,P06760,P08649,P85971,P97840,Q63467,Q63532,Q91ZS3                                                                                                   |

|      |                        |                                 |    |                                                                                                          |
|------|------------------------|---------------------------------|----|----------------------------------------------------------------------------------------------------------|
| 1251 | 1,2,3,6,7,3<br>6,37,42 | 4,5,8,38,3<br>9,40,41,43<br>,44 | 10 | P02631,P06760,P08290,P08649,P16086,P47967,P53792,P85971,P97840,Q91ZS3                                    |
| 1252 | 1,2,3,6,7,3<br>6,37,43 | 4,5,8,38,3<br>9,40,41,42<br>,44 | 8  | P01946,P02091,P02631,P06760,P85971,Q4FZU6,Q63532,Q91ZS3                                                  |
| 1253 | 1,2,3,6,7,3<br>6,37,44 | 4,5,8,38,3<br>9,40,41,42<br>,43 | 9  | B0BNN3,P02631,P05964,P53792,P55314,P85971,P97840,Q63467,Q91ZS3                                           |
| 1254 | 1,2,3,6,7,3<br>6,38,39 | 4,5,8,37,4<br>0,41,42,43<br>,44 | 13 | P00714,P01946,P06760,P15399,P19218,P27213,P97580,P97840,Q30KJ2,Q63467,Q63532,Q6IE51,Q91ZS3               |
| 1255 | 1,2,3,6,7,3<br>6,38,40 | 4,5,8,37,3<br>9,41,42,43<br>,44 | 4  | P15399,P97580,P97840,Q30KJ2                                                                              |
| 1256 | 1,2,3,6,7,3<br>6,38,41 | 4,5,8,37,3<br>9,40,42,43<br>,44 | 11 | P00714,P08649,P15399,P16086,P85971,P97580,P97840,Q30KJ2,Q63467,Q63532,Q91ZS3                             |
| 1257 | 1,2,3,6,7,3<br>6,38,42 | 4,5,8,37,3<br>9,40,41,43<br>,44 | 14 | P08010,P08290,P08649,P08753,P13596,P16086,P19218,P47967,P85971,P97554,P97580,P97840,Q30KJ2,Q91ZS3        |
| 1258 | 1,2,3,6,7,3<br>6,38,43 | 4,5,8,37,3<br>9,40,41,42<br>,44 | 14 | O54800;Q5DWV2,P01946,P02091,P02631,P06760,P15399,P85971,P97580,Q30KJ2,Q561R9,Q63467,Q63532,Q63661,Q6IE51 |
| 1259 | 1,2,3,6,7,3<br>6,38,44 | 4,5,8,37,3<br>9,40,41,42<br>,43 | 9  | P01946,P15399,P53792,P55314,P85971,P97580,P97840,Q30KJ2,Q63467                                           |
| 1260 | 1,2,3,6,7,3<br>6,39,40 | 4,5,8,37,3<br>8,41,42,43<br>,44 | 5  | P01946,P16086,P27213,P55314,Q8CJD3                                                                       |
| 1261 | 1,2,3,6,7,3<br>6,39,41 | 4,5,8,37,3<br>8,40,42,43<br>,44 | 11 | P00714,P01946,P06760,P08010,P08649,P16086,P85971,Q63467,Q63532,Q6IE51,Q91ZS3                             |
| 1262 | 1,2,3,6,7,3<br>6,39,42 | 4,5,8,37,3<br>8,40,41,43<br>,44 | 9  | P01946,P06760,P08010,P08290,P08649,P16086,P27213,P85971,P97840                                           |
| 1263 | 1,2,3,6,7,3<br>6,39,43 | 4,5,8,37,3<br>8,40,41,42<br>,44 | 11 | P00714,P01946,P02091,P02631,P06760,P16086,P55314,P85971,Q63467,Q63532,Q6IE51                             |
| 1264 | 1,2,3,6,7,3<br>6,39,44 | 4,5,8,37,3<br>8,40,41,42<br>,43 | 6  | P01946,P27213,P55314,P85971,Q63467,Q8CJD3                                                                |
| 1265 | 1,2,3,6,7,3<br>6,40,41 | 4,5,8,37,3<br>8,39,42,43<br>,44 | 5  | P12020,P13596,P16086,Q63467,Q63532                                                                       |

|      |                        |                                 |    |                                                                                                          |
|------|------------------------|---------------------------------|----|----------------------------------------------------------------------------------------------------------|
| 1266 | 1,2,3,6,7,3<br>6,40,42 | 4,5,8,37,3<br>8,39,41,43<br>,44 | 6  | P08290,P08649,P13596,P16086,P20759,P36374                                                                |
| 1267 | 1,2,3,6,7,3<br>6,40,43 | 4,5,8,37,3<br>8,39,41,42<br>,44 | 7  | P01946,P02631,P06760,P16086,P85971,Q63532,Q63661                                                         |
| 1268 | 1,2,3,6,7,3<br>6,40,44 | 4,5,8,37,3<br>8,39,41,42<br>,43 | 5  | B0BNN3,P12020,P53792,P55314,Q63467                                                                       |
| 1269 | 1,2,3,6,7,3<br>6,41,42 | 4,5,8,37,3<br>8,39,40,43<br>,44 | 15 | P08010,P08290,P08649,P08753,P13596,P16086,P60905,P85971,P97840,Q62753,Q63357,Q63467,Q63532,Q812E4,Q91ZS3 |
| 1270 | 1,2,3,6,7,3<br>6,41,43 | 4,5,8,37,3<br>8,39,40,42<br>,44 | 11 | O54800;Q5DWV2,P00714,P01946,P02091,P02631,P06760,P08649,P16086,P85971,Q63467,Q63532                      |
| 1271 | 1,2,3,6,7,3<br>6,41,44 | 4,5,8,37,3<br>8,39,40,42<br>,43 | 8  | P02631,P08649,P16086,P55314,P85971,Q63467,Q63532,Q91ZS3                                                  |
| 1272 | 1,2,3,6,7,3<br>6,42,43 | 4,5,8,37,3<br>8,39,40,41<br>,44 | 12 | O35783,P01946,P02631,P06760,P08290,P08649,P16086,P35434,P60905,P85971,Q62975,Q63532                      |
| 1273 | 1,2,3,6,7,3<br>6,42,44 | 4,5,8,37,3<br>8,39,40,41<br>,43 | 11 | P08290,P08649,P13596,P16086,P36374,P53792,P55314,P60905,P85971,P97840,Q63467                             |
| 1274 | 1,2,3,6,7,3<br>6,43,44 | 4,5,8,37,3<br>8,39,40,41<br>,42 | 10 | P01946,P02091,P02631,P06760,P55314,P85971,Q63467,Q63532,Q63661,Q66H69                                    |
| 1275 | 1,2,3,6,7,3<br>7,38,39 | 4,5,8,36,4<br>0,41,42,43<br>,44 | 9  | P00714,P01946,P15399,P19218,P27213,P97580,P97840,Q30KJ2,Q91ZS3                                           |
| 1276 | 1,2,3,6,7,3<br>7,38,40 | 4,5,8,36,3<br>9,41,42,43<br>,44 | 5  | P15399,P97580,P97840,Q30KJ2,Q91ZS3                                                                       |
| 1277 | 1,2,3,6,7,3<br>7,38,41 | 4,5,8,36,3<br>9,40,42,43<br>,44 | 6  | P02631,P15399,P97580,P97840,Q30KJ2,Q91ZS3                                                                |
| 1278 | 1,2,3,6,7,3<br>7,38,42 | 4,5,8,36,3<br>9,40,41,43<br>,44 | 7  | P08290,P15399,P16086,P97580,P97840,Q30KJ2,Q91ZS3                                                         |
| 1279 | 1,2,3,6,7,3<br>7,38,43 | 4,5,8,36,3<br>9,40,41,42<br>,44 | 14 | P01946,P02091,P02631,P06760,P14668,P15399,P85971,P97580,Q30KJ2,Q4FZU6,Q561R9,Q6AYS4,Q7TPB1,Q91ZS3        |
| 1280 | 1,2,3,6,7,3<br>7,38,44 | 4,5,8,36,3<br>9,40,41,42<br>,43 | 7  | P02631,P05964,P15399,P97580,P97840,Q30KJ2,Q91ZS3                                                         |

|      |                        |                                 |    |                                                                              |
|------|------------------------|---------------------------------|----|------------------------------------------------------------------------------|
| 1281 | 1,2,3,6,7,3<br>7,39,40 | 4,5,8,36,3<br>8,41,42,43<br>,44 | 5  | P01946,P15399,P27213,Q8CJD3,Q91ZS3                                           |
| 1282 | 1,2,3,6,7,3<br>7,39,41 | 4,5,8,36,3<br>8,40,42,43<br>,44 | 4  | P00714,P01946,P02631,Q91ZS3                                                  |
| 1283 | 1,2,3,6,7,3<br>7,39,42 | 4,5,8,36,3<br>8,40,41,43<br>,44 | 6  | P01946,P08290,P16086,P27213,P97840,Q91ZS3                                    |
| 1284 | 1,2,3,6,7,3<br>7,39,43 | 4,5,8,36,3<br>8,40,41,42<br>,44 | 9  | P00714,P01946,P02091,P02631,P06760,P85971,Q30KJ2,Q4FZU6,Q91ZS3               |
| 1285 | 1,2,3,6,7,3<br>7,39,44 | 4,5,8,36,3<br>8,40,41,42<br>,43 | 7  | P01946,P02631,P27213,P97840,Q30KJ2,Q8CJD3,Q91ZS3                             |
| 1286 | 1,2,3,6,7,3<br>7,40,41 | 4,5,8,36,3<br>8,39,42,43<br>,44 | 5  | P02631,P12020,P15399,P51907,Q91ZS3                                           |
| 1287 | 1,2,3,6,7,3<br>7,40,42 | 4,5,8,36,3<br>8,39,41,43<br>,44 | 4  | P16086,P20759,P97840,Q91ZS3                                                  |
| 1288 | 1,2,3,6,7,3<br>7,40,43 | 4,5,8,36,3<br>8,39,41,42<br>,44 | 4  | P01946,P02631,P15399,Q30KJ2                                                  |
| 1289 | 1,2,3,6,7,3<br>7,40,44 | 4,5,8,36,3<br>8,39,41,42<br>,43 | 4  | P02631,P12020,P15399,Q91ZS3                                                  |
| 1290 | 1,2,3,6,7,3<br>7,41,42 | 4,5,8,36,3<br>8,39,40,43<br>,44 | 6  | P02631,P08290,P16086,P97840,Q6AYS4,Q91ZS3                                    |
| 1291 | 1,2,3,6,7,3<br>7,41,43 | 4,5,8,36,3<br>8,39,40,42<br>,44 | 11 | P00714,P01946,P02091,P02631,P06760,P51907,P85971,Q63532,Q6AYS4,Q7TPB1,Q91ZS3 |
| 1292 | 1,2,3,6,7,3<br>7,41,44 | 4,5,8,36,3<br>8,39,40,42<br>,43 | 3  | P02631,Q6AYS4,Q91ZS3                                                         |
| 1293 | 1,2,3,6,7,3<br>7,42,43 | 4,5,8,36,3<br>8,39,40,41<br>,44 | 9  | O35783,P01946,P02631,P06760,P16086,P85971,Q62975,Q6AYS4,Q91ZS3               |
| 1294 | 1,2,3,6,7,3<br>7,42,44 | 4,5,8,36,3<br>8,39,40,41<br>,43 | 6  | P02631,P08290,P16086,P97840,Q6AYS4,Q91ZS3                                    |
| 1295 | 1,2,3,6,7,3<br>7,43,44 | 4,5,8,36,3<br>8,39,40,41<br>,42 | 9  | O35783,P01946,P02091,P02631,P10758,P85971,Q30KJ2,Q63661,Q6AYS4               |

|      |                        |                                 |    |                                                                                            |
|------|------------------------|---------------------------------|----|--------------------------------------------------------------------------------------------|
| 1296 | 1,2,3,6,7,3<br>8,39,40 | 4,5,8,36,3<br>7,41,42,43<br>,44 | 7  | P01946,P15399,P27213,P97580,Q30KJ2,Q6IE51,Q9QUL6                                           |
| 1297 | 1,2,3,6,7,3<br>8,39,41 | 4,5,8,36,3<br>7,40,42,43<br>,44 | 8  | P00714,P01946,P15399,P16086,P97580,Q30KJ2,Q6IE51,Q91ZS3                                    |
| 1298 | 1,2,3,6,7,3<br>8,39,42 | 4,5,8,36,3<br>7,40,41,43<br>,44 | 8  | P01946,P08010,P08290,P16086,P19218,P97580,P97840,Q30KJ2                                    |
| 1299 | 1,2,3,6,7,3<br>8,39,43 | 4,5,8,36,3<br>7,40,41,42<br>,44 | 13 | P00714,P01946,P02091,P02631,P06760,P15399,P25031,P85971,P97580,Q30KJ2,Q4FZU6,Q63532,Q6IE51 |
| 1300 | 1,2,3,6,7,3<br>8,39,44 | 4,5,8,36,3<br>7,40,41,42<br>,43 | 7  | P01946,P15399,P97580,P97840,Q30KJ2,Q6IE51,Q9QUL6                                           |
| 1301 | 1,2,3,6,7,3<br>8,40,41 | 4,5,8,36,3<br>7,39,42,43<br>,44 | 5  | P12020,P15399,P16086,P97580,Q30KJ2                                                         |
| 1302 | 1,2,3,6,7,3<br>8,40,42 | 4,5,8,36,3<br>7,39,41,43<br>,44 | 7  | P08290,P15399,P16086,P36374,P97580,P97840,Q30KJ2                                           |
| 1303 | 1,2,3,6,7,3<br>8,40,43 | 4,5,8,36,3<br>7,39,41,42<br>,44 | 5  | P01946,P02631,P15399,P97580,Q30KJ2                                                         |
| 1304 | 1,2,3,6,7,3<br>8,40,44 | 4,5,8,36,3<br>7,39,41,42<br>,43 | 5  | P12020,P15399,P97580,Q30KJ2,Q9QUL6                                                         |
| 1305 | 1,2,3,6,7,3<br>8,41,42 | 4,5,8,36,3<br>7,39,40,43<br>,44 | 13 | O35547,P08010,P08290,P08753,P16086,P54921,P60905,P97580,P97840,Q30KJ2,Q6AYS4,Q8CIZ5,Q91ZS3 |
| 1306 | 1,2,3,6,7,3<br>8,41,43 | 4,5,8,36,3<br>7,39,40,42<br>,44 | 13 | P00714,P01946,P02091,P02631,P15399,P16086,P25031,P85971,P97580,Q30KJ2,Q63532,Q6AYS4,Q7TPB1 |
| 1307 | 1,2,3,6,7,3<br>8,41,44 | 4,5,8,36,3<br>7,39,40,42<br>,43 | 11 | P00774,P01946,P15399,P55091,P97580,P98089,Q30KJ2,Q62635,Q63467,Q8CIZ5,Q91ZS3               |
| 1308 | 1,2,3,6,7,3<br>8,42,43 | 4,5,8,36,3<br>7,39,40,41<br>,44 | 13 | O35547,O35783,P01946,P02091,P02631,P08290,P16086,P25031,P85971,P97580,Q30KJ2,Q62975,Q6AYS4 |
| 1309 | 1,2,3,6,7,3<br>8,42,44 | 4,5,8,36,3<br>7,39,40,41<br>,43 | 7  | P08290,P15399,P16086,P36374,P97580,P97840,Q30KJ2                                           |
| 1310 | 1,2,3,6,7,3<br>8,43,44 | 4,5,8,36,3<br>7,39,40,41<br>,42 | 11 | O35783,P01946,P02091,P02631,P15399,P25031,P85971,P97580,Q30KJ2,Q63661,Q66H69               |

|      |                        |                                 |    |                                                                                     |
|------|------------------------|---------------------------------|----|-------------------------------------------------------------------------------------|
| 1311 | 1,2,3,6,7,3<br>9,40,41 | 4,5,8,36,3<br>7,38,42,43<br>,44 | 5  | P00714,P01946,P06911,P12020,P16086                                                  |
| 1312 | 1,2,3,6,7,3<br>9,40,42 | 4,5,8,36,3<br>7,38,41,43<br>,44 | 4  | P01946,P02780,P16086,P27213                                                         |
| 1313 | 1,2,3,6,7,3<br>9,40,43 | 4,5,8,36,3<br>7,38,41,42<br>,44 | 5  | P00714,P01946,P02091,P16086,Q6IE51                                                  |
| 1314 | 1,2,3,6,7,3<br>9,40,44 | 4,5,8,36,3<br>7,38,41,42<br>,43 | 7  | P01946,P12020,P27213,Q5GRG2,Q6AYL6,Q8CJD3,Q9QUL6                                    |
| 1315 | 1,2,3,6,7,3<br>9,41,42 | 4,5,8,36,3<br>7,38,40,43<br>,44 | 8  | P01946,P08010,P08290,P08753,P16086,P82471,Q6AYR9,Q91ZS3                             |
| 1316 | 1,2,3,6,7,3<br>9,41,43 | 4,5,8,36,3<br>7,38,40,42<br>,44 | 12 | P00714,P01946,P02091,P02631,P06760,P08494,P16086,P82471,P83748,P85971,Q63532,Q6IE51 |
| 1317 | 1,2,3,6,7,3<br>9,41,44 | 4,5,8,36,3<br>7,38,40,42<br>,43 | 5  | O88267,P01946,P12020,P16086,Q63467                                                  |
| 1318 | 1,2,3,6,7,3<br>9,42,43 | 4,5,8,36,3<br>7,38,40,41<br>,44 | 8  | P01946,P02091,P06760,P08290,P16086,P82471,P85971,Q62975                             |
| 1319 | 1,2,3,6,7,3<br>9,42,44 | 4,5,8,36,3<br>7,38,40,41<br>,43 | 3  | P01946,P08290,P16086                                                                |
| 1320 | 1,2,3,6,7,3<br>9,43,44 | 4,5,8,36,3<br>7,38,40,41<br>,42 | 5  | P01946,P02091,P02631,P85971,Q66H69                                                  |
| 1321 | 1,2,3,6,7,4<br>0,41,42 | 4,5,8,36,3<br>7,38,39,43<br>,44 | 5  | P08290,P13596,P16086,P20759,Q6AYS4                                                  |
| 1322 | 1,2,3,6,7,4<br>0,41,43 | 4,5,8,36,3<br>7,38,39,42<br>,44 | 6  | P01946,P02631,P12020,P16086,P51907,Q6AYS4                                           |
| 1323 | 1,2,3,6,7,4<br>0,41,44 | 4,5,8,36,3<br>7,38,39,42<br>,43 | 5  | P05371,P06911,P12020,Q5GRG2,Q9ET32                                                  |
| 1324 | 1,2,3,6,7,4<br>0,42,43 | 4,5,8,36,3<br>7,38,39,41<br>,44 | 5  | O35783,P01946,P16086,Q62975,Q6AYS4                                                  |
| 1325 | 1,2,3,6,7,4<br>0,42,44 | 4,5,8,36,3<br>7,38,39,41<br>,43 | 3  | P16086,P20759,P36374                                                                |

|      |                        |                                 |    |                                                                                                          |
|------|------------------------|---------------------------------|----|----------------------------------------------------------------------------------------------------------|
| 1326 | 1,2,3,6,7,4<br>0,43,44 | 4,5,8,36,3<br>7,38,39,41<br>,42 | 5  | O35783,P01946,P02091,P02631,Q63661                                                                       |
| 1327 | 1,2,3,6,7,4<br>1,42,43 | 4,5,8,36,3<br>7,38,39,40<br>,44 | 15 | O35547,O35783,P01946,P02631,P08290,P0C0A9,P11883,P16086,P54921,P60905,P82471,P85971,Q62975,Q63532,Q6AYS4 |
| 1328 | 1,2,3,6,7,4<br>1,42,44 | 4,5,8,36,3<br>7,38,39,40<br>,43 | 13 | P08010,P08290,P08753,P0C0A9,P16086,P20759,P60905,P82471,P85971,Q62753,Q6AYS4,Q6P6R2,Q9JID2               |
| 1329 | 1,2,3,6,7,4<br>1,43,44 | 4,5,8,36,3<br>7,38,39,40<br>,42 | 11 | O35783,P01946,P02091,P02631,P05371,P82471,P85971,Q63532,Q63661,Q66H69,Q6AYS4                             |
| 1330 | 1,2,3,6,7,4<br>2,43,44 | 4,5,8,36,3<br>7,38,39,40<br>,41 | 13 | O35783,P01946,P02091,P02631,P08290,P16086,P35434,P36374,P85971,Q62975,Q66H69,Q6AYS4,Q6Q7Y5               |
| 1331 | 1,2,3,6,8,3<br>6,37,38 | 4,5,7,39,4<br>0,41,42,43<br>,44 | 2  | Q4FZU6,Q91ZS3                                                                                            |
| 1332 | 1,2,3,6,8,3<br>6,37,39 | 4,5,7,38,4<br>0,41,42,43<br>,44 | 6  | P00714,P27213,Q4FZU6,Q8CJD3,Q91ZS3,Q9Z1F2                                                                |
| 1333 | 1,2,3,6,8,3<br>6,37,40 | 4,5,7,38,3<br>9,41,42,43<br>,44 | 4  | Q64093,Q8CJD3,Q91ZS3,Q9Z1F2                                                                              |
| 1334 | 1,2,3,6,8,3<br>6,37,41 | 4,5,7,38,3<br>9,40,42,43<br>,44 | 3  | P83121,Q91ZS3,Q9Z1F2                                                                                     |
| 1335 | 1,2,3,6,8,3<br>6,37,42 | 4,5,7,38,3<br>9,40,41,43<br>,44 | 1  | Q91ZS3                                                                                                   |
| 1336 | 1,2,3,6,8,3<br>6,37,43 | 4,5,7,38,3<br>9,40,41,42<br>,44 | 6  | P83121,Q4FZU6,Q63942,Q66H69,Q91ZS3,Q9Z1F2                                                                |
| 1337 | 1,2,3,6,8,3<br>6,37,44 | 4,5,7,38,3<br>9,40,41,42<br>,43 | 5  | P53792,P55314,Q8CJD3,Q91ZS3,Q9Z1F2                                                                       |
| 1338 | 1,2,3,6,8,3<br>6,38,39 | 4,5,7,37,4<br>0,41,42,43<br>,44 | 0  |                                                                                                          |
| 1339 | 1,2,3,6,8,3<br>6,38,40 | 4,5,7,37,3<br>9,41,42,43<br>,44 | 1  | Q00715                                                                                                   |
| 1340 | 1,2,3,6,8,3<br>6,38,41 | 4,5,7,37,3<br>9,40,42,43<br>,44 | 1  | Q91ZS3                                                                                                   |

|      |                        |                                 |   |                                           |
|------|------------------------|---------------------------------|---|-------------------------------------------|
| 1341 | 1,2,3,6,8,3<br>6,38,42 | 4,5,7,37,3<br>9,40,41,43<br>,44 | 3 | P08753,P97554,Q6AYL6                      |
| 1342 | 1,2,3,6,8,3<br>6,38,43 | 4,5,7,37,3<br>9,40,41,42<br>,44 | 4 | Q00715,Q4FZU6,Q63942,Q66H69               |
| 1343 | 1,2,3,6,8,3<br>6,38,44 | 4,5,7,37,3<br>9,40,41,42<br>,43 | 1 | P55314                                    |
| 1344 | 1,2,3,6,8,3<br>6,39,40 | 4,5,7,37,3<br>8,41,42,43<br>,44 | 3 | P27213,Q8CJD3,Q9Z1F2                      |
| 1345 | 1,2,3,6,8,3<br>6,39,41 | 4,5,7,37,3<br>8,40,42,43<br>,44 | 2 | P00714,Q9Z1F2                             |
| 1346 | 1,2,3,6,8,3<br>6,39,42 | 4,5,7,37,3<br>8,40,41,43<br>,44 | 2 | P08010,P08753                             |
| 1347 | 1,2,3,6,8,3<br>6,39,43 | 4,5,7,37,3<br>8,40,41,42<br>,44 | 5 | P00714,P06760,Q4FZU6,Q63942,Q66H69        |
| 1348 | 1,2,3,6,8,3<br>6,39,44 | 4,5,7,37,3<br>8,40,41,42<br>,43 | 3 | P27213,P55314,Q8CJD3                      |
| 1349 | 1,2,3,6,8,3<br>6,40,41 | 4,5,7,37,3<br>8,39,42,43<br>,44 | 1 | Q9Z1F2                                    |
| 1350 | 1,2,3,6,8,3<br>6,40,42 | 4,5,7,37,3<br>8,39,41,43<br>,44 | 5 | P20759,P23593,P36374,P62804,Q00715        |
| 1351 | 1,2,3,6,8,3<br>6,40,43 | 4,5,7,37,3<br>8,39,41,42<br>,44 | 4 | Q00715,Q63942,Q66H69,Q9Z1F2               |
| 1352 | 1,2,3,6,8,3<br>6,40,44 | 4,5,7,37,3<br>8,39,41,42<br>,43 | 5 | P22006,P55314,Q00715,Q8CJD3,Q9Z1F2        |
| 1353 | 1,2,3,6,8,3<br>6,41,42 | 4,5,7,37,3<br>8,39,40,43<br>,44 | 6 | P08010,P08753,P60905,Q62753,Q63357,Q812E4 |
| 1354 | 1,2,3,6,8,3<br>6,41,43 | 4,5,7,37,3<br>8,39,40,42<br>,44 | 5 | P00714,P83121,Q63942,Q66H69,Q9Z1F2        |
| 1355 | 1,2,3,6,8,3<br>6,41,44 | 4,5,7,37,3<br>8,39,40,42<br>,43 | 3 | P55314,P83121,Q9Z1F2                      |



|      |                        |                                 |   |                                                  |
|------|------------------------|---------------------------------|---|--------------------------------------------------|
| 1356 | 1,2,3,6,8,3<br>6,42,43 | 4,5,7,37,3<br>8,39,40,41<br>,44 | 6 | P08753,P35434,Q00715,Q62975,Q63942,Q66H69        |
| 1357 | 1,2,3,6,8,3<br>6,42,44 | 4,5,7,37,3<br>8,39,40,41<br>,43 | 5 | P08753,P20759,P36374,P55314,P60905               |
| 1358 | 1,2,3,6,8,3<br>6,43,44 | 4,5,7,37,3<br>8,39,40,41<br>,42 | 7 | P55314,P83121,Q00715,Q63661,Q63942,Q66H69,Q9Z1F2 |
| 1359 | 1,2,3,6,8,3<br>7,38,39 | 4,5,7,36,4<br>0,41,42,43<br>,44 | 2 | Q4FZU6,Q91ZS3                                    |
| 1360 | 1,2,3,6,8,3<br>7,38,40 | 4,5,7,36,3<br>9,41,42,43<br>,44 | 3 | P15399,P82995,Q91ZS3                             |
| 1361 | 1,2,3,6,8,3<br>7,38,41 | 4,5,7,36,3<br>9,40,42,43<br>,44 | 2 | P50115,Q91ZS3                                    |
| 1362 | 1,2,3,6,8,3<br>7,38,42 | 4,5,7,36,3<br>9,40,41,43<br>,44 | 2 | Q4FZU6,Q91ZS3                                    |
| 1363 | 1,2,3,6,8,3<br>7,38,43 | 4,5,7,36,3<br>9,40,41,42<br>,44 | 7 | P02680,Q4FZU6,Q63942,Q66H69,Q6IFV1,Q7TPB1,Q91ZS3 |
| 1364 | 1,2,3,6,8,3<br>7,38,44 | 4,5,7,36,3<br>9,40,41,42<br>,43 | 2 | Q62635,Q91ZS3                                    |
| 1365 | 1,2,3,6,8,3<br>7,39,40 | 4,5,7,36,3<br>8,41,42,43<br>,44 | 3 | P27213,Q8CJD3,Q9Z1F2                             |
| 1366 | 1,2,3,6,8,3<br>7,39,41 | 4,5,7,36,3<br>8,40,42,43<br>,44 | 4 | P00714,P14408,Q91ZS3,Q9Z1F2                      |
| 1367 | 1,2,3,6,8,3<br>7,39,42 | 4,5,7,36,3<br>8,40,41,43<br>,44 | 1 | Q91ZS3                                           |
| 1368 | 1,2,3,6,8,3<br>7,39,43 | 4,5,7,36,3<br>8,40,41,42<br>,44 | 6 | P00714,P14408,Q4FZU6,Q63942,Q66H69,Q9Z1F2        |
| 1369 | 1,2,3,6,8,3<br>7,39,44 | 4,5,7,36,3<br>8,40,41,42<br>,43 | 2 | P27213,Q8CJD3                                    |
| 1370 | 1,2,3,6,8,3<br>7,40,41 | 4,5,7,36,3<br>8,39,42,43<br>,44 | 3 | P51907,Q91ZS3,Q9Z1F2                             |

|      |                        |                                 |   |                                                         |
|------|------------------------|---------------------------------|---|---------------------------------------------------------|
| 1371 | 1,2,3,6,8,3<br>7,40,42 | 4,5,7,36,3<br>8,39,41,43<br>,44 | 1 | P20759                                                  |
| 1372 | 1,2,3,6,8,3<br>7,40,43 | 4,5,7,36,3<br>8,39,41,42<br>,44 | 3 | P51907,Q66H69,Q9Z1F2                                    |
| 1373 | 1,2,3,6,8,3<br>7,40,44 | 4,5,7,36,3<br>8,39,41,42<br>,43 | 3 | P22006,Q8CJD3,Q9Z1F2                                    |
| 1374 | 1,2,3,6,8,3<br>7,41,42 | 4,5,7,36,3<br>8,39,40,43<br>,44 | 2 | P08753,Q91ZS3                                           |
| 1375 | 1,2,3,6,8,3<br>7,41,43 | 4,5,7,36,3<br>8,39,40,42<br>,44 | 8 | P00714,P51907,P83121,Q66H69,Q7TPB1,Q91ZS3,Q9QX79,Q9Z1F2 |
| 1376 | 1,2,3,6,8,3<br>7,41,44 | 4,5,7,36,3<br>8,39,40,42<br>,43 | 2 | Q91ZS3,Q9Z1F2                                           |
| 1377 | 1,2,3,6,8,3<br>7,42,43 | 4,5,7,36,3<br>8,39,40,41<br>,44 | 4 | Q4FZU6,Q62975,Q63942,Q66H69                             |
| 1378 | 1,2,3,6,8,3<br>7,42,44 | 4,5,7,36,3<br>8,39,40,41<br>,43 | 2 | P20759,Q91ZS3                                           |
| 1379 | 1,2,3,6,8,3<br>7,43,44 | 4,5,7,36,3<br>8,39,40,41<br>,42 | 3 | Q4FZU6,Q66H69,Q9Z1F2                                    |
| 1380 | 1,2,3,6,8,3<br>8,39,40 | 4,5,7,36,3<br>7,41,42,43<br>,44 | 0 |                                                         |
| 1381 | 1,2,3,6,8,3<br>8,39,41 | 4,5,7,36,3<br>7,40,42,43<br>,44 | 1 | P00714                                                  |
| 1382 | 1,2,3,6,8,3<br>8,39,42 | 4,5,7,36,3<br>7,40,41,43<br>,44 | 2 | P08753,P19218                                           |
| 1383 | 1,2,3,6,8,3<br>8,39,43 | 4,5,7,36,3<br>7,40,41,42<br>,44 | 6 | P00714,P14408,Q4FZU6,Q63942,Q66H69,Q6IFV1               |
| 1384 | 1,2,3,6,8,3<br>8,39,44 | 4,5,7,36,3<br>7,40,41,42<br>,43 | 0 |                                                         |
| 1385 | 1,2,3,6,8,3<br>8,40,41 | 4,5,7,36,3<br>7,39,42,43<br>,44 | 1 | P50115                                                  |

|      |                        |                                 |   |                                                         |
|------|------------------------|---------------------------------|---|---------------------------------------------------------|
| 1386 | 1,2,3,6,8,3<br>8,40,42 | 4,5,7,36,3<br>7,39,41,43<br>,44 | 2 | P20759,P36374                                           |
| 1387 | 1,2,3,6,8,3<br>8,40,43 | 4,5,7,36,3<br>7,39,41,42<br>,44 | 2 | Q63942,Q66H69                                           |
| 1388 | 1,2,3,6,8,3<br>8,40,44 | 4,5,7,36,3<br>7,39,41,42<br>,43 | 2 | P22006,Q62635                                           |
| 1389 | 1,2,3,6,8,3<br>8,41,42 | 4,5,7,36,3<br>7,39,40,43<br>,44 | 6 | O35547,P08010,P08753,P50115,P54921,Q8CIZ5               |
| 1390 | 1,2,3,6,8,3<br>8,41,43 | 4,5,7,36,3<br>7,39,40,42<br>,44 | 5 | P11883,P50115,Q63942,Q66H69,Q7TPB1                      |
| 1391 | 1,2,3,6,8,3<br>8,41,44 | 4,5,7,36,3<br>7,39,40,42<br>,43 | 6 | P00774,P50115,P98089,Q05695,Q62635,Q8CIZ5               |
| 1392 | 1,2,3,6,8,3<br>8,42,43 | 4,5,7,36,3<br>7,39,40,41<br>,44 | 6 | P08753,P11883,P35434,Q4FZU6,Q63942,Q66H69               |
| 1393 | 1,2,3,6,8,3<br>8,42,44 | 4,5,7,36,3<br>7,39,40,41<br>,43 | 2 | P08753,P36374                                           |
| 1394 | 1,2,3,6,8,3<br>8,43,44 | 4,5,7,36,3<br>7,39,40,41<br>,42 | 2 | Q63942,Q66H69                                           |
| 1395 | 1,2,3,6,8,3<br>9,40,41 | 4,5,7,36,3<br>7,38,42,43<br>,44 | 2 | P00714,Q9Z1F2                                           |
| 1396 | 1,2,3,6,8,3<br>9,40,42 | 4,5,7,36,3<br>7,38,41,43<br>,44 | 1 | P20759                                                  |
| 1397 | 1,2,3,6,8,3<br>9,40,43 | 4,5,7,36,3<br>7,38,41,42<br>,44 | 5 | P11883,Q5QE79,Q63942,Q66H69,Q9Z1F2                      |
| 1398 | 1,2,3,6,8,3<br>9,40,44 | 4,5,7,36,3<br>7,38,41,42<br>,43 | 4 | P20766,P27213,Q6AYL6,Q8CJD3                             |
| 1399 | 1,2,3,6,8,3<br>9,41,42 | 4,5,7,36,3<br>7,38,40,43<br>,44 | 3 | P08010,P08753,P82471                                    |
| 1400 | 1,2,3,6,8,3<br>9,41,43 | 4,5,7,36,3<br>7,38,40,42<br>,44 | 8 | P00714,P08494,P11883,P14408,P82471,Q63942,Q66H69,Q9Z1F2 |

|      |                         |                                 |   |                                                         |
|------|-------------------------|---------------------------------|---|---------------------------------------------------------|
| 1401 | 1,2,3,6,8,3<br>9,41,44  | 4,5,7,36,3<br>7,38,40,42<br>,43 | 1 | Q9Z1F2                                                  |
| 1402 | 1,2,3,6,8,3<br>9,42,43  | 4,5,7,36,3<br>7,38,40,41<br>,44 | 4 | P11883,P35434,Q63942,Q66H69                             |
| 1403 | 1,2,3,6,8,3<br>9,42,44  | 4,5,7,36,3<br>7,38,40,41<br>,43 | 0 |                                                         |
| 1404 | 1,2,3,6,8,3<br>9,43,44  | 4,5,7,36,3<br>7,38,40,41<br>,42 | 3 | P11883,Q63942,Q66H69                                    |
| 1405 | 1,2,3,6,8,4<br>0,41,42  | 4,5,7,36,3<br>7,38,39,43<br>,44 | 3 | P08753,P20759,Q6P6R2                                    |
| 1406 | 1,2,3,6,8,4<br>0,41,43  | 4,5,7,36,3<br>7,38,39,42<br>,44 | 4 | P11883,P51907,Q66H69,Q9Z1F2                             |
| 1407 | 1,2,3,6,8,4<br>0,41,44  | 4,5,7,36,3<br>7,38,39,42<br>,43 | 4 | P06911,P12020,Q5GRG2,Q9Z1F2                             |
| 1408 | 1,2,3,6,8,4<br>0,42,43  | 4,5,7,36,3<br>7,38,39,41<br>,44 | 3 | P11883,P36374,Q66H69                                    |
| 1409 | 1,2,3,6,8,4<br>0,42,44  | 4,5,7,36,3<br>7,38,39,41<br>,43 | 4 | P20759,P22006,P36374,Q6P6R2                             |
| 1410 | 1,2,3,6,8,4<br>0,43,44  | 4,5,7,36,3<br>7,38,39,41<br>,42 | 3 | P11883,Q66H69,Q9Z1F2                                    |
| 1411 | 1,2,3,6,8,4<br>1,42,43  | 4,5,7,36,3<br>7,38,39,40<br>,44 | 8 | P08753,P11883,P35434,P54921,P60905,P82471,P83121,Q66H69 |
| 1412 | 1,2,3,6,8,4<br>1,42,44  | 4,5,7,36,3<br>7,38,39,40<br>,43 | 6 | P08753,P20759,P60905,Q62753,Q6P6R2,Q9JID2               |
| 1413 | 1,2,3,6,8,4<br>1,43,44  | 4,5,7,36,3<br>7,38,39,40<br>,42 | 4 | P11883,P83121,Q66H69,Q9Z1F2                             |
| 1414 | 1,2,3,6,8,4<br>2,43,44  | 4,5,7,36,3<br>7,38,39,40<br>,41 | 5 | P11883,P35434,P36374,Q66H69,Q6Q7Y5                      |
| 1415 | 1,2,3,6,36,<br>37,38,39 | 4,5,7,8,40,<br>41,42,43,4<br>4  | 4 | P00714,Q4FZU6,Q561R9,Q91ZS3                             |

|      |                         |                                |   |                                                  |
|------|-------------------------|--------------------------------|---|--------------------------------------------------|
| 1416 | 1,2,3,6,36,<br>37,38,40 | 4,5,7,8,39,<br>41,42,43,4<br>4 | 2 | P15399,Q91ZS3                                    |
| 1417 | 1,2,3,6,36,<br>37,38,41 | 4,5,7,8,39,<br>40,42,43,4<br>4 | 3 | P00714,Q5M819,Q91ZS3                             |
| 1418 | 1,2,3,6,36,<br>37,38,42 | 4,5,7,8,39,<br>40,41,43,4<br>4 | 5 | P10715,P97840,Q4FZU6,Q6AYL6,Q91ZS3               |
| 1419 | 1,2,3,6,36,<br>37,38,43 | 4,5,7,8,39,<br>40,41,42,4<br>4 | 6 | P00714,P06760,Q4FZU6,Q561R9,Q6IFV1,Q91ZS3        |
| 1420 | 1,2,3,6,36,<br>37,38,44 | 4,5,7,8,39,<br>40,41,42,4<br>3 | 4 | P15399,P55314,Q4FZU6,Q91ZS3                      |
| 1421 | 1,2,3,6,36,<br>37,39,40 | 4,5,7,8,38,<br>41,42,43,4<br>4 | 7 | O35547,P00714,P27213,P50115,P50116,Q05695,Q8CJD3 |
| 1422 | 1,2,3,6,36,<br>37,39,41 | 4,5,7,8,38,<br>40,42,43,4<br>4 | 2 | P00714,Q91ZS3                                    |
| 1423 | 1,2,3,6,36,<br>37,39,42 | 4,5,7,8,38,<br>40,41,43,4<br>4 | 5 | P50115,P50116,Q05695,Q4FZU6,Q91ZS3               |
| 1424 | 1,2,3,6,36,<br>37,39,43 | 4,5,7,8,38,<br>40,41,42,4<br>4 | 6 | P00714,P06760,P50115,P50116,Q05695,Q4FZU6        |
| 1425 | 1,2,3,6,36,<br>37,39,44 | 4,5,7,8,38,<br>40,41,42,4<br>3 | 5 | P50115,P50116,P55314,Q8CJD3,Q91ZS3               |
| 1426 | 1,2,3,6,36,<br>37,40,41 | 4,5,7,8,38,<br>39,42,43,4<br>4 | 5 | P00714,P51907,Q80WL1,Q91ZS3,Q9Z1F2               |
| 1427 | 1,2,3,6,36,<br>37,40,42 | 4,5,7,8,38,<br>39,41,43,4<br>4 | 3 | P50116,Q05695,Q91ZS3                             |
| 1428 | 1,2,3,6,36,<br>37,40,43 | 4,5,7,8,38,<br>39,41,42,4<br>4 | 3 | P00714,P50116,Q05695                             |
| 1429 | 1,2,3,6,36,<br>37,40,44 | 4,5,7,8,38,<br>39,41,42,4<br>3 | 5 | O35547,P50116,P55314,Q80WL1,Q8CJD3               |
| 1430 | 1,2,3,6,36,<br>37,41,42 | 4,5,7,8,38,<br>39,40,43,4<br>4 | 2 | Q6AYS4,Q91ZS3                                    |

|      |                         |                                |   |                                                  |
|------|-------------------------|--------------------------------|---|--------------------------------------------------|
| 1431 | 1,2,3,6,36,<br>37,41,43 | 4,5,7,8,38,<br>39,40,42,4<br>4 | 5 | P00714,P06760,P83121,Q6AYS4,Q91ZS3               |
| 1432 | 1,2,3,6,36,<br>37,41,44 | 4,5,7,8,38,<br>39,40,42,4<br>3 | 2 | P55314,Q91ZS3                                    |
| 1433 | 1,2,3,6,36,<br>37,42,43 | 4,5,7,8,38,<br>39,40,41,4<br>4 | 7 | P06760,P10715,P19629,Q05695,Q4FZU6,Q68FS4,Q6AYS4 |
| 1434 | 1,2,3,6,36,<br>37,42,44 | 4,5,7,8,38,<br>39,40,41,4<br>3 | 3 | P50116,P55314,Q91ZS3                             |
| 1435 | 1,2,3,6,36,<br>37,43,44 | 4,5,7,8,38,<br>39,40,41,4<br>2 | 4 | P55314,Q4FZU6,Q63661,Q66H69                      |
| 1436 | 1,2,3,6,36,<br>38,39,40 | 4,5,7,8,37,<br>41,42,43,4<br>4 | 1 | P00714                                           |
| 1437 | 1,2,3,6,36,<br>38,39,41 | 4,5,7,8,37,<br>40,42,43,4<br>4 | 1 | P00714                                           |
| 1438 | 1,2,3,6,36,<br>38,39,42 | 4,5,7,8,37,<br>40,41,43,4<br>4 | 0 |                                                  |
| 1439 | 1,2,3,6,36,<br>38,39,43 | 4,5,7,8,37,<br>40,41,42,4<br>4 | 4 | P00714,P06760,Q4FZU6,Q6IFV1                      |
| 1440 | 1,2,3,6,36,<br>38,39,44 | 4,5,7,8,37,<br>40,41,42,4<br>3 | 1 | P55314                                           |
| 1441 | 1,2,3,6,36,<br>38,40,41 | 4,5,7,8,37,<br>39,42,43,4<br>4 | 1 | P00714                                           |
| 1442 | 1,2,3,6,36,<br>38,40,42 | 4,5,7,8,37,<br>39,41,43,4<br>4 | 2 | Q68FS4,Q99041                                    |
| 1443 | 1,2,3,6,36,<br>38,40,43 | 4,5,7,8,37,<br>39,41,42,4<br>4 | 2 | P00714,Q63661                                    |
| 1444 | 1,2,3,6,36,<br>38,40,44 | 4,5,7,8,37,<br>39,41,42,4<br>3 | 2 | P55314,Q99041                                    |
| 1445 | 1,2,3,6,36,<br>38,41,42 | 4,5,7,8,37,<br>39,40,43,4<br>4 | 2 | Q8CIZ5,Q91ZS3                                    |

|      |                         |                                |   |                                           |
|------|-------------------------|--------------------------------|---|-------------------------------------------|
| 1446 | 1,2,3,6,36,<br>38,41,43 | 4,5,7,8,37,<br>39,40,42,4<br>4 | 2 | P00714,Q63661                             |
| 1447 | 1,2,3,6,36,<br>38,41,44 | 4,5,7,8,37,<br>39,40,42,4<br>3 | 5 | P00774,P55314,P98089,Q62635,Q8CIZ5        |
| 1448 | 1,2,3,6,36,<br>38,42,43 | 4,5,7,8,37,<br>39,40,41,4<br>4 | 5 | P10715,P35434,Q4FZU6,Q68FS4,Q99041        |
| 1449 | 1,2,3,6,36,<br>38,42,44 | 4,5,7,8,37,<br>39,40,41,4<br>3 | 3 | P55314,Q68FS4,Q99041                      |
| 1450 | 1,2,3,6,36,<br>38,43,44 | 4,5,7,8,37,<br>39,40,41,4<br>2 | 6 | P34901,P55314,Q4FZU6,Q63661,Q66H69,Q99041 |
| 1451 | 1,2,3,6,36,<br>39,40,41 | 4,5,7,8,37,<br>38,42,43,4<br>4 | 1 | P00714                                    |
| 1452 | 1,2,3,6,36,<br>39,40,42 | 4,5,7,8,37,<br>38,41,43,4<br>4 | 3 | P50115,P50116,Q05695                      |
| 1453 | 1,2,3,6,36,<br>39,40,43 | 4,5,7,8,37,<br>38,41,42,4<br>4 | 4 | P00714,P50116,P55314,Q05695               |
| 1454 | 1,2,3,6,36,<br>39,40,44 | 4,5,7,8,37,<br>38,41,42,4<br>3 | 4 | P27213,P50116,P55314,Q8CJD3               |
| 1455 | 1,2,3,6,36,<br>39,41,42 | 4,5,7,8,37,<br>38,40,43,4<br>4 | 1 | P08010                                    |
| 1456 | 1,2,3,6,36,<br>39,41,43 | 4,5,7,8,37,<br>38,40,42,4<br>4 | 3 | P00714,P06760,P08494                      |
| 1457 | 1,2,3,6,36,<br>39,41,44 | 4,5,7,8,37,<br>38,40,42,4<br>3 | 1 | P55314                                    |
| 1458 | 1,2,3,6,36,<br>39,42,43 | 4,5,7,8,37,<br>38,40,41,4<br>4 | 5 | P06760,P35434,Q05695,Q4FZU6,Q68FS4        |
| 1459 | 1,2,3,6,36,<br>39,42,44 | 4,5,7,8,37,<br>38,40,41,4<br>3 | 3 | P50116,P55314,Q68FS4                      |
| 1460 | 1,2,3,6,36,<br>39,43,44 | 4,5,7,8,37,<br>38,40,41,4<br>2 | 4 | P06760,P55314,Q63661,Q66H69               |

|      |                         |                                |   |                                           |
|------|-------------------------|--------------------------------|---|-------------------------------------------|
| 1461 | 1,2,3,6,36,<br>40,41,42 | 4,5,7,8,37,<br>38,39,43,4<br>4 | 1 | P23593                                    |
| 1462 | 1,2,3,6,36,<br>40,41,43 | 4,5,7,8,37,<br>38,39,42,4<br>4 | 2 | P00714,Q63661                             |
| 1463 | 1,2,3,6,36,<br>40,41,44 | 4,5,7,8,37,<br>38,39,42,4<br>3 | 2 | P55314,Q80WL1                             |
| 1464 | 1,2,3,6,36,<br>40,42,43 | 4,5,7,8,37,<br>38,39,41,4<br>4 | 3 | Q05695,Q68FS4,Q99041                      |
| 1465 | 1,2,3,6,36,<br>40,42,44 | 4,5,7,8,37,<br>38,39,41,4<br>3 | 5 | P50116,P55314,Q68FS4,Q7TPB1,Q99041        |
| 1466 | 1,2,3,6,36,<br>40,43,44 | 4,5,7,8,37,<br>38,39,41,4<br>2 | 3 | P55314,Q63661,Q66H69                      |
| 1467 | 1,2,3,6,36,<br>41,42,43 | 4,5,7,8,37,<br>38,39,40,4<br>4 | 4 | P35434,P82471,Q66H69,Q6AYS4               |
| 1468 | 1,2,3,6,36,<br>41,42,44 | 4,5,7,8,37,<br>38,39,40,4<br>3 | 1 | P55314                                    |
| 1469 | 1,2,3,6,36,<br>41,43,44 | 4,5,7,8,37,<br>38,39,40,4<br>2 | 4 | P55314,P83121,Q63661,Q66H69               |
| 1470 | 1,2,3,6,36,<br>42,43,44 | 4,5,7,8,37,<br>38,39,40,4<br>1 | 6 | P35434,P55314,Q63661,Q66H69,Q68FS4,Q99041 |
| 1471 | 1,2,3,6,37,<br>38,39,40 | 4,5,7,8,36,<br>41,42,43,4<br>4 | 3 | P00714,P15399,P82995                      |
| 1472 | 1,2,3,6,37,<br>38,39,41 | 4,5,7,8,36,<br>40,42,43,4<br>4 | 3 | P00714,P13432,Q91ZS3                      |
| 1473 | 1,2,3,6,37,<br>38,39,42 | 4,5,7,8,36,<br>40,41,43,4<br>4 | 2 | Q4FZU6,Q91ZS3                             |
| 1474 | 1,2,3,6,37,<br>38,39,43 | 4,5,7,8,36,<br>40,41,42,4<br>4 | 5 | P00714,P82995,Q4FZU6,Q561R9,Q6IFV1        |
| 1475 | 1,2,3,6,37,<br>38,39,44 | 4,5,7,8,36,<br>40,41,42,4<br>3 | 4 | P15399,Q4FZU6,Q91ZS3,Q9JJS8               |



|      |                         |                                |   |                                           |
|------|-------------------------|--------------------------------|---|-------------------------------------------|
| 1476 | 1,2,3,6,37,<br>38,40,41 | 4,5,7,8,36,<br>39,42,43,4<br>4 | 5 | P00714,P15399,P82995,Q6AYS4,Q91ZS3        |
| 1477 | 1,2,3,6,37,<br>38,40,42 | 4,5,7,8,36,<br>39,41,43,4<br>4 | 3 | Q6AYS4,Q91ZS3,Q99041                      |
| 1478 | 1,2,3,6,37,<br>38,40,43 | 4,5,7,8,36,<br>39,41,42,4<br>4 | 5 | P15399,P82995,Q4FZU6,Q6AYS4,Q6IFV1        |
| 1479 | 1,2,3,6,37,<br>38,40,44 | 4,5,7,8,36,<br>39,41,42,4<br>3 | 2 | P15399,P82995                             |
| 1480 | 1,2,3,6,37,<br>38,41,42 | 4,5,7,8,36,<br>39,40,43,4<br>4 | 2 | Q6AYS4,Q91ZS3                             |
| 1481 | 1,2,3,6,37,<br>38,41,43 | 4,5,7,8,36,<br>39,40,42,4<br>4 | 6 | P00714,Q4FZU6,Q6AYS4,Q6IFV1,Q7TPB1,Q91ZS3 |
| 1482 | 1,2,3,6,37,<br>38,41,44 | 4,5,7,8,36,<br>39,40,42,4<br>3 | 6 | P00774,P15399,P98089,Q62635,Q6AYS4,Q91ZS3 |
| 1483 | 1,2,3,6,37,<br>38,42,43 | 4,5,7,8,36,<br>39,40,41,4<br>4 | 4 | P06866,Q4FZU6,Q6AYS4,Q99041               |
| 1484 | 1,2,3,6,37,<br>38,42,44 | 4,5,7,8,36,<br>39,40,41,4<br>3 | 4 | P97840,Q6AYS4,Q91ZS3,Q99041               |
| 1485 | 1,2,3,6,37,<br>38,43,44 | 4,5,7,8,36,<br>39,40,41,4<br>2 | 5 | P15399,Q4FZU6,Q63661,Q6AYS4,Q6IFV1        |
| 1486 | 1,2,3,6,37,<br>39,40,41 | 4,5,7,8,36,<br>38,42,43,4<br>4 | 2 | P00714,Q91ZS3                             |
| 1487 | 1,2,3,6,37,<br>39,40,42 | 4,5,7,8,36,<br>38,41,43,4<br>4 | 2 | P50116,Q05695                             |
| 1488 | 1,2,3,6,37,<br>39,40,43 | 4,5,7,8,36,<br>38,41,42,4<br>4 | 5 | P00714,P50116,P82995,Q05695,Q4FZU6        |
| 1489 | 1,2,3,6,37,<br>39,40,44 | 4,5,7,8,36,<br>38,41,42,4<br>3 | 5 | O35547,P50116,Q6AYL6,Q8CJD3,Q9QUL6        |
| 1490 | 1,2,3,6,37,<br>39,41,42 | 4,5,7,8,36,<br>38,40,43,4<br>4 | 2 | Q6AYS4,Q91ZS3                             |

|      |                         |                                |   |                             |
|------|-------------------------|--------------------------------|---|-----------------------------|
| 1491 | 1,2,3,6,37,<br>39,41,43 | 4,5,7,8,36,<br>38,40,42,4<br>4 | 4 | P00714,Q4FZU6,Q6AYS4,Q91ZS3 |
| 1492 | 1,2,3,6,37,<br>39,41,44 | 4,5,7,8,36,<br>38,40,42,4<br>3 | 1 | Q91ZS3                      |
| 1493 | 1,2,3,6,37,<br>39,42,43 | 4,5,7,8,36,<br>38,40,41,4<br>4 | 4 | P50116,Q05695,Q4FZU6,Q6AYS4 |
| 1494 | 1,2,3,6,37,<br>39,42,44 | 4,5,7,8,36,<br>38,40,41,4<br>3 | 1 | P50116                      |
| 1495 | 1,2,3,6,37,<br>39,43,44 | 4,5,7,8,36,<br>38,40,41,4<br>2 | 3 | P50116,Q4FZU6,Q6AYS4        |
| 1496 | 1,2,3,6,37,<br>40,41,42 | 4,5,7,8,36,<br>38,39,43,4<br>4 | 2 | Q6AYS4,Q91ZS3               |
| 1497 | 1,2,3,6,37,<br>40,41,43 | 4,5,7,8,36,<br>38,39,42,4<br>4 | 3 | P00714,P51907,Q6AYS4        |
| 1498 | 1,2,3,6,37,<br>40,41,44 | 4,5,7,8,36,<br>38,39,42,4<br>3 | 4 | P06911,Q5GRG2,Q6AYS4,Q80WL1 |
| 1499 | 1,2,3,6,37,<br>40,42,43 | 4,5,7,8,36,<br>38,39,41,4<br>4 | 3 | P50116,Q05695,Q6AYS4        |
| 1500 | 1,2,3,6,37,<br>40,42,44 | 4,5,7,8,36,<br>38,39,41,4<br>3 | 3 | P50116,Q6AYS4,Q99041        |
| 1501 | 1,2,3,6,37,<br>40,43,44 | 4,5,7,8,36,<br>38,39,41,4<br>2 | 3 | P50116,Q63661,Q6AYS4        |
| 1502 | 1,2,3,6,37,<br>41,42,43 | 4,5,7,8,36,<br>38,39,40,4<br>4 | 2 | Q6AYS4,Q91ZS3               |
| 1503 | 1,2,3,6,37,<br>41,42,44 | 4,5,7,8,36,<br>38,39,40,4<br>3 | 3 | Q6AYS4,Q6P6R2,Q91ZS3        |
| 1504 | 1,2,3,6,37,<br>41,43,44 | 4,5,7,8,36,<br>38,39,40,4<br>2 | 2 | Q66H69,Q6AYS4               |
| 1505 | 1,2,3,6,37,<br>42,43,44 | 4,5,7,8,36,<br>38,39,40,4<br>1 | 3 | Q4FZU6,Q6AYS4,Q99041        |

|      |                         |                                |   |                                    |
|------|-------------------------|--------------------------------|---|------------------------------------|
| 1506 | 1,2,3,6,38,<br>39,40,41 | 4,5,7,8,36,<br>37,42,43,4<br>4 | 2 | P00714,P13432                      |
| 1507 | 1,2,3,6,38,<br>39,40,42 | 4,5,7,8,36,<br>37,41,43,4<br>4 | 1 | Q99041                             |
| 1508 | 1,2,3,6,38,<br>39,40,43 | 4,5,7,8,36,<br>37,41,42,4<br>4 | 4 | P00714,P82995,Q6IFV1,Q99041        |
| 1509 | 1,2,3,6,38,<br>39,40,44 | 4,5,7,8,36,<br>37,41,42,4<br>3 | 2 | Q99041,Q9QUL6                      |
| 1510 | 1,2,3,6,38,<br>39,41,42 | 4,5,7,8,36,<br>37,40,43,4<br>4 | 2 | P13432,Q6AYS4                      |
| 1511 | 1,2,3,6,38,<br>39,41,43 | 4,5,7,8,36,<br>37,40,42,4<br>4 | 2 | P00714,Q6AYS4                      |
| 1512 | 1,2,3,6,38,<br>39,41,44 | 4,5,7,8,36,<br>37,40,42,4<br>3 | 3 | P00774,P98089,Q62635               |
| 1513 | 1,2,3,6,38,<br>39,42,43 | 4,5,7,8,36,<br>37,40,41,4<br>4 | 4 | Q4FZU6,Q6AYS4,Q6IFU7,Q99041        |
| 1514 | 1,2,3,6,38,<br>39,42,44 | 4,5,7,8,36,<br>37,40,41,4<br>3 | 1 | Q99041                             |
| 1515 | 1,2,3,6,38,<br>39,43,44 | 4,5,7,8,36,<br>37,40,41,4<br>2 | 5 | P01946,Q4FZU6,Q66H69,Q99041,Q9JJS8 |
| 1516 | 1,2,3,6,38,<br>40,41,42 | 4,5,7,8,36,<br>37,39,43,4<br>4 | 2 | Q6AYS4,Q8CIZ5                      |
| 1517 | 1,2,3,6,38,<br>40,41,43 | 4,5,7,8,36,<br>37,39,42,4<br>4 | 3 | P00714,Q5HZV9,Q6AYS4               |
| 1518 | 1,2,3,6,38,<br>40,41,44 | 4,5,7,8,36,<br>37,39,42,4<br>3 | 5 | P00774,P98089,Q5GRG2,Q62635,Q8CIZ5 |
| 1519 | 1,2,3,6,38,<br>40,42,43 | 4,5,7,8,36,<br>37,39,41,4<br>4 | 4 | P07171,Q68FS4,Q6AYS4,Q99041        |
| 1520 | 1,2,3,6,38,<br>40,42,44 | 4,5,7,8,36,<br>37,39,41,4<br>3 | 2 | P22006,Q99041                      |

|      |                         |                                |   |                                                  |
|------|-------------------------|--------------------------------|---|--------------------------------------------------|
| 1521 | 1,2,3,6,38,<br>40,43,44 | 4,5,7,8,36,<br>37,39,41,4<br>2 | 2 | Q63661,Q99041                                    |
| 1522 | 1,2,3,6,38,<br>41,42,43 | 4,5,7,8,36,<br>37,39,40,4<br>4 | 4 | P54921,P82471,Q5HZV9,Q6AYS4                      |
| 1523 | 1,2,3,6,38,<br>41,42,44 | 4,5,7,8,36,<br>37,39,40,4<br>3 | 6 | P00774,P98089,Q62635,Q6AYS4,Q6P6R2,Q8CIZ5        |
| 1524 | 1,2,3,6,38,<br>41,43,44 | 4,5,7,8,36,<br>37,39,40,4<br>2 | 7 | P00774,P55091,P98089,Q62635,Q63661,Q66H69,Q6AYS4 |
| 1525 | 1,2,3,6,38,<br>42,43,44 | 4,5,7,8,36,<br>37,39,40,4<br>1 | 5 | Q4FZU6,Q66H69,Q68FS4,Q6AYS4,Q99041               |
| 1526 | 1,2,3,6,39,<br>40,41,42 | 4,5,7,8,36,<br>37,38,43,4<br>4 | 1 | P13432                                           |
| 1527 | 1,2,3,6,39,<br>40,41,43 | 4,5,7,8,36,<br>37,38,42,4<br>4 | 1 | P00714                                           |
| 1528 | 1,2,3,6,39,<br>40,41,44 | 4,5,7,8,36,<br>37,38,42,4<br>3 | 7 | P06911,P10715,P12020,P16391,P19629,Q5GRG2,Q6AYL6 |
| 1529 | 1,2,3,6,39,<br>40,42,43 | 4,5,7,8,36,<br>37,38,41,4<br>4 | 2 | Q05695,Q99041                                    |
| 1530 | 1,2,3,6,39,<br>40,42,44 | 4,5,7,8,36,<br>37,38,41,4<br>3 | 3 | P50116,Q99041,Q9QUL6                             |
| 1531 | 1,2,3,6,39,<br>40,43,44 | 4,5,7,8,36,<br>37,38,41,4<br>2 | 3 | P50116,Q6AYL6,Q99041                             |
| 1532 | 1,2,3,6,39,<br>41,42,43 | 4,5,7,8,36,<br>37,38,40,4<br>4 | 3 | P08494,P82471,Q6AYS4                             |
| 1533 | 1,2,3,6,39,<br>41,42,44 | 4,5,7,8,36,<br>37,38,40,4<br>3 | 3 | P82471,Q6AYS4,Q6P6R2                             |
| 1534 | 1,2,3,6,39,<br>41,43,44 | 4,5,7,8,36,<br>37,38,40,4<br>2 | 3 | P08494,Q66H69,Q6AYS4                             |
| 1535 | 1,2,3,6,39,<br>42,43,44 | 4,5,7,8,36,<br>37,38,40,4<br>1 | 3 | Q66H69,Q6AYS4,Q99041                             |

|      |                         |                                 |   |                                                         |
|------|-------------------------|---------------------------------|---|---------------------------------------------------------|
| 1536 | 1,2,3,6,40,<br>41,42,43 | 4,5,7,8,36,<br>37,38,39,4<br>4  | 2 | Q5HZV9,Q6AYS4                                           |
| 1537 | 1,2,3,6,40,<br>41,42,44 | 4,5,7,8,36,<br>37,38,39,4<br>3  | 2 | Q6AYS4,Q6P6R2                                           |
| 1538 | 1,2,3,6,40,<br>41,43,44 | 4,5,7,8,36,<br>37,38,39,4<br>2  | 3 | Q63661,Q66H69,Q6AYS4                                    |
| 1539 | 1,2,3,6,40,<br>42,43,44 | 4,5,7,8,36,<br>37,38,39,4<br>1  | 3 | Q68FS4,Q6AYS4,Q99041                                    |
| 1540 | 1,2,3,6,41,<br>42,43,44 | 4,5,7,8,36,<br>37,38,39,4<br>0  | 4 | P82471,Q66H69,Q6AYS4,Q6P6R2                             |
| 1541 | 1,2,3,7,8,3<br>6,37,38  | 4,5,6,39,4<br>0,41,42,43<br>,44 | 2 | Q09030,Q91ZS3                                           |
| 1542 | 1,2,3,7,8,3<br>6,37,39  | 4,5,6,38,4<br>0,41,42,43<br>,44 | 4 | P01835,P01946,P06760,P27213                             |
| 1543 | 1,2,3,7,8,3<br>6,37,40  | 4,5,6,38,3<br>9,41,42,43<br>,44 | 4 | B0BNN3,P01835,Q09030,Q6IFU7                             |
| 1544 | 1,2,3,7,8,3<br>6,37,41  | 4,5,6,38,3<br>9,40,42,43<br>,44 | 8 | B0BNN3,P01835,P06760,P83121,Q09030,Q63467,Q6IFU7,Q91ZS3 |
| 1545 | 1,2,3,7,8,3<br>6,37,42  | 4,5,6,38,3<br>9,40,41,43<br>,44 | 6 | P00762,P01835,P85971,Q08849,Q09030,Q91ZS3               |
| 1546 | 1,2,3,7,8,3<br>6,37,43  | 4,5,6,38,3<br>9,40,41,42<br>,44 | 7 | P01946,P06760,P16391,P83121,P85971,Q09030,Q9QX79        |
| 1547 | 1,2,3,7,8,3<br>6,37,44  | 4,5,6,38,3<br>9,40,41,42<br>,43 | 7 | B0BNN3,P00762,P13432,P53792,Q09030,Q63467,Q6IFU7        |
| 1548 | 1,2,3,7,8,3<br>6,38,39  | 4,5,6,37,4<br>0,41,42,43<br>,44 | 4 | P01946,P06760,P27213,Q63467                             |
| 1549 | 1,2,3,7,8,3<br>6,38,40  | 4,5,6,37,3<br>9,41,42,43<br>,44 | 1 | Q09030                                                  |
| 1550 | 1,2,3,7,8,3<br>6,38,41  | 4,5,6,37,3<br>9,40,42,43<br>,44 | 4 | P50115,P50116,Q09030,Q63467                             |

|      |                        |                                 |    |                                                                                                          |
|------|------------------------|---------------------------------|----|----------------------------------------------------------------------------------------------------------|
| 1551 | 1,2,3,7,8,3<br>6,38,42 | 4,5,6,37,3<br>9,40,41,43<br>,44 | 9  | P04905,P08010,P08753,P47727,P60905,P85971,Q08849,Q09030,Q6AYL6                                           |
| 1552 | 1,2,3,7,8,3<br>6,38,43 | 4,5,6,37,3<br>9,40,41,42<br>,44 | 6  | O54800;Q5DWV2,P01946,P06760,P16391,P85971,Q63467                                                         |
| 1553 | 1,2,3,7,8,3<br>6,38,44 | 4,5,6,37,3<br>9,40,41,42<br>,43 | 2  | P01946,Q63467                                                                                            |
| 1554 | 1,2,3,7,8,3<br>6,39,40 | 4,5,6,37,3<br>8,41,42,43<br>,44 | 4  | P01835,P01946,P20766,P27213                                                                              |
| 1555 | 1,2,3,7,8,3<br>6,39,41 | 4,5,6,37,3<br>8,40,42,43<br>,44 | 5  | P01835,P01946,P06760,P08010,Q63467                                                                       |
| 1556 | 1,2,3,7,8,3<br>6,39,42 | 4,5,6,37,3<br>8,40,41,43<br>,44 | 15 | O54728,P00762,P01835,P01946,P04905,P06760,P08010,P08753,P16086,P27213,P36970,P85971,Q08849,Q09030,Q6AYR9 |
| 1557 | 1,2,3,7,8,3<br>6,39,43 | 4,5,6,37,3<br>8,40,41,42<br>,44 | 5  | P01946,P02091,P06760,P85971,Q63467                                                                       |
| 1558 | 1,2,3,7,8,3<br>6,39,44 | 4,5,6,37,3<br>8,40,41,42<br>,43 | 5  | P01946,P20766,P27213,P55314,Q63467                                                                       |
| 1559 | 1,2,3,7,8,3<br>6,40,41 | 4,5,6,37,3<br>8,39,42,43<br>,44 | 3  | P01835,Q09030,Q63467                                                                                     |
| 1560 | 1,2,3,7,8,3<br>6,40,42 | 4,5,6,37,3<br>8,39,41,43<br>,44 | 7  | P00762,P01835,P16086,P20759,P36374,Q08849,Q09030                                                         |
| 1561 | 1,2,3,7,8,3<br>6,40,43 | 4,5,6,37,3<br>8,39,41,42<br>,44 | 4  | P01946,P06760,P85971,Q09030                                                                              |
| 1562 | 1,2,3,7,8,3<br>6,40,44 | 4,5,6,37,3<br>8,39,41,42<br>,43 | 5  | B0BNN3,P13432,P55314,Q09030,Q63467                                                                       |
| 1563 | 1,2,3,7,8,3<br>6,41,42 | 4,5,6,37,3<br>8,39,40,43<br>,44 | 15 | P01835,P04905,P08010,P08649,P08753,POC0A9,P16086,P60905,P83121,P85971,Q09030,Q63357,Q63467,Q6AYR9,Q812E4 |
| 1564 | 1,2,3,7,8,3<br>6,41,43 | 4,5,6,37,3<br>8,39,40,42<br>,44 | 8  | P01946,P02651,P06760,P83121,P85971,Q09030,Q63467,Q9QX79                                                  |
| 1565 | 1,2,3,7,8,3<br>6,41,44 | 4,5,6,37,3<br>8,39,40,42<br>,43 | 7  | B0BNN3,P01946,P83121,P85971,Q09030,Q63467,Q99MH3                                                         |

|      |                        |                                 |    |                                                                              |
|------|------------------------|---------------------------------|----|------------------------------------------------------------------------------|
| 1566 | 1,2,3,7,8,3<br>6,42,43 | 4,5,6,37,3<br>8,39,40,41<br>,44 | 9  | P01946,P06760,P16086,P16391,P60905,P85971,Q08849,Q09030,Q62975               |
| 1567 | 1,2,3,7,8,3<br>6,42,44 | 4,5,6,37,3<br>8,39,40,41<br>,43 | 8  | P00762,P20759,P36374,P60905,P85971,Q08849,Q09030,Q63467                      |
| 1568 | 1,2,3,7,8,3<br>6,43,44 | 4,5,6,37,3<br>8,39,40,41<br>,42 | 11 | P01946,P02091,P06760,P13432,P55314,P83121,P85971,Q63467,Q63661,Q66H69,Q9QX79 |
| 1569 | 1,2,3,7,8,3<br>7,38,39 | 4,5,6,36,4<br>0,41,42,43<br>,44 | 1  | P01946                                                                       |
| 1570 | 1,2,3,7,8,3<br>7,38,40 | 4,5,6,36,3<br>9,41,42,43<br>,44 | 0  |                                                                              |
| 1571 | 1,2,3,7,8,3<br>7,38,41 | 4,5,6,36,3<br>9,40,42,43<br>,44 | 3  | P50115,P50116,Q91ZS3                                                         |
| 1572 | 1,2,3,7,8,3<br>7,38,42 | 4,5,6,36,3<br>9,40,41,43<br>,44 | 1  | Q91ZS3                                                                       |
| 1573 | 1,2,3,7,8,3<br>7,38,43 | 4,5,6,36,3<br>9,40,41,42<br>,44 | 3  | P01946,Q7TPB1,Q9QX79                                                         |
| 1574 | 1,2,3,7,8,3<br>7,38,44 | 4,5,6,36,3<br>9,40,41,42<br>,43 | 1  | P01946                                                                       |
| 1575 | 1,2,3,7,8,3<br>7,39,40 | 4,5,6,36,3<br>8,41,42,43<br>,44 | 3  | P01835,P01946,P27213                                                         |
| 1576 | 1,2,3,7,8,3<br>7,39,41 | 4,5,6,36,3<br>8,40,42,43<br>,44 | 3  | P01835,P01946,Q91ZS3                                                         |
| 1577 | 1,2,3,7,8,3<br>7,39,42 | 4,5,6,36,3<br>8,40,41,43<br>,44 | 3  | P01835,P01946,Q08849                                                         |
| 1578 | 1,2,3,7,8,3<br>7,39,43 | 4,5,6,36,3<br>8,40,41,42<br>,44 | 4  | P01946,P02091,P06760,Q9QX79                                                  |
| 1579 | 1,2,3,7,8,3<br>7,39,44 | 4,5,6,36,3<br>8,40,41,42<br>,43 | 2  | P01946,P27213                                                                |
| 1580 | 1,2,3,7,8,3<br>7,40,41 | 4,5,6,36,3<br>8,39,42,43<br>,44 | 4  | P01835,P51907,Q09030,Q61FU7                                                  |

|      |                        |                                 |   |                                                  |
|------|------------------------|---------------------------------|---|--------------------------------------------------|
| 1581 | 1,2,3,7,8,3<br>7,40,42 | 4,5,6,36,3<br>8,39,41,43<br>,44 | 3 | P01835,P20759,Q09030                             |
| 1582 | 1,2,3,7,8,3<br>7,40,43 | 4,5,6,36,3<br>8,39,41,42<br>,44 | 2 | P01946,Q9QX79                                    |
| 1583 | 1,2,3,7,8,3<br>7,40,44 | 4,5,6,36,3<br>8,39,41,42<br>,43 | 1 | Q6IFU7                                           |
| 1584 | 1,2,3,7,8,3<br>7,41,42 | 4,5,6,36,3<br>8,39,40,43<br>,44 | 3 | P01835,Q09030,Q91ZS3                             |
| 1585 | 1,2,3,7,8,3<br>7,41,43 | 4,5,6,36,3<br>8,39,40,42<br>,44 | 7 | P01946,P06760,P51907,P83121,P85971,Q7TPB1,Q9QX79 |
| 1586 | 1,2,3,7,8,3<br>7,41,44 | 4,5,6,36,3<br>8,39,40,42<br>,43 | 2 | P83121,Q6IFU7                                    |
| 1587 | 1,2,3,7,8,3<br>7,42,43 | 4,5,6,36,3<br>8,39,40,41<br>,44 | 6 | O35783,P01946,P85971,Q09030,Q62975,Q9QX79        |
| 1588 | 1,2,3,7,8,3<br>7,42,44 | 4,5,6,36,3<br>8,39,40,41<br>,43 | 2 | P20759,Q08849                                    |
| 1589 | 1,2,3,7,8,3<br>7,43,44 | 4,5,6,36,3<br>8,39,40,41<br>,42 | 4 | P01946,P02091,P85971,Q9QX79                      |
| 1590 | 1,2,3,7,8,3<br>8,39,40 | 4,5,6,36,3<br>7,41,42,43<br>,44 | 2 | P01946,P27213                                    |
| 1591 | 1,2,3,7,8,3<br>8,39,41 | 4,5,6,36,3<br>7,40,42,43<br>,44 | 3 | P01946,P50115,P50116                             |
| 1592 | 1,2,3,7,8,3<br>8,39,42 | 4,5,6,36,3<br>7,40,41,43<br>,44 | 5 | P01946,P08010,P08753,P47727,Q80WL1               |
| 1593 | 1,2,3,7,8,3<br>8,39,43 | 4,5,6,36,3<br>7,40,41,42<br>,44 | 5 | P01946,P02091,P06760,P85971,Q80WL1               |
| 1594 | 1,2,3,7,8,3<br>8,39,44 | 4,5,6,36,3<br>7,40,41,42<br>,43 | 1 | P01946                                           |
| 1595 | 1,2,3,7,8,3<br>8,40,41 | 4,5,6,36,3<br>7,39,42,43<br>,44 | 2 | P50115,P50116                                    |



|      |                        |                                 |    |                                                                       |
|------|------------------------|---------------------------------|----|-----------------------------------------------------------------------|
| 1596 | 1,2,3,7,8,3<br>8,40,42 | 4,5,6,36,3<br>7,39,41,43<br>,44 | 2  | P20759,P36374                                                         |
| 1597 | 1,2,3,7,8,3<br>8,40,43 | 4,5,6,36,3<br>7,39,41,42<br>,44 | 1  | P01946                                                                |
| 1598 | 1,2,3,7,8,3<br>8,40,44 | 4,5,6,36,3<br>7,39,41,42<br>,43 | 0  |                                                                       |
| 1599 | 1,2,3,7,8,3<br>8,41,42 | 4,5,6,36,3<br>7,39,40,43<br>,44 | 10 | O35547,P08010,P08753,P0C0A9,P16086,P50115,P50116,P54921,P60905,Q9QZK9 |
| 1600 | 1,2,3,7,8,3<br>8,41,43 | 4,5,6,36,3<br>7,39,40,42<br>,44 | 6  | P01946,P50115,P50116,P85971,Q7TPB1,Q9QX79                             |
| 1601 | 1,2,3,7,8,3<br>8,41,44 | 4,5,6,36,3<br>7,39,40,42<br>,43 | 8  | P01946,P50115,P50116,P55091,P98089,Q05695,Q62635,Q63467               |
| 1602 | 1,2,3,7,8,3<br>8,42,43 | 4,5,6,36,3<br>7,39,40,41<br>,44 | 6  | O35547,P01946,P47727,P85971,Q62975,Q9JHB9                             |
| 1603 | 1,2,3,7,8,3<br>8,42,44 | 4,5,6,36,3<br>7,39,40,41<br>,43 | 3  | P20759,P36374,Q9QZK9                                                  |
| 1604 | 1,2,3,7,8,3<br>8,43,44 | 4,5,6,36,3<br>7,39,40,41<br>,42 | 3  | P01946,P02091,P85971                                                  |
| 1605 | 1,2,3,7,8,3<br>9,40,41 | 4,5,6,36,3<br>7,38,42,43<br>,44 | 4  | P01835,P01946,P10715,P20766                                           |
| 1606 | 1,2,3,7,8,3<br>9,40,42 | 4,5,6,36,3<br>7,38,41,43<br>,44 | 6  | P01835,P01946,P16086,P20759,P20766,P27213                             |
| 1607 | 1,2,3,7,8,3<br>9,40,43 | 4,5,6,36,3<br>7,38,41,42<br>,44 | 3  | P01946,P02091,P20766                                                  |
| 1608 | 1,2,3,7,8,3<br>9,40,44 | 4,5,6,36,3<br>7,38,41,42<br>,43 | 5  | P01946,P10715,P20766,P27213,Q6AYL6                                    |
| 1609 | 1,2,3,7,8,3<br>9,41,42 | 4,5,6,36,3<br>7,38,40,43<br>,44 | 9  | P01835,P01946,P08010,P08753,P0C0A9,P16086,P20766,P82471,Q6AYR9        |
| 1610 | 1,2,3,7,8,3<br>9,41,43 | 4,5,6,36,3<br>7,38,40,42<br>,44 | 7  | P01946,P02091,P06760,P08494,P82471,P85971,Q9QX79                      |

|      |                         |                                 |    |                                                                                            |
|------|-------------------------|---------------------------------|----|--------------------------------------------------------------------------------------------|
| 1611 | 1,2,3,7,8,3<br>9,41,44  | 4,5,6,36,3<br>7,38,40,42<br>,43 | 3  | P01946,P20766,Q63467                                                                       |
| 1612 | 1,2,3,7,8,3<br>9,42,43  | 4,5,6,36,3<br>7,38,40,41<br>,44 | 9  | P01946,P02091,P06760,P0C0A9,P16086,P20766,P85971,Q62975,Q6AYR9                             |
| 1613 | 1,2,3,7,8,3<br>9,42,44  | 4,5,6,36,3<br>7,38,40,41<br>,43 | 4  | P01946,P0C0A9,P20766,Q08849                                                                |
| 1614 | 1,2,3,7,8,3<br>9,43,44  | 4,5,6,36,3<br>7,38,40,41<br>,42 | 4  | P01946,P02091,P20766,P85971                                                                |
| 1615 | 1,2,3,7,8,4<br>0,41,42  | 4,5,6,36,3<br>7,38,39,43<br>,44 | 5  | P01835,P16086,P20759,Q09030,Q9JJS8                                                         |
| 1616 | 1,2,3,7,8,4<br>0,41,43  | 4,5,6,36,3<br>7,38,39,42<br>,44 | 3  | P01946,P51907,Q9QX79                                                                       |
| 1617 | 1,2,3,7,8,4<br>0,41,44  | 4,5,6,36,3<br>7,38,39,42<br>,43 | 4  | P10715,P31044,Q5GRG2,Q9ET32                                                                |
| 1618 | 1,2,3,7,8,4<br>0,42,43  | 4,5,6,36,3<br>7,38,39,41<br>,44 | 6  | O35783,P01946,P16086,Q09030,Q62975,Q9JHB9                                                  |
| 1619 | 1,2,3,7,8,4<br>0,42,44  | 4,5,6,36,3<br>7,38,39,41<br>,43 | 4  | P20759,P20766,P36374,Q9QZ76                                                                |
| 1620 | 1,2,3,7,8,4<br>0,43,44  | 4,5,6,36,3<br>7,38,39,41<br>,42 | 2  | P01946,P02091                                                                              |
| 1621 | 1,2,3,7,8,4<br>1,42,43  | 4,5,6,36,3<br>7,38,39,40<br>,44 | 13 | O35547,P01946,P08753,P0C0A9,P16086,P54921,P60905,P82471,P83121,P85971,Q09030,Q62975,Q9QX79 |
| 1622 | 1,2,3,7,8,4<br>1,42,44  | 4,5,6,36,3<br>7,38,39,40<br>,43 | 6  | P08753,P0C0A9,P16086,P20759,P60905,Q9JID2                                                  |
| 1623 | 1,2,3,7,8,4<br>1,43,44  | 4,5,6,36,3<br>7,38,39,40<br>,42 | 6  | P01946,P02091,P83121,P85971,Q63467,Q9QX79                                                  |
| 1624 | 1,2,3,7,8,4<br>2,43,44  | 4,5,6,36,3<br>7,38,39,40<br>,41 | 8  | O35783,P01946,P02091,P0C0A9,P60905,P85971,Q62975,Q6Q7Y5                                    |
| 1625 | 1,2,3,7,36,<br>37,38,39 | 4,5,6,8,40,<br>41,42,43,4<br>4  | 7  | P01946,P02793,Q7TP54,P06760,P97840,Q6P6R2,Q91ZS3,Q9Z0V6                                    |

|      |                         |                                |   |                                                                |
|------|-------------------------|--------------------------------|---|----------------------------------------------------------------|
| 1626 | 1,2,3,7,36,<br>37,38,40 | 4,5,6,8,39,<br>41,42,43,4<br>4 | 0 |                                                                |
| 1627 | 1,2,3,7,36,<br>37,38,41 | 4,5,6,8,39,<br>40,42,43,4<br>4 | 3 | P06760,Q91ZS3,Q9Z0V6                                           |
| 1628 | 1,2,3,7,36,<br>37,38,42 | 4,5,6,8,39,<br>40,41,43,4<br>4 | 5 | P02793;Q7TP54,P06760,P47967,P97840,Q91ZS3                      |
| 1629 | 1,2,3,7,36,<br>37,38,43 | 4,5,6,8,39,<br>40,41,42,4<br>4 | 4 | P01946,P06760,P14668,Q9Z0V6                                    |
| 1630 | 1,2,3,7,36,<br>37,38,44 | 4,5,6,8,39,<br>40,41,42,4<br>3 | 3 | P01946,P05964,P97840                                           |
| 1631 | 1,2,3,7,36,<br>37,39,40 | 4,5,6,8,38,<br>41,42,43,4<br>4 | 7 | P01835,P01946,P06760,P27213,Q05695,Q8CJD3,Q9Z0V6               |
| 1632 | 1,2,3,7,36,<br>37,39,41 | 4,5,6,8,38,<br>40,42,43,4<br>4 | 6 | P00714,P01835,P01946,P06760,Q91ZS3,Q9Z0V6                      |
| 1633 | 1,2,3,7,36,<br>37,39,42 | 4,5,6,8,38,<br>40,41,43,4<br>4 | 7 | O54728,P01835,P01946,P02793;Q7TP54,P06760,P97840,Q62635        |
| 1634 | 1,2,3,7,36,<br>37,39,43 | 4,5,6,8,38,<br>40,41,42,4<br>4 | 7 | D3ZUC6,P00714,P01946,P02091,P06760,Q8CIZ5,Q9Z0V6               |
| 1635 | 1,2,3,7,36,<br>37,39,44 | 4,5,6,8,38,<br>40,41,42,4<br>3 | 8 | A2RUV9,P01946,P02793;Q7TP54,P06760,P27213,P55314,Q8CJD3,Q9Z0V6 |
| 1636 | 1,2,3,7,36,<br>37,40,41 | 4,5,6,8,38,<br>39,42,43,4<br>4 | 2 | P01835,Q9Z0V6                                                  |
| 1637 | 1,2,3,7,36,<br>37,40,42 | 4,5,6,8,38,<br>39,41,43,4<br>4 | 1 | P01835                                                         |
| 1638 | 1,2,3,7,36,<br>37,40,43 | 4,5,6,8,38,<br>39,41,42,4<br>4 | 5 | P01946,P06760,P14668,Q05695,Q9Z0V6                             |
| 1639 | 1,2,3,7,36,<br>37,40,44 | 4,5,6,8,38,<br>39,41,42,4<br>3 | 2 | B0BNN3,P55314                                                  |
| 1640 | 1,2,3,7,36,<br>37,41,42 | 4,5,6,8,38,<br>39,40,43,4<br>4 | 4 | P01835,P06760,P08649,Q91ZS3                                    |

|      |                         |                                |   |                                                         |
|------|-------------------------|--------------------------------|---|---------------------------------------------------------|
| 1641 | 1,2,3,7,36,<br>37,41,43 | 4,5,6,8,38,<br>39,40,42,4<br>4 | 6 | D3ZUC6,P00714,P01946,P06760,P83121,Q9Z0V6               |
| 1642 | 1,2,3,7,36,<br>37,41,44 | 4,5,6,8,38,<br>39,40,42,4<br>3 | 3 | P06760,Q63467,Q9Z0V6                                    |
| 1643 | 1,2,3,7,36,<br>37,42,43 | 4,5,6,8,38,<br>39,40,41,4<br>4 | 4 | P01946,P06760,P06911,Q62975                             |
| 1644 | 1,2,3,7,36,<br>37,42,44 | 4,5,6,8,38,<br>39,40,41,4<br>3 | 2 | P02793;Q7TP54,P97840                                    |
| 1645 | 1,2,3,7,36,<br>37,43,44 | 4,5,6,8,38,<br>39,40,41,4<br>2 | 8 | P01946,P02091,P06760,P13432,P14668,P55314,Q63661,Q9Z0V6 |
| 1646 | 1,2,3,7,36,<br>38,39,40 | 4,5,6,8,37,<br>41,42,43,4<br>4 | 1 | P01946                                                  |
| 1647 | 1,2,3,7,36,<br>38,39,41 | 4,5,6,8,37,<br>40,42,43,4<br>4 | 4 | P00714,P01946,P06760,Q63467                             |
| 1648 | 1,2,3,7,36,<br>38,39,42 | 4,5,6,8,37,<br>40,41,43,4<br>4 | 5 | O54728,P01946,P02793;Q7TP54,P06760,P97840               |
| 1649 | 1,2,3,7,36,<br>38,39,43 | 4,5,6,8,37,<br>40,41,42,4<br>4 | 5 | P00714,P01946,P02091,P06760,Q6P6R2                      |
| 1650 | 1,2,3,7,36,<br>38,39,44 | 4,5,6,8,37,<br>40,41,42,4<br>3 | 4 | P01946,P06760,P55314,Q63467                             |
| 1651 | 1,2,3,7,36,<br>38,40,41 | 4,5,6,8,37,<br>39,42,43,4<br>4 | 0 |                                                         |
| 1652 | 1,2,3,7,36,<br>38,40,42 | 4,5,6,8,37,<br>39,41,43,4<br>4 | 0 |                                                         |
| 1653 | 1,2,3,7,36,<br>38,40,43 | 4,5,6,8,37,<br>39,41,42,4<br>4 | 3 | P01946,P06760,Q63661                                    |
| 1654 | 1,2,3,7,36,<br>38,40,44 | 4,5,6,8,37,<br>39,41,42,4<br>3 | 1 | P55314                                                  |
| 1655 | 1,2,3,7,36,<br>38,41,42 | 4,5,6,8,37,<br>39,40,43,4<br>4 | 3 | P08010,P08649,P16086                                    |

|      |                         |                                |   |                                                         |
|------|-------------------------|--------------------------------|---|---------------------------------------------------------|
| 1656 | 1,2,3,7,36,<br>38,41,43 | 4,5,6,8,37,<br>39,40,42,4<br>4 | 3 | P01946,P06760,Q63661                                    |
| 1657 | 1,2,3,7,36,<br>38,41,44 | 4,5,6,8,37,<br>39,40,42,4<br>3 | 2 | P01946,Q63467                                           |
| 1658 | 1,2,3,7,36,<br>38,42,43 | 4,5,6,8,37,<br>39,40,41,4<br>4 | 4 | P01946,P06760,P06911,Q62975                             |
| 1659 | 1,2,3,7,36,<br>38,42,44 | 4,5,6,8,37,<br>39,40,41,4<br>3 | 2 | P02793;Q7TP54,P97840                                    |
| 1660 | 1,2,3,7,36,<br>38,43,44 | 4,5,6,8,37,<br>39,40,41,4<br>2 | 6 | P01946,P02091,P06760,P34901,P55314,Q63661               |
| 1661 | 1,2,3,7,36,<br>39,40,41 | 4,5,6,8,37,<br>38,42,43,4<br>4 | 4 | P00714,P01835,P01946,P06760                             |
| 1662 | 1,2,3,7,36,<br>39,40,42 | 4,5,6,8,37,<br>38,41,43,4<br>4 | 7 | O54728,P00774,P01835,P01946,P02793;Q7TP54,P16086,P27213 |
| 1663 | 1,2,3,7,36,<br>39,40,43 | 4,5,6,8,37,<br>38,41,42,4<br>4 | 4 | P01946,P02091,P06760,Q8CIZ5                             |
| 1664 | 1,2,3,7,36,<br>39,40,44 | 4,5,6,8,37,<br>38,41,42,4<br>3 | 4 | P01946,P27213,P55314,Q8CJD3                             |
| 1665 | 1,2,3,7,36,<br>39,41,42 | 4,5,6,8,37,<br>38,40,43,4<br>4 | 8 | P01835,P01946,P06760,P08010,P08649,POC0A9,P16086,Q6AYR9 |
| 1666 | 1,2,3,7,36,<br>39,41,43 | 4,5,6,8,37,<br>38,40,42,4<br>4 | 8 | D3ZUC6,P00714,P01946,P02091,P06760,P08494,P22006,Q9Z0V6 |
| 1667 | 1,2,3,7,36,<br>39,41,44 | 4,5,6,8,37,<br>38,40,42,4<br>3 | 4 | P01946,P06760,P55314,Q63467                             |
| 1668 | 1,2,3,7,36,<br>39,42,43 | 4,5,6,8,37,<br>38,40,41,4<br>4 | 8 | O54728,P01946,P02091,P06760,P16086,Q62635,Q62975,Q6AYR9 |
| 1669 | 1,2,3,7,36,<br>39,42,44 | 4,5,6,8,37,<br>38,40,41,4<br>3 | 4 | P01946,P02793;Q7TP54,P06760,P55314                      |
| 1670 | 1,2,3,7,36,<br>39,43,44 | 4,5,6,8,37,<br>38,40,41,4<br>2 | 6 | P01946,P02091,P06760,P55314,Q63467,Q63661               |

|      |                         |                                |   |                                                                |
|------|-------------------------|--------------------------------|---|----------------------------------------------------------------|
| 1671 | 1,2,3,7,36,<br>40,41,42 | 4,5,6,8,37,<br>38,39,43,4<br>4 | 4 | P01835,P08649,P16086,Q09030                                    |
| 1672 | 1,2,3,7,36,<br>40,41,43 | 4,5,6,8,37,<br>38,39,42,4<br>4 | 3 | P01946,P06760,Q63661                                           |
| 1673 | 1,2,3,7,36,<br>40,41,44 | 4,5,6,8,37,<br>38,39,42,4<br>3 | 2 | P55314,Q63467                                                  |
| 1674 | 1,2,3,7,36,<br>40,42,43 | 4,5,6,8,37,<br>38,39,41,4<br>4 | 4 | P01946,P06760,P16086,Q62975                                    |
| 1675 | 1,2,3,7,36,<br>40,42,44 | 4,5,6,8,37,<br>38,39,41,4<br>3 | 2 | P55314,Q7TPB1                                                  |
| 1676 | 1,2,3,7,36,<br>40,43,44 | 4,5,6,8,37,<br>38,39,41,4<br>2 | 5 | P01946,P02091,P13432,P55314,Q63661                             |
| 1677 | 1,2,3,7,36,<br>41,42,43 | 4,5,6,8,37,<br>38,39,40,4<br>4 | 9 | P01946,P06760,P08649,P0C0A9,P16086,P60905,P82471,P83121,Q62975 |
| 1678 | 1,2,3,7,36,<br>41,42,44 | 4,5,6,8,37,<br>38,39,40,4<br>3 | 5 | P08649,P0C0A9,P16086,P60905,Q63467                             |
| 1679 | 1,2,3,7,36,<br>41,43,44 | 4,5,6,8,37,<br>38,39,40,4<br>2 | 8 | D3ZUC6,P01946,P02091,P06760,P55314,P83121,Q63467,Q63661        |
| 1680 | 1,2,3,7,36,<br>42,43,44 | 4,5,6,8,37,<br>38,39,40,4<br>1 | 7 | P01946,P02091,P06760,P0C0A9,P55314,Q62975,Q63661               |
| 1681 | 1,2,3,7,37,<br>38,39,40 | 4,5,6,8,36,<br>41,42,43,4<br>4 | 1 | P01946                                                         |
| 1682 | 1,2,3,7,37,<br>38,39,41 | 4,5,6,8,36,<br>40,42,43,4<br>4 | 3 | P00714,P01946,Q91ZS3                                           |
| 1683 | 1,2,3,7,37,<br>38,39,42 | 4,5,6,8,36,<br>40,41,43,4<br>4 | 2 | P01946,P97840                                                  |
| 1684 | 1,2,3,7,37,<br>38,39,43 | 4,5,6,8,36,<br>40,41,42,4<br>4 | 6 | P00714,P01946,P02091,P06760,P14668,P23593                      |
| 1685 | 1,2,3,7,37,<br>38,39,44 | 4,5,6,8,36,<br>40,41,42,4<br>3 | 3 | A2RUV9,P01946,Q9JJS8                                           |

|      |                         |                                |   |                                    |
|------|-------------------------|--------------------------------|---|------------------------------------|
| 1686 | 1,2,3,7,37,<br>38,40,41 | 4,5,6,8,36,<br>39,42,43,4<br>4 | 0 |                                    |
| 1687 | 1,2,3,7,37,<br>38,40,42 | 4,5,6,8,36,<br>39,41,43,4<br>4 | 0 |                                    |
| 1688 | 1,2,3,7,37,<br>38,40,43 | 4,5,6,8,36,<br>39,41,42,4<br>4 | 2 | P01946,P14668                      |
| 1689 | 1,2,3,7,37,<br>38,40,44 | 4,5,6,8,36,<br>39,41,42,4<br>3 | 0 |                                    |
| 1690 | 1,2,3,7,37,<br>38,41,42 | 4,5,6,8,36,<br>39,40,43,4<br>4 | 2 | Q6AYS4,Q91ZS3                      |
| 1691 | 1,2,3,7,37,<br>38,41,43 | 4,5,6,8,36,<br>39,40,42,4<br>4 | 3 | P01946,P06760,Q6AYS4               |
| 1692 | 1,2,3,7,37,<br>38,41,44 | 4,5,6,8,36,<br>39,40,42,4<br>3 | 1 | P01946                             |
| 1693 | 1,2,3,7,37,<br>38,42,43 | 4,5,6,8,36,<br>39,40,41,4<br>4 | 5 | P01946,P06760,P06866,Q62975,Q6AYS4 |
| 1694 | 1,2,3,7,37,<br>38,42,44 | 4,5,6,8,36,<br>39,40,41,4<br>3 | 1 | P97840                             |
| 1695 | 1,2,3,7,37,<br>38,43,44 | 4,5,6,8,36,<br>39,40,41,4<br>2 | 4 | P01946,P02091,P14668,Q63661        |
| 1696 | 1,2,3,7,37,<br>39,40,41 | 4,5,6,8,36,<br>38,42,43,4<br>4 | 4 | P00714,P01835,P01946,P10715        |
| 1697 | 1,2,3,7,37,<br>39,40,42 | 4,5,6,8,36,<br>38,41,43,4<br>4 | 3 | P01835,P01946,Q05695               |
| 1698 | 1,2,3,7,37,<br>39,40,43 | 4,5,6,8,36,<br>38,41,42,4<br>4 | 5 | P01946,P02091,P06760,Q05695,Q8CIZ5 |
| 1699 | 1,2,3,7,37,<br>39,40,44 | 4,5,6,8,36,<br>38,41,42,4<br>3 | 4 | P01946,P27213,Q6AYL6,Q8CJD3        |
| 1700 | 1,2,3,7,37,<br>39,41,42 | 4,5,6,8,36,<br>38,40,43,4<br>4 | 3 | P01835,P01946,Q91ZS3               |

|      |                         |                                |   |                                           |
|------|-------------------------|--------------------------------|---|-------------------------------------------|
| 1701 | 1,2,3,7,37,<br>39,41,43 | 4,5,6,8,36,<br>38,40,42,4<br>4 | 6 | P00714,P01946,P02091,P06760,P22006,Q9Z0V6 |
| 1702 | 1,2,3,7,37,<br>39,41,44 | 4,5,6,8,36,<br>38,40,42,4<br>3 | 1 | P01946                                    |
| 1703 | 1,2,3,7,37,<br>39,42,43 | 4,5,6,8,36,<br>38,40,41,4<br>4 | 4 | P01946,P02091,P06760,Q62975               |
| 1704 | 1,2,3,7,37,<br>39,42,44 | 4,5,6,8,36,<br>38,40,41,4<br>3 | 1 | P01946                                    |
| 1705 | 1,2,3,7,37,<br>39,43,44 | 4,5,6,8,36,<br>38,40,41,4<br>2 | 4 | A2RUV9,P01946,P02091,P06760               |
| 1706 | 1,2,3,7,37,<br>40,41,42 | 4,5,6,8,36,<br>38,39,43,4<br>4 | 1 | P01835                                    |
| 1707 | 1,2,3,7,37,<br>40,41,43 | 4,5,6,8,36,<br>38,39,42,4<br>4 | 2 | P01946,P51907                             |
| 1708 | 1,2,3,7,37,<br>40,41,44 | 4,5,6,8,36,<br>38,39,42,4<br>3 | 2 | P10715,Q5GRG2                             |
| 1709 | 1,2,3,7,37,<br>40,42,43 | 4,5,6,8,36,<br>38,39,41,4<br>4 | 3 | P01946,Q05695,Q62975                      |
| 1710 | 1,2,3,7,37,<br>40,42,44 | 4,5,6,8,36,<br>38,39,41,4<br>3 | 0 |                                           |
| 1711 | 1,2,3,7,37,<br>40,43,44 | 4,5,6,8,36,<br>38,39,41,4<br>2 | 3 | P01946,P02091,Q63661                      |
| 1712 | 1,2,3,7,37,<br>41,42,43 | 4,5,6,8,36,<br>38,39,40,4<br>4 | 4 | P01946,P06760,Q62975,Q6AYS4               |
| 1713 | 1,2,3,7,37,<br>41,42,44 | 4,5,6,8,36,<br>38,39,40,4<br>3 | 1 | Q6AYS4                                    |
| 1714 | 1,2,3,7,37,<br>41,43,44 | 4,5,6,8,36,<br>38,39,40,4<br>2 | 5 | P01946,P02091,P06760,P83121,Q6AYS4        |
| 1715 | 1,2,3,7,37,<br>42,43,44 | 4,5,6,8,36,<br>38,39,40,4<br>1 | 5 | O35783,P01946,P02091,Q62975,Q6AYS4        |



|      |                         |                                |   |                                    |
|------|-------------------------|--------------------------------|---|------------------------------------|
| 1716 | 1,2,3,7,38,<br>39,40,41 | 4,5,6,8,36,<br>37,42,43,4<br>4 | 2 | P01946,P10715                      |
| 1717 | 1,2,3,7,38,<br>39,40,42 | 4,5,6,8,36,<br>37,41,43,4<br>4 | 1 | P01946                             |
| 1718 | 1,2,3,7,38,<br>39,40,43 | 4,5,6,8,36,<br>37,41,42,4<br>4 | 2 | P01946,P02091                      |
| 1719 | 1,2,3,7,38,<br>39,40,44 | 4,5,6,8,36,<br>37,41,42,4<br>3 | 2 | P01946,Q9QUL6                      |
| 1720 | 1,2,3,7,38,<br>39,41,42 | 4,5,6,8,36,<br>37,40,43,4<br>4 | 5 | O35547,P01946,P08010,P0C0A9,P16086 |
| 1721 | 1,2,3,7,38,<br>39,41,43 | 4,5,6,8,36,<br>37,40,42,4<br>4 | 4 | P00714,P01946,P02091,P06760        |
| 1722 | 1,2,3,7,38,<br>39,41,44 | 4,5,6,8,36,<br>37,40,42,4<br>3 | 1 | P01946                             |
| 1723 | 1,2,3,7,38,<br>39,42,43 | 4,5,6,8,36,<br>37,40,41,4<br>4 | 4 | P01946,P02091,P06760,Q62975        |
| 1724 | 1,2,3,7,38,<br>39,42,44 | 4,5,6,8,36,<br>37,40,41,4<br>3 | 1 | P01946                             |
| 1725 | 1,2,3,7,38,<br>39,43,44 | 4,5,6,8,36,<br>37,40,41,4<br>2 | 5 | A2RUV9,P01946,P02091,P06760,P23593 |
| 1726 | 1,2,3,7,38,<br>40,41,42 | 4,5,6,8,36,<br>37,39,43,4<br>4 | 1 | P16086                             |
| 1727 | 1,2,3,7,38,<br>40,41,43 | 4,5,6,8,36,<br>37,39,42,4<br>4 | 1 | P01946                             |
| 1728 | 1,2,3,7,38,<br>40,41,44 | 4,5,6,8,36,<br>37,39,42,4<br>3 | 2 | P10715,Q5GRG2                      |
| 1729 | 1,2,3,7,38,<br>40,42,43 | 4,5,6,8,36,<br>37,39,41,4<br>4 | 3 | P01946,Q62975,Q9JHB9               |
| 1730 | 1,2,3,7,38,<br>40,42,44 | 4,5,6,8,36,<br>37,39,41,4<br>3 | 1 | Q99041                             |

|      |                         |                                |    |                                                                       |
|------|-------------------------|--------------------------------|----|-----------------------------------------------------------------------|
| 1731 | 1,2,3,7,38,<br>40,43,44 | 4,5,6,8,36,<br>37,39,41,4<br>2 | 3  | P01946,P02091,Q63661                                                  |
| 1732 | 1,2,3,7,38,<br>41,42,43 | 4,5,6,8,36,<br>37,39,40,4<br>4 | 10 | O35547,P01946,P06866,P0C0A9,P16086,P54921,P82471,Q62975,Q6AYS4,Q8CJD3 |
| 1733 | 1,2,3,7,38,<br>41,42,44 | 4,5,6,8,36,<br>37,39,40,4<br>3 | 5  | O35547,P0C0A9,P55091,P98089,Q8CIZ5                                    |
| 1734 | 1,2,3,7,38,<br>41,43,44 | 4,5,6,8,36,<br>37,39,40,4<br>2 | 6  | P00774,P01946,P02091,P55091,P98089,Q63661                             |
| 1735 | 1,2,3,7,38,<br>42,43,44 | 4,5,6,8,36,<br>37,39,40,4<br>1 | 5  | O35783,P01946,P02091,P0C0A9,Q62975                                    |
| 1736 | 1,2,3,7,39,<br>40,41,42 | 4,5,6,8,36,<br>37,38,43,4<br>4 | 3  | P01835,P01946,P16086                                                  |
| 1737 | 1,2,3,7,39,<br>40,41,43 | 4,5,6,8,36,<br>37,38,42,4<br>4 | 5  | P00714,P01946,P02091,P06760,Q6AYL6                                    |
| 1738 | 1,2,3,7,39,<br>40,41,44 | 4,5,6,8,36,<br>37,38,42,4<br>3 | 6  | P01946,P10715,P19629,P31044,Q5GRG2,Q6AYL6                             |
| 1739 | 1,2,3,7,39,<br>40,42,43 | 4,5,6,8,36,<br>37,38,41,4<br>4 | 4  | P01946,P02091,P16086,Q05695                                           |
| 1740 | 1,2,3,7,39,<br>40,42,44 | 4,5,6,8,36,<br>37,38,41,4<br>3 | 1  | P01946                                                                |
| 1741 | 1,2,3,7,39,<br>40,43,44 | 4,5,6,8,36,<br>37,38,41,4<br>2 | 3  | P01946,P02091,Q6AYL6                                                  |
| 1742 | 1,2,3,7,39,<br>41,42,43 | 4,5,6,8,36,<br>37,38,40,4<br>4 | 10 | P00731,P01946,P02091,P06760,P0C0A9,P16086,P22006,P82471,Q6AYR9,Q6AYS4 |
| 1743 | 1,2,3,7,39,<br>41,42,44 | 4,5,6,8,36,<br>37,38,40,4<br>3 | 3  | P01946,P0C0A9,P16086                                                  |
| 1744 | 1,2,3,7,39,<br>41,43,44 | 4,5,6,8,36,<br>37,38,40,4<br>2 | 4  | P01946,P02091,P06760,P08494                                           |
| 1745 | 1,2,3,7,39,<br>42,43,44 | 4,5,6,8,36,<br>37,38,40,4<br>1 | 5  | P01946,P02091,P06760,P0C0A9,Q62975                                    |

|      |                         |                                |   |                                                         |
|------|-------------------------|--------------------------------|---|---------------------------------------------------------|
| 1746 | 1,2,3,7,40,<br>41,42,43 | 4,5,6,8,36,<br>37,38,39,4<br>4 | 3 | P01946,P16086,Q6AYS4                                    |
| 1747 | 1,2,3,7,40,<br>41,42,44 | 4,5,6,8,36,<br>37,38,39,4<br>3 | 1 | P16086                                                  |
| 1748 | 1,2,3,7,40,<br>41,43,44 | 4,5,6,8,36,<br>37,38,39,4<br>2 | 4 | P01946,P02091,Q63661,Q6AYL6                             |
| 1749 | 1,2,3,7,40,<br>42,43,44 | 4,5,6,8,36,<br>37,38,39,4<br>1 | 4 | O35783,P01946,P02091,Q62975                             |
| 1750 | 1,2,3,7,41,<br>42,43,44 | 4,5,6,8,36,<br>37,38,39,4<br>0 | 8 | O35783,P01946,P02091,P0C0A9,P16086,P82471,Q62975,Q6AYS4 |
| 1751 | 1,2,3,8,36,<br>37,38,39 | 4,5,6,7,40,<br>41,42,43,4<br>4 | 0 |                                                         |
| 1752 | 1,2,3,8,36,<br>37,38,40 | 4,5,6,7,39,<br>41,42,43,4<br>4 | 0 |                                                         |
| 1753 | 1,2,3,8,36,<br>37,38,41 | 4,5,6,7,39,<br>40,42,43,4<br>4 | 2 | P83121,Q91ZS3                                           |
| 1754 | 1,2,3,8,36,<br>37,38,42 | 4,5,6,7,39,<br>40,41,43,4<br>4 | 2 | P12020,Q6AYL6                                           |
| 1755 | 1,2,3,8,36,<br>37,38,43 | 4,5,6,7,39,<br>40,41,42,4<br>4 | 2 | P83121,Q64268                                           |
| 1756 | 1,2,3,8,36,<br>37,38,44 | 4,5,6,7,39,<br>40,41,42,4<br>3 | 0 |                                                         |
| 1757 | 1,2,3,8,36,<br>37,39,40 | 4,5,6,7,38,<br>41,42,43,4<br>4 | 3 | P01835,P27213,Q8CJD3                                    |
| 1758 | 1,2,3,8,36,<br>37,39,41 | 4,5,6,7,38,<br>40,42,43,4<br>4 | 3 | P00714,P01835,P83121                                    |
| 1759 | 1,2,3,8,36,<br>37,39,42 | 4,5,6,7,38,<br>40,41,43,4<br>4 | 1 | P01835                                                  |
| 1760 | 1,2,3,8,36,<br>37,39,43 | 4,5,6,7,38,<br>40,41,42,4<br>4 | 4 | P00714,P06760,P83121,Q8CIZ5                             |

|      |                         |                                |   |                                    |
|------|-------------------------|--------------------------------|---|------------------------------------|
| 1761 | 1,2,3,8,36,<br>37,39,44 | 4,5,6,7,38,<br>40,41,42,4<br>3 | 2 | P55314,Q8CJD3                      |
| 1762 | 1,2,3,8,36,<br>37,40,41 | 4,5,6,7,38,<br>39,42,43,4<br>4 | 3 | P01835,P51907,P83121               |
| 1763 | 1,2,3,8,36,<br>37,40,42 | 4,5,6,7,38,<br>39,41,43,4<br>4 | 2 | P01835,Q64093                      |
| 1764 | 1,2,3,8,36,<br>37,40,43 | 4,5,6,7,38,<br>39,41,42,4<br>4 | 1 | P83121                             |
| 1765 | 1,2,3,8,36,<br>37,40,44 | 4,5,6,7,38,<br>39,41,42,4<br>3 | 1 | Q8CJD3                             |
| 1766 | 1,2,3,8,36,<br>37,41,42 | 4,5,6,7,38,<br>39,40,43,4<br>4 | 2 | P01835,P83121                      |
| 1767 | 1,2,3,8,36,<br>37,41,43 | 4,5,6,7,38,<br>39,40,42,4<br>4 | 3 | P06760,P83121,Q9QX79               |
| 1768 | 1,2,3,8,36,<br>37,41,44 | 4,5,6,7,38,<br>39,40,42,4<br>3 | 1 | P83121                             |
| 1769 | 1,2,3,8,36,<br>37,42,43 | 4,5,6,7,38,<br>39,40,41,4<br>4 | 5 | P06911,P12020,P19629,P83121,Q62975 |
| 1770 | 1,2,3,8,36,<br>37,42,44 | 4,5,6,7,38,<br>39,40,41,4<br>3 | 0 |                                    |
| 1771 | 1,2,3,8,36,<br>37,43,44 | 4,5,6,7,38,<br>39,40,41,4<br>2 | 3 | P13432,P83121,Q63661               |
| 1772 | 1,2,3,8,36,<br>38,39,40 | 4,5,6,7,37,<br>41,42,43,4<br>4 | 0 |                                    |
| 1773 | 1,2,3,8,36,<br>38,39,41 | 4,5,6,7,37,<br>40,42,43,4<br>4 | 1 | P00714                             |
| 1774 | 1,2,3,8,36,<br>38,39,42 | 4,5,6,7,37,<br>40,41,43,4<br>4 | 1 | O54728                             |
| 1775 | 1,2,3,8,36,<br>38,39,43 | 4,5,6,7,37,<br>40,41,42,4<br>4 | 1 | P06760                             |

|      |                         |                                |   |                                    |
|------|-------------------------|--------------------------------|---|------------------------------------|
| 1776 | 1,2,3,8,36,<br>38,39,44 | 4,5,6,7,37,<br>40,41,42,4<br>3 | 1 | P55314                             |
| 1777 | 1,2,3,8,36,<br>38,40,41 | 4,5,6,7,37,<br>39,42,43,4<br>4 | 0 |                                    |
| 1778 | 1,2,3,8,36,<br>38,40,42 | 4,5,6,7,37,<br>39,41,43,4<br>4 | 1 | P15999                             |
| 1779 | 1,2,3,8,36,<br>38,40,43 | 4,5,6,7,37,<br>39,41,42,4<br>4 | 0 |                                    |
| 1780 | 1,2,3,8,36,<br>38,40,44 | 4,5,6,7,37,<br>39,41,42,4<br>3 | 0 |                                    |
| 1781 | 1,2,3,8,36,<br>38,41,42 | 4,5,6,7,37,<br>39,40,43,4<br>4 | 3 | P08753,P83121,Q6AYL6               |
| 1782 | 1,2,3,8,36,<br>38,41,43 | 4,5,6,7,37,<br>39,40,42,4<br>4 | 1 | P83121                             |
| 1783 | 1,2,3,8,36,<br>38,41,44 | 4,5,6,7,37,<br>39,40,42,4<br>3 | 1 | P83121                             |
| 1784 | 1,2,3,8,36,<br>38,42,43 | 4,5,6,7,37,<br>39,40,41,4<br>4 | 5 | P06911,P12020,P15999,Q5GRG2,Q62975 |
| 1785 | 1,2,3,8,36,<br>38,42,44 | 4,5,6,7,37,<br>39,40,41,4<br>3 | 1 | P15999                             |
| 1786 | 1,2,3,8,36,<br>38,43,44 | 4,5,6,7,37,<br>39,40,41,4<br>2 | 4 | P55314,P83121,Q63661,Q66H69        |
| 1787 | 1,2,3,8,36,<br>39,40,41 | 4,5,6,7,37,<br>38,42,43,4<br>4 | 1 | P01835                             |
| 1788 | 1,2,3,8,36,<br>39,40,42 | 4,5,6,7,37,<br>38,41,43,4<br>4 | 1 | P01835                             |
| 1789 | 1,2,3,8,36,<br>39,40,43 | 4,5,6,7,37,<br>38,41,42,4<br>4 | 1 | Q5QE79                             |
| 1790 | 1,2,3,8,36,<br>39,40,44 | 4,5,6,7,37,<br>38,41,42,4<br>3 | 3 | P20766,P55314,Q8CJD3               |

|      |                         |                                |   |                             |
|------|-------------------------|--------------------------------|---|-----------------------------|
| 1791 | 1,2,3,8,36,<br>39,41,42 | 4,5,6,7,37,<br>38,40,43,4<br>4 | 3 | P01835,P83121,Q6AYR9        |
| 1792 | 1,2,3,8,36,<br>39,41,43 | 4,5,6,7,37,<br>38,40,42,4<br>4 | 4 | P00714,P06760,P08494,P83121 |
| 1793 | 1,2,3,8,36,<br>39,41,44 | 4,5,6,7,37,<br>38,40,42,4<br>3 | 2 | P55314,P83121               |
| 1794 | 1,2,3,8,36,<br>39,42,43 | 4,5,6,7,37,<br>38,40,41,4<br>4 | 2 | O54728,P06760               |
| 1795 | 1,2,3,8,36,<br>39,42,44 | 4,5,6,7,37,<br>38,40,41,4<br>3 | 1 | P55314                      |
| 1796 | 1,2,3,8,36,<br>39,43,44 | 4,5,6,7,37,<br>38,40,41,4<br>2 | 3 | P01946,P55314,P83121        |
| 1797 | 1,2,3,8,36,<br>40,41,42 | 4,5,6,7,37,<br>38,39,43,4<br>4 | 1 | P01835                      |
| 1798 | 1,2,3,8,36,<br>40,41,43 | 4,5,6,7,37,<br>38,39,42,4<br>4 | 1 | P83121                      |
| 1799 | 1,2,3,8,36,<br>40,41,44 | 4,5,6,7,37,<br>38,39,42,4<br>3 | 1 | P83121                      |
| 1800 | 1,2,3,8,36,<br>40,42,43 | 4,5,6,7,37,<br>38,39,41,4<br>4 | 0 |                             |
| 1801 | 1,2,3,8,36,<br>40,42,44 | 4,5,6,7,37,<br>38,39,41,4<br>3 | 2 | P62804,Q7TPB1               |
| 1802 | 1,2,3,8,36,<br>40,43,44 | 4,5,6,7,37,<br>38,39,41,4<br>2 | 3 | P13432,P55314,Q63661        |
| 1803 | 1,2,3,8,36,<br>41,42,43 | 4,5,6,7,37,<br>38,39,40,4<br>4 | 2 | P82471,P83121               |
| 1804 | 1,2,3,8,36,<br>41,42,44 | 4,5,6,7,37,<br>38,39,40,4<br>3 | 1 | P83121                      |
| 1805 | 1,2,3,8,36,<br>41,43,44 | 4,5,6,7,37,<br>38,39,40,4<br>2 | 4 | P55314,P83121,Q63661,Q66H69 |

|      |                         |                                |   |                             |
|------|-------------------------|--------------------------------|---|-----------------------------|
| 1806 | 1,2,3,8,36,<br>42,43,44 | 4,5,6,7,37,<br>38,39,40,4<br>1 | 3 | P55314,P83121,Q66H69        |
| 1807 | 1,2,3,8,37,<br>38,39,40 | 4,5,6,7,36,<br>41,42,43,4<br>4 | 1 | P35281                      |
| 1808 | 1,2,3,8,37,<br>38,39,41 | 4,5,6,7,36,<br>40,42,43,4<br>4 | 1 | P00714                      |
| 1809 | 1,2,3,8,37,<br>38,39,42 | 4,5,6,7,36,<br>40,41,43,4<br>4 | 0 |                             |
| 1810 | 1,2,3,8,37,<br>38,39,43 | 4,5,6,7,36,<br>40,41,42,4<br>4 | 2 | P05539,Q61FV1               |
| 1811 | 1,2,3,8,37,<br>38,39,44 | 4,5,6,7,36,<br>40,41,42,4<br>3 | 2 | P05539,Q9JJS8               |
| 1812 | 1,2,3,8,37,<br>38,40,41 | 4,5,6,7,36,<br>39,42,43,4<br>4 | 0 |                             |
| 1813 | 1,2,3,8,37,<br>38,40,42 | 4,5,6,7,36,<br>39,41,43,4<br>4 | 0 |                             |
| 1814 | 1,2,3,8,37,<br>38,40,43 | 4,5,6,7,36,<br>39,41,42,4<br>4 | 0 |                             |
| 1815 | 1,2,3,8,37,<br>38,40,44 | 4,5,6,7,36,<br>39,41,42,4<br>3 | 1 | P05539                      |
| 1816 | 1,2,3,8,37,<br>38,41,42 | 4,5,6,7,36,<br>39,40,43,4<br>4 | 0 |                             |
| 1817 | 1,2,3,8,37,<br>38,41,43 | 4,5,6,7,36,<br>39,40,42,4<br>4 | 2 | P83121,Q9QX79               |
| 1818 | 1,2,3,8,37,<br>38,41,44 | 4,5,6,7,36,<br>39,40,42,4<br>3 | 2 | P83121,Q62635               |
| 1819 | 1,2,3,8,37,<br>38,42,43 | 4,5,6,7,36,<br>39,40,41,4<br>4 | 4 | P06866,P12020,Q62975,Q8VD89 |
| 1820 | 1,2,3,8,37,<br>38,42,44 | 4,5,6,7,36,<br>39,40,41,4<br>3 | 0 |                             |

|      |                         |                                |   |               |
|------|-------------------------|--------------------------------|---|---------------|
| 1821 | 1,2,3,8,37,<br>38,43,44 | 4,5,6,7,36,<br>39,40,41,4<br>2 | 1 | P05539        |
| 1822 | 1,2,3,8,37,<br>39,40,41 | 4,5,6,7,36,<br>38,42,43,4<br>4 | 2 | P01835,P10715 |
| 1823 | 1,2,3,8,37,<br>39,40,42 | 4,5,6,7,36,<br>38,41,43,4<br>4 | 1 | P01835        |
| 1824 | 1,2,3,8,37,<br>39,40,43 | 4,5,6,7,36,<br>38,41,42,4<br>4 | 2 | Q05695,Q8CIZ5 |
| 1825 | 1,2,3,8,37,<br>39,40,44 | 4,5,6,7,36,<br>38,41,42,4<br>3 | 1 | Q8CJD3        |
| 1826 | 1,2,3,8,37,<br>39,41,42 | 4,5,6,7,36,<br>38,40,43,4<br>4 | 1 | P01835        |
| 1827 | 1,2,3,8,37,<br>39,41,43 | 4,5,6,7,36,<br>38,40,42,4<br>4 | 2 | P00714,P83121 |
| 1828 | 1,2,3,8,37,<br>39,41,44 | 4,5,6,7,36,<br>38,40,42,4<br>3 | 1 | P83121        |
| 1829 | 1,2,3,8,37,<br>39,42,43 | 4,5,6,7,36,<br>38,40,41,4<br>4 | 0 |               |
| 1830 | 1,2,3,8,37,<br>39,42,44 | 4,5,6,7,36,<br>38,40,41,4<br>3 | 0 |               |
| 1831 | 1,2,3,8,37,<br>39,43,44 | 4,5,6,7,36,<br>38,40,41,4<br>2 | 0 |               |
| 1832 | 1,2,3,8,37,<br>40,41,42 | 4,5,6,7,36,<br>38,39,43,4<br>4 | 1 | P01835        |
| 1833 | 1,2,3,8,37,<br>40,41,43 | 4,5,6,7,36,<br>38,39,42,4<br>4 | 2 | P51907,P83121 |
| 1834 | 1,2,3,8,37,<br>40,41,44 | 4,5,6,7,36,<br>38,39,42,4<br>3 | 1 | P10715        |
| 1835 | 1,2,3,8,37,<br>40,42,43 | 4,5,6,7,36,<br>38,39,41,4<br>4 | 0 |               |



|      |                         |                                |   |               |
|------|-------------------------|--------------------------------|---|---------------|
| 1836 | 1,2,3,8,37,<br>40,42,44 | 4,5,6,7,36,<br>38,39,41,4<br>3 | 0 |               |
| 1837 | 1,2,3,8,37,<br>40,43,44 | 4,5,6,7,36,<br>38,39,41,4<br>2 | 1 | P19218        |
| 1838 | 1,2,3,8,37,<br>41,42,43 | 4,5,6,7,36,<br>38,39,40,4<br>4 | 1 | P83121        |
| 1839 | 1,2,3,8,37,<br>41,42,44 | 4,5,6,7,36,<br>38,39,40,4<br>3 | 1 | P83121        |
| 1840 | 1,2,3,8,37,<br>41,43,44 | 4,5,6,7,36,<br>38,39,40,4<br>2 | 2 | P83121,Q9QX79 |
| 1841 | 1,2,3,8,37,<br>42,43,44 | 4,5,6,7,36,<br>38,39,40,4<br>1 | 2 | P83121,Q62975 |
| 1842 | 1,2,3,8,38,<br>39,40,41 | 4,5,6,7,36,<br>37,42,43,4<br>4 | 0 |               |
| 1843 | 1,2,3,8,38,<br>39,40,42 | 4,5,6,7,36,<br>37,41,43,4<br>4 | 0 |               |
| 1844 | 1,2,3,8,38,<br>39,40,43 | 4,5,6,7,36,<br>37,41,42,4<br>4 | 0 |               |
| 1845 | 1,2,3,8,38,<br>39,40,44 | 4,5,6,7,36,<br>37,41,42,4<br>3 | 0 |               |
| 1846 | 1,2,3,8,38,<br>39,41,42 | 4,5,6,7,36,<br>37,40,43,4<br>4 | 0 |               |
| 1847 | 1,2,3,8,38,<br>39,41,43 | 4,5,6,7,36,<br>37,40,42,4<br>4 | 2 | P00714,P00731 |
| 1848 | 1,2,3,8,38,<br>39,41,44 | 4,5,6,7,36,<br>37,40,42,4<br>3 | 0 |               |
| 1849 | 1,2,3,8,38,<br>39,42,43 | 4,5,6,7,36,<br>37,40,41,4<br>4 | 1 | Q80WL1        |
| 1850 | 1,2,3,8,38,<br>39,42,44 | 4,5,6,7,36,<br>37,40,41,4<br>3 | 1 | Q99041        |

|      |                         |                                |   |                                           |
|------|-------------------------|--------------------------------|---|-------------------------------------------|
| 1851 | 1,2,3,8,38,<br>39,43,44 | 4,5,6,7,36,<br>37,40,41,4<br>2 | 2 | P01946,Q9JJS8                             |
| 1852 | 1,2,3,8,38,<br>40,41,42 | 4,5,6,7,36,<br>37,39,43,4<br>4 | 0 |                                           |
| 1853 | 1,2,3,8,38,<br>40,41,43 | 4,5,6,7,36,<br>37,39,42,4<br>4 | 0 |                                           |
| 1854 | 1,2,3,8,38,<br>40,41,44 | 4,5,6,7,36,<br>37,39,42,4<br>3 | 1 | Q62635                                    |
| 1855 | 1,2,3,8,38,<br>40,42,43 | 4,5,6,7,36,<br>37,39,41,4<br>4 | 2 | Q99041,Q9JHB9                             |
| 1856 | 1,2,3,8,38,<br>40,42,44 | 4,5,6,7,36,<br>37,39,41,4<br>3 | 1 | Q99041                                    |
| 1857 | 1,2,3,8,38,<br>40,43,44 | 4,5,6,7,36,<br>37,39,41,4<br>2 | 1 | Q99041                                    |
| 1858 | 1,2,3,8,38,<br>41,42,43 | 4,5,6,7,36,<br>37,39,40,4<br>4 | 6 | P00731,P06866,P54921,P82471,P83121,Q8CJD3 |
| 1859 | 1,2,3,8,38,<br>41,42,44 | 4,5,6,7,36,<br>37,39,40,4<br>3 | 3 | P55091,P98089,Q8CIZ5                      |
| 1860 | 1,2,3,8,38,<br>41,43,44 | 4,5,6,7,36,<br>37,39,40,4<br>2 | 4 | P00774,P55091,P83121,P98089               |
| 1861 | 1,2,3,8,38,<br>42,43,44 | 4,5,6,7,36,<br>37,39,40,4<br>1 | 1 | Q99041                                    |
| 1862 | 1,2,3,8,39,<br>40,41,42 | 4,5,6,7,36,<br>37,38,43,4<br>4 | 1 | P01835                                    |
| 1863 | 1,2,3,8,39,<br>40,41,43 | 4,5,6,7,36,<br>37,38,42,4<br>4 | 0 |                                           |
| 1864 | 1,2,3,8,39,<br>40,41,44 | 4,5,6,7,36,<br>37,38,42,4<br>3 | 6 | P10715,P19629,P20766,P31044,Q5GRG2,Q6AYL6 |
| 1865 | 1,2,3,8,39,<br>40,42,43 | 4,5,6,7,36,<br>37,38,41,4<br>4 | 2 | P20766,Q5QE79                             |

|      |                          |                                |   |                                                         |
|------|--------------------------|--------------------------------|---|---------------------------------------------------------|
| 1866 | 1,2,3,8,39,<br>40,42,44  | 4,5,6,7,36,<br>37,38,41,4<br>3 | 1 | P20766                                                  |
| 1867 | 1,2,3,8,39,<br>40,43,44  | 4,5,6,7,36,<br>37,38,41,4<br>2 | 3 | P20766,Q5QE79,Q6AYL6                                    |
| 1868 | 1,2,3,8,39,<br>41,42,43  | 4,5,6,7,36,<br>37,38,40,4<br>4 | 3 | P00731,P82471,P83121                                    |
| 1869 | 1,2,3,8,39,<br>41,42,44  | 4,5,6,7,36,<br>37,38,40,4<br>3 | 1 | P20766                                                  |
| 1870 | 1,2,3,8,39,<br>41,43,44  | 4,5,6,7,36,<br>37,38,40,4<br>2 | 3 | P01946,P08494,P83121                                    |
| 1871 | 1,2,3,8,39,<br>42,43,44  | 4,5,6,7,36,<br>37,38,40,4<br>1 | 1 | P20766                                                  |
| 1872 | 1,2,3,8,40,<br>41,42,43  | 4,5,6,7,36,<br>37,38,39,4<br>4 | 1 | Q6PCU2                                                  |
| 1873 | 1,2,3,8,40,<br>41,42,44  | 4,5,6,7,36,<br>37,38,39,4<br>3 | 1 | Q6PCU2                                                  |
| 1874 | 1,2,3,8,40,<br>41,43,44  | 4,5,6,7,36,<br>37,38,39,4<br>2 | 3 | P19218,P83121,Q6PCU2                                    |
| 1875 | 1,2,3,8,40,<br>42,43,44  | 4,5,6,7,36,<br>37,38,39,4<br>1 | 2 | Q6PCU2,Q99041                                           |
| 1876 | 1,2,3,8,41,<br>42,43,44  | 4,5,6,7,36,<br>37,38,39,4<br>0 | 4 | P00731,P82471,P83121,Q6PCU2                             |
| 1877 | 1,2,3,36,3<br>7,38,39,40 | 4,5,6,7,8,4<br>1,42,43,44      | 1 | P00714                                                  |
| 1878 | 1,2,3,36,3<br>7,38,39,41 | 4,5,6,7,8,4<br>0,42,43,44      | 3 | P00714,Q5M819,Q9Z0V6                                    |
| 1879 | 1,2,3,36,3<br>7,38,39,42 | 4,5,6,7,8,4<br>0,41,43,44      | 3 | P12020,Q63617,Q99041                                    |
| 1880 | 1,2,3,36,3<br>7,38,39,43 | 4,5,6,7,8,4<br>0,41,42,44      | 8 | P00714,P06760,P12020,P14669,Q63617,Q6IFV1,Q6P6R2,Q9Z0V6 |
| 1881 | 1,2,3,36,3<br>7,38,39,44 | 4,5,6,7,8,4<br>0,41,42,43      | 4 | P55314,Q63617,Q99041,Q9JJS8                             |
| 1882 | 1,2,3,36,3<br>7,38,40,41 | 4,5,6,7,8,3<br>9,42,43,44      | 0 |                                                         |

|      |                          |                           |   |                                                                |
|------|--------------------------|---------------------------|---|----------------------------------------------------------------|
| 1883 | 1,2,3,36,3<br>7,38,40,42 | 4,5,6,7,8,3<br>9,41,43,44 | 2 | Q63617,Q99041                                                  |
| 1884 | 1,2,3,36,3<br>7,38,40,43 | 4,5,6,7,8,3<br>9,41,42,44 | 2 | Q63661,Q99041                                                  |
| 1885 | 1,2,3,36,3<br>7,38,40,44 | 4,5,6,7,8,3<br>9,41,42,43 | 1 | Q99041                                                         |
| 1886 | 1,2,3,36,3<br>7,38,41,42 | 4,5,6,7,8,3<br>9,40,43,44 | 0 |                                                                |
| 1887 | 1,2,3,36,3<br>7,38,41,43 | 4,5,6,7,8,3<br>9,40,42,44 | 4 | P00714,P06760,P83121,Q9Z0V6                                    |
| 1888 | 1,2,3,36,3<br>7,38,41,44 | 4,5,6,7,8,3<br>9,40,42,43 | 0 |                                                                |
| 1889 | 1,2,3,36,3<br>7,38,42,43 | 4,5,6,7,8,3<br>9,40,41,44 | 9 | P06760,P06866,P06911,P07171,P10715,P12020,Q5GRG2,Q63617,Q99041 |
| 1890 | 1,2,3,36,3<br>7,38,42,44 | 4,5,6,7,8,3<br>9,40,41,43 | 2 | Q63617,Q99041                                                  |
| 1891 | 1,2,3,36,3<br>7,38,43,44 | 4,5,6,7,8,3<br>9,40,41,42 | 4 | P55314,Q63617,Q63661,Q99041                                    |
| 1892 | 1,2,3,36,3<br>7,39,40,41 | 4,5,6,7,8,3<br>8,42,43,44 | 3 | P00714,P01835,Q9Z0V6                                           |
| 1893 | 1,2,3,36,3<br>7,39,40,42 | 4,5,6,7,8,3<br>8,41,43,44 | 6 | P00774,P01835,P50115,P50116,Q05695,Q99041                      |
| 1894 | 1,2,3,36,3<br>7,39,40,43 | 4,5,6,7,8,3<br>8,41,42,44 | 8 | O35547,P00714,P06760,P50115,P50116,Q05695,Q8CIZ5,Q9Z0V6        |
| 1895 | 1,2,3,36,3<br>7,39,40,44 | 4,5,6,7,8,3<br>8,41,42,43 | 6 | O35547,P50115,P50116,P54921,P55314,Q8CJD3                      |
| 1896 | 1,2,3,36,3<br>7,39,41,42 | 4,5,6,7,8,3<br>8,40,43,44 | 1 | P01835                                                         |
| 1897 | 1,2,3,36,3<br>7,39,41,43 | 4,5,6,7,8,3<br>8,40,42,44 | 5 | D3ZUC6,P00714,P06760,P83121,Q9Z0V6                             |
| 1898 | 1,2,3,36,3<br>7,39,41,44 | 4,5,6,7,8,3<br>8,40,42,43 | 2 | P55314,Q9Z0V6                                                  |
| 1899 | 1,2,3,36,3<br>7,39,42,43 | 4,5,6,7,8,3<br>8,40,41,44 | 9 | O54728,P06760,P12020,P50115,P50116,Q05695,Q62635,Q63617,Q99041 |
| 1900 | 1,2,3,36,3<br>7,39,42,44 | 4,5,6,7,8,3<br>8,40,41,43 | 5 | P50115,P50116,P55314,Q63617,Q99041                             |
| 1901 | 1,2,3,36,3<br>7,39,43,44 | 4,5,6,7,8,3<br>8,40,41,42 | 9 | P06760,P50115,P50116,P55314,Q63617,Q63661,Q9JJS8,Q9QW07,Q9Z0V6 |
| 1902 | 1,2,3,36,3<br>7,40,41,42 | 4,5,6,7,8,3<br>8,39,43,44 | 1 | P01835                                                         |
| 1903 | 1,2,3,36,3<br>7,40,41,43 | 4,5,6,7,8,3<br>8,39,42,44 | 3 | P00714,P83121,Q9Z0V6                                           |
| 1904 | 1,2,3,36,3<br>7,40,41,44 | 4,5,6,7,8,3<br>8,39,42,43 | 2 | P19218,Q80WL1                                                  |
| 1905 | 1,2,3,36,3<br>7,40,42,43 | 4,5,6,7,8,3<br>8,39,41,44 | 5 | P07171,P50115,P50116,Q05695,Q99041                             |

|      |                                                 |   |                                                         |
|------|-------------------------------------------------|---|---------------------------------------------------------|
| 1906 | 1,2,3,36,3 4,5,6,7,8,3<br>7,40,42,44 8,39,41,43 | 4 | P50115,P50116,Q7TPB1,Q99041                             |
| 1907 | 1,2,3,36,3 4,5,6,7,8,3<br>7,40,43,44 8,39,41,42 | 8 | O35547,P19218,P50115,P50116,P55314,Q63661,Q99041,Q9QW07 |
| 1908 | 1,2,3,36,3 4,5,6,7,8,3<br>7,41,42,43 8,39,40,44 | 3 | P06760,P83121,Q6AYS4                                    |
| 1909 | 1,2,3,36,3 4,5,6,7,8,3<br>7,41,42,44 8,39,40,43 | 1 | P83121                                                  |
| 1910 | 1,2,3,36,3 4,5,6,7,8,3<br>7,41,43,44 8,39,40,42 | 4 | P06760,P83121,Q63661,Q9Z0V6                             |
| 1911 | 1,2,3,36,3 4,5,6,7,8,3<br>7,42,43,44 8,39,40,41 | 5 | P50115,P50116,Q63617,Q63661,Q99041                      |
| 1912 | 1,2,3,36,3 4,5,6,7,8,3<br>8,39,40,41 7,42,43,44 | 1 | P00714                                                  |
| 1913 | 1,2,3,36,3 4,5,6,7,8,3<br>8,39,40,42 7,41,43,44 | 2 | Q63617,Q99041                                           |
| 1914 | 1,2,3,36,3 4,5,6,7,8,3<br>8,39,40,43 7,41,42,44 | 4 | P00714,P07171,Q63617,Q99041                             |
| 1915 | 1,2,3,36,3 4,5,6,7,8,3<br>8,39,40,44 7,41,42,43 | 2 | P55314,Q99041                                           |
| 1916 | 1,2,3,36,3 4,5,6,7,8,3<br>8,39,41,42 7,40,43,44 | 1 | Q63617                                                  |
| 1917 | 1,2,3,36,3 4,5,6,7,8,3<br>8,39,41,43 7,40,42,44 | 3 | P00714,P01946,P06760                                    |
| 1918 | 1,2,3,36,3 4,5,6,7,8,3<br>8,39,41,44 7,40,42,43 | 1 | P55314                                                  |
| 1919 | 1,2,3,36,3 4,5,6,7,8,3<br>8,39,42,43 7,40,41,44 | 8 | O54728,P06760,P06866,P06911,P07171,P12020,Q63617,Q99041 |
| 1920 | 1,2,3,36,3 4,5,6,7,8,3<br>8,39,42,44 7,40,41,43 | 3 | P55314,Q63617,Q99041                                    |
| 1921 | 1,2,3,36,3 4,5,6,7,8,3<br>8,39,43,44 7,40,41,42 | 8 | P01946,P06760,P34901,P55314,Q63617,Q63661,Q99041,Q9JJS8 |
| 1922 | 1,2,3,36,3 4,5,6,7,8,3<br>8,40,41,42 7,39,43,44 | 0 |                                                         |
| 1923 | 1,2,3,36,3 4,5,6,7,8,3<br>8,40,41,43 7,39,42,44 | 2 | P00714,Q63661                                           |
| 1924 | 1,2,3,36,3 4,5,6,7,8,3<br>8,40,41,44 7,39,42,43 | 0 |                                                         |
| 1925 | 1,2,3,36,3 4,5,6,7,8,3<br>8,40,42,43 7,39,41,44 | 4 | P07171,P11598,Q63617,Q99041                             |
| 1926 | 1,2,3,36,3 4,5,6,7,8,3<br>8,40,42,44 7,39,41,43 | 2 | Q7TPB1,Q99041                                           |
| 1927 | 1,2,3,36,3 4,5,6,7,8,3<br>8,40,43,44 7,39,41,42 | 3 | P55314,Q63661,Q99041                                    |
| 1928 | 1,2,3,36,3 4,5,6,7,8,3<br>8,41,42,43 7,39,40,44 | 2 | P06866,Q63617                                           |

|      |                          |                           |   |                                                  |
|------|--------------------------|---------------------------|---|--------------------------------------------------|
| 1929 | 1,2,3,36,3<br>8,41,42,44 | 4,5,6,7,8,3<br>7,39,40,43 | 1 | Q99041                                           |
| 1930 | 1,2,3,36,3<br>8,41,43,44 | 4,5,6,7,8,3<br>7,39,40,42 | 5 | P00774,P55314,P83121,P98089,Q63661               |
| 1931 | 1,2,3,36,3<br>8,42,43,44 | 4,5,6,7,8,3<br>7,39,40,41 | 5 | P15999,P55314,Q63617,Q63661,Q99041               |
| 1932 | 1,2,3,36,3<br>9,40,41,42 | 4,5,6,7,8,3<br>7,38,43,44 | 1 | P01835                                           |
| 1933 | 1,2,3,36,3<br>9,40,41,43 | 4,5,6,7,8,3<br>7,38,42,44 | 2 | P00714,P06760                                    |
| 1934 | 1,2,3,36,3<br>9,40,41,44 | 4,5,6,7,8,3<br>7,38,42,43 | 3 | P10715,P19629,P55314                             |
| 1935 | 1,2,3,36,3<br>9,40,42,43 | 4,5,6,7,8,3<br>7,38,41,44 | 7 | O54728,P07171,P50115,P50116,Q05695,Q63617,Q99041 |
| 1936 | 1,2,3,36,3<br>9,40,42,44 | 4,5,6,7,8,3<br>7,38,41,43 | 5 | P50115,P50116,P55314,Q7TPB1,Q99041               |
| 1937 | 1,2,3,36,3<br>9,40,43,44 | 4,5,6,7,8,3<br>7,38,41,42 | 5 | P50115,P50116,P55314,Q63661,Q99041               |
| 1938 | 1,2,3,36,3<br>9,41,42,43 | 4,5,6,7,8,3<br>7,38,40,44 | 2 | P06760,P82471                                    |
| 1939 | 1,2,3,36,3<br>9,41,42,44 | 4,5,6,7,8,3<br>7,38,40,43 | 1 | P55314                                           |
| 1940 | 1,2,3,36,3<br>9,41,43,44 | 4,5,6,7,8,3<br>7,38,40,42 | 7 | D3ZUC6,P01946,P06760,P08494,P55314,P83121,Q63661 |
| 1941 | 1,2,3,36,3<br>9,42,43,44 | 4,5,6,7,8,3<br>7,38,40,41 | 6 | P06760,P50115,P50116,P55314,Q63617,Q99041        |
| 1942 | 1,2,3,36,4<br>0,41,42,43 | 4,5,6,7,8,3<br>7,38,39,44 | 1 | P11598                                           |
| 1943 | 1,2,3,36,4<br>0,41,42,44 | 4,5,6,7,8,3<br>7,38,39,43 | 1 | Q7TPB1                                           |
| 1944 | 1,2,3,36,4<br>0,41,43,44 | 4,5,6,7,8,3<br>7,38,39,42 | 4 | P19218,P55314,P83121,Q63661                      |
| 1945 | 1,2,3,36,4<br>0,42,43,44 | 4,5,6,7,8,3<br>7,38,39,41 | 6 | P50115,P50116,P55314,Q63661,Q7TPB1,Q99041        |
| 1946 | 1,2,3,36,4<br>1,42,43,44 | 4,5,6,7,8,3<br>7,38,39,40 | 3 | P82471,P83121,Q63661                             |
| 1947 | 1,2,3,37,3<br>8,39,40,41 | 4,5,6,7,8,3<br>6,42,43,44 | 2 | P00714,P07171                                    |
| 1948 | 1,2,3,37,3<br>8,39,40,42 | 4,5,6,7,8,3<br>6,41,43,44 | 3 | P07171,Q63617,Q99041                             |
| 1949 | 1,2,3,37,3<br>8,39,40,43 | 4,5,6,7,8,3<br>6,41,42,44 | 5 | P00714,P07171,Q6IFV1,Q812E4,Q99041               |
| 1950 | 1,2,3,37,3<br>8,39,40,44 | 4,5,6,7,8,3<br>6,41,42,43 | 5 | P07171,P16636,Q812E4,Q99041,Q9JJS8               |
| 1951 | 1,2,3,37,3<br>8,39,41,42 | 4,5,6,7,8,3<br>6,40,43,44 | 3 | P07171,P13432,Q6AYS4                             |

|      |                          |                           |   |                                                                |
|------|--------------------------|---------------------------|---|----------------------------------------------------------------|
| 1952 | 1,2,3,37,3<br>8,39,41,43 | 4,5,6,7,8,3<br>6,40,42,44 | 3 | P00714,P07171,Q6AYS4                                           |
| 1953 | 1,2,3,37,3<br>8,39,41,44 | 4,5,6,7,8,3<br>6,40,42,43 | 1 | Q9JJS8                                                         |
| 1954 | 1,2,3,37,3<br>8,39,42,43 | 4,5,6,7,8,3<br>6,40,41,44 | 6 | P06866,P07171,P12020,Q63617,Q6AYS4,Q99041                      |
| 1955 | 1,2,3,37,3<br>8,39,42,44 | 4,5,6,7,8,3<br>6,40,41,43 | 4 | P07171,Q63617,Q99041,Q9JJS8                                    |
| 1956 | 1,2,3,37,3<br>8,39,43,44 | 4,5,6,7,8,3<br>6,40,41,42 | 9 | P01946,P05539,P07171,P23593,Q63617,Q812E4,Q99041,Q9JJS8,Q9QW07 |
| 1957 | 1,2,3,37,3<br>8,40,41,42 | 4,5,6,7,8,3<br>6,39,43,44 | 2 | P07171,Q6AYS4                                                  |
| 1958 | 1,2,3,37,3<br>8,40,41,43 | 4,5,6,7,8,3<br>6,39,42,44 | 4 | P00714,P07171,P55016,Q6AYS4                                    |
| 1959 | 1,2,3,37,3<br>8,40,41,44 | 4,5,6,7,8,3<br>6,39,42,43 | 0 |                                                                |
| 1960 | 1,2,3,37,3<br>8,40,42,43 | 4,5,6,7,8,3<br>6,39,41,44 | 7 | P06866,P07171,P11598,Q63617,Q6AYS4,Q8VD89,Q99041               |
| 1961 | 1,2,3,37,3<br>8,40,42,44 | 4,5,6,7,8,3<br>6,39,41,43 | 3 | P07171,P83748,Q99041                                           |
| 1962 | 1,2,3,37,3<br>8,40,43,44 | 4,5,6,7,8,3<br>6,39,41,42 | 4 | P07171,Q63661,Q99041,Q9QW07                                    |
| 1963 | 1,2,3,37,3<br>8,41,42,43 | 4,5,6,7,8,3<br>6,39,40,44 | 4 | P06866,P07171,Q6AYS4,Q6P6T1                                    |
| 1964 | 1,2,3,37,3<br>8,41,42,44 | 4,5,6,7,8,3<br>6,39,40,43 | 1 | Q6AYS4                                                         |
| 1965 | 1,2,3,37,3<br>8,41,43,44 | 4,5,6,7,8,3<br>6,39,40,42 | 4 | P00774,P83121,P98089,Q6AYS4                                    |
| 1966 | 1,2,3,37,3<br>8,42,43,44 | 4,5,6,7,8,3<br>6,39,40,41 | 5 | P06866,P07171,Q63617,Q6AYS4,Q99041                             |
| 1967 | 1,2,3,37,3<br>9,40,41,42 | 4,5,6,7,8,3<br>6,38,43,44 | 2 | P01835,P07171                                                  |
| 1968 | 1,2,3,37,3<br>9,40,41,43 | 4,5,6,7,8,3<br>6,38,42,44 | 3 | P00714,P07171,P97554                                           |
| 1969 | 1,2,3,37,3<br>9,40,41,44 | 4,5,6,7,8,3<br>6,38,42,43 | 4 | P10715,P19629,Q5GRG2,Q6AYL6                                    |
| 1970 | 1,2,3,37,3<br>9,40,42,43 | 4,5,6,7,8,3<br>6,38,41,44 | 5 | P07171,P50115,P50116,Q05695,Q99041                             |
| 1971 | 1,2,3,37,3<br>9,40,42,44 | 4,5,6,7,8,3<br>6,38,41,43 | 4 | P07171,P50115,P50116,Q99041                                    |
| 1972 | 1,2,3,37,3<br>9,40,43,44 | 4,5,6,7,8,3<br>6,38,41,42 | 8 | O35547,P07171,P50115,P50116,Q6AYL6,Q812E4,Q99041,Q9QW07        |
| 1973 | 1,2,3,37,3<br>9,41,42,43 | 4,5,6,7,8,3<br>6,38,40,44 | 3 | P00731,P07171,Q6AYS4                                           |
| 1974 | 1,2,3,37,3<br>9,41,42,44 | 4,5,6,7,8,3<br>6,38,40,43 | 1 | Q6AYS4                                                         |

|      |                          |                           |   |                                                         |
|------|--------------------------|---------------------------|---|---------------------------------------------------------|
| 1975 | 1,2,3,37,3<br>9,41,43,44 | 4,5,6,7,8,3<br>6,38,40,42 | 3 | P01946,P83121,Q6AYS4                                    |
| 1976 | 1,2,3,37,3<br>9,42,43,44 | 4,5,6,7,8,3<br>6,38,40,41 | 6 | P07171,P50115,P50116,Q63617,Q6AYS4,Q99041               |
| 1977 | 1,2,3,37,4<br>0,41,42,43 | 4,5,6,7,8,3<br>6,38,39,44 | 3 | P07171,P11598,Q6AYS4                                    |
| 1978 | 1,2,3,37,4<br>0,41,42,44 | 4,5,6,7,8,3<br>6,38,39,43 | 2 | P07171,Q6AYS4                                           |
| 1979 | 1,2,3,37,4<br>0,41,43,44 | 4,5,6,7,8,3<br>6,38,39,42 | 3 | P07171,P19218,Q6AYS4                                    |
| 1980 | 1,2,3,37,4<br>0,42,43,44 | 4,5,6,7,8,3<br>6,38,39,41 | 6 | P07171,P19218,P50115,P50116,Q6AYS4,Q99041               |
| 1981 | 1,2,3,37,4<br>1,42,43,44 | 4,5,6,7,8,3<br>6,38,39,40 | 3 | P07171,P83121,Q6AYS4                                    |
| 1982 | 1,2,3,38,3<br>9,40,41,42 | 4,5,6,7,8,3<br>6,37,43,44 | 3 | P07171,P13432,Q99041                                    |
| 1983 | 1,2,3,38,3<br>9,40,41,43 | 4,5,6,7,8,3<br>6,37,42,44 | 3 | P00714,P07171,Q9QZQ5                                    |
| 1984 | 1,2,3,38,3<br>9,40,41,44 | 4,5,6,7,8,3<br>6,37,42,43 | 2 | P10715,P19629                                           |
| 1985 | 1,2,3,38,3<br>9,40,42,43 | 4,5,6,7,8,3<br>6,37,41,44 | 4 | P07171,P11598,Q63617,Q99041                             |
| 1986 | 1,2,3,38,3<br>9,40,42,44 | 4,5,6,7,8,3<br>6,37,41,43 | 3 | P07171,Q63617,Q99041                                    |
| 1987 | 1,2,3,38,3<br>9,40,43,44 | 4,5,6,7,8,3<br>6,37,41,42 | 3 | P07171,Q99041,Q9QZQ5                                    |
| 1988 | 1,2,3,38,3<br>9,41,42,43 | 4,5,6,7,8,3<br>6,37,40,44 | 7 | P00731,P06866,P07171,P82471,Q63617,Q6AYS4,Q99041        |
| 1989 | 1,2,3,38,3<br>9,41,42,44 | 4,5,6,7,8,3<br>6,37,40,43 | 1 | Q99041                                                  |
| 1990 | 1,2,3,38,3<br>9,41,43,44 | 4,5,6,7,8,3<br>6,37,40,42 | 5 | P00731,P00774,P01946,P98089,Q9JJS8                      |
| 1991 | 1,2,3,38,3<br>9,42,43,44 | 4,5,6,7,8,3<br>6,37,40,41 | 4 | P07171,Q63617,Q99041,Q9JJS8                             |
| 1992 | 1,2,3,38,4<br>0,41,42,43 | 4,5,6,7,8,3<br>6,37,39,44 | 4 | P07171,P11598,Q6AYS4,Q99041                             |
| 1993 | 1,2,3,38,4<br>0,41,42,44 | 4,5,6,7,8,3<br>6,37,39,43 | 2 | P07171,Q99041                                           |
| 1994 | 1,2,3,38,4<br>0,41,43,44 | 4,5,6,7,8,3<br>6,37,39,42 | 5 | P00774,P07171,P98089,Q63661,Q99041                      |
| 1995 | 1,2,3,38,4<br>0,42,43,44 | 4,5,6,7,8,3<br>6,37,39,41 | 2 | P07171,Q99041                                           |
| 1996 | 1,2,3,38,4<br>1,42,43,44 | 4,5,6,7,8,3<br>6,37,39,40 | 8 | P00731,P00774,P07171,P55091,P82471,P98089,Q6AYS4,Q99041 |
| 1997 | 1,2,3,39,4<br>0,41,42,43 | 4,5,6,7,8,3<br>6,37,38,44 | 2 | P07171,Q6AYS4                                           |



|      |                          |                                   |    |                                                                                                                                                                                                                                                                                                       |
|------|--------------------------|-----------------------------------|----|-------------------------------------------------------------------------------------------------------------------------------------------------------------------------------------------------------------------------------------------------------------------------------------------------------|
| 1998 | 1,2,3,39,4<br>0,41,42,44 | 4,5,6,7,8,3<br>6,37,38,43         | 4  | P07171,P10715,P19629,Q99041                                                                                                                                                                                                                                                                           |
| 1999 | 1,2,3,39,4<br>0,41,43,44 | 4,5,6,7,8,3<br>6,37,38,42         | 5  | P07171,P10715,P19218,P19629,Q6AYL6                                                                                                                                                                                                                                                                    |
| 2000 | 1,2,3,39,4<br>0,42,43,44 | 4,5,6,7,8,3<br>6,37,38,41         | 4  | P07171,P50115,P50116,Q99041                                                                                                                                                                                                                                                                           |
| 2001 | 1,2,3,39,4<br>1,42,43,44 | 4,5,6,7,8,3<br>6,37,38,40         | 5  | P00731,P07171,P82471,Q6AYS4,Q99041                                                                                                                                                                                                                                                                    |
| 2002 | 1,2,3,40,4<br>1,42,43,44 | 4,5,6,7,8,3<br>6,37,38,39         | 5  | P07171,P19218,Q6AYS4,Q6PCU2,Q99041                                                                                                                                                                                                                                                                    |
| 2003 | 1,2,4,5,6,7<br>,8,36     | 3,37,38,39<br>,40,41,42,<br>43,44 | 40 | D3ZUK3,G3V686,P00762,P02631,P05539,P07171,P07897,P07943,P08010,P08753,P11030,P11598,P15473,P20762,P35444,P36374,P51886,P52590,P53792,P60905,P80202,P83748,P97605,Q01205,Q09030,Q30KJ2,Q4AEF8,Q5ZQU0,Q63467,Q63475,Q63514,Q63532,Q63617,Q63942,Q6AYS4,Q6IE51,Q7TP52,Q99MH3,Q9JJS8,Q9QZQ5               |
| 2004 | 1,2,4,5,6,7<br>,8,37     | 3,36,38,39<br>,40,41,42,<br>43,44 | 26 | G3V686,O88267,P02631,P02803,P07171,P11598,P11762,P18418,P20762,P52590,P53792,P83748,Q01205,Q09030,Q30KJ2,Q5ZQU0,Q63467,Q63532,Q63617,Q6IE51,Q7TP52,Q7TPB1,Q80YN4,Q91ZS3,Q99041,Q9QZQ5                                                                                                                 |
| 2005 | 1,2,4,5,6,7<br>,8,38     | 3,36,37,39<br>,40,41,42,<br>43,44 | 33 | G3V686,O88267,P02631,P02803,P07171,P08010,P08753,P15399,P19218,P20762,P25031,P35444,P36374,P50116,P51886,P52590,P53792,P83748,P97580,P97605,Q01205,Q09030,Q30KJ2,Q5M871,Q5ZQU0,Q63467,Q63514,Q63532,Q63942,Q6IE51,Q7TP52,Q7TPB1,Q9QZQ5                                                                |
| 2006 | 1,2,4,5,6,7<br>,8,39     | 3,36,37,38<br>,40,41,42,<br>43,44 | 28 | G3V686,O35568,O88267,P02631,P05539,P07171,P07943,P08010,P08753,P11598,P19218,P20762,P36374,P52590,P83748,P97605,Q01205,Q09030,Q30KJ2,Q5ZQU0,Q63467,Q63532,Q63617,Q63942,Q6IE51,Q7TP52,Q80YN4,Q9QZQ5                                                                                                   |
| 2007 | 1,2,4,5,6,7<br>,8,40     | 3,36,37,38<br>,39,41,42,<br>43,44 | 28 | G3V686,P02631,P02803,P05539,P07171,P12020,P20762,P36374,P36376,P52590,P53792,P70709,P83748,P97605,Q01205,Q09030,Q30KJ2,Q3T1K5,Q5ZQU0,Q63467,Q63532,Q63617,Q6IE51,Q7TP52,Q80YN4,Q9JJS8,Q9QZ76,Q9QZQ5                                                                                                   |
| 2008 | 1,2,4,5,6,7<br>,8,41     | 3,36,37,38<br>,39,40,42,<br>43,44 | 42 | D3ZUK3,G3V686,O88267,P02631,P05371,P05539,P07171,P07897,P08010,P08753,P11598,P18418,P20762,P35444,P36374,P50116,P51886,P52590,P54921,P60905,P83748,P97605,Q01205,Q09030,Q30KJ2,Q498S8,Q5M871,Q5ZQU0,Q62753,Q63467,Q63475,Q63532,Q63617,Q6IE51,Q7TP52,Q7TPB1,Q80YN4,Q812E4,Q99041,Q99MH3,Q9JJS8,Q9QZQ5 |
| 2009 | 1,2,4,5,6,7<br>,8,42     | 3,36,37,38<br>,39,40,41,<br>43,44 | 41 | G3V686,O08815,O35547,P02631,P02781,P04905,P05539,P07171,P07897,P08010,P08290,P08753,P19218,P20759,P20762,P35444,P36374,P52590,P54921,P60905,P83748,P97605,Q01205,Q09030,Q30KJ2,Q4AEF8,Q5ZQU0,Q62753,Q63357,Q63467,Q63514,Q63532,Q63942,Q6IE51,Q7TP52,Q812E4,Q9JID2,Q9JJS8,Q9QZ76,Q9QZK9,Q9QZQ5        |
| 2010 | 1,2,4,5,6,7<br>,8,43     | 3,36,37,38<br>,39,40,41,<br>42,44 | 27 | D3ZUK3,G3V686,O88267,P02631,P05539,P07171,P16636,P20762,P35444,P36374,P51886,P52590,P60905,P83748,Q01205,Q09030,Q30KJ2,Q63416,Q63467,Q63532,Q63617,Q63942,Q6IE51,Q7TP52,Q7TPB1,Q80YN4,Q9QZQ5                                                                                                          |
| 2011 | 1,2,4,5,6,7<br>,8,44     | 3,36,37,38<br>,39,40,41,<br>42,43 | 31 | D3ZUK3,G3V686,O35568,O88267,P02631,P05539,P07171,P07897,P07943,P11598,P20762,P35444,P36374,P51886,P52590,P53792,P60905,P83748,P97605,Q01205,Q09030,Q30KJ2,Q3T1K5,Q5ZQU0,Q63467,Q63514,Q63532,Q63617,Q6IE51,Q7TP52,Q9QZQ5                                                                              |
| 2012 | 1,2,4,5,6,7<br>,36,37    | 3,8,38,39,<br>40,41,42,4<br>3,44  | 18 | G3V686,P02631,P05539,P11030,P11762,P35467,P52590,P53792,P83748,Q01205,Q09030,Q30KJ2,Q63467,Q63532,Q6IE51,Q7TP52,Q91ZS3,Q9QZQ5                                                                                                                                                                         |
| 2013 | 1,2,4,5,6,7<br>,36,38    | 3,8,37,39,<br>40,41,42,4<br>3,44  | 20 | G3V686,P02631,P05539,P15399,P19218,P20762,P25031,P51907,P52590,P53792,P83748,P97580,Q01205,Q30KJ2,Q5ZQU0,Q63467,Q63532,Q6IE51,Q7TP52,Q9QZQ5                                                                                                                                                           |
| 2014 | 1,2,4,5,6,7<br>,36,39    | 3,8,37,38,<br>40,41,42,4<br>3,44  | 17 | G3V686,P02631,P05539,P08010,P19218,P35467,P52590,P83748,Q01205,Q30KJ2,Q5ZQU0,Q63467,Q63475,Q63532,Q6IE51,Q7TP52,Q9QZQ5                                                                                                                                                                                |

|      |                       |                                  |    |                                                                                                                                                                                                                       |
|------|-----------------------|----------------------------------|----|-----------------------------------------------------------------------------------------------------------------------------------------------------------------------------------------------------------------------|
| 2015 | 1,2,4,5,6,7<br>,36,40 | 3,8,37,38,<br>39,41,42,4<br>3,44 | 18 | G3V686,P00731,P02631,P05539,P13596,P36376,P52590,P53792,P83748,Q01205,Q09030,Q30KJ2,Q63467,Q63532,Q6IE51,Q7TP52,Q9JJ<br>S8,Q9QZQ5                                                                                     |
| 2016 | 1,2,4,5,6,7<br>,36,41 | 3,8,37,38,<br>39,40,42,4<br>3,44 | 26 | G3V686,P02631,P05539,P08010,P08649,P11030,P13596,P18418,P23785,P35467,P51886,P52590,P60905,P83748,P97605,Q01205,Q0903<br>0,Q30KJ2,Q5ZQU0,Q63467,Q63475,Q63532,Q6IE51,Q7TP52,Q99MH3,Q9QZQ5                             |
| 2017 | 1,2,4,5,6,7<br>,36,42 | 3,8,37,38,<br>39,40,41,4<br>3,44 | 30 | G3V686,P00762,P02631,P02781,P04905,P05539,P08010,P08290,P08649,P08753,P13596,P14408,P19629,P20762,P36374,P52590,P60905<br>,P83748,P97554,Q01205,Q09030,Q30KJ2,Q5XI73,Q63357,Q63467,Q63532,Q6IE51,Q7TP52,Q812E4,Q9QZQ5 |
| 2018 | 1,2,4,5,6,7<br>,36,43 | 3,8,37,38,<br>39,40,41,4<br>2,44 | 19 | G3V686,O55145,P02631,P05539,P16636,P20762,P51886,P52590,P83748,Q01205,Q09030,Q30KJ2,Q63467,Q63532,Q63661,Q63942,Q6I<br>E51,Q7TP52,Q8CHN8                                                                              |
| 2019 | 1,2,4,5,6,7<br>,36,44 | 3,8,37,38,<br>39,40,41,4<br>2,43 | 19 | G3V686,P02631,P05539,P07171,P51886,P52590,P53792,P55314,P83748,Q01205,Q30KJ2,Q5ZQU0,Q63467,Q63475,Q63532,Q6IE51,Q7T<br>P52,Q99MH3,Q9QZQ5                                                                              |
| 2020 | 1,2,4,5,6,7<br>,37,38 | 3,8,36,39,<br>40,41,42,4<br>3,44 | 18 | G3V686,P02631,P05964,P11762,P15399,P19218,P25031,P52590,P83748,P97580,P97840,Q30KJ2,Q63467,Q63532,Q6IE51,Q7TP52,Q7TP<br>B1,Q91ZS3                                                                                     |
| 2021 | 1,2,4,5,6,7<br>,37,39 | 3,8,36,38,<br>40,41,42,4<br>3,44 | 12 | G3V686,O88267,P02631,P15399,P35467,P52590,P83748,Q30KJ2,Q63467,Q63532,Q6IE51,Q7TP52                                                                                                                                   |
| 2022 | 1,2,4,5,6,7<br>,37,40 | 3,8,36,38,<br>39,41,42,4<br>3,44 | 12 | G3V686,P02631,P02803,P05539,P15399,P36376,P52590,P83748,Q30KJ2,Q63532,Q6IE51,Q7TP52                                                                                                                                   |
| 2023 | 1,2,4,5,6,7<br>,37,41 | 3,8,36,38,<br>39,40,42,4<br>3,44 | 20 | G3V686,O88267,P02631,P05539,P11762,P18418,P35467,P52590,P83748,P97605,Q01205,Q30KJ2,Q63467,Q63532,Q6IE51,Q7TP52,Q7T<br>PB1,Q80YN4,Q91ZS3,Q9QZQ5                                                                       |
| 2024 | 1,2,4,5,6,7<br>,37,42 | 3,8,36,38,<br>39,40,41,4<br>3,44 | 12 | G3V686,P02631,P05539,P08290,P52590,Q09030,Q30KJ2,Q63532,Q6IE51,Q7TP52,Q91ZS3,Q9QZQ5                                                                                                                                   |
| 2025 | 1,2,4,5,6,7<br>,37,43 | 3,8,36,38,<br>39,40,41,4<br>2,44 | 14 | G3V686,P02631,P14480,P15399,P16636,P20762,P52590,P83748,Q30KJ2,Q63467,Q63532,Q6IE51,Q7TP52,Q7TPB1                                                                                                                     |
| 2026 | 1,2,4,5,6,7<br>,37,44 | 3,8,36,38,<br>39,40,41,4<br>2,43 | 12 | G3V686,P02631,P05964,P15399,P52590,P83748,Q30KJ2,Q63467,Q63532,Q6IE51,Q7TP52,Q9QZQ5                                                                                                                                   |
| 2027 | 1,2,4,5,6,7<br>,38,39 | 3,8,36,37,<br>40,41,42,4<br>3,44 | 14 | G3V686,O88267,P15399,P19218,P25031,P51907,P52590,P83748,P97580,Q30KJ2,Q63467,Q63532,Q6IE51,Q7TP52                                                                                                                     |
| 2028 | 1,2,4,5,6,7<br>,38,40 | 3,8,36,37,<br>39,41,42,4<br>3,44 | 12 | P02803,P05539,P15399,P25031,P52590,P70709,P83748,P97580,Q30KJ2,Q63532,Q6IE51,Q7TP52                                                                                                                                   |
| 2029 | 1,2,4,5,6,7<br>,38,41 | 3,8,36,37,<br>39,40,42,4<br>3,44 | 21 | G3V686,O35547,O88267,P02631,P05539,P08010,P15399,P25031,P50116,P52590,P83748,P97580,P97605,Q01205,Q30KJ2,Q63467,Q634<br>75,Q63532,Q6IE51,Q7TP52,Q7TPB1                                                                |

|      |                       |                                  |    |                                                                                                                                                                                                     |
|------|-----------------------|----------------------------------|----|-----------------------------------------------------------------------------------------------------------------------------------------------------------------------------------------------------|
| 2030 | 1,2,4,5,6,7<br>,38,42 | 3,8,36,37,<br>39,40,41,4<br>3,44 | 26 | G3V686,O35547,P02781,P05539,P08010,P08290,P08753,P15399,P19218,P20762,P25031,P36374,P47727,P51907,P52590,P54921,P60905,P97554,P97580,Q30KJ2,Q5XI73,Q63532,Q6IE51,Q7TP52,Q9QZK9,Q9QZQ5               |
| 2031 | 1,2,4,5,6,7<br>,38,43 | 3,8,36,37,<br>39,40,41,4<br>2,44 | 18 | G3V686,P01681,P02631,P15399,P16636,P20762,P25031,P52590,P83748,P97580,Q30KJ2,Q5HZV9,Q63467,Q63532,Q63942,Q6IE51,Q7TP52,Q7TPB1                                                                       |
| 2032 | 1,2,4,5,6,7<br>,38,44 | 3,8,36,37,<br>39,40,41,4<br>2,43 | 15 | G3V686,O35568,P02631,P15399,P25031,P51907,P52590,P61206,P84079,P84082,P83748,P97580,Q30KJ2,Q63467,Q63532,Q6IE51,Q7TP52                                                                              |
| 2033 | 1,2,4,5,6,7<br>,39,40 | 3,8,36,37,<br>38,41,42,4<br>3,44 | 10 | G3V686,P05539,P35467,P36376,P52590,P83748,Q30KJ2,Q63532,Q6IE51,Q7TP52                                                                                                                               |
| 2034 | 1,2,4,5,6,7<br>,39,41 | 3,8,36,37,<br>38,40,42,4<br>3,44 | 19 | G3V686,O88267,P02631,P05539,P08010,P18418,P35467,P52590,P83748,P97605,Q01205,Q30KJ2,Q5ZQU0,Q63467,Q63475,Q63532,Q6IE51,Q7TP52,Q80YN4                                                                |
| 2035 | 1,2,4,5,6,7<br>,39,42 | 3,8,36,37,<br>38,40,41,4<br>3,44 | 19 | G3V686,P05539,P08010,P08290,P08753,P19218,P20762,P35467,P36374,P51907,P52590,P83748,P97605,Q30KJ2,Q5XI73,Q63532,Q6IE51,Q7TP52,Q9QZQ5                                                                |
| 2036 | 1,2,4,5,6,7<br>,39,43 | 3,8,36,37,<br>38,40,41,4<br>2,44 | 16 | G3V686,O88267,P02631,P05539,P14480,P16636,P20762,P25031,P52590,P83748,Q30KJ2,Q63467,Q63532,Q63942,Q6IE51,Q7TP52                                                                                     |
| 2037 | 1,2,4,5,6,7<br>,39,44 | 3,8,36,37,<br>38,40,41,4<br>2,43 | 14 | G3V686,O35568,O88267,P02631,P05539,P35467,P51907,P52590,P83748,Q30KJ2,Q63467,Q63532,Q6IE51,Q7TP52                                                                                                   |
| 2038 | 1,2,4,5,6,7<br>,40,41 | 3,8,36,37,<br>38,39,42,4<br>3,44 | 19 | G3V686,P02631,P05371,P05539,P12020,P18418,P35467,P36376,P52590,P70709,P83748,P97605,Q30KJ2,Q63467,Q63532,Q6IE51,Q7TP52,Q80YN4,Q9JJS8                                                                |
| 2039 | 1,2,4,5,6,7<br>,40,42 | 3,8,36,37,<br>38,39,41,4<br>3,44 | 18 | G3V686,P02781,P05539,P08290,P14408,P20762,P36374,P36376,P52590,P70709,Q09030,Q30KJ2,Q63532,Q6IE51,Q7TP52,Q9JJS8,Q9QZ76,Q9QZQ5                                                                       |
| 2040 | 1,2,4,5,6,7<br>,40,43 | 3,8,36,37,<br>38,39,41,4<br>2,44 | 15 | G3V686,O55145,P02631,P05539,P16636,P20762,P25236,P36376,P52590,P70709,P83748,Q30KJ2,Q63532,Q6IE51,Q7TP52                                                                                            |
| 2041 | 1,2,4,5,6,7<br>,40,44 | 3,8,36,37,<br>38,39,41,4<br>2,43 | 13 | G3V686,P02631,P05539,P12020,P36376,P52590,P83748,Q30KJ2,Q63467,Q63532,Q6IE51,Q7TP52,Q9QZ76                                                                                                          |
| 2042 | 1,2,4,5,6,7<br>,41,42 | 3,8,36,37,<br>38,39,40,4<br>3,44 | 28 | G3V686,O35547,P02631,P02781,P05539,P08010,P08290,P08753,P13596,P35467,P36374,P52590,P54921,P60905,P82471,P83748,P97605,Q09030,Q30KJ2,Q62753,Q63357,Q63467,Q63532,Q6IE51,Q7TP52,Q812E4,Q9JJS8,Q9QZQ5 |
| 2043 | 1,2,4,5,6,7<br>,41,43 | 3,8,36,37,<br>38,39,40,4<br>2,44 | 22 | G3V686,O88267,P02631,P05371,P05539,P16636,P20762,P25031,P51886,P52590,P54921,P82471,P83748,Q01205,Q30KJ2,Q5HZV9,Q63467,Q63532,Q6IE51,Q7TP52,Q7TPB1,Q80YN4                                           |
| 2044 | 1,2,4,5,6,7<br>,41,44 | 3,8,36,37,<br>38,39,40,4<br>2,43 | 18 | G3V686,O88267,P02631,P05371,P05539,P12020,P18418,P35467,P52590,P83748,P97605,Q01205,Q30KJ2,Q63467,Q63475,Q63532,Q6IE51,Q7TP52                                                                       |

|      |                       |                                  |    |                                                                                                                                                           |
|------|-----------------------|----------------------------------|----|-----------------------------------------------------------------------------------------------------------------------------------------------------------|
| 2045 | 1,2,4,5,6,7<br>,42,43 | 3,8,36,37,<br>38,39,40,4<br>1,44 | 22 | G3V686,O35547,P02631,P05539,P08290,P08723,P16636,P19629,P20762,P25031,P25236,P36374,P52590,P54921,P60905,P82471,P83748,Q30KJ2,Q63532,Q63942,Q6IE51,Q7TP52 |
| 2046 | 1,2,4,5,6,7<br>,42,44 | 3,8,36,37,<br>38,39,40,4<br>1,43 | 21 | G3V686,P02631,P05539,P08010,P08290,P08753,P14408,P20762,P36374,P51907,P52590,P60905,Q30KJ2,Q5XI73,Q63467,Q63514,Q63532,Q6IE51,Q7TP52,Q9JID2,Q9QQZQ5       |
| 2047 | 1,2,4,5,6,7<br>,43,44 | 3,8,36,37,<br>38,39,40,4<br>1,42 | 17 | G3V686,P01681,P02631,P05539,P16636,P20762,P25031,P25236,P51886,P52590,P83748,Q30KJ2,Q63467,Q63532,Q63661,Q6IE51,Q7TP52                                    |
| 2048 | 1,2,4,5,6,8<br>,36,37 | 3,7,38,39,<br>40,41,42,4<br>3,44 | 6  | G3V686,P07171,P11030,Q01205,Q63942,Q7TP52                                                                                                                 |
| 2049 | 1,2,4,5,6,8<br>,36,38 | 3,7,37,39,<br>40,41,42,4<br>3,44 | 6  | P07171,P19218,P20762,Q01205,Q63942,Q7TP52                                                                                                                 |
| 2050 | 1,2,4,5,6,8<br>,36,39 | 3,7,37,38,<br>40,41,42,4<br>3,44 | 7  | P07171,P07943,Q01205,Q5ZQU0,Q63942,Q6AYS4,Q7TP52                                                                                                          |
| 2051 | 1,2,4,5,6,8<br>,36,40 | 3,7,37,38,<br>39,41,42,4<br>3,44 | 8  | P02803,P07171,P20762,P22006,Q01205,Q63942,Q6AYS4,Q7TP52                                                                                                   |
| 2052 | 1,2,4,5,6,8<br>,36,41 | 3,7,37,38,<br>39,40,42,4<br>3,44 | 12 | G3V686,P07171,P08010,P08753,P11030,Q01205,Q5ZQU0,Q63467,Q63475,Q63942,Q7TP52,Q99MH3                                                                       |
| 2053 | 1,2,4,5,6,8<br>,36,42 | 3,7,37,38,<br>39,40,41,4<br>3,44 | 20 | G3V686,P04905,P05539,P07171,P08010,P08290,P08753,P0DMW0,P0DMW1,P10715,P19629,P20762,P36374,P60905,P97554,Q01205,Q63357,Q63514,Q63942,Q7TP52,Q812E4        |
| 2054 | 1,2,4,5,6,8<br>,36,43 | 3,7,37,38,<br>39,40,41,4<br>2,44 | 14 | G3V686,P01681,P07171,P07943,P19629,P20762,P51886,P83748,Q00715,Q01177,Q01205,Q63942,Q66H69,Q7TP52                                                         |
| 2055 | 1,2,4,5,6,8<br>,36,44 | 3,7,37,38,<br>39,40,41,4<br>2,43 | 11 | G3V686,P07171,P07943,P20762,P22006,Q01205,Q63467,Q63514,Q63942,Q7TP52,Q99MH3                                                                              |
| 2056 | 1,2,4,5,6,8<br>,37,38 | 3,7,36,39,<br>40,41,42,4<br>3,44 | 6  | P02803,P97580,Q01205,Q63942,Q7TP52,Q7TPB1                                                                                                                 |
| 2057 | 1,2,4,5,6,8<br>,37,39 | 3,7,36,38,<br>40,41,42,4<br>3,44 | 2  | Q63942,Q7TP52                                                                                                                                             |
| 2058 | 1,2,4,5,6,8<br>,37,40 | 3,7,36,38,<br>39,41,42,4<br>3,44 | 2  | P02803,P22006                                                                                                                                             |
| 2059 | 1,2,4,5,6,8<br>,37,41 | 3,7,36,38,<br>39,40,42,4<br>3,44 | 4  | Q01205,Q7TP52,Q7TPB1,Q91ZS3                                                                                                                               |

|      |                       |                                  |    |                                                                                            |
|------|-----------------------|----------------------------------|----|--------------------------------------------------------------------------------------------|
| 2060 | 1,2,4,5,6,8<br>,37,42 | 3,7,36,38,<br>39,40,41,4<br>3,44 | 4  | P08753,P19629,Q63942,Q7TP52                                                                |
| 2061 | 1,2,4,5,6,8<br>,37,43 | 3,7,36,38,<br>39,40,41,4<br>2,44 | 7  | P01681,P20762,P25236,P83748,Q63942,Q7TP52,Q7TPB1                                           |
| 2062 | 1,2,4,5,6,8<br>,37,44 | 3,7,36,38,<br>39,40,41,4<br>2,43 | 3  | P22006,Q01205,Q7TP52                                                                       |
| 2063 | 1,2,4,5,6,8<br>,38,39 | 3,7,36,37,<br>40,41,42,4<br>3,44 | 4  | P19218,P97580,Q63942,Q7TP52                                                                |
| 2064 | 1,2,4,5,6,8<br>,38,40 | 3,7,36,37,<br>39,41,42,4<br>3,44 | 5  | P02803,P22006,P70709,Q63942,Q7TP52                                                         |
| 2065 | 1,2,4,5,6,8<br>,38,41 | 3,7,36,37,<br>39,40,42,4<br>3,44 | 10 | P08753,P50115,P50116,P50280,P97580,Q01205,Q5U2V4,Q63942,Q7TP52,Q7TPB1                      |
| 2066 | 1,2,4,5,6,8<br>,38,42 | 3,7,36,37,<br>39,40,41,4<br>3,44 | 13 | P08010,P08290,P08753,P19218,P20762,P36374,P60905,P97554,Q63514,Q63942,Q7TP52,Q9QZK9,Q9Z0V6 |
| 2067 | 1,2,4,5,6,8<br>,38,43 | 3,7,36,37,<br>39,40,41,4<br>2,44 | 9  | P01681,P20762,P83748,P97580,Q06000,Q63942,Q64268,Q7TP52,Q7TPB1                             |
| 2068 | 1,2,4,5,6,8<br>,38,44 | 3,7,36,37,<br>39,40,41,4<br>2,43 | 8  | P22006,P97580,Q01205,Q62635,Q63514,Q63942,Q7TP52,Q9Z0V6                                    |
| 2069 | 1,2,4,5,6,8<br>,39,40 | 3,7,36,37,<br>38,41,42,4<br>3,44 | 4  | P02803,P36376,Q63942,Q7TP52                                                                |
| 2070 | 1,2,4,5,6,8<br>,39,41 | 3,7,36,37,<br>38,40,42,4<br>3,44 | 7  | O88267,P07943,P08010,P97605,Q01205,Q63942,Q7TP52                                           |
| 2071 | 1,2,4,5,6,8<br>,39,42 | 3,7,36,37,<br>38,40,41,4<br>3,44 | 6  | P08010,P08753,P20762,P36374,Q63942,Q7TP52                                                  |
| 2072 | 1,2,4,5,6,8<br>,39,43 | 3,7,36,37,<br>38,40,41,4<br>2,44 | 6  | P07943,P20762,P25236,P83748,Q63942,Q7TP52                                                  |
| 2073 | 1,2,4,5,6,8<br>,39,44 | 3,7,36,37,<br>38,40,41,4<br>2,43 | 4  | P07943,Q01205,Q63942,Q7TP52                                                                |
| 2074 | 1,2,4,5,6,8<br>,40,41 | 3,7,36,37,<br>38,39,42,4<br>3,44 | 5  | P02803,P70709,Q01205,Q7TP52,Q9JJS8                                                         |

|      |                        |                                  |    |                                                                                                                               |
|------|------------------------|----------------------------------|----|-------------------------------------------------------------------------------------------------------------------------------|
| 2075 | 1,2,4,5,6,8<br>,40,42  | 3,7,36,37,<br>38,39,41,4<br>3,44 | 12 | P02781,P02803,P08753,P20762,P22006,P25236,P36374,P70709,Q7TP52,Q9JJS8,Q9QZ76,Q9Z0V6                                           |
| 2076 | 1,2,4,5,6,8<br>,40,43  | 3,7,36,37,<br>38,39,41,4<br>2,44 | 8  | P01681,P02803,P20762,P25236,P70709,P83748,Q63942,Q7TP52                                                                       |
| 2077 | 1,2,4,5,6,8<br>,40,44  | 3,7,36,37,<br>38,39,41,4<br>2,43 | 7  | P02803,P22006,P25236,P36374,Q7TP52,Q9QZ76,Q9Z0V6                                                                              |
| 2078 | 1,2,4,5,6,8<br>,41,42  | 3,7,36,37,<br>38,39,40,4<br>3,44 | 18 | G3V686,O08815,P08010,P08290,P08753,P36374,P54921,P60905,P82471,P97605,Q01205,Q62753,Q63357,Q63514,Q7TP52,Q812E4,Q9JJS8,Q9QZK9 |
| 2079 | 1,2,4,5,6,8<br>,41,43  | 3,7,36,37,<br>38,39,40,4<br>2,44 | 11 | P02793;Q7TP54,P20762,P54921,P82471,P83748,Q01205,Q63598,Q63942,Q66H69,Q7TP52,Q7TPB1                                           |
| 2080 | 1,2,4,5,6,8<br>,41,44  | 3,7,36,37,<br>38,39,40,4<br>2,43 | 4  | G3V686,P07171,Q01205,Q7TP52                                                                                                   |
| 2081 | 1,2,4,5,6,8<br>,42,43  | 3,7,36,37,<br>38,39,40,4<br>1,44 | 10 | P08753,P19629,P20762,P25236,P36374,P54921,P60905,Q63514,Q63942,Q7TP52                                                         |
| 2082 | 1,2,4,5,6,8<br>,42,44  | 3,7,36,37,<br>38,39,40,4<br>1,43 | 13 | G3V686,P08753,P20762,P22006,P25236,P36374,P60905,Q63514,Q63942,Q7TP52,Q9JID2,Q9QZ76,Q9Z0V6                                    |
| 2083 | 1,2,4,5,6,8<br>,43,44  | 3,7,36,37,<br>38,39,40,4<br>1,42 | 8  | P01681,P20762,P25236,P83748,Q63598,Q63942,Q66H69,Q7TP52                                                                       |
| 2084 | 1,2,4,5,6,3<br>6,37,38 | 3,7,8,39,4<br>0,41,42,43<br>,44  | 3  | P15399,P97580,Q7TP52                                                                                                          |
| 2085 | 1,2,4,5,6,3<br>6,37,39 | 3,7,8,38,4<br>0,41,42,43<br>,44  | 2  | P35467,Q7TP52                                                                                                                 |
| 2086 | 1,2,4,5,6,3<br>6,37,40 | 3,7,8,38,3<br>9,41,42,43<br>,44  | 3  | P00731,P11030,Q7TP52                                                                                                          |
| 2087 | 1,2,4,5,6,3<br>6,37,41 | 3,7,8,38,3<br>9,40,42,43<br>,44  | 5  | G3V686,P11030,P35467,Q7TP52,Q91ZS3                                                                                            |
| 2088 | 1,2,4,5,6,3<br>6,37,42 | 3,7,8,38,3<br>9,40,41,43<br>,44  | 4  | G3V686,P10715,P19629,Q7TP52                                                                                                   |
| 2089 | 1,2,4,5,6,3<br>6,37,43 | 3,7,8,38,3<br>9,40,41,42<br>,44  | 6  | G3V686,P10715,P19629,P83748,Q63942,Q7TP52                                                                                     |

|      |                        |                                 |    |                                                                       |
|------|------------------------|---------------------------------|----|-----------------------------------------------------------------------|
| 2090 | 1,2,4,5,6,3<br>6,37,44 | 3,7,8,38,3<br>9,40,41,42<br>,43 | 2  | G3V686,Q7TP52                                                         |
| 2091 | 1,2,4,5,6,3<br>6,38,39 | 3,7,8,37,4<br>0,41,42,43<br>,44 | 3  | P19218,P51907,Q7TP52                                                  |
| 2092 | 1,2,4,5,6,3<br>6,38,40 | 3,7,8,37,3<br>9,41,42,43<br>,44 | 1  | Q7TP52                                                                |
| 2093 | 1,2,4,5,6,3<br>6,38,41 | 3,7,8,37,3<br>9,40,42,43<br>,44 | 2  | G3V686,Q7TP52                                                         |
| 2094 | 1,2,4,5,6,3<br>6,38,42 | 3,7,8,37,3<br>9,40,41,43<br>,44 | 9  | G3V686,P08753,P10715,P19218,P19629,P51907,P97554,Q6AYL6,Q7TP52        |
| 2095 | 1,2,4,5,6,3<br>6,38,43 | 3,7,8,37,3<br>9,40,41,42<br>,44 | 10 | O55145,P01681,P10715,P19629,P20762,P34901,Q5HZV9,Q63661,Q63942,Q7TP52 |
| 2096 | 1,2,4,5,6,3<br>6,38,44 | 3,7,8,37,3<br>9,40,41,42<br>,43 | 3  | P34901,P51907,Q7TP52                                                  |
| 2097 | 1,2,4,5,6,3<br>6,39,40 | 3,7,8,37,3<br>8,41,42,43<br>,44 | 3  | P35467,P36376,Q7TP52                                                  |
| 2098 | 1,2,4,5,6,3<br>6,39,41 | 3,7,8,37,3<br>8,40,42,43<br>,44 | 3  | G3V686,P35467,Q7TP52                                                  |
| 2099 | 1,2,4,5,6,3<br>6,39,42 | 3,7,8,37,3<br>8,40,41,43<br>,44 | 6  | G3V686,P05539,P08010,P35467,P51907,Q7TP52                             |
| 2100 | 1,2,4,5,6,3<br>6,39,43 | 3,7,8,37,3<br>8,40,41,42<br>,44 | 5  | O55145,P20762,P83748,Q63942,Q7TP52                                    |
| 2101 | 1,2,4,5,6,3<br>6,39,44 | 3,7,8,37,3<br>8,40,41,42<br>,43 | 4  | G3V686,P51907,P55314,Q7TP52                                           |
| 2102 | 1,2,4,5,6,3<br>6,40,41 | 3,7,8,37,3<br>8,39,42,43<br>,44 | 4  | G3V686,P05539,P23593,Q7TP52                                           |
| 2103 | 1,2,4,5,6,3<br>6,40,42 | 3,7,8,37,3<br>8,39,41,43<br>,44 | 5  | G3V686,P05539,P14408,P23593,Q7TP52                                    |
| 2104 | 1,2,4,5,6,3<br>6,40,43 | 3,7,8,37,3<br>8,39,41,42<br>,44 | 8  | O55145,P01681,P20762,P25236,P83748,Q63661,Q63942,Q7TP52               |

|      |                        |                                 |   |                                                                |
|------|------------------------|---------------------------------|---|----------------------------------------------------------------|
| 2105 | 1,2,4,5,6,3<br>6,40,44 | 3,7,8,37,3<br>8,39,41,42<br>,43 | 2 | P22006,Q7TP52                                                  |
| 2106 | 1,2,4,5,6,3<br>6,41,42 | 3,7,8,37,3<br>8,39,40,43<br>,44 | 8 | G3V686,P05539,P08010,P08753,P54921,P60905,Q7TP52,Q812E4        |
| 2107 | 1,2,4,5,6,3<br>6,41,43 | 3,7,8,37,3<br>8,39,40,42<br>,44 | 5 | G3V686,P83748,Q5HZV9,Q63942,Q7TP52                             |
| 2108 | 1,2,4,5,6,3<br>6,41,44 | 3,7,8,37,3<br>8,39,40,42<br>,43 | 3 | G3V686,Q7TP52,Q99MH3                                           |
| 2109 | 1,2,4,5,6,3<br>6,42,43 | 3,7,8,37,3<br>8,39,40,41<br>,44 | 8 | G3V686,P05539,P10715,P19629,P20762,P31044,Q63942,Q7TP52        |
| 2110 | 1,2,4,5,6,3<br>6,42,44 | 3,7,8,37,3<br>8,39,40,41<br>,43 | 8 | G3V686,P05539,P14408,P36374,P51907,P60905,P97554,Q7TP52        |
| 2111 | 1,2,4,5,6,3<br>6,43,44 | 3,7,8,37,3<br>8,39,40,41<br>,42 | 8 | G3V686,P01681,P20762,P34901,P55314,Q63661,Q63942,Q7TP52        |
| 2112 | 1,2,4,5,6,3<br>7,38,39 | 3,7,8,36,4<br>0,41,42,43<br>,44 | 3 | P15399,P19218,P97580                                           |
| 2113 | 1,2,4,5,6,3<br>7,38,40 | 3,7,8,36,3<br>9,41,42,43<br>,44 | 3 | P02803,P15399,P97580                                           |
| 2114 | 1,2,4,5,6,3<br>7,38,41 | 3,7,8,36,3<br>9,40,42,43<br>,44 | 5 | P15399,P97580,Q7TP52,Q7TPB1,Q91ZS3                             |
| 2115 | 1,2,4,5,6,3<br>7,38,42 | 3,7,8,36,3<br>9,40,41,43<br>,44 | 4 | P10715,P19629,P97580,Q7TP52                                    |
| 2116 | 1,2,4,5,6,3<br>7,38,43 | 3,7,8,36,3<br>9,40,41,42<br>,44 | 9 | P01681,P14480,P15399,P97580,Q5HZV9,Q63942,Q61FV1,Q7TP52,Q7TPB1 |
| 2117 | 1,2,4,5,6,3<br>7,38,44 | 3,7,8,36,3<br>9,40,41,42<br>,43 | 3 | P15399,P97580,Q7TP52                                           |
| 2118 | 1,2,4,5,6,3<br>7,39,40 | 3,7,8,36,3<br>8,41,42,43<br>,44 | 2 | P02803,P35467                                                  |
| 2119 | 1,2,4,5,6,3<br>7,39,41 | 3,7,8,36,3<br>8,40,42,43<br>,44 | 2 | P35467,Q7TP52                                                  |



|      |                        |                                 |   |                                    |
|------|------------------------|---------------------------------|---|------------------------------------|
| 2120 | 1,2,4,5,6,3<br>7,39,42 | 3,7,8,36,3<br>8,40,41,43<br>,44 | 2 | P35467,Q7TP52                      |
| 2121 | 1,2,4,5,6,3<br>7,39,43 | 3,7,8,36,3<br>8,40,41,42<br>,44 | 5 | P14480,P25236,P83748,Q63942,Q7TP52 |
| 2122 | 1,2,4,5,6,3<br>7,39,44 | 3,7,8,36,3<br>8,40,41,42<br>,43 | 2 | P35467,Q7TP52                      |
| 2123 | 1,2,4,5,6,3<br>7,40,41 | 3,7,8,36,3<br>8,39,42,43<br>,44 | 1 | Q7TP52                             |
| 2124 | 1,2,4,5,6,3<br>7,40,42 | 3,7,8,36,3<br>8,39,41,43<br>,44 | 3 | P02803,P25236,Q7TP52               |
| 2125 | 1,2,4,5,6,3<br>7,40,43 | 3,7,8,36,3<br>8,39,41,42<br>,44 | 2 | P25236,P83748                      |
| 2126 | 1,2,4,5,6,3<br>7,40,44 | 3,7,8,36,3<br>8,39,41,42<br>,43 | 2 | P22006,P25236                      |
| 2127 | 1,2,4,5,6,3<br>7,41,42 | 3,7,8,36,3<br>8,39,40,43<br>,44 | 2 | G3V686,Q7TP52                      |
| 2128 | 1,2,4,5,6,3<br>7,41,43 | 3,7,8,36,3<br>8,39,40,42<br>,44 | 4 | P83748,Q5HZV9,Q7TP52,Q7TPB1        |
| 2129 | 1,2,4,5,6,3<br>7,41,44 | 3,7,8,36,3<br>8,39,40,42<br>,43 | 2 | G3V686,Q7TP52                      |
| 2130 | 1,2,4,5,6,3<br>7,42,43 | 3,7,8,36,3<br>8,39,40,41<br>,44 | 5 | P10715,P19629,P25236,Q63942,Q7TP52 |
| 2131 | 1,2,4,5,6,3<br>7,42,44 | 3,7,8,36,3<br>8,39,40,41<br>,43 | 3 | G3V686,P25236,Q7TP52               |
| 2132 | 1,2,4,5,6,3<br>7,43,44 | 3,7,8,36,3<br>8,39,40,41<br>,42 | 4 | P01681,P25236,Q63661,Q7TP52        |
| 2133 | 1,2,4,5,6,3<br>8,39,40 | 3,7,8,36,3<br>7,41,42,43<br>,44 | 0 |                                    |
| 2134 | 1,2,4,5,6,3<br>8,39,41 | 3,7,8,36,3<br>7,40,42,43<br>,44 | 1 | Q7TP52                             |

|      |                        |                                 |    |                                                                              |
|------|------------------------|---------------------------------|----|------------------------------------------------------------------------------|
| 2135 | 1,2,4,5,6,3<br>8,39,42 | 3,7,8,36,3<br>7,40,41,43<br>,44 | 3  | P19218,P51907,Q7TP52                                                         |
| 2136 | 1,2,4,5,6,3<br>8,39,43 | 3,7,8,36,3<br>7,40,41,42<br>,44 | 8  | P01681,P14480,P83748,P97580,Q5HZV9,Q63942,Q6IFU7,Q7TP52                      |
| 2137 | 1,2,4,5,6,3<br>8,39,44 | 3,7,8,36,3<br>7,40,41,42<br>,43 | 3  | P51907,P97580,Q7TP52                                                         |
| 2138 | 1,2,4,5,6,3<br>8,40,41 | 3,7,8,36,3<br>7,39,42,43<br>,44 | 2  | P70709,Q7TP52                                                                |
| 2139 | 1,2,4,5,6,3<br>8,40,42 | 3,7,8,36,3<br>7,39,41,43<br>,44 | 2  | P70709,Q7TP52                                                                |
| 2140 | 1,2,4,5,6,3<br>8,40,43 | 3,7,8,36,3<br>7,39,41,42<br>,44 | 8  | P01681,P01835,P20762,P25236,P70709,Q5HZV9,Q63942,Q7TP52                      |
| 2141 | 1,2,4,5,6,3<br>8,40,44 | 3,7,8,36,3<br>7,39,41,42<br>,43 | 5  | P01835,P22006,P70709,Q62635,Q7TP52                                           |
| 2142 | 1,2,4,5,6,3<br>8,41,42 | 3,7,8,36,3<br>7,39,40,43<br>,44 | 7  | O35547,P08010,P08753,P54921,Q62902,Q7TP52,Q8CIZ5                             |
| 2143 | 1,2,4,5,6,3<br>8,41,43 | 3,7,8,36,3<br>7,39,40,42<br>,44 | 7  | P01681,P83748,P97580,Q5HZV9,Q63942,Q7TP52,Q7TPB1                             |
| 2144 | 1,2,4,5,6,3<br>8,41,44 | 3,7,8,36,3<br>7,39,40,42<br>,43 | 6  | P00774,P98089,Q05695,Q62635,Q7TP52,Q8CIZ5                                    |
| 2145 | 1,2,4,5,6,3<br>8,42,43 | 3,7,8,36,3<br>7,39,40,41<br>,44 | 11 | P01681,P10715,P19629,P20762,P25031,P25236,P54921,Q5HZV9,Q63942,Q6IFU7,Q7TP52 |
| 2146 | 1,2,4,5,6,3<br>8,42,44 | 3,7,8,36,3<br>7,39,40,41<br>,43 | 3  | P51907,Q63514,Q7TP52                                                         |
| 2147 | 1,2,4,5,6,3<br>8,43,44 | 3,7,8,36,3<br>7,39,40,41<br>,42 | 9  | P01681,P01835,P25236,P34901,P97580,P98089,Q63661,Q63942,Q7TP52               |
| 2148 | 1,2,4,5,6,3<br>9,40,41 | 3,7,8,36,3<br>7,38,42,43<br>,44 | 4  | P35467,P36376,P70709,Q7TP52                                                  |
| 2149 | 1,2,4,5,6,3<br>9,40,42 | 3,7,8,36,3<br>7,38,41,43<br>,44 | 2  | P25236,Q7TP52                                                                |

|      |                        |                                 |   |                                           |
|------|------------------------|---------------------------------|---|-------------------------------------------|
| 2150 | 1,2,4,5,6,3<br>9,40,43 | 3,7,8,36,3<br>7,38,41,42<br>,44 | 5 | P25236,P36376,P83748,Q63942,Q7TP52        |
| 2151 | 1,2,4,5,6,3<br>9,40,44 | 3,7,8,36,3<br>7,38,41,42<br>,43 | 2 | P25236,P36376                             |
| 2152 | 1,2,4,5,6,3<br>9,41,42 | 3,7,8,36,3<br>7,38,40,43<br>,44 | 6 | G3V686,P08010,P08753,P35467,P82471,Q7TP52 |
| 2153 | 1,2,4,5,6,3<br>9,41,43 | 3,7,8,36,3<br>7,38,40,42<br>,44 | 5 | P82471,P83748,Q5HZV9,Q63942,Q7TP52        |
| 2154 | 1,2,4,5,6,3<br>9,41,44 | 3,7,8,36,3<br>7,38,40,42<br>,43 | 3 | O88267,P35467,Q7TP52                      |
| 2155 | 1,2,4,5,6,3<br>9,42,43 | 3,7,8,36,3<br>7,38,40,41<br>,44 | 5 | P20762,P25236,Q63942,Q6IFU7,Q7TP52        |
| 2156 | 1,2,4,5,6,3<br>9,42,44 | 3,7,8,36,3<br>7,38,40,41<br>,43 | 3 | P25236,P51907,Q7TP52                      |
| 2157 | 1,2,4,5,6,3<br>9,43,44 | 3,7,8,36,3<br>7,38,40,41<br>,42 | 4 | P25236,P83748,Q63942,Q7TP52               |
| 2158 | 1,2,4,5,6,4<br>0,41,42 | 3,7,8,36,3<br>7,38,39,43<br>,44 | 4 | P23593,P70709,Q7TP52,Q9JJS8               |
| 2159 | 1,2,4,5,6,4<br>0,41,43 | 3,7,8,36,3<br>7,38,39,42<br>,44 | 4 | P70709,P83748,Q5HZV9,Q7TP52               |
| 2160 | 1,2,4,5,6,4<br>0,41,44 | 3,7,8,36,3<br>7,38,39,42<br>,43 | 5 | P06911,P12020,P70709,Q5GRG2,Q7TP52        |
| 2161 | 1,2,4,5,6,4<br>0,42,43 | 3,7,8,36,3<br>7,38,39,41<br>,44 | 5 | P20762,P25236,P70709,Q5HZV9,Q7TP52        |
| 2162 | 1,2,4,5,6,4<br>0,42,44 | 3,7,8,36,3<br>7,38,39,41<br>,43 | 6 | P22006,P25236,P36374,P70709,Q7TP52,Q9QZ76 |
| 2163 | 1,2,4,5,6,4<br>0,43,44 | 3,7,8,36,3<br>7,38,39,41<br>,42 | 4 | P01681,P25236,Q63661,Q7TP52               |
| 2164 | 1,2,4,5,6,4<br>1,42,43 | 3,7,8,36,3<br>7,38,39,40<br>,44 | 6 | G3V686,P54921,P60905,P82471,Q5HZV9,Q7TP52 |

|      |                        |                                  |    |                                                                                                                                                                                                                   |
|------|------------------------|----------------------------------|----|-------------------------------------------------------------------------------------------------------------------------------------------------------------------------------------------------------------------|
| 2165 | 1,2,4,5,6,4<br>1,42,44 | 3,7,8,36,3<br>7,38,39,40<br>,43  | 5  | G3V686,P60905,P82471,Q6P6R2,Q7TP52                                                                                                                                                                                |
| 2166 | 1,2,4,5,6,4<br>1,43,44 | 3,7,8,36,3<br>7,38,39,40<br>,42  | 5  | G3V686,P28648,P83748,Q63661,Q7TP52                                                                                                                                                                                |
| 2167 | 1,2,4,5,6,4<br>2,43,44 | 3,7,8,36,3<br>7,38,39,40<br>,41  | 6  | G3V686,P01681,P20762,P25236,Q63942,Q7TP52                                                                                                                                                                         |
| 2168 | 1,2,4,5,7,8<br>,36,37  | 3,6,38,39,<br>40,41,42,4<br>3,44 | 13 | P00762,P02803,P07171,P11762,P52590,Q01205,Q03191,Q09030,Q5ZQU0,Q63467,Q6AYS4,Q7TP52,Q99MH3                                                                                                                        |
| 2169 | 1,2,4,5,7,8<br>,36,38  | 3,6,37,39,<br>40,41,42,4<br>3,44 | 15 | P00762,P07171,P15473,P35444,P51886,P51907,P52590,Q01205,Q09030,Q5ZQU0,Q63467,Q6AYS4,Q6IE51,Q7TP52,Q99MH3                                                                                                          |
| 2170 | 1,2,4,5,7,8<br>,36,39  | 3,6,37,38,<br>40,41,42,4<br>3,44 | 16 | P00762,P07171,P08010,P15473,P35444,P51886,P52590,Q01205,Q09030,Q5ZQU0,Q63467,Q63475,Q6AYS4,Q6IE51,Q7TP52,Q99MH3                                                                                                   |
| 2171 | 1,2,4,5,7,8<br>,36,40  | 3,6,37,38,<br>39,41,42,4<br>3,44 | 16 | P00762,P00774,P02803,P05539,P07171,P52590,Q01205,Q09030,Q5ZQU0,Q63467,Q6AYS4,Q6IE51,Q7TP52,Q99MH3,Q9JJS8,Q9QZ76                                                                                                   |
| 2172 | 1,2,4,5,7,8<br>,36,41  | 3,6,37,38,<br>39,40,42,4<br>3,44 | 23 | P00762,P05539,P07171,P08010,P18418,P35444,P51886,P52590,P60905,P97605,Q01205,Q03191,Q09030,Q5ZQU0,Q63467,Q63475,Q68FS4,Q6AYS4,Q6IE51,Q7TP52,Q812E4,Q99041,Q99MH3                                                  |
| 2173 | 1,2,4,5,7,8<br>,36,42  | 3,6,37,38,<br>39,40,41,4<br>3,44 | 30 | O08815,P00762,P02781,P04905,P05539,P07171,P08010,P08290,P08644,P08721,P08753,P14408,P35444,P36374,P47727,P52590,P60905,P82995,Q01205,Q09030,Q5ZQU0,Q63357,Q63467,Q6AYS4,Q7TP52,Q812E4,Q99MH3,Q9QZ76,Q9QZK9,Q9QZQ5 |
| 2174 | 1,2,4,5,7,8<br>,36,43  | 3,6,37,38,<br>39,40,41,4<br>2,44 | 21 | P05539,P07171,P13432,P16391,P16636,P20762,P35444,P51886,P52590,P83748,Q01205,Q03191,Q09030,Q5ZQU0,Q63416,Q63467,Q63942,Q6AYS4,Q6IE51,Q7TP52,Q99MH3                                                                |
| 2175 | 1,2,4,5,7,8<br>,36,44  | 3,6,37,38,<br>39,40,41,4<br>2,43 | 17 | P00762,P07171,P08721,P13432,P15473,P35444,P51886,P52590,Q01205,Q03191,Q09030,Q5ZQU0,Q63467,Q63475,Q6AYS4,Q7TP52,Q99MH3                                                                                            |
| 2176 | 1,2,4,5,7,8<br>,37,38  | 3,6,36,39,<br>40,41,42,4<br>3,44 | 8  | P02803,P07171,P52590,Q01205,Q09030,Q63467,Q6IE51,Q7TPB1                                                                                                                                                           |
| 2177 | 1,2,4,5,7,8<br>,37,39  | 3,6,36,38,<br>40,41,42,4<br>3,44 | 9  | P02803,P07171,P52590,Q01205,Q09030,Q5ZQU0,Q63467,Q6IE51,Q9ESW0                                                                                                                                                    |
| 2178 | 1,2,4,5,7,8<br>,37,40  | 3,6,36,38,<br>39,41,42,4<br>3,44 | 5  | P02803,P52590,Q03191,Q09030,Q9QZ76                                                                                                                                                                                |
| 2179 | 1,2,4,5,7,8<br>,37,41  | 3,6,36,38,<br>39,40,42,4<br>3,44 | 15 | P07171,P11762,P18418,P52590,Q01205,Q03191,Q09030,Q5ZQU0,Q63467,Q63475,Q63617,Q68FS4,Q7TPB1,Q99041,Q99MH3                                                                                                          |

|      |                       |                                  |    |                                                                                                                                             |
|------|-----------------------|----------------------------------|----|---------------------------------------------------------------------------------------------------------------------------------------------|
| 2180 | 1,2,4,5,7,8<br>,37,42 | 3,6,36,38,<br>39,40,41,4<br>3,44 | 5  | P00762,P02803,P52590,Q01205,Q09030                                                                                                          |
| 2181 | 1,2,4,5,7,8<br>,37,43 | 3,6,36,38,<br>39,40,41,4<br>2,44 | 12 | P16391,P16636,P20762,P52590,P83748,Q01205,Q03191,Q09030,Q63416,Q63467,Q7TPB1,Q9QX79                                                         |
| 2182 | 1,2,4,5,7,8<br>,37,44 | 3,6,36,38,<br>39,40,41,4<br>2,43 | 7  | P00762,P07171,P52590,Q01205,Q03191,Q09030,Q63467                                                                                            |
| 2183 | 1,2,4,5,7,8<br>,38,39 | 3,6,36,37,<br>40,41,42,4<br>3,44 | 13 | O88267,P02803,P07171,P19218,P35444,P51907,P52590,Q01205,Q5ZQU0,Q63467,Q6AYS4,Q6IE51,Q80WL1                                                  |
| 2184 | 1,2,4,5,7,8<br>,38,40 | 3,6,36,37,<br>39,41,42,4<br>3,44 | 6  | P02803,P52590,Q09030,Q6AYS4,Q6IE51,Q9QZ76                                                                                                   |
| 2185 | 1,2,4,5,7,8<br>,38,41 | 3,6,36,37,<br>39,40,42,4<br>3,44 | 18 | O35547,P07171,P08010,P35444,P50115,P50116,P52590,P97605,Q01205,Q09030,Q5M871,Q5ZQU0,Q63467,Q63475,Q68FS4,Q6IE51,Q7TPB1,Q99MH3               |
| 2186 | 1,2,4,5,7,8<br>,38,42 | 3,6,36,37,<br>39,40,41,4<br>3,44 | 20 | O08815,O35547,P02803,P04905,P08010,P08290,P08753,P19218,P35444,P36374,P47727,P51907,P52590,P60905,Q01205,Q09030,Q63467,Q80WL1,Q9QZ76,Q9QZK9 |
| 2187 | 1,2,4,5,7,8<br>,38,43 | 3,6,36,37,<br>39,40,41,4<br>2,44 | 16 | P16391,P16636,P20762,P35444,P51886,P52590,P83748,Q01205,Q06000,Q09030,Q63467,Q63942,Q64268,Q6IE51,Q7TPB1,Q80WL1                             |
| 2188 | 1,2,4,5,7,8<br>,38,44 | 3,6,36,37,<br>39,40,41,4<br>2,43 | 8  | P07171,P35444,P51907,P52590,Q01205,Q5ZQU0,Q63467,Q6IE51                                                                                     |
| 2189 | 1,2,4,5,7,8<br>,39,40 | 3,6,36,37,<br>38,41,42,4<br>3,44 | 7  | P02803,P36376,P52590,Q09030,Q5ZQU0,Q6AYS4,Q6IE51                                                                                            |
| 2190 | 1,2,4,5,7,8<br>,39,41 | 3,6,36,37,<br>38,40,42,4<br>3,44 | 16 | O88267,P07171,P08010,P18418,P35444,P52590,P97605,Q01205,Q09030,Q5ZQU0,Q63467,Q63475,Q68FS4,Q6IE51,Q99041,Q9ESW0                             |
| 2191 | 1,2,4,5,7,8<br>,39,42 | 3,6,36,37,<br>38,40,41,4<br>3,44 | 16 | O08815,P00762,P04905,P08010,P08753,P35444,P36374,P47727,P51907,P52590,P97605,Q09030,Q5ZQU0,Q63467,Q6IE51,Q9QZK9                             |
| 2192 | 1,2,4,5,7,8<br>,39,43 | 3,6,36,37,<br>38,40,41,4<br>2,44 | 11 | O88267,P16636,P20762,P51886,P52590,P83748,Q01205,Q63467,Q63942,Q6IE51,Q80WL1                                                                |
| 2193 | 1,2,4,5,7,8<br>,39,44 | 3,6,36,37,<br>38,40,41,4<br>2,43 | 12 | O88267,P07171,P35444,P51907,P52590,Q01205,Q5ZQU0,Q63467,Q63475,Q6AYS4,Q6IE51,Q9ESW0                                                         |
| 2194 | 1,2,4,5,7,8<br>,40,41 | 3,6,36,37,<br>38,39,42,4<br>3,44 | 14 | P02803,P07171,P18418,P52590,P97605,Q01205,Q09030,Q5ZQU0,Q63467,Q63617,Q68FS4,Q6IE51,Q9JJS8,Q9QZ76                                           |

|      |                        |                                  |    |                                                                                                                                                                                                            |
|------|------------------------|----------------------------------|----|------------------------------------------------------------------------------------------------------------------------------------------------------------------------------------------------------------|
| 2195 | 1,2,4,5,7,8<br>,40,42  | 3,6,36,37,<br>38,39,41,4<br>3,44 | 12 | P00762,P02781,P02803,P05539,P20759,P36374,P52590,P60905,Q09030,Q9JHB9,Q9JJS8,Q9QZ76                                                                                                                        |
| 2196 | 1,2,4,5,7,8<br>,40,43  | 3,6,36,37,<br>38,39,41,4<br>2,44 | 9  | P02803,P16636,P20762,P52590,P83748,Q03191,Q09030,Q6IE51,Q9QZ76                                                                                                                                             |
| 2197 | 1,2,4,5,7,8<br>,40,44  | 3,6,36,37,<br>38,39,41,4<br>2,43 | 11 | P02803,P07171,P35444,P52590,Q01205,Q09030,Q5M819,Q63467,Q63617,Q6AYS4,Q9QZ76                                                                                                                               |
| 2198 | 1,2,4,5,7,8<br>,41,42  | 3,6,36,37,<br>38,39,40,4<br>3,44 | 29 | O08815,O35547,P02781,P04905,P05539,P07171,P08010,P08290,P08644,P08753,P35444,P36374,P52590,P54921,P60905,P82471,P97605,Q01205,Q09030,Q5ZQU0,Q62753,Q63357,Q63467,Q7TP52,Q812E4,Q99MH3,Q9JJS8,Q9QZ76,Q9QZK9 |
| 2199 | 1,2,4,5,7,8<br>,41,43  | 3,6,36,37,<br>38,39,40,4<br>2,44 | 21 | P07171,P16636,P20762,P30836,P35444,P50116,P51886,P52590,P54921,P82471,P83748,Q01205,Q03191,Q09030,Q63467,Q63475,Q68FS4,Q6IE51,Q7TP52,Q7TPB1,Q9QX79                                                         |
| 2200 | 1,2,4,5,7,8<br>,41,44  | 3,6,36,37,<br>38,39,40,4<br>2,43 | 15 | O88267,P07171,P18418,P35444,P52590,P60905,P97605,Q01205,Q09030,Q5ZQU0,Q63467,Q63475,Q63617,Q68FS4,Q99MH3                                                                                                   |
| 2201 | 1,2,4,5,7,8<br>,42,43  | 3,6,36,37,<br>38,39,40,4<br>1,44 | 17 | O08815,O35547,P08723,P08753,P16391,P16636,P20762,P35444,P36374,P47727,P52590,P54921,P60905,P83748,Q09030,Q7TP52,Q9JHB9                                                                                     |
| 2202 | 1,2,4,5,7,8<br>,42,44  | 3,6,36,37,<br>38,39,40,4<br>1,43 | 19 | O08815,P00714,P00762,P07171,P08010,P08644,P08753,P35444,P36374,P51907,P52590,P60905,Q01205,Q09030,Q63467,Q63514,Q7TP52,Q9QZ76,Q9QZK9                                                                       |
| 2203 | 1,2,4,5,7,8<br>,43,44  | 3,6,36,37,<br>38,39,40,4<br>1,42 | 13 | P07171,P13432,P16636,P20762,P35444,P51886,P52590,P83748,Q01205,Q03191,Q09030,Q63467,Q6IE51                                                                                                                 |
| 2204 | 1,2,4,5,7,3<br>6,37,38 | 3,6,8,39,4<br>0,41,42,43<br>,44  | 5  | P11762,P52590,Q63467,Q6IE51,Q7TP52                                                                                                                                                                         |
| 2205 | 1,2,4,5,7,3<br>6,37,39 | 3,6,8,38,4<br>0,41,42,43<br>,44  | 5  | P00762,P35467,P52590,Q63467,Q6IE51                                                                                                                                                                         |
| 2206 | 1,2,4,5,7,3<br>6,37,40 | 3,6,8,38,3<br>9,41,42,43<br>,44  | 6  | P00762,P00774,P02803,P52590,Q09030,Q63467                                                                                                                                                                  |
| 2207 | 1,2,4,5,7,3<br>6,37,41 | 3,6,8,38,3<br>9,40,42,43<br>,44  | 10 | P11762,P18418,P35467,P52590,Q01205,Q09030,Q63467,Q63475,Q7TP52,Q99MH3                                                                                                                                      |
| 2208 | 1,2,4,5,7,3<br>6,37,42 | 3,6,8,38,3<br>9,40,41,43<br>,44  | 8  | P00762,P05539,P14408,P19629,P52590,Q09030,Q63467,Q7TP52                                                                                                                                                    |
| 2209 | 1,2,4,5,7,3<br>6,37,43 | 3,6,8,38,3<br>9,40,41,42<br>,44  | 11 | D3ZUC6,P06760,P16636,P52590,P83748,Q03191,Q09030,Q63467,Q6IE51,Q7TP52,Q8CHN8                                                                                                                               |

|      |                        |                                 |    |                                                                                                          |
|------|------------------------|---------------------------------|----|----------------------------------------------------------------------------------------------------------|
| 2210 | 1,2,4,5,7,3<br>6,37,44 | 3,6,8,38,3<br>9,40,41,42<br>,43 | 7  | P00762,P05964,P13432,P52590,Q63467,Q7TP52,Q99MH3                                                         |
| 2211 | 1,2,4,5,7,3<br>6,38,39 | 3,6,8,37,4<br>0,41,42,43<br>,44 | 7  | P19218,P51907,P52590,Q63467,Q6IE51,Q6P6R2,Q7TP52                                                         |
| 2212 | 1,2,4,5,7,3<br>6,38,40 | 3,6,8,37,3<br>9,41,42,43<br>,44 | 4  | P02803,P52590,Q63467,Q6IE51                                                                              |
| 2213 | 1,2,4,5,7,3<br>6,38,41 | 3,6,8,37,3<br>9,40,42,43<br>,44 | 8  | P52590,Q01205,Q5ZQU0,Q63467,Q63475,Q6IE51,Q7TP52,Q99MH3                                                  |
| 2214 | 1,2,4,5,7,3<br>6,38,42 | 3,6,8,37,3<br>9,40,41,43<br>,44 | 15 | P05539,P08010,P08290,P14408,P47727,P51907,P52590,P60905,P97554,Q09030,Q63467,Q6AYL6,Q6IE51,Q7TP52,Q9QZK9 |
| 2215 | 1,2,4,5,7,3<br>6,38,43 | 3,6,8,37,3<br>9,40,41,42<br>,44 | 10 | O70594,P16636,P51907,P52590,P83748,Q63467,Q63661,Q6IE51,Q7TP52,Q8CHN8                                    |
| 2216 | 1,2,4,5,7,3<br>6,38,44 | 3,6,8,37,3<br>9,40,41,42<br>,43 | 7  | P34901,P51907,P52590,Q63467,Q6IE51,Q7TP52,Q99MH3                                                         |
| 2217 | 1,2,4,5,7,3<br>6,39,40 | 3,6,8,37,3<br>8,41,42,43<br>,44 | 8  | P00762,P00774,P05539,P35467,P36376,P52590,Q63467,Q6IE51                                                  |
| 2218 | 1,2,4,5,7,3<br>6,39,41 | 3,6,8,37,3<br>8,40,42,43<br>,44 | 10 | P05539,P08010,P35467,P52590,Q5ZQU0,Q63467,Q63475,Q6IE51,Q7TP52,Q99MH3                                    |
| 2219 | 1,2,4,5,7,3<br>6,39,42 | 3,6,8,37,3<br>8,40,41,43<br>,44 | 14 | O54728,P00762,P05539,P08010,P08644,P14408,P35467,P47727,P51907,P52590,P82995,Q63467,Q6IE51,Q7TP52        |
| 2220 | 1,2,4,5,7,3<br>6,39,43 | 3,6,8,37,3<br>8,40,41,42<br>,44 | 11 | D3ZUC6,O89117,P05539,P06760,P16636,P51907,P52590,P83748,Q63467,Q6IE51,Q7TP52                             |
| 2221 | 1,2,4,5,7,3<br>6,39,44 | 3,6,8,37,3<br>8,40,41,42<br>,43 | 9  | P00762,P35467,P51907,P52590,Q5ZQU0,Q63467,Q63475,Q6IE51,Q7TP52                                           |
| 2222 | 1,2,4,5,7,3<br>6,40,41 | 3,6,8,37,3<br>8,39,42,43<br>,44 | 7  | P05539,P52590,Q09030,Q63467,Q6IE51,Q7TP52,Q9JJS8                                                         |
| 2223 | 1,2,4,5,7,3<br>6,40,42 | 3,6,8,37,3<br>8,39,41,43<br>,44 | 10 | P00762,P00774,P02782,P05539,P14408,P52590,Q09030,Q7TP52,Q9JJS8,Q9QZ76                                    |
| 2224 | 1,2,4,5,7,3<br>6,40,43 | 3,6,8,37,3<br>8,39,41,42<br>,44 | 10 | O55145,P05539,P16636,P52590,P83748,Q09030,Q63467,Q63661,Q6IE51,Q7TP52                                    |

|      |                        |                                 |    |                                                                                                                               |
|------|------------------------|---------------------------------|----|-------------------------------------------------------------------------------------------------------------------------------|
| 2225 | 1,2,4,5,7,3<br>6,40,44 | 3,6,8,37,3<br>8,39,41,42<br>,43 | 7  | P00762,P05539,P13432,P52590,Q63467,Q6IE51,Q7TP52                                                                              |
| 2226 | 1,2,4,5,7,3<br>6,41,42 | 3,6,8,37,3<br>8,39,40,43<br>,44 | 18 | G3V686,P00762,P05539,P08010,P08644,P08649,P08753,P14408,P35467,P52590,P54921,P60905,P82995,Q09030,Q63467,Q7TP52,Q812E4,Q99MH3 |
| 2227 | 1,2,4,5,7,3<br>6,41,43 | 3,6,8,37,3<br>8,39,40,42<br>,44 | 15 | D3ZUC6,O89117,P05539,P06760,P16636,P51886,P52590,P83748,Q03191,Q09030,Q63467,Q63475,Q6IE51,Q7TP52,Q99MH3                      |
| 2228 | 1,2,4,5,7,3<br>6,41,44 | 3,6,8,37,3<br>8,39,40,42<br>,43 | 11 | G3V686,P05539,P52590,Q01205,Q09030,Q5ZQU0,Q63467,Q63475,Q6IE51,Q7TP52,Q99MH3                                                  |
| 2229 | 1,2,4,5,7,3<br>6,42,43 | 3,6,8,37,3<br>8,39,40,41<br>,44 | 16 | P02782,P05539,P06911,P14408,P16636,P19629,P47727,P51907,P52590,P60905,P82995,P83748,Q09030,Q63467,Q7TP52,Q8CHN8               |
| 2230 | 1,2,4,5,7,3<br>6,42,44 | 3,6,8,37,3<br>8,39,40,41<br>,43 | 15 | G3V686,P00762,P02782,P05539,P08644,P14408,P51907,P52590,P60905,P82995,Q09030,Q63467,Q64605,Q7TP52,Q99MH3                      |
| 2231 | 1,2,4,5,7,3<br>6,43,44 | 3,6,8,37,3<br>8,39,40,41<br>,42 | 15 | D3ZUC6,O89117,P05539,P13432,P16636,P34901,P51886,P51907,P52590,P83748,Q03191,Q63467,Q63661,Q6IE51,Q7TP52                      |
| 2232 | 1,2,4,5,7,3<br>7,38,39 | 3,6,8,36,4<br>0,41,42,43<br>,44 | 3  | P51907,P52590,Q6IE51                                                                                                          |
| 2233 | 1,2,4,5,7,3<br>7,38,40 | 3,6,8,36,3<br>9,41,42,43<br>,44 | 3  | P02803,P52590,Q6IE51                                                                                                          |
| 2234 | 1,2,4,5,7,3<br>7,38,41 | 3,6,8,36,3<br>9,40,42,43<br>,44 | 3  | P52590,Q63467,Q6IE51                                                                                                          |
| 2235 | 1,2,4,5,7,3<br>7,38,42 | 3,6,8,36,3<br>9,40,41,43<br>,44 | 3  | P14408,P51907,P52590                                                                                                          |
| 2236 | 1,2,4,5,7,3<br>7,38,43 | 3,6,8,36,3<br>9,40,41,42<br>,44 | 4  | P52590,P83748,Q6IE51,Q7TPB1                                                                                                   |
| 2237 | 1,2,4,5,7,3<br>7,38,44 | 3,6,8,36,3<br>9,40,41,42<br>,43 | 5  | P05964,P51907,P52590,Q63467,Q6IE51                                                                                            |
| 2238 | 1,2,4,5,7,3<br>7,39,40 | 3,6,8,36,3<br>8,41,42,43<br>,44 | 4  | P02803,P35467,P52590,Q6IE51                                                                                                   |
| 2239 | 1,2,4,5,7,3<br>7,39,41 | 3,6,8,36,3<br>8,40,42,43<br>,44 | 9  | O88267,P18418,P35467,P52590,Q63467,Q63475,Q68FS4,Q6IE51,Q9ESW0                                                                |



|      |                        |                                 |   |                                           |
|------|------------------------|---------------------------------|---|-------------------------------------------|
| 2240 | 1,2,4,5,7,3<br>7,39,42 | 3,6,8,36,3<br>8,40,41,43<br>,44 | 3 | P35467,P51907,P52590                      |
| 2241 | 1,2,4,5,7,3<br>7,39,43 | 3,6,8,36,3<br>8,40,41,42<br>,44 | 5 | P14480,P52590,P83748,Q6IE51,Q8CIZ5        |
| 2242 | 1,2,4,5,7,3<br>7,39,44 | 3,6,8,36,3<br>8,40,41,42<br>,43 | 6 | P35467,P51907,P52590,Q63467,Q6IE51,Q9ESW0 |
| 2243 | 1,2,4,5,7,3<br>7,40,41 | 3,6,8,36,3<br>8,39,42,43<br>,44 | 3 | P18418,P35467,P52590                      |
| 2244 | 1,2,4,5,7,3<br>7,40,42 | 3,6,8,36,3<br>8,39,41,43<br>,44 | 6 | P02782,P02803,P14408,P52590,Q09030,Q9QZ76 |
| 2245 | 1,2,4,5,7,3<br>7,40,43 | 3,6,8,36,3<br>8,39,41,42<br>,44 | 4 | P52590,P83748,Q03191,Q6IE51               |
| 2246 | 1,2,4,5,7,3<br>7,40,44 | 3,6,8,36,3<br>8,39,41,42<br>,43 | 1 | P52590                                    |
| 2247 | 1,2,4,5,7,3<br>7,41,42 | 3,6,8,36,3<br>8,39,40,43<br>,44 | 4 | P14408,P35467,P52590,Q09030               |
| 2248 | 1,2,4,5,7,3<br>7,41,43 | 3,6,8,36,3<br>8,39,40,42<br>,44 | 5 | P52590,P83748,Q03191,Q6IE51,Q7TPB1        |
| 2249 | 1,2,4,5,7,3<br>7,41,44 | 3,6,8,36,3<br>8,39,40,42<br>,43 | 5 | P05964,P18418,P52590,Q63467,Q63475        |
| 2250 | 1,2,4,5,7,3<br>7,42,43 | 3,6,8,36,3<br>8,39,40,41<br>,44 | 3 | P16636,P19629,P52590                      |
| 2251 | 1,2,4,5,7,3<br>7,42,44 | 3,6,8,36,3<br>8,39,40,41<br>,43 | 3 | P14408,P51907,P52590                      |
| 2252 | 1,2,4,5,7,3<br>7,43,44 | 3,6,8,36,3<br>8,39,40,41<br>,42 | 5 | P05964,P52590,P83748,Q03191,Q63661        |
| 2253 | 1,2,4,5,7,3<br>8,39,40 | 3,6,8,36,3<br>7,41,42,43<br>,44 | 4 | P02803,P51907,P52590,Q6IE51               |
| 2254 | 1,2,4,5,7,3<br>8,39,41 | 3,6,8,36,3<br>7,40,42,43<br>,44 | 6 | O88267,P51907,P52590,Q63467,Q63475,Q6IE51 |

|      |                        |                                 |    |                                                                              |
|------|------------------------|---------------------------------|----|------------------------------------------------------------------------------|
| 2255 | 1,2,4,5,7,3<br>8,39,42 | 3,6,8,36,3<br>7,40,41,43<br>,44 | 6  | P08010,P19218,P47727,P51907,P52590,Q6IE51                                    |
| 2256 | 1,2,4,5,7,3<br>8,39,43 | 3,6,8,36,3<br>7,40,41,42<br>,44 | 6  | P25031,P51907,P52590,P83748,Q6IE51,Q80WL1                                    |
| 2257 | 1,2,4,5,7,3<br>8,39,44 | 3,6,8,36,3<br>7,40,41,42<br>,43 | 4  | P51907,P52590,Q63467,Q6IE51                                                  |
| 2258 | 1,2,4,5,7,3<br>8,40,41 | 3,6,8,36,3<br>7,39,42,43<br>,44 | 2  | P52590,Q6IE51                                                                |
| 2259 | 1,2,4,5,7,3<br>8,40,42 | 3,6,8,36,3<br>7,39,41,43<br>,44 | 6  | P02782,P02803,P14408,P51907,P52590,Q9QZ76                                    |
| 2260 | 1,2,4,5,7,3<br>8,40,43 | 3,6,8,36,3<br>7,39,41,42<br>,44 | 4  | O70594,P52590,P83748,Q6IE51                                                  |
| 2261 | 1,2,4,5,7,3<br>8,40,44 | 3,6,8,36,3<br>7,39,41,42<br>,43 | 3  | P51907,P52590,Q6IE51                                                         |
| 2262 | 1,2,4,5,7,3<br>8,41,42 | 3,6,8,36,3<br>7,39,40,43<br>,44 | 11 | O35547,P08010,P08753,P14408,P51907,P52590,P54921,P60905,Q62902,Q6IE51,Q9QZK9 |
| 2263 | 1,2,4,5,7,3<br>8,41,43 | 3,6,8,36,3<br>7,39,40,42<br>,44 | 9  | O35547,P16636,P25031,P52590,P83748,Q63467,Q6IE51,Q7TPB1,Q8CJD3               |
| 2264 | 1,2,4,5,7,3<br>8,41,44 | 3,6,8,36,3<br>7,39,40,42<br>,43 | 8  | P51907,P52590,P55091,P98089,Q05695,Q63467,Q63475,Q6IE51                      |
| 2265 | 1,2,4,5,7,3<br>8,42,43 | 3,6,8,36,3<br>7,39,40,41<br>,44 | 11 | O35547,P08723,P14408,P16636,P25031,P47727,P51907,P52590,P54921,Q6IE51,Q9JHB9 |
| 2266 | 1,2,4,5,7,3<br>8,42,44 | 3,6,8,36,3<br>7,39,40,41<br>,43 | 4  | P14408,P51907,P52590,Q9QZK9                                                  |
| 2267 | 1,2,4,5,7,3<br>8,43,44 | 3,6,8,36,3<br>7,39,40,41<br>,42 | 8  | P25031,P34901,P51907,P52590,P83748,Q63467,Q63661,Q6IE51                      |
| 2268 | 1,2,4,5,7,3<br>9,40,41 | 3,6,8,36,3<br>7,38,42,43<br>,44 | 4  | P35467,P36376,P52590,Q6IE51                                                  |
| 2269 | 1,2,4,5,7,3<br>9,40,42 | 3,6,8,36,3<br>7,38,41,43<br>,44 | 7  | P02782,P05539,P14408,P35467,P51907,P52590,Q6IE51                             |

|      |                        |                                 |    |                                                                       |
|------|------------------------|---------------------------------|----|-----------------------------------------------------------------------|
| 2270 | 1,2,4,5,7,3<br>9,40,43 | 3,6,8,36,3<br>7,38,41,42<br>,44 | 5  | P16636,P36376,P52590,P83748,Q6IE51                                    |
| 2271 | 1,2,4,5,7,3<br>9,40,44 | 3,6,8,36,3<br>7,38,41,42<br>,43 | 5  | P36376,P51907,P52590,Q6AYL6,Q6IE51                                    |
| 2272 | 1,2,4,5,7,3<br>9,41,42 | 3,6,8,36,3<br>7,38,40,43<br>,44 | 10 | P05539,P08010,P35467,P51907,P52590,P54921,P82471,P97605,Q6AYR9,Q6IE51 |
| 2273 | 1,2,4,5,7,3<br>9,41,43 | 3,6,8,36,3<br>7,38,40,42<br>,44 | 8  | D3ZUC6,O88267,P16636,P52590,P82471,P83748,Q63467,Q6IE51               |
| 2274 | 1,2,4,5,7,3<br>9,41,44 | 3,6,8,36,3<br>7,38,40,42<br>,43 | 8  | O88267,P35467,P51907,P52590,Q63467,Q63475,Q6IE51,Q9ESW0               |
| 2275 | 1,2,4,5,7,3<br>9,42,43 | 3,6,8,36,3<br>7,38,40,41<br>,44 | 6  | P05539,P16636,P51907,P52590,P83748,Q6IE51                             |
| 2276 | 1,2,4,5,7,3<br>9,42,44 | 3,6,8,36,3<br>7,38,40,41<br>,43 | 4  | P14408,P51907,P52590,Q6IE51                                           |
| 2277 | 1,2,4,5,7,3<br>9,43,44 | 3,6,8,36,3<br>7,38,40,41<br>,42 | 7  | O89117,P16636,P51907,P52590,P83748,Q63467,Q6IE51                      |
| 2278 | 1,2,4,5,7,4<br>0,41,42 | 3,6,8,36,3<br>7,38,39,43<br>,44 | 6  | P05539,P14408,P52590,Q09030,Q9JJS8,Q9QZ76                             |
| 2279 | 1,2,4,5,7,4<br>0,41,43 | 3,6,8,36,3<br>7,38,39,42<br>,44 | 4  | P16636,P52590,P83748,Q6IE51                                           |
| 2280 | 1,2,4,5,7,4<br>0,41,44 | 3,6,8,36,3<br>7,38,39,42<br>,43 | 4  | P52590,Q5GRG2,Q63467,Q6IE51                                           |
| 2281 | 1,2,4,5,7,4<br>0,42,43 | 3,6,8,36,3<br>7,38,39,41<br>,44 | 7  | P02782,P05539,P14408,P16636,P52590,Q9JHB9,Q9QZ76                      |
| 2282 | 1,2,4,5,7,4<br>0,42,44 | 3,6,8,36,3<br>7,38,39,41<br>,43 | 7  | P02782,P05539,P14408,P36374,P51907,P52590,Q9QZ76                      |
| 2283 | 1,2,4,5,7,4<br>0,43,44 | 3,6,8,36,3<br>7,38,39,41<br>,42 | 4  | P52590,P83748,Q63661,Q6IE51                                           |
| 2284 | 1,2,4,5,7,4<br>1,42,43 | 3,6,8,36,3<br>7,38,39,40<br>,44 | 9  | O35547,P05539,P16636,P52590,P54921,P60905,P82471,P83748,Q7TP52        |

|      |                        |                                 |    |                                                                       |
|------|------------------------|---------------------------------|----|-----------------------------------------------------------------------|
| 2285 | 1,2,4,5,7,4<br>1,42,44 | 3,6,8,36,3<br>7,38,39,40<br>,43 | 10 | P05539,P08010,P08644,P14408,P51907,P52590,P60905,P97605,Q63467,Q7TP52 |
| 2286 | 1,2,4,5,7,4<br>1,43,44 | 3,6,8,36,3<br>7,38,39,40<br>,42 | 8  | P16636,P28648,P52590,P83748,Q63467,Q63475,Q63661,Q6IE51               |
| 2287 | 1,2,4,5,7,4<br>2,43,44 | 3,6,8,36,3<br>7,38,39,40<br>,41 | 6  | P08723,P14408,P16636,P51907,P52590,P60905                             |
| 2288 | 1,2,4,5,8,3<br>6,37,38 | 3,6,7,39,4<br>0,41,42,43<br>,44 | 2  | P02803,Q6AYS4                                                         |
| 2289 | 1,2,4,5,8,3<br>6,37,39 | 3,6,7,38,4<br>0,41,42,43<br>,44 | 1  | Q6AYS4                                                                |
| 2290 | 1,2,4,5,8,3<br>6,37,40 | 3,6,7,38,3<br>9,41,42,43<br>,44 | 3  | P00774,P02803,Q6AYS4                                                  |
| 2291 | 1,2,4,5,8,3<br>6,37,41 | 3,6,7,38,3<br>9,40,42,43<br>,44 | 3  | P83121,Q01205,Q99MH3                                                  |
| 2292 | 1,2,4,5,8,3<br>6,37,42 | 3,6,7,38,3<br>9,40,41,43<br>,44 | 3  | P00762,P19629,Q6AYL6                                                  |
| 2293 | 1,2,4,5,8,3<br>6,37,43 | 3,6,7,38,3<br>9,40,41,42<br>,44 | 5  | P16391,P19629,P83121,Q03191,Q63942                                    |
| 2294 | 1,2,4,5,8,3<br>6,37,44 | 3,6,7,38,3<br>9,40,41,42<br>,43 | 4  | P13432,P16086,Q6AYS4,Q99MH3                                           |
| 2295 | 1,2,4,5,8,3<br>6,38,39 | 3,6,7,37,4<br>0,41,42,43<br>,44 | 2  | P51907,Q6AYS4                                                         |
| 2296 | 1,2,4,5,8,3<br>6,38,40 | 3,6,7,37,3<br>9,41,42,43<br>,44 | 2  | P02803,Q6AYS4                                                         |
| 2297 | 1,2,4,5,8,3<br>6,38,41 | 3,6,7,37,3<br>9,40,42,43<br>,44 | 4  | P50116,Q01205,Q7TP52,Q99MH3                                           |
| 2298 | 1,2,4,5,8,3<br>6,38,42 | 3,6,7,37,3<br>9,40,41,43<br>,44 | 9  | P08753,P19629,P47727,P51907,P97554,Q62902,Q6AYL6,Q7TP52,Q9QZK9        |
| 2299 | 1,2,4,5,8,3<br>6,38,43 | 3,6,7,37,3<br>9,40,41,42<br>,44 | 3  | P16391,Q63942,Q64268                                                  |

|      |                        |                                 |   |                                                         |
|------|------------------------|---------------------------------|---|---------------------------------------------------------|
| 2300 | 1,2,4,5,8,3<br>6,38,44 | 3,6,7,37,3<br>9,40,41,42<br>,43 | 3 | P51907,Q6AYS4,Q99MH3                                    |
| 2301 | 1,2,4,5,8,3<br>6,39,40 | 3,6,7,37,3<br>8,41,42,43<br>,44 | 3 | P00774,P02803,Q6AYS4                                    |
| 2302 | 1,2,4,5,8,3<br>6,39,41 | 3,6,7,37,3<br>8,40,42,43<br>,44 | 5 | Q01205,Q5ZQU0,Q63475,Q6AYS4,Q99MH3                      |
| 2303 | 1,2,4,5,8,3<br>6,39,42 | 3,6,7,37,3<br>8,40,41,43<br>,44 | 4 | P08010,P51907,Q6AYS4,Q7TP52                             |
| 2304 | 1,2,4,5,8,3<br>6,39,43 | 3,6,7,37,3<br>8,40,41,42<br>,44 | 2 | Q63942,Q6AYS4                                           |
| 2305 | 1,2,4,5,8,3<br>6,39,44 | 3,6,7,37,3<br>8,40,41,42<br>,43 | 3 | P51907,Q6AYS4,Q99MH3                                    |
| 2306 | 1,2,4,5,8,3<br>6,40,41 | 3,6,7,37,3<br>8,39,42,43<br>,44 | 2 | Q6AYS4,Q99MH3                                           |
| 2307 | 1,2,4,5,8,3<br>6,40,42 | 3,6,7,37,3<br>8,39,41,43<br>,44 | 6 | P00762,P00774,P02803,P14408,Q6AYS4,Q9QZ76               |
| 2308 | 1,2,4,5,8,3<br>6,40,43 | 3,6,7,37,3<br>8,39,41,42<br>,44 | 1 | Q63942                                                  |
| 2309 | 1,2,4,5,8,3<br>6,40,44 | 3,6,7,37,3<br>8,39,41,42<br>,43 | 2 | P13432,Q6AYS4                                           |
| 2310 | 1,2,4,5,8,3<br>6,41,42 | 3,6,7,37,3<br>8,39,40,43<br>,44 | 8 | P08010,P08753,P60905,Q01205,Q7TP52,Q812E4,Q99MH3,Q9QZK9 |
| 2311 | 1,2,4,5,8,3<br>6,41,43 | 3,6,7,37,3<br>8,39,40,42<br>,44 | 5 | P83121,Q01205,Q63942,Q7TP52,Q99MH3                      |
| 2312 | 1,2,4,5,8,3<br>6,41,44 | 3,6,7,37,3<br>8,39,40,42<br>,43 | 6 | P07171,P83121,Q01205,Q63475,Q7TP52,Q99MH3               |
| 2313 | 1,2,4,5,8,3<br>6,42,43 | 3,6,7,37,3<br>8,39,40,41<br>,44 | 7 | P06911,P10715,P16391,P19629,P60905,Q63942,Q7TP52        |
| 2314 | 1,2,4,5,8,3<br>6,42,44 | 3,6,7,37,3<br>8,39,40,41<br>,43 | 5 | P00762,P51907,P60905,Q7TP52,Q99MH3                      |

|      |                        |                                 |   |                                           |
|------|------------------------|---------------------------------|---|-------------------------------------------|
| 2315 | 1,2,4,5,8,3<br>6,43,44 | 3,6,7,37,3<br>8,39,40,41<br>,42 | 6 | P13432,Q03191,Q63661,Q63942,Q7TP52,Q99MH3 |
| 2316 | 1,2,4,5,8,3<br>7,38,39 | 3,6,7,36,4<br>0,41,42,43<br>,44 | 1 | P02803                                    |
| 2317 | 1,2,4,5,8,3<br>7,38,40 | 3,6,7,36,3<br>9,41,42,43<br>,44 | 1 | P02803                                    |
| 2318 | 1,2,4,5,8,3<br>7,38,41 | 3,6,7,36,3<br>9,40,42,43<br>,44 | 2 | P50116,Q7TPB1                             |
| 2319 | 1,2,4,5,8,3<br>7,38,42 | 3,6,7,36,3<br>9,40,41,43<br>,44 | 1 | P02803                                    |
| 2320 | 1,2,4,5,8,3<br>7,38,43 | 3,6,7,36,3<br>9,40,41,42<br>,44 | 3 | Q63942,Q64268,Q7TPB1                      |
| 2321 | 1,2,4,5,8,3<br>7,38,44 | 3,6,7,36,3<br>9,40,41,42<br>,43 | 1 | P16086                                    |
| 2322 | 1,2,4,5,8,3<br>7,39,40 | 3,6,7,36,3<br>8,41,42,43<br>,44 | 1 | P02803                                    |
| 2323 | 1,2,4,5,8,3<br>7,39,41 | 3,6,7,36,3<br>8,40,42,43<br>,44 | 1 | Q68FS4                                    |
| 2324 | 1,2,4,5,8,3<br>7,39,42 | 3,6,7,36,3<br>8,40,41,43<br>,44 | 0 |                                           |
| 2325 | 1,2,4,5,8,3<br>7,39,43 | 3,6,7,36,3<br>8,40,41,42<br>,44 | 2 | Q63942,Q8CIZ5                             |
| 2326 | 1,2,4,5,8,3<br>7,39,44 | 3,6,7,36,3<br>8,40,41,42<br>,43 | 1 | P16086                                    |
| 2327 | 1,2,4,5,8,3<br>7,40,41 | 3,6,7,36,3<br>8,39,42,43<br>,44 | 1 | P02803                                    |
| 2328 | 1,2,4,5,8,3<br>7,40,42 | 3,6,7,36,3<br>8,39,41,43<br>,44 | 2 | P02803,Q9QZ76                             |
| 2329 | 1,2,4,5,8,3<br>7,40,43 | 3,6,7,36,3<br>8,39,41,42<br>,44 | 1 | P02803                                    |

|      |                        |                                 |   |                             |
|------|------------------------|---------------------------------|---|-----------------------------|
| 2330 | 1,2,4,5,8,3<br>7,40,44 | 3,6,7,36,3<br>8,39,41,42<br>,43 | 3 | P02803,P16086,P22006        |
| 2331 | 1,2,4,5,8,3<br>7,41,42 | 3,6,7,36,3<br>8,39,40,43<br>,44 | 0 |                             |
| 2332 | 1,2,4,5,8,3<br>7,41,43 | 3,6,7,36,3<br>8,39,40,42<br>,44 | 4 | P83121,Q03191,Q63598,Q7TPB1 |
| 2333 | 1,2,4,5,8,3<br>7,41,44 | 3,6,7,36,3<br>8,39,40,42<br>,43 | 1 | Q99MH3                      |
| 2334 | 1,2,4,5,8,3<br>7,42,43 | 3,6,7,36,3<br>8,39,40,41<br>,44 | 1 | P19629                      |
| 2335 | 1,2,4,5,8,3<br>7,42,44 | 3,6,7,36,3<br>8,39,40,41<br>,43 | 0 |                             |
| 2336 | 1,2,4,5,8,3<br>7,43,44 | 3,6,7,36,3<br>8,39,40,41<br>,42 | 2 | P16086,Q03191               |
| 2337 | 1,2,4,5,8,3<br>8,39,40 | 3,6,7,36,3<br>7,41,42,43<br>,44 | 2 | P02803,Q6AYS4               |
| 2338 | 1,2,4,5,8,3<br>8,39,41 | 3,6,7,36,3<br>7,40,42,43<br>,44 | 1 | P50116                      |
| 2339 | 1,2,4,5,8,3<br>8,39,42 | 3,6,7,36,3<br>7,40,41,43<br>,44 | 4 | P47727,P51907,Q80WL1,Q9QZK9 |
| 2340 | 1,2,4,5,8,3<br>8,39,43 | 3,6,7,36,3<br>7,40,41,42<br>,44 | 3 | Q63942,Q64268,Q80WL1        |
| 2341 | 1,2,4,5,8,3<br>8,39,44 | 3,6,7,36,3<br>7,40,41,42<br>,43 | 2 | P51907,Q6AYS4               |
| 2342 | 1,2,4,5,8,3<br>8,40,41 | 3,6,7,36,3<br>7,39,42,43<br>,44 | 3 | P02803,P50115,P50116        |
| 2343 | 1,2,4,5,8,3<br>8,40,42 | 3,6,7,36,3<br>7,39,41,43<br>,44 | 2 | P02803,Q9QZ76               |
| 2344 | 1,2,4,5,8,3<br>8,40,43 | 3,6,7,36,3<br>7,39,41,42<br>,44 | 2 | P02803,Q63942               |

|      |                        |                                 |   |                                                                |
|------|------------------------|---------------------------------|---|----------------------------------------------------------------|
| 2345 | 1,2,4,5,8,3<br>8,40,44 | 3,6,7,36,3<br>7,39,41,42<br>,43 | 2 | P02803,P22006                                                  |
| 2346 | 1,2,4,5,8,3<br>8,41,42 | 3,6,7,36,3<br>7,39,40,43<br>,44 | 9 | O35547,P08010,P08753,P50115,P50116,P54921,P60905,Q62902,Q9QZK9 |
| 2347 | 1,2,4,5,8,3<br>8,41,43 | 3,6,7,36,3<br>7,39,40,42<br>,44 | 7 | P50115,P50116,Q5U2V4,Q63598,Q63942,Q7TPB1,Q8CJD3               |
| 2348 | 1,2,4,5,8,3<br>8,41,44 | 3,6,7,36,3<br>7,39,40,42<br>,43 | 8 | P50115,P50116,P55091,P98089,Q05695,Q5U2V4,Q62635,Q99MH3        |
| 2349 | 1,2,4,5,8,3<br>8,42,43 | 3,6,7,36,3<br>7,39,40,41<br>,44 | 6 | P16391,P19629,P47727,Q63942,Q64268,Q80WL1                      |
| 2350 | 1,2,4,5,8,3<br>8,42,44 | 3,6,7,36,3<br>7,39,40,41<br>,43 | 2 | P51907,Q9QZK9                                                  |
| 2351 | 1,2,4,5,8,3<br>8,43,44 | 3,6,7,36,3<br>7,39,40,41<br>,42 | 2 | Q06000,Q63942                                                  |
| 2352 | 1,2,4,5,8,3<br>9,40,41 | 3,6,7,36,3<br>7,38,42,43<br>,44 | 0 |                                                                |
| 2353 | 1,2,4,5,8,3<br>9,40,42 | 3,6,7,36,3<br>7,38,41,43<br>,44 | 1 | P02803                                                         |
| 2354 | 1,2,4,5,8,3<br>9,40,43 | 3,6,7,36,3<br>7,38,41,42<br>,44 | 2 | P02803,Q63942                                                  |
| 2355 | 1,2,4,5,8,3<br>9,40,44 | 3,6,7,36,3<br>7,38,41,42<br>,43 | 1 | Q6AYS4                                                         |
| 2356 | 1,2,4,5,8,3<br>9,41,42 | 3,6,7,36,3<br>7,38,40,43<br>,44 | 3 | P08010,P08753,P82471                                           |
| 2357 | 1,2,4,5,8,3<br>9,41,43 | 3,6,7,36,3<br>7,38,40,42<br>,44 | 1 | Q63942                                                         |
| 2358 | 1,2,4,5,8,3<br>9,41,44 | 3,6,7,36,3<br>7,38,40,42<br>,43 | 0 |                                                                |
| 2359 | 1,2,4,5,8,3<br>9,42,43 | 3,6,7,36,3<br>7,38,40,41<br>,44 | 2 | Q63942,Q80WL1                                                  |



|      |                         |                                 |   |                                    |
|------|-------------------------|---------------------------------|---|------------------------------------|
| 2360 | 1,2,4,5,8,3<br>9,42,44  | 3,6,7,36,3<br>7,38,40,41<br>,43 | 1 | P51907                             |
| 2361 | 1,2,4,5,8,3<br>9,43,44  | 3,6,7,36,3<br>7,38,40,41<br>,42 | 1 | Q63942                             |
| 2362 | 1,2,4,5,8,4<br>0,41,42  | 3,6,7,36,3<br>7,38,39,43<br>,44 | 2 | Q9JJS8,Q9QZ76                      |
| 2363 | 1,2,4,5,8,4<br>0,41,43  | 3,6,7,36,3<br>7,38,39,42<br>,44 | 1 | P97840                             |
| 2364 | 1,2,4,5,8,4<br>0,41,44  | 3,6,7,36,3<br>7,38,39,42<br>,43 | 0 |                                    |
| 2365 | 1,2,4,5,8,4<br>0,42,43  | 3,6,7,36,3<br>7,38,39,41<br>,44 | 3 | P02803,Q9JHB9,Q9QZ76               |
| 2366 | 1,2,4,5,8,4<br>0,42,44  | 3,6,7,36,3<br>7,38,39,41<br>,43 | 5 | P22006,P36374,Q5M819,Q6PCU2,Q9QZ76 |
| 2367 | 1,2,4,5,8,4<br>0,43,44  | 3,6,7,36,3<br>7,38,39,41<br>,42 | 0 |                                    |
| 2368 | 1,2,4,5,8,4<br>1,42,43  | 3,6,7,36,3<br>7,38,39,40<br>,44 | 3 | P54921,P60905,P82471               |
| 2369 | 1,2,4,5,8,4<br>1,42,44  | 3,6,7,36,3<br>7,38,39,40<br>,43 | 3 | P08753,P60905,Q9QZK9               |
| 2370 | 1,2,4,5,8,4<br>1,43,44  | 3,6,7,36,3<br>7,38,39,40<br>,42 | 3 | P28648,P83121,Q63598               |
| 2371 | 1,2,4,5,8,4<br>2,43,44  | 3,6,7,36,3<br>7,38,39,40<br>,41 | 1 | P60905                             |
| 2372 | 1,2,4,5,36,<br>37,38,39 | 3,6,7,8,40,<br>41,42,43,4<br>4  | 2 | P51907,Q6P6R2                      |
| 2373 | 1,2,4,5,36,<br>37,38,40 | 3,6,7,8,39,<br>41,42,43,4<br>4  | 1 | P02803                             |
| 2374 | 1,2,4,5,36,<br>37,38,41 | 3,6,7,8,39,<br>40,42,43,4<br>4  | 0 |                                    |

|      |                         |                                |   |                                           |
|------|-------------------------|--------------------------------|---|-------------------------------------------|
| 2375 | 1,2,4,5,36,<br>37,38,42 | 3,6,7,8,39,<br>40,41,43,4<br>4 | 6 | P10715,P12020,P14408,P19629,P51907,Q6AYL6 |
| 2376 | 1,2,4,5,36,<br>37,38,43 | 3,6,7,8,39,<br>40,41,42,4<br>4 | 2 | P12020,P19629                             |
| 2377 | 1,2,4,5,36,<br>37,38,44 | 3,6,7,8,39,<br>40,41,42,4<br>3 | 2 | P16086,P51907                             |
| 2378 | 1,2,4,5,36,<br>37,39,40 | 3,6,7,8,38,<br>41,42,43,4<br>4 | 2 | P00774,P50115                             |
| 2379 | 1,2,4,5,36,<br>37,39,41 | 3,6,7,8,38,<br>40,42,43,4<br>4 | 1 | P35467                                    |
| 2380 | 1,2,4,5,36,<br>37,39,42 | 3,6,7,8,38,<br>40,41,43,4<br>4 | 3 | P00774,P50115,P51907                      |
| 2381 | 1,2,4,5,36,<br>37,39,43 | 3,6,7,8,38,<br>40,41,42,4<br>4 | 4 | D3ZUC6,P50115,Q6P6R2,Q8CIZ5               |
| 2382 | 1,2,4,5,36,<br>37,39,44 | 3,6,7,8,38,<br>40,41,42,4<br>3 | 3 | P16086,P50115,P51907                      |
| 2383 | 1,2,4,5,36,<br>37,40,41 | 3,6,7,8,38,<br>39,42,43,4<br>4 | 0 |                                           |
| 2384 | 1,2,4,5,36,<br>37,40,42 | 3,6,7,8,38,<br>39,41,43,4<br>4 | 3 | P00774,P14408,P50115                      |
| 2385 | 1,2,4,5,36,<br>37,40,43 | 3,6,7,8,38,<br>39,41,42,4<br>4 | 1 | Q8CIZ5                                    |
| 2386 | 1,2,4,5,36,<br>37,40,44 | 3,6,7,8,38,<br>39,41,42,4<br>3 | 1 | P16086                                    |
| 2387 | 1,2,4,5,36,<br>37,41,42 | 3,6,7,8,38,<br>39,40,43,4<br>4 | 1 | P14408                                    |
| 2388 | 1,2,4,5,36,<br>37,41,43 | 3,6,7,8,38,<br>39,40,42,4<br>4 | 2 | D3ZUC6,P83121                             |
| 2389 | 1,2,4,5,36,<br>37,41,44 | 3,6,7,8,38,<br>39,40,42,4<br>3 | 1 | Q99MH3                                    |

|      |                         |                                |   |                                                         |
|------|-------------------------|--------------------------------|---|---------------------------------------------------------|
| 2390 | 1,2,4,5,36,<br>37,42,43 | 3,6,7,8,38,<br>39,40,41,4<br>4 | 8 | P06911,P10715,P12020,P14408,P19629,P31044,P50115,Q5GRG2 |
| 2391 | 1,2,4,5,36,<br>37,42,44 | 3,6,7,8,38,<br>39,40,41,4<br>3 | 2 | P14408,P51907                                           |
| 2392 | 1,2,4,5,36,<br>37,43,44 | 3,6,7,8,38,<br>39,40,41,4<br>2 | 3 | P13432,P16086,Q63661                                    |
| 2393 | 1,2,4,5,36,<br>38,39,40 | 3,6,7,8,37,<br>41,42,43,4<br>4 | 1 | P51907                                                  |
| 2394 | 1,2,4,5,36,<br>38,39,41 | 3,6,7,8,37,<br>40,42,43,4<br>4 | 1 | P51907                                                  |
| 2395 | 1,2,4,5,36,<br>38,39,42 | 3,6,7,8,37,<br>40,41,43,4<br>4 | 1 | P51907                                                  |
| 2396 | 1,2,4,5,36,<br>38,39,43 | 3,6,7,8,37,<br>40,41,42,4<br>4 | 3 | P34901,P51907,Q6P6R2                                    |
| 2397 | 1,2,4,5,36,<br>38,39,44 | 3,6,7,8,37,<br>40,41,42,4<br>3 | 2 | P34901,P51907                                           |
| 2398 | 1,2,4,5,36,<br>38,40,41 | 3,6,7,8,37,<br>39,42,43,4<br>4 | 0 |                                                         |
| 2399 | 1,2,4,5,36,<br>38,40,42 | 3,6,7,8,37,<br>39,41,43,4<br>4 | 2 | P14408,P51907                                           |
| 2400 | 1,2,4,5,36,<br>38,40,43 | 3,6,7,8,37,<br>39,41,42,4<br>4 | 1 | Q63661                                                  |
| 2401 | 1,2,4,5,36,<br>38,40,44 | 3,6,7,8,37,<br>39,41,42,4<br>3 | 1 | P51907                                                  |
| 2402 | 1,2,4,5,36,<br>38,41,42 | 3,6,7,8,37,<br>39,40,43,4<br>4 | 5 | P14408,P51907,Q62902,Q6AYL6,Q7TP52                      |
| 2403 | 1,2,4,5,36,<br>38,41,43 | 3,6,7,8,37,<br>39,40,42,4<br>4 | 0 |                                                         |
| 2404 | 1,2,4,5,36,<br>38,41,44 | 3,6,7,8,37,<br>39,40,42,4<br>3 | 4 | P51907,P98089,Q05695,Q99MH3                             |

|      |                         |                                |    |                                                                       |
|------|-------------------------|--------------------------------|----|-----------------------------------------------------------------------|
| 2405 | 1,2,4,5,36,<br>38,42,43 | 3,6,7,8,37,<br>39,40,41,4<br>4 | 10 | P06911,P10715,P12020,P14408,P19629,P31044,P51907,Q5GRG2,Q6AYL6,Q7TP52 |
| 2406 | 1,2,4,5,36,<br>38,42,44 | 3,6,7,8,37,<br>39,40,41,4<br>3 | 2  | P14408,P51907                                                         |
| 2407 | 1,2,4,5,36,<br>38,43,44 | 3,6,7,8,37,<br>39,40,41,4<br>2 | 3  | P34901,P51907,Q63661                                                  |
| 2408 | 1,2,4,5,36,<br>39,40,41 | 3,6,7,8,37,<br>38,42,43,4<br>4 | 1  | P35467                                                                |
| 2409 | 1,2,4,5,36,<br>39,40,42 | 3,6,7,8,37,<br>38,41,43,4<br>4 | 4  | P00774,P14408,P50115,P51907                                           |
| 2410 | 1,2,4,5,36,<br>39,40,43 | 3,6,7,8,37,<br>38,41,42,4<br>4 | 2  | P50115,Q8CIZ5                                                         |
| 2411 | 1,2,4,5,36,<br>39,40,44 | 3,6,7,8,37,<br>38,41,42,4<br>3 | 1  | P51907                                                                |
| 2412 | 1,2,4,5,36,<br>39,41,42 | 3,6,7,8,37,<br>38,40,43,4<br>4 | 4  | P08010,P35467,P51907,Q7TP52                                           |
| 2413 | 1,2,4,5,36,<br>39,41,43 | 3,6,7,8,37,<br>38,40,42,4<br>4 | 2  | D3ZUC6,O89117                                                         |
| 2414 | 1,2,4,5,36,<br>39,41,44 | 3,6,7,8,37,<br>38,40,42,4<br>3 | 4  | P35467,P51907,Q63475,Q99MH3                                           |
| 2415 | 1,2,4,5,36,<br>39,42,43 | 3,6,7,8,37,<br>38,40,41,4<br>4 | 2  | P50115,P51907                                                         |
| 2416 | 1,2,4,5,36,<br>39,42,44 | 3,6,7,8,37,<br>38,40,41,4<br>3 | 2  | P14408,P51907                                                         |
| 2417 | 1,2,4,5,36,<br>39,43,44 | 3,6,7,8,37,<br>38,40,41,4<br>2 | 5  | D3ZUC6,O89117,P34901,P51907,Q63661                                    |
| 2418 | 1,2,4,5,36,<br>40,41,42 | 3,6,7,8,37,<br>38,39,43,4<br>4 | 2  | P14408,P23593                                                         |
| 2419 | 1,2,4,5,36,<br>40,41,43 | 3,6,7,8,37,<br>38,39,42,4<br>4 | 1  | D3ZUC6                                                                |

|      |                         |                                |   |                                           |
|------|-------------------------|--------------------------------|---|-------------------------------------------|
| 2420 | 1,2,4,5,36,<br>40,41,44 | 3,6,7,8,37,<br>38,39,42,4<br>3 | 0 |                                           |
| 2421 | 1,2,4,5,36,<br>40,42,43 | 3,6,7,8,37,<br>38,39,41,4<br>4 | 1 | P14408                                    |
| 2422 | 1,2,4,5,36,<br>40,42,44 | 3,6,7,8,37,<br>38,39,41,4<br>3 | 3 | P14408,P51907,Q7TPB1                      |
| 2423 | 1,2,4,5,36,<br>40,43,44 | 3,6,7,8,37,<br>38,39,41,4<br>2 | 2 | P13432,Q63661                             |
| 2424 | 1,2,4,5,36,<br>41,42,43 | 3,6,7,8,37,<br>38,39,40,4<br>4 | 4 | D3ZUC6,P54921,P82471,Q7TP52               |
| 2425 | 1,2,4,5,36,<br>41,42,44 | 3,6,7,8,37,<br>38,39,40,4<br>3 | 5 | P14408,P51907,Q64605,Q7TP52,Q99MH3        |
| 2426 | 1,2,4,5,36,<br>41,43,44 | 3,6,7,8,37,<br>38,39,40,4<br>2 | 6 | D3ZUC6,O89117,P28648,P83121,Q63661,Q7TP52 |
| 2427 | 1,2,4,5,36,<br>42,43,44 | 3,6,7,8,37,<br>38,39,40,4<br>1 | 4 | P14408,P51907,Q63661,Q7TP52               |
| 2428 | 1,2,4,5,37,<br>38,39,40 | 3,6,7,8,36,<br>41,42,43,4<br>4 | 1 | P02803                                    |
| 2429 | 1,2,4,5,37,<br>38,39,41 | 3,6,7,8,36,<br>40,42,43,4<br>4 | 0 |                                           |
| 2430 | 1,2,4,5,37,<br>38,39,42 | 3,6,7,8,36,<br>40,41,43,4<br>4 | 1 | P51907                                    |
| 2431 | 1,2,4,5,37,<br>38,39,43 | 3,6,7,8,36,<br>40,41,42,4<br>4 | 2 | P14480,P80020                             |
| 2432 | 1,2,4,5,37,<br>38,39,44 | 3,6,7,8,36,<br>40,41,42,4<br>3 | 2 | P16086,P51907                             |
| 2433 | 1,2,4,5,37,<br>38,40,41 | 3,6,7,8,36,<br>39,42,43,4<br>4 | 0 |                                           |
| 2434 | 1,2,4,5,37,<br>38,40,42 | 3,6,7,8,36,<br>39,41,43,4<br>4 | 2 | P02803,P14408                             |

|      |                         |                                |   |                                           |
|------|-------------------------|--------------------------------|---|-------------------------------------------|
| 2435 | 1,2,4,5,37,<br>38,40,43 | 3,6,7,8,36,<br>39,41,42,4<br>4 | 2 | P02803,P80020                             |
| 2436 | 1,2,4,5,37,<br>38,40,44 | 3,6,7,8,36,<br>39,41,42,4<br>3 | 1 | P16086                                    |
| 2437 | 1,2,4,5,37,<br>38,41,42 | 3,6,7,8,36,<br>39,40,43,4<br>4 | 0 |                                           |
| 2438 | 1,2,4,5,37,<br>38,41,43 | 3,6,7,8,36,<br>39,40,42,4<br>4 | 2 | P80020,Q7TPB1                             |
| 2439 | 1,2,4,5,37,<br>38,41,44 | 3,6,7,8,36,<br>39,40,42,4<br>3 | 1 | P98089                                    |
| 2440 | 1,2,4,5,37,<br>38,42,43 | 3,6,7,8,36,<br>39,40,41,4<br>4 | 6 | P06866,P06911,P10715,P12020,P19629,P80020 |
| 2441 | 1,2,4,5,37,<br>38,42,44 | 3,6,7,8,36,<br>39,40,41,4<br>3 | 2 | P14408,P51907                             |
| 2442 | 1,2,4,5,37,<br>38,43,44 | 3,6,7,8,36,<br>39,40,41,4<br>2 | 2 | P16086,Q63661                             |
| 2443 | 1,2,4,5,37,<br>39,40,41 | 3,6,7,8,36,<br>38,42,43,4<br>4 | 1 | P35467                                    |
| 2444 | 1,2,4,5,37,<br>39,40,42 | 3,6,7,8,36,<br>38,41,43,4<br>4 | 1 | P50115                                    |
| 2445 | 1,2,4,5,37,<br>39,40,43 | 3,6,7,8,36,<br>38,41,42,4<br>4 | 1 | Q8CIZ5                                    |
| 2446 | 1,2,4,5,37,<br>39,40,44 | 3,6,7,8,36,<br>38,41,42,4<br>3 | 1 | P16086                                    |
| 2447 | 1,2,4,5,37,<br>39,41,42 | 3,6,7,8,36,<br>38,40,43,4<br>4 | 1 | P35467                                    |
| 2448 | 1,2,4,5,37,<br>39,41,43 | 3,6,7,8,36,<br>38,40,42,4<br>4 | 0 |                                           |
| 2449 | 1,2,4,5,37,<br>39,41,44 | 3,6,7,8,36,<br>38,40,42,4<br>3 | 1 | P35467                                    |

|      |                         |                                |   |               |
|------|-------------------------|--------------------------------|---|---------------|
| 2450 | 1,2,4,5,37,<br>39,42,43 | 3,6,7,8,36,<br>38,40,41,4<br>4 | 1 | P50115        |
| 2451 | 1,2,4,5,37,<br>39,42,44 | 3,6,7,8,36,<br>38,40,41,4<br>3 | 1 | P51907        |
| 2452 | 1,2,4,5,37,<br>39,43,44 | 3,6,7,8,36,<br>38,40,41,4<br>2 | 1 | P16086        |
| 2453 | 1,2,4,5,37,<br>40,41,42 | 3,6,7,8,36,<br>38,39,43,4<br>4 | 0 |               |
| 2454 | 1,2,4,5,37,<br>40,41,43 | 3,6,7,8,36,<br>38,39,42,4<br>4 | 0 |               |
| 2455 | 1,2,4,5,37,<br>40,41,44 | 3,6,7,8,36,<br>38,39,42,4<br>3 | 0 |               |
| 2456 | 1,2,4,5,37,<br>40,42,43 | 3,6,7,8,36,<br>38,39,41,4<br>4 | 0 |               |
| 2457 | 1,2,4,5,37,<br>40,42,44 | 3,6,7,8,36,<br>38,39,41,4<br>3 | 2 | O54858,P14408 |
| 2458 | 1,2,4,5,37,<br>40,43,44 | 3,6,7,8,36,<br>38,39,41,4<br>2 | 2 | P16086,Q63661 |
| 2459 | 1,2,4,5,37,<br>41,42,43 | 3,6,7,8,36,<br>38,39,40,4<br>4 | 0 |               |
| 2460 | 1,2,4,5,37,<br>41,42,44 | 3,6,7,8,36,<br>38,39,40,4<br>3 | 0 |               |
| 2461 | 1,2,4,5,37,<br>41,43,44 | 3,6,7,8,36,<br>38,39,40,4<br>2 | 1 | P28648        |
| 2462 | 1,2,4,5,37,<br>42,43,44 | 3,6,7,8,36,<br>38,39,40,4<br>1 | 0 |               |
| 2463 | 1,2,4,5,38,<br>39,40,41 | 3,6,7,8,36,<br>37,42,43,4<br>4 | 0 |               |
| 2464 | 1,2,4,5,38,<br>39,40,42 | 3,6,7,8,36,<br>37,41,43,4<br>4 | 1 | P51907        |

|      |                         |                                |   |                                           |
|------|-------------------------|--------------------------------|---|-------------------------------------------|
| 2465 | 1,2,4,5,38,<br>39,40,43 | 3,6,7,8,36,<br>37,41,42,4<br>4 | 0 |                                           |
| 2466 | 1,2,4,5,38,<br>39,40,44 | 3,6,7,8,36,<br>37,41,42,4<br>3 | 1 | P51907                                    |
| 2467 | 1,2,4,5,38,<br>39,41,42 | 3,6,7,8,36,<br>37,40,43,4<br>4 | 1 | P51907                                    |
| 2468 | 1,2,4,5,38,<br>39,41,43 | 3,6,7,8,36,<br>37,40,42,4<br>4 | 0 |                                           |
| 2469 | 1,2,4,5,38,<br>39,41,44 | 3,6,7,8,36,<br>37,40,42,4<br>3 | 2 | P51907,P98089                             |
| 2470 | 1,2,4,5,38,<br>39,42,43 | 3,6,7,8,36,<br>37,40,41,4<br>4 | 4 | P06866,P51907,Q6IFU7,Q80WL1               |
| 2471 | 1,2,4,5,38,<br>39,42,44 | 3,6,7,8,36,<br>37,40,41,4<br>3 | 1 | P51907                                    |
| 2472 | 1,2,4,5,38,<br>39,43,44 | 3,6,7,8,36,<br>37,40,41,4<br>2 | 2 | P34901,P51907                             |
| 2473 | 1,2,4,5,38,<br>40,41,42 | 3,6,7,8,36,<br>37,39,43,4<br>4 | 0 |                                           |
| 2474 | 1,2,4,5,38,<br>40,41,43 | 3,6,7,8,36,<br>37,39,42,4<br>4 | 0 |                                           |
| 2475 | 1,2,4,5,38,<br>40,41,44 | 3,6,7,8,36,<br>37,39,42,4<br>3 | 2 | P98089,Q62635                             |
| 2476 | 1,2,4,5,38,<br>40,42,43 | 3,6,7,8,36,<br>37,39,41,4<br>4 | 0 |                                           |
| 2477 | 1,2,4,5,38,<br>40,42,44 | 3,6,7,8,36,<br>37,39,41,4<br>3 | 2 | P14408,P51907                             |
| 2478 | 1,2,4,5,38,<br>40,43,44 | 3,6,7,8,36,<br>37,39,41,4<br>2 | 1 | Q63661                                    |
| 2479 | 1,2,4,5,38,<br>41,42,43 | 3,6,7,8,36,<br>37,39,40,4<br>4 | 6 | O35547,P06866,P54921,P82471,Q62902,Q8CJD3 |



|      |                         |                                |   |                                    |
|------|-------------------------|--------------------------------|---|------------------------------------|
| 2480 | 1,2,4,5,38,<br>41,42,44 | 3,6,7,8,36,<br>37,39,40,4<br>3 | 5 | P51907,P55091,P98089,Q8CIZ5,Q9QZK9 |
| 2481 | 1,2,4,5,38,<br>41,43,44 | 3,6,7,8,36,<br>37,39,40,4<br>2 | 5 | P00774,P28648,P55091,P98089,Q63661 |
| 2482 | 1,2,4,5,38,<br>42,43,44 | 3,6,7,8,36,<br>37,39,40,4<br>1 | 1 | P51907                             |
| 2483 | 1,2,4,5,39,<br>40,41,42 | 3,6,7,8,36,<br>37,38,43,4<br>4 | 0 |                                    |
| 2484 | 1,2,4,5,39,<br>40,41,43 | 3,6,7,8,36,<br>37,38,42,4<br>4 | 0 |                                    |
| 2485 | 1,2,4,5,39,<br>40,41,44 | 3,6,7,8,36,<br>37,38,42,4<br>3 | 4 | P10715,P19629,Q5GRG2,Q6AYL6        |
| 2486 | 1,2,4,5,39,<br>40,42,43 | 3,6,7,8,36,<br>37,38,41,4<br>4 | 0 |                                    |
| 2487 | 1,2,4,5,39,<br>40,42,44 | 3,6,7,8,36,<br>37,38,41,4<br>3 | 2 | O54858,P51907                      |
| 2488 | 1,2,4,5,39,<br>40,43,44 | 3,6,7,8,36,<br>37,38,41,4<br>2 | 1 | Q6AYL6                             |
| 2489 | 1,2,4,5,39,<br>41,42,43 | 3,6,7,8,36,<br>37,38,40,4<br>4 | 1 | P82471                             |
| 2490 | 1,2,4,5,39,<br>41,42,44 | 3,6,7,8,36,<br>37,38,40,4<br>3 | 1 | P51907                             |
| 2491 | 1,2,4,5,39,<br>41,43,44 | 3,6,7,8,36,<br>37,38,40,4<br>2 | 0 |                                    |
| 2492 | 1,2,4,5,39,<br>42,43,44 | 3,6,7,8,36,<br>37,38,40,4<br>1 | 1 | P51907                             |
| 2493 | 1,2,4,5,40,<br>41,42,43 | 3,6,7,8,36,<br>37,38,39,4<br>4 | 0 |                                    |
| 2494 | 1,2,4,5,40,<br>41,42,44 | 3,6,7,8,36,<br>37,38,39,4<br>3 | 2 | P14408,Q6PCU2                      |

|      |                         |                                  |    |                                                                                                                                                                                              |
|------|-------------------------|----------------------------------|----|----------------------------------------------------------------------------------------------------------------------------------------------------------------------------------------------|
| 2495 | 1,2,4,5,40,<br>41,43,44 | 3,6,7,8,36,<br>37,38,39,4<br>2   | 3  | P19218,P28648,Q63661                                                                                                                                                                         |
| 2496 | 1,2,4,5,40,<br>42,43,44 | 3,6,7,8,36,<br>37,38,39,4<br>1   | 1  | Q6PCU2                                                                                                                                                                                       |
| 2497 | 1,2,4,5,41,<br>42,43,44 | 3,6,7,8,36,<br>37,38,39,4<br>0   | 1  | P82471                                                                                                                                                                                       |
| 2498 | 1,2,4,6,7,8<br>,36,37   | 3,5,38,39,<br>40,41,42,4<br>3,44 | 21 | D3ZUK3,G3V686,P02631,P05964,P07171,P11598,P15399,P18418,P25236,Q01205,Q30KJ2,Q63467,Q63532,Q63617,Q6IE51,Q7TP52,Q8CJD3,Q91ZS3,Q99041,Q99MH3,Q9QZQ5                                           |
| 2499 | 1,2,4,6,7,8<br>,36,38   | 3,5,37,39,<br>40,41,42,4<br>3,44 | 20 | D3ZUK3,G3V686,O08557,P02631,P07171,P11598,P15399,P18427,P19218,P20762,P97580,Q00715,Q01205,Q30KJ2,Q63467,Q63532,Q6IE51,Q7TP52,Q99MH3,Q9QZQ5                                                  |
| 2500 | 1,2,4,6,7,8<br>,36,39   | 3,5,37,38,<br>40,41,42,4<br>3,44 | 17 | D3ZUK3,G3V686,P02631,P07171,P11598,P18427,P20762,P25236,Q01205,Q30KJ2,Q63467,Q63532,Q63617,Q6IE51,Q7TP52,Q8CJD3,Q9QZQ5                                                                       |
| 2501 | 1,2,4,6,7,8<br>,36,40   | 3,5,37,38,<br>39,41,42,4<br>3,44 | 22 | D3ZUK3,G3V686,P00731,P02631,P02803,P07171,P11598,P12020,P18427,P20762,P25236,Q00715,Q01205,Q30KJ2,Q63467,Q63532,Q63617,Q6IE51,Q7TP52,Q8CJD3,Q9JJS8,Q9QZQ5                                    |
| 2502 | 1,2,4,6,7,8<br>,36,41   | 3,5,37,38,<br>39,40,42,4<br>3,44 | 22 | D3ZUK3,G3V686,P02631,P07171,P08010,P08649,P11598,P12020,P18418,P18427,Q01205,Q30KJ2,Q63467,Q63475,Q63532,Q63617,Q6IE51,Q7TP52,Q91ZS3,Q99041,Q99MH3,Q9QZQ5                                    |
| 2503 | 1,2,4,6,7,8<br>,36,42   | 3,5,37,38,<br>39,40,41,4<br>3,44 | 27 | D3ZUK3,G3V686,P02631,P05539,P07171,P08010,P08290,P08649,P08753,P11598,P20759,P20762,P25236,P36374,P60905,P97554,Q01205,Q09030,Q30KJ2,Q62753,Q63467,Q63532,Q63617,Q6IE51,Q7TP52,Q812E4,Q9QZQ5 |
| 2504 | 1,2,4,6,7,8<br>,36,43   | 3,5,37,38,<br>39,40,41,4<br>2,44 | 23 | D3ZUK3,G3V686,O54858,P02631,P06760,P07171,P11598,P18427,P20762,P25236,P51886,P83748,Q00715,Q01205,Q30KJ2,Q63467,Q63532,Q63617,Q63942,Q66H69,Q6IE51,Q7TP52,Q9QZQ5                             |
| 2505 | 1,2,4,6,7,8<br>,36,44   | 3,5,37,38,<br>39,40,41,4<br>2,43 | 19 | D3ZUK3,G3V686,P02631,P07171,P11598,P18427,P20762,P25236,Q00715,Q01205,Q30KJ2,Q63467,Q63532,Q63617,Q6IE51,Q7TP52,Q8CJD3,Q99MH3,Q9QZQ5                                                         |
| 2506 | 1,2,4,6,7,8<br>,37,38   | 3,5,36,39,<br>40,41,42,4<br>3,44 | 16 | D3ZUK3,P02631,P02803,P05964,P11598,P15399,P25236,P97580,P97840,Q30KJ2,Q63532,Q63617,Q6IE51,Q7TPB1,Q91ZS3,Q9QZQ5                                                                              |
| 2507 | 1,2,4,6,7,8<br>,37,39   | 3,5,36,38,<br>40,41,42,4<br>3,44 | 14 | D3ZUK3,P02631,P11598,P15399,P18418,P25236,Q30KJ2,Q63532,Q63617,Q6IE51,Q8CJD3,Q91ZS3,Q99041,Q9QZQ5                                                                                            |
| 2508 | 1,2,4,6,7,8<br>,37,40   | 3,5,36,38,<br>39,41,42,4<br>3,44 | 15 | D3ZUK3,P02631,P02803,P11598,P12020,P15399,P18418,P25236,Q30KJ2,Q63532,Q63617,Q6IE51,Q8CJD3,Q91ZS3,Q9QZQ5                                                                                     |
| 2509 | 1,2,4,6,7,8<br>,37,41   | 3,5,36,38,<br>39,40,42,4<br>3,44 | 21 | D3ZUK3,G3V686,P02631,P05964,P11598,P12020,P15399,P18418,Q01205,Q30KJ2,Q63467,Q63532,Q63617,Q68FS4,Q6IE51,Q7TP52,Q7TPB1,Q91ZS3,Q99041,Q9JH85,Q9QZQ5                                           |

|      |                       |                                  |    |                                                                                                                                                                  |
|------|-----------------------|----------------------------------|----|------------------------------------------------------------------------------------------------------------------------------------------------------------------|
| 2510 | 1,2,4,6,7,8<br>,37,42 | 3,5,36,38,<br>39,40,41,4<br>3,44 | 13 | G3V686,P02631,P08290,P11598,P20759,P25236,Q30KJ2,Q63532,Q63617,Q6IE51,Q7TP52,Q91ZS3,Q9QZQ5                                                                       |
| 2511 | 1,2,4,6,7,8<br>,37,43 | 3,5,36,38,<br>39,40,41,4<br>2,44 | 16 | D3ZUK3,P02631,P05964,P11598,P14480,P15399,P20762,P25236,P83748,Q30KJ2,Q63532,Q63617,Q6IE51,Q7TP52,Q7TPB1,Q99PP0                                                  |
| 2512 | 1,2,4,6,7,8<br>,37,44 | 3,5,36,38,<br>39,40,41,4<br>2,43 | 18 | D3ZUK3,G3V686,P02631,P05964,P07171,P11598,P15399,P18418,P25236,Q30KJ2,Q63467,Q63532,Q63617,Q6IE51,Q7TP52,Q8CJD3,Q91ZS3,Q9QZQ5                                    |
| 2513 | 1,2,4,6,7,8<br>,38,39 | 3,5,36,37,<br>40,41,42,4<br>3,44 | 13 | D3ZUK3,P02631,P11598,P15399,P19218,P20762,P25236,P97580,Q30KJ2,Q63532,Q6IE51,Q7TP52,Q80WL1                                                                       |
| 2514 | 1,2,4,6,7,8<br>,38,40 | 3,5,36,37,<br>39,41,42,4<br>3,44 | 14 | D3ZUK3,P02631,P02803,P11598,P12020,P15399,P20762,P25236,P70709,P97580,Q30KJ2,Q63532,Q63617,Q6IE51                                                                |
| 2515 | 1,2,4,6,7,8<br>,38,41 | 3,5,36,37,<br>39,40,42,4<br>3,44 | 23 | D3ZUK3,P02631,P11598,P12020,P15399,P18418,P50115,P50116,P50280,P70709,P97580,Q01205,Q30KJ2,Q62635,Q63467,Q63532,Q63617,Q6IE51,Q7TP52,Q7TPB1,Q8CIZ5,Q91ZS3,Q99041 |
| 2516 | 1,2,4,6,7,8<br>,38,42 | 3,5,36,37,<br>39,40,41,4<br>3,44 | 19 | O35547,P02631,P08010,P08290,P08753,P11598,P15399,P19218,P20759,P20762,P25236,P36374,P97580,Q30KJ2,Q63532,Q6IE51,Q7TP52,Q80WL1,Q9QZQ5                             |
| 2517 | 1,2,4,6,7,8<br>,38,43 | 3,5,36,37,<br>39,40,41,4<br>2,44 | 18 | D3ZUK3,P02631,P11598,P14480,P15399,P20762,P25031,P25236,P83748,P97580,Q30KJ2,Q63532,Q63942,Q64268,Q6IE51,Q7TP52,Q7TPB1,Q80WL1                                    |
| 2518 | 1,2,4,6,7,8<br>,38,44 | 3,5,36,37,<br>39,40,41,4<br>2,43 | 17 | D3ZUK3,O08557,P02631,P07171,P11598,P15399,P20762,P25236,P97580,P98089,Q30KJ2,Q62635,Q63467,Q63532,Q63617,Q6IE51,Q7TP52                                           |
| 2519 | 1,2,4,6,7,8<br>,39,40 | 3,5,36,37,<br>38,41,42,4<br>3,44 | 11 | D3ZUK3,P02631,P02803,P11598,P12020,P25236,Q30KJ2,Q63532,Q63617,Q6IE51,Q8CJD3                                                                                     |
| 2520 | 1,2,4,6,7,8<br>,39,41 | 3,5,36,37,<br>38,40,42,4<br>3,44 | 18 | D3ZUK3,G3V686,O88267,P02631,P08010,P11598,P12020,P18418,Q01205,Q30KJ2,Q63467,Q63475,Q63532,Q63617,Q6IE51,Q7TP52,Q99041,Q9QZQ5                                    |
| 2521 | 1,2,4,6,7,8<br>,39,42 | 3,5,36,37,<br>38,40,41,4<br>3,44 | 16 | G3V686,P02631,P08010,P08290,P08753,P11598,P20759,P20762,P25236,P36374,Q30KJ2,Q63532,Q63617,Q6IE51,Q7TP52,Q9QZQ5                                                  |
| 2522 | 1,2,4,6,7,8<br>,39,43 | 3,5,36,37,<br>38,40,41,4<br>2,44 | 15 | D3ZUK3,P02631,P11598,P14480,P20762,P25236,P83748,Q30KJ2,Q63532,Q63617,Q63942,Q6IE51,Q7TP52,Q80WL1,Q99PP0                                                         |
| 2523 | 1,2,4,6,7,8<br>,39,44 | 3,5,36,37,<br>38,40,41,4<br>2,43 | 14 | D3ZUK3,O88267,P02631,P07171,P11598,P12020,P25236,Q30KJ2,Q63467,Q63532,Q63617,Q6IE51,Q7TP52,Q8CJD3                                                                |
| 2524 | 1,2,4,6,7,8<br>,40,41 | 3,5,36,37,<br>38,39,42,4<br>3,44 | 17 | D3ZUK3,P02631,P05371,P06911,P11598,P12020,P18418,P25236,P70709,Q30KJ2,Q5GRG2,Q63532,Q63617,Q6IE51,Q7TP52,Q99041,Q91JS8                                           |

|      |                        |                                  |    |                                                                                                                                                                                                            |
|------|------------------------|----------------------------------|----|------------------------------------------------------------------------------------------------------------------------------------------------------------------------------------------------------------|
| 2525 | 1,2,4,6,7,8<br>,40,42  | 3,5,36,37,<br>38,39,41,4<br>3,44 | 16 | P02631,P02803,P08290,P20759,P20762,P25236,P36374,P70709,Q30KJ2,Q63532,Q63617,Q6IE51,Q7TP52,Q9JJS8,Q9QZ76,Q9QZQ5                                                                                            |
| 2526 | 1,2,4,6,7,8<br>,40,43  | 3,5,36,37,<br>38,39,41,4<br>2,44 | 13 | D3ZUK3,P02631,P11598,P12020,P20762,P25236,P70709,P83748,Q30KJ2,Q63532,Q63617,Q6IE51,Q7TP52                                                                                                                 |
| 2527 | 1,2,4,6,7,8<br>,40,44  | 3,5,36,37,<br>38,39,41,4<br>2,43 | 15 | D3ZUK3,P02631,P07171,P11598,P12020,P14669,P20759,P25236,P70709,Q30KJ2,Q5GRG2,Q63532,Q63617,Q6IE51,Q8CJD3                                                                                                   |
| 2528 | 1,2,4,6,7,8<br>,41,42  | 3,5,36,37,<br>38,39,40,4<br>3,44 | 29 | D3ZUK3,G3V686,O35547,P02631,P08010,P08290,P08649,P08753,P11598,P16086,P18418,P20759,P25236,P36374,P54921,P60905,Q30KJ2,Q62753,Q63357,Q63532,Q63617,Q6IE51,Q6P6R2,Q7TP52,Q812E4,Q99041,Q9JJS8,Q9QW07,Q9QZQ5 |
| 2529 | 1,2,4,6,7,8<br>,41,43  | 3,5,36,37,<br>38,39,40,4<br>2,44 | 18 | D3ZUK3,G3V686,P02631,P11598,P20762,P25236,P54921,P83748,Q01205,Q30KJ2,Q63467,Q63532,Q63617,Q66H69,Q6IE51,Q7TP52,Q7TPB1,Q99041                                                                              |
| 2530 | 1,2,4,6,7,8<br>,41,44  | 3,5,36,37,<br>38,39,40,4<br>2,43 | 21 | D3ZUK3,G3V686,O88267,P02631,P05371,P07171,P11598,P12020,P18418,P25236,Q01205,Q30KJ2,Q63467,Q63475,Q63532,Q63617,Q6IE51,Q7TP52,Q99041,Q99MH3,Q9QZQ5                                                         |
| 2531 | 1,2,4,6,7,8<br>,42,43  | 3,5,36,37,<br>38,39,40,4<br>1,44 | 17 | G3V686,O35783,P02631,P08290,P20762,P25236,P36374,P54921,P60905,P83748,Q30KJ2,Q63532,Q63617,Q6IE51,Q7TP52,Q99PP0,Q9QZQ5                                                                                     |
| 2532 | 1,2,4,6,7,8<br>,42,44  | 3,5,36,37,<br>38,39,40,4<br>1,43 | 22 | D3ZUK3,G3V686,P00714,P02631,P07171,P08290,P11598,P20759,P20762,P25236,P36374,P60905,Q30KJ2,Q62753,Q63467,Q63514,Q63532,Q63617,Q6IE51,Q6P6R2,Q7TP52,Q9QZQ5                                                  |
| 2533 | 1,2,4,6,7,8<br>,43,44  | 3,5,36,37,<br>38,39,40,4<br>1,42 | 15 | D3ZUK3,G3V686,P02631,P07171,P11598,P20762,P25236,P83748,Q30KJ2,Q63467,Q63532,Q63617,Q66H69,Q6IE51,Q7TP52                                                                                                   |
| 2534 | 1,2,4,6,7,3<br>6,37,38 | 3,5,8,39,4<br>0,41,42,43<br>,44  | 13 | P02631,P05964,P15399,P25236,P47967,P97580,P97840,Q30KJ2,Q63467,Q63532,Q6IE51,Q7TP52,Q91ZS3                                                                                                                 |
| 2535 | 1,2,4,6,7,3<br>6,37,39 | 3,5,8,38,4<br>0,41,42,43<br>,44  | 15 | G3V686,P02631,P05964,P06760,P15399,P25236,P35467,P97840,Q30KJ2,Q63467,Q63532,Q6IE51,Q7TP52,Q8CJD3,Q91ZS3                                                                                                   |
| 2536 | 1,2,4,6,7,3<br>6,37,40 | 3,5,8,38,3<br>9,41,42,43<br>,44  | 10 | P00731,P02631,P15399,P25236,Q30KJ2,Q63532,Q6IE51,Q7TP52,Q8CJD3,Q91ZS3                                                                                                                                      |
| 2537 | 1,2,4,6,7,3<br>6,37,41 | 3,5,8,38,3<br>9,40,42,43<br>,44  | 17 | G3V686,P02631,P05964,P08649,P15399,P18418,P35467,P97840,Q30KJ2,Q63467,Q63532,Q6IE51,Q7TP52,Q91ZS3,Q99041,Q9JI85,Q9QZQ5                                                                                     |
| 2538 | 1,2,4,6,7,3<br>6,37,42 | 3,5,8,38,3<br>9,40,41,43<br>,44  | 13 | G3V686,P02631,P08290,P08649,P25236,P47967,P97840,Q30KJ2,Q63532,Q6IE51,Q7TP52,Q91ZS3,Q9QZQ5                                                                                                                 |
| 2539 | 1,2,4,6,7,3<br>6,37,43 | 3,5,8,38,3<br>9,40,41,42<br>,44  | 15 | D3ZUC6,G3V686,P02631,P05964,P06760,P14480,P15399,P25236,P83748,Q30KJ2,Q63532,Q6IE51,Q7TP52,Q91ZS3,Q99PP0                                                                                                   |

|      |                        |                                 |    |                                                                                                                 |
|------|------------------------|---------------------------------|----|-----------------------------------------------------------------------------------------------------------------|
| 2540 | 1,2,4,6,7,3<br>6,37,44 | 3,5,8,38,3<br>9,40,41,42<br>,43 | 14 | G3V686,P02631,P05942,P05964,P15399,P25236,P97840,Q30KJ2,Q63467,Q63532,Q6IE51,Q7TP52,Q8CJD3,Q91ZS3               |
| 2541 | 1,2,4,6,7,3<br>6,38,39 | 3,5,8,37,4<br>0,41,42,43<br>,44 | 11 | P15399,P19218,P25236,P51907,P97580,P97840,Q30KJ2,Q63467,Q63532,Q6IE51,Q7TP52                                    |
| 2542 | 1,2,4,6,7,3<br>6,38,40 | 3,5,8,37,3<br>9,41,42,43<br>,44 | 8  | P15399,P25236,P97580,P97840,Q30KJ2,Q63532,Q6IE51,Q7TP52                                                         |
| 2543 | 1,2,4,6,7,3<br>6,38,41 | 3,5,8,37,3<br>9,40,42,43<br>,44 | 15 | G3V686,P02631,P08649,P15399,P50280,P97580,P97840,Q30KJ2,Q63467,Q63475,Q63532,Q6IE51,Q7TP52,Q8CIZ5,Q91ZS3        |
| 2544 | 1,2,4,6,7,3<br>6,38,42 | 3,5,8,37,3<br>9,40,41,43<br>,44 | 16 | G3V686,P08290,P08649,P15399,P19218,P25236,P47967,P51907,P97554,P97580,P97840,Q30KJ2,Q63532,Q6IE51,Q7TP52,Q9QZQ5 |
| 2545 | 1,2,4,6,7,3<br>6,38,43 | 3,5,8,37,3<br>9,40,41,42<br>,44 | 16 | G3V686,O70594,P02631,P06760,P14480,P15399,P20762,P25031,P25236,P83748,P97580,Q30KJ2,Q63467,Q63532,Q6IE51,Q7TP52 |
| 2546 | 1,2,4,6,7,3<br>6,38,44 | 3,5,8,37,3<br>9,40,41,42<br>,43 | 12 | G3V686,P02631,P15399,P25236,P51907,P97580,P97840,Q30KJ2,Q63467,Q63532,Q6IE51,Q7TP52                             |
| 2547 | 1,2,4,6,7,3<br>6,39,40 | 3,5,8,37,3<br>8,41,42,43<br>,44 | 8  | P12020,P25236,P35467,Q30KJ2,Q63532,Q6IE51,Q7TP52,Q8CJD3                                                         |
| 2548 | 1,2,4,6,7,3<br>6,39,41 | 3,5,8,37,3<br>8,40,42,43<br>,44 | 11 | G3V686,P02631,P06760,P08649,P35467,Q30KJ2,Q63467,Q63475,Q63532,Q6IE51,Q7TP52                                    |
| 2549 | 1,2,4,6,7,3<br>6,39,42 | 3,5,8,37,3<br>8,40,41,43<br>,44 | 15 | G3V686,P05539,P08010,P08290,P08649,P25236,P35467,P51907,P97840,Q30KJ2,Q5XI73,Q63532,Q6IE51,Q7TP52,Q9QZQ5        |
| 2550 | 1,2,4,6,7,3<br>6,39,43 | 3,5,8,37,3<br>8,40,41,42<br>,44 | 15 | D3ZUC6,G3V686,P02631,P06760,P14480,P18427,P20762,P25236,P83748,Q30KJ2,Q63467,Q63532,Q6IE51,Q7TP52,Q99PP0        |
| 2551 | 1,2,4,6,7,3<br>6,39,44 | 3,5,8,37,3<br>8,40,41,42<br>,43 | 11 | G3V686,P02631,P25236,P35467,P51907,Q30KJ2,Q63467,Q63532,Q6IE51,Q7TP52,Q8CJD3                                    |
| 2552 | 1,2,4,6,7,3<br>6,40,41 | 3,5,8,37,3<br>8,39,42,43<br>,44 | 12 | G3V686,P02631,P05539,P08649,P12020,P18418,Q30KJ2,Q63467,Q63532,Q6IE51,Q7TP52,Q9JJS8                             |
| 2553 | 1,2,4,6,7,3<br>6,40,42 | 3,5,8,37,3<br>8,39,41,43<br>,44 | 12 | G3V686,P05539,P08290,P08649,P13596,P25236,Q30KJ2,Q63532,Q6IE51,Q7TP52,Q9JJS8,Q9QZQ5                             |
| 2554 | 1,2,4,6,7,3<br>6,40,43 | 3,5,8,37,3<br>8,39,41,42<br>,44 | 10 | G3V686,P02631,P18427,P20762,P25236,P83748,Q30KJ2,Q63532,Q6IE51,Q7TP52                                           |

|      |                        |                                 |    |                                                                                                                                      |
|------|------------------------|---------------------------------|----|--------------------------------------------------------------------------------------------------------------------------------------|
| 2555 | 1,2,4,6,7,3<br>6,40,44 | 3,5,8,37,3<br>8,39,41,42<br>,43 | 12 | G3V686,P00731,P02631,P12020,P25236,Q30KJ2,Q5GRG2,Q63467,Q63532,Q6IE51,Q7TP52,Q8CJD3                                                  |
| 2556 | 1,2,4,6,7,3<br>6,41,42 | 3,5,8,37,3<br>8,39,40,43<br>,44 | 19 | G3V686,P05539,P08010,P08290,P08649,P13596,P16086,P54921,P60905,P97840,Q30KJ2,Q62740,Q62753,Q63467,Q63532,Q6IE51,Q7TP52,Q812E4,Q9QZQ5 |
| 2557 | 1,2,4,6,7,3<br>6,41,43 | 3,5,8,37,3<br>8,39,40,42<br>,44 | 14 | D3ZUC6,G3V686,P01836,P02631,P05539,P06760,P08649,P25236,P83748,Q30KJ2,Q63467,Q63532,Q6IE51,Q7TP52                                    |
| 2558 | 1,2,4,6,7,3<br>6,41,44 | 3,5,8,37,3<br>8,39,40,42<br>,43 | 13 | G3V686,P02631,P05371,P08649,P12020,P18418,Q30KJ2,Q63467,Q63475,Q63532,Q6IE51,Q7TP52,Q99MH3                                           |
| 2559 | 1,2,4,6,7,3<br>6,42,43 | 3,5,8,37,3<br>8,39,40,41<br>,44 | 16 | D3ZUC6,G3V686,P02631,P05539,P06760,P08290,P08649,P16636,P20762,P25236,P83748,Q30KJ2,Q63532,Q6IE51,Q7TP52,Q99PP0                      |
| 2560 | 1,2,4,6,7,3<br>6,42,44 | 3,5,8,37,3<br>8,39,40,41<br>,43 | 14 | G3V686,P02631,P05539,P08290,P08649,P25236,P51907,P97840,Q30KJ2,Q63467,Q63532,Q6IE51,Q7TP52,Q9QZQ5                                    |
| 2561 | 1,2,4,6,7,3<br>6,43,44 | 3,5,8,37,3<br>8,39,40,41<br>,42 | 13 | D3ZUC6,G3V686,P02631,P06760,P20762,P25236,P83748,Q30KJ2,Q63467,Q63532,Q63661,Q6IE51,Q7TP52                                           |
| 2562 | 1,2,4,6,7,3<br>7,38,39 | 3,5,8,36,4<br>0,41,42,43<br>,44 | 11 | P02631,P05964,P15399,P19218,P25236,P97580,P97840,Q30KJ2,Q63532,Q6IE51,Q91ZS3                                                         |
| 2563 | 1,2,4,6,7,3<br>7,38,40 | 3,5,8,36,3<br>9,41,42,43<br>,44 | 10 | P02631,P02803,P15399,P25236,P97580,P97840,Q30KJ2,Q63532,Q6IE51,Q91ZS3                                                                |
| 2564 | 1,2,4,6,7,3<br>7,38,41 | 3,5,8,36,3<br>9,40,42,43<br>,44 | 12 | P02631,P05964,P15399,P18418,P50280,P97580,P97840,Q30KJ2,Q63532,Q6IE51,Q7TPB1,Q91ZS3                                                  |
| 2565 | 1,2,4,6,7,3<br>7,38,42 | 3,5,8,36,3<br>9,40,41,43<br>,44 | 12 | P02631,P08290,P15399,P25236,P47967,P97580,P97840,Q30KJ2,Q63532,Q6IE51,Q7TP52,Q91ZS3                                                  |
| 2566 | 1,2,4,6,7,3<br>7,38,43 | 3,5,8,36,3<br>9,40,41,42<br>,44 | 16 | P02631,P05964,P14480,P15399,P25031,P25236,P80020,P83748,P97580,P97840,Q30KJ2,Q63532,Q6IE51,Q7TPB1,Q91ZS3,Q99PP0                      |
| 2567 | 1,2,4,6,7,3<br>7,38,44 | 3,5,8,36,3<br>9,40,41,42<br>,43 | 11 | P02631,P05964,P15399,P25236,P97580,P97840,Q30KJ2,Q63532,Q6AYR9,Q6IE51,Q91ZS3                                                         |
| 2568 | 1,2,4,6,7,3<br>7,39,40 | 3,5,8,36,3<br>8,41,42,43<br>,44 | 9  | P02631,P12020,P15399,P25236,P35467,Q30KJ2,Q63532,Q6IE51,Q8CJD3                                                                       |
| 2569 | 1,2,4,6,7,3<br>7,39,41 | 3,5,8,36,3<br>8,40,42,43<br>,44 | 11 | O88267,P02631,P15399,P18418,P25236,P35467,Q30KJ2,Q63532,Q6IE51,Q91ZS3,Q9JI85                                                         |

|      |                        |                                 |    |                                                                                                          |
|------|------------------------|---------------------------------|----|----------------------------------------------------------------------------------------------------------|
| 2570 | 1,2,4,6,7,3<br>7,39,42 | 3,5,8,36,3<br>8,40,41,43<br>,44 | 9  | P02631,P08290,P25236,P35467,P97840,Q30KJ2,Q63532,Q6IE51,Q91ZS3                                           |
| 2571 | 1,2,4,6,7,3<br>7,39,43 | 3,5,8,36,3<br>8,40,41,42<br>,44 | 10 | P02631,P06760,P14480,P15399,P25236,P83748,Q30KJ2,Q63532,Q6IE51,Q99PP0                                    |
| 2572 | 1,2,4,6,7,3<br>7,39,44 | 3,5,8,36,3<br>8,40,41,42<br>,43 | 10 | P02631,P05964,P15399,P25236,P35467,P97840,Q30KJ2,Q63532,Q6IE51,Q8CJD3                                    |
| 2573 | 1,2,4,6,7,3<br>7,40,41 | 3,5,8,36,3<br>8,39,42,43<br>,44 | 11 | P02631,P06911,P12020,P15399,P18418,P25236,Q30KJ2,Q5GRG2,Q63532,Q6IE51,Q91ZS3                             |
| 2574 | 1,2,4,6,7,3<br>7,40,42 | 3,5,8,36,3<br>8,39,41,43<br>,44 | 6  | P02631,P15399,P25236,P97840,Q30KJ2,Q6IE51                                                                |
| 2575 | 1,2,4,6,7,3<br>7,40,43 | 3,5,8,36,3<br>8,39,41,42<br>,44 | 9  | P02631,P14480,P15399,P25236,P83748,Q30KJ2,Q63532,Q6IE51,Q99PP0                                           |
| 2576 | 1,2,4,6,7,3<br>7,40,44 | 3,5,8,36,3<br>8,39,41,42<br>,43 | 8  | P02631,P12020,P15399,P25236,Q30KJ2,Q5GRG2,Q6IE51,Q8CJD3                                                  |
| 2577 | 1,2,4,6,7,3<br>7,41,42 | 3,5,8,36,3<br>8,39,40,43<br>,44 | 13 | G3V686,P02631,P08290,P18418,P25236,P35467,P97840,Q30KJ2,Q63532,Q6IE51,Q7TP52,Q91ZS3,Q9QZQ5               |
| 2578 | 1,2,4,6,7,3<br>7,41,43 | 3,5,8,36,3<br>8,39,40,42<br>,44 | 15 | G3V686,P02631,P05964,P14480,P15399,P25236,P83748,Q30KJ2,Q5HZV9,Q63532,Q6IE51,Q7TP52,Q7TPB1,Q91ZS3,Q99PP0 |
| 2579 | 1,2,4,6,7,3<br>7,41,44 | 3,5,8,36,3<br>8,39,40,42<br>,43 | 13 | G3V686,P02631,P05964,P12020,P15399,P18418,P25236,Q30KJ2,Q63532,Q6IE51,Q7TP52,Q91ZS3,Q9JI85               |
| 2580 | 1,2,4,6,7,3<br>7,42,43 | 3,5,8,36,3<br>8,39,40,41<br>,44 | 12 | G3V686,P02631,P08290,P14480,P20762,P25236,P83748,Q30KJ2,Q63532,Q6IE51,Q7TP52,Q99PP0                      |
| 2581 | 1,2,4,6,7,3<br>7,42,44 | 3,5,8,36,3<br>8,39,40,41<br>,43 | 10 | G3V686,P02631,P08290,P15399,P25236,P97840,Q30KJ2,Q7TP52,Q91ZS3,Q9QZQ5                                    |
| 2582 | 1,2,4,6,7,3<br>7,43,44 | 3,5,8,36,3<br>8,39,40,41<br>,42 | 9  | P02631,P05964,P14480,P15399,P25236,P83748,Q30KJ2,Q63532,Q6IE51                                           |
| 2583 | 1,2,4,6,7,3<br>8,39,40 | 3,5,8,36,3<br>7,41,42,43<br>,44 | 9  | P12020,P15399,P25236,P70709,P83121,P97580,Q30KJ2,Q63532,Q6IE51                                           |
| 2584 | 1,2,4,6,7,3<br>8,39,41 | 3,5,8,36,3<br>7,40,42,43<br>,44 | 9  | O88267,P13432,P15399,P50280,P97580,Q30KJ2,Q63532,Q6IE51,Q7TP52                                           |

|      |                        |                                 |    |                                                                                                                               |
|------|------------------------|---------------------------------|----|-------------------------------------------------------------------------------------------------------------------------------|
| 2585 | 1,2,4,6,7,3<br>8,39,42 | 3,5,8,36,3<br>7,40,41,43<br>,44 | 11 | P08290,P15399,P19218,P25236,P51907,P97580,P97840,Q30KJ2,Q63532,Q6IE51,Q7TP52                                                  |
| 2586 | 1,2,4,6,7,3<br>8,39,43 | 3,5,8,36,3<br>7,40,41,42<br>,44 | 13 | P02631,P14480,P15399,P20762,P25031,P25236,P83748,P97580,Q30KJ2,Q5HZV9,Q63532,Q6IE51,Q80WL1                                    |
| 2587 | 1,2,4,6,7,3<br>8,39,44 | 3,5,8,36,3<br>7,40,41,42<br>,43 | 8  | P15399,P25236,P51907,P97580,P97840,Q30KJ2,Q63532,Q6IE51                                                                       |
| 2588 | 1,2,4,6,7,3<br>8,40,41 | 3,5,8,36,3<br>7,39,42,43<br>,44 | 10 | P06911,P12020,P15399,P25236,P50280,P70709,P97580,Q30KJ2,Q63532,Q6IE51                                                         |
| 2589 | 1,2,4,6,7,3<br>8,40,42 | 3,5,8,36,3<br>7,39,41,43<br>,44 | 9  | P08290,P15399,P25236,P70709,P83121,P97580,P97840,Q30KJ2,Q6IE51                                                                |
| 2590 | 1,2,4,6,7,3<br>8,40,43 | 3,5,8,36,3<br>7,39,41,42<br>,44 | 13 | O70594,P02631,P15399,P20762,P25031,P25236,P70709,P83748,P97580,Q30KJ2,Q5HZV9,Q63532,Q6IE51                                    |
| 2591 | 1,2,4,6,7,3<br>8,40,44 | 3,5,8,36,3<br>7,39,41,42<br>,43 | 9  | P12020,P15399,P25236,P70709,P97580,Q30KJ2,Q5GRG2,Q62635,Q6IE51                                                                |
| 2592 | 1,2,4,6,7,3<br>8,41,42 | 3,5,8,36,3<br>7,39,40,43<br>,44 | 17 | G3V686,O35547,P08010,P08290,P08649,P15399,P16086,P25031,P54921,P70709,P97580,P97840,Q30KJ2,Q63532,Q6IE51,Q7TP52,Q8CIZ5        |
| 2593 | 1,2,4,6,7,3<br>8,41,43 | 3,5,8,36,3<br>7,39,40,42<br>,44 | 13 | P02631,P14480,P15399,P25031,P25236,P83748,P97580,Q30KJ2,Q5HZV9,Q63532,Q6IE51,Q7TP52,Q7TPB1                                    |
| 2594 | 1,2,4,6,7,3<br>8,41,44 | 3,5,8,36,3<br>7,39,40,42<br>,43 | 18 | G3V686,P00774,P02631,P12020,P15399,P25236,P50280,P55091,P97580,P98089,Q05695,Q30KJ2,Q62635,Q63467,Q63532,Q6IE51,Q7TP52,Q8CIZ5 |
| 2595 | 1,2,4,6,7,3<br>8,42,43 | 3,5,8,36,3<br>7,39,40,41<br>,44 | 14 | P02631,P08290,P14480,P15399,P20762,P25031,P25236,P54921,P97580,Q30KJ2,Q5HZV9,Q63532,Q6IE51,Q7TP52                             |
| 2596 | 1,2,4,6,7,3<br>8,42,44 | 3,5,8,36,3<br>7,39,40,41<br>,43 | 11 | G3V686,P08290,P15399,P25236,P51907,P97580,P97840,Q30KJ2,Q63532,Q6IE51,Q7TP52                                                  |
| 2597 | 1,2,4,6,7,3<br>8,43,44 | 3,5,8,36,3<br>7,39,40,41<br>,42 | 14 | P02631,P14480,P15399,P20762,P25031,P25236,P83748,P97580,P98089,Q30KJ2,Q63532,Q63661,Q6IE51,Q7TP52                             |
| 2598 | 1,2,4,6,7,3<br>9,40,41 | 3,5,8,36,3<br>7,38,42,43<br>,44 | 11 | P06911,P12020,P18418,P25236,P35467,P70709,Q30KJ2,Q5GRG2,Q63532,Q6AYL6,Q6IE51                                                  |
| 2599 | 1,2,4,6,7,3<br>9,40,42 | 3,5,8,36,3<br>7,38,41,43<br>,44 | 5  | P25236,P35467,P83121,Q30KJ2,Q6IE51                                                                                            |



|      |                        |                                 |    |                                                                                                          |
|------|------------------------|---------------------------------|----|----------------------------------------------------------------------------------------------------------|
| 2600 | 1,2,4,6,7,3<br>9,40,43 | 3,5,8,36,3<br>7,38,41,42<br>,44 | 9  | P02631,P20762,P25236,P83748,Q30KJ2,Q63532,Q6AYL6,Q6IE51,Q99PP0                                           |
| 2601 | 1,2,4,6,7,3<br>9,40,44 | 3,5,8,36,3<br>7,38,41,42<br>,43 | 9  | P06911,P12020,P15399,P25236,Q30KJ2,Q5GRG2,Q6AYL6,Q6IE51,Q8CJD3                                           |
| 2602 | 1,2,4,6,7,3<br>9,41,42 | 3,5,8,36,3<br>7,38,40,43<br>,44 | 13 | G3V686,P08010,P08290,P08649,P16086,P25236,P35467,P54921,P82471,Q30KJ2,Q63532,Q6IE51,Q7TP52               |
| 2603 | 1,2,4,6,7,3<br>9,41,43 | 3,5,8,36,3<br>7,38,40,42<br>,44 | 14 | D3ZUC6,G3V686,O88267,P02631,P06760,P14480,P22006,P25236,P83748,Q30KJ2,Q5HZV9,Q63532,Q6IE51,Q7TP52        |
| 2604 | 1,2,4,6,7,3<br>9,41,44 | 3,5,8,36,3<br>7,38,40,42<br>,43 | 15 | G3V686,O88267,P02631,P05371,P06911,P12020,P18418,P25236,P35467,Q30KJ2,Q63467,Q63475,Q63532,Q6IE51,Q7TP52 |
| 2605 | 1,2,4,6,7,3<br>9,42,43 | 3,5,8,36,3<br>7,38,40,41<br>,44 | 12 | G3V686,P02631,P08290,P14480,P20762,P25236,P83748,Q30KJ2,Q63532,Q6IE51,Q7TP52,Q99PP0                      |
| 2606 | 1,2,4,6,7,3<br>9,42,44 | 3,5,8,36,3<br>7,38,40,41<br>,43 | 9  | G3V686,P08290,P25236,P51907,P97840,Q30KJ2,Q63532,Q6IE51,Q7TP52                                           |
| 2607 | 1,2,4,6,7,3<br>9,43,44 | 3,5,8,36,3<br>7,38,40,41<br>,42 | 9  | P02631,P14480,P20762,P25236,P83748,Q30KJ2,Q63532,Q6IE51,Q7TP52                                           |
| 2608 | 1,2,4,6,7,4<br>0,41,42 | 3,5,8,36,3<br>7,38,39,43<br>,44 | 13 | G3V686,P05539,P08290,P12020,P16086,P20759,P25236,P70709,Q30KJ2,Q63532,Q6IE51,Q7TP52,Q9JJS8               |
| 2609 | 1,2,4,6,7,4<br>0,41,43 | 3,5,8,36,3<br>7,38,39,42<br>,44 | 10 | P02631,P12020,P25236,P70709,P83748,Q30KJ2,Q5HZV9,Q63532,Q6IE51,Q7TP52                                    |
| 2610 | 1,2,4,6,7,4<br>0,41,44 | 3,5,8,36,3<br>7,38,39,42<br>,43 | 12 | P02631,P05371,P06911,P12020,P18418,P25236,P70709,Q30KJ2,Q5GRG2,Q63532,Q6AYL6,Q6IE51                      |
| 2611 | 1,2,4,6,7,4<br>0,42,43 | 3,5,8,36,3<br>7,38,39,41<br>,44 | 11 | P02631,P20762,P25236,P70709,P83748,Q30KJ2,Q5HZV9,Q63532,Q6IE51,Q7TP52,Q99PP0                             |
| 2612 | 1,2,4,6,7,4<br>0,42,44 | 3,5,8,36,3<br>7,38,39,41<br>,43 | 10 | G3V686,P12020,P20759,P25236,P36374,P70709,Q30KJ2,Q6IE51,Q6P6R2,Q7TP52                                    |
| 2613 | 1,2,4,6,7,4<br>0,43,44 | 3,5,8,36,3<br>7,38,39,41<br>,42 | 12 | P02631,P12020,P15399,P20762,P25236,P70709,P83748,Q30KJ2,Q63532,Q63661,Q6AYL6,Q6IE51                      |
| 2614 | 1,2,4,6,7,4<br>1,42,43 | 3,5,8,36,3<br>7,38,39,40<br>,44 | 14 | G3V686,P02631,P08290,P16086,P20762,P25236,P54921,P82471,P83748,Q30KJ2,Q5HZV9,Q63532,Q6IE51,Q7TP52        |

|      |                        |                                 |    |                                                                                     |
|------|------------------------|---------------------------------|----|-------------------------------------------------------------------------------------|
| 2615 | 1,2,4,6,7,4<br>1,42,44 | 3,5,8,36,3<br>7,38,39,40<br>,43 | 12 | G3V686,P02631,P08290,P08649,P12020,P25236,Q30KJ2,Q62753,Q63532,Q6IE51,Q6P6R2,Q7TP52 |
| 2616 | 1,2,4,6,7,4<br>1,43,44 | 3,5,8,36,3<br>7,38,39,40<br>,42 | 11 | G3V686,P02631,P05371,P12020,P25236,P83748,Q30KJ2,Q63467,Q63532,Q6IE51,Q7TP52        |
| 2617 | 1,2,4,6,7,4<br>2,43,44 | 3,5,8,36,3<br>7,38,39,40<br>,41 | 10 | G3V686,O35783,P02631,P08290,P20762,P25236,Q30KJ2,Q63532,Q6IE51,Q7TP52               |
| 2618 | 1,2,4,6,8,3<br>6,37,38 | 3,5,7,39,4<br>0,41,42,43<br>,44 | 5  | P15399,P25236,P97580,Q7TP52,Q91ZS3                                                  |
| 2619 | 1,2,4,6,8,3<br>6,37,39 | 3,5,7,38,4<br>0,41,42,43<br>,44 | 4  | P25236,Q7TP52,Q8CJD3,Q91ZS3                                                         |
| 2620 | 1,2,4,6,8,3<br>6,37,40 | 3,5,7,38,3<br>9,41,42,43<br>,44 | 4  | P00731,P02803,P25236,Q8CJD3                                                         |
| 2621 | 1,2,4,6,8,3<br>6,37,41 | 3,5,7,38,3<br>9,40,42,43<br>,44 | 3  | Q7TP52,Q91ZS3,Q99MH3                                                                |
| 2622 | 1,2,4,6,8,3<br>6,37,42 | 3,5,7,38,3<br>9,40,41,43<br>,44 | 3  | P25236,Q7TP52,Q91ZS3                                                                |
| 2623 | 1,2,4,6,8,3<br>6,37,43 | 3,5,7,38,3<br>9,40,41,42<br>,44 | 5  | P14480,P25236,Q63942,Q66H69,Q7TP52                                                  |
| 2624 | 1,2,4,6,8,3<br>6,37,44 | 3,5,7,38,3<br>9,40,41,42<br>,43 | 3  | P25236,Q7TP52,Q8CJD3                                                                |
| 2625 | 1,2,4,6,8,3<br>6,38,39 | 3,5,7,37,4<br>0,41,42,43<br>,44 | 2  | P25236,Q7TP52                                                                       |
| 2626 | 1,2,4,6,8,3<br>6,38,40 | 3,5,7,37,3<br>9,41,42,43<br>,44 | 4  | P02803,P25236,Q00715,Q7TP52                                                         |
| 2627 | 1,2,4,6,8,3<br>6,38,41 | 3,5,7,37,3<br>9,40,42,43<br>,44 | 4  | P50280,Q7TP52,Q8CIZ5,Q99MH3                                                         |
| 2628 | 1,2,4,6,8,3<br>6,38,42 | 3,5,7,37,3<br>9,40,41,43<br>,44 | 4  | P25236,P97554,Q00715,Q7TP52                                                         |
| 2629 | 1,2,4,6,8,3<br>6,38,43 | 3,5,7,37,3<br>9,40,41,42<br>,44 | 8  | P18427,P20762,P25236,Q00715,Q63942,Q64268,Q66H69,Q7TP52                             |

|      |                        |                                 |   |                                                         |
|------|------------------------|---------------------------------|---|---------------------------------------------------------|
| 2630 | 1,2,4,6,8,3<br>6,38,44 | 3,5,7,37,3<br>9,40,41,42<br>,43 | 5 | O08557,P25236,Q00715,Q62635,Q7TP52                      |
| 2631 | 1,2,4,6,8,3<br>6,39,40 | 3,5,7,37,3<br>8,41,42,43<br>,44 | 3 | P25236,Q00715,Q8CJD3                                    |
| 2632 | 1,2,4,6,8,3<br>6,39,41 | 3,5,7,37,3<br>8,40,42,43<br>,44 | 1 | Q7TP52                                                  |
| 2633 | 1,2,4,6,8,3<br>6,39,42 | 3,5,7,37,3<br>8,40,41,43<br>,44 | 2 | P25236,Q7TP52                                           |
| 2634 | 1,2,4,6,8,3<br>6,39,43 | 3,5,7,37,3<br>8,40,41,42<br>,44 | 7 | P18427,P20762,P25236,Q00715,Q63942,Q66H69,Q7TP52        |
| 2635 | 1,2,4,6,8,3<br>6,39,44 | 3,5,7,37,3<br>8,40,41,42<br>,43 | 3 | P25236,Q7TP52,Q8CJD3                                    |
| 2636 | 1,2,4,6,8,3<br>6,40,41 | 3,5,7,37,3<br>8,39,42,43<br>,44 | 2 | P25236,Q7TP52                                           |
| 2637 | 1,2,4,6,8,3<br>6,40,42 | 3,5,7,37,3<br>8,39,41,43<br>,44 | 5 | P20759,P25236,P62804,Q00715,Q7TP52                      |
| 2638 | 1,2,4,6,8,3<br>6,40,43 | 3,5,7,37,3<br>8,39,41,42<br>,44 | 7 | P18427,P20762,P25236,Q00715,Q63942,Q66H69,Q7TP52        |
| 2639 | 1,2,4,6,8,3<br>6,40,44 | 3,5,7,37,3<br>8,39,41,42<br>,43 | 4 | P25236,Q00715,Q7TP52,Q8CJD3                             |
| 2640 | 1,2,4,6,8,3<br>6,41,42 | 3,5,7,37,3<br>8,39,40,43<br>,44 | 6 | G3V686,P08010,P08753,P25236,Q62753,Q7TP52               |
| 2641 | 1,2,4,6,8,3<br>6,41,43 | 3,5,7,37,3<br>8,39,40,42<br>,44 | 5 | D3ZUC6,P18427,P25236,Q66H69,Q7TP52                      |
| 2642 | 1,2,4,6,8,3<br>6,41,44 | 3,5,7,37,3<br>8,39,40,42<br>,43 | 3 | P25236,Q7TP52,Q99MH3                                    |
| 2643 | 1,2,4,6,8,3<br>6,42,43 | 3,5,7,37,3<br>8,39,40,41<br>,44 | 8 | P10715,P19629,P20762,P25236,Q00715,Q63942,Q66H69,Q7TP52 |
| 2644 | 1,2,4,6,8,3<br>6,42,44 | 3,5,7,37,3<br>8,39,40,41<br>,43 | 3 | P20759,P25236,Q7TP52                                    |

|      |                        |                                 |   |                                                                |
|------|------------------------|---------------------------------|---|----------------------------------------------------------------|
| 2645 | 1,2,4,6,8,3<br>6,43,44 | 3,5,7,37,3<br>8,39,40,41<br>,42 | 8 | P18427,P20762,P25236,Q00715,Q63661,Q63942,Q66H69,Q7TP52        |
| 2646 | 1,2,4,6,8,3<br>7,38,39 | 3,5,7,36,4<br>0,41,42,43<br>,44 | 3 | P15399,P25236,P97580                                           |
| 2647 | 1,2,4,6,8,3<br>7,38,40 | 3,5,7,36,3<br>9,41,42,43<br>,44 | 5 | P02803,P15399,P25236,P35281,P97580                             |
| 2648 | 1,2,4,6,8,3<br>7,38,41 | 3,5,7,36,3<br>9,40,42,43<br>,44 | 6 | P15399,P50280,P97580,Q62635,Q7TPB1,Q91ZS3                      |
| 2649 | 1,2,4,6,8,3<br>7,38,42 | 3,5,7,36,3<br>9,40,41,43<br>,44 | 3 | P25236,P97580,Q91ZS3                                           |
| 2650 | 1,2,4,6,8,3<br>7,38,43 | 3,5,7,36,3<br>9,40,41,42<br>,44 | 9 | P02680,P14480,P15399,P25236,P97580,Q63942,Q64268,Q6IFV1,Q7TPB1 |
| 2651 | 1,2,4,6,8,3<br>7,38,44 | 3,5,7,36,3<br>9,40,41,42<br>,43 | 6 | P05964,P15399,P25236,P97580,Q62635,Q6AYR9                      |
| 2652 | 1,2,4,6,8,3<br>7,39,40 | 3,5,7,36,3<br>8,41,42,43<br>,44 | 3 | P02803,P25236,Q8CJD3                                           |
| 2653 | 1,2,4,6,8,3<br>7,39,41 | 3,5,7,36,3<br>8,40,42,43<br>,44 | 2 | P25236,Q91ZS3                                                  |
| 2654 | 1,2,4,6,8,3<br>7,39,42 | 3,5,7,36,3<br>8,40,41,43<br>,44 | 1 | P25236                                                         |
| 2655 | 1,2,4,6,8,3<br>7,39,43 | 3,5,7,36,3<br>8,40,41,42<br>,44 | 4 | P02680,P14480,P25236,Q63942                                    |
| 2656 | 1,2,4,6,8,3<br>7,39,44 | 3,5,7,36,3<br>8,40,41,42<br>,43 | 2 | P25236,Q8CJD3                                                  |
| 2657 | 1,2,4,6,8,3<br>7,40,41 | 3,5,7,36,3<br>8,39,42,43<br>,44 | 2 | P06911,P25236                                                  |
| 2658 | 1,2,4,6,8,3<br>7,40,42 | 3,5,7,36,3<br>8,39,41,43<br>,44 | 3 | P02803,P20759,P25236                                           |
| 2659 | 1,2,4,6,8,3<br>7,40,43 | 3,5,7,36,3<br>8,39,41,42<br>,44 | 2 | P02803,P25236                                                  |

|      |                        |                                 |   |                                                         |
|------|------------------------|---------------------------------|---|---------------------------------------------------------|
| 2660 | 1,2,4,6,8,3<br>7,40,44 | 3,5,7,36,3<br>8,39,41,42<br>,43 | 4 | P02803,P25236,Q5GRG2,Q8CJD3                             |
| 2661 | 1,2,4,6,8,3<br>7,41,42 | 3,5,7,36,3<br>8,39,40,43<br>,44 | 2 | P25236,Q91ZS3                                           |
| 2662 | 1,2,4,6,8,3<br>7,41,43 | 3,5,7,36,3<br>8,39,40,42<br>,44 | 4 | P25236,Q63598,Q66H69,Q7TPB1                             |
| 2663 | 1,2,4,6,8,3<br>7,41,44 | 3,5,7,36,3<br>8,39,40,42<br>,43 | 1 | P25236                                                  |
| 2664 | 1,2,4,6,8,3<br>7,42,43 | 3,5,7,36,3<br>8,39,40,41<br>,44 | 2 | P20762,P25236                                           |
| 2665 | 1,2,4,6,8,3<br>7,42,44 | 3,5,7,36,3<br>8,39,40,41<br>,43 | 2 | P25236,Q6P6R2                                           |
| 2666 | 1,2,4,6,8,3<br>7,43,44 | 3,5,7,36,3<br>8,39,40,41<br>,42 | 2 | P25236,Q66H69                                           |
| 2667 | 1,2,4,6,8,3<br>8,39,40 | 3,5,7,36,3<br>7,41,42,43<br>,44 | 3 | P02803,P25236,P70709                                    |
| 2668 | 1,2,4,6,8,3<br>8,39,41 | 3,5,7,36,3<br>7,40,42,43<br>,44 | 3 | P13432,P50280,Q62635                                    |
| 2669 | 1,2,4,6,8,3<br>8,39,42 | 3,5,7,36,3<br>7,40,41,43<br>,44 | 2 | P25236,Q80WL1                                           |
| 2670 | 1,2,4,6,8,3<br>8,39,43 | 3,5,7,36,3<br>7,40,41,42<br>,44 | 8 | P14480,P20762,P25236,P97580,Q63942,Q64268,Q6IFV1,Q80WL1 |
| 2671 | 1,2,4,6,8,3<br>8,39,44 | 3,5,7,36,3<br>7,40,41,42<br>,43 | 2 | P25236,Q62635                                           |
| 2672 | 1,2,4,6,8,3<br>8,40,41 | 3,5,7,36,3<br>7,39,42,43<br>,44 | 5 | P25236,P50115,P50280,P70709,Q62635                      |
| 2673 | 1,2,4,6,8,3<br>8,40,42 | 3,5,7,36,3<br>7,39,41,43<br>,44 | 3 | P02803,P25236,P70709                                    |
| 2674 | 1,2,4,6,8,3<br>8,40,43 | 3,5,7,36,3<br>7,39,41,42<br>,44 | 6 | P02803,P20762,P25236,P70709,Q5HZV9,Q63942               |

|      |                        |                                 |    |                                                                       |
|------|------------------------|---------------------------------|----|-----------------------------------------------------------------------|
| 2675 | 1,2,4,6,8,3<br>8,40,44 | 3,5,7,36,3<br>7,39,41,42<br>,43 | 4  | P22006,P25236,P70709,Q62635                                           |
| 2676 | 1,2,4,6,8,3<br>8,41,42 | 3,5,7,36,3<br>7,39,40,43<br>,44 | 6  | P08753,P25236,P54921,P70709,Q7TP52,Q8CIZ5                             |
| 2677 | 1,2,4,6,8,3<br>8,41,43 | 3,5,7,36,3<br>7,39,40,42<br>,44 | 10 | P25236,P50115,P50280,Q5HZV9,Q5U2V4,Q62635,Q63598,Q63942,Q66H69,Q7TPB1 |
| 2678 | 1,2,4,6,8,3<br>8,41,44 | 3,5,7,36,3<br>7,39,40,42<br>,43 | 10 | P00774,P25236,P50115,P50280,P55091,P98089,Q05695,Q5U2V4,Q62635,Q8CIZ5 |
| 2679 | 1,2,4,6,8,3<br>8,42,43 | 3,5,7,36,3<br>7,39,40,41<br>,44 | 7  | P20762,P25236,Q5HZV9,Q63942,Q64268,Q66H69,Q80WL1                      |
| 2680 | 1,2,4,6,8,3<br>8,42,44 | 3,5,7,36,3<br>7,39,40,41<br>,43 | 3  | P25236,Q62635,Q9Z0V6                                                  |
| 2681 | 1,2,4,6,8,3<br>8,43,44 | 3,5,7,36,3<br>7,39,40,41<br>,42 | 8  | P20762,P25236,P97580,P98089,Q62635,Q63942,Q64268,Q66H69               |
| 2682 | 1,2,4,6,8,3<br>9,40,41 | 3,5,7,36,3<br>7,38,42,43<br>,44 | 6  | P06911,P12020,P25236,P70709,Q5GRG2,Q62975                             |
| 2683 | 1,2,4,6,8,3<br>9,40,42 | 3,5,7,36,3<br>7,38,41,43<br>,44 | 1  | P25236                                                                |
| 2684 | 1,2,4,6,8,3<br>9,40,43 | 3,5,7,36,3<br>7,38,41,42<br>,44 | 4  | P20762,P25236,Q5QE79,Q63942                                           |
| 2685 | 1,2,4,6,8,3<br>9,40,44 | 3,5,7,36,3<br>7,38,41,42<br>,43 | 6  | P06911,P12020,P25236,Q5GRG2,Q6AYL6,Q8CJD3                             |
| 2686 | 1,2,4,6,8,3<br>9,41,42 | 3,5,7,36,3<br>7,38,40,43<br>,44 | 2  | P08010,P25236                                                         |
| 2687 | 1,2,4,6,8,3<br>9,41,43 | 3,5,7,36,3<br>7,38,40,42<br>,44 | 2  | P25236,Q66H69                                                         |
| 2688 | 1,2,4,6,8,3<br>9,41,44 | 3,5,7,36,3<br>7,38,40,42<br>,43 | 2  | P06911,P25236                                                         |
| 2689 | 1,2,4,6,8,3<br>9,42,43 | 3,5,7,36,3<br>7,38,40,41<br>,44 | 4  | P20762,P25236,Q63942,Q80WL1                                           |

|      |                         |                                 |   |                                                  |
|------|-------------------------|---------------------------------|---|--------------------------------------------------|
| 2690 | 1,2,4,6,8,3<br>9,42,44  | 3,5,7,36,3<br>7,38,40,41<br>,43 | 1 | P25236                                           |
| 2691 | 1,2,4,6,8,3<br>9,43,44  | 3,5,7,36,3<br>7,38,40,41<br>,42 | 4 | P20762,P25236,Q63942,Q66H69                      |
| 2692 | 1,2,4,6,8,4<br>0,41,42  | 3,5,7,36,3<br>7,38,39,43<br>,44 | 5 | P20759,P25236,P70709,Q6P6R2,Q9JJS8               |
| 2693 | 1,2,4,6,8,4<br>0,41,43  | 3,5,7,36,3<br>7,38,39,42<br>,44 | 4 | P25236,P70709,Q5HZV9,Q66H69                      |
| 2694 | 1,2,4,6,8,4<br>0,41,44  | 3,5,7,36,3<br>7,38,39,42<br>,43 | 7 | P06911,P12020,P14669,P25236,P70709,Q5GRG2,Q62635 |
| 2695 | 1,2,4,6,8,4<br>0,42,43  | 3,5,7,36,3<br>7,38,39,41<br>,44 | 4 | P20762,P25236,P70709,Q63355                      |
| 2696 | 1,2,4,6,8,4<br>0,42,44  | 3,5,7,36,3<br>7,38,39,41<br>,43 | 7 | P20759,P25236,P36374,P70709,Q6P6R2,Q9QZ76,Q9Z0V6 |
| 2697 | 1,2,4,6,8,4<br>0,43,44  | 3,5,7,36,3<br>7,38,39,41<br>,42 | 4 | P20762,P25236,P70709,Q66H69                      |
| 2698 | 1,2,4,6,8,4<br>1,42,43  | 3,5,7,36,3<br>7,38,39,40<br>,44 | 7 | P20762,P25236,P54921,P82471,Q5HZV9,Q66H69,Q7TP52 |
| 2699 | 1,2,4,6,8,4<br>1,42,44  | 3,5,7,36,3<br>7,38,39,40<br>,43 | 5 | P20759,P25236,Q62753,Q6P6R2,Q7TP52               |
| 2700 | 1,2,4,6,8,4<br>1,43,44  | 3,5,7,36,3<br>7,38,39,40<br>,42 | 3 | P25236,Q63598,Q66H69                             |
| 2701 | 1,2,4,6,8,4<br>2,43,44  | 3,5,7,36,3<br>7,38,39,40<br>,41 | 5 | P20762,P25236,Q66H69,Q6P6R2,Q7TP52               |
| 2702 | 1,2,4,6,36,<br>37,38,39 | 3,5,7,8,40,<br>41,42,43,4<br>4  | 3 | P15399,P25236,Q91ZS3                             |
| 2703 | 1,2,4,6,36,<br>37,38,40 | 3,5,7,8,39,<br>41,42,43,4<br>4  | 2 | P15399,P25236                                    |
| 2704 | 1,2,4,6,36,<br>37,38,41 | 3,5,7,8,39,<br>40,42,43,4<br>4  | 5 | P15399,P50280,Q5M819,Q7TP52,Q91ZS3               |

|      |                         |                                |   |                                                  |
|------|-------------------------|--------------------------------|---|--------------------------------------------------|
| 2705 | 1,2,4,6,36,<br>37,38,42 | 3,5,7,8,39,<br>40,41,43,4<br>4 | 7 | P10715,P15399,P25236,P47967,P97840,Q7TP52,Q91ZS3 |
| 2706 | 1,2,4,6,36,<br>37,38,43 | 3,5,7,8,39,<br>40,41,42,4<br>4 | 7 | P14480,P15399,P25236,P80020,Q4FZU6,Q6IFV1,Q7TP52 |
| 2707 | 1,2,4,6,36,<br>37,38,44 | 3,5,7,8,39,<br>40,41,42,4<br>3 | 5 | P05964,P15399,P25236,P97840,Q6AYR9               |
| 2708 | 1,2,4,6,36,<br>37,39,40 | 3,5,7,8,38,<br>41,42,43,4<br>4 | 5 | O35547,P25236,P50115,P50116,Q8CJD3               |
| 2709 | 1,2,4,6,36,<br>37,39,41 | 3,5,7,8,38,<br>40,42,43,4<br>4 | 4 | P35467,Q5M819,Q7TP52,Q91ZS3                      |
| 2710 | 1,2,4,6,36,<br>37,39,42 | 3,5,7,8,38,<br>40,41,43,4<br>4 | 4 | P25236,P50115,P50116,Q7TP52                      |
| 2711 | 1,2,4,6,36,<br>37,39,43 | 3,5,7,8,38,<br>40,41,42,4<br>4 | 6 | D3ZUC6,P06760,P14480,P25236,P50115,P50116        |
| 2712 | 1,2,4,6,36,<br>37,39,44 | 3,5,7,8,38,<br>40,41,42,4<br>3 | 4 | P25236,P50115,P50116,Q8CJD3                      |
| 2713 | 1,2,4,6,36,<br>37,40,41 | 3,5,7,8,38,<br>39,42,43,4<br>4 | 1 | P25236                                           |
| 2714 | 1,2,4,6,36,<br>37,40,42 | 3,5,7,8,38,<br>39,41,43,4<br>4 | 3 | P25236,P50115,P50116                             |
| 2715 | 1,2,4,6,36,<br>37,40,43 | 3,5,7,8,38,<br>39,41,42,4<br>4 | 3 | P25236,P50115,P50116                             |
| 2716 | 1,2,4,6,36,<br>37,40,44 | 3,5,7,8,38,<br>39,41,42,4<br>3 | 5 | O35547,P00731,P25236,P50116,Q8CJD3               |
| 2717 | 1,2,4,6,36,<br>37,41,42 | 3,5,7,8,38,<br>39,40,43,4<br>4 | 4 | G3V686,P25236,Q7TP52,Q91ZS3                      |
| 2718 | 1,2,4,6,36,<br>37,41,43 | 3,5,7,8,38,<br>39,40,42,4<br>4 | 4 | D3ZUC6,P14480,P25236,Q7TP52                      |
| 2719 | 1,2,4,6,36,<br>37,41,44 | 3,5,7,8,38,<br>39,40,42,4<br>3 | 4 | P25236,Q7TP52,Q91ZS3,Q9JHB9                      |



|      |                         |                                |   |                                           |
|------|-------------------------|--------------------------------|---|-------------------------------------------|
| 2720 | 1,2,4,6,36,<br>37,42,43 | 3,5,7,8,38,<br>39,40,41,4<br>4 | 6 | P10715,P14480,P19629,P25236,P50115,Q7TP52 |
| 2721 | 1,2,4,6,36,<br>37,42,44 | 3,5,7,8,38,<br>39,40,41,4<br>3 | 4 | P25236,P50115,P50116,Q7TP52               |
| 2722 | 1,2,4,6,36,<br>37,43,44 | 3,5,7,8,38,<br>39,40,41,4<br>2 | 5 | D3ZUC6,P14480,P25236,Q63661,Q7TP52        |
| 2723 | 1,2,4,6,36,<br>38,39,40 | 3,5,7,8,37,<br>41,42,43,4<br>4 | 2 | P15399,P25236                             |
| 2724 | 1,2,4,6,36,<br>38,39,41 | 3,5,7,8,37,<br>40,42,43,4<br>4 | 3 | P50280,Q5M819,Q7TP52                      |
| 2725 | 1,2,4,6,36,<br>38,39,42 | 3,5,7,8,37,<br>40,41,43,4<br>4 | 3 | P25236,P51907,Q7TP52                      |
| 2726 | 1,2,4,6,36,<br>38,39,43 | 3,5,7,8,37,<br>40,41,42,4<br>4 | 3 | P14480,P25236,Q7TP52                      |
| 2727 | 1,2,4,6,36,<br>38,39,44 | 3,5,7,8,37,<br>40,41,42,4<br>3 | 3 | P25236,P51907,Q7TP52                      |
| 2728 | 1,2,4,6,36,<br>38,40,41 | 3,5,7,8,37,<br>39,42,43,4<br>4 | 3 | P50280,P70709,Q7TP52                      |
| 2729 | 1,2,4,6,36,<br>38,40,42 | 3,5,7,8,37,<br>39,41,43,4<br>4 | 3 | P25236,P70709,Q7TP52                      |
| 2730 | 1,2,4,6,36,<br>38,40,43 | 3,5,7,8,37,<br>39,41,42,4<br>4 | 4 | P15399,P25236,Q5HZV9,Q63661               |
| 2731 | 1,2,4,6,36,<br>38,40,44 | 3,5,7,8,37,<br>39,41,42,4<br>3 | 3 | P15399,P25236,Q62635                      |
| 2732 | 1,2,4,6,36,<br>38,41,42 | 3,5,7,8,37,<br>39,40,43,4<br>4 | 2 | Q7TP52,Q8CIZ5                             |
| 2733 | 1,2,4,6,36,<br>38,41,43 | 3,5,7,8,37,<br>39,40,42,4<br>4 | 4 | D3ZUC6,P25236,Q5HZV9,Q7TP52               |
| 2734 | 1,2,4,6,36,<br>38,41,44 | 3,5,7,8,37,<br>39,40,42,4<br>3 | 6 | P50280,P98089,Q05695,Q62635,Q7TP52,Q8CIZ5 |

|      |                         |                                |   |                                           |
|------|-------------------------|--------------------------------|---|-------------------------------------------|
| 2735 | 1,2,4,6,36,<br>38,42,43 | 3,5,7,8,37,<br>39,40,41,4<br>4 | 6 | P06866,P10715,P25236,Q5HZV9,Q6IFU7,Q7TP52 |
| 2736 | 1,2,4,6,36,<br>38,42,44 | 3,5,7,8,37,<br>39,40,41,4<br>3 | 4 | P25236,P51907,P97554,Q7TP52               |
| 2737 | 1,2,4,6,36,<br>38,43,44 | 3,5,7,8,37,<br>39,40,41,4<br>2 | 4 | P25236,P98089,Q63661,Q7TP52               |
| 2738 | 1,2,4,6,36,<br>39,40,41 | 3,5,7,8,37,<br>38,42,43,4<br>4 | 3 | P25236,P35467,Q62975                      |
| 2739 | 1,2,4,6,36,<br>39,40,42 | 3,5,7,8,37,<br>38,41,43,4<br>4 | 4 | P25236,P50115,P50116,Q7TP52               |
| 2740 | 1,2,4,6,36,<br>39,40,43 | 3,5,7,8,37,<br>38,41,42,4<br>4 | 3 | P25236,P50115,P50116                      |
| 2741 | 1,2,4,6,36,<br>39,40,44 | 3,5,7,8,37,<br>38,41,42,4<br>3 | 4 | P25236,P50115,P50116,Q8CJD3               |
| 2742 | 1,2,4,6,36,<br>39,41,42 | 3,5,7,8,37,<br>38,40,43,4<br>4 | 3 | P25236,P35467,Q7TP52                      |
| 2743 | 1,2,4,6,36,<br>39,41,43 | 3,5,7,8,37,<br>38,40,42,4<br>4 | 4 | D3ZUC6,P06760,P25236,Q7TP52               |
| 2744 | 1,2,4,6,36,<br>39,41,44 | 3,5,7,8,37,<br>38,40,42,4<br>3 | 3 | P25236,P35467,Q7TP52                      |
| 2745 | 1,2,4,6,36,<br>39,42,43 | 3,5,7,8,37,<br>38,40,41,4<br>4 | 3 | P25236,P50115,Q7TP52                      |
| 2746 | 1,2,4,6,36,<br>39,42,44 | 3,5,7,8,37,<br>38,40,41,4<br>3 | 5 | P25236,P50115,P50116,P51907,Q7TP52        |
| 2747 | 1,2,4,6,36,<br>39,43,44 | 3,5,7,8,37,<br>38,40,41,4<br>2 | 4 | D3ZUC6,P25236,Q63661,Q7TP52               |
| 2748 | 1,2,4,6,36,<br>40,41,42 | 3,5,7,8,37,<br>38,39,43,4<br>4 | 4 | P23593,P25236,P70709,Q7TP52               |
| 2749 | 1,2,4,6,36,<br>40,41,43 | 3,5,7,8,37,<br>38,39,42,4<br>4 | 4 | D3ZUC6,P25236,Q5HZV9,Q7TP52               |

|      |                         |                                |   |                                                         |
|------|-------------------------|--------------------------------|---|---------------------------------------------------------|
| 2750 | 1,2,4,6,36,<br>40,41,44 | 3,5,7,8,37,<br>38,39,42,4<br>3 | 5 | P06911,P12020,P25236,Q5GRG2,Q7TP52                      |
| 2751 | 1,2,4,6,36,<br>40,42,43 | 3,5,7,8,37,<br>38,39,41,4<br>4 | 2 | P25236,Q7TP52                                           |
| 2752 | 1,2,4,6,36,<br>40,42,44 | 3,5,7,8,37,<br>38,39,41,4<br>3 | 4 | P25236,P50116,Q7TP52,Q7TPB1                             |
| 2753 | 1,2,4,6,36,<br>40,43,44 | 3,5,7,8,37,<br>38,39,41,4<br>2 | 3 | P25236,Q63661,Q7TP52                                    |
| 2754 | 1,2,4,6,36,<br>41,42,43 | 3,5,7,8,37,<br>38,39,40,4<br>4 | 7 | D3ZUC6,G3V686,P25236,P54921,P82471,Q5HZV9,Q7TP52        |
| 2755 | 1,2,4,6,36,<br>41,42,44 | 3,5,7,8,37,<br>38,39,40,4<br>3 | 4 | G3V686,P25236,Q6P6R2,Q7TP52                             |
| 2756 | 1,2,4,6,36,<br>41,43,44 | 3,5,7,8,37,<br>38,39,40,4<br>2 | 5 | D3ZUC6,P25236,Q63661,Q66H69,Q7TP52                      |
| 2757 | 1,2,4,6,36,<br>42,43,44 | 3,5,7,8,37,<br>38,39,40,4<br>1 | 3 | P25236,Q63661,Q7TP52                                    |
| 2758 | 1,2,4,6,37,<br>38,39,40 | 3,5,7,8,36,<br>41,42,43,4<br>4 | 3 | P15399,P25236,P35281                                    |
| 2759 | 1,2,4,6,37,<br>38,39,41 | 3,5,7,8,36,<br>40,42,43,4<br>4 | 6 | P13432,P15399,P25236,P50280,P97580,Q91ZS3               |
| 2760 | 1,2,4,6,37,<br>38,39,42 | 3,5,7,8,36,<br>40,41,43,4<br>4 | 2 | P15399,P25236                                           |
| 2761 | 1,2,4,6,37,<br>38,39,43 | 3,5,7,8,36,<br>40,41,42,4<br>4 | 8 | P02680,P14480,P15399,P25236,P80020,P97580,Q4FZU6,Q6IFV1 |
| 2762 | 1,2,4,6,37,<br>38,39,44 | 3,5,7,8,36,<br>40,41,42,4<br>3 | 5 | P15399,P25236,P97580,Q6AYR9,Q9JJS8                      |
| 2763 | 1,2,4,6,37,<br>38,40,41 | 3,5,7,8,36,<br>39,42,43,4<br>4 | 4 | P15399,P25236,P50280,P70709                             |
| 2764 | 1,2,4,6,37,<br>38,40,42 | 3,5,7,8,36,<br>39,41,43,4<br>4 | 2 | P15399,P25236                                           |

|      |                         |                                |    |                                                                              |
|------|-------------------------|--------------------------------|----|------------------------------------------------------------------------------|
| 2765 | 1,2,4,6,37,<br>38,40,43 | 3,5,7,8,36,<br>39,41,42,4<br>4 | 8  | P14480,P15399,P25236,P80020,P97580,Q5HZV9,Q6AYR9,Q6IFV1                      |
| 2766 | 1,2,4,6,37,<br>38,40,44 | 3,5,7,8,36,<br>39,41,42,4<br>3 | 4  | P15399,P25236,Q62635,Q6AYR9                                                  |
| 2767 | 1,2,4,6,37,<br>38,41,42 | 3,5,7,8,36,<br>39,40,43,4<br>4 | 5  | P15399,P25236,P80020,Q8CIZ5,Q91ZS3                                           |
| 2768 | 1,2,4,6,37,<br>38,41,43 | 3,5,7,8,36,<br>39,40,42,4<br>4 | 8  | P14480,P15399,P25236,P80020,P97580,Q5HZV9,Q6IFV1,Q7TPB1                      |
| 2769 | 1,2,4,6,37,<br>38,41,44 | 3,5,7,8,36,<br>39,40,42,4<br>3 | 11 | P00774,P05964,P15399,P25236,P50280,P97580,P98089,Q62635,Q6AYR9,Q8CIZ5,Q91ZS3 |
| 2770 | 1,2,4,6,37,<br>38,42,43 | 3,5,7,8,36,<br>39,40,41,4<br>4 | 10 | B0BNN3,P06866,P10715,P14480,P15399,P25236,P80020,Q5HZV9,Q6IFU7,Q6P6T1        |
| 2771 | 1,2,4,6,37,<br>38,42,44 | 3,5,7,8,36,<br>39,40,41,4<br>3 | 3  | P15399,P25236,P97840                                                         |
| 2772 | 1,2,4,6,37,<br>38,43,44 | 3,5,7,8,36,<br>39,40,41,4<br>2 | 8  | P05964,P14480,P15399,P25236,P80020,P97580,P98089,Q6AYR9                      |
| 2773 | 1,2,4,6,37,<br>39,40,41 | 3,5,7,8,36,<br>38,42,43,4<br>4 | 4  | P06911,P25236,P35467,Q62975                                                  |
| 2774 | 1,2,4,6,37,<br>39,40,42 | 3,5,7,8,36,<br>38,41,43,4<br>4 | 3  | P25236,P50115,P50116                                                         |
| 2775 | 1,2,4,6,37,<br>39,40,43 | 3,5,7,8,36,<br>38,41,42,4<br>4 | 5  | P14480,P16573,P25236,P50115,P50116                                           |
| 2776 | 1,2,4,6,37,<br>39,40,44 | 3,5,7,8,36,<br>38,41,42,4<br>3 | 6  | O35547,P25236,P50116,Q5GRG2,Q6AYL6,Q8CJD3                                    |
| 2777 | 1,2,4,6,37,<br>39,41,42 | 3,5,7,8,36,<br>38,40,43,4<br>4 | 4  | P13432,P25236,P35467,Q91ZS3                                                  |
| 2778 | 1,2,4,6,37,<br>39,41,43 | 3,5,7,8,36,<br>38,40,42,4<br>4 | 3  | P14480,P25236,Q5HZV9                                                         |
| 2779 | 1,2,4,6,37,<br>39,41,44 | 3,5,7,8,36,<br>38,40,42,4<br>3 | 2  | P25236,P35467                                                                |

|      |                         |                                |   |                                           |
|------|-------------------------|--------------------------------|---|-------------------------------------------|
| 2780 | 1,2,4,6,37,<br>39,42,43 | 3,5,7,8,36,<br>38,40,41,4<br>4 | 4 | P14480,P25236,P50115,P50116               |
| 2781 | 1,2,4,6,37,<br>39,42,44 | 3,5,7,8,36,<br>38,40,41,4<br>3 | 3 | P25236,P50115,P50116                      |
| 2782 | 1,2,4,6,37,<br>39,43,44 | 3,5,7,8,36,<br>38,40,41,4<br>2 | 3 | P14480,P25236,P50116                      |
| 2783 | 1,2,4,6,37,<br>40,41,42 | 3,5,7,8,36,<br>38,39,43,4<br>4 | 2 | P25236,P70709                             |
| 2784 | 1,2,4,6,37,<br>40,41,43 | 3,5,7,8,36,<br>38,39,42,4<br>4 | 2 | P25236,Q5HZV9                             |
| 2785 | 1,2,4,6,37,<br>40,41,44 | 3,5,7,8,36,<br>38,39,42,4<br>3 | 5 | O54728,P06911,P12020,P25236,Q5GRG2        |
| 2786 | 1,2,4,6,37,<br>40,42,43 | 3,5,7,8,36,<br>38,39,41,4<br>4 | 2 | P25236,P50116                             |
| 2787 | 1,2,4,6,37,<br>40,42,44 | 3,5,7,8,36,<br>38,39,41,4<br>3 | 3 | P25236,P50116,Q6P6R2                      |
| 2788 | 1,2,4,6,37,<br>40,43,44 | 3,5,7,8,36,<br>38,39,41,4<br>2 | 2 | P25236,P50116                             |
| 2789 | 1,2,4,6,37,<br>41,42,43 | 3,5,7,8,36,<br>38,39,40,4<br>4 | 2 | P25236,Q5HZV9                             |
| 2790 | 1,2,4,6,37,<br>41,42,44 | 3,5,7,8,36,<br>38,39,40,4<br>3 | 2 | P25236,Q6P6R2                             |
| 2791 | 1,2,4,6,37,<br>41,43,44 | 3,5,7,8,36,<br>38,39,40,4<br>2 | 1 | P25236                                    |
| 2792 | 1,2,4,6,37,<br>42,43,44 | 3,5,7,8,36,<br>38,39,40,4<br>1 | 1 | P25236                                    |
| 2793 | 1,2,4,6,38,<br>39,40,41 | 3,5,7,8,36,<br>37,42,43,4<br>4 | 6 | P06911,P13432,P25236,P50280,P70709,Q62975 |
| 2794 | 1,2,4,6,38,<br>39,40,42 | 3,5,7,8,36,<br>37,41,43,4<br>4 | 3 | P25236,P70709,P83121                      |

|      |                         |                                |    |                                                                       |
|------|-------------------------|--------------------------------|----|-----------------------------------------------------------------------|
| 2795 | 1,2,4,6,38,<br>39,40,43 | 3,5,7,8,36,<br>37,41,42,4<br>4 | 5  | P15399,P25236,P70709,Q5HZV9,Q6IFV1                                    |
| 2796 | 1,2,4,6,38,<br>39,40,44 | 3,5,7,8,36,<br>37,41,42,4<br>3 | 3  | P15399,P25236,Q62635                                                  |
| 2797 | 1,2,4,6,38,<br>39,41,42 | 3,5,7,8,36,<br>37,40,43,4<br>4 | 3  | P13432,P25236,Q8CIZ5                                                  |
| 2798 | 1,2,4,6,38,<br>39,41,43 | 3,5,7,8,36,<br>37,40,42,4<br>4 | 5  | B0BNN3,P13432,P14480,P25236,Q5HZV9                                    |
| 2799 | 1,2,4,6,38,<br>39,41,44 | 3,5,7,8,36,<br>37,40,42,4<br>3 | 6  | P00774,P25236,P50280,P98089,Q62635,Q8CIZ5                             |
| 2800 | 1,2,4,6,38,<br>39,42,43 | 3,5,7,8,36,<br>37,40,41,4<br>4 | 7  | B0BNN3,P06866,P14480,P25236,Q5HZV9,Q6IFU7,Q80WL1                      |
| 2801 | 1,2,4,6,38,<br>39,42,44 | 3,5,7,8,36,<br>37,40,41,4<br>3 | 2  | P25236,P51907                                                         |
| 2802 | 1,2,4,6,38,<br>39,43,44 | 3,5,7,8,36,<br>37,40,41,4<br>2 | 3  | P14480,P25236,P98089                                                  |
| 2803 | 1,2,4,6,38,<br>40,41,42 | 3,5,7,8,36,<br>37,39,43,4<br>4 | 3  | P25236,P70709,Q8CIZ5                                                  |
| 2804 | 1,2,4,6,38,<br>40,41,43 | 3,5,7,8,36,<br>37,39,42,4<br>4 | 3  | P25236,P70709,Q5HZV9                                                  |
| 2805 | 1,2,4,6,38,<br>40,41,44 | 3,5,7,8,36,<br>37,39,42,4<br>3 | 10 | P06911,P12020,P15399,P25236,P50280,P70709,P98089,Q5GRG2,Q62635,Q8CIZ5 |
| 2806 | 1,2,4,6,38,<br>40,42,43 | 3,5,7,8,36,<br>37,39,41,4<br>4 | 6  | B0BNN3,P25236,P70709,Q5HZV9,Q63355,Q6IFU7                             |
| 2807 | 1,2,4,6,38,<br>40,42,44 | 3,5,7,8,36,<br>37,39,41,4<br>3 | 4  | P25236,P70709,Q62635,Q6TMA8                                           |
| 2808 | 1,2,4,6,38,<br>40,43,44 | 3,5,7,8,36,<br>37,39,41,4<br>2 | 8  | P01835,P15399,P25236,P70709,P98089,Q5HZV9,Q62635,Q63661               |
| 2809 | 1,2,4,6,38,<br>41,42,43 | 3,5,7,8,36,<br>37,39,40,4<br>4 | 10 | B0BNN3,P06866,P25236,P27213,P54921,P70709,P82471,Q5HZV9,Q6IFU7,Q8CIZ5 |

|      |                         |                                |    |                                                                       |
|------|-------------------------|--------------------------------|----|-----------------------------------------------------------------------|
| 2810 | 1,2,4,6,38,<br>41,42,44 | 3,5,7,8,36,<br>37,39,40,4<br>3 | 8  | P25236,P55091,P70709,P98089,Q05695,Q62635,Q6P6R2,Q8CIZ5               |
| 2811 | 1,2,4,6,38,<br>41,43,44 | 3,5,7,8,36,<br>37,39,40,4<br>2 | 8  | P00774,P25236,P27213,P55091,P98089,Q5HZV9,Q62635,Q8CIZ5               |
| 2812 | 1,2,4,6,38,<br>42,43,44 | 3,5,7,8,36,<br>37,39,40,4<br>1 | 5  | B0BNN3,P25236,P98089,Q5HZV9,Q6IFU7                                    |
| 2813 | 1,2,4,6,39,<br>40,41,42 | 3,5,7,8,36,<br>37,38,43,4<br>4 | 3  | P13432,P25236,P70709                                                  |
| 2814 | 1,2,4,6,39,<br>40,41,43 | 3,5,7,8,36,<br>37,38,42,4<br>4 | 4  | P25236,P70709,Q5HZV9,Q6AYL6                                           |
| 2815 | 1,2,4,6,39,<br>40,41,44 | 3,5,7,8,36,<br>37,38,42,4<br>3 | 10 | P06911,P10715,P12020,P16391,P19629,P25236,P70709,Q5GRG2,Q62975,Q6AYL6 |
| 2816 | 1,2,4,6,39,<br>40,42,43 | 3,5,7,8,36,<br>37,38,41,4<br>4 | 4  | P25236,P50116,Q5HZV9,Q6IFU7                                           |
| 2817 | 1,2,4,6,39,<br>40,42,44 | 3,5,7,8,36,<br>37,38,41,4<br>3 | 2  | P25236,P50116                                                         |
| 2818 | 1,2,4,6,39,<br>40,43,44 | 3,5,7,8,36,<br>37,38,41,4<br>2 | 3  | P25236,P50116,Q6AYL6                                                  |
| 2819 | 1,2,4,6,39,<br>41,42,43 | 3,5,7,8,36,<br>37,38,40,4<br>4 | 3  | P25236,P82471,Q5HZV9                                                  |
| 2820 | 1,2,4,6,39,<br>41,42,44 | 3,5,7,8,36,<br>37,38,40,4<br>3 | 2  | P25236,Q6P6R2                                                         |
| 2821 | 1,2,4,6,39,<br>41,43,44 | 3,5,7,8,36,<br>37,38,40,4<br>2 | 1  | P25236                                                                |
| 2822 | 1,2,4,6,39,<br>42,43,44 | 3,5,7,8,36,<br>37,38,40,4<br>1 | 1  | P25236                                                                |
| 2823 | 1,2,4,6,40,<br>41,42,43 | 3,5,7,8,36,<br>37,38,39,4<br>4 | 3  | P25236,P70709,Q5HZV9                                                  |
| 2824 | 1,2,4,6,40,<br>41,42,44 | 3,5,7,8,36,<br>37,38,39,4<br>3 | 5  | P06911,P25236,P70709,Q5GRG2,Q6P6R2                                    |

|      |                         |                                 |    |                                                                              |
|------|-------------------------|---------------------------------|----|------------------------------------------------------------------------------|
| 2825 | 1,2,4,6,40,<br>41,43,44 | 3,5,7,8,36,<br>37,38,39,4<br>2  | 7  | P06911,P12020,P25236,P70709,Q5GRG2,Q5HZV9,Q6AYL6                             |
| 2826 | 1,2,4,6,40,<br>42,43,44 | 3,5,7,8,36,<br>37,38,39,4<br>1  | 3  | P25236,P70709,Q6P6R2                                                         |
| 2827 | 1,2,4,6,41,<br>42,43,44 | 3,5,7,8,36,<br>37,38,39,4<br>0  | 6  | P25236,P27213,P82471,Q5HZV9,Q6P6R2,Q7TP52                                    |
| 2828 | 1,2,4,7,8,3<br>6,37,38  | 3,5,6,39,4<br>0,41,42,43<br>,44 | 5  | P05964,P11598,P15978,Q63467,Q99MH3                                           |
| 2829 | 1,2,4,7,8,3<br>6,37,39  | 3,5,6,38,4<br>0,41,42,43<br>,44 | 5  | P01835,P06760,P11598,Q63467,Q8CJD3                                           |
| 2830 | 1,2,4,7,8,3<br>6,37,40  | 3,5,6,38,3<br>9,41,42,43<br>,44 | 4  | P00774,P02803,Q63617,Q8CJD3                                                  |
| 2831 | 1,2,4,7,8,3<br>6,37,41  | 3,5,6,38,3<br>9,40,42,43<br>,44 | 11 | P01835,P05964,P11598,P18418,Q01205,Q63467,Q63475,Q63617,Q68FS4,Q99041,Q99MH3 |
| 2832 | 1,2,4,7,8,3<br>6,37,42  | 3,5,6,38,3<br>9,40,41,43<br>,44 | 7  | P00762,P01835,P15978,P47967,P82995,Q09030,Q99MH3                             |
| 2833 | 1,2,4,7,8,3<br>6,37,43  | 3,5,6,38,3<br>9,40,41,42<br>,44 | 5  | D3ZUC6,P05964,P06760,P16391,Q63467                                           |
| 2834 | 1,2,4,7,8,3<br>6,37,44  | 3,5,6,38,3<br>9,40,41,42<br>,43 | 6  | P05964,P07171,P11598,Q63467,Q8CJD3,Q99MH3                                    |
| 2835 | 1,2,4,7,8,3<br>6,38,39  | 3,5,6,37,4<br>0,41,42,43<br>,44 | 4  | P11598,P51907,Q63467,Q80WL1                                                  |
| 2836 | 1,2,4,7,8,3<br>6,38,40  | 3,5,6,37,3<br>9,41,42,43<br>,44 | 1  | P02803                                                                       |
| 2837 | 1,2,4,7,8,3<br>6,38,41  | 3,5,6,37,3<br>9,40,42,43<br>,44 | 7  | P11598,P50115,P50116,Q01205,Q63467,Q63475,Q99MH3                             |
| 2838 | 1,2,4,7,8,3<br>6,38,42  | 3,5,6,37,3<br>9,40,41,43<br>,44 | 7  | P08649,P15978,P47967,P51907,P82995,Q80WL1,Q99MH3                             |
| 2839 | 1,2,4,7,8,3<br>6,38,43  | 3,5,6,37,3<br>9,40,41,42<br>,44 | 6  | D3ZUC6,P06760,P16391,Q63467,Q64268,Q80WL1                                    |



|      |                        |                                 |    |                                                                                            |
|------|------------------------|---------------------------------|----|--------------------------------------------------------------------------------------------|
| 2840 | 1,2,4,7,8,3<br>6,38,44 | 3,5,6,37,3<br>9,40,41,42<br>,43 | 5  | P07171,P11598,P51907,Q63467,Q99MH3                                                         |
| 2841 | 1,2,4,7,8,3<br>6,39,40 | 3,5,6,37,3<br>8,41,42,43<br>,44 | 3  | P00774,P02803,Q8CJD3                                                                       |
| 2842 | 1,2,4,7,8,3<br>6,39,41 | 3,5,6,37,3<br>8,40,42,43<br>,44 | 11 | P01835,P11598,P18418,P30919,P82995,Q63467,Q63475,Q63617,Q68FS4,Q99041,Q99MH3               |
| 2843 | 1,2,4,7,8,3<br>6,39,42 | 3,5,6,37,3<br>8,40,41,43<br>,44 | 8  | P01835,P08010,P08649,P51907,P82995,Q561R9,Q63467,Q80WL1                                    |
| 2844 | 1,2,4,7,8,3<br>6,39,43 | 3,5,6,37,3<br>8,40,41,42<br>,44 | 4  | D3ZUC6,P06760,Q63467,Q80WL1                                                                |
| 2845 | 1,2,4,7,8,3<br>6,39,44 | 3,5,6,37,3<br>8,40,41,42<br>,43 | 8  | P07171,P11598,P51907,P82995,Q63467,Q63475,Q8CJD3,Q99MH3                                    |
| 2846 | 1,2,4,7,8,3<br>6,40,41 | 3,5,6,37,3<br>8,39,42,43<br>,44 | 5  | P18418,Q63467,Q63617,Q99MH3,Q9JJS8                                                         |
| 2847 | 1,2,4,7,8,3<br>6,40,42 | 3,5,6,37,3<br>8,39,41,43<br>,44 | 7  | P00774,P20759,P82995,Q09030,Q561R9,Q9JJS8,Q9QZ76                                           |
| 2848 | 1,2,4,7,8,3<br>6,40,43 | 3,5,6,37,3<br>8,39,41,42<br>,44 | 1  | D3ZUC6                                                                                     |
| 2849 | 1,2,4,7,8,3<br>6,40,44 | 3,5,6,37,3<br>8,39,41,42<br>,43 | 6  | P11598,P97574,Q63467,Q63617,Q8CJD3,Q99MH3                                                  |
| 2850 | 1,2,4,7,8,3<br>6,41,42 | 3,5,6,37,3<br>8,39,40,43<br>,44 | 13 | P01835,P08010,P08649,P08721,P54921,P60905,P82995,Q09030,Q561R9,Q63467,Q7TP52,Q812E4,Q99MH3 |
| 2851 | 1,2,4,7,8,3<br>6,41,43 | 3,5,6,37,3<br>8,39,40,42<br>,44 | 8  | D3ZUC6,P01836,P06760,P51886,Q63467,Q63475,Q63617,Q99MH3                                    |
| 2852 | 1,2,4,7,8,3<br>6,41,44 | 3,5,6,37,3<br>8,39,40,42<br>,43 | 11 | D3ZUK3,P07171,P08721,P11598,P18418,P82995,Q01205,Q63467,Q63475,Q63617,Q99MH3               |
| 2853 | 1,2,4,7,8,3<br>6,42,43 | 3,5,6,37,3<br>8,39,40,41<br>,44 | 6  | D3ZUC6,P06760,P16391,P16636,P82995,Q80WL1                                                  |
| 2854 | 1,2,4,7,8,3<br>6,42,44 | 3,5,6,37,3<br>8,39,40,41<br>,43 | 11 | P00714,P00762,P08649,P08721,P20759,P51907,P60905,P82995,Q561R9,Q63467,Q99MH3               |

|      |                        |                                 |   |                                           |
|------|------------------------|---------------------------------|---|-------------------------------------------|
| 2855 | 1,2,4,7,8,3<br>6,43,44 | 3,5,6,37,3<br>8,39,40,41<br>,42 | 5 | D3ZUC6,P13432,Q63467,Q63661,Q99MH3        |
| 2856 | 1,2,4,7,8,3<br>7,38,39 | 3,5,6,36,4<br>0,41,42,43<br>,44 | 3 | P02803,P11598,Q80WL1                      |
| 2857 | 1,2,4,7,8,3<br>7,38,40 | 3,5,6,36,3<br>9,41,42,43<br>,44 | 1 | P02803                                    |
| 2858 | 1,2,4,7,8,3<br>7,38,41 | 3,5,6,36,3<br>9,40,42,43<br>,44 | 5 | P05964,P18418,P50115,Q63617,Q68FS4        |
| 2859 | 1,2,4,7,8,3<br>7,38,42 | 3,5,6,36,3<br>9,40,41,43<br>,44 | 2 | P02803,Q80WL1                             |
| 2860 | 1,2,4,7,8,3<br>7,38,43 | 3,5,6,36,3<br>9,40,41,42<br>,44 | 5 | P05964,P14480,Q64268,Q7TPB1,Q80WL1        |
| 2861 | 1,2,4,7,8,3<br>7,38,44 | 3,5,6,36,3<br>9,40,41,42<br>,43 | 2 | P05964,P11598                             |
| 2862 | 1,2,4,7,8,3<br>7,39,40 | 3,5,6,36,3<br>8,41,42,43<br>,44 | 3 | P02803,Q63617,Q8CJD3                      |
| 2863 | 1,2,4,7,8,3<br>7,39,41 | 3,5,6,36,3<br>8,40,42,43<br>,44 | 6 | P01835,P11598,P18418,Q63617,Q68FS4,Q99041 |
| 2864 | 1,2,4,7,8,3<br>7,39,42 | 3,5,6,36,3<br>8,40,41,43<br>,44 | 3 | P01835,Q561R9,Q80WL1                      |
| 2865 | 1,2,4,7,8,3<br>7,39,43 | 3,5,6,36,3<br>8,40,41,42<br>,44 | 4 | P06760,P14480,Q80WL1,Q99PP0               |
| 2866 | 1,2,4,7,8,3<br>7,39,44 | 3,5,6,36,3<br>8,40,41,42<br>,43 | 4 | P05964,P11598,Q64057,Q8CJD3               |
| 2867 | 1,2,4,7,8,3<br>7,40,41 | 3,5,6,36,3<br>8,39,42,43<br>,44 | 4 | P02803,P18418,Q63617,Q68FS4               |
| 2868 | 1,2,4,7,8,3<br>7,40,42 | 3,5,6,36,3<br>8,39,41,43<br>,44 | 3 | P02803,P20759,Q561R9                      |
| 2869 | 1,2,4,7,8,3<br>7,40,43 | 3,5,6,36,3<br>8,39,41,42<br>,44 | 2 | P02803,Q63617                             |

|      |                        |                                 |   |                                                         |
|------|------------------------|---------------------------------|---|---------------------------------------------------------|
| 2870 | 1,2,4,7,8,3<br>7,40,44 | 3,5,6,36,3<br>8,39,41,42<br>,43 | 4 | P02803,Q5GRG2,Q63617,Q8CJD3                             |
| 2871 | 1,2,4,7,8,3<br>7,41,42 | 3,5,6,36,3<br>8,39,40,43<br>,44 | 4 | P01835,P18418,Q561R9,Q63617                             |
| 2872 | 1,2,4,7,8,3<br>7,41,43 | 3,5,6,36,3<br>8,39,40,42<br>,44 | 8 | D3ZUC6,P05964,P18418,P30836,Q63617,Q68FS4,Q7TPB1,Q9QX79 |
| 2873 | 1,2,4,7,8,3<br>7,41,44 | 3,5,6,36,3<br>8,39,40,42<br>,43 | 8 | P05964,P11598,P18418,Q63467,Q63475,Q63617,Q68FS4,Q99MH3 |
| 2874 | 1,2,4,7,8,3<br>7,42,43 | 3,5,6,36,3<br>8,39,40,41<br>,44 | 2 | Q80WL1,Q99PP0                                           |
| 2875 | 1,2,4,7,8,3<br>7,42,44 | 3,5,6,36,3<br>8,39,40,41<br>,43 | 2 | P00714,Q561R9                                           |
| 2876 | 1,2,4,7,8,3<br>7,43,44 | 3,5,6,36,3<br>8,39,40,41<br>,42 | 1 | P05964                                                  |
| 2877 | 1,2,4,7,8,3<br>8,39,40 | 3,5,6,36,3<br>7,41,42,43<br>,44 | 2 | P02803,Q80WL1                                           |
| 2878 | 1,2,4,7,8,3<br>8,39,41 | 3,5,6,36,3<br>7,40,42,43<br>,44 | 6 | P11598,P50115,P50116,Q63475,Q68FS4,Q80WL1               |
| 2879 | 1,2,4,7,8,3<br>8,39,42 | 3,5,6,36,3<br>7,40,41,43<br>,44 | 2 | P51907,Q80WL1                                           |
| 2880 | 1,2,4,7,8,3<br>8,39,43 | 3,5,6,36,3<br>7,40,41,42<br>,44 | 2 | Q64268,Q80WL1                                           |
| 2881 | 1,2,4,7,8,3<br>8,39,44 | 3,5,6,36,3<br>7,40,41,42<br>,43 | 3 | P11598,P51907,Q80WL1                                    |
| 2882 | 1,2,4,7,8,3<br>8,40,41 | 3,5,6,36,3<br>7,39,42,43<br>,44 | 5 | P02803,P50115,P50116,Q63617,Q68FS4                      |
| 2883 | 1,2,4,7,8,3<br>8,40,42 | 3,5,6,36,3<br>7,39,41,43<br>,44 | 4 | P02803,P20759,Q80WL1,Q9QZ76                             |
| 2884 | 1,2,4,7,8,3<br>8,40,43 | 3,5,6,36,3<br>7,39,41,42<br>,44 | 2 | P02803,Q80WL1                                           |

|      |                        |                                 |    |                                                                                     |
|------|------------------------|---------------------------------|----|-------------------------------------------------------------------------------------|
| 2885 | 1,2,4,7,8,3<br>8,40,44 | 3,5,6,36,3<br>7,39,41,42<br>,43 | 1  | P02803                                                                              |
| 2886 | 1,2,4,7,8,3<br>8,41,42 | 3,5,6,36,3<br>7,39,40,43<br>,44 | 7  | O35547,P08010,P50115,P50116,P54921,Q80WL1,Q9QZK9                                    |
| 2887 | 1,2,4,7,8,3<br>8,41,43 | 3,5,6,36,3<br>7,39,40,42<br>,44 | 7  | P50115,P50116,P55091,Q64268,Q68FS4,Q7TPB1,Q80WL1                                    |
| 2888 | 1,2,4,7,8,3<br>8,41,44 | 3,5,6,36,3<br>7,39,40,42<br>,43 | 12 | P11598,P50115,P50116,P55091,P98089,Q05695,Q62635,Q63467,Q63475,Q63617,Q68FS4,Q99MH3 |
| 2889 | 1,2,4,7,8,3<br>8,42,43 | 3,5,6,36,3<br>7,39,40,41<br>,44 | 4  | O35547,P54921,Q64268,Q80WL1                                                         |
| 2890 | 1,2,4,7,8,3<br>8,42,44 | 3,5,6,36,3<br>7,39,40,41<br>,43 | 3  | P00714,P51907,Q80WL1                                                                |
| 2891 | 1,2,4,7,8,3<br>8,43,44 | 3,5,6,36,3<br>7,39,40,41<br>,42 | 3  | P98089,Q64268,Q80WL1                                                                |
| 2892 | 1,2,4,7,8,3<br>9,40,41 | 3,5,6,36,3<br>7,38,42,43<br>,44 | 6  | P10715,P18418,P31044,Q5GRG2,Q63617,Q68FS4                                           |
| 2893 | 1,2,4,7,8,3<br>9,40,42 | 3,5,6,36,3<br>7,38,41,43<br>,44 | 2  | P02803,Q561R9                                                                       |
| 2894 | 1,2,4,7,8,3<br>9,40,43 | 3,5,6,36,3<br>7,38,41,42<br>,44 | 0  |                                                                                     |
| 2895 | 1,2,4,7,8,3<br>9,40,44 | 3,5,6,36,3<br>7,38,41,42<br>,43 | 5  | P11598,Q5GRG2,Q63617,Q6AYL6,Q8CJD3                                                  |
| 2896 | 1,2,4,7,8,3<br>9,41,42 | 3,5,6,36,3<br>7,38,40,43<br>,44 | 3  | P01835,P08010,Q561R9                                                                |
| 2897 | 1,2,4,7,8,3<br>9,41,43 | 3,5,6,36,3<br>7,38,40,42<br>,44 | 5  | D3ZUC6,P22006,Q63617,Q68FS4,Q80WL1                                                  |
| 2898 | 1,2,4,7,8,3<br>9,41,44 | 3,5,6,36,3<br>7,38,40,42<br>,43 | 9  | O88267,P11598,P18418,Q63467,Q63475,Q63617,Q64057,Q68FS4,Q99MH3                      |
| 2899 | 1,2,4,7,8,3<br>9,42,43 | 3,5,6,36,3<br>7,38,40,41<br>,44 | 2  | Q561R9,Q80WL1                                                                       |

|      |                         |                                 |   |                                                         |
|------|-------------------------|---------------------------------|---|---------------------------------------------------------|
| 2900 | 1,2,4,7,8,3<br>9,42,44  | 3,5,6,36,3<br>7,38,40,41<br>,43 | 3 | P51907,Q561R9,Q80WL1                                    |
| 2901 | 1,2,4,7,8,3<br>9,43,44  | 3,5,6,36,3<br>7,38,40,41<br>,42 | 2 | Q64057,Q80WL1                                           |
| 2902 | 1,2,4,7,8,4<br>0,41,42  | 3,5,6,36,3<br>7,38,39,43<br>,44 | 5 | P20759,Q561R9,Q63617,Q9JJS8,Q9QZ76                      |
| 2903 | 1,2,4,7,8,4<br>0,41,43  | 3,5,6,36,3<br>7,38,39,42<br>,44 | 2 | Q63617,Q68FS4                                           |
| 2904 | 1,2,4,7,8,4<br>0,41,44  | 3,5,6,36,3<br>7,38,39,42<br>,43 | 8 | P06911,P10715,P12020,P18418,P31044,Q5GRG2,Q63617,Q68FS4 |
| 2905 | 1,2,4,7,8,4<br>0,42,43  | 3,5,6,36,3<br>7,38,39,41<br>,44 | 1 | Q561R9                                                  |
| 2906 | 1,2,4,7,8,4<br>0,42,44  | 3,5,6,36,3<br>7,38,39,41<br>,43 | 4 | P00714,P20759,Q561R9,Q9QZ76                             |
| 2907 | 1,2,4,7,8,4<br>0,43,44  | 3,5,6,36,3<br>7,38,39,41<br>,42 | 2 | Q63617,Q6AYL6                                           |
| 2908 | 1,2,4,7,8,4<br>1,42,43  | 3,5,6,36,3<br>7,38,39,40<br>,44 | 5 | O35547,P54921,P60905,P82471,Q561R9                      |
| 2909 | 1,2,4,7,8,4<br>1,42,44  | 3,5,6,36,3<br>7,38,39,40<br>,43 | 6 | P00714,P20759,P60905,Q561R9,Q63617,Q99MH3               |
| 2910 | 1,2,4,7,8,4<br>1,43,44  | 3,5,6,36,3<br>7,38,39,40<br>,42 | 4 | D3ZUC6,Q63467,Q63617,Q99MH3                             |
| 2911 | 1,2,4,7,8,4<br>2,43,44  | 3,5,6,36,3<br>7,38,39,40<br>,41 | 3 | P00714,Q561R9,Q80WL1                                    |
| 2912 | 1,2,4,7,36,<br>37,38,39 | 3,5,6,8,40,<br>41,42,43,4<br>4  | 4 | P05964,P06760,P51907,P97840                             |
| 2913 | 1,2,4,7,36,<br>37,38,40 | 3,5,6,8,39,<br>41,42,43,4<br>4  | 2 | P01836,P02803                                           |
| 2914 | 1,2,4,7,36,<br>37,38,41 | 3,5,6,8,39,<br>40,42,43,4<br>4  | 5 | P01836,P05964,Q5M819,Q91ZS3,Q99MH3                      |

|      |                         |                                |   |                                                         |
|------|-------------------------|--------------------------------|---|---------------------------------------------------------|
| 2915 | 1,2,4,7,36,<br>37,38,42 | 3,5,6,8,39,<br>40,41,43,4<br>4 | 4 | P01836,P47967,P51907,P97840                             |
| 2916 | 1,2,4,7,36,<br>37,38,43 | 3,5,6,8,39,<br>40,41,42,4<br>4 | 6 | D3ZUC6,P01836,P05964,P06760,P14480,P80020               |
| 2917 | 1,2,4,7,36,<br>37,38,44 | 3,5,6,8,39,<br>40,41,42,4<br>3 | 3 | P05964,P51907,P97840                                    |
| 2918 | 1,2,4,7,36,<br>37,39,40 | 3,5,6,8,38,<br>41,42,43,4<br>4 | 2 | P00774,Q8CJD3                                           |
| 2919 | 1,2,4,7,36,<br>37,39,41 | 3,5,6,8,38,<br>40,42,43,4<br>4 | 8 | D3ZUC6,P01835,P01836,P06760,P18418,P35467,Q63467,Q63475 |
| 2920 | 1,2,4,7,36,<br>37,39,42 | 3,5,6,8,38,<br>40,41,43,4<br>4 | 7 | P00774,P01835,P02793;Q7TP54,P06760,P47967,P51907,P97840 |
| 2921 | 1,2,4,7,36,<br>37,39,43 | 3,5,6,8,38,<br>40,41,42,4<br>4 | 4 | D3ZUC6,P01836,P06760,P14480                             |
| 2922 | 1,2,4,7,36,<br>37,39,44 | 3,5,6,8,38,<br>40,41,42,4<br>3 | 4 | P05964,P51907,Q63467,Q8CJD3                             |
| 2923 | 1,2,4,7,36,<br>37,40,41 | 3,5,6,8,38,<br>39,42,43,4<br>4 | 2 | P01836,P18418                                           |
| 2924 | 1,2,4,7,36,<br>37,40,42 | 3,5,6,8,38,<br>39,41,43,4<br>4 | 2 | P00774,P01836                                           |
| 2925 | 1,2,4,7,36,<br>37,40,43 | 3,5,6,8,38,<br>39,41,42,4<br>4 | 3 | D3ZUC6,P01836,P06760                                    |
| 2926 | 1,2,4,7,36,<br>37,40,44 | 3,5,6,8,38,<br>39,41,42,4<br>3 | 1 | Q8CJD3                                                  |
| 2927 | 1,2,4,7,36,<br>37,41,42 | 3,5,6,8,38,<br>39,40,43,4<br>4 | 4 | P01835,P01836,P08649,P82995                             |
| 2928 | 1,2,4,7,36,<br>37,41,43 | 3,5,6,8,38,<br>39,40,42,4<br>4 | 4 | D3ZUC6,P01836,P05964,P06760                             |
| 2929 | 1,2,4,7,36,<br>37,41,44 | 3,5,6,8,38,<br>39,40,42,4<br>3 | 5 | P05964,P18418,Q63467,Q63475,Q99MH3                      |

|      |                         |                                |   |                                                         |
|------|-------------------------|--------------------------------|---|---------------------------------------------------------|
| 2930 | 1,2,4,7,36,<br>37,42,43 | 3,5,6,8,38,<br>39,40,41,4<br>4 | 4 | D3ZUC6,P01836,P06760,P47967                             |
| 2931 | 1,2,4,7,36,<br>37,42,44 | 3,5,6,8,38,<br>39,40,41,4<br>3 | 4 | P47967,P51907,P82995,P97840                             |
| 2932 | 1,2,4,7,36,<br>37,43,44 | 3,5,6,8,38,<br>39,40,41,4<br>2 | 4 | D3ZUC6,P05964,P06760,Q63661                             |
| 2933 | 1,2,4,7,36,<br>38,39,40 | 3,5,6,8,37,<br>41,42,43,4<br>4 | 2 | P01836,P51907                                           |
| 2934 | 1,2,4,7,36,<br>38,39,41 | 3,5,6,8,37,<br>40,42,43,4<br>4 | 5 | P01836,P06760,P51907,Q63467,Q63475                      |
| 2935 | 1,2,4,7,36,<br>38,39,42 | 3,5,6,8,37,<br>40,41,43,4<br>4 | 7 | P01836,P02793;Q7TP54,P08649,P47967,P51907,P97840,Q80WL1 |
| 2936 | 1,2,4,7,36,<br>38,39,43 | 3,5,6,8,37,<br>40,41,42,4<br>4 | 7 | D3ZUC6,O70594,P01836,P06760,P14480,P51907,Q80WL1        |
| 2937 | 1,2,4,7,36,<br>38,39,44 | 3,5,6,8,37,<br>40,41,42,4<br>3 | 2 | P51907,Q63467                                           |
| 2938 | 1,2,4,7,36,<br>38,40,41 | 3,5,6,8,37,<br>39,42,43,4<br>4 | 1 | P01836                                                  |
| 2939 | 1,2,4,7,36,<br>38,40,42 | 3,5,6,8,37,<br>39,41,43,4<br>4 | 3 | P01836,P14408,P51907                                    |
| 2940 | 1,2,4,7,36,<br>38,40,43 | 3,5,6,8,37,<br>39,41,42,4<br>4 | 4 | D3ZUC6,O70594,P01836,Q63661                             |
| 2941 | 1,2,4,7,36,<br>38,40,44 | 3,5,6,8,37,<br>39,41,42,4<br>3 | 1 | P51907                                                  |
| 2942 | 1,2,4,7,36,<br>38,41,42 | 3,5,6,8,37,<br>39,40,43,4<br>4 | 4 | P01836,P08649,P51907,P82995                             |
| 2943 | 1,2,4,7,36,<br>38,41,43 | 3,5,6,8,37,<br>39,40,42,4<br>4 | 4 | D3ZUC6,P01836,P06760,Q63467                             |
| 2944 | 1,2,4,7,36,<br>38,41,44 | 3,5,6,8,37,<br>39,40,42,4<br>3 | 7 | P51907,P55091,P98089,Q05695,Q63467,Q63475,Q99MH3        |

|      |                         |                                |   |                                                                |
|------|-------------------------|--------------------------------|---|----------------------------------------------------------------|
| 2945 | 1,2,4,7,36,<br>38,42,43 | 3,5,6,8,37,<br>39,40,41,4<br>4 | 7 | D3ZUC6,P01836,P06760,P06866,P47967,P51907,Q80WL1               |
| 2946 | 1,2,4,7,36,<br>38,42,44 | 3,5,6,8,37,<br>39,40,41,4<br>3 | 5 | P14408,P47967,P51907,P82995,P97840                             |
| 2947 | 1,2,4,7,36,<br>38,43,44 | 3,5,6,8,37,<br>39,40,41,4<br>2 | 5 | D3ZUC6,P06760,P51907,Q63467,Q63661                             |
| 2948 | 1,2,4,7,36,<br>39,40,41 | 3,5,6,8,37,<br>38,42,43,4<br>4 | 2 | P01836,P35467                                                  |
| 2949 | 1,2,4,7,36,<br>39,40,42 | 3,5,6,8,37,<br>38,41,43,4<br>4 | 4 | P00774,P01836,P51907,Q561R9                                    |
| 2950 | 1,2,4,7,36,<br>39,40,43 | 3,5,6,8,37,<br>38,41,42,4<br>4 | 3 | D3ZUC6,P01836,P06760                                           |
| 2951 | 1,2,4,7,36,<br>39,40,44 | 3,5,6,8,37,<br>38,41,42,4<br>3 | 2 | P51907,Q8CJD3                                                  |
| 2952 | 1,2,4,7,36,<br>39,41,42 | 3,5,6,8,37,<br>38,40,43,4<br>4 | 9 | P01835,P01836,P06760,P08010,P08649,P35467,P51907,P82995,Q561R9 |
| 2953 | 1,2,4,7,36,<br>39,41,43 | 3,5,6,8,37,<br>38,40,42,4<br>4 | 6 | D3ZUC6,O89117,P01836,P06760,P22006,Q63467                      |
| 2954 | 1,2,4,7,36,<br>39,41,44 | 3,5,6,8,37,<br>38,40,42,4<br>3 | 7 | D3ZUC6,P35467,P51907,P82995,Q63467,Q63475,Q99MH3               |
| 2955 | 1,2,4,7,36,<br>39,42,43 | 3,5,6,8,37,<br>38,40,41,4<br>4 | 5 | D3ZUC6,P01836,P06760,P51907,P82995                             |
| 2956 | 1,2,4,7,36,<br>39,42,44 | 3,5,6,8,37,<br>38,40,41,4<br>3 | 4 | P02793;Q7TP54,P51907,P82995,Q561R9                             |
| 2957 | 1,2,4,7,36,<br>39,43,44 | 3,5,6,8,37,<br>38,40,41,4<br>2 | 6 | D3ZUC6,O89117,P06760,P51907,Q63467,Q63661                      |
| 2958 | 1,2,4,7,36,<br>40,41,42 | 3,5,6,8,37,<br>38,39,43,4<br>4 | 5 | P01836,P08649,P82995,Q561R9,Q9JJS8                             |
| 2959 | 1,2,4,7,36,<br>40,41,43 | 3,5,6,8,37,<br>38,39,42,4<br>4 | 3 | D3ZUC6,P01836,P06760                                           |



|      |                         |                                |   |                                                         |
|------|-------------------------|--------------------------------|---|---------------------------------------------------------|
| 2960 | 1,2,4,7,36,<br>40,41,44 | 3,5,6,8,37,<br>38,39,42,4<br>3 | 3 | Q5GRG2,Q63467,Q99MH3                                    |
| 2961 | 1,2,4,7,36,<br>40,42,43 | 3,5,6,8,37,<br>38,39,41,4<br>4 | 3 | D3ZUC6,P01836,Q561R9                                    |
| 2962 | 1,2,4,7,36,<br>40,42,44 | 3,5,6,8,37,<br>38,39,41,4<br>3 | 5 | P14408,P51907,P82995,Q561R9,Q7TPB1                      |
| 2963 | 1,2,4,7,36,<br>40,43,44 | 3,5,6,8,37,<br>38,39,41,4<br>2 | 2 | D3ZUC6,Q63661                                           |
| 2964 | 1,2,4,7,36,<br>41,42,43 | 3,5,6,8,37,<br>38,39,40,4<br>4 | 8 | D3ZUC6,P01836,P06760,P08649,P16636,P54921,P82471,P82995 |
| 2965 | 1,2,4,7,36,<br>41,42,44 | 3,5,6,8,37,<br>38,39,40,4<br>3 | 6 | P08649,P51907,P82995,Q561R9,Q63467,Q99MH3               |
| 2966 | 1,2,4,7,36,<br>41,43,44 | 3,5,6,8,37,<br>38,39,40,4<br>2 | 8 | D3ZUC6,Q89117,P06760,P82995,Q63467,Q63475,Q63661,Q99MH3 |
| 2967 | 1,2,4,7,36,<br>42,43,44 | 3,5,6,8,37,<br>38,39,40,4<br>1 | 5 | D3ZUC6,P06760,P51907,P82995,Q63661                      |
| 2968 | 1,2,4,7,37,<br>38,39,40 | 3,5,6,8,36,<br>41,42,43,4<br>4 | 1 | P02803                                                  |
| 2969 | 1,2,4,7,37,<br>38,39,41 | 3,5,6,8,36,<br>40,42,43,4<br>4 | 0 |                                                         |
| 2970 | 1,2,4,7,37,<br>38,39,42 | 3,5,6,8,36,<br>40,41,43,4<br>4 | 3 | P51907,P97840,Q80WL1                                    |
| 2971 | 1,2,4,7,37,<br>38,39,43 | 3,5,6,8,36,<br>40,41,42,4<br>4 | 5 | P06760,P14480,P23593,P80020,Q80WL1                      |
| 2972 | 1,2,4,7,37,<br>38,39,44 | 3,5,6,8,36,<br>40,41,42,4<br>3 | 2 | P05964,P51907                                           |
| 2973 | 1,2,4,7,37,<br>38,40,41 | 3,5,6,8,36,<br>39,42,43,4<br>4 | 1 | P01836                                                  |
| 2974 | 1,2,4,7,37,<br>38,40,42 | 3,5,6,8,36,<br>39,41,43,4<br>4 | 1 | P02803                                                  |

|      |                         |                                |   |                                           |
|------|-------------------------|--------------------------------|---|-------------------------------------------|
| 2975 | 1,2,4,7,37,<br>38,40,43 | 3,5,6,8,36,<br>39,41,42,4<br>4 | 2 | P01836,P80020                             |
| 2976 | 1,2,4,7,37,<br>38,40,44 | 3,5,6,8,36,<br>39,41,42,4<br>3 | 2 | P15399,Q6AYR9                             |
| 2977 | 1,2,4,7,37,<br>38,41,42 | 3,5,6,8,36,<br>39,40,43,4<br>4 | 1 | P01836                                    |
| 2978 | 1,2,4,7,37,<br>38,41,43 | 3,5,6,8,36,<br>39,40,42,4<br>4 | 5 | D3ZUC6,P01836,P05964,P14480,P80020        |
| 2979 | 1,2,4,7,37,<br>38,41,44 | 3,5,6,8,36,<br>39,40,42,4<br>3 | 5 | P05964,P55091,P98089,Q05695,Q62635        |
| 2980 | 1,2,4,7,37,<br>38,42,43 | 3,5,6,8,36,<br>39,40,41,4<br>4 | 6 | P01836,P06866,P14480,P80020,Q6P6T1,Q80WL1 |
| 2981 | 1,2,4,7,37,<br>38,42,44 | 3,5,6,8,36,<br>39,40,41,4<br>3 | 2 | P51907,P97840                             |
| 2982 | 1,2,4,7,37,<br>38,43,44 | 3,5,6,8,36,<br>39,40,41,4<br>2 | 3 | P05964,P14480,P80020                      |
| 2983 | 1,2,4,7,37,<br>39,40,41 | 3,5,6,8,36,<br>38,42,43,4<br>4 | 4 | P10715,P18418,P35467,Q5GRG2               |
| 2984 | 1,2,4,7,37,<br>39,40,42 | 3,5,6,8,36,<br>38,41,43,4<br>4 | 1 | Q561R9                                    |
| 2985 | 1,2,4,7,37,<br>39,40,43 | 3,5,6,8,36,<br>38,41,42,4<br>4 | 3 | Q6AYL6,Q8CIZ5,Q99PP0                      |
| 2986 | 1,2,4,7,37,<br>39,40,44 | 3,5,6,8,36,<br>38,41,42,4<br>3 | 3 | Q5GRG2,Q6AYL6,Q8CJD3                      |
| 2987 | 1,2,4,7,37,<br>39,41,42 | 3,5,6,8,36,<br>38,40,43,4<br>4 | 3 | P01835,P35467,Q561R9                      |
| 2988 | 1,2,4,7,37,<br>39,41,43 | 3,5,6,8,36,<br>38,40,42,4<br>4 | 5 | D3ZUC6,P01836,P06760,P14480,P22006        |
| 2989 | 1,2,4,7,37,<br>39,41,44 | 3,5,6,8,36,<br>38,40,42,4<br>3 | 3 | P05964,P18418,P35467                      |

|      |                         |                                |   |                                    |
|------|-------------------------|--------------------------------|---|------------------------------------|
| 2990 | 1,2,4,7,37,<br>39,42,43 | 3,5,6,8,36,<br>38,40,41,4<br>4 | 4 | D3ZUC6,P06760,P14480,Q99PP0        |
| 2991 | 1,2,4,7,37,<br>39,42,44 | 3,5,6,8,36,<br>38,40,41,4<br>3 | 2 | P51907,Q561R9                      |
| 2992 | 1,2,4,7,37,<br>39,43,44 | 3,5,6,8,36,<br>38,40,41,4<br>2 | 5 | D3ZUC6,P05964,P14480,Q62636,Q64057 |
| 2993 | 1,2,4,7,37,<br>40,41,42 | 3,5,6,8,36,<br>38,39,43,4<br>4 | 1 | Q561R9                             |
| 2994 | 1,2,4,7,37,<br>40,41,43 | 3,5,6,8,36,<br>38,39,42,4<br>4 | 2 | D3ZUC6,P01836                      |
| 2995 | 1,2,4,7,37,<br>40,41,44 | 3,5,6,8,36,<br>38,39,42,4<br>3 | 4 | P06911,P10715,P18418,Q5GRG2        |
| 2996 | 1,2,4,7,37,<br>40,42,43 | 3,5,6,8,36,<br>38,39,41,4<br>4 | 2 | P01836,Q99PP0                      |
| 2997 | 1,2,4,7,37,<br>40,42,44 | 3,5,6,8,36,<br>38,39,41,4<br>3 | 1 | Q561R9                             |
| 2998 | 1,2,4,7,37,<br>40,43,44 | 3,5,6,8,36,<br>38,39,41,4<br>2 | 1 | Q6AYL6                             |
| 2999 | 1,2,4,7,37,<br>41,42,43 | 3,5,6,8,36,<br>38,39,40,4<br>4 | 3 | D3ZUC6,P01836,P06866               |
| 3000 | 1,2,4,7,37,<br>41,42,44 | 3,5,6,8,36,<br>38,39,40,4<br>3 | 1 | Q561R9                             |
| 3001 | 1,2,4,7,37,<br>41,43,44 | 3,5,6,8,36,<br>38,39,40,4<br>2 | 3 | D3ZUC6,P05964,Q62636               |
| 3002 | 1,2,4,7,37,<br>42,43,44 | 3,5,6,8,36,<br>38,39,40,4<br>1 | 0 |                                    |
| 3003 | 1,2,4,7,38,<br>39,40,41 | 3,5,6,8,36,<br>37,42,43,4<br>4 | 2 | P01836,P10715                      |
| 3004 | 1,2,4,7,38,<br>39,40,42 | 3,5,6,8,36,<br>37,41,43,4<br>4 | 1 | P51907                             |

|      |                         |                                |   |                                                  |
|------|-------------------------|--------------------------------|---|--------------------------------------------------|
| 3005 | 1,2,4,7,38,<br>39,40,43 | 3,5,6,8,36,<br>37,41,42,4<br>4 | 2 | O70594,P01836                                    |
| 3006 | 1,2,4,7,38,<br>39,40,44 | 3,5,6,8,36,<br>37,41,42,4<br>3 | 3 | P51907,Q5GRG2,Q6AYL6                             |
| 3007 | 1,2,4,7,38,<br>39,41,42 | 3,5,6,8,36,<br>37,40,43,4<br>4 | 3 | P01836,P13432,P51907                             |
| 3008 | 1,2,4,7,38,<br>39,41,43 | 3,5,6,8,36,<br>37,40,42,4<br>4 | 5 | D3ZUC6,P01836,P06760,P22006,Q80WL1               |
| 3009 | 1,2,4,7,38,<br>39,41,44 | 3,5,6,8,36,<br>37,40,42,4<br>3 | 5 | P51907,P55091,P98089,Q05695,Q920P0               |
| 3010 | 1,2,4,7,38,<br>39,42,43 | 3,5,6,8,36,<br>37,40,41,4<br>4 | 4 | P01836,P06866,P51907,Q80WL1                      |
| 3011 | 1,2,4,7,38,<br>39,42,44 | 3,5,6,8,36,<br>37,40,41,4<br>3 | 3 | P51907,Q80WL1,Q9Z1F2                             |
| 3012 | 1,2,4,7,38,<br>39,43,44 | 3,5,6,8,36,<br>37,40,41,4<br>2 | 4 | P23593,P51907,Q64057,Q80WL1                      |
| 3013 | 1,2,4,7,38,<br>40,41,42 | 3,5,6,8,36,<br>37,39,43,4<br>4 | 1 | P01836                                           |
| 3014 | 1,2,4,7,38,<br>40,41,43 | 3,5,6,8,36,<br>37,39,42,4<br>4 | 1 | P01836                                           |
| 3015 | 1,2,4,7,38,<br>40,41,44 | 3,5,6,8,36,<br>37,39,42,4<br>3 | 6 | P10715,P55091,P98089,Q05695,Q5GRG2,Q62635        |
| 3016 | 1,2,4,7,38,<br>40,42,43 | 3,5,6,8,36,<br>37,39,41,4<br>4 | 1 | P01836                                           |
| 3017 | 1,2,4,7,38,<br>40,42,44 | 3,5,6,8,36,<br>37,39,41,4<br>3 | 2 | P00714,P51907                                    |
| 3018 | 1,2,4,7,38,<br>40,43,44 | 3,5,6,8,36,<br>37,39,41,4<br>2 | 1 | Q63661                                           |
| 3019 | 1,2,4,7,38,<br>41,42,43 | 3,5,6,8,36,<br>37,39,40,4<br>4 | 7 | O35547,P01836,P06866,P27213,P54921,P55091,P82471 |

|      |                         |                                |   |                                                         |
|------|-------------------------|--------------------------------|---|---------------------------------------------------------|
| 3020 | 1,2,4,7,38,<br>41,42,44 | 3,5,6,8,36,<br>37,39,40,4<br>3 | 5 | P51907,P55091,P98089,Q05695,Q8CIZ5                      |
| 3021 | 1,2,4,7,38,<br>41,43,44 | 3,5,6,8,36,<br>37,39,40,4<br>2 | 6 | D3ZUC6,P00774,P27213,P55091,P98089,Q05695               |
| 3022 | 1,2,4,7,38,<br>42,43,44 | 3,5,6,8,36,<br>37,39,40,4<br>1 | 2 | P51907,Q80WL1                                           |
| 3023 | 1,2,4,7,39,<br>40,41,42 | 3,5,6,8,36,<br>37,38,43,4<br>4 | 2 | P35467,Q561R9                                           |
| 3024 | 1,2,4,7,39,<br>40,41,43 | 3,5,6,8,36,<br>37,38,42,4<br>4 | 4 | D3ZUC6,P01836,P22006,Q6AYL6                             |
| 3025 | 1,2,4,7,39,<br>40,41,44 | 3,5,6,8,36,<br>37,38,42,4<br>3 | 8 | P06911,P10715,P12020,P19629,P31044,P35467,Q5GRG2,Q6AYL6 |
| 3026 | 1,2,4,7,39,<br>40,42,43 | 3,5,6,8,36,<br>37,38,41,4<br>4 | 2 | P01836,Q561R9                                           |
| 3027 | 1,2,4,7,39,<br>40,42,44 | 3,5,6,8,36,<br>37,38,41,4<br>3 | 2 | P51907,Q561R9                                           |
| 3028 | 1,2,4,7,39,<br>40,43,44 | 3,5,6,8,36,<br>37,38,41,4<br>2 | 1 | Q6AYL6                                                  |
| 3029 | 1,2,4,7,39,<br>41,42,43 | 3,5,6,8,36,<br>37,38,40,4<br>4 | 7 | D3ZUC6,P01836,P06760,P22006,P54921,P82471,Q561R9        |
| 3030 | 1,2,4,7,39,<br>41,42,44 | 3,5,6,8,36,<br>37,38,40,4<br>3 | 3 | P35467,P51907,Q561R9                                    |
| 3031 | 1,2,4,7,39,<br>41,43,44 | 3,5,6,8,36,<br>37,38,40,4<br>2 | 3 | D3ZUC6,P22006,Q64057                                    |
| 3032 | 1,2,4,7,39,<br>42,43,44 | 3,5,6,8,36,<br>37,38,40,4<br>1 | 2 | P51907,Q561R9                                           |
| 3033 | 1,2,4,7,40,<br>41,42,43 | 3,5,6,8,36,<br>37,38,39,4<br>4 | 2 | P01836,Q561R9                                           |
| 3034 | 1,2,4,7,40,<br>41,42,44 | 3,5,6,8,36,<br>37,38,39,4<br>3 | 2 | Q561R9,Q5GRG2                                           |

|      |                         |                                |   |                             |
|------|-------------------------|--------------------------------|---|-----------------------------|
| 3035 | 1,2,4,7,40,<br>41,43,44 | 3,5,6,8,36,<br>37,38,39,4<br>2 | 3 | D3ZUC6,Q5GRG2,Q6AYL6        |
| 3036 | 1,2,4,7,40,<br>42,43,44 | 3,5,6,8,36,<br>37,38,39,4<br>1 | 1 | Q561R9                      |
| 3037 | 1,2,4,7,41,<br>42,43,44 | 3,5,6,8,36,<br>37,38,39,4<br>0 | 4 | D3ZUC6,P27213,P82471,Q561R9 |
| 3038 | 1,2,4,8,36,<br>37,38,39 | 3,5,6,7,40,<br>41,42,43,4<br>4 | 1 | Q80WL1                      |
| 3039 | 1,2,4,8,36,<br>37,38,40 | 3,5,6,7,39,<br>41,42,43,4<br>4 | 1 | P02803                      |
| 3040 | 1,2,4,8,36,<br>37,38,41 | 3,5,6,7,39,<br>40,42,43,4<br>4 | 1 | Q99MH3                      |
| 3041 | 1,2,4,8,36,<br>37,38,42 | 3,5,6,7,39,<br>40,41,43,4<br>4 | 1 | P15978                      |
| 3042 | 1,2,4,8,36,<br>37,38,43 | 3,5,6,7,39,<br>40,41,42,4<br>4 | 2 | Q64268,Q80WL1               |
| 3043 | 1,2,4,8,36,<br>37,38,44 | 3,5,6,7,39,<br>40,41,42,4<br>3 | 1 | Q99MH3                      |
| 3044 | 1,2,4,8,36,<br>37,39,40 | 3,5,6,7,38,<br>41,42,43,4<br>4 | 3 | P00774,P02803,Q8CJD3        |
| 3045 | 1,2,4,8,36,<br>37,39,41 | 3,5,6,7,38,<br>40,42,43,4<br>4 | 1 | P01835                      |
| 3046 | 1,2,4,8,36,<br>37,39,42 | 3,5,6,7,38,<br>40,41,43,4<br>4 | 2 | P00774,P01835               |
| 3047 | 1,2,4,8,36,<br>37,39,43 | 3,5,6,7,38,<br>40,41,42,4<br>4 | 2 | D3ZUC6,P06760               |
| 3048 | 1,2,4,8,36,<br>37,39,44 | 3,5,6,7,38,<br>40,41,42,4<br>3 | 1 | Q8CJD3                      |
| 3049 | 1,2,4,8,36,<br>37,40,41 | 3,5,6,7,38,<br>39,42,43,4<br>4 | 0 |                             |

|      |                         |                                |   |                      |
|------|-------------------------|--------------------------------|---|----------------------|
| 3050 | 1,2,4,8,36,<br>37,40,42 | 3,5,6,7,38,<br>39,41,43,4<br>4 | 3 | P00774,P02803,Q561R9 |
| 3051 | 1,2,4,8,36,<br>37,40,43 | 3,5,6,7,38,<br>39,41,42,4<br>4 | 0 |                      |
| 3052 | 1,2,4,8,36,<br>37,40,44 | 3,5,6,7,38,<br>39,41,42,4<br>3 | 2 | O35547,Q8CJD3        |
| 3053 | 1,2,4,8,36,<br>37,41,42 | 3,5,6,7,38,<br>39,40,43,4<br>4 | 3 | P01835,Q561R9,Q99MH3 |
| 3054 | 1,2,4,8,36,<br>37,41,43 | 3,5,6,7,38,<br>39,40,42,4<br>4 | 3 | D3ZUC6,P83121,Q9QUL6 |
| 3055 | 1,2,4,8,36,<br>37,41,44 | 3,5,6,7,38,<br>39,40,42,4<br>3 | 1 | Q99MH3               |
| 3056 | 1,2,4,8,36,<br>37,42,43 | 3,5,6,7,38,<br>39,40,41,4<br>4 | 1 | P19629               |
| 3057 | 1,2,4,8,36,<br>37,42,44 | 3,5,6,7,38,<br>39,40,41,4<br>3 | 1 | Q561R9               |
| 3058 | 1,2,4,8,36,<br>37,43,44 | 3,5,6,7,38,<br>39,40,41,4<br>2 | 2 | D3ZUC6,Q63661        |
| 3059 | 1,2,4,8,36,<br>38,39,40 | 3,5,6,7,37,<br>41,42,43,4<br>4 | 2 | P02803,P10758        |
| 3060 | 1,2,4,8,36,<br>38,39,41 | 3,5,6,7,37,<br>40,42,43,4<br>4 | 0 |                      |
| 3061 | 1,2,4,8,36,<br>38,39,42 | 3,5,6,7,37,<br>40,41,43,4<br>4 | 2 | P51907,Q80WL1        |
| 3062 | 1,2,4,8,36,<br>38,39,43 | 3,5,6,7,37,<br>40,41,42,4<br>4 | 3 | D3ZUC6,Q64268,Q80WL1 |
| 3063 | 1,2,4,8,36,<br>38,39,44 | 3,5,6,7,37,<br>40,41,42,4<br>3 | 2 | P51907,Q80WL1        |
| 3064 | 1,2,4,8,36,<br>38,40,41 | 3,5,6,7,37,<br>39,42,43,4<br>4 | 0 |                      |

|      |                         |                                |   |                             |
|------|-------------------------|--------------------------------|---|-----------------------------|
| 3065 | 1,2,4,8,36,<br>38,40,42 | 3,5,6,7,37,<br>39,41,43,4<br>4 | 1 | P02803                      |
| 3066 | 1,2,4,8,36,<br>38,40,43 | 3,5,6,7,37,<br>39,41,42,4<br>4 | 1 | Q64268                      |
| 3067 | 1,2,4,8,36,<br>38,40,44 | 3,5,6,7,37,<br>39,41,42,4<br>3 | 0 |                             |
| 3068 | 1,2,4,8,36,<br>38,41,42 | 3,5,6,7,37,<br>39,40,43,4<br>4 | 1 | Q99MH3                      |
| 3069 | 1,2,4,8,36,<br>38,41,43 | 3,5,6,7,37,<br>39,40,42,4<br>4 | 2 | D3ZUC6,Q64268               |
| 3070 | 1,2,4,8,36,<br>38,41,44 | 3,5,6,7,37,<br>39,40,42,4<br>3 | 4 | P98089,Q05695,Q62635,Q99MH3 |
| 3071 | 1,2,4,8,36,<br>38,42,43 | 3,5,6,7,37,<br>39,40,41,4<br>4 | 3 | P06866,Q64268,Q80WL1        |
| 3072 | 1,2,4,8,36,<br>38,42,44 | 3,5,6,7,37,<br>39,40,41,4<br>3 | 2 | P15999,P51907               |
| 3073 | 1,2,4,8,36,<br>38,43,44 | 3,5,6,7,37,<br>39,40,41,4<br>2 | 3 | Q63661,Q64268,Q80WL1        |
| 3074 | 1,2,4,8,36,<br>39,40,41 | 3,5,6,7,37,<br>38,42,43,4<br>4 | 1 | Q62975                      |
| 3075 | 1,2,4,8,36,<br>39,40,42 | 3,5,6,7,37,<br>38,41,43,4<br>4 | 2 | P00774,Q561R9               |
| 3076 | 1,2,4,8,36,<br>39,40,43 | 3,5,6,7,37,<br>38,41,42,4<br>4 | 2 | D3ZUC6,Q5QE79               |
| 3077 | 1,2,4,8,36,<br>39,40,44 | 3,5,6,7,37,<br>38,41,42,4<br>3 | 1 | Q8CJD3                      |
| 3078 | 1,2,4,8,36,<br>39,41,42 | 3,5,6,7,37,<br>38,40,43,4<br>4 | 2 | P01835,Q561R9               |
| 3079 | 1,2,4,8,36,<br>39,41,43 | 3,5,6,7,37,<br>38,40,42,4<br>4 | 2 | D3ZUC6,P06760               |



|      |                         |                                |   |                      |
|------|-------------------------|--------------------------------|---|----------------------|
| 3080 | 1,2,4,8,36,<br>39,41,44 | 3,5,6,7,37,<br>38,40,42,4<br>3 | 2 | P30919,Q99MH3        |
| 3081 | 1,2,4,8,36,<br>39,42,43 | 3,5,6,7,37,<br>38,40,41,4<br>4 | 3 | D3ZUC6,Q561R9,Q80WL1 |
| 3082 | 1,2,4,8,36,<br>39,42,44 | 3,5,6,7,37,<br>38,40,41,4<br>3 | 2 | P51907,Q561R9        |
| 3083 | 1,2,4,8,36,<br>39,43,44 | 3,5,6,7,37,<br>38,40,41,4<br>2 | 1 | D3ZUC6               |
| 3084 | 1,2,4,8,36,<br>40,41,42 | 3,5,6,7,37,<br>38,39,43,4<br>4 | 1 | Q561R9               |
| 3085 | 1,2,4,8,36,<br>40,41,43 | 3,5,6,7,37,<br>38,39,42,4<br>4 | 1 | D3ZUC6               |
| 3086 | 1,2,4,8,36,<br>40,41,44 | 3,5,6,7,37,<br>38,39,42,4<br>3 | 2 | Q5GRG2,Q99MH3        |
| 3087 | 1,2,4,8,36,<br>40,42,43 | 3,5,6,7,37,<br>38,39,41,4<br>4 | 1 | Q561R9               |
| 3088 | 1,2,4,8,36,<br>40,42,44 | 3,5,6,7,37,<br>38,39,41,4<br>3 | 3 | P00714,Q561R9,Q7TPB1 |
| 3089 | 1,2,4,8,36,<br>40,43,44 | 3,5,6,7,37,<br>38,39,41,4<br>2 | 1 | Q63661               |
| 3090 | 1,2,4,8,36,<br>41,42,43 | 3,5,6,7,37,<br>38,39,40,4<br>4 | 3 | D3ZUC6,Q561R9,Q9QUL6 |
| 3091 | 1,2,4,8,36,<br>41,42,44 | 3,5,6,7,37,<br>38,39,40,4<br>3 | 2 | Q561R9,Q99MH3        |
| 3092 | 1,2,4,8,36,<br>41,43,44 | 3,5,6,7,37,<br>38,39,40,4<br>2 | 3 | D3ZUC6,Q63661,Q99MH3 |
| 3093 | 1,2,4,8,36,<br>42,43,44 | 3,5,6,7,37,<br>38,39,40,4<br>1 | 1 | Q561R9               |
| 3094 | 1,2,4,8,37,<br>38,39,40 | 3,5,6,7,36,<br>41,42,43,4<br>4 | 3 | P02803,P35281,Q9QZA6 |

|      |                         |                                |   |                                    |
|------|-------------------------|--------------------------------|---|------------------------------------|
| 3095 | 1,2,4,8,37,<br>38,39,41 | 3,5,6,7,36,<br>40,42,43,4<br>4 | 0 |                                    |
| 3096 | 1,2,4,8,37,<br>38,39,42 | 3,5,6,7,36,<br>40,41,43,4<br>4 | 1 | Q80WL1                             |
| 3097 | 1,2,4,8,37,<br>38,39,43 | 3,5,6,7,36,<br>40,41,42,4<br>4 | 5 | P14480,P80020,Q64268,Q6IFV1,Q80WL1 |
| 3098 | 1,2,4,8,37,<br>38,39,44 | 3,5,6,7,36,<br>40,41,42,4<br>3 | 1 | Q80WL1                             |
| 3099 | 1,2,4,8,37,<br>38,40,41 | 3,5,6,7,36,<br>39,42,43,4<br>4 | 1 | P02803                             |
| 3100 | 1,2,4,8,37,<br>38,40,42 | 3,5,6,7,36,<br>39,41,43,4<br>4 | 1 | P02803                             |
| 3101 | 1,2,4,8,37,<br>38,40,43 | 3,5,6,7,36,<br>39,41,42,4<br>4 | 2 | P02803,Q64268                      |
| 3102 | 1,2,4,8,37,<br>38,40,44 | 3,5,6,7,36,<br>39,41,42,4<br>3 | 2 | P02803,Q6AYR9                      |
| 3103 | 1,2,4,8,37,<br>38,41,42 | 3,5,6,7,36,<br>39,40,43,4<br>4 | 0 |                                    |
| 3104 | 1,2,4,8,37,<br>38,41,43 | 3,5,6,7,36,<br>39,40,42,4<br>4 | 4 | P27213,P80020,Q64268,Q7TPB1        |
| 3105 | 1,2,4,8,37,<br>38,41,44 | 3,5,6,7,36,<br>39,40,42,4<br>3 | 3 | P98089,Q05695,Q62635               |
| 3106 | 1,2,4,8,37,<br>38,42,43 | 3,5,6,7,36,<br>39,40,41,4<br>4 | 5 | P06866,P80020,Q64268,Q6P6T1,Q80WL1 |
| 3107 | 1,2,4,8,37,<br>38,42,44 | 3,5,6,7,36,<br>39,40,41,4<br>3 | 0 |                                    |
| 3108 | 1,2,4,8,37,<br>38,43,44 | 3,5,6,7,36,<br>39,40,41,4<br>2 | 3 | Q64268,Q6AYR9,Q80WL1               |
| 3109 | 1,2,4,8,37,<br>39,40,41 | 3,5,6,7,36,<br>38,42,43,4<br>4 | 2 | Q62975,Q68FS4                      |

|      |                         |                                |   |               |
|------|-------------------------|--------------------------------|---|---------------|
| 3110 | 1,2,4,8,37,<br>39,40,42 | 3,5,6,7,36,<br>38,41,43,4<br>4 | 2 | P02803,Q561R9 |
| 3111 | 1,2,4,8,37,<br>39,40,43 | 3,5,6,7,36,<br>38,41,42,4<br>4 | 2 | P02803,Q8CIZ5 |
| 3112 | 1,2,4,8,37,<br>39,40,44 | 3,5,6,7,36,<br>38,41,42,4<br>3 | 2 | Q6AYL6,Q8CJD3 |
| 3113 | 1,2,4,8,37,<br>39,41,42 | 3,5,6,7,36,<br>38,40,43,4<br>4 | 2 | P01835,Q561R9 |
| 3114 | 1,2,4,8,37,<br>39,41,43 | 3,5,6,7,36,<br>38,40,42,4<br>4 | 1 | D3ZUC6        |
| 3115 | 1,2,4,8,37,<br>39,41,44 | 3,5,6,7,36,<br>38,40,42,4<br>3 | 1 | Q64057        |
| 3116 | 1,2,4,8,37,<br>39,42,43 | 3,5,6,7,36,<br>38,40,41,4<br>4 | 1 | Q80WL1        |
| 3117 | 1,2,4,8,37,<br>39,42,44 | 3,5,6,7,36,<br>38,40,41,4<br>3 | 1 | Q561R9        |
| 3118 | 1,2,4,8,37,<br>39,43,44 | 3,5,6,7,36,<br>38,40,41,4<br>2 | 1 | Q64057        |
| 3119 | 1,2,4,8,37,<br>40,41,42 | 3,5,6,7,36,<br>38,39,43,4<br>4 | 1 | Q561R9        |
| 3120 | 1,2,4,8,37,<br>40,41,43 | 3,5,6,7,36,<br>38,39,42,4<br>4 | 1 | Q68FV8        |
| 3121 | 1,2,4,8,37,<br>40,41,44 | 3,5,6,7,36,<br>38,39,42,4<br>3 | 1 | Q5GRG2        |
| 3122 | 1,2,4,8,37,<br>40,42,43 | 3,5,6,7,36,<br>38,39,41,4<br>4 | 2 | P02803,Q561R9 |
| 3123 | 1,2,4,8,37,<br>40,42,44 | 3,5,6,7,36,<br>38,39,41,4<br>3 | 2 | P00714,Q561R9 |
| 3124 | 1,2,4,8,37,<br>40,43,44 | 3,5,6,7,36,<br>38,39,41,4<br>2 | 1 | P19218        |

|      |                         |                                |   |                             |
|------|-------------------------|--------------------------------|---|-----------------------------|
| 3125 | 1,2,4,8,37,<br>41,42,43 | 3,5,6,7,36,<br>38,39,40,4<br>4 | 3 | P27213,Q561R9,Q9QUL6        |
| 3126 | 1,2,4,8,37,<br>41,42,44 | 3,5,6,7,36,<br>38,39,40,4<br>3 | 1 | Q561R9                      |
| 3127 | 1,2,4,8,37,<br>41,43,44 | 3,5,6,7,36,<br>38,39,40,4<br>2 | 2 | O88600,Q63598               |
| 3128 | 1,2,4,8,37,<br>42,43,44 | 3,5,6,7,36,<br>38,39,40,4<br>1 | 1 | Q561R9                      |
| 3129 | 1,2,4,8,38,<br>39,40,41 | 3,5,6,7,36,<br>37,42,43,4<br>4 | 1 | Q62975                      |
| 3130 | 1,2,4,8,38,<br>39,40,42 | 3,5,6,7,36,<br>37,41,43,4<br>4 | 2 | P02803,Q80WL1               |
| 3131 | 1,2,4,8,38,<br>39,40,43 | 3,5,6,7,36,<br>37,41,42,4<br>4 | 1 | Q80WL1                      |
| 3132 | 1,2,4,8,38,<br>39,40,44 | 3,5,6,7,36,<br>37,41,42,4<br>3 | 0 |                             |
| 3133 | 1,2,4,8,38,<br>39,41,42 | 3,5,6,7,36,<br>37,40,43,4<br>4 | 2 | P13432,Q80WL1               |
| 3134 | 1,2,4,8,38,<br>39,41,43 | 3,5,6,7,36,<br>37,40,42,4<br>4 | 3 | B0BNN3,Q64268,Q80WL1        |
| 3135 | 1,2,4,8,38,<br>39,41,44 | 3,5,6,7,36,<br>37,40,42,4<br>3 | 4 | P55091,P98089,Q05695,Q62635 |
| 3136 | 1,2,4,8,38,<br>39,42,43 | 3,5,6,7,36,<br>37,40,41,4<br>4 | 4 | B0BNN3,P06866,Q64268,Q80WL1 |
| 3137 | 1,2,4,8,38,<br>39,42,44 | 3,5,6,7,36,<br>37,40,41,4<br>3 | 2 | P51907,Q80WL1               |
| 3138 | 1,2,4,8,38,<br>39,43,44 | 3,5,6,7,36,<br>37,40,41,4<br>2 | 4 | P23593,Q64057,Q64268,Q80WL1 |
| 3139 | 1,2,4,8,38,<br>40,41,42 | 3,5,6,7,36,<br>37,39,43,4<br>4 | 1 | Q6TMA8                      |

|      |                         |                                |   |                                                         |
|------|-------------------------|--------------------------------|---|---------------------------------------------------------|
| 3140 | 1,2,4,8,38,<br>40,41,43 | 3,5,6,7,36,<br>37,39,42,4<br>4 | 0 |                                                         |
| 3141 | 1,2,4,8,38,<br>40,41,44 | 3,5,6,7,36,<br>37,39,42,4<br>3 | 4 | P98089,Q05695,Q5GRG2,Q62635                             |
| 3142 | 1,2,4,8,38,<br>40,42,43 | 3,5,6,7,36,<br>37,39,41,4<br>4 | 2 | B0BNN3,Q80WL1                                           |
| 3143 | 1,2,4,8,38,<br>40,42,44 | 3,5,6,7,36,<br>37,39,41,4<br>3 | 2 | P00714,Q6TMA8                                           |
| 3144 | 1,2,4,8,38,<br>40,43,44 | 3,5,6,7,36,<br>37,39,41,4<br>2 | 0 |                                                         |
| 3145 | 1,2,4,8,38,<br>41,42,43 | 3,5,6,7,36,<br>37,39,40,4<br>4 | 7 | B0BNN3,P06866,P27213,P54921,P55091,P82471,Q80WL1        |
| 3146 | 1,2,4,8,38,<br>41,42,44 | 3,5,6,7,36,<br>37,39,40,4<br>3 | 6 | P55091,P98089,Q05695,Q5U2V4,Q62635,Q8CIZ5               |
| 3147 | 1,2,4,8,38,<br>41,43,44 | 3,5,6,7,36,<br>37,39,40,4<br>2 | 8 | P00774,P27213,P55091,P98089,Q05695,Q5U2V4,Q62635,Q63598 |
| 3148 | 1,2,4,8,38,<br>42,43,44 | 3,5,6,7,36,<br>37,39,40,4<br>1 | 2 | Q64268,Q80WL1                                           |
| 3149 | 1,2,4,8,39,<br>40,41,42 | 3,5,6,7,36,<br>37,38,43,4<br>4 | 1 | Q561R9                                                  |
| 3150 | 1,2,4,8,39,<br>40,41,43 | 3,5,6,7,36,<br>37,38,42,4<br>4 | 1 | Q6AYL6                                                  |
| 3151 | 1,2,4,8,39,<br>40,41,44 | 3,5,6,7,36,<br>37,38,42,4<br>3 | 7 | P06911,P10715,P19629,P31044,Q5GRG2,Q62975,Q6AYL6        |
| 3152 | 1,2,4,8,39,<br>40,42,43 | 3,5,6,7,36,<br>37,38,41,4<br>4 | 2 | Q561R9,Q80WL1                                           |
| 3153 | 1,2,4,8,39,<br>40,42,44 | 3,5,6,7,36,<br>37,38,41,4<br>3 | 1 | Q561R9                                                  |
| 3154 | 1,2,4,8,39,<br>40,43,44 | 3,5,6,7,36,<br>37,38,41,4<br>2 | 1 | Q6AYL6                                                  |

|      |                          |                                |   |                             |
|------|--------------------------|--------------------------------|---|-----------------------------|
| 3155 | 1,2,4,8,39,<br>41,42,43  | 3,5,6,7,36,<br>37,38,40,4<br>4 | 3 | P82471,Q561R9,Q80WL1        |
| 3156 | 1,2,4,8,39,<br>41,42,44  | 3,5,6,7,36,<br>37,38,40,4<br>3 | 1 | Q561R9                      |
| 3157 | 1,2,4,8,39,<br>41,43,44  | 3,5,6,7,36,<br>37,38,40,4<br>2 | 1 | Q64057                      |
| 3158 | 1,2,4,8,39,<br>42,43,44  | 3,5,6,7,36,<br>37,38,40,4<br>1 | 3 | Q561R9,Q64057,Q80WL1        |
| 3159 | 1,2,4,8,40,<br>41,42,43  | 3,5,6,7,36,<br>37,38,39,4<br>4 | 2 | Q561R9,Q6PCU2               |
| 3160 | 1,2,4,8,40,<br>41,42,44  | 3,5,6,7,36,<br>37,38,39,4<br>3 | 2 | Q561R9,Q6PCU2               |
| 3161 | 1,2,4,8,40,<br>41,43,44  | 3,5,6,7,36,<br>37,38,39,4<br>2 | 3 | P19218,Q6AYL6,Q6PCU2        |
| 3162 | 1,2,4,8,40,<br>42,43,44  | 3,5,6,7,36,<br>37,38,39,4<br>1 | 4 | P00714,P15087,Q561R9,Q6PCU2 |
| 3163 | 1,2,4,8,41,<br>42,43,44  | 3,5,6,7,36,<br>37,38,39,4<br>0 | 4 | P27213,P82471,Q561R9,Q6PCU2 |
| 3164 | 1,2,4,36,3<br>7,38,39,40 | 3,5,6,7,8,4<br>1,42,43,44      | 2 | P35281,Q9JID2               |
| 3165 | 1,2,4,36,3<br>7,38,39,41 | 3,5,6,7,8,4<br>0,42,43,44      | 1 | Q5M819                      |
| 3166 | 1,2,4,36,3<br>7,38,39,42 | 3,5,6,7,8,4<br>0,41,43,44      | 1 | P51907                      |
| 3167 | 1,2,4,36,3<br>7,38,39,43 | 3,5,6,7,8,4<br>0,41,42,44      | 4 | D3ZUC6,P06760,P14480,P80020 |
| 3168 | 1,2,4,36,3<br>7,38,39,44 | 3,5,6,7,8,4<br>0,41,42,43      | 2 | P51907,Q9JJS8               |
| 3169 | 1,2,4,36,3<br>7,38,40,41 | 3,5,6,7,8,3<br>9,42,43,44      | 1 | Q5M819                      |
| 3170 | 1,2,4,36,3<br>7,38,40,42 | 3,5,6,7,8,3<br>9,41,43,44      | 0 |                             |
| 3171 | 1,2,4,36,3<br>7,38,40,43 | 3,5,6,7,8,3<br>9,41,42,44      | 1 | P80020                      |
| 3172 | 1,2,4,36,3<br>7,38,40,44 | 3,5,6,7,8,3<br>9,41,42,43      | 1 | Q6AYR9                      |

|      |                                                 |   |                                                  |
|------|-------------------------------------------------|---|--------------------------------------------------|
| 3173 | 1,2,4,36,3 3,5,6,7,8,3<br>7,38,41,42 9,40,43,44 | 1 | Q5M819                                           |
| 3174 | 1,2,4,36,3 3,5,6,7,8,3<br>7,38,41,43 9,40,42,44 | 5 | D3ZUC6,P06866,P27213,P80020,Q5M819               |
| 3175 | 1,2,4,36,3 3,5,6,7,8,3<br>7,38,41,44 9,40,42,43 | 1 | P98089                                           |
| 3176 | 1,2,4,36,3 3,5,6,7,8,3<br>7,38,42,43 9,40,41,44 | 6 | P06866,P10715,P12020,P19629,P80020,Q6P6T1        |
| 3177 | 1,2,4,36,3 3,5,6,7,8,3<br>7,38,42,44 9,40,41,43 | 1 | P51907                                           |
| 3178 | 1,2,4,36,3 3,5,6,7,8,3<br>7,38,43,44 9,40,41,42 | 4 | D3ZUC6,P80020,Q63661,Q6AYR9                      |
| 3179 | 1,2,4,36,3 3,5,6,7,8,3<br>7,39,40,41 8,42,43,44 | 1 | Q62975                                           |
| 3180 | 1,2,4,36,3 3,5,6,7,8,3<br>7,39,40,42 8,41,43,44 | 3 | P00774,P50115,P50116                             |
| 3181 | 1,2,4,36,3 3,5,6,7,8,3<br>7,39,40,43 8,41,42,44 | 6 | D3ZUC6,O35547,P50115,P50116,Q05695,Q8CIZ5        |
| 3182 | 1,2,4,36,3 3,5,6,7,8,3<br>7,39,40,44 8,41,42,43 | 4 | O35547,P50115,P50116,Q8CJD3                      |
| 3183 | 1,2,4,36,3 3,5,6,7,8,3<br>7,39,41,42 8,40,43,44 | 1 | P01835                                           |
| 3184 | 1,2,4,36,3 3,5,6,7,8,3<br>7,39,41,43 8,40,42,44 | 3 | D3ZUC6,P06760,P36374                             |
| 3185 | 1,2,4,36,3 3,5,6,7,8,3<br>7,39,41,44 8,40,42,43 | 1 | Q9JHB9                                           |
| 3186 | 1,2,4,36,3 3,5,6,7,8,3<br>7,39,42,43 8,40,41,44 | 4 | D3ZUC6,P06760,P50115,P50116                      |
| 3187 | 1,2,4,36,3 3,5,6,7,8,3<br>7,39,42,44 8,40,41,43 | 3 | P50115,P50116,P51907                             |
| 3188 | 1,2,4,36,3 3,5,6,7,8,3<br>7,39,43,44 8,40,41,42 | 4 | D3ZUC6,P06760,P50115,P50116                      |
| 3189 | 1,2,4,36,3 3,5,6,7,8,3<br>7,40,41,42 8,39,43,44 | 1 | Q561R9                                           |
| 3190 | 1,2,4,36,3 3,5,6,7,8,3<br>7,40,41,43 8,39,42,44 | 1 | D3ZUC6                                           |
| 3191 | 1,2,4,36,3 3,5,6,7,8,3<br>7,40,41,44 8,39,42,43 | 2 | P19218,Q5GRG2                                    |
| 3192 | 1,2,4,36,3 3,5,6,7,8,3<br>7,40,42,43 8,39,41,44 | 3 | D3ZUC6,P50115,P50116                             |
| 3193 | 1,2,4,36,3 3,5,6,7,8,3<br>7,40,42,44 8,39,41,43 | 4 | P50115,P50116,Q561R9,Q7TPB1                      |
| 3194 | 1,2,4,36,3 3,5,6,7,8,3<br>7,40,43,44 8,39,41,42 | 7 | D3ZUC6,O35547,P08753,P19218,P50115,P50116,Q63661 |
| 3195 | 1,2,4,36,3 3,5,6,7,8,3<br>7,41,42,43 8,39,40,44 | 4 | D3ZUC6,P06866,P27213,Q9QUL6                      |

|      |                          |                           |   |                                           |
|------|--------------------------|---------------------------|---|-------------------------------------------|
| 3196 | 1,2,4,36,3<br>7,41,42,44 | 3,5,6,7,8,3<br>8,39,40,43 | 1 | Q561R9                                    |
| 3197 | 1,2,4,36,3<br>7,41,43,44 | 3,5,6,7,8,3<br>8,39,40,42 | 2 | D3ZUC6,Q63661                             |
| 3198 | 1,2,4,36,3<br>7,42,43,44 | 3,5,6,7,8,3<br>8,39,40,41 | 3 | D3ZUC6,P50115,P50116                      |
| 3199 | 1,2,4,36,3<br>8,39,40,41 | 3,5,6,7,8,3<br>7,42,43,44 | 2 | P10758,Q62975                             |
| 3200 | 1,2,4,36,3<br>8,39,40,42 | 3,5,6,7,8,3<br>7,41,43,44 | 2 | P10758,P51907                             |
| 3201 | 1,2,4,36,3<br>8,39,40,43 | 3,5,6,7,8,3<br>7,41,42,44 | 1 | D3ZUC6                                    |
| 3202 | 1,2,4,36,3<br>8,39,40,44 | 3,5,6,7,8,3<br>7,41,42,43 | 1 | P51907                                    |
| 3203 | 1,2,4,36,3<br>8,39,41,42 | 3,5,6,7,8,3<br>7,40,43,44 | 2 | P10758,P51907                             |
| 3204 | 1,2,4,36,3<br>8,39,41,43 | 3,5,6,7,8,3<br>7,40,42,44 | 2 | D3ZUC6,P06760                             |
| 3205 | 1,2,4,36,3<br>8,39,41,44 | 3,5,6,7,8,3<br>7,40,42,43 | 2 | P51907,P98089                             |
| 3206 | 1,2,4,36,3<br>8,39,42,43 | 3,5,6,7,8,3<br>7,40,41,44 | 6 | B0BNN3,D3ZUC6,P06866,P51907,Q6IFU7,Q80WL1 |
| 3207 | 1,2,4,36,3<br>8,39,42,44 | 3,5,6,7,8,3<br>7,40,41,43 | 1 | P51907                                    |
| 3208 | 1,2,4,36,3<br>8,39,43,44 | 3,5,6,7,8,3<br>7,40,41,42 | 4 | D3ZUC6,P51907,Q63661,Q9JJS8               |
| 3209 | 1,2,4,36,3<br>8,40,41,42 | 3,5,6,7,8,3<br>7,39,43,44 | 0 |                                           |
| 3210 | 1,2,4,36,3<br>8,40,41,43 | 3,5,6,7,8,3<br>7,39,42,44 | 2 | D3ZUC6,P27213                             |
| 3211 | 1,2,4,36,3<br>8,40,41,44 | 3,5,6,7,8,3<br>7,39,42,43 | 2 | P98089,Q62635                             |
| 3212 | 1,2,4,36,3<br>8,40,42,43 | 3,5,6,7,8,3<br>7,39,41,44 | 1 | P06866                                    |
| 3213 | 1,2,4,36,3<br>8,40,42,44 | 3,5,6,7,8,3<br>7,39,41,43 | 2 | P51907,Q7TPB1                             |
| 3214 | 1,2,4,36,3<br>8,40,43,44 | 3,5,6,7,8,3<br>7,39,41,42 | 1 | Q63661                                    |
| 3215 | 1,2,4,36,3<br>8,41,42,43 | 3,5,6,7,8,3<br>7,39,40,44 | 3 | D3ZUC6,P06866,P27213                      |
| 3216 | 1,2,4,36,3<br>8,41,42,44 | 3,5,6,7,8,3<br>7,39,40,43 | 3 | P51907,P98089,Q8CIZ5                      |
| 3217 | 1,2,4,36,3<br>8,41,43,44 | 3,5,6,7,8,3<br>7,39,40,42 | 6 | D3ZUC6,P00774,P27213,P55091,P98089,Q63661 |
| 3218 | 1,2,4,36,3<br>8,42,43,44 | 3,5,6,7,8,3<br>7,39,40,41 | 2 | P51907,Q63661                             |



|      |                          |                           |   |                                                         |
|------|--------------------------|---------------------------|---|---------------------------------------------------------|
| 3219 | 1,2,4,36,3<br>9,40,41,42 | 3,5,6,7,8,3<br>7,38,43,44 | 1 | Q561R9                                                  |
| 3220 | 1,2,4,36,3<br>9,40,41,43 | 3,5,6,7,8,3<br>7,38,42,44 | 1 | D3ZUC6                                                  |
| 3221 | 1,2,4,36,3<br>9,40,41,44 | 3,5,6,7,8,3<br>7,38,42,43 | 4 | P10715,P19629,Q5GRG2,Q62975                             |
| 3222 | 1,2,4,36,3<br>9,40,42,43 | 3,5,6,7,8,3<br>7,38,41,44 | 4 | D3ZUC6,P50115,P50116,Q561R9                             |
| 3223 | 1,2,4,36,3<br>9,40,42,44 | 3,5,6,7,8,3<br>7,38,41,43 | 5 | P50115,P50116,P51907,Q561R9,Q7TPB1                      |
| 3224 | 1,2,4,36,3<br>9,40,43,44 | 3,5,6,7,8,3<br>7,38,41,42 | 5 | D3ZUC6,P50115,P50116,Q63661,Q6AYL6                      |
| 3225 | 1,2,4,36,3<br>9,41,42,43 | 3,5,6,7,8,3<br>7,38,40,44 | 4 | D3ZUC6,P06760,P82471,Q561R9                             |
| 3226 | 1,2,4,36,3<br>9,41,42,44 | 3,5,6,7,8,3<br>7,38,40,43 | 2 | P51907,Q561R9                                           |
| 3227 | 1,2,4,36,3<br>9,41,43,44 | 3,5,6,7,8,3<br>7,38,40,42 | 2 | D3ZUC6,O89117                                           |
| 3228 | 1,2,4,36,3<br>9,42,43,44 | 3,5,6,7,8,3<br>7,38,40,41 | 5 | D3ZUC6,P50115,P50116,P51907,Q561R9                      |
| 3229 | 1,2,4,36,4<br>0,41,42,43 | 3,5,6,7,8,3<br>7,38,39,44 | 2 | D3ZUC6,Q561R9                                           |
| 3230 | 1,2,4,36,4<br>0,41,42,44 | 3,5,6,7,8,3<br>7,38,39,43 | 2 | Q561R9,Q7TPB1                                           |
| 3231 | 1,2,4,36,4<br>0,41,43,44 | 3,5,6,7,8,3<br>7,38,39,42 | 3 | D3ZUC6,P19218,Q63661                                    |
| 3232 | 1,2,4,36,4<br>0,42,43,44 | 3,5,6,7,8,3<br>7,38,39,41 | 5 | P50115,P50116,Q561R9,Q63661,Q7TPB1                      |
| 3233 | 1,2,4,36,4<br>1,42,43,44 | 3,5,6,7,8,3<br>7,38,39,40 | 4 | D3ZUC6,P27213,Q561R9,Q63661                             |
| 3234 | 1,2,4,37,3<br>8,39,40,41 | 3,5,6,7,8,3<br>6,42,43,44 | 2 | P13432,Q62975                                           |
| 3235 | 1,2,4,37,3<br>8,39,40,42 | 3,5,6,7,8,3<br>6,41,43,44 | 0 |                                                         |
| 3236 | 1,2,4,37,3<br>8,39,40,43 | 3,5,6,7,8,3<br>6,41,42,44 | 3 | P35281,P80020,Q812E4                                    |
| 3237 | 1,2,4,37,3<br>8,39,40,44 | 3,5,6,7,8,3<br>6,41,42,43 | 2 | Q6AYR9,Q812E4                                           |
| 3238 | 1,2,4,37,3<br>8,39,41,42 | 3,5,6,7,8,3<br>6,40,43,44 | 2 | P13432,P80020                                           |
| 3239 | 1,2,4,37,3<br>8,39,41,43 | 3,5,6,7,8,3<br>6,40,42,44 | 7 | B0BNN3,D3ZUC6,P06866,P14480,P36374,P53792,P80020        |
| 3240 | 1,2,4,37,3<br>8,39,41,44 | 3,5,6,7,8,3<br>6,40,42,43 | 2 | P98089,Q9JJS8                                           |
| 3241 | 1,2,4,37,3<br>8,39,42,43 | 3,5,6,7,8,3<br>6,40,41,44 | 8 | B0BNN3,P01015,P06866,P14480,P80020,Q6IFU7,Q6P6T1,Q80WL1 |

|      |                          |                           |   |                                                  |
|------|--------------------------|---------------------------|---|--------------------------------------------------|
| 3242 | 1,2,4,37,3<br>8,39,42,44 | 3,5,6,7,8,3<br>6,40,41,43 | 2 | P51907,Q9JJS8                                    |
| 3243 | 1,2,4,37,3<br>8,39,43,44 | 3,5,6,7,8,3<br>6,40,41,42 | 7 | P14480,P19223,P23593,P80020,Q64057,Q812E4,Q9JJS8 |
| 3244 | 1,2,4,37,3<br>8,40,41,42 | 3,5,6,7,8,3<br>6,39,43,44 | 1 | P80020                                           |
| 3245 | 1,2,4,37,3<br>8,40,41,43 | 3,5,6,7,8,3<br>6,39,42,44 | 3 | P27213,P55016,P80020                             |
| 3246 | 1,2,4,37,3<br>8,40,41,44 | 3,5,6,7,8,3<br>6,39,42,43 | 4 | P98089,Q5GRG2,Q62635,Q6AYR9                      |
| 3247 | 1,2,4,37,3<br>8,40,42,43 | 3,5,6,7,8,3<br>6,39,41,44 | 3 | B0BNN3,P06866,P80020                             |
| 3248 | 1,2,4,37,3<br>8,40,42,44 | 3,5,6,7,8,3<br>6,39,41,43 | 1 | O54858                                           |
| 3249 | 1,2,4,37,3<br>8,40,43,44 | 3,5,6,7,8,3<br>6,39,41,42 | 4 | P08010,P08753,P80020,Q6AYR9                      |
| 3250 | 1,2,4,37,3<br>8,41,42,43 | 3,5,6,7,8,3<br>6,39,40,44 | 5 | B0BNN3,P06866,P27213,P80020,Q6P6T1               |
| 3251 | 1,2,4,37,3<br>8,41,42,44 | 3,5,6,7,8,3<br>6,39,40,43 | 2 | P80020,P98089                                    |
| 3252 | 1,2,4,37,3<br>8,41,43,44 | 3,5,6,7,8,3<br>6,39,40,42 | 5 | P00774,P27213,P55091,P80020,P98089               |
| 3253 | 1,2,4,37,3<br>8,42,43,44 | 3,5,6,7,8,3<br>6,39,40,41 | 3 | B0BNN3,P06866,P80020                             |
| 3254 | 1,2,4,37,3<br>9,40,41,42 | 3,5,6,7,8,3<br>6,38,43,44 | 1 | Q561R9                                           |
| 3255 | 1,2,4,37,3<br>9,40,41,43 | 3,5,6,7,8,3<br>6,38,42,44 | 4 | D3ZUC6,P53792,P97554,Q6AYL6                      |
| 3256 | 1,2,4,37,3<br>9,40,41,44 | 3,5,6,7,8,3<br>6,38,42,43 | 6 | P06911,P10715,P19629,Q5GRG2,Q62975,Q6AYL6        |
| 3257 | 1,2,4,37,3<br>9,40,42,43 | 3,5,6,7,8,3<br>6,38,41,44 | 4 | P50115,P50116,Q05695,Q561R9                      |
| 3258 | 1,2,4,37,3<br>9,40,42,44 | 3,5,6,7,8,3<br>6,38,41,43 | 4 | O54858,P50115,P50116,Q561R9                      |
| 3259 | 1,2,4,37,3<br>9,40,43,44 | 3,5,6,7,8,3<br>6,38,41,42 | 6 | O35547,P08753,P50115,P50116,Q6AYL6,Q812E4        |
| 3260 | 1,2,4,37,3<br>9,41,42,43 | 3,5,6,7,8,3<br>6,38,40,44 | 3 | D3ZUC6,P06866,P53792                             |
| 3261 | 1,2,4,37,3<br>9,41,42,44 | 3,5,6,7,8,3<br>6,38,40,43 | 1 | Q561R9                                           |
| 3262 | 1,2,4,37,3<br>9,41,43,44 | 3,5,6,7,8,3<br>6,38,40,42 | 3 | D3ZUC6,Q62636,Q64057                             |
| 3263 | 1,2,4,37,3<br>9,42,43,44 | 3,5,6,7,8,3<br>6,38,40,41 | 3 | P50115,P50116,Q64057                             |
| 3264 | 1,2,4,37,4<br>0,41,42,43 | 3,5,6,7,8,3<br>6,38,39,44 | 2 | P27213,Q561R9                                    |

|      |                          |                           |   |                                                         |
|------|--------------------------|---------------------------|---|---------------------------------------------------------|
| 3265 | 1,2,4,37,4<br>0,41,42,44 | 3,5,6,7,8,3<br>6,38,39,43 | 1 | Q561R9                                                  |
| 3266 | 1,2,4,37,4<br>0,41,43,44 | 3,5,6,7,8,3<br>6,38,39,42 | 2 | P19218,Q6AYL6                                           |
| 3267 | 1,2,4,37,4<br>0,42,43,44 | 3,5,6,7,8,3<br>6,38,39,41 | 4 | P19218,P50115,P50116,Q561R9                             |
| 3268 | 1,2,4,37,4<br>1,42,43,44 | 3,5,6,7,8,3<br>6,38,39,40 | 2 | P27213,Q561R9                                           |
| 3269 | 1,2,4,38,3<br>9,40,41,42 | 3,5,6,7,8,3<br>6,37,43,44 | 1 | P13432                                                  |
| 3270 | 1,2,4,38,3<br>9,40,41,43 | 3,5,6,7,8,3<br>6,37,42,44 | 2 | B0BNN3,P53792                                           |
| 3271 | 1,2,4,38,3<br>9,40,41,44 | 3,5,6,7,8,3<br>6,37,42,43 | 8 | P06911,P10715,P19629,P98089,Q5GRG2,Q62635,Q62975,Q6AYL6 |
| 3272 | 1,2,4,38,3<br>9,40,42,43 | 3,5,6,7,8,3<br>6,37,41,44 | 4 | B0BNN3,P06866,Q6IFU7,Q80WL1                             |
| 3273 | 1,2,4,38,3<br>9,40,42,44 | 3,5,6,7,8,3<br>6,37,41,43 | 2 | O54858,P51907                                           |
| 3274 | 1,2,4,38,3<br>9,40,43,44 | 3,5,6,7,8,3<br>6,37,41,42 | 1 | Q6AYL6                                                  |
| 3275 | 1,2,4,38,3<br>9,41,42,43 | 3,5,6,7,8,3<br>6,37,40,44 | 8 | B0BNN3,P06866,P13432,P53792,P80020,P82471,Q6IFU7,Q80WL1 |
| 3276 | 1,2,4,38,3<br>9,41,42,44 | 3,5,6,7,8,3<br>6,37,40,43 | 2 | P51907,P98089                                           |
| 3277 | 1,2,4,38,3<br>9,41,43,44 | 3,5,6,7,8,3<br>6,37,40,42 | 6 | B0BNN3,P00774,P53792,P55091,P98089,Q64057               |
| 3278 | 1,2,4,38,3<br>9,42,43,44 | 3,5,6,7,8,3<br>6,37,40,41 | 5 | B0BNN3,P06866,P51907,Q6IFU7,Q80WL1                      |
| 3279 | 1,2,4,38,4<br>0,41,42,43 | 3,5,6,7,8,3<br>6,37,39,44 | 3 | B0BNN3,P06866,P27213                                    |
| 3280 | 1,2,4,38,4<br>0,41,42,44 | 3,5,6,7,8,3<br>6,37,39,43 | 3 | P98089,Q62635,Q6TMA8                                    |
| 3281 | 1,2,4,38,4<br>0,41,43,44 | 3,5,6,7,8,3<br>6,37,39,42 | 6 | P00774,P27213,P55091,P98089,Q62635,Q63661               |
| 3282 | 1,2,4,38,4<br>0,42,43,44 | 3,5,6,7,8,3<br>6,37,39,41 | 2 | B0BNN3,Q99041                                           |
| 3283 | 1,2,4,38,4<br>1,42,43,44 | 3,5,6,7,8,3<br>6,37,39,40 | 6 | B0BNN3,P00774,P06866,P27213,P55091,P98089               |
| 3284 | 1,2,4,39,4<br>0,41,42,43 | 3,5,6,7,8,3<br>6,37,38,44 | 2 | P53792,Q561R9                                           |
| 3285 | 1,2,4,39,4<br>0,41,42,44 | 3,5,6,7,8,3<br>6,37,38,43 | 3 | P10715,P19629,Q561R9                                    |
| 3286 | 1,2,4,39,4<br>0,41,43,44 | 3,5,6,7,8,3<br>6,37,38,42 | 7 | D3ZUC6,P10715,P19218,P19629,P53792,Q5GRG2,Q6AYL6        |
| 3287 | 1,2,4,39,4<br>0,42,43,44 | 3,5,6,7,8,3<br>6,37,38,41 | 3 | P50115,P50116,Q561R9                                    |

|      |                          |                                  |    |                                                                                                                                      |
|------|--------------------------|----------------------------------|----|--------------------------------------------------------------------------------------------------------------------------------------|
| 3288 | 1,2,4,39,4<br>1,42,43,44 | 3,5,6,7,8,3<br>6,37,38,40        | 4  | D3ZUC6,P53792,P82471,Q561R9                                                                                                          |
| 3289 | 1,2,4,40,4<br>1,42,43,44 | 3,5,6,7,8,3<br>6,37,38,39        | 4  | P19218,P27213,Q561R9,Q6PCU2                                                                                                          |
| 3290 | 1,2,5,6,7,8<br>,36,37    | 3,4,38,39,<br>40,41,42,4<br>3,44 | 14 | B0BNN3,P00762,P02631,P07171,P11030,P52590,P53792,Q01205,Q09030,Q63467,Q63942,Q91ZS3,Q9QZQ5,Q9Z1F2                                    |
| 3291 | 1,2,5,6,7,8<br>,36,38    | 3,4,37,39,<br>40,41,42,4<br>3,44 | 12 | P00762,P02631,P07171,P08753,P19218,P52590,P53792,P97580,Q01205,Q63467,Q63532,Q63942                                                  |
| 3292 | 1,2,5,6,7,8<br>,36,39    | 3,4,37,38,<br>40,41,42,4<br>3,44 | 11 | B0BNN3,P00762,P07171,P19218,P27213,P52590,P83748,Q01205,Q63467,Q63532,Q63942                                                         |
| 3293 | 1,2,5,6,7,8<br>,36,40    | 3,4,37,38,<br>39,41,42,4<br>3,44 | 13 | B0BNN3,P00762,P00774,P07171,P27213,P36374,P52590,P53792,Q01205,Q09030,Q63467,Q9JJS8,Q9Z1F2                                           |
| 3294 | 1,2,5,6,7,8<br>,36,41    | 3,4,37,38,<br>39,40,42,4<br>3,44 | 15 | B0BNN3,P00762,P02631,P07171,P08010,P08753,P23785,P52590,Q01205,Q09030,Q63467,Q63532,Q99MH3,Q9JJS8,Q9Z1F2                             |
| 3295 | 1,2,5,6,7,8<br>,36,42    | 3,4,37,38,<br>39,40,41,4<br>3,44 | 19 | B0BNN3,P00762,P04905,P08010,P08290,P08753,P19218,P36374,P52590,P53792,P60905,Q01205,Q09030,Q63357,Q63467,Q63942,Q812E4,Q9JJS8,Q9QZQ5 |
| 3296 | 1,2,5,6,7,8<br>,36,43    | 3,4,37,38,<br>39,40,41,4<br>2,44 | 11 | P02631,P16636,P20762,P52590,P53792,P83748,Q01205,Q63467,Q63532,Q63942,Q9Z1F2                                                         |
| 3297 | 1,2,5,6,7,8<br>,36,44    | 3,4,37,38,<br>39,40,41,4<br>2,43 | 10 | B0BNN3,P00762,P02631,P07171,P36374,P52590,P53792,Q01205,Q63467,Q9Z1F2                                                                |
| 3298 | 1,2,5,6,7,8<br>,37,38    | 3,4,36,39,<br>40,41,42,4<br>3,44 | 11 | P02631,P15399,P19218,P52590,P53792,P97580,P97840,Q63467,Q63942,Q7TPB1,Q91ZS3                                                         |
| 3299 | 1,2,5,6,7,8<br>,37,39    | 3,4,36,38,<br>40,41,42,4<br>3,44 | 9  | B0BNN3,O88267,P02631,P19218,P27213,P52590,Q63467,Q63942,Q91ZS3                                                                       |
| 3300 | 1,2,5,6,7,8<br>,37,40    | 3,4,36,38,<br>39,41,42,4<br>3,44 | 8  | B0BNN3,P02631,P02803,P27213,P52590,P53792,Q9QUL6,Q9Z1F2                                                                              |
| 3301 | 1,2,5,6,7,8<br>,37,41    | 3,4,36,38,<br>39,40,42,4<br>3,44 | 9  | B0BNN3,O88267,P02631,P52590,Q01205,Q63467,Q7TPB1,Q91ZS3,Q9Z1F2                                                                       |
| 3302 | 1,2,5,6,7,8<br>,37,42    | 3,4,36,38,<br>39,40,41,4<br>3,44 | 10 | B0BNN3,P00762,P02631,P08290,P08753,P36374,P52590,P53792,Q91ZS3,Q9QZQ5                                                                |
| 3303 | 1,2,5,6,7,8<br>,37,43    | 3,4,36,38,<br>39,40,41,4<br>2,44 | 10 | P02631,P10758,P16636,P52590,P83748,Q03191,Q63467,Q63942,Q7TPB1,Q9Z1F2                                                                |

|      |                       |                                  |    |                                                                                                   |
|------|-----------------------|----------------------------------|----|---------------------------------------------------------------------------------------------------|
| 3304 | 1,2,5,6,7,8<br>,37,44 | 3,4,36,38,<br>39,40,41,4<br>2,43 | 8  | B0BNN3,P00762,P02631,P52590,P53792,Q63467,Q9QUL6,Q9Z1F2                                           |
| 3305 | 1,2,5,6,7,8<br>,38,39 | 3,4,36,37,<br>40,41,42,4<br>3,44 | 9  | O88267,P19218,P27213,P52590,P97580,Q63467,Q63942,Q6IE51,Q9QUL6                                    |
| 3306 | 1,2,5,6,7,8<br>,38,40 | 3,4,36,37,<br>39,41,42,4<br>3,44 | 6  | P02803,P52590,P53792,P97580,Q63942,Q9QUL6                                                         |
| 3307 | 1,2,5,6,7,8<br>,38,41 | 3,4,36,37,<br>39,40,42,4<br>3,44 | 11 | O88267,P02631,P08753,P19218,P50115,P50116,P52590,P97580,Q01205,Q63467,Q7TPB1                      |
| 3308 | 1,2,5,6,7,8<br>,38,42 | 3,4,36,37,<br>39,40,41,4<br>3,44 | 14 | O08815,O35547,P04905,P08010,P08290,P08753,P19218,P36374,P52590,P53792,P60905,P97580,Q63942,Q9QZK9 |
| 3309 | 1,2,5,6,7,8<br>,38,43 | 3,4,36,37,<br>39,40,41,4<br>2,44 | 11 | P02631,P16636,P20762,P25031,P50116,P52590,P83748,P97580,Q63467,Q63942,Q7TPB1                      |
| 3310 | 1,2,5,6,7,8<br>,38,44 | 3,4,36,37,<br>39,40,41,4<br>2,43 | 8  | P02631,P52590,P53792,P97580,Q62635,Q63467,Q63942,Q9QUL6                                           |
| 3311 | 1,2,5,6,7,8<br>,39,40 | 3,4,36,37,<br>38,41,42,4<br>3,44 | 6  | B0BNN3,P02803,P27213,P52590,Q9QUL6,Q9Z1F2                                                         |
| 3312 | 1,2,5,6,7,8<br>,39,41 | 3,4,36,37,<br>38,40,42,4<br>3,44 | 11 | O88267,P08010,P08753,P12785,P35467,P52590,P83748,P97605,Q01205,Q63467,Q9Z1F2                      |
| 3313 | 1,2,5,6,7,8<br>,39,42 | 3,4,36,37,<br>38,40,41,4<br>3,44 | 10 | P00762,P04905,P08010,P08290,P08753,P19218,P27213,P36374,P52590,Q63942                             |
| 3314 | 1,2,5,6,7,8<br>,39,43 | 3,4,36,37,<br>38,40,41,4<br>2,44 | 8  | O88267,P02631,P16636,P20762,P52590,P83748,Q63467,Q63942                                           |
| 3315 | 1,2,5,6,7,8<br>,39,44 | 3,4,36,37,<br>38,40,41,4<br>2,43 | 8  | B0BNN3,O88267,P02631,P27213,P52590,Q63467,Q63942,Q9QUL6                                           |
| 3316 | 1,2,5,6,7,8<br>,40,41 | 3,4,36,37,<br>38,39,42,4<br>3,44 | 6  | B0BNN3,P12020,P52590,Q63467,Q9JJS8,Q9Z1F2                                                         |
| 3317 | 1,2,5,6,7,8<br>,40,42 | 3,4,36,37,<br>38,39,41,4<br>3,44 | 12 | B0BNN3,P00762,P02781,P08290,P08753,P20759,P36374,P52590,P53792,Q9JJS8,Q9QUL6,Q9QZ76               |
| 3318 | 1,2,5,6,7,8<br>,40,43 | 3,4,36,37,<br>38,39,41,4<br>2,44 | 8  | P02631,P16636,P20762,P52590,P83748,Q63942,Q9JJS8,Q9Z1F2                                           |

|      |                        |                                  |    |                                                                                                                               |
|------|------------------------|----------------------------------|----|-------------------------------------------------------------------------------------------------------------------------------|
| 3319 | 1,2,5,6,7,8<br>,40,44  | 3,4,36,37,<br>38,39,41,4<br>2,43 | 11 | B0BNN3,P02631,P12020,P36374,P52590,P53792,Q63467,Q6P6T1,Q9QUL6,Q9QZ76,Q9Z1F2                                                  |
| 3320 | 1,2,5,6,7,8<br>,41,42  | 3,4,36,37,<br>38,39,40,4<br>3,44 | 18 | O08815,O35547,P02781,P04905,P08010,P08290,P08753,P36374,P52590,P54921,P60905,P97605,Q62753,Q63357,Q63467,Q812E4,Q9JID2,Q9JJS8 |
| 3321 | 1,2,5,6,7,8<br>,41,43  | 3,4,36,37,<br>38,39,40,4<br>2,44 | 14 | O88267,P02631,P10758,P12785,P16636,P50116,P52590,P54921,P83748,Q63467,Q63532,Q63942,Q7TPB1,Q9Z1F2                             |
| 3322 | 1,2,5,6,7,8<br>,41,44  | 3,4,36,37,<br>38,39,40,4<br>2,43 | 12 | B0BNN3,O88267,P02631,P07171,P08753,P12020,P52590,P97605,Q01205,Q63467,Q9JID2,Q9Z1F2                                           |
| 3323 | 1,2,5,6,7,8<br>,42,43  | 3,4,36,37,<br>38,39,40,4<br>1,44 | 12 | P02631,P08290,P08753,P10758,P16636,P20762,P36374,P52590,P54921,P60905,P83748,Q63942                                           |
| 3324 | 1,2,5,6,7,8<br>,42,44  | 3,4,36,37,<br>38,39,40,4<br>1,43 | 11 | B0BNN3,P00762,P08290,P08753,P20759,P36374,P52590,P53792,P60905,Q63467,Q9JID2                                                  |
| 3325 | 1,2,5,6,7,8<br>,43,44  | 3,4,36,37,<br>38,39,40,4<br>1,42 | 9  | P02631,P10758,P16636,P20762,P52590,P83748,Q63467,Q63942,Q9Z1F2                                                                |
| 3326 | 1,2,5,6,7,3<br>6,37,38 | 3,4,8,39,4<br>0,41,42,43<br>,44  | 10 | P02631,P15399,P19218,P52590,P53792,P97580,P97840,Q561R9,Q63467,Q91ZS3                                                         |
| 3327 | 1,2,5,6,7,3<br>6,37,39 | 3,4,8,38,4<br>0,41,42,43<br>,44  | 9  | B0BNN3,P00714,P00762,P27213,P35467,P97840,Q63467,Q91ZS3,Q9QUL6                                                                |
| 3328 | 1,2,5,6,7,3<br>6,37,40 | 3,4,8,38,3<br>9,41,42,43<br>,44  | 7  | B0BNN3,P00762,P00774,P53792,Q63467,Q91ZS3,Q9QUL6                                                                              |
| 3329 | 1,2,5,6,7,3<br>6,37,41 | 3,4,8,38,3<br>9,40,42,43<br>,44  | 8  | B0BNN3,P00714,P02631,P23785,P35467,P97840,Q63467,Q91ZS3                                                                       |
| 3330 | 1,2,5,6,7,3<br>6,37,42 | 3,4,8,38,3<br>9,40,41,43<br>,44  | 8  | B0BNN3,P00762,P00774,P08290,P53792,P97840,Q63467,Q91ZS3                                                                       |
| 3331 | 1,2,5,6,7,3<br>6,37,43 | 3,4,8,38,3<br>9,40,41,42<br>,44  | 8  | P02631,P16636,P52590,P83748,Q63467,Q63532,Q63942,Q8CHN8                                                                       |
| 3332 | 1,2,5,6,7,3<br>6,37,44 | 3,4,8,38,3<br>9,40,41,42<br>,43  | 8  | B0BNN3,P00762,P02631,P53792,P97840,Q63467,Q91ZS3,Q9QUL6                                                                       |
| 3333 | 1,2,5,6,7,3<br>6,38,39 | 3,4,8,37,4<br>0,41,42,43<br>,44  | 9  | P00714,P19218,P27213,P52590,P97580,P97840,Q63467,Q6IE51,Q9QUL6                                                                |

|      |                        |                                 |    |                                                                                                   |
|------|------------------------|---------------------------------|----|---------------------------------------------------------------------------------------------------|
| 3334 | 1,2,5,6,7,3<br>6,38,40 | 3,4,8,37,3<br>9,41,42,43<br>,44 | 7  | P15399,P52590,P53792,P97580,P97840,Q63467,Q9QUL6                                                  |
| 3335 | 1,2,5,6,7,3<br>6,38,41 | 3,4,8,37,3<br>9,40,42,43<br>,44 | 5  | P23785,P52590,P97580,P97840,Q63467                                                                |
| 3336 | 1,2,5,6,7,3<br>6,38,42 | 3,4,8,37,3<br>9,40,41,43<br>,44 | 7  | P08290,P08753,P19218,P52590,P53792,P97840,Q63467                                                  |
| 3337 | 1,2,5,6,7,3<br>6,38,43 | 3,4,8,37,3<br>9,40,41,42<br>,44 | 11 | P02631,P16636,P25031,P52590,P83748,P97580,Q561R9,Q63467,Q63532,Q63942,Q8CHN8                      |
| 3338 | 1,2,5,6,7,3<br>6,38,44 | 3,4,8,37,3<br>9,40,41,42<br>,43 | 6  | P52590,P53792,P97580,P97840,Q63467,Q9QUL6                                                         |
| 3339 | 1,2,5,6,7,3<br>6,39,40 | 3,4,8,37,3<br>8,41,42,43<br>,44 | 7  | B0BNN3,P00762,P00774,P27213,P35467,Q63467,Q9QUL6                                                  |
| 3340 | 1,2,5,6,7,3<br>6,39,41 | 3,4,8,37,3<br>8,40,42,43<br>,44 | 6  | B0BNN3,P00714,P23785,P35467,P83748,Q63467                                                         |
| 3341 | 1,2,5,6,7,3<br>6,39,42 | 3,4,8,37,3<br>8,40,41,43<br>,44 | 11 | B0BNN3,P00762,P00774,P08010,P08290,P08753,P19218,P27213,P35467,P97840,Q63467                      |
| 3342 | 1,2,5,6,7,3<br>6,39,43 | 3,4,8,37,3<br>8,40,41,42<br>,44 | 9  | P00714,P02631,P16636,P52590,P83748,Q63467,Q63532,Q63942,Q6IE51                                    |
| 3343 | 1,2,5,6,7,3<br>6,39,44 | 3,4,8,37,3<br>8,40,41,42<br>,43 | 6  | B0BNN3,P00762,P27213,P35467,Q63467,Q9QUL6                                                         |
| 3344 | 1,2,5,6,7,3<br>6,40,41 | 3,4,8,37,3<br>8,39,42,43<br>,44 | 6  | B0BNN3,P12020,P35467,Q63467,Q80WL1,Q9JJS8                                                         |
| 3345 | 1,2,5,6,7,3<br>6,40,42 | 3,4,8,37,3<br>8,39,41,43<br>,44 | 8  | B0BNN3,P00762,P00774,P08290,P36374,P53792,Q9JJS8,Q9QUL6                                           |
| 3346 | 1,2,5,6,7,3<br>6,40,43 | 3,4,8,37,3<br>8,39,41,42<br>,44 | 6  | O55145,P02631,P16636,P52590,P83748,Q63467                                                         |
| 3347 | 1,2,5,6,7,3<br>6,40,44 | 3,4,8,37,3<br>8,39,41,42<br>,43 | 6  | B0BNN3,P00762,P53792,Q63467,Q6P6T1,Q9QUL6                                                         |
| 3348 | 1,2,5,6,7,3<br>6,41,42 | 3,4,8,37,3<br>8,39,40,43<br>,44 | 14 | B0BNN3,P00762,P08010,P08290,P08649,P08753,P23785,P35467,P54921,P60905,P97840,Q63467,Q812E4,Q9JJS8 |

|      |                        |                                 |    |                                                                              |
|------|------------------------|---------------------------------|----|------------------------------------------------------------------------------|
| 3349 | 1,2,5,6,7,3<br>6,41,43 | 3,4,8,37,3<br>8,39,40,42<br>,44 | 8  | P00714,P02631,P16636,P23785,P52590,P83748,Q63467,Q63532                      |
| 3350 | 1,2,5,6,7,3<br>6,41,44 | 3,4,8,37,3<br>8,39,40,42<br>,43 | 6  | B0BNN3,P04355,P23785,P35467,P52590,Q63467                                    |
| 3351 | 1,2,5,6,7,3<br>6,42,43 | 3,4,8,37,3<br>8,39,40,41<br>,44 | 8  | P02631,P08290,P16636,P52590,P83748,Q63467,Q63942,Q8CHN8                      |
| 3352 | 1,2,5,6,7,3<br>6,42,44 | 3,4,8,37,3<br>8,39,40,41<br>,43 | 8  | B0BNN3,P00762,P08290,P36374,P53792,P97840,Q63467,Q9QUL6                      |
| 3353 | 1,2,5,6,7,3<br>6,43,44 | 3,4,8,37,3<br>8,39,40,41<br>,42 | 7  | P02631,P16636,P52590,P83748,Q63467,Q63661,Q63942                             |
| 3354 | 1,2,5,6,7,3<br>7,38,39 | 3,4,8,36,4<br>0,41,42,43<br>,44 | 9  | P00714,P15399,P19218,P27213,P52590,P97580,P97840,Q91ZS3,Q9QUL6               |
| 3355 | 1,2,5,6,7,3<br>7,38,40 | 3,4,8,36,3<br>9,41,42,43<br>,44 | 6  | P02803,P15399,P52590,P97580,P97840,Q9QUL6                                    |
| 3356 | 1,2,5,6,7,3<br>7,38,41 | 3,4,8,36,3<br>9,40,42,43<br>,44 | 6  | P02631,P15399,P52590,P97580,P97840,Q91ZS3                                    |
| 3357 | 1,2,5,6,7,3<br>7,38,42 | 3,4,8,36,3<br>9,40,41,43<br>,44 | 8  | P08290,P15399,P19218,P52590,P97580,P97840,Q91ZS3,Q9QUL6                      |
| 3358 | 1,2,5,6,7,3<br>7,38,43 | 3,4,8,36,3<br>9,40,41,42<br>,44 | 11 | P02631,P15399,P25031,P52590,P83748,P97580,P97840,Q561R9,Q63942,Q61FV1,Q7TPB1 |
| 3359 | 1,2,5,6,7,3<br>7,38,44 | 3,4,8,36,3<br>9,40,41,42<br>,43 | 7  | P02631,P15399,P52590,P97580,P97840,Q91ZS3,Q9QUL6                             |
| 3360 | 1,2,5,6,7,3<br>7,39,40 | 3,4,8,36,3<br>8,41,42,43<br>,44 | 4  | B0BNN3,P27213,P35467,Q9QUL6                                                  |
| 3361 | 1,2,5,6,7,3<br>7,39,41 | 3,4,8,36,3<br>8,40,42,43<br>,44 | 5  | O88267,P00714,P35467,P52590,Q91ZS3                                           |
| 3362 | 1,2,5,6,7,3<br>7,39,42 | 3,4,8,36,3<br>8,40,41,43<br>,44 | 7  | P08290,P19218,P27213,P35467,P97840,Q91ZS3,Q9QUL6                             |
| 3363 | 1,2,5,6,7,3<br>7,39,43 | 3,4,8,36,3<br>8,40,41,42<br>,44 | 5  | P00714,P02631,P52590,P83748,Q63942                                           |



|      |                        |                                 |    |                                                                       |
|------|------------------------|---------------------------------|----|-----------------------------------------------------------------------|
| 3364 | 1,2,5,6,7,3<br>7,39,44 | 3,4,8,36,3<br>8,40,41,42<br>,43 | 6  | B0BNN3,O88267,P27213,P35467,P97840,Q9QUL6                             |
| 3365 | 1,2,5,6,7,3<br>7,40,41 | 3,4,8,36,3<br>8,39,42,43<br>,44 | 5  | B0BNN3,P12020,P35467,Q80WL1,Q91ZS3                                    |
| 3366 | 1,2,5,6,7,3<br>7,40,42 | 3,4,8,36,3<br>8,39,41,43<br>,44 | 3  | B0BNN3,P97840,Q9QUL6                                                  |
| 3367 | 1,2,5,6,7,3<br>7,40,43 | 3,4,8,36,3<br>8,39,41,42<br>,44 | 4  | P02631,P10758,P52590,P83748                                           |
| 3368 | 1,2,5,6,7,3<br>7,40,44 | 3,4,8,36,3<br>8,39,41,42<br>,43 | 3  | B0BNN3,P12020,Q9QUL6                                                  |
| 3369 | 1,2,5,6,7,3<br>7,41,42 | 3,4,8,36,3<br>8,39,40,43<br>,44 | 5  | P08290,P35467,P52590,P97840,Q91ZS3                                    |
| 3370 | 1,2,5,6,7,3<br>7,41,43 | 3,4,8,36,3<br>8,39,40,42<br>,44 | 8  | P00714,P02631,P10758,P16636,P52590,P83748,Q7TPB1,Q91ZS3               |
| 3371 | 1,2,5,6,7,3<br>7,41,44 | 3,4,8,36,3<br>8,39,40,42<br>,43 | 7  | B0BNN3,O88267,P02631,P35467,P52590,Q63467,Q91ZS3                      |
| 3372 | 1,2,5,6,7,3<br>7,42,43 | 3,4,8,36,3<br>8,39,40,41<br>,44 | 6  | P02631,P08290,P10758,P16636,P52590,P83748                             |
| 3373 | 1,2,5,6,7,3<br>7,42,44 | 3,4,8,36,3<br>8,39,40,41<br>,43 | 4  | B0BNN3,P08290,P97840,Q9QUL6                                           |
| 3374 | 1,2,5,6,7,3<br>7,43,44 | 3,4,8,36,3<br>8,39,40,41<br>,42 | 4  | P02631,P10758,P52590,P83748                                           |
| 3375 | 1,2,5,6,7,3<br>8,39,40 | 3,4,8,36,3<br>7,41,42,43<br>,44 | 6  | P15399,P27213,P52590,P97580,Q6IE51,Q9QUL6                             |
| 3376 | 1,2,5,6,7,3<br>8,39,41 | 3,4,8,36,3<br>7,40,42,43<br>,44 | 10 | O88267,P00714,P13432,P19218,P23785,P52590,P97580,Q63467,Q6IE51,Q9QUL6 |
| 3377 | 1,2,5,6,7,3<br>8,39,42 | 3,4,8,36,3<br>7,40,41,43<br>,44 | 7  | P08290,P08753,P19218,P52590,P97580,P97840,Q9QUL6                      |
| 3378 | 1,2,5,6,7,3<br>8,39,43 | 3,4,8,36,3<br>7,40,41,42<br>,44 | 9  | O88267,P00714,P19218,P25031,P52590,P83748,P97580,Q63942,Q6IE51        |

|      |                        |                                 |    |                                                                              |
|------|------------------------|---------------------------------|----|------------------------------------------------------------------------------|
| 3379 | 1,2,5,6,7,3<br>8,39,44 | 3,4,8,36,3<br>7,40,41,42<br>,43 | 7  | O88267,P52590,P97580,P97840,Q63467,Q6IE51,Q9QUL6                             |
| 3380 | 1,2,5,6,7,3<br>8,40,41 | 3,4,8,36,3<br>7,39,42,43<br>,44 | 5  | P12020,P15399,P52590,P97580,Q9QUL6                                           |
| 3381 | 1,2,5,6,7,3<br>8,40,42 | 3,4,8,36,3<br>7,39,41,43<br>,44 | 5  | P08290,P52590,P97580,P97840,Q9QUL6                                           |
| 3382 | 1,2,5,6,7,3<br>8,40,43 | 3,4,8,36,3<br>7,39,41,42<br>,44 | 6  | P15399,P25031,P52590,P83748,P97580,Q63942                                    |
| 3383 | 1,2,5,6,7,3<br>8,40,44 | 3,4,8,36,3<br>7,39,41,42<br>,43 | 5  | P12020,P15399,P52590,P97580,Q9QUL6                                           |
| 3384 | 1,2,5,6,7,3<br>8,41,42 | 3,4,8,36,3<br>7,39,40,43<br>,44 | 11 | O35547,P08010,P08290,P08753,P19218,P25031,P52590,P54921,P97580,P97840,Q8CIZ5 |
| 3385 | 1,2,5,6,7,3<br>8,41,43 | 3,4,8,36,3<br>7,39,40,42<br>,44 | 10 | P00714,P02631,P16636,P25031,P52590,P83748,P97580,Q63467,Q7TPB1,Q8CJD3        |
| 3386 | 1,2,5,6,7,3<br>8,41,44 | 3,4,8,36,3<br>7,39,40,42<br>,43 | 11 | O88267,P23785,P52590,P55091,P97580,P98089,Q05695,Q62635,Q63467,Q8CIZ5,Q9QUL6 |
| 3387 | 1,2,5,6,7,3<br>8,42,43 | 3,4,8,36,3<br>7,39,40,41<br>,44 | 9  | P08290,P16636,P25031,P52590,P54921,P83748,P97580,Q63942,Q8CHN8               |
| 3388 | 1,2,5,6,7,3<br>8,42,44 | 3,4,8,36,3<br>7,39,40,41<br>,43 | 5  | P08290,P52590,P97580,P97840,Q9QUL6                                           |
| 3389 | 1,2,5,6,7,3<br>8,43,44 | 3,4,8,36,3<br>7,39,40,41<br>,42 | 7  | P02631,P25031,P52590,P83748,P97580,Q63467,Q63942                             |
| 3390 | 1,2,5,6,7,3<br>9,40,41 | 3,4,8,36,3<br>7,38,42,43<br>,44 | 5  | O88267,P00714,P12020,P35467,Q9QUL6                                           |
| 3391 | 1,2,5,6,7,3<br>9,40,42 | 3,4,8,36,3<br>7,38,41,43<br>,44 | 3  | P27213,P35467,Q9QUL6                                                         |
| 3392 | 1,2,5,6,7,3<br>9,40,43 | 3,4,8,36,3<br>7,38,41,42<br>,44 | 5  | P16636,P52590,P83748,Q6IE51,Q9QUL6                                           |
| 3393 | 1,2,5,6,7,3<br>9,40,44 | 3,4,8,36,3<br>7,38,41,42<br>,43 | 8  | B0BNN3,P12020,P27213,P35467,Q5GRG2,Q6AYL6,Q6P6T1,Q9QUL6                      |

|      |                        |                                 |   |                                                                |
|------|------------------------|---------------------------------|---|----------------------------------------------------------------|
| 3394 | 1,2,5,6,7,3<br>9,41,42 | 3,4,8,36,3<br>7,38,40,43<br>,44 | 6 | P08010,P08290,P08753,P35467,P52590,Q6AYR9                      |
| 3395 | 1,2,5,6,7,3<br>9,41,43 | 3,4,8,36,3<br>7,38,40,42<br>,44 | 8 | O88267,P00714,P02631,P16636,P52590,P83748,Q63467,Q6IE51        |
| 3396 | 1,2,5,6,7,3<br>9,41,44 | 3,4,8,36,3<br>7,38,40,42<br>,43 | 6 | O88267,P12020,P35467,P52590,Q63467,Q9QUL6                      |
| 3397 | 1,2,5,6,7,3<br>9,42,43 | 3,4,8,36,3<br>7,38,40,41<br>,44 | 5 | P08290,P16636,P52590,P83748,Q63942                             |
| 3398 | 1,2,5,6,7,3<br>9,42,44 | 3,4,8,36,3<br>7,38,40,41<br>,43 | 4 | P08290,P35467,P97840,Q9QUL6                                    |
| 3399 | 1,2,5,6,7,3<br>9,43,44 | 3,4,8,36,3<br>7,38,40,41<br>,42 | 7 | O88267,P02631,P16636,P52590,P83748,Q63467,Q63942               |
| 3400 | 1,2,5,6,7,4<br>0,41,42 | 3,4,8,36,3<br>7,38,39,43<br>,44 | 3 | P08290,P35467,Q9JJS8                                           |
| 3401 | 1,2,5,6,7,4<br>0,41,43 | 3,4,8,36,3<br>7,38,39,42<br>,44 | 5 | P02631,P16636,P52590,P83748,Q9JJS8                             |
| 3402 | 1,2,5,6,7,4<br>0,41,44 | 3,4,8,36,3<br>7,38,39,42<br>,43 | 9 | B0BNN3,P06911,P12020,P52590,Q5GRG2,Q63467,Q80WL1,Q9ET32,Q9QUL6 |
| 3403 | 1,2,5,6,7,4<br>0,42,43 | 3,4,8,36,3<br>7,38,39,41<br>,44 | 4 | P16636,P52590,P83748,Q9JJS8                                    |
| 3404 | 1,2,5,6,7,4<br>0,42,44 | 3,4,8,36,3<br>7,38,39,41<br>,43 | 5 | P08290,P36374,Q9QUL6,Q9QZ76,Q9R1T5                             |
| 3405 | 1,2,5,6,7,4<br>0,43,44 | 3,4,8,36,3<br>7,38,39,41<br>,42 | 4 | P02631,P52590,P83748,Q9QUL6                                    |
| 3406 | 1,2,5,6,7,4<br>1,42,43 | 3,4,8,36,3<br>7,38,39,40<br>,44 | 9 | P02631,P08290,P08753,P16636,P52590,P54921,P60905,P82471,P83748 |
| 3407 | 1,2,5,6,7,4<br>1,42,44 | 3,4,8,36,3<br>7,38,39,40<br>,43 | 8 | P08290,P08753,P35467,P52590,P60905,Q63467,Q6P6R2,Q9JID2        |
| 3408 | 1,2,5,6,7,4<br>1,43,44 | 3,4,8,36,3<br>7,38,39,40<br>,42 | 7 | O88267,P02631,P10758,P16636,P52590,P83748,Q63467               |

|      |                        |                                 |   |                                           |
|------|------------------------|---------------------------------|---|-------------------------------------------|
| 3409 | 1,2,5,6,7,4<br>2,43,44 | 3,4,8,36,3<br>7,38,39,40<br>,41 | 6 | P02631,P08290,P10758,P16636,P52590,P83748 |
| 3410 | 1,2,5,6,8,3<br>6,37,38 | 3,4,7,39,4<br>0,41,42,43<br>,44 | 3 | P53792,Q63942,Q91ZS3                      |
| 3411 | 1,2,5,6,8,3<br>6,37,39 | 3,4,7,38,4<br>0,41,42,43<br>,44 | 4 | B0BNN3,P27213,Q63942,Q9Z1F2               |
| 3412 | 1,2,5,6,8,3<br>6,37,40 | 3,4,7,38,3<br>9,41,42,43<br>,44 | 6 | B0BNN3,P00774,P02803,P53792,Q63942,Q9Z1F2 |
| 3413 | 1,2,5,6,8,3<br>6,37,41 | 3,4,7,38,3<br>9,40,42,43<br>,44 | 5 | B0BNN3,P11030,P83121,Q91ZS3,Q9Z1F2        |
| 3414 | 1,2,5,6,8,3<br>6,37,42 | 3,4,7,38,3<br>9,40,41,43<br>,44 | 4 | P00762,P00774,P53792,Q63942               |
| 3415 | 1,2,5,6,8,3<br>6,37,43 | 3,4,7,38,3<br>9,40,41,42<br>,44 | 3 | P83121,Q63942,Q9Z1F2                      |
| 3416 | 1,2,5,6,8,3<br>6,37,44 | 3,4,7,38,3<br>9,40,41,42<br>,43 | 4 | B0BNN3,P53792,Q63942,Q9Z1F2               |
| 3417 | 1,2,5,6,8,3<br>6,38,39 | 3,4,7,37,4<br>0,41,42,43<br>,44 | 2 | P19218,Q63942                             |
| 3418 | 1,2,5,6,8,3<br>6,38,40 | 3,4,7,37,3<br>9,41,42,43<br>,44 | 3 | P22006,Q63942,Q9QUL6                      |
| 3419 | 1,2,5,6,8,3<br>6,38,41 | 3,4,7,37,3<br>9,40,42,43<br>,44 | 4 | P23785,P50115,P50116,Q63942               |
| 3420 | 1,2,5,6,8,3<br>6,38,42 | 3,4,7,37,3<br>9,40,41,43<br>,44 | 5 | P08753,P19218,P97554,Q63942,Q6AYL6        |
| 3421 | 1,2,5,6,8,3<br>6,38,43 | 3,4,7,37,3<br>9,40,41,42<br>,44 | 2 | Q63942,Q6IFV1                             |
| 3422 | 1,2,5,6,8,3<br>6,38,44 | 3,4,7,37,3<br>9,40,41,42<br>,43 | 3 | P22006,P53792,Q63942                      |
| 3423 | 1,2,5,6,8,3<br>6,39,40 | 3,4,7,37,3<br>8,41,42,43<br>,44 | 6 | B0BNN3,P00774,P27213,Q63942,Q9QUL6,Q9Z1F2 |

|      |                        |                                 |   |                                                         |
|------|------------------------|---------------------------------|---|---------------------------------------------------------|
| 3424 | 1,2,5,6,8,3<br>6,39,41 | 3,4,7,37,3<br>8,40,42,43<br>,44 | 4 | P00714,P12785,Q63942,Q9Z1F2                             |
| 3425 | 1,2,5,6,8,3<br>6,39,42 | 3,4,7,37,3<br>8,40,41,43<br>,44 | 4 | P00774,P08753,P27213,Q63942                             |
| 3426 | 1,2,5,6,8,3<br>6,39,43 | 3,4,7,37,3<br>8,40,41,42<br>,44 | 3 | P00714,Q63942,Q9Z1F2                                    |
| 3427 | 1,2,5,6,8,3<br>6,39,44 | 3,4,7,37,3<br>8,40,41,42<br>,43 | 5 | B0BNN3,P27213,Q63942,Q9QUL6,Q9Z1F2                      |
| 3428 | 1,2,5,6,8,3<br>6,40,41 | 3,4,7,37,3<br>8,39,42,43<br>,44 | 3 | B0BNN3,Q9JJS8,Q9Z1F2                                    |
| 3429 | 1,2,5,6,8,3<br>6,40,42 | 3,4,7,37,3<br>8,39,41,43<br>,44 | 8 | A2RUV9,P00762,P00774,P23593,P36374,P62804,Q63942,Q9JJS8 |
| 3430 | 1,2,5,6,8,3<br>6,40,43 | 3,4,7,37,3<br>8,39,41,42<br>,44 | 3 | Q00715,Q63942,Q9Z1F2                                    |
| 3431 | 1,2,5,6,8,3<br>6,40,44 | 3,4,7,37,3<br>8,39,41,42<br>,43 | 6 | B0BNN3,P22006,P53792,Q6P6T1,Q9QUL6,Q9Z1F2               |
| 3432 | 1,2,5,6,8,3<br>6,41,42 | 3,4,7,37,3<br>8,39,40,43<br>,44 | 5 | A2RUV9,P08753,P60905,Q63942,Q812E4                      |
| 3433 | 1,2,5,6,8,3<br>6,41,43 | 3,4,7,37,3<br>8,39,40,42<br>,44 | 3 | P83121,Q63942,Q9Z1F2                                    |
| 3434 | 1,2,5,6,8,3<br>6,41,44 | 3,4,7,37,3<br>8,39,40,42<br>,43 | 3 | B0BNN3,Q99MH3,Q9Z1F2                                    |
| 3435 | 1,2,5,6,8,3<br>6,42,43 | 3,4,7,37,3<br>8,39,40,41<br>,44 | 3 | P08753,P19629,Q63942                                    |
| 3436 | 1,2,5,6,8,3<br>6,42,44 | 3,4,7,37,3<br>8,39,40,41<br>,43 | 5 | P00762,P08753,P36374,P53792,Q63942                      |
| 3437 | 1,2,5,6,8,3<br>6,43,44 | 3,4,7,37,3<br>8,39,40,41<br>,42 | 3 | Q63942,Q66H69,Q9Z1F2                                    |
| 3438 | 1,2,5,6,8,3<br>7,38,39 | 3,4,7,36,4<br>0,41,42,43<br>,44 | 3 | P19218,Q63942,Q9QUL6                                    |

|      |                        |                                 |   |                                    |
|------|------------------------|---------------------------------|---|------------------------------------|
| 3439 | 1,2,5,6,8,3<br>7,38,40 | 3,4,7,36,3<br>9,41,42,43<br>,44 | 4 | P02803,P22006,Q63942,Q9QUL6        |
| 3440 | 1,2,5,6,8,3<br>7,38,41 | 3,4,7,36,3<br>9,40,42,43<br>,44 | 4 | P50115,P50116,Q63942,Q91ZS3        |
| 3441 | 1,2,5,6,8,3<br>7,38,42 | 3,4,7,36,3<br>9,40,41,43<br>,44 | 3 | P08753,P19218,Q63942               |
| 3442 | 1,2,5,6,8,3<br>7,38,43 | 3,4,7,36,3<br>9,40,41,42<br>,44 | 3 | Q63942,Q6IFV1,Q7TPB1               |
| 3443 | 1,2,5,6,8,3<br>7,38,44 | 3,4,7,36,3<br>9,40,41,42<br>,43 | 4 | P22006,Q62635,Q63942,Q9QUL6        |
| 3444 | 1,2,5,6,8,3<br>7,39,40 | 3,4,7,36,3<br>8,41,42,43<br>,44 | 5 | P02803,P27213,Q63942,Q9QUL6,Q9Z1F2 |
| 3445 | 1,2,5,6,8,3<br>7,39,41 | 3,4,7,36,3<br>8,40,42,43<br>,44 | 3 | P00714,Q91ZS3,Q9Z1F2               |
| 3446 | 1,2,5,6,8,3<br>7,39,42 | 3,4,7,36,3<br>8,40,41,43<br>,44 | 1 | Q63942                             |
| 3447 | 1,2,5,6,8,3<br>7,39,43 | 3,4,7,36,3<br>8,40,41,42<br>,44 | 3 | P00714,Q63942,Q9Z1F2               |
| 3448 | 1,2,5,6,8,3<br>7,39,44 | 3,4,7,36,3<br>8,40,41,42<br>,43 | 4 | P27213,Q63942,Q9QUL6,Q9Z1F2        |
| 3449 | 1,2,5,6,8,3<br>7,40,41 | 3,4,7,36,3<br>8,39,42,43<br>,44 | 2 | P51907,Q9Z1F2                      |
| 3450 | 1,2,5,6,8,3<br>7,40,42 | 3,4,7,36,3<br>8,39,41,43<br>,44 | 1 | P02803                             |
| 3451 | 1,2,5,6,8,3<br>7,40,43 | 3,4,7,36,3<br>8,39,41,42<br>,44 | 3 | P51907,Q63942,Q9Z1F2               |
| 3452 | 1,2,5,6,8,3<br>7,40,44 | 3,4,7,36,3<br>8,39,41,42<br>,43 | 4 | B0BNN3,P22006,Q9QUL6,Q9Z1F2        |
| 3453 | 1,2,5,6,8,3<br>7,41,42 | 3,4,7,36,3<br>8,39,40,43<br>,44 | 2 | P08753,Q91ZS3                      |

|      |                        |                                 |   |                                           |
|------|------------------------|---------------------------------|---|-------------------------------------------|
| 3454 | 1,2,5,6,8,3<br>7,41,43 | 3,4,7,36,3<br>8,39,40,42<br>,44 | 5 | P51907,P83121,Q63942,Q7TPB1,Q9Z1F2        |
| 3455 | 1,2,5,6,8,3<br>7,41,44 | 3,4,7,36,3<br>8,39,40,42<br>,43 | 1 | Q9Z1F2                                    |
| 3456 | 1,2,5,6,8,3<br>7,42,43 | 3,4,7,36,3<br>8,39,40,41<br>,44 | 1 | Q63942                                    |
| 3457 | 1,2,5,6,8,3<br>7,42,44 | 3,4,7,36,3<br>8,39,40,41<br>,43 | 0 |                                           |
| 3458 | 1,2,5,6,8,3<br>7,43,44 | 3,4,7,36,3<br>8,39,40,41<br>,42 | 3 | P10758,Q63942,Q9Z1F2                      |
| 3459 | 1,2,5,6,8,3<br>8,39,40 | 3,4,7,36,3<br>7,41,42,43<br>,44 | 4 | P02803,P27213,Q63942,Q9QUL6               |
| 3460 | 1,2,5,6,8,3<br>8,39,41 | 3,4,7,36,3<br>7,40,42,43<br>,44 | 5 | P00714,P13432,P50115,P50116,Q63942        |
| 3461 | 1,2,5,6,8,3<br>8,39,42 | 3,4,7,36,3<br>7,40,41,43<br>,44 | 3 | P08753,P19218,Q63942                      |
| 3462 | 1,2,5,6,8,3<br>8,39,43 | 3,4,7,36,3<br>7,40,41,42<br>,44 | 3 | P00714,Q63942,Q6IFV1                      |
| 3463 | 1,2,5,6,8,3<br>8,39,44 | 3,4,7,36,3<br>7,40,41,42<br>,43 | 2 | Q63942,Q9QUL6                             |
| 3464 | 1,2,5,6,8,3<br>8,40,41 | 3,4,7,36,3<br>7,39,42,43<br>,44 | 3 | P50115,P50116,Q62635                      |
| 3465 | 1,2,5,6,8,3<br>8,40,42 | 3,4,7,36,3<br>7,39,41,43<br>,44 | 6 | A2RUV9,P02803,P06760,P22006,Q63942,Q9QUL6 |
| 3466 | 1,2,5,6,8,3<br>8,40,43 | 3,4,7,36,3<br>7,39,41,42<br>,44 | 2 | Q63942,Q6IFV1                             |
| 3467 | 1,2,5,6,8,3<br>8,40,44 | 3,4,7,36,3<br>7,39,41,42<br>,43 | 5 | P06760,P22006,Q62635,Q63942,Q9QUL6        |
| 3468 | 1,2,5,6,8,3<br>8,41,42 | 3,4,7,36,3<br>7,39,40,43<br>,44 | 6 | P08753,P50115,P50116,P54921,Q63942,Q8CIZ5 |

|      |                        |                                 |   |                                           |
|------|------------------------|---------------------------------|---|-------------------------------------------|
| 3469 | 1,2,5,6,8,3<br>8,41,43 | 3,4,7,36,3<br>7,39,40,42<br>,44 | 5 | P50115,P50116,Q63942,Q61FV1,Q7TPB1        |
| 3470 | 1,2,5,6,8,3<br>8,41,44 | 3,4,7,36,3<br>7,39,40,42<br>,43 | 6 | P50115,P50116,P98089,Q05695,Q62635,Q8CIZ5 |
| 3471 | 1,2,5,6,8,3<br>8,42,43 | 3,4,7,36,3<br>7,39,40,41<br>,44 | 2 | P08753,Q63942                             |
| 3472 | 1,2,5,6,8,3<br>8,42,44 | 3,4,7,36,3<br>7,39,40,41<br>,43 | 5 | P08753,P22006,P36374,Q63942,Q9QUL6        |
| 3473 | 1,2,5,6,8,3<br>8,43,44 | 3,4,7,36,3<br>7,39,40,41<br>,42 | 3 | Q62635,Q63942,Q61FV1                      |
| 3474 | 1,2,5,6,8,3<br>9,40,41 | 3,4,7,36,3<br>7,38,42,43<br>,44 | 2 | P12785,Q9Z1F2                             |
| 3475 | 1,2,5,6,8,3<br>9,40,42 | 3,4,7,36,3<br>7,38,41,43<br>,44 | 3 | P27213,Q63942,Q9QUL6                      |
| 3476 | 1,2,5,6,8,3<br>9,40,43 | 3,4,7,36,3<br>7,38,41,42<br>,44 | 3 | P12785,Q63942,Q9Z1F2                      |
| 3477 | 1,2,5,6,8,3<br>9,40,44 | 3,4,7,36,3<br>7,38,41,42<br>,43 | 4 | P27213,Q6P6T1,Q9QUL6,Q9Z1F2               |
| 3478 | 1,2,5,6,8,3<br>9,41,42 | 3,4,7,36,3<br>7,38,40,43<br>,44 | 3 | P08010,P08753,Q63942                      |
| 3479 | 1,2,5,6,8,3<br>9,41,43 | 3,4,7,36,3<br>7,38,40,42<br>,44 | 4 | P00714,P12785,Q63942,Q9Z1F2               |
| 3480 | 1,2,5,6,8,3<br>9,41,44 | 3,4,7,36,3<br>7,38,40,42<br>,43 | 2 | O88267,Q9Z1F2                             |
| 3481 | 1,2,5,6,8,3<br>9,42,43 | 3,4,7,36,3<br>7,38,40,41<br>,44 | 1 | Q63942                                    |
| 3482 | 1,2,5,6,8,3<br>9,42,44 | 3,4,7,36,3<br>7,38,40,41<br>,43 | 3 | P08753,Q63942,Q9QUL6                      |
| 3483 | 1,2,5,6,8,3<br>9,43,44 | 3,4,7,36,3<br>7,38,40,41<br>,42 | 2 | Q63942,Q9Z1F2                             |



|      |                         |                                 |   |                                           |
|------|-------------------------|---------------------------------|---|-------------------------------------------|
| 3484 | 1,2,5,6,8,4<br>0,41,42  | 3,4,7,36,3<br>7,38,39,43<br>,44 | 3 | A2RUV9,P08753,Q9JJS8                      |
| 3485 | 1,2,5,6,8,4<br>0,41,43  | 3,4,7,36,3<br>7,38,39,42<br>,44 | 5 | P02793;Q7TP54,P12785,P51907,Q63942,Q9Z1F2 |
| 3486 | 1,2,5,6,8,4<br>0,41,44  | 3,4,7,36,3<br>7,38,39,42<br>,43 | 5 | P06760,P06911,P12020,Q5GRG2,Q9Z1F2        |
| 3487 | 1,2,5,6,8,4<br>0,42,43  | 3,4,7,36,3<br>7,38,39,41<br>,44 | 2 | A2RUV9,Q63942                             |
| 3488 | 1,2,5,6,8,4<br>0,42,44  | 3,4,7,36,3<br>7,38,39,41<br>,43 | 5 | P06760,P22006,P36374,Q9QUL6,Q9QZ76        |
| 3489 | 1,2,5,6,8,4<br>0,43,44  | 3,4,7,36,3<br>7,38,39,41<br>,42 | 2 | Q63942,Q9Z1F2                             |
| 3490 | 1,2,5,6,8,4<br>1,42,43  | 3,4,7,36,3<br>7,38,39,40<br>,44 | 4 | P08753,P54921,P82471,Q63942               |
| 3491 | 1,2,5,6,8,4<br>1,42,44  | 3,4,7,36,3<br>7,38,39,40<br>,43 | 3 | P08753,Q6P6R2,Q9JID2                      |
| 3492 | 1,2,5,6,8,4<br>1,43,44  | 3,4,7,36,3<br>7,38,39,40<br>,42 | 4 | P83121,Q63942,Q66H69,Q9Z1F2               |
| 3493 | 1,2,5,6,8,4<br>2,43,44  | 3,4,7,36,3<br>7,38,39,40<br>,41 | 1 | Q63942                                    |
| 3494 | 1,2,5,6,36,<br>37,38,39 | 3,4,7,8,40,<br>41,42,43,4<br>4  | 4 | P00714,P19218,Q561R9,Q9QUL6               |
| 3495 | 1,2,5,6,36,<br>37,38,40 | 3,4,7,8,39,<br>41,42,43,4<br>4  | 1 | Q9QUL6                                    |
| 3496 | 1,2,5,6,36,<br>37,38,41 | 3,4,7,8,39,<br>40,42,43,4<br>4  | 3 | P00714,Q5M819,Q91ZS3                      |
| 3497 | 1,2,5,6,36,<br>37,38,42 | 3,4,7,8,39,<br>40,41,43,4<br>4  | 4 | P10715,P97840,Q6AYL6,Q91ZS3               |
| 3498 | 1,2,5,6,36,<br>37,38,43 | 3,4,7,8,39,<br>40,41,42,4<br>4  | 4 | P00714,Q561R9,Q63942,Q6IFV1               |

|      |                         |                                |   |                                                  |
|------|-------------------------|--------------------------------|---|--------------------------------------------------|
| 3499 | 1,2,5,6,36,<br>37,38,44 | 3,4,7,8,39,<br>40,41,42,4<br>3 | 2 | P97840,Q9QUL6                                    |
| 3500 | 1,2,5,6,36,<br>37,39,40 | 3,4,7,8,38,<br>41,42,43,4<br>4 | 7 | O35547,P00714,P00774,P27213,P35467,Q05695,Q9QUL6 |
| 3501 | 1,2,5,6,36,<br>37,39,41 | 3,4,7,8,38,<br>40,42,43,4<br>4 | 3 | P00714,P35467,Q91ZS3                             |
| 3502 | 1,2,5,6,36,<br>37,39,42 | 3,4,7,8,38,<br>40,41,43,4<br>4 | 2 | P00774,P35467                                    |
| 3503 | 1,2,5,6,36,<br>37,39,43 | 3,4,7,8,38,<br>40,41,42,4<br>4 | 3 | P00714,Q05695,Q63942                             |
| 3504 | 1,2,5,6,36,<br>37,39,44 | 3,4,7,8,38,<br>40,41,42,4<br>3 | 2 | P27213,Q9QUL6                                    |
| 3505 | 1,2,5,6,36,<br>37,40,41 | 3,4,7,8,38,<br>39,42,43,4<br>4 | 4 | B0BNN3,P00714,Q80WL1,Q9Z1F2                      |
| 3506 | 1,2,5,6,36,<br>37,40,42 | 3,4,7,8,38,<br>39,41,43,4<br>4 | 2 | P00774,Q05695                                    |
| 3507 | 1,2,5,6,36,<br>37,40,43 | 3,4,7,8,38,<br>39,41,42,4<br>4 | 3 | P00714,Q05695,Q63942                             |
| 3508 | 1,2,5,6,36,<br>37,40,44 | 3,4,7,8,38,<br>39,41,42,4<br>3 | 4 | B0BNN3,O35547,Q80WL1,Q9QUL6                      |
| 3509 | 1,2,5,6,36,<br>37,41,42 | 3,4,7,8,38,<br>39,40,43,4<br>4 | 1 | Q91ZS3                                           |
| 3510 | 1,2,5,6,36,<br>37,41,43 | 3,4,7,8,38,<br>39,40,42,4<br>4 | 3 | P00714,P83121,Q9Z1F2                             |
| 3511 | 1,2,5,6,36,<br>37,41,44 | 3,4,7,8,38,<br>39,40,42,4<br>3 | 2 | B0BNN3,Q80WL1                                    |
| 3512 | 1,2,5,6,36,<br>37,42,43 | 3,4,7,8,38,<br>39,40,41,4<br>4 | 4 | P10715,P19629,Q05695,Q63942                      |
| 3513 | 1,2,5,6,36,<br>37,42,44 | 3,4,7,8,38,<br>39,40,41,4<br>3 | 0 |                                                  |

|      |                         |                                |   |                             |
|------|-------------------------|--------------------------------|---|-----------------------------|
| 3514 | 1,2,5,6,36,<br>37,43,44 | 3,4,7,8,38,<br>39,40,41,4<br>2 | 1 | Q63942                      |
| 3515 | 1,2,5,6,36,<br>38,39,40 | 3,4,7,8,37,<br>41,42,43,4<br>4 | 2 | P00714,Q9QUL6               |
| 3516 | 1,2,5,6,36,<br>38,39,41 | 3,4,7,8,37,<br>40,42,43,4<br>4 | 2 | P00714,P23785               |
| 3517 | 1,2,5,6,36,<br>38,39,42 | 3,4,7,8,37,<br>40,41,43,4<br>4 | 2 | P19218,Q9QUL6               |
| 3518 | 1,2,5,6,36,<br>38,39,43 | 3,4,7,8,37,<br>40,41,42,4<br>4 | 3 | P00714,Q63942,Q6IFV1        |
| 3519 | 1,2,5,6,36,<br>38,39,44 | 3,4,7,8,37,<br>40,41,42,4<br>3 | 1 | Q9QUL6                      |
| 3520 | 1,2,5,6,36,<br>38,40,41 | 3,4,7,8,37,<br>39,42,43,4<br>4 | 1 | P00714                      |
| 3521 | 1,2,5,6,36,<br>38,40,42 | 3,4,7,8,37,<br>39,41,43,4<br>4 | 2 | Q64057,Q9QUL6               |
| 3522 | 1,2,5,6,36,<br>38,40,43 | 3,4,7,8,37,<br>39,41,42,4<br>4 | 2 | Q63942,Q6IFV1               |
| 3523 | 1,2,5,6,36,<br>38,40,44 | 3,4,7,8,37,<br>39,41,42,4<br>3 | 2 | P22006,Q9QUL6               |
| 3524 | 1,2,5,6,36,<br>38,41,42 | 3,4,7,8,37,<br>39,40,43,4<br>4 | 2 | P08753,Q8CIZ5               |
| 3525 | 1,2,5,6,36,<br>38,41,43 | 3,4,7,8,37,<br>39,40,42,4<br>4 | 2 | P00714,Q63942               |
| 3526 | 1,2,5,6,36,<br>38,41,44 | 3,4,7,8,37,<br>39,40,42,4<br>3 | 4 | P23785,P98089,Q62635,Q8CIZ5 |
| 3527 | 1,2,5,6,36,<br>38,42,43 | 3,4,7,8,37,<br>39,40,41,4<br>4 | 3 | P10715,Q63942,Q6IFU7        |
| 3528 | 1,2,5,6,36,<br>38,42,44 | 3,4,7,8,37,<br>39,40,41,4<br>3 | 1 | Q9QUL6                      |

|      |                         |                                |   |                      |
|------|-------------------------|--------------------------------|---|----------------------|
| 3529 | 1,2,5,6,36,<br>38,43,44 | 3,4,7,8,37,<br>39,40,41,4<br>2 | 2 | Q63661,Q63942        |
| 3530 | 1,2,5,6,36,<br>39,40,41 | 3,4,7,8,37,<br>38,42,43,4<br>4 | 2 | P00714,P35467        |
| 3531 | 1,2,5,6,36,<br>39,40,42 | 3,4,7,8,37,<br>38,41,43,4<br>4 | 3 | P00774,Q05695,Q9QUL6 |
| 3532 | 1,2,5,6,36,<br>39,40,43 | 3,4,7,8,37,<br>38,41,42,4<br>4 | 3 | P00714,Q05695,Q63942 |
| 3533 | 1,2,5,6,36,<br>39,40,44 | 3,4,7,8,37,<br>38,41,42,4<br>3 | 3 | P27213,Q6P6T1,Q9QUL6 |
| 3534 | 1,2,5,6,36,<br>39,41,42 | 3,4,7,8,37,<br>38,40,43,4<br>4 | 1 | P35467               |
| 3535 | 1,2,5,6,36,<br>39,41,43 | 3,4,7,8,37,<br>38,40,42,4<br>4 | 2 | P00714,Q63942        |
| 3536 | 1,2,5,6,36,<br>39,41,44 | 3,4,7,8,37,<br>38,40,42,4<br>3 | 2 | P23785,P35467        |
| 3537 | 1,2,5,6,36,<br>39,42,43 | 3,4,7,8,37,<br>38,40,41,4<br>4 | 1 | Q63942               |
| 3538 | 1,2,5,6,36,<br>39,42,44 | 3,4,7,8,37,<br>38,40,41,4<br>3 | 1 | Q9QUL6               |
| 3539 | 1,2,5,6,36,<br>39,43,44 | 3,4,7,8,37,<br>38,40,41,4<br>2 | 1 | Q63942               |
| 3540 | 1,2,5,6,36,<br>40,41,42 | 3,4,7,8,37,<br>38,39,43,4<br>4 | 3 | A2RUV9,P23593,Q9JJS8 |
| 3541 | 1,2,5,6,36,<br>40,41,43 | 3,4,7,8,37,<br>38,39,42,4<br>4 | 2 | P00714,Q9Z1F2        |
| 3542 | 1,2,5,6,36,<br>40,41,44 | 3,4,7,8,37,<br>38,39,42,4<br>3 | 3 | B0BNN3,Q80WL1,Q9Z1F2 |
| 3543 | 1,2,5,6,36,<br>40,42,43 | 3,4,7,8,37,<br>38,39,41,4<br>4 | 2 | Q05695,Q63942        |

|      |                         |                                |   |                             |
|------|-------------------------|--------------------------------|---|-----------------------------|
| 3544 | 1,2,5,6,36,<br>40,42,44 | 3,4,7,8,37,<br>38,39,41,4<br>3 | 2 | Q7TPB1,Q9QUL6               |
| 3545 | 1,2,5,6,36,<br>40,43,44 | 3,4,7,8,37,<br>38,39,41,4<br>2 | 1 | Q63661                      |
| 3546 | 1,2,5,6,36,<br>41,42,43 | 3,4,7,8,37,<br>38,39,40,4<br>4 | 2 | P82471,Q63942               |
| 3547 | 1,2,5,6,36,<br>41,42,44 | 3,4,7,8,37,<br>38,39,40,4<br>3 | 0 |                             |
| 3548 | 1,2,5,6,36,<br>41,43,44 | 3,4,7,8,37,<br>38,39,40,4<br>2 | 1 | Q63661                      |
| 3549 | 1,2,5,6,36,<br>42,43,44 | 3,4,7,8,37,<br>38,39,40,4<br>1 | 1 | Q63942                      |
| 3550 | 1,2,5,6,37,<br>38,39,40 | 3,4,7,8,36,<br>41,42,43,4<br>4 | 2 | P00714,Q9QUL6               |
| 3551 | 1,2,5,6,37,<br>38,39,41 | 3,4,7,8,36,<br>40,42,43,4<br>4 | 3 | P00714,P13432,Q91ZS3        |
| 3552 | 1,2,5,6,37,<br>38,39,42 | 3,4,7,8,36,<br>40,41,43,4<br>4 | 2 | P19218,Q9QUL6               |
| 3553 | 1,2,5,6,37,<br>38,39,43 | 3,4,7,8,36,<br>40,41,42,4<br>4 | 4 | P00714,Q561R9,Q63942,Q61FV1 |
| 3554 | 1,2,5,6,37,<br>38,39,44 | 3,4,7,8,36,<br>40,41,42,4<br>3 | 1 | Q9QUL6                      |
| 3555 | 1,2,5,6,37,<br>38,40,41 | 3,4,7,8,36,<br>39,42,43,4<br>4 | 1 | P00714                      |
| 3556 | 1,2,5,6,37,<br>38,40,42 | 3,4,7,8,36,<br>39,41,43,4<br>4 | 1 | Q9QUL6                      |
| 3557 | 1,2,5,6,37,<br>38,40,43 | 3,4,7,8,36,<br>39,41,42,4<br>4 | 2 | Q63942,Q61FV1               |
| 3558 | 1,2,5,6,37,<br>38,40,44 | 3,4,7,8,36,<br>39,41,42,4<br>3 | 2 | P22006,Q9QUL6               |

|      |                         |                                |   |                             |
|------|-------------------------|--------------------------------|---|-----------------------------|
| 3559 | 1,2,5,6,37,<br>38,41,42 | 3,4,7,8,36,<br>39,40,43,4<br>4 | 1 | Q91ZS3                      |
| 3560 | 1,2,5,6,37,<br>38,41,43 | 3,4,7,8,36,<br>39,40,42,4<br>4 | 3 | P00714,Q63942,Q6IFV1        |
| 3561 | 1,2,5,6,37,<br>38,41,44 | 3,4,7,8,36,<br>39,40,42,4<br>3 | 2 | P98089,Q62635               |
| 3562 | 1,2,5,6,37,<br>38,42,43 | 3,4,7,8,36,<br>39,40,41,4<br>4 | 3 | Q63942,Q6IFU7,Q6IFV1        |
| 3563 | 1,2,5,6,37,<br>38,42,44 | 3,4,7,8,36,<br>39,40,41,4<br>3 | 2 | P97840,Q9QUL6               |
| 3564 | 1,2,5,6,37,<br>38,43,44 | 3,4,7,8,36,<br>39,40,41,4<br>2 | 2 | Q63942,Q6IFV1               |
| 3565 | 1,2,5,6,37,<br>39,40,41 | 3,4,7,8,36,<br>38,42,43,4<br>4 | 3 | P00714,P35467,Q9QUL6        |
| 3566 | 1,2,5,6,37,<br>39,40,42 | 3,4,7,8,36,<br>38,41,43,4<br>4 | 2 | Q05695,Q9QUL6               |
| 3567 | 1,2,5,6,37,<br>39,40,43 | 3,4,7,8,36,<br>38,41,42,4<br>4 | 3 | P00714,Q05695,Q63942        |
| 3568 | 1,2,5,6,37,<br>39,40,44 | 3,4,7,8,36,<br>38,41,42,4<br>3 | 4 | O35547,P27213,Q6AYL6,Q9QUL6 |
| 3569 | 1,2,5,6,37,<br>39,41,42 | 3,4,7,8,36,<br>38,40,43,4<br>4 | 3 | P13432,P35467,Q91ZS3        |
| 3570 | 1,2,5,6,37,<br>39,41,43 | 3,4,7,8,36,<br>38,40,42,4<br>4 | 2 | P00714,Q63942               |
| 3571 | 1,2,5,6,37,<br>39,41,44 | 3,4,7,8,36,<br>38,40,42,4<br>3 | 1 | P35467                      |
| 3572 | 1,2,5,6,37,<br>39,42,43 | 3,4,7,8,36,<br>38,40,41,4<br>4 | 2 | Q05695,Q63942               |
| 3573 | 1,2,5,6,37,<br>39,42,44 | 3,4,7,8,36,<br>38,40,41,4<br>3 | 1 | Q9QUL6                      |

|      |                         |                                |   |                             |
|------|-------------------------|--------------------------------|---|-----------------------------|
| 3574 | 1,2,5,6,37,<br>39,43,44 | 3,4,7,8,36,<br>38,40,41,4<br>2 | 1 | Q63942                      |
| 3575 | 1,2,5,6,37,<br>40,41,42 | 3,4,7,8,36,<br>38,39,43,4<br>4 | 0 |                             |
| 3576 | 1,2,5,6,37,<br>40,41,43 | 3,4,7,8,36,<br>38,39,42,4<br>4 | 3 | P00714,P51907,Q9Z1F2        |
| 3577 | 1,2,5,6,37,<br>40,41,44 | 3,4,7,8,36,<br>38,39,42,4<br>3 | 4 | Q5GRG2,Q80WL1,Q9QUL6,Q9Z1F2 |
| 3578 | 1,2,5,6,37,<br>40,42,43 | 3,4,7,8,36,<br>38,39,41,4<br>4 | 1 | Q05695                      |
| 3579 | 1,2,5,6,37,<br>40,42,44 | 3,4,7,8,36,<br>38,39,41,4<br>3 | 1 | Q9QUL6                      |
| 3580 | 1,2,5,6,37,<br>40,43,44 | 3,4,7,8,36,<br>38,39,41,4<br>2 | 0 |                             |
| 3581 | 1,2,5,6,37,<br>41,42,43 | 3,4,7,8,36,<br>38,39,40,4<br>4 | 0 |                             |
| 3582 | 1,2,5,6,37,<br>41,42,44 | 3,4,7,8,36,<br>38,39,40,4<br>3 | 1 | Q6P6R2                      |
| 3583 | 1,2,5,6,37,<br>41,43,44 | 3,4,7,8,36,<br>38,39,40,4<br>2 | 0 |                             |
| 3584 | 1,2,5,6,37,<br>42,43,44 | 3,4,7,8,36,<br>38,39,40,4<br>1 | 0 |                             |
| 3585 | 1,2,5,6,38,<br>39,40,41 | 3,4,7,8,36,<br>37,42,43,4<br>4 | 3 | P00714,P13432,Q9QUL6        |
| 3586 | 1,2,5,6,38,<br>39,40,42 | 3,4,7,8,36,<br>37,41,43,4<br>4 | 2 | Q99041,Q9QUL6               |
| 3587 | 1,2,5,6,38,<br>39,40,43 | 3,4,7,8,36,<br>37,41,42,4<br>4 | 4 | P00714,Q63942,Q6IFV1,Q9QUL6 |
| 3588 | 1,2,5,6,38,<br>39,40,44 | 3,4,7,8,36,<br>37,41,42,4<br>3 | 1 | Q9QUL6                      |

|      |                         |                                |   |                                           |
|------|-------------------------|--------------------------------|---|-------------------------------------------|
| 3589 | 1,2,5,6,38,<br>39,41,42 | 3,4,7,8,36,<br>37,40,43,4<br>4 | 1 | P13432                                    |
| 3590 | 1,2,5,6,38,<br>39,41,43 | 3,4,7,8,36,<br>37,40,42,4<br>4 | 3 | P00714,Q63942,Q6IFV1                      |
| 3591 | 1,2,5,6,38,<br>39,41,44 | 3,4,7,8,36,<br>37,40,42,4<br>3 | 3 | P98089,Q62635,Q9QUL6                      |
| 3592 | 1,2,5,6,38,<br>39,42,43 | 3,4,7,8,36,<br>37,40,41,4<br>4 | 4 | Q63942,Q6IFU7,Q6IFV1,Q99041               |
| 3593 | 1,2,5,6,38,<br>39,42,44 | 3,4,7,8,36,<br>37,40,41,4<br>3 | 2 | Q99041,Q9QUL6                             |
| 3594 | 1,2,5,6,38,<br>39,43,44 | 3,4,7,8,36,<br>37,40,41,4<br>2 | 3 | Q63942,Q6IFV1,Q9QUL6                      |
| 3595 | 1,2,5,6,38,<br>40,41,42 | 3,4,7,8,36,<br>37,39,43,4<br>4 | 0 |                                           |
| 3596 | 1,2,5,6,38,<br>40,41,43 | 3,4,7,8,36,<br>37,39,42,4<br>4 | 2 | P00714,Q6IFV1                             |
| 3597 | 1,2,5,6,38,<br>40,41,44 | 3,4,7,8,36,<br>37,39,42,4<br>3 | 3 | P98089,Q62635,Q9QUL6                      |
| 3598 | 1,2,5,6,38,<br>40,42,43 | 3,4,7,8,36,<br>37,39,41,4<br>4 | 3 | Q63942,Q6IFU7,Q99041                      |
| 3599 | 1,2,5,6,38,<br>40,42,44 | 3,4,7,8,36,<br>37,39,41,4<br>3 | 4 | P06760,P22006,Q99041,Q9QUL6               |
| 3600 | 1,2,5,6,38,<br>40,43,44 | 3,4,7,8,36,<br>37,39,41,4<br>2 | 3 | Q63942,Q99041,Q9QUL6                      |
| 3601 | 1,2,5,6,38,<br>41,42,43 | 3,4,7,8,36,<br>37,39,40,4<br>4 | 6 | P54921,P82471,Q5HZV9,Q63942,Q6IFU7,Q8CJD3 |
| 3602 | 1,2,5,6,38,<br>41,42,44 | 3,4,7,8,36,<br>37,39,40,4<br>3 | 3 | P98089,Q62635,Q8CIZ5                      |
| 3603 | 1,2,5,6,38,<br>41,43,44 | 3,4,7,8,36,<br>37,39,40,4<br>2 | 4 | P00774,P55091,P98089,Q62635               |



|      |                         |                                |   |                                                         |
|------|-------------------------|--------------------------------|---|---------------------------------------------------------|
| 3604 | 1,2,5,6,38,<br>42,43,44 | 3,4,7,8,36,<br>37,39,40,4<br>1 | 3 | Q63942,Q6IFU7,Q99041                                    |
| 3605 | 1,2,5,6,39,<br>40,41,42 | 3,4,7,8,36,<br>37,38,43,4<br>4 | 2 | P13432,P35467                                           |
| 3606 | 1,2,5,6,39,<br>40,41,43 | 3,4,7,8,36,<br>37,38,42,4<br>4 | 1 | P00714                                                  |
| 3607 | 1,2,5,6,39,<br>40,41,44 | 3,4,7,8,36,<br>37,38,42,4<br>3 | 8 | P06911,P10715,P19629,P35467,Q5GRG2,Q6AYL6,Q6P6T1,Q9QUL6 |
| 3608 | 1,2,5,6,39,<br>40,42,43 | 3,4,7,8,36,<br>37,38,41,4<br>4 | 3 | Q05695,Q63942,Q6IFU7                                    |
| 3609 | 1,2,5,6,39,<br>40,42,44 | 3,4,7,8,36,<br>37,38,41,4<br>3 | 2 | Q99041,Q9QUL6                                           |
| 3610 | 1,2,5,6,39,<br>40,43,44 | 3,4,7,8,36,<br>37,38,41,4<br>2 | 3 | Q63942,Q6AYL6,Q9QUL6                                    |
| 3611 | 1,2,5,6,39,<br>41,42,43 | 3,4,7,8,36,<br>37,38,40,4<br>4 | 3 | P82471,Q63942,Q6IFU7                                    |
| 3612 | 1,2,5,6,39,<br>41,42,44 | 3,4,7,8,36,<br>37,38,40,4<br>3 | 1 | P35467                                                  |
| 3613 | 1,2,5,6,39,<br>41,43,44 | 3,4,7,8,36,<br>37,38,40,4<br>2 | 0 |                                                         |
| 3614 | 1,2,5,6,39,<br>42,43,44 | 3,4,7,8,36,<br>37,38,40,4<br>1 | 1 | Q63942                                                  |
| 3615 | 1,2,5,6,40,<br>41,42,43 | 3,4,7,8,36,<br>37,38,39,4<br>4 | 0 |                                                         |
| 3616 | 1,2,5,6,40,<br>41,42,44 | 3,4,7,8,36,<br>37,38,39,4<br>3 | 2 | Q6P6R2,Q9QUL6                                           |
| 3617 | 1,2,5,6,40,<br>41,43,44 | 3,4,7,8,36,<br>37,38,39,4<br>2 | 1 | Q9Z1F2                                                  |
| 3618 | 1,2,5,6,40,<br>42,43,44 | 3,4,7,8,36,<br>37,38,39,4<br>1 | 1 | Q99041                                                  |

|      |                         |                                 |    |                                                                       |
|------|-------------------------|---------------------------------|----|-----------------------------------------------------------------------|
| 3619 | 1,2,5,6,41,<br>42,43,44 | 3,4,7,8,36,<br>37,38,39,4<br>0  | 2  | P82471,Q6P6R2                                                         |
| 3620 | 1,2,5,7,8,3<br>6,37,38  | 3,4,6,39,4<br>0,41,42,43<br>,44 | 4  | P00762,P52590,P53792,Q63467                                           |
| 3621 | 1,2,5,7,8,3<br>6,37,39  | 3,4,6,38,4<br>0,41,42,43<br>,44 | 6  | B0BNN3,P00762,P00774,P01835,P27213,Q63467                             |
| 3622 | 1,2,5,7,8,3<br>6,37,40  | 3,4,6,38,3<br>9,41,42,43<br>,44 | 10 | B0BNN3,P00762,P00774,P01835,P02625,P02803,P53792,Q03191,Q09030,Q63467 |
| 3623 | 1,2,5,7,8,3<br>6,37,41  | 3,4,6,38,3<br>9,40,42,43<br>,44 | 9  | B0BNN3,P00762,P01835,P52590,P83121,Q03191,Q09030,Q63467,Q99MH3        |
| 3624 | 1,2,5,7,8,3<br>6,37,42  | 3,4,6,38,3<br>9,40,41,43<br>,44 | 7  | B0BNN3,P00762,P00774,P01835,P53792,Q09030,Q63467                      |
| 3625 | 1,2,5,7,8,3<br>6,37,43  | 3,4,6,38,3<br>9,40,41,42<br>,44 | 6  | P16391,P16636,P52590,P83121,Q03191,Q63467                             |
| 3626 | 1,2,5,7,8,3<br>6,37,44  | 3,4,6,38,3<br>9,40,41,42<br>,43 | 8  | B0BNN3,P00762,P13432,P53792,Q03191,Q5HZV9,Q63467,Q99MH3               |
| 3627 | 1,2,5,7,8,3<br>6,38,39  | 3,4,6,37,4<br>0,41,42,43<br>,44 | 5  | P00762,P19218,P27213,P52590,Q63467                                    |
| 3628 | 1,2,5,7,8,3<br>6,38,40  | 3,4,6,37,3<br>9,41,42,43<br>,44 | 4  | P00762,P02803,P52590,Q63467                                           |
| 3629 | 1,2,5,7,8,3<br>6,38,41  | 3,4,6,37,3<br>9,40,42,43<br>,44 | 8  | P00762,P23785,P50115,P50116,P52590,Q01205,Q63467,Q99MH3               |
| 3630 | 1,2,5,7,8,3<br>6,38,42  | 3,4,6,37,3<br>9,40,41,43<br>,44 | 9  | P00762,P04905,P08753,P19218,P47727,P52590,Q63467,Q6AYL6,Q9QZK9        |
| 3631 | 1,2,5,7,8,3<br>6,38,43  | 3,4,6,37,3<br>9,40,41,42<br>,44 | 5  | P16391,P16636,P52590,Q63467,Q63942                                    |
| 3632 | 1,2,5,7,8,3<br>6,38,44  | 3,4,6,37,3<br>9,40,41,42<br>,43 | 5  | P00762,P52590,P53792,Q63467,Q99MH3                                    |
| 3633 | 1,2,5,7,8,3<br>6,39,40  | 3,4,6,37,3<br>8,41,42,43<br>,44 | 6  | B0BNN3,P00762,P00774,P01835,P27213,Q63467                             |

|      |                        |                                 |    |                                                                                                                 |
|------|------------------------|---------------------------------|----|-----------------------------------------------------------------------------------------------------------------|
| 3634 | 1,2,5,7,8,3<br>6,39,41 | 3,4,6,37,3<br>8,40,42,43<br>,44 | 8  | B0BNN3,P00762,P01835,P12785,P23785,P52590,Q63467,Q99MH3                                                         |
| 3635 | 1,2,5,7,8,3<br>6,39,42 | 3,4,6,37,3<br>8,40,41,43<br>,44 | 12 | B0BNN3,P00762,P00774,P01835,P04905,P08010,P08644,P08753,P27213,P82995,Q63467,Q6AYR9                             |
| 3636 | 1,2,5,7,8,3<br>6,39,43 | 3,4,6,37,3<br>8,40,41,42<br>,44 | 5  | P16636,P52590,Q03191,Q63467,Q63942                                                                              |
| 3637 | 1,2,5,7,8,3<br>6,39,44 | 3,4,6,37,3<br>8,40,41,42<br>,43 | 5  | B0BNN3,P00762,P27213,Q5HZV9,Q63467                                                                              |
| 3638 | 1,2,5,7,8,3<br>6,40,41 | 3,4,6,37,3<br>8,39,42,43<br>,44 | 6  | B0BNN3,P00762,P01835,Q09030,Q63467,Q9JJS8                                                                       |
| 3639 | 1,2,5,7,8,3<br>6,40,42 | 3,4,6,37,3<br>8,39,41,43<br>,44 | 9  | B0BNN3,P00762,P00774,P01835,P02625,P36374,Q09030,Q9JJS8,Q9QZ76                                                  |
| 3640 | 1,2,5,7,8,3<br>6,40,43 | 3,4,6,37,3<br>8,39,41,42<br>,44 | 4  | P16636,P52590,Q03191,Q63467                                                                                     |
| 3641 | 1,2,5,7,8,3<br>6,40,44 | 3,4,6,37,3<br>8,39,41,42<br>,43 | 6  | B0BNN3,P00762,P02625,P53792,Q03191,Q63467                                                                       |
| 3642 | 1,2,5,7,8,3<br>6,41,42 | 3,4,6,37,3<br>8,39,40,43<br>,44 | 16 | B0BNN3,P00762,P01835,P04905,P08010,P08644,P08753,P52590,P60905,P82995,Q09030,Q63467,Q6AYR9,Q812E4,Q99MH3,Q9JJS8 |
| 3643 | 1,2,5,7,8,3<br>6,41,43 | 3,4,6,37,3<br>8,39,40,42<br>,44 | 6  | P16636,P52590,P83121,Q03191,Q63467,Q99MH3                                                                       |
| 3644 | 1,2,5,7,8,3<br>6,41,44 | 3,4,6,37,3<br>8,39,40,42<br>,43 | 9  | B0BNN3,P00762,P52590,P82995,P83121,Q01205,Q03191,Q63467,Q99MH3                                                  |
| 3645 | 1,2,5,7,8,3<br>6,42,43 | 3,4,6,37,3<br>8,39,40,41<br>,44 | 9  | P06911,P16391,P16636,P52590,P60905,P82995,Q09030,Q63467,Q63942                                                  |
| 3646 | 1,2,5,7,8,3<br>6,42,44 | 3,4,6,37,3<br>8,39,40,41<br>,43 | 10 | B0BNN3,P00762,P08644,P08753,P36374,P53792,P60905,P82995,Q63467,Q99MH3                                           |
| 3647 | 1,2,5,7,8,3<br>6,43,44 | 3,4,6,37,3<br>8,39,40,41<br>,42 | 5  | P13432,P16636,P52590,Q03191,Q63467                                                                              |
| 3648 | 1,2,5,7,8,3<br>7,38,39 | 3,4,6,36,4<br>0,41,42,43<br>,44 | 3  | P19218,P27213,P52590                                                                                            |

|      |                        |                                 |   |                                                  |
|------|------------------------|---------------------------------|---|--------------------------------------------------|
| 3649 | 1,2,5,7,8,3<br>7,38,40 | 3,4,6,36,3<br>9,41,42,43<br>,44 | 2 | P02803,P52590                                    |
| 3650 | 1,2,5,7,8,3<br>7,38,41 | 3,4,6,36,3<br>9,40,42,43<br>,44 | 4 | P50115,P50116,P52590,Q63467                      |
| 3651 | 1,2,5,7,8,3<br>7,38,42 | 3,4,6,36,3<br>9,40,41,43<br>,44 | 2 | P00762,P52590                                    |
| 3652 | 1,2,5,7,8,3<br>7,38,43 | 3,4,6,36,3<br>9,40,41,42<br>,44 | 5 | P16391,P52590,Q03191,Q63942,Q7TPB1               |
| 3653 | 1,2,5,7,8,3<br>7,38,44 | 3,4,6,36,3<br>9,40,41,42<br>,43 | 2 | P52590,Q63467                                    |
| 3654 | 1,2,5,7,8,3<br>7,39,40 | 3,4,6,36,3<br>8,41,42,43<br>,44 | 7 | B0BNN3,P00762,P00774,P01835,P02803,P27213,Q9QUL6 |
| 3655 | 1,2,5,7,8,3<br>7,39,41 | 3,4,6,36,3<br>8,40,42,43<br>,44 | 4 | O88267,P01835,P52590,Q63467                      |
| 3656 | 1,2,5,7,8,3<br>7,39,42 | 3,4,6,36,3<br>8,40,41,43<br>,44 | 5 | P00762,P00774,P01835,P27213,P52590               |
| 3657 | 1,2,5,7,8,3<br>7,39,43 | 3,4,6,36,3<br>8,40,41,42<br>,44 | 3 | P52590,Q03191,Q8CIZ5                             |
| 3658 | 1,2,5,7,8,3<br>7,39,44 | 3,4,6,36,3<br>8,40,41,42<br>,43 | 6 | B0BNN3,P00762,P27213,P52590,Q5HZV9,Q63467        |
| 3659 | 1,2,5,7,8,3<br>7,40,41 | 3,4,6,36,3<br>8,39,42,43<br>,44 | 5 | B0BNN3,P01835,P02803,P52590,Q03191               |
| 3660 | 1,2,5,7,8,3<br>7,40,42 | 3,4,6,36,3<br>8,39,41,43<br>,44 | 7 | B0BNN3,P00762,P00774,P01835,P02625,P02803,Q9QZ76 |
| 3661 | 1,2,5,7,8,3<br>7,40,43 | 3,4,6,36,3<br>8,39,41,42<br>,44 | 3 | P02803,P52590,Q03191                             |
| 3662 | 1,2,5,7,8,3<br>7,40,44 | 3,4,6,36,3<br>8,39,41,42<br>,43 | 6 | B0BNN3,P00762,P02625,P02803,Q03191,Q9QUL6        |
| 3663 | 1,2,5,7,8,3<br>7,41,42 | 3,4,6,36,3<br>8,39,40,43<br>,44 | 4 | P00762,P01835,P08753,P52590                      |

|      |                        |                                 |   |                                                                |
|------|------------------------|---------------------------------|---|----------------------------------------------------------------|
| 3664 | 1,2,5,7,8,3<br>7,41,43 | 3,4,6,36,3<br>8,39,40,42<br>,44 | 5 | P16636,P52590,P83121,Q03191,Q7TPB1                             |
| 3665 | 1,2,5,7,8,3<br>7,41,44 | 3,4,6,36,3<br>8,39,40,42<br>,43 | 5 | B0BNN3,P00762,P52590,Q03191,Q63467                             |
| 3666 | 1,2,5,7,8,3<br>7,42,43 | 3,4,6,36,3<br>8,39,40,41<br>,44 | 3 | P16391,P16636,P52590                                           |
| 3667 | 1,2,5,7,8,3<br>7,42,44 | 3,4,6,36,3<br>8,39,40,41<br>,43 | 3 | B0BNN3,P00762,P52590                                           |
| 3668 | 1,2,5,7,8,3<br>7,43,44 | 3,4,6,36,3<br>8,39,40,41<br>,42 | 3 | P10758,P52590,Q03191                                           |
| 3669 | 1,2,5,7,8,3<br>8,39,40 | 3,4,6,36,3<br>7,41,42,43<br>,44 | 4 | P02803,P27213,P52590,Q9QUL6                                    |
| 3670 | 1,2,5,7,8,3<br>8,39,41 | 3,4,6,36,3<br>7,40,42,43<br>,44 | 5 | O88267,P50115,P50116,P52590,Q63467                             |
| 3671 | 1,2,5,7,8,3<br>8,39,42 | 3,4,6,36,3<br>7,40,41,43<br>,44 | 3 | P08753,P19218,P52590                                           |
| 3672 | 1,2,5,7,8,3<br>8,39,43 | 3,4,6,36,3<br>7,40,41,42<br>,44 | 3 | P16636,P52590,Q63942                                           |
| 3673 | 1,2,5,7,8,3<br>8,39,44 | 3,4,6,36,3<br>7,40,41,42<br>,43 | 3 | P52590,Q63467,Q9QUL6                                           |
| 3674 | 1,2,5,7,8,3<br>8,40,41 | 3,4,6,36,3<br>7,39,42,43<br>,44 | 3 | P50115,P50116,P52590                                           |
| 3675 | 1,2,5,7,8,3<br>8,40,42 | 3,4,6,36,3<br>7,39,41,43<br>,44 | 5 | P00762,P02625,P02803,P52590,Q9QZ76                             |
| 3676 | 1,2,5,7,8,3<br>8,40,43 | 3,4,6,36,3<br>7,39,41,42<br>,44 | 2 | P02803,P52590                                                  |
| 3677 | 1,2,5,7,8,3<br>8,40,44 | 3,4,6,36,3<br>7,39,41,42<br>,43 | 2 | P52590,Q9QUL6                                                  |
| 3678 | 1,2,5,7,8,3<br>8,41,42 | 3,4,6,36,3<br>7,39,40,43<br>,44 | 9 | O08815,O35547,P08010,P08753,P50115,P50116,P52590,P54921,Q9QZK9 |

|      |                        |                                 |   |                                                         |
|------|------------------------|---------------------------------|---|---------------------------------------------------------|
| 3679 | 1,2,5,7,8,3<br>8,41,43 | 3,4,6,36,3<br>7,39,40,42<br>,44 | 7 | P16636,P50115,P50116,P52590,Q63467,Q7TPB1,Q8CJD3        |
| 3680 | 1,2,5,7,8,3<br>8,41,44 | 3,4,6,36,3<br>7,39,40,42<br>,43 | 7 | P50115,P50116,P52590,P55091,Q05695,Q62635,Q63467        |
| 3681 | 1,2,5,7,8,3<br>8,42,43 | 3,4,6,36,3<br>7,39,40,41<br>,44 | 8 | O35547,P08723,P08753,P16391,P16636,P47727,P52590,Q63942 |
| 3682 | 1,2,5,7,8,3<br>8,42,44 | 3,4,6,36,3<br>7,39,40,41<br>,43 | 4 | P00762,P08753,P52590,Q9QZK9                             |
| 3683 | 1,2,5,7,8,3<br>8,43,44 | 3,4,6,36,3<br>7,39,40,41<br>,42 | 2 | P52590,Q63467                                           |
| 3684 | 1,2,5,7,8,3<br>9,40,41 | 3,4,6,36,3<br>7,38,42,43<br>,44 | 4 | P01835,P10715,P12785,P52590                             |
| 3685 | 1,2,5,7,8,3<br>9,40,42 | 3,4,6,36,3<br>7,38,41,43<br>,44 | 5 | P00762,P00774,P01835,P27213,Q9QUL6                      |
| 3686 | 1,2,5,7,8,3<br>9,40,43 | 3,4,6,36,3<br>7,38,41,42<br>,44 | 3 | P16636,P52590,Q8CIZ5                                    |
| 3687 | 1,2,5,7,8,3<br>9,40,44 | 3,4,6,36,3<br>7,38,41,42<br>,43 | 7 | B0BNN3,P00762,P10715,P27213,Q6AYL6,Q6P6T1,Q9QUL6        |
| 3688 | 1,2,5,7,8,3<br>9,41,42 | 3,4,6,36,3<br>7,38,40,43<br>,44 | 6 | P00762,P01835,P08010,P08753,P52590,Q6AYR9               |
| 3689 | 1,2,5,7,8,3<br>9,41,43 | 3,4,6,36,3<br>7,38,40,42<br>,44 | 6 | O88267,P12785,P16636,P52590,P83748,Q63467               |
| 3690 | 1,2,5,7,8,3<br>9,41,44 | 3,4,6,36,3<br>7,38,40,42<br>,43 | 3 | O88267,P52590,Q63467                                    |
| 3691 | 1,2,5,7,8,3<br>9,42,43 | 3,4,6,36,3<br>7,38,40,41<br>,44 | 4 | P16636,P52590,Q63942,Q6AYR9                             |
| 3692 | 1,2,5,7,8,3<br>9,42,44 | 3,4,6,36,3<br>7,38,40,41<br>,43 | 2 | P00762,P52590                                           |
| 3693 | 1,2,5,7,8,3<br>9,43,44 | 3,4,6,36,3<br>7,38,40,41<br>,42 | 3 | P16636,P52590,Q63467                                    |

|      |                         |                                 |   |                                                                |
|------|-------------------------|---------------------------------|---|----------------------------------------------------------------|
| 3694 | 1,2,5,7,8,4<br>0,41,42  | 3,4,6,36,3<br>7,38,39,43<br>,44 | 6 | P00762,P01835,P02625,P52590,Q9JJS8,Q9QZ76                      |
| 3695 | 1,2,5,7,8,4<br>0,41,43  | 3,4,6,36,3<br>7,38,39,42<br>,44 | 5 | P12785,P16636,P52590,Q03191,Q9JJS8                             |
| 3696 | 1,2,5,7,8,4<br>0,41,44  | 3,4,6,36,3<br>7,38,39,42<br>,43 | 7 | B0BNN3,P10715,P31044,P52590,Q5GRG2,Q63467,Q9ET32               |
| 3697 | 1,2,5,7,8,4<br>0,42,43  | 3,4,6,36,3<br>7,38,39,41<br>,44 | 6 | P02625,P16636,P52590,Q9JHB9,Q9JJS8,Q9QZ76                      |
| 3698 | 1,2,5,7,8,4<br>0,42,44  | 3,4,6,36,3<br>7,38,39,41<br>,43 | 8 | B0BNN3,P00762,P02625,P20759,P36374,Q5M819,Q9QUL6,Q9QZ76        |
| 3699 | 1,2,5,7,8,4<br>0,43,44  | 3,4,6,36,3<br>7,38,39,41<br>,42 | 2 | P52590,Q03191                                                  |
| 3700 | 1,2,5,7,8,4<br>1,42,43  | 3,4,6,36,3<br>7,38,39,40<br>,44 | 8 | O35547,P08753,P0C0A9,P16636,P52590,P54921,P60905,P82471        |
| 3701 | 1,2,5,7,8,4<br>1,42,44  | 3,4,6,36,3<br>7,38,39,40<br>,43 | 9 | P00762,P08644,P08753,P0C0A9,P52590,P60905,Q63467,Q812E4,Q9JID2 |
| 3702 | 1,2,5,7,8,4<br>1,43,44  | 3,4,6,36,3<br>7,38,39,40<br>,42 | 5 | P16636,P52590,P83121,Q03191,Q63467                             |
| 3703 | 1,2,5,7,8,4<br>2,43,44  | 3,4,6,36,3<br>7,38,39,40<br>,41 | 2 | P16636,P52590                                                  |
| 3704 | 1,2,5,7,36,<br>37,38,39 | 3,4,6,8,40,<br>41,42,43,4<br>4  | 3 | P19218,P97840,Q6P6R2                                           |
| 3705 | 1,2,5,7,36,<br>37,38,40 | 3,4,6,8,39,<br>41,42,43,4<br>4  | 2 | O70417,P00762                                                  |
| 3706 | 1,2,5,7,36,<br>37,38,41 | 3,4,6,8,39,<br>40,42,43,4<br>4  | 1 | Q63467                                                         |
| 3707 | 1,2,5,7,36,<br>37,38,42 | 3,4,6,8,39,<br>40,41,43,4<br>4  | 3 | P00762,P97840,Q6AYL6                                           |
| 3708 | 1,2,5,7,36,<br>37,38,43 | 3,4,6,8,39,<br>40,41,42,4<br>4  | 4 | P16636,P52590,Q6P6R2,Q8CHN8                                    |

|      |                         |                                |   |                                                                |
|------|-------------------------|--------------------------------|---|----------------------------------------------------------------|
| 3709 | 1,2,5,7,36,<br>37,38,44 | 3,4,6,8,39,<br>40,41,42,4<br>3 | 3 | P00762,P97840,Q63467                                           |
| 3710 | 1,2,5,7,36,<br>37,39,40 | 3,4,6,8,38,<br>41,42,43,4<br>4 | 9 | B0BNN3,O70417,P00762,P00774,P01835,P27213,P35467,Q8CIZ5,Q9QUL6 |
| 3711 | 1,2,5,7,36,<br>37,39,41 | 3,4,6,8,38,<br>40,42,43,4<br>4 | 7 | B0BNN3,P00714,P00762,P01835,P35467,Q63467,Q9Z0V6               |
| 3712 | 1,2,5,7,36,<br>37,39,42 | 3,4,6,8,38,<br>40,41,43,4<br>4 | 6 | B0BNN3,P00762,P00774,P01835,P35467,P97840                      |
| 3713 | 1,2,5,7,36,<br>37,39,43 | 3,4,6,8,38,<br>40,41,42,4<br>4 | 6 | P00714,P06760,P16636,Q6P6R2,Q8CIZ5,Q9Z0V6                      |
| 3714 | 1,2,5,7,36,<br>37,39,44 | 3,4,6,8,38,<br>40,41,42,4<br>3 | 5 | B0BNN3,P00762,P27213,P35467,Q63467                             |
| 3715 | 1,2,5,7,36,<br>37,40,41 | 3,4,6,8,38,<br>39,42,43,4<br>4 | 4 | B0BNN3,O70417,P00762,P01835                                    |
| 3716 | 1,2,5,7,36,<br>37,40,42 | 3,4,6,8,38,<br>39,41,43,4<br>4 | 6 | B0BNN3,O70417,P00762,P00774,P01835,P02625                      |
| 3717 | 1,2,5,7,36,<br>37,40,43 | 3,4,6,8,38,<br>39,41,42,4<br>4 | 3 | P16636,Q03191,Q8CIZ5                                           |
| 3718 | 1,2,5,7,36,<br>37,40,44 | 3,4,6,8,38,<br>39,41,42,4<br>3 | 5 | B0BNN3,O70417,P00762,P02625,Q9QUL6                             |
| 3719 | 1,2,5,7,36,<br>37,41,42 | 3,4,6,8,38,<br>39,40,43,4<br>4 | 5 | B0BNN3,P00762,P01835,P35467,Q63467                             |
| 3720 | 1,2,5,7,36,<br>37,41,43 | 3,4,6,8,38,<br>39,40,42,4<br>4 | 7 | D3ZUC6,P16636,P52590,P83121,Q03191,Q63467,Q9Z0V6               |
| 3721 | 1,2,5,7,36,<br>37,41,44 | 3,4,6,8,38,<br>39,40,42,4<br>3 | 4 | B0BNN3,P00762,Q63467,Q99MH3                                    |
| 3722 | 1,2,5,7,36,<br>37,42,43 | 3,4,6,8,38,<br>39,40,41,4<br>4 | 3 | P06911,P16636,Q8CHN8                                           |
| 3723 | 1,2,5,7,36,<br>37,42,44 | 3,4,6,8,38,<br>39,40,41,4<br>3 | 5 | B0BNN3,O70417,P00762,P97840,Q63467                             |



|      |                         |                                |   |                                    |
|------|-------------------------|--------------------------------|---|------------------------------------|
| 3724 | 1,2,5,7,36,<br>37,43,44 | 3,4,6,8,38,<br>39,40,41,4<br>2 | 4 | P13432,P16636,Q03191,Q63467        |
| 3725 | 1,2,5,7,36,<br>38,39,40 | 3,4,6,8,37,<br>41,42,43,4<br>4 | 3 | P27213,Q6P6R2,Q9QUL6               |
| 3726 | 1,2,5,7,36,<br>38,39,41 | 3,4,6,8,37,<br>40,42,43,4<br>4 | 3 | P00714,P23785,Q63467               |
| 3727 | 1,2,5,7,36,<br>38,39,42 | 3,4,6,8,37,<br>40,41,43,4<br>4 | 4 | P00762,P19218,P51907,P97840        |
| 3728 | 1,2,5,7,36,<br>38,39,43 | 3,4,6,8,37,<br>40,41,42,4<br>4 | 5 | P00714,P16636,P52590,Q63467,Q6P6R2 |
| 3729 | 1,2,5,7,36,<br>38,39,44 | 3,4,6,8,37,<br>40,41,42,4<br>3 | 3 | P51907,Q63467,Q9QUL6               |
| 3730 | 1,2,5,7,36,<br>38,40,41 | 3,4,6,8,37,<br>39,42,43,4<br>4 | 1 | Q63467                             |
| 3731 | 1,2,5,7,36,<br>38,40,42 | 3,4,6,8,37,<br>39,41,43,4<br>4 | 3 | O70417,P00762,P02625               |
| 3732 | 1,2,5,7,36,<br>38,40,43 | 3,4,6,8,37,<br>39,41,42,4<br>4 | 2 | P16636,P52590                      |
| 3733 | 1,2,5,7,36,<br>38,40,44 | 3,4,6,8,37,<br>39,41,42,4<br>3 | 5 | O70417,P00762,P02625,Q63467,Q9QUL6 |
| 3734 | 1,2,5,7,36,<br>38,41,42 | 3,4,6,8,37,<br>39,40,43,4<br>4 | 1 | Q63467                             |
| 3735 | 1,2,5,7,36,<br>38,41,43 | 3,4,6,8,37,<br>39,40,42,4<br>4 | 4 | P16636,P52590,Q63467,Q8CJD3        |
| 3736 | 1,2,5,7,36,<br>38,41,44 | 3,4,6,8,37,<br>39,40,42,4<br>3 | 3 | P23785,Q63467,Q99MH3               |
| 3737 | 1,2,5,7,36,<br>38,42,43 | 3,4,6,8,37,<br>39,40,41,4<br>4 | 4 | P06911,P16636,P52590,Q8CHN8        |
| 3738 | 1,2,5,7,36,<br>38,42,44 | 3,4,6,8,37,<br>39,40,41,4<br>3 | 4 | P00762,P51907,P97840,Q63467        |

|      |                         |                                |   |                                                         |
|------|-------------------------|--------------------------------|---|---------------------------------------------------------|
| 3739 | 1,2,5,7,36,<br>38,43,44 | 3,4,6,8,37,<br>39,40,41,4<br>2 | 4 | P16636,P52590,Q63467,Q63661                             |
| 3740 | 1,2,5,7,36,<br>39,40,41 | 3,4,6,8,37,<br>38,42,43,4<br>4 | 5 | B0BNN3,P00762,P01835,P35467,Q63467                      |
| 3741 | 1,2,5,7,36,<br>39,40,42 | 3,4,6,8,37,<br>38,41,43,4<br>4 | 6 | B0BNN3,P00762,P00774,P01835,P27213,Q9QUL6               |
| 3742 | 1,2,5,7,36,<br>39,40,43 | 3,4,6,8,37,<br>38,41,42,4<br>4 | 2 | P16636,Q8CIZ5                                           |
| 3743 | 1,2,5,7,36,<br>39,40,44 | 3,4,6,8,37,<br>38,41,42,4<br>3 | 6 | B0BNN3,P00762,P27213,Q63467,Q6P6T1,Q9QUL6               |
| 3744 | 1,2,5,7,36,<br>39,41,42 | 3,4,6,8,37,<br>38,40,43,4<br>4 | 8 | P00762,P01835,P08010,P08644,P35467,P82995,Q63467,Q6AYR9 |
| 3745 | 1,2,5,7,36,<br>39,41,43 | 3,4,6,8,37,<br>38,40,42,4<br>4 | 7 | D3ZUC6,P00714,P06760,P16636,P22006,P52590,Q63467        |
| 3746 | 1,2,5,7,36,<br>39,41,44 | 3,4,6,8,37,<br>38,40,42,4<br>3 | 5 | B0BNN3,P00762,P23785,P35467,Q63467                      |
| 3747 | 1,2,5,7,36,<br>39,42,43 | 3,4,6,8,37,<br>38,40,41,4<br>4 | 3 | P16636,Q62635,Q6AYR9                                    |
| 3748 | 1,2,5,7,36,<br>39,42,44 | 3,4,6,8,37,<br>38,40,41,4<br>3 | 5 | B0BNN3,P00762,P51907,P82995,Q63467                      |
| 3749 | 1,2,5,7,36,<br>39,43,44 | 3,4,6,8,37,<br>38,40,41,4<br>2 | 2 | P16636,Q63467                                           |
| 3750 | 1,2,5,7,36,<br>40,41,42 | 3,4,6,8,37,<br>38,39,43,4<br>4 | 6 | B0BNN3,O70417,P00762,P01835,P02625,Q9JJS8               |
| 3751 | 1,2,5,7,36,<br>40,41,43 | 3,4,6,8,37,<br>38,39,42,4<br>4 | 2 | P16636,Q63467                                           |
| 3752 | 1,2,5,7,36,<br>40,41,44 | 3,4,6,8,37,<br>38,39,42,4<br>3 | 4 | B0BNN3,O70417,P00762,Q63467                             |
| 3753 | 1,2,5,7,36,<br>40,42,43 | 3,4,6,8,37,<br>38,39,41,4<br>4 | 3 | P02625,P02782,P16636                                    |

|      |                         |                                |   |                                                  |
|------|-------------------------|--------------------------------|---|--------------------------------------------------|
| 3754 | 1,2,5,7,36,<br>40,42,44 | 3,4,6,8,37,<br>38,39,41,4<br>3 | 7 | B0BNN3,O70417,P00762,P02625,Q7TPB1,Q9QUL6,Q9R1T5 |
| 3755 | 1,2,5,7,36,<br>40,43,44 | 3,4,6,8,37,<br>38,39,41,4<br>2 | 5 | P13432,P16636,Q03191,Q63467,Q63661               |
| 3756 | 1,2,5,7,36,<br>41,42,43 | 3,4,6,8,37,<br>38,39,40,4<br>4 | 5 | P16636,P52590,P54921,P82995,Q63467               |
| 3757 | 1,2,5,7,36,<br>41,42,44 | 3,4,6,8,37,<br>38,39,40,4<br>3 | 5 | B0BNN3,P00762,P08644,P82995,Q63467               |
| 3758 | 1,2,5,7,36,<br>41,43,44 | 3,4,6,8,37,<br>38,39,40,4<br>2 | 7 | D3ZUC6,P16636,P52590,P83121,Q03191,Q63467,Q63661 |
| 3759 | 1,2,5,7,36,<br>42,43,44 | 3,4,6,8,37,<br>38,39,40,4<br>1 | 3 | P16636,P82995,Q63467                             |
| 3760 | 1,2,5,7,37,<br>38,39,40 | 3,4,6,8,36,<br>41,42,43,4<br>4 | 2 | P27213,Q9QUL6                                    |
| 3761 | 1,2,5,7,37,<br>38,39,41 | 3,4,6,8,36,<br>40,42,43,4<br>4 | 2 | P00714,P52590                                    |
| 3762 | 1,2,5,7,37,<br>38,39,42 | 3,4,6,8,36,<br>40,41,43,4<br>4 | 2 | P19218,P97840                                    |
| 3763 | 1,2,5,7,37,<br>38,39,43 | 3,4,6,8,36,<br>40,41,42,4<br>4 | 2 | P00714,P52590                                    |
| 3764 | 1,2,5,7,37,<br>38,39,44 | 3,4,6,8,36,<br>40,41,42,4<br>3 | 1 | Q9QUL6                                           |
| 3765 | 1,2,5,7,37,<br>38,40,41 | 3,4,6,8,36,<br>39,42,43,4<br>4 | 0 |                                                  |
| 3766 | 1,2,5,7,37,<br>38,40,42 | 3,4,6,8,36,<br>39,41,43,4<br>4 | 2 | P02625,Q9QUL6                                    |
| 3767 | 1,2,5,7,37,<br>38,40,43 | 3,4,6,8,36,<br>39,41,42,4<br>4 | 1 | P52590                                           |
| 3768 | 1,2,5,7,37,<br>38,40,44 | 3,4,6,8,36,<br>39,41,42,4<br>3 | 1 | Q9QUL6                                           |

|      |                         |                                |   |                                    |
|------|-------------------------|--------------------------------|---|------------------------------------|
| 3769 | 1,2,5,7,37,<br>38,41,42 | 3,4,6,8,36,<br>39,40,43,4<br>4 | 1 | P52590                             |
| 3770 | 1,2,5,7,37,<br>38,41,43 | 3,4,6,8,36,<br>39,40,42,4<br>4 | 2 | P52590,Q8CJD3                      |
| 3771 | 1,2,5,7,37,<br>38,41,44 | 3,4,6,8,36,<br>39,40,42,4<br>3 | 1 | P52590                             |
| 3772 | 1,2,5,7,37,<br>38,42,43 | 3,4,6,8,36,<br>39,40,41,4<br>4 | 3 | P06866,P06911,P52590               |
| 3773 | 1,2,5,7,37,<br>38,42,44 | 3,4,6,8,36,<br>39,40,41,4<br>3 | 2 | P97840,Q9QUL6                      |
| 3774 | 1,2,5,7,37,<br>38,43,44 | 3,4,6,8,36,<br>39,40,41,4<br>2 | 1 | P52590                             |
| 3775 | 1,2,5,7,37,<br>39,40,41 | 3,4,6,8,36,<br>38,42,43,4<br>4 | 3 | P01835,P10715,P35467               |
| 3776 | 1,2,5,7,37,<br>39,40,42 | 3,4,6,8,36,<br>38,41,43,4<br>4 | 5 | P00774,P01835,P27213,P35467,Q9QUL6 |
| 3777 | 1,2,5,7,37,<br>39,40,43 | 3,4,6,8,36,<br>38,41,42,4<br>4 | 1 | Q8CIZ5                             |
| 3778 | 1,2,5,7,37,<br>39,40,44 | 3,4,6,8,36,<br>38,41,42,4<br>3 | 4 | B0BNN3,P27213,Q6AYL6,Q9QUL6        |
| 3779 | 1,2,5,7,37,<br>39,41,42 | 3,4,6,8,36,<br>38,40,43,4<br>4 | 2 | P01835,P35467                      |
| 3780 | 1,2,5,7,37,<br>39,41,43 | 3,4,6,8,36,<br>38,40,42,4<br>4 | 3 | P00714,P22006,P52590               |
| 3781 | 1,2,5,7,37,<br>39,41,44 | 3,4,6,8,36,<br>38,40,42,4<br>3 | 2 | O88267,P35467                      |
| 3782 | 1,2,5,7,37,<br>39,42,43 | 3,4,6,8,36,<br>38,40,41,4<br>4 | 1 | P16636                             |
| 3783 | 1,2,5,7,37,<br>39,42,44 | 3,4,6,8,36,<br>38,40,41,4<br>3 | 2 | P00762,Q9QUL6                      |

|      |                         |                                |   |                                    |
|------|-------------------------|--------------------------------|---|------------------------------------|
| 3784 | 1,2,5,7,37,<br>39,43,44 | 3,4,6,8,36,<br>38,40,41,4<br>2 | 1 | P52590                             |
| 3785 | 1,2,5,7,37,<br>40,41,42 | 3,4,6,8,36,<br>38,39,43,4<br>4 | 2 | P01835,P02625                      |
| 3786 | 1,2,5,7,37,<br>40,41,43 | 3,4,6,8,36,<br>38,39,42,4<br>4 | 1 | P52590                             |
| 3787 | 1,2,5,7,37,<br>40,41,44 | 3,4,6,8,36,<br>38,39,42,4<br>3 | 3 | B0BNN3,P10715,Q5GRG2               |
| 3788 | 1,2,5,7,37,<br>40,42,43 | 3,4,6,8,36,<br>38,39,41,4<br>4 | 2 | P02625,P16636                      |
| 3789 | 1,2,5,7,37,<br>40,42,44 | 3,4,6,8,36,<br>38,39,41,4<br>3 | 5 | B0BNN3,O70417,P00762,P02625,Q9QUL6 |
| 3790 | 1,2,5,7,37,<br>40,43,44 | 3,4,6,8,36,<br>38,39,41,4<br>2 | 1 | Q03191                             |
| 3791 | 1,2,5,7,37,<br>41,42,43 | 3,4,6,8,36,<br>38,39,40,4<br>4 | 2 | P16636,P52590                      |
| 3792 | 1,2,5,7,37,<br>41,42,44 | 3,4,6,8,36,<br>38,39,40,4<br>3 | 0 |                                    |
| 3793 | 1,2,5,7,37,<br>41,43,44 | 3,4,6,8,36,<br>38,39,40,4<br>2 | 2 | P52590,Q03191                      |
| 3794 | 1,2,5,7,37,<br>42,43,44 | 3,4,6,8,36,<br>38,39,40,4<br>1 | 2 | P16636,P52590                      |
| 3795 | 1,2,5,7,38,<br>39,40,41 | 3,4,6,8,36,<br>37,42,43,4<br>4 | 2 | P10715,Q9QUL6                      |
| 3796 | 1,2,5,7,38,<br>39,40,42 | 3,4,6,8,36,<br>37,41,43,4<br>4 | 1 | Q9QUL6                             |
| 3797 | 1,2,5,7,38,<br>39,40,43 | 3,4,6,8,36,<br>37,41,42,4<br>4 | 1 | P52590                             |
| 3798 | 1,2,5,7,38,<br>39,40,44 | 3,4,6,8,36,<br>37,41,42,4<br>3 | 1 | Q9QUL6                             |

|      |                         |                                |   |                                           |
|------|-------------------------|--------------------------------|---|-------------------------------------------|
| 3799 | 1,2,5,7,38,<br>39,41,42 | 3,4,6,8,36,<br>37,40,43,4<br>4 | 1 | P52590                                    |
| 3800 | 1,2,5,7,38,<br>39,41,43 | 3,4,6,8,36,<br>37,40,42,4<br>4 | 3 | P00714,P52590,Q8CJD3                      |
| 3801 | 1,2,5,7,38,<br>39,41,44 | 3,4,6,8,36,<br>37,40,42,4<br>3 | 4 | O88267,P52590,Q63467,Q9QUL6               |
| 3802 | 1,2,5,7,38,<br>39,42,43 | 3,4,6,8,36,<br>37,40,41,4<br>4 | 2 | P16636,P52590                             |
| 3803 | 1,2,5,7,38,<br>39,42,44 | 3,4,6,8,36,<br>37,40,41,4<br>3 | 2 | P51907,Q9QUL6                             |
| 3804 | 1,2,5,7,38,<br>39,43,44 | 3,4,6,8,36,<br>37,40,41,4<br>2 | 2 | P23593,P52590                             |
| 3805 | 1,2,5,7,38,<br>40,41,42 | 3,4,6,8,36,<br>37,39,43,4<br>4 | 1 | P02625                                    |
| 3806 | 1,2,5,7,38,<br>40,41,43 | 3,4,6,8,36,<br>37,39,42,4<br>4 | 2 | P52590,Q8CJD3                             |
| 3807 | 1,2,5,7,38,<br>40,41,44 | 3,4,6,8,36,<br>37,39,42,4<br>3 | 4 | P10715,P52590,Q5GRG2,Q9QUL6               |
| 3808 | 1,2,5,7,38,<br>40,42,43 | 3,4,6,8,36,<br>37,39,41,4<br>4 | 3 | P02625,P16636,P52590                      |
| 3809 | 1,2,5,7,38,<br>40,42,44 | 3,4,6,8,36,<br>37,39,41,4<br>3 | 2 | P02625,Q9QUL6                             |
| 3810 | 1,2,5,7,38,<br>40,43,44 | 3,4,6,8,36,<br>37,39,41,4<br>2 | 1 | P52590                                    |
| 3811 | 1,2,5,7,38,<br>41,42,43 | 3,4,6,8,36,<br>37,39,40,4<br>4 | 6 | O35547,P16636,P52590,P54921,P82471,Q8CJD3 |
| 3812 | 1,2,5,7,38,<br>41,42,44 | 3,4,6,8,36,<br>37,39,40,4<br>3 | 2 | P52590,P55091                             |
| 3813 | 1,2,5,7,38,<br>41,43,44 | 3,4,6,8,36,<br>37,39,40,4<br>2 | 6 | P00774,P52590,P55091,P98089,Q63467,Q8CJD3 |

|      |                         |                                |   |                                                  |
|------|-------------------------|--------------------------------|---|--------------------------------------------------|
| 3814 | 1,2,5,7,38,<br>42,43,44 | 3,4,6,8,36,<br>37,39,40,4<br>1 | 2 | P16636,P52590                                    |
| 3815 | 1,2,5,7,39,<br>40,41,42 | 3,4,6,8,36,<br>37,38,43,4<br>4 | 2 | P01835,P35467                                    |
| 3816 | 1,2,5,7,39,<br>40,41,43 | 3,4,6,8,36,<br>37,38,42,4<br>4 | 3 | P00714,P16636,P52590                             |
| 3817 | 1,2,5,7,39,<br>40,41,44 | 3,4,6,8,36,<br>37,38,42,4<br>3 | 7 | P10715,P19629,P31044,P35467,Q5GRG2,Q6AYL6,Q9QUL6 |
| 3818 | 1,2,5,7,39,<br>40,42,43 | 3,4,6,8,36,<br>37,38,41,4<br>4 | 1 | P16636                                           |
| 3819 | 1,2,5,7,39,<br>40,42,44 | 3,4,6,8,36,<br>37,38,41,4<br>3 | 1 | Q9QUL6                                           |
| 3820 | 1,2,5,7,39,<br>40,43,44 | 3,4,6,8,36,<br>37,38,41,4<br>2 | 2 | Q6AYL6,Q9QUL6                                    |
| 3821 | 1,2,5,7,39,<br>41,42,43 | 3,4,6,8,36,<br>37,38,40,4<br>4 | 6 | P0C0A9,P16636,P22006,P52590,P82471,Q6AYR9        |
| 3822 | 1,2,5,7,39,<br>41,42,44 | 3,4,6,8,36,<br>37,38,40,4<br>3 | 2 | P0C0A9,P35467                                    |
| 3823 | 1,2,5,7,39,<br>41,43,44 | 3,4,6,8,36,<br>37,38,40,4<br>2 | 4 | O88267,P16636,P52590,Q63467                      |
| 3824 | 1,2,5,7,39,<br>42,43,44 | 3,4,6,8,36,<br>37,38,40,4<br>1 | 2 | P16636,P52590                                    |
| 3825 | 1,2,5,7,40,<br>41,42,43 | 3,4,6,8,36,<br>37,38,39,4<br>4 | 3 | P16636,P52590,Q9JJS8                             |
| 3826 | 1,2,5,7,40,<br>41,42,44 | 3,4,6,8,36,<br>37,38,39,4<br>3 | 2 | P02625,Q9R1T5                                    |
| 3827 | 1,2,5,7,40,<br>41,43,44 | 3,4,6,8,36,<br>37,38,39,4<br>2 | 1 | P52590                                           |
| 3828 | 1,2,5,7,40,<br>42,43,44 | 3,4,6,8,36,<br>37,38,39,4<br>1 | 3 | P02625,P16636,Q9R1T5                             |

|      |                         |                                |   |                                                                |
|------|-------------------------|--------------------------------|---|----------------------------------------------------------------|
| 3829 | 1,2,5,7,41,<br>42,43,44 | 3,4,6,8,36,<br>37,38,39,4<br>0 | 4 | P0C0A9,P16636,P52590,P82471                                    |
| 3830 | 1,2,5,8,36,<br>37,38,39 | 3,4,6,7,40,<br>41,42,43,4<br>4 | 0 |                                                                |
| 3831 | 1,2,5,8,36,<br>37,38,40 | 3,4,6,7,39,<br>41,42,43,4<br>4 | 2 | P02625,P02803                                                  |
| 3832 | 1,2,5,8,36,<br>37,38,41 | 3,4,6,7,39,<br>40,42,43,4<br>4 | 1 | P83121                                                         |
| 3833 | 1,2,5,8,36,<br>37,38,42 | 3,4,6,7,39,<br>40,41,43,4<br>4 | 2 | P12020,Q6AYL6                                                  |
| 3834 | 1,2,5,8,36,<br>37,38,43 | 3,4,6,7,39,<br>40,41,42,4<br>4 | 5 | P12020,P16391,P83121,Q63942,Q6IFV1                             |
| 3835 | 1,2,5,8,36,<br>37,38,44 | 3,4,6,7,39,<br>40,41,42,4<br>3 | 1 | P16086                                                         |
| 3836 | 1,2,5,8,36,<br>37,39,40 | 3,4,6,7,38,<br>41,42,43,4<br>4 | 8 | B0BNN3,O35547,P00762,P00774,P01835,P09605;P25809,P27213,Q8CIZ5 |
| 3837 | 1,2,5,8,36,<br>37,39,41 | 3,4,6,7,38,<br>40,42,43,4<br>4 | 3 | P00714,P01835,P83121                                           |
| 3838 | 1,2,5,8,36,<br>37,39,42 | 3,4,6,7,38,<br>40,41,43,4<br>4 | 3 | P00762,P00774,P01835                                           |
| 3839 | 1,2,5,8,36,<br>37,39,43 | 3,4,6,7,38,<br>40,41,42,4<br>4 | 4 | P09605;P25809,P83121,Q63942,Q8CIZ5                             |
| 3840 | 1,2,5,8,36,<br>37,39,44 | 3,4,6,7,38,<br>40,41,42,4<br>3 | 5 | B0BNN3,P00762,P09605;P25809,P16086,Q5HZV9                      |
| 3841 | 1,2,5,8,36,<br>37,40,41 | 3,4,6,7,38,<br>39,42,43,4<br>4 | 4 | B0BNN3,P01835,P83121,Q9Z1F2                                    |
| 3842 | 1,2,5,8,36,<br>37,40,42 | 3,4,6,7,38,<br>39,41,43,4<br>4 | 4 | P00762,P00774,P01835,P02625                                    |
| 3843 | 1,2,5,8,36,<br>37,40,43 | 3,4,6,7,38,<br>39,41,42,4<br>4 | 4 | P09605;P25809,P83121,Q03191,Q8CIZ5                             |



|      |                         |                                |   |                                                  |
|------|-------------------------|--------------------------------|---|--------------------------------------------------|
| 3844 | 1,2,5,8,36,<br>37,40,44 | 3,4,6,7,38,<br>39,41,42,4<br>3 | 6 | B0BNN3,O35547,P00762,P02625,P09605,P25809,P16086 |
| 3845 | 1,2,5,8,36,<br>37,41,42 | 3,4,6,7,38,<br>39,40,43,4<br>4 | 3 | P00762,P01835,P83121                             |
| 3846 | 1,2,5,8,36,<br>37,41,43 | 3,4,6,7,38,<br>39,40,42,4<br>4 | 2 | P83121,Q03191                                    |
| 3847 | 1,2,5,8,36,<br>37,41,44 | 3,4,6,7,38,<br>39,40,42,4<br>3 | 3 | B0BNN3,P83121,Q99MH3                             |
| 3848 | 1,2,5,8,36,<br>37,42,43 | 3,4,6,7,38,<br>39,40,41,4<br>4 | 6 | P06911,P12020,P16391,P19629,P83121,Q63942        |
| 3849 | 1,2,5,8,36,<br>37,42,44 | 3,4,6,7,38,<br>39,40,41,4<br>3 | 1 | P00762                                           |
| 3850 | 1,2,5,8,36,<br>37,43,44 | 3,4,6,7,38,<br>39,40,41,4<br>2 | 5 | P09605,P25809,P13432,P16086,P83121,Q03191        |
| 3851 | 1,2,5,8,36,<br>38,39,40 | 3,4,6,7,37,<br>41,42,43,4<br>4 | 0 |                                                  |
| 3852 | 1,2,5,8,36,<br>38,39,41 | 3,4,6,7,37,<br>40,42,43,4<br>4 | 0 |                                                  |
| 3853 | 1,2,5,8,36,<br>38,39,42 | 3,4,6,7,37,<br>40,41,43,4<br>4 | 0 |                                                  |
| 3854 | 1,2,5,8,36,<br>38,39,43 | 3,4,6,7,37,<br>40,41,42,4<br>4 | 3 | Q63942,Q6IFV1,Q6P6R2                             |
| 3855 | 1,2,5,8,36,<br>38,39,44 | 3,4,6,7,37,<br>40,41,42,4<br>3 | 0 |                                                  |
| 3856 | 1,2,5,8,36,<br>38,40,41 | 3,4,6,7,37,<br>39,42,43,4<br>4 | 0 |                                                  |
| 3857 | 1,2,5,8,36,<br>38,40,42 | 3,4,6,7,37,<br>39,41,43,4<br>4 | 1 | P02625                                           |
| 3858 | 1,2,5,8,36,<br>38,40,43 | 3,4,6,7,37,<br>39,41,42,4<br>4 | 1 | Q63942                                           |

|      |                         |                                |   |                                    |
|------|-------------------------|--------------------------------|---|------------------------------------|
| 3859 | 1,2,5,8,36,<br>38,40,44 | 3,4,6,7,37,<br>39,41,42,4<br>3 | 2 | P02625,P22006                      |
| 3860 | 1,2,5,8,36,<br>38,41,42 | 3,4,6,7,37,<br>39,40,43,4<br>4 | 3 | P08753,P50116,Q6AYL6               |
| 3861 | 1,2,5,8,36,<br>38,41,43 | 3,4,6,7,37,<br>39,40,42,4<br>4 | 3 | P50116,P83121,Q63942               |
| 3862 | 1,2,5,8,36,<br>38,41,44 | 3,4,6,7,37,<br>39,40,42,4<br>3 | 4 | P50116,P83121,Q05695,Q99MH3        |
| 3863 | 1,2,5,8,36,<br>38,42,43 | 3,4,6,7,37,<br>39,40,41,4<br>4 | 5 | P06911,P12020,P16391,Q5GRG2,Q63942 |
| 3864 | 1,2,5,8,36,<br>38,42,44 | 3,4,6,7,37,<br>39,40,41,4<br>3 | 0 |                                    |
| 3865 | 1,2,5,8,36,<br>38,43,44 | 3,4,6,7,37,<br>39,40,41,4<br>2 | 1 | Q63942                             |
| 3866 | 1,2,5,8,36,<br>39,40,41 | 3,4,6,7,37,<br>38,42,43,4<br>4 | 2 | P01835,P12785                      |
| 3867 | 1,2,5,8,36,<br>39,40,42 | 3,4,6,7,37,<br>38,41,43,4<br>4 | 3 | P00762,P00774,P01835               |
| 3868 | 1,2,5,8,36,<br>39,40,43 | 3,4,6,7,37,<br>38,41,42,4<br>4 | 2 | Q63942,Q8CIZ5                      |
| 3869 | 1,2,5,8,36,<br>39,40,44 | 3,4,6,7,37,<br>38,41,42,4<br>3 | 5 | B0BNN3,P00762,P27213,Q6P6T1,Q9QUL6 |
| 3870 | 1,2,5,8,36,<br>39,41,42 | 3,4,6,7,37,<br>38,40,43,4<br>4 | 3 | P01835,P08753,Q6AYR9               |
| 3871 | 1,2,5,8,36,<br>39,41,43 | 3,4,6,7,37,<br>38,40,42,4<br>4 | 4 | P00714,P12785,P83121,Q63942        |
| 3872 | 1,2,5,8,36,<br>39,41,44 | 3,4,6,7,37,<br>38,40,42,4<br>3 | 1 | P83121                             |
| 3873 | 1,2,5,8,36,<br>39,42,43 | 3,4,6,7,37,<br>38,40,41,4<br>4 | 1 | Q63942                             |

|      |                         |                                |   |                             |
|------|-------------------------|--------------------------------|---|-----------------------------|
| 3874 | 1,2,5,8,36,<br>39,42,44 | 3,4,6,7,37,<br>38,40,41,4<br>3 | 1 | P00762                      |
| 3875 | 1,2,5,8,36,<br>39,43,44 | 3,4,6,7,37,<br>38,40,41,4<br>2 | 1 | Q63942                      |
| 3876 | 1,2,5,8,36,<br>40,41,42 | 3,4,6,7,37,<br>38,39,43,4<br>4 | 4 | P00762,P01835,P02625,Q9JJS8 |
| 3877 | 1,2,5,8,36,<br>40,41,43 | 3,4,6,7,37,<br>38,39,42,4<br>4 | 3 | P12785,P83121,Q9Z1F2        |
| 3878 | 1,2,5,8,36,<br>40,41,44 | 3,4,6,7,37,<br>38,39,42,4<br>3 | 1 | B0BNN3                      |
| 3879 | 1,2,5,8,36,<br>40,42,43 | 3,4,6,7,37,<br>38,39,41,4<br>4 | 2 | P02625,P62804               |
| 3880 | 1,2,5,8,36,<br>40,42,44 | 3,4,6,7,37,<br>38,39,41,4<br>3 | 4 | P00762,P02625,P62804,Q7TPB1 |
| 3881 | 1,2,5,8,36,<br>40,43,44 | 3,4,6,7,37,<br>38,39,41,4<br>2 | 1 | P13432                      |
| 3882 | 1,2,5,8,36,<br>41,42,43 | 3,4,6,7,37,<br>38,39,40,4<br>4 | 1 | P83121                      |
| 3883 | 1,2,5,8,36,<br>41,42,44 | 3,4,6,7,37,<br>38,39,40,4<br>3 | 3 | P00762,P83121,Q99MH3        |
| 3884 | 1,2,5,8,36,<br>41,43,44 | 3,4,6,7,37,<br>38,39,40,4<br>2 | 2 | P83121,Q03191               |
| 3885 | 1,2,5,8,36,<br>42,43,44 | 3,4,6,7,37,<br>38,39,40,4<br>1 | 2 | P83121,Q63942               |
| 3886 | 1,2,5,8,37,<br>38,39,40 | 3,4,6,7,36,<br>41,42,43,4<br>4 | 4 | P02803,P08649,P35281,Q9QUL6 |
| 3887 | 1,2,5,8,37,<br>38,39,41 | 3,4,6,7,36,<br>40,42,43,4<br>4 | 0 |                             |
| 3888 | 1,2,5,8,37,<br>38,39,42 | 3,4,6,7,36,<br>40,41,43,4<br>4 | 0 |                             |

|      |                         |                                |   |                                           |
|------|-------------------------|--------------------------------|---|-------------------------------------------|
| 3889 | 1,2,5,8,37,<br>38,39,43 | 3,4,6,7,36,<br>40,41,42,4<br>4 | 3 | P08649,Q63942,Q6IFV1                      |
| 3890 | 1,2,5,8,37,<br>38,39,44 | 3,4,6,7,36,<br>40,41,42,4<br>3 | 3 | P08649,P16086,Q9QUL6                      |
| 3891 | 1,2,5,8,37,<br>38,40,41 | 3,4,6,7,36,<br>39,42,43,4<br>4 | 1 | P02803                                    |
| 3892 | 1,2,5,8,37,<br>38,40,42 | 3,4,6,7,36,<br>39,41,43,4<br>4 | 2 | P02625,P02803                             |
| 3893 | 1,2,5,8,37,<br>38,40,43 | 3,4,6,7,36,<br>39,41,42,4<br>4 | 3 | P02803,P08649,Q6IFV1                      |
| 3894 | 1,2,5,8,37,<br>38,40,44 | 3,4,6,7,36,<br>39,41,42,4<br>3 | 6 | P02625,P02803,P08649,P16086,P22006,Q9QUL6 |
| 3895 | 1,2,5,8,37,<br>38,41,42 | 3,4,6,7,36,<br>39,40,43,4<br>4 | 0 |                                           |
| 3896 | 1,2,5,8,37,<br>38,41,43 | 3,4,6,7,36,<br>39,40,42,4<br>4 | 3 | P50116,P83121,Q6IFV1                      |
| 3897 | 1,2,5,8,37,<br>38,41,44 | 3,4,6,7,36,<br>39,40,42,4<br>3 | 1 | Q62635                                    |
| 3898 | 1,2,5,8,37,<br>38,42,43 | 3,4,6,7,36,<br>39,40,41,4<br>4 | 5 | P06866,P06911,P12020,Q63942,Q8VD89        |
| 3899 | 1,2,5,8,37,<br>38,42,44 | 3,4,6,7,36,<br>39,40,41,4<br>3 | 0 |                                           |
| 3900 | 1,2,5,8,37,<br>38,43,44 | 3,4,6,7,36,<br>39,40,41,4<br>2 | 4 | P08649,P16086,Q63942,Q6IFV1               |
| 3901 | 1,2,5,8,37,<br>39,40,41 | 3,4,6,7,36,<br>38,42,43,4<br>4 | 2 | P01835,P10715                             |
| 3902 | 1,2,5,8,37,<br>39,40,42 | 3,4,6,7,36,<br>38,41,43,4<br>4 | 3 | P00774,P01835,P02803                      |
| 3903 | 1,2,5,8,37,<br>39,40,43 | 3,4,6,7,36,<br>38,41,42,4<br>4 | 2 | P08649,Q8CIZ5                             |

|      |                         |                                |   |                             |
|------|-------------------------|--------------------------------|---|-----------------------------|
| 3904 | 1,2,5,8,37,<br>39,40,44 | 3,4,6,7,36,<br>38,41,42,4<br>3 | 3 | P08649,P16086,Q9QUL6        |
| 3905 | 1,2,5,8,37,<br>39,41,42 | 3,4,6,7,36,<br>38,40,43,4<br>4 | 1 | P01835                      |
| 3906 | 1,2,5,8,37,<br>39,41,43 | 3,4,6,7,36,<br>38,40,42,4<br>4 | 3 | P00714,P12785,P83121        |
| 3907 | 1,2,5,8,37,<br>39,41,44 | 3,4,6,7,36,<br>38,40,42,4<br>3 | 0 |                             |
| 3908 | 1,2,5,8,37,<br>39,42,43 | 3,4,6,7,36,<br>38,40,41,4<br>4 | 1 | Q63942                      |
| 3909 | 1,2,5,8,37,<br>39,42,44 | 3,4,6,7,36,<br>38,40,41,4<br>3 | 0 |                             |
| 3910 | 1,2,5,8,37,<br>39,43,44 | 3,4,6,7,36,<br>38,40,41,4<br>2 | 2 | P08649,P16086               |
| 3911 | 1,2,5,8,37,<br>40,41,42 | 3,4,6,7,36,<br>38,39,43,4<br>4 | 2 | P01835,P02625               |
| 3912 | 1,2,5,8,37,<br>40,41,43 | 3,4,6,7,36,<br>38,39,42,4<br>4 | 4 | P51907,P83121,Q5XI73,Q9Z1F2 |
| 3913 | 1,2,5,8,37,<br>40,41,44 | 3,4,6,7,36,<br>38,39,42,4<br>3 | 1 | P10715                      |
| 3914 | 1,2,5,8,37,<br>40,42,43 | 3,4,6,7,36,<br>38,39,41,4<br>4 | 1 | P02625                      |
| 3915 | 1,2,5,8,37,<br>40,42,44 | 3,4,6,7,36,<br>38,39,41,4<br>3 | 1 | P02625                      |
| 3916 | 1,2,5,8,37,<br>40,43,44 | 3,4,6,7,36,<br>38,39,41,4<br>2 | 2 | P08649,P16086               |
| 3917 | 1,2,5,8,37,<br>41,42,43 | 3,4,6,7,36,<br>38,39,40,4<br>4 | 1 | P83121                      |
| 3918 | 1,2,5,8,37,<br>41,42,44 | 3,4,6,7,36,<br>38,39,40,4<br>3 | 1 | P83121                      |

|      |                         |                                |   |                                    |
|------|-------------------------|--------------------------------|---|------------------------------------|
| 3919 | 1,2,5,8,37,<br>41,43,44 | 3,4,6,7,36,<br>38,39,40,4<br>2 | 3 | O88600,P83121,Q03191               |
| 3920 | 1,2,5,8,37,<br>42,43,44 | 3,4,6,7,36,<br>38,39,40,4<br>1 | 0 |                                    |
| 3921 | 1,2,5,8,38,<br>39,40,41 | 3,4,6,7,36,<br>37,42,43,4<br>4 | 0 |                                    |
| 3922 | 1,2,5,8,38,<br>39,40,42 | 3,4,6,7,36,<br>37,41,43,4<br>4 | 2 | P02803,Q9QUL6                      |
| 3923 | 1,2,5,8,38,<br>39,40,43 | 3,4,6,7,36,<br>37,41,42,4<br>4 | 3 | P08649,Q63942,Q6IFV1               |
| 3924 | 1,2,5,8,38,<br>39,40,44 | 3,4,6,7,36,<br>37,41,42,4<br>3 | 2 | P08649,Q9QUL6                      |
| 3925 | 1,2,5,8,38,<br>39,41,42 | 3,4,6,7,36,<br>37,40,43,4<br>4 | 2 | P08753,P50116                      |
| 3926 | 1,2,5,8,38,<br>39,41,43 | 3,4,6,7,36,<br>37,40,42,4<br>4 | 5 | P00714,P00731,P50116,Q63942,Q6IFV1 |
| 3927 | 1,2,5,8,38,<br>39,41,44 | 3,4,6,7,36,<br>37,40,42,4<br>3 | 2 | Q05695,Q62635                      |
| 3928 | 1,2,5,8,38,<br>39,42,43 | 3,4,6,7,36,<br>37,40,41,4<br>4 | 1 | Q63942                             |
| 3929 | 1,2,5,8,38,<br>39,42,44 | 3,4,6,7,36,<br>37,40,41,4<br>3 | 0 |                                    |
| 3930 | 1,2,5,8,38,<br>39,43,44 | 3,4,6,7,36,<br>37,40,41,4<br>2 | 2 | P08649,Q63942                      |
| 3931 | 1,2,5,8,38,<br>40,41,42 | 3,4,6,7,36,<br>37,39,43,4<br>4 | 2 | P02625,P50116                      |
| 3932 | 1,2,5,8,38,<br>40,41,43 | 3,4,6,7,36,<br>37,39,42,4<br>4 | 1 | P50116                             |
| 3933 | 1,2,5,8,38,<br>40,41,44 | 3,4,6,7,36,<br>37,39,42,4<br>3 | 1 | Q62635                             |

|      |                         |                                |   |                                                  |
|------|-------------------------|--------------------------------|---|--------------------------------------------------|
| 3934 | 1,2,5,8,38,<br>40,42,43 | 3,4,6,7,36,<br>37,39,41,4<br>4 | 2 | P02625,Q63942                                    |
| 3935 | 1,2,5,8,38,<br>40,42,44 | 3,4,6,7,36,<br>37,39,41,4<br>3 | 5 | P02625,P06760,P22006,Q99041,Q9QUL6               |
| 3936 | 1,2,5,8,38,<br>40,43,44 | 3,4,6,7,36,<br>37,39,41,4<br>2 | 1 | P08649                                           |
| 3937 | 1,2,5,8,38,<br>41,42,43 | 3,4,6,7,36,<br>37,39,40,4<br>4 | 4 | P00731,P50116,P54921,Q8CJD3                      |
| 3938 | 1,2,5,8,38,<br>41,42,44 | 3,4,6,7,36,<br>37,39,40,4<br>3 | 3 | P50116,P55091,Q05695                             |
| 3939 | 1,2,5,8,38,<br>41,43,44 | 3,4,6,7,36,<br>37,39,40,4<br>2 | 7 | P00774,P50115,P50116,P55091,P83121,P98089,Q62635 |
| 3940 | 1,2,5,8,38,<br>42,43,44 | 3,4,6,7,36,<br>37,39,40,4<br>1 | 2 | Q63942,Q99041                                    |
| 3941 | 1,2,5,8,39,<br>40,41,42 | 3,4,6,7,36,<br>37,38,43,4<br>4 | 1 | P01835                                           |
| 3942 | 1,2,5,8,39,<br>40,41,43 | 3,4,6,7,36,<br>37,38,42,4<br>4 | 2 | P12785,P47967                                    |
| 3943 | 1,2,5,8,39,<br>40,41,44 | 3,4,6,7,36,<br>37,38,42,4<br>3 | 6 | P10715,P19629,P31044,P47967,Q5GRG2,Q6AYL6        |
| 3944 | 1,2,5,8,39,<br>40,42,43 | 3,4,6,7,36,<br>37,38,41,4<br>4 | 0 |                                                  |
| 3945 | 1,2,5,8,39,<br>40,42,44 | 3,4,6,7,36,<br>37,38,41,4<br>3 | 1 | Q9QUL6                                           |
| 3946 | 1,2,5,8,39,<br>40,43,44 | 3,4,6,7,36,<br>37,38,41,4<br>2 | 2 | P08649,Q6AYL6                                    |
| 3947 | 1,2,5,8,39,<br>41,42,43 | 3,4,6,7,36,<br>37,38,40,4<br>4 | 2 | P00731,P82471                                    |
| 3948 | 1,2,5,8,39,<br>41,42,44 | 3,4,6,7,36,<br>37,38,40,4<br>3 | 0 |                                                  |

|      |                          |                                |   |                                    |
|------|--------------------------|--------------------------------|---|------------------------------------|
| 3949 | 1,2,5,8,39,<br>41,43,44  | 3,4,6,7,36,<br>37,38,40,4<br>2 | 2 | P12785,P83121                      |
| 3950 | 1,2,5,8,39,<br>42,43,44  | 3,4,6,7,36,<br>37,38,40,4<br>1 | 1 | Q63942                             |
| 3951 | 1,2,5,8,40,<br>41,42,43  | 3,4,6,7,36,<br>37,38,39,4<br>4 | 2 | P02625,Q6PCU2                      |
| 3952 | 1,2,5,8,40,<br>41,42,44  | 3,4,6,7,36,<br>37,38,39,4<br>3 | 2 | P02625,Q6PCU2                      |
| 3953 | 1,2,5,8,40,<br>41,43,44  | 3,4,6,7,36,<br>37,38,39,4<br>2 | 3 | P47967,P83121,Q6PCU2               |
| 3954 | 1,2,5,8,40,<br>42,43,44  | 3,4,6,7,36,<br>37,38,39,4<br>1 | 2 | P02625,Q6PCU2                      |
| 3955 | 1,2,5,8,41,<br>42,43,44  | 3,4,6,7,36,<br>37,38,39,4<br>0 | 3 | P82471,P83121,Q6PCU2               |
| 3956 | 1,2,5,36,3<br>7,38,39,40 | 3,4,6,7,8,4<br>1,42,43,44      | 5 | O70417,P00714,P26772,Q6P6R2,Q9QUL6 |
| 3957 | 1,2,5,36,3<br>7,38,39,41 | 3,4,6,7,8,4<br>0,42,43,44      | 2 | P00714,Q5M819                      |
| 3958 | 1,2,5,36,3<br>7,38,39,42 | 3,4,6,7,8,4<br>0,41,43,44      | 2 | P12020,Q63617                      |
| 3959 | 1,2,5,36,3<br>7,38,39,43 | 3,4,6,7,8,4<br>0,41,42,44      | 5 | P00714,P12020,Q63617,Q6IFV1,Q6P6R2 |
| 3960 | 1,2,5,36,3<br>7,38,39,44 | 3,4,6,7,8,4<br>0,41,42,43      | 4 | P16086,Q63617,Q9JJS8,Q9QUL6        |
| 3961 | 1,2,5,36,3<br>7,38,40,41 | 3,4,6,7,8,3<br>9,42,43,44      | 1 | O70417                             |
| 3962 | 1,2,5,36,3<br>7,38,40,42 | 3,4,6,7,8,3<br>9,41,43,44      | 3 | O70417,P02625,Q99041               |
| 3963 | 1,2,5,36,3<br>7,38,40,43 | 3,4,6,7,8,3<br>9,41,42,44      | 1 | Q6IFV1                             |
| 3964 | 1,2,5,36,3<br>7,38,40,44 | 3,4,6,7,8,3<br>9,41,42,43      | 5 | O70417,P02625,P16086,Q99041,Q9QUL6 |
| 3965 | 1,2,5,36,3<br>7,38,41,42 | 3,4,6,7,8,3<br>9,40,43,44      | 2 | O70417,Q6AYL6                      |
| 3966 | 1,2,5,36,3<br>7,38,41,43 | 3,4,6,7,8,3<br>9,40,42,44      | 2 | P00714,P83121                      |
| 3967 | 1,2,5,36,3<br>7,38,41,44 | 3,4,6,7,8,3<br>9,40,42,43      | 1 | O70417                             |



|      |                                                 |   |                                                         |
|------|-------------------------------------------------|---|---------------------------------------------------------|
| 3968 | 1,2,5,36,3 3,4,6,7,8,3<br>7,38,42,43 9,40,41,44 | 8 | P06866,P06911,P10715,P11598,P12020,Q5GRG2,Q63617,Q99041 |
| 3969 | 1,2,5,36,3 3,4,6,7,8,3<br>7,38,42,44 9,40,41,43 | 3 | O70417,Q63617,Q99041                                    |
| 3970 | 1,2,5,36,3 3,4,6,7,8,3<br>7,38,43,44 9,40,41,42 | 4 | P16086,Q63617,Q63661,Q99041                             |
| 3971 | 1,2,5,36,3 3,4,6,7,8,3<br>7,39,40,41 8,42,43,44 | 4 | O70417,P00714,P01835,P35467                             |
| 3972 | 1,2,5,36,3 3,4,6,7,8,3<br>7,39,40,42 8,41,43,44 | 5 | O70417,P00774,P01835,P50115,Q05695                      |
| 3973 | 1,2,5,36,3 3,4,6,7,8,3<br>7,39,40,43 8,41,42,44 | 5 | O35547,P00714,P50115,Q05695,Q8CIZ5                      |
| 3974 | 1,2,5,36,3 3,4,6,7,8,3<br>7,39,40,44 8,41,42,43 | 7 | O35547,O70417,P16086,P50115,P50116,P54921,Q9QUL6        |
| 3975 | 1,2,5,36,3 3,4,6,7,8,3<br>7,39,41,42 8,40,43,44 | 2 | P01835,P35467                                           |
| 3976 | 1,2,5,36,3 3,4,6,7,8,3<br>7,39,41,43 8,40,42,44 | 4 | D3ZUC6,P00714,P83121,Q9Z0V6                             |
| 3977 | 1,2,5,36,3 3,4,6,7,8,3<br>7,39,41,44 8,40,42,43 | 1 | P35467                                                  |
| 3978 | 1,2,5,36,3 3,4,6,7,8,3<br>7,39,42,43 8,40,41,44 | 6 | P06911,P12020,P50115,Q05695,Q62635,Q63617               |
| 3979 | 1,2,5,36,3 3,4,6,7,8,3<br>7,39,42,44 8,40,41,43 | 2 | P50115,Q63617                                           |
| 3980 | 1,2,5,36,3 3,4,6,7,8,3<br>7,39,43,44 8,40,41,42 | 3 | P16086,P50115,Q63617                                    |
| 3981 | 1,2,5,36,3 3,4,6,7,8,3<br>7,40,41,42 8,39,43,44 | 3 | O70417,P01835,P02625                                    |
| 3982 | 1,2,5,36,3 3,4,6,7,8,3<br>7,40,41,43 8,39,42,44 | 2 | P00714,P83121                                           |
| 3983 | 1,2,5,36,3 3,4,6,7,8,3<br>7,40,41,44 8,39,42,43 | 4 | B0BNN3,O70417,P02625,Q80WL1                             |
| 3984 | 1,2,5,36,3 3,4,6,7,8,3<br>7,40,42,43 8,39,41,44 | 6 | O70417,P02625,P11598,P50115,Q05695,Q99041               |
| 3985 | 1,2,5,36,3 3,4,6,7,8,3<br>7,40,42,44 8,39,41,43 | 6 | O70417,P00762,P02625,P50115,Q7TPB1,Q99041               |
| 3986 | 1,2,5,36,3 3,4,6,7,8,3<br>7,40,43,44 8,39,41,42 | 7 | O35547,O70417,P05369,P08010,P16086,P50115,Q63661        |
| 3987 | 1,2,5,36,3 3,4,6,7,8,3<br>7,41,42,43 8,39,40,44 | 2 | P11598,P83121                                           |
| 3988 | 1,2,5,36,3 3,4,6,7,8,3<br>7,41,42,44 8,39,40,43 | 1 | O70417                                                  |
| 3989 | 1,2,5,36,3 3,4,6,7,8,3<br>7,41,43,44 8,39,40,42 | 2 | P05369,P83121                                           |
| 3990 | 1,2,5,36,3 3,4,6,7,8,3<br>7,42,43,44 8,39,40,41 | 3 | P50115,Q63617,Q99041                                    |

|      |                          |                           |   |                                           |
|------|--------------------------|---------------------------|---|-------------------------------------------|
| 3991 | 1,2,5,36,3<br>8,39,40,41 | 3,4,6,7,8,3<br>7,42,43,44 | 1 | P00714                                    |
| 3992 | 1,2,5,36,3<br>8,39,40,42 | 3,4,6,7,8,3<br>7,41,43,44 | 4 | O70417,Q63617,Q99041,Q9QUL6               |
| 3993 | 1,2,5,36,3<br>8,39,40,43 | 3,4,6,7,8,3<br>7,41,42,44 | 4 | P00714,Q63617,Q6P6R2,Q99041               |
| 3994 | 1,2,5,36,3<br>8,39,40,44 | 3,4,6,7,8,3<br>7,41,42,43 | 3 | O70417,Q99041,Q9QUL6                      |
| 3995 | 1,2,5,36,3<br>8,39,41,42 | 3,4,6,7,8,3<br>7,40,43,44 | 0 |                                           |
| 3996 | 1,2,5,36,3<br>8,39,41,43 | 3,4,6,7,8,3<br>7,40,42,44 | 1 | P00714                                    |
| 3997 | 1,2,5,36,3<br>8,39,41,44 | 3,4,6,7,8,3<br>7,40,42,43 | 0 |                                           |
| 3998 | 1,2,5,36,3<br>8,39,42,43 | 3,4,6,7,8,3<br>7,40,41,44 | 6 | P06911,P11598,P12020,Q63617,Q6IFU7,Q99041 |
| 3999 | 1,2,5,36,3<br>8,39,42,44 | 3,4,6,7,8,3<br>7,40,41,43 | 4 | P51907,Q63617,Q99041,Q9QUL6               |
| 4000 | 1,2,5,36,3<br>8,39,43,44 | 3,4,6,7,8,3<br>7,40,41,42 | 2 | Q63617,Q99041                             |
| 4001 | 1,2,5,36,3<br>8,40,41,42 | 3,4,6,7,8,3<br>7,39,43,44 | 2 | O70417,P02625                             |
| 4002 | 1,2,5,36,3<br>8,40,41,43 | 3,4,6,7,8,3<br>7,39,42,44 | 1 | P00714                                    |
| 4003 | 1,2,5,36,3<br>8,40,41,44 | 3,4,6,7,8,3<br>7,39,42,43 | 1 | O70417                                    |
| 4004 | 1,2,5,36,3<br>8,40,42,43 | 3,4,6,7,8,3<br>7,39,41,44 | 4 | P02625,P11598,Q63617,Q99041               |
| 4005 | 1,2,5,36,3<br>8,40,42,44 | 3,4,6,7,8,3<br>7,39,41,43 | 5 | O70417,P02625,Q7TPB1,Q99041,Q9QUL6        |
| 4006 | 1,2,5,36,3<br>8,40,43,44 | 3,4,6,7,8,3<br>7,39,41,42 | 2 | Q63661,Q99041                             |
| 4007 | 1,2,5,36,3<br>8,41,42,43 | 3,4,6,7,8,3<br>7,39,40,44 | 3 | P06866,P11598,Q8CJD3                      |
| 4008 | 1,2,5,36,3<br>8,41,42,44 | 3,4,6,7,8,3<br>7,39,40,43 | 0 |                                           |
| 4009 | 1,2,5,36,3<br>8,41,43,44 | 3,4,6,7,8,3<br>7,39,40,42 | 3 | P83121,P98089,Q63661                      |
| 4010 | 1,2,5,36,3<br>8,42,43,44 | 3,4,6,7,8,3<br>7,39,40,41 | 2 | Q63617,Q99041                             |
| 4011 | 1,2,5,36,3<br>9,40,41,42 | 3,4,6,7,8,3<br>7,38,43,44 | 2 | O70417,P01835                             |
| 4012 | 1,2,5,36,3<br>9,40,41,43 | 3,4,6,7,8,3<br>7,38,42,44 | 1 | P00714                                    |
| 4013 | 1,2,5,36,3<br>9,40,41,44 | 3,4,6,7,8,3<br>7,38,42,43 | 3 | O70417,P10715,P19629                      |

|      |                                                 |   |                                                  |
|------|-------------------------------------------------|---|--------------------------------------------------|
| 4014 | 1,2,5,36,3 3,4,6,7,8,3<br>9,40,42,43 7,38,41,44 | 4 | P11598,P50115,Q05695,Q99041                      |
| 4015 | 1,2,5,36,3 3,4,6,7,8,3<br>9,40,42,44 7,38,41,43 | 5 | O70417,P50115,Q7TPB1,Q99041,Q9QUL6               |
| 4016 | 1,2,5,36,3 3,4,6,7,8,3<br>9,40,43,44 7,38,41,42 | 2 | P50115,Q99041                                    |
| 4017 | 1,2,5,36,3 3,4,6,7,8,3<br>9,41,42,43 7,38,40,44 | 0 |                                                  |
| 4018 | 1,2,5,36,3 3,4,6,7,8,3<br>9,41,42,44 7,38,40,43 | 0 |                                                  |
| 4019 | 1,2,5,36,3 3,4,6,7,8,3<br>9,41,43,44 7,38,40,42 | 2 | D3ZUC6,P83121                                    |
| 4020 | 1,2,5,36,3 3,4,6,7,8,3<br>9,42,43,44 7,38,40,41 | 3 | P50115,Q63617,Q99041                             |
| 4021 | 1,2,5,36,4 3,4,6,7,8,3<br>0,41,42,43 7,38,39,44 | 2 | P02625,P11598                                    |
| 4022 | 1,2,5,36,4 3,4,6,7,8,3<br>0,41,42,44 7,38,39,43 | 3 | O70417,P02625,Q7TPB1                             |
| 4023 | 1,2,5,36,4 3,4,6,7,8,3<br>0,41,43,44 7,38,39,42 | 1 | Q63661                                           |
| 4024 | 1,2,5,36,4 3,4,6,7,8,3<br>0,42,43,44 7,38,39,41 | 4 | P02625,P11598,Q7TPB1,Q99041                      |
| 4025 | 1,2,5,36,4 3,4,6,7,8,3<br>1,42,43,44 7,38,39,40 | 1 | P83121                                           |
| 4026 | 1,2,5,37,3 3,4,6,7,8,3<br>8,39,40,41 6,42,43,44 | 1 | P00714                                           |
| 4027 | 1,2,5,37,3 3,4,6,7,8,3<br>8,39,40,42 6,41,43,44 | 3 | O54858,Q99041,Q9QUL6                             |
| 4028 | 1,2,5,37,3 3,4,6,7,8,3<br>8,39,40,43 6,41,42,44 | 7 | P00714,P08649,P16086,Q62753,Q6IFV1,Q812E4,Q99041 |
| 4029 | 1,2,5,37,3 3,4,6,7,8,3<br>8,39,40,44 6,41,42,43 | 5 | O54858,P08649,P16086,Q99041,Q9QUL6               |
| 4030 | 1,2,5,37,3 3,4,6,7,8,3<br>8,39,41,42 6,40,43,44 | 1 | P13432                                           |
| 4031 | 1,2,5,37,3 3,4,6,7,8,3<br>8,39,41,43 6,40,42,44 | 2 | P00714,Q6IFV1                                    |
| 4032 | 1,2,5,37,3 3,4,6,7,8,3<br>8,39,41,44 6,40,42,43 | 0 |                                                  |
| 4033 | 1,2,5,37,3 3,4,6,7,8,3<br>8,39,42,43 6,40,41,44 | 7 | P06866,P11598,P12020,Q63617,Q6IFU7,Q6IFV1,Q99041 |
| 4034 | 1,2,5,37,3 3,4,6,7,8,3<br>8,39,42,44 6,40,41,43 | 4 | O54858,Q63617,Q99041,Q9QUL6                      |
| 4035 | 1,2,5,37,3 3,4,6,7,8,3<br>8,39,43,44 6,40,41,42 | 7 | P08649,P16086,P23593,Q63617,Q6IFV1,Q99041,Q9JJS8 |
| 4036 | 1,2,5,37,3 3,4,6,7,8,3<br>8,40,41,42 6,39,43,44 | 4 | O54858,O70417,P02625,P11598                      |

|      |                                                 |   |                                                         |
|------|-------------------------------------------------|---|---------------------------------------------------------|
| 4037 | 1,2,5,37,3 3,4,6,7,8,3<br>8,40,41,43 6,39,42,44 | 2 | P00714,Q6IFV1                                           |
| 4038 | 1,2,5,37,3 3,4,6,7,8,3<br>8,40,41,44 6,39,42,43 | 2 | O70417,P16086                                           |
| 4039 | 1,2,5,37,3 3,4,6,7,8,3<br>8,40,42,43 6,39,41,44 | 4 | P02625,P11598,Q8VD89,Q99041                             |
| 4040 | 1,2,5,37,3 3,4,6,7,8,3<br>8,40,42,44 6,39,41,43 | 5 | O54858,O70417,P02625,Q99041,Q9QUL6                      |
| 4041 | 1,2,5,37,3 3,4,6,7,8,3<br>8,40,43,44 6,39,41,42 | 4 | P08010,P08649,P16086,Q99041                             |
| 4042 | 1,2,5,37,3 3,4,6,7,8,3<br>8,41,42,43 6,39,40,44 | 3 | P06866,P11598,Q8CJD3                                    |
| 4043 | 1,2,5,37,3 3,4,6,7,8,3<br>8,41,42,44 6,39,40,43 | 0 |                                                         |
| 4044 | 1,2,5,37,3 3,4,6,7,8,3<br>8,41,43,44 6,39,40,42 | 3 | P00774,P16086,P98089                                    |
| 4045 | 1,2,5,37,3 3,4,6,7,8,3<br>8,42,43,44 6,39,40,41 | 3 | P11598,Q63617,Q99041                                    |
| 4046 | 1,2,5,37,3 3,4,6,7,8,3<br>9,40,41,42 6,38,43,44 | 2 | O54858,P01835                                           |
| 4047 | 1,2,5,37,3 3,4,6,7,8,3<br>9,40,41,43 6,38,42,44 | 2 | P00714,P97554                                           |
| 4048 | 1,2,5,37,3 3,4,6,7,8,3<br>9,40,41,44 6,38,42,43 | 5 | O54858,P10715,P19629,Q5GRG2,Q6AYL6                      |
| 4049 | 1,2,5,37,3 3,4,6,7,8,3<br>9,40,42,43 6,38,41,44 | 6 | O54858,P11598,P50115,Q05695,Q8CIZ5,Q99041               |
| 4050 | 1,2,5,37,3 3,4,6,7,8,3<br>9,40,42,44 6,38,41,43 | 5 | O54858,O70417,P50115,Q99041,Q9QUL6                      |
| 4051 | 1,2,5,37,3 3,4,6,7,8,3<br>9,40,43,44 6,38,41,42 | 8 | O35547,P08649,P16086,P50115,Q6AYL6,Q812E4,Q8CIZ5,Q99041 |
| 4052 | 1,2,5,37,3 3,4,6,7,8,3<br>9,41,42,43 6,38,40,44 | 1 | P11598                                                  |
| 4053 | 1,2,5,37,3 3,4,6,7,8,3<br>9,41,42,44 6,38,40,43 | 0 |                                                         |
| 4054 | 1,2,5,37,3 3,4,6,7,8,3<br>9,41,43,44 6,38,40,42 | 0 |                                                         |
| 4055 | 1,2,5,37,3 3,4,6,7,8,3<br>9,42,43,44 6,38,40,41 | 3 | P50115,Q63617,Q99041                                    |
| 4056 | 1,2,5,37,4 3,4,6,7,8,3<br>0,41,42,43 6,38,39,44 | 2 | P02625,P11598                                           |
| 4057 | 1,2,5,37,4 3,4,6,7,8,3<br>0,41,42,44 6,38,39,43 | 3 | O54858,O70417,P02625                                    |
| 4058 | 1,2,5,37,4 3,4,6,7,8,3<br>0,41,43,44 6,38,39,42 | 2 | P05369,P19218                                           |
| 4059 | 1,2,5,37,4 3,4,6,7,8,3<br>0,42,43,44 6,38,39,41 | 4 | O54858,P02625,P11598,Q99041                             |

|      |                                                 |   |                                           |
|------|-------------------------------------------------|---|-------------------------------------------|
| 4060 | 1,2,5,37,4 3,4,6,7,8,3<br>1,42,43,44 6,38,39,40 | 1 | P83121                                    |
| 4061 | 1,2,5,38,3 3,4,6,7,8,3<br>9,40,41,42 6,37,43,44 | 2 | O54858,P13432                             |
| 4062 | 1,2,5,38,3 3,4,6,7,8,3<br>9,40,41,43 6,37,42,44 | 1 | P00714                                    |
| 4063 | 1,2,5,38,3 3,4,6,7,8,3<br>9,40,41,44 6,37,42,43 | 3 | P10715,P19629,Q9QUL6                      |
| 4064 | 1,2,5,38,3 3,4,6,7,8,3<br>9,40,42,43 6,37,41,44 | 5 | P11598,Q63617,Q64611,Q6IFU7,Q99041        |
| 4065 | 1,2,5,38,3 3,4,6,7,8,3<br>9,40,42,44 6,37,41,43 | 3 | O54858,Q99041,Q9QUL6                      |
| 4066 | 1,2,5,38,3 3,4,6,7,8,3<br>9,40,43,44 6,37,41,42 | 3 | P08649,Q99041,Q9QUL6                      |
| 4067 | 1,2,5,38,3 3,4,6,7,8,3<br>9,41,42,43 6,37,40,44 | 5 | P00731,P06866,P11598,Q6IFU7,Q8CJD3        |
| 4068 | 1,2,5,38,3 3,4,6,7,8,3<br>9,41,42,44 6,37,40,43 | 0 |                                           |
| 4069 | 1,2,5,38,3 3,4,6,7,8,3<br>9,41,43,44 6,37,40,42 | 3 | P00731,P00774,P98089                      |
| 4070 | 1,2,5,38,3 3,4,6,7,8,3<br>9,42,43,44 6,37,40,41 | 3 | Q63617,Q6IFU7,Q99041                      |
| 4071 | 1,2,5,38,4 3,4,6,7,8,3<br>0,41,42,43 6,37,39,44 | 3 | P11598,Q8CJD3,Q99041                      |
| 4072 | 1,2,5,38,4 3,4,6,7,8,3<br>0,41,42,44 6,37,39,43 | 3 | O54858,P02625,Q99041                      |
| 4073 | 1,2,5,38,4 3,4,6,7,8,3<br>0,41,43,44 6,37,39,42 | 1 | P98089                                    |
| 4074 | 1,2,5,38,4 3,4,6,7,8,3<br>0,42,43,44 6,37,39,41 | 4 | O54858,P02625,P11598,Q99041               |
| 4075 | 1,2,5,38,4 3,4,6,7,8,3<br>1,42,43,44 6,37,39,40 | 6 | P00731,P11598,P55091,P98089,Q8CJD3,Q99041 |
| 4076 | 1,2,5,39,4 3,4,6,7,8,3<br>0,41,42,43 6,37,38,44 | 1 | P11598                                    |
| 4077 | 1,2,5,39,4 3,4,6,7,8,3<br>0,41,42,44 6,37,38,43 | 3 | O54858,P10715,P19629                      |
| 4078 | 1,2,5,39,4 3,4,6,7,8,3<br>0,41,43,44 6,37,38,42 | 4 | P10715,P19629,P47967,Q6AYL6               |
| 4079 | 1,2,5,39,4 3,4,6,7,8,3<br>0,42,43,44 6,37,38,41 | 3 | O54858,P11598,Q99041                      |
| 4080 | 1,2,5,39,4 3,4,6,7,8,3<br>1,42,43,44 6,37,38,40 | 2 | P00731,P82471                             |
| 4081 | 1,2,5,40,4 3,4,6,7,8,3<br>1,42,43,44 6,37,38,39 | 4 | P02625,P11598,Q6PCU2,Q99041               |

|      |                        |                                 |   |                                                                |
|------|------------------------|---------------------------------|---|----------------------------------------------------------------|
| 4082 | 1,2,6,7,8,3<br>6,37,38 | 3,4,5,39,4<br>0,41,42,43<br>,44 | 8 | P02631,P11598,P15399,P53792,P97580,P97840,Q63467,Q91ZS3        |
| 4083 | 1,2,6,7,8,3<br>6,37,39 | 3,4,5,38,4<br>0,41,42,43<br>,44 | 9 | B0BNN3,P01835,P02631,P11598,P27213,P97840,Q63467,Q8CJD3,Q91ZS3 |
| 4084 | 1,2,6,7,8,3<br>6,37,40 | 3,4,5,38,3<br>9,41,42,43<br>,44 | 6 | B0BNN3,P00774,P02631,P53792,Q8CJD3,Q91ZS3                      |
| 4085 | 1,2,6,7,8,3<br>6,37,41 | 3,4,5,38,3<br>9,40,42,43<br>,44 | 8 | B0BNN3,P01835,P02631,P11598,P97840,Q63467,Q91ZS3,Q9Z1F2        |
| 4086 | 1,2,6,7,8,3<br>6,37,42 | 3,4,5,38,3<br>9,40,41,43<br>,44 | 8 | B0BNN3,P00762,P01835,P02631,P47967,P97840,Q91ZS3,Q9QZQ5        |
| 4087 | 1,2,6,7,8,3<br>6,37,43 | 3,4,5,38,3<br>9,40,41,42<br>,44 | 2 | P02631,Q91ZS3                                                  |
| 4088 | 1,2,6,7,8,3<br>6,37,44 | 3,4,5,38,3<br>9,40,41,42<br>,43 | 8 | B0BNN3,P02631,P11598,P53792,P97840,Q63467,Q8CJD3,Q91ZS3        |
| 4089 | 1,2,6,7,8,3<br>6,38,39 | 3,4,5,37,4<br>0,41,42,43<br>,44 | 5 | P11598,P19218,P97580,P97840,Q63467                             |
| 4090 | 1,2,6,7,8,3<br>6,38,40 | 3,4,5,37,3<br>9,41,42,43<br>,44 | 4 | P15399,P97580,P97840,Q00715                                    |
| 4091 | 1,2,6,7,8,3<br>6,38,41 | 3,4,5,37,3<br>9,40,42,43<br>,44 | 8 | P11598,P50115,P50116,P97580,P97840,Q63467,Q8CIZ5,Q91ZS3        |
| 4092 | 1,2,6,7,8,3<br>6,38,42 | 3,4,5,37,3<br>9,40,41,43<br>,44 | 6 | P08290,P08649,P08753,P19218,P47967,P97840                      |
| 4093 | 1,2,6,7,8,3<br>6,38,43 | 3,4,5,37,3<br>9,40,41,42<br>,44 | 6 | P02631,P97580,Q00715,Q63467,Q63532,Q63942                      |
| 4094 | 1,2,6,7,8,3<br>6,38,44 | 3,4,5,37,3<br>9,40,41,42<br>,43 | 7 | P02631,P11598,P53792,P97580,P97840,Q62635,Q63467               |
| 4095 | 1,2,6,7,8,3<br>6,39,40 | 3,4,5,37,3<br>8,41,42,43<br>,44 | 6 | B0BNN3,P00774,P11598,P12020,P27213,Q8CJD3                      |
| 4096 | 1,2,6,7,8,3<br>6,39,41 | 3,4,5,37,3<br>8,40,42,43<br>,44 | 5 | P01835,P11598,P12785,Q63467,Q91ZS3                             |

|      |                        |                                 |    |                                                                                     |
|------|------------------------|---------------------------------|----|-------------------------------------------------------------------------------------|
| 4097 | 1,2,6,7,8,3<br>6,39,42 | 3,4,5,37,3<br>8,40,41,43<br>,44 | 5  | P00774,P01835,P08290,P08649,P97840                                                  |
| 4098 | 1,2,6,7,8,3<br>6,39,43 | 3,4,5,37,3<br>8,40,41,42<br>,44 | 6  | P02631,P06760,P83748,Q63467,Q63532,Q63942                                           |
| 4099 | 1,2,6,7,8,3<br>6,39,44 | 3,4,5,37,3<br>8,40,41,42<br>,43 | 4  | B0BNN3,P11598,Q63467,Q8CJD3                                                         |
| 4100 | 1,2,6,7,8,3<br>6,40,41 | 3,4,5,37,3<br>8,39,42,43<br>,44 | 5  | B0BNN3,P12020,Q63467,Q9JJS8,Q9Z1F2                                                  |
| 4101 | 1,2,6,7,8,3<br>6,40,42 | 3,4,5,37,3<br>8,39,41,43<br>,44 | 5  | P00762,P00774,P20759,P36374,Q9JJS8                                                  |
| 4102 | 1,2,6,7,8,3<br>6,40,43 | 3,4,5,37,3<br>8,39,41,42<br>,44 | 2  | P02631,Q00715                                                                       |
| 4103 | 1,2,6,7,8,3<br>6,40,44 | 3,4,5,37,3<br>8,39,41,42<br>,43 | 8  | B0BNN3,P11598,P12020,P53792,Q00715,Q5GRG2,Q63467,Q8CJD3                             |
| 4104 | 1,2,6,7,8,3<br>6,41,42 | 3,4,5,37,3<br>8,39,40,43<br>,44 | 12 | P01835,P08010,P08290,P08649,P08753,P16086,P20759,P97840,Q63467,Q812E4,Q91ZS3,Q9JJS8 |
| 4105 | 1,2,6,7,8,3<br>6,41,43 | 3,4,5,37,3<br>8,39,40,42<br>,44 | 6  | P02631,P12785,P83748,Q63467,Q63532,Q9Z1F2                                           |
| 4106 | 1,2,6,7,8,3<br>6,41,44 | 3,4,5,37,3<br>8,39,40,42<br>,43 | 6  | B0BNN3,P02631,P11598,P12020,Q63467,Q99MH3                                           |
| 4107 | 1,2,6,7,8,3<br>6,42,43 | 3,4,5,37,3<br>8,39,40,41<br>,44 | 3  | P02631,P08290,P16636                                                                |
| 4108 | 1,2,6,7,8,3<br>6,42,44 | 3,4,5,37,3<br>8,39,40,41<br>,43 | 9  | B0BNN3,P00762,P08290,P08649,P20759,P36374,P53792,P97840,Q63467                      |
| 4109 | 1,2,6,7,8,3<br>6,43,44 | 3,4,5,37,3<br>8,39,40,41<br>,42 | 5  | P02631,P11598,Q00715,Q63467,Q66H69                                                  |
| 4110 | 1,2,6,7,8,3<br>7,38,39 | 3,4,5,36,4<br>0,41,42,43<br>,44 | 8  | P02631,P11598,P15399,P19218,P97580,P97840,Q30KJ2,Q91ZS3                             |
| 4111 | 1,2,6,7,8,3<br>7,38,40 | 3,4,5,36,3<br>9,41,42,43<br>,44 | 6  | P02631,P02803,P15399,P97580,P97840,Q91ZS3                                           |

|      |                        |                                 |   |                                                                |
|------|------------------------|---------------------------------|---|----------------------------------------------------------------|
| 4112 | 1,2,6,7,8,3<br>7,38,41 | 3,4,5,36,3<br>9,40,42,43<br>,44 | 9 | P02631,P11598,P15399,P50115,P50116,P97580,P97840,Q62635,Q91ZS3 |
| 4113 | 1,2,6,7,8,3<br>7,38,42 | 3,4,5,36,3<br>9,40,41,43<br>,44 | 5 | P15399,P19218,P97580,P97840,Q91ZS3                             |
| 4114 | 1,2,6,7,8,3<br>7,38,43 | 3,4,5,36,3<br>9,40,41,42<br>,44 | 9 | P02631,P02680,P15399,P97580,P97840,Q30KJ2,Q6IFV1,Q7TPB1,Q91ZS3 |
| 4115 | 1,2,6,7,8,3<br>7,38,44 | 3,4,5,36,3<br>9,40,41,42<br>,43 | 7 | P02631,P11598,P15399,P97580,P97840,Q62635,Q91ZS3               |
| 4116 | 1,2,6,7,8,3<br>7,39,40 | 3,4,5,36,3<br>8,41,42,43<br>,44 | 5 | P02803,P12020,P27213,Q8CJD3,Q91ZS3                             |
| 4117 | 1,2,6,7,8,3<br>7,39,41 | 3,4,5,36,3<br>8,40,42,43<br>,44 | 7 | O88267,P01835,P02631,P11598,P12020,Q91ZS3,Q9JI85               |
| 4118 | 1,2,6,7,8,3<br>7,39,42 | 3,4,5,36,3<br>8,40,41,43<br>,44 | 3 | P01835,P97840,Q91ZS3                                           |
| 4119 | 1,2,6,7,8,3<br>7,39,43 | 3,4,5,36,3<br>8,40,41,42<br>,44 | 3 | P02631,P83748,Q91ZS3                                           |
| 4120 | 1,2,6,7,8,3<br>7,39,44 | 3,4,5,36,3<br>8,40,41,42<br>,43 | 5 | P02631,P11598,P97840,Q8CJD3,Q91ZS3                             |
| 4121 | 1,2,6,7,8,3<br>7,40,41 | 3,4,5,36,3<br>8,39,42,43<br>,44 | 9 | P02631,P06911,P12020,P51907,P70545,Q5GRG2,Q63617,Q91ZS3,Q9Z1F2 |
| 4122 | 1,2,6,7,8,3<br>7,40,42 | 3,4,5,36,3<br>8,39,41,43<br>,44 | 3 | P20759,P97840,Q91ZS3                                           |
| 4123 | 1,2,6,7,8,3<br>7,40,43 | 3,4,5,36,3<br>8,39,41,42<br>,44 | 1 | P02631                                                         |
| 4124 | 1,2,6,7,8,3<br>7,40,44 | 3,4,5,36,3<br>8,39,41,42<br>,43 | 6 | B0BNN3,P02631,P11598,P12020,Q5GRG2,Q8CJD3                      |
| 4125 | 1,2,6,7,8,3<br>7,41,42 | 3,4,5,36,3<br>8,39,40,43<br>,44 | 4 | P01835,P02631,P97840,Q91ZS3                                    |
| 4126 | 1,2,6,7,8,3<br>7,41,43 | 3,4,5,36,3<br>8,39,40,42<br>,44 | 4 | P02631,Q7TPB1,Q91ZS3,Q9Z1F2                                    |



|      |                        |                                 |    |                                                                              |
|------|------------------------|---------------------------------|----|------------------------------------------------------------------------------|
| 4127 | 1,2,6,7,8,3<br>7,41,44 | 3,4,5,36,3<br>8,39,40,42<br>,43 | 7  | O54728,P02631,P11598,P12020,Q63467,Q91ZS3,Q9JI85                             |
| 4128 | 1,2,6,7,8,3<br>7,42,43 | 3,4,5,36,3<br>8,39,40,41<br>,44 | 2  | P02631,Q91ZS3                                                                |
| 4129 | 1,2,6,7,8,3<br>7,42,44 | 3,4,5,36,3<br>8,39,40,41<br>,43 | 5  | P02631,P20759,P97840,Q6P6R2,Q91ZS3                                           |
| 4130 | 1,2,6,7,8,3<br>7,43,44 | 3,4,5,36,3<br>8,39,40,41<br>,42 | 2  | P02631,P10758                                                                |
| 4131 | 1,2,6,7,8,3<br>8,39,40 | 3,4,5,36,3<br>7,41,42,43<br>,44 | 4  | P12020,P15399,P97580,Q9QUL6                                                  |
| 4132 | 1,2,6,7,8,3<br>8,39,41 | 3,4,5,36,3<br>7,40,42,43<br>,44 | 7  | O88267,P11598,P13432,P50115,P50116,P97580,Q91ZS3                             |
| 4133 | 1,2,6,7,8,3<br>8,39,42 | 3,4,5,36,3<br>7,40,41,43<br>,44 | 4  | P08290,P19218,P97580,P97840                                                  |
| 4134 | 1,2,6,7,8,3<br>8,39,43 | 3,4,5,36,3<br>7,40,41,42<br>,44 | 4  | P02631,P97580,Q63942,Q6IFV1                                                  |
| 4135 | 1,2,6,7,8,3<br>8,39,44 | 3,4,5,36,3<br>7,40,41,42<br>,43 | 5  | P11598,P97580,P97840,Q62635,Q9QUL6                                           |
| 4136 | 1,2,6,7,8,3<br>8,40,41 | 3,4,5,36,3<br>7,39,42,43<br>,44 | 8  | P06911,P12020,P15399,P50115,P50116,P97580,Q5GRG2,Q62635                      |
| 4137 | 1,2,6,7,8,3<br>8,40,42 | 3,4,5,36,3<br>7,39,41,43<br>,44 | 2  | P20759,P97840                                                                |
| 4138 | 1,2,6,7,8,3<br>8,40,43 | 3,4,5,36,3<br>7,39,41,42<br>,44 | 3  | P02631,P15399,P97580                                                         |
| 4139 | 1,2,6,7,8,3<br>8,40,44 | 3,4,5,36,3<br>7,39,41,42<br>,43 | 7  | P11598,P12020,P15399,P97580,Q5GRG2,Q62635,Q9QUL6                             |
| 4140 | 1,2,6,7,8,3<br>8,41,42 | 3,4,5,36,3<br>7,39,40,43<br>,44 | 11 | O35547,P08290,P08753,P16086,P50115,P50116,P54921,P97580,P97840,Q8CIZ5,Q91ZS3 |
| 4141 | 1,2,6,7,8,3<br>8,41,43 | 3,4,5,36,3<br>7,39,40,42<br>,44 | 6  | P02631,P50115,P50116,P55091,P97580,Q7TPB1                                    |

|      |                        |                                 |    |                                                                                            |
|------|------------------------|---------------------------------|----|--------------------------------------------------------------------------------------------|
| 4142 | 1,2,6,7,8,3<br>8,41,44 | 3,4,5,36,3<br>7,39,40,42<br>,43 | 13 | O54728,P02631,P11598,P12020,P50115,P50116,P55091,P97580,P98089,Q05695,Q62635,Q63467,Q8CIZ5 |
| 4143 | 1,2,6,7,8,3<br>8,42,43 | 3,4,5,36,3<br>7,39,40,41<br>,44 | 4  | P02631,P08290,P97580,Q63942                                                                |
| 4144 | 1,2,6,7,8,3<br>8,42,44 | 3,4,5,36,3<br>7,39,40,41<br>,43 | 5  | P08290,P20759,P97580,P97840,Q62635                                                         |
| 4145 | 1,2,6,7,8,3<br>8,43,44 | 3,4,5,36,3<br>7,39,40,41<br>,42 | 4  | P02631,P97580,Q62635,Q66H69                                                                |
| 4146 | 1,2,6,7,8,3<br>9,40,41 | 3,4,5,36,3<br>7,38,42,43<br>,44 | 8  | P06911,P10715,P12020,P12785,P19629,P31044,Q5GRG2,Q6AYL6                                    |
| 4147 | 1,2,6,7,8,3<br>9,40,42 | 3,4,5,36,3<br>7,38,41,43<br>,44 | 1  | P20759                                                                                     |
| 4148 | 1,2,6,7,8,3<br>9,40,43 | 3,4,5,36,3<br>7,38,41,42<br>,44 | 4  | P02631,P12785,P83748,Q6AYL6                                                                |
| 4149 | 1,2,6,7,8,3<br>9,40,44 | 3,4,5,36,3<br>7,38,41,42<br>,43 | 9  | P06911,P10715,P11598,P12020,P68370,Q5GRG2,Q6AYL6,Q8CJD3,Q9QUL6                             |
| 4150 | 1,2,6,7,8,3<br>9,41,42 | 3,4,5,36,3<br>7,38,40,43<br>,44 | 6  | P01835,P08010,P08290,P08753,P13432,P16086                                                  |
| 4151 | 1,2,6,7,8,3<br>9,41,43 | 3,4,5,36,3<br>7,38,40,42<br>,44 | 4  | O88267,P02631,P12785,P83748                                                                |
| 4152 | 1,2,6,7,8,3<br>9,41,44 | 3,4,5,36,3<br>7,38,40,42<br>,43 | 7  | O88267,P06911,P11598,P12020,P31044,Q5GRG2,Q63467                                           |
| 4153 | 1,2,6,7,8,3<br>9,42,43 | 3,4,5,36,3<br>7,38,40,41<br>,44 | 1  | P02631                                                                                     |
| 4154 | 1,2,6,7,8,3<br>9,42,44 | 3,4,5,36,3<br>7,38,40,41<br>,43 | 2  | P20759,P97840                                                                              |
| 4155 | 1,2,6,7,8,3<br>9,43,44 | 3,4,5,36,3<br>7,38,40,41<br>,42 | 3  | P02631,P11598,Q66H69                                                                       |
| 4156 | 1,2,6,7,8,4<br>0,41,42 | 3,4,5,36,3<br>7,38,39,43<br>,44 | 5  | P12020,P16086,P20759,Q6P6R2,Q9JJS8                                                         |

|      |                         |                                 |    |                                                                              |
|------|-------------------------|---------------------------------|----|------------------------------------------------------------------------------|
| 4157 | 1,2,6,7,8,4<br>0,41,43  | 3,4,5,36,3<br>7,38,39,42<br>,44 | 5  | P02631,P12020,P12785,Q9JJS8,Q9Z1F2                                           |
| 4158 | 1,2,6,7,8,4<br>0,41,44  | 3,4,5,36,3<br>7,38,39,42<br>,43 | 11 | O54728,P06911,P10715,P11598,P12020,P19629,P31044,Q5GRG2,Q63617,Q6AYL6,Q9ET32 |
| 4159 | 1,2,6,7,8,4<br>0,42,43  | 3,4,5,36,3<br>7,38,39,41<br>,44 | 2  | P02631,Q9JJS8                                                                |
| 4160 | 1,2,6,7,8,4<br>0,42,44  | 3,4,5,36,3<br>7,38,39,41<br>,43 | 4  | P12020,P20759,P36374,Q6P6R2                                                  |
| 4161 | 1,2,6,7,8,4<br>0,43,44  | 3,4,5,36,3<br>7,38,39,41<br>,42 | 3  | P02631,P12020,Q6AYL6                                                         |
| 4162 | 1,2,6,7,8,4<br>1,42,43  | 3,4,5,36,3<br>7,38,39,40<br>,44 | 5  | P02631,P08290,P16086,P54921,P82471                                           |
| 4163 | 1,2,6,7,8,4<br>1,42,44  | 3,4,5,36,3<br>7,38,39,40<br>,43 | 6  | P08290,P08753,P12020,P20759,Q6P6R2,Q9JID2                                    |
| 4164 | 1,2,6,7,8,4<br>1,43,44  | 3,4,5,36,3<br>7,38,39,40<br>,42 | 5  | O54728,P02631,P12020,Q63467,Q66H69                                           |
| 4165 | 1,2,6,7,8,4<br>2,43,44  | 3,4,5,36,3<br>7,38,39,40<br>,41 | 3  | P02631,Q66H69,Q6P6R2                                                         |
| 4166 | 1,2,6,7,36,<br>37,38,39 | 3,4,5,8,40,<br>41,42,43,4<br>4  | 5  | P15399,P19218,P97580,P97840,Q91ZS3                                           |
| 4167 | 1,2,6,7,36,<br>37,38,40 | 3,4,5,8,39,<br>41,42,43,4<br>4  | 4  | P15399,P97580,P97840,Q91ZS3                                                  |
| 4168 | 1,2,6,7,36,<br>37,38,41 | 3,4,5,8,39,<br>40,42,43,4<br>4  | 5  | P15399,P97580,P97840,Q5M819,Q91ZS3                                           |
| 4169 | 1,2,6,7,36,<br>37,38,42 | 3,4,5,8,39,<br>40,41,43,4<br>4  | 5  | P15399,P47967,P97580,P97840,Q91ZS3                                           |
| 4170 | 1,2,6,7,36,<br>37,38,43 | 3,4,5,8,39,<br>40,41,42,4<br>4  | 7  | P02631,P14480,P15399,P97580,P97840,Q6IFV1,Q91ZS3                             |
| 4171 | 1,2,6,7,36,<br>37,38,44 | 3,4,5,8,39,<br>40,41,42,4<br>3  | 5  | P02631,P15399,P97580,P97840,Q91ZS3                                           |

|      |                         |                                |   |                                                         |
|------|-------------------------|--------------------------------|---|---------------------------------------------------------|
| 4172 | 1,2,6,7,36,<br>37,39,40 | 3,4,5,8,38,<br>41,42,43,4<br>4 | 7 | B0BNN3,P00774,P27213,P35467,P97840,Q8CJD3,Q91ZS3        |
| 4173 | 1,2,6,7,36,<br>37,39,41 | 3,4,5,8,38,<br>40,42,43,4<br>4 | 7 | P00714,P01835,P35467,P97840,Q5M819,Q91ZS3,Q9JI85        |
| 4174 | 1,2,6,7,36,<br>37,39,42 | 3,4,5,8,38,<br>40,41,43,4<br>4 | 6 | P00774,P01835,P35467,P47967,P97840,Q91ZS3               |
| 4175 | 1,2,6,7,36,<br>37,39,43 | 3,4,5,8,38,<br>40,41,42,4<br>4 | 8 | D3ZUC6,P00714,P02631,P06760,P14480,P83748,P97840,Q91ZS3 |
| 4176 | 1,2,6,7,36,<br>37,39,44 | 3,4,5,8,38,<br>40,41,42,4<br>3 | 5 | B0BNN3,P35467,P97840,Q8CJD3,Q91ZS3                      |
| 4177 | 1,2,6,7,36,<br>37,40,41 | 3,4,5,8,38,<br>39,42,43,4<br>4 | 4 | B0BNN3,P12020,P97840,Q91ZS3                             |
| 4178 | 1,2,6,7,36,<br>37,40,42 | 3,4,5,8,38,<br>39,41,43,4<br>4 | 3 | P00774,P97840,Q91ZS3                                    |
| 4179 | 1,2,6,7,36,<br>37,40,43 | 3,4,5,8,38,<br>39,41,42,4<br>4 | 1 | P02631                                                  |
| 4180 | 1,2,6,7,36,<br>37,40,44 | 3,4,5,8,38,<br>39,41,42,4<br>3 | 7 | B0BNN3,O35547,P12020,P15399,P97840,Q5GRG2,Q8CJD3        |
| 4181 | 1,2,6,7,36,<br>37,41,42 | 3,4,5,8,38,<br>39,40,43,4<br>4 | 4 | P01835,P08649,P97840,Q91ZS3                             |
| 4182 | 1,2,6,7,36,<br>37,41,43 | 3,4,5,8,38,<br>39,40,42,4<br>4 | 5 | D3ZUC6,P02631,P06760,P97840,Q91ZS3                      |
| 4183 | 1,2,6,7,36,<br>37,41,44 | 3,4,5,8,38,<br>39,40,42,4<br>3 | 8 | B0BNN3,P02631,P12020,P97840,Q63467,Q91ZS3,Q9JHB9,Q9JI85 |
| 4184 | 1,2,6,7,36,<br>37,42,43 | 3,4,5,8,38,<br>39,40,41,4<br>4 | 4 | P02631,P47967,P97840,Q91ZS3                             |
| 4185 | 1,2,6,7,36,<br>37,42,44 | 3,4,5,8,38,<br>39,40,41,4<br>3 | 3 | P47967,P97840,Q91ZS3                                    |
| 4186 | 1,2,6,7,36,<br>37,43,44 | 3,4,5,8,38,<br>39,40,41,4<br>2 | 3 | P02631,P05942,P97840                                    |

|      |                         |                                |   |                                                  |
|------|-------------------------|--------------------------------|---|--------------------------------------------------|
| 4187 | 1,2,6,7,36,<br>38,39,40 | 3,4,5,8,37,<br>41,42,43,4<br>4 | 3 | P15399,P97840,Q9QUL6                             |
| 4188 | 1,2,6,7,36,<br>38,39,41 | 3,4,5,8,37,<br>40,42,43,4<br>4 | 6 | P00714,P97580,P97840,Q5M819,Q63467,Q91ZS3        |
| 4189 | 1,2,6,7,36,<br>38,39,42 | 3,4,5,8,37,<br>40,41,43,4<br>4 | 4 | P08649,P19218,P47967,P97840                      |
| 4190 | 1,2,6,7,36,<br>38,39,43 | 3,4,5,8,37,<br>40,41,42,4<br>4 | 3 | P06760,P97580,P97840                             |
| 4191 | 1,2,6,7,36,<br>38,39,44 | 3,4,5,8,37,<br>40,41,42,4<br>3 | 5 | P15399,P97580,P97840,Q63467,Q9QUL6               |
| 4192 | 1,2,6,7,36,<br>38,40,41 | 3,4,5,8,37,<br>39,42,43,4<br>4 | 3 | P12020,P15399,P97840                             |
| 4193 | 1,2,6,7,36,<br>38,40,42 | 3,4,5,8,37,<br>39,41,43,4<br>4 | 1 | P97840                                           |
| 4194 | 1,2,6,7,36,<br>38,40,43 | 3,4,5,8,37,<br>39,41,42,4<br>4 | 2 | P15399,P97840                                    |
| 4195 | 1,2,6,7,36,<br>38,40,44 | 3,4,5,8,37,<br>39,41,42,4<br>3 | 4 | P12020,P15399,P97840,Q9QUL6                      |
| 4196 | 1,2,6,7,36,<br>38,41,42 | 3,4,5,8,37,<br>39,40,43,4<br>4 | 6 | P08290,P08649,P16086,P97840,Q8CIZ5,Q91ZS3        |
| 4197 | 1,2,6,7,36,<br>38,41,43 | 3,4,5,8,37,<br>39,40,42,4<br>4 | 4 | P02631,P97580,P97840,Q63467                      |
| 4198 | 1,2,6,7,36,<br>38,41,44 | 3,4,5,8,37,<br>39,40,42,4<br>3 | 7 | P15399,P97580,P97840,P98089,Q62635,Q63467,Q8CIZ5 |
| 4199 | 1,2,6,7,36,<br>38,42,43 | 3,4,5,8,37,<br>39,40,41,4<br>4 | 2 | P47967,P97840                                    |
| 4200 | 1,2,6,7,36,<br>38,42,44 | 3,4,5,8,37,<br>39,40,41,4<br>3 | 4 | P08290,P08649,P47967,P97840                      |
| 4201 | 1,2,6,7,36,<br>38,43,44 | 3,4,5,8,37,<br>39,40,41,4<br>2 | 6 | P02631,P15399,P97580,P97840,Q63467,Q63661        |

|      |                         |                                |   |                                                  |
|------|-------------------------|--------------------------------|---|--------------------------------------------------|
| 4202 | 1,2,6,7,36,<br>39,40,41 | 3,4,5,8,37,<br>38,42,43,4<br>4 | 4 | P06911,P12020,P35467,Q5GRG2                      |
| 4203 | 1,2,6,7,36,<br>39,40,42 | 3,4,5,8,37,<br>38,41,43,4<br>4 | 2 | P00774,P97840                                    |
| 4204 | 1,2,6,7,36,<br>39,40,43 | 3,4,5,8,37,<br>38,41,42,4<br>4 | 1 | P83748                                           |
| 4205 | 1,2,6,7,36,<br>39,40,44 | 3,4,5,8,37,<br>38,41,42,4<br>3 | 7 | B0BNN3,P12020,P97840,Q5GRG2,Q6AYL6,Q8CJD3,Q9QUL6 |
| 4206 | 1,2,6,7,36,<br>39,41,42 | 3,4,5,8,37,<br>38,40,43,4<br>4 | 6 | P01835,P08649,P16086,P35467,P97840,Q91ZS3        |
| 4207 | 1,2,6,7,36,<br>39,41,43 | 3,4,5,8,37,<br>38,40,42,4<br>4 | 6 | D3ZUC6,P00714,P06760,P22006,P83748,Q63467        |
| 4208 | 1,2,6,7,36,<br>39,41,44 | 3,4,5,8,37,<br>38,40,42,4<br>3 | 4 | P12020,P35467,P97840,Q63467                      |
| 4209 | 1,2,6,7,36,<br>39,42,43 | 3,4,5,8,37,<br>38,40,41,4<br>4 | 2 | P06760,P97840                                    |
| 4210 | 1,2,6,7,36,<br>39,42,44 | 3,4,5,8,37,<br>38,40,41,4<br>3 | 2 | P08649,P97840                                    |
| 4211 | 1,2,6,7,36,<br>39,43,44 | 3,4,5,8,37,<br>38,40,41,4<br>2 | 3 | D3ZUC6,P02631,Q63467                             |
| 4212 | 1,2,6,7,36,<br>40,41,42 | 3,4,5,8,37,<br>38,39,43,4<br>4 | 4 | P08649,P16086,P97840,Q9JJS8                      |
| 4213 | 1,2,6,7,36,<br>40,41,43 | 3,4,5,8,37,<br>38,39,42,4<br>4 | 1 | P12020                                           |
| 4214 | 1,2,6,7,36,<br>40,41,44 | 3,4,5,8,37,<br>38,39,42,4<br>3 | 5 | B0BNN3,P06911,P12020,Q5GRG2,Q63467               |
| 4215 | 1,2,6,7,36,<br>40,42,43 | 3,4,5,8,37,<br>38,39,41,4<br>4 | 0 |                                                  |
| 4216 | 1,2,6,7,36,<br>40,42,44 | 3,4,5,8,37,<br>38,39,41,4<br>3 | 3 | P97840,Q7TPB1,Q9R1T5                             |

|      |                         |                                |   |                                                         |
|------|-------------------------|--------------------------------|---|---------------------------------------------------------|
| 4217 | 1,2,6,7,36,<br>40,43,44 | 3,4,5,8,37,<br>38,39,41,4<br>2 | 2 | P02631,Q63661                                           |
| 4218 | 1,2,6,7,36,<br>41,42,43 | 3,4,5,8,37,<br>38,39,40,4<br>4 | 6 | P08649,P16086,P16636,P54921,P97840,Q6AYS4               |
| 4219 | 1,2,6,7,36,<br>41,42,44 | 3,4,5,8,37,<br>38,39,40,4<br>3 | 5 | P08649,P82995,P97840,Q63467,Q6P6R2                      |
| 4220 | 1,2,6,7,36,<br>41,43,44 | 3,4,5,8,37,<br>38,39,40,4<br>2 | 4 | D3ZUC6,P02631,P04355,Q63467                             |
| 4221 | 1,2,6,7,36,<br>42,43,44 | 3,4,5,8,37,<br>38,39,40,4<br>1 | 2 | P02631,P97840                                           |
| 4222 | 1,2,6,7,37,<br>38,39,40 | 3,4,5,8,36,<br>41,42,43,4<br>4 | 5 | P15399,P97580,P97840,Q91ZS3,Q9QUL6                      |
| 4223 | 1,2,6,7,37,<br>38,39,41 | 3,4,5,8,36,<br>40,42,43,4<br>4 | 6 | P00714,P13432,P15399,P97580,P97840,Q91ZS3               |
| 4224 | 1,2,6,7,37,<br>38,39,42 | 3,4,5,8,36,<br>40,41,43,4<br>4 | 5 | P15399,P19218,P97580,P97840,Q91ZS3                      |
| 4225 | 1,2,6,7,37,<br>38,39,43 | 3,4,5,8,36,<br>40,41,42,4<br>4 | 8 | P02631,P14480,P15399,P97580,P97840,Q4FZU6,Q6IFV1,Q91ZS3 |
| 4226 | 1,2,6,7,37,<br>38,39,44 | 3,4,5,8,36,<br>40,41,42,4<br>3 | 5 | P15399,P97580,P97840,Q91ZS3,Q9QUL6                      |
| 4227 | 1,2,6,7,37,<br>38,40,41 | 3,4,5,8,36,<br>39,42,43,4<br>4 | 5 | P12020,P15399,P97580,P97840,Q91ZS3                      |
| 4228 | 1,2,6,7,37,<br>38,40,42 | 3,4,5,8,36,<br>39,41,43,4<br>4 | 4 | P15399,P97580,P97840,Q91ZS3                             |
| 4229 | 1,2,6,7,37,<br>38,40,43 | 3,4,5,8,36,<br>39,41,42,4<br>4 | 5 | P02631,P15399,P97580,P97840,Q6IFV1                      |
| 4230 | 1,2,6,7,37,<br>38,40,44 | 3,4,5,8,36,<br>39,41,42,4<br>3 | 8 | P12020,P15399,P97580,P97840,Q5GRG2,Q62635,Q6AYR9,Q9QUL6 |
| 4231 | 1,2,6,7,37,<br>38,41,42 | 3,4,5,8,36,<br>39,40,43,4<br>4 | 7 | O54861,P15399,P97580,P97840,Q6AYS4,Q8CIZ5,Q91ZS3        |

|      |                         |                                |    |                                                                       |
|------|-------------------------|--------------------------------|----|-----------------------------------------------------------------------|
| 4232 | 1,2,6,7,37,<br>38,41,43 | 3,4,5,8,36,<br>39,40,42,4<br>4 | 8  | O54861,P02631,P15399,P97580,P97840,Q6AYS4,Q6IFV1,Q91ZS3               |
| 4233 | 1,2,6,7,37,<br>38,41,44 | 3,4,5,8,36,<br>39,40,42,4<br>3 | 10 | O54728,P12020,P15399,P97580,P97840,P98089,Q62635,Q6AYS4,Q8CIZ5,Q91ZS3 |
| 4234 | 1,2,6,7,37,<br>38,42,43 | 3,4,5,8,36,<br>39,40,41,4<br>4 | 8  | O54861,P02631,P06866,P15399,P97580,P97840,Q6AYS4,Q91ZS3               |
| 4235 | 1,2,6,7,37,<br>38,42,44 | 3,4,5,8,36,<br>39,40,41,4<br>3 | 5  | P15399,P97580,P97840,Q6AYS4,Q91ZS3                                    |
| 4236 | 1,2,6,7,37,<br>38,43,44 | 3,4,5,8,36,<br>39,40,41,4<br>2 | 5  | P02631,P15399,P97580,P97840,Q6AYS4                                    |
| 4237 | 1,2,6,7,37,<br>39,40,41 | 3,4,5,8,36,<br>38,42,43,4<br>4 | 9  | P06911,P10715,P12020,P13432,P19629,P35467,Q5GRG2,Q6AYL6,Q91ZS3        |
| 4238 | 1,2,6,7,37,<br>39,40,42 | 3,4,5,8,36,<br>38,41,43,4<br>4 | 4  | P35467,P97840,Q91ZS3,Q9QUL6                                           |
| 4239 | 1,2,6,7,37,<br>39,40,43 | 3,4,5,8,36,<br>38,41,42,4<br>4 | 1  | Q6AYL6                                                                |
| 4240 | 1,2,6,7,37,<br>39,40,44 | 3,4,5,8,36,<br>38,41,42,4<br>3 | 7  | P12020,P15399,P97840,Q5GRG2,Q6AYL6,Q8CJD3,Q9QUL6                      |
| 4241 | 1,2,6,7,37,<br>39,41,42 | 3,4,5,8,36,<br>38,40,43,4<br>4 | 6  | P01835,P13432,P35467,P97840,Q6AYS4,Q91ZS3                             |
| 4242 | 1,2,6,7,37,<br>39,41,43 | 3,4,5,8,36,<br>38,40,42,4<br>4 | 6  | P00714,P02631,P22006,P83748,Q6AYS4,Q91ZS3                             |
| 4243 | 1,2,6,7,37,<br>39,41,44 | 3,4,5,8,36,<br>38,40,42,4<br>3 | 5  | P12020,P35467,P97840,Q91ZS3,Q9JI85                                    |
| 4244 | 1,2,6,7,37,<br>39,42,43 | 3,4,5,8,36,<br>38,40,41,4<br>4 | 2  | P97840,Q6AYS4                                                         |
| 4245 | 1,2,6,7,37,<br>39,42,44 | 3,4,5,8,36,<br>38,40,41,4<br>3 | 2  | P97840,Q91ZS3                                                         |
| 4246 | 1,2,6,7,37,<br>39,43,44 | 3,4,5,8,36,<br>38,40,41,4<br>2 | 2  | P02631,P97840                                                         |



|      |                         |                                |    |                                                                              |
|------|-------------------------|--------------------------------|----|------------------------------------------------------------------------------|
| 4247 | 1,2,6,7,37,<br>40,41,42 | 3,4,5,8,36,<br>38,39,43,4<br>4 | 4  | P12020,P97840,Q6AYS4,Q91ZS3                                                  |
| 4248 | 1,2,6,7,37,<br>40,41,43 | 3,4,5,8,36,<br>38,39,42,4<br>4 | 4  | P02631,P12020,P51907,Q6AYS4                                                  |
| 4249 | 1,2,6,7,37,<br>40,41,44 | 3,4,5,8,36,<br>38,39,42,4<br>3 | 11 | O54728,P06911,P10715,P12020,P15399,P19629,P31044,P47727,Q5GRG2,Q6AYL6,Q91ZS3 |
| 4250 | 1,2,6,7,37,<br>40,42,43 | 3,4,5,8,36,<br>38,39,41,4<br>4 | 2  | P97840,Q6AYS4                                                                |
| 4251 | 1,2,6,7,37,<br>40,42,44 | 3,4,5,8,36,<br>38,39,41,4<br>3 | 3  | P97840,Q6P6R2,Q9QUL6                                                         |
| 4252 | 1,2,6,7,37,<br>40,43,44 | 3,4,5,8,36,<br>38,39,41,4<br>2 | 4  | P02631,P12020,P15399,Q6AYL6                                                  |
| 4253 | 1,2,6,7,37,<br>41,42,43 | 3,4,5,8,36,<br>38,39,40,4<br>4 | 5  | O54861,P02631,P97840,Q6AYS4,Q91ZS3                                           |
| 4254 | 1,2,6,7,37,<br>41,42,44 | 3,4,5,8,36,<br>38,39,40,4<br>3 | 4  | P97840,Q6AYS4,Q6P6R2,Q91ZS3                                                  |
| 4255 | 1,2,6,7,37,<br>41,43,44 | 3,4,5,8,36,<br>38,39,40,4<br>2 | 4  | O54728,P02631,Q6AYS4,Q91ZS3                                                  |
| 4256 | 1,2,6,7,37,<br>42,43,44 | 3,4,5,8,36,<br>38,39,40,4<br>1 | 3  | P02631,P97840,Q6AYS4                                                         |
| 4257 | 1,2,6,7,38,<br>39,40,41 | 3,4,5,8,36,<br>37,42,43,4<br>4 | 9  | P06911,P10715,P12020,P13432,P15399,P19629,P97580,Q5GRG2,Q9QUL6               |
| 4258 | 1,2,6,7,38,<br>39,40,42 | 3,4,5,8,36,<br>37,41,43,4<br>4 | 4  | P15399,P83121,P97840,Q9QUL6                                                  |
| 4259 | 1,2,6,7,38,<br>39,40,43 | 3,4,5,8,36,<br>37,41,42,4<br>4 | 3  | P15399,P97580,Q6IFV1                                                         |
| 4260 | 1,2,6,7,38,<br>39,40,44 | 3,4,5,8,36,<br>37,41,42,4<br>3 | 8  | P12020,P15399,P19629,P97580,P97840,Q5GRG2,Q6AYL6,Q9QUL6                      |
| 4261 | 1,2,6,7,38,<br>39,41,42 | 3,4,5,8,36,<br>37,40,43,4<br>4 | 6  | P13432,P16086,P97580,P97840,Q8CIZ5,Q91ZS3                                    |

|      |                         |                                |    |                                                                                            |
|------|-------------------------|--------------------------------|----|--------------------------------------------------------------------------------------------|
| 4262 | 1,2,6,7,38,<br>39,41,43 | 3,4,5,8,36,<br>37,40,42,4<br>4 | 4  | P00714,P13432,P22006,P97580                                                                |
| 4263 | 1,2,6,7,38,<br>39,41,44 | 3,4,5,8,36,<br>37,40,42,4<br>3 | 8  | O88267,P12020,P15399,P97580,P97840,P98089,Q62635,Q8CIZ5                                    |
| 4264 | 1,2,6,7,38,<br>39,42,43 | 3,4,5,8,36,<br>37,40,41,4<br>4 | 3  | P97580,P97840,Q6IFU7                                                                       |
| 4265 | 1,2,6,7,38,<br>39,42,44 | 3,4,5,8,36,<br>37,40,41,4<br>3 | 3  | P97580,P97840,Q9QUL6                                                                       |
| 4266 | 1,2,6,7,38,<br>39,43,44 | 3,4,5,8,36,<br>37,40,41,4<br>2 | 4  | P15399,P23593,P97580,P97840                                                                |
| 4267 | 1,2,6,7,38,<br>40,41,42 | 3,4,5,8,36,<br>37,39,43,4<br>4 | 4  | P12020,P97840,Q6AYS4,Q8CIZ5                                                                |
| 4268 | 1,2,6,7,38,<br>40,41,43 | 3,4,5,8,36,<br>37,39,42,4<br>4 | 4  | P12020,P15399,P97580,Q6AYS4                                                                |
| 4269 | 1,2,6,7,38,<br>40,41,44 | 3,4,5,8,36,<br>37,39,42,4<br>3 | 13 | O54728,P06911,P10715,P12020,P15399,P19629,P31044,P97580,P98089,Q5GRG2,Q62635,Q8CIZ5,Q9QUL6 |
| 4270 | 1,2,6,7,38,<br>40,42,43 | 3,4,5,8,36,<br>37,39,41,4<br>4 | 3  | P15399,P97840,Q6AYS4                                                                       |
| 4271 | 1,2,6,7,38,<br>40,42,44 | 3,4,5,8,36,<br>37,39,41,4<br>3 | 3  | P15399,P97840,Q9QUL6                                                                       |
| 4272 | 1,2,6,7,38,<br>40,43,44 | 3,4,5,8,36,<br>37,39,41,4<br>2 | 3  | P12020,P15399,P97580                                                                       |
| 4273 | 1,2,6,7,38,<br>41,42,43 | 3,4,5,8,36,<br>37,39,40,4<br>4 | 5  | P06866,P54921,P97580,P97840,Q6AYS4                                                         |
| 4274 | 1,2,6,7,38,<br>41,42,44 | 3,4,5,8,36,<br>37,39,40,4<br>3 | 7  | P55091,P97840,P98089,Q62635,Q6AYS4,Q6P6R2,Q8CIZ5                                           |
| 4275 | 1,2,6,7,38,<br>41,43,44 | 3,4,5,8,36,<br>37,39,40,4<br>2 | 9  | O54728,P00774,P02631,P15399,P55091,P97580,P98089,Q62635,Q6AYS4                             |
| 4276 | 1,2,6,7,38,<br>42,43,44 | 3,4,5,8,36,<br>37,39,40,4<br>1 | 3  | P97580,P97840,Q6AYS4                                                                       |

|      |                         |                                |    |                                                                              |
|------|-------------------------|--------------------------------|----|------------------------------------------------------------------------------|
| 4277 | 1,2,6,7,39,<br>40,41,42 | 3,4,5,8,36,<br>37,38,43,4<br>4 | 4  | P12020,P13432,P16086,P35467                                                  |
| 4278 | 1,2,6,7,39,<br>40,41,43 | 3,4,5,8,36,<br>37,38,42,4<br>4 | 4  | P00714,P12020,P83748,Q6AYL6                                                  |
| 4279 | 1,2,6,7,39,<br>40,41,44 | 3,4,5,8,36,<br>37,38,42,4<br>3 | 11 | P06911,P10715,P12020,P16391,P19629,P31044,P35467,P68370,Q5GRG2,Q6AYL6,Q9QUL6 |
| 4280 | 1,2,6,7,39,<br>40,42,43 | 3,4,5,8,36,<br>37,38,41,4<br>4 | 0  |                                                                              |
| 4281 | 1,2,6,7,39,<br>40,42,44 | 3,4,5,8,36,<br>37,38,41,4<br>3 | 4  | P12020,P97840,Q6AYL6,Q9QUL6                                                  |
| 4282 | 1,2,6,7,39,<br>40,43,44 | 3,4,5,8,36,<br>37,38,41,4<br>2 | 3  | P12020,Q5GRG2,Q6AYL6                                                         |
| 4283 | 1,2,6,7,39,<br>41,42,43 | 3,4,5,8,36,<br>37,38,40,4<br>4 | 4  | P16086,P22006,P82471,Q6AYS4                                                  |
| 4284 | 1,2,6,7,39,<br>41,42,44 | 3,4,5,8,36,<br>37,38,40,4<br>3 | 4  | P12020,P35467,P97840,Q6P6R2                                                  |
| 4285 | 1,2,6,7,39,<br>41,43,44 | 3,4,5,8,36,<br>37,38,40,4<br>2 | 5  | O88267,P02631,P12020,Q6AYL6,Q6AYS4                                           |
| 4286 | 1,2,6,7,39,<br>42,43,44 | 3,4,5,8,36,<br>37,38,40,4<br>1 | 2  | P97840,Q6AYS4                                                                |
| 4287 | 1,2,6,7,40,<br>41,42,43 | 3,4,5,8,36,<br>37,38,39,4<br>4 | 3  | P16086,Q6AYS4,Q9JJS8                                                         |
| 4288 | 1,2,6,7,40,<br>41,42,44 | 3,4,5,8,36,<br>37,38,39,4<br>3 | 5  | P06911,P12020,Q5GRG2,Q6AYS4,Q6P6R2                                           |
| 4289 | 1,2,6,7,40,<br>41,43,44 | 3,4,5,8,36,<br>37,38,39,4<br>2 | 6  | O54728,P06911,P12020,Q5GRG2,Q6AYL6,Q6AYS4                                    |
| 4290 | 1,2,6,7,40,<br>42,43,44 | 3,4,5,8,36,<br>37,38,39,4<br>1 | 1  | Q6AYS4                                                                       |
| 4291 | 1,2,6,7,41,<br>42,43,44 | 3,4,5,8,36,<br>37,38,39,4<br>0 | 3  | P82471,Q6AYS4,Q6P6R2                                                         |

|      |                         |                                |   |                                           |
|------|-------------------------|--------------------------------|---|-------------------------------------------|
| 4292 | 1,2,6,8,36,<br>37,38,39 | 3,4,5,7,40,<br>41,42,43,4<br>4 | 2 | Q8K4G9,Q91ZS3                             |
| 4293 | 1,2,6,8,36,<br>37,38,40 | 3,4,5,7,39,<br>41,42,43,4<br>4 | 3 | P35281,Q8K4G9,Q91ZS3                      |
| 4294 | 1,2,6,8,36,<br>37,38,41 | 3,4,5,7,39,<br>40,42,43,4<br>4 | 3 | Q5M819,Q8K4G9,Q91ZS3                      |
| 4295 | 1,2,6,8,36,<br>37,38,42 | 3,4,5,7,39,<br>40,41,43,4<br>4 | 3 | P97840,Q8K4G9,Q91ZS3                      |
| 4296 | 1,2,6,8,36,<br>37,38,43 | 3,4,5,7,39,<br>40,41,42,4<br>4 | 5 | P02680,Q4FZU6,Q63942,Q6IFV1,Q8K4G9        |
| 4297 | 1,2,6,8,36,<br>37,38,44 | 3,4,5,7,39,<br>40,41,42,4<br>3 | 2 | Q62635,Q91ZS3                             |
| 4298 | 1,2,6,8,36,<br>37,39,40 | 3,4,5,7,38,<br>41,42,43,4<br>4 | 4 | O35547,P00774,Q8CJD3,Q8K4G9               |
| 4299 | 1,2,6,8,36,<br>37,39,41 | 3,4,5,7,38,<br>40,42,43,4<br>4 | 6 | P00714,P01835,Q8K4G9,Q91ZS3,Q9JHB9,Q9Z1F2 |
| 4300 | 1,2,6,8,36,<br>37,39,42 | 3,4,5,7,38,<br>40,41,43,4<br>4 | 3 | P00774,P01835,Q91ZS3                      |
| 4301 | 1,2,6,8,36,<br>37,39,43 | 3,4,5,7,38,<br>40,41,42,4<br>4 | 2 | Q4FZU6,Q63942                             |
| 4302 | 1,2,6,8,36,<br>37,39,44 | 3,4,5,7,38,<br>40,41,42,4<br>3 | 2 | Q8CJD3,Q9JHB9                             |
| 4303 | 1,2,6,8,36,<br>37,40,41 | 3,4,5,7,38,<br>39,42,43,4<br>4 | 3 | Q8K4G9,Q91ZS3,Q9Z1F2                      |
| 4304 | 1,2,6,8,36,<br>37,40,42 | 3,4,5,7,38,<br>39,41,43,4<br>4 | 2 | P00774,Q8K4G9                             |
| 4305 | 1,2,6,8,36,<br>37,40,43 | 3,4,5,7,38,<br>39,41,42,4<br>4 | 2 | O35547,Q9Z1F2                             |
| 4306 | 1,2,6,8,36,<br>37,40,44 | 3,4,5,7,38,<br>39,41,42,4<br>3 | 3 | O35547,Q8CJD3,Q9Z1F2                      |

|      |                         |                                |   |                             |
|------|-------------------------|--------------------------------|---|-----------------------------|
| 4307 | 1,2,6,8,36,<br>37,41,42 | 3,4,5,7,38,<br>39,40,43,4<br>4 | 2 | P01835,Q91ZS3               |
| 4308 | 1,2,6,8,36,<br>37,41,43 | 3,4,5,7,38,<br>39,40,42,4<br>4 | 3 | P83121,Q91ZS3,Q9Z1F2        |
| 4309 | 1,2,6,8,36,<br>37,41,44 | 3,4,5,7,38,<br>39,40,42,4<br>3 | 3 | Q91ZS3,Q9JHB9,Q9Z1F2        |
| 4310 | 1,2,6,8,36,<br>37,42,43 | 3,4,5,7,38,<br>39,40,41,4<br>4 | 1 | Q63942                      |
| 4311 | 1,2,6,8,36,<br>37,42,44 | 3,4,5,7,38,<br>39,40,41,4<br>3 | 0 |                             |
| 4312 | 1,2,6,8,36,<br>37,43,44 | 3,4,5,7,38,<br>39,40,41,4<br>2 | 2 | Q66H69,Q9Z1F2               |
| 4313 | 1,2,6,8,36,<br>38,39,40 | 3,4,5,7,37,<br>41,42,43,4<br>4 | 1 | Q8K4G9                      |
| 4314 | 1,2,6,8,36,<br>38,39,41 | 3,4,5,7,37,<br>40,42,43,4<br>4 | 1 | Q8K4G9                      |
| 4315 | 1,2,6,8,36,<br>38,39,42 | 3,4,5,7,37,<br>40,41,43,4<br>4 | 1 | Q8K4G9                      |
| 4316 | 1,2,6,8,36,<br>38,39,43 | 3,4,5,7,37,<br>40,41,42,4<br>4 | 3 | Q63942,Q6IFV1,Q8K4G9        |
| 4317 | 1,2,6,8,36,<br>38,39,44 | 3,4,5,7,37,<br>40,41,42,4<br>3 | 0 |                             |
| 4318 | 1,2,6,8,36,<br>38,40,41 | 3,4,5,7,37,<br>39,42,43,4<br>4 | 2 | Q62635,Q8K4G9               |
| 4319 | 1,2,6,8,36,<br>38,40,42 | 3,4,5,7,37,<br>39,41,43,4<br>4 | 4 | P15999,P62804,Q00715,Q8K4G9 |
| 4320 | 1,2,6,8,36,<br>38,40,43 | 3,4,5,7,37,<br>39,41,42,4<br>4 | 4 | Q00715,Q63942,Q6IFV1,Q8K4G9 |
| 4321 | 1,2,6,8,36,<br>38,40,44 | 3,4,5,7,37,<br>39,41,42,4<br>3 | 3 | Q00715,Q62635,Q8K4G9        |

|      |                         |                                |   |                             |
|------|-------------------------|--------------------------------|---|-----------------------------|
| 4322 | 1,2,6,8,36,<br>38,41,42 | 3,4,5,7,37,<br>39,40,43,4<br>4 | 2 | P15999,Q8CIZ5               |
| 4323 | 1,2,6,8,36,<br>38,41,43 | 3,4,5,7,37,<br>39,40,42,4<br>4 | 3 | Q63942,Q66H69,Q6IFV1        |
| 4324 | 1,2,6,8,36,<br>38,41,44 | 3,4,5,7,37,<br>39,40,42,4<br>3 | 4 | P98089,Q05695,Q62635,Q8CIZ5 |
| 4325 | 1,2,6,8,36,<br>38,42,43 | 3,4,5,7,37,<br>39,40,41,4<br>4 | 3 | P15999,Q00715,Q63942        |
| 4326 | 1,2,6,8,36,<br>38,42,44 | 3,4,5,7,37,<br>39,40,41,4<br>3 | 2 | P15999,P62804               |
| 4327 | 1,2,6,8,36,<br>38,43,44 | 3,4,5,7,37,<br>39,40,41,4<br>2 | 4 | Q00715,Q63942,Q66H69,Q6IFV1 |
| 4328 | 1,2,6,8,36,<br>39,40,41 | 3,4,5,7,37,<br>38,42,43,4<br>4 | 3 | P12785,Q8K4G9,Q9Z1F2        |
| 4329 | 1,2,6,8,36,<br>39,40,42 | 3,4,5,7,37,<br>38,41,43,4<br>4 | 2 | P00774,P62804               |
| 4330 | 1,2,6,8,36,<br>39,40,43 | 3,4,5,7,37,<br>38,41,42,4<br>4 | 3 | P12785,Q00715,Q63942        |
| 4331 | 1,2,6,8,36,<br>39,40,44 | 3,4,5,7,37,<br>38,41,42,4<br>3 | 2 | Q5GRG2,Q8CJD3               |
| 4332 | 1,2,6,8,36,<br>39,41,42 | 3,4,5,7,37,<br>38,40,43,4<br>4 | 1 | P01835                      |
| 4333 | 1,2,6,8,36,<br>39,41,43 | 3,4,5,7,37,<br>38,40,42,4<br>4 | 3 | P00714,P12785,Q63942        |
| 4334 | 1,2,6,8,36,<br>39,41,44 | 3,4,5,7,37,<br>38,40,42,4<br>3 | 0 |                             |
| 4335 | 1,2,6,8,36,<br>39,42,43 | 3,4,5,7,37,<br>38,40,41,4<br>4 | 1 | Q63942                      |
| 4336 | 1,2,6,8,36,<br>39,42,44 | 3,4,5,7,37,<br>38,40,41,4<br>3 | 1 | P62804                      |

|      |                         |                                |   |                             |
|------|-------------------------|--------------------------------|---|-----------------------------|
| 4337 | 1,2,6,8,36,<br>39,43,44 | 3,4,5,7,37,<br>38,40,41,4<br>2 | 2 | Q63942,Q66H69               |
| 4338 | 1,2,6,8,36,<br>40,41,42 | 3,4,5,7,37,<br>38,39,43,4<br>4 | 2 | P62804,Q9JJS8               |
| 4339 | 1,2,6,8,36,<br>40,41,43 | 3,4,5,7,37,<br>38,39,42,4<br>4 | 2 | P12785,Q9Z1F2               |
| 4340 | 1,2,6,8,36,<br>40,41,44 | 3,4,5,7,37,<br>38,39,42,4<br>3 | 4 | P06911,P12020,Q5GRG2,Q9Z1F2 |
| 4341 | 1,2,6,8,36,<br>40,42,43 | 3,4,5,7,37,<br>38,39,41,4<br>4 | 2 | P62804,Q00715               |
| 4342 | 1,2,6,8,36,<br>40,42,44 | 3,4,5,7,37,<br>38,39,41,4<br>3 | 4 | P20759,P62804,Q6P6R2,Q7TPB1 |
| 4343 | 1,2,6,8,36,<br>40,43,44 | 3,4,5,7,37,<br>38,39,41,4<br>2 | 3 | Q00715,Q66H69,Q9Z1F2        |
| 4344 | 1,2,6,8,36,<br>41,42,43 | 3,4,5,7,37,<br>38,39,40,4<br>4 | 1 | Q66H69                      |
| 4345 | 1,2,6,8,36,<br>41,42,44 | 3,4,5,7,37,<br>38,39,40,4<br>3 | 1 | Q6P6R2                      |
| 4346 | 1,2,6,8,36,<br>41,43,44 | 3,4,5,7,37,<br>38,39,40,4<br>2 | 2 | Q66H69,Q9Z1F2               |
| 4347 | 1,2,6,8,36,<br>42,43,44 | 3,4,5,7,37,<br>38,39,40,4<br>1 | 2 | P62804,Q66H69               |
| 4348 | 1,2,6,8,37,<br>38,39,40 | 3,4,5,7,36,<br>41,42,43,4<br>4 | 3 | P02803,P35281,Q8K4G9        |
| 4349 | 1,2,6,8,37,<br>38,39,41 | 3,4,5,7,36,<br>40,42,43,4<br>4 | 3 | P02782,P13432,Q91ZS3        |
| 4350 | 1,2,6,8,37,<br>38,39,42 | 3,4,5,7,36,<br>40,41,43,4<br>4 | 1 | Q91ZS3                      |
| 4351 | 1,2,6,8,37,<br>38,39,43 | 3,4,5,7,36,<br>40,41,42,4<br>4 | 4 | P02680,Q4FZU6,Q63942,Q6IFV1 |

|      |                         |                                |   |                                           |
|------|-------------------------|--------------------------------|---|-------------------------------------------|
| 4352 | 1,2,6,8,37,<br>38,39,44 | 3,4,5,7,36,<br>40,41,42,4<br>3 | 1 | Q62635                                    |
| 4353 | 1,2,6,8,37,<br>38,40,41 | 3,4,5,7,36,<br>39,42,43,4<br>4 | 2 | Q62635,Q91ZS3                             |
| 4354 | 1,2,6,8,37,<br>38,40,42 | 3,4,5,7,36,<br>39,41,43,4<br>4 | 1 | P02803                                    |
| 4355 | 1,2,6,8,37,<br>38,40,43 | 3,4,5,7,36,<br>39,41,42,4<br>4 | 1 | Q6IFV1                                    |
| 4356 | 1,2,6,8,37,<br>38,40,44 | 3,4,5,7,36,<br>39,41,42,4<br>3 | 3 | P15399,Q62635,Q6AYR9                      |
| 4357 | 1,2,6,8,37,<br>38,41,42 | 3,4,5,7,36,<br>39,40,43,4<br>4 | 2 | Q8CIZ5,Q91ZS3                             |
| 4358 | 1,2,6,8,37,<br>38,41,43 | 3,4,5,7,36,<br>39,40,42,4<br>4 | 2 | Q6IFV1,Q91ZS3                             |
| 4359 | 1,2,6,8,37,<br>38,41,44 | 3,4,5,7,36,<br>39,40,42,4<br>3 | 5 | O54728,P98089,Q62635,Q8CIZ5,Q91ZS3        |
| 4360 | 1,2,6,8,37,<br>38,42,43 | 3,4,5,7,36,<br>39,40,41,4<br>4 | 6 | P02680,P06866,Q4FZU6,Q63942,Q6IFV1,Q8VD89 |
| 4361 | 1,2,6,8,37,<br>38,42,44 | 3,4,5,7,36,<br>39,40,41,4<br>3 | 2 | P97840,Q62635                             |
| 4362 | 1,2,6,8,37,<br>38,43,44 | 3,4,5,7,36,<br>39,40,41,4<br>2 | 4 | Q62635,Q63942,Q6AYR9,Q6IFV1               |
| 4363 | 1,2,6,8,37,<br>39,40,41 | 3,4,5,7,36,<br>38,42,43,4<br>4 | 5 | P06911,P10715,P13432,Q5GRG2,Q9Z1F2        |
| 4364 | 1,2,6,8,37,<br>39,40,42 | 3,4,5,7,36,<br>38,41,43,4<br>4 | 0 |                                           |
| 4365 | 1,2,6,8,37,<br>39,40,43 | 3,4,5,7,36,<br>38,41,42,4<br>4 | 1 | Q6AYL6                                    |
| 4366 | 1,2,6,8,37,<br>39,40,44 | 3,4,5,7,36,<br>38,41,42,4<br>3 | 5 | O35547,Q5GRG2,Q6AYL6,Q8CJD3,Q9QUL6        |



|      |                         |                                |   |                                                  |
|------|-------------------------|--------------------------------|---|--------------------------------------------------|
| 4367 | 1,2,6,8,37,<br>39,41,42 | 3,4,5,7,36,<br>38,40,43,4<br>4 | 3 | P01835,P13432,Q91ZS3                             |
| 4368 | 1,2,6,8,37,<br>39,41,43 | 3,4,5,7,36,<br>38,40,42,4<br>4 | 3 | P00714,P12785,Q9Z1F2                             |
| 4369 | 1,2,6,8,37,<br>39,41,44 | 3,4,5,7,36,<br>38,40,42,4<br>3 | 2 | P02782,Q91ZS3                                    |
| 4370 | 1,2,6,8,37,<br>39,42,43 | 3,4,5,7,36,<br>38,40,41,4<br>4 | 1 | Q63942                                           |
| 4371 | 1,2,6,8,37,<br>39,42,44 | 3,4,5,7,36,<br>38,40,41,4<br>3 | 0 |                                                  |
| 4372 | 1,2,6,8,37,<br>39,43,44 | 3,4,5,7,36,<br>38,40,41,4<br>2 | 0 |                                                  |
| 4373 | 1,2,6,8,37,<br>40,41,42 | 3,4,5,7,36,<br>38,39,43,4<br>4 | 2 | Q6P6R2,Q91ZS3                                    |
| 4374 | 1,2,6,8,37,<br>40,41,43 | 3,4,5,7,36,<br>38,39,42,4<br>4 | 2 | P51907,Q9Z1F2                                    |
| 4375 | 1,2,6,8,37,<br>40,41,44 | 3,4,5,7,36,<br>38,39,42,4<br>3 | 7 | O54728,P06911,P10715,P12020,P47727,Q5GRG2,Q9Z1F2 |
| 4376 | 1,2,6,8,37,<br>40,42,43 | 3,4,5,7,36,<br>38,39,41,4<br>4 | 0 |                                                  |
| 4377 | 1,2,6,8,37,<br>40,42,44 | 3,4,5,7,36,<br>38,39,41,4<br>3 | 2 | P20759,Q6P6R2                                    |
| 4378 | 1,2,6,8,37,<br>40,43,44 | 3,4,5,7,36,<br>38,39,41,4<br>2 | 2 | Q6AYL6,Q9Z1F2                                    |
| 4379 | 1,2,6,8,37,<br>41,42,43 | 3,4,5,7,36,<br>38,39,40,4<br>4 | 0 |                                                  |
| 4380 | 1,2,6,8,37,<br>41,42,44 | 3,4,5,7,36,<br>38,39,40,4<br>3 | 2 | Q6P6R2,Q91ZS3                                    |
| 4381 | 1,2,6,8,37,<br>41,43,44 | 3,4,5,7,36,<br>38,39,40,4<br>2 | 3 | O54728,Q66H69,Q9Z1F2                             |

|      |                         |                                |   |                                                         |
|------|-------------------------|--------------------------------|---|---------------------------------------------------------|
| 4382 | 1,2,6,8,37,<br>42,43,44 | 3,4,5,7,36,<br>38,39,40,4<br>1 | 1 | Q6P6R2                                                  |
| 4383 | 1,2,6,8,38,<br>39,40,41 | 3,4,5,7,36,<br>37,42,43,4<br>4 | 4 | P06911,P13432,P19629,Q62635                             |
| 4384 | 1,2,6,8,38,<br>39,40,42 | 3,4,5,7,36,<br>37,41,43,4<br>4 | 0 |                                                         |
| 4385 | 1,2,6,8,38,<br>39,40,43 | 3,4,5,7,36,<br>37,41,42,4<br>4 | 2 | Q63942,Q6IFV1                                           |
| 4386 | 1,2,6,8,38,<br>39,40,44 | 3,4,5,7,36,<br>37,41,42,4<br>3 | 3 | Q5GRG2,Q62635,Q9QUL6                                    |
| 4387 | 1,2,6,8,38,<br>39,41,42 | 3,4,5,7,36,<br>37,40,43,4<br>4 | 2 | P13432,Q8CIZ5                                           |
| 4388 | 1,2,6,8,38,<br>39,41,43 | 3,4,5,7,36,<br>37,40,42,4<br>4 | 4 | P00714,P13432,Q63942,Q6IFV1                             |
| 4389 | 1,2,6,8,38,<br>39,41,44 | 3,4,5,7,36,<br>37,40,42,4<br>3 | 4 | P98089,Q05695,Q62635,Q8CIZ5                             |
| 4390 | 1,2,6,8,38,<br>39,42,43 | 3,4,5,7,36,<br>37,40,41,4<br>4 | 3 | Q63942,Q6IFU7,Q6IFV1                                    |
| 4391 | 1,2,6,8,38,<br>39,42,44 | 3,4,5,7,36,<br>37,40,41,4<br>3 | 1 | Q62635                                                  |
| 4392 | 1,2,6,8,38,<br>39,43,44 | 3,4,5,7,36,<br>37,40,41,4<br>2 | 4 | Q62635,Q63942,Q66H69,Q6IFV1                             |
| 4393 | 1,2,6,8,38,<br>40,41,42 | 3,4,5,7,36,<br>37,39,43,4<br>4 | 2 | Q62635,Q8CIZ5                                           |
| 4394 | 1,2,6,8,38,<br>40,41,43 | 3,4,5,7,36,<br>37,39,42,4<br>4 | 2 | Q62635,Q6IFV1                                           |
| 4395 | 1,2,6,8,38,<br>40,41,44 | 3,4,5,7,36,<br>37,39,42,4<br>3 | 8 | O54728,P06911,P12020,P19629,P98089,Q5GRG2,Q62635,Q8CIZ5 |
| 4396 | 1,2,6,8,38,<br>40,42,43 | 3,4,5,7,36,<br>37,39,41,4<br>4 | 2 | Q63942,Q6IFV1                                           |

|      |                         |                                |   |                                                  |
|------|-------------------------|--------------------------------|---|--------------------------------------------------|
| 4397 | 1,2,6,8,38,<br>40,42,44 | 3,4,5,7,36,<br>37,39,41,4<br>3 | 3 | P62804,Q62635,Q6P6R2                             |
| 4398 | 1,2,6,8,38,<br>40,43,44 | 3,4,5,7,36,<br>37,39,41,4<br>2 | 2 | Q62635,Q6IFV1                                    |
| 4399 | 1,2,6,8,38,<br>41,42,43 | 3,4,5,7,36,<br>37,39,40,4<br>4 | 1 | P54921                                           |
| 4400 | 1,2,6,8,38,<br>41,42,44 | 3,4,5,7,36,<br>37,39,40,4<br>3 | 6 | P55091,P98089,Q05695,Q62635,Q6P6R2,Q8CIZ5        |
| 4401 | 1,2,6,8,38,<br>41,43,44 | 3,4,5,7,36,<br>37,39,40,4<br>2 | 7 | O54728,P00774,P55091,P98089,Q05695,Q62635,Q66H69 |
| 4402 | 1,2,6,8,38,<br>42,43,44 | 3,4,5,7,36,<br>37,39,40,4<br>1 | 3 | Q62635,Q63942,Q66H69                             |
| 4403 | 1,2,6,8,39,<br>40,41,42 | 3,4,5,7,36,<br>37,38,43,4<br>4 | 1 | P13432                                           |
| 4404 | 1,2,6,8,39,<br>40,41,43 | 3,4,5,7,36,<br>37,38,42,4<br>4 | 3 | P12785,Q6AYL6,Q9Z1F2                             |
| 4405 | 1,2,6,8,39,<br>40,41,44 | 3,4,5,7,36,<br>37,38,42,4<br>3 | 7 | P06911,P10715,P12020,P19629,P31044,Q5GRG2,Q6AYL6 |
| 4406 | 1,2,6,8,39,<br>40,42,43 | 3,4,5,7,36,<br>37,38,41,4<br>4 | 0 |                                                  |
| 4407 | 1,2,6,8,39,<br>40,42,44 | 3,4,5,7,36,<br>37,38,41,4<br>3 | 3 | P62804,Q6P6R2,Q9QUL6                             |
| 4408 | 1,2,6,8,39,<br>40,43,44 | 3,4,5,7,36,<br>37,38,41,4<br>2 | 1 | Q6AYL6                                           |
| 4409 | 1,2,6,8,39,<br>41,42,43 | 3,4,5,7,36,<br>37,38,40,4<br>4 | 1 | P82471                                           |
| 4410 | 1,2,6,8,39,<br>41,42,44 | 3,4,5,7,36,<br>37,38,40,4<br>3 | 1 | Q6P6R2                                           |
| 4411 | 1,2,6,8,39,<br>41,43,44 | 3,4,5,7,36,<br>37,38,40,4<br>2 | 2 | P12785,Q66H69                                    |

|      |                          |                                |   |                                                  |
|------|--------------------------|--------------------------------|---|--------------------------------------------------|
| 4412 | 1,2,6,8,39,<br>42,43,44  | 3,4,5,7,36,<br>37,38,40,4<br>1 | 2 | Q63942,Q66H69                                    |
| 4413 | 1,2,6,8,40,<br>41,42,43  | 3,4,5,7,36,<br>37,38,39,4<br>4 | 1 | Q6P6R2                                           |
| 4414 | 1,2,6,8,40,<br>41,42,44  | 3,4,5,7,36,<br>37,38,39,4<br>3 | 5 | P06911,P20759,Q5GRG2,Q6P6R2,Q6PCU2               |
| 4415 | 1,2,6,8,40,<br>41,43,44  | 3,4,5,7,36,<br>37,38,39,4<br>2 | 7 | O54728,P06911,P12020,Q5GRG2,Q66H69,Q6AYL6,Q9Z1F2 |
| 4416 | 1,2,6,8,40,<br>42,43,44  | 3,4,5,7,36,<br>37,38,39,4<br>1 | 4 | P62804,Q66H69,Q6P6R2,Q6PCU2                      |
| 4417 | 1,2,6,8,41,<br>42,43,44  | 3,4,5,7,36,<br>37,38,39,4<br>0 | 2 | Q66H69,Q6P6R2                                    |
| 4418 | 1,2,6,36,3<br>7,38,39,40 | 3,4,5,7,8,4<br>1,42,43,44      | 4 | O35547,P15399,P35281,P60905                      |
| 4419 | 1,2,6,36,3<br>7,38,39,41 | 3,4,5,7,8,4<br>0,42,43,44      | 6 | P00714,P13432,P97840,Q5M819,Q91ZS3,Q9JHB9        |
| 4420 | 1,2,6,36,3<br>7,38,39,42 | 3,4,5,7,8,4<br>0,41,43,44      | 2 | P97840,Q91ZS3                                    |
| 4421 | 1,2,6,36,3<br>7,38,39,43 | 3,4,5,7,8,4<br>0,41,42,44      | 4 | P00714,P14480,Q4FZU6,Q6IFV1                      |
| 4422 | 1,2,6,36,3<br>7,38,39,44 | 3,4,5,7,8,4<br>0,41,42,43      | 3 | P97840,Q9JHB9,Q9JJS8                             |
| 4423 | 1,2,6,36,3<br>7,38,40,41 | 3,4,5,7,8,3<br>9,42,43,44      | 4 | P15399,P55016,Q5M819,Q91ZS3                      |
| 4424 | 1,2,6,36,3<br>7,38,40,42 | 3,4,5,7,8,3<br>9,41,43,44      | 1 | P97840                                           |
| 4425 | 1,2,6,36,3<br>7,38,40,43 | 3,4,5,7,8,3<br>9,41,42,44      | 2 | P15399,Q6IFV1                                    |
| 4426 | 1,2,6,36,3<br>7,38,40,44 | 3,4,5,7,8,3<br>9,41,42,43      | 5 | O35547,P15399,P97840,Q6AYR9,Q9QUL6               |
| 4427 | 1,2,6,36,3<br>7,38,41,42 | 3,4,5,7,8,3<br>9,40,43,44      | 4 | P97840,Q5M819,Q6AYS4,Q91ZS3                      |
| 4428 | 1,2,6,36,3<br>7,38,41,43 | 3,4,5,7,8,3<br>9,40,42,44      | 6 | P00714,P55016,Q5M819,Q6AYS4,Q6IFV1,Q91ZS3        |
| 4429 | 1,2,6,36,3<br>7,38,41,44 | 3,4,5,7,8,3<br>9,40,42,43      | 6 | P97840,P98089,Q5M819,Q62635,Q91ZS3,Q9JHB9        |
| 4430 | 1,2,6,36,3<br>7,38,42,43 | 3,4,5,7,8,3<br>9,40,41,44      | 6 | P06866,P10715,P97840,Q4FZU6,Q6AYS4,Q6IFV1        |
| 4431 | 1,2,6,36,3<br>7,38,42,44 | 3,4,5,7,8,3<br>9,40,41,43      | 1 | P97840                                           |

|      |                                                 |   |                                                  |
|------|-------------------------------------------------|---|--------------------------------------------------|
| 4432 | 1,2,6,36,3 3,4,5,7,8,3<br>7,38,43,44 9,40,41,42 | 3 | Q4FZU6,Q6AYR9,Q6IFV1                             |
| 4433 | 1,2,6,36,3 3,4,5,7,8,3<br>7,39,40,41 8,42,43,44 | 7 | O35547,P00714,P08723,P35467,P47727,Q5M819,Q91ZS3 |
| 4434 | 1,2,6,36,3 3,4,5,7,8,3<br>7,39,40,42 8,41,43,44 | 7 | O35547,P00774,P49744,P50115,P50116,Q05695,Q8CJD3 |
| 4435 | 1,2,6,36,3 3,4,5,7,8,3<br>7,39,40,43 8,41,42,44 | 6 | O35547,P00714,P50115,P50116,Q05695,Q812E4        |
| 4436 | 1,2,6,36,3 3,4,5,7,8,3<br>7,39,40,44 8,41,42,43 | 6 | O35547,P50115,P50116,P54921,Q8CJD3,Q9QUL6        |
| 4437 | 1,2,6,36,3 3,4,5,7,8,3<br>7,39,41,42 8,40,43,44 | 4 | P01835,P35467,Q5M819,Q91ZS3                      |
| 4438 | 1,2,6,36,3 3,4,5,7,8,3<br>7,39,41,43 8,40,42,44 | 3 | D3ZUC6,P00714,Q5M819                             |
| 4439 | 1,2,6,36,3 3,4,5,7,8,3<br>7,39,41,44 8,40,42,43 | 3 | P35467,Q91ZS3,Q9JHB9                             |
| 4440 | 1,2,6,36,3 3,4,5,7,8,3<br>7,39,42,43 8,40,41,44 | 4 | P50115,P50116,Q05695,Q4FZU6                      |
| 4441 | 1,2,6,36,3 3,4,5,7,8,3<br>7,39,42,44 8,40,41,43 | 4 | P50115,P50116,P97840,Q8CJD3                      |
| 4442 | 1,2,6,36,3 3,4,5,7,8,3<br>7,39,43,44 8,40,41,42 | 3 | O35547,P50115,P50116                             |
| 4443 | 1,2,6,36,3 3,4,5,7,8,3<br>7,40,41,42 8,39,43,44 | 2 | Q6AYS4,Q91ZS3                                    |
| 4444 | 1,2,6,36,3 3,4,5,7,8,3<br>7,40,41,43 8,39,42,44 | 3 | P00714,P47727,Q6AYS4                             |
| 4445 | 1,2,6,36,3 3,4,5,7,8,3<br>7,40,41,44 8,39,42,43 | 6 | O35547,P06911,P47727,Q5GRG2,Q80WL1,Q9JHB9        |
| 4446 | 1,2,6,36,3 3,4,5,7,8,3<br>7,40,42,43 8,39,41,44 | 4 | P50115,P50116,Q05695,Q6AYS4                      |
| 4447 | 1,2,6,36,3 3,4,5,7,8,3<br>7,40,42,44 8,39,41,43 | 5 | O35547,P50115,P50116,P97840,Q7TPB1               |
| 4448 | 1,2,6,36,3 3,4,5,7,8,3<br>7,40,43,44 8,39,41,42 | 4 | O35547,P08010,P50115,P50116                      |
| 4449 | 1,2,6,36,3 3,4,5,7,8,3<br>7,41,42,43 8,39,40,44 | 2 | Q6AYS4,Q91ZS3                                    |
| 4450 | 1,2,6,36,3 3,4,5,7,8,3<br>7,41,42,44 8,39,40,43 | 4 | P97840,Q6AYS4,Q6P6R2,Q91ZS3                      |
| 4451 | 1,2,6,36,3 3,4,5,7,8,3<br>7,41,43,44 8,39,40,42 | 2 | Q6AYS4,Q9JHB9                                    |
| 4452 | 1,2,6,36,3 3,4,5,7,8,3<br>7,42,43,44 8,39,40,41 | 3 | P50115,P50116,Q6AYS4                             |
| 4453 | 1,2,6,36,3 3,4,5,7,8,3<br>8,39,40,41 7,42,43,44 | 3 | P00714,P13432,Q5M819                             |
| 4454 | 1,2,6,36,3 3,4,5,7,8,3<br>8,39,40,42 7,41,43,44 | 0 |                                                  |

|      |                          |                           |   |                                                  |
|------|--------------------------|---------------------------|---|--------------------------------------------------|
| 4455 | 1,2,6,36,3<br>8,39,40,43 | 3,4,5,7,8,3<br>7,41,42,44 | 2 | P00714,Q6IFV1                                    |
| 4456 | 1,2,6,36,3<br>8,39,40,44 | 3,4,5,7,8,3<br>7,41,42,43 | 1 | Q9QUL6                                           |
| 4457 | 1,2,6,36,3<br>8,39,41,42 | 3,4,5,7,8,3<br>7,40,43,44 | 3 | P13432,P97840,Q5M819                             |
| 4458 | 1,2,6,36,3<br>8,39,41,43 | 3,4,5,7,8,3<br>7,40,42,44 | 3 | P00714,Q5M819,Q6IFV1                             |
| 4459 | 1,2,6,36,3<br>8,39,41,44 | 3,4,5,7,8,3<br>7,40,42,43 | 3 | P98089,Q5M819,Q62635                             |
| 4460 | 1,2,6,36,3<br>8,39,42,43 | 3,4,5,7,8,3<br>7,40,41,44 | 2 | Q6IFU7,Q6IFV1                                    |
| 4461 | 1,2,6,36,3<br>8,39,42,44 | 3,4,5,7,8,3<br>7,40,41,43 | 1 | P97840                                           |
| 4462 | 1,2,6,36,3<br>8,39,43,44 | 3,4,5,7,8,3<br>7,40,41,42 | 1 | Q6IFV1                                           |
| 4463 | 1,2,6,36,3<br>8,40,41,42 | 3,4,5,7,8,3<br>7,39,43,44 | 1 | Q8CIZ5                                           |
| 4464 | 1,2,6,36,3<br>8,40,41,43 | 3,4,5,7,8,3<br>7,39,42,44 | 2 | P55016,Q6IFV1                                    |
| 4465 | 1,2,6,36,3<br>8,40,41,44 | 3,4,5,7,8,3<br>7,39,42,43 | 4 | P98089,Q5GRG2,Q62635,Q8CIZ5                      |
| 4466 | 1,2,6,36,3<br>8,40,42,43 | 3,4,5,7,8,3<br>7,39,41,44 | 3 | Q6IFU7,Q99041,Q9ESW0                             |
| 4467 | 1,2,6,36,3<br>8,40,42,44 | 3,4,5,7,8,3<br>7,39,41,43 | 4 | P15999,P97840,Q7TPB1,Q99041                      |
| 4468 | 1,2,6,36,3<br>8,40,43,44 | 3,4,5,7,8,3<br>7,39,41,42 | 2 | Q63661,Q99041                                    |
| 4469 | 1,2,6,36,3<br>8,41,42,43 | 3,4,5,7,8,3<br>7,39,40,44 | 3 | P06866,Q6AYS4,Q6IFU7                             |
| 4470 | 1,2,6,36,3<br>8,41,42,44 | 3,4,5,7,8,3<br>7,39,40,43 | 4 | P97840,P98089,Q62635,Q8CIZ5                      |
| 4471 | 1,2,6,36,3<br>8,41,43,44 | 3,4,5,7,8,3<br>7,39,40,42 | 3 | P00774,P98089,Q62635                             |
| 4472 | 1,2,6,36,3<br>8,42,43,44 | 3,4,5,7,8,3<br>7,39,40,41 | 3 | P15999,Q6IFU7,Q99041                             |
| 4473 | 1,2,6,36,3<br>9,40,41,42 | 3,4,5,7,8,3<br>7,38,43,44 | 0 |                                                  |
| 4474 | 1,2,6,36,3<br>9,40,41,43 | 3,4,5,7,8,3<br>7,38,42,44 | 1 | P00714                                           |
| 4475 | 1,2,6,36,3<br>9,40,41,44 | 3,4,5,7,8,3<br>7,38,42,43 | 7 | P06911,P10715,P12020,P16391,P19629,Q5GRG2,Q6AYL6 |
| 4476 | 1,2,6,36,3<br>9,40,42,43 | 3,4,5,7,8,3<br>7,38,41,44 | 3 | P50115,P50116,Q05695                             |
| 4477 | 1,2,6,36,3<br>9,40,42,44 | 3,4,5,7,8,3<br>7,38,41,43 | 5 | P50115,P50116,Q7TPB1,Q8CJD3,Q9QUL6               |

|      |                          |                           |   |                                                                |
|------|--------------------------|---------------------------|---|----------------------------------------------------------------|
| 4478 | 1,2,6,36,3<br>9,40,43,44 | 3,4,5,7,8,3<br>7,38,41,42 | 3 | P50115,P50116,Q6AYL6                                           |
| 4479 | 1,2,6,36,3<br>9,41,42,43 | 3,4,5,7,8,3<br>7,38,40,44 | 1 | Q6AYS4                                                         |
| 4480 | 1,2,6,36,3<br>9,41,42,44 | 3,4,5,7,8,3<br>7,38,40,43 | 0 |                                                                |
| 4481 | 1,2,6,36,3<br>9,41,43,44 | 3,4,5,7,8,3<br>7,38,40,42 | 1 | D3ZUC6                                                         |
| 4482 | 1,2,6,36,3<br>9,42,43,44 | 3,4,5,7,8,3<br>7,38,40,41 | 2 | P50115,P50116                                                  |
| 4483 | 1,2,6,36,4<br>0,41,42,43 | 3,4,5,7,8,3<br>7,38,39,44 | 1 | Q6AYS4                                                         |
| 4484 | 1,2,6,36,4<br>0,41,42,44 | 3,4,5,7,8,3<br>7,38,39,43 | 2 | Q6P6R2,Q7TPB1                                                  |
| 4485 | 1,2,6,36,4<br>0,41,43,44 | 3,4,5,7,8,3<br>7,38,39,42 | 0 |                                                                |
| 4486 | 1,2,6,36,4<br>0,42,43,44 | 3,4,5,7,8,3<br>7,38,39,41 | 5 | P50115,P50116,P62804,Q7TPB1,Q99041                             |
| 4487 | 1,2,6,36,4<br>1,42,43,44 | 3,4,5,7,8,3<br>7,38,39,40 | 2 | Q6AYS4,Q6P6R2                                                  |
| 4488 | 1,2,6,37,3<br>8,39,40,41 | 3,4,5,7,8,3<br>6,42,43,44 | 5 | P00714,P13432,P15399,P55016,Q91ZS3                             |
| 4489 | 1,2,6,37,3<br>8,39,40,42 | 3,4,5,7,8,3<br>6,41,43,44 | 3 | P07171,P97840,Q9QUL6                                           |
| 4490 | 1,2,6,37,3<br>8,39,40,43 | 3,4,5,7,8,3<br>6,41,42,44 | 9 | P00714,P07171,P08644,P15399,P35281,P55016,P60905,Q6IFV1,Q812E4 |
| 4491 | 1,2,6,37,3<br>8,39,40,44 | 3,4,5,7,8,3<br>6,41,42,43 | 7 | O35547,P15399,P60905,Q6AYL6,Q6AYR9,Q812E4,Q9QUL6               |
| 4492 | 1,2,6,37,3<br>8,39,41,42 | 3,4,5,7,8,3<br>6,40,43,44 | 4 | P13432,P97840,Q6AYS4,Q91ZS3                                    |
| 4493 | 1,2,6,37,3<br>8,39,41,43 | 3,4,5,7,8,3<br>6,40,42,44 | 6 | P00714,P13432,P36374,P55016,Q6AYS4,Q6IFV1                      |
| 4494 | 1,2,6,37,3<br>8,39,41,44 | 3,4,5,7,8,3<br>6,40,42,43 | 6 | P13432,P98089,Q62635,Q6AYS4,Q91ZS3,Q9JHB9                      |
| 4495 | 1,2,6,37,3<br>8,39,42,43 | 3,4,5,7,8,3<br>6,40,41,44 | 6 | P06866,P07171,Q4FZU6,Q6AYS4,Q6IFU7,Q6IFV1                      |
| 4496 | 1,2,6,37,3<br>8,39,42,44 | 3,4,5,7,8,3<br>6,40,41,43 | 3 | P97840,Q6AYS4,Q9QUL6                                           |
| 4497 | 1,2,6,37,3<br>8,39,43,44 | 3,4,5,7,8,3<br>6,40,41,42 | 6 | P23593,Q4FZU6,Q6AYS4,Q6IFV1,Q812E4,Q9JJS8                      |
| 4498 | 1,2,6,37,3<br>8,40,41,42 | 3,4,5,7,8,3<br>6,39,43,44 | 3 | P55016,Q6AYS4,Q91ZS3                                           |
| 4499 | 1,2,6,37,3<br>8,40,41,43 | 3,4,5,7,8,3<br>6,39,42,44 | 4 | P15399,P55016,Q6AYS4,Q6IFV1                                    |
| 4500 | 1,2,6,37,3<br>8,40,41,44 | 3,4,5,7,8,3<br>6,39,42,43 | 9 | O54728,P06911,P15399,P47727,P98089,Q5GRG2,Q62635,Q6AYR9,Q6AYS4 |

|      |                                                 |    |                                                                       |
|------|-------------------------------------------------|----|-----------------------------------------------------------------------|
| 4501 | 1,2,6,37,3 3,4,5,7,8,3<br>8,40,42,43 6,39,41,44 | 7  | P06866,P07171,Q6AYS4,Q6IFU7,Q6IFV1,Q8VD89,Q99041                      |
| 4502 | 1,2,6,37,3 3,4,5,7,8,3<br>8,40,42,44 6,39,41,43 | 4  | P97840,Q6AYS4,Q99041,Q9QUL6                                           |
| 4503 | 1,2,6,37,3 3,4,5,7,8,3<br>8,40,43,44 6,39,41,42 | 5  | P08010,P15399,Q6AYR9,Q6AYS4,Q6IFV1                                    |
| 4504 | 1,2,6,37,3 3,4,5,7,8,3<br>8,41,42,43 6,39,40,44 | 7  | P06866,P55016,Q6AYS4,Q6IFU7,Q6IFV1,Q6P6T1,Q91ZS3                      |
| 4505 | 1,2,6,37,3 3,4,5,7,8,3<br>8,41,42,44 6,39,40,43 | 7  | P97840,P98089,Q62635,Q6AYS4,Q6P6R2,Q8CIZ5,Q91ZS3                      |
| 4506 | 1,2,6,37,3 3,4,5,7,8,3<br>8,41,43,44 6,39,40,42 | 6  | O54728,P00774,P98089,Q62635,Q6AYS4,Q6IFV1                             |
| 4507 | 1,2,6,37,3 3,4,5,7,8,3<br>8,42,43,44 6,39,40,41 | 6  | P06866,P97840,Q4FZU6,Q6AYS4,Q6IFV1,Q99041                             |
| 4508 | 1,2,6,37,3 3,4,5,7,8,3<br>9,40,41,42 6,38,43,44 | 2  | P13432,Q6AYS4                                                         |
| 4509 | 1,2,6,37,3 3,4,5,7,8,3<br>9,40,41,43 6,38,42,44 | 5  | P00714,P47727,P97554,Q6AYL6,Q6AYS4                                    |
| 4510 | 1,2,6,37,3 3,4,5,7,8,3<br>9,40,41,44 6,38,42,43 | 10 | O35547,P06911,P08723,P10715,P12020,P16391,P19629,P47727,Q5GRG2,Q6AYL6 |
| 4511 | 1,2,6,37,3 3,4,5,7,8,3<br>9,40,42,43 6,38,41,44 | 6  | P07171,P49744,P50115,P50116,Q05695,Q6AYS4                             |
| 4512 | 1,2,6,37,3 3,4,5,7,8,3<br>9,40,42,44 6,38,41,43 | 5  | P49744,P50115,P50116,Q8CJD3,Q9QUL6                                    |
| 4513 | 1,2,6,37,3 3,4,5,7,8,3<br>9,40,43,44 6,38,41,42 | 8  | O35547,P08010,P50115,P50116,P60905,Q64335,Q6AYL6,Q812E4               |
| 4514 | 1,2,6,37,3 3,4,5,7,8,3<br>9,41,42,43 6,38,40,44 | 2  | P13432,Q6AYS4                                                         |
| 4515 | 1,2,6,37,3 3,4,5,7,8,3<br>9,41,42,44 6,38,40,43 | 2  | Q6AYS4,Q6P6R2                                                         |
| 4516 | 1,2,6,37,3 3,4,5,7,8,3<br>9,41,43,44 6,38,40,42 | 1  | Q6AYS4                                                                |
| 4517 | 1,2,6,37,3 3,4,5,7,8,3<br>9,42,43,44 6,38,40,41 | 3  | P50115,P50116,Q6AYS4                                                  |
| 4518 | 1,2,6,37,4 3,4,5,7,8,3<br>0,41,42,43 6,38,39,44 | 2  | P07171,Q6AYS4                                                         |
| 4519 | 1,2,6,37,4 3,4,5,7,8,3<br>0,41,42,44 6,38,39,43 | 3  | Q5GRG2,Q6AYS4,Q6P6R2                                                  |
| 4520 | 1,2,6,37,4 3,4,5,7,8,3<br>0,41,43,44 6,38,39,42 | 6  | O54728,P19218,P47727,Q5GRG2,Q6AYL6,Q6AYS4                             |
| 4521 | 1,2,6,37,4 3,4,5,7,8,3<br>0,42,43,44 6,38,39,41 | 4  | P50115,P50116,Q6AYS4,Q99041                                           |
| 4522 | 1,2,6,37,4 3,4,5,7,8,3<br>1,42,43,44 6,38,39,40 | 2  | Q6AYS4,Q6P6R2                                                         |
| 4523 | 1,2,6,38,3 3,4,5,7,8,3<br>9,40,41,42 6,37,43,44 | 1  | P13432                                                                |



|      |                          |                                |    |                                                                              |
|------|--------------------------|--------------------------------|----|------------------------------------------------------------------------------|
| 4524 | 1,2,6,38,3<br>9,40,41,43 | 3,4,5,7,8,3<br>6,37,42,44      | 5  | P00714,P13432,P55016,Q6AYS4,Q6IFV1                                           |
| 4525 | 1,2,6,38,3<br>9,40,41,44 | 3,4,5,7,8,3<br>6,37,42,43      | 11 | P06911,P10715,P12020,P13432,P16391,P19629,P98089,Q5GRG2,Q62635,Q6AYL6,Q9QUL6 |
| 4526 | 1,2,6,38,3<br>9,40,42,43 | 3,4,5,7,8,3<br>6,37,41,44      | 6  | P07171,Q64611,Q6AYS4,Q6IFU7,Q6IFV1,Q99041                                    |
| 4527 | 1,2,6,38,3<br>9,40,42,44 | 3,4,5,7,8,3<br>6,37,41,43      | 2  | Q99041,Q9QUL6                                                                |
| 4528 | 1,2,6,38,3<br>9,40,43,44 | 3,4,5,7,8,3<br>6,37,41,42      | 3  | Q6AYL6,Q6IFV1,Q99041                                                         |
| 4529 | 1,2,6,38,3<br>9,41,42,43 | 3,4,5,7,8,3<br>6,37,40,44      | 4  | P06866,P13432,Q6AYS4,Q6IFU7                                                  |
| 4530 | 1,2,6,38,3<br>9,41,42,44 | 3,4,5,7,8,3<br>6,37,40,43      | 5  | P13432,P98089,Q62635,Q6AYS4,Q8CIZ5                                           |
| 4531 | 1,2,6,38,3<br>9,41,43,44 | 3,4,5,7,8,3<br>6,37,40,42      | 6  | P00774,P55091,P98089,Q62635,Q6AYS4,Q6IFV1                                    |
| 4532 | 1,2,6,38,3<br>9,42,43,44 | 3,4,5,7,8,3<br>6,37,40,41      | 3  | Q6AYS4,Q6IFU7,Q99041                                                         |
| 4533 | 1,2,6,38,4<br>0,41,42,43 | 3,4,5,7,8,3<br>6,37,39,44      | 5  | P07171,P55016,Q5HZV9,Q6AYS4,Q6IFU7                                           |
| 4534 | 1,2,6,38,4<br>0,41,42,44 | 3,4,5,7,8,3<br>6,37,39,43      | 5  | P98089,Q62635,Q6AYS4,Q6P6R2,Q8CIZ5                                           |
| 4535 | 1,2,6,38,4<br>0,41,43,44 | 3,4,5,7,8,3<br>6,37,39,42      | 7  | O54728,P00774,P55016,P55091,P98089,Q62635,Q6AYS4                             |
| 4536 | 1,2,6,38,4<br>0,42,43,44 | 3,4,5,7,8,3<br>6,37,39,41      | 3  | Q6AYS4,Q6IFU7,Q99041                                                         |
| 4537 | 1,2,6,38,4<br>1,42,43,44 | 3,4,5,7,8,3<br>6,37,39,40      | 8  | P00774,P55091,P98089,Q62635,Q6AYS4,Q6IFU7,Q6P6R2,Q8CIZ5                      |
| 4538 | 1,2,6,39,4<br>0,41,42,43 | 3,4,5,7,8,3<br>6,37,38,44      | 3  | P07171,P13432,Q6AYS4                                                         |
| 4539 | 1,2,6,39,4<br>0,41,42,44 | 3,4,5,7,8,3<br>6,37,38,43      | 9  | P06911,P10715,P13432,P16391,P19629,Q5GRG2,Q6AYL6,Q6AYS4,Q6P6R2               |
| 4540 | 1,2,6,39,4<br>0,41,43,44 | 3,4,5,7,8,3<br>6,37,38,42      | 6  | P06911,P10715,P19629,Q5GRG2,Q6AYL6,Q6AYS4                                    |
| 4541 | 1,2,6,39,4<br>0,42,43,44 | 3,4,5,7,8,3<br>6,37,38,41      | 5  | P50115,P50116,Q6AYL6,Q6AYS4,Q99041                                           |
| 4542 | 1,2,6,39,4<br>1,42,43,44 | 3,4,5,7,8,3<br>6,37,38,40      | 3  | P82471,Q6AYS4,Q6P6R2                                                         |
| 4543 | 1,2,6,40,4<br>1,42,43,44 | 3,4,5,7,8,3<br>6,37,38,39      | 3  | Q6AYS4,Q6P6R2,Q6PCU2                                                         |
| 4544 | 1,2,7,8,36,<br>37,38,39  | 3,4,5,6,40,<br>41,42,43,4<br>4 | 2  | P01835,P97840                                                                |
| 4545 | 1,2,7,8,36,<br>37,38,40  | 3,4,5,6,39,<br>41,42,43,4<br>4 | 1  | P02803                                                                       |

|      |                         |                                |   |                                           |
|------|-------------------------|--------------------------------|---|-------------------------------------------|
| 4546 | 1,2,7,8,36,<br>37,38,41 | 3,4,5,6,39,<br>40,42,43,4<br>4 | 3 | P01835,Q91ZS3,Q99MH3                      |
| 4547 | 1,2,7,8,36,<br>37,38,42 | 3,4,5,6,39,<br>40,41,43,4<br>4 | 3 | P01835,P47967,P97840                      |
| 4548 | 1,2,7,8,36,<br>37,38,43 | 3,4,5,6,39,<br>40,41,42,4<br>4 | 1 | P16391                                    |
| 4549 | 1,2,7,8,36,<br>37,38,44 | 3,4,5,6,39,<br>40,41,42,4<br>3 | 1 | P97840                                    |
| 4550 | 1,2,7,8,36,<br>37,39,40 | 3,4,5,6,38,<br>41,42,43,4<br>4 | 6 | B0BNN3,P00762,P00774,P01835,P27213,Q8CJD3 |
| 4551 | 1,2,7,8,36,<br>37,39,41 | 3,4,5,6,38,<br>40,42,43,4<br>4 | 4 | P01835,Q63467,Q91ZS3,Q9Z0V6               |
| 4552 | 1,2,7,8,36,<br>37,39,42 | 3,4,5,6,38,<br>40,41,43,4<br>4 | 4 | P00762,P00774,P01835,P97840               |
| 4553 | 1,2,7,8,36,<br>37,39,43 | 3,4,5,6,38,<br>40,41,42,4<br>4 | 3 | D3ZUC6,P01835,P06760                      |
| 4554 | 1,2,7,8,36,<br>37,39,44 | 3,4,5,6,38,<br>40,41,42,4<br>3 | 6 | B0BNN3,P00762,P01835,Q5HZV9,Q63467,Q8CJD3 |
| 4555 | 1,2,7,8,36,<br>37,40,41 | 3,4,5,6,38,<br>39,42,43,4<br>4 | 2 | B0BNN3,P01835                             |
| 4556 | 1,2,7,8,36,<br>37,40,42 | 3,4,5,6,38,<br>39,41,43,4<br>4 | 5 | B0BNN3,P00762,P00774,P01835,P02625        |
| 4557 | 1,2,7,8,36,<br>37,40,43 | 3,4,5,6,38,<br>39,41,42,4<br>4 | 1 | P01835                                    |
| 4558 | 1,2,7,8,36,<br>37,40,44 | 3,4,5,6,38,<br>39,41,42,4<br>3 | 4 | B0BNN3,P00762,P01835,Q8CJD3               |
| 4559 | 1,2,7,8,36,<br>37,41,42 | 3,4,5,6,38,<br>39,40,43,4<br>4 | 4 | P00762,P01835,P82995,Q91ZS3               |
| 4560 | 1,2,7,8,36,<br>37,41,43 | 3,4,5,6,38,<br>39,40,42,4<br>4 | 4 | D3ZUC6,P01835,P06760,P83121               |

|      |                         |                                |   |                                    |
|------|-------------------------|--------------------------------|---|------------------------------------|
| 4561 | 1,2,7,8,36,<br>37,41,44 | 3,4,5,6,38,<br>39,40,42,4<br>3 | 4 | B0BNN3,P01835,Q63467,Q99MH3        |
| 4562 | 1,2,7,8,36,<br>37,42,43 | 3,4,5,6,38,<br>39,40,41,4<br>4 | 2 | P01835,P16391                      |
| 4563 | 1,2,7,8,36,<br>37,42,44 | 3,4,5,6,38,<br>39,40,41,4<br>3 | 5 | B0BNN3,P00762,P01835,P82995,P97840 |
| 4564 | 1,2,7,8,36,<br>37,43,44 | 3,4,5,6,38,<br>39,40,41,4<br>2 | 0 |                                    |
| 4565 | 1,2,7,8,36,<br>38,39,40 | 3,4,5,6,37,<br>41,42,43,4<br>4 | 0 |                                    |
| 4566 | 1,2,7,8,36,<br>38,39,41 | 3,4,5,6,37,<br>40,42,43,4<br>4 | 2 | P01835,Q63467                      |
| 4567 | 1,2,7,8,36,<br>38,39,42 | 3,4,5,6,37,<br>40,41,43,4<br>4 | 2 | P01835,P97840                      |
| 4568 | 1,2,7,8,36,<br>38,39,43 | 3,4,5,6,37,<br>40,41,42,4<br>4 | 1 | P06760                             |
| 4569 | 1,2,7,8,36,<br>38,39,44 | 3,4,5,6,37,<br>40,41,42,4<br>3 | 1 | Q63467                             |
| 4570 | 1,2,7,8,36,<br>38,40,41 | 3,4,5,6,37,<br>39,42,43,4<br>4 | 0 |                                    |
| 4571 | 1,2,7,8,36,<br>38,40,42 | 3,4,5,6,37,<br>39,41,43,4<br>4 | 1 | P02625                             |
| 4572 | 1,2,7,8,36,<br>38,40,43 | 3,4,5,6,37,<br>39,41,42,4<br>4 | 0 |                                    |
| 4573 | 1,2,7,8,36,<br>38,40,44 | 3,4,5,6,37,<br>39,41,42,4<br>3 | 0 |                                    |
| 4574 | 1,2,7,8,36,<br>38,41,42 | 3,4,5,6,37,<br>39,40,43,4<br>4 | 2 | P01835,P82995                      |
| 4575 | 1,2,7,8,36,<br>38,41,43 | 3,4,5,6,37,<br>39,40,42,4<br>4 | 2 | P50116,Q63467                      |

|      |                         |                                |   |                                                  |
|------|-------------------------|--------------------------------|---|--------------------------------------------------|
| 4576 | 1,2,7,8,36,<br>38,41,44 | 3,4,5,6,37,<br>39,40,42,4<br>3 | 7 | P50115,P55091,P98089,Q05695,Q62635,Q63467,Q99MH3 |
| 4577 | 1,2,7,8,36,<br>38,42,43 | 3,4,5,6,37,<br>39,40,41,4<br>4 | 2 | P15999,P16391                                    |
| 4578 | 1,2,7,8,36,<br>38,42,44 | 3,4,5,6,37,<br>39,40,41,4<br>3 | 3 | P15999,P82995,P97840                             |
| 4579 | 1,2,7,8,36,<br>38,43,44 | 3,4,5,6,37,<br>39,40,41,4<br>2 | 1 | Q63467                                           |
| 4580 | 1,2,7,8,36,<br>39,40,41 | 3,4,5,6,37,<br>38,42,43,4<br>4 | 5 | P01835,P10715,P12785,P19629,P31044               |
| 4581 | 1,2,7,8,36,<br>39,40,42 | 3,4,5,6,37,<br>38,41,43,4<br>4 | 4 | P00762,P00774,P01835,P82995                      |
| 4582 | 1,2,7,8,36,<br>39,40,43 | 3,4,5,6,37,<br>38,41,42,4<br>4 | 1 | P01835                                           |
| 4583 | 1,2,7,8,36,<br>39,40,44 | 3,4,5,6,37,<br>38,41,42,4<br>3 | 7 | B0BNN3,P00762,P01835,P10715,Q5GRG2,Q6AYL6,Q8CJD3 |
| 4584 | 1,2,7,8,36,<br>39,41,42 | 3,4,5,6,37,<br>38,40,43,4<br>4 | 2 | P01835,P82995                                    |
| 4585 | 1,2,7,8,36,<br>39,41,43 | 3,4,5,6,37,<br>38,40,42,4<br>4 | 6 | D3ZUC6,P01835,P06760,P12785,P22006,Q63467        |
| 4586 | 1,2,7,8,36,<br>39,41,44 | 3,4,5,6,37,<br>38,40,42,4<br>3 | 4 | P01835,P82995,Q63467,Q99MH3                      |
| 4587 | 1,2,7,8,36,<br>39,42,43 | 3,4,5,6,37,<br>38,40,41,4<br>4 | 3 | P01835,P06760,P82995                             |
| 4588 | 1,2,7,8,36,<br>39,42,44 | 3,4,5,6,37,<br>38,40,41,4<br>3 | 3 | P00762,P01835,P82995                             |
| 4589 | 1,2,7,8,36,<br>39,43,44 | 3,4,5,6,37,<br>38,40,41,4<br>2 | 2 | D3ZUC6,Q63467                                    |
| 4590 | 1,2,7,8,36,<br>40,41,42 | 3,4,5,6,37,<br>38,39,43,4<br>4 | 5 | P00762,P01835,P02625,P82995,Q9JJS8               |

|      |                         |                                |   |                                                  |
|------|-------------------------|--------------------------------|---|--------------------------------------------------|
| 4591 | 1,2,7,8,36,<br>40,41,43 | 3,4,5,6,37,<br>38,39,42,4<br>4 | 3 | D3ZUC6,P01835,P12785                             |
| 4592 | 1,2,7,8,36,<br>40,41,44 | 3,4,5,6,37,<br>38,39,42,4<br>3 | 7 | B0BNN3,P01835,P10715,P31044,Q5GRG2,Q63467,Q99MH3 |
| 4593 | 1,2,7,8,36,<br>40,42,43 | 3,4,5,6,37,<br>38,39,41,4<br>4 | 1 | P01835                                           |
| 4594 | 1,2,7,8,36,<br>40,42,44 | 3,4,5,6,37,<br>38,39,41,4<br>3 | 7 | B0BNN3,P00762,P01835,P02625,P20759,P82995,Q7TPB1 |
| 4595 | 1,2,7,8,36,<br>40,43,44 | 3,4,5,6,37,<br>38,39,41,4<br>2 | 0 |                                                  |
| 4596 | 1,2,7,8,36,<br>41,42,43 | 3,4,5,6,37,<br>38,39,40,4<br>4 | 4 | D3ZUC6,P01835,P16636,P82995                      |
| 4597 | 1,2,7,8,36,<br>41,42,44 | 3,4,5,6,37,<br>38,39,40,4<br>3 | 5 | P00762,P01835,P82995,Q63467,Q99MH3               |
| 4598 | 1,2,7,8,36,<br>41,43,44 | 3,4,5,6,37,<br>38,39,40,4<br>2 | 5 | D3ZUC6,P82995,P83121,Q63467,Q99MH3               |
| 4599 | 1,2,7,8,36,<br>42,43,44 | 3,4,5,6,37,<br>38,39,40,4<br>1 | 1 | P82995                                           |
| 4600 | 1,2,7,8,37,<br>38,39,40 | 3,4,5,6,36,<br>41,42,43,4<br>4 | 3 | P02803,P35281,Q9QZA6                             |
| 4601 | 1,2,7,8,37,<br>38,39,41 | 3,4,5,6,36,<br>40,42,43,4<br>4 | 2 | P01835,Q91ZS3                                    |
| 4602 | 1,2,7,8,37,<br>38,39,42 | 3,4,5,6,36,<br>40,41,43,4<br>4 | 2 | P01835,P97840                                    |
| 4603 | 1,2,7,8,37,<br>38,39,43 | 3,4,5,6,36,<br>40,41,42,4<br>4 | 2 | P23593,Q6IFV1                                    |
| 4604 | 1,2,7,8,37,<br>38,39,44 | 3,4,5,6,36,<br>40,41,42,4<br>3 | 0 |                                                  |
| 4605 | 1,2,7,8,37,<br>38,40,41 | 3,4,5,6,36,<br>39,42,43,4<br>4 | 0 |                                                  |

|      |                         |                                |   |                                           |
|------|-------------------------|--------------------------------|---|-------------------------------------------|
| 4606 | 1,2,7,8,37,<br>38,40,42 | 3,4,5,6,36,<br>39,41,43,4<br>4 | 2 | P02625,P02803                             |
| 4607 | 1,2,7,8,37,<br>38,40,43 | 3,4,5,6,36,<br>39,41,42,4<br>4 | 1 | P02803                                    |
| 4608 | 1,2,7,8,37,<br>38,40,44 | 3,4,5,6,36,<br>39,41,42,4<br>3 | 0 |                                           |
| 4609 | 1,2,7,8,37,<br>38,41,42 | 3,4,5,6,36,<br>39,40,43,4<br>4 | 2 | P01835,Q91ZS3                             |
| 4610 | 1,2,7,8,37,<br>38,41,43 | 3,4,5,6,36,<br>39,40,42,4<br>4 | 1 | P50115                                    |
| 4611 | 1,2,7,8,37,<br>38,41,44 | 3,4,5,6,36,<br>39,40,42,4<br>3 | 5 | P50115,P55091,P98089,Q05695,Q62635        |
| 4612 | 1,2,7,8,37,<br>38,42,43 | 3,4,5,6,36,<br>39,40,41,4<br>4 | 2 | P06866,Q6P6T1                             |
| 4613 | 1,2,7,8,37,<br>38,42,44 | 3,4,5,6,36,<br>39,40,41,4<br>3 | 1 | P97840                                    |
| 4614 | 1,2,7,8,37,<br>38,43,44 | 3,4,5,6,36,<br>39,40,41,4<br>2 | 0 |                                           |
| 4615 | 1,2,7,8,37,<br>39,40,41 | 3,4,5,6,36,<br>38,42,43,4<br>4 | 6 | P01835,P10715,P19629,P31044,Q5GRG2,Q6AYL6 |
| 4616 | 1,2,7,8,37,<br>39,40,42 | 3,4,5,6,36,<br>38,41,43,4<br>4 | 2 | P00774,P01835                             |
| 4617 | 1,2,7,8,37,<br>39,40,43 | 3,4,5,6,36,<br>38,41,42,4<br>4 | 3 | P01835,Q6AYL6,Q8CIZ5                      |
| 4618 | 1,2,7,8,37,<br>39,40,44 | 3,4,5,6,36,<br>38,41,42,4<br>3 | 5 | P01835,P10715,Q5GRG2,Q6AYL6,Q8CJD3        |
| 4619 | 1,2,7,8,37,<br>39,41,42 | 3,4,5,6,36,<br>38,40,43,4<br>4 | 1 | P01835                                    |
| 4620 | 1,2,7,8,37,<br>39,41,43 | 3,4,5,6,36,<br>38,40,42,4<br>4 | 3 | P01835,P12785,P22006                      |

|      |                         |                                |   |                                                         |
|------|-------------------------|--------------------------------|---|---------------------------------------------------------|
| 4621 | 1,2,7,8,37,<br>39,41,44 | 3,4,5,6,36,<br>38,40,42,4<br>3 | 3 | P01835,P10715,P31044                                    |
| 4622 | 1,2,7,8,37,<br>39,42,43 | 3,4,5,6,36,<br>38,40,41,4<br>4 | 1 | P01835                                                  |
| 4623 | 1,2,7,8,37,<br>39,42,44 | 3,4,5,6,36,<br>38,40,41,4<br>3 | 1 | P01835                                                  |
| 4624 | 1,2,7,8,37,<br>39,43,44 | 3,4,5,6,36,<br>38,40,41,4<br>2 | 0 |                                                         |
| 4625 | 1,2,7,8,37,<br>40,41,42 | 3,4,5,6,36,<br>38,39,43,4<br>4 | 2 | P01835,P02625                                           |
| 4626 | 1,2,7,8,37,<br>40,41,43 | 3,4,5,6,36,<br>38,39,42,4<br>4 | 2 | P01835,P51907                                           |
| 4627 | 1,2,7,8,37,<br>40,41,44 | 3,4,5,6,36,<br>38,39,42,4<br>3 | 8 | P01835,P06911,P10715,P12020,P19629,P31044,Q5GRG2,Q6AYL6 |
| 4628 | 1,2,7,8,37,<br>40,42,43 | 3,4,5,6,36,<br>38,39,41,4<br>4 | 1 | P01835                                                  |
| 4629 | 1,2,7,8,37,<br>40,42,44 | 3,4,5,6,36,<br>38,39,41,4<br>3 | 3 | P01835,P02625,P20759                                    |
| 4630 | 1,2,7,8,37,<br>40,43,44 | 3,4,5,6,36,<br>38,39,41,4<br>2 | 1 | Q6AYL6                                                  |
| 4631 | 1,2,7,8,37,<br>41,42,43 | 3,4,5,6,36,<br>38,39,40,4<br>4 | 1 | P01835                                                  |
| 4632 | 1,2,7,8,37,<br>41,42,44 | 3,4,5,6,36,<br>38,39,40,4<br>3 | 1 | P01835                                                  |
| 4633 | 1,2,7,8,37,<br>41,43,44 | 3,4,5,6,36,<br>38,39,40,4<br>2 | 0 |                                                         |
| 4634 | 1,2,7,8,37,<br>42,43,44 | 3,4,5,6,36,<br>38,39,40,4<br>1 | 0 |                                                         |
| 4635 | 1,2,7,8,38,<br>39,40,41 | 3,4,5,6,36,<br>37,42,43,4<br>4 | 3 | P10715,P19629,P31044                                    |

|      |                         |                                |   |                                                                |
|------|-------------------------|--------------------------------|---|----------------------------------------------------------------|
| 4636 | 1,2,7,8,38,<br>39,40,42 | 3,4,5,6,36,<br>37,41,43,4<br>4 | 0 |                                                                |
| 4637 | 1,2,7,8,38,<br>39,40,43 | 3,4,5,6,36,<br>37,41,42,4<br>4 | 0 |                                                                |
| 4638 | 1,2,7,8,38,<br>39,40,44 | 3,4,5,6,36,<br>37,41,42,4<br>3 | 5 | P10715,P19629,Q5GRG2,Q6AYL6,Q9QUL6                             |
| 4639 | 1,2,7,8,38,<br>39,41,42 | 3,4,5,6,36,<br>37,40,43,4<br>4 | 2 | P01835,P13432                                                  |
| 4640 | 1,2,7,8,38,<br>39,41,43 | 3,4,5,6,36,<br>37,40,42,4<br>4 | 1 | P22006                                                         |
| 4641 | 1,2,7,8,38,<br>39,41,44 | 3,4,5,6,36,<br>37,40,42,4<br>3 | 6 | P31044,P50115,P55091,P98089,Q05695,Q62635                      |
| 4642 | 1,2,7,8,38,<br>39,42,43 | 3,4,5,6,36,<br>37,40,41,4<br>4 | 1 | Q80WL1                                                         |
| 4643 | 1,2,7,8,38,<br>39,42,44 | 3,4,5,6,36,<br>37,40,41,4<br>3 | 0 |                                                                |
| 4644 | 1,2,7,8,38,<br>39,43,44 | 3,4,5,6,36,<br>37,40,41,4<br>2 | 1 | P23593                                                         |
| 4645 | 1,2,7,8,38,<br>40,41,42 | 3,4,5,6,36,<br>37,39,43,4<br>4 | 1 | P50115                                                         |
| 4646 | 1,2,7,8,38,<br>40,41,43 | 3,4,5,6,36,<br>37,39,42,4<br>4 | 1 | P50115                                                         |
| 4647 | 1,2,7,8,38,<br>40,41,44 | 3,4,5,6,36,<br>37,39,42,4<br>3 | 9 | P10715,P19629,P31044,P50115,P55091,P98089,Q05695,Q5GRG2,Q62635 |
| 4648 | 1,2,7,8,38,<br>40,42,43 | 3,4,5,6,36,<br>37,39,41,4<br>4 | 0 |                                                                |
| 4649 | 1,2,7,8,38,<br>40,42,44 | 3,4,5,6,36,<br>37,39,41,4<br>3 | 1 | P02625                                                         |
| 4650 | 1,2,7,8,38,<br>40,43,44 | 3,4,5,6,36,<br>37,39,41,4<br>2 | 0 |                                                                |



|      |                         |                                |    |                                                                       |
|------|-------------------------|--------------------------------|----|-----------------------------------------------------------------------|
| 4651 | 1,2,7,8,38,<br>41,42,43 | 3,4,5,6,36,<br>37,39,40,4<br>4 | 6  | O35547,P06866,P50115,P50116,P54921,P55091                             |
| 4652 | 1,2,7,8,38,<br>41,42,44 | 3,4,5,6,36,<br>37,39,40,4<br>3 | 6  | P50115,P55091,P98089,Q05695,Q62635,Q8CIZ5                             |
| 4653 | 1,2,7,8,38,<br>41,43,44 | 3,4,5,6,36,<br>37,39,40,4<br>2 | 7  | P00774,P50115,P50116,P55091,P98089,Q05695,Q62635                      |
| 4654 | 1,2,7,8,38,<br>42,43,44 | 3,4,5,6,36,<br>37,39,40,4<br>1 | 0  |                                                                       |
| 4655 | 1,2,7,8,39,<br>40,41,42 | 3,4,5,6,36,<br>37,38,43,4<br>4 | 2  | P01835,P10715                                                         |
| 4656 | 1,2,7,8,39,<br>40,41,43 | 3,4,5,6,36,<br>37,38,42,4<br>4 | 4  | P01835,P10715,P12785,Q6AYL6                                           |
| 4657 | 1,2,7,8,39,<br>40,41,44 | 3,4,5,6,36,<br>37,38,42,4<br>3 | 10 | P01835,P06911,P10715,P12020,P19629,P31044,P68370,Q5GRG2,Q6AYL6,Q6P9T8 |
| 4658 | 1,2,7,8,39,<br>40,42,43 | 3,4,5,6,36,<br>37,38,41,4<br>4 | 1  | P01835                                                                |
| 4659 | 1,2,7,8,39,<br>40,42,44 | 3,4,5,6,36,<br>37,38,41,4<br>3 | 1  | P01835                                                                |
| 4660 | 1,2,7,8,39,<br>40,43,44 | 3,4,5,6,36,<br>37,38,41,4<br>2 | 2  | P10715,Q6AYL6                                                         |
| 4661 | 1,2,7,8,39,<br>41,42,43 | 3,4,5,6,36,<br>37,38,40,4<br>4 | 4  | P00731,P01835,P22006,P82471                                           |
| 4662 | 1,2,7,8,39,<br>41,42,44 | 3,4,5,6,36,<br>37,38,40,4<br>3 | 1  | P01835                                                                |
| 4663 | 1,2,7,8,39,<br>41,43,44 | 3,4,5,6,36,<br>37,38,40,4<br>2 | 2  | P12785,Q6AYL6                                                         |
| 4664 | 1,2,7,8,39,<br>42,43,44 | 3,4,5,6,36,<br>37,38,40,4<br>1 | 0  |                                                                       |
| 4665 | 1,2,7,8,40,<br>41,42,43 | 3,4,5,6,36,<br>37,38,39,4<br>4 | 2  | P01835,Q9JJS8                                                         |

|      |                          |                                |   |                                                  |
|------|--------------------------|--------------------------------|---|--------------------------------------------------|
| 4666 | 1,2,7,8,40,<br>41,42,44  | 3,4,5,6,36,<br>37,38,39,4<br>3 | 6 | P01835,P02625,P10715,P20759,P31044,Q5GRG2        |
| 4667 | 1,2,7,8,40,<br>41,43,44  | 3,4,5,6,36,<br>37,38,39,4<br>2 | 4 | P10715,P31044,Q5GRG2,Q6AYL6                      |
| 4668 | 1,2,7,8,40,<br>42,43,44  | 3,4,5,6,36,<br>37,38,39,4<br>1 | 0 |                                                  |
| 4669 | 1,2,7,8,41,<br>42,43,44  | 3,4,5,6,36,<br>37,38,39,4<br>0 | 0 |                                                  |
| 4670 | 1,2,7,36,3<br>7,38,39,40 | 3,4,5,6,8,4<br>1,42,43,44      | 3 | P02793;Q7TP54,P97840,Q9Z0V6                      |
| 4671 | 1,2,7,36,3<br>7,38,39,41 | 3,4,5,6,8,4<br>0,42,43,44      | 5 | P01835,P97840,Q5M819,Q91ZS3,Q9Z0V6               |
| 4672 | 1,2,7,36,3<br>7,38,39,42 | 3,4,5,6,8,4<br>0,41,43,44      | 4 | P01835,P02793;Q7TP54,P47967,P97840               |
| 4673 | 1,2,7,36,3<br>7,38,39,43 | 3,4,5,6,8,4<br>0,41,42,44      | 4 | D3ZUC6,P06760,P97840,Q9Z0V6                      |
| 4674 | 1,2,7,36,3<br>7,38,39,44 | 3,4,5,6,8,4<br>0,41,42,43      | 2 | P02793;Q7TP54,P97840                             |
| 4675 | 1,2,7,36,3<br>7,38,40,41 | 3,4,5,6,8,3<br>9,42,43,44      | 3 | P97840,Q5M819,Q9Z0V6                             |
| 4676 | 1,2,7,36,3<br>7,38,40,42 | 3,4,5,6,8,3<br>9,41,43,44      | 3 | P02625,P02793;Q7TP54,P97840                      |
| 4677 | 1,2,7,36,3<br>7,38,40,43 | 3,4,5,6,8,3<br>9,41,42,44      | 2 | P14668,Q9Z0V6                                    |
| 4678 | 1,2,7,36,3<br>7,38,40,44 | 3,4,5,6,8,3<br>9,41,42,43      | 1 | P97840                                           |
| 4679 | 1,2,7,36,3<br>7,38,41,42 | 3,4,5,6,8,3<br>9,40,43,44      | 4 | P01835,P97840,Q5M819,Q91ZS3                      |
| 4680 | 1,2,7,36,3<br>7,38,41,43 | 3,4,5,6,8,3<br>9,40,42,44      | 4 | D3ZUC6,P06760,Q5M819,Q9Z0V6                      |
| 4681 | 1,2,7,36,3<br>7,38,41,44 | 3,4,5,6,8,3<br>9,40,42,43      | 1 | P97840                                           |
| 4682 | 1,2,7,36,3<br>7,38,42,43 | 3,4,5,6,8,3<br>9,40,41,44      | 4 | P06760,P06866,P47967,P97840                      |
| 4683 | 1,2,7,36,3<br>7,38,42,44 | 3,4,5,6,8,3<br>9,40,41,43      | 3 | P02793;Q7TP54,P47967,P97840                      |
| 4684 | 1,2,7,36,3<br>7,38,43,44 | 3,4,5,6,8,3<br>9,40,41,42      | 3 | D3ZUC6,P14668,P97840                             |
| 4685 | 1,2,7,36,3<br>7,39,40,41 | 3,4,5,6,8,3<br>8,42,43,44      | 4 | P01835,P10715,P35467,Q9Z0V6                      |
| 4686 | 1,2,7,36,3<br>7,39,40,42 | 3,4,5,6,8,3<br>8,41,43,44      | 6 | P00774,P01835,P02793;Q7TP54,P50115,P50116,P97840 |

|      |                                                 |   |                                                                |
|------|-------------------------------------------------|---|----------------------------------------------------------------|
| 4687 | 1,2,7,36,3 3,4,5,6,8,3<br>7,39,40,43 8,41,42,44 | 9 | D3ZUC6,O35547,P01835,P06760,P50115,P50116,Q05695,Q8CIZ5,Q9Z0V6 |
| 4688 | 1,2,7,36,3 3,4,5,6,8,3<br>7,39,40,44 8,41,42,43 | 8 | B0BNN3,O35547,P01835,P02793;Q7TP54,P50115,P50116,Q6AYL6,Q8CJD3 |
| 4689 | 1,2,7,36,3 3,4,5,6,8,3<br>7,39,41,42 8,40,43,44 | 6 | P01681,P01835,P02793;Q7TP54,P35467,P97840,Q9Z0V6               |
| 4690 | 1,2,7,36,3 3,4,5,6,8,3<br>7,39,41,43 8,40,42,44 | 6 | D3ZUC6,P00714,P01835,P06760,P22006,Q9Z0V6                      |
| 4691 | 1,2,7,36,3 3,4,5,6,8,3<br>7,39,41,44 8,40,42,43 | 4 | P01835,P35467,Q9JHB9,Q9Z0V6                                    |
| 4692 | 1,2,7,36,3 3,4,5,6,8,3<br>7,39,42,43 8,40,41,44 | 6 | D3ZUC6,P01835,P06760,P50115,P97840,Q9Z0V6                      |
| 4693 | 1,2,7,36,3 3,4,5,6,8,3<br>7,39,42,44 8,40,41,43 | 5 | P01835,P02793;Q7TP54,P50115,P50116,P97840                      |
| 4694 | 1,2,7,36,3 3,4,5,6,8,3<br>7,39,43,44 8,40,41,42 | 4 | D3ZUC6,P06760,P50115,Q9Z0V6                                    |
| 4695 | 1,2,7,36,3 3,4,5,6,8,3<br>7,40,41,42 8,39,43,44 | 2 | P01835,P02625                                                  |
| 4696 | 1,2,7,36,3 3,4,5,6,8,3<br>7,40,41,43 8,39,42,44 | 3 | D3ZUC6,P01835,Q9Z0V6                                           |
| 4697 | 1,2,7,36,3 3,4,5,6,8,3<br>7,40,41,44 8,39,42,43 | 4 | B0BNN3,P01835,P10715,Q5GRG2                                    |
| 4698 | 1,2,7,36,3 3,4,5,6,8,3<br>7,40,42,43 8,39,41,44 | 2 | P01835,Q05695                                                  |
| 4699 | 1,2,7,36,3 3,4,5,6,8,3<br>7,40,42,44 8,39,41,43 | 7 | P00762,P01835,P02625,P02793;Q7TP54,P50116,P97840,Q7TPB1        |
| 4700 | 1,2,7,36,3 3,4,5,6,8,3<br>7,40,43,44 8,39,41,42 | 2 | D3ZUC6,O35547                                                  |
| 4701 | 1,2,7,36,3 3,4,5,6,8,3<br>7,41,42,43 8,39,40,44 | 5 | D3ZUC6,P01835,P06760,Q6AYS4,Q9Z0V6                             |
| 4702 | 1,2,7,36,3 3,4,5,6,8,3<br>7,41,42,44 8,39,40,43 | 3 | P01835,P82995,P97840                                           |
| 4703 | 1,2,7,36,3 3,4,5,6,8,3<br>7,41,43,44 8,39,40,42 | 3 | D3ZUC6,P06760,Q9Z0V6                                           |
| 4704 | 1,2,7,36,3 3,4,5,6,8,3<br>7,42,43,44 8,39,40,41 | 2 | D3ZUC6,P97840                                                  |
| 4705 | 1,2,7,36,3 3,4,5,6,8,3<br>8,39,40,41 7,42,43,44 | 2 | P10715,P19629                                                  |
| 4706 | 1,2,7,36,3 3,4,5,6,8,3<br>8,39,40,42 7,41,43,44 | 2 | P02793;Q7TP54,P97840                                           |
| 4707 | 1,2,7,36,3 3,4,5,6,8,3<br>8,39,40,43 7,41,42,44 | 0 |                                                                |
| 4708 | 1,2,7,36,3 3,4,5,6,8,3<br>8,39,40,44 7,41,42,43 | 1 | Q9QUL6                                                         |
| 4709 | 1,2,7,36,3 3,4,5,6,8,3<br>8,39,41,42 7,40,43,44 | 3 | P01835,P02793;Q7TP54,P97840                                    |

|      |                                                 |   |                                                  |
|------|-------------------------------------------------|---|--------------------------------------------------|
| 4710 | 1,2,7,36,3 3,4,5,6,8,3<br>8,39,41,43 7,40,42,44 | 5 | D3ZUC6,P00714,P06760,P22006,Q9Z0V6               |
| 4711 | 1,2,7,36,3 3,4,5,6,8,3<br>8,39,41,44 7,40,42,43 | 1 | Q63467                                           |
| 4712 | 1,2,7,36,3 3,4,5,6,8,3<br>8,39,42,43 7,40,41,44 | 3 | P06760,P06866,P97840                             |
| 4713 | 1,2,7,36,3 3,4,5,6,8,3<br>8,39,42,44 7,40,41,43 | 3 | P02793;Q7TP54,P51907,P97840                      |
| 4714 | 1,2,7,36,3 3,4,5,6,8,3<br>8,39,43,44 7,40,41,42 | 2 | D3ZUC6,P23593                                    |
| 4715 | 1,2,7,36,3 3,4,5,6,8,3<br>8,40,41,42 7,39,43,44 | 1 | P02625                                           |
| 4716 | 1,2,7,36,3 3,4,5,6,8,3<br>8,40,41,43 7,39,42,44 | 1 | D3ZUC6                                           |
| 4717 | 1,2,7,36,3 3,4,5,6,8,3<br>8,40,41,44 7,39,42,43 | 3 | P10715,P19629,Q5GRG2                             |
| 4718 | 1,2,7,36,3 3,4,5,6,8,3<br>8,40,42,43 7,39,41,44 | 0 |                                                  |
| 4719 | 1,2,7,36,3 3,4,5,6,8,3<br>8,40,42,44 7,39,41,43 | 4 | P02625,P02793;Q7TP54,P97840,Q7TPB1               |
| 4720 | 1,2,7,36,3 3,4,5,6,8,3<br>8,40,43,44 7,39,41,42 | 1 | Q63661                                           |
| 4721 | 1,2,7,36,3 3,4,5,6,8,3<br>8,41,42,43 7,39,40,44 | 2 | D3ZUC6,P06866                                    |
| 4722 | 1,2,7,36,3 3,4,5,6,8,3<br>8,41,42,44 7,39,40,43 | 4 | P55091,P82995,P97840,Q8CIZ5                      |
| 4723 | 1,2,7,36,3 3,4,5,6,8,3<br>8,41,43,44 7,39,40,42 | 3 | D3ZUC6,P55091,P98089                             |
| 4724 | 1,2,7,36,3 3,4,5,6,8,3<br>8,42,43,44 7,39,40,41 | 2 | P15999,P97840                                    |
| 4725 | 1,2,7,36,3 3,4,5,6,8,3<br>9,40,41,42 7,38,43,44 | 3 | P01835,P35467,P82995                             |
| 4726 | 1,2,7,36,3 3,4,5,6,8,3<br>9,40,41,43 7,38,42,44 | 4 | D3ZUC6,P01835,P22006,Q9Z0V6                      |
| 4727 | 1,2,7,36,3 3,4,5,6,8,3<br>9,40,41,44 7,38,42,43 | 7 | P01835,P06911,P10715,P19629,P31044,Q5GRG2,Q6AYL6 |
| 4728 | 1,2,7,36,3 3,4,5,6,8,3<br>9,40,42,43 7,38,41,44 | 2 | P01835,P50115                                    |
| 4729 | 1,2,7,36,3 3,4,5,6,8,3<br>9,40,42,44 7,38,41,43 | 5 | P01835,P02793;Q7TP54,P50116,P82995,Q7TPB1        |
| 4730 | 1,2,7,36,3 3,4,5,6,8,3<br>9,40,43,44 7,38,41,42 | 2 | D3ZUC6,Q6AYL6                                    |
| 4731 | 1,2,7,36,3 3,4,5,6,8,3<br>9,41,42,43 7,38,40,44 | 5 | D3ZUC6,P01835,P06760,P22006,P82995               |
| 4732 | 1,2,7,36,3 3,4,5,6,8,3<br>9,41,42,44 7,38,40,43 | 4 | P01835,P02793;Q7TP54,P35467,P82995               |

|      |                                                 |   |                                    |
|------|-------------------------------------------------|---|------------------------------------|
| 4733 | 1,2,7,36,3 3,4,5,6,8,3<br>9,41,43,44 7,38,40,42 | 5 | D3ZUC6,P06760,P22006,Q63467,Q9Z0V6 |
| 4734 | 1,2,7,36,3 3,4,5,6,8,3<br>9,42,43,44 7,38,40,41 | 3 | D3ZUC6,P06760,P82995               |
| 4735 | 1,2,7,36,4 3,4,5,6,8,3<br>0,41,42,43 7,38,39,44 | 2 | D3ZUC6,P01835                      |
| 4736 | 1,2,7,36,4 3,4,5,6,8,3<br>0,41,42,44 7,38,39,43 | 5 | P01835,P02625,P82995,Q7TPB1,Q9R1T5 |
| 4737 | 1,2,7,36,4 3,4,5,6,8,3<br>0,41,43,44 7,38,39,42 | 1 | D3ZUC6                             |
| 4738 | 1,2,7,36,4 3,4,5,6,8,3<br>0,42,43,44 7,38,39,41 | 3 | P02625,Q7TPB1,Q9R1T5               |
| 4739 | 1,2,7,36,4 3,4,5,6,8,3<br>1,42,43,44 7,38,39,40 | 2 | D3ZUC6,P82995                      |
| 4740 | 1,2,7,37,3 3,4,5,6,8,3<br>8,39,40,41 6,42,43,44 | 3 | P10715,P13432,P19629               |
| 4741 | 1,2,7,37,3 3,4,5,6,8,3<br>8,39,40,42 6,41,43,44 | 1 | P97840                             |
| 4742 | 1,2,7,37,3 3,4,5,6,8,3<br>8,39,40,43 6,41,42,44 | 3 | P60905,Q6IFV1,Q812E4               |
| 4743 | 1,2,7,37,3 3,4,5,6,8,3<br>8,39,40,44 6,41,42,43 | 4 | Q5GRG2,Q6AYL6,Q812E4,Q9QUL6        |
| 4744 | 1,2,7,37,3 3,4,5,6,8,3<br>8,39,41,42 6,40,43,44 | 3 | P01835,P13432,P97840               |
| 4745 | 1,2,7,37,3 3,4,5,6,8,3<br>8,39,41,43 6,40,42,44 | 5 | P00714,P22006,P23593,P36374,Q9Z0V6 |
| 4746 | 1,2,7,37,3 3,4,5,6,8,3<br>8,39,41,44 6,40,42,43 | 1 | P97840                             |
| 4747 | 1,2,7,37,3 3,4,5,6,8,3<br>8,39,42,43 6,40,41,44 | 2 | P06866,P97840                      |
| 4748 | 1,2,7,37,3 3,4,5,6,8,3<br>8,39,42,44 6,40,41,43 | 1 | P97840                             |
| 4749 | 1,2,7,37,3 3,4,5,6,8,3<br>8,39,43,44 6,40,41,42 | 3 | P23593,Q812E4,Q9JJS8               |
| 4750 | 1,2,7,37,3 3,4,5,6,8,3<br>8,40,41,42 6,39,43,44 | 2 | P97840,Q6AYS4                      |
| 4751 | 1,2,7,37,3 3,4,5,6,8,3<br>8,40,41,43 6,39,42,44 | 2 | P55016,Q6AYS4                      |
| 4752 | 1,2,7,37,3 3,4,5,6,8,3<br>8,40,41,44 6,39,42,43 | 5 | P10715,P19629,P31044,Q5GRG2,Q62635 |
| 4753 | 1,2,7,37,3 3,4,5,6,8,3<br>8,40,42,43 6,39,41,44 | 2 | P06866,Q6AYS4                      |
| 4754 | 1,2,7,37,3 3,4,5,6,8,3<br>8,40,42,44 6,39,41,43 | 2 | P02625,P97840                      |
| 4755 | 1,2,7,37,3 3,4,5,6,8,3<br>8,40,43,44 6,39,41,42 | 1 | P08010                             |

|      |                          |                           |   |                                                         |
|------|--------------------------|---------------------------|---|---------------------------------------------------------|
| 4756 | 1,2,7,37,3<br>8,41,42,43 | 3,4,5,6,8,3<br>6,39,40,44 | 3 | P06866,Q6AYS4,Q6P6T1                                    |
| 4757 | 1,2,7,37,3<br>8,41,42,44 | 3,4,5,6,8,3<br>6,39,40,43 | 3 | P55091,P97840,Q6AYS4                                    |
| 4758 | 1,2,7,37,3<br>8,41,43,44 | 3,4,5,6,8,3<br>6,39,40,42 | 4 | P00774,P55091,P98089,Q6AYS4                             |
| 4759 | 1,2,7,37,3<br>8,42,43,44 | 3,4,5,6,8,3<br>6,39,40,41 | 3 | P06866,P97840,Q6AYS4                                    |
| 4760 | 1,2,7,37,3<br>9,40,41,42 | 3,4,5,6,8,3<br>6,38,43,44 | 3 | P01835,P10715,P35467                                    |
| 4761 | 1,2,7,37,3<br>9,40,41,43 | 3,4,5,6,8,3<br>6,38,42,44 | 7 | P01835,P10715,P22006,P97554,Q4AEF8,Q6AYL6,Q9Z0V6        |
| 4762 | 1,2,7,37,3<br>9,40,41,44 | 3,4,5,6,8,3<br>6,38,42,43 | 8 | P01835,P06911,P10715,P19629,P31044,P35467,Q5GRG2,Q6AYL6 |
| 4763 | 1,2,7,37,3<br>9,40,42,43 | 3,4,5,6,8,3<br>6,38,41,44 | 2 | P01835,Q05695                                           |
| 4764 | 1,2,7,37,3<br>9,40,42,44 | 3,4,5,6,8,3<br>6,38,41,43 | 5 | P01835,P49744,P50116,Q6AYL6,Q9QUL6                      |
| 4765 | 1,2,7,37,3<br>9,40,43,44 | 3,4,5,6,8,3<br>6,38,41,42 | 4 | P50116,P97554,Q6AYL6,Q812E4                             |
| 4766 | 1,2,7,37,3<br>9,41,42,43 | 3,4,5,6,8,3<br>6,38,40,44 | 3 | P01835,P22006,Q6AYS4                                    |
| 4767 | 1,2,7,37,3<br>9,41,42,44 | 3,4,5,6,8,3<br>6,38,40,43 | 2 | P01835,P35467                                           |
| 4768 | 1,2,7,37,3<br>9,41,43,44 | 3,4,5,6,8,3<br>6,38,40,42 | 4 | D3ZUC6,P22006,Q6AYL6,Q9Z0V6                             |
| 4769 | 1,2,7,37,3<br>9,42,43,44 | 3,4,5,6,8,3<br>6,38,40,41 | 0 |                                                         |
| 4770 | 1,2,7,37,4<br>0,41,42,43 | 3,4,5,6,8,3<br>6,38,39,44 | 2 | P01835,Q6AYS4                                           |
| 4771 | 1,2,7,37,4<br>0,41,42,44 | 3,4,5,6,8,3<br>6,38,39,43 | 5 | P01835,P02625,P10715,Q5GRG2,Q6AYS4                      |
| 4772 | 1,2,7,37,4<br>0,41,43,44 | 3,4,5,6,8,3<br>6,38,39,42 | 5 | P10715,P19218,Q5GRG2,Q6AYL6,Q6AYS4                      |
| 4773 | 1,2,7,37,4<br>0,42,43,44 | 3,4,5,6,8,3<br>6,38,39,41 | 2 | P02625,Q6AYS4                                           |
| 4774 | 1,2,7,37,4<br>1,42,43,44 | 3,4,5,6,8,3<br>6,38,39,40 | 1 | Q6AYS4                                                  |
| 4775 | 1,2,7,38,3<br>9,40,41,42 | 3,4,5,6,8,3<br>6,37,43,44 | 1 | P13432                                                  |
| 4776 | 1,2,7,38,3<br>9,40,41,43 | 3,4,5,6,8,3<br>6,37,42,44 | 4 | P10715,P19629,P22006,Q4AEF8                             |
| 4777 | 1,2,7,38,3<br>9,40,41,44 | 3,4,5,6,8,3<br>6,37,42,43 | 7 | P06911,P10715,P19629,P31044,Q5GRG2,Q6AYL6,Q9QUL6        |
| 4778 | 1,2,7,38,3<br>9,40,42,43 | 3,4,5,6,8,3<br>6,37,41,44 | 0 |                                                         |

|      |                          |                           |   |                                           |
|------|--------------------------|---------------------------|---|-------------------------------------------|
| 4779 | 1,2,7,38,3<br>9,40,42,44 | 3,4,5,6,8,3<br>6,37,41,43 | 1 | Q9QUL6                                    |
| 4780 | 1,2,7,38,3<br>9,40,43,44 | 3,4,5,6,8,3<br>6,37,41,42 | 2 | P23593,Q6AYL6                             |
| 4781 | 1,2,7,38,3<br>9,41,42,43 | 3,4,5,6,8,3<br>6,37,40,44 | 5 | P00731,P06866,P13432,P22006,Q6AYS4        |
| 4782 | 1,2,7,38,3<br>9,41,42,44 | 3,4,5,6,8,3<br>6,37,40,43 | 2 | P55091,P97840                             |
| 4783 | 1,2,7,38,3<br>9,41,43,44 | 3,4,5,6,8,3<br>6,37,40,42 | 5 | P00774,P22006,P23593,P55091,P98089        |
| 4784 | 1,2,7,38,3<br>9,42,43,44 | 3,4,5,6,8,3<br>6,37,40,41 | 1 | P23593                                    |
| 4785 | 1,2,7,38,4<br>0,41,42,43 | 3,4,5,6,8,3<br>6,37,39,44 | 2 | P06866,Q6AYS4                             |
| 4786 | 1,2,7,38,4<br>0,41,42,44 | 3,4,5,6,8,3<br>6,37,39,43 | 3 | P02625,P55091,P98089                      |
| 4787 | 1,2,7,38,4<br>0,41,43,44 | 3,4,5,6,8,3<br>6,37,39,42 | 6 | P10715,P19629,P55091,P98089,Q5GRG2,Q6AYL6 |
| 4788 | 1,2,7,38,4<br>0,42,43,44 | 3,4,5,6,8,3<br>6,37,39,41 | 0 |                                           |
| 4789 | 1,2,7,38,4<br>1,42,43,44 | 3,4,5,6,8,3<br>6,37,39,40 | 3 | P55091,P98089,Q6AYS4                      |
| 4790 | 1,2,7,39,4<br>0,41,42,43 | 3,4,5,6,8,3<br>6,37,38,44 | 2 | P01835,P22006                             |
| 4791 | 1,2,7,39,4<br>0,41,42,44 | 3,4,5,6,8,3<br>6,37,38,43 | 6 | P01835,P10715,P19629,P31044,Q5GRG2,Q6AYL6 |
| 4792 | 1,2,7,39,4<br>0,41,43,44 | 3,4,5,6,8,3<br>6,37,38,42 | 6 | P10715,P19629,P31044,P97554,Q5GRG2,Q6AYL6 |
| 4793 | 1,2,7,39,4<br>0,42,43,44 | 3,4,5,6,8,3<br>6,37,38,41 | 1 | Q6AYL6                                    |
| 4794 | 1,2,7,39,4<br>1,42,43,44 | 3,4,5,6,8,3<br>6,37,38,40 | 3 | P00731,P22006,Q6AYS4                      |
| 4795 | 1,2,7,40,4<br>1,42,43,44 | 3,4,5,6,8,3<br>6,37,38,39 | 1 | Q6AYS4                                    |
| 4796 | 1,2,8,36,3<br>7,38,39,40 | 3,4,5,6,7,4<br>1,42,43,44 | 5 | O35547,P35281,Q6AYR8,Q8K4G9,Q9QZA6        |
| 4797 | 1,2,8,36,3<br>7,38,39,41 | 3,4,5,6,7,4<br>0,42,43,44 | 3 | P01835,Q5M819,Q8K4G9                      |
| 4798 | 1,2,8,36,3<br>7,38,39,42 | 3,4,5,6,7,4<br>0,41,43,44 | 2 | P01835,Q8K4G9                             |
| 4799 | 1,2,8,36,3<br>7,38,39,43 | 3,4,5,6,7,4<br>0,41,42,44 | 2 | Q6IFV1,Q8K4G9                             |
| 4800 | 1,2,8,36,3<br>7,38,39,44 | 3,4,5,6,7,4<br>0,41,42,43 | 3 | P05539,Q8K4G9,Q9JJS8                      |
| 4801 | 1,2,8,36,3<br>7,38,40,41 | 3,4,5,6,7,3<br>9,42,43,44 | 1 | Q8K4G9                                    |

|      |                                                 |   |                                           |
|------|-------------------------------------------------|---|-------------------------------------------|
| 4802 | 1,2,8,36,3 3,4,5,6,7,3<br>7,38,40,42 9,41,43,44 | 3 | P02625,P15999,Q8K4G9                      |
| 4803 | 1,2,8,36,3 3,4,5,6,7,3<br>7,38,40,43 9,41,42,44 | 3 | P97605,Q6IFV1,Q8K4G9                      |
| 4804 | 1,2,8,36,3 3,4,5,6,7,3<br>7,38,40,44 9,41,42,43 | 3 | O35547,Q6AYR9,Q8K4G9                      |
| 4805 | 1,2,8,36,3 3,4,5,6,7,3<br>7,38,41,42 9,40,43,44 | 2 | P01835,Q8K4G9                             |
| 4806 | 1,2,8,36,3 3,4,5,6,7,3<br>7,38,41,43 9,40,42,44 | 3 | P83121,Q6IFV1,Q8K4G9                      |
| 4807 | 1,2,8,36,3 3,4,5,6,7,3<br>7,38,41,44 9,40,42,43 | 2 | Q62635,Q8K4G9                             |
| 4808 | 1,2,8,36,3 3,4,5,6,7,3<br>7,38,42,43 9,40,41,44 | 4 | P06866,P12020,P15999,Q8K4G9               |
| 4809 | 1,2,8,36,3 3,4,5,6,7,3<br>7,38,42,44 9,40,41,43 | 2 | P15999,Q8K4G9                             |
| 4810 | 1,2,8,36,3 3,4,5,6,7,3<br>7,38,43,44 9,40,41,42 | 2 | Q6IFV1,Q8K4G9                             |
| 4811 | 1,2,8,36,3 3,4,5,6,7,3<br>7,39,40,41 8,42,43,44 | 5 | O35547,P01835,P10715,Q6AYR8,Q8K4G9        |
| 4812 | 1,2,8,36,3 3,4,5,6,7,3<br>7,39,40,42 8,41,43,44 | 4 | P00774,P01835,P49744,Q8K4G9               |
| 4813 | 1,2,8,36,3 3,4,5,6,7,3<br>7,39,40,43 8,41,42,44 | 4 | O35547,P01835,Q8CIZ5,Q8K4G9               |
| 4814 | 1,2,8,36,3 3,4,5,6,7,3<br>7,39,40,44 8,41,42,43 | 5 | O35547,P01835,P54921,Q8CJD3,Q8K4G9        |
| 4815 | 1,2,8,36,3 3,4,5,6,7,3<br>7,39,41,42 8,40,43,44 | 2 | P01835,Q8K4G9                             |
| 4816 | 1,2,8,36,3 3,4,5,6,7,3<br>7,39,41,43 8,40,42,44 | 5 | D3ZUC6,P01835,P12785,P83121,Q8K4G9        |
| 4817 | 1,2,8,36,3 3,4,5,6,7,3<br>7,39,41,44 8,40,42,43 | 2 | P01835,Q9JHB9                             |
| 4818 | 1,2,8,36,3 3,4,5,6,7,3<br>7,39,42,43 8,40,41,44 | 1 | P01835                                    |
| 4819 | 1,2,8,36,3 3,4,5,6,7,3<br>7,39,42,44 8,40,41,43 | 1 | P01835                                    |
| 4820 | 1,2,8,36,3 3,4,5,6,7,3<br>7,39,43,44 8,40,41,42 | 0 |                                           |
| 4821 | 1,2,8,36,3 3,4,5,6,7,3<br>7,40,41,42 8,39,43,44 | 3 | P01835,P02625,Q8K4G9                      |
| 4822 | 1,2,8,36,3 3,4,5,6,7,3<br>7,40,41,43 8,39,42,44 | 4 | P01835,P83121,Q5XI73,Q8K4G9               |
| 4823 | 1,2,8,36,3 3,4,5,6,7,3<br>7,40,41,44 8,39,42,43 | 6 | O35547,P01835,P10715,P47727,Q5GRG2,Q8K4G9 |
| 4824 | 1,2,8,36,3 3,4,5,6,7,3<br>7,40,42,43 8,39,41,44 | 3 | P01835,P02625,Q8K4G9                      |



|      |                                                 |   |                                    |
|------|-------------------------------------------------|---|------------------------------------|
| 4825 | 1,2,8,36,3 3,4,5,6,7,3<br>7,40,42,44 8,39,41,43 | 3 | P01835,P02625,Q7TPB1               |
| 4826 | 1,2,8,36,3 3,4,5,6,7,3<br>7,40,43,44 8,39,41,42 | 3 | O35547,P08010,P19218               |
| 4827 | 1,2,8,36,3 3,4,5,6,7,3<br>7,41,42,43 8,39,40,44 | 2 | P01835,P83121                      |
| 4828 | 1,2,8,36,3 3,4,5,6,7,3<br>7,41,42,44 8,39,40,43 | 1 | P01835                             |
| 4829 | 1,2,8,36,3 3,4,5,6,7,3<br>7,41,43,44 8,39,40,42 | 3 | D3ZUC6,O88600,P83121               |
| 4830 | 1,2,8,36,3 3,4,5,6,7,3<br>7,42,43,44 8,39,40,41 | 0 |                                    |
| 4831 | 1,2,8,36,3 3,4,5,6,7,3<br>8,39,40,41 7,42,43,44 | 1 | Q8K4G9                             |
| 4832 | 1,2,8,36,3 3,4,5,6,7,3<br>8,39,40,42 7,41,43,44 | 2 | P62804,Q8K4G9                      |
| 4833 | 1,2,8,36,3 3,4,5,6,7,3<br>8,39,40,43 7,41,42,44 | 2 | Q6IFV1,Q8K4G9                      |
| 4834 | 1,2,8,36,3 3,4,5,6,7,3<br>8,39,40,44 7,41,42,43 | 1 | Q8K4G9                             |
| 4835 | 1,2,8,36,3 3,4,5,6,7,3<br>8,39,41,42 7,40,43,44 | 2 | P01835,Q8K4G9                      |
| 4836 | 1,2,8,36,3 3,4,5,6,7,3<br>8,39,41,43 7,40,42,44 | 2 | Q6IFV1,Q8K4G9                      |
| 4837 | 1,2,8,36,3 3,4,5,6,7,3<br>8,39,41,44 7,40,42,43 | 1 | Q8K4G9                             |
| 4838 | 1,2,8,36,3 3,4,5,6,7,3<br>8,39,42,43 7,40,41,44 | 4 | P06866,P15999,Q80WL1,Q8K4G9        |
| 4839 | 1,2,8,36,3 3,4,5,6,7,3<br>8,39,42,44 7,40,41,43 | 2 | P15999,Q8K4G9                      |
| 4840 | 1,2,8,36,3 3,4,5,6,7,3<br>8,39,43,44 7,40,41,42 | 0 |                                    |
| 4841 | 1,2,8,36,3 3,4,5,6,7,3<br>8,40,41,42 7,39,43,44 | 3 | P02625,P15999,Q8K4G9               |
| 4842 | 1,2,8,36,3 3,4,5,6,7,3<br>8,40,41,43 7,39,42,44 | 1 | Q8K4G9                             |
| 4843 | 1,2,8,36,3 3,4,5,6,7,3<br>8,40,41,44 7,39,42,43 | 2 | Q62635,Q8K4G9                      |
| 4844 | 1,2,8,36,3 3,4,5,6,7,3<br>8,40,42,43 7,39,41,44 | 3 | P15999,P62804,Q8K4G9               |
| 4845 | 1,2,8,36,3 3,4,5,6,7,3<br>8,40,42,44 7,39,41,43 | 5 | P02625,P15999,P62804,Q7TPB1,Q8K4G9 |
| 4846 | 1,2,8,36,3 3,4,5,6,7,3<br>8,40,43,44 7,39,41,42 | 1 | Q8K4G9                             |
| 4847 | 1,2,8,36,3 3,4,5,6,7,3<br>8,41,42,43 7,39,40,44 | 3 | P06866,P15999,Q8K4G9               |

|      |                          |                           |   |                                                         |
|------|--------------------------|---------------------------|---|---------------------------------------------------------|
| 4848 | 1,2,8,36,3<br>8,41,42,44 | 3,4,5,6,7,3<br>7,39,40,43 | 2 | P15999,Q8CIZ5                                           |
| 4849 | 1,2,8,36,3<br>8,41,43,44 | 3,4,5,6,7,3<br>7,39,40,42 | 3 | P55091,P98089,Q62635                                    |
| 4850 | 1,2,8,36,3<br>8,42,43,44 | 3,4,5,6,7,3<br>7,39,40,41 | 1 | P15999                                                  |
| 4851 | 1,2,8,36,3<br>9,40,41,42 | 3,4,5,6,7,3<br>7,38,43,44 | 2 | P01835,Q8K4G9                                           |
| 4852 | 1,2,8,36,3<br>9,40,41,43 | 3,4,5,6,7,3<br>7,38,42,44 | 3 | P01835,P12785,Q8K4G9                                    |
| 4853 | 1,2,8,36,3<br>9,40,41,44 | 3,4,5,6,7,3<br>7,38,42,43 | 7 | P01835,P10715,P19629,P31044,Q5GRG2,Q6AYL6,Q8K4G9        |
| 4854 | 1,2,8,36,3<br>9,40,42,43 | 3,4,5,6,7,3<br>7,38,41,44 | 3 | P01835,P62804,Q8K4G9                                    |
| 4855 | 1,2,8,36,3<br>9,40,42,44 | 3,4,5,6,7,3<br>7,38,41,43 | 3 | P01835,P62804,Q7TPB1                                    |
| 4856 | 1,2,8,36,3<br>9,40,43,44 | 3,4,5,6,7,3<br>7,38,41,42 | 1 | Q6AYL6                                                  |
| 4857 | 1,2,8,36,3<br>9,41,42,43 | 3,4,5,6,7,3<br>7,38,40,44 | 2 | D3ZUC6,P01835                                           |
| 4858 | 1,2,8,36,3<br>9,41,42,44 | 3,4,5,6,7,3<br>7,38,40,43 | 1 | P01835                                                  |
| 4859 | 1,2,8,36,3<br>9,41,43,44 | 3,4,5,6,7,3<br>7,38,40,42 | 1 | D3ZUC6                                                  |
| 4860 | 1,2,8,36,3<br>9,42,43,44 | 3,4,5,6,7,3<br>7,38,40,41 | 0 |                                                         |
| 4861 | 1,2,8,36,4<br>0,41,42,43 | 3,4,5,6,7,3<br>7,38,39,44 | 1 | P01835                                                  |
| 4862 | 1,2,8,36,4<br>0,41,42,44 | 3,4,5,6,7,3<br>7,38,39,43 | 3 | P01835,P02625,Q7TPB1                                    |
| 4863 | 1,2,8,36,4<br>0,41,43,44 | 3,4,5,6,7,3<br>7,38,39,42 | 1 | P19218                                                  |
| 4864 | 1,2,8,36,4<br>0,42,43,44 | 3,4,5,6,7,3<br>7,38,39,41 | 3 | P02625,P62804,Q7TPB1                                    |
| 4865 | 1,2,8,36,4<br>1,42,43,44 | 3,4,5,6,7,3<br>7,38,39,40 | 1 | P83121                                                  |
| 4866 | 1,2,8,37,3<br>8,39,40,41 | 3,4,5,6,7,3<br>6,42,43,44 | 7 | P05539,P10715,P13432,P19629,P35281,P55016,Q8K4G9        |
| 4867 | 1,2,8,37,3<br>8,39,40,42 | 3,4,5,6,7,3<br>6,41,43,44 | 3 | P02803,P35281,Q8K4G9                                    |
| 4868 | 1,2,8,37,3<br>8,39,40,43 | 3,4,5,6,7,3<br>6,41,42,44 | 8 | P05539,P08649,P35281,P60905,Q62740,Q6IFV1,Q812E4,Q8K4G9 |
| 4869 | 1,2,8,37,3<br>8,39,40,44 | 3,4,5,6,7,3<br>6,41,42,43 | 7 | P05539,P08649,P35281,P60905,Q812E4,Q8K4G9,Q9QZA6        |
| 4870 | 1,2,8,37,3<br>8,39,41,42 | 3,4,5,6,7,3<br>6,40,43,44 | 2 | P01835,P13432                                           |

|      |                                                 |   |                                                         |
|------|-------------------------------------------------|---|---------------------------------------------------------|
| 4871 | 1,2,8,37,3 3,4,5,6,7,3<br>8,39,41,43 6,40,42,44 | 3 | P05539,P36374,Q6IFV1                                    |
| 4872 | 1,2,8,37,3 3,4,5,6,7,3<br>8,39,41,44 6,40,42,43 | 2 | P05539,Q62635                                           |
| 4873 | 1,2,8,37,3 3,4,5,6,7,3<br>8,39,42,43 6,40,41,44 | 3 | P06866,Q6IFV1,Q80WL1                                    |
| 4874 | 1,2,8,37,3 3,4,5,6,7,3<br>8,39,42,44 6,40,41,43 | 1 | P05539                                                  |
| 4875 | 1,2,8,37,3 3,4,5,6,7,3<br>8,39,43,44 6,40,41,42 | 6 | P05539,P13596,P23593,Q6IFV1,Q812E4,Q9JJS8               |
| 4876 | 1,2,8,37,3 3,4,5,6,7,3<br>8,40,41,42 6,39,43,44 | 2 | P02625,Q8K4G9                                           |
| 4877 | 1,2,8,37,3 3,4,5,6,7,3<br>8,40,41,43 6,39,42,44 | 5 | P05539,P55016,Q5XI73,Q6IFV1,Q8K4G9                      |
| 4878 | 1,2,8,37,3 3,4,5,6,7,3<br>8,40,41,44 6,39,42,43 | 5 | P05539,P10715,P31044,Q5GRG2,Q62635                      |
| 4879 | 1,2,8,37,3 3,4,5,6,7,3<br>8,40,42,43 6,39,41,44 | 3 | P06866,Q6IFV1,Q8VD89                                    |
| 4880 | 1,2,8,37,3 3,4,5,6,7,3<br>8,40,42,44 6,39,41,43 | 1 | P02625                                                  |
| 4881 | 1,2,8,37,3 3,4,5,6,7,3<br>8,40,43,44 6,39,41,42 | 5 | P05539,P08010,P08649,Q6AYR9,Q6IFV1                      |
| 4882 | 1,2,8,37,3 3,4,5,6,7,3<br>8,41,42,43 6,39,40,44 | 2 | P06866,Q6P6T1                                           |
| 4883 | 1,2,8,37,3 3,4,5,6,7,3<br>8,41,42,44 6,39,40,43 | 1 | Q62635                                                  |
| 4884 | 1,2,8,37,3 3,4,5,6,7,3<br>8,41,43,44 6,39,40,42 | 6 | O88600,P00774,P05539,P55091,P98089,Q62635               |
| 4885 | 1,2,8,37,3 3,4,5,6,7,3<br>8,42,43,44 6,39,40,41 | 3 | P05539,P06866,Q8VD89                                    |
| 4886 | 1,2,8,37,3 3,4,5,6,7,3<br>9,40,41,42 6,38,43,44 | 1 | P01835                                                  |
| 4887 | 1,2,8,37,3 3,4,5,6,7,3<br>9,40,41,43 6,38,42,44 | 6 | P01835,P10715,P12785,P97554,Q5XI73,Q6AYL6               |
| 4888 | 1,2,8,37,3 3,4,5,6,7,3<br>9,40,41,44 6,38,42,43 | 8 | P01835,P06911,P10715,P19629,P31044,P47727,Q5GRG2,Q6AYL6 |
| 4889 | 1,2,8,37,3 3,4,5,6,7,3<br>9,40,42,43 6,38,41,44 | 2 | P01835,P49744                                           |
| 4890 | 1,2,8,37,3 3,4,5,6,7,3<br>9,40,42,44 6,38,41,43 | 2 | P01835,P49744                                           |
| 4891 | 1,2,8,37,3 3,4,5,6,7,3<br>9,40,43,44 6,38,41,42 | 7 | O35547,P05539,P08010,P08649,P97554,Q6AYL6,Q812E4        |
| 4892 | 1,2,8,37,3 3,4,5,6,7,3<br>9,41,42,43 6,38,40,44 | 2 | P00731,P01835                                           |
| 4893 | 1,2,8,37,3 3,4,5,6,7,3<br>9,41,42,44 6,38,40,43 | 1 | P01835                                                  |

|      |                          |                           |   |                                                  |
|------|--------------------------|---------------------------|---|--------------------------------------------------|
| 4894 | 1,2,8,37,3<br>9,41,43,44 | 3,4,5,6,7,3<br>6,38,40,42 | 1 | P05539                                           |
| 4895 | 1,2,8,37,3<br>9,42,43,44 | 3,4,5,6,7,3<br>6,38,40,41 | 0 |                                                  |
| 4896 | 1,2,8,37,4<br>0,41,42,43 | 3,4,5,6,7,3<br>6,38,39,44 | 1 | P01835                                           |
| 4897 | 1,2,8,37,4<br>0,41,42,44 | 3,4,5,6,7,3<br>6,38,39,43 | 2 | P01835,P02625                                    |
| 4898 | 1,2,8,37,4<br>0,41,43,44 | 3,4,5,6,7,3<br>6,38,39,42 | 6 | P08010,P10715,P19218,P47727,Q5XI73,Q6AYL6        |
| 4899 | 1,2,8,37,4<br>0,42,43,44 | 3,4,5,6,7,3<br>6,38,39,41 | 1 | P02625                                           |
| 4900 | 1,2,8,37,4<br>1,42,43,44 | 3,4,5,6,7,3<br>6,38,39,40 | 0 |                                                  |
| 4901 | 1,2,8,38,3<br>9,40,41,42 | 3,4,5,6,7,3<br>6,37,43,44 | 2 | P13432,Q8K4G9                                    |
| 4902 | 1,2,8,38,3<br>9,40,41,43 | 3,4,5,6,7,3<br>6,37,42,44 | 2 | P55016,Q6IFV1                                    |
| 4903 | 1,2,8,38,3<br>9,40,41,44 | 3,4,5,6,7,3<br>6,37,42,43 | 7 | P06911,P10715,P19629,P31044,Q5GRG2,Q62635,Q6AYL6 |
| 4904 | 1,2,8,38,3<br>9,40,42,43 | 3,4,5,6,7,3<br>6,37,41,44 | 0 |                                                  |
| 4905 | 1,2,8,38,3<br>9,40,42,44 | 3,4,5,6,7,3<br>6,37,41,43 | 1 | Q99041                                           |
| 4906 | 1,2,8,38,3<br>9,40,43,44 | 3,4,5,6,7,3<br>6,37,41,42 | 3 | P05539,P08649,Q6AYL6                             |
| 4907 | 1,2,8,38,3<br>9,41,42,43 | 3,4,5,6,7,3<br>6,37,40,44 | 3 | P00731,P06866,P13432                             |
| 4908 | 1,2,8,38,3<br>9,41,42,44 | 3,4,5,6,7,3<br>6,37,40,43 | 3 | P55091,P98089,Q62635                             |
| 4909 | 1,2,8,38,3<br>9,41,43,44 | 3,4,5,6,7,3<br>6,37,40,42 | 6 | P00731,P00774,P23593,P55091,P98089,Q62635        |
| 4910 | 1,2,8,38,3<br>9,42,43,44 | 3,4,5,6,7,3<br>6,37,40,41 | 1 | Q80WL1                                           |
| 4911 | 1,2,8,38,4<br>0,41,42,43 | 3,4,5,6,7,3<br>6,37,39,44 | 0 |                                                  |
| 4912 | 1,2,8,38,4<br>0,41,42,44 | 3,4,5,6,7,3<br>6,37,39,43 | 4 | P02625,P55091,P98089,Q62635                      |
| 4913 | 1,2,8,38,4<br>0,41,43,44 | 3,4,5,6,7,3<br>6,37,39,42 | 3 | P55091,P98089,Q62635                             |
| 4914 | 1,2,8,38,4<br>0,42,43,44 | 3,4,5,6,7,3<br>6,37,39,41 | 1 | Q99041                                           |
| 4915 | 1,2,8,38,4<br>1,42,43,44 | 3,4,5,6,7,3<br>6,37,39,40 | 4 | P00731,P55091,P98089,Q62635                      |
| 4916 | 1,2,8,39,4<br>0,41,42,43 | 3,4,5,6,7,3<br>6,37,38,44 | 1 | P01835                                           |

|      |                               |                           |    |                                                                                                                 |
|------|-------------------------------|---------------------------|----|-----------------------------------------------------------------------------------------------------------------|
| 4917 | 1,2,8,39,4<br>0,41,42,44      | 3,4,5,6,7,3<br>6,37,38,43 | 6  | P01835,P10715,P19629,P31044,Q5GRG2,Q6AYL6                                                                       |
| 4918 | 1,2,8,39,4<br>0,41,43,44      | 3,4,5,6,7,3<br>6,37,38,42 | 8  | P10715,P12785,P19218,P19629,P31044,P97554,Q5GRG2,Q6AYL6                                                         |
| 4919 | 1,2,8,39,4<br>0,42,43,44      | 3,4,5,6,7,3<br>6,37,38,41 | 1  | Q6AYL6                                                                                                          |
| 4920 | 1,2,8,39,4<br>1,42,43,44      | 3,4,5,6,7,3<br>6,37,38,40 | 1  | P00731                                                                                                          |
| 4921 | 1,2,8,40,4<br>1,42,43,44      | 3,4,5,6,7,3<br>6,37,38,39 | 2  | P19218,Q6PCU2                                                                                                   |
| 4922 | 1,2,36,37,<br>38,39,40,4<br>1 | 3,4,5,6,7,8<br>,42,43,44  | 9  | P00714,P08723,P26772,P36374,P55016,P60905,Q4AEF8,Q5M819,Q9Z0V6                                                  |
| 4923 | 1,2,36,37,<br>38,39,40,4<br>2 | 3,4,5,6,7,8<br>,41,43,44  | 3  | P07171,P49744,Q99041                                                                                            |
| 4924 | 1,2,36,37,<br>38,39,40,4<br>3 | 3,4,5,6,7,8<br>,41,42,44  | 16 | O35547,P07171,P08010,P08753,P35281,P36374,P49744,P55016,P60905,P97605,Q4AEF8,Q62753,Q6IFV1,Q812E4,Q9JID2,Q9Z0V6 |
| 4925 | 1,2,36,37,<br>38,39,40,4<br>4 | 3,4,5,6,7,8<br>,41,42,43  | 9  | O35547,P49744,P54921,P60905,P97605,Q63357,Q6GMN2,Q812E4,Q99041                                                  |
| 4926 | 1,2,36,37,<br>38,39,41,4<br>2 | 3,4,5,6,7,8<br>,40,43,44  | 3  | P01835,P13432,Q5M819                                                                                            |
| 4927 | 1,2,36,37,<br>38,39,41,4<br>3 | 3,4,5,6,7,8<br>,40,42,44  | 10 | D3ZUC6,P00714,P06866,P36374,P55016,Q4AEF8,Q5M819,Q6IFV1,Q9QZ76,Q9Z0V6                                           |
| 4928 | 1,2,36,37,<br>38,39,41,4<br>4 | 3,4,5,6,7,8<br>,40,42,43  | 5  | P36374,Q5M819,Q9JHB9,Q9JJS8,Q9Z0V6                                                                              |
| 4929 | 1,2,36,37,<br>38,39,42,4<br>3 | 3,4,5,6,7,8<br>,40,41,44  | 6  | P06866,P07171,P12020,Q63617,Q6IFV1,Q99041                                                                       |
| 4930 | 1,2,36,37,<br>38,39,42,4<br>4 | 3,4,5,6,7,8<br>,40,41,43  | 4  | P97840,Q63617,Q99041,Q9JJS8                                                                                     |
| 4931 | 1,2,36,37,<br>38,39,43,4<br>4 | 3,4,5,6,7,8<br>,40,41,42  | 10 | P23593,P36374,P97605,Q4AEF8,Q62753,Q63617,Q6IFV1,Q812E4,Q99041,Q9JJS8                                           |
| 4932 | 1,2,36,37,<br>38,40,41,4<br>2 | 3,4,5,6,7,8<br>,39,43,44  | 4  | P02625,P07171,P55016,Q5M819                                                                                     |
| 4933 | 1,2,36,37,<br>38,40,41,4<br>3 | 3,4,5,6,7,8<br>,39,42,44  | 7  | P07171,P36374,P55016,Q4AEF8,Q5M819,Q6IFV1,Q9Z0V6                                                                |

|      |                               |                          |    |                                                                                                          |
|------|-------------------------------|--------------------------|----|----------------------------------------------------------------------------------------------------------|
| 4934 | 1,2,36,37,<br>38,40,41,4<br>4 | 3,4,5,6,7,8<br>,39,42,43 | 2  | O35547,P55016                                                                                            |
| 4935 | 1,2,36,37,<br>38,40,42,4<br>3 | 3,4,5,6,7,8<br>,39,41,44 | 4  | P06866,P07171,P97605,Q99041                                                                              |
| 4936 | 1,2,36,37,<br>38,40,42,4<br>4 | 3,4,5,6,7,8<br>,39,41,43 | 3  | P02625,Q7TPB1,Q99041                                                                                     |
| 4937 | 1,2,36,37,<br>38,40,43,4<br>4 | 3,4,5,6,7,8<br>,39,41,42 | 8  | O35547,P08010,P08753,P97605,Q4AEF8,Q62753,Q6AYR9,Q99041                                                  |
| 4938 | 1,2,36,37,<br>38,41,42,4<br>3 | 3,4,5,6,7,8<br>,39,40,44 | 6  | P06866,P07171,P55016,Q5M819,Q6AYS4,Q6P6T1                                                                |
| 4939 | 1,2,36,37,<br>38,41,42,4<br>4 | 3,4,5,6,7,8<br>,39,40,43 | 0  |                                                                                                          |
| 4940 | 1,2,36,37,<br>38,41,43,4<br>4 | 3,4,5,6,7,8<br>,39,40,42 | 6  | D3ZUC6,P36374,P55016,P98089,Q4AEF8,Q5M819                                                                |
| 4941 | 1,2,36,37,<br>38,42,43,4<br>4 | 3,4,5,6,7,8<br>,39,40,41 | 5  | P06866,P15999,P97605,Q63617,Q99041                                                                       |
| 4942 | 1,2,36,37,<br>39,40,41,4<br>2 | 3,4,5,6,7,8<br>,38,43,44 | 3  | P01835,P07171,P49744                                                                                     |
| 4943 | 1,2,36,37,<br>39,40,41,4<br>3 | 3,4,5,6,7,8<br>,38,42,44 | 11 | D3ZUC6,O35547,P00714,P01835,P07171,P36374,P55016,P60905,P97554,Q4AEF8,Q9Z0V6                             |
| 4944 | 1,2,36,37,<br>39,40,41,4<br>4 | 3,4,5,6,7,8<br>,38,42,43 | 12 | O35547,P01835,P08723,P10715,P19629,P36374,P47727,Q4AEF8,Q5GRG2,Q6AYL6,Q9JHB9,Q9Z0V6                      |
| 4945 | 1,2,36,37,<br>39,40,42,4<br>3 | 3,4,5,6,7,8<br>,38,41,44 | 8  | O35547,P01835,P07171,P49744,P50115,P50116,Q05695,Q99041                                                  |
| 4946 | 1,2,36,37,<br>39,40,42,4<br>4 | 3,4,5,6,7,8<br>,38,41,43 | 8  | O35547,P01835,P49744,P50115,P50116,Q7TPB1,Q8CJD3,Q99041                                                  |
| 4947 | 1,2,36,37,<br>39,40,43,4<br>4 | 3,4,5,6,7,8<br>,38,41,42 | 15 | O35547,P05369,P08010,P08753,P49744,P50115,P50116,P54921,P60905,P97605,Q4AEF8,Q62753,Q63357,Q6AYL6,Q812E4 |
| 4948 | 1,2,36,37,<br>39,41,42,4<br>3 | 3,4,5,6,7,8<br>,38,40,44 | 7  | D3ZUC6,P01835,P06866,P07171,P22006,Q6AYS4,Q9Z0V6                                                         |

|      |                               |                          |   |                                                                |
|------|-------------------------------|--------------------------|---|----------------------------------------------------------------|
| 4949 | 1,2,36,37,<br>39,41,42,4<br>4 | 3,4,5,6,7,8<br>,38,40,43 | 1 | P01835                                                         |
| 4950 | 1,2,36,37,<br>39,41,43,4<br>4 | 3,4,5,6,7,8<br>,38,40,42 | 5 | D3ZUC6,P05369,P36374,Q4AEF8,Q9Z0V6                             |
| 4951 | 1,2,36,37,<br>39,42,43,4<br>4 | 3,4,5,6,7,8<br>,38,40,41 | 5 | D3ZUC6,P50115,P50116,Q63617,Q99041                             |
| 4952 | 1,2,36,37,<br>40,41,42,4<br>3 | 3,4,5,6,7,8<br>,38,39,44 | 3 | P01835,P07171,Q6AYS4                                           |
| 4953 | 1,2,36,37,<br>40,41,42,4<br>4 | 3,4,5,6,7,8<br>,38,39,43 | 3 | P01835,P02625,Q7TPB1                                           |
| 4954 | 1,2,36,37,<br>40,41,43,4<br>4 | 3,4,5,6,7,8<br>,38,39,42 | 7 | D3ZUC6,O35547,P05369,P08010,P19218,P47727,Q4AEF8               |
| 4955 | 1,2,36,37,<br>40,42,43,4<br>4 | 3,4,5,6,7,8<br>,38,39,41 | 9 | O35547,P02625,P08010,P19218,P50115,P50116,P97605,Q7TPB1,Q99041 |
| 4956 | 1,2,36,37,<br>41,42,43,4<br>4 | 3,4,5,6,7,8<br>,38,39,40 | 2 | D3ZUC6,Q6AYS4                                                  |
| 4957 | 1,2,36,38,<br>39,40,41,4<br>2 | 3,4,5,6,7,8<br>,37,43,44 | 2 | P07171,P13432                                                  |
| 4958 | 1,2,36,38,<br>39,40,41,4<br>3 | 3,4,5,6,7,8<br>,37,42,44 | 5 | P00714,P07171,P55016,Q4AEF8,Q9QZQ5                             |
| 4959 | 1,2,36,38,<br>39,40,41,4<br>4 | 3,4,5,6,7,8<br>,37,42,43 | 4 | P10715,P19629,Q4AEF8,Q5GRG2                                    |
| 4960 | 1,2,36,38,<br>39,40,42,4<br>3 | 3,4,5,6,7,8<br>,37,41,44 | 5 | P06866,P07171,Q63617,Q6IFU7,Q99041                             |
| 4961 | 1,2,36,38,<br>39,40,42,4<br>4 | 3,4,5,6,7,8<br>,37,41,43 | 2 | Q7TPB1,Q99041                                                  |
| 4962 | 1,2,36,38,<br>39,40,43,4<br>4 | 3,4,5,6,7,8<br>,37,41,42 | 4 | P97605,Q4AEF8,Q99041,Q9QZQ5                                    |
| 4963 | 1,2,36,38,<br>39,41,42,4<br>3 | 3,4,5,6,7,8<br>,37,40,44 | 4 | D3ZUC6,P06866,P07171,Q6IFU7                                    |

|      |                               |                          |   |                                           |
|------|-------------------------------|--------------------------|---|-------------------------------------------|
| 4964 | 1,2,36,38,<br>39,41,42,4<br>4 | 3,4,5,6,7,8<br>,37,40,43 | 0 |                                           |
| 4965 | 1,2,36,38,<br>39,41,43,4<br>4 | 3,4,5,6,7,8<br>,37,40,42 | 3 | D3ZUC6,P98089,Q4AEF8                      |
| 4966 | 1,2,36,38,<br>39,42,43,4<br>4 | 3,4,5,6,7,8<br>,37,40,41 | 4 | P15999,Q63617,Q6IFU7,Q99041               |
| 4967 | 1,2,36,38,<br>40,41,42,4<br>3 | 3,4,5,6,7,8<br>,37,39,44 | 3 | P06866,P07171,P55016                      |
| 4968 | 1,2,36,38,<br>40,41,42,4<br>4 | 3,4,5,6,7,8<br>,37,39,43 | 4 | P02625,P15999,Q7TPB1,Q99041               |
| 4969 | 1,2,36,38,<br>40,41,43,4<br>4 | 3,4,5,6,7,8<br>,37,39,42 | 3 | P55016,P98089,Q4AEF8                      |
| 4970 | 1,2,36,38,<br>40,42,43,4<br>4 | 3,4,5,6,7,8<br>,37,39,41 | 4 | P02625,P15999,Q7TPB1,Q99041               |
| 4971 | 1,2,36,38,<br>41,42,43,4<br>4 | 3,4,5,6,7,8<br>,37,39,40 | 6 | P06866,P15999,P55091,P98089,Q6AYS4,Q99041 |
| 4972 | 1,2,36,39,<br>40,41,42,4<br>3 | 3,4,5,6,7,8<br>,37,38,44 | 4 | D3ZUC6,P01835,P07171,Q9R044               |
| 4973 | 1,2,36,39,<br>40,41,42,4<br>4 | 3,4,5,6,7,8<br>,37,38,43 | 4 | P01835,P10715,P19629,Q7TPB1               |
| 4974 | 1,2,36,39,<br>40,41,43,4<br>4 | 3,4,5,6,7,8<br>,37,38,42 | 6 | D3ZUC6,P10715,P19218,P19629,Q4AEF8,Q6AYL6 |
| 4975 | 1,2,36,39,<br>40,42,43,4<br>4 | 3,4,5,6,7,8<br>,37,38,41 | 4 | P50115,P50116,Q7TPB1,Q99041               |
| 4976 | 1,2,36,39,<br>41,42,43,4<br>4 | 3,4,5,6,7,8<br>,37,38,40 | 1 | D3ZUC6                                    |
| 4977 | 1,2,36,40,<br>41,42,43,4<br>4 | 3,4,5,6,7,8<br>,37,38,39 | 2 | P19218,Q7TPB1                             |
| 4978 | 1,2,37,38,<br>39,40,41,4<br>2 | 3,4,5,6,7,8<br>,36,43,44 | 6 | O54858,P07171,P13432,P49744,P55016,Q07116 |



|      |                               |                          |    |                                                                                                                                                           |
|------|-------------------------------|--------------------------|----|-----------------------------------------------------------------------------------------------------------------------------------------------------------|
| 4979 | 1,2,37,38,<br>39,40,41,4<br>3 | 3,4,5,6,7,8<br>,36,42,44 | 12 | P00714,P07171,P13432,P36374,P55016,P60905,P97554,Q07116,Q4AEF8,Q6IFV1,Q812E4,Q9QZQ5                                                                       |
| 4980 | 1,2,37,38,<br>39,40,41,4<br>4 | 3,4,5,6,7,8<br>,36,42,43 | 14 | O54858,P05539,P07171,P10715,P19629,P36374,P55016,P60905,Q07116,Q4AEF8,Q5GRG2,Q63357,Q6AYL6,Q812E4                                                         |
| 4981 | 1,2,37,38,<br>39,40,42,4<br>3 | 3,4,5,6,7,8<br>,36,41,44 | 12 | O54858,P06866,P07171,P49744,P55016,P97605,Q07116,Q4AEF8,Q64611,Q6IFV1,Q812E4,Q99041                                                                       |
| 4982 | 1,2,37,38,<br>39,40,42,4<br>4 | 3,4,5,6,7,8<br>,36,41,43 | 6  | O54858,P07171,P49744,Q07116,Q99041,Q9QUL6                                                                                                                 |
| 4983 | 1,2,37,38,<br>39,40,43,4<br>4 | 3,4,5,6,7,8<br>,36,41,42 | 22 | O35547,P04905,P05539,P07171,P08010,P08649,P08753,P23593,P36374,P49744,P60905,P97605,Q07116,Q4AEF8,Q62753,Q63357,Q6AYL6,Q6IFV1,Q812E4,Q99041,Q9JJS8,Q9QZQ5 |
| 4984 | 1,2,37,38,<br>39,41,42,4<br>3 | 3,4,5,6,7,8<br>,36,40,44 | 8  | P00731,P06866,P07171,P13432,P55016,Q4AEF8,Q6AYS4,Q6P6T1                                                                                                   |
| 4985 | 1,2,37,38,<br>39,41,42,4<br>4 | 3,4,5,6,7,8<br>,36,40,43 | 3  | P07171,P13432,Q6AYS4                                                                                                                                      |
| 4986 | 1,2,37,38,<br>39,41,43,4<br>4 | 3,4,5,6,7,8<br>,36,40,42 | 11 | P05539,P07171,P23593,P36374,P55016,P98089,Q4AEF8,Q6AYS4,Q6IFV1,Q812E4,Q9JJS8                                                                              |
| 4987 | 1,2,37,38,<br>39,42,43,4<br>4 | 3,4,5,6,7,8<br>,36,40,41 | 7  | P06866,P07171,P23593,Q63617,Q6AYS4,Q99041,Q9JJS8                                                                                                          |
| 4988 | 1,2,37,38,<br>40,41,42,4<br>3 | 3,4,5,6,7,8<br>,36,39,44 | 6  | P06866,P07171,P55016,Q07116,Q4AEF8,Q6AYS4                                                                                                                 |
| 4989 | 1,2,37,38,<br>40,41,42,4<br>4 | 3,4,5,6,7,8<br>,36,39,43 | 5  | O54858,P02625,P07171,Q07116,Q6AYS4                                                                                                                        |
| 4990 | 1,2,37,38,<br>40,41,43,4<br>4 | 3,4,5,6,7,8<br>,36,39,42 | 13 | P04905,P05539,P07171,P08010,P19218,P36374,P55016,P98089,Q07116,Q4AEF8,Q6AYR9,Q6AYS4,Q9QZQ5                                                                |
| 4991 | 1,2,37,38,<br>40,42,43,4<br>4 | 3,4,5,6,7,8<br>,36,39,41 | 9  | O54858,P06866,P07171,P08010,P97605,Q07116,Q6AYS4,Q8VD89,Q99041                                                                                            |
| 4992 | 1,2,37,38,<br>41,42,43,4<br>4 | 3,4,5,6,7,8<br>,36,39,40 | 5  | P06866,P07171,P55091,P98089,Q6AYS4                                                                                                                        |
| 4993 | 1,2,37,39,<br>40,41,42,4<br>3 | 3,4,5,6,7,8<br>,36,38,44 | 5  | P01835,P07171,P49744,Q4AEF8,Q6AYS4                                                                                                                        |

|      |                               |                                   |    |                                                                                                                                                                      |
|------|-------------------------------|-----------------------------------|----|----------------------------------------------------------------------------------------------------------------------------------------------------------------------|
| 4994 | 1,2,37,39,<br>40,41,42,4<br>4 | 3,4,5,6,7,8<br>,36,38,43          | 8  | O54858,P01835,P07171,P10715,P19629,P49744,Q07116,Q6AYL6                                                                                                              |
| 4995 | 1,2,37,39,<br>40,41,43,4<br>4 | 3,4,5,6,7,8<br>,36,38,42          | 21 | O35547,P04905,P05369,P07171,P08010,P08753,P10715,P19218,P19629,P36374,P47727,P49744,P60905,P97554,Q07116,Q4AEF8,Q5GR<br>G2,Q6AYL6,Q6AYS4,Q812E4,Q9QZQ5               |
| 4996 | 1,2,37,39,<br>40,42,43,4<br>4 | 3,4,5,6,7,8<br>,36,38,41          | 10 | O54858,P07171,P08010,P49744,P50115,P50116,Q07116,Q6AYL6,Q6AYS4,Q99041                                                                                                |
| 4997 | 1,2,37,39,<br>41,42,43,4<br>4 | 3,4,5,6,7,8<br>,36,38,40          | 3  | P00731,P07171,Q6AYS4                                                                                                                                                 |
| 4998 | 1,2,37,40,<br>41,42,43,4<br>4 | 3,4,5,6,7,8<br>,36,38,39          | 5  | O54858,P07171,P19218,Q07116,Q6AYS4                                                                                                                                   |
| 4999 | 1,2,38,39,<br>40,41,42,4<br>3 | 3,4,5,6,7,8<br>,36,37,44          | 10 | P06866,P07171,P13432,P53792,P55016,Q07116,Q4AEF8,Q6AYS4,Q6IFU7,Q99041                                                                                                |
| 5000 | 1,2,38,39,<br>40,41,42,4<br>4 | 3,4,5,6,7,8<br>,36,37,43          | 7  | O54858,P07171,P10715,P13432,P19629,Q07116,Q99041                                                                                                                     |
| 5001 | 1,2,38,39,<br>40,41,43,4<br>4 | 3,4,5,6,7,8<br>,36,37,42          | 9  | P07171,P10715,P19629,P55016,P98089,Q07116,Q4AEF8,Q6AYL6,Q9QZQ5                                                                                                       |
| 5002 | 1,2,38,39,<br>40,42,43,4<br>4 | 3,4,5,6,7,8<br>,36,37,41          | 6  | O54858,P07171,P11762,Q07116,Q6IFU7,Q99041                                                                                                                            |
| 5003 | 1,2,38,39,<br>41,42,43,4<br>4 | 3,4,5,6,7,8<br>,36,37,40          | 8  | P00731,P06866,P07171,P55091,P98089,Q6AYS4,Q6IFU7,Q99041                                                                                                              |
| 5004 | 1,2,38,40,<br>41,42,43,4<br>4 | 3,4,5,6,7,8<br>,36,37,39          | 8  | P07171,P55016,P55091,P98089,Q07116,Q4AEF8,Q6AYS4,Q99041                                                                                                              |
| 5005 | 1,2,39,40,<br>41,42,43,4<br>4 | 3,4,5,6,7,8<br>,36,37,38          | 9  | O54858,P07171,P10715,P19218,P19629,Q4AEF8,Q6AYL6,Q6AYS4,Q99041                                                                                                       |
| 5006 | 1,3,4,5,6,7<br>,8,36          | 2,37,38,39<br>,40,41,42,<br>43,44 | 23 | O54858,P05539,P07171,P07897,P08010,P08753,P11030,P19218,P35446,P36374,P49744,P53792,P55314,P60905,P85971,Q01205,Q0711<br>6,Q09030,Q3T1K5,Q4AEF8,Q63617,Q6AYS4,Q99041 |
| 5007 | 1,3,4,5,6,7<br>,8,37          | 2,36,38,39<br>,40,41,42,<br>43,44 | 12 | P07171,P07897,P11030,P11762,P52590,P53792,Q09030,Q3T1K5,Q4AEF8,Q63617,Q7TPB1,Q99041                                                                                  |
| 5008 | 1,3,4,5,6,7<br>,8,38          | 2,36,37,39<br>,40,41,42,<br>43,44 | 18 | O35547,P05539,P07171,P07897,P08010,P08753,P19218,P36374,P49744,P52590,P53792,P60905,P97580,Q30KJ2,Q4AEF8,Q5M871,Q6IE<br>51,Q7TPB1                                    |

|      |                       |                                   |    |                                                                                                                                                                                                                                               |
|------|-----------------------|-----------------------------------|----|-----------------------------------------------------------------------------------------------------------------------------------------------------------------------------------------------------------------------------------------------|
| 5009 | 1,3,4,5,6,7<br>,8,39  | 2,36,37,38<br>,40,41,42,<br>43,44 | 16 | O54728,P02625,P05539,P07171,P07897,P08010,P08753,P19218,P36374,P52590,Q4AEF8,Q63617,Q6IE51,Q7TPB1,Q99041,Q9ESW0                                                                                                                               |
| 5010 | 1,3,4,5,6,7<br>,8,40  | 2,36,37,38<br>,39,41,42,<br>43,44 | 12 | P05539,P06866,P07171,P07897,P36374,P53792,Q09030,Q3T1K5,Q4AEF8,Q63617,Q9JJS8,Q9QZ76                                                                                                                                                           |
| 5011 | 1,3,4,5,6,7<br>,8,41  | 2,36,37,38<br>,39,40,42,<br>43,44 | 24 | O35547,P05539,P07171,P07897,P08010,P08753,P18418,P36374,P49744,P52590,P60905,P80201,P85971,P97605,Q09030,Q4AEF8,Q5M871,Q62753,Q63357,Q63617,Q7TPB1,Q80YN4,Q99041,Q9JJS8                                                                       |
| 5012 | 1,3,4,5,6,7<br>,8,42  | 2,36,37,38<br>,39,40,41,<br>43,44 | 34 | O08815,O35547,P02781,P04905,P05539,P07171,P07897,P08010,P08290,P08753,P16086,P19218,P20759,P35446,P36374,P47727,P49744,P52590,P53792,P55016,P60905,P85971,P97554,Q09030,Q3T1K5,Q4AEF8,Q62753,Q63357,Q6AYR8,Q812E4,Q9JJS8,Q9QZ76,Q9QZK9,Q9QZQ5 |
| 5013 | 1,3,4,5,6,7<br>,8,43  | 2,36,37,38<br>,39,40,41,<br>42,44 | 20 | O54858,P01681,P02091,P05539,P07171,P36374,P49744,P52590,P60905,P83748,P85971,Q09030,Q3T1K5,Q4AEF8,Q63416,Q63617,Q64268,Q7TPB1,Q9QX79,Q9WUW3                                                                                                   |
| 5014 | 1,3,4,5,6,7<br>,8,44  | 2,36,37,38<br>,39,40,41,<br>42,43 | 15 | P05539,P06866,P07171,P07897,P36374,P49744,P52590,P53792,P55016,P60905,P85971,Q3T1K5,Q4AEF8,Q5I0D1,Q63617                                                                                                                                      |
| 5015 | 1,3,4,5,6,7<br>,36,37 | 2,8,38,39,<br>40,41,42,4<br>3,44  | 6  | P05539,P11030,P11762,P22734,P53792,Q4AEF8                                                                                                                                                                                                     |
| 5016 | 1,3,4,5,6,7<br>,36,38 | 2,8,37,39,<br>40,41,42,4<br>3,44  | 10 | P05539,P08010,P13596,P19218,P49744,P53792,P55314,P97580,Q4AEF8,Q6IE51                                                                                                                                                                         |
| 5017 | 1,3,4,5,6,7<br>,36,39 | 2,8,37,38,<br>40,41,42,4<br>3,44  | 11 | O54728,P05539,P08010,P19218,P22734,P35446,P55314,Q4AEF8,Q62635,Q6IE51,Q8VD89                                                                                                                                                                  |
| 5018 | 1,3,4,5,6,7<br>,36,40 | 2,8,37,38,<br>39,41,42,4<br>3,44  | 9  | P00731,P05539,P11030,P13596,P53792,P55314,Q09030,Q4AEF8,Q6IRE4                                                                                                                                                                                |
| 5019 | 1,3,4,5,6,7<br>,36,41 | 2,8,37,38,<br>39,40,42,4<br>3,44  | 12 | P05539,P08010,P08649,P11030,P13596,P49744,P60905,Q09030,Q4AEF8,Q6BEA2,Q8VD89,Q99041                                                                                                                                                           |
| 5020 | 1,3,4,5,6,7<br>,36,42 | 2,8,37,38,<br>39,40,41,4<br>3,44  | 26 | O54728,P02781,P04905,P05539,P08010,P08290,P08649,P08753,P13596,P16086,P17046,P19218,P19629,P35446,P36374,P47727,P53792,P60905,P97554,Q09030,Q4AEF8,Q5XI73,Q62635,Q63357,Q6AYR8,Q812E4                                                         |
| 5021 | 1,3,4,5,6,7<br>,36,43 | 2,8,37,38,<br>39,40,41,4<br>2,44  | 10 | P01681,P02091,P05539,P06760,P22734,P49744,P55314,P83748,P85971,Q6IE51                                                                                                                                                                         |
| 5022 | 1,3,4,5,6,7<br>,36,44 | 2,8,37,38,<br>39,40,41,4<br>2,43  | 9  | P05539,P07897,P34901,P49744,P53792,P55314,P60905,Q4AEF8,Q6BEA2                                                                                                                                                                                |
| 5023 | 1,3,4,5,6,7<br>,37,38 | 2,8,36,39,<br>40,41,42,4<br>3,44  | 7  | P15399,P19218,P52590,P62804,P97580,Q30KJ2,Q7TPB1                                                                                                                                                                                              |

|      |                       |                                  |    |                                                                                                                                      |
|------|-----------------------|----------------------------------|----|--------------------------------------------------------------------------------------------------------------------------------------|
| 5024 | 1,3,4,5,6,7<br>,37,39 | 2,8,36,38,<br>40,41,42,4<br>3,44 | 7  | P02625,P05539,P15999,P19218,P62804,Q6IE51,Q9ESW0                                                                                     |
| 5025 | 1,3,4,5,6,7<br>,37,40 | 2,8,36,38,<br>39,41,42,4<br>3,44 | 2  | P05539,Q6IRE4                                                                                                                        |
| 5026 | 1,3,4,5,6,7<br>,37,41 | 2,8,36,38,<br>39,40,42,4<br>3,44 | 8  | P05539,P11030,P18418,P62804,Q6IRE4,Q7TPB1,Q8K4G9,Q99041                                                                              |
| 5027 | 1,3,4,5,6,7<br>,37,42 | 2,8,36,38,<br>39,40,41,4<br>3,44 | 6  | P05539,P17046,P19629,Q4AEF8,Q5XI73,Q8K4G9                                                                                            |
| 5028 | 1,3,4,5,6,7<br>,37,43 | 2,8,36,38,<br>39,40,41,4<br>2,44 | 8  | P01681,P02091,P05539,P52590,P62804,P83748,Q7TPB1,Q8K4G9                                                                              |
| 5029 | 1,3,4,5,6,7<br>,37,44 | 2,8,36,38,<br>39,40,41,4<br>2,43 | 3  | P62804,Q4AEF8,Q8K4G9                                                                                                                 |
| 5030 | 1,3,4,5,6,7<br>,38,39 | 2,8,36,37,<br>40,41,42,4<br>3,44 | 9  | O54728,P02625,P05539,P08010,P19218,P52590,P97580,Q30KJ2,Q6IE51                                                                       |
| 5031 | 1,3,4,5,6,7<br>,38,40 | 2,8,36,37,<br>39,41,42,4<br>3,44 | 7  | P01835,P05539,P15399,P97580,Q30KJ2,Q6IE51,Q6IRE4                                                                                     |
| 5032 | 1,3,4,5,6,7<br>,38,41 | 2,8,36,37,<br>39,40,42,4<br>3,44 | 10 | O35547,P05539,P08010,P49744,P52590,P62804,P97580,Q6IE51,Q6IRE4,Q7TPB1                                                                |
| 5033 | 1,3,4,5,6,7<br>,38,42 | 2,8,36,37,<br>39,40,41,4<br>3,44 | 19 | O35547,P02781,P05539,P08010,P08290,P08753,P12785,P17046,P19218,P25031,P36374,P47727,P52590,P60905,P97554,P97580,Q4AEF8,Q5XI73,Q6AYR8 |
| 5034 | 1,3,4,5,6,7<br>,38,43 | 2,8,36,37,<br>39,40,41,4<br>2,44 | 12 | P01681,P01835,P02091,P05539,P25031,P49744,P52590,P83748,P97580,Q30KJ2,Q6IE51,Q7TPB1                                                  |
| 5035 | 1,3,4,5,6,7<br>,38,44 | 2,8,36,37,<br>39,40,41,4<br>2,43 | 9  | P01835,P05539,P12785,P34901,P49744,P52590,P97580,Q30KJ2,Q8K4G9                                                                       |
| 5036 | 1,3,4,5,6,7<br>,39,40 | 2,8,36,37,<br>38,41,42,4<br>3,44 | 3  | P05539,Q6IE51,Q6IRE4                                                                                                                 |
| 5037 | 1,3,4,5,6,7<br>,39,41 | 2,8,36,37,<br>38,40,42,4<br>3,44 | 12 | P02625,P05539,P08010,P15999,P62804,Q6BEA2,Q6IE51,Q6IRE4,Q80YN4,Q8K4G9,Q8VD89,Q9ESW0                                                  |
| 5038 | 1,3,4,5,6,7<br>,39,42 | 2,8,36,37,<br>38,40,41,4<br>3,44 | 15 | O54728,P05539,P08010,P08753,P16086,P17046,P19218,P35446,P36374,P47727,Q4AEF8,Q5XI73,Q6AYR8,Q6AYR9,Q8K4G9                             |

|      |                       |                                  |    |                                                                                                                                                                                |
|------|-----------------------|----------------------------------|----|--------------------------------------------------------------------------------------------------------------------------------------------------------------------------------|
| 5039 | 1,3,4,5,6,7<br>,39,43 | 2,8,36,37,<br>38,40,41,4<br>2,44 | 11 | O54728,P01681,P01946,P02091,P02625,P05539,P52590,P83748,Q6IE51,Q7TPB1,Q8K4G9                                                                                                   |
| 5040 | 1,3,4,5,6,7<br>,39,44 | 2,8,36,37,<br>38,40,41,4<br>2,43 | 5  | P05539,Q6BEA2,Q6IE51,Q8K4G9,Q9ESW0                                                                                                                                             |
| 5041 | 1,3,4,5,6,7<br>,40,41 | 2,8,36,37,<br>38,39,42,4<br>3,44 | 3  | P05539,Q6IRE4,Q9JJS8                                                                                                                                                           |
| 5042 | 1,3,4,5,6,7<br>,40,42 | 2,8,36,37,<br>38,39,41,4<br>3,44 | 15 | P02781,P02782,P05539,P13596,P16086,P17046,P36374,P60905,Q4AEF8,Q5XI73,Q6AYR8,Q6IRE4,Q8K4G9,Q9JJS8,Q9QZ76                                                                       |
| 5043 | 1,3,4,5,6,7<br>,40,43 | 2,8,36,37,<br>38,39,41,4<br>2,44 | 6  | P01681,P01835,P02091,P05539,P83748,Q8K4G9                                                                                                                                      |
| 5044 | 1,3,4,5,6,7<br>,40,44 | 2,8,36,37,<br>38,39,41,4<br>2,43 | 4  | P05539,P06866,P36374,Q8K4G9                                                                                                                                                    |
| 5045 | 1,3,4,5,6,7<br>,41,42 | 2,8,36,37,<br>38,39,40,4<br>3,44 | 25 | O35547,P02781,P05539,P08010,P08290,P08753,P13596,P16086,P17046,P35446,P36374,P54921,P60905,P80201,P82471,P97605,Q4AEF8,Q5XI73,Q62753,Q63357,Q6AYR8,Q6AYR9,Q6IRE4,Q812E4,Q8K4G9 |
| 5046 | 1,3,4,5,6,7<br>,41,43 | 2,8,36,37,<br>38,39,40,4<br>2,44 | 12 | P01681,P02091,P05539,P49744,P52590,P60905,P62804,P82471,P83748,Q6IE51,Q7TPB1,Q8K4G9                                                                                            |
| 5047 | 1,3,4,5,6,7<br>,41,44 | 2,8,36,37,<br>38,39,40,4<br>2,43 | 6  | P05539,P49744,P60905,P62804,Q6BEA2,Q8K4G9                                                                                                                                      |
| 5048 | 1,3,4,5,6,7<br>,42,43 | 2,8,36,37,<br>38,39,40,4<br>1,44 | 20 | O35547,P01681,P02091,P05539,P08723,P16086,P17046,P19629,P35434,P36374,P47727,P52590,P60905,P82471,Q4AEF8,Q62975,Q6AYR8,Q80WY6,Q8K4G9,Q9JHB9                                    |
| 5049 | 1,3,4,5,6,7<br>,42,44 | 2,8,36,37,<br>38,39,40,4<br>1,43 | 11 | P05539,P08010,P08753,P17046,P36374,P60905,Q4AEF8,Q5XI73,Q6AYR8,Q8K4G9,Q9JID2                                                                                                   |
| 5050 | 1,3,4,5,6,7<br>,43,44 | 2,8,36,37,<br>38,39,40,4<br>1,42 | 9  | P01681,P01835,P02091,P05539,P34901,P49744,P52590,P83748,Q8K4G9                                                                                                                 |
| 5051 | 1,3,4,5,6,8<br>,36,37 | 2,7,38,39,<br>40,41,42,4<br>3,44 | 4  | P11030,P19629,P53792,Q4AEF8                                                                                                                                                    |
| 5052 | 1,3,4,5,6,8<br>,36,38 | 2,7,37,39,<br>40,41,42,4<br>3,44 | 4  | P19218,P49744,Q4AEF8,Q6AYL6                                                                                                                                                    |
| 5053 | 1,3,4,5,6,8<br>,36,39 | 2,7,37,38,<br>40,41,42,4<br>3,44 | 5  | O54728,P11030,P55314,Q4AEF8,Q6AYS4                                                                                                                                             |

|      |                       |                                  |    |                                                                                                          |
|------|-----------------------|----------------------------------|----|----------------------------------------------------------------------------------------------------------|
| 5054 | 1,3,4,5,6,8<br>,36,40 | 2,7,37,38,<br>39,41,42,4<br>3,44 | 4  | P11030,P23593,Q4AEF8,Q6AYS4                                                                              |
| 5055 | 1,3,4,5,6,8<br>,36,41 | 2,7,37,38,<br>39,40,42,4<br>3,44 | 7  | P05539,P08010,P08753,P11030,P49744,P60905,Q4AEF8                                                         |
| 5056 | 1,3,4,5,6,8<br>,36,42 | 2,7,37,38,<br>39,40,41,4<br>3,44 | 15 | O54728,P04905,P05539,P08010,P08753,P10715,P19629,P23593,P36374,P60905,P97554,Q4AEF8,Q63357,Q6AYL6,Q812E4 |
| 5057 | 1,3,4,5,6,8<br>,36,43 | 2,7,37,38,<br>39,40,41,4<br>2,44 | 6  | P01681,P19629,P55314,Q4AEF8,Q64268,Q9QX79                                                                |
| 5058 | 1,3,4,5,6,8<br>,36,44 | 2,7,37,38,<br>39,40,41,4<br>2,43 | 5  | P06866,P07171,P53792,P55314,Q4AEF8                                                                       |
| 5059 | 1,3,4,5,6,8<br>,37,38 | 2,7,36,39,<br>40,41,42,4<br>3,44 | 2  | P82995,Q7TPB1                                                                                            |
| 5060 | 1,3,4,5,6,8<br>,37,39 | 2,7,36,38,<br>40,41,42,4<br>3,44 | 0  |                                                                                                          |
| 5061 | 1,3,4,5,6,8<br>,37,40 | 2,7,36,38,<br>39,41,42,4<br>3,44 | 2  | P82995,Q6P777                                                                                            |
| 5062 | 1,3,4,5,6,8<br>,37,41 | 2,7,36,38,<br>39,40,42,4<br>3,44 | 2  | P11030,Q7TPB1                                                                                            |
| 5063 | 1,3,4,5,6,8<br>,37,42 | 2,7,36,38,<br>39,40,41,4<br>3,44 | 3  | P08753,P19629,Q4AEF8                                                                                     |
| 5064 | 1,3,4,5,6,8<br>,37,43 | 2,7,36,38,<br>39,40,41,4<br>2,44 | 6  | P01681,P02793;Q7TP54,P19629,Q64268,Q7TPB1,Q9QX79                                                         |
| 5065 | 1,3,4,5,6,8<br>,37,44 | 2,7,36,38,<br>39,40,41,4<br>2,43 | 2  | P22006,Q4AEF8                                                                                            |
| 5066 | 1,3,4,5,6,8<br>,38,39 | 2,7,36,37,<br>40,41,42,4<br>3,44 | 2  | P02625,P19218                                                                                            |
| 5067 | 1,3,4,5,6,8<br>,38,40 | 2,7,36,37,<br>39,41,42,4<br>3,44 | 4  | D3ZUC6,P01835,P22006,P82995                                                                              |
| 5068 | 1,3,4,5,6,8<br>,38,41 | 2,7,36,37,<br>39,40,42,4<br>3,44 | 6  | P08010,P08753,P49744,P50115,P50116,Q7TPB1                                                                |

|      |                       |                                  |    |                                                                                            |
|------|-----------------------|----------------------------------|----|--------------------------------------------------------------------------------------------|
| 5069 | 1,3,4,5,6,8<br>,38,42 | 2,7,36,37,<br>39,40,41,4<br>3,44 | 13 | P08010,P08753,P19218,P19629,P36374,P47727,P60905,P97554,Q4AEF8,Q62902,Q6AYL6,Q9QZK9,Q9Z0V6 |
| 5070 | 1,3,4,5,6,8<br>,38,43 | 2,7,36,37,<br>39,40,41,4<br>2,44 | 8  | P01681,P01835,P02793;Q7TP54,P49744,P82995,Q64268,Q7TPB1,Q9QX79                             |
| 5071 | 1,3,4,5,6,8<br>,38,44 | 2,7,36,37,<br>39,40,41,4<br>2,43 | 4  | P01835,P22006,P49744,Q4AEF8                                                                |
| 5072 | 1,3,4,5,6,8<br>,39,40 | 2,7,36,37,<br>38,41,42,4<br>3,44 | 1  | Q5I0D1                                                                                     |
| 5073 | 1,3,4,5,6,8<br>,39,41 | 2,7,36,37,<br>38,40,42,4<br>3,44 | 4  | P02625,P08010,Q5I0D1,Q9ESW0                                                                |
| 5074 | 1,3,4,5,6,8<br>,39,42 | 2,7,36,37,<br>38,40,41,4<br>3,44 | 5  | O54728,P08010,P08753,P36374,Q4AEF8                                                         |
| 5075 | 1,3,4,5,6,8<br>,39,43 | 2,7,36,37,<br>38,40,41,4<br>2,44 | 6  | P01681,P02625,P97840,Q5I0D1,Q64268,Q7TPB1                                                  |
| 5076 | 1,3,4,5,6,8<br>,39,44 | 2,7,36,37,<br>38,40,41,4<br>2,43 | 3  | Q4AEF8,Q5I0D1,Q9ESW0                                                                       |
| 5077 | 1,3,4,5,6,8<br>,40,41 | 2,7,36,37,<br>38,39,42,4<br>3,44 | 5  | P23593,P97840,Q5I0D1,Q6IRE4,Q9JJS8                                                         |
| 5078 | 1,3,4,5,6,8<br>,40,42 | 2,7,36,37,<br>38,39,41,4<br>3,44 | 9  | P02781,P08753,P22006,P23593,P36374,P60905,Q4AEF8,Q9QZ76,Q9Z0V6                             |
| 5079 | 1,3,4,5,6,8<br>,40,43 | 2,7,36,37,<br>38,39,41,4<br>2,44 | 5  | P01681,P01835,P02793;Q7TP54,P97840,Q9QX79                                                  |
| 5080 | 1,3,4,5,6,8<br>,40,44 | 2,7,36,37,<br>38,39,41,4<br>2,43 | 5  | P06866,P22006,P36374,Q4AEF8,Q5I0D1                                                         |
| 5081 | 1,3,4,5,6,8<br>,41,42 | 2,7,36,37,<br>38,39,40,4<br>3,44 | 12 | O35547,P08010,P08753,P09456,P36374,P54921,P60905,P82471,Q4AEF8,Q62753,Q63357,Q812E4        |
| 5082 | 1,3,4,5,6,8<br>,41,43 | 2,7,36,37,<br>38,39,40,4<br>2,44 | 10 | P01681,P02793;Q7TP54,P49744,P60905,P82471,P97840,Q5I0D1,Q7TPB1,Q9QX79,Q9WUW3               |
| 5083 | 1,3,4,5,6,8<br>,41,44 | 2,7,36,37,<br>38,39,40,4<br>2,43 | 3  | P49744,P60905,Q5I0D1                                                                       |

|      |                        |                                  |    |                                                                                     |
|------|------------------------|----------------------------------|----|-------------------------------------------------------------------------------------|
| 5084 | 1,3,4,5,6,8<br>,42,43  | 2,7,36,37,<br>38,39,40,4<br>1,44 | 12 | P01681,P08753,P10715,P19629,P35434,P36374,P60905,Q4AEF8,Q64268,Q6AYR8,Q9QX79,Q9WUW3 |
| 5085 | 1,3,4,5,6,8<br>,42,44  | 2,7,36,37,<br>38,39,40,4<br>1,43 | 9  | P08753,P22006,P36374,P60905,Q4AEF8,Q5I0D1,Q6AYR8,Q9JID2,Q9Z0V6                      |
| 5086 | 1,3,4,5,6,8<br>,43,44  | 2,7,36,37,<br>38,39,40,4<br>1,42 | 7  | P01681,P01835,P02793;Q7TP54,Q5I0D1,Q66H69,Q9QX79,Q9WUW3                             |
| 5087 | 1,3,4,5,6,3<br>6,37,38 | 2,7,8,39,4<br>0,41,42,43<br>,44  | 1  | P10715                                                                              |
| 5088 | 1,3,4,5,6,3<br>6,37,39 | 2,7,8,38,4<br>0,41,42,43<br>,44  | 7  | O54728,P11030,P55091,P55314,P98089,Q62635,Q6P777                                    |
| 5089 | 1,3,4,5,6,3<br>6,37,40 | 2,7,8,38,3<br>9,41,42,43<br>,44  | 5  | P00731,P11030,P55091,Q6P777,Q80WL1                                                  |
| 5090 | 1,3,4,5,6,3<br>6,37,41 | 2,7,8,38,3<br>9,40,42,43<br>,44  | 1  | P11030                                                                              |
| 5091 | 1,3,4,5,6,3<br>6,37,42 | 2,7,8,38,3<br>9,40,41,43<br>,44  | 6  | O54728,P10715,P19629,Q4AEF8,Q62635,Q6AYL6                                           |
| 5092 | 1,3,4,5,6,3<br>6,37,43 | 2,7,8,38,3<br>9,40,41,42<br>,44  | 5  | P01681,P10715,P19629,P55314,Q9QW07                                                  |
| 5093 | 1,3,4,5,6,3<br>6,37,44 | 2,7,8,38,3<br>9,40,41,42<br>,43  | 1  | P55314                                                                              |
| 5094 | 1,3,4,5,6,3<br>6,38,39 | 2,7,8,37,4<br>0,41,42,43<br>,44  | 3  | O54728,P19218,P55314                                                                |
| 5095 | 1,3,4,5,6,3<br>6,38,40 | 2,7,8,37,3<br>9,41,42,43<br>,44  | 1  | P01835                                                                              |
| 5096 | 1,3,4,5,6,3<br>6,38,41 | 2,7,8,37,3<br>9,40,42,43<br>,44  | 0  |                                                                                     |
| 5097 | 1,3,4,5,6,3<br>6,38,42 | 2,7,8,37,3<br>9,40,41,43<br>,44  | 11 | O54728,P05539,P08753,P10715,P12785,P19218,P19629,P60905,P97554,Q4AEF8,Q6AYL6        |
| 5098 | 1,3,4,5,6,3<br>6,38,43 | 2,7,8,37,3<br>9,40,41,42<br>,44  | 7  | P01681,P01835,P10715,P19629,P31044,P34901,P55314                                    |



|      |                        |                                 |    |                                                                                     |
|------|------------------------|---------------------------------|----|-------------------------------------------------------------------------------------|
| 5099 | 1,3,4,5,6,3<br>6,38,44 | 2,7,8,37,3<br>9,40,41,42<br>,43 | 4  | P01835,P12785,P34901,P55314                                                         |
| 5100 | 1,3,4,5,6,3<br>6,39,40 | 2,7,8,37,3<br>8,41,42,43<br>,44 | 4  | O54728,P05539,P55091,P55314                                                         |
| 5101 | 1,3,4,5,6,3<br>6,39,41 | 2,7,8,37,3<br>8,40,42,43<br>,44 | 4  | O54728,P02625,P05539,P55314                                                         |
| 5102 | 1,3,4,5,6,3<br>6,39,42 | 2,7,8,37,3<br>8,40,41,43<br>,44 | 5  | O54728,P05539,P08010,P55314,Q62635                                                  |
| 5103 | 1,3,4,5,6,3<br>6,39,43 | 2,7,8,37,3<br>8,40,41,42<br>,44 | 5  | O54728,P01681,P02625,P55314,Q62635                                                  |
| 5104 | 1,3,4,5,6,3<br>6,39,44 | 2,7,8,37,3<br>8,40,41,42<br>,43 | 3  | O54728,P34901,P55314                                                                |
| 5105 | 1,3,4,5,6,3<br>6,40,41 | 2,7,8,37,3<br>8,39,42,43<br>,44 | 5  | P05539,P11030,P23593,Q6IRE4,Q80WL1                                                  |
| 5106 | 1,3,4,5,6,3<br>6,40,42 | 2,7,8,37,3<br>8,39,41,43<br>,44 | 5  | O54728,P05539,P23593,P36374,Q6IRE4                                                  |
| 5107 | 1,3,4,5,6,3<br>6,40,43 | 2,7,8,37,3<br>8,39,41,42<br>,44 | 5  | P01681,P01835,P05539,P55314,Q9QW07                                                  |
| 5108 | 1,3,4,5,6,3<br>6,40,44 | 2,7,8,37,3<br>8,39,41,42<br>,43 | 4  | P06866,P55314,Q6P6T1,Q80WL1                                                         |
| 5109 | 1,3,4,5,6,3<br>6,41,42 | 2,7,8,37,3<br>8,39,40,43<br>,44 | 7  | P05539,P08010,P08753,P23593,P60905,Q63357,Q812E4                                    |
| 5110 | 1,3,4,5,6,3<br>6,41,43 | 2,7,8,37,3<br>8,39,40,42<br>,44 | 3  | P01681,P05539,P55314                                                                |
| 5111 | 1,3,4,5,6,3<br>6,41,44 | 2,7,8,37,3<br>8,39,40,42<br>,43 | 4  | P05539,P55314,Q6BEA2,Q80WL1                                                         |
| 5112 | 1,3,4,5,6,3<br>6,42,43 | 2,7,8,37,3<br>8,39,40,41<br>,44 | 12 | O54728,P01681,P05539,P10715,P19629,P31044,P35434,P55314,P60905,Q5GRG2,Q62635,Q6AYR8 |
| 5113 | 1,3,4,5,6,3<br>6,42,44 | 2,7,8,37,3<br>8,39,40,41<br>,43 | 7  | P05539,P36374,P55314,P60905,P97554,Q4AEF8,Q6AYR8                                    |

|      |                        |                                 |   |                                                         |
|------|------------------------|---------------------------------|---|---------------------------------------------------------|
| 5114 | 1,3,4,5,6,3<br>6,43,44 | 2,7,8,37,3<br>8,39,40,41<br>,42 | 5 | P01681,P01835,P34901,P55314,Q9QW07                      |
| 5115 | 1,3,4,5,6,3<br>7,38,39 | 2,7,8,36,4<br>0,41,42,43<br>,44 | 4 | P02625,P19218,P62804,P82995                             |
| 5116 | 1,3,4,5,6,3<br>7,38,40 | 2,7,8,36,3<br>9,41,42,43<br>,44 | 3 | P01835,P82995,Q6IRE4                                    |
| 5117 | 1,3,4,5,6,3<br>7,38,41 | 2,7,8,36,3<br>9,40,42,43<br>,44 | 3 | P62804,P82995,Q7TPB1                                    |
| 5118 | 1,3,4,5,6,3<br>7,38,42 | 2,7,8,36,3<br>9,40,41,43<br>,44 | 4 | P10715,P12785,P19629,Q6AYL6                             |
| 5119 | 1,3,4,5,6,3<br>7,38,43 | 2,7,8,36,3<br>9,40,41,42<br>,44 | 8 | P01681,P01835,P10715,P19629,P82995,Q6IFW6,Q7TPB1,Q9QW07 |
| 5120 | 1,3,4,5,6,3<br>7,38,44 | 2,7,8,36,3<br>9,40,41,42<br>,43 | 3 | P01835,P12785,P82995                                    |
| 5121 | 1,3,4,5,6,3<br>7,39,40 | 2,7,8,36,3<br>8,41,42,43<br>,44 | 4 | P55091,P82995,Q6IRE4,Q6P777                             |
| 5122 | 1,3,4,5,6,3<br>7,39,41 | 2,7,8,36,3<br>8,40,42,43<br>,44 | 3 | P02625,P62804,Q9ESW0                                    |
| 5123 | 1,3,4,5,6,3<br>7,39,42 | 2,7,8,36,3<br>8,40,41,43<br>,44 | 1 | O54728                                                  |
| 5124 | 1,3,4,5,6,3<br>7,39,43 | 2,7,8,36,3<br>8,40,41,42<br>,44 | 5 | P01681,P02625,P82995,Q6IFW6,Q9QW07                      |
| 5125 | 1,3,4,5,6,3<br>7,39,44 | 2,7,8,36,3<br>8,40,41,42<br>,43 | 1 | Q9QW07                                                  |
| 5126 | 1,3,4,5,6,3<br>7,40,41 | 2,7,8,36,3<br>8,39,42,43<br>,44 | 3 | P82995,Q6IRE4,Q80WL1                                    |
| 5127 | 1,3,4,5,6,3<br>7,40,42 | 2,7,8,36,3<br>8,39,41,43<br>,44 | 1 | Q6IRE4                                                  |
| 5128 | 1,3,4,5,6,3<br>7,40,43 | 2,7,8,36,3<br>8,39,41,42<br>,44 | 5 | P01681,P01835,P82995,Q6P777,Q9QW07                      |

|      |                        |                                 |   |                                    |
|------|------------------------|---------------------------------|---|------------------------------------|
| 5129 | 1,3,4,5,6,3<br>7,40,44 | 2,7,8,36,3<br>8,39,41,42<br>,43 | 4 | P22006,P82995,Q80WL1,Q9QW07        |
| 5130 | 1,3,4,5,6,3<br>7,41,42 | 2,7,8,36,3<br>8,39,40,43<br>,44 | 1 | Q6IRE4                             |
| 5131 | 1,3,4,5,6,3<br>7,41,43 | 2,7,8,36,3<br>8,39,40,42<br>,44 | 3 | P01681,P62804,Q7TPB1               |
| 5132 | 1,3,4,5,6,3<br>7,41,44 | 2,7,8,36,3<br>8,39,40,42<br>,43 | 2 | P62804,Q80WL1                      |
| 5133 | 1,3,4,5,6,3<br>7,42,43 | 2,7,8,36,3<br>8,39,40,41<br>,44 | 5 | P01681,P10715,P19629,P31044,Q6AYR8 |
| 5134 | 1,3,4,5,6,3<br>7,42,44 | 2,7,8,36,3<br>8,39,40,41<br>,43 | 1 | Q6AYR8                             |
| 5135 | 1,3,4,5,6,3<br>7,43,44 | 2,7,8,36,3<br>8,39,40,41<br>,42 | 3 | P01681,P01835,Q9QW07               |
| 5136 | 1,3,4,5,6,3<br>8,39,40 | 2,7,8,36,3<br>7,41,42,43<br>,44 | 3 | P01835,P82995,Q6IRE4               |
| 5137 | 1,3,4,5,6,3<br>8,39,41 | 2,7,8,36,3<br>7,40,42,43<br>,44 | 1 | P02625                             |
| 5138 | 1,3,4,5,6,3<br>8,39,42 | 2,7,8,36,3<br>7,40,41,43<br>,44 | 2 | O54728,P19218                      |
| 5139 | 1,3,4,5,6,3<br>8,39,43 | 2,7,8,36,3<br>7,40,41,42<br>,44 | 5 | P01681,P01835,P02625,P82995,Q6IFW6 |
| 5140 | 1,3,4,5,6,3<br>8,39,44 | 2,7,8,36,3<br>7,40,41,42<br>,43 | 2 | P01835,P34901                      |
| 5141 | 1,3,4,5,6,3<br>8,40,41 | 2,7,8,36,3<br>7,39,42,43<br>,44 | 3 | P01835,P82995,Q6IRE4               |
| 5142 | 1,3,4,5,6,3<br>8,40,42 | 2,7,8,36,3<br>7,39,41,43<br>,44 | 3 | P01835,P12785,Q6IRE4               |
| 5143 | 1,3,4,5,6,3<br>8,40,43 | 2,7,8,36,3<br>7,39,41,42<br>,44 | 4 | P01681,P01835,P82995,Q9QW07        |

|      |                        |                                 |   |                                                                |
|------|------------------------|---------------------------------|---|----------------------------------------------------------------|
| 5144 | 1,3,4,5,6,3<br>8,40,44 | 2,7,8,36,3<br>7,39,41,42<br>,43 | 3 | P01835,P22006,P82995                                           |
| 5145 | 1,3,4,5,6,3<br>8,41,42 | 2,7,8,36,3<br>7,39,40,43<br>,44 | 6 | O35547,P08010,P08753,P60905,Q62902,Q6IRE4                      |
| 5146 | 1,3,4,5,6,3<br>8,41,43 | 2,7,8,36,3<br>7,39,40,42<br>,44 | 5 | P01681,P01835,Q5HZV9,Q7TPB1,Q8CJD3                             |
| 5147 | 1,3,4,5,6,3<br>8,41,44 | 2,7,8,36,3<br>7,39,40,42<br>,43 | 3 | P00774,P01835,Q05695                                           |
| 5148 | 1,3,4,5,6,3<br>8,42,43 | 2,7,8,36,3<br>7,39,40,41<br>,44 | 9 | B0BNN3,P01681,P01835,P10715,P19629,P31044,Q5GRG2,Q5HZV9,Q6AYR8 |
| 5149 | 1,3,4,5,6,3<br>8,42,44 | 2,7,8,36,3<br>7,39,40,41<br>,43 | 3 | P01835,P12785,Q6AYR8                                           |
| 5150 | 1,3,4,5,6,3<br>8,43,44 | 2,7,8,36,3<br>7,39,40,41<br>,42 | 4 | P01681,P01835,P34901,Q9QW07                                    |
| 5151 | 1,3,4,5,6,3<br>9,40,41 | 2,7,8,36,3<br>7,38,42,43<br>,44 | 1 | Q6IRE4                                                         |
| 5152 | 1,3,4,5,6,3<br>9,40,42 | 2,7,8,36,3<br>7,38,41,43<br>,44 | 2 | O54728,Q6IRE4                                                  |
| 5153 | 1,3,4,5,6,3<br>9,40,43 | 2,7,8,36,3<br>7,38,41,42<br>,44 | 5 | P01681,P01835,P82995,Q99MH3,Q9QW07                             |
| 5154 | 1,3,4,5,6,3<br>9,40,44 | 2,7,8,36,3<br>7,38,41,42<br>,43 | 1 | Q6P6T1                                                         |
| 5155 | 1,3,4,5,6,3<br>9,41,42 | 2,7,8,36,3<br>7,38,40,43<br>,44 | 6 | P05539,P08010,P08753,P82471,Q6AYR9,Q6IRE4                      |
| 5156 | 1,3,4,5,6,3<br>9,41,43 | 2,7,8,36,3<br>7,38,40,42<br>,44 | 3 | P01681,P02625,P82471                                           |
| 5157 | 1,3,4,5,6,3<br>9,41,44 | 2,7,8,36,3<br>7,38,40,42<br>,43 | 4 | P02625,Q5I0D1,Q6BEA2,Q9ESW0                                    |
| 5158 | 1,3,4,5,6,3<br>9,42,43 | 2,7,8,36,3<br>7,38,40,41<br>,44 | 6 | O54728,P01681,P35434,P82471,Q62635,Q6AYR8                      |

|      |                        |                                  |    |                                                                                            |
|------|------------------------|----------------------------------|----|--------------------------------------------------------------------------------------------|
| 5159 | 1,3,4,5,6,3<br>9,42,44 | 2,7,8,36,3<br>7,38,40,41<br>,43  | 1  | Q6AYR8                                                                                     |
| 5160 | 1,3,4,5,6,3<br>9,43,44 | 2,7,8,36,3<br>7,38,40,41<br>,42  | 5  | P01681,P01835,P02625,P34901,Q9QW07                                                         |
| 5161 | 1,3,4,5,6,4<br>0,41,42 | 2,7,8,36,3<br>7,38,39,43<br>,44  | 3  | P05539,P23593,Q6IRE4                                                                       |
| 5162 | 1,3,4,5,6,4<br>0,41,43 | 2,7,8,36,3<br>7,38,39,42<br>,44  | 5  | P01681,P01835,P02793;Q7TP54,P97840,Q5HZV9                                                  |
| 5163 | 1,3,4,5,6,4<br>0,41,44 | 2,7,8,36,3<br>7,38,39,42<br>,43  | 2  | Q6IRE4,Q80WL1                                                                              |
| 5164 | 1,3,4,5,6,4<br>0,42,43 | 2,7,8,36,3<br>7,38,39,41<br>,44  | 5  | P01681,P01835,P05539,Q6AYR8,Q9JHB9                                                         |
| 5165 | 1,3,4,5,6,4<br>0,42,44 | 2,7,8,36,3<br>7,38,39,41<br>,43  | 3  | P22006,P36374,Q6AYR8                                                                       |
| 5166 | 1,3,4,5,6,4<br>0,43,44 | 2,7,8,36,3<br>7,38,39,41<br>,42  | 3  | P01681,P01835,Q9QW07                                                                       |
| 5167 | 1,3,4,5,6,4<br>1,42,43 | 2,7,8,36,3<br>7,38,39,40<br>,44  | 9  | P01681,P05539,P35434,P54921,P60905,P82471,Q5HZV9,Q6AYR8,Q9QZA6                             |
| 5168 | 1,3,4,5,6,4<br>1,42,44 | 2,7,8,36,3<br>7,38,39,40<br>,43  | 3  | P60905,P82471,Q6AYR8                                                                       |
| 5169 | 1,3,4,5,6,4<br>1,43,44 | 2,7,8,36,3<br>7,38,39,40<br>,42  | 3  | P01681,P01835,P82471                                                                       |
| 5170 | 1,3,4,5,6,4<br>2,43,44 | 2,7,8,36,3<br>7,38,39,40<br>,41  | 5  | P01681,P01835,P35434,P60905,Q6AYR8                                                         |
| 5171 | 1,3,4,5,7,8<br>,36,37  | 2,6,38,39,<br>40,41,42,4<br>3,44 | 11 | O54728,P00762,P07171,P11762,P22734,P53792,P98089,Q09030,Q4AEF8,Q62635,Q6AYS4               |
| 5172 | 1,3,4,5,7,8<br>,36,38  | 2,6,37,39,<br>40,41,42,4<br>3,44 | 8  | O54728,P07171,P19218,P49744,Q09030,Q4AEF8,Q6AYS4,Q6P6R2                                    |
| 5173 | 1,3,4,5,7,8<br>,36,39  | 2,6,37,38,<br>40,41,42,4<br>3,44 | 13 | O54728,P05539,P07171,P08010,P22734,P36970,P98089,Q09030,Q4AEF8,Q62635,Q6AYS4,Q6P6R2,Q9ESW0 |

|      |                       |                                  |    |                                                                                                                                                                                              |
|------|-----------------------|----------------------------------|----|----------------------------------------------------------------------------------------------------------------------------------------------------------------------------------------------|
| 5174 | 1,3,4,5,7,8<br>,36,40 | 2,6,37,38,<br>39,41,42,4<br>3,44 | 10 | O54728,P00774,P05539,P07171,P98089,Q09030,Q4AEF8,Q4FZU6,Q62635,Q6AYS4                                                                                                                        |
| 5175 | 1,3,4,5,7,8<br>,36,41 | 2,6,37,38,<br>39,40,42,4<br>3,44 | 13 | P05539,P07171,P07897,P08010,P08721,P49744,P60905,Q09030,Q4AEF8,Q4FZU6,Q6AYS4,Q8VD89,Q99041                                                                                                   |
| 5176 | 1,3,4,5,7,8<br>,36,42 | 2,6,37,38,<br>39,40,41,4<br>3,44 | 27 | O54728,P00762,P00774,P02781,P04905,P05539,P07171,P07897,P08010,P08644,P08721,P08753,P19629,P36374,P47727,P60905,P97554,Q09030,Q4AEF8,Q62635,Q63357,Q64335,Q6AYL6,Q6AYR9,Q6AYS4,Q812E4,Q9QZK9 |
| 5177 | 1,3,4,5,7,8<br>,36,43 | 2,6,37,38,<br>39,40,41,4<br>2,44 | 18 | O54728,P01681,P02091,P05539,P07171,P13432,P16391,P22734,P49744,P52590,P60905,Q09030,Q4AEF8,Q62635,Q63416,Q64268,Q6AYS4,Q9QX79                                                                |
| 5178 | 1,3,4,5,7,8<br>,36,44 | 2,6,37,38,<br>39,40,41,4<br>2,43 | 14 | P00762,P05539,P07171,P07897,P08721,P13432,P49744,P53792,P55314,P60571,P60905,Q09030,Q4AEF8,Q6AYS4                                                                                            |
| 5179 | 1,3,4,5,7,8<br>,37,38 | 2,6,36,39,<br>40,41,42,4<br>3,44 | 3  | P52590,P62804,Q7TPB1                                                                                                                                                                         |
| 5180 | 1,3,4,5,7,8<br>,37,39 | 2,6,36,38,<br>40,41,42,4<br>3,44 | 6  | O54728,P62804,P98089,Q62635,Q8CIZ5,Q9ESW0                                                                                                                                                    |
| 5181 | 1,3,4,5,7,8<br>,37,40 | 2,6,36,38,<br>39,41,42,4<br>3,44 | 2  | P98089,Q09030                                                                                                                                                                                |
| 5182 | 1,3,4,5,7,8<br>,37,41 | 2,6,36,38,<br>39,40,42,4<br>3,44 | 8  | P18418,P62804,Q09030,Q63617,Q68FS4,Q7TPB1,Q99041,Q9ESW0                                                                                                                                      |
| 5183 | 1,3,4,5,7,8<br>,37,42 | 2,6,36,38,<br>39,40,41,4<br>3,44 | 4  | Q09030,Q4AEF8,Q62635,Q62894                                                                                                                                                                  |
| 5184 | 1,3,4,5,7,8<br>,37,43 | 2,6,36,38,<br>39,40,41,4<br>2,44 | 11 | P01681,P02091,P16391,P52590,Q09030,Q62635,Q63416,Q64268,Q7TPB1,Q8CIZ5,Q9QX79                                                                                                                 |
| 5185 | 1,3,4,5,7,8<br>,37,44 | 2,6,36,38,<br>39,40,41,4<br>2,43 | 3  | P07171,Q4AEF8,Q9ESW0                                                                                                                                                                         |
| 5186 | 1,3,4,5,7,8<br>,38,39 | 2,6,36,37,<br>40,41,42,4<br>3,44 | 7  | O54728,P08010,P19218,P52590,Q6AYS4,Q6P6R2,Q9ESW0                                                                                                                                             |
| 5187 | 1,3,4,5,7,8<br>,38,40 | 2,6,36,37,<br>39,41,42,4<br>3,44 | 1  | Q6AYS4                                                                                                                                                                                       |
| 5188 | 1,3,4,5,7,8<br>,38,41 | 2,6,36,37,<br>39,40,42,4<br>3,44 | 8  | O35547,P08010,P49744,P50115,P50116,P52590,P60905,Q7TPB1                                                                                                                                      |

|      |                       |                                  |    |                                                                                                                                                                  |
|------|-----------------------|----------------------------------|----|------------------------------------------------------------------------------------------------------------------------------------------------------------------|
| 5189 | 1,3,4,5,7,8<br>,38,42 | 2,6,36,37,<br>39,40,41,4<br>3,44 | 17 | O35547,P04905,P08010,P08723,P08753,P19218,P36374,P47727,P52590,P60905,Q09030,Q4AEF8,Q62902,Q63357,Q64335,Q9JHB9,Q9QZK9                                           |
| 5190 | 1,3,4,5,7,8<br>,38,43 | 2,6,36,37,<br>39,40,41,4<br>2,44 | 8  | P01681,P02091,P16391,P49744,P52590,Q64268,Q7TPB1,Q9QX79                                                                                                          |
| 5191 | 1,3,4,5,7,8<br>,38,44 | 2,6,36,37,<br>39,40,41,4<br>2,43 | 3  | P07171,P49744,P52590                                                                                                                                             |
| 5192 | 1,3,4,5,7,8<br>,39,40 | 2,6,36,37,<br>38,41,42,4<br>3,44 | 4  | O54728,P98089,Q6AYS4,Q9ESW0                                                                                                                                      |
| 5193 | 1,3,4,5,7,8<br>,39,41 | 2,6,36,37,<br>38,40,42,4<br>3,44 | 6  | O54728,P08010,Q68FS4,Q8VD89,Q99041,Q9ESW0                                                                                                                        |
| 5194 | 1,3,4,5,7,8<br>,39,42 | 2,6,36,37,<br>38,40,41,4<br>3,44 | 13 | O54728,P04905,P05539,P08010,P08753,P36374,P36970,P47727,P60905,Q4AEF8,Q62635,Q6AYR9,Q9ESW0                                                                       |
| 5195 | 1,3,4,5,7,8<br>,39,43 | 2,6,36,37,<br>38,40,41,4<br>2,44 | 11 | O54728,P01681,P01946,P02091,P52590,Q62635,Q64268,Q7TPB1,Q8CIZ5,Q9ESW0,Q9QX79                                                                                     |
| 5196 | 1,3,4,5,7,8<br>,39,44 | 2,6,36,37,<br>38,40,41,4<br>2,43 | 4  | O54728,P07171,Q6AYS4,Q9ESW0                                                                                                                                      |
| 5197 | 1,3,4,5,7,8<br>,40,41 | 2,6,36,37,<br>38,39,42,4<br>3,44 | 6  | P05539,Q09030,Q4FZU6,Q63617,Q6IRE4,Q9JJS8                                                                                                                        |
| 5198 | 1,3,4,5,7,8<br>,40,42 | 2,6,36,37,<br>38,39,41,4<br>3,44 | 12 | P02781,P05539,P20759,P36374,P60905,Q09030,Q4AEF8,Q4FZU6,Q5M819,Q9JHB9,Q9JJS8,Q9QZ76                                                                              |
| 5199 | 1,3,4,5,7,8<br>,40,43 | 2,6,36,37,<br>38,39,41,4<br>2,44 | 9  | P01681,P02091,P52590,P97840,Q09030,Q5M819,Q8CIZ5,Q9JHB9,Q9QX79                                                                                                   |
| 5200 | 1,3,4,5,7,8<br>,40,44 | 2,6,36,37,<br>38,39,41,4<br>2,43 | 7  | P06866,P07171,Q4FZU6,Q5M819,Q63617,Q6AYS4,Q9QZ76                                                                                                                 |
| 5201 | 1,3,4,5,7,8<br>,41,42 | 2,6,36,37,<br>38,39,40,4<br>3,44 | 23 | O08815,O35547,P02781,P04905,P05539,P08010,P08644,P08753,P36374,P54921,P60905,P82471,P97605,Q09030,Q4AEF8,Q4FZU6,Q62753,Q62894,Q63357,Q64335,Q6AYR9,Q812E4,Q9QZK9 |
| 5202 | 1,3,4,5,7,8<br>,41,43 | 2,6,36,37,<br>38,39,40,4<br>2,44 | 12 | O35547,P01681,P02091,P49744,P52590,P60905,P82471,P97840,Q09030,Q7TPB1,Q9QX79,Q9WUW3                                                                              |
| 5203 | 1,3,4,5,7,8<br>,41,44 | 2,6,36,37,<br>38,39,40,4<br>2,43 | 6  | P07171,P49744,P60905,Q4FZU6,Q63617,Q9ESW0                                                                                                                        |

|      |                        |                                  |    |                                                                                                                                                                                       |
|------|------------------------|----------------------------------|----|---------------------------------------------------------------------------------------------------------------------------------------------------------------------------------------|
| 5204 | 1,3,4,5,7,8<br>,42,43  | 2,6,36,37,<br>38,39,40,4<br>1,44 | 26 | O35547,P01681,P02091,P04905,P05539,P08723,P08753,P16391,P19629,P36374,P47727,P52590,P60905,Q09030,Q4AEF8,Q62635,Q62894,Q62975,Q63357,Q64268,Q64335,Q6AYR8,Q6AYR9,Q9JHB9,Q9QX79,Q9WUW3 |
| 5205 | 1,3,4,5,7,8<br>,42,44  | 2,6,36,37,<br>38,39,40,4<br>1,43 | 15 | P00714,P05539,P07171,P08010,P08644,P08753,P36374,P47727,P55016,P60905,Q09030,Q4AEF8,Q5M819,Q6AYR8,Q9QZK9                                                                              |
| 5206 | 1,3,4,5,7,8<br>,43,44  | 2,6,36,37,<br>38,39,40,4<br>1,42 | 10 | P01681,P02091,P07171,P13432,P52590,P60905,Q5M819,Q64268,Q9QX79,Q9WUW3                                                                                                                 |
| 5207 | 1,3,4,5,7,3<br>6,37,38 | 2,6,8,39,4<br>0,41,42,43<br>,44  | 5  | O54728,P11762,P12785,P62804,Q6P6R2                                                                                                                                                    |
| 5208 | 1,3,4,5,7,3<br>6,37,39 | 2,6,8,38,4<br>0,41,42,43<br>,44  | 8  | O54728,P22734,P62804,P98089,Q62635,Q6P6R2,Q8CIZ5,Q9ESW0                                                                                                                               |
| 5209 | 1,3,4,5,7,3<br>6,37,40 | 2,6,8,38,3<br>9,41,42,43<br>,44  | 8  | O54728,P00774,P05539,P98089,Q09030,Q62635,Q6IRE4,Q8CIZ5                                                                                                                               |
| 5210 | 1,3,4,5,7,3<br>6,37,41 | 2,6,8,38,3<br>9,40,42,43<br>,44  | 5  | P05539,P11762,P62804,Q09030,Q6IRE4                                                                                                                                                    |
| 5211 | 1,3,4,5,7,3<br>6,37,42 | 2,6,8,38,3<br>9,40,41,43<br>,44  | 8  | O54728,P00774,P02782,P05539,P19629,P98089,Q09030,Q62635                                                                                                                               |
| 5212 | 1,3,4,5,7,3<br>6,37,43 | 2,6,8,38,3<br>9,40,41,42<br>,44  | 11 | O54728,P01681,P02091,P06760,P19629,P22734,P62804,Q62635,Q6P6R2,Q8CIZ5,Q9QW07                                                                                                          |
| 5213 | 1,3,4,5,7,3<br>6,37,44 | 2,6,8,38,3<br>9,40,41,42<br>,43  | 2  | P13432,P55314                                                                                                                                                                         |
| 5214 | 1,3,4,5,7,3<br>6,38,39 | 2,6,8,37,4<br>0,41,42,43<br>,44  | 4  | O54728,P19218,P51907,Q6P6R2                                                                                                                                                           |
| 5215 | 1,3,4,5,7,3<br>6,38,40 | 2,6,8,37,3<br>9,41,42,43<br>,44  | 4  | O54728,P05539,Q6IRE4,Q6P6R2                                                                                                                                                           |
| 5216 | 1,3,4,5,7,3<br>6,38,41 | 2,6,8,37,3<br>9,40,42,43<br>,44  | 3  | P05539,P49744,P62804                                                                                                                                                                  |
| 5217 | 1,3,4,5,7,3<br>6,38,42 | 2,6,8,37,3<br>9,40,41,43<br>,44  | 12 | O54728,P02782,P05539,P08010,P12785,P19218,P47727,P51907,P60905,P97554,Q5XI73,Q6AYL6                                                                                                   |
| 5218 | 1,3,4,5,7,3<br>6,38,43 | 2,6,8,37,3<br>9,40,41,42<br>,44  | 7  | O54728,P01681,P02091,P05539,P06760,P34901,Q6P6R2                                                                                                                                      |



|      |                        |                                 |    |                                                                                                                 |
|------|------------------------|---------------------------------|----|-----------------------------------------------------------------------------------------------------------------|
| 5219 | 1,3,4,5,7,3<br>6,38,44 | 2,6,8,37,3<br>9,40,41,42<br>,43 | 3  | P12785,P34901,P55314                                                                                            |
| 5220 | 1,3,4,5,7,3<br>6,39,40 | 2,6,8,37,3<br>8,41,42,43<br>,44 | 8  | O54728,P00774,P05539,P98089,Q62635,Q6IRE4,Q6P6R2,Q8CIZ5                                                         |
| 5221 | 1,3,4,5,7,3<br>6,39,41 | 2,6,8,37,3<br>8,40,42,43<br>,44 | 6  | O54728,P05539,P08010,P62804,Q8VD89,Q9ESW0                                                                       |
| 5222 | 1,3,4,5,7,3<br>6,39,42 | 2,6,8,37,3<br>8,40,41,43<br>,44 | 10 | O54728,P00774,P05539,P08010,P08644,P47727,P98089,Q5XI73,Q62635,Q6AYR9                                           |
| 5223 | 1,3,4,5,7,3<br>6,39,43 | 2,6,8,37,3<br>8,40,41,42<br>,44 | 10 | O54728,P01681,P01946,P02091,P05539,P06760,P22734,Q62635,Q6P6R2,Q8CIZ5                                           |
| 5224 | 1,3,4,5,7,3<br>6,39,44 | 2,6,8,37,3<br>8,40,41,42<br>,43 | 6  | O54728,P05539,P34901,P55314,Q8VD89,Q9ESW0                                                                       |
| 5225 | 1,3,4,5,7,3<br>6,40,41 | 2,6,8,37,3<br>8,39,42,43<br>,44 | 5  | P05539,Q09030,Q4FZU6,Q6IRE4,Q8VD89                                                                              |
| 5226 | 1,3,4,5,7,3<br>6,40,42 | 2,6,8,37,3<br>8,39,41,43<br>,44 | 9  | O54728,P00774,P02782,P05539,P14408,P98089,Q09030,Q62635,Q6IRE4                                                  |
| 5227 | 1,3,4,5,7,3<br>6,40,43 | 2,6,8,37,3<br>8,39,41,42<br>,44 | 8  | O54728,P01681,P02091,P05539,Q62635,Q6P6R2,Q8CIZ5,Q9QW07                                                         |
| 5228 | 1,3,4,5,7,3<br>6,40,44 | 2,6,8,37,3<br>8,39,41,42<br>,43 | 4  | P05539,P13432,P55314,Q4FZU6                                                                                     |
| 5229 | 1,3,4,5,7,3<br>6,41,42 | 2,6,8,37,3<br>8,39,40,43<br>,44 | 13 | O54728,P05539,P08010,P08644,P08649,P08753,P60905,Q09030,Q62635,Q63357,Q6AYR9,Q6IRE4,Q812E4                      |
| 5230 | 1,3,4,5,7,3<br>6,41,43 | 2,6,8,37,3<br>8,39,40,42<br>,44 | 4  | P01681,P02091,P05539,P06760                                                                                     |
| 5231 | 1,3,4,5,7,3<br>6,41,44 | 2,6,8,37,3<br>8,39,40,42<br>,43 | 4  | P05539,P55314,Q4FZU6,Q8VD89                                                                                     |
| 5232 | 1,3,4,5,7,3<br>6,42,43 | 2,6,8,37,3<br>8,39,40,41<br>,44 | 16 | O54728,P01681,P02091,P02782,P05539,P06760,P06911,P16636,P19629,P47727,P60905,Q5GRG2,Q62635,Q62975,Q6AYR8,Q6AYR9 |
| 5233 | 1,3,4,5,7,3<br>6,42,44 | 2,6,8,37,3<br>8,39,40,41<br>,43 | 13 | O54728,P02782,P05539,P08644,P08721,P14408,P17046,P36374,P55314,P60905,Q4AEF8,Q5XI73,Q6AYR8                      |

|      |                        |                                 |    |                                                                       |
|------|------------------------|---------------------------------|----|-----------------------------------------------------------------------|
| 5234 | 1,3,4,5,7,3<br>6,43,44 | 2,6,8,37,3<br>8,39,40,41<br>,42 | 7  | P01681,P02091,P05539,P13432,P34901,P55314,Q9QW07                      |
| 5235 | 1,3,4,5,7,3<br>7,38,39 | 2,6,8,36,4<br>0,41,42,43<br>,44 | 5  | O54728,P19218,P62804,Q6P6R2,Q9ESW0                                    |
| 5236 | 1,3,4,5,7,3<br>7,38,40 | 2,6,8,36,3<br>9,41,42,43<br>,44 | 2  | P62804,Q6IRE4                                                         |
| 5237 | 1,3,4,5,7,3<br>7,38,41 | 2,6,8,36,3<br>9,40,42,43<br>,44 | 3  | P62804,Q6IRE4,Q7TPB1                                                  |
| 5238 | 1,3,4,5,7,3<br>7,38,42 | 2,6,8,36,3<br>9,40,41,43<br>,44 | 2  | P12785,P17046                                                         |
| 5239 | 1,3,4,5,7,3<br>7,38,43 | 2,6,8,36,3<br>9,40,41,42<br>,44 | 7  | P01681,P02091,P52590,P62804,Q6P6R2,Q7TPB1,Q9QW07                      |
| 5240 | 1,3,4,5,7,3<br>7,38,44 | 2,6,8,36,3<br>9,40,41,42<br>,43 | 2  | P12785,P62804                                                         |
| 5241 | 1,3,4,5,7,3<br>7,39,40 | 2,6,8,36,3<br>8,41,42,43<br>,44 | 8  | O54728,P15999,P62804,P98089,Q62635,Q6IRE4,Q8CIZ5,Q9ESW0               |
| 5242 | 1,3,4,5,7,3<br>7,39,41 | 2,6,8,36,3<br>8,40,42,43<br>,44 | 4  | P15999,P62804,Q6IRE4,Q9ESW0                                           |
| 5243 | 1,3,4,5,7,3<br>7,39,42 | 2,6,8,36,3<br>8,40,41,43<br>,44 | 4  | O54728,P98089,Q62635,Q9ESW0                                           |
| 5244 | 1,3,4,5,7,3<br>7,39,43 | 2,6,8,36,3<br>8,40,41,42<br>,44 | 10 | O54728,P01681,P01946,P02091,P62804,Q62635,Q6P6R2,Q8CIZ5,Q9ESW0,Q9QW07 |
| 5245 | 1,3,4,5,7,3<br>7,39,44 | 2,6,8,36,3<br>8,40,41,42<br>,43 | 3  | P62804,Q9ESW0,Q9QW07                                                  |
| 5246 | 1,3,4,5,7,3<br>7,40,41 | 2,6,8,36,3<br>8,39,42,43<br>,44 | 2  | P62804,Q6IRE4                                                         |
| 5247 | 1,3,4,5,7,3<br>7,40,42 | 2,6,8,36,3<br>8,39,41,43<br>,44 | 6  | P02782,P05539,P17046,P98089,Q62635,Q6IRE4                             |
| 5248 | 1,3,4,5,7,3<br>7,40,43 | 2,6,8,36,3<br>8,39,41,42<br>,44 | 6  | P01681,P02091,P62804,Q62635,Q8CIZ5,Q9QW07                             |

|      |                        |                                 |   |                                                         |
|------|------------------------|---------------------------------|---|---------------------------------------------------------|
| 5249 | 1,3,4,5,7,3<br>7,40,44 | 2,6,8,36,3<br>8,39,41,42<br>,43 | 2 | Q6IRE4,Q9QW07                                           |
| 5250 | 1,3,4,5,7,3<br>7,41,42 | 2,6,8,36,3<br>8,39,40,43<br>,44 | 3 | P05539,P17046,Q6IRE4                                    |
| 5251 | 1,3,4,5,7,3<br>7,41,43 | 2,6,8,36,3<br>8,39,40,42<br>,44 | 5 | P01681,P02091,P62804,Q7TPB1,Q9QX79                      |
| 5252 | 1,3,4,5,7,3<br>7,41,44 | 2,6,8,36,3<br>8,39,40,42<br>,43 | 3 | P62804,Q8K4G9,Q9ESW0                                    |
| 5253 | 1,3,4,5,7,3<br>7,42,43 | 2,6,8,36,3<br>8,39,40,41<br>,44 | 8 | P01681,P02091,P17046,P19629,Q62635,Q62975,Q6AYR8,Q8K4G9 |
| 5254 | 1,3,4,5,7,3<br>7,42,44 | 2,6,8,36,3<br>8,39,40,41<br>,43 | 3 | P17046,Q6AYR8,Q8K4G9                                    |
| 5255 | 1,3,4,5,7,3<br>7,43,44 | 2,6,8,36,3<br>8,39,40,41<br>,42 | 5 | P01681,P02091,P62804,Q8K4G9,Q9QW07                      |
| 5256 | 1,3,4,5,7,3<br>8,39,40 | 2,6,8,36,3<br>7,41,42,43<br>,44 | 3 | O54728,Q6IRE4,Q6P6R2                                    |
| 5257 | 1,3,4,5,7,3<br>8,39,41 | 2,6,8,36,3<br>7,40,42,43<br>,44 | 5 | O54728,P08010,P62804,Q6IRE4,Q9ESW0                      |
| 5258 | 1,3,4,5,7,3<br>8,39,42 | 2,6,8,36,3<br>7,40,41,43<br>,44 | 7 | O35547,O54728,P08010,P19218,P47727,P51907,Q5XI73        |
| 5259 | 1,3,4,5,7,3<br>8,39,43 | 2,6,8,36,3<br>7,40,41,42<br>,44 | 7 | O54728,P01681,P01946,P02091,P52590,P62804,Q6P6R2        |
| 5260 | 1,3,4,5,7,3<br>8,39,44 | 2,6,8,36,3<br>7,40,41,42<br>,43 | 4 | O54728,P34901,P51907,Q9ESW0                             |
| 5261 | 1,3,4,5,7,3<br>8,40,41 | 2,6,8,36,3<br>7,39,42,43<br>,44 | 3 | P62804,Q4FZU6,Q6IRE4                                    |
| 5262 | 1,3,4,5,7,3<br>8,40,42 | 2,6,8,36,3<br>7,39,41,43<br>,44 | 6 | P02782,P05539,P12785,P17046,Q6IRE4,Q9JHB9               |
| 5263 | 1,3,4,5,7,3<br>8,40,43 | 2,6,8,36,3<br>7,39,41,42<br>,44 | 3 | P01681,P02091,Q9QW07                                    |

|      |                        |                                 |    |                                                                                                   |
|------|------------------------|---------------------------------|----|---------------------------------------------------------------------------------------------------|
| 5264 | 1,3,4,5,7,3<br>8,40,44 | 2,6,8,36,3<br>7,39,41,42<br>,43 | 0  |                                                                                                   |
| 5265 | 1,3,4,5,7,3<br>8,41,42 | 2,6,8,36,3<br>7,39,40,43<br>,44 | 10 | O35547,P05539,P08010,P08753,P17046,P47727,P60905,Q62902,Q6IRE4,Q9QZK9                             |
| 5266 | 1,3,4,5,7,3<br>8,41,43 | 2,6,8,36,3<br>7,39,40,42<br>,44 | 8  | O35547,P01681,P02091,P49744,P52590,P62804,Q7TPB1,Q8CJD3                                           |
| 5267 | 1,3,4,5,7,3<br>8,41,44 | 2,6,8,36,3<br>7,39,40,42<br>,43 | 2  | P62804,Q05695                                                                                     |
| 5268 | 1,3,4,5,7,3<br>8,42,43 | 2,6,8,36,3<br>7,39,40,41<br>,44 | 14 | O35547,P01681,P02091,P06911,P08723,P12785,P17046,P47727,P52590,P60905,Q5GRG2,Q62975,Q6AYR8,Q9JHB9 |
| 5269 | 1,3,4,5,7,3<br>8,42,44 | 2,6,8,36,3<br>7,39,40,41<br>,43 | 8  | P12785,P17046,P47727,P51907,P60905,Q5XI73,Q6AYR8,Q8K4G9                                           |
| 5270 | 1,3,4,5,7,3<br>8,43,44 | 2,6,8,36,3<br>7,39,40,41<br>,42 | 6  | P01681,P02091,P34901,P52590,Q8K4G9,Q9QW07                                                         |
| 5271 | 1,3,4,5,7,3<br>9,40,41 | 2,6,8,36,3<br>7,38,42,43<br>,44 | 6  | P05539,P62804,Q4FZU6,Q6IRE4,Q8VD89,Q9ESW0                                                         |
| 5272 | 1,3,4,5,7,3<br>9,40,42 | 2,6,8,36,3<br>7,38,41,43<br>,44 | 9  | O54728,P02780,P02782,P05539,P98089,Q62635,Q6AYR9,Q6IRE4,Q9JHB9                                    |
| 5273 | 1,3,4,5,7,3<br>9,40,43 | 2,6,8,36,3<br>7,38,41,42<br>,44 | 8  | O54728,P01681,P01946,P02091,Q62635,Q6P6R2,Q8CIZ5,Q9QW07                                           |
| 5274 | 1,3,4,5,7,3<br>9,40,44 | 2,6,8,36,3<br>7,38,41,42<br>,43 | 2  | Q4FZU6,Q9ESW0                                                                                     |
| 5275 | 1,3,4,5,7,3<br>9,41,42 | 2,6,8,36,3<br>7,38,40,43<br>,44 | 8  | O35547,O54728,P05539,P08010,P82471,Q6AYR9,Q6IRE4,Q9ESW0                                           |
| 5276 | 1,3,4,5,7,3<br>9,41,43 | 2,6,8,36,3<br>7,38,40,42<br>,44 | 8  | O54728,P01946,P02091,P05539,P62804,P82471,Q8K4G9,Q9ESW0                                           |
| 5277 | 1,3,4,5,7,3<br>9,41,44 | 2,6,8,36,3<br>7,38,40,42<br>,43 | 5  | P62804,Q4FZU6,Q8K4G9,Q8VD89,Q9ESW0                                                                |
| 5278 | 1,3,4,5,7,3<br>9,42,43 | 2,6,8,36,3<br>7,38,40,41<br>,44 | 12 | O54728,P01681,P01946,P02091,P05539,P47727,P82471,Q62635,Q6AYR8,Q6AYR9,Q8K4G9,Q9JHB9               |

|      |                        |                                 |    |                                                                              |
|------|------------------------|---------------------------------|----|------------------------------------------------------------------------------|
| 5279 | 1,3,4,5,7,3<br>9,42,44 | 2,6,8,36,3<br>7,38,40,41<br>,43 | 8  | O54728,P05539,P17046,P51907,Q5XI73,Q6AYR8,Q8K4G9,Q9ESW0                      |
| 5280 | 1,3,4,5,7,3<br>9,43,44 | 2,6,8,36,3<br>7,38,40,41<br>,42 | 8  | O54728,P01681,P01946,P02091,P34901,Q8K4G9,Q9ESW0,Q9QW07                      |
| 5281 | 1,3,4,5,7,4<br>0,41,42 | 2,6,8,36,3<br>7,38,39,43<br>,44 | 7  | P02782,P05539,P17046,P60905,Q4FZU6,Q6IRE4,Q9JJS8                             |
| 5282 | 1,3,4,5,7,4<br>0,41,43 | 2,6,8,36,3<br>7,38,39,42<br>,44 | 3  | P01681,P02091,P05539                                                         |
| 5283 | 1,3,4,5,7,4<br>0,41,44 | 2,6,8,36,3<br>7,38,39,42<br>,43 | 5  | P02680,P05539,Q4FZU6,Q6IRE4,Q8K4G9                                           |
| 5284 | 1,3,4,5,7,4<br>0,42,43 | 2,6,8,36,3<br>7,38,39,41<br>,44 | 9  | P01681,P02091,P02782,P05539,P17046,Q62635,Q6AYR8,Q8K4G9,Q9JHB9               |
| 5285 | 1,3,4,5,7,4<br>0,42,44 | 2,6,8,36,3<br>7,38,39,41<br>,43 | 10 | P02680,P02782,P05539,P17046,P36374,Q4FZU6,Q6AYR8,Q6IRE4,Q8K4G9,Q9QZ76        |
| 5286 | 1,3,4,5,7,4<br>0,43,44 | 2,6,8,36,3<br>7,38,39,41<br>,42 | 4  | P01681,P02091,Q8K4G9,Q9QW07                                                  |
| 5287 | 1,3,4,5,7,4<br>1,42,43 | 2,6,8,36,3<br>7,38,39,40<br>,44 | 10 | O35547,P02091,P05539,P17046,P54921,P60905,P82471,Q6AYR8,Q6AYR9,Q8K4G9        |
| 5288 | 1,3,4,5,7,4<br>1,42,44 | 2,6,8,36,3<br>7,38,39,40<br>,43 | 11 | O35547,P02680,P05539,P08010,P08644,P17046,P60905,P82471,Q4FZU6,Q6AYR8,Q8K4G9 |
| 5289 | 1,3,4,5,7,4<br>1,43,44 | 2,6,8,36,3<br>7,38,39,40<br>,42 | 4  | P01681,P02091,P62804,Q8K4G9                                                  |
| 5290 | 1,3,4,5,7,4<br>2,43,44 | 2,6,8,36,3<br>7,38,39,40<br>,41 | 10 | P01681,P02091,P02782,P05539,P08723,P17046,P60905,Q62975,Q6AYR8,Q8K4G9        |
| 5291 | 1,3,4,5,8,3<br>6,37,38 | 2,6,7,39,4<br>0,41,42,43<br>,44 | 3  | Q6AYL6,Q6AYS4,Q6P6R2                                                         |
| 5292 | 1,3,4,5,8,3<br>6,37,39 | 2,6,7,38,4<br>0,41,42,43<br>,44 | 8  | O54728,P55091,P98089,Q62635,Q6AYS4,Q6P6R2,Q8CIZ5,Q9ESW0                      |
| 5293 | 1,3,4,5,8,3<br>6,37,40 | 2,6,7,38,3<br>9,41,42,43<br>,44 | 6  | P00774,P55091,P98089,Q62635,Q6AYS4,Q8CIZ5                                    |

|      |                        |                                 |    |                                                                                            |
|------|------------------------|---------------------------------|----|--------------------------------------------------------------------------------------------|
| 5294 | 1,3,4,5,8,3<br>6,37,41 | 2,6,7,38,3<br>9,40,42,43<br>,44 | 1  | P83121                                                                                     |
| 5295 | 1,3,4,5,8,3<br>6,37,42 | 2,6,7,38,3<br>9,40,41,43<br>,44 | 8  | O54728,P00774,P12020,P19629,P98089,Q4AEF8,Q62635,Q6AYL6                                    |
| 5296 | 1,3,4,5,8,3<br>6,37,43 | 2,6,7,38,3<br>9,40,41,42<br>,44 | 13 | O54728,P01681,P12020,P16391,P19629,P22734,P83121,Q62635,Q64268,Q8CIZ5,Q9QUL6,Q9QW07,Q9QX79 |
| 5297 | 1,3,4,5,8,3<br>6,37,44 | 2,6,7,38,3<br>9,40,41,42<br>,43 | 3  | P13432,P55314,Q9QW07                                                                       |
| 5298 | 1,3,4,5,8,3<br>6,38,39 | 2,6,7,37,4<br>0,41,42,43<br>,44 | 3  | O54728,Q6AYS4,Q6P6R2                                                                       |
| 5299 | 1,3,4,5,8,3<br>6,38,40 | 2,6,7,37,3<br>9,41,42,43<br>,44 | 1  | Q6AYS4                                                                                     |
| 5300 | 1,3,4,5,8,3<br>6,38,41 | 2,6,7,37,3<br>9,40,42,43<br>,44 | 1  | P50116                                                                                     |
| 5301 | 1,3,4,5,8,3<br>6,38,42 | 2,6,7,37,3<br>9,40,41,43<br>,44 | 12 | O54728,P08753,P12020,P19629,P47727,P60905,P97554,Q4AEF8,Q5GRG2,Q62902,Q6AYL6,Q9QZK9        |
| 5302 | 1,3,4,5,8,3<br>6,38,43 | 2,6,7,37,3<br>9,40,41,42<br>,44 | 10 | O54728,P01681,P12020,P16391,P19629,P34901,Q5GRG2,Q64268,Q6P6R2,Q9QX79                      |
| 5303 | 1,3,4,5,8,3<br>6,38,44 | 2,6,7,37,3<br>9,40,41,42<br>,43 | 3  | P34901,P55314,Q6AYS4                                                                       |
| 5304 | 1,3,4,5,8,3<br>6,39,40 | 2,6,7,37,3<br>8,41,42,43<br>,44 | 8  | O54728,P00774,P55091,P97840,P98089,Q62635,Q6AYS4,Q8CIZ5                                    |
| 5305 | 1,3,4,5,8,3<br>6,39,41 | 2,6,7,37,3<br>8,40,42,43<br>,44 | 4  | O54728,P97840,Q6AYS4,Q9ESW0                                                                |
| 5306 | 1,3,4,5,8,3<br>6,39,42 | 2,6,7,37,3<br>8,40,41,43<br>,44 | 9  | O54728,P00774,P08010,P47727,P98089,Q4AEF8,Q62635,Q6AYR9,Q6AYS4                             |
| 5307 | 1,3,4,5,8,3<br>6,39,43 | 2,6,7,37,3<br>8,40,41,42<br>,44 | 9  | O54728,P01681,P97840,Q62635,Q64268,Q6AYS4,Q6P6R2,Q8CIZ5,Q9QX79                             |
| 5308 | 1,3,4,5,8,3<br>6,39,44 | 2,6,7,37,3<br>8,40,41,42<br>,43 | 4  | O54728,P55314,Q6AYS4,Q9ESW0                                                                |

|      |                        |                                 |    |                                                                                                   |
|------|------------------------|---------------------------------|----|---------------------------------------------------------------------------------------------------|
| 5309 | 1,3,4,5,8,3<br>6,40,41 | 2,6,7,37,3<br>8,39,42,43<br>,44 | 4  | P23593,P97840,Q4FZU6,Q6IRE4                                                                       |
| 5310 | 1,3,4,5,8,3<br>6,40,42 | 2,6,7,37,3<br>8,39,41,43<br>,44 | 7  | O54728,P00774,P23593,P36374,P98089,Q4AEF8,Q62635                                                  |
| 5311 | 1,3,4,5,8,3<br>6,40,43 | 2,6,7,37,3<br>8,39,41,42<br>,44 | 8  | O54728,P01681,P97840,Q62635,Q64268,Q8CIZ5,Q9QW07,Q9QX79                                           |
| 5312 | 1,3,4,5,8,3<br>6,40,44 | 2,6,7,37,3<br>8,39,41,42<br>,43 | 4  | P13432,P55314,P97840,Q6AYS4                                                                       |
| 5313 | 1,3,4,5,8,3<br>6,41,42 | 2,6,7,37,3<br>8,39,40,43<br>,44 | 10 | O54728,P08010,P08721,P08753,P60905,Q62894,Q63357,Q6AYL6,Q6AYR9,Q812E4                             |
| 5314 | 1,3,4,5,8,3<br>6,41,43 | 2,6,7,37,3<br>8,39,40,42<br>,44 | 6  | P01681,P83121,P97840,Q64268,Q9QUL6,Q9QX79                                                         |
| 5315 | 1,3,4,5,8,3<br>6,41,44 | 2,6,7,37,3<br>8,39,40,42<br>,43 | 3  | P55314,P83121,P97840                                                                              |
| 5316 | 1,3,4,5,8,3<br>6,42,43 | 2,6,7,37,3<br>8,39,40,41<br>,44 | 14 | O54728,P01681,P06911,P10715,P12020,P16391,P19629,P47727,P60905,Q5GRG2,Q62635,Q64268,Q9QUL6,Q9QX79 |
| 5317 | 1,3,4,5,8,3<br>6,42,44 | 2,6,7,37,3<br>8,39,40,41<br>,43 | 6  | O54728,P08721,P36374,P55314,P60905,Q4AEF8                                                         |
| 5318 | 1,3,4,5,8,3<br>6,43,44 | 2,6,7,37,3<br>8,39,40,41<br>,42 | 8  | P01681,P13432,P34901,P55314,P97840,Q64268,Q9QW07,Q9QX79                                           |
| 5319 | 1,3,4,5,8,3<br>7,38,39 | 2,6,7,36,4<br>0,41,42,43<br>,44 | 3  | O54728,Q6P6R2,Q9R1T5                                                                              |
| 5320 | 1,3,4,5,8,3<br>7,38,40 | 2,6,7,36,3<br>9,41,42,43<br>,44 | 0  |                                                                                                   |
| 5321 | 1,3,4,5,8,3<br>7,38,41 | 2,6,7,36,3<br>9,40,42,43<br>,44 | 2  | Q62894,Q7TPB1                                                                                     |
| 5322 | 1,3,4,5,8,3<br>7,38,42 | 2,6,7,36,3<br>9,40,41,43<br>,44 | 5  | P12020,P12785,P19629,Q62894,Q6AYL6                                                                |
| 5323 | 1,3,4,5,8,3<br>7,38,43 | 2,6,7,36,3<br>9,40,41,42<br>,44 | 6  | P01681,P12020,Q64268,Q7TPB1,Q9QW07,Q9QX79                                                         |

|      |                        |                                 |   |                                                                |
|------|------------------------|---------------------------------|---|----------------------------------------------------------------|
| 5324 | 1,3,4,5,8,3<br>7,38,44 | 2,6,7,36,3<br>9,40,41,42<br>,43 | 1 | Q9QW07                                                         |
| 5325 | 1,3,4,5,8,3<br>7,39,40 | 2,6,7,36,3<br>8,41,42,43<br>,44 | 6 | O54728,P55091,P97840,P98089,Q8CIZ5,Q9QW07                      |
| 5326 | 1,3,4,5,8,3<br>7,39,41 | 2,6,7,36,3<br>8,40,42,43<br>,44 | 2 | P97840,Q9ESW0                                                  |
| 5327 | 1,3,4,5,8,3<br>7,39,42 | 2,6,7,36,3<br>8,40,41,43<br>,44 | 4 | O54728,P98089,Q62635,Q9ESW0                                    |
| 5328 | 1,3,4,5,8,3<br>7,39,43 | 2,6,7,36,3<br>8,40,41,42<br>,44 | 8 | O54728,P01681,P97840,Q62635,Q64268,Q8CIZ5,Q9QW07,Q9QX79        |
| 5329 | 1,3,4,5,8,3<br>7,39,44 | 2,6,7,36,3<br>8,40,41,42<br>,43 | 2 | Q9ESW0,Q9QW07                                                  |
| 5330 | 1,3,4,5,8,3<br>7,40,41 | 2,6,7,36,3<br>8,39,42,43<br>,44 | 2 | P97840,Q6IRE4                                                  |
| 5331 | 1,3,4,5,8,3<br>7,40,42 | 2,6,7,36,3<br>8,39,41,43<br>,44 | 1 | P98089                                                         |
| 5332 | 1,3,4,5,8,3<br>7,40,43 | 2,6,7,36,3<br>8,39,41,42<br>,44 | 6 | P01681,P97840,Q64268,Q8CIZ5,Q9QW07,Q9QX79                      |
| 5333 | 1,3,4,5,8,3<br>7,40,44 | 2,6,7,36,3<br>8,39,41,42<br>,43 | 2 | P97840,Q9QW07                                                  |
| 5334 | 1,3,4,5,8,3<br>7,41,42 | 2,6,7,36,3<br>8,39,40,43<br>,44 | 1 | Q62894                                                         |
| 5335 | 1,3,4,5,8,3<br>7,41,43 | 2,6,7,36,3<br>8,39,40,42<br>,44 | 8 | P01681,P83121,P97840,Q62894,Q64268,Q7TPB1,Q9QUL6,Q9QX79        |
| 5336 | 1,3,4,5,8,3<br>7,41,44 | 2,6,7,36,3<br>8,39,40,42<br>,43 | 2 | P97840,Q9ESW0                                                  |
| 5337 | 1,3,4,5,8,3<br>7,42,43 | 2,6,7,36,3<br>8,39,40,41<br>,44 | 9 | P01681,P06911,P12020,P19629,Q5GRG2,Q62635,Q62894,Q64268,Q9QX79 |
| 5338 | 1,3,4,5,8,3<br>7,42,44 | 2,6,7,36,3<br>8,39,40,41<br>,43 | 0 |                                                                |



|      |                        |                                 |    |                                                                                                   |
|------|------------------------|---------------------------------|----|---------------------------------------------------------------------------------------------------|
| 5339 | 1,3,4,5,8,3<br>7,43,44 | 2,6,7,36,3<br>8,39,40,41<br>,42 | 5  | P01681,P97840,Q64268,Q9QW07,Q9QX79                                                                |
| 5340 | 1,3,4,5,8,3<br>8,39,40 | 2,6,7,36,3<br>7,41,42,43<br>,44 | 3  | O54728,P97840,Q6AYS4                                                                              |
| 5341 | 1,3,4,5,8,3<br>8,39,41 | 2,6,7,36,3<br>7,40,42,43<br>,44 | 2  | P97840,Q9ESW0                                                                                     |
| 5342 | 1,3,4,5,8,3<br>8,39,42 | 2,6,7,36,3<br>7,40,41,43<br>,44 | 4  | O54728,P08753,P19218,P47727                                                                       |
| 5343 | 1,3,4,5,8,3<br>8,39,43 | 2,6,7,36,3<br>7,40,41,42<br>,44 | 5  | O54728,P01681,P97840,Q64268,Q6P6R2                                                                |
| 5344 | 1,3,4,5,8,3<br>8,39,44 | 2,6,7,36,3<br>7,40,41,42<br>,43 | 1  | Q9ESW0                                                                                            |
| 5345 | 1,3,4,5,8,3<br>8,40,41 | 2,6,7,36,3<br>7,39,42,43<br>,44 | 2  | P97840,Q6IRE4                                                                                     |
| 5346 | 1,3,4,5,8,3<br>8,40,42 | 2,6,7,36,3<br>7,39,41,43<br>,44 | 1  | Q9JHB9                                                                                            |
| 5347 | 1,3,4,5,8,3<br>8,40,43 | 2,6,7,36,3<br>7,39,41,42<br>,44 | 5  | P01681,P97840,Q64268,Q9QW07,Q9QX79                                                                |
| 5348 | 1,3,4,5,8,3<br>8,40,44 | 2,6,7,36,3<br>7,39,41,42<br>,43 | 2  | P22006,P97840                                                                                     |
| 5349 | 1,3,4,5,8,3<br>8,41,42 | 2,6,7,36,3<br>7,39,40,43<br>,44 | 8  | O35547,P08010,P08753,P50116,P60905,Q62894,Q62902,Q9QZK9                                           |
| 5350 | 1,3,4,5,8,3<br>8,41,43 | 2,6,7,36,3<br>7,39,40,42<br>,44 | 8  | P01681,P50116,P97840,Q62894,Q64268,Q7TPB1,Q8CJD3,Q9QX79                                           |
| 5351 | 1,3,4,5,8,3<br>8,41,44 | 2,6,7,36,3<br>7,39,40,42<br>,43 | 3  | P50115,P50116,Q05695                                                                              |
| 5352 | 1,3,4,5,8,3<br>8,42,43 | 2,6,7,36,3<br>7,39,40,41<br>,44 | 14 | B0BNN3,P01681,P06911,P08723,P12020,P19629,P47727,P60905,Q5GRG2,Q62894,Q64268,Q6AYR8,Q9JHB9,Q9QX79 |
| 5353 | 1,3,4,5,8,3<br>8,42,44 | 2,6,7,36,3<br>7,39,40,41<br>,43 | 4  | P12785,P60905,Q6AYR8,Q9QZK9                                                                       |

|      |                        |                                 |    |                                                                       |
|------|------------------------|---------------------------------|----|-----------------------------------------------------------------------|
| 5354 | 1,3,4,5,8,3<br>8,43,44 | 2,6,7,36,3<br>7,39,40,41<br>,42 | 6  | P01681,P34901,P97840,Q64268,Q9QW07,Q9QX79                             |
| 5355 | 1,3,4,5,8,3<br>9,40,41 | 2,6,7,36,3<br>7,38,42,43<br>,44 | 5  | P47967,P97840,Q4FZU6,Q6IRE4,Q9ESW0                                    |
| 5356 | 1,3,4,5,8,3<br>9,40,42 | 2,6,7,36,3<br>7,38,41,43<br>,44 | 4  | O54728,P97840,P98089,Q62635                                           |
| 5357 | 1,3,4,5,8,3<br>9,40,43 | 2,6,7,36,3<br>7,38,41,42<br>,44 | 6  | O54728,P01681,P97840,Q62635,Q8CIZ5,Q9QW07                             |
| 5358 | 1,3,4,5,8,3<br>9,40,44 | 2,6,7,36,3<br>7,38,41,42<br>,43 | 3  | P97840,Q5I0D1,Q6AYS4                                                  |
| 5359 | 1,3,4,5,8,3<br>9,41,42 | 2,6,7,36,3<br>7,38,40,43<br>,44 | 8  | O54728,P08010,P08753,P82471,P97840,Q62894,Q6AYR9,Q9ESW0               |
| 5360 | 1,3,4,5,8,3<br>9,41,43 | 2,6,7,36,3<br>7,38,40,42<br>,44 | 5  | P01681,P82471,P97840,Q9ESW0,Q9QX79                                    |
| 5361 | 1,3,4,5,8,3<br>9,41,44 | 2,6,7,36,3<br>7,38,40,42<br>,43 | 3  | P97840,Q5I0D1,Q9ESW0                                                  |
| 5362 | 1,3,4,5,8,3<br>9,42,43 | 2,6,7,36,3<br>7,38,40,41<br>,44 | 10 | O54728,P01681,P12020,P47727,P97840,Q62635,Q62894,Q64268,Q6AYR9,Q9JHB9 |
| 5363 | 1,3,4,5,8,3<br>9,42,44 | 2,6,7,36,3<br>7,38,40,41<br>,43 | 2  | O54728,Q9ESW0                                                         |
| 5364 | 1,3,4,5,8,3<br>9,43,44 | 2,6,7,36,3<br>7,38,40,41<br>,42 | 7  | P01681,P97840,Q5I0D1,Q64268,Q9ESW0,Q9QW07,Q9QX79                      |
| 5365 | 1,3,4,5,8,4<br>0,41,42 | 2,6,7,36,3<br>7,38,39,43<br>,44 | 4  | P23593,P97840,Q4FZU6,Q6IRE4                                           |
| 5366 | 1,3,4,5,8,4<br>0,41,43 | 2,6,7,36,3<br>7,38,39,42<br>,44 | 5  | P01681,P02793,Q7TP54,P47967,P97840,Q9QX79                             |
| 5367 | 1,3,4,5,8,4<br>0,41,44 | 2,6,7,36,3<br>7,38,39,42<br>,43 | 4  | P47967,P97840,Q4FZU6,Q5I0D1                                           |
| 5368 | 1,3,4,5,8,4<br>0,42,43 | 2,6,7,36,3<br>7,38,39,41<br>,44 | 5  | P01681,P97840,Q5M819,Q62635,Q9JHB9                                    |

|      |                         |                                 |    |                                                                              |
|------|-------------------------|---------------------------------|----|------------------------------------------------------------------------------|
| 5369 | 1,3,4,5,8,4<br>0,42,44  | 2,6,7,36,3<br>7,38,39,41<br>,43 | 4  | P36374,P97840,Q5M819,Q9QZ76                                                  |
| 5370 | 1,3,4,5,8,4<br>0,43,44  | 2,6,7,36,3<br>7,38,39,41<br>,42 | 5  | P01681,P97840,Q5M819,Q9QW07,Q9QX79                                           |
| 5371 | 1,3,4,5,8,4<br>1,42,43  | 2,6,7,36,3<br>7,38,39,40<br>,44 | 8  | P01681,P54921,P60905,P82471,P97840,Q62894,Q9QUL6,Q9QX79                      |
| 5372 | 1,3,4,5,8,4<br>1,42,44  | 2,6,7,36,3<br>7,38,39,40<br>,43 | 3  | P08753,P60905,P97840                                                         |
| 5373 | 1,3,4,5,8,4<br>1,43,44  | 2,6,7,36,3<br>7,38,39,40<br>,42 | 5  | P01681,P83121,P97840,Q5I0D1,Q9QX79                                           |
| 5374 | 1,3,4,5,8,4<br>2,43,44  | 2,6,7,36,3<br>7,38,39,40<br>,41 | 6  | P01681,P60905,P97840,Q5M819,Q6AYR8,Q9QX79                                    |
| 5375 | 1,3,4,5,36,<br>37,38,39 | 2,6,7,8,40,<br>41,42,43,4<br>4  | 4  | O54728,P12020,Q6P6R2,Q9QW07                                                  |
| 5376 | 1,3,4,5,36,<br>37,38,40 | 2,6,7,8,39,<br>41,42,43,4<br>4  | 2  | Q6P6R2,Q9QW07                                                                |
| 5377 | 1,3,4,5,36,<br>37,38,41 | 2,6,7,8,39,<br>40,42,43,4<br>4  | 1  | P62804                                                                       |
| 5378 | 1,3,4,5,36,<br>37,38,42 | 2,6,7,8,39,<br>40,41,43,4<br>4  | 8  | O54728,P06911,P10715,P12020,P12785,P19629,Q5GRG2,Q6AYL6                      |
| 5379 | 1,3,4,5,36,<br>37,38,43 | 2,6,7,8,39,<br>40,41,42,4<br>4  | 11 | O54728,P01681,P06911,P10715,P12020,P19629,P34901,Q5GRG2,Q64268,Q6P6R2,Q9QW07 |
| 5380 | 1,3,4,5,36,<br>37,38,44 | 2,6,7,8,39,<br>40,41,42,4<br>3  | 4  | P12785,P34901,P55314,Q9QW07                                                  |
| 5381 | 1,3,4,5,36,<br>37,39,40 | 2,6,7,8,38,<br>41,42,43,4<br>4  | 11 | O54728,P00774,P50115,P50116,P55091,P98089,Q62635,Q6P6R2,Q6P777,Q8CIZ5,Q9QW07 |
| 5382 | 1,3,4,5,36,<br>37,39,41 | 2,6,7,8,38,<br>40,42,43,4<br>4  | 3  | O54728,P62804,Q9ESW0                                                         |
| 5383 | 1,3,4,5,36,<br>37,39,42 | 2,6,7,8,38,<br>40,41,43,4<br>4  | 7  | O54728,P00774,P12020,P50115,P55091,P98089,Q62635                             |

|      |                         |                                |    |                                                                       |
|------|-------------------------|--------------------------------|----|-----------------------------------------------------------------------|
| 5384 | 1,3,4,5,36,<br>37,39,43 | 2,6,7,8,38,<br>40,41,42,4<br>4 | 10 | O54728,P01681,P12020,P22734,P50115,P98089,Q62635,Q6P6R2,Q8CIZ5,Q9QW07 |
| 5385 | 1,3,4,5,36,<br>37,39,44 | 2,6,7,8,38,<br>40,41,42,4<br>3 | 5  | O54728,P50115,P55314,Q9ESW0,Q9QW07                                    |
| 5386 | 1,3,4,5,36,<br>37,40,41 | 2,6,7,8,38,<br>39,42,43,4<br>4 | 2  | Q6IRE4,Q80WL1                                                         |
| 5387 | 1,3,4,5,36,<br>37,40,42 | 2,6,7,8,38,<br>39,41,43,4<br>4 | 7  | O54728,P00774,P50115,P55091,P98089,Q62635,Q6IRE4                      |
| 5388 | 1,3,4,5,36,<br>37,40,43 | 2,6,7,8,38,<br>39,41,42,4<br>4 | 6  | P01681,P50115,Q62635,Q6P6R2,Q8CIZ5,Q9QW07                             |
| 5389 | 1,3,4,5,36,<br>37,40,44 | 2,6,7,8,38,<br>39,41,42,4<br>3 | 3  | P50115,P55314,Q9QW07                                                  |
| 5390 | 1,3,4,5,36,<br>37,41,42 | 2,6,7,8,38,<br>39,40,43,4<br>4 | 2  | O54728,Q62635                                                         |
| 5391 | 1,3,4,5,36,<br>37,41,43 | 2,6,7,8,38,<br>39,40,42,4<br>4 | 4  | P01681,P62804,P83121,Q9QUL6                                           |
| 5392 | 1,3,4,5,36,<br>37,41,44 | 2,6,7,8,38,<br>39,40,42,4<br>3 | 1  | P55314                                                                |
| 5393 | 1,3,4,5,36,<br>37,42,43 | 2,6,7,8,38,<br>39,40,41,4<br>4 | 10 | O54728,P01681,P06911,P10715,P12020,P19629,P31044,P50115,Q5GRG2,Q62635 |
| 5394 | 1,3,4,5,36,<br>37,42,44 | 2,6,7,8,38,<br>39,40,41,4<br>3 | 3  | O54728,P50115,P55314                                                  |
| 5395 | 1,3,4,5,36,<br>37,43,44 | 2,6,7,8,38,<br>39,40,41,4<br>2 | 6  | P01681,P13432,P34901,P50115,P55314,Q9QW07                             |
| 5396 | 1,3,4,5,36,<br>38,39,40 | 2,6,7,8,37,<br>41,42,43,4<br>4 | 2  | O54728,Q6P6R2                                                         |
| 5397 | 1,3,4,5,36,<br>38,39,41 | 2,6,7,8,37,<br>40,42,43,4<br>4 | 2  | O54728,Q6P6R2                                                         |
| 5398 | 1,3,4,5,36,<br>38,39,42 | 2,6,7,8,37,<br>40,41,43,4<br>4 | 5  | O54728,P12020,P47727,P51907,Q5GRG2                                    |

|      |                         |                                |    |                                                                                            |
|------|-------------------------|--------------------------------|----|--------------------------------------------------------------------------------------------|
| 5399 | 1,3,4,5,36,<br>38,39,43 | 2,6,7,8,37,<br>40,41,42,4<br>4 | 6  | O54728,P01681,P12020,P34901,Q6P6R2,Q9QW07                                                  |
| 5400 | 1,3,4,5,36,<br>38,39,44 | 2,6,7,8,37,<br>40,41,42,4<br>3 | 5  | O54728,P34901,P51907,P55314,Q9QW07                                                         |
| 5401 | 1,3,4,5,36,<br>38,40,41 | 2,6,7,8,37,<br>39,42,43,4<br>4 | 1  | Q6IRE4                                                                                     |
| 5402 | 1,3,4,5,36,<br>38,40,42 | 2,6,7,8,37,<br>39,41,43,4<br>4 | 3  | O54728,P12785,Q6IRE4                                                                       |
| 5403 | 1,3,4,5,36,<br>38,40,43 | 2,6,7,8,37,<br>39,41,42,4<br>4 | 5  | O54728,P01681,P34901,Q6P6R2,Q9QW07                                                         |
| 5404 | 1,3,4,5,36,<br>38,40,44 | 2,6,7,8,37,<br>39,41,42,4<br>3 | 4  | P12785,P34901,P55314,Q9QW07                                                                |
| 5405 | 1,3,4,5,36,<br>38,41,42 | 2,6,7,8,37,<br>39,40,43,4<br>4 | 4  | O54728,P60905,Q62902,Q6AYL6                                                                |
| 5406 | 1,3,4,5,36,<br>38,41,43 | 2,6,7,8,37,<br>39,40,42,4<br>4 | 2  | P01681,Q8CJD3                                                                              |
| 5407 | 1,3,4,5,36,<br>38,41,44 | 2,6,7,8,37,<br>39,40,42,4<br>3 | 2  | P34901,P55314                                                                              |
| 5408 | 1,3,4,5,36,<br>38,42,43 | 2,6,7,8,37,<br>39,40,41,4<br>4 | 13 | O54728,P01681,P06911,P10715,P12020,P12785,P19629,P31044,P34901,P47727,Q5GRG2,Q6AYL6,Q6AYR8 |
| 5409 | 1,3,4,5,36,<br>38,42,44 | 2,6,7,8,37,<br>39,40,41,4<br>3 | 5  | O54728,P12785,P34901,P51907,P55314                                                         |
| 5410 | 1,3,4,5,36,<br>38,43,44 | 2,6,7,8,37,<br>39,40,41,4<br>2 | 4  | P01681,P34901,P55314,Q9QW07                                                                |
| 5411 | 1,3,4,5,36,<br>39,40,41 | 2,6,7,8,37,<br>38,42,43,4<br>4 | 3  | O54728,P97840,Q6IRE4                                                                       |
| 5412 | 1,3,4,5,36,<br>39,40,42 | 2,6,7,8,37,<br>38,41,43,4<br>4 | 7  | O54728,P00774,P50115,P55091,P98089,Q62635,Q6IRE4                                           |
| 5413 | 1,3,4,5,36,<br>39,40,43 | 2,6,7,8,37,<br>38,41,42,4<br>4 | 8  | O54728,P01681,P50115,P97840,Q62635,Q6P6R2,Q8CIZ5,Q9QW07                                    |

|      |                         |                                |   |                                                         |
|------|-------------------------|--------------------------------|---|---------------------------------------------------------|
| 5414 | 1,3,4,5,36,<br>39,40,44 | 2,6,7,8,37,<br>38,41,42,4<br>3 | 5 | O54728,P50115,P55314,Q6P6T1,Q9QW07                      |
| 5415 | 1,3,4,5,36,<br>39,41,42 | 2,6,7,8,37,<br>38,40,43,4<br>4 | 4 | O54728,P08010,Q62635,Q6AYR9                             |
| 5416 | 1,3,4,5,36,<br>39,41,43 | 2,6,7,8,37,<br>38,40,42,4<br>4 | 4 | O54728,P01681,P97840,Q62635                             |
| 5417 | 1,3,4,5,36,<br>39,41,44 | 2,6,7,8,37,<br>38,40,42,4<br>3 | 3 | O54728,P55314,Q9ESW0                                    |
| 5418 | 1,3,4,5,36,<br>39,42,43 | 2,6,7,8,37,<br>38,40,41,4<br>4 | 8 | O54728,P01681,P06911,P12020,P50115,Q5GRG2,Q62635,Q6AYR9 |
| 5419 | 1,3,4,5,36,<br>39,42,44 | 2,6,7,8,37,<br>38,40,41,4<br>3 | 4 | O54728,P50115,P51907,P55314                             |
| 5420 | 1,3,4,5,36,<br>39,43,44 | 2,6,7,8,37,<br>38,40,41,4<br>2 | 6 | O54728,P01681,P34901,P50115,P55314,Q9QW07               |
| 5421 | 1,3,4,5,36,<br>40,41,42 | 2,6,7,8,37,<br>38,39,43,4<br>4 | 5 | O54728,P05539,P23593,Q4FZU6,Q6IRE4                      |
| 5422 | 1,3,4,5,36,<br>40,41,43 | 2,6,7,8,37,<br>38,39,42,4<br>4 | 2 | P01681,P97840                                           |
| 5423 | 1,3,4,5,36,<br>40,41,44 | 2,6,7,8,37,<br>38,39,42,4<br>3 | 5 | P02680,P55314,Q4FZU6,Q6IRE4,Q80WL1                      |
| 5424 | 1,3,4,5,36,<br>40,42,43 | 2,6,7,8,37,<br>38,39,41,4<br>4 | 6 | O54728,P01681,P02782,P11598,P50115,Q62635               |
| 5425 | 1,3,4,5,36,<br>40,42,44 | 2,6,7,8,37,<br>38,39,41,4<br>3 | 5 | O54728,P02680,P02782,P55314,Q7TPB1                      |
| 5426 | 1,3,4,5,36,<br>40,43,44 | 2,6,7,8,37,<br>38,39,41,4<br>2 | 6 | P01681,P13432,P34901,P55314,P97840,Q9QW07               |
| 5427 | 1,3,4,5,36,<br>41,42,43 | 2,6,7,8,37,<br>38,39,40,4<br>4 | 7 | O54728,P01681,P60905,P82471,Q62635,Q6AYR9,Q9QUL6        |
| 5428 | 1,3,4,5,36,<br>41,42,44 | 2,6,7,8,37,<br>38,39,40,4<br>3 | 3 | P02680,P55314,P60905                                    |

|      |                         |                                |   |                                                                |
|------|-------------------------|--------------------------------|---|----------------------------------------------------------------|
| 5429 | 1,3,4,5,36,<br>41,43,44 | 2,6,7,8,37,<br>38,39,40,4<br>2 | 5 | P01681,P34901,P55314,P83121,P97840                             |
| 5430 | 1,3,4,5,36,<br>42,43,44 | 2,6,7,8,37,<br>38,39,40,4<br>1 | 5 | O54728,P01681,P34901,P55314,Q6AYR8                             |
| 5431 | 1,3,4,5,37,<br>38,39,40 | 2,6,7,8,36,<br>41,42,43,4<br>4 | 5 | O54728,P82995,Q6IRE4,Q6P6R2,Q9QW07                             |
| 5432 | 1,3,4,5,37,<br>38,39,41 | 2,6,7,8,36,<br>40,42,43,4<br>4 | 2 | P62804,Q9ESW0                                                  |
| 5433 | 1,3,4,5,37,<br>38,39,42 | 2,6,7,8,36,<br>40,41,43,4<br>4 | 3 | O54728,P12020,P12785                                           |
| 5434 | 1,3,4,5,37,<br>38,39,43 | 2,6,7,8,36,<br>40,41,42,4<br>4 | 7 | O54728,P01681,P12020,P62804,P82995,Q6P6R2,Q9QW07               |
| 5435 | 1,3,4,5,37,<br>38,39,44 | 2,6,7,8,36,<br>40,41,42,4<br>3 | 3 | P62804,Q9JJS8,Q9QW07                                           |
| 5436 | 1,3,4,5,37,<br>38,40,41 | 2,6,7,8,36,<br>39,42,43,4<br>4 | 2 | P62804,Q6IRE4                                                  |
| 5437 | 1,3,4,5,37,<br>38,40,42 | 2,6,7,8,36,<br>39,41,43,4<br>4 | 2 | P12785,Q6IRE4                                                  |
| 5438 | 1,3,4,5,37,<br>38,40,43 | 2,6,7,8,36,<br>39,41,42,4<br>4 | 4 | P01681,P82995,Q6P6R2,Q9QW07                                    |
| 5439 | 1,3,4,5,37,<br>38,40,44 | 2,6,7,8,36,<br>39,41,42,4<br>3 | 2 | P12785,Q9QW07                                                  |
| 5440 | 1,3,4,5,37,<br>38,41,42 | 2,6,7,8,36,<br>39,40,43,4<br>4 | 2 | P12785,Q6IRE4                                                  |
| 5441 | 1,3,4,5,37,<br>38,41,43 | 2,6,7,8,36,<br>39,40,42,4<br>4 | 5 | P01681,P62804,Q7TPB1,Q8CJD3,Q9QW07                             |
| 5442 | 1,3,4,5,37,<br>38,41,44 | 2,6,7,8,36,<br>39,40,42,4<br>3 | 1 | P62804                                                         |
| 5443 | 1,3,4,5,37,<br>38,42,43 | 2,6,7,8,36,<br>39,40,41,4<br>4 | 9 | B0BNN3,P01681,P06911,P10715,P12020,P12785,P19629,P31044,Q5GRG2 |

|      |                         |                                |    |                                                                       |
|------|-------------------------|--------------------------------|----|-----------------------------------------------------------------------|
| 5444 | 1,3,4,5,37,<br>38,42,44 | 2,6,7,8,36,<br>39,40,41,4<br>3 | 1  | P12785                                                                |
| 5445 | 1,3,4,5,37,<br>38,43,44 | 2,6,7,8,36,<br>39,40,41,4<br>2 | 4  | P01681,P12785,P34901,Q9QW07                                           |
| 5446 | 1,3,4,5,37,<br>39,40,41 | 2,6,7,8,36,<br>38,42,43,4<br>4 | 3  | P62804,P97840,Q6IRE4                                                  |
| 5447 | 1,3,4,5,37,<br>39,40,42 | 2,6,7,8,36,<br>38,41,43,4<br>4 | 8  | O54728,P00774,P50115,P55091,P98089,Q62635,Q6IRE4,Q8CIZ5               |
| 5448 | 1,3,4,5,37,<br>39,40,43 | 2,6,7,8,36,<br>38,41,42,4<br>4 | 10 | O54728,P01681,P50115,P97840,Q05695,Q62635,Q6P6R2,Q6P777,Q8CIZ5,Q9QW07 |
| 5449 | 1,3,4,5,37,<br>39,40,44 | 2,6,7,8,36,<br>38,41,42,4<br>3 | 4  | P50115,P50116,Q8CIZ5,Q9QW07                                           |
| 5450 | 1,3,4,5,37,<br>39,41,42 | 2,6,7,8,36,<br>38,40,43,4<br>4 | 3  | O54728,Q6IRE4,Q9ESW0                                                  |
| 5451 | 1,3,4,5,37,<br>39,41,43 | 2,6,7,8,36,<br>38,40,42,4<br>4 | 4  | P01681,P62804,P97840,Q9QW07                                           |
| 5452 | 1,3,4,5,37,<br>39,41,44 | 2,6,7,8,36,<br>38,40,42,4<br>3 | 2  | P62804,Q9ESW0                                                         |
| 5453 | 1,3,4,5,37,<br>39,42,43 | 2,6,7,8,36,<br>38,40,41,4<br>4 | 7  | O54728,P01681,P12020,P50115,Q5GRG2,Q62635,Q8CIZ5                      |
| 5454 | 1,3,4,5,37,<br>39,42,44 | 2,6,7,8,36,<br>38,40,41,4<br>3 | 3  | O54728,P50115,Q9ESW0                                                  |
| 5455 | 1,3,4,5,37,<br>39,43,44 | 2,6,7,8,36,<br>38,40,41,4<br>2 | 4  | P01681,P50115,Q8CIZ5,Q9QW07                                           |
| 5456 | 1,3,4,5,37,<br>40,41,42 | 2,6,7,8,36,<br>38,39,43,4<br>4 | 1  | Q6IRE4                                                                |
| 5457 | 1,3,4,5,37,<br>40,41,43 | 2,6,7,8,36,<br>38,39,42,4<br>4 | 4  | P01681,P62804,P97840,Q9QW07                                           |
| 5458 | 1,3,4,5,37,<br>40,41,44 | 2,6,7,8,36,<br>38,39,42,4<br>3 | 2  | Q6IRE4,Q80WL1                                                         |



|      |                         |                                |   |                                                  |
|------|-------------------------|--------------------------------|---|--------------------------------------------------|
| 5459 | 1,3,4,5,37,<br>40,42,43 | 2,6,7,8,36,<br>38,39,41,4<br>4 | 6 | P01681,P11598,P50115,Q62635,Q8CIZ5,Q9QW07        |
| 5460 | 1,3,4,5,37,<br>40,42,44 | 2,6,7,8,36,<br>38,39,41,4<br>3 | 0 |                                                  |
| 5461 | 1,3,4,5,37,<br>40,43,44 | 2,6,7,8,36,<br>38,39,41,4<br>2 | 4 | P01681,P97840,Q8CIZ5,Q9QW07                      |
| 5462 | 1,3,4,5,37,<br>41,42,43 | 2,6,7,8,36,<br>38,39,40,4<br>4 | 2 | P01681,Q9QUL6                                    |
| 5463 | 1,3,4,5,37,<br>41,42,44 | 2,6,7,8,36,<br>38,39,40,4<br>3 | 0 |                                                  |
| 5464 | 1,3,4,5,37,<br>41,43,44 | 2,6,7,8,36,<br>38,39,40,4<br>2 | 4 | P01681,P62804,P97840,Q9QW07                      |
| 5465 | 1,3,4,5,37,<br>42,43,44 | 2,6,7,8,36,<br>38,39,40,4<br>1 | 3 | P01681,Q6AYR8,Q9QW07                             |
| 5466 | 1,3,4,5,38,<br>39,40,41 | 2,6,7,8,36,<br>37,42,43,4<br>4 | 1 | Q6IRE4                                           |
| 5467 | 1,3,4,5,38,<br>39,40,42 | 2,6,7,8,36,<br>37,41,43,4<br>4 | 2 | O54728,Q6IRE4                                    |
| 5468 | 1,3,4,5,38,<br>39,40,43 | 2,6,7,8,36,<br>37,41,42,4<br>4 | 5 | O54728,P01681,P97840,Q6P6R2,Q9QW07               |
| 5469 | 1,3,4,5,38,<br>39,40,44 | 2,6,7,8,36,<br>37,41,42,4<br>3 | 1 | Q9QW07                                           |
| 5470 | 1,3,4,5,38,<br>39,41,42 | 2,6,7,8,36,<br>37,40,43,4<br>4 | 1 | O54728                                           |
| 5471 | 1,3,4,5,38,<br>39,41,43 | 2,6,7,8,36,<br>37,40,42,4<br>4 | 5 | B0BNN3,P01681,P62804,P97840,Q8CJD3               |
| 5472 | 1,3,4,5,38,<br>39,41,44 | 2,6,7,8,36,<br>37,40,42,4<br>3 | 1 | Q9ESW0                                           |
| 5473 | 1,3,4,5,38,<br>39,42,43 | 2,6,7,8,36,<br>37,40,41,4<br>4 | 7 | B0BNN3,O54728,P01681,P12020,P47727,Q5GRG2,Q6AYR8 |

|      |                         |                                |   |                                                  |
|------|-------------------------|--------------------------------|---|--------------------------------------------------|
| 5474 | 1,3,4,5,38,<br>39,42,44 | 2,6,7,8,36,<br>37,40,41,4<br>3 | 3 | O54728,P12785,P51907                             |
| 5475 | 1,3,4,5,38,<br>39,43,44 | 2,6,7,8,36,<br>37,40,41,4<br>2 | 4 | P01681,P34901,Q9JJS8,Q9QW07                      |
| 5476 | 1,3,4,5,38,<br>40,41,42 | 2,6,7,8,36,<br>37,39,43,4<br>4 | 1 | Q6IRE4                                           |
| 5477 | 1,3,4,5,38,<br>40,41,43 | 2,6,7,8,36,<br>37,39,42,4<br>4 | 3 | P01681,P97840,Q8CJD3                             |
| 5478 | 1,3,4,5,38,<br>40,41,44 | 2,6,7,8,36,<br>37,39,42,4<br>3 | 1 | Q6IRE4                                           |
| 5479 | 1,3,4,5,38,<br>40,42,43 | 2,6,7,8,36,<br>37,39,41,4<br>4 | 5 | B0BNN3,P01681,P11598,Q6AYR8,Q9JHB9               |
| 5480 | 1,3,4,5,38,<br>40,42,44 | 2,6,7,8,36,<br>37,39,41,4<br>3 | 2 | P12785,Q6AYR8                                    |
| 5481 | 1,3,4,5,38,<br>40,43,44 | 2,6,7,8,36,<br>37,39,41,4<br>2 | 5 | P01681,P01835,P34901,P97840,Q9QW07               |
| 5482 | 1,3,4,5,38,<br>41,42,43 | 2,6,7,8,36,<br>37,39,40,4<br>4 | 7 | B0BNN3,O35547,P01681,P82471,Q62902,Q6AYR8,Q8CJD3 |
| 5483 | 1,3,4,5,38,<br>41,42,44 | 2,6,7,8,36,<br>37,39,40,4<br>3 | 2 | P12785,Q6AYR8                                    |
| 5484 | 1,3,4,5,38,<br>41,43,44 | 2,6,7,8,36,<br>37,39,40,4<br>2 | 4 | P00774,P01681,P34901,Q8CJD3                      |
| 5485 | 1,3,4,5,38,<br>42,43,44 | 2,6,7,8,36,<br>37,39,40,4<br>1 | 5 | B0BNN3,P01681,P12785,P34901,Q6AYR8               |
| 5486 | 1,3,4,5,39,<br>40,41,42 | 2,6,7,8,36,<br>37,38,43,4<br>4 | 3 | O54728,P97840,Q6IRE4                             |
| 5487 | 1,3,4,5,39,<br>40,41,43 | 2,6,7,8,36,<br>37,38,42,4<br>4 | 3 | P01681,P47967,P97840                             |
| 5488 | 1,3,4,5,39,<br>40,41,44 | 2,6,7,8,36,<br>37,38,42,4<br>3 | 6 | P10715,P47967,P97840,Q4FZU6,Q6IRE4,Q9ESW0        |

|      |                         |                                  |   |                                                         |
|------|-------------------------|----------------------------------|---|---------------------------------------------------------|
| 5489 | 1,3,4,5,39,<br>40,42,43 | 2,6,7,8,36,<br>37,38,41,4<br>4   | 7 | O54728,P01681,P50115,P97840,Q62635,Q8CIZ5,Q9JHB9        |
| 5490 | 1,3,4,5,39,<br>40,42,44 | 2,6,7,8,36,<br>37,38,41,4<br>3   | 1 | O54728                                                  |
| 5491 | 1,3,4,5,39,<br>40,43,44 | 2,6,7,8,36,<br>37,38,41,4<br>2   | 4 | P01681,P97840,Q8CIZ5,Q9QW07                             |
| 5492 | 1,3,4,5,39,<br>41,42,43 | 2,6,7,8,36,<br>37,38,40,4<br>4   | 5 | O54728,P82471,P97840,Q62635,Q6AYR9                      |
| 5493 | 1,3,4,5,39,<br>41,42,44 | 2,6,7,8,36,<br>37,38,40,4<br>3   | 2 | P82471,Q9ESW0                                           |
| 5494 | 1,3,4,5,39,<br>41,43,44 | 2,6,7,8,36,<br>37,38,40,4<br>2   | 4 | P01681,P97840,Q9ESW0,Q9QW07                             |
| 5495 | 1,3,4,5,39,<br>42,43,44 | 2,6,7,8,36,<br>37,38,40,4<br>1   | 4 | O54728,P01681,P70545,Q6AYR8                             |
| 5496 | 1,3,4,5,40,<br>41,42,43 | 2,6,7,8,36,<br>37,38,39,4<br>4   | 3 | P01681,P11598,P97840                                    |
| 5497 | 1,3,4,5,40,<br>41,42,44 | 2,6,7,8,36,<br>37,38,39,4<br>3   | 3 | P02680,Q4FZU6,Q6IRE4                                    |
| 5498 | 1,3,4,5,40,<br>41,43,44 | 2,6,7,8,36,<br>37,38,39,4<br>2   | 4 | P01681,P47967,P97840,Q9QW07                             |
| 5499 | 1,3,4,5,40,<br>42,43,44 | 2,6,7,8,36,<br>37,38,39,4<br>1   | 4 | P01681,P97840,Q6AYR8,Q9QW07                             |
| 5500 | 1,3,4,5,41,<br>42,43,44 | 2,6,7,8,36,<br>37,38,39,4<br>0   | 5 | P01681,P60905,P82471,P97840,Q6AYR8                      |
| 5501 | 1,3,4,6,7,8<br>,36,37   | 2,5,38,39,<br>40,41,42,4<br>3,44 | 5 | O54858,P07171,P11598,Q63617,Q99041                      |
| 5502 | 1,3,4,6,7,8<br>,36,38   | 2,5,37,39,<br>40,41,42,4<br>3,44 | 7 | O08557,O54858,P07171,P11598,P19218,P97580,Q30KJ2        |
| 5503 | 1,3,4,6,7,8<br>,36,39   | 2,5,37,38,<br>40,41,42,4<br>3,44 | 8 | O54728,O54858,P02625,P07171,P08010,P11598,Q63617,Q99041 |

|      |                       |                                  |    |                                                                                                   |
|------|-----------------------|----------------------------------|----|---------------------------------------------------------------------------------------------------|
| 5504 | 1,3,4,6,7,8<br>,36,40 | 2,5,37,38,<br>39,41,42,4<br>3,44 | 3  | P05539,P11598,Q63617                                                                              |
| 5505 | 1,3,4,6,7,8<br>,36,41 | 2,5,37,38,<br>39,40,42,4<br>3,44 | 11 | O54858,P05539,P07171,P08010,P08649,P11598,P18418,P85971,Q63617,Q8VD89,Q99041                      |
| 5506 | 1,3,4,6,7,8<br>,36,42 | 2,5,37,38,<br>39,40,41,4<br>3,44 | 14 | O54858,P05539,P08010,P08649,P08753,P16086,P20759,P36374,P60905,P85971,P97554,Q4AEF8,Q62753,Q63617 |
| 5507 | 1,3,4,6,7,8<br>,36,43 | 2,5,37,38,<br>39,40,41,4<br>2,44 | 11 | O54858,O70417,P01681,P02651,P06760,P11598,P85971,Q63617,Q64268,Q9QX79,Q9WUW3                      |
| 5508 | 1,3,4,6,7,8<br>,36,44 | 2,5,37,38,<br>39,40,41,4<br>2,43 | 7  | O54858,P07171,P11598,P53792,P55314,P85971,Q63617                                                  |
| 5509 | 1,3,4,6,7,8<br>,37,38 | 2,5,36,39,<br>40,41,42,4<br>3,44 | 6  | P11598,P15399,P97580,Q30KJ2,Q63617,Q7TPB1                                                         |
| 5510 | 1,3,4,6,7,8<br>,37,39 | 2,5,36,38,<br>40,41,42,4<br>3,44 | 5  | O70417,P02625,P11598,Q63617,Q99041                                                                |
| 5511 | 1,3,4,6,7,8<br>,37,40 | 2,5,36,38,<br>39,41,42,4<br>3,44 | 2  | P11598,Q63617                                                                                     |
| 5512 | 1,3,4,6,7,8<br>,37,41 | 2,5,36,38,<br>39,40,42,4<br>3,44 | 5  | P11598,P18418,Q63617,Q7TPB1,Q99041                                                                |
| 5513 | 1,3,4,6,7,8<br>,37,42 | 2,5,36,38,<br>39,40,41,4<br>3,44 | 3  | P16086,P20759,Q63617                                                                              |
| 5514 | 1,3,4,6,7,8<br>,37,43 | 2,5,36,38,<br>39,40,41,4<br>2,44 | 11 | O54858,O70417,P01681,P02631,P85971,Q63617,Q64268,Q7TPB1,Q99041,Q9QX79,Q9WUW3                      |
| 5515 | 1,3,4,6,7,8<br>,37,44 | 2,5,36,38,<br>39,40,41,4<br>2,43 | 2  | P11598,Q63617                                                                                     |
| 5516 | 1,3,4,6,7,8<br>,38,39 | 2,5,36,37,<br>40,41,42,4<br>3,44 | 6  | O70417,P02625,P11598,P19218,P97580,Q30KJ2                                                         |
| 5517 | 1,3,4,6,7,8<br>,38,40 | 2,5,36,37,<br>39,41,42,4<br>3,44 | 5  | P11598,P15399,P97580,Q30KJ2,Q63617                                                                |
| 5518 | 1,3,4,6,7,8<br>,38,41 | 2,5,36,37,<br>39,40,42,4<br>3,44 | 10 | O70417,P08010,P11598,P50115,P50116,P97580,Q30KJ2,Q63617,Q7TPB1,Q99041                             |

|      |                       |                                  |    |                                                                                                                 |
|------|-----------------------|----------------------------------|----|-----------------------------------------------------------------------------------------------------------------|
| 5519 | 1,3,4,6,7,8<br>,38,42 | 2,5,36,37,<br>39,40,41,4<br>3,44 | 12 | O35547,P05369,P08010,P08753,P16086,P19218,P20759,P36374,P60905,P97554,P97580,Q30KJ2                             |
| 5520 | 1,3,4,6,7,8<br>,38,43 | 2,5,36,37,<br>39,40,41,4<br>2,44 | 10 | O54858,O70417,P01681,P85971,P97580,Q30KJ2,Q64268,Q7TPB1,Q9QX79,Q9WUW3                                           |
| 5521 | 1,3,4,6,7,8<br>,38,44 | 2,5,36,37,<br>39,40,41,4<br>2,43 | 5  | P11598,P15399,P97580,Q30KJ2,Q63617                                                                              |
| 5522 | 1,3,4,6,7,8<br>,39,40 | 2,5,36,37,<br>38,41,42,4<br>3,44 | 2  | P11598,Q63617                                                                                                   |
| 5523 | 1,3,4,6,7,8<br>,39,41 | 2,5,36,37,<br>38,40,42,4<br>3,44 | 8  | O70417,P02625,P08010,P11598,P18418,Q63617,Q8VD89,Q99041                                                         |
| 5524 | 1,3,4,6,7,8<br>,39,42 | 2,5,36,37,<br>38,40,41,4<br>3,44 | 8  | O70417,P08010,P08753,P16086,P19218,P20759,P36374,Q63617                                                         |
| 5525 | 1,3,4,6,7,8<br>,39,43 | 2,5,36,37,<br>38,40,41,4<br>2,44 | 11 | O70417,P01681,P02091,P02625,P11598,P85971,Q63617,Q64268,Q7TPB1,Q9QX79,Q9WUW3                                    |
| 5526 | 1,3,4,6,7,8<br>,39,44 | 2,5,36,37,<br>38,40,41,4<br>2,43 | 4  | O70417,P02625,P11598,Q63617                                                                                     |
| 5527 | 1,3,4,6,7,8<br>,40,41 | 2,5,36,37,<br>38,39,42,4<br>3,44 | 7  | P06911,P11598,P12020,P18418,Q63617,Q99041,Q9JJS8                                                                |
| 5528 | 1,3,4,6,7,8<br>,40,42 | 2,5,36,37,<br>38,39,41,4<br>3,44 | 6  | P16086,P20759,P36374,Q63617,Q9JJS8,Q9QZ76                                                                       |
| 5529 | 1,3,4,6,7,8<br>,40,43 | 2,5,36,37,<br>38,39,41,4<br>2,44 | 5  | O70417,P01681,Q63617,Q9QX79,Q9WUW3                                                                              |
| 5530 | 1,3,4,6,7,8<br>,40,44 | 2,5,36,37,<br>38,39,41,4<br>2,43 | 5  | P06866,P11598,P12020,P20759,Q63617                                                                              |
| 5531 | 1,3,4,6,7,8<br>,41,42 | 2,5,36,37,<br>38,39,40,4<br>3,44 | 16 | O35547,P05539,P08010,P08649,P08753,P16086,P20759,P36374,P54921,P60905,P82471,Q3MIE4,Q62753,Q63357,Q63617,Q99041 |
| 5532 | 1,3,4,6,7,8<br>,41,43 | 2,5,36,37,<br>38,39,40,4<br>2,44 | 12 | O54858,O70417,P01681,P02625,P85971,Q63617,Q64268,Q7TPB1,Q99041,Q9QUL6,Q9QX79,Q9WUW3                             |
| 5533 | 1,3,4,6,7,8<br>,41,44 | 2,5,36,37,<br>38,39,40,4<br>2,43 | 5  | P11598,P12020,P18418,Q63617,Q99041                                                                              |

|      |                        |                                  |    |                                                                                                   |
|------|------------------------|----------------------------------|----|---------------------------------------------------------------------------------------------------|
| 5534 | 1,3,4,6,7,8<br>,42,43  | 2,5,36,37,<br>38,39,40,4<br>1,44 | 14 | O35783,O70417,P01681,P16086,P26772,P35434,P36374,P60905,P85971,Q62975,Q63617,Q64268,Q9QX79,Q9WUW3 |
| 5535 | 1,3,4,6,7,8<br>,42,44  | 2,5,36,37,<br>38,39,40,4<br>1,43 | 9  | P00714,P11598,P16086,P20759,P36374,P60905,Q4AEF8,Q62753,Q63617                                    |
| 5536 | 1,3,4,6,7,8<br>,43,44  | 2,5,36,37,<br>38,39,40,4<br>1,42 | 10 | O70417,P01681,P02091,P11598,P85971,Q63617,Q64268,Q66H69,Q9QX79,Q9WUW3                             |
| 5537 | 1,3,4,6,7,3<br>6,37,38 | 2,5,8,39,4<br>0,41,42,43<br>,44  | 3  | P15399,P97580,Q30KJ2                                                                              |
| 5538 | 1,3,4,6,7,3<br>6,37,39 | 2,5,8,38,4<br>0,41,42,43<br>,44  | 2  | P02625,P06760                                                                                     |
| 5539 | 1,3,4,6,7,3<br>6,37,40 | 2,5,8,38,3<br>9,41,42,43<br>,44  | 1  | P00731                                                                                            |
| 5540 | 1,3,4,6,7,3<br>6,37,41 | 2,5,8,38,3<br>9,40,42,43<br>,44  | 5  | P06760,P08649,P18418,P62804,Q99041                                                                |
| 5541 | 1,3,4,6,7,3<br>6,37,42 | 2,5,8,38,3<br>9,40,41,43<br>,44  | 4  | P05539,P08649,P16086,Q5FVI6                                                                       |
| 5542 | 1,3,4,6,7,3<br>6,37,43 | 2,5,8,38,3<br>9,40,41,42<br>,44  | 2  | P01681,P06760                                                                                     |
| 5543 | 1,3,4,6,7,3<br>6,37,44 | 2,5,8,38,3<br>9,40,41,42<br>,43  | 1  | P55314                                                                                            |
| 5544 | 1,3,4,6,7,3<br>6,38,39 | 2,5,8,37,4<br>0,41,42,43<br>,44  | 6  | O54728,P02625,P15399,P19218,P97580,Q30KJ2                                                         |
| 5545 | 1,3,4,6,7,3<br>6,38,40 | 2,5,8,37,3<br>9,41,42,43<br>,44  | 2  | P15399,P97580                                                                                     |
| 5546 | 1,3,4,6,7,3<br>6,38,41 | 2,5,8,37,3<br>9,40,42,43<br>,44  | 2  | P08649,P97580                                                                                     |
| 5547 | 1,3,4,6,7,3<br>6,38,42 | 2,5,8,37,3<br>9,40,41,43<br>,44  | 9  | P05539,P08649,P12785,P13596,P16086,P19218,P97554,P97580,Q5XI73                                    |
| 5548 | 1,3,4,6,7,3<br>6,38,43 | 2,5,8,37,3<br>9,40,41,42<br>,44  | 5  | P01681,P06760,P15399,P97580,Q30KJ2                                                                |

|      |                        |                                 |   |                                                         |
|------|------------------------|---------------------------------|---|---------------------------------------------------------|
| 5549 | 1,3,4,6,7,3<br>6,38,44 | 2,5,8,37,3<br>9,40,41,42<br>,43 | 4 | P12785,P15399,P55314,P97580                             |
| 5550 | 1,3,4,6,7,3<br>6,39,40 | 2,5,8,37,3<br>8,41,42,43<br>,44 | 1 | P05539                                                  |
| 5551 | 1,3,4,6,7,3<br>6,39,41 | 2,5,8,37,3<br>8,40,42,43<br>,44 | 7 | P02625,P05539,P06760,P08010,P08649,Q8VD89,Q99041        |
| 5552 | 1,3,4,6,7,3<br>6,39,42 | 2,5,8,37,3<br>8,40,41,43<br>,44 | 6 | O54728,P05539,P08010,P08649,P16086,Q5XI73               |
| 5553 | 1,3,4,6,7,3<br>6,39,43 | 2,5,8,37,3<br>8,40,41,42<br>,44 | 6 | O54728,P01681,P02091,P02625,P05539,P06760               |
| 5554 | 1,3,4,6,7,3<br>6,39,44 | 2,5,8,37,3<br>8,40,41,42<br>,43 | 3 | P02625,P55314,Q8VD89                                    |
| 5555 | 1,3,4,6,7,3<br>6,40,41 | 2,5,8,37,3<br>8,39,42,43<br>,44 | 5 | P05539,P08649,P12020,P13596,Q8VD89                      |
| 5556 | 1,3,4,6,7,3<br>6,40,42 | 2,5,8,37,3<br>8,39,41,43<br>,44 | 5 | P05539,P08649,P13596,P16086,Q5XI73                      |
| 5557 | 1,3,4,6,7,3<br>6,40,43 | 2,5,8,37,3<br>8,39,41,42<br>,44 | 2 | P01681,P05539                                           |
| 5558 | 1,3,4,6,7,3<br>6,40,44 | 2,5,8,37,3<br>8,39,41,42<br>,43 | 3 | P05539,P12020,P55314                                    |
| 5559 | 1,3,4,6,7,3<br>6,41,42 | 2,5,8,37,3<br>8,39,40,43<br>,44 | 8 | P05539,P08010,P08649,P13596,P16086,P60905,Q5XI73,Q62753 |
| 5560 | 1,3,4,6,7,3<br>6,41,43 | 2,5,8,37,3<br>8,39,40,42<br>,44 | 6 | O54858,P01681,P05539,P06760,P08649,Q9QUL6               |
| 5561 | 1,3,4,6,7,3<br>6,41,44 | 2,5,8,37,3<br>8,39,40,42<br>,43 | 4 | P05539,P08649,P55314,Q8VD89                             |
| 5562 | 1,3,4,6,7,3<br>6,42,43 | 2,5,8,37,3<br>8,39,40,41<br>,44 | 8 | P01681,P05539,P06760,P08649,P16086,P35434,P60905,Q62975 |
| 5563 | 1,3,4,6,7,3<br>6,42,44 | 2,5,8,37,3<br>8,39,40,41<br>,43 | 7 | P05539,P08649,P13596,P16086,P55314,P60905,Q5XI73        |

|      |                        |                                 |   |                                           |
|------|------------------------|---------------------------------|---|-------------------------------------------|
| 5564 | 1,3,4,6,7,3<br>6,43,44 | 2,5,8,37,3<br>8,39,40,41<br>,42 | 4 | P01681,P02091,P06760,P55314               |
| 5565 | 1,3,4,6,7,3<br>7,38,39 | 2,5,8,36,4<br>0,41,42,43<br>,44 | 6 | P02625,P15399,P19218,P62804,P97580,Q30KJ2 |
| 5566 | 1,3,4,6,7,3<br>7,38,40 | 2,5,8,36,3<br>9,41,42,43<br>,44 | 3 | P15399,P97580,Q30KJ2                      |
| 5567 | 1,3,4,6,7,3<br>7,38,41 | 2,5,8,36,3<br>9,40,42,43<br>,44 | 5 | P15399,P62804,P97580,Q30KJ2,Q7TPB1        |
| 5568 | 1,3,4,6,7,3<br>7,38,42 | 2,5,8,36,3<br>9,40,41,43<br>,44 | 4 | P12785,P15399,P97580,Q30KJ2               |
| 5569 | 1,3,4,6,7,3<br>7,38,43 | 2,5,8,36,3<br>9,40,41,42<br>,44 | 6 | P01681,P15399,P62804,P97580,Q30KJ2,Q7TPB1 |
| 5570 | 1,3,4,6,7,3<br>7,38,44 | 2,5,8,36,3<br>9,40,41,42<br>,43 | 5 | P12785,P15399,P62804,P97580,Q30KJ2        |
| 5571 | 1,3,4,6,7,3<br>7,39,40 | 2,5,8,36,3<br>8,41,42,43<br>,44 | 1 | P15399                                    |
| 5572 | 1,3,4,6,7,3<br>7,39,41 | 2,5,8,36,3<br>8,40,42,43<br>,44 | 4 | P02625,P18418,P62804,Q99041               |
| 5573 | 1,3,4,6,7,3<br>7,39,42 | 2,5,8,36,3<br>8,40,41,43<br>,44 | 1 | P16086                                    |
| 5574 | 1,3,4,6,7,3<br>7,39,43 | 2,5,8,36,3<br>8,40,41,42<br>,44 | 5 | P01681,P02091,P02625,P06760,P62804        |
| 5575 | 1,3,4,6,7,3<br>7,39,44 | 2,5,8,36,3<br>8,40,41,42<br>,43 | 2 | P02625,P62804                             |
| 5576 | 1,3,4,6,7,3<br>7,40,41 | 2,5,8,36,3<br>8,39,42,43<br>,44 | 3 | P12020,P18418,P62804                      |
| 5577 | 1,3,4,6,7,3<br>7,40,42 | 2,5,8,36,3<br>8,39,41,43<br>,44 | 0 |                                           |
| 5578 | 1,3,4,6,7,3<br>7,40,43 | 2,5,8,36,3<br>8,39,41,42<br>,44 | 2 | P01681,P15399                             |



|      |                        |                                 |   |                                           |
|------|------------------------|---------------------------------|---|-------------------------------------------|
| 5579 | 1,3,4,6,7,3<br>7,40,44 | 2,5,8,36,3<br>8,39,41,42<br>,43 | 2 | P12020,P15399                             |
| 5580 | 1,3,4,6,7,3<br>7,41,42 | 2,5,8,36,3<br>8,39,40,43<br>,44 | 1 | P16086                                    |
| 5581 | 1,3,4,6,7,3<br>7,41,43 | 2,5,8,36,3<br>8,39,40,42<br>,44 | 4 | P01681,P06760,P62804,Q7TPB1               |
| 5582 | 1,3,4,6,7,3<br>7,41,44 | 2,5,8,36,3<br>8,39,40,42<br>,43 | 2 | P18418,P62804                             |
| 5583 | 1,3,4,6,7,3<br>7,42,43 | 2,5,8,36,3<br>8,39,40,41<br>,44 | 3 | O35783,P01681,Q62975                      |
| 5584 | 1,3,4,6,7,3<br>7,42,44 | 2,5,8,36,3<br>8,39,40,41<br>,43 | 0 |                                           |
| 5585 | 1,3,4,6,7,3<br>7,43,44 | 2,5,8,36,3<br>8,39,40,41<br>,42 | 2 | P01681,P02091                             |
| 5586 | 1,3,4,6,7,3<br>8,39,40 | 2,5,8,36,3<br>7,41,42,43<br>,44 | 4 | P15399,P83121,P97580,Q30KJ2               |
| 5587 | 1,3,4,6,7,3<br>8,39,41 | 2,5,8,36,3<br>7,40,42,43<br>,44 | 6 | P02625,P13432,P15399,P62804,P97580,Q30KJ2 |
| 5588 | 1,3,4,6,7,3<br>8,39,42 | 2,5,8,36,3<br>7,40,41,43<br>,44 | 5 | P08010,P16086,P19218,P97580,Q5XI73        |
| 5589 | 1,3,4,6,7,3<br>8,39,43 | 2,5,8,36,3<br>7,40,41,42<br>,44 | 6 | P01681,P02091,P02625,P15399,P97580,Q30KJ2 |
| 5590 | 1,3,4,6,7,3<br>8,39,44 | 2,5,8,36,3<br>7,40,41,42<br>,43 | 4 | P02625,P15399,P97580,Q30KJ2               |
| 5591 | 1,3,4,6,7,3<br>8,40,41 | 2,5,8,36,3<br>7,39,42,43<br>,44 | 3 | P12020,P15399,P97580                      |
| 5592 | 1,3,4,6,7,3<br>8,40,42 | 2,5,8,36,3<br>7,39,41,43<br>,44 | 5 | P12785,P15399,P16086,P83121,P97580        |
| 5593 | 1,3,4,6,7,3<br>8,40,43 | 2,5,8,36,3<br>7,39,41,42<br>,44 | 5 | P01681,P01835,P15399,P97580,Q30KJ2        |

|      |                        |                                 |   |                                                         |
|------|------------------------|---------------------------------|---|---------------------------------------------------------|
| 5594 | 1,3,4,6,7,3<br>8,40,44 | 2,5,8,36,3<br>7,39,41,42<br>,43 | 5 | P01835,P12020,P15399,P97580,Q30KJ2                      |
| 5595 | 1,3,4,6,7,3<br>8,41,42 | 2,5,8,36,3<br>7,39,40,43<br>,44 | 6 | O35547,P08010,P08649,P16086,P60905,P97580               |
| 5596 | 1,3,4,6,7,3<br>8,41,43 | 2,5,8,36,3<br>7,39,40,42<br>,44 | 8 | P01681,P02625,P15399,P62804,P97580,Q30KJ2,Q5HZV9,Q7TPB1 |
| 5597 | 1,3,4,6,7,3<br>8,41,44 | 2,5,8,36,3<br>7,39,40,42<br>,43 | 5 | P00774,P15399,P97580,Q05695,Q8CIZ5                      |
| 5598 | 1,3,4,6,7,3<br>8,42,43 | 2,5,8,36,3<br>7,39,40,41<br>,44 | 8 | B0BNN3,O35547,P01681,P16086,P97580,Q30KJ2,Q5HZV9,Q62975 |
| 5599 | 1,3,4,6,7,3<br>8,42,44 | 2,5,8,36,3<br>7,39,40,41<br>,43 | 3 | P12785,P97580,Q5XI73                                    |
| 5600 | 1,3,4,6,7,3<br>8,43,44 | 2,5,8,36,3<br>7,39,40,41<br>,42 | 6 | P01681,P01835,P02091,P15399,P97580,Q30KJ2               |
| 5601 | 1,3,4,6,7,3<br>9,40,41 | 2,5,8,36,3<br>7,38,42,43<br>,44 | 3 | P06911,P12020,Q8VD89                                    |
| 5602 | 1,3,4,6,7,3<br>9,40,42 | 2,5,8,36,3<br>7,38,41,43<br>,44 | 3 | P05539,P16086,P83121                                    |
| 5603 | 1,3,4,6,7,3<br>9,40,43 | 2,5,8,36,3<br>7,38,41,42<br>,44 | 2 | P01681,P02091                                           |
| 5604 | 1,3,4,6,7,3<br>9,40,44 | 2,5,8,36,3<br>7,38,41,42<br>,43 | 3 | P12020,Q5GRG2,Q6AYL6                                    |
| 5605 | 1,3,4,6,7,3<br>9,41,42 | 2,5,8,36,3<br>7,38,40,43<br>,44 | 5 | P05539,P08010,P08649,P16086,P82471                      |
| 5606 | 1,3,4,6,7,3<br>9,41,43 | 2,5,8,36,3<br>7,38,40,42<br>,44 | 7 | P01681,P02091,P02625,P06760,P22006,P62804,P82471        |
| 5607 | 1,3,4,6,7,3<br>9,41,44 | 2,5,8,36,3<br>7,38,40,42<br>,43 | 3 | P02625,P12020,Q8VD89                                    |
| 5608 | 1,3,4,6,7,3<br>9,42,43 | 2,5,8,36,3<br>7,38,40,41<br>,44 | 5 | P01681,P02091,P02625,P16086,P35434                      |

|      |                        |                                 |   |                                                         |
|------|------------------------|---------------------------------|---|---------------------------------------------------------|
| 5609 | 1,3,4,6,7,3<br>9,42,44 | 2,5,8,36,3<br>7,38,40,41<br>,43 | 2 | P16086,Q5XI73                                           |
| 5610 | 1,3,4,6,7,3<br>9,43,44 | 2,5,8,36,3<br>7,38,40,41<br>,42 | 3 | P01681,P02091,P02625                                    |
| 5611 | 1,3,4,6,7,4<br>0,41,42 | 2,5,8,36,3<br>7,38,39,43<br>,44 | 4 | P05539,P13596,P16086,Q9JJS8                             |
| 5612 | 1,3,4,6,7,4<br>0,41,43 | 2,5,8,36,3<br>7,38,39,42<br>,44 | 1 | P01681                                                  |
| 5613 | 1,3,4,6,7,4<br>0,41,44 | 2,5,8,36,3<br>7,38,39,42<br>,43 | 3 | P06911,P12020,Q5GRG2                                    |
| 5614 | 1,3,4,6,7,4<br>0,42,43 | 2,5,8,36,3<br>7,38,39,41<br>,44 | 3 | P01681,P05539,P16086                                    |
| 5615 | 1,3,4,6,7,4<br>0,42,44 | 2,5,8,36,3<br>7,38,39,41<br>,43 | 3 | P16086,P20759,P36374                                    |
| 5616 | 1,3,4,6,7,4<br>0,43,44 | 2,5,8,36,3<br>7,38,39,41<br>,42 | 2 | P01681,P02091                                           |
| 5617 | 1,3,4,6,7,4<br>1,42,43 | 2,5,8,36,3<br>7,38,39,40<br>,44 | 8 | O35547,P01681,P05539,P16086,P54921,P60905,P82471,Q5HZV9 |
| 5618 | 1,3,4,6,7,4<br>1,42,44 | 2,5,8,36,3<br>7,38,39,40<br>,43 | 4 | P05539,P08649,P16086,P60905                             |
| 5619 | 1,3,4,6,7,4<br>1,43,44 | 2,5,8,36,3<br>7,38,39,40<br>,42 | 2 | P01681,P02091                                           |
| 5620 | 1,3,4,6,7,4<br>2,43,44 | 2,5,8,36,3<br>7,38,39,40<br>,41 | 7 | O35783,P01681,P02091,P16086,P26772,P35434,Q62975        |
| 5621 | 1,3,4,6,8,3<br>6,37,38 | 2,5,7,39,4<br>0,41,42,43<br>,44 | 0 |                                                         |
| 5622 | 1,3,4,6,8,3<br>6,37,39 | 2,5,7,38,4<br>0,41,42,43<br>,44 | 3 | P02625,P55091,Q8CJD3                                    |
| 5623 | 1,3,4,6,8,3<br>6,37,40 | 2,5,7,38,3<br>9,41,42,43<br>,44 | 2 | P55091,Q8CJD3                                           |

|      |                        |                                 |   |                             |
|------|------------------------|---------------------------------|---|-----------------------------|
| 5624 | 1,3,4,6,8,3<br>6,37,41 | 2,5,7,38,3<br>9,40,42,43<br>,44 | 0 |                             |
| 5625 | 1,3,4,6,8,3<br>6,37,42 | 2,5,7,38,3<br>9,40,41,43<br>,44 | 1 | P19629                      |
| 5626 | 1,3,4,6,8,3<br>6,37,43 | 2,5,7,38,3<br>9,40,41,42<br>,44 | 4 | P01681,Q64268,Q9QUL6,Q9QX79 |
| 5627 | 1,3,4,6,8,3<br>6,37,44 | 2,5,7,38,3<br>9,40,41,42<br>,43 | 2 | P55314,Q8CJD3               |
| 5628 | 1,3,4,6,8,3<br>6,38,39 | 2,5,7,37,4<br>0,41,42,43<br>,44 | 1 | P02625                      |
| 5629 | 1,3,4,6,8,3<br>6,38,40 | 2,5,7,37,3<br>9,41,42,43<br>,44 | 0 |                             |
| 5630 | 1,3,4,6,8,3<br>6,38,41 | 2,5,7,37,3<br>9,40,42,43<br>,44 | 0 |                             |
| 5631 | 1,3,4,6,8,3<br>6,38,42 | 2,5,7,37,3<br>9,40,41,43<br>,44 | 2 | P97554,Q6AYL6               |
| 5632 | 1,3,4,6,8,3<br>6,38,43 | 2,5,7,37,3<br>9,40,41,42<br>,44 | 2 | P01681,Q64268               |
| 5633 | 1,3,4,6,8,3<br>6,38,44 | 2,5,7,37,3<br>9,40,41,42<br>,43 | 2 | O08557,P55314               |
| 5634 | 1,3,4,6,8,3<br>6,39,40 | 2,5,7,37,3<br>8,41,42,43<br>,44 | 1 | Q8CJD3                      |
| 5635 | 1,3,4,6,8,3<br>6,39,41 | 2,5,7,37,3<br>8,40,42,43<br>,44 | 1 | P02625                      |
| 5636 | 1,3,4,6,8,3<br>6,39,42 | 2,5,7,37,3<br>8,40,41,43<br>,44 | 1 | O54728                      |
| 5637 | 1,3,4,6,8,3<br>6,39,43 | 2,5,7,37,3<br>8,40,41,42<br>,44 | 4 | O70417,P01681,P02625,Q64268 |
| 5638 | 1,3,4,6,8,3<br>6,39,44 | 2,5,7,37,3<br>8,40,41,42<br>,43 | 3 | P02625,P55314,Q8CJD3        |

|      |                        |                                 |   |                                                  |
|------|------------------------|---------------------------------|---|--------------------------------------------------|
| 5639 | 1,3,4,6,8,3<br>6,40,41 | 2,5,7,37,3<br>8,39,42,43<br>,44 | 1 | P23593                                           |
| 5640 | 1,3,4,6,8,3<br>6,40,42 | 2,5,7,37,3<br>8,39,41,43<br>,44 | 2 | P20759,P23593                                    |
| 5641 | 1,3,4,6,8,3<br>6,40,43 | 2,5,7,37,3<br>8,39,41,42<br>,44 | 2 | P01681,Q64268                                    |
| 5642 | 1,3,4,6,8,3<br>6,40,44 | 2,5,7,37,3<br>8,39,41,42<br>,43 | 2 | P55314,Q8CJD3                                    |
| 5643 | 1,3,4,6,8,3<br>6,41,42 | 2,5,7,37,3<br>8,39,40,43<br>,44 | 3 | P08010,P08753,P60905                             |
| 5644 | 1,3,4,6,8,3<br>6,41,43 | 2,5,7,37,3<br>8,39,40,42<br>,44 | 5 | P01681,Q64268,Q66H69,Q9QUL6,Q9QX79               |
| 5645 | 1,3,4,6,8,3<br>6,41,44 | 2,5,7,37,3<br>8,39,40,42<br>,43 | 1 | P55314                                           |
| 5646 | 1,3,4,6,8,3<br>6,42,43 | 2,5,7,37,3<br>8,39,40,41<br>,44 | 6 | P01681,P10715,P19629,P35434,Q64268,Q9QUL6        |
| 5647 | 1,3,4,6,8,3<br>6,42,44 | 2,5,7,37,3<br>8,39,40,41<br>,43 | 3 | P55314,P60905,P97554                             |
| 5648 | 1,3,4,6,8,3<br>6,43,44 | 2,5,7,37,3<br>8,39,40,41<br>,42 | 4 | P01681,P55314,Q64268,Q66H69                      |
| 5649 | 1,3,4,6,8,3<br>7,38,39 | 2,5,7,36,4<br>0,41,42,43<br>,44 | 4 | P02625,P16636,P82995,Q9R1T5                      |
| 5650 | 1,3,4,6,8,3<br>7,38,40 | 2,5,7,36,3<br>9,41,42,43<br>,44 | 3 | P16636,P35281,P82995                             |
| 5651 | 1,3,4,6,8,3<br>7,38,41 | 2,5,7,36,3<br>9,40,42,43<br>,44 | 2 | P16636,Q7TPB1                                    |
| 5652 | 1,3,4,6,8,3<br>7,38,42 | 2,5,7,36,3<br>9,40,41,43<br>,44 | 1 | P12785                                           |
| 5653 | 1,3,4,6,8,3<br>7,38,43 | 2,5,7,36,3<br>9,40,41,42<br>,44 | 7 | O70417,P01681,P82995,Q64268,Q6IFV1,Q7TPB1,Q9QX79 |

|      |                        |                                 |   |                                                  |
|------|------------------------|---------------------------------|---|--------------------------------------------------|
| 5654 | 1,3,4,6,8,3<br>7,38,44 | 2,5,7,36,3<br>9,40,41,42<br>,43 | 1 | P16636                                           |
| 5655 | 1,3,4,6,8,3<br>7,39,40 | 2,5,7,36,3<br>8,41,42,43<br>,44 | 2 | P82995,Q8CJD3                                    |
| 5656 | 1,3,4,6,8,3<br>7,39,41 | 2,5,7,36,3<br>8,40,42,43<br>,44 | 1 | P02625                                           |
| 5657 | 1,3,4,6,8,3<br>7,39,42 | 2,5,7,36,3<br>8,40,41,43<br>,44 | 0 |                                                  |
| 5658 | 1,3,4,6,8,3<br>7,39,43 | 2,5,7,36,3<br>8,40,41,42<br>,44 | 4 | O70417,P01681,P02625,Q64268                      |
| 5659 | 1,3,4,6,8,3<br>7,39,44 | 2,5,7,36,3<br>8,40,41,42<br>,43 | 3 | P02625,P16636,Q8CJD3                             |
| 5660 | 1,3,4,6,8,3<br>7,40,41 | 2,5,7,36,3<br>8,39,42,43<br>,44 | 1 | P51907                                           |
| 5661 | 1,3,4,6,8,3<br>7,40,42 | 2,5,7,36,3<br>8,39,41,43<br>,44 | 1 | P20759                                           |
| 5662 | 1,3,4,6,8,3<br>7,40,43 | 2,5,7,36,3<br>8,39,41,42<br>,44 | 4 | P01681,P51907,P82995,Q64268                      |
| 5663 | 1,3,4,6,8,3<br>7,40,44 | 2,5,7,36,3<br>8,39,41,42<br>,43 | 2 | P16636,Q8CJD3                                    |
| 5664 | 1,3,4,6,8,3<br>7,41,42 | 2,5,7,36,3<br>8,39,40,43<br>,44 | 0 |                                                  |
| 5665 | 1,3,4,6,8,3<br>7,41,43 | 2,5,7,36,3<br>8,39,40,42<br>,44 | 7 | O70417,P01681,P51907,Q64268,Q7TPB1,Q9QUL6,Q9QX79 |
| 5666 | 1,3,4,6,8,3<br>7,41,44 | 2,5,7,36,3<br>8,39,40,42<br>,43 | 0 |                                                  |
| 5667 | 1,3,4,6,8,3<br>7,42,43 | 2,5,7,36,3<br>8,39,40,41<br>,44 | 5 | P01681,P04276,P19629,Q64268,Q9QUL6               |
| 5668 | 1,3,4,6,8,3<br>7,42,44 | 2,5,7,36,3<br>8,39,40,41<br>,43 | 0 |                                                  |

|      |                        |                                 |   |                                                                |
|------|------------------------|---------------------------------|---|----------------------------------------------------------------|
| 5669 | 1,3,4,6,8,3<br>7,43,44 | 2,5,7,36,3<br>8,39,40,41<br>,42 | 4 | P01681,Q64268,Q66H69,Q9QX79                                    |
| 5670 | 1,3,4,6,8,3<br>8,39,40 | 2,5,7,36,3<br>7,41,42,43<br>,44 | 1 | P82995                                                         |
| 5671 | 1,3,4,6,8,3<br>8,39,41 | 2,5,7,36,3<br>7,40,42,43<br>,44 | 3 | O70417,P02625,P13432                                           |
| 5672 | 1,3,4,6,8,3<br>8,39,42 | 2,5,7,36,3<br>7,40,41,43<br>,44 | 1 | P19218                                                         |
| 5673 | 1,3,4,6,8,3<br>8,39,43 | 2,5,7,36,3<br>7,40,41,42<br>,44 | 5 | B0BNN3,O70417,P01681,P02625,Q64268                             |
| 5674 | 1,3,4,6,8,3<br>8,39,44 | 2,5,7,36,3<br>7,40,41,42<br>,43 | 1 | P02625                                                         |
| 5675 | 1,3,4,6,8,3<br>8,40,41 | 2,5,7,36,3<br>7,39,42,43<br>,44 | 0 |                                                                |
| 5676 | 1,3,4,6,8,3<br>8,40,42 | 2,5,7,36,3<br>7,39,41,43<br>,44 | 0 |                                                                |
| 5677 | 1,3,4,6,8,3<br>8,40,43 | 2,5,7,36,3<br>7,39,41,42<br>,44 | 5 | B0BNN3,P01681,P01835,P82995,Q64268                             |
| 5678 | 1,3,4,6,8,3<br>8,40,44 | 2,5,7,36,3<br>7,39,41,42<br>,43 | 2 | P01835,P16636                                                  |
| 5679 | 1,3,4,6,8,3<br>8,41,42 | 2,5,7,36,3<br>7,39,40,43<br>,44 | 2 | P08753,Q8CIZ5                                                  |
| 5680 | 1,3,4,6,8,3<br>8,41,43 | 2,5,7,36,3<br>7,39,40,42<br>,44 | 9 | B0BNN3,O70417,P01681,P02625,Q5HZV9,Q64268,Q7TPB1,Q9QUL6,Q9QX79 |
| 5681 | 1,3,4,6,8,3<br>8,41,44 | 2,5,7,36,3<br>7,39,40,42<br>,43 | 4 | P00774,Q05695,Q62635,Q8CIZ5                                    |
| 5682 | 1,3,4,6,8,3<br>8,42,43 | 2,5,7,36,3<br>7,39,40,41<br>,44 | 5 | B0BNN3,O70417,P01681,P35434,Q64268                             |
| 5683 | 1,3,4,6,8,3<br>8,42,44 | 2,5,7,36,3<br>7,39,40,41<br>,43 | 1 | P12785                                                         |

|      |                        |                                 |   |                                    |
|------|------------------------|---------------------------------|---|------------------------------------|
| 5684 | 1,3,4,6,8,3<br>8,43,44 | 2,5,7,36,3<br>7,39,40,41<br>,42 | 5 | O70417,P01681,P01835,Q64268,Q66H69 |
| 5685 | 1,3,4,6,8,3<br>9,40,41 | 2,5,7,36,3<br>7,38,42,43<br>,44 | 1 | P06911                             |
| 5686 | 1,3,4,6,8,3<br>9,40,42 | 2,5,7,36,3<br>7,38,41,43<br>,44 | 0 |                                    |
| 5687 | 1,3,4,6,8,3<br>9,40,43 | 2,5,7,36,3<br>7,38,41,42<br>,44 | 2 | O70417,P01681                      |
| 5688 | 1,3,4,6,8,3<br>9,40,44 | 2,5,7,36,3<br>7,38,41,42<br>,43 | 2 | Q6AYL6,Q8CJD3                      |
| 5689 | 1,3,4,6,8,3<br>9,41,42 | 2,5,7,36,3<br>7,38,40,43<br>,44 | 2 | P08010,P82471                      |
| 5690 | 1,3,4,6,8,3<br>9,41,43 | 2,5,7,36,3<br>7,38,40,42<br>,44 | 4 | O70417,P01681,P02625,Q64268        |
| 5691 | 1,3,4,6,8,3<br>9,41,44 | 2,5,7,36,3<br>7,38,40,42<br>,43 | 2 | O70417,P02625                      |
| 5692 | 1,3,4,6,8,3<br>9,42,43 | 2,5,7,36,3<br>7,38,40,41<br>,44 | 5 | O70417,P01681,P02625,P35434,Q64268 |
| 5693 | 1,3,4,6,8,3<br>9,42,44 | 2,5,7,36,3<br>7,38,40,41<br>,43 | 0 |                                    |
| 5694 | 1,3,4,6,8,3<br>9,43,44 | 2,5,7,36,3<br>7,38,40,41<br>,42 | 5 | O70417,P01681,P02625,Q64268,Q66H69 |
| 5695 | 1,3,4,6,8,4<br>0,41,42 | 2,5,7,36,3<br>7,38,39,43<br>,44 | 2 | P20759,P23593                      |
| 5696 | 1,3,4,6,8,4<br>0,41,43 | 2,5,7,36,3<br>7,38,39,42<br>,44 | 3 | P01681,P51907,P97840               |
| 5697 | 1,3,4,6,8,4<br>0,41,44 | 2,5,7,36,3<br>7,38,39,42<br>,43 | 3 | P06911,P12020,Q5GRG2               |
| 5698 | 1,3,4,6,8,4<br>0,42,43 | 2,5,7,36,3<br>7,38,39,41<br>,44 | 1 | P01681                             |



|      |                         |                                 |   |                                                         |
|------|-------------------------|---------------------------------|---|---------------------------------------------------------|
| 5699 | 1,3,4,6,8,4<br>0,42,44  | 2,5,7,36,3<br>7,38,39,41<br>,43 | 3 | P00714,P20759,P36374                                    |
| 5700 | 1,3,4,6,8,4<br>0,43,44  | 2,5,7,36,3<br>7,38,39,41<br>,42 | 2 | P01681,Q66H69                                           |
| 5701 | 1,3,4,6,8,4<br>1,42,43  | 2,5,7,36,3<br>7,38,39,40<br>,44 | 8 | O70417,P01681,P35434,P54921,P60905,P82471,Q9QUL6,Q9WUW3 |
| 5702 | 1,3,4,6,8,4<br>1,42,44  | 2,5,7,36,3<br>7,38,39,40<br>,43 | 3 | P20759,P60905,Q6P6R2                                    |
| 5703 | 1,3,4,6,8,4<br>1,43,44  | 2,5,7,36,3<br>7,38,39,40<br>,42 | 5 | O70417,P01681,Q66H69,Q9QX79,Q9WUW3                      |
| 5704 | 1,3,4,6,8,4<br>2,43,44  | 2,5,7,36,3<br>7,38,39,40<br>,41 | 6 | O70417,P01681,P35434,Q64268,Q66H69,Q9WUW3               |
| 5705 | 1,3,4,6,36,<br>37,38,39 | 2,5,7,8,40,<br>41,42,43,4<br>4  | 1 | P02625                                                  |
| 5706 | 1,3,4,6,36,<br>37,38,40 | 2,5,7,8,39,<br>41,42,43,4<br>4  | 1 | P15399                                                  |
| 5707 | 1,3,4,6,36,<br>37,38,41 | 2,5,7,8,39,<br>40,42,43,4<br>4  | 1 | Q5M819                                                  |
| 5708 | 1,3,4,6,36,<br>37,38,42 | 2,5,7,8,39,<br>40,41,43,4<br>4  | 3 | P10715,P12785,Q6AYL6                                    |
| 5709 | 1,3,4,6,36,<br>37,38,43 | 2,5,7,8,39,<br>40,41,42,4<br>4  | 3 | P01681,P10715,Q64268                                    |
| 5710 | 1,3,4,6,36,<br>37,38,44 | 2,5,7,8,39,<br>40,41,42,4<br>3  | 2 | P12785,P55314                                           |
| 5711 | 1,3,4,6,36,<br>37,39,40 | 2,5,7,8,38,<br>41,42,43,4<br>4  | 5 | O35547,P50115,P50116,P55091,Q8CJD3                      |
| 5712 | 1,3,4,6,36,<br>37,39,41 | 2,5,7,8,38,<br>40,42,43,4<br>4  | 1 | P02625                                                  |
| 5713 | 1,3,4,6,36,<br>37,39,42 | 2,5,7,8,38,<br>40,41,43,4<br>4  | 4 | O54728,P50115,P50116,P55091                             |

|      |                         |                                |   |                                    |
|------|-------------------------|--------------------------------|---|------------------------------------|
| 5714 | 1,3,4,6,36,<br>37,39,43 | 2,5,7,8,38,<br>40,41,42,4<br>4 | 5 | P01681,P02625,P06760,P50115,P50116 |
| 5715 | 1,3,4,6,36,<br>37,39,44 | 2,5,7,8,38,<br>40,41,42,4<br>3 | 5 | P02625,P50115,P50116,P55314,Q8CJD3 |
| 5716 | 1,3,4,6,36,<br>37,40,41 | 2,5,7,8,38,<br>39,42,43,4<br>4 | 1 | Q80WL1                             |
| 5717 | 1,3,4,6,36,<br>37,40,42 | 2,5,7,8,38,<br>39,41,43,4<br>4 | 3 | P50115,P50116,P55091               |
| 5718 | 1,3,4,6,36,<br>37,40,43 | 2,5,7,8,38,<br>39,41,42,4<br>4 | 3 | P01681,P50115,P50116               |
| 5719 | 1,3,4,6,36,<br>37,40,44 | 2,5,7,8,38,<br>39,41,42,4<br>3 | 5 | O35547,P50115,P50116,P55314,Q8CJD3 |
| 5720 | 1,3,4,6,36,<br>37,41,42 | 2,5,7,8,38,<br>39,40,43,4<br>4 | 0 |                                    |
| 5721 | 1,3,4,6,36,<br>37,41,43 | 2,5,7,8,38,<br>39,40,42,4<br>4 | 3 | P01681,P06760,Q9QUL6               |
| 5722 | 1,3,4,6,36,<br>37,41,44 | 2,5,7,8,38,<br>39,40,42,4<br>3 | 1 | P55314                             |
| 5723 | 1,3,4,6,36,<br>37,42,43 | 2,5,7,8,38,<br>39,40,41,4<br>4 | 5 | P01681,P10715,P19629,P50115,P50116 |
| 5724 | 1,3,4,6,36,<br>37,42,44 | 2,5,7,8,38,<br>39,40,41,4<br>3 | 3 | P50115,P50116,P55314               |
| 5725 | 1,3,4,6,36,<br>37,43,44 | 2,5,7,8,38,<br>39,40,41,4<br>2 | 4 | P01681,P50115,P50116,P55314        |
| 5726 | 1,3,4,6,36,<br>38,39,40 | 2,5,7,8,37,<br>41,42,43,4<br>4 | 0 |                                    |
| 5727 | 1,3,4,6,36,<br>38,39,41 | 2,5,7,8,37,<br>40,42,43,4<br>4 | 1 | P02625                             |
| 5728 | 1,3,4,6,36,<br>38,39,42 | 2,5,7,8,37,<br>40,41,43,4<br>4 | 1 | O54728                             |

|      |                         |                                |   |                                                  |
|------|-------------------------|--------------------------------|---|--------------------------------------------------|
| 5729 | 1,3,4,6,36,<br>38,39,43 | 2,5,7,8,37,<br>40,41,42,4<br>4 | 3 | B0BNN3,P01681,P02625                             |
| 5730 | 1,3,4,6,36,<br>38,39,44 | 2,5,7,8,37,<br>40,41,42,4<br>3 | 2 | P02625,P55314                                    |
| 5731 | 1,3,4,6,36,<br>38,40,41 | 2,5,7,8,37,<br>39,42,43,4<br>4 | 0 |                                                  |
| 5732 | 1,3,4,6,36,<br>38,40,42 | 2,5,7,8,37,<br>39,41,43,4<br>4 | 1 | P12785                                           |
| 5733 | 1,3,4,6,36,<br>38,40,43 | 2,5,7,8,37,<br>39,41,42,4<br>4 | 2 | P01681,P01835                                    |
| 5734 | 1,3,4,6,36,<br>38,40,44 | 2,5,7,8,37,<br>39,41,42,4<br>3 | 2 | P01835,P55314                                    |
| 5735 | 1,3,4,6,36,<br>38,41,42 | 2,5,7,8,37,<br>39,40,43,4<br>4 | 0 |                                                  |
| 5736 | 1,3,4,6,36,<br>38,41,43 | 2,5,7,8,37,<br>39,40,42,4<br>4 | 2 | P01681,Q5HZV9                                    |
| 5737 | 1,3,4,6,36,<br>38,41,44 | 2,5,7,8,37,<br>39,40,42,4<br>3 | 1 | P55314                                           |
| 5738 | 1,3,4,6,36,<br>38,42,43 | 2,5,7,8,37,<br>39,40,41,4<br>4 | 7 | B0BNN3,P01681,P10715,P12785,P19629,P31044,P35434 |
| 5739 | 1,3,4,6,36,<br>38,42,44 | 2,5,7,8,37,<br>39,40,41,4<br>3 | 3 | P12785,P55314,P97554                             |
| 5740 | 1,3,4,6,36,<br>38,43,44 | 2,5,7,8,37,<br>39,40,41,4<br>2 | 4 | P01681,P01835,P34901,P55314                      |
| 5741 | 1,3,4,6,36,<br>39,40,41 | 2,5,7,8,37,<br>38,42,43,4<br>4 | 0 |                                                  |
| 5742 | 1,3,4,6,36,<br>39,40,42 | 2,5,7,8,37,<br>38,41,43,4<br>4 | 3 | O54728,P50115,P50116                             |
| 5743 | 1,3,4,6,36,<br>39,40,43 | 2,5,7,8,37,<br>38,41,42,4<br>4 | 3 | P01681,P50115,P50116                             |

|      |                         |                                |   |                                           |
|------|-------------------------|--------------------------------|---|-------------------------------------------|
| 5744 | 1,3,4,6,36,<br>39,40,44 | 2,5,7,8,37,<br>38,41,42,4<br>3 | 4 | P50115,P50116,P55314,Q8CJD3               |
| 5745 | 1,3,4,6,36,<br>39,41,42 | 2,5,7,8,37,<br>38,40,43,4<br>4 | 0 |                                           |
| 5746 | 1,3,4,6,36,<br>39,41,43 | 2,5,7,8,37,<br>38,40,42,4<br>4 | 3 | P01681,P02625,P06760                      |
| 5747 | 1,3,4,6,36,<br>39,41,44 | 2,5,7,8,37,<br>38,40,42,4<br>3 | 3 | P02625,P55314,Q8VD89                      |
| 5748 | 1,3,4,6,36,<br>39,42,43 | 2,5,7,8,37,<br>38,40,41,4<br>4 | 6 | O54728,P01681,P35434,P50115,P50116,Q62635 |
| 5749 | 1,3,4,6,36,<br>39,42,44 | 2,5,7,8,37,<br>38,40,41,4<br>3 | 3 | P50115,P50116,P55314                      |
| 5750 | 1,3,4,6,36,<br>39,43,44 | 2,5,7,8,37,<br>38,40,41,4<br>2 | 5 | P01681,P02625,P50115,P50116,P55314        |
| 5751 | 1,3,4,6,36,<br>40,41,42 | 2,5,7,8,37,<br>38,39,43,4<br>4 | 1 | P23593                                    |
| 5752 | 1,3,4,6,36,<br>40,41,43 | 2,5,7,8,37,<br>38,39,42,4<br>4 | 1 | P01681                                    |
| 5753 | 1,3,4,6,36,<br>40,41,44 | 2,5,7,8,37,<br>38,39,42,4<br>3 | 3 | P06911,P55314,Q80WL1                      |
| 5754 | 1,3,4,6,36,<br>40,42,43 | 2,5,7,8,37,<br>38,39,41,4<br>4 | 3 | P01681,P50115,P50116                      |
| 5755 | 1,3,4,6,36,<br>40,42,44 | 2,5,7,8,37,<br>38,39,41,4<br>3 | 4 | P50115,P50116,P55314,Q7TPB1               |
| 5756 | 1,3,4,6,36,<br>40,43,44 | 2,5,7,8,37,<br>38,39,41,4<br>2 | 3 | P01681,P50116,P55314                      |
| 5757 | 1,3,4,6,36,<br>41,42,43 | 2,5,7,8,37,<br>38,39,40,4<br>4 | 4 | P01681,P35434,P82471,Q9QUL6               |
| 5758 | 1,3,4,6,36,<br>41,42,44 | 2,5,7,8,37,<br>38,39,40,4<br>3 | 1 | P55314                                    |

|      |                         |                                |   |                                                         |
|------|-------------------------|--------------------------------|---|---------------------------------------------------------|
| 5759 | 1,3,4,6,36,<br>41,43,44 | 2,5,7,8,37,<br>38,39,40,4<br>2 | 2 | P01681,P55314                                           |
| 5760 | 1,3,4,6,36,<br>42,43,44 | 2,5,7,8,37,<br>38,39,40,4<br>1 | 5 | P01681,P35434,P50115,P50116,P55314                      |
| 5761 | 1,3,4,6,37,<br>38,39,40 | 2,5,7,8,36,<br>41,42,43,4<br>4 | 5 | P15399,P16636,P35281,P82995,Q99MH3                      |
| 5762 | 1,3,4,6,37,<br>38,39,41 | 2,5,7,8,36,<br>40,42,43,4<br>4 | 5 | P02625,P13432,P16636,P62804,P82995                      |
| 5763 | 1,3,4,6,37,<br>38,39,42 | 2,5,7,8,36,<br>40,41,43,4<br>4 | 1 | P12785                                                  |
| 5764 | 1,3,4,6,37,<br>38,39,43 | 2,5,7,8,36,<br>40,41,42,4<br>4 | 6 | B0BNN3,P01681,P02625,P82995,Q6IFV1,Q812E4               |
| 5765 | 1,3,4,6,37,<br>38,39,44 | 2,5,7,8,36,<br>40,41,42,4<br>3 | 4 | P02625,P16636,P82995,Q9JJS8                             |
| 5766 | 1,3,4,6,37,<br>38,40,41 | 2,5,7,8,36,<br>39,42,43,4<br>4 | 3 | P15399,P16636,P82995                                    |
| 5767 | 1,3,4,6,37,<br>38,40,42 | 2,5,7,8,36,<br>39,41,43,4<br>4 | 2 | P12785,P82995                                           |
| 5768 | 1,3,4,6,37,<br>38,40,43 | 2,5,7,8,36,<br>39,41,42,4<br>4 | 6 | B0BNN3,P01681,P01835,P15399,P82995,Q99MH3               |
| 5769 | 1,3,4,6,37,<br>38,40,44 | 2,5,7,8,36,<br>39,41,42,4<br>3 | 6 | P01835,P12785,P15399,P16636,P82995,Q6AYR9               |
| 5770 | 1,3,4,6,37,<br>38,41,42 | 2,5,7,8,36,<br>39,40,43,4<br>4 | 1 | P12785                                                  |
| 5771 | 1,3,4,6,37,<br>38,41,43 | 2,5,7,8,36,<br>39,40,42,4<br>4 | 8 | B0BNN3,P00762,P01681,P02625,P62804,P82995,Q5HZV9,Q7TPB1 |
| 5772 | 1,3,4,6,37,<br>38,41,44 | 2,5,7,8,36,<br>39,40,42,4<br>3 | 2 | P16636,P62804                                           |
| 5773 | 1,3,4,6,37,<br>38,42,43 | 2,5,7,8,36,<br>39,40,41,4<br>4 | 5 | B0BNN3,P01681,P10715,P12785,Q6P6T1                      |

|      |                         |                                |   |                                                         |
|------|-------------------------|--------------------------------|---|---------------------------------------------------------|
| 5774 | 1,3,4,6,37,<br>38,42,44 | 2,5,7,8,36,<br>39,40,41,4<br>3 | 2 | P12785,P16636                                           |
| 5775 | 1,3,4,6,37,<br>38,43,44 | 2,5,7,8,36,<br>39,40,41,4<br>2 | 5 | B0BNN3,P01681,P01835,P12785,P82995                      |
| 5776 | 1,3,4,6,37,<br>39,40,41 | 2,5,7,8,36,<br>38,42,43,4<br>4 | 1 | P16636                                                  |
| 5777 | 1,3,4,6,37,<br>39,40,42 | 2,5,7,8,36,<br>38,41,43,4<br>4 | 4 | P50115,P50116,P55091,Q99MH3                             |
| 5778 | 1,3,4,6,37,<br>39,40,43 | 2,5,7,8,36,<br>38,41,42,4<br>4 | 8 | P01681,P50115,P50116,P82995,Q05695,Q812E4,Q8CIZ5,Q99MH3 |
| 5779 | 1,3,4,6,37,<br>39,40,44 | 2,5,7,8,36,<br>38,41,42,4<br>3 | 7 | O35547,P16636,P50115,P50116,P82995,Q6AYL6,Q8CJD3        |
| 5780 | 1,3,4,6,37,<br>39,41,42 | 2,5,7,8,36,<br>38,40,43,4<br>4 | 1 | P13432                                                  |
| 5781 | 1,3,4,6,37,<br>39,41,43 | 2,5,7,8,36,<br>38,40,42,4<br>4 | 3 | P01681,P02625,P62804                                    |
| 5782 | 1,3,4,6,37,<br>39,41,44 | 2,5,7,8,36,<br>38,40,42,4<br>3 | 3 | P02625,P16636,P62804                                    |
| 5783 | 1,3,4,6,37,<br>39,42,43 | 2,5,7,8,36,<br>38,40,41,4<br>4 | 4 | P01681,P50115,P50116,Q99MH3                             |
| 5784 | 1,3,4,6,37,<br>39,42,44 | 2,5,7,8,36,<br>38,40,41,4<br>3 | 2 | P50115,P50116                                           |
| 5785 | 1,3,4,6,37,<br>39,43,44 | 2,5,7,8,36,<br>38,40,41,4<br>2 | 5 | P01681,P02625,P50115,P50116,Q812E4                      |
| 5786 | 1,3,4,6,37,<br>40,41,42 | 2,5,7,8,36,<br>38,39,43,4<br>4 | 0 |                                                         |
| 5787 | 1,3,4,6,37,<br>40,41,43 | 2,5,7,8,36,<br>38,39,42,4<br>4 | 3 | P01681,P51907,P82995                                    |
| 5788 | 1,3,4,6,37,<br>40,41,44 | 2,5,7,8,36,<br>38,39,42,4<br>3 | 4 | P06911,P16636,Q5GRG2,Q80WL1                             |

|      |                         |                                |   |                                           |
|------|-------------------------|--------------------------------|---|-------------------------------------------|
| 5789 | 1,3,4,6,37,<br>40,42,43 | 2,5,7,8,36,<br>38,39,41,4<br>4 | 4 | P01681,P50115,P50116,Q99MH3               |
| 5790 | 1,3,4,6,37,<br>40,42,44 | 2,5,7,8,36,<br>38,39,41,4<br>3 | 2 | P50115,P50116                             |
| 5791 | 1,3,4,6,37,<br>40,43,44 | 2,5,7,8,36,<br>38,39,41,4<br>2 | 4 | P01681,P50116,P82995,Q9QW07               |
| 5792 | 1,3,4,6,37,<br>41,42,43 | 2,5,7,8,36,<br>38,39,40,4<br>4 | 3 | P01681,Q5HZV9,Q9QUL6                      |
| 5793 | 1,3,4,6,37,<br>41,42,44 | 2,5,7,8,36,<br>38,39,40,4<br>3 | 0 |                                           |
| 5794 | 1,3,4,6,37,<br>41,43,44 | 2,5,7,8,36,<br>38,39,40,4<br>2 | 1 | P01681                                    |
| 5795 | 1,3,4,6,37,<br>42,43,44 | 2,5,7,8,36,<br>38,39,40,4<br>1 | 2 | P01681,P50116                             |
| 5796 | 1,3,4,6,38,<br>39,40,41 | 2,5,7,8,36,<br>37,42,43,4<br>4 | 2 | P13432,P82995                             |
| 5797 | 1,3,4,6,38,<br>39,40,42 | 2,5,7,8,36,<br>37,41,43,4<br>4 | 2 | P83121,Q99MH3                             |
| 5798 | 1,3,4,6,38,<br>39,40,43 | 2,5,7,8,36,<br>37,41,42,4<br>4 | 6 | B0BNN3,P00762,P01681,P01835,P82995,Q99MH3 |
| 5799 | 1,3,4,6,38,<br>39,40,44 | 2,5,7,8,36,<br>37,41,42,4<br>3 | 3 | P01835,P16636,P82995                      |
| 5800 | 1,3,4,6,38,<br>39,41,42 | 2,5,7,8,36,<br>37,40,43,4<br>4 | 1 | P13432                                    |
| 5801 | 1,3,4,6,38,<br>39,41,43 | 2,5,7,8,36,<br>37,40,42,4<br>4 | 6 | B0BNN3,P00762,P01681,P02625,P13432,Q5HZV9 |
| 5802 | 1,3,4,6,38,<br>39,41,44 | 2,5,7,8,36,<br>37,40,42,4<br>3 | 2 | P02625,P16636                             |
| 5803 | 1,3,4,6,38,<br>39,42,43 | 2,5,7,8,36,<br>37,40,41,4<br>4 | 5 | B0BNN3,P01681,P02625,Q6IFU7,Q99MH3        |

|      |                         |                                |   |                                                  |
|------|-------------------------|--------------------------------|---|--------------------------------------------------|
| 5804 | 1,3,4,6,38,<br>39,42,44 | 2,5,7,8,36,<br>37,40,41,4<br>3 | 1 | P12785                                           |
| 5805 | 1,3,4,6,38,<br>39,43,44 | 2,5,7,8,36,<br>37,40,41,4<br>2 | 5 | B0BNN3,P01681,P01835,P02625,Q9JJS8               |
| 5806 | 1,3,4,6,38,<br>40,41,42 | 2,5,7,8,36,<br>37,39,43,4<br>4 | 0 |                                                  |
| 5807 | 1,3,4,6,38,<br>40,41,43 | 2,5,7,8,36,<br>37,39,42,4<br>4 | 6 | B0BNN3,P00762,P01681,P01835,P82995,Q5HZV9        |
| 5808 | 1,3,4,6,38,<br>40,41,44 | 2,5,7,8,36,<br>37,39,42,4<br>3 | 3 | P01835,P06911,P16636                             |
| 5809 | 1,3,4,6,38,<br>40,42,43 | 2,5,7,8,36,<br>37,39,41,4<br>4 | 5 | B0BNN3,P01681,P01835,Q5HZV9,Q99MH3               |
| 5810 | 1,3,4,6,38,<br>40,42,44 | 2,5,7,8,36,<br>37,39,41,4<br>3 | 2 | P01835,P12785                                    |
| 5811 | 1,3,4,6,38,<br>40,43,44 | 2,5,7,8,36,<br>37,39,41,4<br>2 | 4 | B0BNN3,P01681,P01835,P82995                      |
| 5812 | 1,3,4,6,38,<br>41,42,43 | 2,5,7,8,36,<br>37,39,40,4<br>4 | 7 | B0BNN3,P00762,P01681,P27213,P82471,Q5HZV9,Q8CJD3 |
| 5813 | 1,3,4,6,38,<br>41,42,44 | 2,5,7,8,36,<br>37,39,40,4<br>3 | 2 | P12785,Q8CIZ5                                    |
| 5814 | 1,3,4,6,38,<br>41,43,44 | 2,5,7,8,36,<br>37,39,40,4<br>2 | 7 | B0BNN3,P00762,P00774,P01681,P01835,P27213,Q5HZV9 |
| 5815 | 1,3,4,6,38,<br>42,43,44 | 2,5,7,8,36,<br>37,39,40,4<br>1 | 4 | B0BNN3,P01681,P01835,P12785                      |
| 5816 | 1,3,4,6,39,<br>40,41,42 | 2,5,7,8,36,<br>37,38,43,4<br>4 | 1 | P13432                                           |
| 5817 | 1,3,4,6,39,<br>40,41,43 | 2,5,7,8,36,<br>37,38,42,4<br>4 | 1 | P01681                                           |
| 5818 | 1,3,4,6,39,<br>40,41,44 | 2,5,7,8,36,<br>37,38,42,4<br>3 | 6 | P06911,P10715,P16391,P19629,Q5GRG2,Q6AYL6        |



|      |                         |                                 |   |                             |
|------|-------------------------|---------------------------------|---|-----------------------------|
| 5819 | 1,3,4,6,39,<br>40,42,43 | 2,5,7,8,36,<br>37,38,41,4<br>4  | 4 | P01681,P50115,P50116,Q99MH3 |
| 5820 | 1,3,4,6,39,<br>40,42,44 | 2,5,7,8,36,<br>37,38,41,4<br>3  | 2 | P50115,P50116               |
| 5821 | 1,3,4,6,39,<br>40,43,44 | 2,5,7,8,36,<br>37,38,41,4<br>2  | 3 | P01681,P50116,Q6AYL6        |
| 5822 | 1,3,4,6,39,<br>41,42,43 | 2,5,7,8,36,<br>37,38,40,4<br>4  | 4 | P01681,P02625,P82471,Q5HZV9 |
| 5823 | 1,3,4,6,39,<br>41,42,44 | 2,5,7,8,36,<br>37,38,40,4<br>3  | 0 |                             |
| 5824 | 1,3,4,6,39,<br>41,43,44 | 2,5,7,8,36,<br>37,38,40,4<br>2  | 2 | P01681,P02625               |
| 5825 | 1,3,4,6,39,<br>42,43,44 | 2,5,7,8,36,<br>37,38,40,4<br>1  | 4 | P01681,P35434,P50115,P50116 |
| 5826 | 1,3,4,6,40,<br>41,42,43 | 2,5,7,8,36,<br>37,38,39,4<br>4  | 2 | P01681,Q5HZV9               |
| 5827 | 1,3,4,6,40,<br>41,42,44 | 2,5,7,8,36,<br>37,38,39,4<br>3  | 1 | Q6P6R2                      |
| 5828 | 1,3,4,6,40,<br>41,43,44 | 2,5,7,8,36,<br>37,38,39,4<br>2  | 1 | P01681                      |
| 5829 | 1,3,4,6,40,<br>42,43,44 | 2,5,7,8,36,<br>37,38,39,4<br>1  | 2 | P01681,P50116               |
| 5830 | 1,3,4,6,41,<br>42,43,44 | 2,5,7,8,36,<br>37,38,39,4<br>0  | 4 | P01681,P27213,P35434,P82471 |
| 5831 | 1,3,4,7,8,3<br>6,37,38  | 2,5,6,39,4<br>0,41,42,43<br>,44 | 0 |                             |
| 5832 | 1,3,4,7,8,3<br>6,37,39  | 2,5,6,38,4<br>0,41,42,43<br>,44 | 4 | O54728,P06760,P98089,Q62635 |
| 5833 | 1,3,4,7,8,3<br>6,37,40  | 2,5,6,38,3<br>9,41,42,43<br>,44 | 2 | P00774,Q63617               |

|      |                        |                                 |   |                                                  |
|------|------------------------|---------------------------------|---|--------------------------------------------------|
| 5834 | 1,3,4,7,8,3<br>6,37,41 | 2,5,6,38,3<br>9,40,42,43<br>,44 | 5 | P18418,P46844,Q63617,Q99041,Q9QUL6               |
| 5835 | 1,3,4,7,8,3<br>6,37,42 | 2,5,6,38,3<br>9,40,41,43<br>,44 | 2 | P00774,Q62635                                    |
| 5836 | 1,3,4,7,8,3<br>6,37,43 | 2,5,6,38,3<br>9,40,41,42<br>,44 | 5 | P06760,Q62635,Q64268,Q9QUL6,Q9QX79               |
| 5837 | 1,3,4,7,8,3<br>6,37,44 | 2,5,6,38,3<br>9,40,41,42<br>,43 | 2 | P11598,Q6IFU7                                    |
| 5838 | 1,3,4,7,8,3<br>6,38,39 | 2,5,6,37,4<br>0,41,42,43<br>,44 | 2 | O54728,Q6P6R2                                    |
| 5839 | 1,3,4,7,8,3<br>6,38,40 | 2,5,6,37,3<br>9,41,42,43<br>,44 | 0 |                                                  |
| 5840 | 1,3,4,7,8,3<br>6,38,41 | 2,5,6,37,3<br>9,40,42,43<br>,44 | 1 | Q99041                                           |
| 5841 | 1,3,4,7,8,3<br>6,38,42 | 2,5,6,37,3<br>9,40,41,43<br>,44 | 7 | P08649,P08721,P15978,P47727,P60905,P97554,Q6AYL6 |
| 5842 | 1,3,4,7,8,3<br>6,38,43 | 2,5,6,37,3<br>9,40,41,42<br>,44 | 4 | P06760,P16391,Q64268,Q9QX79                      |
| 5843 | 1,3,4,7,8,3<br>6,38,44 | 2,5,6,37,3<br>9,40,41,42<br>,43 | 2 | P08721,P11598                                    |
| 5844 | 1,3,4,7,8,3<br>6,39,40 | 2,5,6,37,3<br>8,41,42,43<br>,44 | 3 | O54728,P00774,P36970                             |
| 5845 | 1,3,4,7,8,3<br>6,39,41 | 2,5,6,37,3<br>8,40,42,43<br>,44 | 6 | O54728,P06760,P08010,Q63617,Q8VD89,Q99041        |
| 5846 | 1,3,4,7,8,3<br>6,39,42 | 2,5,6,37,3<br>8,40,41,43<br>,44 | 6 | O54728,P00774,P08010,P08649,P36970,Q62635        |
| 5847 | 1,3,4,7,8,3<br>6,39,43 | 2,5,6,37,3<br>8,40,41,42<br>,44 | 7 | O54728,P02091,P06760,Q62635,Q64268,Q8CIZ5,Q9QX79 |
| 5848 | 1,3,4,7,8,3<br>6,39,44 | 2,5,6,37,3<br>8,40,41,42<br>,43 | 2 | O54728,P11598                                    |

|      |                        |                                 |   |                                                         |
|------|------------------------|---------------------------------|---|---------------------------------------------------------|
| 5849 | 1,3,4,7,8,3<br>6,40,41 | 2,5,6,37,3<br>8,39,42,43<br>,44 | 4 | Q4FZU6,Q63617,Q8VD89,Q99041                             |
| 5850 | 1,3,4,7,8,3<br>6,40,42 | 2,5,6,37,3<br>8,39,41,43<br>,44 | 3 | P00774,P20759,Q62635                                    |
| 5851 | 1,3,4,7,8,3<br>6,40,43 | 2,5,6,37,3<br>8,39,41,42<br>,44 | 2 | Q64268,Q9QX79                                           |
| 5852 | 1,3,4,7,8,3<br>6,40,44 | 2,5,6,37,3<br>8,39,41,42<br>,43 | 1 | Q63617                                                  |
| 5853 | 1,3,4,7,8,3<br>6,41,42 | 2,5,6,37,3<br>8,39,40,43<br>,44 | 5 | P08010,P08649,P08721,P60905,Q9QUL6                      |
| 5854 | 1,3,4,7,8,3<br>6,41,43 | 2,5,6,37,3<br>8,39,40,42<br>,44 | 8 | O54858,P06760,Q63617,Q64268,Q99041,Q9QUL6,Q9QX79,Q9WUW3 |
| 5855 | 1,3,4,7,8,3<br>6,41,44 | 2,5,6,37,3<br>8,39,40,42<br>,43 | 5 | P08721,P11598,Q63617,Q8VD89,Q99041                      |
| 5856 | 1,3,4,7,8,3<br>6,42,43 | 2,5,6,37,3<br>8,39,40,41<br>,44 | 8 | P06760,P60905,Q62635,Q62975,Q64268,Q9QUL6,Q9QX79,Q9WUW3 |
| 5857 | 1,3,4,7,8,3<br>6,42,44 | 2,5,6,37,3<br>8,39,40,41<br>,43 | 4 | P00714,P08721,P20759,P60905                             |
| 5858 | 1,3,4,7,8,3<br>6,43,44 | 2,5,6,37,3<br>8,39,40,41<br>,42 | 6 | P02091,P06760,P13432,Q64268,Q9QX79,Q9WUW3               |
| 5859 | 1,3,4,7,8,3<br>7,38,39 | 2,5,6,36,4<br>0,41,42,43<br>,44 | 0 |                                                         |
| 5860 | 1,3,4,7,8,3<br>7,38,40 | 2,5,6,36,3<br>9,41,42,43<br>,44 | 0 |                                                         |
| 5861 | 1,3,4,7,8,3<br>7,38,41 | 2,5,6,36,3<br>9,40,42,43<br>,44 | 5 | P50115,P62804,Q63617,Q7TPB1,Q99041                      |
| 5862 | 1,3,4,7,8,3<br>7,38,42 | 2,5,6,36,3<br>9,40,41,43<br>,44 | 1 | P12785                                                  |
| 5863 | 1,3,4,7,8,3<br>7,38,43 | 2,5,6,36,3<br>9,40,41,42<br>,44 | 3 | Q64268,Q7TPB1,Q9QX79                                    |

|      |                        |                                 |   |                                                         |
|------|------------------------|---------------------------------|---|---------------------------------------------------------|
| 5864 | 1,3,4,7,8,3<br>7,38,44 | 2,5,6,36,3<br>9,40,41,42<br>,43 | 0 |                                                         |
| 5865 | 1,3,4,7,8,3<br>7,39,40 | 2,5,6,36,3<br>8,41,42,43<br>,44 | 2 | Q63617,Q8CIZ5                                           |
| 5866 | 1,3,4,7,8,3<br>7,39,41 | 2,5,6,36,3<br>8,40,42,43<br>,44 | 5 | P18418,P62804,Q63617,Q68FS4,Q99041                      |
| 5867 | 1,3,4,7,8,3<br>7,39,42 | 2,5,6,36,3<br>8,40,41,43<br>,44 | 2 | O54728,Q62635                                           |
| 5868 | 1,3,4,7,8,3<br>7,39,43 | 2,5,6,36,3<br>8,40,41,42<br>,44 | 6 | P02091,P06760,Q62635,Q64268,Q8CIZ5,Q9QX79               |
| 5869 | 1,3,4,7,8,3<br>7,39,44 | 2,5,6,36,3<br>8,40,41,42<br>,43 | 2 | A2RUV9,P11598                                           |
| 5870 | 1,3,4,7,8,3<br>7,40,41 | 2,5,6,36,3<br>8,39,42,43<br>,44 | 4 | P18418,Q63617,Q68FS4,Q99041                             |
| 5871 | 1,3,4,7,8,3<br>7,40,42 | 2,5,6,36,3<br>8,39,41,43<br>,44 | 1 | P20759                                                  |
| 5872 | 1,3,4,7,8,3<br>7,40,43 | 2,5,6,36,3<br>8,39,41,42<br>,44 | 4 | Q63617,Q64268,Q8CIZ5,Q9QX79                             |
| 5873 | 1,3,4,7,8,3<br>7,40,44 | 2,5,6,36,3<br>8,39,41,42<br>,43 | 2 | Q63617,Q6IFU7                                           |
| 5874 | 1,3,4,7,8,3<br>7,41,42 | 2,5,6,36,3<br>8,39,40,43<br>,44 | 2 | Q63617,Q99041                                           |
| 5875 | 1,3,4,7,8,3<br>7,41,43 | 2,5,6,36,3<br>8,39,40,42<br>,44 | 8 | P62804,Q63617,Q64268,Q7TPB1,Q99041,Q9QUL6,Q9QX79,Q9WUW3 |
| 5876 | 1,3,4,7,8,3<br>7,41,44 | 2,5,6,36,3<br>8,39,40,42<br>,43 | 4 | P18418,Q63617,Q6IFU7,Q99041                             |
| 5877 | 1,3,4,7,8,3<br>7,42,43 | 2,5,6,36,3<br>8,39,40,41<br>,44 | 6 | Q62635,Q62975,Q64268,Q9QUL6,Q9QX79,Q9WUW3               |
| 5878 | 1,3,4,7,8,3<br>7,42,44 | 2,5,6,36,3<br>8,39,40,41<br>,43 | 1 | P00714                                                  |

|      |                        |                                 |   |                                                         |
|------|------------------------|---------------------------------|---|---------------------------------------------------------|
| 5879 | 1,3,4,7,8,3<br>7,43,44 | 2,5,6,36,3<br>8,39,40,41<br>,42 | 4 | P02091,Q64268,Q9QX79,Q9WUW3                             |
| 5880 | 1,3,4,7,8,3<br>8,39,40 | 2,5,6,36,3<br>7,41,42,43<br>,44 | 0 |                                                         |
| 5881 | 1,3,4,7,8,3<br>8,39,41 | 2,5,6,36,3<br>7,40,42,43<br>,44 | 0 |                                                         |
| 5882 | 1,3,4,7,8,3<br>8,39,42 | 2,5,6,36,3<br>7,40,41,43<br>,44 | 5 | O54728,P08010,P19218,P47727,Q80WL1                      |
| 5883 | 1,3,4,7,8,3<br>8,39,43 | 2,5,6,36,3<br>7,40,41,42<br>,44 | 4 | P02091,Q64268,Q80WL1,Q9QX79                             |
| 5884 | 1,3,4,7,8,3<br>8,39,44 | 2,5,6,36,3<br>7,40,41,42<br>,43 | 1 | P11598                                                  |
| 5885 | 1,3,4,7,8,3<br>8,40,41 | 2,5,6,36,3<br>7,39,42,43<br>,44 | 2 | P50115,Q63617                                           |
| 5886 | 1,3,4,7,8,3<br>8,40,42 | 2,5,6,36,3<br>7,39,41,43<br>,44 | 0 |                                                         |
| 5887 | 1,3,4,7,8,3<br>8,40,43 | 2,5,6,36,3<br>7,39,41,42<br>,44 | 2 | Q64268,Q9QX79                                           |
| 5888 | 1,3,4,7,8,3<br>8,40,44 | 2,5,6,36,3<br>7,39,41,42<br>,43 | 0 |                                                         |
| 5889 | 1,3,4,7,8,3<br>8,41,42 | 2,5,6,36,3<br>7,39,40,43<br>,44 | 4 | O35547,P08010,P50115,P60905                             |
| 5890 | 1,3,4,7,8,3<br>8,41,43 | 2,5,6,36,3<br>7,39,40,42<br>,44 | 7 | P50115,P50116,Q64268,Q7TPB1,Q9QUL6,Q9QX79,Q9WUW3        |
| 5891 | 1,3,4,7,8,3<br>8,41,44 | 2,5,6,36,3<br>7,39,40,42<br>,43 | 3 | P50115,Q05695,Q63617                                    |
| 5892 | 1,3,4,7,8,3<br>8,42,43 | 2,5,6,36,3<br>7,39,40,41<br>,44 | 8 | O35547,P47727,Q62975,Q64268,Q80WL1,Q9JHB9,Q9QX79,Q9WUW3 |
| 5893 | 1,3,4,7,8,3<br>8,42,44 | 2,5,6,36,3<br>7,39,40,41<br>,43 | 2 | P00714,P12785                                           |

|      |                        |                                 |   |                                                  |
|------|------------------------|---------------------------------|---|--------------------------------------------------|
| 5894 | 1,3,4,7,8,3<br>8,43,44 | 2,5,6,36,3<br>7,39,40,41<br>,42 | 5 | P01681,P02091,Q64268,Q9QX79,Q9WUW3               |
| 5895 | 1,3,4,7,8,3<br>9,40,41 | 2,5,6,36,3<br>7,38,42,43<br>,44 | 4 | P10715,Q4FZU6,Q63617,Q99041                      |
| 5896 | 1,3,4,7,8,3<br>9,40,42 | 2,5,6,36,3<br>7,38,41,43<br>,44 | 3 | O54728,P36970,Q561R9                             |
| 5897 | 1,3,4,7,8,3<br>9,40,43 | 2,5,6,36,3<br>7,38,41,42<br>,44 | 4 | P02091,Q64268,Q8CIZ5,Q9QX79                      |
| 5898 | 1,3,4,7,8,3<br>9,40,44 | 2,5,6,36,3<br>7,38,41,42<br>,43 | 2 | Q63617,Q6AYL6                                    |
| 5899 | 1,3,4,7,8,3<br>9,41,42 | 2,5,6,36,3<br>7,38,40,43<br>,44 | 2 | P08010,Q561R9                                    |
| 5900 | 1,3,4,7,8,3<br>9,41,43 | 2,5,6,36,3<br>7,38,40,42<br>,44 | 7 | P02091,P06760,P22006,Q64268,Q99041,Q9QUL6,Q9QX79 |
| 5901 | 1,3,4,7,8,3<br>9,41,44 | 2,5,6,36,3<br>7,38,40,42<br>,43 | 4 | P11598,Q63617,Q8VD89,Q9ESW0                      |
| 5902 | 1,3,4,7,8,3<br>9,42,43 | 2,5,6,36,3<br>7,38,40,41<br>,44 | 4 | O54728,P02091,Q62635,Q64268                      |
| 5903 | 1,3,4,7,8,3<br>9,42,44 | 2,5,6,36,3<br>7,38,40,41<br>,43 | 1 | Q561R9                                           |
| 5904 | 1,3,4,7,8,3<br>9,43,44 | 2,5,6,36,3<br>7,38,40,41<br>,42 | 4 | P01946,P02091,Q64268,Q9QX79                      |
| 5905 | 1,3,4,7,8,4<br>0,41,42 | 2,5,6,36,3<br>7,38,39,43<br>,44 | 5 | P20759,Q4FZU6,Q561R9,Q63617,Q9JJS8               |
| 5906 | 1,3,4,7,8,4<br>0,41,43 | 2,5,6,36,3<br>7,38,39,42<br>,44 | 2 | Q63617,Q9QX79                                    |
| 5907 | 1,3,4,7,8,4<br>0,41,44 | 2,5,6,36,3<br>7,38,39,42<br>,43 | 6 | P06911,P10715,P31044,Q4FZU6,Q5GRG2,Q63617        |
| 5908 | 1,3,4,7,8,4<br>0,42,43 | 2,5,6,36,3<br>7,38,39,41<br>,44 | 2 | Q9JHB9,Q9QX79                                    |

|      |                         |                                 |   |                                                                |
|------|-------------------------|---------------------------------|---|----------------------------------------------------------------|
| 5909 | 1,3,4,7,8,4<br>0,42,44  | 2,5,6,36,3<br>7,38,39,41<br>,43 | 4 | P00714,P20759,P36374,Q561R9                                    |
| 5910 | 1,3,4,7,8,4<br>0,43,44  | 2,5,6,36,3<br>7,38,39,41<br>,42 | 3 | P02091,Q63617,Q9QX79                                           |
| 5911 | 1,3,4,7,8,4<br>1,42,43  | 2,5,6,36,3<br>7,38,39,40<br>,44 | 8 | O35547,P54921,P60905,P82471,Q64268,Q9QUL6,Q9QX79,Q9WUW3        |
| 5912 | 1,3,4,7,8,4<br>1,42,44  | 2,5,6,36,3<br>7,38,39,40<br>,43 | 5 | P00714,P20759,P60905,Q561R9,Q63617                             |
| 5913 | 1,3,4,7,8,4<br>1,43,44  | 2,5,6,36,3<br>7,38,39,40<br>,42 | 5 | P02091,Q63617,Q9QUL6,Q9QX79,Q9WUW3                             |
| 5914 | 1,3,4,7,8,4<br>2,43,44  | 2,5,6,36,3<br>7,38,39,40<br>,41 | 9 | O35783,P00714,P02091,P26772,P60905,Q62975,Q64268,Q9QX79,Q9WUW3 |
| 5915 | 1,3,4,7,36,<br>37,38,39 | 2,5,6,8,40,<br>41,42,43,4<br>4  | 4 | O54728,P06760,P62804,Q6P6R2                                    |
| 5916 | 1,3,4,7,36,<br>37,38,40 | 2,5,6,8,39,<br>41,42,43,4<br>4  | 0 |                                                                |
| 5917 | 1,3,4,7,36,<br>37,38,41 | 2,5,6,8,39,<br>40,42,43,4<br>4  | 2 | P06760,P62804                                                  |
| 5918 | 1,3,4,7,36,<br>37,38,42 | 2,5,6,8,39,<br>40,41,43,4<br>4  | 2 | P12785,P47967                                                  |
| 5919 | 1,3,4,7,36,<br>37,38,43 | 2,5,6,8,39,<br>40,41,42,4<br>4  | 3 | P06760,Q64268,Q6P6R2                                           |
| 5920 | 1,3,4,7,36,<br>37,38,44 | 2,5,6,8,39,<br>40,41,42,4<br>3  | 1 | P12785                                                         |
| 5921 | 1,3,4,7,36,<br>37,39,40 | 2,5,6,8,38,<br>41,42,43,4<br>4  | 9 | O54728,P00774,P50115,P50116,P55091,P98089,Q62635,Q8CIZ5,Q8CJD3 |
| 5922 | 1,3,4,7,36,<br>37,39,41 | 2,5,6,8,38,<br>40,42,43,4<br>4  | 2 | P06760,P62804                                                  |
| 5923 | 1,3,4,7,36,<br>37,39,42 | 2,5,6,8,38,<br>40,41,43,4<br>4  | 7 | O54728,P00774,P06760,P50115,P50116,P98089,Q62635               |

|      |                         |                                |   |                                                         |
|------|-------------------------|--------------------------------|---|---------------------------------------------------------|
| 5924 | 1,3,4,7,36,<br>37,39,43 | 2,5,6,8,38,<br>40,41,42,4<br>4 | 8 | A2RUV9,O54728,P02091,P06760,P50115,Q62635,Q6P6R2,Q8CIZ5 |
| 5925 | 1,3,4,7,36,<br>37,39,44 | 2,5,6,8,38,<br>40,41,42,4<br>3 | 6 | A2RUV9,O54728,P06760,P50115,P50116,Q8CJD3               |
| 5926 | 1,3,4,7,36,<br>37,40,41 | 2,5,6,8,38,<br>39,42,43,4<br>4 | 0 |                                                         |
| 5927 | 1,3,4,7,36,<br>37,40,42 | 2,5,6,8,38,<br>39,41,43,4<br>4 | 4 | P00774,P50116,P98089,Q62635                             |
| 5928 | 1,3,4,7,36,<br>37,40,43 | 2,5,6,8,38,<br>39,41,42,4<br>4 | 3 | P06760,Q62635,Q8CIZ5                                    |
| 5929 | 1,3,4,7,36,<br>37,40,44 | 2,5,6,8,38,<br>39,41,42,4<br>3 | 1 | P50116                                                  |
| 5930 | 1,3,4,7,36,<br>37,41,42 | 2,5,6,8,38,<br>39,40,43,4<br>4 | 2 | P06760,P08649                                           |
| 5931 | 1,3,4,7,36,<br>37,41,43 | 2,5,6,8,38,<br>39,40,42,4<br>4 | 3 | P06760,P62804,Q9QUL6                                    |
| 5932 | 1,3,4,7,36,<br>37,41,44 | 2,5,6,8,38,<br>39,40,42,4<br>3 | 1 | P62804                                                  |
| 5933 | 1,3,4,7,36,<br>37,42,43 | 2,5,6,8,38,<br>39,40,41,4<br>4 | 5 | P06760,P19629,Q62635,Q62975,Q9QUL6                      |
| 5934 | 1,3,4,7,36,<br>37,42,44 | 2,5,6,8,38,<br>39,40,41,4<br>3 | 0 |                                                         |
| 5935 | 1,3,4,7,36,<br>37,43,44 | 2,5,6,8,38,<br>39,40,41,4<br>2 | 2 | P02091,P06760                                           |
| 5936 | 1,3,4,7,36,<br>38,39,40 | 2,5,6,8,37,<br>41,42,43,4<br>4 | 2 | O54728,Q6P6R2                                           |
| 5937 | 1,3,4,7,36,<br>38,39,41 | 2,5,6,8,37,<br>40,42,43,4<br>4 | 3 | O54728,P06760,Q8VDB9                                    |
| 5938 | 1,3,4,7,36,<br>38,39,42 | 2,5,6,8,37,<br>40,41,43,4<br>4 | 3 | O54728,P51907,Q9Z1F2                                    |



|      |                         |                                |   |                                           |
|------|-------------------------|--------------------------------|---|-------------------------------------------|
| 5939 | 1,3,4,7,36,<br>38,39,43 | 2,5,6,8,37,<br>40,41,42,4<br>4 | 5 | O54728,P01946,P02091,P06760,Q6P6R2        |
| 5940 | 1,3,4,7,36,<br>38,39,44 | 2,5,6,8,37,<br>40,41,42,4<br>3 | 4 | A2RUV9,O54728,P51907,P55314               |
| 5941 | 1,3,4,7,36,<br>38,40,41 | 2,5,6,8,37,<br>39,42,43,4<br>4 | 0 |                                           |
| 5942 | 1,3,4,7,36,<br>38,40,42 | 2,5,6,8,37,<br>39,41,43,4<br>4 | 1 | P12785                                    |
| 5943 | 1,3,4,7,36,<br>38,40,43 | 2,5,6,8,37,<br>39,41,42,4<br>4 | 0 |                                           |
| 5944 | 1,3,4,7,36,<br>38,40,44 | 2,5,6,8,37,<br>39,41,42,4<br>3 | 0 |                                           |
| 5945 | 1,3,4,7,36,<br>38,41,42 | 2,5,6,8,37,<br>39,40,43,4<br>4 | 2 | P01836,P08649                             |
| 5946 | 1,3,4,7,36,<br>38,41,43 | 2,5,6,8,37,<br>39,40,42,4<br>4 | 3 | P01836,P06760,Q9QUL6                      |
| 5947 | 1,3,4,7,36,<br>38,41,44 | 2,5,6,8,37,<br>39,40,42,4<br>3 | 1 | Q05695                                    |
| 5948 | 1,3,4,7,36,<br>38,42,43 | 2,5,6,8,37,<br>39,40,41,4<br>4 | 4 | P01836,P06760,P12785,Q62975               |
| 5949 | 1,3,4,7,36,<br>38,42,44 | 2,5,6,8,37,<br>39,40,41,4<br>3 | 3 | P12785,P51907,Q9Z1F2                      |
| 5950 | 1,3,4,7,36,<br>38,43,44 | 2,5,6,8,37,<br>39,40,41,4<br>2 | 2 | P02091,P06760                             |
| 5951 | 1,3,4,7,36,<br>39,40,41 | 2,5,6,8,37,<br>38,42,43,4<br>4 | 1 | Q8VD89                                    |
| 5952 | 1,3,4,7,36,<br>39,40,42 | 2,5,6,8,37,<br>38,41,43,4<br>4 | 6 | O54728,P00774,P50115,P50116,P98089,Q62635 |
| 5953 | 1,3,4,7,36,<br>39,40,43 | 2,5,6,8,37,<br>38,41,42,4<br>4 | 5 | O54728,P02091,P06760,Q62635,Q8CIZ5        |

|      |                         |                                |   |                                           |
|------|-------------------------|--------------------------------|---|-------------------------------------------|
| 5954 | 1,3,4,7,36,<br>39,40,44 | 2,5,6,8,37,<br>38,41,42,4<br>3 | 2 | P50116,P55314                             |
| 5955 | 1,3,4,7,36,<br>39,41,42 | 2,5,6,8,37,<br>38,40,43,4<br>4 | 4 | O54728,P06760,P08010,P08649               |
| 5956 | 1,3,4,7,36,<br>39,41,43 | 2,5,6,8,37,<br>38,40,42,4<br>4 | 5 | O54728,P02091,P06760,P22006,Q9QUL6        |
| 5957 | 1,3,4,7,36,<br>39,41,44 | 2,5,6,8,37,<br>38,40,42,4<br>3 | 2 | P06760,Q8VD89                             |
| 5958 | 1,3,4,7,36,<br>39,42,43 | 2,5,6,8,37,<br>38,40,41,4<br>4 | 4 | O54728,P02091,P06760,Q62635               |
| 5959 | 1,3,4,7,36,<br>39,42,44 | 2,5,6,8,37,<br>38,40,41,4<br>3 | 2 | O54728,P51907                             |
| 5960 | 1,3,4,7,36,<br>39,43,44 | 2,5,6,8,37,<br>38,40,41,4<br>2 | 6 | A2RUV9,O54728,P01946,P02091,P06760,P55314 |
| 5961 | 1,3,4,7,36,<br>40,41,42 | 2,5,6,8,37,<br>38,39,43,4<br>4 | 3 | P05539,P08649,Q4FZU6                      |
| 5962 | 1,3,4,7,36,<br>40,41,43 | 2,5,6,8,37,<br>38,39,42,4<br>4 | 2 | P01836,P06760                             |
| 5963 | 1,3,4,7,36,<br>40,41,44 | 2,5,6,8,37,<br>38,39,42,4<br>3 | 2 | Q4FZU6,Q8VD89                             |
| 5964 | 1,3,4,7,36,<br>40,42,43 | 2,5,6,8,37,<br>38,39,41,4<br>4 | 1 | Q62635                                    |
| 5965 | 1,3,4,7,36,<br>40,42,44 | 2,5,6,8,37,<br>38,39,41,4<br>3 | 2 | P00714,Q7TPB1                             |
| 5966 | 1,3,4,7,36,<br>40,43,44 | 2,5,6,8,37,<br>38,39,41,4<br>2 | 1 | P02091                                    |
| 5967 | 1,3,4,7,36,<br>41,42,43 | 2,5,6,8,37,<br>38,39,40,4<br>4 | 6 | P01836,P05539,P06760,P08649,P82471,Q9QUL6 |
| 5968 | 1,3,4,7,36,<br>41,42,44 | 2,5,6,8,37,<br>38,39,40,4<br>3 | 3 | P08649,P08721,P60905                      |

|      |                         |                                |   |                                    |
|------|-------------------------|--------------------------------|---|------------------------------------|
| 5969 | 1,3,4,7,36,<br>41,43,44 | 2,5,6,8,37,<br>38,39,40,4<br>2 | 3 | P02091,P06760,Q9QUL6               |
| 5970 | 1,3,4,7,36,<br>42,43,44 | 2,5,6,8,37,<br>38,39,40,4<br>1 | 3 | P02091,P06760,Q62975               |
| 5971 | 1,3,4,7,37,<br>38,39,40 | 2,5,6,8,36,<br>41,42,43,4<br>4 | 1 | P62804                             |
| 5972 | 1,3,4,7,37,<br>38,39,41 | 2,5,6,8,36,<br>40,42,43,4<br>4 | 1 | P62804                             |
| 5973 | 1,3,4,7,37,<br>38,39,42 | 2,5,6,8,36,<br>40,41,43,4<br>4 | 3 | O54728,P12785,Q9Z1F2               |
| 5974 | 1,3,4,7,37,<br>38,39,43 | 2,5,6,8,36,<br>40,41,42,4<br>4 | 5 | A2RUV9,P02091,P06760,P62804,Q6P6R2 |
| 5975 | 1,3,4,7,37,<br>38,39,44 | 2,5,6,8,36,<br>40,41,42,4<br>3 | 3 | A2RUV9,P62804,Q9JJS8               |
| 5976 | 1,3,4,7,37,<br>38,40,41 | 2,5,6,8,36,<br>39,42,43,4<br>4 | 1 | P62804                             |
| 5977 | 1,3,4,7,37,<br>38,40,42 | 2,5,6,8,36,<br>39,41,43,4<br>4 | 1 | P12785                             |
| 5978 | 1,3,4,7,37,<br>38,40,43 | 2,5,6,8,36,<br>39,41,42,4<br>4 | 0 |                                    |
| 5979 | 1,3,4,7,37,<br>38,40,44 | 2,5,6,8,36,<br>39,41,42,4<br>3 | 1 | P12785                             |
| 5980 | 1,3,4,7,37,<br>38,41,42 | 2,5,6,8,36,<br>39,40,43,4<br>4 | 1 | P12785                             |
| 5981 | 1,3,4,7,37,<br>38,41,43 | 2,5,6,8,36,<br>39,40,42,4<br>4 | 4 | P06760,P62804,Q7TPB1,Q9QUL6        |
| 5982 | 1,3,4,7,37,<br>38,41,44 | 2,5,6,8,36,<br>39,40,42,4<br>3 | 2 | P62804,Q05695                      |
| 5983 | 1,3,4,7,37,<br>38,42,43 | 2,5,6,8,36,<br>39,40,41,4<br>4 | 4 | P06866,P12785,Q62975,Q6P6T1        |

|      |                         |                                |   |                                    |
|------|-------------------------|--------------------------------|---|------------------------------------|
| 5984 | 1,3,4,7,37,<br>38,42,44 | 2,5,6,8,36,<br>39,40,41,4<br>3 | 2 | P12785,Q9Z1F2                      |
| 5985 | 1,3,4,7,37,<br>38,43,44 | 2,5,6,8,36,<br>39,40,41,4<br>2 | 3 | P02091,P12785,P62804               |
| 5986 | 1,3,4,7,37,<br>39,40,41 | 2,5,6,8,36,<br>38,42,43,4<br>4 | 2 | P10715,P62804                      |
| 5987 | 1,3,4,7,37,<br>39,40,42 | 2,5,6,8,36,<br>38,41,43,4<br>4 | 5 | O54728,P00774,P50116,P98089,Q62635 |
| 5988 | 1,3,4,7,37,<br>39,40,43 | 2,5,6,8,36,<br>38,41,42,4<br>4 | 5 | P02091,P50116,Q62635,Q812E4,Q8CIZ5 |
| 5989 | 1,3,4,7,37,<br>39,40,44 | 2,5,6,8,36,<br>38,41,42,4<br>3 | 3 | A2RUV9,P50116,Q6AYL6               |
| 5990 | 1,3,4,7,37,<br>39,41,42 | 2,5,6,8,36,<br>38,40,43,4<br>4 | 0 |                                    |
| 5991 | 1,3,4,7,37,<br>39,41,43 | 2,5,6,8,36,<br>38,40,42,4<br>4 | 4 | P02091,P06760,P22006,P62804        |
| 5992 | 1,3,4,7,37,<br>39,41,44 | 2,5,6,8,36,<br>38,40,42,4<br>3 | 2 | A2RUV9,P62804                      |
| 5993 | 1,3,4,7,37,<br>39,42,43 | 2,5,6,8,36,<br>38,40,41,4<br>4 | 4 | O54728,P02091,P06760,Q62635        |
| 5994 | 1,3,4,7,37,<br>39,42,44 | 2,5,6,8,36,<br>38,40,41,4<br>3 | 1 | P50116                             |
| 5995 | 1,3,4,7,37,<br>39,43,44 | 2,5,6,8,36,<br>38,40,41,4<br>2 | 5 | A2RUV9,P01946,P02091,P06760,P62804 |
| 5996 | 1,3,4,7,37,<br>40,41,42 | 2,5,6,8,36,<br>38,39,43,4<br>4 | 0 |                                    |
| 5997 | 1,3,4,7,37,<br>40,41,43 | 2,5,6,8,36,<br>38,39,42,4<br>4 | 1 | P62804                             |
| 5998 | 1,3,4,7,37,<br>40,41,44 | 2,5,6,8,36,<br>38,39,42,4<br>3 | 3 | P10715,P62804,Q5GRG2               |

|      |                         |                                |   |                                           |
|------|-------------------------|--------------------------------|---|-------------------------------------------|
| 5999 | 1,3,4,7,37,<br>40,42,43 | 2,5,6,8,36,<br>38,39,41,4<br>4 | 1 | Q62635                                    |
| 6000 | 1,3,4,7,37,<br>40,42,44 | 2,5,6,8,36,<br>38,39,41,4<br>3 | 2 | P00714,P50116                             |
| 6001 | 1,3,4,7,37,<br>40,43,44 | 2,5,6,8,36,<br>38,39,41,4<br>2 | 1 | P02091                                    |
| 6002 | 1,3,4,7,37,<br>41,42,43 | 2,5,6,8,36,<br>38,39,40,4<br>4 | 2 | P06760,Q9QUL6                             |
| 6003 | 1,3,4,7,37,<br>41,42,44 | 2,5,6,8,36,<br>38,39,40,4<br>3 | 0 |                                           |
| 6004 | 1,3,4,7,37,<br>41,43,44 | 2,5,6,8,36,<br>38,39,40,4<br>2 | 2 | P02091,P62804                             |
| 6005 | 1,3,4,7,37,<br>42,43,44 | 2,5,6,8,36,<br>38,39,40,4<br>1 | 2 | P02091,Q62975                             |
| 6006 | 1,3,4,7,38,<br>39,40,41 | 2,5,6,8,36,<br>37,42,43,4<br>4 | 0 |                                           |
| 6007 | 1,3,4,7,38,<br>39,40,42 | 2,5,6,8,36,<br>37,41,43,4<br>4 | 2 | O54728,Q9Z1F2                             |
| 6008 | 1,3,4,7,38,<br>39,40,43 | 2,5,6,8,36,<br>37,41,42,4<br>4 | 1 | P02091                                    |
| 6009 | 1,3,4,7,38,<br>39,40,44 | 2,5,6,8,36,<br>37,41,42,4<br>3 | 0 |                                           |
| 6010 | 1,3,4,7,38,<br>39,41,42 | 2,5,6,8,36,<br>37,40,43,4<br>4 | 3 | P08010,P13432,Q9Z1F2                      |
| 6011 | 1,3,4,7,38,<br>39,41,43 | 2,5,6,8,36,<br>37,40,42,4<br>4 | 6 | B0BNN3,P01946,P02091,P06760,P22006,P62804 |
| 6012 | 1,3,4,7,38,<br>39,41,44 | 2,5,6,8,36,<br>37,40,42,4<br>3 | 2 | P62804,Q05695                             |
| 6013 | 1,3,4,7,38,<br>39,42,43 | 2,5,6,8,36,<br>37,40,41,4<br>4 | 4 | B0BNN3,O54728,P02091,Q9Z1F2               |

|      |                         |                                |   |                                                         |
|------|-------------------------|--------------------------------|---|---------------------------------------------------------|
| 6014 | 1,3,4,7,38,<br>39,42,44 | 2,5,6,8,36,<br>37,40,41,4<br>3 | 3 | P12785,P51907,Q9Z1F2                                    |
| 6015 | 1,3,4,7,38,<br>39,43,44 | 2,5,6,8,36,<br>37,40,41,4<br>2 | 4 | A2RUV9,P01946,P02091,P23593                             |
| 6016 | 1,3,4,7,38,<br>40,41,42 | 2,5,6,8,36,<br>37,39,43,4<br>4 | 0 |                                                         |
| 6017 | 1,3,4,7,38,<br>40,41,43 | 2,5,6,8,36,<br>37,39,42,4<br>4 | 0 |                                                         |
| 6018 | 1,3,4,7,38,<br>40,41,44 | 2,5,6,8,36,<br>37,39,42,4<br>3 | 1 | Q05695                                                  |
| 6019 | 1,3,4,7,38,<br>40,42,43 | 2,5,6,8,36,<br>37,39,41,4<br>4 | 2 | B0BNN3,Q9JHB9                                           |
| 6020 | 1,3,4,7,38,<br>40,42,44 | 2,5,6,8,36,<br>37,39,41,4<br>3 | 2 | P00714,P12785                                           |
| 6021 | 1,3,4,7,38,<br>40,43,44 | 2,5,6,8,36,<br>37,39,41,4<br>2 | 2 | P01681,P02091                                           |
| 6022 | 1,3,4,7,38,<br>41,42,43 | 2,5,6,8,36,<br>37,39,40,4<br>4 | 6 | B0BNN3,O35547,P27213,P82471,Q8CJD3,Q9QUL6               |
| 6023 | 1,3,4,7,38,<br>41,42,44 | 2,5,6,8,36,<br>37,39,40,4<br>3 | 2 | P12785,Q05695                                           |
| 6024 | 1,3,4,7,38,<br>41,43,44 | 2,5,6,8,36,<br>37,39,40,4<br>2 | 5 | P00774,P02091,P55091,P62804,Q05695                      |
| 6025 | 1,3,4,7,38,<br>42,43,44 | 2,5,6,8,36,<br>37,39,40,4<br>1 | 4 | P02091,P12785,Q62975,Q9Z1F2                             |
| 6026 | 1,3,4,7,39,<br>40,41,42 | 2,5,6,8,36,<br>37,38,43,4<br>4 | 1 | Q561R9                                                  |
| 6027 | 1,3,4,7,39,<br>40,41,43 | 2,5,6,8,36,<br>37,38,42,4<br>4 | 3 | P02091,P22006,Q6AYL6                                    |
| 6028 | 1,3,4,7,39,<br>40,41,44 | 2,5,6,8,36,<br>37,38,42,4<br>3 | 8 | P06911,P10715,P19629,P31044,Q4FZU6,Q5GRG2,Q6AYL6,Q8VD89 |

|      |                         |                                |   |                                    |
|------|-------------------------|--------------------------------|---|------------------------------------|
| 6029 | 1,3,4,7,39,<br>40,42,43 | 2,5,6,8,36,<br>37,38,41,4<br>4 | 3 | O54728,P02091,Q62635               |
| 6030 | 1,3,4,7,39,<br>40,42,44 | 2,5,6,8,36,<br>37,38,41,4<br>3 | 2 | P50116,Q561R9                      |
| 6031 | 1,3,4,7,39,<br>40,43,44 | 2,5,6,8,36,<br>37,38,41,4<br>2 | 2 | P02091,Q6AYL6                      |
| 6032 | 1,3,4,7,39,<br>41,42,43 | 2,5,6,8,36,<br>37,38,40,4<br>4 | 4 | P02091,P06760,P22006,P82471        |
| 6033 | 1,3,4,7,39,<br>41,42,44 | 2,5,6,8,36,<br>37,38,40,4<br>3 | 1 | Q561R9                             |
| 6034 | 1,3,4,7,39,<br>41,43,44 | 2,5,6,8,36,<br>37,38,40,4<br>2 | 5 | P01946,P02091,P06760,P22006,P62804 |
| 6035 | 1,3,4,7,39,<br>42,43,44 | 2,5,6,8,36,<br>37,38,40,4<br>1 | 1 | P02091                             |
| 6036 | 1,3,4,7,40,<br>41,42,43 | 2,5,6,8,36,<br>37,38,39,4<br>4 | 0 |                                    |
| 6037 | 1,3,4,7,40,<br>41,42,44 | 2,5,6,8,36,<br>37,38,39,4<br>3 | 2 | Q4FZU6,Q561R9                      |
| 6038 | 1,3,4,7,40,<br>41,43,44 | 2,5,6,8,36,<br>37,38,39,4<br>2 | 2 | P02091,Q6AYL6                      |
| 6039 | 1,3,4,7,40,<br>42,43,44 | 2,5,6,8,36,<br>37,38,39,4<br>1 | 1 | P02091                             |
| 6040 | 1,3,4,7,41,<br>42,43,44 | 2,5,6,8,36,<br>37,38,39,4<br>0 | 2 | P02091,P82471                      |
| 6041 | 1,3,4,8,36,<br>37,38,39 | 2,5,6,7,40,<br>41,42,43,4<br>4 | 3 | O54728,Q6P6R2,Q9R1T5               |
| 6042 | 1,3,4,8,36,<br>37,38,40 | 2,5,6,7,39,<br>41,42,43,4<br>4 | 2 | P35281,P83748                      |
| 6043 | 1,3,4,8,36,<br>37,38,41 | 2,5,6,7,39,<br>40,42,43,4<br>4 | 0 |                                    |

|      |                         |                                |   |                                           |
|------|-------------------------|--------------------------------|---|-------------------------------------------|
| 6044 | 1,3,4,8,36,<br>37,38,42 | 2,5,6,7,39,<br>40,41,43,4<br>4 | 4 | P12020,P12785,P83748,Q6AYL6               |
| 6045 | 1,3,4,8,36,<br>37,38,43 | 2,5,6,7,39,<br>40,41,42,4<br>4 | 3 | Q64268,Q9QUL6,Q9QX79                      |
| 6046 | 1,3,4,8,36,<br>37,38,44 | 2,5,6,7,39,<br>40,41,42,4<br>3 | 1 | P83748                                    |
| 6047 | 1,3,4,8,36,<br>37,39,40 | 2,5,6,7,38,<br>41,42,43,4<br>4 | 6 | O54728,P00774,P55091,P98089,Q8CIZ5,Q8CJD3 |
| 6048 | 1,3,4,8,36,<br>37,39,41 | 2,5,6,7,38,<br>40,42,43,4<br>4 | 0 |                                           |
| 6049 | 1,3,4,8,36,<br>37,39,42 | 2,5,6,7,38,<br>40,41,43,4<br>4 | 5 | O54728,P00774,P83748,P98089,Q62635        |
| 6050 | 1,3,4,8,36,<br>37,39,43 | 2,5,6,7,38,<br>40,41,42,4<br>4 | 6 | O54728,P06760,Q62635,Q64268,Q8CIZ5,Q9QUL6 |
| 6051 | 1,3,4,8,36,<br>37,39,44 | 2,5,6,7,38,<br>40,41,42,4<br>3 | 1 | Q8CJD3                                    |
| 6052 | 1,3,4,8,36,<br>37,40,41 | 2,5,6,7,38,<br>39,42,43,4<br>4 | 0 |                                           |
| 6053 | 1,3,4,8,36,<br>37,40,42 | 2,5,6,7,38,<br>39,41,43,4<br>4 | 4 | P00774,P83748,P98089,Q62635               |
| 6054 | 1,3,4,8,36,<br>37,40,43 | 2,5,6,7,38,<br>39,41,42,4<br>4 | 3 | Q64268,Q8CIZ5,Q9QUL6                      |
| 6055 | 1,3,4,8,36,<br>37,40,44 | 2,5,6,7,38,<br>39,41,42,4<br>3 | 2 | P83748,Q8CJD3                             |
| 6056 | 1,3,4,8,36,<br>37,41,42 | 2,5,6,7,38,<br>39,40,43,4<br>4 | 2 | P83748,Q9QUL6                             |
| 6057 | 1,3,4,8,36,<br>37,41,43 | 2,5,6,7,38,<br>39,40,42,4<br>4 | 4 | P83121,Q64268,Q9QUL6,Q9QX79               |
| 6058 | 1,3,4,8,36,<br>37,41,44 | 2,5,6,7,38,<br>39,40,42,4<br>3 | 0 |                                           |



|      |                         |                                |   |                                    |
|------|-------------------------|--------------------------------|---|------------------------------------|
| 6059 | 1,3,4,8,36,<br>37,42,43 | 2,5,6,7,38,<br>39,40,41,4<br>4 | 5 | P12020,P19629,Q62635,Q64268,Q9QUL6 |
| 6060 | 1,3,4,8,36,<br>37,42,44 | 2,5,6,7,38,<br>39,40,41,4<br>3 | 1 | P83748                             |
| 6061 | 1,3,4,8,36,<br>37,43,44 | 2,5,6,7,38,<br>39,40,41,4<br>2 | 3 | Q64268,Q9QUL6,Q9QX79               |
| 6062 | 1,3,4,8,36,<br>38,39,40 | 2,5,6,7,37,<br>41,42,43,4<br>4 | 2 | O54728,P10758                      |
| 6063 | 1,3,4,8,36,<br>38,39,41 | 2,5,6,7,37,<br>40,42,43,4<br>4 | 1 | P10758                             |
| 6064 | 1,3,4,8,36,<br>38,39,42 | 2,5,6,7,37,<br>40,41,43,4<br>4 | 3 | O54728,P10758,P83748               |
| 6065 | 1,3,4,8,36,<br>38,39,43 | 2,5,6,7,37,<br>40,41,42,4<br>4 | 3 | O54728,Q64268,Q6P6R2               |
| 6066 | 1,3,4,8,36,<br>38,39,44 | 2,5,6,7,37,<br>40,41,42,4<br>3 | 0 |                                    |
| 6067 | 1,3,4,8,36,<br>38,40,41 | 2,5,6,7,37,<br>39,42,43,4<br>4 | 0 |                                    |
| 6068 | 1,3,4,8,36,<br>38,40,42 | 2,5,6,7,37,<br>39,41,43,4<br>4 | 1 | P83748                             |
| 6069 | 1,3,4,8,36,<br>38,40,43 | 2,5,6,7,37,<br>39,41,42,4<br>4 | 3 | P01681,P35467,Q64268               |
| 6070 | 1,3,4,8,36,<br>38,40,44 | 2,5,6,7,37,<br>39,41,42,4<br>3 | 1 | P83748                             |
| 6071 | 1,3,4,8,36,<br>38,41,42 | 2,5,6,7,37,<br>39,40,43,4<br>4 | 2 | P83748,Q9QUL6                      |
| 6072 | 1,3,4,8,36,<br>38,41,43 | 2,5,6,7,37,<br>39,40,42,4<br>4 | 3 | Q64268,Q9QUL6,Q9QX79               |
| 6073 | 1,3,4,8,36,<br>38,41,44 | 2,5,6,7,37,<br>39,40,42,4<br>3 | 2 | P83748,Q05695                      |

|      |                         |                                |   |                                                  |
|------|-------------------------|--------------------------------|---|--------------------------------------------------|
| 6074 | 1,3,4,8,36,<br>38,42,43 | 2,5,6,7,37,<br>39,40,41,4<br>4 | 7 | B0BNN3,P12020,P19629,P35467,Q5GRG2,Q64268,Q9QUL6 |
| 6075 | 1,3,4,8,36,<br>38,42,44 | 2,5,6,7,37,<br>39,40,41,4<br>3 | 2 | P12785,P83748                                    |
| 6076 | 1,3,4,8,36,<br>38,43,44 | 2,5,6,7,37,<br>39,40,41,4<br>2 | 3 | P01681,P35467,Q64268                             |
| 6077 | 1,3,4,8,36,<br>39,40,41 | 2,5,6,7,37,<br>38,42,43,4<br>4 | 1 | P97840                                           |
| 6078 | 1,3,4,8,36,<br>39,40,42 | 2,5,6,7,37,<br>38,41,43,4<br>4 | 5 | O54728,P00774,P83748,P98089,Q62635               |
| 6079 | 1,3,4,8,36,<br>39,40,43 | 2,5,6,7,37,<br>38,41,42,4<br>4 | 5 | O54728,P97840,Q62635,Q64268,Q8CIZ5               |
| 6080 | 1,3,4,8,36,<br>39,40,44 | 2,5,6,7,37,<br>38,41,42,4<br>3 | 1 | Q8CJD3                                           |
| 6081 | 1,3,4,8,36,<br>39,41,42 | 2,5,6,7,37,<br>38,40,43,4<br>4 | 1 | O54728                                           |
| 6082 | 1,3,4,8,36,<br>39,41,43 | 2,5,6,7,37,<br>38,40,42,4<br>4 | 4 | P06760,P97840,Q64268,Q9QUL6                      |
| 6083 | 1,3,4,8,36,<br>39,41,44 | 2,5,6,7,37,<br>38,40,42,4<br>3 | 0 |                                                  |
| 6084 | 1,3,4,8,36,<br>39,42,43 | 2,5,6,7,37,<br>38,40,41,4<br>4 | 4 | O54728,Q62635,Q64268,Q9QUL6                      |
| 6085 | 1,3,4,8,36,<br>39,42,44 | 2,5,6,7,37,<br>38,40,41,4<br>3 | 2 | O54728,P83748                                    |
| 6086 | 1,3,4,8,36,<br>39,43,44 | 2,5,6,7,37,<br>38,40,41,4<br>2 | 2 | P55314,Q64268                                    |
| 6087 | 1,3,4,8,36,<br>40,41,42 | 2,5,6,7,37,<br>38,39,43,4<br>4 | 2 | P23593,P83748                                    |
| 6088 | 1,3,4,8,36,<br>40,41,43 | 2,5,6,7,37,<br>38,39,42,4<br>4 | 3 | P97840,Q9QUL6,Q9QX79                             |

|      |                         |                                |   |                             |
|------|-------------------------|--------------------------------|---|-----------------------------|
| 6089 | 1,3,4,8,36,<br>40,41,44 | 2,5,6,7,37,<br>38,39,42,4<br>3 | 0 |                             |
| 6090 | 1,3,4,8,36,<br>40,42,43 | 2,5,6,7,37,<br>38,39,41,4<br>4 | 3 | Q62635,Q64268,Q9QUL6        |
| 6091 | 1,3,4,8,36,<br>40,42,44 | 2,5,6,7,37,<br>38,39,41,4<br>3 | 3 | P00714,P83748,Q7TPB1        |
| 6092 | 1,3,4,8,36,<br>40,43,44 | 2,5,6,7,37,<br>38,39,41,4<br>2 | 3 | P01681,P97840,Q64268        |
| 6093 | 1,3,4,8,36,<br>41,42,43 | 2,5,6,7,37,<br>38,39,40,4<br>4 | 3 | P82471,Q64268,Q9QUL6        |
| 6094 | 1,3,4,8,36,<br>41,42,44 | 2,5,6,7,37,<br>38,39,40,4<br>3 | 2 | P08721,P83748               |
| 6095 | 1,3,4,8,36,<br>41,43,44 | 2,5,6,7,37,<br>38,39,40,4<br>2 | 4 | P97840,Q64268,Q9QUL6,Q9QX79 |
| 6096 | 1,3,4,8,36,<br>42,43,44 | 2,5,6,7,37,<br>38,39,40,4<br>1 | 2 | Q64268,Q9QUL6               |
| 6097 | 1,3,4,8,37,<br>38,39,40 | 2,5,6,7,36,<br>41,42,43,4<br>4 | 2 | P16636,P35281               |
| 6098 | 1,3,4,8,37,<br>38,39,41 | 2,5,6,7,36,<br>40,42,43,4<br>4 | 2 | P16636,Q9R1T5               |
| 6099 | 1,3,4,8,37,<br>38,39,42 | 2,5,6,7,36,<br>40,41,43,4<br>4 | 1 | P83748                      |
| 6100 | 1,3,4,8,37,<br>38,39,43 | 2,5,6,7,36,<br>40,41,42,4<br>4 | 4 | B0BNN3,Q64268,Q812E4,Q9R1T5 |
| 6101 | 1,3,4,8,37,<br>38,39,44 | 2,5,6,7,36,<br>40,41,42,4<br>3 | 3 | P16636,P83748,Q9JJS8        |
| 6102 | 1,3,4,8,37,<br>38,40,41 | 2,5,6,7,36,<br>39,42,43,4<br>4 | 2 | P16636,P83748               |
| 6103 | 1,3,4,8,37,<br>38,40,42 | 2,5,6,7,36,<br>39,41,43,4<br>4 | 1 | P83748                      |

|      |                         |                                |   |                                           |
|------|-------------------------|--------------------------------|---|-------------------------------------------|
| 6104 | 1,3,4,8,37,<br>38,40,43 | 2,5,6,7,36,<br>39,41,42,4<br>4 | 3 | P01681,P35467,Q64268                      |
| 6105 | 1,3,4,8,37,<br>38,40,44 | 2,5,6,7,36,<br>39,41,42,4<br>3 | 2 | P16636,P83748                             |
| 6106 | 1,3,4,8,37,<br>38,41,42 | 2,5,6,7,36,<br>39,40,43,4<br>4 | 2 | P83748,Q62894                             |
| 6107 | 1,3,4,8,37,<br>38,41,43 | 2,5,6,7,36,<br>39,40,42,4<br>4 | 5 | B0BNN3,Q64268,Q7TPB1,Q9QUL6,Q9QX79        |
| 6108 | 1,3,4,8,37,<br>38,41,44 | 2,5,6,7,36,<br>39,40,42,4<br>3 | 3 | P16636,P83748,Q05695                      |
| 6109 | 1,3,4,8,37,<br>38,42,43 | 2,5,6,7,36,<br>39,40,41,4<br>4 | 6 | B0BNN3,P12020,P35467,Q64268,Q6P6T1,Q9QUL6 |
| 6110 | 1,3,4,8,37,<br>38,42,44 | 2,5,6,7,36,<br>39,40,41,4<br>3 | 3 | P00714,P12785,P83748                      |
| 6111 | 1,3,4,8,37,<br>38,43,44 | 2,5,6,7,36,<br>39,40,41,4<br>2 | 4 | P01681,P35467,Q64268,Q9QX79               |
| 6112 | 1,3,4,8,37,<br>39,40,41 | 2,5,6,7,36,<br>38,42,43,4<br>4 | 2 | P16636,P97840                             |
| 6113 | 1,3,4,8,37,<br>39,40,42 | 2,5,6,7,36,<br>38,41,43,4<br>4 | 3 | P00774,P83748,P98089                      |
| 6114 | 1,3,4,8,37,<br>39,40,43 | 2,5,6,7,36,<br>38,41,42,4<br>4 | 4 | P97840,Q64268,Q812E4,Q8CIZ5               |
| 6115 | 1,3,4,8,37,<br>39,40,44 | 2,5,6,7,36,<br>38,41,42,4<br>3 | 2 | P16636,Q8CJD3                             |
| 6116 | 1,3,4,8,37,<br>39,41,42 | 2,5,6,7,36,<br>38,40,43,4<br>4 | 1 | P83748                                    |
| 6117 | 1,3,4,8,37,<br>39,41,43 | 2,5,6,7,36,<br>38,40,42,4<br>4 | 4 | P97840,Q64268,Q9QUL6,Q9QX79               |
| 6118 | 1,3,4,8,37,<br>39,41,44 | 2,5,6,7,36,<br>38,40,42,4<br>3 | 1 | P16636                                    |

|      |                         |                                |   |                             |
|------|-------------------------|--------------------------------|---|-----------------------------|
| 6119 | 1,3,4,8,37,<br>39,42,43 | 2,5,6,7,36,<br>38,40,41,4<br>4 | 3 | Q62635,Q64268,Q9QUL6        |
| 6120 | 1,3,4,8,37,<br>39,42,44 | 2,5,6,7,36,<br>38,40,41,4<br>3 | 1 | P83748                      |
| 6121 | 1,3,4,8,37,<br>39,43,44 | 2,5,6,7,36,<br>38,40,41,4<br>2 | 1 | Q64268                      |
| 6122 | 1,3,4,8,37,<br>40,41,42 | 2,5,6,7,36,<br>38,39,43,4<br>4 | 1 | P83748                      |
| 6123 | 1,3,4,8,37,<br>40,41,43 | 2,5,6,7,36,<br>38,39,42,4<br>4 | 4 | P51907,P97840,Q9QUL6,Q9QX79 |
| 6124 | 1,3,4,8,37,<br>40,41,44 | 2,5,6,7,36,<br>38,39,42,4<br>3 | 2 | P16636,P83748               |
| 6125 | 1,3,4,8,37,<br>40,42,43 | 2,5,6,7,36,<br>38,39,41,4<br>4 | 1 | Q64268                      |
| 6126 | 1,3,4,8,37,<br>40,42,44 | 2,5,6,7,36,<br>38,39,41,4<br>3 | 2 | P00714,P83748               |
| 6127 | 1,3,4,8,37,<br>40,43,44 | 2,5,6,7,36,<br>38,39,41,4<br>2 | 3 | P97840,Q64268,Q9QW07        |
| 6128 | 1,3,4,8,37,<br>41,42,43 | 2,5,6,7,36,<br>38,39,40,4<br>4 | 4 | Q62894,Q64268,Q9QUL6,Q9QX79 |
| 6129 | 1,3,4,8,37,<br>41,42,44 | 2,5,6,7,36,<br>38,39,40,4<br>3 | 1 | P83748                      |
| 6130 | 1,3,4,8,37,<br>41,43,44 | 2,5,6,7,36,<br>38,39,40,4<br>2 | 4 | P97840,Q64268,Q9QUL6,Q9QX79 |
| 6131 | 1,3,4,8,37,<br>42,43,44 | 2,5,6,7,36,<br>38,39,40,4<br>1 | 2 | Q64268,Q9QUL6               |
| 6132 | 1,3,4,8,38,<br>39,40,41 | 2,5,6,7,36,<br>37,42,43,4<br>4 | 0 |                             |
| 6133 | 1,3,4,8,38,<br>39,40,42 | 2,5,6,7,36,<br>37,41,43,4<br>4 | 1 | P83748                      |

|      |                         |                                |   |                                                  |
|------|-------------------------|--------------------------------|---|--------------------------------------------------|
| 6134 | 1,3,4,8,38,<br>39,40,43 | 2,5,6,7,36,<br>37,41,42,4<br>4 | 3 | B0BNN3,P97840,Q64268                             |
| 6135 | 1,3,4,8,38,<br>39,40,44 | 2,5,6,7,36,<br>37,41,42,4<br>3 | 2 | P16636,P83748                                    |
| 6136 | 1,3,4,8,38,<br>39,41,42 | 2,5,6,7,36,<br>37,40,43,4<br>4 | 2 | P13432,P83748                                    |
| 6137 | 1,3,4,8,38,<br>39,41,43 | 2,5,6,7,36,<br>37,40,42,4<br>4 | 4 | B0BNN3,P97840,Q64268,Q9QUL6                      |
| 6138 | 1,3,4,8,38,<br>39,41,44 | 2,5,6,7,36,<br>37,40,42,4<br>3 | 1 | Q05695                                           |
| 6139 | 1,3,4,8,38,<br>39,42,43 | 2,5,6,7,36,<br>37,40,41,4<br>4 | 4 | B0BNN3,O54728,Q64268,Q80WL1                      |
| 6140 | 1,3,4,8,38,<br>39,42,44 | 2,5,6,7,36,<br>37,40,41,4<br>3 | 1 | P83748                                           |
| 6141 | 1,3,4,8,38,<br>39,43,44 | 2,5,6,7,36,<br>37,40,41,4<br>2 | 4 | B0BNN3,P01681,Q64268,Q9JJS8                      |
| 6142 | 1,3,4,8,38,<br>40,41,42 | 2,5,6,7,36,<br>37,39,43,4<br>4 | 1 | P83748                                           |
| 6143 | 1,3,4,8,38,<br>40,41,43 | 2,5,6,7,36,<br>37,39,42,4<br>4 | 3 | B0BNN3,P97840,Q64268                             |
| 6144 | 1,3,4,8,38,<br>40,41,44 | 2,5,6,7,36,<br>37,39,42,4<br>3 | 3 | P16636,P83748,Q05695                             |
| 6145 | 1,3,4,8,38,<br>40,42,43 | 2,5,6,7,36,<br>37,39,41,4<br>4 | 4 | B0BNN3,P35467,Q64268,Q9JHB9                      |
| 6146 | 1,3,4,8,38,<br>40,42,44 | 2,5,6,7,36,<br>37,39,41,4<br>3 | 3 | P00714,P12785,P83748                             |
| 6147 | 1,3,4,8,38,<br>40,43,44 | 2,5,6,7,36,<br>37,39,41,4<br>2 | 4 | P01681,P35467,P97840,Q64268                      |
| 6148 | 1,3,4,8,38,<br>41,42,43 | 2,5,6,7,36,<br>37,39,40,4<br>4 | 7 | B0BNN3,P27213,P82471,Q62894,Q64268,Q8CJD3,Q9QUL6 |

|      |                         |                                |   |                                                         |
|------|-------------------------|--------------------------------|---|---------------------------------------------------------|
| 6149 | 1,3,4,8,38,<br>41,42,44 | 2,5,6,7,36,<br>37,39,40,4<br>3 | 2 | P83748,Q05695                                           |
| 6150 | 1,3,4,8,38,<br>41,43,44 | 2,5,6,7,36,<br>37,39,40,4<br>2 | 8 | B0BNN3,P00774,P01681,P27213,Q05695,Q64268,Q9QUL6,Q9QX79 |
| 6151 | 1,3,4,8,38,<br>42,43,44 | 2,5,6,7,36,<br>37,39,40,4<br>1 | 4 | B0BNN3,P01681,P35467,Q64268                             |
| 6152 | 1,3,4,8,39,<br>40,41,42 | 2,5,6,7,36,<br>37,38,43,4<br>4 | 3 | P83748,P97840,Q561R9                                    |
| 6153 | 1,3,4,8,39,<br>40,41,43 | 2,5,6,7,36,<br>37,38,42,4<br>4 | 1 | P97840                                                  |
| 6154 | 1,3,4,8,39,<br>40,41,44 | 2,5,6,7,36,<br>37,38,42,4<br>3 | 6 | P06911,P10715,P19629,P97840,Q5GRG2,Q6AYL6               |
| 6155 | 1,3,4,8,39,<br>40,42,43 | 2,5,6,7,36,<br>37,38,41,4<br>4 | 2 | P97840,Q62635                                           |
| 6156 | 1,3,4,8,39,<br>40,42,44 | 2,5,6,7,36,<br>37,38,41,4<br>3 | 2 | P83748,Q561R9                                           |
| 6157 | 1,3,4,8,39,<br>40,43,44 | 2,5,6,7,36,<br>37,38,41,4<br>2 | 2 | P97840,Q6AYL6                                           |
| 6158 | 1,3,4,8,39,<br>41,42,43 | 2,5,6,7,36,<br>37,38,40,4<br>4 | 4 | P82471,P97840,Q64268,Q9QUL6                             |
| 6159 | 1,3,4,8,39,<br>41,42,44 | 2,5,6,7,36,<br>37,38,40,4<br>3 | 2 | P83748,Q561R9                                           |
| 6160 | 1,3,4,8,39,<br>41,43,44 | 2,5,6,7,36,<br>37,38,40,4<br>2 | 1 | P97840                                                  |
| 6161 | 1,3,4,8,39,<br>42,43,44 | 2,5,6,7,36,<br>37,38,40,4<br>1 | 1 | Q64268                                                  |
| 6162 | 1,3,4,8,40,<br>41,42,43 | 2,5,6,7,36,<br>37,38,39,4<br>4 | 2 | P97840,Q9QUL6                                           |
| 6163 | 1,3,4,8,40,<br>41,42,44 | 2,5,6,7,36,<br>37,38,39,4<br>3 | 3 | P83748,Q4FZU6,Q561R9                                    |

|      |                          |                                |    |                                                                                     |
|------|--------------------------|--------------------------------|----|-------------------------------------------------------------------------------------|
| 6164 | 1,3,4,8,40,<br>41,43,44  | 2,5,6,7,36,<br>37,38,39,4<br>2 | 2  | P19218,P97840                                                                       |
| 6165 | 1,3,4,8,40,<br>42,43,44  | 2,5,6,7,36,<br>37,38,39,4<br>1 | 3  | P00714,P97840,Q561R9                                                                |
| 6166 | 1,3,4,8,41,<br>42,43,44  | 2,5,6,7,36,<br>37,38,39,4<br>0 | 5  | P27213,P82471,P97840,Q9QUL6,Q9WUW3                                                  |
| 6167 | 1,3,4,36,3<br>7,38,39,40 | 2,5,6,7,8,4<br>1,42,43,44      | 5  | O54728,P10758,P35281,Q6P6R2,Q9JID2                                                  |
| 6168 | 1,3,4,36,3<br>7,38,39,41 | 2,5,6,7,8,4<br>0,42,43,44      | 3  | P10758,P62804,Q5M819                                                                |
| 6169 | 1,3,4,36,3<br>7,38,39,42 | 2,5,6,7,8,4<br>0,41,43,44      | 5  | O54728,P10758,P12020,P12785,P83748                                                  |
| 6170 | 1,3,4,36,3<br>7,38,39,43 | 2,5,6,7,8,4<br>0,41,42,44      | 7  | B0BNN3,O54728,P06760,P12020,Q64268,Q6P6R2,Q812E4                                    |
| 6171 | 1,3,4,36,3<br>7,38,39,44 | 2,5,6,7,8,4<br>0,41,42,43      | 2  | P83748,Q9JJS8                                                                       |
| 6172 | 1,3,4,36,3<br>7,38,40,41 | 2,5,6,7,8,3<br>9,42,43,44      | 1  | P83748                                                                              |
| 6173 | 1,3,4,36,3<br>7,38,40,42 | 2,5,6,7,8,3<br>9,41,43,44      | 3  | O88267,P12785,P83748                                                                |
| 6174 | 1,3,4,36,3<br>7,38,40,43 | 2,5,6,7,8,3<br>9,41,42,44      | 3  | P21581,P97605,Q9QW07                                                                |
| 6175 | 1,3,4,36,3<br>7,38,40,44 | 2,5,6,7,8,3<br>9,41,42,43      | 4  | P12785,P16636,P54921,P83748                                                         |
| 6176 | 1,3,4,36,3<br>7,38,41,42 | 2,5,6,7,8,3<br>9,40,43,44      | 2  | P12785,P83748                                                                       |
| 6177 | 1,3,4,36,3<br>7,38,41,43 | 2,5,6,7,8,3<br>9,40,42,44      | 2  | P06760,Q9QUL6                                                                       |
| 6178 | 1,3,4,36,3<br>7,38,41,44 | 2,5,6,7,8,3<br>9,40,42,43      | 1  | P83748                                                                              |
| 6179 | 1,3,4,36,3<br>7,38,42,43 | 2,5,6,7,8,3<br>9,40,41,44      | 12 | B0BNN3,P06866,P06911,P10715,P12020,P12785,P19629,P21581,Q5GRG2,Q64268,Q6P6T1,Q9QUL6 |
| 6180 | 1,3,4,36,3<br>7,38,42,44 | 2,5,6,7,8,3<br>9,40,41,43      | 2  | P12785,P83748                                                                       |
| 6181 | 1,3,4,36,3<br>7,38,43,44 | 2,5,6,7,8,3<br>9,40,41,42      | 4  | P01681,P12785,P97605,Q9QW07                                                         |
| 6182 | 1,3,4,36,3<br>7,39,40,41 | 2,5,6,7,8,3<br>8,42,43,44      | 0  |                                                                                     |
| 6183 | 1,3,4,36,3<br>7,39,40,42 | 2,5,6,7,8,3<br>8,41,43,44      | 9  | O54728,P00774,P50115,P50116,P55091,P83748,P98089,Q05695,Q62635                      |
| 6184 | 1,3,4,36,3<br>7,39,40,43 | 2,5,6,7,8,3<br>8,41,42,44      | 10 | O35547,O54728,P50115,P50116,Q05695,Q62635,Q6P6R2,Q812E4,Q8CIZ5,Q9QW07               |



|      |                          |                           |   |                                                                |
|------|--------------------------|---------------------------|---|----------------------------------------------------------------|
| 6185 | 1,3,4,36,3<br>7,39,40,44 | 2,5,6,7,8,3<br>8,41,42,43 | 5 | O35547,P50115,P50116,P54921,Q8CJD3                             |
| 6186 | 1,3,4,36,3<br>7,39,41,42 | 2,5,6,7,8,3<br>8,40,43,44 | 2 | O54728,P83748                                                  |
| 6187 | 1,3,4,36,3<br>7,39,41,43 | 2,5,6,7,8,3<br>8,40,42,44 | 3 | P06760,P22006,Q9QUL6                                           |
| 6188 | 1,3,4,36,3<br>7,39,41,44 | 2,5,6,7,8,3<br>8,40,42,43 | 0 |                                                                |
| 6189 | 1,3,4,36,3<br>7,39,42,43 | 2,5,6,7,8,3<br>8,40,41,44 | 9 | O54728,P06760,P12020,P50115,P50116,Q05695,Q62635,Q8CIZ5,Q9QUL6 |
| 6190 | 1,3,4,36,3<br>7,39,42,44 | 2,5,6,7,8,3<br>8,40,41,43 | 4 | O54728,P50115,P50116,P83748                                    |
| 6191 | 1,3,4,36,3<br>7,39,43,44 | 2,5,6,7,8,3<br>8,40,41,42 | 7 | P06760,P50115,P50116,P55314,Q812E4,Q8CIZ5,Q9QW07               |
| 6192 | 1,3,4,36,3<br>7,40,41,42 | 2,5,6,7,8,3<br>8,39,43,44 | 1 | P83748                                                         |
| 6193 | 1,3,4,36,3<br>7,40,41,43 | 2,5,6,7,8,3<br>8,39,42,44 | 1 | Q9QUL6                                                         |
| 6194 | 1,3,4,36,3<br>7,40,41,44 | 2,5,6,7,8,3<br>8,39,42,43 | 2 | P19218,P83748                                                  |
| 6195 | 1,3,4,36,3<br>7,40,42,43 | 2,5,6,7,8,3<br>8,39,41,44 | 6 | O88267,P21581,P50115,P50116,Q05695,Q62635                      |
| 6196 | 1,3,4,36,3<br>7,40,42,44 | 2,5,6,7,8,3<br>8,39,41,43 | 5 | O88267,P50115,P50116,P83748,Q7TPB1                             |
| 6197 | 1,3,4,36,3<br>7,40,43,44 | 2,5,6,7,8,3<br>8,39,41,42 | 7 | O35547,P08753,P19218,P50115,P50116,P97605,Q9QW07               |
| 6198 | 1,3,4,36,3<br>7,41,42,43 | 2,5,6,7,8,3<br>8,39,40,44 | 2 | P06760,Q9QUL6                                                  |
| 6199 | 1,3,4,36,3<br>7,41,42,44 | 2,5,6,7,8,3<br>8,39,40,43 | 1 | P83748                                                         |
| 6200 | 1,3,4,36,3<br>7,41,43,44 | 2,5,6,7,8,3<br>8,39,40,42 | 1 | Q9QUL6                                                         |
| 6201 | 1,3,4,36,3<br>7,42,43,44 | 2,5,6,7,8,3<br>8,39,40,41 | 3 | P50115,P50116,Q9QUL6                                           |
| 6202 | 1,3,4,36,3<br>8,39,40,41 | 2,5,6,7,8,3<br>7,42,43,44 | 1 | P10758                                                         |
| 6203 | 1,3,4,36,3<br>8,39,40,42 | 2,5,6,7,8,3<br>7,41,43,44 | 4 | O54728,P02631,P10758,P83748                                    |
| 6204 | 1,3,4,36,3<br>8,39,40,43 | 2,5,6,7,8,3<br>7,41,42,44 | 3 | B0BNN3,O54728,Q6P6R2                                           |
| 6205 | 1,3,4,36,3<br>8,39,40,44 | 2,5,6,7,8,3<br>7,41,42,43 | 2 | P10758,P83748                                                  |
| 6206 | 1,3,4,36,3<br>8,39,41,42 | 2,5,6,7,8,3<br>7,40,43,44 | 3 | O54728,P10758,P83748                                           |
| 6207 | 1,3,4,36,3<br>8,39,41,43 | 2,5,6,7,8,3<br>7,40,42,44 | 3 | B0BNN3,P06760,Q9QUL6                                           |

|      |                          |                           |   |                                           |
|------|--------------------------|---------------------------|---|-------------------------------------------|
| 6208 | 1,3,4,36,3<br>8,39,41,44 | 2,5,6,7,8,3<br>7,40,42,43 | 1 | P10758                                    |
| 6209 | 1,3,4,36,3<br>8,39,42,43 | 2,5,6,7,8,3<br>7,40,41,44 | 4 | B0BNN3,O54728,P12020,Q5GRG2               |
| 6210 | 1,3,4,36,3<br>8,39,42,44 | 2,5,6,7,8,3<br>7,40,41,43 | 6 | O54728,P10758,P12785,P51907,P83748,Q9Z1F2 |
| 6211 | 1,3,4,36,3<br>8,39,43,44 | 2,5,6,7,8,3<br>7,40,41,42 | 4 | B0BNN3,P34901,P55314,Q9JJS8               |
| 6212 | 1,3,4,36,3<br>8,40,41,42 | 2,5,6,7,8,3<br>7,39,43,44 | 1 | P83748                                    |
| 6213 | 1,3,4,36,3<br>8,40,41,43 | 2,5,6,7,8,3<br>7,39,42,44 | 0 |                                           |
| 6214 | 1,3,4,36,3<br>8,40,41,44 | 2,5,6,7,8,3<br>7,39,42,43 | 1 | P83748                                    |
| 6215 | 1,3,4,36,3<br>8,40,42,43 | 2,5,6,7,8,3<br>7,39,41,44 | 3 | B0BNN3,O88267,P21581                      |
| 6216 | 1,3,4,36,3<br>8,40,42,44 | 2,5,6,7,8,3<br>7,39,41,43 | 4 | O88267,P12785,P83748,Q7TPB1               |
| 6217 | 1,3,4,36,3<br>8,40,43,44 | 2,5,6,7,8,3<br>7,39,41,42 | 2 | P01681,Q9QW07                             |
| 6218 | 1,3,4,36,3<br>8,41,42,43 | 2,5,6,7,8,3<br>7,39,40,44 | 3 | B0BNN3,P27213,Q9QUL6                      |
| 6219 | 1,3,4,36,3<br>8,41,42,44 | 2,5,6,7,8,3<br>7,39,40,43 | 2 | P12785,P83748                             |
| 6220 | 1,3,4,36,3<br>8,41,43,44 | 2,5,6,7,8,3<br>7,39,40,42 | 2 | P00774,P27213                             |
| 6221 | 1,3,4,36,3<br>8,42,43,44 | 2,5,6,7,8,3<br>7,39,40,41 | 3 | B0BNN3,P01681,P12785                      |
| 6222 | 1,3,4,36,3<br>9,40,41,42 | 2,5,6,7,8,3<br>7,38,43,44 | 2 | O54728,P83748                             |
| 6223 | 1,3,4,36,3<br>9,40,41,43 | 2,5,6,7,8,3<br>7,38,42,44 | 1 | P97840                                    |
| 6224 | 1,3,4,36,3<br>9,40,41,44 | 2,5,6,7,8,3<br>7,38,42,43 | 2 | P10715,P19629                             |
| 6225 | 1,3,4,36,3<br>9,40,42,43 | 2,5,6,7,8,3<br>7,38,41,44 | 6 | O54728,P50115,P50116,Q05695,Q62635,Q8CIZ5 |
| 6226 | 1,3,4,36,3<br>9,40,42,44 | 2,5,6,7,8,3<br>7,38,41,43 | 5 | O54728,P50115,P50116,P83748,Q7TPB1        |
| 6227 | 1,3,4,36,3<br>9,40,43,44 | 2,5,6,7,8,3<br>7,38,41,42 | 4 | P50115,P50116,P55314,Q9QW07               |
| 6228 | 1,3,4,36,3<br>9,41,42,43 | 2,5,6,7,8,3<br>7,38,40,44 | 5 | O54728,P06760,P82471,Q62635,Q9QUL6        |
| 6229 | 1,3,4,36,3<br>9,41,42,44 | 2,5,6,7,8,3<br>7,38,40,43 | 1 | P83748                                    |
| 6230 | 1,3,4,36,3<br>9,41,43,44 | 2,5,6,7,8,3<br>7,38,40,42 | 2 | P06760,P55314                             |

|      |                          |                           |   |                                                         |
|------|--------------------------|---------------------------|---|---------------------------------------------------------|
| 6231 | 1,3,4,36,3<br>9,42,43,44 | 2,5,6,7,8,3<br>7,38,40,41 | 4 | O54728,P50115,P50116,P55314                             |
| 6232 | 1,3,4,36,4<br>0,41,42,43 | 2,5,6,7,8,3<br>7,38,39,44 | 1 | Q9QUL6                                                  |
| 6233 | 1,3,4,36,4<br>0,41,42,44 | 2,5,6,7,8,3<br>7,38,39,43 | 2 | P83748,Q7TPB1                                           |
| 6234 | 1,3,4,36,4<br>0,41,43,44 | 2,5,6,7,8,3<br>7,38,39,42 | 1 | P19218                                                  |
| 6235 | 1,3,4,36,4<br>0,42,43,44 | 2,5,6,7,8,3<br>7,38,39,41 | 4 | O88267,P50115,P50116,Q7TPB1                             |
| 6236 | 1,3,4,36,4<br>1,42,43,44 | 2,5,6,7,8,3<br>7,38,39,40 | 2 | P27213,Q9QUL6                                           |
| 6237 | 1,3,4,37,3<br>8,39,40,41 | 2,5,6,7,8,3<br>6,42,43,44 | 3 | P13432,P16636,P62804                                    |
| 6238 | 1,3,4,37,3<br>8,39,40,42 | 2,5,6,7,8,3<br>6,41,43,44 | 4 | P12785,P16636,P83748,Q99MH3                             |
| 6239 | 1,3,4,37,3<br>8,39,40,43 | 2,5,6,7,8,3<br>6,41,42,44 | 8 | B0BNN3,P35281,P82995,P97605,Q812E4,Q99MH3,Q9QW07,Q9QZQ5 |
| 6240 | 1,3,4,37,3<br>8,39,40,44 | 2,5,6,7,8,3<br>6,41,42,43 | 5 | P16636,P54921,P83748,Q812E4,Q9JJS8                      |
| 6241 | 1,3,4,37,3<br>8,39,41,42 | 2,5,6,7,8,3<br>6,40,43,44 | 2 | P13432,P83748                                           |
| 6242 | 1,3,4,37,3<br>8,39,41,43 | 2,5,6,7,8,3<br>6,40,42,44 | 6 | B0BNN3,P00762,P36374,P62804,Q812E4,Q9R1T5               |
| 6243 | 1,3,4,37,3<br>8,39,41,44 | 2,5,6,7,8,3<br>6,40,42,43 | 3 | P16636,P62804,Q9JJS8                                    |
| 6244 | 1,3,4,37,3<br>8,39,42,43 | 2,5,6,7,8,3<br>6,40,41,44 | 4 | B0BNN3,P06866,P12020,Q6P6T1                             |
| 6245 | 1,3,4,37,3<br>8,39,42,44 | 2,5,6,7,8,3<br>6,40,41,43 | 5 | P12785,P16636,P83748,Q9JJS8,Q9Z1F2                      |
| 6246 | 1,3,4,37,3<br>8,39,43,44 | 2,5,6,7,8,3<br>6,40,41,42 | 5 | B0BNN3,P23593,Q812E4,Q9JJS8,Q9QW07                      |
| 6247 | 1,3,4,37,3<br>8,40,41,42 | 2,5,6,7,8,3<br>6,39,43,44 | 2 | P12785,P83748                                           |
| 6248 | 1,3,4,37,3<br>8,40,41,43 | 2,5,6,7,8,3<br>6,39,42,44 | 1 | B0BNN3                                                  |
| 6249 | 1,3,4,37,3<br>8,40,41,44 | 2,5,6,7,8,3<br>6,39,42,43 | 2 | P16636,P83748                                           |
| 6250 | 1,3,4,37,3<br>8,40,42,43 | 2,5,6,7,8,3<br>6,39,41,44 | 3 | B0BNN3,P12785,Q99MH3                                    |
| 6251 | 1,3,4,37,3<br>8,40,42,44 | 2,5,6,7,8,3<br>6,39,41,43 | 3 | P12785,P16636,P83748                                    |
| 6252 | 1,3,4,37,3<br>8,40,43,44 | 2,5,6,7,8,3<br>6,39,41,42 | 8 | B0BNN3,P01681,P08010,P08753,P12785,P97605,Q812E4,Q9QW07 |
| 6253 | 1,3,4,37,3<br>8,41,42,43 | 2,5,6,7,8,3<br>6,39,40,44 | 6 | B0BNN3,P06866,P27213,P80020,Q6P6T1,Q9QUL6               |

|      |                          |                           |   |                                                         |
|------|--------------------------|---------------------------|---|---------------------------------------------------------|
| 6254 | 1,3,4,37,3<br>8,41,42,44 | 2,5,6,7,8,3<br>6,39,40,43 | 3 | P12785,P16636,P83748                                    |
| 6255 | 1,3,4,37,3<br>8,41,43,44 | 2,5,6,7,8,3<br>6,39,40,42 | 4 | B0BNN3,P00774,P27213,P62804                             |
| 6256 | 1,3,4,37,3<br>8,42,43,44 | 2,5,6,7,8,3<br>6,39,40,41 | 2 | B0BNN3,P12785                                           |
| 6257 | 1,3,4,37,3<br>9,40,41,42 | 2,5,6,7,8,3<br>6,38,43,44 | 1 | P83748                                                  |
| 6258 | 1,3,4,37,3<br>9,40,41,43 | 2,5,6,7,8,3<br>6,38,42,44 | 2 | P97840,Q812E4                                           |
| 6259 | 1,3,4,37,3<br>9,40,41,44 | 2,5,6,7,8,3<br>6,38,42,43 | 4 | P10715,P16636,P19629,Q6AYL6                             |
| 6260 | 1,3,4,37,3<br>9,40,42,43 | 2,5,6,7,8,3<br>6,38,41,44 | 7 | P50115,P50116,Q01205,Q05695,Q62635,Q8CIZ5,Q99MH3        |
| 6261 | 1,3,4,37,3<br>9,40,42,44 | 2,5,6,7,8,3<br>6,38,41,43 | 4 | P16636,P50115,P50116,P83748                             |
| 6262 | 1,3,4,37,3<br>9,40,43,44 | 2,5,6,7,8,3<br>6,38,41,42 | 8 | O35547,P08753,P50115,P50116,Q6AYL6,Q812E4,Q8CIZ5,Q9QW07 |
| 6263 | 1,3,4,37,3<br>9,41,42,43 | 2,5,6,7,8,3<br>6,38,40,44 | 2 | P53792,Q9QUL6                                           |
| 6264 | 1,3,4,37,3<br>9,41,42,44 | 2,5,6,7,8,3<br>6,38,40,43 | 1 | P83748                                                  |
| 6265 | 1,3,4,37,3<br>9,41,43,44 | 2,5,6,7,8,3<br>6,38,40,42 | 2 | P62804,Q812E4                                           |
| 6266 | 1,3,4,37,3<br>9,42,43,44 | 2,5,6,7,8,3<br>6,38,40,41 | 2 | P50115,P50116                                           |
| 6267 | 1,3,4,37,4<br>0,41,42,43 | 2,5,6,7,8,3<br>6,38,39,44 | 1 | Q9QUL6                                                  |
| 6268 | 1,3,4,37,4<br>0,41,42,44 | 2,5,6,7,8,3<br>6,38,39,43 | 1 | P83748                                                  |
| 6269 | 1,3,4,37,4<br>0,41,43,44 | 2,5,6,7,8,3<br>6,38,39,42 | 1 | P19218                                                  |
| 6270 | 1,3,4,37,4<br>0,42,43,44 | 2,5,6,7,8,3<br>6,38,39,41 | 2 | P50115,P50116                                           |
| 6271 | 1,3,4,37,4<br>1,42,43,44 | 2,5,6,7,8,3<br>6,38,39,40 | 2 | P27213,Q9QUL6                                           |
| 6272 | 1,3,4,38,3<br>9,40,41,42 | 2,5,6,7,8,3<br>6,37,43,44 | 4 | P02631,P10758,P13432,P83748                             |
| 6273 | 1,3,4,38,3<br>9,40,41,43 | 2,5,6,7,8,3<br>6,37,42,44 | 4 | B0BNN3,P00762,P53792,Q9QZQ5                             |
| 6274 | 1,3,4,38,3<br>9,40,41,44 | 2,5,6,7,8,3<br>6,37,42,43 | 3 | P10715,P16636,P19629                                    |
| 6275 | 1,3,4,38,3<br>9,40,42,43 | 2,5,6,7,8,3<br>6,37,41,44 | 2 | B0BNN3,Q99MH3                                           |
| 6276 | 1,3,4,38,3<br>9,40,42,44 | 2,5,6,7,8,3<br>6,37,41,43 | 4 | P02631,P12785,P83748,Q9Z1F2                             |

|      |                          |                                  |    |                                                                                            |
|------|--------------------------|----------------------------------|----|--------------------------------------------------------------------------------------------|
| 6277 | 1,3,4,38,3<br>9,40,43,44 | 2,5,6,7,8,3<br>6,37,41,42        | 4  | B0BNN3,P01681,Q9QW07,Q9QZQ5                                                                |
| 6278 | 1,3,4,38,3<br>9,41,42,43 | 2,5,6,7,8,3<br>6,37,40,44        | 5  | B0BNN3,P00731,P06866,P53792,P82471                                                         |
| 6279 | 1,3,4,38,3<br>9,41,42,44 | 2,5,6,7,8,3<br>6,37,40,43        | 1  | P83748                                                                                     |
| 6280 | 1,3,4,38,3<br>9,41,43,44 | 2,5,6,7,8,3<br>6,37,40,42        | 5  | B0BNN3,P00762,P00774,Q9JJS8,Q9QZQ5                                                         |
| 6281 | 1,3,4,38,3<br>9,42,43,44 | 2,5,6,7,8,3<br>6,37,40,41        | 3  | B0BNN3,Q9JJS8,Q9Z1F2                                                                       |
| 6282 | 1,3,4,38,4<br>0,41,42,43 | 2,5,6,7,8,3<br>6,37,39,44        | 3  | B0BNN3,P27213,Q8CJD3                                                                       |
| 6283 | 1,3,4,38,4<br>0,41,42,44 | 2,5,6,7,8,3<br>6,37,39,43        | 2  | P12785,P83748                                                                              |
| 6284 | 1,3,4,38,4<br>0,41,43,44 | 2,5,6,7,8,3<br>6,37,39,42        | 4  | B0BNN3,P00774,P27213,Q9QZQ5                                                                |
| 6285 | 1,3,4,38,4<br>0,42,43,44 | 2,5,6,7,8,3<br>6,37,39,41        | 3  | B0BNN3,P01681,P12785                                                                       |
| 6286 | 1,3,4,38,4<br>1,42,43,44 | 2,5,6,7,8,3<br>6,37,39,40        | 4  | B0BNN3,P00774,P27213,Q8CJD3                                                                |
| 6287 | 1,3,4,39,4<br>0,41,42,43 | 2,5,6,7,8,3<br>6,37,38,44        | 2  | P53792,P97840                                                                              |
| 6288 | 1,3,4,39,4<br>0,41,42,44 | 2,5,6,7,8,3<br>6,37,38,43        | 3  | P10715,P83748,Q561R9                                                                       |
| 6289 | 1,3,4,39,4<br>0,41,43,44 | 2,5,6,7,8,3<br>6,37,38,42        | 6  | P10715,P19218,P19629,P97840,Q6AYL6,Q9QZQ5                                                  |
| 6290 | 1,3,4,39,4<br>0,42,43,44 | 2,5,6,7,8,3<br>6,37,38,41        | 2  | P50115,P50116                                                                              |
| 6291 | 1,3,4,39,4<br>1,42,43,44 | 2,5,6,7,8,3<br>6,37,38,40        | 2  | P53792,P82471                                                                              |
| 6292 | 1,3,4,40,4<br>1,42,43,44 | 2,5,6,7,8,3<br>6,37,38,39        | 3  | P19218,P27213,Q561R9                                                                       |
| 6293 | 1,3,5,6,7,8<br>,36,37    | 2,4,38,39,<br>40,41,42,4<br>3,44 | 7  | B0BNN3,P00762,P11030,P27213,P53792,P98089,Q6TMA8                                           |
| 6294 | 1,3,5,6,7,8<br>,36,38    | 2,4,37,39,<br>40,41,42,4<br>3,44 | 5  | O54858,P08753,P19218,P53792,Q561R9                                                         |
| 6295 | 1,3,5,6,7,8<br>,36,39    | 2,4,37,38,<br>40,41,42,4<br>3,44 | 8  | B0BNN3,O54728,P19218,P27213,P53792,P80020,P98089,Q6TMA8                                    |
| 6296 | 1,3,5,6,7,8<br>,36,40    | 2,4,37,38,<br>39,41,42,4<br>3,44 | 13 | B0BNN3,P00762,P00774,P01015,P06866,P27213,P36374,P53792,P80020,P98089,Q64057,Q6IRE4,Q9JJS8 |

|      |                       |                                  |    |                                                                                                                                      |
|------|-----------------------|----------------------------------|----|--------------------------------------------------------------------------------------------------------------------------------------|
| 6297 | 1,3,5,6,7,8<br>,36,41 | 2,4,37,38,<br>39,40,42,4<br>3,44 | 12 | B0BNN3,O54858,P01015,P08010,P08753,P11030,P19223,P60905,P80020,Q6IRE4,Q9JJS8,Q9Z1F2                                                  |
| 6298 | 1,3,5,6,7,8<br>,36,42 | 2,4,37,38,<br>39,40,41,4<br>3,44 | 19 | P00762,P00774,P01015,P04905,P08010,P08753,P16086,P17046,P19218,P36374,P53792,P60905,P80020,P98089,Q4AEF8,Q63357,Q6AYR9,Q6IRE4,Q812E4 |
| 6299 | 1,3,5,6,7,8<br>,36,43 | 2,4,37,38,<br>39,40,41,4<br>2,44 | 7  | O54858,P01681,P02091,P02651,P53792,Q6TMA8,Q9QX79                                                                                     |
| 6300 | 1,3,5,6,7,8<br>,36,44 | 2,4,37,38,<br>39,40,41,4<br>2,43 | 10 | B0BNN3,P00762,P01015,P02761,P06866,P07171,P36374,P53792,P55314,P80020                                                                |
| 6301 | 1,3,5,6,7,8<br>,37,38 | 2,4,36,39,<br>40,41,42,4<br>3,44 | 5  | P19218,P53792,Q561R9,Q6IRE4,Q7TPB1                                                                                                   |
| 6302 | 1,3,5,6,7,8<br>,37,39 | 2,4,36,38,<br>40,41,42,4<br>3,44 | 5  | P19218,P27213,P98089,Q6IRE4,Q6TMA8                                                                                                   |
| 6303 | 1,3,5,6,7,8<br>,37,40 | 2,4,36,38,<br>39,41,42,4<br>3,44 | 6  | B0BNN3,P27213,P51907,P53792,P98089,Q6IRE4                                                                                            |
| 6304 | 1,3,5,6,7,8<br>,37,41 | 2,4,36,38,<br>39,40,42,4<br>3,44 | 5  | P51907,Q6IRE4,Q7TPB1,Q99041,Q9Z1F2                                                                                                   |
| 6305 | 1,3,5,6,7,8<br>,37,42 | 2,4,36,38,<br>39,40,41,4<br>3,44 | 8  | P08753,P17046,P19218,P36374,P53792,P98089,Q4AEF8,Q6IRE4                                                                              |
| 6306 | 1,3,5,6,7,8<br>,37,43 | 2,4,36,38,<br>39,40,41,4<br>2,44 | 7  | P01681,P02091,P10758,P51907,Q6TMA8,Q7TPB1,Q9QX79                                                                                     |
| 6307 | 1,3,5,6,7,8<br>,37,44 | 2,4,36,38,<br>39,40,41,4<br>2,43 | 2  | B0BNN3,P53792                                                                                                                        |
| 6308 | 1,3,5,6,7,8<br>,38,39 | 2,4,36,37,<br>40,41,42,4<br>3,44 | 4  | P19218,P27213,Q561R9,Q6IRE4                                                                                                          |
| 6309 | 1,3,5,6,7,8<br>,38,40 | 2,4,36,37,<br>39,41,42,4<br>3,44 | 3  | D3ZUC6,P53792,Q6IRE4                                                                                                                 |
| 6310 | 1,3,5,6,7,8<br>,38,41 | 2,4,36,37,<br>39,40,42,4<br>3,44 | 6  | P08753,P19218,P50115,P50116,Q6IRE4,Q7TPB1                                                                                            |
| 6311 | 1,3,5,6,7,8<br>,38,42 | 2,4,36,37,<br>39,40,41,4<br>3,44 | 12 | D3ZUC6,O35547,P04905,P08010,P08753,P17046,P19218,P36374,P47727,P53792,P60905,Q6IRE4                                                  |

|      |                       |                                  |    |                                                                                                                 |
|------|-----------------------|----------------------------------|----|-----------------------------------------------------------------------------------------------------------------|
| 6312 | 1,3,5,6,7,8<br>,38,43 | 2,4,36,37,<br>39,40,41,4<br>2,44 | 7  | P01681,P02091,P19218,P52590,Q561R9,Q7TPB1,Q9QX79                                                                |
| 6313 | 1,3,5,6,7,8<br>,38,44 | 2,4,36,37,<br>39,40,41,4<br>2,43 | 1  | P53792                                                                                                          |
| 6314 | 1,3,5,6,7,8<br>,39,40 | 2,4,36,37,<br>38,41,42,4<br>3,44 | 5  | P06866,P27213,P80020,P98089,Q6IRE4                                                                              |
| 6315 | 1,3,5,6,7,8<br>,39,41 | 2,4,36,37,<br>38,40,42,4<br>3,44 | 3  | P08010,P08753,Q6IRE4                                                                                            |
| 6316 | 1,3,5,6,7,8<br>,39,42 | 2,4,36,37,<br>38,40,41,4<br>3,44 | 12 | O54728,P04905,P08010,P08753,P16086,P17046,P19218,P27213,P36374,P98089,Q6AYR9,Q6IRE4                             |
| 6317 | 1,3,5,6,7,8<br>,39,43 | 2,4,36,37,<br>38,40,41,4<br>2,44 | 4  | P01681,P01946,P02091,Q6TMA8                                                                                     |
| 6318 | 1,3,5,6,7,8<br>,39,44 | 2,4,36,37,<br>38,40,41,4<br>2,43 | 3  | P06866,P27213,P80020                                                                                            |
| 6319 | 1,3,5,6,7,8<br>,40,41 | 2,4,36,37,<br>38,39,42,4<br>3,44 | 8  | P01015,P19223,P51907,P80020,Q6IRE4,Q80WL1,Q9JJS8,Q9Z1F2                                                         |
| 6320 | 1,3,5,6,7,8<br>,40,42 | 2,4,36,37,<br>38,39,41,4<br>3,44 | 13 | D3ZUC6,P02781,P08753,P16086,P17046,P20759,P36374,P53792,P80020,P98089,Q6IRE4,Q9JJS8,Q9QZ76                      |
| 6321 | 1,3,5,6,7,8<br>,40,43 | 2,4,36,37,<br>38,39,41,4<br>2,44 | 4  | P01681,P02091,P51907,Q9QX79                                                                                     |
| 6322 | 1,3,5,6,7,8<br>,40,44 | 2,4,36,37,<br>38,39,41,4<br>2,43 | 9  | B0BNN3,P01015,P06866,P36374,P53792,P80020,Q6IRE4,Q6P6T1,Q9ET32                                                  |
| 6323 | 1,3,5,6,7,8<br>,41,42 | 2,4,36,37,<br>38,39,40,4<br>3,44 | 16 | O35547,P04905,P08010,P08753,P16086,P17046,P36374,P54921,P60905,Q62753,Q63357,Q6AYR9,Q6IRE4,Q812E4,Q9JID2,Q9JJS8 |
| 6324 | 1,3,5,6,7,8<br>,41,43 | 2,4,36,37,<br>38,39,40,4<br>2,44 | 6  | P01681,P02091,P51907,Q7TPB1,Q9QX79,Q9Z1F2                                                                       |
| 6325 | 1,3,5,6,7,8<br>,41,44 | 2,4,36,37,<br>38,39,40,4<br>2,43 | 6  | P01015,P06866,P08753,P80020,Q6IRE4,Q9JID2                                                                       |
| 6326 | 1,3,5,6,7,8<br>,42,43 | 2,4,36,37,<br>38,39,40,4<br>1,44 | 10 | P01681,P02091,P08753,P16086,P17046,P35434,P36374,P60905,Q62975,Q6AYR9                                           |

|      |                        |                                  |    |                                                                              |
|------|------------------------|----------------------------------|----|------------------------------------------------------------------------------|
| 6327 | 1,3,5,6,7,8<br>,42,44  | 2,4,36,37,<br>38,39,40,4<br>1,43 | 10 | P01015,P08753,P17046,P20759,P36374,P53792,P60905,P80020,Q4AEF8,Q9JID2        |
| 6328 | 1,3,5,6,7,8<br>,43,44  | 2,4,36,37,<br>38,39,40,4<br>1,42 | 4  | P01681,P02091,P10758,Q9QX79                                                  |
| 6329 | 1,3,5,6,7,3<br>6,37,38 | 2,4,8,39,4<br>0,41,42,43<br>,44  | 4  | P19218,P53792,Q561R9,Q6IRE4                                                  |
| 6330 | 1,3,5,6,7,3<br>6,37,39 | 2,4,8,38,4<br>0,41,42,43<br>,44  | 11 | B0BNN3,O54728,P00714,P00774,P19218,P27213,P55091,P98089,Q62635,Q6IRE4,Q6TMA8 |
| 6331 | 1,3,5,6,7,3<br>6,37,40 | 2,4,8,38,3<br>9,41,42,43<br>,44  | 10 | B0BNN3,P00774,P27213,P53792,P55091,P98089,Q5U2V4,Q64057,Q6IRE4,Q80WL1        |
| 6332 | 1,3,5,6,7,3<br>6,37,41 | 2,4,8,38,3<br>9,40,42,43<br>,44  | 5  | B0BNN3,P11030,Q6IRE4,Q6TMA8,Q80WL1                                           |
| 6333 | 1,3,5,6,7,3<br>6,37,42 | 2,4,8,38,3<br>9,40,41,43<br>,44  | 6  | P00774,P17046,P53792,P98089,Q62635,Q6IRE4                                    |
| 6334 | 1,3,5,6,7,3<br>6,37,43 | 2,4,8,38,3<br>9,40,41,42<br>,44  | 7  | P01681,P02091,P98089,Q561R9,Q62635,Q6TMA8,Q9QW07                             |
| 6335 | 1,3,5,6,7,3<br>6,37,44 | 2,4,8,38,3<br>9,40,41,42<br>,43  | 7  | B0BNN3,P02761,P17046,P53792,P55314,Q6IRE4,Q80WL1                             |
| 6336 | 1,3,5,6,7,3<br>6,38,39 | 2,4,8,37,4<br>0,41,42,43<br>,44  | 5  | O54728,P19218,P27213,Q561R9,Q6IRE4                                           |
| 6337 | 1,3,5,6,7,3<br>6,38,40 | 2,4,8,37,3<br>9,41,42,43<br>,44  | 4  | P53792,Q561R9,Q64057,Q6IRE4                                                  |
| 6338 | 1,3,5,6,7,3<br>6,38,41 | 2,4,8,37,3<br>9,40,42,43<br>,44  | 3  | P19218,Q561R9,Q6IRE4                                                         |
| 6339 | 1,3,5,6,7,3<br>6,38,42 | 2,4,8,37,3<br>9,40,41,43<br>,44  | 7  | P08753,P17046,P19218,P53792,P97554,Q6AYL6,Q6IRE4                             |
| 6340 | 1,3,5,6,7,3<br>6,38,43 | 2,4,8,37,3<br>9,40,41,42<br>,44  | 3  | P01681,P02091,Q561R9                                                         |
| 6341 | 1,3,5,6,7,3<br>6,38,44 | 2,4,8,37,3<br>9,40,41,42<br>,43  | 5  | P17046,P53792,P55314,Q561R9,Q6IRE4                                           |



|      |                        |                                 |    |                                                                                            |
|------|------------------------|---------------------------------|----|--------------------------------------------------------------------------------------------|
| 6342 | 1,3,5,6,7,3<br>6,39,40 | 2,4,8,37,3<br>8,41,42,43<br>,44 | 8  | B0BNN3,O54728,P00774,P27213,P55091,P98089,Q6IRE4,Q80WL1                                    |
| 6343 | 1,3,5,6,7,3<br>6,39,41 | 2,4,8,37,3<br>8,40,42,43<br>,44 | 6  | O54728,P00714,Q6IRE4,Q6TMA8,Q80WL1,Q8VD89                                                  |
| 6344 | 1,3,5,6,7,3<br>6,39,42 | 2,4,8,37,3<br>8,40,41,43<br>,44 | 12 | O54728,P00774,P08010,P08753,P16086,P17046,P19218,P27213,P98089,Q62635,Q6AYR9,Q6IRE4        |
| 6345 | 1,3,5,6,7,3<br>6,39,43 | 2,4,8,37,3<br>8,40,41,42<br>,44 | 8  | O54728,P00714,P01946,P02091,P55314,P98089,Q62635,Q6TMA8                                    |
| 6346 | 1,3,5,6,7,3<br>6,39,44 | 2,4,8,37,3<br>8,40,41,42<br>,43 | 6  | B0BNN3,O54728,P27213,P55314,P80020,Q6IRE4                                                  |
| 6347 | 1,3,5,6,7,3<br>6,40,41 | 2,4,8,37,3<br>8,39,42,43<br>,44 | 7  | B0BNN3,P02761,P19223,Q64057,Q6IRE4,Q80WL1,Q9JJS8                                           |
| 6348 | 1,3,5,6,7,3<br>6,40,42 | 2,4,8,37,3<br>8,39,41,43<br>,44 | 12 | P00774,P02761,P16086,P17046,P23593,P36374,P53792,P98089,Q64057,Q6IRE4,Q80WL1,Q9JJS8        |
| 6349 | 1,3,5,6,7,3<br>6,40,43 | 2,4,8,37,3<br>8,39,41,42<br>,44 | 4  | P01681,P02091,Q6IRE4,Q80WL1                                                                |
| 6350 | 1,3,5,6,7,3<br>6,40,44 | 2,4,8,37,3<br>8,39,41,42<br>,43 | 11 | B0BNN3,P01015,P02761,P06866,P17046,P53792,P55314,P80020,Q6IRE4,Q6P6T1,Q80WL1               |
| 6351 | 1,3,5,6,7,3<br>6,41,42 | 2,4,8,37,3<br>8,39,40,43<br>,44 | 13 | P02761,P08010,P08649,P08753,P16086,P17046,P19223,P60905,Q63357,Q6AYR9,Q6IRE4,Q80WL1,Q812E4 |
| 6352 | 1,3,5,6,7,3<br>6,41,43 | 2,4,8,37,3<br>8,39,40,42<br>,44 | 4  | P00714,P02091,Q6TMA8,Q80WL1                                                                |
| 6353 | 1,3,5,6,7,3<br>6,41,44 | 2,4,8,37,3<br>8,39,40,42<br>,43 | 6  | B0BNN3,P01015,P02761,P55314,Q6IRE4,Q80WL1                                                  |
| 6354 | 1,3,5,6,7,3<br>6,42,43 | 2,4,8,37,3<br>8,39,40,41<br>,44 | 11 | P01681,P02091,P16086,P16636,P17046,P24368,P35434,P60905,Q62635,Q62975,Q6AYR9               |
| 6355 | 1,3,5,6,7,3<br>6,42,44 | 2,4,8,37,3<br>8,39,40,41<br>,43 | 8  | P02761,P17046,P36374,P53792,P55314,P60905,Q6IRE4,Q80WL1                                    |
| 6356 | 1,3,5,6,7,3<br>6,43,44 | 2,4,8,37,3<br>8,39,40,41<br>,42 | 4  | P01681,P02091,P55314,Q6TMA8                                                                |

|      |                        |                                 |   |                                                         |
|------|------------------------|---------------------------------|---|---------------------------------------------------------|
| 6357 | 1,3,5,6,7,3<br>7,38,39 | 2,4,8,36,4<br>0,41,42,43<br>,44 | 5 | P19218,P27213,P62804,Q561R9,Q6IRE4                      |
| 6358 | 1,3,5,6,7,3<br>7,38,40 | 2,4,8,36,3<br>9,41,42,43<br>,44 | 4 | P15399,P17046,Q561R9,Q6IRE4                             |
| 6359 | 1,3,5,6,7,3<br>7,38,41 | 2,4,8,36,3<br>9,40,42,43<br>,44 | 5 | P17046,P62804,Q561R9,Q6IRE4,Q7TPB1                      |
| 6360 | 1,3,5,6,7,3<br>7,38,42 | 2,4,8,36,3<br>9,40,41,43<br>,44 | 3 | P17046,P19218,Q6IRE4                                    |
| 6361 | 1,3,5,6,7,3<br>7,38,43 | 2,4,8,36,3<br>9,40,41,42<br>,44 | 6 | P01681,P02091,P17046,Q561R9,Q7TPB1,Q9QW07               |
| 6362 | 1,3,5,6,7,3<br>7,38,44 | 2,4,8,36,3<br>9,40,41,42<br>,43 | 4 | P17046,P53792,Q561R9,Q6IRE4                             |
| 6363 | 1,3,5,6,7,3<br>7,39,40 | 2,4,8,36,3<br>8,41,42,43<br>,44 | 5 | P27213,P55091,P98089,Q6IRE4,Q80WL1                      |
| 6364 | 1,3,5,6,7,3<br>7,39,41 | 2,4,8,36,3<br>8,40,42,43<br>,44 | 5 | P00714,P62804,Q6IRE4,Q6TMA8,Q80WL1                      |
| 6365 | 1,3,5,6,7,3<br>7,39,42 | 2,4,8,36,3<br>8,40,41,43<br>,44 | 7 | O54728,P17046,P19218,P27213,P98089,Q62635,Q6IRE4        |
| 6366 | 1,3,5,6,7,3<br>7,39,43 | 2,4,8,36,3<br>8,40,41,42<br>,44 | 8 | P00714,P01946,P02091,P98089,Q62635,Q6TMA8,Q8CIZ5,Q9QW07 |
| 6367 | 1,3,5,6,7,3<br>7,39,44 | 2,4,8,36,3<br>8,40,41,42<br>,43 | 3 | P17046,P27213,Q6IRE4                                    |
| 6368 | 1,3,5,6,7,3<br>7,40,41 | 2,4,8,36,3<br>8,39,42,43<br>,44 | 4 | P17046,P51907,Q6IRE4,Q80WL1                             |
| 6369 | 1,3,5,6,7,3<br>7,40,42 | 2,4,8,36,3<br>8,39,41,43<br>,44 | 4 | P17046,P98089,Q6IRE4,Q80WL1                             |
| 6370 | 1,3,5,6,7,3<br>7,40,43 | 2,4,8,36,3<br>8,39,41,42<br>,44 | 7 | P01681,P02091,P17046,P51907,Q6IRE4,Q80WL1,Q9QW07        |
| 6371 | 1,3,5,6,7,3<br>7,40,44 | 2,4,8,36,3<br>8,39,41,42<br>,43 | 7 | B0BNN3,P17046,P53792,Q6IRE4,Q80WL1,Q9QUL6,Q9QW07        |

|      |                        |                                 |   |                                                                |
|------|------------------------|---------------------------------|---|----------------------------------------------------------------|
| 6372 | 1,3,5,6,7,3<br>7,41,42 | 2,4,8,36,3<br>8,39,40,43<br>,44 | 3 | P17046,Q6IRE4,Q80WL1                                           |
| 6373 | 1,3,5,6,7,3<br>7,41,43 | 2,4,8,36,3<br>8,39,40,42<br>,44 | 9 | P00714,P02091,P17046,P51907,P62804,Q6IRE4,Q6TMA8,Q7TPB1,Q80WL1 |
| 6374 | 1,3,5,6,7,3<br>7,41,44 | 2,4,8,36,3<br>8,39,40,42<br>,43 | 4 | P17046,P62804,Q6IRE4,Q80WL1                                    |
| 6375 | 1,3,5,6,7,3<br>7,42,43 | 2,4,8,36,3<br>8,39,40,41<br>,44 | 4 | P02091,P17046,Q62635,Q62975                                    |
| 6376 | 1,3,5,6,7,3<br>7,42,44 | 2,4,8,36,3<br>8,39,40,41<br>,43 | 4 | P17046,P53792,Q6IRE4,Q80WL1                                    |
| 6377 | 1,3,5,6,7,3<br>7,43,44 | 2,4,8,36,3<br>8,39,40,41<br>,42 | 6 | P01681,P02091,P10758,P17046,Q6TMA8,Q9QW07                      |
| 6378 | 1,3,5,6,7,3<br>8,39,40 | 2,4,8,36,3<br>7,41,42,43<br>,44 | 3 | P27213,Q6IRE4,Q9QUL6                                           |
| 6379 | 1,3,5,6,7,3<br>8,39,41 | 2,4,8,36,3<br>7,40,42,43<br>,44 | 5 | P00714,P13432,P19218,Q561R9,Q6IRE4                             |
| 6380 | 1,3,5,6,7,3<br>8,39,42 | 2,4,8,36,3<br>7,40,41,43<br>,44 | 5 | O54728,P08753,P17046,P19218,Q6IRE4                             |
| 6381 | 1,3,5,6,7,3<br>8,39,43 | 2,4,8,36,3<br>7,40,41,42<br>,44 | 6 | P00714,P01681,P01946,P02091,P19218,Q561R9                      |
| 6382 | 1,3,5,6,7,3<br>8,39,44 | 2,4,8,36,3<br>7,40,41,42<br>,43 | 5 | P17046,P27213,Q561R9,Q6IRE4,Q9QUL6                             |
| 6383 | 1,3,5,6,7,3<br>8,40,41 | 2,4,8,36,3<br>7,39,42,43<br>,44 | 3 | P17046,Q6IRE4,Q80WL1                                           |
| 6384 | 1,3,5,6,7,3<br>8,40,42 | 2,4,8,36,3<br>7,39,41,43<br>,44 | 5 | D3ZUC6,P17046,P36374,Q64057,Q6IRE4                             |
| 6385 | 1,3,5,6,7,3<br>8,40,43 | 2,4,8,36,3<br>7,39,41,42<br>,44 | 6 | P01681,P01835,P02091,P17046,Q561R9,Q6IRE4                      |
| 6386 | 1,3,5,6,7,3<br>8,40,44 | 2,4,8,36,3<br>7,39,41,42<br>,43 | 3 | P17046,Q6IRE4,Q9QUL6                                           |

|      |                        |                                 |    |                                                                       |
|------|------------------------|---------------------------------|----|-----------------------------------------------------------------------|
| 6387 | 1,3,5,6,7,3<br>8,41,42 | 2,4,8,36,3<br>7,39,40,43<br>,44 | 8  | O35547,P08010,P08753,P16086,P17046,P19218,P60905,Q6IRE4               |
| 6388 | 1,3,5,6,7,3<br>8,41,43 | 2,4,8,36,3<br>7,39,40,42<br>,44 | 8  | P00714,P01681,P02091,P17046,Q561R9,Q6IRE4,Q7TPB1,Q8CJD3               |
| 6389 | 1,3,5,6,7,3<br>8,41,44 | 2,4,8,36,3<br>7,39,40,42<br>,43 | 2  | P17046,Q6IRE4                                                         |
| 6390 | 1,3,5,6,7,3<br>8,42,43 | 2,4,8,36,3<br>7,39,40,41<br>,44 | 6  | P01681,P02091,P17046,P19218,Q62975,Q6AYR8                             |
| 6391 | 1,3,5,6,7,3<br>8,42,44 | 2,4,8,36,3<br>7,39,40,41<br>,43 | 4  | P17046,P36374,Q6AYR8,Q6IRE4                                           |
| 6392 | 1,3,5,6,7,3<br>8,43,44 | 2,4,8,36,3<br>7,39,40,41<br>,42 | 5  | P01681,P01835,P02091,P17046,Q561R9                                    |
| 6393 | 1,3,5,6,7,3<br>9,40,41 | 2,4,8,36,3<br>7,38,42,43<br>,44 | 3  | P00714,Q6IRE4,Q80WL1                                                  |
| 6394 | 1,3,5,6,7,3<br>9,40,42 | 2,4,8,36,3<br>7,38,41,43<br>,44 | 10 | O54728,P00774,P02780,P16086,P17046,P27213,P98089,Q6AYR9,Q6IRE4,Q99MH3 |
| 6395 | 1,3,5,6,7,3<br>9,40,43 | 2,4,8,36,3<br>7,38,41,42<br>,44 | 4  | P01681,P02091,Q6IRE4,Q99MH3                                           |
| 6396 | 1,3,5,6,7,3<br>9,40,44 | 2,4,8,36,3<br>7,38,41,42<br>,43 | 8  | P06866,P17046,P27213,Q6AYL6,Q6IRE4,Q6P6T1,Q80WL1,Q9QUL6               |
| 6397 | 1,3,5,6,7,3<br>9,41,42 | 2,4,8,36,3<br>7,38,40,43<br>,44 | 7  | P08010,P08753,P16086,P17046,P82471,Q6AYR9,Q6IRE4                      |
| 6398 | 1,3,5,6,7,3<br>9,41,43 | 2,4,8,36,3<br>7,38,40,42<br>,44 | 5  | P00714,P01946,P02091,Q6IRE4,Q6TMA8                                    |
| 6399 | 1,3,5,6,7,3<br>9,41,44 | 2,4,8,36,3<br>7,38,40,42<br>,43 | 2  | Q6IRE4,Q80WL1                                                         |
| 6400 | 1,3,5,6,7,3<br>9,42,43 | 2,4,8,36,3<br>7,38,40,41<br>,44 | 8  | O54728,P01946,P02091,P16086,P17046,Q62635,Q62975,Q6AYR9               |
| 6401 | 1,3,5,6,7,3<br>9,42,44 | 2,4,8,36,3<br>7,38,40,41<br>,43 | 3  | P17046,P27213,Q6IRE4                                                  |

|      |                        |                                 |    |                                                                                     |
|------|------------------------|---------------------------------|----|-------------------------------------------------------------------------------------|
| 6402 | 1,3,5,6,7,3<br>9,43,44 | 2,4,8,36,3<br>7,38,40,41<br>,42 | 5  | P01681,P01946,P02091,Q6TMA8,Q9QW07                                                  |
| 6403 | 1,3,5,6,7,4<br>0,41,42 | 2,4,8,36,3<br>7,38,39,43<br>,44 | 6  | P16086,P17046,P19223,Q6IRE4,Q80WL1,Q9JJS8                                           |
| 6404 | 1,3,5,6,7,4<br>0,41,43 | 2,4,8,36,3<br>7,38,39,42<br>,44 | 5  | P02091,P17046,P51907,Q6IRE4,Q80WL1                                                  |
| 6405 | 1,3,5,6,7,4<br>0,41,44 | 2,4,8,36,3<br>7,38,39,42<br>,43 | 7  | P06866,P12020,P17046,Q5GRG2,Q6IRE4,Q80WL1,Q9ET32                                    |
| 6406 | 1,3,5,6,7,4<br>0,42,43 | 2,4,8,36,3<br>7,38,39,41<br>,44 | 6  | P01681,P02091,P17046,Q62975,Q6IRE4,Q99MH3                                           |
| 6407 | 1,3,5,6,7,4<br>0,42,44 | 2,4,8,36,3<br>7,38,39,41<br>,43 | 4  | P17046,P36374,Q6IRE4,Q80WL1                                                         |
| 6408 | 1,3,5,6,7,4<br>0,43,44 | 2,4,8,36,3<br>7,38,39,41<br>,42 | 6  | P01681,P02091,P17046,Q6IRE4,Q80WL1,Q9QW07                                           |
| 6409 | 1,3,5,6,7,4<br>1,42,43 | 2,4,8,36,3<br>7,38,39,40<br>,44 | 12 | P02091,P08753,P0C0A9,P16086,P17046,P54921,P60905,P82471,Q62975,Q6AYR9,Q6IRE4,Q9QZA6 |
| 6410 | 1,3,5,6,7,4<br>1,42,44 | 2,4,8,36,3<br>7,38,39,40<br>,43 | 8  | P08753,P0C0A9,P16086,P17046,P60905,Q6IRE4,Q80WL1,Q9JID2                             |
| 6411 | 1,3,5,6,7,4<br>1,43,44 | 2,4,8,36,3<br>7,38,39,40<br>,42 | 4  | P01681,P02091,P17046,Q80WL1                                                         |
| 6412 | 1,3,5,6,7,4<br>2,43,44 | 2,4,8,36,3<br>7,38,39,40<br>,41 | 6  | P01681,P02091,P17046,P60905,Q62975,Q6AYR8                                           |
| 6413 | 1,3,5,6,8,3<br>6,37,38 | 2,4,7,39,4<br>0,41,42,43<br>,44 | 2  | P53792,Q561R9                                                                       |
| 6414 | 1,3,5,6,8,3<br>6,37,39 | 2,4,7,38,4<br>0,41,42,43<br>,44 | 5  | O54728,P00774,P27213,P55091,P98089                                                  |
| 6415 | 1,3,5,6,8,3<br>6,37,40 | 2,4,7,38,3<br>9,41,42,43<br>,44 | 10 | P00774,P11030,P51907,P53792,P55091,P98089,Q64057,Q6IRE4,Q80WL1,Q9Z1F2               |
| 6416 | 1,3,5,6,8,3<br>6,37,41 | 2,4,7,38,3<br>9,40,42,43<br>,44 | 6  | P11030,P51907,P83121,Q6IRE4,Q80WL1,Q9Z1F2                                           |

|      |                        |                                 |   |                                                  |
|------|------------------------|---------------------------------|---|--------------------------------------------------|
| 6417 | 1,3,5,6,8,3<br>6,37,42 | 2,4,7,38,3<br>9,40,41,43<br>,44 | 7 | P00774,P08753,P19629,P53792,P98089,Q6AYL6,Q920P0 |
| 6418 | 1,3,5,6,8,3<br>6,37,43 | 2,4,7,38,3<br>9,40,41,42<br>,44 | 7 | P01681,P51907,P83121,P98089,Q6TMA8,Q9QW07,Q9Z1F2 |
| 6419 | 1,3,5,6,8,3<br>6,37,44 | 2,4,7,38,3<br>9,40,41,42<br>,43 | 4 | P53792,P55314,Q80WL1,Q9Z1F2                      |
| 6420 | 1,3,5,6,8,3<br>6,38,39 | 2,4,7,37,4<br>0,41,42,43<br>,44 | 4 | O54728,P19218,P27213,Q561R9                      |
| 6421 | 1,3,5,6,8,3<br>6,38,40 | 2,4,7,37,3<br>9,41,42,43<br>,44 | 4 | P53792,Q561R9,Q64057,Q6IRE4                      |
| 6422 | 1,3,5,6,8,3<br>6,38,41 | 2,4,7,37,3<br>9,40,42,43<br>,44 | 5 | P08753,P50115,P50116,Q561R9,Q6IRE4               |
| 6423 | 1,3,5,6,8,3<br>6,38,42 | 2,4,7,37,3<br>9,40,41,43<br>,44 | 4 | P08753,P19218,P97554,Q6AYL6                      |
| 6424 | 1,3,5,6,8,3<br>6,38,43 | 2,4,7,37,3<br>9,40,41,42<br>,44 | 2 | P01681,Q561R9                                    |
| 6425 | 1,3,5,6,8,3<br>6,38,44 | 2,4,7,37,3<br>9,40,41,42<br>,43 | 3 | P53792,P55314,Q561R9                             |
| 6426 | 1,3,5,6,8,3<br>6,39,40 | 2,4,7,37,3<br>8,41,42,43<br>,44 | 7 | O54728,P00774,P27213,P55091,P80020,P98089,Q6IRE4 |
| 6427 | 1,3,5,6,8,3<br>6,39,41 | 2,4,7,37,3<br>8,40,42,43<br>,44 | 3 | P00714,Q6IRE4,Q9Z1F2                             |
| 6428 | 1,3,5,6,8,3<br>6,39,42 | 2,4,7,37,3<br>8,40,41,43<br>,44 | 7 | O54728,P00774,P08753,P19218,P27213,P98089,Q6AYR9 |
| 6429 | 1,3,5,6,8,3<br>6,39,43 | 2,4,7,37,3<br>8,40,41,42<br>,44 | 5 | O54728,P00714,P01681,P98089,Q6TMA8               |
| 6430 | 1,3,5,6,8,3<br>6,39,44 | 2,4,7,37,3<br>8,40,41,42<br>,43 | 4 | P06866,P27213,P55314,P80020                      |
| 6431 | 1,3,5,6,8,3<br>6,40,41 | 2,4,7,37,3<br>8,39,42,43<br>,44 | 7 | P19223,P23593,P51907,Q64057,Q6IRE4,Q80WL1,Q9Z1F2 |

|      |                        |                                 |   |                                                                |
|------|------------------------|---------------------------------|---|----------------------------------------------------------------|
| 6432 | 1,3,5,6,8,3<br>6,40,42 | 2,4,7,37,3<br>8,39,41,43<br>,44 | 7 | P00774,P23593,P36374,P98089,Q64057,Q6IRE4,Q920P0               |
| 6433 | 1,3,5,6,8,3<br>6,40,43 | 2,4,7,37,3<br>8,39,41,42<br>,44 | 3 | P01681,P51907,Q9Z1F2                                           |
| 6434 | 1,3,5,6,8,3<br>6,40,44 | 2,4,7,37,3<br>8,39,41,42<br>,43 | 9 | P06866,P22006,P53792,P55314,P80020,Q6IRE4,Q6P6T1,Q80WL1,Q9Z1F2 |
| 6435 | 1,3,5,6,8,3<br>6,41,42 | 2,4,7,37,3<br>8,39,40,43<br>,44 | 9 | P08010,P08753,P19223,P23593,P60905,Q63357,Q6AYR9,Q6IRE4,Q812E4 |
| 6436 | 1,3,5,6,8,3<br>6,41,43 | 2,4,7,37,3<br>8,39,40,42<br>,44 | 4 | P01681,P51907,P83121,Q9Z1F2                                    |
| 6437 | 1,3,5,6,8,3<br>6,41,44 | 2,4,7,37,3<br>8,39,40,42<br>,43 | 6 | P01015,P55314,P80020,Q6IRE4,Q80WL1,Q9Z1F2                      |
| 6438 | 1,3,5,6,8,3<br>6,42,43 | 2,4,7,37,3<br>8,39,40,41<br>,44 | 8 | P01681,P08753,P10715,P19629,P35434,P60905,Q5GRG2,Q920P0        |
| 6439 | 1,3,5,6,8,3<br>6,42,44 | 2,4,7,37,3<br>8,39,40,41<br>,43 | 6 | P08753,P36374,P53792,P55314,P60905,P80020                      |
| 6440 | 1,3,5,6,8,3<br>6,43,44 | 2,4,7,37,3<br>8,39,40,41<br>,42 | 3 | P01681,P55314,Q9QW07                                           |
| 6441 | 1,3,5,6,8,3<br>7,38,39 | 2,4,7,36,4<br>0,41,42,43<br>,44 | 4 | P19218,P27213,P82995,Q561R9                                    |
| 6442 | 1,3,5,6,8,3<br>7,38,40 | 2,4,7,36,3<br>9,41,42,43<br>,44 | 6 | D3ZUC6,P22006,P51907,P82995,Q561R9,Q6IRE4                      |
| 6443 | 1,3,5,6,8,3<br>7,38,41 | 2,4,7,36,3<br>9,40,42,43<br>,44 | 6 | P50115,P51907,P82995,Q561R9,Q6IRE4,Q7TPB1                      |
| 6444 | 1,3,5,6,8,3<br>7,38,42 | 2,4,7,36,3<br>9,40,41,43<br>,44 | 4 | D3ZUC6,P08753,P19218,Q6IRE4                                    |
| 6445 | 1,3,5,6,8,3<br>7,38,43 | 2,4,7,36,3<br>9,40,41,42<br>,44 | 7 | P01681,P51907,P82995,Q561R9,Q6IFV1,Q7TPB1,Q9QW07               |
| 6446 | 1,3,5,6,8,3<br>7,38,44 | 2,4,7,36,3<br>9,40,41,42<br>,43 | 4 | D3ZUC6,P22006,P82995,Q561R9                                    |

|      |                        |                                 |   |                                                         |
|------|------------------------|---------------------------------|---|---------------------------------------------------------|
| 6447 | 1,3,5,6,8,3<br>7,39,40 | 2,4,7,36,3<br>8,41,42,43<br>,44 | 6 | P27213,P51907,P55091,P82995,P98089,Q6IRE4               |
| 6448 | 1,3,5,6,8,3<br>7,39,41 | 2,4,7,36,3<br>8,40,42,43<br>,44 | 4 | P00714,P51907,Q6IRE4,Q9Z1F2                             |
| 6449 | 1,3,5,6,8,3<br>7,39,42 | 2,4,7,36,3<br>8,40,41,43<br>,44 | 3 | P27213,P98089,Q6IRE4                                    |
| 6450 | 1,3,5,6,8,3<br>7,39,43 | 2,4,7,36,3<br>8,40,41,42<br>,44 | 8 | P00714,P01681,P51907,P82995,P98089,Q6TMA8,Q8CIZ5,Q9QW07 |
| 6451 | 1,3,5,6,8,3<br>7,39,44 | 2,4,7,36,3<br>8,40,41,42<br>,43 | 2 | P27213,Q9QW07                                           |
| 6452 | 1,3,5,6,8,3<br>7,40,41 | 2,4,7,36,3<br>8,39,42,43<br>,44 | 5 | P51907,P82995,Q6IRE4,Q80WL1,Q9Z1F2                      |
| 6453 | 1,3,5,6,8,3<br>7,40,42 | 2,4,7,36,3<br>8,39,41,43<br>,44 | 4 | D3ZUC6,P51907,P98089,Q6IRE4                             |
| 6454 | 1,3,5,6,8,3<br>7,40,43 | 2,4,7,36,3<br>8,39,41,42<br>,44 | 5 | P01681,P51907,P82995,Q9QW07,Q9Z1F2                      |
| 6455 | 1,3,5,6,8,3<br>7,40,44 | 2,4,7,36,3<br>8,39,41,42<br>,43 | 8 | D3ZUC6,P22006,P51907,P82995,Q6IRE4,Q80WL1,Q9QW07,Q9Z1F2 |
| 6456 | 1,3,5,6,8,3<br>7,41,42 | 2,4,7,36,3<br>8,39,40,43<br>,44 | 3 | P08753,P51907,Q6IRE4                                    |
| 6457 | 1,3,5,6,8,3<br>7,41,43 | 2,4,7,36,3<br>8,39,40,42<br>,44 | 7 | P01681,P02793;Q7TP54,P51907,P83121,Q7TPB1,Q9QX79,Q9Z1F2 |
| 6458 | 1,3,5,6,8,3<br>7,41,44 | 2,4,7,36,3<br>8,39,40,42<br>,43 | 4 | P51907,Q6IRE4,Q80WL1,Q9Z1F2                             |
| 6459 | 1,3,5,6,8,3<br>7,42,43 | 2,4,7,36,3<br>8,39,40,41<br>,44 | 3 | P01681,P19629,P51907                                    |
| 6460 | 1,3,5,6,8,3<br>7,42,44 | 2,4,7,36,3<br>8,39,40,41<br>,43 | 1 | D3ZUC6                                                  |
| 6461 | 1,3,5,6,8,3<br>7,43,44 | 2,4,7,36,3<br>8,39,40,41<br>,42 | 3 | P01681,P51907,Q9QW07                                    |



|      |                        |                                 |   |                                                                |
|------|------------------------|---------------------------------|---|----------------------------------------------------------------|
| 6462 | 1,3,5,6,8,3<br>8,39,40 | 2,4,7,36,3<br>7,41,42,43<br>,44 | 4 | D3ZUC6,P27213,P82995,Q6IRE4                                    |
| 6463 | 1,3,5,6,8,3<br>8,39,41 | 2,4,7,36,3<br>7,40,42,43<br>,44 | 5 | P00714,P13432,P50115,P50116,Q6IRE4                             |
| 6464 | 1,3,5,6,8,3<br>8,39,42 | 2,4,7,36,3<br>7,40,41,43<br>,44 | 4 | D3ZUC6,O54728,P08753,P19218                                    |
| 6465 | 1,3,5,6,8,3<br>8,39,43 | 2,4,7,36,3<br>7,40,41,42<br>,44 | 5 | P01681,P82995,Q561R9,Q63942,Q6IFV1                             |
| 6466 | 1,3,5,6,8,3<br>8,39,44 | 2,4,7,36,3<br>7,40,41,42<br>,43 | 0 |                                                                |
| 6467 | 1,3,5,6,8,3<br>8,40,41 | 2,4,7,36,3<br>7,39,42,43<br>,44 | 6 | D3ZUC6,P50115,P50116,P51907,P82995,Q6IRE4                      |
| 6468 | 1,3,5,6,8,3<br>8,40,42 | 2,4,7,36,3<br>7,39,41,43<br>,44 | 6 | D3ZUC6,P08753,P22006,P36374,Q64057,Q6IRE4                      |
| 6469 | 1,3,5,6,8,3<br>8,40,43 | 2,4,7,36,3<br>7,39,41,42<br>,44 | 6 | P01681,P01835,P51907,P82995,Q561R9,Q6IFV1                      |
| 6470 | 1,3,5,6,8,3<br>8,40,44 | 2,4,7,36,3<br>7,39,41,42<br>,43 | 5 | D3ZUC6,P06760,P22006,P82995,Q6IRE4                             |
| 6471 | 1,3,5,6,8,3<br>8,41,42 | 2,4,7,36,3<br>7,39,40,43<br>,44 | 5 | D3ZUC6,P08753,P50115,P50116,Q6IRE4                             |
| 6472 | 1,3,5,6,8,3<br>8,41,43 | 2,4,7,36,3<br>7,39,40,42<br>,44 | 8 | P01681,P02793;Q7TP54,P50115,P50116,P51907,Q561R9,Q7TPB1,Q8CJD3 |
| 6473 | 1,3,5,6,8,3<br>8,41,44 | 2,4,7,36,3<br>7,39,40,42<br>,43 | 4 | P50115,P50116,Q05695,Q6IRE4                                    |
| 6474 | 1,3,5,6,8,3<br>8,42,43 | 2,4,7,36,3<br>7,39,40,41<br>,44 | 3 | P01681,P08753,Q5GRG2                                           |
| 6475 | 1,3,5,6,8,3<br>8,42,44 | 2,4,7,36,3<br>7,39,40,41<br>,43 | 4 | D3ZUC6,P08753,P22006,P36374                                    |
| 6476 | 1,3,5,6,8,3<br>8,43,44 | 2,4,7,36,3<br>7,39,40,41<br>,42 | 4 | P01681,P01835,Q561R9,Q9QW07                                    |

|      |                        |                                 |   |                                                         |
|------|------------------------|---------------------------------|---|---------------------------------------------------------|
| 6477 | 1,3,5,6,8,3<br>9,40,41 | 2,4,7,36,3<br>7,38,42,43<br>,44 | 4 | P47967,P51907,Q6IRE4,Q9Z1F2                             |
| 6478 | 1,3,5,6,8,3<br>9,40,42 | 2,4,7,36,3<br>7,38,41,43<br>,44 | 4 | D3ZUC6,P27213,P98089,Q6IRE4                             |
| 6479 | 1,3,5,6,8,3<br>9,40,43 | 2,4,7,36,3<br>7,38,41,42<br>,44 | 5 | P01681,P51907,P82995,Q99MH3,Q9QW07                      |
| 6480 | 1,3,5,6,8,3<br>9,40,44 | 2,4,7,36,3<br>7,38,41,42<br>,43 | 6 | P06866,P27213,P80020,Q5I0D1,Q6IRE4,Q6P6T1               |
| 6481 | 1,3,5,6,8,3<br>9,41,42 | 2,4,7,36,3<br>7,38,40,43<br>,44 | 4 | P08010,P08753,Q6AYR9,Q6IRE4                             |
| 6482 | 1,3,5,6,8,3<br>9,41,43 | 2,4,7,36,3<br>7,38,40,42<br>,44 | 2 | P00714,P51907                                           |
| 6483 | 1,3,5,6,8,3<br>9,41,44 | 2,4,7,36,3<br>7,38,40,42<br>,43 | 2 | Q5I0D1,Q6IRE4                                           |
| 6484 | 1,3,5,6,8,3<br>9,42,43 | 2,4,7,36,3<br>7,38,40,41<br>,44 | 5 | O54728,P01681,P08753,P35434,Q6AYR9                      |
| 6485 | 1,3,5,6,8,3<br>9,42,44 | 2,4,7,36,3<br>7,38,40,41<br>,43 | 1 | P08753                                                  |
| 6486 | 1,3,5,6,8,3<br>9,43,44 | 2,4,7,36,3<br>7,38,40,41<br>,42 | 3 | P01681,Q5I0D1,Q9QW07                                    |
| 6487 | 1,3,5,6,8,4<br>0,41,42 | 2,4,7,36,3<br>7,38,39,43<br>,44 | 7 | D3ZUC6,P08753,P19223,P23593,P51907,Q6IRE4,Q9JJS8        |
| 6488 | 1,3,5,6,8,4<br>0,41,43 | 2,4,7,36,3<br>7,38,39,42<br>,44 | 7 | P01681,P02793,Q7TP54,P47967,P51907,P97840,Q6IRE4,Q9Z1F2 |
| 6489 | 1,3,5,6,8,4<br>0,41,44 | 2,4,7,36,3<br>7,38,39,42<br>,43 | 8 | P06866,P47967,P51907,Q5I0D1,Q6IRE4,Q80WL1,Q9ET32,Q9Z1F2 |
| 6490 | 1,3,5,6,8,4<br>0,42,43 | 2,4,7,36,3<br>7,38,39,41<br>,44 | 2 | P01681,P51907                                           |
| 6491 | 1,3,5,6,8,4<br>0,42,44 | 2,4,7,36,3<br>7,38,39,41<br>,43 | 5 | D3ZUC6,P06760,P22006,P36374,Q6IRE4                      |

|      |                         |                                 |    |                                                                                            |
|------|-------------------------|---------------------------------|----|--------------------------------------------------------------------------------------------|
| 6492 | 1,3,5,6,8,4<br>0,43,44  | 2,4,7,36,3<br>7,38,39,41<br>,42 | 4  | P01681,P51907,Q9QW07,Q9Z1F2                                                                |
| 6493 | 1,3,5,6,8,4<br>1,42,43  | 2,4,7,36,3<br>7,38,39,40<br>,44 | 6  | P01681,P08753,P51907,P54921,P60905,P82471                                                  |
| 6494 | 1,3,5,6,8,4<br>1,42,44  | 2,4,7,36,3<br>7,38,39,40<br>,43 | 4  | P08753,P60905,Q6IRE4,Q9JID2                                                                |
| 6495 | 1,3,5,6,8,4<br>1,43,44  | 2,4,7,36,3<br>7,38,39,40<br>,42 | 6  | P01681,P02793,Q7TP54,P51907,P83121,Q5I0D1,Q9Z1F2                                           |
| 6496 | 1,3,5,6,8,4<br>2,43,44  | 2,4,7,36,3<br>7,38,39,40<br>,41 | 4  | P01681,P35434,P36374,Q6Q7Y5                                                                |
| 6497 | 1,3,5,6,36,<br>37,38,39 | 2,4,7,8,40,<br>41,42,43,4<br>4  | 6  | O54728,P00714,P19218,Q561R9,Q6IRE4,Q9QW07                                                  |
| 6498 | 1,3,5,6,36,<br>37,38,40 | 2,4,7,8,39,<br>41,42,43,4<br>4  | 5  | Q561R9,Q64057,Q6IRE4,Q80WL1,Q9QW07                                                         |
| 6499 | 1,3,5,6,36,<br>37,38,41 | 2,4,7,8,39,<br>40,42,43,4<br>4  | 4  | P00714,Q561R9,Q6IRE4,Q80WL1                                                                |
| 6500 | 1,3,5,6,36,<br>37,38,42 | 2,4,7,8,39,<br>40,41,43,4<br>4  | 3  | P10715,Q6AYL6,Q6IRE4                                                                       |
| 6501 | 1,3,5,6,36,<br>37,38,43 | 2,4,7,8,39,<br>40,41,42,4<br>4  | 5  | P00714,P01681,Q561R9,Q6IFV1,Q9QW07                                                         |
| 6502 | 1,3,5,6,36,<br>37,38,44 | 2,4,7,8,39,<br>40,41,42,4<br>3  | 5  | P55314,Q561R9,Q6IRE4,Q80WL1,Q9QW07                                                         |
| 6503 | 1,3,5,6,36,<br>37,39,40 | 2,4,7,8,38,<br>41,42,43,4<br>4  | 13 | O35547,O54728,P00714,P00774,P27213,P50115,P55091,P98089,Q05695,Q5U2V4,Q6IRE4,Q80WL1,Q9QW07 |
| 6504 | 1,3,5,6,36,<br>37,39,41 | 2,4,7,8,38,<br>40,42,43,4<br>4  | 4  | P00714,Q6IRE4,Q6TMA8,Q80WL1                                                                |
| 6505 | 1,3,5,6,36,<br>37,39,42 | 2,4,7,8,38,<br>40,41,43,4<br>4  | 8  | O54728,P00774,P50115,P55091,P98089,Q05695,Q62635,Q6IRE4                                    |
| 6506 | 1,3,5,6,36,<br>37,39,43 | 2,4,7,8,38,<br>40,41,42,4<br>4  | 10 | O54728,P00714,P01681,P55091,P98089,Q05695,Q62635,Q6TMA8,Q8CIZ5,Q9QW07                      |

|      |                         |                                |    |                                                                       |
|------|-------------------------|--------------------------------|----|-----------------------------------------------------------------------|
| 6507 | 1,3,5,6,36,<br>37,39,44 | 2,4,7,8,38,<br>40,41,42,4<br>3 | 5  | P27213,P55314,Q6IRE4,Q80WL1,Q9QW07                                    |
| 6508 | 1,3,5,6,36,<br>37,40,41 | 2,4,7,8,38,<br>39,42,43,4<br>4 | 5  | P00714,P51907,Q64057,Q6IRE4,Q80WL1                                    |
| 6509 | 1,3,5,6,36,<br>37,40,42 | 2,4,7,8,38,<br>39,41,43,4<br>4 | 8  | P00774,P55091,P98089,Q05695,Q64057,Q6IRE4,Q80WL1,Q920P0               |
| 6510 | 1,3,5,6,36,<br>37,40,43 | 2,4,7,8,38,<br>39,41,42,4<br>4 | 8  | P01681,P51907,P55091,P98089,Q05695,Q80WL1,Q8CIZ5,Q9QW07               |
| 6511 | 1,3,5,6,36,<br>37,40,44 | 2,4,7,8,38,<br>39,41,42,4<br>3 | 5  | O35547,P55314,Q6IRE4,Q80WL1,Q9QW07                                    |
| 6512 | 1,3,5,6,36,<br>37,41,42 | 2,4,7,8,38,<br>39,40,43,4<br>4 | 3  | Q6IRE4,Q80WL1,Q920P0                                                  |
| 6513 | 1,3,5,6,36,<br>37,41,43 | 2,4,7,8,38,<br>39,40,42,4<br>4 | 5  | P00714,P51907,P83121,Q6TMA8,Q80WL1                                    |
| 6514 | 1,3,5,6,36,<br>37,41,44 | 2,4,7,8,38,<br>39,40,42,4<br>3 | 3  | P55314,Q6IRE4,Q80WL1                                                  |
| 6515 | 1,3,5,6,36,<br>37,42,43 | 2,4,7,8,38,<br>39,40,41,4<br>4 | 10 | P01681,P10715,P19629,P31044,P98089,Q05695,Q5GRG2,Q62635,Q68FS4,Q920P0 |
| 6516 | 1,3,5,6,36,<br>37,42,44 | 2,4,7,8,38,<br>39,40,41,4<br>3 | 3  | P55314,Q6IRE4,Q80WL1                                                  |
| 6517 | 1,3,5,6,36,<br>37,43,44 | 2,4,7,8,38,<br>39,40,41,4<br>2 | 4  | P01681,P55314,Q80WL1,Q9QW07                                           |
| 6518 | 1,3,5,6,36,<br>38,39,40 | 2,4,7,8,37,<br>41,42,43,4<br>4 | 5  | O54728,P00714,P27213,Q561R9,Q6IRE4                                    |
| 6519 | 1,3,5,6,36,<br>38,39,41 | 2,4,7,8,37,<br>40,42,43,4<br>4 | 3  | P00714,Q561R9,Q6IRE4                                                  |
| 6520 | 1,3,5,6,36,<br>38,39,42 | 2,4,7,8,37,<br>40,41,43,4<br>4 | 3  | O54728,P19218,Q6IRE4                                                  |
| 6521 | 1,3,5,6,36,<br>38,39,43 | 2,4,7,8,37,<br>40,41,42,4<br>4 | 6  | O54728,P00714,P01681,Q561R9,Q6IFV1,Q9QW07                             |

|      |                         |                                |    |                                                                       |
|------|-------------------------|--------------------------------|----|-----------------------------------------------------------------------|
| 6522 | 1,3,5,6,36,<br>38,39,44 | 2,4,7,8,37,<br>40,41,42,4<br>3 | 2  | P55314,Q561R9                                                         |
| 6523 | 1,3,5,6,36,<br>38,40,41 | 2,4,7,8,37,<br>39,42,43,4<br>4 | 5  | P00714,Q561R9,Q64057,Q6IRE4,Q80WL1                                    |
| 6524 | 1,3,5,6,36,<br>38,40,42 | 2,4,7,8,37,<br>39,41,43,4<br>4 | 3  | Q64057,Q68FS4,Q6IRE4                                                  |
| 6525 | 1,3,5,6,36,<br>38,40,43 | 2,4,7,8,37,<br>39,41,42,4<br>4 | 5  | P01681,P01835,Q561R9,Q64057,Q9QW07                                    |
| 6526 | 1,3,5,6,36,<br>38,40,44 | 2,4,7,8,37,<br>39,41,42,4<br>3 | 5  | P55314,Q561R9,Q6IRE4,Q80WL1,Q9QW07                                    |
| 6527 | 1,3,5,6,36,<br>38,41,42 | 2,4,7,8,37,<br>39,40,43,4<br>4 | 3  | P08753,Q6AYL6,Q6IRE4                                                  |
| 6528 | 1,3,5,6,36,<br>38,41,43 | 2,4,7,8,37,<br>39,40,42,4<br>4 | 4  | P00714,P01681,Q561R9,Q8CJD3                                           |
| 6529 | 1,3,5,6,36,<br>38,41,44 | 2,4,7,8,37,<br>39,40,42,4<br>3 | 4  | P55314,Q561R9,Q6IRE4,Q80WL1                                           |
| 6530 | 1,3,5,6,36,<br>38,42,43 | 2,4,7,8,37,<br>39,40,41,4<br>4 | 9  | P01681,P06911,P10715,P19629,P31044,P35434,Q5GRG2,Q68FS4,Q6AYL6        |
| 6531 | 1,3,5,6,36,<br>38,42,44 | 2,4,7,8,37,<br>39,40,41,4<br>3 | 4  | P17046,P55314,Q68FS4,Q6IRE4                                           |
| 6532 | 1,3,5,6,36,<br>38,43,44 | 2,4,7,8,37,<br>39,40,41,4<br>2 | 5  | P01681,P01835,P55314,Q561R9,Q9QW07                                    |
| 6533 | 1,3,5,6,36,<br>39,40,41 | 2,4,7,8,37,<br>38,42,43,4<br>4 | 3  | P00714,Q6IRE4,Q80WL1                                                  |
| 6534 | 1,3,5,6,36,<br>39,40,42 | 2,4,7,8,37,<br>38,41,43,4<br>4 | 10 | O54728,P00774,P27213,P55091,P98089,Q05695,Q62635,Q64057,Q6IRE4,Q80WL1 |
| 6535 | 1,3,5,6,36,<br>39,40,43 | 2,4,7,8,37,<br>38,41,42,4<br>4 | 8  | O54728,P00714,P01681,P98089,Q05695,Q62635,Q8CIZ5,Q9QW07               |
| 6536 | 1,3,5,6,36,<br>39,40,44 | 2,4,7,8,37,<br>38,41,42,4<br>3 | 8  | P06866,P27213,P55314,Q6IRE4,Q6P6T1,Q80WL1,Q9QUL6,Q9QW07               |

|      |                         |                                |   |                                                                |
|------|-------------------------|--------------------------------|---|----------------------------------------------------------------|
| 6537 | 1,3,5,6,36,<br>39,41,42 | 2,4,7,8,37,<br>38,40,43,4<br>4 | 3 | O54728,Q6AYR9,Q6IRE4                                           |
| 6538 | 1,3,5,6,36,<br>39,41,43 | 2,4,7,8,37,<br>38,40,42,4<br>4 | 2 | P00714,Q6TMA8                                                  |
| 6539 | 1,3,5,6,36,<br>39,41,44 | 2,4,7,8,37,<br>38,40,42,4<br>3 | 3 | P55314,Q6IRE4,Q80WL1                                           |
| 6540 | 1,3,5,6,36,<br>39,42,43 | 2,4,7,8,37,<br>38,40,41,4<br>4 | 7 | O54728,P35434,P98089,Q05695,Q62635,Q68FS4,Q6AYR9               |
| 6541 | 1,3,5,6,36,<br>39,42,44 | 2,4,7,8,37,<br>38,40,41,4<br>3 | 3 | O54728,P55314,Q6IRE4                                           |
| 6542 | 1,3,5,6,36,<br>39,43,44 | 2,4,7,8,37,<br>38,40,41,4<br>2 | 3 | P01681,P55314,Q9QW07                                           |
| 6543 | 1,3,5,6,36,<br>40,41,42 | 2,4,7,8,37,<br>38,39,43,4<br>4 | 5 | P19223,P23593,Q64057,Q6IRE4,Q80WL1                             |
| 6544 | 1,3,5,6,36,<br>40,41,43 | 2,4,7,8,37,<br>38,39,42,4<br>4 | 5 | P00714,P01681,P51907,Q6IRE4,Q80WL1                             |
| 6545 | 1,3,5,6,36,<br>40,41,44 | 2,4,7,8,37,<br>38,39,42,4<br>3 | 4 | P55314,Q6IRE4,Q6P6T1,Q80WL1                                    |
| 6546 | 1,3,5,6,36,<br>40,42,43 | 2,4,7,8,37,<br>38,39,41,4<br>4 | 9 | P01681,P98089,Q05695,Q62635,Q64057,Q68FS4,Q6IRE4,Q80WL1,Q920P0 |
| 6547 | 1,3,5,6,36,<br>40,42,44 | 2,4,7,8,37,<br>38,39,41,4<br>3 | 6 | P17046,P55314,Q68FS4,Q6IRE4,Q7TPB1,Q80WL1                      |
| 6548 | 1,3,5,6,36,<br>40,43,44 | 2,4,7,8,37,<br>38,39,41,4<br>2 | 4 | P01681,P55314,Q80WL1,Q9QW07                                    |
| 6549 | 1,3,5,6,36,<br>41,42,43 | 2,4,7,8,37,<br>38,39,40,4<br>4 | 4 | P35434,P82471,Q6AYR9,Q9QZA6                                    |
| 6550 | 1,3,5,6,36,<br>41,42,44 | 2,4,7,8,37,<br>38,39,40,4<br>3 | 3 | P55314,Q6IRE4,Q80WL1                                           |
| 6551 | 1,3,5,6,36,<br>41,43,44 | 2,4,7,8,37,<br>38,39,40,4<br>2 | 3 | P01681,P55314,Q80WL1                                           |

|      |                         |                                |   |                                                                |
|------|-------------------------|--------------------------------|---|----------------------------------------------------------------|
| 6552 | 1,3,5,6,36,<br>42,43,44 | 2,4,7,8,37,<br>38,39,40,4<br>1 | 4 | P01681,P35434,P55314,Q68FS4                                    |
| 6553 | 1,3,5,6,37,<br>38,39,40 | 2,4,7,8,36,<br>41,42,43,4<br>4 | 8 | P00714,P27213,P82995,Q561R9,Q6IRE4,Q99MH3,Q9QUL6,Q9QW07        |
| 6554 | 1,3,5,6,37,<br>38,39,41 | 2,4,7,8,36,<br>40,42,43,4<br>4 | 6 | P00714,P13432,P62804,P82995,Q561R9,Q6IRE4                      |
| 6555 | 1,3,5,6,37,<br>38,39,42 | 2,4,7,8,36,<br>40,41,43,4<br>4 | 4 | P19218,P82995,Q6IRE4,Q99MH3                                    |
| 6556 | 1,3,5,6,37,<br>38,39,43 | 2,4,7,8,36,<br>40,41,42,4<br>4 | 7 | P00714,P01681,P82995,Q561R9,Q6IFV1,Q99MH3,Q9QW07               |
| 6557 | 1,3,5,6,37,<br>38,39,44 | 2,4,7,8,36,<br>40,41,42,4<br>3 | 4 | P82995,Q561R9,Q6IRE4,Q9QW07                                    |
| 6558 | 1,3,5,6,37,<br>38,40,41 | 2,4,7,8,36,<br>39,42,43,4<br>4 | 5 | P51907,P82995,Q561R9,Q6IRE4,Q80WL1                             |
| 6559 | 1,3,5,6,37,<br>38,40,42 | 2,4,7,8,36,<br>39,41,43,4<br>4 | 6 | D3ZUC6,P17046,P82995,Q64057,Q6IRE4,Q99MH3                      |
| 6560 | 1,3,5,6,37,<br>38,40,43 | 2,4,7,8,36,<br>39,41,42,4<br>4 | 9 | P01681,P01835,P51907,P82995,Q561R9,Q6IFV1,Q6IRE4,Q99MH3,Q9QW07 |
| 6561 | 1,3,5,6,37,<br>38,40,44 | 2,4,7,8,36,<br>39,41,42,4<br>3 | 8 | D3ZUC6,P22006,P82995,Q561R9,Q6IRE4,Q80WL1,Q9QUL6,Q9QW07        |
| 6562 | 1,3,5,6,37,<br>38,41,42 | 2,4,7,8,36,<br>39,40,43,4<br>4 | 2 | P17046,Q6IRE4                                                  |
| 6563 | 1,3,5,6,37,<br>38,41,43 | 2,4,7,8,36,<br>39,40,42,4<br>4 | 8 | P00714,P01681,P51907,P82995,Q561R9,Q6IFV1,Q7TPB1,Q8CJD3        |
| 6564 | 1,3,5,6,37,<br>38,41,44 | 2,4,7,8,36,<br>39,40,42,4<br>3 | 4 | P82995,Q561R9,Q6IRE4,Q80WL1                                    |
| 6565 | 1,3,5,6,37,<br>38,42,43 | 2,4,7,8,36,<br>39,40,41,4<br>4 | 7 | P01681,P10715,P17046,P31044,P82995,Q5GRG2,Q99MH3               |
| 6566 | 1,3,5,6,37,<br>38,42,44 | 2,4,7,8,36,<br>39,40,41,4<br>3 | 3 | D3ZUC6,P17046,Q6IRE4                                           |

|      |                         |                                |    |                                                                              |
|------|-------------------------|--------------------------------|----|------------------------------------------------------------------------------|
| 6567 | 1,3,5,6,37,<br>38,43,44 | 2,4,7,8,36,<br>39,40,41,4<br>2 | 6  | P01681,P01835,P82995,Q561R9,Q6IFV1,Q9QW07                                    |
| 6568 | 1,3,5,6,37,<br>39,40,41 | 2,4,7,8,36,<br>38,42,43,4<br>4 | 5  | P00714,P51907,P82995,Q6IRE4,Q80WL1                                           |
| 6569 | 1,3,5,6,37,<br>39,40,42 | 2,4,7,8,36,<br>38,41,43,4<br>4 | 8  | P00774,P27213,P55091,P98089,Q05695,Q6IRE4,Q80WL1,Q99MH3                      |
| 6570 | 1,3,5,6,37,<br>39,40,43 | 2,4,7,8,36,<br>38,41,42,4<br>4 | 11 | P00714,P01681,P51907,P55091,P82995,P98089,Q05695,Q6IRE4,Q8CIZ5,Q99MH3,Q9QW07 |
| 6571 | 1,3,5,6,37,<br>39,40,44 | 2,4,7,8,36,<br>38,41,42,4<br>3 | 8  | O35547,P27213,P82995,Q6IRE4,Q80WL1,Q99MH3,Q9QUL6,Q9QW07                      |
| 6572 | 1,3,5,6,37,<br>39,41,42 | 2,4,7,8,36,<br>38,40,43,4<br>4 | 2  | P13432,Q6IRE4                                                                |
| 6573 | 1,3,5,6,37,<br>39,41,43 | 2,4,7,8,36,<br>38,40,42,4<br>4 | 4  | P00714,P51907,P82995,Q6TMA8                                                  |
| 6574 | 1,3,5,6,37,<br>39,41,44 | 2,4,7,8,36,<br>38,40,42,4<br>3 | 2  | Q6IRE4,Q80WL1                                                                |
| 6575 | 1,3,5,6,37,<br>39,42,43 | 2,4,7,8,36,<br>38,40,41,4<br>4 | 4  | P98089,Q05695,Q62635,Q99MH3                                                  |
| 6576 | 1,3,5,6,37,<br>39,42,44 | 2,4,7,8,36,<br>38,40,41,4<br>3 | 1  | Q6IRE4                                                                       |
| 6577 | 1,3,5,6,37,<br>39,43,44 | 2,4,7,8,36,<br>38,40,41,4<br>2 | 3  | P01681,P82995,Q9QW07                                                         |
| 6578 | 1,3,5,6,37,<br>40,41,42 | 2,4,7,8,36,<br>38,39,43,4<br>4 | 4  | P17046,P51907,Q6IRE4,Q80WL1                                                  |
| 6579 | 1,3,5,6,37,<br>40,41,43 | 2,4,7,8,36,<br>38,39,42,4<br>4 | 7  | P00714,P01681,P51907,P82995,Q6IRE4,Q80WL1,Q9QW07                             |
| 6580 | 1,3,5,6,37,<br>40,41,44 | 2,4,7,8,36,<br>38,39,42,4<br>3 | 4  | P51907,P82995,Q6IRE4,Q80WL1                                                  |
| 6581 | 1,3,5,6,37,<br>40,42,43 | 2,4,7,8,36,<br>38,39,41,4<br>4 | 9  | P01681,P11598,P17046,P51907,P98089,Q05695,Q6IRE4,Q80WL1,Q99MH3               |



|      |                         |                                |   |                                                                |
|------|-------------------------|--------------------------------|---|----------------------------------------------------------------|
| 6582 | 1,3,5,6,37,<br>40,42,44 | 2,4,7,8,36,<br>38,39,41,4<br>3 | 4 | D3ZUC6,P17046,Q6IRE4,Q80WL1                                    |
| 6583 | 1,3,5,6,37,<br>40,43,44 | 2,4,7,8,36,<br>38,39,41,4<br>2 | 6 | P01681,P51907,P82995,Q80WL1,Q99MH3,Q9QW07                      |
| 6584 | 1,3,5,6,37,<br>41,42,43 | 2,4,7,8,36,<br>38,39,40,4<br>4 | 2 | P51907,Q6IRE4                                                  |
| 6585 | 1,3,5,6,37,<br>41,42,44 | 2,4,7,8,36,<br>38,39,40,4<br>3 | 3 | P17046,Q6IRE4,Q80WL1                                           |
| 6586 | 1,3,5,6,37,<br>41,43,44 | 2,4,7,8,36,<br>38,39,40,4<br>2 | 4 | P01681,P51907,Q80WL1,Q9QW07                                    |
| 6587 | 1,3,5,6,37,<br>42,43,44 | 2,4,7,8,36,<br>38,39,40,4<br>1 | 3 | P01681,P17046,Q9QW07                                           |
| 6588 | 1,3,5,6,38,<br>39,40,41 | 2,4,7,8,36,<br>37,42,43,4<br>4 | 4 | P00714,P13432,P82995,Q6IRE4                                    |
| 6589 | 1,3,5,6,38,<br>39,40,42 | 2,4,7,8,36,<br>37,41,43,4<br>4 | 4 | D3ZUC6,Q6IRE4,Q99MH3,Q9QUL6                                    |
| 6590 | 1,3,5,6,38,<br>39,40,43 | 2,4,7,8,36,<br>37,41,42,4<br>4 | 9 | P00714,P01681,P01835,P82995,Q561R9,Q6IFV1,Q6IRE4,Q99MH3,Q9QW07 |
| 6591 | 1,3,5,6,38,<br>39,40,44 | 2,4,7,8,36,<br>37,41,42,4<br>3 | 5 | P82995,Q6IRE4,Q99MH3,Q9QUL6,Q9QW07                             |
| 6592 | 1,3,5,6,38,<br>39,41,42 | 2,4,7,8,36,<br>37,40,43,4<br>4 | 2 | P13432,Q6IRE4                                                  |
| 6593 | 1,3,5,6,38,<br>39,41,43 | 2,4,7,8,36,<br>37,40,42,4<br>4 | 5 | P00714,P01681,P82995,Q561R9,Q8CJD3                             |
| 6594 | 1,3,5,6,38,<br>39,41,44 | 2,4,7,8,36,<br>37,40,42,4<br>3 | 1 | Q6IRE4                                                         |
| 6595 | 1,3,5,6,38,<br>39,42,43 | 2,4,7,8,36,<br>37,40,41,4<br>4 | 4 | O54728,P01681,Q6IFU7,Q99MH3                                    |
| 6596 | 1,3,5,6,38,<br>39,42,44 | 2,4,7,8,36,<br>37,40,41,4<br>3 | 2 | P17046,Q6IRE4                                                  |

|      |                         |                                |   |                                                                |
|------|-------------------------|--------------------------------|---|----------------------------------------------------------------|
| 6597 | 1,3,5,6,38,<br>39,43,44 | 2,4,7,8,36,<br>37,40,41,4<br>2 | 5 | P01681,P01835,P82995,Q561R9,Q9QW07                             |
| 6598 | 1,3,5,6,38,<br>40,41,42 | 2,4,7,8,36,<br>37,39,43,4<br>4 | 4 | D3ZUC6,P17046,Q64057,Q6IRE4                                    |
| 6599 | 1,3,5,6,38,<br>40,41,43 | 2,4,7,8,36,<br>37,39,42,4<br>4 | 8 | P00714,P01681,P01835,P51907,P82995,Q561R9,Q6IRE4,Q8CJD3        |
| 6600 | 1,3,5,6,38,<br>40,41,44 | 2,4,7,8,36,<br>37,39,42,4<br>3 | 3 | P82995,Q6IRE4,Q80WL1                                           |
| 6601 | 1,3,5,6,38,<br>40,42,43 | 2,4,7,8,36,<br>37,39,41,4<br>4 | 8 | P01681,P01835,P11598,P17046,P82995,Q6IRE4,Q99041,Q99MH3        |
| 6602 | 1,3,5,6,38,<br>40,42,44 | 2,4,7,8,36,<br>37,39,41,4<br>3 | 7 | D3ZUC6,P06760,P17046,P22006,Q6IRE4,Q99041,Q9QUL6               |
| 6603 | 1,3,5,6,38,<br>40,43,44 | 2,4,7,8,36,<br>37,39,41,4<br>2 | 6 | P01681,P01835,P82995,Q561R9,Q99MH3,Q9QW07                      |
| 6604 | 1,3,5,6,38,<br>41,42,43 | 2,4,7,8,36,<br>37,39,40,4<br>4 | 5 | P01681,P17046,P82471,Q6IRE4,Q8CJD3                             |
| 6605 | 1,3,5,6,38,<br>41,42,44 | 2,4,7,8,36,<br>37,39,40,4<br>3 | 2 | P17046,Q6IRE4                                                  |
| 6606 | 1,3,5,6,38,<br>41,43,44 | 2,4,7,8,36,<br>37,39,40,4<br>2 | 5 | P00774,P01681,P01835,Q561R9,Q8CJD3                             |
| 6607 | 1,3,5,6,38,<br>42,43,44 | 2,4,7,8,36,<br>37,39,40,4<br>1 | 6 | P01681,P01835,P17046,Q68FS4,Q6AYR8,Q99041                      |
| 6608 | 1,3,5,6,39,<br>40,41,42 | 2,4,7,8,36,<br>37,38,43,4<br>4 | 4 | P13432,Q6IRE4,Q80WL1,Q99MH3                                    |
| 6609 | 1,3,5,6,39,<br>40,41,43 | 2,4,7,8,36,<br>37,38,42,4<br>4 | 7 | P00714,P47967,P51907,P82995,Q6IRE4,Q80WL1,Q99MH3               |
| 6610 | 1,3,5,6,39,<br>40,41,44 | 2,4,7,8,36,<br>37,38,42,4<br>3 | 9 | P06911,P10715,P16391,P19629,P47967,Q6AYL6,Q6IRE4,Q6P6T1,Q80WL1 |
| 6611 | 1,3,5,6,39,<br>40,42,43 | 2,4,7,8,36,<br>37,38,41,4<br>4 | 5 | P01681,P98089,Q05695,Q6IRE4,Q99MH3                             |

|      |                         |                                 |    |                                                                              |
|------|-------------------------|---------------------------------|----|------------------------------------------------------------------------------|
| 6612 | 1,3,5,6,39,<br>40,42,44 | 2,4,7,8,36,<br>37,38,41,4<br>3  | 5  | P17046,Q6IRE4,Q80WL1,Q99MH3,Q9QUL6                                           |
| 6613 | 1,3,5,6,39,<br>40,43,44 | 2,4,7,8,36,<br>37,38,41,4<br>2  | 5  | P01681,P82995,Q6AYL6,Q99MH3,Q9QW07                                           |
| 6614 | 1,3,5,6,39,<br>41,42,43 | 2,4,7,8,36,<br>37,38,40,4<br>4  | 3  | P82471,Q6AYR9,Q6IRE4                                                         |
| 6615 | 1,3,5,6,39,<br>41,42,44 | 2,4,7,8,36,<br>37,38,40,4<br>3  | 1  | Q6IRE4                                                                       |
| 6616 | 1,3,5,6,39,<br>41,43,44 | 2,4,7,8,36,<br>37,38,40,4<br>2  | 1  | P01681                                                                       |
| 6617 | 1,3,5,6,39,<br>42,43,44 | 2,4,7,8,36,<br>37,38,40,4<br>1  | 2  | P01681,Q99MH3                                                                |
| 6618 | 1,3,5,6,40,<br>41,42,43 | 2,4,7,8,36,<br>37,38,39,4<br>4  | 7  | P01681,P11598,P17046,P51907,Q6IRE4,Q80WL1,Q99MH3                             |
| 6619 | 1,3,5,6,40,<br>41,42,44 | 2,4,7,8,36,<br>37,38,39,4<br>3  | 3  | P17046,Q6IRE4,Q80WL1                                                         |
| 6620 | 1,3,5,6,40,<br>41,43,44 | 2,4,7,8,36,<br>37,38,39,4<br>2  | 6  | P01681,P47967,P51907,Q6IRE4,Q80WL1,Q9QW07                                    |
| 6621 | 1,3,5,6,40,<br>42,43,44 | 2,4,7,8,36,<br>37,38,39,4<br>1  | 5  | P01681,P17046,Q80WL1,Q99041,Q99MH3                                           |
| 6622 | 1,3,5,6,41,<br>42,43,44 | 2,4,7,8,36,<br>37,38,39,4<br>0  | 5  | P01681,P17046,P82471,Q80WL1,Q9QZA6                                           |
| 6623 | 1,3,5,7,8,3<br>6,37,38  | 2,4,6,39,4<br>0,41,42,43<br>,44 | 3  | P25236,P53792,Q6P6R2                                                         |
| 6624 | 1,3,5,7,8,3<br>6,37,39  | 2,4,6,38,4<br>0,41,42,43<br>,44 | 11 | B0BNN3,O54728,P00762,P00774,P27213,P98089,Q5HZV9,Q62635,Q6P6R2,Q6TMA8,Q8CIZ5 |
| 6625 | 1,3,5,7,8,3<br>6,37,40  | 2,4,6,38,3<br>9,41,42,43<br>,44 | 9  | B0BNN3,P00762,P00774,P53792,P98089,Q5HZV9,Q62635,Q6IRE4,Q8CIZ5               |
| 6626 | 1,3,5,7,8,3<br>6,37,41  | 2,4,6,38,3<br>9,40,42,43<br>,44 | 5  | B0BNN3,P00762,P25236,P83121,Q6IRE4                                           |

|      |                        |                                 |    |                                                                                     |
|------|------------------------|---------------------------------|----|-------------------------------------------------------------------------------------|
| 6627 | 1,3,5,7,8,3<br>6,37,42 | 2,4,6,38,3<br>9,40,41,43<br>,44 | 8  | B0BNN3,O54728,P00762,P00774,P53792,P98089,Q62635,Q6IRE4                             |
| 6628 | 1,3,5,7,8,3<br>6,37,43 | 2,4,6,38,3<br>9,40,41,42<br>,44 | 10 | P02091,P16391,P83121,P98089,Q62635,Q6P6R2,Q6TMA8,Q8CIZ5,Q9QW07,Q9QX79               |
| 6629 | 1,3,5,7,8,3<br>6,37,44 | 2,4,6,38,3<br>9,40,41,42<br>,43 | 6  | B0BNN3,P00762,P13432,P53792,Q5HZV9,Q6IFU7                                           |
| 6630 | 1,3,5,7,8,3<br>6,38,39 | 2,4,6,37,4<br>0,41,42,43<br>,44 | 5  | O54728,P19218,P25236,P27213,Q6P6R2                                                  |
| 6631 | 1,3,5,7,8,3<br>6,38,40 | 2,4,6,37,3<br>9,41,42,43<br>,44 | 2  | P53792,Q6IRE4                                                                       |
| 6632 | 1,3,5,7,8,3<br>6,38,41 | 2,4,6,37,3<br>9,40,42,43<br>,44 | 4  | P25236,P50115,P50116,Q6IRE4                                                         |
| 6633 | 1,3,5,7,8,3<br>6,38,42 | 2,4,6,37,3<br>9,40,41,43<br>,44 | 11 | O54728,P00762,P04905,P08753,P17046,P19218,P47727,P60905,Q64335,Q6AYL6,Q6IRE4        |
| 6634 | 1,3,5,7,8,3<br>6,38,43 | 2,4,6,37,3<br>9,40,41,42<br>,44 | 4  | P02091,P16391,Q6P6R2,Q9QX79                                                         |
| 6635 | 1,3,5,7,8,3<br>6,38,44 | 2,4,6,37,3<br>9,40,41,42<br>,43 | 1  | P53792                                                                              |
| 6636 | 1,3,5,7,8,3<br>6,39,40 | 2,4,6,37,3<br>8,41,42,43<br>,44 | 11 | B0BNN3,O54728,P00762,P00774,P27213,P80020,P98089,Q62635,Q6IRE4,Q6P6R2,Q8CIZ5        |
| 6637 | 1,3,5,7,8,3<br>6,39,41 | 2,4,6,37,3<br>8,40,42,43<br>,44 | 4  | O54728,P25236,Q6IRE4,Q8VD89                                                         |
| 6638 | 1,3,5,7,8,3<br>6,39,42 | 2,4,6,37,3<br>8,40,41,43<br>,44 | 12 | O54728,P00762,P00774,P04905,P08010,P08644,P08753,P27213,P98089,Q62635,Q6AYR9,Q6IRE4 |
| 6639 | 1,3,5,7,8,3<br>6,39,43 | 2,4,6,37,3<br>8,40,41,42<br>,44 | 8  | O54728,P01946,P02091,P98089,Q62635,Q6P6R2,Q6TMA8,Q8CIZ5                             |
| 6640 | 1,3,5,7,8,3<br>6,39,44 | 2,4,6,37,3<br>8,40,41,42<br>,43 | 7  | B0BNN3,O54728,P00762,P27213,P55314,P80020,Q5HZV9                                    |
| 6641 | 1,3,5,7,8,3<br>6,40,41 | 2,4,6,37,3<br>8,39,42,43<br>,44 | 7  | B0BNN3,P14480,P25236,P80020,Q4FZU6,Q6IRE4,Q9JJS8                                    |

|      |                        |                                 |    |                                                                                                   |
|------|------------------------|---------------------------------|----|---------------------------------------------------------------------------------------------------|
| 6642 | 1,3,5,7,8,3<br>6,40,42 | 2,4,6,37,3<br>8,39,41,43<br>,44 | 13 | O54728,P00762,P00774,P14480,P17046,P36374,P80020,P98089,Q62635,Q64057,Q6AYR9,Q6IRE4,Q9JJS8        |
| 6643 | 1,3,5,7,8,3<br>6,40,43 | 2,4,6,37,3<br>8,39,41,42<br>,44 | 5  | P02091,P98089,Q62635,Q8CIZ5,Q9QX79                                                                |
| 6644 | 1,3,5,7,8,3<br>6,40,44 | 2,4,6,37,3<br>8,39,41,42<br>,43 | 11 | B0BNN3,P00762,P01015,P06866,P13432,P53792,P55314,P80020,Q5HZV9,Q6IRE4,Q6P6T1                      |
| 6645 | 1,3,5,7,8,3<br>6,41,42 | 2,4,6,37,3<br>8,39,40,43<br>,44 | 13 | P00762,P04905,P08010,P08644,P08753,P0C0A9,P25236,P60905,Q63357,Q64335,Q6AYR9,Q6IRE4,Q812E4        |
| 6646 | 1,3,5,7,8,3<br>6,41,43 | 2,4,6,37,3<br>8,39,40,42<br>,44 | 5  | P02091,P02651,P83121,Q6TMA8,Q9QX79                                                                |
| 6647 | 1,3,5,7,8,3<br>6,41,44 | 2,4,6,37,3<br>8,39,40,42<br>,43 | 7  | B0BNN3,P00762,P01015,P25236,P80020,P83121,Q6IRE4                                                  |
| 6648 | 1,3,5,7,8,3<br>6,42,43 | 2,4,6,37,3<br>8,39,40,41<br>,44 | 14 | O54728,P02091,P06911,P08753,P16391,P16636,P60905,P98089,Q5GRG2,Q62635,Q62975,Q64335,Q6AYR9,Q9QX79 |
| 6649 | 1,3,5,7,8,3<br>6,42,44 | 2,4,6,37,3<br>8,39,40,41<br>,43 | 11 | B0BNN3,P00762,P08644,P08753,P17046,P32755,P36374,P53792,P60905,P80020,Q5HZV9                      |
| 6650 | 1,3,5,7,8,3<br>6,43,44 | 2,4,6,37,3<br>8,39,40,41<br>,42 | 5  | P02091,P13432,P55314,Q9QW07,Q9QX79                                                                |
| 6651 | 1,3,5,7,8,3<br>7,38,39 | 2,4,6,36,4<br>0,41,42,43<br>,44 | 5  | O54728,P19218,P27213,Q6IRE4,Q6P6R2                                                                |
| 6652 | 1,3,5,7,8,3<br>7,38,40 | 2,4,6,36,3<br>9,41,42,43<br>,44 | 1  | Q6IRE4                                                                                            |
| 6653 | 1,3,5,7,8,3<br>7,38,41 | 2,4,6,36,3<br>9,40,42,43<br>,44 | 6  | P25236,P50115,P50116,P62804,Q6IRE4,Q7TPB1                                                         |
| 6654 | 1,3,5,7,8,3<br>7,38,42 | 2,4,6,36,3<br>9,40,41,43<br>,44 | 3  | P17046,P19218,Q6IRE4                                                                              |
| 6655 | 1,3,5,7,8,3<br>7,38,43 | 2,4,6,36,3<br>9,40,41,42<br>,44 | 5  | P02091,P16391,Q7TPB1,Q9QW07,Q9QX79                                                                |
| 6656 | 1,3,5,7,8,3<br>7,38,44 | 2,4,6,36,3<br>9,40,41,42<br>,43 | 0  |                                                                                                   |

|      |                        |                                 |    |                                                                       |
|------|------------------------|---------------------------------|----|-----------------------------------------------------------------------|
| 6657 | 1,3,5,7,8,3<br>7,39,40 | 2,4,6,36,3<br>8,41,42,43<br>,44 | 6  | P00774,P27213,P98089,Q62635,Q6IRE4,Q8CIZ5                             |
| 6658 | 1,3,5,7,8,3<br>7,39,41 | 2,4,6,36,3<br>8,40,42,43<br>,44 | 3  | P25236,P62804,Q6IRE4                                                  |
| 6659 | 1,3,5,7,8,3<br>7,39,42 | 2,4,6,36,3<br>8,40,41,43<br>,44 | 6  | O54728,P00774,P27213,P98089,Q62635,Q6IRE4                             |
| 6660 | 1,3,5,7,8,3<br>7,39,43 | 2,4,6,36,3<br>8,40,41,42<br>,44 | 10 | O54728,P01946,P02091,P98089,Q62635,Q6P6R2,Q6TMA8,Q8CIZ5,Q9QW07,Q9QX79 |
| 6661 | 1,3,5,7,8,3<br>7,39,44 | 2,4,6,36,3<br>8,40,41,42<br>,43 | 2  | P27213,Q5HZV9                                                         |
| 6662 | 1,3,5,7,8,3<br>7,40,41 | 2,4,6,36,3<br>8,39,42,43<br>,44 | 2  | P51907,Q6IRE4                                                         |
| 6663 | 1,3,5,7,8,3<br>7,40,42 | 2,4,6,36,3<br>8,39,41,43<br>,44 | 5  | P00774,P17046,P98089,Q62635,Q6IRE4                                    |
| 6664 | 1,3,5,7,8,3<br>7,40,43 | 2,4,6,36,3<br>8,39,41,42<br>,44 | 7  | P02091,P51907,P98089,Q62635,Q8CIZ5,Q9QW07,Q9QX79                      |
| 6665 | 1,3,5,7,8,3<br>7,40,44 | 2,4,6,36,3<br>8,39,41,42<br>,43 | 4  | B0BNN3,Q5HZV9,Q6IRE4,Q9QW07                                           |
| 6666 | 1,3,5,7,8,3<br>7,41,42 | 2,4,6,36,3<br>8,39,40,43<br>,44 | 3  | P08753,P17046,Q6IRE4                                                  |
| 6667 | 1,3,5,7,8,3<br>7,41,43 | 2,4,6,36,3<br>8,39,40,42<br>,44 | 6  | P02091,P51907,P83121,Q6TMA8,Q7TPB1,Q9QX79                             |
| 6668 | 1,3,5,7,8,3<br>7,41,44 | 2,4,6,36,3<br>8,39,40,42<br>,43 | 2  | Q6IFU7,Q6IRE4                                                         |
| 6669 | 1,3,5,7,8,3<br>7,42,43 | 2,4,6,36,3<br>8,39,40,41<br>,44 | 7  | P02091,P16391,P17046,P98089,Q62635,Q62975,Q9QX79                      |
| 6670 | 1,3,5,7,8,3<br>7,42,44 | 2,4,6,36,3<br>8,39,40,41<br>,43 | 2  | P17046,Q5HZV9                                                         |
| 6671 | 1,3,5,7,8,3<br>7,43,44 | 2,4,6,36,3<br>8,39,40,41<br>,42 | 3  | P02091,Q9QW07,Q9QX79                                                  |

|      |                        |                                 |    |                                                                              |
|------|------------------------|---------------------------------|----|------------------------------------------------------------------------------|
| 6672 | 1,3,5,7,8,3<br>8,39,40 | 2,4,6,36,3<br>7,41,42,43<br>,44 | 3  | O54728,P27213,Q6IRE4                                                         |
| 6673 | 1,3,5,7,8,3<br>8,39,41 | 2,4,6,36,3<br>7,40,42,43<br>,44 | 4  | P25236,P50115,P50116,Q6IRE4                                                  |
| 6674 | 1,3,5,7,8,3<br>8,39,42 | 2,4,6,36,3<br>7,40,41,43<br>,44 | 6  | O54728,P08753,P17046,P19218,P47727,Q6IRE4                                    |
| 6675 | 1,3,5,7,8,3<br>8,39,43 | 2,4,6,36,3<br>7,40,41,42<br>,44 | 4  | O54728,P01946,P02091,Q6P6R2                                                  |
| 6676 | 1,3,5,7,8,3<br>8,39,44 | 2,4,6,36,3<br>7,40,41,42<br>,43 | 0  |                                                                              |
| 6677 | 1,3,5,7,8,3<br>8,40,41 | 2,4,6,36,3<br>7,39,42,43<br>,44 | 4  | P25236,P50115,P50116,Q6IRE4                                                  |
| 6678 | 1,3,5,7,8,3<br>8,40,42 | 2,4,6,36,3<br>7,39,41,43<br>,44 | 3  | P17046,Q6IRE4,Q9JHB9                                                         |
| 6679 | 1,3,5,7,8,3<br>8,40,43 | 2,4,6,36,3<br>7,39,41,42<br>,44 | 2  | P02091,Q9QX79                                                                |
| 6680 | 1,3,5,7,8,3<br>8,40,44 | 2,4,6,36,3<br>7,39,41,42<br>,43 | 1  | Q6IRE4                                                                       |
| 6681 | 1,3,5,7,8,3<br>8,41,42 | 2,4,6,36,3<br>7,39,40,43<br>,44 | 11 | O35547,P08010,P08753,P0C0A9,P17046,P25236,P50115,P50116,P60905,Q64335,Q6IRE4 |
| 6682 | 1,3,5,7,8,3<br>8,41,43 | 2,4,6,36,3<br>7,39,40,42<br>,44 | 6  | P02091,P50115,P50116,Q7TPB1,Q8CJD3,Q9QX79                                    |
| 6683 | 1,3,5,7,8,3<br>8,41,44 | 2,4,6,36,3<br>7,39,40,42<br>,43 | 5  | P25236,P50115,P50116,Q05695,Q6IRE4                                           |
| 6684 | 1,3,5,7,8,3<br>8,42,43 | 2,4,6,36,3<br>7,39,40,41<br>,44 | 11 | O35547,P02091,P06911,P08723,P08753,P16391,P17046,P47727,Q62975,Q64335,Q9JHB9 |
| 6685 | 1,3,5,7,8,3<br>8,42,44 | 2,4,6,36,3<br>7,39,40,41<br>,43 | 4  | P08753,P17046,P36374,P60905                                                  |
| 6686 | 1,3,5,7,8,3<br>8,43,44 | 2,4,6,36,3<br>7,39,40,41<br>,42 | 3  | P02091,Q9QW07,Q9QX79                                                         |

|      |                        |                                 |   |                                                                |
|------|------------------------|---------------------------------|---|----------------------------------------------------------------|
| 6687 | 1,3,5,7,8,3<br>9,40,41 | 2,4,6,36,3<br>7,38,42,43<br>,44 | 3 | P10715,Q4FZU6,Q6IRE4                                           |
| 6688 | 1,3,5,7,8,3<br>9,40,42 | 2,4,6,36,3<br>7,38,41,43<br>,44 | 9 | O54728,P00774,P02780,P17046,P27213,P98089,Q62635,Q6AYR9,Q6IRE4 |
| 6689 | 1,3,5,7,8,3<br>9,40,43 | 2,4,6,36,3<br>7,38,41,42<br>,44 | 7 | O54728,P01946,P02091,P98089,Q62635,Q8CIZ5,Q9QW07               |
| 6690 | 1,3,5,7,8,3<br>9,40,44 | 2,4,6,36,3<br>7,38,41,42<br>,43 | 6 | P06866,P27213,P80020,Q5HZV9,Q6IRE4,Q6P6T1                      |
| 6691 | 1,3,5,7,8,3<br>9,41,42 | 2,4,6,36,3<br>7,38,40,43<br>,44 | 6 | O54728,P08010,P08753,P0C0A9,Q6AYR9,Q6IRE4                      |
| 6692 | 1,3,5,7,8,3<br>9,41,43 | 2,4,6,36,3<br>7,38,40,42<br>,44 | 4 | P01946,P02091,Q6TMA8,Q9QX79                                    |
| 6693 | 1,3,5,7,8,3<br>9,41,44 | 2,4,6,36,3<br>7,38,40,42<br>,43 | 1 | Q6IRE4                                                         |
| 6694 | 1,3,5,7,8,3<br>9,42,43 | 2,4,6,36,3<br>7,38,40,41<br>,44 | 9 | O54728,P01946,P02091,P0C0A9,P98089,Q62635,Q62975,Q6AYR9,Q9JHB9 |
| 6695 | 1,3,5,7,8,3<br>9,42,44 | 2,4,6,36,3<br>7,38,40,41<br>,43 | 5 | O54728,P0C0A9,P17046,Q5HZV9,Q6AYR9                             |
| 6696 | 1,3,5,7,8,3<br>9,43,44 | 2,4,6,36,3<br>7,38,40,41<br>,42 | 3 | P01946,P02091,Q9QW07                                           |
| 6697 | 1,3,5,7,8,4<br>0,41,42 | 2,4,6,36,3<br>7,38,39,43<br>,44 | 7 | P08753,P14480,P17046,Q4FZU6,Q6AYR9,Q6IRE4,Q9JJS8               |
| 6698 | 1,3,5,7,8,4<br>0,41,43 | 2,4,6,36,3<br>7,38,39,42<br>,44 | 4 | P02091,P51907,Q6IRE4,Q9QX79                                    |
| 6699 | 1,3,5,7,8,4<br>0,41,44 | 2,4,6,36,3<br>7,38,39,42<br>,43 | 6 | P10715,P14480,P80020,Q4FZU6,Q6IRE4,Q9ET32                      |
| 6700 | 1,3,5,7,8,4<br>0,42,43 | 2,4,6,36,3<br>7,38,39,41<br>,44 | 7 | P02091,P17046,P98089,Q5M819,Q62635,Q62975,Q9JHB9               |
| 6701 | 1,3,5,7,8,4<br>0,42,44 | 2,4,6,36,3<br>7,38,39,41<br>,43 | 9 | P14480,P17046,P20759,P36374,P80020,Q4FZU6,Q5M819,Q6IRE4,Q9QZ76 |



|      |                         |                                 |    |                                                                                     |
|------|-------------------------|---------------------------------|----|-------------------------------------------------------------------------------------|
| 6702 | 1,3,5,7,8,4<br>0,43,44  | 2,4,6,36,3<br>7,38,39,41<br>,42 | 4  | P02091,Q5M819,Q9QW07,Q9QX79                                                         |
| 6703 | 1,3,5,7,8,4<br>1,42,43  | 2,4,6,36,3<br>7,38,39,40<br>,44 | 12 | O35547,P02091,P08753,P0C0A9,P17046,P54921,P60905,P82471,Q62975,Q64335,Q6AYR9,Q9QX79 |
| 6704 | 1,3,5,7,8,4<br>1,42,44  | 2,4,6,36,3<br>7,38,39,40<br>,43 | 8  | P08753,P0C0A9,P14480,P17046,P60905,Q4FZU6,Q6IRE4,Q9JID2                             |
| 6705 | 1,3,5,7,8,4<br>1,43,44  | 2,4,6,36,3<br>7,38,39,40<br>,42 | 3  | P02091,P83121,Q9QX79                                                                |
| 6706 | 1,3,5,7,8,4<br>2,43,44  | 2,4,6,36,3<br>7,38,39,40<br>,41 | 9  | P02091,P08723,P0C0A9,P17046,P60905,Q5M819,Q62975,Q6Q7Y5,Q9QX79                      |
| 6707 | 1,3,5,7,36,<br>37,38,39 | 2,4,6,8,40,<br>41,42,43,4<br>4  | 6  | D4A5U3,O54728,P19218,P27213,Q6IRE4,Q6P6R2                                           |
| 6708 | 1,3,5,7,36,<br>37,38,40 | 2,4,6,8,39,<br>41,42,43,4<br>4  | 3  | Q6IRE4,Q6P6R2,Q9QW07                                                                |
| 6709 | 1,3,5,7,36,<br>37,38,41 | 2,4,6,8,39,<br>40,42,43,4<br>4  | 3  | P25236,P62804,Q6IRE4                                                                |
| 6710 | 1,3,5,7,36,<br>37,38,42 | 2,4,6,8,39,<br>40,41,43,4<br>4  | 5  | O54728,P06911,P17046,Q6AYL6,Q6IRE4                                                  |
| 6711 | 1,3,5,7,36,<br>37,38,43 | 2,4,6,8,39,<br>40,41,42,4<br>4  | 5  | P02091,P06911,Q561R9,Q6P6R2,Q9QW07                                                  |
| 6712 | 1,3,5,7,36,<br>37,38,44 | 2,4,6,8,39,<br>40,41,42,4<br>3  | 2  | Q6IRE4,Q9QW07                                                                       |
| 6713 | 1,3,5,7,36,<br>37,39,40 | 2,4,6,8,38,<br>41,42,43,4<br>4  | 12 | B0BNN3,O54728,P00774,P27213,P55091,P98089,Q5U2V4,Q62635,Q6IRE4,Q6P6R2,Q8CIZ5,Q9QW07 |
| 6714 | 1,3,5,7,36,<br>37,39,41 | 2,4,6,8,38,<br>40,42,43,4<br>4  | 8  | O54728,P00714,P25236,P62804,Q62635,Q6IRE4,Q6TMA8,Q9Z0V6                             |
| 6715 | 1,3,5,7,36,<br>37,39,42 | 2,4,6,8,38,<br>40,41,43,4<br>4  | 9  | O54728,P00762,P00774,P17046,P27213,P98089,Q5U2V4,Q62635,Q6IRE4                      |
| 6716 | 1,3,5,7,36,<br>37,39,43 | 2,4,6,8,38,<br>40,41,42,4<br>4  | 12 | O54728,P00714,P01946,P02091,P06760,P98089,Q62635,Q6P6R2,Q6TMA8,Q8CIZ5,Q9QW07,Q9Z0V6 |

|      |                         |                                |    |                                                                       |
|------|-------------------------|--------------------------------|----|-----------------------------------------------------------------------|
| 6717 | 1,3,5,7,36,<br>37,39,44 | 2,4,6,8,38,<br>40,41,42,4<br>3 | 8  | B0BNN3,O54728,P27213,P55314,Q5HZV9,Q6IRE4,Q6TMA8,Q9QW07               |
| 6718 | 1,3,5,7,36,<br>37,40,41 | 2,4,6,8,38,<br>39,42,43,4<br>4 | 4  | B0BNN3,P25236,Q6IRE4,Q80WL1                                           |
| 6719 | 1,3,5,7,36,<br>37,40,42 | 2,4,6,8,38,<br>39,41,43,4<br>4 | 10 | O54728,P00762,P00774,P17046,P98089,Q5U2V4,Q62635,Q64057,Q6IRE4,Q80WL1 |
| 6720 | 1,3,5,7,36,<br>37,40,43 | 2,4,6,8,38,<br>39,41,42,4<br>4 | 9  | P02091,P98089,Q05695,Q5U2V4,Q62635,Q6IRE4,Q6P6R2,Q8CIZ5,Q9QW07        |
| 6721 | 1,3,5,7,36,<br>37,40,44 | 2,4,6,8,38,<br>39,41,42,4<br>3 | 6  | B0BNN3,P55314,Q5HZV9,Q6IRE4,Q80WL1,Q9QW07                             |
| 6722 | 1,3,5,7,36,<br>37,41,42 | 2,4,6,8,38,<br>39,40,43,4<br>4 | 4  | P17046,P25236,Q62635,Q6IRE4                                           |
| 6723 | 1,3,5,7,36,<br>37,41,43 | 2,4,6,8,38,<br>39,40,42,4<br>4 | 8  | P02091,P06760,P62804,P83121,Q62635,Q6IRE4,Q6TMA8,Q9Z0V6               |
| 6724 | 1,3,5,7,36,<br>37,41,44 | 2,4,6,8,38,<br>39,40,42,4<br>3 | 4  | B0BNN3,P25236,Q6IRE4,Q80WL1                                           |
| 6725 | 1,3,5,7,36,<br>37,42,43 | 2,4,6,8,38,<br>39,40,41,4<br>4 | 10 | O54728,P02091,P06911,P17046,P50280,P98089,Q5GRG2,Q62635,Q62975,Q8CIZ5 |
| 6726 | 1,3,5,7,36,<br>37,42,44 | 2,4,6,8,38,<br>39,40,41,4<br>3 | 3  | P00762,P17046,Q6IRE4                                                  |
| 6727 | 1,3,5,7,36,<br>37,43,44 | 2,4,6,8,38,<br>39,40,41,4<br>2 | 6  | P02091,P13432,P55314,Q6TMA8,Q8CIZ5,Q9QW07                             |
| 6728 | 1,3,5,7,36,<br>38,39,40 | 2,4,6,8,37,<br>41,42,43,4<br>4 | 4  | O54728,P27213,Q6IRE4,Q6P6R2                                           |
| 6729 | 1,3,5,7,36,<br>38,39,41 | 2,4,6,8,37,<br>40,42,43,4<br>4 | 5  | O54728,P00714,P25236,Q6IRE4,Q6P6R2                                    |
| 6730 | 1,3,5,7,36,<br>38,39,42 | 2,4,6,8,37,<br>40,41,43,4<br>4 | 5  | O54728,P17046,P19218,P47727,Q6IRE4                                    |
| 6731 | 1,3,5,7,36,<br>38,39,43 | 2,4,6,8,37,<br>40,41,42,4<br>4 | 6  | O54728,P01946,P02091,Q6P6R2,Q6TMA8,Q9QW07                             |

|      |                         |                                |   |                                                                |
|------|-------------------------|--------------------------------|---|----------------------------------------------------------------|
| 6732 | 1,3,5,7,36,<br>38,39,44 | 2,4,6,8,37,<br>40,41,42,4<br>3 | 3 | O54728,P55314,Q6IRE4                                           |
| 6733 | 1,3,5,7,36,<br>38,40,41 | 2,4,6,8,37,<br>39,42,43,4<br>4 | 2 | P25236,Q6IRE4                                                  |
| 6734 | 1,3,5,7,36,<br>38,40,42 | 2,4,6,8,37,<br>39,41,43,4<br>4 | 5 | O54728,P02782,P17046,Q64057,Q6IRE4                             |
| 6735 | 1,3,5,7,36,<br>38,40,43 | 2,4,6,8,37,<br>39,41,42,4<br>4 | 4 | P02091,Q6IRE4,Q6P6R2,Q9QW07                                    |
| 6736 | 1,3,5,7,36,<br>38,40,44 | 2,4,6,8,37,<br>39,41,42,4<br>3 | 3 | P55314,Q6IRE4,Q9QW07                                           |
| 6737 | 1,3,5,7,36,<br>38,41,42 | 2,4,6,8,37,<br>39,40,43,4<br>4 | 4 | P17046,P25236,Q6AYL6,Q6IRE4                                    |
| 6738 | 1,3,5,7,36,<br>38,41,43 | 2,4,6,8,37,<br>39,40,42,4<br>4 | 3 | P02091,P25236,Q8CJD3                                           |
| 6739 | 1,3,5,7,36,<br>38,41,44 | 2,4,6,8,37,<br>39,40,42,4<br>3 | 2 | P25236,Q6IRE4                                                  |
| 6740 | 1,3,5,7,36,<br>38,42,43 | 2,4,6,8,37,<br>39,40,41,4<br>4 | 7 | O54728,P02091,P06911,P17046,P47727,Q5GRG2,Q62975               |
| 6741 | 1,3,5,7,36,<br>38,42,44 | 2,4,6,8,37,<br>39,40,41,4<br>3 | 2 | P17046,Q6IRE4                                                  |
| 6742 | 1,3,5,7,36,<br>38,43,44 | 2,4,6,8,37,<br>39,40,41,4<br>2 | 3 | P02091,P55314,Q9QW07                                           |
| 6743 | 1,3,5,7,36,<br>39,40,41 | 2,4,6,8,37,<br>38,42,43,4<br>4 | 5 | O54728,P25236,Q6IRE4,Q80WL1,Q8VD89                             |
| 6744 | 1,3,5,7,36,<br>39,40,42 | 2,4,6,8,37,<br>38,41,43,4<br>4 | 9 | O54728,P00762,P00774,P17046,P27213,P98089,Q62635,Q6AYR9,Q6IRE4 |
| 6745 | 1,3,5,7,36,<br>39,40,43 | 2,4,6,8,37,<br>38,41,42,4<br>4 | 9 | O54728,P01946,P02091,P98089,Q62635,Q6IRE4,Q6P6R2,Q8CIZ5,Q9QW07 |
| 6746 | 1,3,5,7,36,<br>39,40,44 | 2,4,6,8,37,<br>38,41,42,4<br>3 | 9 | B0BNN3,O54728,P27213,P55314,Q5HZV9,Q6IRE4,Q6P6T1,Q80WL1,Q9QW07 |

|      |                         |                                |    |                                                                                            |
|------|-------------------------|--------------------------------|----|--------------------------------------------------------------------------------------------|
| 6747 | 1,3,5,7,36,<br>39,41,42 | 2,4,6,8,37,<br>38,40,43,4<br>4 | 8  | O54728,P08010,P0C0A9,P17046,P25236,Q62635,Q6AYR9,Q6IRE4                                    |
| 6748 | 1,3,5,7,36,<br>39,41,43 | 2,4,6,8,37,<br>38,40,42,4<br>4 | 9  | O54728,P00714,P01946,P02091,P06760,P22006,Q62635,Q6P6R2,Q6TMA8                             |
| 6749 | 1,3,5,7,36,<br>39,41,44 | 2,4,6,8,37,<br>38,40,42,4<br>3 | 5  | O54728,P25236,P55314,Q6IRE4,Q8VD89                                                         |
| 6750 | 1,3,5,7,36,<br>39,42,43 | 2,4,6,8,37,<br>38,40,41,4<br>4 | 13 | O54728,P01946,P02091,P06911,P16636,P17046,P50280,P98089,Q62635,Q62975,Q6AYR9,Q6TMA8,Q8CIZ5 |
| 6751 | 1,3,5,7,36,<br>39,42,44 | 2,4,6,8,37,<br>38,40,41,4<br>3 | 7  | O54728,P00762,P17046,P55314,Q62635,Q6AYR9,Q6IRE4                                           |
| 6752 | 1,3,5,7,36,<br>39,43,44 | 2,4,6,8,37,<br>38,40,41,4<br>2 | 7  | O54728,P01946,P02091,P55314,Q6TMA8,Q8CIZ5,Q9QW07                                           |
| 6753 | 1,3,5,7,36,<br>40,41,42 | 2,4,6,8,37,<br>38,39,43,4<br>4 | 8  | P14480,P17046,Q4FZU6,Q64057,Q6AYR9,Q6IRE4,Q80WL1,Q9JJS8                                    |
| 6754 | 1,3,5,7,36,<br>40,41,43 | 2,4,6,8,37,<br>38,39,42,4<br>4 | 3  | P02091,Q6IRE4,Q80WL1                                                                       |
| 6755 | 1,3,5,7,36,<br>40,41,44 | 2,4,6,8,37,<br>38,39,42,4<br>3 | 6  | B0BNN3,P02680,P55314,Q4FZU6,Q6IRE4,Q80WL1                                                  |
| 6756 | 1,3,5,7,36,<br>40,42,43 | 2,4,6,8,37,<br>38,39,41,4<br>4 | 9  | O54728,P02091,P02782,P17046,P50280,P98089,Q62635,Q62975,Q6IRE4                             |
| 6757 | 1,3,5,7,36,<br>40,42,44 | 2,4,6,8,37,<br>38,39,41,4<br>3 | 8  | P00762,P02680,P02782,P17046,P55314,Q6IRE4,Q7TPB1,Q80WL1                                    |
| 6758 | 1,3,5,7,36,<br>40,43,44 | 2,4,6,8,37,<br>38,39,41,4<br>2 | 5  | P02091,P13432,P55314,Q80WL1,Q9QW07                                                         |
| 6759 | 1,3,5,7,36,<br>41,42,43 | 2,4,6,8,37,<br>38,39,40,4<br>4 | 11 | P02091,P0C0A9,P16636,P17046,P24368,P60905,P82471,Q62635,Q62975,Q6AYR9,Q6IRE4               |
| 6760 | 1,3,5,7,36,<br>41,42,44 | 2,4,6,8,37,<br>38,39,40,4<br>3 | 7  | P02680,P08644,P0C0A9,P17046,P60905,Q6IRE4,Q80WL1                                           |
| 6761 | 1,3,5,7,36,<br>41,43,44 | 2,4,6,8,37,<br>38,39,40,4<br>2 | 3  | P02091,P55314,P83121                                                                       |

|      |                         |                                |   |                                           |
|------|-------------------------|--------------------------------|---|-------------------------------------------|
| 6762 | 1,3,5,7,36,<br>42,43,44 | 2,4,6,8,37,<br>38,39,40,4<br>1 | 6 | P02091,P0C0A9,P17046,P50280,P55314,Q62975 |
| 6763 | 1,3,5,7,37,<br>38,39,40 | 2,4,6,8,36,<br>41,42,43,4<br>4 | 4 | P27213,Q6IRE4,Q6P6R2,Q9QW07               |
| 6764 | 1,3,5,7,37,<br>38,39,41 | 2,4,6,8,36,<br>40,42,43,4<br>4 | 5 | P00714,P18427,P25236,P62804,Q6IRE4        |
| 6765 | 1,3,5,7,37,<br>38,39,42 | 2,4,6,8,36,<br>40,41,43,4<br>4 | 5 | O54728,P17046,P18427,P19218,Q6IRE4        |
| 6766 | 1,3,5,7,37,<br>38,39,43 | 2,4,6,8,36,<br>40,41,42,4<br>4 | 6 | O54728,P01946,P02091,P62804,Q6P6R2,Q9QW07 |
| 6767 | 1,3,5,7,37,<br>38,39,44 | 2,4,6,8,36,<br>40,41,42,4<br>3 | 4 | P18427,P62804,Q6IRE4,Q9QW07               |
| 6768 | 1,3,5,7,37,<br>38,40,41 | 2,4,6,8,36,<br>39,42,43,4<br>4 | 3 | P18427,P62804,Q6IRE4                      |
| 6769 | 1,3,5,7,37,<br>38,40,42 | 2,4,6,8,36,<br>39,41,43,4<br>4 | 3 | P17046,P18427,Q6IRE4                      |
| 6770 | 1,3,5,7,37,<br>38,40,43 | 2,4,6,8,36,<br>39,41,42,4<br>4 | 4 | P02091,Q6IRE4,Q6P6R2,Q9QW07               |
| 6771 | 1,3,5,7,37,<br>38,40,44 | 2,4,6,8,36,<br>39,41,42,4<br>3 | 4 | P17046,P18427,Q6IRE4,Q9QW07               |
| 6772 | 1,3,5,7,37,<br>38,41,42 | 2,4,6,8,36,<br>39,40,43,4<br>4 | 3 | P17046,P18427,Q6IRE4                      |
| 6773 | 1,3,5,7,37,<br>38,41,43 | 2,4,6,8,36,<br>39,40,42,4<br>4 | 5 | P02091,P62804,Q6IRE4,Q7TPB1,Q8CJD3        |
| 6774 | 1,3,5,7,37,<br>38,41,44 | 2,4,6,8,36,<br>39,40,42,4<br>3 | 4 | P17046,P18427,P62804,Q6IRE4               |
| 6775 | 1,3,5,7,37,<br>38,42,43 | 2,4,6,8,36,<br>39,40,41,4<br>4 | 5 | P02091,P06911,P17046,Q5GRG2,Q62975        |
| 6776 | 1,3,5,7,37,<br>38,42,44 | 2,4,6,8,36,<br>39,40,41,4<br>3 | 3 | P17046,P18427,Q6IRE4                      |

|      |                         |                                |    |                                                                              |
|------|-------------------------|--------------------------------|----|------------------------------------------------------------------------------|
| 6777 | 1,3,5,7,37,<br>38,43,44 | 2,4,6,8,36,<br>39,40,41,4<br>2 | 3  | P02091,P17046,Q9QW07                                                         |
| 6778 | 1,3,5,7,37,<br>39,40,41 | 2,4,6,8,36,<br>38,42,43,4<br>4 | 4  | P10715,P62804,Q6IRE4,Q80WL1                                                  |
| 6779 | 1,3,5,7,37,<br>39,40,42 | 2,4,6,8,36,<br>38,41,43,4<br>4 | 10 | O54728,P00774,P17046,P18427,P27213,P98089,Q05695,Q62635,Q6IRE4,Q8CIZ5        |
| 6780 | 1,3,5,7,37,<br>39,40,43 | 2,4,6,8,36,<br>38,41,42,4<br>4 | 11 | O54728,P01946,P02091,P98089,Q05695,Q62635,Q6IRE4,Q6P6R2,Q8CIZ5,Q99MH3,Q9QW07 |
| 6781 | 1,3,5,7,37,<br>39,40,44 | 2,4,6,8,36,<br>38,41,42,4<br>3 | 5  | P27213,Q6IRE4,Q80WL1,Q8CIZ5,Q9QW07                                           |
| 6782 | 1,3,5,7,37,<br>39,41,42 | 2,4,6,8,36,<br>38,40,43,4<br>4 | 6  | O54728,P17046,P18427,Q00715,Q62635,Q6IRE4                                    |
| 6783 | 1,3,5,7,37,<br>39,41,43 | 2,4,6,8,36,<br>38,40,42,4<br>4 | 9  | P00714,P01946,P02091,P22006,P62804,Q62635,Q6IRE4,Q6TMA8,Q9Z0V6               |
| 6784 | 1,3,5,7,37,<br>39,41,44 | 2,4,6,8,36,<br>38,40,42,4<br>3 | 3  | P18427,P62804,Q6IRE4                                                         |
| 6785 | 1,3,5,7,37,<br>39,42,43 | 2,4,6,8,36,<br>38,40,41,4<br>4 | 9  | O54728,P01946,P02091,P17046,P50280,P98089,Q62635,Q62975,Q8CIZ5               |
| 6786 | 1,3,5,7,37,<br>39,42,44 | 2,4,6,8,36,<br>38,40,41,4<br>3 | 4  | O54728,P17046,P18427,Q6IRE4                                                  |
| 6787 | 1,3,5,7,37,<br>39,43,44 | 2,4,6,8,36,<br>38,40,41,4<br>2 | 5  | P01946,P02091,Q6TMA8,Q8CIZ5,Q9QW07                                           |
| 6788 | 1,3,5,7,37,<br>40,41,42 | 2,4,6,8,36,<br>38,39,43,4<br>4 | 4  | P17046,P18427,Q6IRE4,Q80WL1                                                  |
| 6789 | 1,3,5,7,37,<br>40,41,43 | 2,4,6,8,36,<br>38,39,42,4<br>4 | 6  | P02091,P51907,P62804,Q6IRE4,Q80WL1,Q9QW07                                    |
| 6790 | 1,3,5,7,37,<br>40,41,44 | 2,4,6,8,36,<br>38,39,42,4<br>3 | 5  | P10715,P17046,Q6IRE4,Q80WL1,Q9ET32                                           |
| 6791 | 1,3,5,7,37,<br>40,42,43 | 2,4,6,8,36,<br>38,39,41,4<br>4 | 9  | P02091,P17046,P50280,P98089,Q05695,Q62635,Q62975,Q6IRE4,Q8CIZ5               |

|      |                         |                                |   |                                                  |
|------|-------------------------|--------------------------------|---|--------------------------------------------------|
| 6792 | 1,3,5,7,37,<br>40,42,44 | 2,4,6,8,36,<br>38,39,41,4<br>3 | 4 | P17046,P18427,Q6IRE4,Q80WL1                      |
| 6793 | 1,3,5,7,37,<br>40,43,44 | 2,4,6,8,36,<br>38,39,41,4<br>2 | 6 | P02091,P17046,Q6IRE4,Q80WL1,Q8CIZ5,Q9QW07        |
| 6794 | 1,3,5,7,37,<br>41,42,43 | 2,4,6,8,36,<br>38,39,40,4<br>4 | 5 | P02091,P17046,Q62635,Q62975,Q6IRE4               |
| 6795 | 1,3,5,7,37,<br>41,42,44 | 2,4,6,8,36,<br>38,39,40,4<br>3 | 4 | P17046,P18427,Q6IRE4,Q80WL1                      |
| 6796 | 1,3,5,7,37,<br>41,43,44 | 2,4,6,8,36,<br>38,39,40,4<br>2 | 3 | P02091,P62804,Q9QW07                             |
| 6797 | 1,3,5,7,37,<br>42,43,44 | 2,4,6,8,36,<br>38,39,40,4<br>1 | 5 | P02091,P17046,P50280,Q62975,Q9QW07               |
| 6798 | 1,3,5,7,38,<br>39,40,41 | 2,4,6,8,36,<br>37,42,43,4<br>4 | 2 | P10715,Q6IRE4                                    |
| 6799 | 1,3,5,7,38,<br>39,40,42 | 2,4,6,8,36,<br>37,41,43,4<br>4 | 3 | O54728,P17046,Q6IRE4                             |
| 6800 | 1,3,5,7,38,<br>39,40,43 | 2,4,6,8,36,<br>37,41,42,4<br>4 | 7 | O54728,P01946,P02091,Q6IRE4,Q6P6R2,Q99MH3,Q9QW07 |
| 6801 | 1,3,5,7,38,<br>39,40,44 | 2,4,6,8,36,<br>37,41,42,4<br>3 | 3 | Q6IRE4,Q9QUL6,Q9QW07                             |
| 6802 | 1,3,5,7,38,<br>39,41,42 | 2,4,6,8,36,<br>37,40,43,4<br>4 | 4 | O54728,P0C0A9,P17046,Q6IRE4                      |
| 6803 | 1,3,5,7,38,<br>39,41,43 | 2,4,6,8,36,<br>37,40,42,4<br>4 | 6 | P00714,P01946,P02091,P62804,Q6IRE4,Q8CJD3        |
| 6804 | 1,3,5,7,38,<br>39,41,44 | 2,4,6,8,36,<br>37,40,42,4<br>3 | 2 | P62804,Q6IRE4                                    |
| 6805 | 1,3,5,7,38,<br>39,42,43 | 2,4,6,8,36,<br>37,40,41,4<br>4 | 6 | O54728,P01946,P02091,P17046,P47727,Q62975        |
| 6806 | 1,3,5,7,38,<br>39,42,44 | 2,4,6,8,36,<br>37,40,41,4<br>3 | 3 | O54728,P17046,Q6IRE4                             |

|      |                         |                                |    |                                                                              |
|------|-------------------------|--------------------------------|----|------------------------------------------------------------------------------|
| 6807 | 1,3,5,7,38,<br>39,43,44 | 2,4,6,8,36,<br>37,40,41,4<br>2 | 3  | P01946,P02091,Q9QW07                                                         |
| 6808 | 1,3,5,7,38,<br>40,41,42 | 2,4,6,8,36,<br>37,39,43,4<br>4 | 2  | P17046,Q6IRE4                                                                |
| 6809 | 1,3,5,7,38,<br>40,41,43 | 2,4,6,8,36,<br>37,39,42,4<br>4 | 3  | P02091,Q6IRE4,Q8CJD3                                                         |
| 6810 | 1,3,5,7,38,<br>40,41,44 | 2,4,6,8,36,<br>37,39,42,4<br>3 | 5  | P10715,P17046,Q4FZU6,Q6IRE4,Q9ET32                                           |
| 6811 | 1,3,5,7,38,<br>40,42,43 | 2,4,6,8,36,<br>37,39,41,4<br>4 | 5  | P02091,P17046,Q62975,Q6IRE4,Q9JHB9                                           |
| 6812 | 1,3,5,7,38,<br>40,42,44 | 2,4,6,8,36,<br>37,39,41,4<br>3 | 2  | P17046,Q6IRE4                                                                |
| 6813 | 1,3,5,7,38,<br>40,43,44 | 2,4,6,8,36,<br>37,39,41,4<br>2 | 4  | P02091,P17046,Q6IRE4,Q9QW07                                                  |
| 6814 | 1,3,5,7,38,<br>41,42,43 | 2,4,6,8,36,<br>37,39,40,4<br>4 | 8  | O35547,P02091,P0C0A9,P17046,P82471,Q62975,Q6IRE4,Q8CJD3                      |
| 6815 | 1,3,5,7,38,<br>41,42,44 | 2,4,6,8,36,<br>37,39,40,4<br>3 | 3  | P0C0A9,P17046,Q6IRE4                                                         |
| 6816 | 1,3,5,7,38,<br>41,43,44 | 2,4,6,8,36,<br>37,39,40,4<br>2 | 3  | P02091,P17046,Q8CJD3                                                         |
| 6817 | 1,3,5,7,38,<br>42,43,44 | 2,4,6,8,36,<br>37,39,40,4<br>1 | 5  | P02091,P0C0A9,P17046,Q62975,Q6AYR8                                           |
| 6818 | 1,3,5,7,39,<br>40,41,42 | 2,4,6,8,36,<br>37,38,43,4<br>4 | 5  | O54728,P17046,Q4FZU6,Q6AYR9,Q6IRE4                                           |
| 6819 | 1,3,5,7,39,<br>40,41,43 | 2,4,6,8,36,<br>37,38,42,4<br>4 | 4  | P00714,P01946,P02091,Q6IRE4                                                  |
| 6820 | 1,3,5,7,39,<br>40,41,44 | 2,4,6,8,36,<br>37,38,42,4<br>3 | 8  | P02680,P10715,P19629,Q4FZU6,Q6AYL6,Q6IRE4,Q80WL1,Q9ET32                      |
| 6821 | 1,3,5,7,39,<br>40,42,43 | 2,4,6,8,36,<br>37,38,41,4<br>4 | 11 | O54728,P02091,P17046,P50280,P98089,Q62635,Q6AYR9,Q6IRE4,Q8CIZ5,Q99MH3,Q9JHB9 |



|      |                         |                                |    |                                                                       |
|------|-------------------------|--------------------------------|----|-----------------------------------------------------------------------|
| 6822 | 1,3,5,7,39,<br>40,42,44 | 2,4,6,8,36,<br>37,38,41,4<br>3 | 4  | O54728,P17046,P50280,Q6IRE4                                           |
| 6823 | 1,3,5,7,39,<br>40,43,44 | 2,4,6,8,36,<br>37,38,41,4<br>2 | 5  | P01946,P02091,Q6AYL6,Q8CIZ5,Q9QW07                                    |
| 6824 | 1,3,5,7,39,<br>41,42,43 | 2,4,6,8,36,<br>37,38,40,4<br>4 | 10 | O54728,P01946,P02091,P0C0A9,P17046,P22006,P82471,Q62635,Q6AYR9,Q6IRE4 |
| 6825 | 1,3,5,7,39,<br>41,42,44 | 2,4,6,8,36,<br>37,38,40,4<br>3 | 4  | P0C0A9,P17046,Q6AYR9,Q6IRE4                                           |
| 6826 | 1,3,5,7,39,<br>41,43,44 | 2,4,6,8,36,<br>37,38,40,4<br>2 | 2  | P01946,P02091                                                         |
| 6827 | 1,3,5,7,39,<br>42,43,44 | 2,4,6,8,36,<br>37,38,40,4<br>1 | 7  | O54728,P01946,P02091,P0C0A9,P17046,P50280,Q62975                      |
| 6828 | 1,3,5,7,40,<br>41,42,43 | 2,4,6,8,36,<br>37,38,39,4<br>4 | 4  | P02091,P17046,Q6AYR9,Q6IRE4                                           |
| 6829 | 1,3,5,7,40,<br>41,42,44 | 2,4,6,8,36,<br>37,38,39,4<br>3 | 7  | P02680,P14480,P17046,Q4FZU6,Q6IRE4,Q80WL1,Q9ET32                      |
| 6830 | 1,3,5,7,40,<br>41,43,44 | 2,4,6,8,36,<br>37,38,39,4<br>2 | 6  | P02091,P17046,Q6IRE4,Q80WL1,Q9ET32,Q9QW07                             |
| 6831 | 1,3,5,7,40,<br>42,43,44 | 2,4,6,8,36,<br>37,38,39,4<br>1 | 7  | P02091,P02782,P17046,P50280,Q62975,Q6AYR8,Q6IRE4                      |
| 6832 | 1,3,5,7,41,<br>42,43,44 | 2,4,6,8,36,<br>37,38,39,4<br>0 | 7  | P02091,P0C0A9,P17046,P82471,Q62975,Q6AYR8,Q6IRE4                      |
| 6833 | 1,3,5,8,36,<br>37,38,39 | 2,4,6,7,40,<br>41,42,43,4<br>4 | 4  | O54728,P12020,Q6P6R2,Q9QW07                                           |
| 6834 | 1,3,5,8,36,<br>37,38,40 | 2,4,6,7,39,<br>41,42,43,4<br>4 | 3  | Q6IRE4,Q6P6R2,Q9QW07                                                  |
| 6835 | 1,3,5,8,36,<br>37,38,41 | 2,4,6,7,39,<br>40,42,43,4<br>4 | 3  | P25236,P83121,Q6IRE4                                                  |
| 6836 | 1,3,5,8,36,<br>37,38,42 | 2,4,6,7,39,<br>40,41,43,4<br>4 | 6  | O54728,P06911,P12020,Q5GRG2,Q6AYL6,Q920P0                             |

|      |                         |                                |    |                                                                                            |
|------|-------------------------|--------------------------------|----|--------------------------------------------------------------------------------------------|
| 6837 | 1,3,5,8,36,<br>37,38,43 | 2,4,6,7,39,<br>40,41,42,4<br>4 | 7  | P06911,P12020,P16391,P83121,Q5GRG2,Q6P6R2,Q9QW07                                           |
| 6838 | 1,3,5,8,36,<br>37,38,44 | 2,4,6,7,39,<br>40,41,42,4<br>3 | 1  | Q9QW07                                                                                     |
| 6839 | 1,3,5,8,36,<br>37,39,40 | 2,4,6,7,38,<br>41,42,43,4<br>4 | 12 | O54728,P00774,P09605;P25809,P27213,P55091,P98089,Q5HZV9,Q62635,Q6IRE4,Q6P6R2,Q8CIZ5,Q9QW07 |
| 6840 | 1,3,5,8,36,<br>37,39,41 | 2,4,6,7,38,<br>40,42,43,4<br>4 | 5  | O54728,P00714,P25236,P83121,Q6IRE4                                                         |
| 6841 | 1,3,5,8,36,<br>37,39,42 | 2,4,6,7,38,<br>40,41,43,4<br>4 | 7  | O54728,P00774,P09605;P25809,P12020,P55091,P98089,Q62635                                    |
| 6842 | 1,3,5,8,36,<br>37,39,43 | 2,4,6,7,38,<br>40,41,42,4<br>4 | 10 | O54728,P09605;P25809,P12020,P83121,P98089,Q62635,Q6P6R2,Q6TMA8,Q8CIZ5,Q9QW07               |
| 6843 | 1,3,5,8,36,<br>37,39,44 | 2,4,6,7,38,<br>40,41,42,4<br>3 | 6  | O54728,P09605;P25809,P27213,P55314,Q5HZV9,Q9QW07                                           |
| 6844 | 1,3,5,8,36,<br>37,40,41 | 2,4,6,7,38,<br>39,42,43,4<br>4 | 4  | P51907,P83121,Q6IRE4,Q80WL1                                                                |
| 6845 | 1,3,5,8,36,<br>37,40,42 | 2,4,6,7,38,<br>39,41,43,4<br>4 | 9  | O54728,P00774,P09605;P25809,P55091,P98089,Q62635,Q64057,Q6IRE4,Q920P0                      |
| 6846 | 1,3,5,8,36,<br>37,40,43 | 2,4,6,7,38,<br>39,41,42,4<br>4 | 7  | P09605;P25809,P51907,P83121,P98089,Q62635,Q8CIZ5,Q9QW07                                    |
| 6847 | 1,3,5,8,36,<br>37,40,44 | 2,4,6,7,38,<br>39,41,42,4<br>3 | 6  | O35547,P09605;P25809,Q5HZV9,Q6IRE4,Q80WL1,Q9QW07                                           |
| 6848 | 1,3,5,8,36,<br>37,41,42 | 2,4,6,7,38,<br>39,40,43,4<br>4 | 3  | P83121,Q6IRE4,Q920P0                                                                       |
| 6849 | 1,3,5,8,36,<br>37,41,43 | 2,4,6,7,38,<br>39,40,42,4<br>4 | 3  | P51907,P83121,Q9QX79                                                                       |
| 6850 | 1,3,5,8,36,<br>37,41,44 | 2,4,6,7,38,<br>39,40,42,4<br>3 | 3  | P83121,Q6IRE4,Q80WL1                                                                       |
| 6851 | 1,3,5,8,36,<br>37,42,43 | 2,4,6,7,38,<br>39,40,41,4<br>4 | 12 | O54728,P06911,P09605;P25809,P12020,P19629,P83121,P98089,Q5GRG2,Q62635,Q62975,Q8CIZ5,Q920P0 |

|      |                         |                                |   |                                                  |
|------|-------------------------|--------------------------------|---|--------------------------------------------------|
| 6852 | 1,3,5,8,36,<br>37,42,44 | 2,4,6,7,38,<br>39,40,41,4<br>3 | 2 | P09605;P25809,Q5HZV9                             |
| 6853 | 1,3,5,8,36,<br>37,43,44 | 2,4,6,7,38,<br>39,40,41,4<br>2 | 5 | P09605;P25809,P13432,P83121,Q8CIZ5,Q9QW07        |
| 6854 | 1,3,5,8,36,<br>38,39,40 | 2,4,6,7,37,<br>41,42,43,4<br>4 | 3 | O54728,Q6IRE4,Q6P6R2                             |
| 6855 | 1,3,5,8,36,<br>38,39,41 | 2,4,6,7,37,<br>40,42,43,4<br>4 | 3 | O54728,P25236,Q6IRE4                             |
| 6856 | 1,3,5,8,36,<br>38,39,42 | 2,4,6,7,37,<br>40,41,43,4<br>4 | 3 | O54728,P12020,P19218                             |
| 6857 | 1,3,5,8,36,<br>38,39,43 | 2,4,6,7,37,<br>40,41,42,4<br>4 | 4 | O54728,P12020,Q6P6R2,Q9QW07                      |
| 6858 | 1,3,5,8,36,<br>38,39,44 | 2,4,6,7,37,<br>40,41,42,4<br>3 | 3 | O54728,P55314,Q9QW07                             |
| 6859 | 1,3,5,8,36,<br>38,40,41 | 2,4,6,7,37,<br>39,42,43,4<br>4 | 3 | P14480,P25236,Q6IRE4                             |
| 6860 | 1,3,5,8,36,<br>38,40,42 | 2,4,6,7,37,<br>39,41,43,4<br>4 | 4 | O54728,P14480,Q64057,Q6IRE4                      |
| 6861 | 1,3,5,8,36,<br>38,40,43 | 2,4,6,7,37,<br>39,41,42,4<br>4 | 2 | Q6P6R2,Q9QW07                                    |
| 6862 | 1,3,5,8,36,<br>38,40,44 | 2,4,6,7,37,<br>39,41,42,4<br>3 | 2 | Q6IRE4,Q9QW07                                    |
| 6863 | 1,3,5,8,36,<br>38,41,42 | 2,4,6,7,37,<br>39,40,43,4<br>4 | 4 | P08753,P25236,Q6AYL6,Q6IRE4                      |
| 6864 | 1,3,5,8,36,<br>38,41,43 | 2,4,6,7,37,<br>39,40,42,4<br>4 | 3 | P50116,P83121,Q8CJD3                             |
| 6865 | 1,3,5,8,36,<br>38,41,44 | 2,4,6,7,37,<br>39,40,42,4<br>3 | 3 | P25236,P83121,Q6IRE4                             |
| 6866 | 1,3,5,8,36,<br>38,42,43 | 2,4,6,7,37,<br>39,40,41,4<br>4 | 7 | O54728,P06911,P12020,P16391,Q5GRG2,Q62975,Q6AYL6 |

|      |                         |                                |   |                                                                |
|------|-------------------------|--------------------------------|---|----------------------------------------------------------------|
| 6867 | 1,3,5,8,36,<br>38,42,44 | 2,4,6,7,37,<br>39,40,41,4<br>3 | 0 |                                                                |
| 6868 | 1,3,5,8,36,<br>38,43,44 | 2,4,6,7,37,<br>39,40,41,4<br>2 | 1 | Q9QW07                                                         |
| 6869 | 1,3,5,8,36,<br>39,40,41 | 2,4,6,7,37,<br>38,42,43,4<br>4 | 4 | O54728,P14480,P97840,Q6IRE4                                    |
| 6870 | 1,3,5,8,36,<br>39,40,42 | 2,4,6,7,37,<br>38,41,43,4<br>4 | 9 | O54728,P00774,P02631,P14480,P55091,P98089,Q62635,Q6AYR9,Q6IRE4 |
| 6871 | 1,3,5,8,36,<br>39,40,43 | 2,4,6,7,37,<br>38,41,42,4<br>4 | 7 | O54728,P97840,P98089,Q62635,Q6P6R2,Q8CIZ5,Q9QW07               |
| 6872 | 1,3,5,8,36,<br>39,40,44 | 2,4,6,7,37,<br>38,41,42,4<br>3 | 9 | O54728,P06866,P27213,P55314,P80020,Q5HZV9,Q6IRE4,Q6P6T1,Q9QW07 |
| 6873 | 1,3,5,8,36,<br>39,41,42 | 2,4,6,7,37,<br>38,40,43,4<br>4 | 4 | O54728,P08753,Q6AYR9,Q6IRE4                                    |
| 6874 | 1,3,5,8,36,<br>39,41,43 | 2,4,6,7,37,<br>38,40,42,4<br>4 | 4 | O54728,P00714,P83121,P97840                                    |
| 6875 | 1,3,5,8,36,<br>39,41,44 | 2,4,6,7,37,<br>38,40,42,4<br>3 | 3 | P55314,P83121,Q6IRE4                                           |
| 6876 | 1,3,5,8,36,<br>39,42,43 | 2,4,6,7,37,<br>38,40,41,4<br>4 | 8 | O54728,P06911,P12020,P98089,Q5GRG2,Q62635,Q6AYR9,Q8CIZ5        |
| 6877 | 1,3,5,8,36,<br>39,42,44 | 2,4,6,7,37,<br>38,40,41,4<br>3 | 3 | O54728,P55314,Q5HZV9                                           |
| 6878 | 1,3,5,8,36,<br>39,43,44 | 2,4,6,7,37,<br>38,40,41,4<br>2 | 4 | O54728,P55314,Q8CIZ5,Q9QW07                                    |
| 6879 | 1,3,5,8,36,<br>40,41,42 | 2,4,6,7,37,<br>38,39,43,4<br>4 | 5 | P14480,P23593,Q64057,Q6AYR9,Q6IRE4                             |
| 6880 | 1,3,5,8,36,<br>40,41,43 | 2,4,6,7,37,<br>38,39,42,4<br>4 | 4 | P51907,P83121,P97840,Q6IRE4                                    |
| 6881 | 1,3,5,8,36,<br>40,41,44 | 2,4,6,7,37,<br>38,39,42,4<br>3 | 4 | P14480,Q4FZU6,Q6IRE4,Q80WL1                                    |

|      |                         |                                |   |                                                  |
|------|-------------------------|--------------------------------|---|--------------------------------------------------|
| 6882 | 1,3,5,8,36,<br>40,42,43 | 2,4,6,7,37,<br>38,39,41,4<br>4 | 4 | O54728,P98089,Q62635,Q920P0                      |
| 6883 | 1,3,5,8,36,<br>40,42,44 | 2,4,6,7,37,<br>38,39,41,4<br>3 | 3 | P14480,Q6IRE4,Q7TPB1                             |
| 6884 | 1,3,5,8,36,<br>40,43,44 | 2,4,6,7,37,<br>38,39,41,4<br>2 | 4 | P13432,P55314,P97840,Q9QW07                      |
| 6885 | 1,3,5,8,36,<br>41,42,43 | 2,4,6,7,37,<br>38,39,40,4<br>4 | 2 | P83121,Q6AYR9                                    |
| 6886 | 1,3,5,8,36,<br>41,42,44 | 2,4,6,7,37,<br>38,39,40,4<br>3 | 4 | P14480,P60905,P83121,Q6IRE4                      |
| 6887 | 1,3,5,8,36,<br>41,43,44 | 2,4,6,7,37,<br>38,39,40,4<br>2 | 2 | P83121,P97840                                    |
| 6888 | 1,3,5,8,36,<br>42,43,44 | 2,4,6,7,37,<br>38,39,40,4<br>1 | 1 | P83121                                           |
| 6889 | 1,3,5,8,37,<br>38,39,40 | 2,4,6,7,36,<br>41,42,43,4<br>4 | 6 | P08649,P35281,P82995,Q6IRE4,Q6P6R2,Q9QW07        |
| 6890 | 1,3,5,8,37,<br>38,39,41 | 2,4,6,7,36,<br>40,42,43,4<br>4 | 3 | P25236,Q6IRE4,Q9R1T5                             |
| 6891 | 1,3,5,8,37,<br>38,39,42 | 2,4,6,7,36,<br>40,41,43,4<br>4 | 4 | O54728,P12020,P18427,Q6IRE4                      |
| 6892 | 1,3,5,8,37,<br>38,39,43 | 2,4,6,7,36,<br>40,41,42,4<br>4 | 7 | P08649,P12020,Q62740,Q6IFV1,Q6P6R2,Q9QW07,Q9R1T5 |
| 6893 | 1,3,5,8,37,<br>38,39,44 | 2,4,6,7,36,<br>40,41,42,4<br>3 | 2 | P08649,Q9QW07                                    |
| 6894 | 1,3,5,8,37,<br>38,40,41 | 2,4,6,7,36,<br>39,42,43,4<br>4 | 2 | P51907,Q6IRE4                                    |
| 6895 | 1,3,5,8,37,<br>38,40,42 | 2,4,6,7,36,<br>39,41,43,4<br>4 | 3 | D3ZUC6,P18427,Q6IRE4                             |
| 6896 | 1,3,5,8,37,<br>38,40,43 | 2,4,6,7,36,<br>39,41,42,4<br>4 | 6 | P08649,P51907,P82995,Q62740,Q6IFV1,Q9QW07        |

|      |                         |                                |   |                                                         |
|------|-------------------------|--------------------------------|---|---------------------------------------------------------|
| 6897 | 1,3,5,8,37,<br>38,40,44 | 2,4,6,7,36,<br>39,41,42,4<br>3 | 3 | P08649,Q6IRE4,Q9QW07                                    |
| 6898 | 1,3,5,8,37,<br>38,41,42 | 2,4,6,7,36,<br>39,40,43,4<br>4 | 2 | P18427,Q6IRE4                                           |
| 6899 | 1,3,5,8,37,<br>38,41,43 | 2,4,6,7,36,<br>39,40,42,4<br>4 | 5 | P51907,P83121,Q7TPB1,Q8CJD3,Q9QX79                      |
| 6900 | 1,3,5,8,37,<br>38,41,44 | 2,4,6,7,36,<br>39,40,42,4<br>3 | 2 | P18427,Q6IRE4                                           |
| 6901 | 1,3,5,8,37,<br>38,42,43 | 2,4,6,7,36,<br>39,40,41,4<br>4 | 4 | P06911,P12020,Q5GRG2,Q62975                             |
| 6902 | 1,3,5,8,37,<br>38,42,44 | 2,4,6,7,36,<br>39,40,41,4<br>3 | 2 | P18427,P83748                                           |
| 6903 | 1,3,5,8,37,<br>38,43,44 | 2,4,6,7,36,<br>39,40,41,4<br>2 | 2 | P08649,Q9QW07                                           |
| 6904 | 1,3,5,8,37,<br>39,40,41 | 2,4,6,7,36,<br>38,42,43,4<br>4 | 4 | P47967,P51907,P97840,Q6IRE4                             |
| 6905 | 1,3,5,8,37,<br>39,40,42 | 2,4,6,7,36,<br>38,41,43,4<br>4 | 7 | O54728,P00774,P55091,P98089,Q62635,Q6IRE4,Q8CIZ5        |
| 6906 | 1,3,5,8,37,<br>39,40,43 | 2,4,6,7,36,<br>38,41,42,4<br>4 | 8 | P08649,P51907,P97840,P98089,Q62635,Q62740,Q8CIZ5,Q9QW07 |
| 6907 | 1,3,5,8,37,<br>39,40,44 | 2,4,6,7,36,<br>38,41,42,4<br>3 | 6 | P08649,P27213,Q5HZV9,Q6IRE4,Q8CIZ5,Q9QW07               |
| 6908 | 1,3,5,8,37,<br>39,41,42 | 2,4,6,7,36,<br>38,40,43,4<br>4 | 2 | P18427,Q6IRE4                                           |
| 6909 | 1,3,5,8,37,<br>39,41,43 | 2,4,6,7,36,<br>38,40,42,4<br>4 | 6 | P00714,P51907,P83121,P97840,Q9QW07,Q9QX79               |
| 6910 | 1,3,5,8,37,<br>39,41,44 | 2,4,6,7,36,<br>38,40,42,4<br>3 | 1 | Q6IRE4                                                  |
| 6911 | 1,3,5,8,37,<br>39,42,43 | 2,4,6,7,36,<br>38,40,41,4<br>4 | 5 | O54728,P12020,P98089,Q62635,Q8CIZ5                      |

|      |                         |                                |   |                                                  |
|------|-------------------------|--------------------------------|---|--------------------------------------------------|
| 6912 | 1,3,5,8,37,<br>39,42,44 | 2,4,6,7,36,<br>38,40,41,4<br>3 | 2 | P18427,Q5HZV9                                    |
| 6913 | 1,3,5,8,37,<br>39,43,44 | 2,4,6,7,36,<br>38,40,41,4<br>2 | 3 | P08649,Q8CIZ5,Q9QW07                             |
| 6914 | 1,3,5,8,37,<br>40,41,42 | 2,4,6,7,36,<br>38,39,43,4<br>4 | 2 | P51907,Q6IRE4                                    |
| 6915 | 1,3,5,8,37,<br>40,41,43 | 2,4,6,7,36,<br>38,39,42,4<br>4 | 7 | P47967,P51907,P83121,P97840,Q6IRE4,Q9QW07,Q9QX79 |
| 6916 | 1,3,5,8,37,<br>40,41,44 | 2,4,6,7,36,<br>38,39,42,4<br>3 | 5 | P10715,P47967,P51907,Q6IRE4,Q80WL1               |
| 6917 | 1,3,5,8,37,<br>40,42,43 | 2,4,6,7,36,<br>38,39,41,4<br>4 | 5 | P51907,P98089,Q62635,Q8CIZ5,Q9QW07               |
| 6918 | 1,3,5,8,37,<br>40,42,44 | 2,4,6,7,36,<br>38,39,41,4<br>3 | 2 | P18427,Q6IRE4                                    |
| 6919 | 1,3,5,8,37,<br>40,43,44 | 2,4,6,7,36,<br>38,39,41,4<br>2 | 5 | P08649,P51907,P97840,Q8CIZ5,Q9QW07               |
| 6920 | 1,3,5,8,37,<br>41,42,43 | 2,4,6,7,36,<br>38,39,40,4<br>4 | 3 | P51907,P83121,Q9QX79                             |
| 6921 | 1,3,5,8,37,<br>41,42,44 | 2,4,6,7,36,<br>38,39,40,4<br>3 | 4 | O70594,P18427,P83121,Q6IRE4                      |
| 6922 | 1,3,5,8,37,<br>41,43,44 | 2,4,6,7,36,<br>38,39,40,4<br>2 | 5 | P51907,P83121,P97840,Q9QW07,Q9QX79               |
| 6923 | 1,3,5,8,37,<br>42,43,44 | 2,4,6,7,36,<br>38,39,40,4<br>1 | 1 | Q9QW07                                           |
| 6924 | 1,3,5,8,38,<br>39,40,41 | 2,4,6,7,36,<br>37,42,43,4<br>4 | 2 | P47967,Q6IRE4                                    |
| 6925 | 1,3,5,8,38,<br>39,40,42 | 2,4,6,7,36,<br>37,41,43,4<br>4 | 4 | D3ZUC6,O54728,P02631,Q6IRE4                      |
| 6926 | 1,3,5,8,38,<br>39,40,43 | 2,4,6,7,36,<br>37,41,42,4<br>4 | 5 | P08649,P97840,Q6P6R2,Q9QW07,Q9QZQ5               |

|      |                         |                                |   |                                           |
|------|-------------------------|--------------------------------|---|-------------------------------------------|
| 6927 | 1,3,5,8,38,<br>39,40,44 | 2,4,6,7,36,<br>37,41,42,4<br>3 | 3 | P08649,Q6IRE4,Q9QW07                      |
| 6928 | 1,3,5,8,38,<br>39,41,42 | 2,4,6,7,36,<br>37,40,43,4<br>4 | 3 | O54728,P08753,Q6IRE4                      |
| 6929 | 1,3,5,8,38,<br>39,41,43 | 2,4,6,7,36,<br>37,40,42,4<br>4 | 4 | P00714,P00731,P97840,Q8CJD3               |
| 6930 | 1,3,5,8,38,<br>39,41,44 | 2,4,6,7,36,<br>37,40,42,4<br>3 | 1 | Q6IRE4                                    |
| 6931 | 1,3,5,8,38,<br>39,42,43 | 2,4,6,7,36,<br>37,40,41,4<br>4 | 3 | O54728,P12020,Q5GRG2                      |
| 6932 | 1,3,5,8,38,<br>39,42,44 | 2,4,6,7,36,<br>37,40,41,4<br>3 | 1 | O54728                                    |
| 6933 | 1,3,5,8,38,<br>39,43,44 | 2,4,6,7,36,<br>37,40,41,4<br>2 | 3 | P08649,Q9QW07,Q9QZQ5                      |
| 6934 | 1,3,5,8,38,<br>40,41,42 | 2,4,6,7,36,<br>37,39,43,4<br>4 | 2 | P14480,Q6IRE4                             |
| 6935 | 1,3,5,8,38,<br>40,41,43 | 2,4,6,7,36,<br>37,39,42,4<br>4 | 6 | P47967,P51907,P97840,Q6IRE4,Q8CJD3,Q9QZQ5 |
| 6936 | 1,3,5,8,38,<br>40,41,44 | 2,4,6,7,36,<br>37,39,42,4<br>3 | 2 | P14480,Q6IRE4                             |
| 6937 | 1,3,5,8,38,<br>40,42,43 | 2,4,6,7,36,<br>37,39,41,4<br>4 | 2 | P35467,Q9JHB9                             |
| 6938 | 1,3,5,8,38,<br>40,42,44 | 2,4,6,7,36,<br>37,39,41,4<br>3 | 6 | D3ZUC6,P06760,P14480,P22006,P83748,Q6IRE4 |
| 6939 | 1,3,5,8,38,<br>40,43,44 | 2,4,6,7,36,<br>37,39,41,4<br>2 | 6 | P01681,P08649,P35467,P97840,Q9QW07,Q9QZQ5 |
| 6940 | 1,3,5,8,38,<br>41,42,43 | 2,4,6,7,36,<br>37,39,40,4<br>4 | 3 | P00731,P50116,Q8CJD3                      |
| 6941 | 1,3,5,8,38,<br>41,42,44 | 2,4,6,7,36,<br>37,39,40,4<br>3 | 3 | P08753,P14480,Q6IRE4                      |



|      |                         |                                |   |                                                  |
|------|-------------------------|--------------------------------|---|--------------------------------------------------|
| 6942 | 1,3,5,8,38,<br>41,43,44 | 2,4,6,7,36,<br>37,39,40,4<br>2 | 3 | P50116,P83121,Q8CJD3                             |
| 6943 | 1,3,5,8,38,<br>42,43,44 | 2,4,6,7,36,<br>37,39,40,4<br>1 | 1 | P35467                                           |
| 6944 | 1,3,5,8,39,<br>40,41,42 | 2,4,6,7,36,<br>37,38,43,4<br>4 | 5 | P02631,P14480,P97840,Q6AYR9,Q6IRE4               |
| 6945 | 1,3,5,8,39,<br>40,41,43 | 2,4,6,7,36,<br>37,38,42,4<br>4 | 5 | P47967,P51907,P97840,Q6IRE4,Q9QZQ5               |
| 6946 | 1,3,5,8,39,<br>40,41,44 | 2,4,6,7,36,<br>37,38,42,4<br>3 | 6 | P10715,P14480,P19629,P47967,P97840,Q6IRE4        |
| 6947 | 1,3,5,8,39,<br>40,42,43 | 2,4,6,7,36,<br>37,38,41,4<br>4 | 7 | O54728,P97840,P98089,Q62635,Q8CIZ5,Q99MH3,Q9JHB9 |
| 6948 | 1,3,5,8,39,<br>40,42,44 | 2,4,6,7,36,<br>37,38,41,4<br>3 | 2 | P14480,Q6IRE4                                    |
| 6949 | 1,3,5,8,39,<br>40,43,44 | 2,4,6,7,36,<br>37,38,41,4<br>2 | 6 | P08649,P47967,P97840,Q8CIZ5,Q9QW07,Q9QZQ5        |
| 6950 | 1,3,5,8,39,<br>41,42,43 | 2,4,6,7,36,<br>37,38,40,4<br>4 | 5 | O54728,P00731,P82471,P97840,Q6AYR9               |
| 6951 | 1,3,5,8,39,<br>41,42,44 | 2,4,6,7,36,<br>37,38,40,4<br>3 | 2 | P14480,Q6IRE4                                    |
| 6952 | 1,3,5,8,39,<br>41,43,44 | 2,4,6,7,36,<br>37,38,40,4<br>2 | 3 | P47967,P83121,P97840                             |
| 6953 | 1,3,5,8,39,<br>42,43,44 | 2,4,6,7,36,<br>37,38,40,4<br>1 | 1 | O54728                                           |
| 6954 | 1,3,5,8,40,<br>41,42,43 | 2,4,6,7,36,<br>37,38,39,4<br>4 | 3 | P51907,P97840,Q6IRE4                             |
| 6955 | 1,3,5,8,40,<br>41,42,44 | 2,4,6,7,36,<br>37,38,39,4<br>3 | 3 | P14480,Q4FZU6,Q6IRE4                             |
| 6956 | 1,3,5,8,40,<br>41,43,44 | 2,4,6,7,36,<br>37,38,39,4<br>2 | 5 | P47967,P51907,P83121,P97840,Q9QW07               |

|      |                          |                                |    |                                                                                                   |
|------|--------------------------|--------------------------------|----|---------------------------------------------------------------------------------------------------|
| 6957 | 1,3,5,8,40,<br>42,43,44  | 2,4,6,7,36,<br>37,38,39,4<br>1 | 2  | P97840,Q5M819                                                                                     |
| 6958 | 1,3,5,8,41,<br>42,43,44  | 2,4,6,7,36,<br>37,38,39,4<br>0 | 4  | P00731,P82471,P83121,P97840                                                                       |
| 6959 | 1,3,5,36,3<br>7,38,39,40 | 2,4,6,7,8,4<br>1,42,43,44      | 5  | O54728,P20762,Q6IRE4,Q6P6R2,Q9QW07                                                                |
| 6960 | 1,3,5,36,3<br>7,38,39,41 | 2,4,6,7,8,4<br>0,42,43,44      | 6  | O54728,P00714,P20762,P25236,Q6IRE4,Q6P6R2                                                         |
| 6961 | 1,3,5,36,3<br>7,38,39,42 | 2,4,6,7,8,4<br>0,41,43,44      | 5  | O54728,P12020,Q5GRG2,Q63617,Q6IRE4                                                                |
| 6962 | 1,3,5,36,3<br>7,38,39,43 | 2,4,6,7,8,4<br>0,41,42,44      | 9  | O54728,P00714,P12020,P14669,Q63617,Q6IFV1,Q6P6R2,Q9QW07,Q9QZQ5                                    |
| 6963 | 1,3,5,36,3<br>7,38,39,44 | 2,4,6,7,8,4<br>0,41,42,43      | 8  | O54728,P20762,P55314,Q63617,Q6IRE4,Q6P6R2,Q9JJS8,Q9QW07                                           |
| 6964 | 1,3,5,36,3<br>7,38,40,41 | 2,4,6,7,8,3<br>9,42,43,44      | 4  | P20762,P25236,Q6IRE4,Q80WL1                                                                       |
| 6965 | 1,3,5,36,3<br>7,38,40,42 | 2,4,6,7,8,3<br>9,41,43,44      | 4  | O54728,P11598,Q64057,Q6IRE4                                                                       |
| 6966 | 1,3,5,36,3<br>7,38,40,43 | 2,4,6,7,8,3<br>9,41,42,44      | 4  | P11598,Q6P6R2,Q9QW07,Q9QZQ5                                                                       |
| 6967 | 1,3,5,36,3<br>7,38,40,44 | 2,4,6,7,8,3<br>9,41,42,43      | 5  | P20762,P54921,Q6IRE4,Q80WL1,Q9QW07                                                                |
| 6968 | 1,3,5,36,3<br>7,38,41,42 | 2,4,6,7,8,3<br>9,40,43,44      | 5  | P12020,P20762,P25236,Q6AYL6,Q6IRE4                                                                |
| 6969 | 1,3,5,36,3<br>7,38,41,43 | 2,4,6,7,8,3<br>9,40,42,44      | 6  | P00714,P12020,P83121,Q6P6R2,Q8CJD3,Q9QW07                                                         |
| 6970 | 1,3,5,36,3<br>7,38,41,44 | 2,4,6,7,8,3<br>9,40,42,43      | 5  | P20762,P25236,Q6IRE4,Q80WL1,Q9QW07                                                                |
| 6971 | 1,3,5,36,3<br>7,38,42,43 | 2,4,6,7,8,3<br>9,40,41,44      | 11 | O54728,P06911,P10715,P11598,P12020,P19629,P31044,Q5GRG2,Q63617,Q6AYL6,Q9QW07                      |
| 6972 | 1,3,5,36,3<br>7,38,42,44 | 2,4,6,7,8,3<br>9,40,41,43      | 4  | P12020,P83748,Q63617,Q6IRE4                                                                       |
| 6973 | 1,3,5,36,3<br>7,38,43,44 | 2,4,6,7,8,3<br>9,40,41,42      | 4  | P12020,Q63617,Q9QW07,Q9QZQ5                                                                       |
| 6974 | 1,3,5,36,3<br>7,39,40,41 | 2,4,6,7,8,3<br>8,42,43,44      | 6  | O54728,P00714,P20762,Q6IRE4,Q80WL1,Q9QW07                                                         |
| 6975 | 1,3,5,36,3<br>7,39,40,42 | 2,4,6,7,8,3<br>8,41,43,44      | 13 | O54728,P00774,P02631,P11598,P50115,P50116,P55091,P98089,Q05695,Q5U2V4,Q62635,Q6IRE4,Q8CIZ5        |
| 6976 | 1,3,5,36,3<br>7,39,40,43 | 2,4,6,7,8,3<br>8,41,42,44      | 14 | O35547,O54728,P00714,P50115,P50116,P55091,P98089,Q05695,Q62635,Q62740,Q6P6R2,Q8CIZ5,Q9QW07,Q9QZQ5 |
| 6977 | 1,3,5,36,3<br>7,39,40,44 | 2,4,6,7,8,3<br>8,41,42,43      | 13 | O35547,O54728,P20762,P27213,P50115,P50116,P54921,P55314,Q5HZV9,Q6IRE4,Q80WL1,Q8CIZ5,Q9QW07        |
| 6978 | 1,3,5,36,3<br>7,39,41,42 | 2,4,6,7,8,3<br>8,40,43,44      | 4  | O54728,P20762,Q62635,Q6IRE4                                                                       |

|      |                                                 |    |                                                                                            |
|------|-------------------------------------------------|----|--------------------------------------------------------------------------------------------|
| 6979 | 1,3,5,36,3 2,4,6,7,8,3<br>7,39,41,43 8,40,42,44 | 8  | O54728,P00714,P83121,Q62635,Q6P6R2,Q6TMA8,Q9QW07,Q9Z0V6                                    |
| 6980 | 1,3,5,36,3 2,4,6,7,8,3<br>7,39,41,44 8,40,42,43 | 5  | P20762,P55314,Q6IRE4,Q80WL1,Q9QW07                                                         |
| 6981 | 1,3,5,36,3 2,4,6,7,8,3<br>7,39,42,43 8,40,41,44 | 13 | O54728,P06911,P11598,P12020,P50115,P50280,P98089,Q05695,Q5GRG2,Q62635,Q63617,Q8CIZ5,Q9QW07 |
| 6982 | 1,3,5,36,3 2,4,6,7,8,3<br>7,39,42,44 8,40,41,43 | 8  | O54728,P50115,P50116,P55314,Q62635,Q63617,Q6IRE4,Q9QW07                                    |
| 6983 | 1,3,5,36,3 2,4,6,7,8,3<br>7,39,43,44 8,40,41,42 | 6  | O54728,P50115,P55314,Q63617,Q8CIZ5,Q9QW07                                                  |
| 6984 | 1,3,5,36,3 2,4,6,7,8,3<br>7,40,41,42 8,39,43,44 | 5  | P11598,P20762,Q64057,Q6IRE4,Q80WL1                                                         |
| 6985 | 1,3,5,36,3 2,4,6,7,8,3<br>7,40,41,43 8,39,42,44 | 7  | P00714,P51907,P83121,Q6IRE4,Q80WL1,Q9QW07,Q9QZQ5                                           |
| 6986 | 1,3,5,36,3 2,4,6,7,8,3<br>7,40,41,44 8,39,42,43 | 4  | P20762,Q6IRE4,Q80WL1,Q9QW07                                                                |
| 6987 | 1,3,5,36,3 2,4,6,7,8,3<br>7,40,42,43 8,39,41,44 | 13 | O54728,P11598,P12020,P21581,P50115,P50280,P98089,Q05695,Q62635,Q6IRE4,Q8CIZ5,Q920P0,Q9QW07 |
| 6988 | 1,3,5,36,3 2,4,6,7,8,3<br>7,40,42,44 8,39,41,43 | 6  | P50115,P50116,Q6IRE4,Q7TPB1,Q80WL1,Q9QW07                                                  |
| 6989 | 1,3,5,36,3 2,4,6,7,8,3<br>7,40,43,44 8,39,41,42 | 7  | O35547,P50115,P55314,Q80WL1,Q8CIZ5,Q9QW07,Q9QZQ5                                           |
| 6990 | 1,3,5,36,3 2,4,6,7,8,3<br>7,41,42,43 8,39,40,44 | 4  | P11598,P12020,P83121,Q62635                                                                |
| 6991 | 1,3,5,36,3 2,4,6,7,8,3<br>7,41,42,44 8,39,40,43 | 3  | P20762,Q6IRE4,Q80WL1                                                                       |
| 6992 | 1,3,5,36,3 2,4,6,7,8,3<br>7,41,43,44 8,39,40,42 | 3  | P83121,Q80WL1,Q9QW07                                                                       |
| 6993 | 1,3,5,36,3 2,4,6,7,8,3<br>7,42,43,44 8,39,40,41 | 7  | P06911,P11598,P12020,P50115,P50280,Q63617,Q9QW07                                           |
| 6994 | 1,3,5,36,3 2,4,6,7,8,3<br>8,39,40,41 7,42,43,44 | 8  | O54728,P00714,P02631,P20762,P25236,Q6IRE4,Q6P6R2,Q9QZQ5                                    |
| 6995 | 1,3,5,36,3 2,4,6,7,8,3<br>8,39,40,42 7,41,43,44 | 6  | O54728,P02631,P11598,Q63617,Q6IRE4,Q99041                                                  |
| 6996 | 1,3,5,36,3 2,4,6,7,8,3<br>8,39,40,43 7,41,42,44 | 6  | O54728,P00714,Q63617,Q6P6R2,Q9QW07,Q9QZQ5                                                  |
| 6997 | 1,3,5,36,3 2,4,6,7,8,3<br>8,39,40,44 7,41,42,43 | 7  | O54728,P02631,P55314,Q6IRE4,Q99041,Q9QW07,Q9QZQ5                                           |
| 6998 | 1,3,5,36,3 2,4,6,7,8,3<br>8,39,41,42 7,40,43,44 | 4  | O54728,P02631,P25236,Q6IRE4                                                                |
| 6999 | 1,3,5,36,3 2,4,6,7,8,3<br>8,39,41,43 7,40,42,44 | 5  | O54728,P00714,Q6P6R2,Q8CJD3,Q9QZQ5                                                         |
| 7000 | 1,3,5,36,3 2,4,6,7,8,3<br>8,39,41,44 7,40,42,43 | 4  | P20762,P25236,P55314,Q6IRE4                                                                |
| 7001 | 1,3,5,36,3 2,4,6,7,8,3<br>8,39,42,43 7,40,41,44 | 8  | O54728,P06911,P11598,P12020,P14669,Q5GRG2,Q63617,Q99041                                    |

|      |                          |                           |    |                                                                              |
|------|--------------------------|---------------------------|----|------------------------------------------------------------------------------|
| 7002 | 1,3,5,36,3<br>8,39,42,44 | 2,4,6,7,8,3<br>7,40,41,43 | 6  | O54728,P02631,P55314,Q63617,Q6IRE4,Q99041                                    |
| 7003 | 1,3,5,36,3<br>8,39,43,44 | 2,4,6,7,8,3<br>7,40,41,42 | 8  | O54728,P55314,Q63617,Q6P6R2,Q99041,Q9JJS8,Q9QW07,Q9QZQ5                      |
| 7004 | 1,3,5,36,3<br>8,40,41,42 | 2,4,6,7,8,3<br>7,39,43,44 | 5  | P02631,P11598,P14480,Q64057,Q6IRE4                                           |
| 7005 | 1,3,5,36,3<br>8,40,41,43 | 2,4,6,7,8,3<br>7,39,42,44 | 5  | P11598,Q6IRE4,Q8CJD3,Q9QW07,Q9QZQ5                                           |
| 7006 | 1,3,5,36,3<br>8,40,41,44 | 2,4,6,7,8,3<br>7,39,42,43 | 5  | P14480,P20762,Q6IRE4,Q80WL1,Q9QZQ5                                           |
| 7007 | 1,3,5,36,3<br>8,40,42,43 | 2,4,6,7,8,3<br>7,39,41,44 | 6  | O54728,P11598,P12020,Q63617,Q6IRE4,Q99041                                    |
| 7008 | 1,3,5,36,3<br>8,40,42,44 | 2,4,6,7,8,3<br>7,39,41,43 | 6  | P02631,P14480,P83748,Q6IRE4,Q7TPB1,Q99041                                    |
| 7009 | 1,3,5,36,3<br>8,40,43,44 | 2,4,6,7,8,3<br>7,39,41,42 | 4  | P55314,Q99041,Q9QW07,Q9QZQ5                                                  |
| 7010 | 1,3,5,36,3<br>8,41,42,43 | 2,4,6,7,8,3<br>7,39,40,44 | 4  | P11598,P12020,Q5GRG2,Q8CJD3                                                  |
| 7011 | 1,3,5,36,3<br>8,41,42,44 | 2,4,6,7,8,3<br>7,39,40,43 | 1  | Q6IRE4                                                                       |
| 7012 | 1,3,5,36,3<br>8,41,43,44 | 2,4,6,7,8,3<br>7,39,40,42 | 4  | P83121,Q8CJD3,Q9QW07,Q9QZQ5                                                  |
| 7013 | 1,3,5,36,3<br>8,42,43,44 | 2,4,6,7,8,3<br>7,39,40,41 | 6  | P06911,P11598,P12020,Q63617,Q99041,Q9QW07                                    |
| 7014 | 1,3,5,36,3<br>9,40,41,42 | 2,4,6,7,8,3<br>7,38,43,44 | 8  | O54728,P02631,P11598,P14480,Q62635,Q6AYR9,Q6IRE4,Q80WL1                      |
| 7015 | 1,3,5,36,3<br>9,40,41,43 | 2,4,6,7,8,3<br>7,38,42,44 | 7  | O54728,P00714,P97840,Q62635,Q6IRE4,Q9QW07,Q9QZQ5                             |
| 7016 | 1,3,5,36,3<br>9,40,41,44 | 2,4,6,7,8,3<br>7,38,42,43 | 10 | P02631,P02680,P10715,P19629,P20762,P55314,Q6IRE4,Q6P6T1,Q80WL1,Q9QZQ5        |
| 7017 | 1,3,5,36,3<br>9,40,42,43 | 2,4,6,7,8,3<br>7,38,41,44 | 11 | O54728,P11598,P50115,P50280,P98089,Q05695,Q62635,Q6IRE4,Q8CIZ5,Q99041,Q9QW07 |
| 7018 | 1,3,5,36,3<br>9,40,42,44 | 2,4,6,7,8,3<br>7,38,41,43 | 8  | O54728,P02631,P50115,P50116,P55314,Q6IRE4,Q7TPB1,Q99041                      |
| 7019 | 1,3,5,36,3<br>9,40,43,44 | 2,4,6,7,8,3<br>7,38,41,42 | 6  | O54728,P50115,P55314,Q8CIZ5,Q9QW07,Q9QZQ5                                    |
| 7020 | 1,3,5,36,3<br>9,41,42,43 | 2,4,6,7,8,3<br>7,38,40,44 | 5  | O54728,P11598,P82471,Q62635,Q6AYR9                                           |
| 7021 | 1,3,5,36,3<br>9,41,42,44 | 2,4,6,7,8,3<br>7,38,40,43 | 4  | O54728,P02631,P55314,Q6IRE4                                                  |
| 7022 | 1,3,5,36,3<br>9,41,43,44 | 2,4,6,7,8,3<br>7,38,40,42 | 4  | P55314,P83121,Q9QW07,Q9QZQ5                                                  |
| 7023 | 1,3,5,36,3<br>9,42,43,44 | 2,4,6,7,8,3<br>7,38,40,41 | 10 | O54728,P11598,P12020,P50115,P50280,P55314,Q62635,Q63617,Q99041,Q9QW07        |
| 7024 | 1,3,5,36,4<br>0,41,42,43 | 2,4,6,7,8,3<br>7,38,39,44 | 4  | P11598,Q62635,Q6IRE4,Q80WL1                                                  |

|      |                          |                           |    |                                                                                                   |
|------|--------------------------|---------------------------|----|---------------------------------------------------------------------------------------------------|
| 7025 | 1,3,5,36,4<br>0,41,42,44 | 2,4,6,7,8,3<br>7,38,39,43 | 6  | P02631,P02680,P14480,Q6IRE4,Q7TPB1,Q80WL1                                                         |
| 7026 | 1,3,5,36,4<br>0,41,43,44 | 2,4,6,7,8,3<br>7,38,39,42 | 5  | P55314,Q6IRE4,Q80WL1,Q9QW07,Q9QZQ5                                                                |
| 7027 | 1,3,5,36,4<br>0,42,43,44 | 2,4,6,7,8,3<br>7,38,39,41 | 7  | P11598,P50115,P50280,P55314,Q7TPB1,Q99041,Q9QW07                                                  |
| 7028 | 1,3,5,36,4<br>1,42,43,44 | 2,4,6,7,8,3<br>7,38,39,40 | 2  | P11598,P83121                                                                                     |
| 7029 | 1,3,5,37,3<br>8,39,40,41 | 2,4,6,7,8,3<br>6,42,43,44 | 7  | P00714,P18427,P20762,P82995,Q6IRE4,Q9QW07,Q9QZQ5                                                  |
| 7030 | 1,3,5,37,3<br>8,39,40,42 | 2,4,6,7,8,3<br>6,41,43,44 | 8  | O54728,P02631,P07171,P11598,P18427,Q6IRE4,Q99041,Q99MH3                                           |
| 7031 | 1,3,5,37,3<br>8,39,40,43 | 2,4,6,7,8,3<br>6,41,42,44 | 14 | P00714,P07171,P08649,P11598,P82995,Q62740,Q62753,Q6IFV1,Q6IRE4,Q6P6R2,Q812E4,Q99MH3,Q9QW07,Q9QZQ5 |
| 7032 | 1,3,5,37,3<br>8,39,40,44 | 2,4,6,7,8,3<br>6,41,42,43 | 9  | P08649,P18427,P20762,P54921,P82995,Q6IRE4,Q9QUL6,Q9QW07,Q9QZQ5                                    |
| 7033 | 1,3,5,37,3<br>8,39,41,42 | 2,4,6,7,8,3<br>6,40,43,44 | 4  | P13432,P18427,P20762,Q6IRE4                                                                       |
| 7034 | 1,3,5,37,3<br>8,39,41,43 | 2,4,6,7,8,3<br>6,40,42,44 | 6  | P00714,P18427,P62804,Q8CJD3,Q9QW07,Q9QZQ5                                                         |
| 7035 | 1,3,5,37,3<br>8,39,41,44 | 2,4,6,7,8,3<br>6,40,42,43 | 6  | P18427,P20762,P62804,Q6IRE4,Q9QW07,Q9QZQ5                                                         |
| 7036 | 1,3,5,37,3<br>8,39,42,43 | 2,4,6,7,8,3<br>6,40,41,44 | 12 | O54728,P06911,P07171,P11598,P12020,P18427,Q5GRG2,Q63617,Q99041,Q99MH3,Q9QW07,Q9QZQ5               |
| 7037 | 1,3,5,37,3<br>8,39,42,44 | 2,4,6,7,8,3<br>6,40,41,43 | 6  | P18427,Q63617,Q6IRE4,Q99041,Q9JJS8,Q9QW07                                                         |
| 7038 | 1,3,5,37,3<br>8,39,43,44 | 2,4,6,7,8,3<br>6,40,41,42 | 9  | P08649,P18427,P23593,Q62740,Q63617,Q812E4,Q9JJS8,Q9QW07,Q9QZQ5                                    |
| 7039 | 1,3,5,37,3<br>8,40,41,42 | 2,4,6,7,8,3<br>6,39,43,44 | 4  | P11598,P18427,P20762,Q6IRE4                                                                       |
| 7040 | 1,3,5,37,3<br>8,40,41,43 | 2,4,6,7,8,3<br>6,39,42,44 | 7  | P11598,P51907,P82995,Q6IRE4,Q8CJD3,Q9QW07,Q9QZQ5                                                  |
| 7041 | 1,3,5,37,3<br>8,40,41,44 | 2,4,6,7,8,3<br>6,39,42,43 | 6  | P18427,P20762,Q6IRE4,Q80WL1,Q9QW07,Q9QZQ5                                                         |
| 7042 | 1,3,5,37,3<br>8,40,42,43 | 2,4,6,7,8,3<br>6,39,41,44 | 9  | P07171,P11598,P12020,P18427,Q6IRE4,Q99041,Q99MH3,Q9QW07,Q9QZQ5                                    |
| 7043 | 1,3,5,37,3<br>8,40,42,44 | 2,4,6,7,8,3<br>6,39,41,43 | 7  | P11598,P17046,P18427,P83748,Q6IRE4,Q99041,Q9QW07                                                  |
| 7044 | 1,3,5,37,3<br>8,40,43,44 | 2,4,6,7,8,3<br>6,39,41,42 | 7  | P08010,P08649,P18427,P82995,Q99041,Q9QW07,Q9QZQ5                                                  |
| 7045 | 1,3,5,37,3<br>8,41,42,43 | 2,4,6,7,8,3<br>6,39,40,44 | 5  | P11598,P12020,P18427,Q6IRE4,Q8CJD3                                                                |
| 7046 | 1,3,5,37,3<br>8,41,42,44 | 2,4,6,7,8,3<br>6,39,40,43 | 5  | P17046,P18427,P20762,P83748,Q6IRE4                                                                |
| 7047 | 1,3,5,37,3<br>8,41,43,44 | 2,4,6,7,8,3<br>6,39,40,42 | 4  | P18427,Q8CJD3,Q9QW07,Q9QZQ5                                                                       |

|      |                          |                           |    |                                                                                                                        |
|------|--------------------------|---------------------------|----|------------------------------------------------------------------------------------------------------------------------|
| 7048 | 1,3,5,37,3<br>8,42,43,44 | 2,4,6,7,8,3<br>6,39,40,41 | 7  | P11598,P12020,P17046,P18427,Q63617,Q99041,Q9QW07                                                                       |
| 7049 | 1,3,5,37,3<br>9,40,41,42 | 2,4,6,7,8,3<br>6,38,43,44 | 6  | P02631,P11598,P18427,P20762,Q6IRE4,Q80WL1                                                                              |
| 7050 | 1,3,5,37,3<br>9,40,41,43 | 2,4,6,7,8,3<br>6,38,42,44 | 9  | P00714,P47967,P51907,P97554,P97840,Q62740,Q6IRE4,Q9QW07,Q9QZQ5                                                         |
| 7051 | 1,3,5,37,3<br>9,40,41,44 | 2,4,6,7,8,3<br>6,38,42,43 | 9  | P10715,P18427,P19629,P20762,P47967,Q6IRE4,Q80WL1,Q9QW07,Q9QZQ5                                                         |
| 7052 | 1,3,5,37,3<br>9,40,42,43 | 2,4,6,7,8,3<br>6,38,41,44 | 17 | O54728,P07171,P11598,P18427,P50115,P50116,P50280,P98089,Q01205,Q05695,Q62635,Q62740,Q6IRE4,Q8CIZ5,Q99MH3,Q9QW07,Q9QZQ5 |
| 7053 | 1,3,5,37,3<br>9,40,42,44 | 2,4,6,7,8,3<br>6,38,41,43 | 8  | P02631,P18427,P50115,P50116,Q6IRE4,Q99041,Q99MH3,Q9QW07                                                                |
| 7054 | 1,3,5,37,3<br>9,40,43,44 | 2,4,6,7,8,3<br>6,38,41,42 | 11 | O35547,P08649,P50115,P50116,Q62740,Q6AYL6,Q812E4,Q8CIZ5,Q99MH3,Q9QW07,Q9QZQ5                                           |
| 7055 | 1,3,5,37,3<br>9,41,42,43 | 2,4,6,7,8,3<br>6,38,40,44 | 5  | P00731,P11598,P18427,Q62635,Q6IRE4                                                                                     |
| 7056 | 1,3,5,37,3<br>9,41,42,44 | 2,4,6,7,8,3<br>6,38,40,43 | 4  | P18427,P20762,Q00715,Q6IRE4                                                                                            |
| 7057 | 1,3,5,37,3<br>9,41,43,44 | 2,4,6,7,8,3<br>6,38,40,42 | 3  | P18427,Q9QW07,Q9QZQ5                                                                                                   |
| 7058 | 1,3,5,37,3<br>9,42,43,44 | 2,4,6,7,8,3<br>6,38,40,41 | 7  | O54728,P11598,P18427,P50115,P50280,Q63617,Q9QW07                                                                       |
| 7059 | 1,3,5,37,4<br>0,41,42,43 | 2,4,6,7,8,3<br>6,38,39,44 | 5  | P11598,P18427,P51907,Q6IRE4,Q80WL1                                                                                     |
| 7060 | 1,3,5,37,4<br>0,41,42,44 | 2,4,6,7,8,3<br>6,38,39,43 | 6  | P11598,P17046,P18427,P20762,Q6IRE4,Q80WL1                                                                              |
| 7061 | 1,3,5,37,4<br>0,41,43,44 | 2,4,6,7,8,3<br>6,38,39,42 | 8  | P08649,P19218,P47967,P51907,Q6IRE4,Q80WL1,Q9QW07,Q9QZQ5                                                                |
| 7062 | 1,3,5,37,4<br>0,42,43,44 | 2,4,6,7,8,3<br>6,38,39,41 | 8  | P11598,P17046,P18427,P50115,P50280,Q99041,Q99MH3,Q9QW07                                                                |
| 7063 | 1,3,5,37,4<br>1,42,43,44 | 2,4,6,7,8,3<br>6,38,39,40 | 3  | P11598,P18427,P83121                                                                                                   |
| 7064 | 1,3,5,38,3<br>9,40,41,42 | 2,4,6,7,8,3<br>6,37,43,44 | 6  | P02631,P11598,P13432,P18427,Q6IRE4,Q9QZQ5                                                                              |
| 7065 | 1,3,5,38,3<br>9,40,41,43 | 2,4,6,7,8,3<br>6,37,42,44 | 8  | P00714,P11598,P47967,Q6IRE4,Q8CJD3,Q99MH3,Q9QW07,Q9QZQ5                                                                |
| 7066 | 1,3,5,38,3<br>9,40,41,44 | 2,4,6,7,8,3<br>6,37,42,43 | 7  | P02631,P10715,P18427,P19629,P20762,Q6IRE4,Q9QZQ5                                                                       |
| 7067 | 1,3,5,38,3<br>9,40,42,43 | 2,4,6,7,8,3<br>6,37,41,44 | 11 | O54728,P02631,P07171,P11598,Q01205,Q63617,Q6IRE4,Q99041,Q99MH3,Q9QW07,Q9QZQ5                                           |
| 7068 | 1,3,5,38,3<br>9,40,42,44 | 2,4,6,7,8,3<br>6,37,41,43 | 6  | P02631,P18427,Q6IRE4,Q99041,Q99MH3,Q9QZQ5                                                                              |
| 7069 | 1,3,5,38,3<br>9,40,43,44 | 2,4,6,7,8,3<br>6,37,41,42 | 5  | P08649,Q99041,Q99MH3,Q9QW07,Q9QZQ5                                                                                     |
| 7070 | 1,3,5,38,3<br>9,41,42,43 | 2,4,6,7,8,3<br>6,37,40,44 | 7  | O54728,P00731,P11598,P82471,Q6IRE4,Q8CJD3,Q9QZQ5                                                                       |

|      |                          |                                 |   |                                                                |
|------|--------------------------|---------------------------------|---|----------------------------------------------------------------|
| 7071 | 1,3,5,38,3<br>9,41,42,44 | 2,4,6,7,8,3<br>6,37,40,43       | 3 | P02631,P18427,Q6IRE4                                           |
| 7072 | 1,3,5,38,3<br>9,41,43,44 | 2,4,6,7,8,3<br>6,37,40,42       | 4 | P00731,Q8CJD3,Q9QW07,Q9QZQ5                                    |
| 7073 | 1,3,5,38,3<br>9,42,43,44 | 2,4,6,7,8,3<br>6,37,40,41       | 7 | O54728,P11598,P12020,Q63617,Q99041,Q9QW07,Q9QZQ5               |
| 7074 | 1,3,5,38,4<br>0,41,42,43 | 2,4,6,7,8,3<br>6,37,39,44       | 5 | P07171,P11598,Q6IRE4,Q8CJD3,Q9QZQ5                             |
| 7075 | 1,3,5,38,4<br>0,41,42,44 | 2,4,6,7,8,3<br>6,37,39,43       | 7 | P02631,P11598,P14480,P17046,P18427,Q6IRE4,Q9QZQ5               |
| 7076 | 1,3,5,38,4<br>0,41,43,44 | 2,4,6,7,8,3<br>6,37,39,42       | 4 | Q6IRE4,Q8CJD3,Q9QW07,Q9QZQ5                                    |
| 7077 | 1,3,5,38,4<br>0,42,43,44 | 2,4,6,7,8,3<br>6,37,39,41       | 6 | P11598,P17046,Q99041,Q99MH3,Q9QW07,Q9QZQ5                      |
| 7078 | 1,3,5,38,4<br>1,42,43,44 | 2,4,6,7,8,3<br>6,37,39,40       | 4 | P00731,P11598,Q8CJD3,Q9QZQ5                                    |
| 7079 | 1,3,5,39,4<br>0,41,42,43 | 2,4,6,7,8,3<br>6,37,38,44       | 7 | P07171,P11598,P97840,Q6AYR9,Q6IRE4,Q99MH3,Q9QZQ5               |
| 7080 | 1,3,5,39,4<br>0,41,42,44 | 2,4,6,7,8,3<br>6,37,38,43       | 8 | P02631,P02680,P10715,P14480,P18427,P19629,Q6IRE4,Q80WL1        |
| 7081 | 1,3,5,39,4<br>0,41,43,44 | 2,4,6,7,8,3<br>6,37,38,42       | 9 | P10715,P19629,P47967,P97840,Q6AYL6,Q6IRE4,Q80WL1,Q9QW07,Q9QZQ5 |
| 7082 | 1,3,5,39,4<br>0,42,43,44 | 2,4,6,7,8,3<br>6,37,38,41       | 7 | P11598,P50115,P50280,Q99041,Q99MH3,Q9QW07,Q9QZQ5               |
| 7083 | 1,3,5,39,4<br>1,42,43,44 | 2,4,6,7,8,3<br>6,37,38,40       | 4 | P00731,P11598,P82471,Q9QZQ5                                    |
| 7084 | 1,3,5,40,4<br>1,42,43,44 | 2,4,6,7,8,3<br>6,37,38,39       | 5 | P11598,P17046,Q6IRE4,Q80WL1,Q9QZQ5                             |
| 7085 | 1,3,6,7,8,3<br>6,37,38   | 2,4,5,39,4<br>0,41,42,43<br>,44 | 1 | P53792                                                         |
| 7086 | 1,3,6,7,8,3<br>6,37,39   | 2,4,5,38,4<br>0,41,42,43<br>,44 | 4 | P00774,P11598,P27213,P98089                                    |
| 7087 | 1,3,6,7,8,3<br>6,37,40   | 2,4,5,38,3<br>9,41,42,43<br>,44 | 5 | B0BNN3,P00774,P51907,P53792,P98089                             |
| 7088 | 1,3,6,7,8,3<br>6,37,41   | 2,4,5,38,3<br>9,40,42,43<br>,44 | 3 | O54858,P51907,Q99041                                           |
| 7089 | 1,3,6,7,8,3<br>6,37,42   | 2,4,5,38,3<br>9,40,41,43<br>,44 | 4 | P00774,P16086,P53792,P98089                                    |
| 7090 | 1,3,6,7,8,3<br>6,37,43   | 2,4,5,38,3<br>9,40,41,42<br>,44 | 6 | O54858,P02651,P06760,P51907,Q6TMA8,Q9QX79                      |

|      |                        |                                 |   |                                           |
|------|------------------------|---------------------------------|---|-------------------------------------------|
| 7091 | 1,3,6,7,8,3<br>6,37,44 | 2,4,5,38,3<br>9,40,41,42<br>,43 | 3 | B0BNN3,P11598,P53792                      |
| 7092 | 1,3,6,7,8,3<br>6,38,39 | 2,4,5,37,4<br>0,41,42,43<br>,44 | 2 | P11598,P19218                             |
| 7093 | 1,3,6,7,8,3<br>6,38,40 | 2,4,5,37,3<br>9,41,42,43<br>,44 | 0 |                                           |
| 7094 | 1,3,6,7,8,3<br>6,38,41 | 2,4,5,37,3<br>9,40,42,43<br>,44 | 2 | O54858,P50115                             |
| 7095 | 1,3,6,7,8,3<br>6,38,42 | 2,4,5,37,3<br>9,40,41,43<br>,44 | 4 | P08649,P08753,P16086,P19218               |
| 7096 | 1,3,6,7,8,3<br>6,38,43 | 2,4,5,37,3<br>9,40,41,42<br>,44 | 1 | O54858                                    |
| 7097 | 1,3,6,7,8,3<br>6,38,44 | 2,4,5,37,3<br>9,40,41,42<br>,43 | 2 | P11598,P53792                             |
| 7098 | 1,3,6,7,8,3<br>6,39,40 | 2,4,5,37,3<br>8,41,42,43<br>,44 | 4 | P00774,P27213,P80020,P98089               |
| 7099 | 1,3,6,7,8,3<br>6,39,41 | 2,4,5,37,3<br>8,40,42,43<br>,44 | 2 | P11598,Q8VD89                             |
| 7100 | 1,3,6,7,8,3<br>6,39,42 | 2,4,5,37,3<br>8,40,41,43<br>,44 | 6 | O54728,P00774,P08649,P16086,P19218,P98089 |
| 7101 | 1,3,6,7,8,3<br>6,39,43 | 2,4,5,37,3<br>8,40,41,42<br>,44 | 4 | O54858,P02091,P06760,Q6TMA8               |
| 7102 | 1,3,6,7,8,3<br>6,39,44 | 2,4,5,37,3<br>8,40,41,42<br>,43 | 4 | P11598,P27213,P55314,P80020               |
| 7103 | 1,3,6,7,8,3<br>6,40,41 | 2,4,5,37,3<br>8,39,42,43<br>,44 | 3 | P12020,P51907,Q9JJS8                      |
| 7104 | 1,3,6,7,8,3<br>6,40,42 | 2,4,5,37,3<br>8,39,41,43<br>,44 | 6 | P00774,P16086,P20759,P36374,P98089,Q9JJS8 |
| 7105 | 1,3,6,7,8,3<br>6,40,43 | 2,4,5,37,3<br>8,39,41,42<br>,44 | 1 | P51907                                    |



|      |                        |                                 |   |                                           |
|------|------------------------|---------------------------------|---|-------------------------------------------|
| 7106 | 1,3,6,7,8,3<br>6,40,44 | 2,4,5,37,3<br>8,39,41,42<br>,43 | 5 | B0BNN3,P06866,P12020,P53792,P80020        |
| 7107 | 1,3,6,7,8,3<br>6,41,42 | 2,4,5,37,3<br>8,39,40,43<br>,44 | 6 | P08010,P08649,P08753,P16086,P20759,P60905 |
| 7108 | 1,3,6,7,8,3<br>6,41,43 | 2,4,5,37,3<br>8,39,40,42<br>,44 | 4 | O54858,P02651,P51907,Q9QX79               |
| 7109 | 1,3,6,7,8,3<br>6,41,44 | 2,4,5,37,3<br>8,39,40,42<br>,43 | 1 | P11598                                    |
| 7110 | 1,3,6,7,8,3<br>6,42,43 | 2,4,5,37,3<br>8,39,40,41<br>,44 | 3 | P16086,P35434,Q62975                      |
| 7111 | 1,3,6,7,8,3<br>6,42,44 | 2,4,5,37,3<br>8,39,40,41<br>,43 | 5 | P08649,P16086,P20759,P36374,P53792        |
| 7112 | 1,3,6,7,8,3<br>6,43,44 | 2,4,5,37,3<br>8,39,40,41<br>,42 | 3 | O54858,P02091,P55314                      |
| 7113 | 1,3,6,7,8,3<br>7,38,39 | 2,4,5,36,4<br>0,41,42,43<br>,44 | 1 | P19218                                    |
| 7114 | 1,3,6,7,8,3<br>7,38,40 | 2,4,5,36,3<br>9,41,42,43<br>,44 | 2 | P15399,P51907                             |
| 7115 | 1,3,6,7,8,3<br>7,38,41 | 2,4,5,36,3<br>9,40,42,43<br>,44 | 3 | P50115,P51907,Q7TPB1                      |
| 7116 | 1,3,6,7,8,3<br>7,38,42 | 2,4,5,36,3<br>9,40,41,43<br>,44 | 1 | P19218                                    |
| 7117 | 1,3,6,7,8,3<br>7,38,43 | 2,4,5,36,3<br>9,40,41,42<br>,44 | 3 | Q6IFV1,Q7TPB1,Q9QX79                      |
| 7118 | 1,3,6,7,8,3<br>7,38,44 | 2,4,5,36,3<br>9,40,41,42<br>,43 | 2 | P11598,P15399                             |
| 7119 | 1,3,6,7,8,3<br>7,39,40 | 2,4,5,36,3<br>8,41,42,43<br>,44 | 3 | P27213,P51907,P98089                      |
| 7120 | 1,3,6,7,8,3<br>7,39,41 | 2,4,5,36,3<br>8,40,42,43<br>,44 | 2 | P51907,Q99041                             |

|      |                        |                                 |   |                      |
|------|------------------------|---------------------------------|---|----------------------|
| 7121 | 1,3,6,7,8,3<br>7,39,42 | 2,4,5,36,3<br>8,40,41,43<br>,44 | 2 | P16086,P98089        |
| 7122 | 1,3,6,7,8,3<br>7,39,43 | 2,4,5,36,3<br>8,40,41,42<br>,44 | 3 | P02091,P14408,Q6TMA8 |
| 7123 | 1,3,6,7,8,3<br>7,39,44 | 2,4,5,36,3<br>8,40,41,42<br>,43 | 1 | P11598               |
| 7124 | 1,3,6,7,8,3<br>7,40,41 | 2,4,5,36,3<br>8,39,42,43<br>,44 | 3 | P12020,P51907,Q63617 |
| 7125 | 1,3,6,7,8,3<br>7,40,42 | 2,4,5,36,3<br>8,39,41,43<br>,44 | 3 | P20759,P51907,P98089 |
| 7126 | 1,3,6,7,8,3<br>7,40,43 | 2,4,5,36,3<br>8,39,41,42<br>,44 | 1 | P51907               |
| 7127 | 1,3,6,7,8,3<br>7,40,44 | 2,4,5,36,3<br>8,39,41,42<br>,43 | 2 | P12020,P51907        |
| 7128 | 1,3,6,7,8,3<br>7,41,42 | 2,4,5,36,3<br>8,39,40,43<br>,44 | 2 | P16086,P51907        |
| 7129 | 1,3,6,7,8,3<br>7,41,43 | 2,4,5,36,3<br>8,39,40,42<br>,44 | 3 | P51907,Q7TPB1,Q9QX79 |
| 7130 | 1,3,6,7,8,3<br>7,41,44 | 2,4,5,36,3<br>8,39,40,42<br>,43 | 2 | P11598,P51907        |
| 7131 | 1,3,6,7,8,3<br>7,42,43 | 2,4,5,36,3<br>8,39,40,41<br>,44 | 1 | Q62975               |
| 7132 | 1,3,6,7,8,3<br>7,42,44 | 2,4,5,36,3<br>8,39,40,41<br>,43 | 1 | P20759               |
| 7133 | 1,3,6,7,8,3<br>7,43,44 | 2,4,5,36,3<br>8,39,40,41<br>,42 | 2 | P02091,Q9QX79        |
| 7134 | 1,3,6,7,8,3<br>8,39,40 | 2,4,5,36,3<br>7,41,42,43<br>,44 | 0 |                      |
| 7135 | 1,3,6,7,8,3<br>8,39,41 | 2,4,5,36,3<br>7,40,42,43<br>,44 | 2 | P13432,P50115        |

|      |                        |                                 |   |                                           |
|------|------------------------|---------------------------------|---|-------------------------------------------|
| 7136 | 1,3,6,7,8,3<br>8,39,42 | 2,4,5,36,3<br>7,40,41,43<br>,44 | 2 | P16086,P19218                             |
| 7137 | 1,3,6,7,8,3<br>8,39,43 | 2,4,5,36,3<br>7,40,41,42<br>,44 | 1 | P02091                                    |
| 7138 | 1,3,6,7,8,3<br>8,39,44 | 2,4,5,36,3<br>7,40,41,42<br>,43 | 1 | P11598                                    |
| 7139 | 1,3,6,7,8,3<br>8,40,41 | 2,4,5,36,3<br>7,39,42,43<br>,44 | 3 | P12020,P50115,P51907                      |
| 7140 | 1,3,6,7,8,3<br>8,40,42 | 2,4,5,36,3<br>7,39,41,43<br>,44 | 2 | P16086,P20759                             |
| 7141 | 1,3,6,7,8,3<br>8,40,43 | 2,4,5,36,3<br>7,39,41,42<br>,44 | 0 |                                           |
| 7142 | 1,3,6,7,8,3<br>8,40,44 | 2,4,5,36,3<br>7,39,41,42<br>,43 | 1 | P12020                                    |
| 7143 | 1,3,6,7,8,3<br>8,41,42 | 2,4,5,36,3<br>7,39,40,43<br>,44 | 4 | O35547,P08753,P16086,P50115               |
| 7144 | 1,3,6,7,8,3<br>8,41,43 | 2,4,5,36,3<br>7,39,40,42<br>,44 | 4 | P50115,P50116,Q7TPB1,Q9QX79               |
| 7145 | 1,3,6,7,8,3<br>8,41,44 | 2,4,5,36,3<br>7,39,40,42<br>,43 | 3 | P11598,P50115,Q05695                      |
| 7146 | 1,3,6,7,8,3<br>8,42,43 | 2,4,5,36,3<br>7,39,40,41<br>,44 | 2 | P16086,Q62975                             |
| 7147 | 1,3,6,7,8,3<br>8,42,44 | 2,4,5,36,3<br>7,39,40,41<br>,43 | 1 | P20759                                    |
| 7148 | 1,3,6,7,8,3<br>8,43,44 | 2,4,5,36,3<br>7,39,40,41<br>,42 | 1 | P02091                                    |
| 7149 | 1,3,6,7,8,3<br>9,40,41 | 2,4,5,36,3<br>7,38,42,43<br>,44 | 6 | P06911,P10715,P12020,P19629,P31044,P51907 |
| 7150 | 1,3,6,7,8,3<br>9,40,42 | 2,4,5,36,3<br>7,38,41,43<br>,44 | 3 | P16086,P20759,P98089                      |

|      |                        |                                 |   |                                                                |
|------|------------------------|---------------------------------|---|----------------------------------------------------------------|
| 7151 | 1,3,6,7,8,3<br>9,40,43 | 2,4,5,36,3<br>7,38,41,42<br>,44 | 1 | P02091                                                         |
| 7152 | 1,3,6,7,8,3<br>9,40,44 | 2,4,5,36,3<br>7,38,41,42<br>,43 | 6 | P06866,P12020,P27213,P80020,Q5GRG2,Q6AYL6                      |
| 7153 | 1,3,6,7,8,3<br>9,41,42 | 2,4,5,36,3<br>7,38,40,43<br>,44 | 3 | P08010,P08753,P16086                                           |
| 7154 | 1,3,6,7,8,3<br>9,41,43 | 2,4,5,36,3<br>7,38,40,42<br>,44 | 3 | P02091,P08494,P14408                                           |
| 7155 | 1,3,6,7,8,3<br>9,41,44 | 2,4,5,36,3<br>7,38,40,42<br>,43 | 2 | P11598,P12020                                                  |
| 7156 | 1,3,6,7,8,3<br>9,42,43 | 2,4,5,36,3<br>7,38,40,41<br>,44 | 2 | P02091,P16086                                                  |
| 7157 | 1,3,6,7,8,3<br>9,42,44 | 2,4,5,36,3<br>7,38,40,41<br>,43 | 2 | P16086,P20759                                                  |
| 7158 | 1,3,6,7,8,3<br>9,43,44 | 2,4,5,36,3<br>7,38,40,41<br>,42 | 2 | P01946,P02091                                                  |
| 7159 | 1,3,6,7,8,4<br>0,41,42 | 2,4,5,36,3<br>7,38,39,43<br>,44 | 4 | P16086,P20759,P51907,Q9JJS8                                    |
| 7160 | 1,3,6,7,8,4<br>0,41,43 | 2,4,5,36,3<br>7,38,39,42<br>,44 | 1 | P51907                                                         |
| 7161 | 1,3,6,7,8,4<br>0,41,44 | 2,4,5,36,3<br>7,38,39,42<br>,43 | 9 | P06911,P10715,P12020,P19629,P31044,P51907,Q5GRG2,Q63617,Q9ET32 |
| 7162 | 1,3,6,7,8,4<br>0,42,43 | 2,4,5,36,3<br>7,38,39,41<br>,44 | 2 | P16086,Q62975                                                  |
| 7163 | 1,3,6,7,8,4<br>0,42,44 | 2,4,5,36,3<br>7,38,39,41<br>,43 | 3 | P16086,P20759,P36374                                           |
| 7164 | 1,3,6,7,8,4<br>0,43,44 | 2,4,5,36,3<br>7,38,39,41<br>,42 | 2 | P02091,Q6AYL6                                                  |
| 7165 | 1,3,6,7,8,4<br>1,42,43 | 2,4,5,36,3<br>7,38,39,40<br>,44 | 5 | P16086,P54921,P82471,Q62975,Q9WUW3                             |

|      |                         |                                 |   |                                                  |
|------|-------------------------|---------------------------------|---|--------------------------------------------------|
| 7166 | 1,3,6,7,8,4<br>1,42,44  | 2,4,5,36,3<br>7,38,39,40<br>,43 | 6 | P08753,P16086,P20759,P60905,Q6P6R2,Q9JID2        |
| 7167 | 1,3,6,7,8,4<br>1,43,44  | 2,4,5,36,3<br>7,38,39,40<br>,42 | 3 | P02091,Q9QX79,Q9WUW3                             |
| 7168 | 1,3,6,7,8,4<br>2,43,44  | 2,4,5,36,3<br>7,38,39,40<br>,41 | 6 | P02091,P16086,P26772,P35434,Q62975,Q9WUW3        |
| 7169 | 1,3,6,7,36,<br>37,38,39 | 2,4,5,8,40,<br>41,42,43,4<br>4  | 4 | P15399,P19218,P97840,Q6PCU2                      |
| 7170 | 1,3,6,7,36,<br>37,38,40 | 2,4,5,8,39,<br>41,42,43,4<br>4  | 1 | P15399                                           |
| 7171 | 1,3,6,7,36,<br>37,38,41 | 2,4,5,8,39,<br>40,42,43,4<br>4  | 2 | P15399,Q5M819                                    |
| 7172 | 1,3,6,7,36,<br>37,38,42 | 2,4,5,8,39,<br>40,41,43,4<br>4  | 2 | P47967,P97840                                    |
| 7173 | 1,3,6,7,36,<br>37,38,43 | 2,4,5,8,39,<br>40,41,42,4<br>4  | 3 | P06760,P15399,Q561R9                             |
| 7174 | 1,3,6,7,36,<br>37,38,44 | 2,4,5,8,39,<br>40,41,42,4<br>3  | 2 | P15399,P97840                                    |
| 7175 | 1,3,6,7,36,<br>37,39,40 | 2,4,5,8,38,<br>41,42,43,4<br>4  | 7 | P00774,P27213,P50116,P55091,P98089,Q5U2V4,Q8CJD3 |
| 7176 | 1,3,6,7,36,<br>37,39,41 | 2,4,5,8,38,<br>40,42,43,4<br>4  | 2 | P00714,Q6TMA8                                    |
| 7177 | 1,3,6,7,36,<br>37,39,42 | 2,4,5,8,38,<br>40,41,43,4<br>4  | 7 | O54728,P00774,P16086,P50116,P97840,P98089,Q62635 |
| 7178 | 1,3,6,7,36,<br>37,39,43 | 2,4,5,8,38,<br>40,41,42,4<br>4  | 4 | P02091,P06760,Q62635,Q6TMA8                      |
| 7179 | 1,3,6,7,36,<br>37,39,44 | 2,4,5,8,38,<br>40,41,42,4<br>3  | 3 | P50116,P55314,Q8CJD3                             |
| 7180 | 1,3,6,7,36,<br>37,40,41 | 2,4,5,8,38,<br>39,42,43,4<br>4  | 2 | P51907,Q80WL1                                    |

|      |                         |                                |   |                                    |
|------|-------------------------|--------------------------------|---|------------------------------------|
| 7181 | 1,3,6,7,36,<br>37,40,42 | 2,4,5,8,38,<br>39,41,43,4<br>4 | 5 | P00774,P50116,P98089,Q5U2V4,Q80WL1 |
| 7182 | 1,3,6,7,36,<br>37,40,43 | 2,4,5,8,38,<br>39,41,42,4<br>4 | 3 | P51907,Q5U2V4,Q80WL1               |
| 7183 | 1,3,6,7,36,<br>37,40,44 | 2,4,5,8,38,<br>39,41,42,4<br>3 | 2 | P50116,Q80WL1                      |
| 7184 | 1,3,6,7,36,<br>37,41,42 | 2,4,5,8,38,<br>39,40,43,4<br>4 | 2 | P08649,P16086                      |
| 7185 | 1,3,6,7,36,<br>37,41,43 | 2,4,5,8,38,<br>39,40,42,4<br>4 | 4 | P06760,P51907,Q6AYS4,Q6TMA8        |
| 7186 | 1,3,6,7,36,<br>37,41,44 | 2,4,5,8,38,<br>39,40,42,4<br>3 | 1 | Q80WL1                             |
| 7187 | 1,3,6,7,36,<br>37,42,43 | 2,4,5,8,38,<br>39,40,41,4<br>4 | 4 | P06760,Q62635,Q62975,Q6AYS4        |
| 7188 | 1,3,6,7,36,<br>37,42,44 | 2,4,5,8,38,<br>39,40,41,4<br>3 | 1 | P97840                             |
| 7189 | 1,3,6,7,36,<br>37,43,44 | 2,4,5,8,38,<br>39,40,41,4<br>2 | 2 | P02091,P55314                      |
| 7190 | 1,3,6,7,36,<br>38,39,40 | 2,4,5,8,37,<br>41,42,43,4<br>4 | 0 |                                    |
| 7191 | 1,3,6,7,36,<br>38,39,41 | 2,4,5,8,37,<br>40,42,43,4<br>4 | 1 | P00714                             |
| 7192 | 1,3,6,7,36,<br>38,39,42 | 2,4,5,8,37,<br>40,41,43,4<br>4 | 5 | O54728,P08649,P16086,P19218,P97840 |
| 7193 | 1,3,6,7,36,<br>38,39,43 | 2,4,5,8,37,<br>40,41,42,4<br>4 | 3 | P01946,P02091,P06760               |
| 7194 | 1,3,6,7,36,<br>38,39,44 | 2,4,5,8,37,<br>40,41,42,4<br>3 | 1 | P55314                             |
| 7195 | 1,3,6,7,36,<br>38,40,41 | 2,4,5,8,37,<br>39,42,43,4<br>4 | 0 |                                    |

|      |                         |                                |   |                                           |
|------|-------------------------|--------------------------------|---|-------------------------------------------|
| 7196 | 1,3,6,7,36,<br>38,40,42 | 2,4,5,8,37,<br>39,41,43,4<br>4 | 2 | P16086,Q64057                             |
| 7197 | 1,3,6,7,36,<br>38,40,43 | 2,4,5,8,37,<br>39,41,42,4<br>4 | 0 |                                           |
| 7198 | 1,3,6,7,36,<br>38,40,44 | 2,4,5,8,37,<br>39,41,42,4<br>3 | 0 |                                           |
| 7199 | 1,3,6,7,36,<br>38,41,42 | 2,4,5,8,37,<br>39,40,43,4<br>4 | 2 | P08649,P16086                             |
| 7200 | 1,3,6,7,36,<br>38,41,43 | 2,4,5,8,37,<br>39,40,42,4<br>4 | 1 | P06760                                    |
| 7201 | 1,3,6,7,36,<br>38,41,44 | 2,4,5,8,37,<br>39,40,42,4<br>3 | 0 |                                           |
| 7202 | 1,3,6,7,36,<br>38,42,43 | 2,4,5,8,37,<br>39,40,41,4<br>4 | 2 | P16086,Q62975                             |
| 7203 | 1,3,6,7,36,<br>38,42,44 | 2,4,5,8,37,<br>39,40,41,4<br>3 | 1 | P97840                                    |
| 7204 | 1,3,6,7,36,<br>38,43,44 | 2,4,5,8,37,<br>39,40,41,4<br>2 | 2 | P02091,P55314                             |
| 7205 | 1,3,6,7,36,<br>39,40,41 | 2,4,5,8,37,<br>38,42,43,4<br>4 | 3 | P12020,Q80WL1,Q8VD89                      |
| 7206 | 1,3,6,7,36,<br>39,40,42 | 2,4,5,8,37,<br>38,41,43,4<br>4 | 5 | O54728,P00774,P16086,P50116,P98089        |
| 7207 | 1,3,6,7,36,<br>39,40,43 | 2,4,5,8,37,<br>38,41,42,4<br>4 | 1 | P02091                                    |
| 7208 | 1,3,6,7,36,<br>39,40,44 | 2,4,5,8,37,<br>38,41,42,4<br>3 | 5 | P27213,P50116,P55314,Q80WL1,Q8CJD3        |
| 7209 | 1,3,6,7,36,<br>39,41,42 | 2,4,5,8,37,<br>38,40,43,4<br>4 | 2 | P08649,P16086                             |
| 7210 | 1,3,6,7,36,<br>39,41,43 | 2,4,5,8,37,<br>38,40,42,4<br>4 | 6 | P00714,P02091,P06760,P08494,P22006,Q6TMA8 |

|      |                         |                                |   |                                           |
|------|-------------------------|--------------------------------|---|-------------------------------------------|
| 7211 | 1,3,6,7,36,<br>39,41,44 | 2,4,5,8,37,<br>38,40,42,4<br>3 | 2 | P55314,Q8VD89                             |
| 7212 | 1,3,6,7,36,<br>39,42,43 | 2,4,5,8,37,<br>38,40,41,4<br>4 | 6 | O54728,P02091,P06760,P16086,P35434,Q62635 |
| 7213 | 1,3,6,7,36,<br>39,42,44 | 2,4,5,8,37,<br>38,40,41,4<br>3 | 2 | P16086,P55314                             |
| 7214 | 1,3,6,7,36,<br>39,43,44 | 2,4,5,8,37,<br>38,40,41,4<br>2 | 4 | P01946,P02091,P06760,P55314               |
| 7215 | 1,3,6,7,36,<br>40,41,42 | 2,4,5,8,37,<br>38,39,43,4<br>4 | 5 | P08649,P16086,Q64057,Q80WL1,Q9JJS8        |
| 7216 | 1,3,6,7,36,<br>40,41,43 | 2,4,5,8,37,<br>38,39,42,4<br>4 | 2 | P51907,Q80WL1                             |
| 7217 | 1,3,6,7,36,<br>40,41,44 | 2,4,5,8,37,<br>38,39,42,4<br>3 | 4 | P06911,P12020,Q5GRG2,Q80WL1               |
| 7218 | 1,3,6,7,36,<br>40,42,43 | 2,4,5,8,37,<br>38,39,41,4<br>4 | 1 | P16086                                    |
| 7219 | 1,3,6,7,36,<br>40,42,44 | 2,4,5,8,37,<br>38,39,41,4<br>3 | 3 | P16086,Q7TPB1,Q80WL1                      |
| 7220 | 1,3,6,7,36,<br>40,43,44 | 2,4,5,8,37,<br>38,39,41,4<br>2 | 3 | P02091,P55314,Q80WL1                      |
| 7221 | 1,3,6,7,36,<br>41,42,43 | 2,4,5,8,37,<br>38,39,40,4<br>4 | 6 | P06760,P08649,P16086,P35434,Q62975,Q6AYS4 |
| 7222 | 1,3,6,7,36,<br>41,42,44 | 2,4,5,8,37,<br>38,39,40,4<br>3 | 3 | P08649,P16086,Q80WL1                      |
| 7223 | 1,3,6,7,36,<br>41,43,44 | 2,4,5,8,37,<br>38,39,40,4<br>2 | 2 | P02091,P55314                             |
| 7224 | 1,3,6,7,36,<br>42,43,44 | 2,4,5,8,37,<br>38,39,40,4<br>1 | 5 | P02091,P16086,P35434,P55314,Q62975        |
| 7225 | 1,3,6,7,37,<br>38,39,40 | 2,4,5,8,36,<br>41,42,43,4<br>4 | 2 | P15399,Q99MH3                             |



|      |                         |                                |   |                                    |
|------|-------------------------|--------------------------------|---|------------------------------------|
| 7226 | 1,3,6,7,37,<br>38,39,41 | 2,4,5,8,36,<br>40,42,43,4<br>4 | 4 | P00714,P13432,P15399,P62804        |
| 7227 | 1,3,6,7,37,<br>38,39,42 | 2,4,5,8,36,<br>40,41,43,4<br>4 | 2 | P19218,P97840                      |
| 7228 | 1,3,6,7,37,<br>38,39,43 | 2,4,5,8,36,<br>40,41,42,4<br>4 | 4 | P02091,P15399,Q6IFV1,Q99MH3        |
| 7229 | 1,3,6,7,37,<br>38,39,44 | 2,4,5,8,36,<br>40,41,42,4<br>3 | 1 | P15399                             |
| 7230 | 1,3,6,7,37,<br>38,40,41 | 2,4,5,8,36,<br>39,42,43,4<br>4 | 2 | P15399,P51907                      |
| 7231 | 1,3,6,7,37,<br>38,40,42 | 2,4,5,8,36,<br>39,41,43,4<br>4 | 2 | P15399,Q99MH3                      |
| 7232 | 1,3,6,7,37,<br>38,40,43 | 2,4,5,8,36,<br>39,41,42,4<br>4 | 2 | P15399,Q99MH3                      |
| 7233 | 1,3,6,7,37,<br>38,40,44 | 2,4,5,8,36,<br>39,41,42,4<br>3 | 1 | P15399                             |
| 7234 | 1,3,6,7,37,<br>38,41,42 | 2,4,5,8,36,<br>39,40,43,4<br>4 | 2 | P16086,Q6AYS4                      |
| 7235 | 1,3,6,7,37,<br>38,41,43 | 2,4,5,8,36,<br>39,40,42,4<br>4 | 4 | P15399,P62804,Q6AYS4,Q7TPB1        |
| 7236 | 1,3,6,7,37,<br>38,41,44 | 2,4,5,8,36,<br>39,40,42,4<br>3 | 3 | P15399,P62804,Q6AYS4               |
| 7237 | 1,3,6,7,37,<br>38,42,43 | 2,4,5,8,36,<br>39,40,41,4<br>4 | 2 | Q62975,Q6AYS4                      |
| 7238 | 1,3,6,7,37,<br>38,42,44 | 2,4,5,8,36,<br>39,40,41,4<br>3 | 2 | P97840,Q6AYS4                      |
| 7239 | 1,3,6,7,37,<br>38,43,44 | 2,4,5,8,36,<br>39,40,41,4<br>2 | 3 | P02091,P15399,Q6AYS4               |
| 7240 | 1,3,6,7,37,<br>39,40,41 | 2,4,5,8,36,<br>38,42,43,4<br>4 | 5 | P06911,P10715,P12020,P51907,Q80WL1 |

|      |                         |                                |   |                                                  |
|------|-------------------------|--------------------------------|---|--------------------------------------------------|
| 7241 | 1,3,6,7,37,<br>39,40,42 | 2,4,5,8,36,<br>38,41,43,4<br>4 | 5 | P00774,P50116,P98089,Q05695,Q99MH3               |
| 7242 | 1,3,6,7,37,<br>39,40,43 | 2,4,5,8,36,<br>38,41,42,4<br>4 | 6 | P02091,Q05695,Q6AYL6,Q812E4,Q8CIZ5,Q99MH3        |
| 7243 | 1,3,6,7,37,<br>39,40,44 | 2,4,5,8,36,<br>38,41,42,4<br>3 | 5 | P12020,P50116,Q6AYL6,Q80WL1,Q8CJD3               |
| 7244 | 1,3,6,7,37,<br>39,41,42 | 2,4,5,8,36,<br>38,40,43,4<br>4 | 3 | P13432,P16086,Q6AYS4                             |
| 7245 | 1,3,6,7,37,<br>39,41,43 | 2,4,5,8,36,<br>38,40,42,4<br>4 | 7 | P00714,P02091,P22006,P62804,Q6AYS4,Q6TMA8,Q9QXQ0 |
| 7246 | 1,3,6,7,37,<br>39,41,44 | 2,4,5,8,36,<br>38,40,42,4<br>3 | 1 | P62804                                           |
| 7247 | 1,3,6,7,37,<br>39,42,43 | 2,4,5,8,36,<br>38,40,41,4<br>4 | 4 | P02091,Q62635,Q6AYS4,Q99MH3                      |
| 7248 | 1,3,6,7,37,<br>39,42,44 | 2,4,5,8,36,<br>38,40,41,4<br>3 | 1 | P50116                                           |
| 7249 | 1,3,6,7,37,<br>39,43,44 | 2,4,5,8,36,<br>38,40,41,4<br>2 | 1 | P02091                                           |
| 7250 | 1,3,6,7,37,<br>40,41,42 | 2,4,5,8,36,<br>38,39,43,4<br>4 | 4 | P16086,P51907,Q6AYS4,Q80WL1                      |
| 7251 | 1,3,6,7,37,<br>40,41,43 | 2,4,5,8,36,<br>38,39,42,4<br>4 | 3 | P51907,Q6AYS4,Q80WL1                             |
| 7252 | 1,3,6,7,37,<br>40,41,44 | 2,4,5,8,36,<br>38,39,42,4<br>3 | 7 | P06911,P10715,P12020,P51907,Q5GRG2,Q80WL1,Q9ET32 |
| 7253 | 1,3,6,7,37,<br>40,42,43 | 2,4,5,8,36,<br>38,39,41,4<br>4 | 3 | Q05695,Q6AYS4,Q99MH3                             |
| 7254 | 1,3,6,7,37,<br>40,42,44 | 2,4,5,8,36,<br>38,39,41,4<br>3 | 2 | P50116,Q80WL1                                    |
| 7255 | 1,3,6,7,37,<br>40,43,44 | 2,4,5,8,36,<br>38,39,41,4<br>2 | 4 | P02091,Q6AYL6,Q6AYS4,Q80WL1                      |

|      |                         |                                |   |                                           |
|------|-------------------------|--------------------------------|---|-------------------------------------------|
| 7256 | 1,3,6,7,37,<br>41,42,43 | 2,4,5,8,36,<br>38,39,40,4<br>4 | 3 | P16086,Q62975,Q6AYS4                      |
| 7257 | 1,3,6,7,37,<br>41,42,44 | 2,4,5,8,36,<br>38,39,40,4<br>3 | 2 | Q6AYS4,Q80WL1                             |
| 7258 | 1,3,6,7,37,<br>41,43,44 | 2,4,5,8,36,<br>38,39,40,4<br>2 | 3 | P02091,P51907,Q6AYS4                      |
| 7259 | 1,3,6,7,37,<br>42,43,44 | 2,4,5,8,36,<br>38,39,40,4<br>1 | 3 | P02091,Q62975,Q6AYS4                      |
| 7260 | 1,3,6,7,38,<br>39,40,41 | 2,4,5,8,36,<br>37,42,43,4<br>4 | 5 | P06911,P10715,P12020,P13432,P19629        |
| 7261 | 1,3,6,7,38,<br>39,40,42 | 2,4,5,8,36,<br>37,41,43,4<br>4 | 3 | P16086,P83121,Q99MH3                      |
| 7262 | 1,3,6,7,38,<br>39,40,43 | 2,4,5,8,36,<br>37,41,42,4<br>4 | 2 | P02091,Q99MH3                             |
| 7263 | 1,3,6,7,38,<br>39,40,44 | 2,4,5,8,36,<br>37,41,42,4<br>3 | 2 | Q6AYL6,Q9QUL6                             |
| 7264 | 1,3,6,7,38,<br>39,41,42 | 2,4,5,8,36,<br>37,40,43,4<br>4 | 2 | P13432,P16086                             |
| 7265 | 1,3,6,7,38,<br>39,41,43 | 2,4,5,8,36,<br>37,40,42,4<br>4 | 6 | P00714,P01946,P02091,P13432,P22006,Q6AYS4 |
| 7266 | 1,3,6,7,38,<br>39,41,44 | 2,4,5,8,36,<br>37,40,42,4<br>3 | 0 |                                           |
| 7267 | 1,3,6,7,38,<br>39,42,43 | 2,4,5,8,36,<br>37,40,41,4<br>4 | 4 | P02091,P16086,Q6AYS4,Q99MH3               |
| 7268 | 1,3,6,7,38,<br>39,42,44 | 2,4,5,8,36,<br>37,40,41,4<br>3 | 0 |                                           |
| 7269 | 1,3,6,7,38,<br>39,43,44 | 2,4,5,8,36,<br>37,40,41,4<br>2 | 2 | P01946,P02091                             |
| 7270 | 1,3,6,7,38,<br>40,41,42 | 2,4,5,8,36,<br>37,39,43,4<br>4 | 2 | P16086,Q6AYS4                             |

|      |                         |                                |    |                                                                       |
|------|-------------------------|--------------------------------|----|-----------------------------------------------------------------------|
| 7271 | 1,3,6,7,38,<br>40,41,43 | 2,4,5,8,36,<br>37,39,42,4<br>4 | 1  | Q6AYS4                                                                |
| 7272 | 1,3,6,7,38,<br>40,41,44 | 2,4,5,8,36,<br>37,39,42,4<br>3 | 6  | P06911,P10715,P12020,P19629,Q5GRG2,Q9ET32                             |
| 7273 | 1,3,6,7,38,<br>40,42,43 | 2,4,5,8,36,<br>37,39,41,4<br>4 | 3  | P16086,Q6AYS4,Q99MH3                                                  |
| 7274 | 1,3,6,7,38,<br>40,42,44 | 2,4,5,8,36,<br>37,39,41,4<br>3 | 0  |                                                                       |
| 7275 | 1,3,6,7,38,<br>40,43,44 | 2,4,5,8,36,<br>37,39,41,4<br>2 | 1  | P02091                                                                |
| 7276 | 1,3,6,7,38,<br>41,42,43 | 2,4,5,8,36,<br>37,39,40,4<br>4 | 3  | P16086,Q6AYS4,Q8CJD3                                                  |
| 7277 | 1,3,6,7,38,<br>41,42,44 | 2,4,5,8,36,<br>37,39,40,4<br>3 | 3  | P16086,Q6AYS4,Q8CIZ5                                                  |
| 7278 | 1,3,6,7,38,<br>41,43,44 | 2,4,5,8,36,<br>37,39,40,4<br>2 | 3  | P00774,P02091,Q6AYS4                                                  |
| 7279 | 1,3,6,7,38,<br>42,43,44 | 2,4,5,8,36,<br>37,39,40,4<br>1 | 3  | P02091,Q62975,Q6AYS4                                                  |
| 7280 | 1,3,6,7,39,<br>40,41,42 | 2,4,5,8,36,<br>37,38,43,4<br>4 | 2  | P13432,P16086                                                         |
| 7281 | 1,3,6,7,39,<br>40,41,43 | 2,4,5,8,36,<br>37,38,42,4<br>4 | 2  | P02091,Q6AYL6                                                         |
| 7282 | 1,3,6,7,39,<br>40,41,44 | 2,4,5,8,36,<br>37,38,42,4<br>3 | 10 | P06911,P10715,P12020,P16391,P19629,P31044,Q5GRG2,Q6AYL6,Q80WL1,Q9ET32 |
| 7283 | 1,3,6,7,39,<br>40,42,43 | 2,4,5,8,36,<br>37,38,41,4<br>4 | 3  | P02091,P16086,Q99MH3                                                  |
| 7284 | 1,3,6,7,39,<br>40,42,44 | 2,4,5,8,36,<br>37,38,41,4<br>3 | 2  | P16086,P50116                                                         |
| 7285 | 1,3,6,7,39,<br>40,43,44 | 2,4,5,8,36,<br>37,38,41,4<br>2 | 3  | P02091,Q6AYL6,Q99MH3                                                  |

|      |                         |                                |   |                                                  |
|------|-------------------------|--------------------------------|---|--------------------------------------------------|
| 7286 | 1,3,6,7,39,<br>41,42,43 | 2,4,5,8,36,<br>37,38,40,4<br>4 | 6 | P02091,P08494,P16086,P22006,P82471,Q6AYS4        |
| 7287 | 1,3,6,7,39,<br>41,42,44 | 2,4,5,8,36,<br>37,38,40,4<br>3 | 2 | P16086,Q6AYS4                                    |
| 7288 | 1,3,6,7,39,<br>41,43,44 | 2,4,5,8,36,<br>37,38,40,4<br>2 | 4 | P01946,P02091,P08494,Q6AYS4                      |
| 7289 | 1,3,6,7,39,<br>42,43,44 | 2,4,5,8,36,<br>37,38,40,4<br>1 | 3 | P02091,P16086,Q6AYS4                             |
| 7290 | 1,3,6,7,40,<br>41,42,43 | 2,4,5,8,36,<br>37,38,39,4<br>4 | 2 | P16086,Q6AYS4                                    |
| 7291 | 1,3,6,7,40,<br>41,42,44 | 2,4,5,8,36,<br>37,38,39,4<br>3 | 6 | P12020,P16086,Q6AYS4,Q6P6R2,Q80WL1,Q9ET32        |
| 7292 | 1,3,6,7,40,<br>41,43,44 | 2,4,5,8,36,<br>37,38,39,4<br>2 | 7 | P02091,P12020,Q5GRG2,Q6AYL6,Q6AYS4,Q80WL1,Q9ET32 |
| 7293 | 1,3,6,7,40,<br>42,43,44 | 2,4,5,8,36,<br>37,38,39,4<br>1 | 3 | P02091,P16086,Q6AYS4                             |
| 7294 | 1,3,6,7,41,<br>42,43,44 | 2,4,5,8,36,<br>37,38,39,4<br>0 | 4 | P02091,P16086,P82471,Q6AYS4                      |
| 7295 | 1,3,6,8,36,<br>37,38,39 | 2,4,5,7,40,<br>41,42,43,4<br>4 | 0 |                                                  |
| 7296 | 1,3,6,8,36,<br>37,38,40 | 2,4,5,7,39,<br>41,42,43,4<br>4 | 1 | P35281                                           |
| 7297 | 1,3,6,8,36,<br>37,38,41 | 2,4,5,7,39,<br>40,42,43,4<br>4 | 0 |                                                  |
| 7298 | 1,3,6,8,36,<br>37,38,42 | 2,4,5,7,39,<br>40,41,43,4<br>4 | 2 | P36376,Q6AYL6                                    |
| 7299 | 1,3,6,8,36,<br>37,38,43 | 2,4,5,7,39,<br>40,41,42,4<br>4 | 2 | Q64268,Q6IFV1                                    |
| 7300 | 1,3,6,8,36,<br>37,38,44 | 2,4,5,7,39,<br>40,41,42,4<br>3 | 0 |                                                  |

|      |                         |                                |   |                                           |
|------|-------------------------|--------------------------------|---|-------------------------------------------|
| 7301 | 1,3,6,8,36,<br>37,39,40 | 2,4,5,7,38,<br>41,42,43,4<br>4 | 6 | O35547,P00774,P27213,P55091,P98089,Q8CJD3 |
| 7302 | 1,3,6,8,36,<br>37,39,41 | 2,4,5,7,38,<br>40,42,43,4<br>4 | 0 |                                           |
| 7303 | 1,3,6,8,36,<br>37,39,42 | 2,4,5,7,38,<br>40,41,43,4<br>4 | 3 | P00774,P55091,P98089                      |
| 7304 | 1,3,6,8,36,<br>37,39,43 | 2,4,5,7,38,<br>40,41,42,4<br>4 | 0 |                                           |
| 7305 | 1,3,6,8,36,<br>37,39,44 | 2,4,5,7,38,<br>40,41,42,4<br>3 | 1 | Q8CJD3                                    |
| 7306 | 1,3,6,8,36,<br>37,40,41 | 2,4,5,7,38,<br>39,42,43,4<br>4 | 3 | P51907,Q80WL1,Q9Z1F2                      |
| 7307 | 1,3,6,8,36,<br>37,40,42 | 2,4,5,7,38,<br>39,41,43,4<br>4 | 4 | P00774,P55091,P98089,Q64093               |
| 7308 | 1,3,6,8,36,<br>37,40,43 | 2,4,5,7,38,<br>39,41,42,4<br>4 | 1 | P51907                                    |
| 7309 | 1,3,6,8,36,<br>37,40,44 | 2,4,5,7,38,<br>39,41,42,4<br>3 | 3 | O35547,Q80WL1,Q8CJD3                      |
| 7310 | 1,3,6,8,36,<br>37,41,42 | 2,4,5,7,38,<br>39,40,43,4<br>4 | 0 |                                           |
| 7311 | 1,3,6,8,36,<br>37,41,43 | 2,4,5,7,38,<br>39,40,42,4<br>4 | 2 | P51907,P83121                             |
| 7312 | 1,3,6,8,36,<br>37,41,44 | 2,4,5,7,38,<br>39,40,42,4<br>3 | 1 | Q80WL1                                    |
| 7313 | 1,3,6,8,36,<br>37,42,43 | 2,4,5,7,38,<br>39,40,41,4<br>4 | 0 |                                           |
| 7314 | 1,3,6,8,36,<br>37,42,44 | 2,4,5,7,38,<br>39,40,41,4<br>3 | 0 |                                           |
| 7315 | 1,3,6,8,36,<br>37,43,44 | 2,4,5,7,38,<br>39,40,41,4<br>2 | 0 |                                           |

|      |                         |                                |   |                      |
|------|-------------------------|--------------------------------|---|----------------------|
| 7316 | 1,3,6,8,36,<br>38,39,40 | 2,4,5,7,37,<br>41,42,43,4<br>4 | 0 |                      |
| 7317 | 1,3,6,8,36,<br>38,39,41 | 2,4,5,7,37,<br>40,42,43,4<br>4 | 0 |                      |
| 7318 | 1,3,6,8,36,<br>38,39,42 | 2,4,5,7,37,<br>40,41,43,4<br>4 | 2 | O54728,P19218        |
| 7319 | 1,3,6,8,36,<br>38,39,43 | 2,4,5,7,37,<br>40,41,42,4<br>4 | 1 | Q6IFV1               |
| 7320 | 1,3,6,8,36,<br>38,39,44 | 2,4,5,7,37,<br>40,41,42,4<br>3 | 0 |                      |
| 7321 | 1,3,6,8,36,<br>38,40,41 | 2,4,5,7,37,<br>39,42,43,4<br>4 | 0 |                      |
| 7322 | 1,3,6,8,36,<br>38,40,42 | 2,4,5,7,37,<br>39,41,43,4<br>4 | 1 | Q64057               |
| 7323 | 1,3,6,8,36,<br>38,40,43 | 2,4,5,7,37,<br>39,41,42,4<br>4 | 1 | Q6IFV1               |
| 7324 | 1,3,6,8,36,<br>38,40,44 | 2,4,5,7,37,<br>39,41,42,4<br>3 | 0 |                      |
| 7325 | 1,3,6,8,36,<br>38,41,42 | 2,4,5,7,37,<br>39,40,43,4<br>4 | 1 | P08753               |
| 7326 | 1,3,6,8,36,<br>38,41,43 | 2,4,5,7,37,<br>39,40,42,4<br>4 | 0 |                      |
| 7327 | 1,3,6,8,36,<br>38,41,44 | 2,4,5,7,37,<br>39,40,42,4<br>3 | 0 |                      |
| 7328 | 1,3,6,8,36,<br>38,42,43 | 2,4,5,7,37,<br>39,40,41,4<br>4 | 2 | P15999,P35434        |
| 7329 | 1,3,6,8,36,<br>38,42,44 | 2,4,5,7,37,<br>39,40,41,4<br>3 | 1 | P15999               |
| 7330 | 1,3,6,8,36,<br>38,43,44 | 2,4,5,7,37,<br>39,40,41,4<br>2 | 3 | P01681,P35467,Q66H69 |

|      |                         |                                |   |                      |
|------|-------------------------|--------------------------------|---|----------------------|
| 7331 | 1,3,6,8,36,<br>39,40,41 | 2,4,5,7,37,<br>38,42,43,4<br>4 | 0 |                      |
| 7332 | 1,3,6,8,36,<br>39,40,42 | 2,4,5,7,37,<br>38,41,43,4<br>4 | 2 | P00774,P98089        |
| 7333 | 1,3,6,8,36,<br>39,40,43 | 2,4,5,7,37,<br>38,41,42,4<br>4 | 0 |                      |
| 7334 | 1,3,6,8,36,<br>39,40,44 | 2,4,5,7,37,<br>38,41,42,4<br>3 | 2 | P55314,Q8CJD3        |
| 7335 | 1,3,6,8,36,<br>39,41,42 | 2,4,5,7,37,<br>38,40,43,4<br>4 | 0 |                      |
| 7336 | 1,3,6,8,36,<br>39,41,43 | 2,4,5,7,37,<br>38,40,42,4<br>4 | 3 | P00714,P08494,P14408 |
| 7337 | 1,3,6,8,36,<br>39,41,44 | 2,4,5,7,37,<br>38,40,42,4<br>3 | 0 |                      |
| 7338 | 1,3,6,8,36,<br>39,42,43 | 2,4,5,7,37,<br>38,40,41,4<br>4 | 2 | O54728,P35434        |
| 7339 | 1,3,6,8,36,<br>39,42,44 | 2,4,5,7,37,<br>38,40,41,4<br>3 | 0 |                      |
| 7340 | 1,3,6,8,36,<br>39,43,44 | 2,4,5,7,37,<br>38,40,41,4<br>2 | 1 | P55314               |
| 7341 | 1,3,6,8,36,<br>40,41,42 | 2,4,5,7,37,<br>38,39,43,4<br>4 | 2 | P23593,Q64057        |
| 7342 | 1,3,6,8,36,<br>40,41,43 | 2,4,5,7,37,<br>38,39,42,4<br>4 | 2 | P51907,Q9Z1F2        |
| 7343 | 1,3,6,8,36,<br>40,41,44 | 2,4,5,7,37,<br>38,39,42,4<br>3 | 2 | P06911,Q80WL1        |
| 7344 | 1,3,6,8,36,<br>40,42,43 | 2,4,5,7,37,<br>38,39,41,4<br>4 | 0 |                      |
| 7345 | 1,3,6,8,36,<br>40,42,44 | 2,4,5,7,37,<br>38,39,41,4<br>3 | 2 | P20759,Q7TPB1        |



|      |                         |                                |   |                                    |
|------|-------------------------|--------------------------------|---|------------------------------------|
| 7346 | 1,3,6,8,36,<br>40,43,44 | 2,4,5,7,37,<br>38,39,41,4<br>2 | 0 |                                    |
| 7347 | 1,3,6,8,36,<br>41,42,43 | 2,4,5,7,37,<br>38,39,40,4<br>4 | 1 | P35434                             |
| 7348 | 1,3,6,8,36,<br>41,42,44 | 2,4,5,7,37,<br>38,39,40,4<br>3 | 0 |                                    |
| 7349 | 1,3,6,8,36,<br>41,43,44 | 2,4,5,7,37,<br>38,39,40,4<br>2 | 1 | Q66H69                             |
| 7350 | 1,3,6,8,36,<br>42,43,44 | 2,4,5,7,37,<br>38,39,40,4<br>1 | 2 | P35434,Q66H69                      |
| 7351 | 1,3,6,8,37,<br>38,39,40 | 2,4,5,7,36,<br>41,42,43,4<br>4 | 4 | P16636,P35281,P82995,Q99MH3        |
| 7352 | 1,3,6,8,37,<br>38,39,41 | 2,4,5,7,36,<br>40,42,43,4<br>4 | 5 | P13432,P14408,P16636,P82995,Q9R1T5 |
| 7353 | 1,3,6,8,37,<br>38,39,42 | 2,4,5,7,36,<br>40,41,43,4<br>4 | 0 |                                    |
| 7354 | 1,3,6,8,37,<br>38,39,43 | 2,4,5,7,36,<br>40,41,42,4<br>4 | 5 | P14408,P82995,Q6IFV1,Q812E4,Q9R1T5 |
| 7355 | 1,3,6,8,37,<br>38,39,44 | 2,4,5,7,36,<br>40,41,42,4<br>3 | 2 | P16636,P82995                      |
| 7356 | 1,3,6,8,37,<br>38,40,41 | 2,4,5,7,36,<br>39,42,43,4<br>4 | 3 | P16636,P51907,P82995               |
| 7357 | 1,3,6,8,37,<br>38,40,42 | 2,4,5,7,36,<br>39,41,43,4<br>4 | 2 | D3ZUC6,Q99MH3                      |
| 7358 | 1,3,6,8,37,<br>38,40,43 | 2,4,5,7,36,<br>39,41,42,4<br>4 | 5 | P51907,P82995,Q64605,Q6IFV1,Q99MH3 |
| 7359 | 1,3,6,8,37,<br>38,40,44 | 2,4,5,7,36,<br>39,41,42,4<br>3 | 2 | P16636,P82995                      |
| 7360 | 1,3,6,8,37,<br>38,41,42 | 2,4,5,7,36,<br>39,40,43,4<br>4 | 0 |                                    |

|      |                         |                                |   |                                                  |
|------|-------------------------|--------------------------------|---|--------------------------------------------------|
| 7361 | 1,3,6,8,37,<br>38,41,43 | 2,4,5,7,36,<br>39,40,42,4<br>4 | 5 | P14408,P51907,P82995,Q6IFV1,Q7TPB1               |
| 7362 | 1,3,6,8,37,<br>38,41,44 | 2,4,5,7,36,<br>39,40,42,4<br>3 | 1 | P16636                                           |
| 7363 | 1,3,6,8,37,<br>38,42,43 | 2,4,5,7,36,<br>39,40,41,4<br>4 | 1 | Q6IFV1                                           |
| 7364 | 1,3,6,8,37,<br>38,42,44 | 2,4,5,7,36,<br>39,40,41,4<br>3 | 0 |                                                  |
| 7365 | 1,3,6,8,37,<br>38,43,44 | 2,4,5,7,36,<br>39,40,41,4<br>2 | 2 | P82995,Q6IFV1                                    |
| 7366 | 1,3,6,8,37,<br>39,40,41 | 2,4,5,7,36,<br>38,42,43,4<br>4 | 4 | P06911,P10715,P14408,P51907                      |
| 7367 | 1,3,6,8,37,<br>39,40,42 | 2,4,5,7,36,<br>38,41,43,4<br>4 | 3 | P00774,P98089,Q99MH3                             |
| 7368 | 1,3,6,8,37,<br>39,40,43 | 2,4,5,7,36,<br>38,41,42,4<br>4 | 7 | P14408,P51907,P82995,Q64605,Q812E4,Q8CIZ5,Q99MH3 |
| 7369 | 1,3,6,8,37,<br>39,40,44 | 2,4,5,7,36,<br>38,41,42,4<br>3 | 4 | O35547,P16636,Q6AYL6,Q8CJD3                      |
| 7370 | 1,3,6,8,37,<br>39,41,42 | 2,4,5,7,36,<br>38,40,43,4<br>4 | 1 | P13432                                           |
| 7371 | 1,3,6,8,37,<br>39,41,43 | 2,4,5,7,36,<br>38,40,42,4<br>4 | 3 | P00714,P14408,P51907                             |
| 7372 | 1,3,6,8,37,<br>39,41,44 | 2,4,5,7,36,<br>38,40,42,4<br>3 | 2 | P14408,P16636                                    |
| 7373 | 1,3,6,8,37,<br>39,42,43 | 2,4,5,7,36,<br>38,40,41,4<br>4 | 1 | Q99MH3                                           |
| 7374 | 1,3,6,8,37,<br>39,42,44 | 2,4,5,7,36,<br>38,40,41,4<br>3 | 0 |                                                  |
| 7375 | 1,3,6,8,37,<br>39,43,44 | 2,4,5,7,36,<br>38,40,41,4<br>2 | 2 | P14408,Q812E4                                    |

|      |                         |                                |   |                                                  |
|------|-------------------------|--------------------------------|---|--------------------------------------------------|
| 7376 | 1,3,6,8,37,<br>40,41,42 | 2,4,5,7,36,<br>38,39,43,4<br>4 | 1 | P51907                                           |
| 7377 | 1,3,6,8,37,<br>40,41,43 | 2,4,5,7,36,<br>38,39,42,4<br>4 | 4 | P14408,P51907,P82995,Q9Z1F2                      |
| 7378 | 1,3,6,8,37,<br>40,41,44 | 2,4,5,7,36,<br>38,39,42,4<br>3 | 7 | P06911,P10715,P16636,P47727,P51907,Q5GRG2,Q80WL1 |
| 7379 | 1,3,6,8,37,<br>40,42,43 | 2,4,5,7,36,<br>38,39,41,4<br>4 | 2 | P51907,Q99MH3                                    |
| 7380 | 1,3,6,8,37,<br>40,42,44 | 2,4,5,7,36,<br>38,39,41,4<br>3 | 0 |                                                  |
| 7381 | 1,3,6,8,37,<br>40,43,44 | 2,4,5,7,36,<br>38,39,41,4<br>2 | 2 | P51907,P82995                                    |
| 7382 | 1,3,6,8,37,<br>41,42,43 | 2,4,5,7,36,<br>38,39,40,4<br>4 | 1 | P51907                                           |
| 7383 | 1,3,6,8,37,<br>41,42,44 | 2,4,5,7,36,<br>38,39,40,4<br>3 | 2 | O70594,Q6P6R2                                    |
| 7384 | 1,3,6,8,37,<br>41,43,44 | 2,4,5,7,36,<br>38,39,40,4<br>2 | 2 | P14408,P51907                                    |
| 7385 | 1,3,6,8,37,<br>42,43,44 | 2,4,5,7,36,<br>38,39,40,4<br>1 | 0 |                                                  |
| 7386 | 1,3,6,8,38,<br>39,40,41 | 2,4,5,7,36,<br>37,42,43,4<br>4 | 2 | P13432,P14408                                    |
| 7387 | 1,3,6,8,38,<br>39,40,42 | 2,4,5,7,36,<br>37,41,43,4<br>4 | 1 | Q99MH3                                           |
| 7388 | 1,3,6,8,38,<br>39,40,43 | 2,4,5,7,36,<br>37,41,42,4<br>4 | 4 | P14408,P82995,Q6IFV1,Q99MH3                      |
| 7389 | 1,3,6,8,38,<br>39,40,44 | 2,4,5,7,36,<br>37,41,42,4<br>3 | 1 | P16636                                           |
| 7390 | 1,3,6,8,38,<br>39,41,42 | 2,4,5,7,36,<br>37,40,43,4<br>4 | 1 | P13432                                           |

|      |                         |                                |   |                             |
|------|-------------------------|--------------------------------|---|-----------------------------|
| 7391 | 1,3,6,8,38,<br>39,41,43 | 2,4,5,7,36,<br>37,40,42,4<br>4 | 3 | P13432,P14408,Q6IFV1        |
| 7392 | 1,3,6,8,38,<br>39,41,44 | 2,4,5,7,36,<br>37,40,42,4<br>3 | 1 | P14408                      |
| 7393 | 1,3,6,8,38,<br>39,42,43 | 2,4,5,7,36,<br>37,40,41,4<br>4 | 1 | Q99MH3                      |
| 7394 | 1,3,6,8,38,<br>39,42,44 | 2,4,5,7,36,<br>37,40,41,4<br>3 | 0 |                             |
| 7395 | 1,3,6,8,38,<br>39,43,44 | 2,4,5,7,36,<br>37,40,41,4<br>2 | 2 | P14408,Q6IFV1               |
| 7396 | 1,3,6,8,38,<br>40,41,42 | 2,4,5,7,36,<br>37,39,43,4<br>4 | 0 |                             |
| 7397 | 1,3,6,8,38,<br>40,41,43 | 2,4,5,7,36,<br>37,39,42,4<br>4 | 2 | P51907,P82995               |
| 7398 | 1,3,6,8,38,<br>40,41,44 | 2,4,5,7,36,<br>37,39,42,4<br>3 | 4 | P06911,P16636,Q5GRG2,Q62635 |
| 7399 | 1,3,6,8,38,<br>40,42,43 | 2,4,5,7,36,<br>37,39,41,4<br>4 | 2 | P35467,Q99MH3               |
| 7400 | 1,3,6,8,38,<br>40,42,44 | 2,4,5,7,36,<br>37,39,41,4<br>3 | 1 | D3ZUC6                      |
| 7401 | 1,3,6,8,38,<br>40,43,44 | 2,4,5,7,36,<br>37,39,41,4<br>2 | 3 | P01681,P35467,P82995        |
| 7402 | 1,3,6,8,38,<br>41,42,43 | 2,4,5,7,36,<br>37,39,40,4<br>4 | 1 | Q8CJD3                      |
| 7403 | 1,3,6,8,38,<br>41,42,44 | 2,4,5,7,36,<br>37,39,40,4<br>3 | 1 | Q8CIZ5                      |
| 7404 | 1,3,6,8,38,<br>41,43,44 | 2,4,5,7,36,<br>37,39,40,4<br>2 | 1 | P00774                      |
| 7405 | 1,3,6,8,38,<br>42,43,44 | 2,4,5,7,36,<br>37,39,40,4<br>1 | 1 | P35467                      |

|      |                         |                                |   |                                           |
|------|-------------------------|--------------------------------|---|-------------------------------------------|
| 7406 | 1,3,6,8,39,<br>40,41,42 | 2,4,5,7,36,<br>37,38,43,4<br>4 | 1 | P13432                                    |
| 7407 | 1,3,6,8,39,<br>40,41,43 | 2,4,5,7,36,<br>37,38,42,4<br>4 | 3 | P14408,P51907,Q6AYL6                      |
| 7408 | 1,3,6,8,39,<br>40,41,44 | 2,4,5,7,36,<br>37,38,42,4<br>3 | 6 | P06911,P10715,P19629,P31044,Q5GRG2,Q6AYL6 |
| 7409 | 1,3,6,8,39,<br>40,42,43 | 2,4,5,7,36,<br>37,38,41,4<br>4 | 1 | Q99MH3                                    |
| 7410 | 1,3,6,8,39,<br>40,42,44 | 2,4,5,7,36,<br>37,38,41,4<br>3 | 0 |                                           |
| 7411 | 1,3,6,8,39,<br>40,43,44 | 2,4,5,7,36,<br>37,38,41,4<br>2 | 2 | P14408,Q6AYL6                             |
| 7412 | 1,3,6,8,39,<br>41,42,43 | 2,4,5,7,36,<br>37,38,40,4<br>4 | 2 | P08494,P82471                             |
| 7413 | 1,3,6,8,39,<br>41,42,44 | 2,4,5,7,36,<br>37,38,40,4<br>3 | 0 |                                           |
| 7414 | 1,3,6,8,39,<br>41,43,44 | 2,4,5,7,36,<br>37,38,40,4<br>2 | 2 | P08494,P14408                             |
| 7415 | 1,3,6,8,39,<br>42,43,44 | 2,4,5,7,36,<br>37,38,40,4<br>1 | 0 |                                           |
| 7416 | 1,3,6,8,40,<br>41,42,43 | 2,4,5,7,36,<br>37,38,39,4<br>4 | 1 | P51907                                    |
| 7417 | 1,3,6,8,40,<br>41,42,44 | 2,4,5,7,36,<br>37,38,39,4<br>3 | 2 | P20759,Q6P6R2                             |
| 7418 | 1,3,6,8,40,<br>41,43,44 | 2,4,5,7,36,<br>37,38,39,4<br>2 | 2 | P51907,Q6AYL6                             |
| 7419 | 1,3,6,8,40,<br>42,43,44 | 2,4,5,7,36,<br>37,38,39,4<br>1 | 0 |                                           |
| 7420 | 1,3,6,8,41,<br>42,43,44 | 2,4,5,7,36,<br>37,38,39,4<br>0 | 2 | P82471,Q6P6R2                             |

|      |                          |                           |    |                                                                                     |
|------|--------------------------|---------------------------|----|-------------------------------------------------------------------------------------|
| 7421 | 1,3,6,36,3<br>7,38,39,40 | 2,4,5,7,8,4<br>1,42,43,44 | 2  | O35547,P35281                                                                       |
| 7422 | 1,3,6,36,3<br>7,38,39,41 | 2,4,5,7,8,4<br>0,42,43,44 | 4  | P00714,P13432,Q5M819,Q9QZ76                                                         |
| 7423 | 1,3,6,36,3<br>7,38,39,42 | 2,4,5,7,8,4<br>0,41,43,44 | 0  |                                                                                     |
| 7424 | 1,3,6,36,3<br>7,38,39,43 | 2,4,5,7,8,4<br>0,41,42,44 | 5  | P00714,P97605,Q6IFV1,Q812E4,Q9QZ76                                                  |
| 7425 | 1,3,6,36,3<br>7,38,39,44 | 2,4,5,7,8,4<br>0,41,42,43 | 1  | Q9JJS8                                                                              |
| 7426 | 1,3,6,36,3<br>7,38,40,41 | 2,4,5,7,8,3<br>9,42,43,44 | 2  | Q5M819,Q80WL1                                                                       |
| 7427 | 1,3,6,36,3<br>7,38,40,42 | 2,4,5,7,8,3<br>9,41,43,44 | 1  | Q64057                                                                              |
| 7428 | 1,3,6,36,3<br>7,38,40,43 | 2,4,5,7,8,3<br>9,41,42,44 | 2  | P97605,Q6IFV1                                                                       |
| 7429 | 1,3,6,36,3<br>7,38,40,44 | 2,4,5,7,8,3<br>9,41,42,43 | 5  | O35547,P16636,P54921,P97605,Q80WL1                                                  |
| 7430 | 1,3,6,36,3<br>7,38,41,42 | 2,4,5,7,8,3<br>9,40,43,44 | 2  | Q5M819,Q6AYS4                                                                       |
| 7431 | 1,3,6,36,3<br>7,38,41,43 | 2,4,5,7,8,3<br>9,40,42,44 | 4  | P00714,Q5M819,Q6AYS4,Q6IFV1                                                         |
| 7432 | 1,3,6,36,3<br>7,38,41,44 | 2,4,5,7,8,3<br>9,40,42,43 | 3  | Q5M819,Q80WL1,Q9JHB9                                                                |
| 7433 | 1,3,6,36,3<br>7,38,42,43 | 2,4,5,7,8,3<br>9,40,41,44 | 3  | P10715,Q68FS4,Q6AYS4                                                                |
| 7434 | 1,3,6,36,3<br>7,38,42,44 | 2,4,5,7,8,3<br>9,40,41,43 | 0  |                                                                                     |
| 7435 | 1,3,6,36,3<br>7,38,43,44 | 2,4,5,7,8,3<br>9,40,41,42 | 3  | P97605,Q6IFV1,Q9QW07                                                                |
| 7436 | 1,3,6,36,3<br>7,39,40,41 | 2,4,5,7,8,3<br>8,42,43,44 | 4  | O35547,P00714,P08723,Q80WL1                                                         |
| 7437 | 1,3,6,36,3<br>7,39,40,42 | 2,4,5,7,8,3<br>8,41,43,44 | 8  | P00774,P50115,P50116,P55091,P98089,Q05695,Q5U2V4,Q99MH3                             |
| 7438 | 1,3,6,36,3<br>7,39,40,43 | 2,4,5,7,8,3<br>8,41,42,44 | 12 | O35547,P00714,P50115,P50116,P55091,P97605,P98089,Q05695,Q812E4,Q8CIZ5,Q99MH3,Q9QW07 |
| 7439 | 1,3,6,36,3<br>7,39,40,44 | 2,4,5,7,8,3<br>8,41,42,43 | 7  | O35547,P50115,P50116,P54921,P55314,Q80WL1,Q8CJD3                                    |
| 7440 | 1,3,6,36,3<br>7,39,41,42 | 2,4,5,7,8,3<br>8,40,43,44 | 0  |                                                                                     |
| 7441 | 1,3,6,36,3<br>7,39,41,43 | 2,4,5,7,8,3<br>8,40,42,44 | 3  | P00714,Q6TMA8,Q9QZ76                                                                |
| 7442 | 1,3,6,36,3<br>7,39,41,44 | 2,4,5,7,8,3<br>8,40,42,43 | 2  | Q80WL1,Q9JHB9                                                                       |
| 7443 | 1,3,6,36,3<br>7,39,42,43 | 2,4,5,7,8,3<br>8,40,41,44 | 6  | O54728,P50115,P50116,P98089,Q05695,Q62635                                           |

|      |                                                 |   |                                                  |
|------|-------------------------------------------------|---|--------------------------------------------------|
| 7444 | 1,3,6,36,3 2,4,5,7,8,3<br>7,39,42,44 8,40,41,43 | 2 | P50115,P50116                                    |
| 7445 | 1,3,6,36,3 2,4,5,7,8,3<br>7,39,43,44 8,40,41,42 | 6 | O35547,P50115,P50116,P55314,Q812E4,Q9QW07        |
| 7446 | 1,3,6,36,3 2,4,5,7,8,3<br>7,40,41,42 8,39,43,44 | 3 | Q64057,Q6AYS4,Q80WL1                             |
| 7447 | 1,3,6,36,3 2,4,5,7,8,3<br>7,40,41,43 8,39,42,44 | 3 | P51907,Q6AYS4,Q80WL1                             |
| 7448 | 1,3,6,36,3 2,4,5,7,8,3<br>7,40,41,44 8,39,42,43 | 4 | O35547,P47727,P51907,Q80WL1                      |
| 7449 | 1,3,6,36,3 2,4,5,7,8,3<br>7,40,42,43 8,39,41,44 | 6 | P50115,P50116,Q05695,Q68FS4,Q6AYS4,Q99MH3        |
| 7450 | 1,3,6,36,3 2,4,5,7,8,3<br>7,40,42,44 8,39,41,43 | 4 | P50115,P50116,Q7TPB1,Q80WL1                      |
| 7451 | 1,3,6,36,3 2,4,5,7,8,3<br>7,40,43,44 8,39,41,42 | 7 | O35547,P08010,P50115,P50116,P97605,Q80WL1,Q9QW07 |
| 7452 | 1,3,6,36,3 2,4,5,7,8,3<br>7,41,42,43 8,39,40,44 | 1 | Q6AYS4                                           |
| 7453 | 1,3,6,36,3 2,4,5,7,8,3<br>7,41,42,44 8,39,40,43 | 2 | Q6AYS4,Q80WL1                                    |
| 7454 | 1,3,6,36,3 2,4,5,7,8,3<br>7,41,43,44 8,39,40,42 | 2 | Q6AYS4,Q80WL1                                    |
| 7455 | 1,3,6,36,3 2,4,5,7,8,3<br>7,42,43,44 8,39,40,41 | 4 | P50115,P50116,Q68FS4,Q6AYS4                      |
| 7456 | 1,3,6,36,3 2,4,5,7,8,3<br>8,39,40,41 7,42,43,44 | 2 | P00714,P13432                                    |
| 7457 | 1,3,6,36,3 2,4,5,7,8,3<br>8,39,40,42 7,41,43,44 | 1 | Q99MH3                                           |
| 7458 | 1,3,6,36,3 2,4,5,7,8,3<br>8,39,40,43 7,41,42,44 | 4 | P00714,P97605,Q6IFV1,Q99MH3                      |
| 7459 | 1,3,6,36,3 2,4,5,7,8,3<br>8,39,40,44 7,41,42,43 | 1 | P55314                                           |
| 7460 | 1,3,6,36,3 2,4,5,7,8,3<br>8,39,41,42 7,40,43,44 | 1 | P13432                                           |
| 7461 | 1,3,6,36,3 2,4,5,7,8,3<br>8,39,41,43 7,40,42,44 | 3 | P00714,Q5M819,Q9QZ76                             |
| 7462 | 1,3,6,36,3 2,4,5,7,8,3<br>8,39,41,44 7,40,42,43 | 0 |                                                  |
| 7463 | 1,3,6,36,3 2,4,5,7,8,3<br>8,39,42,43 7,40,41,44 | 3 | O54728,Q68FS4,Q6IFU7                             |
| 7464 | 1,3,6,36,3 2,4,5,7,8,3<br>8,39,42,44 7,40,41,43 | 1 | Q68FS4                                           |
| 7465 | 1,3,6,36,3 2,4,5,7,8,3<br>8,39,43,44 7,40,41,42 | 2 | P55314,Q9JJS8                                    |
| 7466 | 1,3,6,36,3 2,4,5,7,8,3<br>8,40,41,42 7,39,43,44 | 1 | Q64057                                           |

|      |                          |                           |   |                                                  |
|------|--------------------------|---------------------------|---|--------------------------------------------------|
| 7467 | 1,3,6,36,3<br>8,40,41,43 | 2,4,5,7,8,3<br>7,39,42,44 | 0 |                                                  |
| 7468 | 1,3,6,36,3<br>8,40,41,44 | 2,4,5,7,8,3<br>7,39,42,43 | 1 | Q80WL1                                           |
| 7469 | 1,3,6,36,3<br>8,40,42,43 | 2,4,5,7,8,3<br>7,39,41,44 | 2 | Q68FS4,Q99MH3                                    |
| 7470 | 1,3,6,36,3<br>8,40,42,44 | 2,4,5,7,8,3<br>7,39,41,43 | 3 | Q68FS4,Q7TPB1,Q99041                             |
| 7471 | 1,3,6,36,3<br>8,40,43,44 | 2,4,5,7,8,3<br>7,39,41,42 | 1 | P97605                                           |
| 7472 | 1,3,6,36,3<br>8,41,42,43 | 2,4,5,7,8,3<br>7,39,40,44 | 1 | Q6AYS4                                           |
| 7473 | 1,3,6,36,3<br>8,41,42,44 | 2,4,5,7,8,3<br>7,39,40,43 | 1 | Q8CIZ5                                           |
| 7474 | 1,3,6,36,3<br>8,41,43,44 | 2,4,5,7,8,3<br>7,39,40,42 | 1 | P00774                                           |
| 7475 | 1,3,6,36,3<br>8,42,43,44 | 2,4,5,7,8,3<br>7,39,40,41 | 3 | P15999,Q68FS4,Q99041                             |
| 7476 | 1,3,6,36,3<br>9,40,41,42 | 2,4,5,7,8,3<br>7,38,43,44 | 1 | Q80WL1                                           |
| 7477 | 1,3,6,36,3<br>9,40,41,43 | 2,4,5,7,8,3<br>7,38,42,44 | 1 | P00714                                           |
| 7478 | 1,3,6,36,3<br>9,40,41,44 | 2,4,5,7,8,3<br>7,38,42,43 | 7 | P06911,P10715,P16391,P19629,P55314,Q5GRG2,Q80WL1 |
| 7479 | 1,3,6,36,3<br>9,40,42,43 | 2,4,5,7,8,3<br>7,38,41,44 | 6 | P50115,P50116,Q05695,Q62635,Q68FS4,Q99MH3        |
| 7480 | 1,3,6,36,3<br>9,40,42,44 | 2,4,5,7,8,3<br>7,38,41,43 | 5 | P50115,P50116,P55314,Q68FS4,Q7TPB1               |
| 7481 | 1,3,6,36,3<br>9,40,43,44 | 2,4,5,7,8,3<br>7,38,41,42 | 3 | P50115,P50116,P55314                             |
| 7482 | 1,3,6,36,3<br>9,41,42,43 | 2,4,5,7,8,3<br>7,38,40,44 | 2 | P08494,Q6AYS4                                    |
| 7483 | 1,3,6,36,3<br>9,41,42,44 | 2,4,5,7,8,3<br>7,38,40,43 | 0 |                                                  |
| 7484 | 1,3,6,36,3<br>9,41,43,44 | 2,4,5,7,8,3<br>7,38,40,42 | 3 | P02803,P08494,P55314                             |
| 7485 | 1,3,6,36,3<br>9,42,43,44 | 2,4,5,7,8,3<br>7,38,40,41 | 5 | P35434,P50115,P50116,P55314,Q68FS4               |
| 7486 | 1,3,6,36,4<br>0,41,42,43 | 2,4,5,7,8,3<br>7,38,39,44 | 2 | Q6AYS4,Q80WL1                                    |
| 7487 | 1,3,6,36,4<br>0,41,42,44 | 2,4,5,7,8,3<br>7,38,39,43 | 2 | Q7TPB1,Q80WL1                                    |
| 7488 | 1,3,6,36,4<br>0,41,43,44 | 2,4,5,7,8,3<br>7,38,39,42 | 1 | Q80WL1                                           |
| 7489 | 1,3,6,36,4<br>0,42,43,44 | 2,4,5,7,8,3<br>7,38,39,41 | 4 | P50115,P50116,Q68FS4,Q7TPB1                      |



|      |                          |                           |    |                                                                                            |
|------|--------------------------|---------------------------|----|--------------------------------------------------------------------------------------------|
| 7490 | 1,3,6,36,4<br>1,42,43,44 | 2,4,5,7,8,3<br>7,38,39,40 | 3  | P02803,P35434,Q6AYS4                                                                       |
| 7491 | 1,3,6,37,3<br>8,39,40,41 | 2,4,5,7,8,3<br>6,42,43,44 | 7  | P00714,P07171,P13432,P16636,P35281,P82995,Q99MH3                                           |
| 7492 | 1,3,6,37,3<br>8,39,40,42 | 2,4,5,7,8,3<br>6,41,43,44 | 5  | P07171,P16636,P82995,Q01205,Q99MH3                                                         |
| 7493 | 1,3,6,37,3<br>8,39,40,43 | 2,4,5,7,8,3<br>6,41,42,44 | 13 | P00714,P07171,P08644,P35281,P60905,P82995,P97605,Q01205,Q64605,Q6IFV1,Q812E4,Q99MH3,Q9QW07 |
| 7494 | 1,3,6,37,3<br>8,39,40,44 | 2,4,5,7,8,3<br>6,41,42,43 | 7  | O35547,P16636,P54921,P82995,Q01205,Q812E4,Q99MH3                                           |
| 7495 | 1,3,6,37,3<br>8,39,41,42 | 2,4,5,7,8,3<br>6,40,43,44 | 3  | P07171,P13432,Q6AYS4                                                                       |
| 7496 | 1,3,6,37,3<br>8,39,41,43 | 2,4,5,7,8,3<br>6,40,42,44 | 10 | P00714,P07171,P13432,P14408,P82995,Q6AYS4,Q6IFV1,Q812E4,Q99MH3,Q9QZ76                      |
| 7497 | 1,3,6,37,3<br>8,39,41,44 | 2,4,5,7,8,3<br>6,40,42,43 | 5  | P13432,P16636,P82995,Q6AYS4,Q9JJS8                                                         |
| 7498 | 1,3,6,37,3<br>8,39,42,43 | 2,4,5,7,8,3<br>6,40,41,44 | 7  | P07171,P82995,Q01205,Q6AYS4,Q6IFU7,Q6IFV1,Q99MH3                                           |
| 7499 | 1,3,6,37,3<br>8,39,42,44 | 2,4,5,7,8,3<br>6,40,41,43 | 4  | P16636,Q6AYS4,Q99MH3,Q9JJS8                                                                |
| 7500 | 1,3,6,37,3<br>8,39,43,44 | 2,4,5,7,8,3<br>6,40,41,42 | 8  | P23593,P82995,Q6AYS4,Q6IFV1,Q812E4,Q99MH3,Q9JJS8,Q9QW07                                    |
| 7501 | 1,3,6,37,3<br>8,40,41,42 | 2,4,5,7,8,3<br>6,39,43,44 | 3  | P07171,Q6AYS4,Q99MH3                                                                       |
| 7502 | 1,3,6,37,3<br>8,40,41,43 | 2,4,5,7,8,3<br>6,39,42,44 | 6  | P07171,P51907,P82995,Q6AYS4,Q6IFV1,Q99MH3                                                  |
| 7503 | 1,3,6,37,3<br>8,40,41,44 | 2,4,5,7,8,3<br>6,39,42,43 | 5  | P06911,P16636,P82995,Q6AYS4,Q80WL1                                                         |
| 7504 | 1,3,6,37,3<br>8,40,42,43 | 2,4,5,7,8,3<br>6,39,41,44 | 7  | P07171,P82995,P97605,Q01205,Q63475,Q6AYS4,Q99MH3                                           |
| 7505 | 1,3,6,37,3<br>8,40,42,44 | 2,4,5,7,8,3<br>6,39,41,43 | 4  | P16636,Q01205,Q6AYS4,Q99MH3                                                                |
| 7506 | 1,3,6,37,3<br>8,40,43,44 | 2,4,5,7,8,3<br>6,39,41,42 | 9  | P08010,P82995,P97605,Q01205,Q6AYS4,Q6IFV1,Q812E4,Q99MH3,Q9QW07                             |
| 7507 | 1,3,6,37,3<br>8,41,42,43 | 2,4,5,7,8,3<br>6,39,40,44 | 2  | P07171,Q6AYS4                                                                              |
| 7508 | 1,3,6,37,3<br>8,41,42,44 | 2,4,5,7,8,3<br>6,39,40,43 | 2  | P16636,Q6AYS4                                                                              |
| 7509 | 1,3,6,37,3<br>8,41,43,44 | 2,4,5,7,8,3<br>6,39,40,42 | 3  | P00774,P82995,Q6AYS4                                                                       |
| 7510 | 1,3,6,37,3<br>8,42,43,44 | 2,4,5,7,8,3<br>6,39,40,41 | 3  | Q01205,Q6AYS4,Q99MH3                                                                       |
| 7511 | 1,3,6,37,3<br>9,40,41,42 | 2,4,5,7,8,3<br>6,38,43,44 | 7  | P07171,P13432,P16391,Q01205,Q6AYS4,Q80WL1,Q99MH3                                           |
| 7512 | 1,3,6,37,3<br>9,40,41,43 | 2,4,5,7,8,3<br>6,38,42,44 | 9  | P00714,P07171,P51907,P82995,P97554,Q6AYL6,Q6AYS4,Q812E4,Q99MH3                             |

|      |                                                 |    |                                                                       |
|------|-------------------------------------------------|----|-----------------------------------------------------------------------|
| 7513 | 1,3,6,37,3 2,4,5,7,8,3<br>9,40,41,44 6,38,42,43 | 10 | O35547,P06911,P10715,P16391,P16636,P19629,P47727,Q5GRG2,Q6AYL6,Q80WL1 |
| 7514 | 1,3,6,37,3 2,4,5,7,8,3<br>9,40,42,43 6,38,41,44 | 8  | P07171,P50115,P50116,Q01205,Q05695,Q63475,Q6AYS4,Q99MH3               |
| 7515 | 1,3,6,37,3 2,4,5,7,8,3<br>9,40,42,44 6,38,41,43 | 5  | P16636,P50115,P50116,Q01205,Q99MH3                                    |
| 7516 | 1,3,6,37,3 2,4,5,7,8,3<br>9,40,43,44 6,38,41,42 | 10 | O35547,P08010,P50115,P50116,P82995,Q01205,Q6AYL6,Q812E4,Q99MH3,Q9QW07 |
| 7517 | 1,3,6,37,3 2,4,5,7,8,3<br>9,41,42,43 6,38,40,44 | 4  | P07171,P13432,Q6AYS4,Q99MH3                                           |
| 7518 | 1,3,6,37,3 2,4,5,7,8,3<br>9,41,42,44 6,38,40,43 | 1  | Q6AYS4                                                                |
| 7519 | 1,3,6,37,3 2,4,5,7,8,3<br>9,41,43,44 6,38,40,42 | 3  | Q6AYS4,Q812E4,Q9QZ76                                                  |
| 7520 | 1,3,6,37,3 2,4,5,7,8,3<br>9,42,43,44 6,38,40,41 | 5  | P50115,P50116,Q01205,Q6AYS4,Q99MH3                                    |
| 7521 | 1,3,6,37,4 2,4,5,7,8,3<br>0,41,42,43 6,38,39,44 | 6  | P07171,P51907,Q01205,Q6AYS4,Q80WL1,Q99MH3                             |
| 7522 | 1,3,6,37,4 2,4,5,7,8,3<br>0,41,42,44 6,38,39,43 | 3  | Q6AYS4,Q6P6R2,Q80WL1                                                  |
| 7523 | 1,3,6,37,4 2,4,5,7,8,3<br>0,41,43,44 6,38,39,42 | 7  | P19218,P47727,P51907,P82995,Q6AYL6,Q6AYS4,Q80WL1                      |
| 7524 | 1,3,6,37,4 2,4,5,7,8,3<br>0,42,43,44 6,38,39,41 | 6  | P07171,P50115,P50116,Q01205,Q6AYS4,Q99MH3                             |
| 7525 | 1,3,6,37,4 2,4,5,7,8,3<br>1,42,43,44 6,38,39,40 | 1  | Q6AYS4                                                                |
| 7526 | 1,3,6,38,3 2,4,5,7,8,3<br>9,40,41,42 6,37,43,44 | 4  | P07171,P13432,Q6AYS4,Q99MH3                                           |
| 7527 | 1,3,6,38,3 2,4,5,7,8,3<br>9,40,41,43 6,37,42,44 | 7  | P00714,P00762,P07171,P13432,P82995,Q6AYS4,Q99MH3                      |
| 7528 | 1,3,6,38,3 2,4,5,7,8,3<br>9,40,41,44 6,37,42,43 | 8  | P06911,P10715,P13432,P16391,P16636,P19629,Q5GRG2,Q6AYL6               |
| 7529 | 1,3,6,38,3 2,4,5,7,8,3<br>9,40,42,43 6,37,41,44 | 6  | P07171,Q01205,Q6AYS4,Q6IFU7,Q99041,Q99MH3                             |
| 7530 | 1,3,6,38,3 2,4,5,7,8,3<br>9,40,42,44 6,37,41,43 | 3  | Q01205,Q99041,Q99MH3                                                  |
| 7531 | 1,3,6,38,3 2,4,5,7,8,3<br>9,40,43,44 6,37,41,42 | 5  | P82995,Q01205,Q6AYL6,Q99MH3,Q9QZQ5                                    |
| 7532 | 1,3,6,38,3 2,4,5,7,8,3<br>9,41,42,43 6,37,40,44 | 6  | B0BNN3,P07171,P13432,Q6AYS4,Q6IFU7,Q99MH3                             |
| 7533 | 1,3,6,38,3 2,4,5,7,8,3<br>9,41,42,44 6,37,40,43 | 2  | P13432,Q6AYS4                                                         |
| 7534 | 1,3,6,38,3 2,4,5,7,8,3<br>9,41,43,44 6,37,40,42 | 2  | P00774,Q6AYS4                                                         |
| 7535 | 1,3,6,38,3 2,4,5,7,8,3<br>9,42,43,44 6,37,40,41 | 5  | Q01205,Q6AYS4,Q6IFU7,Q99041,Q99MH3                                    |

|      |                          |                                |   |                                                         |
|------|--------------------------|--------------------------------|---|---------------------------------------------------------|
| 7536 | 1,3,6,38,4<br>0,41,42,43 | 2,4,5,7,8,3<br>6,37,39,44      | 4 | P07171,Q01205,Q6AYS4,Q99MH3                             |
| 7537 | 1,3,6,38,4<br>0,41,42,44 | 2,4,5,7,8,3<br>6,37,39,43      | 1 | Q6AYS4                                                  |
| 7538 | 1,3,6,38,4<br>0,41,43,44 | 2,4,5,7,8,3<br>6,37,39,42      | 3 | P00774,P82995,Q6AYS4                                    |
| 7539 | 1,3,6,38,4<br>0,42,43,44 | 2,4,5,7,8,3<br>6,37,39,41      | 6 | P07171,Q01205,Q68FS4,Q6AYS4,Q99041,Q99MH3               |
| 7540 | 1,3,6,38,4<br>1,42,43,44 | 2,4,5,7,8,3<br>6,37,39,40      | 2 | P00774,Q6AYS4                                           |
| 7541 | 1,3,6,39,4<br>0,41,42,43 | 2,4,5,7,8,3<br>6,37,38,44      | 5 | P07171,P13432,Q01205,Q6AYS4,Q99MH3                      |
| 7542 | 1,3,6,39,4<br>0,41,42,44 | 2,4,5,7,8,3<br>6,37,38,43      | 6 | P06911,P10715,P16391,P19629,Q6AYS4,Q80WL1               |
| 7543 | 1,3,6,39,4<br>0,41,43,44 | 2,4,5,7,8,3<br>6,37,38,42      | 8 | P06911,P10715,P15978,P19629,Q6AYL6,Q6AYS4,Q80WL1,Q99MH3 |
| 7544 | 1,3,6,39,4<br>0,42,43,44 | 2,4,5,7,8,3<br>6,37,38,41      | 8 | P07171,P11762,P50115,P50116,Q01205,Q6AYS4,Q99041,Q99MH3 |
| 7545 | 1,3,6,39,4<br>1,42,43,44 | 2,4,5,7,8,3<br>6,37,38,40      | 3 | P02803,P82471,Q6AYS4                                    |
| 7546 | 1,3,6,40,4<br>1,42,43,44 | 2,4,5,7,8,3<br>6,37,38,39      | 2 | Q6AYS4,Q80WL1                                           |
| 7547 | 1,3,7,8,36,<br>37,38,39  | 2,4,5,6,40,<br>41,42,43,4<br>4 | 2 | O54728,Q6P6R2                                           |
| 7548 | 1,3,7,8,36,<br>37,38,40  | 2,4,5,6,39,<br>41,42,43,4<br>4 | 0 |                                                         |
| 7549 | 1,3,7,8,36,<br>37,38,41  | 2,4,5,6,39,<br>40,42,43,4<br>4 | 0 |                                                         |
| 7550 | 1,3,7,8,36,<br>37,38,42  | 2,4,5,6,39,<br>40,41,43,4<br>4 | 1 | P36376                                                  |
| 7551 | 1,3,7,8,36,<br>37,38,43  | 2,4,5,6,39,<br>40,41,42,4<br>4 | 4 | P06760,P16391,Q64268,Q9QX79                             |
| 7552 | 1,3,7,8,36,<br>37,38,44  | 2,4,5,6,39,<br>40,41,42,4<br>3 | 1 | Q5HZV9                                                  |
| 7553 | 1,3,7,8,36,<br>37,39,40  | 2,4,5,6,38,<br>41,42,43,4<br>4 | 8 | P00774,P01835,P27213,P98089,Q5HZV9,Q62635,Q8CIZ5,Q8CJD3 |
| 7554 | 1,3,7,8,36,<br>37,39,41  | 2,4,5,6,38,<br>40,42,43,4<br>4 | 2 | P01835,Q9Z0V6                                           |

|      |                         |                                |   |                                                                |
|------|-------------------------|--------------------------------|---|----------------------------------------------------------------|
| 7555 | 1,3,7,8,36,<br>37,39,42 | 2,4,5,6,38,<br>40,41,43,4<br>4 | 6 | O54728,P00774,P01835,P98089,Q5HZV9,Q62635                      |
| 7556 | 1,3,7,8,36,<br>37,39,43 | 2,4,5,6,38,<br>40,41,42,4<br>4 | 9 | O54728,P02091,P06760,P98089,Q62635,Q6P6R2,Q6TMA8,Q8CIZ5,Q9Z0V6 |
| 7557 | 1,3,7,8,36,<br>37,39,44 | 2,4,5,6,38,<br>40,41,42,4<br>3 | 1 | Q5HZV9                                                         |
| 7558 | 1,3,7,8,36,<br>37,40,41 | 2,4,5,6,38,<br>39,42,43,4<br>4 | 3 | P01835,P51907,Q6IFU7                                           |
| 7559 | 1,3,7,8,36,<br>37,40,42 | 2,4,5,6,38,<br>39,41,43,4<br>4 | 4 | P00774,P01835,P98089,Q62635                                    |
| 7560 | 1,3,7,8,36,<br>37,40,43 | 2,4,5,6,38,<br>39,41,42,4<br>4 | 4 | P51907,P98089,Q62635,Q8CIZ5                                    |
| 7561 | 1,3,7,8,36,<br>37,40,44 | 2,4,5,6,38,<br>39,41,42,4<br>3 | 3 | B0BNN3,Q5HZV9,Q6IFU7                                           |
| 7562 | 1,3,7,8,36,<br>37,41,42 | 2,4,5,6,38,<br>39,40,43,4<br>4 | 1 | P01835                                                         |
| 7563 | 1,3,7,8,36,<br>37,41,43 | 2,4,5,6,38,<br>39,40,42,4<br>4 | 6 | P02651,P06760,P51907,P83121,Q9QX79,Q9Z0V6                      |
| 7564 | 1,3,7,8,36,<br>37,41,44 | 2,4,5,6,38,<br>39,40,42,4<br>3 | 1 | Q6IFU7                                                         |
| 7565 | 1,3,7,8,36,<br>37,42,43 | 2,4,5,6,38,<br>39,40,41,4<br>4 | 4 | P06760,P98089,Q62635,Q62975                                    |
| 7566 | 1,3,7,8,36,<br>37,42,44 | 2,4,5,6,38,<br>39,40,41,4<br>3 | 1 | Q5HZV9                                                         |
| 7567 | 1,3,7,8,36,<br>37,43,44 | 2,4,5,6,38,<br>39,40,41,4<br>2 | 2 | P02091,Q9QX79                                                  |
| 7568 | 1,3,7,8,36,<br>38,39,40 | 2,4,5,6,37,<br>41,42,43,4<br>4 | 1 | O54728                                                         |
| 7569 | 1,3,7,8,36,<br>38,39,41 | 2,4,5,6,37,<br>40,42,43,4<br>4 | 0 |                                                                |

|      |                         |                                |   |                                    |
|------|-------------------------|--------------------------------|---|------------------------------------|
| 7570 | 1,3,7,8,36,<br>38,39,42 | 2,4,5,6,37,<br>40,41,43,4<br>4 | 2 | O54728,P19218                      |
| 7571 | 1,3,7,8,36,<br>38,39,43 | 2,4,5,6,37,<br>40,41,42,4<br>4 | 5 | O54728,P01946,P02091,P06760,Q6P6R2 |
| 7572 | 1,3,7,8,36,<br>38,39,44 | 2,4,5,6,37,<br>40,41,42,4<br>3 | 0 |                                    |
| 7573 | 1,3,7,8,36,<br>38,40,41 | 2,4,5,6,37,<br>39,42,43,4<br>4 | 0 |                                    |
| 7574 | 1,3,7,8,36,<br>38,40,42 | 2,4,5,6,37,<br>39,41,43,4<br>4 | 0 |                                    |
| 7575 | 1,3,7,8,36,<br>38,40,43 | 2,4,5,6,37,<br>39,41,42,4<br>4 | 0 |                                    |
| 7576 | 1,3,7,8,36,<br>38,40,44 | 2,4,5,6,37,<br>39,41,42,4<br>3 | 0 |                                    |
| 7577 | 1,3,7,8,36,<br>38,41,42 | 2,4,5,6,37,<br>39,40,43,4<br>4 | 0 |                                    |
| 7578 | 1,3,7,8,36,<br>38,41,43 | 2,4,5,6,37,<br>39,40,42,4<br>4 | 1 | Q9QX79                             |
| 7579 | 1,3,7,8,36,<br>38,41,44 | 2,4,5,6,37,<br>39,40,42,4<br>3 | 1 | Q05695                             |
| 7580 | 1,3,7,8,36,<br>38,42,43 | 2,4,5,6,37,<br>39,40,41,4<br>4 | 2 | P16391,Q62975                      |
| 7581 | 1,3,7,8,36,<br>38,42,44 | 2,4,5,6,37,<br>39,40,41,4<br>3 | 1 | P15999                             |
| 7582 | 1,3,7,8,36,<br>38,43,44 | 2,4,5,6,37,<br>39,40,41,4<br>2 | 1 | P02091                             |
| 7583 | 1,3,7,8,36,<br>39,40,41 | 2,4,5,6,37,<br>38,42,43,4<br>4 | 2 | P01835,P10715                      |
| 7584 | 1,3,7,8,36,<br>39,40,42 | 2,4,5,6,37,<br>38,41,43,4<br>4 | 5 | O54728,P00774,P01835,P98089,Q62635 |

|      |                         |                                |   |                                           |
|------|-------------------------|--------------------------------|---|-------------------------------------------|
| 7585 | 1,3,7,8,36,<br>39,40,43 | 2,4,5,6,37,<br>38,41,42,4<br>4 | 5 | O54728,P02091,P98089,Q62635,Q8CIZ5        |
| 7586 | 1,3,7,8,36,<br>39,40,44 | 2,4,5,6,37,<br>38,41,42,4<br>3 | 2 | P80020,Q5HZV9                             |
| 7587 | 1,3,7,8,36,<br>39,41,42 | 2,4,5,6,37,<br>38,40,43,4<br>4 | 3 | O54728,P01835,Q6AYR9                      |
| 7588 | 1,3,7,8,36,<br>39,41,43 | 2,4,5,6,37,<br>38,40,42,4<br>4 | 5 | P01946,P02091,P06760,P08494,P22006        |
| 7589 | 1,3,7,8,36,<br>39,41,44 | 2,4,5,6,37,<br>38,40,42,4<br>3 | 1 | Q8VD89                                    |
| 7590 | 1,3,7,8,36,<br>39,42,43 | 2,4,5,6,37,<br>38,40,41,4<br>4 | 6 | O54728,P02091,P06760,P98089,Q62635,Q62975 |
| 7591 | 1,3,7,8,36,<br>39,42,44 | 2,4,5,6,37,<br>38,40,41,4<br>3 | 2 | O54728,Q5HZV9                             |
| 7592 | 1,3,7,8,36,<br>39,43,44 | 2,4,5,6,37,<br>38,40,41,4<br>2 | 3 | P01946,P02091,P06760                      |
| 7593 | 1,3,7,8,36,<br>40,41,42 | 2,4,5,6,37,<br>38,39,43,4<br>4 | 2 | P01835,Q9JJS8                             |
| 7594 | 1,3,7,8,36,<br>40,41,43 | 2,4,5,6,37,<br>38,39,42,4<br>4 | 1 | P51907                                    |
| 7595 | 1,3,7,8,36,<br>40,41,44 | 2,4,5,6,37,<br>38,39,42,4<br>3 | 2 | P10715,P31044                             |
| 7596 | 1,3,7,8,36,<br>40,42,43 | 2,4,5,6,37,<br>38,39,41,4<br>4 | 3 | P98089,Q62635,Q62975                      |
| 7597 | 1,3,7,8,36,<br>40,42,44 | 2,4,5,6,37,<br>38,39,41,4<br>3 | 2 | P20759,Q7TPB1                             |
| 7598 | 1,3,7,8,36,<br>40,43,44 | 2,4,5,6,37,<br>38,39,41,4<br>2 | 1 | P02091                                    |
| 7599 | 1,3,7,8,36,<br>41,42,43 | 2,4,5,6,37,<br>38,39,40,4<br>4 | 1 | Q62975                                    |

|      |                         |                                |   |                      |
|------|-------------------------|--------------------------------|---|----------------------|
| 7600 | 1,3,7,8,36,<br>41,42,44 | 2,4,5,6,37,<br>38,39,40,4<br>3 | 0 |                      |
| 7601 | 1,3,7,8,36,<br>41,43,44 | 2,4,5,6,37,<br>38,39,40,4<br>2 | 3 | P02091,P83121,Q9QX79 |
| 7602 | 1,3,7,8,36,<br>42,43,44 | 2,4,5,6,37,<br>38,39,40,4<br>1 | 2 | P02091,Q62975        |
| 7603 | 1,3,7,8,37,<br>38,39,40 | 2,4,5,6,36,<br>41,42,43,4<br>4 | 1 | P35281               |
| 7604 | 1,3,7,8,37,<br>38,39,41 | 2,4,5,6,36,<br>40,42,43,4<br>4 | 0 |                      |
| 7605 | 1,3,7,8,37,<br>38,39,42 | 2,4,5,6,36,<br>40,41,43,4<br>4 | 0 |                      |
| 7606 | 1,3,7,8,37,<br>38,39,43 | 2,4,5,6,36,<br>40,41,42,4<br>4 | 3 | P01946,P02091,P23593 |
| 7607 | 1,3,7,8,37,<br>38,39,44 | 2,4,5,6,36,<br>40,41,42,4<br>3 | 0 |                      |
| 7608 | 1,3,7,8,37,<br>38,40,41 | 2,4,5,6,36,<br>39,42,43,4<br>4 | 1 | P51907               |
| 7609 | 1,3,7,8,37,<br>38,40,42 | 2,4,5,6,36,<br>39,41,43,4<br>4 | 0 |                      |
| 7610 | 1,3,7,8,37,<br>38,40,43 | 2,4,5,6,36,<br>39,41,42,4<br>4 | 0 |                      |
| 7611 | 1,3,7,8,37,<br>38,40,44 | 2,4,5,6,36,<br>39,41,42,4<br>3 | 0 |                      |
| 7612 | 1,3,7,8,37,<br>38,41,42 | 2,4,5,6,36,<br>39,40,43,4<br>4 | 0 |                      |
| 7613 | 1,3,7,8,37,<br>38,41,43 | 2,4,5,6,36,<br>39,40,42,4<br>4 | 2 | Q7TPB1,Q9QX79        |
| 7614 | 1,3,7,8,37,<br>38,41,44 | 2,4,5,6,36,<br>39,40,42,4<br>3 | 1 | Q05695               |

|      |                         |                                |   |                                    |
|------|-------------------------|--------------------------------|---|------------------------------------|
| 7615 | 1,3,7,8,37,<br>38,42,43 | 2,4,5,6,36,<br>39,40,41,4<br>4 | 1 | Q62975                             |
| 7616 | 1,3,7,8,37,<br>38,42,44 | 2,4,5,6,36,<br>39,40,41,4<br>3 | 0 |                                    |
| 7617 | 1,3,7,8,37,<br>38,43,44 | 2,4,5,6,36,<br>39,40,41,4<br>2 | 2 | P02091,Q9QX79                      |
| 7618 | 1,3,7,8,37,<br>39,40,41 | 2,4,5,6,36,<br>38,42,43,4<br>4 | 5 | P01835,P10715,P19629,P31044,P51907 |
| 7619 | 1,3,7,8,37,<br>39,40,42 | 2,4,5,6,36,<br>38,41,43,4<br>4 | 4 | P00774,P01835,P98089,Q62635        |
| 7620 | 1,3,7,8,37,<br>39,40,43 | 2,4,5,6,36,<br>38,41,42,4<br>4 | 4 | P02091,P98089,Q812E4,Q8CIZ5        |
| 7621 | 1,3,7,8,37,<br>39,40,44 | 2,4,5,6,36,<br>38,41,42,4<br>3 | 3 | P10715,Q5HZV9,Q6AYL6               |
| 7622 | 1,3,7,8,37,<br>39,41,42 | 2,4,5,6,36,<br>38,40,43,4<br>4 | 1 | P01835                             |
| 7623 | 1,3,7,8,37,<br>39,41,43 | 2,4,5,6,36,<br>38,40,42,4<br>4 | 3 | P02091,P22006,Q9QX79               |
| 7624 | 1,3,7,8,37,<br>39,41,44 | 2,4,5,6,36,<br>38,40,42,4<br>3 | 0 |                                    |
| 7625 | 1,3,7,8,37,<br>39,42,43 | 2,4,5,6,36,<br>38,40,41,4<br>4 | 5 | P02091,P98089,Q62635,Q62975,Q8CIZ5 |
| 7626 | 1,3,7,8,37,<br>39,42,44 | 2,4,5,6,36,<br>38,40,41,4<br>3 | 1 | Q5HZV9                             |
| 7627 | 1,3,7,8,37,<br>39,43,44 | 2,4,5,6,36,<br>38,40,41,4<br>2 | 3 | P01946,P02091,Q8CIZ5               |
| 7628 | 1,3,7,8,37,<br>40,41,42 | 2,4,5,6,36,<br>38,39,43,4<br>4 | 2 | P01835,P51907                      |
| 7629 | 1,3,7,8,37,<br>40,41,43 | 2,4,5,6,36,<br>38,39,42,4<br>4 | 2 | P51907,Q9QX79                      |



|      |                         |                                |   |                                           |
|------|-------------------------|--------------------------------|---|-------------------------------------------|
| 7630 | 1,3,7,8,37,<br>40,41,44 | 2,4,5,6,36,<br>38,39,42,4<br>3 | 6 | P10715,P31044,P51907,Q5GRG2,Q6IFU7,Q9ET32 |
| 7631 | 1,3,7,8,37,<br>40,42,43 | 2,4,5,6,36,<br>38,39,41,4<br>4 | 3 | P98089,Q62635,Q62975                      |
| 7632 | 1,3,7,8,37,<br>40,42,44 | 2,4,5,6,36,<br>38,39,41,4<br>3 | 1 | P20759                                    |
| 7633 | 1,3,7,8,37,<br>40,43,44 | 2,4,5,6,36,<br>38,39,41,4<br>2 | 1 | P02091                                    |
| 7634 | 1,3,7,8,37,<br>41,42,43 | 2,4,5,6,36,<br>38,39,40,4<br>4 | 2 | Q62975,Q9QX79                             |
| 7635 | 1,3,7,8,37,<br>41,42,44 | 2,4,5,6,36,<br>38,39,40,4<br>3 | 0 |                                           |
| 7636 | 1,3,7,8,37,<br>41,43,44 | 2,4,5,6,36,<br>38,39,40,4<br>2 | 3 | P02091,P51907,Q9QX79                      |
| 7637 | 1,3,7,8,37,<br>42,43,44 | 2,4,5,6,36,<br>38,39,40,4<br>1 | 2 | P02091,Q62975                             |
| 7638 | 1,3,7,8,38,<br>39,40,41 | 2,4,5,6,36,<br>37,42,43,4<br>4 | 3 | P10715,P19629,P31044                      |
| 7639 | 1,3,7,8,38,<br>39,40,42 | 2,4,5,6,36,<br>37,41,43,4<br>4 | 0 |                                           |
| 7640 | 1,3,7,8,38,<br>39,40,43 | 2,4,5,6,36,<br>37,41,42,4<br>4 | 1 | P02091                                    |
| 7641 | 1,3,7,8,38,<br>39,40,44 | 2,4,5,6,36,<br>37,41,42,4<br>3 | 1 | P10715                                    |
| 7642 | 1,3,7,8,38,<br>39,41,42 | 2,4,5,6,36,<br>37,40,43,4<br>4 | 1 | P13432                                    |
| 7643 | 1,3,7,8,38,<br>39,41,43 | 2,4,5,6,36,<br>37,40,42,4<br>4 | 4 | P00731,P01946,P02091,P22006               |
| 7644 | 1,3,7,8,38,<br>39,41,44 | 2,4,5,6,36,<br>37,40,42,4<br>3 | 1 | Q05695                                    |

|      |                         |                                |   |                                                  |
|------|-------------------------|--------------------------------|---|--------------------------------------------------|
| 7645 | 1,3,7,8,38,<br>39,42,43 | 2,4,5,6,36,<br>37,40,41,4<br>4 | 1 | P02091                                           |
| 7646 | 1,3,7,8,38,<br>39,42,44 | 2,4,5,6,36,<br>37,40,41,4<br>3 | 0 |                                                  |
| 7647 | 1,3,7,8,38,<br>39,43,44 | 2,4,5,6,36,<br>37,40,41,4<br>2 | 3 | P01946,P02091,P23593                             |
| 7648 | 1,3,7,8,38,<br>40,41,42 | 2,4,5,6,36,<br>37,39,43,4<br>4 | 0 |                                                  |
| 7649 | 1,3,7,8,38,<br>40,41,43 | 2,4,5,6,36,<br>37,39,42,4<br>4 | 0 |                                                  |
| 7650 | 1,3,7,8,38,<br>40,41,44 | 2,4,5,6,36,<br>37,39,42,4<br>3 | 7 | P10715,P19629,P31044,P50115,Q05695,Q5GRG2,Q9ET32 |
| 7651 | 1,3,7,8,38,<br>40,42,43 | 2,4,5,6,36,<br>37,39,41,4<br>4 | 2 | Q62975,Q9JHB9                                    |
| 7652 | 1,3,7,8,38,<br>40,42,44 | 2,4,5,6,36,<br>37,39,41,4<br>3 | 0 |                                                  |
| 7653 | 1,3,7,8,38,<br>40,43,44 | 2,4,5,6,36,<br>37,39,41,4<br>2 | 2 | P02091,P35467                                    |
| 7654 | 1,3,7,8,38,<br>41,42,43 | 2,4,5,6,36,<br>37,39,40,4<br>4 | 4 | O35547,P00731,Q62975,Q8CJD3                      |
| 7655 | 1,3,7,8,38,<br>41,42,44 | 2,4,5,6,36,<br>37,39,40,4<br>3 | 2 | P50115,Q05695                                    |
| 7656 | 1,3,7,8,38,<br>41,43,44 | 2,4,5,6,36,<br>37,39,40,4<br>2 | 5 | P02091,P50115,P55091,Q05695,Q9QX79               |
| 7657 | 1,3,7,8,38,<br>42,43,44 | 2,4,5,6,36,<br>37,39,40,4<br>1 | 2 | P02091,Q62975                                    |
| 7658 | 1,3,7,8,39,<br>40,41,42 | 2,4,5,6,36,<br>37,38,43,4<br>4 | 2 | P01835,P10715                                    |
| 7659 | 1,3,7,8,39,<br>40,41,43 | 2,4,5,6,36,<br>37,38,42,4<br>4 | 3 | P02091,P10715,Q6AYL6                             |

|      |                          |                                |   |                                                  |
|------|--------------------------|--------------------------------|---|--------------------------------------------------|
| 7660 | 1,3,7,8,39,<br>40,41,44  | 2,4,5,6,36,<br>37,38,42,4<br>3 | 7 | P06911,P10715,P19629,P31044,Q5GRG2,Q6AYL6,Q9ET32 |
| 7661 | 1,3,7,8,39,<br>40,42,43  | 2,4,5,6,36,<br>37,38,41,4<br>4 | 3 | P02091,P98089,Q62635                             |
| 7662 | 1,3,7,8,39,<br>40,42,44  | 2,4,5,6,36,<br>37,38,41,4<br>3 | 0 |                                                  |
| 7663 | 1,3,7,8,39,<br>40,43,44  | 2,4,5,6,36,<br>37,38,41,4<br>2 | 2 | P02091,Q6AYL6                                    |
| 7664 | 1,3,7,8,39,<br>41,42,43  | 2,4,5,6,36,<br>37,38,40,4<br>4 | 4 | P00731,P02091,P22006,P82471                      |
| 7665 | 1,3,7,8,39,<br>41,42,44  | 2,4,5,6,36,<br>37,38,40,4<br>3 | 0 |                                                  |
| 7666 | 1,3,7,8,39,<br>41,43,44  | 2,4,5,6,36,<br>37,38,40,4<br>2 | 3 | P01946,P02091,P08494                             |
| 7667 | 1,3,7,8,39,<br>42,43,44  | 2,4,5,6,36,<br>37,38,40,4<br>1 | 1 | P02091                                           |
| 7668 | 1,3,7,8,40,<br>41,42,43  | 2,4,5,6,36,<br>37,38,39,4<br>4 | 0 |                                                  |
| 7669 | 1,3,7,8,40,<br>41,42,44  | 2,4,5,6,36,<br>37,38,39,4<br>3 | 5 | P10715,P14480,P20759,Q4FZU6,Q9ET32               |
| 7670 | 1,3,7,8,40,<br>41,43,44  | 2,4,5,6,36,<br>37,38,39,4<br>2 | 4 | P02091,P10715,Q6AYL6,Q9ET32                      |
| 7671 | 1,3,7,8,40,<br>42,43,44  | 2,4,5,6,36,<br>37,38,39,4<br>1 | 2 | P02091,Q62975                                    |
| 7672 | 1,3,7,8,41,<br>42,43,44  | 2,4,5,6,36,<br>37,38,39,4<br>0 | 2 | P02091,Q62975                                    |
| 7673 | 1,3,7,36,3<br>7,38,39,40 | 2,4,5,6,8,4<br>1,42,43,44      | 4 | O54728,Q63514,Q6P6R2,Q9Z0V6                      |
| 7674 | 1,3,7,36,3<br>7,38,39,41 | 2,4,5,6,8,4<br>0,42,43,44      | 5 | P06760,P20762,P62804,Q5M819,Q9Z0V6               |
| 7675 | 1,3,7,36,3<br>7,38,39,42 | 2,4,5,6,8,4<br>0,41,43,44      | 4 | O54728,P02793;Q7TP54,Q63598,Q9WTT6               |

|      |                                                 |    |                                                                                                          |
|------|-------------------------------------------------|----|----------------------------------------------------------------------------------------------------------|
| 7676 | 1,3,7,36,3 2,4,5,6,8,4<br>7,38,39,43 0,41,42,44 | 7  | O54728,P01946,P02091,P06760,Q6P6R2,Q812E4,Q9Z0V6                                                         |
| 7677 | 1,3,7,36,3 2,4,5,6,8,4<br>7,38,39,44 0,41,42,43 | 3  | A2RUV9,Q9JJS8,Q9Z0V6                                                                                     |
| 7678 | 1,3,7,36,3 2,4,5,6,8,3<br>7,38,40,41 9,42,43,44 | 2  | P20762,Q9Z0V6                                                                                            |
| 7679 | 1,3,7,36,3 2,4,5,6,8,3<br>7,38,40,42 9,41,43,44 | 0  |                                                                                                          |
| 7680 | 1,3,7,36,3 2,4,5,6,8,3<br>7,38,40,43 9,41,42,44 | 3  | P97605,Q6P6R2,Q9Z0V6                                                                                     |
| 7681 | 1,3,7,36,3 2,4,5,6,8,3<br>7,38,40,44 9,41,42,43 | 1  | P54921                                                                                                   |
| 7682 | 1,3,7,36,3 2,4,5,6,8,3<br>7,38,41,42 9,40,43,44 | 0  |                                                                                                          |
| 7683 | 1,3,7,36,3 2,4,5,6,8,3<br>7,38,41,43 9,40,42,44 | 2  | P06760,Q9Z0V6                                                                                            |
| 7684 | 1,3,7,36,3 2,4,5,6,8,3<br>7,38,41,44 9,40,42,43 | 2  | P20762,Q9Z0V6                                                                                            |
| 7685 | 1,3,7,36,3 2,4,5,6,8,3<br>7,38,42,43 9,40,41,44 | 3  | P06760,P06911,Q62975                                                                                     |
| 7686 | 1,3,7,36,3 2,4,5,6,8,3<br>7,38,42,44 9,40,41,43 | 2  | P02793;Q7TP54,P97840                                                                                     |
| 7687 | 1,3,7,36,3 2,4,5,6,8,3<br>7,38,43,44 9,40,41,42 | 3  | P02091,Q9QW07,Q9Z0V6                                                                                     |
| 7688 | 1,3,7,36,3 2,4,5,6,8,3<br>7,39,40,41 8,42,43,44 | 5  | P01835,P10715,P20762,Q63514,Q9Z0V6                                                                       |
| 7689 | 1,3,7,36,3 2,4,5,6,8,3<br>7,39,40,42 8,41,43,44 | 12 | O54728,P00774,P01835,P02793;Q7TP54,P50115,P50116,P55091,P98089,Q05695,Q5U2V4,Q62635,Q63598               |
| 7690 | 1,3,7,36,3 2,4,5,6,8,3<br>7,39,40,43 8,41,42,44 | 15 | O54728,P02091,P06760,P50115,P50116,P98089,Q05695,Q5U2V4,Q62635,Q63514,Q6P6R2,Q812E4,Q8CIZ5,Q9QW07,Q9Z0V6 |
| 7691 | 1,3,7,36,3 2,4,5,6,8,3<br>7,39,40,44 8,41,42,43 | 8  | O35547,P50115,P50116,P54921,Q5HZV9,Q5U2V4,Q8CJD3,Q9Z0V6                                                  |
| 7692 | 1,3,7,36,3 2,4,5,6,8,3<br>7,39,41,42 8,40,43,44 | 6  | O54728,P01835,P06760,P20762,Q62635,Q9Z0V6                                                                |
| 7693 | 1,3,7,36,3 2,4,5,6,8,3<br>7,39,41,43 8,40,42,44 | 8  | P00714,P02091,P06760,P22006,Q62635,Q63514,Q6TMA8,Q9Z0V6                                                  |
| 7694 | 1,3,7,36,3 2,4,5,6,8,3<br>7,39,41,44 8,40,42,43 | 2  | P20762,Q9Z0V6                                                                                            |
| 7695 | 1,3,7,36,3 2,4,5,6,8,3<br>7,39,42,43 8,40,41,44 | 10 | O54728,P02091,P06760,P50115,P50116,P98089,Q05695,Q62635,Q8CIZ5,Q9Z0V6                                    |
| 7696 | 1,3,7,36,3 2,4,5,6,8,3<br>7,39,42,44 8,40,41,43 | 5  | O54728,P02793;Q7TP54,P50115,P50116,Q5HZV9                                                                |
| 7697 | 1,3,7,36,3 2,4,5,6,8,3<br>7,39,43,44 8,40,41,42 | 10 | A2RUV9,P01946,P02091,P06760,P50115,P50116,Q6TMA8,Q8CIZ5,Q9QW07,Q9Z0V6                                    |
| 7698 | 1,3,7,36,3 2,4,5,6,8,3<br>7,40,41,42 8,39,43,44 | 2  | P01835,Q80WL1                                                                                            |

|      |                                                 |   |                                                         |
|------|-------------------------------------------------|---|---------------------------------------------------------|
| 7699 | 1,3,7,36,3 2,4,5,6,8,3<br>7,40,41,43 8,39,42,44 | 3 | P51907,Q80WL1,Q9Z0V6                                    |
| 7700 | 1,3,7,36,3 2,4,5,6,8,3<br>7,40,41,44 8,39,42,43 | 4 | P10715,P20762,Q80WL1,Q9Z0V6                             |
| 7701 | 1,3,7,36,3 2,4,5,6,8,3<br>7,40,42,43 8,39,41,44 | 8 | P50115,P50116,P98089,Q05695,Q5U2V4,Q62635,Q62975,Q8CIZ5 |
| 7702 | 1,3,7,36,3 2,4,5,6,8,3<br>7,40,42,44 8,39,41,43 | 4 | P50115,P50116,Q5U2V4,Q7TPB1                             |
| 7703 | 1,3,7,36,3 2,4,5,6,8,3<br>7,40,43,44 8,39,41,42 | 6 | P02091,P50115,P50116,Q8CIZ5,Q9QW07,Q9Z0V6               |
| 7704 | 1,3,7,36,3 2,4,5,6,8,3<br>7,41,42,43 8,39,40,44 | 5 | P06760,Q62635,Q62975,Q6AYS4,Q9Z0V6                      |
| 7705 | 1,3,7,36,3 2,4,5,6,8,3<br>7,41,42,44 8,39,40,43 | 0 |                                                         |
| 7706 | 1,3,7,36,3 2,4,5,6,8,3<br>7,41,43,44 8,39,40,42 | 3 | P02091,P06760,Q9Z0V6                                    |
| 7707 | 1,3,7,36,3 2,4,5,6,8,3<br>7,42,43,44 8,39,40,41 | 4 | P02091,P50115,P50116,Q62975                             |
| 7708 | 1,3,7,36,3 2,4,5,6,8,3<br>8,39,40,41 7,42,43,44 | 2 | P10715,P19629                                           |
| 7709 | 1,3,7,36,3 2,4,5,6,8,3<br>8,39,40,42 7,41,43,44 | 3 | O54728,P02793;Q7TP54,Q63598                             |
| 7710 | 1,3,7,36,3 2,4,5,6,8,3<br>8,39,40,43 7,41,42,44 | 3 | O54728,P02091,Q6P6R2                                    |
| 7711 | 1,3,7,36,3 2,4,5,6,8,3<br>8,39,40,44 7,41,42,43 | 0 |                                                         |
| 7712 | 1,3,7,36,3 2,4,5,6,8,3<br>8,39,41,42 7,40,43,44 | 1 | O54728                                                  |
| 7713 | 1,3,7,36,3 2,4,5,6,8,3<br>8,39,41,43 7,40,42,44 | 5 | P01946,P02091,P06760,P22006,Q9Z0V6                      |
| 7714 | 1,3,7,36,3 2,4,5,6,8,3<br>8,39,41,44 7,40,42,43 | 0 |                                                         |
| 7715 | 1,3,7,36,3 2,4,5,6,8,3<br>8,39,42,43 7,40,41,44 | 3 | O54728,P02091,P06760                                    |
| 7716 | 1,3,7,36,3 2,4,5,6,8,3<br>8,39,42,44 7,40,41,43 | 2 | O54728,P02793;Q7TP54                                    |
| 7717 | 1,3,7,36,3 2,4,5,6,8,3<br>8,39,43,44 7,40,41,42 | 3 | P01946,P02091,P06760                                    |
| 7718 | 1,3,7,36,3 2,4,5,6,8,3<br>8,40,41,42 7,39,43,44 | 0 |                                                         |
| 7719 | 1,3,7,36,3 2,4,5,6,8,3<br>8,40,41,43 7,39,42,44 | 0 |                                                         |
| 7720 | 1,3,7,36,3 2,4,5,6,8,3<br>8,40,41,44 7,39,42,43 | 1 | P10715                                                  |
| 7721 | 1,3,7,36,3 2,4,5,6,8,3<br>8,40,42,43 7,39,41,44 | 0 |                                                         |

|      |                          |                           |   |                                                         |
|------|--------------------------|---------------------------|---|---------------------------------------------------------|
| 7722 | 1,3,7,36,3<br>8,40,42,44 | 2,4,5,6,8,3<br>7,39,41,43 | 1 | Q7TPB1                                                  |
| 7723 | 1,3,7,36,3<br>8,40,43,44 | 2,4,5,6,8,3<br>7,39,41,42 | 1 | P02091                                                  |
| 7724 | 1,3,7,36,3<br>8,41,42,43 | 2,4,5,6,8,3<br>7,39,40,44 | 3 | P06760,Q62975,Q8CJD3                                    |
| 7725 | 1,3,7,36,3<br>8,41,42,44 | 2,4,5,6,8,3<br>7,39,40,43 | 0 |                                                         |
| 7726 | 1,3,7,36,3<br>8,41,43,44 | 2,4,5,6,8,3<br>7,39,40,42 | 1 | P02091                                                  |
| 7727 | 1,3,7,36,3<br>8,42,43,44 | 2,4,5,6,8,3<br>7,39,40,41 | 2 | P02091,Q62975                                           |
| 7728 | 1,3,7,36,3<br>9,40,41,42 | 2,4,5,6,8,3<br>7,38,43,44 | 2 | O54728,P01835                                           |
| 7729 | 1,3,7,36,3<br>9,40,41,43 | 2,4,5,6,8,3<br>7,38,42,44 | 4 | P02091,P06760,P22006,Q9Z0V6                             |
| 7730 | 1,3,7,36,3<br>9,40,41,44 | 2,4,5,6,8,3<br>7,38,42,43 | 8 | P10715,P19629,P20762,P31044,Q5GRG2,Q6AYL6,Q80WL1,Q8VD89 |
| 7731 | 1,3,7,36,3<br>9,40,42,43 | 2,4,5,6,8,3<br>7,38,41,44 | 8 | O54728,P02091,P50115,P50116,P98089,Q05695,Q62635,Q8CIZ5 |
| 7732 | 1,3,7,36,3<br>9,40,42,44 | 2,4,5,6,8,3<br>7,38,41,43 | 4 | O54728,P50115,P50116,Q7TPB1                             |
| 7733 | 1,3,7,36,3<br>9,40,43,44 | 2,4,5,6,8,3<br>7,38,41,42 | 6 | P01946,P02091,P50115,P50116,Q6AYL6,Q8CIZ5               |
| 7734 | 1,3,7,36,3<br>9,41,42,43 | 2,4,5,6,8,3<br>7,38,40,44 | 5 | O54728,P02091,P06760,P22006,Q62635                      |
| 7735 | 1,3,7,36,3<br>9,41,42,44 | 2,4,5,6,8,3<br>7,38,40,43 | 0 |                                                         |
| 7736 | 1,3,7,36,3<br>9,41,43,44 | 2,4,5,6,8,3<br>7,38,40,42 | 6 | P01946,P02091,P06760,P08494,P22006,Q9Z0V6               |
| 7737 | 1,3,7,36,3<br>9,42,43,44 | 2,4,5,6,8,3<br>7,38,40,41 | 5 | O54728,P01946,P02091,P06760,P50115                      |
| 7738 | 1,3,7,36,4<br>0,41,42,43 | 2,4,5,6,8,3<br>7,38,39,44 | 0 |                                                         |
| 7739 | 1,3,7,36,4<br>0,41,42,44 | 2,4,5,6,8,3<br>7,38,39,43 | 2 | Q7TPB1,Q80WL1                                           |
| 7740 | 1,3,7,36,4<br>0,41,43,44 | 2,4,5,6,8,3<br>7,38,39,42 | 2 | P02091,Q80WL1                                           |
| 7741 | 1,3,7,36,4<br>0,42,43,44 | 2,4,5,6,8,3<br>7,38,39,41 | 2 | P02091,Q7TPB1                                           |
| 7742 | 1,3,7,36,4<br>1,42,43,44 | 2,4,5,6,8,3<br>7,38,39,40 | 2 | P02091,Q62975                                           |
| 7743 | 1,3,7,37,3<br>8,39,40,41 | 2,4,5,6,8,3<br>6,42,43,44 | 7 | P10715,P13432,P19629,P20762,P62804,Q63514,Q9Z0V6        |
| 7744 | 1,3,7,37,3<br>8,39,40,42 | 2,4,5,6,8,3<br>6,41,43,44 | 2 | Q01205,Q99MH3                                           |

|      |                                                 |   |                                                                |
|------|-------------------------------------------------|---|----------------------------------------------------------------|
| 7745 | 1,3,7,37,3 2,4,5,6,8,3<br>8,39,40,43 6,41,42,44 | 7 | P02091,Q01205,Q63514,Q6P6R2,Q812E4,Q99MH3,Q9QW07               |
| 7746 | 1,3,7,37,3 2,4,5,6,8,3<br>8,39,40,44 6,41,42,43 | 3 | P20762,P54921,Q812E4                                           |
| 7747 | 1,3,7,37,3 2,4,5,6,8,3<br>8,39,41,42 6,40,43,44 | 2 | P13432,P20762                                                  |
| 7748 | 1,3,7,37,3 2,4,5,6,8,3<br>8,39,41,43 6,40,42,44 | 6 | P01946,P02091,P22006,P36374,P62804,Q9Z0V6                      |
| 7749 | 1,3,7,37,3 2,4,5,6,8,3<br>8,39,41,44 6,40,42,43 | 2 | P20762,P62804                                                  |
| 7750 | 1,3,7,37,3 2,4,5,6,8,3<br>8,39,42,43 6,40,41,44 | 3 | P02091,P06866,Q99MH3                                           |
| 7751 | 1,3,7,37,3 2,4,5,6,8,3<br>8,39,42,44 6,40,41,43 | 0 |                                                                |
| 7752 | 1,3,7,37,3 2,4,5,6,8,3<br>8,39,43,44 6,40,41,42 | 7 | A2RUV9,P01946,P02091,P23593,Q812E4,Q9JJS8,Q9QW07               |
| 7753 | 1,3,7,37,3 2,4,5,6,8,3<br>8,40,41,42 6,39,43,44 | 2 | P20762,Q6AYS4                                                  |
| 7754 | 1,3,7,37,3 2,4,5,6,8,3<br>8,40,41,43 6,39,42,44 | 1 | Q6AYS4                                                         |
| 7755 | 1,3,7,37,3 2,4,5,6,8,3<br>8,40,41,44 6,39,42,43 | 3 | P10715,P19629,P20762                                           |
| 7756 | 1,3,7,37,3 2,4,5,6,8,3<br>8,40,42,43 6,39,41,44 | 3 | Q01205,Q6AYS4,Q99MH3                                           |
| 7757 | 1,3,7,37,3 2,4,5,6,8,3<br>8,40,42,44 6,39,41,43 | 0 |                                                                |
| 7758 | 1,3,7,37,3 2,4,5,6,8,3<br>8,40,43,44 6,39,41,42 | 4 | P02091,P08010,Q812E4,Q9QW07                                    |
| 7759 | 1,3,7,37,3 2,4,5,6,8,3<br>8,41,42,43 6,39,40,44 | 6 | P06866,P08689,Q62975,Q6AYS4,Q6P6T1,Q8CJD3                      |
| 7760 | 1,3,7,37,3 2,4,5,6,8,3<br>8,41,42,44 6,39,40,43 | 2 | P20762,Q6AYS4                                                  |
| 7761 | 1,3,7,37,3 2,4,5,6,8,3<br>8,41,43,44 6,39,40,42 | 3 | P02091,P62804,Q6AYS4                                           |
| 7762 | 1,3,7,37,3 2,4,5,6,8,3<br>8,42,43,44 6,39,40,41 | 3 | P02091,Q62975,Q6AYS4                                           |
| 7763 | 1,3,7,37,3 2,4,5,6,8,3<br>9,40,41,42 6,38,43,44 | 3 | P01835,P10715,P20762                                           |
| 7764 | 1,3,7,37,3 2,4,5,6,8,3<br>9,40,41,43 6,38,42,44 | 9 | P02091,P10715,P22006,P51907,P97554,Q63514,Q6AYL6,Q812E4,Q9Z0V6 |
| 7765 | 1,3,7,37,3 2,4,5,6,8,3<br>9,40,41,44 6,38,42,43 | 8 | P06911,P10715,P19629,P20762,P31044,Q5GRG2,Q6AYL6,Q80WL1        |
| 7766 | 1,3,7,37,3 2,4,5,6,8,3<br>9,40,42,43 6,38,41,44 | 9 | P02091,P50115,P50116,P98089,Q01205,Q05695,Q62635,Q8CIZ5,Q99MH3 |
| 7767 | 1,3,7,37,3 2,4,5,6,8,3<br>9,40,42,44 6,38,41,43 | 3 | P50115,P50116,Q01205                                           |

|      |                                                 |   |                                                  |
|------|-------------------------------------------------|---|--------------------------------------------------|
| 7768 | 1,3,7,37,3 2,4,5,6,8,3<br>9,40,43,44 6,38,41,42 | 7 | P02091,P50115,P50116,Q6AYL6,Q812E4,Q8CIZ5,Q9QW07 |
| 7769 | 1,3,7,37,3 2,4,5,6,8,3<br>9,41,42,43 6,38,40,44 | 5 | P02091,P22006,Q62635,Q6AYS4,Q9Z0V6               |
| 7770 | 1,3,7,37,3 2,4,5,6,8,3<br>9,41,42,44 6,38,40,43 | 1 | P20762                                           |
| 7771 | 1,3,7,37,3 2,4,5,6,8,3<br>9,41,43,44 6,38,40,42 | 6 | P01946,P02091,P22006,P62804,Q6AYS4,Q9Z0V6        |
| 7772 | 1,3,7,37,3 2,4,5,6,8,3<br>9,42,43,44 6,38,40,41 | 4 | P02091,P50115,P50116,Q6AYS4                      |
| 7773 | 1,3,7,37,4 2,4,5,6,8,3<br>0,41,42,43 6,38,39,44 | 2 | P51907,Q6AYS4                                    |
| 7774 | 1,3,7,37,4 2,4,5,6,8,3<br>0,41,42,44 6,38,39,43 | 4 | P10715,P20762,Q6AYS4,Q80WL1                      |
| 7775 | 1,3,7,37,4 2,4,5,6,8,3<br>0,41,43,44 6,38,39,42 | 7 | P02091,P10715,P19218,P51907,Q6AYL6,Q6AYS4,Q80WL1 |
| 7776 | 1,3,7,37,4 2,4,5,6,8,3<br>0,42,43,44 6,38,39,41 | 4 | P02091,P50116,Q01205,Q6AYS4                      |
| 7777 | 1,3,7,37,4 2,4,5,6,8,3<br>1,42,43,44 6,38,39,40 | 3 | P02091,Q62975,Q6AYS4                             |
| 7778 | 1,3,7,38,3 2,4,5,6,8,3<br>9,40,41,42 6,37,43,44 | 1 | P13432                                           |
| 7779 | 1,3,7,38,3 2,4,5,6,8,3<br>9,40,41,43 6,37,42,44 | 3 | P02091,P10715,P22006                             |
| 7780 | 1,3,7,38,3 2,4,5,6,8,3<br>9,40,41,44 6,37,42,43 | 6 | P10715,P19629,P20762,P31044,Q5GRG2,Q6AYL6        |
| 7781 | 1,3,7,38,3 2,4,5,6,8,3<br>9,40,42,43 6,37,41,44 | 3 | P02091,Q01205,Q99MH3                             |
| 7782 | 1,3,7,38,3 2,4,5,6,8,3<br>9,40,42,44 6,37,41,43 | 0 |                                                  |
| 7783 | 1,3,7,38,3 2,4,5,6,8,3<br>9,40,43,44 6,37,41,42 | 3 | P01946,P02091,Q6AYL6                             |
| 7784 | 1,3,7,38,3 2,4,5,6,8,3<br>9,41,42,43 6,37,40,44 | 6 | P00731,P02091,P13432,P22006,Q6AYS4,Q8CJD3        |
| 7785 | 1,3,7,38,3 2,4,5,6,8,3<br>9,41,42,44 6,37,40,43 | 0 |                                                  |
| 7786 | 1,3,7,38,3 2,4,5,6,8,3<br>9,41,43,44 6,37,40,42 | 5 | P00731,P01946,P02091,P22006,P23593               |
| 7787 | 1,3,7,38,3 2,4,5,6,8,3<br>9,42,43,44 6,37,40,41 | 2 | P01946,P02091                                    |
| 7788 | 1,3,7,38,4 2,4,5,6,8,3<br>0,41,42,43 6,37,39,44 | 2 | Q6AYS4,Q8CJD3                                    |
| 7789 | 1,3,7,38,4 2,4,5,6,8,3<br>0,41,42,44 6,37,39,43 | 0 |                                                  |
| 7790 | 1,3,7,38,4 2,4,5,6,8,3<br>0,41,43,44 6,37,39,42 | 2 | P02091,P10715                                    |



|      |                          |                           |   |                                                         |
|------|--------------------------|---------------------------|---|---------------------------------------------------------|
| 7791 | 1,3,7,38,4<br>0,42,43,44 | 2,4,5,6,8,3<br>6,37,39,41 | 2 | P02091,Q01205                                           |
| 7792 | 1,3,7,38,4<br>1,42,43,44 | 2,4,5,6,8,3<br>6,37,39,40 | 5 | P00731,P02091,P55091,Q6AYS4,Q8CJD3                      |
| 7793 | 1,3,7,39,4<br>0,41,42,43 | 2,4,5,6,8,3<br>6,37,38,44 | 2 | P02091,P22006                                           |
| 7794 | 1,3,7,39,4<br>0,41,42,44 | 2,4,5,6,8,3<br>6,37,38,43 | 3 | P10715,P19629,Q6AYL6                                    |
| 7795 | 1,3,7,39,4<br>0,41,43,44 | 2,4,5,6,8,3<br>6,37,38,42 | 5 | P01946,P02091,P10715,P19629,Q6AYL6                      |
| 7796 | 1,3,7,39,4<br>0,42,43,44 | 2,4,5,6,8,3<br>6,37,38,41 | 5 | P02091,P50116,Q01205,Q6AYL6,Q99MH3                      |
| 7797 | 1,3,7,39,4<br>1,42,43,44 | 2,4,5,6,8,3<br>6,37,38,40 | 6 | P00731,P01946,P02091,P22006,P82471,Q6AYS4               |
| 7798 | 1,3,7,40,4<br>1,42,43,44 | 2,4,5,6,8,3<br>6,37,38,39 | 2 | P02091,Q6AYS4                                           |
| 7799 | 1,3,8,36,3<br>7,38,39,40 | 2,4,5,6,7,4<br>1,42,43,44 | 4 | O35547,P35281,P83748,P97605                             |
| 7800 | 1,3,8,36,3<br>7,38,39,41 | 2,4,5,6,7,4<br>0,42,43,44 | 4 | P20762,P36376,P83748,Q9R1T5                             |
| 7801 | 1,3,8,36,3<br>7,38,39,42 | 2,4,5,6,7,4<br>0,41,43,44 | 5 | O54728,P12020,P36376,P83748,Q5XFX0                      |
| 7802 | 1,3,8,36,3<br>7,38,39,43 | 2,4,5,6,7,4<br>0,41,42,44 | 8 | P12020,P36376,P97605,Q64268,Q6IFV1,Q6P6R2,Q812E4,Q9R1T5 |
| 7803 | 1,3,8,36,3<br>7,38,39,44 | 2,4,5,6,7,4<br>0,41,42,43 | 4 | P36376,P83748,Q5HZV9,Q9JJS8                             |
| 7804 | 1,3,8,36,3<br>7,38,40,41 | 2,4,5,6,7,3<br>9,42,43,44 | 2 | P20762,P83748                                           |
| 7805 | 1,3,8,36,3<br>7,38,40,42 | 2,4,5,6,7,3<br>9,41,43,44 | 2 | O88267,P83748                                           |
| 7806 | 1,3,8,36,3<br>7,38,40,43 | 2,4,5,6,7,3<br>9,41,42,44 | 2 | P35467,P97605                                           |
| 7807 | 1,3,8,36,3<br>7,38,40,44 | 2,4,5,6,7,3<br>9,41,42,43 | 5 | O35547,P16636,P54921,P83748,P97605                      |
| 7808 | 1,3,8,36,3<br>7,38,41,42 | 2,4,5,6,7,3<br>9,40,43,44 | 2 | P36376,P83748                                           |
| 7809 | 1,3,8,36,3<br>7,38,41,43 | 2,4,5,6,7,3<br>9,40,42,44 | 2 | P36376,P83121                                           |
| 7810 | 1,3,8,36,3<br>7,38,41,44 | 2,4,5,6,7,3<br>9,40,42,43 | 3 | P20762,P36376,P83748                                    |
| 7811 | 1,3,8,36,3<br>7,38,42,43 | 2,4,5,6,7,3<br>9,40,41,44 | 8 | P06911,P12020,P15999,P35467,P36376,P97605,Q5GRG2,Q64268 |
| 7812 | 1,3,8,36,3<br>7,38,42,44 | 2,4,5,6,7,3<br>9,40,41,43 | 3 | P15999,P36376,P83748                                    |
| 7813 | 1,3,8,36,3<br>7,38,43,44 | 2,4,5,6,7,3<br>9,40,41,42 | 4 | P35467,P36376,P97605,Q9QW07                             |

|      |                                                 |    |                                                                       |
|------|-------------------------------------------------|----|-----------------------------------------------------------------------|
| 7814 | 1,3,8,36,3 2,4,5,6,7,3<br>7,39,40,41 8,42,43,44 | 5  | O35547,P01835,P20762,P25031,P83748                                    |
| 7815 | 1,3,8,36,3 2,4,5,6,7,3<br>7,39,40,42 8,41,43,44 | 9  | O54728,P00774,P01835,P25031,P55091,P83748,P98089,Q05695,Q62635        |
| 7816 | 1,3,8,36,3 2,4,5,6,7,3<br>7,39,40,43 8,41,42,44 | 10 | O35547,P08290,P97605,P98089,Q05695,Q62635,Q62740,Q812E4,Q8CIZ5,Q9QW07 |
| 7817 | 1,3,8,36,3 2,4,5,6,7,3<br>7,39,40,44 8,41,42,43 | 6  | O35547,P25031,P54921,P83748,Q5HZV9,Q8CJD3                             |
| 7818 | 1,3,8,36,3 2,4,5,6,7,3<br>7,39,41,42 8,40,43,44 | 3  | P01835,P25031,P83748                                                  |
| 7819 | 1,3,8,36,3 2,4,5,6,7,3<br>7,39,41,43 8,40,42,44 | 2  | P83121,Q9Z0V6                                                         |
| 7820 | 1,3,8,36,3 2,4,5,6,7,3<br>7,39,41,44 8,40,42,43 | 3  | P20762,P25031,P83748                                                  |
| 7821 | 1,3,8,36,3 2,4,5,6,7,3<br>7,39,42,43 8,40,41,44 | 6  | O54728,P12020,P98089,Q5XFX0,Q62635,Q8CIZ5                             |
| 7822 | 1,3,8,36,3 2,4,5,6,7,3<br>7,39,42,44 8,40,41,43 | 3  | P25031,P83748,Q5HZV9                                                  |
| 7823 | 1,3,8,36,3 2,4,5,6,7,3<br>7,39,43,44 8,40,41,42 | 3  | Q812E4,Q8CIZ5,Q9QW07                                                  |
| 7824 | 1,3,8,36,3 2,4,5,6,7,3<br>7,40,41,42 8,39,43,44 | 3  | P01835,P25031,P83748                                                  |
| 7825 | 1,3,8,36,3 2,4,5,6,7,3<br>7,40,41,43 8,39,42,44 | 2  | P51907,P83121                                                         |
| 7826 | 1,3,8,36,3 2,4,5,6,7,3<br>7,40,41,44 8,39,42,43 | 6  | O35547,P20762,P25031,P51907,P83748,Q80WL1                             |
| 7827 | 1,3,8,36,3 2,4,5,6,7,3<br>7,40,42,43 8,39,41,44 | 6  | O88267,P97605,P98089,Q05695,Q62635,Q8CIZ5                             |
| 7828 | 1,3,8,36,3 2,4,5,6,7,3<br>7,40,42,44 8,39,41,43 | 4  | O88267,P25031,P83748,Q7TPB1                                           |
| 7829 | 1,3,8,36,3 2,4,5,6,7,3<br>7,40,43,44 8,39,41,42 | 6  | O35547,P08010,P08290,P97605,Q8CIZ5,Q9QW07                             |
| 7830 | 1,3,8,36,3 2,4,5,6,7,3<br>7,41,42,43 8,39,40,44 | 2  | P36376,P83121                                                         |
| 7831 | 1,3,8,36,3 2,4,5,6,7,3<br>7,41,42,44 8,39,40,43 | 3  | P25031,P36376,P83748                                                  |
| 7832 | 1,3,8,36,3 2,4,5,6,7,3<br>7,41,43,44 8,39,40,42 | 1  | P83121                                                                |
| 7833 | 1,3,8,36,3 2,4,5,6,7,3<br>7,42,43,44 8,39,40,41 | 1  | P36376                                                                |
| 7834 | 1,3,8,36,3 2,4,5,6,7,3<br>8,39,40,41 7,42,43,44 | 1  | P83748                                                                |
| 7835 | 1,3,8,36,3 2,4,5,6,7,3<br>8,39,40,42 7,41,43,44 | 3  | O54728,P02631,P83748                                                  |
| 7836 | 1,3,8,36,3 2,4,5,6,7,3<br>8,39,40,43 7,41,42,44 | 3  | P97605,Q6P6R2,Q9QZQ5                                                  |

|      |                          |                           |   |                                    |
|------|--------------------------|---------------------------|---|------------------------------------|
| 7837 | 1,3,8,36,3<br>8,39,40,44 | 2,4,5,6,7,3<br>7,41,42,43 | 1 | P83748                             |
| 7838 | 1,3,8,36,3<br>8,39,41,42 | 2,4,5,6,7,3<br>7,40,43,44 | 3 | O54728,P36376,P83748               |
| 7839 | 1,3,8,36,3<br>8,39,41,43 | 2,4,5,6,7,3<br>7,40,42,44 | 1 | Q9QZQ5                             |
| 7840 | 1,3,8,36,3<br>8,39,41,44 | 2,4,5,6,7,3<br>7,40,42,43 | 1 | P83748                             |
| 7841 | 1,3,8,36,3<br>8,39,42,43 | 2,4,5,6,7,3<br>7,40,41,44 | 5 | O54728,P12020,P15999,P36376,Q5XFX0 |
| 7842 | 1,3,8,36,3<br>8,39,42,44 | 2,4,5,6,7,3<br>7,40,41,43 | 4 | O54728,P15999,P36376,P83748        |
| 7843 | 1,3,8,36,3<br>8,39,43,44 | 2,4,5,6,7,3<br>7,40,41,42 | 2 | Q9JJS8,Q9QZQ5                      |
| 7844 | 1,3,8,36,3<br>8,40,41,42 | 2,4,5,6,7,3<br>7,39,43,44 | 2 | P02631,P83748                      |
| 7845 | 1,3,8,36,3<br>8,40,41,43 | 2,4,5,6,7,3<br>7,39,42,44 | 1 | Q9QZQ5                             |
| 7846 | 1,3,8,36,3<br>8,40,41,44 | 2,4,5,6,7,3<br>7,39,42,43 | 1 | P83748                             |
| 7847 | 1,3,8,36,3<br>8,40,42,43 | 2,4,5,6,7,3<br>7,39,41,44 | 3 | O88267,P15999,P35467               |
| 7848 | 1,3,8,36,3<br>8,40,42,44 | 2,4,5,6,7,3<br>7,39,41,43 | 3 | P15999,P83748,Q7TPB1               |
| 7849 | 1,3,8,36,3<br>8,40,43,44 | 2,4,5,6,7,3<br>7,39,41,42 | 3 | P35467,P97605,Q9QZQ5               |
| 7850 | 1,3,8,36,3<br>8,41,42,43 | 2,4,5,6,7,3<br>7,39,40,44 | 2 | P15999,P36376                      |
| 7851 | 1,3,8,36,3<br>8,41,42,44 | 2,4,5,6,7,3<br>7,39,40,43 | 3 | P15999,P36376,P83748               |
| 7852 | 1,3,8,36,3<br>8,41,43,44 | 2,4,5,6,7,3<br>7,39,40,42 | 1 | P36376                             |
| 7853 | 1,3,8,36,3<br>8,42,43,44 | 2,4,5,6,7,3<br>7,39,40,41 | 3 | P15999,P35467,P36376               |
| 7854 | 1,3,8,36,3<br>9,40,41,42 | 2,4,5,6,7,3<br>7,38,43,44 | 3 | P01835,P02631,P83748               |
| 7855 | 1,3,8,36,3<br>9,40,41,43 | 2,4,5,6,7,3<br>7,38,42,44 | 2 | P97840,Q9QZQ5                      |
| 7856 | 1,3,8,36,3<br>9,40,41,44 | 2,4,5,6,7,3<br>7,38,42,43 | 5 | P10715,P19629,P25031,P31044,P83748 |
| 7857 | 1,3,8,36,3<br>9,40,42,43 | 2,4,5,6,7,3<br>7,38,41,44 | 4 | O54728,P98089,Q62635,Q8CIZ5        |
| 7858 | 1,3,8,36,3<br>9,40,42,44 | 2,4,5,6,7,3<br>7,38,41,43 | 4 | P02631,P25031,P83748,Q7TPB1        |
| 7859 | 1,3,8,36,3<br>9,40,43,44 | 2,4,5,6,7,3<br>7,38,41,42 | 3 | Q8CIZ5,Q9QW07,Q9QZQ5               |

|      |                          |                           |    |                                                                                                   |
|------|--------------------------|---------------------------|----|---------------------------------------------------------------------------------------------------|
| 7860 | 1,3,8,36,3<br>9,41,42,43 | 2,4,5,6,7,3<br>7,38,40,44 | 1  | O54728                                                                                            |
| 7861 | 1,3,8,36,3<br>9,41,42,44 | 2,4,5,6,7,3<br>7,38,40,43 | 1  | P83748                                                                                            |
| 7862 | 1,3,8,36,3<br>9,41,43,44 | 2,4,5,6,7,3<br>7,38,40,42 | 1  | P08494                                                                                            |
| 7863 | 1,3,8,36,3<br>9,42,43,44 | 2,4,5,6,7,3<br>7,38,40,41 | 1  | O54728                                                                                            |
| 7864 | 1,3,8,36,4<br>0,41,42,43 | 2,4,5,6,7,3<br>7,38,39,44 | 0  |                                                                                                   |
| 7865 | 1,3,8,36,4<br>0,41,42,44 | 2,4,5,6,7,3<br>7,38,39,43 | 3  | P14480,P83748,Q7TPB1                                                                              |
| 7866 | 1,3,8,36,4<br>0,41,43,44 | 2,4,5,6,7,3<br>7,38,39,42 | 2  | P19218,Q9QZQ5                                                                                     |
| 7867 | 1,3,8,36,4<br>0,42,43,44 | 2,4,5,6,7,3<br>7,38,39,41 | 1  | Q7TPB1                                                                                            |
| 7868 | 1,3,8,36,4<br>1,42,43,44 | 2,4,5,6,7,3<br>7,38,39,40 | 1  | P83121                                                                                            |
| 7869 | 1,3,8,37,3<br>8,39,40,41 | 2,4,5,6,7,3<br>6,42,43,44 | 8  | G3V686,P10715,P13432,P16636,P20762,P35281,P83748,Q9QZQ5                                           |
| 7870 | 1,3,8,37,3<br>8,39,40,42 | 2,4,5,6,7,3<br>6,41,43,44 | 5  | G3V686,P16636,P35281,P83748,Q99MH3                                                                |
| 7871 | 1,3,8,37,3<br>8,39,40,43 | 2,4,5,6,7,3<br>6,41,42,44 | 14 | G3V686,P05539,P08290,P08649,P35281,P82995,P97605,Q62740,Q64605,Q6IFV1,Q812E4,Q99MH3,Q9QW07,Q9QZQ5 |
| 7872 | 1,3,8,37,3<br>8,39,40,44 | 2,4,5,6,7,3<br>6,41,42,43 | 10 | G3V686,P05539,P08649,P16636,P20762,P35281,P54921,P83748,Q812E4,Q9QZQ5                             |
| 7873 | 1,3,8,37,3<br>8,39,41,42 | 2,4,5,6,7,3<br>6,40,43,44 | 4  | P13432,P20762,P36376,P83748                                                                       |
| 7874 | 1,3,8,37,3<br>8,39,41,43 | 2,4,5,6,7,3<br>6,40,42,44 | 8  | P00731,P14408,P36374,P36376,Q62740,Q6IFV1,Q9QZQ5,Q9R1T5                                           |
| 7875 | 1,3,8,37,3<br>8,39,41,44 | 2,4,5,6,7,3<br>6,40,42,43 | 5  | P05539,P16636,P20762,P36376,P83748                                                                |
| 7876 | 1,3,8,37,3<br>8,39,42,43 | 2,4,5,6,7,3<br>6,40,41,44 | 2  | P12020,P36376                                                                                     |
| 7877 | 1,3,8,37,3<br>8,39,42,44 | 2,4,5,6,7,3<br>6,40,41,43 | 4  | P16636,P36376,P83748,Q9JJS8                                                                       |
| 7878 | 1,3,8,37,3<br>8,39,43,44 | 2,4,5,6,7,3<br>6,40,41,42 | 10 | P05539,P08649,P23593,P36376,Q62740,Q6IFV1,Q812E4,Q9JJS8,Q9QW07,Q9QZQ5                             |
| 7879 | 1,3,8,37,3<br>8,40,41,42 | 2,4,5,6,7,3<br>6,39,43,44 | 2  | P20762,P83748                                                                                     |
| 7880 | 1,3,8,37,3<br>8,40,41,43 | 2,4,5,6,7,3<br>6,39,42,44 | 2  | P51907,Q9QZQ5                                                                                     |
| 7881 | 1,3,8,37,3<br>8,40,41,44 | 2,4,5,6,7,3<br>6,39,42,43 | 4  | P10715,P16636,P20762,P83748                                                                       |
| 7882 | 1,3,8,37,3<br>8,40,42,43 | 2,4,5,6,7,3<br>6,39,41,44 | 4  | P35467,P97605,Q63475,Q99MH3                                                                       |

|      |                          |                           |    |                                                                               |
|------|--------------------------|---------------------------|----|-------------------------------------------------------------------------------|
| 7883 | 1,3,8,37,3<br>8,40,42,44 | 2,4,5,6,7,3<br>6,39,41,43 | 2  | P16636,P83748                                                                 |
| 7884 | 1,3,8,37,3<br>8,40,43,44 | 2,4,5,6,7,3<br>6,39,41,42 | 11 | G3V686,P05539,P08010,P08290,P08649,P35467,P97605,Q62740,Q812E4,Q9QW07,Q9QQZQ5 |
| 7885 | 1,3,8,37,3<br>8,41,42,43 | 2,4,5,6,7,3<br>6,39,40,44 | 4  | P00731,P06866,P36376,Q6P6T1                                                   |
| 7886 | 1,3,8,37,3<br>8,41,42,44 | 2,4,5,6,7,3<br>6,39,40,43 | 3  | P20762,P36376,P83748                                                          |
| 7887 | 1,3,8,37,3<br>8,41,43,44 | 2,4,5,6,7,3<br>6,39,40,42 | 3  | P05539,P36376,Q9QQZQ5                                                         |
| 7888 | 1,3,8,37,3<br>8,42,43,44 | 2,4,5,6,7,3<br>6,39,40,41 | 2  | P35467,P36376                                                                 |
| 7889 | 1,3,8,37,3<br>9,40,41,42 | 2,4,5,6,7,3<br>6,38,43,44 | 3  | P01835,P20762,P83748                                                          |
| 7890 | 1,3,8,37,3<br>9,40,41,43 | 2,4,5,6,7,3<br>6,38,42,44 | 9  | P08290,P14408,P51907,P97554,P97840,Q62740,Q63514,Q812E4,Q9QQZQ5               |
| 7891 | 1,3,8,37,3<br>9,40,41,44 | 2,4,5,6,7,3<br>6,38,42,43 | 10 | P08290,P10715,P16636,P19629,P20762,P25031,P31044,P83748,Q5GRG2,Q6AYL6         |
| 7892 | 1,3,8,37,3<br>9,40,42,43 | 2,4,5,6,7,3<br>6,38,41,44 | 7  | P98089,Q01205,Q05695,Q62635,Q62740,Q8CIZ5,Q99MH3                              |
| 7893 | 1,3,8,37,3<br>9,40,42,44 | 2,4,5,6,7,3<br>6,38,41,43 | 2  | P25031,P83748                                                                 |
| 7894 | 1,3,8,37,3<br>9,40,43,44 | 2,4,5,6,7,3<br>6,38,41,42 | 10 | O35547,P08010,P08290,P08649,Q62740,Q6AYL6,Q812E4,Q8CIZ5,Q9QW07,Q9QQZQ5        |
| 7895 | 1,3,8,37,3<br>9,41,42,43 | 2,4,5,6,7,3<br>6,38,40,44 | 1  | P00731                                                                        |
| 7896 | 1,3,8,37,3<br>9,41,42,44 | 2,4,5,6,7,3<br>6,38,40,43 | 3  | O70594,P20762,P83748                                                          |
| 7897 | 1,3,8,37,3<br>9,41,43,44 | 2,4,5,6,7,3<br>6,38,40,42 | 2  | P14408,Q9QQZQ5                                                                |
| 7898 | 1,3,8,37,3<br>9,42,43,44 | 2,4,5,6,7,3<br>6,38,40,41 | 0  |                                                                               |
| 7899 | 1,3,8,37,4<br>0,41,42,43 | 2,4,5,6,7,3<br>6,38,39,44 | 1  | P51907                                                                        |
| 7900 | 1,3,8,37,4<br>0,41,42,44 | 2,4,5,6,7,3<br>6,38,39,43 | 2  | P20762,P83748                                                                 |
| 7901 | 1,3,8,37,4<br>0,41,43,44 | 2,4,5,6,7,3<br>6,38,39,42 | 4  | P08290,P19218,P51907,Q9QQZQ5                                                  |
| 7902 | 1,3,8,37,4<br>0,42,43,44 | 2,4,5,6,7,3<br>6,38,39,41 | 0  |                                                                               |
| 7903 | 1,3,8,37,4<br>1,42,43,44 | 2,4,5,6,7,3<br>6,38,39,40 | 0  |                                                                               |
| 7904 | 1,3,8,38,3<br>9,40,41,42 | 2,4,5,6,7,3<br>6,37,43,44 | 3  | P02631,P13432,P83748                                                          |
| 7905 | 1,3,8,38,3<br>9,40,41,43 | 2,4,5,6,7,3<br>6,37,42,44 | 2  | G3V686,Q9QQZQ5                                                                |

|      |                               |                           |    |                                                                              |
|------|-------------------------------|---------------------------|----|------------------------------------------------------------------------------|
| 7906 | 1,3,8,38,3<br>9,40,41,44      | 2,4,5,6,7,3<br>6,37,42,43 | 7  | P10715,P16636,P19629,P20762,P31044,P83748,Q9QZQ5                             |
| 7907 | 1,3,8,38,3<br>9,40,42,43      | 2,4,5,6,7,3<br>6,37,41,44 | 4  | G3V686,Q01205,Q99MH3,Q9QZQ5                                                  |
| 7908 | 1,3,8,38,3<br>9,40,42,44      | 2,4,5,6,7,3<br>6,37,41,43 | 2  | P02631,P83748                                                                |
| 7909 | 1,3,8,38,3<br>9,40,43,44      | 2,4,5,6,7,3<br>6,37,41,42 | 4  | G3V686,P08649,Q9QW07,Q9QZQ5                                                  |
| 7910 | 1,3,8,38,3<br>9,41,42,43      | 2,4,5,6,7,3<br>6,37,40,44 | 4  | B0BNN3,P00731,P13432,P36376                                                  |
| 7911 | 1,3,8,38,3<br>9,41,42,44      | 2,4,5,6,7,3<br>6,37,40,43 | 2  | P36376,P83748                                                                |
| 7912 | 1,3,8,38,3<br>9,41,43,44      | 2,4,5,6,7,3<br>6,37,40,42 | 2  | P00731,Q9QZQ5                                                                |
| 7913 | 1,3,8,38,3<br>9,42,43,44      | 2,4,5,6,7,3<br>6,37,40,41 | 2  | P36376,Q9QZQ5                                                                |
| 7914 | 1,3,8,38,4<br>0,41,42,43      | 2,4,5,6,7,3<br>6,37,39,44 | 3  | P35467,Q8CJD3,Q9QZQ5                                                         |
| 7915 | 1,3,8,38,4<br>0,41,42,44      | 2,4,5,6,7,3<br>6,37,39,43 | 2  | P14480,P83748                                                                |
| 7916 | 1,3,8,38,4<br>0,41,43,44      | 2,4,5,6,7,3<br>6,37,39,42 | 2  | P35467,Q9QZQ5                                                                |
| 7917 | 1,3,8,38,4<br>0,42,43,44      | 2,4,5,6,7,3<br>6,37,39,41 | 3  | P35467,Q99041,Q9QZQ5                                                         |
| 7918 | 1,3,8,38,4<br>1,42,43,44      | 2,4,5,6,7,3<br>6,37,39,40 | 4  | P00731,P35467,P36376,Q8CJD3                                                  |
| 7919 | 1,3,8,39,4<br>0,41,42,43      | 2,4,5,6,7,3<br>6,37,38,44 | 2  | P97840,Q9QZQ5                                                                |
| 7920 | 1,3,8,39,4<br>0,41,42,44      | 2,4,5,6,7,3<br>6,37,38,43 | 5  | P02631,P10715,P14480,P19629,P83748                                           |
| 7921 | 1,3,8,39,4<br>0,41,43,44      | 2,4,5,6,7,3<br>6,37,38,42 | 6  | P10715,P19629,P47967,P97840,Q6AYL6,Q9QZQ5                                    |
| 7922 | 1,3,8,39,4<br>0,42,43,44      | 2,4,5,6,7,3<br>6,37,38,41 | 3  | P11762,Q01205,Q9QZQ5                                                         |
| 7923 | 1,3,8,39,4<br>1,42,43,44      | 2,4,5,6,7,3<br>6,37,38,40 | 1  | P00731                                                                       |
| 7924 | 1,3,8,40,4<br>1,42,43,44      | 2,4,5,6,7,3<br>6,37,38,39 | 2  | P19218,Q6PCU2                                                                |
| 7925 | 1,3,36,37,<br>38,39,40,4<br>1 | 2,4,5,6,7,8<br>,42,43,44  | 11 | P02631,P07171,P08723,P20762,P35281,P36374,P83748,Q5M819,Q63514,Q9QZQ5,Q9Z0V6 |
| 7926 | 1,3,36,37,<br>38,39,40,4<br>2 | 2,4,5,6,7,8<br>,41,43,44  | 7  | O54728,P02631,P07171,P20762,P83748,P97605,Q01205                             |

|      |                               |                          |    |                                                                                                                                             |
|------|-------------------------------|--------------------------|----|---------------------------------------------------------------------------------------------------------------------------------------------|
| 7927 | 1,3,36,37,<br>38,39,40,4<br>3 | 2,4,5,6,7,8<br>,41,42,44 | 20 | O08815,O35547,P07171,P08010,P08290,P35281,P36374,P60905,P97605,Q01205,Q62740,Q62753,Q63514,Q61FV1,Q6P6R2,Q812E4,Q9JID2,Q9QW07,Q9QZQ5,Q9Z0V6 |
| 7928 | 1,3,36,37,<br>38,39,40,4<br>4 | 2,4,5,6,7,8<br>,41,42,43 | 16 | O08815,O35547,P08290,P16636,P20762,P50116,P54921,P60905,P83748,P97605,Q01205,Q63357,Q812E4,Q9JJS8,Q9QW07,Q9QZQ5                             |
| 7929 | 1,3,36,37,<br>38,39,41,4<br>2 | 2,4,5,6,7,8<br>,40,43,44 | 7  | P02631,P07171,P13432,P20762,P36376,P83748,Q5M819                                                                                            |
| 7930 | 1,3,36,37,<br>38,39,41,4<br>3 | 2,4,5,6,7,8<br>,40,42,44 | 13 | P00714,P06760,P07171,P20762,P36374,P36376,P97605,Q5M819,Q63514,Q812E4,Q9QZ76,Q9QZQ5,Q9Z0V6                                                  |
| 7931 | 1,3,36,37,<br>38,39,41,4<br>4 | 2,4,5,6,7,8<br>,40,42,43 | 9  | P20762,P36374,P36376,P83748,Q5M819,Q9JJS8,Q9QZ76,Q9QZQ5,Q9Z0V6                                                                              |
| 7932 | 1,3,36,37,<br>38,39,42,4<br>3 | 2,4,5,6,7,8<br>,40,41,44 | 12 | O54728,P06866,P07171,P12020,P14669,P36376,P97605,Q01205,Q5GRG2,Q5XFX0,Q63617,Q9QZQ5                                                         |
| 7933 | 1,3,36,37,<br>38,39,42,4<br>4 | 2,4,5,6,7,8<br>,40,41,43 | 7  | P20762,P36376,P83748,P97605,Q01205,Q63617,Q9JJS8                                                                                            |
| 7934 | 1,3,36,37,<br>38,39,43,4<br>4 | 2,4,5,6,7,8<br>,40,41,42 | 13 | P23593,P36374,P36376,P97605,Q01205,Q62753,Q63617,Q812E4,Q9JJS8,Q9QW07,Q9QZ76,Q9QZQ5,Q9Z0V6                                                  |
| 7935 | 1,3,36,37,<br>38,40,41,4<br>2 | 2,4,5,6,7,8<br>,39,43,44 | 6  | O88267,P02631,P07171,P20762,P83748,Q01205                                                                                                   |
| 7936 | 1,3,36,37,<br>38,40,41,4<br>3 | 2,4,5,6,7,8<br>,39,42,44 | 8  | P07171,P08290,P20762,P36374,P55016,P97605,Q9QZQ5,Q9Z0V6                                                                                     |
| 7937 | 1,3,36,37,<br>38,40,41,4<br>4 | 2,4,5,6,7,8<br>,39,42,43 | 6  | P16636,P20762,P83748,P97605,Q80WL1,Q9QZQ5                                                                                                   |
| 7938 | 1,3,36,37,<br>38,40,42,4<br>3 | 2,4,5,6,7,8<br>,39,41,44 | 8  | O88267,P07171,P21581,P38444,P97605,Q01205,Q99041,Q9QZQ5                                                                                     |
| 7939 | 1,3,36,37,<br>38,40,42,4<br>4 | 2,4,5,6,7,8<br>,39,41,43 | 9  | O88267,P07171,P20762,P83748,P97605,Q01205,Q7TPB1,Q80YN4,Q99041                                                                              |
| 7940 | 1,3,36,37,<br>38,40,43,4<br>4 | 2,4,5,6,7,8<br>,39,41,42 | 14 | O08815,O35547,P07171,P08010,P08290,P08753,P54921,P97605,Q01205,Q62753,Q812E4,Q99041,Q9QW07,Q9QZQ5                                           |
| 7941 | 1,3,36,37,<br>38,41,42,4<br>3 | 2,4,5,6,7,8<br>,39,40,44 | 6  | P06866,P07171,P12020,P36376,Q6AYS4,Q6P6T1                                                                                                   |

|      |                               |                          |    |                                                                                                                                                           |
|------|-------------------------------|--------------------------|----|-----------------------------------------------------------------------------------------------------------------------------------------------------------|
| 7942 | 1,3,36,37,<br>38,41,42,4<br>4 | 2,4,5,6,7,8<br>,39,40,43 | 3  | P20762,P36376,P83748                                                                                                                                      |
| 7943 | 1,3,36,37,<br>38,41,43,4<br>4 | 2,4,5,6,7,8<br>,39,40,42 | 6  | P20762,P36374,P36376,P97605,Q9QZQ5,Q9Z0V6                                                                                                                 |
| 7944 | 1,3,36,37,<br>38,42,43,4<br>4 | 2,4,5,6,7,8<br>,39,40,41 | 8  | P07171,P12020,P36376,P97605,Q01205,Q63617,Q99041,Q9QZQ5                                                                                                   |
| 7945 | 1,3,36,37,<br>39,40,41,4<br>2 | 2,4,5,6,7,8<br>,38,43,44 | 8  | P01835,P02631,P07171,P20762,P83748,Q01205,Q06000,Q63514                                                                                                   |
| 7946 | 1,3,36,37,<br>39,40,41,4<br>3 | 2,4,5,6,7,8<br>,38,42,44 | 13 | O35547,P00714,P07171,P08290,P20762,P36374,P97554,P97605,Q01205,Q63514,Q812E4,Q9QZQ5,Q9Z0V6                                                                |
| 7947 | 1,3,36,37,<br>39,40,41,4<br>4 | 2,4,5,6,7,8<br>,38,42,43 | 14 | O35547,P08290,P08723,P10715,P19629,P20762,P25031,P36374,P54921,P83748,Q63514,Q80WL1,Q9QZQ5,Q9Z0V6                                                         |
| 7948 | 1,3,36,37,<br>39,40,42,4<br>3 | 2,4,5,6,7,8<br>,38,41,44 | 15 | O54728,O88267,P07171,P50115,P50116,P97605,P98089,Q01205,Q05695,Q5U2V4,Q62635,Q63514,Q8CIZ5,Q99MH3,Q9QZQ5                                                  |
| 7949 | 1,3,36,37,<br>39,40,42,4<br>4 | 2,4,5,6,7,8<br>,38,41,43 | 12 | O35547,P02631,P07171,P20762,P25031,P50115,P50116,P54921,P83748,P97605,Q01205,Q7TPB1                                                                       |
| 7950 | 1,3,36,37,<br>39,40,43,4<br>4 | 2,4,5,6,7,8<br>,38,41,42 | 22 | F1LM93,O08815,O35547,P05369,P07171,P08010,P08290,P08753,P50115,P50116,P54921,P97605,Q01205,Q62740,Q62753,Q63357,Q63514,Q812E4,Q8CIZ5,Q9QW07,Q9QZQ5,Q9Z0V6 |
| 7951 | 1,3,36,37,<br>39,41,42,4<br>3 | 2,4,5,6,7,8<br>,38,40,44 | 7  | O54728,P06760,P07171,P22006,Q62635,Q6AYS4,Q9Z0V6                                                                                                          |
| 7952 | 1,3,36,37,<br>39,41,42,4<br>4 | 2,4,5,6,7,8<br>,38,40,43 | 2  | P20762,P83748                                                                                                                                             |
| 7953 | 1,3,36,37,<br>39,41,43,4<br>4 | 2,4,5,6,7,8<br>,38,40,42 | 8  | P05369,P20762,P36374,Q63514,Q812E4,Q9QZ76,Q9QZQ5,Q9Z0V6                                                                                                   |
| 7954 | 1,3,36,37,<br>39,42,43,4<br>4 | 2,4,5,6,7,8<br>,38,40,41 | 7  | O54728,P07171,P50115,P50116,P97605,Q01205,Q63617                                                                                                          |
| 7955 | 1,3,36,37,<br>40,41,42,4<br>3 | 2,4,5,6,7,8<br>,38,39,44 | 7  | O35568,O88267,P07171,P21581,Q01205,Q6AYS4,Q9QZQ5                                                                                                          |
| 7956 | 1,3,36,37,<br>40,41,42,4<br>4 | 2,4,5,6,7,8<br>,38,39,43 | 4  | P20762,P83748,Q7TPB1,Q80WL1                                                                                                                               |



|      |                               |                          |    |                                                                              |
|------|-------------------------------|--------------------------|----|------------------------------------------------------------------------------|
| 7957 | 1,3,36,37,<br>40,41,43,4<br>4 | 2,4,5,6,7,8<br>,38,39,42 | 11 | O35547,P05369,P08010,P08290,P19218,P20762,P97605,Q80WL1,Q9QW07,Q9QZQ5,Q9Z0V6 |
| 7958 | 1,3,36,37,<br>40,42,43,4<br>4 | 2,4,5,6,7,8<br>,38,39,41 | 9  | O88267,P07171,P50115,P50116,P97605,Q01205,Q7TPB1,Q99041,Q9QZQ5               |
| 7959 | 1,3,36,37,<br>41,42,43,4<br>4 | 2,4,5,6,7,8<br>,38,39,40 | 1  | Q6AYS4                                                                       |
| 7960 | 1,3,36,38,<br>39,40,41,4<br>2 | 2,4,5,6,7,8<br>,37,43,44 | 8  | P02631,P07171,P10758,P13432,P20762,P83748,Q01205,Q9QZQ5                      |
| 7961 | 1,3,36,38,<br>39,40,41,4<br>3 | 2,4,5,6,7,8<br>,37,42,44 | 4  | P00714,P07171,Q01205,Q9QZQ5                                                  |
| 7962 | 1,3,36,38,<br>39,40,41,4<br>4 | 2,4,5,6,7,8<br>,37,42,43 | 6  | P02631,P10715,P19629,P20762,P83748,Q9QZQ5                                    |
| 7963 | 1,3,36,38,<br>39,40,42,4<br>3 | 2,4,5,6,7,8<br>,37,41,44 | 10 | O54728,P02631,P07171,P38444,P97605,Q01205,Q63617,Q99041,Q99MH3,Q9QZQ5        |
| 7964 | 1,3,36,38,<br>39,40,42,4<br>4 | 2,4,5,6,7,8<br>,37,41,43 | 9  | P02631,P07171,P20762,P83748,Q01205,Q7TPB1,Q80YN4,Q99041,Q9QZQ5               |
| 7965 | 1,3,36,38,<br>39,40,43,4<br>4 | 2,4,5,6,7,8<br>,37,41,42 | 7  | P07171,P08290,P97605,Q01205,Q99041,Q9QW07,Q9QZQ5                             |
| 7966 | 1,3,36,38,<br>39,41,42,4<br>3 | 2,4,5,6,7,8<br>,37,40,44 | 4  | O54728,P07171,P36376,Q9QZQ5                                                  |
| 7967 | 1,3,36,38,<br>39,41,42,4<br>4 | 2,4,5,6,7,8<br>,37,40,43 | 4  | P02631,P20762,P36376,P83748                                                  |
| 7968 | 1,3,36,38,<br>39,41,43,4<br>4 | 2,4,5,6,7,8<br>,37,40,42 | 3  | Q9JJS8,Q9QZ76,Q9QZQ5                                                         |
| 7969 | 1,3,36,38,<br>39,42,43,4<br>4 | 2,4,5,6,7,8<br>,37,40,41 | 8  | O54728,P07171,P97605,Q01205,Q63617,Q99041,Q9JJS8,Q9QZQ5                      |
| 7970 | 1,3,36,38,<br>40,41,42,4<br>3 | 2,4,5,6,7,8<br>,37,39,44 | 3  | P07171,Q01205,Q9QZQ5                                                         |
| 7971 | 1,3,36,38,<br>40,41,42,4<br>4 | 2,4,5,6,7,8<br>,37,39,43 | 5  | P02631,P20762,P83748,Q7TPB1,Q9QZQ5                                           |

|      |                               |                          |    |                                                                                                                                                                                              |
|------|-------------------------------|--------------------------|----|----------------------------------------------------------------------------------------------------------------------------------------------------------------------------------------------|
| 7972 | 1,3,36,38,<br>40,41,43,4<br>4 | 2,4,5,6,7,8<br>,37,39,42 | 2  | P97605,Q9QZQ5                                                                                                                                                                                |
| 7973 | 1,3,36,38,<br>40,42,43,4<br>4 | 2,4,5,6,7,8<br>,37,39,41 | 10 | O88267,P07171,P15999,P38444,P97605,Q01205,Q7TPB1,Q80YN4,Q99041,Q9QZQ5                                                                                                                        |
| 7974 | 1,3,36,38,<br>41,42,43,4<br>4 | 2,4,5,6,7,8<br>,37,39,40 | 4  | P15999,P36376,Q6AYS4,Q9QZQ5                                                                                                                                                                  |
| 7975 | 1,3,36,39,<br>40,41,42,4<br>3 | 2,4,5,6,7,8<br>,37,38,44 | 6  | O54728,P02631,P07171,Q01205,Q9QZQ5,Q9R044                                                                                                                                                    |
| 7976 | 1,3,36,39,<br>40,41,42,4<br>4 | 2,4,5,6,7,8<br>,37,38,43 | 8  | P02631,P10715,P19629,P20762,P83748,Q01205,Q7TPB1,Q9QZQ5                                                                                                                                      |
| 7977 | 1,3,36,39,<br>40,41,43,4<br>4 | 2,4,5,6,7,8<br>,37,38,42 | 6  | P08290,P10715,P19218,P19629,Q6AYL6,Q9QZQ5                                                                                                                                                    |
| 7978 | 1,3,36,39,<br>40,42,43,4<br>4 | 2,4,5,6,7,8<br>,37,38,41 | 9  | O54728,P07171,P50115,P50116,P97605,Q01205,Q7TPB1,Q99041,Q9QZQ5                                                                                                                               |
| 7979 | 1,3,36,39,<br>41,42,43,4<br>4 | 2,4,5,6,7,8<br>,37,38,40 | 2  | P02803,Q9QZQ5                                                                                                                                                                                |
| 7980 | 1,3,36,40,<br>41,42,43,4<br>4 | 2,4,5,6,7,8<br>,37,38,39 | 4  | P19218,Q01205,Q7TPB1,Q9QZQ5                                                                                                                                                                  |
| 7981 | 1,3,37,38,<br>39,40,41,4<br>2 | 2,4,5,6,7,8<br>,36,43,44 | 11 | P02631,P07171,P13432,P16636,P18427,P20762,P51886,P83748,Q01205,Q99MH3,Q9QZQ5                                                                                                                 |
| 7982 | 1,3,37,38,<br>39,40,41,4<br>3 | 2,4,5,6,7,8<br>,36,42,44 | 20 | G3V686,P00714,P07171,P08290,P13432,P20762,P36374,P55016,P60905,P82995,P97554,P97605,Q01205,Q62740,Q63514,Q6AYS4,Q812E4,Q99MH3,Q9QZQ5,Q9Z0V6                                                  |
| 7983 | 1,3,37,38,<br>39,40,41,4<br>4 | 2,4,5,6,7,8<br>,36,42,43 | 14 | P07171,P08290,P10715,P16636,P18427,P19629,P20762,P36374,P60905,P83748,Q01205,Q63514,Q812E4,Q9QZQ5                                                                                            |
| 7984 | 1,3,37,38,<br>39,40,42,4<br>3 | 2,4,5,6,7,8<br>,36,41,44 | 13 | G3V686,P07171,P97605,Q01205,Q62740,Q63467,Q63475,Q64611,Q6AYS4,Q812E4,Q99041,Q99MH3,Q9QZQ5                                                                                                   |
| 7985 | 1,3,37,38,<br>39,40,42,4<br>4 | 2,4,5,6,7,8<br>,36,41,43 | 12 | P02631,P07171,P16636,P18427,P20762,P51886,P83748,P97605,Q01205,Q99041,Q99MH3,Q9QZQ5                                                                                                          |
| 7986 | 1,3,37,38,<br>39,40,43,4<br>4 | 2,4,5,6,7,8<br>,36,41,42 | 27 | G3V686,O08815,O35547,P04905,P05539,P07171,P08010,P08290,P08649,P08753,P36374,P54921,P60905,P82995,P97605,Q01205,Q62740,Q62753,Q63357,Q63514,Q6AYL6,Q812E4,Q99041,Q99MH3,Q9JJS8,Q9QW07,Q9QZQ5 |

|      |                               |                          |    |                                                                                                                                             |
|------|-------------------------------|--------------------------|----|---------------------------------------------------------------------------------------------------------------------------------------------|
| 7987 | 1,3,37,38,<br>39,41,42,4<br>3 | 2,4,5,6,7,8<br>,36,40,44 | 10 | B0BNN3,P00731,P06866,P07171,P13432,P36376,Q01205,Q6AYS4,Q99MH3,Q9QZQ5                                                                       |
| 7988 | 1,3,37,38,<br>39,41,42,4<br>4 | 2,4,5,6,7,8<br>,36,40,43 | 11 | P07171,P13432,P16636,P18427,P20762,P36376,P83748,Q01205,Q6AYS4,Q9JJS8,Q9QZQ5                                                                |
| 7989 | 1,3,37,38,<br>39,41,43,4<br>4 | 2,4,5,6,7,8<br>,36,40,42 | 11 | P00731,P07171,P20762,P23593,P36374,Q01205,Q6AYS4,Q812E4,Q9JJS8,Q9QZ76,Q9QZQ5                                                                |
| 7990 | 1,3,37,38,<br>39,42,43,4<br>4 | 2,4,5,6,7,8<br>,36,40,41 | 12 | P07171,P23593,P36376,P97605,Q01205,Q63617,Q6AYS4,Q812E4,Q99041,Q99MH3,Q9JJS8,Q9QZQ5                                                         |
| 7991 | 1,3,37,38,<br>40,41,42,4<br>3 | 2,4,5,6,7,8<br>,36,39,44 | 8  | P06866,P07171,P11598,P97605,Q01205,Q6AYS4,Q99MH3,Q9QZQ5                                                                                     |
| 7992 | 1,3,37,38,<br>40,41,42,4<br>4 | 2,4,5,6,7,8<br>,36,39,43 | 10 | P02631,P07171,P16636,P18427,P20762,P51886,P83748,Q01205,Q6AYS4,Q9QZQ5                                                                       |
| 7993 | 1,3,37,38,<br>40,41,43,4<br>4 | 2,4,5,6,7,8<br>,36,39,42 | 13 | P04905,P07171,P08010,P08290,P19218,P20762,P36374,P97605,Q01205,Q6AYS4,Q812E4,Q9QW07,Q9QZQ5                                                  |
| 7994 | 1,3,37,38,<br>40,42,43,4<br>4 | 2,4,5,6,7,8<br>,36,39,41 | 10 | P07171,P08010,P97605,Q01205,Q5ZQU0,Q63475,Q6AYS4,Q99041,Q99MH3,Q9QZQ5                                                                       |
| 7995 | 1,3,37,38,<br>41,42,43,4<br>4 | 2,4,5,6,7,8<br>,36,39,40 | 6  | P00731,P07171,P36376,Q01205,Q6AYS4,Q9QZQ5                                                                                                   |
| 7996 | 1,3,37,39,<br>40,41,42,4<br>3 | 2,4,5,6,7,8<br>,36,38,44 | 7  | P07171,P20762,Q01205,Q63514,Q6AYS4,Q99MH3,Q9QZQ5                                                                                            |
| 7997 | 1,3,37,39,<br>40,41,42,4<br>4 | 2,4,5,6,7,8<br>,36,38,43 | 13 | P02631,P07171,P10715,P16636,P18427,P19629,P20762,P51886,P83748,Q01177,Q01205,Q6AYS4,Q9QZQ5                                                  |
| 7998 | 1,3,37,39,<br>40,41,43,4<br>4 | 2,4,5,6,7,8<br>,36,38,42 | 20 | O35547,P04905,P07171,P08010,P08290,P08753,P10715,P19218,P19629,P20762,P36374,P97554,Q01205,Q62740,Q63514,Q6AYL6,Q6AYS4,Q812E4,Q9QW07,Q9QZQ5 |
| 7999 | 1,3,37,39,<br>40,42,43,4<br>4 | 2,4,5,6,7,8<br>,36,38,41 | 13 | P07171,P50115,P50116,P97605,Q01205,Q62740,Q6AYS4,Q812E4,Q8CIZ5,Q99041,Q99MH3,Q9QW07,Q9QZQ5                                                  |
| 8000 | 1,3,37,39,<br>41,42,43,4<br>4 | 2,4,5,6,7,8<br>,36,38,40 | 6  | P00731,P07171,P20762,Q01205,Q6AYS4,Q9QZQ5                                                                                                   |
| 8001 | 1,3,37,40,<br>41,42,43,4<br>4 | 2,4,5,6,7,8<br>,36,38,39 | 6  | P07171,P19218,P20762,Q01205,Q6AYS4,Q9QZQ5                                                                                                   |

|      |                               |                                  |    |                                                                                                                 |
|------|-------------------------------|----------------------------------|----|-----------------------------------------------------------------------------------------------------------------|
| 8002 | 1,3,38,39,<br>40,41,42,4<br>3 | 2,4,5,6,7,8<br>,36,37,44         | 9  | B0BNN3,P02631,P07171,P13432,P53792,Q01205,Q6AYS4,Q99MH3,Q9QZQ5                                                  |
| 8003 | 1,3,38,39,<br>40,41,42,4<br>4 | 2,4,5,6,7,8<br>,36,37,43         | 9  | P02631,P07171,P10715,P13432,P19629,P20762,P83748,Q01205,Q9QZQ5                                                  |
| 8004 | 1,3,38,39,<br>40,41,43,4<br>4 | 2,4,5,6,7,8<br>,36,37,42         | 7  | P07171,P08290,P10715,P19629,Q01205,Q6AYL6,Q9QZQ5                                                                |
| 8005 | 1,3,38,39,<br>40,42,43,4<br>4 | 2,4,5,6,7,8<br>,36,37,41         | 8  | P02631,P07171,P11762,P97605,Q01205,Q99041,Q99MH3,Q9QZQ5                                                         |
| 8006 | 1,3,38,39,<br>41,42,43,4<br>4 | 2,4,5,6,7,8<br>,36,37,40         | 6  | B0BNN3,P00731,P07171,Q01205,Q6AYS4,Q9QZQ5                                                                       |
| 8007 | 1,3,38,40,<br>41,42,43,4<br>4 | 2,4,5,6,7,8<br>,36,37,39         | 5  | P07171,Q01205,Q6AYS4,Q99041,Q9QZQ5                                                                              |
| 8008 | 1,3,39,40,<br>41,42,43,4<br>4 | 2,4,5,6,7,8<br>,36,37,38         | 9  | P07171,P10715,P11762,P19629,Q01205,Q6AYL6,Q6AYS4,Q99MH3,Q9QZQ5                                                  |
| 8009 | 1,4,5,6,7,8<br>,36,37         | 2,3,38,39,<br>40,41,42,4<br>3,44 | 9  | P00774,P05539,P07171,P11030,P11598,P53792,Q4AEF8,Q63617,Q99041                                                  |
| 8010 | 1,4,5,6,7,8<br>,36,38         | 2,3,37,39,<br>40,41,42,4<br>3,44 | 9  | P05539,P07171,P11598,P19218,P53792,Q4AEF8,Q63617,Q6AYS4,Q99041                                                  |
| 8011 | 1,4,5,6,7,8<br>,36,39         | 2,3,37,38,<br>40,41,42,4<br>3,44 | 9  | P00774,P05539,P07171,P11598,P19218,Q4AEF8,Q63617,Q6AYS4,Q99041                                                  |
| 8012 | 1,4,5,6,7,8<br>,36,40         | 2,3,37,38,<br>39,41,42,4<br>3,44 | 10 | P00731,P00774,P05539,P07171,P53792,Q4AEF8,Q63617,Q6AYS4,Q99041,Q9JJS8                                           |
| 8013 | 1,4,5,6,7,8<br>,36,41         | 2,3,37,38,<br>39,40,42,4<br>3,44 | 12 | P05539,P07171,P08010,P11030,P11598,P18418,Q4AEF8,Q63617,Q80YN4,Q8VD89,Q99041,Q9JJS8                             |
| 8014 | 1,4,5,6,7,8<br>,36,42         | 2,3,37,38,<br>39,40,41,4<br>3,44 | 16 | P00762,P00774,P05539,P07171,P08010,P08753,P19218,P36374,P60905,P97554,Q4AEF8,Q63617,Q812E4,Q99041,Q9JJS8,Q9QZQ5 |
| 8015 | 1,4,5,6,7,8<br>,36,43         | 2,3,37,38,<br>39,40,41,4<br>2,44 | 7  | P01681,P05539,P07171,P16636,P83748,Q63617,Q99041                                                                |
| 8016 | 1,4,5,6,7,8<br>,36,44         | 2,3,37,38,<br>39,40,41,4<br>2,43 | 8  | P05539,P07171,P11598,P53792,Q4AEF8,Q63617,Q6AYS4,Q99041                                                         |

|      |                       |                                  |    |                                                                        |
|------|-----------------------|----------------------------------|----|------------------------------------------------------------------------|
| 8017 | 1,4,5,6,7,8<br>,37,38 | 2,3,36,39,<br>40,41,42,4<br>3,44 | 7  | P07171,P11598,P15399,P19218,Q63617,Q7TPB1,Q99041                       |
| 8018 | 1,4,5,6,7,8<br>,37,39 | 2,3,36,38,<br>40,41,42,4<br>3,44 | 6  | P07171,P11598,P19218,Q63617,Q80YN4,Q99041                              |
| 8019 | 1,4,5,6,7,8<br>,37,40 | 2,3,36,38,<br>39,41,42,4<br>3,44 | 7  | P00774,P02803,P07171,P18418,Q63617,Q99041,Q9JJS8                       |
| 8020 | 1,4,5,6,7,8<br>,37,41 | 2,3,36,38,<br>39,40,42,4<br>3,44 | 8  | P07171,P11598,P18418,Q63617,Q68FS4,Q7TPB1,Q80YN4,Q99041                |
| 8021 | 1,4,5,6,7,8<br>,37,42 | 2,3,36,38,<br>39,40,41,4<br>3,44 | 6  | P05539,P07171,P19218,Q4AEF8,Q63617,Q99041                              |
| 8022 | 1,4,5,6,7,8<br>,37,43 | 2,3,36,38,<br>39,40,41,4<br>2,44 | 5  | P07171,P83748,Q63617,Q7TPB1,Q99041                                     |
| 8023 | 1,4,5,6,7,8<br>,37,44 | 2,3,36,38,<br>39,40,41,4<br>2,43 | 6  | P07171,P11598,P18418,Q4AEF8,Q63617,Q99041                              |
| 8024 | 1,4,5,6,7,8<br>,38,39 | 2,3,36,37,<br>40,41,42,4<br>3,44 | 3  | P07171,P11598,P19218                                                   |
| 8025 | 1,4,5,6,7,8<br>,38,40 | 2,3,36,37,<br>39,41,42,4<br>3,44 | 3  | P02803,P07171,Q63617                                                   |
| 8026 | 1,4,5,6,7,8<br>,38,41 | 2,3,36,37,<br>39,40,42,4<br>3,44 | 9  | P07171,P11598,P19218,P50115,P50116,Q63617,Q7TPB1,Q80YN4,Q99041         |
| 8027 | 1,4,5,6,7,8<br>,38,42 | 2,3,36,37,<br>39,40,41,4<br>3,44 | 9  | O35547,P05539,P07171,P08010,P08753,P19218,P36374,P60905,Q4AEF8         |
| 8028 | 1,4,5,6,7,8<br>,38,43 | 2,3,36,37,<br>39,40,41,4<br>2,44 | 8  | P01681,P07171,P19218,P52590,P83748,Q63617,Q64268,Q7TPB1                |
| 8029 | 1,4,5,6,7,8<br>,38,44 | 2,3,36,37,<br>39,40,41,4<br>2,43 | 3  | P07171,P11598,Q63617                                                   |
| 8030 | 1,4,5,6,7,8<br>,39,40 | 2,3,36,37,<br>38,41,42,4<br>3,44 | 6  | P00774,P02803,P05539,P07171,Q63617,Q99041                              |
| 8031 | 1,4,5,6,7,8<br>,39,41 | 2,3,36,37,<br>38,40,42,4<br>3,44 | 10 | O88267,P05539,P07171,P08010,P11598,P18418,Q63617,Q80YN4,Q8VDB89,Q99041 |

|      |                        |                                  |    |                                                                                                                 |
|------|------------------------|----------------------------------|----|-----------------------------------------------------------------------------------------------------------------|
| 8032 | 1,4,5,6,7,8<br>,39,42  | 2,3,36,37,<br>38,40,41,4<br>3,44 | 8  | P05539,P07171,P08010,P08753,P19218,P36374,Q4AEF8,Q63617                                                         |
| 8033 | 1,4,5,6,7,8<br>,39,43  | 2,3,36,37,<br>38,40,41,4<br>2,44 | 7  | P05539,P07171,P83748,Q63617,Q7TPB1,Q80YN4,Q99041                                                                |
| 8034 | 1,4,5,6,7,8<br>,39,44  | 2,3,36,37,<br>38,40,41,4<br>2,43 | 3  | P07171,P11598,Q63617                                                                                            |
| 8035 | 1,4,5,6,7,8<br>,40,41  | 2,3,36,37,<br>38,39,42,4<br>3,44 | 8  | P05539,P07171,P12020,P18418,Q63617,Q80YN4,Q99041,Q9JJS8                                                         |
| 8036 | 1,4,5,6,7,8<br>,40,42  | 2,3,36,37,<br>38,39,41,4<br>3,44 | 10 | P00774,P02803,P05539,P07171,P20759,P36374,Q4AEF8,Q63617,Q9JJS8,Q9QZ76                                           |
| 8037 | 1,4,5,6,7,8<br>,40,43  | 2,3,36,37,<br>38,39,41,4<br>2,44 | 6  | P01681,P05539,P07171,P83748,Q63617,Q9JJS8                                                                       |
| 8038 | 1,4,5,6,7,8<br>,40,44  | 2,3,36,37,<br>38,39,41,4<br>2,43 | 7  | P05539,P06866,P07171,P11598,P12020,Q63617,Q9QZ76                                                                |
| 8039 | 1,4,5,6,7,8<br>,41,42  | 2,3,36,37,<br>38,39,40,4<br>3,44 | 16 | O35547,P05539,P07171,P08010,P08753,P18418,P36374,P54921,P60905,Q4AEF8,Q62753,Q63357,Q63617,Q812E4,Q99041,Q9JJS8 |
| 8040 | 1,4,5,6,7,8<br>,41,43  | 2,3,36,37,<br>38,39,40,4<br>2,44 | 8  | P05539,P07171,P83748,Q63617,Q7TPB1,Q80YN4,Q99041,Q9JJS8                                                         |
| 8041 | 1,4,5,6,7,8<br>,41,44  | 2,3,36,37,<br>38,39,40,4<br>2,43 | 7  | P05539,P07171,P11598,P12020,P18418,Q63617,Q99041                                                                |
| 8042 | 1,4,5,6,7,8<br>,42,43  | 2,3,36,37,<br>38,39,40,4<br>1,44 | 9  | P05539,P07171,P16636,P36374,P60905,P83748,Q4AEF8,Q63617,Q9JJS8                                                  |
| 8043 | 1,4,5,6,7,8<br>,42,44  | 2,3,36,37,<br>38,39,40,4<br>1,43 | 9  | P00714,P05539,P07171,P08753,P20759,P36374,P60905,Q4AEF8,Q63617                                                  |
| 8044 | 1,4,5,6,7,8<br>,43,44  | 2,3,36,37,<br>38,39,40,4<br>1,42 | 4  | P01681,P07171,P83748,Q63617                                                                                     |
| 8045 | 1,4,5,6,7,3<br>6,37,38 | 2,3,8,39,4<br>0,41,42,43<br>,44  | 3  | P15399,P19218,P20766                                                                                            |
| 8046 | 1,4,5,6,7,3<br>6,37,39 | 2,3,8,38,4<br>0,41,42,43<br>,44  | 4  | P00774,P05539,P19218,P35467                                                                                     |

|      |                        |                                 |   |                                           |
|------|------------------------|---------------------------------|---|-------------------------------------------|
| 8047 | 1,4,5,6,7,3<br>6,37,40 | 2,3,8,38,3<br>9,41,42,43<br>,44 | 4 | P00731,P00774,P05539,P11030               |
| 8048 | 1,4,5,6,7,3<br>6,37,41 | 2,3,8,38,3<br>9,40,42,43<br>,44 | 5 | P05539,P11030,P18418,P20766,Q99041        |
| 8049 | 1,4,5,6,7,3<br>6,37,42 | 2,3,8,38,3<br>9,40,41,43<br>,44 | 3 | P00774,P05539,P14408                      |
| 8050 | 1,4,5,6,7,3<br>6,37,43 | 2,3,8,38,3<br>9,40,41,42<br>,44 | 3 | P05539,P20766,P83748                      |
| 8051 | 1,4,5,6,7,3<br>6,37,44 | 2,3,8,38,3<br>9,40,41,42<br>,43 | 1 | P05539                                    |
| 8052 | 1,4,5,6,7,3<br>6,38,39 | 2,3,8,37,4<br>0,41,42,43<br>,44 | 3 | P05539,P19218,P51907                      |
| 8053 | 1,4,5,6,7,3<br>6,38,40 | 2,3,8,37,3<br>9,41,42,43<br>,44 | 1 | P05539                                    |
| 8054 | 1,4,5,6,7,3<br>6,38,41 | 2,3,8,37,3<br>9,40,42,43<br>,44 | 2 | P05539,P20766                             |
| 8055 | 1,4,5,6,7,3<br>6,38,42 | 2,3,8,37,3<br>9,40,41,43<br>,44 | 6 | P05539,P14408,P19218,P20766,P51907,P97554 |
| 8056 | 1,4,5,6,7,3<br>6,38,43 | 2,3,8,37,3<br>9,40,41,42<br>,44 | 4 | P01681,P05539,P20766,P83748               |
| 8057 | 1,4,5,6,7,3<br>6,38,44 | 2,3,8,37,3<br>9,40,41,42<br>,43 | 3 | P05539,P51907,P61206;P84079;P84082        |
| 8058 | 1,4,5,6,7,3<br>6,39,40 | 2,3,8,37,3<br>8,41,42,43<br>,44 | 2 | P00774,P05539                             |
| 8059 | 1,4,5,6,7,3<br>6,39,41 | 2,3,8,37,3<br>8,40,42,43<br>,44 | 4 | P05539,P35467,Q8VD89,Q99041               |
| 8060 | 1,4,5,6,7,3<br>6,39,42 | 2,3,8,37,3<br>8,40,41,43<br>,44 | 4 | O54728,P00774,P05539,P19218               |
| 8061 | 1,4,5,6,7,3<br>6,39,43 | 2,3,8,37,3<br>8,40,41,42<br>,44 | 3 | P05539,P16636,P83748                      |

|      |                        |                                 |   |                                           |
|------|------------------------|---------------------------------|---|-------------------------------------------|
| 8062 | 1,4,5,6,7,3<br>6,39,44 | 2,3,8,37,3<br>8,40,41,42<br>,43 | 2 | P05539,Q8VD89                             |
| 8063 | 1,4,5,6,7,3<br>6,40,41 | 2,3,8,37,3<br>8,39,42,43<br>,44 | 5 | P05539,P12020,Q8VD89,Q99041,Q9JJS8        |
| 8064 | 1,4,5,6,7,3<br>6,40,42 | 2,3,8,37,3<br>8,39,41,43<br>,44 | 4 | P00774,P05539,P14408,Q9JJS8               |
| 8065 | 1,4,5,6,7,3<br>6,40,43 | 2,3,8,37,3<br>8,39,41,42<br>,44 | 3 | P05539,P16636,P83748                      |
| 8066 | 1,4,5,6,7,3<br>6,40,44 | 2,3,8,37,3<br>8,39,41,42<br>,43 | 2 | P00731,P05539                             |
| 8067 | 1,4,5,6,7,3<br>6,41,42 | 2,3,8,37,3<br>8,39,40,43<br>,44 | 6 | P05539,P08010,P08649,P60905,Q812E4,Q9JJS8 |
| 8068 | 1,4,5,6,7,3<br>6,41,43 | 2,3,8,37,3<br>8,39,40,42<br>,44 | 4 | P05539,P16636,P83748,Q99041               |
| 8069 | 1,4,5,6,7,3<br>6,41,44 | 2,3,8,37,3<br>8,39,40,42<br>,43 | 3 | P05539,P18484,Q8VD89                      |
| 8070 | 1,4,5,6,7,3<br>6,42,43 | 2,3,8,37,3<br>8,39,40,41<br>,44 | 4 | P05539,P16636,P19629,P83748               |
| 8071 | 1,4,5,6,7,3<br>6,42,44 | 2,3,8,37,3<br>8,39,40,41<br>,43 | 3 | P05539,P14408,Q4AEF8                      |
| 8072 | 1,4,5,6,7,3<br>6,43,44 | 2,3,8,37,3<br>8,39,40,41<br>,42 | 4 | P01681,P05539,P16636,P83748               |
| 8073 | 1,4,5,6,7,3<br>7,38,39 | 2,3,8,36,4<br>0,41,42,43<br>,44 | 4 | P15399,P19218,P20766,P62804               |
| 8074 | 1,4,5,6,7,3<br>7,38,40 | 2,3,8,36,3<br>9,41,42,43<br>,44 | 3 | P02803,P15399,P20766                      |
| 8075 | 1,4,5,6,7,3<br>7,38,41 | 2,3,8,36,3<br>9,40,42,43<br>,44 | 4 | P15399,P20766,P62804,Q7TPB1               |
| 8076 | 1,4,5,6,7,3<br>7,38,42 | 2,3,8,36,3<br>9,40,41,43<br>,44 | 2 | P19218,P20766                             |



|      |                        |                                 |   |                                                  |
|------|------------------------|---------------------------------|---|--------------------------------------------------|
| 8077 | 1,4,5,6,7,3<br>7,38,43 | 2,3,8,36,3<br>9,40,41,42<br>,44 | 5 | P01681,P15399,P20766,P83748,Q7TPB1               |
| 8078 | 1,4,5,6,7,3<br>7,38,44 | 2,3,8,36,3<br>9,40,41,42<br>,43 | 3 | P15399,P20766,P61206;P84079;P84082               |
| 8079 | 1,4,5,6,7,3<br>7,39,40 | 2,3,8,36,3<br>8,41,42,43<br>,44 | 1 | P00774                                           |
| 8080 | 1,4,5,6,7,3<br>7,39,41 | 2,3,8,36,3<br>8,40,42,43<br>,44 | 6 | P15999,P18418,P35467,P62804,Q80YN4,Q99041        |
| 8081 | 1,4,5,6,7,3<br>7,39,42 | 2,3,8,36,3<br>8,40,41,43<br>,44 | 3 | P00774,P05539,P19218                             |
| 8082 | 1,4,5,6,7,3<br>7,39,43 | 2,3,8,36,3<br>8,40,41,42<br>,44 | 1 | P83748                                           |
| 8083 | 1,4,5,6,7,3<br>7,39,44 | 2,3,8,36,3<br>8,40,41,42<br>,43 | 0 |                                                  |
| 8084 | 1,4,5,6,7,3<br>7,40,41 | 2,3,8,36,3<br>8,39,42,43<br>,44 | 5 | P05539,P12020,P18418,Q99041,Q9JJS8               |
| 8085 | 1,4,5,6,7,3<br>7,40,42 | 2,3,8,36,3<br>8,39,41,43<br>,44 | 2 | P00774,P05539                                    |
| 8086 | 1,4,5,6,7,3<br>7,40,43 | 2,3,8,36,3<br>8,39,41,42<br>,44 | 1 | P83748                                           |
| 8087 | 1,4,5,6,7,3<br>7,40,44 | 2,3,8,36,3<br>8,39,41,42<br>,43 | 1 | P12020                                           |
| 8088 | 1,4,5,6,7,3<br>7,41,42 | 2,3,8,36,3<br>8,39,40,43<br>,44 | 2 | P05539,P18418                                    |
| 8089 | 1,4,5,6,7,3<br>7,41,43 | 2,3,8,36,3<br>8,39,40,42<br>,44 | 7 | P05539,P20766,P62804,P83748,Q7TPB1,Q80YN4,Q99041 |
| 8090 | 1,4,5,6,7,3<br>7,41,44 | 2,3,8,36,3<br>8,39,40,42<br>,43 | 3 | P18418,P62804,Q99041                             |
| 8091 | 1,4,5,6,7,3<br>7,42,43 | 2,3,8,36,3<br>8,39,40,41<br>,44 | 2 | P05539,P83748                                    |

|      |                        |                                 |   |                                           |
|------|------------------------|---------------------------------|---|-------------------------------------------|
| 8092 | 1,4,5,6,7,3<br>7,42,44 | 2,3,8,36,3<br>8,39,40,41<br>,43 | 1 | P05539                                    |
| 8093 | 1,4,5,6,7,3<br>7,43,44 | 2,3,8,36,3<br>8,39,40,41<br>,42 | 2 | P01681,P83748                             |
| 8094 | 1,4,5,6,7,3<br>8,39,40 | 2,3,8,36,3<br>7,41,42,43<br>,44 | 1 | P83121                                    |
| 8095 | 1,4,5,6,7,3<br>8,39,41 | 2,3,8,36,3<br>7,40,42,43<br>,44 | 3 | P05539,P13432,P19218                      |
| 8096 | 1,4,5,6,7,3<br>8,39,42 | 2,3,8,36,3<br>7,40,41,43<br>,44 | 4 | P05539,P19218,P51907,P83121               |
| 8097 | 1,4,5,6,7,3<br>8,39,43 | 2,3,8,36,3<br>7,40,41,42<br>,44 | 2 | P19218,P83748                             |
| 8098 | 1,4,5,6,7,3<br>8,39,44 | 2,3,8,36,3<br>7,40,41,42<br>,43 | 1 | P51907                                    |
| 8099 | 1,4,5,6,7,3<br>8,40,41 | 2,3,8,36,3<br>7,39,42,43<br>,44 | 2 | P05539,P12020                             |
| 8100 | 1,4,5,6,7,3<br>8,40,42 | 2,3,8,36,3<br>7,39,41,43<br>,44 | 2 | P05539,P83121                             |
| 8101 | 1,4,5,6,7,3<br>8,40,43 | 2,3,8,36,3<br>7,39,41,42<br>,44 | 4 | P01681,P01835,P05539,P83748               |
| 8102 | 1,4,5,6,7,3<br>8,40,44 | 2,3,8,36,3<br>7,39,41,42<br>,43 | 3 | P01835,P15399,P83121                      |
| 8103 | 1,4,5,6,7,3<br>8,41,42 | 2,3,8,36,3<br>7,39,40,43<br>,44 | 5 | O35547,P05539,P08010,P19218,P20766        |
| 8104 | 1,4,5,6,7,3<br>8,41,43 | 2,3,8,36,3<br>7,39,40,42<br>,44 | 6 | P05539,P20766,P83748,Q5HZV9,Q7TPB1,Q8CJD3 |
| 8105 | 1,4,5,6,7,3<br>8,41,44 | 2,3,8,36,3<br>7,39,40,42<br>,43 | 2 | P61206;P84079;P84082,Q05695               |
| 8106 | 1,4,5,6,7,3<br>8,42,43 | 2,3,8,36,3<br>7,39,40,41<br>,44 | 4 | P01681,P05539,P19218,P20766               |

|      |                        |                                 |   |                                    |
|------|------------------------|---------------------------------|---|------------------------------------|
| 8107 | 1,4,5,6,7,3<br>8,42,44 | 2,3,8,36,3<br>7,39,40,41<br>,43 | 2 | P05539,P51907                      |
| 8108 | 1,4,5,6,7,3<br>8,43,44 | 2,3,8,36,3<br>7,39,40,41<br>,42 | 3 | P01681,P01835,P83748               |
| 8109 | 1,4,5,6,7,3<br>9,40,41 | 2,3,8,36,3<br>7,38,42,43<br>,44 | 5 | P05539,P06911,P12020,P35467,Q8VD89 |
| 8110 | 1,4,5,6,7,3<br>9,40,42 | 2,3,8,36,3<br>7,38,41,43<br>,44 | 3 | P00774,P05539,P83121               |
| 8111 | 1,4,5,6,7,3<br>9,40,43 | 2,3,8,36,3<br>7,38,41,42<br>,44 | 2 | P05539,P83748                      |
| 8112 | 1,4,5,6,7,3<br>9,40,44 | 2,3,8,36,3<br>7,38,41,42<br>,43 | 4 | P05539,P12020,P83121,Q6AYL6        |
| 8113 | 1,4,5,6,7,3<br>9,41,42 | 2,3,8,36,3<br>7,38,40,43<br>,44 | 3 | P05539,P08010,P35467               |
| 8114 | 1,4,5,6,7,3<br>9,41,43 | 2,3,8,36,3<br>7,38,40,42<br>,44 | 4 | P05539,P22006,P83748,Q80YN4        |
| 8115 | 1,4,5,6,7,3<br>9,41,44 | 2,3,8,36,3<br>7,38,40,42<br>,43 | 4 | P05539,P12020,P35467,Q8VD89        |
| 8116 | 1,4,5,6,7,3<br>9,42,43 | 2,3,8,36,3<br>7,38,40,41<br>,44 | 3 | P05539,P16636,P83748               |
| 8117 | 1,4,5,6,7,3<br>9,42,44 | 2,3,8,36,3<br>7,38,40,41<br>,43 | 2 | P05539,P51907                      |
| 8118 | 1,4,5,6,7,3<br>9,43,44 | 2,3,8,36,3<br>7,38,40,41<br>,42 | 2 | P05539,P83748                      |
| 8119 | 1,4,5,6,7,4<br>0,41,42 | 2,3,8,36,3<br>7,38,39,43<br>,44 | 2 | P05539,Q9JJS8                      |
| 8120 | 1,4,5,6,7,4<br>0,41,43 | 2,3,8,36,3<br>7,38,39,42<br>,44 | 3 | P05539,P83748,Q9JJS8               |
| 8121 | 1,4,5,6,7,4<br>0,41,44 | 2,3,8,36,3<br>7,38,39,42<br>,43 | 5 | P05539,P06911,P12020,P18418,Q5GRG2 |

|      |                        |                                 |   |                                           |
|------|------------------------|---------------------------------|---|-------------------------------------------|
| 8122 | 1,4,5,6,7,4<br>0,42,43 | 2,3,8,36,3<br>7,38,39,41<br>,44 | 3 | P05539,P83748,Q9JJS8                      |
| 8123 | 1,4,5,6,7,4<br>0,42,44 | 2,3,8,36,3<br>7,38,39,41<br>,43 | 2 | P05539,Q9QZ76                             |
| 8124 | 1,4,5,6,7,4<br>0,43,44 | 2,3,8,36,3<br>7,38,39,41<br>,42 | 3 | P01681,P05539,P83748                      |
| 8125 | 1,4,5,6,7,4<br>1,42,43 | 2,3,8,36,3<br>7,38,39,40<br>,44 | 6 | P05539,P16636,P54921,P60905,P82471,P83748 |
| 8126 | 1,4,5,6,7,4<br>1,42,44 | 2,3,8,36,3<br>7,38,39,40<br>,43 | 2 | P05539,P60905                             |
| 8127 | 1,4,5,6,7,4<br>1,43,44 | 2,3,8,36,3<br>7,38,39,40<br>,42 | 2 | P05539,P83748                             |
| 8128 | 1,4,5,6,7,4<br>2,43,44 | 2,3,8,36,3<br>7,38,39,40<br>,41 | 1 | P05539                                    |
| 8129 | 1,4,5,6,8,3<br>6,37,38 | 2,3,7,39,4<br>0,41,42,43<br>,44 | 0 |                                           |
| 8130 | 1,4,5,6,8,3<br>6,37,39 | 2,3,7,38,4<br>0,41,42,43<br>,44 | 2 | P00774,P55091                             |
| 8131 | 1,4,5,6,8,3<br>6,37,40 | 2,3,7,38,3<br>9,41,42,43<br>,44 | 5 | P00731,P00774,P02803,P11030,P55091        |
| 8132 | 1,4,5,6,8,3<br>6,37,41 | 2,3,7,38,3<br>9,40,42,43<br>,44 | 2 | P11030,Q99041                             |
| 8133 | 1,4,5,6,8,3<br>6,37,42 | 2,3,7,38,3<br>9,40,41,43<br>,44 | 3 | P00774,P19629,Q4AEF8                      |
| 8134 | 1,4,5,6,8,3<br>6,37,43 | 2,3,7,38,3<br>9,40,41,42<br>,44 | 1 | P01681                                    |
| 8135 | 1,4,5,6,8,3<br>6,37,44 | 2,3,7,38,3<br>9,40,41,42<br>,43 | 1 | P07171                                    |
| 8136 | 1,4,5,6,8,3<br>6,38,39 | 2,3,7,37,4<br>0,41,42,43<br>,44 | 2 | P19218,Q6AYS4                             |

|      |                        |                                 |   |                                    |
|------|------------------------|---------------------------------|---|------------------------------------|
| 8137 | 1,4,5,6,8,3<br>6,38,40 | 2,3,7,37,3<br>9,41,42,43<br>,44 | 1 | Q6AYS4                             |
| 8138 | 1,4,5,6,8,3<br>6,38,41 | 2,3,7,37,3<br>9,40,42,43<br>,44 | 1 | P50116                             |
| 8139 | 1,4,5,6,8,3<br>6,38,42 | 2,3,7,37,3<br>9,40,41,43<br>,44 | 5 | P08753,P19218,P97554,Q4AEF8,Q6AYL6 |
| 8140 | 1,4,5,6,8,3<br>6,38,43 | 2,3,7,37,3<br>9,40,41,42<br>,44 | 2 | P01681,Q64268                      |
| 8141 | 1,4,5,6,8,3<br>6,38,44 | 2,3,7,37,3<br>9,40,41,42<br>,43 | 1 | P07171                             |
| 8142 | 1,4,5,6,8,3<br>6,39,40 | 2,3,7,37,3<br>8,41,42,43<br>,44 | 2 | P00774,Q6AYS4                      |
| 8143 | 1,4,5,6,8,3<br>6,39,41 | 2,3,7,37,3<br>8,40,42,43<br>,44 | 1 | Q99041                             |
| 8144 | 1,4,5,6,8,3<br>6,39,42 | 2,3,7,37,3<br>8,40,41,43<br>,44 | 2 | P00774,Q4AEF8                      |
| 8145 | 1,4,5,6,8,3<br>6,39,43 | 2,3,7,37,3<br>8,40,41,42<br>,44 | 0 |                                    |
| 8146 | 1,4,5,6,8,3<br>6,39,44 | 2,3,7,37,3<br>8,40,41,42<br>,43 | 2 | P07171,Q6AYS4                      |
| 8147 | 1,4,5,6,8,3<br>6,40,41 | 2,3,7,37,3<br>8,39,42,43<br>,44 | 2 | P23593,Q9JJS8                      |
| 8148 | 1,4,5,6,8,3<br>6,40,42 | 2,3,7,37,3<br>8,39,41,43<br>,44 | 4 | P00774,P05539,P23593,Q9JJS8        |
| 8149 | 1,4,5,6,8,3<br>6,40,43 | 2,3,7,37,3<br>8,39,41,42<br>,44 | 1 | P01681                             |
| 8150 | 1,4,5,6,8,3<br>6,40,44 | 2,3,7,37,3<br>8,39,41,42<br>,43 | 2 | P06866,P07171                      |
| 8151 | 1,4,5,6,8,3<br>6,41,42 | 2,3,7,37,3<br>8,39,40,43<br>,44 | 5 | P05539,P08753,P60905,Q812E4,Q9JJS8 |

|      |                        |                                 |   |                             |
|------|------------------------|---------------------------------|---|-----------------------------|
| 8152 | 1,4,5,6,8,3<br>6,41,43 | 2,3,7,37,3<br>8,39,40,42<br>,44 | 0 |                             |
| 8153 | 1,4,5,6,8,3<br>6,41,44 | 2,3,7,37,3<br>8,39,40,42<br>,43 | 1 | P07171                      |
| 8154 | 1,4,5,6,8,3<br>6,42,43 | 2,3,7,37,3<br>8,39,40,41<br>,44 | 3 | P01681,P10715,P19629        |
| 8155 | 1,4,5,6,8,3<br>6,42,44 | 2,3,7,37,3<br>8,39,40,41<br>,43 | 2 | P07171,Q4AEF8               |
| 8156 | 1,4,5,6,8,3<br>6,43,44 | 2,3,7,37,3<br>8,39,40,41<br>,42 | 2 | P01681,P07171               |
| 8157 | 1,4,5,6,8,3<br>7,38,39 | 2,3,7,36,4<br>0,41,42,43<br>,44 | 1 | P19218                      |
| 8158 | 1,4,5,6,8,3<br>7,38,40 | 2,3,7,36,3<br>9,41,42,43<br>,44 | 3 | P02803,P06760,P35281        |
| 8159 | 1,4,5,6,8,3<br>7,38,41 | 2,3,7,36,3<br>9,40,42,43<br>,44 | 1 | Q7TPB1                      |
| 8160 | 1,4,5,6,8,3<br>7,38,42 | 2,3,7,36,3<br>9,40,41,43<br>,44 | 1 | P19218                      |
| 8161 | 1,4,5,6,8,3<br>7,38,43 | 2,3,7,36,3<br>9,40,41,42<br>,44 | 4 | P01681,Q64268,Q6IFV1,Q7TPB1 |
| 8162 | 1,4,5,6,8,3<br>7,38,44 | 2,3,7,36,3<br>9,40,41,42<br>,43 | 0 |                             |
| 8163 | 1,4,5,6,8,3<br>7,39,40 | 2,3,7,36,3<br>8,41,42,43<br>,44 | 3 | P00774,P02803,P55091        |
| 8164 | 1,4,5,6,8,3<br>7,39,41 | 2,3,7,36,3<br>8,40,42,43<br>,44 | 1 | Q99041                      |
| 8165 | 1,4,5,6,8,3<br>7,39,42 | 2,3,7,36,3<br>8,40,41,43<br>,44 | 1 | P00774                      |
| 8166 | 1,4,5,6,8,3<br>7,39,43 | 2,3,7,36,3<br>8,40,41,42<br>,44 | 0 |                             |

|      |                        |                                 |   |                      |
|------|------------------------|---------------------------------|---|----------------------|
| 8167 | 1,4,5,6,8,3<br>7,39,44 | 2,3,7,36,3<br>8,40,41,42<br>,43 | 0 |                      |
| 8168 | 1,4,5,6,8,3<br>7,40,41 | 2,3,7,36,3<br>8,39,42,43<br>,44 | 0 |                      |
| 8169 | 1,4,5,6,8,3<br>7,40,42 | 2,3,7,36,3<br>8,39,41,43<br>,44 | 3 | P00774,P02803,P06760 |
| 8170 | 1,4,5,6,8,3<br>7,40,43 | 2,3,7,36,3<br>8,39,41,42<br>,44 | 2 | P01681,P02793;Q7TP54 |
| 8171 | 1,4,5,6,8,3<br>7,40,44 | 2,3,7,36,3<br>8,39,41,42<br>,43 | 1 | P06760               |
| 8172 | 1,4,5,6,8,3<br>7,41,42 | 2,3,7,36,3<br>8,39,40,43<br>,44 | 0 |                      |
| 8173 | 1,4,5,6,8,3<br>7,41,43 | 2,3,7,36,3<br>8,39,40,42<br>,44 | 2 | P02793;Q7TP54,Q7TPB1 |
| 8174 | 1,4,5,6,8,3<br>7,41,44 | 2,3,7,36,3<br>8,39,40,42<br>,43 | 0 |                      |
| 8175 | 1,4,5,6,8,3<br>7,42,43 | 2,3,7,36,3<br>8,39,40,41<br>,44 | 1 | P19629               |
| 8176 | 1,4,5,6,8,3<br>7,42,44 | 2,3,7,36,3<br>8,39,40,41<br>,43 | 0 |                      |
| 8177 | 1,4,5,6,8,3<br>7,43,44 | 2,3,7,36,3<br>8,39,40,41<br>,42 | 1 | P01681               |
| 8178 | 1,4,5,6,8,3<br>8,39,40 | 2,3,7,36,3<br>7,41,42,43<br>,44 | 1 | P02803               |
| 8179 | 1,4,5,6,8,3<br>8,39,41 | 2,3,7,36,3<br>7,40,42,43<br>,44 | 1 | P13432               |
| 8180 | 1,4,5,6,8,3<br>8,39,42 | 2,3,7,36,3<br>7,40,41,43<br>,44 | 1 | P19218               |
| 8181 | 1,4,5,6,8,3<br>8,39,43 | 2,3,7,36,3<br>7,40,41,42<br>,44 | 3 | P01681,Q64268,Q61FV1 |

|      |                        |                                 |   |                                                  |
|------|------------------------|---------------------------------|---|--------------------------------------------------|
| 8182 | 1,4,5,6,8,3<br>8,39,44 | 2,3,7,36,3<br>7,40,41,42<br>,43 | 0 |                                                  |
| 8183 | 1,4,5,6,8,3<br>8,40,41 | 2,3,7,36,3<br>7,39,42,43<br>,44 | 2 | P06760,P50115                                    |
| 8184 | 1,4,5,6,8,3<br>8,40,42 | 2,3,7,36,3<br>7,39,41,43<br>,44 | 3 | P02803,P06760,Q9Z0V6                             |
| 8185 | 1,4,5,6,8,3<br>8,40,43 | 2,3,7,36,3<br>7,39,41,42<br>,44 | 3 | P01681,P01835,P02793;Q7TP54                      |
| 8186 | 1,4,5,6,8,3<br>8,40,44 | 2,3,7,36,3<br>7,39,41,42<br>,43 | 3 | P01835,P06760,P22006                             |
| 8187 | 1,4,5,6,8,3<br>8,41,42 | 2,3,7,36,3<br>7,39,40,43<br>,44 | 3 | P08753,P50115,P50116                             |
| 8188 | 1,4,5,6,8,3<br>8,41,43 | 2,3,7,36,3<br>7,39,40,42<br>,44 | 6 | P01681,P02793;Q7TP54,P50115,P50116,Q7TPB1,Q8CJD3 |
| 8189 | 1,4,5,6,8,3<br>8,41,44 | 2,3,7,36,3<br>7,39,40,42<br>,43 | 4 | P50115,P50116,Q05695,Q62635                      |
| 8190 | 1,4,5,6,8,3<br>8,42,43 | 2,3,7,36,3<br>7,39,40,41<br>,44 | 3 | P01681,Q64268,Q6IFU7                             |
| 8191 | 1,4,5,6,8,3<br>8,42,44 | 2,3,7,36,3<br>7,39,40,41<br>,43 | 2 | P06760,Q9Z0V6                                    |
| 8192 | 1,4,5,6,8,3<br>8,43,44 | 2,3,7,36,3<br>7,39,40,41<br>,42 | 2 | P01681,P01835                                    |
| 8193 | 1,4,5,6,8,3<br>9,40,41 | 2,3,7,36,3<br>7,38,42,43<br>,44 | 2 | P06911,Q62975                                    |
| 8194 | 1,4,5,6,8,3<br>9,40,42 | 2,3,7,36,3<br>7,38,41,43<br>,44 | 1 | P00774                                           |
| 8195 | 1,4,5,6,8,3<br>9,40,43 | 2,3,7,36,3<br>7,38,41,42<br>,44 | 1 | P01681                                           |
| 8196 | 1,4,5,6,8,3<br>9,40,44 | 2,3,7,36,3<br>7,38,41,42<br>,43 | 1 | P06760                                           |



|      |                        |                                 |   |                                    |
|------|------------------------|---------------------------------|---|------------------------------------|
| 8197 | 1,4,5,6,8,3<br>9,41,42 | 2,3,7,36,3<br>7,38,40,43<br>,44 | 1 | P08753                             |
| 8198 | 1,4,5,6,8,3<br>9,41,43 | 2,3,7,36,3<br>7,38,40,42<br>,44 | 1 | P02793;Q7TP54                      |
| 8199 | 1,4,5,6,8,3<br>9,41,44 | 2,3,7,36,3<br>7,38,40,42<br>,43 | 0 |                                    |
| 8200 | 1,4,5,6,8,3<br>9,42,43 | 2,3,7,36,3<br>7,38,40,41<br>,44 | 0 |                                    |
| 8201 | 1,4,5,6,8,3<br>9,42,44 | 2,3,7,36,3<br>7,38,40,41<br>,43 | 0 |                                    |
| 8202 | 1,4,5,6,8,3<br>9,43,44 | 2,3,7,36,3<br>7,38,40,41<br>,42 | 1 | P01681                             |
| 8203 | 1,4,5,6,8,4<br>0,41,42 | 2,3,7,36,3<br>7,38,39,43<br>,44 | 4 | A2RUV9,P06760,P23593,Q9JJS8        |
| 8204 | 1,4,5,6,8,4<br>0,41,43 | 2,3,7,36,3<br>7,38,39,42<br>,44 | 4 | P01681,P02793;Q7TP54,P97840,Q9JJS8 |
| 8205 | 1,4,5,6,8,4<br>0,41,44 | 2,3,7,36,3<br>7,38,39,42<br>,43 | 3 | P06760,P06911,Q5GRG2               |
| 8206 | 1,4,5,6,8,4<br>0,42,43 | 2,3,7,36,3<br>7,38,39,41<br>,44 | 1 | P01681                             |
| 8207 | 1,4,5,6,8,4<br>0,42,44 | 2,3,7,36,3<br>7,38,39,41<br>,43 | 5 | P00714,P06760,P36374,Q9QZ76,Q9Z0V6 |
| 8208 | 1,4,5,6,8,4<br>0,43,44 | 2,3,7,36,3<br>7,38,39,41<br>,42 | 2 | P01681,P02793;Q7TP54               |
| 8209 | 1,4,5,6,8,4<br>1,42,43 | 2,3,7,36,3<br>7,38,39,40<br>,44 | 3 | P02793;Q7TP54,P54921,P82471        |
| 8210 | 1,4,5,6,8,4<br>1,42,44 | 2,3,7,36,3<br>7,38,39,40<br>,43 | 1 | Q6P6R2                             |
| 8211 | 1,4,5,6,8,4<br>1,43,44 | 2,3,7,36,3<br>7,38,39,40<br>,42 | 2 | P01681,P02793;Q7TP54               |

|      |                         |                                 |   |                                           |
|------|-------------------------|---------------------------------|---|-------------------------------------------|
| 8212 | 1,4,5,6,8,4<br>2,43,44  | 2,3,7,36,3<br>7,38,39,40<br>,41 | 1 | P01681                                    |
| 8213 | 1,4,5,6,36,<br>37,38,39 | 2,3,7,8,40,<br>41,42,43,4<br>4  | 2 | P19218,P20766                             |
| 8214 | 1,4,5,6,36,<br>37,38,40 | 2,3,7,8,39,<br>41,42,43,4<br>4  | 1 | P20766                                    |
| 8215 | 1,4,5,6,36,<br>37,38,41 | 2,3,7,8,39,<br>40,42,43,4<br>4  | 2 | P20766,Q5M819                             |
| 8216 | 1,4,5,6,36,<br>37,38,42 | 2,3,7,8,39,<br>40,41,43,4<br>4  | 3 | P10715,P20766,Q6AYL6                      |
| 8217 | 1,4,5,6,36,<br>37,38,43 | 2,3,7,8,39,<br>40,41,42,4<br>4  | 4 | P01681,P10715,P20766,Q6IFV1               |
| 8218 | 1,4,5,6,36,<br>37,38,44 | 2,3,7,8,39,<br>40,41,42,4<br>3  | 1 | P20766                                    |
| 8219 | 1,4,5,6,36,<br>37,39,40 | 2,3,7,8,38,<br>41,42,43,4<br>4  | 6 | O35547,P00774,P50115,P50116,P55091,P98089 |
| 8220 | 1,4,5,6,36,<br>37,39,41 | 2,3,7,8,38,<br>40,42,43,4<br>4  | 1 | P35467                                    |
| 8221 | 1,4,5,6,36,<br>37,39,42 | 2,3,7,8,38,<br>40,41,43,4<br>4  | 3 | P00774,P50115,P55091                      |
| 8222 | 1,4,5,6,36,<br>37,39,43 | 2,3,7,8,38,<br>40,41,42,4<br>4  | 1 | P50115                                    |
| 8223 | 1,4,5,6,36,<br>37,39,44 | 2,3,7,8,38,<br>40,41,42,4<br>3  | 1 | P50115                                    |
| 8224 | 1,4,5,6,36,<br>37,40,41 | 2,3,7,8,38,<br>39,42,43,4<br>4  | 2 | P20766,Q80WL1                             |
| 8225 | 1,4,5,6,36,<br>37,40,42 | 2,3,7,8,38,<br>39,41,43,4<br>4  | 4 | P00774,P20766,P50115,P55091               |
| 8226 | 1,4,5,6,36,<br>37,40,43 | 2,3,7,8,38,<br>39,41,42,4<br>4  | 2 | P01681,P20766                             |

|      |                         |                                |   |                      |
|------|-------------------------|--------------------------------|---|----------------------|
| 8227 | 1,4,5,6,36,<br>37,40,44 | 2,3,7,8,38,<br>39,41,42,4<br>3 | 3 | O35547,P00731,Q80WL1 |
| 8228 | 1,4,5,6,36,<br>37,41,42 | 2,3,7,8,38,<br>39,40,43,4<br>4 | 2 | P20766,Q566E6        |
| 8229 | 1,4,5,6,36,<br>37,41,43 | 2,3,7,8,38,<br>39,40,42,4<br>4 | 1 | P20766               |
| 8230 | 1,4,5,6,36,<br>37,41,44 | 2,3,7,8,38,<br>39,40,42,4<br>3 | 3 | P20766,Q80WL1,Q9JHB9 |
| 8231 | 1,4,5,6,36,<br>37,42,43 | 2,3,7,8,38,<br>39,40,41,4<br>4 | 3 | P10715,P19629,P20766 |
| 8232 | 1,4,5,6,36,<br>37,42,44 | 2,3,7,8,38,<br>39,40,41,4<br>3 | 0 |                      |
| 8233 | 1,4,5,6,36,<br>37,43,44 | 2,3,7,8,38,<br>39,40,41,4<br>2 | 2 | P01681,P20766        |
| 8234 | 1,4,5,6,36,<br>38,39,40 | 2,3,7,8,37,<br>41,42,43,4<br>4 | 0 |                      |
| 8235 | 1,4,5,6,36,<br>38,39,41 | 2,3,7,8,37,<br>40,42,43,4<br>4 | 0 |                      |
| 8236 | 1,4,5,6,36,<br>38,39,42 | 2,3,7,8,37,<br>40,41,43,4<br>4 | 2 | P19218,P51907        |
| 8237 | 1,4,5,6,36,<br>38,39,43 | 2,3,7,8,37,<br>40,41,42,4<br>4 | 2 | P01681,Q6IFU7        |
| 8238 | 1,4,5,6,36,<br>38,39,44 | 2,3,7,8,37,<br>40,41,42,4<br>3 | 1 | P51907               |
| 8239 | 1,4,5,6,36,<br>38,40,41 | 2,3,7,8,37,<br>39,42,43,4<br>4 | 1 | P20766               |
| 8240 | 1,4,5,6,36,<br>38,40,42 | 2,3,7,8,37,<br>39,41,43,4<br>4 | 1 | P20766               |
| 8241 | 1,4,5,6,36,<br>38,40,43 | 2,3,7,8,37,<br>39,41,42,4<br>4 | 3 | P01681,P01835,P20766 |

|      |                         |                                |   |                                           |
|------|-------------------------|--------------------------------|---|-------------------------------------------|
| 8242 | 1,4,5,6,36,<br>38,40,44 | 2,3,7,8,37,<br>39,41,42,4<br>3 | 1 | P01835                                    |
| 8243 | 1,4,5,6,36,<br>38,41,42 | 2,3,7,8,37,<br>39,40,43,4<br>4 | 1 | P20766                                    |
| 8244 | 1,4,5,6,36,<br>38,41,43 | 2,3,7,8,37,<br>39,40,42,4<br>4 | 2 | P01681,P20766                             |
| 8245 | 1,4,5,6,36,<br>38,41,44 | 2,3,7,8,37,<br>39,40,42,4<br>3 | 2 | P20766,Q05695                             |
| 8246 | 1,4,5,6,36,<br>38,42,43 | 2,3,7,8,37,<br>39,40,41,4<br>4 | 6 | P01681,P10715,P19629,P20766,P31044,Q6IFU7 |
| 8247 | 1,4,5,6,36,<br>38,42,44 | 2,3,7,8,37,<br>39,40,41,4<br>3 | 3 | P20766,P51907,P97554                      |
| 8248 | 1,4,5,6,36,<br>38,43,44 | 2,3,7,8,37,<br>39,40,41,4<br>2 | 3 | P01681,P01835,P20766                      |
| 8249 | 1,4,5,6,36,<br>39,40,41 | 2,3,7,8,37,<br>38,42,43,4<br>4 | 1 | Q62975                                    |
| 8250 | 1,4,5,6,36,<br>39,40,42 | 2,3,7,8,37,<br>38,41,43,4<br>4 | 3 | P00774,P05539,P50115                      |
| 8251 | 1,4,5,6,36,<br>39,40,43 | 2,3,7,8,37,<br>38,41,42,4<br>4 | 1 | P50115                                    |
| 8252 | 1,4,5,6,36,<br>39,40,44 | 2,3,7,8,37,<br>38,41,42,4<br>3 | 1 | Q6P6T1                                    |
| 8253 | 1,4,5,6,36,<br>39,41,42 | 2,3,7,8,37,<br>38,40,43,4<br>4 | 1 | P05539                                    |
| 8254 | 1,4,5,6,36,<br>39,41,43 | 2,3,7,8,37,<br>38,40,42,4<br>4 | 0 |                                           |
| 8255 | 1,4,5,6,36,<br>39,41,44 | 2,3,7,8,37,<br>38,40,42,4<br>3 | 0 |                                           |
| 8256 | 1,4,5,6,36,<br>39,42,43 | 2,3,7,8,37,<br>38,40,41,4<br>4 | 4 | P05539,P50115,Q62635,Q6IFU7               |

|      |                         |                                |   |                      |
|------|-------------------------|--------------------------------|---|----------------------|
| 8257 | 1,4,5,6,36,<br>39,42,44 | 2,3,7,8,37,<br>38,40,41,4<br>3 | 1 | P51907               |
| 8258 | 1,4,5,6,36,<br>39,43,44 | 2,3,7,8,37,<br>38,40,41,4<br>2 | 1 | P01681               |
| 8259 | 1,4,5,6,36,<br>40,41,42 | 2,3,7,8,37,<br>38,39,43,4<br>4 | 3 | P05539,P23593,Q9JJS8 |
| 8260 | 1,4,5,6,36,<br>40,41,43 | 2,3,7,8,37,<br>38,39,42,4<br>4 | 0 |                      |
| 8261 | 1,4,5,6,36,<br>40,41,44 | 2,3,7,8,37,<br>38,39,42,4<br>3 | 1 | Q80WL1               |
| 8262 | 1,4,5,6,36,<br>40,42,43 | 2,3,7,8,37,<br>38,39,41,4<br>4 | 1 | P05539               |
| 8263 | 1,4,5,6,36,<br>40,42,44 | 2,3,7,8,37,<br>38,39,41,4<br>3 | 2 | P05539,Q7TPB1        |
| 8264 | 1,4,5,6,36,<br>40,43,44 | 2,3,7,8,37,<br>38,39,41,4<br>2 | 1 | P01681               |
| 8265 | 1,4,5,6,36,<br>41,42,43 | 2,3,7,8,37,<br>38,39,40,4<br>4 | 1 | P05539               |
| 8266 | 1,4,5,6,36,<br>41,42,44 | 2,3,7,8,37,<br>38,39,40,4<br>3 | 1 | P05539               |
| 8267 | 1,4,5,6,36,<br>41,43,44 | 2,3,7,8,37,<br>38,39,40,4<br>2 | 1 | P01681               |
| 8268 | 1,4,5,6,36,<br>42,43,44 | 2,3,7,8,37,<br>38,39,40,4<br>1 | 1 | P01681               |
| 8269 | 1,4,5,6,37,<br>38,39,40 | 2,3,7,8,36,<br>41,42,43,4<br>4 | 3 | P20766,P35281,P82995 |
| 8270 | 1,4,5,6,37,<br>38,39,41 | 2,3,7,8,36,<br>40,42,43,4<br>4 | 3 | P13432,P20766,P62804 |
| 8271 | 1,4,5,6,37,<br>38,39,42 | 2,3,7,8,36,<br>40,41,43,4<br>4 | 2 | P19218,P20766        |

|      |                         |                                |   |                                    |
|------|-------------------------|--------------------------------|---|------------------------------------|
| 8272 | 1,4,5,6,37,<br>38,39,43 | 2,3,7,8,36,<br>40,41,42,4<br>4 | 4 | P01681,P20766,P82995,Q6IFV1        |
| 8273 | 1,4,5,6,37,<br>38,39,44 | 2,3,7,8,36,<br>40,41,42,4<br>3 | 1 | P20766                             |
| 8274 | 1,4,5,6,37,<br>38,40,41 | 2,3,7,8,36,<br>39,42,43,4<br>4 | 1 | P20766                             |
| 8275 | 1,4,5,6,37,<br>38,40,42 | 2,3,7,8,36,<br>39,41,43,4<br>4 | 1 | P20766                             |
| 8276 | 1,4,5,6,37,<br>38,40,43 | 2,3,7,8,36,<br>39,41,42,4<br>4 | 5 | P01681,P01835,P20766,P82995,Q6IFV1 |
| 8277 | 1,4,5,6,37,<br>38,40,44 | 2,3,7,8,36,<br>39,41,42,4<br>3 | 4 | P01835,P06760,P20766,Q6AYR9        |
| 8278 | 1,4,5,6,37,<br>38,41,42 | 2,3,7,8,36,<br>39,40,43,4<br>4 | 1 | P20766                             |
| 8279 | 1,4,5,6,37,<br>38,41,43 | 2,3,7,8,36,<br>39,40,42,4<br>4 | 4 | P01681,P20766,Q6IFV1,Q7TPB1        |
| 8280 | 1,4,5,6,37,<br>38,41,44 | 2,3,7,8,36,<br>39,40,42,4<br>3 | 1 | P20766                             |
| 8281 | 1,4,5,6,37,<br>38,42,43 | 2,3,7,8,36,<br>39,40,41,4<br>4 | 5 | P01681,P10715,P19629,P20766,Q6IFU7 |
| 8282 | 1,4,5,6,37,<br>38,42,44 | 2,3,7,8,36,<br>39,40,41,4<br>3 | 1 | P20766                             |
| 8283 | 1,4,5,6,37,<br>38,43,44 | 2,3,7,8,36,<br>39,40,41,4<br>2 | 3 | P01681,P01835,P20766               |
| 8284 | 1,4,5,6,37,<br>39,40,41 | 2,3,7,8,36,<br>38,42,43,4<br>4 | 1 | Q62975                             |
| 8285 | 1,4,5,6,37,<br>39,40,42 | 2,3,7,8,36,<br>38,41,43,4<br>4 | 3 | P00774,P50115,P55091               |
| 8286 | 1,4,5,6,37,<br>39,40,43 | 2,3,7,8,36,<br>38,41,42,4<br>4 | 1 | Q8CIZ5                             |

|      |                         |                                |   |                      |
|------|-------------------------|--------------------------------|---|----------------------|
| 8287 | 1,4,5,6,37,<br>39,40,44 | 2,3,7,8,36,<br>38,41,42,4<br>3 | 3 | O35547,P50116,Q6AYL6 |
| 8288 | 1,4,5,6,37,<br>39,41,42 | 2,3,7,8,36,<br>38,40,43,4<br>4 | 1 | P13432               |
| 8289 | 1,4,5,6,37,<br>39,41,43 | 2,3,7,8,36,<br>38,40,42,4<br>4 | 0 |                      |
| 8290 | 1,4,5,6,37,<br>39,41,44 | 2,3,7,8,36,<br>38,40,42,4<br>3 | 0 |                      |
| 8291 | 1,4,5,6,37,<br>39,42,43 | 2,3,7,8,36,<br>38,40,41,4<br>4 | 1 | P50115               |
| 8292 | 1,4,5,6,37,<br>39,42,44 | 2,3,7,8,36,<br>38,40,41,4<br>3 | 0 |                      |
| 8293 | 1,4,5,6,37,<br>39,43,44 | 2,3,7,8,36,<br>38,40,41,4<br>2 | 1 | P01681               |
| 8294 | 1,4,5,6,37,<br>40,41,42 | 2,3,7,8,36,<br>38,39,43,4<br>4 | 0 |                      |
| 8295 | 1,4,5,6,37,<br>40,41,43 | 2,3,7,8,36,<br>38,39,42,4<br>4 | 1 | P20766               |
| 8296 | 1,4,5,6,37,<br>40,41,44 | 2,3,7,8,36,<br>38,39,42,4<br>3 | 3 | P06911,Q5GRG2,Q80WL1 |
| 8297 | 1,4,5,6,37,<br>40,42,43 | 2,3,7,8,36,<br>38,39,41,4<br>4 | 0 |                      |
| 8298 | 1,4,5,6,37,<br>40,42,44 | 2,3,7,8,36,<br>38,39,41,4<br>3 | 1 | P06760               |
| 8299 | 1,4,5,6,37,<br>40,43,44 | 2,3,7,8,36,<br>38,39,41,4<br>2 | 1 | P01681               |
| 8300 | 1,4,5,6,37,<br>41,42,43 | 2,3,7,8,36,<br>38,39,40,4<br>4 | 1 | P20766               |
| 8301 | 1,4,5,6,37,<br>41,42,44 | 2,3,7,8,36,<br>38,39,40,4<br>3 | 0 |                      |

|      |                         |                                |   |                             |
|------|-------------------------|--------------------------------|---|-----------------------------|
| 8302 | 1,4,5,6,37,<br>41,43,44 | 2,3,7,8,36,<br>38,39,40,4<br>2 | 1 | P20766                      |
| 8303 | 1,4,5,6,37,<br>42,43,44 | 2,3,7,8,36,<br>38,39,40,4<br>1 | 1 | P01681                      |
| 8304 | 1,4,5,6,38,<br>39,40,41 | 2,3,7,8,36,<br>37,42,43,4<br>4 | 2 | P13432,Q62975               |
| 8305 | 1,4,5,6,38,<br>39,40,42 | 2,3,7,8,36,<br>37,41,43,4<br>4 | 1 | P83121                      |
| 8306 | 1,4,5,6,38,<br>39,40,43 | 2,3,7,8,36,<br>37,41,42,4<br>4 | 4 | P01681,P01835,Q6IFU7,Q6IFV1 |
| 8307 | 1,4,5,6,38,<br>39,40,44 | 2,3,7,8,36,<br>37,41,42,4<br>3 | 2 | P01835,P83121               |
| 8308 | 1,4,5,6,38,<br>39,41,42 | 2,3,7,8,36,<br>37,40,43,4<br>4 | 1 | P13432                      |
| 8309 | 1,4,5,6,38,<br>39,41,43 | 2,3,7,8,36,<br>37,40,42,4<br>4 | 4 | B0BNN3,P13432,Q5HZV9,Q6IFU7 |
| 8310 | 1,4,5,6,38,<br>39,41,44 | 2,3,7,8,36,<br>37,40,42,4<br>3 | 1 | Q05695                      |
| 8311 | 1,4,5,6,38,<br>39,42,43 | 2,3,7,8,36,<br>37,40,41,4<br>4 | 3 | B0BNN3,P01681,Q6IFU7        |
| 8312 | 1,4,5,6,38,<br>39,42,44 | 2,3,7,8,36,<br>37,40,41,4<br>3 | 1 | P51907                      |
| 8313 | 1,4,5,6,38,<br>39,43,44 | 2,3,7,8,36,<br>37,40,41,4<br>2 | 2 | P01681,P01835               |
| 8314 | 1,4,5,6,38,<br>40,41,42 | 2,3,7,8,36,<br>37,39,43,4<br>4 | 1 | P20766                      |
| 8315 | 1,4,5,6,38,<br>40,41,43 | 2,3,7,8,36,<br>37,39,42,4<br>4 | 4 | P01681,P01835,P20766,Q5HZV9 |
| 8316 | 1,4,5,6,38,<br>40,41,44 | 2,3,7,8,36,<br>37,39,42,4<br>3 | 3 | P01835,P06760,P06911        |



|      |                         |                                |   |                                                  |
|------|-------------------------|--------------------------------|---|--------------------------------------------------|
| 8317 | 1,4,5,6,38,<br>40,42,43 | 2,3,7,8,36,<br>37,39,41,4<br>4 | 4 | P01681,P01835,P20766,Q6IFU7                      |
| 8318 | 1,4,5,6,38,<br>40,42,44 | 2,3,7,8,36,<br>37,39,41,4<br>3 | 2 | P01835,P06760                                    |
| 8319 | 1,4,5,6,38,<br>40,43,44 | 2,3,7,8,36,<br>37,39,41,4<br>2 | 2 | P01681,P01835                                    |
| 8320 | 1,4,5,6,38,<br>41,42,43 | 2,3,7,8,36,<br>37,39,40,4<br>4 | 6 | B0BNN3,P20766,P27213,Q5HZV9,Q6IFU7,Q8CJD3        |
| 8321 | 1,4,5,6,38,<br>41,42,44 | 2,3,7,8,36,<br>37,39,40,4<br>3 | 3 | P20766,Q05695,Q8CIZ5                             |
| 8322 | 1,4,5,6,38,<br>41,43,44 | 2,3,7,8,36,<br>37,39,40,4<br>2 | 4 | P00774,P01681,P01835,P20766                      |
| 8323 | 1,4,5,6,38,<br>42,43,44 | 2,3,7,8,36,<br>37,39,40,4<br>1 | 4 | P01681,P01835,P20766,Q6IFU7                      |
| 8324 | 1,4,5,6,39,<br>40,41,42 | 2,3,7,8,36,<br>37,38,43,4<br>4 | 1 | P13432                                           |
| 8325 | 1,4,5,6,39,<br>40,41,43 | 2,3,7,8,36,<br>37,38,42,4<br>4 | 0 |                                                  |
| 8326 | 1,4,5,6,39,<br>40,41,44 | 2,3,7,8,36,<br>37,38,42,4<br>3 | 7 | P06911,P10715,P16391,P19629,Q5GRG2,Q62975,Q6AYL6 |
| 8327 | 1,4,5,6,39,<br>40,42,43 | 2,3,7,8,36,<br>37,38,41,4<br>4 | 2 | Q6IFU7,Q99MH3                                    |
| 8328 | 1,4,5,6,39,<br>40,42,44 | 2,3,7,8,36,<br>37,38,41,4<br>3 | 0 |                                                  |
| 8329 | 1,4,5,6,39,<br>40,43,44 | 2,3,7,8,36,<br>37,38,41,4<br>2 | 2 | P01681,Q6AYL6                                    |
| 8330 | 1,4,5,6,39,<br>41,42,43 | 2,3,7,8,36,<br>37,38,40,4<br>4 | 2 | P82471,Q6IFU7                                    |
| 8331 | 1,4,5,6,39,<br>41,42,44 | 2,3,7,8,36,<br>37,38,40,4<br>3 | 0 |                                                  |

|      |                         |                                 |   |                                                                |
|------|-------------------------|---------------------------------|---|----------------------------------------------------------------|
| 8332 | 1,4,5,6,39,<br>41,43,44 | 2,3,7,8,36,<br>37,38,40,4<br>2  | 0 |                                                                |
| 8333 | 1,4,5,6,39,<br>42,43,44 | 2,3,7,8,36,<br>37,38,40,4<br>1  | 1 | Q6IFU7                                                         |
| 8334 | 1,4,5,6,40,<br>41,42,43 | 2,3,7,8,36,<br>37,38,39,4<br>4  | 1 | Q5HZV9                                                         |
| 8335 | 1,4,5,6,40,<br>41,42,44 | 2,3,7,8,36,<br>37,38,39,4<br>3  | 1 | P06760                                                         |
| 8336 | 1,4,5,6,40,<br>41,43,44 | 2,3,7,8,36,<br>37,38,39,4<br>2  | 1 | P01681                                                         |
| 8337 | 1,4,5,6,40,<br>42,43,44 | 2,3,7,8,36,<br>37,38,39,4<br>1  | 1 | P01681                                                         |
| 8338 | 1,4,5,6,41,<br>42,43,44 | 2,3,7,8,36,<br>37,38,39,4<br>0  | 1 | P82471                                                         |
| 8339 | 1,4,5,7,8,3<br>6,37,38  | 2,3,6,39,4<br>0,41,42,43<br>,44 | 3 | P07171,Q6AYS4,Q6P6R2                                           |
| 8340 | 1,4,5,7,8,3<br>6,37,39  | 2,3,6,38,4<br>0,41,42,43<br>,44 | 9 | P00762,P00774,P07171,P98089,Q62635,Q6AYS4,Q6P6R2,Q8CIZ5,Q99041 |
| 8341 | 1,4,5,7,8,3<br>6,37,40  | 2,3,6,38,3<br>9,41,42,43<br>,44 | 8 | P00762,P00774,P02803,P07171,P98089,Q4FZU6,Q63617,Q6AYS4        |
| 8342 | 1,4,5,7,8,3<br>6,37,41  | 2,3,6,38,3<br>9,40,42,43<br>,44 | 5 | P07171,P18418,Q63617,Q68FS4,Q99041                             |
| 8343 | 1,4,5,7,8,3<br>6,37,42  | 2,3,6,38,3<br>9,40,41,43<br>,44 | 5 | P00762,P00774,P07171,P98089,Q62635                             |
| 8344 | 1,4,5,7,8,3<br>6,37,43  | 2,3,6,38,3<br>9,40,41,42<br>,44 | 4 | P07171,P16391,Q62635,Q8CIZ5                                    |
| 8345 | 1,4,5,7,8,3<br>6,37,44  | 2,3,6,38,3<br>9,40,41,42<br>,43 | 3 | P00762,P07171,Q6AYS4                                           |
| 8346 | 1,4,5,7,8,3<br>6,38,39  | 2,3,6,37,4<br>0,41,42,43<br>,44 | 5 | P07171,P19218,P51907,Q6AYS4,Q6P6R2                             |

|      |                        |                                 |    |                                                                                            |
|------|------------------------|---------------------------------|----|--------------------------------------------------------------------------------------------|
| 8347 | 1,4,5,7,8,3<br>6,38,40 | 2,3,6,37,3<br>9,41,42,43<br>,44 | 4  | P02803,P07171,Q4FZU6,Q6AYS4                                                                |
| 8348 | 1,4,5,7,8,3<br>6,38,41 | 2,3,6,37,3<br>9,40,42,43<br>,44 | 6  | P07171,P50115,P50116,Q4FZU6,Q68FS4,Q99041                                                  |
| 8349 | 1,4,5,7,8,3<br>6,38,42 | 2,3,6,37,3<br>9,40,41,43<br>,44 | 6  | P07171,P14408,P19218,P47727,P51907,Q6AYL6                                                  |
| 8350 | 1,4,5,7,8,3<br>6,38,43 | 2,3,6,37,3<br>9,40,41,42<br>,44 | 4  | P07171,P16391,Q64268,Q6P6R2                                                                |
| 8351 | 1,4,5,7,8,3<br>6,38,44 | 2,3,6,37,3<br>9,40,41,42<br>,43 | 3  | P07171,P51907,Q6AYS4                                                                       |
| 8352 | 1,4,5,7,8,3<br>6,39,40 | 2,3,6,37,3<br>8,41,42,43<br>,44 | 6  | P00762,P00774,P07171,P98089,Q4FZU6,Q6AYS4                                                  |
| 8353 | 1,4,5,7,8,3<br>6,39,41 | 2,3,6,37,3<br>8,40,42,43<br>,44 | 8  | P05539,P07171,Q4FZU6,Q63617,Q68FS4,Q6AYS4,Q8VD89,Q99041                                    |
| 8354 | 1,4,5,7,8,3<br>6,39,42 | 2,3,6,37,3<br>8,40,41,43<br>,44 | 8  | O54728,P00762,P00774,P05539,P07171,P98089,Q62635,Q6AYS4                                    |
| 8355 | 1,4,5,7,8,3<br>6,39,43 | 2,3,6,37,3<br>8,40,41,42<br>,44 | 6  | P07171,P16636,Q62635,Q6AYS4,Q6P6R2,Q8CIZ5                                                  |
| 8356 | 1,4,5,7,8,3<br>6,39,44 | 2,3,6,37,3<br>8,40,41,42<br>,43 | 4  | P00762,P07171,Q4FZU6,Q6AYS4                                                                |
| 8357 | 1,4,5,7,8,3<br>6,40,41 | 2,3,6,37,3<br>8,39,42,43<br>,44 | 8  | P05539,P07171,Q4FZU6,Q63617,Q68FS4,Q6AYS4,Q99041,Q9JJS8                                    |
| 8358 | 1,4,5,7,8,3<br>6,40,42 | 2,3,6,37,3<br>8,39,41,43<br>,44 | 9  | P00762,P00774,P05539,P07171,P14408,Q4FZU6,Q6AYS4,Q9JJS8,Q9QZ76                             |
| 8359 | 1,4,5,7,8,3<br>6,40,43 | 2,3,6,37,3<br>8,39,41,42<br>,44 | 5  | P05539,P07171,P16636,Q6AYS4,Q8CIZ5                                                         |
| 8360 | 1,4,5,7,8,3<br>6,40,44 | 2,3,6,37,3<br>8,39,41,42<br>,43 | 5  | P00762,P07171,Q4FZU6,Q63617,Q6AYS4                                                         |
| 8361 | 1,4,5,7,8,3<br>6,41,42 | 2,3,6,37,3<br>8,39,40,43<br>,44 | 13 | P00762,P05539,P07171,P08010,P08721,P08753,P60905,P82995,Q4FZU6,Q63617,Q812E4,Q99041,Q9JJS8 |

|      |                        |                                 |    |                                                                       |
|------|------------------------|---------------------------------|----|-----------------------------------------------------------------------|
| 8362 | 1,4,5,7,8,3<br>6,41,43 | 2,3,6,37,3<br>8,39,40,42<br>,44 | 5  | P05539,P07171,P16636,Q63617,Q99041                                    |
| 8363 | 1,4,5,7,8,3<br>6,41,44 | 2,3,6,37,3<br>8,39,40,42<br>,43 | 5  | P07171,Q4FZU6,Q63617,Q8VD89,Q99041                                    |
| 8364 | 1,4,5,7,8,3<br>6,42,43 | 2,3,6,37,3<br>8,39,40,41<br>,44 | 5  | P05539,P16391,P16636,P60905,Q62635                                    |
| 8365 | 1,4,5,7,8,3<br>6,42,44 | 2,3,6,37,3<br>8,39,40,41<br>,43 | 10 | P00714,P00762,P05539,P07171,P08721,P14408,P60905,P82995,Q4AEF8,Q4FZU6 |
| 8366 | 1,4,5,7,8,3<br>6,43,44 | 2,3,6,37,3<br>8,39,40,41<br>,42 | 3  | P07171,P13432,P16636                                                  |
| 8367 | 1,4,5,7,8,3<br>7,38,39 | 2,3,6,36,4<br>0,41,42,43<br>,44 | 1  | P19218                                                                |
| 8368 | 1,4,5,7,8,3<br>7,38,40 | 2,3,6,36,3<br>9,41,42,43<br>,44 | 1  | P02803                                                                |
| 8369 | 1,4,5,7,8,3<br>7,38,41 | 2,3,6,36,3<br>9,40,42,43<br>,44 | 8  | P18418,P50115,P50116,P62804,Q63617,Q68FS4,Q7TPB1,Q99041               |
| 8370 | 1,4,5,7,8,3<br>7,38,42 | 2,3,6,36,3<br>9,40,41,43<br>,44 | 1  | P19218                                                                |
| 8371 | 1,4,5,7,8,3<br>7,38,43 | 2,3,6,36,3<br>9,40,41,42<br>,44 | 3  | P16391,Q64268,Q7TPB1                                                  |
| 8372 | 1,4,5,7,8,3<br>7,38,44 | 2,3,6,36,3<br>9,40,41,42<br>,43 | 1  | Q9R044                                                                |
| 8373 | 1,4,5,7,8,3<br>7,39,40 | 2,3,6,36,3<br>8,41,42,43<br>,44 | 6  | P00774,P02803,P98089,Q63617,Q6AYS4,Q8CIZ5                             |
| 8374 | 1,4,5,7,8,3<br>7,39,41 | 2,3,6,36,3<br>8,40,42,43<br>,44 | 6  | P18418,P62804,Q63617,Q68FS4,Q99041,Q9ESW0                             |
| 8375 | 1,4,5,7,8,3<br>7,39,42 | 2,3,6,36,3<br>8,40,41,43<br>,44 | 3  | P00774,P98089,Q62635                                                  |
| 8376 | 1,4,5,7,8,3<br>7,39,43 | 2,3,6,36,3<br>8,40,41,42<br>,44 | 2  | Q62635,Q8CIZ5                                                         |

|      |                        |                                 |   |                                                  |
|------|------------------------|---------------------------------|---|--------------------------------------------------|
| 8377 | 1,4,5,7,8,3<br>7,39,44 | 2,3,6,36,3<br>8,40,41,42<br>,43 | 1 | Q9ESW0                                           |
| 8378 | 1,4,5,7,8,3<br>7,40,41 | 2,3,6,36,3<br>8,39,42,43<br>,44 | 7 | P02803,P18418,Q4FZU6,Q63617,Q68FS4,Q99041,Q9JJS8 |
| 8379 | 1,4,5,7,8,3<br>7,40,42 | 2,3,6,36,3<br>8,39,41,43<br>,44 | 6 | P00774,P02803,Q4FZU6,Q63617,Q9JJS8,Q9QZ76        |
| 8380 | 1,4,5,7,8,3<br>7,40,43 | 2,3,6,36,3<br>8,39,41,42<br>,44 | 3 | P02803,Q63617,Q8CIZ5                             |
| 8381 | 1,4,5,7,8,3<br>7,40,44 | 2,3,6,36,3<br>8,39,41,42<br>,43 | 3 | P02803,Q4FZU6,Q63617                             |
| 8382 | 1,4,5,7,8,3<br>7,41,42 | 2,3,6,36,3<br>8,39,40,43<br>,44 | 4 | P18418,Q4FZU6,Q63617,Q99041                      |
| 8383 | 1,4,5,7,8,3<br>7,41,43 | 2,3,6,36,3<br>8,39,40,42<br>,44 | 5 | Q63617,Q68FS4,Q7TPB1,Q99041,Q9QX79               |
| 8384 | 1,4,5,7,8,3<br>7,41,44 | 2,3,6,36,3<br>8,39,40,42<br>,43 | 6 | P07171,P18418,Q4FZU6,Q63617,Q68FS4,Q99041        |
| 8385 | 1,4,5,7,8,3<br>7,42,43 | 2,3,6,36,3<br>8,39,40,41<br>,44 | 2 | P16391,Q62635                                    |
| 8386 | 1,4,5,7,8,3<br>7,42,44 | 2,3,6,36,3<br>8,39,40,41<br>,43 | 1 | P00714                                           |
| 8387 | 1,4,5,7,8,3<br>7,43,44 | 2,3,6,36,3<br>8,39,40,41<br>,42 | 0 |                                                  |
| 8388 | 1,4,5,7,8,3<br>8,39,40 | 2,3,6,36,3<br>7,41,42,43<br>,44 | 3 | P02803,Q4FZU6,Q6AYS4                             |
| 8389 | 1,4,5,7,8,3<br>8,39,41 | 2,3,6,36,3<br>7,40,42,43<br>,44 | 5 | P50115,P50116,Q4FZU6,Q68FS4,Q99041               |
| 8390 | 1,4,5,7,8,3<br>8,39,42 | 2,3,6,36,3<br>7,40,41,43<br>,44 | 2 | P19218,P51907                                    |
| 8391 | 1,4,5,7,8,3<br>8,39,43 | 2,3,6,36,3<br>7,40,41,42<br>,44 | 2 | Q64268,Q6P6R2                                    |

|      |                        |                                 |   |                                                  |
|------|------------------------|---------------------------------|---|--------------------------------------------------|
| 8392 | 1,4,5,7,8,3<br>8,39,44 | 2,3,6,36,3<br>7,40,41,42<br>,43 | 2 | P51907,Q6AYS4                                    |
| 8393 | 1,4,5,7,8,3<br>8,40,41 | 2,3,6,36,3<br>7,39,42,43<br>,44 | 5 | P50115,P50116,Q4FZU6,Q63617,Q68FS4               |
| 8394 | 1,4,5,7,8,3<br>8,40,42 | 2,3,6,36,3<br>7,39,41,43<br>,44 | 3 | P02803,Q4FZU6,Q9QZ76                             |
| 8395 | 1,4,5,7,8,3<br>8,40,43 | 2,3,6,36,3<br>7,39,41,42<br>,44 | 1 | P02803                                           |
| 8396 | 1,4,5,7,8,3<br>8,40,44 | 2,3,6,36,3<br>7,39,41,42<br>,43 | 1 | Q4FZU6                                           |
| 8397 | 1,4,5,7,8,3<br>8,41,42 | 2,3,6,36,3<br>7,39,40,43<br>,44 | 5 | O35547,P08753,P50115,P50116,Q4FZU6               |
| 8398 | 1,4,5,7,8,3<br>8,41,43 | 2,3,6,36,3<br>7,39,40,42<br>,44 | 5 | P50115,P50116,Q68FS4,Q7TPB1,Q8CJD3               |
| 8399 | 1,4,5,7,8,3<br>8,41,44 | 2,3,6,36,3<br>7,39,40,42<br>,43 | 7 | P07171,P50115,P50116,Q05695,Q4FZU6,Q63617,Q68FS4 |
| 8400 | 1,4,5,7,8,3<br>8,42,43 | 2,3,6,36,3<br>7,39,40,41<br>,44 | 3 | O35547,P16391,Q64268                             |
| 8401 | 1,4,5,7,8,3<br>8,42,44 | 2,3,6,36,3<br>7,39,40,41<br>,43 | 2 | P00714,P51907                                    |
| 8402 | 1,4,5,7,8,3<br>8,43,44 | 2,3,6,36,3<br>7,39,40,41<br>,42 | 1 | Q64268                                           |
| 8403 | 1,4,5,7,8,3<br>9,40,41 | 2,3,6,36,3<br>7,38,42,43<br>,44 | 5 | P10715,Q4FZU6,Q63617,Q68FS4,Q99041               |
| 8404 | 1,4,5,7,8,3<br>9,40,42 | 2,3,6,36,3<br>7,38,41,43<br>,44 | 3 | P00774,Q4FZU6,Q561R9                             |
| 8405 | 1,4,5,7,8,3<br>9,40,43 | 2,3,6,36,3<br>7,38,41,42<br>,44 | 1 | Q8CIZ5                                           |
| 8406 | 1,4,5,7,8,3<br>9,40,44 | 2,3,6,36,3<br>7,38,41,42<br>,43 | 4 | Q4FZU6,Q63617,Q6AYL6,Q6AYS4                      |

|      |                        |                                 |   |                                                                |
|------|------------------------|---------------------------------|---|----------------------------------------------------------------|
| 8407 | 1,4,5,7,8,3<br>9,41,42 | 2,3,6,36,3<br>7,38,40,43<br>,44 | 3 | P08010,Q4FZU6,Q99041                                           |
| 8408 | 1,4,5,7,8,3<br>9,41,43 | 2,3,6,36,3<br>7,38,40,42<br>,44 | 4 | P22006,Q63617,Q68FS4,Q99041                                    |
| 8409 | 1,4,5,7,8,3<br>9,41,44 | 2,3,6,36,3<br>7,38,40,42<br>,43 | 7 | P07171,Q4FZU6,Q63617,Q68FS4,Q8VD89,Q99041,Q9ESW0               |
| 8410 | 1,4,5,7,8,3<br>9,42,43 | 2,3,6,36,3<br>7,38,40,41<br>,44 | 2 | P16636,Q62635                                                  |
| 8411 | 1,4,5,7,8,3<br>9,42,44 | 2,3,6,36,3<br>7,38,40,41<br>,43 | 4 | P00714,P51907,Q4FZU6,Q561R9                                    |
| 8412 | 1,4,5,7,8,3<br>9,43,44 | 2,3,6,36,3<br>7,38,40,41<br>,42 | 0 |                                                                |
| 8413 | 1,4,5,7,8,4<br>0,41,42 | 2,3,6,36,3<br>7,38,39,43<br>,44 | 6 | P05539,Q4FZU6,Q561R9,Q63617,Q9JJS8,Q9QZ76                      |
| 8414 | 1,4,5,7,8,4<br>0,41,43 | 2,3,6,36,3<br>7,38,39,42<br>,44 | 4 | Q4FZU6,Q63617,Q68FS4,Q9JJS8                                    |
| 8415 | 1,4,5,7,8,4<br>0,41,44 | 2,3,6,36,3<br>7,38,39,42<br>,43 | 8 | P07171,P10715,P18418,P31044,Q4FZU6,Q5GRG2,Q63617,Q68FS4        |
| 8416 | 1,4,5,7,8,4<br>0,42,43 | 2,3,6,36,3<br>7,38,39,41<br>,44 | 4 | Q4FZU6,Q9JHB9,Q9JJS8,Q9QZ76                                    |
| 8417 | 1,4,5,7,8,4<br>0,42,44 | 2,3,6,36,3<br>7,38,39,41<br>,43 | 6 | P00714,Q4FZU6,Q561R9,Q5M819,Q63617,Q9QZ76                      |
| 8418 | 1,4,5,7,8,4<br>0,43,44 | 2,3,6,36,3<br>7,38,39,41<br>,42 | 2 | Q4FZU6,Q63617                                                  |
| 8419 | 1,4,5,7,8,4<br>1,42,43 | 2,3,6,36,3<br>7,38,39,40<br>,44 | 9 | O35547,P05539,P16636,P54921,P60905,P82471,Q4FZU6,Q63617,Q9JJS8 |
| 8420 | 1,4,5,7,8,4<br>1,42,44 | 2,3,6,36,3<br>7,38,39,40<br>,43 | 6 | P00714,P07171,P60905,Q4FZU6,Q561R9,Q63617                      |
| 8421 | 1,4,5,7,8,4<br>1,43,44 | 2,3,6,36,3<br>7,38,39,40<br>,42 | 4 | P07171,Q4FZU6,Q63617,Q68FS4                                    |

|      |                         |                                 |   |                                                  |
|------|-------------------------|---------------------------------|---|--------------------------------------------------|
| 8422 | 1,4,5,7,8,4<br>2,43,44  | 2,3,6,36,3<br>7,38,39,40<br>,41 | 1 | P00714                                           |
| 8423 | 1,4,5,7,36,<br>37,38,39 | 2,3,6,8,40,<br>41,42,43,4<br>4  | 4 | P11883,P19218,P51907,Q6P6R2                      |
| 8424 | 1,4,5,7,36,<br>37,38,40 | 2,3,6,8,39,<br>41,42,43,4<br>4  | 3 | P11883,P20766,Q6P6R2                             |
| 8425 | 1,4,5,7,36,<br>37,38,41 | 2,3,6,8,39,<br>40,42,43,4<br>4  | 3 | P11883,P20766,P62804                             |
| 8426 | 1,4,5,7,36,<br>37,38,42 | 2,3,6,8,39,<br>40,41,43,4<br>4  | 5 | P11883,P14408,P20766,P51907,Q6AYL6               |
| 8427 | 1,4,5,7,36,<br>37,38,43 | 2,3,6,8,39,<br>40,41,42,4<br>4  | 2 | P20766,Q6P6R2                                    |
| 8428 | 1,4,5,7,36,<br>37,38,44 | 2,3,6,8,39,<br>40,41,42,4<br>3  | 2 | P11883,P20766                                    |
| 8429 | 1,4,5,7,36,<br>37,39,40 | 2,3,6,8,38,<br>41,42,43,4<br>4  | 7 | P00774,P11883,P55091,P98089,Q62635,Q6P6R2,Q8CIZ5 |
| 8430 | 1,4,5,7,36,<br>37,39,41 | 2,3,6,8,38,<br>40,42,43,4<br>4  | 4 | P11883,P35467,P62804,Q99041                      |
| 8431 | 1,4,5,7,36,<br>37,39,42 | 2,3,6,8,38,<br>40,41,43,4<br>4  | 7 | O54728,P00774,P05539,P11883,P14408,P98089,Q62635 |
| 8432 | 1,4,5,7,36,<br>37,39,43 | 2,3,6,8,38,<br>40,41,42,4<br>4  | 3 | Q62635,Q6P6R2,Q8CIZ5                             |
| 8433 | 1,4,5,7,36,<br>37,39,44 | 2,3,6,8,38,<br>40,41,42,4<br>3  | 1 | P11883                                           |
| 8434 | 1,4,5,7,36,<br>37,40,41 | 2,3,6,8,38,<br>39,42,43,4<br>4  | 3 | P11883,P18418,Q4FZU6                             |
| 8435 | 1,4,5,7,36,<br>37,40,42 | 2,3,6,8,38,<br>39,41,43,4<br>4  | 6 | P00774,P05539,P11883,P14408,P98089,Q62635        |
| 8436 | 1,4,5,7,36,<br>37,40,43 | 2,3,6,8,38,<br>39,41,42,4<br>4  | 2 | Q62635,Q8CIZ5                                    |



|      |                         |                                |   |                                           |
|------|-------------------------|--------------------------------|---|-------------------------------------------|
| 8437 | 1,4,5,7,36,<br>37,40,44 | 2,3,6,8,38,<br>39,41,42,4<br>3 | 2 | P11883,Q4FZU6                             |
| 8438 | 1,4,5,7,36,<br>37,41,42 | 2,3,6,8,38,<br>39,40,43,4<br>4 | 2 | P05539,P14408                             |
| 8439 | 1,4,5,7,36,<br>37,41,43 | 2,3,6,8,38,<br>39,40,42,4<br>4 | 1 | P62804                                    |
| 8440 | 1,4,5,7,36,<br>37,41,44 | 2,3,6,8,38,<br>39,40,42,4<br>3 | 3 | P11883,P18418,Q4FZU6                      |
| 8441 | 1,4,5,7,36,<br>37,42,43 | 2,3,6,8,38,<br>39,40,41,4<br>4 | 5 | P05539,P14408,P16636,P19629,Q62635        |
| 8442 | 1,4,5,7,36,<br>37,42,44 | 2,3,6,8,38,<br>39,40,41,4<br>3 | 3 | P00762,P11883,P14408                      |
| 8443 | 1,4,5,7,36,<br>37,43,44 | 2,3,6,8,38,<br>39,40,41,4<br>2 | 0 |                                           |
| 8444 | 1,4,5,7,36,<br>38,39,40 | 2,3,6,8,37,<br>41,42,43,4<br>4 | 2 | P51907,Q6P6R2                             |
| 8445 | 1,4,5,7,36,<br>38,39,41 | 2,3,6,8,37,<br>40,42,43,4<br>4 | 2 | P51907,Q8VD89                             |
| 8446 | 1,4,5,7,36,<br>38,39,42 | 2,3,6,8,37,<br>40,41,43,4<br>4 | 6 | O54728,P05539,P14408,P19218,P51907,Q9Z1F2 |
| 8447 | 1,4,5,7,36,<br>38,39,43 | 2,3,6,8,37,<br>40,41,42,4<br>4 | 2 | P51907,Q6P6R2                             |
| 8448 | 1,4,5,7,36,<br>38,39,44 | 2,3,6,8,37,<br>40,41,42,4<br>3 | 1 | P51907                                    |
| 8449 | 1,4,5,7,36,<br>38,40,41 | 2,3,6,8,37,<br>39,42,43,4<br>4 | 2 | P05539,Q4FZU6                             |
| 8450 | 1,4,5,7,36,<br>38,40,42 | 2,3,6,8,37,<br>39,41,43,4<br>4 | 4 | P05539,P14408,P51907,Q4FZU6               |
| 8451 | 1,4,5,7,36,<br>38,40,43 | 2,3,6,8,37,<br>39,41,42,4<br>4 | 1 | Q6P6R2                                    |

|      |                         |                                |   |                                                  |
|------|-------------------------|--------------------------------|---|--------------------------------------------------|
| 8452 | 1,4,5,7,36,<br>38,40,44 | 2,3,6,8,37,<br>39,41,42,4<br>3 | 2 | P51907,Q4FZU6                                    |
| 8453 | 1,4,5,7,36,<br>38,41,42 | 2,3,6,8,37,<br>39,40,43,4<br>4 | 4 | P05539,P14408,P20766,Q4FZU6                      |
| 8454 | 1,4,5,7,36,<br>38,41,43 | 2,3,6,8,37,<br>39,40,42,4<br>4 | 2 | P20766,Q8CJD3                                    |
| 8455 | 1,4,5,7,36,<br>38,41,44 | 2,3,6,8,37,<br>39,40,42,4<br>3 | 2 | Q05695,Q4FZU6                                    |
| 8456 | 1,4,5,7,36,<br>38,42,43 | 2,3,6,8,37,<br>39,40,41,4<br>4 | 5 | P05539,P06911,P14408,P16636,P51907               |
| 8457 | 1,4,5,7,36,<br>38,42,44 | 2,3,6,8,37,<br>39,40,41,4<br>3 | 2 | P14408,P51907                                    |
| 8458 | 1,4,5,7,36,<br>38,43,44 | 2,3,6,8,37,<br>39,40,41,4<br>2 | 1 | P51907                                           |
| 8459 | 1,4,5,7,36,<br>39,40,41 | 2,3,6,8,37,<br>38,42,43,4<br>4 | 3 | P05539,Q4FZU6,Q8VD89                             |
| 8460 | 1,4,5,7,36,<br>39,40,42 | 2,3,6,8,37,<br>38,41,43,4<br>4 | 7 | O54728,P00774,P05539,P14408,P98089,Q4FZU6,Q62635 |
| 8461 | 1,4,5,7,36,<br>39,40,43 | 2,3,6,8,37,<br>38,41,42,4<br>4 | 4 | P05539,Q62635,Q6P6R2,Q8CIZ5                      |
| 8462 | 1,4,5,7,36,<br>39,40,44 | 2,3,6,8,37,<br>38,41,42,4<br>3 | 1 | Q4FZU6                                           |
| 8463 | 1,4,5,7,36,<br>39,41,42 | 2,3,6,8,37,<br>38,40,43,4<br>4 | 4 | O54728,P05539,P35467,Q4FZU6                      |
| 8464 | 1,4,5,7,36,<br>39,41,43 | 2,3,6,8,37,<br>38,40,42,4<br>4 | 3 | P05539,P16636,P22006                             |
| 8465 | 1,4,5,7,36,<br>39,41,44 | 2,3,6,8,37,<br>38,40,42,4<br>3 | 3 | P05539,Q4FZU6,Q8VD89                             |
| 8466 | 1,4,5,7,36,<br>39,42,43 | 2,3,6,8,37,<br>38,40,41,4<br>4 | 5 | O54728,P05539,P16636,P51907,Q62635               |

|      |                         |                                |   |                                           |
|------|-------------------------|--------------------------------|---|-------------------------------------------|
| 8467 | 1,4,5,7,36,<br>39,42,44 | 2,3,6,8,37,<br>38,40,41,4<br>3 | 4 | O54728,P05539,P14408,P51907               |
| 8468 | 1,4,5,7,36,<br>39,43,44 | 2,3,6,8,37,<br>38,40,41,4<br>2 | 1 | P51907                                    |
| 8469 | 1,4,5,7,36,<br>40,41,42 | 2,3,6,8,37,<br>38,39,43,4<br>4 | 4 | P05539,P14408,Q4FZU6,Q9JJS8               |
| 8470 | 1,4,5,7,36,<br>40,41,43 | 2,3,6,8,37,<br>38,39,42,4<br>4 | 3 | P05539,P16636,Q4FZU6                      |
| 8471 | 1,4,5,7,36,<br>40,41,44 | 2,3,6,8,37,<br>38,39,42,4<br>3 | 4 | P02680,P05539,Q4FZU6,Q8VD89               |
| 8472 | 1,4,5,7,36,<br>40,42,43 | 2,3,6,8,37,<br>38,39,41,4<br>4 | 6 | P00774,P02782,P05539,P14408,P16636,Q62635 |
| 8473 | 1,4,5,7,36,<br>40,42,44 | 2,3,6,8,37,<br>38,39,41,4<br>3 | 5 | P00714,P05539,P14408,Q4FZU6,Q7TPB1        |
| 8474 | 1,4,5,7,36,<br>40,43,44 | 2,3,6,8,37,<br>38,39,41,4<br>2 | 2 | P05539,Q4FZU6                             |
| 8475 | 1,4,5,7,36,<br>41,42,43 | 2,3,6,8,37,<br>38,39,40,4<br>4 | 2 | P05539,P16636                             |
| 8476 | 1,4,5,7,36,<br>41,42,44 | 2,3,6,8,37,<br>38,39,40,4<br>3 | 5 | P02680,P05539,P14408,P82995,Q4FZU6        |
| 8477 | 1,4,5,7,36,<br>41,43,44 | 2,3,6,8,37,<br>38,39,40,4<br>2 | 2 | P05539,Q4FZU6                             |
| 8478 | 1,4,5,7,36,<br>42,43,44 | 2,3,6,8,37,<br>38,39,40,4<br>1 | 4 | P05539,P14408,P16636,P51907               |
| 8479 | 1,4,5,7,37,<br>38,39,40 | 2,3,6,8,36,<br>41,42,43,4<br>4 | 2 | P02803,Q6P6R2                             |
| 8480 | 1,4,5,7,37,<br>38,39,41 | 2,3,6,8,36,<br>40,42,43,4<br>4 | 1 | P62804                                    |
| 8481 | 1,4,5,7,37,<br>38,39,42 | 2,3,6,8,36,<br>40,41,43,4<br>4 | 2 | P19218,P51907                             |

|      |                         |                                |   |                                    |
|------|-------------------------|--------------------------------|---|------------------------------------|
| 8482 | 1,4,5,7,37,<br>38,39,43 | 2,3,6,8,36,<br>40,41,42,4<br>4 | 2 | P62804,Q6P6R2                      |
| 8483 | 1,4,5,7,37,<br>38,39,44 | 2,3,6,8,36,<br>40,41,42,4<br>3 | 2 | P51907,P62804                      |
| 8484 | 1,4,5,7,37,<br>38,40,41 | 2,3,6,8,36,<br>39,42,43,4<br>4 | 3 | P20766,P62804,Q4FZU6               |
| 8485 | 1,4,5,7,37,<br>38,40,42 | 2,3,6,8,36,<br>39,41,43,4<br>4 | 2 | P14408,P20766                      |
| 8486 | 1,4,5,7,37,<br>38,40,43 | 2,3,6,8,36,<br>39,41,42,4<br>4 | 1 | P20766                             |
| 8487 | 1,4,5,7,37,<br>38,40,44 | 2,3,6,8,36,<br>39,41,42,4<br>3 | 0 |                                    |
| 8488 | 1,4,5,7,37,<br>38,41,42 | 2,3,6,8,36,<br>39,40,43,4<br>4 | 1 | P20766                             |
| 8489 | 1,4,5,7,37,<br>38,41,43 | 2,3,6,8,36,<br>39,40,42,4<br>4 | 4 | P20766,P62804,Q7TPB1,Q8CJD3        |
| 8490 | 1,4,5,7,37,<br>38,41,44 | 2,3,6,8,36,<br>39,40,42,4<br>3 | 3 | P20766,P62804,Q05695               |
| 8491 | 1,4,5,7,37,<br>38,42,43 | 2,3,6,8,36,<br>39,40,41,4<br>4 | 1 | P20766                             |
| 8492 | 1,4,5,7,37,<br>38,42,44 | 2,3,6,8,36,<br>39,40,41,4<br>3 | 3 | P14408,P20766,P51907               |
| 8493 | 1,4,5,7,37,<br>38,43,44 | 2,3,6,8,36,<br>39,40,41,4<br>2 | 2 | P20766,P62804                      |
| 8494 | 1,4,5,7,37,<br>39,40,41 | 2,3,6,8,36,<br>38,42,43,4<br>4 | 5 | P10715,P18418,P35467,P62804,Q4FZU6 |
| 8495 | 1,4,5,7,37,<br>39,40,42 | 2,3,6,8,36,<br>38,41,43,4<br>4 | 3 | P00774,P98089,Q62635               |
| 8496 | 1,4,5,7,37,<br>39,40,43 | 2,3,6,8,36,<br>38,41,42,4<br>4 | 2 | Q62635,Q8CIZ5                      |

|      |                         |                                |   |                             |
|------|-------------------------|--------------------------------|---|-----------------------------|
| 8497 | 1,4,5,7,37,<br>39,40,44 | 2,3,6,8,36,<br>38,41,42,4<br>3 | 2 | Q4FZU6,Q6AYL6               |
| 8498 | 1,4,5,7,37,<br>39,41,42 | 2,3,6,8,36,<br>38,40,43,4<br>4 | 1 | P35467                      |
| 8499 | 1,4,5,7,37,<br>39,41,43 | 2,3,6,8,36,<br>38,40,42,4<br>4 | 2 | P22006,P62804               |
| 8500 | 1,4,5,7,37,<br>39,41,44 | 2,3,6,8,36,<br>38,40,42,4<br>3 | 2 | P62804,Q9ESW0               |
| 8501 | 1,4,5,7,37,<br>39,42,43 | 2,3,6,8,36,<br>38,40,41,4<br>4 | 2 | Q62635,Q8CIZ5               |
| 8502 | 1,4,5,7,37,<br>39,42,44 | 2,3,6,8,36,<br>38,40,41,4<br>3 | 1 | P51907                      |
| 8503 | 1,4,5,7,37,<br>39,43,44 | 2,3,6,8,36,<br>38,40,41,4<br>2 | 2 | P62804,Q8CIZ5               |
| 8504 | 1,4,5,7,37,<br>40,41,42 | 2,3,6,8,36,<br>38,39,43,4<br>4 | 1 | Q4FZU6                      |
| 8505 | 1,4,5,7,37,<br>40,41,43 | 2,3,6,8,36,<br>38,39,42,4<br>4 | 1 | P62804                      |
| 8506 | 1,4,5,7,37,<br>40,41,44 | 2,3,6,8,36,<br>38,39,42,4<br>3 | 4 | P10715,P18418,Q4FZU6,Q5GRG2 |
| 8507 | 1,4,5,7,37,<br>40,42,43 | 2,3,6,8,36,<br>38,39,41,4<br>4 | 2 | Q62635,Q8CIZ5               |
| 8508 | 1,4,5,7,37,<br>40,42,44 | 2,3,6,8,36,<br>38,39,41,4<br>3 | 3 | P00714,P14408,Q4FZU6        |
| 8509 | 1,4,5,7,37,<br>40,43,44 | 2,3,6,8,36,<br>38,39,41,4<br>2 | 0 |                             |
| 8510 | 1,4,5,7,37,<br>41,42,43 | 2,3,6,8,36,<br>38,39,40,4<br>4 | 0 |                             |
| 8511 | 1,4,5,7,37,<br>41,42,44 | 2,3,6,8,36,<br>38,39,40,4<br>3 | 1 | Q4FZU6                      |

|      |                         |                                |   |                             |
|------|-------------------------|--------------------------------|---|-----------------------------|
| 8512 | 1,4,5,7,37,<br>41,43,44 | 2,3,6,8,36,<br>38,39,40,4<br>2 | 1 | P62804                      |
| 8513 | 1,4,5,7,37,<br>42,43,44 | 2,3,6,8,36,<br>38,39,40,4<br>1 | 0 |                             |
| 8514 | 1,4,5,7,38,<br>39,40,41 | 2,3,6,8,36,<br>37,42,43,4<br>4 | 1 | Q4FZU6                      |
| 8515 | 1,4,5,7,38,<br>39,40,42 | 2,3,6,8,36,<br>37,41,43,4<br>4 | 3 | P51907,P83121,Q4FZU6        |
| 8516 | 1,4,5,7,38,<br>39,40,43 | 2,3,6,8,36,<br>37,41,42,4<br>4 | 1 | Q6P6R2                      |
| 8517 | 1,4,5,7,38,<br>39,40,44 | 2,3,6,8,36,<br>37,41,42,4<br>3 | 2 | P51907,Q4FZU6               |
| 8518 | 1,4,5,7,38,<br>39,41,42 | 2,3,6,8,36,<br>37,40,43,4<br>4 | 3 | P13432,P51907,Q4FZU6        |
| 8519 | 1,4,5,7,38,<br>39,41,43 | 2,3,6,8,36,<br>37,40,42,4<br>4 | 3 | P22006,P62804,Q8CJD3        |
| 8520 | 1,4,5,7,38,<br>39,41,44 | 2,3,6,8,36,<br>37,40,42,4<br>3 | 4 | P51907,P62804,Q05695,Q4FZU6 |
| 8521 | 1,4,5,7,38,<br>39,42,43 | 2,3,6,8,36,<br>37,40,41,4<br>4 | 2 | P51907,Q9Z1F2               |
| 8522 | 1,4,5,7,38,<br>39,42,44 | 2,3,6,8,36,<br>37,40,41,4<br>3 | 2 | P51907,Q9Z1F2               |
| 8523 | 1,4,5,7,38,<br>39,43,44 | 2,3,6,8,36,<br>37,40,41,4<br>2 | 2 | P23593,P51907               |
| 8524 | 1,4,5,7,38,<br>40,41,42 | 2,3,6,8,36,<br>37,39,43,4<br>4 | 2 | P14408,Q4FZU6               |
| 8525 | 1,4,5,7,38,<br>40,41,43 | 2,3,6,8,36,<br>37,39,42,4<br>4 | 2 | Q4FZU6,Q8CJD3               |
| 8526 | 1,4,5,7,38,<br>40,41,44 | 2,3,6,8,36,<br>37,39,42,4<br>3 | 2 | Q05695,Q4FZU6               |

|      |                         |                                |   |                                                         |
|------|-------------------------|--------------------------------|---|---------------------------------------------------------|
| 8527 | 1,4,5,7,38,<br>40,42,43 | 2,3,6,8,36,<br>37,39,41,4<br>4 | 1 | P14408                                                  |
| 8528 | 1,4,5,7,38,<br>40,42,44 | 2,3,6,8,36,<br>37,39,41,4<br>3 | 4 | P00714,P14408,P51907,Q4FZU6                             |
| 8529 | 1,4,5,7,38,<br>40,43,44 | 2,3,6,8,36,<br>37,39,41,4<br>2 | 0 |                                                         |
| 8530 | 1,4,5,7,38,<br>41,42,43 | 2,3,6,8,36,<br>37,39,40,4<br>4 | 2 | O35547,Q8CJD3                                           |
| 8531 | 1,4,5,7,38,<br>41,42,44 | 2,3,6,8,36,<br>37,39,40,4<br>3 | 4 | P14408,P51907,Q05695,Q4FZU6                             |
| 8532 | 1,4,5,7,38,<br>41,43,44 | 2,3,6,8,36,<br>37,39,40,4<br>2 | 3 | P55091,Q05695,Q8CJD3                                    |
| 8533 | 1,4,5,7,38,<br>42,43,44 | 2,3,6,8,36,<br>37,39,40,4<br>1 | 1 | P51907                                                  |
| 8534 | 1,4,5,7,39,<br>40,41,42 | 2,3,6,8,36,<br>37,38,43,4<br>4 | 3 | P05539,Q4FZU6,Q561R9                                    |
| 8535 | 1,4,5,7,39,<br>40,41,43 | 2,3,6,8,36,<br>37,38,42,4<br>4 | 2 | P22006,Q4FZU6                                           |
| 8536 | 1,4,5,7,39,<br>40,41,44 | 2,3,6,8,36,<br>37,38,42,4<br>3 | 8 | P06911,P10715,P19629,P31044,Q4FZU6,Q5GRG2,Q6AYL6,Q8VD89 |
| 8537 | 1,4,5,7,39,<br>40,42,43 | 2,3,6,8,36,<br>37,38,41,4<br>4 | 3 | P05539,Q62635,Q8CIZ5                                    |
| 8538 | 1,4,5,7,39,<br>40,42,44 | 2,3,6,8,36,<br>37,38,41,4<br>3 | 3 | P51907,Q4FZU6,Q561R9                                    |
| 8539 | 1,4,5,7,39,<br>40,43,44 | 2,3,6,8,36,<br>37,38,41,4<br>2 | 3 | Q4FZU6,Q6AYL6,Q8CIZ5                                    |
| 8540 | 1,4,5,7,39,<br>41,42,43 | 2,3,6,8,36,<br>37,38,40,4<br>4 | 4 | P05539,P16636,P22006,P82471                             |
| 8541 | 1,4,5,7,39,<br>41,42,44 | 2,3,6,8,36,<br>37,38,40,4<br>3 | 2 | P51907,Q4FZU6                                           |

|      |                         |                                |   |                                                         |
|------|-------------------------|--------------------------------|---|---------------------------------------------------------|
| 8542 | 1,4,5,7,39,<br>41,43,44 | 2,3,6,8,36,<br>37,38,40,4<br>2 | 1 | P22006                                                  |
| 8543 | 1,4,5,7,39,<br>42,43,44 | 2,3,6,8,36,<br>37,38,40,4<br>1 | 1 | P51907                                                  |
| 8544 | 1,4,5,7,40,<br>41,42,43 | 2,3,6,8,36,<br>37,38,39,4<br>4 | 3 | P05539,Q4FZU6,Q9JJS8                                    |
| 8545 | 1,4,5,7,40,<br>41,42,44 | 2,3,6,8,36,<br>37,38,39,4<br>3 | 5 | P02680,P05539,P14408,Q4FZU6,Q561R9                      |
| 8546 | 1,4,5,7,40,<br>41,43,44 | 2,3,6,8,36,<br>37,38,39,4<br>2 | 2 | Q4FZU6,Q6AYL6                                           |
| 8547 | 1,4,5,7,40,<br>42,43,44 | 2,3,6,8,36,<br>37,38,39,4<br>1 | 2 | P14408,Q4FZU6                                           |
| 8548 | 1,4,5,7,41,<br>42,43,44 | 2,3,6,8,36,<br>37,38,39,4<br>0 | 3 | P05539,P82471,Q4FZU6                                    |
| 8549 | 1,4,5,8,36,<br>37,38,39 | 2,3,6,7,40,<br>41,42,43,4<br>4 | 4 | P11883,P16086,Q6AYS4,Q6P6R2                             |
| 8550 | 1,4,5,8,36,<br>37,38,40 | 2,3,6,7,39,<br>41,42,43,4<br>4 | 5 | P02803,P11883,P16086,P35281,Q6AYS4                      |
| 8551 | 1,4,5,8,36,<br>37,38,41 | 2,3,6,7,39,<br>40,42,43,4<br>4 | 1 | P16086                                                  |
| 8552 | 1,4,5,8,36,<br>37,38,42 | 2,3,6,7,39,<br>40,41,43,4<br>4 | 2 | P12020,Q6AYL6                                           |
| 8553 | 1,4,5,8,36,<br>37,38,43 | 2,3,6,7,39,<br>40,41,42,4<br>4 | 5 | P12020,P16086,P16391,Q64268,Q6P6R2                      |
| 8554 | 1,4,5,8,36,<br>37,38,44 | 2,3,6,7,39,<br>40,41,42,4<br>3 | 2 | P11883,P16086                                           |
| 8555 | 1,4,5,8,36,<br>37,39,40 | 2,3,6,7,38,<br>41,42,43,4<br>4 | 8 | O35547,P00774,P11883,P16086,P55091,P98089,Q6AYS4,Q8CIZ5 |
| 8556 | 1,4,5,8,36,<br>37,39,41 | 2,3,6,7,38,<br>40,42,43,4<br>4 | 0 |                                                         |



|      |                         |                                |   |                                    |
|------|-------------------------|--------------------------------|---|------------------------------------|
| 8557 | 1,4,5,8,36,<br>37,39,42 | 2,3,6,7,38,<br>40,41,43,4<br>4 | 4 | O54728,P00774,P98089,Q62635        |
| 8558 | 1,4,5,8,36,<br>37,39,43 | 2,3,6,7,38,<br>40,41,42,4<br>4 | 4 | P16086,Q62635,Q6P6R2,Q8CIZ5        |
| 8559 | 1,4,5,8,36,<br>37,39,44 | 2,3,6,7,38,<br>40,41,42,4<br>3 | 3 | P11883,P16086,Q6AYS4               |
| 8560 | 1,4,5,8,36,<br>37,40,41 | 2,3,6,7,38,<br>39,42,43,4<br>4 | 1 | Q4FZU6                             |
| 8561 | 1,4,5,8,36,<br>37,40,42 | 2,3,6,7,38,<br>39,41,43,4<br>4 | 2 | P00774,P98089                      |
| 8562 | 1,4,5,8,36,<br>37,40,43 | 2,3,6,7,38,<br>39,41,42,4<br>4 | 2 | P16086,Q8CIZ5                      |
| 8563 | 1,4,5,8,36,<br>37,40,44 | 2,3,6,7,38,<br>39,41,42,4<br>3 | 4 | O35547,P11883,P16086,Q6AYS4        |
| 8564 | 1,4,5,8,36,<br>37,41,42 | 2,3,6,7,38,<br>39,40,43,4<br>4 | 0 |                                    |
| 8565 | 1,4,5,8,36,<br>37,41,43 | 2,3,6,7,38,<br>39,40,42,4<br>4 | 2 | P83121,Q9QUL6                      |
| 8566 | 1,4,5,8,36,<br>37,41,44 | 2,3,6,7,38,<br>39,40,42,4<br>3 | 1 | P16086                             |
| 8567 | 1,4,5,8,36,<br>37,42,43 | 2,3,6,7,38,<br>39,40,41,4<br>4 | 5 | P06911,P12020,P19629,Q5GRG2,Q62635 |
| 8568 | 1,4,5,8,36,<br>37,42,44 | 2,3,6,7,38,<br>39,40,41,4<br>3 | 0 |                                    |
| 8569 | 1,4,5,8,36,<br>37,43,44 | 2,3,6,7,38,<br>39,40,41,4<br>2 | 1 | P16086                             |
| 8570 | 1,4,5,8,36,<br>38,39,40 | 2,3,6,7,37,<br>41,42,43,4<br>4 | 3 | P10758,Q6AYS4,Q6P6R2               |
| 8571 | 1,4,5,8,36,<br>38,39,41 | 2,3,6,7,37,<br>40,42,43,4<br>4 | 1 | Q6AYS4                             |

|      |                         |                                |   |                                           |
|------|-------------------------|--------------------------------|---|-------------------------------------------|
| 8572 | 1,4,5,8,36,<br>38,39,42 | 2,3,6,7,37,<br>40,41,43,4<br>4 | 3 | O54728,P51907,Q6AYS4                      |
| 8573 | 1,4,5,8,36,<br>38,39,43 | 2,3,6,7,37,<br>40,41,42,4<br>4 | 3 | Q64268,Q6AYS4,Q6P6R2                      |
| 8574 | 1,4,5,8,36,<br>38,39,44 | 2,3,6,7,37,<br>40,41,42,4<br>3 | 3 | P16086,P51907,Q6AYS4                      |
| 8575 | 1,4,5,8,36,<br>38,40,41 | 2,3,6,7,37,<br>39,42,43,4<br>4 | 1 | Q4FZU6                                    |
| 8576 | 1,4,5,8,36,<br>38,40,42 | 2,3,6,7,37,<br>39,41,43,4<br>4 | 0 |                                           |
| 8577 | 1,4,5,8,36,<br>38,40,43 | 2,3,6,7,37,<br>39,41,42,4<br>4 | 2 | P16086,Q64268                             |
| 8578 | 1,4,5,8,36,<br>38,40,44 | 2,3,6,7,37,<br>39,41,42,4<br>3 | 2 | P16086,Q6AYS4                             |
| 8579 | 1,4,5,8,36,<br>38,41,42 | 2,3,6,7,37,<br>39,40,43,4<br>4 | 1 | Q6AYL6                                    |
| 8580 | 1,4,5,8,36,<br>38,41,43 | 2,3,6,7,37,<br>39,40,42,4<br>4 | 2 | Q64268,Q8CJD3                             |
| 8581 | 1,4,5,8,36,<br>38,41,44 | 2,3,6,7,37,<br>39,40,42,4<br>3 | 2 | P16086,Q05695                             |
| 8582 | 1,4,5,8,36,<br>38,42,43 | 2,3,6,7,37,<br>39,40,41,4<br>4 | 6 | P06911,P12020,P16391,P19629,Q5GRG2,Q64268 |
| 8583 | 1,4,5,8,36,<br>38,42,44 | 2,3,6,7,37,<br>39,40,41,4<br>3 | 2 | P00714,P51907                             |
| 8584 | 1,4,5,8,36,<br>38,43,44 | 2,3,6,7,37,<br>39,40,41,4<br>2 | 2 | P16086,Q64268                             |
| 8585 | 1,4,5,8,36,<br>39,40,41 | 2,3,6,7,37,<br>38,42,43,4<br>4 | 4 | P97840,Q4FZU6,Q62975,Q6AYS4               |
| 8586 | 1,4,5,8,36,<br>39,40,42 | 2,3,6,7,37,<br>38,41,43,4<br>4 | 6 | O54728,P00774,P98089,Q4FZU6,Q62635,Q6AYS4 |

|      |                         |                                |   |                             |
|------|-------------------------|--------------------------------|---|-----------------------------|
| 8587 | 1,4,5,8,36,<br>39,40,43 | 2,3,6,7,37,<br>38,41,42,4<br>4 | 4 | P97840,Q62635,Q6AYS4,Q8CIZ5 |
| 8588 | 1,4,5,8,36,<br>39,40,44 | 2,3,6,7,37,<br>38,41,42,4<br>3 | 3 | P16086,Q4FZU6,Q6AYS4        |
| 8589 | 1,4,5,8,36,<br>39,41,42 | 2,3,6,7,37,<br>38,40,43,4<br>4 | 0 |                             |
| 8590 | 1,4,5,8,36,<br>39,41,43 | 2,3,6,7,37,<br>38,40,42,4<br>4 | 1 | P97840                      |
| 8591 | 1,4,5,8,36,<br>39,41,44 | 2,3,6,7,37,<br>38,40,42,4<br>3 | 2 | Q4FZU6,Q6AYS4               |
| 8592 | 1,4,5,8,36,<br>39,42,43 | 2,3,6,7,37,<br>38,40,41,4<br>4 | 2 | O54728,Q62635               |
| 8593 | 1,4,5,8,36,<br>39,42,44 | 2,3,6,7,37,<br>38,40,41,4<br>3 | 2 | P51907,Q6AYS4               |
| 8594 | 1,4,5,8,36,<br>39,43,44 | 2,3,6,7,37,<br>38,40,41,4<br>2 | 1 | P16086                      |
| 8595 | 1,4,5,8,36,<br>40,41,42 | 2,3,6,7,37,<br>38,39,43,4<br>4 | 3 | P23593,Q4FZU6,Q9JJS8        |
| 8596 | 1,4,5,8,36,<br>40,41,43 | 2,3,6,7,37,<br>38,39,42,4<br>4 | 2 | P97840,Q4FZU6               |
| 8597 | 1,4,5,8,36,<br>40,41,44 | 2,3,6,7,37,<br>38,39,42,4<br>3 | 1 | Q4FZU6                      |
| 8598 | 1,4,5,8,36,<br>40,42,43 | 2,3,6,7,37,<br>38,39,41,4<br>4 | 2 | P00774,Q62635               |
| 8599 | 1,4,5,8,36,<br>40,42,44 | 2,3,6,7,37,<br>38,39,41,4<br>3 | 3 | P00714,Q4FZU6,Q7TPB1        |
| 8600 | 1,4,5,8,36,<br>40,43,44 | 2,3,6,7,37,<br>38,39,41,4<br>2 | 2 | P16086,P97840               |
| 8601 | 1,4,5,8,36,<br>41,42,43 | 2,3,6,7,37,<br>38,39,40,4<br>4 | 1 | Q9QUL6                      |

|      |                         |                                |   |                                    |
|------|-------------------------|--------------------------------|---|------------------------------------|
| 8602 | 1,4,5,8,36,<br>41,42,44 | 2,3,6,7,37,<br>38,39,40,4<br>3 | 1 | Q4FZU6                             |
| 8603 | 1,4,5,8,36,<br>41,43,44 | 2,3,6,7,37,<br>38,39,40,4<br>2 | 1 | P97840                             |
| 8604 | 1,4,5,8,36,<br>42,43,44 | 2,3,6,7,37,<br>38,39,40,4<br>1 | 0 |                                    |
| 8605 | 1,4,5,8,37,<br>38,39,40 | 2,3,6,7,36,<br>41,42,43,4<br>4 | 4 | P02803,P08649,P16086,P35281        |
| 8606 | 1,4,5,8,37,<br>38,39,41 | 2,3,6,7,36,<br>40,42,43,4<br>4 | 3 | P16086,Q68FS4,Q9R1T5               |
| 8607 | 1,4,5,8,37,<br>38,39,42 | 2,3,6,7,36,<br>40,41,43,4<br>4 | 0 |                                    |
| 8608 | 1,4,5,8,37,<br>38,39,43 | 2,3,6,7,36,<br>40,41,42,4<br>4 | 5 | P08649,P16086,Q64268,Q6IFV1,Q6P6R2 |
| 8609 | 1,4,5,8,37,<br>38,39,44 | 2,3,6,7,36,<br>40,41,42,4<br>3 | 1 | P16086                             |
| 8610 | 1,4,5,8,37,<br>38,40,41 | 2,3,6,7,36,<br>39,42,43,4<br>4 | 2 | P02803,P16086                      |
| 8611 | 1,4,5,8,37,<br>38,40,42 | 2,3,6,7,36,<br>39,41,43,4<br>4 | 1 | P02803                             |
| 8612 | 1,4,5,8,37,<br>38,40,43 | 2,3,6,7,36,<br>39,41,42,4<br>4 | 4 | P02803,P08649,P16086,Q64268        |
| 8613 | 1,4,5,8,37,<br>38,40,44 | 2,3,6,7,36,<br>39,41,42,4<br>3 | 4 | P02803,P06760,P08649,P16086        |
| 8614 | 1,4,5,8,37,<br>38,41,42 | 2,3,6,7,36,<br>39,40,43,4<br>4 | 0 |                                    |
| 8615 | 1,4,5,8,37,<br>38,41,43 | 2,3,6,7,36,<br>39,40,42,4<br>4 | 4 | P16086,Q64268,Q7TPB1,Q8CJD3        |
| 8616 | 1,4,5,8,37,<br>38,41,44 | 2,3,6,7,36,<br>39,40,42,4<br>3 | 2 | P16086,Q05695                      |

|      |                         |                                |   |                             |
|------|-------------------------|--------------------------------|---|-----------------------------|
| 8617 | 1,4,5,8,37,<br>38,42,43 | 2,3,6,7,36,<br>39,40,41,4<br>4 | 2 | P12020,Q64268               |
| 8618 | 1,4,5,8,37,<br>38,42,44 | 2,3,6,7,36,<br>39,40,41,4<br>3 | 1 | P00714                      |
| 8619 | 1,4,5,8,37,<br>38,43,44 | 2,3,6,7,36,<br>39,40,41,4<br>2 | 3 | P08649,P16086,Q64268        |
| 8620 | 1,4,5,8,37,<br>39,40,41 | 2,3,6,7,36,<br>38,42,43,4<br>4 | 4 | P97840,Q4FZU6,Q62975,Q68FS4 |
| 8621 | 1,4,5,8,37,<br>39,40,42 | 2,3,6,7,36,<br>38,41,43,4<br>4 | 3 | P00774,P02803,P98089        |
| 8622 | 1,4,5,8,37,<br>39,40,43 | 2,3,6,7,36,<br>38,41,42,4<br>4 | 4 | P08649,P16086,P97840,Q8CIZ5 |
| 8623 | 1,4,5,8,37,<br>39,40,44 | 2,3,6,7,36,<br>38,41,42,4<br>3 | 2 | P08649,P16086               |
| 8624 | 1,4,5,8,37,<br>39,41,42 | 2,3,6,7,36,<br>38,40,43,4<br>4 | 0 |                             |
| 8625 | 1,4,5,8,37,<br>39,41,43 | 2,3,6,7,36,<br>38,40,42,4<br>4 | 1 | P97840                      |
| 8626 | 1,4,5,8,37,<br>39,41,44 | 2,3,6,7,36,<br>38,40,42,4<br>3 | 2 | P16086,Q9ESW0               |
| 8627 | 1,4,5,8,37,<br>39,42,43 | 2,3,6,7,36,<br>38,40,41,4<br>4 | 2 | Q62635,Q8CIZ5               |
| 8628 | 1,4,5,8,37,<br>39,42,44 | 2,3,6,7,36,<br>38,40,41,4<br>3 | 0 |                             |
| 8629 | 1,4,5,8,37,<br>39,43,44 | 2,3,6,7,36,<br>38,40,41,4<br>2 | 3 | P08649,P16086,Q8CIZ5        |
| 8630 | 1,4,5,8,37,<br>40,41,42 | 2,3,6,7,36,<br>38,39,43,4<br>4 | 1 | Q4FZU6                      |
| 8631 | 1,4,5,8,37,<br>40,41,43 | 2,3,6,7,36,<br>38,39,42,4<br>4 | 2 | P16086,P97840               |

|      |                         |                                |   |                             |
|------|-------------------------|--------------------------------|---|-----------------------------|
| 8632 | 1,4,5,8,37,<br>40,41,44 | 2,3,6,7,36,<br>38,39,42,4<br>3 | 2 | P16086,Q4FZU6               |
| 8633 | 1,4,5,8,37,<br>40,42,43 | 2,3,6,7,36,<br>38,39,41,4<br>4 | 0 |                             |
| 8634 | 1,4,5,8,37,<br>40,42,44 | 2,3,6,7,36,<br>38,39,41,4<br>3 | 2 | P00714,P06760               |
| 8635 | 1,4,5,8,37,<br>40,43,44 | 2,3,6,7,36,<br>38,39,41,4<br>2 | 3 | P08649,P16086,P97840        |
| 8636 | 1,4,5,8,37,<br>41,42,43 | 2,3,6,7,36,<br>38,39,40,4<br>4 | 1 | Q9QUL6                      |
| 8637 | 1,4,5,8,37,<br>41,42,44 | 2,3,6,7,36,<br>38,39,40,4<br>3 | 0 |                             |
| 8638 | 1,4,5,8,37,<br>41,43,44 | 2,3,6,7,36,<br>38,39,40,4<br>2 | 3 | O88600,P16086,P97840        |
| 8639 | 1,4,5,8,37,<br>42,43,44 | 2,3,6,7,36,<br>38,39,40,4<br>1 | 0 |                             |
| 8640 | 1,4,5,8,38,<br>39,40,41 | 2,3,6,7,36,<br>37,42,43,4<br>4 | 2 | Q4FZU6,Q62975               |
| 8641 | 1,4,5,8,38,<br>39,40,42 | 2,3,6,7,36,<br>37,41,43,4<br>4 | 1 | P02803                      |
| 8642 | 1,4,5,8,38,<br>39,40,43 | 2,3,6,7,36,<br>37,41,42,4<br>4 | 3 | P08649,P16086,P97840        |
| 8643 | 1,4,5,8,38,<br>39,40,44 | 2,3,6,7,36,<br>37,41,42,4<br>3 | 4 | P06760,P08649,P16086,Q6AYS4 |
| 8644 | 1,4,5,8,38,<br>39,41,42 | 2,3,6,7,36,<br>37,40,43,4<br>4 | 2 | P13432,P97608               |
| 8645 | 1,4,5,8,38,<br>39,41,43 | 2,3,6,7,36,<br>37,40,42,4<br>4 | 1 | P97840                      |
| 8646 | 1,4,5,8,38,<br>39,41,44 | 2,3,6,7,36,<br>37,40,42,4<br>3 | 2 | P16086,Q05695               |

|      |                         |                                |   |                             |
|------|-------------------------|--------------------------------|---|-----------------------------|
| 8647 | 1,4,5,8,38,<br>39,42,43 | 2,3,6,7,36,<br>37,40,41,4<br>4 | 4 | B0BNN3,Q64268,Q6IFU7,Q80WL1 |
| 8648 | 1,4,5,8,38,<br>39,42,44 | 2,3,6,7,36,<br>37,40,41,4<br>3 | 1 | P51907                      |
| 8649 | 1,4,5,8,38,<br>39,43,44 | 2,3,6,7,36,<br>37,40,41,4<br>2 | 2 | P16086,Q64268               |
| 8650 | 1,4,5,8,38,<br>40,41,42 | 2,3,6,7,36,<br>37,39,43,4<br>4 | 2 | P06760,Q4FZU6               |
| 8651 | 1,4,5,8,38,<br>40,41,43 | 2,3,6,7,36,<br>37,39,42,4<br>4 | 2 | P97840,Q8CJD3               |
| 8652 | 1,4,5,8,38,<br>40,41,44 | 2,3,6,7,36,<br>37,39,42,4<br>3 | 4 | P06760,P16086,Q05695,Q4FZU6 |
| 8653 | 1,4,5,8,38,<br>40,42,43 | 2,3,6,7,36,<br>37,39,41,4<br>4 | 0 |                             |
| 8654 | 1,4,5,8,38,<br>40,42,44 | 2,3,6,7,36,<br>37,39,41,4<br>3 | 3 | P00714,P06760,Q4FZU6        |
| 8655 | 1,4,5,8,38,<br>40,43,44 | 2,3,6,7,36,<br>37,39,41,4<br>2 | 3 | P08649,P16086,P97840        |
| 8656 | 1,4,5,8,38,<br>41,42,43 | 2,3,6,7,36,<br>37,39,40,4<br>4 | 4 | B0BNN3,P27213,P50116,Q8CJD3 |
| 8657 | 1,4,5,8,38,<br>41,42,44 | 2,3,6,7,36,<br>37,39,40,4<br>3 | 2 | Q05695,Q4FZU6               |
| 8658 | 1,4,5,8,38,<br>41,43,44 | 2,3,6,7,36,<br>37,39,40,4<br>2 | 4 | P16086,P27213,Q05695,Q8CJD3 |
| 8659 | 1,4,5,8,38,<br>42,43,44 | 2,3,6,7,36,<br>37,39,40,4<br>1 | 0 |                             |
| 8660 | 1,4,5,8,39,<br>40,41,42 | 2,3,6,7,36,<br>37,38,43,4<br>4 | 3 | P97840,Q4FZU6,Q561R9        |
| 8661 | 1,4,5,8,39,<br>40,41,43 | 2,3,6,7,36,<br>37,38,42,4<br>4 | 3 | P47967,P97840,Q4FZU6        |

|      |                          |                                |   |                                                                |
|------|--------------------------|--------------------------------|---|----------------------------------------------------------------|
| 8662 | 1,4,5,8,39,<br>40,41,44  | 2,3,6,7,36,<br>37,38,42,4<br>3 | 9 | P06911,P10715,P19629,P47967,P97840,Q4FZU6,Q5GRG2,Q62975,Q6AYL6 |
| 8663 | 1,4,5,8,39,<br>40,42,43  | 2,3,6,7,36,<br>37,38,41,4<br>4 | 2 | P97840,Q8CIZ5                                                  |
| 8664 | 1,4,5,8,39,<br>40,42,44  | 2,3,6,7,36,<br>37,38,41,4<br>3 | 3 | P06760,Q4FZU6,Q561R9                                           |
| 8665 | 1,4,5,8,39,<br>40,43,44  | 2,3,6,7,36,<br>37,38,41,4<br>2 | 4 | P08649,P16086,P97840,Q6AYL6                                    |
| 8666 | 1,4,5,8,39,<br>41,42,43  | 2,3,6,7,36,<br>37,38,40,4<br>4 | 2 | P82471,P97840                                                  |
| 8667 | 1,4,5,8,39,<br>41,42,44  | 2,3,6,7,36,<br>37,38,40,4<br>3 | 2 | Q4FZU6,Q561R9                                                  |
| 8668 | 1,4,5,8,39,<br>41,43,44  | 2,3,6,7,36,<br>37,38,40,4<br>2 | 1 | P97840                                                         |
| 8669 | 1,4,5,8,39,<br>42,43,44  | 2,3,6,7,36,<br>37,38,40,4<br>1 | 0 |                                                                |
| 8670 | 1,4,5,8,40,<br>41,42,43  | 2,3,6,7,36,<br>37,38,39,4<br>4 | 2 | P97840,Q4FZU6                                                  |
| 8671 | 1,4,5,8,40,<br>41,42,44  | 2,3,6,7,36,<br>37,38,39,4<br>3 | 4 | P00714,P06760,Q4FZU6,Q561R9                                    |
| 8672 | 1,4,5,8,40,<br>41,43,44  | 2,3,6,7,36,<br>37,38,39,4<br>2 | 3 | P47967,P97840,Q4FZU6                                           |
| 8673 | 1,4,5,8,40,<br>42,43,44  | 2,3,6,7,36,<br>37,38,39,4<br>1 | 2 | P00714,P97840                                                  |
| 8674 | 1,4,5,8,41,<br>42,43,44  | 2,3,6,7,36,<br>37,38,39,4<br>0 | 2 | P27213,P97840                                                  |
| 8675 | 1,4,5,36,3<br>7,38,39,40 | 2,3,6,7,8,4<br>1,42,43,44      | 5 | P11883,P16086,P35281,Q6P6R2,Q9JID2                             |
| 8676 | 1,4,5,36,3<br>7,38,39,41 | 2,3,6,7,8,4<br>0,42,43,44      | 6 | P11883,P16086,P20766,P36374,Q5M819,Q6P6R2                      |
| 8677 | 1,4,5,36,3<br>7,38,39,42 | 2,3,6,7,8,4<br>0,41,43,44      | 5 | O54728,P11883,P12020,P20766,P51907                             |



|      |                                                 |   |                                                                |
|------|-------------------------------------------------|---|----------------------------------------------------------------|
| 8678 | 1,4,5,36,3 2,3,6,7,8,4<br>7,38,39,43 0,41,42,44 | 5 | P12020,P16086,P20759,P20766,Q6P6R2                             |
| 8679 | 1,4,5,36,3 2,3,6,7,8,4<br>7,38,39,44 0,41,42,43 | 3 | P11883,P16086,P51907                                           |
| 8680 | 1,4,5,36,3 2,3,6,7,8,3<br>7,38,40,41 9,42,43,44 | 3 | P11883,P16086,P20766                                           |
| 8681 | 1,4,5,36,3 2,3,6,7,8,3<br>7,38,40,42 9,41,43,44 | 3 | P11883,P14408,P20766                                           |
| 8682 | 1,4,5,36,3 2,3,6,7,8,3<br>7,38,40,43 9,41,42,44 | 4 | P16086,P20766,Q62753,Q6P6R2                                    |
| 8683 | 1,4,5,36,3 2,3,6,7,8,3<br>7,38,40,44 9,41,42,43 | 5 | O35547,P11883,P16086,P20766,P54921                             |
| 8684 | 1,4,5,36,3 2,3,6,7,8,3<br>7,38,41,42 9,40,43,44 | 3 | P11883,P20766,Q6AYL6                                           |
| 8685 | 1,4,5,36,3 2,3,6,7,8,3<br>7,38,41,43 9,40,42,44 | 2 | P16086,P20766                                                  |
| 8686 | 1,4,5,36,3 2,3,6,7,8,3<br>7,38,41,44 9,40,42,43 | 3 | P11883,P16086,P20766                                           |
| 8687 | 1,4,5,36,3 2,3,6,7,8,3<br>7,38,42,43 9,40,41,44 | 6 | P06911,P10715,P12020,P19629,P20766,Q5GRG2                      |
| 8688 | 1,4,5,36,3 2,3,6,7,8,3<br>7,38,42,44 9,40,41,43 | 4 | P11883,P14408,P20766,P51907                                    |
| 8689 | 1,4,5,36,3 2,3,6,7,8,3<br>7,38,43,44 9,40,41,42 | 2 | P16086,P20766                                                  |
| 8690 | 1,4,5,36,3 2,3,6,7,8,3<br>7,39,40,41 8,42,43,44 | 2 | P11883,Q62975                                                  |
| 8691 | 1,4,5,36,3 2,3,6,7,8,3<br>7,39,40,42 8,41,43,44 | 9 | O54728,P00774,P11883,P50115,P50116,P55091,P98089,Q62635,Q8CIZ5 |
| 8692 | 1,4,5,36,3 2,3,6,7,8,3<br>7,39,40,43 8,41,42,44 | 8 | O35547,P00774,P16086,P50115,P50116,Q62635,Q6P6R2,Q8CIZ5        |
| 8693 | 1,4,5,36,3 2,3,6,7,8,3<br>7,39,40,44 8,41,42,43 | 7 | O35547,P11883,P16086,P50115,P50116,P54921,Q8CIZ5               |
| 8694 | 1,4,5,36,3 2,3,6,7,8,3<br>7,39,41,42 8,40,43,44 | 1 | P11883                                                         |
| 8695 | 1,4,5,36,3 2,3,6,7,8,3<br>7,39,41,43 8,40,42,44 | 1 | P36374                                                         |
| 8696 | 1,4,5,36,3 2,3,6,7,8,3<br>7,39,41,44 8,40,42,43 | 2 | P11883,P16086                                                  |
| 8697 | 1,4,5,36,3 2,3,6,7,8,3<br>7,39,42,43 8,40,41,44 | 5 | O54728,P12020,P50115,Q62635,Q8CIZ5                             |
| 8698 | 1,4,5,36,3 2,3,6,7,8,3<br>7,39,42,44 8,40,41,43 | 4 | P11883,P50115,P50116,P51907                                    |
| 8699 | 1,4,5,36,3 2,3,6,7,8,3<br>7,39,43,44 8,40,41,42 | 4 | P16086,P50115,P50116,Q8CIZ5                                    |
| 8700 | 1,4,5,36,3 2,3,6,7,8,3<br>7,40,41,42 8,39,43,44 | 2 | P11883,Q4FZU6                                                  |

|      |                                                 |   |                                                  |
|------|-------------------------------------------------|---|--------------------------------------------------|
| 8701 | 1,4,5,36,3 2,3,6,7,8,3<br>7,40,41,43 8,39,42,44 | 1 | P16086                                           |
| 8702 | 1,4,5,36,3 2,3,6,7,8,3<br>7,40,41,44 8,39,42,43 | 5 | O35547,P11883,P16086,Q4FZU6,Q80WL1               |
| 8703 | 1,4,5,36,3 2,3,6,7,8,3<br>7,40,42,43 8,39,41,44 | 4 | P00774,P50115,Q62635,Q8CIZ5                      |
| 8704 | 1,4,5,36,3 2,3,6,7,8,3<br>7,40,42,44 8,39,41,43 | 5 | P11883,P14408,P50115,P50116,Q7TPB1               |
| 8705 | 1,4,5,36,3 2,3,6,7,8,3<br>7,40,43,44 8,39,41,42 | 7 | O35547,P05369,P08010,P16086,P50115,P50116,Q8CIZ5 |
| 8706 | 1,4,5,36,3 2,3,6,7,8,3<br>7,41,42,43 8,39,40,44 | 2 | P20766,Q9QUL6                                    |
| 8707 | 1,4,5,36,3 2,3,6,7,8,3<br>7,41,42,44 8,39,40,43 | 1 | P11883                                           |
| 8708 | 1,4,5,36,3 2,3,6,7,8,3<br>7,41,43,44 8,39,40,42 | 2 | P05369,P16086                                    |
| 8709 | 1,4,5,36,3 2,3,6,7,8,3<br>7,42,43,44 8,39,40,41 | 1 | P50115                                           |
| 8710 | 1,4,5,36,3 2,3,6,7,8,3<br>8,39,40,41 7,42,43,44 | 3 | P10758,Q4FZU6,Q62975                             |
| 8711 | 1,4,5,36,3 2,3,6,7,8,3<br>8,39,40,42 7,41,43,44 | 4 | O54728,P02631,P10758,P51907                      |
| 8712 | 1,4,5,36,3 2,3,6,7,8,3<br>8,39,40,43 7,41,42,44 | 2 | P16086,Q6P6R2                                    |
| 8713 | 1,4,5,36,3 2,3,6,7,8,3<br>8,39,40,44 7,41,42,43 | 2 | P16086,P51907                                    |
| 8714 | 1,4,5,36,3 2,3,6,7,8,3<br>8,39,41,42 7,40,43,44 | 2 | P10758,P51907                                    |
| 8715 | 1,4,5,36,3 2,3,6,7,8,3<br>8,39,41,43 7,40,42,44 | 1 | Q6P6R2                                           |
| 8716 | 1,4,5,36,3 2,3,6,7,8,3<br>8,39,41,44 7,40,42,43 | 2 | P16086,P51907                                    |
| 8717 | 1,4,5,36,3 2,3,6,7,8,3<br>8,39,42,43 7,40,41,44 | 5 | O54728,P12020,P51907,Q5GRG2,Q6IFU7               |
| 8718 | 1,4,5,36,3 2,3,6,7,8,3<br>8,39,42,44 7,40,41,43 | 1 | P51907                                           |
| 8719 | 1,4,5,36,3 2,3,6,7,8,3<br>8,39,43,44 7,40,41,42 | 2 | P16086,P51907                                    |
| 8720 | 1,4,5,36,3 2,3,6,7,8,3<br>8,40,41,42 7,39,43,44 | 4 | P02631,P14408,P20766,Q4FZU6                      |
| 8721 | 1,4,5,36,3 2,3,6,7,8,3<br>8,40,41,43 7,39,42,44 | 1 | P20766                                           |
| 8722 | 1,4,5,36,3 2,3,6,7,8,3<br>8,40,41,44 7,39,42,43 | 2 | P16086,Q4FZU6                                    |
| 8723 | 1,4,5,36,3 2,3,6,7,8,3<br>8,40,42,43 7,39,41,44 | 1 | P14408                                           |

|      |                          |                           |   |                                           |
|------|--------------------------|---------------------------|---|-------------------------------------------|
| 8724 | 1,4,5,36,3<br>8,40,42,44 | 2,3,6,7,8,3<br>7,39,41,43 | 3 | P14408,P51907,Q7TPB1                      |
| 8725 | 1,4,5,36,3<br>8,40,43,44 | 2,3,6,7,8,3<br>7,39,41,42 | 1 | P16086                                    |
| 8726 | 1,4,5,36,3<br>8,41,42,43 | 2,3,6,7,8,3<br>7,39,40,44 | 3 | P20766,P27213,Q8CJD3                      |
| 8727 | 1,4,5,36,3<br>8,41,42,44 | 2,3,6,7,8,3<br>7,39,40,43 | 3 | P14408,P20766,P51907                      |
| 8728 | 1,4,5,36,3<br>8,41,43,44 | 2,3,6,7,8,3<br>7,39,40,42 | 3 | P16086,P20766,P27213                      |
| 8729 | 1,4,5,36,3<br>8,42,43,44 | 2,3,6,7,8,3<br>7,39,40,41 | 2 | P14408,P51907                             |
| 8730 | 1,4,5,36,3<br>9,40,41,42 | 2,3,6,7,8,3<br>7,38,43,44 | 2 | P02631,Q4FZU6                             |
| 8731 | 1,4,5,36,3<br>9,40,41,43 | 2,3,6,7,8,3<br>7,38,42,44 | 1 | P97840                                    |
| 8732 | 1,4,5,36,3<br>9,40,41,44 | 2,3,6,7,8,3<br>7,38,42,43 | 4 | P10715,P19629,Q4FZU6,Q62975               |
| 8733 | 1,4,5,36,3<br>9,40,42,43 | 2,3,6,7,8,3<br>7,38,41,44 | 5 | O54728,P00774,P50115,Q62635,Q8CIZ5        |
| 8734 | 1,4,5,36,3<br>9,40,42,44 | 2,3,6,7,8,3<br>7,38,41,43 | 6 | P02631,P50115,P50116,P51907,Q4FZU6,Q7TPB1 |
| 8735 | 1,4,5,36,3<br>9,40,43,44 | 2,3,6,7,8,3<br>7,38,41,42 | 3 | P16086,P50115,Q8CIZ5                      |
| 8736 | 1,4,5,36,3<br>9,41,42,43 | 2,3,6,7,8,3<br>7,38,40,44 | 1 | Q62635                                    |
| 8737 | 1,4,5,36,3<br>9,41,42,44 | 2,3,6,7,8,3<br>7,38,40,43 | 2 | P51907,Q4FZU6                             |
| 8738 | 1,4,5,36,3<br>9,41,43,44 | 2,3,6,7,8,3<br>7,38,40,42 | 0 |                                           |
| 8739 | 1,4,5,36,3<br>9,42,43,44 | 2,3,6,7,8,3<br>7,38,40,41 | 2 | P50115,P51907                             |
| 8740 | 1,4,5,36,4<br>0,41,42,43 | 2,3,6,7,8,3<br>7,38,39,44 | 1 | Q4FZU6                                    |
| 8741 | 1,4,5,36,4<br>0,41,42,44 | 2,3,6,7,8,3<br>7,38,39,43 | 4 | P02680,P14408,Q4FZU6,Q7TPB1               |
| 8742 | 1,4,5,36,4<br>0,41,43,44 | 2,3,6,7,8,3<br>7,38,39,42 | 1 | Q4FZU6                                    |
| 8743 | 1,4,5,36,4<br>0,42,43,44 | 2,3,6,7,8,3<br>7,38,39,41 | 3 | P14408,P50115,Q7TPB1                      |
| 8744 | 1,4,5,36,4<br>1,42,43,44 | 2,3,6,7,8,3<br>7,38,39,40 | 1 | P27213                                    |
| 8745 | 1,4,5,37,3<br>8,39,40,41 | 2,3,6,7,8,3<br>6,42,43,44 | 3 | P13432,P16086,Q62975                      |
| 8746 | 1,4,5,37,3<br>8,39,40,42 | 2,3,6,7,8,3<br>6,41,43,44 | 1 | O54858                                    |

|      |                          |                           |   |                                                  |
|------|--------------------------|---------------------------|---|--------------------------------------------------|
| 8747 | 1,4,5,37,3<br>8,39,40,43 | 2,3,6,7,8,3<br>6,41,42,44 | 7 | P08649,P16086,P35281,Q62753,Q6IFV1,Q6P6R2,Q812E4 |
| 8748 | 1,4,5,37,3<br>8,39,40,44 | 2,3,6,7,8,3<br>6,41,42,43 | 6 | O54858,P08649,P11883,P16086,P54921,Q812E4        |
| 8749 | 1,4,5,37,3<br>8,39,41,42 | 2,3,6,7,8,3<br>6,40,43,44 | 2 | P13432,P20766                                    |
| 8750 | 1,4,5,37,3<br>8,39,41,43 | 2,3,6,7,8,3<br>6,40,42,44 | 5 | P16086,P20759,P20766,P36374,P62804               |
| 8751 | 1,4,5,37,3<br>8,39,41,44 | 2,3,6,7,8,3<br>6,40,42,43 | 2 | P16086,P62804                                    |
| 8752 | 1,4,5,37,3<br>8,39,42,43 | 2,3,6,7,8,3<br>6,40,41,44 | 5 | B0BNN3,P06866,P12020,P20766,Q6IFU7               |
| 8753 | 1,4,5,37,3<br>8,39,42,44 | 2,3,6,7,8,3<br>6,40,41,43 | 1 | P51907                                           |
| 8754 | 1,4,5,37,3<br>8,39,43,44 | 2,3,6,7,8,3<br>6,40,41,42 | 5 | P08649,P16086,P23593,Q812E4,Q9JJS8               |
| 8755 | 1,4,5,37,3<br>8,40,41,42 | 2,3,6,7,8,3<br>6,39,43,44 | 2 | O54858,P20766                                    |
| 8756 | 1,4,5,37,3<br>8,40,41,43 | 2,3,6,7,8,3<br>6,39,42,44 | 2 | P16086,P20766                                    |
| 8757 | 1,4,5,37,3<br>8,40,41,44 | 2,3,6,7,8,3<br>6,39,42,43 | 2 | P16086,P20766                                    |
| 8758 | 1,4,5,37,3<br>8,40,42,43 | 2,3,6,7,8,3<br>6,39,41,44 | 1 | P20766                                           |
| 8759 | 1,4,5,37,3<br>8,40,42,44 | 2,3,6,7,8,3<br>6,39,41,43 | 3 | O54858,P06760,P20766                             |
| 8760 | 1,4,5,37,3<br>8,40,43,44 | 2,3,6,7,8,3<br>6,39,41,42 | 5 | P08010,P08649,P16086,P20766,Q62753               |
| 8761 | 1,4,5,37,3<br>8,41,42,43 | 2,3,6,7,8,3<br>6,39,40,44 | 6 | B0BNN3,P06866,P20766,P27213,Q6P6T1,Q8CJD3        |
| 8762 | 1,4,5,37,3<br>8,41,42,44 | 2,3,6,7,8,3<br>6,39,40,43 | 1 | P20766                                           |
| 8763 | 1,4,5,37,3<br>8,41,43,44 | 2,3,6,7,8,3<br>6,39,40,42 | 3 | P16086,P20766,P27213                             |
| 8764 | 1,4,5,37,3<br>8,42,43,44 | 2,3,6,7,8,3<br>6,39,40,41 | 1 | P20766                                           |
| 8765 | 1,4,5,37,3<br>9,40,41,42 | 2,3,6,7,8,3<br>6,38,43,44 | 1 | O54858                                           |
| 8766 | 1,4,5,37,3<br>9,40,41,43 | 2,3,6,7,8,3<br>6,38,42,44 | 3 | P16086,P97554,P97840                             |
| 8767 | 1,4,5,37,3<br>9,40,41,44 | 2,3,6,7,8,3<br>6,38,42,43 | 6 | P10715,P16086,P19629,Q4FZU6,Q62975,Q6AYL6        |
| 8768 | 1,4,5,37,3<br>9,40,42,43 | 2,3,6,7,8,3<br>6,38,41,44 | 4 | P50115,P50116,Q62635,Q8CIZ5                      |
| 8769 | 1,4,5,37,3<br>9,40,42,44 | 2,3,6,7,8,3<br>6,38,41,43 | 3 | O54858,P50115,P50116                             |

|      |                                                 |    |                                                                       |
|------|-------------------------------------------------|----|-----------------------------------------------------------------------|
| 8770 | 1,4,5,37,3 2,3,6,7,8,3<br>9,40,43,44 6,38,41,42 | 10 | O35547,P08010,P08649,P08753,P16086,P50115,P50116,Q6AYL6,Q812E4,Q8CIZ5 |
| 8771 | 1,4,5,37,3 2,3,6,7,8,3<br>9,41,42,43 6,38,40,44 | 0  |                                                                       |
| 8772 | 1,4,5,37,3 2,3,6,7,8,3<br>9,41,42,44 6,38,40,43 | 0  |                                                                       |
| 8773 | 1,4,5,37,3 2,3,6,7,8,3<br>9,41,43,44 6,38,40,42 | 1  | P16086                                                                |
| 8774 | 1,4,5,37,3 2,3,6,7,8,3<br>9,42,43,44 6,38,40,41 | 1  | P50115                                                                |
| 8775 | 1,4,5,37,4 2,3,6,7,8,3<br>0,41,42,43 6,38,39,44 | 0  |                                                                       |
| 8776 | 1,4,5,37,4 2,3,6,7,8,3<br>0,41,42,44 6,38,39,43 | 2  | O54858,Q4FZU6                                                         |
| 8777 | 1,4,5,37,4 2,3,6,7,8,3<br>0,41,43,44 6,38,39,42 | 3  | P05369,P16086,P19218                                                  |
| 8778 | 1,4,5,37,4 2,3,6,7,8,3<br>0,42,43,44 6,38,39,41 | 2  | O54858,P50115                                                         |
| 8779 | 1,4,5,37,4 2,3,6,7,8,3<br>1,42,43,44 6,38,39,40 | 1  | P27213                                                                |
| 8780 | 1,4,5,38,3 2,3,6,7,8,3<br>9,40,41,42 6,37,43,44 | 4  | O54858,P02631,P13432,Q4FZU6                                           |
| 8781 | 1,4,5,38,3 2,3,6,7,8,3<br>9,40,41,43 6,37,42,44 | 2  | B0BNN3,Q9QZQ5                                                         |
| 8782 | 1,4,5,38,3 2,3,6,7,8,3<br>9,40,41,44 6,37,42,43 | 5  | P10715,P16086,P19629,Q4FZU6,Q62975                                    |
| 8783 | 1,4,5,38,3 2,3,6,7,8,3<br>9,40,42,43 6,37,41,44 | 3  | B0BNN3,Q64611,Q6IFU7                                                  |
| 8784 | 1,4,5,38,3 2,3,6,7,8,3<br>9,40,42,44 6,37,41,43 | 3  | O54858,P02631,P51907                                                  |
| 8785 | 1,4,5,38,3 2,3,6,7,8,3<br>9,40,43,44 6,37,41,42 | 3  | P08649,P16086,Q9QZQ5                                                  |
| 8786 | 1,4,5,38,3 2,3,6,7,8,3<br>9,41,42,43 6,37,40,44 | 4  | B0BNN3,P13432,Q6IFU7,Q8CJD3                                           |
| 8787 | 1,4,5,38,3 2,3,6,7,8,3<br>9,41,42,44 6,37,40,43 | 1  | P51907                                                                |
| 8788 | 1,4,5,38,3 2,3,6,7,8,3<br>9,41,43,44 6,37,40,42 | 1  | P16086                                                                |
| 8789 | 1,4,5,38,3 2,3,6,7,8,3<br>9,42,43,44 6,37,40,41 | 3  | B0BNN3,P51907,Q6IFU7                                                  |
| 8790 | 1,4,5,38,4 2,3,6,7,8,3<br>0,41,42,43 6,37,39,44 | 3  | B0BNN3,P27213,Q8CJD3                                                  |
| 8791 | 1,4,5,38,4 2,3,6,7,8,3<br>0,41,42,44 6,37,39,43 | 3  | O54858,P06760,Q4FZU6                                                  |
| 8792 | 1,4,5,38,4 2,3,6,7,8,3<br>0,41,43,44 6,37,39,42 | 3  | P16086,P27213,Q9QZQ5                                                  |

|      |                          |                                 |   |                                                  |
|------|--------------------------|---------------------------------|---|--------------------------------------------------|
| 8793 | 1,4,5,38,4<br>0,42,43,44 | 2,3,6,7,8,3<br>6,37,39,41       | 0 |                                                  |
| 8794 | 1,4,5,38,4<br>1,42,43,44 | 2,3,6,7,8,3<br>6,37,39,40       | 3 | B0BNN3,P27213,Q8CJD3                             |
| 8795 | 1,4,5,39,4<br>0,41,42,43 | 2,3,6,7,8,3<br>6,37,38,44       | 1 | P97840                                           |
| 8796 | 1,4,5,39,4<br>0,41,42,44 | 2,3,6,7,8,3<br>6,37,38,43       | 5 | O54858,P02631,P02680,Q4FZU6,Q561R9               |
| 8797 | 1,4,5,39,4<br>0,41,43,44 | 2,3,6,7,8,3<br>6,37,38,42       | 7 | P10715,P19629,P47967,P97840,Q4FZU6,Q6AYL6,Q9QZQ5 |
| 8798 | 1,4,5,39,4<br>0,42,43,44 | 2,3,6,7,8,3<br>6,37,38,41       | 3 | O54858,P50115,Q91ZS3                             |
| 8799 | 1,4,5,39,4<br>1,42,43,44 | 2,3,6,7,8,3<br>6,37,38,40       | 0 |                                                  |
| 8800 | 1,4,5,40,4<br>1,42,43,44 | 2,3,6,7,8,3<br>6,37,38,39       | 2 | P27213,Q4FZU6                                    |
| 8801 | 1,4,6,7,8,3<br>6,37,38   | 2,3,5,39,4<br>0,41,42,43<br>,44 | 4 | P11598,P15399,Q63617,Q99041                      |
| 8802 | 1,4,6,7,8,3<br>6,37,39   | 2,3,5,38,4<br>0,41,42,43<br>,44 | 5 | P00774,P11598,Q63617,Q8CJD3,Q99041               |
| 8803 | 1,4,6,7,8,3<br>6,37,40   | 2,3,5,38,3<br>9,41,42,43<br>,44 | 7 | P00731,P00774,P11598,P18418,Q63617,Q8CJD3,Q99041 |
| 8804 | 1,4,6,7,8,3<br>6,37,41   | 2,3,5,38,3<br>9,40,42,43<br>,44 | 6 | P07171,P11598,P18418,Q63617,Q99041,Q9JI85        |
| 8805 | 1,4,6,7,8,3<br>6,37,42   | 2,3,5,38,3<br>9,40,41,43<br>,44 | 5 | P00774,P08649,P11598,Q63617,Q99041               |
| 8806 | 1,4,6,7,8,3<br>6,37,43   | 2,3,5,38,3<br>9,40,41,42<br>,44 | 3 | P11598,Q63617,Q99041                             |
| 8807 | 1,4,6,7,8,3<br>6,37,44   | 2,3,5,38,3<br>9,40,41,42<br>,43 | 5 | P07171,P11598,Q63617,Q8CJD3,Q99041               |
| 8808 | 1,4,6,7,8,3<br>6,38,39   | 2,3,5,37,4<br>0,41,42,43<br>,44 | 4 | P11598,P19218,Q63617,Q99041                      |
| 8809 | 1,4,6,7,8,3<br>6,38,40   | 2,3,5,37,3<br>9,41,42,43<br>,44 | 2 | P11598,Q63617                                    |
| 8810 | 1,4,6,7,8,3<br>6,38,41   | 2,3,5,37,3<br>9,40,42,43<br>,44 | 4 | P11598,P50115,Q63617,Q99041                      |

|      |                        |                                 |   |                                                         |
|------|------------------------|---------------------------------|---|---------------------------------------------------------|
| 8811 | 1,4,6,7,8,3<br>6,38,42 | 2,3,5,37,3<br>9,40,41,43<br>,44 | 4 | P08649,P11598,P19218,P97554                             |
| 8812 | 1,4,6,7,8,3<br>6,38,43 | 2,3,5,37,3<br>9,40,41,42<br>,44 | 3 | P11598,Q63617,Q64268                                    |
| 8813 | 1,4,6,7,8,3<br>6,38,44 | 2,3,5,37,3<br>9,40,41,42<br>,43 | 4 | O08557,P07171,P11598,Q63617                             |
| 8814 | 1,4,6,7,8,3<br>6,39,40 | 2,3,5,37,3<br>8,41,42,43<br>,44 | 6 | P00774,P11598,P12020,Q63617,Q8CJD3,Q99041               |
| 8815 | 1,4,6,7,8,3<br>6,39,41 | 2,3,5,37,3<br>8,40,42,43<br>,44 | 6 | P07171,P11598,P18418,Q63617,Q8VD89,Q99041               |
| 8816 | 1,4,6,7,8,3<br>6,39,42 | 2,3,5,37,3<br>8,40,41,43<br>,44 | 5 | P00774,P08649,P11598,Q63617,Q99041                      |
| 8817 | 1,4,6,7,8,3<br>6,39,43 | 2,3,5,37,3<br>8,40,41,42<br>,44 | 3 | P11598,Q63617,Q99041                                    |
| 8818 | 1,4,6,7,8,3<br>6,39,44 | 2,3,5,37,3<br>8,40,41,42<br>,43 | 5 | P07171,P11598,Q63617,Q8CJD3,Q99041                      |
| 8819 | 1,4,6,7,8,3<br>6,40,41 | 2,3,5,37,3<br>8,39,42,43<br>,44 | 8 | P06911,P11598,P12020,P18418,Q63617,Q8VD89,Q99041,Q9JJS8 |
| 8820 | 1,4,6,7,8,3<br>6,40,42 | 2,3,5,37,3<br>8,39,41,43<br>,44 | 6 | P00774,P05539,P11598,P20759,Q63617,Q9JJS8               |
| 8821 | 1,4,6,7,8,3<br>6,40,43 | 2,3,5,37,3<br>8,39,41,42<br>,44 | 2 | P11598,Q63617                                           |
| 8822 | 1,4,6,7,8,3<br>6,40,44 | 2,3,5,37,3<br>8,39,41,42<br>,43 | 6 | P07171,P11598,P12020,Q5GRG2,Q63617,Q8CJD3               |
| 8823 | 1,4,6,7,8,3<br>6,41,42 | 2,3,5,37,3<br>8,39,40,43<br>,44 | 6 | P05539,P08649,P11598,Q63617,Q99041,Q9JJS8               |
| 8824 | 1,4,6,7,8,3<br>6,41,43 | 2,3,5,37,3<br>8,39,40,42<br>,44 | 4 | P11598,Q63617,Q99041,Q9QUL6                             |
| 8825 | 1,4,6,7,8,3<br>6,41,44 | 2,3,5,37,3<br>8,39,40,42<br>,43 | 7 | P07171,P11598,P12020,P18418,Q63617,Q8VD89,Q99041        |

|      |                        |                                 |   |                                                         |
|------|------------------------|---------------------------------|---|---------------------------------------------------------|
| 8826 | 1,4,6,7,8,3<br>6,42,43 | 2,3,5,37,3<br>8,39,40,41<br>,44 | 2 | P05539,Q63617                                           |
| 8827 | 1,4,6,7,8,3<br>6,42,44 | 2,3,5,37,3<br>8,39,40,41<br>,43 | 6 | P00714,P07171,P08649,P11598,P20759,Q63617               |
| 8828 | 1,4,6,7,8,3<br>6,43,44 | 2,3,5,37,3<br>8,39,40,41<br>,42 | 3 | P07171,P11598,Q63617                                    |
| 8829 | 1,4,6,7,8,3<br>7,38,39 | 2,3,5,36,4<br>0,41,42,43<br>,44 | 5 | P11598,P15399,P19218,Q63617,Q99041                      |
| 8830 | 1,4,6,7,8,3<br>7,38,40 | 2,3,5,36,3<br>9,41,42,43<br>,44 | 6 | P02803,P11598,P15399,P35281,Q63617,Q6AYR9               |
| 8831 | 1,4,6,7,8,3<br>7,38,41 | 2,3,5,36,3<br>9,40,42,43<br>,44 | 7 | P11598,P15399,P18418,P50115,Q63617,Q7TPB1,Q99041        |
| 8832 | 1,4,6,7,8,3<br>7,38,42 | 2,3,5,36,3<br>9,40,41,43<br>,44 | 4 | P11598,P15399,P19218,Q63617                             |
| 8833 | 1,4,6,7,8,3<br>7,38,43 | 2,3,5,36,3<br>9,40,41,42<br>,44 | 5 | P11598,P15399,Q63617,Q64268,Q7TPB1                      |
| 8834 | 1,4,6,7,8,3<br>7,38,44 | 2,3,5,36,3<br>9,40,41,42<br>,43 | 4 | P11598,P15399,Q63617,Q6AYR9                             |
| 8835 | 1,4,6,7,8,3<br>7,39,40 | 2,3,5,36,3<br>8,41,42,43<br>,44 | 7 | P00774,P02803,P11598,P12020,Q63617,Q8CJD3,Q99041        |
| 8836 | 1,4,6,7,8,3<br>7,39,41 | 2,3,5,36,3<br>8,40,42,43<br>,44 | 6 | P11598,P18418,Q63617,Q68FS4,Q99041,Q9JI85               |
| 8837 | 1,4,6,7,8,3<br>7,39,42 | 2,3,5,36,3<br>8,40,41,43<br>,44 | 4 | P00774,P11598,Q63617,Q99041                             |
| 8838 | 1,4,6,7,8,3<br>7,39,43 | 2,3,5,36,3<br>8,40,41,42<br>,44 | 3 | P11598,Q63617,Q99041                                    |
| 8839 | 1,4,6,7,8,3<br>7,39,44 | 2,3,5,36,3<br>8,40,41,42<br>,43 | 4 | P11598,Q63617,Q8CJD3,Q99041                             |
| 8840 | 1,4,6,7,8,3<br>7,40,41 | 2,3,5,36,3<br>8,39,42,43<br>,44 | 8 | P06911,P11598,P12020,P18418,Q5GRG2,Q63617,Q99041,Q9JJS8 |



|      |                        |                                 |   |                                                         |
|------|------------------------|---------------------------------|---|---------------------------------------------------------|
| 8841 | 1,4,6,7,8,3<br>7,40,42 | 2,3,5,36,3<br>8,39,41,43<br>,44 | 4 | P00774,P02803,P20759,Q63617                             |
| 8842 | 1,4,6,7,8,3<br>7,40,43 | 2,3,5,36,3<br>8,39,41,42<br>,44 | 3 | P11598,Q63617,Q99041                                    |
| 8843 | 1,4,6,7,8,3<br>7,40,44 | 2,3,5,36,3<br>8,39,41,42<br>,43 | 7 | P06911,P11598,P12020,P18418,Q5GRG2,Q63617,Q8CJD3        |
| 8844 | 1,4,6,7,8,3<br>7,41,42 | 2,3,5,36,3<br>8,39,40,43<br>,44 | 4 | P11598,P18418,Q63617,Q99041                             |
| 8845 | 1,4,6,7,8,3<br>7,41,43 | 2,3,5,36,3<br>8,39,40,42<br>,44 | 5 | P11598,P18418,Q63617,Q7TPB1,Q99041                      |
| 8846 | 1,4,6,7,8,3<br>7,41,44 | 2,3,5,36,3<br>8,39,40,42<br>,43 | 7 | P06911,P11598,P12020,P18418,Q63617,Q99041,Q9JI85        |
| 8847 | 1,4,6,7,8,3<br>7,42,43 | 2,3,5,36,3<br>8,39,40,41<br>,44 | 1 | Q63617                                                  |
| 8848 | 1,4,6,7,8,3<br>7,42,44 | 2,3,5,36,3<br>8,39,40,41<br>,43 | 4 | P00714,P11598,P20759,Q63617                             |
| 8849 | 1,4,6,7,8,3<br>7,43,44 | 2,3,5,36,3<br>8,39,40,41<br>,42 | 2 | P11598,Q63617                                           |
| 8850 | 1,4,6,7,8,3<br>8,39,40 | 2,3,5,36,3<br>7,41,42,43<br>,44 | 5 | P11598,P12020,P15399,P83121,Q63617                      |
| 8851 | 1,4,6,7,8,3<br>8,39,41 | 2,3,5,36,3<br>7,40,42,43<br>,44 | 5 | P11598,P13432,P50115,Q63617,Q99041                      |
| 8852 | 1,4,6,7,8,3<br>8,39,42 | 2,3,5,36,3<br>7,40,41,43<br>,44 | 3 | P11598,P19218,P83121                                    |
| 8853 | 1,4,6,7,8,3<br>8,39,43 | 2,3,5,36,3<br>7,40,41,42<br>,44 | 3 | P11598,Q63617,Q64268                                    |
| 8854 | 1,4,6,7,8,3<br>8,39,44 | 2,3,5,36,3<br>7,40,41,42<br>,43 | 3 | P11598,P83121,Q63617                                    |
| 8855 | 1,4,6,7,8,3<br>8,40,41 | 2,3,5,36,3<br>7,39,42,43<br>,44 | 8 | P06911,P11598,P12020,P18418,P50115,Q5GRG2,Q63617,Q99041 |

|      |                        |                                 |    |                                                                       |
|------|------------------------|---------------------------------|----|-----------------------------------------------------------------------|
| 8856 | 1,4,6,7,8,3<br>8,40,42 | 2,3,5,36,3<br>7,39,41,43<br>,44 | 3  | P20759,P83121,Q63617                                                  |
| 8857 | 1,4,6,7,8,3<br>8,40,43 | 2,3,5,36,3<br>7,39,41,42<br>,44 | 3  | P11598,P15399,Q63617                                                  |
| 8858 | 1,4,6,7,8,3<br>8,40,44 | 2,3,5,36,3<br>7,39,41,42<br>,43 | 6  | P11598,P12020,P15399,P83121,Q5GRG2,Q63617                             |
| 8859 | 1,4,6,7,8,3<br>8,41,42 | 2,3,5,36,3<br>7,39,40,43<br>,44 | 6  | O35547,P11598,P50115,Q63617,Q8CIZ5,Q99041                             |
| 8860 | 1,4,6,7,8,3<br>8,41,43 | 2,3,5,36,3<br>7,39,40,42<br>,44 | 7  | P11598,P50115,P50116,Q63617,Q64268,Q7TPB1,Q99041                      |
| 8861 | 1,4,6,7,8,3<br>8,41,44 | 2,3,5,36,3<br>7,39,40,42<br>,43 | 8  | P11598,P12020,P50115,Q05695,Q62635,Q63617,Q8CIZ5,Q99041               |
| 8862 | 1,4,6,7,8,3<br>8,42,43 | 2,3,5,36,3<br>7,39,40,41<br>,44 | 1  | Q64268                                                                |
| 8863 | 1,4,6,7,8,3<br>8,42,44 | 2,3,5,36,3<br>7,39,40,41<br>,43 | 4  | P00714,P11598,P20759,Q63617                                           |
| 8864 | 1,4,6,7,8,3<br>8,43,44 | 2,3,5,36,3<br>7,39,40,41<br>,42 | 3  | P11598,Q63617,Q64268                                                  |
| 8865 | 1,4,6,7,8,3<br>9,40,41 | 2,3,5,36,3<br>7,38,42,43<br>,44 | 10 | P06911,P10715,P11598,P12020,P18418,P31044,Q5GRG2,Q63617,Q6AYL6,Q99041 |
| 8866 | 1,4,6,7,8,3<br>9,40,42 | 2,3,5,36,3<br>7,38,41,43<br>,44 | 6  | P00774,P11598,P20759,P83121,Q561R9,Q63617                             |
| 8867 | 1,4,6,7,8,3<br>9,40,43 | 2,3,5,36,3<br>7,38,41,42<br>,44 | 4  | P11598,P22282,Q63617,Q6AYL6                                           |
| 8868 | 1,4,6,7,8,3<br>9,40,44 | 2,3,5,36,3<br>7,38,41,42<br>,43 | 8  | P06911,P11598,P12020,P83121,Q5GRG2,Q63617,Q6AYL6,Q8CJD3               |
| 8869 | 1,4,6,7,8,3<br>9,41,42 | 2,3,5,36,3<br>7,38,40,43<br>,44 | 6  | P08010,P11598,P13432,Q561R9,Q63617,Q99041                             |
| 8870 | 1,4,6,7,8,3<br>9,41,43 | 2,3,5,36,3<br>7,38,40,42<br>,44 | 4  | P11598,P22006,Q63617,Q99041                                           |

|      |                         |                                 |    |                                                                              |
|------|-------------------------|---------------------------------|----|------------------------------------------------------------------------------|
| 8871 | 1,4,6,7,8,3<br>9,41,44  | 2,3,5,36,3<br>7,38,40,42<br>,43 | 8  | P06911,P11598,P12020,P18418,Q5GRG2,Q63617,Q8VD89,Q99041                      |
| 8872 | 1,4,6,7,8,3<br>9,42,43  | 2,3,5,36,3<br>7,38,40,41<br>,44 | 1  | Q63617                                                                       |
| 8873 | 1,4,6,7,8,3<br>9,42,44  | 2,3,5,36,3<br>7,38,40,41<br>,43 | 5  | P00714,P11598,P20759,Q561R9,Q63617                                           |
| 8874 | 1,4,6,7,8,3<br>9,43,44  | 2,3,5,36,3<br>7,38,40,41<br>,42 | 2  | P11598,Q63617                                                                |
| 8875 | 1,4,6,7,8,4<br>0,41,42  | 2,3,5,36,3<br>7,38,39,43<br>,44 | 7  | P12020,P18418,P20759,Q561R9,Q63617,Q99041,Q9JJS8                             |
| 8876 | 1,4,6,7,8,4<br>0,41,43  | 2,3,5,36,3<br>7,38,39,42<br>,44 | 5  | P11598,P12020,Q63617,Q99041,Q9JJS8                                           |
| 8877 | 1,4,6,7,8,4<br>0,41,44  | 2,3,5,36,3<br>7,38,39,42<br>,43 | 11 | P06911,P10715,P11598,P12020,P14669,P18418,P31044,Q5GRG2,Q63617,Q6AYL6,Q99041 |
| 8878 | 1,4,6,7,8,4<br>0,42,43  | 2,3,5,36,3<br>7,38,39,41<br>,44 | 2  | Q63617,Q9JJS8                                                                |
| 8879 | 1,4,6,7,8,4<br>0,42,44  | 2,3,5,36,3<br>7,38,39,41<br>,43 | 6  | P00714,P11598,P12020,P20759,Q561R9,Q63617                                    |
| 8880 | 1,4,6,7,8,4<br>0,43,44  | 2,3,5,36,3<br>7,38,39,41<br>,42 | 5  | P11598,P12020,P22282,Q63617,Q6AYL6                                           |
| 8881 | 1,4,6,7,8,4<br>1,42,43  | 2,3,5,36,3<br>7,38,39,40<br>,44 | 4  | P54921,P82471,Q63617,Q99041                                                  |
| 8882 | 1,4,6,7,8,4<br>1,42,44  | 2,3,5,36,3<br>7,38,39,40<br>,43 | 9  | P00714,P11598,P12020,P18418,P20759,Q561R9,Q63617,Q6P6R2,Q99041               |
| 8883 | 1,4,6,7,8,4<br>1,43,44  | 2,3,5,36,3<br>7,38,39,40<br>,42 | 4  | P11598,P12020,Q63617,Q99041                                                  |
| 8884 | 1,4,6,7,8,4<br>2,43,44  | 2,3,5,36,3<br>7,38,39,40<br>,41 | 2  | P00714,Q63617                                                                |
| 8885 | 1,4,6,7,36,<br>37,38,39 | 2,3,5,8,40,<br>41,42,43,4<br>4  | 3  | P15399,P19218,P97840                                                         |

|      |                         |                                |   |                                    |
|------|-------------------------|--------------------------------|---|------------------------------------|
| 8886 | 1,4,6,7,36,<br>37,38,40 | 2,3,5,8,39,<br>41,42,43,4<br>4 | 3 | P0C0A9,P15399,Q6AYR9               |
| 8887 | 1,4,6,7,36,<br>37,38,41 | 2,3,5,8,39,<br>40,42,43,4<br>4 | 4 | P15399,P20766,Q5M819,Q99041        |
| 8888 | 1,4,6,7,36,<br>37,38,42 | 2,3,5,8,39,<br>40,41,43,4<br>4 | 5 | P15399,P20766,P47967,P97840,Q5FVI6 |
| 8889 | 1,4,6,7,36,<br>37,38,43 | 2,3,5,8,39,<br>40,41,42,4<br>4 | 2 | P15399,P20766                      |
| 8890 | 1,4,6,7,36,<br>37,38,44 | 2,3,5,8,39,<br>40,41,42,4<br>3 | 3 | P15399,P97840,Q6AYR9               |
| 8891 | 1,4,6,7,36,<br>37,39,40 | 2,3,5,8,38,<br>41,42,43,4<br>4 | 4 | O35547,P00774,P50116,Q8CJD3        |
| 8892 | 1,4,6,7,36,<br>37,39,41 | 2,3,5,8,38,<br>40,42,43,4<br>4 | 5 | P18418,P35467,Q5M819,Q99041,Q9JI85 |
| 8893 | 1,4,6,7,36,<br>37,39,42 | 2,3,5,8,38,<br>40,41,43,4<br>4 | 3 | P00774,P50116,P97840               |
| 8894 | 1,4,6,7,36,<br>37,39,43 | 2,3,5,8,38,<br>40,41,42,4<br>4 | 1 | P06760                             |
| 8895 | 1,4,6,7,36,<br>37,39,44 | 2,3,5,8,38,<br>40,41,42,4<br>3 | 3 | P50116,Q8CJD3,Q9JI85               |
| 8896 | 1,4,6,7,36,<br>37,40,41 | 2,3,5,8,38,<br>39,42,43,4<br>4 | 3 | P12020,P18418,Q99041               |
| 8897 | 1,4,6,7,36,<br>37,40,42 | 2,3,5,8,38,<br>39,41,43,4<br>4 | 3 | P00774,P50116,Q5FVI6               |
| 8898 | 1,4,6,7,36,<br>37,40,43 | 2,3,5,8,38,<br>39,41,42,4<br>4 | 0 |                                    |
| 8899 | 1,4,6,7,36,<br>37,40,44 | 2,3,5,8,38,<br>39,41,42,4<br>3 | 5 | O35547,P00731,P12020,P50116,Q8CJD3 |
| 8900 | 1,4,6,7,36,<br>37,41,42 | 2,3,5,8,38,<br>39,40,43,4<br>4 | 3 | P08649,P18418,Q99041               |

|      |                         |                                |   |                                    |
|------|-------------------------|--------------------------------|---|------------------------------------|
| 8901 | 1,4,6,7,36,<br>37,41,43 | 2,3,5,8,38,<br>39,40,42,4<br>4 | 2 | P06760,Q99041                      |
| 8902 | 1,4,6,7,36,<br>37,41,44 | 2,3,5,8,38,<br>39,40,42,4<br>3 | 4 | P18418,Q99041,Q9JHB9,Q9JI85        |
| 8903 | 1,4,6,7,36,<br>37,42,43 | 2,3,5,8,38,<br>39,40,41,4<br>4 | 0 |                                    |
| 8904 | 1,4,6,7,36,<br>37,42,44 | 2,3,5,8,38,<br>39,40,41,4<br>3 | 2 | P97840,Q5FVI6                      |
| 8905 | 1,4,6,7,36,<br>37,43,44 | 2,3,5,8,38,<br>39,40,41,4<br>2 | 0 |                                    |
| 8906 | 1,4,6,7,36,<br>38,39,40 | 2,3,5,8,37,<br>41,42,43,4<br>4 | 2 | P15399,P83121                      |
| 8907 | 1,4,6,7,36,<br>38,39,41 | 2,3,5,8,37,<br>40,42,43,4<br>4 | 3 | P13432,Q5M819,Q8VD89               |
| 8908 | 1,4,6,7,36,<br>38,39,42 | 2,3,5,8,37,<br>40,41,43,4<br>4 | 5 | P08649,P19218,P51907,P83121,P97840 |
| 8909 | 1,4,6,7,36,<br>38,39,43 | 2,3,5,8,37,<br>40,41,42,4<br>4 | 0 |                                    |
| 8910 | 1,4,6,7,36,<br>38,39,44 | 2,3,5,8,37,<br>40,41,42,4<br>3 | 2 | P51907,P83121                      |
| 8911 | 1,4,6,7,36,<br>38,40,41 | 2,3,5,8,37,<br>39,42,43,4<br>4 | 2 | P12020,P15399                      |
| 8912 | 1,4,6,7,36,<br>38,40,42 | 2,3,5,8,37,<br>39,41,43,4<br>4 | 1 | P83121                             |
| 8913 | 1,4,6,7,36,<br>38,40,43 | 2,3,5,8,37,<br>39,41,42,4<br>4 | 1 | P15399                             |
| 8914 | 1,4,6,7,36,<br>38,40,44 | 2,3,5,8,37,<br>39,41,42,4<br>3 | 3 | P12020,P15399,P83121               |
| 8915 | 1,4,6,7,36,<br>38,41,42 | 2,3,5,8,37,<br>39,40,43,4<br>4 | 2 | P05539,P08649                      |

|      |                         |                                |   |                                                  |
|------|-------------------------|--------------------------------|---|--------------------------------------------------|
| 8916 | 1,4,6,7,36,<br>38,41,43 | 2,3,5,8,37,<br>39,40,42,4<br>4 | 0 |                                                  |
| 8917 | 1,4,6,7,36,<br>38,41,44 | 2,3,5,8,37,<br>39,40,42,4<br>3 | 2 | Q05695,Q8CIZ5                                    |
| 8918 | 1,4,6,7,36,<br>38,42,43 | 2,3,5,8,37,<br>39,40,41,4<br>4 | 0 |                                                  |
| 8919 | 1,4,6,7,36,<br>38,42,44 | 2,3,5,8,37,<br>39,40,41,4<br>3 | 3 | P08649,P51907,P97840                             |
| 8920 | 1,4,6,7,36,<br>38,43,44 | 2,3,5,8,37,<br>39,40,41,4<br>2 | 0 |                                                  |
| 8921 | 1,4,6,7,36,<br>39,40,41 | 2,3,5,8,37,<br>38,42,43,4<br>4 | 6 | P05539,P06911,P12020,Q5GRG2,Q8VD89,Q99041        |
| 8922 | 1,4,6,7,36,<br>39,40,42 | 2,3,5,8,37,<br>38,41,43,4<br>4 | 4 | P00774,P05539,P50116,P83121                      |
| 8923 | 1,4,6,7,36,<br>39,40,43 | 2,3,5,8,37,<br>38,41,42,4<br>4 | 0 |                                                  |
| 8924 | 1,4,6,7,36,<br>39,40,44 | 2,3,5,8,37,<br>38,41,42,4<br>3 | 7 | P06911,P12020,P50116,P83121,Q5GRG2,Q6AYL6,Q8CJD3 |
| 8925 | 1,4,6,7,36,<br>39,41,42 | 2,3,5,8,37,<br>38,40,43,4<br>4 | 3 | P05539,P08649,P35467                             |
| 8926 | 1,4,6,7,36,<br>39,41,43 | 2,3,5,8,37,<br>38,40,42,4<br>4 | 3 | P06760,P22006,Q99041                             |
| 8927 | 1,4,6,7,36,<br>39,41,44 | 2,3,5,8,37,<br>38,40,42,4<br>3 | 2 | P12020,Q8VD89                                    |
| 8928 | 1,4,6,7,36,<br>39,42,43 | 2,3,5,8,37,<br>38,40,41,4<br>4 | 1 | P05539                                           |
| 8929 | 1,4,6,7,36,<br>39,42,44 | 2,3,5,8,37,<br>38,40,41,4<br>3 | 2 | P08649,P51907                                    |
| 8930 | 1,4,6,7,36,<br>39,43,44 | 2,3,5,8,37,<br>38,40,41,4<br>2 | 0 |                                                  |

|      |                         |                                |   |                             |
|------|-------------------------|--------------------------------|---|-----------------------------|
| 8931 | 1,4,6,7,36,<br>40,41,42 | 2,3,5,8,37,<br>38,39,43,4<br>4 | 3 | P05539,P08649,Q9JJS8        |
| 8932 | 1,4,6,7,36,<br>40,41,43 | 2,3,5,8,37,<br>38,39,42,4<br>4 | 2 | P05539,P12020               |
| 8933 | 1,4,6,7,36,<br>40,41,44 | 2,3,5,8,37,<br>38,39,42,4<br>3 | 4 | P06911,P12020,Q5GRG2,Q8VD89 |
| 8934 | 1,4,6,7,36,<br>40,42,43 | 2,3,5,8,37,<br>38,39,41,4<br>4 | 1 | P05539                      |
| 8935 | 1,4,6,7,36,<br>40,42,44 | 2,3,5,8,37,<br>38,39,41,4<br>3 | 4 | P00714,P05539,P83121,Q7TPB1 |
| 8936 | 1,4,6,7,36,<br>40,43,44 | 2,3,5,8,37,<br>38,39,41,4<br>2 | 0 |                             |
| 8937 | 1,4,6,7,36,<br>41,42,43 | 2,3,5,8,37,<br>38,39,40,4<br>4 | 2 | P05539,P08649               |
| 8938 | 1,4,6,7,36,<br>41,42,44 | 2,3,5,8,37,<br>38,39,40,4<br>3 | 2 | P05539,P08649               |
| 8939 | 1,4,6,7,36,<br>41,43,44 | 2,3,5,8,37,<br>38,39,40,4<br>2 | 0 |                             |
| 8940 | 1,4,6,7,36,<br>42,43,44 | 2,3,5,8,37,<br>38,39,40,4<br>1 | 1 | P05539                      |
| 8941 | 1,4,6,7,37,<br>38,39,40 | 2,3,5,8,36,<br>41,42,43,4<br>4 | 3 | P15399,P35281,P83121        |
| 8942 | 1,4,6,7,37,<br>38,39,41 | 2,3,5,8,36,<br>40,42,43,4<br>4 | 4 | P13432,P15399,P62804,Q99041 |
| 8943 | 1,4,6,7,37,<br>38,39,42 | 2,3,5,8,36,<br>40,41,43,4<br>4 | 4 | P15399,P19218,P83121,P97840 |
| 8944 | 1,4,6,7,37,<br>38,39,43 | 2,3,5,8,36,<br>40,41,42,4<br>4 | 4 | P14480,P15399,Q6IFV1,Q812E4 |
| 8945 | 1,4,6,7,37,<br>38,39,44 | 2,3,5,8,36,<br>40,41,42,4<br>3 | 3 | P15399,P83121,Q6AYR9        |

|      |                         |                                |    |                                                                       |
|------|-------------------------|--------------------------------|----|-----------------------------------------------------------------------|
| 8946 | 1,4,6,7,37,<br>38,40,41 | 2,3,5,8,36,<br>39,42,43,4<br>4 | 4  | P06911,P12020,P15399,P18418                                           |
| 8947 | 1,4,6,7,37,<br>38,40,42 | 2,3,5,8,36,<br>39,41,43,4<br>4 | 2  | P15399,P83121                                                         |
| 8948 | 1,4,6,7,37,<br>38,40,43 | 2,3,5,8,36,<br>39,41,42,4<br>4 | 2  | P15399,Q6AYR9                                                         |
| 8949 | 1,4,6,7,37,<br>38,40,44 | 2,3,5,8,36,<br>39,41,42,4<br>3 | 5  | P12020,P15399,P83121,Q5GRG2,Q6AYR9                                    |
| 8950 | 1,4,6,7,37,<br>38,41,42 | 2,3,5,8,36,<br>39,40,43,4<br>4 | 2  | P15399,P20766                                                         |
| 8951 | 1,4,6,7,37,<br>38,41,43 | 2,3,5,8,36,<br>39,40,42,4<br>4 | 4  | P15399,P20766,P62804,Q7TPB1                                           |
| 8952 | 1,4,6,7,37,<br>38,41,44 | 2,3,5,8,36,<br>39,40,42,4<br>3 | 6  | P12020,P15399,P18418,P62804,Q05695,Q6AYR9                             |
| 8953 | 1,4,6,7,37,<br>38,42,43 | 2,3,5,8,36,<br>39,40,41,4<br>4 | 2  | P15399,Q6P6T1                                                         |
| 8954 | 1,4,6,7,37,<br>38,42,44 | 2,3,5,8,36,<br>39,40,41,4<br>3 | 3  | P15399,P83121,P97840                                                  |
| 8955 | 1,4,6,7,37,<br>38,43,44 | 2,3,5,8,36,<br>39,40,41,4<br>2 | 2  | P15399,Q6AYR9                                                         |
| 8956 | 1,4,6,7,37,<br>39,40,41 | 2,3,5,8,36,<br>38,42,43,4<br>4 | 10 | P06911,P10715,P12020,P13432,P18418,P35467,Q5GRG2,Q6AYL6,Q99041,Q9JI85 |
| 8957 | 1,4,6,7,37,<br>39,40,42 | 2,3,5,8,36,<br>38,41,43,4<br>4 | 3  | P00774,P50116,P83121                                                  |
| 8958 | 1,4,6,7,37,<br>39,40,43 | 2,3,5,8,36,<br>38,41,42,4<br>4 | 3  | P50116,Q6AYL6,Q812E4                                                  |
| 8959 | 1,4,6,7,37,<br>39,40,44 | 2,3,5,8,36,<br>38,41,42,4<br>3 | 7  | P06911,P12020,P50116,P83121,Q5GRG2,Q6AYL6,Q8CJD3                      |
| 8960 | 1,4,6,7,37,<br>39,41,42 | 2,3,5,8,36,<br>38,40,43,4<br>4 | 2  | P13432,P35467                                                         |



|      |                         |                                |   |                                                  |
|------|-------------------------|--------------------------------|---|--------------------------------------------------|
| 8961 | 1,4,6,7,37,<br>39,41,43 | 2,3,5,8,36,<br>38,40,42,4<br>4 | 3 | P22006,P62804,Q99041                             |
| 8962 | 1,4,6,7,37,<br>39,41,44 | 2,3,5,8,36,<br>38,40,42,4<br>3 | 6 | P06911,P12020,P18418,P62804,Q99041,Q9JI85        |
| 8963 | 1,4,6,7,37,<br>39,42,43 | 2,3,5,8,36,<br>38,40,41,4<br>4 | 0 |                                                  |
| 8964 | 1,4,6,7,37,<br>39,42,44 | 2,3,5,8,36,<br>38,40,41,4<br>3 | 2 | P50116,P83121                                    |
| 8965 | 1,4,6,7,37,<br>39,43,44 | 2,3,5,8,36,<br>38,40,41,4<br>2 | 1 | Q812E4                                           |
| 8966 | 1,4,6,7,37,<br>40,41,42 | 2,3,5,8,36,<br>38,39,43,4<br>4 | 2 | P12020,P18418                                    |
| 8967 | 1,4,6,7,37,<br>40,41,43 | 2,3,5,8,36,<br>38,39,42,4<br>4 | 1 | P12020                                           |
| 8968 | 1,4,6,7,37,<br>40,41,44 | 2,3,5,8,36,<br>38,39,42,4<br>3 | 7 | P06911,P10715,P12020,P18418,P47727,Q5GRG2,Q6AYL6 |
| 8969 | 1,4,6,7,37,<br>40,42,43 | 2,3,5,8,36,<br>38,39,41,4<br>4 | 0 |                                                  |
| 8970 | 1,4,6,7,37,<br>40,42,44 | 2,3,5,8,36,<br>38,39,41,4<br>3 | 4 | P00714,P50116,P83121,Q5FVI6                      |
| 8971 | 1,4,6,7,37,<br>40,43,44 | 2,3,5,8,36,<br>38,39,41,4<br>2 | 1 | Q6AYL6                                           |
| 8972 | 1,4,6,7,37,<br>41,42,43 | 2,3,5,8,36,<br>38,39,40,4<br>4 | 0 |                                                  |
| 8973 | 1,4,6,7,37,<br>41,42,44 | 2,3,5,8,36,<br>38,39,40,4<br>3 | 2 | P18418,Q6P6R2                                    |
| 8974 | 1,4,6,7,37,<br>41,43,44 | 2,3,5,8,36,<br>38,39,40,4<br>2 | 0 |                                                  |
| 8975 | 1,4,6,7,37,<br>42,43,44 | 2,3,5,8,36,<br>38,39,40,4<br>1 | 0 |                                                  |

|      |                         |                                |   |                                                         |
|------|-------------------------|--------------------------------|---|---------------------------------------------------------|
| 8976 | 1,4,6,7,38,<br>39,40,41 | 2,3,5,8,36,<br>37,42,43,4<br>4 | 7 | P06911,P12020,P13432,P15399,P19629,P83121,Q5GRG2        |
| 8977 | 1,4,6,7,38,<br>39,40,42 | 2,3,5,8,36,<br>37,41,43,4<br>4 | 1 | P83121                                                  |
| 8978 | 1,4,6,7,38,<br>39,40,43 | 2,3,5,8,36,<br>37,41,42,4<br>4 | 2 | P15399,P83121                                           |
| 8979 | 1,4,6,7,38,<br>39,40,44 | 2,3,5,8,36,<br>37,41,42,4<br>3 | 6 | P06911,P12020,P15399,P83121,Q5GRG2,Q6AYL6               |
| 8980 | 1,4,6,7,38,<br>39,41,42 | 2,3,5,8,36,<br>37,40,43,4<br>4 | 2 | P13432,P83121                                           |
| 8981 | 1,4,6,7,38,<br>39,41,43 | 2,3,5,8,36,<br>37,40,42,4<br>4 | 2 | P13432,P22006                                           |
| 8982 | 1,4,6,7,38,<br>39,41,44 | 2,3,5,8,36,<br>37,40,42,4<br>3 | 4 | P06911,P12020,P13432,Q05695                             |
| 8983 | 1,4,6,7,38,<br>39,42,43 | 2,3,5,8,36,<br>37,40,41,4<br>4 | 3 | B0BNN3,P83121,Q6IFU7                                    |
| 8984 | 1,4,6,7,38,<br>39,42,44 | 2,3,5,8,36,<br>37,40,41,4<br>3 | 2 | P51907,P83121                                           |
| 8985 | 1,4,6,7,38,<br>39,43,44 | 2,3,5,8,36,<br>37,40,41,4<br>2 | 2 | P23593,P83121                                           |
| 8986 | 1,4,6,7,38,<br>40,41,42 | 2,3,5,8,36,<br>37,39,43,4<br>4 | 1 | P83121                                                  |
| 8987 | 1,4,6,7,38,<br>40,41,43 | 2,3,5,8,36,<br>37,39,42,4<br>4 | 3 | P12020,P15399,Q5HZV9                                    |
| 8988 | 1,4,6,7,38,<br>40,41,44 | 2,3,5,8,36,<br>37,39,42,4<br>3 | 8 | P06911,P12020,P15399,P19629,P83121,Q05695,Q5GRG2,Q62635 |
| 8989 | 1,4,6,7,38,<br>40,42,43 | 2,3,5,8,36,<br>37,39,41,4<br>4 | 1 | P83121                                                  |
| 8990 | 1,4,6,7,38,<br>40,42,44 | 2,3,5,8,36,<br>37,39,41,4<br>3 | 2 | P00714,P83121                                           |

|      |                         |                                |    |                                                                       |
|------|-------------------------|--------------------------------|----|-----------------------------------------------------------------------|
| 8991 | 1,4,6,7,38,<br>40,43,44 | 2,3,5,8,36,<br>37,39,41,4<br>2 | 3  | P01835,P15399,P83121                                                  |
| 8992 | 1,4,6,7,38,<br>41,42,43 | 2,3,5,8,36,<br>37,39,40,4<br>4 | 3  | B0BNN3,P27213,Q5HZV9                                                  |
| 8993 | 1,4,6,7,38,<br>41,42,44 | 2,3,5,8,36,<br>37,39,40,4<br>3 | 2  | Q05695,Q8CIZ5                                                         |
| 8994 | 1,4,6,7,38,<br>41,43,44 | 2,3,5,8,36,<br>37,39,40,4<br>2 | 4  | P00774,P27213,P55091,Q05695                                           |
| 8995 | 1,4,6,7,38,<br>42,43,44 | 2,3,5,8,36,<br>37,39,40,4<br>1 | 0  |                                                                       |
| 8996 | 1,4,6,7,39,<br>40,41,42 | 2,3,5,8,36,<br>37,38,43,4<br>4 | 5  | P06911,P12020,P13432,P83121,Q561R9                                    |
| 8997 | 1,4,6,7,39,<br>40,41,43 | 2,3,5,8,36,<br>37,38,42,4<br>4 | 4  | P06911,P12020,P22006,Q6AYL6                                           |
| 8998 | 1,4,6,7,39,<br>40,41,44 | 2,3,5,8,36,<br>37,38,42,4<br>3 | 10 | P06911,P10715,P12020,P16391,P19629,P31044,P83121,Q5GRG2,Q6AYL6,Q8VD89 |
| 8999 | 1,4,6,7,39,<br>40,42,43 | 2,3,5,8,36,<br>37,38,41,4<br>4 | 1  | P83121                                                                |
| 9000 | 1,4,6,7,39,<br>40,42,44 | 2,3,5,8,36,<br>37,38,41,4<br>3 | 5  | P12020,P50116,P83121,Q561R9,Q6AYL6                                    |
| 9001 | 1,4,6,7,39,<br>40,43,44 | 2,3,5,8,36,<br>37,38,41,4<br>2 | 4  | P12020,P22282,P83121,Q6AYL6                                           |
| 9002 | 1,4,6,7,39,<br>41,42,43 | 2,3,5,8,36,<br>37,38,40,4<br>4 | 3  | P13432,P22006,P82471                                                  |
| 9003 | 1,4,6,7,39,<br>41,42,44 | 2,3,5,8,36,<br>37,38,40,4<br>3 | 2  | P12020,Q561R9                                                         |
| 9004 | 1,4,6,7,39,<br>41,43,44 | 2,3,5,8,36,<br>37,38,40,4<br>2 | 3  | P12020,P22006,Q6AYL6                                                  |
| 9005 | 1,4,6,7,39,<br>42,43,44 | 2,3,5,8,36,<br>37,38,40,4<br>1 | 0  |                                                                       |

|      |                         |                                |   |                                           |
|------|-------------------------|--------------------------------|---|-------------------------------------------|
| 9006 | 1,4,6,7,40,<br>41,42,43 | 2,3,5,8,36,<br>37,38,39,4<br>4 | 2 | P05539,Q9JJS8                             |
| 9007 | 1,4,6,7,40,<br>41,42,44 | 2,3,5,8,36,<br>37,38,39,4<br>3 | 5 | P06911,P12020,Q561R9,Q5GRG2,Q6P6R2        |
| 9008 | 1,4,6,7,40,<br>41,43,44 | 2,3,5,8,36,<br>37,38,39,4<br>2 | 4 | P06911,P12020,Q5GRG2,Q6AYL6               |
| 9009 | 1,4,6,7,40,<br>42,43,44 | 2,3,5,8,36,<br>37,38,39,4<br>1 | 1 | P00714                                    |
| 9010 | 1,4,6,7,41,<br>42,43,44 | 2,3,5,8,36,<br>37,38,39,4<br>0 | 2 | P27213,Q6P6R2                             |
| 9011 | 1,4,6,8,36,<br>37,38,39 | 2,3,5,7,40,<br>41,42,43,4<br>4 | 1 | P0C0A9                                    |
| 9012 | 1,4,6,8,36,<br>37,38,40 | 2,3,5,7,39,<br>41,42,43,4<br>4 | 4 | P0C0A9,P30120,P35281,Q6AYR9               |
| 9013 | 1,4,6,8,36,<br>37,38,41 | 2,3,5,7,39,<br>40,42,43,4<br>4 | 1 | Q5M819                                    |
| 9014 | 1,4,6,8,36,<br>37,38,42 | 2,3,5,7,39,<br>40,41,43,4<br>4 | 0 |                                           |
| 9015 | 1,4,6,8,36,<br>37,38,43 | 2,3,5,7,39,<br>40,41,42,4<br>4 | 4 | P0C0A9,Q64268,Q6AYR9,Q6IFV1               |
| 9016 | 1,4,6,8,36,<br>37,38,44 | 2,3,5,7,39,<br>40,41,42,4<br>3 | 2 | P0C0A9,Q6AYR9                             |
| 9017 | 1,4,6,8,36,<br>37,39,40 | 2,3,5,7,38,<br>41,42,43,4<br>4 | 6 | O35547,P00774,P0C0A9,P35281,P55091,Q8CJD3 |
| 9018 | 1,4,6,8,36,<br>37,39,41 | 2,3,5,7,38,<br>40,42,43,4<br>4 | 2 | Q99041,Q9JHB9                             |
| 9019 | 1,4,6,8,36,<br>37,39,42 | 2,3,5,7,38,<br>40,41,43,4<br>4 | 1 | P00774                                    |
| 9020 | 1,4,6,8,36,<br>37,39,43 | 2,3,5,7,38,<br>40,41,42,4<br>4 | 0 |                                           |

|      |                         |                                |   |                      |
|------|-------------------------|--------------------------------|---|----------------------|
| 9021 | 1,4,6,8,36,<br>37,39,44 | 2,3,5,7,38,<br>40,41,42,4<br>3 | 3 | O35547,Q8CJD3,Q9JHB9 |
| 9022 | 1,4,6,8,36,<br>37,40,41 | 2,3,5,7,38,<br>39,42,43,4<br>4 | 1 | P0C0A9               |
| 9023 | 1,4,6,8,36,<br>37,40,42 | 2,3,5,7,38,<br>39,41,43,4<br>4 | 1 | P00774               |
| 9024 | 1,4,6,8,36,<br>37,40,43 | 2,3,5,7,38,<br>39,41,42,4<br>4 | 2 | O35547,P0C0A9        |
| 9025 | 1,4,6,8,36,<br>37,40,44 | 2,3,5,7,38,<br>39,41,42,4<br>3 | 3 | O35547,P0C0A9,Q8CJD3 |
| 9026 | 1,4,6,8,36,<br>37,41,42 | 2,3,5,7,38,<br>39,40,43,4<br>4 | 0 |                      |
| 9027 | 1,4,6,8,36,<br>37,41,43 | 2,3,5,7,38,<br>39,40,42,4<br>4 | 1 | Q9QUL6               |
| 9028 | 1,4,6,8,36,<br>37,41,44 | 2,3,5,7,38,<br>39,40,42,4<br>3 | 1 | Q9JHB9               |
| 9029 | 1,4,6,8,36,<br>37,42,43 | 2,3,5,7,38,<br>39,40,41,4<br>4 | 0 |                      |
| 9030 | 1,4,6,8,36,<br>37,42,44 | 2,3,5,7,38,<br>39,40,41,4<br>3 | 1 | P00714               |
| 9031 | 1,4,6,8,36,<br>37,43,44 | 2,3,5,7,38,<br>39,40,41,4<br>2 | 0 |                      |
| 9032 | 1,4,6,8,36,<br>38,39,40 | 2,3,5,7,37,<br>41,42,43,4<br>4 | 1 | P10758               |
| 9033 | 1,4,6,8,36,<br>38,39,41 | 2,3,5,7,37,<br>40,42,43,4<br>4 | 1 | P13432               |
| 9034 | 1,4,6,8,36,<br>38,39,42 | 2,3,5,7,37,<br>40,41,43,4<br>4 | 1 | P19218               |
| 9035 | 1,4,6,8,36,<br>38,39,43 | 2,3,5,7,37,<br>40,41,42,4<br>4 | 2 | Q64268,Q6IFV1        |

|      |                         |                                |   |                      |
|------|-------------------------|--------------------------------|---|----------------------|
| 9036 | 1,4,6,8,36,<br>38,39,44 | 2,3,5,7,37,<br>40,41,42,4<br>3 | 0 |                      |
| 9037 | 1,4,6,8,36,<br>38,40,41 | 2,3,5,7,37,<br>39,42,43,4<br>4 | 0 |                      |
| 9038 | 1,4,6,8,36,<br>38,40,42 | 2,3,5,7,37,<br>39,41,43,4<br>4 | 0 |                      |
| 9039 | 1,4,6,8,36,<br>38,40,43 | 2,3,5,7,37,<br>39,41,42,4<br>4 | 1 | Q64268               |
| 9040 | 1,4,6,8,36,<br>38,40,44 | 2,3,5,7,37,<br>39,41,42,4<br>3 | 0 |                      |
| 9041 | 1,4,6,8,36,<br>38,41,42 | 2,3,5,7,37,<br>39,40,43,4<br>4 | 1 | Q8CIZ5               |
| 9042 | 1,4,6,8,36,<br>38,41,43 | 2,3,5,7,37,<br>39,40,42,4<br>4 | 2 | P27213,Q64268        |
| 9043 | 1,4,6,8,36,<br>38,41,44 | 2,3,5,7,37,<br>39,40,42,4<br>3 | 3 | Q05695,Q62635,Q8CIZ5 |
| 9044 | 1,4,6,8,36,<br>38,42,43 | 2,3,5,7,37,<br>39,40,41,4<br>4 | 1 | Q64268               |
| 9045 | 1,4,6,8,36,<br>38,42,44 | 2,3,5,7,37,<br>39,40,41,4<br>3 | 2 | P00714,P15999        |
| 9046 | 1,4,6,8,36,<br>38,43,44 | 2,3,5,7,37,<br>39,40,41,4<br>2 | 1 | Q64268               |
| 9047 | 1,4,6,8,36,<br>39,40,41 | 2,3,5,7,37,<br>38,42,43,4<br>4 | 2 | P06911,Q62975        |
| 9048 | 1,4,6,8,36,<br>39,40,42 | 2,3,5,7,37,<br>38,41,43,4<br>4 | 1 | P00774               |
| 9049 | 1,4,6,8,36,<br>39,40,43 | 2,3,5,7,37,<br>38,41,42,4<br>4 | 0 |                      |
| 9050 | 1,4,6,8,36,<br>39,40,44 | 2,3,5,7,37,<br>38,41,42,4<br>3 | 2 | Q62975,Q8CJD3        |

|      |                         |                                |   |                      |
|------|-------------------------|--------------------------------|---|----------------------|
| 9051 | 1,4,6,8,36,<br>39,41,42 | 2,3,5,7,37,<br>38,40,43,4<br>4 | 0 |                      |
| 9052 | 1,4,6,8,36,<br>39,41,43 | 2,3,5,7,37,<br>38,40,42,4<br>4 | 0 |                      |
| 9053 | 1,4,6,8,36,<br>39,41,44 | 2,3,5,7,37,<br>38,40,42,4<br>3 | 0 |                      |
| 9054 | 1,4,6,8,36,<br>39,42,43 | 2,3,5,7,37,<br>38,40,41,4<br>4 | 0 |                      |
| 9055 | 1,4,6,8,36,<br>39,42,44 | 2,3,5,7,37,<br>38,40,41,4<br>3 | 0 |                      |
| 9056 | 1,4,6,8,36,<br>39,43,44 | 2,3,5,7,37,<br>38,40,41,4<br>2 | 0 |                      |
| 9057 | 1,4,6,8,36,<br>40,41,42 | 2,3,5,7,37,<br>38,39,43,4<br>4 | 2 | P23593,Q9JJS8        |
| 9058 | 1,4,6,8,36,<br>40,41,43 | 2,3,5,7,37,<br>38,39,42,4<br>4 | 0 |                      |
| 9059 | 1,4,6,8,36,<br>40,41,44 | 2,3,5,7,37,<br>38,39,42,4<br>3 | 3 | P06911,P12020,Q5GRG2 |
| 9060 | 1,4,6,8,36,<br>40,42,43 | 2,3,5,7,37,<br>38,39,41,4<br>4 | 0 |                      |
| 9061 | 1,4,6,8,36,<br>40,42,44 | 2,3,5,7,37,<br>38,39,41,4<br>3 | 2 | P00714,Q7TPB1        |
| 9062 | 1,4,6,8,36,<br>40,43,44 | 2,3,5,7,37,<br>38,39,41,4<br>2 | 0 |                      |
| 9063 | 1,4,6,8,36,<br>41,42,43 | 2,3,5,7,37,<br>38,39,40,4<br>4 | 2 | P27213,Q9QUL6        |
| 9064 | 1,4,6,8,36,<br>41,42,44 | 2,3,5,7,37,<br>38,39,40,4<br>3 | 1 | Q6P6R2               |
| 9065 | 1,4,6,8,36,<br>41,43,44 | 2,3,5,7,37,<br>38,39,40,4<br>2 | 0 |                      |

|      |                         |                                |   |                                                  |
|------|-------------------------|--------------------------------|---|--------------------------------------------------|
| 9066 | 1,4,6,8,36,<br>42,43,44 | 2,3,5,7,37,<br>38,39,40,4<br>1 | 0 |                                                  |
| 9067 | 1,4,6,8,37,<br>38,39,40 | 2,3,5,7,36,<br>41,42,43,4<br>4 | 4 | P02803,P0C0A9,P35281,Q6AYR9                      |
| 9068 | 1,4,6,8,37,<br>38,39,41 | 2,3,5,7,36,<br>40,42,43,4<br>4 | 3 | P02782,P13432,Q9R1T5                             |
| 9069 | 1,4,6,8,37,<br>38,39,42 | 2,3,5,7,36,<br>40,41,43,4<br>4 | 0 |                                                  |
| 9070 | 1,4,6,8,37,<br>38,39,43 | 2,3,5,7,36,<br>40,41,42,4<br>4 | 5 | B0BNN3,Q64268,Q6IFV1,Q812E4,Q9R1T5               |
| 9071 | 1,4,6,8,37,<br>38,39,44 | 2,3,5,7,36,<br>40,41,42,4<br>3 | 2 | P16636,Q6AYR9                                    |
| 9072 | 1,4,6,8,37,<br>38,40,41 | 2,3,5,7,36,<br>39,42,43,4<br>4 | 4 | P06911,P0C0A9,P35281,Q6AYR9                      |
| 9073 | 1,4,6,8,37,<br>38,40,42 | 2,3,5,7,36,<br>39,41,43,4<br>4 | 2 | P02803,P35281                                    |
| 9074 | 1,4,6,8,37,<br>38,40,43 | 2,3,5,7,36,<br>39,41,42,4<br>4 | 7 | P08644,P0C0A9,P35281,P97605,Q64268,Q6AYR9,Q6IFV1 |
| 9075 | 1,4,6,8,37,<br>38,40,44 | 2,3,5,7,36,<br>39,41,42,4<br>3 | 3 | P0C0A9,P16636,Q6AYR9                             |
| 9076 | 1,4,6,8,37,<br>38,41,42 | 2,3,5,7,36,<br>39,40,43,4<br>4 | 0 |                                                  |
| 9077 | 1,4,6,8,37,<br>38,41,43 | 2,3,5,7,36,<br>39,40,42,4<br>4 | 4 | P27213,Q64268,Q6IFV1,Q7TPB1                      |
| 9078 | 1,4,6,8,37,<br>38,41,44 | 2,3,5,7,36,<br>39,40,42,4<br>3 | 3 | Q05695,Q62635,Q6AYR9                             |
| 9079 | 1,4,6,8,37,<br>38,42,43 | 2,3,5,7,36,<br>39,40,41,4<br>4 | 4 | B0BNN3,Q64268,Q6IFV1,Q6P6T1                      |
| 9080 | 1,4,6,8,37,<br>38,42,44 | 2,3,5,7,36,<br>39,40,41,4<br>3 | 1 | P00714                                           |



|      |                         |                                |   |                                                  |
|------|-------------------------|--------------------------------|---|--------------------------------------------------|
| 9081 | 1,4,6,8,37,<br>38,43,44 | 2,3,5,7,36,<br>39,40,41,4<br>2 | 3 | Q64268,Q6AYR9,Q6IFV1                             |
| 9082 | 1,4,6,8,37,<br>39,40,41 | 2,3,5,7,36,<br>38,42,43,4<br>4 | 7 | P06911,P08723,P0C0A9,P13432,P35281,Q5GRG2,Q62975 |
| 9083 | 1,4,6,8,37,<br>39,40,42 | 2,3,5,7,36,<br>38,41,43,4<br>4 | 1 | P00774                                           |
| 9084 | 1,4,6,8,37,<br>39,40,43 | 2,3,5,7,36,<br>38,41,42,4<br>4 | 4 | P0C0A9,P35281,Q6AYL6,Q812E4                      |
| 9085 | 1,4,6,8,37,<br>39,40,44 | 2,3,5,7,36,<br>38,41,42,4<br>3 | 6 | O35547,P06911,P0C0A9,Q5GRG2,Q6AYL6,Q8CJD3        |
| 9086 | 1,4,6,8,37,<br>39,41,42 | 2,3,5,7,36,<br>38,40,43,4<br>4 | 1 | P13432                                           |
| 9087 | 1,4,6,8,37,<br>39,41,43 | 2,3,5,7,36,<br>38,40,42,4<br>4 | 0 |                                                  |
| 9088 | 1,4,6,8,37,<br>39,41,44 | 2,3,5,7,36,<br>38,40,42,4<br>3 | 2 | P02782,P06911                                    |
| 9089 | 1,4,6,8,37,<br>39,42,43 | 2,3,5,7,36,<br>38,40,41,4<br>4 | 0 |                                                  |
| 9090 | 1,4,6,8,37,<br>39,42,44 | 2,3,5,7,36,<br>38,40,41,4<br>3 | 0 |                                                  |
| 9091 | 1,4,6,8,37,<br>39,43,44 | 2,3,5,7,36,<br>38,40,41,4<br>2 | 1 | Q812E4                                           |
| 9092 | 1,4,6,8,37,<br>40,41,42 | 2,3,5,7,36,<br>38,39,43,4<br>4 | 0 |                                                  |
| 9093 | 1,4,6,8,37,<br>40,41,43 | 2,3,5,7,36,<br>38,39,42,4<br>4 | 2 | P0C0A9,P51907                                    |
| 9094 | 1,4,6,8,37,<br>40,41,44 | 2,3,5,7,36,<br>38,39,42,4<br>3 | 5 | P06911,P0C0A9,P12020,P47727,Q5GRG2               |
| 9095 | 1,4,6,8,37,<br>40,42,43 | 2,3,5,7,36,<br>38,39,41,4<br>4 | 0 |                                                  |

|      |                         |                                |   |                                    |
|------|-------------------------|--------------------------------|---|------------------------------------|
| 9096 | 1,4,6,8,37,<br>40,42,44 | 2,3,5,7,36,<br>38,39,41,4<br>3 | 1 | P00714                             |
| 9097 | 1,4,6,8,37,<br>40,43,44 | 2,3,5,7,36,<br>38,39,41,4<br>2 | 3 | P08010,P0C0A9,Q6AYL6               |
| 9098 | 1,4,6,8,37,<br>41,42,43 | 2,3,5,7,36,<br>38,39,40,4<br>4 | 2 | P27213,Q9QUL6                      |
| 9099 | 1,4,6,8,37,<br>41,42,44 | 2,3,5,7,36,<br>38,39,40,4<br>3 | 1 | Q6P6R2                             |
| 9100 | 1,4,6,8,37,<br>41,43,44 | 2,3,5,7,36,<br>38,39,40,4<br>2 | 0 |                                    |
| 9101 | 1,4,6,8,37,<br>42,43,44 | 2,3,5,7,36,<br>38,39,40,4<br>1 | 0 |                                    |
| 9102 | 1,4,6,8,38,<br>39,40,41 | 2,3,5,7,36,<br>37,42,43,4<br>4 | 3 | P06911,P13432,Q62975               |
| 9103 | 1,4,6,8,38,<br>39,40,42 | 2,3,5,7,36,<br>37,41,43,4<br>4 | 1 | P83121                             |
| 9104 | 1,4,6,8,38,<br>39,40,43 | 2,3,5,7,36,<br>37,41,42,4<br>4 | 2 | B0BNN3,Q6IFV1                      |
| 9105 | 1,4,6,8,38,<br>39,40,44 | 2,3,5,7,36,<br>37,41,42,4<br>3 | 5 | P06911,P83121,Q5GRG2,Q62975,Q6AYL6 |
| 9106 | 1,4,6,8,38,<br>39,41,42 | 2,3,5,7,36,<br>37,40,43,4<br>4 | 1 | P13432                             |
| 9107 | 1,4,6,8,38,<br>39,41,43 | 2,3,5,7,36,<br>37,40,42,4<br>4 | 4 | B0BNN3,P13432,Q64268,Q6IFV1        |
| 9108 | 1,4,6,8,38,<br>39,41,44 | 2,3,5,7,36,<br>37,40,42,4<br>3 | 5 | P02782,P06911,P13432,Q05695,Q62635 |
| 9109 | 1,4,6,8,38,<br>39,42,43 | 2,3,5,7,36,<br>37,40,41,4<br>4 | 4 | B0BNN3,Q64268,Q6IFU7,Q80WL1        |
| 9110 | 1,4,6,8,38,<br>39,42,44 | 2,3,5,7,36,<br>37,40,41,4<br>3 | 0 |                                    |

|      |                         |                                |   |                                                         |
|------|-------------------------|--------------------------------|---|---------------------------------------------------------|
| 9111 | 1,4,6,8,38,<br>39,43,44 | 2,3,5,7,36,<br>37,40,41,4<br>2 | 3 | B0BNN3,Q64268,Q6IFV1                                    |
| 9112 | 1,4,6,8,38,<br>40,41,42 | 2,3,5,7,36,<br>37,39,43,4<br>4 | 0 |                                                         |
| 9113 | 1,4,6,8,38,<br>40,41,43 | 2,3,5,7,36,<br>37,39,42,4<br>4 | 3 | B0BNN3,P27213,Q5HZV9                                    |
| 9114 | 1,4,6,8,38,<br>40,41,44 | 2,3,5,7,36,<br>37,39,42,4<br>3 | 5 | P06911,P12020,Q05695,Q5GRG2,Q62635                      |
| 9115 | 1,4,6,8,38,<br>40,42,43 | 2,3,5,7,36,<br>37,39,41,4<br>4 | 1 | B0BNN3                                                  |
| 9116 | 1,4,6,8,38,<br>40,42,44 | 2,3,5,7,36,<br>37,39,41,4<br>3 | 2 | P00714,P06760                                           |
| 9117 | 1,4,6,8,38,<br>40,43,44 | 2,3,5,7,36,<br>37,39,41,4<br>2 | 1 | P01835                                                  |
| 9118 | 1,4,6,8,38,<br>41,42,43 | 2,3,5,7,36,<br>37,39,40,4<br>4 | 3 | B0BNN3,P27213,Q5HZV9                                    |
| 9119 | 1,4,6,8,38,<br>41,42,44 | 2,3,5,7,36,<br>37,39,40,4<br>3 | 4 | Q05695,Q62635,Q6P6R2,Q8CIZ5                             |
| 9120 | 1,4,6,8,38,<br>41,43,44 | 2,3,5,7,36,<br>37,39,40,4<br>2 | 4 | P00774,P27213,Q05695,Q62635                             |
| 9121 | 1,4,6,8,38,<br>42,43,44 | 2,3,5,7,36,<br>37,39,40,4<br>1 | 3 | B0BNN3,P00714,Q64268                                    |
| 9122 | 1,4,6,8,39,<br>40,41,42 | 2,3,5,7,36,<br>37,38,43,4<br>4 | 3 | P06911,P13432,Q561R9                                    |
| 9123 | 1,4,6,8,39,<br>40,41,43 | 2,3,5,7,36,<br>37,38,42,4<br>4 | 1 | Q6AYL6                                                  |
| 9124 | 1,4,6,8,39,<br>40,41,44 | 2,3,5,7,36,<br>37,38,42,4<br>3 | 8 | P06911,P10715,P12020,P19629,P31044,Q5GRG2,Q62975,Q6AYL6 |
| 9125 | 1,4,6,8,39,<br>40,42,43 | 2,3,5,7,36,<br>37,38,41,4<br>4 | 0 |                                                         |

|      |                          |                                |    |                                                                              |
|------|--------------------------|--------------------------------|----|------------------------------------------------------------------------------|
| 9126 | 1,4,6,8,39,<br>40,42,44  | 2,3,5,7,36,<br>37,38,41,4<br>3 | 1  | Q561R9                                                                       |
| 9127 | 1,4,6,8,39,<br>40,43,44  | 2,3,5,7,36,<br>37,38,41,4<br>2 | 2  | P22282,Q6AYL6                                                                |
| 9128 | 1,4,6,8,39,<br>41,42,43  | 2,3,5,7,36,<br>37,38,40,4<br>4 | 1  | P13432                                                                       |
| 9129 | 1,4,6,8,39,<br>41,42,44  | 2,3,5,7,36,<br>37,38,40,4<br>3 | 2  | Q561R9,Q6P6R2                                                                |
| 9130 | 1,4,6,8,39,<br>41,43,44  | 2,3,5,7,36,<br>37,38,40,4<br>2 | 0  |                                                                              |
| 9131 | 1,4,6,8,39,<br>42,43,44  | 2,3,5,7,36,<br>37,38,40,4<br>1 | 0  |                                                                              |
| 9132 | 1,4,6,8,40,<br>41,42,43  | 2,3,5,7,36,<br>37,38,39,4<br>4 | 1  | P27213                                                                       |
| 9133 | 1,4,6,8,40,<br>41,42,44  | 2,3,5,7,36,<br>37,38,39,4<br>3 | 6  | P00714,P06911,P14669,Q561R9,Q5GRG2,Q6P6R2                                    |
| 9134 | 1,4,6,8,40,<br>41,43,44  | 2,3,5,7,36,<br>37,38,39,4<br>2 | 3  | P06911,Q5GRG2,Q6AYL6                                                         |
| 9135 | 1,4,6,8,40,<br>42,43,44  | 2,3,5,7,36,<br>37,38,39,4<br>1 | 1  | P00714                                                                       |
| 9136 | 1,4,6,8,41,<br>42,43,44  | 2,3,5,7,36,<br>37,38,39,4<br>0 | 2  | P27213,Q6P6R2                                                                |
| 9137 | 1,4,6,36,3<br>7,38,39,40 | 2,3,5,7,8,4<br>1,42,43,44      | 11 | O35547,P08723,P0C0A9,P30120,P35281,P60905,P83121,P97605,Q62975,Q6AYR9,Q9JID2 |
| 9138 | 1,4,6,36,3<br>7,38,39,41 | 2,3,5,7,8,4<br>0,42,43,44      | 4  | P13432,P36374,Q5M819,Q9JHB9                                                  |
| 9139 | 1,4,6,36,3<br>7,38,39,42 | 2,3,5,7,8,4<br>0,41,43,44      | 0  |                                                                              |
| 9140 | 1,4,6,36,3<br>7,38,39,43 | 2,3,5,7,8,4<br>0,41,42,44      | 4  | P0C0A9,P97605,Q6IFV1,Q812E4                                                  |
| 9141 | 1,4,6,36,3<br>7,38,39,44 | 2,3,5,7,8,4<br>0,41,42,43      | 3  | P0C0A9,Q6AYR9,Q9JHB9                                                         |
| 9142 | 1,4,6,36,3<br>7,38,40,41 | 2,3,5,7,8,3<br>9,42,43,44      | 5  | P08723,P0C0A9,P20766,Q5M819,Q6AYR9                                           |

|      |                          |                           |   |                                                         |
|------|--------------------------|---------------------------|---|---------------------------------------------------------|
| 9143 | 1,4,6,36,3<br>7,38,40,42 | 2,3,5,7,8,3<br>9,41,43,44 | 2 | P20766,P97605                                           |
| 9144 | 1,4,6,36,3<br>7,38,40,43 | 2,3,5,7,8,3<br>9,41,42,44 | 6 | P08010,P0C0A9,P20766,P97605,Q6AYR9,Q6IFV1               |
| 9145 | 1,4,6,36,3<br>7,38,40,44 | 2,3,5,7,8,3<br>9,41,42,43 | 7 | O35547,P0C0A9,P15399,P30120,P54921,P97605,Q6AYR9        |
| 9146 | 1,4,6,36,3<br>7,38,41,42 | 2,3,5,7,8,3<br>9,40,43,44 | 2 | P20766,Q5M819                                           |
| 9147 | 1,4,6,36,3<br>7,38,41,43 | 2,3,5,7,8,3<br>9,40,42,44 | 4 | P20766,P27213,Q5M819,Q6IFV1                             |
| 9148 | 1,4,6,36,3<br>7,38,41,44 | 2,3,5,7,8,3<br>9,40,42,43 | 4 | P20766,Q5M819,Q6AYR9,Q9JHB9                             |
| 9149 | 1,4,6,36,3<br>7,38,42,43 | 2,3,5,7,8,3<br>9,40,41,44 | 6 | P06866,P10715,P20766,P97605,Q6IFU7,Q6P6T1               |
| 9150 | 1,4,6,36,3<br>7,38,42,44 | 2,3,5,7,8,3<br>9,40,41,43 | 1 | P20766                                                  |
| 9151 | 1,4,6,36,3<br>7,38,43,44 | 2,3,5,7,8,3<br>9,40,41,42 | 3 | P20766,P97605,Q6AYR9                                    |
| 9152 | 1,4,6,36,3<br>7,39,40,41 | 2,3,5,7,8,3<br>8,42,43,44 | 8 | O35547,P06911,P08723,P0C0A9,P47727,Q5M819,Q62975,Q9JHB9 |
| 9153 | 1,4,6,36,3<br>7,39,40,42 | 2,3,5,7,8,3<br>8,41,43,44 | 5 | O35547,P00774,P50115,P50116,P55091                      |
| 9154 | 1,4,6,36,3<br>7,39,40,43 | 2,3,5,7,8,3<br>8,41,42,44 | 8 | O35547,P08753,P0C0A9,P50115,P50116,P97605,Q812E4,Q8CIZ5 |
| 9155 | 1,4,6,36,3<br>7,39,40,44 | 2,3,5,7,8,3<br>8,41,42,43 | 8 | O35547,P08723,P0C0A9,P50115,P50116,P54921,Q62975,Q8CJD3 |
| 9156 | 1,4,6,36,3<br>7,39,41,42 | 2,3,5,7,8,3<br>8,40,43,44 | 2 | P13432,Q5M819                                           |
| 9157 | 1,4,6,36,3<br>7,39,41,43 | 2,3,5,7,8,3<br>8,40,42,44 | 3 | P22006,P36374,Q5M819                                    |
| 9158 | 1,4,6,36,3<br>7,39,41,44 | 2,3,5,7,8,3<br>8,40,42,43 | 2 | P08723,Q9JHB9                                           |
| 9159 | 1,4,6,36,3<br>7,39,42,43 | 2,3,5,7,8,3<br>8,40,41,44 | 2 | P50115,P50116                                           |
| 9160 | 1,4,6,36,3<br>7,39,42,44 | 2,3,5,7,8,3<br>8,40,41,43 | 2 | P50115,P50116                                           |
| 9161 | 1,4,6,36,3<br>7,39,43,44 | 2,3,5,7,8,3<br>8,40,41,42 | 5 | O35547,P50115,P50116,P97605,Q812E4                      |
| 9162 | 1,4,6,36,3<br>7,40,41,42 | 2,3,5,7,8,3<br>8,39,43,44 | 0 |                                                         |
| 9163 | 1,4,6,36,3<br>7,40,41,43 | 2,3,5,7,8,3<br>8,39,42,44 | 2 | P0C0A9,P47727                                           |
| 9164 | 1,4,6,36,3<br>7,40,41,44 | 2,3,5,7,8,3<br>8,39,42,43 | 8 | O35547,P06911,P08723,P0C0A9,P47727,Q5GRG2,Q80WL1,Q9JHB9 |
| 9165 | 1,4,6,36,3<br>7,40,42,43 | 2,3,5,7,8,3<br>8,39,41,44 | 3 | P50115,P50116,P97605                                    |

|      |                                                 |   |                                                                |
|------|-------------------------------------------------|---|----------------------------------------------------------------|
| 9166 | 1,4,6,36,3 2,3,5,7,8,3<br>7,40,42,44 8,39,41,43 | 4 | O35547,P50115,P50116,Q7TPB1                                    |
| 9167 | 1,4,6,36,3 2,3,5,7,8,3<br>7,40,43,44 8,39,41,42 | 9 | O08815,O35547,P04905,P08010,P08753,P0C0A9,P50115,P50116,P97605 |
| 9168 | 1,4,6,36,3 2,3,5,7,8,3<br>7,41,42,43 8,39,40,44 | 2 | P27213,Q9QUL6                                                  |
| 9169 | 1,4,6,36,3 2,3,5,7,8,3<br>7,41,42,44 8,39,40,43 | 0 |                                                                |
| 9170 | 1,4,6,36,3 2,3,5,7,8,3<br>7,41,43,44 8,39,40,42 | 2 | P27213,Q9JHB9                                                  |
| 9171 | 1,4,6,36,3 2,3,5,7,8,3<br>7,42,43,44 8,39,40,41 | 2 | P50115,P50116                                                  |
| 9172 | 1,4,6,36,3 2,3,5,7,8,3<br>8,39,40,41 7,42,43,44 | 4 | P10758,P13432,Q5M819,Q62975                                    |
| 9173 | 1,4,6,36,3 2,3,5,7,8,3<br>8,39,40,42 7,41,43,44 | 2 | P10758,P83121                                                  |
| 9174 | 1,4,6,36,3 2,3,5,7,8,3<br>8,39,40,43 7,41,42,44 | 2 | P97605,Q6IFV1                                                  |
| 9175 | 1,4,6,36,3 2,3,5,7,8,3<br>8,39,40,44 7,41,42,43 | 2 | P83121,Q62975                                                  |
| 9176 | 1,4,6,36,3 2,3,5,7,8,3<br>8,39,41,42 7,40,43,44 | 3 | P10758,P13432,Q5M819                                           |
| 9177 | 1,4,6,36,3 2,3,5,7,8,3<br>8,39,41,43 7,40,42,44 | 2 | B0BNN3,Q5M819                                                  |
| 9178 | 1,4,6,36,3 2,3,5,7,8,3<br>8,39,41,44 7,40,42,43 | 2 | Q5M819,Q62975                                                  |
| 9179 | 1,4,6,36,3 2,3,5,7,8,3<br>8,39,42,43 7,40,41,44 | 2 | B0BNN3,Q6IFU7                                                  |
| 9180 | 1,4,6,36,3 2,3,5,7,8,3<br>8,39,42,44 7,40,41,43 | 1 | P51907                                                         |
| 9181 | 1,4,6,36,3 2,3,5,7,8,3<br>8,39,43,44 7,40,41,42 | 0 |                                                                |
| 9182 | 1,4,6,36,3 2,3,5,7,8,3<br>8,40,41,42 7,39,43,44 | 0 |                                                                |
| 9183 | 1,4,6,36,3 2,3,5,7,8,3<br>8,40,41,43 7,39,42,44 | 2 | P27213,Q5HZV9                                                  |
| 9184 | 1,4,6,36,3 2,3,5,7,8,3<br>8,40,41,44 7,39,42,43 | 2 | P06911,Q5GRG2                                                  |
| 9185 | 1,4,6,36,3 2,3,5,7,8,3<br>8,40,42,43 7,39,41,44 | 2 | P97605,Q6IFU7                                                  |
| 9186 | 1,4,6,36,3 2,3,5,7,8,3<br>8,40,42,44 7,39,41,43 | 2 | P83121,Q7TPB1                                                  |
| 9187 | 1,4,6,36,3 2,3,5,7,8,3<br>8,40,43,44 7,39,41,42 | 2 | P01835,P97605                                                  |
| 9188 | 1,4,6,36,3 2,3,5,7,8,3<br>8,41,42,43 7,39,40,44 | 4 | B0BNN3,P27213,Q5HZV9,Q6IFU7                                    |

|      |                          |                           |    |                                                                                                          |
|------|--------------------------|---------------------------|----|----------------------------------------------------------------------------------------------------------|
| 9189 | 1,4,6,36,3<br>8,41,42,44 | 2,3,5,7,8,3<br>7,39,40,43 | 1  | Q8CIZ5                                                                                                   |
| 9190 | 1,4,6,36,3<br>8,41,43,44 | 2,3,5,7,8,3<br>7,39,40,42 | 1  | P27213                                                                                                   |
| 9191 | 1,4,6,36,3<br>8,42,43,44 | 2,3,5,7,8,3<br>7,39,40,41 | 2  | P27213,Q6IFU7                                                                                            |
| 9192 | 1,4,6,36,3<br>9,40,41,42 | 2,3,5,7,8,3<br>7,38,43,44 | 1  | P13432                                                                                                   |
| 9193 | 1,4,6,36,3<br>9,40,41,43 | 2,3,5,7,8,3<br>7,38,42,44 | 0  |                                                                                                          |
| 9194 | 1,4,6,36,3<br>9,40,41,44 | 2,3,5,7,8,3<br>7,38,42,43 | 8  | P06911,P10715,P12020,P16391,P19629,Q5GRG2,Q62975,Q6AYL6                                                  |
| 9195 | 1,4,6,36,3<br>9,40,42,43 | 2,3,5,7,8,3<br>7,38,41,44 | 2  | P50115,P50116                                                                                            |
| 9196 | 1,4,6,36,3<br>9,40,42,44 | 2,3,5,7,8,3<br>7,38,41,43 | 4  | P50115,P50116,P83121,Q7TPB1                                                                              |
| 9197 | 1,4,6,36,3<br>9,40,43,44 | 2,3,5,7,8,3<br>7,38,41,42 | 3  | P50115,P50116,Q6AYL6                                                                                     |
| 9198 | 1,4,6,36,3<br>9,41,42,43 | 2,3,5,7,8,3<br>7,38,40,44 | 1  | P22006                                                                                                   |
| 9199 | 1,4,6,36,3<br>9,41,42,44 | 2,3,5,7,8,3<br>7,38,40,43 | 0  |                                                                                                          |
| 9200 | 1,4,6,36,3<br>9,41,43,44 | 2,3,5,7,8,3<br>7,38,40,42 | 0  |                                                                                                          |
| 9201 | 1,4,6,36,3<br>9,42,43,44 | 2,3,5,7,8,3<br>7,38,40,41 | 2  | P50115,P50116                                                                                            |
| 9202 | 1,4,6,36,4<br>0,41,42,43 | 2,3,5,7,8,3<br>7,38,39,44 | 1  | P27213                                                                                                   |
| 9203 | 1,4,6,36,4<br>0,41,42,44 | 2,3,5,7,8,3<br>7,38,39,43 | 1  | Q7TPB1                                                                                                   |
| 9204 | 1,4,6,36,4<br>0,41,43,44 | 2,3,5,7,8,3<br>7,38,39,42 | 0  |                                                                                                          |
| 9205 | 1,4,6,36,4<br>0,42,43,44 | 2,3,5,7,8,3<br>7,38,39,41 | 3  | P50115,P50116,Q7TPB1                                                                                     |
| 9206 | 1,4,6,36,4<br>1,42,43,44 | 2,3,5,7,8,3<br>7,38,39,40 | 1  | P27213                                                                                                   |
| 9207 | 1,4,6,37,3<br>8,39,40,41 | 2,3,5,7,8,3<br>6,42,43,44 | 8  | P06911,P08723,P0C0A9,P13432,P16636,P35281,P60905,Q62975                                                  |
| 9208 | 1,4,6,37,3<br>8,39,40,42 | 2,3,5,7,8,3<br>6,41,43,44 | 3  | P35281,P83121,Q99MH3                                                                                     |
| 9209 | 1,4,6,37,3<br>8,39,40,43 | 2,3,5,7,8,3<br>6,41,42,44 | 13 | B0BNN3,P04905,P08644,P08753,P0C0A9,P35281,P60905,P82995,P97605,Q6AYR9,Q6IFV1,Q812E4,Q99MH3               |
| 9210 | 1,4,6,37,3<br>8,39,40,44 | 2,3,5,7,8,3<br>6,41,42,43 | 15 | O35547,P04905,P0C0A9,P15399,P16636,P35281,P54921,P60905,P83121,P97605,Q62975,Q63357,Q6AYL6,Q6AYR9,Q812E4 |
| 9211 | 1,4,6,37,3<br>8,39,41,42 | 2,3,5,7,8,3<br>6,40,43,44 | 1  | P13432                                                                                                   |

|      |                          |                           |    |                                                                                            |
|------|--------------------------|---------------------------|----|--------------------------------------------------------------------------------------------|
| 9212 | 1,4,6,37,3<br>8,39,41,43 | 2,3,5,7,8,3<br>6,40,42,44 | 6  | B0BNN3,P00762,P13432,P36374,Q6IFV1,Q812E4                                                  |
| 9213 | 1,4,6,37,3<br>8,39,41,44 | 2,3,5,7,8,3<br>6,40,42,43 | 5  | P13432,P16636,Q62975,Q6AYR9,Q9JHB9                                                         |
| 9214 | 1,4,6,37,3<br>8,39,42,43 | 2,3,5,7,8,3<br>6,40,41,44 | 4  | B0BNN3,P06866,Q6IFU7,Q6IFV1                                                                |
| 9215 | 1,4,6,37,3<br>8,39,42,44 | 2,3,5,7,8,3<br>6,40,41,43 | 1  | P83121                                                                                     |
| 9216 | 1,4,6,37,3<br>8,39,43,44 | 2,3,5,7,8,3<br>6,40,41,42 | 7  | B0BNN3,P23593,P97605,Q6AYR9,Q6IFV1,Q812E4,Q9JJS8                                           |
| 9217 | 1,4,6,37,3<br>8,40,41,42 | 2,3,5,7,8,3<br>6,39,43,44 | 1  | P20766                                                                                     |
| 9218 | 1,4,6,37,3<br>8,40,41,43 | 2,3,5,7,8,3<br>6,39,42,44 | 10 | B0BNN3,P00762,P04905,P08644,P0C0A9,P20766,P27213,Q5HZV9,Q6AYR9,Q6IFV1                      |
| 9219 | 1,4,6,37,3<br>8,40,41,44 | 2,3,5,7,8,3<br>6,39,42,43 | 9  | P04905,P06911,P0C0A9,P15399,P16636,P47727,Q5GRG2,Q62635,Q6AYR9                             |
| 9220 | 1,4,6,37,3<br>8,40,42,43 | 2,3,5,7,8,3<br>6,39,41,44 | 4  | B0BNN3,P97605,Q6IFU7,Q99MH3                                                                |
| 9221 | 1,4,6,37,3<br>8,40,42,44 | 2,3,5,7,8,3<br>6,39,41,43 | 2  | P83121,Q6AYR9                                                                              |
| 9222 | 1,4,6,37,3<br>8,40,43,44 | 2,3,5,7,8,3<br>6,39,41,42 | 11 | P01835,P04905,P08010,P08644,P08753,P0C0A9,P15399,P97605,Q6AYR9,Q6IFV1,Q812E4               |
| 9223 | 1,4,6,37,3<br>8,41,42,43 | 2,3,5,7,8,3<br>6,39,40,44 | 8  | B0BNN3,P06866,P20766,P27213,P80020,Q5HZV9,Q6IFU7,Q6P6T1                                    |
| 9224 | 1,4,6,37,3<br>8,41,42,44 | 2,3,5,7,8,3<br>6,39,40,43 | 2  | P20766,Q8CIZ5                                                                              |
| 9225 | 1,4,6,37,3<br>8,41,43,44 | 2,3,5,7,8,3<br>6,39,40,42 | 5  | B0BNN3,P00774,P20766,P27213,Q6AYR9                                                         |
| 9226 | 1,4,6,37,3<br>8,42,43,44 | 2,3,5,7,8,3<br>6,39,40,41 | 4  | B0BNN3,P27213,P97605,Q6IFU7                                                                |
| 9227 | 1,4,6,37,3<br>9,40,41,42 | 2,3,5,7,8,3<br>6,38,43,44 | 1  | P13432                                                                                     |
| 9228 | 1,4,6,37,3<br>9,40,41,43 | 2,3,5,7,8,3<br>6,38,42,44 | 7  | P04905,P0C0A9,P13432,P36374,P47727,Q6AYL6,Q812E4                                           |
| 9229 | 1,4,6,37,3<br>9,40,41,44 | 2,3,5,7,8,3<br>6,38,42,43 | 13 | O35547,P04905,P06911,P08723,P0C0A9,P10715,P12020,P16391,P19629,P47727,Q5GRG2,Q62975,Q6AYL6 |
| 9230 | 1,4,6,37,3<br>9,40,42,43 | 2,3,5,7,8,3<br>6,38,41,44 | 3  | P50115,P50116,Q99MH3                                                                       |
| 9231 | 1,4,6,37,3<br>9,40,42,44 | 2,3,5,7,8,3<br>6,38,41,43 | 3  | P50115,P50116,P83121                                                                       |
| 9232 | 1,4,6,37,3<br>9,40,43,44 | 2,3,5,7,8,3<br>6,38,41,42 | 13 | O35547,P04905,P08010,P08753,P0C0A9,P50115,P50116,P60905,P97605,Q62902,Q63357,Q6AYL6,Q812E4 |
| 9233 | 1,4,6,37,3<br>9,41,42,43 | 2,3,5,7,8,3<br>6,38,40,44 | 1  | P13432                                                                                     |
| 9234 | 1,4,6,37,3<br>9,41,42,44 | 2,3,5,7,8,3<br>6,38,40,43 | 1  | P13432                                                                                     |



|      |                          |                           |    |                                                                       |
|------|--------------------------|---------------------------|----|-----------------------------------------------------------------------|
| 9235 | 1,4,6,37,3<br>9,41,43,44 | 2,3,5,7,8,3<br>6,38,40,42 | 2  | P36374,Q812E4                                                         |
| 9236 | 1,4,6,37,3<br>9,42,43,44 | 2,3,5,7,8,3<br>6,38,40,41 | 2  | P50115,P50116                                                         |
| 9237 | 1,4,6,37,4<br>0,41,42,43 | 2,3,5,7,8,3<br>6,38,39,44 | 1  | P27213                                                                |
| 9238 | 1,4,6,37,4<br>0,41,42,44 | 2,3,5,7,8,3<br>6,38,39,43 | 3  | P06911,Q5GRG2,Q6P6R2                                                  |
| 9239 | 1,4,6,37,4<br>0,41,43,44 | 2,3,5,7,8,3<br>6,38,39,42 | 8  | P04905,P06911,P08010,P19218,P27213,P47727,Q5GRG2,Q6AYL6               |
| 9240 | 1,4,6,37,4<br>0,42,43,44 | 2,3,5,7,8,3<br>6,38,39,41 | 3  | P50115,P50116,P97605                                                  |
| 9241 | 1,4,6,37,4<br>1,42,43,44 | 2,3,5,7,8,3<br>6,38,39,40 | 1  | P27213                                                                |
| 9242 | 1,4,6,38,3<br>9,40,41,42 | 2,3,5,7,8,3<br>6,37,43,44 | 2  | P13432,P83121                                                         |
| 9243 | 1,4,6,38,3<br>9,40,41,43 | 2,3,5,7,8,3<br>6,37,42,44 | 5  | B0BNN3,P00762,P08644,P13432,Q5HZV9                                    |
| 9244 | 1,4,6,38,3<br>9,40,41,44 | 2,3,5,7,8,3<br>6,37,42,43 | 10 | P06911,P10715,P12020,P13432,P16391,P19629,P83121,Q5GRG2,Q62975,Q6AYL6 |
| 9245 | 1,4,6,38,3<br>9,40,42,43 | 2,3,5,7,8,3<br>6,37,41,44 | 4  | B0BNN3,P83121,Q6IFU7,Q99MH3                                           |
| 9246 | 1,4,6,38,3<br>9,40,42,44 | 2,3,5,7,8,3<br>6,37,41,43 | 2  | P11762,P83121                                                         |
| 9247 | 1,4,6,38,3<br>9,40,43,44 | 2,3,5,7,8,3<br>6,37,41,42 | 6  | B0BNN3,P01835,P08644,P83121,P97605,Q6AYL6                             |
| 9248 | 1,4,6,38,3<br>9,41,42,43 | 2,3,5,7,8,3<br>6,37,40,44 | 6  | B0BNN3,P06866,P13432,P53792,Q5HZV9,Q6IFU7                             |
| 9249 | 1,4,6,38,3<br>9,41,42,44 | 2,3,5,7,8,3<br>6,37,40,43 | 2  | P13432,Q8CIZ5                                                         |
| 9250 | 1,4,6,38,3<br>9,41,43,44 | 2,3,5,7,8,3<br>6,37,40,42 | 4  | B0BNN3,P00762,P00774,P13432                                           |
| 9251 | 1,4,6,38,3<br>9,42,43,44 | 2,3,5,7,8,3<br>6,37,40,41 | 2  | B0BNN3,Q6IFU7                                                         |
| 9252 | 1,4,6,38,4<br>0,41,42,43 | 2,3,5,7,8,3<br>6,37,39,44 | 4  | B0BNN3,P27213,Q5HZV9,Q6IFU7                                           |
| 9253 | 1,4,6,38,4<br>0,41,42,44 | 2,3,5,7,8,3<br>6,37,39,43 | 3  | P06911,Q6P6R2,Q8CIZ5                                                  |
| 9254 | 1,4,6,38,4<br>0,41,43,44 | 2,3,5,7,8,3<br>6,37,39,42 | 6  | B0BNN3,P00762,P01835,P06911,P27213,Q62635                             |
| 9255 | 1,4,6,38,4<br>0,42,43,44 | 2,3,5,7,8,3<br>6,37,39,41 | 3  | B0BNN3,P01835,Q6IFU7                                                  |
| 9256 | 1,4,6,38,4<br>1,42,43,44 | 2,3,5,7,8,3<br>6,37,39,40 | 5  | B0BNN3,P00774,P27213,Q5HZV9,Q6IFU7                                    |
| 9257 | 1,4,6,39,4<br>0,41,42,43 | 2,3,5,7,8,3<br>6,37,38,44 | 3  | P13432,P53792,Q6IFU7                                                  |

|      |                          |                                |   |                                                                |
|------|--------------------------|--------------------------------|---|----------------------------------------------------------------|
| 9258 | 1,4,6,39,4<br>0,41,42,44 | 2,3,5,7,8,3<br>6,37,38,43      | 9 | P06911,P10715,P11762,P13432,P16391,P19629,Q561R9,Q5GRG2,Q6AYL6 |
| 9259 | 1,4,6,39,4<br>0,41,43,44 | 2,3,5,7,8,3<br>6,37,38,42      | 5 | P06911,P10715,P19629,Q5GRG2,Q6AYL6                             |
| 9260 | 1,4,6,39,4<br>0,42,43,44 | 2,3,5,7,8,3<br>6,37,38,41      | 4 | P11762,P50115,P50116,Q6AYL6                                    |
| 9261 | 1,4,6,39,4<br>1,42,43,44 | 2,3,5,7,8,3<br>6,37,38,40      | 0 |                                                                |
| 9262 | 1,4,6,40,4<br>1,42,43,44 | 2,3,5,7,8,3<br>6,37,38,39      | 2 | P27213,Q6P6R2                                                  |
| 9263 | 1,4,7,8,36,<br>37,38,39  | 2,3,5,6,40,<br>41,42,43,4<br>4 | 2 | P11598,P11883                                                  |
| 9264 | 1,4,7,8,36,<br>37,38,40  | 2,3,5,6,39,<br>41,42,43,4<br>4 | 3 | P02803,P11883,P35281                                           |
| 9265 | 1,4,7,8,36,<br>37,38,41  | 2,3,5,6,39,<br>40,42,43,4<br>4 | 5 | P11598,P11883,Q63617,Q68FS4,Q99041                             |
| 9266 | 1,4,7,8,36,<br>37,38,42  | 2,3,5,6,39,<br>40,41,43,4<br>4 | 3 | P11883,P15978,P47967                                           |
| 9267 | 1,4,7,8,36,<br>37,38,43  | 2,3,5,6,39,<br>40,41,42,4<br>4 | 2 | P16391,Q64268                                                  |
| 9268 | 1,4,7,8,36,<br>37,38,44  | 2,3,5,6,39,<br>40,41,42,4<br>3 | 3 | P11598,P11883,Q6AYR9                                           |
| 9269 | 1,4,7,8,36,<br>37,39,40  | 2,3,5,6,38,<br>41,42,43,4<br>4 | 7 | P00774,P11598,P11883,P98089,Q63617,Q8CIZ5,Q8CJD3               |
| 9270 | 1,4,7,8,36,<br>37,39,41  | 2,3,5,6,38,<br>40,42,43,4<br>4 | 6 | P01835,P11598,P18418,Q63617,Q68FS4,Q99041                      |
| 9271 | 1,4,7,8,36,<br>37,39,42  | 2,3,5,6,38,<br>40,41,43,4<br>4 | 4 | P00774,P01835,Q561R9,Q62635                                    |
| 9272 | 1,4,7,8,36,<br>37,39,43  | 2,3,5,6,38,<br>40,41,42,4<br>4 | 3 | P06760,Q62635,Q8CIZ5                                           |
| 9273 | 1,4,7,8,36,<br>37,39,44  | 2,3,5,6,38,<br>40,41,42,4<br>3 | 3 | P11598,P11883,Q8CJD3                                           |
| 9274 | 1,4,7,8,36,<br>37,40,41  | 2,3,5,6,38,<br>39,42,43,4<br>4 | 5 | P18418,Q4FZU6,Q63617,Q68FS4,Q99041                             |

|      |                         |                                |   |                                    |
|------|-------------------------|--------------------------------|---|------------------------------------|
| 9275 | 1,4,7,8,36,<br>37,40,42 | 2,3,5,6,38,<br>39,41,43,4<br>4 | 3 | P00774,Q561R9,Q63617               |
| 9276 | 1,4,7,8,36,<br>37,40,43 | 2,3,5,6,38,<br>39,41,42,4<br>4 | 2 | Q63617,Q8CIZ5                      |
| 9277 | 1,4,7,8,36,<br>37,40,44 | 2,3,5,6,38,<br>39,41,42,4<br>3 | 4 | P11598,P11883,Q63617,Q8CJD3        |
| 9278 | 1,4,7,8,36,<br>37,41,42 | 2,3,5,6,38,<br>39,40,43,4<br>4 | 5 | P01835,P18418,Q561R9,Q63617,Q99041 |
| 9279 | 1,4,7,8,36,<br>37,41,43 | 2,3,5,6,38,<br>39,40,42,4<br>4 | 3 | Q63617,Q99041,Q9QUL6               |
| 9280 | 1,4,7,8,36,<br>37,41,44 | 2,3,5,6,38,<br>39,40,42,4<br>3 | 5 | P11598,P18418,Q63617,Q68FS4,Q99041 |
| 9281 | 1,4,7,8,36,<br>37,42,43 | 2,3,5,6,38,<br>39,40,41,4<br>4 | 2 | Q62635,Q9QUL6                      |
| 9282 | 1,4,7,8,36,<br>37,42,44 | 2,3,5,6,38,<br>39,40,41,4<br>3 | 2 | P00714,Q561R9                      |
| 9283 | 1,4,7,8,36,<br>37,43,44 | 2,3,5,6,38,<br>39,40,41,4<br>2 | 0 |                                    |
| 9284 | 1,4,7,8,36,<br>38,39,40 | 2,3,5,6,37,<br>41,42,43,4<br>4 | 2 | P10758,P11598                      |
| 9285 | 1,4,7,8,36,<br>38,39,41 | 2,3,5,6,37,<br>40,42,43,4<br>4 | 3 | P11598,Q68FS4,Q99041               |
| 9286 | 1,4,7,8,36,<br>38,39,42 | 2,3,5,6,37,<br>40,41,43,4<br>4 | 3 | P19218,P51907,Q80WL1               |
| 9287 | 1,4,7,8,36,<br>38,39,43 | 2,3,5,6,37,<br>40,41,42,4<br>4 | 3 | Q64268,Q6P6R2,Q80WL1               |
| 9288 | 1,4,7,8,36,<br>38,39,44 | 2,3,5,6,37,<br>40,41,42,4<br>3 | 2 | P11598,P51907                      |
| 9289 | 1,4,7,8,36,<br>38,40,41 | 2,3,5,6,37,<br>39,42,43,4<br>4 | 3 | Q4FZU6,Q63617,Q99041               |

|      |                         |                                |   |                                                         |
|------|-------------------------|--------------------------------|---|---------------------------------------------------------|
| 9290 | 1,4,7,8,36,<br>38,40,42 | 2,3,5,6,37,<br>39,41,43,4<br>4 | 0 |                                                         |
| 9291 | 1,4,7,8,36,<br>38,40,43 | 2,3,5,6,37,<br>39,41,42,4<br>4 | 1 | Q64268                                                  |
| 9292 | 1,4,7,8,36,<br>38,40,44 | 2,3,5,6,37,<br>39,41,42,4<br>3 | 1 | P11598                                                  |
| 9293 | 1,4,7,8,36,<br>38,41,42 | 2,3,5,6,37,<br>39,40,43,4<br>4 | 1 | P08649                                                  |
| 9294 | 1,4,7,8,36,<br>38,41,43 | 2,3,5,6,37,<br>39,40,42,4<br>4 | 4 | P27213,Q64268,Q99041,Q9QUL6                             |
| 9295 | 1,4,7,8,36,<br>38,41,44 | 2,3,5,6,37,<br>39,40,42,4<br>3 | 3 | P11598,Q05695,Q63617                                    |
| 9296 | 1,4,7,8,36,<br>38,42,43 | 2,3,5,6,37,<br>39,40,41,4<br>4 | 2 | P16391,Q64268                                           |
| 9297 | 1,4,7,8,36,<br>38,42,44 | 2,3,5,6,37,<br>39,40,41,4<br>3 | 2 | P00714,P51907                                           |
| 9298 | 1,4,7,8,36,<br>38,43,44 | 2,3,5,6,37,<br>39,40,41,4<br>2 | 1 | Q64268                                                  |
| 9299 | 1,4,7,8,36,<br>39,40,41 | 2,3,5,6,37,<br>38,42,43,4<br>4 | 8 | P10715,P11598,P31044,Q4FZU6,Q63617,Q68FS4,Q8VD89,Q99041 |
| 9300 | 1,4,7,8,36,<br>39,40,42 | 2,3,5,6,37,<br>38,41,43,4<br>4 | 2 | P00774,Q561R9                                           |
| 9301 | 1,4,7,8,36,<br>39,40,43 | 2,3,5,6,37,<br>38,41,42,4<br>4 | 1 | Q8CIZ5                                                  |
| 9302 | 1,4,7,8,36,<br>39,40,44 | 2,3,5,6,37,<br>38,41,42,4<br>3 | 5 | P11598,Q4FZU6,Q63617,Q6AYL6,Q8CJD3                      |
| 9303 | 1,4,7,8,36,<br>39,41,42 | 2,3,5,6,37,<br>38,40,43,4<br>4 | 6 | P01835,P08649,P82995,Q561R9,Q63617,Q99041               |
| 9304 | 1,4,7,8,36,<br>39,41,43 | 2,3,5,6,37,<br>38,40,42,4<br>4 | 5 | P06760,P22006,Q63617,Q99041,Q9QUL6                      |

|      |                         |                                |    |                                                                       |
|------|-------------------------|--------------------------------|----|-----------------------------------------------------------------------|
| 9305 | 1,4,7,8,36,<br>39,41,44 | 2,3,5,6,37,<br>38,40,42,4<br>3 | 6  | P11598,P30919,Q4FZU6,Q63617,Q8VD89,Q99041                             |
| 9306 | 1,4,7,8,36,<br>39,42,43 | 2,3,5,6,37,<br>38,40,41,4<br>4 | 2  | Q561R9,Q62635                                                         |
| 9307 | 1,4,7,8,36,<br>39,42,44 | 2,3,5,6,37,<br>38,40,41,4<br>3 | 4  | P00714,P51907,P82995,Q561R9                                           |
| 9308 | 1,4,7,8,36,<br>39,43,44 | 2,3,5,6,37,<br>38,40,41,4<br>2 | 1  | P11598                                                                |
| 9309 | 1,4,7,8,36,<br>40,41,42 | 2,3,5,6,37,<br>38,39,43,4<br>4 | 4  | Q4FZU6,Q561R9,Q63617,Q9JJS8                                           |
| 9310 | 1,4,7,8,36,<br>40,41,43 | 2,3,5,6,37,<br>38,39,42,4<br>4 | 3  | Q4FZU6,Q63617,Q99041                                                  |
| 9311 | 1,4,7,8,36,<br>40,41,44 | 2,3,5,6,37,<br>38,39,42,4<br>3 | 10 | P06911,P10715,P11598,P18418,P31044,Q4FZU6,Q5GRG2,Q63617,Q8VD89,Q99041 |
| 9312 | 1,4,7,8,36,<br>40,42,43 | 2,3,5,6,37,<br>38,39,41,4<br>4 | 2  | P00774,Q561R9                                                         |
| 9313 | 1,4,7,8,36,<br>40,42,44 | 2,3,5,6,37,<br>38,39,41,4<br>3 | 6  | P00714,P20759,Q4FZU6,Q561R9,Q63617,Q7TPB1                             |
| 9314 | 1,4,7,8,36,<br>40,43,44 | 2,3,5,6,37,<br>38,39,41,4<br>2 | 1  | Q63617                                                                |
| 9315 | 1,4,7,8,36,<br>41,42,43 | 2,3,5,6,37,<br>38,39,40,4<br>4 | 4  | P82995,Q561R9,Q63617,Q9QUL6                                           |
| 9316 | 1,4,7,8,36,<br>41,42,44 | 2,3,5,6,37,<br>38,39,40,4<br>3 | 7  | P00714,P08649,P08721,P82995,Q4FZU6,Q561R9,Q63617                      |
| 9317 | 1,4,7,8,36,<br>41,43,44 | 2,3,5,6,37,<br>38,39,40,4<br>2 | 3  | Q63617,Q99041,Q9QUL6                                                  |
| 9318 | 1,4,7,8,36,<br>42,43,44 | 2,3,5,6,37,<br>38,39,40,4<br>1 | 3  | P00714,P82995,Q561R9                                                  |
| 9319 | 1,4,7,8,37,<br>38,39,40 | 2,3,5,6,36,<br>41,42,43,4<br>4 | 3  | P02803,P35281,Q9QZA6                                                  |

|      |                         |                                |    |                                                                       |
|------|-------------------------|--------------------------------|----|-----------------------------------------------------------------------|
| 9320 | 1,4,7,8,37,<br>38,39,41 | 2,3,5,6,36,<br>40,42,43,4<br>4 | 5  | P11598,P13432,Q63617,Q68FS4,Q99041                                    |
| 9321 | 1,4,7,8,37,<br>38,39,42 | 2,3,5,6,36,<br>40,41,43,4<br>4 | 0  |                                                                       |
| 9322 | 1,4,7,8,37,<br>38,39,43 | 2,3,5,6,36,<br>40,41,42,4<br>4 | 3  | P23593,Q64268,Q80WL1                                                  |
| 9323 | 1,4,7,8,37,<br>38,39,44 | 2,3,5,6,36,<br>40,41,42,4<br>3 | 1  | P11598                                                                |
| 9324 | 1,4,7,8,37,<br>38,40,41 | 2,3,5,6,36,<br>39,42,43,4<br>4 | 4  | P18418,Q63617,Q68FS4,Q99041                                           |
| 9325 | 1,4,7,8,37,<br>38,40,42 | 2,3,5,6,36,<br>39,41,43,4<br>4 | 1  | P02803                                                                |
| 9326 | 1,4,7,8,37,<br>38,40,43 | 2,3,5,6,36,<br>39,41,42,4<br>4 | 2  | P02803,Q64268                                                         |
| 9327 | 1,4,7,8,37,<br>38,40,44 | 2,3,5,6,36,<br>39,41,42,4<br>3 | 3  | P11598,Q63617,Q6AYR9                                                  |
| 9328 | 1,4,7,8,37,<br>38,41,42 | 2,3,5,6,36,<br>39,40,43,4<br>4 | 1  | Q63617                                                                |
| 9329 | 1,4,7,8,37,<br>38,41,43 | 2,3,5,6,36,<br>39,40,42,4<br>4 | 7  | P27213,Q63617,Q64268,Q68FS4,Q7TPB1,Q99041,Q9QUL6                      |
| 9330 | 1,4,7,8,37,<br>38,41,44 | 2,3,5,6,36,<br>39,40,42,4<br>3 | 6  | P11598,P18418,Q05695,Q63617,Q68FS4,Q99041                             |
| 9331 | 1,4,7,8,37,<br>38,42,43 | 2,3,5,6,36,<br>39,40,41,4<br>4 | 3  | P06866,Q64268,Q6P6T1                                                  |
| 9332 | 1,4,7,8,37,<br>38,42,44 | 2,3,5,6,36,<br>39,40,41,4<br>3 | 1  | P00714                                                                |
| 9333 | 1,4,7,8,37,<br>38,43,44 | 2,3,5,6,36,<br>39,40,41,4<br>2 | 2  | Q64268,Q6AYR9                                                         |
| 9334 | 1,4,7,8,37,<br>39,40,41 | 2,3,5,6,36,<br>38,42,43,4<br>4 | 10 | P06911,P10715,P18418,P31044,Q4FZU6,Q5GRG2,Q63617,Q68FS4,Q6AYL6,Q99041 |

|      |                         |                                |    |                                                                              |
|------|-------------------------|--------------------------------|----|------------------------------------------------------------------------------|
| 9335 | 1,4,7,8,37,<br>39,40,42 | 2,3,5,6,36,<br>38,41,43,4<br>4 | 3  | P00774,Q561R9,Q63617                                                         |
| 9336 | 1,4,7,8,37,<br>39,40,43 | 2,3,5,6,36,<br>38,41,42,4<br>4 | 4  | Q63617,Q6AYL6,Q812E4,Q8CIZ5                                                  |
| 9337 | 1,4,7,8,37,<br>39,40,44 | 2,3,5,6,36,<br>38,41,42,4<br>3 | 6  | P10715,P11598,Q5GRG2,Q63617,Q6AYL6,Q8CJD3                                    |
| 9338 | 1,4,7,8,37,<br>39,41,42 | 2,3,5,6,36,<br>38,40,43,4<br>4 | 5  | P01835,P18418,Q561R9,Q63617,Q99041                                           |
| 9339 | 1,4,7,8,37,<br>39,41,43 | 2,3,5,6,36,<br>38,40,42,4<br>4 | 4  | P22006,Q63617,Q68FS4,Q99041                                                  |
| 9340 | 1,4,7,8,37,<br>39,41,44 | 2,3,5,6,36,<br>38,40,42,4<br>3 | 6  | P11598,P18418,P31044,Q63617,Q68FS4,Q99041                                    |
| 9341 | 1,4,7,8,37,<br>39,42,43 | 2,3,5,6,36,<br>38,40,41,4<br>4 | 2  | Q561R9,Q62635                                                                |
| 9342 | 1,4,7,8,37,<br>39,42,44 | 2,3,5,6,36,<br>38,40,41,4<br>3 | 2  | P00714,Q561R9                                                                |
| 9343 | 1,4,7,8,37,<br>39,43,44 | 2,3,5,6,36,<br>38,40,41,4<br>2 | 1  | Q64057                                                                       |
| 9344 | 1,4,7,8,37,<br>40,41,42 | 2,3,5,6,36,<br>38,39,43,4<br>4 | 5  | P18418,Q4FZU6,Q561R9,Q63617,Q99041                                           |
| 9345 | 1,4,7,8,37,<br>40,41,43 | 2,3,5,6,36,<br>38,39,42,4<br>4 | 3  | Q63617,Q68FS4,Q99041                                                         |
| 9346 | 1,4,7,8,37,<br>40,41,44 | 2,3,5,6,36,<br>38,39,42,4<br>3 | 11 | P06911,P10715,P11598,P18418,P31044,Q4FZU6,Q5GRG2,Q63617,Q68FS4,Q6AYL6,Q99041 |
| 9347 | 1,4,7,8,37,<br>40,42,43 | 2,3,5,6,36,<br>38,39,41,4<br>4 | 2  | Q561R9,Q63617                                                                |
| 9348 | 1,4,7,8,37,<br>40,42,44 | 2,3,5,6,36,<br>38,39,41,4<br>3 | 3  | P00714,Q561R9,Q63617                                                         |
| 9349 | 1,4,7,8,37,<br>40,43,44 | 2,3,5,6,36,<br>38,39,41,4<br>2 | 2  | Q63617,Q6AYL6                                                                |

|      |                         |                                |   |                                                  |
|------|-------------------------|--------------------------------|---|--------------------------------------------------|
| 9350 | 1,4,7,8,37,<br>41,42,43 | 2,3,5,6,36,<br>38,39,40,4<br>4 | 5 | P27213,Q561R9,Q63617,Q99041,Q9QUL6               |
| 9351 | 1,4,7,8,37,<br>41,42,44 | 2,3,5,6,36,<br>38,39,40,4<br>3 | 4 | P00714,P18418,Q561R9,Q63617                      |
| 9352 | 1,4,7,8,37,<br>41,43,44 | 2,3,5,6,36,<br>38,39,40,4<br>2 | 3 | Q63617,Q68FS4,Q99041                             |
| 9353 | 1,4,7,8,37,<br>42,43,44 | 2,3,5,6,36,<br>38,39,40,4<br>1 | 2 | P00714,Q561R9                                    |
| 9354 | 1,4,7,8,38,<br>39,40,41 | 2,3,5,6,36,<br>37,42,43,4<br>4 | 7 | P10715,P13432,P19629,P31044,Q4FZU6,Q63617,Q68FS4 |
| 9355 | 1,4,7,8,38,<br>39,40,42 | 2,3,5,6,36,<br>37,41,43,4<br>4 | 2 | P83121,Q561R9                                    |
| 9356 | 1,4,7,8,38,<br>39,40,43 | 2,3,5,6,36,<br>37,41,42,4<br>4 | 1 | Q64268                                           |
| 9357 | 1,4,7,8,38,<br>39,40,44 | 2,3,5,6,36,<br>37,41,42,4<br>3 | 5 | P10715,P11598,P83121,Q5GRG2,Q6AYL6               |
| 9358 | 1,4,7,8,38,<br>39,41,42 | 2,3,5,6,36,<br>37,40,43,4<br>4 | 1 | P13432                                           |
| 9359 | 1,4,7,8,38,<br>39,41,43 | 2,3,5,6,36,<br>37,40,42,4<br>4 | 3 | P22006,Q64268,Q68FS4                             |
| 9360 | 1,4,7,8,38,<br>39,41,44 | 2,3,5,6,36,<br>37,40,42,4<br>3 | 5 | P11598,P31044,Q05695,Q63617,Q68FS4               |
| 9361 | 1,4,7,8,38,<br>39,42,43 | 2,3,5,6,36,<br>37,40,41,4<br>4 | 3 | B0BNN3,Q64268,Q80WL1                             |
| 9362 | 1,4,7,8,38,<br>39,42,44 | 2,3,5,6,36,<br>37,40,41,4<br>3 | 2 | P00714,P51907                                    |
| 9363 | 1,4,7,8,38,<br>39,43,44 | 2,3,5,6,36,<br>37,40,41,4<br>2 | 3 | P23593,Q64268,Q80WL1                             |
| 9364 | 1,4,7,8,38,<br>40,41,42 | 2,3,5,6,36,<br>37,39,43,4<br>4 | 3 | Q4FZU6,Q561R9,Q63617                             |



|      |                         |                                |    |                                                                                     |
|------|-------------------------|--------------------------------|----|-------------------------------------------------------------------------------------|
| 9365 | 1,4,7,8,38,<br>40,41,43 | 2,3,5,6,36,<br>37,39,42,4<br>4 | 1  | Q63617                                                                              |
| 9366 | 1,4,7,8,38,<br>40,41,44 | 2,3,5,6,36,<br>37,39,42,4<br>3 | 10 | P06911,P10715,P11598,P19629,P31044,Q05695,Q4FZU6,Q5GRG2,Q63617,Q68FS4               |
| 9367 | 1,4,7,8,38,<br>40,42,43 | 2,3,5,6,36,<br>37,39,41,4<br>4 | 0  |                                                                                     |
| 9368 | 1,4,7,8,38,<br>40,42,44 | 2,3,5,6,36,<br>37,39,41,4<br>3 | 3  | P00714,Q4FZU6,Q561R9                                                                |
| 9369 | 1,4,7,8,38,<br>40,43,44 | 2,3,5,6,36,<br>37,39,41,4<br>2 | 0  |                                                                                     |
| 9370 | 1,4,7,8,38,<br>41,42,43 | 2,3,5,6,36,<br>37,39,40,4<br>4 | 4  | O35547,P27213,Q64268,Q9QUL6                                                         |
| 9371 | 1,4,7,8,38,<br>41,42,44 | 2,3,5,6,36,<br>37,39,40,4<br>3 | 6  | P00714,P55091,Q05695,Q4FZU6,Q561R9,Q63617                                           |
| 9372 | 1,4,7,8,38,<br>41,43,44 | 2,3,5,6,36,<br>37,39,40,4<br>2 | 4  | P27213,P55091,Q05695,Q63617                                                         |
| 9373 | 1,4,7,8,38,<br>42,43,44 | 2,3,5,6,36,<br>37,39,40,4<br>1 | 2  | P00714,Q64268                                                                       |
| 9374 | 1,4,7,8,39,<br>40,41,42 | 2,3,5,6,36,<br>37,38,43,4<br>4 | 4  | P10715,Q4FZU6,Q561R9,Q63617                                                         |
| 9375 | 1,4,7,8,39,<br>40,41,43 | 2,3,5,6,36,<br>37,38,42,4<br>4 | 6  | P10715,P22006,Q63617,Q68FS4,Q6AYL6,Q99041                                           |
| 9376 | 1,4,7,8,39,<br>40,41,44 | 2,3,5,6,36,<br>37,38,42,4<br>3 | 12 | P06911,P10715,P11598,P12020,P18418,P19629,P31044,Q4FZU6,Q5GRG2,Q63617,Q68FS4,Q6AYL6 |
| 9377 | 1,4,7,8,39,<br>40,42,43 | 2,3,5,6,36,<br>37,38,41,4<br>4 | 1  | Q561R9                                                                              |
| 9378 | 1,4,7,8,39,<br>40,42,44 | 2,3,5,6,36,<br>37,38,41,4<br>3 | 4  | P00714,Q4FZU6,Q561R9,Q63617                                                         |
| 9379 | 1,4,7,8,39,<br>40,43,44 | 2,3,5,6,36,<br>37,38,41,4<br>2 | 2  | Q63617,Q6AYL6                                                                       |

|      |                          |                                |   |                                                         |
|------|--------------------------|--------------------------------|---|---------------------------------------------------------|
| 9380 | 1,4,7,8,39,<br>41,42,43  | 2,3,5,6,36,<br>37,38,40,4<br>4 | 3 | P22006,Q561R9,Q63617                                    |
| 9381 | 1,4,7,8,39,<br>41,42,44  | 2,3,5,6,36,<br>37,38,40,4<br>3 | 3 | Q4FZU6,Q561R9,Q63617                                    |
| 9382 | 1,4,7,8,39,<br>41,43,44  | 2,3,5,6,36,<br>37,38,40,4<br>2 | 4 | P22006,Q63617,Q68FS4,Q6AYL6                             |
| 9383 | 1,4,7,8,39,<br>42,43,44  | 2,3,5,6,36,<br>37,38,40,4<br>1 | 2 | P00714,Q561R9                                           |
| 9384 | 1,4,7,8,40,<br>41,42,43  | 2,3,5,6,36,<br>37,38,39,4<br>4 | 4 | Q4FZU6,Q561R9,Q63617,Q9JJS8                             |
| 9385 | 1,4,7,8,40,<br>41,42,44  | 2,3,5,6,36,<br>37,38,39,4<br>3 | 8 | P00714,P10715,P20759,P31044,Q4FZU6,Q561R9,Q5GRG2,Q63617 |
| 9386 | 1,4,7,8,40,<br>41,43,44  | 2,3,5,6,36,<br>37,38,39,4<br>2 | 6 | P10715,P31044,Q4FZU6,Q5GRG2,Q63617,Q6AYL6               |
| 9387 | 1,4,7,8,40,<br>42,43,44  | 2,3,5,6,36,<br>37,38,39,4<br>1 | 3 | P00714,Q561R9,Q63617                                    |
| 9388 | 1,4,7,8,41,<br>42,43,44  | 2,3,5,6,36,<br>37,38,39,4<br>0 | 4 | P00714,P27213,Q561R9,Q63617                             |
| 9389 | 1,4,7,36,3<br>7,38,39,40 | 2,3,5,6,8,4<br>1,42,43,44      | 4 | P11883,P35281,Q6P6R2,Q9JID2                             |
| 9390 | 1,4,7,36,3<br>7,38,39,41 | 2,3,5,6,8,4<br>0,42,43,44      | 4 | P11883,P36374,P62804,Q5M819                             |
| 9391 | 1,4,7,36,3<br>7,38,39,42 | 2,3,5,6,8,4<br>0,41,43,44      | 5 | P02793;Q7TP54,P11883,P47967,P51907,Q9Z1F2               |
| 9392 | 1,4,7,36,3<br>7,38,39,43 | 2,3,5,6,8,4<br>0,41,42,44      | 3 | P06760,Q6P6R2,Q812E4                                    |
| 9393 | 1,4,7,36,3<br>7,38,39,44 | 2,3,5,6,8,4<br>0,41,42,43      | 2 | P11883,P51907                                           |
| 9394 | 1,4,7,36,3<br>7,38,40,41 | 2,3,5,6,8,3<br>9,42,43,44      | 2 | P11883,Q5M819                                           |
| 9395 | 1,4,7,36,3<br>7,38,40,42 | 2,3,5,6,8,3<br>9,41,43,44      | 1 | P11883                                                  |
| 9396 | 1,4,7,36,3<br>7,38,40,43 | 2,3,5,6,8,3<br>9,41,42,44      | 2 | P08753,P97605                                           |
| 9397 | 1,4,7,36,3<br>7,38,40,44 | 2,3,5,6,8,3<br>9,41,42,43      | 3 | P11883,P54921,Q6AYR9                                    |

|      |                                                 |   |                                                         |
|------|-------------------------------------------------|---|---------------------------------------------------------|
| 9398 | 1,4,7,36,3 2,3,5,6,8,3<br>7,38,41,42 9,40,43,44 | 2 | P11883,Q5M819                                           |
| 9399 | 1,4,7,36,3 2,3,5,6,8,3<br>7,38,41,43 9,40,42,44 | 5 | P06760,P20766,P27213,P62804,Q5M819                      |
| 9400 | 1,4,7,36,3 2,3,5,6,8,3<br>7,38,41,44 9,40,42,43 | 2 | P11883,Q05695                                           |
| 9401 | 1,4,7,36,3 2,3,5,6,8,3<br>7,38,42,43 9,40,41,44 | 4 | P06866,P47967,Q6P6T1,Q9Z1F2                             |
| 9402 | 1,4,7,36,3 2,3,5,6,8,3<br>7,38,42,44 9,40,41,43 | 6 | P00714,P11883,P47967,P51907,P97840,Q9Z1F2               |
| 9403 | 1,4,7,36,3 2,3,5,6,8,3<br>7,38,43,44 9,40,41,42 | 2 | P97605,Q6AYR9                                           |
| 9404 | 1,4,7,36,3 2,3,5,6,8,3<br>7,39,40,41 8,42,43,44 | 3 | P08723,P10715,P11883                                    |
| 9405 | 1,4,7,36,3 2,3,5,6,8,3<br>7,39,40,42 8,41,43,44 | 7 | P00774,P11883,P50115,P50116,P98089,Q561R9,Q62635        |
| 9406 | 1,4,7,36,3 2,3,5,6,8,3<br>7,39,40,43 8,41,42,44 | 8 | O35547,P00774,P08753,P50115,P50116,Q62635,Q812E4,Q8CIZ5 |
| 9407 | 1,4,7,36,3 2,3,5,6,8,3<br>7,39,40,44 8,41,42,43 | 8 | O35547,P08753,P11883,P50115,P50116,P54921,Q6AYL6,Q8CJD3 |
| 9408 | 1,4,7,36,3 2,3,5,6,8,3<br>7,39,41,42 8,40,43,44 | 3 | P01835,P11883,Q561R9                                    |
| 9409 | 1,4,7,36,3 2,3,5,6,8,3<br>7,39,41,43 8,40,42,44 | 4 | D3ZUC6,P06760,P22006,P36374                             |
| 9410 | 1,4,7,36,3 2,3,5,6,8,3<br>7,39,41,44 8,40,42,43 | 2 | P11883,Q9JHB9                                           |
| 9411 | 1,4,7,36,3 2,3,5,6,8,3<br>7,39,42,43 8,40,41,44 | 4 | P06760,P50115,P50116,Q62635                             |
| 9412 | 1,4,7,36,3 2,3,5,6,8,3<br>7,39,42,44 8,40,41,43 | 5 | P11883,P50115,P50116,P51907,Q561R9                      |
| 9413 | 1,4,7,36,3 2,3,5,6,8,3<br>7,39,43,44 8,40,41,42 | 4 | P06760,P50115,P50116,Q812E4                             |
| 9414 | 1,4,7,36,3 2,3,5,6,8,3<br>7,40,41,42 8,39,43,44 | 3 | P11883,Q4FZU6,Q561R9                                    |
| 9415 | 1,4,7,36,3 2,3,5,6,8,3<br>7,40,41,43 8,39,42,44 | 0 |                                                         |
| 9416 | 1,4,7,36,3 2,3,5,6,8,3<br>7,40,41,44 8,39,42,43 | 5 | P10715,P11883,P18418,Q4FZU6,Q5GRG2                      |
| 9417 | 1,4,7,36,3 2,3,5,6,8,3<br>7,40,42,43 8,39,41,44 | 5 | P00774,P50115,P50116,Q561R9,Q62635                      |
| 9418 | 1,4,7,36,3 2,3,5,6,8,3<br>7,40,42,44 8,39,41,43 | 6 | P00714,P11883,P50115,P50116,Q561R9,Q7TPB1               |
| 9419 | 1,4,7,36,3 2,3,5,6,8,3<br>7,40,43,44 8,39,41,42 | 7 | O35547,P08010,P08753,P50115,P50116,P97605,Q9WUF4        |
| 9420 | 1,4,7,36,3 2,3,5,6,8,3<br>7,41,42,43 8,39,40,44 | 3 | P06760,P27213,Q9QUL6                                    |

|      |                          |                           |   |                             |
|------|--------------------------|---------------------------|---|-----------------------------|
| 9421 | 1,4,7,36,3<br>7,41,42,44 | 2,3,5,6,8,3<br>8,39,40,43 | 2 | P11883,Q561R9               |
| 9422 | 1,4,7,36,3<br>7,41,43,44 | 2,3,5,6,8,3<br>8,39,40,42 | 1 | D3ZUC6                      |
| 9423 | 1,4,7,36,3<br>7,42,43,44 | 2,3,5,6,8,3<br>8,39,40,41 | 2 | P50115,P50116               |
| 9424 | 1,4,7,36,3<br>8,39,40,41 | 2,3,5,6,8,3<br>7,42,43,44 | 1 | P10758                      |
| 9425 | 1,4,7,36,3<br>8,39,40,42 | 2,3,5,6,8,3<br>7,41,43,44 | 4 | P10758,P51907,P83121,Q9Z1F2 |
| 9426 | 1,4,7,36,3<br>8,39,40,43 | 2,3,5,6,8,3<br>7,41,42,44 | 1 | Q6P6R2                      |
| 9427 | 1,4,7,36,3<br>8,39,40,44 | 2,3,5,6,8,3<br>7,41,42,43 | 3 | P11883,P51907,P83121        |
| 9428 | 1,4,7,36,3<br>8,39,41,42 | 2,3,5,6,8,3<br>7,40,43,44 | 4 | P08649,P10758,P51907,Q9Z1F2 |
| 9429 | 1,4,7,36,3<br>8,39,41,43 | 2,3,5,6,8,3<br>7,40,42,44 | 2 | P06760,P22006               |
| 9430 | 1,4,7,36,3<br>8,39,41,44 | 2,3,5,6,8,3<br>7,40,42,43 | 3 | P51907,Q05695,Q8VD89        |
| 9431 | 1,4,7,36,3<br>8,39,42,43 | 2,3,5,6,8,3<br>7,40,41,44 | 2 | P51907,Q9Z1F2               |
| 9432 | 1,4,7,36,3<br>8,39,42,44 | 2,3,5,6,8,3<br>7,40,41,43 | 2 | P51907,Q9Z1F2               |
| 9433 | 1,4,7,36,3<br>8,39,43,44 | 2,3,5,6,8,3<br>7,40,41,42 | 2 | P23593,P51907               |
| 9434 | 1,4,7,36,3<br>8,40,41,42 | 2,3,5,6,8,3<br>7,39,43,44 | 1 | Q4FZU6                      |
| 9435 | 1,4,7,36,3<br>8,40,41,43 | 2,3,5,6,8,3<br>7,39,42,44 | 1 | P27213                      |
| 9436 | 1,4,7,36,3<br>8,40,41,44 | 2,3,5,6,8,3<br>7,39,42,43 | 3 | Q05695,Q4FZU6,Q5GRG2        |
| 9437 | 1,4,7,36,3<br>8,40,42,43 | 2,3,5,6,8,3<br>7,39,41,44 | 1 | Q9Z1F2                      |
| 9438 | 1,4,7,36,3<br>8,40,42,44 | 2,3,5,6,8,3<br>7,39,41,43 | 4 | P00714,P51907,Q7TPB1,Q9Z1F2 |
| 9439 | 1,4,7,36,3<br>8,40,43,44 | 2,3,5,6,8,3<br>7,39,41,42 | 0 |                             |
| 9440 | 1,4,7,36,3<br>8,41,42,43 | 2,3,5,6,8,3<br>7,39,40,44 | 3 | P06866,P27213,Q9QUL6        |
| 9441 | 1,4,7,36,3<br>8,41,42,44 | 2,3,5,6,8,3<br>7,39,40,43 | 3 | P51907,Q05695,Q9Z1F2        |
| 9442 | 1,4,7,36,3<br>8,41,43,44 | 2,3,5,6,8,3<br>7,39,40,42 | 2 | P27213,Q05695               |
| 9443 | 1,4,7,36,3<br>8,42,43,44 | 2,3,5,6,8,3<br>7,39,40,41 | 3 | P00714,P51907,Q9Z1F2        |

|      |                          |                           |   |                                                         |
|------|--------------------------|---------------------------|---|---------------------------------------------------------|
| 9444 | 1,4,7,36,3<br>9,40,41,42 | 2,3,5,6,8,3<br>7,38,43,44 | 2 | Q4FZU6,Q561R9                                           |
| 9445 | 1,4,7,36,3<br>9,40,41,43 | 2,3,5,6,8,3<br>7,38,42,44 | 1 | P22006                                                  |
| 9446 | 1,4,7,36,3<br>9,40,41,44 | 2,3,5,6,8,3<br>7,38,42,43 | 8 | P06911,P10715,P19629,P31044,Q4FZU6,Q5GRG2,Q6AYL6,Q8VD89 |
| 9447 | 1,4,7,36,3<br>9,40,42,43 | 2,3,5,6,8,3<br>7,38,41,44 | 5 | P00774,P50115,P50116,Q561R9,Q62635                      |
| 9448 | 1,4,7,36,3<br>9,40,42,44 | 2,3,5,6,8,3<br>7,38,41,43 | 6 | P50115,P50116,P51907,Q4FZU6,Q561R9,Q7TPB1               |
| 9449 | 1,4,7,36,3<br>9,40,43,44 | 2,3,5,6,8,3<br>7,38,41,42 | 3 | P50115,P50116,Q6AYL6                                    |
| 9450 | 1,4,7,36,3<br>9,41,42,43 | 2,3,5,6,8,3<br>7,38,40,44 | 3 | P06760,P22006,Q561R9                                    |
| 9451 | 1,4,7,36,3<br>9,41,42,44 | 2,3,5,6,8,3<br>7,38,40,43 | 4 | P51907,P82995,Q4FZU6,Q561R9                             |
| 9452 | 1,4,7,36,3<br>9,41,43,44 | 2,3,5,6,8,3<br>7,38,40,42 | 3 | D3ZUC6,P06760,P22006                                    |
| 9453 | 1,4,7,36,3<br>9,42,43,44 | 2,3,5,6,8,3<br>7,38,40,41 | 4 | P50115,P50116,P51907,Q561R9                             |
| 9454 | 1,4,7,36,4<br>0,41,42,43 | 2,3,5,6,8,3<br>7,38,39,44 | 2 | P27213,Q561R9                                           |
| 9455 | 1,4,7,36,4<br>0,41,42,44 | 2,3,5,6,8,3<br>7,38,39,43 | 4 | P00714,Q4FZU6,Q561R9,Q7TPB1                             |
| 9456 | 1,4,7,36,4<br>0,41,43,44 | 2,3,5,6,8,3<br>7,38,39,42 | 1 | Q4FZU6                                                  |
| 9457 | 1,4,7,36,4<br>0,42,43,44 | 2,3,5,6,8,3<br>7,38,39,41 | 5 | P00714,P50115,P50116,Q561R9,Q7TPB1                      |
| 9458 | 1,4,7,36,4<br>1,42,43,44 | 2,3,5,6,8,3<br>7,38,39,40 | 3 | P27213,P82995,Q561R9                                    |
| 9459 | 1,4,7,37,3<br>8,39,40,41 | 2,3,5,6,8,3<br>6,42,43,44 | 5 | P10715,P13432,P19629,P36374,P62804                      |
| 9460 | 1,4,7,37,3<br>8,39,40,42 | 2,3,5,6,8,3<br>6,41,43,44 | 2 | P83121,Q9Z1F2                                           |
| 9461 | 1,4,7,37,3<br>8,39,40,43 | 2,3,5,6,8,3<br>6,41,42,44 | 5 | P08753,P35281,P60905,P97605,Q812E4                      |
| 9462 | 1,4,7,37,3<br>8,39,40,44 | 2,3,5,6,8,3<br>6,41,42,43 | 8 | P08753,P11883,P54921,P83121,Q63357,Q6AYL6,Q6AYR9,Q812E4 |
| 9463 | 1,4,7,37,3<br>8,39,41,42 | 2,3,5,6,8,3<br>6,40,43,44 | 2 | P13432,Q9Z1F2                                           |
| 9464 | 1,4,7,37,3<br>8,39,41,43 | 2,3,5,6,8,3<br>6,40,42,44 | 4 | P13432,P22006,P36374,P62804                             |
| 9465 | 1,4,7,37,3<br>8,39,41,44 | 2,3,5,6,8,3<br>6,40,42,43 | 3 | P36374,P62804,Q05695                                    |
| 9466 | 1,4,7,37,3<br>8,39,42,43 | 2,3,5,6,8,3<br>6,40,41,44 | 4 | B0BNN3,P06866,Q6P6T1,Q9Z1F2                             |

|      |                          |                           |   |                                                         |
|------|--------------------------|---------------------------|---|---------------------------------------------------------|
| 9467 | 1,4,7,37,3<br>8,39,42,44 | 2,3,5,6,8,3<br>6,40,41,43 | 3 | P51907,P83121,Q9Z1F2                                    |
| 9468 | 1,4,7,37,3<br>8,39,43,44 | 2,3,5,6,8,3<br>6,40,41,42 | 3 | P23593,Q812E4,Q9JJS8                                    |
| 9469 | 1,4,7,37,3<br>8,40,41,42 | 2,3,5,6,8,3<br>6,39,43,44 | 0 |                                                         |
| 9470 | 1,4,7,37,3<br>8,40,41,43 | 2,3,5,6,8,3<br>6,39,42,44 | 1 | P27213                                                  |
| 9471 | 1,4,7,37,3<br>8,40,41,44 | 2,3,5,6,8,3<br>6,39,42,43 | 5 | P06911,P10715,P31044,Q5GRG2,Q6AYR9                      |
| 9472 | 1,4,7,37,3<br>8,40,42,43 | 2,3,5,6,8,3<br>6,39,41,44 | 0 |                                                         |
| 9473 | 1,4,7,37,3<br>8,40,42,44 | 2,3,5,6,8,3<br>6,39,41,43 | 3 | P00714,P83121,Q9Z1F2                                    |
| 9474 | 1,4,7,37,3<br>8,40,43,44 | 2,3,5,6,8,3<br>6,39,41,42 | 5 | P08010,P08753,P97605,Q6AYR9,Q812E4                      |
| 9475 | 1,4,7,37,3<br>8,41,42,43 | 2,3,5,6,8,3<br>6,39,40,44 | 4 | P06866,P27213,P80020,Q6P6T1                             |
| 9476 | 1,4,7,37,3<br>8,41,42,44 | 2,3,5,6,8,3<br>6,39,40,43 | 2 | Q05695,Q9Z1F2                                           |
| 9477 | 1,4,7,37,3<br>8,41,43,44 | 2,3,5,6,8,3<br>6,39,40,42 | 4 | P27213,P62804,Q05695,Q6AYR9                             |
| 9478 | 1,4,7,37,3<br>8,42,43,44 | 2,3,5,6,8,3<br>6,39,40,41 | 2 | P00714,Q9Z1F2                                           |
| 9479 | 1,4,7,37,3<br>9,40,41,42 | 2,3,5,6,8,3<br>6,38,43,44 | 2 | P13432,Q561R9                                           |
| 9480 | 1,4,7,37,3<br>9,40,41,43 | 2,3,5,6,8,3<br>6,38,42,44 | 7 | P08753,P10715,P22006,P36374,P97554,Q6AYL6,Q812E4        |
| 9481 | 1,4,7,37,3<br>9,40,41,44 | 2,3,5,6,8,3<br>6,38,42,43 | 8 | P06911,P10715,P18418,P19629,P31044,Q4FZU6,Q5GRG2,Q6AYL6 |
| 9482 | 1,4,7,37,3<br>9,40,42,43 | 2,3,5,6,8,3<br>6,38,41,44 | 5 | P50115,P50116,Q561R9,Q62635,Q8CIZ5                      |
| 9483 | 1,4,7,37,3<br>9,40,42,44 | 2,3,5,6,8,3<br>6,38,41,43 | 5 | P50115,P50116,P83121,Q561R9,Q6AYL6                      |
| 9484 | 1,4,7,37,3<br>9,40,43,44 | 2,3,5,6,8,3<br>6,38,41,42 | 7 | P08753,P50115,P50116,Q63357,Q6AYL6,Q812E4,Q8CIZ5        |
| 9485 | 1,4,7,37,3<br>9,41,42,43 | 2,3,5,6,8,3<br>6,38,40,44 | 2 | P22006,Q561R9                                           |
| 9486 | 1,4,7,37,3<br>9,41,42,44 | 2,3,5,6,8,3<br>6,38,40,43 | 1 | Q561R9                                                  |
| 9487 | 1,4,7,37,3<br>9,41,43,44 | 2,3,5,6,8,3<br>6,38,40,42 | 4 | P22006,P36374,P62804,Q6AYL6                             |
| 9488 | 1,4,7,37,3<br>9,42,43,44 | 2,3,5,6,8,3<br>6,38,40,41 | 3 | P50115,P50116,Q561R9                                    |
| 9489 | 1,4,7,37,4<br>0,41,42,43 | 2,3,5,6,8,3<br>6,38,39,44 | 2 | P27213,Q561R9                                           |

|      |                          |                           |   |                                                         |
|------|--------------------------|---------------------------|---|---------------------------------------------------------|
| 9490 | 1,4,7,37,4<br>0,41,42,44 | 2,3,5,6,8,3<br>6,38,39,43 | 5 | P00714,Q4FZU6,Q561R9,Q5GRG2,Q63942                      |
| 9491 | 1,4,7,37,4<br>0,41,43,44 | 2,3,5,6,8,3<br>6,38,39,42 | 5 | P08753,P10715,P19218,Q5GRG2,Q6AYL6                      |
| 9492 | 1,4,7,37,4<br>0,42,43,44 | 2,3,5,6,8,3<br>6,38,39,41 | 4 | P00714,P50115,P50116,Q561R9                             |
| 9493 | 1,4,7,37,4<br>1,42,43,44 | 2,3,5,6,8,3<br>6,38,39,40 | 2 | P27213,Q561R9                                           |
| 9494 | 1,4,7,38,3<br>9,40,41,42 | 2,3,5,6,8,3<br>6,37,43,44 | 5 | P13432,P83121,Q4FZU6,Q561R9,Q9Z1F2                      |
| 9495 | 1,4,7,38,3<br>9,40,41,43 | 2,3,5,6,8,3<br>6,37,42,44 | 2 | P13432,P22006                                           |
| 9496 | 1,4,7,38,3<br>9,40,41,44 | 2,3,5,6,8,3<br>6,37,42,43 | 8 | P06911,P10715,P19629,P31044,Q05695,Q4FZU6,Q5GRG2,Q6AYL6 |
| 9497 | 1,4,7,38,3<br>9,40,42,43 | 2,3,5,6,8,3<br>6,37,41,44 | 3 | B0BNN3,P83121,Q9Z1F2                                    |
| 9498 | 1,4,7,38,3<br>9,40,42,44 | 2,3,5,6,8,3<br>6,37,41,43 | 5 | P00714,P51907,P83121,Q561R9,Q9Z1F2                      |
| 9499 | 1,4,7,38,3<br>9,40,43,44 | 2,3,5,6,8,3<br>6,37,41,42 | 2 | P83121,Q6AYL6                                           |
| 9500 | 1,4,7,38,3<br>9,41,42,43 | 2,3,5,6,8,3<br>6,37,40,44 | 6 | B0BNN3,P06866,P13432,P22006,P53792,Q9Z1F2               |
| 9501 | 1,4,7,38,3<br>9,41,42,44 | 2,3,5,6,8,3<br>6,37,40,43 | 4 | P13432,P51907,Q05695,Q9Z1F2                             |
| 9502 | 1,4,7,38,3<br>9,41,43,44 | 2,3,5,6,8,3<br>6,37,40,42 | 3 | P22006,P23593,Q05695                                    |
| 9503 | 1,4,7,38,3<br>9,42,43,44 | 2,3,5,6,8,3<br>6,37,40,41 | 4 | B0BNN3,P23593,P51907,Q9Z1F2                             |
| 9504 | 1,4,7,38,4<br>0,41,42,43 | 2,3,5,6,8,3<br>6,37,39,44 | 2 | B0BNN3,P27213                                           |
| 9505 | 1,4,7,38,4<br>0,41,42,44 | 2,3,5,6,8,3<br>6,37,39,43 | 4 | P00714,Q05695,Q4FZU6,Q561R9                             |
| 9506 | 1,4,7,38,4<br>0,41,43,44 | 2,3,5,6,8,3<br>6,37,39,42 | 2 | P27213,Q6AYL6                                           |
| 9507 | 1,4,7,38,4<br>0,42,43,44 | 2,3,5,6,8,3<br>6,37,39,41 | 2 | P00714,Q9Z1F2                                           |
| 9508 | 1,4,7,38,4<br>1,42,43,44 | 2,3,5,6,8,3<br>6,37,39,40 | 5 | B0BNN3,P27213,P55091,Q05695,Q9Z1F2                      |
| 9509 | 1,4,7,39,4<br>0,41,42,43 | 2,3,5,6,8,3<br>6,37,38,44 | 3 | P22006,P53792,Q561R9                                    |
| 9510 | 1,4,7,39,4<br>0,41,42,44 | 2,3,5,6,8,3<br>6,37,38,43 | 8 | P06911,P10715,P19629,P31044,Q4FZU6,Q561R9,Q5GRG2,Q6AYL6 |
| 9511 | 1,4,7,39,4<br>0,41,43,44 | 2,3,5,6,8,3<br>6,37,38,42 | 8 | P06911,P10715,P19629,P22006,P31044,Q4FZU6,Q5GRG2,Q6AYL6 |
| 9512 | 1,4,7,39,4<br>0,42,43,44 | 2,3,5,6,8,3<br>6,37,38,41 | 4 | P50115,P50116,Q561R9,Q6AYL6                             |

|      |                          |                           |    |                                                                       |
|------|--------------------------|---------------------------|----|-----------------------------------------------------------------------|
| 9513 | 1,4,7,39,4<br>1,42,43,44 | 2,3,5,6,8,3<br>6,37,38,40 | 2  | P22006,Q561R9                                                         |
| 9514 | 1,4,7,40,4<br>1,42,43,44 | 2,3,5,6,8,3<br>6,37,38,39 | 3  | P27213,Q4FZU6,Q561R9                                                  |
| 9515 | 1,4,8,36,3<br>7,38,39,40 | 2,3,5,6,7,4<br>1,42,43,44 | 9  | O35547,P0C0A9,P10758,P11883,P16086,P35281,P97605,Q9JID2,Q9QZA6        |
| 9516 | 1,4,8,36,3<br>7,38,39,41 | 2,3,5,6,7,4<br>0,42,43,44 | 5  | P10758,P11883,P36374,Q5M819,Q9R1T5                                    |
| 9517 | 1,4,8,36,3<br>7,38,39,42 | 2,3,5,6,7,4<br>0,41,43,44 | 3  | P10758,P11883,P83748                                                  |
| 9518 | 1,4,8,36,3<br>7,38,39,43 | 2,3,5,6,7,4<br>0,41,42,44 | 6  | P16086,P97605,Q64268,Q6IFV1,Q6P6R2,Q812E4                             |
| 9519 | 1,4,8,36,3<br>7,38,39,44 | 2,3,5,6,7,4<br>0,41,42,43 | 3  | P11883,P16086,Q6AYR9                                                  |
| 9520 | 1,4,8,36,3<br>7,38,40,41 | 2,3,5,6,7,3<br>9,42,43,44 | 3  | P0C0A9,P11883,P35281                                                  |
| 9521 | 1,4,8,36,3<br>7,38,40,42 | 2,3,5,6,7,3<br>9,41,43,44 | 4  | P11883,P35281,P83748,P97605                                           |
| 9522 | 1,4,8,36,3<br>7,38,40,43 | 2,3,5,6,7,3<br>9,41,42,44 | 8  | P08010,P0C0A9,P16086,P35281,P80201,P97605,Q64268,Q6AYR9               |
| 9523 | 1,4,8,36,3<br>7,38,40,44 | 2,3,5,6,7,3<br>9,41,42,43 | 10 | O35547,P0C0A9,P11883,P16086,P54921,P80201,P82471,P83748,P97605,Q6AYR9 |
| 9524 | 1,4,8,36,3<br>7,38,41,42 | 2,3,5,6,7,3<br>9,40,43,44 | 3  | P11883,P36376,P83748                                                  |
| 9525 | 1,4,8,36,3<br>7,38,41,43 | 2,3,5,6,7,3<br>9,40,42,44 | 3  | P27213,Q64268,Q9QUL6                                                  |
| 9526 | 1,4,8,36,3<br>7,38,41,44 | 2,3,5,6,7,3<br>9,40,42,43 | 5  | P02780,P11883,P16086,Q05695,Q6AYR9                                    |
| 9527 | 1,4,8,36,3<br>7,38,42,43 | 2,3,5,6,7,3<br>9,40,41,44 | 7  | P06866,P12020,P36376,P97605,Q64268,Q6P6T1,Q9QUL6                      |
| 9528 | 1,4,8,36,3<br>7,38,42,44 | 2,3,5,6,7,3<br>9,40,41,43 | 4  | P00714,P11883,P36376,P83748                                           |
| 9529 | 1,4,8,36,3<br>7,38,43,44 | 2,3,5,6,7,3<br>9,40,41,42 | 4  | P16086,P97605,Q64268,Q6AYR9                                           |
| 9530 | 1,4,8,36,3<br>7,39,40,41 | 2,3,5,6,7,3<br>8,42,43,44 | 6  | O35547,P08723,P11883,P25031,P35281,Q62975                             |
| 9531 | 1,4,8,36,3<br>7,39,40,42 | 2,3,5,6,7,3<br>8,41,43,44 | 6  | P00774,P11883,P25031,P83748,P98089,Q561R9                             |
| 9532 | 1,4,8,36,3<br>7,39,40,43 | 2,3,5,6,7,3<br>8,41,42,44 | 9  | O35547,P00774,P08290,P0C0A9,P35281,P80201,P97605,Q812E4,Q8CIZ5        |
| 9533 | 1,4,8,36,3<br>7,39,40,44 | 2,3,5,6,7,3<br>8,41,42,43 | 7  | O35547,P0C0A9,P11883,P16086,P25031,P54921,Q8CJD3                      |
| 9534 | 1,4,8,36,3<br>7,39,41,42 | 2,3,5,6,7,3<br>8,40,43,44 | 2  | P01835,Q561R9                                                         |
| 9535 | 1,4,8,36,3<br>7,39,41,43 | 2,3,5,6,7,3<br>8,40,42,44 | 3  | P22006,P36374,Q9QUL6                                                  |



|      |                                                 |   |                                                         |
|------|-------------------------------------------------|---|---------------------------------------------------------|
| 9536 | 1,4,8,36,3 2,3,5,6,7,3<br>7,39,41,44 8,40,42,43 | 3 | P11883,P25031,Q9JHB9                                    |
| 9537 | 1,4,8,36,3 2,3,5,6,7,3<br>7,39,42,43 8,40,41,44 | 3 | Q561R9,Q62635,Q9QUL6                                    |
| 9538 | 1,4,8,36,3 2,3,5,6,7,3<br>7,39,42,44 8,40,41,43 | 4 | P11883,P25031,P83748,Q561R9                             |
| 9539 | 1,4,8,36,3 2,3,5,6,7,3<br>7,39,43,44 8,40,41,42 | 4 | O35547,P16086,P97605,Q812E4                             |
| 9540 | 1,4,8,36,3 2,3,5,6,7,3<br>7,40,41,42 8,39,43,44 | 3 | P25031,P83748,Q561R9                                    |
| 9541 | 1,4,8,36,3 2,3,5,6,7,3<br>7,40,41,43 8,39,42,44 | 1 | Q9QUL6                                                  |
| 9542 | 1,4,8,36,3 2,3,5,6,7,3<br>7,40,41,44 8,39,42,43 | 5 | O35547,P11883,P25031,P47727,Q5GRG2                      |
| 9543 | 1,4,8,36,3 2,3,5,6,7,3<br>7,40,42,43 8,39,41,44 | 4 | P00774,P80201,P97605,Q561R9                             |
| 9544 | 1,4,8,36,3 2,3,5,6,7,3<br>7,40,42,44 8,39,41,43 | 6 | P00714,P11883,P25031,P83748,Q561R9,Q7TPB1               |
| 9545 | 1,4,8,36,3 2,3,5,6,7,3<br>7,40,43,44 8,39,41,42 | 8 | O35547,P08010,P08290,P08753,P0C0A9,P16086,P80201,P97605 |
| 9546 | 1,4,8,36,3 2,3,5,6,7,3<br>7,41,42,43 8,39,40,44 | 3 | P27213,Q561R9,Q9QUL6                                    |
| 9547 | 1,4,8,36,3 2,3,5,6,7,3<br>7,41,42,44 8,39,40,43 | 2 | P83748,Q561R9                                           |
| 9548 | 1,4,8,36,3 2,3,5,6,7,3<br>7,41,43,44 8,39,40,42 | 3 | O88600,P27213,Q9QUL6                                    |
| 9549 | 1,4,8,36,3 2,3,5,6,7,3<br>7,42,43,44 8,39,40,41 | 4 | P00714,P97605,Q561R9,Q9QUL6                             |
| 9550 | 1,4,8,36,3 2,3,5,6,7,3<br>8,39,40,41 7,42,43,44 | 2 | P10758,Q62975                                           |
| 9551 | 1,4,8,36,3 2,3,5,6,7,3<br>8,39,40,42 7,41,43,44 | 3 | P02631,P10758,P83748                                    |
| 9552 | 1,4,8,36,3 2,3,5,6,7,3<br>8,39,40,43 7,41,42,44 | 3 | P80201,P97605,Q64268                                    |
| 9553 | 1,4,8,36,3 2,3,5,6,7,3<br>8,39,40,44 7,41,42,43 | 1 | P10758                                                  |
| 9554 | 1,4,8,36,3 2,3,5,6,7,3<br>8,39,41,42 7,40,43,44 | 2 | P10758,P83748                                           |
| 9555 | 1,4,8,36,3 2,3,5,6,7,3<br>8,39,41,43 7,40,42,44 | 2 | Q64268,Q9QUL6                                           |
| 9556 | 1,4,8,36,3 2,3,5,6,7,3<br>8,39,41,44 7,40,42,43 | 2 | P10758,Q05695                                           |
| 9557 | 1,4,8,36,3 2,3,5,6,7,3<br>8,39,42,43 7,40,41,44 | 3 | B0BNN3,Q64268,Q80WL1                                    |
| 9558 | 1,4,8,36,3 2,3,5,6,7,3<br>8,39,42,44 7,40,41,43 | 3 | P10758,P51907,P83748                                    |

|      |                          |                           |   |                                                                |
|------|--------------------------|---------------------------|---|----------------------------------------------------------------|
| 9559 | 1,4,8,36,3<br>8,39,43,44 | 2,3,5,6,7,3<br>7,40,41,42 | 2 | P97605,Q64268                                                  |
| 9560 | 1,4,8,36,3<br>8,40,41,42 | 2,3,5,6,7,3<br>7,39,43,44 | 1 | P83748                                                         |
| 9561 | 1,4,8,36,3<br>8,40,41,43 | 2,3,5,6,7,3<br>7,39,42,44 | 1 | P27213                                                         |
| 9562 | 1,4,8,36,3<br>8,40,41,44 | 2,3,5,6,7,3<br>7,39,42,43 | 2 | Q05695,Q4FZU6                                                  |
| 9563 | 1,4,8,36,3<br>8,40,42,43 | 2,3,5,6,7,3<br>7,39,41,44 | 4 | P15999,P80201,P97605,Q64268                                    |
| 9564 | 1,4,8,36,3<br>8,40,42,44 | 2,3,5,6,7,3<br>7,39,41,43 | 4 | P00714,P15999,P83748,Q7TPB1                                    |
| 9565 | 1,4,8,36,3<br>8,40,43,44 | 2,3,5,6,7,3<br>7,39,41,42 | 3 | P80201,P97605,Q64268                                           |
| 9566 | 1,4,8,36,3<br>8,41,42,43 | 2,3,5,6,7,3<br>7,39,40,44 | 4 | B0BNN3,P27213,Q64268,Q9QUL6                                    |
| 9567 | 1,4,8,36,3<br>8,41,42,44 | 2,3,5,6,7,3<br>7,39,40,43 | 4 | P00714,P15999,P83748,Q05695                                    |
| 9568 | 1,4,8,36,3<br>8,41,43,44 | 2,3,5,6,7,3<br>7,39,40,42 | 3 | P27213,Q05695,Q64268                                           |
| 9569 | 1,4,8,36,3<br>8,42,43,44 | 2,3,5,6,7,3<br>7,39,40,41 | 4 | P00714,P15999,P27213,Q64268                                    |
| 9570 | 1,4,8,36,3<br>9,40,41,42 | 2,3,5,6,7,3<br>7,38,43,44 | 2 | Q4FZU6,Q561R9                                                  |
| 9571 | 1,4,8,36,3<br>9,40,41,43 | 2,3,5,6,7,3<br>7,38,42,44 | 1 | P97840                                                         |
| 9572 | 1,4,8,36,3<br>9,40,41,44 | 2,3,5,6,7,3<br>7,38,42,43 | 9 | P06911,P10715,P19629,P25031,P31044,Q4FZU6,Q5GRG2,Q62975,Q6AYL6 |
| 9573 | 1,4,8,36,3<br>9,40,42,43 | 2,3,5,6,7,3<br>7,38,41,44 | 2 | P00774,Q561R9                                                  |
| 9574 | 1,4,8,36,3<br>9,40,42,44 | 2,3,5,6,7,3<br>7,38,41,43 | 5 | P00714,P25031,P83748,Q561R9,Q7TPB1                             |
| 9575 | 1,4,8,36,3<br>9,40,43,44 | 2,3,5,6,7,3<br>7,38,41,42 | 2 | P97605,Q6AYL6                                                  |
| 9576 | 1,4,8,36,3<br>9,41,42,43 | 2,3,5,6,7,3<br>7,38,40,44 | 3 | P22006,Q561R9,Q9QUL6                                           |
| 9577 | 1,4,8,36,3<br>9,41,42,44 | 2,3,5,6,7,3<br>7,38,40,43 | 2 | P83748,Q561R9                                                  |
| 9578 | 1,4,8,36,3<br>9,41,43,44 | 2,3,5,6,7,3<br>7,38,40,42 | 0 |                                                                |
| 9579 | 1,4,8,36,3<br>9,42,43,44 | 2,3,5,6,7,3<br>7,38,40,41 | 1 | Q561R9                                                         |
| 9580 | 1,4,8,36,4<br>0,41,42,43 | 2,3,5,6,7,3<br>7,38,39,44 | 3 | P27213,Q561R9,Q9QUL6                                           |
| 9581 | 1,4,8,36,4<br>0,41,42,44 | 2,3,5,6,7,3<br>7,38,39,43 | 5 | P00714,P83748,Q4FZU6,Q561R9,Q7TPB1                             |

|      |                          |                           |    |                                                                                            |
|------|--------------------------|---------------------------|----|--------------------------------------------------------------------------------------------|
| 9582 | 1,4,8,36,4<br>0,41,43,44 | 2,3,5,6,7,3<br>7,38,39,42 | 2  | P19218,P27213                                                                              |
| 9583 | 1,4,8,36,4<br>0,42,43,44 | 2,3,5,6,7,3<br>7,38,39,41 | 3  | P00714,Q561R9,Q7TPB1                                                                       |
| 9584 | 1,4,8,36,4<br>1,42,43,44 | 2,3,5,6,7,3<br>7,38,39,40 | 3  | P27213,Q561R9,Q9QUL6                                                                       |
| 9585 | 1,4,8,37,3<br>8,39,40,41 | 2,3,5,6,7,3<br>6,42,43,44 | 8  | P08723,P0C0A9,P10715,P10758,P13432,P35281,P36374,Q62975                                    |
| 9586 | 1,4,8,37,3<br>8,39,40,42 | 2,3,5,6,7,3<br>6,41,43,44 | 3  | P02803,P35281,P83748                                                                       |
| 9587 | 1,4,8,37,3<br>8,39,40,43 | 2,3,5,6,7,3<br>6,41,42,44 | 12 | B0BNN3,P08290,P08649,P0C0A9,P16086,P35281,P60905,P97605,Q64268,Q6IFV1,Q812E4,Q8CJ52        |
| 9588 | 1,4,8,37,3<br>8,39,40,44 | 2,3,5,6,7,3<br>6,41,42,43 | 13 | O35547,P08649,P0C0A9,P16086,P16636,P35281,P54921,P60905,P97605,Q63357,Q6AYR9,Q812E4,Q9QZA6 |
| 9589 | 1,4,8,37,3<br>8,39,41,42 | 2,3,5,6,7,3<br>6,40,43,44 | 2  | P13432,P83748                                                                              |
| 9590 | 1,4,8,37,3<br>8,39,41,43 | 2,3,5,6,7,3<br>6,40,42,44 | 8  | B0BNN3,P13432,P36374,P53792,Q64268,Q6IFV1,Q812E4,Q9R1T5                                    |
| 9591 | 1,4,8,37,3<br>8,39,41,44 | 2,3,5,6,7,3<br>6,40,42,43 | 3  | P16086,P16636,Q05695                                                                       |
| 9592 | 1,4,8,37,3<br>8,39,42,43 | 2,3,5,6,7,3<br>6,40,41,44 | 6  | B0BNN3,P06866,P97605,Q64268,Q6P6T1,Q80WL1                                                  |
| 9593 | 1,4,8,37,3<br>8,39,42,44 | 2,3,5,6,7,3<br>6,40,41,43 | 1  | P83748                                                                                     |
| 9594 | 1,4,8,37,3<br>8,39,43,44 | 2,3,5,6,7,3<br>6,40,41,42 | 9  | B0BNN3,P13596,P16086,P23593,P97605,Q64268,Q6AYR9,Q812E4,Q9JJS8                             |
| 9595 | 1,4,8,37,3<br>8,40,41,42 | 2,3,5,6,7,3<br>6,39,43,44 | 1  | P83748                                                                                     |
| 9596 | 1,4,8,37,3<br>8,40,41,43 | 2,3,5,6,7,3<br>6,39,42,44 | 2  | P27213,P35281                                                                              |
| 9597 | 1,4,8,37,3<br>8,40,41,44 | 2,3,5,6,7,3<br>6,39,42,43 | 7  | P10715,P16086,P16636,P83748,Q05695,Q5GRG2,Q6AYR9                                           |
| 9598 | 1,4,8,37,3<br>8,40,42,43 | 2,3,5,6,7,3<br>6,39,41,44 | 3  | B0BNN3,P97605,Q64268                                                                       |
| 9599 | 1,4,8,37,3<br>8,40,42,44 | 2,3,5,6,7,3<br>6,39,41,43 | 2  | P00714,P83748                                                                              |
| 9600 | 1,4,8,37,3<br>8,40,43,44 | 2,3,5,6,7,3<br>6,39,41,42 | 12 | P04905,P08010,P08290,P08649,P08753,P0C0A9,P16086,P80201,P97605,Q64268,Q6AYR9,Q812E4        |
| 9601 | 1,4,8,37,3<br>8,41,42,43 | 2,3,5,6,7,3<br>6,39,40,44 | 7  | B0BNN3,P06866,P27213,P36376,Q64268,Q6P6T1,Q9QUL6                                           |
| 9602 | 1,4,8,37,3<br>8,41,42,44 | 2,3,5,6,7,3<br>6,39,40,43 | 4  | P00714,P36376,P83748,Q05695                                                                |
| 9603 | 1,4,8,37,3<br>8,41,43,44 | 2,3,5,6,7,3<br>6,39,40,42 | 6  | O88600,P16086,P27213,Q05695,Q64268,Q6AYR9                                                  |
| 9604 | 1,4,8,37,3<br>8,42,43,44 | 2,3,5,6,7,3<br>6,39,40,41 | 6  | B0BNN3,P00714,P27213,P36376,P97605,Q64268                                                  |

|      |                          |                           |    |                                                                                            |
|------|--------------------------|---------------------------|----|--------------------------------------------------------------------------------------------|
| 9605 | 1,4,8,37,3<br>9,40,41,42 | 2,3,5,6,7,3<br>6,38,43,44 | 2  | P13432,Q561R9                                                                              |
| 9606 | 1,4,8,37,3<br>9,40,41,43 | 2,3,5,6,7,3<br>6,38,42,44 | 8  | P08290,P35281,P36374,P53792,P97554,P97840,Q6AYL6,Q812E4                                    |
| 9607 | 1,4,8,37,3<br>9,40,41,44 | 2,3,5,6,7,3<br>6,38,42,43 | 11 | O35547,P06911,P08723,P10715,P19629,P25031,P31044,P47727,Q5GRG2,Q62975,Q6AYL6               |
| 9608 | 1,4,8,37,3<br>9,40,42,43 | 2,3,5,6,7,3<br>6,38,41,44 | 3  | P97605,Q561R9,Q8CIZ5                                                                       |
| 9609 | 1,4,8,37,3<br>9,40,42,44 | 2,3,5,6,7,3<br>6,38,41,43 | 3  | P00714,P83748,Q561R9                                                                       |
| 9610 | 1,4,8,37,3<br>9,40,43,44 | 2,3,5,6,7,3<br>6,38,41,42 | 13 | O35547,P04905,P08010,P08290,P08649,P08753,P16086,P97605,Q63357,Q6AYL6,Q812E4,Q8CIZ5,Q8CJ52 |
| 9611 | 1,4,8,37,3<br>9,41,42,43 | 2,3,5,6,7,3<br>6,38,40,44 | 4  | P22006,P53792,Q561R9,Q9QUL6                                                                |
| 9612 | 1,4,8,37,3<br>9,41,42,44 | 2,3,5,6,7,3<br>6,38,40,43 | 2  | P83748,Q561R9                                                                              |
| 9613 | 1,4,8,37,3<br>9,41,43,44 | 2,3,5,6,7,3<br>6,38,40,42 | 3  | P36374,Q64057,Q812E4                                                                       |
| 9614 | 1,4,8,37,3<br>9,42,43,44 | 2,3,5,6,7,3<br>6,38,40,41 | 1  | Q561R9                                                                                     |
| 9615 | 1,4,8,37,4<br>0,41,42,43 | 2,3,5,6,7,3<br>6,38,39,44 | 3  | P27213,Q561R9,Q9QUL6                                                                       |
| 9616 | 1,4,8,37,4<br>0,41,42,44 | 2,3,5,6,7,3<br>6,38,39,43 | 4  | P00714,P83748,Q4FZU6,Q561R9                                                                |
| 9617 | 1,4,8,37,4<br>0,41,43,44 | 2,3,5,6,7,3<br>6,38,39,42 | 7  | P04905,P08010,P08290,P19218,P27213,P47727,Q6AYL6                                           |
| 9618 | 1,4,8,37,4<br>0,42,43,44 | 2,3,5,6,7,3<br>6,38,39,41 | 3  | P00714,P97605,Q561R9                                                                       |
| 9619 | 1,4,8,37,4<br>1,42,43,44 | 2,3,5,6,7,3<br>6,38,39,40 | 3  | P27213,Q561R9,Q9QUL6                                                                       |
| 9620 | 1,4,8,38,3<br>9,40,41,42 | 2,3,5,6,7,3<br>6,37,43,44 | 5  | P02631,P10758,P13432,P83748,Q561R9                                                         |
| 9621 | 1,4,8,38,3<br>9,40,41,43 | 2,3,5,6,7,3<br>6,37,42,44 | 3  | B0BNN3,P13432,P53792                                                                       |
| 9622 | 1,4,8,38,3<br>9,40,41,44 | 2,3,5,6,7,3<br>6,37,42,43 | 9  | P06911,P10715,P10758,P19629,P31044,Q05695,Q5GRG2,Q62975,Q6AYL6                             |
| 9623 | 1,4,8,38,3<br>9,40,42,43 | 2,3,5,6,7,3<br>6,37,41,44 | 1  | B0BNN3                                                                                     |
| 9624 | 1,4,8,38,3<br>9,40,42,44 | 2,3,5,6,7,3<br>6,37,41,43 | 4  | P00714,P11762,P83748,Q561R9                                                                |
| 9625 | 1,4,8,38,3<br>9,40,43,44 | 2,3,5,6,7,3<br>6,37,41,42 | 4  | B0BNN3,P08649,P97605,Q6AYL6                                                                |
| 9626 | 1,4,8,38,3<br>9,41,42,43 | 2,3,5,6,7,3<br>6,37,40,44 | 7  | B0BNN3,P00731,P06866,P13432,P27213,P53792,Q64268                                           |
| 9627 | 1,4,8,38,3<br>9,41,42,44 | 2,3,5,6,7,3<br>6,37,40,43 | 4  | P13432,P83748,Q05695,Q561R9                                                                |

|      |                               |                           |    |                                                                                                                                                                                       |
|------|-------------------------------|---------------------------|----|---------------------------------------------------------------------------------------------------------------------------------------------------------------------------------------|
| 9628 | 1,4,8,38,3<br>9,41,43,44      | 2,3,5,6,7,3<br>6,37,40,42 | 3  | B0BNN3,P53792,Q05695                                                                                                                                                                  |
| 9629 | 1,4,8,38,3<br>9,42,43,44      | 2,3,5,6,7,3<br>6,37,40,41 | 4  | B0BNN3,P11762,Q64268,Q80WL1                                                                                                                                                           |
| 9630 | 1,4,8,38,4<br>0,41,42,43      | 2,3,5,6,7,3<br>6,37,39,44 | 2  | B0BNN3,P27213                                                                                                                                                                         |
| 9631 | 1,4,8,38,4<br>0,41,42,44      | 2,3,5,6,7,3<br>6,37,39,43 | 5  | P00714,P83748,Q05695,Q4FZU6,Q561R9                                                                                                                                                    |
| 9632 | 1,4,8,38,4<br>0,41,43,44      | 2,3,5,6,7,3<br>6,37,39,42 | 3  | B0BNN3,P27213,Q05695                                                                                                                                                                  |
| 9633 | 1,4,8,38,4<br>0,42,43,44      | 2,3,5,6,7,3<br>6,37,39,41 | 4  | B0BNN3,P00714,P27213,P97605                                                                                                                                                           |
| 9634 | 1,4,8,38,4<br>1,42,43,44      | 2,3,5,6,7,3<br>6,37,39,40 | 4  | B0BNN3,P27213,P55091,Q05695                                                                                                                                                           |
| 9635 | 1,4,8,39,4<br>0,41,42,43      | 2,3,5,6,7,3<br>6,37,38,44 | 3  | P53792,P97840,Q561R9                                                                                                                                                                  |
| 9636 | 1,4,8,39,4<br>0,41,42,44      | 2,3,5,6,7,3<br>6,37,38,43 | 8  | P10715,P11762,P19629,P83748,Q4FZU6,Q561R9,Q5GRG2,Q6AYL6                                                                                                                               |
| 9637 | 1,4,8,39,4<br>0,41,43,44      | 2,3,5,6,7,3<br>6,37,38,42 | 6  | P10715,P19218,P19629,P97840,Q5GRG2,Q6AYL6                                                                                                                                             |
| 9638 | 1,4,8,39,4<br>0,42,43,44      | 2,3,5,6,7,3<br>6,37,38,41 | 3  | P11762,Q561R9,Q6AYL6                                                                                                                                                                  |
| 9639 | 1,4,8,39,4<br>1,42,43,44      | 2,3,5,6,7,3<br>6,37,38,40 | 2  | P53792,Q561R9                                                                                                                                                                         |
| 9640 | 1,4,8,40,4<br>1,42,43,44      | 2,3,5,6,7,3<br>6,37,38,39 | 5  | P00714,P19218,P27213,Q561R9,Q6PCU2                                                                                                                                                    |
| 9641 | 1,4,36,37,<br>38,39,40,4<br>1 | 2,3,5,6,7,8<br>,42,43,44  | 13 | O35547,P08723,P0C0A9,P10758,P11883,P35281,P36374,P60905,P97605,Q5M819,Q62975,Q6Q7Y5,Q9JID2                                                                                            |
| 9642 | 1,4,36,37,<br>38,39,40,4<br>2 | 2,3,5,6,7,8<br>,41,43,44  | 8  | P02631,P10758,P11883,P35281,P50116,P83748,P97605,Q9Z1F2                                                                                                                               |
| 9643 | 1,4,36,37,<br>38,39,40,4<br>3 | 2,3,5,6,7,8<br>,41,42,44  | 20 | F1LM93,O08815,O35547,P04905,P08010,P08290,P08753,P0C0A9,P16086,P35281,P36374,P60905,P80201,P97605,Q62753,Q6IFV1,Q6P6R2,Q812E4,Q9JID2,Q9QZQ5                                           |
| 9644 | 1,4,36,37,<br>38,39,40,4<br>4 | 2,3,5,6,7,8<br>,41,42,43  | 26 | F1LM93,O08815,O35547,P04905,P07861,P08290,P08723,P08753,P0C0A9,P10758,P11883,P16086,P35281,P36374,P40241,P50116,P54921,P60905,P80201,P82471,P97605,Q62975,Q63357,Q6AYR9,Q812E4,Q9JID2 |
| 9645 | 1,4,36,37,<br>38,39,41,4<br>2 | 2,3,5,6,7,8<br>,40,43,44  | 5  | P10758,P11883,P13432,P83748,Q5M819                                                                                                                                                    |
| 9646 | 1,4,36,37,<br>38,39,41,4<br>3 | 2,3,5,6,7,8<br>,40,42,44  | 9  | B0BNN3,P22006,P36374,P53792,P97605,Q5M819,Q812E4,Q9JID2,Q9QZ76                                                                                                                        |

|      |                               |                          |    |                                                                                                          |
|------|-------------------------------|--------------------------|----|----------------------------------------------------------------------------------------------------------|
| 9647 | 1,4,36,37,<br>38,39,41,4<br>4 | 2,3,5,6,7,8<br>,40,42,43 | 6  | P10758,P11883,P16086,P36374,Q5M819,Q9JHB9                                                                |
| 9648 | 1,4,36,37,<br>38,39,42,4<br>3 | 2,3,5,6,7,8<br>,40,41,44 | 7  | B0BNN3,P06866,P12020,P97605,Q6IFU7,Q6P6T1,Q9Z1F2                                                         |
| 9649 | 1,4,36,37,<br>38,39,42,4<br>4 | 2,3,5,6,7,8<br>,40,41,43 | 7  | P10758,P11883,P51907,P83748,P97605,Q9JJS8,Q9Z1F2                                                         |
| 9650 | 1,4,36,37,<br>38,39,43,4<br>4 | 2,3,5,6,7,8<br>,40,41,42 | 10 | P02781,P08753,P16086,P23593,P36374,P97605,Q62753,Q6AYR9,Q812E4,Q9JJS8                                    |
| 9651 | 1,4,36,37,<br>38,40,41,4<br>2 | 2,3,5,6,7,8<br>,39,43,44 | 4  | P11883,P83748,P97605,Q5M819                                                                              |
| 9652 | 1,4,36,37,<br>38,40,41,4<br>3 | 2,3,5,6,7,8<br>,39,42,44 | 11 | P04905,P08010,P08290,P08753,P0C0A9,P20766,P27213,P36374,P55016,P97605,Q5M819                             |
| 9653 | 1,4,36,37,<br>38,40,41,4<br>4 | 2,3,5,6,7,8<br>,39,42,43 | 11 | O35547,P04905,P08723,P08753,P0C0A9,P11883,P16086,P36374,P83748,P97605,Q6AYR9                             |
| 9654 | 1,4,36,37,<br>38,40,42,4<br>3 | 2,3,5,6,7,8<br>,39,41,44 | 4  | O88267,P06866,P80201,P97605                                                                              |
| 9655 | 1,4,36,37,<br>38,40,42,4<br>4 | 2,3,5,6,7,8<br>,39,41,43 | 8  | O88267,P00714,P11883,P80201,P83748,P97605,Q7TPB1,Q8N7M5                                                  |
| 9656 | 1,4,36,37,<br>38,40,43,4<br>4 | 2,3,5,6,7,8<br>,39,41,42 | 15 | O08815,O35547,P04905,P08010,P08290,P08753,P0C0A9,P16086,P54921,P80201,P97605,Q62753,Q63357,Q6AYR9,Q812E4 |
| 9657 | 1,4,36,37,<br>38,41,42,4<br>3 | 2,3,5,6,7,8<br>,39,40,44 | 10 | B0BNN3,P06866,P20766,P27213,P36376,P80020,P97605,Q5M819,Q6P6T1,Q9QUL6                                    |
| 9658 | 1,4,36,37,<br>38,41,42,4<br>4 | 2,3,5,6,7,8<br>,39,40,43 | 3  | P11883,P36376,P83748                                                                                     |
| 9659 | 1,4,36,37,<br>38,41,43,4<br>4 | 2,3,5,6,7,8<br>,39,40,42 | 8  | P02780,P16086,P20766,P27213,P36374,P97605,Q5M819,Q6AYR9                                                  |
| 9660 | 1,4,36,37,<br>38,42,43,4<br>4 | 2,3,5,6,7,8<br>,39,40,41 | 3  | P06866,P27213,P97605                                                                                     |
| 9661 | 1,4,36,37,<br>39,40,41,4<br>2 | 2,3,5,6,7,8<br>,38,43,44 | 2  | P11883,Q561R9                                                                                            |

|      |                               |                          |    |                                                                                                                                                           |
|------|-------------------------------|--------------------------|----|-----------------------------------------------------------------------------------------------------------------------------------------------------------|
| 9662 | 1,4,36,37,<br>39,40,41,4<br>3 | 2,3,5,6,7,8<br>,38,42,44 | 12 | O35547,P04905,P08290,P08723,P08753,P22006,P36374,P53792,P60905,P97605,Q812E4,Q9JID2                                                                       |
| 9663 | 1,4,36,37,<br>39,40,41,4<br>4 | 2,3,5,6,7,8<br>,38,42,43 | 16 | O35547,P04905,P08290,P08723,P08753,P10715,P11883,P19629,P25031,P36374,P47727,P54921,Q5GRG2,Q62975,Q6AYL6,Q9JHB9                                           |
| 9664 | 1,4,36,37,<br>39,40,42,4<br>3 | 2,3,5,6,7,8<br>,38,41,44 | 12 | O35547,P00774,P50115,P50116,P80201,P97605,Q01205,Q05695,Q561R9,Q5M871,Q62635,Q8CIZ5                                                                       |
| 9665 | 1,4,36,37,<br>39,40,42,4<br>4 | 2,3,5,6,7,8<br>,38,41,43 | 9  | O35547,P11883,P50115,P50116,P83748,P97605,Q561R9,Q5M871,Q7TPB1                                                                                            |
| 9666 | 1,4,36,37,<br>39,40,43,4<br>4 | 2,3,5,6,7,8<br>,38,41,42 | 22 | F1LM93,O08815,O35547,P04905,P05369,P08010,P08290,P08753,P0C0A9,P16086,P36374,P50115,P50116,P54921,P60905,P80201,P97605,Q62753,Q63357,Q6AYL6,Q812E4,Q8CIZ5 |
| 9667 | 1,4,36,37,<br>39,41,42,4<br>3 | 2,3,5,6,7,8<br>,38,40,44 | 5  | P22006,P36374,P53792,Q561R9,Q9QUL6                                                                                                                        |
| 9668 | 1,4,36,37,<br>39,41,42,4<br>4 | 2,3,5,6,7,8<br>,38,40,43 | 3  | P11883,P83748,Q561R9                                                                                                                                      |
| 9669 | 1,4,36,37,<br>39,41,43,4<br>4 | 2,3,5,6,7,8<br>,38,40,42 | 6  | P02781,P05369,P08753,P22006,P36374,Q812E4                                                                                                                 |
| 9670 | 1,4,36,37,<br>39,42,43,4<br>4 | 2,3,5,6,7,8<br>,38,40,41 | 4  | P50115,P50116,P97605,Q561R9                                                                                                                               |
| 9671 | 1,4,36,37,<br>40,41,42,4<br>3 | 2,3,5,6,7,8<br>,38,39,44 | 4  | P27213,P97605,Q561R9,Q9QUL6                                                                                                                               |
| 9672 | 1,4,36,37,<br>40,41,42,4<br>4 | 2,3,5,6,7,8<br>,38,39,43 | 4  | P11883,P83748,Q561R9,Q7TPB1                                                                                                                               |
| 9673 | 1,4,36,37,<br>40,41,43,4<br>4 | 2,3,5,6,7,8<br>,38,39,42 | 12 | O08815,O35547,P04905,P05369,P08010,P08290,P08753,P19218,P27213,P36374,P47727,P97605                                                                       |
| 9674 | 1,4,36,37,<br>40,42,43,4<br>4 | 2,3,5,6,7,8<br>,38,39,41 | 10 | O35547,O88267,P08010,P19218,P50115,P50116,P80201,P97605,Q561R9,Q7TPB1                                                                                     |
| 9675 | 1,4,36,37,<br>41,42,43,4<br>4 | 2,3,5,6,7,8<br>,38,39,40 | 3  | P27213,Q561R9,Q9QUL6                                                                                                                                      |
| 9676 | 1,4,36,38,<br>39,40,41,4<br>2 | 2,3,5,6,7,8<br>,37,43,44 | 4  | P02631,P10758,P13432,P83748                                                                                                                               |

|      |                               |                          |   |                                                         |
|------|-------------------------------|--------------------------|---|---------------------------------------------------------|
| 9677 | 1,4,36,38,<br>39,40,41,4<br>3 | 2,3,5,6,7,8<br>,37,42,44 | 6 | B0BNN3,P10758,P36374,P53792,P97605,Q9QZQ5               |
| 9678 | 1,4,36,38,<br>39,40,41,4<br>4 | 2,3,5,6,7,8<br>,37,42,43 | 7 | P02631,P10715,P10758,P11883,P19629,Q5GRG2,Q62975        |
| 9679 | 1,4,36,38,<br>39,40,42,4<br>3 | 2,3,5,6,7,8<br>,37,41,44 | 7 | B0BNN3,P10758,P80201,P97605,Q01205,Q6IFU7,Q9Z1F2        |
| 9680 | 1,4,36,38,<br>39,40,42,4<br>4 | 2,3,5,6,7,8<br>,37,41,43 | 8 | P02631,P10758,P11883,P51907,P83748,P97605,Q7TPB1,Q9Z1F2 |
| 9681 | 1,4,36,38,<br>39,40,43,4<br>4 | 2,3,5,6,7,8<br>,37,41,42 | 6 | P08290,P08753,P80201,P97605,Q63357,Q9QZQ5               |
| 9682 | 1,4,36,38,<br>39,41,42,4<br>3 | 2,3,5,6,7,8<br>,37,40,44 | 6 | B0BNN3,P06866,P22006,P27213,P53792,Q6IFU7               |
| 9683 | 1,4,36,38,<br>39,41,42,4<br>4 | 2,3,5,6,7,8<br>,37,40,43 | 5 | P02631,P10758,P51907,P83748,Q9Z1F2                      |
| 9684 | 1,4,36,38,<br>39,41,43,4<br>4 | 2,3,5,6,7,8<br>,37,40,42 | 4 | B0BNN3,P36374,P53792,Q9QZQ5                             |
| 9685 | 1,4,36,38,<br>39,42,43,4<br>4 | 2,3,5,6,7,8<br>,37,40,41 | 5 | B0BNN3,P51907,P97605,Q6IFU7,Q9Z1F2                      |
| 9686 | 1,4,36,38,<br>40,41,42,4<br>3 | 2,3,5,6,7,8<br>,37,39,44 | 3 | B0BNN3,P27213,P97605                                    |
| 9687 | 1,4,36,38,<br>40,41,42,4<br>4 | 2,3,5,6,7,8<br>,37,39,43 | 3 | P02631,P83748,Q7TPB1                                    |
| 9688 | 1,4,36,38,<br>40,41,43,4<br>4 | 2,3,5,6,7,8<br>,37,39,42 | 3 | P27213,P97605,Q9QZQ5                                    |
| 9689 | 1,4,36,38,<br>40,42,43,4<br>4 | 2,3,5,6,7,8<br>,37,39,41 | 5 | O88267,P27213,P80201,P97605,Q7TPB1                      |
| 9690 | 1,4,36,38,<br>41,42,43,4<br>4 | 2,3,5,6,7,8<br>,37,39,40 | 2 | B0BNN3,P27213                                           |
| 9691 | 1,4,36,39,<br>40,41,42,4<br>3 | 2,3,5,6,7,8<br>,37,38,44 | 3 | P22006,P53792,Q561R9                                    |



|      |                               |                          |    |                                                                                                                                                                                                     |
|------|-------------------------------|--------------------------|----|-----------------------------------------------------------------------------------------------------------------------------------------------------------------------------------------------------|
| 9692 | 1,4,36,39,<br>40,41,42,4<br>4 | 2,3,5,6,7,8<br>,37,38,43 | 6  | P02631,P19629,P83748,Q4FZU6,Q561R9,Q7TPB1                                                                                                                                                           |
| 9693 | 1,4,36,39,<br>40,41,43,4<br>4 | 2,3,5,6,7,8<br>,37,38,42 | 8  | P08290,P08753,P10715,P19218,P19629,P53792,Q6AYL6,Q9QZQ5                                                                                                                                             |
| 9694 | 1,4,36,39,<br>40,42,43,4<br>4 | 2,3,5,6,7,8<br>,37,38,41 | 7  | P11762,P50115,P50116,P80201,P97605,Q561R9,Q7TPB1                                                                                                                                                    |
| 9695 | 1,4,36,39,<br>41,42,43,4<br>4 | 2,3,5,6,7,8<br>,37,38,40 | 3  | P22006,P53792,Q561R9                                                                                                                                                                                |
| 9696 | 1,4,36,40,<br>41,42,43,4<br>4 | 2,3,5,6,7,8<br>,37,38,39 | 4  | P19218,P27213,Q561R9,Q7TPB1                                                                                                                                                                         |
| 9697 | 1,4,37,38,<br>39,40,41,4<br>2 | 2,3,5,6,7,8<br>,36,43,44 | 9  | O54858,P02631,P10758,P11883,P13432,P53792,P83748,Q01205,Q07116                                                                                                                                      |
| 9698 | 1,4,37,38,<br>39,40,41,4<br>3 | 2,3,5,6,7,8<br>,36,42,44 | 18 | B0BNN3,P04905,P08290,P08753,P13432,P35281,P36374,P53792,P55016,P60905,P80020,P97554,P97605,Q01205,Q07116,Q812E4,Q9JID2,Q9QZQ5                                                                       |
| 9699 | 1,4,37,38,<br>39,40,41,4<br>4 | 2,3,5,6,7,8<br>,36,42,43 | 21 | P04905,P06911,P08290,P08723,P08753,P10715,P11883,P13432,P16086,P16636,P19629,P36374,P60905,Q07116,Q5GRG2,Q62975,Q63357,Q6AYL6,Q6AYR9,Q812E4,Q9QZQ5                                                  |
| 9700 | 1,4,37,38,<br>39,40,42,4<br>3 | 2,3,5,6,7,8<br>,36,41,44 | 16 | B0BNN3,P01015,P06866,P07171,P35281,P80020,P80201,P97605,Q01205,Q07116,Q63467,Q64611,Q6IFU7,Q812E4,Q99MH3,Q9Z1F2                                                                                     |
| 9701 | 1,4,37,38,<br>39,40,42,4<br>4 | 2,3,5,6,7,8<br>,36,41,43 | 11 | O54858,P02631,P11883,P50116,P83121,P83748,P97605,Q01205,Q07116,Q8N7M5,Q9Z1F2                                                                                                                        |
| 9702 | 1,4,37,38,<br>39,40,43,4<br>4 | 2,3,5,6,7,8<br>,36,41,42 | 28 | B0BNN3,F1LM93,O08815,O35547,P04905,P07861,P08010,P08290,P08649,P08753,P0C0A9,P16086,P36374,P54921,P60905,P80201,P97605,Q01205,Q07116,Q62753,Q63357,Q6AYL6,Q6AYR9,Q812E4,Q8CJ52,Q8N7M5,Q9JJS8,Q9QZQ5 |
| 9703 | 1,4,37,38,<br>39,41,42,4<br>3 | 2,3,5,6,7,8<br>,36,40,44 | 11 | B0BNN3,P01015,P06866,P13432,P22006,P27213,P36374,P53792,P80020,Q6IFU7,Q6P6T1                                                                                                                        |
| 9704 | 1,4,37,38,<br>39,41,42,4<br>4 | 2,3,5,6,7,8<br>,36,40,43 | 4  | P11883,P13432,P83748,Q9Z1F2                                                                                                                                                                         |
| 9705 | 1,4,37,38,<br>39,41,43,4<br>4 | 2,3,5,6,7,8<br>,36,40,42 | 13 | B0BNN3,P02781,P08753,P16086,P23593,P27213,P36374,P53792,P97605,Q6AYR9,Q812E4,Q9JJS8,Q9QZQ5                                                                                                          |
| 9706 | 1,4,37,38,<br>39,42,43,4<br>4 | 2,3,5,6,7,8<br>,36,40,41 | 9  | B0BNN3,P06866,P23593,P97605,Q01205,Q812E4,Q8N7M5,Q9JJS8,Q9Z1F2                                                                                                                                      |

|      |                               |                          |    |                                                                                                                                             |
|------|-------------------------------|--------------------------|----|---------------------------------------------------------------------------------------------------------------------------------------------|
| 9707 | 1,4,37,38,<br>40,41,42,4<br>3 | 2,3,5,6,7,8<br>,36,39,44 | 7  | B0BNN3,P06866,P27213,P80020,P97605,Q01205,Q07116                                                                                            |
| 9708 | 1,4,37,38,<br>40,41,42,4<br>4 | 2,3,5,6,7,8<br>,36,39,43 | 6  | O54858,P11883,P83748,Q01205,Q07116,Q8N7M5                                                                                                   |
| 9709 | 1,4,37,38,<br>40,41,43,4<br>4 | 2,3,5,6,7,8<br>,36,39,42 | 14 | B0BNN3,P04905,P08010,P08290,P08753,P16086,P19218,P27213,P36374,P97605,Q07116,Q6AYR9,Q812E4,Q9QZQ5                                           |
| 9710 | 1,4,37,38,<br>40,42,43,4<br>4 | 2,3,5,6,7,8<br>,36,39,41 | 10 | B0BNN3,O54858,P08010,P27213,P80201,P80202,P97605,Q01205,Q07116,Q8N7M5                                                                       |
| 9711 | 1,4,37,38,<br>41,42,43,4<br>4 | 2,3,5,6,7,8<br>,36,39,40 | 4  | B0BNN3,P06866,P27213,P80020                                                                                                                 |
| 9712 | 1,4,37,39,<br>40,41,42,4<br>3 | 2,3,5,6,7,8<br>,36,38,44 | 5  | P13432,P22006,P53792,Q01205,Q561R9                                                                                                          |
| 9713 | 1,4,37,39,<br>40,41,42,4<br>4 | 2,3,5,6,7,8<br>,36,38,43 | 7  | O54858,P10715,P19629,P83748,Q01205,Q561R9,Q6AYL6                                                                                            |
| 9714 | 1,4,37,39,<br>40,41,43,4<br>4 | 2,3,5,6,7,8<br>,36,38,42 | 20 | O35547,P04905,P05369,P08010,P08290,P08753,P10715,P19218,P19629,P36374,P47727,P53792,P60905,P97554,P97605,Q01205,Q63357,Q6AYL6,Q812E4,Q9QZQ5 |
| 9715 | 1,4,37,39,<br>40,42,43,4<br>4 | 2,3,5,6,7,8<br>,36,38,41 | 11 | O54858,P08010,P08753,P50115,P50116,P80201,P97605,Q01205,Q561R9,Q6AYL6,Q812E4                                                                |
| 9716 | 1,4,37,39,<br>41,42,43,4<br>4 | 2,3,5,6,7,8<br>,36,38,40 | 3  | P22006,P53792,Q561R9                                                                                                                        |
| 9717 | 1,4,37,40,<br>41,42,43,4<br>4 | 2,3,5,6,7,8<br>,36,38,39 | 4  | P19218,P27213,Q01205,Q561R9                                                                                                                 |
| 9718 | 1,4,38,39,<br>40,41,42,4<br>3 | 2,3,5,6,7,8<br>,36,37,44 | 9  | B0BNN3,P06866,P11762,P13432,P27213,P53792,Q01205,Q6IFU7,Q9QZQ5                                                                              |
| 9719 | 1,4,38,39,<br>40,41,42,4<br>4 | 2,3,5,6,7,8<br>,36,37,43 | 13 | O54858,P02631,P10715,P10758,P11762,P13432,P19629,P53792,P83748,Q01205,Q07116,Q561R9,Q9Z1F2                                                  |
| 9720 | 1,4,38,39,<br>40,41,43,4<br>4 | 2,3,5,6,7,8<br>,36,37,42 | 12 | B0BNN3,P08290,P08753,P10715,P19629,P36374,P53792,P97605,Q01205,Q07116,Q6AYL6,Q9QZQ5                                                         |
| 9721 | 1,4,38,39,<br>40,42,43,4<br>4 | 2,3,5,6,7,8<br>,36,37,41 | 10 | B0BNN3,O54858,P11762,P80201,P97605,Q01205,Q07116,Q6IFU7,Q9QZQ5,Q9Z1F2                                                                       |

|      |                               |                                 |   |                                                         |
|------|-------------------------------|---------------------------------|---|---------------------------------------------------------|
| 9722 | 1,4,38,39,<br>41,42,43,4<br>4 | 2,3,5,6,7,8<br>,36,37,40        | 8 | B0BNN3,P00731,P06866,P11762,P27213,P53792,Q6IFU7,Q9Z1F2 |
| 9723 | 1,4,38,40,<br>41,42,43,4<br>4 | 2,3,5,6,7,8<br>,36,37,39        | 5 | B0BNN3,P27213,Q01205,Q07116,Q9QZQ5                      |
| 9724 | 1,4,39,40,<br>41,42,43,4<br>4 | 2,3,5,6,7,8<br>,36,37,38        | 8 | P11762,P19218,P19629,P53792,Q01205,Q561R9,Q6AYL6,Q9QZQ5 |
| 9725 | 1,5,6,7,8,3<br>6,37,38        | 2,3,4,39,4<br>0,41,42,43<br>,44 | 2 | P19218,P53792                                           |
| 9726 | 1,5,6,7,8,3<br>6,37,39        | 2,3,4,38,4<br>0,41,42,43<br>,44 | 7 | B0BNN3,P00762,P00774,P19218,P27213,P98089,Q6TMA8        |
| 9727 | 1,5,6,7,8,3<br>6,37,40        | 2,3,4,38,3<br>9,41,42,43<br>,44 | 6 | B0BNN3,P00762,P00774,P53792,P98089,Q9JJS8               |
| 9728 | 1,5,6,7,8,3<br>6,37,41        | 2,3,4,38,3<br>9,40,42,43<br>,44 | 3 | B0BNN3,Q6TMA8,Q99041                                    |
| 9729 | 1,5,6,7,8,3<br>6,37,42        | 2,3,4,38,3<br>9,40,41,43<br>,44 | 6 | B0BNN3,P00762,P00774,P19218,P53792,P98089               |
| 9730 | 1,5,6,7,8,3<br>6,37,43        | 2,3,4,38,3<br>9,40,41,42<br>,44 | 1 | Q6TMA8                                                  |
| 9731 | 1,5,6,7,8,3<br>6,37,44        | 2,3,4,38,3<br>9,40,41,42<br>,43 | 4 | B0BNN3,P00762,P07171,P53792                             |
| 9732 | 1,5,6,7,8,3<br>6,38,39        | 2,3,4,37,4<br>0,41,42,43<br>,44 | 1 | P19218                                                  |
| 9733 | 1,5,6,7,8,3<br>6,38,40        | 2,3,4,37,3<br>9,41,42,43<br>,44 | 2 | P53792,Q64057                                           |
| 9734 | 1,5,6,7,8,3<br>6,38,41        | 2,3,4,37,3<br>9,40,42,43<br>,44 | 3 | P19218,P50115,P50116                                    |
| 9735 | 1,5,6,7,8,3<br>6,38,42        | 2,3,4,37,3<br>9,40,41,43<br>,44 | 3 | P08753,P19218,P53792                                    |
| 9736 | 1,5,6,7,8,3<br>6,38,43        | 2,3,4,37,3<br>9,40,41,42<br>,44 | 1 | P19218                                                  |

|      |                        |                                 |   |                                                  |
|------|------------------------|---------------------------------|---|--------------------------------------------------|
| 9737 | 1,5,6,7,8,3<br>6,38,44 | 2,3,4,37,3<br>9,40,41,42<br>,43 | 2 | P07171,P53792                                    |
| 9738 | 1,5,6,7,8,3<br>6,39,40 | 2,3,4,37,3<br>8,41,42,43<br>,44 | 6 | B0BNN3,P00762,P00774,P27213,P80020,P98089        |
| 9739 | 1,5,6,7,8,3<br>6,39,41 | 2,3,4,37,3<br>8,40,42,43<br>,44 | 5 | B0BNN3,P12785,Q6TMA8,Q8VD89,Q99041               |
| 9740 | 1,5,6,7,8,3<br>6,39,42 | 2,3,4,37,3<br>8,40,41,43<br>,44 | 5 | P00762,P00774,P08753,P19218,P98089               |
| 9741 | 1,5,6,7,8,3<br>6,39,43 | 2,3,4,37,3<br>8,40,41,42<br>,44 | 4 | P12785,P16636,P83748,Q6TMA8                      |
| 9742 | 1,5,6,7,8,3<br>6,39,44 | 2,3,4,37,3<br>8,40,41,42<br>,43 | 5 | B0BNN3,P00762,P07171,P27213,P80020               |
| 9743 | 1,5,6,7,8,3<br>6,40,41 | 2,3,4,37,3<br>8,39,42,43<br>,44 | 5 | B0BNN3,P12020,Q63617,Q80WL1,Q9JJS8               |
| 9744 | 1,5,6,7,8,3<br>6,40,42 | 2,3,4,37,3<br>8,39,41,43<br>,44 | 7 | B0BNN3,P00762,P00774,P53792,P98089,Q64057,Q9JJS8 |
| 9745 | 1,5,6,7,8,3<br>6,40,43 | 2,3,4,37,3<br>8,39,41,42<br>,44 | 2 | P16636,Q9JJS8                                    |
| 9746 | 1,5,6,7,8,3<br>6,40,44 | 2,3,4,37,3<br>8,39,41,42<br>,43 | 7 | B0BNN3,P00762,P06866,P53792,P80020,Q6P6T1,Q80WL1 |
| 9747 | 1,5,6,7,8,3<br>6,41,42 | 2,3,4,37,3<br>8,39,40,43<br>,44 | 4 | P00762,P08753,Q812E4,Q9JJS8                      |
| 9748 | 1,5,6,7,8,3<br>6,41,43 | 2,3,4,37,3<br>8,39,40,42<br>,44 | 4 | P12785,P16636,Q6TMA8,Q9JJS8                      |
| 9749 | 1,5,6,7,8,3<br>6,41,44 | 2,3,4,37,3<br>8,39,40,42<br>,43 | 3 | B0BNN3,P07171,P80020                             |
| 9750 | 1,5,6,7,8,3<br>6,42,43 | 2,3,4,37,3<br>8,39,40,41<br>,44 | 2 | P16636,Q9JJS8                                    |
| 9751 | 1,5,6,7,8,3<br>6,42,44 | 2,3,4,37,3<br>8,39,40,41<br>,43 | 5 | B0BNN3,P00762,P36374,P53792,P80020               |

|      |                        |                                 |   |                                                         |
|------|------------------------|---------------------------------|---|---------------------------------------------------------|
| 9752 | 1,5,6,7,8,3<br>6,43,44 | 2,3,4,37,3<br>8,39,40,41<br>,42 | 1 | P16636                                                  |
| 9753 | 1,5,6,7,8,3<br>7,38,39 | 2,3,4,36,4<br>0,41,42,43<br>,44 | 1 | P19218                                                  |
| 9754 | 1,5,6,7,8,3<br>7,38,40 | 2,3,4,36,3<br>9,41,42,43<br>,44 | 1 | P02803                                                  |
| 9755 | 1,5,6,7,8,3<br>7,38,41 | 2,3,4,36,3<br>9,40,42,43<br>,44 | 3 | P50115,P50116,Q7TPB1                                    |
| 9756 | 1,5,6,7,8,3<br>7,38,42 | 2,3,4,36,3<br>9,40,41,43<br>,44 | 1 | P19218                                                  |
| 9757 | 1,5,6,7,8,3<br>7,38,43 | 2,3,4,36,3<br>9,40,41,42<br>,44 | 2 | Q6IFV1,Q7TPB1                                           |
| 9758 | 1,5,6,7,8,3<br>7,38,44 | 2,3,4,36,3<br>9,40,41,42<br>,43 | 1 | P53792                                                  |
| 9759 | 1,5,6,7,8,3<br>7,39,40 | 2,3,4,36,3<br>8,41,42,43<br>,44 | 3 | P00774,P27213,P98089                                    |
| 9760 | 1,5,6,7,8,3<br>7,39,41 | 2,3,4,36,3<br>8,40,42,43<br>,44 | 2 | Q6TMA8,Q99041                                           |
| 9761 | 1,5,6,7,8,3<br>7,39,42 | 2,3,4,36,3<br>8,40,41,43<br>,44 | 3 | P00774,P19218,P98089                                    |
| 9762 | 1,5,6,7,8,3<br>7,39,43 | 2,3,4,36,3<br>8,40,41,42<br>,44 | 1 | Q6TMA8                                                  |
| 9763 | 1,5,6,7,8,3<br>7,39,44 | 2,3,4,36,3<br>8,40,41,42<br>,43 | 3 | B0BNN3,P01836,P27213                                    |
| 9764 | 1,5,6,7,8,3<br>7,40,41 | 2,3,4,36,3<br>8,39,42,43<br>,44 | 8 | B0BNN3,P12020,P51907,Q63617,Q80WL1,Q99041,Q9JJS8,Q9Z1F2 |
| 9765 | 1,5,6,7,8,3<br>7,40,42 | 2,3,4,36,3<br>8,39,41,43<br>,44 | 3 | P00774,P98089,Q9JJS8                                    |
| 9766 | 1,5,6,7,8,3<br>7,40,43 | 2,3,4,36,3<br>8,39,41,42<br>,44 | 1 | P51907                                                  |

|      |                        |                                 |   |                                           |
|------|------------------------|---------------------------------|---|-------------------------------------------|
| 9767 | 1,5,6,7,8,3<br>7,40,44 | 2,3,4,36,3<br>8,39,41,42<br>,43 | 6 | B0BNN3,P01836,P12020,P53792,Q80WL1,Q9QUL6 |
| 9768 | 1,5,6,7,8,3<br>7,41,42 | 2,3,4,36,3<br>8,39,40,43<br>,44 | 1 | Q9JJS8                                    |
| 9769 | 1,5,6,7,8,3<br>7,41,43 | 2,3,4,36,3<br>8,39,40,42<br>,44 | 4 | P51907,Q6TMA8,Q7TPB1,Q99041               |
| 9770 | 1,5,6,7,8,3<br>7,41,44 | 2,3,4,36,3<br>8,39,40,42<br>,43 | 1 | B0BNN3                                    |
| 9771 | 1,5,6,7,8,3<br>7,42,43 | 2,3,4,36,3<br>8,39,40,41<br>,44 | 0 |                                           |
| 9772 | 1,5,6,7,8,3<br>7,42,44 | 2,3,4,36,3<br>8,39,40,41<br>,43 | 0 |                                           |
| 9773 | 1,5,6,7,8,3<br>7,43,44 | 2,3,4,36,3<br>8,39,40,41<br>,42 | 1 | P10758                                    |
| 9774 | 1,5,6,7,8,3<br>8,39,40 | 2,3,4,36,3<br>7,41,42,43<br>,44 | 2 | P27213,Q9QUL6                             |
| 9775 | 1,5,6,7,8,3<br>8,39,41 | 2,3,4,36,3<br>7,40,42,43<br>,44 | 4 | P13432,P19218,P50115,P50116               |
| 9776 | 1,5,6,7,8,3<br>8,39,42 | 2,3,4,36,3<br>7,40,41,43<br>,44 | 2 | P08753,P19218                             |
| 9777 | 1,5,6,7,8,3<br>8,39,43 | 2,3,4,36,3<br>7,40,41,42<br>,44 | 2 | P19218,Q6IFV1                             |
| 9778 | 1,5,6,7,8,3<br>8,39,44 | 2,3,4,36,3<br>7,40,41,42<br>,43 | 1 | Q9QUL6                                    |
| 9779 | 1,5,6,7,8,3<br>8,40,41 | 2,3,4,36,3<br>7,39,42,43<br>,44 | 3 | P12020,P50115,P50116                      |
| 9780 | 1,5,6,7,8,3<br>8,40,42 | 2,3,4,36,3<br>7,39,41,43<br>,44 | 1 | P06760                                    |
| 9781 | 1,5,6,7,8,3<br>8,40,43 | 2,3,4,36,3<br>7,39,41,42<br>,44 | 0 |                                           |

|      |                        |                                 |   |                                                                |
|------|------------------------|---------------------------------|---|----------------------------------------------------------------|
| 9782 | 1,5,6,7,8,3<br>8,40,44 | 2,3,4,36,3<br>7,39,41,42<br>,43 | 2 | P06760,Q9QUL6                                                  |
| 9783 | 1,5,6,7,8,3<br>8,41,42 | 2,3,4,36,3<br>7,39,40,43<br>,44 | 5 | O35547,P08753,P19218,P50115,P50116                             |
| 9784 | 1,5,6,7,8,3<br>8,41,43 | 2,3,4,36,3<br>7,39,40,42<br>,44 | 4 | P50115,P50116,Q7TPB1,Q8CJD3                                    |
| 9785 | 1,5,6,7,8,3<br>8,41,44 | 2,3,4,36,3<br>7,39,40,42<br>,43 | 3 | P50115,P50116,Q05695                                           |
| 9786 | 1,5,6,7,8,3<br>8,42,43 | 2,3,4,36,3<br>7,39,40,41<br>,44 | 1 | P19218                                                         |
| 9787 | 1,5,6,7,8,3<br>8,42,44 | 2,3,4,36,3<br>7,39,40,41<br>,43 | 0 |                                                                |
| 9788 | 1,5,6,7,8,3<br>8,43,44 | 2,3,4,36,3<br>7,39,40,41<br>,42 | 0 |                                                                |
| 9789 | 1,5,6,7,8,3<br>9,40,41 | 2,3,4,36,3<br>7,38,42,43<br>,44 | 6 | P06911,P10715,P12020,P12785,P19629,P31044                      |
| 9790 | 1,5,6,7,8,3<br>9,40,42 | 2,3,4,36,3<br>7,38,41,43<br>,44 | 3 | P00774,P27213,P98089                                           |
| 9791 | 1,5,6,7,8,3<br>9,40,43 | 2,3,4,36,3<br>7,38,41,42<br>,44 | 1 | P12785                                                         |
| 9792 | 1,5,6,7,8,3<br>9,40,44 | 2,3,4,36,3<br>7,38,41,42<br>,43 | 9 | P01836,P06866,P12020,P27213,P80020,Q5GRG2,Q6AYL6,Q6P6T1,Q9QUL6 |
| 9793 | 1,5,6,7,8,3<br>9,41,42 | 2,3,4,36,3<br>7,38,40,43<br>,44 | 3 | P08753,P13432,P19218                                           |
| 9794 | 1,5,6,7,8,3<br>9,41,43 | 2,3,4,36,3<br>7,38,40,42<br>,44 | 3 | P12785,P83748,Q6TMA8                                           |
| 9795 | 1,5,6,7,8,3<br>9,41,44 | 2,3,4,36,3<br>7,38,40,42<br>,43 | 1 | P12020                                                         |
| 9796 | 1,5,6,7,8,3<br>9,42,43 | 2,3,4,36,3<br>7,38,40,41<br>,44 | 1 | P16636                                                         |

|      |                         |                                 |    |                                                                       |
|------|-------------------------|---------------------------------|----|-----------------------------------------------------------------------|
| 9797 | 1,5,6,7,8,3<br>9,42,44  | 2,3,4,36,3<br>7,38,40,41<br>,43 | 0  |                                                                       |
| 9798 | 1,5,6,7,8,3<br>9,43,44  | 2,3,4,36,3<br>7,38,40,41<br>,42 | 0  |                                                                       |
| 9799 | 1,5,6,7,8,4<br>0,41,42  | 2,3,4,36,3<br>7,38,39,43<br>,44 | 1  | Q9JJS8                                                                |
| 9800 | 1,5,6,7,8,4<br>0,41,43  | 2,3,4,36,3<br>7,38,39,42<br>,44 | 3  | P12785,P51907,Q9JJS8                                                  |
| 9801 | 1,5,6,7,8,4<br>0,41,44  | 2,3,4,36,3<br>7,38,39,42<br>,43 | 10 | B0BNN3,P06866,P06911,P10715,P12020,P31044,Q5GRG2,Q63617,Q80WL1,Q9ET32 |
| 9802 | 1,5,6,7,8,4<br>0,42,43  | 2,3,4,36,3<br>7,38,39,41<br>,44 | 1  | Q9JJS8                                                                |
| 9803 | 1,5,6,7,8,4<br>0,42,44  | 2,3,4,36,3<br>7,38,39,41<br>,43 | 4  | P06760,P20759,P36374,Q9QZ76                                           |
| 9804 | 1,5,6,7,8,4<br>0,43,44  | 2,3,4,36,3<br>7,38,39,41<br>,42 | 0  |                                                                       |
| 9805 | 1,5,6,7,8,4<br>1,42,43  | 2,3,4,36,3<br>7,38,39,40<br>,44 | 4  | P08753,P16636,P54921,Q9JJS8                                           |
| 9806 | 1,5,6,7,8,4<br>1,42,44  | 2,3,4,36,3<br>7,38,39,40<br>,43 | 2  | P08753,Q9JID2                                                         |
| 9807 | 1,5,6,7,8,4<br>1,43,44  | 2,3,4,36,3<br>7,38,39,40<br>,42 | 0  |                                                                       |
| 9808 | 1,5,6,7,8,4<br>2,43,44  | 2,3,4,36,3<br>7,38,39,40<br>,41 | 0  |                                                                       |
| 9809 | 1,5,6,7,36,<br>37,38,39 | 2,3,4,8,40,<br>41,42,43,4<br>4  | 4  | P19218,P20766,P97840,Q6PCU2                                           |
| 9810 | 1,5,6,7,36,<br>37,38,40 | 2,3,4,8,39,<br>41,42,43,4<br>4  | 2  | P20766,Q64057                                                         |
| 9811 | 1,5,6,7,36,<br>37,38,41 | 2,3,4,8,39,<br>40,42,43,4<br>4  | 3  | P20766,Q5M819,Q5QE79                                                  |



|      |                         |                                |   |                                                                |
|------|-------------------------|--------------------------------|---|----------------------------------------------------------------|
| 9812 | 1,5,6,7,36,<br>37,38,42 | 2,3,4,8,39,<br>40,41,43,4<br>4 | 3 | P19218,P20766,P97840                                           |
| 9813 | 1,5,6,7,36,<br>37,38,43 | 2,3,4,8,39,<br>40,41,42,4<br>4 | 4 | P20766,Q561R9,Q6IFV1,Q6TMA8                                    |
| 9814 | 1,5,6,7,36,<br>37,38,44 | 2,3,4,8,39,<br>40,41,42,4<br>3 | 2 | P20766,P97840                                                  |
| 9815 | 1,5,6,7,36,<br>37,39,40 | 2,3,4,8,38,<br>41,42,43,4<br>4 | 9 | B0BNN3,O35547,P00774,P27213,P55091,P98089,Q5U2V4,Q80WL1,Q9QUL6 |
| 9816 | 1,5,6,7,36,<br>37,39,41 | 2,3,4,8,38,<br>40,42,43,4<br>4 | 5 | B0BNN3,P00714,P35467,Q6TMA8,Q80WL1                             |
| 9817 | 1,5,6,7,36,<br>37,39,42 | 2,3,4,8,38,<br>40,41,43,4<br>4 | 5 | P00774,P19218,P97840,P98089,Q62635                             |
| 9818 | 1,5,6,7,36,<br>37,39,43 | 2,3,4,8,38,<br>40,41,42,4<br>4 | 4 | P98089,Q62635,Q6TMA8,Q8CIZ5                                    |
| 9819 | 1,5,6,7,36,<br>37,39,44 | 2,3,4,8,38,<br>40,41,42,4<br>3 | 2 | B0BNN3,Q6TMA8                                                  |
| 9820 | 1,5,6,7,36,<br>37,40,41 | 2,3,4,8,38,<br>39,42,43,4<br>4 | 3 | B0BNN3,P20766,Q80WL1                                           |
| 9821 | 1,5,6,7,36,<br>37,40,42 | 2,3,4,8,38,<br>39,41,43,4<br>4 | 7 | B0BNN3,P00762,P00774,P20766,P98089,Q64057,Q80WL1               |
| 9822 | 1,5,6,7,36,<br>37,40,43 | 2,3,4,8,38,<br>39,41,42,4<br>4 | 4 | P00774,P20766,P98089,Q80WL1                                    |
| 9823 | 1,5,6,7,36,<br>37,40,44 | 2,3,4,8,38,<br>39,41,42,4<br>3 | 4 | B0BNN3,O35547,Q80WL1,Q9QUL6                                    |
| 9824 | 1,5,6,7,36,<br>37,41,42 | 2,3,4,8,38,<br>39,40,43,4<br>4 | 4 | P20766,Q566E6,Q5QE79,Q80WL1                                    |
| 9825 | 1,5,6,7,36,<br>37,41,43 | 2,3,4,8,38,<br>39,40,42,4<br>4 | 3 | P20766,Q6TMA8,Q80WL1                                           |
| 9826 | 1,5,6,7,36,<br>37,41,44 | 2,3,4,8,38,<br>39,40,42,4<br>3 | 4 | B0BNN3,P20766,Q80WL1,Q9JHB9                                    |

|      |                         |                                |   |                             |
|------|-------------------------|--------------------------------|---|-----------------------------|
| 9827 | 1,5,6,7,36,<br>37,42,43 | 2,3,4,8,38,<br>39,40,41,4<br>4 | 4 | P16636,P20766,Q62635,Q6TMA8 |
| 9828 | 1,5,6,7,36,<br>37,42,44 | 2,3,4,8,38,<br>39,40,41,4<br>3 | 4 | B0BNN3,P00762,P97840,Q80WL1 |
| 9829 | 1,5,6,7,36,<br>37,43,44 | 2,3,4,8,38,<br>39,40,41,4<br>2 | 3 | P20766,Q6TMA8,Q80WL1        |
| 9830 | 1,5,6,7,36,<br>38,39,40 | 2,3,4,8,37,<br>41,42,43,4<br>4 | 1 | Q9QUL6                      |
| 9831 | 1,5,6,7,36,<br>38,39,41 | 2,3,4,8,37,<br>40,42,43,4<br>4 | 1 | P19218                      |
| 9832 | 1,5,6,7,36,<br>38,39,42 | 2,3,4,8,37,<br>40,41,43,4<br>4 | 2 | P19218,P97840               |
| 9833 | 1,5,6,7,36,<br>38,39,43 | 2,3,4,8,37,<br>40,41,42,4<br>4 | 2 | P19218,Q6TMA8               |
| 9834 | 1,5,6,7,36,<br>38,39,44 | 2,3,4,8,37,<br>40,41,42,4<br>3 | 1 | Q9QUL6                      |
| 9835 | 1,5,6,7,36,<br>38,40,41 | 2,3,4,8,37,<br>39,42,43,4<br>4 | 3 | P20766,Q64057,Q80WL1        |
| 9836 | 1,5,6,7,36,<br>38,40,42 | 2,3,4,8,37,<br>39,41,43,4<br>4 | 2 | P20766,Q64057               |
| 9837 | 1,5,6,7,36,<br>38,40,43 | 2,3,4,8,37,<br>39,41,42,4<br>4 | 1 | P20766                      |
| 9838 | 1,5,6,7,36,<br>38,40,44 | 2,3,4,8,37,<br>39,41,42,4<br>3 | 2 | Q80WL1,Q9QUL6               |
| 9839 | 1,5,6,7,36,<br>38,41,42 | 2,3,4,8,37,<br>39,40,43,4<br>4 | 3 | P19218,P20766,Q5QE79        |
| 9840 | 1,5,6,7,36,<br>38,41,43 | 2,3,4,8,37,<br>39,40,42,4<br>4 | 2 | P20766,Q8CJD3               |
| 9841 | 1,5,6,7,36,<br>38,41,44 | 2,3,4,8,37,<br>39,40,42,4<br>3 | 2 | P20766,Q05695               |

|      |                         |                                |   |                                           |
|------|-------------------------|--------------------------------|---|-------------------------------------------|
| 9842 | 1,5,6,7,36,<br>38,42,43 | 2,3,4,8,37,<br>39,40,41,4<br>4 | 3 | P16636,P19218,P20766                      |
| 9843 | 1,5,6,7,36,<br>38,42,44 | 2,3,4,8,37,<br>39,40,41,4<br>3 | 2 | P20766,P97840                             |
| 9844 | 1,5,6,7,36,<br>38,43,44 | 2,3,4,8,37,<br>39,40,41,4<br>2 | 1 | P20766                                    |
| 9845 | 1,5,6,7,36,<br>39,40,41 | 2,3,4,8,37,<br>38,42,43,4<br>4 | 3 | P35467,Q80WL1,Q8VD89                      |
| 9846 | 1,5,6,7,36,<br>39,40,42 | 2,3,4,8,37,<br>38,41,43,4<br>4 | 2 | P00774,P98089                             |
| 9847 | 1,5,6,7,36,<br>39,40,43 | 2,3,4,8,37,<br>38,41,42,4<br>4 | 2 | P00774,P98089                             |
| 9848 | 1,5,6,7,36,<br>39,40,44 | 2,3,4,8,37,<br>38,41,42,4<br>3 | 6 | B0BNN3,P06866,P27213,Q6P6T1,Q80WL1,Q9QUL6 |
| 9849 | 1,5,6,7,36,<br>39,41,42 | 2,3,4,8,37,<br>38,40,43,4<br>4 | 1 | P35467                                    |
| 9850 | 1,5,6,7,36,<br>39,41,43 | 2,3,4,8,37,<br>38,40,42,4<br>4 | 5 | P00714,P16636,P22006,P83748,Q6TMA8        |
| 9851 | 1,5,6,7,36,<br>39,41,44 | 2,3,4,8,37,<br>38,40,42,4<br>3 | 4 | B0BNN3,P35467,Q80WL1,Q8VD89               |
| 9852 | 1,5,6,7,36,<br>39,42,43 | 2,3,4,8,37,<br>38,40,41,4<br>4 | 3 | P16636,Q62635,Q6TMA8                      |
| 9853 | 1,5,6,7,36,<br>39,42,44 | 2,3,4,8,37,<br>38,40,41,4<br>3 | 0 |                                           |
| 9854 | 1,5,6,7,36,<br>39,43,44 | 2,3,4,8,37,<br>38,40,41,4<br>2 | 1 | Q6TMA8                                    |
| 9855 | 1,5,6,7,36,<br>40,41,42 | 2,3,4,8,37,<br>38,39,43,4<br>4 | 3 | Q64057,Q80WL1,Q9JJS8                      |
| 9856 | 1,5,6,7,36,<br>40,41,43 | 2,3,4,8,37,<br>38,39,42,4<br>4 | 3 | P16636,Q80WL1,Q9JJS8                      |

|      |                         |                                |   |                                           |
|------|-------------------------|--------------------------------|---|-------------------------------------------|
| 9857 | 1,5,6,7,36,<br>40,41,44 | 2,3,4,8,37,<br>38,39,42,4<br>3 | 5 | B0BNN3,P06911,P12020,Q5GRG2,Q80WL1        |
| 9858 | 1,5,6,7,36,<br>40,42,43 | 2,3,4,8,37,<br>38,39,41,4<br>4 | 3 | P00774,P16636,Q9JJS8                      |
| 9859 | 1,5,6,7,36,<br>40,42,44 | 2,3,4,8,37,<br>38,39,41,4<br>3 | 6 | B0BNN3,P00762,P02761,Q7TPB1,Q80WL1,Q9QUL6 |
| 9860 | 1,5,6,7,36,<br>40,43,44 | 2,3,4,8,37,<br>38,39,41,4<br>2 | 1 | Q80WL1                                    |
| 9861 | 1,5,6,7,36,<br>41,42,43 | 2,3,4,8,37,<br>38,39,40,4<br>4 | 1 | P16636                                    |
| 9862 | 1,5,6,7,36,<br>41,42,44 | 2,3,4,8,37,<br>38,39,40,4<br>3 | 2 | Q5XI22,Q80WL1                             |
| 9863 | 1,5,6,7,36,<br>41,43,44 | 2,3,4,8,37,<br>38,39,40,4<br>2 | 3 | P16636,Q6TMA8,Q80WL1                      |
| 9864 | 1,5,6,7,36,<br>42,43,44 | 2,3,4,8,37,<br>38,39,40,4<br>1 | 1 | P16636                                    |
| 9865 | 1,5,6,7,37,<br>38,39,40 | 2,3,4,8,36,<br>41,42,43,4<br>4 | 3 | P15399,P20766,Q9QUL6                      |
| 9866 | 1,5,6,7,37,<br>38,39,41 | 2,3,4,8,36,<br>40,42,43,4<br>4 | 4 | P13432,P19218,P20766,P62804               |
| 9867 | 1,5,6,7,37,<br>38,39,42 | 2,3,4,8,36,<br>40,41,43,4<br>4 | 3 | P19218,P20766,P97840                      |
| 9868 | 1,5,6,7,37,<br>38,39,43 | 2,3,4,8,36,<br>40,41,42,4<br>4 | 4 | P19218,P20766,Q6IFV1,Q6TMA8               |
| 9869 | 1,5,6,7,37,<br>38,39,44 | 2,3,4,8,36,<br>40,41,42,4<br>3 | 2 | P20766,Q9QUL6                             |
| 9870 | 1,5,6,7,37,<br>38,40,41 | 2,3,4,8,36,<br>39,42,43,4<br>4 | 2 | P20766,Q80WL1                             |
| 9871 | 1,5,6,7,37,<br>38,40,42 | 2,3,4,8,36,<br>39,41,43,4<br>4 | 2 | P20766,Q9QUL6                             |

|      |                         |                                |   |                                    |
|------|-------------------------|--------------------------------|---|------------------------------------|
| 9872 | 1,5,6,7,37,<br>38,40,43 | 2,3,4,8,36,<br>39,41,42,4<br>4 | 3 | P15399,P20766,Q6IFV1               |
| 9873 | 1,5,6,7,37,<br>38,40,44 | 2,3,4,8,36,<br>39,41,42,4<br>3 | 4 | P15399,P20766,Q80WL1,Q9QUL6        |
| 9874 | 1,5,6,7,37,<br>38,41,42 | 2,3,4,8,36,<br>39,40,43,4<br>4 | 2 | P20766,Q5QE79                      |
| 9875 | 1,5,6,7,37,<br>38,41,43 | 2,3,4,8,36,<br>39,40,42,4<br>4 | 4 | P20766,Q6IFV1,Q7TPB1,Q8CJD3        |
| 9876 | 1,5,6,7,37,<br>38,41,44 | 2,3,4,8,36,<br>39,40,42,4<br>3 | 2 | P20766,Q5QE79                      |
| 9877 | 1,5,6,7,37,<br>38,42,43 | 2,3,4,8,36,<br>39,40,41,4<br>4 | 1 | P20766                             |
| 9878 | 1,5,6,7,37,<br>38,42,44 | 2,3,4,8,36,<br>39,40,41,4<br>3 | 3 | P17046,P20766,P97840               |
| 9879 | 1,5,6,7,37,<br>38,43,44 | 2,3,4,8,36,<br>39,40,41,4<br>2 | 1 | P20766                             |
| 9880 | 1,5,6,7,37,<br>39,40,41 | 2,3,4,8,36,<br>38,42,43,4<br>4 | 5 | P10715,P12020,P13432,P35467,Q80WL1 |
| 9881 | 1,5,6,7,37,<br>39,40,42 | 2,3,4,8,36,<br>38,41,43,4<br>4 | 3 | P00774,P98089,Q9QUL6               |
| 9882 | 1,5,6,7,37,<br>39,40,43 | 2,3,4,8,36,<br>38,41,42,4<br>4 | 2 | Q8CIZ5,Q99MH3                      |
| 9883 | 1,5,6,7,37,<br>39,40,44 | 2,3,4,8,36,<br>38,41,42,4<br>3 | 5 | O35547,P27213,Q6AYL6,Q80WL1,Q9QUL6 |
| 9884 | 1,5,6,7,37,<br>39,41,42 | 2,3,4,8,36,<br>38,40,43,4<br>4 | 2 | P13432,P35467                      |
| 9885 | 1,5,6,7,37,<br>39,41,43 | 2,3,4,8,36,<br>38,40,42,4<br>4 | 4 | P00714,P22006,P83748,Q6TMA8        |
| 9886 | 1,5,6,7,37,<br>39,41,44 | 2,3,4,8,36,<br>38,40,42,4<br>3 | 2 | P35467,Q80WL1                      |

|      |                         |                                |   |                                                  |
|------|-------------------------|--------------------------------|---|--------------------------------------------------|
| 9887 | 1,5,6,7,37,<br>39,42,43 | 2,3,4,8,36,<br>38,40,41,4<br>4 | 1 | Q6TMA8                                           |
| 9888 | 1,5,6,7,37,<br>39,42,44 | 2,3,4,8,36,<br>38,40,41,4<br>3 | 1 | Q9QUL6                                           |
| 9889 | 1,5,6,7,37,<br>39,43,44 | 2,3,4,8,36,<br>38,40,41,4<br>2 | 1 | Q6TMA8                                           |
| 9890 | 1,5,6,7,37,<br>40,41,42 | 2,3,4,8,36,<br>38,39,43,4<br>4 | 3 | P20766,Q80WL1,Q9JJS8                             |
| 9891 | 1,5,6,7,37,<br>40,41,43 | 2,3,4,8,36,<br>38,39,42,4<br>4 | 3 | P20766,P51907,Q80WL1                             |
| 9892 | 1,5,6,7,37,<br>40,41,44 | 2,3,4,8,36,<br>38,39,42,4<br>3 | 7 | B0BNN3,P06911,P10715,P12020,Q5GRG2,Q80WL1,Q9ET32 |
| 9893 | 1,5,6,7,37,<br>40,42,43 | 2,3,4,8,36,<br>38,39,41,4<br>4 | 0 |                                                  |
| 9894 | 1,5,6,7,37,<br>40,42,44 | 2,3,4,8,36,<br>38,39,41,4<br>3 | 3 | P17046,Q80WL1,Q9QUL6                             |
| 9895 | 1,5,6,7,37,<br>40,43,44 | 2,3,4,8,36,<br>38,39,41,4<br>2 | 1 | Q80WL1                                           |
| 9896 | 1,5,6,7,37,<br>41,42,43 | 2,3,4,8,36,<br>38,39,40,4<br>4 | 1 | P20766                                           |
| 9897 | 1,5,6,7,37,<br>41,42,44 | 2,3,4,8,36,<br>38,39,40,4<br>3 | 2 | Q5QE79,Q80WL1                                    |
| 9898 | 1,5,6,7,37,<br>41,43,44 | 2,3,4,8,36,<br>38,39,40,4<br>2 | 2 | P20766,Q80WL1                                    |
| 9899 | 1,5,6,7,37,<br>42,43,44 | 2,3,4,8,36,<br>38,39,40,4<br>1 | 0 |                                                  |
| 9900 | 1,5,6,7,38,<br>39,40,41 | 2,3,4,8,36,<br>37,42,43,4<br>4 | 4 | P10715,P13432,P19629,Q9QUL6                      |
| 9901 | 1,5,6,7,38,<br>39,40,42 | 2,3,4,8,36,<br>37,41,43,4<br>4 | 2 | P83121,Q9QUL6                                    |

|      |                         |                                |   |                                                         |
|------|-------------------------|--------------------------------|---|---------------------------------------------------------|
| 9902 | 1,5,6,7,38,<br>39,40,43 | 2,3,4,8,36,<br>37,41,42,4<br>4 | 2 | Q6IFV1,Q99MH3                                           |
| 9903 | 1,5,6,7,38,<br>39,40,44 | 2,3,4,8,36,<br>37,41,42,4<br>3 | 2 | P83121,Q9QUL6                                           |
| 9904 | 1,5,6,7,38,<br>39,41,42 | 2,3,4,8,36,<br>37,40,43,4<br>4 | 2 | P13432,P19218                                           |
| 9905 | 1,5,6,7,38,<br>39,41,43 | 2,3,4,8,36,<br>37,40,42,4<br>4 | 3 | P00714,P13432,Q8CJD3                                    |
| 9906 | 1,5,6,7,38,<br>39,41,44 | 2,3,4,8,36,<br>37,40,42,4<br>3 | 2 | P13432,Q9QUL6                                           |
| 9907 | 1,5,6,7,38,<br>39,42,43 | 2,3,4,8,36,<br>37,40,41,4<br>4 | 2 | P19218,Q6IFU7                                           |
| 9908 | 1,5,6,7,38,<br>39,42,44 | 2,3,4,8,36,<br>37,40,41,4<br>3 | 1 | Q9QUL6                                                  |
| 9909 | 1,5,6,7,38,<br>39,43,44 | 2,3,4,8,36,<br>37,40,41,4<br>2 | 0 |                                                         |
| 9910 | 1,5,6,7,38,<br>40,41,42 | 2,3,4,8,36,<br>37,39,43,4<br>4 | 1 | P20766                                                  |
| 9911 | 1,5,6,7,38,<br>40,41,43 | 2,3,4,8,36,<br>37,39,42,4<br>4 | 2 | P20766,Q8CJD3                                           |
| 9912 | 1,5,6,7,38,<br>40,41,44 | 2,3,4,8,36,<br>37,39,42,4<br>3 | 8 | P06911,P10715,P12020,P19629,Q5GRG2,Q80WL1,Q9ET32,Q9QUL6 |
| 9913 | 1,5,6,7,38,<br>40,42,43 | 2,3,4,8,36,<br>37,39,41,4<br>4 | 1 | P20766                                                  |
| 9914 | 1,5,6,7,38,<br>40,42,44 | 2,3,4,8,36,<br>37,39,41,4<br>3 | 3 | P06760,P17046,Q9QUL6                                    |
| 9915 | 1,5,6,7,38,<br>40,43,44 | 2,3,4,8,36,<br>37,39,41,4<br>2 | 0 |                                                         |
| 9916 | 1,5,6,7,38,<br>41,42,43 | 2,3,4,8,36,<br>37,39,40,4<br>4 | 2 | P20766,Q8CJD3                                           |

|      |                         |                                |    |                                                                              |
|------|-------------------------|--------------------------------|----|------------------------------------------------------------------------------|
| 9917 | 1,5,6,7,38,<br>41,42,44 | 2,3,4,8,36,<br>37,39,40,4<br>3 | 4  | P17046,P20766,Q5QE79,Q8CIZ5                                                  |
| 9918 | 1,5,6,7,38,<br>41,43,44 | 2,3,4,8,36,<br>37,39,40,4<br>2 | 2  | P20766,Q8CJD3                                                                |
| 9919 | 1,5,6,7,38,<br>42,43,44 | 2,3,4,8,36,<br>37,39,40,4<br>1 | 2  | P17046,P20766                                                                |
| 9920 | 1,5,6,7,39,<br>40,41,42 | 2,3,4,8,36,<br>37,38,43,4<br>4 | 2  | P13432,P35467                                                                |
| 9921 | 1,5,6,7,39,<br>40,41,43 | 2,3,4,8,36,<br>37,38,42,4<br>4 | 3  | P12785,P83748,Q6AYL6                                                         |
| 9922 | 1,5,6,7,39,<br>40,41,44 | 2,3,4,8,36,<br>37,38,42,4<br>3 | 11 | P06911,P10715,P12020,P19629,P31044,P35467,Q5GRG2,Q6AYL6,Q80WL1,Q9ET32,Q9QUL6 |
| 9923 | 1,5,6,7,39,<br>40,42,43 | 2,3,4,8,36,<br>37,38,41,4<br>4 | 1  | Q99MH3                                                                       |
| 9924 | 1,5,6,7,39,<br>40,42,44 | 2,3,4,8,36,<br>37,38,41,4<br>3 | 1  | Q9QUL6                                                                       |
| 9925 | 1,5,6,7,39,<br>40,43,44 | 2,3,4,8,36,<br>37,38,41,4<br>2 | 1  | Q6AYL6                                                                       |
| 9926 | 1,5,6,7,39,<br>41,42,43 | 2,3,4,8,36,<br>37,38,40,4<br>4 | 2  | P16636,P22006                                                                |
| 9927 | 1,5,6,7,39,<br>41,42,44 | 2,3,4,8,36,<br>37,38,40,4<br>3 | 1  | P35467                                                                       |
| 9928 | 1,5,6,7,39,<br>41,43,44 | 2,3,4,8,36,<br>37,38,40,4<br>2 | 0  |                                                                              |
| 9929 | 1,5,6,7,39,<br>42,43,44 | 2,3,4,8,36,<br>37,38,40,4<br>1 | 0  |                                                                              |
| 9930 | 1,5,6,7,40,<br>41,42,43 | 2,3,4,8,36,<br>37,38,39,4<br>4 | 1  | Q9JJS8                                                                       |
| 9931 | 1,5,6,7,40,<br>41,42,44 | 2,3,4,8,36,<br>37,38,39,4<br>3 | 4  | P12020,P17046,Q80WL1,Q9ET32                                                  |



|      |                         |                                |   |                                           |
|------|-------------------------|--------------------------------|---|-------------------------------------------|
| 9932 | 1,5,6,7,40,<br>41,43,44 | 2,3,4,8,36,<br>37,38,39,4<br>2 | 5 | P12020,Q5GRG2,Q6AYL6,Q80WL1,Q9ET32        |
| 9933 | 1,5,6,7,40,<br>42,43,44 | 2,3,4,8,36,<br>37,38,39,4<br>1 | 1 | P17046                                    |
| 9934 | 1,5,6,7,41,<br>42,43,44 | 2,3,4,8,36,<br>37,38,39,4<br>0 | 0 |                                           |
| 9935 | 1,5,6,8,36,<br>37,38,39 | 2,3,4,7,40,<br>41,42,43,4<br>4 | 2 | P01836,P19218                             |
| 9936 | 1,5,6,8,36,<br>37,38,40 | 2,3,4,7,39,<br>41,42,43,4<br>4 | 2 | P35281,Q64057                             |
| 9937 | 1,5,6,8,36,<br>37,38,41 | 2,3,4,7,39,<br>40,42,43,4<br>4 | 0 |                                           |
| 9938 | 1,5,6,8,36,<br>37,38,42 | 2,3,4,7,39,<br>40,41,43,4<br>4 | 2 | P19218,Q6AYL6                             |
| 9939 | 1,5,6,8,36,<br>37,38,43 | 2,3,4,7,39,<br>40,41,42,4<br>4 | 1 | Q6IFV1                                    |
| 9940 | 1,5,6,8,36,<br>37,38,44 | 2,3,4,7,39,<br>40,41,42,4<br>3 | 1 | P01836                                    |
| 9941 | 1,5,6,8,36,<br>37,39,40 | 2,3,4,7,38,<br>41,42,43,4<br>4 | 6 | O35547,P00774,P01836,P27213,P55091,P98089 |
| 9942 | 1,5,6,8,36,<br>37,39,41 | 2,3,4,7,38,<br>40,42,43,4<br>4 | 0 |                                           |
| 9943 | 1,5,6,8,36,<br>37,39,42 | 2,3,4,7,38,<br>40,41,43,4<br>4 | 4 | P00774,P01836,P55091,P98089               |
| 9944 | 1,5,6,8,36,<br>37,39,43 | 2,3,4,7,38,<br>40,41,42,4<br>4 | 3 | P98089,Q6TMA8,Q8CIZ5                      |
| 9945 | 1,5,6,8,36,<br>37,39,44 | 2,3,4,7,38,<br>40,41,42,4<br>3 | 2 | O35547,P01836                             |
| 9946 | 1,5,6,8,36,<br>37,40,41 | 2,3,4,7,38,<br>39,42,43,4<br>4 | 3 | P51907,Q80WL1,Q9Z1F2                      |

|      |                         |                                |   |                                    |
|------|-------------------------|--------------------------------|---|------------------------------------|
| 9947 | 1,5,6,8,36,<br>37,40,42 | 2,3,4,7,38,<br>39,41,43,4<br>4 | 5 | P00774,P55091,P98089,Q64057,Q920P0 |
| 9948 | 1,5,6,8,36,<br>37,40,43 | 2,3,4,7,38,<br>39,41,42,4<br>4 | 4 | O35547,P00774,P51907,Q9Z1F2        |
| 9949 | 1,5,6,8,36,<br>37,40,44 | 2,3,4,7,38,<br>39,41,42,4<br>3 | 4 | B0BNN3,O35547,P01836,Q80WL1        |
| 9950 | 1,5,6,8,36,<br>37,41,42 | 2,3,4,7,38,<br>39,40,43,4<br>4 | 1 | Q566E6                             |
| 9951 | 1,5,6,8,36,<br>37,41,43 | 2,3,4,7,38,<br>39,40,42,4<br>4 | 2 | P51907,Q9Z1F2                      |
| 9952 | 1,5,6,8,36,<br>37,41,44 | 2,3,4,7,38,<br>39,40,42,4<br>3 | 4 | P01836,Q80WL1,Q9JHB9,Q9Z1F2        |
| 9953 | 1,5,6,8,36,<br>37,42,43 | 2,3,4,7,38,<br>39,40,41,4<br>4 | 1 | Q920P0                             |
| 9954 | 1,5,6,8,36,<br>37,42,44 | 2,3,4,7,38,<br>39,40,41,4<br>3 | 1 | P01836                             |
| 9955 | 1,5,6,8,36,<br>37,43,44 | 2,3,4,7,38,<br>39,40,41,4<br>2 | 1 | P01836                             |
| 9956 | 1,5,6,8,36,<br>38,39,40 | 2,3,4,7,37,<br>41,42,43,4<br>4 | 0 |                                    |
| 9957 | 1,5,6,8,36,<br>38,39,41 | 2,3,4,7,37,<br>40,42,43,4<br>4 | 0 |                                    |
| 9958 | 1,5,6,8,36,<br>38,39,42 | 2,3,4,7,37,<br>40,41,43,4<br>4 | 1 | P19218                             |
| 9959 | 1,5,6,8,36,<br>38,39,43 | 2,3,4,7,37,<br>40,41,42,4<br>4 | 2 | Q63942,Q6IFV1                      |
| 9960 | 1,5,6,8,36,<br>38,39,44 | 2,3,4,7,37,<br>40,41,42,4<br>3 | 1 | P01836                             |
| 9961 | 1,5,6,8,36,<br>38,40,41 | 2,3,4,7,37,<br>39,42,43,4<br>4 | 1 | Q64057                             |

|      |                         |                                |   |                             |
|------|-------------------------|--------------------------------|---|-----------------------------|
| 9962 | 1,5,6,8,36,<br>38,40,42 | 2,3,4,7,37,<br>39,41,43,4<br>4 | 2 | A2RUV9,Q64057               |
| 9963 | 1,5,6,8,36,<br>38,40,43 | 2,3,4,7,37,<br>39,41,42,4<br>4 | 1 | Q6IFV1                      |
| 9964 | 1,5,6,8,36,<br>38,40,44 | 2,3,4,7,37,<br>39,41,42,4<br>3 | 2 | P01836,P06760               |
| 9965 | 1,5,6,8,36,<br>38,41,42 | 2,3,4,7,37,<br>39,40,43,4<br>4 | 2 | A2RUV9,P08753               |
| 9966 | 1,5,6,8,36,<br>38,41,43 | 2,3,4,7,37,<br>39,40,42,4<br>4 | 2 | P50116,Q6IFV1               |
| 9967 | 1,5,6,8,36,<br>38,41,44 | 2,3,4,7,37,<br>39,40,42,4<br>3 | 2 | P01836,Q05695               |
| 9968 | 1,5,6,8,36,<br>38,42,43 | 2,3,4,7,37,<br>39,40,41,4<br>4 | 0 |                             |
| 9969 | 1,5,6,8,36,<br>38,42,44 | 2,3,4,7,37,<br>39,40,41,4<br>3 | 1 | P01836                      |
| 9970 | 1,5,6,8,36,<br>38,43,44 | 2,3,4,7,37,<br>39,40,41,4<br>2 | 2 | P01836,Q6IFV1               |
| 9971 | 1,5,6,8,36,<br>39,40,41 | 2,3,4,7,37,<br>38,42,43,4<br>4 | 1 | P12785                      |
| 9972 | 1,5,6,8,36,<br>39,40,42 | 2,3,4,7,37,<br>38,41,43,4<br>4 | 2 | P00774,P98089               |
| 9973 | 1,5,6,8,36,<br>39,40,43 | 2,3,4,7,37,<br>38,41,42,4<br>4 | 2 | P00774,P12785               |
| 9974 | 1,5,6,8,36,<br>39,40,44 | 2,3,4,7,37,<br>38,41,42,4<br>3 | 4 | P01836,P06866,Q6P6T1,Q9QUL6 |
| 9975 | 1,5,6,8,36,<br>39,41,42 | 2,3,4,7,37,<br>38,40,43,4<br>4 | 0 |                             |
| 9976 | 1,5,6,8,36,<br>39,41,43 | 2,3,4,7,37,<br>38,40,42,4<br>4 | 2 | P00714,P12785               |

|      |                         |                                |   |                                           |
|------|-------------------------|--------------------------------|---|-------------------------------------------|
| 9977 | 1,5,6,8,36,<br>39,41,44 | 2,3,4,7,37,<br>38,40,42,4<br>3 | 1 | P01836                                    |
| 9978 | 1,5,6,8,36,<br>39,42,43 | 2,3,4,7,37,<br>38,40,41,4<br>4 | 0 |                                           |
| 9979 | 1,5,6,8,36,<br>39,42,44 | 2,3,4,7,37,<br>38,40,41,4<br>3 | 1 | P01836                                    |
| 9980 | 1,5,6,8,36,<br>39,43,44 | 2,3,4,7,37,<br>38,40,41,4<br>2 | 1 | P01836                                    |
| 9981 | 1,5,6,8,36,<br>40,41,42 | 2,3,4,7,37,<br>38,39,43,4<br>4 | 5 | A2RUV9,P23593,Q64057,Q80WL1,Q9JJS8        |
| 9982 | 1,5,6,8,36,<br>40,41,43 | 2,3,4,7,37,<br>38,39,42,4<br>4 | 4 | P12785,P51907,Q9JJS8,Q9Z1F2               |
| 9983 | 1,5,6,8,36,<br>40,41,44 | 2,3,4,7,37,<br>38,39,42,4<br>3 | 3 | P01836,Q80WL1,Q9Z1F2                      |
| 9984 | 1,5,6,8,36,<br>40,42,43 | 2,3,4,7,37,<br>38,39,41,4<br>4 | 2 | A2RUV9,P00774                             |
| 9985 | 1,5,6,8,36,<br>40,42,44 | 2,3,4,7,37,<br>38,39,41,4<br>3 | 3 | P01836,P06760,Q7TPB1                      |
| 9986 | 1,5,6,8,36,<br>40,43,44 | 2,3,4,7,37,<br>38,39,41,4<br>2 | 1 | P01836                                    |
| 9987 | 1,5,6,8,36,<br>41,42,43 | 2,3,4,7,37,<br>38,39,40,4<br>4 | 0 |                                           |
| 9988 | 1,5,6,8,36,<br>41,42,44 | 2,3,4,7,37,<br>38,39,40,4<br>3 | 1 | P01836                                    |
| 9989 | 1,5,6,8,36,<br>41,43,44 | 2,3,4,7,37,<br>38,39,40,4<br>2 | 1 | P01836                                    |
| 9990 | 1,5,6,8,36,<br>42,43,44 | 2,3,4,7,37,<br>38,39,40,4<br>1 | 1 | P01836                                    |
| 9991 | 1,5,6,8,37,<br>38,39,40 | 2,3,4,7,36,<br>41,42,43,4<br>4 | 6 | P01836,P06760,P08649,P35281,P82995,Q9QUL6 |

|       |                         |                                |   |                             |
|-------|-------------------------|--------------------------------|---|-----------------------------|
| 9992  | 1,5,6,8,37,<br>38,39,41 | 2,3,4,7,36,<br>40,42,43,4<br>4 | 2 | P01836,P13432               |
| 9993  | 1,5,6,8,37,<br>38,39,42 | 2,3,4,7,36,<br>40,41,43,4<br>4 | 2 | P01836,P19218               |
| 9994  | 1,5,6,8,37,<br>38,39,43 | 2,3,4,7,36,<br>40,41,42,4<br>4 | 3 | P01836,P08649,Q6IFV1        |
| 9995  | 1,5,6,8,37,<br>38,39,44 | 2,3,4,7,36,<br>40,41,42,4<br>3 | 1 | P01836                      |
| 9996  | 1,5,6,8,37,<br>38,40,41 | 2,3,4,7,36,<br>39,42,43,4<br>4 | 2 | P06760,P51907               |
| 9997  | 1,5,6,8,37,<br>38,40,42 | 2,3,4,7,36,<br>39,41,43,4<br>4 | 3 | D3ZUC6,P01836,P06760        |
| 9998  | 1,5,6,8,37,<br>38,40,43 | 2,3,4,7,36,<br>39,41,42,4<br>4 | 4 | P08649,P51907,P82995,Q6IFV1 |
| 9999  | 1,5,6,8,37,<br>38,40,44 | 2,3,4,7,36,<br>39,41,42,4<br>3 | 4 | P01836,P06760,P08649,Q9QUL6 |
| 10000 | 1,5,6,8,37,<br>38,41,42 | 2,3,4,7,36,<br>39,40,43,4<br>4 | 0 |                             |
| 10001 | 1,5,6,8,37,<br>38,41,43 | 2,3,4,7,36,<br>39,40,42,4<br>4 | 4 | P11442,P51907,Q6IFV1,Q7TPB1 |
| 10002 | 1,5,6,8,37,<br>38,41,44 | 2,3,4,7,36,<br>39,40,42,4<br>3 | 3 | P01836,P06760,Q05695        |
| 10003 | 1,5,6,8,37,<br>38,42,43 | 2,3,4,7,36,<br>39,40,41,4<br>4 | 1 | Q6IFV1                      |
| 10004 | 1,5,6,8,37,<br>38,42,44 | 2,3,4,7,36,<br>39,40,41,4<br>3 | 2 | P01836,P06760               |
| 10005 | 1,5,6,8,37,<br>38,43,44 | 2,3,4,7,36,<br>39,40,41,4<br>2 | 3 | P01836,P08649,Q6IFV1        |
| 10006 | 1,5,6,8,37,<br>39,40,41 | 2,3,4,7,36,<br>38,42,43,4<br>4 | 4 | P01836,P10715,P13432,P51907 |

|       |                         |                                |   |                                                                |
|-------|-------------------------|--------------------------------|---|----------------------------------------------------------------|
| 10007 | 1,5,6,8,37,<br>39,40,42 | 2,3,4,7,36,<br>38,41,43,4<br>4 | 4 | P00774,P01836,P06760,P98089                                    |
| 10008 | 1,5,6,8,37,<br>39,40,43 | 2,3,4,7,36,<br>38,41,42,4<br>4 | 5 | O35547,P01836,P08649,P51907,Q8CIZ5                             |
| 10009 | 1,5,6,8,37,<br>39,40,44 | 2,3,4,7,36,<br>38,41,42,4<br>3 | 6 | O35547,P01836,P06760,P08649,Q6AYL6,Q9QUL6                      |
| 10010 | 1,5,6,8,37,<br>39,41,42 | 2,3,4,7,36,<br>38,40,43,4<br>4 | 2 | P01836,P13432                                                  |
| 10011 | 1,5,6,8,37,<br>39,41,43 | 2,3,4,7,36,<br>38,40,42,4<br>4 | 2 | P12785,P51907                                                  |
| 10012 | 1,5,6,8,37,<br>39,41,44 | 2,3,4,7,36,<br>38,40,42,4<br>3 | 1 | P01836                                                         |
| 10013 | 1,5,6,8,37,<br>39,42,43 | 2,3,4,7,36,<br>38,40,41,4<br>4 | 1 | P01836                                                         |
| 10014 | 1,5,6,8,37,<br>39,42,44 | 2,3,4,7,36,<br>38,40,41,4<br>3 | 1 | P01836                                                         |
| 10015 | 1,5,6,8,37,<br>39,43,44 | 2,3,4,7,36,<br>38,40,41,4<br>2 | 3 | P01836,P08649,P13596                                           |
| 10016 | 1,5,6,8,37,<br>40,41,42 | 2,3,4,7,36,<br>38,39,43,4<br>4 | 6 | A2RUV9,P06760,P34901,P51907,Q80WL1,Q9JJS8                      |
| 10017 | 1,5,6,8,37,<br>40,41,43 | 2,3,4,7,36,<br>38,39,42,4<br>4 | 5 | P02793;Q7TP54,P11442,P51907,Q5XI73,Q9Z1F2                      |
| 10018 | 1,5,6,8,37,<br>40,41,44 | 2,3,4,7,36,<br>38,39,42,4<br>3 | 9 | P01836,P06760,P06911,P10715,P47727,P51907,Q5GRG2,Q80WL1,Q9Z1F2 |
| 10019 | 1,5,6,8,37,<br>40,42,43 | 2,3,4,7,36,<br>38,39,41,4<br>4 | 1 | P51907                                                         |
| 10020 | 1,5,6,8,37,<br>40,42,44 | 2,3,4,7,36,<br>38,39,41,4<br>3 | 2 | P01836,P06760                                                  |
| 10021 | 1,5,6,8,37,<br>40,43,44 | 2,3,4,7,36,<br>38,39,41,4<br>2 | 5 | O35547,P01836,P08010,P08649,P51907                             |

|       |                         |                                |   |                             |
|-------|-------------------------|--------------------------------|---|-----------------------------|
| 10022 | 1,5,6,8,37,<br>41,42,43 | 2,3,4,7,36,<br>38,39,40,4<br>4 | 1 | P51907                      |
| 10023 | 1,5,6,8,37,<br>41,42,44 | 2,3,4,7,36,<br>38,39,40,4<br>3 | 2 | P01836,P06760               |
| 10024 | 1,5,6,8,37,<br>41,43,44 | 2,3,4,7,36,<br>38,39,40,4<br>2 | 3 | P01836,P51907,Q9Z1F2        |
| 10025 | 1,5,6,8,37,<br>42,43,44 | 2,3,4,7,36,<br>38,39,40,4<br>1 | 1 | P01836                      |
| 10026 | 1,5,6,8,38,<br>39,40,41 | 2,3,4,7,36,<br>37,42,43,4<br>4 | 2 | P06760,P13432               |
| 10027 | 1,5,6,8,38,<br>39,40,42 | 2,3,4,7,36,<br>37,41,43,4<br>4 | 3 | P01836,P06760,Q9QUL6        |
| 10028 | 1,5,6,8,38,<br>39,40,43 | 2,3,4,7,36,<br>37,41,42,4<br>4 | 2 | P08649,Q6IFV1               |
| 10029 | 1,5,6,8,38,<br>39,40,44 | 2,3,4,7,36,<br>37,41,42,4<br>3 | 4 | P01836,P06760,P08649,Q9QUL6 |
| 10030 | 1,5,6,8,38,<br>39,41,42 | 2,3,4,7,36,<br>37,40,43,4<br>4 | 2 | P13432,P19218               |
| 10031 | 1,5,6,8,38,<br>39,41,43 | 2,3,4,7,36,<br>37,40,42,4<br>4 | 2 | P13432,Q6IFV1               |
| 10032 | 1,5,6,8,38,<br>39,41,44 | 2,3,4,7,36,<br>37,40,42,4<br>3 | 3 | P01836,P13432,Q05695        |
| 10033 | 1,5,6,8,38,<br>39,42,43 | 2,3,4,7,36,<br>37,40,41,4<br>4 | 2 | Q6IFU7,Q6IFV1               |
| 10034 | 1,5,6,8,38,<br>39,42,44 | 2,3,4,7,36,<br>37,40,41,4<br>3 | 2 | P01836,P06760               |
| 10035 | 1,5,6,8,38,<br>39,43,44 | 2,3,4,7,36,<br>37,40,41,4<br>2 | 2 | P01836,Q6IFV1               |
| 10036 | 1,5,6,8,38,<br>40,41,42 | 2,3,4,7,36,<br>37,39,43,4<br>4 | 2 | A2RUV9,P06760               |

|       |                         |                                |   |                                                                |
|-------|-------------------------|--------------------------------|---|----------------------------------------------------------------|
| 10037 | 1,5,6,8,38,<br>40,41,43 | 2,3,4,7,36,<br>37,39,42,4<br>4 | 3 | P02793;Q7TP54,P51907,Q6IFV1                                    |
| 10038 | 1,5,6,8,38,<br>40,41,44 | 2,3,4,7,36,<br>37,39,42,4<br>3 | 6 | P01836,P06760,P06911,P50115,Q5GRG2,Q62635                      |
| 10039 | 1,5,6,8,38,<br>40,42,43 | 2,3,4,7,36,<br>37,39,41,4<br>4 | 2 | P06760,Q6IFV1                                                  |
| 10040 | 1,5,6,8,38,<br>40,42,44 | 2,3,4,7,36,<br>37,39,41,4<br>3 | 4 | D3ZUC6,P01836,P06760,Q9QUL6                                    |
| 10041 | 1,5,6,8,38,<br>40,43,44 | 2,3,4,7,36,<br>37,39,41,4<br>2 | 4 | P01836,P06760,P08649,Q6IFV1                                    |
| 10042 | 1,5,6,8,38,<br>41,42,43 | 2,3,4,7,36,<br>37,39,40,4<br>4 | 2 | P50116,Q8CJD3                                                  |
| 10043 | 1,5,6,8,38,<br>41,42,44 | 2,3,4,7,36,<br>37,39,40,4<br>3 | 4 | P01836,P06760,Q05695,Q8CIZ5                                    |
| 10044 | 1,5,6,8,38,<br>41,43,44 | 2,3,4,7,36,<br>37,39,40,4<br>2 | 5 | P01836,P50115,P50116,Q05695,Q6IFV1                             |
| 10045 | 1,5,6,8,38,<br>42,43,44 | 2,3,4,7,36,<br>37,39,40,4<br>1 | 1 | P01836                                                         |
| 10046 | 1,5,6,8,39,<br>40,41,42 | 2,3,4,7,36,<br>37,38,43,4<br>4 | 3 | P01836,P06760,P13432                                           |
| 10047 | 1,5,6,8,39,<br>40,41,43 | 2,3,4,7,36,<br>37,38,42,4<br>4 | 3 | P12785,P47967,P51907                                           |
| 10048 | 1,5,6,8,39,<br>40,41,44 | 2,3,4,7,36,<br>37,38,42,4<br>3 | 9 | P01836,P06760,P06911,P10715,P19629,P31044,P47967,Q5GRG2,Q6AYL6 |
| 10049 | 1,5,6,8,39,<br>40,42,43 | 2,3,4,7,36,<br>37,38,41,4<br>4 | 1 | Q99MH3                                                         |
| 10050 | 1,5,6,8,39,<br>40,42,44 | 2,3,4,7,36,<br>37,38,41,4<br>3 | 3 | P01836,P06760,Q9QUL6                                           |
| 10051 | 1,5,6,8,39,<br>40,43,44 | 2,3,4,7,36,<br>37,38,41,4<br>2 | 3 | P01836,P08649,Q6AYL6                                           |



|       |                          |                                |   |                                                  |
|-------|--------------------------|--------------------------------|---|--------------------------------------------------|
| 10052 | 1,5,6,8,39,<br>41,42,43  | 2,3,4,7,36,<br>37,38,40,4<br>4 | 0 |                                                  |
| 10053 | 1,5,6,8,39,<br>41,42,44  | 2,3,4,7,36,<br>37,38,40,4<br>3 | 1 | P01836                                           |
| 10054 | 1,5,6,8,39,<br>41,43,44  | 2,3,4,7,36,<br>37,38,40,4<br>2 | 2 | P01836,P12785                                    |
| 10055 | 1,5,6,8,39,<br>42,43,44  | 2,3,4,7,36,<br>37,38,40,4<br>1 | 1 | P01836                                           |
| 10056 | 1,5,6,8,40,<br>41,42,43  | 2,3,4,7,36,<br>37,38,39,4<br>4 | 3 | A2RUV9,P51907,Q9JJS8                             |
| 10057 | 1,5,6,8,40,<br>41,42,44  | 2,3,4,7,36,<br>37,38,39,4<br>3 | 5 | P01836,P06760,P14480,Q6P6R2,Q80WL1               |
| 10058 | 1,5,6,8,40,<br>41,43,44  | 2,3,4,7,36,<br>37,38,39,4<br>2 | 6 | P01836,P02793;Q7TP54,P47967,P51907,Q80WL1,Q9Z1F2 |
| 10059 | 1,5,6,8,40,<br>42,43,44  | 2,3,4,7,36,<br>37,38,39,4<br>1 | 2 | P01836,P06760                                    |
| 10060 | 1,5,6,8,41,<br>42,43,44  | 2,3,4,7,36,<br>37,38,39,4<br>0 | 1 | P01836                                           |
| 10061 | 1,5,6,36,3<br>7,38,39,40 | 2,3,4,7,8,4<br>1,42,43,44      | 6 | F1LM93,O35547,P20766,P35281,P60905,Q9QUL6        |
| 10062 | 1,5,6,36,3<br>7,38,39,41 | 2,3,4,7,8,4<br>0,42,43,44      | 5 | P00714,P13432,P20766,Q5M819,Q9JHB9               |
| 10063 | 1,5,6,36,3<br>7,38,39,42 | 2,3,4,7,8,4<br>0,41,43,44      | 2 | P19218,P20766                                    |
| 10064 | 1,5,6,36,3<br>7,38,39,43 | 2,3,4,7,8,4<br>0,41,42,44      | 4 | P00714,P20766,Q561R9,Q6IFV1                      |
| 10065 | 1,5,6,36,3<br>7,38,39,44 | 2,3,4,7,8,4<br>0,41,42,43      | 2 | P01836,P20766                                    |
| 10066 | 1,5,6,36,3<br>7,38,40,41 | 2,3,4,7,8,3<br>9,42,43,44      | 4 | P20766,Q5M819,Q64057,Q80WL1                      |
| 10067 | 1,5,6,36,3<br>7,38,40,42 | 2,3,4,7,8,3<br>9,41,43,44      | 2 | P20766,Q64057                                    |
| 10068 | 1,5,6,36,3<br>7,38,40,43 | 2,3,4,7,8,3<br>9,41,42,44      | 4 | O35547,P08010,P20766,Q6IFV1                      |
| 10069 | 1,5,6,36,3<br>7,38,40,44 | 2,3,4,7,8,3<br>9,41,42,43      | 6 | O35547,P20766,P54921,P82471,Q80WL1,Q9QUL6        |

|       |                          |                           |    |                                                                              |
|-------|--------------------------|---------------------------|----|------------------------------------------------------------------------------|
| 10070 | 1,5,6,36,3<br>7,38,41,42 | 2,3,4,7,8,3<br>9,40,43,44 | 3  | P20766,Q566E6,Q5M819                                                         |
| 10071 | 1,5,6,36,3<br>7,38,41,43 | 2,3,4,7,8,3<br>9,40,42,44 | 4  | P00714,P20766,Q5M819,Q6IFV1                                                  |
| 10072 | 1,5,6,36,3<br>7,38,41,44 | 2,3,4,7,8,3<br>9,40,42,43 | 3  | P20766,Q80WL1,Q9JHB9                                                         |
| 10073 | 1,5,6,36,3<br>7,38,42,43 | 2,3,4,7,8,3<br>9,40,41,44 | 4  | P10715,P20766,Q6IFU7,Q6IFV1                                                  |
| 10074 | 1,5,6,36,3<br>7,38,42,44 | 2,3,4,7,8,3<br>9,40,41,43 | 1  | P20766                                                                       |
| 10075 | 1,5,6,36,3<br>7,38,43,44 | 2,3,4,7,8,3<br>9,40,41,42 | 3  | P20766,P36970,Q6IFV1                                                         |
| 10076 | 1,5,6,36,3<br>7,39,40,41 | 2,3,4,7,8,3<br>8,42,43,44 | 3  | O35547,P00714,Q80WL1                                                         |
| 10077 | 1,5,6,36,3<br>7,39,40,42 | 2,3,4,7,8,3<br>8,41,43,44 | 8  | O35547,P00774,P50115,P50116,P55091,P98089,Q05695,Q80WL1                      |
| 10078 | 1,5,6,36,3<br>7,39,40,43 | 2,3,4,7,8,3<br>8,41,42,44 | 11 | F1LM93,O35547,P00714,P00774,P50115,P50116,P55091,P98089,Q05695,Q80WL1,Q8CIZ5 |
| 10079 | 1,5,6,36,3<br>7,39,40,44 | 2,3,4,7,8,3<br>8,41,42,43 | 8  | F1LM93,O35547,P01836,P50115,P50116,P54921,Q80WL1,Q9QUL6                      |
| 10080 | 1,5,6,36,3<br>7,39,41,42 | 2,3,4,7,8,3<br>8,40,43,44 | 3  | P20766,Q566E6,Q80WL1                                                         |
| 10081 | 1,5,6,36,3<br>7,39,41,43 | 2,3,4,7,8,3<br>8,40,42,44 | 3  | P00714,P20766,Q6TMA8                                                         |
| 10082 | 1,5,6,36,3<br>7,39,41,44 | 2,3,4,7,8,3<br>8,40,42,43 | 2  | Q80WL1,Q9JHB9                                                                |
| 10083 | 1,5,6,36,3<br>7,39,42,43 | 2,3,4,7,8,3<br>8,40,41,44 | 4  | P50115,P98089,Q05695,Q62635                                                  |
| 10084 | 1,5,6,36,3<br>7,39,42,44 | 2,3,4,7,8,3<br>8,40,41,43 | 3  | P01836,P50115,P50116                                                         |
| 10085 | 1,5,6,36,3<br>7,39,43,44 | 2,3,4,7,8,3<br>8,40,41,42 | 3  | O35547,P50115,Q6TMA8                                                         |
| 10086 | 1,5,6,36,3<br>7,40,41,42 | 2,3,4,7,8,3<br>8,39,43,44 | 3  | P20766,Q64057,Q80WL1                                                         |
| 10087 | 1,5,6,36,3<br>7,40,41,43 | 2,3,4,7,8,3<br>8,39,42,44 | 4  | O35547,P20766,P51907,Q80WL1                                                  |
| 10088 | 1,5,6,36,3<br>7,40,41,44 | 2,3,4,7,8,3<br>8,39,42,43 | 5  | O35547,P20766,P47727,Q80WL1,Q9JHB9                                           |
| 10089 | 1,5,6,36,3<br>7,40,42,43 | 2,3,4,7,8,3<br>8,39,41,44 | 6  | P00774,P20766,P50115,P98089,Q05695,Q80WL1                                    |
| 10090 | 1,5,6,36,3<br>7,40,42,44 | 2,3,4,7,8,3<br>8,39,41,43 | 6  | O35547,P20766,P50115,P50116,Q7TPB1,Q80WL1                                    |
| 10091 | 1,5,6,36,3<br>7,40,43,44 | 2,3,4,7,8,3<br>8,39,41,42 | 7  | O35547,P05369,P08010,P20766,P42854,P50115,Q80WL1                             |
| 10092 | 1,5,6,36,3<br>7,41,42,43 | 2,3,4,7,8,3<br>8,39,40,44 | 2  | P20766,Q80WL1                                                                |

|       |                          |                           |   |                             |
|-------|--------------------------|---------------------------|---|-----------------------------|
| 10093 | 1,5,6,36,3<br>7,41,42,44 | 2,3,4,7,8,3<br>8,39,40,43 | 3 | P20766,Q566E6,Q80WL1        |
| 10094 | 1,5,6,36,3<br>7,41,43,44 | 2,3,4,7,8,3<br>8,39,40,42 | 3 | P05369,P20766,Q80WL1        |
| 10095 | 1,5,6,36,3<br>7,42,43,44 | 2,3,4,7,8,3<br>8,39,40,41 | 2 | P20766,P50115               |
| 10096 | 1,5,6,36,3<br>8,39,40,41 | 2,3,4,7,8,3<br>7,42,43,44 | 3 | P00714,P13432,P20766        |
| 10097 | 1,5,6,36,3<br>8,39,40,42 | 2,3,4,7,8,3<br>7,41,43,44 | 1 | Q9QUL6                      |
| 10098 | 1,5,6,36,3<br>8,39,40,43 | 2,3,4,7,8,3<br>7,41,42,44 | 1 | Q6IFV1                      |
| 10099 | 1,5,6,36,3<br>8,39,40,44 | 2,3,4,7,8,3<br>7,41,42,43 | 1 | Q9QUL6                      |
| 10100 | 1,5,6,36,3<br>8,39,41,42 | 2,3,4,7,8,3<br>7,40,43,44 | 2 | P13432,P20766               |
| 10101 | 1,5,6,36,3<br>8,39,41,43 | 2,3,4,7,8,3<br>7,40,42,44 | 3 | P00714,P20766,Q6IFV1        |
| 10102 | 1,5,6,36,3<br>8,39,41,44 | 2,3,4,7,8,3<br>7,40,42,43 | 0 |                             |
| 10103 | 1,5,6,36,3<br>8,39,42,43 | 2,3,4,7,8,3<br>7,40,41,44 | 3 | P20766,Q6IFU7,Q6IFV1        |
| 10104 | 1,5,6,36,3<br>8,39,42,44 | 2,3,4,7,8,3<br>7,40,41,43 | 0 |                             |
| 10105 | 1,5,6,36,3<br>8,39,43,44 | 2,3,4,7,8,3<br>7,40,41,42 | 1 | Q6IFV1                      |
| 10106 | 1,5,6,36,3<br>8,40,41,42 | 2,3,4,7,8,3<br>7,39,43,44 | 4 | A2RUV9,P20766,Q64057,Q80WL1 |
| 10107 | 1,5,6,36,3<br>8,40,41,43 | 2,3,4,7,8,3<br>7,39,42,44 | 2 | P20766,Q6IFV1               |
| 10108 | 1,5,6,36,3<br>8,40,41,44 | 2,3,4,7,8,3<br>7,39,42,43 | 2 | P20766,Q80WL1               |
| 10109 | 1,5,6,36,3<br>8,40,42,43 | 2,3,4,7,8,3<br>7,39,41,44 | 3 | P20766,Q64057,Q6IFU7        |
| 10110 | 1,5,6,36,3<br>8,40,42,44 | 2,3,4,7,8,3<br>7,39,41,43 | 4 | P06760,P20766,Q7TPB1,Q9QUL6 |
| 10111 | 1,5,6,36,3<br>8,40,43,44 | 2,3,4,7,8,3<br>7,39,41,42 | 1 | P20766                      |
| 10112 | 1,5,6,36,3<br>8,41,42,43 | 2,3,4,7,8,3<br>7,39,40,44 | 3 | P20766,Q6IFU7,Q8CJD3        |
| 10113 | 1,5,6,36,3<br>8,41,42,44 | 2,3,4,7,8,3<br>7,39,40,43 | 1 | P20766                      |
| 10114 | 1,5,6,36,3<br>8,41,43,44 | 2,3,4,7,8,3<br>7,39,40,42 | 1 | P20766                      |
| 10115 | 1,5,6,36,3<br>8,42,43,44 | 2,3,4,7,8,3<br>7,39,40,41 | 2 | P20766,Q6IFU7               |

|       |                          |                           |    |                                                                       |
|-------|--------------------------|---------------------------|----|-----------------------------------------------------------------------|
| 10116 | 1,5,6,36,3<br>9,40,41,42 | 2,3,4,7,8,3<br>7,38,43,44 | 1  | Q80WL1                                                                |
| 10117 | 1,5,6,36,3<br>9,40,41,43 | 2,3,4,7,8,3<br>7,38,42,44 | 2  | P00714,Q80WL1                                                         |
| 10118 | 1,5,6,36,3<br>9,40,41,44 | 2,3,4,7,8,3<br>7,38,42,43 | 6  | P06911,P10715,P19629,Q5GRG2,Q6P6T1,Q80WL1                             |
| 10119 | 1,5,6,36,3<br>9,40,42,43 | 2,3,4,7,8,3<br>7,38,41,44 | 5  | P00774,P50115,P98089,Q05695,Q6IFU7                                    |
| 10120 | 1,5,6,36,3<br>9,40,42,44 | 2,3,4,7,8,3<br>7,38,41,43 | 5  | P50115,P50116,Q7TPB1,Q80WL1,Q9QUL6                                    |
| 10121 | 1,5,6,36,3<br>9,40,43,44 | 2,3,4,7,8,3<br>7,38,41,42 | 2  | P50115,Q80WL1                                                         |
| 10122 | 1,5,6,36,3<br>9,41,42,43 | 2,3,4,7,8,3<br>7,38,40,44 | 1  | Q6IFU7                                                                |
| 10123 | 1,5,6,36,3<br>9,41,42,44 | 2,3,4,7,8,3<br>7,38,40,43 | 1  | Q80WL1                                                                |
| 10124 | 1,5,6,36,3<br>9,41,43,44 | 2,3,4,7,8,3<br>7,38,40,42 | 0  |                                                                       |
| 10125 | 1,5,6,36,3<br>9,42,43,44 | 2,3,4,7,8,3<br>7,38,40,41 | 1  | P50115                                                                |
| 10126 | 1,5,6,36,4<br>0,41,42,43 | 2,3,4,7,8,3<br>7,38,39,44 | 1  | Q80WL1                                                                |
| 10127 | 1,5,6,36,4<br>0,41,42,44 | 2,3,4,7,8,3<br>7,38,39,43 | 2  | Q7TPB1,Q80WL1                                                         |
| 10128 | 1,5,6,36,4<br>0,41,43,44 | 2,3,4,7,8,3<br>7,38,39,42 | 1  | Q80WL1                                                                |
| 10129 | 1,5,6,36,4<br>0,42,43,44 | 2,3,4,7,8,3<br>7,38,39,41 | 2  | Q7TPB1,Q80WL1                                                         |
| 10130 | 1,5,6,36,4<br>1,42,43,44 | 2,3,4,7,8,3<br>7,38,39,40 | 1  | Q80WL1                                                                |
| 10131 | 1,5,6,37,3<br>8,39,40,41 | 2,3,4,7,8,3<br>6,42,43,44 | 5  | P00714,P13432,P20766,P35281,P82995                                    |
| 10132 | 1,5,6,37,3<br>8,39,40,42 | 2,3,4,7,8,3<br>6,41,43,44 | 4  | D3ZUK3,P20766,Q99MH3,Q9QUL6                                           |
| 10133 | 1,5,6,37,3<br>8,39,40,43 | 2,3,4,7,8,3<br>6,41,42,44 | 10 | P08010,P08649,P20766,P35281,P60905,P82995,Q62753,Q6IFV1,Q812E4,Q99MH3 |
| 10134 | 1,5,6,37,3<br>8,39,40,44 | 2,3,4,7,8,3<br>6,41,42,43 | 10 | O35547,P01836,P06760,P08649,P20766,P54921,P60905,P82995,Q812E4,Q9QUL6 |
| 10135 | 1,5,6,37,3<br>8,39,41,42 | 2,3,4,7,8,3<br>6,40,43,44 | 3  | D3ZUK3,P13432,P20766                                                  |
| 10136 | 1,5,6,37,3<br>8,39,41,43 | 2,3,4,7,8,3<br>6,40,42,44 | 5  | P00714,P13432,P20766,P36374,Q6IFV1                                    |
| 10137 | 1,5,6,37,3<br>8,39,41,44 | 2,3,4,7,8,3<br>6,40,42,43 | 3  | P01836,P13432,P20766                                                  |
| 10138 | 1,5,6,37,3<br>8,39,42,43 | 2,3,4,7,8,3<br>6,40,41,44 | 6  | D3ZUK3,P20766,Q64611,Q6IFU7,Q6IFV1,Q99MH3                             |

|       |                          |                           |    |                                                                       |
|-------|--------------------------|---------------------------|----|-----------------------------------------------------------------------|
| 10139 | 1,5,6,37,3<br>8,39,42,44 | 2,3,4,7,8,3<br>6,40,41,43 | 4  | D3ZUK3,P01836,P20766,Q9QUL6                                           |
| 10140 | 1,5,6,37,3<br>8,39,43,44 | 2,3,4,7,8,3<br>6,40,41,42 | 6  | P01836,P08649,P20766,P23593,Q6IFV1,Q812E4                             |
| 10141 | 1,5,6,37,3<br>8,40,41,42 | 2,3,4,7,8,3<br>6,39,43,44 | 4  | D3ZUK3,P06760,P20766,Q80WL1                                           |
| 10142 | 1,5,6,37,3<br>8,40,41,43 | 2,3,4,7,8,3<br>6,39,42,44 | 6  | P11442,P20766,P36970,P51907,P82995,Q6IFV1                             |
| 10143 | 1,5,6,37,3<br>8,40,41,44 | 2,3,4,7,8,3<br>6,39,42,43 | 4  | P01836,P06760,P20766,Q80WL1                                           |
| 10144 | 1,5,6,37,3<br>8,40,42,43 | 2,3,4,7,8,3<br>6,39,41,44 | 7  | D3ZUK3,P20766,Q63475,Q64611,Q6IFU7,Q6IFV1,Q99MH3                      |
| 10145 | 1,5,6,37,3<br>8,40,42,44 | 2,3,4,7,8,3<br>6,39,41,43 | 5  | D3ZUK3,P01836,P06760,P20766,Q9QUL6                                    |
| 10146 | 1,5,6,37,3<br>8,40,43,44 | 2,3,4,7,8,3<br>6,39,41,42 | 6  | P08010,P08649,P20766,P36970,P82995,Q6IFV1                             |
| 10147 | 1,5,6,37,3<br>8,41,42,43 | 2,3,4,7,8,3<br>6,39,40,44 | 4  | P20766,Q6IFU7,Q6IFV1,Q8CJD3                                           |
| 10148 | 1,5,6,37,3<br>8,41,42,44 | 2,3,4,7,8,3<br>6,39,40,43 | 1  | P20766                                                                |
| 10149 | 1,5,6,37,3<br>8,41,43,44 | 2,3,4,7,8,3<br>6,39,40,42 | 3  | P20766,P36970,Q6IFV1                                                  |
| 10150 | 1,5,6,37,3<br>8,42,43,44 | 2,3,4,7,8,3<br>6,39,40,41 | 4  | P20766,P36970,Q6IFU7,Q6IFV1                                           |
| 10151 | 1,5,6,37,3<br>9,40,41,42 | 2,3,4,7,8,3<br>6,38,43,44 | 3  | D3ZUK3,P13432,Q80WL1                                                  |
| 10152 | 1,5,6,37,3<br>9,40,41,43 | 2,3,4,7,8,3<br>6,38,42,44 | 5  | P00714,P51907,P97554,Q6AYL6,Q80WL1                                    |
| 10153 | 1,5,6,37,3<br>9,40,41,44 | 2,3,4,7,8,3<br>6,38,42,43 | 10 | O35547,P01836,P06911,P10715,P16391,P19629,P47727,Q5GRG2,Q6AYL6,Q80WL1 |
| 10154 | 1,5,6,37,3<br>9,40,42,43 | 2,3,4,7,8,3<br>6,38,41,44 | 8  | D3ZUK3,P50115,P50116,P98089,Q05695,Q63475,Q64611,Q99MH3               |
| 10155 | 1,5,6,37,3<br>9,40,42,44 | 2,3,4,7,8,3<br>6,38,41,43 | 10 | D3ZUK3,O35547,O54858,P01836,P06760,P50115,P50116,Q80WL1,Q99MH3,Q9QUL6 |
| 10156 | 1,5,6,37,3<br>9,40,43,44 | 2,3,4,7,8,3<br>6,38,41,42 | 10 | O35547,P01836,P08010,P08649,P50115,P50116,Q6AYL6,Q80WL1,Q812E4,Q99MH3 |
| 10157 | 1,5,6,37,3<br>9,41,42,43 | 2,3,4,7,8,3<br>6,38,40,44 | 1  | P13432                                                                |
| 10158 | 1,5,6,37,3<br>9,41,42,44 | 2,3,4,7,8,3<br>6,38,40,43 | 2  | P01836,Q80WL1                                                         |
| 10159 | 1,5,6,37,3<br>9,41,43,44 | 2,3,4,7,8,3<br>6,38,40,42 | 2  | P01836,Q80WL1                                                         |
| 10160 | 1,5,6,37,3<br>9,42,43,44 | 2,3,4,7,8,3<br>6,38,40,41 | 2  | P01836,P50115                                                         |
| 10161 | 1,5,6,37,4<br>0,41,42,43 | 2,3,4,7,8,3<br>6,38,39,44 | 3  | P20766,P51907,Q80WL1                                                  |

|       |                          |                           |   |                                                                |
|-------|--------------------------|---------------------------|---|----------------------------------------------------------------|
| 10162 | 1,5,6,37,4<br>0,41,42,44 | 2,3,4,7,8,3<br>6,38,39,43 | 4 | P01836,P06760,P20766,Q80WL1                                    |
| 10163 | 1,5,6,37,4<br>0,41,43,44 | 2,3,4,7,8,3<br>6,38,39,42 | 7 | P05369,P08010,P20766,P47727,P51907,Q6AYL6,Q80WL1               |
| 10164 | 1,5,6,37,4<br>0,42,43,44 | 2,3,4,7,8,3<br>6,38,39,41 | 4 | P01836,Q63475,Q80WL1,Q99MH3                                    |
| 10165 | 1,5,6,37,4<br>1,42,43,44 | 2,3,4,7,8,3<br>6,38,39,40 | 2 | P20766,Q80WL1                                                  |
| 10166 | 1,5,6,38,3<br>9,40,41,42 | 2,3,4,7,8,3<br>6,37,43,44 | 3 | D3ZUK3,P06760,P13432                                           |
| 10167 | 1,5,6,38,3<br>9,40,41,43 | 2,3,4,7,8,3<br>6,37,42,44 | 4 | P00714,P13432,Q6IFV1,Q99MH3                                    |
| 10168 | 1,5,6,38,3<br>9,40,41,44 | 2,3,4,7,8,3<br>6,37,42,43 | 9 | P01836,P06760,P06911,P10715,P13432,P19629,Q5GRG2,Q80WL1,Q9QUL6 |
| 10169 | 1,5,6,38,3<br>9,40,42,43 | 2,3,4,7,8,3<br>6,37,41,44 | 6 | D3ZUK3,Q63475,Q64611,Q6IFU7,Q6IFV1,Q99MH3                      |
| 10170 | 1,5,6,38,3<br>9,40,42,44 | 2,3,4,7,8,3<br>6,37,41,43 | 6 | D3ZUK3,Q54858,P01836,P06760,Q99MH3,Q9QUL6                      |
| 10171 | 1,5,6,38,3<br>9,40,43,44 | 2,3,4,7,8,3<br>6,37,41,42 | 6 | P01836,P08649,Q6AYL6,Q6IFV1,Q99MH3,Q9QUL6                      |
| 10172 | 1,5,6,38,3<br>9,41,42,43 | 2,3,4,7,8,3<br>6,37,40,44 | 4 | P13432,P20766,Q6IFU7,Q8CJD3                                    |
| 10173 | 1,5,6,38,3<br>9,41,42,44 | 2,3,4,7,8,3<br>6,37,40,43 | 1 | P13432                                                         |
| 10174 | 1,5,6,38,3<br>9,41,43,44 | 2,3,4,7,8,3<br>6,37,40,42 | 1 | Q6IFV1                                                         |
| 10175 | 1,5,6,38,3<br>9,42,43,44 | 2,3,4,7,8,3<br>6,37,40,41 | 1 | Q6IFU7                                                         |
| 10176 | 1,5,6,38,4<br>0,41,42,43 | 2,3,4,7,8,3<br>6,37,39,44 | 3 | P20766,Q6IFU7,Q8CJD3                                           |
| 10177 | 1,5,6,38,4<br>0,41,42,44 | 2,3,4,7,8,3<br>6,37,39,43 | 3 | P06760,P20766,Q80WL1                                           |
| 10178 | 1,5,6,38,4<br>0,41,43,44 | 2,3,4,7,8,3<br>6,37,39,42 | 3 | P20766,P36970,Q80WL1                                           |
| 10179 | 1,5,6,38,4<br>0,42,43,44 | 2,3,4,7,8,3<br>6,37,39,41 | 5 | P06760,P20766,Q6IFU7,Q99041,Q99MH3                             |
| 10180 | 1,5,6,38,4<br>1,42,43,44 | 2,3,4,7,8,3<br>6,37,39,40 | 3 | P20766,Q6IFU7,Q8CJD3                                           |
| 10181 | 1,5,6,39,4<br>0,41,42,43 | 2,3,4,7,8,3<br>6,37,38,44 | 3 | P13432,Q6IFU7,Q99MH3                                           |
| 10182 | 1,5,6,39,4<br>0,41,42,44 | 2,3,4,7,8,3<br>6,37,38,43 | 7 | P01836,P06760,P10715,P13432,P16391,P19629,Q80WL1               |
| 10183 | 1,5,6,39,4<br>0,41,43,44 | 2,3,4,7,8,3<br>6,37,38,42 | 6 | P10715,P15978,P19629,P47967,Q6AYL6,Q80WL1                      |
| 10184 | 1,5,6,39,4<br>0,42,43,44 | 2,3,4,7,8,3<br>6,37,38,41 | 3 | P01836,P11762,Q99MH3                                           |

|       |                          |                                |    |                                                                       |
|-------|--------------------------|--------------------------------|----|-----------------------------------------------------------------------|
| 10185 | 1,5,6,39,4<br>1,42,43,44 | 2,3,4,7,8,3<br>6,37,38,40      | 0  |                                                                       |
| 10186 | 1,5,6,40,4<br>1,42,43,44 | 2,3,4,7,8,3<br>6,37,38,39      | 1  | Q80WL1                                                                |
| 10187 | 1,5,7,8,36,<br>37,38,39  | 2,3,4,6,40,<br>41,42,43,4<br>4 | 4  | P11883,P19218,Q5HZV9,Q6P6R2                                           |
| 10188 | 1,5,7,8,36,<br>37,38,40  | 2,3,4,6,39,<br>41,42,43,4<br>4 | 3  | P00762,P02625,P11883                                                  |
| 10189 | 1,5,7,8,36,<br>37,38,41  | 2,3,4,6,39,<br>40,42,43,4<br>4 | 2  | P25236,P50116                                                         |
| 10190 | 1,5,7,8,36,<br>37,38,42  | 2,3,4,6,39,<br>40,41,43,4<br>4 | 2  | P00762,P19218                                                         |
| 10191 | 1,5,7,8,36,<br>37,38,43  | 2,3,4,6,39,<br>40,41,42,4<br>4 | 2  | P16391,Q6P6R2                                                         |
| 10192 | 1,5,7,8,36,<br>37,38,44  | 2,3,4,6,39,<br>40,41,42,4<br>3 | 3  | P00762,P11883,Q5HZV9                                                  |
| 10193 | 1,5,7,8,36,<br>37,39,40  | 2,3,4,6,38,<br>41,42,43,4<br>4 | 10 | B0BNN3,P00762,P00774,P01835,P11883,P27213,P98089,Q5HZV9,Q62635,Q8CIZ5 |
| 10194 | 1,5,7,8,36,<br>37,39,41  | 2,3,4,6,38,<br>40,42,43,4<br>4 | 5  | B0BNN3,P00762,P01835,Q5HZV9,Q6TMA8                                    |
| 10195 | 1,5,7,8,36,<br>37,39,42  | 2,3,4,6,38,<br>40,41,43,4<br>4 | 7  | O54728,P00762,P00774,P01835,P98089,Q5HZV9,Q62635                      |
| 10196 | 1,5,7,8,36,<br>37,39,43  | 2,3,4,6,38,<br>40,41,42,4<br>4 | 6  | P00774,P98089,Q62635,Q6P6R2,Q6TMA8,Q8CIZ5                             |
| 10197 | 1,5,7,8,36,<br>37,39,44  | 2,3,4,6,38,<br>40,41,42,4<br>3 | 4  | B0BNN3,P00762,P11883,Q5HZV9                                           |
| 10198 | 1,5,7,8,36,<br>37,40,41  | 2,3,4,6,38,<br>39,42,43,4<br>4 | 5  | B0BNN3,P00762,P01835,Q4FZU6,Q9JJS8                                    |
| 10199 | 1,5,7,8,36,<br>37,40,42  | 2,3,4,6,38,<br>39,41,43,4<br>4 | 8  | B0BNN3,P00762,P00774,P01835,P02625,P98089,Q5HZV9,Q62635               |
| 10200 | 1,5,7,8,36,<br>37,40,43  | 2,3,4,6,38,<br>39,41,42,4<br>4 | 4  | P00774,P98089,Q62635,Q8CIZ5                                           |

|       |                         |                                |   |                                    |
|-------|-------------------------|--------------------------------|---|------------------------------------|
| 10201 | 1,5,7,8,36,<br>37,40,44 | 2,3,4,6,38,<br>39,41,42,4<br>3 | 5 | B0BNN3,P00762,P02625,P11883,Q5HZV9 |
| 10202 | 1,5,7,8,36,<br>37,41,42 | 2,3,4,6,38,<br>39,40,43,4<br>4 | 3 | B0BNN3,P00762,P01835               |
| 10203 | 1,5,7,8,36,<br>37,41,43 | 2,3,4,6,38,<br>39,40,42,4<br>4 | 2 | P83121,Q6TMA8                      |
| 10204 | 1,5,7,8,36,<br>37,41,44 | 2,3,4,6,38,<br>39,40,42,4<br>3 | 3 | B0BNN3,P00762,Q5HZV9               |
| 10205 | 1,5,7,8,36,<br>37,42,43 | 2,3,4,6,38,<br>39,40,41,4<br>4 | 5 | P00774,P16391,P16636,P98089,Q62635 |
| 10206 | 1,5,7,8,36,<br>37,42,44 | 2,3,4,6,38,<br>39,40,41,4<br>3 | 3 | B0BNN3,P00762,Q5HZV9               |
| 10207 | 1,5,7,8,36,<br>37,43,44 | 2,3,4,6,38,<br>39,40,41,4<br>2 | 0 |                                    |
| 10208 | 1,5,7,8,36,<br>38,39,40 | 2,3,4,6,37,<br>41,42,43,4<br>4 | 1 | Q6P6R2                             |
| 10209 | 1,5,7,8,36,<br>38,39,41 | 2,3,4,6,37,<br>40,42,43,4<br>4 | 2 | P25236,P50116                      |
| 10210 | 1,5,7,8,36,<br>38,39,42 | 2,3,4,6,37,<br>40,41,43,4<br>4 | 3 | O54728,P00762,P19218               |
| 10211 | 1,5,7,8,36,<br>38,39,43 | 2,3,4,6,37,<br>40,41,42,4<br>4 | 1 | Q6P6R2                             |
| 10212 | 1,5,7,8,36,<br>38,39,44 | 2,3,4,6,37,<br>40,41,42,4<br>3 | 1 | Q5HZV9                             |
| 10213 | 1,5,7,8,36,<br>38,40,41 | 2,3,4,6,37,<br>39,42,43,4<br>4 | 3 | P50115,P50116,Q4FZU6               |
| 10214 | 1,5,7,8,36,<br>38,40,42 | 2,3,4,6,37,<br>39,41,43,4<br>4 | 2 | P00762,P02625                      |
| 10215 | 1,5,7,8,36,<br>38,40,43 | 2,3,4,6,37,<br>39,41,42,4<br>4 | 0 |                                    |



|       |                         |                                |   |                                                  |
|-------|-------------------------|--------------------------------|---|--------------------------------------------------|
| 10216 | 1,5,7,8,36,<br>38,40,44 | 2,3,4,6,37,<br>39,41,42,4<br>3 | 3 | P00762,P02625,Q4FZU6                             |
| 10217 | 1,5,7,8,36,<br>38,41,42 | 2,3,4,6,37,<br>39,40,43,4<br>4 | 1 | P50116                                           |
| 10218 | 1,5,7,8,36,<br>38,41,43 | 2,3,4,6,37,<br>39,40,42,4<br>4 | 3 | P50115,P50116,Q8CJD3                             |
| 10219 | 1,5,7,8,36,<br>38,41,44 | 2,3,4,6,37,<br>39,40,42,4<br>3 | 4 | P50115,P50116,Q05695,Q4FZU6                      |
| 10220 | 1,5,7,8,36,<br>38,42,43 | 2,3,4,6,37,<br>39,40,41,4<br>4 | 3 | P06911,P16391,P16636                             |
| 10221 | 1,5,7,8,36,<br>38,42,44 | 2,3,4,6,37,<br>39,40,41,4<br>3 | 1 | P00762                                           |
| 10222 | 1,5,7,8,36,<br>38,43,44 | 2,3,4,6,37,<br>39,40,41,4<br>2 | 0 |                                                  |
| 10223 | 1,5,7,8,36,<br>39,40,41 | 2,3,4,6,37,<br>38,42,43,4<br>4 | 6 | B0BNN3,P00762,P01835,P10715,P12785,Q4FZU6        |
| 10224 | 1,5,7,8,36,<br>39,40,42 | 2,3,4,6,37,<br>38,41,43,4<br>4 | 7 | O54728,P00762,P00774,P01835,P98089,Q4FZU6,Q62635 |
| 10225 | 1,5,7,8,36,<br>39,40,43 | 2,3,4,6,37,<br>38,41,42,4<br>4 | 5 | P00774,P12785,P98089,Q62635,Q8CIZ5               |
| 10226 | 1,5,7,8,36,<br>39,40,44 | 2,3,4,6,37,<br>38,41,42,4<br>3 | 6 | B0BNN3,P00762,P80020,Q4FZU6,Q5HZV9,Q6P6T1        |
| 10227 | 1,5,7,8,36,<br>39,41,42 | 2,3,4,6,37,<br>38,40,43,4<br>4 | 4 | P00762,P01835,Q4FZU6,Q6AYR9                      |
| 10228 | 1,5,7,8,36,<br>39,41,43 | 2,3,4,6,37,<br>38,40,42,4<br>4 | 4 | P12785,P16636,P22006,Q6TMA8                      |
| 10229 | 1,5,7,8,36,<br>39,41,44 | 2,3,4,6,37,<br>38,40,42,4<br>3 | 5 | B0BNN3,P00762,Q4FZU6,Q5HZV9,Q8VD89               |
| 10230 | 1,5,7,8,36,<br>39,42,43 | 2,3,4,6,37,<br>38,40,41,4<br>4 | 5 | O54728,P00774,P16636,P98089,Q62635               |

|       |                         |                                |   |                                                                |
|-------|-------------------------|--------------------------------|---|----------------------------------------------------------------|
| 10231 | 1,5,7,8,36,<br>39,42,44 | 2,3,4,6,37,<br>38,40,41,4<br>3 | 2 | P00762,Q5HZV9                                                  |
| 10232 | 1,5,7,8,36,<br>39,43,44 | 2,3,4,6,37,<br>38,40,41,4<br>2 | 0 |                                                                |
| 10233 | 1,5,7,8,36,<br>40,41,42 | 2,3,4,6,37,<br>38,39,43,4<br>4 | 6 | P00762,P01835,P02625,P14480,Q4FZU6,Q9JJS8                      |
| 10234 | 1,5,7,8,36,<br>40,41,43 | 2,3,4,6,37,<br>38,39,42,4<br>4 | 4 | P12785,P16636,Q4FZU6,Q9JJS8                                    |
| 10235 | 1,5,7,8,36,<br>40,41,44 | 2,3,4,6,37,<br>38,39,42,4<br>3 | 9 | B0BNN3,P00762,P02625,P10715,P14480,P31044,Q4FZU6,Q80WL1,Q9ET32 |
| 10236 | 1,5,7,8,36,<br>40,42,43 | 2,3,4,6,37,<br>38,39,41,4<br>4 | 6 | P00774,P02625,P16636,P98089,Q62635,Q9JJS8                      |
| 10237 | 1,5,7,8,36,<br>40,42,44 | 2,3,4,6,37,<br>38,39,41,4<br>3 | 7 | B0BNN3,P00762,P02625,P14480,Q4FZU6,Q5HZV9,Q7TPB1               |
| 10238 | 1,5,7,8,36,<br>40,43,44 | 2,3,4,6,37,<br>38,39,41,4<br>2 | 0 |                                                                |
| 10239 | 1,5,7,8,36,<br>41,42,43 | 2,3,4,6,37,<br>38,39,40,4<br>4 | 1 | P16636                                                         |
| 10240 | 1,5,7,8,36,<br>41,42,44 | 2,3,4,6,37,<br>38,39,40,4<br>3 | 4 | B0BNN3,P00762,P82995,Q4FZU6                                    |
| 10241 | 1,5,7,8,36,<br>41,43,44 | 2,3,4,6,37,<br>38,39,40,4<br>2 | 1 | P16636                                                         |
| 10242 | 1,5,7,8,36,<br>42,43,44 | 2,3,4,6,37,<br>38,39,40,4<br>1 | 1 | P16636                                                         |
| 10243 | 1,5,7,8,37,<br>38,39,40 | 2,3,4,6,36,<br>41,42,43,4<br>4 | 2 | P02803,P35281                                                  |
| 10244 | 1,5,7,8,37,<br>38,39,41 | 2,3,4,6,36,<br>40,42,43,4<br>4 | 1 | P50116                                                         |
| 10245 | 1,5,7,8,37,<br>38,39,42 | 2,3,4,6,36,<br>40,41,43,4<br>4 | 1 | P19218                                                         |

|       |                         |                                |   |                             |
|-------|-------------------------|--------------------------------|---|-----------------------------|
| 10246 | 1,5,7,8,37,<br>38,39,43 | 2,3,4,6,36,<br>40,41,42,4<br>4 | 2 | Q6IFV1,Q6P6R2               |
| 10247 | 1,5,7,8,37,<br>38,39,44 | 2,3,4,6,36,<br>40,41,42,4<br>3 | 1 | Q5HZV9                      |
| 10248 | 1,5,7,8,37,<br>38,40,41 | 2,3,4,6,36,<br>39,42,43,4<br>4 | 2 | P50115,P50116               |
| 10249 | 1,5,7,8,37,<br>38,40,42 | 2,3,4,6,36,<br>39,41,43,4<br>4 | 2 | P02625,P02803               |
| 10250 | 1,5,7,8,37,<br>38,40,43 | 2,3,4,6,36,<br>39,41,42,4<br>4 | 0 |                             |
| 10251 | 1,5,7,8,37,<br>38,40,44 | 2,3,4,6,36,<br>39,41,42,4<br>3 | 1 | P02625                      |
| 10252 | 1,5,7,8,37,<br>38,41,42 | 2,3,4,6,36,<br>39,40,43,4<br>4 | 2 | P50115,P50116               |
| 10253 | 1,5,7,8,37,<br>38,41,43 | 2,3,4,6,36,<br>39,40,42,4<br>4 | 4 | P50115,P50116,Q7TPB1,Q8CJD3 |
| 10254 | 1,5,7,8,37,<br>38,41,44 | 2,3,4,6,36,<br>39,40,42,4<br>3 | 3 | P50115,P50116,Q05695        |
| 10255 | 1,5,7,8,37,<br>38,42,43 | 2,3,4,6,36,<br>39,40,41,4<br>4 | 1 | P16391                      |
| 10256 | 1,5,7,8,37,<br>38,42,44 | 2,3,4,6,36,<br>39,40,41,4<br>3 | 0 |                             |
| 10257 | 1,5,7,8,37,<br>38,43,44 | 2,3,4,6,36,<br>39,40,41,4<br>2 | 0 |                             |
| 10258 | 1,5,7,8,37,<br>39,40,41 | 2,3,4,6,36,<br>38,42,43,4<br>4 | 4 | P01835,P10715,P31044,Q4FZU6 |
| 10259 | 1,5,7,8,37,<br>39,40,42 | 2,3,4,6,36,<br>38,41,43,4<br>4 | 4 | P00774,P01835,P98089,Q62635 |
| 10260 | 1,5,7,8,37,<br>39,40,43 | 2,3,4,6,36,<br>38,41,42,4<br>4 | 3 | P00774,P98089,Q8CIZ5        |

|       |                         |                                |   |                                                  |
|-------|-------------------------|--------------------------------|---|--------------------------------------------------|
| 10261 | 1,5,7,8,37,<br>39,40,44 | 2,3,4,6,36,<br>38,41,42,4<br>3 | 4 | B0BNN3,P10715,Q5HZV9,Q6AYL6                      |
| 10262 | 1,5,7,8,37,<br>39,41,42 | 2,3,4,6,36,<br>38,40,43,4<br>4 | 1 | P01835                                           |
| 10263 | 1,5,7,8,37,<br>39,41,43 | 2,3,4,6,36,<br>38,40,42,4<br>4 | 3 | P12785,P22006,Q6TMA8                             |
| 10264 | 1,5,7,8,37,<br>39,41,44 | 2,3,4,6,36,<br>38,40,42,4<br>3 | 1 | Q5HZV9                                           |
| 10265 | 1,5,7,8,37,<br>39,42,43 | 2,3,4,6,36,<br>38,40,41,4<br>4 | 4 | P00774,P98089,Q62635,Q8CIZ5                      |
| 10266 | 1,5,7,8,37,<br>39,42,44 | 2,3,4,6,36,<br>38,40,41,4<br>3 | 2 | P00762,Q5HZV9                                    |
| 10267 | 1,5,7,8,37,<br>39,43,44 | 2,3,4,6,36,<br>38,40,41,4<br>2 | 1 | Q8CIZ5                                           |
| 10268 | 1,5,7,8,37,<br>40,41,42 | 2,3,4,6,36,<br>38,39,43,4<br>4 | 5 | P01835,P02625,P34901,Q4FZU6,Q9JJS8               |
| 10269 | 1,5,7,8,37,<br>40,41,43 | 2,3,4,6,36,<br>38,39,42,4<br>4 | 1 | P51907                                           |
| 10270 | 1,5,7,8,37,<br>40,41,44 | 2,3,4,6,36,<br>38,39,42,4<br>3 | 7 | B0BNN3,P10715,P31044,Q4FZU6,Q5GRG2,Q80WL1,Q9ET32 |
| 10271 | 1,5,7,8,37,<br>40,42,43 | 2,3,4,6,36,<br>38,39,41,4<br>4 | 4 | P00774,P02625,P98089,Q8CIZ5                      |
| 10272 | 1,5,7,8,37,<br>40,42,44 | 2,3,4,6,36,<br>38,39,41,4<br>3 | 4 | P00762,P02625,Q4FZU6,Q5HZV9                      |
| 10273 | 1,5,7,8,37,<br>40,43,44 | 2,3,4,6,36,<br>38,39,41,4<br>2 | 1 | Q8CIZ5                                           |
| 10274 | 1,5,7,8,37,<br>41,42,43 | 2,3,4,6,36,<br>38,39,40,4<br>4 | 0 |                                                  |
| 10275 | 1,5,7,8,37,<br>41,42,44 | 2,3,4,6,36,<br>38,39,40,4<br>3 | 0 |                                                  |

|       |                         |                                |   |                                                                |
|-------|-------------------------|--------------------------------|---|----------------------------------------------------------------|
| 10276 | 1,5,7,8,37,<br>41,43,44 | 2,3,4,6,36,<br>38,39,40,4<br>2 | 0 |                                                                |
| 10277 | 1,5,7,8,37,<br>42,43,44 | 2,3,4,6,36,<br>38,39,40,4<br>1 | 0 |                                                                |
| 10278 | 1,5,7,8,38,<br>39,40,41 | 2,3,4,6,36,<br>37,42,43,4<br>4 | 6 | P10715,P19629,P31044,P50115,P50116,Q4FZU6                      |
| 10279 | 1,5,7,8,38,<br>39,40,42 | 2,3,4,6,36,<br>37,41,43,4<br>4 | 0 |                                                                |
| 10280 | 1,5,7,8,38,<br>39,40,43 | 2,3,4,6,36,<br>37,41,42,4<br>4 | 0 |                                                                |
| 10281 | 1,5,7,8,38,<br>39,40,44 | 2,3,4,6,36,<br>37,41,42,4<br>3 | 2 | P10715,Q9QUL6                                                  |
| 10282 | 1,5,7,8,38,<br>39,41,42 | 2,3,4,6,36,<br>37,40,43,4<br>4 | 3 | P13432,P19218,P50116                                           |
| 10283 | 1,5,7,8,38,<br>39,41,43 | 2,3,4,6,36,<br>37,40,42,4<br>4 | 4 | P22006,P50115,P50116,Q8CJD3                                    |
| 10284 | 1,5,7,8,38,<br>39,41,44 | 2,3,4,6,36,<br>37,40,42,4<br>3 | 3 | P50115,P50116,Q05695                                           |
| 10285 | 1,5,7,8,38,<br>39,42,43 | 2,3,4,6,36,<br>37,40,41,4<br>4 | 0 |                                                                |
| 10286 | 1,5,7,8,38,<br>39,42,44 | 2,3,4,6,36,<br>37,40,41,4<br>3 | 0 |                                                                |
| 10287 | 1,5,7,8,38,<br>39,43,44 | 2,3,4,6,36,<br>37,40,41,4<br>2 | 1 | P23593                                                         |
| 10288 | 1,5,7,8,38,<br>40,41,42 | 2,3,4,6,36,<br>37,39,43,4<br>4 | 4 | P02625,P50115,P50116,Q4FZU6                                    |
| 10289 | 1,5,7,8,38,<br>40,41,43 | 2,3,4,6,36,<br>37,39,42,4<br>4 | 3 | P50115,P50116,Q8CJD3                                           |
| 10290 | 1,5,7,8,38,<br>40,41,44 | 2,3,4,6,36,<br>37,39,42,4<br>3 | 9 | P10715,P19629,P31044,P50115,P50116,Q05695,Q4FZU6,Q5GRG2,Q9ET32 |

|       |                         |                                |   |                                                         |
|-------|-------------------------|--------------------------------|---|---------------------------------------------------------|
| 10291 | 1,5,7,8,38,<br>40,42,43 | 2,3,4,6,36,<br>37,39,41,4<br>4 | 1 | P02625                                                  |
| 10292 | 1,5,7,8,38,<br>40,42,44 | 2,3,4,6,36,<br>37,39,41,4<br>3 | 3 | P02625,P06760,Q4FZU6                                    |
| 10293 | 1,5,7,8,38,<br>40,43,44 | 2,3,4,6,36,<br>37,39,41,4<br>2 | 0 |                                                         |
| 10294 | 1,5,7,8,38,<br>41,42,43 | 2,3,4,6,36,<br>37,39,40,4<br>4 | 3 | P50115,P50116,Q8CJD3                                    |
| 10295 | 1,5,7,8,38,<br>41,42,44 | 2,3,4,6,36,<br>37,39,40,4<br>3 | 4 | P50115,P50116,Q05695,Q4FZU6                             |
| 10296 | 1,5,7,8,38,<br>41,43,44 | 2,3,4,6,36,<br>37,39,40,4<br>2 | 5 | P50115,P50116,P55091,Q05695,Q8CJD3                      |
| 10297 | 1,5,7,8,38,<br>42,43,44 | 2,3,4,6,36,<br>37,39,40,4<br>1 | 0 |                                                         |
| 10298 | 1,5,7,8,39,<br>40,41,42 | 2,3,4,6,36,<br>37,38,43,4<br>4 | 3 | P01835,P10715,Q4FZU6                                    |
| 10299 | 1,5,7,8,39,<br>40,41,43 | 2,3,4,6,36,<br>37,38,42,4<br>4 | 4 | P10715,P12785,Q4FZU6,Q6AYL6                             |
| 10300 | 1,5,7,8,39,<br>40,41,44 | 2,3,4,6,36,<br>37,38,42,4<br>3 | 8 | P06911,P10715,P19629,P31044,Q4FZU6,Q5GRG2,Q6AYL6,Q9ET32 |
| 10301 | 1,5,7,8,39,<br>40,42,43 | 2,3,4,6,36,<br>37,38,41,4<br>4 | 4 | P00774,P98089,Q62635,Q8CIZ5                             |
| 10302 | 1,5,7,8,39,<br>40,42,44 | 2,3,4,6,36,<br>37,38,41,4<br>3 | 2 | Q4FZU6,Q5HZV9                                           |
| 10303 | 1,5,7,8,39,<br>40,43,44 | 2,3,4,6,36,<br>37,38,41,4<br>2 | 2 | Q6AYL6,Q8CIZ5                                           |
| 10304 | 1,5,7,8,39,<br>41,42,43 | 2,3,4,6,36,<br>37,38,40,4<br>4 | 2 | P16636,P22006                                           |
| 10305 | 1,5,7,8,39,<br>41,42,44 | 2,3,4,6,36,<br>37,38,40,4<br>3 | 1 | Q4FZU6                                                  |

|       |                          |                                |   |                                           |
|-------|--------------------------|--------------------------------|---|-------------------------------------------|
| 10306 | 1,5,7,8,39,<br>41,43,44  | 2,3,4,6,36,<br>37,38,40,4<br>2 | 1 | P12785                                    |
| 10307 | 1,5,7,8,39,<br>42,43,44  | 2,3,4,6,36,<br>37,38,40,4<br>1 | 0 |                                           |
| 10308 | 1,5,7,8,40,<br>41,42,43  | 2,3,4,6,36,<br>37,38,39,4<br>4 | 3 | P02625,Q4FZU6,Q9JJS8                      |
| 10309 | 1,5,7,8,40,<br>41,42,44  | 2,3,4,6,36,<br>37,38,39,4<br>3 | 5 | P02625,P10715,P14480,Q4FZU6,Q9ET32        |
| 10310 | 1,5,7,8,40,<br>41,43,44  | 2,3,4,6,36,<br>37,38,39,4<br>2 | 4 | P10715,Q4FZU6,Q6AYL6,Q9ET32               |
| 10311 | 1,5,7,8,40,<br>42,43,44  | 2,3,4,6,36,<br>37,38,39,4<br>1 | 1 | P02625                                    |
| 10312 | 1,5,7,8,41,<br>42,43,44  | 2,3,4,6,36,<br>37,38,39,4<br>0 | 0 |                                           |
| 10313 | 1,5,7,36,3<br>7,38,39,40 | 2,3,4,6,8,4<br>1,42,43,44      | 4 | B0LT89,P11883,P20766,Q6P6R2               |
| 10314 | 1,5,7,36,3<br>7,38,39,41 | 2,3,4,6,8,4<br>0,42,43,44      | 6 | P11883,P20766,P25236,Q5M819,Q6P6R2,Q9Z0V6 |
| 10315 | 1,5,7,36,3<br>7,38,39,42 | 2,3,4,6,8,4<br>0,41,43,44      | 4 | O54728,P11883,P19218,P20766               |
| 10316 | 1,5,7,36,3<br>7,38,39,43 | 2,3,4,6,8,4<br>0,41,42,44      | 4 | P20766,Q6P6R2,Q6TMA8,Q9Z0V6               |
| 10317 | 1,5,7,36,3<br>7,38,39,44 | 2,3,4,6,8,4<br>0,41,42,43      | 2 | P11883,Q5HZV9                             |
| 10318 | 1,5,7,36,3<br>7,38,40,41 | 2,3,4,6,8,3<br>9,42,43,44      | 3 | P11883,P20766,Q80WL1                      |
| 10319 | 1,5,7,36,3<br>7,38,40,42 | 2,3,4,6,8,3<br>9,41,43,44      | 3 | P02625,P11883,P20766                      |
| 10320 | 1,5,7,36,3<br>7,38,40,43 | 2,3,4,6,8,3<br>9,41,42,44      | 3 | P20766,Q62753,Q6P6R2                      |
| 10321 | 1,5,7,36,3<br>7,38,40,44 | 2,3,4,6,8,3<br>9,41,42,43      | 5 | P02625,P11883,P20766,P54921,P82471        |
| 10322 | 1,5,7,36,3<br>7,38,41,42 | 2,3,4,6,8,3<br>9,40,43,44      | 3 | P11883,P20766,Q5QE79                      |
| 10323 | 1,5,7,36,3<br>7,38,41,43 | 2,3,4,6,8,3<br>9,40,42,44      | 3 | P20766,Q8CJD3,Q9Z0V6                      |
| 10324 | 1,5,7,36,3<br>7,38,41,44 | 2,3,4,6,8,3<br>9,40,42,43      | 3 | P11883,P20766,Q5QE79                      |

|       |                                                 |    |                                                                                     |
|-------|-------------------------------------------------|----|-------------------------------------------------------------------------------------|
| 10325 | 1,5,7,36,3 2,3,4,6,8,3<br>7,38,42,43 9,40,41,44 | 2  | P06911,P20766                                                                       |
| 10326 | 1,5,7,36,3 2,3,4,6,8,3<br>7,38,42,44 9,40,41,43 | 4  | P11883,P20766,P97840,Q5QE79                                                         |
| 10327 | 1,5,7,36,3 2,3,4,6,8,3<br>7,38,43,44 9,40,41,42 | 1  | P20766                                                                              |
| 10328 | 1,5,7,36,3 2,3,4,6,8,3<br>7,39,40,41 8,42,43,44 | 7  | B0BNN3,P01835,P10715,P11883,P35467,Q80WL1,Q9Z0V6                                    |
| 10329 | 1,5,7,36,3 2,3,4,6,8,3<br>7,39,40,42 8,41,43,44 | 10 | P00762,P00774,P01835,P11883,P50115,P55091,P98089,Q5U2V4,Q62635,Q8CIZ5               |
| 10330 | 1,5,7,36,3 2,3,4,6,8,3<br>7,39,40,43 8,41,42,44 | 12 | O35547,P00774,P50115,P98089,Q05695,Q5U2V4,Q62635,Q62753,Q6P6R2,Q6TMA8,Q8CIZ5,Q9Z0V6 |
| 10331 | 1,5,7,36,3 2,3,4,6,8,3<br>7,39,40,44 8,41,42,43 | 8  | B0BNN3,O35547,P00762,P11883,P54921,Q5HZV9,Q80WL1,Q8CIZ5                             |
| 10332 | 1,5,7,36,3 2,3,4,6,8,3<br>7,39,41,42 8,40,43,44 | 4  | P01835,P11883,P35467,Q62635                                                         |
| 10333 | 1,5,7,36,3 2,3,4,6,8,3<br>7,39,41,43 8,40,42,44 | 3  | P22006,Q6TMA8,Q9Z0V6                                                                |
| 10334 | 1,5,7,36,3 2,3,4,6,8,3<br>7,39,41,44 8,40,42,43 | 6  | B0BNN3,P11883,Q5HZV9,Q63355,Q80WL1,Q9Z0V6                                           |
| 10335 | 1,5,7,36,3 2,3,4,6,8,3<br>7,39,42,43 8,40,41,44 | 8  | O54728,P00774,P16636,P50115,P98089,Q62635,Q6TMA8,Q8CIZ5                             |
| 10336 | 1,5,7,36,3 2,3,4,6,8,3<br>7,39,42,44 8,40,41,43 | 3  | P00762,P11883,Q5HZV9                                                                |
| 10337 | 1,5,7,36,3 2,3,4,6,8,3<br>7,39,43,44 8,40,41,42 | 3  | Q6TMA8,Q8CIZ5,Q9Z0V6                                                                |
| 10338 | 1,5,7,36,3 2,3,4,6,8,3<br>7,40,41,42 8,39,43,44 | 5  | P01835,P02625,P11883,Q4FZU6,Q80WL1                                                  |
| 10339 | 1,5,7,36,3 2,3,4,6,8,3<br>7,40,41,43 8,39,42,44 | 3  | P20766,Q80WL1,Q9Z0V6                                                                |
| 10340 | 1,5,7,36,3 2,3,4,6,8,3<br>7,40,41,44 8,39,42,43 | 6  | B0BNN3,P02625,P10715,P11883,Q4FZU6,Q80WL1                                           |
| 10341 | 1,5,7,36,3 2,3,4,6,8,3<br>7,40,42,43 8,39,41,44 | 5  | P00774,P02625,P98089,Q62635,Q8CIZ5                                                  |
| 10342 | 1,5,7,36,3 2,3,4,6,8,3<br>7,40,42,44 8,39,41,43 | 7  | B0BNN3,P00762,P02625,P11883,Q5HZV9,Q7TPB1,Q80WL1                                    |
| 10343 | 1,5,7,36,3 2,3,4,6,8,3<br>7,40,43,44 8,39,41,42 | 5  | O35547,P05369,P08010,Q80WL1,Q8CIZ5                                                  |
| 10344 | 1,5,7,36,3 2,3,4,6,8,3<br>7,41,42,43 8,39,40,44 | 3  | P16636,P20766,Q62635                                                                |
| 10345 | 1,5,7,36,3 2,3,4,6,8,3<br>7,41,42,44 8,39,40,43 | 4  | P00762,P11883,Q5QE79,Q80WL1                                                         |
| 10346 | 1,5,7,36,3 2,3,4,6,8,3<br>7,41,43,44 8,39,40,42 | 4  | P05369,Q6TMA8,Q80WL1,Q9Z0V6                                                         |
| 10347 | 1,5,7,36,3 2,3,4,6,8,3<br>7,42,43,44 8,39,40,41 | 0  |                                                                                     |



|       |                          |                           |    |                                                                       |
|-------|--------------------------|---------------------------|----|-----------------------------------------------------------------------|
| 10348 | 1,5,7,36,3<br>8,39,40,41 | 2,3,4,6,8,3<br>7,42,43,44 | 2  | P10715,Q4FZU6                                                         |
| 10349 | 1,5,7,36,3<br>8,39,40,42 | 2,3,4,6,8,3<br>7,41,43,44 | 1  | O54728                                                                |
| 10350 | 1,5,7,36,3<br>8,39,40,43 | 2,3,4,6,8,3<br>7,41,42,44 | 1  | Q6P6R2                                                                |
| 10351 | 1,5,7,36,3<br>8,39,40,44 | 2,3,4,6,8,3<br>7,41,42,43 | 1  | Q9QUL6                                                                |
| 10352 | 1,5,7,36,3<br>8,39,41,42 | 2,3,4,6,8,3<br>7,40,43,44 | 0  |                                                                       |
| 10353 | 1,5,7,36,3<br>8,39,41,43 | 2,3,4,6,8,3<br>7,40,42,44 | 2  | P22006,Q6P6R2                                                         |
| 10354 | 1,5,7,36,3<br>8,39,41,44 | 2,3,4,6,8,3<br>7,40,42,43 | 0  |                                                                       |
| 10355 | 1,5,7,36,3<br>8,39,42,43 | 2,3,4,6,8,3<br>7,40,41,44 | 2  | O54728,P16636                                                         |
| 10356 | 1,5,7,36,3<br>8,39,42,44 | 2,3,4,6,8,3<br>7,40,41,43 | 1  | P51907                                                                |
| 10357 | 1,5,7,36,3<br>8,39,43,44 | 2,3,4,6,8,3<br>7,40,41,42 | 0  |                                                                       |
| 10358 | 1,5,7,36,3<br>8,40,41,42 | 2,3,4,6,8,3<br>7,39,43,44 | 4  | P02625,P20766,Q4FZU6,Q64057                                           |
| 10359 | 1,5,7,36,3<br>8,40,41,43 | 2,3,4,6,8,3<br>7,39,42,44 | 2  | P20766,Q8CJD3                                                         |
| 10360 | 1,5,7,36,3<br>8,40,41,44 | 2,3,4,6,8,3<br>7,39,42,43 | 3  | P10715,Q4FZU6,Q80WL1                                                  |
| 10361 | 1,5,7,36,3<br>8,40,42,43 | 2,3,4,6,8,3<br>7,39,41,44 | 2  | P02625,P16636                                                         |
| 10362 | 1,5,7,36,3<br>8,40,42,44 | 2,3,4,6,8,3<br>7,39,41,43 | 3  | P02625,Q4FZU6,Q7TPB1                                                  |
| 10363 | 1,5,7,36,3<br>8,40,43,44 | 2,3,4,6,8,3<br>7,39,41,42 | 0  |                                                                       |
| 10364 | 1,5,7,36,3<br>8,41,42,43 | 2,3,4,6,8,3<br>7,39,40,44 | 3  | P16636,P20766,Q8CJD3                                                  |
| 10365 | 1,5,7,36,3<br>8,41,42,44 | 2,3,4,6,8,3<br>7,39,40,43 | 2  | P20766,Q5QE79                                                         |
| 10366 | 1,5,7,36,3<br>8,41,43,44 | 2,3,4,6,8,3<br>7,39,40,42 | 2  | P20766,Q8CJD3                                                         |
| 10367 | 1,5,7,36,3<br>8,42,43,44 | 2,3,4,6,8,3<br>7,39,40,41 | 0  |                                                                       |
| 10368 | 1,5,7,36,3<br>9,40,41,42 | 2,3,4,6,8,3<br>7,38,43,44 | 2  | P01835,Q4FZU6                                                         |
| 10369 | 1,5,7,36,3<br>9,40,41,43 | 2,3,4,6,8,3<br>7,38,42,44 | 1  | P22006                                                                |
| 10370 | 1,5,7,36,3<br>9,40,41,44 | 2,3,4,6,8,3<br>7,38,42,43 | 10 | B0BNN3,P02680,P10715,P19629,P31044,Q4FZU6,Q5GRG2,Q6AYL6,Q80WL1,Q8VD89 |

|       |                          |                           |   |                                           |
|-------|--------------------------|---------------------------|---|-------------------------------------------|
| 10371 | 1,5,7,36,3<br>9,40,42,43 | 2,3,4,6,8,3<br>7,38,41,44 | 6 | O54728,P00774,P16636,P98089,Q62635,Q8CIZ5 |
| 10372 | 1,5,7,36,3<br>9,40,42,44 | 2,3,4,6,8,3<br>7,38,41,43 | 4 | P00762,Q4FZU6,Q5HZV9,Q7TPB1               |
| 10373 | 1,5,7,36,3<br>9,40,43,44 | 2,3,4,6,8,3<br>7,38,41,42 | 2 | Q6AYL6,Q8CIZ5                             |
| 10374 | 1,5,7,36,3<br>9,41,42,43 | 2,3,4,6,8,3<br>7,38,40,44 | 3 | P16636,P22006,Q62635                      |
| 10375 | 1,5,7,36,3<br>9,41,42,44 | 2,3,4,6,8,3<br>7,38,40,43 | 1 | Q4FZU6                                    |
| 10376 | 1,5,7,36,3<br>9,41,43,44 | 2,3,4,6,8,3<br>7,38,40,42 | 2 | P22006,Q6TMA8                             |
| 10377 | 1,5,7,36,3<br>9,42,43,44 | 2,3,4,6,8,3<br>7,38,40,41 | 1 | P16636                                    |
| 10378 | 1,5,7,36,4<br>0,41,42,43 | 2,3,4,6,8,3<br>7,38,39,44 | 4 | P02625,P16636,Q4FZU6,Q9JJS8               |
| 10379 | 1,5,7,36,4<br>0,41,42,44 | 2,3,4,6,8,3<br>7,38,39,43 | 6 | P02625,P02680,P14480,Q4FZU6,Q7TPB1,Q80WL1 |
| 10380 | 1,5,7,36,4<br>0,41,43,44 | 2,3,4,6,8,3<br>7,38,39,42 | 2 | Q4FZU6,Q80WL1                             |
| 10381 | 1,5,7,36,4<br>0,42,43,44 | 2,3,4,6,8,3<br>7,38,39,41 | 3 | P02625,P16636,Q7TPB1                      |
| 10382 | 1,5,7,36,4<br>1,42,43,44 | 2,3,4,6,8,3<br>7,38,39,40 | 1 | P16636                                    |
| 10383 | 1,5,7,37,3<br>8,39,40,41 | 2,3,4,6,8,3<br>6,42,43,44 | 3 | P10715,P13432,P19629                      |
| 10384 | 1,5,7,37,3<br>8,39,40,42 | 2,3,4,6,8,3<br>6,41,43,44 | 0 |                                           |
| 10385 | 1,5,7,37,3<br>8,39,40,43 | 2,3,4,6,8,3<br>6,41,42,44 | 5 | Q62740,Q62753,Q6IFV1,Q6P6R2,Q812E4        |
| 10386 | 1,5,7,37,3<br>8,39,40,44 | 2,3,4,6,8,3<br>6,41,42,43 | 3 | P11883,P54921,Q9QUL6                      |
| 10387 | 1,5,7,37,3<br>8,39,41,42 | 2,3,4,6,8,3<br>6,40,43,44 | 4 | P13432,P20766,Q00715,Q5QE79               |
| 10388 | 1,5,7,37,3<br>8,39,41,43 | 2,3,4,6,8,3<br>6,40,42,44 | 4 | P20766,P22006,P36374,P62804               |
| 10389 | 1,5,7,37,3<br>8,39,41,44 | 2,3,4,6,8,3<br>6,40,42,43 | 2 | P62804,Q5QE79                             |
| 10390 | 1,5,7,37,3<br>8,39,42,43 | 2,3,4,6,8,3<br>6,40,41,44 | 1 | P20766                                    |
| 10391 | 1,5,7,37,3<br>8,39,42,44 | 2,3,4,6,8,3<br>6,40,41,43 | 0 |                                           |
| 10392 | 1,5,7,37,3<br>8,39,43,44 | 2,3,4,6,8,3<br>6,40,41,42 | 2 | P23593,Q812E4                             |
| 10393 | 1,5,7,37,3<br>8,40,41,42 | 2,3,4,6,8,3<br>6,39,43,44 | 2 | P02625,P20766                             |

|       |                          |                           |   |                                                         |
|-------|--------------------------|---------------------------|---|---------------------------------------------------------|
| 10394 | 1,5,7,37,3<br>8,40,41,43 | 2,3,4,6,8,3<br>6,39,42,44 | 2 | P20766,Q8CJD3                                           |
| 10395 | 1,5,7,37,3<br>8,40,41,44 | 2,3,4,6,8,3<br>6,39,42,43 | 5 | P10715,P19629,P20766,Q4FZU6,Q80WL1                      |
| 10396 | 1,5,7,37,3<br>8,40,42,43 | 2,3,4,6,8,3<br>6,39,41,44 | 2 | P02625,P20766                                           |
| 10397 | 1,5,7,37,3<br>8,40,42,44 | 2,3,4,6,8,3<br>6,39,41,43 | 3 | P02625,P20766,Q9QUL6                                    |
| 10398 | 1,5,7,37,3<br>8,40,43,44 | 2,3,4,6,8,3<br>6,39,41,42 | 3 | P08010,P20766,Q62753                                    |
| 10399 | 1,5,7,37,3<br>8,41,42,43 | 2,3,4,6,8,3<br>6,39,40,44 | 2 | P20766,Q8CJD3                                           |
| 10400 | 1,5,7,37,3<br>8,41,42,44 | 2,3,4,6,8,3<br>6,39,40,43 | 3 | P18427,P20766,Q5QE79                                    |
| 10401 | 1,5,7,37,3<br>8,41,43,44 | 2,3,4,6,8,3<br>6,39,40,42 | 3 | P20766,P62804,Q8CJD3                                    |
| 10402 | 1,5,7,37,3<br>8,42,43,44 | 2,3,4,6,8,3<br>6,39,40,41 | 1 | P20766                                                  |
| 10403 | 1,5,7,37,3<br>9,40,41,42 | 2,3,4,6,8,3<br>6,38,43,44 | 3 | P01835,P10715,Q4FZU6                                    |
| 10404 | 1,5,7,37,3<br>9,40,41,43 | 2,3,4,6,8,3<br>6,38,42,44 | 4 | P10715,P22006,P97554,Q6AYL6                             |
| 10405 | 1,5,7,37,3<br>9,40,41,44 | 2,3,4,6,8,3<br>6,38,42,43 | 8 | P10715,P19629,P31044,Q4FZU6,Q5GRG2,Q6AYL6,Q80WL1,Q9ET32 |
| 10406 | 1,5,7,37,3<br>9,40,42,43 | 2,3,4,6,8,3<br>6,38,41,44 | 6 | P00774,P98089,Q05695,Q62635,Q8CIZ5,Q99MH3               |
| 10407 | 1,5,7,37,3<br>9,40,42,44 | 2,3,4,6,8,3<br>6,38,41,43 | 1 | Q9QUL6                                                  |
| 10408 | 1,5,7,37,3<br>9,40,43,44 | 2,3,4,6,8,3<br>6,38,41,42 | 7 | O35547,P08010,P97554,Q62753,Q6AYL6,Q812E4,Q8CIZ5        |
| 10409 | 1,5,7,37,3<br>9,41,42,43 | 2,3,4,6,8,3<br>6,38,40,44 | 1 | P22006                                                  |
| 10410 | 1,5,7,37,3<br>9,41,42,44 | 2,3,4,6,8,3<br>6,38,40,43 | 1 | Q00715                                                  |
| 10411 | 1,5,7,37,3<br>9,41,43,44 | 2,3,4,6,8,3<br>6,38,40,42 | 3 | P22006,P62804,Q6TMA8                                    |
| 10412 | 1,5,7,37,3<br>9,42,43,44 | 2,3,4,6,8,3<br>6,38,40,41 | 0 |                                                         |
| 10413 | 1,5,7,37,4<br>0,41,42,43 | 2,3,4,6,8,3<br>6,38,39,44 | 1 | P02625                                                  |
| 10414 | 1,5,7,37,4<br>0,41,42,44 | 2,3,4,6,8,3<br>6,38,39,43 | 4 | P02625,P10715,Q4FZU6,Q80WL1                             |
| 10415 | 1,5,7,37,4<br>0,41,43,44 | 2,3,4,6,8,3<br>6,38,39,42 | 5 | P05369,P10715,Q6AYL6,Q80WL1,Q9ET32                      |
| 10416 | 1,5,7,37,4<br>0,42,43,44 | 2,3,4,6,8,3<br>6,38,39,41 | 1 | P02625                                                  |

|       |                          |                           |   |                                                  |
|-------|--------------------------|---------------------------|---|--------------------------------------------------|
| 10417 | 1,5,7,37,4<br>1,42,43,44 | 2,3,4,6,8,3<br>6,38,39,40 | 0 |                                                  |
| 10418 | 1,5,7,38,3<br>9,40,41,42 | 2,3,4,6,8,3<br>6,37,43,44 | 2 | P13432,Q4FZU6                                    |
| 10419 | 1,5,7,38,3<br>9,40,41,43 | 2,3,4,6,8,3<br>6,37,42,44 | 3 | P10715,P22006,Q8CJD3                             |
| 10420 | 1,5,7,38,3<br>9,40,41,44 | 2,3,4,6,8,3<br>6,37,42,43 | 7 | P10715,P19629,P31044,Q4FZU6,Q5GRG2,Q6AYL6,Q9QUL6 |
| 10421 | 1,5,7,38,3<br>9,40,42,43 | 2,3,4,6,8,3<br>6,37,41,44 | 1 | Q99MH3                                           |
| 10422 | 1,5,7,38,3<br>9,40,42,44 | 2,3,4,6,8,3<br>6,37,41,43 | 1 | Q9QUL6                                           |
| 10423 | 1,5,7,38,3<br>9,40,43,44 | 2,3,4,6,8,3<br>6,37,41,42 | 1 | Q6AYL6                                           |
| 10424 | 1,5,7,38,3<br>9,41,42,43 | 2,3,4,6,8,3<br>6,37,40,44 | 4 | P00731,P13432,P22006,Q8CJD3                      |
| 10425 | 1,5,7,38,3<br>9,41,42,44 | 2,3,4,6,8,3<br>6,37,40,43 | 0 |                                                  |
| 10426 | 1,5,7,38,3<br>9,41,43,44 | 2,3,4,6,8,3<br>6,37,40,42 | 3 | P22006,P23593,Q8CJD3                             |
| 10427 | 1,5,7,38,3<br>9,42,43,44 | 2,3,4,6,8,3<br>6,37,40,41 | 0 |                                                  |
| 10428 | 1,5,7,38,4<br>0,41,42,43 | 2,3,4,6,8,3<br>6,37,39,44 | 2 | P02625,Q8CJD3                                    |
| 10429 | 1,5,7,38,4<br>0,41,42,44 | 2,3,4,6,8,3<br>6,37,39,43 | 2 | P02625,Q4FZU6                                    |
| 10430 | 1,5,7,38,4<br>0,41,43,44 | 2,3,4,6,8,3<br>6,37,39,42 | 2 | P10715,Q8CJD3                                    |
| 10431 | 1,5,7,38,4<br>0,42,43,44 | 2,3,4,6,8,3<br>6,37,39,41 | 1 | P02625                                           |
| 10432 | 1,5,7,38,4<br>1,42,43,44 | 2,3,4,6,8,3<br>6,37,39,40 | 2 | P55091,Q8CJD3                                    |
| 10433 | 1,5,7,39,4<br>0,41,42,43 | 2,3,4,6,8,3<br>6,37,38,44 | 2 | P22006,Q4FZU6                                    |
| 10434 | 1,5,7,39,4<br>0,41,42,44 | 2,3,4,6,8,3<br>6,37,38,43 | 4 | P02680,P10715,P19629,Q4FZU6                      |
| 10435 | 1,5,7,39,4<br>0,41,43,44 | 2,3,4,6,8,3<br>6,37,38,42 | 6 | P10715,P19629,P97554,Q4FZU6,Q6AYL6,Q9ET32        |
| 10436 | 1,5,7,39,4<br>0,42,43,44 | 2,3,4,6,8,3<br>6,37,38,41 | 1 | Q6AYL6                                           |
| 10437 | 1,5,7,39,4<br>1,42,43,44 | 2,3,4,6,8,3<br>6,37,38,40 | 1 | P22006                                           |
| 10438 | 1,5,7,40,4<br>1,42,43,44 | 2,3,4,6,8,3<br>6,37,38,39 | 2 | P02625,Q4FZU6                                    |
| 10439 | 1,5,8,36,3<br>7,38,39,40 | 2,3,4,6,7,4<br>1,42,43,44 | 7 | F1LM93,O35547,P11883,P16086,P35281,P82471,Q6P6R2 |

|       |                          |                           |    |                                                                                                          |
|-------|--------------------------|---------------------------|----|----------------------------------------------------------------------------------------------------------|
| 10440 | 1,5,8,36,3<br>7,38,39,41 | 2,3,4,6,7,4<br>0,42,43,44 | 2  | P11883,P16086                                                                                            |
| 10441 | 1,5,8,36,3<br>7,38,39,42 | 2,3,4,6,7,4<br>0,41,43,44 | 2  | P11883,P12020                                                                                            |
| 10442 | 1,5,8,36,3<br>7,38,39,43 | 2,3,4,6,7,4<br>0,41,42,44 | 6  | P12020,P13596,P16086,Q62740,Q6IFV1,Q6P6R2                                                                |
| 10443 | 1,5,8,36,3<br>7,38,39,44 | 2,3,4,6,7,4<br>0,41,42,43 | 4  | P01836,P11883,P16086,Q5HZV9                                                                              |
| 10444 | 1,5,8,36,3<br>7,38,40,41 | 2,3,4,6,7,3<br>9,42,43,44 | 2  | P11883,P16086                                                                                            |
| 10445 | 1,5,8,36,3<br>7,38,40,42 | 2,3,4,6,7,3<br>9,41,43,44 | 2  | P02625,P11883                                                                                            |
| 10446 | 1,5,8,36,3<br>7,38,40,43 | 2,3,4,6,7,3<br>9,41,42,44 | 5  | P08010,P16086,Q5XI73,Q62753,Q6IFV1                                                                       |
| 10447 | 1,5,8,36,3<br>7,38,40,44 | 2,3,4,6,7,3<br>9,41,42,43 | 7  | O35547,P02625,P11883,P16086,P54921,P82471,Q5HZV9                                                         |
| 10448 | 1,5,8,36,3<br>7,38,41,42 | 2,3,4,6,7,3<br>9,40,43,44 | 1  | P11883                                                                                                   |
| 10449 | 1,5,8,36,3<br>7,38,41,43 | 2,3,4,6,7,3<br>9,40,42,44 | 4  | P16086,P83121,Q5XI73,Q6IFV1                                                                              |
| 10450 | 1,5,8,36,3<br>7,38,41,44 | 2,3,4,6,7,3<br>9,40,42,43 | 2  | P11883,P16086                                                                                            |
| 10451 | 1,5,8,36,3<br>7,38,42,43 | 2,3,4,6,7,3<br>9,40,41,44 | 4  | P06911,P12020,P16391,Q5GRG2                                                                              |
| 10452 | 1,5,8,36,3<br>7,38,42,44 | 2,3,4,6,7,3<br>9,40,41,43 | 1  | P11883                                                                                                   |
| 10453 | 1,5,8,36,3<br>7,38,43,44 | 2,3,4,6,7,3<br>9,40,41,42 | 3  | P13596,P16086,Q6IFV1                                                                                     |
| 10454 | 1,5,8,36,3<br>7,39,40,41 | 2,3,4,6,7,3<br>8,42,43,44 | 4  | O35547,P01835,P11883,P25031                                                                              |
| 10455 | 1,5,8,36,3<br>7,39,40,42 | 2,3,4,6,7,3<br>8,41,43,44 | 11 | P00774,P01835,P02631,P09605;P25809,P11883,P25031,P55091,P98089,Q5HZV9,Q62635,Q8CIZ5                      |
| 10456 | 1,5,8,36,3<br>7,39,40,43 | 2,3,4,6,7,3<br>8,41,42,44 | 14 | F1LM93,O35547,P00774,P08290,P09605;P25809,P13596,P16086,P98089,Q5XI73,Q62635,Q62740,Q62753,Q6P6R2,Q8CIZ5 |
| 10457 | 1,5,8,36,3<br>7,39,40,44 | 2,3,4,6,7,3<br>8,41,42,43 | 10 | F1LM93,O35547,P01836,P09605;P25809,P11883,P16086,P25031,P54921,Q5HZV9,Q8CIZ5                             |
| 10458 | 1,5,8,36,3<br>7,39,41,42 | 2,3,4,6,7,3<br>8,40,43,44 | 1  | P01835                                                                                                   |
| 10459 | 1,5,8,36,3<br>7,39,41,43 | 2,3,4,6,7,3<br>8,40,42,44 | 4  | P12785,P83121,Q5XI73,Q6TMA8                                                                              |
| 10460 | 1,5,8,36,3<br>7,39,41,44 | 2,3,4,6,7,3<br>8,40,42,43 | 4  | P11883,P16086,P25031,Q5HZV9                                                                              |
| 10461 | 1,5,8,36,3<br>7,39,42,43 | 2,3,4,6,7,3<br>8,40,41,44 | 6  | P00774,P09605;P25809,P12020,P98089,Q62635,Q8CIZ5                                                         |
| 10462 | 1,5,8,36,3<br>7,39,42,44 | 2,3,4,6,7,3<br>8,40,41,43 | 5  | P01836,P09605;P25809,P11883,P25031,Q5HZV9                                                                |

|       |                                                 |   |                                                                |
|-------|-------------------------------------------------|---|----------------------------------------------------------------|
| 10463 | 1,5,8,36,3 2,3,4,6,7,3<br>7,39,43,44 8,40,41,42 | 5 | O35547,P09605;P25809,P13596,P16086,Q8CIZ5                      |
| 10464 | 1,5,8,36,3 2,3,4,6,7,3<br>7,40,41,42 8,39,43,44 | 3 | P01835,P02625,P25031                                           |
| 10465 | 1,5,8,36,3 2,3,4,6,7,3<br>7,40,41,43 8,39,42,44 | 3 | P16086,P51907,Q5XI73                                           |
| 10466 | 1,5,8,36,3 2,3,4,6,7,3<br>7,40,41,44 8,39,42,43 | 6 | O35547,P02625,P11883,P16086,P25031,Q80WL1                      |
| 10467 | 1,5,8,36,3 2,3,4,6,7,3<br>7,40,42,43 8,39,41,44 | 7 | P00774,P02625,P09605;P25809,P98089,Q62635,Q8CIZ5,Q920P0        |
| 10468 | 1,5,8,36,3 2,3,4,6,7,3<br>7,40,42,44 8,39,41,43 | 7 | P00762,P02625,P09605;P25809,P11883,P25031,Q5HZV9,Q7TPB1        |
| 10469 | 1,5,8,36,3 2,3,4,6,7,3<br>7,40,43,44 8,39,41,42 | 8 | O35547,P05369,P08010,P09605;P25809,P16086,Q5XI73,Q62753,Q8CIZ5 |
| 10470 | 1,5,8,36,3 2,3,4,6,7,3<br>7,41,42,43 8,39,40,44 | 1 | P83121                                                         |
| 10471 | 1,5,8,36,3 2,3,4,6,7,3<br>7,41,42,44 8,39,40,43 | 0 |                                                                |
| 10472 | 1,5,8,36,3 2,3,4,6,7,3<br>7,41,43,44 8,39,40,42 | 5 | O88600,P05369,P16086,P83121,Q5XI73                             |
| 10473 | 1,5,8,36,3 2,3,4,6,7,3<br>7,42,43,44 8,39,40,41 | 1 | P09605;P25809                                                  |
| 10474 | 1,5,8,36,3 2,3,4,6,7,3<br>8,39,40,41 7,42,43,44 | 1 | P02631                                                         |
| 10475 | 1,5,8,36,3 2,3,4,6,7,3<br>8,39,40,42 7,41,43,44 | 1 | P02631                                                         |
| 10476 | 1,5,8,36,3 2,3,4,6,7,3<br>8,39,40,43 7,41,42,44 | 4 | P16086,Q6IFV1,Q6P6R2,Q9QZQ5                                    |
| 10477 | 1,5,8,36,3 2,3,4,6,7,3<br>8,39,40,44 7,41,42,43 | 2 | P02631,P16086                                                  |
| 10478 | 1,5,8,36,3 2,3,4,6,7,3<br>8,39,41,42 7,40,43,44 | 1 | P02631                                                         |
| 10479 | 1,5,8,36,3 2,3,4,6,7,3<br>8,39,41,43 7,40,42,44 | 1 | Q6IFV1                                                         |
| 10480 | 1,5,8,36,3 2,3,4,6,7,3<br>8,39,41,44 7,40,42,43 | 1 | P16086                                                         |
| 10481 | 1,5,8,36,3 2,3,4,6,7,3<br>8,39,42,43 7,40,41,44 | 1 | P12020                                                         |
| 10482 | 1,5,8,36,3 2,3,4,6,7,3<br>8,39,42,44 7,40,41,43 | 1 | P02631                                                         |
| 10483 | 1,5,8,36,3 2,3,4,6,7,3<br>8,39,43,44 7,40,41,42 | 2 | P16086,Q9QZQ5                                                  |
| 10484 | 1,5,8,36,3 2,3,4,6,7,3<br>8,40,41,42 7,39,43,44 | 4 | P02625,P02631,P14480,Q4FZU6                                    |
| 10485 | 1,5,8,36,3 2,3,4,6,7,3<br>8,40,41,43 7,39,42,44 | 2 | Q5XI73,Q9QZQ5                                                  |

|       |                          |                           |   |                                           |
|-------|--------------------------|---------------------------|---|-------------------------------------------|
| 10486 | 1,5,8,36,3<br>8,40,41,44 | 2,3,4,6,7,3<br>7,39,42,43 | 5 | P02625,P14480,P16086,Q4FZU6,Q99PP0        |
| 10487 | 1,5,8,36,3<br>8,40,42,43 | 2,3,4,6,7,3<br>7,39,41,44 | 1 | P02625                                    |
| 10488 | 1,5,8,36,3<br>8,40,42,44 | 2,3,4,6,7,3<br>7,39,41,43 | 6 | P02625,P02631,P06760,P14480,P15999,Q7TPB1 |
| 10489 | 1,5,8,36,3<br>8,40,43,44 | 2,3,4,6,7,3<br>7,39,41,42 | 2 | P16086,Q9QZQ5                             |
| 10490 | 1,5,8,36,3<br>8,41,42,43 | 2,3,4,6,7,3<br>7,39,40,44 | 1 | Q8CJD3                                    |
| 10491 | 1,5,8,36,3<br>8,41,42,44 | 2,3,4,6,7,3<br>7,39,40,43 | 0 |                                           |
| 10492 | 1,5,8,36,3<br>8,41,43,44 | 2,3,4,6,7,3<br>7,39,40,42 | 1 | P16086                                    |
| 10493 | 1,5,8,36,3<br>8,42,43,44 | 2,3,4,6,7,3<br>7,39,40,41 | 1 | P15999                                    |
| 10494 | 1,5,8,36,3<br>9,40,41,42 | 2,3,4,6,7,3<br>7,38,43,44 | 4 | P01835,P02631,P14480,Q4FZU6               |
| 10495 | 1,5,8,36,3<br>9,40,41,43 | 2,3,4,6,7,3<br>7,38,42,44 | 4 | P12785,P97840,Q5XI73,Q9QZQ5               |
| 10496 | 1,5,8,36,3<br>9,40,41,44 | 2,3,4,6,7,3<br>7,38,42,43 | 6 | P10715,P14480,P19629,P25031,P31044,Q4FZU6 |
| 10497 | 1,5,8,36,3<br>9,40,42,43 | 2,3,4,6,7,3<br>7,38,41,44 | 4 | P00774,P98089,Q62635,Q8CIZ5               |
| 10498 | 1,5,8,36,3<br>9,40,42,44 | 2,3,4,6,7,3<br>7,38,41,43 | 6 | P02625,P02631,P14480,P25031,Q5HZV9,Q7TPB1 |
| 10499 | 1,5,8,36,3<br>9,40,43,44 | 2,3,4,6,7,3<br>7,38,41,42 | 3 | P16086,Q8CIZ5,Q9QZQ5                      |
| 10500 | 1,5,8,36,3<br>9,41,42,43 | 2,3,4,6,7,3<br>7,38,40,44 | 0 |                                           |
| 10501 | 1,5,8,36,3<br>9,41,42,44 | 2,3,4,6,7,3<br>7,38,40,43 | 0 |                                           |
| 10502 | 1,5,8,36,3<br>9,41,43,44 | 2,3,4,6,7,3<br>7,38,40,42 | 1 | P12785                                    |
| 10503 | 1,5,8,36,3<br>9,42,43,44 | 2,3,4,6,7,3<br>7,38,40,41 | 0 |                                           |
| 10504 | 1,5,8,36,4<br>0,41,42,43 | 2,3,4,6,7,3<br>7,38,39,44 | 1 | P02625                                    |
| 10505 | 1,5,8,36,4<br>0,41,42,44 | 2,3,4,6,7,3<br>7,38,39,43 | 4 | P02625,P14480,Q4FZU6,Q7TPB1               |
| 10506 | 1,5,8,36,4<br>0,41,43,44 | 2,3,4,6,7,3<br>7,38,39,42 | 1 | Q5XI73                                    |
| 10507 | 1,5,8,36,4<br>0,42,43,44 | 2,3,4,6,7,3<br>7,38,39,41 | 2 | P02625,Q7TPB1                             |
| 10508 | 1,5,8,36,4<br>1,42,43,44 | 2,3,4,6,7,3<br>7,38,39,40 | 0 |                                           |

|       |                          |                           |    |                                                                                                   |
|-------|--------------------------|---------------------------|----|---------------------------------------------------------------------------------------------------|
| 10509 | 1,5,8,37,3<br>8,39,40,41 | 2,3,4,6,7,3<br>6,42,43,44 | 6  | G3V686,P08649,P10715,P13432,P16086,P35281                                                         |
| 10510 | 1,5,8,37,3<br>8,39,40,42 | 2,3,4,6,7,3<br>6,41,43,44 | 5  | G3V686,P02631,P06760,P08649,P35281                                                                |
| 10511 | 1,5,8,37,3<br>8,39,40,43 | 2,3,4,6,7,3<br>6,41,42,44 | 14 | G3V686,P08010,P08290,P08649,P13596,P16086,P35281,P60905,Q5XI73,Q62740,Q62753,Q6IFV1,Q812E4,Q9QZQ5 |
| 10512 | 1,5,8,37,3<br>8,39,40,44 | 2,3,4,6,7,3<br>6,41,42,43 | 11 | G3V686,O35547,P01836,P06760,P08649,P13596,P16086,P35281,P54921,P60905,Q9QUL6                      |
| 10513 | 1,5,8,37,3<br>8,39,41,42 | 2,3,4,6,7,3<br>6,40,43,44 | 1  | P13432                                                                                            |
| 10514 | 1,5,8,37,3<br>8,39,41,43 | 2,3,4,6,7,3<br>6,40,42,44 | 8  | P08649,P13596,P16086,P36374,Q5XI73,Q62740,Q6IFV1,Q9QZQ5                                           |
| 10515 | 1,5,8,37,3<br>8,39,41,44 | 2,3,4,6,7,3<br>6,40,42,43 | 3  | P01836,P08649,P16086                                                                              |
| 10516 | 1,5,8,37,3<br>8,39,42,43 | 2,3,4,6,7,3<br>6,40,41,44 | 5  | P12020,P13596,Q62740,Q64611,Q6IFV1                                                                |
| 10517 | 1,5,8,37,3<br>8,39,42,44 | 2,3,4,6,7,3<br>6,40,41,43 | 1  | P01836                                                                                            |
| 10518 | 1,5,8,37,3<br>8,39,43,44 | 2,3,4,6,7,3<br>6,40,41,42 | 9  | P01836,P08649,P13596,P16086,P23593,Q62740,Q6IFV1,Q812E4,Q9QZQ5                                    |
| 10519 | 1,5,8,37,3<br>8,40,41,42 | 2,3,4,6,7,3<br>6,39,43,44 | 2  | P02625,P06760                                                                                     |
| 10520 | 1,5,8,37,3<br>8,40,41,43 | 2,3,4,6,7,3<br>6,39,42,44 | 9  | G3V686,P08649,P11442,P13596,P16086,P51907,Q5XI73,Q6IFV1,Q9QZQ5                                    |
| 10521 | 1,5,8,37,3<br>8,40,41,44 | 2,3,4,6,7,3<br>6,39,42,43 | 5  | P01836,P06760,P08649,P10715,P16086                                                                |
| 10522 | 1,5,8,37,3<br>8,40,42,43 | 2,3,4,6,7,3<br>6,39,41,44 | 5  | G3V686,P02625,P08649,Q63475,Q6IFV1                                                                |
| 10523 | 1,5,8,37,3<br>8,40,42,44 | 2,3,4,6,7,3<br>6,39,41,43 | 4  | P01836,P02625,P06760,P08649                                                                       |
| 10524 | 1,5,8,37,3<br>8,40,43,44 | 2,3,4,6,7,3<br>6,39,41,42 | 11 | G3V686,P08010,P08290,P08649,P13596,P16086,Q5XI73,Q62740,Q62753,Q6IFV1,Q9QZQ5                      |
| 10525 | 1,5,8,37,3<br>8,41,42,43 | 2,3,4,6,7,3<br>6,39,40,44 | 1  | Q8CJD3                                                                                            |
| 10526 | 1,5,8,37,3<br>8,41,42,44 | 2,3,4,6,7,3<br>6,39,40,43 | 0  |                                                                                                   |
| 10527 | 1,5,8,37,3<br>8,41,43,44 | 2,3,4,6,7,3<br>6,39,40,42 | 7  | O88600,P08649,P13596,P16086,Q5XI73,Q6IFV1,Q9QZQ5                                                  |
| 10528 | 1,5,8,37,3<br>8,42,43,44 | 2,3,4,6,7,3<br>6,39,40,41 | 1  | P13596                                                                                            |
| 10529 | 1,5,8,37,3<br>9,40,41,42 | 2,3,4,6,7,3<br>6,38,43,44 | 3  | P01835,P02631,P34901                                                                              |
| 10530 | 1,5,8,37,3<br>9,40,41,43 | 2,3,4,6,7,3<br>6,38,42,44 | 12 | P08290,P08649,P12785,P13596,P16086,P47967,P51907,P97554,P97840,Q5XI73,Q62740,Q9QZQ5               |
| 10531 | 1,5,8,37,3<br>9,40,41,44 | 2,3,4,6,7,3<br>6,38,42,43 | 11 | O35547,P01836,P08649,P10715,P16086,P19629,P25031,P31044,P47967,Q5GRG2,Q6AYL6                      |



|       |                          |                           |    |                                                                                                          |
|-------|--------------------------|---------------------------|----|----------------------------------------------------------------------------------------------------------|
| 10532 | 1,5,8,37,3<br>9,40,42,43 | 2,3,4,6,7,3<br>6,38,41,44 | 7  | P00774,P08649,P13596,P98089,Q62635,Q62740,Q8CIZ5                                                         |
| 10533 | 1,5,8,37,3<br>9,40,42,44 | 2,3,4,6,7,3<br>6,38,41,43 | 5  | O54858,P01836,P06760,P08649,Q5HZV9                                                                       |
| 10534 | 1,5,8,37,3<br>9,40,43,44 | 2,3,4,6,7,3<br>6,38,41,42 | 15 | O35547,P01836,P08010,P08290,P08649,P13596,P16086,P97554,Q5XI73,Q62740,Q62753,Q6AYL6,Q812E4,Q8CIZ5,Q9QZQ5 |
| 10535 | 1,5,8,37,3<br>9,41,42,43 | 2,3,4,6,7,3<br>6,38,40,44 | 2  | P00731,P13596                                                                                            |
| 10536 | 1,5,8,37,3<br>9,41,42,44 | 2,3,4,6,7,3<br>6,38,40,43 | 1  | P01836                                                                                                   |
| 10537 | 1,5,8,37,3<br>9,41,43,44 | 2,3,4,6,7,3<br>6,38,40,42 | 5  | P01836,P08649,P13596,P16086,Q5XI73                                                                       |
| 10538 | 1,5,8,37,3<br>9,42,43,44 | 2,3,4,6,7,3<br>6,38,40,41 | 2  | P01836,P13596                                                                                            |
| 10539 | 1,5,8,37,4<br>0,41,42,43 | 2,3,4,6,7,3<br>6,38,39,44 | 2  | P02625,P51907                                                                                            |
| 10540 | 1,5,8,37,4<br>0,41,42,44 | 2,3,4,6,7,3<br>6,38,39,43 | 5  | P01836,P02625,P06760,P14480,Q4FZU6                                                                       |
| 10541 | 1,5,8,37,4<br>0,41,43,44 | 2,3,4,6,7,3<br>6,38,39,42 | 10 | P05369,P08010,P08290,P08649,P13596,P16086,P47967,P51907,Q5XI73,Q9QZQ5                                    |
| 10542 | 1,5,8,37,4<br>0,42,43,44 | 2,3,4,6,7,3<br>6,38,39,41 | 3  | P01836,P02625,P08649                                                                                     |
| 10543 | 1,5,8,37,4<br>1,42,43,44 | 2,3,4,6,7,3<br>6,38,39,40 | 0  |                                                                                                          |
| 10544 | 1,5,8,38,3<br>9,40,41,42 | 2,3,4,6,7,3<br>6,37,43,44 | 3  | P02631,P06760,P13432                                                                                     |
| 10545 | 1,5,8,38,3<br>9,40,41,43 | 2,3,4,6,7,3<br>6,37,42,44 | 6  | G3V686,P08649,P47967,Q5XI73,Q6IFV1,Q9QZQ5                                                                |
| 10546 | 1,5,8,38,3<br>9,40,41,44 | 2,3,4,6,7,3<br>6,37,42,43 | 11 | P01836,P02631,P06760,P08649,P10715,P16086,P19629,P31044,P47967,Q4FZU6,Q9QZQ5                             |
| 10547 | 1,5,8,38,3<br>9,40,42,43 | 2,3,4,6,7,3<br>6,37,41,44 | 4  | G3V686,P08649,Q64611,Q9QZQ5                                                                              |
| 10548 | 1,5,8,38,3<br>9,40,42,44 | 2,3,4,6,7,3<br>6,37,41,43 | 4  | P01836,P02631,P06760,P11762                                                                              |
| 10549 | 1,5,8,38,3<br>9,40,43,44 | 2,3,4,6,7,3<br>6,37,41,42 | 7  | G3V686,P01836,P08649,P13596,P16086,Q6IFV1,Q9QZQ5                                                         |
| 10550 | 1,5,8,38,3<br>9,41,42,43 | 2,3,4,6,7,3<br>6,37,40,44 | 3  | P00731,P13432,Q8CJD3                                                                                     |
| 10551 | 1,5,8,38,3<br>9,41,42,44 | 2,3,4,6,7,3<br>6,37,40,43 | 1  | P02631                                                                                                   |
| 10552 | 1,5,8,38,3<br>9,41,43,44 | 2,3,4,6,7,3<br>6,37,40,42 | 5  | P00731,P08649,P13596,P16086,Q9QZQ5                                                                       |
| 10553 | 1,5,8,38,3<br>9,42,43,44 | 2,3,4,6,7,3<br>6,37,40,41 | 0  |                                                                                                          |
| 10554 | 1,5,8,38,4<br>0,41,42,43 | 2,3,4,6,7,3<br>6,37,39,44 | 2  | P02625,Q8CJD3                                                                                            |

|       |                               |                           |    |                                                                                                                                      |
|-------|-------------------------------|---------------------------|----|--------------------------------------------------------------------------------------------------------------------------------------|
| 10555 | 1,5,8,38,4<br>0,41,42,44      | 2,3,4,6,7,3<br>6,37,39,43 | 5  | P02625,P02631,P06760,P14480,Q4FZU6                                                                                                   |
| 10556 | 1,5,8,38,4<br>0,41,43,44      | 2,3,4,6,7,3<br>6,37,39,42 | 5  | P08649,P16086,P47967,Q5XI73,Q9QZQ5                                                                                                   |
| 10557 | 1,5,8,38,4<br>0,42,43,44      | 2,3,4,6,7,3<br>6,37,39,41 | 4  | P02625,P06760,P08649,Q9QZQ5                                                                                                          |
| 10558 | 1,5,8,38,4<br>1,42,43,44      | 2,3,4,6,7,3<br>6,37,39,40 | 2  | P00731,Q8CJD3                                                                                                                        |
| 10559 | 1,5,8,39,4<br>0,41,42,43      | 2,3,4,6,7,3<br>6,37,38,44 | 1  | P97840                                                                                                                               |
| 10560 | 1,5,8,39,4<br>0,41,42,44      | 2,3,4,6,7,3<br>6,37,38,43 | 7  | P01836,P02631,P06760,P10715,P14480,P19629,Q4FZU6                                                                                     |
| 10561 | 1,5,8,39,4<br>0,41,43,44      | 2,3,4,6,7,3<br>6,37,38,42 | 10 | P08649,P10715,P12785,P19629,P47967,P97554,P97840,Q5XI73,Q6AYL6,Q9QZQ5                                                                |
| 10562 | 1,5,8,39,4<br>0,42,43,44      | 2,3,4,6,7,3<br>6,37,38,41 | 3  | P01836,P08649,P11762                                                                                                                 |
| 10563 | 1,5,8,39,4<br>1,42,43,44      | 2,3,4,6,7,3<br>6,37,38,40 | 1  | P00731                                                                                                                               |
| 10564 | 1,5,8,40,4<br>1,42,43,44      | 2,3,4,6,7,3<br>6,37,38,39 | 3  | P02625,Q4FZU6,Q6PCU2                                                                                                                 |
| 10565 | 1,5,36,37,<br>38,39,40,4<br>1 | 2,3,4,6,7,8<br>,42,43,44  | 14 | D3ZUK3,F1LM93,O35547,P02631,P11883,P16086,P20762,P20766,P26772,P36374,P60905,P85971,Q5M819,Q9QZQ5                                    |
| 10566 | 1,5,36,37,<br>38,39,40,4<br>2 | 2,3,4,6,7,8<br>,41,43,44  | 6  | D3ZUK3,O54858,P02631,P11883,P20762,P20766                                                                                            |
| 10567 | 1,5,36,37,<br>38,39,40,4<br>3 | 2,3,4,6,7,8<br>,41,42,44  | 19 | D3ZUK3,F1LM93,O35547,P08010,P08290,P16086,P20759,P20766,P35281,P36374,P60905,P97605,Q62740,Q62753,Q6IFV1,Q6P6R2,Q812E4,Q9JID2,Q9QZQ5 |
| 10568 | 1,5,36,37,<br>38,39,40,4<br>4 | 2,3,4,6,7,8<br>,41,42,43  | 19 | B0LT89,D3ZUK3,F1LM93,O35547,P02631,P08290,P11883,P16086,P20762,P20766,P54921,P60905,P82471,P85971,Q63357,Q6GMN2,Q812E4,Q9QUL6,Q9QZQ5 |
| 10569 | 1,5,36,37,<br>38,39,41,4<br>2 | 2,3,4,6,7,8<br>,40,43,44  | 8  | D3ZUK3,P02631,P11883,P13432,P20762,P20766,Q566E6,Q5M819                                                                              |
| 10570 | 1,5,36,37,<br>38,39,41,4<br>3 | 2,3,4,6,7,8<br>,40,42,44  | 12 | D3ZUK3,P00714,P16086,P20759,P20766,P36374,Q5M819,Q6IFV1,Q6P6R2,Q9QZ76,Q9QZQ5,Q9Z0V6                                                  |
| 10571 | 1,5,36,37,<br>38,39,41,4<br>4 | 2,3,4,6,7,8<br>,40,42,43  | 8  | D3ZUK3,P11883,P16086,P20762,P20766,P36374,Q9JHB9,Q9QZQ5                                                                              |
| 10572 | 1,5,36,37,<br>38,39,42,4<br>3 | 2,3,4,6,7,8<br>,40,41,44  | 9  | D3ZUK3,P06911,P12020,P20766,Q5GRG2,Q63617,Q6IFU7,Q6IFV1,Q9QZQ5                                                                       |

|       |                               |                          |    |                                                                                                                        |
|-------|-------------------------------|--------------------------|----|------------------------------------------------------------------------------------------------------------------------|
| 10573 | 1,5,36,37,<br>38,39,42,4<br>4 | 2,3,4,6,7,8<br>,40,41,43 | 6  | D3ZUK3,P02631,P11883,P20762,P20766,Q63617                                                                              |
| 10574 | 1,5,36,37,<br>38,39,43,4<br>4 | 2,3,4,6,7,8<br>,40,41,42 | 14 | D3ZUK3,O35547,P16086,P20759,P20766,P23593,P36374,P97605,Q62753,Q63617,Q6IFV1,Q812E4,Q9JJS8,Q9QZQ5                      |
| 10575 | 1,5,36,37,<br>38,40,41,4<br>2 | 2,3,4,6,7,8<br>,39,43,44 | 7  | D3ZUK3,P02625,P02631,P11883,P20762,P20766,Q64057                                                                       |
| 10576 | 1,5,36,37,<br>38,40,41,4<br>3 | 2,3,4,6,7,8<br>,39,42,44 | 8  | D3ZUK3,P08010,P16086,P20766,P36374,Q62753,Q6IFV1,Q9QZQ5                                                                |
| 10577 | 1,5,36,37,<br>38,40,41,4<br>4 | 2,3,4,6,7,8<br>,39,42,43 | 10 | D3ZUK3,O35547,P02625,P11883,P16086,P20762,P20766,P85971,Q80WL1,Q9QZQ5                                                  |
| 10578 | 1,5,36,37,<br>38,40,42,4<br>3 | 2,3,4,6,7,8<br>,39,41,44 | 9  | D3ZUK3,P02625,P11598,P12020,P20766,P97605,Q01205,Q63475,Q9QZQ5                                                         |
| 10579 | 1,5,36,37,<br>38,40,42,4<br>4 | 2,3,4,6,7,8<br>,39,41,43 | 9  | D3ZUK3,O54858,P02625,P02631,P11883,P20762,P20766,Q7TPB1,Q99041                                                         |
| 10580 | 1,5,36,37,<br>38,40,43,4<br>4 | 2,3,4,6,7,8<br>,39,41,42 | 12 | D3ZUK3,F1LM93,O35547,P05369,P08010,P08290,P16086,P20766,P54921,P97605,Q62753,Q9QZQ5                                    |
| 10581 | 1,5,36,37,<br>38,41,42,4<br>3 | 2,3,4,6,7,8<br>,39,40,44 | 6  | D3ZUK3,P06866,P11598,P12020,P20766,Q8CJD3                                                                              |
| 10582 | 1,5,36,37,<br>38,41,42,4<br>4 | 2,3,4,6,7,8<br>,39,40,43 | 4  | D3ZUK3,P11883,P20762,P20766                                                                                            |
| 10583 | 1,5,36,37,<br>38,41,43,4<br>4 | 2,3,4,6,7,8<br>,39,40,42 | 5  | P05369,P16086,P20766,P36374,Q9QZQ5                                                                                     |
| 10584 | 1,5,36,37,<br>38,42,43,4<br>4 | 2,3,4,6,7,8<br>,39,40,41 | 4  | D3ZUK3,P12020,P20766,Q63617                                                                                            |
| 10585 | 1,5,36,37,<br>39,40,41,4<br>2 | 2,3,4,6,7,8<br>,38,43,44 | 6  | D3ZUK3,P01835,P02631,P11883,P20762,Q80WL1                                                                              |
| 10586 | 1,5,36,37,<br>39,40,41,4<br>3 | 2,3,4,6,7,8<br>,38,42,44 | 13 | D3ZUK3,F1LM93,O35547,P00714,P08290,P16086,P36374,P97554,Q62753,Q63514,Q80WL1,Q9QZQ5,Q9Z0V6                             |
| 10587 | 1,5,36,37,<br>39,40,41,4<br>4 | 2,3,4,6,7,8<br>,38,42,43 | 17 | D3ZUK3,F1LM93,O35547,P02631,P05369,P08290,P10715,P11883,P16086,P19629,P20762,P25031,P36374,P54921,P85971,Q80WL1,Q9QZQ5 |

|       |                               |                          |    |                                                                                                                                      |
|-------|-------------------------------|--------------------------|----|--------------------------------------------------------------------------------------------------------------------------------------|
| 10588 | 1,5,36,37,<br>39,40,42,4<br>3 | 2,3,4,6,7,8<br>,38,41,44 | 12 | D3ZUK3,O35547,P00774,P11598,P50115,P50116,P98089,Q01205,Q05695,Q62635,Q8CIZ5,Q9QZQ5                                                  |
| 10589 | 1,5,36,37,<br>39,40,42,4<br>4 | 2,3,4,6,7,8<br>,38,41,43 | 11 | D3ZUK3,O35547,O54858,P02625,P02631,P11883,P20762,P50115,P50116,Q5HZV9,Q7TPB1                                                         |
| 10590 | 1,5,36,37,<br>39,40,43,4<br>4 | 2,3,4,6,7,8<br>,38,41,42 | 19 | D3ZUK3,F1LM93,O35547,P05369,P08010,P08290,P08753,P16086,P50115,P50116,P54921,P60905,P97605,Q62740,Q62753,Q63357,Q812E4,Q8CIZ5,Q9QZQ5 |
| 10591 | 1,5,36,37,<br>39,41,42,4<br>3 | 2,3,4,6,7,8<br>,38,40,44 | 2  | D3ZUK3,Q62635                                                                                                                        |
| 10592 | 1,5,36,37,<br>39,41,42,4<br>4 | 2,3,4,6,7,8<br>,38,40,43 | 4  | D3ZUK3,P02631,P11883,P20762                                                                                                          |
| 10593 | 1,5,36,37,<br>39,41,43,4<br>4 | 2,3,4,6,7,8<br>,38,40,42 | 5  | P05369,P16086,P36374,Q9QZQ5,Q9Z0V6                                                                                                   |
| 10594 | 1,5,36,37,<br>39,42,43,4<br>4 | 2,3,4,6,7,8<br>,38,40,41 | 3  | D3ZUK3,P50115,P50116                                                                                                                 |
| 10595 | 1,5,36,37,<br>40,41,42,4<br>3 | 2,3,4,6,7,8<br>,38,39,44 | 5  | D3ZUK3,P02625,P11598,P20766,Q80WL1                                                                                                   |
| 10596 | 1,5,36,37,<br>40,41,42,4<br>4 | 2,3,4,6,7,8<br>,38,39,43 | 7  | D3ZUK3,P02625,P02631,P11883,P20762,Q7TPB1,Q80WL1                                                                                     |
| 10597 | 1,5,36,37,<br>40,41,43,4<br>4 | 2,3,4,6,7,8<br>,38,39,42 | 10 | O35547,P05369,P08010,P08290,P16086,P19218,P20766,Q62753,Q80WL1,Q9QZQ5                                                                |
| 10598 | 1,5,36,37,<br>40,42,43,4<br>4 | 2,3,4,6,7,8<br>,38,39,41 | 10 | D3ZUK3,O35547,P02625,P05369,P08010,P11598,P50115,P50116,Q7TPB1,Q80WL1                                                                |
| 10599 | 1,5,36,37,<br>41,42,43,4<br>4 | 2,3,4,6,7,8<br>,38,39,40 | 3  | D3ZUK3,P05369,P20766                                                                                                                 |
| 10600 | 1,5,36,38,<br>39,40,41,4<br>2 | 2,3,4,6,7,8<br>,37,43,44 | 5  | D3ZUK3,P02631,P13432,P20762,Q9QZQ5                                                                                                   |
| 10601 | 1,5,36,38,<br>39,40,41,4<br>3 | 2,3,4,6,7,8<br>,37,42,44 | 5  | D3ZUK3,P00714,P02631,P36374,Q9QZQ5                                                                                                   |
| 10602 | 1,5,36,38,<br>39,40,41,4<br>4 | 2,3,4,6,7,8<br>,37,42,43 | 9  | D3ZUK3,P02631,P10715,P11883,P16086,P19629,P20762,P85971,Q9QZQ5                                                                       |

|       |                               |                          |    |                                                                              |
|-------|-------------------------------|--------------------------|----|------------------------------------------------------------------------------|
| 10603 | 1,5,36,38,<br>39,40,42,4<br>3 | 2,3,4,6,7,8<br>,37,41,44 | 8  | D3ZUK3,P02631,P11598,Q01205,Q63617,Q6IFU7,Q99041,Q9QZQ5                      |
| 10604 | 1,5,36,38,<br>39,40,42,4<br>4 | 2,3,4,6,7,8<br>,37,41,43 | 9  | D3ZUK3,O54858,P02631,P11883,P20762,Q7TPB1,Q99041,Q9QUL6,Q9QZQ5               |
| 10605 | 1,5,36,38,<br>39,40,43,4<br>4 | 2,3,4,6,7,8<br>,37,41,42 | 5  | D3ZUK3,P16086,Q62753,Q99041,Q9QZQ5                                           |
| 10606 | 1,5,36,38,<br>39,41,42,4<br>3 | 2,3,4,6,7,8<br>,37,40,44 | 5  | D3ZUK3,P02631,Q6IFU7,Q8CJD3,Q9QZQ5                                           |
| 10607 | 1,5,36,38,<br>39,41,42,4<br>4 | 2,3,4,6,7,8<br>,37,40,43 | 3  | D3ZUK3,P02631,P20762                                                         |
| 10608 | 1,5,36,38,<br>39,41,43,4<br>4 | 2,3,4,6,7,8<br>,37,40,42 | 2  | P16086,Q9QZQ5                                                                |
| 10609 | 1,5,36,38,<br>39,42,43,4<br>4 | 2,3,4,6,7,8<br>,37,40,41 | 5  | D3ZUK3,Q63617,Q6IFU7,Q99041,Q9QZQ5                                           |
| 10610 | 1,5,36,38,<br>40,41,42,4<br>3 | 2,3,4,6,7,8<br>,37,39,44 | 7  | D3ZUK3,P02625,P02631,P11598,P20766,Q8CJD3,Q9QZQ5                             |
| 10611 | 1,5,36,38,<br>40,41,42,4<br>4 | 2,3,4,6,7,8<br>,37,39,43 | 9  | D3ZUK3,P02625,P02631,P14480,P20762,P20766,Q4FZU6,Q7TPB1,Q9QZQ5               |
| 10612 | 1,5,36,38,<br>40,41,43,4<br>4 | 2,3,4,6,7,8<br>,37,39,42 | 3  | P16086,P20766,Q9QZQ5                                                         |
| 10613 | 1,5,36,38,<br>40,42,43,4<br>4 | 2,3,4,6,7,8<br>,37,39,41 | 7  | D3ZUK3,P02625,P02631,P11598,Q7TPB1,Q99041,Q9QZQ5                             |
| 10614 | 1,5,36,38,<br>41,42,43,4<br>4 | 2,3,4,6,7,8<br>,37,39,40 | 4  | D3ZUK3,P20766,Q8CJD3,Q9QZQ5                                                  |
| 10615 | 1,5,36,39,<br>40,41,42,4<br>3 | 2,3,4,6,7,8<br>,37,38,44 | 4  | D3ZUK3,P02631,P11598,Q9QZQ5                                                  |
| 10616 | 1,5,36,39,<br>40,41,42,4<br>4 | 2,3,4,6,7,8<br>,37,38,43 | 11 | D3ZUK3,O54858,P02631,P02680,P10715,P14480,P19629,P20762,Q4FZU6,Q7TPB1,Q80WL1 |
| 10617 | 1,5,36,39,<br>40,41,43,4<br>4 | 2,3,4,6,7,8<br>,37,38,42 | 6  | P08290,P10715,P19629,Q6AYL6,Q80WL1,Q9QZQ5                                    |

|       |                               |                          |    |                                                                                                                                                                                       |
|-------|-------------------------------|--------------------------|----|---------------------------------------------------------------------------------------------------------------------------------------------------------------------------------------|
| 10618 | 1,5,36,39,<br>40,42,43,4<br>4 | 2,3,4,6,7,8<br>,37,38,41 | 9  | D3ZUK3,P02631,P11762,P50115,P50116,Q01205,Q7TPB1,Q99041,Q9QZQ5                                                                                                                        |
| 10619 | 1,5,36,39,<br>41,42,43,4<br>4 | 2,3,4,6,7,8<br>,37,38,40 | 2  | D3ZUK3,Q9QZQ5                                                                                                                                                                         |
| 10620 | 1,5,36,40,<br>41,42,43,4<br>4 | 2,3,4,6,7,8<br>,37,38,39 | 6  | D3ZUK3,P02625,P11598,Q7TPB1,Q80WL1,Q9QZQ5                                                                                                                                             |
| 10621 | 1,5,37,38,<br>39,40,41,4<br>2 | 2,3,4,6,7,8<br>,36,43,44 | 11 | D3ZUK3,O54858,P02631,P07171,P13432,P18427,P20762,P20766,P85971,Q01205,Q9QZQ5                                                                                                          |
| 10622 | 1,5,37,38,<br>39,40,41,4<br>3 | 2,3,4,6,7,8<br>,36,42,44 | 22 | B5DFC9,D3ZUK3,G3V686,P00714,P07171,P08010,P08290,P08649,P13432,P16086,P20766,P36374,P60905,P85971,P97554,Q01205,Q5XI73,Q62740,Q62753,Q6IFV1,Q812E4,Q9QZQ5                             |
| 10623 | 1,5,37,38,<br>39,40,41,4<br>4 | 2,3,4,6,7,8<br>,36,42,43 | 18 | D3ZUK3,G3V686,O35547,O54858,P02631,P08290,P08649,P10715,P11883,P16086,P18427,P19629,P20762,P20766,P36374,P60905,P85971,Q9QZQ5                                                         |
| 10624 | 1,5,37,38,<br>39,40,42,4<br>3 | 2,3,4,6,7,8<br>,36,41,44 | 18 | D3ZUK3,G3V686,O54858,P02631,P07171,P08649,P11598,P20766,Q01205,Q62740,Q62753,Q63475,Q64611,Q6IFU7,Q6IFV1,Q99041,Q99MH3,Q9QZQ5                                                         |
| 10625 | 1,5,37,38,<br>39,40,42,4<br>4 | 2,3,4,6,7,8<br>,36,41,43 | 15 | D3ZUK3,G3V686,O54800;Q5DWW2,O54858,P02631,P06760,P08649,P11883,P18427,P20762,P85971,Q01205,Q99041,Q9QUL6,Q9QZQ5                                                                       |
| 10626 | 1,5,37,38,<br>39,40,43,4<br>4 | 2,3,4,6,7,8<br>,36,41,42 | 26 | B5DFC9,D3ZUK3,F1LM93,G3V686,O35547,O54858,P04905,P08010,P08290,P08649,P08753,P13596,P16086,P36374,P54921,P60905,P85971,P97605,Q01205,Q62740,Q62753,Q63357,Q6IFV1,Q812E4,Q99MH3,Q9QZQ5 |
| 10627 | 1,5,37,38,<br>39,41,42,4<br>3 | 2,3,4,6,7,8<br>,36,40,44 | 11 | D3ZUK3,P00731,P06866,P07171,P11598,P13432,P20766,Q01205,Q6IFU7,Q8CJD3,Q9QZQ5                                                                                                          |
| 10628 | 1,5,37,38,<br>39,41,42,4<br>4 | 2,3,4,6,7,8<br>,36,40,43 | 9  | D3ZUK3,O54858,P02631,P13432,P18427,P20762,P20766,Q00715,Q9QZQ5                                                                                                                        |
| 10629 | 1,5,37,38,<br>39,41,43,4<br>4 | 2,3,4,6,7,8<br>,36,40,42 | 13 | B5DFC9,D3ZUK3,P08649,P13596,P16086,P20759,P20766,P23593,P36374,Q62740,Q6IFV1,Q812E4,Q9QZQ5                                                                                            |
| 10630 | 1,5,37,38,<br>39,42,43,4<br>4 | 2,3,4,6,7,8<br>,36,40,41 | 10 | D3ZUK3,O54858,P20766,P23593,Q01205,Q63617,Q64611,Q6IFU7,Q99041,Q9QZQ5                                                                                                                 |
| 10631 | 1,5,37,38,<br>40,41,42,4<br>3 | 2,3,4,6,7,8<br>,36,39,44 | 9  | D3ZUK3,O54858,P02625,P07171,P11598,P20766,Q01205,Q8CJD3,Q9QZQ5                                                                                                                        |
| 10632 | 1,5,37,38,<br>40,41,42,4<br>4 | 2,3,4,6,7,8<br>,36,39,43 | 11 | D3ZUK3,O54858,P02625,P02631,P06760,P18427,P20762,P20766,P85971,Q01205,Q9QZQ5                                                                                                          |

|       |                               |                          |    |                                                                                                                                                                                |
|-------|-------------------------------|--------------------------|----|--------------------------------------------------------------------------------------------------------------------------------------------------------------------------------|
| 10633 | 1,5,37,38,<br>40,41,43,4<br>4 | 2,3,4,6,7,8<br>,36,39,42 | 12 | D3ZUK3,P04905,P05369,P08010,P08290,P08649,P16086,P20766,P36374,Q5XI73,Q62753,Q9QZQ5                                                                                            |
| 10634 | 1,5,37,38,<br>40,42,43,4<br>4 | 2,3,4,6,7,8<br>,36,39,41 | 13 | D3ZUK3,O54858,P02625,P08010,P08649,P11598,P20766,P80202,P97605,Q01205,Q63475,Q99041,Q9QZQ5                                                                                     |
| 10635 | 1,5,37,38,<br>41,42,43,4<br>4 | 2,3,4,6,7,8<br>,36,39,40 | 4  | D3ZUK3,P20766,Q8CJD3,Q9QZQ5                                                                                                                                                    |
| 10636 | 1,5,37,39,<br>40,41,42,4<br>3 | 2,3,4,6,7,8<br>,36,38,44 | 6  | D3ZUK3,O54858,P07171,P11598,Q01205,Q9QZQ5                                                                                                                                      |
| 10637 | 1,5,37,39,<br>40,41,42,4<br>4 | 2,3,4,6,7,8<br>,36,38,43 | 12 | D3ZUK3,O54800,Q5DWV2,O54858,P02631,P10715,P18427,P19629,P20762,P85971,Q01205,Q80WL1,Q9QZQ5                                                                                     |
| 10638 | 1,5,37,39,<br>40,41,43,4<br>4 | 2,3,4,6,7,8<br>,36,38,42 | 25 | B5DFC9,D3ZUK3,O35547,O54858,P04905,P05369,P08010,P08290,P08649,P10715,P16086,P19629,P36374,P47727,P47967,P60905,P97554,Q01205,Q5XI73,Q62740,Q62753,Q6AYL6,Q80WL1,Q812E4,Q9QZQ5 |
| 10639 | 1,5,37,39,<br>40,42,43,4<br>4 | 2,3,4,6,7,8<br>,36,38,41 | 15 | D3ZUK3,O35547,O54800,Q5DWV2,O54858,P08010,P08649,P11598,P50115,P50116,Q01205,Q62740,Q8CIZ5,Q99041,Q99MH3,Q9QZQ5                                                                |
| 10640 | 1,5,37,39,<br>41,42,43,4<br>4 | 2,3,4,6,7,8<br>,36,38,40 | 3  | D3ZUK3,P00731,Q9QZQ5                                                                                                                                                           |
| 10641 | 1,5,37,40,<br>41,42,43,4<br>4 | 2,3,4,6,7,8<br>,36,38,39 | 8  | D3ZUK3,O54858,P02625,P05369,P11598,Q01205,Q80WL1,Q9QZQ5                                                                                                                        |
| 10642 | 1,5,38,39,<br>40,41,42,4<br>3 | 2,3,4,6,7,8<br>,36,37,44 | 11 | D3ZUK3,O54858,P02631,P07171,P11598,P13432,Q01205,Q64611,Q6IFU7,Q8CJD3,Q9QZQ5                                                                                                   |
| 10643 | 1,5,38,39,<br>40,41,42,4<br>4 | 2,3,4,6,7,8<br>,36,37,43 | 13 | D3ZUK3,O54858,P02631,P06760,P10715,P11762,P13432,P19629,P20762,P85971,Q01205,Q4FZU6,Q9QZQ5                                                                                     |
| 10644 | 1,5,38,39,<br>40,41,43,4<br>4 | 2,3,4,6,7,8<br>,36,37,42 | 10 | D3ZUK3,P08290,P08649,P10715,P16086,P19629,P47967,Q01205,Q6AYL6,Q9QZQ5                                                                                                          |
| 10645 | 1,5,38,39,<br>40,42,43,4<br>4 | 2,3,4,6,7,8<br>,36,37,41 | 12 | D3ZUK3,O54858,P02631,P08649,P11598,P11762,Q01205,Q64611,Q6IFU7,Q99041,Q99MH3,Q9QZQ5                                                                                            |
| 10646 | 1,5,38,39,<br>41,42,43,4<br>4 | 2,3,4,6,7,8<br>,36,37,40 | 6  | D3ZUK3,P00731,P02631,Q6IFU7,Q8CJD3,Q9QZQ5                                                                                                                                      |
| 10647 | 1,5,38,40,<br>41,42,43,4<br>4 | 2,3,4,6,7,8<br>,36,37,39 | 8  | D3ZUK3,O54858,P02625,P02631,P11598,Q01205,Q8CJD3,Q9QZQ5                                                                                                                        |

|       |                               |                                |    |                                                                       |
|-------|-------------------------------|--------------------------------|----|-----------------------------------------------------------------------|
| 10648 | 1,5,39,40,<br>41,42,43,4<br>4 | 2,3,4,6,7,8<br>,36,37,38       | 10 | D3ZUK3,O54858,P02631,P10715,P11598,P11762,P19629,Q01205,Q6AYL6,Q9QZQ5 |
| 10649 | 1,6,7,8,36,<br>37,38,39       | 2,3,4,5,40,<br>41,42,43,4<br>4 | 3  | P11598,P19218,P97840                                                  |
| 10650 | 1,6,7,8,36,<br>37,38,40       | 2,3,4,5,39,<br>41,42,43,4<br>4 | 4  | P11598,P15399,P35281,P82471                                           |
| 10651 | 1,6,7,8,36,<br>37,38,41       | 2,3,4,5,39,<br>40,42,43,4<br>4 | 3  | P11598,Q5M819,Q99041                                                  |
| 10652 | 1,6,7,8,36,<br>37,38,42       | 2,3,4,5,39,<br>40,41,43,4<br>4 | 4  | P19218,P36376,P47967,P97840                                           |
| 10653 | 1,6,7,8,36,<br>37,38,43       | 2,3,4,5,39,<br>40,41,42,4<br>4 | 2  | Q6IFV1,Q99068                                                         |
| 10654 | 1,6,7,8,36,<br>37,38,44       | 2,3,4,5,39,<br>40,41,42,4<br>3 | 3  | P11598,P97840,Q6AYR9                                                  |
| 10655 | 1,6,7,8,36,<br>37,39,40       | 2,3,4,5,38,<br>41,42,43,4<br>4 | 6  | O35547,P00774,P11598,P98089,Q6AYR8,Q8CJD3                             |
| 10656 | 1,6,7,8,36,<br>37,39,41       | 2,3,4,5,38,<br>40,42,43,4<br>4 | 6  | P01835,P11598,P34901,Q99041,Q9JHB9,Q9JI85                             |
| 10657 | 1,6,7,8,36,<br>37,39,42       | 2,3,4,5,38,<br>40,41,43,4<br>4 | 4  | P00774,P01835,P97840,P98089                                           |
| 10658 | 1,6,7,8,36,<br>37,39,43       | 2,3,4,5,38,<br>40,41,42,4<br>4 | 1  | Q6TMA8                                                                |
| 10659 | 1,6,7,8,36,<br>37,39,44       | 2,3,4,5,38,<br>40,41,42,4<br>3 | 3  | P11598,Q8CJD3,Q9JHB9                                                  |
| 10660 | 1,6,7,8,36,<br>37,40,41       | 2,3,4,5,38,<br>39,42,43,4<br>4 | 8  | B0BNN3,P11598,P12020,P34901,P51907,Q63617,Q99041,Q9JJS8               |
| 10661 | 1,6,7,8,36,<br>37,40,42       | 2,3,4,5,38,<br>39,41,43,4<br>4 | 3  | P00774,P34901,P98089                                                  |
| 10662 | 1,6,7,8,36,<br>37,40,43       | 2,3,4,5,38,<br>39,41,42,4<br>4 | 1  | P51907                                                                |



|       |                         |                                |   |                                           |
|-------|-------------------------|--------------------------------|---|-------------------------------------------|
| 10663 | 1,6,7,8,36,<br>37,40,44 | 2,3,4,5,38,<br>39,41,42,4<br>3 | 6 | B0BNN3,O35547,P11598,P12020,Q5GRG2,Q8CJD3 |
| 10664 | 1,6,7,8,36,<br>37,41,42 | 2,3,4,5,38,<br>39,40,43,4<br>4 | 2 | P01835,P34901                             |
| 10665 | 1,6,7,8,36,<br>37,41,43 | 2,3,4,5,38,<br>39,40,42,4<br>4 | 3 | P51907,Q6TMA8,Q99041                      |
| 10666 | 1,6,7,8,36,<br>37,41,44 | 2,3,4,5,38,<br>39,40,42,4<br>3 | 5 | B0BNN3,P11598,Q99041,Q9JHB9,Q9JI85        |
| 10667 | 1,6,7,8,36,<br>37,42,43 | 2,3,4,5,38,<br>39,40,41,4<br>4 | 0 |                                           |
| 10668 | 1,6,7,8,36,<br>37,42,44 | 2,3,4,5,38,<br>39,40,41,4<br>3 | 1 | P97840                                    |
| 10669 | 1,6,7,8,36,<br>37,43,44 | 2,3,4,5,38,<br>39,40,41,4<br>2 | 1 | P11598                                    |
| 10670 | 1,6,7,8,36,<br>38,39,40 | 2,3,4,5,37,<br>41,42,43,4<br>4 | 1 | P11598                                    |
| 10671 | 1,6,7,8,36,<br>38,39,41 | 2,3,4,5,37,<br>40,42,43,4<br>4 | 2 | P11598,P13432                             |
| 10672 | 1,6,7,8,36,<br>38,39,42 | 2,3,4,5,37,<br>40,41,43,4<br>4 | 2 | P19218,P97840                             |
| 10673 | 1,6,7,8,36,<br>38,39,43 | 2,3,4,5,37,<br>40,41,42,4<br>4 | 1 | Q6IFV1                                    |
| 10674 | 1,6,7,8,36,<br>38,39,44 | 2,3,4,5,37,<br>40,41,42,4<br>3 | 1 | P11598                                    |
| 10675 | 1,6,7,8,36,<br>38,40,41 | 2,3,4,5,37,<br>39,42,43,4<br>4 | 2 | P11598,P12020                             |
| 10676 | 1,6,7,8,36,<br>38,40,42 | 2,3,4,5,37,<br>39,41,43,4<br>4 | 0 |                                           |
| 10677 | 1,6,7,8,36,<br>38,40,43 | 2,3,4,5,37,<br>39,41,42,4<br>4 | 0 |                                           |

|       |                         |                                |    |                                                                       |
|-------|-------------------------|--------------------------------|----|-----------------------------------------------------------------------|
| 10678 | 1,6,7,8,36,<br>38,40,44 | 2,3,4,5,37,<br>39,41,42,4<br>3 | 2  | P11598,P12020                                                         |
| 10679 | 1,6,7,8,36,<br>38,41,42 | 2,3,4,5,37,<br>39,40,43,4<br>4 | 1  | P08649                                                                |
| 10680 | 1,6,7,8,36,<br>38,41,43 | 2,3,4,5,37,<br>39,40,42,4<br>4 | 0  |                                                                       |
| 10681 | 1,6,7,8,36,<br>38,41,44 | 2,3,4,5,37,<br>39,40,42,4<br>3 | 3  | P11598,P50115,Q05695                                                  |
| 10682 | 1,6,7,8,36,<br>38,42,43 | 2,3,4,5,37,<br>39,40,41,4<br>4 | 1  | P15999                                                                |
| 10683 | 1,6,7,8,36,<br>38,42,44 | 2,3,4,5,37,<br>39,40,41,4<br>3 | 2  | P15999,P97840                                                         |
| 10684 | 1,6,7,8,36,<br>38,43,44 | 2,3,4,5,37,<br>39,40,41,4<br>2 | 1  | P11598                                                                |
| 10685 | 1,6,7,8,36,<br>39,40,41 | 2,3,4,5,37,<br>38,42,43,4<br>4 | 10 | P06911,P10715,P11598,P12020,P12785,P19629,P31044,P34901,Q5GRG2,Q63617 |
| 10686 | 1,6,7,8,36,<br>39,40,42 | 2,3,4,5,37,<br>38,41,43,4<br>4 | 2  | P00774,P98089                                                         |
| 10687 | 1,6,7,8,36,<br>39,40,43 | 2,3,4,5,37,<br>38,41,42,4<br>4 | 2  | P00774,P12785                                                         |
| 10688 | 1,6,7,8,36,<br>39,40,44 | 2,3,4,5,37,<br>38,41,42,4<br>3 | 6  | P06911,P11598,P12020,Q5GRG2,Q6AYL6,Q8CJD3                             |
| 10689 | 1,6,7,8,36,<br>39,41,42 | 2,3,4,5,37,<br>38,40,43,4<br>4 | 3  | P01835,P08649,P34901                                                  |
| 10690 | 1,6,7,8,36,<br>39,41,43 | 2,3,4,5,37,<br>38,40,42,4<br>4 | 3  | P12785,P22006,Q6TMA8                                                  |
| 10691 | 1,6,7,8,36,<br>39,41,44 | 2,3,4,5,37,<br>38,40,42,4<br>3 | 4  | P11598,P12020,P31044,Q8VD89                                           |
| 10692 | 1,6,7,8,36,<br>39,42,43 | 2,3,4,5,37,<br>38,40,41,4<br>4 | 0  |                                                                       |

|       |                         |                                |   |                                                                |
|-------|-------------------------|--------------------------------|---|----------------------------------------------------------------|
| 10693 | 1,6,7,8,36,<br>39,42,44 | 2,3,4,5,37,<br>38,40,41,4<br>3 | 1 | P11598                                                         |
| 10694 | 1,6,7,8,36,<br>39,43,44 | 2,3,4,5,37,<br>38,40,41,4<br>2 | 1 | P11598                                                         |
| 10695 | 1,6,7,8,36,<br>40,41,42 | 2,3,4,5,37,<br>38,39,43,4<br>4 | 3 | P20759,P34901,Q9JJS8                                           |
| 10696 | 1,6,7,8,36,<br>40,41,43 | 2,3,4,5,37,<br>38,39,42,4<br>4 | 5 | P12020,P12785,P51907,Q63617,Q9JJS8                             |
| 10697 | 1,6,7,8,36,<br>40,41,44 | 2,3,4,5,37,<br>38,39,42,4<br>3 | 9 | P06911,P10715,P11598,P12020,P19629,P31044,Q5GRG2,Q63617,Q80WL1 |
| 10698 | 1,6,7,8,36,<br>40,42,43 | 2,3,4,5,37,<br>38,39,41,4<br>4 | 2 | P00774,Q9JJS8                                                  |
| 10699 | 1,6,7,8,36,<br>40,42,44 | 2,3,4,5,37,<br>38,39,41,4<br>3 | 2 | P20759,Q7TPB1                                                  |
| 10700 | 1,6,7,8,36,<br>40,43,44 | 2,3,4,5,37,<br>38,39,41,4<br>2 | 0 |                                                                |
| 10701 | 1,6,7,8,36,<br>41,42,43 | 2,3,4,5,37,<br>38,39,40,4<br>4 | 0 |                                                                |
| 10702 | 1,6,7,8,36,<br>41,42,44 | 2,3,4,5,37,<br>38,39,40,4<br>3 | 1 | P08649                                                         |
| 10703 | 1,6,7,8,36,<br>41,43,44 | 2,3,4,5,37,<br>38,39,40,4<br>2 | 1 | P11598                                                         |
| 10704 | 1,6,7,8,36,<br>42,43,44 | 2,3,4,5,37,<br>38,39,40,4<br>1 | 0 |                                                                |
| 10705 | 1,6,7,8,37,<br>38,39,40 | 2,3,4,5,36,<br>41,42,43,4<br>4 | 3 | P11598,P15399,P35281                                           |
| 10706 | 1,6,7,8,37,<br>38,39,41 | 2,3,4,5,36,<br>40,42,43,4<br>4 | 4 | P02782,P11598,P13432,P34901                                    |
| 10707 | 1,6,7,8,37,<br>38,39,42 | 2,3,4,5,36,<br>40,41,43,4<br>4 | 2 | P19218,P97840                                                  |

|       |                         |                                |    |                                                                                                          |
|-------|-------------------------|--------------------------------|----|----------------------------------------------------------------------------------------------------------|
| 10708 | 1,6,7,8,37,<br>38,39,43 | 2,3,4,5,36,<br>40,41,42,4<br>4 | 2  | P23593,Q6IFV1                                                                                            |
| 10709 | 1,6,7,8,37,<br>38,39,44 | 2,3,4,5,36,<br>40,41,42,4<br>3 | 1  | P11598                                                                                                   |
| 10710 | 1,6,7,8,37,<br>38,40,41 | 2,3,4,5,36,<br>39,42,43,4<br>4 | 9  | P06911,P11442,P12020,P15399,P34901,P50115,P51907,Q5GRG2,Q63617                                           |
| 10711 | 1,6,7,8,37,<br>38,40,42 | 2,3,4,5,36,<br>39,41,43,4<br>4 | 1  | P34901                                                                                                   |
| 10712 | 1,6,7,8,37,<br>38,40,43 | 2,3,4,5,36,<br>39,41,42,4<br>4 | 3  | P11442,P15399,Q6IFV1                                                                                     |
| 10713 | 1,6,7,8,37,<br>38,40,44 | 2,3,4,5,36,<br>39,41,42,4<br>3 | 5  | P11598,P12020,P15399,Q5GRG2,Q6AYR9                                                                       |
| 10714 | 1,6,7,8,37,<br>38,41,42 | 2,3,4,5,36,<br>39,40,43,4<br>4 | 1  | P34901                                                                                                   |
| 10715 | 1,6,7,8,37,<br>38,41,43 | 2,3,4,5,36,<br>39,40,42,4<br>4 | 4  | P11442,P50115,Q6IFV1,Q7TPB1                                                                              |
| 10716 | 1,6,7,8,37,<br>38,41,44 | 2,3,4,5,36,<br>39,40,42,4<br>3 | 5  | P11598,P12020,P50115,Q05695,Q62635                                                                       |
| 10717 | 1,6,7,8,37,<br>38,42,43 | 2,3,4,5,36,<br>39,40,41,4<br>4 | 1  | Q6IFV1                                                                                                   |
| 10718 | 1,6,7,8,37,<br>38,42,44 | 2,3,4,5,36,<br>39,40,41,4<br>3 | 1  | P97840                                                                                                   |
| 10719 | 1,6,7,8,37,<br>38,43,44 | 2,3,4,5,36,<br>39,40,41,4<br>2 | 2  | Q6AYR9,Q6IFV1                                                                                            |
| 10720 | 1,6,7,8,37,<br>39,40,41 | 2,3,4,5,36,<br>38,42,43,4<br>4 | 15 | P06911,P08723,P10715,P11598,P12020,P13432,P19629,P31044,P34901,P47727,P51907,Q5GRG2,Q63617,Q6AYL6,Q99041 |
| 10721 | 1,6,7,8,37,<br>39,40,42 | 2,3,4,5,36,<br>38,41,43,4<br>4 | 3  | P00774,P34901,P98089                                                                                     |
| 10722 | 1,6,7,8,37,<br>39,40,43 | 2,3,4,5,36,<br>38,41,42,4<br>4 | 4  | P22283,Q62902,Q6AYL6,Q812E4                                                                              |

|       |                         |                                |    |                                                                                                   |
|-------|-------------------------|--------------------------------|----|---------------------------------------------------------------------------------------------------|
| 10723 | 1,6,7,8,37,<br>39,40,44 | 2,3,4,5,36,<br>38,41,42,4<br>3 | 10 | O35547,P06911,P10715,P11598,P12020,P19629,Q5GRG2,Q62902,Q6AYL6,Q8CJD3                             |
| 10724 | 1,6,7,8,37,<br>39,41,42 | 2,3,4,5,36,<br>38,40,43,4<br>4 | 3  | P01835,P13432,P34901                                                                              |
| 10725 | 1,6,7,8,37,<br>39,41,43 | 2,3,4,5,36,<br>38,40,42,4<br>4 | 4  | P12785,P22006,P34901,Q99041                                                                       |
| 10726 | 1,6,7,8,37,<br>39,41,44 | 2,3,4,5,36,<br>38,40,42,4<br>3 | 5  | P06911,P11598,P12020,P31044,Q9JJ85                                                                |
| 10727 | 1,6,7,8,37,<br>39,42,43 | 2,3,4,5,36,<br>38,40,41,4<br>4 | 1  | P34901                                                                                            |
| 10728 | 1,6,7,8,37,<br>39,42,44 | 2,3,4,5,36,<br>38,40,41,4<br>3 | 0  |                                                                                                   |
| 10729 | 1,6,7,8,37,<br>39,43,44 | 2,3,4,5,36,<br>38,40,41,4<br>2 | 2  | P11598,Q6AYL6                                                                                     |
| 10730 | 1,6,7,8,37,<br>40,41,42 | 2,3,4,5,36,<br>38,39,43,4<br>4 | 5  | P12020,P34901,P51907,Q63617,Q9JJS8                                                                |
| 10731 | 1,6,7,8,37,<br>40,41,43 | 2,3,4,5,36,<br>38,39,42,4<br>4 | 6  | P11442,P12020,P34901,P47727,P51907,Q63617                                                         |
| 10732 | 1,6,7,8,37,<br>40,41,44 | 2,3,4,5,36,<br>38,39,42,4<br>3 | 14 | P06911,P10715,P11598,P12020,P19629,P31044,P34901,P47727,P51907,Q5GRG2,Q63617,Q6AYL6,Q80WL1,Q9ET32 |
| 10733 | 1,6,7,8,37,<br>40,42,43 | 2,3,4,5,36,<br>38,39,41,4<br>4 | 1  | P34901                                                                                            |
| 10734 | 1,6,7,8,37,<br>40,42,44 | 2,3,4,5,36,<br>38,39,41,4<br>3 | 2  | P20759,P34901                                                                                     |
| 10735 | 1,6,7,8,37,<br>40,43,44 | 2,3,4,5,36,<br>38,39,41,4<br>2 | 4  | P08010,P12020,P22283,Q6AYL6                                                                       |
| 10736 | 1,6,7,8,37,<br>41,42,43 | 2,3,4,5,36,<br>38,39,40,4<br>4 | 1  | P34901                                                                                            |
| 10737 | 1,6,7,8,37,<br>41,42,44 | 2,3,4,5,36,<br>38,39,40,4<br>3 | 2  | P34901,Q6P6R2                                                                                     |

|       |                         |                                |    |                                                                                     |
|-------|-------------------------|--------------------------------|----|-------------------------------------------------------------------------------------|
| 10738 | 1,6,7,8,37,<br>41,43,44 | 2,3,4,5,36,<br>38,39,40,4<br>2 | 0  |                                                                                     |
| 10739 | 1,6,7,8,37,<br>42,43,44 | 2,3,4,5,36,<br>38,39,40,4<br>1 | 0  |                                                                                     |
| 10740 | 1,6,7,8,38,<br>39,40,41 | 2,3,4,5,36,<br>37,42,43,4<br>4 | 9  | P06911,P10715,P11598,P12020,P13432,P19629,P31044,P34901,Q5GRG2                      |
| 10741 | 1,6,7,8,38,<br>39,40,42 | 2,3,4,5,36,<br>37,41,43,4<br>4 | 1  | P83121                                                                              |
| 10742 | 1,6,7,8,38,<br>39,40,43 | 2,3,4,5,36,<br>37,41,42,4<br>4 | 1  | Q6IFV1                                                                              |
| 10743 | 1,6,7,8,38,<br>39,40,44 | 2,3,4,5,36,<br>37,41,42,4<br>3 | 9  | P06911,P10715,P11598,P12020,P19629,P83121,Q5GRG2,Q6AYL6,Q9QUL6                      |
| 10744 | 1,6,7,8,38,<br>39,41,42 | 2,3,4,5,36,<br>37,40,43,4<br>4 | 3  | P13432,P19218,P34901                                                                |
| 10745 | 1,6,7,8,38,<br>39,41,43 | 2,3,4,5,36,<br>37,40,42,4<br>4 | 3  | P13432,P22006,Q6IFV1                                                                |
| 10746 | 1,6,7,8,38,<br>39,41,44 | 2,3,4,5,36,<br>37,40,42,4<br>3 | 8  | P06911,P11598,P12020,P13432,P31044,P50115,Q05695,Q62635                             |
| 10747 | 1,6,7,8,38,<br>39,42,43 | 2,3,4,5,36,<br>37,40,41,4<br>4 | 1  | P19218                                                                              |
| 10748 | 1,6,7,8,38,<br>39,42,44 | 2,3,4,5,36,<br>37,40,41,4<br>3 | 0  |                                                                                     |
| 10749 | 1,6,7,8,38,<br>39,43,44 | 2,3,4,5,36,<br>37,40,41,4<br>2 | 3  | P11598,P23593,Q6IFV1                                                                |
| 10750 | 1,6,7,8,38,<br>40,41,42 | 2,3,4,5,36,<br>37,39,43,4<br>4 | 2  | P34901,P50115                                                                       |
| 10751 | 1,6,7,8,38,<br>40,41,43 | 2,3,4,5,36,<br>37,39,42,4<br>4 | 2  | P12020,P50115                                                                       |
| 10752 | 1,6,7,8,38,<br>40,41,44 | 2,3,4,5,36,<br>37,39,42,4<br>3 | 12 | P06911,P10715,P11598,P12020,P19629,P31044,P50115,Q05695,Q5GRG2,Q62635,Q63617,Q9ET32 |

|       |                         |                                |    |                                                                                            |
|-------|-------------------------|--------------------------------|----|--------------------------------------------------------------------------------------------|
| 10753 | 1,6,7,8,38,<br>40,42,43 | 2,3,4,5,36,<br>37,39,41,4<br>4 | 0  |                                                                                            |
| 10754 | 1,6,7,8,38,<br>40,42,44 | 2,3,4,5,36,<br>37,39,41,4<br>3 | 1  | P20759                                                                                     |
| 10755 | 1,6,7,8,38,<br>40,43,44 | 2,3,4,5,36,<br>37,39,41,4<br>2 | 0  |                                                                                            |
| 10756 | 1,6,7,8,38,<br>41,42,43 | 2,3,4,5,36,<br>37,39,40,4<br>4 | 1  | P50115                                                                                     |
| 10757 | 1,6,7,8,38,<br>41,42,44 | 2,3,4,5,36,<br>37,39,40,4<br>3 | 5  | P50115,Q05695,Q62635,Q6P6R2,Q8CIZ5                                                         |
| 10758 | 1,6,7,8,38,<br>41,43,44 | 2,3,4,5,36,<br>37,39,40,4<br>2 | 4  | P50115,P55091,Q05695,Q62635                                                                |
| 10759 | 1,6,7,8,38,<br>42,43,44 | 2,3,4,5,36,<br>37,39,40,4<br>1 | 0  |                                                                                            |
| 10760 | 1,6,7,8,39,<br>40,41,42 | 2,3,4,5,36,<br>37,38,43,4<br>4 | 7  | P06911,P10715,P12020,P13432,P19629,P31044,P34901                                           |
| 10761 | 1,6,7,8,39,<br>40,41,43 | 2,3,4,5,36,<br>37,38,42,4<br>4 | 10 | P06911,P10715,P12020,P12785,P19629,P22006,P31044,P34901,Q63617,Q6AYL6                      |
| 10762 | 1,6,7,8,39,<br>40,41,44 | 2,3,4,5,36,<br>37,38,42,4<br>3 | 13 | P06911,P10715,P11598,P12020,P19629,P31044,P68370,P69897,Q5GRG2,Q63617,Q6AYL6,Q6P9T8,Q9ET32 |
| 10763 | 1,6,7,8,39,<br>40,42,43 | 2,3,4,5,36,<br>37,38,41,4<br>4 | 1  | P34901                                                                                     |
| 10764 | 1,6,7,8,39,<br>40,42,44 | 2,3,4,5,36,<br>37,38,41,4<br>3 | 4  | P12020,P20759,Q5GRG2,Q6AYL6                                                                |
| 10765 | 1,6,7,8,39,<br>40,43,44 | 2,3,4,5,36,<br>37,38,41,4<br>2 | 5  | P12020,P22282,P22283,Q5GRG2,Q6AYL6                                                         |
| 10766 | 1,6,7,8,39,<br>41,42,43 | 2,3,4,5,36,<br>37,38,40,4<br>4 | 3  | P13432,P22006,P34901                                                                       |
| 10767 | 1,6,7,8,39,<br>41,42,44 | 2,3,4,5,36,<br>37,38,40,4<br>3 | 2  | P12020,Q6P6R2                                                                              |

|       |                          |                                |    |                                                                              |
|-------|--------------------------|--------------------------------|----|------------------------------------------------------------------------------|
| 10768 | 1,6,7,8,39,<br>41,43,44  | 2,3,4,5,36,<br>37,38,40,4<br>2 | 5  | P11598,P12020,P12785,P22006,Q6AYL6                                           |
| 10769 | 1,6,7,8,39,<br>42,43,44  | 2,3,4,5,36,<br>37,38,40,4<br>1 | 0  |                                                                              |
| 10770 | 1,6,7,8,40,<br>41,42,43  | 2,3,4,5,36,<br>37,38,39,4<br>4 | 2  | P34901,Q9JJS8                                                                |
| 10771 | 1,6,7,8,40,<br>41,42,44  | 2,3,4,5,36,<br>37,38,39,4<br>3 | 11 | P06911,P10715,P12020,P19629,P20759,P31044,P34901,Q5GRG2,Q63617,Q6P6R2,Q9ET32 |
| 10772 | 1,6,7,8,40,<br>41,43,44  | 2,3,4,5,36,<br>37,38,39,4<br>2 | 9  | P06911,P10715,P12020,P19629,P31044,Q5GRG2,Q63617,Q6AYL6,Q9ET32               |
| 10773 | 1,6,7,8,40,<br>42,43,44  | 2,3,4,5,36,<br>37,38,39,4<br>1 | 0  |                                                                              |
| 10774 | 1,6,7,8,41,<br>42,43,44  | 2,3,4,5,36,<br>37,38,39,4<br>0 | 1  | Q6P6R2                                                                       |
| 10775 | 1,6,7,36,3<br>7,38,39,40 | 2,3,4,5,8,4<br>1,42,43,44      | 8  | O35547,P08723,P15399,P30120,P35281,P60905,P82471,P97840                      |
| 10776 | 1,6,7,36,3<br>7,38,39,41 | 2,3,4,5,8,4<br>0,42,43,44      | 4  | P13432,P97840,Q5M819,Q9JHB9                                                  |
| 10777 | 1,6,7,36,3<br>7,38,39,42 | 2,3,4,5,8,4<br>0,41,43,44      | 3  | P19218,P47967,P97840                                                         |
| 10778 | 1,6,7,36,3<br>7,38,39,43 | 2,3,4,5,8,4<br>0,41,42,44      | 4  | P97605,P97840,Q6IFV1,Q812E4                                                  |
| 10779 | 1,6,7,36,3<br>7,38,39,44 | 2,3,4,5,8,4<br>0,41,42,43      | 3  | P15399,P97840,Q9JHB9                                                         |
| 10780 | 1,6,7,36,3<br>7,38,40,41 | 2,3,4,5,8,3<br>9,42,43,44      | 6  | P08723,P15399,P20766,P97840,Q5M819,Q80WL1                                    |
| 10781 | 1,6,7,36,3<br>7,38,40,42 | 2,3,4,5,8,3<br>9,41,43,44      | 2  | P20766,P97840                                                                |
| 10782 | 1,6,7,36,3<br>7,38,40,43 | 2,3,4,5,8,3<br>9,41,42,44      | 5  | P08010,P15399,P20766,P97605,Q6IFV1                                           |
| 10783 | 1,6,7,36,3<br>7,38,40,44 | 2,3,4,5,8,3<br>9,41,42,43      | 7  | O35547,P15399,P54921,P82471,P97605,P97840,Q6AYR9                             |
| 10784 | 1,6,7,36,3<br>7,38,41,42 | 2,3,4,5,8,3<br>9,40,43,44      | 5  | P20766,P97840,Q566E6,Q5M819,Q6AYS4                                           |
| 10785 | 1,6,7,36,3<br>7,38,41,43 | 2,3,4,5,8,3<br>9,40,42,44      | 4  | P20766,Q5M819,Q6AYS4,Q6IFV1                                                  |
| 10786 | 1,6,7,36,3<br>7,38,41,44 | 2,3,4,5,8,3<br>9,40,42,43      | 4  | P20766,P97840,Q5M819,Q9JHB9                                                  |



|       |                          |                           |    |                                                                                                   |
|-------|--------------------------|---------------------------|----|---------------------------------------------------------------------------------------------------|
| 10787 | 1,6,7,36,3<br>7,38,42,43 | 2,3,4,5,8,3<br>9,40,41,44 | 4  | P20766,P47967,P97840,Q6AYS4                                                                       |
| 10788 | 1,6,7,36,3<br>7,38,42,44 | 2,3,4,5,8,3<br>9,40,41,43 | 3  | P20766,P47967,P97840                                                                              |
| 10789 | 1,6,7,36,3<br>7,38,43,44 | 2,3,4,5,8,3<br>9,40,41,42 | 5  | P15399,P20766,P97605,P97840,Q6AYR9                                                                |
| 10790 | 1,6,7,36,3<br>7,39,40,41 | 2,3,4,5,8,3<br>8,42,43,44 | 11 | O35547,P06911,P08723,P10715,P12020,P19629,P34901,P47727,Q5GRG2,Q80WL1,Q9JHB9                      |
| 10791 | 1,6,7,36,3<br>7,39,40,42 | 2,3,4,5,8,3<br>8,41,43,44 | 6  | P00774,P50115,P50116,P97840,P98089,Q5U2V4                                                         |
| 10792 | 1,6,7,36,3<br>7,39,40,43 | 2,3,4,5,8,3<br>8,41,42,44 | 11 | F1LM93,O35547,P00774,P50115,P50116,P60905,P97605,Q62902,Q812E4,Q8CIZ5,Q9QZK9                      |
| 10793 | 1,6,7,36,3<br>7,39,40,44 | 2,3,4,5,8,3<br>8,41,42,43 | 14 | F1LM93,O35547,P08723,P12020,P47727,P50115,P50116,P54921,P60905,Q5GRG2,Q62902,Q6AYL6,Q80WL1,Q8CJD3 |
| 10794 | 1,6,7,36,3<br>7,39,41,42 | 2,3,4,5,8,3<br>8,40,43,44 | 7  | P01835,P13432,P34901,P35467,P97840,Q566E6,Q5M819                                                  |
| 10795 | 1,6,7,36,3<br>7,39,41,43 | 2,3,4,5,8,3<br>8,40,42,44 | 5  | P22006,P36374,Q5M819,Q6TMA8,Q9QZ76                                                                |
| 10796 | 1,6,7,36,3<br>7,39,41,44 | 2,3,4,5,8,3<br>8,40,42,43 | 3  | Q80WL1,Q9JHB9,Q9JI85                                                                              |
| 10797 | 1,6,7,36,3<br>7,39,42,43 | 2,3,4,5,8,3<br>8,40,41,44 | 3  | P50115,P50116,P97840                                                                              |
| 10798 | 1,6,7,36,3<br>7,39,42,44 | 2,3,4,5,8,3<br>8,40,41,43 | 3  | P50115,P50116,P97840                                                                              |
| 10799 | 1,6,7,36,3<br>7,39,43,44 | 2,3,4,5,8,3<br>8,40,41,42 | 4  | O35547,P50116,Q6TMA8,Q812E4                                                                       |
| 10800 | 1,6,7,36,3<br>7,40,41,42 | 2,3,4,5,8,3<br>8,39,43,44 | 2  | P34901,Q80WL1                                                                                     |
| 10801 | 1,6,7,36,3<br>7,40,41,43 | 2,3,4,5,8,3<br>8,39,42,44 | 3  | P47727,P51907,Q80WL1                                                                              |
| 10802 | 1,6,7,36,3<br>7,40,41,44 | 2,3,4,5,8,3<br>8,39,42,43 | 11 | O35547,P06911,P08723,P10715,P12020,P19629,P31044,P47727,Q5GRG2,Q80WL1,Q9JHB9                      |
| 10803 | 1,6,7,36,3<br>7,40,42,43 | 2,3,4,5,8,3<br>8,39,41,44 | 2  | P00774,P50116                                                                                     |
| 10804 | 1,6,7,36,3<br>7,40,42,44 | 2,3,4,5,8,3<br>8,39,41,43 | 4  | P50116,P97840,Q7TPB1,Q80WL1                                                                       |
| 10805 | 1,6,7,36,3<br>7,40,43,44 | 2,3,4,5,8,3<br>8,39,41,42 | 6  | O35547,P08010,P47727,P50116,P97605,Q80WL1                                                         |
| 10806 | 1,6,7,36,3<br>7,41,42,43 | 2,3,4,5,8,3<br>8,39,40,44 | 1  | Q6AYS4                                                                                            |
| 10807 | 1,6,7,36,3<br>7,41,42,44 | 2,3,4,5,8,3<br>8,39,40,43 | 3  | P97840,Q6AYS4,Q80WL1                                                                              |
| 10808 | 1,6,7,36,3<br>7,41,43,44 | 2,3,4,5,8,3<br>8,39,40,42 | 3  | Q6AYS4,Q80WL1,Q9JHB9                                                                              |
| 10809 | 1,6,7,36,3<br>7,42,43,44 | 2,3,4,5,8,3<br>8,39,40,41 | 3  | P50116,P97840,Q6AYS4                                                                              |

|       |                          |                           |   |                                                                |
|-------|--------------------------|---------------------------|---|----------------------------------------------------------------|
| 10810 | 1,6,7,36,3<br>8,39,40,41 | 2,3,4,5,8,3<br>7,42,43,44 | 6 | P06911,P10715,P12020,P13432,P19629,Q5M819                      |
| 10811 | 1,6,7,36,3<br>8,39,40,42 | 2,3,4,5,8,3<br>7,41,43,44 | 2 | P83121,P97840                                                  |
| 10812 | 1,6,7,36,3<br>8,39,40,43 | 2,3,4,5,8,3<br>7,41,42,44 | 1 | Q6IFV1                                                         |
| 10813 | 1,6,7,36,3<br>8,39,40,44 | 2,3,4,5,8,3<br>7,41,42,43 | 5 | P12020,P19629,P83121,Q5GRG2,Q9QUL6                             |
| 10814 | 1,6,7,36,3<br>8,39,41,42 | 2,3,4,5,8,3<br>7,40,43,44 | 4 | P08649,P13432,P97840,Q5M819                                    |
| 10815 | 1,6,7,36,3<br>8,39,41,43 | 2,3,4,5,8,3<br>7,40,42,44 | 3 | P13432,P22006,Q5M819                                           |
| 10816 | 1,6,7,36,3<br>8,39,41,44 | 2,3,4,5,8,3<br>7,40,42,43 | 1 | Q5M819                                                         |
| 10817 | 1,6,7,36,3<br>8,39,42,43 | 2,3,4,5,8,3<br>7,40,41,44 | 2 | P97840,Q6IFU7                                                  |
| 10818 | 1,6,7,36,3<br>8,39,42,44 | 2,3,4,5,8,3<br>7,40,41,43 | 1 | P97840                                                         |
| 10819 | 1,6,7,36,3<br>8,39,43,44 | 2,3,4,5,8,3<br>7,40,41,42 | 0 |                                                                |
| 10820 | 1,6,7,36,3<br>8,40,41,42 | 2,3,4,5,8,3<br>7,39,43,44 | 1 | P97840                                                         |
| 10821 | 1,6,7,36,3<br>8,40,41,43 | 2,3,4,5,8,3<br>7,39,42,44 | 0 |                                                                |
| 10822 | 1,6,7,36,3<br>8,40,41,44 | 2,3,4,5,8,3<br>7,39,42,43 | 6 | P06911,P10715,P12020,P19629,Q5GRG2,Q80WL1                      |
| 10823 | 1,6,7,36,3<br>8,40,42,43 | 2,3,4,5,8,3<br>7,39,41,44 | 0 |                                                                |
| 10824 | 1,6,7,36,3<br>8,40,42,44 | 2,3,4,5,8,3<br>7,39,41,43 | 3 | P83121,P97840,Q7TPB1                                           |
| 10825 | 1,6,7,36,3<br>8,40,43,44 | 2,3,4,5,8,3<br>7,39,41,42 | 1 | P97605                                                         |
| 10826 | 1,6,7,36,3<br>8,41,42,43 | 2,3,4,5,8,3<br>7,39,40,44 | 1 | Q6AYS4                                                         |
| 10827 | 1,6,7,36,3<br>8,41,42,44 | 2,3,4,5,8,3<br>7,39,40,43 | 3 | P08649,P97840,Q8CIZ5                                           |
| 10828 | 1,6,7,36,3<br>8,41,43,44 | 2,3,4,5,8,3<br>7,39,40,42 | 0 |                                                                |
| 10829 | 1,6,7,36,3<br>8,42,43,44 | 2,3,4,5,8,3<br>7,39,40,41 | 2 | P15999,P97840                                                  |
| 10830 | 1,6,7,36,3<br>9,40,41,42 | 2,3,4,5,8,3<br>7,38,43,44 | 2 | P13432,P34901                                                  |
| 10831 | 1,6,7,36,3<br>9,40,41,43 | 2,3,4,5,8,3<br>7,38,42,44 | 2 | P22006,Q6AYL6                                                  |
| 10832 | 1,6,7,36,3<br>9,40,41,44 | 2,3,4,5,8,3<br>7,38,42,43 | 9 | P06911,P10715,P12020,P19629,P31044,Q5GRG2,Q6AYL6,Q80WL1,Q8VD89 |

|       |                          |                           |    |                                                                                            |
|-------|--------------------------|---------------------------|----|--------------------------------------------------------------------------------------------|
| 10833 | 1,6,7,36,3<br>9,40,42,43 | 2,3,4,5,8,3<br>7,38,41,44 | 3  | P00774,P50115,P50116                                                                       |
| 10834 | 1,6,7,36,3<br>9,40,42,44 | 2,3,4,5,8,3<br>7,38,41,43 | 3  | P50116,P83121,Q7TPB1                                                                       |
| 10835 | 1,6,7,36,3<br>9,40,43,44 | 2,3,4,5,8,3<br>7,38,41,42 | 2  | P50116,Q6AYL6                                                                              |
| 10836 | 1,6,7,36,3<br>9,41,42,43 | 2,3,4,5,8,3<br>7,38,40,44 | 1  | P22006                                                                                     |
| 10837 | 1,6,7,36,3<br>9,41,42,44 | 2,3,4,5,8,3<br>7,38,40,43 | 0  |                                                                                            |
| 10838 | 1,6,7,36,3<br>9,41,43,44 | 2,3,4,5,8,3<br>7,38,40,42 | 1  | P22006                                                                                     |
| 10839 | 1,6,7,36,3<br>9,42,43,44 | 2,3,4,5,8,3<br>7,38,40,41 | 0  |                                                                                            |
| 10840 | 1,6,7,36,4<br>0,41,42,43 | 2,3,4,5,8,3<br>7,38,39,44 | 2  | Q6AYS4,Q9JJS8                                                                              |
| 10841 | 1,6,7,36,4<br>0,41,42,44 | 2,3,4,5,8,3<br>7,38,39,43 | 4  | P12020,Q5GRG2,Q7TPB1,Q80WL1                                                                |
| 10842 | 1,6,7,36,4<br>0,41,43,44 | 2,3,4,5,8,3<br>7,38,39,42 | 4  | P12020,Q5GRG2,Q6AYL6,Q80WL1                                                                |
| 10843 | 1,6,7,36,4<br>0,42,43,44 | 2,3,4,5,8,3<br>7,38,39,41 | 1  | Q7TPB1                                                                                     |
| 10844 | 1,6,7,36,4<br>1,42,43,44 | 2,3,4,5,8,3<br>7,38,39,40 | 1  | Q6AYS4                                                                                     |
| 10845 | 1,6,7,37,3<br>8,39,40,41 | 2,3,4,5,8,3<br>6,42,43,44 | 11 | P06911,P08723,P10715,P12020,P13432,P15399,P19629,P34901,P35281,P60905,Q5GRG2               |
| 10846 | 1,6,7,37,3<br>8,39,40,42 | 2,3,4,5,8,3<br>6,41,43,44 | 3  | P83121,P97840,Q99MH3                                                                       |
| 10847 | 1,6,7,37,3<br>8,39,40,43 | 2,3,4,5,8,3<br>6,41,42,44 | 7  | P15399,P35281,P60905,P97605,Q6IFV1,Q812E4,Q99MH3                                           |
| 10848 | 1,6,7,37,3<br>8,39,40,44 | 2,3,4,5,8,3<br>6,41,42,43 | 13 | O35547,P12020,P15399,P19629,P54921,P60905,P83121,Q5GRG2,Q63357,Q6AYL6,Q6AYR9,Q812E4,Q9QUL6 |
| 10849 | 1,6,7,37,3<br>8,39,41,42 | 2,3,4,5,8,3<br>6,40,43,44 | 4  | P13432,P34901,P97840,Q6AYS4                                                                |
| 10850 | 1,6,7,37,3<br>8,39,41,43 | 2,3,4,5,8,3<br>6,40,42,44 | 6  | P13432,P22006,P36374,Q6AYS4,Q6IFV1,Q812E4                                                  |
| 10851 | 1,6,7,37,3<br>8,39,41,44 | 2,3,4,5,8,3<br>6,40,42,43 | 4  | P13432,P15399,P97840,Q9JHB9                                                                |
| 10852 | 1,6,7,37,3<br>8,39,42,43 | 2,3,4,5,8,3<br>6,40,41,44 | 5  | P97840,Q6AYS4,Q6IFU7,Q6IFV1,Q99MH3                                                         |
| 10853 | 1,6,7,37,3<br>8,39,42,44 | 2,3,4,5,8,3<br>6,40,41,43 | 2  | P83121,P97840                                                                              |
| 10854 | 1,6,7,37,3<br>8,39,43,44 | 2,3,4,5,8,3<br>6,40,41,42 | 4  | P15399,P23593,Q6IFV1,Q812E4                                                                |
| 10855 | 1,6,7,37,3<br>8,40,41,42 | 2,3,4,5,8,3<br>6,39,43,44 | 4  | P20766,P34901,P97840,Q6AYS4                                                                |

|       |                          |                           |    |                                                                                            |
|-------|--------------------------|---------------------------|----|--------------------------------------------------------------------------------------------|
| 10856 | 1,6,7,37,3<br>8,40,41,43 | 2,3,4,5,8,3<br>6,39,42,44 | 6  | P11442,P15399,P20766,P55016,Q6AYS4,Q6IFV1                                                  |
| 10857 | 1,6,7,37,3<br>8,40,41,44 | 2,3,4,5,8,3<br>6,39,42,43 | 11 | P06911,P10715,P12020,P15399,P19629,P31044,P47727,Q5GRG2,Q6AYR9,Q6AYS4,Q80WL1               |
| 10858 | 1,6,7,37,3<br>8,40,42,43 | 2,3,4,5,8,3<br>6,39,41,44 | 5  | P97605,Q01205,Q63475,Q6AYS4,Q99MH3                                                         |
| 10859 | 1,6,7,37,3<br>8,40,42,44 | 2,3,4,5,8,3<br>6,39,41,43 | 4  | P15399,P83121,P97840,Q6AYS4                                                                |
| 10860 | 1,6,7,37,3<br>8,40,43,44 | 2,3,4,5,8,3<br>6,39,41,42 | 9  | P04905,P08010,P15399,P97605,Q6AYL6,Q6AYR9,Q6AYS4,Q6IFV1,Q812E4                             |
| 10861 | 1,6,7,37,3<br>8,41,42,43 | 2,3,4,5,8,3<br>6,39,40,44 | 4  | P06866,P20766,Q6AYS4,Q6P6T1                                                                |
| 10862 | 1,6,7,37,3<br>8,41,42,44 | 2,3,4,5,8,3<br>6,39,40,43 | 3  | P20766,P97840,Q6AYS4                                                                       |
| 10863 | 1,6,7,37,3<br>8,41,43,44 | 2,3,4,5,8,3<br>6,39,40,42 | 3  | P20766,Q6AYR9,Q6AYS4                                                                       |
| 10864 | 1,6,7,37,3<br>8,42,43,44 | 2,3,4,5,8,3<br>6,39,40,41 | 2  | P97840,Q6AYS4                                                                              |
| 10865 | 1,6,7,37,3<br>9,40,41,42 | 2,3,4,5,8,3<br>6,38,43,44 | 4  | P10715,P13432,P34901,Q6AYS4                                                                |
| 10866 | 1,6,7,37,3<br>9,40,41,43 | 2,3,4,5,8,3<br>6,38,42,44 | 12 | P10715,P12020,P13432,P19629,P22006,P34901,P47727,P97554,Q62902,Q6AYL6,Q6AYS4,Q812E4        |
| 10867 | 1,6,7,37,3<br>9,40,41,44 | 2,3,4,5,8,3<br>6,38,42,43 | 13 | O35547,P06911,P08723,P10715,P12020,P16391,P19629,P31044,P47727,Q5GRG2,Q62902,Q6AYL6,Q80WL1 |
| 10868 | 1,6,7,37,3<br>9,40,42,43 | 2,3,4,5,8,3<br>6,38,41,44 | 5  | P50116,Q01205,Q05695,Q6AYS4,Q99MH3                                                         |
| 10869 | 1,6,7,37,3<br>9,40,42,44 | 2,3,4,5,8,3<br>6,38,41,43 | 3  | P50116,P83121,Q6AYL6                                                                       |
| 10870 | 1,6,7,37,3<br>9,40,43,44 | 2,3,4,5,8,3<br>6,38,41,42 | 12 | O35547,P04905,P08010,P08753,P47727,P50116,P60905,Q62902,Q63357,Q6AYL6,Q812E4,Q9QZK9        |
| 10871 | 1,6,7,37,3<br>9,41,42,43 | 2,3,4,5,8,3<br>6,38,40,44 | 4  | P13432,P22006,P34901,Q6AYS4                                                                |
| 10872 | 1,6,7,37,3<br>9,41,42,44 | 2,3,4,5,8,3<br>6,38,40,43 | 2  | P13432,Q6AYS4                                                                              |
| 10873 | 1,6,7,37,3<br>9,41,43,44 | 2,3,4,5,8,3<br>6,38,40,42 | 3  | P22006,Q6AYL6,Q6AYS4                                                                       |
| 10874 | 1,6,7,37,3<br>9,42,43,44 | 2,3,4,5,8,3<br>6,38,40,41 | 2  | P50116,Q6AYS4                                                                              |
| 10875 | 1,6,7,37,4<br>0,41,42,43 | 2,3,4,5,8,3<br>6,38,39,44 | 2  | P34901,Q6AYS4                                                                              |
| 10876 | 1,6,7,37,4<br>0,41,42,44 | 2,3,4,5,8,3<br>6,38,39,43 | 8  | P06911,P10715,P12020,P34901,Q5GRG2,Q6AYS4,Q6P6R2,Q80WL1                                    |
| 10877 | 1,6,7,37,4<br>0,41,43,44 | 2,3,4,5,8,3<br>6,38,39,42 | 11 | P04905,P06911,P08010,P10715,P12020,P19629,P47727,Q5GRG2,Q6AYL6,Q6AYS4,Q80WL1               |
| 10878 | 1,6,7,37,4<br>0,42,43,44 | 2,3,4,5,8,3<br>6,38,39,41 | 3  | P50116,Q01205,Q6AYS4                                                                       |

|       |                          |                           |    |                                                                                     |
|-------|--------------------------|---------------------------|----|-------------------------------------------------------------------------------------|
| 10879 | 1,6,7,37,4<br>1,42,43,44 | 2,3,4,5,8,3<br>6,38,39,40 | 1  | Q6AYS4                                                                              |
| 10880 | 1,6,7,38,3<br>9,40,41,42 | 2,3,4,5,8,3<br>6,37,43,44 | 4  | P13432,P19629,P34901,P83121                                                         |
| 10881 | 1,6,7,38,3<br>9,40,41,43 | 2,3,4,5,8,3<br>6,37,42,44 | 5  | P10715,P13432,P19629,P22006,Q6AYL6                                                  |
| 10882 | 1,6,7,38,3<br>9,40,41,44 | 2,3,4,5,8,3<br>6,37,42,43 | 12 | P06911,P10715,P12020,P13432,P16391,P19629,P31044,P83121,Q5GRG2,Q6AYL6,Q6P9T8,Q9QUL6 |
| 10883 | 1,6,7,38,3<br>9,40,42,43 | 2,3,4,5,8,3<br>6,37,41,44 | 4  | P83121,Q01205,Q6IFU7,Q99MH3                                                         |
| 10884 | 1,6,7,38,3<br>9,40,42,44 | 2,3,4,5,8,3<br>6,37,41,43 | 2  | P83121,Q9QUL6                                                                       |
| 10885 | 1,6,7,38,3<br>9,40,43,44 | 2,3,4,5,8,3<br>6,37,41,42 | 3  | P19629,P83121,Q6AYL6                                                                |
| 10886 | 1,6,7,38,3<br>9,41,42,43 | 2,3,4,5,8,3<br>6,37,40,44 | 4  | P13432,P22006,Q6AYS4,Q6IFU7                                                         |
| 10887 | 1,6,7,38,3<br>9,41,42,44 | 2,3,4,5,8,3<br>6,37,40,43 | 3  | P13432,P97840,Q6AYS4                                                                |
| 10888 | 1,6,7,38,3<br>9,41,43,44 | 2,3,4,5,8,3<br>6,37,40,42 | 4  | P13432,P22006,P23593,Q6AYS4                                                         |
| 10889 | 1,6,7,38,3<br>9,42,43,44 | 2,3,4,5,8,3<br>6,37,40,41 | 2  | Q6AYS4,Q6IFU7                                                                       |
| 10890 | 1,6,7,38,4<br>0,41,42,43 | 2,3,4,5,8,3<br>6,37,39,44 | 1  | Q6AYS4                                                                              |
| 10891 | 1,6,7,38,4<br>0,41,42,44 | 2,3,4,5,8,3<br>6,37,39,43 | 6  | P06911,P12020,P19629,Q5GRG2,Q6AYS4,Q8CIZ5                                           |
| 10892 | 1,6,7,38,4<br>0,41,43,44 | 2,3,4,5,8,3<br>6,37,39,42 | 7  | P06911,P10715,P12020,P19629,Q5GRG2,Q6AYL6,Q6AYS4                                    |
| 10893 | 1,6,7,38,4<br>0,42,43,44 | 2,3,4,5,8,3<br>6,37,39,41 | 1  | Q6AYS4                                                                              |
| 10894 | 1,6,7,38,4<br>1,42,43,44 | 2,3,4,5,8,3<br>6,37,39,40 | 2  | P55091,Q6AYS4                                                                       |
| 10895 | 1,6,7,39,4<br>0,41,42,43 | 2,3,4,5,8,3<br>6,37,38,44 | 5  | P13432,P22006,P34901,Q6AYL6,Q6AYS4                                                  |
| 10896 | 1,6,7,39,4<br>0,41,42,44 | 2,3,4,5,8,3<br>6,37,38,43 | 10 | P06911,P10715,P12020,P13432,P16391,P19629,P31044,Q5GRG2,Q6AYL6,Q6P9T8               |
| 10897 | 1,6,7,39,4<br>0,41,43,44 | 2,3,4,5,8,3<br>6,37,38,42 | 9  | P06911,P10715,P12020,P19629,P22006,P31044,Q5GRG2,Q6AYL6,Q6P9T8                      |
| 10898 | 1,6,7,39,4<br>0,42,43,44 | 2,3,4,5,8,3<br>6,37,38,41 | 4  | P50116,Q01205,Q6AYL6,Q99MH3                                                         |
| 10899 | 1,6,7,39,4<br>1,42,43,44 | 2,3,4,5,8,3<br>6,37,38,40 | 2  | P22006,Q6AYS4                                                                       |
| 10900 | 1,6,7,40,4<br>1,42,43,44 | 2,3,4,5,8,3<br>6,37,38,39 | 4  | P12020,Q6AYL6,Q6AYS4,Q6P6R2                                                         |
| 10901 | 1,6,8,36,3<br>7,38,39,40 | 2,3,4,5,7,4<br>1,42,43,44 | 11 | F1LM93,O35547,P08723,P0C0A9,P30120,P35281,P60905,P82471,P97605,Q6AYR8,Q8K4G9        |

|       |                          |                           |    |                                                                                                   |
|-------|--------------------------|---------------------------|----|---------------------------------------------------------------------------------------------------|
| 10902 | 1,6,8,36,3<br>7,38,39,41 | 2,3,4,5,7,4<br>0,42,43,44 | 7  | P02782,P08723,P13432,P36376,Q5M819,Q6AYR8,Q9JHB9                                                  |
| 10903 | 1,6,8,36,3<br>7,38,39,42 | 2,3,4,5,7,4<br>0,41,43,44 | 1  | P36376                                                                                            |
| 10904 | 1,6,8,36,3<br>7,38,39,43 | 2,3,4,5,7,4<br>0,41,42,44 | 6  | P02782,P36376,P97605,Q6IFV1,Q812E4,Q99068                                                         |
| 10905 | 1,6,8,36,3<br>7,38,39,44 | 2,3,4,5,7,4<br>0,41,42,43 | 6  | O35547,P02782,P36376,P97605,Q6AYR9,Q9JHB9                                                         |
| 10906 | 1,6,8,36,3<br>7,38,40,41 | 2,3,4,5,7,3<br>9,42,43,44 | 7  | P08723,P0C0A9,P30120,P35281,P47727,Q5M819,Q6AYR8                                                  |
| 10907 | 1,6,8,36,3<br>7,38,40,42 | 2,3,4,5,7,3<br>9,41,43,44 | 2  | P35281,P97605                                                                                     |
| 10908 | 1,6,8,36,3<br>7,38,40,43 | 2,3,4,5,7,3<br>9,41,42,44 | 10 | O35547,P08010,P0C0A9,P35281,P80201,P97605,Q5XI73,Q6AYR9,Q6IFV1,Q99068                             |
| 10909 | 1,6,8,36,3<br>7,38,40,44 | 2,3,4,5,7,3<br>9,41,42,43 | 7  | O35547,P0C0A9,P30120,P54921,P82471,P97605,Q6AYR9                                                  |
| 10910 | 1,6,8,36,3<br>7,38,41,42 | 2,3,4,5,7,3<br>9,40,43,44 | 2  | P36376,Q5M819                                                                                     |
| 10911 | 1,6,8,36,3<br>7,38,41,43 | 2,3,4,5,7,3<br>9,40,42,44 | 7  | P02782,P36376,P97605,Q5M819,Q5XI73,Q6IFV1,Q99068                                                  |
| 10912 | 1,6,8,36,3<br>7,38,41,44 | 2,3,4,5,7,3<br>9,40,42,43 | 4  | P02782,P36376,Q6AYR9,Q9JHB9                                                                       |
| 10913 | 1,6,8,36,3<br>7,38,42,43 | 2,3,4,5,7,3<br>9,40,41,44 | 4  | P15999,P36376,P97605,Q6IFV1                                                                       |
| 10914 | 1,6,8,36,3<br>7,38,42,44 | 2,3,4,5,7,3<br>9,40,41,43 | 3  | P15999,P36376,P97605                                                                              |
| 10915 | 1,6,8,36,3<br>7,38,43,44 | 2,3,4,5,7,3<br>9,40,41,42 | 5  | P36376,P97605,Q6AYR9,Q6IFV1,Q99068                                                                |
| 10916 | 1,6,8,36,3<br>7,39,40,41 | 2,3,4,5,7,3<br>8,42,43,44 | 9  | O35547,P06911,P08723,P25031,P34901,P35281,P47727,Q6AYR8,Q9JHB9                                    |
| 10917 | 1,6,8,36,3<br>7,39,40,42 | 2,3,4,5,7,3<br>8,41,43,44 | 7  | O35547,P00774,P25031,P34901,P35281,P55091,P98089                                                  |
| 10918 | 1,6,8,36,3<br>7,39,40,43 | 2,3,4,5,7,3<br>8,41,42,44 | 11 | F1LM93,O35547,P00774,P08010,P0C0A9,P35281,P60905,P97605,Q62902,Q812E4,Q8CIZ5                      |
| 10919 | 1,6,8,36,3<br>7,39,40,44 | 2,3,4,5,7,3<br>8,41,42,43 | 14 | F1LM93,O35547,P01836,P08723,P0C0A9,P25031,P47727,P54921,P60905,P97605,Q62902,Q6AYL6,Q8CJD3,Q9JHB9 |
| 10920 | 1,6,8,36,3<br>7,39,41,42 | 2,3,4,5,7,3<br>8,40,43,44 | 3  | P01835,P13432,P34901                                                                              |
| 10921 | 1,6,8,36,3<br>7,39,41,43 | 2,3,4,5,7,3<br>8,40,42,44 | 3  | P02782,P12785,Q5XI73                                                                              |
| 10922 | 1,6,8,36,3<br>7,39,41,44 | 2,3,4,5,7,3<br>8,40,42,43 | 4  | O35547,P02782,P08723,Q9JHB9                                                                       |
| 10923 | 1,6,8,36,3<br>7,39,42,43 | 2,3,4,5,7,3<br>8,40,41,44 | 1  | P97605                                                                                            |
| 10924 | 1,6,8,36,3<br>7,39,42,44 | 2,3,4,5,7,3<br>8,40,41,43 | 0  |                                                                                                   |

|       |                                                 |   |                                                         |
|-------|-------------------------------------------------|---|---------------------------------------------------------|
| 10925 | 1,6,8,36,3 2,3,4,5,7,3<br>7,39,43,44 8,40,41,42 | 3 | O35547,P97605,Q812E4                                    |
| 10926 | 1,6,8,36,3 2,3,4,5,7,3<br>7,40,41,42 8,39,43,44 | 1 | P34901                                                  |
| 10927 | 1,6,8,36,3 2,3,4,5,7,3<br>7,40,41,43 8,39,42,44 | 5 | O35547,P47727,P51907,P97605,Q5XI73                      |
| 10928 | 1,6,8,36,3 2,3,4,5,7,3<br>7,40,41,44 8,39,42,43 | 8 | O35547,P06911,P08723,P25031,P47727,Q5GRG2,Q80WL1,Q9JHB9 |
| 10929 | 1,6,8,36,3 2,3,4,5,7,3<br>7,40,42,43 8,39,41,44 | 2 | P00774,P97605                                           |
| 10930 | 1,6,8,36,3 2,3,4,5,7,3<br>7,40,42,44 8,39,41,43 | 4 | O35547,P25031,P97605,Q7TPB1                             |
| 10931 | 1,6,8,36,3 2,3,4,5,7,3<br>7,40,43,44 8,39,41,42 | 6 | O35547,P04905,P08010,P47727,P97605,Q5XI73               |
| 10932 | 1,6,8,36,3 2,3,4,5,7,3<br>7,41,42,43 8,39,40,44 | 1 | P36376                                                  |
| 10933 | 1,6,8,36,3 2,3,4,5,7,3<br>7,41,42,44 8,39,40,43 | 1 | P36376                                                  |
| 10934 | 1,6,8,36,3 2,3,4,5,7,3<br>7,41,43,44 8,39,40,42 | 3 | P02782,Q5XI73,Q9JHB9                                    |
| 10935 | 1,6,8,36,3 2,3,4,5,7,3<br>7,42,43,44 8,39,40,41 | 2 | P36376,P97605                                           |
| 10936 | 1,6,8,36,3 2,3,4,5,7,3<br>8,39,40,41 7,42,43,44 | 4 | P13432,P19629,Q62975,Q6AYR8                             |
| 10937 | 1,6,8,36,3 2,3,4,5,7,3<br>8,39,40,42 7,41,43,44 | 1 | P11762                                                  |
| 10938 | 1,6,8,36,3 2,3,4,5,7,3<br>8,39,40,43 7,41,42,44 | 2 | P97605,Q6IFV1                                           |
| 10939 | 1,6,8,36,3 2,3,4,5,7,3<br>8,39,40,44 7,41,42,43 | 1 | P97605                                                  |
| 10940 | 1,6,8,36,3 2,3,4,5,7,3<br>8,39,41,42 7,40,43,44 | 2 | P13432,P36376                                           |
| 10941 | 1,6,8,36,3 2,3,4,5,7,3<br>8,39,41,43 7,40,42,44 | 3 | P02782,P13432,Q6IFV1                                    |
| 10942 | 1,6,8,36,3 2,3,4,5,7,3<br>8,39,41,44 7,40,42,43 | 2 | P02782,Q9JHB9                                           |
| 10943 | 1,6,8,36,3 2,3,4,5,7,3<br>8,39,42,43 7,40,41,44 | 4 | P15999,P36376,Q6IFU7,Q6IFV1                             |
| 10944 | 1,6,8,36,3 2,3,4,5,7,3<br>8,39,42,44 7,40,41,43 | 3 | P11762,P15999,P36376                                    |
| 10945 | 1,6,8,36,3 2,3,4,5,7,3<br>8,39,43,44 7,40,41,42 | 2 | P97605,Q6IFV1                                           |
| 10946 | 1,6,8,36,3 2,3,4,5,7,3<br>8,40,41,42 7,39,43,44 | 1 | P15999                                                  |
| 10947 | 1,6,8,36,3 2,3,4,5,7,3<br>8,40,41,43 7,39,42,44 | 1 | Q6IFV1                                                  |

|       |                          |                           |    |                                                                       |
|-------|--------------------------|---------------------------|----|-----------------------------------------------------------------------|
| 10948 | 1,6,8,36,3<br>8,40,41,44 | 2,3,4,5,7,3<br>7,39,42,43 | 4  | P06911,P19629,Q5GRG2,Q62635                                           |
| 10949 | 1,6,8,36,3<br>8,40,42,43 | 2,3,4,5,7,3<br>7,39,41,44 | 3  | P15999,P97605,Q6IFV1                                                  |
| 10950 | 1,6,8,36,3<br>8,40,42,44 | 2,3,4,5,7,3<br>7,39,41,43 | 2  | P15999,Q7TPB1                                                         |
| 10951 | 1,6,8,36,3<br>8,40,43,44 | 2,3,4,5,7,3<br>7,39,41,42 | 2  | P97605,Q6IFV1                                                         |
| 10952 | 1,6,8,36,3<br>8,41,42,43 | 2,3,4,5,7,3<br>7,39,40,44 | 2  | P15999,P36376                                                         |
| 10953 | 1,6,8,36,3<br>8,41,42,44 | 2,3,4,5,7,3<br>7,39,40,43 | 3  | P15999,P36376,Q8CIZ5                                                  |
| 10954 | 1,6,8,36,3<br>8,41,43,44 | 2,3,4,5,7,3<br>7,39,40,42 | 2  | P36376,Q6IFV1                                                         |
| 10955 | 1,6,8,36,3<br>8,42,43,44 | 2,3,4,5,7,3<br>7,39,40,41 | 3  | P15999,P36376,P97605                                                  |
| 10956 | 1,6,8,36,3<br>9,40,41,42 | 2,3,4,5,7,3<br>7,38,43,44 | 2  | P13432,P34901                                                         |
| 10957 | 1,6,8,36,3<br>9,40,41,43 | 2,3,4,5,7,3<br>7,38,42,44 | 1  | P12785                                                                |
| 10958 | 1,6,8,36,3<br>9,40,41,44 | 2,3,4,5,7,3<br>7,38,42,43 | 10 | P06911,P08723,P10715,P12020,P19629,P31044,P47727,Q5GRG2,Q62975,Q6AYL6 |
| 10959 | 1,6,8,36,3<br>9,40,42,43 | 2,3,4,5,7,3<br>7,38,41,44 | 2  | P00774,P11762                                                         |
| 10960 | 1,6,8,36,3<br>9,40,42,44 | 2,3,4,5,7,3<br>7,38,41,43 | 2  | P11762,Q7TPB1                                                         |
| 10961 | 1,6,8,36,3<br>9,40,43,44 | 2,3,4,5,7,3<br>7,38,41,42 | 2  | P97605,Q6AYL6                                                         |
| 10962 | 1,6,8,36,3<br>9,41,42,43 | 2,3,4,5,7,3<br>7,38,40,44 | 0  |                                                                       |
| 10963 | 1,6,8,36,3<br>9,41,42,44 | 2,3,4,5,7,3<br>7,38,40,43 | 1  | P11762                                                                |
| 10964 | 1,6,8,36,3<br>9,41,43,44 | 2,3,4,5,7,3<br>7,38,40,42 | 2  | P02782,P12785                                                         |
| 10965 | 1,6,8,36,3<br>9,42,43,44 | 2,3,4,5,7,3<br>7,38,40,41 | 1  | P11762                                                                |
| 10966 | 1,6,8,36,4<br>0,41,42,43 | 2,3,4,5,7,3<br>7,38,39,44 | 0  |                                                                       |
| 10967 | 1,6,8,36,4<br>0,41,42,44 | 2,3,4,5,7,3<br>7,38,39,43 | 2  | Q6P6R2,Q7TPB1                                                         |
| 10968 | 1,6,8,36,4<br>0,41,43,44 | 2,3,4,5,7,3<br>7,38,39,42 | 1  | P47727                                                                |
| 10969 | 1,6,8,36,4<br>0,42,43,44 | 2,3,4,5,7,3<br>7,38,39,41 | 3  | P11762,P97605,Q7TPB1                                                  |
| 10970 | 1,6,8,36,4<br>1,42,43,44 | 2,3,4,5,7,3<br>7,38,39,40 | 0  |                                                                       |



|       |                          |                           |    |                                                                                                                               |
|-------|--------------------------|---------------------------|----|-------------------------------------------------------------------------------------------------------------------------------|
| 10971 | 1,6,8,37,3<br>8,39,40,41 | 2,3,4,5,7,3<br>6,42,43,44 | 13 | P02782,P06911,P08723,P10715,P11442,P13432,P19629,P34901,P35281,P47727,P60905,Q62975,Q6AYR8                                    |
| 10972 | 1,6,8,37,3<br>8,39,40,42 | 2,3,4,5,7,3<br>6,41,43,44 | 5  | P34901,P35281,P97605,Q63475,Q99MH3                                                                                            |
| 10973 | 1,6,8,37,3<br>8,39,40,43 | 2,3,4,5,7,3<br>6,41,42,44 | 18 | O35547,P08010,P08644,P08649,P0C0A9,P11442,P13596,P35281,P60905,P82995,P97605,Q5XI73,Q64605,Q6IFV1,Q812E4,Q8CJ52,Q99068,Q99MH3 |
| 10974 | 1,6,8,37,3<br>8,39,40,44 | 2,3,4,5,7,3<br>6,41,42,43 | 17 | O35547,P01836,P02782,P08649,P08723,P0C0A9,P16636,P30120,P35281,P54921,P60905,P97605,Q5GRG2,Q63357,Q6AYL6,Q6AYR9,Q812E4        |
| 10975 | 1,6,8,37,3<br>8,39,41,42 | 2,3,4,5,7,3<br>6,40,43,44 | 3  | P13432,P34901,P36376                                                                                                          |
| 10976 | 1,6,8,37,3<br>8,39,41,43 | 2,3,4,5,7,3<br>6,40,42,44 | 11 | P02782,P11442,P13432,P13596,P14408,P36374,P36376,Q5XI73,Q6IFV1,Q812E4,Q99068                                                  |
| 10977 | 1,6,8,37,3<br>8,39,41,44 | 2,3,4,5,7,3<br>6,40,42,43 | 7  | P01836,P02782,P13432,P16636,P36376,Q62635,Q9JHB9                                                                              |
| 10978 | 1,6,8,37,3<br>8,39,42,43 | 2,3,4,5,7,3<br>6,40,41,44 | 4  | P36376,P97605,Q6IFU7,Q6IFV1                                                                                                   |
| 10979 | 1,6,8,37,3<br>8,39,42,44 | 2,3,4,5,7,3<br>6,40,41,43 | 2  | P01836,P36376                                                                                                                 |
| 10980 | 1,6,8,37,3<br>8,39,43,44 | 2,3,4,5,7,3<br>6,40,41,42 | 9  | P02782,P13596,P23593,P36376,P97605,Q09030,Q6AYR9,Q6IFV1,Q812E4                                                                |
| 10981 | 1,6,8,37,3<br>8,40,41,42 | 2,3,4,5,7,3<br>6,39,43,44 | 1  | P34901                                                                                                                        |
| 10982 | 1,6,8,37,3<br>8,40,41,43 | 2,3,4,5,7,3<br>6,39,42,44 | 11 | P08010,P08644,P11442,P35281,P47727,P51907,P55016,P97605,Q5XI73,Q6IFV1,Q99068                                                  |
| 10983 | 1,6,8,37,3<br>8,40,41,44 | 2,3,4,5,7,3<br>6,39,42,43 | 12 | P02782,P06760,P06911,P08723,P10715,P16636,P19629,P31044,P47727,Q5GRG2,Q62635,Q6AYR9                                           |
| 10984 | 1,6,8,37,3<br>8,40,42,43 | 2,3,4,5,7,3<br>6,39,41,44 | 4  | P97605,Q63475,Q6IFV1,Q99MH3                                                                                                   |
| 10985 | 1,6,8,37,3<br>8,40,42,44 | 2,3,4,5,7,3<br>6,39,41,43 | 3  | P01836,P06760,P97605                                                                                                          |
| 10986 | 1,6,8,37,3<br>8,40,43,44 | 2,3,4,5,7,3<br>6,39,41,42 | 11 | O35547,P04905,P08010,P08644,P08649,P13596,P97605,Q5XI73,Q6AYR9,Q6IFV1,Q812E4                                                  |
| 10987 | 1,6,8,37,3<br>8,41,42,43 | 2,3,4,5,7,3<br>6,39,40,44 | 4  | P06866,P36376,Q6IFV1,Q6P6T1                                                                                                   |
| 10988 | 1,6,8,37,3<br>8,41,42,44 | 2,3,4,5,7,3<br>6,39,40,43 | 4  | P36376,Q62635,Q6P6R2,Q8CIZ5                                                                                                   |
| 10989 | 1,6,8,37,3<br>8,41,43,44 | 2,3,4,5,7,3<br>6,39,40,42 | 6  | P02782,P36376,Q5XI73,Q62635,Q6AYR9,Q6IFV1                                                                                     |
| 10990 | 1,6,8,37,3<br>8,42,43,44 | 2,3,4,5,7,3<br>6,39,40,41 | 3  | P36376,P97605,Q6IFV1                                                                                                          |
| 10991 | 1,6,8,37,3<br>9,40,41,42 | 2,3,4,5,7,3<br>6,38,43,44 | 2  | P13432,P34901                                                                                                                 |
| 10992 | 1,6,8,37,3<br>9,40,41,43 | 2,3,4,5,7,3<br>6,38,42,44 | 16 | O35547,P02782,P08723,P11442,P12785,P13432,P34901,P35281,P47727,P51907,P60905,P97554,Q5XI73,Q64605,Q6AYL6,Q812E4               |
| 10993 | 1,6,8,37,3<br>9,40,41,44 | 2,3,4,5,7,3<br>6,38,42,43 | 16 | O35547,P01836,P02782,P04905,P06911,P08723,P10715,P12020,P19629,P31044,P34901,P47727,Q5GRG2,Q62902,Q62975,Q6AYL6               |

|       |                          |                           |    |                                                                                                                 |
|-------|--------------------------|---------------------------|----|-----------------------------------------------------------------------------------------------------------------|
| 10994 | 1,6,8,37,3<br>9,40,42,43 | 2,3,4,5,7,3<br>6,38,41,44 | 4  | P34901,P97605,Q63475,Q99MH3                                                                                     |
| 10995 | 1,6,8,37,3<br>9,40,42,44 | 2,3,4,5,7,3<br>6,38,41,43 | 4  | O35547,P01836,P34901,Q6AYL6                                                                                     |
| 10996 | 1,6,8,37,3<br>9,40,43,44 | 2,3,4,5,7,3<br>6,38,41,42 | 16 | O35547,P01836,P04905,P08010,P08649,P13596,P22283,P47727,P60905,P97605,Q5XI73,Q62902,Q63357,Q6AYL6,Q812E4,Q8CJ52 |
| 10997 | 1,6,8,37,3<br>9,41,42,43 | 2,3,4,5,7,3<br>6,38,40,44 | 2  | P13432,P34901                                                                                                   |
| 10998 | 1,6,8,37,3<br>9,41,42,44 | 2,3,4,5,7,3<br>6,38,40,43 | 3  | P01836,P13432,P34901                                                                                            |
| 10999 | 1,6,8,37,3<br>9,41,43,44 | 2,3,4,5,7,3<br>6,38,40,42 | 5  | P02782,P13596,Q5XI73,Q6AYL6,Q812E4                                                                              |
| 11000 | 1,6,8,37,3<br>9,42,43,44 | 2,3,4,5,7,3<br>6,38,40,41 | 1  | P01836                                                                                                          |
| 11001 | 1,6,8,37,4<br>0,41,42,43 | 2,3,4,5,7,3<br>6,38,39,44 | 2  | P34901,P51907                                                                                                   |
| 11002 | 1,6,8,37,4<br>0,41,42,44 | 2,3,4,5,7,3<br>6,38,39,43 | 6  | P06760,P06911,P34901,P47727,Q5GRG2,Q6P6R2                                                                       |
| 11003 | 1,6,8,37,4<br>0,41,43,44 | 2,3,4,5,7,3<br>6,38,39,42 | 10 | O35547,P04905,P06911,P08010,P22283,P47727,P51907,Q5GRG2,Q5XI73,Q6AYL6                                           |
| 11004 | 1,6,8,37,4<br>0,42,43,44 | 2,3,4,5,7,3<br>6,38,39,41 | 3  | P08010,P97605,Q63475                                                                                            |
| 11005 | 1,6,8,37,4<br>1,42,43,44 | 2,3,4,5,7,3<br>6,38,39,40 | 1  | Q6P6R2                                                                                                          |
| 11006 | 1,6,8,38,3<br>9,40,41,42 | 2,3,4,5,7,3<br>6,37,43,44 | 3  | P11762,P13432,P34901                                                                                            |
| 11007 | 1,6,8,38,3<br>9,40,41,43 | 2,3,4,5,7,3<br>6,37,42,44 | 6  | P02782,P08644,P13432,P19629,Q5XI73,Q6IFV1                                                                       |
| 11008 | 1,6,8,38,3<br>9,40,41,44 | 2,3,4,5,7,3<br>6,37,42,43 | 11 | P02782,P06911,P10715,P12020,P13432,P19629,P31044,Q5GRG2,Q62635,Q62975,Q6AYL6                                    |
| 11009 | 1,6,8,38,3<br>9,40,42,43 | 2,3,4,5,7,3<br>6,37,41,44 | 7  | P11762,P97605,Q63475,Q64611,Q6IFU7,Q6IFV1,Q99MH3                                                                |
| 11010 | 1,6,8,38,3<br>9,40,42,44 | 2,3,4,5,7,3<br>6,37,41,43 | 3  | P01836,P06760,P11762                                                                                            |
| 11011 | 1,6,8,38,3<br>9,40,43,44 | 2,3,4,5,7,3<br>6,37,41,42 | 7  | P08644,P08649,P11762,P97605,Q09030,Q6AYL6,Q6IFV1                                                                |
| 11012 | 1,6,8,38,3<br>9,41,42,43 | 2,3,4,5,7,3<br>6,37,40,44 | 5  | P11762,P13432,P36376,Q6IFU7,Q6IFV1                                                                              |
| 11013 | 1,6,8,38,3<br>9,41,42,44 | 2,3,4,5,7,3<br>6,37,40,43 | 3  | P11762,P13432,P36376                                                                                            |
| 11014 | 1,6,8,38,3<br>9,41,43,44 | 2,3,4,5,7,3<br>6,37,40,42 | 4  | P02782,P13432,Q09030,Q6IFV1                                                                                     |
| 11015 | 1,6,8,38,3<br>9,42,43,44 | 2,3,4,5,7,3<br>6,37,40,41 | 4  | P11762,P36376,Q6IFU7,Q6IFV1                                                                                     |
| 11016 | 1,6,8,38,4<br>0,41,42,43 | 2,3,4,5,7,3<br>6,37,39,44 | 0  |                                                                                                                 |

|       |                               |                           |    |                                                                                                                                                                                       |
|-------|-------------------------------|---------------------------|----|---------------------------------------------------------------------------------------------------------------------------------------------------------------------------------------|
| 11017 | 1,6,8,38,4<br>0,41,42,44      | 2,3,4,5,7,3<br>6,37,39,43 | 7  | P06760,P06911,P11762,P22734,Q62635,Q6P6R2,Q8CIZ5                                                                                                                                      |
| 11018 | 1,6,8,38,4<br>0,41,43,44      | 2,3,4,5,7,3<br>6,37,39,42 | 7  | P06911,P19629,Q5GRG2,Q5XI73,Q62635,Q63150,Q6IFV1                                                                                                                                      |
| 11019 | 1,6,8,38,4<br>0,42,43,44      | 2,3,4,5,7,3<br>6,37,39,41 | 3  | P11762,P97605,Q63475                                                                                                                                                                  |
| 11020 | 1,6,8,38,4<br>1,42,43,44      | 2,3,4,5,7,3<br>6,37,39,40 | 1  | P36376                                                                                                                                                                                |
| 11021 | 1,6,8,39,4<br>0,41,42,43      | 2,3,4,5,7,3<br>6,37,38,44 | 3  | P11762,P13432,P34901                                                                                                                                                                  |
| 11022 | 1,6,8,39,4<br>0,41,42,44      | 2,3,4,5,7,3<br>6,37,38,43 | 10 | P06911,P10715,P11762,P13432,P19629,P31044,P34901,Q5GRG2,Q6AYL6,Q6P6R2                                                                                                                 |
| 11023 | 1,6,8,39,4<br>0,41,43,44      | 2,3,4,5,7,3<br>6,37,38,42 | 10 | P06911,P10715,P11762,P12785,P19629,P31044,P47727,Q5GRG2,Q5XI73,Q6AYL6                                                                                                                 |
| 11024 | 1,6,8,39,4<br>0,42,43,44      | 2,3,4,5,7,3<br>6,37,38,41 | 2  | P11762,Q6AYL6                                                                                                                                                                         |
| 11025 | 1,6,8,39,4<br>1,42,43,44      | 2,3,4,5,7,3<br>6,37,38,40 | 1  | P11762                                                                                                                                                                                |
| 11026 | 1,6,8,40,4<br>1,42,43,44      | 2,3,4,5,7,3<br>6,37,38,39 | 2  | P11762,Q6P6R2                                                                                                                                                                         |
| 11027 | 1,6,36,37,<br>38,39,40,4<br>1 | 2,3,4,5,7,8<br>,42,43,44  | 20 | F1LM93,O35547,P04905,P08723,P0C0A9,P13432,P20762,P30120,P35281,P35444,P36374,P47727,P55016,P60905,P97605,Q5M819,Q62975,Q6AYR8,Q6Q7Y5,Q9JHB9                                           |
| 11028 | 1,6,36,37,<br>38,39,40,4<br>2 | 2,3,4,5,7,8<br>,41,43,44  | 7  | O35547,P35281,P35444,P49744,P97605,Q01205,Q5M871                                                                                                                                      |
| 11029 | 1,6,36,37,<br>38,39,40,4<br>3 | 2,3,4,5,7,8<br>,41,42,44  | 23 | F1LM93,O08815,O35547,P04905,P08010,P08644,P08723,P08753,P0C0A9,P35281,P35444,P36374,P55016,P60905,P80201,P97605,Q01205,Q62753,Q63357,Q6IFV1,Q812E4,Q9JID2,Q9QZK9                      |
| 11030 | 1,6,36,37,<br>38,39,40,4<br>4 | 2,3,4,5,7,8<br>,41,42,43  | 26 | F1LM93,O08815,O35547,P04905,P08010,P08723,P08753,P0C0A9,P30120,P35281,P35444,P36374,P40241,P47727,P50116,P54921,P60905,P82471,P97605,Q01205,Q09030,Q63357,Q6AYR9,Q6GMN2,Q812E4,Q9JHB9 |
| 11031 | 1,6,36,37,<br>38,39,41,4<br>2 | 2,3,4,5,7,8<br>,40,43,44  | 5  | P13432,P20766,P36376,Q566E6,Q5M819                                                                                                                                                    |
| 11032 | 1,6,36,37,<br>38,39,41,4<br>3 | 2,3,4,5,7,8<br>,40,42,44  | 15 | P00714,P13432,P20766,P22006,P36374,P36376,P55016,P60905,P97605,Q5M819,Q6AYS4,Q6IFV1,Q812E4,Q9JHB9,Q9QZ76                                                                              |
| 11033 | 1,6,36,37,<br>38,39,41,4<br>4 | 2,3,4,5,7,8<br>,40,42,43  | 12 | O35547,P02782,P08723,P13432,P20762,P36374,P36376,P97605,Q09030,Q5M819,Q9JHB9,Q9QZ76                                                                                                   |
| 11034 | 1,6,36,37,<br>38,39,42,4<br>3 | 2,3,4,5,7,8<br>,40,41,44  | 9  | P06866,P20766,P35444,P36376,P97605,Q01205,Q6AYS4,Q6IFU7,Q6IFV1                                                                                                                        |

|       |                               |                          |    |                                                                                                                                                                  |
|-------|-------------------------------|--------------------------|----|------------------------------------------------------------------------------------------------------------------------------------------------------------------|
| 11035 | 1,6,36,37,<br>38,39,42,4<br>4 | 2,3,4,5,7,8<br>,40,41,43 | 4  | P36376,P97605,P97840,Q09030                                                                                                                                      |
| 11036 | 1,6,36,37,<br>38,39,43,4<br>4 | 2,3,4,5,7,8<br>,40,41,42 | 16 | O08815,O35547,P02781,P08010,P23593,P36374,P60905,P97605,Q09030,Q62753,Q6AYR9,Q6IFV1,Q812E4,Q9JHB9,Q9JJS8,Q9QZ76                                                  |
| 11037 | 1,6,36,37,<br>38,40,41,4<br>2 | 2,3,4,5,7,8<br>,39,43,44 | 6  | P20766,P35444,P55016,P97605,Q5M819,Q6AYS4                                                                                                                        |
| 11038 | 1,6,36,37,<br>38,40,41,4<br>3 | 2,3,4,5,7,8<br>,39,42,44 | 14 | O08815,O35547,P04905,P08010,P08723,P20766,P35444,P36374,P47727,P55016,P97605,Q5M819,Q6AYS4,Q6IFV1                                                                |
| 11039 | 1,6,36,37,<br>38,40,41,4<br>4 | 2,3,4,5,7,8<br>,39,42,43 | 16 | O08815,O35547,P04905,P06911,P08723,P0C0A9,P20762,P20766,P30120,P47727,P97605,Q5GRG2,Q5M819,Q6AYR9,Q80WL1,Q9JHB9                                                  |
| 11040 | 1,6,36,37,<br>38,40,42,4<br>3 | 2,3,4,5,7,8<br>,39,41,44 | 12 | P07171,P08010,P20766,P35444,P38444,P80201,P97605,Q01205,Q63475,Q6AYS4,Q6IFV1,Q9ESW0                                                                              |
| 11041 | 1,6,36,37,<br>38,40,42,4<br>4 | 2,3,4,5,7,8<br>,39,41,43 | 5  | O35547,P20766,P97605,Q01205,Q7TPB1                                                                                                                               |
| 11042 | 1,6,36,37,<br>38,40,43,4<br>4 | 2,3,4,5,7,8<br>,39,41,42 | 20 | F1LM93,O08815,O35547,P04905,P08010,P08753,P0C0A9,P20766,P36970,P47727,P54921,P60905,P80201,P97605,Q01205,Q62753,Q6357,Q6AYR9,Q6IFV1,Q812E4                       |
| 11043 | 1,6,36,37,<br>38,41,42,4<br>3 | 2,3,4,5,7,8<br>,39,40,44 | 8  | P06866,P20766,P36376,P55016,P97605,Q5M819,Q6AYS4,Q6IFV1                                                                                                          |
| 11044 | 1,6,36,37,<br>38,41,42,4<br>4 | 2,3,4,5,7,8<br>,39,40,43 | 5  | P20766,P36376,Q5M819,Q6AYS4,Q9JHB9                                                                                                                               |
| 11045 | 1,6,36,37,<br>38,41,43,4<br>4 | 2,3,4,5,7,8<br>,39,40,42 | 11 | P02781,P20766,P36374,P36376,P36970,P97605,Q5M819,Q6AYR9,Q6AYS4,Q6IFV1,Q9JHB9                                                                                     |
| 11046 | 1,6,36,37,<br>38,42,43,4<br>4 | 2,3,4,5,7,8<br>,39,40,41 | 8  | P15999,P20766,P36376,P36970,P97605,Q01205,Q6AYS4,Q6IFV1                                                                                                          |
| 11047 | 1,6,36,37,<br>39,40,41,4<br>2 | 2,3,4,5,7,8<br>,38,43,44 | 8  | O35547,P08723,P13432,P34901,P35444,P49744,Q01205,Q80WL1                                                                                                          |
| 11048 | 1,6,36,37,<br>39,40,41,4<br>3 | 2,3,4,5,7,8<br>,38,42,44 | 17 | F1LM93,O08815,O35547,P00714,P04905,P08010,P08723,P35444,P36374,P47727,P60905,P97605,Q5M819,Q63514,Q80WL1,Q812E4,Q9QZK9                                           |
| 11049 | 1,6,36,37,<br>39,40,41,4<br>4 | 2,3,4,5,7,8<br>,38,42,43 | 23 | F1LM93,O08815,O35547,P04905,P06911,P08723,P10715,P16391,P19629,P20762,P35444,P36374,P47727,P54921,P60905,P97605,Q5GRG2,Q62902,Q62975,Q63357,Q6AYL6,Q80WL1,Q9JHB9 |

|       |                               |                          |    |                                                                                                                                                                                |
|-------|-------------------------------|--------------------------|----|--------------------------------------------------------------------------------------------------------------------------------------------------------------------------------|
| 11050 | 1,6,36,37,<br>39,40,42,4<br>3 | 2,3,4,5,7,8<br>,38,41,44 | 12 | O35547,P00774,P35444,P49744,P50115,P50116,P97605,Q01205,Q05695,Q5M871,Q63475,Q99MH3                                                                                            |
| 11051 | 1,6,36,37,<br>39,40,42,4<br>4 | 2,3,4,5,7,8<br>,38,41,43 | 10 | O35547,P35444,P49744,P50115,P50116,P97605,Q01205,Q5M871,Q7TPB1,Q8CJD3                                                                                                          |
| 11052 | 1,6,36,37,<br>39,40,43,4<br>4 | 2,3,4,5,7,8<br>,38,41,42 | 25 | F1LM93,O08815,O35547,P02781,P04905,P05369,P08010,P08723,P08753,P35444,P36374,P47727,P50115,P50116,P54921,P60905,P80201,P97605,Q01205,Q62753,Q62902,Q63357,Q6AYL6,Q812E4,Q9QZK9 |
| 11053 | 1,6,36,37,<br>39,41,42,4<br>3 | 2,3,4,5,7,8<br>,38,40,44 | 5  | P13432,P22006,P35444,Q5M819,Q6AYS4                                                                                                                                             |
| 11054 | 1,6,36,37,<br>39,41,42,4<br>4 | 2,3,4,5,7,8<br>,38,40,43 | 2  | Q6AYS4,Q9JHB9                                                                                                                                                                  |
| 11055 | 1,6,36,37,<br>39,41,43,4<br>4 | 2,3,4,5,7,8<br>,38,40,42 | 10 | O35547,P02781,P05369,P36374,P47727,P97605,Q6AYS4,Q812E4,Q9JHB9,Q9QZ76                                                                                                          |
| 11056 | 1,6,36,37,<br>39,42,43,4<br>4 | 2,3,4,5,7,8<br>,38,40,41 | 6  | O35547,P50115,P50116,P97605,Q01205,Q6AYS4                                                                                                                                      |
| 11057 | 1,6,36,37,<br>40,41,42,4<br>3 | 2,3,4,5,7,8<br>,38,39,44 | 5  | P35444,P97605,Q01205,Q6AYS4,Q80WL1                                                                                                                                             |
| 11058 | 1,6,36,37,<br>40,41,42,4<br>4 | 2,3,4,5,7,8<br>,38,39,43 | 5  | O35547,P47727,Q6AYS4,Q7TPB1,Q80WL1                                                                                                                                             |
| 11059 | 1,6,36,37,<br>40,41,43,4<br>4 | 2,3,4,5,7,8<br>,38,39,42 | 15 | O08815,O35547,P04905,P05369,P08010,P08723,P08753,P19218,P36374,P47727,P97605,Q6AYS4,Q80WL1,Q9JHB9,Q9QZK9                                                                       |
| 11060 | 1,6,36,37,<br>40,42,43,4<br>4 | 2,3,4,5,7,8<br>,38,39,41 | 11 | O35547,P08010,P50115,P50116,P80201,P97605,Q01205,Q63475,Q6AYS4,Q7TPB1,Q80WL1                                                                                                   |
| 11061 | 1,6,36,37,<br>41,42,43,4<br>4 | 2,3,4,5,7,8<br>,38,39,40 | 2  | P97605,Q6AYS4                                                                                                                                                                  |
| 11062 | 1,6,36,38,<br>39,40,41,4<br>2 | 2,3,4,5,7,8<br>,37,43,44 | 3  | P11762,P13432,Q5M819                                                                                                                                                           |
| 11063 | 1,6,36,38,<br>39,40,41,4<br>3 | 2,3,4,5,7,8<br>,37,42,44 | 6  | P13432,P36374,P55016,P97605,Q5M819,Q6IFV1                                                                                                                                      |
| 11064 | 1,6,36,38,<br>39,40,41,4<br>4 | 2,3,4,5,7,8<br>,37,42,43 | 10 | P06911,P08723,P10715,P13432,P16391,P19629,Q09030,Q5GRG2,Q62975,Q9JHB9                                                                                                          |

|       |                               |                          |   |                                                                |
|-------|-------------------------------|--------------------------|---|----------------------------------------------------------------|
| 11065 | 1,6,36,38,<br>39,40,42,4<br>3 | 2,3,4,5,7,8<br>,37,41,44 | 9 | P07171,P11762,P38444,P97605,Q01205,Q63475,Q6IFU7,Q6IFV1,Q99MH3 |
| 11066 | 1,6,36,38,<br>39,40,42,4<br>4 | 2,3,4,5,7,8<br>,37,41,43 | 8 | P11762,P30836,P83121,P97605,Q01205,Q09030,Q7TPB1,Q9QX79        |
| 11067 | 1,6,36,38,<br>39,40,43,4<br>4 | 2,3,4,5,7,8<br>,37,41,42 | 7 | P80201,P97605,Q01205,Q09030,Q63357,Q6IFV1,Q9QZQ5               |
| 11068 | 1,6,36,38,<br>39,41,42,4<br>3 | 2,3,4,5,7,8<br>,37,40,44 | 6 | P13432,P22006,P36376,Q5M819,Q6AYS4,Q6IFU7                      |
| 11069 | 1,6,36,38,<br>39,41,42,4<br>4 | 2,3,4,5,7,8<br>,37,40,43 | 4 | P11762,P13432,P36376,Q5M819                                    |
| 11070 | 1,6,36,38,<br>39,41,43,4<br>4 | 2,3,4,5,7,8<br>,37,40,42 | 6 | P36374,P97605,Q09030,Q5M819,Q6IFV1,Q9QZ76                      |
| 11071 | 1,6,36,38,<br>39,42,43,4<br>4 | 2,3,4,5,7,8<br>,37,40,41 | 6 | P11762,P15999,P97605,Q01205,Q09030,Q6IFU7                      |
| 11072 | 1,6,36,38,<br>40,41,42,4<br>3 | 2,3,4,5,7,8<br>,37,39,44 | 5 | P55016,P97605,Q01205,Q6AYS4,Q6IFU7                             |
| 11073 | 1,6,36,38,<br>40,41,42,4<br>4 | 2,3,4,5,7,8<br>,37,39,43 | 2 | P15999,Q7TPB1                                                  |
| 11074 | 1,6,36,38,<br>40,41,43,4<br>4 | 2,3,4,5,7,8<br>,37,39,42 | 2 | P55016,P97605                                                  |
| 11075 | 1,6,36,38,<br>40,42,43,4<br>4 | 2,3,4,5,7,8<br>,37,39,41 | 9 | P11762,P15999,P38444,P80201,P97605,Q01205,Q6IFU7,Q7TPB1,Q99041 |
| 11076 | 1,6,36,38,<br>41,42,43,4<br>4 | 2,3,4,5,7,8<br>,37,39,40 | 4 | P15999,P36376,Q6AYS4,Q6IFU7                                    |
| 11077 | 1,6,36,39,<br>40,41,42,4<br>3 | 2,3,4,5,7,8<br>,37,38,44 | 4 | P11762,P13432,Q01205,Q6AYS4                                    |
| 11078 | 1,6,36,39,<br>40,41,42,4<br>4 | 2,3,4,5,7,8<br>,37,38,43 | 7 | P06911,P10715,P11762,P16391,P19629,Q7TPB1,Q80WL1               |
| 11079 | 1,6,36,39,<br>40,41,43,4<br>4 | 2,3,4,5,7,8<br>,37,38,42 | 8 | P06911,P10715,P19629,P47727,P97605,Q5GRG2,Q6AYL6,Q80WL1        |

|       |                               |                          |    |                                                                                                                                                                                                                                               |
|-------|-------------------------------|--------------------------|----|-----------------------------------------------------------------------------------------------------------------------------------------------------------------------------------------------------------------------------------------------|
| 11080 | 1,6,36,39,<br>40,42,43,4<br>4 | 2,3,4,5,7,8<br>,37,38,41 | 6  | P11762,P50115,P50116,P97605,Q01205,Q7TPB1                                                                                                                                                                                                     |
| 11081 | 1,6,36,39,<br>41,42,43,4<br>4 | 2,3,4,5,7,8<br>,37,38,40 | 2  | P11762,Q6AYS4                                                                                                                                                                                                                                 |
| 11082 | 1,6,36,40,<br>41,42,43,4<br>4 | 2,3,4,5,7,8<br>,37,38,39 | 5  | P11762,Q01205,Q6AYS4,Q7TPB1,Q80WL1                                                                                                                                                                                                            |
| 11083 | 1,6,37,38,<br>39,40,41,4<br>2 | 2,3,4,5,7,8<br>,36,43,44 | 12 | P07171,P13432,P20762,P34901,P35281,P35444,P55016,Q01205,Q07116,Q09030,Q6AYS4,Q99MH3                                                                                                                                                           |
| 11084 | 1,6,37,38,<br>39,40,41,4<br>3 | 2,3,4,5,7,8<br>,36,42,44 | 27 | P04905,P07171,P08010,P08644,P08723,P11442,P13432,P35281,P35444,P36374,P47727,P55016,P60905,P82995,P97554,P97605,Q01205,Q07116,Q09030,Q63514,Q64605,Q6AYL6,Q6AYS4,Q6IFV1,Q812E4,Q99MH3,Q9QZQ5                                                  |
| 11085 | 1,6,37,38,<br>39,40,41,4<br>4 | 2,3,4,5,7,8<br>,36,42,43 | 28 | O08815,O35547,P04905,P06911,P08723,P10715,P13432,P16391,P16636,P19629,P20762,P31044,P35444,P36374,P47727,P55016,P60905,P97605,Q01205,Q07116,Q09030,Q5GRG2,Q62975,Q63357,Q6AYL6,Q6AYR9,Q812E4,Q9JHB9                                           |
| 11086 | 1,6,37,38,<br>39,40,42,4<br>3 | 2,3,4,5,7,8<br>,36,41,44 | 19 | P07171,P08010,P35281,P35444,P49744,P60905,P97605,Q01205,Q07116,Q09030,Q5ZQU0,Q63467,Q63475,Q64611,Q6AYS4,Q6IFU7,Q6IFV1,Q812E4,Q99MH3                                                                                                          |
| 11087 | 1,6,37,38,<br>39,40,42,4<br>4 | 2,3,4,5,7,8<br>,36,41,43 | 15 | O35547,O54858,P07171,P11762,P35444,P49744,P60905,P83121,P97605,Q01205,Q07116,Q09030,Q63475,Q99MH3,Q9QUL6                                                                                                                                      |
| 11088 | 1,6,37,38,<br>39,40,43,4<br>4 | 2,3,4,5,7,8<br>,36,41,42 | 34 | F1LM93,O08815,O35547,P02781,P04905,P07171,P07861,P08010,P08644,P08649,P08753,P35444,P36374,P47727,P54921,P60905,P82995,P97605,Q01205,Q07116,Q09030,Q62753,Q62902,Q63357,Q6AYL6,Q6AYR9,Q6AYS4,Q6IFV1,Q812E4,Q8CJ52,Q99MH3,Q9QZK9,Q9QZQ5,Q9WUD9 |
| 11089 | 1,6,37,38,<br>39,41,42,4<br>3 | 2,3,4,5,7,8<br>,36,40,44 | 14 | P06866,P07171,P13432,P35444,P36374,P36376,P55016,P97605,Q01205,Q09030,Q6AYS4,Q6IFU7,Q6IFV1,Q99MH3                                                                                                                                             |
| 11090 | 1,6,37,38,<br>39,41,42,4<br>4 | 2,3,4,5,7,8<br>,36,40,43 | 6  | P13432,P20762,P36376,Q01205,Q09030,Q6AYS4                                                                                                                                                                                                     |
| 11091 | 1,6,37,38,<br>39,41,43,4<br>4 | 2,3,4,5,7,8<br>,36,40,42 | 15 | P02781,P02782,P13432,P23593,P36374,P55016,P60905,P97605,Q01205,Q09030,Q6AYR9,Q6AYS4,Q6IFV1,Q812E4,Q9QZ76                                                                                                                                      |
| 11092 | 1,6,37,38,<br>39,42,43,4<br>4 | 2,3,4,5,7,8<br>,36,40,41 | 13 | P07171,P23593,P36376,P97605,Q01205,Q09030,Q64611,Q6AYS4,Q6IFU7,Q6IFV1,Q812E4,Q99MH3,Q9JJS8                                                                                                                                                    |
| 11093 | 1,6,37,38,<br>40,41,42,4<br>3 | 2,3,4,5,7,8<br>,36,39,44 | 12 | P07171,P20766,P35444,P55016,P97605,Q01205,Q07116,Q63475,Q6AYS4,Q6IFU7,Q6IFV1,Q99MH3                                                                                                                                                           |
| 11094 | 1,6,37,38,<br>40,41,42,4<br>4 | 2,3,4,5,7,8<br>,36,39,43 | 7  | P06760,P20762,P20766,P97605,Q01205,Q07116,Q6AYS4                                                                                                                                                                                              |

|       |                               |                          |    |                                                                                                                                                                                                     |
|-------|-------------------------------|--------------------------|----|-----------------------------------------------------------------------------------------------------------------------------------------------------------------------------------------------------|
| 11095 | 1,6,37,38,<br>40,41,43,4<br>4 | 2,3,4,5,7,8<br>,36,39,42 | 21 | O08815,P04905,P08010,P08644,P08753,P20766,P36374,P36970,P47727,P55016,P97605,Q01205,Q07116,Q09030,Q63357,Q6AYL6,Q6AYR9,Q6AYS4,Q6IFV1,Q812E4,Q9QZQ5                                                  |
| 11096 | 1,6,37,38,<br>40,42,43,4<br>4 | 2,3,4,5,7,8<br>,36,39,41 | 13 | P07171,P08010,P20766,P36970,P97605,Q01205,Q07116,Q09030,Q5ZQU0,Q63475,Q6AYS4,Q6IFV1,Q99MH3                                                                                                          |
| 11097 | 1,6,37,38,<br>41,42,43,4<br>4 | 2,3,4,5,7,8<br>,36,39,40 | 7  | P20766,P36376,P36970,P97605,Q01205,Q09030,Q6AYS4                                                                                                                                                    |
| 11098 | 1,6,37,39,<br>40,41,42,4<br>3 | 2,3,4,5,7,8<br>,36,38,44 | 9  | P07171,P13432,P34901,P35444,P49744,P97605,Q01205,Q6AYS4,Q99MH3                                                                                                                                      |
| 11099 | 1,6,37,39,<br>40,41,42,4<br>4 | 2,3,4,5,7,8<br>,36,38,43 | 17 | O35547,O54858,P06911,P10715,P13432,P16391,P19629,P20762,P34901,P35444,P47727,P49744,Q01205,Q5GRG2,Q6AYL6,Q6AYS4,Q80WL1                                                                              |
| 11100 | 1,6,37,39,<br>40,41,43,4<br>4 | 2,3,4,5,7,8<br>,36,38,42 | 28 | F1LM93,O08815,O35547,P04905,P05369,P06911,P08010,P08723,P08753,P10715,P15978,P19629,P35444,P36374,P47727,P60905,P97554,P97605,Q01205,Q09030,Q5GRG2,Q62902,Q63357,Q6AYL6,Q6AYS4,Q80WL1,Q812E4,Q9QZK9 |
| 11101 | 1,6,37,39,<br>40,42,43,4<br>4 | 2,3,4,5,7,8<br>,36,38,41 | 18 | O35547,P07171,P08010,P11762,P35444,P49744,P50115,P50116,P97605,Q01205,Q09030,Q5M871,Q5ZQU0,Q63475,Q6AYL6,Q6AYS4,Q812E4,Q99MH3                                                                       |
| 11102 | 1,6,37,39,<br>41,42,43,4<br>4 | 2,3,4,5,7,8<br>,36,38,40 | 4  | P13432,Q01205,Q09030,Q6AYS4                                                                                                                                                                         |
| 11103 | 1,6,37,40,<br>41,42,43,4<br>4 | 2,3,4,5,7,8<br>,36,38,39 | 8  | P07171,P08010,P47727,P97605,Q01205,Q6AYS4,Q6P6R2,Q80WL1                                                                                                                                             |
| 11104 | 1,6,38,39,<br>40,41,42,4<br>3 | 2,3,4,5,7,8<br>,36,37,44 | 11 | P07171,P11762,P13432,P55016,Q01205,Q07116,Q09030,Q6AYS4,Q6IFU7,Q6IFV1,Q99MH3                                                                                                                        |
| 11105 | 1,6,38,39,<br>40,41,42,4<br>4 | 2,3,4,5,7,8<br>,36,37,43 | 12 | P06911,P10715,P11762,P13432,P16391,P19629,P22734,Q01205,Q07116,Q09030,Q5GRG2,Q6AYS4                                                                                                                 |
| 11106 | 1,6,38,39,<br>40,41,43,4<br>4 | 2,3,4,5,7,8<br>,36,37,42 | 17 | P04905,P06911,P08644,P10715,P11762,P13432,P19629,P55016,P97605,Q01205,Q07116,Q09030,Q5GRG2,Q6AYL6,Q6AYS4,Q6IFV1,Q9QZQ5                                                                              |
| 11107 | 1,6,38,39,<br>40,42,43,4<br>4 | 2,3,4,5,7,8<br>,36,37,41 | 12 | P07171,P11762,P97605,Q01205,Q07116,Q09030,Q63475,Q64611,Q6AYS4,Q6IFU7,Q99041,Q99MH3                                                                                                                 |
| 11108 | 1,6,38,39,<br>41,42,43,4<br>4 | 2,3,4,5,7,8<br>,36,37,40 | 7  | P07171,P11762,P13432,Q01205,Q09030,Q6AYS4,Q6IFU7                                                                                                                                                    |
| 11109 | 1,6,38,40,<br>41,42,43,4<br>4 | 2,3,4,5,7,8<br>,36,37,39 | 9  | P07171,P11762,P22734,P97605,Q01205,Q07116,Q09030,Q6AYS4,Q6IFU7                                                                                                                                      |



|       |                               |                           |    |                                                                              |
|-------|-------------------------------|---------------------------|----|------------------------------------------------------------------------------|
| 11110 | 1,6,39,40,<br>41,42,43,4<br>4 | 2,3,4,5,7,8<br>,36,37,38  | 10 | P07171,P10715,P11762,P13432,P19629,Q01205,Q09030,Q6AYL6,Q6AYS4,Q99MH3        |
| 11111 | 1,7,8,36,3<br>7,38,39,40      | 2,3,4,5,6,4<br>1,42,43,44 | 7  | P11883,P35281,P60905,P82471,P97605,Q6AYR8,Q9QZA6                             |
| 11112 | 1,7,8,36,3<br>7,38,39,41      | 2,3,4,5,6,4<br>0,42,43,44 | 6  | P01835,P11883,P36376,Q5M819,Q6AYR8,Q9Z0V6                                    |
| 11113 | 1,7,8,36,3<br>7,38,39,42      | 2,3,4,5,6,4<br>0,41,43,44 | 3  | P01835,P11883,P36376                                                         |
| 11114 | 1,7,8,36,3<br>7,38,39,43      | 2,3,4,5,6,4<br>0,41,42,44 | 7  | P23593,P36376,P97605,Q6IFV1,Q6P6R2,Q812E4,Q9Z0V6                             |
| 11115 | 1,7,8,36,3<br>7,38,39,44      | 2,3,4,5,6,4<br>0,41,42,43 | 3  | P11883,P36376,Q5HZV9                                                         |
| 11116 | 1,7,8,36,3<br>7,38,40,41      | 2,3,4,5,6,3<br>9,42,43,44 | 2  | P11883,Q6AYR8                                                                |
| 11117 | 1,7,8,36,3<br>7,38,40,42      | 2,3,4,5,6,3<br>9,41,43,44 | 2  | P02625,P11883                                                                |
| 11118 | 1,7,8,36,3<br>7,38,40,43      | 2,3,4,5,6,3<br>9,41,42,44 | 3  | P08010,P38444,P97605                                                         |
| 11119 | 1,7,8,36,3<br>7,38,40,44      | 2,3,4,5,6,3<br>9,41,42,43 | 6  | P11883,P54921,P82471,P97605,Q5HZV9,Q6AYR9                                    |
| 11120 | 1,7,8,36,3<br>7,38,41,42      | 2,3,4,5,6,3<br>9,40,43,44 | 4  | P01835,P11883,P34901,P36376                                                  |
| 11121 | 1,7,8,36,3<br>7,38,41,43      | 2,3,4,5,6,3<br>9,40,42,44 | 2  | P36376,Q9Z0V6                                                                |
| 11122 | 1,7,8,36,3<br>7,38,41,44      | 2,3,4,5,6,3<br>9,40,42,43 | 3  | P11883,P36376,Q05695                                                         |
| 11123 | 1,7,8,36,3<br>7,38,42,43      | 2,3,4,5,6,3<br>9,40,41,44 | 3  | P16391,P36376,P97605                                                         |
| 11124 | 1,7,8,36,3<br>7,38,42,44      | 2,3,4,5,6,3<br>9,40,41,43 | 5  | P11883,P15999,P36376,P97840,Q5HZV9                                           |
| 11125 | 1,7,8,36,3<br>7,38,43,44      | 2,3,4,5,6,3<br>9,40,41,42 | 2  | P36376,P97605                                                                |
| 11126 | 1,7,8,36,3<br>7,39,40,41      | 2,3,4,5,6,3<br>8,42,43,44 | 9  | P01835,P08723,P10715,P11883,P19629,P31044,P34901,Q6AYR8,Q9Z0V6               |
| 11127 | 1,7,8,36,3<br>7,39,40,42      | 2,3,4,5,6,3<br>8,41,43,44 | 7  | P00774,P01835,P11883,P34901,P98089,Q5HZV9,Q62635                             |
| 11128 | 1,7,8,36,3<br>7,39,40,43      | 2,3,4,5,6,3<br>8,41,42,44 | 11 | F1LM93,O35547,P00774,P01835,P97605,P98089,Q62902,Q812E4,Q8CIZ5,Q8CJ52,Q9Z0V6 |
| 11129 | 1,7,8,36,3<br>7,39,40,44      | 2,3,4,5,6,3<br>8,41,42,43 | 10 | O35547,P01835,P10715,P11883,P54921,P82471,Q5HZV9,Q62902,Q6AYL6,Q8CJD3        |
| 11130 | 1,7,8,36,3<br>7,39,41,42      | 2,3,4,5,6,3<br>8,40,43,44 | 2  | P01835,P34901                                                                |
| 11131 | 1,7,8,36,3<br>7,39,41,43      | 2,3,4,5,6,3<br>8,40,42,44 | 6  | P01835,P12785,P22006,P36374,Q6TMA8,Q9Z0V6                                    |

|       |                                                 |   |                                                                |
|-------|-------------------------------------------------|---|----------------------------------------------------------------|
| 11132 | 1,7,8,36,3 2,3,4,5,6,3<br>7,39,41,44 8,40,42,43 | 5 | P01835,P11883,P31044,Q5HZV9,Q9JHB9                             |
| 11133 | 1,7,8,36,3 2,3,4,5,6,3<br>7,39,42,43 8,40,41,44 | 5 | P00774,P01835,P98089,Q62635,Q8CIZ5                             |
| 11134 | 1,7,8,36,3 2,3,4,5,6,3<br>7,39,42,44 8,40,41,43 | 3 | P01835,P11883,Q5HZV9                                           |
| 11135 | 1,7,8,36,3 2,3,4,5,6,3<br>7,39,43,44 8,40,41,42 | 1 | Q8CIZ5                                                         |
| 11136 | 1,7,8,36,3 2,3,4,5,6,3<br>7,40,41,42 8,39,43,44 | 3 | P01835,P02625,P34901                                           |
| 11137 | 1,7,8,36,3 2,3,4,5,6,3<br>7,40,41,43 8,39,42,44 | 4 | P01835,P34901,P51907,Q9Z0V6                                    |
| 11138 | 1,7,8,36,3 2,3,4,5,6,3<br>7,40,41,44 8,39,42,43 | 9 | B0BNN3,P01835,P10715,P11883,P19629,P31044,P47727,Q5GRG2,Q5HZV9 |
| 11139 | 1,7,8,36,3 2,3,4,5,6,3<br>7,40,42,43 8,39,41,44 | 6 | P00774,P01835,P02625,P97605,P98089,Q62635                      |
| 11140 | 1,7,8,36,3 2,3,4,5,6,3<br>7,40,42,44 8,39,41,43 | 6 | P00762,P01835,P02625,P11883,Q5HZV9,Q7TPB1                      |
| 11141 | 1,7,8,36,3 2,3,4,5,6,3<br>7,40,43,44 8,39,41,42 | 3 | O35547,P08010,P97605                                           |
| 11142 | 1,7,8,36,3 2,3,4,5,6,3<br>7,41,42,43 8,39,40,44 | 3 | P01835,P34901,P36376                                           |
| 11143 | 1,7,8,36,3 2,3,4,5,6,3<br>7,41,42,44 8,39,40,43 | 2 | P01835,P36376                                                  |
| 11144 | 1,7,8,36,3 2,3,4,5,6,3<br>7,41,43,44 8,39,40,42 | 0 |                                                                |
| 11145 | 1,7,8,36,3 2,3,4,5,6,3<br>7,42,43,44 8,39,40,41 | 1 | P36376                                                         |
| 11146 | 1,7,8,36,3 2,3,4,5,6,3<br>8,39,40,41 7,42,43,44 | 3 | P10715,P19629,P31044                                           |
| 11147 | 1,7,8,36,3 2,3,4,5,6,3<br>8,39,40,42 7,41,43,44 | 0 |                                                                |
| 11148 | 1,7,8,36,3 2,3,4,5,6,3<br>8,39,40,43 7,41,42,44 | 2 | P38444,P97605                                                  |
| 11149 | 1,7,8,36,3 2,3,4,5,6,3<br>8,39,40,44 7,41,42,43 | 3 | P10715,P19629,Q5HZV9                                           |
| 11150 | 1,7,8,36,3 2,3,4,5,6,3<br>8,39,41,42 7,40,43,44 | 3 | P01835,P13432,P36376                                           |
| 11151 | 1,7,8,36,3 2,3,4,5,6,3<br>8,39,41,43 7,40,42,44 | 2 | P22006,Q99376                                                  |
| 11152 | 1,7,8,36,3 2,3,4,5,6,3<br>8,39,41,44 7,40,42,43 | 2 | P31044,Q05695                                                  |
| 11153 | 1,7,8,36,3 2,3,4,5,6,3<br>8,39,42,43 7,40,41,44 | 1 | P36376                                                         |
| 11154 | 1,7,8,36,3 2,3,4,5,6,3<br>8,39,42,44 7,40,41,43 | 2 | P15999,P36376                                                  |

|       |                          |                           |   |                                                                |
|-------|--------------------------|---------------------------|---|----------------------------------------------------------------|
| 11155 | 1,7,8,36,3<br>8,39,43,44 | 2,3,4,5,6,3<br>7,40,41,42 | 1 | P23593                                                         |
| 11156 | 1,7,8,36,3<br>8,40,41,42 | 2,3,4,5,6,3<br>7,39,43,44 | 2 | P02625,P34901                                                  |
| 11157 | 1,7,8,36,3<br>8,40,41,43 | 2,3,4,5,6,3<br>7,39,42,44 | 0 |                                                                |
| 11158 | 1,7,8,36,3<br>8,40,41,44 | 2,3,4,5,6,3<br>7,39,42,43 | 6 | P10715,P19629,P31044,Q05695,Q4FZU6,Q5GRG2                      |
| 11159 | 1,7,8,36,3<br>8,40,42,43 | 2,3,4,5,6,3<br>7,39,41,44 | 3 | P02625,P15999,P38444                                           |
| 11160 | 1,7,8,36,3<br>8,40,42,44 | 2,3,4,5,6,3<br>7,39,41,43 | 3 | P02625,P15999,Q7TPB1                                           |
| 11161 | 1,7,8,36,3<br>8,40,43,44 | 2,3,4,5,6,3<br>7,39,41,42 | 2 | P38444,P97605                                                  |
| 11162 | 1,7,8,36,3<br>8,41,42,43 | 2,3,4,5,6,3<br>7,39,40,44 | 2 | P15999,P36376                                                  |
| 11163 | 1,7,8,36,3<br>8,41,42,44 | 2,3,4,5,6,3<br>7,39,40,43 | 3 | P15999,P36376,Q05695                                           |
| 11164 | 1,7,8,36,3<br>8,41,43,44 | 2,3,4,5,6,3<br>7,39,40,42 | 2 | P36376,Q05695                                                  |
| 11165 | 1,7,8,36,3<br>8,42,43,44 | 2,3,4,5,6,3<br>7,39,40,41 | 2 | P15999,P36376                                                  |
| 11166 | 1,7,8,36,3<br>9,40,41,42 | 2,3,4,5,6,3<br>7,38,43,44 | 4 | P01835,P10715,P34901,Q4FZU6                                    |
| 11167 | 1,7,8,36,3<br>9,40,41,43 | 2,3,4,5,6,3<br>7,38,42,44 | 5 | P01835,P10715,P12785,P19629,P22006                             |
| 11168 | 1,7,8,36,3<br>9,40,41,44 | 2,3,4,5,6,3<br>7,38,42,43 | 9 | P01835,P06911,P10715,P19629,P31044,Q4FZU6,Q5GRG2,Q5HZV9,Q6AYL6 |
| 11169 | 1,7,8,36,3<br>9,40,42,43 | 2,3,4,5,6,3<br>7,38,41,44 | 4 | P00774,P01835,P98089,Q62635                                    |
| 11170 | 1,7,8,36,3<br>9,40,42,44 | 2,3,4,5,6,3<br>7,38,41,43 | 3 | P01835,Q5HZV9,Q7TPB1                                           |
| 11171 | 1,7,8,36,3<br>9,40,43,44 | 2,3,4,5,6,3<br>7,38,41,42 | 1 | Q6AYL6                                                         |
| 11172 | 1,7,8,36,3<br>9,41,42,43 | 2,3,4,5,6,3<br>7,38,40,44 | 2 | P01835,P22006                                                  |
| 11173 | 1,7,8,36,3<br>9,41,42,44 | 2,3,4,5,6,3<br>7,38,40,43 | 2 | P01835,P82995                                                  |
| 11174 | 1,7,8,36,3<br>9,41,43,44 | 2,3,4,5,6,3<br>7,38,40,42 | 2 | P12785,P22006                                                  |
| 11175 | 1,7,8,36,3<br>9,42,43,44 | 2,3,4,5,6,3<br>7,38,40,41 | 0 |                                                                |
| 11176 | 1,7,8,36,4<br>0,41,42,43 | 2,3,4,5,6,3<br>7,38,39,44 | 3 | P01835,P34901,Q9JJS8                                           |
| 11177 | 1,7,8,36,4<br>0,41,42,44 | 2,3,4,5,6,3<br>7,38,39,43 | 7 | P01835,P02625,P10715,P31044,P82995,Q4FZU6,Q7TPB1               |

|       |                          |                           |    |                                                                                            |
|-------|--------------------------|---------------------------|----|--------------------------------------------------------------------------------------------|
| 11178 | 1,7,8,36,4<br>0,41,43,44 | 2,3,4,5,6,3<br>7,38,39,42 | 3  | P10715,P31044,Q6AYL6                                                                       |
| 11179 | 1,7,8,36,4<br>0,42,43,44 | 2,3,4,5,6,3<br>7,38,39,41 | 2  | P02625,Q7TPB1                                                                              |
| 11180 | 1,7,8,36,4<br>1,42,43,44 | 2,3,4,5,6,3<br>7,38,39,40 | 1  | P82995                                                                                     |
| 11181 | 1,7,8,37,3<br>8,39,40,41 | 2,3,4,5,6,3<br>6,42,43,44 | 7  | P10715,P13432,P19629,P31044,P34901,P35281,Q6AYR8                                           |
| 11182 | 1,7,8,37,3<br>8,39,40,42 | 2,3,4,5,6,3<br>6,41,43,44 | 2  | P34901,P35281                                                                              |
| 11183 | 1,7,8,37,3<br>8,39,40,43 | 2,3,4,5,6,3<br>6,41,42,44 | 8  | G3V686,P35281,P60905,P97605,Q62740,Q6IFV1,Q812E4,Q8CJ52                                    |
| 11184 | 1,7,8,37,3<br>8,39,40,44 | 2,3,4,5,6,3<br>6,41,42,43 | 13 | G3V686,P10715,P19629,P35281,P54921,P60905,Q5GRG2,Q5HZV9,Q63357,Q6AYL6,Q812E4,Q8CJ52,Q9QZA6 |
| 11185 | 1,7,8,37,3<br>8,39,41,42 | 2,3,4,5,6,3<br>6,40,43,44 | 4  | P01835,P13432,P34901,P36376                                                                |
| 11186 | 1,7,8,37,3<br>8,39,41,43 | 2,3,4,5,6,3<br>6,40,42,44 | 6  | P13432,P22006,P23593,P36374,P36376,Q6IFV1                                                  |
| 11187 | 1,7,8,37,3<br>8,39,41,44 | 2,3,4,5,6,3<br>6,40,42,43 | 4  | P10715,P31044,P36376,Q05695                                                                |
| 11188 | 1,7,8,37,3<br>8,39,42,43 | 2,3,4,5,6,3<br>6,40,41,44 | 3  | P06866,P23593,P36376                                                                       |
| 11189 | 1,7,8,37,3<br>8,39,42,44 | 2,3,4,5,6,3<br>6,40,41,43 | 1  | P36376                                                                                     |
| 11190 | 1,7,8,37,3<br>8,39,43,44 | 2,3,4,5,6,3<br>6,40,41,42 | 4  | P23593,P36376,Q6IFV1,Q812E4                                                                |
| 11191 | 1,7,8,37,3<br>8,40,41,42 | 2,3,4,5,6,3<br>6,39,43,44 | 2  | P02625,P34901                                                                              |
| 11192 | 1,7,8,37,3<br>8,40,41,43 | 2,3,4,5,6,3<br>6,39,42,44 | 2  | P11442,P34901                                                                              |
| 11193 | 1,7,8,37,3<br>8,40,41,44 | 2,3,4,5,6,3<br>6,39,42,43 | 7  | P06911,P10715,P19629,P31044,Q05695,Q5GRG2,Q6AYR9                                           |
| 11194 | 1,7,8,37,3<br>8,40,42,43 | 2,3,4,5,6,3<br>6,39,41,44 | 1  | P97605                                                                                     |
| 11195 | 1,7,8,37,3<br>8,40,42,44 | 2,3,4,5,6,3<br>6,39,41,43 | 1  | P02625                                                                                     |
| 11196 | 1,7,8,37,3<br>8,40,43,44 | 2,3,4,5,6,3<br>6,39,41,42 | 5  | P08010,P97605,Q6AYR9,Q812E4,Q8CJ52                                                         |
| 11197 | 1,7,8,37,3<br>8,41,42,43 | 2,3,4,5,6,3<br>6,39,40,44 | 4  | P06866,P34901,P36376,Q6P6T1                                                                |
| 11198 | 1,7,8,37,3<br>8,41,42,44 | 2,3,4,5,6,3<br>6,39,40,43 | 2  | P36376,Q05695                                                                              |
| 11199 | 1,7,8,37,3<br>8,41,43,44 | 2,3,4,5,6,3<br>6,39,40,42 | 2  | P36376,Q05695                                                                              |
| 11200 | 1,7,8,37,3<br>8,42,43,44 | 2,3,4,5,6,3<br>6,39,40,41 | 1  | P36376                                                                                     |

|       |                          |                           |    |                                                                                     |
|-------|--------------------------|---------------------------|----|-------------------------------------------------------------------------------------|
| 11201 | 1,7,8,37,3<br>9,40,41,42 | 2,3,4,5,6,3<br>6,38,43,44 | 6  | P01835,P10715,P13432,P19629,P31044,P34901                                           |
| 11202 | 1,7,8,37,3<br>9,40,41,43 | 2,3,4,5,6,3<br>6,38,42,44 | 11 | P01835,P10715,P12785,P19629,P22006,P31044,P34901,P97554,Q6AYL6,Q812E4,Q8CJ52        |
| 11203 | 1,7,8,37,3<br>9,40,41,44 | 2,3,4,5,6,3<br>6,38,42,43 | 11 | P01835,P06911,P08723,P10715,P19629,P31044,P34901,P47727,Q5GRG2,Q6AYL6,Q9ET32        |
| 11204 | 1,7,8,37,3<br>9,40,42,43 | 2,3,4,5,6,3<br>6,38,41,44 | 5  | P00774,P01835,P34901,P98089,Q8CIZ5                                                  |
| 11205 | 1,7,8,37,3<br>9,40,42,44 | 2,3,4,5,6,3<br>6,38,41,43 | 5  | P01835,P10715,P34901,Q5HZV9,Q6AYL6                                                  |
| 11206 | 1,7,8,37,3<br>9,40,43,44 | 2,3,4,5,6,3<br>6,38,41,42 | 12 | O35547,P08010,P10715,P22283,P60905,P97554,Q62902,Q63357,Q6AYL6,Q812E4,Q8CIZ5,Q8CJ52 |
| 11207 | 1,7,8,37,3<br>9,41,42,43 | 2,3,4,5,6,3<br>6,38,40,44 | 3  | P01835,P22006,P34901                                                                |
| 11208 | 1,7,8,37,3<br>9,41,42,44 | 2,3,4,5,6,3<br>6,38,40,43 | 2  | P01835,P34901                                                                       |
| 11209 | 1,7,8,37,3<br>9,41,43,44 | 2,3,4,5,6,3<br>6,38,40,42 | 3  | P22006,P97554,Q6AYL6                                                                |
| 11210 | 1,7,8,37,3<br>9,42,43,44 | 2,3,4,5,6,3<br>6,38,40,41 | 0  |                                                                                     |
| 11211 | 1,7,8,37,4<br>0,41,42,43 | 2,3,4,5,6,3<br>6,38,39,44 | 2  | P01835,P34901                                                                       |
| 11212 | 1,7,8,37,4<br>0,41,42,44 | 2,3,4,5,6,3<br>6,38,39,43 | 7  | P01835,P02625,P10715,P31044,P34901,Q4FZU6,Q5GRG2                                    |
| 11213 | 1,7,8,37,4<br>0,41,43,44 | 2,3,4,5,6,3<br>6,38,39,42 | 10 | P08010,P10715,P19629,P22283,P31044,P47727,P51907,Q5GRG2,Q6AYL6,Q9ET32               |
| 11214 | 1,7,8,37,4<br>0,42,43,44 | 2,3,4,5,6,3<br>6,38,39,41 | 1  | P02625                                                                              |
| 11215 | 1,7,8,37,4<br>1,42,43,44 | 2,3,4,5,6,3<br>6,38,39,40 | 0  |                                                                                     |
| 11216 | 1,7,8,38,3<br>9,40,41,42 | 2,3,4,5,6,3<br>6,37,43,44 | 5  | P10715,P13432,P19629,P31044,P34901                                                  |
| 11217 | 1,7,8,38,3<br>9,40,41,43 | 2,3,4,5,6,3<br>6,37,42,44 | 6  | P10715,P13432,P19629,P22006,P31044,Q6AYL6                                           |
| 11218 | 1,7,8,38,3<br>9,40,41,44 | 2,3,4,5,6,3<br>6,37,42,43 | 9  | P06911,P10715,P19629,P31044,Q05695,Q4FZU6,Q5GRG2,Q6AYL6,Q6P9T8                      |
| 11219 | 1,7,8,38,3<br>9,40,42,43 | 2,3,4,5,6,3<br>6,37,41,44 | 0  |                                                                                     |
| 11220 | 1,7,8,38,3<br>9,40,42,44 | 2,3,4,5,6,3<br>6,37,41,43 | 0  |                                                                                     |
| 11221 | 1,7,8,38,3<br>9,40,43,44 | 2,3,4,5,6,3<br>6,37,41,42 | 4  | P10715,P19629,P23593,Q6AYL6                                                         |
| 11222 | 1,7,8,38,3<br>9,41,42,43 | 2,3,4,5,6,3<br>6,37,40,44 | 5  | P00731,P13432,P22006,P36376,Q99376                                                  |
| 11223 | 1,7,8,38,3<br>9,41,42,44 | 2,3,4,5,6,3<br>6,37,40,43 | 3  | P13432,P36376,Q05695                                                                |

|       |                               |                           |    |                                                                                                                                             |
|-------|-------------------------------|---------------------------|----|---------------------------------------------------------------------------------------------------------------------------------------------|
| 11224 | 1,7,8,38,3<br>9,41,43,44      | 2,3,4,5,6,3<br>6,37,40,42 | 4  | P00731,P22006,P23593,Q05695                                                                                                                 |
| 11225 | 1,7,8,38,3<br>9,42,43,44      | 2,3,4,5,6,3<br>6,37,40,41 | 2  | P23593,P36376                                                                                                                               |
| 11226 | 1,7,8,38,4<br>0,41,42,43      | 2,3,4,5,6,3<br>6,37,39,44 | 1  | P34901                                                                                                                                      |
| 11227 | 1,7,8,38,4<br>0,41,42,44      | 2,3,4,5,6,3<br>6,37,39,43 | 7  | P02625,P10715,P19629,P31044,Q05695,Q4FZU6,Q5GRG2                                                                                            |
| 11228 | 1,7,8,38,4<br>0,41,43,44      | 2,3,4,5,6,3<br>6,37,39,42 | 6  | P10715,P19629,P31044,Q05695,Q5GRG2,Q6AYL6                                                                                                   |
| 11229 | 1,7,8,38,4<br>0,42,43,44      | 2,3,4,5,6,3<br>6,37,39,41 | 1  | P02625                                                                                                                                      |
| 11230 | 1,7,8,38,4<br>1,42,43,44      | 2,3,4,5,6,3<br>6,37,39,40 | 4  | P00731,P36376,P55091,Q05695                                                                                                                 |
| 11231 | 1,7,8,39,4<br>0,41,42,43      | 2,3,4,5,6,3<br>6,37,38,44 | 4  | P01835,P10715,P22006,P34901                                                                                                                 |
| 11232 | 1,7,8,39,4<br>0,41,42,44      | 2,3,4,5,6,3<br>6,37,38,43 | 10 | P01835,P06911,P10715,P19629,P31044,P34901,Q4FZU6,Q5GRG2,Q6AYL6,Q6P9T8                                                                       |
| 11233 | 1,7,8,39,4<br>0,41,43,44      | 2,3,4,5,6,3<br>6,37,38,42 | 11 | P06911,P10715,P12785,P19629,P22006,P31044,P97554,Q5GRG2,Q6AYL6,Q6P9T8,Q9ET32                                                                |
| 11234 | 1,7,8,39,4<br>0,42,43,44      | 2,3,4,5,6,3<br>6,37,38,41 | 1  | Q6AYL6                                                                                                                                      |
| 11235 | 1,7,8,39,4<br>1,42,43,44      | 2,3,4,5,6,3<br>6,37,38,40 | 2  | P00731,P22006                                                                                                                               |
| 11236 | 1,7,8,40,4<br>1,42,43,44      | 2,3,4,5,6,3<br>6,37,38,39 | 2  | P10715,Q4FZU6                                                                                                                               |
| 11237 | 1,7,36,37,<br>38,39,40,4<br>1 | 2,3,4,5,6,8<br>,42,43,44  | 14 | P08723,P10715,P11883,P13432,P19629,P20762,P35281,P36374,P60905,Q5M819,Q63514,Q6AYR8,Q6Q7Y5,Q9Z0V6                                           |
| 11238 | 1,7,36,37,<br>38,39,40,4<br>2 | 2,3,4,5,6,8<br>,41,43,44  | 7  | P02793;Q7TP54,P11883,P20762,P38444,P97605,P97840,Q01205                                                                                     |
| 11239 | 1,7,36,37,<br>38,39,40,4<br>3 | 2,3,4,5,6,8<br>,41,42,44  | 20 | F1LM93,O08815,O35547,P08010,P08753,P09456,P35281,P36374,P38444,P60905,P97605,Q01205,Q62753,Q63514,Q6IFV1,Q6P6R2,Q812E4,Q8CJ52,Q9JID2,Q9Z0V6 |
| 11240 | 1,7,36,37,<br>38,39,40,4<br>4 | 2,3,4,5,6,8<br>,41,42,43  | 18 | B0LT89,F1LM93,O08815,O35547,P08723,P08753,P09456,P11883,P20762,P36374,P54921,P60905,P82471,P97605,Q63357,Q6GMN2,Q812E4,Q9Z0V6               |
| 11241 | 1,7,36,37,<br>38,39,41,4<br>2 | 2,3,4,5,6,8<br>,40,43,44  | 9  | P01835,P02793;Q7TP54,P11883,P13432,P20762,P36376,P97840,Q5M819,Q9Z0V6                                                                       |
| 11242 | 1,7,36,37,<br>38,39,41,4<br>3 | 2,3,4,5,6,8<br>,40,42,44  | 9  | P22006,P36374,P36376,P97605,Q5M819,Q63514,Q812E4,Q9QZ76,Q9Z0V6                                                                              |

|       |                               |                          |    |                                                                                                          |
|-------|-------------------------------|--------------------------|----|----------------------------------------------------------------------------------------------------------|
| 11243 | 1,7,36,37,<br>38,39,41,4<br>4 | 2,3,4,5,6,8<br>,40,42,43 | 7  | P11883,P20762,P36374,P36376,Q5M819,Q9JHB9,Q9Z0V6                                                         |
| 11244 | 1,7,36,37,<br>38,39,42,4<br>3 | 2,3,4,5,6,8<br>,40,41,44 | 4  | P06866,P36376,P97605,Q9Z0V6                                                                              |
| 11245 | 1,7,36,37,<br>38,39,42,4<br>4 | 2,3,4,5,6,8<br>,40,41,43 | 6  | P02793;Q7TP54,P11883,P20762,P36376,P97605,P97840                                                         |
| 11246 | 1,7,36,37,<br>38,39,43,4<br>4 | 2,3,4,5,6,8<br>,40,41,42 | 9  | P02781,P08753,P23593,P36374,P97605,Q62753,Q812E4,Q9JJS8,Q9Z0V6                                           |
| 11247 | 1,7,36,37,<br>38,40,41,4<br>2 | 2,3,4,5,6,8<br>,39,43,44 | 4  | P02625,P11883,P20762,Q5M819                                                                              |
| 11248 | 1,7,36,37,<br>38,40,41,4<br>3 | 2,3,4,5,6,8<br>,39,42,44 | 7  | P08010,P20766,P36374,P55016,P97605,Q5M819,Q9Z0V6                                                         |
| 11249 | 1,7,36,37,<br>38,40,41,4<br>4 | 2,3,4,5,6,8<br>,39,42,43 | 12 | P08723,P09456,P10715,P11883,P19629,P20762,P31044,P36374,P47727,P97605,Q5GRG2,Q9Z0V6                      |
| 11250 | 1,7,36,37,<br>38,40,42,4<br>3 | 2,3,4,5,6,8<br>,39,41,44 | 4  | P02625,P38444,P97605,Q01205                                                                              |
| 11251 | 1,7,36,37,<br>38,40,42,4<br>4 | 2,3,4,5,6,8<br>,39,41,43 | 8  | P02625,P02793;Q7TP54,P11883,P20762,P38444,P97605,P97840,Q7TPB1                                           |
| 11252 | 1,7,36,37,<br>38,40,43,4<br>4 | 2,3,4,5,6,8<br>,39,41,42 | 15 | F1LM93,O08815,O35547,P04905,P08010,P08753,P09456,P38444,P54921,P97605,Q62753,Q63357,Q6AYR9,Q812E4,Q9Z0V6 |
| 11253 | 1,7,36,37,<br>38,41,42,4<br>3 | 2,3,4,5,6,8<br>,39,40,44 | 7  | P06866,P20766,P36376,Q5M819,Q6AYS4,Q6P6T1,Q9Z0V6                                                         |
| 11254 | 1,7,36,37,<br>38,41,42,4<br>4 | 2,3,4,5,6,8<br>,39,40,43 | 4  | P11883,P20762,P36376,P97840                                                                              |
| 11255 | 1,7,36,37,<br>38,41,43,4<br>4 | 2,3,4,5,6,8<br>,39,40,42 | 6  | P20766,P36374,P36376,P97605,Q5M819,Q9Z0V6                                                                |
| 11256 | 1,7,36,37,<br>38,42,43,4<br>4 | 2,3,4,5,6,8<br>,39,40,41 | 3  | P36376,P97605,P97840                                                                                     |
| 11257 | 1,7,36,37,<br>39,40,41,4<br>2 | 2,3,4,5,6,8<br>,38,43,44 | 5  | P01835,P11883,P20762,P34901,Q9Z0V6                                                                       |

|       |                               |                          |    |                                                                                                                                                                                       |
|-------|-------------------------------|--------------------------|----|---------------------------------------------------------------------------------------------------------------------------------------------------------------------------------------|
| 11258 | 1,7,36,37,<br>39,40,41,4<br>3 | 2,3,4,5,6,8<br>,38,42,44 | 15 | F1LM93,O35547,P01835,P08723,P08753,P10715,P22006,P36374,P60905,P97554,P97605,Q63514,Q6AYL6,Q812E4,Q9Z0V6                                                                              |
| 11259 | 1,7,36,37,<br>39,40,41,4<br>4 | 2,3,4,5,6,8<br>,38,42,43 | 22 | F1LM93,O35547,P01835,P06911,P08723,P08753,P10715,P11883,P19629,P20762,P31044,P36374,P47727,P54921,P60905,Q5GRG2,Q62902,Q63514,Q6AYL6,Q80WL1,Q9JHB9,Q9Z0V6                             |
| 11260 | 1,7,36,37,<br>39,40,42,4<br>3 | 2,3,4,5,6,8<br>,38,41,44 | 15 | P00774,P01835,P38444,P49744,P50115,P50116,P97605,P98089,Q01205,Q05695,Q5U2V4,Q62635,Q63072,Q8CIZ5,Q9Z0V6                                                                              |
| 11261 | 1,7,36,37,<br>39,40,42,4<br>4 | 2,3,4,5,6,8<br>,38,41,43 | 13 | O35547,P01835,P02793,Q7TP54,P11883,P20762,P49744,P50115,P50116,P97605,Q01205,Q5HZV9,Q5U2V4,Q7TPB1                                                                                     |
| 11262 | 1,7,36,37,<br>39,40,43,4<br>4 | 2,3,4,5,6,8<br>,38,41,42 | 26 | F1LM93,O08815,O35547,P04905,P05369,P08010,P08753,P09456,P36374,P50115,P50116,P54921,P60905,P97605,Q01205,Q62753,Q62902,Q63357,Q63514,Q6AYL6,Q812E4,Q8CIZ5,Q8CJ52,Q9QZK9,Q9WUF4,Q9Z0V6 |
| 11263 | 1,7,36,37,<br>39,41,42,4<br>3 | 2,3,4,5,6,8<br>,38,40,44 | 3  | P01835,P22006,Q9Z0V6                                                                                                                                                                  |
| 11264 | 1,7,36,37,<br>39,41,42,4<br>4 | 2,3,4,5,6,8<br>,38,40,43 | 4  | P01835,P11883,P20762,Q9Z0V6                                                                                                                                                           |
| 11265 | 1,7,36,37,<br>39,41,43,4<br>4 | 2,3,4,5,6,8<br>,38,40,42 | 5  | P05369,P22006,P36374,Q9QZ76,Q9Z0V6                                                                                                                                                    |
| 11266 | 1,7,36,37,<br>39,42,43,4<br>4 | 2,3,4,5,6,8<br>,38,40,41 | 4  | P50115,P50116,P97605,Q9Z0V6                                                                                                                                                           |
| 11267 | 1,7,36,37,<br>40,41,42,4<br>3 | 2,3,4,5,6,8<br>,38,39,44 | 3  | P01835,Q6AYS4,Q9Z0V6                                                                                                                                                                  |
| 11268 | 1,7,36,37,<br>40,41,42,4<br>4 | 2,3,4,5,6,8<br>,38,39,43 | 6  | P01835,P02625,P11883,P20762,Q7TPB1,Q80WL1                                                                                                                                             |
| 11269 | 1,7,36,37,<br>40,41,43,4<br>4 | 2,3,4,5,6,8<br>,38,39,42 | 14 | O35547,P04905,P05369,P08010,P08753,P09456,P10715,P19218,P36374,P47727,P97605,Q6AYL6,Q80WL1,Q9Z0V6                                                                                     |
| 11270 | 1,7,36,37,<br>40,42,43,4<br>4 | 2,3,4,5,6,8<br>,38,39,41 | 8  | P02625,P08010,P38444,P50115,P50116,P97605,Q01205,Q7TPB1                                                                                                                               |
| 11271 | 1,7,36,37,<br>41,42,43,4<br>4 | 2,3,4,5,6,8<br>,38,39,40 | 2  | Q6AYS4,Q9Z0V6                                                                                                                                                                         |
| 11272 | 1,7,36,38,<br>39,40,41,4<br>2 | 2,3,4,5,6,8<br>,37,43,44 | 2  | P13432,P20762                                                                                                                                                                         |



|       |                               |                          |   |                                                         |
|-------|-------------------------------|--------------------------|---|---------------------------------------------------------|
| 11273 | 1,7,36,38,<br>39,40,41,4<br>3 | 2,3,4,5,6,8<br>,37,42,44 | 5 | P19629,P22006,P36374,P55016,Q9Z0V6                      |
| 11274 | 1,7,36,38,<br>39,40,41,4<br>4 | 2,3,4,5,6,8<br>,37,42,43 | 8 | P06911,P10715,P11883,P19629,P20762,P31044,Q5GRG2,Q6AYL6 |
| 11275 | 1,7,36,38,<br>39,40,42,4<br>3 | 2,3,4,5,6,8<br>,37,41,44 | 3 | P38444,P97605,Q01205                                    |
| 11276 | 1,7,36,38,<br>39,40,42,4<br>4 | 2,3,4,5,6,8<br>,37,41,43 | 6 | P02793;Q7TP54,P11883,P20762,P38444,Q01205,Q7TPB1        |
| 11277 | 1,7,36,38,<br>39,40,43,4<br>4 | 2,3,4,5,6,8<br>,37,41,42 | 5 | P08753,P38444,P97605,Q63357,Q6AYL6                      |
| 11278 | 1,7,36,38,<br>39,41,42,4<br>3 | 2,3,4,5,6,8<br>,37,40,44 | 5 | P06866,P13432,P22006,P36376,Q99376                      |
| 11279 | 1,7,36,38,<br>39,41,42,4<br>4 | 2,3,4,5,6,8<br>,37,40,43 | 2 | P20762,P36376                                           |
| 11280 | 1,7,36,38,<br>39,41,43,4<br>4 | 2,3,4,5,6,8<br>,37,40,42 | 4 | P22006,P23593,P36374,Q9Z0V6                             |
| 11281 | 1,7,36,38,<br>39,42,43,4<br>4 | 2,3,4,5,6,8<br>,37,40,41 | 1 | P97605                                                  |
| 11282 | 1,7,36,38,<br>40,41,42,4<br>3 | 2,3,4,5,6,8<br>,37,39,44 | 0 |                                                         |
| 11283 | 1,7,36,38,<br>40,41,42,4<br>4 | 2,3,4,5,6,8<br>,37,39,43 | 4 | P02625,P20762,Q4FZU6,Q7TPB1                             |
| 11284 | 1,7,36,38,<br>40,41,43,4<br>4 | 2,3,4,5,6,8<br>,37,39,42 | 2 | P19629,P97605                                           |
| 11285 | 1,7,36,38,<br>40,42,43,4<br>4 | 2,3,4,5,6,8<br>,37,39,41 | 6 | P02625,P15999,P38444,P97605,Q01205,Q7TPB1               |
| 11286 | 1,7,36,38,<br>41,42,43,4<br>4 | 2,3,4,5,6,8<br>,37,39,40 | 2 | P15999,P36376                                           |
| 11287 | 1,7,36,39,<br>40,41,42,4<br>3 | 2,3,4,5,6,8<br>,37,38,44 | 2 | P01835,P22006                                           |

|       |                               |                          |    |                                                                                                                                                                  |
|-------|-------------------------------|--------------------------|----|------------------------------------------------------------------------------------------------------------------------------------------------------------------|
| 11288 | 1,7,36,39,<br>40,41,42,4<br>4 | 2,3,4,5,6,8<br>,37,38,43 | 8  | P01835,P10715,P19629,P20762,P31044,Q4FZU6,Q5GRG2,Q7TPB1                                                                                                          |
| 11289 | 1,7,36,39,<br>40,41,43,4<br>4 | 2,3,4,5,6,8<br>,37,38,42 | 7  | P10715,P19629,P22006,P31044,Q5GRG2,Q6AYL6,Q9Z0V6                                                                                                                 |
| 11290 | 1,7,36,39,<br>40,42,43,4<br>4 | 2,3,4,5,6,8<br>,37,38,41 | 5  | P50115,P50116,P97605,Q01205,Q7TPB1                                                                                                                               |
| 11291 | 1,7,36,39,<br>41,42,43,4<br>4 | 2,3,4,5,6,8<br>,37,38,40 | 1  | P22006                                                                                                                                                           |
| 11292 | 1,7,36,40,<br>41,42,43,4<br>4 | 2,3,4,5,6,8<br>,37,38,39 | 1  | Q7TPB1                                                                                                                                                           |
| 11293 | 1,7,37,38,<br>39,40,41,4<br>2 | 2,3,4,5,6,8<br>,36,43,44 | 7  | P10715,P11883,P13432,P19629,P20762,P34901,Q01205                                                                                                                 |
| 11294 | 1,7,37,38,<br>39,40,41,4<br>3 | 2,3,4,5,6,8<br>,36,42,44 | 18 | P04905,P08753,P10715,P13432,P19629,P22006,P36374,P55016,P60905,P97554,P97605,Q01205,Q32KJ6,Q62753,Q63514,Q6AYL6,Q812E4,Q9Z0V6                                    |
| 11295 | 1,7,37,38,<br>39,40,41,4<br>4 | 2,3,4,5,6,8<br>,36,42,43 | 19 | P04905,P06911,P08723,P08753,P10715,P11883,P13432,P19629,P20762,P31044,P36374,P47727,P60905,Q01205,Q5GRG2,Q63357,Q63514,Q6AYL6,Q812E4                             |
| 11296 | 1,7,37,38,<br>39,40,42,4<br>3 | 2,3,4,5,6,8<br>,36,41,44 | 6  | P07171,P49744,P97605,Q01205,Q812E4,Q99MH3                                                                                                                        |
| 11297 | 1,7,37,38,<br>39,40,42,4<br>4 | 2,3,4,5,6,8<br>,36,41,43 | 6  | P11883,P20762,P49744,P83121,P97605,Q01205                                                                                                                        |
| 11298 | 1,7,37,38,<br>39,40,43,4<br>4 | 2,3,4,5,6,8<br>,36,41,42 | 23 | F1LM93,G3V686,O08815,O35547,P04905,P08010,P08753,P09456,P23593,P36374,P54921,P60905,P97554,P97605,Q01205,Q62740,Q62753,Q62902,Q63357,Q6AYL6,Q6AYR9,Q812E4,Q8CJ52 |
| 11299 | 1,7,37,38,<br>39,41,42,4<br>3 | 2,3,4,5,6,8<br>,36,40,44 | 9  | P00731,P06866,P13432,P22006,P36374,P36376,Q01205,Q6AYS4,Q6P6T1                                                                                                   |
| 11300 | 1,7,37,38,<br>39,41,42,4<br>4 | 2,3,4,5,6,8<br>,36,40,43 | 5  | P11883,P13432,P20762,P36376,Q6AYS4                                                                                                                               |
| 11301 | 1,7,37,38,<br>39,41,43,4<br>4 | 2,3,4,5,6,8<br>,36,40,42 | 8  | P02781,P22006,P23593,P36374,Q6AYS4,Q812E4,Q9QZ76,Q9Z0V6                                                                                                          |
| 11302 | 1,7,37,38,<br>39,42,43,4<br>4 | 2,3,4,5,6,8<br>,36,40,41 | 6  | P23593,P36376,P97605,Q01205,Q6AYS4,Q812E4                                                                                                                        |

|       |                               |                          |    |                                                                                                                                                           |
|-------|-------------------------------|--------------------------|----|-----------------------------------------------------------------------------------------------------------------------------------------------------------|
| 11303 | 1,7,37,38,<br>40,41,42,4<br>3 | 2,3,4,5,6,8<br>,36,39,44 | 5  | P06866,P55016,P97605,Q01205,Q6AYS4                                                                                                                        |
| 11304 | 1,7,37,38,<br>40,41,42,4<br>4 | 2,3,4,5,6,8<br>,36,39,43 | 7  | P02625,P10715,P11883,P19629,P20762,Q01205,Q6AYS4                                                                                                          |
| 11305 | 1,7,37,38,<br>40,41,43,4<br>4 | 2,3,4,5,6,8<br>,36,39,42 | 14 | P04905,P08010,P08753,P09456,P10715,P19629,P36374,P47727,P97605,Q01205,Q6AYL6,Q6AYR9,Q6AYS4,Q812E4                                                         |
| 11306 | 1,7,37,38,<br>40,42,43,4<br>4 | 2,3,4,5,6,8<br>,36,39,41 | 5  | P02625,P08010,P97605,Q01205,Q6AYS4                                                                                                                        |
| 11307 | 1,7,37,38,<br>41,42,43,4<br>4 | 2,3,4,5,6,8<br>,36,39,40 | 4  | P06866,P36376,Q01205,Q6AYS4                                                                                                                               |
| 11308 | 1,7,37,39,<br>40,41,42,4<br>3 | 2,3,4,5,6,8<br>,36,38,44 | 8  | P01835,P13432,P22006,P34901,Q01205,Q63514,Q6AYL6,Q6AYS4                                                                                                   |
| 11309 | 1,7,37,39,<br>40,41,42,4<br>4 | 2,3,4,5,6,8<br>,36,38,43 | 10 | P01835,P10715,P19629,P20762,P31044,P34901,Q01177,Q01205,Q5GRG2,Q6AYL6                                                                                     |
| 11310 | 1,7,37,39,<br>40,41,43,4<br>4 | 2,3,4,5,6,8<br>,36,38,42 | 22 | O35547,P04905,P05369,P08010,P08753,P10715,P19629,P22006,P31044,P36374,P47727,P60905,P97554,Q01205,Q5GRG2,Q62902,Q63357,Q63514,Q6AYL6,Q812E4,Q8CJ52,Q9Z0V6 |
| 11311 | 1,7,37,39,<br>40,42,43,4<br>4 | 2,3,4,5,6,8<br>,36,38,41 | 8  | P08010,P49744,P50115,P50116,P97605,Q01205,Q6AYL6,Q812E4                                                                                                   |
| 11312 | 1,7,37,39,<br>41,42,43,4<br>4 | 2,3,4,5,6,8<br>,36,38,40 | 3  | P22006,Q01205,Q6AYS4                                                                                                                                      |
| 11313 | 1,7,37,40,<br>41,42,43,4<br>4 | 2,3,4,5,6,8<br>,36,38,39 | 4  | P10715,Q01205,Q6AYL6,Q6AYS4                                                                                                                               |
| 11314 | 1,7,38,39,<br>40,41,42,4<br>3 | 2,3,4,5,6,8<br>,36,37,44 | 5  | P07171,P13432,P22006,Q01205,Q6AYS4                                                                                                                        |
| 11315 | 1,7,38,39,<br>40,41,42,4<br>4 | 2,3,4,5,6,8<br>,36,37,43 | 7  | P10715,P13432,P19629,P20762,P31044,Q01205,Q5GRG2                                                                                                          |
| 11316 | 1,7,38,39,<br>40,41,43,4<br>4 | 2,3,4,5,6,8<br>,36,37,42 | 9  | P10715,P19629,P22006,P31044,P36374,P97554,Q01205,Q5GRG2,Q6AYL6                                                                                            |
| 11317 | 1,7,38,39,<br>40,42,43,4<br>4 | 2,3,4,5,6,8<br>,36,37,41 | 3  | P97605,Q01205,Q6AYL6                                                                                                                                      |

|       |                               |                          |    |                                                                                                                                                                                                                   |
|-------|-------------------------------|--------------------------|----|-------------------------------------------------------------------------------------------------------------------------------------------------------------------------------------------------------------------|
| 11318 | 1,7,38,39,<br>41,42,43,4<br>4 | 2,3,4,5,6,8<br>,36,37,40 | 6  | P00731,P13432,P22006,P23593,Q01205,Q6AYS4                                                                                                                                                                         |
| 11319 | 1,7,38,40,<br>41,42,43,4<br>4 | 2,3,4,5,6,8<br>,36,37,39 | 2  | Q01205,Q6AYS4                                                                                                                                                                                                     |
| 11320 | 1,7,39,40,<br>41,42,43,4<br>4 | 2,3,4,5,6,8<br>,36,37,38 | 6  | P10715,P19629,P22006,Q01205,Q6AYL6,Q6AYS4                                                                                                                                                                         |
| 11321 | 1,8,36,37,<br>38,39,40,4<br>1 | 2,3,4,5,6,7<br>,42,43,44 | 23 | F1LM93,G3V686,O35547,P08290,P08723,P10715,P11883,P13432,P19629,P20762,P25031,P35281,P36374,P55016,P60905,P83748,P97605,Q5M819,Q6AYR8,Q6IE51,Q6Q7Y5,Q8K4G9,Q9QZQ5                                                  |
| 11322 | 1,8,36,37,<br>38,39,40,4<br>2 | 2,3,4,5,6,7<br>,41,43,44 | 12 | G3V686,P02631,P11883,P20762,P25031,P35281,P38444,P49744,P83748,P97605,Q6IE51,Q8K4G9                                                                                                                               |
| 11323 | 1,8,36,37,<br>38,39,40,4<br>3 | 2,3,4,5,6,7<br>,41,42,44 | 25 | F1LM93,G3V686,O35547,P08010,P08290,P08753,P13596,P16086,P35281,P36374,P38444,P60905,P80201,P97605,Q5XI73,Q62740,Q62753,Q6AYR8,Q6IFV1,Q812E4,Q8CJ52,Q8K4G9,Q99068,Q9JID2,Q9QZQ5                                    |
| 11324 | 1,8,36,37,<br>38,39,40,4<br>4 | 2,3,4,5,6,7<br>,41,42,43 | 30 | F1LM93,G3V686,O35547,P05539,P08010,P08290,P08723,P11883,P16086,P20762,P25031,P35281,P36374,P38444,P54921,P60905,P80201,P82471,P83748,P97605,Q5HZV9,Q63357,Q6AYR8,Q6AYR9,Q6GMN2,Q6IE51,Q812E4,Q8CJ52,Q9QZA6,Q9QZQ5 |
| 11325 | 1,8,36,37,<br>38,39,41,4<br>2 | 2,3,4,5,6,7<br>,40,43,44 | 9  | P01835,P11883,P13432,P20762,P36376,P83748,Q5M819,Q5XFX0,Q6IE51                                                                                                                                                    |
| 11326 | 1,8,36,37,<br>38,39,41,4<br>3 | 2,3,4,5,6,7<br>,40,42,44 | 16 | P02782,P08290,P13596,P22006,P36374,P36376,P55016,P97605,Q5M819,Q5XI73,Q6IFV1,Q812E4,Q99068,Q9QZ76,Q9QZQ5,Q9Z0V6                                                                                                   |
| 11327 | 1,8,36,37,<br>38,39,41,4<br>4 | 2,3,4,5,6,7<br>,40,42,43 | 12 | P02781,P02782,P08723,P11883,P16086,P20762,P36374,P36376,P83748,P97605,Q6IE51,Q9JHB9                                                                                                                               |
| 11328 | 1,8,36,37,<br>38,39,42,4<br>3 | 2,3,4,5,6,7<br>,40,41,44 | 10 | P06866,P12020,P13596,P15999,P36376,P38444,P97605,Q5XFX0,Q6IE51,Q6IFV1                                                                                                                                             |
| 11329 | 1,8,36,37,<br>38,39,42,4<br>4 | 2,3,4,5,6,7<br>,40,41,43 | 8  | P11883,P15999,P20762,P36376,P83748,P97605,Q5HZV9,Q6IE51                                                                                                                                                           |
| 11330 | 1,8,36,37,<br>38,39,43,4<br>4 | 2,3,4,5,6,7<br>,40,41,42 | 21 | G3V686,O35547,P02781,P05539,P08010,P08290,P13596,P16086,P23593,P36374,P36376,P60905,P97605,Q5XI73,Q62740,Q62753,Q6IE51,Q6IFV1,Q812E4,Q9JJS8,Q9QZQ5                                                                |
| 11331 | 1,8,36,37,<br>38,40,41,4<br>2 | 2,3,4,5,6,7<br>,39,43,44 | 9  | P02625,P11883,P20762,P34901,P36376,P83748,P97605,Q6IE51,Q8K4G9                                                                                                                                                    |
| 11332 | 1,8,36,37,<br>38,40,41,4<br>3 | 2,3,4,5,6,7<br>,39,42,44 | 14 | G3V686,O35568,P08010,P08290,P35281,P36374,P36376,P55016,P97605,Q5XI73,Q6IE51,Q6IFV1,Q99068,Q9QZQ5                                                                                                                 |

|       |                               |                          |    |                                                                                                                                                                                                                          |
|-------|-------------------------------|--------------------------|----|--------------------------------------------------------------------------------------------------------------------------------------------------------------------------------------------------------------------------|
| 11333 | 1,8,36,37,<br>38,40,41,4<br>4 | 2,3,4,5,6,7<br>,39,42,43 | 16 | O35547,P08290,P08723,P10715,P11883,P16086,P20762,P25031,P36374,P36376,P47727,P83748,P97605,Q6AYR9,Q6IE51,Q9JHB9                                                                                                          |
| 11334 | 1,8,36,37,<br>38,40,42,4<br>3 | 2,3,4,5,6,7<br>,39,41,44 | 14 | G3V686,O35568,O88267,P02625,P08010,P15999,P36376,P38444,P80201,P97605,Q01205,Q63475,Q6IE51,Q6IFV1                                                                                                                        |
| 11335 | 1,8,36,37,<br>38,40,42,4<br>4 | 2,3,4,5,6,7<br>,39,41,43 | 13 | O88267,P02625,P11883,P15999,P20762,P25031,P36376,P38444,P80201,P83748,P97605,Q6IE51,Q7TPB1                                                                                                                               |
| 11336 | 1,8,36,37,<br>38,40,43,4<br>4 | 2,3,4,5,6,7<br>,39,41,42 | 23 | F1LM93,G3V686,O35547,P02781,P04905,P08010,P08290,P08753,P13596,P16086,P38444,P54921,P80201,P97605,Q5XI73,Q62753,Q63357,Q6AYR9,Q6IE51,Q6IFV1,Q812E4,Q8CJ52,Q9QZQ5                                                         |
| 11337 | 1,8,36,37,<br>38,41,42,4<br>3 | 2,3,4,5,6,7<br>,39,40,44 | 6  | P06866,P15999,P36376,P97605,Q6IE51,Q6P6T1                                                                                                                                                                                |
| 11338 | 1,8,36,37,<br>38,41,42,4<br>4 | 2,3,4,5,6,7<br>,39,40,43 | 6  | P11883,P15999,P20762,P36376,P83748,Q6IE51                                                                                                                                                                                |
| 11339 | 1,8,36,37,<br>38,41,43,4<br>4 | 2,3,4,5,6,7<br>,39,40,42 | 13 | O88600,P02780,P02781,P08290,P13596,P16086,P36374,P36376,P97605,Q5XI73,Q6IE51,Q6IFV1,Q9QZQ5                                                                                                                               |
| 11340 | 1,8,36,37,<br>38,42,43,4<br>4 | 2,3,4,5,6,7<br>,39,40,41 | 6  | P13596,P15999,P36376,P38444,P97605,Q6IE51                                                                                                                                                                                |
| 11341 | 1,8,36,37,<br>39,40,41,4<br>2 | 2,3,4,5,6,7<br>,38,43,44 | 9  | P01835,P02631,P11883,P20762,P25031,P34901,P49744,P83748,Q6IE51                                                                                                                                                           |
| 11342 | 1,8,36,37,<br>39,40,41,4<br>3 | 2,3,4,5,6,7<br>,38,42,44 | 25 | F1LM93,O35547,O35568,P01835,P08010,P08290,P08723,P12785,P13596,P25031,P35281,P36374,P47727,P60905,P97554,P97605,Q5XI73,Q62740,Q63514,Q6AYR8,Q6IE51,Q812E4,Q8CJ52,Q9QZQ5,Q9Z0V6                                           |
| 11343 | 1,8,36,37,<br>39,40,41,4<br>4 | 2,3,4,5,6,7<br>,38,42,43 | 23 | F1LM93,O35547,P01835,P08290,P08723,P10715,P11883,P19629,P20762,P25031,P31044,P36374,P47727,P54921,P60905,P83748,P97605,Q5GRG2,Q5HZV9,Q6AYL6,Q6AYR8,Q6IE51,Q9JHB9                                                         |
| 11344 | 1,8,36,37,<br>39,40,42,4<br>3 | 2,3,4,5,6,7<br>,38,41,44 | 17 | O35547,O35568,P00774,P01835,P13596,P25031,P38444,P49744,P80201,P97605,P98089,Q01205,Q05695,Q5M871,Q62635,Q6IE51,Q8CIZ5                                                                                                   |
| 11345 | 1,8,36,37,<br>39,40,42,4<br>4 | 2,3,4,5,6,7<br>,38,41,43 | 14 | O35547,P01835,P02631,P11883,P20762,P25031,P49744,P50116,P54921,P83748,P97605,Q5HZV9,Q6IE51,Q7TPB1                                                                                                                        |
| 11346 | 1,8,36,37,<br>39,40,43,4<br>4 | 2,3,4,5,6,7<br>,38,41,42 | 31 | F1LM93,G3V686,O35547,P02781,P04905,P05369,P08010,P08290,P08753,P13596,P16086,P25031,P36374,P38444,P47727,P49744,P54921,P60905,P80201,P97605,Q5XI73,Q62740,Q62753,Q62902,Q63357,Q6AYL6,Q6IE51,Q812E4,Q8CIZ5,Q8CJ52,Q9QZQ5 |
| 11347 | 1,8,36,37,<br>39,41,42,4<br>3 | 2,3,4,5,6,7<br>,38,40,44 | 6  | P01835,P22006,P25031,P36376,P97605,Q6IE51                                                                                                                                                                                |

|       |                               |                          |    |                                                                                                          |
|-------|-------------------------------|--------------------------|----|----------------------------------------------------------------------------------------------------------|
| 11348 | 1,8,36,37,<br>39,41,42,4<br>4 | 2,3,4,5,6,7<br>,38,40,43 | 7  | P01835,P11883,P20762,P25031,P36376,P83748,Q6IE51                                                         |
| 11349 | 1,8,36,37,<br>39,41,43,4<br>4 | 2,3,4,5,6,7<br>,38,40,42 | 15 | O35547,P02781,P05369,P08290,P13596,P25031,P36374,P36376,P97605,Q5XI73,Q6IE51,Q812E4,Q9JHB9,Q9QZ76,Q9QZQ5 |
| 11350 | 1,8,36,37,<br>39,42,43,4<br>4 | 2,3,4,5,6,7<br>,38,40,41 | 5  | P13596,P25031,P36376,P97605,Q6IE51                                                                       |
| 11351 | 1,8,36,37,<br>40,41,42,4<br>3 | 2,3,4,5,6,7<br>,38,39,44 | 6  | O35568,P01835,P25031,P34901,P97605,Q6IE51                                                                |
| 11352 | 1,8,36,37,<br>40,41,42,4<br>4 | 2,3,4,5,6,7<br>,38,39,43 | 10 | P01835,P02625,P11883,P20762,P25031,P34901,P83748,P97605,Q6IE51,Q7TPB1                                    |
| 11353 | 1,8,36,37,<br>40,41,43,4<br>4 | 2,3,4,5,6,7<br>,38,39,42 | 13 | O35547,P04905,P05369,P08010,P08290,P19218,P25031,P36374,P47727,P97605,Q5XI73,Q6IE51,Q9QZQ5               |
| 11354 | 1,8,36,37,<br>40,42,43,4<br>4 | 2,3,4,5,6,7<br>,38,39,41 | 10 | O35547,O88267,P02625,P08010,P25031,P38444,P80201,P97605,Q6IE51,Q7TPB1                                    |
| 11355 | 1,8,36,37,<br>41,42,43,4<br>4 | 2,3,4,5,6,7<br>,38,39,40 | 4  | P25031,P36376,P97605,Q6IE51                                                                              |
| 11356 | 1,8,36,38,<br>39,40,41,4<br>2 | 2,3,4,5,6,7<br>,37,43,44 | 7  | P02631,P10758,P11762,P13432,P20762,P83748,Q6IE51                                                         |
| 11357 | 1,8,36,38,<br>39,40,41,4<br>3 | 2,3,4,5,6,7<br>,37,42,44 | 9  | G3V686,P08290,P36374,P55016,P97605,Q5XI73,Q6IFV1,Q99376,Q9QZQ5                                           |
| 11358 | 1,8,36,38,<br>39,40,41,4<br>4 | 2,3,4,5,6,7<br>,37,42,43 | 12 | G3V686,P02631,P08290,P10715,P19629,P20762,P31044,P83748,P97605,Q5GRG2,Q62975,Q9QZQ5                      |
| 11359 | 1,8,36,38,<br>39,40,42,4<br>3 | 2,3,4,5,6,7<br>,37,41,44 | 10 | G3V686,P02631,P11762,P15999,P38444,P80201,P97605,Q01205,Q6IE51,Q9QZQ5                                    |
| 11360 | 1,8,36,38,<br>39,40,42,4<br>4 | 2,3,4,5,6,7<br>,37,41,43 | 10 | G3V686,P02631,P11762,P15999,P20762,P38444,P83748,P97605,Q6IE51,Q7TPB1                                    |
| 11361 | 1,8,36,38,<br>39,40,43,4<br>4 | 2,3,4,5,6,7<br>,37,41,42 | 9  | G3V686,P08290,P13596,P38444,P80201,P97605,Q5XI73,Q63357,Q9QZQ5                                           |
| 11362 | 1,8,36,38,<br>39,41,42,4<br>3 | 2,3,4,5,6,7<br>,37,40,44 | 8  | P11762,P13432,P15999,P22006,P36376,Q5XFX0,Q6IE51,Q99376                                                  |

|       |                               |                          |    |                                                                              |
|-------|-------------------------------|--------------------------|----|------------------------------------------------------------------------------|
| 11363 | 1,8,36,38,<br>39,41,42,4<br>4 | 2,3,4,5,6,7<br>,37,40,43 | 7  | P02631,P11762,P15999,P20762,P36376,P83748,Q6IE51                             |
| 11364 | 1,8,36,38,<br>39,41,43,4<br>4 | 2,3,4,5,6,7<br>,37,40,42 | 6  | P13596,P36374,P36376,P97605,Q5XI73,Q9QZQ5                                    |
| 11365 | 1,8,36,38,<br>39,42,43,4<br>4 | 2,3,4,5,6,7<br>,37,40,41 | 6  | P11762,P15999,P36376,P38444,P97605,Q6IE51                                    |
| 11366 | 1,8,36,38,<br>40,41,42,4<br>3 | 2,3,4,5,6,7<br>,37,39,44 | 6  | P15999,P36376,P38444,P97605,Q6IE51,Q9QZQ5                                    |
| 11367 | 1,8,36,38,<br>40,41,42,4<br>4 | 2,3,4,5,6,7<br>,37,39,43 | 9  | P02625,P02631,P14480,P15999,P20762,P36376,P83748,Q6IE51,Q7TPB1               |
| 11368 | 1,8,36,38,<br>40,41,43,4<br>4 | 2,3,4,5,6,7<br>,37,39,42 | 5  | P08290,P97605,Q5XI73,Q6IE51,Q9QZQ5                                           |
| 11369 | 1,8,36,38,<br>40,42,43,4<br>4 | 2,3,4,5,6,7<br>,37,39,41 | 9  | P02625,P11762,P15999,P38444,P80201,P97605,Q6IE51,Q7TPB1,Q9QZQ5               |
| 11370 | 1,8,36,38,<br>41,42,43,4<br>4 | 2,3,4,5,6,7<br>,37,39,40 | 4  | P15999,P36376,P97605,Q6IE51                                                  |
| 11371 | 1,8,36,39,<br>40,41,42,4<br>3 | 2,3,4,5,6,7<br>,37,38,44 | 5  | P01835,P11762,P25031,Q6IE51,Q9QZQ5                                           |
| 11372 | 1,8,36,39,<br>40,41,42,4<br>4 | 2,3,4,5,6,7<br>,37,38,43 | 11 | P01835,P02631,P10715,P11762,P19629,P20762,P25031,P31044,P83748,Q6IE51,Q7TPB1 |
| 11373 | 1,8,36,39,<br>40,41,43,4<br>4 | 2,3,4,5,6,7<br>,37,38,42 | 10 | P08290,P10715,P12785,P19629,P25031,P97605,Q5XI73,Q6AYL6,Q6IE51,Q9QZQ5        |
| 11374 | 1,8,36,39,<br>40,42,43,4<br>4 | 2,3,4,5,6,7<br>,37,38,41 | 9  | P11762,P25031,P38444,P80201,P97605,Q01205,Q6IE51,Q7TPB1,Q9QZQ5               |
| 11375 | 1,8,36,39,<br>41,42,43,4<br>4 | 2,3,4,5,6,7<br>,37,38,40 | 4  | P11762,P25031,P36376,Q6IE51                                                  |
| 11376 | 1,8,36,40,<br>41,42,43,4<br>4 | 2,3,4,5,6,7<br>,37,38,39 | 7  | P02625,P11762,P19218,P25031,P97605,Q6IE51,Q7TPB1                             |
| 11377 | 1,8,37,38,<br>39,40,41,4<br>2 | 2,3,4,5,6,7<br>,36,43,44 | 11 | G3V686,P02631,P10715,P13432,P20762,P34901,P35281,P83748,Q01205,Q07116,Q6IE51 |

|       |                               |                          |    |                                                                                                                                                                                                                                                      |
|-------|-------------------------------|--------------------------|----|------------------------------------------------------------------------------------------------------------------------------------------------------------------------------------------------------------------------------------------------------|
| 11378 | 1,8,37,38,<br>39,40,41,4<br>3 | 2,3,4,5,6,7<br>,36,42,44 | 27 | G3V686,P04905,P05539,P08010,P08290,P08649,P10715,P11442,P13432,P13596,P35281,P36374,P55016,P60905,P97554,P97605,Q01205,Q07116,Q5XI73,Q62740,Q62753,Q63514,Q64605,Q6IFV1,Q812E4,Q8CJ52,Q9QZQ5                                                         |
| 11379 | 1,8,37,38,<br>39,40,41,4<br>4 | 2,3,4,5,6,7<br>,36,42,43 | 32 | G3V686,O35547,P04905,P05539,P06911,P08290,P08649,P08723,P10715,P13432,P13596,P16086,P16636,P19629,P20762,P31044,P35281,P36374,P47727,P60905,P83748,P85971,P97605,Q07116,Q5GRG2,Q62975,Q63357,Q6AYL6,Q6AYR9,Q6IE51,Q812E4,Q9QZQ5                      |
| 11380 | 1,8,37,38,<br>39,40,42,4<br>3 | 2,3,4,5,6,7<br>,36,41,44 | 20 | G3V686,P08010,P08649,P13596,P35281,P38444,P49744,P80201,P97605,Q01205,Q07116,Q62740,Q63467,Q63475,Q64611,Q6IE51,Q6IFV1,Q812E4,Q99MH3,Q9QZQ5                                                                                                          |
| 11381 | 1,8,37,38,<br>39,40,42,4<br>4 | 2,3,4,5,6,7<br>,36,41,43 | 15 | G3V686,O54858,P02631,P05539,P11762,P13596,P20762,P35281,P49744,P80202,P83748,P97605,Q01205,Q07116,Q6IE51                                                                                                                                             |
| 11382 | 1,8,37,38,<br>39,40,43,4<br>4 | 2,3,4,5,6,7<br>,36,41,42 | 35 | F1LM93,G3V686,O35547,P02781,P04905,P05539,P08010,P08290,P08649,P08753,P13596,P16086,P23593,P35281,P36374,P38444,P54921,P60905,P80201,P97554,P97605,Q01205,Q07116,Q09030,Q5XI73,Q62740,Q62753,Q63357,Q6AYL6,Q6AYR9,Q6IE51,Q6IFV1,Q812E4,Q8CJ52,Q9QZQ5 |
| 11383 | 1,8,37,38,<br>39,41,42,4<br>3 | 2,3,4,5,6,7<br>,36,40,44 | 14 | G3V686,P00731,P06866,P13432,P13596,P22006,P36374,P36376,P97605,Q01205,Q6IE51,Q6IFV1,Q6P6T1,Q9QZQ5                                                                                                                                                    |
| 11384 | 1,8,37,38,<br>39,41,42,4<br>4 | 2,3,4,5,6,7<br>,36,40,43 | 6  | P05539,P13432,P20762,P36376,P83748,Q6IE51                                                                                                                                                                                                            |
| 11385 | 1,8,37,38,<br>39,41,43,4<br>4 | 2,3,4,5,6,7<br>,36,40,42 | 19 | G3V686,P00731,P02781,P02782,P05539,P08290,P13596,P16086,P23593,P36374,P36376,P97605,Q09030,Q5XI73,Q62740,Q6IE51,Q6IFV1,Q812E4,Q9QZQ5                                                                                                                 |
| 11386 | 1,8,37,38,<br>39,42,43,4<br>4 | 2,3,4,5,6,7<br>,36,40,41 | 12 | G3V686,P05539,P13596,P23593,P36376,P97605,Q01205,Q62740,Q6IE51,Q6IFV1,Q812E4,Q9QZQ5                                                                                                                                                                  |
| 11387 | 1,8,37,38,<br>40,41,42,4<br>3 | 2,3,4,5,6,7<br>,36,39,44 | 11 | G3V686,O35568,P06866,P34901,P36376,P55016,P97605,Q01205,Q07116,Q6IE51,Q9QZQ5                                                                                                                                                                         |
| 11388 | 1,8,37,38,<br>40,41,42,4<br>4 | 2,3,4,5,6,7<br>,36,39,43 | 12 | G3V686,P02625,P06760,P10715,P20762,P34901,P36376,P83748,P97605,Q01205,Q07116,Q6IE51                                                                                                                                                                  |
| 11389 | 1,8,37,38,<br>40,41,43,4<br>4 | 2,3,4,5,6,7<br>,36,39,42 | 21 | G3V686,P04905,P05539,P08010,P08290,P08649,P10715,P13596,P16086,P36374,P47727,P55016,P97605,Q01205,Q07116,Q5XI73,Q6AYR9,Q6IE51,Q6IFV1,Q812E4,Q9QZQ5                                                                                                   |
| 11390 | 1,8,37,38,<br>40,42,43,4<br>4 | 2,3,4,5,6,7<br>,36,39,41 | 16 | G3V686,P02625,P05539,P08010,P08649,P13596,P36376,P38444,P80201,P80202,P97605,Q01205,Q07116,Q63475,Q6IE51,Q9QZQ5                                                                                                                                      |
| 11391 | 1,8,37,38,<br>41,42,43,4<br>4 | 2,3,4,5,6,7<br>,36,39,40 | 6  | P00731,P13596,P36376,P97605,Q6IE51,Q9QZQ5                                                                                                                                                                                                            |
| 11392 | 1,8,37,39,<br>40,41,42,4<br>3 | 2,3,4,5,6,7<br>,36,38,44 | 13 | G3V686,O35568,P01835,P13432,P13596,P25031,P34901,P49744,P97605,Q01205,Q62740,Q6IE51,Q9QZQ5                                                                                                                                                           |



|       |                                |                          |    |                                                                                                                                                                                                                                                                                                       |
|-------|--------------------------------|--------------------------|----|-------------------------------------------------------------------------------------------------------------------------------------------------------------------------------------------------------------------------------------------------------------------------------------------------------|
| 11393 | 1,8,37,39,<br>40,41,42,4<br>4  | 2,3,4,5,6,7<br>,36,38,43 | 15 | P01835,P02631,P10715,P11762,P19629,P20762,P25031,P31044,P34901,P49744,P83748,Q01205,Q5GRG2,Q6AYL6,Q6IE51                                                                                                                                                                                              |
| 11394 | 1,8,37,39,<br>40,41,43,4<br>4  | 2,3,4,5,6,7<br>,36,38,42 | 33 | F1LM93,G3V686,O35547,P02781,P04905,P05369,P08010,P08290,P08649,P08723,P08753,P10715,P13596,P19218,P19629,P25031,P31044,P36374,P47727,P60905,P97554,P97605,Q01205,Q5GRG2,Q5XI73,Q62740,Q62902,Q63357,Q6AYL6,Q6IE51,Q812E4,Q8CJ52,Q9QZQ5                                                                |
| 11395 | 1,8,37,39,<br>40,42,43,4<br>4  | 2,3,4,5,6,7<br>,36,38,41 | 17 | G3V686,O35547,P08010,P08649,P11762,P13596,P25031,P49744,P80201,P97605,Q01205,Q62740,Q63475,Q6AYL6,Q6IE51,Q812E4,Q9QZQ5                                                                                                                                                                                |
| 11396 | 1,8,37,39,<br>41,42,43,4<br>4  | 2,3,4,5,6,7<br>,36,38,40 | 4  | P00731,P13596,P36376,Q6IE51                                                                                                                                                                                                                                                                           |
| 11397 | 1,8,37,40,<br>41,42,43,4<br>4  | 2,3,4,5,6,7<br>,36,38,39 | 10 | P02625,P08010,P13596,P19218,P25031,P34901,P97605,Q01205,Q6IE51,Q9QZQ5                                                                                                                                                                                                                                 |
| 11398 | 1,8,38,39,<br>40,41,42,4<br>3  | 2,3,4,5,6,7<br>,36,37,44 | 11 | G3V686,P02631,P11762,P13432,P53792,P97605,Q01205,Q07116,Q6IE51,Q99376,Q9QZQ5                                                                                                                                                                                                                          |
| 11399 | 1,8,38,39,<br>40,41,42,4<br>4  | 2,3,4,5,6,7<br>,36,37,43 | 13 | G3V686,P02631,P10715,P11762,P13432,P19629,P20762,P31044,P83748,Q01205,Q07116,Q6IE51,Q9QZQ5                                                                                                                                                                                                            |
| 11400 | 1,8,38,39,<br>40,41,43,4<br>4  | 2,3,4,5,6,7<br>,36,37,42 | 16 | G3V686,P08290,P08649,P10715,P11762,P13596,P19629,P31044,P97554,P97605,Q01205,Q07116,Q09030,Q5XI73,Q6AYL6,Q9QZQ5                                                                                                                                                                                       |
| 11401 | 1,8,38,39,<br>40,42,43,4<br>4  | 2,3,4,5,6,7<br>,36,37,41 | 13 | G3V686,P02631,P11762,P13596,P38444,P80201,P80202,P97605,Q01205,Q07116,Q64611,Q6IE51,Q9QZQ5                                                                                                                                                                                                            |
| 11402 | 1,8,38,39,<br>41,42,43,4<br>4  | 2,3,4,5,6,7<br>,36,37,40 | 7  | P00731,P11762,P13432,P13596,P36376,Q6IE51,Q9QZQ5                                                                                                                                                                                                                                                      |
| 11403 | 1,8,38,40,<br>41,42,43,4<br>4  | 2,3,4,5,6,7<br>,36,37,39 | 7  | G3V686,P11762,P97605,Q01205,Q07116,Q6IE51,Q9QZQ5                                                                                                                                                                                                                                                      |
| 11404 | 1,8,39,40,<br>41,42,43,4<br>4  | 2,3,4,5,6,7<br>,36,37,38 | 7  | P10715,P11762,P19629,Q01205,Q6AYL6,Q6IE51,Q9QZQ5                                                                                                                                                                                                                                                      |
| 11405 | 1,36,37,38<br>,39,40,41,<br>42 | 2,3,4,5,6,7<br>,8,43,44  | 26 | D3ZUK3,G3V686,O35568,P02631,P07171,P10758,P11883,P13432,P20762,P35281,P35444,P36374,P38444,P49744,P55016,P60905,P83748,P85971,P97605,Q01205,Q07116,Q5M819,Q5M871,Q63514,Q6IE51,Q9QZQ5                                                                                                                 |
| 11406 | 1,36,37,38<br>,39,40,41,<br>43 | 2,3,4,5,6,7<br>,8,42,44  | 42 | F1LM93,G3V686,O08815,O35547,O35568,P02781,P04905,P07171,P07897,P08010,P08290,P08723,P08753,P13432,P20762,P22006,P35281,P35444,P36374,P38444,P47727,P49744,P55016,P60905,P85971,P97554,P97605,Q01205,Q07116,Q4AEF8,Q5M819,Q5XI73,Q62740,Q62753,Q63357,Q63514,Q6IFV1,Q812E4,Q9JID2,Q9QZ76,Q9QZQ5,Q9Z0V6 |
| 11407 | 1,36,37,38<br>,39,40,41,<br>44 | 2,3,4,5,6,7<br>,8,42,43  | 41 | F1LM93,G3V686,O08815,O35547,P02631,P02781,P04905,P08010,P08290,P08723,P08753,P10715,P11883,P16086,P19629,P20762,P36374,P40241,P47727,P49744,P54921,P55016,P60905,P83748,P85971,P97605,Q01205,Q07116,Q09030,Q5GRG2,Q5M819,Q62975,Q63357,Q63514,Q6GMN2,Q6IE51,Q6Q7Y5,Q812E4,Q9JHB9,Q9QZQ5,Q9Z0V6        |

|       |                                |                         |    |                                                                                                                                                                                                                                                                                                                                                 |
|-------|--------------------------------|-------------------------|----|-------------------------------------------------------------------------------------------------------------------------------------------------------------------------------------------------------------------------------------------------------------------------------------------------------------------------------------------------|
| 11408 | 1,36,37,38<br>,39,40,42,<br>43 | 2,3,4,5,6,7<br>,8,41,44 | 35 | D3ZUK3,G3V686,O35547,O35568,O88267,P02631,P06866,P07171,P07897,P08010,P20762,P35281,P35444,P36374,P38444,P49744,P50116,P55016,P60905,P80201,P97605,Q01205,Q07116,Q498S8,Q5M871,Q62740,Q62753,Q63475,Q63514,Q64611,Q6IE51,Q6IFV1,Q812E4,Q9JID2,Q9QZQ5                                                                                            |
| 11409 | 1,36,37,38<br>,39,40,42,<br>44 | 2,3,4,5,6,7<br>,8,41,43 | 27 | D3ZUK3,G3V686,O35547,O54858,P02631,P07171,P11883,P20762,P38444,P49744,P50116,P54921,P60905,P80201,P80202,P83748,P85971,P97605,Q01205,Q07116,Q09030,Q498S8,Q5M871,Q63357,Q6IE51,Q7TPB1,Q9QZQ5                                                                                                                                                    |
| 11410 | 1,36,37,38<br>,39,40,43,<br>44 | 2,3,4,5,6,7<br>,8,41,42 | 48 | F1LM93,G3V686,O08815,O35547,P02781,P04905,P05369,P07171,P07861,P07897,P08010,P08290,P08723,P08753,P09456,P13596,P16086,P20762,P35444,P36374,P38444,P49744,P50116,P54921,P60905,P80201,P85971,P97605,Q01205,Q07116,Q09030,Q498S8,Q5M871,Q62740,Q62753,Q63357,Q63514,Q6AYR9,Q6GMN2,Q6IE51,Q6IFV1,Q812E4,Q8CJ52,Q9JID2,Q9JJS8,Q9QZK9,Q9QZQ5,Q9Z0V6 |
| 11411 | 1,36,37,38<br>,39,41,42,<br>43 | 2,3,4,5,6,7<br>,8,40,44 | 20 | D3ZUK3,O35568,P06866,P07171,P13432,P20762,P22006,P36374,P36376,P53792,P55016,P97605,Q01205,Q5M819,Q5XFX0,Q6AYS4,Q6IE51,Q9QZ76,Q9QZQ5,Q9Z0V6                                                                                                                                                                                                     |
| 11412 | 1,36,37,38<br>,39,41,42,<br>44 | 2,3,4,5,6,7<br>,8,40,43 | 14 | D3ZUK3,P02631,P11883,P13432,P20762,P36374,P36376,P83748,P97605,Q01205,Q09030,Q5M819,Q6IE51,Q9QZQ5                                                                                                                                                                                                                                               |
| 11413 | 1,36,37,38<br>,39,41,43,<br>44 | 2,3,4,5,6,7<br>,8,40,42 | 30 | O08815,O35547,P02781,P05369,P08010,P08290,P08753,P16086,P20762,P22006,P23593,P36374,P36376,P55016,P60905,P97605,Q01205,Q09030,Q4AEF8,Q5M819,Q62753,Q63357,Q63514,Q6IFV1,Q812E4,Q9JHB9,Q9JJS8,Q9QZ76,Q9QZQ5,Q9Z0V6                                                                                                                               |
| 11414 | 1,36,37,38<br>,39,42,43,<br>44 | 2,3,4,5,6,7<br>,8,40,41 | 19 | D3ZUK3,P06866,P07171,P20762,P23593,P36374,P36376,P38444,P80201,P97605,Q01205,Q09030,Q5M871,Q62753,Q63617,Q6IE51,Q812E4,Q9JJS8,Q9QZQ5                                                                                                                                                                                                            |
| 11415 | 1,36,37,38<br>,40,41,42,<br>43 | 2,3,4,5,6,7<br>,8,39,44 | 20 | D3ZUK3,O35568,O88267,P06866,P07171,P08010,P20762,P20766,P35444,P36374,P36376,P38444,P55016,P97605,Q01205,Q07116,Q5M819,Q6AYS4,Q6IE51,Q9QZQ5                                                                                                                                                                                                     |
| 11416 | 1,36,37,38<br>,40,41,42,<br>44 | 2,3,4,5,6,7<br>,8,39,43 | 17 | D3ZUK3,P02625,P02631,P07171,P11883,P20762,P20766,P36376,P38444,P83748,P85971,P97605,Q01205,Q07116,Q6IE51,Q7TPB1,Q9QZQ5                                                                                                                                                                                                                          |
| 11417 | 1,36,37,38<br>,40,41,43,<br>44 | 2,3,4,5,6,7<br>,8,39,42 | 33 | F1LM93,G3V686,O08815,O35547,P02781,P04905,P05369,P07171,P08010,P08290,P08723,P08753,P16086,P19218,P20762,P20766,P36374,P38444,P47727,P55016,P60905,P97605,Q01205,Q07116,Q4AEF8,Q5XI73,Q62753,Q63357,Q6AYR9,Q6IE51,Q812E4,Q9QZQ5,Q9Z0V6                                                                                                          |
| 11418 | 1,36,37,38<br>,40,42,43,<br>44 | 2,3,4,5,6,7<br>,8,39,41 | 26 | D3ZUK3,G3V686,O35547,O88267,P02625,P07171,P08010,P15999,P20762,P36376,P38444,P80201,P80202,P97605,Q01205,Q07116,Q498S8,Q5M871,Q5ZQU0,Q62753,Q63475,Q6IE51,Q7TPB1,Q80YN4,Q99041,Q9QZQ5                                                                                                                                                           |
| 11419 | 1,36,37,38<br>,41,42,43,<br>44 | 2,3,4,5,6,7<br>,8,39,40 | 13 | P06866,P07171,P15999,P20762,P20766,P36374,P36376,P97605,Q01205,Q5M819,Q6AYS4,Q6IE51,Q9QZQ5                                                                                                                                                                                                                                                      |
| 11420 | 1,36,37,39<br>,40,41,42,<br>43 | 2,3,4,5,6,7<br>,8,38,44 | 22 | D3ZUK3,O35547,O35568,P01835,P02631,P07171,P07897,P20762,P22006,P25031,P35444,P36374,P49744,P53792,P97605,Q01205,Q5M871,Q63514,Q6IE51,Q8CG08,Q9QZQ5,Q9Z0V6                                                                                                                                                                                       |
| 11421 | 1,36,37,39<br>,40,41,42,<br>44 | 2,3,4,5,6,7<br>,8,38,43 | 25 | D3ZUK3,O35547,O54858,P01835,P02631,P07171,P08723,P10715,P11883,P19629,P20762,P25031,P36374,P49744,P50116,P52590,P83748,P85971,P97605,Q01205,Q5M871,Q6IE51,Q7TPB1,Q80WL1,Q9QZQ5                                                                                                                                                                  |
| 11422 | 1,36,37,39<br>,40,41,43,<br>44 | 2,3,4,5,6,7<br>,8,38,42 | 41 | F1LM93,O08815,O35547,P02781,P04905,P05369,P07171,P08010,P08290,P08723,P10715,P19218,P19629,P20762,P25031,P35444,P36374,P47727,P49744,P50116,P54921,P60905,P97554,P97605,Q01205,Q4AEF8,Q5XI73,Q62753,Q62902,Q63357,Q63514,Q6AYL6,Q6GMN2,Q6IE51,Q812E4,Q8CJ52,Q9JHB9,Q9QZK9,Q9QZQ5,Q9Z0V6                                                         |

|       |                                |                         |    |                                                                                                                                                                                                                                                                                                                                                                             |
|-------|--------------------------------|-------------------------|----|-----------------------------------------------------------------------------------------------------------------------------------------------------------------------------------------------------------------------------------------------------------------------------------------------------------------------------------------------------------------------------|
| 11423 | 1,36,37,39<br>.40,42,43,<br>44 | 2,3,4,5,6,7<br>,8,38,41 | 27 | D3ZUK3,O35547,P05369,P07171,P08010,P08753,P11762,P20762,P25031,P35444,P38444,P49744,P50115,P50116,P60905,P80201,P97605,Q01205,Q498S8,Q5M871,Q62753,Q63357,Q6IE51,Q7TPB1,Q812E4,Q8CIZ5,Q9QZQ5                                                                                                                                                                                |
| 11424 | 1,36,37,39<br>.41,42,43,<br>44 | 2,3,4,5,6,7<br>,8,38,40 | 12 | P05369,P07171,P20762,P22006,P36374,P36376,P97605,Q01205,Q6AYS4,Q6IE51,Q9QZQ5,Q9Z0V6                                                                                                                                                                                                                                                                                         |
| 11425 | 1,36,37,40<br>.41,42,43,<br>44 | 2,3,4,5,6,7<br>,8,38,39 | 18 | D3ZUK3,O35547,O35568,P02625,P05369,P07171,P08010,P19218,P20762,P25031,P97605,Q01205,Q5M871,Q6AYS4,Q6IE51,Q7TPB1,Q80WL1,Q9QZQ5                                                                                                                                                                                                                                               |
| 11426 | 1,36,38,39<br>.40,41,42,<br>43 | 2,3,4,5,6,7<br>,8,37,44 | 17 | D3ZUK3,P02631,P07171,P11762,P13432,P20762,P22006,P36374,P38444,P53792,P55016,P97605,Q01205,Q07116,Q6IFU7,Q99376,Q9QZQ5                                                                                                                                                                                                                                                      |
| 11427 | 1,36,38,39<br>.40,41,42,<br>44 | 2,3,4,5,6,7<br>,8,37,43 | 19 | D3ZUK3,O54858,P02631,P07171,P10715,P10758,P11762,P11883,P13432,P19629,P20762,P83748,P85971,P97605,Q01205,Q07116,Q6IE51,Q7TPB1,Q9QZQ5                                                                                                                                                                                                                                        |
| 11428 | 1,36,38,39<br>.40,41,43,<br>44 | 2,3,4,5,6,7<br>,8,37,42 | 21 | G3V686,P02631,P04905,P07171,P08290,P08753,P10715,P11762,P19629,P20762,P36374,P38444,P55016,P97605,Q01205,Q07116,Q09030,Q4AEF8,Q63357,Q6AYL6,Q9QZQ5                                                                                                                                                                                                                          |
| 11429 | 1,36,38,39<br>.40,42,43,<br>44 | 2,3,4,5,6,7<br>,8,37,41 | 22 | D3ZUK3,G3V686,P02631,P07171,P11762,P15999,P20762,P38444,P80201,P80202,P97605,Q01205,Q07116,Q09030,Q498S8,Q5M871,Q6IE51,Q6IFU7,Q7TPB1,Q80YN4,Q99041,Q9QZQ5                                                                                                                                                                                                                   |
| 11430 | 1,36,38,39<br>.41,42,43,<br>44 | 2,3,4,5,6,7<br>,8,37,40 | 13 | P02631,P07171,P11762,P15999,P20762,P22006,P36376,P97605,Q01205,Q09030,Q6IE51,Q6IFU7,Q9QZQ5                                                                                                                                                                                                                                                                                  |
| 11431 | 1,36,38,40<br>.41,42,43,<br>44 | 2,3,4,5,6,7<br>,8,37,39 | 15 | D3ZUK3,P02631,P07171,P11762,P15999,P20762,P38444,P55016,P80202,P97605,Q01205,Q07116,Q6IE51,Q7TPB1,Q9QZQ5                                                                                                                                                                                                                                                                    |
| 11432 | 1,36,39,40<br>.41,42,43,<br>44 | 2,3,4,5,6,7<br>,8,37,38 | 12 | D3ZUK3,P02631,P07171,P10715,P11762,P19629,P20762,P97605,Q01205,Q6IE51,Q7TPB1,Q9QZQ5                                                                                                                                                                                                                                                                                         |
| 11433 | 1,37,38,39<br>.40,41,42,<br>43 | 2,3,4,5,6,7<br>,8,36,44 | 38 | D3ZUK3,G3V686,O35568,O54858,P02631,P06866,P07171,P07897,P08010,P10960,P13432,P20762,P35444,P36374,P49744,P53792,P55016,P60571,P60905,P85971,P97605,Q01205,Q07116,Q09030,Q4AEF8,Q5ZQU0,Q62740,Q63467,Q63514,Q64611,Q6AYS4,Q6IE51,Q6IFU7,Q6IFV1,Q812E4,Q8CG08,Q99MH3,Q9QZQ5                                                                                                   |
| 11434 | 1,37,38,39<br>.40,41,42,<br>44 | 2,3,4,5,6,7<br>,8,36,43 | 31 | D3ZUK3,G3V686,O54858,P02631,P07171,P07897,P10715,P10960,P11762,P11883,P13432,P19629,P20762,P36374,P49744,P51886,P55016,P60905,P80202,P83748,P85971,P97605,Q01177,Q01205,Q07116,Q09030,Q498S8,Q6AYS4,Q6IE51,Q8N7M5,Q9QZQ5                                                                                                                                                    |
| 11435 | 1,37,38,39<br>.40,41,43,<br>44 | 2,3,4,5,6,7<br>,8,36,42 | 52 | D3ZUK3,F1LM93,G3V686,O08815,O35547,O54858,P02781,P04905,P05369,P05539,P07171,P07897,P08010,P08290,P08649,P08723,P08753,P10715,P12368,P13432,P13596,P16086,P19629,P20762,P23593,P35444,P36374,P47727,P49744,P53792,P55016,P60905,P85971,P97554,P97605,Q01205,Q07116,Q09030,Q4AEF8,Q5XI73,Q62740,Q62753,Q63357,Q63514,Q6AYL6,Q6AYR9,Q6AYS4,Q6IE51,Q6IFV1,Q812E4,Q8CJ52,Q9QZQ5 |
| 11436 | 1,37,38,39<br>.40,42,43,<br>44 | 2,3,4,5,6,7<br>,8,36,41 | 45 | D3ZUK3,G3V686,O35547,O54858,P02631,P04905,P04937,P07171,P07897,P08010,P08649,P08753,P10960,P11762,P13596,P20762,P35444,P36374,P38444,P49744,P50116,P60905,P80201,P80202,P85971,P97605,Q01205,Q07116,Q09030,Q498S8,Q5M871,Q5ZQU0,Q62740,Q62753,Q63357,Q63467,Q63475,Q64611,Q6AYS4,Q6IE51,Q812E4,Q8N7M5,Q99041,Q99MH3,Q9QZQ5                                                  |
| 11437 | 1,37,38,39<br>.41,42,43,<br>44 | 2,3,4,5,6,7<br>,8,36,40 | 23 | D3ZUK3,G3V686,P00731,P06866,P07171,P07897,P11762,P13432,P20762,P23593,P36374,P36376,P53792,P55016,P97605,Q01205,Q07116,Q09030,Q6AYS4,Q6IE51,Q812E4,Q9JJS8,Q9QZQ5                                                                                                                                                                                                            |

|       |                                |                                   |    |                                                                                                                                                                                                                                                                                                                                                                                                                                            |
|-------|--------------------------------|-----------------------------------|----|--------------------------------------------------------------------------------------------------------------------------------------------------------------------------------------------------------------------------------------------------------------------------------------------------------------------------------------------------------------------------------------------------------------------------------------------|
| 11438 | 1,37,38,40<br>,41,42,43,<br>44 | 2,3,4,5,6,7<br>,8,36,39           | 22 | D3ZUK3,G3V686,O35568,O54858,P04905,P07171,P07897,P08010,P10960,P20762,P36374,P55016,P80202,P85971,P97605,Q01205,Q07116,Q09030,Q5ZQU0,Q6AYS4,Q6IE51,Q9QZQ5                                                                                                                                                                                                                                                                                  |
| 11439 | 1,37,39,40<br>,41,42,43,<br>44 | 2,3,4,5,6,7<br>,8,36,38           | 32 | D3ZUK3,G3V686,O35547,O54858,P04905,P05369,P07171,P07897,P08010,P10715,P11762,P19218,P19629,P20762,P35444,P36374,P49744,P53792,P85971,P97554,P97605,Q01205,Q07116,Q09030,Q5M871,Q63514,Q6AYL6,Q6AYS4,Q6IE51,Q812E4,Q8CG08,Q9QZQ5                                                                                                                                                                                                            |
| 11440 | 1,38,39,40<br>,41,42,43,<br>44 | 2,3,4,5,6,7<br>,8,36,37           | 25 | D3ZUK3,G3V686,O54858,P02631,P07171,P07897,P10715,P10960,P11762,P13432,P19629,P20762,P53792,P55016,P80202,P85971,P97605,Q01205,Q07116,Q09030,Q6AYL6,Q6AYS4,Q6IE51,Q6IFU7,Q9QZQ5                                                                                                                                                                                                                                                             |
| 11441 | 2,3,4,5,6,7<br>,8,36           | 1,37,38,39<br>,40,41,42,<br>43,44 | 51 | D3ZUK3,G3V686,O35568,O54858,P02631,P04905,P04937,P05539,P07171,P07897,P08010,P08753,P10715,P10960,P11762,P13432,P13596,P19629,P20762,P35444,P36374,P49744,P51886,P53792,P55016,P60905,P80202,P83748,P85971,P97605,Q01205,Q07116,Q09030,Q498S8,Q4AEF8,Q5M871,Q5ZQU0,Q62740,Q63357,Q63467,Q63514,Q63532,Q6AYL6,Q6AYS4,Q6IE51,Q812E4,Q8CG08,Q8N7M5,Q91XN4,Q99MH3,Q9QZQ5                                                                       |
| 11442 | 2,3,4,5,6,7<br>,8,37           | 1,36,38,39<br>,40,41,42,<br>43,44 | 23 | D3ZUK3,G3V686,P02631,P07171,P07897,P10960,P11762,P19629,P20762,P36374,P38444,P53792,P55016,P80202,P85971,P97605,Q01205,Q07116,Q09030,Q63532,Q6IE51,Q7TPB1,Q9QZQ5                                                                                                                                                                                                                                                                           |
| 11443 | 2,3,4,5,6,7<br>,8,38           | 1,36,37,39<br>,40,41,42,<br>43,44 | 38 | D3ZUK3,G3V686,O35547,O35568,P02631,P04905,P05369,P07171,P07897,P08010,P08753,P11762,P19218,P19629,P20762,P25031,P35444,P36374,P38444,P47727,P49744,P50116,P52590,P60905,P85971,P97605,Q01205,Q09030,Q5M871,Q63357,Q63514,Q63532,Q6AYS4,Q6IE51,Q7TPB1,Q8CG08,Q9QZQ5,Q9Z0V6                                                                                                                                                                  |
| 11444 | 2,3,4,5,6,7<br>,8,39           | 1,36,37,38<br>,40,41,42,<br>43,44 | 35 | D3ZUK3,G3V686,O35568,O88267,P02631,P04905,P05369,P07171,P07897,P08010,P08753,P10960,P20762,P20766,P35444,P36374,P36376,P38444,P55016,P80201,P80202,P83748,P85971,P97605,Q01205,Q07116,Q09030,Q5M871,Q5ZQU0,Q63532,Q6AYS4,Q6IE51,Q7TPB1,Q9QZQ5                                                                                                                                                                                              |
| 11445 | 2,3,4,5,6,7<br>,8,40           | 1,36,37,38<br>,39,41,42,<br>43,44 | 23 | D3ZUK3,G3V686,P02631,P02781,P06866,P07171,P07897,P20762,P35444,P36374,P36376,P55016,P83748,P85971,P97605,Q01205,Q09030,Q5M819,Q6AYS4,Q6IE51,Q9QZ76,Q9QZQ5,Q9Z0V6                                                                                                                                                                                                                                                                           |
| 11446 | 2,3,4,5,6,7<br>,8,41           | 1,36,37,38<br>,39,40,42,<br>43,44 | 48 | D3ZUK3,F1LM93,G3V686,O08815,O35547,O35568,O54858,O88267,P02631,P04905,P07171,P07897,P08010,P08753,P10960,P11762,P20762,P35444,P36374,P36376,P38444,P49744,P50116,P52590,P54921,P60905,P80201,P80202,P83748,P85971,P97605,Q01205,Q07116,Q09030,Q498S8,Q5M871,Q5ZQU0,Q62753,Q63357,Q63475,Q63532,Q63617,Q6IE51,Q7TPB1,Q80YN4,Q812E4,Q99041,Q9QZQ5                                                                                            |
| 11447 | 2,3,4,5,6,7<br>,8,42           | 1,36,37,38<br>,39,40,41,<br>43,44 | 61 | D3ZUK3,F1LM93,G3V686,O08815,O35547,O35568,P02631,P02781,P04905,P05369,P05539,P07171,P07861,P07897,P08010,P08290,P08723,P08753,P09456,P10715,P12368,P16086,P19629,P20762,P35444,P36374,P38444,P47727,P49744,P54921,P55016,P60905,P63322,P80201,P85971,P97554,P97605,Q01205,Q07116,Q09030,Q498S8,Q4AEF8,Q5M819,Q5XI73,Q62740,Q62753,Q63357,Q63514,Q6AYL6,Q6AYR8,Q6AYR9,Q6GMN2,Q6IE51,Q812E4,Q8CJ52,Q9JHB9,Q9JID2,Q9QZ76,Q9QZK9,Q9QZQ5,Q9Z0V6 |
| 11448 | 2,3,4,5,6,7<br>,8,43           | 1,36,37,38<br>,39,40,41,<br>42,44 | 37 | D3ZUK3,G3V686,O35547,O54858,P02631,P07171,P08723,P10715,P10960,P11883,P13432,P19629,P20762,P25031,P35444,P36374,P36376,P38444,P49744,P51886,P52590,P55016,P60905,P83748,P85971,P97605,Q01205,Q07116,Q09030,Q498S8,Q5M819,Q5M871,Q63357,Q63532,Q6IE51,Q7TPB1,Q9QZQ5                                                                                                                                                                         |
| 11449 | 2,3,4,5,6,7<br>,8,44           | 1,36,37,38<br>,39,40,41,<br>42,43 | 38 | D3ZUK3,G3V686,O35568,P02631,P06866,P07171,P07897,P08010,P10960,P13432,P20762,P20766,P35444,P36374,P36376,P38444,P49744,P52590,P53792,P55016,P60905,P80201,P85971,P97605,Q01205,Q07116,Q09030,Q498S8,Q4AEF8,Q5M819,Q5M871,Q63514,Q6AYS4,Q6IE51,Q8CG08,Q9JID2,Q9QZQ5,Q9Z0V6                                                                                                                                                                  |
| 11450 | 2,3,4,5,6,7<br>,36,37          | 1,8,38,39,<br>40,41,42,4<br>3,44  | 18 | G3V686,P00731,P02631,P10715,P11762,P13432,P13596,P19629,P53792,P80202,P85971,P97605,Q01205,Q07116,Q09030,Q63532,Q6IE51,Q9QZQ5                                                                                                                                                                                                                                                                                                              |
| 11451 | 2,3,4,5,6,7<br>,36,38          | 1,8,37,39,<br>40,41,42,4<br>3,44  | 20 | G3V686,P02631,P08010,P10715,P11762,P13596,P19629,P20762,P25031,P34901,P49744,P85971,P97605,Q01205,Q07116,Q09030,Q63532,Q6AYL6,Q6IE51,Q9QZQ5                                                                                                                                                                                                                                                                                                |

|       |                       |                                  |    |                                                                                                                                                                                                                                                                                                               |
|-------|-----------------------|----------------------------------|----|---------------------------------------------------------------------------------------------------------------------------------------------------------------------------------------------------------------------------------------------------------------------------------------------------------------|
| 11452 | 2,3,4,5,6,7<br>,36,39 | 1,8,37,38,<br>40,41,42,4<br>3,44 | 18 | G3V686,O35568,P02625,P05539,P08010,P13596,P20762,P34901,P36376,P80202,P83748,P85971,P97605,Q01205,Q07116,Q63532,Q6IE51,Q9QQZQ5                                                                                                                                                                                |
| 11453 | 2,3,4,5,6,7<br>,36,40 | 1,8,37,38,<br>39,41,42,4<br>3,44 | 14 | G3V686,P00731,P05539,P11762,P13432,P13596,P20762,P36374,P36376,P97605,Q01205,Q09030,Q6IE51,Q9QQZQ5                                                                                                                                                                                                            |
| 11454 | 2,3,4,5,6,7<br>,36,41 | 1,8,37,38,<br>39,40,42,4<br>3,44 | 30 | G3V686,P02631,P05539,P07897,P08010,P08649,P11762,P13596,P36376,P38444,P49744,P60905,P80201,P80202,P83748,P85971,P97605,Q01205,Q07116,Q09030,Q62740,Q63357,Q63467,Q63475,Q63532,Q64611,Q6IE51,Q812E4,Q99MH3,Q9QQZQ5                                                                                            |
| 11455 | 2,3,4,5,6,7<br>,36,42 | 1,8,37,38,<br>39,40,41,4<br>3,44 | 43 | F1LM93,G3V686,O35547,P02781,P02782,P04905,P05539,P07897,P08010,P08290,P08644,P08649,P08723,P08753,P10715,P13596,P16086,P19629,P20762,P22283,P31044,P35281,P36374,P47727,P55016,P60905,P85971,P97554,P97605,Q01205,Q07116,Q09030,Q5XI73,Q62740,Q62753,Q63357,Q6AYL6,Q6AYR8,Q6AYR9,Q6IE51,Q812E4,Q8CJ52,Q9QQZQ5 |
| 11456 | 2,3,4,5,6,7<br>,36,43 | 1,8,37,38,<br>39,40,41,4<br>2,44 | 25 | G3V686,O54858,P02631,P05539,P10715,P11762,P11883,P13432,P16636,P19629,P20762,P25031,P31044,P34901,P36376,P49744,P83748,P85971,P97605,Q01205,Q07116,Q09030,Q63532,Q6IE51,Q9QQZQ5                                                                                                                               |
| 11457 | 2,3,4,5,6,7<br>,36,44 | 1,8,37,38,<br>39,40,41,4<br>2,43 | 25 | G3V686,O35568,P02631,P05539,P07897,P13432,P13596,P20762,P34901,P35281,P36374,P36376,P49744,P53792,P55016,P85971,P97605,Q01205,Q07116,Q09030,Q62740,Q63467,Q63532,Q6IE51,Q9QQZQ5                                                                                                                               |
| 11458 | 2,3,4,5,6,7<br>,37,38 | 1,8,36,39,<br>40,41,42,4<br>3,44 | 11 | G3V686,P02631,P10715,P11762,P19629,P25031,P97605,Q01205,Q6IE51,Q7TPB1,Q9QQZQ5                                                                                                                                                                                                                                 |
| 11459 | 2,3,4,5,6,7<br>,37,39 | 1,8,36,38,<br>40,41,42,4<br>3,44 | 13 | G3V686,P02625,P02631,P11762,P15999,P36376,P38444,P83748,P97605,Q01205,Q6IE51,Q7TPB1,Q9QQZQ5                                                                                                                                                                                                                   |
| 11460 | 2,3,4,5,6,7<br>,37,40 | 1,8,36,38,<br>39,41,42,4<br>3,44 | 9  | G3V686,P02631,P11762,P15999,P36376,P97605,Q09030,Q6IE51,Q9QQZQ5                                                                                                                                                                                                                                               |
| 11461 | 2,3,4,5,6,7<br>,37,41 | 1,8,36,38,<br>39,40,42,4<br>3,44 | 13 | G3V686,P02631,P11762,P15999,P38444,P80201,P83748,P97605,Q01205,Q09030,Q6IE51,Q7TPB1,Q9QQZQ5                                                                                                                                                                                                                   |
| 11462 | 2,3,4,5,6,7<br>,37,42 | 1,8,36,38,<br>39,40,41,4<br>3,44 | 16 | G3V686,P02631,P08290,P10715,P11762,P13596,P19629,P36374,P38444,P97605,Q09030,Q5XI73,Q6AYL6,Q6AYR8,Q6IE51,Q9QQZQ5                                                                                                                                                                                              |
| 11463 | 2,3,4,5,6,7<br>,37,43 | 1,8,36,38,<br>39,40,41,4<br>2,44 | 19 | G3V686,P02631,P10715,P10758,P11762,P11883,P14480,P19629,P20762,P25031,P36376,P83748,P85971,P97605,Q63532,Q6IE51,Q7TPB1,Q99PP0,Q9QQZQ5                                                                                                                                                                         |
| 11464 | 2,3,4,5,6,7<br>,37,44 | 1,8,36,38,<br>39,40,41,4<br>2,43 | 10 | G3V686,P02631,P11762,P36376,P38444,P97605,Q01205,Q6IE51,Q99376,Q9QQZQ5                                                                                                                                                                                                                                        |
| 11465 | 2,3,4,5,6,7<br>,38,39 | 1,8,36,37,<br>40,41,42,4<br>3,44 | 12 | O35568,P02625,P05369,P08010,P19218,P25031,P83748,P97605,Q01205,Q6IE51,Q7TPB1,Q9QQZQ5                                                                                                                                                                                                                          |
| 11466 | 2,3,4,5,6,7<br>,38,40 | 1,8,36,37,<br>39,41,42,4<br>3,44 | 8  | P01835,P13596,P20762,P25031,P36374,P36376,P97605,Q6IE51                                                                                                                                                                                                                                                       |

|       |                       |                                  |    |                                                                                                                                                                                                                                                                                                              |
|-------|-----------------------|----------------------------------|----|--------------------------------------------------------------------------------------------------------------------------------------------------------------------------------------------------------------------------------------------------------------------------------------------------------------|
| 11467 | 2,3,4,5,6,7<br>,38,41 | 1,8,36,37,<br>39,40,42,4<br>3,44 | 21 | G3V686,O35547,P02631,P08010,P11762,P13596,P25031,P38444,P49744,P50115,P50116,P52590,P80201,P97605,Q01205,Q5M871,Q63532,Q6IE51,Q7TPB1,Q8CIZ5,Q9QZQ5                                                                                                                                                           |
| 11468 | 2,3,4,5,6,7<br>,38,42 | 1,8,36,37,<br>39,40,41,4<br>3,44 | 38 | F1LM93,G3V686,O08815,O35547,P02781,P04905,P05369,P08010,P08290,P08723,P08753,P10715,P12785,P13596,P16086,P19218,P19629,P20762,P25031,P36374,P47727,P54921,P60905,P97554,P97605,Q5XI73,Q62753,Q62902,Q63357,Q63514,Q6AYL6,Q6AYR8,Q6IE51,Q812E4,Q8CJ52,Q9JHB9,Q9QZK9,Q9QZQ5                                    |
| 11469 | 2,3,4,5,6,7<br>,38,43 | 1,8,36,37,<br>39,40,41,4<br>2,44 | 22 | G3V686,O35547,P01835,P02631,P08723,P10715,P11883,P17559,P19629,P20762,P25031,P34901,P49744,P52590,P83748,P85971,P97605,Q01205,Q5HZV9,Q63532,Q6IE51,Q7TPB1                                                                                                                                                    |
| 11470 | 2,3,4,5,6,7<br>,38,44 | 1,8,36,37,<br>39,40,41,4<br>2,43 | 13 | G3V686,O35568,P01835,P02631,P20762,P25031,P34901,P36374,P49744,P97605,Q01205,Q6IE51,Q9QZQ5                                                                                                                                                                                                                   |
| 11471 | 2,3,4,5,6,7<br>,39,40 | 1,8,36,37,<br>38,41,42,4<br>3,44 | 6  | P15999,P36376,P83748,P97605,Q6IE51,Q9QZQ5                                                                                                                                                                                                                                                                    |
| 11472 | 2,3,4,5,6,7<br>,39,41 | 1,8,36,37,<br>38,40,42,4<br>3,44 | 19 | G3V686,O35547,O88267,P02625,P08010,P13596,P15999,P36376,P38444,P80201,P80202,P83748,P97605,Q01205,Q63475,Q63532,Q6IE51,Q7TPB1,Q9QZQ5                                                                                                                                                                         |
| 11473 | 2,3,4,5,6,7<br>,39,42 | 1,8,36,37,<br>38,40,41,4<br>3,44 | 30 | F1LM93,G3V686,O08815,O35547,P02780,P02781,P04905,P05369,P05539,P08010,P08290,P08723,P08753,P13596,P16086,P20762,P36374,P36376,P38444,P47727,P55016,P80201,P97605,Q5XI73,Q62753,Q63357,Q6AYR8,Q6AYR9,Q6IE51,Q9QZQ5                                                                                            |
| 11474 | 2,3,4,5,6,7<br>,39,43 | 1,8,36,37,<br>38,40,41,4<br>2,44 | 14 | G3V686,P02625,P02631,P11883,P20762,P25031,P36376,P83748,P85971,P97605,Q63532,Q6IE51,Q7TPB1,Q99PP0                                                                                                                                                                                                            |
| 11475 | 2,3,4,5,6,7<br>,39,44 | 1,8,36,37,<br>38,40,41,4<br>2,43 | 12 | G3V686,O35568,P02625,P34901,P36376,P38444,P55016,P83748,P97605,Q01205,Q6IE51,Q9QZQ5                                                                                                                                                                                                                          |
| 11476 | 2,3,4,5,6,7<br>,40,41 | 1,8,36,37,<br>38,39,42,4<br>3,44 | 12 | G3V686,P05539,P13596,P36376,P38444,P80201,P83748,P97605,Q01205,Q09030,Q6IE51,Q9QZQ5                                                                                                                                                                                                                          |
| 11477 | 2,3,4,5,6,7<br>,40,42 | 1,8,36,37,<br>38,39,41,4<br>3,44 | 22 | G3V686,P02780,P02781,P02782,P05369,P05539,P08290,P13596,P16086,P20762,P36374,P36376,P60905,P97605,Q09030,Q5XI73,Q6AYR8,Q6IE51,Q812E4,Q9JHB9,Q9QZ76,Q9QZQ5                                                                                                                                                    |
| 11478 | 2,3,4,5,6,7<br>,40,43 | 1,8,36,37,<br>38,39,41,4<br>2,44 | 11 | G3V686,P01835,P02631,P11883,P20762,P25031,P36374,P36376,P83748,P97605,Q6IE51                                                                                                                                                                                                                                 |
| 11479 | 2,3,4,5,6,7<br>,40,44 | 1,8,36,37,<br>38,39,41,4<br>2,43 | 12 | G3V686,O35568,P06866,P13596,P36374,P36376,P97605,Q5M819,Q5XFX0,Q6IE51,Q99376,Q9QZQ5                                                                                                                                                                                                                          |
| 11480 | 2,3,4,5,6,7<br>,41,42 | 1,8,36,37,<br>38,39,40,4<br>3,44 | 43 | F1LM93,G3V686,O08815,O35547,P02781,P04905,P05539,P08010,P08290,P08649,P08723,P08753,P0C0A9,P13596,P16086,P25031,P35281,P36374,P36376,P38444,P54921,P60905,P80201,P82471,P85971,P97605,Q01205,Q09030,Q5XI73,Q62740,Q62753,Q63357,Q6AYR8,Q6AYR9,Q6GMN2,Q6IE51,Q6IFV1,Q812E4,Q8CJ52,Q99068,Q9JID2,Q9QZQ5,Q9WUD9 |
| 11481 | 2,3,4,5,6,7<br>,41,43 | 1,8,36,37,<br>38,39,40,4<br>2,44 | 22 | G3V686,O35547,P02631,P11883,P20762,P25031,P35281,P36376,P38444,P49744,P52590,P54921,P60905,P80201,P83748,P85971,P97605,Q01205,Q5HZV9,Q63532,Q6IE51,Q7TPB1                                                                                                                                                    |

|       |                       |                                  |    |                                                                                                                                                                                                                                                                                                                      |
|-------|-----------------------|----------------------------------|----|----------------------------------------------------------------------------------------------------------------------------------------------------------------------------------------------------------------------------------------------------------------------------------------------------------------------|
| 11482 | 2,3,4,5,6,7<br>,41,44 | 1,8,36,37,<br>38,39,40,4<br>2,43 | 19 | G3V686,O35568,P02631,P08010,P13596,P35281,P36376,P38444,P49744,P60905,P80201,P97605,Q01205,Q5M871,Q62740,Q63475,Q6I<br>E51,Q8K4G9,Q9QZQ5                                                                                                                                                                             |
| 11483 | 2,3,4,5,6,7<br>,42,43 | 1,8,36,37,<br>38,39,40,4<br>1,44 | 43 | F1LM93,G3V686,O35547,P02631,P02781,P02782,P04905,P05539,P08290,P08723,P10715,P11883,P16086,P16636,P19629,P20762,P2436<br>8,P25031,P26772,P31044,P35281,P36374,P36376,P47727,P54921,P60905,P83748,P85971,P97605,Q09030,Q5GRG2,Q5HZV9,Q62975,Q<br>63357,Q6AYR8,Q6AYR9,Q6GMN2,Q6IE51,Q812E4,Q8K4G9,Q99PP0,Q9JHB9,Q9QZQ5 |
| 11484 | 2,3,4,5,6,7<br>,42,44 | 1,8,36,37,<br>38,39,40,4<br>1,43 | 40 | F1LM93,G3V686,O35547,O35568,P02781,P04905,P05539,P08010,P08290,P08723,P08753,P13596,P16086,P20762,P35281,P36374,P3637<br>6,P38444,P47727,P55016,P60905,P85971,P97554,P97605,Q01205,Q5M819,Q5XI73,Q62740,Q62753,Q63514,Q6AYR8,Q6IE51,Q6IFV1,Q<br>812E4,Q8CJ52,Q8K4G9,Q99068,Q9JID2,Q9QZQ5,Q9Z0V6                      |
| 11485 | 2,3,4,5,6,7<br>,43,44 | 1,8,36,37,<br>38,39,40,4<br>1,42 | 21 | G3V686,O35568,P01835,P02631,P10758,P11883,P13432,P20762,P25031,P34901,P35281,P36374,P36376,P38444,P49744,P83748,P8597<br>1,P97605,Q01205,Q6IE51,Q8K4G9                                                                                                                                                               |
| 11486 | 2,3,4,5,6,8<br>,36,37 | 1,7,38,39,<br>40,41,42,4<br>3,44 | 7  | P10715,P13432,P19629,Q01205,Q07116,Q6AYL6,Q6AYS4                                                                                                                                                                                                                                                                     |
| 11487 | 2,3,4,5,6,8<br>,36,38 | 1,7,37,39,<br>40,41,42,4<br>3,44 | 11 | P10715,P19629,P20762,P22006,P34901,P36374,P49744,P97605,Q01205,Q6AYL6,Q6AYS4                                                                                                                                                                                                                                         |
| 11488 | 2,3,4,5,6,8<br>,36,39 | 1,7,37,38,<br>40,41,42,4<br>3,44 | 6  | P08010,P20762,P97605,Q01205,Q07116,Q6AYS4                                                                                                                                                                                                                                                                            |
| 11489 | 2,3,4,5,6,8<br>,36,40 | 1,7,37,38,<br>39,41,42,4<br>3,44 | 9  | P00731,P13432,P20762,P22006,P36374,P36376,P97605,Q01205,Q6AYS4                                                                                                                                                                                                                                                       |
| 11490 | 2,3,4,5,6,8<br>,36,41 | 1,7,37,38,<br>39,40,42,4<br>3,44 | 15 | G3V686,P07171,P08010,P08753,P38444,P49744,P60905,P97605,Q01205,Q07116,Q63357,Q6AYL6,Q6AYS4,Q812E4,Q99MH3                                                                                                                                                                                                             |
| 11491 | 2,3,4,5,6,8<br>,36,42 | 1,7,37,38,<br>39,40,41,4<br>3,44 | 33 | F1LM93,G3V686,O08815,P02781,P04905,P08010,P08723,P08753,P09456,P10715,P12368,P19629,P20762,P31044,P36374,P47727,P5501<br>6,P60905,P97554,P97605,Q01205,Q07116,Q32KJ6,Q4AEF8,Q5GRG2,Q62753,Q63357,Q63514,Q6AYL6,Q6AYS4,Q812E4,Q8CJ52,Q9Z0V<br>6                                                                       |
| 11492 | 2,3,4,5,6,8<br>,36,43 | 1,7,37,38,<br>39,40,41,4<br>2,44 | 14 | G3V686,P10715,P11883,P13432,P19629,P20762,P31044,P34901,Q00715,Q01177,Q01205,Q07116,Q5GRG2,Q6AYS4                                                                                                                                                                                                                    |
| 11493 | 2,3,4,5,6,8<br>,36,44 | 1,7,37,38,<br>39,40,41,4<br>2,43 | 14 | G3V686,P07171,P13432,P20762,P22006,P34901,P36374,P55016,P97605,Q01205,Q07116,Q63514,Q6AYS4,Q99MH3                                                                                                                                                                                                                    |
| 11494 | 2,3,4,5,6,8<br>,37,38 | 1,7,36,39,<br>40,41,42,4<br>3,44 | 6  | P10715,P19629,P22006,Q01205,Q6AYL6,Q7TPB1                                                                                                                                                                                                                                                                            |
| 11495 | 2,3,4,5,6,8<br>,37,39 | 1,7,36,38,<br>40,41,42,4<br>3,44 | 5  | P02625,P38444,P97605,Q01205,Q7TPB1                                                                                                                                                                                                                                                                                   |
| 11496 | 2,3,4,5,6,8<br>,37,40 | 1,7,36,38,<br>39,41,42,4<br>3,44 | 2  | P22006,P36376                                                                                                                                                                                                                                                                                                        |

|       |                       |                                  |    |                                                                                                                                                                                                                          |
|-------|-----------------------|----------------------------------|----|--------------------------------------------------------------------------------------------------------------------------------------------------------------------------------------------------------------------------|
| 11497 | 2,3,4,5,6,8<br>,37,41 | 1,7,36,38,<br>39,40,42,4<br>3,44 | 4  | P38444,P97605,Q01205,Q7TPB1                                                                                                                                                                                              |
| 11498 | 2,3,4,5,6,8<br>,37,42 | 1,7,36,38,<br>39,40,41,4<br>3,44 | 9  | P08753,P10715,P19629,P22006,P36374,P97605,Q01205,Q6AYL6,Q9Z0V6                                                                                                                                                           |
| 11499 | 2,3,4,5,6,8<br>,37,43 | 1,7,36,38,<br>39,40,41,4<br>2,44 | 8  | P10715,P11883,P19629,P20762,P31044,Q01205,Q4FZU6,Q7TPB1                                                                                                                                                                  |
| 11500 | 2,3,4,5,6,8<br>,37,44 | 1,7,36,38,<br>39,40,41,4<br>2,43 | 5  | P22006,P38444,P97605,Q01205,Q99376                                                                                                                                                                                       |
| 11501 | 2,3,4,5,6,8<br>,38,39 | 1,7,36,37,<br>40,41,42,4<br>3,44 | 7  | P02625,P05369,P20762,P97605,Q01205,Q6AYS4,Q7TPB1                                                                                                                                                                         |
| 11502 | 2,3,4,5,6,8<br>,38,40 | 1,7,36,37,<br>39,41,42,4<br>3,44 | 7  | P01835,P20762,P22006,P36374,Q01205,Q6AYS4,Q9Z0V6                                                                                                                                                                         |
| 11503 | 2,3,4,5,6,8<br>,38,41 | 1,7,36,37,<br>39,40,42,4<br>3,44 | 11 | O35547,P08010,P08753,P38444,P49744,P50115,P50116,P97605,Q01205,Q7TPB1,Q8CIZ5                                                                                                                                             |
| 11504 | 2,3,4,5,6,8<br>,38,42 | 1,7,36,37,<br>39,40,41,4<br>3,44 | 31 | F1LM93,O08815,O35547,P02781,P04905,P05369,P08010,P08723,P08753,P09456,P10715,P19629,P20762,P22006,P31044,P36374,P47727,P60905,P97554,P97605,Q01205,Q5GRG2,Q62753,Q62902,Q63357,Q63514,Q6AYL6,Q812E4,Q8CJ52,Q9QZK9,Q9Z0V6 |
| 11505 | 2,3,4,5,6,8<br>,38,43 | 1,7,36,37,<br>39,40,41,4<br>2,44 | 14 | P01681,P01835,P10715,P11883,P19629,P20762,P31044,P34901,P49744,Q01205,Q06000,Q5HZV9,Q7TPB1,Q9Z0V6                                                                                                                        |
| 11506 | 2,3,4,5,6,8<br>,38,44 | 1,7,36,37,<br>39,40,41,4<br>2,43 | 11 | P01835,P20762,P22006,P34901,P36374,P49744,P97605,Q01205,Q62635,Q63514,Q9Z0V6                                                                                                                                             |
| 11507 | 2,3,4,5,6,8<br>,39,40 | 1,7,36,37,<br>38,41,42,4<br>3,44 | 4  | P20766,P36376,P97605,Q6AYS4                                                                                                                                                                                              |
| 11508 | 2,3,4,5,6,8<br>,39,41 | 1,7,36,37,<br>38,40,42,4<br>3,44 | 6  | P02625,P08010,P38444,P97605,Q01205,Q7TPB1                                                                                                                                                                                |
| 11509 | 2,3,4,5,6,8<br>,39,42 | 1,7,36,37,<br>38,40,41,4<br>3,44 | 18 | F1LM93,O08815,P02781,P04905,P05369,P08010,P08753,P09456,P20762,P20766,P36374,P47727,P97605,Q01205,Q62753,Q63357,Q6AYR9,Q9Z0V6                                                                                            |
| 11510 | 2,3,4,5,6,8<br>,39,43 | 1,7,36,37,<br>38,40,41,4<br>2,44 | 7  | P02625,P11883,P20762,P20766,P97605,Q01205,Q7TPB1                                                                                                                                                                         |
| 11511 | 2,3,4,5,6,8<br>,39,44 | 1,7,36,37,<br>38,40,41,4<br>2,43 | 6  | P20766,P38444,P97605,Q01205,Q6AYS4,Q9Z0V6                                                                                                                                                                                |



|       |                        |                                  |    |                                                                                                                                                                                                     |
|-------|------------------------|----------------------------------|----|-----------------------------------------------------------------------------------------------------------------------------------------------------------------------------------------------------|
| 11512 | 2,3,4,5,6,8<br>,40,41  | 1,7,36,37,<br>38,39,42,4<br>3,44 | 3  | P36376,P97605,Q01205                                                                                                                                                                                |
| 11513 | 2,3,4,5,6,8<br>,40,42  | 1,7,36,37,<br>38,39,41,4<br>3,44 | 12 | P02781,P08753,P20762,P22006,P36374,P36376,P97605,Q5M819,Q812E4,Q9JHB9,Q9QZ76,Q9Z0V6                                                                                                                 |
| 11514 | 2,3,4,5,6,8<br>,40,43  | 1,7,36,37,<br>38,39,41,4<br>2,44 | 9  | P01835,P02793;Q7TP54,P11883,P20762,P36374,P36376,P97840,Q5M819,Q9Z0V6                                                                                                                               |
| 11515 | 2,3,4,5,6,8<br>,40,44  | 1,7,36,37,<br>38,39,41,4<br>2,43 | 9  | P06866,P22006,P36374,P36376,P97605,Q01205,Q5M819,Q6AYS4,Q9Z0V6                                                                                                                                      |
| 11516 | 2,3,4,5,6,8<br>,41,42  | 1,7,36,37,<br>38,39,40,4<br>3,44 | 28 | F1LM93,G3V686,O08815,O35547,P02781,P04905,P07861,P08010,P08753,P09456,P36374,P38444,P54921,P60905,P97605,Q01205,Q62753,Q62902,Q63357,Q63514,Q6AYL6,Q6AYR9,Q6GMN2,Q812E4,Q8CJ52,Q9JID2,Q9QZK9,Q9Z0V6 |
| 11517 | 2,3,4,5,6,8<br>,41,43  | 1,7,36,37,<br>38,39,40,4<br>2,44 | 11 | P02793;Q7TP54,P11883,P20762,P38444,P49744,P54921,P97605,P97840,Q01205,Q5HZV9,Q7TPB1                                                                                                                 |
| 11518 | 2,3,4,5,6,8<br>,41,44  | 1,7,36,37,<br>38,39,40,4<br>2,43 | 6  | G3V686,P38444,P49744,P97605,Q01205,Q9Z0V6                                                                                                                                                           |
| 11519 | 2,3,4,5,6,8<br>,42,43  | 1,7,36,37,<br>38,39,40,4<br>1,44 | 26 | F1LM93,O08815,O35547,P04905,P08723,P08753,P09456,P10715,P11883,P19629,P20762,P31044,P36374,P47727,P54921,P60905,P97605,Q5GRG2,Q5M819,Q63357,Q63514,Q6AYR8,Q6GMN2,Q812E4,Q9JHB9,Q9Z0V6               |
| 11520 | 2,3,4,5,6,8<br>,42,44  | 1,7,36,37,<br>38,39,40,4<br>1,43 | 24 | F1LM93,G3V686,O08815,P04905,P08010,P08723,P08753,P09456,P20762,P22006,P36374,P55016,P60905,P97554,P97605,Q01205,Q5M819,Q62753,Q63514,Q6AYR8,Q812E4,Q8CJ52,Q9JID2,Q9Z0V6                             |
| 11521 | 2,3,4,5,6,8<br>,43,44  | 1,7,36,37,<br>38,39,40,4<br>1,42 | 11 | P01681,P01835,P11883,P13432,P20762,P34901,P36374,P97605,Q01205,Q5M819,Q9Z0V6                                                                                                                        |
| 11522 | 2,3,4,5,6,3<br>6,37,38 | 1,7,8,39,4<br>0,41,42,43<br>,44  | 7  | P10715,P19629,P31044,P34901,Q4FZU6,Q6AYL6,Q6P9T8                                                                                                                                                    |
| 11523 | 2,3,4,5,6,3<br>6,37,39 | 1,7,8,38,4<br>0,41,42,43<br>,44  | 0  |                                                                                                                                                                                                     |
| 11524 | 2,3,4,5,6,3<br>6,37,40 | 1,7,8,38,3<br>9,41,42,43<br>,44  | 2  | P00731,P36376                                                                                                                                                                                       |
| 11525 | 2,3,4,5,6,3<br>6,37,41 | 1,7,8,38,3<br>9,40,42,43<br>,44  | 3  | G3V686,P97605,Q01205                                                                                                                                                                                |
| 11526 | 2,3,4,5,6,3<br>6,37,42 | 1,7,8,38,3<br>9,40,41,43<br>,44  | 8  | G3V686,P10715,P19629,P22283,P31044,P97554,Q5GRG2,Q6AYL6                                                                                                                                             |

|       |                        |                                 |    |                                                                                                                        |
|-------|------------------------|---------------------------------|----|------------------------------------------------------------------------------------------------------------------------|
| 11527 | 2,3,4,5,6,3<br>6,37,43 | 1,7,8,38,3<br>9,40,41,42<br>,44 | 7  | P10715,P13432,P19629,P31044,P34901,Q4FZU6,Q5GRG2                                                                       |
| 11528 | 2,3,4,5,6,3<br>6,37,44 | 1,7,8,38,3<br>9,40,41,42<br>,43 | 4  | G3V686,P13432,P34901,Q99376                                                                                            |
| 11529 | 2,3,4,5,6,3<br>6,38,39 | 1,7,8,37,4<br>0,41,42,43<br>,44 | 3  | P02625,P10715,P34901                                                                                                   |
| 11530 | 2,3,4,5,6,3<br>6,38,40 | 1,7,8,37,3<br>9,41,42,43<br>,44 | 3  | P01835,P22006,P34901                                                                                                   |
| 11531 | 2,3,4,5,6,3<br>6,38,41 | 1,7,8,37,3<br>9,40,42,43<br>,44 | 5  | P34901,P97605,Q01205,Q6AYL6,Q8CIZ5                                                                                     |
| 11532 | 2,3,4,5,6,3<br>6,38,42 | 1,7,8,37,3<br>9,40,41,43<br>,44 | 17 | P04905,P08010,P08753,P10715,P12785,P19629,P22283,P31044,P34901,P36374,P47727,P97554,Q5GRG2,Q62902,Q6AYL6,Q812E4,Q8CJ52 |
| 11533 | 2,3,4,5,6,3<br>6,38,43 | 1,7,8,37,3<br>9,40,41,42<br>,44 | 10 | P01835,P10715,P19629,P20762,P31044,P34901,Q4FZU6,Q5GRG2,Q5HZV9,Q6AYL6                                                  |
| 11534 | 2,3,4,5,6,3<br>6,38,44 | 1,7,8,37,3<br>9,40,41,42<br>,43 | 4  | P01835,P10715,P22006,P34901                                                                                            |
| 11535 | 2,3,4,5,6,3<br>6,39,40 | 1,7,8,37,3<br>8,41,42,43<br>,44 | 1  | P36376                                                                                                                 |
| 11536 | 2,3,4,5,6,3<br>6,39,41 | 1,7,8,37,3<br>8,40,42,43<br>,44 | 5  | G3V686,P02625,P08010,P97605,Q01205                                                                                     |
| 11537 | 2,3,4,5,6,3<br>6,39,42 | 1,7,8,37,3<br>8,40,41,43<br>,44 | 12 | G3V686,P04905,P08010,P10715,P19629,P22283,P31044,P47727,P97605,Q5GRG2,Q6AYL6,Q6AYR9                                    |
| 11538 | 2,3,4,5,6,3<br>6,39,43 | 1,7,8,37,3<br>8,40,41,42<br>,44 | 6  | P02625,P10715,P11883,P20762,P31044,P34901                                                                              |
| 11539 | 2,3,4,5,6,3<br>6,39,44 | 1,7,8,37,3<br>8,40,41,42<br>,43 | 2  | G3V686,P34901                                                                                                          |
| 11540 | 2,3,4,5,6,3<br>6,40,41 | 1,7,8,37,3<br>8,39,42,43<br>,44 | 3  | P23593,P36376,P97605                                                                                                   |
| 11541 | 2,3,4,5,6,3<br>6,40,42 | 1,7,8,37,3<br>8,39,41,43<br>,44 | 5  | P02781,P23593,P36374,P36376,Q812E4                                                                                     |

|       |                        |                                 |    |                                                                                                                                      |
|-------|------------------------|---------------------------------|----|--------------------------------------------------------------------------------------------------------------------------------------|
| 11542 | 2,3,4,5,6,3<br>6,40,43 | 1,7,8,37,3<br>8,39,41,42<br>,44 | 6  | P01835,P11883,P13432,P20762,P34901,P36376                                                                                            |
| 11543 | 2,3,4,5,6,3<br>6,40,44 | 1,7,8,37,3<br>8,39,41,42<br>,43 | 7  | P00731,P06866,P13432,P22006,P34901,P36376,Q6P6T1                                                                                     |
| 11544 | 2,3,4,5,6,3<br>6,41,42 | 1,7,8,37,3<br>8,39,40,43<br>,44 | 19 | F1LM93,G3V686,P04905,P08010,P08753,P13596,P22283,P54921,P60905,P97554,P97605,Q62740,Q62753,Q62902,Q63357,Q6AYL6,Q6AYR9,Q812E4,Q8CJ52 |
| 11545 | 2,3,4,5,6,3<br>6,41,43 | 1,7,8,37,3<br>8,39,40,42<br>,44 | 4  | G3V686,P11883,P34901,Q5HZV9                                                                                                          |
| 11546 | 2,3,4,5,6,3<br>6,41,44 | 1,7,8,37,3<br>8,39,40,42<br>,43 | 5  | G3V686,P34901,P35281,P97605,Q01205                                                                                                   |
| 11547 | 2,3,4,5,6,3<br>6,42,43 | 1,7,8,37,3<br>8,39,40,41<br>,44 | 17 | G3V686,P06911,P08723,P10715,P11883,P19629,P20762,P31044,P34901,P36374,P47727,P60905,Q5GRG2,Q63357,Q6AYL6,Q6AYR8,Q9QZA6               |
| 11548 | 2,3,4,5,6,3<br>6,42,44 | 1,7,8,37,3<br>8,39,40,41<br>,43 | 15 | G3V686,P10715,P11442,P13432,P19629,P22283,P34901,P35281,P36374,P60905,P97554,Q6AYL6,Q6AYR8,Q812E4,Q8CJ52                             |
| 11549 | 2,3,4,5,6,3<br>6,43,44 | 1,7,8,37,3<br>8,39,40,41<br>,42 | 9  | G3V686,P01835,P10715,P11883,P13432,P20762,P31044,P34901,P35281                                                                       |
| 11550 | 2,3,4,5,6,3<br>7,38,39 | 1,7,8,36,4<br>0,41,42,43<br>,44 | 2  | P02625,Q4FZU6                                                                                                                        |
| 11551 | 2,3,4,5,6,3<br>7,38,40 | 1,7,8,36,3<br>9,41,42,43<br>,44 | 3  | P01835,P22006,P82995                                                                                                                 |
| 11552 | 2,3,4,5,6,3<br>7,38,41 | 1,7,8,36,3<br>9,40,42,43<br>,44 | 1  | Q7TPB1                                                                                                                               |
| 11553 | 2,3,4,5,6,3<br>7,38,42 | 1,7,8,36,3<br>9,40,41,43<br>,44 | 6  | P10715,P12785,P19629,P31044,Q5GRG2,Q6AYL6                                                                                            |
| 11554 | 2,3,4,5,6,3<br>7,38,43 | 1,7,8,36,3<br>9,40,41,42<br>,44 | 10 | P01835,P10715,P14480,P19629,P31044,P34901,Q4FZU6,Q5GRG2,Q5HZV9,Q7TPB1                                                                |
| 11555 | 2,3,4,5,6,3<br>7,38,44 | 1,7,8,36,3<br>9,40,41,42<br>,43 | 4  | P01835,P12785,P22006,P34901                                                                                                          |
| 11556 | 2,3,4,5,6,3<br>7,39,40 | 1,7,8,36,3<br>8,41,42,43<br>,44 | 2  | P15999,P36376                                                                                                                        |

|       |                        |                                 |    |                                                                       |
|-------|------------------------|---------------------------------|----|-----------------------------------------------------------------------|
| 11557 | 2,3,4,5,6,3<br>7,39,41 | 1,7,8,36,3<br>8,40,42,43<br>,44 | 4  | P02625,P15999,P38444,P97605                                           |
| 11558 | 2,3,4,5,6,3<br>7,39,42 | 1,7,8,36,3<br>8,40,41,43<br>,44 | 2  | P10715,P31044                                                         |
| 11559 | 2,3,4,5,6,3<br>7,39,43 | 1,7,8,36,3<br>8,40,41,42<br>,44 | 5  | P02625,P14480,P31044,Q4FZU6,Q7TPB1                                    |
| 11560 | 2,3,4,5,6,3<br>7,39,44 | 1,7,8,36,3<br>8,40,41,42<br>,43 | 0  |                                                                       |
| 11561 | 2,3,4,5,6,3<br>7,40,41 | 1,7,8,36,3<br>8,39,42,43<br>,44 | 1  | P36376                                                                |
| 11562 | 2,3,4,5,6,3<br>7,40,42 | 1,7,8,36,3<br>8,39,41,43<br>,44 | 2  | P22006,P36376                                                         |
| 11563 | 2,3,4,5,6,3<br>7,40,43 | 1,7,8,36,3<br>8,39,41,42<br>,44 | 2  | P01835,P36376                                                         |
| 11564 | 2,3,4,5,6,3<br>7,40,44 | 1,7,8,36,3<br>8,39,41,42<br>,43 | 3  | P22006,P36376,Q99376                                                  |
| 11565 | 2,3,4,5,6,3<br>7,41,42 | 1,7,8,36,3<br>8,39,40,43<br>,44 | 4  | G3V686,P38444,P97605,Q8CJ52                                           |
| 11566 | 2,3,4,5,6,3<br>7,41,43 | 1,7,8,36,3<br>8,39,40,42<br>,44 | 4  | P11883,P38444,Q5HZV9,Q7TPB1                                           |
| 11567 | 2,3,4,5,6,3<br>7,41,44 | 1,7,8,36,3<br>8,39,40,42<br>,43 | 2  | P38444,P97605                                                         |
| 11568 | 2,3,4,5,6,3<br>7,42,43 | 1,7,8,36,3<br>8,39,40,41<br>,44 | 10 | P06911,P10715,P11883,P19629,P20762,P31044,Q4FZU6,Q5GRG2,Q5HZV9,Q6AYR8 |
| 11569 | 2,3,4,5,6,3<br>7,42,44 | 1,7,8,36,3<br>8,39,40,41<br>,43 | 4  | P10715,P22006,Q6AYR8,Q99376                                           |
| 11570 | 2,3,4,5,6,3<br>7,43,44 | 1,7,8,36,3<br>8,39,40,41<br>,42 | 4  | P01835,P13432,P34901,Q4FZU6                                           |
| 11571 | 2,3,4,5,6,3<br>8,39,40 | 1,7,8,36,3<br>7,41,42,43<br>,44 | 2  | P01835,P36376                                                         |

|       |                        |                                 |    |                                                                                                                                      |
|-------|------------------------|---------------------------------|----|--------------------------------------------------------------------------------------------------------------------------------------|
| 11572 | 2,3,4,5,6,3<br>8,39,41 | 1,7,8,36,3<br>7,40,42,43<br>,44 | 2  | P02625,P97605                                                                                                                        |
| 11573 | 2,3,4,5,6,3<br>8,39,42 | 1,7,8,36,3<br>7,40,41,43<br>,44 | 5  | P05369,P08010,P10715,P31044,P47727                                                                                                   |
| 11574 | 2,3,4,5,6,3<br>8,39,43 | 1,7,8,36,3<br>7,40,41,42<br>,44 | 10 | P01835,P02625,P10715,P11883,P20762,P31044,P34901,Q4FZU6,Q5HZV9,Q7TPB1                                                                |
| 11575 | 2,3,4,5,6,3<br>8,39,44 | 1,7,8,36,3<br>7,40,41,42<br>,43 | 3  | P01835,P02625,P34901                                                                                                                 |
| 11576 | 2,3,4,5,6,3<br>8,40,41 | 1,7,8,36,3<br>7,39,42,43<br>,44 | 4  | P01835,P36376,P68511,P97605                                                                                                          |
| 11577 | 2,3,4,5,6,3<br>8,40,42 | 1,7,8,36,3<br>7,39,41,43<br>,44 | 7  | P01835,P02781,P12785,P22006,P36374,Q6AYR8,Q9Z0V6                                                                                     |
| 11578 | 2,3,4,5,6,3<br>8,40,43 | 1,7,8,36,3<br>7,39,41,42<br>,44 | 7  | P01681,P01835,P11883,P20762,P34901,P36376,Q5HZV9                                                                                     |
| 11579 | 2,3,4,5,6,3<br>8,40,44 | 1,7,8,36,3<br>7,39,41,42<br>,43 | 5  | P01835,P22006,P34901,P36376,Q9Z0V6                                                                                                   |
| 11580 | 2,3,4,5,6,3<br>8,41,42 | 1,7,8,36,3<br>7,39,40,43<br>,44 | 16 | F1LM93,O35547,P08010,P08753,P22283,P54921,P60905,P97605,Q62902,Q63357,Q6AYL6,Q6AYR8,Q812E4,Q8CIZ5,Q8CJ52,Q9WUF4                      |
| 11581 | 2,3,4,5,6,3<br>8,41,43 | 1,7,8,36,3<br>7,39,40,42<br>,44 | 9  | O35547,P00774,P01835,P11883,P25031,P34901,Q5HZV9,Q7TPB1,Q8CJD3                                                                       |
| 11582 | 2,3,4,5,6,3<br>8,41,44 | 1,7,8,36,3<br>7,39,40,42<br>,43 | 8  | P00774,P01835,P34901,P97605,P98089,Q05695,Q62635,Q8CIZ5                                                                              |
| 11583 | 2,3,4,5,6,3<br>8,42,43 | 1,7,8,36,3<br>7,39,40,41<br>,44 | 19 | O35547,P01835,P06911,P08723,P10715,P11883,P19629,P20762,P25031,P31044,P34901,P47727,P54921,Q5GRG2,Q5HZV9,Q62902,Q6AYL6,Q6AYR8,Q9JHB9 |
| 11584 | 2,3,4,5,6,3<br>8,42,44 | 1,7,8,36,3<br>7,39,40,41<br>,43 | 14 | F1LM93,P01835,P08723,P10715,P12785,P22006,P34901,P36374,P97554,Q62902,Q63514,Q6AYR8,Q8CJ52,Q9Z0V6                                    |
| 11585 | 2,3,4,5,6,3<br>8,43,44 | 1,7,8,36,3<br>7,39,40,41<br>,42 | 8  | P01681,P01835,P10715,P11883,P20762,P34901,P98089,Q5HZV9                                                                              |
| 11586 | 2,3,4,5,6,3<br>9,40,41 | 1,7,8,36,3<br>7,38,42,43<br>,44 | 2  | P36376,P97605                                                                                                                        |

|       |                        |                                 |    |                                                                              |
|-------|------------------------|---------------------------------|----|------------------------------------------------------------------------------|
| 11587 | 2,3,4,5,6,3<br>9,40,42 | 1,7,8,36,3<br>7,38,41,43<br>,44 | 1  | P36376                                                                       |
| 11588 | 2,3,4,5,6,3<br>9,40,43 | 1,7,8,36,3<br>7,38,41,42<br>,44 | 4  | P01835,P11883,P20762,P36376                                                  |
| 11589 | 2,3,4,5,6,3<br>9,40,44 | 1,7,8,36,3<br>7,38,41,42<br>,43 | 2  | P36376,Q6P6T1                                                                |
| 11590 | 2,3,4,5,6,3<br>9,41,42 | 1,7,8,36,3<br>7,38,40,43<br>,44 | 8  | P08010,P08753,P38444,P82471,P97605,Q62753,Q6AYR9,Q8CJ52                      |
| 11591 | 2,3,4,5,6,3<br>9,41,43 | 1,7,8,36,3<br>7,38,40,42<br>,44 | 6  | P02625,P11883,P38444,P97605,Q5HZV9,Q7TPB1                                    |
| 11592 | 2,3,4,5,6,3<br>9,41,44 | 1,7,8,36,3<br>7,38,40,42<br>,43 | 3  | P02625,P38444,P97605                                                         |
| 11593 | 2,3,4,5,6,3<br>9,42,43 | 1,7,8,36,3<br>7,38,40,41<br>,44 | 11 | P08723,P10715,P11883,P19629,P20762,P31044,P47727,Q5GRG2,Q5HZV9,Q6AYR8,Q6AYR9 |
| 11594 | 2,3,4,5,6,3<br>9,42,44 | 1,7,8,36,3<br>7,38,40,41<br>,43 | 2  | P97605,Q6AYR8                                                                |
| 11595 | 2,3,4,5,6,3<br>9,43,44 | 1,7,8,36,3<br>7,38,40,41<br>,42 | 4  | P01835,P02625,P11883,P34901                                                  |
| 11596 | 2,3,4,5,6,4<br>0,41,42 | 1,7,8,36,3<br>7,38,39,43<br>,44 | 6  | P02781,P23593,P36376,P97605,Q812E4,Q8CJ52                                    |
| 11597 | 2,3,4,5,6,4<br>0,41,43 | 1,7,8,36,3<br>7,38,39,42<br>,44 | 4  | P01835,P11883,P36376,Q5HZV9                                                  |
| 11598 | 2,3,4,5,6,4<br>0,41,44 | 1,7,8,36,3<br>7,38,39,42<br>,43 | 2  | P36376,P97605                                                                |
| 11599 | 2,3,4,5,6,4<br>0,42,43 | 1,7,8,36,3<br>7,38,39,41<br>,44 | 8  | P01835,P11883,P20762,P36374,P36376,Q5HZV9,Q6AYR8,Q9JHB9                      |
| 11600 | 2,3,4,5,6,4<br>0,42,44 | 1,7,8,36,3<br>7,38,39,41<br>,43 | 7  | P22006,P36374,P36376,Q5M819,Q6AYR8,Q99376,Q9Z0V6                             |
| 11601 | 2,3,4,5,6,4<br>0,43,44 | 1,7,8,36,3<br>7,38,39,41<br>,42 | 7  | P01681,P01835,P11883,P13432,P20762,P34901,P36376                             |

|       |                        |                                  |    |                                                                                                                                                                                                                                                                                                       |
|-------|------------------------|----------------------------------|----|-------------------------------------------------------------------------------------------------------------------------------------------------------------------------------------------------------------------------------------------------------------------------------------------------------|
| 11602 | 2,3,4,5,6,4<br>1,42,43 | 1,7,8,36,3<br>7,38,39,40<br>,44  | 17 | BOLT89,F1LM93,G3V686,O35547,P08723,P11883,P35281,P54921,P60905,P82471,P97605,Q5HZV9,Q63357,Q6AYR8,Q6GMN2,Q8CJ52,Q9QZA6                                                                                                                                                                                |
| 11603 | 2,3,4,5,6,4<br>1,42,44 | 1,7,8,36,3<br>7,38,39,40<br>,43  | 14 | F1LM93,G3V686,P08010,P35281,P38444,P60905,P97605,Q62753,Q6AYR8,Q6P6R2,Q812E4,Q8CJ52,Q99068,Q9JID2                                                                                                                                                                                                     |
| 11604 | 2,3,4,5,6,4<br>1,43,44 | 1,7,8,36,3<br>7,38,39,40<br>,42  | 8  | P01835,P11883,P28648,P34901,P35281,P38444,P97605,Q5HZV9                                                                                                                                                                                                                                               |
| 11605 | 2,3,4,5,6,4<br>2,43,44 | 1,7,8,36,3<br>7,38,39,40<br>,41  | 13 | P01835,P08723,P10715,P11883,P19629,P20762,P31044,P34901,P35281,P36374,P60905,Q6AYR8,Q9Z0V6                                                                                                                                                                                                            |
| 11606 | 2,3,4,5,7,8<br>,36,37  | 1,6,38,39,<br>40,41,42,4<br>3,44 | 13 | P07171,P11762,P13432,P19629,P97605,Q01205,Q07116,Q09030,Q6AYL6,Q6AYS4,Q6IFU7,Q99MH3,Q9QZQ5                                                                                                                                                                                                            |
| 11607 | 2,3,4,5,7,8<br>,36,38  | 1,6,37,39,<br>40,41,42,4<br>3,44 | 21 | D3ZUK3,O35547,P04905,P07171,P08010,P11762,P13432,P19629,P34901,P35444,P47727,P49744,P50116,P85971,P97605,Q01205,Q09030,Q5ZQU0,Q6AYL6,Q6AYS4,Q99MH3                                                                                                                                                    |
| 11608 | 2,3,4,5,7,8<br>,36,39  | 1,6,37,38,<br>40,41,42,4<br>3,44 | 17 | D3ZUK3,P04905,P07171,P08010,P20766,P35444,P36970,P47727,P55016,P97605,Q01205,Q07116,Q09030,Q5ZQU0,Q63475,Q6AYS4,Q99MH3                                                                                                                                                                                |
| 11609 | 2,3,4,5,7,8<br>,36,40  | 1,6,37,38,<br>39,41,42,4<br>3,44 | 14 | P07171,P11762,P13432,P20766,P35444,P36374,P36376,P36970,P97605,Q01205,Q09030,Q6AYS4,Q6IFU7,Q9QZ76                                                                                                                                                                                                     |
| 11610 | 2,3,4,5,7,8<br>,36,41  | 1,6,37,38,<br>39,40,42,4<br>3,44 | 30 | D3ZUK3,O35547,P04905,P07171,P07897,P08010,P11762,P35444,P49744,P50116,P60905,P80201,P85971,P97605,Q01205,Q07116,Q09030,Q5M871,Q5ZQU0,Q63357,Q63467,Q63475,Q64611,Q6AYS4,Q6IFU7,Q6IFV1,Q812E4,Q99041,Q99MH3,Q9QZQ5                                                                                     |
| 11611 | 2,3,4,5,7,8<br>,36,42  | 1,6,37,38,<br>39,40,41,4<br>3,44 | 42 | F1LM93,O08815,O35547,P02781,P02782,P04905,P06911,P07171,P07897,P08010,P08290,P08644,P08649,P08723,P08753,P10715,P13432,P19629,P35444,P36374,P36970,P47727,P55016,P60905,P85971,P97554,P97605,Q01205,Q07116,Q09030,Q5GRG2,Q5XI73,Q62753,Q63357,Q6AYL6,Q6AYR9,Q6AYS4,Q6IFV1,Q812E4,Q99MH3,Q9QZK9,Q9QZQ5 |
| 11612 | 2,3,4,5,7,8<br>,36,43  | 1,6,37,38,<br>39,40,41,4<br>2,44 | 27 | D3ZUK3,O54858,P06911,P07171,P08723,P10715,P11762,P13432,P16391,P16636,P19629,P20762,P34901,P35444,P47727,P49744,P51886,P60905,P83748,P85971,P97605,Q01205,Q07116,Q09030,Q5GRG2,Q6AYS4,Q99MH3                                                                                                          |
| 11613 | 2,3,4,5,7,8<br>,36,44  | 1,6,37,38,<br>39,40,41,4<br>2,43 | 25 | D3ZUK3,P07171,P07897,P13432,P20766,P34901,P35444,P36374,P49744,P55016,P60571,P60905,P85971,P97605,Q01205,Q07116,Q09030,Q5ZQU0,Q63467,Q63475,Q6AYS4,Q6IFU7,Q6IFV1,Q99MH3,Q9QZQ5                                                                                                                        |
| 11614 | 2,3,4,5,7,8<br>,37,38  | 1,6,36,39,<br>40,41,42,4<br>3,44 | 7  | P11762,P19629,P97605,Q01205,Q09030,Q6AYS4,Q7TPB1                                                                                                                                                                                                                                                      |
| 11615 | 2,3,4,5,7,8<br>,37,39  | 1,6,36,38,<br>40,41,42,4<br>3,44 | 7  | P11762,P36970,P97605,Q01205,Q09030,Q6AYS4,Q7TPB1                                                                                                                                                                                                                                                      |
| 11616 | 2,3,4,5,7,8<br>,37,40  | 1,6,36,38,<br>39,41,42,4<br>3,44 | 8  | P11762,P13432,P36376,P97605,Q01205,Q09030,Q6AYS4,Q6IFU7                                                                                                                                                                                                                                               |

|       |                       |                                  |    |                                                                                                                                                                                                                   |
|-------|-----------------------|----------------------------------|----|-------------------------------------------------------------------------------------------------------------------------------------------------------------------------------------------------------------------|
| 11617 | 2,3,4,5,7,8<br>,37,41 | 1,6,36,38,<br>39,40,42,4<br>3,44 | 12 | P11762,P38444,P50116,P80201,P97605,Q01205,Q09030,Q63475,Q6IFU7,Q7TPB1,Q99041,Q99MH3                                                                                                                               |
| 11618 | 2,3,4,5,7,8<br>,37,42 | 1,6,36,38,<br>39,40,41,4<br>3,44 | 13 | P04905,P08723,P11762,P19629,P36374,P47727,P55016,P97605,Q01205,Q09030,Q63357,Q6AYL6,Q9QZQ5                                                                                                                        |
| 11619 | 2,3,4,5,7,8<br>,37,43 | 1,6,36,38,<br>39,40,41,4<br>2,44 | 12 | P11762,P13432,P16391,P19629,P20762,P52590,P85971,P97605,Q01205,Q09030,Q7TPB1,Q9QX79                                                                                                                               |
| 11620 | 2,3,4,5,7,8<br>,37,44 | 1,6,36,38,<br>39,40,41,4<br>2,43 | 12 | P07171,P11762,P13432,P35444,P55016,P97605,Q01205,Q09030,Q5M819,Q6AYS4,Q6IFU7,Q9R044                                                                                                                               |
| 11621 | 2,3,4,5,7,8<br>,38,39 | 1,6,36,37,<br>40,41,42,4<br>3,44 | 9  | O35547,P05369,P08010,P35444,P47727,P97605,Q01205,Q6AYS4,Q80WL1                                                                                                                                                    |
| 11622 | 2,3,4,5,7,8<br>,38,40 | 1,6,36,37,<br>39,41,42,4<br>3,44 | 8  | P35444,P36374,P97605,Q01205,Q09030,Q6AYS4,Q9JHB9,Q9QZ76                                                                                                                                                           |
| 11623 | 2,3,4,5,7,8<br>,38,41 | 1,6,36,37,<br>39,40,42,4<br>3,44 | 17 | O35547,P08010,P11762,P35444,P49744,P50115,P50116,P52590,P80201,P97605,Q01205,Q09030,Q5M871,Q63475,Q6AYS4,Q7TPB1,Q99MH3                                                                                            |
| 11624 | 2,3,4,5,7,8<br>,38,42 | 1,6,36,37,<br>39,40,41,4<br>3,44 | 30 | F1LM93,O08815,O35547,P02781,P04905,P05369,P08010,P08723,P08753,P10715,P19629,P35444,P36374,P47727,P50116,P60905,P97554,P97605,Q01205,Q09030,Q5GRG2,Q62902,Q63357,Q6AYL6,Q6AYR8,Q6AYS4,Q80WL1,Q812E4,Q9JHB9,Q9QZK9 |
| 11625 | 2,3,4,5,7,8<br>,38,43 | 1,6,36,37,<br>39,40,41,4<br>2,44 | 21 | O35547,P08723,P16391,P19629,P20762,P25031,P34901,P35444,P47727,P49744,P50116,P52590,P85971,P97605,Q01205,Q09030,Q5M871,Q6AYS4,Q7TPB1,Q80WL1,Q9JHB9                                                                |
| 11626 | 2,3,4,5,7,8<br>,38,44 | 1,6,36,37,<br>39,40,41,4<br>2,43 | 14 | O35547,P07171,P13432,P34901,P35444,P36374,P49744,P50116,P52590,P97605,Q01205,Q5M871,Q6AYS4,Q9R044                                                                                                                 |
| 11627 | 2,3,4,5,7,8<br>,39,40 | 1,6,36,37,<br>38,41,42,4<br>3,44 | 8  | P20766,P36376,P36970,P97605,Q01205,Q09030,Q5M819,Q6AYS4                                                                                                                                                           |
| 11628 | 2,3,4,5,7,8<br>,39,41 | 1,6,36,37,<br>38,40,42,4<br>3,44 | 16 | O35547,P08010,P20766,P35444,P36970,P38444,P50116,P80201,P97605,Q01205,Q09030,Q5ZQU0,Q63475,Q6AYS4,Q7TPB1,Q9ESW0                                                                                                   |
| 11629 | 2,3,4,5,7,8<br>,39,42 | 1,6,36,37,<br>38,40,41,4<br>3,44 | 30 | F1LM93,O08815,O35547,P02781,P04905,P05369,P08010,P08644,P08723,P08753,P09456,P0C0A9,P20766,P35444,P36374,P36970,P47727,P55016,P60905,P97605,Q01205,Q09030,Q5M819,Q63357,Q6AYR9,Q6AYS4,Q80WL1,Q9JHB9,Q9QZK9,Q9QZQ5 |
| 11630 | 2,3,4,5,7,8<br>,39,43 | 1,6,36,37,<br>38,40,41,4<br>2,44 | 14 | P20762,P20766,P35444,P47727,P52590,P83748,P85971,P97605,Q01205,Q09030,Q5M819,Q6AYS4,Q7TPB1,Q80WL1                                                                                                                 |
| 11631 | 2,3,4,5,7,8<br>,39,44 | 1,6,36,37,<br>38,40,41,4<br>2,43 | 9  | P07171,P20766,P35444,P36970,P55016,P97605,Q01205,Q5M819,Q6AYS4                                                                                                                                                    |



|       |                        |                                  |    |                                                                                                                                                                                                                                                                                                        |
|-------|------------------------|----------------------------------|----|--------------------------------------------------------------------------------------------------------------------------------------------------------------------------------------------------------------------------------------------------------------------------------------------------------|
| 11632 | 2,3,4,5,7,8<br>,40,41  | 1,6,36,37,<br>38,39,42,4<br>3,44 | 9  | P20766,P35444,P36376,P50116,P97605,Q01205,Q09030,Q6AYS4,Q6IFU7                                                                                                                                                                                                                                         |
| 11633 | 2,3,4,5,7,8<br>,40,42  | 1,6,36,37,<br>38,39,41,4<br>3,44 | 22 | O08815,O35547,P02781,P02782,P08723,P20766,P35444,P36374,P36376,P36970,P55016,P60905,P97605,Q01205,Q09030,Q5M819,Q6A<br>YR9,Q6AYS4,Q6IFV1,Q812E4,Q9JHB9,Q9QZ76                                                                                                                                          |
| 11634 | 2,3,4,5,7,8<br>,40,43  | 1,6,36,37,<br>38,39,41,4<br>2,44 | 10 | P13432,P20762,P20766,P36376,P97605,Q01205,Q09030,Q5M819,Q6AYS4,Q9JHB9                                                                                                                                                                                                                                  |
| 11635 | 2,3,4,5,7,8<br>,40,44  | 1,6,36,37,<br>38,39,41,4<br>2,43 | 16 | P06866,P07171,P13432,P20766,P35444,P36374,P36376,P55016,P97605,Q01205,Q09030,Q5M819,Q6AYS4,Q6IFU7,Q6IFV1,Q9QZ76                                                                                                                                                                                        |
| 11636 | 2,3,4,5,7,8<br>,41,42  | 1,6,36,37,<br>38,39,40,4<br>3,44 | 37 | F1LM93,O08815,O35547,P02781,P04905,P07861,P08010,P08644,P08723,P08753,P09456,P0C0A9,P35444,P36374,P36970,P38444,P4024<br>1,P47727,P50116,P54921,P60905,P80201,P97605,Q01205,Q09030,Q62753,Q62902,Q63357,Q6AYR9,Q6GMN2,Q6IFV1,Q812E4,Q8CJ52,<br>Q9JHB9,Q9QZK9,Q9QZQ5,Q9WUD9                             |
| 11637 | 2,3,4,5,7,8<br>,41,43  | 1,6,36,37,<br>38,39,40,4<br>2,44 | 18 | O35547,P20762,P35444,P49744,P50116,P52590,P54921,P60905,P80201,P83748,P85971,P97605,Q01205,Q09030,Q5M871,Q63357,Q7T<br>PB1,Q9QX79                                                                                                                                                                      |
| 11638 | 2,3,4,5,7,8<br>,41,44  | 1,6,36,37,<br>38,39,40,4<br>2,43 | 21 | O35547,P07171,P08010,P20766,P35281,P35444,P38444,P49744,P50116,P60905,P80201,P97605,Q01205,Q09030,Q5M871,Q63475,Q6A<br>YS4,Q6IFU7,Q6IFV1,Q812E4,Q99MH3                                                                                                                                                 |
| 11639 | 2,3,4,5,7,8<br>,42,43  | 1,6,36,37,<br>38,39,40,4<br>1,44 | 41 | F1LM93,O08815,O35547,P02781,P04905,P06911,P08723,P08753,P0C0A9,P10715,P13432,P16391,P16636,P19629,P20762,P20766,P2677<br>2,P30120,P35444,P36374,P40241,P47727,P52590,P54921,P55016,P60905,P85971,P97605,Q01205,Q09030,Q5GRG2,Q5M819,Q62975,Q<br>63357,Q6AYR8,Q6AYR9,Q6GMN2,Q6Q7Y5,Q80WL1,Q812E4,Q9JHB9 |
| 11640 | 2,3,4,5,7,8<br>,42,44  | 1,6,36,37,<br>38,39,40,4<br>1,43 | 36 | F1LM93,O08815,O35547,P00714,P02781,P04905,P07171,P08010,P08644,P08723,P08753,P0C0A9,P13432,P20766,P35281,P35444,P3637<br>4,P47727,P55016,P60905,P97605,Q01205,Q09030,Q5M819,Q62753,Q63357,Q63514,Q6AYR8,Q6AYS4,Q6IFV1,Q812E4,Q9JHB9,Q9JID2,<br>Q9QZ76,Q9QZK9,Q9QZQ5                                    |
| 11641 | 2,3,4,5,7,8<br>,43,44  | 1,6,36,37,<br>38,39,40,4<br>1,42 | 17 | P07171,P08723,P13432,P20762,P20766,P34901,P35281,P35444,P36374,P52590,P55016,P85971,P97605,Q01205,Q09030,Q5M819,Q6AY<br>S4                                                                                                                                                                             |
| 11642 | 2,3,4,5,7,3<br>6,37,38 | 1,6,8,39,4<br>0,41,42,43<br>,44  | 8  | P01836,P10715,P11762,P19629,P34901,Q01205,Q09030,Q6AYL6                                                                                                                                                                                                                                                |
| 11643 | 2,3,4,5,7,3<br>6,37,39 | 1,6,8,38,4<br>0,41,42,43<br>,44  | 1  | P11762                                                                                                                                                                                                                                                                                                 |
| 11644 | 2,3,4,5,7,3<br>6,37,40 | 1,6,8,38,3<br>9,41,42,43<br>,44  | 4  | P11762,P13432,P36376,Q09030                                                                                                                                                                                                                                                                            |
| 11645 | 2,3,4,5,7,3<br>6,37,41 | 1,6,8,38,3<br>9,40,42,43<br>,44  | 7  | P01836,P11762,P97605,Q01205,Q09030,Q63475,Q99MH3                                                                                                                                                                                                                                                       |
| 11646 | 2,3,4,5,7,3<br>6,37,42 | 1,6,8,38,3<br>9,40,41,43<br>,44  | 15 | P02782,P06911,P08644,P10715,P11762,P13432,P19629,P22283,P31044,P97605,Q09030,Q5GRG2,Q5XI73,Q6AYL6,Q9QZQ5                                                                                                                                                                                               |

|       |                        |                                 |    |                                                                                                                                                                                                                              |
|-------|------------------------|---------------------------------|----|------------------------------------------------------------------------------------------------------------------------------------------------------------------------------------------------------------------------------|
| 11647 | 2,3,4,5,7,3<br>6,37,43 | 1,6,8,38,3<br>9,40,41,42<br>,44 | 11 | P01836,P06760,P06911,P10715,P11762,P13432,P19629,P31044,P34901,Q09030,Q5GRG2                                                                                                                                                 |
| 11648 | 2,3,4,5,7,3<br>6,37,44 | 1,6,8,38,3<br>9,40,41,42<br>,43 | 7  | P11762,P13432,P34901,Q01205,Q09030,Q6IFU7,Q99MH3                                                                                                                                                                             |
| 11649 | 2,3,4,5,7,3<br>6,38,39 | 1,6,8,37,4<br>0,41,42,43<br>,44 | 6  | P34901,P47727,P51907,P97605,Q6IE51,Q6P6R2                                                                                                                                                                                    |
| 11650 | 2,3,4,5,7,3<br>6,38,40 | 1,6,8,37,3<br>9,41,42,43<br>,44 | 3  | P01836,P34901,Q09030                                                                                                                                                                                                         |
| 11651 | 2,3,4,5,7,3<br>6,38,41 | 1,6,8,37,3<br>9,40,42,43<br>,44 | 12 | O35547,P01836,P08010,P11762,P13596,P49744,P97605,Q01205,Q09030,Q63475,Q6AYL6,Q99MH3                                                                                                                                          |
| 11652 | 2,3,4,5,7,3<br>6,38,42 | 1,6,8,37,3<br>9,40,41,43<br>,44 | 31 | O35547,P01836,P02781,P02782,P04905,P06911,P08010,P08723,P10715,P12785,P13596,P19629,P22283,P31044,P34901,P36374,P47727<br>,P51907,P60905,P97554,P97605,Q09030,Q5GRG2,Q5XI73,Q62902,Q63357,Q6AYL6,Q6AYR8,Q812E4,Q8CJ52,Q9QZK9 |
| 11653 | 2,3,4,5,7,3<br>6,38,43 | 1,6,8,37,3<br>9,40,41,42<br>,44 | 13 | P01836,P06760,P06911,P10715,P11762,P13432,P19629,P25031,P31044,P34901,P47727,Q5GRG2,Q6AYL6                                                                                                                                   |
| 11654 | 2,3,4,5,7,3<br>6,38,44 | 1,6,8,37,3<br>9,40,41,42<br>,43 | 5  | P13432,P34901,P51907,Q01205,Q99MH3                                                                                                                                                                                           |
| 11655 | 2,3,4,5,7,3<br>6,39,40 | 1,6,8,37,3<br>8,41,42,43<br>,44 | 2  | P36376,P97605                                                                                                                                                                                                                |
| 11656 | 2,3,4,5,7,3<br>6,39,41 | 1,6,8,37,3<br>8,40,42,43<br>,44 | 7  | P01836,P08010,P80201,P97605,Q01205,Q63475,Q99MH3                                                                                                                                                                             |
| 11657 | 2,3,4,5,7,3<br>6,39,42 | 1,6,8,37,3<br>8,40,41,43<br>,44 | 15 | O54728,P02782,P04905,P08010,P08644,P22283,P47727,P51907,P97605,Q09030,Q5XI73,Q62635,Q6AYR9,Q6IFV1,Q99068                                                                                                                     |
| 11658 | 2,3,4,5,7,3<br>6,39,43 | 1,6,8,37,3<br>8,40,41,42<br>,44 | 5  | P01836,P06760,P16636,P34901,P83748                                                                                                                                                                                           |
| 11659 | 2,3,4,5,7,3<br>6,39,44 | 1,6,8,37,3<br>8,40,41,42<br>,43 | 6  | P34901,P51907,P97605,Q01205,Q63475,Q6IFV1                                                                                                                                                                                    |
| 11660 | 2,3,4,5,7,3<br>6,40,41 | 1,6,8,37,3<br>8,39,42,43<br>,44 | 7  | P01836,P13596,P36376,P97605,Q01205,Q09030,Q6IFV1                                                                                                                                                                             |
| 11661 | 2,3,4,5,7,3<br>6,40,42 | 1,6,8,37,3<br>8,39,41,43<br>,44 | 18 | P01836,P02781,P02782,P05539,P08644,P13432,P13596,P14408,P36374,P36376,P97605,Q09030,Q5XI73,Q6AYR9,Q6IFV1,Q812E4,Q990<br>68,Q9QZ76                                                                                            |

|       |                        |                                 |    |                                                                                                                                                                                                                                                      |
|-------|------------------------|---------------------------------|----|------------------------------------------------------------------------------------------------------------------------------------------------------------------------------------------------------------------------------------------------------|
| 11662 | 2,3,4,5,7,3<br>6,40,43 | 1,6,8,37,3<br>8,39,41,42<br>,44 | 7  | P01836,P02782,P13432,P16636,P34901,P36376,Q09030                                                                                                                                                                                                     |
| 11663 | 2,3,4,5,7,3<br>6,40,44 | 1,6,8,37,3<br>8,39,41,42<br>,43 | 6  | P02782,P13432,P34901,P36376,Q09030,Q6IFV1                                                                                                                                                                                                            |
| 11664 | 2,3,4,5,7,3<br>6,41,42 | 1,6,8,37,3<br>8,39,40,43<br>,44 | 35 | F1LM93,G3V686,O35547,P01836,P02781,P02782,P04905,P05539,P08010,P08644,P08649,P08753,P0C0A9,P13596,P22283,P35281,P47727,P54921,P60905,P80201,P97605,Q01205,Q09030,Q5XI73,Q62902,Q63357,Q64605,Q6AYL6,Q6AYR9,Q6IFV1,Q812E4,Q8CJ52,Q99068,Q99MH3,Q9WUD9 |
| 11665 | 2,3,4,5,7,3<br>6,41,43 | 1,6,8,37,3<br>8,39,40,42<br>,44 | 10 | P01836,P06760,P11762,P16636,P35281,P83748,P97605,Q01205,Q09030,Q63475                                                                                                                                                                                |
| 11666 | 2,3,4,5,7,3<br>6,41,44 | 1,6,8,37,3<br>8,39,40,42<br>,43 | 11 | G3V686,P34901,P35281,P97605,Q01205,Q09030,Q63467,Q63475,Q64611,Q6IFV1,Q99MH3                                                                                                                                                                         |
| 11667 | 2,3,4,5,7,3<br>6,42,43 | 1,6,8,37,3<br>8,39,40,41<br>,44 | 30 | O35547,P01836,P02782,P04905,P05539,P06760,P06911,P08723,P0C0A9,P10715,P13432,P16636,P19629,P24368,P30120,P31044,P34901,P35281,P36374,P47727,P60905,Q09030,Q5GRG2,Q62975,Q63357,Q6AYL6,Q6AYR8,Q6AYR9,Q812E4,Q9JHB9                                    |
| 11668 | 2,3,4,5,7,3<br>6,42,44 | 1,6,8,37,3<br>8,39,40,41<br>,43 | 26 | G3V686,P02782,P04905,P08010,P08644,P08723,P0C0A9,P11442,P13432,P13596,P34901,P35281,P36374,P47727,P51907,P55016,P60905,P97554,P97605,Q09030,Q5XI73,Q64605,Q6AYR8,Q6IFV1,Q812E4,Q99068                                                                |
| 11669 | 2,3,4,5,7,3<br>6,43,44 | 1,6,8,37,3<br>8,39,40,41<br>,42 | 4  | P13432,P16636,P34901,P35281                                                                                                                                                                                                                          |
| 11670 | 2,3,4,5,7,3<br>7,38,39 | 1,6,8,36,4<br>0,41,42,43<br>,44 | 1  | P11762                                                                                                                                                                                                                                               |
| 11671 | 2,3,4,5,7,3<br>7,38,40 | 1,6,8,36,3<br>9,41,42,43<br>,44 | 1  | P11762                                                                                                                                                                                                                                               |
| 11672 | 2,3,4,5,7,3<br>7,38,41 | 1,6,8,36,3<br>9,40,42,43<br>,44 | 3  | P11762,P97605,Q7TPB1                                                                                                                                                                                                                                 |
| 11673 | 2,3,4,5,7,3<br>7,38,42 | 1,6,8,36,3<br>9,40,41,43<br>,44 | 8  | P06911,P10715,P12785,P19629,P47727,Q5GRG2,Q5XI73,Q6AYL6                                                                                                                                                                                              |
| 11674 | 2,3,4,5,7,3<br>7,38,43 | 1,6,8,36,3<br>9,40,41,42<br>,44 | 8  | P06911,P10715,P11762,P19629,P25031,P34901,Q5GRG2,Q7TPB1                                                                                                                                                                                              |
| 11675 | 2,3,4,5,7,3<br>7,38,44 | 1,6,8,36,3<br>9,40,41,42<br>,43 | 3  | P11762,P12785,P34901                                                                                                                                                                                                                                 |
| 11676 | 2,3,4,5,7,3<br>7,39,40 | 1,6,8,36,3<br>8,41,42,43<br>,44 | 2  | P15999,P36376                                                                                                                                                                                                                                        |

|       |                        |                                 |    |                                                                              |
|-------|------------------------|---------------------------------|----|------------------------------------------------------------------------------|
| 11677 | 2,3,4,5,7,3<br>7,39,41 | 1,6,8,36,3<br>8,40,42,43<br>,44 | 5  | P11762,P15999,P38444,P80201,P97605                                           |
| 11678 | 2,3,4,5,7,3<br>7,39,42 | 1,6,8,36,3<br>8,40,41,43<br>,44 | 2  | P97605,Q5XI73                                                                |
| 11679 | 2,3,4,5,7,3<br>7,39,43 | 1,6,8,36,3<br>8,40,41,42<br>,44 | 4  | P15999,P83748,Q7TPB1,Q99PP0                                                  |
| 11680 | 2,3,4,5,7,3<br>7,39,44 | 1,6,8,36,3<br>8,40,41,42<br>,43 | 2  | P15999,P97605                                                                |
| 11681 | 2,3,4,5,7,3<br>7,40,41 | 1,6,8,36,3<br>8,39,42,43<br>,44 | 5  | P11762,P15999,P36376,P97605,Q09030                                           |
| 11682 | 2,3,4,5,7,3<br>7,40,42 | 1,6,8,36,3<br>8,39,41,43<br>,44 | 3  | P02782,P36376,Q09030                                                         |
| 11683 | 2,3,4,5,7,3<br>7,40,43 | 1,6,8,36,3<br>8,39,41,42<br>,44 | 3  | P11762,P13432,P36376                                                         |
| 11684 | 2,3,4,5,7,3<br>7,40,44 | 1,6,8,36,3<br>8,39,41,42<br>,43 | 4  | P11762,P13432,P36376,Q6IFU7                                                  |
| 11685 | 2,3,4,5,7,3<br>7,41,42 | 1,6,8,36,3<br>8,39,40,43<br>,44 | 4  | P80201,P97605,Q09030,Q6IFV1                                                  |
| 11686 | 2,3,4,5,7,3<br>7,41,43 | 1,6,8,36,3<br>8,39,40,42<br>,44 | 4  | P01836,P11762,P97605,Q7TPB1                                                  |
| 11687 | 2,3,4,5,7,3<br>7,41,44 | 1,6,8,36,3<br>8,39,40,42<br>,43 | 4  | P11762,P38444,P97605,Q6IFU7                                                  |
| 11688 | 2,3,4,5,7,3<br>7,42,43 | 1,6,8,36,3<br>8,39,40,41<br>,44 | 11 | P02782,P06911,P08723,P10715,P19629,P31044,Q09030,Q5GRG2,Q62975,Q6AYR8,Q99PP0 |
| 11689 | 2,3,4,5,7,3<br>7,42,44 | 1,6,8,36,3<br>8,39,40,41<br>,43 | 7  | P02782,P13432,P97605,Q5XI73,Q6AYR8,Q6IFV1,Q99068                             |
| 11690 | 2,3,4,5,7,3<br>7,43,44 | 1,6,8,36,3<br>8,39,40,41<br>,42 | 3  | P11762,P13432,P34901                                                         |
| 11691 | 2,3,4,5,7,3<br>8,39,40 | 1,6,8,36,3<br>7,41,42,43<br>,44 | 1  | P36376                                                                       |

|       |                        |                                 |    |                                                                                                                                                                                       |
|-------|------------------------|---------------------------------|----|---------------------------------------------------------------------------------------------------------------------------------------------------------------------------------------|
| 11692 | 2,3,4,5,7,3<br>8,39,41 | 1,6,8,36,3<br>7,40,42,43<br>,44 | 4  | O35547,P08010,P80201,P97605                                                                                                                                                           |
| 11693 | 2,3,4,5,7,3<br>8,39,42 | 1,6,8,36,3<br>7,40,41,43<br>,44 | 12 | O35547,P04905,P05369,P08010,P08723,P47727,P51907,P97605,Q5XI73,Q6AYR8,Q80WL1,Q9JHB9                                                                                                   |
| 11694 | 2,3,4,5,7,3<br>8,39,43 | 1,6,8,36,3<br>7,40,41,42<br>,44 | 6  | P25031,P34901,P47727,Q6IE51,Q7TPB1,Q80WL1                                                                                                                                             |
| 11695 | 2,3,4,5,7,3<br>8,39,44 | 1,6,8,36,3<br>7,40,41,42<br>,43 | 3  | P34901,P51907,P97605                                                                                                                                                                  |
| 11696 | 2,3,4,5,7,3<br>8,40,41 | 1,6,8,36,3<br>7,39,42,43<br>,44 | 3  | P01836,P36376,P97605                                                                                                                                                                  |
| 11697 | 2,3,4,5,7,3<br>8,40,42 | 1,6,8,36,3<br>7,39,41,43<br>,44 | 11 | O35547,P02781,P02782,P12785,P36374,P47727,P97605,Q5XI73,Q6AYR8,Q9JHB9,Q9QZ76                                                                                                          |
| 11698 | 2,3,4,5,7,3<br>8,40,43 | 1,6,8,36,3<br>7,39,41,42<br>,44 | 5  | P01836,P25031,P34901,P36376,Q9JHB9                                                                                                                                                    |
| 11699 | 2,3,4,5,7,3<br>8,40,44 | 1,6,8,36,3<br>7,39,41,42<br>,43 | 2  | P34901,P36376                                                                                                                                                                         |
| 11700 | 2,3,4,5,7,3<br>8,41,42 | 1,6,8,36,3<br>7,39,40,43<br>,44 | 26 | F1LM93,O08815,O35547,P01836,P02781,P04905,P08010,P08723,P08753,P0C0A9,P13596,P25031,P47727,P50116,P54921,P60905,P80201,P97605,Q5XI73,Q62902,Q63357,Q6AYL6,Q6AYR8,Q812E4,Q8CJ52,Q9QZK9 |
| 11701 | 2,3,4,5,7,3<br>8,41,43 | 1,6,8,36,3<br>7,39,40,42<br>,44 | 9  | O35547,P01836,P25031,P49744,P50116,P52590,P97605,Q7TPB1,Q8CJD3                                                                                                                        |
| 11702 | 2,3,4,5,7,3<br>8,41,44 | 1,6,8,36,3<br>7,39,40,42<br>,43 | 8  | O35547,P00774,P34901,P55091,P97605,P98089,Q05695,Q63475                                                                                                                               |
| 11703 | 2,3,4,5,7,3<br>8,42,43 | 1,6,8,36,3<br>7,39,40,41<br>,44 | 22 | F1LM93,O35547,P01836,P02782,P04905,P06911,P08723,P10715,P19629,P25031,P31044,P34901,P47727,P54921,P60905,Q5GRG2,Q62902,Q62975,Q6AYL6,Q6AYR8,Q80WL1,Q9JHB9                             |
| 11704 | 2,3,4,5,7,3<br>8,42,44 | 1,6,8,36,3<br>7,39,40,41<br>,43 | 17 | F1LM93,O35547,P02782,P04905,P08723,P12785,P34901,P35281,P36374,P47727,P51907,P60905,P97605,Q5XI73,Q62902,Q6AYR8,Q9QZK9                                                                |
| 11705 | 2,3,4,5,7,3<br>8,43,44 | 1,6,8,36,3<br>7,39,40,41<br>,42 | 4  | P08723,P13432,P25031,P34901                                                                                                                                                           |
| 11706 | 2,3,4,5,7,3<br>9,40,41 | 1,6,8,36,3<br>7,38,42,43<br>,44 | 3  | P15999,P36376,P97605                                                                                                                                                                  |

|       |                        |                                 |    |                                                                                                                        |
|-------|------------------------|---------------------------------|----|------------------------------------------------------------------------------------------------------------------------|
| 11707 | 2,3,4,5,7,3<br>9,40,42 | 1,6,8,36,3<br>7,38,41,43<br>,44 | 10 | P02780,P02781,P02782,P36376,P97605,Q5XI73,Q6AYR9,Q6IFV1,Q99068,Q9JHB9                                                  |
| 11708 | 2,3,4,5,7,3<br>9,40,43 | 1,6,8,36,3<br>7,38,41,42<br>,44 | 3  | P36376,P83748,Q9JHB9                                                                                                   |
| 11709 | 2,3,4,5,7,3<br>9,40,44 | 1,6,8,36,3<br>7,38,41,42<br>,43 | 3  | P36376,P97605,Q5M819                                                                                                   |
| 11710 | 2,3,4,5,7,3<br>9,41,42 | 1,6,8,36,3<br>7,38,40,43<br>,44 | 17 | F1LM93,O08815,O35547,P04905,P08010,P08644,P0C0A9,P47727,P54921,P80201,P97605,Q5XI73,Q63357,Q6AYR9,Q6IFV1,Q99068,Q9WUD9 |
| 11711 | 2,3,4,5,7,3<br>9,41,43 | 1,6,8,36,3<br>7,38,40,42<br>,44 | 4  | P01836,P83748,P97605,Q7TPB1                                                                                            |
| 11712 | 2,3,4,5,7,3<br>9,41,44 | 1,6,8,36,3<br>7,38,40,42<br>,43 | 6  | P38444,P80201,P97605,Q63475,Q6IFV1,Q9ESW0                                                                              |
| 11713 | 2,3,4,5,7,3<br>9,42,43 | 1,6,8,36,3<br>7,38,40,41<br>,44 | 14 | O35547,P02782,P04905,P06911,P08723,P0C0A9,P16636,P30120,P47727,P97605,Q5GRG2,Q6AYR8,Q6AYR9,Q9JHB9                      |
| 11714 | 2,3,4,5,7,3<br>9,42,44 | 1,6,8,36,3<br>7,38,40,41<br>,43 | 15 | P02782,P04905,P08010,P08723,P0C0A9,P11442,P35281,P47727,P51907,P55016,P97605,Q5XI73,Q6AYR8,Q6IFV1,Q99068               |
| 11715 | 2,3,4,5,7,3<br>9,43,44 | 1,6,8,36,3<br>7,38,40,41<br>,42 | 2  | P34901,P97605                                                                                                          |
| 11716 | 2,3,4,5,7,4<br>0,41,42 | 1,6,8,36,3<br>7,38,39,43<br>,44 | 14 | O35547,P01836,P02781,P02782,P13596,P36376,P60905,P97605,Q09030,Q6AYR9,Q6IFV1,Q812E4,Q99068,Q9JHB9                      |
| 11717 | 2,3,4,5,7,4<br>0,41,43 | 1,6,8,36,3<br>7,38,39,42<br>,44 | 3  | P01836,P36376,P97605                                                                                                   |
| 11718 | 2,3,4,5,7,4<br>0,41,44 | 1,6,8,36,3<br>7,38,39,42<br>,43 | 4  | P36376,P97605,Q6IFV1,Q99068                                                                                            |
| 11719 | 2,3,4,5,7,4<br>0,42,43 | 1,6,8,36,3<br>7,38,39,41<br>,44 | 11 | P01836,P02781,P02782,P08723,P30120,P36374,P36376,Q09030,Q5M819,Q6AYR8,Q9JHB9                                           |
| 11720 | 2,3,4,5,7,4<br>0,42,44 | 1,6,8,36,3<br>7,38,39,41<br>,43 | 12 | P02782,P13432,P36374,P36376,P97605,Q5M819,Q5XI73,Q6AYR8,Q6IFV1,Q99068,Q9JHB9,Q9QZ76                                    |
| 11721 | 2,3,4,5,7,4<br>0,43,44 | 1,6,8,36,3<br>7,38,39,41<br>,42 | 4  | P13432,P34901,P36376,Q5M819                                                                                            |

|       |                        |                                 |    |                                                                                                                                                                             |
|-------|------------------------|---------------------------------|----|-----------------------------------------------------------------------------------------------------------------------------------------------------------------------------|
| 11722 | 2,3,4,5,7,4<br>1,42,43 | 1,6,8,36,3<br>7,38,39,40<br>,44 | 22 | F1LM93,O35547,P01836,P02782,P04905,P08723,P0C0A9,P16636,P30120,P35281,P40241,P47727,P54921,P60905,P82471,P97605,Q0903<br>0,Q63357,Q6AYR8,Q6AYR9,Q812E4,Q9JHB9               |
| 11723 | 2,3,4,5,7,4<br>1,42,44 | 1,6,8,36,3<br>7,38,39,40<br>,43 | 18 | F1LM93,O35547,P04905,P08010,P08644,P08723,P0C0A9,P35281,P60905,P80201,P97605,Q5XI73,Q6AYR8,Q6IFV1,Q812E4,Q8CJ52,Q8K<br>4G9,Q99068                                           |
| 11724 | 2,3,4,5,7,4<br>1,43,44 | 1,6,8,36,3<br>7,38,39,40<br>,42 | 5  | P28648,P34901,P35281,P97605,Q8K4G9                                                                                                                                          |
| 11725 | 2,3,4,5,7,4<br>2,43,44 | 1,6,8,36,3<br>7,38,39,40<br>,41 | 20 | F1LM93,O35547,P02782,P08723,P0C0A9,P13432,P26772,P30120,P34901,P35281,P36374,P47727,P60905,P97605,Q5M819,Q62975,Q6A<br>YR8,Q8K4G9,Q99068,Q9JHB9                             |
| 11726 | 2,3,4,5,8,3<br>6,37,38 | 1,6,7,39,4<br>0,41,42,43<br>,44 | 8  | P06911,P10715,P12020,P19629,Q01205,Q5GRG2,Q6AYL6,Q6AYS4                                                                                                                     |
| 11727 | 2,3,4,5,8,3<br>6,37,39 | 1,6,7,38,4<br>0,41,42,43<br>,44 | 2  | Q01205,Q6AYS4                                                                                                                                                               |
| 11728 | 2,3,4,5,8,3<br>6,37,40 | 1,6,7,38,3<br>9,41,42,43<br>,44 | 2  | P13432,Q6AYS4                                                                                                                                                               |
| 11729 | 2,3,4,5,8,3<br>6,37,41 | 1,6,7,38,3<br>9,40,42,43<br>,44 | 5  | P83121,Q01205,Q6AYL6,Q6AYS4,Q99MH3                                                                                                                                          |
| 11730 | 2,3,4,5,8,3<br>6,37,42 | 1,6,7,38,3<br>9,40,41,43<br>,44 | 9  | P06911,P10715,P12020,P13432,P19629,P31044,Q5GRG2,Q6AYL6,Q6AYS4                                                                                                              |
| 11731 | 2,3,4,5,8,3<br>6,37,43 | 1,6,7,38,3<br>9,40,41,42<br>,44 | 12 | P06911,P10715,P12020,P13432,P16391,P19629,P31044,P83121,Q01205,Q5GRG2,Q6AYL6,Q6AYS4                                                                                         |
| 11732 | 2,3,4,5,8,3<br>6,37,44 | 1,6,7,38,3<br>9,40,41,42<br>,43 | 5  | P13432,P34901,Q01205,Q6AYS4,Q99MH3                                                                                                                                          |
| 11733 | 2,3,4,5,8,3<br>6,38,39 | 1,6,7,37,4<br>0,41,42,43<br>,44 | 5  | P34901,Q01205,Q6AYL6,Q6AYS4,Q80WL1                                                                                                                                          |
| 11734 | 2,3,4,5,8,3<br>6,38,40 | 1,6,7,37,3<br>9,41,42,43<br>,44 | 2  | P22006,Q6AYS4                                                                                                                                                               |
| 11735 | 2,3,4,5,8,3<br>6,38,41 | 1,6,7,37,3<br>9,40,42,43<br>,44 | 8  | P50115,P50116,P97605,Q01205,Q62902,Q6AYL6,Q6AYS4,Q99MH3                                                                                                                     |
| 11736 | 2,3,4,5,8,3<br>6,38,42 | 1,6,7,37,3<br>9,40,41,43<br>,44 | 24 | O35547,P04905,P06911,P08010,P08723,P08753,P10715,P12020,P19629,P22283,P31044,P36374,P47727,P60905,P97554,Q01205,Q5GR<br>G2,Q62902,Q63357,Q6AYL6,Q6AYS4,Q80WL1,Q812E4,Q9QZK9 |

|       |                        |                                 |    |                                                                                                                                                    |
|-------|------------------------|---------------------------------|----|----------------------------------------------------------------------------------------------------------------------------------------------------|
| 11737 | 2,3,4,5,8,3<br>6,38,43 | 1,6,7,37,3<br>9,40,41,42<br>,44 | 13 | P06911,P10715,P12020,P13432,P16391,P19629,P31044,P34901,Q01205,Q5GRG2,Q6AYL6,Q6AYS4,Q80WL1                                                         |
| 11738 | 2,3,4,5,8,3<br>6,38,44 | 1,6,7,37,3<br>9,40,41,42<br>,43 | 7  | P13432,P22006,P34901,Q01205,Q6AYL6,Q6AYS4,Q99MH3                                                                                                   |
| 11739 | 2,3,4,5,8,3<br>6,39,40 | 1,6,7,37,3<br>8,41,42,43<br>,44 | 4  | P20766,P36376,P36970,Q6AYS4                                                                                                                        |
| 11740 | 2,3,4,5,8,3<br>6,39,41 | 1,6,7,37,3<br>8,40,42,43<br>,44 | 7  | P08010,P20766,P36970,P97605,Q01205,Q6AYS4,Q99MH3                                                                                                   |
| 11741 | 2,3,4,5,8,3<br>6,39,42 | 1,6,7,37,3<br>8,40,41,43<br>,44 | 15 | O54728,P04905,P06911,P08010,P09456,P12020,P20766,P22283,P36970,P47727,P97605,Q5GRG2,Q6AYL6,Q6AYR9,Q6AYS4                                           |
| 11742 | 2,3,4,5,8,3<br>6,39,43 | 1,6,7,37,3<br>8,40,41,42<br>,44 | 7  | P06911,P12020,P20766,P34901,P97840,Q5GRG2,Q6AYS4                                                                                                   |
| 11743 | 2,3,4,5,8,3<br>6,39,44 | 1,6,7,37,3<br>8,40,41,42<br>,43 | 4  | P20766,P34901,Q01205,Q6AYS4                                                                                                                        |
| 11744 | 2,3,4,5,8,3<br>6,40,41 | 1,6,7,37,3<br>8,39,42,43<br>,44 | 4  | P97605,P97840,Q01205,Q6AYS4                                                                                                                        |
| 11745 | 2,3,4,5,8,3<br>6,40,42 | 1,6,7,37,3<br>8,39,41,43<br>,44 | 5  | P13432,P36374,Q6AYS4,Q812E4,Q9QZ76                                                                                                                 |
| 11746 | 2,3,4,5,8,3<br>6,40,43 | 1,6,7,37,3<br>8,39,41,42<br>,44 | 3  | P13432,P97840,Q6AYS4                                                                                                                               |
| 11747 | 2,3,4,5,8,3<br>6,40,44 | 1,6,7,37,3<br>8,39,41,42<br>,43 | 5  | P13432,P20766,P22006,P34901,Q6AYS4                                                                                                                 |
| 11748 | 2,3,4,5,8,3<br>6,41,42 | 1,6,7,37,3<br>8,39,40,43<br>,44 | 21 | F1LM93,O08815,O35547,P04905,P08010,P08644,P08753,P09456,P22283,P60905,P97605,Q01205,Q62902,Q63357,Q6AYL6,Q6AYR9,Q6AYS4,Q812E4,Q8CJ52,Q99MH3,Q9QZK9 |
| 11749 | 2,3,4,5,8,3<br>6,41,43 | 1,6,7,37,3<br>8,39,40,42<br>,44 | 5  | P83121,P97840,Q01205,Q99MH3,Q9QUL6                                                                                                                 |
| 11750 | 2,3,4,5,8,3<br>6,41,44 | 1,6,7,37,3<br>8,39,40,42<br>,43 | 6  | P83121,P97605,Q01205,Q63475,Q6AYS4,Q99MH3                                                                                                          |
| 11751 | 2,3,4,5,8,3<br>6,42,43 | 1,6,7,37,3<br>8,39,40,41<br>,44 | 16 | P04905,P06911,P08723,P10715,P12020,P13432,P16391,P19629,P31044,P36374,P47727,P60905,Q5GRG2,Q63357,Q6AYL6,Q6AYR9                                    |



|       |                        |                                 |    |                                                                                                                 |
|-------|------------------------|---------------------------------|----|-----------------------------------------------------------------------------------------------------------------|
| 11752 | 2,3,4,5,8,3<br>6,42,44 | 1,6,7,37,3<br>8,39,40,41<br>,43 | 16 | P04905,P08723,P11442,P13432,P34901,P36374,P47727,P55016,P60905,P97554,Q01205,Q6AYL6,Q6AYS4,Q6IFV1,Q812E4,Q99MH3 |
| 11753 | 2,3,4,5,8,3<br>6,43,44 | 1,6,7,37,3<br>8,39,40,41<br>,42 | 5  | P13432,P34901,P83121,Q01205,Q6AYS4                                                                              |
| 11754 | 2,3,4,5,8,3<br>7,38,39 | 1,6,7,36,4<br>0,41,42,43<br>,44 | 2  | Q6AYS4,Q80WL1                                                                                                   |
| 11755 | 2,3,4,5,8,3<br>7,38,40 | 1,6,7,36,3<br>9,41,42,43<br>,44 | 2  | P22006,Q6AYS4                                                                                                   |
| 11756 | 2,3,4,5,8,3<br>7,38,41 | 1,6,7,36,3<br>9,40,42,43<br>,44 | 3  | P50115,P50116,Q7TPB1                                                                                            |
| 11757 | 2,3,4,5,8,3<br>7,38,42 | 1,6,7,36,3<br>9,40,41,43<br>,44 | 8  | P06911,P10715,P12020,P19629,P47727,Q5GRG2,Q6AYL6,Q80WL1                                                         |
| 11758 | 2,3,4,5,8,3<br>7,38,43 | 1,6,7,36,3<br>9,40,41,42<br>,44 | 8  | P06911,P10715,P12020,P16391,P19629,Q5GRG2,Q7TPB1,Q80WL1                                                         |
| 11759 | 2,3,4,5,8,3<br>7,38,44 | 1,6,7,36,3<br>9,40,41,42<br>,43 | 3  | P22006,P34901,Q6AYS4                                                                                            |
| 11760 | 2,3,4,5,8,3<br>7,39,40 | 1,6,7,36,3<br>8,41,42,43<br>,44 | 1  | Q6AYS4                                                                                                          |
| 11761 | 2,3,4,5,8,3<br>7,39,41 | 1,6,7,36,3<br>8,40,42,43<br>,44 | 1  | P97605                                                                                                          |
| 11762 | 2,3,4,5,8,3<br>7,39,42 | 1,6,7,36,3<br>8,40,41,43<br>,44 | 2  | P12020,Q5GRG2                                                                                                   |
| 11763 | 2,3,4,5,8,3<br>7,39,43 | 1,6,7,36,3<br>8,40,41,42<br>,44 | 3  | P12020,P97840,Q7TPB1                                                                                            |
| 11764 | 2,3,4,5,8,3<br>7,39,44 | 1,6,7,36,3<br>8,40,41,42<br>,43 | 1  | Q6AYS4                                                                                                          |
| 11765 | 2,3,4,5,8,3<br>7,40,41 | 1,6,7,36,3<br>8,39,42,43<br>,44 | 1  | P97840                                                                                                          |
| 11766 | 2,3,4,5,8,3<br>7,40,42 | 1,6,7,36,3<br>8,39,41,43<br>,44 | 0  |                                                                                                                 |

|       |                        |                                 |    |                                                                                                   |
|-------|------------------------|---------------------------------|----|---------------------------------------------------------------------------------------------------|
| 11767 | 2,3,4,5,8,3<br>7,40,43 | 1,6,7,36,3<br>8,39,41,42<br>,44 | 2  | P13432,P97840                                                                                     |
| 11768 | 2,3,4,5,8,3<br>7,40,44 | 1,6,7,36,3<br>8,39,41,42<br>,43 | 4  | P13432,P22006,Q5M819,Q6AYS4                                                                       |
| 11769 | 2,3,4,5,8,3<br>7,41,42 | 1,6,7,36,3<br>8,39,40,43<br>,44 | 2  | P97605,Q6AYL6                                                                                     |
| 11770 | 2,3,4,5,8,3<br>7,41,43 | 1,6,7,36,3<br>8,39,40,42<br>,44 | 4  | P83121,P97840,Q7TPB1,Q9QUL6                                                                       |
| 11771 | 2,3,4,5,8,3<br>7,41,44 | 1,6,7,36,3<br>8,39,40,42<br>,43 | 1  | P97605                                                                                            |
| 11772 | 2,3,4,5,8,3<br>7,42,43 | 1,6,7,36,3<br>8,39,40,41<br>,44 | 8  | P06911,P08723,P10715,P12020,P19629,P31044,Q5GRG2,Q6AYL6                                           |
| 11773 | 2,3,4,5,8,3<br>7,42,44 | 1,6,7,36,3<br>8,39,40,41<br>,43 | 2  | P13432,Q5M819                                                                                     |
| 11774 | 2,3,4,5,8,3<br>7,43,44 | 1,6,7,36,3<br>8,39,40,41<br>,42 | 1  | P13432                                                                                            |
| 11775 | 2,3,4,5,8,3<br>8,39,40 | 1,6,7,36,3<br>7,41,42,43<br>,44 | 1  | Q6AYS4                                                                                            |
| 11776 | 2,3,4,5,8,3<br>8,39,41 | 1,6,7,36,3<br>7,40,42,43<br>,44 | 4  | P50115,P50116,P97605,Q6AYS4                                                                       |
| 11777 | 2,3,4,5,8,3<br>8,39,42 | 1,6,7,36,3<br>7,40,41,43<br>,44 | 14 | O35547,P04905,P05369,P08010,P08753,P09456,P12020,P47727,Q5GRG2,Q6AYL6,Q6AYS4,Q80WL1,Q9JHB9,Q9QZK9 |
| 11778 | 2,3,4,5,8,3<br>8,39,43 | 1,6,7,36,3<br>7,40,41,42<br>,44 | 6  | P12020,P34901,Q5GRG2,Q6AYS4,Q7TPB1,Q80WL1                                                         |
| 11779 | 2,3,4,5,8,3<br>8,39,44 | 1,6,7,36,3<br>7,40,41,42<br>,43 | 3  | P34901,Q6AYS4,Q80WL1                                                                              |
| 11780 | 2,3,4,5,8,3<br>8,40,41 | 1,6,7,36,3<br>7,39,42,43<br>,44 | 4  | P50115,P50116,P97840,Q6AYS4                                                                       |
| 11781 | 2,3,4,5,8,3<br>8,40,42 | 1,6,7,36,3<br>7,39,41,43<br>,44 | 6  | P22006,P36374,Q6AYS4,Q6TMA8,Q9JHB9,Q9QZ76                                                         |

|       |                        |                                 |    |                                                                                                                                      |
|-------|------------------------|---------------------------------|----|--------------------------------------------------------------------------------------------------------------------------------------|
| 11782 | 2,3,4,5,8,3<br>8,40,43 | 1,6,7,36,3<br>7,39,41,42<br>,44 | 3  | P97840,Q6AYS4,Q9JHB9                                                                                                                 |
| 11783 | 2,3,4,5,8,3<br>8,40,44 | 1,6,7,36,3<br>7,39,41,42<br>,43 | 3  | P22006,P34901,Q6AYS4                                                                                                                 |
| 11784 | 2,3,4,5,8,3<br>8,41,42 | 1,6,7,36,3<br>7,39,40,43<br>,44 | 19 | F1LM93,O08815,O35547,P04905,P08010,P08753,P09456,P47727,P50115,P50116,P54921,P60905,P97605,Q62902,Q63357,Q6AYL6,Q812E4,Q8CJ52,Q9QZK9 |
| 11785 | 2,3,4,5,8,3<br>8,41,43 | 1,6,7,36,3<br>7,39,40,42<br>,44 | 6  | O35547,P50115,P50116,P97840,Q7TPB1,Q8CJD3                                                                                            |
| 11786 | 2,3,4,5,8,3<br>8,41,44 | 1,6,7,36,3<br>7,39,40,42<br>,43 | 9  | P00774,P50115,P50116,P97605,P98089,Q01205,Q05695,Q5U2V4,Q62635                                                                       |
| 11787 | 2,3,4,5,8,3<br>8,42,43 | 1,6,7,36,3<br>7,39,40,41<br>,44 | 16 | O35547,P06911,P08723,P10715,P12020,P16391,P19629,P31044,P47727,Q5GRG2,Q62902,Q6AYL6,Q6AYR8,Q80WL1,Q9JHB9,Q9JI85                      |
| 11788 | 2,3,4,5,8,3<br>8,42,44 | 1,6,7,36,3<br>7,39,40,41<br>,43 | 11 | F1LM93,O35547,P08723,P22006,P36374,P47727,P60905,Q62902,Q6AYL6,Q6AYR8,Q9QZK9                                                         |
| 11789 | 2,3,4,5,8,3<br>8,43,44 | 1,6,7,36,3<br>7,39,40,41<br>,42 | 3  | P13432,P34901,Q80WL1                                                                                                                 |
| 11790 | 2,3,4,5,8,3<br>9,40,41 | 1,6,7,36,3<br>7,38,42,43<br>,44 | 6  | P20766,P36376,P47967,P97605,P97840,Q6AYS4                                                                                            |
| 11791 | 2,3,4,5,8,3<br>9,40,42 | 1,6,7,36,3<br>7,38,41,43<br>,44 | 6  | P20766,P36970,Q5M819,Q6AYR9,Q6AYS4,Q9JHB9                                                                                            |
| 11792 | 2,3,4,5,8,3<br>9,40,43 | 1,6,7,36,3<br>7,38,41,42<br>,44 | 5  | P20766,P36376,P97840,Q5M819,Q6AYS4                                                                                                   |
| 11793 | 2,3,4,5,8,3<br>9,40,44 | 1,6,7,36,3<br>7,38,41,42<br>,43 | 5  | P20766,P36376,P97840,Q5M819,Q6AYS4                                                                                                   |
| 11794 | 2,3,4,5,8,3<br>9,41,42 | 1,6,7,36,3<br>7,38,40,43<br>,44 | 12 | F1LM93,O08815,O35547,P04905,P08010,P08753,P09456,P20766,P36970,P97605,Q63357,Q6AYR9                                                  |
| 11795 | 2,3,4,5,8,3<br>9,41,43 | 1,6,7,36,3<br>7,38,40,42<br>,44 | 4  | P20766,P97605,P97840,Q7TPB1                                                                                                          |
| 11796 | 2,3,4,5,8,3<br>9,41,44 | 1,6,7,36,3<br>7,38,40,42<br>,43 | 4  | P20766,P97605,P97840,Q6AYS4                                                                                                          |

|       |                         |                                 |    |                                                                                                                                                    |
|-------|-------------------------|---------------------------------|----|----------------------------------------------------------------------------------------------------------------------------------------------------|
| 11797 | 2,3,4,5,8,3<br>9,42,43  | 1,6,7,36,3<br>7,38,40,41<br>,44 | 12 | P06911,P08723,P09456,P12020,P20766,P47727,P97840,Q5GRG2,Q5M819,Q6AYR9,Q80WL1,Q9JHB9                                                                |
| 11798 | 2,3,4,5,8,3<br>9,42,44  | 1,6,7,36,3<br>7,38,40,41<br>,43 | 6  | P09456,P20766,P47727,P97605,Q5M819,Q6AYS4                                                                                                          |
| 11799 | 2,3,4,5,8,3<br>9,43,44  | 1,6,7,36,3<br>7,38,40,41<br>,42 | 5  | P20766,P34901,P97840,Q5M819,Q6AYS4                                                                                                                 |
| 11800 | 2,3,4,5,8,4<br>0,41,42  | 1,6,7,36,3<br>7,38,39,43<br>,44 | 5  | P02781,P97605,P97840,Q812E4,Q9QZ76                                                                                                                 |
| 11801 | 2,3,4,5,8,4<br>0,41,43  | 1,6,7,36,3<br>7,38,39,42<br>,44 | 2  | P47967,P97840                                                                                                                                      |
| 11802 | 2,3,4,5,8,4<br>0,41,44  | 1,6,7,36,3<br>7,38,39,42<br>,43 | 5  | P20766,P47967,P97605,P97840,Q6AYS4                                                                                                                 |
| 11803 | 2,3,4,5,8,4<br>0,42,43  | 1,6,7,36,3<br>7,38,39,41<br>,44 | 6  | P08723,P36374,P97840,Q5M819,Q9JHB9,Q9JI85                                                                                                          |
| 11804 | 2,3,4,5,8,4<br>0,42,44  | 1,6,7,36,3<br>7,38,39,41<br>,43 | 8  | P00714,P13432,P20766,P22006,P36374,Q5M819,Q6AYS4,Q9QZ76                                                                                            |
| 11805 | 2,3,4,5,8,4<br>0,43,44  | 1,6,7,36,3<br>7,38,39,41<br>,42 | 4  | P13432,P20766,P97840,Q5M819                                                                                                                        |
| 11806 | 2,3,4,5,8,4<br>1,42,43  | 1,6,7,36,3<br>7,38,39,40<br>,44 | 21 | F1LM93,O08815,O35547,P04897,P08723,P09456,P30120,P54921,P60905,P82471,P83121,P97605,P97840,Q62902,Q63357,Q6AYR8,Q6AYR9,Q6GMN2,Q812E4,Q9JHB9,Q9QUL6 |
| 11807 | 2,3,4,5,8,4<br>1,42,44  | 1,6,7,36,3<br>7,38,39,40<br>,43 | 12 | F1LM93,O08815,O35547,P08010,P08753,P09456,P35281,P60905,P97605,Q6IFV1,Q812E4,Q9QZK9                                                                |
| 11808 | 2,3,4,5,8,4<br>1,43,44  | 1,6,7,36,3<br>7,38,39,40<br>,42 | 3  | P83121,P97605,P97840                                                                                                                               |
| 11809 | 2,3,4,5,8,4<br>2,43,44  | 1,6,7,36,3<br>7,38,39,40<br>,41 | 12 | P08723,P13432,P20766,P30120,P35281,P36374,P47727,P60905,Q5M819,Q6AYR8,Q6Q7Y5,Q9JHB9                                                                |
| 11810 | 2,3,4,5,36,<br>37,38,39 | 1,6,7,8,40,<br>41,42,43,4<br>4  | 4  | P12020,P34901,Q6AYL6,Q6P6R2                                                                                                                        |
| 11811 | 2,3,4,5,36,<br>37,38,40 | 1,6,7,8,39,<br>41,42,43,4<br>4  | 0  |                                                                                                                                                    |

|       |                         |                                |    |                                                                                     |
|-------|-------------------------|--------------------------------|----|-------------------------------------------------------------------------------------|
| 11812 | 2,3,4,5,36,<br>37,38,41 | 1,6,7,8,39,<br>40,42,43,4<br>4 | 1  | Q6AYL6                                                                              |
| 11813 | 2,3,4,5,36,<br>37,38,42 | 1,6,7,8,39,<br>40,41,43,4<br>4 | 12 | P06911,P10715,P12020,P12785,P19629,P22282,P22283,P31044,Q5GRG2,Q6AYL6,Q6P9T8,Q9ET32 |
| 11814 | 2,3,4,5,36,<br>37,38,43 | 1,6,7,8,39,<br>40,41,42,4<br>4 | 10 | P06911,P10715,P12020,P19629,P31044,P34901,P69897,Q5GRG2,Q6AYL6,Q6P9T8               |
| 11815 | 2,3,4,5,36,<br>37,38,44 | 1,6,7,8,39,<br>40,41,42,4<br>3 | 3  | P12785,P13432,P34901                                                                |
| 11816 | 2,3,4,5,36,<br>37,39,40 | 1,6,7,8,38,<br>41,42,43,4<br>4 | 0  |                                                                                     |
| 11817 | 2,3,4,5,36,<br>37,39,41 | 1,6,7,8,38,<br>40,42,43,4<br>4 | 0  |                                                                                     |
| 11818 | 2,3,4,5,36,<br>37,39,42 | 1,6,7,8,38,<br>40,41,43,4<br>4 | 9  | P06911,P10715,P12020,P19629,P22283,P31044,Q5GRG2,Q62635,Q6AYL6                      |
| 11819 | 2,3,4,5,36,<br>37,39,43 | 1,6,7,8,38,<br>40,41,42,4<br>4 | 6  | P06911,P12020,P31044,P34901,Q5GRG2,Q6P6R2                                           |
| 11820 | 2,3,4,5,36,<br>37,39,44 | 1,6,7,8,38,<br>40,41,42,4<br>3 | 1  | P34901                                                                              |
| 11821 | 2,3,4,5,36,<br>37,40,41 | 1,6,7,8,38,<br>39,42,43,4<br>4 | 0  |                                                                                     |
| 11822 | 2,3,4,5,36,<br>37,40,42 | 1,6,7,8,38,<br>39,41,43,4<br>4 | 1  | P02782                                                                              |
| 11823 | 2,3,4,5,36,<br>37,40,43 | 1,6,7,8,38,<br>39,41,42,4<br>4 | 1  | P13432                                                                              |
| 11824 | 2,3,4,5,36,<br>37,40,44 | 1,6,7,8,38,<br>39,41,42,4<br>3 | 2  | P13432,P34901                                                                       |
| 11825 | 2,3,4,5,36,<br>37,41,42 | 1,6,7,8,38,<br>39,40,43,4<br>4 | 2  | P22283,Q6AYL6                                                                       |
| 11826 | 2,3,4,5,36,<br>37,41,43 | 1,6,7,8,38,<br>39,40,42,4<br>4 | 2  | P83121,Q9QUL6                                                                       |

|       |                         |                                |    |                                                                                     |
|-------|-------------------------|--------------------------------|----|-------------------------------------------------------------------------------------|
| 11827 | 2,3,4,5,36,<br>37,41,44 | 1,6,7,8,38,<br>39,40,42,4<br>3 | 1  | Q99MH3                                                                              |
| 11828 | 2,3,4,5,36,<br>37,42,43 | 1,6,7,8,38,<br>39,40,41,4<br>4 | 10 | P06911,P10715,P11598,P12020,P13432,P19629,P31044,Q5GRG2,Q6AYL6,Q6P9T8               |
| 11829 | 2,3,4,5,36,<br>37,42,44 | 1,6,7,8,38,<br>39,40,41,4<br>3 | 6  | P10715,P12020,P13432,P19629,P34901,Q6AYL6                                           |
| 11830 | 2,3,4,5,36,<br>37,43,44 | 1,6,7,8,38,<br>39,40,41,4<br>2 | 2  | P13432,P34901                                                                       |
| 11831 | 2,3,4,5,36,<br>38,39,40 | 1,6,7,8,37,<br>41,42,43,4<br>4 | 1  | P34901                                                                              |
| 11832 | 2,3,4,5,36,<br>38,39,41 | 1,6,7,8,37,<br>40,42,43,4<br>4 | 1  | P34901                                                                              |
| 11833 | 2,3,4,5,36,<br>38,39,42 | 1,6,7,8,37,<br>40,41,43,4<br>4 | 12 | O54728,P06911,P10715,P12020,P22283,P31044,P34901,P47727,P51907,Q5GRG2,Q6AYL6,Q9ET32 |
| 11834 | 2,3,4,5,36,<br>38,39,43 | 1,6,7,8,37,<br>40,41,42,4<br>4 | 8  | P06911,P10715,P12020,P20759,P31044,P34901,Q5GRG2,Q6P6R2                             |
| 11835 | 2,3,4,5,36,<br>38,39,44 | 1,6,7,8,37,<br>40,41,42,4<br>3 | 3  | P34901,P51907,Q9JJS8                                                                |
| 11836 | 2,3,4,5,36,<br>38,40,41 | 1,6,7,8,37,<br>39,42,43,4<br>4 | 0  |                                                                                     |
| 11837 | 2,3,4,5,36,<br>38,40,42 | 1,6,7,8,37,<br>39,41,43,4<br>4 | 3  | P02782,P12785,Q6AYL6                                                                |
| 11838 | 2,3,4,5,36,<br>38,40,43 | 1,6,7,8,37,<br>39,41,42,4<br>4 | 1  | P34901                                                                              |
| 11839 | 2,3,4,5,36,<br>38,40,44 | 1,6,7,8,37,<br>39,41,42,4<br>3 | 3  | P13432,P22006,P34901                                                                |
| 11840 | 2,3,4,5,36,<br>38,41,42 | 1,6,7,8,37,<br>39,40,43,4<br>4 | 11 | O35547,P08010,P12020,P22282,P22283,P47727,Q5GRG2,Q62902,Q6AYL6,Q812E4,Q8CJ52        |
| 11841 | 2,3,4,5,36,<br>38,41,43 | 1,6,7,8,37,<br>39,40,42,4<br>4 | 3  | P34901,Q6AYL6,Q8CJD3                                                                |

|       |                         |                                |    |                                                                                                                 |
|-------|-------------------------|--------------------------------|----|-----------------------------------------------------------------------------------------------------------------|
| 11842 | 2,3,4,5,36,<br>38,41,44 | 1,6,7,8,37,<br>39,40,42,4<br>3 | 4  | P00774,P34901,P98089,Q99MH3                                                                                     |
| 11843 | 2,3,4,5,36,<br>38,42,43 | 1,6,7,8,37,<br>39,40,41,4<br>4 | 16 | P06911,P08723,P10715,P11598,P12020,P19629,P31044,P34901,P47727,Q5GRG2,Q62902,Q6AYL6,Q6AYR8,Q6P9T8,Q9ET32,Q9JI85 |
| 11844 | 2,3,4,5,36,<br>38,42,44 | 1,6,7,8,37,<br>39,40,41,4<br>3 | 13 | P10715,P11442,P12020,P12785,P22282,P22283,P34901,P47727,P51907,P97554,Q62902,Q6AYL6,Q6AYR8                      |
| 11845 | 2,3,4,5,36,<br>38,43,44 | 1,6,7,8,37,<br>39,40,41,4<br>2 | 5  | P06911,P10715,P12020,P13432,P34901                                                                              |
| 11846 | 2,3,4,5,36,<br>39,40,41 | 1,6,7,8,37,<br>38,42,43,4<br>4 | 1  | P36376                                                                                                          |
| 11847 | 2,3,4,5,36,<br>39,40,42 | 1,6,7,8,37,<br>38,41,43,4<br>4 | 2  | P02782,Q6AYR9                                                                                                   |
| 11848 | 2,3,4,5,36,<br>39,40,43 | 1,6,7,8,37,<br>38,41,42,4<br>4 | 2  | P34901,P36376                                                                                                   |
| 11849 | 2,3,4,5,36,<br>39,40,44 | 1,6,7,8,37,<br>38,41,42,4<br>3 | 3  | P34901,P36376,Q6P6T1                                                                                            |
| 11850 | 2,3,4,5,36,<br>39,41,42 | 1,6,7,8,37,<br>38,40,43,4<br>4 | 4  | P08010,P22283,P97605,Q6AYR9                                                                                     |
| 11851 | 2,3,4,5,36,<br>39,41,43 | 1,6,7,8,37,<br>38,40,42,4<br>4 | 1  | P34901                                                                                                          |
| 11852 | 2,3,4,5,36,<br>39,41,44 | 1,6,7,8,37,<br>38,40,42,4<br>3 | 1  | P34901                                                                                                          |
| 11853 | 2,3,4,5,36,<br>39,42,43 | 1,6,7,8,37,<br>38,40,41,4<br>4 | 11 | O54728,P06911,P10715,P12020,P19629,P31044,P34901,P47727,Q5GRG2,Q62635,Q6AYR9                                    |
| 11854 | 2,3,4,5,36,<br>39,42,44 | 1,6,7,8,37,<br>38,40,41,4<br>3 | 5  | P11442,P22283,P34901,P51907,Q99068                                                                              |
| 11855 | 2,3,4,5,36,<br>39,43,44 | 1,6,7,8,37,<br>38,40,41,4<br>2 | 1  | P34901                                                                                                          |
| 11856 | 2,3,4,5,36,<br>40,41,42 | 1,6,7,8,37,<br>38,39,43,4<br>4 | 5  | P02782,P23593,Q6AYR9,Q6IFV1,Q812E4                                                                              |

|       |                         |                                |    |                                                                                            |
|-------|-------------------------|--------------------------------|----|--------------------------------------------------------------------------------------------|
| 11857 | 2,3,4,5,36,<br>40,41,43 | 1,6,7,8,37,<br>38,39,42,4<br>4 | 1  | P97840                                                                                     |
| 11858 | 2,3,4,5,36,<br>40,41,44 | 1,6,7,8,37,<br>38,39,42,4<br>3 | 0  |                                                                                            |
| 11859 | 2,3,4,5,36,<br>40,42,43 | 1,6,7,8,37,<br>38,39,41,4<br>4 | 7  | P02782,P06911,P11598,P12020,P13432,P31044,Q9JHB9                                           |
| 11860 | 2,3,4,5,36,<br>40,42,44 | 1,6,7,8,37,<br>38,39,41,4<br>3 | 7  | P02782,P11442,P13432,P34901,Q6IFV1,Q7TPB1,Q99068                                           |
| 11861 | 2,3,4,5,36,<br>40,43,44 | 1,6,7,8,37,<br>38,39,41,4<br>2 | 3  | P13432,P19218,P34901                                                                       |
| 11862 | 2,3,4,5,36,<br>41,42,43 | 1,6,7,8,37,<br>38,39,40,4<br>4 | 13 | P06911,P11598,P12020,P35281,P54921,P60905,P82471,Q5GRG2,Q62902,Q6AYL6,Q6AYR8,Q6AYR9,Q9QUL6 |
| 11863 | 2,3,4,5,36,<br>41,42,44 | 1,6,7,8,37,<br>38,39,40,4<br>3 | 10 | P11442,P22283,P35281,P60905,P97605,Q64605,Q6IFV1,Q812E4,Q8CJ52,Q99068                      |
| 11864 | 2,3,4,5,36,<br>41,43,44 | 1,6,7,8,37,<br>38,39,40,4<br>2 | 3  | P34901,P35281,P83121                                                                       |
| 11865 | 2,3,4,5,36,<br>42,43,44 | 1,6,7,8,37,<br>38,39,40,4<br>1 | 12 | P06911,P08723,P10715,P11442,P12020,P13432,P19629,P31044,P34901,P35281,Q5GRG2,Q6AYR8        |
| 11866 | 2,3,4,5,37,<br>38,39,40 | 1,6,7,8,36,<br>41,42,43,4<br>4 | 0  |                                                                                            |
| 11867 | 2,3,4,5,37,<br>38,39,41 | 1,6,7,8,36,<br>40,42,43,4<br>4 | 0  |                                                                                            |
| 11868 | 2,3,4,5,37,<br>38,39,42 | 1,6,7,8,36,<br>40,41,43,4<br>4 | 5  | P06911,P12020,P12785,Q5GRG2,Q6AYL6                                                         |
| 11869 | 2,3,4,5,37,<br>38,39,43 | 1,6,7,8,36,<br>40,41,42,4<br>4 | 5  | P06911,P12020,P20759,P34901,Q5GRG2                                                         |
| 11870 | 2,3,4,5,37,<br>38,39,44 | 1,6,7,8,36,<br>40,41,42,4<br>3 | 2  | P34901,Q9JJS8                                                                              |
| 11871 | 2,3,4,5,37,<br>38,40,41 | 1,6,7,8,36,<br>39,42,43,4<br>4 | 0  |                                                                                            |



|       |                         |                                |    |                                                                                     |
|-------|-------------------------|--------------------------------|----|-------------------------------------------------------------------------------------|
| 11872 | 2,3,4,5,37,<br>38,40,42 | 1,6,7,8,36,<br>39,41,43,4<br>4 | 2  | P11598,P12785                                                                       |
| 11873 | 2,3,4,5,37,<br>38,40,43 | 1,6,7,8,36,<br>39,41,42,4<br>4 | 0  |                                                                                     |
| 11874 | 2,3,4,5,37,<br>38,40,44 | 1,6,7,8,36,<br>39,41,42,4<br>3 | 3  | P12785,P22006,P34901                                                                |
| 11875 | 2,3,4,5,37,<br>38,41,42 | 1,6,7,8,36,<br>39,40,43,4<br>4 | 3  | P12785,P22282,Q6AYL6                                                                |
| 11876 | 2,3,4,5,37,<br>38,41,43 | 1,6,7,8,36,<br>39,40,42,4<br>4 | 3  | P80020,Q7TPB1,Q8CJD3                                                                |
| 11877 | 2,3,4,5,37,<br>38,41,44 | 1,6,7,8,36,<br>39,40,42,4<br>3 | 2  | P00774,P98089                                                                       |
| 11878 | 2,3,4,5,37,<br>38,42,43 | 1,6,7,8,36,<br>39,40,41,4<br>4 | 12 | P06911,P10715,P11598,P12020,P12785,P19629,P31044,P80020,Q5GRG2,Q6AYL6,Q6AYR8,Q6P9T8 |
| 11879 | 2,3,4,5,37,<br>38,42,44 | 1,6,7,8,36,<br>39,40,41,4<br>3 | 5  | P12020,P12785,P34901,Q6AYL6,Q6AYR8                                                  |
| 11880 | 2,3,4,5,37,<br>38,43,44 | 1,6,7,8,36,<br>39,40,41,4<br>2 | 1  | P34901                                                                              |
| 11881 | 2,3,4,5,37,<br>39,40,41 | 1,6,7,8,36,<br>38,42,43,4<br>4 | 2  | P15999,P36376                                                                       |
| 11882 | 2,3,4,5,37,<br>39,40,42 | 1,6,7,8,36,<br>38,41,43,4<br>4 | 0  |                                                                                     |
| 11883 | 2,3,4,5,37,<br>39,40,43 | 1,6,7,8,36,<br>38,41,42,4<br>4 | 2  | P36376,Q8CIZ5                                                                       |
| 11884 | 2,3,4,5,37,<br>39,40,44 | 1,6,7,8,36,<br>38,41,42,4<br>3 | 1  | P36376                                                                              |
| 11885 | 2,3,4,5,37,<br>39,41,42 | 1,6,7,8,36,<br>38,40,43,4<br>4 | 0  |                                                                                     |
| 11886 | 2,3,4,5,37,<br>39,41,43 | 1,6,7,8,36,<br>38,40,42,4<br>4 | 0  |                                                                                     |

|       |                         |                                |   |                                                         |
|-------|-------------------------|--------------------------------|---|---------------------------------------------------------|
| 11887 | 2,3,4,5,37,<br>39,41,44 | 1,6,7,8,36,<br>38,40,42,4<br>3 | 0 |                                                         |
| 11888 | 2,3,4,5,37,<br>39,42,43 | 1,6,7,8,36,<br>38,40,41,4<br>4 | 7 | P06911,P10715,P11598,P12020,P19629,P31044,Q5GRG2        |
| 11889 | 2,3,4,5,37,<br>39,42,44 | 1,6,7,8,36,<br>38,40,41,4<br>3 | 0 |                                                         |
| 11890 | 2,3,4,5,37,<br>39,43,44 | 1,6,7,8,36,<br>38,40,41,4<br>2 | 2 | P34901,Q9JJS8                                           |
| 11891 | 2,3,4,5,37,<br>40,41,42 | 1,6,7,8,36,<br>38,39,43,4<br>4 | 0 |                                                         |
| 11892 | 2,3,4,5,37,<br>40,41,43 | 1,6,7,8,36,<br>38,39,42,4<br>4 | 1 | P97840                                                  |
| 11893 | 2,3,4,5,37,<br>40,41,44 | 1,6,7,8,36,<br>38,39,42,4<br>3 | 1 | P19218                                                  |
| 11894 | 2,3,4,5,37,<br>40,42,43 | 1,6,7,8,36,<br>38,39,41,4<br>4 | 2 | P02782,P11598                                           |
| 11895 | 2,3,4,5,37,<br>40,42,44 | 1,6,7,8,36,<br>38,39,41,4<br>3 | 1 | P22006                                                  |
| 11896 | 2,3,4,5,37,<br>40,43,44 | 1,6,7,8,36,<br>38,39,41,4<br>2 | 3 | P13432,P19218,P34901                                    |
| 11897 | 2,3,4,5,37,<br>41,42,43 | 1,6,7,8,36,<br>38,39,40,4<br>4 | 3 | P11598,P12020,Q5GRG2                                    |
| 11898 | 2,3,4,5,37,<br>41,42,44 | 1,6,7,8,36,<br>38,39,40,4<br>3 | 0 |                                                         |
| 11899 | 2,3,4,5,37,<br>41,43,44 | 1,6,7,8,36,<br>38,39,40,4<br>2 | 0 |                                                         |
| 11900 | 2,3,4,5,37,<br>42,43,44 | 1,6,7,8,36,<br>38,39,40,4<br>1 | 8 | P06911,P10715,P12020,P13432,P19629,P31044,P34901,Q6AYR8 |
| 11901 | 2,3,4,5,38,<br>39,40,41 | 1,6,7,8,36,<br>37,42,43,4<br>4 | 0 |                                                         |

|       |                         |                                |    |                                                                                            |
|-------|-------------------------|--------------------------------|----|--------------------------------------------------------------------------------------------|
| 11902 | 2,3,4,5,38,<br>39,40,42 | 1,6,7,8,36,<br>37,41,43,4<br>4 | 1  | Q9JHB9                                                                                     |
| 11903 | 2,3,4,5,38,<br>39,40,43 | 1,6,7,8,36,<br>37,41,42,4<br>4 | 1  | P34901                                                                                     |
| 11904 | 2,3,4,5,38,<br>39,40,44 | 1,6,7,8,36,<br>37,41,42,4<br>3 | 1  | P34901                                                                                     |
| 11905 | 2,3,4,5,38,<br>39,41,42 | 1,6,7,8,36,<br>37,40,43,4<br>4 | 6  | O35547,P08010,P22283,P47727,P63095,P97605                                                  |
| 11906 | 2,3,4,5,38,<br>39,41,43 | 1,6,7,8,36,<br>37,40,42,4<br>4 | 4  | B0BNN3,P20759,P34901,Q8CJD3                                                                |
| 11907 | 2,3,4,5,38,<br>39,41,44 | 1,6,7,8,36,<br>37,40,42,4<br>3 | 3  | P00774,P34901,P98089                                                                       |
| 11908 | 2,3,4,5,38,<br>39,42,43 | 1,6,7,8,36,<br>37,40,41,4<br>4 | 13 | B0BNN3,P06911,P08723,P10715,P11598,P12020,P31044,P34901,P47727,Q5GRG2,Q6AYR8,Q80WL1,Q9JHB9 |
| 11909 | 2,3,4,5,38,<br>39,42,44 | 1,6,7,8,36,<br>37,40,41,4<br>3 | 5  | P12785,P34901,P47727,P51907,Q6AYR8                                                         |
| 11910 | 2,3,4,5,38,<br>39,43,44 | 1,6,7,8,36,<br>37,40,41,4<br>2 | 2  | P34901,Q9JJS8                                                                              |
| 11911 | 2,3,4,5,38,<br>40,41,42 | 1,6,7,8,36,<br>37,39,43,4<br>4 | 1  | P11598                                                                                     |
| 11912 | 2,3,4,5,38,<br>40,41,43 | 1,6,7,8,36,<br>37,39,42,4<br>4 | 2  | P97840,Q8CJD3                                                                              |
| 11913 | 2,3,4,5,38,<br>40,41,44 | 1,6,7,8,36,<br>37,39,42,4<br>3 | 2  | P00774,P98089                                                                              |
| 11914 | 2,3,4,5,38,<br>40,42,43 | 1,6,7,8,36,<br>37,39,41,4<br>4 | 5  | P02782,P11598,Q6AYR8,Q9JHB9,Q9JI85                                                         |
| 11915 | 2,3,4,5,38,<br>40,42,44 | 1,6,7,8,36,<br>37,39,41,4<br>3 | 6  | P12785,P22006,P34901,Q6AYR8,Q6TMA8,Q99041                                                  |
| 11916 | 2,3,4,5,38,<br>40,43,44 | 1,6,7,8,36,<br>37,39,41,4<br>2 | 2  | P01835,P34901                                                                              |

|       |                         |                                |    |                                                                                            |
|-------|-------------------------|--------------------------------|----|--------------------------------------------------------------------------------------------|
| 11917 | 2,3,4,5,38,<br>41,42,43 | 1,6,7,8,36,<br>37,39,40,4<br>4 | 13 | B0BNN3,O35547,P08723,P11598,P12020,P47727,P54921,P82471,Q5GRG2,Q62902,Q6AYL6,Q6AYR8,Q8CJD3 |
| 11918 | 2,3,4,5,38,<br>41,42,44 | 1,6,7,8,36,<br>37,39,40,4<br>3 | 9  | F1LM93,O35547,P00774,P12785,P98089,Q62902,Q6AYR8,Q8CIZ5,Q8CJ52                             |
| 11919 | 2,3,4,5,38,<br>41,43,44 | 1,6,7,8,36,<br>37,39,40,4<br>2 | 5  | P00774,P34901,P55091,P98089,Q8CJD3                                                         |
| 11920 | 2,3,4,5,38,<br>42,43,44 | 1,6,7,8,36,<br>37,39,40,4<br>1 | 12 | P06911,P08723,P10715,P12020,P12785,P31044,P34901,P47727,Q5GRG2,Q6AYR8,Q99041,Q9JI85        |
| 11921 | 2,3,4,5,39,<br>40,41,42 | 1,6,7,8,36,<br>37,38,43,4<br>4 | 3  | P36376,P97605,Q6AYR9                                                                       |
| 11922 | 2,3,4,5,39,<br>40,41,43 | 1,6,7,8,36,<br>37,38,42,4<br>4 | 3  | P36376,P47967,P97840                                                                       |
| 11923 | 2,3,4,5,39,<br>40,41,44 | 1,6,7,8,36,<br>37,38,42,4<br>3 | 3  | P36376,P47967,P97840                                                                       |
| 11924 | 2,3,4,5,39,<br>40,42,43 | 1,6,7,8,36,<br>37,38,41,4<br>4 | 3  | P11598,P36376,Q9JHB9                                                                       |
| 11925 | 2,3,4,5,39,<br>40,42,44 | 1,6,7,8,36,<br>37,38,41,4<br>3 | 3  | P36376,Q5M819,Q99068                                                                       |
| 11926 | 2,3,4,5,39,<br>40,43,44 | 1,6,7,8,36,<br>37,38,41,4<br>2 | 3  | P34901,P36376,P97840                                                                       |
| 11927 | 2,3,4,5,39,<br>41,42,43 | 1,6,7,8,36,<br>37,38,40,4<br>4 | 5  | P11598,P30120,P82471,Q6AYR8,Q6AYR9                                                         |
| 11928 | 2,3,4,5,39,<br>41,42,44 | 1,6,7,8,36,<br>37,38,40,4<br>3 | 3  | P97605,Q6IFV1,Q99068                                                                       |
| 11929 | 2,3,4,5,39,<br>41,43,44 | 1,6,7,8,36,<br>37,38,40,4<br>2 | 2  | P34901,P97840                                                                              |
| 11930 | 2,3,4,5,39,<br>42,43,44 | 1,6,7,8,36,<br>37,38,40,4<br>1 | 3  | P08723,P34901,Q6AYR8                                                                       |
| 11931 | 2,3,4,5,40,<br>41,42,43 | 1,6,7,8,36,<br>37,38,39,4<br>4 | 4  | P11598,P97840,Q6AYR8,Q9JHB9                                                                |

|       |                         |                                  |    |                                                                                                                                                                                                                                                      |
|-------|-------------------------|----------------------------------|----|------------------------------------------------------------------------------------------------------------------------------------------------------------------------------------------------------------------------------------------------------|
| 11932 | 2,3,4,5,40,<br>41,42,44 | 1,6,7,8,36,<br>37,38,39,4<br>3   | 3  | Q6AYR8,Q6IFV1,Q99068                                                                                                                                                                                                                                 |
| 11933 | 2,3,4,5,40,<br>41,43,44 | 1,6,7,8,36,<br>37,38,39,4<br>2   | 4  | P19218,P36376,P47967,P97840                                                                                                                                                                                                                          |
| 11934 | 2,3,4,5,40,<br>42,43,44 | 1,6,7,8,36,<br>37,38,39,4<br>1   | 7  | P02782,P11598,P13432,P34901,Q5M819,Q6AYR8,Q9JHB9                                                                                                                                                                                                     |
| 11935 | 2,3,4,5,41,<br>42,43,44 | 1,6,7,8,36,<br>37,38,39,4<br>0   | 5  | P08723,P30120,P35281,P82471,Q6AYR8                                                                                                                                                                                                                   |
| 11936 | 2,3,4,6,7,8<br>,36,37   | 1,5,38,39,<br>40,41,42,4<br>3,44 | 15 | D3ZUK3,G3V686,O54858,P02631,P07171,P11598,P11762,P19629,P85971,Q01205,Q07116,Q09030,Q63532,Q99041,Q9QZQ5                                                                                                                                             |
| 11937 | 2,3,4,6,7,8<br>,36,38   | 1,5,37,39,<br>40,41,42,4<br>3,44 | 16 | D3ZUK3,O54800;Q5DWW2,O54858,P02631,P05369,P07171,P08649,P11598,P20762,P85971,Q00715,Q01205,Q63532,Q6AYL6,Q6IE51,Q9QZQ5                                                                                                                               |
| 11938 | 2,3,4,6,7,8<br>,36,39   | 1,5,37,38,<br>40,41,42,4<br>3,44 | 19 | D3ZUK3,G3V686,O54858,P02625,P02631,P07171,P08010,P08649,P11598,P18427,P20762,P20766,P80202,P85971,Q01205,Q07116,Q63532,Q6IE51,Q9QZQ5                                                                                                                 |
| 11939 | 2,3,4,6,7,8<br>,36,40   | 1,5,37,38,<br>39,41,42,4<br>3,44 | 14 | D3ZUK3,O54858,P00731,P02631,P07171,P18427,P20762,P20766,P36374,P85971,Q00715,Q01205,Q09030,Q9QZQ5                                                                                                                                                    |
| 11940 | 2,3,4,6,7,8<br>,36,41   | 1,5,37,38,<br>39,40,42,4<br>3,44 | 27 | B5DFC9,D3ZUK3,G3V686,O54858,P02631,P07171,P08010,P08649,P11598,P16086,P20766,P80202,P85971,P97605,Q01205,Q07116,Q09030,Q62740,Q62753,Q63475,Q63532,Q63617,Q64611,Q812E4,Q99041,Q99MH3,Q9QZQ5                                                         |
| 11941 | 2,3,4,6,7,8<br>,36,42   | 1,5,37,38,<br>39,40,41,4<br>3,44 | 35 | B5DFC9,D3ZUK3,F1LM93,G3V686,O35547,O54858,P02631,P02781,P04905,P05369,P07171,P08010,P08290,P08649,P08753,P10715,P13596,P16086,P19629,P20762,P20766,P36374,P60905,P85971,P97554,Q01205,Q07116,Q09030,Q5XI73,Q62740,Q62753,Q63357,Q6AYL6,Q812E4,Q9QZQ5 |
| 11942 | 2,3,4,6,7,8<br>,36,43   | 1,5,37,38,<br>39,40,41,4<br>2,44 | 24 | D3ZUK3,G3V686,O54800;Q5DWW2,O54858,P02631,P06760,P07171,P10715,P11883,P13432,P18427,P19629,P20762,P20766,P83748,P85971,Q00715,Q01177,Q01205,Q07116,Q63532,Q6IE51,Q99PP0,Q9QZQ5                                                                       |
| 11943 | 2,3,4,6,7,8<br>,36,44   | 1,5,37,38,<br>39,40,41,4<br>2,43 | 19 | B5DFC9,D3ZUK3,G3V686,O54858,P02631,P07171,P11598,P13432,P20762,P20766,P36374,P85971,Q00715,Q01205,Q07116,Q62740,Q64611,Q99MH3,Q9QZQ5                                                                                                                 |
| 11944 | 2,3,4,6,7,8<br>,37,38   | 1,5,36,39,<br>40,41,42,4<br>3,44 | 8  | D3ZUK3,P02631,P11598,P11762,P85971,Q01205,Q7TPB1,Q9QZQ5                                                                                                                                                                                              |
| 11945 | 2,3,4,6,7,8<br>,37,39   | 1,5,36,38,<br>40,41,42,4<br>3,44 | 9  | D3ZUK3,P02625,P02631,P11598,P20766,P85971,Q01205,Q7TPB1,Q9QZQ5                                                                                                                                                                                       |
| 11946 | 2,3,4,6,7,8<br>,37,40   | 1,5,36,38,<br>39,41,42,4<br>3,44 | 5  | D3ZUK3,P02631,P20766,Q63617,Q9QZQ5                                                                                                                                                                                                                   |

|       |                       |                                  |    |                                                                                                                                                                                |
|-------|-----------------------|----------------------------------|----|--------------------------------------------------------------------------------------------------------------------------------------------------------------------------------|
| 11947 | 2,3,4,6,7,8<br>,37,41 | 1,5,36,38,<br>39,40,42,4<br>3,44 | 12 | D3ZUK3,G3V686,P02631,P11598,P11762,P85971,P97605,Q01205,Q63617,Q7TPB1,Q99041,Q9QZQ5                                                                                            |
| 11948 | 2,3,4,6,7,8<br>,37,42 | 1,5,36,38,<br>39,40,41,4<br>3,44 | 10 | D3ZUK3,G3V686,P02631,P08290,P16086,P19629,P20762,P36374,P85971,Q9QZQ5                                                                                                          |
| 11949 | 2,3,4,6,7,8<br>,37,43 | 1,5,36,38,<br>39,40,41,4<br>2,44 | 15 | D3ZUK3,O54858,P02631,P02680,P11883,P14480,P19629,P20762,P83748,P85971,Q4FZU6,Q63532,Q7TPB1,Q99PP0,Q9QZQ5                                                                       |
| 11950 | 2,3,4,6,7,8<br>,37,44 | 1,5,36,38,<br>39,40,41,4<br>2,43 | 8  | D3ZUK3,P02631,P11598,P20766,P85971,Q01205,Q6IFU7,Q9QZQ5                                                                                                                        |
| 11951 | 2,3,4,6,7,8<br>,38,39 | 1,5,36,37,<br>40,41,42,4<br>3,44 | 14 | D3ZUK3,P02625,P02631,P05369,P08010,P11598,P20762,P20766,P85971,Q01205,Q6IE51,Q7TPB1,Q80WL1,Q9QZQ5                                                                              |
| 11952 | 2,3,4,6,7,8<br>,38,40 | 1,5,36,37,<br>39,41,42,4<br>3,44 | 5  | D3ZUK3,P05369,P20762,Q6IE51,Q9QZQ5                                                                                                                                             |
| 11953 | 2,3,4,6,7,8<br>,38,41 | 1,5,36,37,<br>39,40,42,4<br>3,44 | 17 | D3ZUK3,O35547,O54858,P02631,P05369,P08010,P11598,P50115,P50116,P85971,P97605,Q01205,Q62753,Q6IE51,Q7TPB1,Q8CIZ5,Q9QZQ5                                                         |
| 11954 | 2,3,4,6,7,8<br>,38,42 | 1,5,36,37,<br>39,40,41,4<br>3,44 | 25 | D3ZUK3,F1LM93,O08815,O35547,P04905,P05369,P08010,P08290,P08753,P10715,P16086,P20762,P36374,P47727,P60905,P85971,P97554,Q5XI73,Q62753,Q63357,Q6AYL6,Q80WL1,Q812E4,Q9QZQ5,Q9Z0V6 |
| 11955 | 2,3,4,6,7,8<br>,38,43 | 1,5,36,37,<br>39,40,41,4<br>2,44 | 16 | D3ZUK3,O35547,O54858,P02631,P11883,P20762,P25031,P83748,P85971,Q01205,Q5HZV9,Q63532,Q6IE51,Q7TPB1,Q80WL1,Q9QZQ5                                                                |
| 11956 | 2,3,4,6,7,8<br>,38,44 | 1,5,36,37,<br>39,40,41,4<br>2,43 | 10 | D3ZUK3,P02631,P11598,P20762,P36374,P85971,Q01205,Q62635,Q9QZQ5,Q9R044                                                                                                          |
| 11957 | 2,3,4,6,7,8<br>,39,40 | 1,5,36,37,<br>38,41,42,4<br>3,44 | 7  | D3ZUK3,P11598,P20762,P20766,P36376,Q6IE51,Q9QZQ5                                                                                                                               |
| 11958 | 2,3,4,6,7,8<br>,39,41 | 1,5,36,37,<br>38,40,42,4<br>3,44 | 17 | D3ZUK3,P02625,P02631,P08010,P11598,P16086,P20766,P85971,P97605,Q01205,Q62753,Q63475,Q63617,Q6IE51,Q7TPB1,Q99041,Q9QZQ5                                                         |
| 11959 | 2,3,4,6,7,8<br>,39,42 | 1,5,36,37,<br>38,40,41,4<br>3,44 | 19 | D3ZUK3,F1LM93,O08815,O35547,P04905,P05369,P08010,P08290,P08753,P16086,P20762,P20766,P36374,P85971,P97605,Q5XI73,Q62753,Q80WL1,Q9QZQ5                                           |
| 11960 | 2,3,4,6,7,8<br>,39,43 | 1,5,36,37,<br>38,40,41,4<br>2,44 | 15 | D3ZUK3,O54858,P02625,P02631,P11883,P20762,P20766,P83748,P85971,Q63532,Q6IE51,Q7TPB1,Q80WL1,Q99PP0,Q9QZQ5                                                                       |
| 11961 | 2,3,4,6,7,8<br>,39,44 | 1,5,36,37,<br>38,40,41,4<br>2,43 | 10 | D3ZUK3,P02625,P02631,P11598,P20762,P20766,P85971,Q01205,Q6IE51,Q9QZQ5                                                                                                          |

|       |                        |                                  |    |                                                                                                                                                                                                                                        |
|-------|------------------------|----------------------------------|----|----------------------------------------------------------------------------------------------------------------------------------------------------------------------------------------------------------------------------------------|
| 11962 | 2,3,4,6,7,8<br>,40,41  | 1,5,36,37,<br>38,39,42,4<br>3,44 | 10 | D3ZUK3,P02631,P12020,P16086,P20766,P97605,Q01205,Q63617,Q99041,Q9QZQ5                                                                                                                                                                  |
| 11963 | 2,3,4,6,7,8<br>,40,42  | 1,5,36,37,<br>38,39,41,4<br>3,44 | 13 | D3ZUK3,P02781,P05369,P08290,P16086,P20759,P20762,P20766,P36374,Q62753,Q9QZ76,Q9QZQ5,Q9Z0V6                                                                                                                                             |
| 11964 | 2,3,4,6,7,8<br>,40,43  | 1,5,36,37,<br>38,39,41,4<br>2,44 | 9  | D3ZUK3,P02631,P11883,P20762,P20766,P83748,P85971,Q99PP0,Q9QZQ5                                                                                                                                                                         |
| 11965 | 2,3,4,6,7,8<br>,40,44  | 1,5,36,37,<br>38,39,41,4<br>2,43 | 10 | D3ZUK3,P02631,P11598,P12020,P20762,P20766,P36374,Q5M819,Q63617,Q9QZQ5                                                                                                                                                                  |
| 11966 | 2,3,4,6,7,8<br>,41,42  | 1,5,36,37,<br>38,39,40,4<br>3,44 | 33 | D3ZUK3,F1LM93,G3V686,O08815,O35547,P02631,P02781,P04905,P05369,P07861,P08010,P08290,P08649,P08753,P16086,P20762,P20766,P36374,P54921,P60905,P85971,P97605,Q01205,Q3MIE4,Q62740,Q62753,Q63357,Q63617,Q6GMN2,Q6P6R2,Q812E4,Q9JID2,Q9QZQ5 |
| 11967 | 2,3,4,6,7,8<br>,41,43  | 1,5,36,37,<br>38,39,40,4<br>2,44 | 21 | D3ZUK3,G3V686,O35547,O54858,P02625,P02631,P11883,P16086,P20762,P20766,P54921,P83748,P85971,P97605,Q01205,Q5HZV9,Q63532,Q63617,Q7TPB1,Q99041,Q9QZQ5                                                                                     |
| 11968 | 2,3,4,6,7,8<br>,41,44  | 1,5,36,37,<br>38,39,40,4<br>2,43 | 15 | D3ZUK3,G3V686,P02631,P07171,P11598,P12020,P20766,P85971,P97605,Q01205,Q62740,Q62753,Q63475,Q63617,Q9QZQ5                                                                                                                               |
| 11969 | 2,3,4,6,7,8<br>,42,43  | 1,5,36,37,<br>38,39,40,4<br>1,44 | 25 | D3ZUK3,F1LM93,G3V686,O35547,P02631,P08290,P08723,P10715,P11883,P16086,P19629,P20762,P20766,P26772,P36374,P54921,P60905,P85971,Q62975,Q63357,Q6GMN2,Q80WL1,Q99PP0,Q9JHB9,Q9QZQ5                                                         |
| 11970 | 2,3,4,6,7,8<br>,42,44  | 1,5,36,37,<br>38,39,40,4<br>1,43 | 28 | B5DFC9,D3ZUK3,F1LM93,G3V686,O35547,P00714,P02631,P08010,P08290,P16086,P20759,P20762,P20766,P36374,P60905,P85971,P97605,Q01205,Q5M819,Q5XI73,Q62740,Q62753,Q63514,Q6P6R2,Q812E4,Q9JID2,Q9QZQ5,Q9Z0V6                                    |
| 11971 | 2,3,4,6,7,8<br>,43,44  | 1,5,36,37,<br>38,39,40,4<br>1,42 | 11 | D3ZUK3,O54858,P02631,P11883,P13432,P20762,P20766,P83748,P85971,Q01205,Q9QZQ5                                                                                                                                                           |
| 11972 | 2,3,4,6,7,3<br>6,37,38 | 1,5,8,39,4<br>0,41,42,43<br>,44  | 7  | P01836,P02631,P10715,P11762,P97840,Q4FZU6,Q9QZQ5                                                                                                                                                                                       |
| 11973 | 2,3,4,6,7,3<br>6,37,39 | 1,5,8,38,4<br>0,41,42,43<br>,44  | 7  | G3V686,P02625,P02631,P06760,Q6IE51,Q8CJD3,Q9QZQ5                                                                                                                                                                                       |
| 11974 | 2,3,4,6,7,3<br>6,37,40 | 1,5,8,38,3<br>9,41,42,43<br>,44  | 5  | P00731,P01836,P02631,P11762,Q9QZQ5                                                                                                                                                                                                     |
| 11975 | 2,3,4,6,7,3<br>6,37,41 | 1,5,8,38,3<br>9,40,42,43<br>,44  | 9  | G3V686,P01836,P02631,P06760,P08649,P11762,P13596,Q63532,Q9QZQ5                                                                                                                                                                         |
| 11976 | 2,3,4,6,7,3<br>6,37,42 | 1,5,8,38,3<br>9,40,41,43<br>,44  | 13 | G3V686,P01836,P02631,P08290,P08649,P10715,P13596,P16086,P19629,P47967,Q5XI73,Q6AYL6,Q9QZQ5                                                                                                                                             |

|       |                        |                                 |    |                                                                                                                                                        |
|-------|------------------------|---------------------------------|----|--------------------------------------------------------------------------------------------------------------------------------------------------------|
| 11977 | 2,3,4,6,7,3<br>6,37,43 | 1,5,8,38,3<br>9,40,41,42<br>,44 | 15 | G3V686,O54858,P01836,P02631,P06760,P10715,P11762,P14480,P19629,P83748,P85971,Q4FZU6,Q63532,Q99PP0,Q9QZQ5                                               |
| 11978 | 2,3,4,6,7,3<br>6,37,44 | 1,5,8,38,3<br>9,40,41,42<br>,43 | 4  | G3V686,P02631,P13432,Q9QZQ5                                                                                                                            |
| 11979 | 2,3,4,6,7,3<br>6,38,39 | 1,5,8,37,4<br>0,41,42,43<br>,44 | 3  | P01836,P02625,Q6IE51                                                                                                                                   |
| 11980 | 2,3,4,6,7,3<br>6,38,40 | 1,5,8,37,3<br>9,41,42,43<br>,44 | 4  | P00731,P01836,P13596,Q6IE51                                                                                                                            |
| 11981 | 2,3,4,6,7,3<br>6,38,41 | 1,5,8,37,3<br>9,40,42,43<br>,44 | 9  | G3V686,P01836,P08649,P13596,Q62740,Q63532,Q6IE51,Q8CIZ5,Q9QZQ5                                                                                         |
| 11982 | 2,3,4,6,7,3<br>6,38,42 | 1,5,8,37,3<br>9,40,41,43<br>,44 | 21 | G3V686,O35547,P01836,P05369,P08010,P08290,P08649,P10715,P12785,P13596,P16086,P19629,P36374,P47727,P47967,P97554,P9784<br>0,Q5XI73,Q62740,Q6AYL6,Q9QZQ5 |
| 11983 | 2,3,4,6,7,3<br>6,38,43 | 1,5,8,37,3<br>9,40,41,42<br>,44 | 15 | O54800;Q5DWV2,O54858,P01836,P02631,P06760,P10715,P14480,P19629,P20762,P25031,P85971,Q4FZU6,Q5HZV9,Q63532,Q6IE51                                        |
| 11984 | 2,3,4,6,7,3<br>6,38,44 | 1,5,8,37,3<br>9,40,41,42<br>,43 | 5  | G3V686,P13596,P34901,Q6IE51,Q9QZQ5                                                                                                                     |
| 11985 | 2,3,4,6,7,3<br>6,39,40 | 1,5,8,37,3<br>8,41,42,43<br>,44 | 4  | P00731,P13596,P36376,Q6IE51                                                                                                                            |
| 11986 | 2,3,4,6,7,3<br>6,39,41 | 1,5,8,37,3<br>8,40,42,43<br>,44 | 12 | G3V686,P01836,P02625,P06760,P08010,P08649,P13596,P16086,Q63475,Q63532,Q6IE51,Q9QZQ5                                                                    |
| 11987 | 2,3,4,6,7,3<br>6,39,42 | 1,5,8,37,3<br>8,40,41,43<br>,44 | 9  | G3V686,P01836,P08010,P08290,P08649,P13596,P16086,Q5XI73,Q9QZQ5                                                                                         |
| 11988 | 2,3,4,6,7,3<br>6,39,43 | 1,5,8,37,3<br>8,40,41,42<br>,44 | 12 | G3V686,P01836,P02625,P02631,P06760,P14480,P20762,P83748,P85971,Q63532,Q6IE51,Q99PP0                                                                    |
| 11989 | 2,3,4,6,7,3<br>6,39,44 | 1,5,8,37,3<br>8,40,41,42<br>,43 | 4  | G3V686,P02625,Q6IE51,Q9QZQ5                                                                                                                            |
| 11990 | 2,3,4,6,7,3<br>6,40,41 | 1,5,8,37,3<br>8,39,42,43<br>,44 | 6  | G3V686,P01836,P08649,P13596,P16086,Q9QZQ5                                                                                                              |
| 11991 | 2,3,4,6,7,3<br>6,40,42 | 1,5,8,37,3<br>8,39,41,43<br>,44 | 11 | G3V686,P00731,P01836,P08290,P08649,P13596,P16086,P36374,Q5XI73,Q62740,Q9QZQ5                                                                           |



|       |                        |                                 |    |                                                                                                                                                    |
|-------|------------------------|---------------------------------|----|----------------------------------------------------------------------------------------------------------------------------------------------------|
| 11992 | 2,3,4,6,7,3<br>6,40,43 | 1,5,8,37,3<br>8,39,41,42<br>,44 | 6  | P01836,P02631,P20762,P83748,Q6IE51,Q99PP0                                                                                                          |
| 11993 | 2,3,4,6,7,3<br>6,40,44 | 1,5,8,37,3<br>8,39,41,42<br>,43 | 5  | G3V686,P00731,P13432,P13596,Q9QZQ5                                                                                                                 |
| 11994 | 2,3,4,6,7,3<br>6,41,42 | 1,5,8,37,3<br>8,39,40,43<br>,44 | 21 | F1LM93,G3V686,O35547,P01836,P08010,P08290,P08649,P13596,P16086,P54921,P60905,P85971,P97605,Q5XI73,Q62740,Q62753,Q63357,Q6IFV1,Q812E4,Q8CJ52,Q9QZQ5 |
| 11995 | 2,3,4,6,7,3<br>6,41,43 | 1,5,8,37,3<br>8,39,40,42<br>,44 | 14 | G3V686,O54858,P01836,P02625,P02631,P06760,P08649,P11883,P16086,P83748,P85971,Q5HZV9,Q63532,Q6IE51                                                  |
| 11996 | 2,3,4,6,7,3<br>6,41,44 | 1,5,8,37,3<br>8,39,40,42<br>,43 | 12 | D3ZUK3,G3V686,P02631,P08649,P13596,P35281,Q01205,Q62740,Q63475,Q64611,Q99MH3,Q9QZQ5                                                                |
| 11997 | 2,3,4,6,7,3<br>6,42,43 | 1,5,8,37,3<br>8,39,40,41<br>,44 | 18 | G3V686,P01836,P02631,P06760,P08290,P08649,P10715,P11883,P13596,P16086,P19629,P20762,P26772,P31044,P85971,Q62975,Q99PP0,Q9QZQ5                      |
| 11998 | 2,3,4,6,7,3<br>6,42,44 | 1,5,8,37,3<br>8,39,40,41<br>,43 | 14 | G3V686,P08290,P08649,P13596,P16086,P35281,P36374,P60905,P85971,P97554,Q5XI73,Q62740,Q6IFV1,Q9QZQ5                                                  |
| 11999 | 2,3,4,6,7,3<br>6,43,44 | 1,5,8,37,3<br>8,39,40,41<br>,42 | 9  | G3V686,P02631,P06760,P13432,P20762,P34901,P35281,P85971,Q63532                                                                                     |
| 12000 | 2,3,4,6,7,3<br>7,38,39 | 1,5,8,36,4<br>0,41,42,43<br>,44 | 3  | P02625,Q4FZU6,Q6IE51                                                                                                                               |
| 12001 | 2,3,4,6,7,3<br>7,38,40 | 1,5,8,36,3<br>9,41,42,43<br>,44 | 0  |                                                                                                                                                    |
| 12002 | 2,3,4,6,7,3<br>7,38,41 | 1,5,8,36,3<br>9,40,42,43<br>,44 | 5  | P01836,P02631,P11762,Q7TPB1,Q8CIZ5                                                                                                                 |
| 12003 | 2,3,4,6,7,3<br>7,38,42 | 1,5,8,36,3<br>9,40,41,43<br>,44 | 8  | P08290,P10715,P12785,P16086,P19629,P97840,Q5XI73,Q9QZQ5                                                                                            |
| 12004 | 2,3,4,6,7,3<br>7,38,43 | 1,5,8,36,3<br>9,40,41,42<br>,44 | 10 | P01836,P02631,P10715,P14480,P25031,Q4FZU6,Q5HZV9,Q6IE51,Q7TPB1,Q99PP0                                                                              |
| 12005 | 2,3,4,6,7,3<br>7,38,44 | 1,5,8,36,3<br>9,40,41,42<br>,43 | 2  | P02631,P12785                                                                                                                                      |
| 12006 | 2,3,4,6,7,3<br>7,39,40 | 1,5,8,36,3<br>8,41,42,43<br>,44 | 0  |                                                                                                                                                    |

|       |                        |                                 |    |                                                                                                   |
|-------|------------------------|---------------------------------|----|---------------------------------------------------------------------------------------------------|
| 12007 | 2,3,4,6,7,3<br>7,39,41 | 1,5,8,36,3<br>8,40,42,43<br>,44 | 4  | P02625,P02631,Q6IE51,Q9QZQ5                                                                       |
| 12008 | 2,3,4,6,7,3<br>7,39,42 | 1,5,8,36,3<br>8,40,41,43<br>,44 | 3  | P16086,Q5XI73,Q9QZQ5                                                                              |
| 12009 | 2,3,4,6,7,3<br>7,39,43 | 1,5,8,36,3<br>8,40,41,42<br>,44 | 9  | P02625,P02631,P06760,P14480,P83748,Q4FZU6,Q6IE51,Q7TPB1,Q99PP0                                    |
| 12010 | 2,3,4,6,7,3<br>7,39,44 | 1,5,8,36,3<br>8,40,41,42<br>,43 | 3  | A2RUV9,P02625,P02631                                                                              |
| 12011 | 2,3,4,6,7,3<br>7,40,41 | 1,5,8,36,3<br>8,39,42,43<br>,44 | 1  | P02631                                                                                            |
| 12012 | 2,3,4,6,7,3<br>7,40,42 | 1,5,8,36,3<br>8,39,41,43<br>,44 | 2  | P16086,Q9QZQ5                                                                                     |
| 12013 | 2,3,4,6,7,3<br>7,40,43 | 1,5,8,36,3<br>8,39,41,42<br>,44 | 4  | P02631,P14480,P83748,Q99PP0                                                                       |
| 12014 | 2,3,4,6,7,3<br>7,40,44 | 1,5,8,36,3<br>8,39,41,42<br>,43 | 1  | P02631                                                                                            |
| 12015 | 2,3,4,6,7,3<br>7,41,42 | 1,5,8,36,3<br>8,39,40,43<br>,44 | 8  | G3V686,P01836,P02631,P08290,P08649,P13596,P16086,Q9QZQ5                                           |
| 12016 | 2,3,4,6,7,3<br>7,41,43 | 1,5,8,36,3<br>8,39,40,42<br>,44 | 10 | G3V686,P01836,P02625,P02631,P11883,P14480,P83748,Q5HZV9,Q7TPB1,Q99PP0                             |
| 12017 | 2,3,4,6,7,3<br>7,41,44 | 1,5,8,36,3<br>8,39,40,42<br>,43 | 3  | G3V686,P02631,Q9QZQ5                                                                              |
| 12018 | 2,3,4,6,7,3<br>7,42,43 | 1,5,8,36,3<br>8,39,40,41<br>,44 | 14 | G3V686,P01836,P02631,P10715,P11883,P14480,P16086,P19629,P20762,P85971,Q4FZU6,Q62975,Q99PP0,Q9QZQ5 |
| 12019 | 2,3,4,6,7,3<br>7,42,44 | 1,5,8,36,3<br>8,39,40,41<br>,43 | 5  | G3V686,P02631,P16086,Q5XI73,Q9QZQ5                                                                |
| 12020 | 2,3,4,6,7,3<br>7,43,44 | 1,5,8,36,3<br>8,39,40,41<br>,42 | 3  | P02631,P14480,Q4FZU6                                                                              |
| 12021 | 2,3,4,6,7,3<br>8,39,40 | 1,5,8,36,3<br>7,41,42,43<br>,44 | 2  | P83121,Q6IE51                                                                                     |

|       |                        |                                 |    |                                                                                                                                             |
|-------|------------------------|---------------------------------|----|---------------------------------------------------------------------------------------------------------------------------------------------|
| 12022 | 2,3,4,6,7,3<br>8,39,41 | 1,5,8,36,3<br>7,40,42,43<br>,44 | 6  | P01836,P02625,P08010,P09605;P25809,Q6IE51,Q8CIZ5                                                                                            |
| 12023 | 2,3,4,6,7,3<br>8,39,42 | 1,5,8,36,3<br>7,40,41,43<br>,44 | 11 | O35547,P05369,P08010,P08290,P16086,P25031,P42854,Q5XI73,Q6IE51,Q80WL1,Q9QZQ5                                                                |
| 12024 | 2,3,4,6,7,3<br>8,39,43 | 1,5,8,36,3<br>7,40,41,42<br>,44 | 14 | P01836,P02625,P02631,P11883,P14480,P20762,P25031,P83748,Q4FZU6,Q5HZV9,Q6IE51,Q7TPB1,Q80WL1,Q99PP0                                           |
| 12025 | 2,3,4,6,7,3<br>8,39,44 | 1,5,8,36,3<br>7,40,41,42<br>,43 | 2  | P02625,Q6IE51                                                                                                                               |
| 12026 | 2,3,4,6,7,3<br>8,40,41 | 1,5,8,36,3<br>7,39,42,43<br>,44 | 5  | P01836,P09605;P25809,P13596,Q6IE51,Q8CIZ5                                                                                                   |
| 12027 | 2,3,4,6,7,3<br>8,40,42 | 1,5,8,36,3<br>7,39,41,43<br>,44 | 8  | P01836,P05369,P08290,P12785,P13596,P16086,P36374,Q5XI73                                                                                     |
| 12028 | 2,3,4,6,7,3<br>8,40,43 | 1,5,8,36,3<br>7,39,41,42<br>,44 | 8  | P01835,P01836,P02631,P11883,P20762,P25031,Q5HZV9,Q6IE51                                                                                     |
| 12029 | 2,3,4,6,7,3<br>8,40,44 | 1,5,8,36,3<br>7,39,41,42<br>,43 | 2  | P01835,Q62635                                                                                                                               |
| 12030 | 2,3,4,6,7,3<br>8,41,42 | 1,5,8,36,3<br>7,39,40,43<br>,44 | 19 | F1LM93,G3V686,O35547,P01836,P05369,P08010,P08290,P08649,P09605;P25809,P13596,P16086,P25031,P54921,Q5XI73,Q62740,Q62753,Q8CIZ5,Q8CJ52,Q9QZQ5 |
| 12031 | 2,3,4,6,7,3<br>8,41,43 | 1,5,8,36,3<br>7,39,40,42<br>,44 | 13 | O35547,P00774,P01836,P02625,P02631,P09605;P25809,P11883,P25031,P83748,Q5HZV9,Q63532,Q6IE51,Q7TPB1                                           |
| 12032 | 2,3,4,6,7,3<br>8,41,44 | 1,5,8,36,3<br>7,39,40,42<br>,43 | 8  | P00774,P09605;P25809,P55091,P98089,Q05695,Q62635,Q6IE51,Q8CIZ5                                                                              |
| 12033 | 2,3,4,6,7,3<br>8,42,43 | 1,5,8,36,3<br>7,39,40,41<br>,44 | 19 | F1LM93,O35547,P01836,P02631,P08290,P10715,P11883,P16086,P19629,P20762,P25031,P47727,P54921,P85971,Q4FZU6,Q5HZV9,Q62975,Q80WL1,Q99PP0        |
| 12034 | 2,3,4,6,7,3<br>8,42,44 | 1,5,8,36,3<br>7,39,40,41<br>,43 | 11 | F1LM93,O35547,P08290,P12785,P13596,P16086,P25031,P36374,P97554,Q5XI73,Q9QZQ5                                                                |
| 12035 | 2,3,4,6,7,3<br>8,43,44 | 1,5,8,36,3<br>7,39,40,41<br>,42 | 8  | P01835,P02631,P11883,P20762,P25031,P34901,P98089,Q6IE51                                                                                     |
| 12036 | 2,3,4,6,7,3<br>9,40,41 | 1,5,8,36,3<br>7,38,42,43<br>,44 | 4  | P12020,P16086,P36376,Q6IE51                                                                                                                 |

|       |                        |                                 |    |                                                                                                          |
|-------|------------------------|---------------------------------|----|----------------------------------------------------------------------------------------------------------|
| 12037 | 2,3,4,6,7,3<br>9,40,42 | 1,5,8,36,3<br>7,38,41,43<br>,44 | 6  | O88600,P13596,P16086,P36376,Q5XI73,Q9QZQ5                                                                |
| 12038 | 2,3,4,6,7,3<br>9,40,43 | 1,5,8,36,3<br>7,38,41,42<br>,44 | 6  | P11883,P20762,P36376,P83748,Q6IE51,Q99PP0                                                                |
| 12039 | 2,3,4,6,7,3<br>9,40,44 | 1,5,8,36,3<br>7,38,41,42<br>,43 | 3  | P12020,P36376,Q6IE51                                                                                     |
| 12040 | 2,3,4,6,7,3<br>9,41,42 | 1,5,8,36,3<br>7,38,40,43<br>,44 | 15 | F1LM93,G3V686,O35547,P01836,P02625,P08010,P08290,P08649,P13596,P16086,P54921,P97605,Q5XI73,Q62753,Q9QZQ5 |
| 12041 | 2,3,4,6,7,3<br>9,41,43 | 1,5,8,36,3<br>7,38,40,42<br>,44 | 12 | P01836,P02625,P02631,P06760,P11883,P16086,P83748,Q5HZV9,Q63532,Q6IE51,Q7TPB1,Q99PP0                      |
| 12042 | 2,3,4,6,7,3<br>9,41,44 | 1,5,8,36,3<br>7,38,40,42<br>,43 | 4  | G3V686,P02625,P97605,Q6IE51                                                                              |
| 12043 | 2,3,4,6,7,3<br>9,42,43 | 1,5,8,36,3<br>7,38,40,41<br>,44 | 9  | P01836,P02625,P08290,P11883,P16086,P20762,P85971,Q6IE51,Q99PP0                                           |
| 12044 | 2,3,4,6,7,3<br>9,42,44 | 1,5,8,36,3<br>7,38,40,41<br>,43 | 5  | G3V686,P08290,P16086,Q5XI73,Q9QZQ5                                                                       |
| 12045 | 2,3,4,6,7,3<br>9,43,44 | 1,5,8,36,3<br>7,38,40,41<br>,42 | 6  | P02625,P02631,P11883,P20762,P83748,Q6IE51                                                                |
| 12046 | 2,3,4,6,7,4<br>0,41,42 | 1,5,8,36,3<br>7,38,39,43<br>,44 | 8  | G3V686,P01836,P08290,P13596,P16086,Q62753,Q6IFV1,Q9QZQ5                                                  |
| 12047 | 2,3,4,6,7,4<br>0,41,43 | 1,5,8,36,3<br>7,38,39,42<br>,44 | 7  | P01836,P02631,P11883,P16086,P83748,Q5HZV9,Q6IE51                                                         |
| 12048 | 2,3,4,6,7,4<br>0,41,44 | 1,5,8,36,3<br>7,38,39,42<br>,43 | 3  | P06911,P12020,P13596                                                                                     |
| 12049 | 2,3,4,6,7,4<br>0,42,43 | 1,5,8,36,3<br>7,38,39,41<br>,44 | 10 | P01836,P11883,P16086,P20762,P25236,P26772,P36374,Q5HZV9,Q99PP0,Q9JHB9                                    |
| 12050 | 2,3,4,6,7,4<br>0,42,44 | 1,5,8,36,3<br>7,38,39,41<br>,43 | 7  | P13596,P16086,P36374,Q5XI73,Q6IFV1,Q6P6R2,Q9QZQ5                                                         |
| 12051 | 2,3,4,6,7,4<br>0,43,44 | 1,5,8,36,3<br>7,38,39,41<br>,42 | 4  | P02631,P11883,P20762,P25236                                                                              |

|       |                        |                                 |    |                                                                                                                                          |
|-------|------------------------|---------------------------------|----|------------------------------------------------------------------------------------------------------------------------------------------|
| 12052 | 2,3,4,6,7,4<br>1,42,43 | 1,5,8,36,3<br>7,38,39,40<br>,44 | 19 | F1LM93,G3V686,O35547,P01836,P02631,P08290,P08649,P11883,P16086,P20762,P26772,P35281,P54921,P60905,P82471,P85971,Q5HZ<br>V9,Q6GMN2,Q99PP0 |
| 12053 | 2,3,4,6,7,4<br>1,42,44 | 1,5,8,36,3<br>7,38,39,40<br>,43 | 19 | F1LM93,G3V686,O35547,P08010,P08290,P08649,P13596,P16086,P35281,P60905,P97605,Q5XI73,Q62740,Q62753,Q6IFV1,Q6P6R2,Q81<br>2E4,Q9JID2,Q9QZQ5 |
| 12054 | 2,3,4,6,7,4<br>1,43,44 | 1,5,8,36,3<br>7,38,39,40<br>,42 | 6  | G3V686,P02631,P11883,P35281,P83748,Q5HZV9                                                                                                |
| 12055 | 2,3,4,6,7,4<br>2,43,44 | 1,5,8,36,3<br>7,38,39,40<br>,41 | 12 | G3V686,P02631,P08290,P11883,P16086,P20762,P25236,P26772,P35281,P36374,P85971,Q62975                                                      |
| 12056 | 2,3,4,6,8,3<br>6,37,38 | 1,5,7,39,4<br>0,41,42,43<br>,44 | 4  | P10715,P19629,Q4FZU6,Q6AYL6                                                                                                              |
| 12057 | 2,3,4,6,8,3<br>6,37,39 | 1,5,7,38,4<br>0,41,42,43<br>,44 | 4  | P02625,P20766,Q4FZU6,Q8CJD3                                                                                                              |
| 12058 | 2,3,4,6,8,3<br>6,37,40 | 1,5,7,38,3<br>9,41,42,43<br>,44 | 2  | P00731,Q8CJD3                                                                                                                            |
| 12059 | 2,3,4,6,8,3<br>6,37,41 | 1,5,7,38,3<br>9,40,42,43<br>,44 | 1  | Q01205                                                                                                                                   |
| 12060 | 2,3,4,6,8,3<br>6,37,42 | 1,5,7,38,3<br>9,40,41,43<br>,44 | 4  | P10715,P19629,Q4FZU6,Q6AYL6                                                                                                              |
| 12061 | 2,3,4,6,8,3<br>6,37,43 | 1,5,7,38,3<br>9,40,41,42<br>,44 | 6  | P02680,P10715,P19629,P20762,Q4FZU6,Q9QUL6                                                                                                |
| 12062 | 2,3,4,6,8,3<br>6,37,44 | 1,5,7,38,3<br>9,40,41,42<br>,43 | 2  | P13432,Q8CJD3                                                                                                                            |
| 12063 | 2,3,4,6,8,3<br>6,38,39 | 1,5,7,37,4<br>0,41,42,43<br>,44 | 3  | P02625,Q4FZU6,Q80WL1                                                                                                                     |
| 12064 | 2,3,4,6,8,3<br>6,38,40 | 1,5,7,37,3<br>9,41,42,43<br>,44 | 1  | Q00715                                                                                                                                   |
| 12065 | 2,3,4,6,8,3<br>6,38,41 | 1,5,7,37,3<br>9,40,42,43<br>,44 | 3  | P50115,Q01205,Q8CIZ5                                                                                                                     |
| 12066 | 2,3,4,6,8,3<br>6,38,42 | 1,5,7,37,3<br>9,40,41,43<br>,44 | 8  | P05369,P10715,P19629,P36374,P97554,Q00715,Q6AYL6,Q80WL1                                                                                  |

|       |                        |                                 |    |                                                                              |
|-------|------------------------|---------------------------------|----|------------------------------------------------------------------------------|
| 12067 | 2,3,4,6,8,3<br>6,38,43 | 1,5,7,37,3<br>9,40,41,42<br>,44 | 9  | P10715,P11883,P19629,P20762,Q00715,Q01177,Q4FZU6,Q64268,Q80WL1               |
| 12068 | 2,3,4,6,8,3<br>6,38,44 | 1,5,7,37,3<br>9,40,41,42<br>,43 | 2  | Q00715,Q62635                                                                |
| 12069 | 2,3,4,6,8,3<br>6,39,40 | 1,5,7,37,3<br>8,41,42,43<br>,44 | 2  | P20766,Q8CJD3                                                                |
| 12070 | 2,3,4,6,8,3<br>6,39,41 | 1,5,7,37,3<br>8,40,42,43<br>,44 | 3  | P02625,P20766,Q01205                                                         |
| 12071 | 2,3,4,6,8,3<br>6,39,42 | 1,5,7,37,3<br>8,40,41,43<br>,44 | 2  | P08010,P20766                                                                |
| 12072 | 2,3,4,6,8,3<br>6,39,43 | 1,5,7,37,3<br>8,40,41,42<br>,44 | 7  | P02625,P11883,P18427,P20762,P20766,Q00715,Q4FZU6                             |
| 12073 | 2,3,4,6,8,3<br>6,39,44 | 1,5,7,37,3<br>8,40,41,42<br>,43 | 3  | P02625,P20766,Q8CJD3                                                         |
| 12074 | 2,3,4,6,8,3<br>6,40,41 | 1,5,7,37,3<br>8,39,42,43<br>,44 | 1  | P20766                                                                       |
| 12075 | 2,3,4,6,8,3<br>6,40,42 | 1,5,7,37,3<br>8,39,41,43<br>,44 | 4  | P20766,P36374,P62804,Q00715                                                  |
| 12076 | 2,3,4,6,8,3<br>6,40,43 | 1,5,7,37,3<br>8,39,41,42<br>,44 | 6  | P11883,P18427,P20762,P20766,Q00715,Q5QE79                                    |
| 12077 | 2,3,4,6,8,3<br>6,40,44 | 1,5,7,37,3<br>8,39,41,42<br>,43 | 6  | P00731,P13432,P20766,P22006,Q00715,Q8CJD3                                    |
| 12078 | 2,3,4,6,8,3<br>6,41,42 | 1,5,7,37,3<br>8,39,40,43<br>,44 | 9  | F1LM93,P08010,P08753,P60905,Q62740,Q62753,Q63357,Q6AYL6,Q812E4               |
| 12079 | 2,3,4,6,8,3<br>6,41,43 | 1,5,7,37,3<br>8,39,40,42<br>,44 | 2  | P11883,Q9QUL6                                                                |
| 12080 | 2,3,4,6,8,3<br>6,41,44 | 1,5,7,37,3<br>8,39,40,42<br>,43 | 3  | P20766,Q01205,Q99MH3                                                         |
| 12081 | 2,3,4,6,8,3<br>6,42,43 | 1,5,7,37,3<br>8,39,40,41<br>,44 | 11 | P10715,P11883,P19629,P20762,P20766,P31044,Q00715,Q4FZU6,Q5GRG2,Q6AYL6,Q9QUL6 |

|       |                        |                                 |   |                                                         |
|-------|------------------------|---------------------------------|---|---------------------------------------------------------|
| 12082 | 2,3,4,6,8,3<br>6,42,44 | 1,5,7,37,3<br>8,39,40,41<br>,43 | 3 | P20766,P36374,P97554                                    |
| 12083 | 2,3,4,6,8,3<br>6,43,44 | 1,5,7,37,3<br>8,39,40,41<br>,42 | 5 | P11883,P13432,P20762,P20766,Q00715                      |
| 12084 | 2,3,4,6,8,3<br>7,38,39 | 1,5,7,36,4<br>0,41,42,43<br>,44 | 3 | P02625,Q4FZU6,Q80WL1                                    |
| 12085 | 2,3,4,6,8,3<br>7,38,40 | 1,5,7,36,3<br>9,41,42,43<br>,44 | 0 |                                                         |
| 12086 | 2,3,4,6,8,3<br>7,38,41 | 1,5,7,36,3<br>9,40,42,43<br>,44 | 3 | P50115,Q7TPB1,Q8CIZ5                                    |
| 12087 | 2,3,4,6,8,3<br>7,38,42 | 1,5,7,36,3<br>9,40,41,43<br>,44 | 4 | P10715,P19629,Q4FZU6,Q6AYL6                             |
| 12088 | 2,3,4,6,8,3<br>7,38,43 | 1,5,7,36,3<br>9,40,41,42<br>,44 | 8 | P02680,P10715,P14480,P19629,Q4FZU6,Q64268,Q7TPB1,Q80WL1 |
| 12089 | 2,3,4,6,8,3<br>7,38,44 | 1,5,7,36,3<br>9,40,41,42<br>,43 | 2 | Q4FZU6,Q62635                                           |
| 12090 | 2,3,4,6,8,3<br>7,39,40 | 1,5,7,36,3<br>8,41,42,43<br>,44 | 2 | P20766,Q8CJD3                                           |
| 12091 | 2,3,4,6,8,3<br>7,39,41 | 1,5,7,36,3<br>8,40,42,43<br>,44 | 2 | P02625,P20766                                           |
| 12092 | 2,3,4,6,8,3<br>7,39,42 | 1,5,7,36,3<br>8,40,41,43<br>,44 | 2 | P20766,Q4FZU6                                           |
| 12093 | 2,3,4,6,8,3<br>7,39,43 | 1,5,7,36,3<br>8,40,41,42<br>,44 | 7 | P02625,P02680,P11883,P14480,P20766,Q4FZU6,Q7TPB1        |
| 12094 | 2,3,4,6,8,3<br>7,39,44 | 1,5,7,36,3<br>8,40,41,42<br>,43 | 3 | P02625,P20766,Q8CJD3                                    |
| 12095 | 2,3,4,6,8,3<br>7,40,41 | 1,5,7,36,3<br>8,39,42,43<br>,44 | 0 |                                                         |
| 12096 | 2,3,4,6,8,3<br>7,40,42 | 1,5,7,36,3<br>8,39,41,43<br>,44 | 0 |                                                         |

|       |                        |                                 |    |                                                                       |
|-------|------------------------|---------------------------------|----|-----------------------------------------------------------------------|
| 12097 | 2,3,4,6,8,3<br>7,40,43 | 1,5,7,36,3<br>8,39,41,42<br>,44 | 2  | P11883,P25236                                                         |
| 12098 | 2,3,4,6,8,3<br>7,40,44 | 1,5,7,36,3<br>8,39,41,42<br>,43 | 3  | P20766,P22006,Q8CJD3                                                  |
| 12099 | 2,3,4,6,8,3<br>7,41,42 | 1,5,7,36,3<br>8,39,40,43<br>,44 | 0  |                                                                       |
| 12100 | 2,3,4,6,8,3<br>7,41,43 | 1,5,7,36,3<br>8,39,40,42<br>,44 | 6  | P02625,P11883,Q4FZU6,Q5HZV9,Q7TPB1,Q9QUL6                             |
| 12101 | 2,3,4,6,8,3<br>7,41,44 | 1,5,7,36,3<br>8,39,40,42<br>,43 | 0  |                                                                       |
| 12102 | 2,3,4,6,8,3<br>7,42,43 | 1,5,7,36,3<br>8,39,40,41<br>,44 | 7  | P10715,P11883,P19629,P20762,P25236,P31044,Q4FZU6                      |
| 12103 | 2,3,4,6,8,3<br>7,42,44 | 1,5,7,36,3<br>8,39,40,41<br>,43 | 1  | Q6P6R2                                                                |
| 12104 | 2,3,4,6,8,3<br>7,43,44 | 1,5,7,36,3<br>8,39,40,41<br>,42 | 3  | P11883,P25236,Q4FZU6                                                  |
| 12105 | 2,3,4,6,8,3<br>8,39,40 | 1,5,7,36,3<br>7,41,42,43<br>,44 | 1  | P20766                                                                |
| 12106 | 2,3,4,6,8,3<br>8,39,41 | 1,5,7,36,3<br>7,40,42,43<br>,44 | 3  | P02625,P50115,Q8CIZ5                                                  |
| 12107 | 2,3,4,6,8,3<br>8,39,42 | 1,5,7,36,3<br>7,40,41,43<br>,44 | 4  | P05369,P20766,Q80WL1,Q9Z0V6                                           |
| 12108 | 2,3,4,6,8,3<br>8,39,43 | 1,5,7,36,3<br>7,40,41,42<br>,44 | 10 | B0BNN3,P02625,P02680,P11883,P20762,P20766,Q4FZU6,Q5HZV9,Q7TPB1,Q80WL1 |
| 12109 | 2,3,4,6,8,3<br>8,39,44 | 1,5,7,36,3<br>7,40,41,42<br>,43 | 4  | P02625,P20766,Q62635,Q80WL1                                           |
| 12110 | 2,3,4,6,8,3<br>8,40,41 | 1,5,7,36,3<br>7,39,42,43<br>,44 | 3  | P50115,Q62635,Q8CIZ5                                                  |
| 12111 | 2,3,4,6,8,3<br>8,40,42 | 1,5,7,36,3<br>7,39,41,43<br>,44 | 5  | P05369,P36374,Q63355,Q6TMA8,Q9Z0V6                                    |



|       |                        |                                 |    |                                                                                     |
|-------|------------------------|---------------------------------|----|-------------------------------------------------------------------------------------|
| 12112 | 2,3,4,6,8,3<br>8,40,43 | 1,5,7,36,3<br>7,39,41,42<br>,44 | 4  | P01835,P11883,P20762,Q5HZV9                                                         |
| 12113 | 2,3,4,6,8,3<br>8,40,44 | 1,5,7,36,3<br>7,39,41,42<br>,43 | 5  | P01835,P22006,Q62635,Q6TMA8,Q9Z0V6                                                  |
| 12114 | 2,3,4,6,8,3<br>8,41,42 | 1,5,7,36,3<br>7,39,40,43<br>,44 | 12 | F1LM93,O35547,P05369,P08010,P08753,P50115,P50116,P54921,Q62753,Q6AYL6,Q8CIZ5,Q9Z0V6 |
| 12115 | 2,3,4,6,8,3<br>8,41,43 | 1,5,7,36,3<br>7,39,40,42<br>,44 | 10 | B0BNN3,P00762,P00774,P02625,P11883,P50115,P50116,Q5HZV9,Q5U2V4,Q7TPB1               |
| 12116 | 2,3,4,6,8,3<br>8,41,44 | 1,5,7,36,3<br>7,39,40,42<br>,43 | 7  | P00774,P50115,P98089,Q05695,Q5U2V4,Q62635,Q8CIZ5                                    |
| 12117 | 2,3,4,6,8,3<br>8,42,43 | 1,5,7,36,3<br>7,39,40,41<br>,44 | 12 | B0BNN3,O35547,P10715,P11883,P19629,P20762,P31044,Q4FZU6,Q5GRG2,Q5HZV9,Q80WL1,Q9Z0V6 |
| 12118 | 2,3,4,6,8,3<br>8,42,44 | 1,5,7,36,3<br>7,39,40,41<br>,43 | 5  | P36374,P97554,Q62635,Q6TMA8,Q9Z0V6                                                  |
| 12119 | 2,3,4,6,8,3<br>8,43,44 | 1,5,7,36,3<br>7,39,40,41<br>,42 | 7  | P01835,P11883,P20762,P98089,Q4FZU6,Q62635,Q80WL1                                    |
| 12120 | 2,3,4,6,8,3<br>9,40,41 | 1,5,7,36,3<br>7,38,42,43<br>,44 | 1  | P20766                                                                              |
| 12121 | 2,3,4,6,8,3<br>9,40,42 | 1,5,7,36,3<br>7,38,41,43<br>,44 | 2  | P20766,Q9Z0V6                                                                       |
| 12122 | 2,3,4,6,8,3<br>9,40,43 | 1,5,7,36,3<br>7,38,41,42<br>,44 | 5  | P11883,P20762,P20766,P25236,Q5QE79                                                  |
| 12123 | 2,3,4,6,8,3<br>9,40,44 | 1,5,7,36,3<br>7,38,41,42<br>,43 | 2  | P20766,Q8CJD3                                                                       |
| 12124 | 2,3,4,6,8,3<br>9,41,42 | 1,5,7,36,3<br>7,38,40,43<br>,44 | 3  | P08010,P20766,Q62753                                                                |
| 12125 | 2,3,4,6,8,3<br>9,41,43 | 1,5,7,36,3<br>7,38,40,42<br>,44 | 5  | P02625,P11883,P20766,Q5HZV9,Q7TPB1                                                  |
| 12126 | 2,3,4,6,8,3<br>9,41,44 | 1,5,7,36,3<br>7,38,40,42<br>,43 | 2  | P02625,P20766                                                                       |

|       |                         |                                 |    |                                                                                     |
|-------|-------------------------|---------------------------------|----|-------------------------------------------------------------------------------------|
| 12127 | 2,3,4,6,8,3<br>9,42,43  | 1,5,7,36,3<br>7,38,40,41<br>,44 | 7  | P02625,P11883,P20762,P20766,P25236,Q4FZU6,Q80WL1                                    |
| 12128 | 2,3,4,6,8,3<br>9,42,44  | 1,5,7,36,3<br>7,38,40,41<br>,43 | 2  | P20766,Q9Z0V6                                                                       |
| 12129 | 2,3,4,6,8,3<br>9,43,44  | 1,5,7,36,3<br>7,38,40,41<br>,42 | 5  | P02625,P11883,P20762,P20766,P25236                                                  |
| 12130 | 2,3,4,6,8,4<br>0,41,42  | 1,5,7,36,3<br>7,38,39,43<br>,44 | 4  | P20766,Q62753,Q6P6R2,Q9Z0V6                                                         |
| 12131 | 2,3,4,6,8,4<br>0,41,43  | 1,5,7,36,3<br>7,38,39,42<br>,44 | 3  | P11883,P20766,Q5HZV9                                                                |
| 12132 | 2,3,4,6,8,4<br>0,41,44  | 1,5,7,36,3<br>7,38,39,42<br>,43 | 1  | P20766                                                                              |
| 12133 | 2,3,4,6,8,4<br>0,42,43  | 1,5,7,36,3<br>7,38,39,41<br>,44 | 9  | P11883,P20762,P20766,P25236,P36374,Q5HZV9,Q5QE79,Q63355,Q9Z0V6                      |
| 12134 | 2,3,4,6,8,4<br>0,42,44  | 1,5,7,36,3<br>7,38,39,41<br>,43 | 9  | P00714,P20766,P22006,P25236,P36374,Q5M819,Q6P6R2,Q6TMA8,Q9Z0V6                      |
| 12135 | 2,3,4,6,8,4<br>0,43,44  | 1,5,7,36,3<br>7,38,39,41<br>,42 | 5  | P11883,P20762,P20766,P25236,Q5QE79                                                  |
| 12136 | 2,3,4,6,8,4<br>1,42,43  | 1,5,7,36,3<br>7,38,39,40<br>,44 | 12 | B0LT89,F1LM93,O35547,P11883,P20762,P20766,P26772,P54921,P82471,Q5HZV9,Q6GMN2,Q9QUL6 |
| 12137 | 2,3,4,6,8,4<br>1,42,44  | 1,5,7,36,3<br>7,38,39,40<br>,43 | 7  | F1LM93,P20766,P60905,Q62753,Q6P6R2,Q9JID2,Q9Z0V6                                    |
| 12138 | 2,3,4,6,8,4<br>1,43,44  | 1,5,7,36,3<br>7,38,39,40<br>,42 | 2  | P11883,P20766                                                                       |
| 12139 | 2,3,4,6,8,4<br>2,43,44  | 1,5,7,36,3<br>7,38,39,40<br>,41 | 8  | P11883,P20762,P20766,P25236,P26772,P36374,Q6P6R2,Q9Z0V6                             |
| 12140 | 2,3,4,6,36,<br>37,38,39 | 1,5,7,8,40,<br>41,42,43,4<br>4  | 2  | P02625,Q4FZU6                                                                       |
| 12141 | 2,3,4,6,36,<br>37,38,40 | 1,5,7,8,39,<br>41,42,43,4<br>4  | 1  | P00731                                                                              |

|       |                         |                                |   |                                                         |
|-------|-------------------------|--------------------------------|---|---------------------------------------------------------|
| 12142 | 2,3,4,6,36,<br>37,38,41 | 1,5,7,8,39,<br>40,42,43,4<br>4 | 1 | Q4FZU6                                                  |
| 12143 | 2,3,4,6,36,<br>37,38,42 | 1,5,7,8,39,<br>40,41,43,4<br>4 | 8 | P10715,P12785,P19629,P31044,P97554,Q4FZU6,Q6AYL6,Q9ET32 |
| 12144 | 2,3,4,6,36,<br>37,38,43 | 1,5,7,8,39,<br>40,41,42,4<br>4 | 6 | P10715,P14480,P19629,P31044,Q4FZU6,Q5HZV9               |
| 12145 | 2,3,4,6,36,<br>37,38,44 | 1,5,7,8,39,<br>40,41,42,4<br>3 | 2 | P12785,Q4FZU6                                           |
| 12146 | 2,3,4,6,36,<br>37,39,40 | 1,5,7,8,38,<br>41,42,43,4<br>4 | 3 | P00731,P50116,Q8CJD3                                    |
| 12147 | 2,3,4,6,36,<br>37,39,41 | 1,5,7,8,38,<br>40,42,43,4<br>4 | 1 | P02625                                                  |
| 12148 | 2,3,4,6,36,<br>37,39,42 | 1,5,7,8,38,<br>40,41,43,4<br>4 | 3 | P10715,Q4FZU6,Q9ET32                                    |
| 12149 | 2,3,4,6,36,<br>37,39,43 | 1,5,7,8,38,<br>40,41,42,4<br>4 | 4 | P02625,P06760,P14480,Q4FZU6                             |
| 12150 | 2,3,4,6,36,<br>37,39,44 | 1,5,7,8,38,<br>40,41,42,4<br>3 | 3 | P02625,Q4FZU6,Q8CJD3                                    |
| 12151 | 2,3,4,6,36,<br>37,40,41 | 1,5,7,8,38,<br>39,42,43,4<br>4 | 0 |                                                         |
| 12152 | 2,3,4,6,36,<br>37,40,42 | 1,5,7,8,38,<br>39,41,43,4<br>4 | 0 |                                                         |
| 12153 | 2,3,4,6,36,<br>37,40,43 | 1,5,7,8,38,<br>39,41,42,4<br>4 | 1 | Q4FZU6                                                  |
| 12154 | 2,3,4,6,36,<br>37,40,44 | 1,5,7,8,38,<br>39,41,42,4<br>3 | 2 | P00731,Q8CJD3                                           |
| 12155 | 2,3,4,6,36,<br>37,41,42 | 1,5,7,8,38,<br>39,40,43,4<br>4 | 1 | Q6AYL6                                                  |

---
