# Supplementary material for: Dynamic Changes of Urine Proteome in Rat Models Inoculated with Two Different Hepatoma Cell Lines
Source: Hindawi journal article supplement (doi:10.1155/2021/8895330), 2021-01-07
Supplement: f1 [file 8895330.f1.zip]

Title: Dynamic changes of urine proteome in rat models inoculated with two different hepatoma cell lines. Full author: Yameng Zhang, Yufei Gao, Jing Wei & Youhe Gao\*.

Table S4 In CBRH-7919 model, the occurrence of the protein in 6435 random allocations.

| Day 5      |           | Day 7      |           | Day 14     |           | Day 28     |           |
|------------|-----------|------------|-----------|------------|-----------|------------|-----------|
| Protein ID | Occurance |
| Q5RKI1     | 485       | P35280     | 495       | P29315     | 400       | P35280     | 495       |
| P02091     | 479       | Q4G075     | 396       | P82471     | 386       | Q5RKI1     | 495       |
| P20760     | 364       | Q9R168     | 371       | P20766     | 375       | P51740     | 492       |
| P06760     | 355       | P23739     | 371       | Q03191     | 371       | P02091     | 443       |
| P00774     | 349       | Q811M5     | 369       | Q99041     | 370       | P55091     | 390       |
| P22283     | 345       | iRT-Kit_Wf | 367       | P62804     | 365       | P19218     | 360       |
| P00762     | 342       | Q9WTT6     | 361       | Q4G075     | 353       | P52590     | 357       |
| P07647     | 341       | P25809     | 349       | P52590     | 349       | P49134     | 355       |
| P02782     | 340       | P52590     | 346       | P06760     | 347       | P97580     | 354       |
| P02780     | 339       | P06760     | 344       | P22273     | 343       | P36860     | 345       |
| P97840     | 339       | P30919     | 343       | Q9WTT6     | 340       | Q62635     | 343       |
| P52590     | 338       | P36860     | 341       | P47967     | 340       | P97840     | 337       |
| Q9JI85     | 338       | P00762     | 340       | Q68G31     | 339       | P00762     | 335       |
| P47967     | 338       | P01835     | 340       | P80299     | 336       | Q6AY61     | 335       |
| Q5GRG2     | 336       | Q6P6R2     | 339       | P22006     | 329       | Q68G31     | 334       |
| Q9WUW8     | 335       | O70417     | 337       | O70417     | 326       | D3ZUC6     | 333       |
| P30120     | 335       | P22006     | 337       | Q9QX74     | 325       | Q9QX74     | 333       |
| Q8CIZ5     | 334       | P47967     | 336       | P00762     | 324       | Q99041     | 332       |
| P01835     | 333       | Q5GRG2     | 333       | P19218     | 323       | P01681     | 330       |
| Q9JHB9     | 332       | Q6IMF3     | 331       | P36860     | 318       | P47967     | 326       |
| P06761     | 330       | Q9QX74     | 329       | P21588     | 316       | P01039     | 326       |
| O70417     | 330       | P80299     | 328       | P50116     | 315       | P80299     | 326       |
| P80299     | 325       | P19223     | 328       | P97840     | 311       | P50116     | 321       |
| P01681     | 324       | P20766     | 328       | P01835     | 309       | Q9EQS0     | 321       |
| P35280     | 322       | P10758     | 327       | P25809     | 303       | Q4KLZ6     | 320       |
| O70594     | 321       | P50116     | 326       | P01681     | 302       | P36376     | 319       |
| P11598     | 321       | Q99041     | 324       | P22282     | 301       | Q9Z1F2     | 315       |
| P36860     | 319       | Q6IG02     | 321       | Q6IG02     | 297       | P19132     | 315       |
| P46844     | 319       | P06911     | 316       | Q6IMF3     | 290       | P01835     | 312       |
| P20766     | 316       | P70549     | 308       | Q6P6Q2     | 290       | O70417     | 310       |
| P50116     | 313       | P19629     | 307       | P70549     | 282       | P15399     | 310       |
| Q63493     | 312       | Q6IFW6     | 304       | P11598     | 281       | P06760     | 308       |
| Q99041     | 307       | Q6P6Q2     | 304       | P97580     | 278       | P36374     | 307       |
| P02781     | 304       | P97840     | 297       | Q812E4     | 278       | P01946     | 305       |
| iRT-Kit_Wf | 303       | P11598     | 297       | Q6IFW6     | 271       | Q30KJ2     | 301       |
| P08723     | 303       | P22282     | 297       | Q63617     | 268       | P70549     | 298       |
| Q6IFW6     | 299       | P23593     | 296       | P06911     | 257       | P22273     | 296       |
| P19629     | 297       | Q68G31     | 296       | P50115     | 251       | Q64093     | 296       |
| P97580     | 297       | Q63617     | 295       | Q6AYR9     | 249       | P35745     | 290       |
| Q62714     | 295       | P01946     | 291       | Q30KJ2     | 246       | P20766     | 289       |
| Q68G31     | 295       | P02783     | 289       | P02783     | 245       | Q99MH3     | 287       |
| P20646     | 294       | Q99MH3     | 289       | P01039     | 240       | P09656     | 285       |
| Q99MH3     | 291       | Q9Z2L0     | 287       | Q99MH3     | 239       | P11598     | 285       |
| P02783     | 289       | D4A5U3     | 282       | Q63532     | 238       | Q9QWN8     | 280       |
| P50280     | 287       | Q4KLZ6     | 281       | Q6IG05     | 238       | Q91XN4     | 275       |
| P22282     | 285       | O89117     | 281       | O54728     | 237       | P98089     | 273       |
| P70549     | 283       | P01681     | 278       | P26342     | 235       | P25809     | 270       |
| P06911     | 281       | P97580     | 274       | P00714     | 235       | P13432     | 270       |
| Q63617     | 279       | P22273     | 274       | Q9QW07     | 235       | Q9Z0V6     | 270       |
| Q63618     | 278       | P36374     | 273       | Q6IFU7     | 229       | P20762     | 268       |
| Q6P6Q2     | 275       | Q03191     | 271       | D3ZUC6     | 225       | P08721     | 263       |
| Q66H69     | 273       | Q9Z0J6     | 267       | Q9R168     | 225       | P08649     | 258       |
| P18418     | 271       | P42854     | 264       | Q6P6R2     | 224       | Q6AYQ8     | 255       |
| P57113     | 270       | Q4FZU2     | 260       | Q9QYP1     | 211       | Q6IG05     | 242       |
| P08937     | 267       | O70594     | 259       | P15399     | 210       | Q09030     | 240       |
| P02631     | 263       | P02780     | 257       | Q5RJR2     | 209       | Q510D7     | 240       |
| Q5M8C6     | 263       | P02091     | 253       | P36376     | 203       | Q9R168     | 235       |
| P25031     | 263       | P12020     | 252       | Q9QWN8     | 200       | Q63617     | 230       |
| Q03191     | 259       | Q05702     | 250       | Q80WL1     | 190       | P21674     | 228       |
| Q9Z1F2     | 258       | Q30KJ2     | 248       | Q4KLZ6     | 189       | Q9QW07     | 226       |
| P29315     | 257       | P50115     | 246       | P08649     | 183       | P82471     | 220       |
| Q6IMF3     | 256       | Q63474     | 246       | Q54800;Q!  | 182       | P25031     | 216       |
| Q6AY61     | 253       | Q6AY61     | 241       | Q811M5     | 182       | O54858     | 198       |
| Q6TMA8     | 252       | P09656     | 240       | P13432     | 178       | P08723     | 190       |
| Q4FZU2     | 251       | Q00715     | 240       | P02631     | 177       | P63029     | 186       |
| P48508     | 250       | Q09030     | 235       | P23739     | 176       | P0C0A9     | 185       |
| Q6IG02     | 248       | Q812E4     | 232       | P49134     | 171       | P19814     | 184       |
| P50115     | 244       | P54921     | 231       | Q9WVK7     | 171       | Q923V8     | 184       |

|           |     |           |     |           |     |            |     |
|-----------|-----|-----------|-----|-----------|-----|------------|-----|
| Q30KJ2    | 243 | Q9EQS0    | 218 | Q63474    | 169 | P22282     | 184 |
| P55091    | 242 | P01039    | 215 | P21674    | 166 | O89117     | 176 |
| P22273    | 241 | P08649    | 213 | Q9JI85    | 166 | P00774     | 176 |
| Q812E4    | 239 | P00507    | 208 | P35280    | 165 | Q4AEF8     | 171 |
| Q4KLZ6    | 233 | P62804    | 204 | P35745    | 164 | P50115     | 167 |
| Q811M5    | 233 | Q9JI85    | 204 | O88797    | 156 | P19629     | 167 |
| P46462    | 233 | P13676    | 202 | Q09030    | 154 | O54800;Q!  | 166 |
| P0C0A9    | 231 | Q66H69    | 202 | P20646    | 154 | P12020     | 165 |
| Q4G075    | 230 | P15399    | 198 | Q9JJ50    | 152 | Q62714     | 165 |
| B0BNN3    | 230 | P63029    | 191 | Q4FZU2    | 147 | O54728     | 165 |
| P36374    | 229 | P00714    | 190 | Q9Z0J6    | 138 | P11883     | 161 |
| Q9R0T3    | 228 | P20761    | 185 | P54921    | 133 | Q80WL1     | 157 |
| D3ZUC6    | 228 | O54800;Q! | 184 | Q8VD89    | 131 | P08494     | 153 |
| P0DMW0;f  | 228 | Q9QW07    | 183 | Q66H69    | 131 | P62804     | 153 |
| P20761    | 227 | P50280    | 182 | Q62975    | 131 | P42854     | 148 |
| D4A5U3    | 219 | Q6IG05    | 179 | P20762    | 131 | Q63474     | 148 |
| P20762    | 219 | P05539    | 177 | P05539    | 128 | P14173     | 147 |
| Q5RLM2    | 218 | P22283    | 174 | Q6AY61    | 128 | P23739     | 145 |
| Q8CJ52    | 218 | Q9QYP1    | 174 | Q5I0J9    | 127 | Q5GRG2     | 144 |
| Q9QW07    | 217 | P47727    | 171 | Q10758    | 127 | P02793;Q7  | 142 |
| P01946    | 216 | P18418    | 170 | O54858    | 120 | P97829     | 135 |
| P35745    | 216 | P02631    | 170 | Q5BJY9    | 117 | P54921     | 134 |
| P08649    | 214 | Q5I0D1    | 169 | O89117    | 116 | F1M3L7     | 133 |
| P19468    | 214 | Q63532    | 168 | Q00715    | 113 | Q99PP0     | 131 |
| Q9QX74    | 212 | O54728    | 165 | P12020    | 111 | D3ZTX0     | 130 |
| Q63598    | 207 | P36376    | 162 | P00731    | 111 | B0BNN3     | 127 |
| Q6Q0N1    | 206 | P08723    | 162 | Q6IFU8    | 102 | Q9Z0J6     | 126 |
| P12020    | 206 | Q62714    | 160 | P36374    | 100 | P02625     | 122 |
| Q9R168    | 204 | D3ZUC6    | 159 | P07150    | 98  | Q9JJ50     | 119 |
| P09456    | 204 | B1H234    | 157 | Q62761;Q! | 98  | Q63751     | 107 |
| B1H234    | 202 | O54858    | 157 | P08723    | 96  | P02631     | 106 |
| P10758    | 201 | P20646    | 157 | Q9EQS0    | 95  | Q6P6R2     | 105 |
| Q6IFU8    | 201 | P13432    | 154 | P22283    | 92  | P10758     | 102 |
| Q5QE79    | 200 | Q91ZS3    | 152 | Q5GRG2    | 92  | Q66H69     | 101 |
| P54921    | 194 | Q9JHB9    | 144 | Q9Z2L0    | 91  | Q9QZQ5     | 100 |
| Q6IG05    | 192 | B0LT89    | 138 | P30120    | 88  | G3V686     | 98  |
| P15399    | 190 | P30120    | 137 | P06761    | 88  | Q8CIZ5     | 97  |
| P98089    | 189 | P06761    | 136 | P00507    | 87  | P06911     | 97  |
| Q9WTW7    | 189 | Q9JJ50    | 133 | P47727    | 86  | Q6PCU2     | 95  |
| O54728    | 189 | Q9WVK7    | 132 | Q62714    | 84  | D4A5U3     | 95  |
| O55004    | 186 | P55091    | 131 | P09656    | 83  | Q6IFW6     | 94  |
| P00714    | 176 | P19218    | 127 | Q9QZQ5    | 73  | P30120     | 94  |
| Q64093    | 175 | P21674    | 117 | Q5RLM2    | 72  | Q63475     | 94  |
| P21674    | 173 | Q10743    | 115 | Q9Z1F2    | 70  | Q05702     | 93  |
| Q63424    | 171 | P49134    | 113 | Q5PQL7    | 70  | Q5QE79     | 93  |
| P53790    | 168 | Q6IFU7    | 111 | P00758    | 69  | P02770     | 92  |
| P17988    | 167 | P11762    | 110 | P02625    | 67  | Q812E4     | 92  |
| P36376    | 167 | Q5PQL7    | 106 | P63081    | 66  | P80202     | 91  |
| Q6IFU7    | 165 | P20762    | 105 | O35547    | 65  | iRT-Kit_WF | 91  |
| Q63270    | 163 | Q9Z1F2    | 105 | Q06000    | 64  | P60905     | 88  |
| Q63751    | 159 | P16636    | 102 | P57113    | 61  | P00714     | 81  |
| Q00715    | 149 | P02625    | 100 | P0C0A9    | 60  | Q6P6Q2     | 81  |
| O35077    | 146 | P35745    | 99  | P97615    | 59  | P23593     | 77  |
| B0LT89    | 144 | Q63598    | 97  | Q63598    | 59  | Q9JI85     | 77  |
| Q62761;Q! | 144 | Q8CJD3    | 94  | P19223    | 57  | O35276     | 76  |
| Q6P6S4    | 143 | Q6IFU8    | 90  | P14173    | 56  | P48199     | 75  |
| P08721    | 142 | Q10758    | 83  | O55145    | 55  | Q8K4G9     | 75  |
| P07150    | 141 | Q9QZQ5    | 81  | P17559    | 53  | P85971     | 70  |
| P19223    | 139 | Q63493    | 80  | P42854    | 51  | P26772     | 66  |
| Q05175    | 139 | Q5QE79    | 80  | P19629    | 47  | P24368     | 64  |
| Q62635    | 139 | P17559    | 78  | Q05511    | 47  | Q6AYR9     | 64  |
| Q8R431    | 136 | P08937    | 76  | Q63493    | 45  | P16636     | 62  |
| Q923S2    | 136 | P0C0A9    | 76  | Q62894    | 45  | P07174     | 61  |
| O70377    | 131 | Q80WL1    | 75  | B1H234    | 43  | Q5I0D1     | 61  |
| P22006    | 129 | Q9R0T3    | 75  | G3V686    | 42  | P80020     | 60  |
| Q3ZAV1    | 124 | P11883    | 74  | Q99PP0    | 41  | O55004     | 53  |
| Q5I0E9    | 122 | P31044    | 73  | Q05702    | 38  | Q6IG02     | 53  |
| P31430    | 119 | P25031    | 70  | Q8CFN2    | 38  | P97615     | 50  |
| Q9Z0V6    | 118 | P20760    | 69  | Q9WVH8    | 38  | Q9QW30     | 49  |
| Q9Z2L0    | 117 | P02782    | 68  | Q9QZK9    | 37  | Q5BJY9     | 47  |
| Q03248    | 115 | Q5I0J9    | 68  | Q8CGS4    | 35  | P19223     | 47  |
| Q71MB6    | 115 | P19132    | 66  | P10758    | 35  | Q9Z2L0     | 46  |
| P19132    | 115 | O35547    | 63  | Q6AYR8    | 35  | P29315     | 45  |
| Q9Z0W7    | 114 | P04762    | 58  | Q923V8    | 34  | Q4G075     | 44  |

|          |     |           |    |            |    |        |    |
|----------|-----|-----------|----|------------|----|--------|----|
| P31044   | 113 | O55145    | 57 | Q5I0D1     | 32 | Q03191 | 43 |
| Q9Z0J6   | 113 | Q5M8C6    | 53 | Q9WUW8     | 30 | P30919 | 42 |
| Q5M7T9   | 111 | P09456    | 53 | P0DMW0;f   | 27 | P06761 | 41 |
| Q6MG61   | 111 | P46462    | 52 | O70594     | 25 | Q9QYP1 | 41 |
| P30904   | 110 | Q6AYR9    | 51 | O55004     | 25 | B1H234 | 39 |
| P19814   | 110 | P46844    | 46 | Q9Z0V6     | 24 | P20767 | 39 |
| P60905   | 110 | P60905    | 44 | P02454     | 23 | P05539 | 38 |
| Q10758   | 110 | P36375    | 41 | Q6TMA8     | 22 | P02782 | 36 |
| Q6P6R2   | 107 | Q6AYQ8    | 40 | Q63150     | 22 | Q5I0J9 | 35 |
| P18297   | 105 | P04355    | 40 | Q6P6S4     | 21 | Q63618 | 34 |
| P23593   | 105 | Q6AYC4    | 36 | Q64093     | 21 | Q9WUC4 | 34 |
| P04905   | 103 | P07150    | 35 | P97584     | 20 | P17475 | 34 |
| Q5I0D1   | 103 | Q64268    | 35 | Q01205     | 20 | P02454 | 33 |
| P07151   | 98  | Q99PP0    | 35 | B0LT89     | 19 | Q6AYR8 | 33 |
| O70257   | 97  | Q91XN4    | 34 | O08839     | 18 | Q63149 | 32 |
| P62804   | 96  | O35077    | 34 | P20761     | 17 | Q6IFU7 | 32 |
| O88797   | 94  | P33436    | 32 | P18298     | 16 | P53792 | 32 |
| Q80W57   | 93  | P27590    | 32 | Q5QE79     | 16 | D3ZTE0 | 31 |
| P40241   | 93  | P24368    | 32 | P98166     | 15 | Q62812 | 31 |
| P11883   | 89  | G3V686    | 32 | P05964     | 15 | P22006 | 30 |
| O35547   | 89  | O08815    | 31 | P97523     | 15 | Q63556 | 30 |
| O88339;Q | 88  | P55159    | 29 | iRT-Kit_WF | 14 | Q8K1G0 | 30 |
| P13432   | 87  | P97697    | 29 | B0BNN3     | 14 | Q5PPH0 | 30 |
| Q05702   | 87  | Q78P75    | 29 | Q5M8C6     | 14 | Q811M5 | 29 |
| P25809   | 84  | P07647    | 29 | P50280     | 14 | P02651 | 29 |
| Q62902   | 80  | P04905    | 28 | B2RYW9     | 13 | Q6DGG1 | 28 |
| Q80WL1   | 80  | P26772    | 28 | P07171     | 13 | P48032 | 28 |
| P38918   | 78  | Q3ZAV1    | 27 | Q62902     | 12 | P70502 | 28 |
| Q9WUW9   | 77  | P02781    | 27 | P02780     | 12 | Q5EGZ1 | 28 |
| A2RUW1   | 76  | Q62946    | 26 | P04905     | 12 | O35568 | 27 |
| Q498D9   | 75  | P97615    | 25 | P07647     | 12 | O55145 | 27 |
| P18757   | 72  | Q62761;Q  | 25 | O08815     | 12 | Q9WTT6 | 27 |
| P23928   | 72  | P80202    | 24 | Q63424     | 12 | O08815 | 26 |
| P51907   | 71  | Q62894    | 24 | P84039     | 11 | Q63493 | 26 |
| Q64602   | 70  | Q9WUW8    | 23 | Q64240     | 10 | Q6IMF3 | 24 |
| Q9EQS0   | 70  | Q06000    | 23 | Q9WUC4     | 10 | Q920G2 | 24 |
| Q9JJ40   | 68  | Q6TMA8    | 23 | Q9JHB9     | 10 | Q8VD89 | 24 |
| P02761   | 68  | Q5RKI1    | 23 | P48032     | 10 | O35547 | 23 |
| Q5I0D7   | 65  | Q64335    | 22 | P18418     | 10 | P22283 | 23 |
| D3ZHA0   | 63  | B0BNN3    | 20 | Q9QX79     | 9  | Q63514 | 22 |
| Q5I0J9   | 61  | P19939    | 19 | P17046     | 9  | Q00715 | 21 |
| Q6B345   | 61  | P19814    | 19 | P08010     | 9  | Q4FZU2 | 21 |
| P10247   | 60  | P02454    | 18 | P80202     | 8  | P20646 | 20 |
| Q6AYQ8   | 60  | P35952    | 18 | P13852     | 8  | Q4TU93 | 20 |
| P09527   | 60  | Q9QZK9    | 18 | P35952     | 8  | B5DFC9 | 19 |
| Q09030   | 60  | P05964    | 17 | P02782     | 8  | P19939 | 19 |
| P49134   | 58  | Q9Z0V6    | 17 | P0DP29;PC  | 7  | P12368 | 19 |
| D3ZTX0   | 58  | P14173    | 17 | P33436     | 7  | Q99376 | 18 |
| Q09326   | 58  | P05369    | 17 | Q08163     | 7  | P47727 | 18 |
| O35763   | 57  | P97675    | 16 | P24368     | 7  | Q9WUW8 | 17 |
| P24368   | 57  | P0DP29;PC | 16 | Q07523     | 7  | Q9JHB9 | 16 |
| P70545   | 56  | Q4FZU4    | 14 | Q99376     | 7  | Q9QX79 | 15 |
| O08557   | 55  | Q6P9T8    | 14 | P15999     | 6  | Q00657 | 15 |
| Q6AY41   | 55  | Q8CJ52    | 14 | P14562     | 6  | P07379 | 15 |
| Q63355   | 55  | P39069    | 13 | P04636     | 6  | P17559 | 14 |
| Q78P75   | 55  | P55281    | 13 | P06866     | 6  | P33436 | 14 |
| Q66HG3   | 52  | Q8K1G0    | 12 | Q01984     | 6  | P97584 | 14 |
| Q63317   | 51  | Q6RUV5    | 12 | Q68FX1     | 5  | Q6IFU8 | 13 |
| Q6PCU2   | 51  | Q6Q7Y5    | 12 | P01946     | 5  | P46462 | 13 |
| P08010   | 51  | Q5BK81    | 11 | O70257     | 5  | Q05511 | 13 |
| Q63474   | 49  | P68511    | 11 | Q5I0D7     | 5  | Q63532 | 12 |
| P02454   | 49  | O55004    | 11 | Q6RUV5     | 5  | P39069 | 11 |
| P05539   | 48  | P02761    | 10 | D3ZTX0     | 5  | Q8CJ52 | 11 |
| O88267   | 47  | Q64093    | 10 | Q4V885     | 4  | P09456 | 11 |
| P17559   | 46  | P82471    | 10 | P49744     | 4  | Q05695 | 11 |
| P05369   | 46  | P07335    | 10 | Q8CJD3     | 4  | P46720 | 11 |
| P63029   | 45  | P23785    | 9  | P11762     | 4  | Q8CG08 | 10 |
| P29975   | 44  | F1M3L7    | 9  | A0JPJ7     | 3  | Q5M8C6 | 10 |
| P48037   | 44  | P18757    | 8  | P02781     | 3  | P18418 | 10 |
| P28570   | 44  | Q4AEF8    | 7  | P46462     | 3  | P04916 | 10 |
| Q9QYP1   | 44  | Q64240    | 7  | P20759     | 3  | Q4V885 | 10 |
| P19218   | 44  | P07151    | 7  | Q9JJS8     | 3  | P50280 | 10 |
| P01039   | 44  | P14046    | 7  | P81556     | 2  | Q9JJS8 | 9  |
| Q6AYR9   | 42  | O88797    | 7  | Q91ZS3     | 2  | Q6P6S4 | 9  |

|           |    |        |   |           |   |          |   |
|-----------|----|--------|---|-----------|---|----------|---|
| P23739    | 40 | Q9WVH8 | 7 | O54861    | 2 | Q9QZ76   | 8 |
| Q4G063    | 39 | P06866 | 7 | P51792;P5 | 2 | P07171   | 8 |
| Q6Q7Y5    | 39 | Q5RLM2 | 6 | Q5M872    | 2 | P11030   | 8 |
| Q8CFN2    | 39 | P38918 | 6 | Q8CJ52    | 2 | P0C0K7   | 7 |
| Q62946    | 38 | Q9WTW7 | 6 | Q6DGG1    | 2 | P00758   | 7 |
| Q8CJD3    | 38 | P07174 | 6 | P39069    | 2 | P06866   | 7 |
| P11762    | 37 | P17046 | 6 | P09527    | 2 | Q05175   | 7 |
| P63081    | 36 | P13265 | 6 | P01836    | 1 | Q9EQV9   | 7 |
| Q9QYU4    | 36 | P28648 | 6 | Q91XN4    | 1 | Q06000   | 7 |
| Q5PQL7    | 36 | Q63751 | 6 | O35276    | 1 | Q6AY41   | 7 |
| P34901    | 35 | P69897 | 6 | P46844    | 1 | Q91ZS3   | 7 |
| Q9R1T5    | 33 | Q5BJY9 | 6 | Q9QZ76    | 1 | Q6AYC4   | 7 |
| Q9QZK9    | 33 | P46720 | 5 | Q64268    | 1 | P25236   | 7 |
| P63095    | 30 | P34901 | 5 | P08721    | 1 | P00731   | 7 |
| P01836    | 29 | Q4V885 | 5 | P70712    | 1 | P50503   | 7 |
| Q3T1J9    | 29 | P16228 | 5 | Q6P777    | 1 | P50137   | 7 |
| Q91J3     | 29 | A0JPJ7 | 5 | P11442    | 1 | O88339;Q | 6 |
| P14668    | 29 | P40241 | 5 | P60905    | 1 | Q62894   | 6 |
| P02625    | 27 | P01836 | 4 | P10247    | 1 | P26453   | 5 |
| P70709    | 27 | Q5I0E9 | 4 | Q62687    | 1 | Q5RLM2   | 5 |
| Q62812    | 25 | P13852 | 4 | P31044    | 1 | Q5PQL7   | 5 |
| Q9JJ19    | 25 | P15978 | 4 | P11883    | 1 | P49744   | 4 |
| P36970    | 25 | P18297 | 4 | Q5U2V4    | 1 | P62898   | 4 |
| Q68FT5    | 25 | P98089 | 4 | Q9ES87    | 1 | P07861   | 4 |
| Q64335    | 24 | P70619 | 3 | P10719    | 1 | P35444   | 3 |
| P05371    | 23 | P38438 | 3 | Q4AEF8    | 1 | P57113   | 3 |
| P35952    | 23 | P10719 | 3 | A2RUW1    | 0 | Q9ES87   | 3 |
| O89117    | 23 | Q9WU74 | 3 | A4KWA5;A  | 0 | Q64119   | 3 |
| P46720    | 22 | Q62902 | 3 | B0BNA5    | 0 | Q8CJD3   | 3 |
| P68035;P6 | 22 | Q5M872 | 3 | B0BND0    | 0 | P08937   | 3 |
| B2RYW9    | 22 | Q5PPH0 | 3 | B0BNE5    | 0 | P35952   | 3 |
| Q06000    | 22 | O54861 | 3 | B5DEN9    | 0 | P07647   | 3 |
| P07171    | 21 | P01041 | 3 | B5DFC9    | 0 | P70712   | 3 |
| O08815    | 20 | P00774 | 3 | D3Z8L7    | 0 | Q64240   | 3 |
| Q5BJY9    | 20 | Q63467 | 3 | D3ZHA0    | 0 | P13852   | 3 |
| Q923V8    | 19 | Q9WUC4 | 3 | D3ZTD8    | 0 | Q5RKI7   | 3 |
| Q9WVH8    | 19 | O70257 | 3 | D3ZTE0    | 0 | P07897   | 2 |
| P82471    | 19 | Q5U2V4 | 3 | D3ZTV3    | 0 | Q498R7   | 2 |
| P61206;P8 | 19 | Q6RY07 | 3 | D3ZUK3    | 0 | Q78P75   | 2 |
| P27590    | 16 | P08721 | 3 | D3ZW55    | 0 | Q7TP52   | 2 |
| P12368    | 16 | P53790 | 2 | D4A1J4    | 0 | P20760   | 2 |
| Q8K1G0    | 16 | O08557 | 2 | D4A1R8    | 0 | P04355   | 2 |
| P04904    | 15 | P29315 | 2 | D4A5U3    | 0 | Q9WVH8   | 2 |
| Q91ZS3    | 15 | O88917 | 2 | D4AE59    | 0 | P04276   | 2 |
| Q99MZ8    | 15 | P00731 | 2 | E9PT87;P2 | 0 | Q4FZU6   | 2 |
| P97523    | 15 | Q9QZK8 | 2 | F1LM93    | 0 | P84039   | 1 |
| P52847    | 14 | P20759 | 2 | F1M3L7    | 0 | Q62997   | 1 |
| Q8R5M3    | 14 | Q9JJS8 | 2 | G3V7W1    | 0 | P17046   | 1 |
| Q9WTT6    | 14 | P34080 | 2 | H1UBN0;C  | 0 | Q07523   | 1 |
| Q923M1    | 14 | Q07523 | 2 | O08557    | 0 | P07150   | 1 |
| P60711;P6 | 13 | D3ZHA0 | 1 | O08628    | 0 | P12346   | 1 |
| Q6AYS7    | 13 | P48508 | 1 | O08651    | 0 | P0DMW0;f | 1 |
| Q6Q0N0    | 13 | Q63556 | 1 | O09175    | 0 | P10719   | 1 |
| Q9QZK8    | 13 | P48037 | 1 | O35077    | 0 | Q62740   | 1 |
| O54800;Q! | 13 | Q05175 | 1 | O35112    | 0 | Q8R431   | 1 |
| Q5U2Q3    | 12 | Q80WY6 | 1 | O35142    | 0 | Q10758   | 1 |
| Q99MA2    | 12 | P17988 | 1 | O35217    | 0 | P11762   | 1 |
| P63322    | 12 | Q6DGG1 | 1 | O35244    | 0 | P69897   | 1 |
| Q920G2    | 11 | P61589 | 1 | O35264    | 0 | B2RYW9   | 1 |
| Q8K3P7    | 11 | P12368 | 1 | O35331    | 0 | P01015   | 1 |
| Q3MIE4    | 11 | Q9Z0W7 | 1 | O35509    | 0 | Q63467   | 1 |
| Q62753    | 11 | Q63317 | 1 | O35568    | 0 | A0JPJ7   | 0 |
| P10536    | 11 | Q8R431 | 1 | O35760    | 0 | A2RUW1   | 0 |
| Q62687    | 11 | Q9QX79 | 1 | O35763    | 0 | A4KWA5;A | 0 |
| P19112    | 10 | Q63424 | 1 | O35952    | 0 | B0BNA5   | 0 |
| P26772    | 10 | Q63618 | 1 | O35956    | 0 | B0BND0   | 0 |
| O54861    | 10 | Q1WIM3 | 1 | O54715    | 0 | B0BNE5   | 0 |
| P07943    | 9  | P08753 | 1 | O54975    | 0 | B0LT89   | 0 |
| O88917    | 9  | P08934 | 1 | O55006    | 0 | B5DEN9   | 0 |
| Q5U2V4    | 8  | Q01984 | 1 | O55096    | 0 | D3Z8L7   | 0 |
| Q3T1J1    | 8  | O54715 | 1 | O70215    | 0 | D3ZHA0   | 0 |
| Q498R7    | 8  | P35053 | 1 | O70244    | 0 | D3ZTD8   | 0 |
| P97605    | 8  | Q01205 | 1 | O70352    | 0 | D3ZTV3   | 0 |
| Q63357    | 8  | Q63475 | 1 | O70377    | 0 | D3ZUK3   | 0 |

|           |             |             |             |   |
|-----------|-------------|-------------|-------------|---|
| P09606    | 7 Q9QZ76    | 1 O70489    | 0 D3ZW55    | 0 |
| Q8CGS4    | 7 P10247    | 1 O70513    | 0 D4A1J4    | 0 |
| P15999    | 7 P07379    | 1 O70535    | 0 D4A1R8    | 0 |
| P01041    | 7 A2RUW1    | 0 O70540    | 0 D4AE59    | 0 |
| Q99376    | 7 A4KWA5;A  | 0 O88204    | 0 E9PT87;P2 | 0 |
| Q4FZU6    | 7 B0BNA5    | 0 O88267    | 0 F1LM93    | 0 |
| Q64319    | 7 B0BND0    | 0 O88339;Q  | 0 G3V7W1    | 0 |
| P97608    | 7 B0BNE5    | 0 O88600    | 0 H1UBN0;Q  | 0 |
| P38438    | 6 B2RYW9    | 0 O88766    | 0 O08557    | 0 |
| P16636    | 6 B5DEN9    | 0 O88767    | 0 O08628    | 0 |
| Q5M872    | 6 B5DFC9    | 0 O88775    | 0 O08651    | 0 |
| Q6RUV5    | 6 D3Z8L7    | 0 O88917    | 0 O08839    | 0 |
| P20673    | 5 D3ZTD8    | 0 O88989    | 0 O09175    | 0 |
| P04916    | 5 D3ZTE0    | 0 P00502    | 0 O35077    | 0 |
| P97584    | 5 D3ZTV3    | 0 P00689    | 0 O35112    | 0 |
| Q08463    | 5 D3ZTX0    | 0 P00774    | 0 O35142    | 0 |
| P02793;Q7 | 5 D3ZUK3    | 0 P00786    | 0 O35217    | 0 |
| Q6AYE5    | 5 D3ZW55    | 0 P00787    | 0 O35244    | 0 |
| Q64268    | 5 D4A1J4    | 0 P00884    | 0 O35264    | 0 |
| P10760    | 5 D4A1R8    | 0 P01015    | 0 O35331    | 0 |
| P46413    | 5 D4AE59    | 0 P01026    | 0 O35509    | 0 |
| P51792;P5 | 5 E9PT87;P2 | 0 P01041    | 0 O35760    | 0 |
| P24268    | 4 F1LM93    | 0 P01048    | 0 O35763    | 0 |
| Q6AY33    | 4 G3V7W1    | 0 P01830    | 0 O35952    | 0 |
| Q7M0E3    | 4 H1UBN0;Q  | 0 P02091    | 0 O35956    | 0 |
| P10719    | 4 O08628    | 0 P02650    | 0 O54715    | 0 |
| P01015    | 4 O08651    | 0 P02651    | 0 O54861    | 0 |
| Q6GMN2    | 4 O08839    | 0 P02680    | 0 O54975    | 0 |
| P97697    | 4 O09175    | 0 P02696    | 0 O55006    | 0 |
| Q5RKI0    | 3 O35112    | 0 P02761    | 0 O55096    | 0 |
| Q6AYT0    | 3 O35142    | 0 P02764    | 0 O70215    | 0 |
| Q1WIM3    | 3 O35217    | 0 P02767    | 0 O70244    | 0 |
| Q9QWN8    | 3 O35244    | 0 P02770    | 0 O70257    | 0 |
| P14046    | 3 O35264    | 0 P02793;Q7 | 0 O70352    | 0 |
| P62630    | 3 O35276    | 0 P03994    | 0 O70377    | 0 |
| Q8VI04    | 3 O35331    | 0 P04041    | 0 O70489    | 0 |
| Q4QQT4    | 3 O35509    | 0 P04073    | 0 O70513    | 0 |
| B0BNA5    | 2 O35568    | 0 P04218    | 0 O70535    | 0 |
| Q91Y81    | 2 O35760    | 0 P04276    | 0 O70540    | 0 |
| P70619    | 2 O35763    | 0 P04355    | 0 O70594    | 0 |
| P37996    | 2 O35952    | 0 P04639    | 0 O88204    | 0 |
| O55145    | 2 O35956    | 0 P04642    | 0 O88267    | 0 |
| O35956    | 2 O54975    | 0 P04762    | 0 O88600    | 0 |
| P18421    | 2 O55006    | 0 P04764    | 0 O88766    | 0 |
| P81556    | 2 O55096    | 0 P04785    | 0 O88767    | 0 |
| P35053    | 2 O70215    | 0 P04797    | 0 O88775    | 0 |
| P18427    | 2 O70244    | 0 P04897    | 0 O88797    | 0 |
| Q9QYP2    | 2 O70352    | 0 P04903    | 0 O88917    | 0 |
| P15978    | 2 O70377    | 0 P04904    | 0 O88989    | 0 |
| O35244    | 1 O70489    | 0 P04906    | 0 P00502    | 0 |
| P00884    | 1 O70513    | 0 P04916    | 0 P00507    | 0 |
| P41562    | 1 O70535    | 0 P04937    | 0 P00689    | 0 |
| P38652    | 1 O70540    | 0 P05065    | 0 P00786    | 0 |
| P45592    | 1 O88204    | 0 P05197    | 0 P00787    | 0 |
| P22734    | 1 O88267    | 0 P05369    | 0 P00884    | 0 |
| Q5U1Y4    | 1 O88339;Q  | 0 P05371    | 0 P01026    | 0 |
| P48032    | 1 O88600    | 0 P05544    | 0 P01041    | 0 |
| Q10743    | 1 O88766    | 0 P05545    | 0 P01048    | 0 |
| Q9JJ50    | 1 O88767    | 0 P05712    | 0 P01830    | 0 |
| Q7TQ94    | 1 O88775    | 0 P06214    | 0 P01836    | 0 |
| Q6P6T4    | 1 O88989    | 0 P06399    | 0 P02650    | 0 |
| P43427    | 1 P00502    | 0 P06685    | 0 P02680    | 0 |
| P08753    | 1 P00689    | 0 P07151    | 0 P02696    | 0 |
| P06399    | 1 P00758    | 0 P07154    | 0 P02761    | 0 |
| Q5U316    | 1 P00786    | 0 P07174    | 0 P02764    | 0 |
| P33436    | 1 P00787    | 0 P07314    | 0 P02767    | 0 |
| P06866    | 1 P00884    | 0 P07335    | 0 P02780    | 0 |
| Q63199    | 1 P01015    | 0 P07340    | 0 P02781    | 0 |
| A0JPJ7    | 0 P01026    | 0 P07379    | 0 P02783    | 0 |
| A4KWA5;A  | 0 P01048    | 0 P07483    | 0 P03994    | 0 |
| B0BND0    | 0 P01830    | 0 P07522    | 0 P04041    | 0 |
| B0BNE5    | 0 P02650    | 0 P07632    | 0 P04073    | 0 |
| B5DEN9    | 0 P02651    | 0 P07861    | 0 P04218    | 0 |
| B5DFC9    | 0 P02680    | 0 P07897    | 0 P04636    | 0 |

|           |             |             |             |   |
|-----------|-------------|-------------|-------------|---|
| D3Z8L7    | 0 P02696    | 0 P07943    | 0 P04639    | 0 |
| D3ZTD8    | 0 P02764    | 0 P08289    | 0 P04642    | 0 |
| D3ZTE0    | 0 P02767    | 0 P08290    | 0 P04762    | 0 |
| D3ZTV3    | 0 P02770    | 0 P08460    | 0 P04764    | 0 |
| D3ZUK3    | 0 P02793;Q7 | 0 P08494    | 0 P04785    | 0 |
| D3ZW55    | 0 P03994    | 0 P08592    | 0 P04797    | 0 |
| D4A1J4    | 0 P04041    | 0 P08644;P2 | 0 P04897    | 0 |
| D4A1R8    | 0 P04073    | 0 P08650    | 0 P04903    | 0 |
| D4AE59    | 0 P04218    | 0 P08753    | 0 P04904    | 0 |
| E9PT87;P2 | 0 P04276    | 0 P08932    | 0 P04905    | 0 |
| F1LM93    | 0 P04636    | 0 P08934    | 0 P04906    | 0 |
| F1M3L7    | 0 P04639    | 0 P08937    | 0 P04937    | 0 |
| G3V686    | 0 P04642    | 0 P09006    | 0 P05065    | 0 |
| G3V7W1    | 0 P04764    | 0 P09034    | 0 P05197    | 0 |
| H1UBN0;C  | 0 P04785    | 0 P09456    | 0 P05369    | 0 |
| O08628    | 0 P04797    | 0 P09606    | 0 P05371    | 0 |
| O08651    | 0 P04897    | 0 P0C0K7    | 0 P05544    | 0 |
| O08839    | 0 P04903    | 0 P0CG51;P€ | 0 P05545    | 0 |
| O09175    | 0 P04904    | 0 P10111    | 0 P05712    | 0 |
| O35112    | 0 P04906    | 0 P10252    | 0 P05964    | 0 |
| O35142    | 0 P04916    | 0 P10536    | 0 P06214    | 0 |
| O35217    | 0 P04937    | 0 P10760    | 0 P06399    | 0 |
| O35264    | 0 P05065    | 0 P10824    | 0 P06685    | 0 |
| O35276    | 0 P05197    | 0 P10959    | 0 P07151    | 0 |
| O35331    | 0 P05371    | 0 P10960    | 0 P07154    | 0 |
| O35509    | 0 P05544    | 0 P11030    | 0 P07314    | 0 |
| O35568    | 0 P05545    | 0 P11232    | 0 P07335    | 0 |
| O35760    | 0 P05712    | 0 P11348    | 0 P07340    | 0 |
| O35952    | 0 P06214    | 0 P11980    | 0 P07483    | 0 |
| O54715    | 0 P06399    | 0 P12346    | 0 P07522    | 0 |
| O54858    | 0 P06685    | 0 P12368    | 0 P07632    | 0 |
| O54975    | 0 P07154    | 0 P13221    | 0 P07943    | 0 |
| O55006    | 0 P07171    | 0 P13265    | 0 P08010    | 0 |
| O55096    | 0 P07314    | 0 P13596    | 0 P08289    | 0 |
| O70215    | 0 P07340    | 0 P13635    | 0 P08290    | 0 |
| O70244    | 0 P07483    | 0 P13676    | 0 P08460    | 0 |
| O70352    | 0 P07522    | 0 P14046    | 0 P08592    | 0 |
| O70489    | 0 P07632    | 0 P14408    | 0 P08644;P2 | 0 |
| O70513    | 0 P07861    | 0 P14480    | 0 P08650    | 0 |
| O70535    | 0 P07897    | 0 P14630    | 0 P08753    | 0 |
| O70540    | 0 P07943    | 0 P14668    | 0 P08932    | 0 |
| O88204    | 0 P08010    | 0 P14669    | 0 P08934    | 0 |
| O88600    | 0 P08289    | 0 P14740    | 0 P09006    | 0 |
| O88766    | 0 P08290    | 0 P14841    | 0 P09034    | 0 |
| O88767    | 0 P08460    | 0 P14925    | 0 P09527    | 0 |
| O88775    | 0 P08494    | 0 P14942    | 0 P09606    | 0 |
| O88989    | 0 P08592    | 0 P15083    | 0 P0CG51;P€ | 0 |
| P00502    | 0 P08644;P2 | 0 P15087    | 0 P0DP29;PC | 0 |
| P00507    | 0 P08650    | 0 P15390    | 0 P10111    | 0 |
| P00689    | 0 P08932    | 0 P15473    | 0 P10247    | 0 |
| P00731    | 0 P09006    | 0 P15684    | 0 P10252    | 0 |
| P00758    | 0 P09034    | 0 P15800    | 0 P10536    | 0 |
| P00786    | 0 P09527    | 0 P15943    | 0 P10760    | 0 |
| P00787    | 0 P09606    | 0 P15978    | 0 P10824    | 0 |
| P01026    | 0 P0C0K7    | 0 P16086    | 0 P10959    | 0 |
| P01048    | 0 P0CG51;P€ | 0 P16228    | 0 P10960    | 0 |
| P01830    | 0 P0DMW0;i  | 0 P16290    | 0 P11232    | 0 |
| P02650    | 0 P10111    | 0 P16310    | 0 P11348    | 0 |
| P02651    | 0 P10252    | 0 P16391    | 0 P11442    | 0 |
| P02680    | 0 P10536    | 0 P16446    | 0 P11980    | 0 |
| P02696    | 0 P10760    | 0 P16573    | 0 P13221    | 0 |
| P02764    | 0 P10824    | 0 P16617    | 0 P13265    | 0 |
| P02767    | 0 P10959    | 0 P16636    | 0 P13596    | 0 |
| P02770    | 0 P10960    | 0 P17164    | 0 P13635    | 0 |
| P03994    | 0 P11030    | 0 P17475    | 0 P13676    | 0 |
| P04041    | 0 P11232    | 0 P17988    | 0 P14046    | 0 |
| P04073    | 0 P11348    | 0 P18292    | 0 P14408    | 0 |
| P04218    | 0 P11442    | 0 P18297    | 0 P14480    | 0 |
| P04276    | 0 P11980    | 0 P18421    | 0 P14562    | 0 |
| P04355    | 0 P12346    | 0 P18427    | 0 P14630    | 0 |
| P04636    | 0 P13221    | 0 P18757    | 0 P14668    | 0 |
| P04639    | 0 P13596    | 0 P19112    | 0 P14669    | 0 |
| P04642    | 0 P13635    | 0 P19132    | 0 P14740    | 0 |
| P04762    | 0 P14408    | 0 P19468    | 0 P14841    | 0 |

|           |   |           |   |           |   |           |   |
|-----------|---|-----------|---|-----------|---|-----------|---|
| P04764    | 0 | P14480    | 0 | P19804    | 0 | P14925    | 0 |
| P04785    | 0 | P14562    | 0 | P19814    | 0 | P14942    | 0 |
| P04797    | 0 | P14630    | 0 | P19939    | 0 | P15083    | 0 |
| P04897    | 0 | P14668    | 0 | P20059    | 0 | P15087    | 0 |
| P04903    | 0 | P14669    | 0 | P20611    | 0 | P15390    | 0 |
| P04906    | 0 | P14740    | 0 | P20673    | 0 | P15473    | 0 |
| P04937    | 0 | P14841    | 0 | P20760    | 0 | P15684    | 0 |
| P05065    | 0 | P14925    | 0 | P20767    | 0 | P15800    | 0 |
| P05197    | 0 | P14942    | 0 | P20786    | 0 | P15943    | 0 |
| P05544    | 0 | P15083    | 0 | P20961    | 0 | P15978    | 0 |
| P05545    | 0 | P15087    | 0 | P21581    | 0 | P15999    | 0 |
| P05712    | 0 | P15390    | 0 | P21670    | 0 | P16086    | 0 |
| P05964    | 0 | P15473    | 0 | P21704    | 0 | P16228    | 0 |
| P06214    | 0 | P15684    | 0 | P21708;P2 | 0 | P16290    | 0 |
| P06685    | 0 | P15800    | 0 | P22057    | 0 | P16310    | 0 |
| P07154    | 0 | P15943    | 0 | P22734    | 0 | P16391    | 0 |
| P07174    | 0 | P15999    | 0 | P22985    | 0 | P16446    | 0 |
| P07314    | 0 | P16086    | 0 | P23377    | 0 | P16573    | 0 |
| P07335    | 0 | P16290    | 0 | P23593    | 0 | P16617    | 0 |
| P07340    | 0 | P16310    | 0 | P23680    | 0 | P17164    | 0 |
| P07379    | 0 | P16391    | 0 | P23764    | 0 | P17988    | 0 |
| P07483    | 0 | P16446    | 0 | P23785    | 0 | P18292    | 0 |
| P07522    | 0 | P16573    | 0 | P23928    | 0 | P18297    | 0 |
| P07632    | 0 | P16617    | 0 | P24090    | 0 | P18298    | 0 |
| P07861    | 0 | P17164    | 0 | P24268    | 0 | P18421    | 0 |
| P07897    | 0 | P17475    | 0 | P24594    | 0 | P18427    | 0 |
| P08289    | 0 | P18292    | 0 | P25031    | 0 | P18757    | 0 |
| P08290    | 0 | P18298    | 0 | P25093    | 0 | P19112    | 0 |
| P08460    | 0 | P18421    | 0 | P25113    | 0 | P19468    | 0 |
| P08494    | 0 | P18427    | 0 | P25236    | 0 | P19804    | 0 |
| P08592    | 0 | P19112    | 0 | P26051    | 0 | P20059    | 0 |
| P08644;P2 | 0 | P19468    | 0 | P26453    | 0 | P20611    | 0 |
| P08650    | 0 | P19804    | 0 | P26644    | 0 | P20673    | 0 |
| P08932    | 0 | P20059    | 0 | P26772    | 0 | P20759    | 0 |
| P08934    | 0 | P20611    | 0 | P27139    | 0 | P20761    | 0 |
| P09006    | 0 | P20673    | 0 | P27274    | 0 | P20786    | 0 |
| P09034    | 0 | P20767    | 0 | P27590    | 0 | P20961    | 0 |
| P09656    | 0 | P20786    | 0 | P27605    | 0 | P21581    | 0 |
| POCOK7    | 0 | P20961    | 0 | P27653    | 0 | P21588    | 0 |
| POCG51;PC | 0 | P21581    | 0 | P27867    | 0 | P21670    | 0 |
| P0DP29;PC | 0 | P21588    | 0 | P28037    | 0 | P21704    | 0 |
| P10111    | 0 | P21670    | 0 | P28075    | 0 | P21708;P2 | 0 |
| P10252    | 0 | P21704    | 0 | P28480    | 0 | P22057    | 0 |
| P10824    | 0 | P21708;P2 | 0 | P28494    | 0 | P22734    | 0 |
| P10959    | 0 | P22057    | 0 | P28570    | 0 | P22985    | 0 |
| P10960    | 0 | P22734    | 0 | P28648    | 0 | P23377    | 0 |
| P11030    | 0 | P22985    | 0 | P28826    | 0 | P23680    | 0 |
| P11232    | 0 | P23377    | 0 | P29288    | 0 | P23764    | 0 |
| P11348    | 0 | P23680    | 0 | P29534    | 0 | P23785    | 0 |
| P11442    | 0 | P23764    | 0 | P29598    | 0 | P23928    | 0 |
| P11980    | 0 | P23928    | 0 | P29975    | 0 | P24090    | 0 |
| P12346    | 0 | P24090    | 0 | P30121    | 0 | P24268    | 0 |
| P13221    | 0 | P24268    | 0 | P30152    | 0 | P24594    | 0 |
| P13265    | 0 | P24594    | 0 | P30713    | 0 | P25093    | 0 |
| P13596    | 0 | P25093    | 0 | P30836    | 0 | P25113    | 0 |
| P13635    | 0 | P25113    | 0 | P30904    | 0 | P26051    | 0 |
| P13676    | 0 | P25236    | 0 | P30919    | 0 | P26342    | 0 |
| P13852    | 0 | P26051    | 0 | P31211    | 0 | P26644    | 0 |
| P14173    | 0 | P26342    | 0 | P31430    | 0 | P27139    | 0 |
| P14408    | 0 | P26453    | 0 | P31977    | 0 | P27274    | 0 |
| P14480    | 0 | P26644    | 0 | P32038    | 0 | P27590    | 0 |
| P14562    | 0 | P27139    | 0 | P32755    | 0 | P27605    | 0 |
| P14630    | 0 | P27274    | 0 | P34058    | 0 | P27653    | 0 |
| P14669    | 0 | P27605    | 0 | P34080    | 0 | P27867    | 0 |
| P14740    | 0 | P27653    | 0 | P34158    | 0 | P28037    | 0 |
| P14841    | 0 | P27867    | 0 | P34900    | 0 | P28075    | 0 |
| P14925    | 0 | P28037    | 0 | P34901    | 0 | P28480    | 0 |
| P14942    | 0 | P28075    | 0 | P35053    | 0 | P28494    | 0 |
| P15083    | 0 | P28480    | 0 | P35213    | 0 | P28570    | 0 |
| P15087    | 0 | P28494    | 0 | P35444    | 0 | P28648    | 0 |
| P15390    | 0 | P28570    | 0 | P35446    | 0 | P28826    | 0 |
| P15473    | 0 | P28826    | 0 | P35704    | 0 | P29288    | 0 |
| P15684    | 0 | P29288    | 0 | P35859    | 0 | P29534    | 0 |
| P15800    | 0 | P29534    | 0 | P36373    | 0 | P29598    | 0 |

|           |   |           |   |           |   |           |   |
|-----------|---|-----------|---|-----------|---|-----------|---|
| P15943    | 0 | P29598    | 0 | P36375    | 0 | P29975    | 0 |
| P16086    | 0 | P29975    | 0 | P36953    | 0 | P30121    | 0 |
| P16228    | 0 | P30121    | 0 | P36970    | 0 | P30152    | 0 |
| P16290    | 0 | P30152    | 0 | P36972    | 0 | P30713    | 0 |
| P16310    | 0 | P30713    | 0 | P37996    | 0 | P30836    | 0 |
| P16391    | 0 | P30836    | 0 | P38438    | 0 | P30904    | 0 |
| P16446    | 0 | P30904    | 0 | P38444    | 0 | P31044    | 0 |
| P16573    | 0 | P31211    | 0 | P38652    | 0 | P31211    | 0 |
| P16617    | 0 | P31430    | 0 | P38659    | 0 | P31430    | 0 |
| P17046    | 0 | P31977    | 0 | P38918    | 0 | P31977    | 0 |
| P17164    | 0 | P32038    | 0 | P40241    | 0 | P32038    | 0 |
| P17475    | 0 | P32755    | 0 | P41498    | 0 | P32755    | 0 |
| P18292    | 0 | P34058    | 0 | P41562    | 0 | P34058    | 0 |
| P18298    | 0 | P34158    | 0 | P41740    | 0 | P34080    | 0 |
| P19804    | 0 | P34900    | 0 | P42123    | 0 | P34158    | 0 |
| P19939    | 0 | P35213    | 0 | P43303    | 0 | P34900    | 0 |
| P20059    | 0 | P35444    | 0 | P43427    | 0 | P34901    | 0 |
| P20611    | 0 | P35446    | 0 | P45479    | 0 | P35053    | 0 |
| P20759    | 0 | P35704    | 0 | P45592    | 0 | P35213    | 0 |
| P20767    | 0 | P35859    | 0 | P46413    | 0 | P35446    | 0 |
| P20786    | 0 | P36373    | 0 | P46720    | 0 | P35704    | 0 |
| P20961    | 0 | P36953    | 0 | P46953    | 0 | P35859    | 0 |
| P21581    | 0 | P36970    | 0 | P47820    | 0 | P36373    | 0 |
| P21588    | 0 | P36972    | 0 | P47853    | 0 | P36375    | 0 |
| P21670    | 0 | P37996    | 0 | P48037    | 0 | P36953    | 0 |
| P21704    | 0 | P38444    | 0 | P48199    | 0 | P36970    | 0 |
| P21708;P2 | 0 | P38652    | 0 | P48284    | 0 | P36972    | 0 |
| P22057    | 0 | P38659    | 0 | P48500    | 0 | P37996    | 0 |
| P22985    | 0 | P41498    | 0 | P48508    | 0 | P38438    | 0 |
| P23377    | 0 | P41562    | 0 | P49002    | 0 | P38444    | 0 |
| P23680    | 0 | P41740    | 0 | P50123    | 0 | P38652    | 0 |
| P23764    | 0 | P42123    | 0 | P50137    | 0 | P38659    | 0 |
| P23785    | 0 | P43303    | 0 | P50398    | 0 | P38918    | 0 |
| P24090    | 0 | P43427    | 0 | P50399    | 0 | P40241    | 0 |
| P24594    | 0 | P45479    | 0 | P50430    | 0 | P41498    | 0 |
| P25093    | 0 | P45592    | 0 | P50503    | 0 | P41562    | 0 |
| P25113    | 0 | P46413    | 0 | P50609    | 0 | P41740    | 0 |
| P25236    | 0 | P46953    | 0 | P51635    | 0 | P42123    | 0 |
| P26051    | 0 | P47820    | 0 | P51647    | 0 | P43303    | 0 |
| P26342    | 0 | P47853    | 0 | P51740    | 0 | P43427    | 0 |
| P26453    | 0 | P48032    | 0 | P51886    | 0 | P45479    | 0 |
| P26644    | 0 | P48199    | 0 | P51907    | 0 | P45592    | 0 |
| P27139    | 0 | P48284    | 0 | P52759    | 0 | P46413    | 0 |
| P27274    | 0 | P48500    | 0 | P52796    | 0 | P46844    | 0 |
| P27605    | 0 | P49002    | 0 | P52847    | 0 | P46953    | 0 |
| P27653    | 0 | P49744    | 0 | P53369    | 0 | P47820    | 0 |
| P27867    | 0 | P50123    | 0 | P53790    | 0 | P47853    | 0 |
| P28037    | 0 | P50137    | 0 | P53792    | 0 | P48037    | 0 |
| P28075    | 0 | P50398    | 0 | P53812    | 0 | P48284    | 0 |
| P28480    | 0 | P50399    | 0 | P53813    | 0 | P48500    | 0 |
| P28494    | 0 | P50430    | 0 | P54311    | 0 | P48508    | 0 |
| P28648    | 0 | P50503    | 0 | P54313    | 0 | P49002    | 0 |
| P28826    | 0 | P50609    | 0 | P55018    | 0 | P50123    | 0 |
| P29288    | 0 | P51635    | 0 | P55053    | 0 | P50398    | 0 |
| P29534    | 0 | P51647    | 0 | P55091    | 0 | P50399    | 0 |
| P29598    | 0 | P51740    | 0 | P55146    | 0 | P50430    | 0 |
| P30121    | 0 | P51792;P5 | 0 | P55159    | 0 | P50609    | 0 |
| P30152    | 0 | P51886    | 0 | P55260    | 0 | P51635    | 0 |
| P30713    | 0 | P51907    | 0 | P55281    | 0 | P51647    | 0 |
| P30836    | 0 | P52759    | 0 | P55314    | 0 | P51792;P5 | 0 |
| P30919    | 0 | P52796    | 0 | P57097    | 0 | P51886    | 0 |
| P31211    | 0 | P52847    | 0 | P59647    | 0 | P51907    | 0 |
| P31977    | 0 | P53369    | 0 | P60711;P6 | 0 | P52759    | 0 |
| P32038    | 0 | P53792    | 0 | P60901    | 0 | P52796    | 0 |
| P32755    | 0 | P53812    | 0 | P61107    | 0 | P52847    | 0 |
| P34058    | 0 | P53813    | 0 | P61206;P8 | 0 | P53369    | 0 |
| P34080    | 0 | P54311    | 0 | P61459    | 0 | P53790    | 0 |
| P34158    | 0 | P54313    | 0 | P61589    | 0 | P53812    | 0 |
| P34900    | 0 | P55018    | 0 | P61943    | 0 | P53813    | 0 |
| P35213    | 0 | P55053    | 0 | P61972    | 0 | P54311    | 0 |
| P35444    | 0 | P55146    | 0 | P61983    | 0 | P54313    | 0 |
| P35446    | 0 | P55260    | 0 | P62260    | 0 | P55018    | 0 |
| P35704    | 0 | P55314    | 0 | P62630    | 0 | P55053    | 0 |
| P35859    | 0 | P57097    | 0 | P62749    | 0 | P55146    | 0 |



|           |   |           |   |           |   |           |   |
|-----------|---|-----------|---|-----------|---|-----------|---|
| P36373    | 0 | P57113    | 0 | P62775    | 0 | P55159    | 0 |
| P36375    | 0 | P59647    | 0 | P62815    | 0 | P55260    | 0 |
| P36953    | 0 | P60711;P6 | 0 | P62828;Q£ | 0 | P55281    | 0 |
| P36972    | 0 | P60901    | 0 | P62836    | 0 | P55314    | 0 |
| P38444    | 0 | P61107    | 0 | P62898    | 0 | P57097    | 0 |
| P38659    | 0 | P61206;P8 | 0 | P62959    | 0 | P59647    | 0 |
| P39069    | 0 | P61459    | 0 | P62963    | 0 | P60711;P6 | 0 |
| P41498    | 0 | P61943    | 0 | P63018    | 0 | P60901    | 0 |
| P41740    | 0 | P61972    | 0 | P63029    | 0 | P61107    | 0 |
| P42123    | 0 | P61983    | 0 | P63095    | 0 | P61206;P8 | 0 |
| P42854    | 0 | P62260    | 0 | P63102    | 0 | P61459    | 0 |
| P43303    | 0 | P62630    | 0 | P63322    | 0 | P61589    | 0 |
| P45479    | 0 | P62749    | 0 | P68035;P6 | 0 | P61943    | 0 |
| P46953    | 0 | P62775    | 0 | P68255    | 0 | P61972    | 0 |
| P47727    | 0 | P62815    | 0 | P68370    | 0 | P61983    | 0 |
| P47820    | 0 | P62828;Q£ | 0 | P68511    | 0 | P62260    | 0 |
| P47853    | 0 | P62836    | 0 | P69897    | 0 | P62630    | 0 |
| P48199    | 0 | P62898    | 0 | P70470    | 0 | P62749    | 0 |
| P48284    | 0 | P62959    | 0 | P70490    | 0 | P62775    | 0 |
| P48500    | 0 | P62963    | 0 | P70502    | 0 | P62815    | 0 |
| P49002    | 0 | P63018    | 0 | P70545    | 0 | P62828;Q£ | 0 |
| P49744    | 0 | P63081    | 0 | P70619    | 0 | P62836    | 0 |
| P50123    | 0 | P63095    | 0 | P70709    | 0 | P62959    | 0 |
| P50137    | 0 | P63102    | 0 | P80020    | 0 | P62963    | 0 |
| P50398    | 0 | P63322    | 0 | P80067    | 0 | P63018    | 0 |
| P50399    | 0 | P68035;P6 | 0 | P80201    | 0 | P63081    | 0 |
| P50430    | 0 | P68255    | 0 | P80204    | 0 | P63095    | 0 |
| P50503    | 0 | P68370    | 0 | P80254    | 0 | P63102    | 0 |
| P50609    | 0 | P70470    | 0 | P81827    | 0 | P63322    | 0 |
| P51635    | 0 | P70490    | 0 | P81828    | 0 | P68035;P6 | 0 |
| P51647    | 0 | P70502    | 0 | P82252    | 0 | P68255    | 0 |
| P51740    | 0 | P70545    | 0 | P82450    | 0 | P68370    | 0 |
| P51886    | 0 | P70709    | 0 | P82995    | 0 | P68511    | 0 |
| P52759    | 0 | P70712    | 0 | P83121    | 0 | P70470    | 0 |
| P52796    | 0 | P80020    | 0 | P85968    | 0 | P70490    | 0 |
| P53369    | 0 | P80067    | 0 | P85971    | 0 | P70545    | 0 |
| P53792    | 0 | P80201    | 0 | P85973    | 0 | P70619    | 0 |
| P53812    | 0 | P80204    | 0 | P97532    | 0 | P70709    | 0 |
| P53813    | 0 | P80254    | 0 | P97546    | 0 | P80067    | 0 |
| P54311    | 0 | P81556    | 0 | P97553    | 0 | P80201    | 0 |
| P54313    | 0 | P81827    | 0 | P97574    | 0 | P80204    | 0 |
| P55018    | 0 | P81828    | 0 | P97603    | 0 | P80254    | 0 |
| P55053    | 0 | P82252    | 0 | P97605    | 0 | P81556    | 0 |
| P55146    | 0 | P82450    | 0 | P97608    | 0 | P81827    | 0 |
| P55159    | 0 | P82995    | 0 | P97675    | 0 | P81828    | 0 |
| P55260    | 0 | P83121    | 0 | P97697    | 0 | P82252    | 0 |
| P55281    | 0 | P84039    | 0 | P97710    | 0 | P82450    | 0 |
| P55314    | 0 | P85968    | 0 | P97829    | 0 | P82995    | 0 |
| P57097    | 0 | P85971    | 0 | P98089    | 0 | P83121    | 0 |
| P59647    | 0 | P85973    | 0 | P98158    | 0 | P85968    | 0 |
| P60901    | 0 | P97523    | 0 | Q00238    | 0 | P85973    | 0 |
| P61107    | 0 | P97532    | 0 | Q00495    | 0 | P97523    | 0 |
| P61459    | 0 | P97546    | 0 | Q00657    | 0 | P97532    | 0 |
| P61589    | 0 | P97553    | 0 | Q00918    | 0 | P97546    | 0 |
| P61943    | 0 | P97574    | 0 | Q01177    | 0 | P97553    | 0 |
| P61972    | 0 | P97584    | 0 | Q01460    | 0 | P97574    | 0 |
| P61983    | 0 | P97603    | 0 | Q02445    | 0 | P97603    | 0 |
| P62260    | 0 | P97605    | 0 | Q02765    | 0 | P97605    | 0 |
| P62749    | 0 | P97608    | 0 | Q02974    | 0 | P97608    | 0 |
| P62775    | 0 | P97710    | 0 | Q03248    | 0 | P97675    | 0 |
| P62815    | 0 | P97829    | 0 | Q03336    | 0 | P97697    | 0 |
| P62828;Q£ | 0 | P98158    | 0 | Q03626    | 0 | P97710    | 0 |
| P62836    | 0 | P98166    | 0 | Q04589    | 0 | P98158    | 0 |
| P62898    | 0 | Q00238    | 0 | Q04807    | 0 | P98166    | 0 |
| P62959    | 0 | Q00495    | 0 | Q05030    | 0 | Q00238    | 0 |
| P62963    | 0 | Q00657    | 0 | Q05175    | 0 | Q00495    | 0 |
| P63018    | 0 | Q00918    | 0 | Q05695    | 0 | Q00918    | 0 |
| P63102    | 0 | Q01177    | 0 | Q05820    | 0 | Q01177    | 0 |
| P68255    | 0 | Q01460    | 0 | Q05982    | 0 | Q01205    | 0 |
| P68370    | 0 | Q02445    | 0 | Q06496    | 0 | Q01460    | 0 |
| P68511    | 0 | Q02765    | 0 | Q06880    | 0 | Q01984    | 0 |
| P69897    | 0 | Q02974    | 0 | Q07116    | 0 | Q02445    | 0 |
| P70470    | 0 | Q03248    | 0 | Q07936    | 0 | Q02765    | 0 |
| P70490    | 0 | Q03336    | 0 | Q08406    | 0 | Q02974    | 0 |

|        |          |          |          |   |
|--------|----------|----------|----------|---|
| P70502 | 0 Q03626 | 0 Q08415 | 0 Q03248 | 0 |
| P70712 | 0 Q04589 | 0 Q08420 | 0 Q03336 | 0 |
| P80020 | 0 Q04807 | 0 Q08463 | 0 Q03626 | 0 |
| P80067 | 0 Q05030 | 0 Q08464 | 0 Q04589 | 0 |
| P80201 | 0 Q05511 | 0 Q08849 | 0 Q04807 | 0 |
| P80202 | 0 Q05695 | 0 Q09326 | 0 Q05030 | 0 |
| P80204 | 0 Q05820 | 0 Q0PMD2 | 0 Q05820 | 0 |
| P80254 | 0 Q05982 | 0 Q10743 | 0 Q05982 | 0 |
| P81827 | 0 Q06496 | 0 Q1WIM1 | 0 Q06496 | 0 |
| P81828 | 0 Q06880 | 0 Q1WIM3 | 0 Q06880 | 0 |
| P82252 | 0 Q07116 | 0 Q32KJ6 | 0 Q07116 | 0 |
| P82450 | 0 Q07936 | 0 Q32PY2 | 0 Q07936 | 0 |
| P82995 | 0 Q08163 | 0 Q3KRC4 | 0 Q08163 | 0 |
| P83121 | 0 Q08406 | 0 Q3KRD8 | 0 Q08406 | 0 |
| P84039 | 0 Q08415 | 0 Q3MIE4 | 0 Q08415 | 0 |
| P85968 | 0 Q08420 | 0 Q3MIF4 | 0 Q08420 | 0 |
| P85971 | 0 Q08463 | 0 Q3T1J1 | 0 Q08463 | 0 |
| P85973 | 0 Q08464 | 0 Q3T1J9 | 0 Q08464 | 0 |
| P97532 | 0 Q08849 | 0 Q3T1K5 | 0 Q08849 | 0 |
| P97546 | 0 Q09326 | 0 Q3ZAV1 | 0 Q09326 | 0 |
| P97553 | 0 Q0PMD2 | 0 Q497B0 | 0 Q0PMD2 | 0 |
| P97574 | 0 Q1WIM1 | 0 Q498D9 | 0 Q10743 | 0 |
| P97603 | 0 Q32KJ6 | 0 Q498R7 | 0 Q1WIM1 | 0 |
| P97615 | 0 Q32PY2 | 0 Q498S8 | 0 Q1WIM3 | 0 |
| P97675 | 0 Q3KRC4 | 0 Q499T2 | 0 Q32KJ6 | 0 |
| P97710 | 0 Q3KRD8 | 0 Q4FZU4 | 0 Q32PY2 | 0 |
| P97829 | 0 Q3MIE4 | 0 Q4FZU6 | 0 Q3KRC4 | 0 |
| P98158 | 0 Q3MIF4 | 0 Q4FZV0 | 0 Q3KRD8 | 0 |
| P98166 | 0 Q3T1J1 | 0 Q4G063 | 0 Q3MIE4 | 0 |
| Q00238 | 0 Q3T1J9 | 0 Q4KM73 | 0 Q3MIF4 | 0 |
| Q00495 | 0 Q3T1K5 | 0 Q4QQT4 | 0 Q3T1J1 | 0 |
| Q00657 | 0 Q497B0 | 0 Q4QQV8 | 0 Q3T1J9 | 0 |
| Q00918 | 0 Q498D9 | 0 Q4QQW8 | 0 Q3T1K5 | 0 |
| Q01177 | 0 Q498R7 | 0 Q4TU93 | 0 Q3ZAV1 | 0 |
| Q01205 | 0 Q498S8 | 0 Q4V8I1 | 0 Q497B0 | 0 |
| Q01460 | 0 Q499T2 | 0 Q4V8K5 | 0 Q498D9 | 0 |
| Q01984 | 0 Q4FZU6 | 0 Q561R9 | 0 Q498S8 | 0 |
| Q02445 | 0 Q4FZV0 | 0 Q562C9 | 0 Q499T2 | 0 |
| Q02765 | 0 Q4G063 | 0 Q568Z6 | 0 Q4FZU4 | 0 |
| Q02974 | 0 Q4KM73 | 0 Q56A20 | 0 Q4FZV0 | 0 |
| Q03336 | 0 Q4QQT4 | 0 Q5BJP3 | 0 Q4G063 | 0 |
| Q03626 | 0 Q4QQV8 | 0 Q5BK81 | 0 Q4KM73 | 0 |
| Q04589 | 0 Q4QQW8 | 0 Q5EGZ1 | 0 Q4QQT4 | 0 |
| Q04807 | 0 Q4TU93 | 0 Q5FVF9 | 0 Q4QQV8 | 0 |
| Q05030 | 0 Q4V8I1 | 0 Q5FVH2 | 0 Q4QQW8 | 0 |
| Q05511 | 0 Q4V8K5 | 0 Q5FVI6 | 0 Q4V8I1 | 0 |
| Q05695 | 0 Q561R9 | 0 Q5FVR0 | 0 Q4V8K5 | 0 |
| Q05820 | 0 Q562C9 | 0 Q5FVR3 | 0 Q561R9 | 0 |
| Q05982 | 0 Q568Z6 | 0 Q5HZW5 | 0 Q562C9 | 0 |
| Q06496 | 0 Q56A20 | 0 Q5HZW7 | 0 Q568Z6 | 0 |
| Q06880 | 0 Q5BJP3 | 0 Q5I0D5 | 0 Q56A20 | 0 |
| Q07116 | 0 Q5EGZ1 | 0 Q5I0E9 | 0 Q5BJP3 | 0 |
| Q07523 | 0 Q5FVF9 | 0 Q5I0M2 | 0 Q5BK81 | 0 |
| Q07936 | 0 Q5FVH2 | 0 Q5M7T9 | 0 Q5FVF9 | 0 |
| Q08163 | 0 Q5FVI6 | 0 Q5M819 | 0 Q5FVH2 | 0 |
| Q08406 | 0 Q5FVR0 | 0 Q5M843 | 0 Q5FVI6 | 0 |
| Q08415 | 0 Q5FVR3 | 0 Q5M871 | 0 Q5FVR0 | 0 |
| Q08420 | 0 Q5HZW5 | 0 Q5M876 | 0 Q5FVR3 | 0 |
| Q08464 | 0 Q5HZW7 | 0 Q5PPH0 | 0 Q5HZW5 | 0 |
| Q08849 | 0 Q5I0D5 | 0 Q5RJI6 | 0 Q5HZW7 | 0 |
| Q0PMD2 | 0 Q5I0D7 | 0 Q5RKH6 | 0 Q5I0D5 | 0 |
| Q1WIM1 | 0 Q5I0M2 | 0 Q5RKI0 | 0 Q5I0E9 | 0 |
| Q32KJ6 | 0 Q5M7T9 | 0 Q5RKI1 | 0 Q5I0M2 | 0 |
| Q32PY2 | 0 Q5M819 | 0 Q5RKI7 | 0 Q5M7T9 | 0 |
| Q3KRC4 | 0 Q5M843 | 0 Q5U1Y4 | 0 Q5M819 | 0 |
| Q3KRD8 | 0 Q5M871 | 0 Q5U2P2 | 0 Q5M843 | 0 |
| Q3MIF4 | 0 Q5M876 | 0 Q5U2Q3 | 0 Q5M871 | 0 |
| Q3T1K5 | 0 Q5RJI6 | 0 Q5U300 | 0 Q5M872 | 0 |
| Q497B0 | 0 Q5RJR2 | 0 Q5U316 | 0 Q5M876 | 0 |
| Q498S8 | 0 Q5RKH6 | 0 Q5U367 | 0 Q5RJI6 | 0 |
| Q499T2 | 0 Q5RKI0 | 0 Q5XFX0 | 0 Q5RJR2 | 0 |
| Q4AEF8 | 0 Q5RKI7 | 0 Q5XI43 | 0 Q5RKH6 | 0 |
| Q4FZU4 | 0 Q5U1Y4 | 0 Q5XI73 | 0 Q5RKI0 | 0 |
| Q4FZV0 | 0 Q5U2P2 | 0 Q5XI89 | 0 Q5U1Y4 | 0 |

|        |   |        |   |        |   |          |   |
|--------|---|--------|---|--------|---|----------|---|
| Q4KM73 | 0 | Q5U2Q3 | 0 | Q5XID1 | 0 | Q5U2P2   | 0 |
| Q4QQV8 | 0 | Q5U300 | 0 | Q5XIE8 | 0 | Q5U2Q3   | 0 |
| Q4QQW8 | 0 | Q5U316 | 0 | Q5XIL0 | 0 | Q5U2V4   | 0 |
| Q4TU93 | 0 | Q5U367 | 0 | Q5ZQU0 | 0 | Q5U300   | 0 |
| Q4V885 | 0 | Q5XFX0 | 0 | Q62632 | 0 | Q5U316   | 0 |
| Q4V8I1 | 0 | Q5XI43 | 0 | Q62635 | 0 | Q5U367   | 0 |
| Q4V8K5 | 0 | Q5XI73 | 0 | Q62638 | 0 | Q5XFX0   | 0 |
| Q561R9 | 0 | Q5XI89 | 0 | Q62718 | 0 | Q5XI43   | 0 |
| Q562C9 | 0 | Q5XID1 | 0 | Q62740 | 0 | Q5XI73   | 0 |
| Q568Z6 | 0 | Q5XIE8 | 0 | Q62745 | 0 | Q5XI89   | 0 |
| Q56A20 | 0 | Q5XIL0 | 0 | Q62753 | 0 | Q5XID1   | 0 |
| Q5BJP3 | 0 | Q5ZQU0 | 0 | Q62786 | 0 | Q5XIE8   | 0 |
| Q5BK81 | 0 | Q62632 | 0 | Q62795 | 0 | Q5XIL0   | 0 |
| Q5EGZ1 | 0 | Q62635 | 0 | Q62812 | 0 | Q5ZQU0   | 0 |
| Q5FVF9 | 0 | Q62638 | 0 | Q62867 | 0 | Q62632   | 0 |
| Q5FVH2 | 0 | Q62687 | 0 | Q62930 | 0 | Q62638   | 0 |
| Q5FVI6 | 0 | Q62718 | 0 | Q62946 | 0 | Q62687   | 0 |
| Q5FVR0 | 0 | Q62740 | 0 | Q62997 | 0 | Q62718   | 0 |
| Q5FVR3 | 0 | Q62745 | 0 | Q63041 | 0 | Q62745   | 0 |
| Q5HZW5 | 0 | Q62753 | 0 | Q63060 | 0 | Q62753   | 0 |
| Q5HZW7 | 0 | Q62786 | 0 | Q63072 | 0 | Q62761;Q | 0 |
| Q5I0D5 | 0 | Q62795 | 0 | Q63081 | 0 | Q62786   | 0 |
| Q5I0M2 | 0 | Q62812 | 0 | Q63083 | 0 | Q62795   | 0 |
| Q5M819 | 0 | Q62867 | 0 | Q63135 | 0 | Q62867   | 0 |
| Q5M843 | 0 | Q62930 | 0 | Q63149 | 0 | Q62902   | 0 |
| Q5M871 | 0 | Q62975 | 0 | Q63199 | 0 | Q62930   | 0 |
| Q5M876 | 0 | Q62997 | 0 | Q63228 | 0 | Q62946   | 0 |
| Q5PPH0 | 0 | Q63041 | 0 | Q63257 | 0 | Q62975   | 0 |
| Q5RJI6 | 0 | Q63060 | 0 | Q63270 | 0 | Q63041   | 0 |
| Q5RJR2 | 0 | Q63072 | 0 | Q63317 | 0 | Q63060   | 0 |
| Q5RKH6 | 0 | Q63081 | 0 | Q63355 | 0 | Q63072   | 0 |
| Q5RKI7 | 0 | Q63083 | 0 | Q63357 | 0 | Q63081   | 0 |
| Q5U2P2 | 0 | Q63135 | 0 | Q63416 | 0 | Q63083   | 0 |
| Q5U300 | 0 | Q63149 | 0 | Q63467 | 0 | Q63135   | 0 |
| Q5U367 | 0 | Q63150 | 0 | Q63475 | 0 | Q63150   | 0 |
| Q5XFX0 | 0 | Q63199 | 0 | Q63514 | 0 | Q63199   | 0 |
| Q5XI43 | 0 | Q63228 | 0 | Q63515 | 0 | Q63228   | 0 |
| Q5XI73 | 0 | Q63257 | 0 | Q63530 | 0 | Q63257   | 0 |
| Q5XI89 | 0 | Q63270 | 0 | Q63556 | 0 | Q63270   | 0 |
| Q5XID1 | 0 | Q63355 | 0 | Q63618 | 0 | Q63317   | 0 |
| Q5XIE8 | 0 | Q63357 | 0 | Q63621 | 0 | Q63355   | 0 |
| Q5XIL0 | 0 | Q63416 | 0 | Q63678 | 0 | Q63357   | 0 |
| Q5ZQU0 | 0 | Q63514 | 0 | Q63691 | 0 | Q63416   | 0 |
| Q62632 | 0 | Q63515 | 0 | Q63716 | 0 | Q63424   | 0 |
| Q62638 | 0 | Q63530 | 0 | Q63751 | 0 | Q63515   | 0 |
| Q62718 | 0 | Q63621 | 0 | Q63772 | 0 | Q63530   | 0 |
| Q62740 | 0 | Q63678 | 0 | Q63797 | 0 | Q63598   | 0 |
| Q62745 | 0 | Q63691 | 0 | Q64057 | 0 | Q63621   | 0 |
| Q62786 | 0 | Q63716 | 0 | Q64119 | 0 | Q63678   | 0 |
| Q62795 | 0 | Q63772 | 0 | Q641X3 | 0 | Q63691   | 0 |
| Q62867 | 0 | Q63797 | 0 | Q641Z6 | 0 | Q63716   | 0 |
| Q62894 | 0 | Q64057 | 0 | Q641Z7 | 0 | Q63772   | 0 |
| Q62930 | 0 | Q64119 | 0 | Q641Z8 | 0 | Q63797   | 0 |
| Q62975 | 0 | Q641X3 | 0 | Q64230 | 0 | Q64057   | 0 |
| Q62997 | 0 | Q641Z6 | 0 | Q642A7 | 0 | Q641X3   | 0 |
| Q63041 | 0 | Q641Z7 | 0 | Q64319 | 0 | Q641Z6   | 0 |
| Q63060 | 0 | Q641Z8 | 0 | Q64335 | 0 | Q641Z7   | 0 |
| Q63072 | 0 | Q64230 | 0 | Q64361 | 0 | Q641Z8   | 0 |
| Q63081 | 0 | Q642A7 | 0 | Q64537 | 0 | Q64230   | 0 |
| Q63083 | 0 | Q64319 | 0 | Q64573 | 0 | Q64268   | 0 |
| Q63135 | 0 | Q64361 | 0 | Q64602 | 0 | Q642A7   | 0 |
| Q63149 | 0 | Q64537 | 0 | Q64604 | 0 | Q64319   | 0 |
| Q63150 | 0 | Q64573 | 0 | Q64605 | 0 | Q64335   | 0 |
| Q63228 | 0 | Q64602 | 0 | Q64611 | 0 | Q64361   | 0 |
| Q63257 | 0 | Q64604 | 0 | Q64640 | 0 | Q64537   | 0 |
| Q63416 | 0 | Q64605 | 0 | Q66H12 | 0 | Q64573   | 0 |
| Q63467 | 0 | Q64611 | 0 | Q66H94 | 0 | Q64602   | 0 |
| Q63475 | 0 | Q64640 | 0 | Q66HG3 | 0 | Q64604   | 0 |
| Q63514 | 0 | Q66H12 | 0 | Q66HG4 | 0 | Q64605   | 0 |
| Q63515 | 0 | Q66H94 | 0 | Q675A5 | 0 | Q64611   | 0 |
| Q63530 | 0 | Q66HG3 | 0 | Q68FP1 | 0 | Q64640   | 0 |
| Q63532 | 0 | Q66HG4 | 0 | Q68FQ0 | 0 | Q66H12   | 0 |
| Q63556 | 0 | Q675A5 | 0 | Q68FQ2 | 0 | Q66H94   | 0 |
| Q63621 | 0 | Q68FP1 | 0 | Q68FS4 | 0 | Q66HG3   | 0 |

|        |   |        |   |        |   |        |   |
|--------|---|--------|---|--------|---|--------|---|
| Q63678 | 0 | Q68FQ0 | 0 | Q68FT5 | 0 | Q66HG4 | 0 |
| Q63691 | 0 | Q68FQ2 | 0 | Q6AXR4 | 0 | Q675A5 | 0 |
| Q63716 | 0 | Q68FS4 | 0 | Q6AXS4 | 0 | Q68FP1 | 0 |
| Q63772 | 0 | Q68FT5 | 0 | Q6AY33 | 0 | Q68FQ0 | 0 |
| Q63797 | 0 | Q68FX1 | 0 | Q6AY41 | 0 | Q68FQ2 | 0 |
| Q64057 | 0 | Q6AXR4 | 0 | Q6AYC4 | 0 | Q68FS4 | 0 |
| Q64119 | 0 | Q6AXS4 | 0 | Q6AYD4 | 0 | Q68FT5 | 0 |
| Q641X3 | 0 | Q6AY33 | 0 | Q6AYE5 | 0 | Q68FX1 | 0 |
| Q641Z6 | 0 | Q6AY41 | 0 | Q6AYH6 | 0 | Q6AXR4 | 0 |
| Q641Z7 | 0 | Q6AYD4 | 0 | Q6AYP5 | 0 | Q6AXS4 | 0 |
| Q641Z8 | 0 | Q6AYE5 | 0 | Q6AYQ8 | 0 | Q6AY33 | 0 |
| Q64230 | 0 | Q6AYH6 | 0 | Q6AYR5 | 0 | Q6AYD4 | 0 |
| Q64240 | 0 | Q6AYP5 | 0 | Q6AYR6 | 0 | Q6AYE5 | 0 |
| Q642A7 | 0 | Q6AYR5 | 0 | Q6AYS4 | 0 | Q6AYH6 | 0 |
| Q64361 | 0 | Q6AYR6 | 0 | Q6AYS7 | 0 | Q6AYP5 | 0 |
| Q64537 | 0 | Q6AYR8 | 0 | Q6AYT0 | 0 | Q6AYR5 | 0 |
| Q64573 | 0 | Q6AYS4 | 0 | Q6AYT8 | 0 | Q6AYR6 | 0 |
| Q64604 | 0 | Q6AYS7 | 0 | Q6B345 | 0 | Q6AYS4 | 0 |
| Q64605 | 0 | Q6AYT0 | 0 | Q6BEA2 | 0 | Q6AYS7 | 0 |
| Q64611 | 0 | Q6AYT8 | 0 | Q6GMN2 | 0 | Q6AYT0 | 0 |
| Q64640 | 0 | Q6B345 | 0 | Q6I7R3 | 0 | Q6AYT8 | 0 |
| Q66H12 | 0 | Q6BEA2 | 0 | Q6IE52 | 0 | Q6B345 | 0 |
| Q66H94 | 0 | Q6GMN2 | 0 | Q6IE64 | 0 | Q6BEA2 | 0 |
| Q66HG4 | 0 | Q6I7R3 | 0 | Q6IRE4 | 0 | Q6GMN2 | 0 |
| Q675A5 | 0 | Q6IE52 | 0 | Q6IRK9 | 0 | Q6I7R3 | 0 |
| Q68FP1 | 0 | Q6IE64 | 0 | Q6IUU3 | 0 | Q6IE52 | 0 |
| Q68FQ0 | 0 | Q6IRE4 | 0 | Q6MG61 | 0 | Q6IE64 | 0 |
| Q68FQ2 | 0 | Q6IRK9 | 0 | Q6MG71 | 0 | Q6IRE4 | 0 |
| Q68FS4 | 0 | Q6IUU3 | 0 | Q6MGD0 | 0 | Q6IRK9 | 0 |
| Q68FX1 | 0 | Q6MG61 | 0 | Q6NX65 | 0 | Q6IUU3 | 0 |
| Q6AXR4 | 0 | Q6MG71 | 0 | Q6NYB7 | 0 | Q6MG61 | 0 |
| Q6AXS4 | 0 | Q6MGD0 | 0 | Q6P6S9 | 0 | Q6MG71 | 0 |
| Q6AYC4 | 0 | Q6NX65 | 0 | Q6P6T1 | 0 | Q6MGD0 | 0 |
| Q6AYD4 | 0 | Q6NYB7 | 0 | Q6P6T4 | 0 | Q6NX65 | 0 |
| Q6AYH6 | 0 | Q6P6S4 | 0 | Q6P6V0 | 0 | Q6NYB7 | 0 |
| Q6AYP5 | 0 | Q6P6S9 | 0 | Q6P734 | 0 | Q6P6S9 | 0 |
| Q6AYR5 | 0 | Q6P6T1 | 0 | Q6P767 | 0 | Q6P6T1 | 0 |
| Q6AYR6 | 0 | Q6P6T4 | 0 | Q6P7A9 | 0 | Q6P6T4 | 0 |
| Q6AYR8 | 0 | Q6P6V0 | 0 | Q6P7Q4 | 0 | Q6P6V0 | 0 |
| Q6AYS4 | 0 | Q6P734 | 0 | Q6P7S1 | 0 | Q6P734 | 0 |
| Q6AYT8 | 0 | Q6P767 | 0 | Q6P9T8 | 0 | Q6P767 | 0 |
| Q6BEA2 | 0 | Q6P777 | 0 | Q6PCU2 | 0 | Q6P777 | 0 |
| Q6DGG1 | 0 | Q6P7A9 | 0 | Q6PEC4 | 0 | Q6P7A9 | 0 |
| Q6I7R3 | 0 | Q6P7Q4 | 0 | Q6Q0N0 | 0 | Q6P7Q4 | 0 |
| Q6IE52 | 0 | Q6P7S1 | 0 | Q6Q0N1 | 0 | Q6P7S1 | 0 |
| Q6IE64 | 0 | Q6PCU2 | 0 | Q6Q7Y5 | 0 | Q6P9T8 | 0 |
| Q6IRE4 | 0 | Q6PEC4 | 0 | Q6RY07 | 0 | Q6PEC4 | 0 |
| Q6IRK9 | 0 | Q6Q0N0 | 0 | Q6TUD4 | 0 | Q6Q0N0 | 0 |
| Q6IUU3 | 0 | Q6Q0N1 | 0 | Q6X936 | 0 | Q6Q0N1 | 0 |
| Q6MG71 | 0 | Q6TUD4 | 0 | Q6XQN1 | 0 | Q6Q7Y5 | 0 |
| Q6MGD0 | 0 | Q6X936 | 0 | Q711G3 | 0 | Q6RUV5 | 0 |
| Q6NX65 | 0 | Q6XQN1 | 0 | Q71MB6 | 0 | Q6RY07 | 0 |
| Q6NYB7 | 0 | Q711G3 | 0 | Q76HN1 | 0 | Q6TMA8 | 0 |
| Q6P6S9 | 0 | Q71MB6 | 0 | Q78P75 | 0 | Q6TUD4 | 0 |
| Q6P6T1 | 0 | Q76HN1 | 0 | Q793F9 | 0 | Q6X936 | 0 |
| Q6P6V0 | 0 | Q793F9 | 0 | Q794F9 | 0 | Q6XQN1 | 0 |
| Q6P734 | 0 | Q794F9 | 0 | Q7M0E3 | 0 | Q711G3 | 0 |
| Q6P767 | 0 | Q7M0E3 | 0 | Q7TP52 | 0 | Q71MB6 | 0 |
| Q6P777 | 0 | Q7TP52 | 0 | Q7TPB4 | 0 | Q76HN1 | 0 |
| Q6P7A9 | 0 | Q7TPB4 | 0 | Q7TQ94 | 0 | Q793F9 | 0 |
| Q6P7Q4 | 0 | Q7TQ94 | 0 | Q80W57 | 0 | Q794F9 | 0 |
| Q6P7S1 | 0 | Q80W57 | 0 | Q80WD0 | 0 | Q7M0E3 | 0 |
| Q6P9T8 | 0 | Q80WD0 | 0 | Q80WD1 | 0 | Q7TPB4 | 0 |
| Q6PEC4 | 0 | Q80WD1 | 0 | Q80WF4 | 0 | Q7TQ94 | 0 |
| Q6RY07 | 0 | Q80WF4 | 0 | Q80WY6 | 0 | Q80W57 | 0 |
| Q6TUD4 | 0 | Q80YN4 | 0 | Q80YN4 | 0 | Q80WD0 | 0 |
| Q6X936 | 0 | Q810F4 | 0 | Q810F4 | 0 | Q80WD1 | 0 |
| Q6XQN1 | 0 | Q811A3 | 0 | Q811A3 | 0 | Q80WF4 | 0 |
| Q711G3 | 0 | Q811X6 | 0 | Q811X6 | 0 | Q80WY6 | 0 |
| Q76HN1 | 0 | Q812E9 | 0 | Q812E9 | 0 | Q80YN4 | 0 |
| Q793F9 | 0 | Q8CFN2 | 0 | Q8CG08 | 0 | Q810F4 | 0 |
| Q794F9 | 0 | Q8CG08 | 0 | Q8CG45 | 0 | Q811A3 | 0 |
| Q7TP52 | 0 | Q8CG45 | 0 | Q8CGU6 | 0 | Q811X6 | 0 |
| Q7TPB4 | 0 | Q8CGS4 | 0 | Q8CHN3 | 0 | Q812E9 | 0 |

|        |   |        |   |        |   |        |   |
|--------|---|--------|---|--------|---|--------|---|
| Q80WD0 | 0 | Q8CGU6 | 0 | Q8CHN8 | 0 | Q8CFN2 | 0 |
| Q80WD1 | 0 | Q8CHN3 | 0 | Q8CIZ5 | 0 | Q8CG45 | 0 |
| Q80WF4 | 0 | Q8CHN8 | 0 | Q8JZQ0 | 0 | Q8CGS4 | 0 |
| Q80WY6 | 0 | Q8CIZ5 | 0 | Q8K1G0 | 0 | Q8CGU6 | 0 |
| Q80YN4 | 0 | Q8JZQ0 | 0 | Q8K3P7 | 0 | Q8CHN3 | 0 |
| Q810F4 | 0 | Q8K3P7 | 0 | Q8K3V3 | 0 | Q8CHN8 | 0 |
| Q811A3 | 0 | Q8K3V3 | 0 | Q8K4G9 | 0 | Q8JZQ0 | 0 |
| Q811X6 | 0 | Q8K4G9 | 0 | Q8K4Y7 | 0 | Q8K3P7 | 0 |
| Q812E9 | 0 | Q8K4Y7 | 0 | Q8N7M5 | 0 | Q8K3V3 | 0 |
| Q8CG08 | 0 | Q8N7M5 | 0 | Q8R431 | 0 | Q8K4Y7 | 0 |
| Q8CG45 | 0 | Q8R491 | 0 | Q8R491 | 0 | Q8N7M5 | 0 |
| Q8CGU6 | 0 | Q8R4C0 | 0 | Q8R4C0 | 0 | Q8R491 | 0 |
| Q8CHN3 | 0 | Q8R4E1 | 0 | Q8R4E1 | 0 | Q8R4C0 | 0 |
| Q8CHN8 | 0 | Q8R5M3 | 0 | Q8R5M3 | 0 | Q8R4E1 | 0 |
| Q8JZQ0 | 0 | Q8R5M5 | 0 | Q8R5M5 | 0 | Q8R5M3 | 0 |
| Q8K3V3 | 0 | Q8VBX1 | 0 | Q8VBX1 | 0 | Q8R5M5 | 0 |
| Q8K4G9 | 0 | Q8VD89 | 0 | Q8VI04 | 0 | Q8VBX1 | 0 |
| Q8K4Y7 | 0 | Q8VI04 | 0 | Q8VIF7 | 0 | Q8VI04 | 0 |
| Q8N7M5 | 0 | Q8VIF7 | 0 | Q91XT9 | 0 | Q8VIF7 | 0 |
| Q8R491 | 0 | Q91XT9 | 0 | Q91Y81 | 0 | Q91XT9 | 0 |
| Q8R4C0 | 0 | Q91Y81 | 0 | Q920A6 | 0 | Q91Y81 | 0 |
| Q8R4E1 | 0 | Q920A6 | 0 | Q920G2 | 0 | Q920A6 | 0 |
| Q8R5M5 | 0 | Q920G2 | 0 | Q920J4 | 0 | Q920J4 | 0 |
| Q8VBX1 | 0 | Q920J4 | 0 | Q920P0 | 0 | Q920P0 | 0 |
| Q8VD89 | 0 | Q920P0 | 0 | Q923M1 | 0 | Q923M1 | 0 |
| Q8VIF7 | 0 | Q923M1 | 0 | Q923S2 | 0 | Q923S2 | 0 |
| Q91XN4 | 0 | Q923S2 | 0 | Q924B5 | 0 | Q924B5 | 0 |
| Q91XT9 | 0 | Q923V8 | 0 | Q99068 | 0 | Q99068 | 0 |
| Q920A6 | 0 | Q924B5 | 0 | Q99J86 | 0 | Q99J86 | 0 |
| Q920J4 | 0 | Q99068 | 0 | Q99M75 | 0 | Q99M75 | 0 |
| Q920P0 | 0 | Q99376 | 0 | Q99MA2 | 0 | Q99MA2 | 0 |
| Q924B5 | 0 | Q99J86 | 0 | Q99MF4 | 0 | Q99MF4 | 0 |
| Q99068 | 0 | Q99M75 | 0 | Q99MZ8 | 0 | Q99MZ8 | 0 |
| Q99J86 | 0 | Q99MA2 | 0 | Q99PD4 | 0 | Q99PD4 | 0 |
| Q99M75 | 0 | Q99MF4 | 0 | Q99PS8 | 0 | Q99PS8 | 0 |
| Q99MF4 | 0 | Q99MZ8 | 0 | Q99PW3 | 0 | Q99PW3 | 0 |
| Q99PD4 | 0 | Q99PD4 | 0 | Q99PW7 | 0 | Q99PW7 | 0 |
| Q99PP0 | 0 | Q99PS8 | 0 | Q9EPB1 | 0 | Q9EPB1 | 0 |
| Q99PS8 | 0 | Q99PW3 | 0 | Q9EPF2 | 0 | Q9EPF2 | 0 |
| Q99PW3 | 0 | Q99PW7 | 0 | Q9EQT1 | 0 | Q9EQT1 | 0 |
| Q99PW7 | 0 | Q9EPB1 | 0 | Q9EQV6 | 0 | Q9EQV6 | 0 |
| Q9EPB1 | 0 | Q9EPF2 | 0 | Q9EQV9 | 0 | Q9EQX9 | 0 |
| Q9EPF2 | 0 | Q9EQT1 | 0 | Q9EQX9 | 0 | Q9ESG3 | 0 |
| Q9EQT1 | 0 | Q9EQV6 | 0 | Q9ESG3 | 0 | Q9ESS6 | 0 |
| Q9EQV6 | 0 | Q9EQV9 | 0 | Q9ESS6 | 0 | Q9ESW0 | 0 |
| Q9EQV9 | 0 | Q9EQX9 | 0 | Q9ESW0 | 0 | Q9ET32 | 0 |
| Q9EQX9 | 0 | Q9ES87 | 0 | Q9ET32 | 0 | Q9JHW1 | 0 |
| Q9ES87 | 0 | Q9ESG3 | 0 | Q9JHW1 | 0 | Q9JHY1 | 0 |
| Q9ESG3 | 0 | Q9ESS6 | 0 | Q9JHY1 | 0 | Q9JI92 | 0 |
| Q9ESS6 | 0 | Q9ESW0 | 0 | Q9JI92 | 0 | Q9JIK1 | 0 |
| Q9ESW0 | 0 | Q9ET32 | 0 | Q9JIK1 | 0 | Q9JJ19 | 0 |
| Q9ET32 | 0 | Q9JHW1 | 0 | Q9JJ19 | 0 | Q9JJ22 | 0 |
| Q9JHW1 | 0 | Q9JHY1 | 0 | Q9JJ22 | 0 | Q9JJ40 | 0 |
| Q9JHY1 | 0 | Q9JI92 | 0 | Q9JJ40 | 0 | Q9JLJ3 | 0 |
| Q9JI92 | 0 | Q9JIK1 | 0 | Q9JLJ3 | 0 | Q9JLS4 | 0 |
| Q9JIK1 | 0 | Q9JJ19 | 0 | Q9JLS4 | 0 | Q9JLZ1 | 0 |
| Q9JJ22 | 0 | Q9JJ22 | 0 | Q9JLZ1 | 0 | Q9QUL6 | 0 |
| Q9JJS8 | 0 | Q9JJ40 | 0 | Q9QUL6 | 0 | Q9QWJ9 | 0 |
| Q9JLS4 | 0 | Q9JLJ3 | 0 | Q9QW30 | 0 | Q9QXN4 | 0 |
| Q9JLZ1 | 0 | Q9JLS4 | 0 | Q9QWJ9 | 0 | Q9QXQ0 | 0 |
| Q9QUL6 | 0 | Q9JLZ1 | 0 | Q9QXN4 | 0 | Q9QY17 | 0 |
| Q9QW30 | 0 | Q9QUL6 | 0 | Q9QXQ0 | 0 | Q9QYP2 | 0 |
| Q9QWJ9 | 0 | Q9QW30 | 0 | Q9QY17 | 0 | Q9QYU4 | 0 |
| Q9QX79 | 0 | Q9QWJ9 | 0 | Q9QYP2 | 0 | Q9QZA2 | 0 |
| Q9QXN4 | 0 | Q9QWN8 | 0 | Q9QYU4 | 0 | Q9QZA6 | 0 |
| Q9QXQ0 | 0 | Q9QXN4 | 0 | Q9QZA2 | 0 | Q9QZH0 | 0 |
| Q9QY17 | 0 | Q9QXQ0 | 0 | Q9QZA6 | 0 | Q9QZK8 | 0 |
| Q9QZ76 | 0 | Q9QY17 | 0 | Q9QZH0 | 0 | Q9QZK9 | 0 |
| Q9QZA2 | 0 | Q9QYP2 | 0 | Q9QZK8 | 0 | Q9R044 | 0 |
| Q9QZA6 | 0 | Q9QYU4 | 0 | Q9R044 | 0 | Q9R063 | 0 |
| Q9QZH0 | 0 | Q9QZA2 | 0 | Q9R063 | 0 | Q9R066 | 0 |
| Q9QZQ5 | 0 | Q9QZA6 | 0 | Q9R066 | 0 | Q9R0D6 | 0 |
| Q9R044 | 0 | Q9QZH0 | 0 | Q9R0D6 | 0 | Q9R0J8 | 0 |
| Q9R063 | 0 | Q9R044 | 0 | Q9R0J8 | 0 | Q9R0T3 | 0 |

|        |   |        |   |        |   |        |   |
|--------|---|--------|---|--------|---|--------|---|
| Q9R066 | 0 | Q9R063 | 0 | Q9R0T3 | 0 | Q9R0T4 | 0 |
| Q9R0D6 | 0 | Q9R066 | 0 | Q9R0T4 | 0 | Q9R1T3 | 0 |
| Q9R0J8 | 0 | Q9R0D6 | 0 | Q9R1T3 | 0 | Q9R1T5 | 0 |
| Q9R0T4 | 0 | Q9R0J8 | 0 | Q9R1T5 | 0 | Q9WTQ2 | 0 |
| Q9R1T3 | 0 | Q9R0T4 | 0 | Q9WTQ2 | 0 | Q9WTW7 | 0 |
| Q9WTQ2 | 0 | Q9R1T3 | 0 | Q9WTW7 | 0 | Q9WU49 | 0 |
| Q9WU49 | 0 | Q9R1T5 | 0 | Q9WU49 | 0 | Q9WU74 | 0 |
| Q9WU74 | 0 | Q9WTQ2 | 0 | Q9WU74 | 0 | Q9WUK5 | 0 |
| Q9WUC4 | 0 | Q9WU49 | 0 | Q9WUK5 | 0 | Q9WUW3 | 0 |
| Q9WUK5 | 0 | Q9WUK5 | 0 | Q9WUW3 | 0 | Q9WUW9 | 0 |
| Q9WUW3 | 0 | Q9WUW3 | 0 | Q9WUW9 | 0 | Q9WVK7 | 0 |
| Q9WVK7 | 0 | Q9WUW9 | 0 | Q9Z0J8 | 0 | Q9Z0J8 | 0 |
| Q9Z0J8 | 0 | Q9Z0J8 | 0 | Q9Z0T0 | 0 | Q9Z0T0 | 0 |
| Q9Z0T0 | 0 | Q9Z0T0 | 0 | Q9Z0W7 | 0 | Q9Z0W7 | 0 |
| Q9Z1Y3 | 0 | Q9Z1Y3 | 0 | Q9Z1Y3 | 0 | Q9Z1Y3 | 0 |
| Q9Z2Y9 | 0 | Q9Z2Y9 | 0 | Q9Z2Y9 | 0 | Q9Z2Y9 | 0 |
| Q9Z339 | 0 | Q9Z339 | 0 | Q9Z339 | 0 | Q9Z339 | 0 |
