# Supplementary material for: Dynamic Changes of Urine Proteome in Rat Models Inoculated with Two Different Hepatoma Cell Lines
Source: Hindawi journal article supplement (doi:10.1155/2021/8895330), 2021-01-07
Supplement: f1 [file 8895330.f1.zip]

Title: Dynamic changes of urine proteome in rat models inoculated with two different hepatoma cell lines. Full author: Yameng Zhang, Yufei Gao, Jing Wei & Youhe Gao\*.

Table S1 All urinary proteins were identified in CBRH-7919 model.

| Protein ID        | 1        | 2        | 3        | 4        | 5        | 6        | 7        | 8        | 9        | 10       | 11       | 12       | 13       | 14       | 15       | 16       |
|-------------------|----------|----------|----------|----------|----------|----------|----------|----------|----------|----------|----------|----------|----------|----------|----------|----------|
|                   | CON-rat1 | CON-rat2 | CON-rat3 | CON-rat4 | CON-rat5 | CON-rat6 | CON-rat7 | CON-rat8 | D5-rat1  | D5-rat2  | D5-rat3  | D5-rat4  | D5-rat5  | D5-rat6  | D5-rat7  | D5-rat8  |
| A0JPJ7            | 2964.621 | 3659.552 | 5869.095 | 4650.362 | 3120.421 | 2723.599 | 3585.343 | 4386.939 | 3761.597 | 2181.831 | 5380.314 | 3198.702 | 2166.383 | 3525.171 | 2414.443 | 3760.716 |
| A2RUW1            | 7093.979 | 8175.456 | 10496.82 | 7318.543 | 3536.441 | 6880.646 | 8101.218 | 10758.55 | 21906.32 | 9020.619 | 36303.8  | 16513.68 | 9600.726 | 9912.034 | 9443.653 | 15279.47 |
| A4KWA5;A4KWA6     | 6368.625 | 5753.219 | 6154.302 | 9242.325 | 10012.46 | 9175.779 | 5582.427 | 6551.714 | 10638.54 | 8133.956 | 6005.537 | 5191.39  | 7565.572 | 9087.402 | 7147.057 | 9140.103 |
| B0BNA5            | 78073.74 | 69025.75 | 56987.84 | 55640.7  | 105946.6 | 70993.93 | 65543.72 | 83059.46 | 180141.4 | 133975.3 | 213407.8 | 145187.8 | 141158.3 | 151197.4 | 129451.2 | 87351.98 |
| B0BND0            | 21178.4  | 28367.38 | 28627.2  | 24475.73 | 29212.05 | 18674.85 | 22791.62 | 29048.03 | 50558.27 | 21934.59 | 32362.51 | 29873.55 | 26369.38 | 31869.91 | 29127    | 37322.87 |
| B0BNE5            | 41713.88 | 40672.64 | 25788.65 | 34237.91 | 68228.14 | 42262.48 | 34846.03 | 45824.05 | 49349.89 | 32375.34 | 97410.92 | 61170.32 | 56261.9  | 77356.52 | 49005.84 | 35232.35 |
| B0BNN3            | 47182.57 | 30822.72 | 40755.96 | 75922.8  | 9666.452 | 9536.402 | 32572.26 | 35264.51 | 7941.877 | 10611.28 | 20619.15 | 7112.283 | 38511.46 | 34868.95 | 13144.93 | 27082.09 |
| B0LT89            | 11268.87 | 3041.778 | 3017.893 | 5099.187 | 5796.908 | 6799.42  | 4223.267 | 8531.273 | 32973.49 | 9673.813 | 19833.84 | 10905.22 | 13540.71 | 8653.619 | 8132.586 | 6763.917 |
| B1H234            | 44589    | 35315.21 | 15579.1  | 52406.43 | 29224.68 | 90746.63 | 29942.72 | 12586.84 | 12655.6  | 10066.48 | 21460.42 | 7529.69  | 17064.44 | 15146.62 | 12098.33 | 13405.34 |
| B2RYW9            | 3290.897 | 5438.727 | 14455.1  | 8518.077 | 7620.694 | 7109.127 | 4894.804 | 6036.168 | 16636.04 | 9950.7   | 9767.934 | 13563.33 | 10490.05 | 11639.45 | 2831.989 | 3489.34  |
| B5DEN9            | 8814.863 | 4645.824 | 8305.754 | 11544.3  | 8043.484 | 7044.059 | 7608.218 | 5910.881 | 14315.98 | 13358.9  | 10528.48 | 9722.336 | 8096.372 | 5610.007 | 3756.495 | 6893.036 |
| B5DFC9            | 452260   | 774483.4 | 468714.1 | 563410.9 | 668093.6 | 958093.3 | 598780   | 819367.4 | 605715.4 | 821986.5 | 325503.5 | 574591.5 | 625076.9 | 506497.9 | 382342.2 | 472877.5 |
| D3Z8L7            | 24975.06 | 19946.44 | 10718.06 | 34642.28 | 15355.79 | 24047.05 | 25293.88 | 23300.7  | 29978.65 | 21144.92 | 38262.27 | 17372.82 | 21459.77 | 31931.06 | 21122.1  | 19478.04 |
| D3ZHA0            | 48224.84 | 59728.97 | 46751.52 | 90731.93 | 51091.65 | 49719.93 | 72763.3  | 88110.75 | 25559.13 | 21884.47 | 14914.24 | 22860.91 | 26061.21 | 33725.49 | 17057.87 | 31383.89 |
| D3ZTD8            | 16736.49 | 26151.42 | 21472.59 | 27550.22 | 22667.62 | 17539.52 | 24086.21 | 20354.49 | 50356.79 | 25270.12 | 17397.99 | 18825.68 | 23552.59 | 28137.03 | 26348.9  | 12953.85 |
| D3ZTE0            | 86859.09 | 142026.7 | 147198.4 | 221199.2 | 130993.8 | 144995.3 | 166958.7 | 183249.6 | 177836.1 | 180503.1 | 141822.9 | 85267.68 | 123155.9 | 116488.7 | 167477   | 185259.4 |
| D3ZTV3            | 17916.63 | 13582.36 | 12870.67 | 15514.25 | 15530.22 | 11273.74 | 21617.62 | 18435.07 | 10426.72 | 20185.9  | 12161.29 | 11060.11 | 9391.606 | 11384.3  | 10729.8  | 17247.13 |
| D3ZTX0            | 7247.252 | 28772.42 | 8026.898 | 8279.075 | 16320.59 | 23065.54 | 11267.17 | 9167.845 | 13875.45 | 15376.83 | 4755.367 | 8154.854 | 9281.967 | 4316.985 | 7350.737 | 7823.297 |
| D3ZUC6            | 277648   | 491903.7 | 54330.86 | 260631.9 | 42150.28 | 252328.2 | 107208.9 | 79873.08 | 402414.4 | 249497.6 | 205611.1 | 165212.1 | 195107.6 | 59017.19 | 168117.1 | 461959.4 |
| D3ZUK3            | 32411.98 | 70145.43 | 44105.5  | 50723.33 | 42744.2  | 40340.48 | 59758.69 | 51489.43 | 16660.47 | 50156.15 | 30592.06 | 27157.53 | 26113.86 | 31752.25 | 41448.52 | 38810.21 |
| D3ZW55            | 5149.304 | 7634.2   | 5717.624 | 6899.54  | 4225.671 | 8811.155 | 6242.303 | 8464.86  | 5384.54  | 4969.938 | 3503.046 | 7090.962 | 7287.974 | 4157.664 | 4296.322 | 5564.522 |
| D4A1J4            | 18078.52 | 16884.32 | 22363.45 | 23572.04 | 35726.38 | 14587.6  | 16601.09 | 18192.54 | 26935.08 | 26303.21 | 47647.29 | 30923.57 | 37776.05 | 41986.64 | 34791.98 | 30448.77 |
| D4A1R8            | 50824.81 | 72951.88 | 50119.79 | 53481.91 | 56723.16 | 44982.36 | 49855.86 | 51797.06 | 122924.9 | 48505    | 63603.06 | 92200.76 | 64080.11 | 59555.46 | 67987.93 | 37420.04 |
| D4A5U3            | 12281.59 | 26517.73 | 15150.76 | 25076.96 | 10935.58 | 12438.9  | 19417.06 | 46658.42 | 9646.978 | 5414.751 | 7178.457 | 4982.992 | 9988.503 | 8533.885 | 3065.045 | 7795.702 |
| D4AE59            | 4558.505 | 4576.222 | 3146.757 | 3545.75  | 3660.509 | 4860.633 | 3980.867 | 2332.662 | 4800.035 | 3645.855 | 8003.456 | 6329.06  | 3590.696 | 4256.587 | 3432.037 | 4878.299 |
| E9PT87;P20689     | 8245.892 | 5572.765 | 9652.221 | 5903.691 | 5156.484 | 7203.293 | 5445.682 | 9789.456 | 21390.41 | 10041.47 | 16028.5  | 9500.338 | 12965.11 | 11614.24 | 10281.57 | 5150.742 |
| F1LM93            | 22842.81 | 20179.63 | 13865.24 | 24424.92 | 17725.46 | 27365.47 | 26261.97 | 19895.91 | 19634.34 | 16001.2  | 56230.94 | 25152.43 | 23038.85 | 13759.06 | 17178.93 | 23929.36 |
| F1M3L7            | 21620.87 | 17051.92 | 9661.711 | 8180.292 | 35337.9  | 9587.537 | 4981.521 | 15187.51 | 12273.32 | 7542.05  | 14739.99 | 14659.15 | 12564.94 | 11669.03 | 10360.68 | 9760.049 |
| G3V686            | 290375.6 | 194803.3 | 105185.7 | 350147.8 | 68790.07 | 117228.8 | 121432.9 | 161468.5 | 140956   | 355103.2 | 133216.7 | 137636.1 | 136065.3 | 107139.3 | 146070.8 | 156564.8 |
| G3V7W1            | 136790.6 | 171374.6 | 172329.2 | 183289.6 | 201251.5 | 119960.2 | 168146.6 | 178069.8 | 207141.6 | 129268.2 | 196814.3 | 154390.2 | 116191.7 | 108589.1 | 194780.1 | 134476.1 |
| H1UBN0;Q5BJS7     | 87477.83 | 86796.36 | 104085   | 69727.26 | 103280.9 | 99118.91 | 62314.2  | 71066.42 | 148747.5 | 65235.12 | 149252.9 | 134927.1 | 106364.8 | 91141.45 | 96246.12 | 82441.04 |
| iRT-Kit_WR_fusion | 134310.8 | 219963.1 | 76710.41 | 47478.96 | 83609.05 | 125164.9 | 265528.2 | 310262.4 | 114410.8 | 56747.88 | 101973.7 | 153493.3 | 72172.77 | 53891.78 | 93717.84 | 87978.55 |
| O08557            | 22382.25 | 10820.95 | 25519.07 | 24151.14 | 18841.77 | 18800.34 | 9852.977 | 36877.13 | 77213.26 | 34674.74 | 45902.23 | 60805.32 | 55780.95 | 54147.85 | 36008.62 | 50904.01 |
| O08628            | 113868.5 | 153561.5 | 98282.7  | 67930.91 | 98879.98 | 169191   | 138911.6 | 126401.5 | 117281.7 | 156409.2 | 62513.73 | 85777.94 | 74394.78 | 83715.46 | 104235   | 131433.6 |
| O08651            | 8111.181 | 6883.398 | 11190.18 | 8502.909 | 10383.5  | 12658.01 | 8487.616 | 8587.119 | 7413.055 | 8212.823 | 20036.76 | 15437.37 | 7986.864 | 14485.41 | 9143.103 | 6083.496 |
| O08815            | 14260.35 | 5889.616 | 3505.464 | 11418.74 | 5084.695 | 8610.202 | 9651.856 | 9859.953 | 9315.535 | 6252.914 | 32254.78 | 13379.59 | 9475.342 | 6051.189 | 9779.232 | 13541.12 |
| O08839            | 1942.485 | 6448.475 | 3715.946 | 4053.86  | 5342.862 | 6290.107 | 4392.148 | 2707.011 | 6268.832 | 6112.383 | 3904.284 | 5542.93  | 5200.146 | 3973.906 | 4261.654 | 4959.004 |
| O09175            | 3325.211 | 6024.681 | 6000.085 | 6797.917 | 9341.714 | 8647.943 | 6745.165 | 7711.937 | 9728.804 | 9259.661 | 17441.8  | 7967.54  | 6280.862 | 9367.184 | 6068.764 | 5979.688 |
| O35077            | 3601.948 | 6991.7   | 2116.656 | 4077.52  | 2817.17  | 4886.502 | 2991.724 | 1581.269 | 10368.17 | 2628.905 | 7255.621 | 10664.31 | 4476.163 | 4578.863 | 3565.985 | 1351.131 |
| O35112            | 76746.63 | 100250   | 84150.78 | 97536.98 | 125854.8 | 147341.3 | 101608   | 91102.81 | 83490.12 | 89088.7  | 52262.84 | 83401.49 | 63000.9  | 90244.91 | 65593.21 | 74423.55 |
| O35142            | 35594.11 | 51945.11 | 39941.19 | 47105.62 | 54838.07 | 35143.39 | 56761.81 | 55872.33 | 20957.1  | 34844.98 | 24943.27 | 25543.84 | 23751.68 | 24572.2  | 26132.17 | 43162.28 |
| O35217            | 474965.2 | 635319.5 | 492452.1 | 641442.7 | 409175.6 | 453141.6 | 497149.2 | 450181.9 | 443954   | 499498.7 | 539023.4 | 422270.9 | 572054.4 | 371643.3 | 418337.5 | 456222.7 |
| O35244            | 152605.1 | 106969.6 | 149533.8 | 146547.8 | 100880.3 | 154354.2 | 116700.9 | 138644.4 | 340594.7 | 207722.4 | 339722   | 262765.8 | 311600.8 | 317908.9 | 251315.1 | 249198.9 |
| O35264            | 21982.8  | 11027.84 | 13846.62 | 21400.03 | 18442.36 | 21797.7  | 12937.8  | 32557.05 | 34356.25 | 25949.15 | 30618.92 | 25710.12 | 35472.6  | 36287.71 | 27551.7  | 18041.7  |

|               |          |          |          |          |          |          |          |          |          |          |          |          |          |          |          |          |
|---------------|----------|----------|----------|----------|----------|----------|----------|----------|----------|----------|----------|----------|----------|----------|----------|----------|
| O35276        | 13201.7  | 20088.93 | 7323.63  | 21271.14 | 17865.17 | 16886.1  | 13147.4  | 13812.55 | 15649.34 | 22110.87 | 13343.25 | 14424.86 | 15778.27 | 15839.1  | 13876.34 | 14051.52 |
| O35331        | 16238.48 | 13892.69 | 20036.73 | 14520.5  | 18948.48 | 17211.57 | 14258.24 | 12586.62 | 20969.66 | 23119.54 | 26308.96 | 24506.21 | 24900.87 | 23796.94 | 16782.71 | 22834.79 |
| O35509        | 102098   | 74060.81 | 60944.32 | 92294.84 | 79304.98 | 83671.87 | 66273.54 | 73233.51 | 148286.1 | 48236.21 | 342757.9 | 108696.2 | 119181.1 | 93589.54 | 81052.87 | 82279.7  |
| O35547        | 43964.2  | 14400.21 | 9183.27  | 24283.96 | 14107.75 | 25852.61 | 19860.12 | 21482.89 | 4394.158 | 1211.177 | 87474.78 | 16123.36 | 12306.57 | 6145.291 | 4387.396 | 24732.93 |
| O35568        | 838045.4 | 1126460  | 1204937  | 1482628  | 1461789  | 2246605  | 1377105  | 1443124  | 1461343  | 1525160  | 767373.5 | 1168860  | 1175163  | 1134645  | 871903.9 | 1010635  |
| O35760        | 34579.34 | 36327.87 | 53134.52 | 64032.93 | 21253.4  | 37597.78 | 56332.07 | 72623.09 | 31139.48 | 94564.89 | 23497.12 | 38986.43 | 45774.36 | 46420.6  | 33194.91 | 39130.78 |
| O35763        | 211369.2 | 216994.6 | 129046.3 | 251343   | 308904.9 | 267713.9 | 171002   | 151738.3 | 480334.8 | 220080.6 | 852153.1 | 494532.8 | 524478.5 | 617574   | 400389.4 | 405693.4 |
| O35952        | 47327.48 | 47363.41 | 45687.64 | 45643.39 | 61139.55 | 28962.3  | 27987.43 | 23639.52 | 66441.12 | 38316.01 | 91538.7  | 52716.63 | 61515.37 | 60978.25 | 46179.08 | 63833.26 |
| O35956        | 10501.02 | 14439.48 | 19074.86 | 6108.15  | 17829.1  | 9646.932 | 7339.626 | 10875.88 | 22517.38 | 12178.4  | 25089.28 | 20148.75 | 4472.235 | 17806.99 | 15965.01 | 11751.59 |
| O54715        | 167400.2 | 162588   | 76984.88 | 72493.25 | 105267.9 | 136152.3 | 117791.9 | 145290.2 | 160334.4 | 127753.2 | 61595.04 | 115290.1 | 91588.15 | 66745.29 | 55295.36 | 60119.17 |
| O54728        | 1546470  | 30737.06 | 3452.724 | 8093268  | 4662.995 | 18070.9  | 11445.46 | 2611471  | 12461.98 | 10000.39 | 1934124  | 13317.95 | 2623100  | 4108686  | 10558.71 | 2830185  |
| O54800;Q5DWV2 | 392386.2 | 478836.5 | 367176.5 | 153631.3 | 96029.99 | 447831   | 182608.3 | 148685   | 239755.9 | 395330.8 | 123699.8 | 227933.1 | 357390.5 | 361761.3 | 152031.6 | 281851.1 |
| O54858        | 63041.32 | 110710.1 | 13662.63 | 79522.91 | 92228.05 | 158255.6 | 87016.55 | 282207.9 | 110001.6 | 106004.3 | 64470.23 | 75943    | 80892.27 | 80750.65 | 88182.55 | 64118.1  |
| O54861        | 23378.14 | 21916.95 | 96367.41 | 47940.32 | 102808.1 | 51725.65 | 106187.8 | 47140.59 | 152406.3 | 96342.88 | 43365.73 | 83640.77 | 52577.49 | 68155.34 | 71143.09 | 70758.24 |
| O54975        | 14763.94 | 10307.4  | 20176.93 | 15805.34 | 16259.16 | 12208.27 | 10583.57 | 17640.46 | 29012.58 | 14493.33 | 29499.4  | 23304.21 | 20134.61 | 26668.2  | 17472.56 | 12079.62 |
| O55004        | 333482.4 | 564227.6 | 277077   | 1023559  | 189966.9 | 469845.5 | 414426.5 | 589124.5 | 135787.7 | 383156.9 | 119236.9 | 150871.6 | 262719.7 | 142611.3 | 198230.2 | 296708.8 |
| O55006        | 579527.3 | 873939.6 | 558659.7 | 738207.1 | 726542.8 | 666684   | 618326.3 | 949109.3 | 1337025  | 1454274  | 729659.7 | 1454083  | 796046.1 | 809590.3 | 995011.3 | 635207.3 |
| O55096        | 14187.57 | 15930.3  | 14363.92 | 8767.832 | 10208.78 | 16289.59 | 14086.83 | 15765.96 | 14181.6  | 16833.72 | 17326.51 | 16872.86 | 17033.63 | 16058.27 | 12293.76 | 17337.81 |
| O55145        | 9238.83  | 18049.36 | 11565.3  | 30585.76 | 9613.256 | 22997.63 | 8225.387 | 7927.396 | 18389.57 | 14736.89 | 14391.45 | 17044.83 | 13066.67 | 9332.273 | 12606.68 | 5270.691 |
| O70215        | 13165.72 | 21762.48 | 18158.84 | 19941.12 | 23456.64 | 22228.94 | 20115.54 | 25099.22 | 26967.66 | 29945.15 | 14784.91 | 18769.61 | 13282.67 | 10724.96 | 18244.01 | 15856.95 |
| O70244        | 144362.3 | 183948.4 | 212371.8 | 237905.1 | 296875.9 | 152253   | 240017.1 | 203375.2 | 133606.2 | 161326.3 | 176920   | 177078.9 | 172773.3 | 175213.1 | 174145.2 | 186067.7 |
| O70257        | 3577.351 | 3772.753 | 3138.135 | 1806.325 | 4511.451 | 2248.116 | 2329.898 | 506.8445 | 9508.106 | 2955.656 | 8284.4   | 7927.531 | 3790.902 | 6613.026 | 5738.055 | 4067.754 |
| O70352        | 29895.8  | 34010.41 | 26212.79 | 33765.94 | 27604.93 | 30225.74 | 30674.48 | 34548.15 | 32396.33 | 21094.66 | 61284.43 | 44696.93 | 45005.23 | 22507.7  | 23612.34 | 34428.04 |
| O70377        | 8878.562 | 8499.397 | 3144.473 | 11253.97 | 16763.36 | 11906.05 | 9662.743 | 5815.531 | 25199.33 | 7614.571 | 43603.2  | 23052.44 | 20005.17 | 19899.43 | 13966.97 | 14847.58 |
| O70417        | 726470.9 | 326482   | 2445750  | 1903038  | 257046.5 | 1246295  | 1599236  | 2470080  | 1028943  | 1066372  | 510782.4 | 1040309  | 189591.6 | 1543743  | 259208.9 | 529713.1 |
| O70489        | 392419   | 449295.6 | 402812.8 | 361187.3 | 456560.9 | 384960.8 | 463068.3 | 397948.4 | 337805   | 417482.5 | 327670.4 | 399755.8 | 337775.7 | 334568.2 | 383316.4 | 433317.5 |
| O70513        | 706572.4 | 733108.8 | 640625.2 | 1038093  | 969815.4 | 792271.1 | 1185553  | 828129.1 | 1026798  | 901280.8 | 539823.3 | 925891.3 | 1458903  | 720154.5 | 793709.8 | 763398.6 |
| O70535        | 171782.8 | 213533.9 | 207030.7 | 196319.3 | 245597.1 | 166573.4 | 198073.3 | 193583   | 203076.4 | 246245.3 | 112491.4 | 180636.5 | 172845   | 162237.2 | 168891   | 156181.1 |
| O70540        | 12258.9  | 15093.5  | 20709.71 | 13687.02 | 14504.15 | 29861.18 | 7919.516 | 18585.77 | 19436.49 | 22584.14 | 15009.68 | 10293.9  | 15419.74 | 7195.796 | 12614.21 | 9231.341 |
| O70594        | 23985    | 17964.56 | 13361.6  | 25549.51 | 22087.56 | 20554.18 | 14213.52 | 17682.3  | 69156.16 | 23330.71 | 100501.4 | 94458.09 | 57781.14 | 73939.77 | 48470.42 | 49754.34 |
| O88204        | 18178.37 | 27552.71 | 28475.86 | 23299.86 | 22055.28 | 34950.27 | 19845.07 | 24909.99 | 31288.96 | 30486.78 | 18957.58 | 26482.46 | 20469.1  | 20712.67 | 24967    | 22859.75 |
| O88267        | 18081.74 | 17959.54 | 29991.3  | 8671.573 | 13344.49 | 15064.11 | 19196.54 | 14039.26 | 37678.13 | 14983.95 | 54469.88 | 23097.5  | 34902.46 | 51962.13 | 23664.98 | 20436.1  |
| O88339;Q4V882 | 2564.241 | 1416.406 | 1567.346 | 2745.288 | 2813.804 | 2104.472 | 2400.669 | 1913.722 | 5350.658 | 1496.547 | 8125.587 | 7263.616 | 4542.685 | 4610.155 | 2397.315 | 4741.37  |
| O88600        | 5956.096 | 6718.449 | 4440.219 | 7130.717 | 6236.824 | 5134.75  | 6252.144 | 3851.051 | 291201.7 | 10104.44 | 18519.43 | 12872.49 | 13265.41 | 17904.48 | 8848.262 | 7940.597 |
| O88766        | 260129.1 | 408011.3 | 196692.6 | 574460.3 | 242513.8 | 364971.9 | 225922.3 | 318049.9 | 178479.5 | 401435.3 | 272886.7 | 268533.4 | 290786.1 | 231776.3 | 202740.4 | 210234.1 |
| O88767        | 247487.9 | 181022.1 | 129767.9 | 158594   | 118601   | 257351.8 | 172224   | 141186.6 | 118494.1 | 151194.8 | 197326.7 | 145429.5 | 141127.5 | 152191.8 | 128957   | 137089.1 |
| O88775        | 14082.62 | 23302.13 | 22421.73 | 20637.56 | 24250.76 | 25649.57 | 18473.88 | 12963.52 | 21346.97 | 22053.52 | 15656.26 | 20576.53 | 20126.93 | 16528.04 | 18715.21 | 19904.97 |
| O88797        | 4021.545 | 2298.658 | 5135.237 | 3262.938 | 4167.036 | 2124.024 | 826.3646 | 6544.43  | 4861.998 | 2320.572 | 13876.92 | 3596.569 | 1353.006 | 2324.303 | 2076.376 | 4364.925 |
| O88917        | 31121.32 | 41083.27 | 62837.05 | 21194.63 | 34275.28 | 27676.26 | 33581.43 | 6802.843 | 95909.91 | 42722.03 | 16789.2  | 53766.19 | 43219.35 | 52104.73 | 52222.16 | 36352.3  |
| O88989        | 428616.7 | 332056.4 | 381135.4 | 258987.1 | 512404.8 | 450238.1 | 396849   | 501083.7 | 511329.2 | 450862.2 | 852001.8 | 665929.7 | 558955.3 | 633725.9 | 360782   | 327313.7 |
| O89117        | 102356.2 | 103020.3 | 72734.7  | 10714.89 | 37958.5  | 125622.6 | 56832.18 | 111567.8 | 127208.4 | 121409.9 | 146600.7 | 59003.41 | 112538.1 | 119660.1 | 7037.138 | 143123   |
| P00502        | 329680.4 | 432326.6 | 342238   | 321722.9 | 561263   | 423005.8 | 313412.4 | 330966.1 | 667679.4 | 362685   | 1072091  | 643856.8 | 703737.2 | 785512.1 | 496769.1 | 468183.4 |
| P00507        | 4697.74  | 6295.315 | 8681.891 | 6192.504 | 6259.701 | 6109.308 | 18332.91 | 6052.355 | 5498.761 | 12125.58 | 4352.046 | 10720.6  | 4437.786 | 9322.289 | 6568.369 | 9131.591 |
| P00689        | 15917559 | 24833654 | 25014754 | 15105843 | 22239254 | 13244222 | 20283910 | 17464414 | 21955660 | 27514396 | 17816412 | 17974592 | 19677128 | 18718806 | 17312914 | 15561839 |
| P00714        | 57244.08 | 93041.03 | 99946.19 | 491084   | 81584.92 | 261967.3 | 259005.2 | 162317.3 | 118227   | 162924.9 | 306751.8 | 145797.6 | 263696.4 | 69627.91 | 83661.21 | 286180.6 |
| P00731        | 9536.903 | 29433.01 | 9416.697 | 7455.204 | 11088.28 | 7334.162 | 8509.153 | 11435.47 | 178864   | 5158.002 | 5550.708 | 5605.079 | 6617.294 | 5497.206 | 6374.376 | 5050.044 |
| P00758        | 752212.1 | 8005153  | 7988823  | 6945413  | 9935169  | 6362597  | 6638053  | 6871663  | 5657593  | 5463190  | 3735830  | 5864784  | 4871928  | 5102725  | 6012706  | 876892.4 |
| P00762        | 1153784  | 1491709  | 9027107  | 8035095  | 849146.1 | 816427.8 | 1377755  | 7616463  | 448636.4 | 901183.3 | 4402054  | 3527245  | 4203583  | 2725946  | 2647870  | 8815534  |
| P00774        | 5663.003 | 41112.31 | 29933    | 31628.47 | 10073.65 | 10004.19 | 12524.91 | 25999.87 | 15230.6  | 4403.088 | 11523.82 | 9706.696 | 9492.911 | 1187.546 | 7365.431 | 8225.191 |

|               |          |          |          |          |          |          |          |          |          |          |          |          |          |          |          |          |
|---------------|----------|----------|----------|----------|----------|----------|----------|----------|----------|----------|----------|----------|----------|----------|----------|----------|
| P00786        | 274288.9 | 262854.1 | 298772.1 | 368324.6 | 136325.9 | 244680.4 | 271871.8 | 221373.9 | 203252   | 264175.7 | 132169.9 | 185624.7 | 200310.9 | 184265.3 | 236054.1 | 254890.6 |
| P00787        | 1079279  | 1279438  | 1015213  | 1778105  | 771682.1 | 958625.9 | 927515.4 | 1387545  | 505828.3 | 771395   | 709016.5 | 516173.4 | 697492.4 | 591653.1 | 592645.3 | 806361.6 |
| P00884        | 335254   | 259001.1 | 365540   | 307078.4 | 392539.6 | 373962.9 | 307789.4 | 293929.5 | 949258.1 | 514991.3 | 839023.7 | 677176.1 | 621238.8 | 806467.9 | 489402.3 | 553944.7 |
| P01015        | 1010999  | 1400526  | 467188   | 1968025  | 660059.8 | 679228.4 | 655834.7 | 1218362  | 369807.1 | 605511   | 546728.9 | 493106   | 833631.6 | 637785.8 | 721526.1 | 1219275  |
| P01026        | 368395.4 | 243513.4 | 316315.4 | 298490.3 | 184893.1 | 312682.8 | 457581.1 | 287278.6 | 328544   | 330606.1 | 148297.6 | 231422.8 | 191686.9 | 302592.5 | 581820.4 | 476067.5 |
| P01039        | 44889.35 | 683108.4 | 44046.32 | 96308    | 227963   | 302149   | 106642.8 | 18497.63 | 3568.651 | 17906.34 | 134719.4 | 16129.35 | 23807.21 | 29147.71 | 21156.63 | 49895.52 |
| P01041        | 118571.6 | 162003.2 | 100019.5 | 168175.6 | 47762.57 | 134342.1 | 82099.08 | 45091.62 | 204282   | 220563.3 | 57626.54 | 163083.4 | 96537.3  | 171013.9 | 69522.28 | 117651.1 |
| P01048        | 1451887  | 2226795  | 2755746  | 3465699  | 1422138  | 1791952  | 1760127  | 1815746  | 3104883  | 3368741  | 2519530  | 2734542  | 2107884  | 2528333  | 1981457  | 2350242  |
| P01681        | 4521165  | 342879.8 | 3214822  | 2451824  | 1781376  | 297931.5 | 799220.6 | 2647360  | 1674849  | 488725.4 | 517145.7 | 365545.1 | 162649   | 452664.8 | 1123249  | 253885.4 |
| P01830        | 228804.3 | 256105.1 | 235054.4 | 250536.4 | 131652.2 | 164091.6 | 194970.4 | 185311.1 | 129391.3 | 199811.6 | 132567.5 | 127746.7 | 157348   | 170112.8 | 148590.9 | 169773.9 |
| P01835        | 240537   | 53405.49 | 15264826 | 20807488 | 13130864 | 61158.5  | 62184.6  | 21432868 | 17375856 | 13294916 | 17092172 | 10518664 | 71946.8  | 7531820  | 8883400  | 9864880  |
| P01836        | 31372496 | 40681180 | 36940708 | 35923552 | 32896732 | 34746664 | 40744684 | 37144504 | 15437518 | 25003220 | 525711.3 | 15123225 | 17605606 | 10493264 | 11719807 | 19268634 |
| P01946        | 510245   | 10419.95 | 285446.9 | 8566.391 | 61845.49 | 188981.9 | 10186.85 | 13566.38 | 7966.267 | 30590.18 | 11803.99 | 5567.516 | 11109.66 | 28070.48 | 184647.5 | 12842.41 |
| P02091        | 375522.5 | 2656.641 | 251154.5 | 5089.108 | 26853.61 | 140330.4 | 13236.51 | 23217.63 | 13306.36 | 32650.13 | 11735.26 | 7222.685 | 7773.986 | 14634.76 | 197298.2 | 15141.53 |
| P02454        | 137295.2 | 306474.6 | 75306.25 | 216777   | 174210.9 | 1055905  | 186204.3 | 460786   | 205635.2 | 297686.4 | 66107.06 | 96880.84 | 79574.17 | 45210.42 | 51622.45 | 72564.46 |
| P02625        | 223628.8 | 274795.5 | 612043.9 | 343913.8 | 153309.3 | 291150.9 | 240818.2 | 649204.4 | 59492.41 | 339995.3 | 282608.7 | 349860.6 | 295266.3 | 220553.9 | 191766.9 | 674510.4 |
| P02631        | 39789.8  | 85795.92 | 25306.59 | 53979.41 | 24481.6  | 100178.8 | 66064.38 | 93553.11 | 19780.04 | 55709.32 | 14496.56 | 31631.91 | 41574.81 | 14701.52 | 12615.93 | 25446.07 |
| P02650        | 2476017  | 2427414  | 1332769  | 2290532  | 3078401  | 1810551  | 2522010  | 2402296  | 2983466  | 3296272  | 1640234  | 2042692  | 2255445  | 2722523  | 1815709  | 2481972  |
| P02651        | 219649.3 | 104798.4 | 148446   | 107146.3 | 109110.3 | 137720.6 | 141975.2 | 152505.8 | 99185.98 | 138367.6 | 43028.19 | 62554.26 | 79271.7  | 93353.72 | 114018.9 | 250879.1 |
| P02680        | 15516.32 | 20429.41 | 15768.88 | 20190.03 | 3453.635 | 12451.79 | 23036.47 | 20697.52 | 10642.53 | 23586.61 | 8772.914 | 11742.2  | 13756.71 | 17890.83 | 14675.3  | 12870.35 |
| P02696        | 10765.41 | 6385.831 | 15888.58 | 10643.7  | 7871.475 | 6238.836 | 7911.426 | 5082.166 | 10483.28 | 6538.377 | 6244.549 | 5777.488 | 6186.47  | 9210.964 | 6230.974 | 6280.876 |
| P02761        | 1.04E+09 | 1.13E+09 | 6.55E+08 | 1.58E+09 | 5.59E+08 | 6.05E+08 | 1.02E+09 | 5.34E+08 | 90276864 | 3.4E+08  | 4.51E+08 | 1.97E+08 | 6.05E+08 | 6.19E+08 | 4.28E+08 | 8.74E+08 |
| P02764        | 4776683  | 5334554  | 4147064  | 6474199  | 2547571  | 3930331  | 2483201  | 3952927  | 6628034  | 9427169  | 7213125  | 8114967  | 8582181  | 7360724  | 6093078  | 4757822  |
| P02767        | 1850545  | 1494942  | 1430032  | 1841914  | 1411066  | 1588200  | 1892146  | 1637253  | 1438278  | 1256504  | 730411.5 | 938698.3 | 996027.1 | 1693556  | 1582513  | 1490729  |
| P02770        | 37906696 | 29407012 | 44543632 | 20924428 | 21188202 | 18980014 | 43426764 | 24287298 | 23117050 | 20736688 | 7298988  | 14261236 | 14957868 | 27102160 | 28142342 | 28367710 |
| P02780        | 43283976 | 25689228 | 22468876 | 73834672 | 29543678 | 50269764 | 67702936 | 70995360 | 9015505  | 8864812  | 73150632 | 19497886 | 13549271 | 8906730  | 6886310  | 43253628 |
| P02781        | 29816660 | 14419548 | 9496852  | 33066184 | 11735669 | 23484706 | 29470758 | 30768968 | 1848406  | 3218916  | 26554888 | 8025886  | 9075513  | 6102920  | 3110920  | 24784478 |
| P02782        | 18294970 | 6310083  | 4791524  | 13772715 | 5580238  | 10520581 | 14089984 | 19026422 | 1807451  | 1856558  | 18579874 | 4245075  | 6483600  | 3394836  | 2010708  | 16431866 |
| P02783        | 44307.59 | 8793.584 | 81753.81 | 23441.23 | 5001.551 | 53334.43 | 12358.79 | 12702.2  | 2646.398 | 5949.293 | 13486.03 | 5375.812 | 2310.334 | 15047.89 | 11889.75 | 37776.96 |
| P02793;Q7TP54 | 11427.95 | 9738.619 | 10737.46 | 7247.268 | 16782.38 | 11967.24 | 10813.87 | 15328.97 | 5522.718 | 10243.17 | 11168.63 | 6703.471 | 8025.839 | 9479.041 | 43241.61 | 3090.68  |
| P03994        | 7298.53  | 5884.325 | 11368.96 | 3062.672 | 10389.76 | 9184.494 | 7156.208 | 4302.225 | 14804.2  | 21720.4  | 9398.218 | 9331.994 | 11733.39 | 8551.622 | 9766.14  | 12931.94 |
| P04041        | 25938    | 24315.99 | 21375.26 | 64785.42 | 34715.33 | 28405.17 | 40758.27 | 42325.16 | 30826.79 | 21849.76 | 34871.13 | 19154.01 | 23711.58 | 29921.44 | 26531.91 | 19198.55 |
| P04073        | 116939.8 | 216064   | 161891   | 150557.2 | 125170.1 | 144235.4 | 142144.8 | 174273.8 | 111270.7 | 163401.2 | 73152.59 | 104572.9 | 177926   | 127784.5 | 88322.49 | 58509.26 |
| P04218        | 52698.34 | 79284.06 | 56642.17 | 72320.95 | 82544.34 | 59290.15 | 46200.72 | 88089.55 | 88208.79 | 157775.3 | 40483.71 | 120352.9 | 95712.77 | 84108.69 | 126305.5 | 96724.93 |
| P04276        | 1350038  | 732519.8 | 1623264  | 1178288  | 762765.3 | 813757.6 | 1780600  | 1114190  | 972206.4 | 1316597  | 438116.9 | 726557.3 | 779043.9 | 872679.4 | 1733233  | 1665315  |
| P04355        | 50843.9  | 38650.31 | 27512.56 | 34866.15 | 44380.91 | 53829.28 | 23601.13 | 21689.28 | 25087.53 | 49741.5  | 39122.26 | 36085.11 | 38234.25 | 48567.13 | 42908.86 | 30787.45 |
| P04636        | 22932    | 31463.38 | 39066.69 | 33381.95 | 33631.38 | 37650.22 | 37648.91 | 66457.66 | 19653.26 | 40185.81 | 17791.83 | 33423.75 | 24566.93 | 31986.91 | 14040.91 | 17604.21 |
| P04639        | 90484.33 | 101216.8 | 119182.3 | 80394.2  | 69584.62 | 84739.73 | 110214.5 | 75702.23 | 72424.74 | 123456.2 | 26927.06 | 55689.66 | 54026.22 | 97915.09 | 86574.34 | 92159.24 |
| P04642        | 168520   | 114469   | 174184.5 | 118735.7 | 76421.7  | 128460.5 | 151287   | 116478.8 | 121286.7 | 117179.5 | 66270.68 | 170345.8 | 134571   | 173789.3 | 124797.2 | 68324.09 |
| P04762        | 6835.334 | 5486.944 | 14550.23 | 4362.769 | 6704.337 | 7005.945 | 8490.317 | 5498.875 | 6736.613 | 9179.663 | 13419.47 | 13810.71 | 5679.575 | 5152.424 | 4148.774 | 9904.438 |
| P04764        | 454271.5 | 350564.8 | 395489.3 | 376895.8 | 516327.8 | 474478   | 513526.3 | 539820.3 | 543832.7 | 604789.7 | 530043   | 575789.9 | 504310.5 | 830974.1 | 527949.7 | 418735.8 |
| P04785        | 98764.07 | 84495.73 | 71731.03 | 97558.24 | 99749.19 | 101627.1 | 96425.65 | 112811.7 | 47901.16 | 72182.56 | 82747.8  | 58444.92 | 72657.17 | 57217.64 | 61996.2  | 60186.07 |
| P04797        | 331661.6 | 283040.6 | 207032.4 | 239283.3 | 259487   | 361793.9 | 249968.7 | 405083.8 | 578693.1 | 357832.5 | 794114.4 | 546958.1 | 539701.9 | 512360.8 | 417874.9 | 373326.8 |
| P04897        | 72447.98 | 37777.18 | 27730.44 | 76225.55 | 58385.88 | 84120.55 | 49799.31 | 77140.16 | 95865.93 | 37114.3  | 169316.1 | 83927.93 | 88401.91 | 68004.26 | 59365.28 | 61551.84 |
| P04903        | 20227.52 | 17145.65 | 14361.8  | 24276.33 | 23640.96 | 18417.76 | 18153.96 | 20633.82 | 32359.01 | 22293.98 | 52975.22 | 26248.73 | 37595.31 | 34066.24 | 21271.95 | 27013.62 |
| P04904        | 690861.8 | 649199.7 | 716335   | 610728.3 | 751895.7 | 693860.2 | 555518.4 | 647392.1 | 1857891  | 1050569  | 1756963  | 1671522  | 1502093  | 1908214  | 1214010  | 1129200  |
| P04905        | 43041.71 | 21961.22 | 13126.93 | 43655.62 | 25533.15 | 31543.13 | 36479.29 | 56378.35 | 18645.57 | 20661.61 | 113806.1 | 24412    | 15436.92 | 18283.08 | 12199.57 | 37186.76 |
| P04906        | 51547.2  | 32438.17 | 37029.05 | 56414.77 | 66794.71 | 36426.82 | 37816.28 | 54233.13 | 90193.82 | 29558.85 | 102983.2 | 77305.38 | 114263.5 | 80885.68 | 50110.26 | 63520.5  |
| P04916        | 46089.91 | 42134.83 | 30955.12 | 67756.26 | 25622.71 | 27395.16 | 47418.89 | 62032.24 | 24791.65 | 18832.23 | 11928.03 | 13876.62 | 30333.29 | 26310.72 | 40209.3  | 28854.35 |

|                  |          |          |          |          |          |          |          |          |          |          |          |          |          |          |          |          |
|------------------|----------|----------|----------|----------|----------|----------|----------|----------|----------|----------|----------|----------|----------|----------|----------|----------|
| P04937           | 6490167  | 6705706  | 8111581  | 8858278  | 10012564 | 9523141  | 7702872  | 7763942  | 9669818  | 8590389  | 7218001  | 6723682  | 9221299  | 11460643 | 6496128  | 8238205  |
| P05065           | 82391.16 | 54359.17 | 45618.64 | 45734.19 | 35597.02 | 80532.63 | 81485.68 | 69956.14 | 53417.06 | 46698.78 | 94809.3  | 57164.74 | 53768.58 | 66772.74 | 43373.15 | 67705.89 |
| P05197           | 31145.34 | 27258.54 | 25875.13 | 30386.2  | 23224.58 | 23534.51 | 32014.54 | 27481.17 | 41784.77 | 31466.27 | 67258.13 | 53302.04 | 43717.34 | 47034.04 | 32639.75 | 31337.39 |
| P05369           | 15063.39 | 13079.44 | 12543.49 | 13044.76 | 6630.313 | 14218.65 | 13553.22 | 10599.72 | 5547.777 | 3622.717 | 46650.7  | 11531.92 | 13654.96 | 3929.808 | 5018.061 | 16032.55 |
| P05371           | 811986.1 | 611916.6 | 312549.3 | 475120.7 | 278840.7 | 585571.5 | 373826.4 | 772017.6 | 214992.5 | 338292.6 | 280756.8 | 243876.3 | 294497.4 | 165479.4 | 217120.9 | 279985   |
| P05539           | 32357.33 | 12023.95 | 14950    | 5396.631 | 19432.42 | 81513.48 | 27670.97 | 8274.945 | 24742.74 | 26119.27 | 22100.61 | 24426.21 | 26889.99 | 33256.13 | 25850.89 | 17518.95 |
| P05544           | 38397716 | 59073708 | 40745652 | 35600116 | 54750136 | 26845284 | 50332456 | 48216732 | 9605594  | 35775884 | 24454784 | 27777408 | 29315800 | 38404664 | 28679630 | 30237710 |
| P05545           | 2844374  | 4460140  | 5198211  | 2262112  | 3602507  | 2320250  | 3788048  | 4861104  | 5245906  | 5396715  | 2023170  | 3566625  | 3494539  | 3474791  | 3206994  | 5388572  |
| P05712           | 11166.19 | 11257.95 | 8892.997 | 10508.36 | 12937.72 | 17338.25 | 7810.957 | 16225.96 | 16003.9  | 5142.048 | 22276.08 | 12587.94 | 11671.86 | 11508.52 | 9992.641 | 10650.63 |
| P05964           | 153336.1 | 234160.3 | 114848.2 | 129597.9 | 61746.14 | 146153.8 | 169071.7 | 127101.4 | 44467.4  | 111322.5 | 286157.1 | 88284.09 | 95467.11 | 135298   | 85855.33 | 201257.4 |
| P06214           | 13735.8  | 12251.15 | 17578.52 | 11260.31 | 17036.65 | 12091.9  | 10259.11 | 13473.03 | 26163.97 | 12354.88 | 23774.8  | 18147.74 | 20829.8  | 19209.14 | 14370.65 | 13238.41 |
| P06399           | 11396.13 | 19554.64 | 7114.586 | 14916.27 | 10685.14 | 16338.95 | 15941.5  | 20416.02 | 6505.718 | 16558.17 | 5207.527 | 10213.82 | 5289.789 | 12964.84 | 8371.685 | 13549.85 |
| P06685           | 40373.46 | 39512.05 | 32075.11 | 45845.09 | 33259.91 | 37584.82 | 38876.04 | 38957.06 | 34050.65 | 37827.56 | 49796.39 | 57501.5  | 33372.26 | 37372.45 | 43055.34 | 28272.67 |
| P06760           | 762039.1 | 854591.9 | 291610.8 | 1508822  | 6014131  | 558709.9 | 4486735  | 5431289  | 1096889  | 236554.8 | 1244928  | 186855.3 | 220409.7 | 490196.3 | 121974.7 | 96143.22 |
| P06761           | 152339.2 | 89329.04 | 83889.55 | 229748   | 113414.8 | 296968.1 | 417900.8 | 298607.6 | 52902.34 | 66131.96 | 161837.8 | 71603.34 | 79361.94 | 67333.74 | 49104.62 | 98351.31 |
| P06866           | 3251309  | 4046398  | 1158261  | 3042665  | 957487.1 | 1900490  | 1319514  | 1480449  | 1765930  | 5081949  | 2327181  | 2384859  | 3503407  | 2429195  | 2289539  | 2761473  |
| P06911           | 502933.7 | 218697.9 | 147156.4 | 341767.3 | 71234.02 | 481938   | 374189   | 819828.4 | 44416.08 | 22901.89 | 269901.2 | 200173.5 | 84800.2  | 128612.5 | 16293.12 | 81030.46 |
| P07150           | 50004.07 | 67172.52 | 45468.96 | 98873.18 | 68392.72 | 83627.66 | 169715.6 | 219138.6 | 63520.8  | 48490.05 | 134470.3 | 47082.68 | 31189.74 | 60458.3  | 45314.04 | 48283.87 |
| P07151           | 2198024  | 2532522  | 2052356  | 3547179  | 1309445  | 2774416  | 2190964  | 3746743  | 818798.5 | 2235197  | 1050090  | 1099345  | 1583596  | 1147374  | 1490914  | 6861406  |
| P07154           | 241685   | 243405.7 | 257974   | 257706.9 | 217075.7 | 232209.3 | 270806.3 | 193038.3 | 160367.7 | 183101.8 | 163772.6 | 170827.1 | 193097.6 | 193255.9 | 155935.3 | 181552   |
| P07171           | 679258.1 | 857771.1 | 496865.6 | 1722031  | 1006817  | 1457967  | 1858518  | 1325891  | 493684.5 | 854812.3 | 511068.2 | 626178.6 | 1093193  | 733286   | 634281.9 | 362851.5 |
| P07174           | 21876.68 | 29650.17 | 97928.54 | 12398.14 | 37080.67 | 37856.83 | 55787.51 | 46614.37 | 51919.62 | 75652.28 | 29057.88 | 61165.54 | 51150.17 | 60882.59 | 47194.47 | 54767.39 |
| P07314           | 2493113  | 2770579  | 2270072  | 2814251  | 2864006  | 2740064  | 1997597  | 2694689  | 7011824  | 2214312  | 5459877  | 5367493  | 5357570  | 5137860  | 4053774  | 4181730  |
| P07335           | 9559.578 | 10337.92 | 12006.16 | 8740.351 | 11564.69 | 5664.338 | 12437.27 | 11459.19 | 13054.06 | 19705.6  | 10037.15 | 8115.262 | 3218.627 | 11041.89 | 7539.445 | 8916.197 |
| P07340           | 61463.95 | 69697.5  | 38061.61 | 61998.27 | 53611.28 | 83406.11 | 242196.7 | 94319.95 | 39701.27 | 65801.3  | 54710.5  | 56371.42 | 43407.83 | 47371.39 | 52091.96 | 38792.49 |
| P07379           | 12420.5  | 5736.761 | 26301.51 | 8492.093 | 19704.76 | 8749.633 | 10562.09 | 13719.83 | 14159.04 | 16553.93 | 16845.19 | 15685.99 | 21370.41 | 33231.29 | 12941.51 | 10138.19 |
| P07483           | 124257   | 98553.9  | 66979.38 | 145899.5 | 149952.6 | 145685.9 | 122405.5 | 144621.3 | 109844.5 | 160322   | 66357.96 | 101806.7 | 99183.48 | 118506   | 106695.8 | 42194.51 |
| P07522           | 28173678 | 31800770 | 25845552 | 29711428 | 38936652 | 32429902 | 27815218 | 27841156 | 19390030 | 26232102 | 23948356 | 25854948 | 23124160 | 18933912 | 12084216 | 19724706 |
| P07632           | 5007607  | 5791240  | 8069196  | 8331117  | 6286375  | 5288325  | 5636095  | 10573693 | 2578349  | 3481748  | 3541946  | 2652450  | 3156557  | 4271144  | 4555416  | 3821759  |
| P07647           | 16232454 | 8062896  | 4311253  | 17457222 | 5603915  | 14640544 | 12630295 | 9608512  | 1487932  | 2195149  | 12455841 | 3325185  | 4125045  | 2558164  | 1345867  | 15399079 |
| P07861           | 1652736  | 828400.1 | 554866.9 | 1469804  | 1060177  | 1101193  | 896565.6 | 1613154  | 1886588  | 644340.5 | 3943972  | 1520016  | 1364442  | 1425373  | 1309227  | 1295948  |
| P07897           | 548471.6 | 698414.8 | 699507.9 | 738374.1 | 899473.4 | 843865.5 | 768395.8 | 724529.8 | 893929.3 | 926171.3 | 490954.4 | 751092.5 | 857432.4 | 965189.2 | 829228.7 | 688459.9 |
| P07943           | 47620.3  | 41186.17 | 26141.57 | 27323.41 | 41577.71 | 27445.92 | 29229.33 | 51570.04 | 59356.34 | 45541.49 | 128860.8 | 19995.22 | 31439.24 | 37386.9  | 78586.75 | 31993.87 |
| P08010           | 32701.95 | 14818.67 | 23143.28 | 21413.28 | 23414.83 | 22288.23 | 27971.44 | 46564.67 | 10984.93 | 16961.28 | 77990.16 | 18436.99 | 14825.96 | 13753.56 | 13578.77 | 29747.21 |
| P08289           | 204273.3 | 207683.9 | 162825.2 | 265936.2 | 177709   | 236297.5 | 166234.3 | 226916.1 | 188392.2 | 120354   | 336259.4 | 165349.9 | 196667.2 | 219726.5 | 185352.5 | 189699.9 |
| P08290           | 21232.33 | 39037.73 | 13229.54 | 24639.5  | 23357.12 | 32288.58 | 19454.21 | 19980.81 | 10577.65 | 19987.45 | 14242.73 | 8482.384 | 22200.11 | 28388.41 | 24471.09 | 13848.25 |
| P08460           | 353043.4 | 497864.8 | 362643.5 | 428245   | 525122.7 | 596852.8 | 400891.6 | 506045.8 | 540100.9 | 672653.3 | 356747.2 | 517269.4 | 387070.5 | 362825.5 | 272777.8 | 389900.9 |
| P08494           | 32225.63 | 11863.6  | 7166.693 | 22960.35 | 17740.76 | 32196.17 | 16985.93 | 20012.3  | 22301.11 | 5573.737 | 20303.46 | 17960.13 | 16556.89 | 11745.37 | 10419.66 | 19233.82 |
| P08592           | 199063.7 | 269463.2 | 275508.7 | 223327.1 | 221877.1 | 238587.9 | 170126.9 | 214919.7 | 300726.9 | 333651.9 | 115391.3 | 256504   | 177762   | 135404.3 | 188669.6 | 224413.6 |
| P08644;P20171;Q0 | 46997.21 | 28207.95 | 39706.45 | 44736.57 | 27161.51 | 57364.39 | 48060.29 | 66140.27 | 44132.37 | 27031.69 | 141533.4 | 50681.62 | 43448.77 | 40714.23 | 40064.65 | 36821.75 |
| P08649           | 959702.5 | 1726548  | 1091754  | 1508117  | 453981.1 | 4034112  | 631552.6 | 2152613  | 3619076  | 9277057  | 2271455  | 4837017  | 4080932  | 3049628  | 3474863  | 3115375  |
| P08650           | 80073.87 | 80098.72 | 63445.98 | 57600.9  | 60655.23 | 53812.13 | 73993.2  | 65172.12 | 44777.13 | 46724.97 | 46981.73 | 41772.02 | 61499.28 | 42429.87 | 34255.96 | 50452.42 |
| P08721           | 6039798  | 2215849  | 3037185  | 2925774  | 3280813  | 3780574  | 4745465  | 1383190  | 1138405  | 1650461  | 1775490  | 869023.8 | 1078372  | 709056.8 | 3103431  | 1500426  |
| P08723           | 13453379 | 4550732  | 3425770  | 10309830 | 806137.7 | 9408406  | 13063826 | 15707275 | 1273133  | 1315073  | 20230854 | 1599333  | 1693245  | 872044.3 | 1405452  | 9576301  |
| P08753           | 30697.45 | 23491.82 | 27040.98 | 27612.11 | 25026.88 | 35555.23 | 19823.22 | 69297.01 | 57773.62 | 23060    | 98972.56 | 33474.02 | 40488.3  | 22905.36 | 36551.29 | 35483.06 |
| P08932           | 1507240  | 1779192  | 2051408  | 2246080  | 1180431  | 1435769  | 1696516  | 1358925  | 2678299  | 3806209  | 2419667  | 2423831  | 2427129  | 3155626  | 2897104  | 2494783  |
| P08934           | 28803.46 | 20885.14 | 28333.06 | 30479.21 | 20606.26 | 2201348  | 35023.79 | 18350.12 | 21763.69 | 25146.21 | 8133.646 | 15171.18 | 16485.04 | 14028.08 | 37289.22 | 35848.28 |
| P08937           | 479845.3 | 371758.2 | 1362541  | 399573.4 | 782615.8 | 711403   | 582781.5 | 1554192  | 302773.8 | 350443   | 318598.7 | 223649.3 | 527123.8 | 71949.37 | 117391.4 |          |
| P09006           | 519171.5 | 327577.7 | 352292.7 | 467898.4 | 158421.9 | 212273.3 | 506999.1 | 404388.2 | 231394.5 | 416261.4 | 271502.5 | 323891.3 | 352656.7 | 269790   | 469814.9 | 514519.6 |

|                   |          |          |          |          |          |          |          |          |          |          |          |          |          |          |          |          |
|-------------------|----------|----------|----------|----------|----------|----------|----------|----------|----------|----------|----------|----------|----------|----------|----------|----------|
| P09034            | 99262.04 | 68346.71 | 102112.8 | 49199.89 | 95645.73 | 64991.96 | 58847.61 | 97955.06 | 214774.3 | 140719.8 | 194219.5 | 141797.6 | 144234.3 | 136550.5 | 146855.3 | 92931.5  |
| P09456            | 17269.73 | 12385.15 | 3714.292 | 12585.62 | 10120.71 | 15199.72 | 20747.38 | 23316.97 | 7822.765 | 3828.557 | 43441.43 | 5317.634 | 9470.12  | 6278.451 | 3713.837 | 18565.8  |
| P09527            | 13768.11 | 10300.2  | 29833.59 | 11340.5  | 13737.92 | 18046.92 | 9672.364 | 30654.52 | 39057.26 | 8472.423 | 42337.09 | 19264.84 | 16376.25 | 14781.83 | 14638.24 | 11404.09 |
| P09606            | 68386.29 | 97654.64 | 38359.46 | 94201.68 | 100687.7 | 88694.62 | 51461.18 | 83169.34 | 188579.8 | 104951.6 | 248687.8 | 173069.6 | 183849.6 | 146894.9 | 90235.23 | 92968.88 |
| P09656            | 16041.78 | 10455    | 43314.13 | 12861.94 | 4900.129 | 24680.49 | 6515.002 | 6783.784 | 14562.91 | 8553.936 | 15130.93 | 12345.09 | 3953.821 | 16333.67 | 20120.59 | 913713.2 |
| POCOA9            | 32060.06 | 12999.31 | 9780.76  | 51227.45 | 8728.021 | 33369.75 | 45484.52 | 41298.07 | 4913.622 | 10600.03 | 86372.09 | 9145.97  | 9697.144 | 14515.91 | 12699.51 | 36108.45 |
| POCOK7            | 14731.05 | 27222.57 | 13235.07 | 28974.81 | 12631.4  | 27111.12 | 16018.38 | 19787.6  | 6930.726 | 20780.58 | 9511.949 | 12203.01 | 12384.88 | 13504.02 | 11236.57 | 17155.36 |
| POCG51;P62982;P6; | 696862.1 | 624343.6 | 227322.3 | 1064309  | 546786.1 | 528408.8 | 498802.1 | 736667.6 | 687229.1 | 304895.8 | 1323677  | 638519.1 | 669492.6 | 480988.2 | 322446   | 591219.7 |
| PODMW0;PODMW1     | 61741.38 | 51874.96 | 36935.15 | 17390.47 | 22584.59 | 38346.15 | 42867.22 | 28925.31 | 125691.4 | 5945.185 | 70302.22 | 11823.58 | 59541.97 | 78723.46 | 47563.19 | 19315.77 |
| PODP29;PODP30;PO  | 142506   | 143480.6 | 59150.19 | 112191.8 | 158943.2 | 169725.2 | 139290.6 | 66333.34 | 128979   | 137162.9 | 183116.5 | 131063.6 | 102260.6 | 102797.3 | 60087.35 | 77924.3  |
| P10111            | 169941.4 | 176402.5 | 129207.3 | 171556.9 | 184290.1 | 150071.9 | 145637.7 | 167782.2 | 216652.5 | 139570.5 | 386577.8 | 229082   | 208022.7 | 217916.4 | 122504.2 | 222489.1 |
| P10247            | 136083.8 | 237646.8 | 176309.7 | 126194   | 279912.6 | 213873.7 | 101465.8 | 226666.4 | 74402.97 | 103429.8 | 80709.33 | 81725.34 | 92302.46 | 49126.7  | 100014.9 | 51897.07 |
| P10252            | 1194445  | 1738542  | 1478397  | 1522408  | 1892130  | 1307871  | 1370853  | 1397766  | 1087760  | 1535015  | 806505.4 | 1339997  | 984977.9 | 1053004  | 996381.9 | 751665.8 |
| P10536            | 7334.337 | 7833.686 | 7036.965 | 9849.048 | 6058.896 | 12110.14 | 6259.698 | 8966.346 | 24538.83 | 5306.159 | 24530.23 | 14807.63 | 14369.21 | 13898.74 | 9773.008 | 14527.54 |
| P10719            | 19397.73 | 23805.29 | 49642.27 | 16706.04 | 20407.03 | 17300.2  | 16065.51 | 47687.93 | 34623.75 | 35286.24 | 43420.16 | 45952.68 | 26194.93 | 26726.04 | 13189.62 | 18702.49 |
| P10758            | 615688.6 | 228741.5 | 329731.8 | 948911.8 | 141979   | 172429.5 | 381578.8 | 209947.5 | 211715   | 374129   | 110715.7 | 420305.2 | 190112.1 | 66295.48 | 426123.9 | 357442.5 |
| P10760            | 35535.26 | 38741.62 | 23279.45 | 37256.68 | 33096.2  | 39837.8  | 33436.27 | 36709.2  | 68375.19 | 32476.65 | 103216.2 | 80764.47 | 76520.38 | 79553.41 | 54680.25 | 52428.53 |
| P10824            | 18694.98 | 22361.23 | 20510.59 | 19545.4  | 12137.74 | 26936.76 | 22773.23 | 29283.73 | 27974.18 | 13288.82 | 54246.72 | 36994.32 | 30916.21 | 34841.3  | 30448.35 | 25119.37 |
| P10959            | 1648081  | 2280854  | 1913554  | 1873725  | 1381609  | 1285750  | 1821027  | 2163354  | 1082252  | 1456909  | 490884.9 | 663503.1 | 1125684  | 1626465  | 1171444  | 1548944  |
| P10960            | 5321687  | 6478264  | 8328513  | 6295902  | 9183846  | 7973352  | 7531028  | 8063606  | 7278626  | 7423814  | 3336881  | 4785865  | 4414654  | 5069977  | 7298835  | 5774797  |
| P11030            | 50438.57 | 42392.07 | 40526.41 | 75481.35 | 54014.8  | 46837.71 | 62015.95 | 52398.78 | 50226.95 | 58616.33 | 58431.92 | 48756.9  | 25946.81 | 24298.83 | 33504.57 | 49902.14 |
| P11232            | 829090.2 | 1006616  | 545092.4 | 1130388  | 758950.1 | 1091682  | 712537.2 | 1217268  | 552972.1 | 601246.3 | 695738.4 | 616953.3 | 776526.5 | 732923.6 | 499744.2 | 536219.2 |
| P11348            | 80583.84 | 63758.01 | 54954.38 | 90140.18 | 88476.86 | 62352.66 | 72976.52 | 59217.21 | 154802.8 | 99758.33 | 157163.2 | 113268.6 | 110821.6 | 127409.1 | 90792.2  | 82938.66 |
| P11442            | 7798.829 | 7725.147 | 12788.63 | 15173.59 | 11230.66 | 8112.102 | 9351.276 | 11168.44 | 13260.88 | 13383.86 | 36721.83 | 23417.12 | 14224.94 | 22207.82 | 9291.512 | 13033.99 |
| P11598            | 72609.14 | 44997.12 | 31853.88 | 139301.4 | 36434.36 | 149644.6 | 215468.1 | 61825.17 | 23060.95 | 36493.74 | 105180.4 | 35454.96 | 44172    | 36547.5  | 25672.64 | 55075.65 |
| P11762            | 12258.82 | 12607.83 | 10697.06 | 15630.78 | 5235.069 | 17161.87 | 7824.685 | 6866.349 | 2114.961 | 5532.396 | 6061.321 | 10158.82 | 4583.237 | 6234.382 | 6178.69  | 3686.677 |
| P11883            | 10499.64 | 22357.96 | 22555.91 | 9411.195 | 11762.67 | 6202.024 | 23831.02 | 31055.2  | 16197.18 | 10307.93 | 33353.65 | 33099.15 | 8967.958 | 36225.87 | 12696.93 | 9185.18  |
| P11980            | 36124.38 | 46688    | 36613.07 | 40790.56 | 32645.5  | 52098.07 | 33414.9  | 52498.45 | 43637.66 | 49837.63 | 63306.89 | 59112.94 | 52793.3  | 57083    | 42029.21 | 40848.65 |
| P12020            | 808303.7 | 841510.7 | 270530.8 | 703910.2 | 185979.8 | 1511338  | 787265   | 2574464  | 78598.65 | 122389.2 | 1014382  | 755504   | 278286.8 | 391564.9 | 130281.4 | 328826.9 |
| P12346            | 10433577 | 6630541  | 11187211 | 6010606  | 4676522  | 6931144  | 11817196 | 8250420  | 9487045  | 10244692 | 2778463  | 5019594  | 5666281  | 10514982 | 14689199 | 11002464 |
| P12368            | 25348.4  | 16951.51 | 9897.974 | 19136.63 | 13586.33 | 23998.15 | 14702.91 | 14632.43 | 23919.35 | 7571.275 | 72034.21 | 18113.45 | 27333.21 | 25037.5  | 13114.84 | 22172.07 |
| P13221            | 52630.95 | 57264.93 | 60248.26 | 52474.94 | 67212.34 | 51023.73 | 58822.24 | 74990.49 | 69754.44 | 76239.49 | 56103.47 | 71609.91 | 67677.5  | 95260.94 | 63919.59 | 45164.73 |
| P13265            | 75562.7  | 105814.3 | 37479.89 | 100772.6 | 107955.2 | 51531.15 | 69587.87 | 27900.76 | 54435.16 | 95076.23 | 63420.39 | 101253   | 67898.56 | 94773.15 | 113100.7 | 94112.23 |
| P13432            | 992373.8 | 52008.48 | 33324.31 | 325832.5 | 355610.3 | 568377.3 | 243795.3 | 1674410  | 94127.05 | 78161.08 | 9834.808 | 60355.6  | 63254.56 | 82206.2  | 151847.6 | 111215.7 |
| P13596            | 77487.03 | 70084.43 | 108153.2 | 98618.96 | 68920.88 | 97038.1  | 88871.74 | 154415.6 | 129341.4 | 138926.9 | 57268.44 | 93733.57 | 69856.06 | 55252.17 | 74436.3  | 58532.39 |
| P13635            | 637437.6 | 649659.9 | 688119.2 | 427279   | 506237.9 | 388089.6 | 714737.7 | 417540.7 | 904608.9 | 765501.4 | 964725.4 | 593789.4 | 608727.7 | 1031521  | 875407.1 | 1008246  |
| P13676            | 5905.299 | 10147.81 | 13879.13 | 8551.468 | 9953.397 | 7327.059 | 15323.82 | 18601.14 | 15459.58 | 4026.483 | 8016.176 | 7432.75  | 10726.33 | 7263.884 | 4063.299 | 8260.429 |
| P13852            | 104992.4 | 251365.6 | 168944.9 | 260607.5 | 184711.4 | 287993.5 | 232242.1 | 287388.2 | 162508.5 | 241022.3 | 145003.1 | 99589.37 | 145463.1 | 82124.41 | 139294.1 | 195735   |
| P14046            | 1173792  | 1775396  | 1712665  | 1130233  | 907290.4 | 1098232  | 2000366  | 977340.8 | 2632008  | 2131012  | 842151.1 | 1116753  | 1507056  | 3119235  | 2486030  | 2492234  |
| P14173            | 883.213  | 314.6875 | 12924.81 | 8260.317 | 7127.444 | 7714.948 | 6261.028 | 11452.32 | 7207.546 | 9234.522 | 7842.048 | 9775.917 | 8689.044 | 15253.67 | 7464.754 | 8528.389 |
| P14408            | 6400.274 | 7424.597 | 12287.9  | 8100.979 | 9375.904 | 8444.508 | 7853.053 | 9503.126 | 16263.86 | 9097.6   | 11687.28 | 12839.98 | 14229.21 | 15575.57 | 7337.732 | 8899.199 |
| P14480            | 27752.21 | 39986.71 | 21706.99 | 35430.72 | 16148.22 | 35308.22 | 71030.75 | 60202.74 | 23394.28 | 56491.96 | 17594.58 | 28300.96 | 26392.88 | 34214.34 | 30075.24 | 26058.27 |
| P14562            | 116057.7 | 98939.06 | 141647.5 | 165117.5 | 196908.9 | 95032.41 | 186061.1 | 335229.3 | 126091.7 | 128638.5 | 151014.4 | 107552.1 | 92580.24 | 105681.8 | 211102.8 | 197292.8 |
| P14630            | 653085.4 | 681483.4 | 1247705  | 758872.3 | 845902.7 | 761227.6 | 708203.9 | 777950.9 | 476892.3 | 456979.7 | 460533.3 | 399573.8 | 465323.1 | 531400.6 | 509626.4 | 417254.7 |
| P14668            | 24679.82 | 41633.87 | 64179.66 | 85965.01 | 71587.78 | 29434.15 | 87234.34 | 66022.63 | 95254.58 | 24733.96 | 147627.8 | 65224.3  | 45011.81 | 30517.01 | 72597.98 | 35055.41 |
| P14669            | 152719.3 | 327057.2 | 196447.4 | 280207.7 | 461138.4 | 276887.3 | 299070.1 | 233207.3 | 400637.3 | 230912.3 | 186339.7 | 244531.8 | 445440.8 | 159548.1 | 236774.2 | 194248.3 |
| P14740            | 1252438  | 1170674  | 1298674  | 1467904  | 1708862  | 1900391  | 1070872  | 1900060  | 3573697  | 1622352  | 2559997  | 2301253  | 2001163  | 2615298  | 2570145  | 1597932  |
| P14841            | 3313221  | 5289279  | 3590869  | 4542200  | 4618165  | 4491556  | 4244557  | 5194166  | 2538167  | 5322763  | 3146618  | 2638018  | 2801769  | 3155485  | 2376340  | 3231210  |
| P14925            | 134662.2 | 120088.7 | 98418.6  | 141316.9 | 124793.6 | 158362.1 | 118845.3 | 129383.2 | 58525.14 | 92999.14 | 69626.34 | 108840.6 | 113638.9 | 115085.4 | 105881.3 | 86926.51 |

|        |          |          |          |          |          |          |          |          |          |          |          |          |          |          |          |          |
|--------|----------|----------|----------|----------|----------|----------|----------|----------|----------|----------|----------|----------|----------|----------|----------|----------|
| P14942 | 45159.49 | 43546.59 | 31308.77 | 35894.69 | 56784.84 | 31624.55 | 30190.3  | 53488.12 | 111589.9 | 36546.27 | 75715.52 | 59043.25 | 51198.92 | 68176.46 | 44282.13 | 39186.07 |
| P15083 | 3131190  | 2571899  | 2297531  | 2998153  | 2136238  | 3009840  | 4731373  | 5862630  | 1817251  | 2482739  | 3434745  | 2563199  | 2504798  | 2413824  | 1991739  | 2502050  |
| P15087 | 7200.545 | 9595.519 | 8554.615 | 8188.408 | 8062.35  | 5816.416 | 6397.319 | 7651.034 | 9591.678 | 10316.01 | 9080.622 | 7565.79  | 10622.02 | 5634.475 | 5889.6   | 8344.049 |
| P15390 | 199996.4 | 229040.5 | 245495.5 | 294718.9 | 230315.3 | 245500.1 | 264714.5 | 142332   | 134926.8 | 208765.7 | 152991.8 | 204174.7 | 192425.4 | 173503.4 | 211636.4 | 226004.7 |
| P15399 | 45268848 | 16031368 | 7674598  | 13923194 | 2781524  | 18614548 | 3480781  | 27314234 | 1439226  | 10856434 | 6395794  | 1594319  | 4298318  | 4979099  | 6985139  | 9617074  |
| P15473 | 88833.56 | 136320.9 | 87485.93 | 131922   | 129318.9 | 153961.6 | 87262.4  | 78486.59 | 121722.1 | 190242.1 | 77058.28 | 112505.3 | 104983   | 108537.3 | 137619.6 | 97475.05 |
| P15684 | 2532870  | 2588687  | 1863789  | 2523265  | 2952536  | 3143319  | 2204046  | 2772303  | 5249896  | 2189624  | 3956771  | 4585912  | 4219105  | 4146520  | 3199018  | 3108299  |
| P15800 | 8814.884 | 11291.7  | 8331.5   | 8450.953 | 9015.984 | 13689.09 | 11231.51 | 71976.38 | 11758.46 | 8988.319 | 7264.062 | 5183.448 | 6616.041 | 4466.819 | 5438.761 | 9147.729 |
| P15943 | 68735.16 | 88897.07 | 61673.88 | 112202.6 | 80597.95 | 114444   | 94299.56 | 90364.45 | 72870.63 | 120547.3 | 44577.8  | 84582.35 | 88061.95 | 73943    | 88041.1  | 79899.52 |
| P15978 | 999416.3 | 989418.5 | 542338.1 | 995842.3 | 1069994  | 1197047  | 1184187  | 396143.6 | 1200435  | 246794.5 | 508297.8 | 472622.5 | 718329.6 | 578464.9 | 665263.9 | 745393.3 |
| P15999 | 8725.081 | 6212.787 | 24303.97 | 8601.602 | 10717.65 | 9358.882 | 6599.77  | 7498.983 | 10379.62 | 26596.37 | 17942.56 | 13494.35 | 15070.1  | 12150.82 | 5289.991 | 11803.88 |
| P16086 | 8145.422 | 6655.739 | 4630.514 | 6916.241 | 5498.67  | 6957.654 | 75731.63 | 11812.3  | 9638.537 | 6661.979 | 8715.91  | 8620.86  | 7364.591 | 7257.74  | 5693.959 | 21313.27 |
| P16228 | 42523.46 | 60623.88 | 31577.86 | 56236.7  | 31395.96 | 48509.18 | 60501.54 | 63315.11 | 36161.09 | 23985.63 | 21441.61 | 28253.37 | 36858.94 | 29203.67 | 24366.5  | 20357.25 |
| P16290 | 64529.64 | 34902.01 | 34919.26 | 24435.7  | 17337.87 | 52558    | 47506.46 | 49828.86 | 57844.07 | 46097.41 | 44196.56 | 62429.83 | 48568.77 | 40657.28 | 77811.9  | 22332.79 |
| P16310 | 42699.2  | 60742.47 | 100952.5 | 55094    | 68548.38 | 51313.6  | 54719.44 | 56866.8  | 89218.44 | 77538.08 | 29625.92 | 50036.53 | 46039.04 | 45013.81 | 39204.15 | 59153.56 |
| P16391 | 477165.1 | 633972.5 | 790232.1 | 611729.8 | 626379.1 | 569616.6 | 640279.2 | 371793.3 | 835332.8 | 305991.5 | 425836.6 | 250555.2 | 833218.3 | 553176.6 | 573734.3 | 620329.4 |
| P16446 | 7688.755 | 7509.968 | 6889.609 | 3896.628 | 10067.37 | 7544.788 | 6780.081 | 7775.618 | 13221.68 | 8554.959 | 17097.03 | 11822.46 | 13880.78 | 11088.91 | 11514.57 | 10025.67 |
| P16573 | 1598977  | 2019402  | 1055335  | 3447788  | 3424678  | 3260485  | 1503020  | 5862140  | 2838431  | 1842544  | 1327414  | 1962342  | 1491273  | 1902396  | 2005656  | 2369698  |
| P16617 | 28929.15 | 34737.84 | 37912.01 | 27205.51 | 33531.57 | 42824.93 | 28641.22 | 30964.87 | 41425.88 | 44646.82 | 49269.18 | 49405.88 | 52158.62 | 57115.08 | 31426.37 | 32668.59 |
| P16636 | 17772.17 | 37437.45 | 11705.28 | 19608.14 | 46061.36 | 102147.9 | 18257.21 | 16974.46 | 268863.7 | 61166.38 | 21717.49 | 66436.55 | 34529.07 | 54010.41 | 32868.07 | 18741.57 |
| P17046 | 50488.05 | 51377.43 | 104665.6 | 45133.15 | 97294.11 | 86139.34 | 65126.84 | 184454   | 116485.3 | 115365.2 | 52133.61 | 77289.86 | 91243.52 | 70328.3  | 143972.9 | 89658.81 |
| P17164 | 597679.9 | 874238.1 | 837356.3 | 700970.8 | 654846.6 | 444207.6 | 502331.3 | 650867.5 | 676397   | 552551.9 | 401331.9 | 695511.8 | 544127.4 | 714129.6 | 635415.9 | 686866.6 |
| P17475 | 7199641  | 6398165  | 4665910  | 5556928  | 2880936  | 4004945  | 6891013  | 5567379  | 6292039  | 6859089  | 2298924  | 3562262  | 4434772  | 7850305  | 6540985  | 7042562  |
| P17559 | 46131.54 | 210180.9 | 78528.42 | 124350.1 | 87844.72 | 536273.4 | 51801.7  | 152202.1 | 164708.5 | 152560.1 | 26820.19 | 63677.98 | 77226.13 | 55428.22 | 40123.31 | 35910.93 |
| P17988 | 3798.248 | 3752.873 | 6113.284 | 3062.041 | 4281.396 | 3379.991 | 3335.475 | 10184.34 | 14101.62 | 7018.095 | 7393.951 | 10413.76 | 16035.41 | 10612.28 | 1952.563 | 3373.555 |
| P18292 | 3845749  | 5564064  | 13621469 | 5145133  | 4092251  | 5554874  | 5782226  | 4454204  | 6510780  | 8146235  | 3612355  | 6195886  | 5331292  | 5823286  | 5603300  | 5187393  |
| P18297 | 5322.632 | 4743.66  | 3894.447 | 4896.822 | 8448.445 | 5946.458 | 3229.54  | 31617    | 13352.73 | 4313.449 | 16929.19 | 9882.839 | 9636.541 | 9690.897 | 8580.402 | 5047.317 |
| P18298 | 8881.92  | 5923.836 | 5043.644 | 9522.792 | 8686.229 | 9022.683 | 9687.945 | 14205    | 15547.81 | 6372.342 | 22234.59 | 13030.4  | 14646.61 | 11872.09 | 8763.378 | 8610.172 |
| P18418 | 145663.8 | 69596.05 | 28402.52 | 184107.5 | 83474.91 | 119958.7 | 81995.01 | 110263.2 | 38896.11 | 55101.47 | 39495.95 | 29398.24 | 36808.24 | 28961.74 | 27757.61 | 46819.14 |
| P18421 | 8610.395 | 6795.735 | 5348.838 | 5682.061 | 6831.626 | 10054.08 | 10056.95 | 14025.87 | 10400.1  | 8107.581 | 12176.83 | 3902.886 | 4815.132 | 3184.262 | 4037.861 | 4781.808 |
| P18427 | 16539.64 | 34128.31 | 16263.91 | 21904.16 | 13022.26 | 30813.16 | 24688.34 | 22614.62 | 8334.139 | 18963.29 | 11592.11 | 8265.842 | 10835.6  | 12774.16 | 11010.51 | 19421.31 |
| P18757 | 35963.92 | 44600.96 | 38117.38 | 47951.59 | 57243.39 | 42315.69 | 28321.15 | 41176.85 | 143710.9 | 50716.56 | 116806.8 | 125088.8 | 133472.7 | 118371.8 | 107814.3 | 90795.38 |
| P19112 | 39294.13 | 46378.14 | 58345.95 | 39789.52 | 59737.37 | 37400.69 | 31409.63 | 36289.83 | 131677.7 | 55825.26 | 119472   | 114859.7 | 79314.17 | 97681.84 | 64344.3  | 60394.57 |
| P19132 | 18106.31 | 18215.71 | 9158.504 | 7988.114 | 23722.6  | 10264.3  | 12185.63 | 25570.35 | 11317.54 | 9606.321 | 2792.773 | 10589.37 | 7020.303 | 7914.862 | 27899.66 | 4071.894 |
| P19218 | 50161.74 | 191644.4 | 160740.7 | 134729.9 | 45998.31 | 59122.66 | 119515.6 | 66961.77 | 253348.4 | 198272.2 | 68283.44 | 114463.6 | 151029.3 | 35235.02 | 163858   | 165013.3 |
| P19223 | 18042.91 | 28907.7  | 9935.458 | 50860.02 | 10207.31 | 11778.78 | 15060.17 | 14512.61 | 4043.248 | 5851.246 | 2727.739 | 1097.438 | 6859.123 | 4681.775 | 2135.965 | 5736.046 |
| P19468 | 280763.3 | 311584.5 | 255706   | 353143   | 543626.1 | 440091.4 | 204135.3 | 401099.8 | 1495236  | 285500.3 | 1298861  | 848630.9 | 645140.3 | 828925.6 | 510207.6 | 392878.8 |
| P19629 | 103092   | 40049.3  | 21481.56 | 24787.14 | 8702.332 | 80491.02 | 47549.43 | 57828.52 | 7403.505 | 27725.22 | 11079.02 | 16003.83 | 5992.674 | 3851.099 | 29546.49 | 20796.52 |
| P19804 | 173984.8 | 100843.4 | 120973.6 | 104154.5 | 192128.6 | 139160.5 | 167888.3 | 200469.8 | 185294.4 | 174241.4 | 205729.7 | 162721.5 | 153415.2 | 226780.1 | 151109.3 | 130514.4 |
| P19814 | 585.7106 | 1245.879 | 3220.135 | 2745.288 | 837.8235 | 1721.405 | 1870.386 | 2170.544 | 3504.286 | 2420.591 | 7748.832 | 1022.462 | 2566.193 | 2928.229 | 2248.686 | 4015.897 |
| P19939 | 214188.8 | 248786.5 | 104066.2 | 261920   | 216259   | 117762.1 | 155114.7 | 106200.2 | 324357.7 | 184754.6 | 301025.3 | 213134.9 | 142253.8 | 116345.2 | 66264.91 | 198566.4 |
| P20059 | 10258569 | 11614993 | 11164358 | 16486486 | 8110312  | 11130343 | 10107279 | 15884482 | 10983231 | 13527524 | 8241101  | 9663293  | 11237236 | 12705905 | 11020061 | 12693801 |
| P20611 | 1667443  | 2388295  | 2226405  | 2092859  | 3012585  | 2256913  | 2426164  | 2058999  | 1956626  | 2589567  | 1649877  | 2378273  | 2377433  | 2449471  | 2577757  | 2424657  |
| P20646 | 10288.83 | 7999.762 | 8827.133 | 24103.99 | 8381.194 | 4400.288 | 26762.24 | 16427.84 | 8674.63  | 5673.844 | 4605.561 | 2197.609 | 3503.288 | 4909.007 | 6847.799 | 6431.417 |
| P20673 | 11025.84 | 5434.69  | 12549.08 | 3990.726 | 6846.841 | 7344.095 | 5678.616 | 6324.654 | 22551.94 | 14266.61 | 11743.87 | 17406.33 | 13699.81 | 14949.06 | 12717.73 | 9685.828 |
| P20759 | 66041.09 | 245968.3 | 166825.9 | 286168.4 | 485228.6 | 144129.6 | 160878.9 | 169594.7 | 282578   | 166954.1 | 114164.8 | 113965.6 | 128040.1 | 230672.1 | 152953.9 | 201841.1 |
| P20760 | 527449.9 | 617741.3 | 448259.2 | 1538188  | 1210398  | 658850.2 | 525249.7 | 1569424  | 538750   | 374210.5 | 188863.3 | 211735.1 | 255033.1 | 423671.3 | 237560.6 | 485655.1 |
| P20761 | 123961.2 | 292327.4 | 317705.5 | 728309.2 | 151565.8 | 253101.8 | 310348.6 | 422029.2 | 64190.74 | 56820.72 | 56712.43 | 50443.24 | 89267.88 | 104187.7 | 93277.04 | 149076.2 |
| P20762 | 730792.8 | 2505572  | 768001.8 | 2074482  | 1089887  | 1002102  | 1166563  | 2289905  | 406592.5 | 966175.8 | 398708.2 | 406255.7 | 343011.2 | 803924.8 | 820063.7 | 927862.6 |

|                   |          |          |          |          |          |          |          |          |          |          |          |          |          |          |          |          |
|-------------------|----------|----------|----------|----------|----------|----------|----------|----------|----------|----------|----------|----------|----------|----------|----------|----------|
| P20766            | 18791.96 | 112123.2 | 61602.13 | 18045.69 | 19934.05 | 35645.43 | 86929.52 | 38314.52 | 32329.41 | 144823.2 | 31145.77 | 25106.95 | 21923.58 | 8378.222 | 28637.36 | 34542.3  |
| P20767            | 14755905 | 13531451 | 12977212 | 40559360 | 14343109 | 16281158 | 13173159 | 27486456 | 22903512 | 27982044 | 19674668 | 25244332 | 8988231  | 14677165 | 19983714 | 13685501 |
| P20786            | 225398.4 | 220413.3 | 204943.2 | 175933.7 | 224852   | 197043.3 | 211371.2 | 206748.3 | 162641.7 | 351720.7 | 122366.4 | 184101.8 | 164564.3 | 93626.44 | 176362.1 | 132406.3 |
| P20961            | 28835.31 | 33041.29 | 7773.934 | 27647.79 | 32925.16 | 22157.87 | 39395.14 | 23058.54 | 39544.5  | 37246.43 | 20615.5  | 36963.74 | 28112.44 | 31392.05 | 39295.22 | 38677.2  |
| P21581            | 53335.61 | 62290.99 | 78297.02 | 74697.76 | 73310.52 | 67456.64 | 62815.5  | 79476.42 | 55226.04 | 57126.25 | 32347.01 | 65755.2  | 59469.12 | 73249.44 | 47944.24 | 40859.59 |
| P21588            | 6007.263 | 6374.271 | 10275.89 | 2926.067 | 3385.111 | 3361.059 | 9432.22  | 17244.66 | 14137.52 | 14947.89 | 2062.445 | 22832.07 | 14437.72 | 14556.57 | 13654.46 | 189339.1 |
| P21670            | 11071.3  | 10582.23 | 4869.292 | 9182.447 | 9796.516 | 11713    | 13212.51 | 20431.89 | 5075.835 | 10033.26 | 8501.442 | 3416.014 | 8228.999 | 13178.81 | 5514.747 | 6411.018 |
| P21674            | 1639.214 | 8925.461 | 7995.831 | 7438.26  | 8987.258 | 4917.552 | 2602.888 | 2432.014 | 2045.465 | 3934.989 | 4272.961 | 1632.738 | 8619.436 | 3186.606 | 10607.29 | 2231.47  |
| P21704            | 25180212 | 29998370 | 28656648 | 23303782 | 25891496 | 21207456 | 24483670 | 26441934 | 13283524 | 25226556 | 12984202 | 25992828 | 16124590 | 13068026 | 19379932 | 12362729 |
| P21708;P27704;P63 | 4773.709 | 4662.88  | 2023.23  | 3260.702 | 5173.992 | 5234.239 | 4568.993 | 3432.49  | 10573.4  | 5005.46  | 7141.423 | 5938.323 | 6944.617 | 4039.177 | 4973.364 | 2784.742 |
| P22006            | 199956.1 | 81191.48 | 103378.3 | 264561.9 | 32210.9  | 464961.6 | 139112.7 | 82543.21 | 180323.8 | 48040.55 | 96342.83 | 44273.74 | 61881.67 | 65333.7  | 61019.98 | 713517.2 |
| P22057            | 4294373  | 3820218  | 4747513  | 4603079  | 1945250  | 5340232  | 3216355  | 4348578  | 1351012  | 2455707  | 2485292  | 2086643  | 2977213  | 2105723  | 2667294  | 2509969  |
| P22273            | 15950.65 | 185253.1 | 172875.8 | 1970634  | 396816.5 | 1255662  | 1392529  | 2255907  | 59102.89 | 141269.3 | 1898634  | 195678.9 | 239254.9 | 56015.94 | 13116.48 | 255203.3 |
| P22282            | 27314188 | 9267078  | 9925492  | 66206936 | 17135424 | 45272340 | 49175296 | 89012448 | 4805341  | 7377161  | 47678740 | 12732267 | 13502011 | 5140367  | 4582339  | 17308206 |
| P22283            | 50834872 | 11873985 | 12605979 | 44566912 | 15131644 | 57181004 | 68849568 | 41248688 | 3790389  | 7800001  | 62132196 | 13522218 | 17301506 | 6389613  | 5756600  | 29756452 |
| P22734            | 142505.7 | 94488.4  | 58610.52 | 62552.94 | 85944.68 | 83796.22 | 103078.6 | 44476.26 | 170871.8 | 163794.2 | 198546.3 | 129969.3 | 87374.43 | 207241.9 | 133699.9 | 168656.7 |
| P22985            | 6031.385 | 5786.802 | 12616.16 | 7832.673 | 8317.35  | 5846.315 | 6188.568 | 11214.6  | 4739.691 | 6227.906 | 7665.034 | 4472.994 | 6819.198 | 7982.163 | 6042.085 | 4111.499 |
| P23377            | 164116   | 170634.6 | 116056.9 | 144235.4 | 147983.5 | 146849.9 | 188844.7 | 166690.3 | 106090.5 | 131585.1 | 92397.49 | 114584.1 | 138590.5 | 156020.8 | 76879.03 | 147075.4 |
| P23593            | 15744.94 | 16480.44 | 14173    | 9801.637 | 20996.5  | 14476.11 | 23610.76 | 12861    | 5253.201 | 27368.44 | 55583.08 | 46907.66 | 20613.52 | 16086.86 | 16973.84 | 9975.234 |
| P23680            | 2337685  | 2628423  | 2514054  | 2070862  | 3040112  | 2971775  | 2473508  | 2274328  | 4083892  | 2619347  | 1825107  | 2559585  | 2267683  | 2275827  | 3212309  | 2085143  |
| P23739            | 37990.19 | 15736.88 | 16381.16 | 24209.91 | 68114.07 | 11980.84 | 16032.15 | 27220.53 | 18352.57 | 24944.33 | 45499.21 | 44091.2  | 65787.25 | 49669.72 | 45604.69 | 31995.9  |
| P23764            | 305782.4 | 355885.1 | 419390.9 | 362765   | 295709.3 | 176861.6 | 288553.3 | 296845.6 | 191123.4 | 322487.7 | 177720.8 | 181695.2 | 169790.1 | 181116.4 | 384127.6 | 266759.7 |
| P23785            | 730579.4 | 735064.2 | 497829.5 | 425561.4 | 1177159  | 621495.1 | 461836.1 | 588965.4 | 979260.7 | 802905.5 | 367611.1 | 688000.5 | 537372.2 | 546984.1 | 561417.3 | 311037.7 |
| P23928            | 2887.542 | 9142.174 | 12227.36 | 11677.05 | 6494.64  | 6101.347 | 6889.265 | 11082.24 | 20670.63 | 9438.51  | 29430    | 25458.46 | 23949.65 | 20488.41 | 19093.68 | 16768.38 |
| P24090            | 46655300 | 62100636 | 46700452 | 81878464 | 59095704 | 69491040 | 61599268 | 47578160 | 72748992 | 89508632 | 34359900 | 52740164 | 57442936 | 55832772 | 52455316 | 64163216 |
| P24268            | 1042849  | 892315.4 | 870719.8 | 1542183  | 1269480  | 930987.5 | 2092299  | 1530920  | 555643.8 | 785843.4 | 618926.6 | 632902.9 | 426946.4 | 636676.7 | 538117   | 588720.9 |
| P24368            | 76893.48 | 44999.14 | 36384.92 | 65655.1  | 20644.23 | 60200.82 | 81936.66 | 88012.03 | 27076.11 | 38785.21 | 128881.5 | 33491.71 | 55232.06 | 19330.47 | 28416.27 | 89687.4  |
| P24594            | 107049.5 | 128890.8 | 109176.7 | 112021.6 | 105527.9 | 156166.3 | 99919.95 | 132495.4 | 80792.8  | 150534.2 | 79470.96 | 85796.88 | 114311.5 | 103366.7 | 192010.3 | 134380.7 |
| P25031            | 65364.56 | 64057.49 | 46386.88 | 60576.6  | 120333.8 | 146807.4 | 51272.78 | 152437.2 | 50231.85 | 143793.1 | 20317.74 | 48023.55 | 39459.94 | 34090.25 | 25798.74 | 53684.23 |
| P25093            | 81488.6  | 88497.31 | 87090.48 | 105657.3 | 126896   | 67580.42 | 62184.8  | 113441.3 | 206328.6 | 89592.02 | 248355.1 | 176894.1 | 149553.8 | 177228.5 | 147327   | 127818.7 |
| P25113            | 95075.73 | 54528.29 | 66720.84 | 53251.36 | 83599.59 | 73046.77 | 77367.32 | 94804.5  | 125513.8 | 92809.23 | 176821.8 | 103057.8 | 102920.8 | 109111.5 | 99568.55 | 83726.16 |
| P25236            | 19764.05 | 16395.31 | 21889.35 | 23042.64 | 16361.11 | 13101.1  | 38201.73 | 24883.42 | 19023.37 | 23938.78 | 11801.25 | 13198.18 | 14825.54 | 10821.66 | 22911.16 | 22394.89 |
| P25809            | 9717.846 | 61716.62 | 11098.71 | 12988.88 | 15614.93 | 12063.23 | 19717.22 | 40899.55 | 5861.107 | 14936.18 | 6873.568 | 6682.195 | 19002.99 | 12810.39 | 5594.704 | 5003.113 |
| P26051            | 1708503  | 2158399  | 3225120  | 1890852  | 2673205  | 2408032  | 1914658  | 2794485  | 2694424  | 2832297  | 1663991  | 2267726  | 2434694  | 2648634  | 1927432  | 1781231  |
| P26342            | 5862.907 | 5558.777 | 12748.67 | 9882.906 | 12534.67 | 10670.73 | 9646.813 | 25659.24 | 9847.371 | 12371.49 | 951.1843 | 11597.63 | 8737.615 | 8542.418 | 10817.17 | 9372.189 |
| P26453            | 44545.76 | 75465.83 | 102301.9 | 65583.82 | 81480.88 | 66410.65 | 80518.85 | 91726.26 | 72462.75 | 83014.71 | 54550.18 | 63569.02 | 55500.39 | 57421.44 | 54794.48 | 43561.45 |
| P26644            | 1252062  | 1092458  | 1442684  | 1867698  | 1049747  | 1130738  | 1497750  | 1492117  | 1717914  | 1662434  | 685265.8 | 895318.6 | 1219481  | 1100598  | 1440611  | 1624563  |
| P26772            | 10044.01 | 14337.83 | 32713.89 | 22559.06 | 17314.5  | 22678.52 | 21477.03 | 25315.77 | 15831.54 | 12633.74 | 9754.271 | 15294.05 | 6283.055 | 9455.674 | 5201.699 | 11048.29 |
| P27139            | 207636.5 | 113621.8 | 133229.5 | 149711.7 | 188901.6 | 226478.1 | 245911.1 | 271633.2 | 186334.9 | 236423.5 | 423989.5 | 211001.6 | 288378.5 | 308864.3 | 190384   | 166411.8 |
| P27274            | 4420909  | 5267736  | 4125321  | 6134550  | 3671971  | 5060431  | 4361261  | 8300742  | 3534594  | 4130892  | 2693587  | 3408113  | 4706353  | 3291549  | 3549138  | 3990129  |
| P27590            | 34550032 | 22322208 | 29072612 | 41981740 | 39653744 | 14364630 | 29610396 | 56684064 | 24414592 | 23637356 | 37061688 | 24500652 | 14989292 | 13892220 | 11321710 | 8772180  |
| P27605            | 19533.39 | 12389.36 | 8119.572 | 10282.9  | 14416.48 | 12154.95 | 11682.49 | 10485.55 | 14101.05 | 14094.45 | 18422.03 | 18345.17 | 10395.61 | 19655.18 | 20383.03 | 10414.11 |
| P27653            | 9507.258 | 12169.22 | 7326.652 | 6215.798 | 9424.394 | 15386.48 | 10529.23 | 9478.194 | 27852.75 | 16712.87 | 19594.87 | 16448.09 | 13008.27 | 26924.3  | 10536.07 | 12501.53 |
| P27867            | 84435.55 | 54689.98 | 50563.43 | 46917.76 | 100930.7 | 71505.61 | 75489.96 | 67486.9  | 88705.36 | 78042.5  | 118417.5 | 108930.8 | 92866.85 | 144214.9 | 93725.35 | 93269.87 |
| P28037            | 10819.89 | 10622.63 | 10665.06 | 10708.19 | 21153.19 | 14707.1  | 10230.29 | 14709.36 | 29014.08 | 12922.35 | 21872.23 | 17472.57 | 13811.01 | 34618.27 | 13741.94 | 4567.188 |
| P28075            | 3690.834 | 4848.581 | 3558.678 | 4272.838 | 2902.282 | 7428.467 | 3656.978 | 3995.052 | 3315.402 | 977.04   | 1894.63  | 4097.89  | 3464.135 | 2985.625 | 3417.332 | 3814.7   |
| P28480            | 4754.156 | 2803.929 | 2465.118 | 3545.75  | 2749.07  | 4586.495 | 3656.978 | 2691.861 | 7374.585 | 1789.851 | 5689.514 | 5809.16  | 4534.678 | 4728.076 | 3284.629 | 2941.957 |
| P28494            | 57688.64 | 66837.52 | 110971.7 | 47898.34 | 61776.91 | 32728.2  | 44502.3  | 57415.07 | 62020.36 | 68957.91 | 28886.21 | 50028.36 | 48137.44 | 32759.55 | 68793.78 | 41243.35 |
| P28570            | 10216.78 | 6415.769 | 6578.154 | 3820.971 | 10950.54 | 7875.305 | 6441.991 | 7235.869 | 37707.8  | 6630.926 | 11687.14 | 15177.31 | 8476.51  | 14788.72 | 13495.93 | 5380.829 |

|        |          |          |          |          |          |          |          |          |          |          |          |          |          |          |          |          |
|--------|----------|----------|----------|----------|----------|----------|----------|----------|----------|----------|----------|----------|----------|----------|----------|----------|
| P28648 | 140398.7 | 129812.6 | 179437.3 | 160819.4 | 182812.3 | 82266.27 | 124313.4 | 176511.7 | 88754.7  | 87162.83 | 137615.5 | 120059.4 | 93723.74 | 44450.88 | 107727.3 | 48533.59 |
| P28826 | 901913.4 | 896317.9 | 1085088  | 1205535  | 998120.1 | 1265255  | 636704.9 | 838413.1 | 3129248  | 823235.5 | 1678213  | 1586147  | 1730422  | 1548626  | 1372376  | 1103550  |
| P29288 | 33015.76 | 26938.4  | 24018.89 | 39520.98 | 29662.21 | 23499.58 | 32580.41 | 18518.3  | 18195.3  | 27890.13 | 19267.57 | 19956.96 | 17909.52 | 20437.03 | 20008.06 | 15176.38 |
| P29315 | 17625.78 | 39520.73 | 261078   | 141516.4 | 20876.68 | 17621.74 | 12724.86 | 19772    | 37688.17 | 28895.77 | 54408.34 | 29873.38 | 31032.13 | 31736.07 | 77247.05 | 197970   |
| P29534 | 86079    | 122173.1 | 75643.9  | 107946.6 | 87337.18 | 108316   | 103416.1 | 128503.6 | 74646.59 | 117284.6 | 62794.22 | 77082.08 | 72978.16 | 82390.87 | 77036.23 | 78860.13 |
| P29598 | 1153747  | 1216040  | 1065772  | 1315430  | 1527070  | 1330816  | 1295114  | 1284313  | 1070167  | 1638768  | 851948.2 | 1294377  | 1398245  | 1253549  | 1451585  | 1473374  |
| P29975 | 380486.1 | 410074.4 | 142923   | 542031   | 680292.4 | 423917.3 | 221030.3 | 516772.4 | 1187761  | 384105.8 | 1129680  | 1149616  | 849547   | 935734.1 | 704149.9 | 502312.4 |
| P30120 | 108729.7 | 58926.77 | 33235.88 | 83850.94 | 36457.52 | 73899.09 | 96538.19 | 209012.7 | 23520.88 | 28673.8  | 157948   | 49862.23 | 80544.56 | 38866.77 | 22750.21 | 169868.4 |
| P30121 | 46921.63 | 76039.72 | 55051.8  | 44442.86 | 85493.13 | 61464.34 | 55072.05 | 52063.41 | 49614.7  | 71093.88 | 35193.74 | 47142.88 | 43828.6  | 56365.95 | 53059.22 | 41648.34 |
| P30152 | 1617824  | 2032800  | 1725913  | 1616017  | 1301006  | 3336149  | 1950378  | 2254719  | 2438509  | 2544927  | 2459537  | 2508898  | 1947356  | 1636819  | 1335230  | 959694.4 |
| P30713 | 28436.33 | 38547.82 | 18140.67 | 40303.99 | 29119.3  | 30335.6  | 32889.49 | 57216.45 | 94376.84 | 34772.73 | 89274.53 | 56299.57 | 56490.66 | 42546.04 | 59876.34 | 38211.85 |
| P30836 | 14878.56 | 23596.78 | 10661.89 | 28096.36 | 16915.58 | 6606.657 | 15507.33 | 13765.63 | 15515.94 | 20559.12 | 7486.072 | 16112.5  | 19327.27 | 14469.72 | 18429.42 | 18875.82 |
| P30904 | 591825.1 | 503124.1 | 427552.4 | 412510   | 610269   | 575286.3 | 394728.1 | 269198   | 1968782  | 523102.1 | 1325128  | 959782.6 | 1174606  | 1488493  | 988466.1 | 1469662  |
| P30919 | 47222.96 | 43122.4  | 22702.93 | 29171.16 | 25612.1  | 20951.3  | 173214.8 | 50318.83 | 53977.29 | 42951.94 | 19298.57 | 45871.84 | 24262.92 | 470565.4 | 47743.65 | 376538.6 |
| P31044 | 1772565  | 927831.4 | 531493.3 | 585604.4 | 676445.6 | 1775727  | 1402447  | 1280315  | 277648   | 712326.4 | 645356.8 | 564106   | 543115.6 | 512357.4 | 468933.3 | 401186.5 |
| P31211 | 871380.4 | 1192546  | 1753035  | 712044.9 | 1930398  | 854201.1 | 1267265  | 664828.7 | 1968420  | 2137602  | 356981.6 | 1103656  | 1325066  | 2123542  | 1283535  | 1332289  |
| P31430 | 18368.3  | 24844.21 | 8920.807 | 20289.38 | 12330.94 | 20679.62 | 14562.36 | 18341.18 | 5530.03  | 6970.297 | 14147.08 | 8780.157 | 5249.369 | 5477.816 | 4122.82  | 2446.111 |
| P31977 | 1868877  | 1257213  | 704110   | 1533760  | 1661482  | 1575053  | 1392474  | 1616449  | 2263319  | 1170874  | 4856646  | 2664177  | 2639316  | 2982757  | 1682602  | 2216939  |
| P32038 | 879222.1 | 1336767  | 680441.4 | 1391677  | 966583.3 | 1170328  | 1020734  | 1234689  | 1215804  | 1213372  | 696073.8 | 808011.4 | 1016970  | 716346.6 | 649070.1 | 833791.3 |
| P32755 | 35881.83 | 24229.62 | 37982.17 | 20356.88 | 49973.41 | 24775.34 | 28600.45 | 20733.76 | 52363.32 | 38608.06 | 37073.64 | 44697.1  | 33831.15 | 48536.73 | 36126.98 | 22057.91 |
| P33436 | 9044.677 | 9698.015 | 9775.782 | 9210.922 | 6303.309 | 10487.32 | 4925.354 | 4945.374 | 4937.368 | 11599.51 | 7548.006 | 8502.476 | 4310.616 | 5751.733 | 1581.207 | 12483.88 |
| P34058 | 32612.04 | 17405.89 | 23583.18 | 28352.33 | 27234.67 | 32633.51 | 25811.29 | 29857.9  | 75303.98 | 24806.57 | 82371.52 | 32551.84 | 53063.29 | 43184.48 | 45805.39 | 34499.48 |
| P34080 | 48701.84 | 43999.15 | 61475.49 | 89225.75 | 24187.45 | 87288    | 43721.32 | 42056.15 | 73938.51 | 105093.3 | 121715.9 | 66420.13 | 36626.06 | 62052.12 | 72258.22 | 41765.48 |
| P34158 | 840440.4 | 126881.2 | 268254.6 | 185423.3 | 538131.3 | 956002.9 | 624263.9 | 11558715 | 14006.76 | 656232.6 | 159423.7 | 84163.95 | 347717.1 | 186797.6 | 578954.6 | 6014.494 |
| P34900 | 86029.71 | 132978.8 | 75250.04 | 92603.88 | 91621.64 | 83256.38 | 100193   | 105739.8 | 76423.23 | 99230.25 | 86182.02 | 83668.09 | 11148.8  | 13320.52 | 112428.5 | 84241.16 |
| P34901 | 93980.85 | 146872.4 | 133547.2 | 89869.48 | 119551.8 | 26478.21 | 64822.2  | 110399   | 89382.75 | 116896.7 | 41209.2  | 140661.2 | 20456.87 | 48259.62 | 144439.2 | 34737.48 |
| P35053 | 21076.14 | 17058.91 | 20433.82 | 29147.47 | 27901.15 | 19241.71 | 28709.23 | 15467.58 | 4061.704 | 4975.145 | 26201.7  | 27057.35 | 15234.8  | 10529.15 | 16334.66 | 12156.86 |
| P35213 | 144137   | 100379.3 | 57227.3  | 120047.7 | 101423.8 | 144208.1 | 139359.4 | 109229.1 | 137766.3 | 68978.9  | 304475.6 | 135561.8 | 97791.25 | 122521.6 | 88830.8  | 108369.5 |
| P35280 | 12104.25 | 78093.69 | 2754797  | 5218.782 | 3136.38  | 29154.74 | 3031529  | 2323566  | 3228134  | 6541.214 | 1275846  | 5325.877 | 3241.761 | 25994.53 | 1897521  | 2984.129 |
| P35444 | 66920.28 | 80619.88 | 47733.94 | 53106.74 | 66586.52 | 84263.72 | 53976.38 | 49140.08 | 53393.52 | 91422.9  | 44509.61 | 59496.9  | 66578.9  | 68266.35 | 61255.5  | 61080    |
| P35446 | 6839.095 | 6072.222 | 2836.184 | 5659.489 | 5391.818 | 8615.803 | 7760.753 | 6061.237 | 4580.79  | 7822.059 | 7571.825 | 7300.986 | 4611.907 | 5929.764 | 3936.296 | 4370.726 |
| P35704 | 32863.1  | 32917.9  | 38873.38 | 51133.39 | 43711.94 | 38174.84 | 47107.57 | 51036.63 | 37376.93 | 33704.25 | 114777.8 | 49670.51 | 35266.95 | 51244.73 | 30417.48 | 29435.41 |
| P35745 | 2062.662 | 13213.58 | 26521.29 | 15847.53 | 6807.916 | 7589.998 | 3913.439 | 3029.533 | 3797.299 | 5599.733 | 11187.19 | 5657.652 | 9529.739 | 9544.168 | 4194.405 | 10348.38 |
| P35859 | 40675.73 | 41326.95 | 47438.17 | 39185.47 | 35916.19 | 42881.34 | 37027.15 | 52910.86 | 74725.16 | 34399.64 | 21523.53 | 32506.28 | 26333.06 | 48577.15 | 51496.98 | 19731.13 |
| P35952 | 40674.55 | 25358.4  | 12198.83 | 27459.67 | 26090.36 | 42516.77 | 21824.98 | 64161.24 | 12077.4  | 22427.92 | 18237.18 | 14552.42 | 18986.82 | 14183.13 | 15474.07 | 14750.97 |
| P36373 | 46160412 | 36496512 | 18755636 | 63002112 | 40881436 | 55311236 | 52331600 | 74543752 | 33490086 | 31118752 | 44926864 | 35746156 | 29242304 | 23771838 | 30720190 | 40002060 |
| P36374 | 3590852  | 825372.4 | 330791.6 | 4747786  | 1223785  | 2302472  | 2845830  | 3226157  | 362274.2 | 383006   | 7986766  | 1773488  | 920068.3 | 439950.3 | 872239.5 | 2051596  |
| P36375 | 68259.59 | 87571.13 | 52694.02 | 63045.15 | 159863.3 | 72568.98 | 42603.73 | 118185.9 | 44976.29 | 47497.6  | 21971.47 | 51952.78 | 45935.63 | 58337.21 | 49491.64 | 40739.88 |
| P36376 | 740348.8 | 1982893  | 2229708  | 1006105  | 1446078  | 845712.3 | 322830.8 | 2390605  | 1919953  | 647238.9 | 697875.4 | 1555110  | 447432.3 | 526135.7 | 2009476  | 333092.2 |
| P36860 | 2274.356 | 10958.71 | 24877.24 | 10932.97 | 2147.534 | 2702.295 | 10829.19 | 22699.97 | 26692.15 | 14935.39 | 35814.6  | 26995.68 | 21001.44 | 51595.93 | 24730.71 | 45868.31 |
| P36953 | 1203270  | 1504801  | 1463970  | 922929.7 | 634333.1 | 576634.4 | 1178895  | 643536.1 | 1457420  | 1625423  | 942622.1 | 1121425  | 1204605  | 1630888  | 1345397  | 1613636  |
| P36970 | 48141.43 | 18481.01 | 26907.55 | 38988.91 | 19702.23 | 25231.05 | 27648.65 | 38455.64 | 89978.67 | 31995.66 | 96581.05 | 46180.23 | 53290.25 | 51431.1  | 69356.47 | 28111.13 |
| P36972 | 24235.8  | 23764.23 | 20091.6  | 6630.254 | 15586.69 | 13373.27 | 22838.66 | 30849.91 | 38636.86 | 24183.16 | 34440.47 | 25673.07 | 17086.38 | 33862.16 | 26578.54 | 13514.92 |
| P37996 | 12696.99 | 14650.61 | 13505.72 | 13270.61 | 14806.72 | 19415.69 | 9151.429 | 8813.253 | 33946.37 | 17241.11 | 41980.61 | 27068.91 | 19074.93 | 11052.91 | 12764.67 | 21115.48 |
| P38438 | 102239.8 | 178483.7 | 140254.9 | 204530.5 | 159266.4 | 189372   | 150606.7 | 362056.3 | 85030.14 | 137387.3 | 53333.35 | 98390.47 | 74714.34 | 95005.16 | 93695.05 | 95119.73 |
| P38444 | 4871.71  | 9602.226 | 7987.35  | 7333.817 | 8143.296 | 8443.779 | 5745.648 | 4244.042 | 8288.865 | 10006.27 | 4822.673 | 7224.871 | 8327.542 | 5494.071 | 6737.14  | 6584.212 |
| P38652 | 12076.46 | 9806.316 | 11035.11 | 9171.152 | 12305.95 | 9841.021 | 14649.74 | 8672.513 | 29894.87 | 14072.63 | 23835.74 | 24906.97 | 22823.16 | 26631.9  | 16207.03 | 11673.31 |
| P38659 | 42171.93 | 89631.36 | 53894.01 | 83546.16 | 52247.95 | 72439.27 | 69752.73 | 54710.87 | 64266.68 | 63076.83 | 71477.95 | 53544.77 | 56045.5  | 50523.16 | 51451.71 | 52441.72 |
| P38918 | 83827.05 | 76704.37 | 64446.12 | 129465.2 | 121491.7 | 73121.34 | 71877.86 | 89065.63 | 265396.5 | 107759.2 | 337872.2 | 213502   | 245956.6 | 256719.6 | 145128.1 | 168166.3 |



|                   |          |          |          |          |          |          |          |          |          |          |          |          |          |          |          |          |
|-------------------|----------|----------|----------|----------|----------|----------|----------|----------|----------|----------|----------|----------|----------|----------|----------|----------|
| P39069            | 32201.05 | 22401.85 | 127535.4 | 18930.51 | 16182.19 | 35861.69 | 17141.34 | 14014.78 | 21826.1  | 35459.6  | 26557.99 | 16488.31 | 28615.12 | 30581.31 | 17116.02 | 16363.28 |
| P40241            | 99864.59 | 50893.86 | 42687.79 | 94414.38 | 44680.14 | 65068.75 | 85018.97 | 94284.83 | 22171.12 | 23145.33 | 135615.3 | 45664.1  | 41443.92 | 19251.27 | 25124.55 | 45958.77 |
| P41498            | 37096.38 | 31884.99 | 34662.7  | 36370.46 | 34774.27 | 54205.61 | 32198.58 | 48081.51 | 69890.09 | 32057.76 | 89858.6  | 57098.7  | 69144.7  | 68284.2  | 54848.4  | 52048.27 |
| P41562            | 99905.76 | 83022.61 | 97346.55 | 61625.65 | 142809.8 | 85713.46 | 100785.7 | 81171.41 | 139301.8 | 182343.4 | 170435.2 | 178714.5 | 180448.8 | 258706.6 | 199282   | 96070.66 |
| P41740            | 9578.208 | 13465.3  | 16889.04 | 8585.544 | 13676.76 | 2578.827 | 6618.264 | 9777.302 | 17101.57 | 10433.11 | 11906.87 | 12456.28 | 6722.533 | 17998.19 | 9146.83  | 8232.688 |
| P42123            | 345145.2 | 230398.3 | 324159.9 | 227003.8 | 364100.7 | 298953.6 | 306059.1 | 329217.3 | 493628   | 357796.6 | 290196.4 | 436687.4 | 381910.7 | 524006.2 | 383577.3 | 157807.9 |
| P42854            | 6491893  | 9627841  | 7888272  | 11007495 | 6736645  | 14116303 | 5209432  | 6386550  | 8514738  | 16993210 | 3308484  | 10200136 | 10993575 | 7804610  | 4361314  | 13357078 |
| P43303            | 335079.2 | 464709   | 409277.8 | 550764.2 | 541673.2 | 394674.7 | 602700.8 | 570800.8 | 429545.3 | 412911.9 | 254454.3 | 355867.3 | 270934.1 | 347643.6 | 318807.7 | 306541.6 |
| P43427            | 30040.02 | 28258.35 | 26134.15 | 38632.93 | 26235.25 | 34205.4  | 20249.47 | 39203.84 | 81039.01 | 36249.76 | 57194.48 | 69950.45 | 80703.52 | 61560.51 | 45134.69 | 35155.29 |
| P45479            | 54449.38 | 62001.03 | 91822.32 | 62605.75 | 63476    | 45744.59 | 64860.59 | 50439.01 | 36963.42 | 67638.98 | 40582.64 | 43201.91 | 47127.8  | 37502.44 | 30356.79 | 52156.11 |
| P45592            | 19420.02 | 17971.43 | 11040.79 | 15614.65 | 18500.58 | 19754.55 | 11832.94 | 14467.48 | 37541.78 | 18738.36 | 63385.83 | 30025.22 | 31363.89 | 17515.46 | 17005.77 | 28009.54 |
| P46413            | 140960.6 | 137088.8 | 89784.56 | 130077.8 | 160457.5 | 206630.5 | 123162.4 | 158464.2 | 287811.3 | 100780.9 | 547631.3 | 217525.9 | 278283.2 | 245955   | 189774.8 | 146082.8 |
| P46462            | 67126.51 | 39711.75 | 30705.31 | 80291.38 | 36954.36 | 95549.41 | 88940.28 | 116183.7 | 24286.79 | 20221.34 | 175644.7 | 42394.98 | 43690.84 | 37429.88 | 22581.21 | 61185.2  |
| P46720            | 112753.8 | 111209.2 | 38219.3  | 128602.2 | 154137.9 | 141252   | 75877.88 | 99284.3  | 325949.8 | 122056.4 | 296208.1 | 250013.8 | 223979.2 | 243060.6 | 194278.2 | 129670.8 |
| P46844            | 7625.535 | 10768.31 | 4522.167 | 10040.51 | 17134.76 | 11666.85 | 7480.315 | 8888.46  | 48881.23 | 14469.01 | 62349.38 | 30493.38 | 27760.9  | 33020.33 | 29179.31 | 15032.49 |
| P46953            | 46071.81 | 56017.56 | 38790.29 | 51321.41 | 72204.65 | 38789.11 | 64352.38 | 46378.24 | 74185.01 | 36371.33 | 127120.4 | 64938.73 | 82644.63 | 74224.52 | 66014.53 | 68479.1  |
| P47727            | 37608.64 | 27740.87 | 7993.056 | 26671.17 | 8393.09  | 27116.73 | 36505.6  | 67757.88 | 16074.15 | 35387.14 | 303728.1 | 60493.75 | 29459.72 | 41883.39 | 29619.9  | 64982.86 |
| P47820            | 114179.3 | 114426.6 | 136185.6 | 106139.1 | 151862.5 | 138104.6 | 142535   | 110988.3 | 83239.27 | 94785.54 | 111249.4 | 88109.75 | 89059.16 | 87057.53 | 87934.39 |          |
| P47853            | 281761.1 | 332176.6 | 263085.7 | 173009   | 408023   | 191847.8 | 303833.1 | 191452   | 261011.3 | 305921   | 247450   | 247426.6 | 338106.6 | 304754.9 | 183343.3 | 257828.2 |
| P47967            | 1031159  | 1809954  | 1321.711 | 1784601  | 11290.69 | 2314452  | 4777.388 | 2046917  | 3931970  | 1924490  | 814928.8 | 618800   | 890169.6 | 3994915  | 3411034  | 2647175  |
| P48032            | 4225.181 | 6586.233 | 6606.223 | 2982.983 | 5493.601 | 5111.41  | 2157.548 | 4176.529 | 7401.494 | 9308.636 | 2390.973 | 6497.466 | 2547.03  | 3790.068 | 7985.908 | 5984.287 |
| P48037            | 25239.57 | 19418.39 | 16186.61 | 22590.88 | 23209.61 | 14677.18 | 22064.43 | 42627.84 | 78457.96 | 32306.59 | 48259.73 | 64928.71 | 63536.84 | 37649.43 | 59290.44 | 37054.98 |
| P48199            | 1361876  | 1174285  | 1637973  | 1000849  | 608877.1 | 795451.7 | 1156525  | 1038265  | 1924052  | 1432450  | 898866.4 | 931899.3 | 1158792  | 1363462  | 1744864  | 1206925  |
| P48284            | 14829.08 | 20603.82 | 15053.09 | 17627.74 | 11753.89 | 15731.49 | 18384.44 | 15467.35 | 11085.68 | 11775.59 | 16108.38 | 9552.783 | 13504.64 | 7924.962 | 13780.52 | 9888.417 |
| P48500            | 110542.5 | 98168.21 | 117855.6 | 105983   | 126143   | 128927.9 | 162981.5 | 223316.3 | 125863.3 | 158338.6 | 162001.1 | 144123.1 | 128701.5 | 223695   | 151446.9 | 83810.14 |
| P48508            | 113748.6 | 137939.5 | 114304.5 | 157884.5 | 161654.2 | 162269   | 114317.9 | 145504.9 | 572429.4 | 197791.8 | 722202.8 | 435321.5 | 459144.8 | 446641.6 | 321369.9 | 311493.7 |
| P49002            | 4294.443 | 4599.471 | 5210.724 | 7702.545 | 7557.956 | 6215.005 | 3598.611 | 7567.717 | 7334.487 | 7977.505 | 8339.083 | 2726.773 | 3986.39  | 6554.622 | 4822.298 | 3789.353 |
| P49134            | 14804.42 | 85857.4  | 31303.31 | 20552.89 | 18739.94 | 28227.51 | 15320.14 | 9080.391 | 13920.04 | 17801.97 | 14821.28 | 26550.92 | 35777.73 | 37642.3  | 23860.36 | 22461.72 |
| P49744            | 14338.3  | 11266.81 | 7266.813 | 16849.78 | 9919.633 | 13121.05 | 12109.03 | 9550.403 | 10047.35 | 11527.77 | 7871.109 | 9369.716 | 13753.98 | 13441.69 | 12629.06 | 17892    |
| P50115            | 14187.37 | 51377.51 | 36619.28 | 35265    | 57615.39 | 76515.75 | 136002.8 | 79248.84 | 9782.252 | 9932.17  | 15949.1  | 5860.642 | 10569.78 | 6546.194 | 8617.467 | 12307.24 |
| P50116            | 21310.26 | 95067.42 | 22404.46 | 60909.47 | 144951.2 | 131884.8 | 212142.7 | 49179.98 | 22375.81 | 22349.42 | 20608.98 | 12185.78 | 3831.834 | 10108.3  | 5707.234 | 4145.992 |
| P50123            | 1223430  | 1112722  | 1086470  | 1164498  | 2101081  | 859426.5 | 905499.5 | 1535532  | 1453844  | 811348.6 | 1070519  | 1534961  | 929463.3 | 1097166  | 1648836  | 1121182  |
| P50137            | 16542.61 | 19430.77 | 23997.77 | 16348.92 | 26182.65 | 21195.8  | 33219.67 | 29117.68 | 43206.85 | 29274.86 | 31295.55 | 40918.83 | 23680.99 | 39085.47 | 20597.91 | 19836.61 |
| P50280            | 22829.28 | 28993.95 | 10586.84 | 23509.8  | 8601.291 | 30594.96 | 20992.1  | 47463.16 | 4535.977 | 5373.712 | 22630.14 | 4350.346 | 2864.47  | 8386.029 | 11347.16 | 13281.9  |
| P50398            | 43768.04 | 41942.96 | 27680.72 | 45839.18 | 42995.78 | 34417.76 | 36939.68 | 33306.88 | 43428.38 | 36250.78 | 75290.64 | 47657.82 | 52761.5  | 61715.15 | 41056.59 | 38994.56 |
| P50399            | 60802.1  | 43723.99 | 37380.36 | 32963.36 | 59245.23 | 37979.2  | 44788.42 | 64015.56 | 94343.73 | 27774.52 | 91861.34 | 60579.07 | 42372.02 | 65965.46 | 45975.93 | 50806.55 |
| P50430            | 342754.9 | 393720.4 | 393314.3 | 409383.6 | 362338.9 | 384107.8 | 296421.6 | 292553.3 | 234280.3 | 359985.1 | 261881.1 | 274307.6 | 255773.4 | 356896.2 | 370117.3 | 409328.3 |
| P50503            | 8929.769 | 6452.952 | 6389.413 | 9865.293 | 17905.04 | 13751.77 | 7952.485 | 7535.398 | 15003.32 | 7502.892 | 27576.42 | 11767.27 | 13147.93 | 13277.94 | 9813.501 | 11658.18 |
| P50609            | 18145.55 | 23815.85 | 16938.25 | 24584.14 | 17686.5  | 24165.29 | 18010.5  | 24470.16 | 14243.14 | 22741.97 | 19204.9  | 14904.68 | 24218.99 | 18358.75 | 32204.17 | 14491.46 |
| P51635            | 615183.8 | 341155.6 | 505199.5 | 351405.5 | 495458.5 | 342857.9 | 496030.1 | 567415.9 | 1037581  | 824959   | 917033.9 | 817850.1 | 675501.5 | 1186584  | 534357.7 | 527855.9 |
| P51647            | 16839.35 | 19054.24 | 30479.09 | 21223    | 21163.12 | 24604.24 | 25552.96 | 25708.05 | 22491.09 | 24624.15 | 23533.43 | 26577.35 | 21596.85 | 28679.3  | 30544.9  | 12301.22 |
| P51740            | 16519.93 | 13591.63 | 6104.298 | 19510.73 | 7029.33  | 163496.2 | 16127.05 | 19090.33 | 12509.03 | 8821.024 | 12310.2  | 6517.471 | 14349.67 | 10293.64 | 7547.117 | 6883.272 |
| P51792;P51794;P51 | 4636.492 | 8982.425 | 5733.07  | 6297.671 | 16347.05 | 6477.247 | 4184.522 | 10220.31 | 11525.26 | 3400.997 | 12891.9  | 10159.36 | 5251.271 | 8586.506 | 5811.798 | 5630.925 |
| P51886            | 37830.53 | 60293.5  | 27652.53 | 39410.47 | 55365.58 | 41265.55 | 40494.66 | 32132.61 | 52498.3  | 79288.91 | 31663.94 | 54045.76 | 39197.26 | 51815.82 | 51502.76 | 33672.22 |
| P51907            | 37646.18 | 26247.55 | 44279.88 | 32270.78 | 54685.88 | 37730.51 | 23089.81 | 30755.17 | 94148.86 | 19718.61 | 124733.9 | 91973.27 | 50755.46 | 79662.99 | 43495.71 | 49736.37 |
| P52590            | 6040092  | 5710925  | 2444312  | 3188662  | 8901668  | 7821860  | 1971415  | 1824090  | 1022650  | 146551.3 | 701476.9 | 476881.6 | 1175107  | 3653831  | 216541.4 | 2150571  |
| P52759            | 565875.5 | 452681.8 | 390788.7 | 679925   | 551444.8 | 51094.9  | 465265.8 | 797467.3 | 990607.5 | 686856.8 | 1199796  | 890720.1 | 701344.5 | 705082   | 639423.8 | 708729.6 |
| P52796            | 39859.51 | 45225.17 | 30818.44 | 54206.18 | 39965.08 | 42949.18 | 43629.19 | 11653.89 | 24485.67 | 22453.42 | 19554.49 | 22771.05 | 31872.14 | 29472.19 | 32955.83 |          |
| P52847            | 13102.84 | 11835.67 | 11193.63 | 11818.63 | 12422.5  | 2552.397 | 11682.6  | 15709.19 | 33668.74 | 17494.88 | 25552.19 | 27937.84 | 25736.42 | 22366.59 | 26977.69 | 14422.31 |

|               |          |          |          |          |          |          |          |          |          |          |          |          |          |          |          |          |
|---------------|----------|----------|----------|----------|----------|----------|----------|----------|----------|----------|----------|----------|----------|----------|----------|----------|
| P53369        | 75558.26 | 99321.97 | 151081.1 | 86541.94 | 104860.8 | 103025.6 | 87237.41 | 72411.3  | 84471.96 | 98205.71 | 70482.91 | 85671.16 | 74322.16 | 87365.82 | 75999.12 | 66493.86 |
| P53790        | 59869.47 | 50233.64 | 29330.78 | 64065.68 | 75255.55 | 54439.19 | 40127.27 | 37401.25 | 181777.1 | 40152.6  | 203082.7 | 136485.8 | 139416   | 139780.3 | 89162.43 | 62812.13 |
| P53792        | 25610.83 | 18145.38 | 23894.02 | 10778.24 | 26579.91 | 18792.71 | 7888.743 | 5955.185 | 28376.51 | 17371.76 | 13218.34 | 35332.23 | 20454.02 | 22261.88 | 19839.5  | 19363.99 |
| P53812        | 11533.11 | 8968.102 | 7243.561 | 13874.62 | 10716.51 | 12732.67 | 7331.255 | 6882.987 | 16215.01 | 11835.99 | 20468.69 | 12982.78 | 10218.47 | 18610.08 | 10464.98 | 6595.484 |
| P53813        | 119908   | 95368.56 | 56400.99 | 136517.8 | 97466.05 | 123568   | 88016.45 | 77476.95 | 35173.57 | 68741.55 | 99697.23 | 66805.37 | 97398.46 | 73692.74 | 60231.29 | 69616.06 |
| P54311        | 59061.23 | 51220.56 | 30159.5  | 45698.37 | 36316.62 | 79179.78 | 42344.67 | 88341.44 | 69944.78 | 31907.91 | 140079.8 | 60241.18 | 65779.94 | 43914.21 | 36403.47 | 66085.77 |
| P54313        | 239491.9 | 144301.1 | 103354.4 | 174931.6 | 190884.3 | 193466   | 162869   | 233962.8 | 245326.3 | 108639.1 | 483444.2 | 279083.5 | 236179.4 | 190772.6 | 215303.9 | 229350.7 |
| P54921        | 3160.813 | 6434.007 | 6539.378 | 2619.853 | 6806.219 | 2763.888 | 9135.195 | 2840.587 | 24793.19 | 1613.669 | 43067.61 | 15227.25 | 19599.35 | 3011.005 | 2375.27  | 14940.43 |
| P55018        | 8023.58  | 15336.35 | 17490.31 | 24636.51 | 17867.98 | 17289.14 | 21613.57 | 12269.61 | 23176.36 | 24354.83 | 17925.69 | 14180.34 | 19807.14 | 22798.12 | 15233.53 | 10270.28 |
| P55053        | 15123.72 | 23727.36 | 17154.04 | 13696.6  | 12234.39 | 13341.46 | 16326.72 | 13785.55 | 13779.02 | 13915.52 | 22399.57 | 14395.54 | 14961.18 | 13122.28 | 11222.59 | 17416.21 |
| P55091        | 25356.19 | 79408.07 | 10563.95 | 35578.62 | 15264.24 | 44441.27 | 31930.53 | 31773.35 | 8887.547 | 12975.94 | 9865.27  | 5311.429 | 6954.288 | 3128.455 | 2280.699 | 1638.589 |
| P55146        | 58270.36 | 60684.12 | 76216.37 | 86495.79 | 54507.81 | 52831.67 | 50152.57 | 77191.29 | 69867.97 | 68737.02 | 38757.75 | 66253.33 | 68774.04 | 45594.34 | 69904.88 | 53866.55 |
| P55159        | 19454.5  | 21848.63 | 28419.35 | 18390.29 | 12276.48 | 21810.95 | 8523.785 | 13445.72 | 20478.29 | 21609.76 | 4637.361 | 9994.738 | 15599.15 | 19164.74 | 15625.73 | 31430.29 |
| P55260        | 33441.3  | 42719.54 | 28710.64 | 59537.04 | 38445.07 | 36752.27 | 45638.73 | 83115.42 | 54333.31 | 34591.43 | 126293.3 | 66683.8  | 59521.07 | 52267.52 | 52293.83 | 50360.79 |
| P55281        | 8889.339 | 13674.63 | 10462.34 | 9760.33  | 14690.82 | 18743.71 | 9374.571 | 9057.028 | 19885.36 | 10665.57 | 8409.44  | 14753.52 | 8833.657 | 10988.09 | 6030.863 | 10913.79 |
| P55314        | 5599.949 | 11147.9  | 6038.257 | 4061.147 | 657630.3 | 336940.4 | 8510.264 | 2873.647 | 4980.314 | 6795.516 | 263363.3 | 3788.018 | 3282.273 | 5373.849 | 7796.335 | 8401.27  |
| P57097        | 48274.21 | 62413.23 | 58395.45 | 54119.76 | 66152.84 | 49267.14 | 47685.29 | 46884.21 | 50761.41 | 50861.03 | 42463.39 | 41080.23 | 52627.9  | 65655.25 | 44837.04 | 30532.18 |
| P57113        | 2095.518 | 5542.324 | 4009.999 | 5710.014 | 5638.108 | 1715.934 | 649.1592 | 4273.851 | 18037.37 | 2412.57  | 12518.26 | 8922.033 | 8119.069 | 7125.079 | 7824.975 | 4987.58  |
| P59647        | 39142.57 | 35259.21 | 43064.88 | 36955.65 | 40053.64 | 52792.47 | 46153.13 | 45157.69 | 65861.6  | 77612.51 | 42518.53 | 46426.36 | 64568.69 | 16733.02 | 33886.18 | 48848.54 |
| P60711;P63259 | 1361207  | 1394741  | 681882.3 | 1523924  | 1524137  | 1234619  | 1139639  | 1395172  | 3378018  | 1312344  | 4356966  | 2746226  | 2856009  | 2543997  | 2285033  | 1851425  |
| P60901        | 6955.236 | 7120.992 | 6602.671 | 6243.799 | 5586.099 | 4910.7   | 6558.307 | 7890.931 | 10127.41 | 3307.97  | 6780.92  | 8334.093 | 10056.12 | 7296.498 | 2733.642 | 3952.36  |
| P60905        | 21547.18 | 7483.346 | 4969.347 | 18365.71 | 9022.697 | 13369.93 | 10580.9  | 20854.08 | 10987.07 | 5484.976 | 45651.07 | 10093.18 | 10965.67 | 7170.399 | 7842.456 | 13744.01 |
| P61107        | 14040.07 | 13789.21 | 15057.15 | 11593    | 8472.633 | 16860.64 | 8949.666 | 14116.42 | 6556.51  | 11525.64 | 15378.2  | 8378.729 | 10979.09 | 12523.66 | 7361.818 | 15178.23 |
| P61206;P84079 | 34256.87 | 27857.49 | 23778.26 | 38983.21 | 36104.27 | 52383.93 | 20915.61 | 33314.49 | 53923.61 | 10056.92 | 98083.88 | 40479.7  | 27078.46 | 27047.35 | 18904.45 | 19173.29 |
| P61459        | 104941.4 | 93692.72 | 87499.11 | 17105.84 | 133224.5 | 75079.19 | 80783.8  | 78105.34 | 114575   | 99174.26 | 82442.16 | 88154.59 | 70097.89 | 119295.2 | 75110.6  | 56362.57 |
| P61589        | 43129.47 | 23428.74 | 25904.22 | 36346.96 | 37338.32 | 47225.6  | 34630.81 | 68976.66 | 39983.1  | 25353.42 | 151003.1 | 57735.94 | 36515.85 | 40946.37 | 36814.98 | 53784.39 |
| P61943        | 16000.34 | 14453.46 | 12952.42 | 16903.01 | 14463.24 | 18366.2  | 16182.75 | 21214.98 | 25719.46 | 23910.64 | 12756.16 | 24546.25 | 15711.64 | 16918.36 | 11821.82 | 14902.07 |
| P61972        | 249279.5 | 333023.4 | 340972.8 | 387615.2 | 357093.6 | 304689.9 | 177872   | 448189.5 | 688932.8 | 447985.6 | 207187.2 | 457689.2 | 309662.7 | 406480.5 | 390881.8 | 390406.7 |
| P61983        | 29919.34 | 35600.18 | 10948.32 | 35263.26 | 34756.1  | 49839.78 | 38195    | 55076.07 | 52254.87 | 26327.78 | 48798.24 | 43225.74 | 37415.58 | 50308.86 | 34957.67 | 23815.07 |
| P62260        | 74958.84 | 67582.38 | 52340.13 | 84680.48 | 73549.83 | 56271.52 | 75009.17 | 85044.77 | 80325.71 | 74161.33 | 202582.4 | 87367.35 | 78019.27 | 85986.14 | 68553.48 | 69544.39 |
| P62630        | 201664.3 | 201665.8 | 156131.5 | 201147.6 | 255205.8 | 267993.5 | 203299.6 | 265128.4 | 607066.3 | 211476.1 | 668492.2 | 447950.8 | 395930.7 | 436793.8 | 320832.6 | 272792.8 |
| P62749        | 29996.35 | 26057.97 | 18620.01 | 39575.65 | 43289.53 | 36448.95 | 24828.57 | 46816.22 | 99510.73 | 32448.96 | 72433.73 | 38717.59 | 40180.7  | 49360.98 | 43822.65 | 33800.57 |
| P62775        | 6089.899 | 11091.37 | 12971.36 | 9840.344 | 9982.859 | 8710.743 | 7801.752 | 11226.35 | 28513.02 | 9316.951 | 6109.452 | 12500.06 | 12994.88 | 12532.09 | 12592.95 | 14689.63 |
| P62804        | 17866.02 | 119722   | 29777.81 | 39600.66 | 38282.86 | 36694.3  | 109817.6 | 94353.36 | 47270.92 | 70134.77 | 125762.6 | 105268.8 | 42280.15 | 82827.34 | 17949.15 | 106189.7 |
| P62815        | 20230.24 | 16592.61 | 36820.56 | 14352.8  | 19460.88 | 18568.94 | 17900.69 | 24889.18 | 39795.58 | 34659.06 | 32508.81 | 44280.44 | 37925.93 | 42142.15 | 26787.84 | 29308.38 |
| P62828;Q8K586 | 13593.24 | 13179.32 | 14121.54 | 11548.03 | 14627.76 | 13030.48 | 14136.12 | 9820.609 | 19006.27 | 13637.93 | 25601.73 | 17498.72 | 17636.58 | 16787.61 | 9905.699 | 14531.39 |
| P62836        | 36945.92 | 32979.23 | 27702.83 | 54591.51 | 32596.62 | 45637.72 | 40634.39 | 69065.5  | 44882.46 | 31905.51 | 181275.8 | 39884.48 | 46924.53 | 43861.21 | 30814.13 | 56964.29 |
| P62898        | 17960    | 41662.86 | 65805.28 | 62829.54 | 46440.91 | 67048.89 | 87761.1  | 81149.15 | 39631.54 | 44800.13 | 28536.48 | 47080.26 | 34473.65 | 46547.77 | 31093.24 | 37389.31 |
| P62959        | 60105.24 | 45585.46 | 50180.91 | 37690.59 | 127685   | 52859.11 | 46796.95 | 79277.74 | 80373.25 | 30965.83 | 127182.7 | 54544.64 | 51081.91 | 49683.33 | 46132.16 | 59704.52 |
| P62963        | 73647.96 | 52049.25 | 47217.11 | 54039.95 | 37539.09 | 43497.59 | 61905.23 | 67235.19 | 106212.6 | 58210.36 | 120723.2 | 74165.36 | 88676.81 | 92615.76 | 65474.34 | 85792.01 |
| P63018        | 350380.6 | 267480.2 | 261700.3 | 299461.2 | 330208.8 | 294502.4 | 348377.3 | 391319.7 | 424890.8 | 286797.7 | 772385.6 | 455197.3 | 446929.3 | 473833.8 | 321138.8 | 370288.6 |
| P63029        | 31833.34 | 42436.61 | 30573.03 | 7945.103 | 19746.8  | 36910.31 | 16340.16 | 25633.94 | 14161.6  | 17527.25 | 44190.55 | 12941.68 | 16647.27 | 18965.15 | 8353.563 | 10770.55 |
| P63081        | 17616.53 | 19836.24 | 15367.47 | 20074.06 | 19085.57 | 2049.845 | 11549.9  | 17352.63 | 31963.96 | 22378.92 | 66433.34 | 41604.41 | 21296.04 | 19539.5  | 33009.36 | 22657.24 |
| P63095        | 115097.7 | 83558.72 | 69728.22 | 130308.6 | 119036.1 | 144153.2 | 83750.26 | 238436.3 | 271930.9 | 61400.8  | 354395.9 | 180266.6 | 114370.7 | 117840.4 | 98047.77 | 100735.7 |
| P63102        | 175900.3 | 134371.8 | 128570.8 | 116623.7 | 148865.8 | 124379.9 | 130169.5 | 163155.2 | 119255.4 | 109929.4 | 323327.1 | 200061.7 | 180742.4 | 198817.7 | 144369.4 | 149994.7 |
| P63322        | 8767.484 | 6956.545 | 3250.379 | 9130.752 | 5755.774 | 7698.818 | 10198.2  | 7275.406 | 9934.985 | 3535.001 | 26578.14 | 11585.81 | 7283.595 | 6255.421 | 4613.426 | 11890.59 |
| P68035;P68136 | 2075501  | 2106299  | 1308116  | 2063729  | 2721587  | 1883873  | 1976881  | 2040810  | 5264873  | 2131122  | 8624289  | 4361131  | 3847117  | 4194291  | 3111997  | 2794971  |
| P68255        | 23679.48 | 16926.75 | 23644.37 | 24411.83 | 15402.21 | 17260.08 | 15905.29 | 13131.41 | 40457.17 | 21355.95 | 26415.34 | 43234.27 | 28283.99 | 28875.24 | 21677.86 | 16177.99 |
| P68370        | 70267.19 | 45843.88 | 19377.57 | 32438.08 | 33941.34 | 67808.7  | 47238.01 | 62007.1  | 43652.21 | 32443.6  | 49630.07 | 47058.27 | 34815.09 | 40134.8  | 20665.15 | 29140.53 |

|        |          |          |          |          |          |          |          |          |          |          |          |          |          |          |          |          |
|--------|----------|----------|----------|----------|----------|----------|----------|----------|----------|----------|----------|----------|----------|----------|----------|----------|
| P68511 | 2693.06  | 5613.602 | 8315.558 | 7708.573 | 4780.663 | 5435.749 | 6017.315 | 4658.555 | 6939.611 | 7545.819 | 14737.16 | 4749.496 | 6333.852 | 7705.821 | 4634.78  | 4303.978 |
| P69897 | 54819.43 | 35789.98 | 21007.39 | 27017.35 | 22769.67 | 58211.59 | 47098.27 | 49410.33 | 40905.88 | 27472.46 | 44956.9  | 34457.37 | 26530.04 | 22139.23 | 18631.97 | 21704.55 |
| P70470 | 21845.06 | 18545.23 | 15287.07 | 27231.93 | 15337.31 | 25259.41 | 23093.21 | 30200.9  | 15791.41 | 15904.27 | 34911.31 | 24888.87 | 16393.06 | 39060.29 | 19320.33 | 19583.86 |
| P70490 | 117456.6 | 100985.5 | 97003.2  | 100843.3 | 78966.19 | 102968.1 | 129883.4 | 136182.7 | 99664.94 | 98009.63 | 81583.93 | 106296.6 | 82842.66 | 53907.27 | 90197.3  | 51363.54 |
| P70502 | 128466.7 | 133358.1 | 20937.28 | 184102.8 | 108725.3 | 86429.49 | 87975.19 | 69717.4  | 124217.2 | 78532.43 | 97225.22 | 133441.5 | 124995.4 | 117364.1 | 77353.4  | 75266.22 |
| P70545 | 33362.63 | 26221.08 | 36659.6  | 29753.97 | 28827.37 | 31527.96 | 26942.58 | 20561.56 | 13148.68 | 16519.41 | 42903.49 | 51679.76 | 80458.13 | 74787.95 | 84300.41 | 38890.29 |
| P70549 | 1631.996 | 22407.67 | 6910.908 | 12783.79 | 18023.75 | 3065.455 | 7678.419 | 7122.958 | 12300.08 | 9557.574 | 20544.65 | 6683.016 | 289.5305 | 8474.301 | 4549.247 | 11817.91 |
| P70619 | 34117.63 | 15853.7  | 39380.3  | 19719.17 | 12241.75 | 26967.03 | 23982.6  | 55592.82 | 53903.98 | 50581.46 | 41321.75 | 60221.29 | 52096.27 | 73487.06 | 47448.79 | 52371.53 |
| P70709 | 32190.91 | 53051.66 | 59765.72 | 53121.64 | 40573.2  | 39326.89 | 84771.8  | 51795.86 | 40915.11 | 26414.11 | 65856.84 | 67148.44 | 15551.05 | 15065.74 | 13859.98 | 18276.26 |
| P70712 | 1484.779 | 4536.971 | 3558.678 | 4530.984 | 3772.071 | 1821.299 | 3043.549 | 1636.497 | 2126.316 | 4005.847 | 3857.935 | 2849.889 | 2349.187 | 3517.929 | 1848.426 | 4143.419 |
| P80020 | 87335.89 | 153728.7 | 57548.1  | 607701.9 | 36043.79 | 80472.61 | 33743.6  | 51840.25 | 22460.1  | 28942.39 | 25129.52 | 10742.32 | 34842.35 | 20731.28 | 22408.31 | 70900.81 |
| P80067 | 567179.3 | 916665.6 | 830697.1 | 804324.2 | 786326.5 | 825613.8 | 660966.9 | 789176.4 | 670446.2 | 612407.4 | 298019.7 | 512068.1 | 390551.2 | 748864.3 | 721511.9 | 525351.9 |
| P80201 | 58654.2  | 159463.8 | 113614.2 | 75211.16 | 67884.38 | 96992.73 | 50103.19 | 133204.9 | 123573   | 143980.7 | 41116.29 | 108173.4 | 87530.6  | 55866.29 | 115853.9 | 70198.38 |
| P80202 | 234732   | 350641.3 | 305610.2 | 148686.3 | 188665.7 | 329062.1 | 196268.7 | 463603.3 | 380015.7 | 298732   | 146697.9 | 257315.2 | 200311.3 | 120356.4 | 212517.7 | 311252.5 |
| P80204 | 47058.4  | 69073.75 | 73506.66 | 53079.08 | 35750.25 | 67977.13 | 36286.06 | 63269.38 | 57527.89 | 96183.69 | 35433.25 | 67191.8  | 57247.88 | 67648.7  | 66486.66 | 61299.37 |
| P80254 | 105020.3 | 73209.97 | 116094.6 | 119953   | 105433.1 | 79921.2  | 55902.64 | 147616   | 144278.9 | 64286.93 | 88730.44 | 168753.5 | 98548.96 | 142702.5 | 109928.8 | 105490   |
| P80299 | 493939   | 887702.3 | 224455.4 | 752332.4 | 146962   | 444706.4 | 686763.6 | 5039.603 | 72725.96 | 187979.6 | 8987.923 | 84476.83 | 254838.5 | 14212.45 | 20015.34 | 4107.433 |
| P81556 | 13811.99 | 11193.6  | 9479.148 | 12704.9  | 7765.229 | 15225.49 | 18817.28 | 7795.833 | 9009.027 | 2450.949 | 53544.57 | 7460.432 | 7363.952 | 7403.366 | 8239.798 | 13461.4  |
| P81827 | 1.08E+08 | 1.27E+08 | 1.33E+08 | 1.26E+08 | 95881192 | 1.43E+08 | 1.61E+08 | 1.53E+08 | 1.86E+08 | 1.7E+08  | 85260312 | 1.74E+08 | 1.19E+08 | 62254400 | 1.63E+08 | 1.81E+08 |
| P81828 | 1.44E+08 | 1.52E+08 | 1.26E+08 | 1.31E+08 | 1.53E+08 | 1.02E+08 | 1.19E+08 | 1.36E+08 | 95644728 | 1.18E+08 | 96724688 | 1.48E+08 | 1.09E+08 | 91808440 | 1.02E+08 | 1.63E+08 |
| P82252 | 26281.81 | 24809.28 | 24385.85 | 25213.16 | 30738.12 | 34274.78 | 23734.28 | 27799.9  | 58501.86 | 17502.19 | 61517.47 | 52180.24 | 41056.93 | 46666.86 | 35084.13 | 24695.05 |
| P82450 | 163126.3 | 236489.8 | 197705.5 | 261156.5 | 240714   | 124206   | 164083.8 | 268208.4 | 191595.8 | 318277.2 | 120826.7 | 308195.6 | 222753.6 | 273448.4 | 282518.2 | 274463   |
| P82471 | 5594.516 | 16302.23 | 9066.799 | 83825.35 | 14692.49 | 10042.31 | 146656.5 | 58021.79 | 19655.71 | 5331.688 | 22663.15 | 13600.86 | 15719.79 | 10568.34 | 7336.154 | 9721.623 |
| P82995 | 39420.83 | 46840.03 | 73837.67 | 36167.32 | 37148.96 | 53945.97 | 35039.01 | 40720.78 | 33266.05 | 27479.44 | 89633.36 | 38903.74 | 28929.86 | 30108.17 | 136867.9 | 41627.56 |
| P83121 | 67528832 | 71422264 | 80330096 | 62695536 | 60804640 | 69429056 | 56496572 | 62730440 | 5698826  | 57879444 | 38817124 | 45690584 | 42482828 | 39050300 | 48996976 | 66976496 |
| P84039 | 21352.29 | 41152.46 | 27392.43 | 29881.52 | 20596.76 | 37912.29 | 37968.55 | 68038.46 | 38480.41 | 54149.86 | 18551.01 | 34365.92 | 35506.13 | 29152.81 | 44752.57 | 57843.36 |
| P85968 | 16645.7  | 16967.01 | 13457.66 | 16659.22 | 17187.65 | 15958.16 | 14446.64 | 18175.57 | 27508.32 | 18554.41 | 45023.8  | 29890.64 | 27625.45 | 37267.95 | 22282.96 | 21188.5  |
| P85971 | 961244.2 | 1393672  | 2103569  | 1079802  | 763416.9 | 1264577  | 843322.1 | 1273811  | 1675354  | 1030957  | 628031.9 | 1126689  | 736055.6 | 914590.7 | 791705.7 | 885685.6 |
| P85973 | 25980.5  | 30362.69 | 17654.03 | 39059.99 | 36271.57 | 34165.79 | 39390.67 | 35814.2  | 34355.27 | 28278.76 | 60281.34 | 39199.84 | 33767.94 | 51680.29 | 29881.4  | 28170.49 |
| P97523 | 19255.12 | 15717.3  | 10112.5  | 20349.32 | 12745.38 | 19555.88 | 21151.54 | 34771.71 | 17423.88 | 12394.36 | 68846.87 | 16477.49 | 13360.36 | 12633.47 | 12327.32 | 24626.32 |
| P97532 | 16711.49 | 9171.118 | 23885.4  | 17080.88 | 8005.416 | 25038.61 | 12494.75 | 15140.62 | 4623.57  | 15922.76 | 10559.72 | 8799.141 | 11489.62 | 11016.69 | 6895.701 | 12130.87 |
| P97546 | 753976.8 | 1147450  | 986102.9 | 1096135  | 1345264  | 1049369  | 933376.8 | 1160306  | 888486.6 | 1188381  | 541856.4 | 946005.8 | 890746.1 | 731954.8 | 863547.6 | 838402   |
| P97553 | 84814.23 | 64147.64 | 71456.39 | 20955.48 | 53816.05 | 45278.42 | 55428.27 | 74897.05 | 80748.02 | 70020.98 | 44354.98 | 65395.23 | 45503.55 | 39016.2  | 47555.29 | 36329.04 |
| P97574 | 119655.2 | 152701.9 | 84238.45 | 193542.4 | 89790.33 | 113495.8 | 174205.8 | 83863.75 | 89972    | 67588.64 | 59943.77 | 68197.5  | 74910.2  | 70768.36 | 88900.47 | 57602.58 |
| P97580 | 6317562  | 3521654  | 2089922  | 2306476  | 336668.8 | 2145402  | 475837.8 | 4355145  | 56520.07 | 1320933  | 184219.8 | 44554.73 | 619291.7 | 1221181  | 449319.6 | 1089808  |
| P97584 | 7922.899 | 10636.85 | 7834.111 | 8714.035 | 7453.425 | 8304.484 | 15043.9  | 19677.01 | 18195.55 | 13316.08 | 43074.55 | 13931.22 | 10341.98 | 17770.12 | 11363.66 | 11043.58 |
| P97603 | 67600.76 | 82908.7  | 70664.17 | 108289.7 | 59596.9  | 93082.08 | 80511.34 | 95735.71 | 92549.3  | 90015.34 | 75620.27 | 69705.17 | 65591.3  | 77526.98 | 74029.91 | 68393.81 |
| P97605 | 70247.25 | 104449.5 | 101416.8 | 18984.82 | 99116.7  | 107821.6 | 83238.38 | 102285.8 | 41921.84 | 117318.1 | 32451.53 | 18368.27 | 62717.39 | 44388.18 | 72993.77 | 88848.45 |
| P97608 | 3918.186 | 7865.31  | 6530.202 | 7075.42  | 8074.612 | 9151.911 | 3418.832 | 4066.27  | 10130.5  | 5250.222 | 12718.48 | 10188.79 | 15773.15 | 7467.365 | 6876.842 | 1809.288 |
| P97615 | 6481.814 | 13245.92 | 11918.86 | 6134.068 | 2764.582 | 6226.903 | 5829.081 | 6947.05  | 7730.119 | 6546.941 | 3241.919 | 7164.438 | 4100.271 | 5665.742 | 3174.79  | 5947.225 |
| P97675 | 123822.4 | 188858.2 | 108311.4 | 128108.9 | 100484.4 | 97798.69 | 104144.5 | 168359.7 | 107205.2 | 80900.76 | 199013.3 | 123576.2 | 153556.3 | 111455.4 | 92191.49 | 111772   |
| P97697 | 25433.63 | 29463.94 | 12300.49 | 46038.43 | 42996.74 | 19067.23 | 33373.95 | 35588.88 | 34688.81 | 14649.21 | 27895.83 | 16036.34 | 30904.6  | 14630.37 | 10351.64 | 19327.03 |
| P97710 | 38769.11 | 40880.77 | 20891.56 | 54115.42 | 61123.38 | 46476.5  | 33767.82 | 43233.36 | 29615.42 | 36614.91 | 35913.39 | 30563.74 | 29456.7  | 36436.12 | 38335.24 | 18596.29 |
| P97829 | 69040.21 | 217992.9 | 72567.92 | 93999.09 | 120033.4 | 113434.9 | 99424.74 | 68274.48 | 47444.41 | 94773.79 | 61284.2  | 56356.05 | 65999.39 | 66216.32 | 62118.93 | 59071.77 |
| P97840 | 130381.1 | 390538.2 | 35034.77 | 34636.76 | 44711.89 | 356877.7 | 22847.58 | 332149.5 | 519676.8 | 238997.8 | 181515.3 | 91332.52 | 181351.1 | 529913.3 | 343696.7 | 284904.9 |
| P98089 | 19166.14 | 158723.7 | 13752.58 | 79239.82 | 15037.69 | 50681.55 | 43623.25 | 74460.34 | 2263.645 | 3142.149 | 3697.92  | 16221.95 | 7416.181 | 4146.482 | 6195.788 | 2437.678 |
| P98158 | 1080423  | 1304589  | 1197544  | 1348882  | 1436792  | 1178783  | 1336734  | 1230503  | 1075545  | 1510482  | 947649.9 | 1730698  | 1412063  | 1357064  | 1336007  | 1339396  |
| P98166 | 13251.49 | 11009.85 | 14107.76 | 12492.08 | 5825.262 | 15061.28 | 10550.35 | 20709.5  | 9463.482 | 9019.424 | 4783.257 | 9474.04  | 7375.764 | 3601.529 | 6573.498 | 7988.222 |
| Q00238 | 259464   | 284484.1 | 262348.5 | 276335.7 | 344478.6 | 346269.1 | 256263   | 239718.6 | 287826.2 | 299556.8 | 170378.8 | 243201.8 | 247239   | 229725.2 | 244230.4 | 206501.7 |

|        |          |          |          |          |          |          |          |          |          |          |          |          |          |          |          |          |
|--------|----------|----------|----------|----------|----------|----------|----------|----------|----------|----------|----------|----------|----------|----------|----------|----------|
| Q00495 | 41214.73 | 64128.82 | 81617.34 | 43111.63 | 44947.17 | 61982.84 | 40274.53 | 96383.84 | 66572.53 | 116172.8 | 35537.82 | 97934.13 | 94882.91 | 98835.27 | 93671.2  | 62961.26 |
| Q00657 | 205750.9 | 200273   | 171884.5 | 296999.5 | 583192.8 | 183981.2 | 144426.5 | 169359.3 | 247964.9 | 222263.6 | 119700.6 | 276073.3 | 415261.9 | 235529.9 | 184250.2 | 114382.5 |
| Q00715 | 52210.59 | 226306.2 | 59430.63 | 61753.51 | 67139.91 | 74712.87 | 112223.5 | 109017.3 | 20057.88 | 62168.12 | 166053.7 | 91447.07 | 38058.13 | 60266.7  | 23769.16 | 114810.1 |
| Q00918 | 11313.87 | 10503.85 | 6275.547 | 13064.21 | 9515.629 | 16825.88 | 6867.098 | 8826.435 | 8478.078 | 12598.69 | 103283.3 | 7567.413 | 7749.607 | 7878.562 | 7614.715 | 9959.939 |
| Q01177 | 2409367  | 3387514  | 2475801  | 4327182  | 2268317  | 2540378  | 2975477  | 2041057  | 3284154  | 3656347  | 1154798  | 2720339  | 3346738  | 2691850  | 2040974  | 4369523  |
| Q01205 | 336390.5 | 607276.6 | 389601.7 | 1021819  | 515579.6 | 482802.3 | 531104.6 | 917869.9 | 854422.4 | 741398.9 | 671730.3 | 715003.6 | 474081.7 | 346018.5 | 723331.5 | 824249.6 |
| Q01460 | 1257549  | 1607373  | 1226025  | 1410278  | 1663235  | 1118148  | 1001927  | 1248672  | 1128327  | 1199907  | 742995.1 | 994728.7 | 1059094  | 1180116  | 942682.8 | 844528.2 |
| Q01984 | 8880.681 | 7297.33  | 8040.617 | 14842.13 | 8997.039 | 8952.565 | 11561.19 | 10505.98 | 17100.21 | 5155.478 | 23788.09 | 20901.91 | 14565.58 | 17211.63 | 11604.8  | 10821.42 |
| Q02445 | 20095.49 | 23455.63 | 18398.13 | 14753.96 | 14687.78 | 15312.59 | 18029.29 | 16065.96 | 13072.02 | 18642.5  | 21645.08 | 14123.89 | 14733.71 | 14465.63 | 9021.756 | 12219.6  |
| Q02765 | 83583.44 | 126915.2 | 117697.8 | 112853.7 | 42931.77 | 62471.61 | 77174.49 | 117532.6 | 78566.4  | 124291.6 | 38606.78 | 79404.46 | 71503.61 | 63745.28 | 71112.8  | 93259.62 |
| Q02974 | 80893.24 | 60838.46 | 150575   | 79902.86 | 91288.34 | 70602.32 | 76148.57 | 88533.93 | 147069   | 74454.39 | 201265.3 | 102402.1 | 172093.2 | 180828.6 | 113704.8 | 128355.1 |
| Q03191 | 416320.4 | 259877.3 | 61528.78 | 240769   | 474053.8 | 155183.7 | 196313.7 | 80144.09 | 873800.8 | 182700.5 | 283593.2 | 552380.6 | 173522.9 | 133837.9 | 78298.52 | 169917.9 |
| Q03248 | 8899.327 | 11203.84 | 10204.5  | 7841.914 | 12747.13 | 7271.789 | 5887.112 | 10632.77 | 45027.86 | 8743.458 | 27789.21 | 17120.15 | 20568.54 | 19001.55 | 13365.94 | 10146.78 |
| Q03336 | 166197.3 | 210379.3 | 159966.5 | 190205.4 | 313538.5 | 241325.6 | 181875.7 | 192800.8 | 244322.9 | 129277.4 | 466888.6 | 298957.8 | 353063.6 | 413445.9 | 209498.5 | 226461.3 |
| Q03626 | 244605.3 | 427957.1 | 361937.2 | 294584.1 | 329764.9 | 322019.2 | 468596.2 | 303704.1 | 491400.6 | 393076.1 | 191278.6 | 246521.3 | 310374.4 | 584313.3 | 395160.1 | 448550.4 |
| Q04589 | 44547.62 | 80656.22 | 33029.67 | 82229.35 | 51345.1  | 31368.35 | 53527.56 | 71901.39 | 43446.86 | 87811.29 | 28104.16 | 74243.95 | 114301.3 | 52703.99 | 51914.5  | 91580.73 |
| Q04807 | 2166780  | 2631433  | 1716558  | 3879797  | 1945049  | 2149545  | 2722324  | 2379786  | 3528687  | 1803159  | 1753542  | 3771329  | 2356576  | 1136174  | 2241089  | 2480311  |
| Q05030 | 21892.22 | 38106.8  | 50647.13 | 30965.05 | 48842.87 | 30212.62 | 36061.22 | 29516.15 | 32566.81 | 36842.91 | 19114.49 | 34350.83 | 26635.51 | 29319.75 | 29883.1  | 17115.11 |
| Q05175 | 177230.4 | 160773.3 | 89528.44 | 211099.2 | 206402.6 | 174360.7 | 92318.71 | 68756.81 | 385375.2 | 113743.9 | 678949.5 | 352051.6 | 368360.5 | 327812.4 | 197185.7 | 244903.2 |
| Q05511 | 16636.06 | 6819     | 21093.22 | 9305.461 | 13625.84 | 5353.254 | 10014.13 | 14168.13 | 14103.82 | 10126.56 | 11042.45 | 9370.994 | 8048.286 | 11543.84 | 14448.61 | 9376.162 |
| Q05695 | 97532.16 | 137444.4 | 136020.1 | 182556.9 | 115149.7 | 156921.2 | 189511.5 | 188113   | 80135.63 | 130911.8 | 101366.8 | 83607.51 | 83853.9  | 124378.4 | 87613.53 | 68696.06 |
| Q05702 | 8338.973 | 8925.715 | 13119.43 | 11331.7  | 7097.762 | 14598.27 | 4995.476 | 14668.92 | 5274.367 | 4708.094 | 3674.97  | 5113.15  | 3386.023 | 2982.079 | 3829.904 | 4585.588 |
| Q05820 | 944916.9 | 862623.4 | 662656.9 | 788882.7 | 419513.8 | 1194954  | 1117272  | 1060675  | 581020.3 | 1046820  | 844322.7 | 519968.9 | 695457.1 | 608718.3 | 530067.2 | 834357.2 |
| Q05982 | 21752.04 | 19568.32 | 11218.16 | 13371.36 | 20344.22 | 16727.21 | 21366.77 | 9557.462 | 31271.89 | 24167.57 | 27667.83 | 24454.85 | 15968.5  | 11210.35 | 20411.76 | 10329.93 |
| Q06000 | 36280.14 | 26931.8  | 38712.23 | 30044.03 | 24354.54 | 36660.59 | 8559.963 | 20248.58 | 30309.33 | 58008.44 | 16887.14 | 11328.63 | 24715.09 | 30349.07 | 4324.486 | 15772.76 |
| Q06496 | 58263.24 | 76134.98 | 45032.86 | 79848.69 | 133994.7 | 95294.41 | 84328.18 | 49647.38 | 155226.4 | 110717.9 | 117074.7 | 191588.3 | 121594.3 | 202172   | 133697.9 | 113293.8 |
| Q06880 | 298412.9 | 359349.8 | 270988.8 | 291912.3 | 304285.8 | 393780   | 259258.3 | 246235   | 263004.5 | 300248.3 | 140753.2 | 239575.1 | 118962.4 | 133556.8 | 179888.3 | 105795.6 |
| Q07116 | 16484.76 | 20774.31 | 36768.22 | 24482.68 | 23830.31 | 23633.05 | 16284.73 | 15398.48 | 21767.44 | 26906.56 | 14636.46 | 16857.53 | 17739.8  | 19968.2  | 25571.79 | 19107.55 |
| Q07523 | 12523.28 | 11482.97 | 38294.89 | 9377.604 | 13331.07 | 17768.58 | 13274.85 | 6709.237 | 15234.88 | 14052.4  | 14204.18 | 29748.86 | 17844.6  | 14698.34 | 14895.24 | 13142.98 |
| Q07936 | 19868.11 | 30860.14 | 18669.68 | 35898.62 | 31204.15 | 33504.88 | 47939.11 | 82069.59 | 41449.85 | 22666.02 | 57676.23 | 29341.61 | 33663.28 | 41767.33 | 39789.08 | 31718.63 |
| Q08163 | 4792.246 | 6856.774 | 4803.204 | 5806.761 | 8069.071 | 13904.23 | 10370.6  | 7645.375 | 9521.719 | 6524.888 | 14003.95 | 7186.819 | 5261.003 | 5093.049 | 3598.593 | 5862.88  |
| Q08406 | 37263.52 | 52913.47 | 47139.64 | 58664.54 | 54873.9  | 40981.44 | 47188.03 | 73540.76 | 49292.93 | 69932.03 | 30876.34 | 46419.82 | 23285.19 | 33008.61 | 37283.41 | 38103.86 |
| Q08415 | 20795.28 | 21635.17 | 16040.23 | 22050.92 | 18508.25 | 11322.13 | 20275.89 | 18535.46 | 30503.05 | 22264.02 | 22848.94 | 33876.52 | 25698.71 | 26556.8  | 24562.82 | 19407.88 |
| Q08420 | 130933.4 | 158303.3 | 196261.7 | 200255.9 | 97309.28 | 162251.9 | 132639.2 | 247785   | 191834.4 | 202220.5 | 121324.4 | 149062.5 | 153564.1 | 194312.8 | 170033.8 | 127000.6 |
| Q08463 | 51567.25 | 194187.4 | 139979.3 | 128933.9 | 175692.8 | 222982.7 | 82288.64 | 268028.7 | 425432.6 | 273430.6 | 168357.9 | 291723.2 | 200124.7 | 269973   | 254696.6 | 95319.62 |
| Q08464 | 32318.78 | 67916.59 | 74911.37 | 60079.82 | 65604.48 | 65873.48 | 52440.42 | 55023.08 | 135063.6 | 67163.16 | 25122.14 | 63796.41 | 50566.87 | 62179.85 | 42452.08 | 24442.3  |
| Q08849 | 12088.42 | 9044.318 | 11787.23 | 15925.87 | 13972.24 | 14639.12 | 20641.45 | 13204.48 | 17487.5  | 8729.877 | 32997.85 | 14982.1  | 18392.33 | 14768.11 | 17016.07 | 17034.54 |
| Q09030 | 1111167  | 795916.4 | 1017187  | 534844.1 | 735350.5 | 1109107  | 443488.1 | 618137.2 | 2098750  | 456500   | 272705.6 | 530324.9 | 539212.2 | 587910   | 195925.8 | 634283.7 |
| Q09326 | 15328.63 | 51495.73 | 71836.94 | 54682.55 | 55662.11 | 40710.24 | 47904.66 | 32065.81 | 59511.81 | 157009   | 18116.18 | 59145.16 | 53237.23 | 56857.11 | 61915.9  | 149636.8 |
| Q0PMD2 | 629961.4 | 1013229  | 733957.5 | 816587.4 | 939429.6 | 986931.1 | 671084.9 | 850216.9 | 863281.4 | 658189.4 | 584511.6 | 669584.4 | 645328.8 | 488794.7 | 573183.2 | 511525.2 |
| Q10743 | 18660.71 | 19866.9  | 22463.55 | 41909.41 | 18316.66 | 22869.29 | 6471.679 | 31444.81 | 17559.94 | 18999.28 | 28056.08 | 7687.059 | 23368.18 | 35583.76 | 29513.85 | 7815.269 |
| Q10758 | 26276.61 | 24270.17 | 13779.2  | 28069.16 | 14736.97 | 13066.65 | 8468.138 | 32399.48 | 5841.699 | 9013.666 | 27758.11 | 6188.471 | 8639.666 | 7301.014 | 14898.08 | 10806.03 |
| Q1WIM1 | 87703.09 | 127178.4 | 128554.7 | 113107.5 | 111221.4 | 127543.4 | 103063.4 | 131740.3 | 90375.68 | 137815.1 | 93315.67 | 137665   | 111374.5 | 110844.2 | 116285.2 | 89858.85 |
| Q1WIM3 | 15492.24 | 17397.04 | 26271.76 | 31089.87 | 7085.137 | 19023.56 | 18757.79 | 11770.9  | 9723.824 | 14305.55 | 5701.94  | 8810.479 | 12033.97 | 10379.31 | 10731.99 | 20215.95 |
| Q30KJ2 | 1285841  | 554172.8 | 218873.4 | 488350.4 | 49951.3  | 341551   | 78341.88 | 935027.4 | 24718.26 | 219498   | 12797.65 | 7808.834 | 76108.02 | 95949.16 | 85330.46 | 256728.2 |
| Q32KJ6 | 85679.57 | 119148.2 | 146848.8 | 125696.8 | 155376   | 76087.45 | 106934.8 | 146640.8 | 96175.45 | 104551   | 48974.2  | 85103.02 | 61444.36 | 86717.96 | 102554.3 | 94589.94 |
| Q32PY2 | 72519.25 | 86026.23 | 47388.77 | 83194.96 | 31498.04 | 42849.07 | 64250.4  | 56464.19 | 36275.74 | 24596.33 | 60896.02 | 51154.39 | 35179.29 | 25760.78 | 39472.12 | 36898.46 |
| Q3KRC4 | 185439.2 | 213835.1 | 156858.5 | 225001   | 297330.8 | 204651.7 | 214907.2 | 204901.4 | 236860.5 | 209967.1 | 251330.1 | 289066.8 | 296317.5 | 222835.3 | 239347.6 | 206898.2 |
| Q3KRD8 | 38756.27 | 28219.92 | 26574.3  | 34158.45 | 22865.19 | 46081.26 | 30426.36 | 31841.52 | 18952.58 | 42637.1  | 24899.39 | 27355.29 | 40001.75 | 35226.5  | 16395.14 | 19699.17 |

|        |          |          |          |          |          |          |          |          |          |          |          |          |          |          |          |          |
|--------|----------|----------|----------|----------|----------|----------|----------|----------|----------|----------|----------|----------|----------|----------|----------|----------|
| Q3MIE4 | 95410.75 | 74490.14 | 26070.81 | 49654.69 | 93981.63 | 77938.77 | 54804.2  | 76310.87 | 145955.8 | 42396.63 | 225745.7 | 139050.8 | 129979.9 | 111003.5 | 81796.5  | 103264.2 |
| Q3MIF4 | 5008.555 | 6611.204 | 4517.658 | 6400.198 | 5028.724 | 6739.732 | 5503.527 | 3877.833 | 8528.549 | 5527.738 | 7366.263 | 5948.818 | 7354.116 | 4298.549 | 7525.959 | 4126.695 |
| Q3T1J1 | 16499.07 | 13237.24 | 7974.61  | 20706.42 | 13643.84 | 17219.95 | 10782.22 | 26498.99 | 12128.46 | 5698.385 | 32050.51 | 10768.49 | 10182.52 | 10777    | 7491.927 | 8604.737 |
| Q3T1J9 | 33904.78 | 27441.39 | 18045.2  | 34851.09 | 40372.02 | 22935.88 | 24594.65 | 25996.08 | 67524.61 | 21363.31 | 90857.58 | 68978.49 | 54383.85 | 70890.23 | 48853.96 | 37973.05 |
| Q3T1K5 | 4262.302 | 4096.931 | 3246.358 | 3260.702 | 5807.185 | 4881.279 | 3607.507 | 3147.319 | 9030.559 | 4052.585 | 9295.834 | 4688.059 | 7815.511 | 6370.669 | 3716.707 | 4517.348 |
| Q3ZAV1 | 21409.23 | 21026.14 | 21555.3  | 24209.32 | 31815.33 | 23434.43 | 11850.08 | 6738.732 | 64699.13 | 17869.72 | 68589.59 | 57599.62 | 52809.39 | 65301.76 | 48647.46 | 26196.8  |
| Q497B0 | 33565.88 | 23443.8  | 39629.59 | 31394.5  | 32408.67 | 34664.37 | 28208.68 | 43720.08 | 72419.84 | 39515.94 | 57651.28 | 40520.68 | 39221.57 | 52075.34 | 28145.2  | 24318.13 |
| Q498D9 | 7084.405 | 3638.448 | 6322.647 | 6996.541 | 6609.159 | 6026.771 | 14199.16 | 6411.773 | 17864.73 | 7061.567 | 24255.96 | 12129.65 | 10828.24 | 19693.68 | 6143.353 | 15654.81 |
| Q498R7 | 22666.55 | 29052.71 | 41017.68 | 24657.3  | 10936.02 | 30449.77 | 14668.81 | 14197.04 | 28218.01 | 14736.61 | 8654.13  | 13380.63 | 13059.73 | 11899.09 | 10618.11 | 20698.71 |
| Q498S8 | 72581.08 | 123247.3 | 115309.1 | 138759.4 | 122175.5 | 143721.7 | 134473.4 | 132451.5 | 60688.18 | 127021.8 | 61199.5  | 98018.06 | 96190.36 | 84723.33 | 87672.84 | 79329.1  |
| Q499T2 | 361835.3 | 506885.3 | 521650.7 | 457002.6 | 443891.4 | 433103.1 | 485008.4 | 460939.6 | 341186.3 | 466591.7 | 273482.7 | 349717.8 | 304237.3 | 339371.3 | 385882.4 | 394566.2 |
| Q4AEF8 | 19799.16 | 23397.46 | 18843.93 | 25612.15 | 20325.29 | 26000.1  | 19715.44 | 13218.91 | 14465.01 | 5804.394 | 9536.074 | 13711.15 | 11679.73 | 11376.66 | 13818.73 | 12519.36 |
| Q4FZU2 | 1477918  | 360117   | 896617.8 | 991593.1 | 1008799  | 310546.5 | 509443.8 | 989290.2 | 138608.1 | 271819.3 | 1792270  | 249497.8 | 275450.1 | 295894.6 | 998689.2 | 383546.5 |
| Q4FZU4 | 12200.42 | 16887.58 | 7485.554 | 8483.925 | 9147.371 | 17907.54 | 11449.33 | 9017.348 | 8486.691 | 10170.66 | 4071.923 | 7177.512 | 4227.075 | 6006.031 | 6841.214 | 4188.243 |
| Q4FZU6 | 9939.621 | 12608.82 | 10480.39 | 9756.981 | 12829.82 | 9649.229 | 18915.91 | 30358.49 | 10310.92 | 9455.55  | 1345.626 | 7122.879 | 8645.714 | 7238.953 | 9163.088 | 4037.672 |
| Q4FZV0 | 306536.3 | 256374.1 | 288478.9 | 393571.8 | 465255.8 | 270446.3 | 356351.1 | 477132.1 | 157213.3 | 144867.3 | 217339   | 169708.3 | 189292.4 | 200026.9 | 199885   | 238748.1 |
| Q4G063 | 13153.12 | 11450.98 | 10131.17 | 18692.39 | 12566.58 | 18538.25 | 32897.21 | 21176    | 5471.007 | 7850.85  | 16529.64 | 5882.668 | 7741.845 | 6870.994 | 8457.691 | 9383.951 |
| Q4G075 | 29801.55 | 42149.66 | 24447.1  | 63801.68 | 43891.59 | 33668.68 | 115688.6 | 115688.3 | 14185.44 | 17965.87 | 41255.51 | 17814.64 | 24794.14 | 29353.62 | 21093.96 | 25016.79 |
| Q4KLZ6 | 5620344  | 8116036  | 4558106  | 11471350 | 5160965  | 4634893  | 67526.38 | 53036.38 | 101036.8 | 45694.43 | 4581325  | 150153.9 | 139311.9 | 3885673  | 76966.73 | 3933497  |
| Q4KM73 | 23153.61 | 14139.12 | 9847.122 | 35341.25 | 28968.17 | 23517.81 | 16785.32 | 24132.71 | 35659.61 | 24890.21 | 40846.04 | 28019.5  | 29861.36 | 26639.46 | 16819.41 | 20235.83 |
| Q4QQT4 | 2468.635 | 2876.185 | 3558.678 | 1657.178 | 2624.45  | 1832.023 | 1529.144 | 1560.745 | 4525.709 | 1384.262 | 13817.03 | 4022.606 | 3435.469 | 3355.544 | 1977.797 | 2075.726 |
| Q4QQV8 | 66475.27 | 81528.94 | 63983.88 | 96778.94 | 70897.99 | 83693.48 | 71093.09 | 51093.21 | 66399.91 | 75244.51 | 70869.09 | 74525.99 | 83813.58 | 65803.47 | 60089.87 | 98376.34 |
| Q4QQW8 | 117347.3 | 153752.2 | 148563.7 | 182493.2 | 144600   | 145864.5 | 136845.3 | 106441.3 | 90481.1  | 157789.9 | 129070.2 | 127271.2 | 137375.1 | 148246.1 | 154151.4 | 199060.5 |
| Q4TU93 | 6511.987 | 9345.091 | 9217.818 | 8549.332 | 10876.22 | 8800.616 | 4386.383 | 1980.379 | 5086.453 | 8455.384 | 5439.105 | 4699.048 | 9803.15  | 9804.156 | 6944.609 | 4428.702 |
| Q4V885 | 599581.4 | 686000.8 | 631792.8 | 824142.3 | 284359.3 | 624467.1 | 556471.1 | 631350.3 | 250488   | 472258.8 | 289520.8 | 283032.3 | 519309.3 | 446345.3 | 412420.8 | 455604.5 |
| Q4V8I1 | 30073.64 | 18960.19 | 15203.22 | 27643.46 | 45397.88 | 16073.32 | 34290.47 | 34253.01 | 26736.54 | 29437.05 | 15251.9  | 38393.11 | 31913.05 | 20701.34 | 30416.96 | 18765.29 |
| Q4V8K5 | 6949.86  | 8612.087 | 5646.924 | 9243.804 | 7766.391 | 7335.416 | 7230.883 | 11038.43 | 13308.95 | 5621.182 | 12757.09 | 6050.102 | 6412.449 | 6428.199 | 8807.45  | 4959.459 |
| Q561R9 | 2008.424 | 3618.733 | 3558.678 | 2745.288 | 3139.325 | 2256.276 | 1887.32  | 1897.988 | 3722.062 | 3558.038 | 7865.406 | 5123.282 | 4229.191 | 3192.333 | 2597.761 | 4774.77  |
| Q562C9 | 195558.3 | 187485.8 | 313366.3 | 238006.1 | 141186.2 | 223044.8 | 159986.5 | 206686.7 | 113544.1 | 140346.6 | 173949.9 | 138927.8 | 138228.3 | 140749.5 | 105662.9 | 129701.8 |
| Q568Z6 | 119816.6 | 153291.5 | 170164   | 151688   | 161289   | 110454   | 119790.5 | 120881.6 | 170835.3 | 151908.9 | 160346.7 | 163400   | 152558.1 | 136872   | 146298   | 117431.6 |
| Q56A20 | 10378.21 | 11478.21 | 7582.522 | 18698.54 | 12899.39 | 25525.42 | 10617.09 | 13746.77 | 7852.018 | 7345.417 | 13540.56 | 9988.864 | 7603.364 | 9109.105 | 9097.181 | 6574.775 |
| Q5BJP3 | 9375.824 | 10571.66 | 5743.244 | 13556.27 | 7756.957 | 12792.2  | 10100.48 | 15792.01 | 8110.902 | 7497.3   | 28781.81 | 9426.832 | 7163.96  | 3696.462 | 12956.99 | 10376.2  |
| Q5BJY9 | 8538.703 | 21365.79 | 16638.35 | 17976.23 | 8296.583 | 10524.23 | 9968.372 | 24604.1  | 6575.861 | 14715.54 | 10549.47 | 6537.578 | 9134.619 | 7045.172 | 2969.317 | 10796.96 |
| Q5BK81 | 32474.65 | 27570.81 | 44062.76 | 33763.19 | 20162.11 | 36080.38 | 20967.36 | 26422.01 | 21769.37 | 24934.18 | 22807.97 | 33028.55 | 25464.31 | 38786.51 | 23319.97 | 27445.25 |
| Q5EGZ1 | 23345.21 | 55279.35 | 11453.37 | 18476.27 | 19832.56 | 30329.6  | 18108.49 | 25186.98 | 18267.75 | 15938.84 | 16197.32 | 19642.02 | 19382.95 | 22823.2  | 15415.97 | 17418.05 |
| Q5FVF9 | 275699.5 | 327035.9 | 343969.6 | 395557.1 | 158501.6 | 237771.5 | 296430.5 | 218967.8 | 250267.9 | 335504.3 | 219943.6 | 276869.8 | 355269   | 311897.4 | 241302.4 | 269544.8 |
| Q5FVH2 | 230417.9 | 223496.4 | 327062.1 | 289724.7 | 460357.2 | 285871.6 | 346842   | 447312.4 | 157531.7 | 226713.9 | 220359.9 | 232044.8 | 254690.5 | 261701.8 | 298821.3 | 284563.5 |
| Q5FVI6 | 434570.5 | 16564.8  | 3670.163 | 9795.414 | 3479.97  | 46961.46 | 522407.8 | 15644.33 | 5895.357 | 5434.695 | 9837.519 | 10036.71 | 5301.435 | 8818.039 | 5584.941 | 6911.723 |
| Q5FVR0 | 1081165  | 1320104  | 1487551  | 1183889  | 1297232  | 1493468  | 1036208  | 1394601  | 2607757  | 2084222  | 831852.6 | 1839648  | 1318151  | 1648613  | 1923944  | 1058050  |
| Q5FVR3 | 31608.78 | 42763.02 | 41456.4  | 44667.89 | 29295.92 | 36952.46 | 43374.19 | 35785.54 | 22860.29 | 31506.08 | 32199.18 | 26707.8  | 23408.85 | 26423.68 | 19050.49 | 27133.59 |
| Q5GRG2 | 205686.1 | 138161.2 | 24104.39 | 95491.7  | 21791.74 | 192709.4 | 109094.5 | 171878.3 | 13491.1  | 11950.27 | 162677.2 | 61362.23 | 23981.96 | 62296.63 | 15923.05 | 27061.96 |
| Q5HZW5 | 165340.1 | 221244.2 | 231874   | 216383.4 | 230196.4 | 193781.2 | 206486.2 | 287113.5 | 139682.1 | 251000.2 | 128819.5 | 182976.2 | 146782.5 | 171484   | 183575.3 | 151142.3 |
| Q5HZW7 | 50958.96 | 48019.98 | 54595.64 | 55444.74 | 35288.36 | 40536.45 | 46251.55 | 41609.76 | 26764.3  | 30079.27 | 39723.22 | 43745.06 | 51668.9  | 24603.73 | 36878.21 | 25100.4  |
| Q5I0D1 | 12860.42 | 8532.304 | 13695.75 | 13164.56 | 17344.93 | 8459.629 | 16618.83 | 10896.83 | 3396.837 | 9690.15  | 26740.86 | 19025.28 | 12181.44 | 4166.189 | 2673.292 | 2127.725 |
| Q5I0D5 | 106599.5 | 119703   | 303748.7 | 222207.8 | 120384.2 | 131362.8 | 100632.3 | 136273.9 | 164496.1 | 162649.2 | 137155.9 | 179468.5 | 138617.2 | 186197.3 | 150515.2 | 133486.6 |
| Q5I0D7 | 44109    | 27279.09 | 14936.73 | 26683.9  | 23877.5  | 27776.17 | 42594.94 | 60838.68 | 133317   | 76853.7  | 96955.34 | 67590.2  | 66191.48 | 82521.77 | 67581.93 | 34335.72 |
| Q5I0E9 | 57134.88 | 49402.4  | 43794.85 | 57350.88 | 67006.09 | 63778.64 | 25841.54 | 65155.24 | 203002.9 | 47800.23 | 151216.3 | 190299.6 | 129307.4 | 128682.3 | 87749.88 | 83832.23 |
| Q5I0J9 | 6785.788 | 8069.367 | 4257.061 | 1645.998 | 11758.3  | 10491.99 | 2026.823 | 4296.796 | 8681.717 | 3414.066 | 7571.664 | 5045.069 | 2672.802 | 7339.072 | 2896.292 | 4179.352 |
| Q5I0M2 | 7190.006 | 5623.81  | 7706.955 | 9249.176 | 12295.81 | 13009    | 7621.963 | 10547.25 | 13512.05 | 8190.21  | 25342.47 | 12220.99 | 16717.75 | 14574.73 | 15413.25 | 16241.64 |

|                      |          |          |          |          |          |          |          |          |          |          |          |          |          |          |          |          |
|----------------------|----------|----------|----------|----------|----------|----------|----------|----------|----------|----------|----------|----------|----------|----------|----------|----------|
| Q5M7T9               | 22264.54 | 19650.26 | 19059.62 | 12610.89 | 30720.42 | 16413.48 | 9038.119 | 13191.45 | 80168.88 | 23136.96 | 50489.83 | 46925.88 | 44059.28 | 50395.05 | 33663.62 | 28300.88 |
| Q5M8I9               | 24038.57 | 19848.18 | 16433.85 | 20396.15 | 33576.07 | 20104.91 | 23138.09 | 19778.34 | 45727.23 | 39605.47 | 30757.28 | 36158.53 | 20340.84 | 32409.58 | 40250.35 | 15841.87 |
| Q5M843               | 16450.49 | 22419.18 | 17116.17 | 18544.16 | 16588.15 | 16634.19 | 20786.99 | 18158.1  | 20966.75 | 20611.75 | 8966.518 | 15341.44 | 16365.97 | 12883.25 | 14045.17 | 12179.76 |
| Q5M871               | 102713.2 | 172957   | 91132.01 | 136351.3 | 131201   | 192236.4 | 146769.8 | 131208.5 | 178069.7 | 143768.4 | 58421.35 | 119168.9 | 99814.04 | 125729.3 | 90993.39 | 84520.11 |
| Q5M872               | 7889.373 | 6809.528 | 17910.62 | 4983.468 | 11402.14 | 6344.155 | 4439.711 | 15808    | 14704.86 | 9618.021 | 3834.075 | 10696.35 | 12154.45 | 12166.68 | 13544.44 | 5732.346 |
| Q5M876               | 224046.3 | 167332.4 | 235988.2 | 207094.4 | 214379.8 | 133926.7 | 168403.3 | 153176.5 | 337105.2 | 119235.1 | 381006.7 | 195005.5 | 244437   | 252877.4 | 194241.4 | 149710.2 |
| Q5M8C6               | 61112.4  | 27028.28 | 48048.83 | 94316.34 | 40882.72 | 77139.98 | 99479.91 | 133814   | 16118.27 | 20428.55 | 92859.1  | 33056.56 | 27176.11 | 24568.51 | 11004.24 | 59391.02 |
| Q5PPH0               | 20385.24 | 39542.11 | 35412.83 | 24204.49 | 11936.83 | 22853.29 | 13983.91 | 16048.02 | 11490.24 | 17505.88 | 17147.71 | 19301.51 | 20167.75 | 22253.36 | 14827.04 | 17298.89 |
| Q5PQL7               | 2315.696 | 7353.756 | 7014.459 | 6452.848 | 5393.058 | 1208.931 | 4788.25  | 7103.789 | 3295.557 | 3157.53  | 5550.508 | 7121.091 | 1717.504 | 1436.22  | 2728.38  | 3864.764 |
| Q5QE79               | 15653.44 | 22468.1  | 37016.01 | 33309.88 | 23315.38 | 37343.68 | 63867.61 | 32017.55 | 24685.63 | 13887.29 | 10452.57 | 8845.287 | 15076.66 | 28085.07 | 3267.572 | 4687.233 |
| Q5RJL6               | 28557.15 | 35935.5  | 39646.15 | 24181.6  | 26128.33 | 27513.22 | 29717.61 | 23152.64 | 29867.9  | 33041.82 | 19887.11 | 26203.48 | 21039.72 | 25571.23 | 29882.88 | 16741.65 |
| Q5RJR2               | 79927.41 | 89848.55 | 102275.7 | 51970.95 | 38589.42 | 70702.3  | 111434   | 49475.55 | 112049.3 | 131328.7 | 107128.2 | 157189   | 141027.9 | 134834.6 | 155583.7 | 139501.3 |
| Q5RKH6               | 2553.758 | 4182.512 | 4895.789 | 2745.288 | 3534.943 | 2823.697 | 3214.075 | 1554.524 | 2861.106 | 3254.041 | 2486.418 | 2115.636 | 2463.902 | 2955.008 | 1157.472 | 2467.818 |
| Q5RKI0               | 18284.7  | 17791.37 | 15422.69 | 11166.87 | 20966.84 | 13978.2  | 17642.86 | 19367.6  | 36907.41 | 20577.18 | 54410.89 | 36528.8  | 35054.36 | 38771.93 | 27863.82 | 23413.83 |
| Q5RKI1               | 9025.865 | 6531.284 | 52229.77 | 5830.463 | 5117.508 | 7952.266 | 57988.25 | 10423.78 | 10576.68 | 62003.95 | 7324.773 | 9037.434 | 21462.91 | 10744.28 | 49968.03 | 4958.793 |
| Q5RKI7               | 225354.9 | 368104.4 | 296592.3 | 172355.5 | 305646.9 | 437144.6 | 176572.7 | 227012.2 | 816265.2 | 185948.5 | 430938.2 | 387384.7 | 354805.8 | 367702.3 | 306913   | 291907.9 |
| Q5RLM2               | 30277.54 | 21684.65 | 29294.94 | 37207.52 | 13672.06 | 55480.59 | 18971.79 | 37695.18 | 245015.3 | 45562.96 | 133853.4 | 51239.42 | 126770.2 | 42180.82 | 105779.5 | 82642.44 |
| Q5U1Y4               | 1073575  | 619521.7 | 794748.2 | 575132.5 | 1132155  | 654997.9 | 789395.4 | 925509.4 | 1993547  | 1576571  | 728902.5 | 1615436  | 1342666  | 2476132  | 980880.7 | 927139.4 |
| Q5U2P2               | 33467.89 | 35388.02 | 50461.95 | 35519.67 | 34748.77 | 40031.05 | 48126.96 | 51238.8  | 41961.25 | 84089.6  | 29559.41 | 98559.12 | 27606.06 | 64717.07 | 29732.57 | 40550.6  |
| Q5U2Q3               | 101037.8 | 92492.71 | 122285.9 | 86797.24 | 144448.7 | 96430.8  | 117558.8 | 109230.9 | 361570.2 | 159615   | 337145.1 | 204925   | 193939.3 | 272821.1 | 156850.9 | 124052.1 |
| Q5U2V4               | 13689.41 | 19586.7  | 22391    | 14825.5  | 15165.63 | 15255.96 | 25907.31 | 25329.4  | 12877.66 | 5951.383 | 11257.85 | 6493.745 | 7119.446 | 7902.663 | 9091.211 | 9459.338 |
| Q5U300               | 12581.02 | 7935.59  | 9290.955 | 5312.695 | 10233.12 | 13127.38 | 9376.902 | 12896.01 | 11792.1  | 6452.218 | 22759.03 | 8805.347 | 10507.38 | 13600.86 | 4984.614 | 10715.18 |
| Q5U316               | 4274.226 | 4393.741 | 9964.371 | 10394.46 | 3236.859 | 5485.76  | 7764.431 | 89322.62 | 8766.863 | 3676.169 | 54090.21 | 7828.765 | 33216.59 | 5371.819 | 5236.834 | 6581.546 |
| Q5U367               | 77422.21 | 71570.22 | 48495.9  | 62481.49 | 60238.7  | 56343.11 | 41913.83 | 56343.57 | 43527.99 | 71299.11 | 41671.7  | 41606.77 | 62090.1  | 69247.48 | 42321.84 | 32768.63 |
| Q5XF0                | 14244.46 | 19109.76 | 10020.45 | 12361.99 | 12678.06 | 13789.63 | 14257.55 | 21902.69 | 13688.09 | 13588.42 | 33931.08 | 12780.95 | 8112.043 | 13476.77 | 11697.27 | 12432.4  |
| Q5XI43               | 4474302  | 6878136  | 4877548  | 5389951  | 5705155  | 6231071  | 4564653  | 5060097  | 6079682  | 6770031  | 3603912  | 5162481  | 4602921  | 5840595  | 4024661  | 3870431  |
| Q5XI73               | 88747.41 | 75273.93 | 51630.11 | 90010.15 | 124074.2 | 99342.98 | 85907.58 | 155162.5 | 75625.93 | 58339.61 | 197178.1 | 116848.5 | 146417.3 | 167250.8 | 116853   | 96103.3  |
| Q5XI89               | 2648.821 | 6963.464 | 5919.037 | 4505.445 | 7665.489 | 4668.951 | 5312.408 | 3838.035 | 5260.844 | 5773.891 | 9087.82  | 5175.344 | 4308.125 | 4903.121 | 5497.127 | 4058.177 |
| Q5XID1               | 2218.636 | 2923.136 | 3220.135 | 3066.414 | 2624.45  | 1618.846 | 1667.491 | 1554.524 | 5077.393 | 1450.281 | 17937.78 | 3626.152 | 2341.686 | 2235.982 | 1413.169 | 4074.302 |
| Q5XIE8               | 22411.12 | 27982.02 | 26096.61 | 26925.8  | 27477.94 | 24005.5  | 16117.88 | 22523.95 | 16956.01 | 27596.18 | 20277.13 | 23157.28 | 17167.29 | 14051.1  | 22723.78 | 20419.15 |
| Q5XIL0               | 31816.66 | 48595.53 | 36474.27 | 40932.14 | 70752.55 | 48561.15 | 35116.26 | 41084.11 | 24759.11 | 30056.55 | 20058.39 | 23776.51 | 18552.31 | 19009.04 | 29734.68 | 18791.09 |
| Q5ZQU0               | 6539.781 | 11484.02 | 10315.28 | 8414.722 | 7649.614 | 6930.401 | 4564.109 | 6429.933 | 11415.76 | 18157.52 | 7652.5   | 16509.25 | 15982.94 | 13919.79 | 11098.5  | 12377.02 |
| Q62632               | 165234.3 | 172766.6 | 140539.3 | 168959.1 | 288972.3 | 197040.6 | 158188   | 207826.2 | 252041.8 | 277391.2 | 131810.3 | 242791.3 | 194830.1 | 167248.3 | 236144   | 176084.7 |
| Q62635               | 77579.72 | 411146.7 | 25336    | 145208.1 | 21034.61 | 92212.52 | 108683.4 | 243303.8 | 15033.35 | 6796.67  | 36055    | 30777.76 | 27479.19 | 76596.45 | 10760.61 | 16123.3  |
| Q62638               | 89848.84 | 69680.3  | 67277.26 | 95717.14 | 86301.21 | 100480.7 | 93636.29 | 104606.9 | 63145.39 | 84947.28 | 77527.45 | 61012.19 | 53858.24 | 56391.69 | 58413.44 | 56158.29 |
| Q62687               | 59011.8  | 55729.41 | 28267.97 | 60434.09 | 79351.66 | 70565.53 | 30172.16 | 40179    | 145927.7 | 38133.82 | 135031.3 | 122228.8 | 87513.19 | 102680.8 | 85339.6  | 67707.88 |
| Q62714               | 13704.83 | 18745.32 | 15698.59 | 71193.56 | 11363.69 | 12256.87 | 12661.61 | 20895.94 | 80695.1  | 61419.63 | 131740.7 | 86403.23 | 31528.78 | 29152.06 | 26037.05 | 47704.58 |
| Q62718               | 6540.316 | 10877.91 | 12755.39 | 13306.29 | 11484.17 | 10960.94 | 7816.925 | 13407.76 | 6041.304 | 9650.139 | 6966.41  | 6931.606 | 6998.609 | 9170.408 | 10314.55 | 8472.879 |
| Q62740               | 252953.7 | 454007.4 | 277800.8 | 506916.8 | 390857.2 | 469090   | 339623.9 | 513684.4 | 550426.5 | 697041.5 | 231909.8 | 377879.1 | 431595.9 | 298107.3 | 392121.6 | 439573.5 |
| Q62745               | 56578.95 | 73237.17 | 104144.7 | 62740.55 | 58938.19 | 67665.18 | 52871.41 | 85001.53 | 82584.57 | 84932.07 | 72785.84 | 116956.1 | 41224.46 | 35118.7  | 42629.17 | 40814.14 |
| Q62753               | 16436.83 | 9509.574 | 8121.653 | 13982.42 | 10457.03 | 15762.22 | 12068.6  | 10636.67 | 23725.44 | 7483.051 | 66416.22 | 22417.1  | 18527.39 | 16747.08 | 12642.44 | 21451.43 |
| Q62761;Q62762;Q62763 | 24386.38 | 12542.26 | 11994.09 | 15149.7  | 13819.41 | 11073.84 | 14703.72 | 735.2054 | 43010.88 | 14535.87 | 37245.9  | 28602.9  | 18174.76 | 16240.71 | 18102.54 | 4925.057 |
| Q62786               | 100676.8 | 111862   | 126418.4 | 119291.4 | 138054.3 | 136607   | 118763.2 | 111906   | 131955.8 | 166066.7 | 92420.09 | 133615   | 117302.1 | 149980.8 | 155319.7 | 121313.6 |
| Q62795               | 25113.27 | 52063.59 | 19594.72 | 29465.75 | 37962.52 | 37904.71 | 31558.75 | 26843.82 | 65833.82 | 48183.08 | 51227.96 | 64296.84 | 48666.9  | 57215.68 | 47063.48 | 58681.56 |
| Q62812               | 3047.639 | 3935.126 | 3381.993 | 7432.219 | 5663.906 | 3412.953 | 295.6559 | 5558.669 | 9690.723 | 10056.07 | 10065.85 | 13097.75 | 10940.08 | 7395.263 | 8390.566 | 7256.388 |
| Q62867               | 2523264  | 3248495  | 2427390  | 3021740  | 2436712  | 2191697  | 3443679  | 4668997  | 2382403  | 3129589  | 2219977  | 2650448  | 3615055  | 4540628  | 3062648  | 4137111  |
| Q62894               | 11558.29 | 12450.83 | 13176.93 | 9701.383 | 4021.095 | 18448.53 | 30205.04 | 12081.74 | 9209.298 | 9927.395 | 10732.16 | 4741.695 | 8920.18  | 7164.635 | 11428.03 | 9611.115 |
| Q62902               | 28984.93 | 18097.34 | 39263.99 | 52712.13 | 17443.03 | 34276.54 | 38886.09 | 45791.07 | 19010.8  | 6690.757 | 37470.92 | 7018.768 | 27527.49 | 8418.133 | 9752.221 | 31894.7  |
| Q62930               | 180363.7 | 189489.9 | 146883   | 295581.8 | 85537.74 | 92859.8  | 184081.3 | 172942.9 | 147786.2 | 270868.5 | 111205.5 | 225257.3 | 161510.6 | 169779.3 | 243419.9 | 231930   |

|        |          |          |          |          |          |          |          |          |          |          |          |          |          |          |          |          |
|--------|----------|----------|----------|----------|----------|----------|----------|----------|----------|----------|----------|----------|----------|----------|----------|----------|
| Q62946 | 181282.1 | 142987.8 | 172579.7 | 223913.3 | 139740.9 | 167033.5 | 287220.9 | 271293   | 94565.13 | 67500.7  | 100752   | 97303.05 | 90219.85 | 77991.94 | 48541.03 | 62169.05 |
| Q62975 | 650.3278 | 5710.856 | 3600.819 | 5631.506 | 6040.995 | 4796.124 | 4214.993 | 8539.254 | 7163.29  | 7509.819 | 7134.705 | 4500.252 | 6219.417 | 5349.113 | 10109.87 | 8278.49  |
| Q62997 | 13507.67 | 26845.29 | 13022.68 | 25417.97 | 21092.3  | 15068.51 | 12179.96 | 13939.28 | 19768.49 | 22476.93 | 4048.668 | 21703.19 | 14487.39 | 11635.61 | 22736.82 | 28158.44 |
| Q63041 | 6437343  | 6729582  | 7557998  | 6676238  | 10641240 | 7383068  | 8374010  | 6849592  | 5527218  | 8288757  | 5562191  | 7840935  | 5985147  | 7858975  | 7988021  | 6279047  |
| Q63060 | 5613.568 | 8252.788 | 7638.247 | 6243.853 | 10703.18 | 9877.514 | 5776.486 | 14184.8  | 20024.97 | 5520.079 | 16690.88 | 11355.47 | 15914.3  | 9899.457 | 8617.909 | 7005.036 |
| Q63072 | 16851.42 | 34436.95 | 28972.13 | 27568.44 | 28026.78 | 20597.85 | 26175.7  | 29344.42 | 30671.01 | 17432.07 | 19616.25 | 16764.38 | 16939.12 | 23270.2  | 19404.2  | 14464.13 |
| Q63081 | 10790.55 | 11171.86 | 7252.424 | 12355.54 | 9239.746 | 16479.54 | 24626.88 | 9903.992 | 8498.856 | 9999.32  | 23953.74 | 11652.1  | 8719.832 | 8164.111 | 7372.505 | 9096.18  |
| Q63083 | 736706.3 | 768225.1 | 405002   | 325977.1 | 316644.7 | 413997.1 | 291747.4 | 533765.3 | 341805.1 | 425955.7 | 397548.7 | 344233.1 | 489040.7 | 279175.7 | 233830.7 | 249482.7 |
| Q63135 | 17852.08 | 40716.24 | 28651.47 | 23079.03 | 24231.89 | 21016.85 | 23194.8  | 22729.75 | 47991.95 | 23995.56 | 20737.13 | 24517.99 | 19476.85 | 3801.267 | 21101.72 | 19833.24 |
| Q63149 | 15211.85 | 22309.91 | 29533.47 | 21825.8  | 15468.66 | 20076.01 | 15625.88 | 14738.04 | 21063.1  | 6040.475 | 17543.23 | 4933.182 | 13429.67 | 19990.76 | 14316.45 | 11347.17 |
| Q63150 | 7919.298 | 8108.763 | 7045.541 | 6505.704 | 3172.311 | 3423.578 | 7815.004 | 9301.363 | 11438.36 | 13834.69 | 13360.87 | 11150.05 | 16702.76 | 14008.9  | 10159.9  | 9881.803 |
| Q63199 | 2846.072 | 6795.545 | 5149.192 | 1917.195 | 4102.898 | 4590.013 | 5950.028 | 3373.249 | 2460.26  | 4922.943 | 3812.593 | 4598.811 | 1801.653 | 2172.67  | 2622.806 | 2119.259 |
| Q63228 | 6435.984 | 7215.049 | 13613.95 | 8522.011 | 9651.268 | 8239.436 | 6774.324 | 6353.907 | 12193.47 | 6871.657 | 7578.983 | 6970.694 | 6613.034 | 10113.14 | 7622.523 | 6258.498 |
| Q63257 | 3104702  | 4116213  | 4672133  | 3761888  | 3397356  | 3792118  | 3723647  | 4444041  | 5103829  | 4274069  | 2804681  | 3297773  | 3128629  | 3449850  | 3285040  | 3167061  |
| Q63270 | 32637.49 | 30329.93 | 22912.69 | 23916.12 | 27748.96 | 26244.8  | 21574.06 | 27568.95 | 119412.5 | 33918.81 | 88572.73 | 61209.82 | 73572.29 | 86430.93 | 41606.76 | 43052.5  |
| Q63317 | 970804.5 | 1398047  | 2394096  | 875393.9 | 739262.2 | 727286.7 | 862574.9 | 774920.9 | 418939.8 | 508885.7 | 391788.2 | 405591.7 | 406276.7 | 466944.2 | 475136.7 | 598770.3 |
| Q63355 | 47550.39 | 34048.86 | 31459.63 | 36074.03 | 41147.99 | 67818.09 | 25610.42 | 37166.91 | 124933.4 | 21391.81 | 122159.4 | 98612.13 | 64163.06 | 65676.79 | 50333.65 | 51278.44 |
| Q63357 | 33444.73 | 15654.97 | 11777.38 | 23885.23 | 14750.99 | 24417.64 | 22795.97 | 31671.57 | 35697.84 | 10071.6  | 83541.27 | 28829.7  | 24564.62 | 21764.14 | 21004.49 | 29823.12 |
| Q63416 | 209251.1 | 187503.9 | 149453.9 | 249916.9 | 161867.1 | 181989   | 180825.3 | 187975.2 | 165172.7 | 267309.7 | 110415.5 | 164310.5 | 200570.1 | 174999.1 | 274265.9 | 221227.8 |
| Q63424 | 102952.9 | 103907.2 | 53277.82 | 96213.24 | 180922.2 | 158851.9 | 48974.7  | 99331.23 | 405260.4 | 47238.87 | 293208.1 | 280448.6 | 191246.5 | 260744.3 | 178276.3 | 107821.7 |
| Q63467 | 387203.5 | 514680.1 | 238846.7 | 426843.4 | 341067.3 | 488915.1 | 331731.5 | 266007.4 | 690626.3 | 393183.5 | 111037.6 | 364122.1 | 300336.6 | 196479.8 | 130002.2 | 238832.3 |
| Q63474 | 3908.712 | 31505.47 | 94869.95 | 29003.43 | 46951.5  | 21965.97 | 28720.5  | 18955.86 | 36024.95 | 18263.75 | 45864.89 | 42564.73 | 41634.54 | 41013.66 | 20063.41 | 65941.05 |
| Q63475 | 30909.04 | 30030.84 | 36813.43 | 50340.76 | 16805.29 | 19618.01 | 16895.94 | 26622.94 | 23612.39 | 17745.8  | 11592.2  | 13070.33 | 32167.93 | 25262.16 | 18141.04 | 27352.38 |
| Q63493 | 42928.72 | 9993.768 | 16429.1  | 29554.72 | 13419.86 | 27337.81 | 35699.21 | 40045.94 | 8651.08  | 5692.979 | 67307.37 | 10669.83 | 9607.376 | 5195.715 | 7484.006 | 8867.928 |
| Q63514 | 67744.88 | 70799.12 | 131619.5 | 79593.55 | 32525.86 | 56409.36 | 51536.5  | 72374.27 | 71236.65 | 61165.38 | 69992.94 | 80288.48 | 83376.8  | 104220.4 | 81390.2  | 75858.43 |
| Q63515 | 66179.75 | 92140.09 | 138731   | 106937.3 | 75217.79 | 140865.2 | 108610.9 | 130259.6 | 179966.4 | 150473.3 | 80708.57 | 110059   | 97120.63 | 113123.9 | 104953.8 | 144363.3 |
| Q63530 | 100671.3 | 92101.43 | 150549.8 | 62083.06 | 149014.8 | 95840.55 | 111660.3 | 122139.1 | 212744.6 | 111004.3 | 205021.3 | 154490.6 | 174737.8 | 223811.6 | 198409.7 | 123162   |
| Q63532 | 189957.4 | 246720.1 | 126375.1 | 206275.8 | 116257.6 | 434052.7 | 117308.6 | 231920.6 | 234940.9 | 231888.1 | 211782.6 | 204405.7 | 67965.52 | 118519.5 | 102976.2 | 190510.5 |
| Q63556 | 200257.8 | 260007.2 | 141196   | 155307.2 | 184306.7 | 92379.72 | 230484.4 | 121475.7 | 116449.5 | 384189.2 | 135246.6 | 179829.3 | 136964.5 | 230588.3 | 271640.5 | 284953   |
| Q63598 | 10206.74 | 15673.53 | 21587.83 | 29407.68 | 67312.01 | 20189.32 | 12296.49 | 14666.74 | 53481.29 | 15265.12 | 86029.09 | 39180.13 | 48062.89 | 61189.35 | 31783.2  | 35910.3  |
| Q63617 | 30870.25 | 10532.56 | 11534.52 | 57936.4  | 9073.61  | 68261.7  | 114815.7 | 43962.29 | 21603.11 | 6143.473 | 71070.76 | 11299.22 | 20053.25 | 4232.998 | 3847.084 | 17390.29 |
| Q63618 | 22854.91 | 7808.073 | 24708.88 | 12489.3  | 29728.13 | 26873.28 | 20161.33 | 17923.77 | 66116.88 | 12644.24 | 97698.73 | 65533.61 | 38595.95 | 71039.56 | 45327.68 | 53167.64 |
| Q63621 | 215677.5 | 276001.2 | 356004.8 | 250388.7 | 205274.6 | 170969.4 | 329439.3 | 420514.5 | 375800.3 | 416466.7 | 186425.8 | 306514.9 | 334067.7 | 357331.7 | 289272   | 408552.2 |
| Q63678 | 94553.32 | 90824.1  | 122401.1 | 87195.84 | 48343.8  | 81397.02 | 74591.48 | 66732.71 | 89226.99 | 93643.86 | 18829.33 | 47315.85 | 61175.87 | 64206.56 | 84971.69 | 103361.5 |
| Q63691 | 193563.5 | 220554.3 | 240588.2 | 263088.5 | 231884.5 | 210275.7 | 232274.3 | 200112   | 236085.8 | 278748.4 | 242882.4 | 250104.1 | 281750.4 | 158988.9 | 116552   | 237502.8 |
| Q63716 | 208687.5 | 245425.8 | 206746.9 | 209507.6 | 281439.4 | 222207   | 197323   | 385957.5 | 424001.3 | 236577.8 | 517037   | 410750.6 | 400057.3 | 384997.6 | 322904.5 | 406123.2 |
| Q63751 | 369372.7 | 234087.3 | 849481.5 | 368887.6 | 330499.1 | 403748.2 | 439705.6 | 425393.6 | 278501.9 | 180568.4 | 237380   | 192827.9 | 97612.13 | 523362.5 | 37230.74 | 57901.24 |
| Q63772 | 130471.5 | 133927.5 | 114933.5 | 139888.3 | 129720   | 106293.3 | 70018.75 | 100171.2 | 112464.4 | 164467.5 | 90242.23 | 155807.1 | 116506.9 | 108905.6 | 128227.8 | 91908.5  |
| Q63797 | 11740.6  | 11566.18 | 9005.605 | 10755.37 | 9700.907 | 7971.953 | 6881.669 | 8469.337 | 10639.62 | 8843.851 | 3402.163 | 7743.451 | 8996.314 | 9025.43  | 7938.53  | 8004.277 |
| Q64057 | 20821.53 | 19032.07 | 27303.63 | 16941.92 | 21474.61 | 20247.06 | 15421.07 | 16829.92 | 47338.06 | 23749.21 | 59400.41 | 31946    | 28866.29 | 32680.09 | 18198.44 | 15298.36 |
| Q64093 | 19542.72 | 23502.57 | 11281.42 | 30630.53 | 50764.98 | 52941.37 | 5964.932 | 20222.31 | 77706.61 | 10085.36 | 72498.66 | 60663.72 | 45576.16 | 66472.06 | 35243.25 | 24723.71 |
| Q64119 | 94565    | 164800.1 | 62634.54 | 27113.06 | 188254.8 | 109751   | 94677.77 | 130879.7 | 76451.93 | 104661.1 | 168042.8 | 131870.7 | 114152.6 | 119024   | 108663.4 | 116299.7 |
| Q641X3 | 92789.23 | 128286.8 | 170214.5 | 116053.7 | 128711.7 | 86668.64 | 179965.6 | 113020.8 | 98648.19 | 123690.8 | 92188.5  | 117527.7 | 93011.16 | 101107.7 | 111807   | 109284   |
| Q641Z6 | 62226.65 | 70990.41 | 41871.36 | 67723.77 | 86986.2  | 109757.7 | 48358.85 | 74325.31 | 118325.4 | 41510.42 | 175154.1 | 133018.5 | 93378.9  | 104270.5 | 58682.83 | 94359.32 |
| Q641Z7 | 66571.97 | 55156.02 | 78486.9  | 79810.08 | 51197.63 | 60436.13 | 72213.41 | 46689.46 | 27605.47 | 45662.22 | 32062.69 | 40154.05 | 27106.2  | 38729.11 | 53610.78 | 44257.05 |
| Q641Z8 | 25736.68 | 42046.14 | 35201.81 | 27326.32 | 31565.58 | 22157.04 | 31597.65 | 29643.97 | 53256.59 | 36358.91 | 37373.57 | 36844.33 | 42300.05 | 28460.75 | 34829.34 | 31039.86 |
| Q64230 | 3757346  | 3476369  | 4534024  | 3593383  | 4108832  | 3910617  | 3821601  | 3277705  | 4161046  | 3273456  | 2584120  | 3407020  | 3172940  | 3801143  | 2809357  | 3098865  |
| Q64240 | 19329536 | 32052724 | 25219366 | 24810810 | 22870120 | 40898220 | 19253214 | 34295968 | 24191158 | 33424646 | 7529539  | 13798047 | 21191510 | 18210516 | 13885459 | 19415770 |
| Q64268 | 24008.33 | 11470.54 | 15673.52 | 16984.39 | 6398.73  | 10740.4  | 24904.26 | 13533.67 | 13839.83 | 22161.38 | 6402.683 | 13009.45 | 11742.91 | 13341.84 | 36514.69 | 25528.01 |

|        |          |          |          |          |          |          |          |          |          |          |          |          |          |          |          |          |
|--------|----------|----------|----------|----------|----------|----------|----------|----------|----------|----------|----------|----------|----------|----------|----------|----------|
| Q642A7 | 674202.7 | 1125758  | 851174.9 | 623927   | 1216380  | 713931.3 | 730126.9 | 1072521  | 805279.4 | 1164304  | 790527.9 | 1201805  | 975630.1 | 1002163  | 1332533  | 839915.5 |
| Q64319 | 1921748  | 2279178  | 1552142  | 1988680  | 3715216  | 3690563  | 1427306  | 2127591  | 6450519  | 1538283  | 5131000  | 4685590  | 4368983  | 3859396  | 3846147  | 2840499  |
| Q64335 | 17462.33 | 21458.5  | 6033.522 | 17647.92 | 33260.59 | 47096.5  | 33133.75 | 22370.05 | 18789.01 | 47563.95 | 9168.477 | 16147.17 | 13029.92 | 21962.35 | 32598.53 | 34117.3  |
| Q64361 | 57639.37 | 65390.01 | 49592.25 | 118630.1 | 30284.57 | 62596.95 | 37342.58 | 66856.18 | 56175.82 | 69404.82 | 25709.65 | 55041    | 60142.64 | 54034.64 | 50257.65 | 62669.64 |
| Q64537 | 18630.25 | 15900.32 | 11179.9  | 24335.36 | 20562.91 | 26371.32 | 33947.94 | 21212.08 | 10161.29 | 16881.29 | 38414.02 | 17315.39 | 18104.57 | 22570.08 | 12350    | 12247.52 |
| Q64573 | 168809   | 156865.8 | 132593.8 | 169976.8 | 110633.2 | 102636   | 149281.2 | 128287.6 | 169517.7 | 116093.8 | 50187    | 58122.18 | 147263.7 | 141243.6 | 115424.8 | 107518   |
| Q64602 | 191568   | 223344.2 | 181597.3 | 254153.4 | 251220.3 | 215577.3 | 125109.5 | 221149.3 | 776928.5 | 248809.9 | 686899.6 | 494413.4 | 629625.3 | 466171.7 | 466647.3 | 344002.4 |
| Q64604 | 94011.63 | 102364.3 | 94952.49 | 94867.93 | 79482.09 | 101949.1 | 85178.14 | 119713.2 | 89454.16 | 98961.35 | 108338.7 | 95151.57 | 89578.46 | 106209.8 | 89360.17 | 98179.69 |
| Q64605 | 16650.03 | 23808.68 | 25335.2  | 26388.27 | 22717.56 | 17428.36 | 15503.7  | 12528.65 | 20716.1  | 15567.54 | 13513.66 | 12480.47 | 19708.66 | 21646.51 | 17678.56 | 16867.26 |
| Q64611 | 5458.088 | 9601.515 | 7718.654 | 5225.961 | 8879.675 | 7572.658 | 5488.5   | 11116.24 | 10920    | 8798.485 | 10642.89 | 7796.934 | 9200.092 | 10214.12 | 8054.479 | 7007.751 |
| Q64640 | 14412.85 | 11651.63 | 10097.14 | 9738.205 | 12754.39 | 12918.29 | 10358.03 | 7876.894 | 31746.54 | 11850.79 | 27784.34 | 15511.34 | 18385.9  | 20518.41 | 15954.73 | 20604.2  |
| Q66H12 | 124826   | 162807.9 | 115471   | 100618.4 | 147464.2 | 126227.5 | 126638.6 | 114620.3 | 124121.4 | 138723.9 | 117168.5 | 117675.4 | 141178.3 | 143512.1 | 160143.9 | 127746.3 |
| Q66H69 | 25222.39 | 24834.61 | 10028.53 | 13565.43 | 11077.61 | 8448.045 | 21612.76 | 35542.53 | 1511.879 | 10232.73 | 10981.27 | 11213.82 | 13509.69 | 4486.965 | 5543.205 | 5967.688 |
| Q66H94 | 5931.099 | 10014.6  | 11659.71 | 9528.537 | 6875.785 | 12135.22 | 7407.817 | 6226.109 | 6656.842 | 12652.48 | 5740.528 | 3958.147 | 7578.012 | 9924.492 | 5423.532 | 8221.955 |
| Q66HG3 | 7091.977 | 11000.4  | 10843.04 | 10946.89 | 15693.12 | 6194.354 | 8540.928 | 11837.27 | 25014.05 | 10329.59 | 44426.07 | 15024.63 | 19425.83 | 21704.8  | 26329.47 | 21948.22 |
| Q66HG4 | 44960.16 | 37800.19 | 61234.83 | 68184.47 | 65809.45 | 42762.24 | 45820.11 | 52079.94 | 65351.57 | 65265.78 | 64763.34 | 70991.71 | 82879.41 | 96448.91 | 56762.2  | 63399.54 |
| Q675A5 | 45001.96 | 48402.75 | 45071.63 | 77170.47 | 65077.41 | 54461.24 | 53878.34 | 41793.15 | 24448.01 | 41511.5  | 31015.91 | 49044.95 | 41990.59 | 37499.18 | 29650.28 | 34034.39 |
| Q68FP1 | 4689033  | 6301154  | 4646626  | 11466562 | 5407202  | 6827554  | 6338597  | 10262763 | 3679669  | 5922405  | 4100012  | 2884498  | 5969506  | 5295289  | 4724932  | 6407498  |
| Q68FQ0 | 4438.804 | 3772.753 | 2933.486 | 4291.882 | 3202.557 | 2554.484 | 2381.772 | 3216.914 | 5686.507 | 3283.511 | 5071.104 | 3846.782 | 5273.901 | 4503.112 | 3109.25  | 2841.269 |
| Q68FQ2 | 51812.58 | 71914.8  | 54536.41 | 100218.2 | 73643.17 | 69003.52 | 51136.82 | 47927.24 | 50979.96 | 60369.13 | 52457.68 | 42899.55 | 36805.27 | 35623.86 | 39464.94 | 37780.28 |
| Q68FS4 | 13541.55 | 13539.28 | 16780.87 | 12047.91 | 19166.73 | 11751.33 | 15335.2  | 7013.248 | 14453.16 | 13072.99 | 25659.21 | 20418.08 | 19572.79 | 23403.47 | 15890.53 | 12848.26 |
| Q68FT5 | 19899.17 | 21967.91 | 22001.11 | 21886.19 | 24667.62 | 13646.92 | 14476.98 | 25860.47 | 68040.21 | 19387.56 | 57707.02 | 43405.38 | 40427.37 | 45238.63 | 31656.63 | 21255.83 |
| Q68FX1 | 8374.633 | 4420.43  | 4225.065 | 6839.058 | 3382.695 | 5472.368 | 4084.903 | 4639.902 | 7262.178 | 3149.229 | 6579.222 | 3261.622 | 3767.798 | 4622.73  | 3263.398 | 3681.054 |
| Q68G31 | 763516.9 | 1335546  | 22908.89 | 28072.11 | 31683.81 | 731538.2 | 28843.92 | 624746.5 | 36704.38 | 425413.2 | 362646.1 | 26973.79 | 504838.8 | 242925.4 | 232990.4 | 40329.7  |
| Q6AXR4 | 124950.9 | 180864.3 | 199598.8 | 157087.3 | 203846.1 | 116657.1 | 326449.6 | 164623.1 | 111739   | 139290   | 156185.7 | 143944.6 | 115663.6 | 125068.8 | 142847.6 | 189352.8 |
| Q6AXS4 | 172818.4 | 118238.2 | 118157   | 71721.98 | 70941.1  | 96364.64 | 66509.52 | 92199.85 | 61408.83 | 85608.44 | 69860.85 | 87574.32 | 78742.27 | 55582.21 | 48345.01 | 47932.31 |
| Q6AY33 | 15911.43 | 11158.36 | 10551.21 | 10678.42 | 8553.919 | 12351.37 | 12285.95 | 14748.01 | 5384.008 | 9977.029 | 7329.796 | 5516.756 | 1897.118 | 4564.496 | 5579.979 | 14052.9  |
| Q6AY41 | 26873.7  | 33907.14 | 20494.23 | 47525.05 | 47241.64 | 37436.84 | 20512.57 | 11115.01 | 97456.36 | 20845.1  | 89305.13 | 53924    | 52934.59 | 66956.41 | 45009.76 | 30389.27 |
| Q6AY61 | 2619.315 | 817.228  | 1464.741 | 7056.253 | 959.5469 | 4088.97  | 1032.011 | 7664.715 | 4022.245 | 3199.883 | 6092.192 | 680.6194 | 3471.843 | 3143.269 | 2848.71  | 3952.095 |
| Q6AYC4 | 6590.398 | 22006.35 | 12717.29 | 12168.62 | 10275.04 | 17294.18 | 8293.503 | 11518.54 | 15406.85 | 9845.125 | 12843.87 | 11439.83 | 8499.856 | 11500.64 | 9807.288 | 9792.604 |
| Q6AYD4 | 537902.7 | 782654.3 | 711408.7 | 525420.5 | 609605.8 | 763473.8 | 593480   | 692489.4 | 765510.3 | 677791.4 | 327788.6 | 631104.8 | 599194.1 | 690973.2 | 554945.1 | 633521.7 |
| Q6AYE5 | 19939.27 | 43959.86 | 19742.13 | 21353.26 | 69390.05 | 36565.72 | 34372.37 | 55709.37 | 40109.96 | 60178.13 | 22677.48 | 19506.77 | 24596.36 | 16013.29 | 28411.43 | 33505.32 |
| Q6AYH6 | 8141.819 | 15208.6  | 10032.74 | 6489.248 | 10154.11 | 12323.03 | 11864.62 | 6487.142 | 15976.31 | 13485.6  | 5883.718 | 7290.859 | 11801.83 | 7839.596 | 7370.614 | 10629.8  |
| Q6AYP5 | 81281.52 | 102946.2 | 126592.7 | 171777.9 | 116173.9 | 100992.6 | 96567.98 | 114722.8 | 124507.9 | 116107.9 | 68095.63 | 101508.4 | 74413.39 | 80508.86 | 85776.7  | 95677.02 |
| Q6AYQ8 | 105.4462 | 2336.177 | 3867.115 | 2497.734 | 7825.085 | 9106.313 | 2274.307 | 6691.904 | 9139.852 | 6454.557 | 6345.559 | 10273.39 | 4584.066 | 8011.532 | 5921.222 | 3290.276 |
| Q6AYR5 | 12877.95 | 7500.229 | 3705.856 | 9787.142 | 10323.36 | 11795.72 | 10558.68 | 10147.61 | 16435.79 | 8699.579 | 16659.17 | 18893.04 | 12348.55 | 15172.84 | 3744.822 | 11810.49 |
| Q6AYR6 | 25653.62 | 20500.75 | 25976.87 | 30419.58 | 16073.26 | 23663.87 | 17606.45 | 13651.46 | 20142.27 | 27172.03 | 25450.75 | 23243.91 | 23973.74 | 22481.23 | 14215.71 | 20673.08 |
| Q6AYR8 | 6747.097 | 10721.23 | 24770.41 | 5838.312 | 13176.76 | 6637.578 | 8140.874 | 17488.45 | 8858.351 | 8825.699 | 9954.244 | 11349.87 | 10777.26 | 22154.56 | 10377.81 | 14219.25 |
| Q6AYR9 | 33297.78 | 12739.14 | 7812.789 | 25341.1  | 6933.689 | 21062.7  | 22180.61 | 37545.98 | 14682.89 | 4094.49  | 95353.96 | 8108.787 | 14950.93 | 11898.43 | 11756.4  | 8418.873 |
| Q6AYS4 | 22871.17 | 19254.01 | 22576.59 | 15750.26 | 33591.13 | 20677.13 | 25880.45 | 23736.58 | 23301.85 | 16260.05 | 14510.88 | 20870.85 | 14025.51 | 14465.24 | 13608.17 | 20243.77 |
| Q6AYS7 | 221839.2 | 239522.5 | 184759.8 | 197684.6 | 304861.9 | 199681.8 | 138528.6 | 186428.1 | 562932.3 | 323032.3 | 700743.8 | 480290.7 | 434994.7 | 491131.5 | 359788.3 | 408969.5 |
| Q6AYT0 | 107712.4 | 104277.5 | 131302.7 | 104612.1 | 171179.3 | 141319.8 | 114410.1 | 119650.6 | 324428.3 | 165634.8 | 294138.4 | 237053   | 283079.9 | 318937.7 | 171408   | 228440.6 |
| Q6AYT8 | 71509.16 | 95015.63 | 95140.55 | 52800.21 | 71642.73 | 105021.4 | 83236.39 | 94674.8  | 33448.95 | 53037.72 | 60872.55 | 55252.13 | 55206.1  | 69762.3  | 38871.59 | 93954.39 |
| Q6B345 | 20599.34 | 27554.24 | 28727.15 | 61035.46 | 35904.51 | 28124.55 | 38545.16 | 42115.56 | 24455.82 | 34500.52 | 90267.25 | 9248.529 | 13695.2  | 23406.12 | 17525.95 | 18395.86 |
| Q6BEA2 | 23482.86 | 20025.22 | 15299.65 | 17737.38 | 15413.97 | 24755.01 | 8564.229 | 29804.71 | 13007.14 | 14032.17 | 13038.01 | 25759.57 | 5489.7   | 9616.496 | 13948.16 | 11033.25 |
| Q6DGG1 | 719743.4 | 777250.3 | 3196203  | 1422706  | 892279.6 | 555372.4 | 634368.3 | 1221937  | 443674.8 | 974829.8 | 680129.8 | 1066770  | 825139.9 | 949937.8 | 859545.6 | 765640.6 |
| Q6GMR2 | 21536.57 | 14473.63 | 5423.311 | 22533.62 | 20654.99 | 20916.35 | 14426.46 | 22349.81 | 11670.04 | 6235.796 | 83641.25 | 11556.76 | 17080.16 | 13490.71 | 8122.166 | 18424.07 |
| Q617R3 | 2608.078 | 6178.201 | 6858.979 | 6535.508 | 4405.085 | 5560.903 | 3100.486 | 9951.967 | 11187.23 | 7531.726 | 8331.595 | 10882.33 | 7763.173 | 6202.157 | 7768.956 | 4539.554 |
| Q61E52 | 253436.1 | 347841.4 | 262560.9 | 170189.5 | 209561.8 | 234099.5 | 360673.1 | 268145.3 | 364514.4 | 284444.5 | 127000.3 | 188384.1 | 206309.6 | 325860.5 | 226411.2 | 312353.3 |



|        |          |          |          |          |          |          |          |          |          |          |          |          |          |          |          |          |
|--------|----------|----------|----------|----------|----------|----------|----------|----------|----------|----------|----------|----------|----------|----------|----------|----------|
| Q6IE64 | 20259.71 | 16329.19 | 22313.14 | 17158.56 | 20663.27 | 25041.56 | 16647.7  | 21897.75 | 19767.74 | 22799.04 | 12655.47 | 10434.23 | 18200.67 | 16356.29 | 9757.764 | 7919.046 |
| Q6IFU7 | 10290.8  | 6149.854 | 10828.9  | 5866.386 | 8738.699 | 4817.742 | 3046.629 | 23254.84 | 1501.515 | 4303.954 | 11811.8  | 3190.139 | 4323.24  | 4381.106 | 7877.921 | 4153.686 |
| Q6IFU8 | 716685.8 | 556792.1 | 406745.8 | 608104.1 | 549025.3 | 185239.8 | 321643   | 781932.5 | 168355.5 | 189853.2 | 1482575  | 190759.9 | 188964.5 | 237859.2 | 547776.2 | 280134.3 |
| Q6IFW6 | 676002.5 | 178185   | 598866   | 405306.8 | 377572.7 | 115034.3 | 225833.6 | 489078.3 | 85143.82 | 140290.4 | 1040904  | 139472.1 | 115090.4 | 128091.6 | 600903.4 | 175437.6 |
| Q6IG02 | 176730.4 | 51058.11 | 212651.4 | 181900.9 | 116890   | 49371.34 | 54722.98 | 124938.3 | 24618.74 | 46467.5  | 384847.6 | 54079.41 | 60580.8  | 52744.93 | 195811.1 | 55319.32 |
| Q6IG05 | 55585.21 | 20490.25 | 19557.25 | 5936.555 | 23574.96 | 13382.34 | 10430.06 | 38808.25 | 5765.098 | 6104.166 | 15152.66 | 14140.81 | 6664.355 | 7377.229 | 15466.74 | 8610.215 |
| Q6IMF3 | 679594.8 | 217608.9 | 346373.5 | 348042.5 | 492343.5 | 126829.5 | 226173.8 | 573665.1 | 77091.58 | 117022.6 | 1073053  | 109461.3 | 99529.2  | 118943.3 | 488855.4 | 145121.8 |
| Q6IRE4 | 17874.08 | 21278.34 | 22577.43 | 20410.31 | 26466.04 | 16378.94 | 19409.38 | 23621.46 | 18668.21 | 19864.48 | 34732.46 | 20702.37 | 16186.83 | 14687.41 | 16395.21 | 16279.67 |
| Q6IRK9 | 2630517  | 3677933  | 3262946  | 2966763  | 3347960  | 4078411  | 2497718  | 2421400  | 3841603  | 4152581  | 2628549  | 3740508  | 2519764  | 4046210  | 4516253  | 3252399  |
| Q6IUU3 | 1048962  | 901128.5 | 899136.7 | 905676.1 | 617402.1 | 946516.8 | 850783.3 | 1170953  | 819338.1 | 599566.8 | 743601.6 | 692583.3 | 667745.5 | 633122.1 | 665569.1 | 3423448  |
| Q6MG61 | 261665.9 | 303762   | 191071   | 263169.5 | 312266   | 312853.7 | 186918.7 | 221442.5 | 992454.8 | 243387.8 | 942585.1 | 600529.2 | 619774   | 710724.1 | 438916.9 | 459285.3 |
| Q6MG71 | 628981.5 | 491189.8 | 540545.9 | 487859.8 | 398593.9 | 523669.4 | 504003.9 | 696631.7 | 612883.9 | 354394.4 | 1360176  | 583535.3 | 476817.2 | 433499.6 | 457040.6 | 543890.6 |
| Q6MGD0 | 10777.96 | 13576.01 | 14147.76 | 9387.745 | 13453.12 | 5447.445 | 8937.349 | 11946.65 | 20638.71 | 17393.38 | 15108.09 | 25031.55 | 17414.88 | 14512.97 | 10861.17 | 12304.49 |
| Q6NX65 | 6370.442 | 5875.978 | 4876.665 | 5978.616 | 6696.959 | 5079.937 | 3876.697 | 9659.367 | 6513.503 | 8078.022 | 11606.62 | 11572.63 | 10746.36 | 7318.366 | 5882.127 | 4898.684 |
| Q6NYB7 | 101295.1 | 95194.35 | 73725.33 | 105870.9 | 81003.77 | 93139.13 | 70547.91 | 110779.6 | 123439.5 | 61593.89 | 231999.3 | 110409.3 | 108827.1 | 90560.64 | 75412.48 | 99522.7  |
| Q6P6Q2 | 299388.9 | 80801.12 | 137453.6 | 202008.5 | 216665.2 | 55718.56 | 88719.81 | 221564.2 | 43073.61 | 53043.14 | 431160.6 | 55091.9  | 56038.44 | 61905.93 | 210427.6 | 70189.13 |
| Q6P6R2 | 5278.008 | 4677.126 | 7811.116 | 8556.902 | 5114.201 | 8238.885 | 14060.08 | 20291.72 | 9316     | 7364.309 | 7670.54  | 2600.365 | 3271.072 | 3989.653 | 4345.306 | 2469.407 |
| Q6P6S4 | 9109.814 | 7789.929 | 8013.559 | 6183.471 | 3593.449 | 10694.74 | 6037.289 | 22533.03 | 10710.05 | 5337.534 | 14090.45 | 3897.78  | 3224.236 | 2016.746 | 6890.931 | 3843.854 |
| Q6P6S9 | 25820.66 | 25773.24 | 31232.61 | 29417.35 | 17869.36 | 20740.96 | 24992.25 | 21907.73 | 10887.34 | 21230.8  | 12010.42 | 12032.6  | 28255.61 | 23477.09 | 19644.14 | 24769.4  |
| Q6P6T1 | 7863.362 | 9447.945 | 10291.63 | 9597.733 | 13299.68 | 18030.9  | 11041.9  | 7514.524 | 10151.92 | 19052.78 | 21143.4  | 15306.04 | 11600.05 | 23288.17 | 10409.14 | 14783.3  |
| Q6P6T4 | 5027.579 | 4694.85  | 6665.863 | 7219.168 | 5732.329 | 4959.682 | 4153.984 | 9190.883 | 22638.77 | 7227.62  | 8980.357 | 7779.322 | 8977.691 | 14913.85 | 10419.24 | 8668.729 |
| Q6P6V0 | 56051.97 | 37545    | 25269.11 | 35132.49 | 48748.08 | 42431.43 | 50707.02 | 35258.73 | 62948.12 | 45406.93 | 80323.19 | 57469.58 | 74790.72 | 74481    | 48682.76 | 32484.71 |
| Q6P734 | 117809.5 | 170702.5 | 126669.6 | 139007   | 93387.8  | 95384.48 | 108196.9 | 137105.5 | 127267.4 | 159003   | 66990.34 | 112947.8 | 147363.8 | 101009.3 | 136746.8 | 154546   |
| Q6P767 | 484083.9 | 542402.1 | 886381.5 | 645293.4 | 1093565  | 399719.7 | 422329.7 | 552576.3 | 724923.3 | 601699.5 | 631391.8 | 667255.9 | 649740.8 | 445734.9 | 981575.5 | 495816.2 |
| Q6P777 | 6400.618 | 9218.939 | 7066.214 | 10659.18 | 11819.63 | 8902.909 | 10538.95 | 10314.97 | 8587.017 | 19069.85 | 9789.406 | 19803.28 | 11197.01 | 18342.42 | 15005    | 16292.27 |
| Q6P7A9 | 725125.2 | 686548.4 | 694771.3 | 788587.4 | 671900.8 | 555211.1 | 635159.4 | 597206.4 | 655688.2 | 747146.8 | 577302.6 | 615535.9 | 590668.7 | 750944.3 | 930272.1 | 756472.4 |
| Q6P7Q4 | 38589.11 | 17544.77 | 56769.64 | 31796.7  | 23552.4  | 29995.66 | 33299.31 | 31281.08 | 32781.54 | 35170.11 | 46120.14 | 48028.91 | 42908.67 | 55761.09 | 40971.68 | 26829.49 |
| Q6P7S1 | 90771.57 | 130273.2 | 162605.8 | 117387.4 | 220359.1 | 81395.12 | 104493.5 | 93057.55 | 192047.4 | 131133.5 | 130934.2 | 153118.1 | 107951.7 | 141388.3 | 169107.8 | 113735.1 |
| Q6P9T8 | 83332.22 | 69496.34 | 35508.63 | 44233.03 | 24959.29 | 75692.02 | 50095.2  | 75205.02 | 34198.27 | 45013.16 | 45718.76 | 65963.14 | 31259.73 | 33649.91 | 32183.71 | 36319.2  |
| Q6PCU2 | 31369.58 | 17219.63 | 43507.14 | 19890.83 | 13469.77 | 31024.46 | 23693.42 | 14854.07 | 66005.66 | 47841.09 | 84960.3  | 78187.7  | 48614.98 | 49487.11 | 37434.86 | 55758.49 |
| Q6PEC4 | 14106.19 | 17067.29 | 14172.85 | 22719.43 | 24832.76 | 24621.57 | 18462.04 | 30634.15 | 52568.62 | 16460.71 | 41919.41 | 19033.79 | 21382.1  | 30048.59 | 42963.6  | 15410.79 |
| Q6Q0N0 | 15175.5  | 9421.276 | 13111.53 | 9126.685 | 5966.626 | 10701.8  | 16662.63 | 14560.91 | 5364.537 | 5256.317 | 8549.857 | 4963.072 | 5412.323 | 3143.168 | 6460.857 | 6876.819 |
| Q6Q0N1 | 47948.1  | 50799.36 | 42798.75 | 42443.49 | 88273.28 | 79801.8  | 50232.68 | 48086.56 | 181405.9 | 79754.02 | 323161.5 | 151961   | 131687.6 | 164956.8 | 99669.3  | 111633.4 |
| Q6Q7Y5 | 271371.7 | 105512.2 | 161795.9 | 312518.3 | 101460.2 | 176355.5 | 188214.1 | 312336.5 | 394861.8 | 75011.03 | 296758.3 | 235327.8 | 122583.6 | 136162.6 | 74388.2  | 118240   |
| Q6RUV5 | 92409.74 | 47866.42 | 61125.92 | 129625.1 | 84831.5  | 140726.2 | 98277.54 | 155418.7 | 106824.1 | 44015.8  | 315779.9 | 83524.98 | 99519.8  | 85892.38 | 65288.83 | 126421.4 |
| Q6RY07 | 24207.66 | 58101.84 | 14206.36 | 33552.8  | 22947.57 | 33290.02 | 29598.53 | 19839.31 | 35715.7  | 12742.25 | 18113.89 | 22495.34 | 15261.13 | 16682.37 | 15419.86 |          |
| Q6TMA8 | 26617.2  | 49007.5  | 23494.39 | 88908.2  | 41860.84 | 27767.76 | 53976.68 | 48648.87 | 8988.991 | 11032.44 | 9847.581 | 9983.791 | 13702.45 | 14676.38 | 13426.77 | 23934.59 |
| Q6TUD4 | 18440868 | 28278152 | 20858956 | 17253314 | 24579376 | 32248396 | 16812942 | 38324664 | 44941428 | 28366654 | 13999607 | 31215060 | 24599572 | 27858214 | 25141636 | 22177178 |
| Q6X936 | 12042.26 | 21226.63 | 30649.45 | 21677.72 | 23021.5  | 21834.06 | 16488.43 | 14592.69 | 17238.79 | 21625.84 | 13372.4  | 17022.18 | 18735.95 | 15927.67 | 12566.79 | 16477.58 |
| Q6XQN1 | 12352.06 | 13291.16 | 9119.197 | 8074.263 | 16163.35 | 10109.83 | 7092.467 | 14316.29 | 19432.66 | 7699.678 | 15995.93 | 14904.74 | 10749.32 | 11519.34 | 15809.84 | 8530.839 |
| Q711G3 | 53774.36 | 51289.67 | 66233.95 | 70213.29 | 88775.13 | 35228.26 | 66687.77 | 55155.19 | 103523.6 | 91329.04 | 171061.3 | 127750.6 | 116690.9 | 143248.7 | 81447.2  | 94994.56 |
| Q71MB6 | 14568.01 | 13270.24 | 11264.04 | 16291.88 | 20607.92 | 18973.8  | 13243.41 | 29265.73 | 56176.68 | 15881.78 | 53815.24 | 40725.23 | 52547.79 | 35694.48 | 35490.39 | 15605.41 |
| Q76HN1 | 73163.28 | 69131.91 | 73832.2  | 84289.98 | 50425.28 | 53136.5  | 57127.86 | 82205.42 | 64126.91 | 113454.3 | 55771.77 | 62473.54 | 74226.96 | 64986.92 | 112656.1 | 74157.12 |
| Q78P75 | 32502.41 | 16678.03 | 8083.596 | 13072.03 | 8560.836 | 33271.24 | 24843.05 | 20566.11 | 13064.89 | 8401.854 | 15504.02 | 10847.42 | 12689.37 | 9497.874 | 9215.181 | 5760.99  |
| Q793F9 | 42492.25 | 82298.63 | 47037.38 | 161796.5 | 25705.77 | 107414.3 | 50652.85 | 66177.55 | 72351.8  | 63503.19 | 94128.28 | 74184.4  | 66923.48 | 59537.34 | 62943.81 | 50949    |
| Q794F9 | 7190.102 | 8244.545 | 23942.17 | 17839.25 | 19268.06 | 18821.04 | 13199.53 | 9038.046 | 23379.06 | 21377.59 | 15257.82 | 20273.81 | 19828.92 | 15877.18 | 22350.15 | 14261.46 |
| Q7M0E3 | 40543.28 | 36627.86 | 34974.64 | 64306.66 | 27230.05 | 38594.43 | 31233    | 53910.98 | 102209.9 | 42334.7  | 100967.2 | 89639.48 | 77652.34 | 73592.34 | 43168.8  | 62611.87 |
| Q7TP52 | 31102.79 | 40764.11 | 15491.04 | 36942.55 | 45850.44 | 25989.86 | 30783.32 | 23480.7  | 93281.1  | 39666.51 | 54551.02 | 46186.58 | 41623.59 | 59092.88 | 42856.88 | 24246.11 |
| Q7TPB4 | 42749.17 | 75166.73 | 54229.77 | 51688.98 | 66932.79 | 76385.75 | 70946.92 | 68262.84 | 104086.7 | 78238.64 | 40006.22 | 64851.5  | 73844.53 | 76555.48 | 57014.2  | 56388.72 |

|        |          |          |          |          |          |          |          |          |          |          |          |          |          |          |          |          |
|--------|----------|----------|----------|----------|----------|----------|----------|----------|----------|----------|----------|----------|----------|----------|----------|----------|
| Q7TQ94 | 33517.18 | 34026.43 | 24126.76 | 34609.23 | 40233.07 | 28227.16 | 27952.04 | 27585.74 | 67692.63 | 36787.83 | 86866.7  | 62394.05 | 67703.71 | 76213.32 | 50641.85 | 46443.76 |
| Q80W57 | 73786.73 | 100069.2 | 49180.7  | 107887   | 148428.3 | 131423.9 | 57016.99 | 93893.23 | 334624.6 | 65681.48 | 310771   | 219714.2 | 199444   | 227369.1 | 148223.2 | 129927.8 |
| Q80WD0 | 45811.21 | 80187.02 | 62835.55 | 64794.9  | 66125.01 | 70878.48 | 61634.95 | 73797.22 | 74522.3  | 84382.13 | 49503.18 | 64268.34 | 48246.73 | 50274.68 | 65072.63 | 56942.78 |
| Q80WD1 | 73161.7  | 123997.3 | 113467.5 | 87037.41 | 118573.7 | 106693.1 | 73874.93 | 118852.3 | 126669.5 | 139889.9 | 61508.14 | 117747.1 | 103324.1 | 140328   | 112582.2 | 80698.17 |
| Q80WF4 | 28982.73 | 49223.29 | 25282.13 | 27569.45 | 45242.38 | 29348.14 | 36207.28 | 36488.23 | 38170.75 | 34219.22 | 21182.38 | 45552.07 | 36613.79 | 50122.02 | 40577.97 | 27889.35 |
| Q80WL1 | 20425.68 | 58901.19 | 21612.75 | 68636.83 | 16063.28 | 50370.72 | 50390.37 | 9687.123 | 24359.18 | 38821.49 | 22988.08 | 30481.31 | 9009.336 | 45717.89 | 22159.34 | 23247.27 |
| Q80WY6 | 20114.96 | 25316.79 | 35846.25 | 38151.79 | 26825.72 | 41223.4  | 38471.3  | 24468.27 | 16563.93 | 55346.52 | 15392.33 | 19119.63 | 27844.43 | 13248.75 | 37882.98 | 34537.41 |
| Q80YN4 | 10876.61 | 15731.46 | 12090.09 | 17666.68 | 16327.27 | 13119.68 | 5530.785 | 11807.47 | 25217.13 | 15593.11 | 8087.005 | 13858.81 | 6849.095 | 13238.35 | 13439.37 | 14235.84 |
| Q810F4 | 55942.67 | 69511.26 | 51281.27 | 71762.98 | 39878.36 | 55831.71 | 91553.5  | 55134.92 | 38959.68 | 71179.46 | 24853.2  | 56537.05 | 39541.1  | 42842.4  | 44212.55 | 30293.81 |
| Q811A3 | 13266.55 | 10378.04 | 10890.37 | 9894.156 | 8234.611 | 4853.208 | 9238.578 | 5871.055 | 8277.281 | 8636.833 | 6009.478 | 4782.627 | 7746.783 | 7852.262 | 7802.045 | 8159.581 |
| Q811M5 | 5624.336 | 9390.504 | 6733.234 | 11614.58 | 10361.64 | 36612.81 | 5635.603 | 5737.716 | 20516.45 | 23577.74 | 4888.808 | 6136.937 | 5448.346 | 5129.578 | 13213.08 | 10643.12 |
| Q811X6 | 73334.44 | 54466.77 | 77620.27 | 50221.75 | 96660.68 | 51240.2  | 64914.75 | 73759.83 | 165324.9 | 95708.22 | 116778.1 | 135422.9 | 98940.65 | 125469.4 | 100045.1 | 78655.4  |
| Q812E4 | 9688.908 | 3944.206 | 1960.554 | 5667.225 | 2555.838 | 5166.739 | 9075.742 | 12032.56 | 9042.283 | 854.9191 | 20467.84 | 3158.531 | 2955.378 | 5819.293 | 942.5548 | 6979.181 |
| Q812E9 | 127347   | 133669.3 | 75130.5  | 133051.1 | 151601.8 | 166078   | 83295.75 | 133975.7 | 211514.8 | 73887.52 | 192234.4 | 190048.6 | 251826.7 | 216314.5 | 154121.7 | 184421.2 |
| Q8CFN2 | 32594.27 | 23388.72 | 27352.79 | 32605.07 | 28256.96 | 46607.79 | 38700.66 | 87355.35 | 26689.69 | 15834.99 | 143434.5 | 35955.29 | 24948.41 | 33121.82 | 16170.83 | 46871.03 |
| Q8CG08 | 78104.35 | 101778.4 | 117685.9 | 113116.6 | 124330   | 101706.1 | 81051.55 | 106964.9 | 154039   | 171850.3 | 85483.32 | 120628.8 | 156666.9 | 198323.5 | 166294.5 | 120452.3 |
| Q8CG45 | 51577.48 | 42516.59 | 28245.26 | 40712.04 | 69800.73 | 48083.98 | 37317.87 | 43488.54 | 54355.99 | 43215.61 | 123684.4 | 75534.56 | 78788.75 | 85488.86 | 57958.93 | 53482.02 |
| Q8CGS4 | 19927.7  | 13219.17 | 11419.4  | 19293.04 | 8861.479 | 11544.85 | 17745.27 | 8063.704 | 24260.16 | 20792.01 | 39784.08 | 27246.37 | 19592.84 | 31674.8  | 15358.33 | 35875.4  |
| Q8CGU6 | 9880.534 | 4823.996 | 9748.976 | 10592.21 | 11938.17 | 23889.29 | 9903.272 | 9516.53  | 9151.454 | 2887.647 | 12198.63 | 6729.345 | 5116.818 | 5544.674 | 9986.785 | 7036.007 |
| Q8CHN3 | 2492906  | 2859150  | 1510637  | 1939151  | 2935265  | 2789057  | 1730708  | 1961193  | 2010305  | 2758183  | 1660138  | 2351682  | 2115764  | 2208451  | 1881715  | 1832846  |
| Q8CHN8 | 14957.59 | 27268.15 | 17800.25 | 22271.87 | 7712.702 | 23798.19 | 16645.19 | 17195.78 | 20135.99 | 21611.51 | 13722.2  | 17316.62 | 18736.74 | 14190.03 | 16153.34 | 15158.2  |
| Q8CIZ5 | 33167.87 | 94486.68 | 44750.86 | 80907.69 | 34068.92 | 38806.8  | 48573.01 | 117784.8 | 19483.75 | 23218.39 | 22123.16 | 23231.03 | 31674.8  | 23834.98 | 20746.09 | 14598.79 |
| Q8CJ52 | 17776.34 | 6920.233 | 4552.353 | 13327.43 | 5903.495 | 12382.81 | 16664.03 | 10213.12 | 6275.064 | 2337.86  | 18684.7  | 3094.823 | 4136.276 | 6006.905 | 35087.81 | 9514.982 |
| Q8CJD3 | 9296.99  | 14508.51 | 5182.398 | 6300.583 | 14180.17 | 8931.173 | 9148.667 | 13493.04 | 18331.71 | 6008.455 | 5157.634 | 38040.47 | 9129.816 | 10839.76 | 8628.143 | 10645.44 |
| Q8JZQ0 | 129200.8 | 142473.6 | 128464.1 | 170162.5 | 149655.7 | 200200.9 | 125032.8 | 156050.3 | 106753.6 | 148906   | 113002.3 | 120026.3 | 151086   | 141527   | 101369.5 | 111677   |
| Q8K1G0 | 5823.641 | 6857.119 | 11353.69 | 10734.8  | 3217.253 | 5799.1   | 5308.231 | 1813.362 | 8104.4   | 7227.945 | 2222.737 | 3003.371 | 3352.042 | 4115.954 | 4937.649 | 4896.212 |
| Q8K3P7 | 6996.168 | 6906.551 | 8499.978 | 7678.421 | 7967.496 | 6850.5   | 6856.937 | 9342.468 | 18342.81 | 7196.331 | 14842    | 21743.3  | 17328.07 | 17175.76 | 8999.245 | 16534.09 |
| Q8K3V3 | 17293.35 | 28297.05 | 36717.34 | 18304.25 | 27814.57 | 29988.72 | 29874.67 | 31103.13 | 39203.15 | 31682.03 | 27646.29 | 34178    | 22771.89 | 26497.74 | 28728.39 | 25455.34 |
| Q8K4G9 | 13055.52 | 21340.44 | 20362.8  | 15083.07 | 21959.38 | 17988.79 | 12273.71 | 11854.32 | 17145.56 | 16015.6  | 18238.34 | 26535.15 | 23539.97 | 10293.55 | 16346.87 | 14216.91 |
| Q8K4Y7 | 9328.145 | 14029.46 | 12233.74 | 8835.063 | 12102.25 | 11053.01 | 11537.46 | 17781.68 | 8361.325 | 11549.85 | 10264.21 | 12738.57 | 11524.82 | 6926.847 | 8056.188 | 9433.869 |
| Q8N7M5 | 15090.51 | 12813.92 | 13615.59 | 19673.88 | 19911.85 | 15524.31 | 13593.25 | 14839.77 | 10162.92 | 10169.7  | 18471.86 | 5613.471 | 15025.91 | 9411.373 | 6970.848 | 11876.81 |
| Q8R431 | 17908.71 | 30263.27 | 16309.99 | 16402.3  | 22750.46 | 28744.46 | 12716.47 | 14444.23 | 75138.19 | 14844.64 | 64622.59 | 50406.02 | 43255.43 | 52669.04 | 30375.21 | 24576.36 |
| Q8R491 | 46186.64 | 75738.62 | 57800.11 | 56148.89 | 38226.34 | 64940.23 | 31185.47 | 76527.59 | 51261.98 | 55391.48 | 92317.53 | 70615.39 | 45050.16 | 34275.95 | 33350.85 | 64739.48 |
| Q8R4C0 | 16198.26 | 11408.88 | 10776.16 | 15521.7  | 5334.776 | 14180.8  | 12711.92 | 16004.4  | 3622.354 | 7222.068 | 12741.24 | 5811.792 | 9507.615 | 9512.871 | 7772.571 | 7000.148 |
| Q8R4E1 | 33909.67 | 41960.16 | 26432.58 | 36383.6  | 32505.26 | 41058.66 | 31591.42 | 45038.26 | 47694.5  | 43908.29 | 39158.19 | 40739.23 | 35238.57 | 18216.04 | 16214.32 | 29210.5  |
| Q8R5M3 | 48044.11 | 43514.77 | 60605.95 | 45248.38 | 31530.95 | 53470.64 | 22875.17 | 68715.41 | 98191.39 | 143642.8 | 62887.69 | 114604.4 | 79565.45 | 107708.7 | 98416.41 | 49890.38 |
| Q8R5M5 | 28335.02 | 17172.57 | 21957.22 | 13703.38 | 26322.9  | 9965.9   | 9601.949 | 11996.35 | 15559.09 | 16201.04 | 16959.79 | 14489.67 | 14128.03 | 22911.07 | 20016.56 | 12685.82 |
| Q8VBX1 | 13401.88 | 10500.69 | 5934.323 | 8703.305 | 3027.826 | 9646.339 | 6512.653 | 10790.31 | 11855.25 | 6975.948 | 26267.82 | 9321.437 | 9183.06  | 10735.69 | 11983    | 6398.068 |
| Q8VD89 | 62255.89 | 175382.7 | 133394.8 | 56701.77 | 106857.1 | 47293.12 | 138123.8 | 116576.2 | 113546.5 | 185916.8 | 106594.6 | 147341   | 188142.8 | 148165.6 | 100488.4 | 177897.1 |
| Q8VI04 | 23278.1  | 19930.8  | 11340.53 | 17303.64 | 24832.54 | 15139.69 | 10100.05 | 29063.06 | 30189.81 | 12544.44 | 57029.43 | 32170.06 | 37277.32 | 34723.83 | 27739.07 | 23016.87 |
| Q8VIF7 | 109070.5 | 97795.52 | 85122.26 | 96995.16 | 157495.1 | 88165.98 | 101601.2 | 110132.5 | 175014   | 113286.1 | 158864.4 | 124742.6 | 152064.7 | 180364.7 | 131654.1 | 98949.82 |
| Q91XN4 | 135467.2 | 155024.4 | 150752.8 | 90997.91 | 126416.6 | 192896.7 | 92441.59 | 107183.7 | 97146.33 | 110434.4 | 63767.87 | 108152.8 | 76721.11 | 57753.18 | 76973.92 | 95471.41 |
| Q91XT9 | 17602.43 | 22298.59 | 22637.77 | 17039.21 | 21464.9  | 20065.04 | 20646.56 | 19347.76 | 11738.56 | 9143.68  | 13447.56 | 11942.4  | 8594.23  | 12916.69 | 13223.75 | 8336.566 |
| Q91Y81 | 5500.886 | 5345.66  | 9664.935 | 5506.233 | 4301.779 | 4774.919 | 4095.327 | 2810.854 | 13636.92 | 10862.85 | 10774.77 | 10072.13 | 9540.382 | 8949.531 | 6785.551 | 6568.29  |
| Q91ZS3 | 17943.03 | 21805.27 | 7549.988 | 8389.996 | 10244.05 | 13063.65 | 10276.19 | 14827.15 | 6704.158 | 9359.662 | 5998.111 | 8496.646 | 6600.738 | 6006.096 | 1896.308 | 5726.159 |
| Q920A6 | 955418.4 | 1078793  | 995027.1 | 1058399  | 980555.9 | 1220244  | 765318.8 | 1110769  | 677797.4 | 933685.4 | 696329.5 | 876635.9 | 585645.4 | 548401.2 | 1148009  | 806853.7 |
| Q920G2 | 9930.617 | 2796.4   | 9041.855 | 11709.49 | 3618.79  | 7836.055 | 7713.238 | 7516.723 | 14778.85 | 13517.21 | 16552.6  | 15212.25 | 17755.59 | 26705.51 | 15679.69 | 16150.23 |
| Q920J4 | 23118.65 | 17538.56 | 15198.11 | 26084    | 20779.77 | 27660.51 | 18644.88 | 28350.39 | 24419.68 | 17198.54 | 23430.98 | 7564.231 | 14129.03 | 12414.35 | 16439.27 | 9725.416 |
| Q920P0 | 21855.09 | 14038.49 | 23976.39 | 19421    | 18350.27 | 10573.83 | 15437.66 | 16115.36 | 40674.03 | 29677.23 | 33400.34 | 34309.39 | 27368.12 | 38210.6  | 21901.91 | 19626.33 |

|        |          |          |          |          |          |          |          |          |          |          |          |          |          |          |          |          |
|--------|----------|----------|----------|----------|----------|----------|----------|----------|----------|----------|----------|----------|----------|----------|----------|----------|
| Q923M1 | 14152.08 | 12911.13 | 13836.37 | 11063.05 | 22937.67 | 16155.36 | 12891.39 | 31700.59 | 29836.96 | 7288.897 | 34254.37 | 32764.65 | 17859.56 | 35592.17 | 15111.4  | 18241.59 |
| Q923S2 | 71049.89 | 74498.09 | 39669.89 | 65578.29 | 92753.84 | 72392.49 | 40761.31 | 46113.65 | 190577.8 | 52524.16 | 239609   | 173665.3 | 213427.3 | 128662.5 | 135252.2 | 104525.3 |
| Q923V8 | 8758.258 | 8292.441 | 17289.7  | 9060.559 | 3247.949 | 6647.497 | 12448.27 | 24189.83 | 7006.903 | 10341    | 3191.856 | 11602.26 | 8612.396 | 5560.2   | 5535.499 | 8254.23  |
| Q924B5 | 14596.68 | 9163.35  | 6562.501 | 10549.52 | 8023.906 | 13641.15 | 9676.105 | 10684.36 | 4871.556 | 8444.544 | 19207.27 | 9480.471 | 7958.781 | 5989.268 | 5671.791 | 5632.976 |
| Q99041 | 1561490  | 400629.9 | 892341   | 4331648  | 1489221  | 4242733  | 4097409  | 3691872  | 211351.7 | 1438026  | 6875437  | 472504.8 | 2319323  | 2509942  | 1133380  | 2165982  |
| Q99068 | 8947.154 | 9834.113 | 11871.6  | 9628.402 | 15876.62 | 13871.63 | 8102.169 | 9691.085 | 11758.48 | 15168.33 | 6754.436 | 10015.38 | 9447.054 | 10497.34 | 7914.478 | 8705.079 |
| Q99376 | 4745.258 | 7120.443 | 5100.815 | 2644.293 | 3925.326 | 2838.15  | 1821.269 | 4410.213 | 3846.232 | 5979.918 | 2560.64  | 3640.339 | 6659.578 | 2083.29  | 7348.743 | 1845.537 |
| Q99J86 | 148568.7 | 192673.9 | 243404.1 | 129066.3 | 221032   | 147345.4 | 164654.3 | 215008.8 | 170356.9 | 175779.9 | 203522.5 | 144625.1 | 113079.6 | 100097.3 | 112268.8 | 132352.3 |
| Q99M75 | 30401.21 | 44209.92 | 29316.02 | 34793.31 | 43336.25 | 16255.99 | 34297.12 | 28953.24 | 20402.06 | 33636.27 | 24096.03 | 20250.25 | 12762.27 | 17285.11 | 17778.45 | 19807.8  |
| Q99MA2 | 322598.5 | 318231.3 | 2378613  | 388815.5 | 284573.2 | 304288.8 | 238172.1 | 333774.1 | 702359.3 | 292422.8 | 982226.7 | 573860.4 | 706072.4 | 617292.4 | 534515.9 | 401170.6 |
| Q99MF4 | 52971.56 | 55635.65 | 38052.54 | 46392.29 | 41150.9  | 63417.39 | 63666.73 | 69503.45 | 43330.07 | 51262.02 | 24790.47 | 45745.86 | 17819.31 | 43059.53 | 18718.3  | 48296.88 |
| Q99MH3 | 1050262  | 2802666  | 1315431  | 50503.91 | 724888.2 | 1401386  | 331329.2 | 907364   | 1885239  | 1114777  | 1050500  | 1070005  | 468426.6 | 301213.5 | 1439315  | 72480.86 |
| Q99MZ8 | 11866.02 | 19039.92 | 9621.491 | 15168.82 | 15813.39 | 18106.8  | 11243.99 | 17589.44 | 37130.07 | 20502.27 | 57568.98 | 32411.47 | 33073.69 | 29214.52 | 20545.96 | 25845.92 |
| Q99PD4 | 3146.441 | 4064.709 | 4740.805 | 5398.821 | 3618.865 | 3503.877 | 2954.916 | 5165.078 | 5941.767 | 3485.493 | 8592.987 | 3508.11  | 5089.345 | 4212.016 | 2859.688 | 4079.06  |
| Q99PP0 | 10566.38 | 24085.7  | 20660.06 | 21463.9  | 14352.84 | 30559.31 | 15995.71 | 17228.06 | 19704.1  | 31188.7  | 9672.195 | 11934.26 | 10097.73 | 12337.04 | 14261.03 | 13060.49 |
| Q99PS8 | 558049.7 | 822806.6 | 538146.9 | 552836.1 | 1041361  | 582657.2 | 760771   | 712102.4 | 665000.2 | 755477   | 400842.6 | 598850.1 | 561687.9 | 664503.9 | 732238.3 | 522335.3 |
| Q99PW3 | 137702.1 | 196869.2 | 261574.9 | 137715.5 | 174026.5 | 160181.1 | 149194.1 | 304342.5 | 144477.7 | 168742.4 | 61806.1  | 92089.26 | 102899.1 | 117513.5 | 210082.8 | 136165.2 |
| Q99PW7 | 10289.39 | 9587.336 | 9991.923 | 11072.43 | 9451.748 | 12956.39 | 11772.04 | 6552.984 | 5460.528 | 8576.979 | 6509.774 | 9153.536 | 5666.326 | 9087.38  | 7675.484 | 5825.753 |
| Q9EPB1 | 5241431  | 7513651  | 6020243  | 6315764  | 6725388  | 4454389  | 5044317  | 5267229  | 4571187  | 6514046  | 8374120  | 6753912  | 4926680  | 5442559  | 7298172  | 6070115  |
| Q9EPF2 | 43673.21 | 64585.25 | 59473.46 | 58203.67 | 70257.13 | 60764.25 | 45663.28 | 44102.05 | 61245.63 | 76304.22 | 27433.84 | 54098.61 | 46977.11 | 48671.04 | 58116.94 | 43554.51 |
| Q9EQS0 | 2436.59  | 2435.752 | 15472.52 | 7478.342 | 6308.134 | 3865.877 | 10037.26 | 21929.79 | 8443.494 | 13722.29 | 9713.949 | 14448.16 | 5478.26  | 11875.33 | 12934.92 | 6128.583 |
| Q9EQT1 | 11439.7  | 10191.68 | 8290.964 | 9502.009 | 11474.65 | 11614.5  | 10085.6  | 10851.51 | 10998.48 | 17515.35 | 15515.68 | 7293.162 | 6362.575 | 9610.161 | 14190.79 | 7659.11  |
| Q9EQV6 | 136879.3 | 128644.2 | 123002.6 | 173540.7 | 113374   | 133475.1 | 126618.4 | 136659.5 | 95706.36 | 143393.7 | 132163.9 | 111424.5 | 136489.5 | 116625.4 | 131161.6 | 151091.3 |
| Q9EQV9 | 99062.2  | 88990.09 | 84822.78 | 98260.27 | 28440.86 | 64845.51 | 75587.73 | 48883.23 | 46609.23 | 75803.68 | 32165.49 | 42643.8  | 55411.07 | 81951.7  | 99505.85 | 90357.98 |
| Q9EQX9 | 14303.13 | 17373.86 | 10793.58 | 13170.9  | 18817.03 | 16521.14 | 16703    | 14147.78 | 32722.73 | 20555.27 | 46158.89 | 19646.99 | 17782.4  | 22734.25 | 14516.43 | 15169.38 |
| Q9ES87 | 78983.87 | 110293.6 | 96885.26 | 213099.3 | 124383.1 | 87568.41 | 13762.99 | 70912.3  | 101028.8 | 139090.2 | 48206.47 | 159580.9 | 135245.1 | 115419   | 109264.9 | 97933.15 |
| Q9ESG3 | 31918.77 | 44003.43 | 35812.69 | 51631.56 | 60109.95 | 47890.31 | 24477.31 | 47564.55 | 101175.7 | 38589.88 | 75219.11 | 69733.01 | 83165.09 | 86628.88 | 46313.92 | 68607.73 |
| Q9ESS6 | 194574.3 | 225226.1 | 148818.2 | 224047.8 | 233965.1 | 225563.6 | 166375.1 | 204971.4 | 192579.7 | 185359.7 | 94205.58 | 163329.7 | 162692.6 | 170292.6 | 141549.3 | 129571.2 |
| Q9ESW0 | 17462.45 | 23337.13 | 21888.02 | 25551.27 | 14291.92 | 20144.43 | 16407.71 | 19181.84 | 10806.54 | 12754.1  | 13211.04 | 14580.54 | 9863.412 | 21958.62 | 12992.18 | 13275.45 |
| Q9ET32 | 21665.13 | 9275.021 | 16808.27 | 13786.73 | 8050.466 | 21712.21 | 9447.758 | 16750.31 | 11647.96 | 4960.233 | 20967.15 | 14024.74 | 12244.44 | 12966.24 | 5124.013 | 20609.16 |
| Q9JHB9 | 665208.2 | 239530.1 | 122288.7 | 306865.9 | 142657.5 | 328500.9 | 446734.9 | 431910.2 | 68724.06 | 72088.92 | 470538.2 | 140562.1 | 63929.69 | 83639.9  | 55334.65 | 407482.9 |
| Q9JHW1 | 23800.63 | 21901.38 | 18037.05 | 27799.46 | 20406.53 | 21089.69 | 26853.55 | 30153.61 | 14423.88 | 18120.93 | 13607.02 | 13989.47 | 21144.79 | 13228.83 | 12331.93 | 15417.28 |
| Q9JHY1 | 1102272  | 1184459  | 1212532  | 1023247  | 904899.9 | 1092048  | 1164232  | 1243701  | 1246236  | 1536512  | 732535.5 | 1004194  | 829634.3 | 907530.8 | 1061723  | 695790.8 |
| Q9JH85 | 523896.6 | 249607.9 | 128217.6 | 306368.4 | 85359.61 | 470394.3 | 226415.3 | 434397.8 | 41199.09 | 60515.22 | 297023.1 | 122068.7 | 174709.6 | 53948.03 | 28615.88 | 110043.8 |
| Q9JI92 | 209088.5 | 180417.6 | 138043.5 | 219893.5 | 192793.8 | 178486.9 | 230281   | 282039.1 | 58896.36 | 134965.7 | 180318.8 | 129888.8 | 146914.4 | 135553.3 | 141497.2 | 148571.4 |
| Q9JIK1 | 716415.4 | 627897.4 | 635719.9 | 483206.6 | 602894.4 | 441408.5 | 965163.6 | 663870.2 | 791860.2 | 870700.9 | 366469.8 | 865029.6 | 725882.9 | 699006.4 | 584680.4 | 508980.6 |
| Q9JI19 | 696689.3 | 588942.9 | 523674   | 682294.4 | 752748.4 | 816039   | 426565.7 | 585153.3 | 1771220  | 583644.4 | 2301338  | 1323045  | 1242978  | 1525162  | 1010842  | 1029237  |
| Q9JJ22 | 14918.68 | 12155.33 | 8271.395 | 7993.317 | 8772.274 | 13088.87 | 9376.887 | 5979.235 | 17200.2  | 10291.82 | 12597.83 | 7958.135 | 8466.744 | 6582.733 | 8249.509 | 8577.691 |
| Q9JJ40 | 490162.3 | 487337.8 | 428667.6 | 455356.7 | 747850.3 | 624737   | 309930.3 | 536182.4 | 2126121  | 407624.7 | 1358955  | 930213.6 | 1018565  | 1216246  | 938703.1 | 549066.3 |
| Q9JJ50 | 15298.01 | 2229.491 | 20246.78 | 27414.44 | 1344.888 | 11433.3  | 18593.8  | 22537.12 | 18242.11 | 21151.66 | 27040.61 | 28589.09 | 25418.27 | 33978.19 | 28216.58 | 26840.17 |
| Q9JJS8 | 10887.96 | 11912.54 | 10293.15 | 19832.74 | 11353.46 | 8759.301 | 3206.914 | 15941.67 | 11702    | 16879.7  | 3323.145 | 7886.452 | 10033.85 | 11659.52 | 17016.78 | 3983.116 |
| Q9JLJ3 | 40575.28 | 41244.6  | 38767.88 | 42354.02 | 55307.48 | 37515.48 | 37987.43 | 41205.08 | 116134.2 | 47741.51 | 135444.2 | 94839.34 | 105406.5 | 110099   | 68462.75 | 61809.31 |
| Q9JLS4 | 34495.47 | 80351.32 | 80425.87 | 85416.48 | 63219.62 | 67609.63 | 54664.16 | 103285   | 87913.04 | 95651.66 | 44175.45 | 85143.56 | 83715.02 | 117175.7 | 82544    | 74387.64 |
| Q9JLZ1 | 5806.538 | 6889.602 | 12676.48 | 10336.99 | 10172.91 | 14518.86 | 7404.479 | 7704.177 | 7413.879 | 6619.753 | 8594.185 | 6486.67  | 7017.185 | 18653.48 | 8169.089 | 6676.935 |
| Q9QUL6 | 1471.905 | 4536.971 | 3558.678 | 3515.921 | 1317.558 | 4123.969 | 3043.549 | 2665.402 | 3146.301 | 3718.357 | 4705.862 | 2726.587 | 3229.403 | 1918.199 | 1905.421 | 6396.246 |
| Q9QW07 | 23730.79 | 3340.824 | 7166.561 | 12124.35 | 4012.592 | 23777.26 | 17946.74 | 22518.34 | 9079.203 | 5475.777 | 27517.68 | 12709.35 | 1247.617 | 7431.29  | 12215.48 | 16607.11 |
| Q9QW30 | 25058.22 | 36295.89 | 19807.48 | 35882.87 | 32686.34 | 49324.93 | 37968.57 | 34053.09 | 21135.55 | 32974.59 | 19156.3  | 18050.19 | 20921.34 | 19598.58 | 26189.37 | 30117.99 |
| Q9QWJ9 | 15332.9  | 20840    | 13636.61 | 15803.28 | 20365.53 | 17431.96 | 15845.29 | 14854.73 | 9470.543 | 14157.57 | 10515.2  | 18555.49 | 15876.39 | 13838.52 | 16161.64 | 16203.66 |
| Q9QWN8 | 23714.51 | 25471.43 | 17319.13 | 25095.95 | 17791.32 | 24649.19 | 15623.98 | 118212.8 | 14825.09 | 5171.688 | 16598.93 | 2762.076 | 30742.43 | 27996.06 | 6172.115 | 7527.593 |

|        |          |          |          |          |          |          |          |          |          |          |          |          |          |          |          |          |
|--------|----------|----------|----------|----------|----------|----------|----------|----------|----------|----------|----------|----------|----------|----------|----------|----------|
| Q9QX74 | 977431.4 | 508793.6 | 724766.1 | 1245412  | 1595986  | 1030202  | 2932904  | 4051348  | 233008.3 | 165279.7 | 266993.5 | 49497.43 | 81402.7  | 111367.7 | 185840   | 117971.9 |
| Q9QX79 | 1636906  | 898083.6 | 1581173  | 1093300  | 994004.8 | 1239638  | 1503747  | 785493.2 | 900072.9 | 981170.7 | 286090   | 455398.8 | 479247.2 | 636544.7 | 1039919  | 924656.3 |
| Q9QXN4 | 11928.32 | 10620.26 | 2795.936 | 12196.18 | 15091.19 | 9994.11  | 12159.87 | 11992.56 | 11166.06 | 5242.447 | 24676.39 | 7060.561 | 8119.425 | 14566.26 | 9437.947 | 11657.99 |
| Q9QXQ0 | 8433.485 | 11780.17 | 14966.91 | 11088.33 | 15002.73 | 10990.62 | 14587.49 | 26226.62 | 30527.29 | 13351.53 | 30116.87 | 21981.77 | 21995.71 | 21884.2  | 12122.28 | 9187.591 |
| Q9QY17 | 28116.51 | 21403.58 | 11603.33 | 21493.74 | 23821.17 | 26987.43 | 19899.39 | 17576.18 | 33052.26 | 13455.41 | 74220.57 | 27176.66 | 33579.43 | 31359.04 | 22124.91 | 32740.9  |
| Q9QYP1 | 584547.6 | 313199.8 | 107033.1 | 1687032  | 17643.65 | 168780.2 | 266928.8 | 35055.55 | 4378.992 | 437986.2 | 17101.01 | 102566   | 107788.1 | 290123.6 | 321038   | 451346.2 |
| Q9QYP2 | 6839.26  | 11874.62 | 8398.73  | 10835.56 | 7628.673 | 7636.054 | 6073.367 | 7774.735 | 1993.207 | 17772.46 | 5575.463 | 18232.72 | 14825.73 | 11888.96 | 12134.51 | 14152.74 |
| Q9QYU4 | 23038.53 | 22199.19 | 21731.67 | 28232.73 | 31212.9  | 22320.53 | 22477.15 | 31366.42 | 82646.98 | 28456.66 | 78432.62 | 44505.48 | 57321.16 | 77729.11 | 43932.38 | 38436.95 |
| Q9QZ76 | 21399.55 | 17892.83 | 41990.89 | 19442.64 | 8084.307 | 19802.21 | 15035.19 | 36368.32 | 12136.33 | 26271.03 | 17990.43 | 35170.21 | 29126.66 | 25858.5  | 17543.18 | 28862.78 |
| Q9QZA2 | 170163.9 | 185213.7 | 151583.5 | 167901.3 | 188425.8 | 134259.5 | 164722.3 | 170409.2 | 173004.8 | 145283.6 | 237406.4 | 220173.9 | 215356.5 | 211188.1 | 168689.7 | 160646.4 |
| Q9QZA6 | 12544.71 | 8998.95  | 6060.023 | 13453.57 | 8773.57  | 11257.29 | 10600.9  | 7963.944 | 4272.917 | 5653.74  | 24655.38 | 6391.975 | 8995.061 | 6306.842 | 5221.116 | 10261.16 |
| Q9QZH0 | 124743.1 | 75800.39 | 84645.27 | 141347   | 88655.55 | 109348.6 | 140125.5 | 114331.3 | 106906.5 | 123143.7 | 51893.17 | 88944.95 | 57512.55 | 127012.6 | 87955.27 | 128779.2 |
| Q9QZK8 | 33708.8  | 22548.83 | 18424.65 | 39919.34 | 18734.78 | 33938.87 | 30506.59 | 42141.45 | 10586.53 | 14084.94 | 23659.13 | 13498.76 | 14546.66 | 12819.23 | 11328.4  | 18253.05 |
| Q9QZK9 | 29389.63 | 16634.94 | 35029.19 | 28190.11 | 16948.68 | 49279.88 | 42257.16 | 61667.41 | 9922.857 | 12258.94 | 95910.64 | 25665.71 | 4685.003 | 31474.33 | 39113.76 | 207807.6 |
| Q9QZQ5 | 79113.99 | 180948.8 | 96176.05 | 128924.6 | 115843.1 | 353522.9 | 89519.89 | 133558.6 | 125198.9 | 225892.5 | 70597.66 | 117088.8 | 109576.5 | 93736.91 | 74565.91 | 92414.66 |
| Q9R044 | 11333.11 | 16487.08 | 12460.89 | 11258.35 | 17089.63 | 8881.189 | 8999.775 | 6411.245 | 11123.09 | 8014.277 | 8667.24  | 9776.299 | 7129.249 | 6559.749 | 9227.441 | 7532.363 |
| Q9R063 | 139188.5 | 97304.55 | 105023.5 | 82939.02 | 67996.33 | 101032   | 106992.8 | 120313.9 | 148254.4 | 104751.2 | 207904.8 | 99786.95 | 105345.3 | 101414   | 75987.41 | 120111.2 |
| Q9R066 | 90399.29 | 113689.5 | 90521.78 | 75400.55 | 90822.77 | 110128.5 | 89822.13 | 126055.5 | 77252.55 | 119521.9 | 47451.46 | 77226.38 | 61953.85 | 67710.39 | 65911.55 | 75529.1  |
| Q9R0D6 | 128460.4 | 171903.1 | 160825.4 | 137216.1 | 154173.6 | 139253.3 | 142415.2 | 164873   | 211170.6 | 134910.4 | 94739.41 | 136671.4 | 119233.4 | 95944.2  | 100744.2 | 133380.5 |
| Q9R0J8 | 47381.81 | 100855.4 | 84662.35 | 72070.21 | 59360.37 | 70021.32 | 52891.88 | 45473.43 | 44145.95 | 53095.25 | 63168.6  | 41553.74 | 43955.12 | 45671    | 55769.62 | 79585.23 |
| Q9R0T3 | 32629.3  | 27859.1  | 25014.47 | 91819.52 | 32552.36 | 51157.81 | 54305.57 | 37337.3  | 14649.73 | 18034.84 | 28654.09 | 17923.88 | 16752.37 | 9624.116 | 5528.889 | 17531.77 |
| Q9R0T4 | 7046158  | 11925518 | 9084906  | 7251290  | 10787157 | 10649002 | 9399055  | 11347194 | 3114002  | 11355200 | 4419639  | 8347045  | 6774438  | 9006068  | 4515842  | 6275580  |
| Q9R168 | 1573.723 | 903.2755 | 5821.417 | 2895.599 | 3911.102 | 3653.973 | 521.8255 | 12148.93 | 438.8409 | 3161.786 | 1968.817 | 7088.812 | 2672.713 | 2035.155 | 4128.205 | 1781.424 |
| Q9R1T3 | 118557.4 | 155932.3 | 116614.1 | 150977.6 | 95551.64 | 121116.6 | 133984.6 | 108044.2 | 60664.98 | 117306.8 | 70092.13 | 67636.24 | 87780.66 | 93832.98 | 73109.81 | 86067.45 |
| Q9R1T5 | 19019.95 | 18508.88 | 26313.99 | 24006.05 | 43189.18 | 17619.12 | 15859.43 | 15742.6  | 81222.81 | 25947.92 | 50695.18 | 46364.45 | 43492.88 | 49507.21 | 29609.8  | 26030.08 |
| Q9WTQ2 | 333753   | 313335.3 | 260549.2 | 284730.9 | 330731.7 | 249626   | 253910.8 | 192638.2 | 168967.7 | 181155   | 296954.7 | 360084.8 | 248530.3 | 196327.4 | 256165.6 | 165697.4 |
| Q9WTT6 | 6449.038 | 7025.339 | 5593.703 | 7687.497 | 8522.07  | 6307.022 | 31245.44 | 29201.67 | 5261.457 | 4439.603 | 10294.13 | 4146.802 | 4717.744 | 4455.731 | 5311.718 | 3944.116 |
| Q9WTW7 | 126692.9 | 118094.5 | 81808.21 | 168205.9 | 296364   | 179476.4 | 72540.03 | 131274   | 758673.7 | 127210   | 338591.1 | 320329.9 | 340984.1 | 394492.3 | 203423   | 160323.9 |
| Q9WU49 | 2476.233 | 2291.172 | 3246.358 | 3551.998 | 2910.753 | 3191.573 | 2224.242 | 2579.96  | 3524.615 | 1724.784 | 15098.42 | 4188.343 | 4420.291 | 3064.036 | 2144.469 | 4277.79  |
| Q9WU74 | 4257.849 | 7085.559 | 3743.003 | 7975.885 | 2626.821 | 8172.231 | 4155.218 | 4704.879 | 5254.084 | 6713.748 | 4337.59  | 3716.471 | 3215.596 | 3174.905 | 4409.814 | 4363.612 |
| Q9WUC4 | 194731.9 | 560000.8 | 441584.5 | 511326.2 | 311738   | 316597.1 | 141461.1 | 312693.8 | 559346.9 | 496888.3 | 261459   | 496151.4 | 273058.4 | 335017.1 | 263618.6 | 251219.6 |
| Q9WUK5 | 198310.4 | 281865.6 | 222229.4 | 293542   | 237813.2 | 284601.1 | 311775.7 | 463520   | 287755.2 | 322425.7 | 224071   | 340135.2 | 312005.2 | 347749.1 | 391785.2 | 281105.6 |
| Q9WUW3 | 79019.3  | 56596.02 | 74671.27 | 79959.34 | 34116.7  | 63507.68 | 105571.4 | 67795.27 | 62191.51 | 84066.24 | 35959.02 | 37754.38 | 52721.36 | 60519.52 | 133558.5 | 120704.6 |
| Q9WUW8 | 17982.08 | 11321.53 | 7772.278 | 27799.67 | 12670.82 | 41232.61 | 15184.15 | 28914.51 | 96410.79 | 43118.61 | 91173.62 | 79814    | 40255.25 | 37216.66 | 72000.97 | 41410.12 |
| Q9WUW9 | 62330.06 | 63766.95 | 57597.36 | 61665.27 | 83348.38 | 88919.46 | 53024.1  | 61889    | 234040.3 | 73695.62 | 279812.7 | 157349.4 | 117346.8 | 108051   | 150375.8 | 101136.4 |
| Q9WVH8 | 23978.52 | 63679.5  | 22610.17 | 34632.37 | 22749.76 | 63492.99 | 42843.45 | 20878.97 | 45647.48 | 51248.4  | 14968.68 | 16301.22 | 27347.93 | 20965.25 | 21659.07 | 26545.85 |
| Q9WVK7 | 7145.32  | 18485.54 | 23403.11 | 13052.5  | 8671.267 | 10645.97 | 9816.744 | 13070.28 | 18441.9  | 13354.63 | 15432.39 | 25625.6  | 8572.129 | 19742.52 | 11930.35 | 8560.881 |
| Q9Z0J6 | 34459.38 | 29773.53 | 94471.85 | 7282.885 | 12464.15 | 18072.2  | 15820.67 | 41767.93 | 39108.16 | 55172.21 | 36716.98 | 63862.56 | 42288.67 | 74437.33 | 52904.16 | 23147.08 |
| Q9Z0J8 | 4977.063 | 9253.384 | 9344.724 | 9455.254 | 6119.99  | 10028.31 | 6676.177 | 6746.923 | 2755.38  | 7375.471 | 3483.062 | 5819.157 | 4432.082 | 5649.547 | 6325.754 | 3841.074 |
| Q9Z0T0 | 11152.46 | 12499.32 | 8665.079 | 13118.13 | 14305.08 | 9897.161 | 12562.53 | 16715.79 | 29928.65 | 10911.75 | 40627.04 | 19633.3  | 24001.03 | 18100.56 | 11608.61 | 11769.83 |
| Q9Z0V6 | 53139.29 | 51456.69 | 30474.13 | 62912.22 | 55963.23 | 35860.72 | 85588.64 | 160213.7 | 43776.26 | 36450.15 | 26526.93 | 22087.25 | 19863.99 | 15709.79 | 55640.64 | 26954.47 |
| Q9Z0W7 | 93761.16 | 85045.59 | 62072.21 | 94381.6  | 135396.4 | 110726.6 | 60679.89 | 79741.52 | 282065.7 | 99543.57 | 365226.6 | 224299.6 | 203475.3 | 272030.4 | 155918.8 | 122783.1 |
| Q9Z1F2 | 3656.027 | 7795.289 | 28855.7  | 5504.741 | 20626.22 | 17419.57 | 2111.945 | 6314.532 | 17028.07 | 8647.033 | 21207.28 | 17483.34 | 16528.1  | 16002.39 | 15579.81 | 47221.13 |
| Q9Z1Y3 | 840022.2 | 930166.3 | 882677.6 | 577613.6 | 1365608  | 999967.9 | 1064746  | 426250.3 | 437241.6 | 976963.6 | 385668.2 | 593520.4 | 645710.5 | 863332.3 | 657430.4 | 575982.1 |
| Q9Z2L0 | 12105.55 | 29521.65 | 23028.41 | 11902.7  | 27445.71 | 18225.27 | 7897.843 | 9014.681 | 39899.74 | 33302.21 | 79802.71 | 17046.06 | 10021.91 | 11575.82 | 19202.44 | 21152.58 |
| Q9Z2Y9 | 107028.1 | 64054.23 | 83582.43 | 78342.38 | 51243.29 | 66432.98 | 82967.92 | 49553.87 | 73690.33 | 104741.6 | 77887.58 | 93143.55 | 93411.59 | 83101.64 | 90237.71 | 73851.75 |
| Q9Z339 | 111558.9 | 106635.5 | 100676.3 | 130105.2 | 49833.05 | 92926.72 | 90791.81 | 121749.5 | 117615.9 | 130426.2 | 173855.1 | 135280.8 | 153326.8 | 142803.8 | 92720.06 | 112463   |

| 17       | 18       | 19       | 20       | 21       | 22       | 23       | 24       | 25       | 26       | 27       | 28       | 29       | 30       | 31       | 32       | 33       |
|----------|----------|----------|----------|----------|----------|----------|----------|----------|----------|----------|----------|----------|----------|----------|----------|----------|
| D7-rat1  | D7-rat2  | D7-rat3  | D7-rat4  | D7-rat5  | D7-rat6  | D7-rat7  | D7-rat8  | D14-rat1 | D14-rat2 | D14-rat3 | D14-rat4 | D14-rat5 | D14-rat6 | D14-rat7 | D14-rat8 | D28-rat1 |
| 1919.766 | 2643.188 | 4824.7   | 2330.602 | 1282.103 | 2131.455 | 1439.455 | 1154.202 | 1697.099 | 2496.585 | 4426.349 | 8057.217 | 2305.404 | 1310.707 | 2002.03  | 3117.718 | 2396.435 |
| 8287.629 | 8419.541 | 10744.44 | 15708.75 | 7058.671 | 8668.59  | 5745.223 | 9397.341 | 7485.921 | 5840.699 | 9610.224 | 15940.97 | 10915.17 | 7731.211 | 8106.85  | 15392.95 | 10516.84 |
| 8755.765 | 8465.674 | 7600.805 | 6477.061 | 5700     | 5672.431 | 4779.194 | 6393.557 | 6907.784 | 6438.863 | 6765.586 | 2227.715 | 6676.911 | 4618.235 | 5842.749 | 4182.896 | 9417.421 |
| 97940.58 | 88638.01 | 107183.7 | 137283.6 | 85499.74 | 72491.2  | 86230.43 | 78663.72 | 82032.55 | 55890.99 | 58577.7  | 87996.2  | 94153.66 | 84638.56 | 104986.9 | 91085.44 | 79398.83 |
| 24685.57 | 22300.41 | 23887.91 | 49907.57 | 25932.55 | 27193.93 | 30089.01 | 36820.43 | 27726.15 | 29252.32 | 28532.24 | 19238.02 | 23236.84 | 29948.04 | 29805.46 | 35190.22 | 26264.23 |
| 41961.08 | 38718.74 | 66945.84 | 48352.19 | 54235.96 | 35456.63 | 32133.48 | 33220.57 | 44120.12 | 24816.88 | 45135.31 | 49340.18 | 47463.45 | 45621.16 | 43299.92 | 43069.03 | 26568.73 |
| 26697.71 | 13948.2  | 52296.24 | 25732.82 | 46949.14 | 32330.12 | 21060.71 | 29535.34 | 22042.84 | 26487.16 | 36816.95 | 16045.38 | 55889.96 | 41388.21 | 40337.28 | 57548.26 | 72172.61 |
| 10362.39 | 8100.998 | 15536.83 | 27111.54 | 9502.433 | 5812.13  | 4202.554 | 5684.448 | 3614.468 | 5777.59  | 13772.77 | 12523.42 | 3977.529 | 7586.813 | 5925.294 | 10546.4  | 5463.271 |
| 16515.95 | 19090.6  | 18871.48 | 15947.69 | 25391.88 | 16212.7  | 13807.2  | 19083.26 | 21609.07 | 25667.94 | 24374.67 | 25617    | 75779.91 | 31825.6  | 35871.54 | 24667.66 | 52560.88 |
| 5476.513 | 4951.538 | 3994.026 | 5974.649 | 11971.24 | 3444.67  | 4012.946 | 5306.601 | 6920.229 | 4794.619 | 10138.44 | 10564.17 | 9679.765 | 3044.994 | 2068.097 | 4077.135 | 4853.165 |
| 9910.273 | 2457.88  | 5887.265 | 5482.493 | 7624.169 | 2976.305 | 6666.014 | 3263.091 | 1195.154 | 3665.153 | 4928.077 | 6687.019 | 4073.171 | 5460.232 | 3229.717 | 6686.428 | 8264.326 |
| 447499.9 | 478297.6 | 348805.8 | 326699   | 549668   | 215426.8 | 272273.1 | 313636.8 | 486964.2 | 437326.3 | 332443.9 | 421310.6 | 433820   | 311076.2 | 303815.9 | 352566.2 | 273679.3 |
| 22366.43 | 22022.79 | 22979.17 | 24919.01 | 21263.2  | 30565.42 | 26464.54 | 19453.3  | 21225.79 | 12920.56 | 39367.76 | 24346.98 | 31397.67 | 21030.62 | 17227.01 | 26482.97 | 26122.46 |
| 24329.82 | 28358.12 | 30268.28 | 21801.65 | 33317.48 | 31635.23 | 42738.46 | 35779.03 | 48866.79 | 35466.18 | 52162.12 | 31617.68 | 48841.05 | 29504.61 | 43574.23 | 51863.25 | 73370.64 |
| 27568.03 | 25614    | 23038.13 | 18111.82 | 21398.22 | 16917.39 | 28865.28 | 20856.88 | 22561.92 | 20757.34 | 27462.44 | 20319.6  | 26253.98 | 20002.3  | 30105.46 | 19712.6  | 22665.91 |
| 175512.7 | 137302.6 | 86667.52 | 95754.59 | 85086.94 | 117746.6 | 199410.2 | 149529.1 | 109968.1 | 104635.2 | 189987.3 | 61137.32 | 121719.8 | 70614.05 | 122606.5 | 80745.48 | 174910   |
| 25241.27 | 10955.61 | 11395.82 | 15511.03 | 15915.36 | 10325.88 | 10393.64 | 19588.06 | 27329.09 | 17434.28 | 8080.561 | 17723.81 | 6574.783 | 17127.06 | 19642.4  | 18789    | 13897.33 |
| 10565.5  | 9629.414 | 8031.232 | 6763.482 | 10827.57 | 6583.961 | 7428.118 | 8304.375 | 7887.954 | 13682.71 | 9548.096 | 7877.572 | 8319.696 | 13051.54 | 4801.008 | 12221.71 | 22915.45 |
| 297613.4 | 206312.7 | 182409.8 | 79658.99 | 79618.77 | 340678.5 | 212583.1 | 328538.5 | 1077791  | 400245   | 286082.3 | 121447.8 | 295767.1 | 577421.6 | 365939.4 | 514639.1 | 608612.8 |
| 39546.38 | 37090.96 | 42785.26 | 38575.68 | 17091.36 | 26971.75 | 54692.72 | 31866.15 | 32840.79 | 39259.93 | 45296.55 | 49614.27 | 22940    | 44754.62 | 52449.77 | 40817.03 | 60423.82 |
| 5866.951 | 5330.805 | 3295.934 | 5347.402 | 2513.449 | 4676.148 | 4512.813 | 5319.919 | 6888.675 | 5436.76  | 4183.168 | 4149.291 | 3572.503 | 6257.284 | 7295.368 | 2593.134 | 5264.752 |
| 19933.63 | 22049.77 | 24619.01 | 33621.24 | 29383.26 | 20743.76 | 17551.87 | 22887.84 | 22559.43 | 15106.24 | 22707.14 | 20704.5  | 26882.44 | 23077.07 | 19960.46 | 19313.01 | 15001.11 |
| 47155.09 | 36082.09 | 33098.99 | 52832.07 | 66939.41 | 31380.72 | 50756.95 | 41472.34 | 53590.92 | 47047.1  | 100668.9 | 36021.66 | 81911.59 | 56042.79 | 68314.03 | 53507.44 | 52133.54 |
| 18020.21 | 5944.984 | 11098.3  | 51302.75 | 14043.91 | 4647.355 | 3795.62  | 4595.787 | 11722.17 | 14431.72 | 114731.1 | 7654.981 | 14606.35 | 16881.11 | 8845.487 | 14554.02 | 10335.98 |
| 2993.97  | 3459.255 | 2987.207 | 4979.671 | 3912.036 | 1792.017 | 1934.727 | 3111.389 | 3050.643 | 3377.349 | 7681.155 | 3769.119 | 3590.135 | 2585.092 | 2621.446 | 3765.736 | 2787.91  |
| 4398.737 | 7528.436 | 12730.44 | 15221.66 | 10503.23 | 21165.48 | 6448.492 | 7523.606 | 7560.494 | 7186.451 | 11206.99 | 14378.07 | 11892.74 | 6682.921 | 6656.07  | 9853.536 | 5538.727 |
| 20112.83 | 23047.29 | 35683.52 | 53490.65 | 23572    | 12981.6  | 12674.33 | 28902.11 | 13384.8  | 17478.22 | 27832.7  | 54702.15 | 35318.91 | 13778.65 | 18998.34 | 30259.73 | 20079.43 |
| 10054.81 | 11688.59 | 12091.2  | 22877.68 | 19622.41 | 14624.56 | 9474.373 | 10281.18 | 12227    | 11244.99 | 14097.82 | 24365.74 | 14759.65 | 19219.47 | 15786.72 | 17527.91 | 10866.14 |
| 235683.5 | 234964.5 | 143998.2 | 143863.2 | 51032.57 | 125711.2 | 84204.8  | 100582.8 | 155417.7 | 135047.6 | 78801.19 | 78579.15 | 47839.74 | 106824.3 | 97114.48 | 95886.59 | 161548.3 |
| 199642.7 | 175297.3 | 152114.3 | 160464.8 | 210095.9 | 147060.1 | 207302.5 | 132342.5 | 196322   | 156721.9 | 185149.7 | 137462.7 | 162569.2 | 207335   | 205594.3 | 170345.8 | 146682.5 |
| 122863.2 | 66965.81 | 95688.65 | 124999.1 | 75253.09 | 88214.08 | 52915.27 | 43501.91 | 70741.21 | 54954    | 79119.22 | 74131.27 | 72948.18 | 94853.5  | 124200.5 | 98575.84 | 73223.02 |
| 54192.71 | 30471.73 | 120218.8 | 86791.96 | 129948.5 | 72118.66 | 76958.06 | 53167.03 | 173580.2 | 214735.4 | 265453.3 | 252503.1 | 127594.1 | 149498.7 | 234117.8 | 101721.4 | 156112.8 |
| 29624.03 | 36477.52 | 52602.35 | 56062.45 | 38081.73 | 38193.7  | 26776.82 | 23519.76 | 33410.75 | 15380.71 | 25325.06 | 22272.94 | 37087.6  | 26471.35 | 30016.94 | 34150.09 | 31534.46 |
| 102986   | 125232.3 | 55239.27 | 72847.09 | 83784.81 | 70778.81 | 101185.7 | 113284.1 | 116958.4 | 114733.3 | 103809.3 | 60439.52 | 72868.31 | 68467.99 | 109395   | 132176.3 | 133595.9 |
| 8775.507 | 8998.105 | 11035.99 | 9059.575 | 10164.95 | 6957.301 | 6788.654 | 4595.002 | 8635.829 | 8820.146 | 12180.92 | 9374.545 | 10388.22 | 11249.15 | 10786.33 | 9976.979 | 10024.07 |
| 7722.653 | 10274.47 | 13784.73 | 25083.98 | 12687.98 | 4336.637 | 2725.568 | 8754.836 | 8279.646 | 7105.442 | 18716.05 | 17645.77 | 13844.76 | 3830.112 | 8835.99  | 14968.04 | 12652.89 |
| 4521.627 | 3116.662 | 2029.85  | 4875.786 | 1853.57  | 3536.025 | 2347.868 | 3070.552 | 2794.208 | 2250.108 | 5342.721 | 1294.924 | 3974.682 | 1461.174 | 1939.195 | 2415.584 | 2428.574 |
| 5766.79  | 7760.931 | 6713.822 | 8362.336 | 10714.46 | 8020.389 | 7098.365 | 8940.479 | 4750.06  | 6212.258 | 9341.737 | 8976.774 | 9896.589 | 4528.169 | 5488.068 | 17702.04 | 6872.026 |
| 7136.015 | 3905.991 | 3022.993 | 12675.87 | 3432.15  | 4341.03  | 3265.036 | 6423.169 | 1937.437 | 2075.147 | 44594.91 | 4957.636 | 4872.03  | 3616.361 | 3263.172 | 3713.909 | 6148.359 |
| 55432.91 | 81953.25 | 63220.53 | 47083.47 | 42521.25 | 53986.01 | 51478.28 | 91927.38 | 80948.63 | 91944.96 | 78449.74 | 94498.56 | 88407.67 | 88137.52 | 96389.77 | 84789.09 | 76445.34 |
| 32299.81 | 38016.05 | 36863.43 | 27968.16 | 53865.33 | 22483.51 | 30305.75 | 24616.14 | 36424.06 | 40189.97 | 30461.82 | 26012.25 | 35023.04 | 25851.03 | 31068.87 | 26348.11 | 25515.7  |
| 410828.8 | 541229.1 | 603850.2 | 550938.3 | 643675   | 407346.2 | 499484.6 | 505293.3 | 444046.3 | 816457.3 | 452991.6 | 778004.3 | 781714.3 | 528855.3 | 519212.2 | 622670.8 | 433578.6 |
| 181961.5 | 199201.9 | 240293.1 | 283342.1 | 167575.4 | 218651.7 | 172820.9 | 178885.4 | 192836.5 | 153128.9 | 199550   | 223147.8 | 193313.3 | 206589.3 | 233651.9 | 213343.3 | 200653   |
| 20304.34 | 39334.65 | 45441.41 | 43500.14 | 33180.83 | 24654.37 | 23727.27 | 18869.16 | 19485.74 | 26018.72 | 22453.16 | 52398.85 | 33642.07 | 33298.75 | 26905.35 | 29651.9  | 18242.1  |

|          |          |          |          |          |          |          |          |          |          |          |          |          |          |          |          |          |
|----------|----------|----------|----------|----------|----------|----------|----------|----------|----------|----------|----------|----------|----------|----------|----------|----------|
| 9262.364 | 13816.5  | 8068.045 | 7422.848 | 11133.37 | 8385.983 | 6632.263 | 9421.795 | 8983.301 | 7951.102 | 8781.854 | 3948.693 | 7782.984 | 9187.688 | 7119.425 | 11810.88 | 6822.379 |
| 15457.5  | 19127.12 | 18676.09 | 30207.61 | 16768.11 | 21442.12 | 20898.87 | 17255.25 | 14520.6  | 11115.44 | 12697.54 | 14628.81 | 17054.49 | 21168.21 | 23264.75 | 23947.07 | 21580.22 |
| 85362.36 | 81556.52 | 128814   | 248304.2 | 97086.62 | 78073.02 | 68190.16 | 109255.7 | 85272.57 | 61968.45 | 122912.5 | 149402.4 | 89310.93 | 97344.72 | 80322.51 | 117450.5 | 76476.06 |
| 15309.17 | 10693.97 | 34071.73 | 58363.93 | 30370.9  | 10997.77 | 12033.91 | 27215.67 | 16644.92 | 15549.18 | 42337.57 | 46305.54 | 43151.48 | 12128.74 | 17097.03 | 43401.7  | 18372.31 |
| 112779.4 | 1312195  | 798049.5 | 764523.3 | 756221.7 | 1002805  | 717257.1 | 914286.6 | 949239.1 | 1082617  | 265712.7 | 845806.6 | 842876   | 853180.3 | 577562.5 | 740383   | 316913.8 |
| 24655.76 | 58501.84 | 40698.71 | 36958.12 | 54268.91 | 14632.45 | 37675.69 | 30378.36 | 36332.5  | 39426.54 | 18965.61 | 35510.86 | 50574.49 | 45862    | 33107.06 | 53364.55 | 60416.64 |
| 343165   | 263645   | 477330.9 | 750160.4 | 405503.9 | 393536.7 | 261197.2 | 330615.9 | 269317.3 | 167893.2 | 315731.5 | 309113.3 | 350962.3 | 357705.3 | 234037   | 426850   | 278269.2 |
| 39883.54 | 46768.76 | 41161.43 | 86685.43 | 48679.47 | 63177.92 | 41547.49 | 52356.51 | 72819.98 | 58343.52 | 89281.05 | 51717.07 | 66143.35 | 50710.25 | 79497.78 | 61467    | 53058.9  |
| 10453.6  | 10809.32 | 8739.587 | 10068.95 | 8591.134 | 6322.863 | 11397.32 | 6040.521 | 8779.755 | 13059.05 | 11819.54 | 13018.58 | 7274.867 | 15766.17 | 15642.57 | 7334.552 | 7355.805 |
| 77372.58 | 153334.2 | 74276.07 | 140703   | 76722.94 | 50242.39 | 56337.93 | 74587.29 | 104167.3 | 114668.3 | 75533.59 | 106179.7 | 80301.01 | 50602.2  | 64414.89 | 121961.8 | 104513.4 |
| 101231.3 | 14501.83 | 3659789  | 129981.7 | 15370.36 | 5042.089 | 69797.8  | 4010822  | 5759.158 | 3530235  | 384283.4 | 2627512  | 15550.55 | 16717.06 | 756979.8 | 4824732  | 2771095  |
| 151838.3 | 249423.5 | 118429.5 | 139971.8 | 117485.3 | 143494.5 | 114880.7 | 126923.8 | 208536.1 | 194564.1 | 89949.34 | 78837.46 | 128115   | 168046.1 | 121076.1 | 193304.8 | 337395.8 |
| 30634.21 | 43492.38 | 31697.4  | 17480.56 | 31752.63 | 83974.59 | 75821.39 | 62167.89 | 74540.03 | 57813.27 | 46067.74 | 45029.25 | 15610.95 | 63746.26 | 76022.29 | 61094.23 | 63220.16 |
| 120816.2 | 104454.6 | 56837.32 | 98692.73 | 59465.9  | 66192.05 | 67942.13 | 82879.5  | 88264.39 | 93746.98 | 50385.7  | 95505.94 | 52741.54 | 71864.3  | 91429.61 | 73405.1  | 70243.37 |
| 14016.85 | 13143.68 | 16700    | 20225.52 | 17775.26 | 14805.62 | 15140.34 | 12298.23 | 15203.9  | 12614.94 | 19956.3  | 15778.88 | 16884.46 | 15738.05 | 11376.3  | 15363.74 | 10484.3  |
| 177411.5 | 366420.2 | 298273.3 | 311098.9 | 302136.9 | 193372.7 | 223166.8 | 279390.7 | 266133.1 | 357167.5 | 206002.8 | 206126   | 257165.8 | 201056.5 | 273713.7 | 484375.6 | 802681.4 |
| 989378.9 | 1313989  | 1196503  | 620952.6 | 518797   | 868775.1 | 1084245  | 622063.4 | 1061877  | 989544.4 | 423776.9 | 817234.6 | 577105.8 | 632829.8 | 1122819  | 511585.5 | 1050080  |
| 15848.42 | 14053.94 | 15804    | 15294.31 | 15017.18 | 13062.75 | 14616.44 | 14896.32 | 19057.05 | 14817.66 | 16852.65 | 12515.02 | 16135.25 | 10824.53 | 13976.62 | 15944.59 | 9449.415 |
| 5981.471 | 9020.777 | 6601.734 | 17713.06 | 16171.73 | 9371.127 | 6690.521 | 7560.564 | 8386.02  | 7295.258 | 6335.182 | 8086.938 | 17407.36 | 16273.07 | 8504.996 | 27075.31 | 11709.77 |
| 28338.28 | 26727.03 | 12343.88 | 11283.05 | 15569.21 | 14556.08 | 21783.8  | 20194.42 | 28436.73 | 37917.2  | 19170.11 | 25462.13 | 20223.02 | 23796.64 | 27860.29 | 26717.85 | 56602.16 |
| 238755.5 | 191554.9 | 223419.1 | 197068.1 | 146297.1 | 187602.3 | 244779.3 | 210087.3 | 249793.8 | 225700.3 | 240551.3 | 184526.9 | 161562.9 | 184207.8 | 265621.9 | 170873   | 119939.6 |
| 5623.656 | 2864.231 | 7222.912 | 7662.932 | 3664.003 | 3528.69  | 3582.892 | 3299.579 | 3934.884 | 2612.245 | 5340.38  | 2141.984 | 1188.469 | 1732.75  | 2305.913 | 3423.9   | 3089.549 |
| 26874.34 | 31753.87 | 54745.05 | 67519.04 | 36006.28 | 28515.71 | 21537.48 | 43887.44 | 38819.95 | 34787.07 | 27537.73 | 48963.74 | 32104.81 | 26943.32 | 28940.39 | 42098.37 | 25184.14 |
| 9323.787 | 9760.951 | 11074.16 | 27338.01 | 15734.23 | 11108.08 | 8200.979 | 12925.23 | 11406.06 | 6441.427 | 16148.47 | 12693.46 | 10329.15 | 9296.007 | 12559.69 | 13490.29 | 13407.9  |
| 1288072  | 685550   | 608246.6 | 1130203  | 122623.5 | 846728   | 216984   | 507422.6 | 1278137  | 559261   | 970268.5 | 834743.9 | 214536.1 | 1526647  | 206844.3 | 533300.8 | 1067246  |
| 417122.4 | 461931.8 | 457707   | 416746.8 | 317959   | 339454   | 364160.9 | 511124.4 | 464425   | 568097.4 | 438799.8 | 494442.3 | 358674   | 470451.9 | 631132.1 | 520907.1 | 529069.9 |
| 861312.3 | 1167612  | 687032.4 | 687583.8 | 1539603  | 528202.3 | 580279.9 | 968281.5 | 938059.6 | 2027009  | 659198.5 | 777602.1 | 2039074  | 657651.8 | 843619.8 | 916765.1 | 1227840  |
| 211188.8 | 227135.3 | 173792.2 | 181270.8 | 182283   | 151099.9 | 194359.2 | 199453.3 | 207642.1 | 222229   | 152059.9 | 198896.2 | 222357.8 | 176054.9 | 234880.3 | 213726.3 | 213387.4 |
| 16584.15 | 15175.8  | 9926.932 | 12706.74 | 17456.6  | 9763.389 | 11557.12 | 10525.46 | 9859.101 | 12774.61 | 9076.725 | 12339.45 | 13375.06 | 15557.22 | 10878.95 | 8320.883 | 16523.78 |
| 29981.09 | 41600.27 | 63503.61 | 118934.7 | 58443.13 | 74944.98 | 38879.34 | 66304.86 | 39949.59 | 34040.21 | 47127.76 | 43218.1  | 18007.54 | 58060.49 | 33748.07 | 62689.99 | 21775.7  |
| 29098.96 | 20774.78 | 15459.38 | 15657.78 | 14137.7  | 20711.38 | 17725.68 | 21092.7  | 12004.46 | 20275.47 | 17692.62 | 16235.47 | 12105.82 | 14366.95 | 17137.09 | 19412.05 | 29031.55 |
| 23118.96 | 16997.86 | 19997.5  | 36808.84 | 23788.38 | 26491.04 | 25908.46 | 22073.75 | 26952.47 | 20976.88 | 23613.54 | 38108.31 | 29835.89 | 22574.8  | 21267.6  | 24356.56 | 20930.86 |
| 2910.915 | 2273.763 | 5565.902 | 5852.026 | 3761.092 | 3170.044 | 3112.848 | 3749.316 | 1915.448 | 3430.197 | 2309.853 | 1968.531 | 4919.831 | 4251.786 | 3868.397 | 4777.796 | 3974.775 |
| 8932.46  | 8307.156 | 10587.29 | 16427.72 | 9601.382 | 8703.298 | 8243.824 | 5382.445 | 8355.586 | 7790.243 | 11157.31 | 8964.595 | 5579.112 | 5858.72  | 7428.465 | 11564.61 | 5706.798 |
| 205543.3 | 279070.4 | 390971.5 | 174756.5 | 319563   | 183116.8 | 182128.8 | 209010.8 | 265863.9 | 296424.6 | 292455.3 | 224221.3 | 305025.8 | 233656.9 | 176455.3 | 259677.6 | 193828.3 |
| 114090.9 | 147777   | 157438.3 | 172533.2 | 128880.9 | 103113.5 | 105519.9 | 138205.3 | 194641.5 | 131546.4 | 165333.1 | 160109.4 | 149843.6 | 192944.4 | 241870.3 | 203638.4 | 236024   |
| 21387.08 | 20027.39 | 16533.34 | 16443.96 | 18251.79 | 14838.06 | 19345.97 | 20329.05 | 19842.37 | 20385.84 | 15319.4  | 17460.72 | 15259.55 | 13381.47 | 25044.07 | 18864.99 | 22365.08 |
| 2048.185 | 2045.595 | 3726.942 | 4050.862 | 3164.382 | 3329.014 | 1248.932 | 1892.862 | 2954.682 | 2134.97  | 859.481  | 1202.662 | 2926.647 | 7023.051 | 1146.834 | 3046.906 | 4125.543 |
| 55983.9  | 57131.66 | 51515.83 | 26024.55 | 13591.56 | 46930.79 | 46761.17 | 37865.95 | 55177.12 | 42005.59 | 47067.34 | 39533.38 | 27012.78 | 33921.2  | 40621.89 | 31380.78 | 37707.73 |
| 404196.5 | 500597.9 | 420267.2 | 494536.8 | 545690.4 | 378579.6 | 264457.9 | 291660.8 | 355176.8 | 366786.9 | 356227.8 | 384184.6 | 445367.2 | 436065.6 | 346823   | 364918.8 | 295328.2 |
| 240255.3 | 6882.668 | 150870.3 | 163529.6 | 22139.91 | 157877.1 | 72675.77 | 67692.48 | 13631.54 | 85542.58 | 25562.21 | 81176.17 | 2326.245 | 100138.1 | 101398.9 | 119322.2 | 197372.4 |
| 388225.8 | 372598.1 | 590475.3 | 653583.3 | 520327.9 | 451884.1 | 411622.5 | 437359.4 | 387715.4 | 280694.9 | 442023   | 449584.4 | 513515.1 | 474703.6 | 314781   | 405440.5 | 220866.7 |
| 9637.828 | 9719.293 | 5496.287 | 26903.55 | 13041.03 | 2301.897 | 5403.778 | 5850.48  | 3651.422 | 3336.791 | 18040.71 | 13788.54 | 7951.008 | 6074.705 | 5590.878 | 3305.434 | 7160.601 |
| 21513678 | 19215620 | 18108928 | 18894842 | 16317583 | 14331335 | 16378173 | 14035172 | 17316070 | 19539790 | 16068776 | 15628922 | 18491154 | 16954984 | 9087015  | 9416069  | 6697781  |
| 52570.34 | 52062.01 | 153604.3 | 121772.7 | 160642.5 | 48446.35 | 35464.4  | 134320.8 | 41144.12 | 34421.39 | 209140.9 | 33570.35 | 188275   | 149331.1 | 131464.3 | 638852.4 | 179651.1 |
| 4810.147 | 6088.48  | 6293.012 | 9887.645 | 9162.69  | 5506.176 | 5404.312 | 4594.513 | 5451.01  | 5136.329 | 27184.19 | 4982.089 | 8513.866 | 9615.492 | 6981.132 | 3562.353 | 12081.04 |
| 7248776  | 5695043  | 7119243  | 5414422  | 1088430  | 5095457  | 6889322  | 4980817  | 5628496  | 5710791  | 1761232  | 3380776  | 720336.6 | 6049220  | 8580335  | 1431461  | 6670208  |
| 2558569  | 2369597  | 2034140  | 5348000  | 5771061  | 3130629  | 3257491  | 4554504  | 7900789  | 4558763  | 10066341 | 2269810  | 4289042  | 6146466  | 5622772  | 12280705 | 6794211  |
| 123800.4 | 32376.36 | 5503.056 | 220234.6 | 21685.86 | 5838.207 | 12465.07 | 4966.24  | 3879.489 | 1852.066 | 585431.3 | 7252.349 | 4674.96  | 8132.784 | 7884.353 | 8014.768 | 5666.559 |

|          |          |          |          |          |          |          |          |          |          |          |          |          |          |          |          |          |
|----------|----------|----------|----------|----------|----------|----------|----------|----------|----------|----------|----------|----------|----------|----------|----------|----------|
| 188330.8 | 241237.8 | 204773.4 | 207777   | 157906   | 210415.3 | 258523.4 | 264367.8 | 244506.6 | 307616.5 | 197722   | 236539.5 | 172536   | 239387.2 | 341194.9 | 332828.5 | 305567.2 |
| 700016.3 | 775550.3 | 1132807  | 778003   | 867813.6 | 606598.5 | 742618.5 | 686814.3 | 808756.7 | 958462.6 | 1069766  | 611251.6 | 998028.7 | 946764.1 | 988142   | 986930.2 | 1396671  |
| 493559.6 | 512833.3 | 560791.5 | 795997.4 | 553038.2 | 471779.7 | 258195.8 | 445301.8 | 538592.8 | 413471.3 | 401027.9 | 370016.1 | 414072.3 | 477383.1 | 368754.5 | 516422.2 | 344014.4 |
| 446282.3 | 1004679  | 1114297  | 785496.9 | 1108691  | 537670.3 | 1097782  | 1361380  | 851071.7 | 1423417  | 1248175  | 1022455  | 1572312  | 763956.7 | 828555.6 | 1572355  | 977376.6 |
| 287960.5 | 329505.1 | 253160.5 | 181873.5 | 220583.1 | 646431.1 | 2611977  | 424234.3 | 224302.7 | 264774.5 | 238910.1 | 226981.1 | 220760.5 | 217023.1 | 375830   | 196312.3 | 147946.5 |
| 348386.4 | 37807.49 | 20451.92 | 10943.01 | 57495.86 | 18601.55 | 9288.477 | 375157.5 | 53247.11 | 78718.61 | 459026.5 | 7626.842 | 10579.12 | 97257.9  | 104696.7 | 90609.82 | 495084.1 |
| 153083.5 | 124409.3 | 55002.95 | 130585.1 | 131154.7 | 49351.38 | 62466.47 | 77416.95 | 139934   | 158941.1 | 99176.77 | 102431.1 | 145487.3 | 54125.79 | 70979.7  | 122411.1 | 141051.9 |
| 1705109  | 2274227  | 2664483  | 2493738  | 1242074  | 1696524  | 2633604  | 1787790  | 1325948  | 1210686  | 1283972  | 961791.6 | 1300629  | 1823173  | 1151895  | 1629565  | 2151901  |
| 839311.9 | 408381.1 | 945721.7 | 187513.6 | 255107.2 | 491446.8 | 664750.8 | 362981.8 | 2786295  | 260014.4 | 770264.7 | 412646.8 | 263963.9 | 628226.9 | 966079.1 | 2663305  | 4925177  |
| 154978.4 | 199040.1 | 218642.5 | 154434.8 | 172820.9 | 178672.2 | 160708.7 | 165214.7 | 231939.4 | 234373   | 164423.7 | 174996.8 | 229676.3 | 219977.9 | 231765.3 | 212104.7 | 325382   |
| 17406142 | 10703178 | 19030824 | 6228824  | 43743.63 | 8621022  | 8640034  | 7296651  | 18821022 | 8663022  | 15956442 | 9024039  | 35188.43 | 6560158  | 8469511  | 7006785  | 27898000 |
| 13562264 | 19333706 | 13651976 | 27875716 | 17865962 | 12148783 | 11263275 | 18941548 | 19851380 | 12966996 | 21133992 | 10876383 | 15421612 | 26746306 | 14700331 | 21525610 | 18671680 |
| 132588   | 9241.803 | 68884.91 | 8719.424 | 60944.35 | 427705.4 | 38499.43 | 26189.88 | 536597.1 | 249363   | 140825.9 | 30455    | 127182.8 | 2623385  | 1144082  | 20511.29 | 13083.01 |
| 141901.6 | 7586.146 | 75314.98 | 5205.108 | 41575.57 | 501933.7 | 38323.89 | 23197.34 | 428675.9 | 190640.8 | 94835.69 | 21228.63 | 113636.6 | 2801891  | 1173239  | 15043.75 | 18692.38 |
| 135045.3 | 143557.8 | 49723.36 | 138958.9 | 91605.66 | 43237.94 | 48136.34 | 38095.94 | 102909.5 | 64775.2  | 51561.88 | 99742.67 | 23255.63 | 33616.32 | 51462.25 | 149593.1 | 102781.3 |
| 146781   | 309867.7 | 97705.6  | 104266.7 | 365734.4 | 174841.4 | 97303.38 | 255041.9 | 396599.3 | 170550   | 204819.5 | 165298.3 | 136297.8 | 774221.9 | 362095.6 | 417933.5 | 379303.2 |
| 30537.2  | 35722.95 | 25522.94 | 49227.58 | 85961.52 | 16425.23 | 18011.73 | 17250.94 | 46858.79 | 21103.88 | 24058.53 | 38650.07 | 23876.19 | 26933.89 | 12377.35 | 35481.95 | 51911.2  |
| 1931479  | 1832804  | 1448855  | 1312416  | 1192984  | 1922009  | 2411219  | 1395630  | 1985719  | 2256046  | 1186005  | 1261127  | 1416682  | 1838615  | 1736167  | 1815080  | 1700100  |
| 79665.65 | 154202.2 | 53569.35 | 58791.42 | 87885.36 | 77948.39 | 208058.6 | 146545.1 | 142804.6 | 140776.6 | 46228.64 | 80045.37 | 79486.38 | 69471.6  | 147039   | 116535.8 | 174168   |
| 11209.83 | 22075.37 | 19961.49 | 11070.69 | 12623.05 | 103017.4 | 528832.3 | 12417.39 | 9431.059 | 15202.27 | 15167.98 | 12901.99 | 13197.57 | 17045.56 | 22422.22 | 14196.53 | 11053.79 |
| 5377.261 | 6465.923 | 6453.038 | 6130.941 | 5310.223 | 5398.825 | 4857.335 | 6919.482 | 6869.725 | 7149.477 | 6109.415 | 2602.165 | 4910.583 | 13050.01 | 6160.224 | 13034.03 | 8661.587 |
| 2.14E+08 | 3.93E+08 | 2.43E+08 | 5.12E+08 | 6.34E+08 | 5.37E+08 | 5.22E+08 | 6.92E+08 | 7.14E+08 | 6.97E+08 | 9.78E+08 | 3.7E+08  | 8.98E+08 | 6.57E+08 | 9.27E+08 | 1.25E+09 | 1.51E+09 |
| 3200942  | 3948922  | 5356792  | 3684127  | 3936417  | 3207841  | 3031816  | 2194572  | 2234772  | 2363821  | 1078531  | 2233069  | 3297741  | 3864156  | 2976009  | 2826739  | 5287891  |
| 918424.9 | 1088824  | 769076.1 | 615704.6 | 1151793  | 1146642  | 1949178  | 1332169  | 1553908  | 1188117  | 1029521  | 752578.6 | 1107136  | 1451120  | 2431807  | 1556073  | 2185077  |
| 23632314 | 20030050 | 9718478  | 10258899 | 20735914 | 24762192 | 43740276 | 29205414 | 21911626 | 22682998 | 12242249 | 19293742 | 19550316 | 38803264 | 37049952 | 21735158 | 29025606 |
| 11357430 | 20538112 | 32789620 | 1.27E+08 | 29998402 | 17180750 | 4869543  | 17262438 | 21711074 | 31205840 | 43061508 | 71734592 | 51807432 | 33702992 | 26024368 | 91719840 | 56875012 |
| 18136634 | 13020377 | 21926260 | 38172572 | 27974782 | 7189034  | 2328587  | 27359492 | 21704152 | 19770186 | 31561198 | 46599176 | 23984808 | 11632574 | 11803642 | 31419398 | 29278810 |
| 9852235  | 5395926  | 10284511 | 12170486 | 20374788 | 5330686  | 1669832  | 17945228 | 7973550  | 13141739 | 16780034 | 20726424 | 10288528 | 6054368  | 7219019  | 8729329  | 13401751 |
| 5179.239 | 3840.061 | 8897.97  | 10330.63 | 12280.99 | 40045.19 | 70395.66 | 4755.372 | 1119.455 | 12879.98 | 12885.38 | 892.5995 | 15249.02 | 9419.576 | 7745.29  | 7889.106 | 1255.072 |
| 10113.15 | 12701.4  | 4004.617 | 9638.357 | 8554.364 | 10539.01 | 46092.88 | 1214.925 | 33301.16 | 22328.51 | 27952.28 | 11051.19 | 12301.79 | 16444.82 | 142837.8 | 3720.588 | 30767.36 |
| 6713.344 | 6671.677 | 3860.485 | 9788.563 | 5666.583 | 5011.706 | 4641.207 | 4358.027 | 7474.986 | 6340.621 | 9641.451 | 7917.322 | 5616.976 | 7684.123 | 5306.821 | 7570.124 | 7212.818 |
| 29650.69 | 30313.38 | 14656.33 | 39164.17 | 31796.77 | 17622.71 | 27070.83 | 19976.9  | 30686.85 | 34189.11 | 29726.92 | 26237.77 | 33101.28 | 31011.29 | 67810.25 | 36751.86 | 52868.21 |
| 142109.2 | 118305.2 | 79957.77 | 88300.81 | 196352   | 110056.8 | 47928.72 | 72408.66 | 121602.6 | 117262.2 | 109843.8 | 108658.1 | 201941.1 | 133449.8 | 80920.23 | 83243.66 | 87926.22 |
| 102206   | 115808.1 | 104911.8 | 92358.72 | 45164.24 | 73199.2  | 91723.8  | 69599.06 | 98866.68 | 98783.25 | 74466.61 | 90421.43 | 70451.58 | 37303.64 | 79086    | 61897.2  | 112742.5 |
| 1243123  | 1187115  | 603498.9 | 734369.1 | 747659.3 | 994954.6 | 2386683  | 1454497  | 1018585  | 1229257  | 402446.9 | 985838.3 | 849405.3 | 565609.2 | 1543975  | 1086520  | 1089892  |
| 33521.76 | 78206.32 | 25562.49 | 88576.81 | 13093.75 | 53214.8  | 92921.52 | 34739.96 | 43373.15 | 37413.57 | 36192.44 | 25230.98 | 25631.62 | 23913.36 | 58878.54 | 37255.56 | 51485.04 |
| 44735.62 | 33209.55 | 38022.33 | 39923.06 | 73094.24 | 24465.03 | 25836.5  | 17873.46 | 29178.28 | 22936.27 | 63359.14 | 54417.57 | 48401.02 | 17549.46 | 13975.87 | 11352.13 | 6092.384 |
| 60916.04 | 69351.37 | 39373.38 | 38708.26 | 60478.63 | 172024.8 | 548209.8 | 72015.9  | 65399.09 | 110165.6 | 45250.3  | 43161.91 | 51300.58 | 100590.8 | 83577.81 | 83128.91 | 141657.1 |
| 98056.73 | 194828.6 | 128631.4 | 165319   | 228754.4 | 145552.5 | 145400.1 | 87599.51 | 150233.7 | 169729   | 177578.8 | 243325.5 | 204997.4 | 173566.4 | 204601.1 | 148654.9 | 95582.82 |
| 6506.394 | 3998.413 | 2082.058 | 4093.171 | 19315.02 | 3115.107 | 3952.65  | 6845.967 | 6621.033 | 5246.755 | 12422.12 | 5956.813 | 10645    | 9835.207 | 6796.923 | 4405.028 | 6448.033 |
| 361284.6 | 510545.7 | 472389.3 | 547444.2 | 465650.6 | 477461.9 | 553785.3 | 388996.5 | 418203.9 | 349358.7 | 437321   | 567298.7 | 449924.5 | 522858.4 | 723545.4 | 528071.5 | 431164.3 |
| 81261.83 | 83997.47 | 96255.99 | 98958.37 | 76464.81 | 53394.3  | 53337.22 | 71764.34 | 62810.41 | 77736.87 | 102977.1 | 116334.6 | 75000.02 | 69006.94 | 81784.02 | 97387.88 | 82094.75 |
| 394877.7 | 545789   | 487026.7 | 584708.4 | 381328.5 | 447252   | 363094.6 | 387961.2 | 378070.7 | 374256.3 | 607780.6 | 507385.9 | 375721.8 | 413561.4 | 505208.3 | 461131.9 | 430104.9 |
| 63503.88 | 41727.55 | 100576.2 | 125501.2 | 79803.52 | 44751.32 | 44471.77 | 66179.16 | 54667.48 | 50004.78 | 89192.88 | 111681.7 | 103814.6 | 57018.39 | 54528.86 | 81575.77 | 43643.8  |
| 21909.47 | 19558.1  | 36225.66 | 42563.87 | 21870.49 | 28640.87 | 21783.67 | 25808.06 | 21567.8  | 16154.88 | 39380.14 | 19075.03 | 26987.31 | 22872.09 | 19621.34 | 24328.6  | 18037.93 |
| 790464.3 | 876527.2 | 1070611  | 1402318  | 1238251  | 1195334  | 812242.2 | 1013419  | 853587.1 | 716664.3 | 919136.9 | 1031578  | 1219648  | 978421.3 | 799511.7 | 978056.6 | 568048.1 |
| 28939.63 | 25562.54 | 53838.38 | 68515.56 | 47528.48 | 13061.61 | 9320.327 | 24543.23 | 24188.04 | 22468.19 | 47221.53 | 73434.45 | 39059.05 | 19716.92 | 14842.7  | 55656.46 | 20121.23 |
| 69004.66 | 36009.11 | 70035.16 | 92816.02 | 88851.85 | 55787.77 | 41195.37 | 48126.49 | 77038.55 | 34399.19 | 90458.05 | 34889.39 | 71855.55 | 38546.96 | 33470.91 | 42613.63 | 49173.83 |
| 30823.13 | 23893.82 | 18723.93 | 24685.11 | 30128.64 | 35392.24 | 54274.04 | 29704.73 | 36093.39 | 25137.71 | 16356.18 | 24860.21 | 49271.77 | 25263.59 | 57904.45 | 30866.03 | 58409.21 |

|          |          |          |          |          |          |          |          |          |          |          |          |          |          |          |           |          |
|----------|----------|----------|----------|----------|----------|----------|----------|----------|----------|----------|----------|----------|----------|----------|-----------|----------|
| 7187839  | 7344261  | 6108439  | 4890942  | 6016590  | 7141039  | 6942556  | 6233429  | 6288145  | 5973300  | 5763096  | 5833266  | 5843608  | 8523959  | 6837586  | 4766042   | 6374512  |
| 47798.32 | 80324.67 | 67259.66 | 102347.5 | 56179.27 | 39819.5  | 35915.31 | 57486.91 | 80103.05 | 50378.54 | 81444.44 | 68107.74 | 70125.84 | 42960.82 | 57242.27 | 60937.9   | 70078.95 |
| 26639.2  | 34571.64 | 48030.27 | 48010.95 | 41313.82 | 33885.72 | 25618.91 | 32752.04 | 22993.36 | 31843.92 | 46822.15 | 60896.54 | 42062.14 | 26192.61 | 29353.96 | 41475.38  | 26081.5  |
| 7288.469 | 6010.898 | 26050.36 | 22289.72 | 22979.66 | 5116.691 | 6326.276 | 9684.211 | 8723.077 | 7935.344 | 17108.06 | 15971.1  | 22414.8  | 8741.555 | 7194.337 | 23155.84  | 12602.68 |
| 246379.5 | 339252.3 | 330132.1 | 286438.3 | 294262.1 | 220489.2 | 274113.2 | 271317.1 | 374914   | 485075.8 | 321058.3 | 343343.2 | 435844.4 | 256923   | 372165   | 374281.3  | 441464   |
| 45140    | 15673.88 | 18442.29 | 13928.78 | 37479.95 | 16548.94 | 6522.787 | 15424.57 | 27577.94 | 21024.18 | 30540.27 | 32321.39 | 44224.59 | 18066.35 | 23683.93 | 17842     | 28134.06 |
| 45269236 | 33822004 | 16605225 | 22211070 | 29338690 | 26944912 | 28204380 | 27894126 | 42493864 | 35172808 | 34887744 | 25658344 | 31142152 | 43042796 | 37123560 | 32693228  | 44450436 |
| 4148126  | 2629729  | 2464071  | 2297978  | 3457316  | 3786105  | 3690853  | 3488799  | 4088822  | 4719886  | 3410330  | 3010777  | 3174998  | 5760032  | 3300077  | 3303550   | 4840191  |
| 11943.85 | 9860.035 | 13108.86 | 19629.45 | 12180.99 | 9945.214 | 8820.77  | 8926.917 | 10316.48 | 8717.963 | 18065.26 | 20488.63 | 10946.61 | 11463.89 | 8669.253 | 14782.7   | 9177.008 |
| 108709.4 | 87973.76 | 93007.09 | 342314.3 | 117308.1 | 67818.41 | 63094.51 | 55796.72 | 89979.67 | 125143.2 | 570418.5 | 209379   | 103383.3 | 67698.27 | 125290.7 | 172082.8  | 88510.63 |
| 9401.768 | 12878.59 | 14798.7  | 21249.58 | 20046.8  | 13482.12 | 14948.67 | 13229.71 | 11250.66 | 11218.27 | 16362.21 | 11855.96 | 16813.95 | 18033.88 | 10820.92 | 16206.19  | 9033.269 |
| 9356.243 | 22250.96 | 7968.597 | 6630.538 | 11773.79 | 90393.3  | 500232   | 10993.89 | 14446.53 | 14445.18 | 15676.8  | 13895.25 | 10692.85 | 11987.16 | 18737.52 | 12751.23  | 17914.71 |
| 34469.78 | 48225.68 | 41526.36 | 34882.62 | 27101.79 | 26090.82 | 36678.46 | 32386.37 | 37950.01 | 57523.38 | 44719.42 | 60498.47 | 27912.59 | 38733.66 | 51387.59 | 29792.76  | 23819.68 |
| 2822871  | 1424165  | 2680988  | 2857182  | 5974074  | 391750.8 | 392975.5 | 108827.1 | 1806764  | 2532021  | 2119432  | 2023034  | 7165446  | 242120.8 | 863166.9 | 180127.1  | 2313664  |
| 107301.9 | 123839   | 174083.5 | 209252.9 | 158384.1 | 61685.78 | 48671.79 | 89819.52 | 100879.6 | 132870.3 | 175908.7 | 205412.4 | 153906.8 | 61280.82 | 83589.3  | 99532.36  | 131736.5 |
| 964329.2 | 2961479  | 3273450  | 1661061  | 2407627  | 1433108  | 2591257  | 1867403  | 1074329  | 2087972  | 1391385  | 1498385  | 2107856  | 1025857  | 1163376  | 2359482   | 2928568  |
| 250556.6 | 128458.6 | 62489.52 | 646539.6 | 45424.05 | 74591.38 | 38781.29 | 76857.39 | 296453.4 | 102746   | 169004.8 | 233212.9 | 149062.1 | 120762.6 | 183668.2 | 86030.97  | 180191.6 |
| 93817.47 | 93141.71 | 132323.5 | 81570.7  | 80734.24 | 45125.59 | 51596    | 26106.94 | 58845.37 | 168335.3 | 109970.6 | 131793.6 | 45095.3  | 49325.36 | 48447.48 | 56479.09  | 91425.45 |
| 1037340  | 1770820  | 1446641  | 538811.2 | 1171651  | 1041211  | 1184403  | 2156072  | 1698218  | 2155470  | 1416475  | 1030799  | 1899430  | 1541838  | 1393024  | 2579966   | 3357925  |
| 164274.1 | 190270.8 | 212883   | 148952.4 | 181929.1 | 139348.6 | 135330.5 | 152945.4 | 214428.4 | 235540.2 | 156503.9 | 203420.1 | 202904.4 | 188019   | 226683.1 | 206445.6  | 277803.4 |
| 739156.9 | 1524565  | 1387817  | 1248880  | 947435.9 | 738861.2 | 829305.2 | 721550.8 | 420589.9 | 453120.3 | 477032.6 | 1063231  | 682480.9 | 820039.8 | 744111.1 | 643813    | 850753.3 |
| 62160.63 | 59492.45 | 35866.44 | 54991.87 | 26970.36 | 53469.64 | 51056    | 17143.5  | 35166.19 | 30673.35 | 25647.92 | 34333.18 | 41386.33 | 29808.72 | 64576.75 | 28286.64  | 49245.68 |
| 3017688  | 2733260  | 5485974  | 4412752  | 3539598  | 3948942  | 3404185  | 3785798  | 3405045  | 2259175  | 3820489  | 3021718  | 3190399  | 3297018  | 3128234  | 4203844   | 4102365  |
| 7344.788 | 15390.36 | 13131.94 | 17927.54 | 17733.1  | 2271.215 | 332.3965 | 7372.14  | 8046.485 | 11690.16 | 14546.86 | 11576.89 | 2549.667 | 7988.227 | 7696.2   | 8288.986  | 5853.781 |
| 52542.96 | 68195.08 | 56142.38 | 49567.04 | 46722.11 | 45266.29 | 66309.68 | 60314.31 | 61804.4  | 101444.5 | 72145.08 | 63993.59 | 53341.29 | 53139.09 | 101777.7 | 59439.25  | 84444.43 |
| 14463.71 | 22475.75 | 23303.87 | 20760.35 | 23581.44 | 29994.96 | 23653.13 | 13941.32 | 20443.65 | 12185.98 | 18874.36 | 14927.06 | 32063.08 | 24201.22 | 16364.89 | 14896.15  | 7576.05  |
| 76907.45 | 131634.5 | 112353.2 | 101117.5 | 102760.1 | 80353.26 | 142540.5 | 83739.13 | 90056.25 | 106315.5 | 76877.7  | 100783.6 | 109140.7 | 127065.9 | 192748.2 | 99824.61  | 133727.4 |
| 19318434 | 21580806 | 25405442 | 19834158 | 26800006 | 17462206 | 24341034 | 22109584 | 19840730 | 26360780 | 26461736 | 29071136 | 26192710 | 22782050 | 25483984 | 24037022  | 15971605 |
| 4619571  | 4772955  | 3249366  | 3953580  | 4325319  | 4064867  | 6604564  | 5145500  | 5082546  | 4875787  | 4281931  | 4132310  | 4103439  | 6899632  | 11075898 | 6217549   | 10663459 |
| 8254330  | 7210212  | 10051431 | 14952568 | 15170648 | 3343682  | 914420.4 | 10625981 | 9891702  | 8291753  | 9314768  | 19749002 | 12433622 | 4856983  | 4295457  | 18293032  | 13126962 |
| 1329561  | 774202.3 | 1849521  | 2220550  | 1748837  | 1279288  | 893525.1 | 1326030  | 1377582  | 850614.2 | 2029358  | 2427035  | 1955181  | 1121670  | 919086.3 | 1732648   | 1305099  |
| 702324.8 | 627957.4 | 644678.7 | 482207.4 | 538582.7 | 676198.3 | 637890.3 | 613848.4 | 598899.8 | 545286.8 | 459719.8 | 532054.6 | 508617.4 | 523705.1 | 619801.4 | 423572.4  | 554767.4 |
| 37793.3  | 35525.05 | 82379.45 | 50620.72 | 17963.66 | 21337.69 | 37767.75 | 55149    | 38250.77 | 30939.37 | 60345.18 | 84255.63 | 52863.21 | 26667.17 | 30308.01 | 68090.88  | 66337.69 |
| 35365.15 | 30573.75 | 51774.82 | 42594.97 | 55372.48 | 16604.44 | 12998.98 | 27060.13 | 26427.94 | 30296.99 | 46154.42 | 70661.92 | 53730.48 | 14507.73 | 14972.2  | 34613.4   | 21509.61 |
| 140049.9 | 169329.6 | 288175.7 | 283755.3 | 146988.9 | 192699.8 | 172729.6 | 200343.7 | 114642.8 | 194904.1 | 140714.5 | 206663.2 | 158756.7 | 290881.5 | 247929   | 339915.6  | 239284   |
| 14045.9  | 20707.97 | 6845.656 | 10690.8  | 9971.97  | 30946.92 | 13692.37 | 22447.07 | 31468.78 | 32962.5  | 18501.57 | 6710.208 | 2226.418 | 28759.7  | 31063.23 | 26529.61  | 29220.99 |
| 377272.8 | 573430.7 | 394734   | 279906.8 | 407224.6 | 305764.9 | 264167   | 398815.5 | 325160.5 | 514138.6 | 377687.5 | 554060.5 | 394895.4 | 379816.6 | 255083.1 | 380441.8  | 266093.9 |
| 13408.47 | 26462.82 | 15712.89 | 5506.229 | 14551.63 | 20875.53 | 20926.81 | 18493.99 | 9490.936 | 29773.32 | 22261.98 | 24821.23 | 19688.26 | 33017.46 | 34085.13 | 32734.38  | 47566.29 |
| 263493   | 237988   | 127530.5 | 194762.5 | 145612.4 | 194497.2 | 246032.1 | 204456.8 | 233070   | 128836.4 | 174406.9 | 171766.4 | 176009   | 146445.5 | 197089.7 | 162513.6  | 229177.7 |
| 33447.47 | 26493.67 | 67083.3  | 83488.36 | 53005.82 | 28630.62 | 25332.75 | 30378.57 | 38029.18 | 36568.69 | 70309.41 | 88404.91 | 65137.88 | 50801.71 | 48862.51 | 66338.78  | 65336.24 |
| 2577493  | 4675174  | 1766343  | 1303909  | 783529.3 | 1622259  | 1232596  | 1219393  | 1657140  | 1715522  | 741835.7 | 1441077  | 626625.3 | 560170.4 | 435084.6 | 800796.4  | 1818005  |
| 64544.83 | 62714.55 | 65188.35 | 53969.8  | 78095.09 | 54650.26 | 76544.26 | 69257.63 | 63784.26 | 63250.73 | 77956.65 | 109939.9 | 103474.3 | 79736    | 56042.66 | 68206.86  | 49497.84 |
| 3553759  | 2183436  | 5092240  | 1985780  | 472827.3 | 2585894  | 2494305  | 4073314  | 3520606  | 3788491  | 2467454  | 2592997  | 641568.8 | 6057866  | 4791810  | 4871555   | 9762981  |
| 5981658  | 4454506  | 11721853 | 16898224 | 8944192  | 3733713  | 1150759  | 13325119 | 7346581  | 6571585  | 9236338  | 21870616 | 11183651 | 4977767  | 6269344  | 17911124  | 20818824 |
| 43763.19 | 13378.8  | 50022.29 | 73475.52 | 43996.34 | 25541.51 | 34690.16 | 27945.67 | 23210.5  | 30694.44 | 41814.61 | 48335.48 | 21256.86 | 23402.13 | 20905.23 | 54301.93  | 24520.75 |
| 1758930  | 2085095  | 2929576  | 1446439  | 1637740  | 1979247  | 2020539  | 1795708  | 1352088  | 1524569  | 1079794  | 690214.3 | 1173295  | 1485849  | 1117699  | 947347.2  | 1659207  |
| 18595.07 | 23997.8  | 12712.51 | 12719.06 | 19222.75 | 23568.47 | 89356.15 | 34829.39 | 18229.82 | 23464.77 | 7998.089 | 20340.19 | 18566.72 | 17502.98 | 42037.23 | 23466.72  | 36073.85 |
| 304139.8 | 482922.8 | 676470.7 | 406141.8 | 784012.8 | 418448.5 | 269186.6 | 241150.7 | 555422.6 | 610877.4 | 746266   | 992363.8 | 835048.3 | 777482.4 | 672949.4 | 2461332.3 | 794531.8 |
| 411632.6 | 319276.6 | 300875.6 | 367312.5 | 315518.3 | 306601.2 | 699561.4 | 400585.4 | 312438.9 | 432501.4 | 317491.2 | 238395.7 | 323192.3 | 284655.7 | 482644   | 335412.9  | 326938.3 |



|          |          |          |          |          |          |          |          |          |          |          |          |          |          |          |          |          |
|----------|----------|----------|----------|----------|----------|----------|----------|----------|----------|----------|----------|----------|----------|----------|----------|----------|
| 87674.58 | 118613.3 | 121416.5 | 103662.2 | 108279.2 | 119418.2 | 110884.2 | 90768.22 | 91551.05 | 121558.2 | 72288.68 | 135008   | 98578.2  | 141759.3 | 181154.6 | 111239   | 58722.86 |
| 14277.77 | 5353.637 | 15563.16 | 32681.51 | 17768.48 | 5440.051 | 3354.477 | 18901.61 | 19363.96 | 12810.19 | 16861.69 | 33087.13 | 17920.69 | 9476.517 | 6596.009 | 15908.97 | 16177.65 |
| 20233.79 | 15253.8  | 24474.37 | 35081.58 | 19165.06 | 14239.78 | 12937.64 | 15046.74 | 13586.62 | 22876.08 | 34306.4  | 33499.66 | 17206.46 | 16848.13 | 12910.54 | 18984.85 | 10036.81 |
| 66959.15 | 117338.6 | 123968.2 | 135833.8 | 111172.7 | 103718.2 | 64753.95 | 81245.16 | 64551.62 | 61470.09 | 102430.7 | 86613.74 | 94915.2  | 102299.5 | 59032.66 | 108903   | 56622.77 |
| 4050.609 | 3278.336 | 2510.504 | 11362.66 | 13210.32 | 10771.87 | 25479    | 6928.713 | 6861.719 | 8364.955 | 12363.12 | 10196.49 | 12148.97 | 7676.507 | 2288.772 | 7110.4   | 8700.725 |
| 7052.341 | 18151.95 | 38514.07 | 33246.97 | 29053.05 | 13882.09 | 14111.18 | 21261.87 | 46961.07 | 17744.47 | 46577.82 | 57233.77 | 34403.48 | 10386.67 | 12394.7  | 37743.56 | 29660.39 |
| 15486.6  | 16926.54 | 16082.23 | 11114.62 | 11921.96 | 11521.11 | 11114.75 | 8571.295 | 12591.26 | 16227.15 | 7380.337 | 10229.73 | 11338.65 | 8389.771 | 9907.543 | 9972.422 | 10813.36 |
| 326717.6 | 393874.3 | 571111.3 | 1104566  | 720727.4 | 424677.7 | 327070   | 622346.5 | 498984.8 | 458878.7 | 778070.9 | 399592.9 | 352632   | 779673   | 627916.6 | 1042803  | 497370.8 |
| 39966.95 | 38408.29 | 51166.75 | 29526.58 | 52065.43 | 21501.81 | 52514.27 | 50293.13 | 37224.5  | 43740.09 | 80109.88 | 92450.16 | 41739.19 | 11365.25 | 35054.89 | 18059.7  | 23634.91 |
| 70461.76 | 60897.89 | 95828.01 | 166339.7 | 81877.81 | 47938.96 | 38507.73 | 52262.41 | 77571.44 | 41138.59 | 68033.05 | 66352.77 | 48636.34 | 83008.17 | 56106.09 | 119443.3 | 93608.26 |
| 152978   | 163375.9 | 208175.2 | 392479.9 | 224780.5 | 122782.8 | 103596.8 | 140925.4 | 164725.6 | 113986.3 | 177450   | 183090.9 | 185975.3 | 149199.8 | 165914.5 | 241253.6 | 268439.9 |
| 155017.3 | 107221   | 92315.02 | 59905.12 | 123540.5 | 86524.06 | 87329.63 | 146089.2 | 68673.88 | 142235.6 | 81056.18 | 125213.1 | 105743.2 | 83157.11 | 158047.9 | 86491.56 | 259473.4 |
| 1062335  | 996827.8 | 840767.6 | 672890.3 | 872598.4 | 888382.2 | 871918.1 | 722571.2 | 926196.5 | 834726.9 | 778372.2 | 667225.1 | 646501.6 | 1408666  | 1161008  | 932831.4 | 1244754  |
| 10664.89 | 6404.042 | 17930.85 | 20730.13 | 17293.45 | 10817.88 | 6974.056 | 12121.64 | 10439.55 | 8706.299 | 16576.64 | 12384.61 | 8585.939 | 9808.725 | 10019.67 | 15179.66 | 13805.3  |
| 40644.12 | 31185.34 | 34160.1  | 31080.97 | 62379.47 | 18650.29 | 22394.42 | 24345.72 | 17532.16 | 23313.97 | 34515.15 | 32764.34 | 39286.78 | 21919.23 | 13001.64 | 15359.78 | 9939.969 |
| 72391.87 | 144521.9 | 454108.7 | 701372.4 | 107633.3 | 78838.62 | 632986.2 | 138125.8 | 362196.4 | 293412.8 | 474350.1 | 313739.6 | 479850.2 | 121491.3 | 314409.4 | 287057.3 | 164333.4 |
| 40606.89 | 45960.98 | 62470.54 | 81690.5  | 72786.69 | 61866.88 | 38791.24 | 47557.93 | 39307.38 | 33609.34 | 37515.29 | 61906.45 | 74468.99 | 53795.12 | 38822.1  | 45316.78 | 32181.62 |
| 23227.94 | 16299.03 | 48583.21 | 36266.12 | 30328.21 | 29274.4  | 19517.63 | 30204.02 | 26205.25 | 36274.88 | 38869.5  | 46833.57 | 29427.62 | 28615.49 | 35758.22 | 40793.88 | 49842.96 |
| 1169698  | 1367959  | 742551.7 | 967622.9 | 1541570  | 1414808  | 1489804  | 1964072  | 1219563  | 1466564  | 824764.5 | 1005230  | 1143471  | 2380093  | 1240355  | 2265570  | 1574009  |
| 4842157  | 5154353  | 2971253  | 3107591  | 2223509  | 4402771  | 7759394  | 4297326  | 6373075  | 5463164  | 4440781  | 3988405  | 1590295  | 4758843  | 9044161  | 5203686  | 7549675  |
| 25548.14 | 30322.48 | 25390.91 | 25611    | 33059.24 | 29611.27 | 48074.96 | 30463.48 | 55244.41 | 31548.67 | 41528.41 | 33920.85 | 26268.3  | 73225.09 | 76103.55 | 47091.48 | 48449.2  |
| 595981.9 | 525028.9 | 572300.6 | 1059873  | 673563.7 | 387619.2 | 307642.4 | 587813.1 | 478672.8 | 578652.1 | 679361.4 | 723108   | 648656   | 710311.6 | 519744.4 | 1090504  | 1030101  |
| 66008.45 | 76171.33 | 118625.7 | 89370.88 | 84253.2  | 86399.63 | 99999.21 | 72981.62 | 74907.51 | 66118.88 | 56413.16 | 81206.37 | 101961.1 | 104712.9 | 91570    | 94338.02 | 44900.73 |
| 7553.418 | 13066.32 | 13265.04 | 15313.95 | 19866.17 | 9174.035 | 10260.6  | 13787.59 | 3710.368 | 6821.649 | 17816.61 | 23191.92 | 15113.32 | 8780.075 | 6304.492 | 10970.37 | 9959.709 |
| 29071.32 | 45901.33 | 51704.35 | 88378.52 | 62271.94 | 20446.71 | 25798.14 | 33281.94 | 27389.66 | 45377.56 | 55812.48 | 73265.72 | 44127.32 | 21338.69 | 34938.88 | 51104.4  | 50198.14 |
| 3537.267 | 4423.762 | 5975.268 | 5199.867 | 3914.917 | 4724.299 | 3453.839 | 4515.881 | 6625.951 | 3036.625 | 8827.707 | 13432.42 | 5920.236 | 7098.034 | 5994.803 | 5856.974 | 10647.59 |
| 7371.953 | 6344.16  | 12775.19 | 7790.083 | 17153.28 | 12128.77 | 7388.278 | 8610.645 | 13478.97 | 18251.52 | 30756.56 | 18892.95 | 14630.01 | 16439.28 | 9491.018 | 15245.25 | 13355.34 |
| 43363.24 | 57802.76 | 52364.76 | 84397.05 | 49214.46 | 43432.96 | 36348.34 | 41851.41 | 18624.13 | 38872.2  | 99390.6  | 65546.41 | 47852.45 | 41335    | 36982.39 | 51815.02 | 27818.78 |
| 400859.2 | 556324.2 | 240669.7 | 1548657  | 142668.6 | 423310.3 | 126766.6 | 275551   | 587412.7 | 269923.4 | 302189.6 | 573557.8 | 507595.4 | 365102.3 | 717402.1 | 296123.9 | 479233.8 |
| 8044337  | 9440090  | 4463053  | 4482136  | 7276964  | 10095747 | 18412184 | 10518333 | 8421080  | 10096420 | 4507778  | 5516878  | 6904210  | 9491391  | 12777509 | 6428228  | 10202987 |
| 14334.69 | 12916.28 | 37474.12 | 43222.99 | 25750.03 | 22102.43 | 8161.183 | 19651.18 | 15370.29 | 8817.399 | 21906.16 | 27680.05 | 18821.13 | 19407.59 | 13753.92 | 19557.39 | 19834.68 |
| 50936.2  | 65677.59 | 73998.3  | 97715.61 | 59548.64 | 54856.25 | 60241.42 | 50584.84 | 55184.54 | 57561.25 | 60171.29 | 74435.86 | 68240.66 | 55195.27 | 56126.76 | 48549.05 | 35454.81 |
| 95682.95 | 140120.2 | 103777   | 76832.1  | 55193.41 | 43099.11 | 25782.27 | 67499.7  | 72333.02 | 103050.9 | 60601.46 | 96649.04 | 69630.19 | 80593.83 | 70987.34 | 47004.2  | 52881.56 |
| 541601.8 | 455227.8 | 147234.1 | 277657.6 | 86318.49 | 120321.9 | 48149.99 | 165946.3 | 571369.7 | 450725.6 | 166746   | 144341.7 | 343999.3 | 9834.672 | 220578.4 | 552605.4 | 527780.1 |
| 64401.49 | 70369.6  | 62402.69 | 75634.67 | 84826.55 | 41943.64 | 45480.97 | 37647.39 | 57853.1  | 44703.64 | 35746.98 | 66387.75 | 51123.93 | 87793.63 | 41334.3  | 49528.06 | 65577.24 |
| 597900.4 | 634338.2 | 532769.4 | 695017.8 | 334114.5 | 735679.2 | 1164372  | 69517.19 | 544987   | 438319.8 | 498069.9 | 427801.8 | 460136.6 | 833945.6 | 637971.3 | 577455   | 555353.8 |
| 26989.63 | 7235.277 | 12390.75 | 38656.06 | 11274.19 | 4081.262 | 5195.557 | 6143.369 | 6417.045 | 10880.65 | 82935.58 | 9422.807 | 10529.19 | 6365.537 | 4907.948 | 8506.407 | 10746.47 |
| 141099.6 | 140860.5 | 130173   | 89603.39 | 103667.1 | 126658.2 | 103403.7 | 78426.47 | 132717.2 | 153626.1 | 65670.65 | 116158.3 | 136531.2 | 116180.3 | 107530.8 | 63352.83 | 198534.3 |
| 2340759  | 1920305  | 1294378  | 1282438  | 1295080  | 3862904  | 8391770  | 2338878  | 2763547  | 1688841  | 1487691  | 1074367  | 1606966  | 3942298  | 2345154  | 1923268  | 2547591  |
| 9079.921 | 13526.66 | 5319.042 | 7767.355 | 6554.622 | 12756.31 | 6046.646 | 6024.504 | 16084.96 | 7369.635 | 8996.002 | 7332.604 | 8421.66  | 20972.65 | 8465.957 | 7203.886 | 8622.841 |
| 8846.196 | 11373.49 | 12012.66 | 12399.19 | 14687.08 | 9834.754 | 6546.512 | 8770.916 | 11031.02 | 5560.791 | 11695.51 | 9037.756 | 11479.06 | 5756.733 | 5129.74  | 7012.126 | 6935.525 |
| 27652.6  | 60817.28 | 36006.78 | 24463.18 | 41359.8  | 375826.1 | 1561781  | 33418.21 | 36771.15 | 44219.5  | 43651.33 | 39230.99 | 32077.52 | 39496.55 | 58149.56 | 27328    | 32919.74 |
| 162949.8 | 203636.7 | 133066.4 | 152517   | 118651.6 | 69937.43 | 185751.7 | 133590.5 | 215005   | 232168.3 | 135294.2 | 149699.4 | 92593.91 | 125990.7 | 473765.6 | 131437   | 242616.6 |
| 501733.3 | 459485.4 | 385949.1 | 267170   | 440796.7 | 414874.3 | 408152.5 | 574096.5 | 432039.1 | 488890.7 | 335430.4 | 505220.2 | 269276   | 725316.1 | 615495.9 | 722655.2 | 789615.8 |
| 90163.57 | 108229   | 100009.3 | 102715.6 | 88611.19 | 71489.38 | 80822.72 | 75882.16 | 44693.32 | 66083.75 | 56211.68 | 108102.9 | 50086.97 | 101578.8 | 92998.31 | 96757.52 | 52079.6  |
| 232658   | 121974.9 | 110029.4 | 228162   | 217686.1 | 132747.4 | 169987.3 | 153739.8 | 241604.1 | 184655.8 | 197254.8 | 115671.1 | 126616.5 | 136030.6 | 201385.6 | 352319.9 | 232612.1 |
| 2418954  | 1680564  | 1940368  | 2264465  | 1531908  | 2511119  | 1948383  | 1854421  | 2401427  | 1699670  | 1957764  | 1707464  | 1294661  | 1672679  | 2357684  | 1541082  | 1694896  |
| 3124388  | 3237577  | 2548967  | 2995859  | 2932742  | 2409918  | 2524847  | 2613718  | 3594782  | 3814556  | 2715653  | 2816602  | 3469563  | 2590657  | 2972882  | 2962168  | 4476928  |
| 114733.6 | 98852.94 | 119407.6 | 102076.2 | 96710.7  | 89895.98 | 89039.75 | 94534.99 | 115021.2 | 95454.95 | 94851.59 | 124972.8 | 126334.3 | 111645   | 99849.66 | 102139.5 | 109728.8 |

|          |          |          |          |          |          |          |          |          |          |          |          |          |          |          |          |          |
|----------|----------|----------|----------|----------|----------|----------|----------|----------|----------|----------|----------|----------|----------|----------|----------|----------|
| 37735.11 | 30120.95 | 58588.38 | 52956.1  | 47086.02 | 34456.7  | 33631.32 | 33186.34 | 34982.49 | 22224.5  | 37960.29 | 39582.31 | 43518.36 | 40214.82 | 25793.35 | 35071.11 | 26075.49 |
| 2931639  | 2538695  | 5092293  | 4053377  | 2873926  | 1909272  | 1839423  | 2772023  | 2670712  | 2683219  | 3938427  | 4418203  | 3295212  | 1962597  | 2531698  | 3092888  | 3085241  |
| 11304.4  | 8315.137 | 9765.505 | 2647.684 | 8624.825 | 8205.824 | 10066.48 | 7455.085 | 6139.457 | 5023.046 | 7488.783 | 4797.373 | 23642.93 | 6364.58  | 4761.931 | 2260.566 | 7149.806 |
| 193531.9 | 174783.6 | 169844.6 | 196530.9 | 195668.2 | 152193.2 | 179277.4 | 232751.5 | 256236.3 | 313858.2 | 391091.3 | 209910.8 | 192550   | 384375.4 | 312484.3 | 389693.9 | 320865.6 |
| 3501120  | 4702394  | 8051501  | 7522967  | 2084756  | 12224963 | 2073169  | 4118209  | 6643700  | 14719541 | 20355664 | 9721659  | 3986011  | 8590980  | 4334867  | 8242205  | 7215070  |
| 116223.5 | 83412.1  | 69690.07 | 64792    | 48429.05 | 73245.72 | 100305.1 | 102372.7 | 113883.2 | 63504.7  | 75912.59 | 70339.73 | 51943.62 | 97421.22 | 112669   | 92968.88 | 135502.8 |
| 3126815  | 2703891  | 3104033  | 4176425  | 3444643  | 3308315  | 2807967  | 3198056  | 3156942  | 2452028  | 2809461  | 2756171  | 2575382  | 4153572  | 3177509  | 3645807  | 2255192  |
| 11343.52 | 8744.805 | 11575.42 | 11832.58 | 4834.886 | 6896.893 | 7151.678 | 5400.572 | 7849.946 | 6063.101 | 8849.433 | 27469.6  | 9034.338 | 5377.571 | 6870.52  | 8815.446 | 5691.501 |
| 76661.4  | 90640.4  | 68648.7  | 84016.63 | 76325.52 | 63529.89 | 61704.41 | 63887.96 | 54669.45 | 83378.41 | 60465.06 | 88750.9  | 70212.16 | 55475.07 | 87675.92 | 71088.43 | 110195.5 |
| 518176.1 | 152264.8 | 638743.8 | 578088.9 | 828521.4 | 357293.7 | 479020.7 | 805815.7 | 660664.7 | 349495.3 | 656035   | 306014.3 | 1140276  | 724771.9 | 1021134  | 1086701  | 1202622  |
| 12179.26 | 10896.56 | 13721.66 | 12642.19 | 29816.52 | 7950.126 | 10983.7  | 8725.593 | 12944.5  | 13365.67 | 16883.74 | 22904.27 | 20403.99 | 8996.42  | 8214.112 | 8418.785 | 12153.13 |
| 11355.94 | 7911.401 | 10044.83 | 16695.57 | 10573.59 | 6182.056 | 5451.569 | 4671.063 | 6730.746 | 2114.988 | 14020.46 | 9374.85  | 4937.74  | 9393.972 | 2208.327 | 8483.76  | 4740.765 |
| 19023.76 | 21381.76 | 17230.85 | 34360.98 | 56024.04 | 22917.7  | 20382.34 | 34298.81 | 33367.88 | 31849.01 | 50618.19 | 33103.97 | 50482.78 | 56031.85 | 38495.93 | 51953.18 | 38225.01 |
| 33119.05 | 33918.29 | 41441.3  | 45423.3  | 59491.1  | 37246.09 | 38462.18 | 49772.95 | 64761.42 | 29829.35 | 52446.42 | 75423.8  | 49985.59 | 45886.46 | 54263.22 | 42075.14 | 63218.13 |
| 65824.69 | 52434.88 | 54931.85 | 43033.23 | 33688.81 | 28117.1  | 42423.55 | 38052.86 | 55189.7  | 50486.68 | 49686    | 36178.93 | 37405.63 | 48229.27 | 60054.56 | 48755.54 | 65223.51 |
| 569708.1 | 237795.3 | 553184.3 | 820437.8 | 572856.5 | 426099.5 | 513698.1 | 354216.3 | 530451.3 | 145208.7 | 362947.7 | 99578.58 | 742837.6 | 369051.4 | 444903.8 | 503412   | 591140.4 |
| 8685.195 | 8981.358 | 12376.57 | 14153.56 | 8635.024 | 8785.514 | 8679.192 | 6584.958 | 7553.384 | 5818.037 | 6530.06  | 8993.63  | 7055.779 | 6224.538 | 6174.777 | 8192.646 | 5858.489 |
| 1798883  | 1822035  | 1947697  | 1384831  | 2566996  | 2486847  | 1962486  | 1985024  | 2647280  | 3065280  | 2329902  | 2443669  | 1430741  | 2680027  | 3173756  | 2095943  | 3821753  |
| 33185.64 | 48498.19 | 44802.45 | 50319.81 | 42425.68 | 34204.35 | 32177.72 | 29101.75 | 33741.56 | 35721.31 | 33297.13 | 41754.91 | 36665.3  | 45628.85 | 43511.02 | 36978.21 | 34409.74 |
| 16744.31 | 35494.56 | 4244.373 | 12217.11 | 6842.314 | 17522.2  | 30131.96 | 7687.43  | 13473.91 | 7513.602 | 15299.04 | 13118.09 | 12435.25 | 13870.85 | 12833.85 | 19487.08 | 35445.3  |
| 146220.1 | 124510.8 | 120392.7 | 92749.46 | 59691.38 | 40105.91 | 132787.5 | 154195.7 | 146338.2 | 148886.1 | 217327.9 | 125636.7 | 69739.66 | 64794.17 | 134211.8 | 114761.8 | 194929.3 |
| 518107.4 | 507474.7 | 510298.9 | 482785.6 | 379660.7 | 387351.8 | 427773.1 | 520848.7 | 615056.4 | 444042.3 | 528201.8 | 480414.2 | 271137.6 | 401569.5 | 451220.7 | 466762.4 | 227642   |
| 3784738  | 5636702  | 3196798  | 3626671  | 4541733  | 5873593  | 9417107  | 6301838  | 6319503  | 6916249  | 3680359  | 3966295  | 4301068  | 7718440  | 6666133  | 5829236  | 6583399  |
| 104395.7 | 54127.23 | 7802.15  | 206274.8 | 35215.58 | 24995.18 | 89406.25 | 18235.46 | 95362.97 | 113612.3 | 198481.6 | 52298.24 | 34891.28 | 40998.27 | 43733.16 | 34948.23 | 69353.38 |
| 5489.392 | 7887.527 | 2401.143 | 8097.332 | 6746.818 | 6380.614 | 4411.417 | 3458.633 | 4326.3   | 4170.322 | 15274.68 | 5361.722 | 6287.341 | 3945.302 | 3597.987 | 4931.71  | 5569.865 |
| 4513511  | 4557788  | 4229387  | 2635598  | 4425184  | 4686539  | 4578809  | 3601641  | 5006744  | 3970138  | 3160002  | 2822985  | 2635542  | 4042434  | 4625212  | 3414361  | 4725120  |
| 7461.301 | 8651.912 | 9973.631 | 9413.746 | 5864.425 | 10762.36 | 7160.525 | 6484.806 | 6932.502 | 3197.798 | 8121.626 | 5358.367 | 5471.746 | 5643.737 | 1871.379 | 5131.182 | 6523.07  |
| 11196.45 | 5500.821 | 10724.75 | 23291.63 | 10853.35 | 4720.677 | 5451.099 | 8303.928 | 7030.978 | 5185.585 | 34951.41 | 13026.58 | 10380.88 | 10048.05 | 4172.244 | 11079.64 | 11134.11 |
| 50901.41 | 58846.86 | 47211.39 | 50902.32 | 45247.05 | 17419.05 | 29632.25 | 47997.73 | 60282.84 | 125030.3 | 71535.42 | 82310.61 | 48839.73 | 30031.32 | 60495.11 | 117432.3 | 123721   |
| 8226.48  | 6981.674 | 9943.779 | 11374.1  | 17674.42 | 5166.293 | 4816.628 | 7506.268 | 5644.935 | 9241.099 | 14222.98 | 11713.8  | 10518.28 | 6680.698 | 5262.832 | 6034.894 | 7323.057 |
| 13890.28 | 19744.84 | 10128.22 | 7392.829 | 12703.99 | 12455.39 | 12655.68 | 15797.27 | 12425.38 | 12722.83 | 20564.23 | 13216.52 | 11440.39 | 14975.57 | 15245.85 | 15662.61 | 17660.41 |
| 80101.64 | 59517    | 128930.4 | 138425.3 | 46147.27 | 81850.49 | 78936.87 | 72168.61 | 74663.3  | 37811.15 | 91621.8  | 55383.54 | 64283.47 | 52244.2  | 34445.08 | 64015.16 | 37696.77 |
| 59603.24 | 46170.95 | 44413.89 | 87971.34 | 64912.14 | 72716.99 | 64864.22 | 50938.43 | 51134.49 | 42566.45 | 49186.35 | 38431.61 | 63305.09 | 65573.14 | 55517.77 | 59895.95 | 30732.53 |
| 11904.39 | 10098.59 | 2807.006 | 16545.59 | 13042.25 | 6199.805 | 28935.54 | 5017.292 | 25828.21 | 21883.06 | 166601.4 | 16703.72 | 15307.86 | 20218.85 | 108520.3 | 8773.98  | 40252.69 |
| 264645.5 | 328648.8 | 83765.23 | 99299.98 | 164315.9 | 50957.95 | 151793.3 | 206420.8 | 402188.4 | 444887.9 | 82230.4  | 169975   | 281756.6 | 52926.29 | 317676.3 | 293565.6 | 771208.9 |
| 40424.34 | 8134.292 | 6299.807 | 65253.11 | 17326.74 | 5293.813 | 5792.249 | 4943.17  | 9798.518 | 8995.122 | 78187.56 | 4624.045 | 18767.13 | 11761.82 | 10471.16 | 7010.741 | 17688.98 |
| 442326   | 342357.2 | 672989.4 | 709113.7 | 661315.3 | 598302.9 | 482513.4 | 418147.8 | 391026.4 | 314336.9 | 597898.3 | 563714.1 | 550694.8 | 618889.9 | 396747.8 | 580596.9 | 369793.2 |
| 1883.281 | 6996.248 | 9299.537 | 44570.21 | 28448.62 | 11497.36 | 20314.29 | 750.5003 | 68982.44 | 30060.57 | 51134.26 | 50033.16 | 26820.72 | 25568.3  | 35442.46 | 35020    | 35737.34 |
| 123125.2 | 121956.8 | 143710.1 | 210835.1 | 148154.6 | 118286.9 | 166441.9 | 98870.11 | 134106.4 | 116609.8 | 211585   | 190229.2 | 145938.2 | 128518.4 | 154970.6 | 144295.8 | 117262.4 |
| 1299.098 | 1270.243 | 10675.87 | 3475.692 | 1520.832 | 2586.147 | 604.9907 | 2969.631 | 3369.455 | 3198.078 | 2127.083 | 2675.862 | 3550.48  | 2644.799 | 3015.619 | 3016.925 | 4879.687 |
| 189917.7 | 111543.8 | 98132.29 | 56618.24 | 191064.4 | 60790.71 | 36215.43 | 174833.4 | 273040.1 | 167234   | 174966.5 | 134207.2 | 176864.5 | 160671   | 120637.9 | 158328.5 | 252123.8 |
| 11511833 | 14383037 | 11597223 | 9757007  | 11607215 | 12924050 | 12536122 | 14401358 | 10604974 | 12189893 | 10644204 | 8193951  | 11909207 | 13527264 | 12804750 | 12127825 | 18549268 |
| 2045222  | 2000744  | 2219096  | 1355125  | 1008373  | 1757776  | 2184009  | 1941670  | 2358401  | 2042951  | 2650912  | 1896078  | 1395258  | 1872896  | 2393201  | 1626296  | 1346972  |
| 26889.84 | 10648.81 | 22395.66 | 15238.98 | 11830.15 | 8028.911 | 4918.125 | 3093.428 | 19279.38 | 28261.51 | 19622.2  | 32965.75 | 24945.77 | 6823.53  | 8746.286 | 3799.017 | 15278.51 |
| 9178.972 | 9502.104 | 12011.14 | 10312.54 | 9588.657 | 6173.521 | 7731.27  | 7051.169 | 7366.702 | 6219.533 | 8354.767 | 7623.177 | 9434.83  | 8633.037 | 9097.744 | 8162.265 | 2751.1   |
| 292364.4 | 192258   | 160371.9 | 195339.7 | 175347.6 | 314707.9 | 402283.6 | 264263.7 | 349109.9 | 190210.8 | 218061.9 | 244074.9 | 194424.5 | 482843.2 | 298500.7 | 339834   | 658030.4 |
| 491982.2 | 369751.8 | 421565.9 | 327619.9 | 252641.9 | 514655.8 | 628930.2 | 511920.9 | 729918   | 679469   | 616318.1 | 498915.1 | 412287.1 | 728535.9 | 490100.3 | 751038.9 | 1567031  |
| 104012.1 | 114828.6 | 126579.9 | 83332.42 | 140563.3 | 160730.8 | 337010   | 178310.9 | 264099.2 | 202210.7 | 178234.1 | 197857.1 | 184264.4 | 197857.1 | 122302.4 | 196919.7 | 333221.4 |
| 445855.1 | 1275039  | 590192.9 | 495986.4 | 472368   | 798091.6 | 1159620  | 663597.7 | 548869.8 | 1969635  | 972350.8 | 715063.8 | 531392.3 | 906893.3 | 534778.3 | 575053.3 | 342631.3 |

|          |          |          |          |          |          |          |          |          |          |          |          |          |          |          |          |          |
|----------|----------|----------|----------|----------|----------|----------|----------|----------|----------|----------|----------|----------|----------|----------|----------|----------|
| 22929.82 | 75667.58 | 40015.95 | 14739.17 | 14161.27 | 8836.815 | 28203.92 | 34394.99 | 21917.29 | 31690.71 | 26852.11 | 6869.003 | 11922.64 | 17238.31 | 92733.62 | 20084.36 | 20151.75 |
| 32139354 | 20818706 | 22240896 | 16132457 | 8786784  | 11947939 | 16589824 | 13276238 | 22486824 | 16351744 | 18041218 | 18848206 | 6341496  | 13941418 | 21529880 | 11593708 | 28616004 |
| 105038.2 | 189695   | 241963.3 | 83056.41 | 155221.3 | 188234.3 | 194726.3 | 146289.9 | 177173.1 | 275628   | 34039.75 | 329917   | 210341.6 | 193472.6 | 268077.6 | 214939.4 | 304866.7 |
| 26080.41 | 33527.99 | 27323.36 | 22030.94 | 14436.49 | 26199.1  | 29669.61 | 27872.16 | 26460.86 | 39719.3  | 30620.88 | 28343.84 | 17472.02 | 24632.57 | 35642.63 | 33152.54 | 31305.88 |
| 60131.86 | 45793.66 | 48973.52 | 49122.16 | 44748.6  | 34353.92 | 43396.64 | 33231.09 | 27901.22 | 25768.33 | 39298.95 | 33088.53 | 38215.64 | 51977.3  | 48446.22 | 42446.05 | 61174.5  |
| 5325.794 | 10129.88 | 3625.587 | 13462.09 | 95647.55 | 3600.952 | 5263.245 | 2333.128 | 14818.65 | 2072.135 | 4058.395 | 10142.24 | 10656.75 | 5289.152 | 26557.2  | 19458.03 | 8502.686 |
| 19222.15 | 3976.232 | 10751.68 | 14290.99 | 18362.46 | 6939.466 | 5679.906 | 10059.11 | 13969.83 | 10866.06 | 23867.86 | 17329.52 | 20679.41 | 9718.845 | 9192.483 | 7871.148 | 10419.06 |
| 2147.792 | 6050.759 | 2330.052 | 7537.952 | 4296.162 | 9819.908 | 2034.856 | 11759.2  | 15452.48 | 9527.412 | 13195.24 | 1754.227 | 1547.578 | 10745.74 | 9143.127 | 12427.68 | 2296.587 |
| 21397284 | 22674154 | 19175502 | 21931510 | 16050217 | 15461909 | 23096200 | 14483908 | 27937420 | 26476908 | 25645432 | 34264764 | 21982652 | 15475344 | 21018250 | 15237175 | 17301108 |
| 5487.062 | 4406.576 | 6704.616 | 8107.721 | 2248.012 | 3808.92  | 2513.972 | 3465.813 | 3723.418 | 2561.029 | 11576.52 | 7137.931 | 4429.183 | 4509.364 | 4093.155 | 2603.391 | 4721.513 |
| 59394.94 | 184851.5 | 138304.1 | 320217.6 | 33805.42 | 466700.1 | 149763.6 | 560850.2 | 17272.65 | 178675.9 | 202014.8 | 323329.2 | 16023.27 | 213785.7 | 739964.8 | 681394.5 | 446711.5 |
| 2283764  | 3192325  | 4110956  | 2661183  | 3205546  | 2684185  | 3453418  | 3707780  | 4013185  | 4296109  | 3106472  | 3119934  | 4487959  | 4982275  | 5152025  | 2990051  | 4578930  |
| 189764.6 | 282500.8 | 227600.7 | 1384179  | 624952   | 59314.06 | 28468.88 | 143558.5 | 173176   | 342495.9 | 738559.5 | 596063.6 | 463565.6 | 13886.8  | 11164.38 | 15756.07 | 257906.8 |
| 15006361 | 16436339 | 36804988 | 35315692 | 25453998 | 5763702  | 3858716  | 16163690 | 14011459 | 16713524 | 47317464 | 37916008 | 20130252 | 9707652  | 10674128 | 28147796 | 24690060 |
| 19371438 | 22063016 | 43299212 | 55848532 | 48519100 | 9905405  | 4823003  | 21902024 | 21561144 | 22985500 | 53511520 | 63509508 | 43015904 | 10081169 | 17817778 | 32974358 | 31873594 |
| 119912.9 | 128519.9 | 131900.7 | 98592.59 | 43811.73 | 89734.42 | 90182.09 | 122444.9 | 128977.3 | 99790.84 | 169557   | 92622.53 | 70008.33 | 159146.7 | 136257.2 | 172140.5 | 89309.28 |
| 7941.968 | 3749.482 | 5490.278 | 5504.863 | 5940.169 | 5908.301 | 8618.229 | 5785.878 | 6902.17  | 4022.8   | 10640.78 | 4748.143 | 5482.835 | 6819.204 | 6499.198 | 6157.705 | 6408.166 |
| 114957.1 | 122259.2 | 125407.7 | 115085.9 | 140085   | 79591.09 | 58709.96 | 122030   | 126119   | 137106.5 | 107493.1 | 114237.3 | 124771.6 | 101123.4 | 84357.05 | 144323.4 | 128386.1 |
| 43727.94 | 49731.02 | 89176.18 | 65112.4  | 71431.91 | 18701.13 | 50979.14 | 43919.97 | 11801.03 | 28889.67 | 26492.9  | 34651    | 16008.75 | 18227.09 | 14238.95 | 22076    | 31380.06 |
| 2493701  | 1611501  | 2116838  | 1289927  | 1342316  | 2147744  | 2751065  | 1729710  | 2772661  | 2201830  | 2047009  | 1853917  | 1469811  | 2500545  | 3057866  | 2021785  | 3768541  |
| 19289.26 | 6474.584 | 20122.13 | 61287.04 | 10912.7  | 12367.17 | 80163.88 | 23064.23 | 25105.54 | 14829.64 | 45105.97 | 17905.43 | 6735.949 | 20796.76 | 57776.22 | 25590.38 | 22048.54 |
| 351655.9 | 426406.1 | 331305   | 294982.2 | 207730.9 | 228780.6 | 649147.1 | 277112.8 | 390581.7 | 337232.8 | 326665.3 | 271224.3 | 183308.6 | 270770.1 | 441844.7 | 326542.6 | 488885.4 |
| 386418   | 493475.5 | 188609.4 | 356631.8 | 142526.8 | 316480.6 | 812884.9 | 382492.4 | 497170.6 | 479099   | 482709.8 | 378257.2 | 106183.3 | 600352.1 | 690921.4 | 642931.8 | 905078.4 |
| 10916.61 | 8961.125 | 15753.14 | 9179.537 | 12338.21 | 12014.07 | 7836.737 | 9145.264 | 10193.33 | 5404.79  | 8382.965 | 8050.263 | 4278.287 | 10613.71 | 8872.373 | 12355.44 | 11210.3  |
| 56568204 | 49732964 | 43573256 | 33995700 | 56731460 | 46691620 | 45170652 | 47295968 | 43209020 | 59989324 | 33848404 | 33545278 | 44796928 | 35070236 | 42983076 | 45523892 | 50617764 |
| 1029706  | 807616.5 | 1068765  | 704321.4 | 1056308  | 562118.8 | 591783.5 | 607979.4 | 943997.9 | 1375972  | 1255416  | 1688690  | 1189746  | 778345.8 | 738610.6 | 666277.6 | 856689   |
| 64930.45 | 47150.5  | 105904   | 116921.4 | 117331.2 | 24264.46 | 14998.57 | 55882.26 | 69278.36 | 63949.84 | 64589.09 | 137840.4 | 76201.59 | 23945.17 | 22784.56 | 104731.2 | 128306.4 |
| 91846.07 | 125869   | 72411.28 | 68243.92 | 49575.4  | 88909.5  | 148484.6 | 79960.08 | 137962.3 | 132645   | 108406.7 | 79528.67 | 43179.91 | 104089.5 | 157206.6 | 169646.8 | 182546.3 |
| 21864.74 | 12039    | 20363.04 | 410266.7 | 19633.02 | 16596.05 | 50306.93 | 5894.157 | 30147.61 | 26539.55 | 1364953  | 29941.1  | 65218.89 | 24139.47 | 14041.32 | 27953.29 | 92950.23 |
| 112368.2 | 99997.63 | 157879.4 | 154909   | 121586.1 | 132148.2 | 113950.9 | 113090.7 | 142758.4 | 76611.19 | 127480.3 | 85429.39 | 147818.8 | 135700.8 | 83796.52 | 125314.3 | 49675.5  |
| 64340.19 | 60777.24 | 78373.76 | 77323.8  | 115502.8 | 77664.71 | 105283.4 | 71774.3  | 63322.4  | 79352.52 | 82311    | 103357.3 | 90055.04 | 110540.5 | 102630.9 | 85049.41 | 83078.25 |
| 18954.49 | 16521.31 | 13585.79 | 16744.98 | 17139.41 | 28492.82 | 56202.84 | 32184.61 | 10276.68 | 31020.12 | 21330.95 | 14820.65 | 18608.25 | 16698.17 | 27785.77 | 18892.27 | 27894.82 |
| 32354.87 | 34335.61 | 20013.94 | 57088.7  | 38053    | 16196.5  | 7230.6   | 6119.212 | 10454.77 | 19304.91 | 60912.73 | 21358.44 | 24390.31 | 9445.765 | 7865.555 | 12972.3  | 19767.24 |
| 2562347  | 2405354  | 1797219  | 2235557  | 1441631  | 2478535  | 2716221  | 1880382  | 1401928  | 2182528  | 1304988  | 2111980  | 1709688  | 2257497  | 3187760  | 1602652  | 2307104  |
| 23608.9  | 16151.88 | 20325.41 | 16226.16 | 14298.43 | 9587.277 | 12700.83 | 15406.96 | 23419.78 | 26853.62 | 44283.07 | 28512.34 | 17664.45 | 6561.325 | 10596.88 | 5766.576 | 9898.817 |
| 98282.9  | 40668.72 | 44372.16 | 58756.94 | 35231.31 | 68046.34 | 95645.95 | 78293.21 | 49717.45 | 51071.71 | 44431.73 | 25374.1  | 36553.96 | 50000.13 | 50444.13 | 33956.29 | 42783.71 |
| 1251089  | 1222610  | 1411052  | 1044804  | 944500.2 | 858793.1 | 1790721  | 1212979  | 1028851  | 928990.6 | 806119.3 | 908990.9 | 1045327  | 898512.1 | 1196220  | 1218298  | 1294978  |
| 27961.95 | 22885.36 | 10383.81 | 21929.43 | 59296.77 | 8121.867 | 10837.15 | 11188.21 | 19023.77 | 23938.71 | 40728.92 | 16954.19 | 19992.31 | 8403.179 | 13564.85 | 6904.982 | 29835.73 |
| 156750.8 | 184260.1 | 226296   | 208859.8 | 179801.6 | 212383.3 | 172684.3 | 114463.5 | 178122.9 | 154106   | 113967.2 | 209857.5 | 221377.3 | 233651.4 | 258689.3 | 164240   | 123539.7 |
| 3447404  | 3375938  | 3549101  | 3543864  | 3581154  | 2878697  | 2759692  | 2865937  | 4536134  | 3196050  | 3490358  | 3199621  | 3602883  | 3637273  | 3363915  | 4327060  | 7289915  |
| 19193060 | 22144942 | 15950885 | 12757103 | 10692134 | 50947512 | 20961492 | 13615413 | 25278256 | 21463540 | 17316436 | 15287115 | 22910848 | 37976800 | 21283764 | 14622122 | 40954584 |
| 11974.12 | 11931.87 | 21253.18 | 11196.34 | 15707.97 | 13142.81 | 12908.28 | 12458.37 | 12669.82 | 9064.879 | 13427.06 | 16671.54 | 15668.48 | 12924.03 | 8453.811 | 12557.41 | 7745.768 |
| 9568.356 | 9680.821 | 17440.94 | 12281.27 | 15168.14 | 12959.29 | 17430.5  | 11084.38 | 14056.13 | 9218.679 | 14512.03 | 10795.34 | 11649.01 | 14632.75 | 10742.04 | 17542.54 | 10596.65 |
| 59444.78 | 60296.27 | 76852.02 | 83510.31 | 85945.54 | 59849.32 | 65654.29 | 82082.02 | 64028.43 | 49632.13 | 75856.96 | 86137.59 | 88747.66 | 60093.94 | 69292.48 | 93568.71 | 44618.75 |
| 13318.97 | 18915.08 | 17238.36 | 18407.49 | 19930.97 | 24364.2  | 15133.1  | 14697.37 | 7818.292 | 5070.819 | 30166.78 | 15607.16 | 10857.77 | 15185.43 | 10915.42 | 13075.84 | 7161.746 |
| 4520.519 | 3849.815 | 2374.15  | 4710.05  | 4533.744 | 2825.158 | 2736.913 | 4062.716 | 3043.904 | 2371.198 | 2682.505 | 5496.621 | 3974.682 | 2167.026 | 1668.557 | 2188.942 | 1914.767 |
| 3627.662 | 4488.704 | 4513.178 | 3279.427 | 3263.486 | 3808.498 | 3288.581 | 3192.874 | 5134.021 | 3036.371 | 4424.979 | 4279.522 | 4594.517 | 3254.131 | 2839.47  | 2371.359 | 3265.261 |
| 37602.76 | 55224.02 | 71917.51 | 2459955  | 42624.24 | 48570.4  | 76008.02 | 41928.2  | 44196.79 | 63565.24 | 48208.83 | 100410.1 | 82946.18 | 35219.38 | 46456.03 | 43993.07 | 38567.59 |
| 5592.868 | 5597.264 | 12718.18 | 8778.961 | 3851.447 | 7679.771 | 4959.827 | 4318.865 | 6416.922 | 8150.539 | 12282.07 | 8098.891 | 6033.381 | 8850.447 | 5029.767 | 8318.422 | 6153.13  |

|          |          |          |          |          |          |          |          |          |          |          |          |          |          |          |          |          |
|----------|----------|----------|----------|----------|----------|----------|----------|----------|----------|----------|----------|----------|----------|----------|----------|----------|
| 131981.3 | 62481.3  | 54747.51 | 140923   | 60243.01 | 46190.68 | 114207.9 | 51446.38 | 139442.8 | 99731.79 | 152096.1 | 49818.94 | 67994.68 | 149557.7 | 228944.4 | 147322.2 | 227226.4 |
| 1481424  | 722482.3 | 1081969  | 1630702  | 1141006  | 1109338  | 968117.4 | 943360.4 | 848648.7 | 523452   | 1692785  | 778945.6 | 1268161  | 959788.2 | 1017886  | 955054.2 | 1056185  |
| 27163.11 | 25676.7  | 23972.09 | 20008.27 | 15158.74 | 21029.71 | 23285.39 | 26696.94 | 30484.21 | 31998.45 | 26729.09 | 40695.96 | 25010.15 | 28286.94 | 30541.93 | 24599.96 | 33006.91 |
| 23119.31 | 22520.85 | 26647.85 | 25086.54 | 131604   | 18988.55 | 16432.23 | 13346    | 414831.4 | 25574.56 | 23312.75 | 20875.69 | 14331.84 | 12443.74 | 180229.7 | 13619.09 | 17339.45 |
| 86600.73 | 85458.55 | 69914.91 | 58625.44 | 64298.2  | 66697.71 | 60163.08 | 84394.48 | 101970.9 | 93222.49 | 63879.35 | 93211.82 | 83348.95 | 79558.34 | 80155.05 | 99553.23 | 134217.1 |
| 1207521  | 1394557  | 1332629  | 897488.4 | 1170373  | 1311153  | 1474289  | 1313605  | 1055172  | 1492844  | 1110813  | 1321667  | 1216492  | 922468.3 | 1336736  | 1286756  | 1096973  |
| 575923.3 | 521229   | 772980.6 | 934215.6 | 684061.1 | 757155.9 | 401973.1 | 619353.4 | 647891.6 | 451633.6 | 725797.6 | 577757.1 | 399486.4 | 692615.8 | 463410.7 | 764838.7 | 415405.4 |
| 101884.4 | 66329.8  | 119232.8 | 214118.5 | 162939.2 | 52677.67 | 16037.82 | 142436.2 | 78999.59 | 78621.32 | 67986.68 | 143723.3 | 162336.5 | 43975.97 | 56298.74 | 194163.6 | 108019.6 |
| 42162.81 | 55275.59 | 58873.75 | 47411.81 | 36449.89 | 50785.02 | 53281.63 | 47279.06 | 59000.63 | 66119.91 | 56126.71 | 64396.34 | 42085.77 | 51772.08 | 64887.94 | 45437.27 | 75247.58 |
| 1771096  | 1592253  | 2484300  | 1347286  | 1190595  | 1159233  | 266010.9 | 934783.6 | 1263712  | 1456817  | 1134173  | 2063259  | 1427456  | 1387525  | 904425.7 | 1094125  | 972526.6 |
| 31920.71 | 43997.54 | 39420.44 | 50732.17 | 63872.51 | 42155.57 | 42305.4  | 38023.29 | 33626.59 | 33609.13 | 36690.78 | 57312.15 | 53542.85 | 43951.61 | 35740.5  | 37847.2  | 38733.41 |
| 16810.01 | 21607.57 | 20836.15 | 10476.34 | 18392.21 | 17269.32 | 15709.7  | 18248.34 | 18465.52 | 22388.7  | 10922.44 | 13314.67 | 19589.81 | 15434.64 | 21006.74 | 18274.88 | 40986.06 |
| 492713.8 | 606357.7 | 935676.6 | 1107510  | 578541.5 | 712735.9 | 534657   | 593410.8 | 752727.9 | 432108   | 593528   | 813019.5 | 659666.1 | 614137.1 | 737486.3 | 1021981  | 864685.7 |
| 257110.5 | 243267.6 | 132824.6 | 359786.4 | 46583.19 | 66673.84 | 125691.7 | 31826.59 | 114734.9 | 44618.63 | 56507.86 | 28451.44 | 50889.97 | 17899.94 | 52396.3  | 608009   | 60288.03 |
| 534784.7 | 691820.3 | 695239.5 | 867611.7 | 450468.9 | 379111.5 | 449658   | 372198.3 | 1190055  | 496976.7 | 881695.4 | 794891.8 | 690463.7 | 695969   | 1367173  | 729172   | 1457944  |
| 1868612  | 1618824  | 1011871  | 901433.6 | 1089548  | 2204898  | 1471018  | 1410396  | 1761971  | 2171618  | 620466.9 | 1201452  | 1339465  | 1864149  | 972706   | 1112769  | 1548669  |
| 222164.6 | 15290.35 | 13578.86 | 523669.8 | 33166.54 | 39418.86 | 11716.92 | 5401.805 | 3532.842 | 3529.505 | 502395.4 | 7579.021 | 5377.281 | 12599.82 | 1682.483 | 8539.59  | 15613.17 |
| 1666456  | 1538514  | 2906348  | 3214512  | 2180169  | 1715396  | 1134184  | 1666074  | 1559393  | 1130817  | 2220819  | 2504066  | 1974704  | 1612170  | 1385343  | 2429360  | 1723019  |
| 939096.5 | 826904.3 | 593101.4 | 518924.5 | 800645.4 | 608000.3 | 541607.1 | 555135.4 | 643719.3 | 700080.4 | 707968   | 539434.5 | 879085.9 | 757368.2 | 602566.9 | 669093.7 | 1239289  |
| 28553.84 | 26493.29 | 30339.43 | 25024.32 | 28902.16 | 21127.25 | 34533.98 | 17803.29 | 33725.98 | 26645.83 | 26740.22 | 35013.92 | 42763.54 | 34445.9  | 39276.56 | 31098.64 | 13484.67 |
| 6753.1   | 5749.373 | 2873.518 | 4673.279 | 2783.76  | 723.6812 | 3875.26  | 3344.985 | 4574.627 | 3434.84  | 4834.403 | 1163.933 | 3697.891 | 5321.874 | 5449.05  | 4052.325 | 4133.443 |
| 25898.48 | 40883    | 57189.61 | 53170.64 | 43318.8  | 44746.12 | 35188.24 | 45400.54 | 32440.36 | 29853.04 | 79173.02 | 34285.83 | 37558.76 | 51139.38 | 54161.8  | 50549.07 | 36157.47 |
| 41204.95 | 114560.3 | 34629.8  | 68034.92 | 36858.08 | 65479.28 | 102843.7 | 45123.91 | 47876.57 | 56107.72 | 42508.27 | 77460.74 | 48467.3  | 56093.16 | 73244.42 | 53572.88 | 51193.07 |
| 404800.8 | 139826   | 1112702  | 307076   | 710047.7 | 48043.97 | 63668.91 | 91514.9  | 16092685 | 96175.55 | 166790.7 | 513438.4 | 640277.6 | 10539.73 | 64840.29 | 33697.58 | 771121.9 |
| 85256.95 | 16249.07 | 27840.15 | 76321.23 | 54795.18 | 62763.5  | 67863.29 | 52222.26 | 89238.62 | 136280.2 | 76182.88 | 81204.11 | 38658.32 | 110908   | 42651.36 | 77545.87 | 85313.43 |
| 59882.02 | 38817.86 | 36612.59 | 70859.44 | 41534.97 | 69687.92 | 90417.21 | 67144.48 | 95858.46 | 99337.09 | 100701.6 | 39825.3  | 41226.96 | 118061.8 | 71820.25 | 66220.42 | 107792.3 |
| 22361.46 | 10527.3  | 22110.09 | 17425.36 | 33965.38 | 4541.274 | 2657.179 | 15204.46 | 23032.09 | 26326.4  | 22130.96 | 36437.3  | 30870.34 | 15573.25 | 17226.69 | 7981.759 | 15819.38 |
| 115170.6 | 104354.9 | 137895.8 | 229969.5 | 156307.2 | 106812.9 | 99314.17 | 127869.7 | 116469.9 | 100385.2 | 135166   | 247954.9 | 207694.4 | 123097.2 | 107934.8 | 158652.2 | 106847.2 |
| 102232.7 | 2767.675 | 6318.532 | 36166.86 | 27557.91 | 2491894  | 10823.23 | 34314.12 | 2729.747 | 2233.989 | 4037.34  | 35655.67 | 41287.52 | 3468221  | 16729.1  | 2327576  | 73318.28 |
| 48063.82 | 39993.93 | 29564.66 | 50558.31 | 38890.43 | 44355.49 | 50910.82 | 45341.05 | 42587.7  | 26171.6  | 42259.1  | 34948.95 | 29926.85 | 36756.81 | 42550.69 | 35356.69 | 46808.13 |
| 5542.88  | 4609.219 | 2277.176 | 3684.524 | 3105.94  | 3638.869 | 5477.002 | 2806.54  | 2955.567 | 4756.185 | 7779.341 | 3165.295 | 3172.539 | 4169.629 | 4241.69  | 5910.218 | 3875.253 |
| 29971.41 | 32374.12 | 49470.82 | 43155.96 | 43410.41 | 34412.21 | 28405.17 | 30181.46 | 29865.39 | 33960.72 | 48298.25 | 59724.54 | 40462.16 | 81035.4  | 46062.79 | 33523.71 | 29819.58 |
| 6631.217 | 9678.815 | 12361.25 | 6848.33  | 7167.616 | 8691.114 | 7477.717 | 9232.736 | 10799.15 | 8464.429 | 12522.04 | 6067.021 | 9394.557 | 3794.46  | 5980.646 | 10543.47 | 15211.36 |
| 53030.02 | 46211.06 | 27076.48 | 28444.13 | 29963.94 | 50626.67 | 73309.91 | 28709.11 | 45515    | 34693.75 | 21052.97 | 38438.27 | 32741.75 | 43018.24 | 33176.88 | 36528.1  | 53825.82 |
| 13464.07 | 16452.49 | 20046.19 | 19403.12 | 26045.16 | 12494.51 | 13412.29 | 16565.43 | 23026.57 | 22927.6  | 17919.31 | 13111.28 | 10927.31 | 24195.58 | 21031.37 | 12802.77 | 42000.5  |
| 49025984 | 36613368 | 46610220 | 61016344 | 35423800 | 20622230 | 35770808 | 38649248 | 43121452 | 39888308 | 48142576 | 63011380 | 45916056 | 25373472 | 49488628 | 49034644 | 53450600 |
| 2685998  | 1200930  | 5206815  | 8152895  | 2559043  | 775432.7 | 523046.3 | 2323648  | 3278075  | 2913614  | 5732459  | 13622624 | 4269919  | 1873301  | 4622359  | 4741820  | 10391154 |
| 66645.44 | 51656.84 | 39360.34 | 134548.8 | 67621.84 | 5749.416 | 47375.91 | 45544.01 | 61006.11 | 68827.71 | 94012.31 | 41242.29 | 8030.08  | 63044.54 | 66463.78 | 69634.05 | 78992.38 |
| 1390261  | 564961.7 | 642112.8 | 1841260  | 426409.7 | 671487   | 2169871  | 421960.8 | 1072641  | 339979.3 | 737192.3 | 1164128  | 395445.3 | 539049   | 1673900  | 397971.3 | 334609.2 |
| 17204.69 | 27860.27 | 42232.16 | 41638.64 | 2786.193 | 32949.28 | 25093.78 | 13078.23 | 21854.79 | 8660.704 | 18626.96 | 24217.79 | 3600.532 | 535.3962 | 702.6844 | 2445.147 | 1769.055 |
| 1164288  | 1259371  | 1585927  | 1071669  | 1019129  | 1389972  | 2087562  | 1524342  | 1579636  | 1398290  | 1282635  | 1390916  | 1241603  | 1637045  | 1283313  | 1523789  | 1400244  |
| 50892.11 | 30049.98 | 41576.13 | 77842.73 | 33526.94 | 56234.27 | 31556.52 | 24090.55 | 27108.85 | 23485.21 | 34722.01 | 92692.89 | 44859.6  | 28677.4  | 35584.4  | 47827.48 | 40349.53 |
| 12209.37 | 22998.95 | 45720.78 | 18152.79 | 23783.62 | 24576.57 | 24360.45 | 14265.74 | 13851.79 | 17020.81 | 21664.14 | 26134.04 | 16333.75 | 14154.79 | 15919.97 | 19887.9  | 18045.25 |
| 19507.37 | 21857.95 | 29440.81 | 22901.23 | 18200.4  | 20833.19 | 17357.83 | 10934.53 | 17170.23 | 12639.65 | 11437.31 | 18728.51 | 14385.55 | 20016.95 | 13190.72 | 23798.12 | 22144.75 |
| 97863.05 | 112047.8 | 82130.3  | 62659.44 | 108516.8 | 112911.9 | 95111.7  | 77654.59 | 104370.2 | 123894   | 91077    | 105479.4 | 106451.1 | 127160.3 | 103847.2 | 118354.3 | 159596.2 |
| 7753.737 | 8474.169 | 8052.558 | 9139.668 | 5851.761 | 7510.691 | 4168.384 | 6518.676 | 5518.015 | 4410.782 | 5638.912 | 5015.553 | 7316.011 | 4744.078 | 5461.984 | 6257.379 | 8064.211 |
| 15874.94 | 15742.64 | 23170.96 | 26772.25 | 16718.43 | 13726.46 | 13154.07 | 14453.92 | 16096.66 | 12342.91 | 17173.91 | 13394.81 | 15481.62 | 8395.012 | 8983.309 | 13655.34 | 6835.596 |
| 51183.68 | 54232.19 | 63441.82 | 56484.42 | 39899.41 | 39650.13 | 48793.48 | 46052.39 | 39503.66 | 53212.39 | 45451.11 | 34992.84 | 40640.63 | 61103.66 | 49430.76 | 39205.53 | 53838.31 |
| 123709.3 | 117720.5 | 248288.2 | 319236.8 | 181689.1 | 156200   | 101075.8 | 151743.7 | 103542   | 71588.16 | 175352.7 | 150536.4 | 171571.7 | 149308.2 | 70332.79 | 179971.3 | 66755.58 |

|          |          |          |          |          |          |          |          |          |          |          |          |          |          |          |          |          |
|----------|----------|----------|----------|----------|----------|----------|----------|----------|----------|----------|----------|----------|----------|----------|----------|----------|
| 21274.04 | 46620.09 | 53521.13 | 29754.2  | 21686.41 | 22866.69 | 21480.6  | 18287.99 | 14072.7  | 33038.76 | 33244.5  | 19508.57 | 28259.37 | 38619.1  | 35154.29 | 28213.69 | 20197.38 |
| 51482.74 | 41260.33 | 82488.2  | 106535.4 | 115280.9 | 25005.12 | 22772.95 | 60706.28 | 55732.37 | 50608.54 | 97827.98 | 108646.5 | 99062.55 | 54017.34 | 39914.9  | 98654.88 | 59624.1  |
| 69455.59 | 67681.94 | 82730.8  | 46258.23 | 37395.48 | 71714.66 | 52600.34 | 47341.05 | 62875.79 | 41212.8  | 50020.4  | 44644.92 | 54649.53 | 63691.03 | 84330.06 | 60269.6  | 81445.84 |
| 128260.3 | 152165.8 | 104223.8 | 212274.3 | 139796.1 | 119920.6 | 137273.6 | 94740.8  | 136108.8 | 122610.2 | 153719.3 | 149645.2 | 133992.5 | 109091.6 | 152993.5 | 114322.1 | 58618.55 |
| 10132.42 | 8721.148 | 11624.7  | 9798.587 | 11069.39 | 7484.438 | 7670.795 | 8223.701 | 6032.092 | 12768.83 | 9312.438 | 6720.378 | 4545.349 | 8045.588 | 11501.42 | 7532.334 | 6789.27  |
| 325480.7 | 432346.8 | 382987.5 | 337278.8 | 414264.8 | 301038.3 | 402674.6 | 251263.8 | 287653.8 | 370696.1 | 306699.8 | 459685.3 | 370929.6 | 400651.8 | 461731.4 | 270799   | 183913.6 |
| 735171.2 | 1194287  | 5269417  | 4610351  | 1818652  | 3106722  | 5760669  | 739014.1 | 3737237  | 3829559  | 3253655  | 3394298  | 7631531  | 2531197  | 1714102  | 4281187  | 5397968  |
| 454318.5 | 431904.1 | 400723.5 | 317077.6 | 212225.6 | 337154.2 | 431463.8 | 399810.7 | 567021   | 457353.6 | 396145.6 | 397367.5 | 310761.5 | 375562.8 | 447262.2 | 422945.3 | 690708.9 |
| 54804.78 | 62118.57 | 54091.98 | 72008.25 | 42504.55 | 76761    | 51825.54 | 41922.07 | 61374.25 | 35850.28 | 46150.43 | 30247.14 | 32241.92 | 48725.19 | 42701.19 | 45279.95 | 46256.95 |
| 61039.11 | 64035.39 | 62428.21 | 37399.55 | 43578.34 | 41811.04 | 31750.46 | 51006.35 | 67980.28 | 60808.29 | 47931.21 | 54777.35 | 50109.72 | 57863.24 | 48209.98 | 52142.78 | 60856.23 |
| 26452.16 | 26184.86 | 23476.83 | 27594.62 | 24212.34 | 27443.38 | 15970.86 | 23598.37 | 19852.33 | 18342.01 | 10524.27 | 12844.38 | 16206.06 | 30572.71 | 19839.17 | 28609.03 | 31566.72 |
| 135898.9 | 105833.8 | 247218   | 224748.9 | 233145.8 | 159936   | 140852.4 | 130545.4 | 102063.2 | 74085.43 | 165837.5 | 187468.4 | 226209.4 | 175645.4 | 96404.84 | 155886.4 | 148037.3 |
| 46404.26 | 35303.43 | 72675.73 | 138722.6 | 62809.44 | 29821.37 | 15860.26 | 47444.83 | 50231.98 | 36247.02 | 91625.02 | 102561.5 | 65338.19 | 33648.86 | 42160.3  | 70059.31 | 56419.79 |
| 123792   | 176312.4 | 325176   | 159348.4 | 180718.1 | 316016.6 | 76286.8  | 138795.9 | 124026.5 | 80536.58 | 120844.9 | 183362.4 | 89781.13 | 266184.5 | 55567.5  | 138239.9 | 68879.63 |
| 20411.33 | 17683.07 | 26084.91 | 42297.65 | 17089.19 | 24135.27 | 15430.11 | 16016.54 | 18716.26 | 14678.25 | 21033.78 | 25225.17 | 18138.54 | 15127.74 | 13750.18 | 19458.08 | 13763.91 |
| 68112.75 | 40036.32 | 55869.46 | 109677.9 | 70151.78 | 60393.93 | 49233.05 | 62549.32 | 25003.95 | 38615.18 | 65130    | 45928.04 | 73912.13 | 78747.42 | 61909.4  | 79826.61 | 57284.09 |
| 45160.46 | 39436.03 | 38829.78 | 118707.5 | 38132.09 | 17836.81 | 3698.454 | 32562.73 | 29863.35 | 21095.68 | 44248.05 | 69807.8  | 54313.38 | 13484.83 | 18005.34 | 33432.47 | 40864.44 |
| 140803   | 86216.36 | 89318.25 | 171863.4 | 102505.1 | 65208.14 | 79884.55 | 106866.4 | 120742   | 100659.8 | 77297.92 | 122384.6 | 108592.2 | 92349.83 | 78714.62 | 121279   | 73034.4  |
| 321513.5 | 446847.4 | 394129.8 | 198932   | 418901.8 | 134976.6 | 107478.5 | 267866.1 | 329018   | 446915.3 | 252461.3 | 276330.3 | 335628.1 | 243131   | 208452.2 | 285898.3 | 384376.6 |
| 3186092  | 1719319  | 1318610  | 337119.7 | 800624.9 | 2886850  | 3574771  | 3165657  | 4054538  | 1930150  | 1305788  | 432253.9 | 1020913  | 2633607  | 3724797  | 2668890  | 1905667  |
| 2501.363 | 7288.292 | 4806.906 | 5697.657 | 2422.296 | 8380.672 | 10578.26 | 5995.51  | 3682.6   | 6681.226 | 7426.662 | 7278.139 | 1657.776 | 6476.958 | 12110.63 | 11280.35 | 5179.834 |
| 39489.21 | 53191.74 | 43631.4  | 46208.5  | 33264.49 | 51681.02 | 48471.3  | 36029.43 | 29036.19 | 29265.61 | 24518.96 | 35360.75 | 35155.98 | 34103.16 | 36722    | 37413.02 | 16875.74 |
| 1672259  | 1389876  | 1025098  | 779292.3 | 1139968  | 2177752  | 2472279  | 1692860  | 1732944  | 1681167  | 716128.4 | 1679200  | 1482456  | 2300286  | 1855553  | 1610826  | 2093635  |
| 13794.08 | 14126.8  | 10993.05 | 21422.43 | 14031.11 | 18796.94 | 9663.541 | 16241.11 | 17664.89 | 24803.77 | 217674.2 | 16132.69 | 329755.5 | 17581.31 | 241055.3 | 16783.07 | 24345.1  |
| 137105.3 | 180017.3 | 171928.6 | 203832.7 | 129858.6 | 110923.9 | 127777.6 | 95328.96 | 122835   | 125720.1 | 138319.2 | 204537.7 | 173792.1 | 136416.8 | 217838.4 | 148923.7 | 169680.1 |
| 222508.3 | 220743.6 | 339722.6 | 440732.6 | 333896.4 | 282990.6 | 234695.5 | 241501.7 | 230530.2 | 162803.3 | 256070   | 299918.4 | 285862   | 232554.7 | 217260.9 | 247563.2 | 132964.1 |
| 4139.225 | 11590.45 | 4850.13  | 6596.583 | 5780.565 | 9026.892 | 9902.433 | 8540.083 | 4614.02  | 10385.3  | 5347.644 | 3820.848 | 6753.514 | 4775.24  | 6172.697 | 4919.449 | 8350.571 |
| 39047.24 | 26737.97 | 66609.91 | 62893.7  | 39327.71 | 30915.86 | 33515.52 | 28486.6  | 43698.99 | 29535.87 | 96706.28 | 45388.74 | 35778.2  | 38117.21 | 40338.29 | 57356.54 | 82817.21 |
| 12218.35 | 5560.963 | 8625.671 | 12102.93 | 8259.788 | 3971.534 | 7874.674 | 10135.54 | 3711.073 | 4156.745 | 11440.9  | 3844.371 | 6040.863 | 15374.19 | 7485.187 | 7132.749 | 3819.05  |
| 32420.1  | 8062.11  | 30893.74 | 10840.53 | 19352.84 | 12048.2  | 20332.76 | 7416.937 | 36060.03 | 27580.95 | 61744.48 | 22199.98 | 18445.84 | 11305.56 | 18799.08 | 11413.88 | 52753.88 |
| 43958.5  | 12719.91 | 20692.63 | 29059.11 | 33272.05 | 6535.336 | 15347.97 | 7619.563 | 26674.22 | 35361.26 | 189778.1 | 25992.13 | 15028.6  | 9186.474 | 16068.01 | 14716.6  | 89257.69 |
| 1160983  | 911882.3 | 815512.3 | 1356293  | 909134.6 | 1179297  | 1955514  | 1267771  | 1459950  | 1134875  | 1030983  | 1114021  | 1010350  | 1086367  | 2400913  | 873059.8 | 1193714  |
| 26676.02 | 27804.59 | 22337.91 | 33011.33 | 33626.54 | 20462.58 | 26587    | 10857.11 | 20592.74 | 11754.72 | 57528.81 | 26723.42 | 33391.97 | 19045.2  | 9499.765 | 20022.48 | 78629.28 |
| 6409.122 | 14258.2  | 14744.21 | 25521.63 | 7963.73  | 9865.185 | 6093.852 | 8079.075 | 12776.49 | 24740.43 | 30291.51 | 20916.56 | 11136.79 | 11530.34 | 8803.684 | 26058.78 | 9435.716 |
| 32499.93 | 36144.52 | 57242.82 | 72088.79 | 47366.38 | 37943.5  | 24701.5  | 37826.89 | 42351.32 | 36586.25 | 55847.99 | 46598.27 | 50669.69 | 42137.41 | 38223.07 | 42846.75 | 32856.79 |
| 41107.25 | 47564.3  | 61400.93 | 68579.75 | 73320.33 | 54989.98 | 47667.68 | 54650.94 | 53465.06 | 47687.4  | 59320.49 | 71193.2  | 70258.38 | 54300.23 | 50264.79 | 58141.17 | 38244.01 |
| 242241.4 | 338140.8 | 391242.4 | 287230.4 | 228825   | 267630.4 | 333402.6 | 425184.3 | 344865.7 | 437127.2 | 408994.1 | 359101.5 | 248440   | 418529.1 | 511022   | 455605.9 | 446244.3 |
| 8567.629 | 8415.226 | 12662.59 | 14399.36 | 10364.37 | 9925.02  | 7208.393 | 13432.19 | 9342.175 | 9661.248 | 13055.97 | 12799.42 | 6633.593 | 13917.01 | 13606.21 | 17226.68 | 16883.52 |
| 11433.61 | 14649.52 | 18383.7  | 10234.37 | 11020.95 | 15130.05 | 19918.91 | 9790.918 | 11889.24 | 7654.105 | 17462.93 | 11448.45 | 19318    | 17689.66 | 15284.29 | 11463.86 | 21506.53 |
| 592304.1 | 621652.3 | 631480.3 | 670031.7 | 789193.6 | 447216.6 | 483538.2 | 422199.1 | 692499.6 | 621805.7 | 527814.3 | 738902.6 | 785354.9 | 557039.1 | 636444.3 | 732083   | 418182.4 |
| 21544.83 | 29575.02 | 21067.38 | 30674.18 | 28948.16 | 22174.14 | 24175.42 | 19831.28 | 15337.51 | 13098.1  | 10626.76 | 30518.84 | 27144.14 | 14480.55 | 12766.81 | 14580.95 | 13002.87 |
| 4624.355 | 57336.57 | 18525.4  | 1503406  | 147980.4 | 4284.459 | 1863.847 | 7531.76  | 15528.85 | 5811.855 | 74123.34 | 21646.63 | 45856.38 | 9776.161 | 7644.349 | 6346.937 | 16275.26 |
| 6180.177 | 3523.941 | 9306.525 | 15036.14 | 6048.146 | 7918.811 | 7633.162 | 5440.915 | 4208.359 | 3267.273 | 8779.224 | 8735.526 | 7782.55  | 9911.684 | 3959.018 | 5992.036 | 7457.234 |
| 43082.04 | 56204.45 | 22574.91 | 85006.27 | 26936.99 | 39667.32 | 64325.02 | 38162.65 | 33597.8  | 39877.33 | 28749.49 | 31379.41 | 13053.68 | 50780.68 | 37621.5  | 45174.87 | 53564.98 |
| 43417.34 | 46911.13 | 74489.53 | 80079.29 | 50214.38 | 65512.06 | 42495.8  | 49516.55 | 50675.89 | 24551.18 | 85875.55 | 34006.98 | 30613.03 | 51058.19 | 32795.32 | 60486.23 | 65153.29 |
| 1309237  | 799238.2 | 3178987  | 804335.8 | 917106.1 | 518309.2 | 610934.6 | 342359.8 | 213973.5 | 504160.3 | 533356.4 | 853758.8 | 1363251  | 546421.1 | 498527.4 | 782468.7 | 2371530  |
| 534343   | 543485.8 | 597560   | 723688.7 | 727032.4 | 612156.7 | 499510.4 | 485590.9 | 729020.1 | 647765.4 | 767639.2 | 694984.4 | 794648.7 | 865601.2 | 875683.4 | 879387.3 | 865654.3 |
| 23759.69 | 28795.05 | 30428.62 | 20926.41 | 33670.77 | 20043.95 | 21693.61 | 24654.29 | 24650.87 | 30610.58 | 27962.52 | 24798.72 | 49156.77 | 37817.55 | 34623.48 | 26518.8  | 41295.01 |
| 8739.268 | 6596.272 | 17831.44 | 22632.18 | 13122.09 | 10390.75 | 9895.581 | 9954.539 | 12052.06 | 5761.939 | 16477.65 | 19460.75 | 10172.77 | 23460.78 | 12716.95 | 17384.74 | 11108.76 |

|          |          |          |          |          |          |          |          |          |          |          |          |          |          |          |          |          |
|----------|----------|----------|----------|----------|----------|----------|----------|----------|----------|----------|----------|----------|----------|----------|----------|----------|
| 98537.5  | 92319.97 | 98731.03 | 59919.5  | 75647.13 | 78859.82 | 77361.45 | 66559.77 | 93759.73 | 82537.21 | 63656.79 | 62710.65 | 53576.96 | 79239    | 86654.82 | 77220.8  | 77818.06 |
| 81997.45 | 79409.63 | 141285.9 | 154897   | 113088.6 | 108152.5 | 66752.84 | 71092.58 | 81866.38 | 54258.64 | 102147.4 | 65001.96 | 48803.58 | 96346.16 | 59788.09 | 107325.8 | 56583.05 |
| 24545.44 | 24620.85 | 19523.5  | 19242.21 | 7252.727 | 16057    | 30307.72 | 18757.35 | 22263.09 | 18626.27 | 30551.14 | 18224.13 | 7201.754 | 25592.39 | 25569.35 | 21163.34 | 8853.552 |
| 8823.869 | 7655.977 | 16940.78 | 20684.38 | 11132.53 | 10516.33 | 7527.383 | 6414.73  | 9274.282 | 6797.735 | 17563.78 | 11304.92 | 7672.417 | 8660.386 | 7462.646 | 10411.96 | 7368.35  |
| 93234.77 | 105902   | 130508.6 | 120301.7 | 82737.13 | 73794.51 | 64490.43 | 97537.59 | 88213.46 | 122748.8 | 89943.58 | 198180.2 | 119899.6 | 87087.16 | 78630.59 | 102066.4 | 76277.34 |
| 45284.84 | 37124.95 | 78669.05 | 112277   | 56237.55 | 46591.29 | 33412.51 | 67013.72 | 54621.88 | 64753.58 | 62290.86 | 94058.33 | 68239.89 | 42684.86 | 44519.18 | 77697.9  | 66877.04 |
| 217175.1 | 172987.3 | 367687.2 | 496679.7 | 228811.3 | 179538.7 | 155461.3 | 211987.1 | 232219.5 | 164442.1 | 237313.8 | 345768.6 | 321063.7 | 153021.2 | 182144   | 259580.1 | 157255.8 |
| 12914.54 | 2648.486 | 23607.29 | 5349.167 | 4653.669 | 2749.853 | 2271.201 | 13600.1  | 2337.307 | 2907.867 | 3922.646 | 24431.38 | 18381.78 | 3294.526 | 2273.804 | 5472.565 | 9259.074 |
| 20504.19 | 58841.96 | 39799.57 | 13609.4  | 15364.35 | 16045.41 | 13396.89 | 19824.63 | 18782.46 | 38307    | 24745.3  | 11538.56 | 16064.15 | 17880.86 | 16504.64 | 12073.94 | 18090.96 |
| 13861.26 | 13444.1  | 16046.77 | 30079.08 | 10477.25 | 7067.428 | 7441.758 | 8568.456 | 19439.63 | 17696.65 | 26465.35 | 13807.15 | 12050.52 | 12232.5  | 9102.225 | 11251.85 | 34616.11 |
| 150539.2 | 32772.75 | 9459.354 | 195521.6 | 23641.03 | 9655.218 | 23539.51 | 3404.336 | 7256.87  | 14137.45 | 775490.9 | 9098.121 | 5862.88  | 17093.54 | 7648.029 | 4502.054 | 48317.27 |
| 67341.86 | 72810.89 | 68370.7  | 57415.27 | 59754.2  | 65827.98 | 69504.56 | 66254.02 | 87710.36 | 75368.66 | 51722.84 | 49515.46 | 61928.11 | 71959.04 | 91208.51 | 76356.16 | 89333.08 |
| 21575.02 | 24820.05 | 13873.81 | 12343.89 | 7583.525 | 34894.94 | 81707.28 | 22352.01 | 22065.88 | 15222.55 | 15569.71 | 15640.8  | 14414.06 | 30016.23 | 21392.54 | 18222.93 | 14420.45 |
| 65198.65 | 54872.23 | 68562.61 | 82094.97 | 50983.31 | 45783.84 | 29168.88 | 44476.61 | 50637.63 | 44544.58 | 48477.29 | 60395.17 | 49055.23 | 41836.78 | 55884.92 | 51495.13 | 47100.64 |
| 12565.61 | 8115.613 | 8289.099 | 44157.2  | 6887.645 | 3363.413 | 5454.813 | 7912.356 | 8876.44  | 8401.387 | 23167.98 | 15927.73 | 8293.346 | 7040.196 | 4548.058 | 7190.422 | 10893.55 |
| 3439.563 | 6008.186 | 2282.907 | 2604.449 | 4909.525 | 9061.543 | 28266.86 | 9484.519 | 3014.144 | 5249.76  | 3379.791 | 3000.725 | 3201.817 | 3106.656 | 8697.709 | 4986.878 | 2319.138 |
| 66459.9  | 43758.11 | 64497.43 | 52187.51 | 42872.93 | 37502.46 | 41207.52 | 42150.26 | 61352.85 | 45149.2  | 51284.47 | 34930.4  | 52885.7  | 53754.14 | 64830.97 | 40707.44 | 70781.56 |
| 4134.043 | 5811.472 | 8105.848 | 8946.639 | 6927.157 | 7854.544 | 6198.347 | 6375.397 | 5637.341 | 3200.207 | 15868.92 | 5833.482 | 6420.145 | 6383.146 | 3287.892 | 4900.524 | 6614.203 |
| 39830.43 | 55923    | 34712.62 | 43351.47 | 21547.5  | 47095.55 | 28767.15 | 37298.87 | 54714.98 | 46705.02 | 31757.96 | 24338.79 | 21703.23 | 50518.18 | 20533.84 | 52543.16 | 35615.66 |
| 1644295  | 1534045  | 2146420  | 2473114  | 2160080  | 1727906  | 1388638  | 1649510  | 1476270  | 1084785  | 1559725  | 1479489  | 1866731  | 1491144  | 1062508  | 1338222  | 872323.1 |
| 6369.082 | 7827.454 | 2530.049 | 8333.34  | 7397.593 | 5685.038 | 2731.967 | 4953.164 | 7312.475 | 2189.479 | 5400.503 | 11370.47 | 7100.162 | 7021.259 | 4690.693 | 4894.751 | 3897.137 |
| 15249.33 | 10527.45 | 24138.94 | 30574.76 | 14855.59 | 7586.083 | 4776.85  | 25034.24 | 10563.92 | 11750.51 | 23609.97 | 23606.28 | 18225.65 | 15634.4  | 11778.75 | 18547.53 | 18027.66 |
| 12696.05 | 16018.34 | 9898.303 | 24351.66 | 14289.75 | 14844.84 | 13080.4  | 11184.31 | 13911.01 | 16142.73 | 16099.75 | 14735    | 7100.67  | 13853.94 | 13529.03 | 12593.89 | 16514.72 |
| 28122.75 | 32192.42 | 36080.59 | 102696.9 | 43189.59 | 23424.94 | 17415.61 | 23014.32 | 20480.3  | 18518.1  | 17764.79 | 36064.7  | 21668.51 | 28673.08 | 28380.47 | 61337.41 | 25774.13 |
| 57333.06 | 59391.24 | 88784.05 | 25666.39 | 74652.75 | 48196.49 | 71776.56 | 57478.03 | 72811.97 | 78957.71 | 118313.7 | 62480.89 | 101122.7 | 101131.1 | 161903.1 | 84513.4  | 113312.8 |
| 34040.06 | 26645.44 | 36425.62 | 114397   | 41321.93 | 22473.22 | 19727.78 | 25164.21 | 52653.08 | 25235.69 | 61615.06 | 74704.88 | 49650.09 | 38250.25 | 28765.86 | 65483.78 | 32617.51 |
| 22466.52 | 12336.8  | 19611.49 | 13702.72 | 15009.45 | 10735.86 | 14811.36 | 16837    | 14802.84 | 18412.23 | 16675.05 | 18423.57 | 14930.83 | 11121.69 | 16149.61 | 17432.85 | 10887.35 |
| 262016.7 | 343240.3 | 220500.6 | 204864.5 | 175933.7 | 448417.5 | 566154.8 | 230969.1 | 249737.4 | 414287.6 | 253341.6 | 291145.3 | 141728.7 | 351733.6 | 412760.1 | 329142.3 | 373898.4 |
| 33348.16 | 20895.54 | 61390.18 | 62895.01 | 26044.58 | 32566.11 | 27334.06 | 31178.59 | 31302.42 | 33410.21 | 53133.44 | 38182.34 | 43861.18 | 42556.8  | 49448.05 | 37631.13 | 25809.74 |
| 69309.41 | 70309.73 | 103396.6 | 182536.9 | 82914.63 | 52978.91 | 44049.86 | 65942.29 | 70506.34 | 46683.89 | 86129.91 | 94530.23 | 66696.33 | 72194.73 | 48145.06 | 100759.7 | 45037.33 |
| 256148.6 | 281129.4 | 394604.1 | 441866.2 | 278991.1 | 270321.8 | 233904.5 | 228913.2 | 214679.5 | 169920.8 | 314939   | 386588.6 | 275524.1 | 291058.2 | 227722.7 | 342179.8 | 219852.3 |
| 47275.57 | 20889.39 | 47313.19 | 59672.45 | 30420.8  | 23704.45 | 18955.77 | 21073.98 | 35862.42 | 18398.98 | 44916.48 | 22171.12 | 24068.56 | 75505.93 | 29388.27 | 51862.64 | 50967.89 |
| 13146.83 | 11603.08 | 7398.703 | 14335.95 | 1690.872 | 7646.542 | 12698.12 | 5133.375 | 6716.524 | 20455.42 | 25232.66 | 8092.337 | 5958.159 | 11770.7  | 14227.33 | 12420.6  | 7031.751 |
| 59150.57 | 62599.24 | 69072.27 | 68817.3  | 125395.5 | 27080.02 | 22837.72 | 13666.29 | 30134.2  | 26665.98 | 39583.04 | 47537.21 | 63100.28 | 42298.33 | 11994.33 | 10175.21 | 10371.7  |
| 22865.52 | 20876.37 | 28741.75 | 27599.28 | 23150.52 | 22724.81 | 24669.35 | 19363.87 | 18809.76 | 20294    | 25756.16 | 26771.54 | 35615.28 | 20801.37 | 20050.21 | 20301.08 | 14017.27 |
| 12988.45 | 10900.64 | 10299.67 | 18703.58 | 19799.23 | 12006.55 | 13482.79 | 8660.764 | 15214.74 | 12863.88 | 14617.56 | 11246.04 | 14302.13 | 21572.56 | 10439.17 | 20091.07 | 10731.07 |
| 36135.81 | 28055.81 | 38375.66 | 76221.75 | 51391.82 | 39034.74 | 26660.87 | 30289.81 | 48042.17 | 35007.94 | 69018.22 | 63590.52 | 47556.82 | 51926.92 | 45128.11 | 60336.4  | 34907.17 |
| 82349.55 | 54699.6  | 82926.87 | 52820.05 | 92435.95 | 44387.93 | 30756.18 | 33672.99 | 69147.23 | 86917.02 | 72027.62 | 95657.76 | 112601.2 | 33163.4  | 64519.69 | 41592.94 | 116425   |
| 51783.98 | 51005.8  | 40808.96 | 68860.62 | 50690.08 | 50055.78 | 40573.67 | 49250.02 | 51205.17 | 35039.3  | 84580.86 | 60557.29 | 56714.34 | 54770.69 | 70109.16 | 75884.73 | 150409.1 |
| 53885.33 | 62576.35 | 87814.74 | 101151.6 | 77763.47 | 66411.91 | 42578.97 | 61166.15 | 64663.83 | 41708.8  | 33152.83 | 93701.09 | 79011.27 | 62965.03 | 59381.58 | 77238.27 | 52597.29 |
| 375862.6 | 305656.1 | 516067.8 | 458925.5 | 439694   | 322223.8 | 299438.9 | 371564   | 342383.3 | 296191.1 | 507589.6 | 590684.8 | 476118.9 | 376379.7 | 402575.1 | 404774.9 | 352502.9 |
| 73157.09 | 16950.31 | 17524.61 | 91436.04 | 30373.98 | 22937.93 | 26150.37 | 17182.82 | 9938.988 | 23496.12 | 249446.3 | 27982.86 | 12954.87 | 43371.51 | 34996.58 | 22057.2  | 91576.02 |
| 16030.45 | 24460.39 | 27691.18 | 10164.93 | 14443.75 | 18269.76 | 43370.79 | 11840.68 | 10438.88 | 14680.85 | 4004.424 | 11940.16 | 18696.06 | 35692.85 | 43882.51 | 25902.11 | 31999.72 |
| 105822.8 | 84218.39 | 179998.6 | 188107.6 | 161950.4 | 104665.1 | 71877.32 | 113910.9 | 111711.7 | 82237.05 | 160996.7 | 172050   | 145739   | 150583   | 102679.3 | 151176.2 | 98927.63 |
| 127869   | 122845.6 | 223822.5 | 262944.1 | 142712   | 111603.6 | 120508.5 | 117074.1 | 161000.8 | 102241   | 213526.5 | 236480.6 | 156622.4 | 102422.1 | 131755.7 | 166757.7 | 138268.4 |
| 4431.5   | 3764.52  | 6380.173 | 15347.29 | 6791.226 | 4962.525 | 6582.024 | 8550.697 | 11047.46 | 5965.36  | 10688.66 | 11815.84 | 5192.162 | 6006.594 | 5773.669 | 15458.36 | 9294.905 |
| 2264586  | 2394903  | 3302547  | 4955828  | 3403302  | 3502015  | 2221554  | 2200260  | 2326748  | 1478876  | 3209255  | 2157380  | 2896328  | 2855211  | 1724154  | 2558565  | 1316390  |
| 23108.66 | 24909.06 | 35248.02 | 48004.64 | 28499.46 | 27671.17 | 13600.74 | 20107.45 | 26957.85 | 20260    | 17814.49 | 28588.26 | 24457.85 | 21273.3  | 16185.61 | 20601.6  | 15983.99 |
| 32664.07 | 45857.46 | 35286.3  | 63721.42 | 32044.95 | 30336.68 | 24759.1  | 29858    | 62358.97 | 32409.03 | 41796.8  | 60603.97 | 49130.17 | 31074.82 | 31620.19 | 41138.5  | 28279.57 |

|          |          |          |          |          |          |          |          |          |          |          |          |          |          |          |          |          |
|----------|----------|----------|----------|----------|----------|----------|----------|----------|----------|----------|----------|----------|----------|----------|----------|----------|
| 3165.106 | 4472.947 | 7739.066 | 15248.35 | 3997.91  | 3090.385 | 2131.192 | 6561.518 | 5407.712 | 2493.192 | 8747.601 | 7458.276 | 12370.24 | 5148.055 | 2799.215 | 6140.071 | 4700.657 |
| 20363.2  | 29665.28 | 23189.58 | 48209.27 | 25025.51 | 18420.74 | 14670.48 | 20413.89 | 34923.34 | 32122.38 | 28918.8  | 41261.05 | 33456.64 | 25573.67 | 32850.98 | 37572    | 24814.2  |
| 17145.86 | 18827.85 | 26458.47 | 25446.69 | 21386.19 | 26714.42 | 15274.45 | 21007.51 | 14058.34 | 21463.87 | 26171.94 | 24955.34 | 21156.48 | 36808.48 | 20152.26 | 24471.93 | 15831.65 |
| 82440.48 | 64434.51 | 132725.3 | 101416   | 46579.46 | 59419.2  | 60140.57 | 58568.18 | 98751.85 | 60092.41 | 62125.13 | 79618.66 | 80709.82 | 67182.76 | 76229.04 | 77845.74 | 90854.21 |
| 55571.09 | 120432.8 | 75259.51 | 150016.2 | 64408    | 101241.5 | 81881.69 | 112501.7 | 50596.05 | 115467.7 | 102555.8 | 68984.61 | 87819.14 | 116026.4 | 65900.59 | 90165.39 | 132929.8 |
| 36539.4  | 38706.74 | 52449.88 | 99871.33 | 44012.33 | 58963.84 | 30029.86 | 30726.34 | 37846.7  | 27508.67 | 34579.98 | 45232.62 | 39539.43 | 44296.31 | 34148.98 | 29611.11 | 30963.45 |
| 2866.098 | 5588.161 | 564.146  | 8823.712 | 12499.53 | 4353.021 | 4257.167 | 1541.848 | 7136.536 | 1681.919 | 9299.565 | 6421.884 | 975.613  | 31938.37 | 5028.684 | 12143.86 | 5807.747 |
| 39920.93 | 55696.97 | 50239.33 | 68508.16 | 45019.33 | 35614.07 | 33752.02 | 24711.42 | 31458.83 | 23198.03 | 41059.75 | 49889.02 | 45441.34 | 49644.11 | 28886.63 | 36412.25 | 29057.46 |
| 33810.65 | 35571.4  | 31040.48 | 25473.18 | 51563.52 | 59606.5  | 47600.07 | 25750.14 | 19872.17 | 23900.38 | 36078.31 | 50167.41 | 45311.93 | 91424.19 | 75907.38 | 34026.56 | 47712.86 |
| 3009.172 | 1717.876 | 2748.898 | 4041.343 | 3273.713 | 3198.645 | 1605.411 | 2160.138 | 1471.514 | 1429.53  | 3884.724 | 3799.393 | 3871.951 | 2531.001 | 2051.163 | 2847.688 | 2740.242 |
| 24233.18 | 75802.13 | 85695.06 | 32871.82 | 54328.25 | 19240.7  | 16908.46 | 85855.26 | 35649.91 | 60022.98 | 142531   | 18699.77 | 102779.4 | 47416.18 | 76457.45 | 90147.24 | 166242.5 |
| 770466.2 | 527158.4 | 727200.9 | 404711.4 | 353746.9 | 625015.9 | 687679.1 | 701040.4 | 795003.8 | 773273.6 | 751068.2 | 725543.8 | 495818.3 | 887620.8 | 1187383  | 628184   | 815290.8 |
| 109509.7 | 56126.11 | 81065.33 | 82641.05 | 70440.98 | 59269.91 | 121221   | 82665.75 | 112816.8 | 107396.6 | 59842.78 | 77864.95 | 51837.31 | 104096.1 | 103816.6 | 37463.86 | 150027.4 |
| 92240.77 | 159586   | 96028.34 | 107858.9 | 97542.03 | 184873.5 | 215034.2 | 135835.5 | 187718.3 | 163095   | 112566.7 | 104395   | 44522.03 | 168650.6 | 168329.1 | 186349.9 | 205346.3 |
| 55272.87 | 85763.06 | 44376.39 | 47852.11 | 27515.52 | 40296.1  | 26757.3  | 43855.34 | 45265.86 | 46562.55 | 22710.33 | 48142.46 | 37591.1  | 38540.56 | 50942.5  | 33367.55 | 53511.62 |
| 59698.8  | 63644.52 | 80181.77 | 116270.7 | 84481.23 | 81815.86 | 86604.15 | 77914.1  | 45967.61 | 52069.47 | 121641.3 | 194278.6 | 124386.3 | 85935.92 | 160410.2 | 96199.07 | 88618.76 |
| 79557.88 | 111655.1 | 203511   | 193470   | 145373   | 236721.8 | 172329   | 20115.24 | 18045.2  | 11745.32 | 615350.9 | 300040   | 556108.9 | 271224.9 | 861205.8 | 685368.8 | 755126.1 |
| 14354.26 | 7410.602 | 15272.07 | 27055.51 | 13031.57 | 6839.229 | 6057.429 | 17941.66 | 10752.77 | 8004.006 | 12423.8  | 26733.75 | 16846.44 | 8050.773 | 3587.015 | 20744.71 | 15531.34 |
| 97855376 | 1.14E+08 | 81058936 | 66564364 | 47115016 | 94529824 | 1.27E+08 | 92154552 | 3.04E+08 | 1.37E+08 | 1.97E+08 | 92941984 | 55181752 | 1.17E+08 | 1.39E+08 | 1.35E+08 | 1.99E+08 |
| 80264296 | 85092656 | 1E+08    | 99155960 | 61515440 | 58173500 | 83347712 | 1.22E+08 | 1.15E+08 | 77811136 | 83235128 | 1.02E+08 | 85123792 | 1.42E+08 | 95473744 | 1.24E+08 | 1.57E+08 |
| 24915.78 | 32877    | 51716.13 | 48785.39 | 53721.59 | 48018.41 | 37196.29 | 36178.47 | 42445.73 | 27200.86 | 35432.12 | 42613.57 | 27738.06 | 37023.9  | 22396.73 | 37026.64 | 25986.42 |
| 102122.6 | 162139.2 | 151226.9 | 200372.1 | 140581.1 | 226295.4 | 218381.8 | 152093.4 | 137937.2 | 194485.6 | 176986.4 | 118190.7 | 148963   | 163954   | 257526   | 241374.4 | 149515.2 |
| 8670.928 | 7707.081 | 15118.13 | 19490.35 | 9730.465 | 6477.344 | 5317.923 | 16874.06 | 11710.76 | 9442.302 | 12799.08 | 19351.84 | 20888.69 | 15326.18 | 84816.7  | 21533.74 | 171489.8 |
| 33759.05 | 29993.39 | 60143.28 | 52804.79 | 43301.04 | 33688.5  | 35426.76 | 42260.12 | 28700.75 | 32458.35 | 54418.86 | 46570.54 | 33127.35 | 35290.29 | 38639.69 | 41829.41 | 29023.02 |
| 36088336 | 34771772 | 24280902 | 27353928 | 34548972 | 50636568 | 48462108 | 51497668 | 68096392 | 14707770 | 63010744 | 26821552 | 18942368 | 46035268 | 65356040 | 61030272 | 88518032 |
| 47039.05 | 59038.96 | 52559.71 | 62901.84 | 36681.68 | 23095.97 | 53295.62 | 64517.97 | 58578.48 | 79204.35 | 42631.59 | 56664.06 | 46596.53 | 20766.32 | 98663.72 | 68866.78 | 60409.62 |
| 19710.1  | 21255.55 | 22685.15 | 30432.7  | 26018.99 | 22656.09 | 19085.73 | 22360.33 | 19725.99 | 17131.02 | 25297.29 | 28153.98 | 21762.95 | 24044.72 | 14586.57 | 19480.27 | 14271.99 |
| 851914.6 | 1099215  | 826435   | 457484.9 | 444351.9 | 974671.2 | 1032590  | 610048.7 | 827290.1 | 1034853  | 764540.6 | 596477.9 | 373946.4 | 1090738  | 834928.1 | 795406.4 | 596211.3 |
| 29139.07 | 27917.08 | 36210.13 | 64011.19 | 39270.78 | 30383.09 | 28015.35 | 25988.52 | 17944.03 | 17976.39 | 51972.68 | 39126.79 | 45816.42 | 24931.84 | 21974.57 | 31984.82 | 16665.17 |
| 12732.44 | 14892.1  | 18917.75 | 32321.54 | 16221.93 | 9155.383 | 10861.49 | 16058.31 | 13667.48 | 20958.95 | 46621.64 | 63204.71 | 21630.8  | 14336.04 | 28482.84 | 19428.56 | 22314.15 |
| 12197.15 | 15485.46 | 12838.79 | 9393.186 | 11047.25 | 9564.574 | 3466.556 | 10294.81 | 13005.04 | 18173.36 | 15120.46 | 11229.93 | 11015.63 | 11631.75 | 10451.37 | 15756.81 | 11848.79 |
| 1142533  | 958144.4 | 969397.3 | 943194.4 | 627024.1 | 942516.4 | 923720.1 | 809341.9 | 961906.9 | 911410.5 | 660705.3 | 543539.3 | 660920.4 | 962236.6 | 1074792  | 814333.5 | 1029263  |
| 40808.59 | 45205.95 | 90870.44 | 27897.6  | 68710.4  | 72951.05 | 74989.3  | 64079.28 | 66969.35 | 62081.8  | 61832.68 | 80595.5  | 64637.63 | 62701.41 | 88779.9  | 59177.92 | 103116.4 |
| 111680   | 79269.05 | 119015.9 | 90774.38 | 66644.64 | 94125.67 | 169050.6 | 100586.3 | 129113.8 | 55315.11 | 66815.48 | 103804.9 | 102232.9 | 79449.75 | 135005.8 | 75702.27 | 138409.7 |
| 546129.9 | 542919.9 | 619873.9 | 52069.57 | 73939.73 | 1609517  | 82632.36 | 8726.075 | 561926.9 | 1186717  | 1869799  | 186723.7 | 261398.8 | 811076.9 | 69097.94 | 100640.9 | 337608.6 |
| 18921.59 | 10719.54 | 14438.94 | 16334.14 | 11668.52 | 6952.511 | 7157.651 | 5934.443 | 9275.404 | 12825.39 | 34777.3  | 24535.7  | 15139.78 | 9641.648 | 8573.334 | 9005.188 | 8674.825 |
| 89854.17 | 62976.44 | 57145.7  | 80311.76 | 93363.97 | 71503.19 | 82822.66 | 77656.8  | 66882.17 | 88799.23 | 79052.34 | 122344.1 | 75844.6  | 86014.99 | 91723.86 | 85625.09 | 88866.17 |
| 76843.6  | 64091.22 | 64556    | 60455.3  | 65355.57 | 62970.12 | 60461.09 | 85645.7  | 101236.4 | 63361.27 | 88620.45 | 60617.5  | 34606.35 | 69533.95 | 87911.35 | 86258.37 | 107227.6 |
| 7483.18  | 6112.481 | 11131.93 | 12648.05 | 4741.558 | 6381.576 | 4018.797 | 5056.429 | 3683.311 | 4812.558 | 8944.77  | 7206.729 | 11950.69 | 6721.096 | 2527.008 | 6418.973 | 6561.358 |
| 4552.692 | 7592.847 | 5022.224 | 4340.337 | 3111.949 | 2089.163 | 2440.867 | 3813.712 | 2941.36  | 4629.192 | 1930.769 | 2081.961 | 2205.943 | 7068.508 | 4571.654 | 7628.599 | 5096.413 |
| 265426.8 | 101969.5 | 140039.6 | 519437.8 | 154175.2 | 101653.9 | 68619.86 | 118856.5 | 98541.23 | 116672   | 571237.6 | 127340.5 | 126975.6 | 141753.9 | 107531.1 | 127581.3 | 131215.1 |
| 29828.12 | 12316    | 15597.56 | 39310.23 | 18881.18 | 8398.379 | 13148.88 | 14663.8  | 19107.5  | 16562.46 | 20513.55 | 16727.22 | 22846.69 | 21289.07 | 20934.64 | 39093.89 | 31505.1  |
| 33861.69 | 31659.26 | 39334.57 | 27504.11 | 28596.99 | 21793.32 | 26087.11 | 27453.43 | 30316.87 | 32514.93 | 32207.62 | 33431.13 | 36829.03 | 49776.22 | 32450.99 | 30016.01 | 47026.6  |
| 69313.91 | 99744.96 | 60186.23 | 109703.5 | 90942.34 | 110060.7 | 71491.7  | 64146.93 | 63593.51 | 114812.4 | 179886.2 | 100764.3 | 196420.3 | 89811.82 | 70161.14 | 128090.6 | 304707.9 |
| 317613.9 | 129871.4 | 172431.7 | 91291.91 | 156696.9 | 236461.6 | 292320.7 | 323277.1 | 457426.3 | 247511.5 | 231148.5 | 72660.1  | 184765.1 | 270672.9 | 432129.8 | 318154.8 | 307941.5 |
| 439418.1 | 32183.76 | 13313.24 | 692006.5 | 93242.38 | 38702.16 | 16220.59 | 4407.433 | 31009.03 | 2742.884 | 1306832  | 9841.818 | 3946.752 | 19205.56 | 6981.728 | 16789.32 | 12246.85 |
| 1428365  | 1314950  | 1369707  | 1239868  | 1048592  | 1114846  | 1326728  | 1326162  | 1411729  | 1483282  | 1375908  | 1273774  | 1245815  | 1429485  | 1554553  | 1384310  | 824684.4 |
| 9815.525 | 7617.615 | 12726.13 | 9324.042 | 8082.16  | 2005.543 | 6464.442 | 6295.124 | 10667.36 | 6486.342 | 25413.71 | 5822.294 | 8945.052 | 5801.479 | 6532.229 | 21086.02 | 10815.05 |
| 274553   | 257243.9 | 257463.7 | 176791   | 212883   | 203699.2 | 218578.3 | 234749.3 | 305361.1 | 302614.5 | 169993.8 | 220853.4 | 279544.4 | 234204.3 | 275860.3 | 232147.7 | 395281.3 |

|          |          |          |          |          |          |          |          |          |          |          |          |          |          |          |          |          |
|----------|----------|----------|----------|----------|----------|----------|----------|----------|----------|----------|----------|----------|----------|----------|----------|----------|
| 60559.87 | 61705.52 | 64948.94 | 67608.41 | 66015.64 | 55154.85 | 41102.97 | 59212.83 | 55832.8  | 54233.13 | 39788.62 | 71042    | 54232.58 | 90257.97 | 69498.39 | 52131.21 | 76536.33 |
| 190076   | 184873.8 | 126343.3 | 104313.6 | 327446.6 | 142489.3 | 137117.8 | 119810.5 | 181275.1 | 155342.3 | 129771.5 | 189056.1 | 326603.7 | 149448.6 | 138995.7 | 114815.6 | 131381.5 |
| 58597.31 | 83635.28 | 59921.64 | 64379.52 | 217563.7 | 25626.18 | 23464.7  | 31120.22 | 46892.93 | 46477.74 | 98287.84 | 85463.48 | 112278.8 | 25510.36 | 30125.62 | 21516.49 | 78917.96 |
| 11126.05 | 10613.76 | 7536.015 | 8806.607 | 11185.76 | 46659.48 | 6359.219 | 101575   | 8668.512 | 7453.737 | 29093.96 | 5704.931 | 14634.79 | 12288.33 | 10093.83 | 9345.813 | 12865.19 |
| 1920431  | 2768091  | 1970241  | 1754291  | 2730123  | 1221843  | 3016817  | 2332653  | 2942111  | 3145962  | 2288832  | 1554926  | 2752469  | 2731673  | 2670008  | 3303111  | 3769118  |
| 457336.1 | 386965.1 | 361503   | 596200.4 | 259688   | 190740.9 | 360652.8 | 209538.3 | 523400.8 | 287999.1 | 593097.8 | 274730.1 | 147947.2 | 1046888  | 349044.7 | 874627.1 | 760572.5 |
| 1047426  | 993188.1 | 936648.6 | 864151.1 | 912610   | 847499.9 | 860745.2 | 975795.4 | 1083266  | 1079173  | 1101283  | 710925.3 | 791096.9 | 1405722  | 1348412  | 1228439  | 1187713  |
| 12403.71 | 9176     | 13767.72 | 35917.47 | 8983.438 | 16228.92 | 26506.78 | 11481.11 | 20082.27 | 3548.785 | 19805.82 | 7345.07  | 6855.569 | 6062.071 | 7409.791 | 19438.97 | 10607.29 |
| 11940.49 | 14508.84 | 14930.67 | 15910.57 | 14919.83 | 3054.86  | 15921.9  | 9994.391 | 17792.24 | 12449.62 | 19003.74 | 14457.35 | 9990.661 | 15011.75 | 11582.92 | 14248.37 | 20533.89 |
| 77805.66 | 93650.02 | 80872.04 | 102257   | 66682.1  | 89254.13 | 76500.84 | 68029.73 | 96727.58 | 116464.1 | 97726.6  | 67011.51 | 94598.84 | 81283.23 | 80869.17 | 93897.58 | 194102.2 |
| 86873.59 | 92131.2  | 135366   | 155288.7 | 143572.5 | 105707.9 | 79524.53 | 104355.7 | 101919.3 | 91983.46 | 104190.3 | 124205.3 | 150796.7 | 94777.41 | 87062.16 | 102513.9 | 72095.59 |
| 80106.82 | 161807.3 | 32674.49 | 187861.7 | 105696.4 | 148284.8 | 160546.9 | 93747.33 | 153470   | 73703.89 | 501663.4 | 69124.63 | 66500.91 | 97113.39 | 110480.8 | 165410   | 317299.7 |
| 7026.645 | 7949.454 | 10668.67 | 5347.195 | 18200.14 | 8694.196 | 8236.529 | 7724.732 | 7852.191 | 7858.977 | 9594.272 | 8973.151 | 14663.48 | 9901.01  | 7793.922 | 11558.46 | 9510.355 |
| 135832   | 132223.9 | 228615.9 | 231634.8 | 308914.9 | 289865.6 | 137892   | 260910.5 | 138630.1 | 106318.3 | 191870.3 | 269314.4 | 303974.8 | 321764.5 | 164746.2 | 264821   | 138514.8 |
| 509727.4 | 411784.8 | 299670.1 | 304390.3 | 301802.3 | 633605.4 | 1279623  | 465862.6 | 505792.5 | 390219.6 | 370467.8 | 280059.7 | 414352.4 | 773793.6 | 475171.9 | 479061.5 | 494577.3 |
| 65970.22 | 65669.33 | 64430.72 | 45242.41 | 55133.29 | 49274.31 | 56155.94 | 75490.36 | 74031.37 | 72633.31 | 22179.48 | 54172.89 | 75276.64 | 15683.04 | 69720.42 | 66779.11 | 103590.1 |
| 3121858  | 2488828  | 1673278  | 3223001  | 1666034  | 1725033  | 1713913  | 2470403  | 3570341  | 3298806  | 1184062  | 4434238  | 2912151  | 2536407  | 3344886  | 3882432  | 4312139  |
| 17595.13 | 32567.74 | 34710.52 | 25711.57 | 19875.92 | 24103.54 | 26398.03 | 12620.29 | 28059.85 | 26938.09 | 28525.12 | 29190.99 | 18322.98 | 36822.72 | 32886.48 | 23638.08 | 32368.3  |
| 85642.34 | 149177.5 | 140444.1 | 408643.9 | 137698.6 | 323638.9 | 176921.7 | 179512.9 | 176108.2 | 101511.4 | 130248.9 | 125800.5 | 86966.69 | 280763.1 | 175983.2 | 288625.8 | 237946.6 |
| 12130.85 | 11248.69 | 9499.521 | 11860.05 | 5174.162 | 8509.055 | 16321.46 | 7204.311 | 20507.56 | 8826.612 | 10436.62 | 2653.399 | 2960.867 | 17039.01 | 7293.744 | 7286.037 | 9627.667 |
| 148953.6 | 130883.5 | 107279.4 | 208367.4 | 87587.53 | 88742.2  | 125621.8 | 74899.48 | 100942.5 | 111444.5 | 575078.9 | 90219.02 | 108909.7 | 101862   | 116211.4 | 68367.86 | 149660.9 |
| 3315.897 | 3550.21  | 2487.364 | 4273.721 | 3640.149 | 1699.193 | 3884.856 | 3150.899 | 5043.91  | 5997.19  | 3226.601 | 2108.572 | 4390.928 | 4802.338 | 9030.372 | 5342.373 | 6805.908 |
| 628067.4 | 557644.8 | 461675.1 | 819023.9 | 1002216  | 537744.6 | 426442.1 | 459797.6 | 477658.9 | 639337.8 | 698778.5 | 850545.4 | 751321.8 | 430500.2 | 395670.5 | 826531.3 | 916750.7 |
| 6210.567 | 6860.538 | 12566.46 | 16258.34 | 18563.82 | 7659.739 | 10810.57 | 9329.165 | 6072.849 | 10790.18 | 15701.5  | 11579.45 | 12454.43 | 16604.41 | 22688.02 | 20512.03 | 15606.61 |
| 41005.67 | 62450.54 | 30002.51 | 22706.05 | 9830.25  | 25512.56 | 6734.721 | 16341.24 | 52255.11 | 54680.57 | 19941.15 | 17913.72 | 3883.217 | 22471.19 | 6114.881 | 27759.17 | 49135.79 |
| 116002   | 124839   | 129269.4 | 147372.9 | 81593.29 | 104968.1 | 109186.3 | 108063.2 | 106962.8 | 125837.1 | 159783.3 | 136472   | 56660.43 | 104316.5 | 93318.64 | 110746.4 | 70233.59 |
| 245334.8 | 187763.5 | 175092   | 110491.5 | 155582.7 | 175061.1 | 219330.1 | 154128.3 | 251876.4 | 256958.5 | 183508.8 | 152385.5 | 99625.89 | 316809.7 | 281949.3 | 215166.8 | 413374.1 |
| 22684.28 | 19250.35 | 11794.87 | 23893.44 | 8904.129 | 17329.14 | 14555.04 | 10391.57 | 30677.91 | 18072.98 | 26558.65 | 15591.33 | 15188.26 | 14213.68 | 25183.84 | 14005.29 | 20604.87 |
| 14665.67 | 9586.928 | 10015.13 | 12891.82 | 58473.73 | 10150.58 | 15101.58 | 11126.07 | 10319.42 | 4953.888 | 18029.96 | 9946.001 | 24093.6  | 9035.534 | 9999.86  | 10850.54 | 7604.488 |
| 46440.18 | 46625.24 | 40993.1  | 43630.01 | 45066.15 | 52457.26 | 30696.88 | 23974.61 | 31176.63 | 73219.47 | 45142.57 | 36504.88 | 25734.15 | 42667.76 | 30241.61 | 30464.54 | 34616.5  |
| 9228.141 | 7133.248 | 7703.909 | 11188.43 | 7116.585 | 3299.714 | 2839.335 | 4200.284 | 5394.959 | 4116.134 | 18611.63 | 3275.66  | 5992.655 | 5574.885 | 4140.714 | 5713.782 | 6763.616 |
| 68099.69 | 64634.27 | 43521.5  | 59236.3  | 46323.46 | 46884.1  | 49344.45 | 42306.67 | 50346.4  | 65778.29 | 37323.47 | 50000.53 | 46618.04 | 53857.17 | 65519.74 | 47417.97 | 42889.51 |
| 19755.2  | 22086.37 | 28073.38 | 26264.44 | 26071.68 | 21352.36 | 27551.26 | 19446.14 | 16321.37 | 14850.59 | 20753.54 | 25777.45 | 31961.67 | 25200.28 | 28513.29 | 16514.9  | 9673.456 |
| 145717.3 | 177562.8 | 172808.9 | 166423.7 | 121445.6 | 116798.8 | 160055.5 | 124144.8 | 148126.6 | 128488.5 | 95857.67 | 192770.9 | 171035.5 | 150331.4 | 191095.6 | 187395.9 | 248873.3 |
| 265299.5 | 182783.8 | 222998   | 133781.4 | 50777.16 | 163098.3 | 169949.6 | 131619   | 144731.5 | 140128.6 | 56374.58 | 224193.5 | 142143.1 | 169145.7 | 197542.2 | 140669.8 | 130075.9 |
| 58531.9  | 50844.62 | 59531.11 | 31903.71 | 36709.61 | 55588.21 | 54742.66 | 32621.19 | 42264.7  | 45662.72 | 34540.23 | 54489.64 | 39047.88 | 38009.7  | 47949.02 | 37404.62 | 68687.95 |
| 13650.38 | 12777.42 | 15321.82 | 19114.26 | 14812.41 | 14892.67 | 10230.04 | 14239.84 | 13448.4  | 11384.73 | 10268.05 | 17306.63 | 15213.18 | 12291.29 | 15365.3  | 20082.13 | 12396.6  |
| 254599.2 | 192520.8 | 77209.34 | 122159.3 | 270029   | 389928.5 | 495302.3 | 276663.9 | 622751.3 | 118313.4 | 93113.88 | 333238.9 | 89593.38 | 427194.8 | 460954.3 | 338681.2 | 666278.6 |
| 53440.73 | 62125.1  | 154584.1 | 51090.28 | 49898.5  | 113923.6 | 52090.34 | 31133.89 | 53555.98 | 36362.7  | 46386.04 | 29935.1  | 56473.11 | 25885.44 | 41609.81 | 23410.44 | 34475.5  |
| 857884.6 | 833047.2 | 830916.1 | 653512.1 | 654323.1 | 804981.3 | 572654.5 | 680987.3 | 765432   | 686398.6 | 702475.4 | 594785.3 | 615418.1 | 854161   | 633740.1 | 676554.9 | 481106.8 |
| 5582.176 | 5967.013 | 11171.15 | 15031.16 | 20829.9  | 14469.39 | 449.5216 | 20509.58 | 4045.988 | 30817.03 | 22182.34 | 13594.13 | 30241.07 | 21036.52 | 24934.66 | 20285.75 | 14735.12 |
| 16176.13 | 13910.86 | 8028.567 | 40907.95 | 17958.66 | 5260.721 | 10304.73 | 8876.066 | 6873.335 | 7464.717 | 67474.74 | 10586.86 | 10801.81 | 17913.52 | 9309.252 | 7836.707 | 11253.26 |
| 123537.6 | 119396.1 | 101257.3 | 77102.74 | 108232.3 | 104498.5 | 120546.9 | 107805.3 | 86951.59 | 113298.7 | 92733.72 | 116792.8 | 113385.3 | 125015.4 | 152254   | 103954.6 | 133234.8 |
| 10161.87 | 17168.57 | 13083.08 | 8047.834 | 8540.021 | 15398.46 | 8220.59  | 11185.06 | 14186.92 | 13780.88 | 11341.41 | 15865.49 | 15451    | 17659.14 | 8922.986 | 21078.18 | 32950.74 |
| 76971.81 | 106615.3 | 77022.73 | 12174.14 | 9054.451 | 251242.2 | 18905.77 | 9046.075 | 117916.4 | 261987.1 | 339531.1 | 42521.72 | 33027.99 | 159045.9 | 13850.95 | 12605.28 | 85760.91 |
| 101699   | 86657.73 | 57993.9  | 59108.9  | 42083.52 | 66441.66 | 94656.23 | 79854.97 | 110077.9 | 98952.23 | 93731.75 | 68072.14 | 33380.2  | 71397.22 | 102856.6 | 66644.87 | 67946.48 |
| 32302.56 | 27345.39 | 66181.52 | 48496.59 | 47667.36 | 12166.5  | 38191.61 | 34779    | 42784.9  | 31524.27 | 72158.52 | 51292.86 | 39942.05 | 68967.48 | 51879.13 | 44756.63 | 41251.02 |
| 223717.7 | 277668.5 | 254678   | 298621.8 | 264569.1 | 233689.5 | 239525.2 | 257400.4 | 263630.3 | 232923.3 | 300258.2 | 202377.9 | 191079   | 291590.7 | 239835.9 | 272037.6 | 148322.1 |
| 28674.97 | 24775.01 | 24394.14 | 16180.2  | 18251.19 | 23820.8  | 36007.03 | 20452.58 | 29317.26 | 22083.64 | 37961.59 | 18992.82 | 38009.16 | 35128.57 | 23422.72 | 34093.02 | 16803.04 |



|          |          |           |          |          |          |          |          |          |          |          |          |          |          |          |          |          |
|----------|----------|-----------|----------|----------|----------|----------|----------|----------|----------|----------|----------|----------|----------|----------|----------|----------|
| 81107.8  | 52855.74 | 126109.1  | 126277.7 | 124454   | 89609.96 | 59745.71 | 92562.66 | 92710.94 | 57852.7  | 105976.2 | 149726.3 | 150900.7 | 62998.84 | 65987.53 | 98961.52 | 73341.06 |
| 2826.513 | 5401.111 | 6533.089  | 4514.66  | 4454.345 | 5333.572 | 5186.345 | 3832.311 | 2701.522 | 4154.481 | 4242.484 | 5655.549 | 5282.346 | 5223.786 | 5644.449 | 4523.829 | 8476.191 |
| 8474.559 | 8043.816 | 12764.53  | 17386.63 | 11927.14 | 14265.17 | 8359.488 | 11288.96 | 5180.89  | 12782.62 | 17964.32 | 20714.12 | 13636.68 | 14002.2  | 17171.03 | 18025.18 | 38229.84 |
| 33411.45 | 36402.33 | 56029.5   | 59124.42 | 38156.5  | 45604.88 | 32023.28 | 34377.11 | 32308.94 | 15271.74 | 34968.28 | 48748.11 | 49963.3  | 36236.33 | 21604.14 | 43301.54 | 18372.8  |
| 4106.349 | 3369.224 | 5781.147  | 8046.298 | 4059.954 | 4641.539 | 3557.557 | 5996.173 | 3842.859 | 2894.489 | 3714.375 | 3511.231 | 6971.834 | 6078.869 | 3827.932 | 4117.729 | 3645.664 |
| 36192.02 | 23943.58 | 55407.18  | 70824.87 | 44896.39 | 36286.26 | 24019.81 | 23354.54 | 25694.36 | 16194.19 | 34381.96 | 23797.29 | 11323.24 | 42573.85 | 27450.13 | 25514.29 | 17627.61 |
| 30076.1  | 27911.25 | 38671.96  | 35638.47 | 43053.8  | 33996.3  | 21645.57 | 23252.74 | 28464.16 | 20208.84 | 54317.09 | 20255.83 | 37871.62 | 43548.77 | 19883.58 | 27838.07 | 22247.47 |
| 7785.427 | 8070.339 | 8100.19   | 13828.21 | 9923.773 | 6498.956 | 7040.9   | 12483.11 | 10208.92 | 5101.419 | 13729.62 | 14969.39 | 5645.233 | 15345.71 | 6568.661 | 9082.553 | 11803.88 |
| 21876.3  | 30726.38 | 31831.26  | 19989.07 | 17937.57 | 20330.19 | 16731.33 | 24378.2  | 31305.15 | 26075.95 | 18789.54 | 13981.35 | 18527.76 | 18278.05 | 19283.69 | 30492.22 | 34367.33 |
| 99892.55 | 85171.02 | 88979.97  | 66759.2  | 67602.77 | 81037.7  | 63320.04 | 85962.95 | 101943.2 | 86084.02 | 61935.67 | 77623.27 | 86070.42 | 74328.02 | 93074.09 | 79321.05 | 104193.8 |
| 377621.7 | 440420.7 | 289507.8  | 434924.8 | 316307.9 | 291644.1 | 330856.8 | 414971   | 363025.1 | 536524.3 | 314162.8 | 497943.5 | 349952.3 | 410603.5 | 515935.3 | 539150.2 | 585807.4 |
| 12508.93 | 11276.15 | 11797.61  | 13284.08 | 12502.95 | 2376.6   | 6218.812 | 4907.801 | 22431.86 | 13222.01 | 10637.43 | 13950.87 | 15804.56 | 7754.653 | 5310.496 | 6826.531 | 8546.269 |
| 542518.7 | 111323.6 | 219710.8  | 366038.2 | 493344.4 | 150924.3 | 236236.6 | 521932   | 557088.6 | 289456   | 526084.3 | 203252.4 | 489877.9 | 1672953  | 470065.7 | 439770.3 | 561263.1 |
| 4627.407 | 5910.14  | 7625.129  | 3294.872 | 5148.245 | 7275.734 | 6260.063 | 3271.818 | 12208.36 | 4807.799 | 6872.152 | 7691.009 | 5803.259 | 9931.586 | 6296.011 | 6563.545 | 22272.11 |
| 10489.42 | 13630.66 | 7540.235  | 6924.143 | 12440.98 | 8807.294 | 8273.455 | 6433.39  | 10527.67 | 17776.22 | 81357.13 | 7729.252 | 15526.37 | 6262.363 | 3218.847 | 2879.885 | 8924.026 |
| 252408.5 | 209886.2 | 310458.7  | 220467.5 | 222178.6 | 180698.2 | 267425.4 | 221038.4 | 256091.1 | 296149.3 | 255960.8 | 329714.3 | 257193   | 184149.6 | 356767.3 | 253722   | 204381.6 |
| 11712.62 | 9420.404 | 13142.09  | 21967.06 | 9545.02  | 8064.765 | 9126.329 | 9423.506 | 9036.911 | 6891.96  | 12407.25 | 15009.79 | 8325.943 | 10661.58 | 10495.77 | 16612.81 | 16690.12 |
| 30251.77 | 19105.8  | 25859.03  | 108854.1 | 14396.33 | 26696.65 | 25509.28 | 12390.49 | 41915.52 | 32388.82 | 147266.8 | 38943.2  | 61660.74 | 25803    | 23432.8  | 19744.86 | 36339.85 |
| 78989.46 | 2067099  | 115685.6  | 140414.1 | 128035.5 | 79974.97 | 56083.2  | 4607276  | 4418780  | 75902.91 | 82405.22 | 88039.23 | 100816.9 | 79411.87 | 73071.23 | 127300.8 | 65639.58 |
| 22586.33 | 23803.23 | 29537.45  | 34793.28 | 21267.21 | 17112.04 | 14361.6  | 20273.66 | 18011.88 | 17970.33 | 19817.82 | 20830.34 | 21320.7  | 22481.61 | 25509.24 | 29566.34 | 25393.43 |
| 1753.94  | 2130.747 | 2978.859  | 2177.858 | 3098.208 | 2107.725 | 1783.41  | 2433.95  | 2148.773 | 2491.87  | 3458.384 | 3734.709 | 2152.48  | 2680.142 | 1090.234 | 1511.231 | 1479.742 |
| 45562.25 | 54136.63 | 61007.94  | 66571.55 | 52362.8  | 66172.67 | 72707.32 | 50250.95 | 72079.5  | 52002.31 | 70898.27 | 55016.91 | 57143.82 | 81057.58 | 67785.54 | 61793.91 | 134885.2 |
| 124318.9 | 165124.8 | 157020.5  | 150031.5 | 123709.9 | 113820.9 | 130515.8 | 162958.2 | 148556.2 | 206880.9 | 181608.9 | 176771   | 120567   | 162459.5 | 198351.6 | 177820.1 | 178907.3 |
| 8858.602 | 7322.253 | 11913.79  | 7242.917 | 4145.486 | 6434.743 | 7023.443 | 2644.761 | 6041.079 | 9394.941 | 4771.607 | 8282.434 | 7783.825 | 5201.196 | 8288.782 | 6276.154 | 1590.369 |
| 326616.6 | 309696.5 | 404958.1  | 271111   | 339720.6 | 316039.4 | 234902.3 | 236084.8 | 423893.9 | 306456.5 | 214358.3 | 223109.6 | 331061.3 | 333578.1 | 302432.4 | 348701.3 | 847562.6 |
| 40915.61 | 31652.17 | 9472.034  | 20420.62 | 26076.09 | 19863    | 33330.14 | 31597.32 | 26356.06 | 40571.98 | 20353.39 | 31424.58 | 20156.04 | 15638.42 | 28777.69 | 33093.96 | 32351.22 |
| 6387.161 | 4526.789 | 4738.077  | 9109.473 | 6023.178 | 5627.823 | 4954.148 | 9003.479 | 13918.18 | 7953.975 | 928.6613 | 8813.254 | 7745.928 | 8409.072 | 5490.167 | 62206.34 | 6319.351 |
| 1699.28  | 2398.9   | 1898.628  | 5837.958 | 4567.574 | 4483.332 | 2887.656 | 3976.834 | 2575.094 | 1836.37  | 2943.406 | 1469.75  | 3536.995 | 2256.207 | 1787.612 | 3411.329 | 2684.968 |
| 153547   | 133722.2 | 154609.5  | 158126.6 | 137042.8 | 119771.8 | 97125.59 | 149610.4 | 136662.3 | 130513.8 | 142672.5 | 142073.5 | 120440.3 | 132620.6 | 118705.8 | 173474.1 | 167853.8 |
| 138492.4 | 132660.8 | 129675.3  | 132816.2 | 125941.1 | 135024.5 | 128851.8 | 123404   | 175529.5 | 126225.5 | 145406.3 | 146089.5 | 151696.4 | 117752.7 | 86138.04 | 119142.7 | 89578.44 |
| 12816.08 | 8680.531 | 7330.218  | 5868.707 | 8073.147 | 7250.448 | 6449.517 | 8794.757 | 9571.206 | 16010.55 | 9251.714 | 7291.06  | 10254.13 | 12179.79 | 10809.77 | 8958.842 | 27607.47 |
| 6387.806 | 6772.338 | 7201.202  | 14016.29 | 14312.69 | 5478.834 | 6813.837 | 7706.846 | 7504.259 | 9974.243 | 9616.434 | 16488.79 | 8238.903 | 5080.24  | 5051.995 | 12013.42 | 15411.91 |
| 9758.774 | 16622.78 | 11245.19  | 35662.41 | 12614.16 | 11623.46 | 18132.33 | 6276.854 | 11710.36 | 19671.62 | 44465.39 | 11008.06 | 8679.503 | 5720.252 | 11272.25 | 5152.39  | 6683.452 |
| 14510.34 | 17717.79 | 12321.35  | 13020.76 | 14778.26 | 10102.54 | 16198.01 | 10464.29 | 26524.52 | 9743.662 | 36057.14 | 21207.94 | 18183.62 | 19656.06 | 28793.71 | 27765.99 | 5887.231 |
| 17155.94 | 21064.34 | 18425.04  | 17654.79 | 22996.42 | 14598.42 | 13780.67 | 18136.92 | 17508.33 | 25190.45 | 20361.25 | 10123.61 | 23455.75 | 20876.01 | 9029.928 | 24045.78 | 11820.39 |
| 244692   | 385252.3 | 297562.4  | 287645.9 | 378744   | 331066.8 | 212786.8 | 309145.6 | 391068.1 | 567547.1 | 296146.1 | 515937.2 | 392216.7 | 491887   | 319643.8 | 468091.1 | 256492.1 |
| 307008.1 | 295440.3 | 2954836.8 | 214318.2 | 242692.7 | 249540.5 | 317059.8 | 364256.4 | 374303.1 | 348661.3 | 310330.2 | 235729.3 | 250667.7 | 301074.7 | 404569.3 | 271338.8 | 194734   |
| 4538.748 | 3869.354 | 7387.918  | 6818.354 | 5349.351 | 148794.9 | 3457.29  | 9647.597 | 3809.539 | 17945.52 | 16293.86 | 5457.966 | 20413.45 | 19113.59 | 10824.77 | 8418.938 | 9595.992 |
| 1471611  | 1114918  | 768148.2  | 1167186  | 962543.9 | 778236.3 | 960090.9 | 814506.4 | 1296939  | 1471089  | 878242.6 | 1188612  | 793154.3 | 1090943  | 1464180  | 1095102  | 2124028  |
| 31079.47 | 33767.84 | 33064.8   | 28189.17 | 21459    | 27065.95 | 21395.8  | 21987.79 | 30031.77 | 31664.66 | 16523.65 | 23230.88 | 20756.17 | 38060.83 | 23766.69 | 26158.97 | 25943.75 |
| 81925.37 | 56364.59 | 32443.82  | 217545.2 | 25453.33 | 24664.35 | 5829.276 | 29601.82 | 123175.2 | 37509.39 | 87980.8  | 127468.6 | 77210.89 | 47995.08 | 114338.3 | 49497.38 | 62059.43 |
| 282530   | 194402.8 | 166076.1  | 161775.5 | 126252.9 | 155812.5 | 150927.5 | 145949.8 | 172254   | 191348.6 | 99134.34 | 275492.9 | 121470.7 | 136865.1 | 164081.8 | 209507.4 | 291562.4 |
| 43071.19 | 36310.91 | 62364.73  | 56920.4  | 35599.74 | 24341    | 24370.4  | 19494.04 | 36264.92 | 41806.27 | 102308.1 | 35274.77 | 35617.37 | 37640.84 | 47860.72 | 31969.94 | 39155.65 |
| 2439.487 | 7356.744 | 15398.99  | 25019.92 | 11468.61 | 1884.719 | 1711.058 | 1829.228 | 2550.152 | 7351.581 | 15561.13 | 9248.274 | 10304.59 | 3265.348 | 2510.577 | 4058.464 | 2288.042 |
| 158892.8 | 144098.3 | 160605.4  | 142838.2 | 127672.9 | 129465.7 | 118809.7 | 110736.5 | 116044.4 | 160872.5 | 91002.24 | 122362.4 | 86665.51 | 109251.4 | 120565.6 | 101999.1 | 88886.78 |
| 43715.46 | 71489.6  | 56891.84  | 493757.8 | 109080.9 | 63797.2  | 64113.61 | 37847.78 | 49115.29 | 59437.68 | 38307.03 | 96800.26 | 61219.48 | 75170.94 | 66706.74 | 52167.25 | 28826.9  |
| 101431.7 | 73410.8  | 125228.7  | 234157.3 | 87894.01 | 111213.3 | 84211.87 | 83377.02 | 95633.26 | 45874.02 | 96088.06 | 60949.07 | 37377.58 | 70607.02 | 54496.54 | 77093.56 | 53905.22 |
| 4759.77  | 2715.559 | 5185.35   | 8302.549 | 6336.095 | 4444.808 | 1824.234 | 4137.029 | 1688.647 | 2414.156 | 5158.647 | 3739.477 | 3960.246 | 7299.522 | 2554.06  | 5840.168 | 4527.619 |
| 10225.32 | 11832.85 | 12545.23  | 11749.27 | 10812.83 | 14050.36 | 16697.67 | 8770.027 | 9331.856 | 7373.433 | 12602.76 | 11199.6  | 14815.95 | 10314.28 | 5874.869 | 7635.468 | 9244.578 |

|          |          |          |          |          |          |          |          |          |          |          |          |          |          |          |          |          |
|----------|----------|----------|----------|----------|----------|----------|----------|----------|----------|----------|----------|----------|----------|----------|----------|----------|
| 24940.75 | 27643.41 | 35588.38 | 40348.94 | 35193.49 | 35342.71 | 24486.66 | 30116.63 | 26508.03 | 20529.42 | 25531.85 | 27084.88 | 31931.41 | 24250.93 | 24586.63 | 32736.03 | 13831.1  |
| 19819.11 | 33025.47 | 31467.41 | 26601.38 | 18301.53 | 20488.47 | 31711.3  | 13676.71 | 28863.87 | 32154.68 | 28658.61 | 31902.01 | 39962.05 | 35324.43 | 41339.1  | 28785.09 | 16482.42 |
| 16700.02 | 15695.08 | 13994.29 | 12317.19 | 14058.02 | 9486.558 | 16664.71 | 10165.97 | 20030.24 | 25275    | 15426.25 | 13239.08 | 17311.17 | 12851.29 | 9788.592 | 9937.716 | 12360.89 |
| 112799.3 | 143279.9 | 110113.8 | 72909.05 | 45633.69 | 96932.57 | 79184.87 | 74937.85 | 111278   | 106246.9 | 62220.09 | 101877.8 | 85125.46 | 116600.5 | 112658.9 | 110966.4 | 202893.5 |
| 16225.52 | 10402.92 | 8161.959 | 14273.53 | 11474.54 | 13319.8  | 16894.55 | 5661.981 | 11644.33 | 7401.679 | 11486.37 | 10512.45 | 14505.22 | 11965.9  | 17279.95 | 6178.112 | 15039.16 |
| 181124.9 | 123466.8 | 194540.3 | 229234.1 | 279449.3 | 165461.2 | 145094.9 | 137554.5 | 196128.6 | 120293.3 | 207656.3 | 194810.3 | 232904.8 | 232679.8 | 180203.6 | 189031.2 | 186978.8 |
| 47803.75 | 34987.69 | 51336.3  | 104906.7 | 75310.08 | 18994.87 | 15600.92 | 59635.16 | 48660.76 | 44733.25 | 59906.92 | 100688.3 | 59183.45 | 24744.24 | 29745.61 | 61056.43 | 31198.24 |
| 11873.92 | 15030.43 | 25485.87 | 8761.82  | 14025.58 | 16039.81 | 11220.39 | 11543.18 | 22266.86 | 15027.1  | 16629.46 | 13181.64 | 16746.72 | 15895.16 | 16985.56 | 20327.82 | 19597.15 |
| 6977.04  | 3465.305 | 3435.616 | 2174.048 | 2631.468 | 2358.01  | 19840.42 | 7729.906 | 1827.587 | 4859.427 | 13512.69 | 4416.989 | 10459.51 | 4347.277 | 10439.79 | 3635.277 | 10212.04 |
| 60694.18 | 21025.41 | 49201.63 | 12789.63 | 49785.83 | 21464.54 | 6911.293 | 12887.34 | 48061.03 | 14331.68 | 56050.09 | 31792.25 | 21258.93 | 28687.46 | 8321.229 | 17543.5  | 6727.131 |
| 19048.82 | 24294.26 | 20867.73 | 10335.83 | 17521.88 | 19888.7  | 28215.92 | 24092.89 | 24831.28 | 31878.34 | 24715.35 | 34349.09 | 26179.09 | 14841.94 | 35431.25 | 21678.88 | 19016.96 |
| 136061.8 | 135468.8 | 148782   | 133872.5 | 91453.96 | 104783.7 | 131564.3 | 170647.4 | 195479.4 | 123773.9 | 432712.3 | 267737.3 | 95625.27 | 77112.12 | 87044.54 | 193925.2 | 155317.3 |
| 2589.503 | 3717.631 | 4215.37  | 5654.036 | 997.502  | 2295.132 | 2328.005 | 1174.724 | 2542.515 | 2033.74  | 3212.539 | 1690.515 | 931.5272 | 2022.4   | 1110.038 | 1861.633 | 2288.461 |
| 22948.02 | 24814.26 | 33025.31 | 30918.5  | 29190.52 | 24327.21 | 19831.14 | 20890.14 | 23356.73 | 17646.27 | 29928.95 | 31309.18 | 36649.74 | 23726.44 | 20823.41 | 23253.83 | 9400.639 |
| 5760.019 | 6866.43  | 7623.665 | 10181.63 | 27669.91 | 5579.022 | 6881.032 | 5581.195 | 5898.743 | 4323.902 | 13827.23 | 4491.255 | 8734.97  | 7388.296 | 3374.621 | 6737.933 | 54266.37 |
| 313475.8 | 180788   | 351658.1 | 394749.6 | 288798.1 | 315437.4 | 239765.2 | 329681.9 | 375254.6 | 156620.2 | 348952.7 | 234993.3 | 124503.5 | 331789.4 | 245329.1 | 343228.6 | 265715.2 |
| 61273.2  | 47581.98 | 80240.68 | 59882.51 | 78026.96 | 41234.3  | 47650    | 31922.43 | 102622.2 | 23482.51 | 51745.96 | 30705.37 | 77383.06 | 70197.6  | 46739.38 | 75700.7  | 77650.41 |
| 1110877  | 1176952  | 1253858  | 1080533  | 1076561  | 811455.9 | 848029.2 | 735178.4 | 1083183  | 1150086  | 985380.2 | 663311.4 | 1414582  | 813547.1 | 1185566  | 1167837  | 639840.3 |
| 38403.4  | 25580.34 | 46903.85 | 29640.07 | 45036.88 | 33915.88 | 38855.6  | 23821.45 | 24450.5  | 25433.05 | 29320.6  | 46568.28 | 41546.95 | 29658.41 | 24041.95 | 34857.57 | 44425.67 |
| 128114.5 | 95121.49 | 150251.8 | 153204.6 | 142405.9 | 182896.5 | 148982.3 | 138937   | 144971.3 | 104193.4 | 184467.7 | 179573   | 156655.3 | 176007.3 | 168401.3 | 174751.5 | 165041.4 |
| 27415.65 | 13812.57 | 16275.6  | 34215.76 | 11977.18 | 6314.472 | 8832.617 | 6963.193 | 11810.66 | 22570.89 | 63169.28 | 19252.5  | 19744.48 | 9414.152 | 15146.45 | 7993.81  | 15650.72 |
| 7763.273 | 11904.55 | 10407.02 | 15968.93 | 9310.152 | 8799.594 | 5169.685 | 8653.46  | 7721.797 | 7259.576 | 15652.54 | 12573.5  | 10784.28 | 10213.73 | 12619.16 | 16234.66 | 4780.173 |
| 5483.725 | 4199.72  | 6777.917 | 15441.75 | 4118.704 | 26723.36 | 3707.251 | 6193.071 | 5907.025 | 11362.64 | 9234.594 | 8041.866 | 4648.809 | 6598.469 | 4753.312 | 5684.514 | 3351.377 |
| 27592.4  | 67695.91 | 64133.37 | 50193.18 | 66718.19 | 48695.7  | 34346.48 | 32415.55 | 32695.37 | 75931.16 | 57728.77 | 47343.78 | 75334.44 | 47393.47 | 31382.96 | 32484.73 | 20772.99 |
| 13436.11 | 8912.32  | 9957.502 | 11060.17 | 15247.5  | 9267.42  | 11661.1  | 13443.82 | 18008.89 | 15259.31 | 12123.29 | 22070.07 | 11352.4  | 15453.57 | 17433.75 | 14016.63 | 16383.56 |
| 5689815  | 5142662  | 3552711  | 4117095  | 3826335  | 4450345  | 4117116  | 3748849  | 4717175  | 4742864  | 3389346  | 4743078  | 3787560  | 4389744  | 4815037  | 4159066  | 5979349  |
| 85749.45 | 84107.91 | 135378.4 | 132340.6 | 115046.5 | 94233.91 | 79834.05 | 104091.7 | 85288.17 | 62107.69 | 102923.2 | 109379.4 | 125109.3 | 100292   | 113114.9 | 108631.3 | 109910.5 |
| 3990.367 | 9174.123 | 7451.498 | 7684.01  | 2998.5   | 3999.251 | 5040.259 | 4671.833 | 7774.657 | 7608.742 | 1212.479 | 6488.463 | 4353.143 | 3100.499 | 4233.284 | 4230.293 | 7988.796 |
| 1044.679 | 1870.336 | 1487.73  | 1808.047 | 2037.437 | 1848.859 | 1836.449 | 1342.728 | 2911.013 | 2491.87  | 3413.902 | 2898.154 | 1612.734 | 2365.832 | 1156.847 | 2656.849 | 3525.785 |
| 17993.63 | 25222.33 | 20614.62 | 35238.36 | 15289.58 | 14461.05 | 24564.56 | 22197.71 | 21567.21 | 31938.98 | 18243.5  | 28271.88 | 11895.94 | 25246.61 | 24046.87 | 35278.68 | 21824.19 |
| 22114.36 | 34633.27 | 29278.72 | 17336.07 | 23192.83 | 24304.19 | 34878.16 | 28570.15 | 24330.74 | 29799.92 | 16785.83 | 34165.95 | 23797.82 | 34793.59 | 63485.78 | 19074.42 | 38758.96 |
| 6365.524 | 11056.01 | 10010.48 | 8171.504 | 5229.835 | 7972.592 | 11617.18 | 5796.33  | 8669.515 | 9027.223 | 9120.107 | 8741.791 | 5346.552 | 4515.658 | 6002.855 | 8629.705 | 5988.246 |
| 177399.2 | 256507   | 184625.6 | 150637.8 | 132026   | 147089.9 | 221340.6 | 142153.7 | 162568.4 | 196084.7 | 135431.9 | 201050.2 | 181620   | 163399.7 | 252618.7 | 165051.4 | 193416.3 |
| 1240087  | 124009.4 | 189957.1 | 2195744  | 179422.8 | 68130.42 | 51736.83 | 15355.04 | 43653.02 | 11800.52 | 2908156  | 16918.38 | 19916.9  | 34954.2  | 26094    | 8506.407 | 60801.73 |
| 64205.11 | 84966.16 | 76591.9  | 104104.9 | 76528.48 | 68896.44 | 74111.45 | 64034.13 | 60073.31 | 98556.01 | 96985.55 | 94905.2  | 66030.78 | 73885.36 | 81163.57 | 82285.63 | 75019.55 |
| 79203.95 | 64321.04 | 97835.99 | 137018.6 | 81652.48 | 104126.7 | 60213.75 | 72104.96 | 70590.27 | 36461.36 | 101130.1 | 35206.69 | 33703.03 | 84679.02 | 42438.18 | 84378.97 | 50991.01 |
| 171336   | 79841.13 | 63417.46 | 64109.53 | 27097.23 | 19214.4  | 23019.72 | 33357.29 | 35945.17 | 23116.21 | 24609.94 | 47003.03 | 35627.2  | 33974.08 | 17092.23 | 19607.32 | 11656.69 |
| 6901.708 | 6964.491 | 7742.45  | 6239.632 | 6384.852 | 8309.234 | 7544.609 | 7112.436 | 9878.905 | 10748.36 | 4330.716 | 6135.481 | 7366.796 | 8058.614 | 8974.422 | 5970.802 | 7490.314 |
| 469515.8 | 353077.2 | 190008.6 | 281367.1 | 403024.5 | 306204.4 | 299059.8 | 304399.7 | 357117.1 | 307080.5 | 159116.2 | 285357.4 | 430886.2 | 179400.7 | 298430.2 | 225531.2 | 470081   |
| 57774.48 | 52214.97 | 74028.79 | 48427.19 | 66458.59 | 38234.59 | 44245.68 | 40939.38 | 47023.28 | 52738.61 | 67378.99 | 60011.16 | 37764.7  | 60616.27 | 50694.89 | 40489.2  | 47002.06 |
| 15404.03 | 12552.85 | 16273.35 | 38812.61 | 18488.55 | 17531.31 | 12657.96 | 16026.92 | 18582.33 | 11907.06 | 25552.03 | 29700.54 | 22579.38 | 14832.4  | 9553.103 | 20687.44 | 11296.81 |
| 11815.17 | 2526.023 | 30922.24 | 7626.725 | 14612.91 | 8337.725 | 10949.16 | 14629.23 | 11225.07 | 7169.624 | 22492.45 | 33460.67 | 14100.12 | 4172.649 | 7218.903 | 23399.76 | 9183.748 |
| 148452.4 | 123672   | 116578.7 | 89921.61 | 107107   | 121594.8 | 120776.2 | 101816.3 | 109262.4 | 117379   | 104298.8 | 120675.8 | 106796.7 | 105085.3 | 113706.1 | 88923.18 | 93042.43 |
| 34340.81 | 29064.07 | 48149.93 | 59633.07 | 37570.47 | 38889.9  | 39320.73 | 32350.11 | 28599.38 | 20355.22 | 51095.7  | 5161.188 | 1427.511 | 32044.67 | 28261.97 | 33828.01 | 20539.48 |
| 7009.002 | 6777.248 | 6553.726 | 9275.178 | 7290.209 | 4656.67  | 6568.269 | 4307.516 | 4422.696 | 5287.15  | 10534.68 | 3795.411 | 4276.335 | 4820.54  | 3726.327 | 3222.998 | 5810.042 |
| 2565003  | 3782394  | 3577740  | 3350149  | 3124849  | 3925336  | 2411054  | 3564444  | 2881186  | 3406529  | 4059138  | 2586536  | 2545510  | 5005475  | 3698018  | 4564051  | 3571519  |
| 8809.667 | 10707.71 | 6210.651 | 13212.33 | 6649.907 | 10616.29 | 30771.43 | 9196.563 | 8479.474 | 10976.54 | 18326.54 | 6743.78  | 5330.664 | 5446.244 | 14026.55 | 4503.901 | 13404.81 |
| 15136.98 | 15335.33 | 38697.06 | 30010    | 24945.61 | 18984.58 | 11103.21 | 27850.55 | 11607.55 | 19265    | 39306.88 | 62425.54 | 27665.23 | 13106.48 | 18296.78 | 44362.3  | 40471.89 |
| 104956.2 | 221566.3 | 164493.2 | 124193.8 | 112491   | 240729.7 | 315134.2 | 252901.6 | 146106.9 | 197332.1 | 88433.95 | 100102.7 | 159020   | 146175.2 | 231094.6 | 207709.9 | 173593.5 |

|          |          |          |          |          |           |          |          |          |          |          |          |          |          |          |          |          |
|----------|----------|----------|----------|----------|-----------|----------|----------|----------|----------|----------|----------|----------|----------|----------|----------|----------|
| 156880   | 68089.97 | 105707   | 186918.8 | 125433.7 | 42327.06  | 46132.05 | 59698.11 | 137209.4 | 97265.23 | 119435.6 | 159949.9 | 142255   | 84291.95 | 70719.69 | 97449.73 | 123359.9 |
| 6553.164 | 5451.499 | 4464.656 | 8778.275 | 3691.548 | 6178.413  | 13752.92 | 7309.913 | 1626.362 | 5755.463 | 16506.7  | 2403.699 | 7446.112 | 3494.801 | 6452.319 | 3232.861 | 5426.925 |
| 15049.72 | 21945.86 | 20389.74 | 14711.52 | 10389.02 | 16912.84  | 18111.49 | 17731.78 | 17962.65 | 19576.1  | 32576.13 | 15417.48 | 11024.76 | 16073.5  | 20880.85 | 21680.37 | 35222.92 |
| 6340701  | 7397153  | 8291699  | 7073392  | 5060897  | 6147356   | 8788722  | 6387694  | 7171351  | 7625825  | 7972107  | 8317408  | 6511294  | 8206685  | 8459361  | 8630184  | 5620052  |
| 10078.03 | 4219.465 | 9488.19  | 12681.52 | 13846.71 | 5999.586  | 3425.631 | 9024.399 | 8677.525 | 7172.631 | 19760.63 | 5352.635 | 10799.61 | 7272.479 | 5087.866 | 11893.64 | 8096.905 |
| 59560.94 | 18616.89 | 27514.2  | 55905.96 | 26687.5  | 20813.05  | 16028.04 | 29729.97 | 18914.5  | 17031.94 | 159139.2 | 19677.54 | 17070.11 | 19405.72 | 17027.35 | 15269.62 | 47958.12 |
| 8018.415 | 12418.15 | 15311.38 | 24730.96 | 9680.678 | 9066.456  | 8481.691 | 7399.083 | 9216.114 | 6758.812 | 19723.51 | 25315.21 | 10416.51 | 9200.186 | 5151.501 | 11481.9  | 9790.485 |
| 307755.3 | 337042.8 | 423704.9 | 284662.2 | 337026.1 | 275510.9  | 273782.7 | 328272.7 | 272592   | 413750.5 | 393574.1 | 327443   | 387987.8 | 324732.5 | 275307.3 | 342919.2 | 426492.7 |
| 13574.29 | 22540.41 | 16302.46 | 14115.8  | 21017.52 | 17862.24  | 25320.86 | 16763.76 | 23615.72 | 28470.63 | 26865.08 | 27812.19 | 23229.82 | 25932.34 | 29745.87 | 22666.21 | 35255.5  |
| 16856.55 | 17741.35 | 14238.46 | 15473.8  | 13196.12 | 14674.78  | 10609.32 | 16110.52 | 31474.33 | 13937.9  | 22312.03 | 13043.25 | 14608.83 | 16244.78 | 8287.752 | 13314.72 | 8264.107 |
| 8804.829 | 7437.263 | 10824.88 | 17641.33 | 8891.457 | 6175.211  | 7403.801 | 7613.716 | 6379.474 | 5386.295 | 13359.45 | 14284.65 | 11690.37 | 14865.5  | 6201.441 | 20416.94 | 4938.68  |
| 4315.684 | 3434.33  | 3751.882 | 3219.017 | 2135.415 | 1779.532  | 3879.952 | 3884.617 | 2710.451 | 3433.466 | 5290.541 | 5166.777 | 5214.429 | 3454.53  | 1878.08  | 3819.47  | 5323.222 |
| 7444.214 | 2562.049 | 4240.416 | 8053.861 | 4551.664 | 6211.588  | 8242.332 | 7387.43  | 4973.717 | 3331.937 | 8561.954 | 5754.774 | 6061.985 | 3486.071 | 7553.202 | 6454.637 | 7321.539 |
| 3552577  | 3586646  | 3457698  | 2613733  | 2328064  | 3118473   | 3587134  | 2762324  | 3930987  | 3000192  | 2381586  | 2807805  | 2447700  | 3058038  | 3362284  | 2759139  | 3800075  |
| 42102.73 | 34022.97 | 59336.78 | 55651.26 | 46839.59 | 46821     | 28799.24 | 37317.35 | 42514.91 | 32904.66 | 41194.41 | 51089.61 | 44957.44 | 43836.82 | 29632.21 | 51938.85 | 28710.6  |
| 540020.8 | 759381.1 | 568128.3 | 512682.4 | 438545.3 | 562481.3  | 526074.2 | 494266.5 | 700864.3 | 716937.9 | 523617.3 | 549116.1 | 503972.5 | 586834.6 | 731654.9 | 559917.6 | 1029413  |
| 35445.24 | 44220.63 | 68245.89 | 87726.41 | 45705.34 | 64403.18  | 37689.48 | 49864.99 | 45332.17 | 28081.53 | 42036.26 | 95643.86 | 47342.72 | 59174.68 | 38394.07 | 76132.99 | 32100.99 |
| 22103.56 | 18125.1  | 39592.92 | 59655.69 | 21741.37 | 19591.25  | 11756.19 | 30450.49 | 27171.49 | 20628.55 | 35952.44 | 51047.34 | 29658.02 | 16142.27 | 17171.55 | 49954.98 | 24708.34 |
| 130512.6 | 178121.9 | 158161.6 | 108999.9 | 115644.4 | 129326    | 343149.6 | 185517.8 | 143245.3 | 150576.9 | 152626.3 | 91234.85 | 123630.4 | 119156.3 | 147164.8 | 123009.2 | 137085.7 |
| 157263.1 | 96754.71 | 232318.3 | 260621.7 | 132847.9 | 194749.1  | 115839.4 | 123750.7 | 128339.6 | 52243.02 | 176906.8 | 80822.38 | 46642.4  | 193574   | 99471.73 | 183500.1 | 88196.34 |
| 506254.9 | 363032.3 | 117193.2 | 786048.1 | 179465.8 | 168544    | 506798.9 | 291034.2 | 402805.2 | 172590.3 | 264154.2 | 138029.2 | 117358.4 | 362394.6 | 301417.9 | 146101.9 | 264808.5 |
| 38508.04 | 75740.85 | 45078.84 | 69228.8  | 2249.731 | 74616.02  | 41282.77 | 23027.92 | 43488.12 | 22135.62 | 30825.84 | 19113.07 | 4578.366 | 22685.24 | 4437.591 | 21837.37 | 23534.24 |
| 11396.89 | 23648.67 | 30836.16 | 49420.28 | 14762.56 | 18911.69  | 17473.64 | 20518.61 | 21962.08 | 27590.59 | 33447.25 | 15135.48 | 7451.481 | 25999.79 | 27947.8  | 48640.16 | 37605.92 |
| 16411.29 | 10448.16 | 24939.96 | 26057.25 | 31320.84 | 6834.568  | 9966.432 | 6163.519 | 10421.43 | 9389.417 | 19510.93 | 35899.33 | 36372.72 | 7312.463 | 19965.54 | 20526.6  | 32333.29 |
| 102294.1 | 52440.18 | 90944.7  | 105863.3 | 26226.53 | 40615.61  | 57167.42 | 46223.53 | 51292.23 | 52290.1  | 45904.89 | 40848.11 | 47267.11 | 67775.69 | 50054.76 | 58232.92 | 71226.91 |
| 108280.4 | 104724   | 112064.1 | 78715.65 | 61522.92 | 72810.38  | 79953.71 | 80249.57 | 85286.22 | 65874.79 | 67893.14 | 57315.54 | 58843.38 | 61631.78 | 71696.7  | 68834.66 | 121143.8 |
| 136841   | 115456.1 | 123351   | 182062.5 | 148637.7 | 129145.2  | 146722.2 | 107625.5 | 135052.3 | 124438.5 | 138742.8 | 181178.1 | 172727.5 | 134912.6 | 143398.1 | 144415.5 | 73482.18 |
| 63813.7  | 87704.88 | 64594.93 | 41844.56 | 120698   | 162627.3  | 304001.7 | 81234.63 | 73788.55 | 74209.22 | 56721.89 | 99852.8  | 28731.62 | 82907.99 | 247570.5 | 93345.56 | 220819.2 |
| 103662.1 | 132327.7 | 47181.26 | 56093.61 | 118104.4 | 142416    | 248764.1 | 105356.5 | 211095.4 | 111501.1 | 87383.2  | 60659.98 | 234858.7 | 199046.4 | 155620.8 | 125864.2 | 154485.4 |
| 28536.39 | 34168.98 | 67437.54 | 57346.23 | 44025.5  | 52303.98  | 30841.33 | 30625.36 | 16364.49 | 12854.33 | 24650.57 | 13817.61 | 40589.88 | 31154.64 | 14860.66 | 32399.83 | 20323.13 |
| 9160.633 | 13727.03 | 57120.59 | 81380.29 | 54031.5  | 9126.075  | 2820.494 | 15487.67 | 9835.935 | 15445.04 | 30019.89 | 67106.59 | 37030.01 | 8556.242 | 13265.05 | 22344.92 | 18556.17 |
| 33776.59 | 22432.94 | 30778.3  | 66657.48 | 33026.18 | 24452.12  | 41472.84 | 43846.2  | 30415.3  | 22257.48 | 37785.64 | 24051.85 | 30529.55 | 38281.52 | 36113.49 | 35175    | 50667.22 |
| 402052.2 | 359687.3 | 362834.6 | 379359.1 | 190671.6 | 245683    | 264276.4 | 314552.6 | 396149.2 | 344793.2 | 232118.3 | 324788.2 | 315277.6 | 291891   | 266415.1 | 339220.8 | 516516.4 |
| 65070.77 | 35702.97 | 49812.03 | 45320.54 | 65341.35 | 53015.47  | 101228.9 | 97540.33 | 93267.19 | 79738.24 | 57052.41 | 61341.99 | 90709.13 | 58486.02 | 106558.9 | 67539.18 | 107392.7 |
| 231175.8 | 208395.3 | 326024.4 | 221319.9 | 203525.4 | 133305.1  | 102464.3 | 210427.3 | 226940.2 | 195564.2 | 187777.2 | 279270.2 | 216900.9 | 122085.5 | 122774.9 | 230003.4 | 237989.1 |
| 312128.1 | 257296.2 | 367009.2 | 416917.3 | 380645.4 | 256247.7  | 254811.3 | 214363.8 | 254387.3 | 219715.4 | 294984.4 | 289917.8 | 340875.7 | 239395.3 | 279101.6 | 302797.3 | 289722.9 |
| 336103   | 468406.2 | 884560.9 | 273427.8 | 705905.4 | 333721.8  | 135443.3 | 177561.2 | 486478.3 | 518102.1 | 946578.1 | 1060468  | 506858.9 | 664622.4 | 372264.4 | 391486.2 | 229155.1 |
| 68447.73 | 132167.4 | 107112   | 74906.3  | 100133   | 96546.03  | 93360.46 | 81947.14 | 93872.41 | 142503.6 | 93575.39 | 106587.5 | 82944.17 | 149743.5 | 135297.8 | 149747.4 | 98416.81 |
| 7190.53  | 8304.8   | 10300.69 | 9409.989 | 10328.02 | 6608.109  | 6687.784 | 9030.519 | 5691.587 | 15874.28 | 15013.28 | 9398.396 | 12673.88 | 16657.82 | 13245.14 | 17120.47 | 12214.11 |
| 19299.43 | 18103.41 | 17430.46 | 19491.77 | 29342.01 | 21612.64  | 20307.61 | 17561.28 | 15024.9  | 21862.27 | 25389.45 | 31787.28 | 22571.88 | 36774.78 | 27819.35 | 22612.38 | 15489.6  |
| 33003.38 | 31738.54 | 51880.17 | 49654.75 | 39585.94 | 53589.6   | 31360.09 | 32170.63 | 29615.55 | 19377.94 | 33416.1  | 22502.88 | 7332.375 | 37714.49 | 23723.44 | 31543.38 | 14276.1  |
| 92784.72 | 143675.4 | 102346   | 85390.06 | 77446.43 | 96551.41  | 147854.5 | 139211.2 | 77658.67 | 22573.2  | 115394.1 | 109688.2 | 85762.52 | 102360.3 | 115353.3 | 79883.49 | 84144.21 |
| 89511.02 | 107831   | 98940.42 | 99920.02 | 66654.86 | 86123.53  | 119128.6 | 98116.22 | 109705.2 | 112257.2 | 112491   | 108130.1 | 75150    | 90357.25 | 103712.4 | 74186.89 | 79774.88 |
| 56738.12 | 47275.07 | 87196.85 | 125534.8 | 73005.17 | 80271.92  | 46544.23 | 100353   | 69618.95 | 46822    | 79720.23 | 81318.33 | 55137.98 | 98430.38 | 51927.02 | 134784.8 | 55205.34 |
| 58484.64 | 70465.41 | 56662.15 | 50333.77 | 32364.76 | 45152.2   | 66811.11 | 64208.84 | 69099.6  | 64302.85 | 62886.18 | 58060.74 | 41021.03 | 70268.6  | 70967.02 | 52305.24 | 50929.8  |
| 25535.45 | 23778.07 | 12791.85 | 31496    | 30807.47 | 24200.94  | 27205.84 | 21873.67 | 46175.34 | 27833.47 | 25566.93 | 16680.04 | 30489.14 | 38501.25 | 27314.92 | 33326.46 | 31180.13 |
| 3036504  | 2564091  | 3435244  | 2236344  | 1985118  | 2746049   | 2640530  | 2746952  | 3001315  | 2242210  | 3315498  | 2345022  | 2528447  | 3261995  | 2647459  | 2845075  | 2464074  |
| 18903488 | 19534654 | 11094683 | 10273504 | 13211355 | 107110139 | 9812378  | 10567656 | 15992900 | 19073472 | 8388698  | 11774733 | 12379257 | 8044027  | 11313415 | 15489757 | 28706218 |
| 17208.05 | 24836.87 | 10303.04 | 10647.32 | 12961.43 | 20152.96  | 74292.36 | 30394.09 | 15568.39 | 25466.96 | 5848.975 | 16406.76 | 14484.02 | 8735.732 | 28776.26 | 12077.85 | 13834.04 |

|          |          |          |          |          |          |          |          |          |          |          |          |          |          |          |          |          |
|----------|----------|----------|----------|----------|----------|----------|----------|----------|----------|----------|----------|----------|----------|----------|----------|----------|
| 843317.3 | 1007746  | 836964.5 | 931568.7 | 841626.6 | 776278.8 | 1230601  | 743576.4 | 749834.4 | 1048709  | 1206311  | 1119292  | 879621.3 | 921865.6 | 1527057  | 855257.1 | 608721.4 |
| 3001128  | 1925793  | 3357940  | 4130810  | 2770370  | 3204835  | 2785862  | 2724120  | 3351768  | 1444950  | 3048787  | 2043015  | 1778754  | 3972249  | 2774041  | 3547639  | 2250908  |
| 36462.12 | 25074.19 | 12544.37 | 18302.09 | 14051.82 | 20057.01 | 17802.86 | 5863.304 | 26140.94 | 17894.62 | 22542.21 | 19492.99 | 14874.89 | 15473.23 | 16787.89 | 17122.51 | 27189.88 |
| 48515.46 | 63591.63 | 45166.63 | 69515.24 | 58096.29 | 41731.22 | 27450.98 | 39230.66 | 37921.04 | 44402.86 | 62266.49 | 30757.07 | 44477.69 | 64276.01 | 27474.16 | 34853.69 | 38177.7  |
| 20875.43 | 19787.54 | 30376.99 | 31632.58 | 23759.51 | 13382.41 | 14940.12 | 12932.26 | 14169.77 | 22718.83 | 37376.29 | 28255.04 | 21703.16 | 15604.46 | 18526.72 | 16254.42 | 13807.17 |
| 129259.3 | 159433.2 | 141697.7 | 119457.3 | 113834.9 | 189073.5 | 191133.4 | 191331.3 | 129570.6 | 149046.7 | 68168.99 | 132391.7 | 179866   | 202478.8 | 169620.1 | 193097.5 | 130126.5 |
| 299448.8 | 329292   | 352224.8 | 539173.2 | 543208.6 | 443314   | 340778.7 | 287270.1 | 310032.3 | 218679.4 | 250263.1 | 312225.1 | 331997.8 | 346080.4 | 228160.8 | 324460   | 198206.8 |
| 96856.9  | 108329.4 | 108458.1 | 116932.7 | 82297.34 | 81891.63 | 96223.44 | 91213.88 | 120817.3 | 113095.7 | 88798.06 | 113135   | 109655   | 93400.89 | 116384.3 | 96561.59 | 80674.64 |
| 24914.47 | 18351.1  | 24961.37 | 21204.61 | 6683.969 | 13442.62 | 8246.574 | 12968.82 | 13485.66 | 7805.533 | 14780.82 | 11140.31 | 11548.63 | 12915.27 | 13200.1  | 17732.23 | 8733.973 |
| 4106.211 | 10597.86 | 9213.734 | 6623.632 | 7949.715 | 6924.418 | 6455.468 | 6151.656 | 12106.9  | 7680.42  | 5543.585 | 13958.26 | 7242.001 | 8600.153 | 5360.854 | 4464.958 | 1227.688 |
| 11363.76 | 11805.66 | 12520.3  | 19244.95 | 12816.95 | 14101.2  | 9231.021 | 10151.81 | 13858.53 | 15406.54 | 15245.91 | 12641.22 | 21953.35 | 19078.9  | 16710.46 | 19116.55 | 12949.49 |
| 130642.5 | 126153.2 | 129583.6 | 95867.72 | 98517.52 | 72916.89 | 78036.72 | 100927.2 | 116257.4 | 127476.9 | 171121.9 | 112287.8 | 81504.19 | 92217.74 | 84108.19 | 87743.54 | 76214.89 |
| 13954.69 | 11747.09 | 35074.5  | 7438.412 | 16925.05 | 3590.021 | 4441.02  | 8098.98  | 8893.346 | 11238.03 | 28101.19 | 9944.265 | 11611.66 | 8623.479 | 6551.81  | 8155.226 | 7216.054 |
| 7533.58  | 8784.396 | 8044.11  | 7509.311 | 5253.378 | 4711.759 | 5992.286 | 5274.438 | 8133.964 | 6885.558 | 4986.888 | 4565.023 | 6593.219 | 2766.279 | 6803.397 | 5188.497 | 6510.176 |
| 12765.87 | 13805.95 | 21357.61 | 42122.77 | 10085.23 | 11498.81 | 17349.61 | 15532.7  | 12662.27 | 10883.31 | 27976.74 | 12602.68 | 9925.99  | 17205.28 | 12729.96 | 16396.39 | 10958.1  |
| 56896.45 | 57177.2  | 59617.39 | 59265.3  | 58430.26 | 64605.93 | 54623.93 | 41452.45 | 50065.21 | 38425.96 | 51685.53 | 44034.61 | 74445.35 | 66908.73 | 58792.22 | 65134.94 | 25136.09 |
| 43451.02 | 47361.71 | 41316.07 | 50907.95 | 44312.9  | 22192.7  | 41692.18 | 61082.81 | 48772.11 | 74607.39 | 50674.86 | 50255.04 | 37698.06 | 58059.55 | 51831.59 | 77043.62 | 39189.4  |
| 4255761  | 5014788  | 5237989  | 4286480  | 5492849  | 4687974  | 4330501  | 5138126  | 5153172  | 6856046  | 5720240  | 4833275  | 6977483  | 5624818  | 4894843  | 6025152  | 7952544  |
| 2653.518 | 4055.627 | 5133.889 | 6095.876 | 1274.145 | 2152.448 | 2549.23  | 2329.684 | 2204.224 | 1665.94  | 4008.38  | 4085.787 | 4035.116 | 2958.165 | 2380.573 | 2561.843 | 2658.309 |
| 42659.93 | 33572.61 | 41741.45 | 41782.06 | 38940.62 | 35775.41 | 30451.96 | 39696.33 | 46038.86 | 42756.48 | 30286.34 | 25746.7  | 29373.68 | 56615.33 | 38810.09 | 68483.3  | 48347.37 |
| 14677.95 | 11351.09 | 18716.42 | 17571.86 | 17345.6  | 14735.1  | 18387.76 | 14548.7  | 18459.06 | 11492.2  | 14634.99 | 20494.62 | 22228.41 | 24652.96 | 16724.49 | 16813.56 | 9826.602 |
| 22134.63 | 19687.46 | 39225.56 | 35609.7  | 27586.58 | 25962.3  | 21942.75 | 25474.46 | 43173.85 | 22196.99 | 28466.96 | 21780.53 | 26929.5  | 21388.3  | 13231.99 | 19185.75 | 5969.926 |
| 2519.668 | 3766.095 | 5077.134 | 1549.491 | 3315.143 | 2938.675 | 1924.518 | 2678.717 | 3043.956 | 1800.148 | 4267.993 | 8153.198 | 2611.51  | 2685.942 | 1621.366 | 2829.158 | 5604.934 |
| 184186.5 | 356064.1 | 816751.2 | 600263.4 | 477769.8 | 35824.66 | 56484.88 | 588340.6 | 642606.1 | 556006.6 | 380514   | 533556.7 | 549631.4 | 854433.9 | 22498.86 | 1048800  | 1172042  |
| 107447.6 | 142831.7 | 140537.3 | 121033   | 115970.8 | 118717.6 | 124821.1 | 133451.7 | 191099.2 | 160393.3 | 195711.3 | 155582.9 | 113510.3 | 119474.3 | 140578.5 | 113763.8 | 95893.47 |
| 69987.67 | 122098   | 97035.45 | 55366.59 | 81227.72 | 52333.7  | 55116.26 | 82355.45 | 105708.7 | 144574.1 | 57054.45 | 105628.1 | 80015.59 | 68681.05 | 56638.04 | 67734.69 | 51854.77 |
| 7797.045 | 12832.55 | 5234.997 | 18171.16 | 4955.903 | 7475.343 | 9883.352 | 5757.453 | 11082.22 | 8516.946 | 8674.23  | 481.6935 | 4578.698 | 5282.3   | 7914.912 | 6281.599 | 9322.852 |
| 27976    | 37922.01 | 62563.59 | 62261.73 | 42569.9  | 48429.71 | 40249.96 | 47131.95 | 29523.94 | 34828.74 | 54023.86 | 42370.22 | 35521.66 | 50072.99 | 30966.37 | 51446.52 | 28246.33 |
| 962.8876 | 6969.37  | 4802.83  | 4974.887 | 1499.725 | 15411.86 | 7397.824 | 707.8312 | 3878.283 | 6070.768 | 2184.466 | 1263.28  | 1272.704 | 18106.62 | 4625.17  | 1176.64  | 4285.784 |
| 5913.309 | 5457.022 | 7300.264 | 4635.5   | 20987.9  | 10685.21 | 4430.868 | 6545.316 | 7336.374 | 9173.27  | 10179.44 | 6764.91  | 6288.489 | 6983.578 | 6057.335 | 9064.696 | 9922.81  |
| 566468.1 | 741009.6 | 581872.1 | 593854.4 | 605113.9 | 527380.3 | 538173.7 | 449044.8 | 646801.8 | 682233.4 | 492641.1 | 504326   | 564870.3 | 482982.2 | 650592.2 | 515142.1 | 692545.8 |
| 35202.4  | 27700.44 | 25617.44 | 22366.24 | 37023.04 | 28692.32 | 27417.42 | 34021.71 | 28370.74 | 41842.25 | 39557.09 | 33837.61 | 37980.03 | 37084.25 | 51292.3  | 26639.11 | 35145.17 |
| 10498.96 | 10425.48 | 9857.689 | 9766.426 | 8836.096 | 4494.491 | 5573.479 | 6513.705 | 9885.35  | 8433.9   | 11211.65 | 2759.895 | 6903.747 | 4076.731 | 5636.331 | 5691.061 | 10191.61 |
| 111949.1 | 114472.2 | 69010.22 | 97241.77 | 63110.8  | 70936.71 | 78335.74 | 95148.48 | 98423.78 | 67823.33 | 37000.95 | 68716.98 | 54019.68 | 84770.22 | 99628.3  | 84062.98 | 96675.66 |
| 15296.08 | 5682.059 | 6363.205 | 37445.08 | 12749.37 | 5814.563 | 3575.704 | 5075.369 | 5485.738 | 3590.473 | 46703.9  | 8017.806 | 9081.808 | 3992.52  | 5233.232 | 7021.299 | 2525.286 |
| 17472.56 | 13230.21 | 11977.62 | 14866.54 | 8546.58  | 15609.9  | 22135.94 | 17344.76 | 11021.38 | 9869.124 | 12261.82 | 6248.505 | 6939.284 | 9332.807 | 12595.56 | 7115.95  | 11437.3  |
| 12808.52 | 21549.2  | 19070.67 | 21985.52 | 20941.96 | 16368.1  | 11215.2  | 19191.09 | 16065.01 | 17412.64 | 12662.03 | 18949.43 | 15244.74 | 18406.21 | 12117.39 | 28961.87 | 12332.09 |
| 7660.145 | 8550.943 | 8846.508 | 9461.188 | 7856.539 | 9341.117 | 4757.844 | 6882.325 | 4090.954 | 7412.697 | 9377.967 | 8383.886 | 4388.44  | 12604.61 | 11321.68 | 3540.588 | 6803.91  |
| 15024.08 | 5804.364 | 8884.134 | 21611.92 | 32079.04 | 12636.68 | 12703.2  | 23920.05 | 18183.74 | 17425.49 | 51852    | 74472.86 | 27904.37 | 13500.29 | 10677.51 | 40370.48 | 20015.83 |
| 31241.59 | 17711.26 | 16246.67 | 27247.29 | 22725.88 | 10824.39 | 14165.71 | 29275    | 20817.34 | 32014.72 | 18540.85 | 26215.14 | 14021.87 | 16356.02 | 12248.54 | 22807.41 | 17109.45 |
| 325825.8 | 277241.3 | 341217.3 | 423385.5 | 293347.8 | 345073   | 291585.4 | 312766.9 | 314769.7 | 204977.5 | 199957.8 | 245741.4 | 325220.7 | 298235.7 | 262396.6 | 340792.6 | 295971.5 |
| 180295.5 | 156134.4 | 221304.2 | 233977.2 | 212180.7 | 225545.4 | 141421.7 | 171512.3 | 159985.8 | 110548.6 | 157886.2 | 135173.6 | 154068.7 | 171132.3 | 110455   | 158585   | 120394   |
| 41292.32 | 38163.16 | 41348.43 | 70168.33 | 24146.88 | 67290.16 | 72481.45 | 56166.52 | 40904.57 | 68210.13 | 44362.06 | 59923.68 | 65140.41 | 93264.81 | 68733.86 | 41849.58 | 66219.56 |
| 33747.95 | 31109.79 | 37833.58 | 22496.59 | 51463.47 | 18277.61 | 23678.74 | 20132.79 | 17588.72 | 37970.5  | 67302.66 | 29493.21 | 35695.7  | 28730.88 | 34515.42 | 22561.98 | 24527.57 |
| 16742.84 | 16763.02 | 14725.87 | 10251.11 | 14325.94 | 11435.77 | 13314.98 | 15955.61 | 22827.27 | 13920.5  | 14227.24 | 33592.01 | 15992.79 | 13339.96 | 10793.16 | 8835.516 | 5891.445 |
| 871095.2 | 949632.5 | 736811.1 | 1097415  | 498674.3 | 863812.1 | 700082.8 | 574597.1 | 856144.1 | 670656.5 | 829162.3 | 599454.5 | 531293   | 698425.9 | 345806   | 753652.3 | 441250.3 |
| 11410.21 | 9693.242 | 20356.69 | 29971.04 | 20803.44 | 10132.84 | 7408.534 | 20148.95 | 18872.31 | 12873.16 | 23061.19 | 34818.65 | 26263.69 | 12791.67 | 13768.99 | 22560.51 | 17760.6  |
| 6707.7   | 7178.416 | 10487.22 | 12641.5  | 4414.761 | 6002.888 | 7494.456 | 5785.766 | 4810.648 | 7040.222 | 11890.74 | 6944.396 | 9708.723 | 5898.797 | 4058.53  | 5755.513 | 6488.822 |
| 270970.2 | 198456   | 98504.7  | 194891   | 212789.8 | 316661.2 | 674554.3 | 272815.1 | 323908   | 187555.5 | 252326.4 | 112052.8 | 191088.5 | 427365.3 | 272832.9 | 320802.8 | 275207.8 |

|          |          |          |          |          |          |          |          |          |          |          |          |          |          |          |          |          |
|----------|----------|----------|----------|----------|----------|----------|----------|----------|----------|----------|----------|----------|----------|----------|----------|----------|
| 30430.69 | 25317.47 | 11208.43 | 16909.04 | 36729.71 | 18547.46 | 17806.66 | 14587.29 | 26218.86 | 33712.94 | 23749.53 | 22227.96 | 40622.02 | 19303.34 | 17095.94 | 16340.36 | 17717.84 |
| 4429.429 | 3872.851 | 1517.852 | 4662.22  | 4195.392 | 3513.375 | 3392.66  | 3619.558 | 4113.028 | 2292.408 | 6122.304 | 3846.987 | 5560.079 | 21467.59 | 2123.325 | 3500.011 | 8097.227 |
| 281658.3 | 134796.2 | 178239.7 | 304012.4 | 351802.1 | 113644.6 | 184414.7 | 307519.8 | 322151.1 | 199209.5 | 442841.1 | 139033.9 | 377415.5 | 1142327  | 265046.2 | 176859.5 | 313478.6 |
| 186143.6 | 63257.08 | 92770.19 | 198535.6 | 274144.6 | 98661.58 | 127728.2 | 266179.6 | 284693.8 | 95891.35 | 285537.7 | 77498.34 | 271615.3 | 760204.5 | 179956.4 | 106918   | 175719.9 |
| 62386.35 | 22754.67 | 32935.95 | 97040.76 | 72746.78 | 26357.64 | 42793.43 | 63028.46 | 74163.64 | 31045.74 | 115324.1 | 28176.66 | 132609.7 | 269259.4 | 57238.83 | 30236.46 | 51422.78 |
| 8288.706 | 6711.502 | 7672.442 | 10564.51 | 8671.927 | 4822.313 | 8704.267 | 6506.47  | 10633.91 | 6105.325 | 14551.99 | 5403.706 | 6094.83  | 77307.48 | 10878.09 | 6151.242 | 14175.16 |
| 188112.2 | 45795.39 | 133715.8 | 178276.5 | 206942.8 | 70266.2  | 124870.2 | 197759.6 | 201624.8 | 96362.8  | 246299.9 | 111458.9 | 266388.8 | 953331.8 | 206296.7 | 162927   | 219630.2 |
| 16816.83 | 13674.98 | 23988.56 | 26759.56 | 20970.19 | 20699.74 | 16494.64 | 15919.07 | 21206.65 | 20847.17 | 24740.77 | 22402.64 | 19002.94 | 24207.59 | 19898.19 | 17842.29 | 14053.21 |
| 2614174  | 3191593  | 3044269  | 2720688  | 2016874  | 2578270  | 2936042  | 2539339  | 2694309  | 2756636  | 3593853  | 3480001  | 2034689  | 2939455  | 4417774  | 3470205  | 2592971  |
| 675720.6 | 585632.3 | 587794.6 | 1001797  | 739848.9 | 455817.7 | 475627.8 | 568652.4 | 600551.8 | 672851.3 | 673064.3 | 958466.1 | 649796.3 | 523858   | 566196.1 | 562529.5 | 369831.8 |
| 364437.4 | 293446.6 | 574518.8 | 625165.6 | 481816.7 | 435492.4 | 264519   | 378293.1 | 313732.2 | 205333.7 | 408331.4 | 336762.1 | 387716.9 | 332937.2 | 254246   | 423045.4 | 256332.7 |
| 503506.6 | 356251.8 | 712835.6 | 904096.7 | 620001.1 | 374701.1 | 326754.6 | 484889.7 | 665441.1 | 469525   | 957732.6 | 953166.7 | 557111.6 | 529271.9 | 516991.3 | 729515.9 | 526962.1 |
| 9140.878 | 11240.2  | 5311.597 | 15897.78 | 7048.904 | 9443.674 | 9251.693 | 8867.656 | 15008.08 | 11219.14 | 14743.12 | 6086.987 | 12238.14 | 13081.35 | 9936.577 | 11507.02 | 8639.771 |
| 6423.745 | 4799.445 | 10842.3  | 13311.22 | 6483.373 | 5977.666 | 4040.197 | 7857.407 | 4791.875 | 4831.443 | 9810.08  | 7275.288 | 10089.3  | 8927.984 | 5289.439 | 7949.867 | 5926.229 |
| 97739.51 | 89850.19 | 115187   | 173703.9 | 94371.93 | 82660.94 | 67769.8  | 111955.7 | 114569.9 | 77275.08 | 128602.8 | 121803.5 | 87207.67 | 100762   | 81704.77 | 142195.3 | 99530.28 |
| 88092.41 | 29330.79 | 44431.67 | 102493.1 | 96133.88 | 35735.9  | 50307.22 | 97077.36 | 76260.02 | 38819.27 | 117734.1 | 54732.33 | 94630.46 | 333741.2 | 66528.65 | 65201.01 | 92321.84 |
| 30879.9  | 16985.57 | 26947.82 | 24590.46 | 32343.87 | 5455.727 | 7782.92  | 3274.985 | 8424.977 | 25515.07 | 14495.05 | 50947.02 | 29903.12 | 2627.009 | 6860.603 | 2531.174 | 14442.54 |
| 5936.153 | 6603.829 | 9692.586 | 11037.21 | 10545.81 | 7477.316 | 5006.261 | 6326.938 | 4129.564 | 5675.729 | 10199.79 | 18718.77 | 5843.067 | 8183.54  | 4855.18  | 8312.177 | 6850.355 |
| 18309.18 | 24533.96 | 26713.59 | 25773.1  | 25738.25 | 20317.43 | 16069.71 | 30018.01 | 23010.53 | 25242.22 | 9000.553 | 20438.74 | 23906.54 | 20251.14 | 13380.97 | 30575.68 | 16595.19 |
| 9267.214 | 8791.678 | 4238.703 | 15541.08 | 6910.181 | 14036.18 | 12078.01 | 10539.74 | 11521.74 | 11613.5  | 13023.77 | 3844.484 | 11103.02 | 1989.551 | 9130.752 | 11239.18 | 12174.98 |
| 3502.011 | 5166.815 | 8619.406 | 10126.42 | 5788.332 | 5207.85  | 3430.796 | 4152.915 | 6461.412 | 4178.741 | 9830.154 | 6067.556 | 5092.124 | 7297.938 | 4035.573 | 6456.827 | 6286.354 |
| 48713.33 | 55081.99 | 69714.16 | 88145.79 | 65422.14 | 42214.44 | 39251.85 | 40540.56 | 45131.8  | 37435.01 | 39487    | 57988.6  | 50721.64 | 43994.21 | 50526    | 48400.19 | 30565.21 |
| 106228.3 | 139213.8 | 119192.1 | 113919.1 | 156544.3 | 115150.9 | 206706.8 | 144483   | 141535.3 | 150630.4 | 96960.55 | 103110.6 | 205606.9 | 73272.12 | 100902.2 | 125197.8 | 173559   |
| 687109.9 | 661988   | 593504.9 | 529231.8 | 394448.3 | 343320.3 | 879084.9 | 524910.3 | 768477.4 | 843399.9 | 503669.8 | 671270.6 | 182004   | 587141.1 | 1421737  | 608916.8 | 282735.9 |
| 14443.72 | 9565.276 | 20829.62 | 22216.65 | 12913.13 | 14474.19 | 6720.862 | 7946.894 | 4624.423 | 7726.122 | 15562.21 | 14274.77 | 27218.65 | 6775.954 | 4155.52  | 9965.184 | 9321.007 |
| 734795.1 | 571853.1 | 824199.3 | 465901.5 | 396608.3 | 443632.4 | 790150.3 | 709720.2 | 807334.3 | 763320.3 | 914468.2 | 646757.7 | 517304.8 | 551615.4 | 1048817  | 597201.2 | 649449.2 |
| 34462.04 | 27686.49 | 45309.61 | 69290.62 | 40353.85 | 31151.76 | 26754.16 | 29245.69 | 33562.67 | 27159.13 | 36743.38 | 61954.6  | 53597.58 | 41497.31 | 54293.35 | 53597.67 | 40865.66 |
| 108631.6 | 110548.8 | 144433.6 | 92957.98 | 80076.22 | 122282.5 | 138740.7 | 115795.7 | 136013.5 | 108399.8 | 95981.41 | 99878.15 | 75216.36 | 139866.6 | 165643.6 | 125744.4 | 108813.2 |
| 31460.47 | 34960.79 | 42754.98 | 60230.67 | 23067.16 | 37837.59 | 22029    | 16564.41 | 52435.33 | 39152.62 | 46487.75 | 41523.14 | 29176.84 | 36755.59 | 32670.12 | 42954.98 | 49004.91 |
| 31640.7  | 47314.66 | 34586.33 | 46584.46 | 40182.09 | 38510.3  | 28295.2  | 40573.98 | 43070.82 | 41394.8  | 37306.35 | 45578.07 | 37120.95 | 43759.55 | 34577.35 | 55162.58 | 60815.99 |
| 32480.05 | 18816.67 | 27047.73 | 30469.84 | 24377.76 | 20354.99 | 17255.67 | 28266.16 | 20929.04 | 19141.12 | 25446.76 | 34288.33 | 25770.79 | 20257.6  | 25401.2  | 27137.36 | 35606.51 |
| 15347.33 | 8544.485 | 9088.602 | 9230.125 | 9486.58  | 4852.185 | 4579.217 | 6374.566 | 10703.26 | 15509.76 | 90973.21 | 11956.72 | 7706.106 | 5673.502 | 6489.666 | 10023.49 | 5765.006 |
| 82341.84 | 73149.05 | 126648.3 | 163120.3 | 77474.45 | 82310.35 | 64929.65 | 61112.33 | 84092.02 | 43244.97 | 102194.2 | 66116.78 | 60765.55 | 91136.82 | 53556.96 | 80946.15 | 43356.07 |
| 82728.93 | 66843.21 | 213449.5 | 158865.7 | 194663.1 | 89200.47 | 87725.96 | 120097.2 | 246869.3 | 181634.4 | 191788.4 | 213473.8 | 177856.8 | 190969.2 | 239353.5 | 179595   | 224665.7 |
| 110101.5 | 62533.41 | 162840   | 247663   | 62981.26 | 56329.79 | 54290.51 | 93535.89 | 76650.73 | 60472.61 | 147626.8 | 260324.3 | 63838.95 | 94639.97 | 76218.63 | 146411.9 | 75773.37 |
| 11948.09 | 30928.27 | 19629.47 | 38765.91 | 19711.1  | 11798.96 | 16212.74 | 14393.71 | 24733.95 | 28577.54 | 32042.36 | 20345.67 | 17631.89 | 18247.85 | 27917.21 | 27727.82 | 29005.68 |
| 27018.87 | 14444.34 | 43416.59 | 41299.5  | 17872.95 | 14074.73 | 18871.54 | 32282.95 | 30017.21 | 14800.36 | 54090.98 | 13846.11 | 38136.15 | 17909.23 | 30058.93 | 61172.07 | 53848.42 |
| 15605520 | 25509762 | 13115842 | 15904034 | 11631898 | 23969624 | 36743256 | 20730138 | 23868306 | 19676640 | 15603040 | 14241171 | 8661581  | 20101022 | 23223258 | 21845404 | 29222454 |
| 18620.33 | 18054.34 | 14385.25 | 13799.55 | 13015.3  | 16225.65 | 9770.355 | 19504    | 18062.11 | 15184.94 | 12372.92 | 11887.44 | 15238.56 | 18261.34 | 15496.35 | 14877.54 | 15596.9  |
| 6990.078 | 9396.474 | 10714.53 | 11756.09 | 10297.35 | 7492.906 | 10021.83 | 3509.687 | 8416.221 | 7109.125 | 13667.03 | 10717.6  | 12352.16 | 14209.22 | 8122.719 | 10913.13 | 6418.094 |
| 79118.44 | 84286.49 | 108756.7 | 115519.1 | 81618.86 | 75606.96 | 69759.35 | 57776.92 | 75852.38 | 49386.73 | 81575.49 | 68088.44 | 66864.99 | 78583.39 | 48931.63 | 101247.3 | 29751.29 |
| 23252.68 | 18074.46 | 34026.71 | 28274.28 | 25481.33 | 33110.2  | 21141.9  | 23753.88 | 31180.58 | 15003.42 | 10475.61 | 18338.65 | 16481.91 | 30427.48 | 24381.46 | 25385.41 | 28390.58 |
| 63078.13 | 59020.15 | 54961.82 | 50370.75 | 39176.98 | 54614.07 | 82346.47 | 47439.38 | 70345.16 | 73665.72 | 49207.56 | 50601.56 | 68666.38 | 90290.37 | 87679.87 | 55875    | 49067.14 |
| 11716.68 | 10166.57 | 8015.903 | 19502.74 | 15519.13 | 9861.124 | 8881.047 | 10735.5  | 23731.53 | 18140.8  | 18183.08 | 16136.39 | 11215.5  | 11923.68 | 20892.43 | 27609.34 | 30987.87 |
| 62614.99 | 45014.26 | 40022.49 | 53673.99 | 44198.48 | 52381.18 | 51540.04 | 51661.57 | 80207.66 | 152020.7 | 65444.79 | 63116.27 | 47101.85 | 79126.66 | 66195.13 | 85551.72 | 52867.2  |
| 23450.08 | 20082.14 | 25575.01 | 19759.77 | 14821.02 | 10562.69 | 16819.11 | 14231.04 | 16473.14 | 18666.39 | 16728.71 | 25165.78 | 17240.26 | 11873.62 | 15057.65 | 12493.46 | 15304.77 |
| 48584.91 | 39034.96 | 54947.48 | 82287.48 | 45094.55 | 41173.1  | 25309.54 | 25412.79 | 38148.41 | 22908.57 | 56416.27 | 51849.48 | 50252.54 | 37125.69 | 27180.94 | 48118.4  | 47574.28 |
| 37668.28 | 34597.55 | 38358.96 | 34060.89 | 38103.36 | 32699.75 | 31435.48 | 27657.75 | 33310.77 | 29805.14 | 40269.55 | 37280    | 38980.93 | 47264.55 | 36875.26 | 32179.18 | 16432.36 |
| 70920.72 | 60876.78 | 55773.98 | 52902.48 | 50332.2  | 57620.84 | 53859.94 | 51298.61 | 53782.63 | 56479.34 | 41249.35 | 58243.39 | 54820.84 | 48639.8  | 54942.03 | 46964.61 | 72661.84 |

|          |          |          |          |          |          |          |          |          |          |          |          |          |          |          |          |          |
|----------|----------|----------|----------|----------|----------|----------|----------|----------|----------|----------|----------|----------|----------|----------|----------|----------|
| 43589.3  | 35084.65 | 46992.67 | 52734.08 | 40607.94 | 48027.17 | 36100.89 | 32936.41 | 35462.66 | 21018.15 | 43658.54 | 35677.73 | 40740.02 | 46565.68 | 25973.98 | 31171.92 | 22826.84 |
| 125093.2 | 117094.9 | 198288.8 | 225628.5 | 156837.1 | 141214.9 | 86400.18 | 118104.9 | 127548   | 77134.01 | 115476.7 | 96465.69 | 67081.73 | 144620.7 | 96239.25 | 136316.6 | 88531.99 |
| 59160.79 | 69339.67 | 56400.2  | 52467.01 | 52892.66 | 52261.16 | 64329.23 | 52907.79 | 67777.21 | 84563.91 | 63953.08 | 67870.84 | 55887.22 | 51774.67 | 65997.98 | 55483.86 | 36638.16 |
| 90369.14 | 110237.2 | 143799.1 | 87690.38 | 56706.55 | 106852   | 94358.66 | 70050.54 | 100984.2 | 84289.07 | 77591.41 | 100172.8 | 68532.56 | 94879.96 | 77945.13 | 70885.46 | 85039.27 |
| 33484.25 | 39097.7  | 32270.61 | 23604.49 | 32519.88 | 26192.97 | 31318.66 | 28513.41 | 41629.09 | 39577.62 | 33152.64 | 32753.69 | 39238.41 | 30815.99 | 26568.55 | 24385.19 | 15388.62 |
| 24274.19 | 53035.53 | 32688.57 | 50256.05 | 23842.77 | 33380.32 | 21082.89 | 5876.032 | 12217.4  | 39891.9  | 29995.46 | 26187.4  | 30051.12 | 64595.57 | 10181.96 | 10132.7  | 16870.27 |
| 28068.32 | 35518.97 | 56493.65 | 21992.38 | 7489.006 | 21706.59 | 12190.08 | 15127.53 | 43510.81 | 10865.99 | 17193.51 | 32711.26 | 23241.51 | 21143.73 | 19875.75 | 16198.65 | 26285.04 |
| 16829.96 | 12005.86 | 12274.42 | 9000.402 | 7040.583 | 12040.2  | 15406.96 | 13583.61 | 14318.41 | 12162.82 | 13518.1  | 13291.86 | 4396.763 | 12318.42 | 15716.77 | 12800.12 | 10994.27 |
| 43898.47 | 57099.05 | 51466.72 | 65385.2  | 26814.27 | 46480.73 | 44203.89 | 36624.26 | 54157.82 | 63158.17 | 47760.51 | 35824.75 | 33585.74 | 49063.25 | 33348.71 | 65619.09 | 51940.59 |
| 6783.285 | 9852.053 | 5099.964 | 2636.785 | 7650.712 | 9147.272 | 6239.224 | 13522.17 | 9548.935 | 12168.29 | 8716.738 | 8159.613 | 8214.131 | 9765.521 | 8905.273 | 11600.53 | 12019.42 |
| 4141.045 | 10281.22 | 19603.31 | 4284.369 | 8049.341 | 31922.83 | 30243.27 | 15491.47 | 11518.03 | 36710.16 | 44571.99 | 5085.111 | 37300.27 | 58729.93 | 4950.012 | 12061.27 | 15622.73 |
| 75911.18 | 72445.67 | 96001.05 | 94676.2  | 80133.93 | 78545.41 | 71823.19 | 73360.58 | 81107.72 | 64939.34 | 74166.3  | 70208.47 | 110662.6 | 85640.37 | 79415.04 | 81486.4  | 44327.92 |
| 3303.514 | 2689.649 | 6271.838 | 17450.22 | 6925.771 | 1752.837 | 4535.767 | 6519.698 | 5327.166 | 3540.318 | 12076.08 | 20563.87 | 12195.06 | 2600.416 | 2004.583 | 9047.214 | 5999.738 |
| 173650.6 | 120024.6 | 213866.3 | 262788.3 | 150220.7 | 205369.6 | 144571.3 | 207211   | 185446.7 | 98130.74 | 170264   | 127559.8 | 108489.6 | 174250.7 | 120465.6 | 246230   | 117504.5 |
| 28630.17 | 18513.41 | 32568.86 | 53452.39 | 38644.75 | 24290.15 | 24317.29 | 36202.33 | 37704.47 | 46339.77 | 66771.51 | 121491.9 | 71024.41 | 35105.47 | 22887.58 | 63018.7  | 51634.58 |
| 128903.1 | 123862.9 | 115048.9 | 101093.3 | 92194.47 | 132845.1 | 129136.2 | 132158.2 | 111336   | 98178.19 | 80596.82 | 70108.98 | 81629.43 | 82714.77 | 77964.28 | 73059.13 | 53968.95 |
| 53028.09 | 47424.01 | 47510.43 | 67552.08 | 60658.89 | 49485.64 | 37971.39 | 46288.56 | 55888.74 | 39189.14 | 61144.64 | 52433.79 | 68103.94 | 64220.57 | 44774.41 | 66185.52 | 32365.19 |
| 25046.41 | 15401.05 | 27182.25 | 53817.07 | 20235.24 | 18713.39 | 16758.29 | 17692.99 | 18548.48 | 16775.26 | 28071.46 | 36638.32 | 85147.46 | 5906.887 | 11897.65 | 25789.87 | 27436.81 |
| 11282.42 | 5458.324 | 9595.904 | 18776.26 | 6804.622 | 4879.118 | 8334.722 | 15374.91 | 6113.07  | 6340.026 | 17941.12 | 16081.76 | 8486.188 | 6922.623 | 17879.92 | 8267.761 | 11240.11 |
| 2055702  | 2313763  | 1613292  | 1619024  | 1730005  | 1897141  | 1727718  | 1739411  | 2041161  | 2292948  | 1855796  | 1762478  | 1209238  | 1990840  | 1996796  | 2014287  | 3125991  |
| 14844.78 | 17006.82 | 11588.43 | 12427.45 | 16181.64 | 11420.86 | 10736.18 | 10671.11 | 20402.56 | 17992.2  | 13440.85 | 17679.42 | 16572.87 | 13738.39 | 13412.66 | 13206.9  | 8432.183 |
| 204833.3 | 73377.81 | 131036.4 | 1214533  | 135358.5 | 15281.45 | 27596.99 | 21291.99 | 21373.05 | 16442.02 | 865474.7 | 60542.18 | 35824.98 | 23707.59 | 21960.54 | 25445.21 | 40882.26 |
| 4839.085 | 4801.063 | 8771.017 | 11241.21 | 11525.66 | 2171.52  | 6717.186 | 9144.151 | 7028.553 | 12317.18 | 11388.25 | 18813.28 | 11338.16 | 4234.287 | 6772.634 | 13192.34 | 10331.06 |
| 10297.83 | 1047.541 | 29905.2  | 11146.36 | 6082.646 | 4928.778 | 13039.75 | 4376.083 | 2229.822 | 8998.022 | 64604.41 | 2325.638 | 3020.365 | 21176.89 | 4213.33  | 4068.635 | 35594.8  |
| 105317.1 | 132560.4 | 117432.8 | 94600.38 | 137321.2 | 95845.63 | 89181.5  | 104539.6 | 128211.3 | 103307.4 | 85391.55 | 112376.4 | 121475.1 | 95193.23 | 91895.13 | 107037.2 | 127882.9 |
| 8452.11  | 7333.611 | 6380.031 | 7190.776 | 3439.395 | 4405.538 | 2072.291 | 3616.821 | 2912.648 | 3389.677 | 4241.47  | 6068.795 | 5366.297 | 6480.673 | 4091.781 | 6047.6   | 15831.3  |
| 9272.669 | 8481.648 | 19098.8  | 21504.86 | 10049.02 | 10496.24 | 6330.104 | 8126.667 | 14374.13 | 5842.879 | 12764.09 | 9809.189 | 9910.635 | 8277.669 | 6833.212 | 6494.334 | 10009.42 |
| 22728.59 | 25459.21 | 31441.17 | 11333.03 | 34487.17 | 21036.21 | 29627.83 | 25455.41 | 24286    | 29864.43 | 31328.44 | 38562.31 | 32468.27 | 28147.84 | 34451.52 | 23541.34 | 42769.55 |
| 20716.47 | 24386.83 | 25562.65 | 5991.96  | 13932.17 | 5706.902 | 16846.83 | 13244.62 | 17985.04 | 16593.91 | 9101.027 | 13825.94 | 12749.93 | 8859.616 | 14163.06 | 4815.323 | 2719.884 |
| 9673.573 | 10434.29 | 8840.885 | 9123.014 | 11085.48 | 7827.31  | 7619.289 | 10857.96 | 9387.384 | 15180.57 | 15611.46 | 13104.51 | 18247.33 | 12369.98 | 6984.381 | 16650.69 | 13068.55 |
| 11097.82 | 7388.132 | 11607.51 | 8829.587 | 9157.06  | 7662.195 | 7012.217 | 13572.93 | 12524.37 | 9890.526 | 14578.73 | 5880.583 | 8886.86  | 14923.41 | 8606.714 | 10471.26 | 10961.65 |
| 28992.41 | 21521.46 | 40938.61 | 63275.93 | 30265.42 | 39964.91 | 19389.64 | 29990.74 | 32263.08 | 17408.52 | 28164.07 | 32031.53 | 24615.27 | 27213.81 | 17200.54 | 34071.87 | 29926.58 |
| 36209.47 | 54998.46 | 51717.7  | 63416.01 | 49242.17 | 30969.36 | 31175.95 | 40949.05 | 35817.5  | 46202.57 | 43371.17 | 80248.02 | 43890.09 | 30339.56 | 30953.75 | 54590.2  | 43641.7  |
| 14179.51 | 6549.74  | 9172.245 | 31051.47 | 16697.22 | 8483.656 | 7755.477 | 12400.28 | 13651.95 | 18003.24 | 32305.43 | 27862.53 | 23316.04 | 12737.81 | 10780.41 | 13205.85 | 12577.46 |
| 28260.1  | 36677.09 | 33649.82 | 46920.45 | 41743.48 | 16807.44 | 17788.21 | 34373.46 | 32860.43 | 37453.5  | 18394.92 | 36909.92 | 32874.16 | 25155.66 | 25570.87 | 52942.79 | 29879.37 |
| 78117.77 | 92000.59 | 66245.5  | 62512.5  | 54646.03 | 65025.82 | 55283.45 | 40269.81 | 58493.43 | 75816.24 | 54132.05 | 92864.28 | 43859.99 | 51417.31 | 36163.17 | 33956.3  | 31479.2  |
| 10302.21 | 11227.84 | 11034.76 | 16121.15 | 13555.59 | 15075.4  | 19085.62 | 18285.58 | 17194.45 | 17345.17 | 15967.07 | 13050.02 | 23545.03 | 11228.33 | 30788.88 | 18753.62 | 12635.19 |
| 5888.14  | 7300.822 | 6330.61  | 11216.96 | 1886.782 | 6673.298 | 6967.969 | 12533.32 | 8397.963 | 3535.672 | 7711.414 | 5938.212 | 7072.98  | 4910.216 | 10119.51 | 7568.044 | 5591.455 |
| 67175.28 | 82281.83 | 48837.65 | 102383.3 | 145426.6 | 87145.44 | 111208   | 98541.63 | 183713.5 | 108234.2 | 82254.12 | 65148.64 | 347082.2 | 31176.3  | 113501.8 | 53922.99 | 128359.9 |
| 20399.56 | 17307.98 | 23024.12 | 40478.33 | 23062.8  | 24279.61 | 17474.73 | 17829.05 | 17528.05 | 9119.512 | 11509.33 | 24940.1  | 19143.9  | 20066.54 | 16015.76 | 17722.07 | 25064.57 |
| 82353.27 | 95092.85 | 103660.6 | 577819.6 | 157847.4 | 96990.38 | 95053.02 | 97315.02 | 89819.57 | 73295.52 | 116953.8 | 94854.28 | 108011.5 | 137201.5 | 141941.3 | 138378.2 | 58608.62 |
| 50191.67 | 80142.28 | 5240.805 | 46570.38 | 53463.97 | 74421.4  | 67674.84 | 69830.61 | 68042.12 | 68108.1  | 73066.36 | 53466.38 | 51042.45 | 66871.41 | 62985.05 | 80446.02 | 74832.88 |
| 15210.35 | 16448.89 | 8873.092 | 14828    | 13710.4  | 12938.25 | 17070.91 | 13137.94 | 14406.85 | 11707.73 | 36055.06 | 14889.75 | 10061.41 | 14410.88 | 13789.06 | 9425.063 | 12011.11 |
| 6588.375 | 1421.128 | 3272.51  | 8700.712 | 6523.537 | 5700.035 | 5427.006 | 4888.71  | 4290.956 | 6166.047 | 11111.8  | 12341.76 | 9115.577 | 6794.558 | 5780.454 | 5035.5   | 4813.039 |
| 1565.105 | 10299.26 | 1936.309 | 9047.871 | 8133.324 | 4344.349 | 3482.19  | 4511.014 | 8728.893 | 7267.002 | 9669.624 | 4453.203 | 6678.335 | 6955.622 | 6534.174 | 4566.9   | 9664.583 |
| 803250.2 | 740077.8 | 708621.8 | 738052.3 | 596910.8 | 586982.9 | 921600.8 | 961973.1 | 1088599  | 898983.8 | 1050105  | 757082.6 | 484640.6 | 847400.4 | 1176744  | 770287.9 | 769135.6 |
| 9343.196 | 7993.372 | 12847.41 | 9467.594 | 9961.592 | 12526.73 | 9256.793 | 6240.593 | 11061.04 | 2909.737 | 9511.72  | 7325.034 | 8150.611 | 11621.46 | 5379.226 | 8671.376 | 16079.46 |
| 24867.13 | 13738.69 | 38413.88 | 22907.16 | 16141.91 | 24729.99 | 12990.11 | 23495.13 | 23044.31 | 18467.33 | 28772.54 | 26718.58 | 21393.67 | 22827.05 | 24030.69 | 26181.41 | 23150.87 |
| 22314.68 | 27279.54 | 25270.57 | 24585.96 | 33265.38 | 19588.22 | 16833.49 | 16079.34 | 24749.62 | 32394.67 | 18471.54 | 23572.07 | 44057.23 | 38182.14 | 31949.47 | 28093.5  | 17571.1  |

|          |          |          |          |          |          |          |          |          |          |          |          |          |          |          |          |          |
|----------|----------|----------|----------|----------|----------|----------|----------|----------|----------|----------|----------|----------|----------|----------|----------|----------|
| 10401.41 | 7773.703 | 21439.73 | 29720.9  | 19974.82 | 16287.74 | 9272.96  | 13556.23 | 18108.46 | 12064.16 | 17792.92 | 13803.21 | 18116.32 | 18749.25 | 14213    | 18378.54 | 18623.13 |
| 79344.45 | 70672.49 | 133014.2 | 246529.1 | 109623.1 | 75432.18 | 51792.44 | 80741.61 | 77500.81 | 39220.4  | 85276.93 | 57008.94 | 56025.37 | 98452.01 | 44428.78 | 84492.32 | 58850.72 |
| 8025.834 | 13176.97 | 9205.69  | 9859.083 | 14657.77 | 8360.115 | 10406.38 | 7845.915 | 11975.95 | 11049.71 | 4766.945 | 13987.51 | 2350.721 | 6373.107 | 14630.2  | 12863.62 | 8751.403 |
| 9009.578 | 9090.869 | 5640.262 | 13996.16 | 6750.507 | 5573.989 | 7650.783 | 7434.315 | 9473.247 | 10773.58 | 7590.861 | 11525.64 | 11454.76 | 5914.392 | 12850.15 | 9911.821 | 13897.64 |
| 254327.2 | 600438.1 | 1469819  | 1112706  | 1140516  | 2491679  | 396642.3 | 218362.2 | 50173.63 | 1026505  | 1560755  | 1428458  | 632965.5 | 1363699  | 306405.4 | 966877   | 53084.31 |
| 8835.272 | 11129.26 | 9664.988 | 12245.39 | 10106.62 | 9150.055 | 7950.495 | 9729.982 | 7639.029 | 13791.46 | 13277.94 | 10563.01 | 8357.399 | 8088.106 | 9920.199 | 9152.612 | 10592.34 |
| 6360.444 | 8760.188 | 5565.698 | 5477.292 | 6392.53  | 3910.142 | 8606.642 | 4870.77  | 3040.576 | 6479.932 | 2753.009 | 12196.58 | 6635.296 | 3337.554 | 5972.323 | 4575.317 | 8963.351 |
| 162816.9 | 101792.9 | 163661.3 | 183299.3 | 92374.88 | 112475   | 171433.6 | 137264.6 | 174754.2 | 137362.4 | 168999.7 | 127513.2 | 140524.2 | 162122   | 167067.2 | 99955.51 | 137269.9 |
| 35021.95 | 24508.2  | 22398.34 | 38118.89 | 19138    | 23284.55 | 38338.82 | 15262.71 | 25683.5  | 34140.21 | 32298.5  | 24076.02 | 17674.5  | 30851.6  | 27034.12 | 27250.94 | 46806.54 |
| 547642.3 | 359848   | 523348.5 | 794765   | 553826.7 | 557639.3 | 452936.4 | 458473.4 | 468230.2 | 365614.7 | 733388.4 | 430200.7 | 445350.7 | 538133.3 | 515581   | 486377.6 | 396885.1 |
| 38530.72 | 35948.9  | 27146.91 | 41646.34 | 68999.59 | 17533.89 | 35659.83 | 13970.21 | 24934.98 | 26464.26 | 35539.67 | 28345.06 | 39870.19 | 28506.88 | 26774.84 | 31273.28 | 62064.33 |
| 286405.3 | 745557.4 | 27539.39 | 513907.8 | 58580.64 | 938734.9 | 2042554  | 32060.66 | 432565.9 | 1403011  | 126468.3 | 365081.2 | 8602.667 | 920029.6 | 652220.4 | 801406.4 | 1857686  |
| 25438.65 | 16490.28 | 20327.25 | 33815.86 | 19714.5  | 25295.59 | 18669.03 | 24059.43 | 15943.42 | 11440.8  | 18524.71 | 18399.36 | 14566.01 | 14444.95 | 17647.7  | 36768.95 | 28763    |
| 2467.764 | 3236.382 | 1593.62  | 6000.569 | 3676.32  | 4385.096 | 2518.074 | 3251.014 | 2677.967 | 1912.582 | 4346.905 | 4680.748 | 4258.188 | 2965.78  | 2313.659 | 2843.462 | 2875.035 |
| 23213.78 | 15926.45 | 6438.651 | 7038.718 | 6544.871 | 7518.368 | 9367.507 | 7509.812 | 11667.9  | 11330.34 | 4396.337 | 10946.18 | 6087.24  | 5625.063 | 9198.95  | 7485.942 | 17691.21 |
| 658094.9 | 547999.3 | 377876.6 | 537713   | 501184.4 | 154980.1 | 538636.4 | 783361   | 580055.3 | 427098   | 476945.4 | 541922.9 | 636832.9 | 544757.1 | 813645.1 | 541545.4 | 815139.5 |
| 172544.8 | 197830.6 | 92226.98 | 80134.84 | 78953.33 | 98991.46 | 195701.5 | 156511.1 | 215516.4 | 236138   | 111640   | 142752.5 | 102317   | 134667.1 | 296128.3 | 122654.3 | 130785.9 |
| 6589.426 | 7588.236 | 7761.751 | 6073.971 | 6399.714 | 5292.463 | 5045.102 | 3818.021 | 5532.907 | 4919.946 | 5512.383 | 8046.932 | 7462.153 | 7286.586 | 3769.581 | 7963.848 | 9034.134 |
| 4468746  | 4751530  | 5026334  | 3252083  | 3437684  | 3740755  | 5418899  | 4762548  | 6017909  | 5909843  | 6142806  | 5756010  | 4073906  | 5418370  | 6054042  | 4217343  | 3128350  |
| 49093.61 | 68996.84 | 43647.02 | 43726.13 | 16642.92 | 37033.14 | 45619.39 | 31473.88 | 38094.74 | 44883.85 | 27213.72 | 47968.81 | 27586.54 | 46117.85 | 43022.61 | 32640.68 | 40173.73 |
| 11215.66 | 4804.986 | 9774.795 | 12989.81 | 14472.37 | 2267.101 | 3188.204 | 10204.95 | 6871.688 | 5059.671 | 14459.54 | 11848.85 | 13393.08 | 5936.019 | 8304.042 | 8732.924 | 5326.688 |
| 2603.184 | 9166.91  | 6916.732 | 5539.222 | 10506.46 | 9619.403 | 13601.17 | 7812.738 | 8220.651 | 11419.55 | 9072.771 | 12762.59 | 6503.27  | 9678.447 | 7553.292 | 13051.29 | 14672.87 |
| 141940.9 | 178410.4 | 168959.4 | 167994.5 | 132978.5 | 125287.3 | 145214.2 | 206010.4 | 164153   | 236909.6 | 146039.5 | 217549.5 | 143091.7 | 141987.3 | 158801.5 | 175643.8 | 122385.9 |
| 50527.42 | 82110.54 | 77933.53 | 44976.03 | 64164.89 | 94369.5  | 118966.5 | 82761.81 | 70779.43 | 85065.23 | 60225.56 | 43985.27 | 88628.38 | 76621.07 | 97270.66 | 95240.76 | 128430.6 |
| 16795.82 | 15419.66 | 26316.07 | 39534.57 | 19653.02 | 14712.65 | 12636.2  | 15955.39 | 14649.08 | 9857.889 | 17675.5  | 24457.14 | 19608.6  | 21721.2  | 15589.55 | 28133.38 | 10370.95 |
| 90795.65 | 90943.2  | 87049.02 | 136038.7 | 86596.7  | 92315.45 | 92480.98 | 74436.65 | 120098.4 | 85293.43 | 72746.94 | 45983.31 | 72901.6  | 161674.6 | 83353.72 | 134986.8 | 44678.59 |
| 51287.88 | 47542.43 | 55204.5  | 66194.8  | 64417.37 | 70713.54 | 54157.07 | 55922.96 | 50984.5  | 27724.86 | 57144.29 | 24574.12 | 35843.45 | 54496.38 | 38245.03 | 58070.21 | 54985.91 |
| 150295   | 167421.7 | 175754.4 | 157984.5 | 142409.1 | 181770   | 150797.3 | 122663.6 | 192647.1 | 165987.6 | 137868.3 | 141802.4 | 125262.4 | 164681.6 | 164913.1 | 154637   | 183557.7 |
| 16314.58 | 13866.64 | 17866.7  | 29954.22 | 18188.03 | 4527.138 | 11337.28 | 16732.87 | 16628.89 | 21843.14 | 45993.05 | 12635.91 | 13748.85 | 17726.57 | 16428.32 | 15431.07 | 13564.25 |
| 17686.69 | 9801.086 | 14319.21 | 37278.04 | 14060.1  | 13137.2  | 8676.367 | 15027.85 | 19785.77 | 6968.012 | 20665.81 | 31278.79 | 14557.79 | 11653.94 | 11706.24 | 18030.13 | 17158.21 |
| 184023.4 | 175737.9 | 131632.6 | 451733.7 | 228164.6 | 121170.8 | 29980.5  | 284197   | 431892.5 | 316646.4 | 523586.7 | 311563.9 | 185624.2 | 277855.8 | 238490.9 | 702218.9 | 459354.2 |
| 15108.03 | 17664.82 | 25644.22 | 24626.8  | 20638.28 | 8197.155 | 12845.74 | 15043.11 | 20284.32 | 22603.8  | 26221.08 | 21139.18 | 26577.38 | 16785.88 | 17463.94 | 17772.45 | 20974.33 |
| 896411.6 | 1037951  | 772225.1 | 723859.5 | 671016.9 | 781460.5 | 796929.1 | 651228.4 | 811123.2 | 1026425  | 667088.8 | 983143.9 | 835611.4 | 1240845  | 1214948  | 993691.3 | 1244142  |
| 137270.3 | 122152   | 279139.5 | 330324.3 | 263392.6 | 53421.66 | 33785.7  | 125305.3 | 107737.8 | 164098   | 219062.4 | 447024.3 | 199810.8 | 60044.55 | 91597.69 | 227426.3 | 170039.2 |
| 168372.2 | 168800.6 | 245323.1 | 234148.4 | 204805.4 | 128817.4 | 171223.7 | 174989   | 171962.6 | 194067.6 | 203683.8 | 246441.6 | 211649.3 | 205241.4 | 211646.1 | 205159.1 | 166052   |
| 1136964  | 783696.8 | 593424.8 | 1219130  | 834883.9 | 744631.8 | 769804.4 | 465209.1 | 842239.9 | 851942.4 | 1009484  | 782075.6 | 722128.9 | 761214.4 | 729328.3 | 468552.4 | 1014311  |
| 842522.4 | 658080.6 | 1313659  | 1363140  | 760109.9 | 1094113  | 824382.9 | 970732.4 | 1005164  | 453107.2 | 1009887  | 788439.5 | 776990.2 | 919966.6 | 778668.6 | 962447.5 | 1253179  |
| 11034.94 | 12746.42 | 11033.92 | 10673.39 | 16815.87 | 6553.503 | 8379.02  | 12745.42 | 13607.52 | 16513.98 | 14843.92 | 23658.29 | 16138.79 | 10961.72 | 11423.95 | 17241.71 | 12445    |
| 875262.3 | 602418.5 | 1054675  | 1208901  | 735909.1 | 952340.7 | 730862.6 | 701163.4 | 737508.1 | 319170.3 | 622559.5 | 491341.5 | 417672.1 | 784733.9 | 569602.5 | 701393.5 | 670110.9 |
| 33349.64 | 15455.79 | 31044.86 | 35985.19 | 18042.3  | 50678.5  | 10936.82 | 20030.81 | 28619.48 | 11953.48 | 1792.428 | 36827.09 | 18670.49 | 29081.79 | 38388    | 20931.95 | 31469.83 |
| 21752.53 | 12880.86 | 8817.849 | 4678.281 | 9555.957 | 8177.695 | 10498.15 | 3625.716 | 7141.776 | 18709.27 | 25918.11 | 6623.165 | 13107.02 | 7373.876 | 8588.992 | 11025.53 | 20623.41 |
| 74315.94 | 61782.45 | 78813.65 | 106562.8 | 71580.31 | 73465.38 | 45993.07 | 56378.5  | 70188.1  | 36036.88 | 83926.89 | 64264.47 | 59629.49 | 59666.63 | 37721.26 | 62140.45 | 31047.72 |
| 73554.3  | 77747.13 | 76510.44 | 57951.49 | 60997.77 | 75764.44 | 60028.25 | 58238.79 | 59573.55 | 41436.64 | 67405.55 | 45311.16 | 44296.1  | 48186.63 | 62610.82 | 44748.53 | 63461.15 |
| 9676.018 | 6460.72  | 40721.58 | 8813.604 | 4665.179 | 11666.15 | 7503.787 | 9553.427 | 4151.615 | 7671.812 | 16160.8  | 7612.816 | 9459.304 | 6202.114 | 7527.039 | 9924.048 | 6794.242 |
| 2639.588 | 669.6315 | 3824.378 | 3165.1   | 2632.584 | 2000.219 | 1448.727 | 2602.353 | 2205.715 | 2009.267 | 3863.775 | 2612.708 | 2492.353 | 1354.586 | 1388.035 | 3298.29  | 975.9822 |
| 3149.279 | 10638.57 | 13550.98 | 26656.44 | 9675.264 | 6830.372 | 5660.897 | 13910.02 | 13353.05 | 10201.38 | 9437.368 | 45419.04 | 13134.43 | 6406.178 | 1590.405 | 10092.47 | 14346.34 |
| 20605.72 | 26601.96 | 11290.53 | 24602.86 | 13678.82 | 20079.04 | 25495.84 | 16478.5  | 23581.44 | 15168.35 | 22435.45 | 20661.03 | 12004.97 | 11784.05 | 20226.97 | 18610.73 | 31618.63 |
| 16635.6  | 17875.11 | 12784.76 | 8517.232 | 16224.76 | 9763.821 | 18026.67 | 14966.03 | 17363.11 | 19584.64 | 21699.21 | 14624.84 | 15703.99 | 15659.1  | 17894.19 | 9497.591 | 12501.59 |
| 74583.02 | 12963.5  | 16520.23 | 239943.7 | 32889.82 | 13604.54 | 14056.83 | 10399.29 | 27383.06 | 116512.4 | 214255.2 | 226358.6 | 9178.567 | 14074.6  | 12755.81 | 198951.5 | 101860.7 |

|          |          |          |          |          |          |          |          |          |          |          |          |          |          |          |          |          |
|----------|----------|----------|----------|----------|----------|----------|----------|----------|----------|----------|----------|----------|----------|----------|----------|----------|
| 3977343  | 1688686  | 2033260  | 1048149  | 2637999  | 547509.5 | 629202.6 | 238236.9 | 1135454  | 2742364  | 1280124  | 1205811  | 2901883  | 408788.6 | 1274007  | 186653.8 | 3182191  |
| 670469.4 | 1024508  | 524907.3 | 489230.9 | 489956.1 | 803105.1 | 1953512  | 790999.6 | 473249.1 | 783827.3 | 379677.7 | 543035.8 | 501918.3 | 718296.6 | 1702269  | 717057.5 | 869663.6 |
| 9213.451 | 7202.741 | 11635.89 | 13399.08 | 3075.909 | 10379.34 | 6741.309 | 5980.86  | 9433.49  | 3545.482 | 9252.378 | 11954.54 | 2419.556 | 8318.733 | 9041.466 | 7053.149 | 6715.989 |
| 17732.95 | 14729.38 | 17416.98 | 24414.61 | 24936.9  | 13175.5  | 14673.46 | 9228.293 | 9896.863 | 14244.18 | 25750.81 | 17628.72 | 25393.06 | 9754.879 | 10158.47 | 9926.303 | 8544.042 |
| 28822.72 | 20159.7  | 43334.28 | 55493.28 | 32326.31 | 28417.24 | 17932.87 | 34159.91 | 20203.08 | 18954.14 | 39947.13 | 42208.09 | 39022.63 | 23905.61 | 22932.4  | 40593.16 | 37523.49 |
| 242723.4 | 222850   | 29197.39 | 962843.3 | 69683.25 | 33857.08 | 504639.4 | 555755.4 | 647362.2 | 228757.7 | 667791.4 | 18139.99 | 26120.36 | 485135   | 909267.3 | 338415.1 | 459661.4 |
| 9748.604 | 12987.96 | 11000.33 | 8669.145 | 6664.471 | 6446.983 | 7560.417 | 8453.616 | 8295.315 | 11747.01 | 7908.401 | 10544.97 | 8483.396 | 8992.911 | 8367.19  | 7205.695 | 5200.269 |
| 27076.2  | 30442.54 | 47097.13 | 34500.9  | 38771.7  | 44901.15 | 30461.04 | 35747.84 | 30884.33 | 32458.06 | 44921.92 | 36161.29 | 40147.8  | 33049.09 | 29515.89 | 36177.87 | 21412.57 |
| 20677.22 | 53686.07 | 26196.06 | 26426.11 | 36466.04 | 24320.67 | 15661.48 | 36112.5  | 33528.23 | 57260.24 | 28483.24 | 35776.5  | 42862.23 | 34757.46 | 27790.57 | 41414.77 | 26486.16 |
| 181423.5 | 184576.7 | 208244.2 | 275242.8 | 202359.6 | 173036.1 | 165995.9 | 168034.5 | 203105.3 | 199548.8 | 226582.7 | 238727.6 | 192103   | 171720.8 | 159732.1 | 191252.7 | 100376.7 |
| 11055.68 | 7803.176 | 14846.58 | 23389.24 | 12942.94 | 5066.733 | 4921.979 | 12335.37 | 11817.64 | 9395.55  | 14477.57 | 13669.62 | 13244.78 | 9409.735 | 10660.57 | 15734.89 | 8620.07  |
| 175203.4 | 142054.8 | 253672.4 | 93799.77 | 93156.23 | 80523.2  | 107721.6 | 80122.72 | 103657.8 | 138044.3 | 31461.29 | 207799.4 | 176106.3 | 79783.95 | 103522.9 | 99950.12 | 121691.6 |
| 20626.86 | 17640.76 | 28808.73 | 32656.6  | 22197.03 | 9700.707 | 5196.109 | 19044.44 | 20317.61 | 27365.35 | 41360.55 | 39988.84 | 30565.52 | 22285.88 | 19591.43 | 31894.81 | 44282.95 |
| 28017.81 | 3457.36  | 42563.86 | 34817.04 | 12608.89 | 37627.76 | 16926.51 | 29677.01 | 11621.88 | 8217.251 | 38509.77 | 31479.26 | 7246.625 | 26246.15 | 49401    | 40617.36 | 8913.447 |
| 82821.11 | 85158.09 | 57974.54 | 67362.31 | 71671.63 | 44710.39 | 35757.13 | 43790.66 | 72479.59 | 53624.31 | 78546.53 | 70164.12 | 43746.96 | 36849.95 | 52047.47 | 78915.03 | 114656.7 |
| 11600.39 | 8516.901 | 11242.77 | 7652.601 | 10889.71 | 7518.44  | 6782.804 | 8035.285 | 8255.201 | 14215.51 | 6422.134 | 13721.46 | 7437.766 | 5528.33  | 7791.146 | 6702.423 | 6812.418 |
| 90572.82 | 122027   | 157701.6 | 172798.3 | 120838.2 | 75956.51 | 63409.54 | 100606.2 | 94818.12 | 91684.5  | 125016.8 | 207299.2 | 127518.4 | 106195.7 | 102194.1 | 162545.4 | 168289.3 |
| 85364.09 | 95011.51 | 53438.9  | 86097.06 | 60923.19 | 54459    | 57890.04 | 55305.27 | 84487.2  | 89581.29 | 55394.77 | 80460.97 | 70994.39 | 65844.71 | 74265.48 | 64781.57 | 91826.16 |
| 115465.9 | 117251.6 | 108119.6 | 106313.1 | 116725.2 | 90598.03 | 99529.2  | 86941.21 | 116896.9 | 130218.9 | 129908.7 | 138571.5 | 121705.2 | 92987.97 | 99644.95 | 112676.7 | 102434.5 |
| 37462.23 | 53216.61 | 69904.05 | 35146.36 | 45799.65 | 42469.87 | 50404.83 | 66268.21 | 46572.68 | 57091.63 | 40378.54 | 50515.94 | 37018.74 | 61782.3  | 72682.43 | 82027.63 | 109565.4 |
| 25603.95 | 21462.62 | 37733.05 | 50548.25 | 34759.38 | 2973.582 | 9104.535 | 19950.23 | 23510.96 | 31689.23 | 37525.84 | 57990.05 | 27439.23 | 27192    | 41170.8  | 42304.02 | 37174.51 |
| 6291417  | 7289769  | 7391199  | 7401286  | 4997562  | 5291021  | 4208282  | 4009580  | 6094689  | 4860969  | 6257794  | 6885865  | 4193079  | 6724667  | 5110455  | 4790939  | 7259840  |
| 748.3622 | 10338.03 | 3994.736 | 9556.576 | 929.9695 | 742.5103 | 3916.273 | 3185.818 | 2286.438 | 2500.312 | 4196.643 | 3238.954 | 3416.199 | 747.3382 | 7439.877 | 549.9781 | 862.3909 |
| 109893   | 98117.31 | 75312.4  | 91741.47 | 104667.9 | 83690.7  | 77086.28 | 88366.62 | 128300.5 | 126060.6 | 93232.27 | 99286.38 | 155104.1 | 98904.06 | 94918.81 | 115411.3 | 149656.2 |
| 26991.39 | 22252.36 | 35015.59 | 34383.58 | 32272.79 | 28481.59 | 24457.13 | 24530.6  | 26285.66 | 13443.94 | 21896.23 | 23179.54 | 21740.42 | 22628.23 | 15440.17 | 18965.46 | 8032.033 |
| 261944.5 | 229161.9 | 339301.7 | 261506.4 | 242943.6 | 192777.8 | 221068.1 | 223724.7 | 272269.5 | 282761.2 | 293933.5 | 348613.6 | 220227.6 | 310030.3 | 275984.3 | 251911.4 | 214658.2 |
| 18498.55 | 10110.66 | 17167.15 | 26191.11 | 15339.12 | 5742.208 | 6617.703 | 3381.698 | 11923.11 | 21384.3  | 15965.51 | 15923.97 | 13350.81 | 4248.752 | 5657.515 | 2302.773 | 4143.463 |
| 273225.1 | 193770.8 | 220941.8 | 428636.4 | 268425.5 | 331807.9 | 216435.1 | 258009   | 251734.8 | 151772.4 | 232690.5 | 186407.9 | 131533.9 | 265724.8 | 136237.2 | 225055.4 | 180634.8 |
| 3472.716 | 2557.749 | 4542.576 | 3339.175 | 4597.861 | 4390.742 | 3395.279 | 4187.017 | 4068.471 | 2502.439 | 2339.641 | 3402.899 | 3780.547 | 5347.561 | 2181.739 | 5851.628 | 7608.546 |
| 7098.797 | 11021.7  | 5207.907 | 4621.53  | 3638.102 | 8146.408 | 8962.835 | 2863.161 | 6448.586 | 8137.431 | 4710.605 | 5600.376 | 4258.133 | 6885.219 | 3881.187 | 6390.105 | 9661.036 |
| 411069.7 | 591845.8 | 123936.8 | 257063   | 150222.9 | 371381.6 | 392304.7 | 295609.1 | 207349.3 | 284002.7 | 230888.4 | 142400.6 | 80877.44 | 479872.6 | 411211.3 | 335592.4 | 401734.3 |
| 197154.4 | 190634   | 198585.2 | 148728.4 | 183692.9 | 227420.4 | 214642.3 | 186593   | 180789.8 | 157882   | 225747.9 | 186354.4 | 146301.8 | 201774.7 | 207375   | 253175.6 | 305482.5 |
| 61487.36 | 85508.09 | 57753.26 | 35900.56 | 53903.69 | 85565.96 | 226351.5 | 91910.86 | 45754.09 | 73371.79 | 25584.71 | 52733.8  | 44698.57 | 56757.18 | 93425.01 | 59257.06 | 66634.23 |
| 38417.92 | 30786.52 | 54612.41 | 28913.02 | 31334.54 | 21980.85 | 60218.57 | 30924.76 | 44051.98 | 29744.61 | 59884.91 | 35587.43 | 28208.12 | 23306.82 | 54322.91 | 35437.22 | 22242.71 |
| 92293.59 | 76514.24 | 186948.5 | 103193.2 | 91598.04 | 69393.81 | 95525.41 | 92070.7  | 95375.38 | 47057.7  | 83900.2  | 71013.68 | 67709.22 | 62799.83 | 75291.8  | 112085.9 | 52983.21 |
| 32507.47 | 35810.26 | 17278.23 | 18464.08 | 26894.95 | 14200.97 | 17481.01 | 21160.9  | 29559.93 | 30172.48 | 7090.733 | 15528.62 | 19514.86 | 12261.94 | 25200.87 | 21098.65 | 36406.07 |
| 59343.1  | 9492.872 | 21255.28 | 13835.12 | 45368.57 | 10351.11 | 7600.068 | 8898.447 | 6230.146 | 10690.66 | 47266.9  | 29479.55 | 16081.16 | 8920.615 | 9144.866 | 8596.316 | 8419.146 |
| 13184.94 | 31741.81 | 51142.83 | 6986.382 | 37615.15 | 21321.66 | 63533.04 | 38454.36 | 80410.64 | 37023.53 | 28567.08 | 38217.68 | 60142.03 | 36956.34 | 28383.6  | 34255.83 | 88226.64 |
| 4513.176 | 6073.35  | 4910.946 | 3175.37  | 4791.552 | 4106.87  | 5767.594 | 3702.762 | 5798.289 | 5601.64  | 3554.149 | 4655.784 | 3822.554 | 4508.503 | 5059.85  | 5173.731 | 9345.437 |
| 14224.52 | 11155.98 | 14640.92 | 25171.33 | 17424.27 | 13285.88 | 5953.215 | 12872.53 | 10083.54 | 7091.99  | 13649.86 | 10581.93 | 11304.68 | 19682.64 | 7634.542 | 19321.35 | 16241.13 |
| 78590.2  | 57764.77 | 44009.44 | 31962.52 | 69184.08 | 30527.9  | 82095.2  | 19466.69 | 89293.42 | 74118.38 | 55483    | 51335.77 | 36359.79 | 30003.59 | 107159.3 | 25423.92 | 38807.38 |
| 126586.6 | 121117.6 | 245402.1 | 272651.1 | 170295.5 | 193970.7 | 127478.3 | 149228.5 | 100400.1 | 69052.4  | 142019   | 124064.7 | 158806.9 | 131430.5 | 77098.45 | 146408.1 | 100171   |
| 10854.22 | 10373.27 | 22303.47 | 22946.6  | 10837.24 | 13171.15 | 19243.63 | 12859.6  | 11038.25 | 6291.158 | 11323.31 | 8259.152 | 60108.05 | 9999.958 | 11258.15 | 15269.38 | 44094.78 |
| 648277.2 | 589823.6 | 655806.9 | 307006.5 | 449160.2 | 558836.1 | 579577.8 | 359971   | 634483.3 | 573957.1 | 530685.7 | 700950.3 | 549017.1 | 760794.6 | 648376.6 | 512241.7 | 957172.3 |
| 3478.67  | 11745.22 | 6567.399 | 5016.457 | 2324.58  | 11472.05 | 15747.92 | 4173.24  | 14852.42 | 22248.82 | 7813.805 | 1938.382 | 3145.781 | 19963.42 | 28769.14 | 12952.85 | 18641.56 |
| 76959.79 | 86285.08 | 70719.98 | 89675.49 | 80162.16 | 65705.05 | 69454.64 | 74594.52 | 86602.16 | 107859.4 | 94688.68 | 77614.64 | 84448.58 | 91650.75 | 109775.5 | 102732.7 | 81278.84 |
| 77393.3  | 136487.9 | 169461.3 | 81348.23 | 135359.9 | 96276.48 | 63309.88 | 88516.39 | 120530.7 | 133570.9 | 113390.8 | 129914.7 | 129773.6 | 121901.7 | 72819.71 | 130571.3 | 100811.7 |



| 34       | 35       | 36       | 37       | 38       | 39       | 40       |
|----------|----------|----------|----------|----------|----------|----------|
| D28-rat2 | D28-rat3 | D28-rat4 | D28-rat5 | D28-rat6 | D28-rat7 | D28-rat8 |
| 4513.814 | 2268.739 | 1999.651 | 5203.31  | 3319.014 | 2899.722 | 1766.46  |
| 7709.329 | 10908.64 | 17321.83 | 26776.28 | 5563.078 | 8067.92  | 9596.89  |
| 6865.884 | 4946.885 | 5365.436 | 4926.121 | 4366.361 | 5434.863 | 3577.776 |
| 68520.23 | 85339.8  | 83247.87 | 45042.65 | 58804.84 | 47113.05 | 50614.88 |
| 14579.3  | 26066.6  | 18995.68 | 20151.82 | 21924.27 | 20256.29 | 34396.05 |
| 25030.61 | 48973.38 | 38367.77 | 47432.14 | 32207.46 | 16749.2  | 28769.61 |
| 59656.6  | 58602.53 | 20336.38 | 122296.2 | 71893.12 | 29690.26 | 36776.14 |
| 4396.022 | 7724.032 | 8638.05  | 11694.94 | 5960.982 | 2914.353 | 6649.74  |
| 46775    | 72798.83 | 56070.7  | 65383.04 | 50819.12 | 114789.3 | 95823.74 |
| 7375.258 | 9729.805 | 4882.466 | 8747.127 | 5751.689 | 2751.599 | 2579.066 |
| 6075.995 | 7479.191 | 2506.032 | 6651.236 | 5756.491 | 4583.923 | 4377.549 |
| 305628.8 | 212196.4 | 293747   | 341140.8 | 270761.3 | 220183.1 | 373878.2 |
| 19782.53 | 23767.95 | 34659.39 | 23129.96 | 8098.87  | 35086.64 | 16477.58 |
| 62655.41 | 57568.23 | 45969.2  | 56486.84 | 96091.41 | 46305.83 | 87935.75 |
| 22266.93 | 25930.65 | 18676.49 | 15873.33 | 17488.09 | 16504.97 | 14560.24 |
| 102870   | 62485.86 | 52607.06 | 45137.41 | 62016.38 | 326078.6 | 90700.35 |
| 17919.56 | 16280.74 | 9966.472 | 13004.57 | 16934.06 | 5758.66  | 9330.566 |
| 7499.353 | 6982.611 | 8726.644 | 12868.02 | 3788.159 | 9733.746 | 5439.693 |
| 575096.8 | 399002.8 | 329818.4 | 128659.7 | 167678.8 | 135626.9 | 126843.1 |
| 42600.52 | 31416.31 | 34803.9  | 17592.93 | 20674.52 | 22005.02 | 33131.28 |
| 6233.729 | 2882.905 | 8127.062 | 2807.49  | 2548.794 | 3274.211 | 4674.485 |
| 7004.375 | 24131.73 | 16932.94 | 19533.71 | 13196.89 | 12617.81 | 14707.46 |
| 53331.39 | 78118.64 | 37539.83 | 48010.37 | 60256.46 | 46338.35 | 45696.64 |
| 19642.84 | 8820.412 | 7334.609 | 14835.07 | 32445.65 | 45996.45 | 23273.13 |
| 2768.999 | 3056.724 | 4413.007 | 5432.273 | 3773.533 | 3533.547 | 4005.543 |
| 6782.868 | 7908.554 | 8089.885 | 19058.16 | 5380.907 | 5721.912 | 9509.529 |
| 9950.468 | 119398.5 | 22777.19 | 54660.46 | 17303.64 | 24072.98 | 28507.59 |
| 4978.928 | 20352.75 | 17239.48 | 25024.03 | 7291.157 | 6297.357 | 8218.962 |
| 182359.3 | 84997.59 | 153675.6 | 33466.38 | 80207.8  | 95747.09 | 47444.96 |
| 121834.3 | 194397.8 | 137408.4 | 178992.2 | 123684.5 | 115261.7 | 123591.6 |
| 59605.71 | 134496.1 | 59019.88 | 116536.4 | 33768.84 | 40908.13 | 54430.48 |
| 180976   | 113258.7 | 137043.7 | 73085.02 | 152822.3 | 58827.9  | 104067.8 |
| 36694.76 | 46851.56 | 40196.22 | 24556.77 | 23634.64 | 14607.17 | 23246.14 |
| 141728.4 | 75070.55 | 79266.99 | 79929.69 | 45670.25 | 96240.21 | 153969.4 |
| 7892.359 | 6161.799 | 9462.513 | 14823.19 | 6587.575 | 7835.904 | 9676.298 |
| 4443.492 | 6599.659 | 14612.32 | 18936.03 | 6307.698 | 4526.609 | 16502.09 |
| 3258.903 | 1422.87  | 3564.828 | 5631.606 | 3081.172 | 3229.576 | 2128.848 |
| 6573.706 | 8259.569 | 9733.231 | 8973.255 | 7176.769 | 7690.315 | 6065.909 |
| 4979.779 | 4086.705 | 2238.434 | 4616.107 | 2420.69  | 4090.199 | 3843.646 |
| 100628.4 | 74515.04 | 98745.01 | 66217.84 | 85991.05 | 57463.18 | 97858.73 |
| 22988.98 | 31731.23 | 17426.85 | 32957.94 | 27641.11 | 24221.5  | 29253.88 |
| 579934.4 | 692158   | 537930.4 | 812238.6 | 465094.8 | 422842.4 | 501358.1 |
| 159604.3 | 223633.5 | 204830.7 | 215482   | 146359.2 | 100093   | 150433.8 |
| 14822.25 | 17434.87 | 25891.91 | 44254.98 | 19728.31 | 17296.97 | 18284.36 |

|          |          |          |          |          |          |          |
|----------|----------|----------|----------|----------|----------|----------|
| 9125.238 | 5000.12  | 5344.788 | 4405.727 | 8569.839 | 4382.591 | 5041.351 |
| 18788.2  | 16323.3  | 20563.63 | 18191.96 | 14279.5  | 10410.54 | 8778.943 |
| 59692.3  | 117753.6 | 117985.9 | 160971.3 | 56950.12 | 58433.9  | 84190.75 |
| 7742.44  | 18939.14 | 27963.33 | 104002.8 | 9151.372 | 23731.16 | 34569.8  |
| 769737.4 | 545759.8 | 379687.6 | 615626.8 | 729981.8 | 519629.6 | 822783.9 |
| 53921.88 | 30024.81 | 38085.2  | 35348.5  | 26094.9  | 26544.02 | 26876.78 |
| 211678.6 | 397743.8 | 327789.8 | 301720.8 | 166648.7 | 141476.4 | 215230.7 |
| 69599.37 | 67703.75 | 63665.44 | 35689.12 | 40759.26 | 30375.46 | 40521.79 |
| 7212.872 | 13395.78 | 8122.583 | 5881.953 | 8218.219 | 7017.598 | 5843.216 |
| 164103.2 | 95415.18 | 113503.1 | 87666.86 | 70857.27 | 91974.37 | 98296.44 |
| 21858.55 | 32217.68 | 3669675  | 3192.467 | 47155.37 | 30243.67 | 37732.14 |
| 227853.6 | 119735.9 | 103665.8 | 110919.1 | 173738.3 | 97174.64 | 100413.9 |
| 36391.61 | 22856.58 | 13815    | 6588.342 | 11850.02 | 13173.65 | 23050.19 |
| 72545.6  | 64874.49 | 78027.43 | 44872.67 | 86875.49 | 73187.09 | 80734.74 |
| 12184.2  | 15932.34 | 12392.01 | 18321.67 | 10902.86 | 9841.618 | 10579.96 |
| 1052419  | 305708.2 | 434624.9 | 427113.2 | 263534.3 | 224246.9 | 282396.8 |
| 1031755  | 742313.1 | 1133461  | 391878.7 | 587728.1 | 658388.6 | 465138.2 |
| 13400.32 | 13969.09 | 18475.78 | 13808.01 | 7865.215 | 10838.63 | 11848.22 |
| 21957.5  | 7771.424 | 14342.35 | 11820.96 | 8140.618 | 4595.331 | 7973.171 |
| 38120.99 | 16551.3  | 40736.46 | 14860.66 | 9180.516 | 30628.06 | 26901.5  |
| 145485.9 | 272590.9 | 178015.4 | 121479.6 | 269994.2 | 210866.6 | 250864.7 |
| 3591.678 | 2873.291 | 2799.223 | 1445.497 | 2762.481 | 3440.205 | 3256.477 |
| 26022.07 | 31876.31 | 38576.67 | 33551.05 | 22765.55 | 19308.03 | 22483.06 |
| 7064.053 | 11806.48 | 12873.46 | 11707.9  | 8192.969 | 4964.271 | 8731.9   |
| 800006.1 | 1142565  | 928804.4 | 91580.69 | 2089026  | 271025.4 | 776267.3 |
| 562578.1 | 580415.8 | 687296.3 | 400198.5 | 474808.9 | 433365.7 | 561665   |
| 3505891  | 748184.1 | 1175661  | 1763061  | 861244.5 | 772546.3 | 1130142  |
| 305788.3 | 168844.5 | 245661.1 | 175654.8 | 205627.8 | 189386.2 | 194212.3 |
| 15637.44 | 9803.967 | 13076.96 | 9319.199 | 14413.93 | 9541.763 | 12006.49 |
| 14154.63 | 48306.58 | 39394.85 | 35034.35 | 16103.19 | 13861.07 | 32745.95 |
| 26068.44 | 12491.96 | 15620.85 | 12730.2  | 16560.05 | 10428.94 | 15119.31 |
| 12340.97 | 23610.69 | 14197.49 | 18729.07 | 16976.37 | 18415.54 | 17583.43 |
| 4334.867 | 3880.29  | 6105.705 | 8101.035 | 3081.172 | 4420.524 | 4283.087 |
| 6127.475 | 6790.505 | 10612.47 | 15450.4  | 7141.814 | 7239.403 | 9504.773 |
| 277359.3 | 262153   | 279636.1 | 318714.8 | 265108.6 | 301459.3 | 216875.3 |
| 229701.9 | 132047.6 | 247916.6 | 233263.4 | 171106.9 | 124086.9 | 187080.1 |
| 23960.75 | 14182.59 | 16799.91 | 13007.46 | 17549.16 | 12700.08 | 16161.57 |
| 4111.574 | 5461.199 | 3715.727 | 1503.946 | 3655.71  | 2679.885 | 2498.05  |
| 26251.01 | 37581.79 | 24700.94 | 20902.76 | 17138.57 | 55966.92 | 36121.5  |
| 407342   | 436936.3 | 456468.5 | 469697.3 | 337996.5 | 209763.4 | 294363.1 |
| 141077.6 | 112112.4 | 76350.36 | 66068.67 | 49868.17 | 1802.047 | 32863.25 |
| 196655   | 410136.5 | 317388.6 | 428151.3 | 280831.5 | 217043.6 | 314103.4 |
| 7475.764 | 6522.71  | 3106.762 | 13506.63 | 7889.967 | 6330.27  | 1800.401 |
| 6422948  | 15277523 | 6915419  | 16348626 | 18876616 | 16041500 | 15455536 |
| 203488.2 | 286597.1 | 157697.2 | 263316.3 | 282418.7 | 90323.7  | 405447.6 |
| 7929.706 | 5062.062 | 5449.522 | 5850.301 | 6482.73  | 5994.062 | 17499.81 |
| 1139460  | 5751568  | 5449385  | 3423737  | 4731079  | 6418407  | 1049631  |
| 10709252 | 4360767  | 4335114  | 2640004  | 5257243  | 3228220  | 3628544  |
| 12786.33 | 106161.9 | 1905.683 | 6159.65  | 26413.76 | 30639.36 | 56920.43 |

|          |          |          |          |          |          |          |
|----------|----------|----------|----------|----------|----------|----------|
| 381311.3 | 214265.5 | 325496.8 | 208691.8 | 285586.4 | 276979.9 | 301476.4 |
| 1444437  | 1213768  | 962964.1 | 1161022  | 1047514  | 783902.5 | 767061   |
| 417841.9 | 350468.4 | 362924.2 | 578841.3 | 245819.6 | 153836.2 | 266584.4 |
| 1388258  | 1490757  | 908762.6 | 2652348  | 1144670  | 1481439  | 1459927  |
| 126666.7 | 236730.3 | 178527   | 208022.7 | 613447.8 | 10266431 | 276133   |
| 112277.1 | 49011.37 | 29020.03 | 12248.02 | 326072   | 191023.5 | 541064.3 |
| 147623.8 | 74788.99 | 105822.6 | 82250.92 | 133056.8 | 122129.7 | 106534.2 |
| 1497993  | 1157249  | 2323545  | 1046284  | 3115210  | 3507287  | 1185752  |
| 446633.5 | 1397799  | 2946324  | 190854.8 | 617205.8 | 1035320  | 2313181  |
| 290348.3 | 266510.7 | 192961.2 | 165144.2 | 131897   | 81494.66 | 149245.8 |
| 11865808 | 24727484 | 15262961 | 21865.88 | 9356492  | 12274072 | 9749100  |
| 26393818 | 18247084 | 26972166 | 13322742 | 29001574 | 16592774 | 15756711 |
| 574667.6 | 3574.94  | 32742.83 | 9160.368 | 349206.1 | 29801.34 | 14056.47 |
| 459522.1 | 8162.17  | 27434.9  | 14072.26 | 309461.1 | 16884.25 | 8750.742 |
| 55810.67 | 38583.8  | 67972.41 | 33231.82 | 14823.13 | 16057.07 | 76047.41 |
| 840618.1 | 160267.5 | 373731.9 | 189877.9 | 423670   | 124296.2 | 148423.6 |
| 40982.89 | 17913.58 | 17962.15 | 31273.36 | 27334.46 | 26007.09 | 38932.38 |
| 2436933  | 1830540  | 1213745  | 1113916  | 1480306  | 2247202  | 1940063  |
| 182566.5 | 75890.12 | 81890.53 | 55224.58 | 67482.28 | 407658.1 | 73707.25 |
| 16250.42 | 21639.07 | 15839.7  | 22024.49 | 29302.65 | 1641016  | 17260.12 |
| 9353.96  | 5435.089 | 5663.836 | 5186.083 | 4615.315 | 8251.5   | 1928.628 |
| 1.65E+09 | 1.32E+09 | 6.63E+08 | 9.91E+08 | 9.99E+08 | 4.64E+08 | 7.98E+08 |
| 4360649  | 3457356  | 7727952  | 3343178  | 5215623  | 4529248  | 2298196  |
| 2057717  | 1344096  | 808995.4 | 977044.4 | 2836498  | 1860748  | 997996.8 |
| 21829028 | 17533432 | 13199262 | 23331592 | 1.17E+08 | 1.16E+08 | 26332690 |
| 68193048 | 33881260 | 51741972 | 95964496 | 43914044 | 44224936 | 71472872 |
| 23008960 | 11151267 | 30387252 | 48278288 | 20631300 | 16484948 | 24815464 |
| 11082164 | 8960722  | 15740985 | 38952932 | 7488531  | 11808341 | 20648656 |
| 7260.138 | 8156.112 | 297204.1 | 13471.41 | 3317.569 | 15029.3  | 24243.81 |
| 25966.04 | 3464.478 | 6243.632 | 14344.07 | 15643.89 | 29442    | 2964.996 |
| 11156.1  | 7004.569 | 5610.711 | 4379.565 | 5416.264 | 6632.523 | 6605.743 |
| 60969.39 | 28555.28 | 37559.52 | 41701.28 | 46082.32 | 39218.02 | 20603.86 |
| 98412.73 | 85703.2  | 74310.14 | 202620.5 | 171788.5 | 76439.39 | 81027.34 |
| 88481.56 | 63864.48 | 67757.33 | 29337.76 | 47127.83 | 44039.07 | 51499.71 |
| 1023125  | 586989.4 | 609797.8 | 699661.1 | 861003.5 | 4681588  | 838073.1 |
| 74387.08 | 29990.1  | 49353.66 | 11914.63 | 28575.77 | 42712.61 | 18853.95 |
| 10232.96 | 26448.04 | 33159.2  | 46438.36 | 34262.64 | 25064.64 | 23629.18 |
| 92393.86 | 58496.86 | 38546.58 | 43209.55 | 233219.5 | 1256942  | 55267.64 |
| 115187.6 | 120535   | 155309.7 | 252321   | 149051.8 | 157599.5 | 131227   |
| 13483.18 | 5937.254 | 9439.027 | 8708.194 | 7615.062 | 6077.909 | 5804.408 |
| 480895.6 | 415245.3 | 489456.6 | 416400.5 | 369227.1 | 261551.8 | 309340.9 |
| 91577.05 | 85139.16 | 93556.72 | 82469.05 | 70229.52 | 65898.73 | 68062.52 |
| 455995.6 | 411424.2 | 515255.2 | 437352.9 | 237428.1 | 294509.2 | 316950.8 |
| 30694.97 | 73426.33 | 61584.11 | 126853.8 | 48262.75 | 39799.46 | 75888.27 |
| 14421.35 | 31104.81 | 24986.82 | 19311.71 | 14838    | 18077.38 | 21184.32 |
| 578775.6 | 935731.6 | 767559.9 | 973204.9 | 692302.4 | 404895.4 | 787848.3 |
| 28975.24 | 28921.6  | 39759.77 | 76689.38 | 34791.13 | 30557.47 | 47489.56 |
| 43147.41 | 63218.54 | 36551.38 | 58062.29 | 39340.48 | 34512.54 | 46388.91 |
| 29146.24 | 20441.99 | 15831.09 | 41156.77 | 31812.05 | 98864.54 | 29678.25 |

|          |          |          |          |          |          |          |
|----------|----------|----------|----------|----------|----------|----------|
| 4795209  | 7318804  | 5097071  | 4641213  | 6025052  | 4724993  | 6174354  |
| 78500.7  | 55907.3  | 124836.9 | 172549.1 | 57358.04 | 63028.83 | 67301.63 |
| 25323.58 | 31088.45 | 36291.05 | 73649.85 | 12034.9  | 22586.02 | 27789.77 |
| 6054.257 | 12062.11 | 22909.63 | 31219.34 | 9899.914 | 21033.56 | 24849.43 |
| 798498.8 | 338079.9 | 573050.9 | 364767.4 | 364005.7 | 533789.3 | 531148.3 |
| 6376.288 | 19062.95 | 16170.97 | 15500.48 | 16630.7  | 16245.49 | 19637.16 |
| 44228248 | 27610584 | 23731982 | 24689368 | 62980776 | 30607418 | 34537960 |
| 3720024  | 2949535  | 3032408  | 3714741  | 6835949  | 3912408  | 3824603  |
| 9957.673 | 11484.48 | 12130.89 | 13872.04 | 9586.883 | 10533.42 | 7474.485 |
| 164721.2 | 82676.85 | 123961.9 | 211891.2 | 167666.1 | 142702.3 | 259579.1 |
| 3454.75  | 11052.45 | 9951.907 | 18048.67 | 13741.45 | 10517.06 | 9663.358 |
| 25384.13 | 19144.49 | 18807.29 | 13231.22 | 27620.96 | 2430817  | 16012.54 |
| 20270.22 | 27623.28 | 44231.34 | 31530.98 | 31859.61 | 25363.73 | 36383.55 |
| 4825823  | 1354369  | 2068734  | 3883194  | 1620318  | 1368061  | 448913.8 |
| 150458   | 110342.3 | 151510.8 | 199224.1 | 103788.4 | 102142.3 | 107187.6 |
| 3903781  | 2507479  | 3877188  | 2974112  | 2627032  | 5195687  | 1826107  |
| 138509.9 | 67513    | 463382.8 | 483779.9 | 337904.9 | 298647.1 | 409922.8 |
| 194595.5 | 77638.5  | 83589.23 | 70857.94 | 96073.3  | 78381.46 | 56949.27 |
| 5856597  | 2077384  | 2859867  | 1690923  | 1068028  | 998799.1 | 2103656  |
| 362208.5 | 219426.9 | 248760.4 | 188251.2 | 220711.8 | 183629.5 | 224813.6 |
| 479497.3 | 631394.7 | 1628221  | 1138949  | 720716.6 | 635329.3 | 580519.1 |
| 35776.09 | 32151.85 | 24895.11 | 31142.7  | 83011.44 | 204942.4 | 15231.73 |
| 2837963  | 5108885  | 3975332  | 3109812  | 2090261  | 1768011  | 2962619  |
| 12549.1  | 7024.978 | 20241.18 | 7659.441 | 9817.38  | 13453.95 | 5886.684 |
| 98384.21 | 52532.88 | 73066.78 | 47652.47 | 58880.36 | 46825.48 | 59196.39 |
| 9837.697 | 18364.95 | 9319.649 | 28783.97 | 19550.81 | 9849.271 | 10032.67 |
| 134678.4 | 84978.09 | 113901.6 | 97969.72 | 88134.73 | 64827.91 | 73747.11 |
| 19356376 | 30449068 | 19020256 | 20582294 | 22879050 | 19767416 | 28482110 |
| 7765800  | 5374690  | 4970954  | 4369105  | 7375498  | 7835975  | 5978450  |
| 14638220 | 6477748  | 13497392 | 27048208 | 10128326 | 7074030  | 15319075 |
| 713057.7 | 1599760  | 1618093  | 4106026  | 893921.3 | 1123581  | 1727638  |
| 374846.9 | 387919.3 | 366272.6 | 242473.3 | 316458.3 | 263657.6 | 299113   |
| 34905.37 | 26787.7  | 70798.91 | 23916.69 | 19765.61 | 31028.99 | 49986.31 |
| 29275.86 | 28851.71 | 41443.84 | 78525.22 | 18750.61 | 32297.4  | 40454.36 |
| 135587.1 | 258066.4 | 233431.3 | 143605.2 | 114898.9 | 64147.95 | 152074   |
| 24739.04 | 16482.63 | 13327.34 | 7014.673 | 7964.567 | 15171.25 | 19194.2  |
| 341795.2 | 272405.3 | 435162.1 | 290062.3 | 312516.6 | 219368.2 | 373615.7 |
| 51010.61 | 17672.33 | 42078.86 | 8230.293 | 8914.964 | 15658.56 | 15967.09 |
| 163580   | 120367.7 | 200886.5 | 87954.19 | 164737.6 | 159931.2 | 170391.4 |
| 37445.59 | 68554.99 | 72316.88 | 78061.36 | 34565.04 | 41402.38 | 57643.45 |
| 2022646  | 533045   | 2352911  | 487469.3 | 362230.5 | 738359.8 | 427075.2 |
| 68050.05 | 42465.09 | 55790.86 | 104852.2 | 71214.56 | 210977.8 | 97763.27 |
| 4396780  | 3412824  | 4440531  | 1089837  | 1393659  | 574548.9 | 486515.5 |
| 9503722  | 7070288  | 18129926 | 24639240 | 6729150  | 4579445  | 7484688  |
| 17220.98 | 29295.21 | 29546.43 | 73502.47 | 24856.77 | 32253.21 | 30385.06 |
| 1514934  | 1146725  | 2155904  | 1198714  | 2325056  | 5233907  | 1204963  |
| 30537.4  | 16490.42 | 19603.25 | 13543.04 | 26365.38 | 355719.8 | 20227.52 |
| 771929.1 | 845840.9 | 492709.3 | 507763.2 | 1289916  | 1234213  | 664113.4 |
| 399172.1 | 322828.5 | 391198.7 | 447780.9 | 734538.3 | 2198958  | 418232.8 |

|          |          |          |          |          |          |          |
|----------|----------|----------|----------|----------|----------|----------|
| 69933.2  | 100598.7 | 77266.33 | 78872.21 | 63821.67 | 47249.14 | 55094.48 |
| 15260.99 | 6647.576 | 26170.94 | 40285.91 | 13920.45 | 9764.111 | 20185.51 |
| 6648.376 | 15561.32 | 18278.89 | 21914.28 | 13461.95 | 10858.33 | 13589.56 |
| 51499.24 | 129024.2 | 112632.2 | 82527.12 | 46858.83 | 33195.41 | 59680.43 |
| 2337.985 | 8674.482 | 40180.36 | 17253.93 | 8777.357 | 5930.527 | 4476.752 |
| 24391.3  | 14863    | 24428.38 | 95969.86 | 11023.16 | 19326.58 | 18380.51 |
| 11485.21 | 8460.362 | 11048.38 | 12184.82 | 6279.928 | 8110.439 | 8581.316 |
| 589231.4 | 796401.2 | 618160.8 | 741279   | 559359.3 | 346931.3 | 529802.1 |
| 19339.06 | 53559.5  | 54890.49 | 78453.8  | 37593.73 | 55966.48 | 62263.89 |
| 71351.41 | 62662.11 | 90760.92 | 50861.96 | 121230.5 | 59968.78 | 91714.56 |
| 268276.1 | 183653.2 | 299870.9 | 227135.5 | 115154.4 | 92321.03 | 139558.8 |
| 158756   | 160734.6 | 115007.5 | 78456.63 | 131328.4 | 120102.8 | 173614.3 |
| 1271246  | 1203987  | 1191196  | 691651.9 | 781869.8 | 591641.1 | 731280.6 |
| 8490.736 | 15212.45 | 14718.74 | 14922.35 | 6549.428 | 5071.522 | 10497.3  |
| 16380.21 | 22125.75 | 27614.62 | 35889.56 | 29228.85 | 31228.42 | 15314.73 |
| 294402.8 | 336595.7 | 186407.6 | 113772.6 | 350575.3 | 383034.3 | 496302.9 |
| 23011.57 | 51765.48 | 45405.69 | 57532.68 | 32805.82 | 30545.16 | 40539.72 |
| 26251.69 | 31138.88 | 35812.48 | 38588.25 | 25401.64 | 26147.83 | 25363.65 |
| 1349326  | 817527.6 | 645423.6 | 1430762  | 4968996  | 2786575  | 2077503  |
| 5032604  | 3404112  | 4016197  | 2076211  | 2944427  | 4808696  | 5424078  |
| 57499.45 | 19401.82 | 26964.14 | 27877.24 | 16958.96 | 15223.59 | 18155.38 |
| 741016.6 | 435148.3 | 651387.5 | 543090.2 | 808070.3 | 399979.5 | 511983.8 |
| 47364.46 | 80082.72 | 63503.06 | 83587.06 | 65072.06 | 39205.24 | 51186.63 |
| 9008.741 | 12790.15 | 19847.76 | 16584    | 14075.56 | 19145.81 | 10450.29 |
| 58841.47 | 24967.14 | 59051.03 | 79028.09 | 30147.16 | 28803.08 | 32815.44 |
| 7021.551 | 10676.92 | 16861.49 | 5328.478 | 6640.031 | 7058.935 | 4851.13  |
| 15165.01 | 19599.49 | 5016.083 | 13754.08 | 63644.17 | 32428.33 | 19793.18 |
| 39004.21 | 42406.09 | 62042.32 | 56828.78 | 39142.97 | 45339.52 | 40243.2  |
| 645598.1 | 167496.3 | 919381.2 | 975182.6 | 826536.9 | 593811.9 | 878457.8 |
| 9099527  | 4517316  | 5981317  | 11750952 | 23725700 | 51362064 | 6712251  |
| 9846.343 | 35324.32 | 28863.97 | 37076.93 | 7506.306 | 6595.624 | 16922.1  |
| 34373.61 | 55979.61 | 51929.84 | 79551.91 | 52153.49 | 43418.17 | 46121.08 |
| 86643.3  | 68026.81 | 74056.05 | 48937.61 | 80080.49 | 32856.18 | 40920.7  |
| 907147.3 | 324234.8 | 588091.8 | 805401.2 | 31896.24 | 390222.1 | 851888.4 |
| 45661.33 | 66633.92 | 61678.42 | 75224.73 | 16670.21 | 44789.04 | 52164.23 |
| 372622.9 | 493834.2 | 497708.7 | 523783.8 | 1477112  | 3206671  | 458457.2 |
| 10139.34 | 8329.581 | 7545.931 | 7431.975 | 13456.86 | 12965.52 | 8494.19  |
| 147469.2 | 110433.4 | 119042.5 | 86684.53 | 136697.8 | 83322.68 | 94198.09 |
| 1250335  | 1709402  | 658246.6 | 1705126  | 6548590  | 19212532 | 2163615  |
| 8175.498 | 6510.363 | 6582.172 | 835.4737 | 1518.242 | 8647.381 | 4996.405 |
| 6450.013 | 7436.484 | 7836.895 | 12243.73 | 6410.025 | 5832.239 | 7141.347 |
| 54684.89 | 57707.37 | 43103.48 | 52698.7  | 76304.08 | 7792869  | 44400.47 |
| 200304.3 | 152432   | 128277.6 | 121062.5 | 118867.8 | 248570.6 | 129631.4 |
| 548767.7 | 577836.3 | 566565.7 | 363597.7 | 266178.5 | 699062.7 | 645699.3 |
| 93713.49 | 112682.5 | 101541   | 55563.18 | 49767.99 | 56169.95 | 69418.84 |
| 140644   | 144016   | 159634.1 | 382033.2 | 210131.8 | 219242   | 84665.94 |
| 791017.9 | 2368537  | 1384380  | 1196037  | 1224531  | 1486754  | 1454570  |
| 5399244  | 3411862  | 4315827  | 2601458  | 2582813  | 3796220  | 3308486  |
| 109248.9 | 123786.5 | 109588.4 | 109616.9 | 129892.7 | 97809.31 | 114316.6 |

|          |          |          |          |          |          |          |
|----------|----------|----------|----------|----------|----------|----------|
| 15228.15 | 36605.19 | 26190.16 | 40385.34 | 24699.78 | 21615.57 | 24452.99 |
| 3745975  | 2981052  | 3172882  | 3568509  | 3302927  | 3081358  | 3695050  |
| 10869.57 | 6608.878 | 6465.578 | 16573.35 | 5641.055 | 6529.69  | 5160.338 |
| 339384.4 | 182758   | 162031.7 | 181975.9 | 239404.4 | 194254.1 | 240308.4 |
| 51602684 | 10867675 | 6305694  | 7361889  | 15085428 | 12592834 | 28730464 |
| 134119.6 | 60573.82 | 95622.8  | 28700.96 | 75611.47 | 104664.5 | 80939.84 |
| 2010091  | 3227302  | 2924243  | 2094300  | 2617636  | 1650108  | 2580264  |
| 3776.643 | 5816.464 | 4723.11  | 15271.85 | 9449.879 | 7501.089 | 8044.963 |
| 107004.1 | 62300.35 | 96244.85 | 57893.87 | 61433.02 | 44676.34 | 62827.71 |
| 408287.6 | 982100.1 | 584662.4 | 851975.6 | 680008.8 | 654982.9 | 884136.1 |
| 13237.19 | 7225.306 | 14610.8  | 11750.31 | 12070.7  | 9460.953 | 10665.88 |
| 7489.252 | 6072.848 | 4503.759 | 19727.06 | 10394.9  | 6303.546 | 6464.448 |
| 47194.05 | 37405.41 | 30782.03 | 48623.99 | 88164.62 | 37359.72 | 39229.34 |
| 75442.85 | 42630.63 | 106000.3 | 78407.56 | 62851.32 | 50481.95 | 77943.51 |
| 76448.91 | 48090.04 | 40424.82 | 28741.89 | 43450.71 | 40804.63 | 43396.07 |
| 229663.7 | 456333   | 152593.1 | 438544.7 | 373087.2 | 360134.4 | 295279.8 |
| 7340.78  | 9210.131 | 9339.378 | 12716.28 | 5527.381 | 5654.333 | 8347.959 |
| 4617629  | 3147156  | 3137103  | 1218444  | 3144690  | 3050892  | 2731891  |
| 53010.54 | 25449.02 | 40778.39 | 40047.8  | 29554.53 | 22712.67 | 27697    |
| 13915.37 | 7865.731 | 17872.11 | 12109.55 | 8285.879 | 11842.95 | 10151.63 |
| 84800.73 | 124686.1 | 97444.44 | 81160.86 | 76367.77 | 69500.88 | 44462.54 |
| 194873   | 341584.9 | 381156.7 | 513424   | 550342.8 | 463270.6 | 648870.1 |
| 6042472  | 3437842  | 3611820  | 6347864  | 21024152 | 15609170 | 6211731  |
| 40931.93 | 32230.88 | 25831.68 | 23037.61 | 33811.89 | 11871.05 | 29578.2  |
| 5049.304 | 2828.274 | 2070.603 | 4012.029 | 4821.887 | 5287.322 | 4186.264 |
| 4033939  | 2957092  | 3681732  | 1800333  | 3048489  | 3322837  | 2851957  |
| 4307.387 | 7114.487 | 4786.235 | 5246.362 | 7723.833 | 17874.39 | 5395.592 |
| 8496.89  | 11501.33 | 8887.119 | 13140.72 | 3870.389 | 5715.735 | 9642.2   |
| 213279.7 | 59906.07 | 100104.4 | 65364.79 | 60440.14 | 60493.95 | 74876.8  |
| 11946.17 | 7058.202 | 12767.89 | 19348.04 | 9532.051 | 16121.56 | 12711.87 |
| 26987.75 | 13855.67 | 13528.81 | 6922.68  | 13487.85 | 10731.76 | 22805.61 |
| 23202.29 | 77733.03 | 44696.35 | 58830.82 | 46572.37 | 42827.67 | 48700.48 |
| 20975.51 | 57555.86 | 38975.89 | 41542.59 | 39115.61 | 24090.02 | 36856.63 |
| 30616.84 | 7189.916 | 12697.57 | 4220.988 | 48027.98 | 61534.86 | 16735.27 |
| 962144.3 | 100013.2 | 165853.8 | 225010   | 92824.91 | 522441.6 | 476185.7 |
| 15006.54 | 17596.64 | 3307.864 | 29954.18 | 30927.17 | 19698.41 | 24557.23 |
| 220144.2 | 637137.6 | 466606.4 | 392835.2 | 305793.9 | 265680.3 | 356822.9 |
| 42715.27 | 22998.13 | 103547.8 | 129683.6 | 63049.33 | 74724.27 | 118327.6 |
| 156419.9 | 103729.8 | 145364.2 | 215746.1 | 91311.83 | 107637   | 96732.85 |
| 6446.441 | 1169.982 | 2210.937 | 2287.864 | 757.4189 | 2473.261 | 2250.641 |
| 274013.3 | 108986.9 | 139550.8 | 111902.7 | 112670   | 43129.73 | 69872.96 |
| 15896220 | 11806301 | 12640447 | 9310410  | 13644198 | 18197616 | 11049192 |
| 1710500  | 1656317  | 1486203  | 1011919  | 2273865  | 1751537  | 2656340  |
| 28591.07 | 8619.636 | 13388.04 | 10647.82 | 10038.21 | 12513.4  | 9167.73  |
| 5832.274 | 5410.312 | 6387.375 | 10035.18 | 8060.299 | 5383.865 | 7645.854 |
| 256113.8 | 264586.2 | 353655.7 | 236013.7 | 929116.1 | 3237916  | 359258.7 |
| 1001848  | 798059   | 1274975  | 456764.9 | 1376311  | 6231981  | 897691.9 |
| 374269.1 | 375949.5 | 216683.3 | 381774.5 | 857641.2 | 6094393  | 199341.9 |
| 1328388  | 550822   | 378392.2 | 371180.7 | 556913.3 | 1772416  | 432868.9 |

|          |          |          |          |          |          |          |
|----------|----------|----------|----------|----------|----------|----------|
| 50179.85 | 23406.98 | 23049.79 | 4416.343 | 22518.65 | 39700.89 | 25166.37 |
| 14667450 | 19177262 | 39553076 | 3912108  | 14758203 | 28500514 | 11975488 |
| 223822.2 | 159278.9 | 244602.6 | 147541.3 | 118699.6 | 139650.6 | 140514.3 |
| 45490.88 | 31145.87 | 32264.68 | 14062.76 | 29905.45 | 32759.46 | 46011.07 |
| 35038.33 | 40438.46 | 43870.45 | 28002.37 | 48229.69 | 31107.06 | 44655.23 |
| 10681.68 | 12900.47 | 12535.95 | 11271.03 | 10308.88 | 90378.38 | 12147.67 |
| 15716.99 | 9802.397 | 16365.23 | 17080.46 | 13221.93 | 16583.86 | 11708.51 |
| 4202.042 | 10643.54 | 9614.551 | 1870.959 | 8085.375 | 1110.434 | 2063.805 |
| 14887541 | 25974340 | 25526268 | 22137992 | 19197918 | 19980874 | 24816028 |
| 3591.678 | 4702.257 | 4182.097 | 5918.802 | 3997.763 | 3252.345 | 3939.334 |
| 2652738  | 515164.2 | 1780770  | 104588.6 | 120008.3 | 578374.2 | 294127   |
| 5703173  | 5329252  | 4165096  | 3645107  | 2846802  | 2550403  | 2990020  |
| 26186.46 | 76897.23 | 19603.52 | 893945.2 | 219516.3 | 298473   | 317691.4 |
| 36876400 | 24130844 | 26628400 | 46764224 | 15271671 | 25589534 | 19756236 |
| 44672704 | 24869796 | 52194968 | 71620568 | 22020192 | 35922676 | 29316656 |
| 77116.73 | 141109.7 | 79286.16 | 46977.13 | 54060.87 | 42573.65 | 80674.73 |
| 6635.408 | 4546.658 | 6526.488 | 1779.321 | 4581.579 | 17852.17 | 4653.264 |
| 147857.9 | 128172.9 | 109971.6 | 133997.7 | 202888.7 | 143048   | 157853.6 |
| 58417    | 26899.67 | 55218.38 | 30249.11 | 53499.82 | 22349.46 | 32814.46 |
| 2094474  | 1906759  | 2004555  | 1094445  | 1812029  | 1793999  | 1582278  |
| 20581.6  | 45613.97 | 51952.26 | 13654.51 | 10359.54 | 42158.79 | 15317.8  |
| 642820.1 | 455410.8 | 407845.1 | 375433   | 377072   | 953056.1 | 273355.2 |
| 862840.6 | 599190.1 | 727234.5 | 180691.5 | 381193.8 | 788485   | 617166.5 |
| 8431.555 | 9933.251 | 13335.59 | 4232.498 | 8259.315 | 2161.459 | 7787.223 |
| 41456912 | 26646524 | 26423792 | 27342584 | 23351036 | 28852794 | 32817200 |
| 787175.3 | 876505.8 | 899390.9 | 1180040  | 1148711  | 1338228  | 1213119  |
| 117189.2 | 52764.73 | 79327.1  | 228686.6 | 42070.98 | 59032.45 | 116787.4 |
| 291149.5 | 110429.2 | 122439.6 | 54446.25 | 103930.2 | 126283.7 | 146321.3 |
| 36394.59 | 23158.9  | 19351.63 | 14574.18 | 103252.4 | 66067.41 | 173127.3 |
| 38087.68 | 139403.9 | 88130.63 | 102128.6 | 83471.95 | 67052.7  | 94625.92 |
| 85345.57 | 78347.38 | 87812.62 | 67848.71 | 51657.41 | 52333.91 | 46862.05 |
| 20986.27 | 12055.21 | 14870.52 | 9425.766 | 40705.62 | 105809   | 22812.13 |
| 58873.12 | 37399.91 | 16667.17 | 23610.63 | 26428.15 | 22523.05 | 8326.432 |
| 2007802  | 1621950  | 2153144  | 1196552  | 1452375  | 1642503  | 1685286  |
| 11985.66 | 8102.293 | 9691.586 | 13425.38 | 9603.315 | 6691.933 | 8168.017 |
| 46305.52 | 36148.45 | 32696.48 | 24067.47 | 52195.19 | 29638.34 | 24498.82 |
| 1252192  | 800301.8 | 747286.9 | 874496.1 | 784867.9 | 3004825  | 870170.3 |
| 63051.96 | 13345.88 | 33268.38 | 14810.63 | 12052.56 | 11325.73 | 7480.244 |
| 225014.3 | 191367   | 198331.3 | 212665.6 | 174697.7 | 116391.9 | 128383.2 |
| 5364059  | 4088532  | 3365203  | 3582234  | 3472169  | 2513584  | 3512226  |
| 59423200 | 44280032 | 34803824 | 12479468 | 48549256 | 20296876 | 23025054 |
| 10582.35 | 16302.1  | 21705.36 | 15932.87 | 11757.19 | 8159.101 | 5515.221 |
| 7007.789 | 12779.65 | 16186.61 | 10368.33 | 9618.547 | 8130.041 | 11224.28 |
| 36415.17 | 62346.35 | 65421.58 | 150247.7 | 64436.96 | 55131.14 | 119113.2 |
| 11510.8  | 8461.461 | 10483.56 | 15040.78 | 12000.62 | 10014.47 | 10543.39 |
| 3364.931 | 4391.875 | 5655.655 | 6499.901 | 3081.172 | 5130.751 | 6128.009 |
| 2425.067 | 3477.165 | 4980.649 | 5888.041 | 3445.862 | 3435.842 | 4663.663 |
| 40719.63 | 63191.34 | 60707.86 | 82406.52 | 48420.07 | 66478.49 | 65866.92 |
| 9488.366 | 17160.95 | 8030.204 | 5481.081 | 8345.532 | 1221.033 | 5884.536 |

|          |          |          |          |          |          |          |
|----------|----------|----------|----------|----------|----------|----------|
| 140615.5 | 92225.69 | 93836.5  | 67183.5  | 172680   | 119006.9 | 76572.91 |
| 664762.8 | 1771904  | 1091714  | 847360.4 | 856098.1 | 659877.7 | 955028.8 |
| 31107.59 | 39144.26 | 36707.64 | 24935.77 | 35305.96 | 52563.13 | 34229.83 |
| 1180375  | 39663.11 | 453544.5 | 108256   | 365700.8 | 14533.05 | 29697.74 |
| 113984.4 | 69614.07 | 78765.64 | 66301.22 | 76716.95 | 54478.05 | 77683.16 |
| 2352476  | 1357659  | 1419877  | 1261039  | 1122364  | 1227417  | 1428301  |
| 333552   | 749010.5 | 505935   | 377773.3 | 327466.9 | 280825.1 | 380261.2 |
| 92104.01 | 52610.25 | 96509.2  | 247987.1 | 71584.52 | 54653.2  | 159812.2 |
| 80156.03 | 71798.48 | 59936.64 | 35040.95 | 48745.69 | 43769.18 | 71136.82 |
| 1279069  | 1184973  | 1874047  | 1422111  | 984888.4 | 1162607  | 1304190  |
| 22707.72 | 42877.48 | 32482.39 | 67552.64 | 44736.15 | 45281.88 | 37713.84 |
| 42400.84 | 19764.12 | 24963.54 | 18059.29 | 15828.21 | 25265.53 | 17511.57 |
| 760095.4 | 944284.6 | 803731.4 | 623951.9 | 296226.8 | 205819.8 | 393784   |
| 56529.85 | 38521.87 | 197212.2 | 45507.32 | 51611.94 | 33397.7  | 54160.76 |
| 1395984  | 623628.6 | 2198539  | 2102841  | 1422885  | 1197658  | 2064729  |
| 1178779  | 707130.9 | 844687.3 | 1001750  | 2387693  | 1323630  | 1230623  |
| 9842.437 | 33721.93 | 3967.001 | 4822.208 | 137604.5 | 26310.08 | 49834.54 |
| 1296256  | 2229688  | 2186451  | 2478759  | 1082505  | 1252857  | 1657811  |
| 1263693  | 783219.1 | 749118   | 633130.8 | 925868.7 | 646796.4 | 806000.2 |
| 17737.19 | 23784.55 | 16240.02 | 26801.55 | 16388.27 | 9035.576 | 13796.62 |
| 6302.515 | 2482.527 | 2606.903 | 5350.796 | 3544.058 | 3092.228 | 4404.037 |
| 20174.39 | 41912.68 | 47916.25 | 50852.39 | 19482.46 | 30924.85 | 23454.29 |
| 103395.6 | 67821.82 | 89165.38 | 42615.14 | 61995.76 | 41165.07 | 65810.84 |
| 509546.4 | 559204.7 | 9275.829 | 156411.2 | 786907.7 | 115164   | 423259.6 |
| 83725.49 | 67969.74 | 72507.77 | 68784.39 | 83314.03 | 63227.8  | 73982.82 |
| 101951.6 | 77190.35 | 75793.57 | 56502.66 | 70647.86 | 63023.69 | 72125.08 |
| 19885.29 | 18534.95 | 7466.317 | 24763.65 | 15480.88 | 5764.076 | 4757.51  |
| 100822.2 | 147893.1 | 184486.8 | 254245.3 | 90122.84 | 118024.9 | 166226.8 |
| 1773.285 | 23898.66 | 8312.471 | 26717.41 | 4997399  | 59750.58 | 21660.6  |
| 42228.7  | 24614.45 | 36661.55 | 22590.77 | 19881.8  | 20192.03 | 30194.18 |
| 7044.574 | 3457.17  | 3873.218 | 2546.928 | 4723.771 | 2747.036 | 5777.667 |
| 29675.33 | 282612.7 | 53023.22 | 50853.84 | 46330.22 | 34563.02 | 33497.26 |
| 6671.42  | 4416.582 | 5754.574 | 3355.342 | 4724.19  | 4150.994 | 6009.471 |
| 50603.09 | 30117.54 | 33218.71 | 40113.37 | 54007.33 | 135043.4 | 27113.16 |
| 28342.55 | 24629.31 | 19256.91 | 22065.63 | 15345.24 | 17381.88 | 12625.46 |
| 49252792 | 39274728 | 48808176 | 56733080 | 35630088 | 35214560 | 53282448 |
| 6672196  | 4928193  | 9409955  | 14493033 | 5221181  | 6750094  | 6423190  |
| 66198.8  | 29148.73 | 34935.66 | 54427.23 | 98914.7  | 103414.5 | 54223.64 |
| 329713.8 | 643243.6 | 317714   | 181976.1 | 542927.1 | 1697918  | 634926.7 |
| 10896.21 | 18106.01 | 1017.63  | 6253.444 | 1550.192 | 5494.746 | 2039.863 |
| 1293890  | 1209786  | 1068751  | 1202383  | 2347982  | 2443865  | 1395867  |
| 20067    | 59356.65 | 44423.93 | 37368.99 | 40890.39 | 37941.23 | 42808.18 |
| 18119.43 | 27247.89 | 12361.64 | 24241.96 | 22129.08 | 14712    | 8318.521 |
| 18937.4  | 16849.88 | 23072.87 | 13468.58 | 10288.08 | 13267.85 | 14271.95 |
| 187696.8 | 88670.61 | 91707.92 | 85252.17 | 129887.2 | 110445.3 | 119460.7 |
| 7347.421 | 4761.998 | 7557.915 | 5205.052 | 6030.896 | 5347.798 | 6905.42  |
| 6535.667 | 12515.23 | 11488.62 | 15774.48 | 9868.14  | 7705.523 | 5912.533 |
| 50294.25 | 40193.41 | 61121.79 | 27713.66 | 42811.75 | 48879.88 | 67184.44 |
| 57461.36 | 191259.5 | 92994.36 | 156116.8 | 80419.43 | 62707.15 | 111290.2 |



|          |          |          |          |          |          |          |
|----------|----------|----------|----------|----------|----------|----------|
| 61186.62 | 32346.1  | 26947.53 | 28418.74 | 16778.04 | 9683.174 | 17915.17 |
| 44609.52 | 72350.3  | 76788.13 | 183861.3 | 52194.06 | 61105.87 | 107837.2 |
| 56797.25 | 68355.69 | 62766.73 | 32860.78 | 29850.7  | 21768.14 | 37659    |
| 89856.92 | 89804.44 | 101703.3 | 117253.3 | 78610.93 | 85826.09 | 82064.25 |
| 9078.584 | 8017.243 | 7870.561 | 6026.628 | 15598.28 | 6615.319 | 3841.527 |
| 220396.2 | 243608.1 | 223279.9 | 331598.4 | 245868.4 | 226287.1 | 169501   |
| 4385834  | 3174430  | 3865866  | 615494.4 | 1771053  | 2021380  | 3839005  |
| 572474.3 | 415993.6 | 461482.4 | 215114.6 | 506271.5 | 373264.5 | 409309.7 |
| 23647.5  | 55195.9  | 48999.82 | 44619.2  | 36152.57 | 28272.3  | 38113.93 |
| 80141.57 | 52197.21 | 59392.17 | 62726.23 | 91354.83 | 42042.18 | 60922.4  |
| 29875.6  | 25899.13 | 34944.07 | 21235.88 | 13752.26 | 8232.159 | 14178.09 |
| 77693.09 | 264716.1 | 187212.9 | 166025.3 | 105070.2 | 111969.3 | 129444.4 |
| 50667.38 | 38677.27 | 84247.11 | 157142.6 | 31316.91 | 53879.59 | 53467.13 |
| 57072.45 | 267502.1 | 155011   | 118061.5 | 66712.19 | 41690.01 | 98524.3  |
| 6462.284 | 21117.04 | 16768.97 | 13819.52 | 10308.85 | 15212.93 | 10206.4  |
| 94568.09 | 79335.47 | 59248.13 | 55519.37 | 57084.88 | 32511.7  | 39418.61 |
| 39724.16 | 21549.49 | 56678.28 | 68643.15 | 31917.24 | 24783.86 | 46734.33 |
| 82543.96 | 93607.41 | 91313.86 | 121354.4 | 81671.16 | 62400.04 | 122981   |
| 654315.9 | 279531.6 | 297935.7 | 284489.8 | 293845.1 | 93709    | 191526.2 |
| 1747019  | 1807622  | 497549.8 | 1084029  | 2611410  | 4019946  | 3461336  |
| 10087.43 | 5059.736 | 11015.02 | 5131.103 | 8005.773 | 15412.9  | 11978.53 |
| 22181.54 | 24309.63 | 31523.3  | 33097.19 | 17450.74 | 23039.41 | 24544.38 |
| 1207451  | 1325650  | 1361959  | 1738392  | 3000802  | 5809840  | 2384311  |
| 21340.08 | 17271.68 | 10966.98 | 9742.909 | 12390.68 | 11268.15 | 17069.31 |
| 226828.2 | 130161.9 | 216283.6 | 121213.5 | 113607.4 | 61811.77 | 101624.9 |
| 113290.1 | 317639.7 | 238673.9 | 185079.5 | 96000.73 | 113628   | 175122.5 |
| 7552.374 | 7130.443 | 10389.96 | 3001.482 | 5161.622 | 8513.532 | 3910.621 |
| 10346.31 | 72918.97 | 52968.9  | 5168.534 | 38725.63 | 38376.04 | 17844.73 |
| 3732.706 | 7429.921 | 5173.794 | 4349.23  | 7442.358 | 6263.6   | 7608.101 |
| 28983.78 | 15372.93 | 38765.35 | 15108.71 | 79122.3  | 41111.69 | 27065.99 |
| 66102.46 | 11724.39 | 41660.21 | 9522.08  | 154898.1 | 40346.97 | 60845.96 |
| 838300   | 1130782  | 1197616  | 730088.8 | 861376.9 | 1720062  | 1074464  |
| 4706.667 | 12639.92 | 17603.82 | 26875.6  | 22292.72 | 17813.58 | 20853.68 |
| 34311.36 | 27224.98 | 19877.9  | 16627.7  | 13785.69 | 10554.58 | 19754.06 |
| 18181.48 | 37284.33 | 40151.57 | 59689.68 | 33406.69 | 26807.85 | 39450.01 |
| 25032.49 | 64133.34 | 59309.83 | 78356.48 | 34880.88 | 42633.55 | 57730.41 |
| 434280.8 | 442357   | 331099.3 | 303328.7 | 295610.7 | 270484.4 | 408441.4 |
| 4995.246 | 13432.27 | 15491.4  | 14583.95 | 2825.542 | 6460.359 | 10683.39 |
| 16768.06 | 8199.399 | 4638.888 | 8919.001 | 16092.54 | 12324.37 | 11108.56 |
| 411209.4 | 470187.9 | 405793.4 | 911088.5 | 401786.4 | 316705.8 | 365600.3 |
| 20297.07 | 10850.12 | 25070.41 | 45106.6  | 16622.63 | 19719.6  | 21439.5  |
| 10400.89 | 41426.57 | 10207.05 | 10480.49 | 258918.6 | 133628.1 | 150289.6 |
| 7308.569 | 7488.059 | 6174.034 | 4688.862 | 6750.477 | 6197.318 | 6026.686 |
| 38300.66 | 22323.01 | 26897.91 | 17006.33 | 22993.45 | 40949.57 | 24668.69 |
| 50650.14 | 56471.77 | 33307.05 | 26552.43 | 24697.09 | 19427.58 | 31252.6  |
| 1560270  | 1253910  | 2654628  | 1465362  | 922837.9 | 478520.8 | 2484641  |
| 881084.2 | 874080.7 | 632079.6 | 653761.1 | 692116.3 | 511383.7 | 552106.5 |
| 48800.54 | 45133.36 | 37450.05 | 31299.83 | 30700.59 | 26892.94 | 37728.66 |
| 7423.147 | 21109.67 | 13616.44 | 12580.81 | 10097.04 | 9955.377 | 13768.59 |

|          |          |          |          |          |          |          |
|----------|----------|----------|----------|----------|----------|----------|
| 70513.47 | 70166.36 | 55476.71 | 53346.95 | 67199.94 | 49192.26 | 57164.98 |
| 40005.14 | 115437.8 | 63036.55 | 58184.3  | 45818.21 | 36046.53 | 63051.26 |
| 7453.382 | 16557.14 | 19021.53 | 11223.51 | 8579.193 | 4648.034 | 15491.53 |
| 7446.89  | 11183.34 | 13056.84 | 14057.87 | 7797.179 | 6561.451 | 9167.451 |
| 88448.65 | 90155.17 | 107117.3 | 155183.3 | 81497.42 | 123376.3 | 99980.71 |
| 49446.71 | 67208.2  | 79570.75 | 115934.4 | 49022.48 | 55182.77 | 56662.2  |
| 101379.6 | 211508.4 | 217241.6 | 350630.7 | 123848.1 | 120675.3 | 211311.4 |
| 9459.955 | 4679.873 | 6178.73  | 21634.6  | 6282.791 | 1745.859 | 1883.884 |
| 33986.65 | 25529.43 | 12190.4  | 19788.2  | 9457.008 | 8113.343 | 16485.04 |
| 37094.12 | 19760.08 | 13058.1  | 11823.91 | 15062.12 | 14061.86 | 8178.91  |
| 28470.05 | 47883.24 | 4886.211 | 7152.674 | 264593.2 | 281026.3 | 284490.7 |
| 99037.39 | 64012.8  | 75291.7  | 68838.9  | 76431.62 | 46001.94 | 62220.88 |
| 13746.65 | 12226.36 | 11461.95 | 14929.78 | 32699.47 | 218918.4 | 11605.13 |
| 76891.95 | 49807.5  | 64368.31 | 39225.73 | 26331.61 | 42201.15 | 34283.45 |
| 6610.656 | 11186.35 | 6814.266 | 5569.445 | 8741.2   | 12796.26 | 12004.81 |
| 4934.021 | 4125.59  | 5674.254 | 75709.16 | 9953.886 | 141400   | 6275.744 |
| 59621.77 | 54341.37 | 46987.65 | 27945.91 | 56427.06 | 34964.65 | 42929.42 |
| 5802.376 | 8521.073 | 4744.64  | 9276.856 | 3366.802 | 5407.265 | 4185.221 |
| 38266.9  | 44033.71 | 34727.24 | 24122.02 | 36620.85 | 13047.73 | 25165.27 |
| 713450.9 | 1754113  | 1298232  | 1620411  | 1223517  | 868193.8 | 1099656  |
| 6898.28  | 7154.509 | 9364.9   | 9191.842 | 12327.39 | 12918.21 | 4667.115 |
| 10529.81 | 36404.27 | 26642.94 | 38740.8  | 10667.07 | 12648.51 | 29307.4  |
| 9272.32  | 17004.97 | 12803.45 | 14243.23 | 8678.76  | 10209.62 | 10520.2  |
| 14130.08 | 24722.26 | 27535.78 | 30693.33 | 19548.65 | 3006.039 | 19235.95 |
| 127142.9 | 67604.9  | 66081.03 | 48306.43 | 79286.33 | 89878.06 | 52657.45 |
| 43750.1  | 36871.91 | 59384.28 | 83893.84 | 24009.35 | 31906.69 | 48875.52 |
| 19770.47 | 19671.34 | 19758.79 | 15112.93 | 14663.03 | 14210.03 | 20293.47 |
| 249743.6 | 333412.9 | 267673.8 | 125548.2 | 268068   | 316049.8 | 295633.2 |
| 46129.37 | 23491.15 | 48476.35 | 51040.14 | 23464.44 | 15858.9  | 25422.27 |
| 54295.38 | 57857.33 | 77954.32 | 90447.12 | 54426.4  | 41598.71 | 61393.12 |
| 173982.2 | 294151.8 | 289629.8 | 416927.1 | 171562.8 | 170689.5 | 203752.7 |
| 15703.44 | 39721.87 | 19372.81 | 39392.12 | 18382.82 | 26626.45 | 28388.22 |
| 10550.18 | 9262.952 | 5091.834 | 11494.25 | 9446.619 | 7838.159 | 6578.232 |
| 106375.9 | 20796.18 | 59789.09 | 96722.19 | 70906.86 | 39306.26 | 64383.8  |
| 9832.11  | 21162.22 | 17121.48 | 29362.72 | 27028.93 | 13558.99 | 11826.25 |
| 11840.56 | 13111.91 | 16081.26 | 13086.28 | 12557.23 | 12547.82 | 13344.79 |
| 38326.64 | 49868.98 | 46967.77 | 56098.05 | 46130.91 | 40106.83 | 51514.8  |
| 194255.3 | 58642.17 | 104560.9 | 93310.88 | 63573.2  | 54832.84 | 101453.3 |
| 81617.82 | 68251.9  | 88505.91 | 87571.68 | 89528.47 | 60988.33 | 45829.81 |
| 52508.41 | 71984.28 | 90796.6  | 111317.2 | 42096.99 | 46854.62 | 59706.43 |
| 434241.9 | 491763.1 | 522868.6 | 592716.9 | 271162.2 | 326608.4 | 398212.7 |
| 42523.36 | 45865.03 | 38634.96 | 23216.76 | 92342.08 | 11065.6  | 56996.06 |
| 27284.63 | 34220.34 | 27209.36 | 8450.335 | 15234.06 | 21489.74 | 13870.42 |
| 54371.02 | 143010.3 | 122580   | 232784.1 | 81281.59 | 101098.9 | 137856.1 |
| 133485.4 | 153356.1 | 221435.6 | 229330.5 | 118758.1 | 124900   | 163680.8 |
| 10660.83 | 7924.164 | 11154.35 | 15963.99 | 7400.43  | 7246.938 | 9271.212 |
| 1063022  | 2574816  | 1937560  | 2559056  | 1712177  | 1504113  | 1904656  |
| 14449.68 | 24168.22 | 19722.36 | 27944.54 | 19893.22 | 19173.73 | 14793.04 |
| 33926.62 | 25099.77 | 60068.87 | 87329.2  | 37966.79 | 35856.5  | 41172.27 |

|          |          |          |          |          |          |          |
|----------|----------|----------|----------|----------|----------|----------|
| 3519.803 | 3602.372 | 5690.405 | 6628.623 | 9179.235 | 5059.777 | 3717.798 |
| 43380.13 | 17421.86 | 59534    | 58767.75 | 25831.32 | 30686.2  | 31136.3  |
| 16350.54 | 20849    | 30595.96 | 26764.01 | 23985.49 | 20804.02 | 19493.22 |
| 103505.2 | 55845.92 | 115935.9 | 54799.7  | 92982.45 | 80498.82 | 67833.88 |
| 96123.53 | 131460.8 | 59956.18 | 84057.21 | 337725.9 | 181197.3 | 87569.09 |
| 30713.17 | 33243.68 | 38681.36 | 48082.11 | 27895.78 | 11908.76 | 30884.18 |
| 8845.424 | 4581.464 | 841.3276 | 167.1668 | 8092.828 | 5399.535 | 3980.718 |
| 28485.05 | 31514.43 | 35483.16 | 60869.63 | 29896.17 | 42932.32 | 25042.11 |
| 24388.93 | 37268.07 | 55299.64 | 19242.8  | 51425.24 | 90299.27 | 71772.3  |
| 3787.246 | 1232.925 | 1352.358 | 1388.836 | 2762.481 | 2633.7   | 2297.854 |
| 359261   | 156172.6 | 47938.43 | 152073.5 | 55914.1  | 35088.52 | 67785.5  |
| 725064.2 | 642472.6 | 631186.8 | 374550.3 | 976014.1 | 764167.6 | 827473.1 |
| 113171.6 | 81739.93 | 84858.13 | 50545.59 | 73903.52 | 39958.18 | 50345.43 |
| 146296.8 | 97576.56 | 106864.3 | 55906.38 | 65857.11 | 110592.6 | 147004.5 |
| 60569.31 | 40505.15 | 55155.1  | 27569.77 | 38717.86 | 38193.39 | 34048.8  |
| 107612.7 | 104119.3 | 159337.5 | 106997.2 | 105044.3 | 76590.64 | 81788.98 |
| 1179448  | 280397.8 | 322408.4 | 5808.892 | 708964.9 | 233726.4 | 202136.5 |
| 10325.3  | 4951.357 | 16181.74 | 22462.38 | 13067.25 | 14200.43 | 17880.68 |
| 1.62E+08 | 1.2E+08  | 1.03E+08 | 47740952 | 39622184 | 72673328 | 78631808 |
| 1.47E+08 | 1.78E+08 | 1.6E+08  | 65764068 | 90589144 | 85188384 | 1.07E+08 |
| 14416.42 | 53973.41 | 35232.98 | 34023.29 | 28540.57 | 17922.48 | 32558.37 |
| 219688.9 | 171274.9 | 125417.2 | 123743   | 190432.7 | 160010   | 203599.3 |
| 325118.2 | 87726.14 | 100015.1 | 34482.12 | 118298.5 | 96082.65 | 12439.13 |
| 24084.97 | 266379.9 | 52283.11 | 50553.46 | 23116.95 | 62026.27 | 307786.4 |
| 62872976 | 58579272 | 45230912 | 32044680 | 30384310 | 42628080 | 44657556 |
| 64044.53 | 58321.68 | 60620.3  | 45636.12 | 36237.72 | 67135.65 | 90336.48 |
| 11179.49 | 20223.84 | 19549.97 | 27885.45 | 18601.09 | 14939.34 | 20116.23 |
| 365292   | 700123   | 437836.1 | 360466.2 | 378815.1 | 485332.6 | 453327.8 |
| 12448.22 | 29075.18 | 31009.61 | 47411.42 | 29411.46 | 25362.56 | 28809.68 |
| 13549.78 | 17070.59 | 16098.59 | 33944.38 | 13014.31 | 16288.39 | 24780.26 |
| 8712.596 | 12928.16 | 14255.18 | 15373.55 | 7124.417 | 8296.004 | 10819.65 |
| 1044456  | 749595.2 | 683003.1 | 537089.1 | 852372.3 | 595830   | 646651.9 |
| 113776.3 | 74930.47 | 94131.33 | 63485.11 | 56316.95 | 55087.46 | 74293.74 |
| 87668.73 | 133952.1 | 131311   | 79023.27 | 108340.6 | 138732.1 | 116043.7 |
| 6167681  | 1172660  | 103375.4 | 85267.21 | 2279748  | 1384101  | 3322911  |
| 7807.653 | 14102.28 | 6431.444 | 11949.54 | 28586.32 | 23229.64 | 15489.96 |
| 83771.87 | 72617.9  | 86261.44 | 77057.8  | 82267.83 | 73044.59 | 77769.61 |
| 121297.7 | 77243.77 | 103080.5 | 48848.67 | 74091.97 | 46143.37 | 71259.28 |
| 7166.734 | 5221.731 | 6047.234 | 3788.22  | 5339.449 | 6046.68  | 4398.333 |
| 6772.189 | 2230.718 | 8378.063 | 2327.199 | 2198.187 | 3467.521 | 3454.514 |
| 102167.4 | 230614.5 | 105328   | 144563.7 | 129113.5 | 110310.3 | 166065.7 |
| 25348.87 | 15172.1  | 27102.52 | 18875.89 | 16031.12 | 15154.32 | 15000.21 |
| 39170.55 | 34856.59 | 36764.6  | 15840.9  | 39982.66 | 28313.43 | 29996.65 |
| 359709.9 | 128011.7 | 72272.46 | 76548.16 | 173448.5 | 95547.56 | 115012.8 |
| 323348.3 | 222865.3 | 51261.34 | 159324   | 389609.6 | 525823.6 | 466064.3 |
| 16434.79 | 185547.7 | 4092.378 | 9436.135 | 299068.4 | 173476.5 | 192457.6 |
| 883199.3 | 1075330  | 1062725  | 876677.6 | 1334939  | 924077.4 | 1444167  |
| 8784.399 | 6845.905 | 8709.477 | 5409.017 | 10859.56 | 11348.25 | 8589.36  |
| 370252.1 | 244712.3 | 309052.2 | 171309.5 | 211274.6 | 165759   | 235674.4 |

|          |          |          |          |          |          |          |
|----------|----------|----------|----------|----------|----------|----------|
| 40853.71 | 52839.92 | 49456.75 | 28296.51 | 42384.43 | 25279.59 | 37718.51 |
| 95552.38 | 133123   | 137664.3 | 283443   | 120770.3 | 90867.56 | 111083.1 |
| 243868.7 | 72206.49 | 177915.3 | 112193.6 | 97318.73 | 69529.77 | 67689.35 |
| 15436.98 | 9400.863 | 14632.69 | 18306.95 | 15383.91 | 13527.98 | 10530.35 |
| 4176392  | 1864585  | 1881141  | 2262266  | 2953616  | 3196489  | 2234561  |
| 560545.6 | 540340.6 | 288013.4 | 158904.9 | 363708.8 | 363716.7 | 441534.1 |
| 1042421  | 942969.4 | 832268.4 | 735060.7 | 1246960  | 797035.3 | 1049138  |
| 7819.931 | 12759.5  | 7866.347 | 22369.2  | 8039.298 | 7122.024 | 9159.275 |
| 28523.66 | 21927.38 | 19738.21 | 9647.397 | 15709.11 | 16527.59 | 23466.38 |
| 203621.6 | 122798.8 | 128629.5 | 82903.95 | 114665.1 | 69746.83 | 90295.02 |
| 58847.7  | 116079.1 | 76914.1  | 124683   | 59524.15 | 57997.68 | 83713.47 |
| 127890.3 | 217123.9 | 299301.8 | 72498.78 | 345269.7 | 180993.1 | 203495.4 |
| 9919.486 | 12401.61 | 10716.32 | 9785.542 | 5363.779 | 3234.358 | 5464.375 |
| 99781.88 | 313628   | 235037.2 | 158915.5 | 148264.9 | 117398.6 | 247854.4 |
| 268982.4 | 265350.1 | 143647.3 | 283272   | 983098.5 | 3566798  | 463100   |
| 104822   | 53866.21 | 99153.16 | 34537.96 | 56490.12 | 54479.76 | 71900.33 |
| 1783725  | 3236883  | 3789305  | 1611875  | 2298058  | 1371357  | 2399163  |
| 43209.6  | 33146.64 | 30848.03 | 16414.82 | 35562.32 | 20706.75 | 19268.25 |
| 132258.1 | 264042.3 | 243299   | 59759.27 | 126100   | 92409.8  | 84754.03 |
| 14847.58 | 9325.509 | 7442.669 | 6270.725 | 8335.657 | 2608.835 | 5050.441 |
| 145581.6 | 308177.3 | 96083.79 | 65938.33 | 318212.3 | 246159.7 | 428501.9 |
| 6891.74  | 1521.795 | 4233.52  | 4598.579 | 3192.373 | 3373.453 | 3962.431 |
| 846600   | 518584.3 | 555348.6 | 845853.8 | 486688.2 | 514273.3 | 610103   |
| 16265.93 | 13627.55 | 20486.02 | 18290.74 | 20358.4  | 10464.25 | 13283.59 |
| 72357.67 | 38741.84 | 13908.18 | 13571.13 | 35444.28 | 22625.69 | 40787.23 |
| 70923.62 | 109609.7 | 94263.39 | 69559.26 | 62533.72 | 59285.79 | 83690.24 |
| 339691.7 | 266038.1 | 347717.9 | 145973.7 | 188356.9 | 269293.2 | 203439.9 |
| 17922.73 | 13781.11 | 17252.3  | 16555.09 | 11931.59 | 6035.52  | 13387.66 |
| 8902.847 | 8883.83  | 11581.57 | 18742.67 | 7952.554 | 9937.594 | 7893.063 |
| 90370.41 | 37602.37 | 42990.61 | 22490.33 | 38179.1  | 48587.47 | 37125.46 |
| 9496.491 | 7215.989 | 5191.724 | 8287.261 | 5479.949 | 5362.189 | 6880.417 |
| 50535.27 | 39764.24 | 42089.07 | 38297.9  | 42670.79 | 30434.94 | 44367.62 |
| 19470.31 | 16849.83 | 19540.66 | 28336.69 | 10706.73 | 21307.46 | 23615.34 |
| 187472.8 | 144966   | 169074.8 | 112783.5 | 131272.6 | 143452.6 | 180861.2 |
| 151274.2 | 159526.9 | 226199.2 | 101833.3 | 59242.8  | 144148.2 | 111248.5 |
| 49447.72 | 56762.49 | 33860.32 | 27532.3  | 38611.1  | 26467.93 | 36924.68 |
| 16114.3  | 11689.24 | 15350.71 | 15265.49 | 17291.2  | 23516.21 | 14123.83 |
| 214266.6 | 261230.3 | 407415.1 | 145564.1 | 152394.8 | 160059.5 | 168956.8 |
| 33046.79 | 53210.53 | 26801.69 | 51673.76 | 24290.93 | 23640.31 | 38488.33 |
| 442752.9 | 614610.6 | 431825.6 | 415516.9 | 632820.1 | 368911.1 | 610818.6 |
| 20620.69 | 26920.35 | 23921.46 | 21599.81 | 14293.73 | 17013.23 | 21632.92 |
| 20698.98 | 13255.01 | 13999.73 | 15861.15 | 27717.15 | 30340.18 | 19423.35 |
| 124652.1 | 124288.6 | 129238.3 | 74462.04 | 95199.84 | 83027.87 | 91245.09 |
| 35497.86 | 18556.55 | 16613.73 | 19771.72 | 16049.68 | 12732.91 | 15205.61 |
| 1635919  | 206810.5 | 15235.11 | 19612.78 | 287903.4 | 180574.1 | 321993.5 |
| 54977.36 | 58336.63 | 58237.86 | 41223.05 | 76904.47 | 93530.1  | 98484.48 |
| 37174.19 | 37892.07 | 41338.3  | 53968.48 | 49209.6  | 29403.1  | 42478.27 |
| 174652   | 302820.3 | 201619.2 | 244002.9 | 160578.5 | 118020.5 | 218825.9 |
| 111107   | 35192.88 | 29425.92 | 11442.89 | 29625.37 | 32820.78 | 36360.02 |

|          |          |          |          |          |          |          |
|----------|----------|----------|----------|----------|----------|----------|
| 38007.73 | 106555.3 | 103700.3 | 197942.4 | 60422.55 | 80433.7  | 100740   |
| 5963.674 | 5429.98  | 4062.886 | 5802.865 | 4472.343 | 3581.18  | 4984.882 |
| 32304.08 | 17641.1  | 16773.58 | 14807.62 | 11885.46 | 17383.1  | 9809.644 |
| 8830.335 | 42041.34 | 24450.03 | 36281.45 | 20501.11 | 14159.42 | 27129.47 |
| 3591.678 | 4644.589 | 3739.333 | 6101.929 | 4242.711 | 3462.974 | 4456.221 |
| 13298.32 | 53872.11 | 26292    | 25974.47 | 10993.62 | 13286.33 | 20223.52 |
| 26076.54 | 46818.56 | 27670.31 | 34735.84 | 26282.38 | 19370.21 | 21599.84 |
| 10719.26 | 7571.938 | 8293.269 | 7020.818 | 6962.086 | 6472.616 | 10895.85 |
| 48363.04 | 27218.91 | 29318.4  | 19931.43 | 16672.04 | 13376.92 | 16093.97 |
| 89099.81 | 60152.63 | 89991.97 | 56079.43 | 73180.57 | 64416.09 | 75794.05 |
| 613282.8 | 379740.9 | 441702.6 | 284760.3 | 414639.2 | 355639.9 | 453098.2 |
| 3738.646 | 8629.396 | 4530.879 | 7026.602 | 4055.038 | 7356.12  | 5540.105 |
| 761597.4 | 232300.2 | 232050.3 | 823835.2 | 1006819  | 485854.7 | 625745.1 |
| 11763.41 | 9636.132 | 10640.94 | 4987.69  | 6989.691 | 5336.203 | 6514.543 |
| 12704.65 | 6567.382 | 4734.363 | 9488.176 | 11637.69 | 24756.08 | 20352.6  |
| 243877.1 | 315603.3 | 267085.1 | 301744.9 | 300579.4 | 327395.4 | 419627.9 |
| 12755.49 | 9389.418 | 13840.05 | 5381.936 | 11054.85 | 8190.54  | 6881.822 |
| 38599.93 | 30480.41 | 30898.54 | 24674.65 | 63114.52 | 43928.19 | 27550.53 |
| 9043246  | 109089.7 | 4938580  | 6647162  | 8393533  | 36250.84 | 5486305  |
| 25895.61 | 20540.38 | 29082.61 | 21904.91 | 16377.49 | 16148.82 | 15548.65 |
| 3798.401 | 2372.2   | 1728.497 | 2537.001 | 2762.481 | 1679.21  | 1494.146 |
| 85319.98 | 121231.8 | 88760.81 | 54296.09 | 82058.27 | 63042.25 | 90168.21 |
| 168611.9 | 155991.1 | 159213.1 | 172111.5 | 188689.8 | 177708.1 | 172031.7 |
| 6075.877 | 7526.564 | 3522.159 | 4752.834 | 5571.622 | 3447.796 | 3078.898 |
| 515897.8 | 353971.4 | 306828.7 | 277705.7 | 240622.4 | 133485.6 | 208120.5 |
| 23076.21 | 34874.35 | 40545.89 | 15830.78 | 32334.22 | 30264.14 | 26991.33 |
| 7108.154 | 12979.28 | 11843.1  | 8403.013 | 12619.17 | 5858.108 | 7688.486 |
| 3364.931 | 4125.434 | 4602.929 | 3578.798 | 3118.013 | 2999.849 | 2799.835 |
| 156119.2 | 146738   | 156310.8 | 171922.7 | 103227.2 | 67680.87 | 135657.9 |
| 87470.39 | 118178.6 | 92224.48 | 133061.4 | 126907.1 | 110257.3 | 138046.8 |
| 10255.76 | 7093.771 | 11705.19 | 10670.91 | 9469.304 | 7499.115 | 11378.45 |
| 16459.21 | 5301.896 | 13171.38 | 20207.17 | 6517.347 | 6093.017 | 13379.93 |
| 11665.81 | 10560.94 | 15213.45 | 6477.436 | 18107.34 | 46540.1  | 15772.21 |
| 19909.81 | 21971.33 | 17474.61 | 18882.8  | 13891.74 | 16418.24 | 14941.74 |
| 10367.84 | 47168.45 | 9175.142 | 14728.4  | 28062.4  | 29212.89 | 28936.81 |
| 244118.8 | 341551.9 | 343366.5 | 424806.6 | 467314.3 | 330421.9 | 406565.7 |
| 182005.4 | 258390.1 | 207960.8 | 255016.3 | 325831.5 | 337900.9 | 458111.3 |
| 11303.73 | 5890.699 | 4741.216 | 3185.612 | 14008.18 | 19867.05 | 12334.98 |
| 1467353  | 1077894  | 1217838  | 506383.2 | 726571   | 461754.7 | 829245.4 |
| 25907.17 | 24224.08 | 29161.82 | 19583.98 | 25291.35 | 18011.54 | 24018.26 |
| 34225.89 | 27005.75 | 140358.1 | 218853.1 | 142389.1 | 95923.6  | 200516.8 |
| 206712.1 | 135241   | 191267.3 | 110908.5 | 141847.3 | 139682.1 | 204682   |
| 44583.49 | 61022.47 | 36134.84 | 25996.16 | 36469.87 | 23069.12 | 35070.88 |
| 7681.958 | 10456.67 | 14467.97 | 13337.59 | 3858.138 | 1627.943 | 1407.528 |
| 99587.09 | 110730.4 | 94331.7  | 69023.49 | 101712.6 | 68501.36 | 76081.48 |
| 18490.26 | 38987.22 | 36298.25 | 65416.17 | 132766.9 | 89398.99 | 91927.98 |
| 28235.45 | 97631.78 | 78283.71 | 59125.99 | 42497.45 | 41674.96 | 52922.84 |
| 4381.963 | 8289.282 | 4317.684 | 6525.283 | 8925.709 | 2340.541 | 5446.62  |
| 7170.511 | 14465.23 | 12300.16 | 11529.95 | 7161.297 | 6504.041 | 8652.68  |

|          |          |          |          |          |          |          |
|----------|----------|----------|----------|----------|----------|----------|
| 15762.2  | 29307.03 | 21694.01 | 26259.03 | 15928.76 | 9706.135 | 15695.4  |
| 26324.66 | 20952.81 | 27265.65 | 21561.89 | 19406.08 | 19738.7  | 16079.44 |
| 18044.48 | 15383.06 | 13058.65 | 14020.65 | 11225.41 | 10889.92 | 15695.76 |
| 158024.6 | 117077.1 | 131989.7 | 42598.23 | 88698.21 | 60852.2  | 67250.84 |
| 10680.35 | 9633.459 | 8358.643 | 11259.14 | 11202.19 | 12609.83 | 7357.536 |
| 84114.61 | 259241   | 155633.4 | 292190.5 | 189231.6 | 154183.1 | 226886.6 |
| 35963.15 | 25801.94 | 63968.6  | 82201.22 | 47684.65 | 58516.66 | 52339.11 |
| 11100.17 | 37786.01 | 10046.55 | 11572.96 | 9173.876 | 13556.29 | 11109.19 |
| 6007.698 | 4339.327 | 4474.114 | 9972.49  | 13121.92 | 4614.251 | 8660.342 |
| 12356.9  | 24058.3  | 11896.85 | 30161.24 | 136939.4 | 57384.15 | 37783.33 |
| 29901.82 | 26156.8  | 31383.13 | 18879.21 | 21657.27 | 17524.62 | 20430.9  |
| 175554.5 | 120694.2 | 137131.1 | 103710.8 | 95292.81 | 101885.7 | 37804.29 |
| 4036.821 | 5133.094 | 4189.809 | 2555.855 | 2477.949 | 1350.579 | 2060.875 |
| 9184.68  | 21482.56 | 20804.96 | 28844.72 | 17915.66 | 11594.31 | 18964.51 |
| 9118.16  | 5080.471 | 4550.068 | 9147.037 | 8316.555 | 91400.45 | 7865.587 |
| 138750.4 | 270514.8 | 497228.4 | 147166.9 | 130306.6 | 107957.3 | 226629.9 |
| 27508.53 | 56587.2  | 25732.02 | 40459.06 | 17478.4  | 43719.23 | 25676    |
| 639893.4 | 728927.6 | 627207.6 | 1213586  | 737302.9 | 486093.9 | 590354.6 |
| 37357.64 | 5125.035 | 31589.18 | 40237.75 | 49623.15 | 62394.97 | 29099.84 |
| 100450.4 | 200264.1 | 164761   | 128969   | 123192.1 | 76943.36 | 85068.96 |
| 14285.06 | 15700.24 | 17589.83 | 14600.29 | 31562.66 | 35627.82 | 23017.04 |
| 10011.71 | 7662.153 | 8697.873 | 23572.2  | 3952.21  | 12503.52 | 15447.82 |
| 10845.33 | 3562.171 | 5366.935 | 50330.46 | 9914.046 | 8013.183 | 3777.081 |
| 31716.25 | 48860.55 | 27061.96 | 81104.49 | 58178.93 | 30653.82 | 35853.43 |
| 27991.17 | 23810.84 | 19165.78 | 16980.28 | 16070.24 | 8268.253 | 9286.032 |
| 4057145  | 3728133  | 4007881  | 2385018  | 3201294  | 2415542  | 2857263  |
| 87121.66 | 129025.2 | 119538.3 | 105833   | 83842.24 | 77384.49 | 89986.43 |
| 5170.554 | 5700.94  | 4902.304 | 4432.07  | 4486.923 | 4306.702 | 4713.285 |
| 2015.186 | 2539.596 | 1965.998 | 1206.03  | 2762.481 | 2699.426 | 2538.302 |
| 34097.47 | 26661.92 | 34678.77 | 18654.55 | 11674.51 | 17845.45 | 20594.72 |
| 40164.98 | 38501.31 | 34450.66 | 31635.57 | 25028.24 | 39174.84 | 34951.45 |
| 6494.432 | 6639.204 | 5422.384 | 6458.639 | 7294.354 | 5835.801 | 5423.958 |
| 197814.4 | 165044.3 | 207229.2 | 93929.59 | 95653.02 | 135775   | 122809.8 |
| 39217.6  | 318687.7 | 43366.23 | 50565.68 | 590080.8 | 350880.4 | 506367.7 |
| 86324.56 | 83718.02 | 81708.23 | 88094.51 | 74338.91 | 86892.06 | 79633.22 |
| 41081.77 | 108066.5 | 63751.92 | 51516.88 | 33441.36 | 29583.61 | 46051.32 |
| 16568.62 | 32938.21 | 33916.33 | 8984.608 | 12651.93 | 32386.7  | 4637.606 |
| 6354.583 | 4304.343 | 5318.162 | 3825.3   | 5407.442 | 7662.848 | 5517.712 |
| 325008   | 132594.1 | 208436.3 | 210639.8 | 164181.6 | 204851   | 215326.3 |
| 33632.82 | 69487.22 | 53732.05 | 50687.64 | 45788.42 | 45907.54 | 52688.05 |
| 6354.796 | 15127.92 | 17182.61 | 35037.59 | 5963.548 | 9653.368 | 15897.33 |
| 10546.85 | 20580.45 | 16242.77 | 32768.41 | 12157.91 | 9409.184 | 15460.12 |
| 79917.67 | 77831.22 | 79505.3  | 68501.83 | 50853.99 | 28532.51 | 84919.02 |
| 16971.7  | 36404.77 | 21531.3  | 17885.97 | 24976.12 | 15583.61 | 34512.13 |
| 5145.381 | 4228.831 | 5518.459 | 6400.398 | 2548.687 | 18571.13 | 4104.326 |
| 5532962  | 3562509  | 4146974  | 2913454  | 4321243  | 2576323  | 5538775  |
| 16242.56 | 4890.772 | 3922.988 | 2029.006 | 6211.715 | 78893.05 | 5629.533 |
| 50451.22 | 18699.61 | 29744.42 | 53828.06 | 65484.77 | 30426.67 | 24273.08 |
| 213118.2 | 138438.6 | 172155.8 | 157351.6 | 255427.2 | 884728.8 | 171437.9 |

|          |          |          |          |          |          |          |
|----------|----------|----------|----------|----------|----------|----------|
| 176318.6 | 131661   | 136864.7 | 148748.4 | 127423   | 91432.97 | 133747.4 |
| 3739.287 | 4452.069 | 4633.262 | 6273.533 | 10462.57 | 72486.56 | 5421.882 |
| 30991.12 | 23234.67 | 28010.89 | 15307.16 | 16638.24 | 4838.819 | 14967.61 |
| 7536607  | 7642279  | 6652781  | 5358242  | 7609508  | 14663563 | 7276766  |
| 8156.238 | 8283.615 | 8122.376 | 11551.93 | 6510.095 | 5458.135 | 6908.184 |
| 18495.25 | 38620.78 | 17875.61 | 11556.79 | 22232.98 | 16534.88 | 23899.96 |
| 10125.44 | 7446.283 | 11244.3  | 15760.73 | 10098.96 | 7979.09  | 8690.233 |
| 604638.1 | 594929.3 | 413925.1 | 309379.6 | 255812.6 | 235602.8 | 310362.7 |
| 33002.09 | 27513.21 | 38560.63 | 26732.66 | 19056    | 19861.55 | 20646.93 |
| 5166.687 | 19628.73 | 6232.526 | 2671.607 | 10513.34 | 10355.16 | 9569.405 |
| 5701.615 | 9019.822 | 6008.475 | 11014.59 | 9938.326 | 5835.771 | 10146.61 |
| 3906.873 | 1730.682 | 3352.46  | 2913.393 | 3441.908 | 3239.551 | 3349.571 |
| 8873.285 | 6474.582 | 12838.32 | 4643.256 | 4969.971 | 8224.423 | 6752.961 |
| 2861131  | 2762594  | 2527546  | 1738459  | 2432755  | 2375410  | 2810356  |
| 14018.3  | 38943.63 | 24581.31 | 41253.8  | 26345.25 | 15571.06 | 29805.99 |
| 1115683  | 719728.5 | 561392.6 | 528241.9 | 547607.9 | 406682.5 | 626780.6 |
| 18487.44 | 55694.28 | 65304.37 | 73697.44 | 26769.65 | 26065.8  | 53333.82 |
| 11028.19 | 20845.41 | 27343.14 | 53415.31 | 17441.37 | 20630.26 | 32854.15 |
| 151174.6 | 129641.6 | 94450.02 | 88364.23 | 111523.7 | 946147.3 | 76587.93 |
| 33760.25 | 209079.6 | 123809.7 | 87830.06 | 77464.5  | 61469.3  | 100262.4 |
| 232774.7 | 102104.6 | 216267   | 91549.11 | 213212.9 | 210755.5 | 198715.1 |
| 24872.7  | 37026.28 | 2435.299 | 3837.177 | 4180.021 | 20107.19 | 19151.81 |
| 23895.22 | 12350.19 | 8925.387 | 6838.929 | 13264.66 | 7144.354 | 12682.43 |
| 8838.361 | 16500.18 | 21601.07 | 23138.13 | 14409.02 | 12068.34 | 13683.96 |
| 57004.13 | 46970    | 56018.18 | 33219.9  | 47520.18 | 220457   | 32298.17 |
| 95887.87 | 52499.47 | 102756.1 | 35883.45 | 61029.12 | 93284.77 | 72374.43 |
| 102732.4 | 144673.8 | 103718.3 | 161694.8 | 130250.5 | 141388.4 | 139938   |
| 219618.7 | 77663.57 | 104263.2 | 56929.64 | 154917.3 | 230090.3 | 115800.4 |
| 116707.3 | 96936.53 | 60994.68 | 48765.61 | 265368.2 | 360847.3 | 100738   |
| 10630.02 | 38180.8  | 21726.46 | 20822.56 | 23913.57 | 25500.59 | 20612.39 |
| 14266.79 | 16975.61 | 28392.13 | 45842.09 | 10861.42 | 11250.9  | 9313.648 |
| 19280.28 | 47120.41 | 50230.65 | 23793.81 | 17558.62 | 7598.889 | 25935.86 |
| 355597.2 | 236525.7 | 240456.7 | 274530   | 342296.8 | 324904   | 270572.1 |
| 101129   | 63366.39 | 41914.77 | 75763.13 | 138318.2 | 142626.2 | 78619.47 |
| 221454.5 | 176712.8 | 194601   | 334777.9 | 159804.8 | 102446.4 | 221431.2 |
| 290714.8 | 274994.8 | 312385.8 | 273507.3 | 150178.7 | 120488.1 | 159352.4 |
| 428616.9 | 747311   | 412193.3 | 538495.3 | 1375048  | 1400378  | 667482.4 |
| 145220.8 | 130986   | 121229.9 | 84736.81 | 88467.72 | 78226.08 | 84582.82 |
| 24321.12 | 8074.463 | 14842.76 | 11907.25 | 16635.14 | 32912.24 | 17025.68 |
| 14610.04 | 22339.31 | 17973.58 | 25797.28 | 17201.3  | 9891.405 | 12636.96 |
| 9844.873 | 41133.02 | 18118.52 | 24863.7  | 8605.952 | 2988.791 | 21430.2  |
| 31803.24 | 86590.3  | 124706.6 | 50917.74 | 96679.74 | 142782.5 | 114946.9 |
| 57529.92 | 99796.73 | 85810.05 | 105284.7 | 114052.6 | 150079.6 | 124128.8 |
| 29737.15 | 73900.29 | 79350.1  | 78543.06 | 57095.64 | 32041.47 | 100118   |
| 60235.25 | 58570.93 | 53748.45 | 51624.27 | 67332.3  | 52795.72 | 52997.13 |
| 18313.09 | 22353.84 | 10982.59 | 26590.36 | 22432.92 | 20173.41 | 19777.91 |
| 2370672  | 3337244  | 2290370  | 2038589  | 2900286  | 1800263  | 2733030  |
| 24626720 | 10911236 | 11819714 | 11565230 | 11276504 | 11678677 | 14985918 |
| 13619.31 | 7322.87  | 12310.46 | 13204.41 | 17097.66 | 245483.6 | 17403.44 |

|          |          |          |          |          |          |          |
|----------|----------|----------|----------|----------|----------|----------|
| 1076420  | 1115224  | 1040104  | 774072.6 | 855633.3 | 982931.6 | 853774.8 |
| 744974.3 | 2952299  | 2601727  | 1408753  | 1544589  | 1146105  | 2060520  |
| 21545.99 | 18421.79 | 18726.11 | 12380.64 | 20962.12 | 15053.39 | 26196.65 |
| 32386.95 | 34349.12 | 35682.14 | 28821.48 | 24306.92 | 37306.38 | 30579.41 |
| 14819.75 | 16881.45 | 19284.04 | 23316.35 | 21039.66 | 20586.94 | 24409.16 |
| 108415.2 | 105823.7 | 81693.97 | 164354.3 | 276607.1 | 342942.7 | 243662.6 |
| 135791.2 | 291367.8 | 241894.4 | 310044.2 | 172849.3 | 168494.6 | 212653.6 |
| 71796.09 | 111187.9 | 94986.13 | 106975.7 | 70949.78 | 78892.89 | 91833.28 |
| 11877.96 | 8859.08  | 9426.768 | 8963.916 | 15076.38 | 10400    | 12368.15 |
| 6591.225 | 4759.868 | 5510.583 | 8977.467 | 6709.291 | 7579.418 | 6148.871 |
| 9448.948 | 16759.83 | 16688.45 | 16735.69 | 8179.453 | 12862.67 | 18597.29 |
| 48942.84 | 117374.8 | 73966.63 | 127551   | 109977.6 | 120185.6 | 136081.3 |
| 14152.69 | 11834.64 | 12436.07 | 14910.23 | 428.9696 | 8542.48  | 11794.85 |
| 7872.549 | 5011.715 | 3864.833 | 5197.25  | 5407.442 | 4710.859 | 4918.792 |
| 7562.78  | 26136.48 | 11910.56 | 6889.84  | 8987.348 | 12074.58 | 13702.99 |
| 30403.85 | 52563.3  | 34983.79 | 52033.03 | 46257.9  | 30815.29 | 34599.46 |
| 54450.71 | 48304.73 | 48901.38 | 44476.85 | 68638.07 | 47734.86 | 68921.45 |
| 8146973  | 6092933  | 5283304  | 6714814  | 6467767  | 5385764  | 6704653  |
| 3364.931 | 3441.568 | 5328.395 | 10355.68 | 2350.874 | 3367.379 | 4175.095 |
| 49487.26 | 35599.06 | 29552.6  | 16167.43 | 49159.6  | 20541.74 | 28906.7  |
| 21694.08 | 12088.93 | 14562.5  | 14071.23 | 15708.82 | 10771.62 | 12491.24 |
| 11539.25 | 29116.03 | 15622.27 | 23539.01 | 14743.59 | 12772.13 | 11539.32 |
| 3986.188 | 2996.644 | 4925.55  | 12489.35 | 4307.222 | 4549.795 | 5543.129 |
| 21000.51 | 859596.2 | 515887.3 | 937939   | 1043532  | 721566.8 | 667702.6 |
| 97315.81 | 138658.9 | 113818.3 | 137012.4 | 154906.7 | 170050.4 | 199867.9 |
| 60108.52 | 100797.1 | 88474.55 | 93651.39 | 92320.01 | 112771.6 | 92369.73 |
| 7273.808 | 4827.896 | 7747.055 | 9383.795 | 7245.113 | 18952.5  | 4981.438 |
| 18267.52 | 56662.09 | 19241.52 | 25878.2  | 20529.25 | 7303.544 | 28815.01 |
| 2419.265 | 8804.147 | 10155.6  | 1723.055 | 2925.835 | 4093.595 | 3539.314 |
| 12359.08 | 4871.116 | 9799.053 | 3357.715 | 7244.571 | 4555.43  | 6175.356 |
| 668563.9 | 599388.2 | 615126.9 | 450490.4 | 566127.8 | 425531.7 | 496376.2 |
| 53136.2  | 33790.42 | 41490.16 | 26621.12 | 21589.67 | 24600.1  | 47071.49 |
| 12667.39 | 9333.245 | 12796.06 | 5470.119 | 6069.623 | 6923.295 | 3769.255 |
| 85122.34 | 62679.44 | 81004    | 43770.34 | 71579.2  | 39068.99 | 61834.34 |
| 6088.877 | 13720.33 | 11676.06 | 4839.46  | 9874.919 | 3106.421 | 7748.129 |
| 7764.28  | 15197.35 | 9913.063 | 10109.88 | 8116.53  | 6583.914 | 13126.85 |
| 14174.33 | 15155    | 14934.14 | 16310.6  | 12831.5  | 9412.07  | 15697.86 |
| 7473.143 | 6142.367 | 6811.554 | 8927.745 | 4687.629 | 2812.645 | 6564.079 |
| 17259.79 | 17043.01 | 32957.15 | 71791.8  | 13876.16 | 22333.1  | 24386.12 |
| 15487.7  | 14864.4  | 19128.49 | 28784.54 | 24044.33 | 19752.74 | 37701.32 |
| 140783.6 | 348158.7 | 261801.1 | 270651.5 | 172569.6 | 150767.6 | 190585.8 |
| 92773.72 | 144415.5 | 139887.4 | 160107.5 | 94124.56 | 87532.38 | 111138.4 |
| 91954.45 | 55784.98 | 54860.7  | 36108.48 | 42281.14 | 45897.92 | 57867.7  |
| 44561.11 | 43010.65 | 36341.23 | 30064.36 | 41864.16 | 30580.52 | 26407.51 |
| 11327.99 | 11891.17 | 18143.97 | 15296.71 | 11817.38 | 23835.57 | 12918.65 |
| 343771.4 | 719422.7 | 504993.8 | 644522.6 | 587622.3 | 276179.9 | 418643.6 |
| 11402.3  | 15231.85 | 22917.81 | 33102.14 | 11237.44 | 13353.25 | 21496.82 |
| 6446.435 | 6231.781 | 6280.802 | 8484.939 | 5098.396 | 19854.43 | 4833.667 |
| 266796.3 | 137205.7 | 104085.7 | 159878.3 | 806090.8 | 1893791  | 290907.8 |



|          |          |          |          |          |          |          |
|----------|----------|----------|----------|----------|----------|----------|
| 22915.38 | 20782.66 | 18790.7  | 44161.67 | 18165.45 | 68168.66 | 15562.36 |
| 6982.476 | 3699.519 | 4795.683 | 2755.316 | 8239.68  | 6539.023 | 6276.679 |
| 527018.8 | 230047.2 | 171575.5 | 404884.7 | 695498.1 | 241632.3 | 233947.4 |
| 303565.3 | 85943.81 | 99631.07 | 355130.6 | 354484.8 | 228622   | 206331.7 |
| 98651.09 | 59122.63 | 37313.83 | 145159.1 | 117238.3 | 80416.98 | 71687    |
| 15925.08 | 6500.294 | 7176.577 | 12600.34 | 24602.08 | 1873.14  | 6004.855 |
| 322885.6 | 149273.3 | 126759.8 | 307208.8 | 331538   | 139833.2 | 239165.6 |
| 30667.24 | 25209.68 | 14839.61 | 28452.18 | 6225.096 | 17353.26 | 19142.17 |
| 1903602  | 3218169  | 2761333  | 2866984  | 3103763  | 3769510  | 4330044  |
| 556348.1 | 608737   | 749439.4 | 822919.2 | 681164.3 | 595008   | 770059   |
| 209308.9 | 535887.9 | 350270.7 | 381671.5 | 214542.8 | 205237.5 | 281797.1 |
| 298771.4 | 685065.9 | 639269.8 | 960479.4 | 405461.4 | 361688   | 549966.6 |
| 9596.246 | 12383.1  | 20853.78 | 9206.991 | 12395.48 | 7211.476 | 9612.496 |
| 5890.887 | 7283.674 | 5188.591 | 7173.793 | 4901.977 | 6062.061 | 5209.957 |
| 84793.42 | 110466.2 | 112304.3 | 140181.2 | 67699.73 | 47975.32 | 84684.63 |
| 113206.5 | 46513.61 | 39296.71 | 130205.5 | 193420.4 | 89754.88 | 98686.96 |
| 17693.11 | 9787.443 | 23043.24 | 23675.95 | 4040.707 | 12942.17 | 6100.79  |
| 4279.559 | 9725.015 | 20130.5  | 12325.93 | 6785.096 | 9503.768 | 12402.73 |
| 13560.89 | 22831.36 | 12140.57 | 30694.15 | 26688.36 | 11525.16 | 20914.46 |
| 16946.06 | 12440.04 | 16222.04 | 12071.22 | 16208.13 | 21825.6  | 13348.03 |
| 7217.65  | 6627.002 | 4016.768 | 4253.625 | 3298.032 | 5218.061 | 3467.572 |
| 30136.46 | 40816.74 | 50627.02 | 72822.14 | 59296.04 | 43212.23 | 57752.44 |
| 252419.2 | 123574.3 | 133096.7 | 211037.6 | 115053.7 | 529135.3 | 143243.3 |
| 835203.9 | 711854.9 | 666448.7 | 543584.2 | 622426.5 | 577441.1 | 643159.9 |
| 7688.284 | 5408.449 | 9443.362 | 22449.22 | 3275.988 | 3739.841 | 12345.09 |
| 525228.9 | 693779.6 | 506233.2 | 410162.8 | 488361.8 | 599981.3 | 707212.3 |
| 40590.46 | 35824.26 | 50701.66 | 53828.96 | 35627.91 | 37193.03 | 42008.28 |
| 104593.8 | 97526.02 | 88779.84 | 50970.6  | 148810.1 | 122955.3 | 121633.9 |
| 64489.64 | 44565.82 | 94560.73 | 64548.07 | 57023.6  | 40942.34 | 44509.5  |
| 55746.43 | 67029.27 | 52285.11 | 34262.77 | 9021.697 | 19474.1  | 22957.15 |
| 19885.07 | 28401.2  | 24167.6  | 22263.05 | 20346.6  | 17311.46 | 18076.52 |
| 12780.52 | 9062.559 | 4781.204 | 8704.691 | 14641.44 | 12022.95 | 15101.97 |
| 39360.83 | 96867.35 | 67633.1  | 49201.38 | 34279.17 | 29807.49 | 37878.29 |
| 124665.5 | 170344.2 | 153062.7 | 198628.5 | 181468   | 128940.8 | 168539.3 |
| 65004.75 | 109416.4 | 139648.7 | 157693.8 | 96389.38 | 103618.4 | 121707.8 |
| 15729.38 | 15100.79 | 18350.23 | 16867.67 | 30161.62 | 13789.79 | 29366.72 |
| 59626.9  | 56157.61 | 24161.02 | 24613.25 | 40412.3  | 63794.44 | 51027.42 |
| 18882396 | 14375275 | 18824900 | 7551768  | 12380870 | 11155192 | 18228066 |
| 17633.06 | 10485.08 | 13370.02 | 8689.238 | 13407.39 | 9385.035 | 9756.587 |
| 7358.722 | 10440.99 | 8916.14  | 8218.812 | 10069.5  | 6884.292 | 7590.115 |
| 34497.95 | 67889.55 | 49285.61 | 81459.36 | 47425.29 | 32465.06 | 35434.93 |
| 11909.82 | 38217.48 | 15256.09 | 18557.18 | 11135.33 | 17555.21 | 21336.38 |
| 67474.09 | 52910.02 | 51765.59 | 54493.76 | 51428.2  | 62691.05 | 64335.48 |
| 28019.7  | 12314.49 | 35641.19 | 30656.33 | 20528.99 | 24528.42 | 42637.23 |
| 80287.92 | 90102.93 | 59173.26 | 51921.73 | 67064.1  | 63703.59 | 56602.7  |
| 20999.78 | 14483.45 | 7229.663 | 19030.88 | 18386.36 | 17120.14 | 17192.8  |
| 44549.65 | 68691.51 | 61673.56 | 60671.97 | 39119.36 | 27753.22 | 42604.29 |
| 14791.57 | 34273.54 | 19349.67 | 28711.8  | 54456.58 | 12045.23 | 18475.07 |
| 62025.3  | 54646.91 | 56821.88 | 31392.07 | 40907.54 | 40255.41 | 42169.18 |

|          |          |          |          |          |          |          |
|----------|----------|----------|----------|----------|----------|----------|
| 10228.99 | 51153.53 | 33944.93 | 39415.24 | 27189.81 | 21526.94 | 26987.87 |
| 46515.57 | 165362.8 | 96909.93 | 89600.3  | 60536.48 | 44909.88 | 67309.13 |
| 39856.18 | 52844.27 | 53010.12 | 55896.11 | 56125.49 | 53497.42 | 63695.43 |
| 79379.94 | 98343.46 | 71521.56 | 73878.14 | 73693.53 | 64630.82 | 64398.27 |
| 26996.37 | 24315.32 | 27630.62 | 30014.28 | 33630.45 | 24332.01 | 32986.95 |
| 91806.42 | 29186.18 | 37411.32 | 25079.46 | 27316.28 | 21904.81 | 25380.49 |
| 37577.05 | 19834.91 | 21658.73 | 14557    | 14087.01 | 16349.59 | 12808.21 |
| 10763.04 | 9514.936 | 12568.81 | 7067.712 | 5502.342 | 8390.293 | 9518.484 |
| 66914.59 | 44611.08 | 42537.21 | 23553.23 | 73513.83 | 21321.96 | 48192.9  |
| 8693.286 | 8399.193 | 6866.854 | 7959.131 | 8990.286 | 6841.086 | 11175.55 |
| 5201.08  | 64087.34 | 5625.165 | 2472.969 | 8067.173 | 92206.19 | 4407.416 |
| 36318.86 | 63554.57 | 45836.4  | 72676.02 | 58637.88 | 37106.28 | 43919.99 |
| 5593.782 | 4122.633 | 10647.17 | 29688.25 | 4241.641 | 10293.76 | 9579.133 |
| 76925.53 | 180365.1 | 128318.2 | 89179.48 | 97009.98 | 53146.55 | 118062.5 |
| 46177.22 | 60573.67 | 41155.96 | 77260.62 | 55243.55 | 62837.3  | 64746.37 |
| 53426.27 | 48826.03 | 42133.32 | 39813.63 | 40172.11 | 33410.66 | 45912.45 |
| 25766.65 | 65679.85 | 51128.05 | 54126.76 | 35617.18 | 24029.52 | 32913.16 |
| 21184.36 | 21026.32 | 28952.12 | 35441.77 | 21334.36 | 25616.88 | 19116.86 |
| 12594.65 | 8509.484 | 8427.173 | 11985.38 | 6100.823 | 7553.385 | 9365.525 |
| 3011252  | 1993248  | 2176577  | 1175986  | 1923396  | 1625398  | 2023976  |
| 15467.24 | 10623.53 | 12799.76 | 12721.69 | 14002.93 | 16263.74 | 10072.96 |
| 56219.18 | 45116.83 | 47006.39 | 34232.75 | 279545.8 | 196263.8 | 465711.5 |
| 10855.15 | 8718.822 | 9887.403 | 22144.38 | 6240.69  | 1749.126 | 11026.96 |
| 22959.94 | 17175.43 | 6597.558 | 4909.849 | 366392.1 | 354812.3 | 185909.2 |
| 153340.2 | 73062.33 | 106869.8 | 89569.8  | 82305.91 | 68896.79 | 95143.11 |
| 7143.103 | 5064.741 | 4473.923 | 4264.255 | 4111.635 | 4135.146 | 4255.642 |
| 7044.53  | 16243.75 | 12379.91 | 12170.32 | 8481.08  | 4395.303 | 11681.09 |
| 43729.61 | 45692.64 | 35518.97 | 31062.87 | 30315.88 | 29811.27 | 26374.4  |
| 12913.85 | 5091.234 | 11206.05 | 5139.94  | 3848.028 | 11130.7  | 2600.212 |
| 17723.03 | 12274.22 | 16139.74 | 9761.563 | 19963.33 | 11272.6  | 13101.52 |
| 9637.887 | 10410.61 | 6588.7   | 10600.67 | 8647.018 | 6189.411 | 10489.87 |
| 8297.332 | 46738.19 | 33602.2  | 26093.25 | 20086.84 | 14304.34 | 24875.61 |
| 51846.58 | 24092.28 | 42652.32 | 89203.64 | 23674.91 | 36370.7  | 44893.08 |
| 11506.25 | 12504.81 | 19874.04 | 28717.7  | 16279.26 | 12205.35 | 28314.95 |
| 43429.83 | 21319.48 | 32561.77 | 32594.41 | 26744.5  | 16530.22 | 19955.06 |
| 23977.17 | 36866.66 | 40966.39 | 46552    | 33997.66 | 32433.25 | 29617.18 |
| 13826.49 | 16711.88 | 7827.202 | 16666.18 | 13636.12 | 10346.17 | 9017.9   |
| 8022.105 | 7110.54  | 4696.52  | 12636.88 | 8802.495 | 4524.969 | 8364.988 |
| 155105.5 | 58658.65 | 73190.13 | 147506.3 | 85288.3  | 216566   | 304636.6 |
| 14995.63 | 27001.86 | 34484.98 | 19406.46 | 13917.72 | 15159.01 | 15473.21 |
| 40424.36 | 127566.3 | 67875.14 | 94253.63 | 160881   | 91419.02 | 117206   |
| 61296.11 | 10056.03 | 60875.94 | 17049.74 | 24620.21 | 5134.651 | 51323.77 |
| 18627.45 | 19462.73 | 20513.94 | 17855.67 | 26060.12 | 23331.12 | 24410.39 |
| 5668.356 | 11382.58 | 7056.639 | 10426.61 | 3384.265 | 6255.669 | 5926.651 |
| 17037.61 | 5564.039 | 12422.28 | 5052.049 | 8651.428 | 4641.461 | 6219.736 |
| 734076.3 | 894151.5 | 788733.3 | 637279.3 | 1059240  | 1106560  | 1047500  |
| 7108.845 | 18560.61 | 16947.73 | 6911.382 | 6301.38  | 4039.852 | 8184.578 |
| 22502.41 | 25503.47 | 21054.56 | 26865.08 | 19272.28 | 22605.36 | 20355.85 |
| 23798.69 | 18376.25 | 14945.48 | 31485.67 | 23484.95 | 10899.06 | 15331.15 |

|          |          |          |          |          |          |          |
|----------|----------|----------|----------|----------|----------|----------|
| 8093.354 | 19702.25 | 14056.72 | 8992.779 | 11205.61 | 9630.154 | 6026.69  |
| 47077.74 | 119898.8 | 85268.05 | 74256.45 | 35959.05 | 23655.32 | 59491.19 |
| 21953.95 | 15437.21 | 5947.005 | 38761.62 | 5850.718 | 14159.9  | 16778.47 |
| 16877.07 | 7465.869 | 10532.73 | 23731.95 | 18661.61 | 12161.65 | 13742.54 |
| 950009   | 2659875  | 792874.6 | 3058773  | 1759897  | 420354.3 | 2625474  |
| 19917.31 | 10813.99 | 15507.92 | 6137.082 | 13271.63 | 8888.662 | 12301.44 |
| 5858.053 | 3501.838 | 3381.778 | 11291.12 | 4116.906 | 8701.506 | 3485.855 |
| 129326.8 | 136373.8 | 132993   | 81616.67 | 137992.4 | 170451.7 | 145170.4 |
| 40181.84 | 28167.08 | 19877.93 | 21913.4  | 44329.22 | 22775.3  | 27897.6  |
| 274485.7 | 741375.9 | 429299.8 | 368445.1 | 350765.9 | 292989.4 | 327939.2 |
| 24374.36 | 27940.69 | 26556.6  | 34908.55 | 64713.63 | 33443.74 | 42706.75 |
| 1164870  | 374090.2 | 1065017  | 180062.6 | 13728.77 | 943928.4 | 186504.1 |
| 18842.61 | 24646.14 | 25571.27 | 14938.94 | 5489.353 | 15741.51 | 11122.24 |
| 3935.915 | 2146.229 | 3588.235 | 4791.921 | 2717.578 | 2811.263 | 3282.443 |
| 11372.68 | 4767.937 | 11254.86 | 3742.084 | 4411.911 | 4871.228 | 5088.31  |
| 572152   | 384670.9 | 401094.4 | 263811.9 | 499547.6 | 701548.9 | 709563.1 |
| 165184.5 | 101060.1 | 113357.7 | 70372.02 | 170511.3 | 257198.7 | 159474.3 |
| 11549.79 | 5851.462 | 9210.762 | 7489.797 | 8519.539 | 8385.3   | 12701.69 |
| 3735622  | 5420750  | 3940566  | 2690017  | 5241593  | 4952898  | 5392371  |
| 50504.47 | 34735.91 | 42734.3  | 27121.76 | 34809.37 | 30956.99 | 36976.48 |
| 7736.173 | 2211.157 | 4206.81  | 9430.714 | 22351.57 | 9470.735 | 2205.298 |
| 20307.2  | 16420.73 | 13774.1  | 11469.08 | 9087.268 | 8157.136 | 9956.666 |
| 138362.8 | 173381.3 | 190771   | 222219.2 | 178013.1 | 189235.3 | 188366.8 |
| 98191.42 | 75787.16 | 52018.48 | 110765.2 | 125623.8 | 305964   | 65811.28 |
| 8390.979 | 19053.77 | 22196.72 | 25905.39 | 14097.05 | 10966.61 | 16673.33 |
| 66397.29 | 64431.77 | 31393.39 | 61219.5  | 81498.77 | 71476.41 | 78452.96 |
| 38138.97 | 69062.13 | 45814.19 | 30998.6  | 28019.54 | 25578.16 | 32446.45 |
| 177859.4 | 142944.9 | 158595.4 | 102789.9 | 136294   | 112724.8 | 132978   |
| 11559.76 | 8250.478 | 12590.84 | 13284.83 | 11096.68 | 13118.2  | 14815.37 |
| 12149.83 | 12173.76 | 18374.8  | 34658.43 | 18911.38 | 9627.126 | 23096.73 |
| 515779.1 | 155667.8 | 317216.1 | 371379.1 | 234566.5 | 106872.9 | 285674.9 |
| 29727.17 | 24627.83 | 24209.2  | 33483.83 | 17523.72 | 19742.89 | 23309.41 |
| 1211097  | 982469.8 | 1061475  | 674126.5 | 997035.4 | 767914.8 | 858637.5 |
| 298655.1 | 192016.2 | 405778.7 | 418922.3 | 111400.4 | 85597.67 | 153316.7 |
| 205515.7 | 205404.6 | 197202.1 | 280570.3 | 108914.3 | 152460.5 | 170657.9 |
| 833242.3 | 575282.1 | 852960.6 | 579250   | 1032356  | 712858.6 | 612368.1 |
| 770004.1 | 1438864  | 1155420  | 656137.9 | 440128.9 | 377548.8 | 660470   |
| 13417.53 | 12605.08 | 10639.36 | 19002.49 | 15097.46 | 16232.38 | 15612.9  |
| 396445.6 | 926257.4 | 667183.1 | 442140   | 370605.9 | 294511.9 | 389252   |
| 19409.61 | 57866.5  | 20079.94 | 15080.69 | 32362.3  | 39183.45 | 25413.26 |
| 17451.23 | 7906.583 | 4454.928 | 12133.34 | 20976.54 | 25447.35 | 19013.66 |
| 21262.44 | 61862.4  | 41678.18 | 68745    | 33086.19 | 21120.96 | 42165.11 |
| 50404.61 | 52132.91 | 33005.92 | 30020.75 | 79860.91 | 35610.34 | 55560.62 |
| 11584.91 | 7741.795 | 9430.806 | 9468.563 | 7809.5   | 11575.66 | 8204.623 |
| 3787.246 | 1726.508 | 2502.872 | 3543.595 | 2762.481 | 3165.198 | 3073.327 |
| 11833.73 | 8317.22  | 8436.043 | 30688.67 | 3746.026 | 5189.169 | 24028.71 |
| 28156.93 | 12863.29 | 15946.59 | 4303.289 | 9281.563 | 11601.54 | 10109.95 |
| 12810    | 10723.94 | 14228.14 | 11669.69 | 13315.95 | 10724.51 | 12797.78 |
| 30155.36 | 26490.65 | 18929.1  | 76349.82 | 23579.98 | 52804.08 | 46208.96 |

|          |          |          |          |          |          |          |
|----------|----------|----------|----------|----------|----------|----------|
| 4568054  | 1821595  | 2006626  | 1007212  | 499500.2 | 1399484  | 318532.4 |
| 1117830  | 540001.9 | 568267.4 | 472520.7 | 919200.4 | 3034641  | 579847.7 |
| 8517.881 | 3597.021 | 10028.7  | 4020.65  | 7297.914 | 6317.834 | 8455.12  |
| 13685.32 | 17205.21 | 10712.88 | 13721.68 | 15269.92 | 11236.56 | 20425.38 |
| 26799.47 | 33460.73 | 40316.54 | 44751.6  | 20714.23 | 27853.78 | 31206.14 |
| 296275   | 178053.3 | 109144.6 | 24016.92 | 396953.7 | 161849.6 | 453782   |
| 8769.291 | 7294.226 | 6406.301 | 2306.956 | 8699.934 | 6524.9   | 9794.985 |
| 12879.26 | 41634.19 | 22461.55 | 26033.96 | 20004.12 | 22470.38 | 23155    |
| 69327.68 | 33892.44 | 28535.72 | 22634.88 | 35925.08 | 21782.83 | 40755.21 |
| 89878.76 | 186886.8 | 145363.8 | 223340.3 | 134222.4 | 130987.9 | 160900.9 |
| 6593.468 | 12764.72 | 13699.39 | 23361.99 | 8105.426 | 6958.033 | 14455.21 |
| 126713.5 | 86503.84 | 111573.8 | 110583.3 | 114186.1 | 139855.8 | 125544.3 |
| 48013.98 | 23624.2  | 35570.39 | 48738.39 | 18242.73 | 27031.21 | 25333.78 |
| 42216.8  | 27102.34 | 37400.61 | 41855.45 | 29384.5  | 58573.89 | 39256.14 |
| 71321.34 | 49137    | 96415.48 | 47142.24 | 41214.41 | 46965.02 | 51823.21 |
| 8860.681 | 5677.918 | 8565.011 | 6328.234 | 5103.869 | 7208.245 | 9040.087 |
| 136470   | 110572.5 | 192278.2 | 198025.1 | 80567.93 | 67529.25 | 112291.1 |
| 94690.49 | 61054.42 | 62793.44 | 56572.31 | 65839.9  | 48226.89 | 71132.7  |
| 122065.8 | 126358   | 125111.1 | 127360.3 | 122930.9 | 113594.1 | 137841.1 |
| 77132.16 | 106614.9 | 82990.55 | 47703.36 | 68825.59 | 83724.05 | 94804    |
| 44494.61 | 31863.76 | 40030.41 | 51474.15 | 52040.46 | 20804.46 | 34023.14 |
| 6126586  | 5757756  | 5369736  | 4414109  | 6738365  | 3701870  | 3696380  |
| 616.2892 | 1264.384 | 2423.877 | 2099.487 | 1400.337 | 8837.063 | 3140.496 |
| 151945.9 | 91031.43 | 85038.55 | 101206.4 | 110291.8 | 72005.16 | 88401.22 |
| 13835.18 | 25294.36 | 18789.8  | 24963.1  | 15541.31 | 12387.17 | 16089.14 |
| 205553.5 | 447077   | 389125.8 | 195741.1 | 214110.6 | 199132   | 287745.6 |
| 10337.16 | 7993.738 | 5045.109 | 6591.469 | 8227.633 | 10116.64 | 4248.43  |
| 85374.9  | 181649   | 165288.6 | 162787.1 | 105118.2 | 78030.7  | 144502.3 |
| 5336.309 | 6629.213 | 7085.318 | 4873.551 | 2762.481 | 2876.821 | 3166.228 |
| 6516.466 | 4660.333 | 9042.138 | 3051.763 | 5685.292 | 6584.013 | 3346.426 |
| 625254.6 | 313757.9 | 229633.8 | 38031.88 | 291064.1 | 242757.5 | 119491.9 |
| 220848.8 | 111634.2 | 185123.2 | 89934.7  | 199313   | 169039.6 | 187567.9 |
| 63624.38 | 41352.85 | 64362.73 | 35087.16 | 56903.49 | 825926.5 | 57169.92 |
| 16992.68 | 42061.53 | 26889.63 | 26785.35 | 23326.86 | 57716    | 19470.56 |
| 29337.58 | 104095.8 | 62061.25 | 64972.21 | 38344.61 | 44005.29 | 52202.84 |
| 38821.58 | 10243.15 | 18160.92 | 25395.33 | 24961.88 | 27976.16 | 21760.06 |
| 9401.432 | 21505.99 | 13023.49 | 20533.89 | 16913.61 | 11967.59 | 8423.524 |
| 87062.85 | 52654.61 | 70544.78 | 47834.2  | 47585.59 | 42166.65 | 67634.95 |
| 8035.074 | 3518.787 | 7602.215 | 4713.269 | 4237.388 | 3281.175 | 5514.153 |
| 4606.83  | 17270.59 | 19632.16 | 15269.89 | 7793.317 | 8850.014 | 12010.37 |
| 103587.6 | 45426.62 | 26806.04 | 37042.89 | 38970.75 | 161052   | 29144.32 |
| 77832.02 | 203283.7 | 129920.5 | 121593.1 | 74990.11 | 76725.99 | 109327.4 |
| 8114.436 | 16891.25 | 10924.59 | 45534.36 | 77728.63 | 7023.248 | 68200.84 |
| 633682.6 | 673761.5 | 495503.2 | 429710.9 | 863925.9 | 355380.4 | 437749.9 |
| 17644.48 | 13797.25 | 7834.762 | 2914.999 | 10608.25 | 11873.74 | 6031.31  |
| 79601.44 | 88554.81 | 82789.99 | 80038.34 | 71429.79 | 72258.43 | 98462.79 |
| 142925.3 | 153060.2 | 112388.5 | 170551.7 | 94450.75 | 61208.14 | 82865.87 |

---
