# Supplementary material for: Dynamic Changes of Urine Proteome in Rat Models Inoculated with Two Different Hepatoma Cell Lines
Source: Hindawi journal article supplement (doi:10.1155/2021/8895330), 2021-01-07
Supplement: f1 [file 8895330.f1.zip]

Title: Dynamic changes of urine proteome in rat models inoculated with two different hepatoma cell lines. Full author: Yameng Zhang, Yufei Gao, Jing Wei & Youhe Gao\*.  
Table S2 All urinary proteins were identified in RH-35 model.

| Protein ID | 1        | 2        | 3        | 4        | 5        | 6        | 7        | 8        | 9        | 10       | 11       | 12       | 13       | 14       | 15       | 16       |
|------------|----------|----------|----------|----------|----------|----------|----------|----------|----------|----------|----------|----------|----------|----------|----------|----------|
|            | CON-RAT  | D5-RAT1  | D5-RAT2  | D5-RAT3  | D5-RAT4  | D5-RAT5  | D5-RAT6  | D5-RAT7  | D5-RAT8  |
| A2RUV9     | 19759.47 | 23196.6  | 121018.3 | 27273.58 | 3471.622 | 10574.48 | 42519.95 | 12749.93 | 16957.71 | 22374.99 | 2030.106 | 59970.19 | 34762.6  | 78475.52 | 45446.24 | 2134.288 |
| A4KWA5;A   | 8003.971 | 15954.47 | 11579.6  | 11950.99 | 18339.97 | 14902.49 | 14760.52 | 12669.5  | 14290.54 | 14795.25 | 13137.04 | 17512.4  | 22343.92 | 25631.18 | 19283.43 | 12787.38 |
| B0BNA5     | 82218.27 | 86841.09 | 73358.23 | 67294.95 | 114631.4 | 78830.42 | 75158.77 | 85012.68 | 106061.6 | 164717.3 | 139061.4 | 80626.16 | 123346.6 | 91431.52 | 129987.2 | 121318.3 |
| B0BND0     | 35782.93 | 43558.06 | 70446.34 | 34698.08 | 81112.37 | 35202.73 | 37751.84 | 31120.47 | 37794.13 | 34860.86 | 44996.86 | 60184.18 | 35108.2  | 28840.71 | 25402.22 | 41058.36 |
| B0BNE5     | 77734.44 | 54256.74 | 78625.64 | 44304.48 | 142344.7 | 55732.69 | 76521.42 | 65961.74 | 114714.8 | 118375.6 | 132108.9 | 83875.26 | 66782.26 | 64128.1  | 88346.77 | 89354.95 |
| B0BNN3     | 52635.48 | 35268.57 | 82767.03 | 165454.5 | 12738.76 | 59348.73 | 3272.119 | 49127.65 | 5108.656 | 14090.92 | 18327.22 | 47758.46 | 5289.173 | 30254.15 | 80707.84 | 3564.313 |
| B0LT89     | 12170.37 | 6224.09  | 4809.591 | 6266.775 | 9378.964 | 5756.564 | 10560.34 | 7071.839 | 7493.734 | 11164.45 | 12243.47 | 7096.247 | 4609.789 | 4573.117 | 6983.643 | 8530.447 |
| B1H234     | 43582.54 | 74461.66 | 82110.98 | 43637.38 | 137297.7 | 72845.54 | 45593.53 | 48135.78 | 43359.78 | 40843.62 | 32802.91 | 39792.05 | 24253.52 | 54177.08 | 48245.56 | 50627.38 |
| B2RYG6     | 8598.708 | 3925.858 | 11149.07 | 12850.35 | 19697.79 | 9270.36  | 9837.142 | 9375.033 | 10831.45 | 18468.11 | 15195.45 | 9623.774 | 6155.83  | 3974.12  | 11951.23 | 6998.159 |
| B4F795     | 21525.28 | 8297.336 | 17372.83 | 12520.98 | 9663.919 | 1589.718 | 13336.94 | 15231.95 | 11217.87 | 4983.792 | 11990.27 | 2644.388 | 7230.171 | 8655.23  | 11808.03 | 25846.29 |
| B5DEN9     | 16625.61 | 16475.42 | 13031.46 | 25310.53 | 23438.23 | 11976.04 | 14187.04 | 14191.28 | 12537.48 | 12792.18 | 15223.71 | 10108.89 | 14473.87 | 11956.76 | 7964.048 | 13223.86 |
| B5DFC9     | 355590.5 | 668056.2 | 495623.7 | 493664   | 239075.1 | 599266.9 | 960197.6 | 449625.7 | 551546.2 | 677890   | 504946.3 | 510793.6 | 661076.2 | 610013   | 633599.2 | 803911.9 |
| D3Z8L7     | 16148.87 | 16754.27 | 12945.43 | 18049.98 | 13700.6  | 12439.66 | 14362.32 | 14528.21 | 29746.25 | 19744.02 | 31780.27 | 13170.27 | 7824.842 | 16049.54 | 9472.729 | 19897.85 |
| D3ZHA0     | 40015.35 | 55427.29 | 39264.83 | 82803.67 | 31698.55 | 45400.15 | 43253.56 | 87153.47 | 23962.28 | 35709.91 | 10403.01 | 26567.85 | 10936.34 | 15561.94 | 19747.21 | 11948.53 |
| D3ZTD8     | 21476.84 | 24949.8  | 20011.5  | 23617.57 | 35895.97 | 14252.6  | 12842.21 | 16237.1  | 16481.87 | 13708.04 | 22737.29 | 18753.24 | 16301.88 | 24533.83 | 18222.28 | 16035.29 |
| D3ZTE0     | 191828   | 289668.7 | 255800.9 | 469402.3 | 201959.2 | 282981.7 | 265262.5 | 334167.1 | 374962.9 | 168543   | 261039.7 | 438610.5 | 403120.3 | 434136.5 | 354302.5 | 306131.6 |
| D3ZTV3     | 10035.86 | 10757.13 | 25267.16 | 25727.77 | 34859.77 | 22129.94 | 20949.07 | 17766.76 | 14439.17 | 17620.98 | 16057.75 | 15874.91 | 21665.87 | 22324.95 | 26100.42 | 29748.49 |
| D3ZTX0     | 9191.115 | 19709.65 | 14142.96 | 23748.61 | 19562.63 | 18449.51 | 17067.43 | 23423.73 | 12597.55 | 17195.61 | 11518.31 | 19489.73 | 13519.12 | 11787.81 | 14801.52 | 8056.403 |
| D3ZUC6     | 536069.1 | 740563   | 91044.08 | 482811.8 | 81058.71 | 115123.8 | 400542.3 | 167146.1 | 313557.4 | 147352.7 | 374679.5 | 623418.3 | 312205.3 | 698102   | 410402.7 | 451158.5 |
| D3ZUK3     | 61917.8  | 134516.9 | 90232.87 | 105698.2 | 20699.66 | 74897.36 | 109490.6 | 103302.4 | 61921.95 | 16975.06 | 60118.29 | 78628.77 | 61742.18 | 83925.67 | 78216.43 | 92691.79 |
| D4A1J4     | 20404.75 | 24871.37 | 23618.14 | 25190.5  | 44840.15 | 21667.54 | 17133.55 | 22149.75 | 38113.79 | 50694.16 | 49158.65 | 22992.13 | 35918.58 | 36870.96 | 33843.23 | 42651.78 |
| D4A1R8     | 28181.47 | 31179.77 | 23916.75 | 25411    | 33476.67 | 21356.15 | 18445.86 | 25486.43 | 30492.27 | 27777.74 | 41357.65 | 30690.5  | 23945.93 | 19093.67 | 24274.93 | 33703.6  |
| D4A5U3     | 19478.7  | 28374.95 | 17877.33 | 29582.31 | 16625.01 | 27392.46 | 14009.63 | 26769.67 | 14898.08 | 23022.73 | 10318.14 | 25651.68 | 14678.12 | 3334.073 | 2469.834 | 16016.87 |
| E9PT87;P2  | 7720.304 | 8531.716 | 10800.34 | 8369.758 | 12508.24 | 10844.07 | 10131.84 | 8073.918 | 9737.037 | 13380.5  | 15752.09 | 7708.666 | 8241.856 | 6985.874 | 7955.313 | 8466.112 |
| F1LM93     | 74390.24 | 11039.89 | 19161.89 | 31698.17 | 41596.68 | 45576.3  | 37576.03 | 44235.42 | 16997.47 | 38842.94 | 25331.54 | 63438.21 | 14939.88 | 13386.74 | 15751.12 | 16392.73 |
| F1M3L7     | 4971.543 | 6996.323 | 10947.46 | 21730.07 | 15475.82 | 13607.17 | 12189.08 | 7474.663 | 9401.078 | 14544.42 | 10482.88 | 11596.45 | 8022.269 | 11786.52 | 5769.777 | 7779.26  |
| G3V686     | 219115.1 | 658213   | 203426   | 396573.5 | 185765.1 | 309196.9 | 233968.1 | 79561.16 | 135571.9 | 95200.81 | 205677.1 | 232547.9 | 231760.8 | 195998   | 96721.31 | 321289.7 |
| G3V7W1     | 165561.4 | 218674.7 | 230014.5 | 238166.5 | 280160.5 | 189403.9 | 154361.5 | 218857.3 | 195779.1 | 187862.6 | 330956.9 | 195526.4 | 189129.6 | 265115   | 230322   | 231339.3 |
| H1UBN0;C   | 37881.57 | 125854.7 | 86181.76 | 116168.2 | 100279   | 128597.5 | 47277.01 | 48134.03 | 197103.7 | 96796.56 | 188780.4 | 131648.8 | 92392.96 | 96636.88 | 114744.3 | 146230.2 |
| O08557     | 16079.59 | 21888.06 | 23704.22 | 19090.07 | 47748.11 | 14657.94 | 24673.57 | 5576.705 | 49685.54 | 52053.01 | 54514.72 | 20111.05 | 27618.37 | 20904.2  | 27610.69 | 48878.65 |
| O08628     | 86432.27 | 110113.4 | 68023.95 | 95701.02 | 75681.52 | 94708.55 | 146920.3 | 121977.8 | 179960.2 | 158677.6 | 111824   | 133493.5 | 73227.61 | 225491.8 | 127265.1 | 117759   |
| O08815     | 20380.05 | 5166.871 | 11774.44 | 14843.87 | 7656.572 | 18152.76 | 11101.33 | 7677.527 | 8841.946 | 21801.23 | 17096.7  | 19679.03 | 6954.443 | 7662.435 | 2295.584 | 4840.472 |
| O09175     | 16520.77 | 24164.35 | 18870.63 | 20121.04 | 14355.73 | 31591.78 | 17486.01 | 30046.73 | 16576.14 | 22698.27 | 35428.5  | 20041.41 | 14743.09 | 25243.01 | 23865.28 | 11610.26 |
| O35077     | 51028.71 | 19442.84 | 24091.08 | 23664.32 | 17334.47 | 16991.48 | 35580.15 | 19524.79 | 26044.09 | 45063.18 | 43211.83 | 20502.78 | 15212.25 | 10500.77 | 44889.38 | 25122.12 |
| O35112     | 113113.4 | 148939.1 | 146912.9 | 123269.6 | 227508.1 | 116005   | 167147.3 | 161170.4 | 103277.5 | 107288.8 | 83530.68 | 80357.8  | 114904.7 | 131790.1 | 111004.4 | 127356.2 |
| O35142     | 33368.29 | 79140.41 | 49526.09 | 104095.5 | 60684.44 | 109890.7 | 49695.94 | 117022.9 | 60094.68 | 54320.11 | 49611.37 | 59186.11 | 47945.27 | 64412.85 | 68589.52 | 33251.64 |
| O35217     | 468569.2 | 544078.3 | 483262.5 | 537871.3 | 383406.7 | 394804.2 | 385706.1 | 450628.2 | 464171.9 | 514043.1 | 812530   | 553397.4 | 447893.7 | 572325.8 | 643557.9 | 480955   |
| O35244     | 299163.1 | 197279.4 | 219359.1 | 249626   | 269440.4 | 186217.7 | 250170.8 | 211685   | 324812.1 | 289835.9 | 371558.1 | 270928.9 | 241040.3 | 229800.5 | 270887.4 | 255657.2 |
| O35264     | 33008.39 | 14844.86 | 29599.21 | 20535.83 | 27242.16 | 26020.88 | 24275.5  | 33116.28 | 39869.82 | 27509.47 | 36378.38 | 20426.86 | 41365.69 | 30884.95 | 48612.72 | 38233.79 |
| O35331     | 22809.59 | 40195.63 | 20929.97 | 24796.35 | 27851    | 20040.76 | 24415.28 | 15207.51 | 25261.85 | 37088.44 | 65483.2  | 19688.17 | 19266.54 | 22014.33 | 25180.37 | 29059.8  |
| O35509;P6  | 123059.5 | 114193.5 | 67196.88 | 132153.4 | 112791.5 | 110903.5 | 115966.3 | 61428.32 | 101028.9 | 108233.9 | 146352.2 | 106812.6 | 81547    | 26274.81 | 45812.63 | 125414.5 |
| O35547     | 43287.28 | 15725.22 | 12891.63 | 17615.64 | 20626.09 | 37192.23 | 7920.547 | 26616.43 | 8272.101 | 17818.13 | 34876.05 | 39463.59 | 11222.94 | 13594.28 | 12457.34 | 13298.03 |
| O35568     | 634001.7 | 1192155  | 802467.4 | 1323031  | 1182789  | 1169301  | 1587219  | 684732   | 404499.3 | 1025841  | 779187.8 | 981480.4 | 1348590  | 961436.4 | 625521.4 | 1204328  |
| O35760     | 17234.3  | 23304.2  | 28957.92 | 43025.71 | 36630.15 | 48864.74 | 23678.63 | 23089.87 | 48880.86 | 30256.76 | 21576.9  | 45324.54 | 15897.74 | 33362.04 | 34394.64 | 14018.37 |
| O35763     | 316178.5 | 284390.3 | 189296.5 | 338867.7 | 452540.9 | 214112.5 | 294827   | 155383.7 | 363917.3 | 479384.7 | 652335.1 | 278669   | 309624.1 | 174777.7 | 251431.8 | 378078.1 |

|          |          |          |          |          |          |          |          |          |          |          |          |          |          |          |          |          |
|----------|----------|----------|----------|----------|----------|----------|----------|----------|----------|----------|----------|----------|----------|----------|----------|----------|
| O35783   | 12668.55 | 8495.176 | 9046.728 | 6857.267 | 3297.921 | 5590.973 | 10606.97 | 4313.938 | 5066.834 | 7680.615 | 5866.969 | 9914.582 | 4241.067 | 3925.547 | 1825.334 | 3293.859 |
| O35952   | 49750.82 | 43941.06 | 50753.72 | 26431.37 | 65047.8  | 17270.31 | 47700.68 | 33927.22 | 60137.86 | 46214.96 | 59903.15 | 46530.7  | 48873.91 | 37939.39 | 47810.8  | 56507.79 |
| O35956   | 7441.617 | 12934.88 | 15306.27 | 8712.472 | 14854.55 | 9210.346 | 10259.74 | 6906.373 | 8808.804 | 24063.35 | 22393.05 | 7602.475 | 7890.676 | 13215.06 | 12381.96 | 17393.58 |
| O54715   | 250014   | 281205.3 | 105606.1 | 133210.3 | 94864.59 | 145439.1 | 121430.7 | 166395.5 | 79151.52 | 82210.22 | 169105.7 | 99836.69 | 56554.53 | 53446.61 | 63010.2  | 76068.54 |
| O54728   | 10513353 | 74262.72 | 11446194 | 5075667  | 8041462  | 24143.14 | 3853602  | 2704878  | 7132811  | 2544877  | 3619506  | 125419.4 | 3357641  | 3554551  | 8535455  | 4509536  |
| O54800;Q | 313662.5 | 416576.2 | 371515.5 | 297052.6 | 95393.41 | 242790.5 | 482595.6 | 235200.8 | 331112.4 | 393911.5 | 253401.6 | 260201.1 | 245276.2 | 224017.9 | 75123.14 | 257061.4 |
| O54858   | 129884   | 159498.7 | 284426.4 | 182833.8 | 107663.6 | 247829.2 | 295833.4 | 255782.1 | 547982.2 | 356349   | 358795.8 | 428355.1 | 549470.4 | 619546.2 | 727256.7 | 491719.6 |
| O54861   | 31245    | 27625.34 | 124539.9 | 76397.33 | 125126.1 | 55805.74 | 38126.87 | 106281.6 | 72694.05 | 65593.4  | 25317.65 | 65211.02 | 127722.9 | 134771   | 87497.39 | 96975.81 |
| O54975   | 15787.13 | 10200.48 | 15085.3  | 13962.62 | 10921.01 | 10368.73 | 12454.95 | 15488.71 | 18116.73 | 28279.28 | 24329.6  | 12730.91 | 12119.1  | 8820.794 | 12101.92 | 15035.29 |
| O55004   | 506429.9 | 718955.1 | 324717.4 | 1216139  | 281425.2 | 596218.5 | 673452.3 | 509052.1 | 270366.9 | 219092.8 | 380685.9 | 406828   | 139166.3 | 142498.2 | 291600.6 | 166766.2 |
| O55006   | 323975.7 | 475917.2 | 411096.1 | 390269.8 | 360850.2 | 228072.5 | 356321.9 | 370483.6 | 415232.3 | 546523.9 | 978515.4 | 899546.1 | 1192318  | 1286260  | 710266.8 | 1116952  |
| O55096   | 19342.87 | 8696.669 | 6482.036 | 11727.51 | 14895.93 | 14069.98 | 13149.4  | 10877.69 | 25551.92 | 34624.14 | 25252.37 | 20137.89 | 25082.99 | 13418.55 | 17419.37 | 21304.84 |
| O55145   | 15612.15 | 12935.09 | 57301.67 | 20509.89 | 8329.045 | 19628.3  | 21764.74 | 28040.03 | 25470.05 | 59298    | 20535.81 | 423355   | 17001.74 | 26786.64 | 20501.13 | 13543.22 |
| O70244   | 239371   | 285714   | 302830   | 387070.4 | 357257.9 | 274158.9 | 247112.3 | 452895.1 | 359317.6 | 300541.3 | 320921.9 | 369577.1 | 346244.2 | 538275.3 | 355699.9 | 521538.2 |
| O70352   | 65327.1  | 89648.36 | 58446.89 | 70437.46 | 64942.79 | 97377    | 79748.72 | 154138   | 52204.92 | 48165.09 | 61568.14 | 80596.86 | 44017.25 | 56264.98 | 36006.75 | 58841.88 |
| O70377   | 18074.17 | 19280.59 | 12469.87 | 11761.03 | 9866.043 | 9847.276 | 6082.909 | 7959.933 | 30654.21 | 13884.73 | 26556.44 | 18455.09 | 18196.24 | 13152.79 | 18551.03 | 21177.27 |
| O70417   | 1546703  | 485809.6 | 5018792  | 2757697  | 400601.2 | 2401733  | 1738544  | 2609203  | 2024772  | 1375264  | 1172131  | 1739080  | 1466396  | 1099835  | 1833793  | 2150488  |
| O70489   | 343186.2 | 485742.8 | 432845.5 | 426783   | 445699.1 | 404043.6 | 425909.4 | 437659.3 | 348387.9 | 317728.1 | 436760.6 | 324163.3 | 331914.4 | 510217.7 | 405787.4 | 349967.7 |
| O70513   | 568794.1 | 897173.9 | 906475.6 | 1326430  | 1126076  | 840285.8 | 726132   | 1255435  | 622096.4 | 720322.1 | 775726.4 | 813050.8 | 847825.1 | 1426718  | 1274490  | 908257.8 |
| O70535   | 212784.2 | 244283.8 | 240978.2 | 154307.6 | 264011.4 | 165267.8 | 196957.4 | 234519.6 | 170070.5 | 162065.1 | 152840.9 | 136560.1 | 169661.6 | 219090.7 | 170579.4 | 234747.5 |
| O70540   | 47326.09 | 32741.85 | 65155.52 | 32765.02 | 30486.1  | 29059.49 | 56599.33 | 2062.429 | 38799.05 | 35836.14 | 40835.05 | 71473.16 | 32685.41 | 32101.09 | 33730.47 | 37560.17 |
| O70594   | 42852.98 | 91074.66 | 14327.98 | 77637.92 | 37018.26 | 37276.05 | 46030.06 | 18291.44 | 54810.73 | 73454.55 | 65822.1  | 38584.75 | 35775.46 | 17594.72 | 52334.08 | 49015.66 |
| O88204   | 39646.56 | 101437.3 | 25048.63 | 54437.1  | 23922.06 | 54314.47 | 43775.01 | 56434.26 | 46213.07 | 46725.88 | 48455.43 | 53659.68 | 65468    | 71965.98 | 58322.2  | 80926.87 |
| O88267   | 10956.87 | 4074.419 | 18145.48 | 14125.87 | 9217.36  | 9739.915 | 6533.811 | 13947.85 | 43920.77 | 46852.82 | 45132.96 | 24932.52 | 30573.53 | 32237.27 | 49160.22 | 33455.31 |
| O88600   | 7413.108 | 10712.55 | 14230.88 | 11418.65 | 10524.91 | 19985.13 | 15685.15 | 7894.872 | 7980.868 | 8530.498 | 9292.707 | 12967.29 | 5866.784 | 6794.071 | 2403.53  | 6374.632 |
| O88766   | 243118.5 | 304859.3 | 244214.3 | 516451.3 | 206646.6 | 215198.3 | 306397.2 | 163227.2 | 179813.8 | 269284.5 | 340001.3 | 245931.2 | 186864.3 | 224282.6 | 235138.2 | 250799.7 |
| O88767   | 236428.4 | 125517.5 | 129487.3 | 163152   | 95410.73 | 97910.06 | 211037.1 | 141912.3 | 119295.9 | 165274.3 | 154158.6 | 104511   | 107233.2 | 100810.8 | 122612   | 99389.86 |
| O88797   | 5789.746 | 6377.762 | 4950.873 | 7236.786 | 7757.784 | 4374.915 | 6632.623 | 4183.156 | 9823.811 | 7554.334 | 18332.66 | 1879.089 | 4285.695 | 6796.986 | 5928.133 | 5655.794 |
| O88917   | 35058.23 | 85566.6  | 85783.03 | 81932.75 | 183533.8 | 90181.41 | 105373.9 | 78553.44 | 84850.41 | 82473.66 | 86006.73 | 76218.34 | 102150.3 | 113911.3 | 133445.2 | 130970.9 |
| O88989   | 371539.8 | 262670.2 | 305620.4 | 202616.3 | 414709.8 | 323740.2 | 388078.8 | 366044.1 | 481343.6 | 984898.3 | 777754.6 | 263531.3 | 449069.7 | 334146.3 | 455078.3 | 383425.2 |
| O89049   | 26791.09 | 17507.68 | 18427.57 | 24411.3  | 30631.09 | 17006.21 | 20246.52 | 24021.86 | 20906.36 | 29348.91 | 33125.4  | 14678.73 | 16156.73 | 14378.97 | 20783.01 | 23153.68 |
| O89117   | 289855.5 | 209454.2 | 99189.25 | 283779.7 | 113676.3 | 70638.02 | 117506.8 | 88969.91 | 114921.9 | 78630.98 | 136453.8 | 162659.6 | 108797.6 | 195019.2 | 141141.1 | 155761.4 |
| P00502   | 431195.4 | 533154.6 | 462804.9 | 395396.6 | 642431.4 | 353536.4 | 515981.1 | 350286.9 | 693173.1 | 945954.1 | 774810   | 438472.8 | 411282.8 | 338646.4 | 430320.9 | 679200.5 |
| P00507   | 4236.025 | 5699.067 | 4401.92  | 6380.291 | 2236.304 | 6693.64  | 789.1814 | 6310.223 | 3952.081 | 6578.254 | 5464.77  | 8029.494 | 5625.206 | 5231.608 | 3855.761 | 8098.419 |
| P00689   | 27026836 | 39776524 | 25401078 | 28908728 | 31139394 | 25287134 | 18753898 | 28000298 | 24046930 | 19014000 | 20605524 | 22555988 | 30481344 | 28616550 | 26971166 | 26846476 |
| P00714   | 60920.34 | 81464.38 | 105515   | 855044.4 | 133087.2 | 159582.3 | 394008   | 456797.1 | 200177.6 | 471493.1 | 408253.2 | 193746.7 | 26157.96 | 148630.6 | 85513.2  | 129382.3 |
| P00731   | 24662.82 | 17982.9  | 20058.58 | 11446    | 17550.43 | 7848.917 | 15299.03 | 19832.41 | 8294.808 | 26165.89 | 16878.72 | 19463.51 | 6391.207 | 6965.992 | 20056.29 | 9269.652 |
| P00758   | 13291510 | 21708284 | 20750368 | 18707378 | 10792490 | 16489252 | 19570210 | 18903786 | 14257280 | 11487132 | 15433826 | 14294633 | 13089333 | 19322604 | 17928068 | 16002964 |
| P00762   | 2507868  | 5725375  | 12470178 | 14591307 | 1777095  | 14007383 | 1966717  | 5845576  | 8141231  | 11994610 | 13897041 | 12117495 | 4746253  | 6492354  | 5834182  | 6004867  |
| P00774   | 2107.438 | 29339.38 | 27313.55 | 22428.15 | 11946.28 | 21915.58 | 12045.12 | 12250.82 | 16121.89 | 19775.24 | 14724.3  | 212306.3 | 17190.39 | 24100.39 | 17641.36 | 1694.042 |
| P00786   | 349983.9 | 364185.2 | 449334.8 | 524868.1 | 253116.5 | 228605.4 | 394428.1 | 427762.5 | 271637.4 | 345099.3 | 450054.2 | 399570.4 | 319796.9 | 475009.1 | 462861.8 | 299833.5 |
| P00787   | 2933578  | 3180848  | 2410618  | 3930150  | 2526699  | 2366528  | 2523507  | 2512775  | 1429591  | 1620267  | 1929208  | 2916661  | 1132372  | 1766351  | 2125148  | 1129735  |
| P00884   | 498526.6 | 379070.8 | 526291.8 | 317751.9 | 671364.3 | 424753.3 | 437319.1 | 378526.5 | 569313.4 | 957043.4 | 678416.1 | 366271.6 | 499931.2 | 392078.5 | 445008.1 | 549337.5 |
| P01015   | 1263793  | 1861755  | 622365.9 | 2681415  | 467741.3 | 1251960  | 998758.9 | 1231681  | 642622.3 | 940761.6 | 1386482  | 1492993  | 564736.8 | 513007.2 | 1518032  | 354121.5 |
| P01026   | 472885.9 | 410332.3 | 421423.1 | 483684.8 | 294934.3 | 283407.1 | 458462.5 | 583327.3 | 219889.7 | 300327.8 | 456244.3 | 324035   | 231093   | 260060.1 | 351062.8 | 243115.3 |
| P01041   | 167588   | 248640.8 | 173346.9 | 171805.5 | 50224.98 | 103589.5 | 364612.1 | 126822.5 | 60780.38 | 87312.48 | 69151.81 | 135547   | 44356.4  | 74303.1  | 110754.6 | 75162.95 |
| P01048   | 1802432  | 2913515  | 2390182  | 4666721  | 1233637  | 2022974  | 2136576  | 2385410  | 2520854  | 3403059  | 2325371  | 4423887  | 2066402  | 3833001  | 3390628  | 4464829  |
| P01681   | 5099428  | 660233.1 | 4462352  | 3854984  | 3130094  | 3306720  | 419200.1 | 1180277  | 502773.5 | 540224.6 | 1271744  | 1591522  | 488292.9 | 713340   | 173623.4 | 544419.3 |
| P01830   | 432537.6 | 488362.1 | 420982.4 | 539411.5 | 236734.7 | 279268.2 | 310748.2 | 245318.1 | 186354.8 | 150114   | 193258   | 232925.3 | 227933.4 | 237023.1 | 302593.4 | 144798.5 |

|           |          |          |          |          |          |          |          |          |          |          |          |          |          |          |          |          |
|-----------|----------|----------|----------|----------|----------|----------|----------|----------|----------|----------|----------|----------|----------|----------|----------|----------|
| P01835    | 29124    | 39180.47 | 25853842 | 29961946 | 24675922 | 39939720 | 67027.91 | 104498.7 | 28177574 | 21947.7  | 16676923 | 36936388 | 43298.53 | 24227224 | 140553.5 | 237579.4 |
| P01836    | 9677561  | 16669750 | 13364846 | 18350630 | 188169.5 | 1001926  | 10296823 | 1044017  | 1041522  | 917068.9 | 6253268  | 8952432  | 5662954  | 1093345  | 5761904  | 5592980  |
| P01946    | 477111.2 | 231077.3 | 343658.2 | 22481.26 | 71651.15 | 17833.78 | 250328.5 | 30258.29 | 10483.36 | 16048.32 | 33580.77 | 26797.84 | 39466.09 | 24609.78 | 2888.483 | 20029.27 |
| P02091    | 1023742  | 30592.21 | 679729.5 | 16137.32 | 69860.71 | 30182.59 | 445101.5 | 15918.1  | 10151.53 | 34083.13 | 31382.52 | 47149.81 | 40063.16 | 8496.959 | 16095.6  | 22958.85 |
| P02454    | 278130.8 | 326987.4 | 159270.3 | 250090.8 | 212900.4 | 208614   | 1481466  | 225366.2 | 90479.32 | 230585.1 | 203661.7 | 141936.8 | 113037.4 | 81316.12 | 107687.4 | 51807.88 |
| P02625    | 240566   | 265174.6 | 803481.5 | 729977.5 | 162193.8 | 532520.3 | 259089.4 | 236112.1 | 302646.4 | 139933   | 445488.1 | 419734.4 | 316406.1 | 284802.4 | 673678.9 | 103088.7 |
| P02631    | 90426.58 | 185943.2 | 69071.93 | 89934.59 | 53585.27 | 219510.5 | 185017   | 75676.2  | 35019.98 | 8954.168 | 45757.16 | 24519.83 | 11321.54 | 47968.29 | 57892.64 | 19598.58 |
| P02650    | 4112451  | 4459813  | 3422523  | 4171191  | 5679170  | 2821794  | 3499706  | 5068796  | 5088578  | 3804672  | 4781715  | 4321409  | 5772209  | 6530258  | 4736926  | 6308584  |
| P02651    | 690150.8 | 296024.4 | 501042.7 | 273797.6 | 299538.4 | 316860.1 | 431479.8 | 443051   | 393660.8 | 187552.8 | 297752.6 | 312848.5 | 262355.3 | 270633.7 | 314663   | 323951.1 |
| P02680    | 12458.82 | 28227.61 | 15787.27 | 19306.04 | 7649.709 | 30541.59 | 16529.73 | 25402.96 | 16241.46 | 19203.11 | 19003.73 | 23505.96 | 17075.85 | 21067.22 | 15591.33 | 21958.28 |
| P02696    | 15385.79 | 38775.74 | 37221.16 | 28176.4  | 11725.56 | 31892.12 | 22919.24 | 19909.93 | 20221.52 | 33656.29 | 16186.35 | 24702.17 | 15464.97 | 11717.4  | 12041.75 | 13251.73 |
| P02761    | 9.78E+08 | 1.55E+09 | 9.26E+08 | 2.35E+09 | 3.51E+08 | 5.92E+08 | 7.03E+08 | 1.44E+09 | 4.98E+08 | 6.96E+08 | 6.67E+08 | 4.16E+08 | 1.95E+08 | 4.41E+08 | 8.95E+08 | 1.03E+08 |
| P02764    | 6142145  | 5437805  | 7663979  | 6570563  | 3564438  | 3219703  | 4543042  | 2862947  | 8034612  | 9276863  | 9764209  | 12501134 | 6909063  | 11771210 | 14414401 | 13584332 |
| P02767    | 2760023  | 2061450  | 2311359  | 2513638  | 1648794  | 1702515  | 2069395  | 2780947  | 1210073  | 2026248  | 1781176  | 1397576  | 1057984  | 1160803  | 1400068  | 1220768  |
| P02770    | 1.07E+08 | 72003072 | 1.08E+08 | 64565668 | 22026062 | 56549152 | 63290256 | 82184416 | 40468984 | 41225624 | 37840200 | 36526064 | 35305232 | 30635110 | 32385164 | 27724308 |
| P02780    | 55487004 | 38656080 | 22567888 | 94993736 | 35778008 | 81917376 | 59019004 | 95111080 | 31625394 | 24746460 | 48878664 | 76931520 | 52239956 | 32861936 | 1825231  | 4350554  |
| P02781    | 25086520 | 10004956 | 11251461 | 23054306 | 14048735 | 27165898 | 19427440 | 31688442 | 8702154  | 12825217 | 22709020 | 30151052 | 17058054 | 10218433 | 1432897  | 1648971  |
| P02782    | 20924404 | 12832733 | 7348560  | 13959537 | 4791692  | 38866012 | 10946492 | 43217028 | 8874284  | 6191124  | 13057770 | 30560856 | 18058054 | 12374326 | 1338493  | 1362379  |
| P02793;Q7 | 9167.545 | 7295.353 | 9864.903 | 11941.7  | 14894.82 | 14095.21 | 2066.624 | 14278.15 | 6272.101 | 2983.649 | 6840.689 | 4531.442 | 3359.941 | 13006.14 | 4385.026 | 3401.746 |
| P02803    | 2637.874 | 9926.743 | 41028.17 | 9410.211 | 15123.64 | 24682.76 | 18901.77 | 6151.427 | 3560.992 | 12093.04 | 5557.721 | 3132.837 | 3532.087 | 21899.72 | 34030.65 | 18238.1  |
| P03994    | 15502.96 | 30829.07 | 21100.73 | 19284.2  | 23855.33 | 24747.61 | 23197.49 | 20198.11 | 26590    | 29122.72 | 12931.13 | 26758.29 | 35191.08 | 32274.11 | 33897.73 | 46247.66 |
| P04041    | 39903.88 | 19079.35 | 36673.24 | 34716.86 | 71446.87 | 39064.84 | 33639.21 | 50256.86 | 21722.95 | 30117.73 | 45919.46 | 20605.38 | 14183.67 | 16008.95 | 13559.59 | 12595.1  |
| P04073    | 81260.02 | 179645.1 | 178791.4 | 312895.3 | 100050.3 | 170875.1 | 150535.3 | 115707.1 | 99831.35 | 133483.6 | 53509.09 | 175767.5 | 69507.97 | 172020   | 89089.02 | 211011.3 |
| P04176    | 5677.231 | 8692.936 | 10752.43 | 10732.32 | 6863.974 | 6744.14  | 5358.877 | 6334.287 | 6015.982 | 11658.76 | 7393.04  | 5709.049 | 5809.836 | 2143.925 | 5625.05  | 4123.283 |
| P04182    | 15824.42 | 8138.863 | 52216.72 | 11862.59 | 6517.893 | 8571.419 | 7756.702 | 9527.689 | 6663.251 | 8175.698 | 8049.452 | 7148.885 | 8069.621 | 9600.137 | 8171.236 | 5907.231 |
| P04218    | 9796.565 | 111424.3 | 46660.49 | 154004.8 | 72101.43 | 66566.74 | 79472.75 | 47180.64 | 34019.57 | 170058.3 | 35070.57 | 67688.69 | 59275.42 | 46204.8  | 52948.62 | 46739.44 |
| P04276    | 2108648  | 1327776  | 2036148  | 1945966  | 1025131  | 1621070  | 1241055  | 2855706  | 1358754  | 978249.1 | 1164016  | 1317964  | 1195553  | 1394180  | 1235944  | 858886.8 |
| P04355    | 51010.76 | 58422.57 | 23836.84 | 29519.27 | 31637.72 | 54211.01 | 41326.3  | 29472.59 | 34733.25 | 8566.139 | 12626.88 | 47616.04 | 48318.15 | 48776.11 | 29937.29 | 40118.5  |
| P04636    | 41613.26 | 47265.72 | 79935.33 | 63948.52 | 53892.27 | 84434.86 | 51155.59 | 79291.02 | 18539.11 | 38368.45 | 36138.74 | 65975.13 | 29563.29 | 56669.7  | 36634.81 | 20325.45 |
| P04639    | 113876.4 | 173551.8 | 112697   | 103557.4 | 88571.3  | 103998.2 | 103810.8 | 143185.1 | 69147.52 | 76022.8  | 78107.49 | 77725.3  | 63847.73 | 97162.75 | 81613.25 | 130561   |
| P04642    | 144466   | 151685.3 | 126222.8 | 167597.5 | 178728.3 | 161650.6 | 174896.3 | 168571.7 | 142431.3 | 328707   | 213325.5 | 139033   | 113202.8 | 129441.1 | 169484.2 | 156448.8 |
| P04762    | 12883.03 | 13724.45 | 38826.81 | 15635.06 | 16986.78 | 10289.92 | 8243.613 | 20715.83 | 11537.41 | 14544.08 | 15888.02 | 14325.52 | 5874.219 | 11322.99 | 4997.395 | 7888.713 |
| P04764    | 771241.3 | 430791.8 | 682546.8 | 640366.4 | 839137.4 | 714306.1 | 768127.9 | 909216.8 | 746000.3 | 1066043  | 826714   | 516100.8 | 702131.4 | 686824.8 | 898619.3 | 722655.1 |
| P04785    | 109068.9 | 160342   | 85010.97 | 167586.5 | 139602   | 144188.4 | 128007.6 | 124706.1 | 77937.06 | 67937.2  | 104459.9 | 94429.11 | 85435.19 | 93189.7  | 83330.37 | 80443.96 |
| P04797    | 686035.5 | 580304.1 | 469695.2 | 450615.4 | 449034.1 | 505876.1 | 731370.1 | 469915.1 | 945653.6 | 911003   | 1028777  | 714864.7 | 547521.4 | 564580.9 | 733376.8 | 606627.9 |
| P04897    | 207659.5 | 146932.6 | 97101.14 | 217555.2 | 199955   | 246113   | 272845.9 | 197779.6 | 222411.8 | 239141.7 | 346659.1 | 289985.9 | 148305.1 | 169100.7 | 164939.8 | 188633   |
| P04903    | 17597.28 | 28569.83 | 12286.57 | 18034.29 | 23492.7  | 26806.93 | 31167.87 | 14205.63 | 38029.31 | 24269.16 | 33523.16 | 21112.96 | 20848.77 | 15137.25 | 22071.77 | 33716.64 |
| P04904    | 1202866  | 1141620  | 1090705  | 1061547  | 942616.9 | 1043795  | 851814.6 | 888247.4 | 1729408  | 1973993  | 1363428  | 874392.9 | 1157864  | 853313.3 | 1218031  | 1366674  |
| P04905    | 47158.48 | 14679.83 | 14573.72 | 40766.97 | 16243.13 | 51344.17 | 25908.07 | 30305.09 | 16136.06 | 23373.42 | 45701.21 | 52775.9  | 26884.86 | 27803.42 | 5419.492 | 7759.617 |
| P04906    | 46583.72 | 52813.77 | 71855.18 | 56355.95 | 78183.89 | 28557.44 | 52164.48 | 35169.77 | 38457.64 | 46738.93 | 66732.34 | 39234.29 | 32496.03 | 40882.22 | 61560.52 | 40561.75 |
| P04916    | 295594.3 | 175368.1 | 157168.9 | 224065.9 | 191958.7 | 191079.9 | 182458.9 | 400962.7 | 112619.3 | 128263.2 | 101937.2 | 156481.9 | 71778.52 | 98999.33 | 149566.1 | 124641.2 |
| P04937    | 10150328 | 14198394 | 13984261 | 16904362 | 23101294 | 13660484 | 17078210 | 16051756 | 16314510 | 12844973 | 13363685 | 14311723 | 16384811 | 18854624 | 18834240 | 15117705 |
| P05065    | 124392.5 | 77103.09 | 98712.12 | 57844.54 | 120772.7 | 79548.67 | 146230.7 | 123562.1 | 113233.1 | 178495.6 | 126226.5 | 84372.58 | 105990.1 | 85181.99 | 121715.9 | 87688.22 |
| P05197    | 37948.94 | 27409.01 | 28932.22 | 28031.94 | 41967.64 | 35406.89 | 33818.54 | 31591.18 | 29168.03 | 34830.69 | 76555.03 | 37073.63 | 25088.72 | 23581.85 | 21634.15 | 25891.46 |
| P05369    | 25397.66 | 11667.94 | 7674.947 | 10649.54 | 16508.33 | 10568.95 | 11153.03 | 12409.7  | 10074.34 | 13785.37 | 71398.82 | 13965.56 | 7258.022 | 5521.1   | 14580.93 | 17917.91 |
| P05371    | 1552353  | 792291.2 | 557684.7 | 586115.3 | 490202.6 | 693088.7 | 998529   | 442458.3 | 285377.2 | 258364.3 | 443435   | 287929.7 | 212074.1 | 311732.8 | 280721.2 | 324961.7 |
| P05539    | 39537.93 | 16403.3  | 23127.87 | 79844.23 | 42159.61 | 33442.38 | 45974.05 | 9239.486 | 30085.85 | 7025.284 | 38742.39 | 18505.24 | 58825.47 | 20160.21 | 27341.44 | 6069.639 |
| P05544    | 34425740 | 1.02E+08 | 60660180 | 64853400 | 74802512 | 57255424 | 34706000 | 77011776 | 49471376 | 54134684 | 41207568 | 32722956 | 46688556 | 54137372 | 37999564 | 41951148 |
| P05545    | 28253224 | 42217840 | 38812456 | 34582896 | 39795084 | 25693024 | 14257737 | 31072266 | 20686540 | 20979314 | 18731640 | 17328990 | 20894236 | 24179440 | 16883328 | 18796232 |

|           |          |          |          |          |          |          |          |          |          |          |          |          |          |          |          |          |
|-----------|----------|----------|----------|----------|----------|----------|----------|----------|----------|----------|----------|----------|----------|----------|----------|----------|
| P05712    | 15177.9  | 13257.25 | 5130.99  | 11229.43 | 22810.35 | 18353.37 | 25412.13 | 7808.348 | 14715    | 15951.17 | 25744.31 | 13471.02 | 9733.192 | 9291.509 | 6513.953 | 17493.62 |
| P05942    | 25865.18 | 66345.91 | 16024.28 | 22402.65 | 20897.04 | 42079.49 | 24663.54 | 20500.96 | 35605.53 | 37216.68 | 41009.63 | 31899.38 | 22512.91 | 36047.02 | 29514.75 | 26493.29 |
| P05964    | 555461.5 | 780560.7 | 350132.6 | 497277.6 | 179719.5 | 312051   | 441823.9 | 258621.6 | 172053   | 435615.3 | 509922.3 | 425624.2 | 153072.3 | 179863.1 | 127196.8 | 118415.7 |
| P06399    | 26911.45 | 29414.14 | 12504.12 | 20023.99 | 23008.38 | 24357.6  | 33711.62 | 28783.79 | 20087.95 | 37430.61 | 33923.71 | 25642.36 | 30139.16 | 29533.86 | 21686.74 | 46071.63 |
| P06685    | 50790.64 | 53040.74 | 46593.61 | 50497.49 | 51132.17 | 36395    | 34638.26 | 40494.8  | 37932.39 | 59964.39 | 52204.11 | 35621    | 19455.26 | 46299.07 | 46469.38 | 39119.92 |
| P06757    | 24848.81 | 17471.93 | 16631.71 | 23241.99 | 15119    | 18424.72 | 19219.66 | 11134.72 | 16199.06 | 56082.45 | 33905.66 | 54602.71 | 10958.4  | 7667.047 | 10420.85 | 20862.13 |
| P06760    | 733368.3 | 889555.5 | 326174.7 | 2069502  | 6218203  | 4829474  | 490190.7 | 5220790  | 79079.18 | 1170440  | 757078.1 | 983156.9 | 252774.8 | 216087.1 | 115105   | 116733.5 |
| P06761    | 99403.27 | 56802.6  | 45875.7  | 159679.5 | 71427.51 | 163816.5 | 170623.1 | 259470.3 | 35422.32 | 37304.81 | 40294.06 | 85956.29 | 81021.3  | 54542.56 | 27935.59 | 18619.08 |
| P06866    | 5209719  | 5580444  | 1853816  | 4105614  | 880730.1 | 1442559  | 2426539  | 1985221  | 2606144  | 4188544  | 3628882  | 9776140  | 2125983  | 2385145  | 5163133  | 4612144  |
| P06911    | 579472.6 | 266609.2 | 166792.3 | 417263.7 | 80258.64 | 705367.8 | 473614.3 | 422997.7 | 18792.76 | 150776.8 | 49709.23 | 118793.9 | 761336.9 | 430316   | 2164.313 | 18973.3  |
| P07150    | 43294.73 | 41953.83 | 38466.26 | 75962.77 | 49916.55 | 112790.5 | 65022.43 | 159313.4 | 23151.61 | 38690.25 | 101166   | 29487.89 | 26595.6  | 30577.05 | 26685.45 | 37581.58 |
| P07151    | 11639615 | 9375837  | 11521533 | 10987968 | 3383988  | 12761795 | 10233710 | 8415956  | 7277302  | 4602364  | 5549070  | 14779028 | 5934729  | 6563081  | 11792446 | 5141899  |
| P07154    | 149751.3 | 195034   | 205610.2 | 209642.4 | 147961.3 | 138960   | 183820.9 | 193934.9 | 180941.2 | 180367.4 | 113664.4 | 175226.1 | 144688.1 | 170712   | 143184   | 150068.4 |
| P07171    | 804394.2 | 904683.6 | 579239.8 | 1792367  | 1527430  | 1175379  | 1722054  | 2335911  | 413630.6 | 491887.9 | 1029595  | 241983.9 | 429945.9 | 890489.1 | 923616.4 | 350116.9 |
| P07314    | 5333162  | 5975792  | 4310544  | 5696335  | 6706320  | 4701562  | 6074835  | 4101992  | 10006451 | 7682880  | 9981522  | 4911070  | 5800158  | 5492867  | 7479811  | 8931961  |
| P07340    | 139533.3 | 138464.5 | 117906.9 | 115921.1 | 126121.6 | 144948   | 136026.4 | 129050.1 | 94742.21 | 94274.95 | 120860.2 | 106513.3 | 103140.4 | 147015.5 | 106800   | 127826.7 |
| P07379    | 25531.46 | 19047.35 | 21141.38 | 30624.45 | 39285.63 | 45041.03 | 24507.74 | 35707.8  | 25272.98 | 59406.42 | 43951.24 | 12643.39 | 27051.22 | 14025.68 | 21328.45 | 30332.07 |
| P07483    | 220597.1 | 188907.2 | 250955.4 | 329455.1 | 206045.5 | 236203.9 | 192089.8 | 245482.7 | 179694.9 | 254093   | 165256.8 | 114128.8 | 146852.7 | 195742.4 | 227277.4 | 174430.6 |
| P07522    | 49094736 | 64683956 | 41576908 | 55571180 | 77717656 | 38938908 | 50259176 | 47447712 | 48331120 | 52316916 | 42137856 | 46973836 | 53482772 | 68345152 | 46264748 | 53390284 |
| P07632    | 9418382  | 10359422 | 16663800 | 15941276 | 7467506  | 17545092 | 9469346  | 8022608  | 5732204  | 6728701  | 4878018  | 6358577  | 5542048  | 5446957  | 7409545  | 5982170  |
| P07647    | 16584894 | 11728224 | 5350398  | 22938728 | 7418852  | 23538566 | 12879336 | 17657060 | 4641001  | 4948608  | 8557326  | 13820979 | 10217665 | 4512479  | 550042.1 | 647216.5 |
| P07861    | 2343438  | 1134707  | 774316.4 | 1935901  | 1594991  | 1746427  | 1686720  | 1265869  | 1880091  | 1718449  | 1939713  | 2172727  | 1224448  | 1144533  | 1074943  | 1238160  |
| P07897    | 595047.4 | 601009.5 | 693966.2 | 793746.6 | 976094.7 | 615075.1 | 835862.8 | 647204.4 | 647956.4 | 572920   | 559357.1 | 570021.3 | 859759.1 | 993474.2 | 829553.5 | 972083.6 |
| P07943    | 61161.41 | 61821.57 | 22668.57 | 97704.24 | 55345.18 | 67232.6  | 38313.89 | 68721.38 | 103189.1 | 50808.49 | 85174.36 | 71183.33 | 63079.39 | 87324.34 | 66532.72 | 81768.16 |
| P08010    | 36066.67 | 19806.93 | 8346.359 | 25462.63 | 34000    | 53500.59 | 26889.66 | 55957.73 | 27381.7  | 68602.37 | 53682.04 | 69076.83 | 24581.75 | 33769.72 | 44590.27 | 14083.9  |
| P08289    | 205718.7 | 173985.2 | 180626   | 214661.7 | 204745.8 | 148114.9 | 229308.4 | 165561.3 | 209886.3 | 149526.3 | 463593.8 | 117069.5 | 95350.65 | 99738.74 | 111924.5 | 113446.9 |
| P08290    | 34746.51 | 57401.09 | 31170.56 | 31921.04 | 32533.65 | 48904.18 | 49444.82 | 23752.98 | 13545.32 | 15932.53 | 29945.89 | 25033.32 | 20903.21 | 57458.74 | 36237.92 | 27904.68 |
| P08460    | 339602.3 | 424752.4 | 472635.7 | 388236.2 | 547215.3 | 398255.4 | 564116.1 | 525894.8 | 538194.9 | 674997.6 | 764208.1 | 469259.8 | 783858.6 | 757163.3 | 725071.9 | 639784   |
| P08494    | 39847.21 | 19135.39 | 23731.91 | 14924.78 | 14997.24 | 21486.23 | 18957.3  | 19385.16 | 5616.605 | 15841.81 | 17250.87 | 11687.92 | 13916.57 | 16478.83 | 18076.74 | 18531.06 |
| P08592    | 446815.6 | 695080.4 | 594245.6 | 681580.3 | 630593.7 | 610315.1 | 583235.2 | 741146.1 | 478359.5 | 492402.8 | 365960.8 | 506649.2 | 359554.2 | 353508.4 | 540060.9 | 556392.1 |
| P08644    | 55300.55 | 38684.74 | 39319.66 | 67111.71 | 9583.903 | 107326.2 | 30787.74 | 69251.43 | 53990.42 | 69393.55 | 15628.01 | 65932.38 | 39563.56 | 42009.02 | 45970.14 | 39175.93 |
| P08649    | 1201620  | 1441496  | 1393051  | 1535806  | 417679.1 | 1549150  | 3687692  | 741036.1 | 2704060  | 1123914  | 1360468  | 4653033  | 4915676  | 3380153  | 3346281  | 3248281  |
| P08650    | 141794.5 | 147189.7 | 156775.7 | 147135.2 | 125697.1 | 68233.18 | 116888   | 133741.4 | 148426.6 | 154298.3 | 167286.6 | 138714.8 | 180724.1 | 163600.7 | 175208.9 | 160340.8 |
| P08689    | 2965.51  | 13012.48 | 1880.235 | 16771.59 | 10814.31 | 8441.584 | 7596.958 | 11304.6  | 7648.952 | 5016.767 | 7887.608 | 7579.671 | 22869.03 | 6803.11  | 8915.068 | 11834.01 |
| P08721    | 8393994  | 3337454  | 3956844  | 4827164  | 3116057  | 1835742  | 4006939  | 4035005  | 1175738  | 4935357  | 1105694  | 3257503  | 567613.6 | 2970096  | 2247918  | 7603520  |
| P08723    | 20748070 | 5983865  | 5064982  | 13384018 | 1334537  | 20894230 | 11950869 | 15582900 | 3239588  | 5274867  | 6182452  | 16619078 | 5586874  | 5334991  | 608444.3 | 640951.4 |
| P08753    | 19771.09 | 19583.76 | 17527.83 | 63028.23 | 6870.912 | 30228.85 | 44414.25 | 18587.89 | 39711.95 | 41901.57 | 78558.05 | 53377.66 | 11802.56 | 25628.63 | 30161.6  | 32115.58 |
| P08932    | 2193110  | 2673176  | 2546216  | 3787418  | 1395350  | 1770455  | 2260952  | 2232974  | 3219112  | 4236353  | 2824708  | 5596268  | 3594223  | 4745862  | 3687974  | 4866000  |
| P08934    | 28914.35 | 17239.85 | 32672.63 | 33568.68 | 9965.225 | 24703.41 | 19608.47 | 38908.17 | 20439.97 | 18816.97 | 20884.33 | 20518.17 | 29207.33 | 25073.66 | 17756.15 | 12260.09 |
| P08937    | 660478.4 | 526851.7 | 1944825  | 649631.9 | 1189990  | 1034535  | 960591.1 | 760164.8 | 145643.6 | 282467.9 | 351249.1 | 525206   | 376394.1 | 213779.9 | 226544   | 144590.9 |
| P09006    | 869018.3 | 541533.3 | 527145.8 | 637744.4 | 232050.9 | 458702.4 | 333428.9 | 754348.2 | 460390.6 | 528362   | 557787.6 | 742409.9 | 408299.2 | 464721.7 | 684802.6 | 530894   |
| P09034    | 131038.1 | 124919.7 | 140689.7 | 98966.56 | 169083.6 | 151547   | 117868.7 | 99550.47 | 218654.9 | 160612   | 251172.9 | 126431.3 | 162865.2 | 144710.3 | 212586.1 | 176174.3 |
| P09456    | 20521.34 | 10738.75 | 6544.942 | 15010.98 | 6967.426 | 20312.4  | 26997.34 | 12539.08 | 12850.95 | 10687.98 | 13103.51 | 16141.71 | 14170.51 | 9189.352 | 2029.456 | 4116.718 |
| P09527    | 32218.4  | 19716.93 | 34752.51 | 27025.46 | 22338.41 | 24784.2  | 46234.67 | 21143.4  | 30375.99 | 62211.37 | 54810.51 | 28764.43 | 22417.43 | 14860.65 | 9318.276 | 17597.15 |
| P09605;P2 | 7152.517 | 14180.69 | 11332.03 | 17466.33 | 4694.644 | 23696.66 | 20177.21 | 6351.419 | 10755.44 | 2590.98  | 8899.327 | 10793.13 | 5091.311 | 2976.144 | 3717.911 | 9082.658 |
| P09606    | 84721.77 | 100656.1 | 45954.33 | 170315.6 | 110791.3 | 71935.09 | 86675.88 | 53684.58 | 104219.4 | 80491.98 | 143250.3 | 56116.91 | 111269.8 | 77867.7  | 90072.92 | 90035.55 |
| POC0A9    | 79109.7  | 40541.95 | 16309.16 | 137941.8 | 38506.7  | 130924   | 55498.19 | 104583.7 | 49490.39 | 58668.2  | 97178.11 | 153423.4 | 60143.03 | 47787.04 | 8503.063 | 14007.13 |
| POC0K7    | 10982.79 | 19923.06 | 9710.347 | 13790.79 | 13944.21 | 18231.71 | 26656.08 | 13016.02 | 11870.41 | 14273.12 | 11408.65 | 13395.59 | 11221.05 | 12794.32 | 14946.2  | 10499.01 |
| POCG51;P6 | 1620418  | 1219591  | 826275   | 1768555  | 1033469  | 1288891  | 1401867  | 1320438  | 1068584  | 1295684  | 1217978  | 1460863  | 720228.1 | 802649.4 | 898659.6 | 907606.3 |

|           |          |          |          |          |          |          |          |          |          |          |          |          |          |          |          |          |
|-----------|----------|----------|----------|----------|----------|----------|----------|----------|----------|----------|----------|----------|----------|----------|----------|----------|
| PODMWO;f  | 22273.39 | 21538.31 | 31919.04 | 24986.36 | 33520.45 | 26172.85 | 44768.86 | 38866.29 | 30001.87 | 33235.73 | 38112.38 | 41211.08 | 26374.01 | 41679.55 | 21851.71 | 29505.91 |
| PODP29;PC | 277738.2 | 242495.2 | 143801.2 | 203700.8 | 280469.9 | 214751.6 | 339294.4 | 311054.5 | 163828.3 | 194043.2 | 237889.7 | 115112.9 | 161098.7 | 141362.8 | 88054.13 | 124819.2 |
| P10111    | 184994.3 | 171133.5 | 108820.9 | 191255   | 174969.9 | 129597.6 | 152884.8 | 158760.5 | 139617.3 | 168624   | 197703.2 | 128018.9 | 93466.05 | 74505.8  | 73548.29 | 83720.53 |
| P10247    | 194247   | 202426.3 | 199143.8 | 126408.3 | 63544.4  | 192965.5 | 44557.4  | 156231.5 | 141609.1 | 128916   | 117976.2 | 154136.7 | 231543.1 | 210108.1 | 209979.5 | 179273.3 |
| P10252    | 1092741  | 2236259  | 1474629  | 1647659  | 1094079  | 1589776  | 1629699  | 1481705  | 1481594  | 1038471  | 933824.5 | 1179449  | 1358143  | 1462294  | 1372760  | 1733699  |
| P10536    | 7304.439 | 11079.47 | 10096.99 | 8657.921 | 7326.242 | 9939.934 | 12143.24 | 5766.894 | 21856.89 | 24884.33 | 50670.94 | 18561.98 | 15611.36 | 10670.47 | 10859.87 | 20111.64 |
| P10715    | 92451.62 | 26686.54 | 20176.09 | 12076.74 | 20031.62 | 21029.67 | 76832.41 | 63178.31 | 20412.93 | 4691.187 | 33654.78 | 42942.09 | 4467.449 | 2203.626 | 17172.74 | 18997.52 |
| P10719    | 26383.59 | 36729.07 | 49388.68 | 34251.94 | 34806.2  | 44677.78 | 27312.46 | 42438.34 | 17708.26 | 39887.96 | 64147.61 | 29012.02 | 33236.03 | 45772.65 | 25285.94 | 6663.245 |
| P10758    | 770528.2 | 292734.3 | 491526.5 | 1095392  | 276053.2 | 262055.3 | 253362.9 | 576011.6 | 807949.8 | 607563.8 | 557053.7 | 1309187  | 721268.8 | 692995.1 | 941021.9 | 101624.5 |
| P10760    | 52315.71 | 56103.78 | 54726.65 | 40703.56 | 49980.25 | 52349.72 | 49366.19 | 28082.15 | 69265.84 | 50534.66 | 76387.47 | 41910.11 | 48765.8  | 54105.56 | 63115.87 | 73724.47 |
| P10959    | 2643016  | 3585512  | 3526762  | 3125147  | 2017043  | 1842861  | 1836787  | 3091977  | 1104752  | 1943883  | 1410164  | 1054248  | 1712999  | 1278793  | 1547136  | 1105716  |
| P10960    | 5115500  | 7914533  | 8843627  | 6414152  | 9225224  | 10636343 | 8840829  | 9155366  | 5990423  | 5242646  | 5155260  | 4867788  | 9307806  | 15366065 | 7041872  | 8763402  |
| P11030    | 96722.99 | 54426.12 | 65300.58 | 65958.23 | 86311.94 | 80013.82 | 51719.44 | 54741.45 | 100251.2 | 137782.6 | 86938.12 | 93045.72 | 65600.88 | 113957.1 | 107989.9 | 93817.38 |
| P11232    | 799124.4 | 1177598  | 742360.4 | 1468079  | 556993.9 | 1320546  | 1115911  | 938075.6 | 616207.4 | 922644.8 | 944477.3 | 669341.8 | 532929.8 | 538722.8 | 519018.9 | 415109.7 |
| P11348    | 83947.95 | 89146.2  | 81945.1  | 125904.9 | 149507.2 | 121929.9 | 72803.55 | 80359.94 | 124791.2 | 141134.8 | 125135   | 73049.3  | 88452.78 | 86055.42 | 114163.2 | 119203.3 |
| P11442    | 4511.4   | 9624.853 | 11179.2  | 9493.665 | 8005.667 | 5364.706 | 7241.416 | 6178.608 | 8101.209 | 11292.28 | 15361.77 | 5681.7   | 7338.044 | 6976.184 | 6787.164 | 9031.133 |
| P11598    | 41153.3  | 29427.64 | 18030.79 | 56201.85 | 4919.222 | 60149.97 | 89870.02 | 116851.3 | 19820.46 | 26758.84 | 28410.73 | 39007.4  | 43188.34 | 35275.88 | 26790    | 15782.42 |
| P11762    | 11470.35 | 21960.46 | 20369.21 | 17502.8  | 18709.95 | 11560.36 | 33265.16 | 10884.17 | 9013.265 | 9739.986 | 8049.054 | 15013.4  | 7715.152 | 14290.17 | 14785.98 | 3906.16  |
| P11883    | 5804.301 | 33897.65 | 35485.17 | 17329.08 | 18234.62 | 38408.58 | 17387.23 | 20950.68 | 14484.04 | 19485.13 | 25034.4  | 17700.8  | 11575.08 | 12328.61 | 2010.689 | 12229.62 |
| P11980    | 43006.09 | 68856.26 | 47112.47 | 65891.77 | 38718.79 | 44783.11 | 52231.84 | 46986.84 | 53828.59 | 61472.21 | 96882.5  | 64133.33 | 40784.63 | 65253.51 | 54493.14 | 54728.83 |
| P12020    | 1217074  | 923416.4 | 312474.3 | 868568.3 | 228623.7 | 2135782  | 1914867  | 888320.6 | 49374.11 | 1059412  | 122003   | 272409.6 | 1230455  | 1128924  | 37674.66 | 58534.81 |
| P12346    | 16986736 | 10648107 | 17657112 | 9376882  | 8024298  | 9740147  | 11626362 | 16137366 | 7177070  | 10315179 | 8383710  | 7847454  | 6951424  | 7855057  | 8852608  | 7048708  |
| P12368    | 38915.83 | 15888.39 | 15883.02 | 10435.93 | 18189.75 | 20607.87 | 23306.83 | 9893.232 | 21651.01 | 24027.89 | 62542.08 | 35129.32 | 15931.91 | 11229.61 | 14134.16 | 27939.93 |
| P12785    | 2256.439 | 1959.182 | 5806.881 | 5770.31  | 1802.759 | 1722.179 | 1769.491 | 844.3473 | 3423.823 | 3880.968 | 16257.49 | 1074.04  | 2924.111 | 1927.701 | 1511.001 | 2133.207 |
| P13221    | 88479.23 | 81746.77 | 85825.59 | 61465.64 | 130048   | 68090.36 | 59771.24 | 91294.34 | 105834.6 | 158531.1 | 94081.17 | 60368.38 | 75099.11 | 84401.53 | 117424.3 | 87979.02 |
| P13265    | 75582.77 | 70952.62 | 64328.63 | 79995.62 | 84964.04 | 17077.26 | 36593.34 | 62748.5  | 16382.5  | 30158.78 | 41097.44 | 49559.97 | 56719.68 | 50561.18 | 34421.09 | 33562.55 |
| P13432    | 1011349  | 153614.1 | 114064.6 | 322703.3 | 183214.2 | 1047901  | 435540.6 | 418470.5 | 199617.7 | 18377.07 | 187728.4 | 1660698  | 131240.5 | 156910   | 87232.03 | 115560.6 |
| P13596    | 110810.8 | 156108.9 | 170957.3 | 156514.1 | 93514.64 | 128468.6 | 170827.9 | 14649.99 | 160812.3 | 97115.16 | 141092.3 | 95835.17 | 165387.7 | 168135   | 192189   | 164806.4 |
| P13635    | 801305.8 | 802813.8 | 901592.1 | 752658.5 | 490431.9 | 642941.6 | 563976.8 | 853469.9 | 488036.1 | 587562.1 | 581077.5 | 600414.8 | 587312.3 | 572963.7 | 637634.2 | 512357.5 |
| P13852    | 83795.48 | 111750.1 | 114178.7 | 280207.2 | 96597.35 | 104958.3 | 171459.9 | 79054.9  | 83390.27 | 57846.66 | 99574.67 | 73378.04 | 116789.3 | 103845.3 | 108252.9 | 95750.95 |
| P14046    | 1453302  | 2592194  | 2565435  | 1559971  | 1214855  | 1900188  | 1377607  | 3487950  | 2056263  | 2305762  | 1568448  | 1030763  | 1667825  | 1676787  | 2142422  | 2055373  |
| P14173    | 5715.248 | 15036.64 | 9607.602 | 8562.819 | 5742.44  | 8627.128 | 3240.393 | 4159.41  | 10551.88 | 21216.27 | 8006.434 | 5641.232 | 5827.536 | 5043.497 | 3808.302 | 5466.64  |
| P14408    | 18917.98 | 17605.09 | 6700.781 | 55298.87 | 26638.75 | 8451.828 | 19441.27 | 7206.573 | 8670.776 | 11476.17 | 25536.75 | 12634.4  | 12854.03 | 10010.93 | 17440.45 | 21297.75 |
| P14480    | 26111.61 | 61222.74 | 16515.79 | 54391.59 | 8179.346 | 43532.47 | 32914.66 | 13553.1  | 16825.6  | 30787.46 | 17377.98 | 36190.77 | 32581.76 | 25424.7  | 9447.506 | 47850.47 |
| P14562    | 170416.1 | 117401.7 | 76107.91 | 168919.1 | 290359.6 | 215467.1 | 166107.6 | 245948.8 | 97931.08 | 125945.7 | 176049.1 | 90439.29 | 125794.7 | 233214.3 | 96413.92 | 105574.7 |
| P14630    | 728347.3 | 617239.8 | 1851458  | 693108.4 | 1187434  | 662134.8 | 1046721  | 900005.8 | 861519.6 | 739262.4 | 747923.1 | 942067.9 | 1291932  | 1591657  | 1552691  | 1558615  |
| P14668    | 28911.2  | 33608.06 | 55159.59 | 124676.3 | 101046.9 | 94019.59 | 26209.86 | 108747.1 | 36077.44 | 25387.16 | 102169.5 | 25979.63 | 10889.91 | 33976.29 | 34940.46 | 65680.86 |
| P14669    | 34341.78 | 35815.85 | 22617.19 | 54403.07 | 31138.36 | 70624.73 | 40393.45 | 107924.2 | 13551.92 | 20542.37 | 117291.6 | 17005.56 | 12083.61 | 14501    | 16859.82 | 2464.1   |
| P14740    | 1546820  | 2130879  | 1759187  | 3027177  | 2470637  | 1943989  | 2574227  | 1633843  | 3420167  | 2737787  | 2792222  | 2526245  | 2600531  | 3222745  | 3651581  | 3710571  |
| P14841    | 9211234  | 13686527 | 9772049  | 12829807 | 12517460 | 10585513 | 11760517 | 10617841 | 6979768  | 6678591  | 7337498  | 7963355  | 7027660  | 8108238  | 7523050  | 6464805  |
| P14925    | 198427.8 | 147815.5 | 227439.4 | 180290.5 | 204753.3 | 143392.4 | 141449.1 | 174252.9 | 110279.4 | 103051   | 128382.7 | 149026   | 124322.6 | 151782.8 | 147369.6 | 140333.3 |
| P14942    | 89445.27 | 67569.96 | 83791.63 | 61160.99 | 135883.4 | 48029.21 | 43556.37 | 52925.37 | 141570   | 163550.6 | 120451.4 | 74343.34 | 91593.45 | 75395.16 | 117420.3 | 122022.8 |
| P15083    | 5190122  | 2881894  | 3624862  | 4807259  | 4585853  | 7071715  | 4543290  | 7949768  | 2625929  | 2755533  | 3645315  | 4764668  | 3577803  | 3627864  | 2406921  | 1745466  |
| P15087    | 10814.35 | 12514.27 | 10481.43 | 27498.9  | 2021.529 | 9689.956 | 8462.458 | 12826.17 | 11865.11 | 11311.05 | 8124.217 | 8200.238 | 11321.1  | 11789.46 | 13223.48 | 14417.98 |
| P15399    | 58310136 | 18863514 | 10114836 | 16576696 | 3039642  | 34141080 | 21204404 | 4313771  | 3533840  | 8381482  | 16480074 | 5777281  | 2954581  | 6776227  | 1232697  | 1646074  |
| P15473    | 151061.2 | 124087.5 | 60172.82 | 98761.76 | 123775.7 | 81533.75 | 141023.9 | 126464.6 | 150856.7 | 72885.51 | 117985.4 | 160058   | 117836.3 | 114341.3 | 99207.3  | 121526   |
| P15684    | 3551616  | 3834305  | 2764391  | 4019504  | 3703954  | 3359882  | 5275172  | 3478342  | 4032915  | 4022464  | 5230961  | 4117463  | 3259374  | 3002939  | 3044068  | 4474864  |
| P15800    | 6346.112 | 8217.502 | 3064.972 | 9658.524 | 8001.691 | 9541.516 | 7162.991 | 8630.513 | 4692.311 | 4932.156 | 7575.167 | 9100.559 | 6405.424 | 5243.624 | 3992.967 | 3648.952 |
| P15943    | 25283.52 | 40335.95 | 31269.11 | 51201.93 | 36843.68 | 47369.56 | 37353.7  | 39141.33 | 25958.04 | 25921.82 | 29181.98 | 41724.04 | 37418.04 | 37634.63 | 34264.27 | 34204.8  |

|        |          |          |          |          |          |          |          |          |          |          |          |          |          |          |          |          |
|--------|----------|----------|----------|----------|----------|----------|----------|----------|----------|----------|----------|----------|----------|----------|----------|----------|
| P15978 | 1089081  | 1174054  | 954347.8 | 1381931  | 660448.4 | 341696.3 | 1227437  | 1350972  | 754952.2 | 865120.9 | 881295.5 | 1235772  | 311163.1 | 287853.2 | 978183.2 | 1009303  |
| P15999 | 44891.64 | 30686.82 | 20827.28 | 8584.965 | 2432.999 | 28406.24 | 18457.83 | 56764.72 | 14112.06 | 28590.63 | 16894.99 | 26481.92 | 55209.41 | 29063.06 | 61741.98 | 14737.58 |
| P16086 | 20214.34 | 28766.93 | 42764.63 | 15044.15 | 3605.028 | 38958.25 | 64245.2  | 15139.37 | 2795.367 | 3555.005 | 9246.829 | 1806.625 | 6723.388 | 9795.271 | 2369.34  | 4323.937 |
| P16228 | 58447.94 | 79687.23 | 57001.01 | 104500.8 | 48563.55 | 66507.55 | 79781.93 | 100901   | 43154.66 | 52276.73 | 35734.62 | 69572.91 | 28136.96 | 36620.57 | 38045.57 | 22925.96 |
| P16296 | 14923.27 | 24100.64 | 19414.15 | 18593.01 | 14467.98 | 12683.92 | 24517.57 | 25832.91 | 12913.29 | 16676.05 | 10803.3  | 9485.949 | 9357.491 | 8360.64  | 10729.11 | 9459.683 |
| P16310 | 29149.37 | 52630.68 | 64376.08 | 45114.78 | 51323.71 | 42419.69 | 43584.81 | 37323.33 | 25477.59 | 31490.15 | 40359.21 | 35197.71 | 59318.98 | 44256.26 | 33324.8  | 47405.65 |
| P16391 | 776956.3 | 925785.9 | 818778.4 | 860836.5 | 1112247  | 315114   | 1084731  | 1494169  | 467407.9 | 1141965  | 946712.6 | 892413.6 | 166882.1 | 196339.5 | 203119.2 | 601091.7 |
| P16573 | 2964964  | 2295139  | 9964660  | 4788885  | 9461499  | 5198500  | 8310607  | 9747273  | 6834555  | 12588412 | 9881937  | 4921536  | 8117883  | 11298510 | 9138708  | 5075012  |
| P16617 | 38039.97 | 31525.41 | 62094.55 | 26022.94 | 38938.75 | 27801.11 | 48154.31 | 40394.26 | 65293.99 | 52558.72 | 67332.34 | 44718.44 | 36036.48 | 41099.19 | 49870.34 | 41265.03 |
| P16636 | 28945.75 | 41961.46 | 7999.323 | 20375    | 61437.31 | 20616.47 | 129364.7 | 21594.62 | 44744.6  | 28497.47 | 32905.17 | 20075.06 | 43120.39 | 84296.28 | 105147.2 | 47404.73 |
| P17046 | 273851.7 | 53542.54 | 250284.2 | 26521.15 | 269532.7 | 129234   | 217088.5 | 35439.46 | 39093.41 | 44970.38 | 197968.4 | 200928.8 | 153696.3 | 67652.2  | 73560.99 | 226951.8 |
| P17164 | 280041.7 | 495586.2 | 403048.3 | 391271.3 | 366115.3 | 360186.2 | 305743   | 312824.3 | 284356.7 | 348752.4 | 327120.5 | 436029.9 | 369765   | 664031.1 | 409807.9 | 1127148  |
| P17475 | 12506106 | 10196152 | 11464025 | 8385092  | 3737992  | 6431226  | 5327787  | 9565979  | 3950666  | 5255916  | 4777062  | 5104728  | 4632378  | 4452780  | 5538054  | 3816816  |
| P17559 | 42812.06 | 274742.4 | 87164.43 | 160639.2 | 129078.5 | 175845.3 | 878050.8 | 56373.6  | 27631.23 | 129119.6 | 62483.58 | 168860   | 55937.47 | 40778.94 | 61517.86 | 50635.71 |
| P18292 | 4430161  | 7148439  | 10650456 | 6238562  | 5411281  | 5734609  | 5927609  | 8287560  | 5663017  | 14199290 | 6335177  | 6025224  | 5927945  | 6197947  | 8915691  | 12464038 |
| P18297 | 5852.814 | 13178.07 | 7868.468 | 12465.97 | 12493.09 | 10986.83 | 13469.8  | 9013.617 | 13555.09 | 8855.127 | 18899.22 | 9279.284 | 9993.028 | 8793.616 | 14311.96 | 13576.49 |
| P18418 | 228530.1 | 94190.7  | 56999.61 | 266804.7 | 80314.29 | 110807.1 | 183808.6 | 115654.2 | 27807.71 | 60373.68 | 32216    | 40709.02 | 25898.88 | 34950.77 | 23779.08 | 17486.81 |
| P18427 | 10356.08 | 39713.23 | 7973.339 | 28280.54 | 5511.157 | 29145.57 | 22413.71 | 24359.72 | 20264.72 | 7534.305 | 18696.81 | 34162.64 | 33120.52 | 17176.52 | 24493.94 | 32551.5  |
| P18484 | 13229.27 | 20060.17 | 19950.17 | 14172.11 | 12276.57 | 8505.044 | 9016.458 | 20099.03 | 11960.02 | 10837.52 | 17988.55 | 16408.74 | 12460.84 | 13482.16 | 16741.54 | 18699.27 |
| P18757 | 66495.88 | 67296.59 | 60200.38 | 70387.52 | 82765.96 | 50032.05 | 66748.36 | 42508.5  | 125829.9 | 92075.4  | 179688.1 | 74563.5  | 67654.31 | 70214.99 | 91130.69 | 135322.6 |
| P19112 | 75463    | 91149.73 | 117877.8 | 89525.82 | 115230.4 | 78544.58 | 72049.79 | 66410.42 | 141216.6 | 191800.4 | 187095.4 | 59075.92 | 68429.45 | 84659.65 | 101219.9 | 133428.1 |
| P19132 | 7024.496 | 7114.869 | 8329.18  | 7063.329 | 9367.877 | 7097.77  | 4326.374 | 10270.83 | 3934.667 | 4697.804 | 3649.061 | 6139.65  | 2510.524 | 6635.374 | 3706.7   | 2434.231 |
| P19218 | 41232.34 | 132908.6 | 119922   | 126866.3 | 45406.74 | 40072.73 | 41940.3  | 100123.9 | 67257.98 | 65788.03 | 244857.4 | 36682.35 | 35119.2  | 172917.3 | 82696.74 | 56139.77 |
| P19223 | 20741.5  | 34766.05 | 16155.72 | 45838.43 | 6749.634 | 13882.39 | 24003.6  | 25703.17 | 13753.52 | 11668.06 | 8172.882 | 30446.3  | 3605.594 | 3496.366 | 4464.77  | 3473.463 |
| P19468 | 432358.9 | 516640.4 | 392738.1 | 542240.6 | 866926.1 | 424020.5 | 673428.9 | 412130.8 | 947514.6 | 914326.9 | 1539073  | 523771.1 | 580382.1 | 478171.9 | 726628.9 | 971584.4 |
| P19629 | 204502.8 | 60203.4  | 33162.56 | 12220.5  | 23065.01 | 101822.4 | 173578.7 | 120046.9 | 16950.57 | 8664.848 | 34422.61 | 45255.63 | 15415.14 | 65818.63 | 37958.83 | 17246.2  |
| P19804 | 287293.7 | 144828.7 | 186836.7 | 140796.5 | 208109.8 | 242101.1 | 199034.1 | 182527   | 219368.8 | 335157.4 | 183081.5 | 128801.5 | 197106.5 | 164786.3 | 178712   | 152875.2 |
| P19814 | 44051.84 | 37269.52 | 24212.12 | 30221.89 | 48746.63 | 18178.29 | 37072.41 | 36524.84 | 9005.4   | 19181.96 | 25031    | 18683.53 | 17628.59 | 23938.37 | 19227.61 | 17067.48 |
| P19939 | 246607.3 | 309667.7 | 300797.2 | 405477.2 | 411681.8 | 140326.8 | 128880.5 | 201407.3 | 322808.9 | 190670.6 | 316792.1 | 413175.5 | 408117.7 | 602234.3 | 391876.8 | 442457.8 |
| P20059 | 22936820 | 25648398 | 22291050 | 41860568 | 3542152  | 24636776 | 18290156 | 26004100 | 18989676 | 16633185 | 18938708 | 22502444 | 15850968 | 17950716 | 23123360 | 15840240 |
| P20171 | 5357.66  | 8393.375 | 12087.83 | 9147.599 | 6167.025 | 11149.07 | 12958.49 | 9498.55  | 19517.74 | 15996.58 | 24570.81 | 17898.22 | 12750.63 | 12436.09 | 9468.216 | 9684.521 |
| P20611 | 2237803  | 3025856  | 2677507  | 2542038  | 3780333  | 1561941  | 2509584  | 2418350  | 1830853  | 1672668  | 1816667  | 1686520  | 2481987  | 2929853  | 2291022  | 3560478  |
| P20646 | 10847.67 | 13958.71 | 11313.92 | 28607.47 | 29478.22 | 25975.11 | 17683.87 | 16375.3  | 11339.46 | 10317.85 | 10316.43 | 9912.073 | 2000.898 | 3077.645 | 7307.011 | 8717.118 |
| P20673 | 15671.17 | 16443.15 | 17379.66 | 13950.48 | 8456.787 | 6331.523 | 8938.592 | 15753.8  | 12938.32 | 26984.52 | 19574.48 | 6555.391 | 14457.95 | 10742.54 | 13167.21 | 8876.628 |
| P20759 | 169718   | 536723.3 | 542833.3 | 621558.4 | 965114.8 | 429794.1 | 375602.7 | 287062.8 | 308283.2 | 470469.3 | 343292.4 | 415490.8 | 336206.3 | 416671.2 | 441829.9 | 252187.4 |
| P20760 | 473201.1 | 1009313  | 584771.3 | 2465311  | 1438062  | 1490411  | 934970   | 725316.8 | 265630.3 | 407107.2 | 319068.4 | 356207.8 | 383334.5 | 413090.2 | 641916.8 | 327818.5 |
| P20761 | 145258.3 | 345718.6 | 421338.4 | 948631   | 188824   | 577169.8 | 366208.5 | 332558.8 | 52952.96 | 60604.67 | 64828.93 | 113249.6 | 68303.17 | 96498.05 | 146532.8 | 44780.19 |
| P20762 | 1187096  | 3816268  | 1261874  | 2736043  | 1691749  | 2452958  | 1785162  | 1795911  | 561509.9 | 411260.5 | 952672.1 | 774927.3 | 479234.9 | 1151438  | 745531.6 | 183978.3 |
| P20766 | 10233.82 | 137373.9 | 77064.29 | 43050.17 | 17008.02 | 29238.45 | 42560.78 | 98285.56 | 59423.05 | 30915.33 | 42070.9  | 24125.21 | 129279.3 | 38407.12 | 28429.05 | 24655.54 |
| P20767 | 20453248 | 25241364 | 18297700 | 56690736 | 15448808 | 37149848 | 20281784 | 19544512 | 29937242 | 24265378 | 27734794 | 42232320 | 23807450 | 49603708 | 17391244 | 45101508 |
| P20786 | 194394.2 | 208388.8 | 275711.8 | 268087   | 257829.6 | 285106.9 | 242624.7 | 245230.8 | 268704.4 | 174841.8 | 191230.7 | 222911.8 | 345900.1 | 325557.2 | 352189.3 | 175581.6 |
| P20961 | 26386.09 | 37965.28 | 20333.43 | 24966.38 | 31970.31 | 20845.3  | 12111.1  | 45409.05 | 30172.38 | 23763.98 | 27863.18 | 29380.7  | 30483.5  | 40371.6  | 37705.71 | 30150.18 |
| P21581 | 7044.135 | 12651.02 | 4070.263 | 8546.887 | 10901.04 | 12262.91 | 22796.05 | 18578.52 | 7139.546 | 8502.559 | 8318.396 | 9481.703 | 12516.81 | 9912.436 | 6581.848 | 10028.7  |
| P21674 | 5389.892 | 5561.121 | 3245.687 | 7734.456 | 7621.983 | 5851.47  | 3378.62  | 7670.605 | 6345.668 | 4023.025 | 5991.979 | 5141.25  | 3944.594 | 4080.346 | 6453.848 | 8377.394 |
| P21704 | 48344440 | 51419316 | 57218172 | 39926200 | 26401744 | 39644364 | 30155828 | 44100724 | 34583336 | 34396272 | 28794426 | 35066588 | 32648770 | 38780300 | 48217696 | 26524218 |
| P21743 | 173269.9 | 106741   | 78147.1  | 67539.34 | 43878.19 | 60414.33 | 71725    | 110949.9 | 87085.97 | 66942.41 | 51028.19 | 54796.14 | 49241.63 | 100871.6 | 74834.6  | 106915.8 |
| P22006 | 230919.4 | 63542.8  | 99461.55 | 246935.1 | 36113.08 | 130384.3 | 602061.8 | 157971.1 | 102297.4 | 148588.4 | 244233.8 | 105587.1 | 98831.7  | 147036.8 | 715515.6 | 43625.2  |
| P22057 | 4573264  | 4396938  | 5856811  | 5484556  | 2169663  | 3738856  | 4807240  | 3633132  | 3022384  | 2982548  | 3799376  | 4452582  | 2655282  | 3021741  | 2957106  | 1883258  |
| P22273 | 16542.81 | 15618.22 | 7808.375 | 18743.71 | 18830.65 | 15428.44 | 24451.39 | 26394.18 | 15490.11 | 17819.39 | 18526.87 | 22224.32 | 14725.21 | 11820.01 | 20881.74 | 22015.35 |

|        |          |          |          |          |          |          |          |          |          |          |          |          |          |          |          |          |
|--------|----------|----------|----------|----------|----------|----------|----------|----------|----------|----------|----------|----------|----------|----------|----------|----------|
| P22282 | 61099736 | 24605238 | 21244044 | 79387376 | 25715366 | 98475888 | 83345440 | 84426568 | 18389916 | 15584187 | 29080660 | 42730156 | 43922248 | 23681766 | 2697991  | 2467990  |
| P22283 | 54539048 | 18120648 | 17812272 | 61316620 | 23254028 | 73971480 | 75933520 | 83358440 | 17247060 | 20372090 | 31412536 | 41446796 | 36599080 | 20232508 | 2073634  | 1949803  |
| P22734 | 161018   | 122391.1 | 159931.2 | 159142.6 | 149557.4 | 85042.87 | 136791.3 | 105325.6 | 180615.1 | 305953.6 | 144515.1 | 149713   | 164723.8 | 101816.7 | 85511.9  | 118380.9 |
| P22985 | 7088.889 | 6900.498 | 10954.26 | 10641.7  | 11142.48 | 5703.853 | 6291     | 6936.999 | 5769.403 | 13665.48 | 10982.97 | 5734.5   | 6669.216 | 6565.287 | 6246.46  | 8215.363 |
| P23377 | 178647.7 | 178877.1 | 142867.3 | 141057.7 | 152071.8 | 187370.3 | 172201.4 | 168315.3 | 131034.1 | 133170.6 | 152596.5 | 218532.7 | 124111.9 | 117094.1 | 80641.1  | 90168.45 |
| P23593 | 5252.213 | 15217.15 | 6781.513 | 9371.92  | 5827.083 | 6449.549 | 24121.93 | 16112.41 | 11177.06 | 22756.1  | 34237.16 | 22705.74 | 25303.83 | 48190.09 | 21543.65 | 14239.46 |
| P23680 | 3290062  | 3736313  | 4240770  | 2651066  | 5586596  | 2637467  | 4103111  | 4100330  | 3954719  | 3037673  | 3031197  | 4088404  | 2713224  | 5197325  | 4800296  | 3876619  |
| P23739 | 23197.04 | 20229.07 | 24280.54 | 15492.95 | 59869.52 | 28019.19 | 14316.43 | 19769.74 | 24580.84 | 28064.7  | 38745.16 | 34553.46 | 5456.673 | 23188.57 | 22033.01 | 20541.78 |
| P23764 | 348242.6 | 353417.9 | 394373.9 | 333292.3 | 342631.5 | 305260.3 | 347451.5 | 261967.1 | 253487.2 | 252815.8 | 265609.8 | 294237.8 | 178591.8 | 253041.3 | 241912.6 | 195598.9 |
| P23785 | 682128.7 | 790637.9 | 418071.5 | 264982.8 | 1033402  | 557138.6 | 600808.1 | 369086.5 | 687605.8 | 513575.2 | 525067.6 | 631138.8 | 791036.9 | 1374256  | 1371321  | 1229185  |
| P23928 | 7826.428 | 13001.03 | 13335.83 | 10091.79 | 7501.16  | 12029.96 | 9111.645 | 6930.52  | 26689.7  | 16843.47 | 39281.77 | 13302.34 | 13476.19 | 18107.41 | 23643.16 | 11531.31 |
| P24090 | 25888452 | 33745828 | 31433334 | 36552600 | 41164656 | 32830378 | 38501816 | 63365776 | 50460940 | 75006440 | 37718816 | 37196312 | 39930432 | 35571392 | 60514524 | 58628788 |
| P24268 | 1496320  | 1394742  | 1859933  | 2398781  | 2049454  | 2204173  | 1326819  | 2670912  | 874020.3 | 1203840  | 1057146  | 1088176  | 1152089  | 2073179  | 1396321  | 1022900  |
| P24368 | 209601.7 | 203163.7 | 81089.51 | 294205.3 | 89967.78 | 266710.5 | 229769.2 | 294562.8 | 117275.5 | 150062.4 | 233261.6 | 293772   | 165411   | 146308.2 | 45637.79 | 65785.44 |
| P24388 | 63220.35 | 225321.5 | 166969.1 | 232874.8 | 98962.54 | 189099.3 | 31151.03 | 160058.9 | 200981.6 | 182051.5 | 127580.1 | 140731.3 | 261406.2 | 296673.2 | 323017.8 | 192477.3 |
| P24594 | 200266.1 | 297081   | 161148.5 | 250139.5 | 115787.2 | 112069   | 279775.7 | 257103.2 | 232115.6 | 383162.6 | 254040.2 | 160672.6 | 193176   | 195699.9 | 175073.5 | 196037.2 |
| P25031 | 130973.3 | 242276   | 152065.9 | 164224   | 168677.2 | 187500.1 | 220497.3 | 34166.38 | 140104.5 | 76419.45 | 268326   | 380574.6 | 217195.2 | 306160.3 | 241899.5 | 85787.21 |
| P25093 | 112836.5 | 77333.73 | 104355.9 | 97151.22 | 166552.3 | 75522.47 | 87929.95 | 81248.09 | 203414   | 165549.3 | 208762.4 | 110828.4 | 134262.9 | 120006.6 | 150712.3 | 192372.3 |
| P25113 | 69996.21 | 88768.69 | 111458.6 | 63817.68 | 101120.9 | 105828.5 | 115811.4 | 109884.7 | 180857.7 | 295522.7 | 234234.6 | 111187.6 | 152280.9 | 153065.2 | 162225.5 | 129903.3 |
| P25236 | 20582.45 | 47461.26 | 7483.792 | 56342.05 | 816.722  | 33616.26 | 9984.134 | 11604.97 | 8100.137 | 6422.294 | 7134.82  | 19223.99 | 23740.98 | 22724.31 | 9060.153 | 8315.93  |
| P25304 | 21112.1  | 19480.33 | 16761.26 | 43558.09 | 20567.36 | 19308.16 | 18469.87 | 36304.31 | 27673.31 | 6091.383 | 21869.3  | 28106.16 | 33141.88 | 35232.68 | 12866.4  | 25490.62 |
| P26051 | 2935347  | 4076117  | 3724202  | 2724164  | 4263821  | 3161570  | 3258159  | 3193749  | 2890211  | 2134388  | 2355684  | 2270771  | 3316131  | 3909089  | 3499895  | 2986423  |
| P26342 | 13781.3  | 11775.23 | 12134.54 | 21002.91 | 19735.9  | 10876.06 | 16335.41 | 9895.091 | 9918.377 | 7302.055 | 11037.7  | 9901.76  | 5156.454 | 11354.41 | 8710.807 | 11694.43 |
| P26453 | 44567.31 | 69837.8  | 47376.86 | 74717.14 | 69385.41 | 46411.57 | 59381.32 | 53980.03 | 46718.47 | 54197.95 | 67088.67 | 37830.5  | 53298.28 | 56350.04 | 54590.04 | 72572.11 |
| P26644 | 2118316  | 1897511  | 1715274  | 3406251  | 1956877  | 1661848  | 1600783  | 2459645  | 1252894  | 1262950  | 1654341  | 1320050  | 1318148  | 1406344  | 1605137  | 1310799  |
| P26772 | 12654.77 | 20024.97 | 41048.98 | 29400.31 | 18079.04 | 25588.29 | 32219.78 | 28262.3  | 13155.55 | 21116.38 | 20720.55 | 20410.96 | 10960.63 | 22420.7  | 32614.99 | 9751.053 |
| P27139 | 200749.5 | 192343.6 | 181781.7 | 232975.5 | 248021.4 | 273970.2 | 194602.8 | 272246.8 | 395343.4 | 326637   | 322281.4 | 357782.3 | 284761   | 274093   | 362111.7 | 278477.1 |
| P27213 | 8402.771 | 7126.385 | 5419.64  | 43113.06 | 4212.746 | 9009.269 | 7477.943 | 10544.94 | 8376.267 | 9920.614 | 8727.86  | 16322.12 | 27426.99 | 16246.67 | 14400.71 | 21679.45 |
| P27274 | 8095926  | 6301165  | 8068799  | 8141571  | 5864066  | 6184950  | 9827252  | 6889811  | 4821451  | 3746232  | 5551537  | 4817463  | 4091975  | 5502035  | 6244387  | 5276553  |
| P27590 | 59688024 | 48963504 | 46821548 | 82501664 | 36435812 | 68055424 | 22549616 | 39754564 | 29088726 | 20220378 | 33972496 | 25078144 | 29541540 | 27496686 | 34992460 | 26835988 |
| P27605 | 10600.33 | 6644.17  | 10090.89 | 7398.418 | 7180.314 | 8778.073 | 6870.233 | 12112.83 | 25665.35 | 13835.9  | 9040.183 | 10550.4  | 10967.06 | 7429.042 | 11632.21 | 10776.75 |
| P27791 | 7365.046 | 6419.634 | 5190.02  | 6857.267 | 4037.406 | 5860.24  | 4318.921 | 3788.121 | 1582.327 | 5499.754 | 2594.76  | 4569.599 | 4293.193 | 4253.768 | 3451.262 | 3669.788 |
| P27867 | 108915.9 | 59803.29 | 99491.08 | 58170.13 | 107422.6 | 73336.97 | 86247.07 | 95136.53 | 129174.9 | 181894.1 | 118005.1 | 72468.12 | 102690.7 | 65213.86 | 100317   | 96909.48 |
| P28037 | 15352.27 | 24961.32 | 24973.17 | 19615.85 | 42713.06 | 17005.72 | 21937.43 | 15419.95 | 25983.84 | 30537.82 | 43778.66 | 16269.95 | 20296.18 | 16453    | 22091.39 | 28741.26 |
| P28494 | 38838.75 | 36698.44 | 45475.61 | 38085.64 | 66111.95 | 34663.08 | 33132    | 32252.23 | 34608.07 | 39881.77 | 46349.75 | 41390.26 | 52061.7  | 52593.31 | 54971.84 | 43277.68 |
| P28648 | 179990.6 | 221442   | 141123.9 | 199020.5 | 281279.6 | 131426.4 | 145118.5 | 116980.9 | 65228.9  | 113292.1 | 64281.65 | 57851.45 | 50807.18 | 40893.55 | 43231.83 |          |
| P28826 | 1691917  | 1582222  | 1810022  | 2412588  | 2112520  | 1377416  | 2584659  | 1088692  | 1942791  | 1511575  | 2465048  | 2500661  | 1761002  | 1504931  | 1861236  | 3019702  |
| P29288 | 48714.56 | 60750.68 | 63873.84 | 68620.66 | 58151.73 | 35669.84 | 23497.78 | 46000.57 | 24959.8  | 31646.12 | 23648.55 | 32511.47 | 18360.88 | 47981.76 | 24918.13 | 28765.97 |
| P29534 | 138425.2 | 191465.6 | 114348   | 169374   | 116825.4 | 145969.4 | 162715   | 182092.2 | 110653   | 105677.4 | 109178.5 | 143559.5 | 99033.22 | 101713.1 | 118084.1 | 118752.6 |
| P29598 | 1584985  | 1811612  | 1855247  | 2252398  | 2464844  | 1701664  | 1969920  | 2279100  | 2186546  | 3248148  | 2499432  | 2348443  | 2455140  | 3359775  | 2773951  | 2842581  |
| P29975 | 332920.1 | 348621.2 | 328381.9 | 487859.2 | 806008.4 | 341699.5 | 481281.3 | 361592.5 | 858381.7 | 1410383  | 1468699  | 556493.6 | 470200   | 572844.8 | 876645.8 | 1052272  |
| P30120 | 174421   | 91410.14 | 42977.03 | 141740.5 | 70350.59 | 237409.3 | 118030.6 | 157319.5 | 52771.34 | 57442.9  | 108874.1 | 302883.3 | 100986.8 | 73235.35 | 9548.254 | 20046.9  |
| P30121 | 90878.63 | 115862.9 | 89960.91 | 70930.82 | 103194.1 | 65313.58 | 77395.76 | 67014.68 | 70828.45 | 63779.81 | 45860.74 | 65981.05 | 89321.39 | 91665.27 | 54110.41 | 55473.77 |
| P30152 | 1631165  | 3112104  | 1935820  | 2531771  | 1503999  | 2008747  | 3080611  | 1567922  | 1827697  | 2075554  | 2169701  | 2868589  | 1881595  | 3854173  | 3282881  | 3167144  |
| P30713 | 66310.6  | 67781.73 | 53882.3  | 70033.23 | 64264.3  | 62887.01 | 43072.16 | 56565.73 | 70813.68 | 88109.2  | 101273.9 | 61365.73 | 76737.01 | 58469.48 | 79824.69 | 64981.96 |
| P30836 | 26775.09 | 43413.34 | 22051.57 | 47820.16 | 23406.51 | 20902.73 | 44648.18 | 31276.77 | 27284.57 | 15186.37 | 26021.6  | 45286.4  | 21122.29 | 11062.36 | 30700.06 | 11361.45 |
| P30904 | 580146.9 | 433641.2 | 444776.7 | 170109.1 | 673993.1 | 344878.3 | 395103   | 209288.2 | 406754.6 | 361870.8 | 435556.2 | 266333.9 | 194651.3 | 218379.5 | 347447.8 | 282996.5 |
| P30919 | 6111.598 | 36618.81 | 62354.15 | 30945.68 | 51322.47 | 367478.3 | 40845.23 | 27069.69 | 14196.19 | 24301.13 | 27879.34 | 66209.94 | 81030.38 | 83137.12 | 67279.54 | 78232.86 |
| P31044 | 2506607  | 1200065  | 692820.4 | 1037610  | 681250.8 | 1345586  | 2537013  | 2372037  | 624213   | 859203   | 662735.4 | 480890.3 | 644953   | 630608.6 | 572902.4 | 545557   |

|        |          |          |          |          |          |          |          |          |          |          |          |          |          |          |          |          |
|--------|----------|----------|----------|----------|----------|----------|----------|----------|----------|----------|----------|----------|----------|----------|----------|----------|
| P31211 | 1117307  | 2183334  | 2412921  | 1367278  | 2795895  | 1437331  | 1289511  | 1368734  | 1545437  | 1811219  | 1773576  | 752303.7 | 1672858  | 1603659  | 1223972  | 1481314  |
| P31430 | 29320.14 | 41118.03 | 26562.46 | 36095.79 | 18835.96 | 14467.28 | 22097.51 | 26702.04 | 10309.96 | 14911.18 | 12644.32 | 85291.7  | 14973.9  | 51564.87 | 11100.59 | 14104.38 |
| P31977 | 2658365  | 1558396  | 1076113  | 2145557  | 2140212  | 1605749  | 1855022  | 1534554  | 1851046  | 2161479  | 3315632  | 2141617  | 1899630  | 1294402  | 1357682  | 2171752  |
| P32038 | 1295331  | 2371963  | 1204160  | 2926373  | 1084440  | 1762794  | 2264089  | 1907698  | 1183144  | 1573115  | 1742650  | 906736.3 | 1379112  | 1267876  | 1192384  | 2115707  |
| P32755 | 61171.48 | 31003.93 | 70119.35 | 24467.71 | 101015.1 | 30467.91 | 41619.29 | 38707.13 | 36721.4  | 94786.13 | 42848.88 | 31690.41 | 33784.48 | 34392.11 | 46495.11 | 62811.8  |
| P34058 | 20498.16 | 21139.51 | 10558.92 | 14308.32 | 14281.16 | 12000.69 | 14550.68 | 21808.95 | 14190.3  | 19212.28 | 25524.39 | 6193.471 | 13841.98 | 11898.33 | 16559.23 | 17336.73 |
| P34080 | 28679.31 | 47859.71 | 49119.95 | 88983.82 | 48108.52 | 100348.8 | 82932.92 | 51090.02 | 30505.93 | 38227.38 | 67308.14 | 34336.84 | 32109.46 | 87689.2  | 35150.98 | 33608.28 |
| P34901 | 175544   | 239267.1 | 277491.1 | 213399.9 | 178341.8 | 63314.48 | 56092.49 | 18604.08 | 52219.31 | 64594.49 | 62608.78 | 90660.53 | 26387.56 | 82698.65 | 47340.81 | 53816.08 |
| P35053 | 25658.19 | 36384.37 | 29356.45 | 45993.23 | 43980.8  | 19383.43 | 14322.32 | 46469.37 | 12599.12 | 17347.62 | 25862.53 | 47021.79 | 21097.84 | 19797.82 | 26674.18 | 5690.396 |
| P35213 | 20723.13 | 18064.18 | 15334.98 | 13049.39 | 13990.49 | 18297.32 | 15116.96 | 17546.72 | 16251.67 | 19511.68 | 23482.64 | 24214.88 | 15164.25 | 11180.09 | 8942.238 | 15369.09 |
| P35280 | 100543.4 | 420935.8 | 1483923  | 383072.5 | 9202618  | 71296.08 | 99260.39 | 107239.4 | 4193441  | 70429.15 | 137362.1 | 2894679  | 6037825  | 1709439  | 41864.33 | 4766102  |
| P35281 | 69384.46 | 18912.06 | 21155.81 | 35783.14 | 19982.23 | 37919.18 | 21108.95 | 53569.94 | 17573.68 | 36927.75 | 26842.01 | 33287.33 | 17531.93 | 11889.38 | 25006.5  | 20293.72 |
| P35434 | 30280.2  | 17669.29 | 37790.25 | 18863.42 | 14956.47 | 26885.27 | 14183.8  | 17872.87 | 13027.02 | 7995.112 | 19370.74 | 13670.17 | 11710.64 | 26765.69 | 15396.02 | 3355.522 |
| P35444 | 41472.53 | 88700    | 46117.16 | 86999.86 | 45284.28 | 26163.33 | 87369.57 | 51221.7  | 73001.82 | 57486.04 | 55489.84 | 88766.05 | 92418.13 | 103636   | 98581.2  | 73175.09 |
| P35446 | 20125.19 | 10381.82 | 12842.86 | 13662.59 | 12360.18 | 11141.86 | 16100.13 | 8048.263 | 13598.36 | 15763.64 | 12162.85 | 14309.82 | 14957.49 | 14122.16 | 19203.25 | 7503.489 |
| P35467 | 1333.963 | 1164.891 | 5500.506 | 2299.673 | 1708.786 | 1764.227 | 1387.378 | 4538.121 | 3820.376 | 3253.489 | 6662.776 | 2505.316 | 2924.111 | 1458.656 | 1208.266 | 1580.872 |
| P35704 | 42921.39 | 66671.8  | 36237.49 | 64375.15 | 59925.62 | 130078.5 | 73508.73 | 117373.4 | 79737.98 | 102155.5 | 177194.6 | 109134.8 | 68357.52 | 72020.93 | 75081.65 | 52411.3  |
| P35859 | 44869.83 | 33393.85 | 38778.14 | 34432.03 | 34986.75 | 30085.45 | 20477.65 | 30929.54 | 20194.31 | 15137.62 | 22357.4  | 17107.63 | 16685.41 | 13635.99 | 15801    | 23354.22 |
| P35952 | 62168.01 | 35700.34 | 81045.26 | 73024.38 | 94961.95 | 47924.41 | 100794.8 | 40982.23 | 53683.82 | 79165.89 | 76255.23 | 50475.37 | 49263.67 | 61838.05 | 89242.87 | 84828.42 |
| P36373 | 95157528 | 79467632 | 45292164 | 1.06E+08 | 73206696 | 89821240 | 70005592 | 93608960 | 50503828 | 46952084 | 70762888 | 84232200 | 63732380 | 60547080 | 45136012 | 47275140 |
| P36374 | 6714255  | 1224224  | 490983.9 | 5728554  | 1677874  | 2703333  | 3750625  | 3322773  | 2424982  | 2315878  | 3721590  | 6962460  | 4306320  | 1560000  | 214637.7 | 140492.1 |
| P36376 | 787660.7 | 4084337  | 1661032  | 2243895  | 2496577  | 1680366  | 1682218  | 754985.1 | 1046838  | 1430618  | 898808.6 | 715518.3 | 1020655  | 1491614  | 1349957  | 950666   |
| P36953 | 2172063  | 1946712  | 2381743  | 1260496  | 1084958  | 889124.3 | 922799.7 | 1305099  | 814532.4 | 921628.4 | 1091543  | 1390358  | 1200560  | 1277650  | 1323380  | 948626.5 |
| P36970 | 28457.58 | 13737.4  | 8443.805 | 8808.729 | 42546.56 | 80161.23 | 31327.03 | 8689.066 | 55345.89 | 47089.96 | 71749.22 | 34868.63 | 32003.03 | 21608.25 | 49814.93 | 66550.39 |
| P38438 | 78760.87 | 101467.2 | 261662.6 | 253745   | 129929.9 | 203804.3 | 136876.4 | 273461.4 | 174458.2 | 183026.5 | 174820.3 | 188689.7 | 178056.5 | 270486.4 | 238474.9 | 234082.1 |
| P38444 | 4059.074 | 13847.95 | 10212.48 | 17007.65 | 13228.4  | 10319.86 | 8387.44  | 6899.671 | 6017.858 | 12926.41 | 4307.787 | 4186.479 | 8937.644 | 9786.762 | 9371.067 | 7671.594 |
| P38652 | 19897.61 | 23600.88 | 15006.6  | 14602.6  | 19080.41 | 17228.04 | 19265.64 | 15228.48 | 22298.8  | 26689.47 | 25808.96 | 14748.79 | 17612.18 | 10740.69 | 15949.36 | 18931.22 |
| P38659 | 70423.37 | 79445.17 | 69437.41 | 84018.11 | 97813.43 | 82501.05 | 87136.13 | 66270.4  | 58500.25 | 50918.04 | 65606.36 | 68602.59 | 79241.3  | 98899.45 | 79223.24 | 71521.69 |
| P38918 | 197549.2 | 198366.8 | 144253.3 | 356793.8 | 171364.8 | 219515.3 | 174361.2 | 179222.3 | 453907.3 | 352564.1 | 583224.4 | 292537.3 | 384212.8 | 279629.1 | 393888   | 423957.7 |
| P39069 | 30478.29 | 18226.97 | 33215.75 | 17598.91 | 14086.56 | 17424.39 | 35219.7  | 17344.06 | 33559.8  | 34185.1  | 24110.93 | 19021.81 | 24257.06 | 25812.39 | 28614.98 | 34874.24 |
| P40241 | 134137.2 | 59047.14 | 61380.36 | 92901.67 | 44147.03 | 111641.8 | 60050.51 | 77607.7  | 35994.05 | 43754.04 | 63521.98 | 127097.9 | 47502.83 | 53155.64 | 29239.08 | 44600.09 |
| P41498 | 36551.15 | 41730.96 | 22606.92 | 43396.18 | 39766.09 | 39209.22 | 41093.66 | 36266.54 | 44081.58 | 35478.93 | 46993.49 | 37766.21 | 35298.48 | 28323.14 | 39475.64 | 34764.3  |
| P41562 | 144272.6 | 126555.3 | 139044.1 | 95854.37 | 199594.4 | 123084.5 | 105189.4 | 136318.7 | 179103.9 | 262084.4 | 199851.2 | 135967.4 | 196243.2 | 178572.8 | 158856.4 | 217546   |
| P42123 | 438361.3 | 284768   | 331436.9 | 286742.8 | 422157.4 | 333227.2 | 284124.1 | 272340.7 | 348644.1 | 837285.9 | 384354.6 | 246946.8 | 337161.4 | 246923   | 384862.7 | 344550.2 |
| P42854 | 16577253 | 23317742 | 19066640 | 24313612 | 9456349  | 10724493 | 27542412 | 11558305 | 25675094 | 19547254 | 34179692 | 32061872 | 25661314 | 20634914 | 38511388 | 9162181  |
| P43303 | 246300.3 | 459647.4 | 278582.3 | 503865.5 | 373319.5 | 337867.7 | 344294.9 | 574581.5 | 216610.3 | 322425   | 240766.3 | 225228.1 | 245264.1 | 362458.3 | 306106.8 | 293292.2 |
| P43427 | 58451.62 | 34148.48 | 32814.33 | 75895.29 | 46214.71 | 41461.88 | 64305.2  | 33419.63 | 50850.98 | 75561.3  | 100750.1 | 52881.73 | 41673.7  | 46566.77 | 52045.77 | 75363.97 |
| P45479 | 89862.22 | 74683.44 | 119990.6 | 83501.25 | 91378.31 | 54198.18 | 69710.02 | 92220.96 | 40130.68 | 43946.11 | 28880.08 | 50110.44 | 55432.18 | 76036.01 | 39912.85 | 44138    |
| P45592 | 30389.68 | 23845.54 | 22918.61 | 21932.33 | 20207.63 | 28233.22 | 25360.07 | 10785.38 | 31115.04 | 22396.87 | 49854.84 | 37106.27 | 30044.22 | 18786.12 | 19681.03 | 34193.42 |
| P46413 | 191586.3 | 238252.4 | 192736.5 | 181115.3 | 340723.3 | 162820.7 | 232381.8 | 182444.1 | 484053.1 | 315867.2 | 608112.4 | 144548.4 | 205503.2 | 206033.3 | 244978.9 | 271320.3 |
| P46462 | 117407.2 | 51747.46 | 47135.73 | 107768.8 | 77329.2  | 151639.5 | 132418.6 | 122664.4 | 55821.78 | 54842.14 | 120754.3 | 112375.5 | 82667.46 | 73855.36 | 26354.33 | 26624.19 |
| P46720 | 115779.5 | 154655.5 | 79469.59 | 196847.4 | 253939.3 | 97951.98 | 217991.1 | 90826.38 | 185948   | 239234.5 | 290611.6 | 91248.73 | 95939.2  | 88926.94 | 197127.9 | 194764   |
| P46844 | 13545.63 | 16355.89 | 15149.11 | 9955.854 | 22161.92 | 23487.97 | 15579.11 | 12724.21 | 33205.79 | 17922.79 | 75343.85 | 26937.77 | 24984.5  | 31434.73 | 29340.59 | 32969.01 |
| P46953 | 104145.1 | 123011.1 | 85684.68 | 143133.9 | 138781.5 | 107775.6 | 78526.63 | 68440.61 | 229598.3 | 151286.1 | 238454.3 | 115971.3 | 183770.4 | 127719.1 | 154380   | 201318.8 |
| P47727 | 56875.09 | 29021.64 | 10749.14 | 31307.69 | 13963.53 | 82418.67 | 38440.47 | 53156.29 | 16063.92 | 52354.87 | 115660.8 | 54446.78 | 56143.18 | 73519.69 | 6789.557 | 6981.916 |
| P47820 | 122842.2 | 129857.1 | 147014.5 | 98770.89 | 133911.9 | 105497.2 | 141759.1 | 153238.3 | 42304.37 | 64183.48 | 75445.67 | 68859.42 | 80639.41 | 105011.5 | 86546.75 | 85890.43 |
| P47853 | 384933   | 475805.4 | 410613   | 242833.9 | 653351.4 | 244107.4 | 293216.9 | 405537.2 | 230441.5 | 241944.2 | 504620   | 302459.5 | 249269.9 | 326007.2 | 215335.4 | 437771.7 |
| P47967 | 1929349  | 2427118  | 1397621  | 1979886  | 32843.5  | 2132716  | 3152978  | 1263749  | 1583839  | 3283715  | 1783764  | 3022284  | 1734115  | 418484.2 | 414614.1 | 2903089  |
| P48032 | 10780.15 | 14934.75 | 13837.58 | 23093.26 | 23954.39 | 12019.63 | 14954.17 | 9645.983 | 13481.37 | 9420.088 | 8905.385 | 9277.36  | 10371.75 | 15846.87 | 10237.63 | 9314.858 |



|           |          |          |          |          |          |          |          |          |          |          |          |          |          |          |          |          |
|-----------|----------|----------|----------|----------|----------|----------|----------|----------|----------|----------|----------|----------|----------|----------|----------|----------|
| P48037    | 21802.5  | 17086.35 | 14109.19 | 25394.33 | 26897.92 | 42526.57 | 15495.29 | 33947.93 | 30167.32 | 28523.97 | 34265.24 | 47418.37 | 23297.75 | 32635.39 | 18729.18 | 55701.44 |
| P48199    | 1831281  | 1622181  | 2841666  | 1625499  | 843828.8 | 1397184  | 1065410  | 1570353  | 1761133  | 1211033  | 1433467  | 1481772  | 3179904  | 2811174  | 2675857  | 1934981  |
| P48284    | 28516.56 | 31212.11 | 24569.3  | 26657.15 | 24654.11 | 24368.74 | 27019.46 | 24446.22 | 22863.8  | 21888.04 | 25376.49 | 28413.76 | 26833.32 | 25146.59 | 26340.32 | 32996.65 |
| P48500    | 203586.2 | 172972.4 | 277844   | 201391.6 | 261840.3 | 313541.4 | 231002.9 | 310380.5 | 294187.8 | 313308.6 | 279411.5 | 178610.2 | 211325.3 | 190389.3 | 299666.4 | 252550.7 |
| P48508    | 167710.2 | 184398   | 163310.5 | 174330.5 | 345727.1 | 196915.2 | 204537.2 | 156407.3 | 416865.8 | 327426.4 | 589804.1 | 242342.2 | 261933.3 | 211996.6 | 266328.3 | 346444.4 |
| P49002    | 37836.4  | 39275.69 | 33234.22 | 36118.54 | 35032.56 | 31888.39 | 22295.72 | 34577.25 | 17961.13 | 14407.57 | 20121.26 | 35725.61 | 27904.88 | 38309.52 | 11873.56 | 11702.44 |
| P49134    | 41320.86 | 61107.23 | 44160.69 | 38072.17 | 37644.39 | 35792.28 | 40568.41 | 37313    | 22538.9  | 23395.31 | 26202.65 | 21412.79 | 22418.17 | 28837.27 | 32071.38 | 40263.42 |
| P49744    | 8652.523 | 8641.966 | 16333.75 | 15637.36 | 22088.89 | 10325.17 | 11175.83 | 9967.594 | 6090.97  | 17079.14 | 8536.922 | 24313.07 | 15170.95 | 7682.549 | 7162.32  | 10023.25 |
| P50115    | 8343.233 | 53247.2  | 41711.45 | 31641.51 | 59532.63 | 54823.4  | 76002.76 | 140904.6 | 15860.89 | 5629.344 | 28558.45 | 26687.96 | 4614.298 | 5538.532 | 4093.592 | 3793.746 |
| P50116    | 24969.66 | 112965.3 | 70428.23 | 64644.57 | 172533.4 | 73278.45 | 140033.4 | 238706.1 | 23686.8  | 8970.117 | 51096.45 | 40933.75 | 4794.82  | 19557.05 | 3780.884 | 778802.9 |
| P50123    | 1697824  | 1143839  | 1675749  | 1195410  | 3376386  | 1239013  | 1076095  | 1048888  | 1027703  | 1055679  | 1128635  | 1019386  | 1064443  | 2160241  | 1364345  | 1664669  |
| P50137    | 12136.19 | 15330.45 | 15914.18 | 193789   | 24718.81 | 15779.26 | 16619.32 | 20826.86 | 15197.35 | 31246.94 | 24532.65 | 7945.773 | 9336.791 | 10665.22 | 14486.15 | 10085.13 |
| P50280    | 25926.38 | 37926.8  | 11581.56 | 36168.13 | 13350.08 | 59471.66 | 21880.39 | 29938.71 | 7638.614 | 12750.59 | 18991.68 | 19205.24 | 16313.56 | 15203.55 | 13131.57 | 7031.299 |
| P50398    | 62487.64 | 48435.58 | 36078.1  | 42688.48 | 79425.92 | 40017.14 | 51844.21 | 46884.83 | 33044.48 | 37462.58 | 39982.66 | 33162.78 | 25944.76 | 27239.71 | 22606.37 | 32877.29 |
| P50399    | 152016.8 | 105542   | 94113.04 | 96866.05 | 173477.2 | 131523.2 | 88596.44 | 130807.5 | 137285.1 | 159196   | 159897.1 | 119304.5 | 96531.03 | 89931.17 | 101915.2 | 125471.3 |
| P50430    | 449279.4 | 572159.5 | 604129.1 | 562761.4 | 784623.6 | 379019.9 | 473033.9 | 444280.3 | 294609.4 | 409239.9 | 425521.9 | 512580.5 | 382981.7 | 472639.7 | 672515.5 | 419322.1 |
| P50503    | 26447.82 | 17884.75 | 11754.6  | 12920.99 | 13660.36 | 15602.81 | 26830.74 | 13464.92 | 18137.7  | 23749.58 | 24155.07 | 18472.47 | 10283.98 | 11873.15 | 11796.22 | 18540.7  |
| P50609    | 21170.7  | 50543.68 | 44420.38 | 29727.09 | 45284.87 | 25787.15 | 49792.75 | 27612.3  | 35358.27 | 28779.45 | 50288.35 | 48151.84 | 46769.36 | 55200.91 | 61554.93 | 38256.22 |
| P51635    | 936921.3 | 449108.8 | 886867.7 | 409871.8 | 946144.1 | 638272.9 | 425103.6 | 605117.1 | 1161869  | 1797645  | 969738   | 650912.9 | 937603   | 532794.5 | 860459.4 | 836919.2 |
| P51647    | 19571.54 | 31861.61 | 38622.85 | 20660.04 | 29480.74 | 40849.11 | 31231.03 | 36465.94 | 21279.65 | 38501.94 | 27512.04 | 20960.38 | 29402.31 | 37469.32 | 27523.19 | 25341.45 |
| P51886    | 50450.64 | 105184.3 | 33670.41 | 72178.16 | 54368.62 | 44944.53 | 61799.84 | 47785.82 | 53245.14 | 46020.5  | 30024.33 | 43794.58 | 34020.1  | 37329.73 | 34958.75 | 33476.96 |
| P51907    | 113169.8 | 164921.7 | 16594.1  | 264331.3 | 120528.7 | 20110.25 | 138726.9 | 20013.64 | 136038.6 | 185735.3 | 347308.3 | 221801.9 | 16480.71 | 125787.2 | 255942.4 | 163444.5 |
| P52303    | 4700.319 | 4288.724 | 3458.517 | 6140.985 | 3861.768 | 3294.417 | 2417.136 | 4110.017 | 1628.808 | 3343.115 | 4862.346 | 2466.331 | 2954.598 | 2064.877 | 3914.405 | 1262.964 |
| P52590    | 8231301  | 7723512  | 3688049  | 3913818  | 10784968 | 2092918  | 9593842  | 2347956  | 3922640  | 2576697  | 713432.8 | 727126.9 | 162535.3 | 331130   | 851642.3 | 32326.96 |
| P52759    | 1065041  | 720717   | 1213228  | 1141761  | 587262.3 | 960879.1 | 681199   | 852370.1 | 2476478  | 2154118  | 1602335  | 1048560  | 1519338  | 1177344  | 1859226  | 1809671  |
| P52796    | 42040.83 | 86460.08 | 57890.28 | 74652.12 | 57528.5  | 54396.04 | 53589.54 | 53302.49 | 35826.87 | 45448.32 | 50440.8  | 52188.56 | 51536.4  | 55647.88 | 51620.59 | 40666.2  |
| P52847    | 23144.01 | 19696.37 | 17854.84 | 18158.22 | 35234.83 | 14712.91 | 16127.02 | 16370.57 | 36360.21 | 27087.84 | 43558.65 | 17940.18 | 22568.43 | 7393.914 | 14520.57 | 38126.94 |
| P53369    | 122318.7 | 144883.8 | 181346.1 | 98884.39 | 118478.1 | 107376.2 | 155877.2 | 119037.4 | 83501.11 | 84261.97 | 88463.59 | 95191.13 | 104119.1 | 124874.7 | 93412.8  | 105325.9 |
| P53790    | 52615.55 | 48168.27 | 37218.93 | 50845.18 | 68679.63 | 38058.64 | 49536.09 | 26549.48 | 76659.66 | 106907   | 118305.9 | 62915.05 | 23460.79 | 39430.05 | 59824.38 | 113640.6 |
| P53792    | 9484.445 | 17333.34 | 14366.02 | 40720.91 | 6774.046 | 8568.754 | 8617.743 | 16345.26 | 7658.846 | 43497.15 | 31615.23 | 25142.03 | 8689.246 | 12841.78 | 13403.07 | 23337.98 |
| P53813    | 146507   | 125423   | 73451.77 | 89882.41 | 134519   | 92114.18 | 131349.8 | 123747.9 | 88461.25 | 100890.9 | 114819.8 | 122014.8 | 126264.5 | 116253.3 | 104353.8 | 103402.2 |
| P54311    | 78889.23 | 52632.34 | 41070.24 | 68112.35 | 14039.75 | 83453.66 | 114244.4 | 102886.7 | 64165.58 | 49363.17 | 93325.97 | 83091.02 | 54625    | 51351.14 | 46702.32 | 46268.87 |
| P54313    | 131533   | 99353.84 | 84709.73 | 100466.7 | 152241.8 | 133904.3 | 123553.4 | 106529   | 136275.9 | 128171.4 | 182101.4 | 137077.9 | 128049.5 | 98483.99 | 108363.8 | 135432.9 |
| P54921    | 9221.44  | 2632.664 | 9297.619 | 7665.38  | 8398.226 | 8428.117 | 7828.243 | 9167.069 | 11536.41 | 8689.612 | 17543.11 | 10222.78 | 7174.966 | 4551.905 | 9093.709 | 5654.68  |
| P55016    | 10170.37 | 25836.48 | 43507.58 | 42081.02 | 63681.25 | 30403.64 | 40712.55 | 38571.79 | 46486.34 | 35569.07 | 53431.66 | 20928.19 | 28614.79 | 46303.09 | 14672.3  | 60703.53 |
| P55018    | 20871.83 | 14095.43 | 8488.233 | 18249.65 | 41046.98 | 16446.7  | 13878.25 | 16078.57 | 7830.209 | 36862.78 | 11746.54 | 8506.662 | 8506.599 | 13055.73 | 12885.54 | 13644.67 |
| P55053    | 24592.21 | 22816.73 | 21252.59 | 22907.23 | 17110.64 | 25956.63 | 47256.4  | 10367.41 | 16552    | 9731.547 | 29721.78 | 18370.98 | 15269.15 | 13983.83 | 7815.093 | 18978.79 |
| P55091    | 41128.5  | 99262.09 | 25108.67 | 50877.12 | 24739.51 | 32201.15 | 70961.61 | 55378.32 | 6740.143 | 8010     | 10819.32 | 66873.34 | 20093.28 | 11487.18 | 6951.347 | 2533.569 |
| P55146    | 131695.6 | 114804.8 | 103110.5 | 112247.1 | 174633.5 | 75920.36 | 112507   | 125467.9 | 73159.55 | 59030.09 | 70853.03 | 94278.16 | 85578.86 | 126504.7 | 75964.73 | 93291.83 |
| P55159    | 27951.67 | 26281.77 | 36333.07 | 16579.35 | 15239.57 | 12744.74 | 16661.02 | 13179.87 | 10513.29 | 14669.35 | 17160.53 | 9006.053 | 16359.38 | 5222.488 | 10242.81 | 18712.98 |
| P55260    | 29921.91 | 40285    | 27901.67 | 59362.77 | 48177.55 | 58319.34 | 30720.44 | 42111.84 | 49654.83 | 48107.79 | 86177.11 | 44787.85 | 38973.19 | 35899.13 | 39034.89 | 50075.17 |
| P55281    | 15528.73 | 17367.27 | 12486.1  | 10948.06 | 12253.49 | 10180.46 | 18655.9  | 12173.46 | 8823.777 | 11981.11 | 8104.271 | 39956.06 | 11796.82 | 15516.63 | 14623.42 | 13905.2  |
| P55314    | 1419883  | 302786.8 | 648356.9 | 187708.8 | 273574.6 | 237449.7 | 79897.44 | 11994.8  | 3431.635 | 120890.1 | 865271.1 | 11162.99 | 3944.625 | 5521.899 | 8055.146 | 198109.6 |
| P57097    | 84165.8  | 83556.31 | 101395.4 | 81815.61 | 101765.4 | 61962.66 | 69634.78 | 88467.03 | 84822.32 | 58587.2  | 77041.25 | 71534.44 | 87829.1  | 116616.4 | 84988.95 | 108053.8 |
| P57113    | 5256.667 | 3926.97  | 5783.652 | 7688.268 | 3222.885 | 5626.49  | 4016.33  | 5308.202 | 12346.55 | 6865.386 | 9234.28  | 6553.303 | 6422.419 | 3960.288 | 6314.577 | 5667.684 |
| P58195    | 16901.14 | 18586.08 | 14068.15 | 24114.65 | 19989.59 | 11151.56 | 17869.68 | 13849.82 | 6733.251 | 16252.08 | 16702.23 | 12752.24 | 11679.36 | 20472.48 | 13918.27 | 20836.81 |
| P60571    | 360474.2 | 337849.6 | 453601.7 | 557721.6 | 405491.3 | 255980.3 | 312079.9 | 378652.1 | 138797.2 | 369211.8 | 338803.3 | 199588.6 | 286058.7 | 303808.1 | 164762.6 | 417319.5 |
| P60711;P6 | 1483982  | 1583041  | 1432338  | 1539796  | 2944925  | 1411589  | 2147291  | 1355200  | 2120760  | 2566204  | 3015846  | 1909801  | 1037409  | 1588163  | 1288179  | 2286206  |
| P60905    | 12677.73 | 17413.73 | 3567.15  | 17831.99 | 13513.33 | 37103.57 | 23454.99 | 29129.8  | 13551.73 | 21723.86 | 22867.33 | 34728.16 | 13202.9  | 10475.77 | 6423.872 | 9974.31  |

|           |          |          |          |          |          |          |          |          |          |          |          |          |          |          |           |          |
|-----------|----------|----------|----------|----------|----------|----------|----------|----------|----------|----------|----------|----------|----------|----------|-----------|----------|
| P61107    | 14035.69 | 22816.58 | 27143.83 | 12342.83 | 19634.31 | 16035.23 | 16914.61 | 11711.86 | 12757.62 | 10539.82 | 15332.5  | 16879.54 | 13194.81 | 12455.37 | 11231.27  | 13829.39 |
| P61206;P8 | 76984.14 | 57199.78 | 39987.44 | 117917.5 | 109813.6 | 91098.55 | 152402   | 37950.48 | 30661.79 | 60216.01 | 82313.59 | 33262.58 | 22838.01 | 22215.69 | 12652.29  | 51601.05 |
| P61459    | 116794.9 | 91637.14 | 105528.5 | 85551.16 | 97588.12 | 84130.36 | 91303.16 | 113104   | 117741.1 | 212037.2 | 126982   | 79263.31 | 131705.1 | 122150   | 117394.5  | 163058   |
| P61589    | 94963.92 | 68602.49 | 76614.84 | 75426.66 | 122663.1 | 132260   | 87647.77 | 84638.02 | 151329.7 | 103788.9 | 155367.9 | 118473.5 | 97213.48 | 110278.6 | 112085.8  | 65738.74 |
| P61943    | 33296.99 | 38160.07 | 27225.67 | 26184.8  | 47621.77 | 35927.53 | 30934.01 | 40777.86 | 28601.59 | 30700.18 | 40016.23 | 31759.95 | 19181.82 | 25237.29 | 31436.5   | 35260.43 |
| P61972    | 330995.6 | 504447.1 | 452260.2 | 425390.5 | 450593.6 | 398925.3 | 392303.6 | 304828.1 | 612680.4 | 479665.6 | 380423.9 | 596210.2 | 664958.3 | 1269564  | 701645.3  | 812156.2 |
| P61983    | 36227.9  | 68016.74 | 40787.02 | 66584.98 | 81624.86 | 68916.35 | 28044.95 | 81652.25 | 41525.31 | 50788.02 | 62429.13 | 47342.84 | 37492.18 | 33844.36 | 32091.66  | 38236.58 |
| P62260    | 119719.1 | 68851.24 | 66137.05 | 111116.3 | 117685.8 | 110855   | 105735.3 | 106663.5 | 87318.07 | 110916.9 | 109196.9 | 88430.77 | 71334.43 | 62496.05 | 48232.2   | 67593.59 |
| P62630    | 239561.2 | 209044.7 | 141623.2 | 213254.3 | 187643.8 | 254386.1 | 261078   | 160647.3 | 209896.4 | 234030.6 | 266427.2 | 181568   | 130759.5 | 139857.8 | 140134.3  | 167684.9 |
| P62804    | 30949.11 | 202360.8 | 39645.35 | 38350.7  | 51524.21 | 74364.95 | 35776.36 | 97593.48 | 29559.69 | 79561.52 | 115738.6 | 110651.2 | 23618.43 | 73547.09 | 41481.13  | 14553.7  |
| P62815    | 33347.03 | 26136.74 | 26439.34 | 7156.816 | 34256.45 | 10501.79 | 23751.78 | 27322.28 | 56930.67 | 98974.67 | 70625    | 33059.52 | 35108.38 | 38553.6  | 39825.43  | 55582.86 |
| P62836    | 61637.52 | 36165.29 | 48753.81 | 73385.03 | 44474.87 | 82880.8  | 83550.22 | 63515.93 | 109140.9 | 110751.4 | 116383.7 | 81618.43 | 56465.04 | 58736.78 | 67697.27  | 57916.63 |
| P62898    | 91341.79 | 86922.37 | 96554.8  | 119618.1 | 135242.2 | 159687.7 | 129545.8 | 208652.9 | 54961.13 | 87283.86 | 61401.74 | 69162.47 | 51714.54 | 65514.92 | 57239.45  | 41769.23 |
| P62959    | 65872.88 | 49157.71 | 50456.67 | 89303.66 | 57225.98 | 49111.1  | 71072.58 | 37566.03 | 84653.08 | 93771.7  | 100680.3 | 53117.25 | 49679.37 | 33938.84 | 55378.16  | 53166.27 |
| P62963    | 90216.58 | 81533.43 | 54883.75 | 70509.25 | 68841.28 | 67441.38 | 72067.67 | 66211.3  | 81298.35 | 75111.79 | 101423.2 | 54644.2  | 56743.82 | 46682.88 | 38096.02  | 51428    |
| P63018    | 401040.1 | 388550.4 | 327283.3 | 454966.9 | 410938.8 | 497035.6 | 417072.1 | 496395.6 | 408906.9 | 498747.1 | 484609.3 | 368302.8 | 356827.8 | 321925.5 | 310308.8  | 349209.3 |
| P63029    | 12417.9  | 10534.23 | 16587.91 | 14450.87 | 20299.03 | 17107.03 | 9913.306 | 6602.659 | 25089.54 | 31538.79 | 48670.35 | 12807.6  | 13583.25 | 22242.46 | 24347.9   | 12138.13 |
| P63036    | 2483.047 | 11420.29 | 7759.083 | 4563.91  | 4075.591 | 2728.048 | 2663.578 | 3011.758 | 1115.557 | 3498.567 | 5080.365 | 3784.421 | 3158.935 | 4274.58  | 5419.604  | 3266.43  |
| P63095    | 35874.78 | 19233.57 | 13278.42 | 34481.33 | 26568.2  | 42740.98 | 56624.79 | 44309.91 | 48274.7  | 59985.8  | 69908.44 | 31538.76 | 26770.51 | 28719.79 | 25739.31  | 48476.41 |
| P63102    | 210925.5 | 163853.5 | 122949.1 | 163147.9 | 185273.9 | 165094.5 | 172112.6 | 179373.7 | 184038.5 | 133678.9 | 342692   | 182848.3 | 172019.7 | 133718.4 | 118834.1  | 133862   |
| P63322    | 47248.92 | 18646.58 | 22027.1  | 30545.26 | 49987.8  | 63215.42 | 58149.88 | 51995.92 | 66866.27 | 55221.9  | 69182.72 | 59147.47 | 35734.51 | 42330.96 | 37164.43  | 31301.67 |
| P63331    | 24012.25 | 15858.59 | 15652.31 | 21456.63 | 27949.32 | 48625.31 | 23965.15 | 25920.15 | 30968.48 | 29801.91 | 31236.06 | 23733.87 | 14460.43 | 19616.01 | 24363.52  | 25858.14 |
| P68035;P6 | 3761561  | 3356862  | 2504389  | 3489959  | 4051129  | 2750372  | 3115040  | 2923252  | 3685032  | 4415114  | 6318573  | 3551801  | 3782360  | 2643623  | 2744089   | 3981760  |
| P68255    | 324772.5 | 244588.3 | 204651.9 | 306933.4 | 226927.6 | 244036.6 | 224761.3 | 239611.2 | 255602.1 | 300522.6 | 476365.9 | 282244.8 | 255792   | 229523.5 | 182934.8  | 183936.3 |
| P68370    | 259542.9 | 149467.3 | 56632.1  | 80914.74 | 85118.42 | 140976.5 | 170246.8 | 147202.7 | 46251.92 | 70852.09 | 77300.23 | 55927.88 | 55882.35 | 53837.82 | 43329.14  | 42841.74 |
| P68511    | 6558.682 | 10184.4  | 9600.801 | 17464.24 | 10695.28 | 18319.86 | 6152.182 | 6193.812 | 21378.07 | 8778.304 | 10132    | 10746.4  | 10895.61 | 11226.79 | 8002.977  | 6548.13  |
| P69897    | 117493.4 | 67910.09 | 31590.2  | 56311.16 | 34676.15 | 97412.7  | 100391.6 | 97905.81 | 48004.61 | 58364.82 | 65316.82 | 41881.11 | 47400.09 | 50581.3  | 43823.99  | 38822.84 |
| P70470    | 50290.91 | 50961.85 | 48373.71 | 62838.1  | 55262.44 | 43725    | 72516.09 | 37805.97 | 48925.88 | 59254.18 | 77571.51 | 45680.65 | 40414.18 | 38620.81 | 27850.38  | 24764.78 |
| P70490    | 93768.51 | 95231.2  | 88972.26 | 113478.6 | 59995.27 | 149166.1 | 83323.33 | 120813.6 | 68845.86 | 92850.75 | 92251.66 | 71519.24 | 76835    | 93224.34 | 91194.85  | 77335.73 |
| P70502    | 182237.1 | 244835.2 | 91665.87 | 271311.7 | 164755.9 | 168410.9 | 272874.8 | 72149.65 | 139579.1 | 191951.5 | 259960.7 | 137393   | 106243.6 | 140796.6 | 113246.7  | 184467.7 |
| P70545    | 50749.23 | 8793.444 | 51013.59 | 53370.11 | 55156.41 | 15995.81 | 36934.3  | 32408.45 | 77429.68 | 81650.5  | 97942.02 | 54561.18 | 38334.64 | 75831.32 | 84223.85  | 84483.02 |
| P70619    | 82193.98 | 53277.88 | 66939.79 | 77610.2  | 27485.46 | 70510.25 | 53342.45 | 76024.77 | 123861.7 | 125573.5 | 137837.5 | 120774.4 | 113855.1 | 76397.31 | 69278.52  | 69653.02 |
| P70709    | 143084   | 200264.8 | 57281.8  | 141731.2 | 59054.88 | 166819.1 | 69126.22 | 66927.11 | 78397.31 | 140709.8 | 70154.84 | 189901.8 | 184145.9 | 81370.14 | 98524.18  | 82380.01 |
| P80020    | 114942.5 | 219788.6 | 54660.85 | 825359.3 | 45404.98 | 80835.77 | 58605.27 | 23532.95 | 18705.3  | 27183.94 | 39001.14 | 116751.1 | 7967.181 | 31213.05 | 46870.18  | 16218.86 |
| P80067    | 267017.2 | 257730.2 | 275022.9 | 303379.6 | 360841.8 | 217481.7 | 278958.4 | 281184.7 | 174633.9 | 332064.6 | 210827.2 | 132606.5 | 259295.8 | 289068.4 | 255438.9  | 336220.8 |
| P80201    | 108255.2 | 178312.2 | 271709.8 | 115092.1 | 302070.8 | 137937.6 | 298304   | 111881   | 78236.45 | 89618.3  | 169531.8 | 168120.3 | 246982.2 | 234066.3 | 91070.45  | 205421.7 |
| P80202    | 345104.8 | 501017.2 | 468793.2 | 363168.9 | 369684.3 | 430173.9 | 479614   | 330057   | 406031.8 | 250577.6 | 365961.7 | 356929.5 | 455862.3 | 815619.3 | 499732.8  | 603385.2 |
| P80204    | 76788.02 | 95738.91 | 30299.64 | 77746.3  | 65846.89 | 36734.02 | 99553.38 | 66092.86 | 89098.3  | 34888.42 | 38104.05 | 83450.77 | 67528.8  | 127837.4 | 44416.53  | 46522.74 |
| P80254    | 90398.69 | 80011.69 | 140654.1 | 116924   | 140185.9 | 75281.13 | 89824.89 | 164381.5 | 242358.3 | 439196.6 | 176544.2 | 98925.99 | 122995.3 | 127972.5 | 224493.1  | 132784.4 |
| P81827    | 1.19E+08 | 1.88E+08 | 1.67E+08 | 1.67E+08 | 1.3E+08  | 1.56E+08 | 2.1E+08  | 2.49E+08 | 1.66E+08 | 1.12E+08 | 2.96E+08 | 2.13E+08 | 2.31E+08 | 2.93E+08 | 3.08E+08  | 2.33E+08 |
| P81828    | 1.1E+08  | 1.55E+08 | 1.04E+08 | 1.78E+08 | 71199648 | 1.49E+08 | 84113864 | 1.01E+08 | 90976768 | 1.01E+08 | 82923328 | 1.35E+08 | 1.19E+08 | 1.35E+08 | 1.2636776 | 1.08E+08 |
| P82450    | 314878.4 | 461293.9 | 417758.2 | 413262.8 | 730914.6 | 380506.3 | 243216.3 | 389454.7 | 447847.3 | 551035.8 | 329438.9 | 357521.9 | 518088   | 605517   | 453280.7  | 616512.5 |
| P82471    | 5467.695 | 13083.74 | 11140.14 | 17118.8  | 20352.29 | 23321.01 | 24569.13 | 27722.84 | 7473.613 | 23059.98 | 13552.66 | 9908.858 | 4893.18  | 9034.799 | 7575.991  | 11764.87 |
| P82995    | 44700.92 | 84712.45 | 16697.96 | 63574.55 | 45123.58 | 17583.02 | 166865.2 | 67243.23 | 88410.86 | 75849.98 | 92125.19 | 58291.09 | 21054.59 | 90437.12 | 51561.26  | 76389.34 |
| P83121    | 85134240 | 93949352 | 94749560 | 13135651 | 81216952 | 5697866  | 15285030 | 77360424 | 7468095  | 58381784 | 5096446  | 86713936 | 66064252 | 13865606 | 86450480  | 79096592 |
| P83748    | 33766.16 | 74319.59 | 15881.12 | 47777.48 | 71022.71 | 77763.41 | 89112.69 | 22373.12 | 15945.03 | 17761.85 | 4652.434 | 40860.48 | 20805.34 | 16962.35 | 27132.77  | 22128.37 |
| P84039    | 29358.49 | 73720.29 | 41681.53 | 81756.09 | 29508.09 | 142751.8 | 64597.1  | 59482.94 | 63554.66 | 42567.73 | 46763.96 | 43916.84 | 65555.7  | 59523.27 | 98816.86  | 34906.17 |
| P85968    | 46153.34 | 45014.97 | 33910.43 | 37819.14 | 55815.42 | 52296.83 | 37339.99 | 35602.78 | 47366.69 | 59370.05 | 59746.87 | 33404.21 | 33308.76 | 32782.32 | 36734.68  | 43086.2  |
| P85971    | 1261619  | 1577132  | 2555987  | 1084897  | 581937.8 | 859247   | 1325541  | 812886.6 | 1196075  | 586372.8 | 989149.4 | 1036430  | 634121   | 1491811  | 1174775   | 1509838  |

|        |          |          |          |          |          |          |          |          |          |          |          |          |          |          |          |          |
|--------|----------|----------|----------|----------|----------|----------|----------|----------|----------|----------|----------|----------|----------|----------|----------|----------|
| P85973 | 33375.76 | 36356.05 | 25189.06 | 65224.45 | 35872.27 | 29492.48 | 33081.46 | 40154.8  | 37858.61 | 32695.32 | 41353.03 | 36597.73 | 27586.91 | 29171.62 | 41011.07 | 39735.8  |
| P97532 | 20567.16 | 17825.37 | 20087.21 | 18021.29 | 10148.83 | 11690.32 | 34243.57 | 12254.3  | 18417.18 | 18058.04 | 16685.45 | 16589.16 | 7357.386 | 7332.264 | 14023.16 | 6364.938 |
| P97546 | 1139913  | 1222952  | 1315669  | 1111930  | 1330704  | 982655   | 1397496  | 1145300  | 851710.9 | 676533.9 | 621275.5 | 688776.3 | 888898.7 | 1140915  | 854613.9 | 1102333  |
| P97553 | 94915.41 | 223845.9 | 147947.6 | 38869.35 | 47575.48 | 106332.8 | 78111.48 | 98014.73 | 93026.74 | 97757.78 | 95095.89 | 75434.72 | 101310   | 138230.4 | 151837.6 | 102139.8 |
| P97554 | 24404.38 | 18489.42 | 15545.49 | 12651.19 | 17912.78 | 14006.3  | 22140.47 | 21107.27 | 18144.34 | 11080.08 | 10924.9  | 50316.81 | 21754.92 | 4975.155 | 12977.24 | 17363.44 |
| P97571 | 14692.61 | 14286.51 | 12323.98 | 15705.38 | 15044.38 | 12421.22 | 29535.08 | 16878.63 | 6845.375 | 12782.04 | 3942.915 | 5608.462 | 5694.121 | 5677.103 | 7170.65  | 5806.893 |
| P97574 | 228959.7 | 245563   | 156620.5 | 308899.5 | 111573.6 | 125896.1 | 175542.5 | 300142.5 | 112497.7 | 128996.6 | 109516.5 | 88120.91 | 79120.45 | 320860.5 | 139514.6 | 277977.3 |
| P97580 | 9524796  | 3116383  | 1587455  | 2311527  | 425388.1 | 4013923  | 2681182  | 397537.7 | 65367.32 | 569015.4 | 1196075  | 103995.3 | 14952.2  | 367895.4 | 30239.3  | 114870.5 |
| P97584 | 9442.501 | 8284.055 | 10858.39 | 7171.899 | 9059.47  | 22054.86 | 3148.844 | 17208.47 | 10487.18 | 13822.65 | 19714.01 | 19132.55 | 14355.08 | 14730.37 | 13003.64 | 17750.7  |
| P97603 | 109759.4 | 142204.1 | 134080.5 | 217144   | 90810.87 | 128456.6 | 108593.8 | 138119.3 | 115330   | 127701.8 | 111704.3 | 109946.9 | 133105.9 | 136588.9 | 119969.7 | 155155.6 |
| P97605 | 23933.79 | 166153.7 | 121526.3 | 102708.6 | 172074.2 | 88548.82 | 122749.9 | 82187.78 | 95677.36 | 52370.37 | 47912.37 | 52426.74 | 64706.77 | 88392.7  | 81314.02 | 61665.88 |
| P97608 | 14706.26 | 9328.374 | 10205.07 | 17441.84 | 14316.29 | 5820.447 | 10606.6  | 16465.66 | 14607.3  | 19115.48 | 20051.67 | 12455.2  | 8313.063 | 5987.429 | 13396.19 | 13946.25 |
| P97615 | 4619.033 | 6420.732 | 11658.82 | 4371.955 | 4815.302 | 5112.812 | 5916.227 | 4364.42  | 1289.44  | 4834.772 | 2239.939 | 2112.61  | 1823.702 | 3198.93  | 3003.565 | 1790.809 |
| P97675 | 123710.8 | 166131   | 132727.5 | 112730.4 | 99216.13 | 109111.7 | 109691.7 | 119892.7 | 121908.3 | 95903.59 | 244481.6 | 348468.8 | 94829.01 | 94064.54 | 126967.4 | 107838.5 |
| P97697 | 56620.41 | 30245.04 | 35723.13 | 39045.76 | 67933.45 | 40353.33 | 48895.87 | 33698.14 | 23176    | 39370.84 | 27533.58 | 32812.48 | 25491.04 | 21901.11 | 25171.95 | 17617.16 |
| P97710 | 121583.1 | 97260.96 | 144760.5 | 110967.2 | 123832.3 | 93205.57 | 66806.2  | 116055.2 | 100216.6 | 92357.55 | 113159.6 | 111524.9 | 103057.3 | 134111.1 | 112994.1 | 125863.3 |
| P97829 | 129515.3 | 115489.6 | 179224.7 | 148074.8 | 153693.4 | 118586   | 162039.9 | 122999.4 | 127499.6 | 135199.5 | 120318.9 | 74536.45 | 74941.27 | 88215.67 | 101458.4 | 150774.1 |
| P97840 | 603873.3 | 834773.1 | 19298.76 | 25414.59 | 28197.29 | 839663.6 | 1029039  | 22502.54 | 577787.6 | 1206861  | 20698.51 | 995094.7 | 402529.8 | 99366.9  | 157658.8 | 690566.4 |
| P98089 | 25812.2  | 304382.8 | 18148.78 | 123993.2 | 4158.865 | 88728.22 | 42323.4  | 47498.28 | 15315.04 | 9738.723 | 12204.16 | 629092.2 | 3815.235 | 24100.39 | 17641.36 | 15361.85 |
| P98106 | 15965.97 | 23039.57 | 15180.35 | 17245.46 | 13864.95 | 11979    | 10602.14 | 20422.18 | 14935.08 | 18076.61 | 22317.46 | 44726.45 | 18076.63 | 22156.53 | 17519.46 | 23089.97 |
| P98158 | 1611813  | 1916589  | 1765899  | 2417625  | 2815123  | 1782731  | 1746160  | 2028438  | 1902744  | 2779565  | 2150480  | 1579662  | 2281642  | 3104119  | 2403086  | 2385006  |
| Q00238 | 235297.3 | 308267.8 | 289870   | 284383.7 | 287963.3 | 272409   | 315531   | 242311.3 | 197635.2 | 209319.2 | 226265.2 | 198940.3 | 228237.6 | 244024.1 | 208491.9 | 267725.3 |
| Q00495 | 75600.2  | 164684.6 | 131983.6 | 119670.2 | 107173.3 | 116805.3 | 133419.2 | 111891.1 | 197991.7 | 156516.5 | 187852.1 | 111692.7 | 160267.8 | 150509.2 | 126051.4 | 188701.4 |
| Q00657 | 215126.9 | 239904.8 | 217107.1 | 372640.2 | 536090.4 | 156555.9 | 220805.7 | 189546.9 | 264085.4 | 191273   | 203115.3 | 190186.3 | 210751.4 | 251613.1 | 260416.6 | 309472.8 |
| Q00715 | 127028.7 | 556216.7 | 123105.7 | 135937.5 | 85876.65 | 198627.9 | 115476.7 | 248898.9 | 82923.32 | 170458.3 | 301859   | 273207.1 | 90029.75 | 194704.1 | 147544.6 | 43197.92 |
| Q01177 | 4608945  | 8856030  | 5414276  | 10149108 | 5969117  | 7074413  | 5415275  | 7324924  | 7637117  | 9340906  | 7235909  | 6181873  | 5576239  | 5929842  | 9940382  | 7697722  |
| Q01205 | 655702.1 | 2235084  | 934738.3 | 1443058  | 1406364  | 1024414  | 1242618  | 1383939  | 957457.3 | 1428293  | 1252866  | 963855.9 | 1118089  | 1539902  | 1240852  | 1092255  |
| Q01460 | 1212798  | 1451779  | 2177850  | 802524.3 | 1298552  | 1102104  | 1258675  | 1179247  | 1315139  | 1028305  | 917313.9 | 1186668  | 1548496  | 1701017  | 1413857  | 1827945  |
| Q02253 | 17439.81 | 20114.9  | 94026.89 | 12315.84 | 20397.26 | 20400.79 | 15066.19 | 16104.18 | 25980.15 | 24269.2  | 31204.76 | 23237.62 | 15964.08 | 18692.01 | 11760.36 | 7217.058 |
| Q02765 | 97461.24 | 142677.6 | 133181.8 | 111504.8 | 66333.69 | 108664.9 | 110800.8 | 181601.7 | 58442.68 | 109265.2 | 127098.8 | 164117.3 | 92670.7  | 102971   | 107273   | 94630.59 |
| Q02974 | 109164.4 | 92135.29 | 96019.61 | 114847.7 | 168989.5 | 91017.09 | 105741.5 | 79159.42 | 163290.3 | 169192.4 | 180392.2 | 83489.55 | 117555   | 88388.16 | 147529.1 | 168299.9 |
| Q03191 | 1891565  | 2384632  | 682429.4 | 982792.5 | 2273816  | 498544.4 | 1402361  | 1348294  | 1568580  | 1082594  | 1570866  | 1417971  | 1371884  | 4639638  | 2225735  | 1189664  |
| Q03336 | 209738.9 | 259882.3 | 204273.7 | 296137.1 | 549596.1 | 178308.3 | 294969.8 | 207958.5 | 494827.8 | 230860.1 | 488375.8 | 177519.8 | 314531.3 | 249485.1 | 310002.6 | 271500.7 |
| Q03626 | 203403.1 | 574211.4 | 320580.2 | 377926.8 | 401947.5 | 352681.3 | 301293.7 | 453006.2 | 329487.3 | 254068.6 | 353021.2 | 283007.4 | 491293   | 436883.4 | 465622.5 | 378490.5 |
| Q04589 | 51675.51 | 26449.92 | 42886.65 | 50538.79 | 22712.06 | 45981.77 | 39293.14 | 67812.38 | 41599.89 | 47284.09 | 45923.17 | 68530.27 | 62397.03 | 56764.65 | 57127.5  | 54958.31 |
| Q04807 | 4896423  | 5039971  | 3265486  | 7930318  | 3006524  | 3570421  | 3544365  | 6786912  | 3354995  | 1661368  | 2479524  | 5867043  | 3055792  | 4257792  | 4565402  | 2805860  |
| Q05030 | 22550.56 | 39949.06 | 40877.34 | 42532.1  | 59618.46 | 34505.29 | 30798.19 | 33440.43 | 31734.69 | 27336.02 | 36896.84 | 36772.87 | 29225.63 | 31234.77 | 25905.79 | 40178.08 |
| Q05175 | 65229.7  | 103617   | 61698.56 | 140777.6 | 115532.8 | 60181.05 | 101255.1 | 100999.8 | 118703.6 | 17630.03 | 197641.2 | 33438.18 | 24319.94 | 69575.72 | 96459.68 | 111604   |
| Q05511 | 16150.75 | 23262.63 | 16472.97 | 30062.13 | 30170.28 | 18391.44 | 19342.57 | 10933.05 | 18363.87 | 13436.69 | 17302.66 | 10544.44 | 16217.72 | 16344.84 | 16284.44 | 12151.62 |
| Q05695 | 155829.3 | 168580.3 | 128366.4 | 284030   | 180933.1 | 187004.1 | 267425.9 | 301406.9 | 99064.45 | 193993.1 | 96639.28 | 113638   | 111247.9 | 139035.4 | 106390.8 | 116347.8 |
| Q05820 | 692970.3 | 760440.8 | 669439.8 | 795384.9 | 198803.6 | 891417.5 | 860434.7 | 928709.1 | 587852.3 | 449132.2 | 783606.6 | 1097972  | 924000.4 | 803434.9 | 1017232  | 837596.9 |
| Q06000 | 67918.11 | 56957.79 | 74874.42 | 55747.86 | 7938.721 | 58397.06 | 70017.48 | 19335.03 | 55457.34 | 60275.84 | 40726.18 | 43682.69 | 58339.27 | 69150.72 | 59531.77 | 47347.58 |
| Q06496 | 57179.82 | 57496.93 | 50568.38 | 67486.98 | 182952.7 | 51021.23 | 92587.78 | 70841.04 | 76656.15 | 223756.6 | 150459.3 | 73590.72 | 78911.46 | 114898   | 146449.8 | 128850.3 |
| Q06880 | 317921.4 | 437843.9 | 315232.8 | 316318.6 | 223266.3 | 247690.1 | 531835.8 | 385951.6 | 333987.3 | 269797.5 | 269145.2 | 253529   | 270760.3 | 478168.1 | 381067.9 | 293902.4 |
| Q07116 | 20177.85 | 35950.17 | 57052.65 | 44753.06 | 51680.21 | 44337.48 | 51638.47 | 42090.53 | 35174.58 | 25427.58 | 32781.71 | 35162.36 | 40415.71 | 55740.73 | 42969.87 | 47101.65 |
| Q07523 | 7927.252 | 14482.05 | 65381.34 | 3779.78  | 15344.9  | 10726.02 | 13887.22 | 10971.25 | 16216.33 | 16339.7  | 75507.59 | 12898.55 | 10672.45 | 15281.55 | 14012.86 | 7621.891 |
| Q07936 | 22136.79 | 40487.59 | 17131.93 | 47144.01 | 42547.09 | 82612.32 | 44961.59 | 47763.9  | 12853.59 | 24165.33 | 48687.93 | 31158.01 | 14072.08 | 22380.29 | 19946.45 | 35373.25 |
| Q08406 | 29309.13 | 56032.82 | 43978.6  | 60610.22 | 40114.99 | 53771.45 | 27674.57 | 68784.93 | 49050.2  | 36547.55 | 42526.78 | 31883.17 | 53302.21 | 41317.3  | 37476.37 | 44034.53 |
| Q08415 | 22187.88 | 17751.72 | 26498.47 | 14915.86 | 21529.85 | 25549.16 | 20280.71 | 30447.35 | 38832.27 | 58808.75 | 31779.49 | 22794.26 | 28554.7  | 22482.62 | 29990.5  | 32085.51 |

|        |          |          |          |          |          |          |          |          |          |          |          |          |          |          |          |          |
|--------|----------|----------|----------|----------|----------|----------|----------|----------|----------|----------|----------|----------|----------|----------|----------|----------|
| Q08420 | 246276   | 202704.5 | 223248.9 | 276542.5 | 149239.8 | 187758.9 | 231819.1 | 166319.5 | 226969.1 | 192572.7 | 225850.3 | 161390.7 | 167254   | 181571   | 291072.6 | 229437.7 |
| Q08463 | 81113.73 | 246657.6 | 193200.9 | 247975.8 | 230974.2 | 202789.7 | 359399.8 | 225293   | 432683   | 273490   | 419883.4 | 317176.1 | 443914   | 742146.1 | 471603.2 | 712627.6 |
| Q08464 | 54815.07 | 82390.2  | 83858.38 | 87168.61 | 83199.94 | 35137.86 | 89824.3  | 67402.19 | 37512.09 | 40217.16 | 37394.96 | 34763.07 | 39489.58 | 60160.53 | 49569.4  | 84115.48 |
| Q08849 | 15575.76 | 27430.85 | 10806.18 | 52060.39 | 43462.55 | 77501.66 | 24648.81 | 12883.77 | 37213.7  | 39294.2  | 43849.82 | 51627.14 | 21589.43 | 7140.929 | 22755.01 | 29606.7  |
| Q09030 | 698111.6 | 865478.4 | 745954.7 | 562053.4 | 608140   | 224226.7 | 1413235  | 458903.9 | 37142.43 | 445227.6 | 528012.9 | 448550.5 | 1282231  | 659526.2 | 1220463  | 613447.8 |
| Q09326 | 19821.56 | 30502.47 | 31398.28 | 22101.15 | 21895.2  | 21177.62 | 27538.12 | 18821.32 | 23094.14 | 34747.7  | 32826.37 | 18828.18 | 26942.51 | 24342.44 | 26003.63 | 19944.68 |
| Q0PMD2 | 845578.1 | 1358756  | 1071761  | 1125949  | 1293966  | 995393.1 | 1175945  | 805983   | 705148.6 | 947051.6 | 712094.9 | 688408.8 | 862211.3 | 669475.4 | 865743.3 | 985996.6 |
| Q10758 | 128277.7 | 55555.73 | 53203.59 | 73887.69 | 72481.85 | 79474.83 | 24826    | 34546.9  | 15935.93 | 76655.43 | 30320.27 | 140166.9 | 15773.37 | 39234.42 | 11801.25 | 33746.16 |
| Q1WIM1 | 89113.91 | 117464.1 | 148733.8 | 120249.7 | 87147.11 | 96866.49 | 130085.1 | 105713.8 | 116655.9 | 109666.1 | 134515.7 | 128825.9 | 167201.8 | 146525.8 | 150943.5 | 166761.4 |
| Q1WIM3 | 25221.94 | 29922.25 | 18797.2  | 30506.47 | 23795.35 | 28071.01 | 25796.09 | 31093.55 | 16487.63 | 20699.76 | 15394.89 | 20221.44 | 13626.84 | 13731.19 | 13732.19 | 13569.29 |
| Q30KJ2 | 2154560  | 797909.3 | 367316.4 | 629917.1 | 57108.42 | 1182692  | 685666.4 | 112084.3 | 26249.87 | 75941.16 | 237086.8 | 13864.75 | 10272.98 | 90658.63 | 7716.135 | 25469.41 |
| Q32KJ6 | 119838.1 | 237668.3 | 214880   | 225974.3 | 210434.9 | 192217.3 | 97893.37 | 179232.1 | 97684.85 | 114392.9 | 95395.41 | 158042.6 | 155442.2 | 214959   | 153287.6 | 203867.9 |
| Q32PY2 | 77336.94 | 73229.25 | 57338.07 | 69371.94 | 57630.06 | 61747.11 | 70608.45 | 71885.63 | 30205.53 | 43919.1  | 59242.78 | 63090.91 | 39166.45 | 38572.19 | 32289.2  | 36185.77 |
| Q3KRC4 | 264447.3 | 378660.4 | 203036.8 | 345968.6 | 408617.8 | 256391   | 233583.5 | 263018.3 | 271607.7 | 422643.5 | 335642.3 | 262593.3 | 202065.7 | 270317.9 | 292175.6 | 320802.9 |
| Q3MIE4 | 139094.4 | 138054   | 65150.77 | 61399.44 | 174635.2 | 95412    | 139687.7 | 70832.14 | 132910.6 | 160677.2 | 243396.9 | 156157.5 | 117768.8 | 78384.08 | 74015.92 | 104799.8 |
| Q3T1J1 | 20180    | 15124.19 | 10910.95 | 25331.52 | 13428.96 | 19319.59 | 30926.36 | 18049.86 | 27963.92 | 14667.96 | 21793.09 | 30111.99 | 13647.66 | 11780.67 | 24850.04 | 16804.97 |
| Q3T1J9 | 12653.61 | 11283.96 | 10855.34 | 13851.31 | 23473.43 | 13077.01 | 11745.71 | 10945.44 | 20406.06 | 20006.35 | 34262.46 | 13782.79 | 12381.94 | 9390.243 | 13315.58 | 21782.28 |
| Q3T1K5 | 39206.72 | 31178.18 | 34079.21 | 49395.23 | 36170.71 | 55298.98 | 34874.72 | 27791.38 | 29542.27 | 31803.55 | 46823.24 | 11493.73 | 24700.85 | 26658.85 | 31968.65 | 39830.63 |
| Q3ZAV1 | 32722.66 | 33464.25 | 17248.1  | 52398.16 | 48154.64 | 26930.6  | 34884.13 | 19953.08 | 44440.92 | 77645.5  | 61773.54 | 33785.23 | 23619.88 | 26151.12 | 32530.46 | 60391.41 |
| Q497B0 | 64905.72 | 48842.83 | 66721.59 | 52585.3  | 79147.23 | 41423.66 | 58794.2  | 34936.41 | 91689.67 | 96136.26 | 79485.43 | 50934.88 | 57932.46 | 65781    | 47036.41 | 68259.52 |
| Q498D9 | 3656.323 | 13738.04 | 7432.31  | 6721.108 | 4305.414 | 3956.956 | 6010.119 | 6424.023 | 13422.14 | 5325.005 | 20236.94 | 5148.821 | 4706.737 | 4743.714 | 6688.042 | 12690.47 |
| Q498R7 | 29808.5  | 59305.3  | 45035.29 | 39544.2  | 24585.33 | 29855.43 | 41107.54 | 17576.31 | 22858.31 | 11293.96 | 25752.62 | 41284.23 | 15680.41 | 11311.83 | 14690.87 | 9895.09  |
| Q498S8 | 86662.86 | 129262.8 | 124106.1 | 178085.4 | 191028.2 | 158229.2 | 190064.3 | 160204.8 | 96945.94 | 75819.78 | 93169.85 | 122965   | 126306.5 | 136270.7 | 122997.8 | 118306.8 |
| Q499T2 | 519887.3 | 611448.9 | 755597.3 | 556943.3 | 642638.9 | 648912.6 | 666798.2 | 532240.6 | 562059.5 | 492519.6 | 464229   | 551625.3 | 695245.6 | 801716   | 747596.1 | 640769.1 |
| Q4AEF8 | 41739.63 | 12838.49 | 46981.3  | 61655.66 | 62480.9  | 46682.68 | 43021.68 | 47051.73 | 29263.05 | 41842.19 | 41595.55 | 42373.17 | 40525.34 | 34072.01 | 22363.35 | 41019.43 |
| Q4FZU2 | 613276.5 | 206563.3 | 1409795  | 690894.5 | 571120.8 | 596990.3 | 146879.7 | 189072.5 | 124304.5 | 313219.8 | 425024.8 | 662971.3 | 109263.2 | 155109.5 | 216331   | 200734.2 |
| Q4FZU6 | 677.8254 | 13023.32 | 6533.434 | 1927.022 | 1302.235 | 17753.63 | 1465.059 | 3121.954 | 4239.447 | 8362.537 | 5766.931 | 3755.233 | 4953.783 | 3184.58  | 7308.804 | 3033.892 |
| Q4FZV0 | 240270.4 | 254019.5 | 248072.5 | 425126   | 380561.8 | 395531.3 | 232503.2 | 292405.2 | 80938.61 | 169415.5 | 184462.6 | 201030.1 | 140434.3 | 208102.1 | 144560   | 142568.9 |
| Q4G075 | 74200.8  | 72537.23 | 64299.26 | 146922.8 | 75827.74 | 135557.1 | 90211.4  | 187167.4 | 16005.25 | 53676.39 | 57083.99 | 102599.3 | 36382.38 | 32954.77 | 44732.22 | 41763.81 |
| Q4KLZ6 | 97683.47 | 60814.78 | 60082.74 | 52469.97 | 86978.11 | 65203.79 | 103678.2 | 40684.7  | 101646   | 141851.1 | 174812.4 | 64254.5  | 59247.88 | 54016.91 | 87659.31 | 109755.7 |
| Q4KM73 | 69950.66 | 45397.12 | 53034.1  | 43267.85 | 69024.45 | 59240.86 | 39652.98 | 26910.97 | 97865.12 | 56369.5  | 62970.91 | 50572.66 | 36420.33 | 31138.16 | 73618.81 | 70866.05 |
| Q4QQV8 | 102804.9 | 100993   | 175661.8 | 148399.8 | 188870.8 | 102444.9 | 98346.57 | 112667.1 | 99304.7  | 132555.2 | 114842.2 | 90697.73 | 102060.6 | 170680.1 | 101873.8 | 127241.3 |
| Q4QQW8 | 414497.8 | 563061.1 | 661876.6 | 647951.8 | 636186.1 | 440384.3 | 532276.8 | 523616.5 | 445133.1 | 589030.8 | 631770.8 | 492536.5 | 431461.3 | 723104.2 | 676890.9 | 519618   |
| Q4TU93 | 8264.588 | 9527.603 | 11533.27 | 5106.676 | 12596.76 | 6018.992 | 9859.328 | 6799.451 | 7928.292 | 8202.271 | 9479.679 | 6745.252 | 7285.692 | 12276.03 | 11542.89 | 7925.82  |
| Q4V885 | 501942.2 | 743999.6 | 528462   | 634619.3 | 457611.4 | 396403.6 | 740341   | 441689.5 | 365010.8 | 282936.8 | 337819.7 | 427127.3 | 284398.9 | 328423.9 | 338751.1 | 289401.4 |
| Q4V8I1 | 26091.16 | 37702.61 | 23791.1  | 36789.48 | 34966.22 | 31608.32 | 5551.82  | 29709.55 | 28212.13 | 10472.14 | 15436.13 | 63616.24 | 38148.22 | 23775.94 | 18504.38 | 37430.42 |
| Q4V8K5 | 27961.04 | 40670.98 | 53701.79 | 35495.75 | 37658.04 | 33087.66 | 26595.76 | 25626.87 | 26153.06 | 27577.03 | 17636.73 | 20621.12 | 22091.49 | 27649.75 | 20995.4  | 25691.73 |
| Q561R9 | 15605.24 | 10708.2  | 2322.983 | 47035.74 | 1943.149 | 2215.29  | 14414.08 | 17055.45 | 22020.26 | 23258.35 | 29185.59 | 11964.58 | 15507.32 | 9368.983 | 24939.64 | 13807.01 |
| Q562C9 | 197043.1 | 185609.1 | 379771.9 | 349215   | 146095.3 | 238656.1 | 331118.8 | 242422.5 | 171219.2 | 138973   | 173154.8 | 216852.4 | 192459.4 | 205519.4 | 177192   | 171070.2 |
| Q566E6 | 8357.263 | 15534.35 | 22232.3  | 12966.34 | 8373.082 | 7483.219 | 11677.93 | 13046.98 | 8863.312 | 6222.958 | 4077.938 | 11542.25 | 13549.59 | 43901.09 | 10364.77 | 20233.71 |
| Q568Z6 | 135085.2 | 248036.7 | 201570.4 | 232572.8 | 189556.7 | 149675.8 | 141512.3 | 146994   | 181572.9 | 210191.3 | 164633   | 188199.9 | 205601.4 | 305417.1 | 178710.6 | 227819.3 |
| Q5BJP3 | 23308.43 | 23304.21 | 23478.7  | 41238.87 | 17775.03 | 25981.26 | 34563.25 | 36732.19 | 25492.64 | 19990.19 | 50166.46 | 48851.77 | 30452.81 | 29474.57 | 35789.86 | 11848.06 |
| Q5BJY9 | 9845.248 | 8874.163 | 7407.796 | 13732.43 | 7892.159 | 10443.89 | 10170.66 | 11112.79 | 1529.068 | 13036.22 | 11058.56 | 2547.364 | 2666.926 | 7027.073 | 4673.141 | 4598.86  |
| Q5BK81 | 60062.06 | 73039.98 | 100664.6 | 81094.8  | 52036.43 | 57693.11 | 59114.2  | 34432.79 | 46763.18 | 61726.63 | 69653.61 | 63994.43 | 51547.62 | 72316.64 | 51723.53 | 39967.7  |
| Q5EGZ1 | 19405.82 | 37360.47 | 16935.77 | 16162.67 | 10278.42 | 13830.01 | 14416.24 | 17464.43 | 21017.08 | 12708.82 | 13581.34 | 13814.66 | 14111.39 | 25385.69 | 16236.95 | 18173.02 |
| Q5FVF9 | 254935   | 318877.9 | 251477.2 | 373051.4 | 280866.5 | 249475.3 | 210506.6 | 290278.3 | 300554.7 | 265358.4 | 247117.7 | 226749.5 | 309902.7 | 317474.3 | 293989.7 | 274095.2 |
| Q5FVH2 | 167194.9 | 211314   | 278766.4 | 255328.4 | 430586.7 | 249651.9 | 213191.4 | 268976.3 | 154309.8 | 176798.4 | 211910.9 | 181608.7 | 201903.3 | 329847.4 | 187921.9 | 252423.2 |
| Q5FVI6 | 17084.77 | 4133.2   | 14685.04 | 50469.35 | 9610.492 | 22137.64 | 33850.19 | 8442.642 | 12387.88 | 35787.07 | 25277.3  | 11929.29 | 7363.675 | 5788.285 | 14529.1  | 18524.22 |
| Q5FVR0 | 1915265  | 1882712  | 2909272  | 1775778  | 3302294  | 1562495  | 2574345  | 2079977  | 1807712  | 1234487  | 1275639  | 1619377  | 2061738  | 2463423  | 2286718  | 2853211  |

|        |          |          |          |          |          |          |          |          |          |          |          |          |          |          |          |          |
|--------|----------|----------|----------|----------|----------|----------|----------|----------|----------|----------|----------|----------|----------|----------|----------|----------|
| Q5FVR3 | 45955.25 | 48182.31 | 58855.14 | 52033.1  | 37049.16 | 47202.8  | 45669.91 | 43848.41 | 38386.67 | 48121.41 | 30644.34 | 34126.17 | 40014.01 | 40806.68 | 38226.14 | 37668.69 |
| Q5GRG2 | 291885.3 | 170505.5 | 41126.22 | 155522   | 39069.69 | 237696   | 246723.8 | 181392.9 | 9559.979 | 93570.92 | 47922.69 | 46025.84 | 254578.5 | 149130.5 | 83673.04 | 10791.21 |
| Q5HZV9 | 12193.85 | 22362.62 | 15370.5  | 27978.32 | 10465.97 | 75690.09 | 8469.82  | 5476.427 | 21133.9  | 8162.177 | 10320.39 | 17812.81 | 4405.63  | 29431.26 | 21668.7  | 18948.39 |
| Q5HZW5 | 292084.4 | 482798.6 | 360817.5 | 604952.9 | 470591.8 | 379199.9 | 386603.8 | 353714.8 | 282711.2 | 298212.9 | 265754.8 | 329864.5 | 376027.3 | 485389.4 | 365159.4 | 412429.2 |
| Q5I0D1 | 35072.38 | 12718.52 | 23854.93 | 20368.92 | 32883.71 | 20161.35 | 12756.77 | 22238.76 | 8543.447 | 7945.964 | 38210.18 | 12375.04 | 3530.009 | 15135.17 | 23145.64 | 13067.76 |
| Q5I0D5 | 153180.1 | 190267.3 | 380638.3 | 202353.7 | 166050.4 | 160139.3 | 190956.1 | 115327.5 | 166951.7 | 147545.7 | 137827   | 153719.7 | 228518.9 | 237008.5 | 217880.8 | 205956.7 |
| Q5I0D7 | 88809.38 | 54824.89 | 95363.69 | 59743.69 | 96611.23 | 89387.41 | 52142.13 | 88262.99 | 112983   | 141119.3 | 112210.7 | 67542.77 | 95988.88 | 82981.54 | 136401.8 | 113666.5 |
| Q5I0E9 | 100880.4 | 121566.2 | 74725.32 | 155040.8 | 151152.3 | 101740.4 | 136702.2 | 81465.08 | 151928.2 | 279367.6 | 298111.3 | 130892.1 | 69242.72 | 85760.88 | 157757.1 | 213292.4 |
| Q5M7T9 | 37452.22 | 39613.32 | 48703.01 | 36632.59 | 48420.94 | 34563.92 | 47546.52 | 31300.92 | 62856.65 | 82326.2  | 70028.45 | 38981.17 | 43517.68 | 26414.73 | 41093.56 | 61903.1  |
| Q5M8I9 | 36481.09 | 20356.52 | 11411.36 | 19947.38 | 7921.583 | 31086.11 | 19582.33 | 7934.407 | 30922.03 | 58344.77 | 36100.95 | 26980.9  | 21757.31 | 24916.94 | 40101.29 | 32665.27 |
| Q5M871 | 150675.3 | 212484.3 | 207398.6 | 182399.9 | 223955.5 | 155266.6 | 228847.5 | 193496   | 125915.7 | 92641.33 | 206902.9 | 126287.4 | 136243.4 | 176954.9 | 71391.45 | 162066   |
| Q5M872 | 8300.955 | 12108.56 | 10205.45 | 7421.987 | 7689.553 | 9113.961 | 12366.5  | 6660.55  | 17910.02 | 13184.03 | 13262.59 | 6870.381 | 13508.9  | 13404.49 | 22865.71 | 10490.85 |
| Q5M876 | 196150.5 | 137964   | 229877.7 | 168228.9 | 357003   | 118116.1 | 205227.1 | 199845.6 | 334244.7 | 271053.7 | 341195.1 | 213234.4 | 244424.5 | 191102.7 | 306275.4 | 301367   |
| Q5M8C6 | 156212.4 | 91717.95 | 87507.92 | 125078.7 | 113441.8 | 125828.8 | 33258.4  | 146925.8 | 49535.24 | 44132.25 | 50814.91 | 118357.4 | 53790.6  | 38269.13 | 22006.87 | 17065.87 |
| Q5QE79 | 32308.98 | 48384.8  | 42104.23 | 38211.48 | 4429.05  | 29349.44 | 12232.34 | 66270.45 | 67740.15 | 3908.364 | 14705.07 | 11850.62 | 13087.97 | 10917.93 | 154363.2 | 19902.76 |
| Q5RJL6 | 23885.36 | 38461.97 | 24176.33 | 26960.49 | 22646.55 | 22728.89 | 20024.75 | 20546.56 | 19062.44 | 22276.18 | 20405.77 | 27193.81 | 21576.46 | 27232.75 | 17915.13 | 22046.37 |
| Q5RJP0 | 119874.4 | 108722.1 | 68437.11 | 108195.2 | 145911.7 | 99018.75 | 133641.3 | 69120.39 | 270340.1 | 133956.6 | 288634.3 | 133522.1 | 139212.9 | 114041.5 | 151871.7 | 175795   |
| Q5RKH6 | 23841.04 | 18405.35 | 14022.3  | 19646.92 | 19792.63 | 16790.46 | 34744.04 | 14124.41 | 23385.71 | 8930.917 | 11114.34 | 28988.63 | 19702.56 | 18692.06 | 13722.11 | 20753.28 |
| Q5RKI0 | 26429.66 | 24186    | 25747.81 | 18341.11 | 27842.95 | 25917.7  | 24908.48 | 21994.72 | 31842.47 | 39187.46 | 43415.93 | 26936.55 | 29269.67 | 29175.64 | 30619.37 | 28058.41 |
| Q5RKI7 | 236388   | 236167.5 | 267144.3 | 378742.7 | 392951.5 | 177100.3 | 475940.8 | 317158.5 | 260112.3 | 354352.3 | 430349.9 | 208170.2 | 88678.17 | 94839.37 | 270988   | 304926.6 |
| Q5RLM2 | 54473.48 | 33207.82 | 58423.37 | 58135.3  | 26492.19 | 30244    | 48317.05 | 35966.78 | 107783.2 | 59273.93 | 74073    | 102636.4 | 27414.74 | 48120.16 | 78510.22 | 103046.8 |
| Q5U2Q3 | 139722.9 | 113300.9 | 133038.6 | 127897.5 | 146442.1 | 127615.4 | 156082.8 | 114252.7 | 272415.7 | 241029.8 | 208042.3 | 114276.8 | 178320.7 | 131822.1 | 199080.6 | 224021.3 |
| Q5U2V4 | 14981.53 | 33399.72 | 13684.91 | 25746.04 | 18560.16 | 19251.46 | 13278    | 48285.2  | 9281.441 | 16649.71 | 28487.75 | 24225.09 | 5566.236 | 26617.6  | 16666.82 | 26390.37 |
| Q5U300 | 21547.96 | 8826.786 | 12876.86 | 8865.896 | 11785.96 | 9794.932 | 13661.93 | 4867.964 | 11051.34 | 12737.9  | 15988.73 | 15113.52 | 12301.13 | 5663.677 | 4285.091 | 21564.38 |
| Q5U367 | 51134.47 | 36178.83 | 36145.94 | 26677.75 | 60363.09 | 21699.38 | 43656.19 | 46329.06 | 21355.24 | 27916.96 | 37619.51 | 45814.63 | 53280.49 | 27940.12 | 28731.08 | 43890.07 |
| Q5XFX0 | 4679.04  | 16617.57 | 11785.64 | 22223.76 | 16260.74 | 15573.68 | 19168.35 | 10057.8  | 25903.6  | 33099.98 | 24745.04 | 10826.51 | 13807.69 | 25192.51 | 11088.36 | 7693.894 |
| Q5XI20 | 2350.569 | 43629.66 | 4845.365 | 2709.001 | 2884.224 | 2895.045 | 3679.011 | 3386.467 | 11237.95 | 6453.331 | 16347.27 | 2583.553 | 4722.371 | 6664.87  | 4941.772 | 5028.307 |
| Q5XI22 | 2796.73  | 4288.724 | 4983.132 | 4380.406 | 943.8269 | 3113.733 | 2572.261 | 4245.696 | 1885.009 | 2095.977 | 5399.208 | 2408.712 | 2939.595 | 500.6129 | 2195.836 | 1050.145 |
| Q5XI32 | 17589.91 | 18361.98 | 27537.69 | 16126.2  | 29551.93 | 21070.93 | 23482.69 | 15676.27 | 21575.02 | 19506.51 | 17854.25 | 19203.61 | 16071.13 | 16718.9  | 12718.24 | 15486.17 |
| Q5XI43 | 6296457  | 9994286  | 8331730  | 7751279  | 6981886  | 7296389  | 9128444  | 6604185  | 7199899  | 6273073  | 4540163  | 6630783  | 8259601  | 8393884  | 7469826  | 7850695  |
| Q5XI73 | 98501.9  | 74764.66 | 51090.64 | 29080.74 | 98036.3  | 88817.57 | 41951.7  | 149754.3 | 90831.72 | 115713.4 | 227278.6 | 77750.65 | 59195.62 | 58098.86 | 85886.43 | 97452.03 |
| Q5XI89 | 22083.18 | 19959.71 | 15664.54 | 10228.46 | 14732.25 | 12874.16 | 17757.11 | 5417.311 | 10928.16 | 33183.14 | 11751.21 | 12063.99 | 10458.94 | 12487.99 | 13143.51 | 17897.16 |
| Q5XIE8 | 34266.05 | 44076.02 | 32364.1  | 41814.05 | 37099.04 | 33080.84 | 35500.04 | 42110.36 | 35868.45 | 21965.24 | 37974.42 | 43682.73 | 29084.52 | 33486.91 | 30280.77 | 21989.71 |
| Q5Y4N8 | 22147.85 | 31637.01 | 17928.41 | 23214.6  | 20164.53 | 15341.28 | 16533.58 | 12025.35 | 7420.912 | 20591.48 | 6787.825 | 7812.379 | 18303.72 | 17699.32 | 9795.354 | 12864.06 |
| Q5ZQU0 | 11002.02 | 16623.4  | 8000.06  | 14943.58 | 13533.63 | 6700.027 | 11314.86 | 9988.874 | 7085.045 | 12065.13 | 15095.85 | 8270.433 | 9225.69  | 9321.482 | 12343.88 | 11628.82 |
| Q62632 | 172200.3 | 210075.4 | 269010.8 | 185608.7 | 356304.5 | 247998.4 | 240932.4 | 208381.8 | 294769.9 | 192951.1 | 383286.6 | 236039.9 | 301083.7 | 476623.5 | 346602.4 | 459165.1 |
| Q62635 | 58622.51 | 241900.8 | 19197.79 | 91224.16 | 28802.52 | 215279.3 | 63227.65 | 147896.9 | 7393.156 | 31425.85 | 41737.26 | 322423.8 | 109515.7 | 52839.6  | 29778.03 | 10733.32 |
| Q62636 | 30270.38 | 29894.68 | 20809.64 | 34033.64 | 22381.02 | 11305.17 | 23603.54 | 13593.94 | 23379.03 | 31324.62 | 65117.13 | 36985.84 | 20140.69 | 11623.1  | 17280.05 | 7833.357 |
| Q62638 | 128178.3 | 94027.52 | 98881.68 | 119112.6 | 96909.29 | 130176.1 | 124106   | 102154.6 | 52405.77 | 73871.09 | 83575.05 | 90076.16 | 93979.05 | 109062.1 | 39034.7  | 74416.34 |
| Q62687 | 43228.9  | 77313.24 | 31204.99 | 87397.56 | 100848.1 | 50337.78 | 92466.23 | 35662.82 | 76747.6  | 125047.2 | 104830.4 | 75776.13 | 25171.98 | 26354.49 | 58346.62 | 123327.9 |
| Q62740 | 201244.8 | 532477.6 | 350460.1 | 760092.8 | 317606.1 | 599115.3 | 484653.9 | 293311.9 | 558153.9 | 539148.8 | 522798.4 | 342461.7 | 612298.8 | 611354   | 687743.4 | 964966   |
| Q62745 | 115229.6 | 99706.16 | 110298   | 178678.5 | 90754.58 | 71793.67 | 59746.5  | 99759.56 | 64029.89 | 92798.73 | 98580.15 | 83971.56 | 54470.01 | 97393.31 | 84036.19 | 92440.2  |
| Q62753 | 25941.67 | 13104.85 | 14888.27 | 16269.98 | 28334.7  | 15337.35 | 19775.27 | 20484.29 | 29326.51 | 27663.35 | 30812.4  | 31431.01 | 20604.68 | 20838.37 | 14212.81 | 18827.06 |
| Q62786 | 89661.09 | 192026.9 | 134509.6 | 225256.5 | 113333   | 177996.6 | 121877.7 | 177653.4 | 186383.1 | 199271.3 | 125195.7 | 122032.2 | 193503.1 | 209708.1 | 200143.4 | 179063.1 |
| Q62795 | 61809.8  | 63220.28 | 36573.15 | 67714.85 | 83481.14 | 51845.43 | 86538.18 | 45964.62 | 71880.84 | 110720.7 | 116607.4 | 74008.13 | 37947.29 | 34223.22 | 73631.71 | 108526.8 |
| Q62812 | 5794.693 | 15873.15 | 4940.516 | 10468.99 | 8647.323 | 7826.221 | 5590.793 | 6838.262 | 15087.69 | 14567.45 | 16566.16 | 7019.492 | 5377.96  | 7185.155 | 9482.716 | 8043.314 |
| Q62867 | 2529321  | 6203728  | 4284009  | 5297041  | 3633542  | 5373524  | 4366487  | 6587994  | 2378247  | 4788433  | 4347852  | 2389253  | 3929477  | 4455311  | 5382483  | 3240942  |
| Q62894 | 14416.91 | 6620.253 | 14833.39 | 9644.083 | 7956.416 | 3471.985 | 5747.045 | 11693.71 | 5286.702 | 2591.795 | 3423.289 | 5981.231 | 5178.737 | 2486.344 | 7951.066 | 6163.228 |
| Q62902 | 63545.02 | 31439.72 | 27603.34 | 53697.75 | 18755.77 | 102917.4 | 101978.5 | 85524.61 | 29841.15 | 18375.86 | 51996.44 | 71287.77 | 104636.9 | 48320.01 | 6038.265 | 29116.83 |

|        |          |          |          |          |          |          |          |          |          |          |          |          |          |          |          |          |
|--------|----------|----------|----------|----------|----------|----------|----------|----------|----------|----------|----------|----------|----------|----------|----------|----------|
| Q62930 | 234755.5 | 176092.8 | 163390.3 | 183326.3 | 99646.76 | 145882.7 | 186326.7 | 256250.3 | 166887.1 | 224746.8 | 262168.7 | 284198.7 | 157351.7 | 185708   | 273940.1 | 233023.1 |
| Q62946 | 170484.9 | 170876.4 | 261955   | 252345.7 | 142747.1 | 259710.8 | 153177   | 276544.8 | 75266.36 | 124936.1 | 150374.6 | 161676.3 | 136243.5 | 131212.3 | 95558.05 | 96185.1  |
| Q62975 | 13820.2  | 14362.39 | 33767.49 | 5086.888 | 14258.62 | 10056.57 | 21673.72 | 11479.17 | 21804.9  | 7645.491 | 12400.46 | 9322.634 | 10450.3  | 17274.02 | 18228.84 | 14991.19 |
| Q62997 | 23978.26 | 38563.77 | 24265.75 | 46089.31 | 29471.4  | 16158.07 | 18563.05 | 18318.66 | 11782.2  | 65419.8  | 3954.784 | 9005.551 | 22362.04 | 17460.18 | 20505.08 | 133574.7 |
| Q63041 | 12305592 | 12834413 | 13021689 | 12653896 | 19435032 | 8597733  | 13274399 | 12279335 | 12037120 | 13450579 | 11140309 | 9148360  | 14133939 | 15924172 | 16284043 | 13445249 |
| Q63072 | 16389.84 | 33975.73 | 26176.32 | 20889.46 | 30390.77 | 21526.62 | 16688.44 | 30309.46 | 18838.79 | 17813.33 | 25710.08 | 49296.37 | 13870.28 | 23356.67 | 18104.06 | 25520.82 |
| Q63083 | 1517934  | 1401109  | 634422.6 | 560727.3 | 502530.4 | 586592.3 | 746729.2 | 476857.1 | 827610.6 | 909739.8 | 2063457  | 797062.4 | 698610.5 | 725907.8 | 682120.8 | 747831.5 |
| Q63150 | 5100.509 | 17396.72 | 21777.45 | 17204.79 | 22289.25 | 13762.43 | 18134.7  | 10972.15 | 31898.31 | 20532.47 | 18867.11 | 11761.55 | 18316.73 | 13127.67 | 7441.979 | 13916.01 |
| Q63203 | 23371.54 | 35605.67 | 26821.96 | 29882.2  | 10929.15 | 25395.64 | 28523.04 | 24296.17 | 38596.14 | 24765.2  | 17231.92 | 25997.42 | 30394.39 | 85767.49 | 45703.45 | 40762.93 |
| Q63257 | 5879115  | 8164118  | 9422862  | 7656773  | 5580665  | 5537279  | 7274765  | 7378966  | 6665650  | 5961096  | 7775080  | 6137079  | 7746988  | 10106391 | 10081228 | 10901453 |
| Q63270 | 62531.66 | 56911.46 | 45052.22 | 25501.5  | 64794.09 | 36531.28 | 52610.8  | 46890.64 | 77666.59 | 115195.7 | 126186.1 | 57683.48 | 50987.29 | 50895.04 | 74970.27 | 116508.9 |
| Q63317 | 1250801  | 1492933  | 2023338  | 1070325  | 833489.1 | 710291.6 | 786735.3 | 759360   | 467523.8 | 368784.8 | 370581.3 | 450687.3 | 709563.7 | 594543.9 | 558773.6 | 284941.5 |
| Q63355 | 30155.38 | 10486.74 | 28180.49 | 18635.8  | 45528.22 | 22774.19 | 67993.2  | 34793.87 | 32351.04 | 27736.8  | 89765.53 | 34422.39 | 24193.57 | 58007.2  | 64482.27 | 45740.39 |
| Q63357 | 31526.59 | 15180.36 | 8406.307 | 23569.34 | 13442.19 | 26439.88 | 23416.74 | 22759.38 | 14500.21 | 21912.35 | 46178.52 | 36085.48 | 11807.49 | 9661.449 | 9107.561 | 10806.04 |
| Q63416 | 417007.4 | 327415.2 | 336277.8 | 385219.2 | 357241.3 | 304191.7 | 361252.7 | 333908.4 | 276149.3 | 275520.4 | 305135.4 | 368919.6 | 372410.5 | 399651.9 | 497376.8 | 352368   |
| Q63424 | 163233   | 141887.5 | 116635   | 202217.6 | 291352.7 | 104529.1 | 284540   | 100976.8 | 201526   | 317138.6 | 326792.2 | 161280   | 68639.8  | 81765.97 | 164656.2 | 272088.6 |
| Q63467 | 2741796  | 3378746  | 1115650  | 1295368  | 1766409  | 1219342  | 3196837  | 1301153  | 1760391  | 1095034  | 724433.9 | 1408223  | 1908471  | 1714053  | 1478599  | 1865673  |
| Q63474 | 15403.32 | 30588.74 | 23788.52 | 33263.96 | 23290.52 | 23707.11 | 18157.49 | 22152.54 | 12399.46 | 36234.6  | 26021.65 | 18078.34 | 10023.2  | 19536.78 | 15503.81 | 16611.2  |
| Q63475 | 50633.77 | 77509.86 | 44607.66 | 105808.8 | 41662.49 | 29946.26 | 54268.92 | 37860.38 | 24490.74 | 34386.44 | 30494.05 | 37624.36 | 12874.53 | 26278.48 | 27284.5  | 16173.63 |
| Q63493 | 22833.81 | 12122.77 | 7859.152 | 13413.52 | 9190.185 | 20775.05 | 25459.17 | 20257.01 | 3957.652 | 8164.696 | 20691.5  | 14171.28 | 7312.196 | 8993.946 | 1653.039 | 2524     |
| Q63514 | 37092.53 | 69941.76 | 39838.64 | 110508.2 | 65814.57 | 64321.23 | 45973.18 | 60222.3  | 60952.2  | 105028.8 | 77700.69 | 84689.23 | 84263.81 | 74916.84 | 93248.48 | 111303.7 |
| Q63515 | 88014.09 | 131007.9 | 141846.5 | 155624.3 | 124116.3 | 94350.91 | 177233.6 | 131765.8 | 123670.3 | 133091.2 | 143514.4 | 155263.3 | 174674.5 | 200106.9 | 188815.2 | 238482.8 |
| Q63530 | 176355.2 | 114452   | 267934.2 | 109750.2 | 338124.5 | 192452.2 | 193540.3 | 209737.8 | 260598.3 | 377321.4 | 259610.5 | 167681.4 | 194216.5 | 189101.8 | 242998.5 | 250331.4 |
| Q63532 | 246328.5 | 758026.8 | 130119.9 | 215001.8 | 89534.69 | 269110.2 | 447696.7 | 82274.52 | 82137.85 | 168985.7 | 141819.8 | 187657   | 112418.6 | 388554.1 | 137957.5 | 303363.8 |
| Q63556 | 396502.8 | 492474   | 426885.8 | 305727.8 | 364397.1 | 210367   | 163512.5 | 364342.3 | 324825.1 | 204114.8 | 219997.6 | 419231.8 | 387309.5 | 347113.1 | 432402.9 | 326667.8 |
| Q63598 | 5369.51  | 8977.086 | 3196.779 | 11111.6  | 5177.393 | 5055.475 | 3059.144 | 7667.902 | 2419.898 | 8931.768 | 7793.218 | 4523.971 | 3236.354 | 3707.078 | 1631.339 | 2671.257 |
| Q63610 | 19321.05 | 37075.49 | 18494.64 | 54962.13 | 53778.27 | 22987.98 | 30250.27 | 30638.29 | 25076.9  | 52294.59 | 37912.62 | 29109.85 | 16847.19 | 25115.36 | 30805.62 | 11595.8  |
| Q63617 | 43836.61 | 9560.438 | 9459.603 | 85230.64 | 12606.4  | 54590.68 | 117862.4 | 129519.8 | 22121.57 | 6313.008 | 19260.43 | 6518.806 | 14296.17 | 16627.12 | 4434.927 | 12758.47 |
| Q63618 | 28753.59 | 32202.1  | 14373.92 | 24044.73 | 28937.01 | 12791.36 | 24111.05 | 8530.521 | 50019.49 | 53042.83 | 57022    | 27226.77 | 35189.95 | 14753.36 | 31072.21 | 34202.07 |
| Q63621 | 258906.3 | 514174.1 | 360153.7 | 405312.3 | 342354.3 | 382930.3 | 308453.9 | 446294.1 | 283720.9 | 308731.3 | 271921.5 | 345308.1 | 335532.7 | 394674.7 | 367373.1 | 364055.7 |
| Q63661 | 7393.618 | 11835.18 | 4936.638 | 4380.406 | 3072.219 | 2625.598 | 2689.082 | 1518.615 | 9308.157 | 8351.813 | 8557.78  | 5099.551 | 3922.039 | 4853.891 | 4506.848 | 3911.76  |
| Q63678 | 128827.1 | 139890.3 | 133030.6 | 152520.6 | 83179.79 | 124919.3 | 87486.36 | 119387.3 | 69851.69 | 85415.49 | 56334.84 | 99216.32 | 66200.69 | 56611.3  | 77513.73 | 56802.83 |
| Q63691 | 204382.2 | 224984.2 | 232423.5 | 268959.5 | 252746.1 | 244152.8 | 233262.1 | 234054.1 | 218412.4 | 217260.3 | 196231.8 | 247066.1 | 207042.6 | 244367.1 | 202192.8 | 243102.2 |
| Q63716 | 240966.2 | 207861.9 | 225649.5 | 196606.3 | 246668.1 | 303092.4 | 232261.9 | 218745.4 | 317492.1 | 261711.8 | 349089.4 | 207013.1 | 252966.7 | 204644.6 | 239150.4 | 234752.5 |
| Q63751 | 303431.3 | 216268.1 | 990886.6 | 425150.6 | 349528   | 450850.1 | 396873.6 | 319077.4 | 39347.57 | 52693.32 | 208239.3 | 195617.6 | 113989.8 | 38070.47 | 96674.19 | 47125.94 |
| Q63772 | 137569.3 | 114049.2 | 97042.59 | 121698.9 | 115920.3 | 81343.14 | 104907.8 | 47434.2  | 82812.3  | 169075.6 | 84368.83 | 114989   | 118496.6 | 129085.2 | 112676.4 | 17020.7  |
| Q63797 | 11863.37 | 18864.23 | 12554.36 | 26801.29 | 20398.58 | 6765.442 | 21762.74 | 16375.17 | 17474.89 | 8703.038 | 16471.21 | 13802    | 8752.397 | 21222.09 | 18828.27 | 15953.85 |
| Q63942 | 105749.1 | 112497.7 | 34772.65 | 30941.64 | 82153.3  | 80193.21 | 18205.11 | 73166.93 | 153122   | 38027.61 | 24951.44 | 9937.377 | 30241.72 | 43507.04 | 43684.74 | 52723.53 |
| Q64057 | 71123.14 | 135181.4 | 70053.8  | 235461.6 | 48169.91 | 53874.16 | 102175.1 | 104876.6 | 67500.34 | 76460.72 | 99926.3  | 81803.77 | 49874.91 | 47311.3  | 56662.55 | 54183.84 |
| Q64093 | 23966.85 | 27862.81 | 4475.593 | 30157.54 | 48687.4  | 24322.27 | 74112.26 | 19248.57 | 63430.14 | 54590.04 | 37149.83 | 29624.29 | 5778.62  | 6799.178 | 25186.4  | 46155.4  |
| Q64119 | 55466.89 | 59223.28 | 49611.33 | 45582.39 | 84117.3  | 36831.81 | 47269.65 | 42537.72 | 69379.2  | 54085.42 | 90816.21 | 56799.68 | 65072.9  | 40892.9  | 52855.76 | 58505.02 |
| Q64194 | 15519.85 | 18123.64 | 24547.71 | 23659.63 | 21147.33 | 9628.712 | 12573.03 | 20371.51 | 9261.789 | 14863.88 | 67738.22 | 11347.48 | 8663.283 | 18905.69 | 18334.79 | 13152.75 |
| Q641X3 | 344107.7 | 383691.1 | 489217.4 | 386091.1 | 351099   | 241096   | 236604.9 | 457274.2 | 171656.7 | 220147.2 | 310420.3 | 261320.2 | 279832.6 | 415325.3 | 317402.9 | 327798.3 |
| Q641Z6 | 81671.87 | 81945.64 | 66143.27 | 63092.12 | 91941.16 | 63847.82 | 124476.3 | 44868.11 | 152052.3 | 82165.3  | 155978.4 | 86958.69 | 67953.94 | 54744.07 | 98259.08 | 53452.8  |
| Q641Z7 | 55531.23 | 29466.94 | 55894.61 | 56645.17 | 64995.62 | 57839.23 | 60795.57 | 63298.74 | 38964    | 60261.08 | 36882.52 | 30172.87 | 38841.8  | 49480.53 | 51759.02 | 49603.82 |
| Q641Z8 | 32837.67 | 47662.66 | 49895.78 | 55759.48 | 43958.56 | 44131.81 | 56245.31 | 50134.63 | 55133    | 56132.65 | 45988.69 | 32762.24 | 45920.67 | 51609.23 | 40410.67 | 47091.38 |
| Q64230 | 5969956  | 6728317  | 7281973  | 6941259  | 4809064  | 4566655  | 7653161  | 5422926  | 4837934  | 4213258  | 5774448  | 4623600  | 4815869  | 5998636  | 5271551  | 8105480  |
| Q64240 | 33969444 | 50698264 | 39044600 | 37125804 | 24895406 | 41715784 | 49000272 | 36884412 | 25645460 | 22271562 | 33258362 | 33707088 | 37733648 | 39685076 | 48011140 | 36093020 |
| Q64268 | 30479.39 | 12240.14 | 25205.76 | 33958.39 | 10937.38 | 12059.54 | 13340.01 | 33644.04 | 13955.42 | 18408.9  | 14414.56 | 14419.17 | 12243.21 | 14242.96 | 15938.36 | 9375.782 |

|        |          |          |          |          |          |          |          |          |          |          |          |          |          |          |          |          |
|--------|----------|----------|----------|----------|----------|----------|----------|----------|----------|----------|----------|----------|----------|----------|----------|----------|
| Q642A7 | 563459.1 | 708195.3 | 654392.6 | 483002.6 | 879606.8 | 670335.4 | 632985.5 | 519401.8 | 720138.2 | 770251   | 552262.1 | 629055.8 | 916146.9 | 1086347  | 979244.6 | 1396845  |
| Q64319 | 3249077  | 2588979  | 2299540  | 2159170  | 5627998  | 2710996  | 6005152  | 1633744  | 4179472  | 4450492  | 5654359  | 3020607  | 1699660  | 1700468  | 3244648  | 3846459  |
| Q64335 | 42983.59 | 29453.53 | 106201.2 | 37661.81 | 61580.29 | 27540.45 | 90136.17 | 52258.59 | 47064.07 | 34137.21 | 55835.44 | 88064.94 | 75949.8  | 82432.69 | 78655.88 | 111638.6 |
| Q64361 | 214257.8 | 244412.7 | 181210.1 | 289126.4 | 205702.6 | 276470.4 | 149979.5 | 223495.9 | 56244.24 | 136004   | 70553.31 | 130447.8 | 52314.73 | 55636.35 | 77471.21 | 42021.5  |
| Q64537 | 21029.41 | 16550.03 | 13442.69 | 22452.71 | 25460.3  | 23299.9  | 24609.41 | 38103.45 | 14038.74 | 14403.42 | 18780.74 | 19937.84 | 14921.38 | 11612.45 | 13937.09 | 12637.63 |
| Q64573 | 178650   | 172307.9 | 200745.9 | 162990.2 | 111754.9 | 114607.6 | 144006.8 | 189841.4 | 109225.2 | 81747.21 | 68726.62 | 70260.87 | 174228.5 | 115311.5 | 158892.6 | 97488.22 |
| Q64602 | 140264.9 | 183000.6 | 133456.2 | 208341.1 | 180366.7 | 160518.9 | 178613.4 | 105917.9 | 321134.2 | 309325.4 | 414724.1 | 230288   | 270021.8 | 163291.4 | 235735.7 | 306745.5 |
| Q64604 | 55984.28 | 149328.4 | 110195.5 | 134633.5 | 93876.97 | 152299.9 | 165411.7 | 130347   | 133387.1 | 116505.3 | 132851.5 | 164818.3 | 137011.4 | 155756.8 | 158509.5 | 154091.3 |
| Q64605 | 11068.78 | 17000.49 | 12576.39 | 23732.31 | 24025.08 | 8342.485 | 14866.88 | 9090.632 | 7326.58  | 16560.86 | 13817.2  | 14374.79 | 11457.59 | 16119.5  | 13647.75 | 12455.75 |
| Q64611 | 29983.29 | 16381.17 | 10922.27 | 15585.05 | 22391.92 | 21439.53 | 5993.49  | 18559.7  | 42632.16 | 34127.76 | 42102.01 | 19348.66 | 33138.02 | 22594.72 | 11569.62 | 23941.85 |
| Q64640 | 17492.63 | 14479.07 | 10824.57 | 18037.7  | 10888.65 | 8166.542 | 13466.04 | 23695.13 | 27273.71 | 17666.02 | 24774.66 | 17968.04 | 16063.79 | 17478.56 | 19869.05 | 15793.69 |
| Q66H12 | 268704.9 | 298077.8 | 303012.2 | 223870.3 | 354683.1 | 201375.7 | 220584   | 192278.8 | 187944.4 | 196705.1 | 221175.5 | 253881.4 | 251150   | 355507.8 | 227997.6 | 323640   |
| Q66H69 | 55354.18 | 40219.85 | 32992.68 | 22355.03 | 10678.29 | 40102.77 | 13150.44 | 33257.49 | 22002.79 | 25804.09 | 34282.95 | 17502.32 | 19818.07 | 20355.44 | 35498.03 | 27381.16 |
| Q66H94 | 8992.968 | 31562.14 | 16484.98 | 10910.19 | 19653.43 | 16467.35 | 24715.84 | 19766.41 | 24910.36 | 20101.62 | 25354.57 | 24877.29 | 21328.26 | 22332.91 | 26685.02 | 14420.01 |
| Q66HD0 | 14869.17 | 25100.31 | 16599.74 | 34339.98 | 20943.39 | 35216.2  | 17856.91 | 22593.37 | 16505.78 | 22139.36 | 22871.91 | 15323.53 | 18545.52 | 17570.52 | 7171.662 | 7613.952 |
| Q66HG4 | 40620.88 | 28338.46 | 52102.34 | 61033.8  | 52018.93 | 42732.09 | 35689.79 | 59942.73 | 52981.25 | 113465.1 | 89093.35 | 33762.1  | 32769.66 | 45480.72 | 62455.74 | 62046.02 |
| Q675A5 | 68793.83 | 100503.5 | 86998.63 | 143676   | 148036.8 | 76082.89 | 105321.9 | 109779.4 | 88845.27 | 62013.07 | 93291.35 | 65972.09 | 80618.77 | 145890.7 | 110190.1 | 52128.29 |
| Q68FP1 | 9619363  | 12995259 | 10818342 | 20403004 | 6866547  | 13288536 | 12774693 | 9995395  | 7847501  | 8173828  | 10445221 | 10772961 | 7687022  | 8145027  | 12894998 | 6662200  |
| Q68FQ2 | 252314   | 412653.4 | 425544.8 | 418339.1 | 376806.6 | 357673.5 | 442575   | 428812.4 | 398870.3 | 285271.7 | 303237.8 | 325072.3 | 408113.4 | 228649.7 | 432156.3 | 370480.2 |
| Q68FS4 | 17653.53 | 20825.6  | 29861.53 | 4386.843 | 19655.4  | 30391.6  | 10095.58 | 8838.422 | 38974.13 | 40711.34 | 30096    | 19706.36 | 32875.17 | 20220.86 | 34232.5  | 30641.32 |
| Q68FT5 | 54204.84 | 14416.61 | 26743.51 | 63700.68 | 45983.92 | 34276.06 | 34217.34 | 31978.08 | 36320.91 | 29594.79 | 46870.18 | 34146.46 | 37979.45 | 25172.26 | 36782.82 | 28550.19 |
| Q68FV8 | 24841.72 | 19627.64 | 12277.7  | 17057.61 | 10215.49 | 6322.76  | 5095.313 | 15640.25 | 84070.97 | 4278.543 | 9263.47  | 8623.173 | 6744.853 | 4610.065 | 15437.75 | 14624.89 |
| Q6AXR4 | 166508.7 | 251309.8 | 364144   | 214179.3 | 265049.2 | 174342.9 | 119325.9 | 341191.2 | 140835.3 | 156487.4 | 167895   | 175625.8 | 172931.4 | 315517.3 | 234545.9 | 233204.4 |
| Q6AXS4 | 276331.3 | 237202   | 120489.8 | 107798.1 | 71346.12 | 107295   | 139287.1 | 75236.42 | 100883.3 | 98196.02 | 144254.9 | 127963.1 | 74027.84 | 69556.86 | 90955.06 | 87658.34 |
| Q6AY33 | 49629.16 | 18905.64 | 17509.88 | 28137.49 | 23691.54 | 25741.44 | 21751.68 | 24913.5  | 10409.79 | 16639.67 | 18956.16 | 10130.42 | 14449.7  | 20269.14 | 13273.59 | 16097.19 |
| Q6AY41 | 54942.44 | 36033.85 | 38291.82 | 56433.5  | 65493.9  | 41825.33 | 59005.54 | 22394.12 | 53887.45 | 71009.56 | 84320.63 | 43287.6  | 43611.4  | 42410.05 | 53943.02 | 85397.56 |
| Q6AY61 | 2413.113 | 4288.724 | 4983.132 | 5770.31  | 2456.675 | 2145.979 | 1827.656 | 4245.696 | 2856.081 | 3980.152 | 2455.708 | 1477.948 | 2761.282 | 3758.308 | 2195.836 | 2388.734 |
| Q6AYD4 | 500677.2 | 685550.9 | 569061.6 | 525068.4 | 531363.6 | 527859.9 | 622972.8 | 510352.5 | 531421.9 | 441813.7 | 356157   | 377880.8 | 514046.6 | 550100.6 | 548726.9 | 398457.1 |
| Q6AYE5 | 58736.93 | 80379.11 | 123711   | 71198.87 | 148108.9 | 73046.8  | 98881.67 | 68891.98 | 64054.52 | 98155.24 | 85127.59 | 66310.82 | 80392.51 | 99950.03 | 78901.86 | 79096.86 |
| Q6AYL6 | 63907.56 | 26324.14 | 12555.99 | 26464.6  | 9289.113 | 40055.7  | 47609.5  | 32676.38 | 25644.33 | 30479.52 | 45506.09 | 38828.05 | 2316.018 | 24438.57 | 14232.19 | 26696.59 |
| Q6AYP5 | 140028.9 | 186786.4 | 191913.1 | 162709.6 | 276442.8 | 156434.5 | 180825   | 162205.7 | 136757.4 | 126754.5 | 147578.1 | 112090.5 | 143552.9 | 158511   | 126869.7 | 210695.9 |
| Q6AYQ8 | 6744.549 | 13724.45 | 4611.92  | 12554.65 | 4241.181 | 5948.764 | 6859.793 | 6742.679 | 5895.548 | 3961.398 | 10176.05 | 44790.31 | 2657.958 | 9801.756 | 6341.905 | 2303.132 |
| Q6AYR6 | 25353.04 | 19661.19 | 41484.95 | 31295.09 | 20073.48 | 16456.36 | 23932.68 | 18184.08 | 13857.11 | 22739.11 | 28553.65 | 15206.18 | 19328    | 19348.55 | 19636.96 | 12934.94 |
| Q6AYR8 | 19948.11 | 22444.04 | 103386.9 | 27269.73 | 48239.51 | 19597.41 | 20808.44 | 12975.91 | 18625.38 | 18257.43 | 24049.61 | 19506.38 | 21707.08 | 16343.94 | 30568.51 | 30772.14 |
| Q6AYR9 | 108228.7 | 80163.82 | 23042    | 147015.8 | 23678.86 | 148650.3 | 92560.61 | 118607.4 | 40357.69 | 69060.76 | 50984.32 | 342951.6 | 100932.5 | 65648.45 | 7789.053 | 10651.98 |
| Q6AYS4 | 12216.58 | 36915.92 | 35394.26 | 90828.87 | 95286.17 | 19225.05 | 40984.78 | 111398   | 30692.66 | 34482.68 | 36632.93 | 27539.23 | 24345.96 | 26511.76 | 20267.53 | 17343.66 |
| Q6AYS7 | 213611.1 | 196349.1 | 212943.1 | 277051.8 | 237994.4 | 198709   | 190601.2 | 156122.2 | 640552.8 | 495149.6 | 901186.1 | 298270.3 | 480882.1 | 342795   | 443361.4 | 453089.9 |
| Q6AYT0 | 117795.7 | 122189.2 | 138240   | 122489.1 | 178363   | 81177.8  | 146248.2 | 101711   | 290885.8 | 163503.3 | 265529.7 | 90736.44 | 215230.3 | 118919.5 | 213108.3 | 219798.5 |
| Q6B345 | 43395.3  | 36930.4  | 72718.09 | 43571.26 | 50734.19 | 63280.84 | 46807.25 | 76480.03 | 73923.09 | 82038.49 | 94673.73 | 59431.84 | 31982.91 | 62202.35 | 51742.51 | 31795.38 |
| Q6BEA2 | 19534.26 | 11582.49 | 20313.85 | 25483.72 | 19305.5  | 14011.43 | 10842.03 | 8339.102 | 12905.93 | 16089.7  | 12388.24 | 12900.78 | 19052.27 | 15766.22 | 19773.79 | 14686.23 |
| Q6DGG1 | 451776.3 | 776874.3 | 2361183  | 1223921  | 793150.8 | 899770.4 | 589584.9 | 807401.1 | 711989.9 | 784611.1 | 683584.9 | 686261.7 | 671158.8 | 657830.4 | 904233.6 | 808476.8 |
| Q6GMN2 | 70735.97 | 32714.43 | 20965.87 | 30459.22 | 45145.6  | 41799.26 | 45541.66 | 39014.57 | 33048.92 | 37073.88 | 81925.34 | 52170.75 | 35890.16 | 28081.22 | 13862.68 | 18996    |
| Q6IE51 | 108802.2 | 167863.7 | 81382.16 | 119305.7 | 80343.69 | 98978.4  | 180860.4 | 19720.74 | 66431.46 | 56571.26 | 55472.91 | 53356.96 | 65974.16 | 123559.7 | 125076.6 | 71203.23 |
| Q6IE52 | 247099.5 | 333917   | 335645.7 | 243683.1 | 161588.1 | 202286.3 | 221368   | 313289.3 | 223322.1 | 160732.5 | 173361.1 | 127553.4 | 246162.8 | 182551.7 | 181614.1 | 223372.4 |
| Q6IE64 | 4651.978 | 8216.229 | 7862.112 | 10890.18 | 7989.948 | 4992.361 | 7146.427 | 5120.597 | 5421.985 | 6344.985 | 6579.697 | 6827.62  | 8213.843 | 8175.13  | 8800.949 | 13350.45 |
| Q6IFU7 | 42260.46 | 23273.57 | 7302.26  | 27285.32 | 28371.27 | 43824    | 5589.889 | 9766.511 | 15502.96 | 28105.83 | 42217.18 | 52125.09 | 9370.417 | 13416.54 | 12299.47 | 25849.89 |
| Q6IFU8 | 1135742  | 741186.6 | 786826.4 | 788325.7 | 813845.6 | 837668.5 | 269342.1 | 401266.8 | 408663.7 | 489423.7 | 1114481  | 2884499  | 218064.2 | 433975.1 | 255302.1 | 398327.3 |
| Q6IFV1 | 7386.893 | 2921.728 | 1664.905 | 1409.8   | 3012.7   | 4823.468 | 1447.377 | 3813.688 | 1322.321 | 2967.232 | 1180.561 | 2981.341 | 3576.808 | 332.2289 | 3731.653 | 1069.31  |
| Q6IFW2 | 23375.4  | 1020095  | 43793.8  | 47425.05 | 21026.67 | 56404.18 | 36687.43 | 29610.61 | 83881.82 | 17515.28 | 38471.7  | 31314.7  | 22455.63 | 19772.48 | 19350.59 | 18682.94 |

|        |          |          |          |          |          |          |           |          |          |          |          |          |          |          |          |          |
|--------|----------|----------|----------|----------|----------|----------|-----------|----------|----------|----------|----------|----------|----------|----------|----------|----------|
| Q6IFW6 | 876525.3 | 277149.4 | 733444.9 | 784398.1 | 754131.6 | 703008.4 | 198976.1  | 306257.2 | 189872.4 | 361030.4 | 564605.6 | 1098493  | 115862.5 | 233631.3 | 131560.6 | 272850.4 |
| Q6IG02 | 321424.2 | 19958.79 | 299805.4 | 194612.9 | 233819.2 | 149976.7 | 72595.4   | 172321.1 | 92925.64 | 152661.1 | 172797   | 513546.4 | 49890.48 | 88394.31 | 56906.04 | 80577.86 |
| Q6IMF3 | 1678499  | 634973.9 | 1100035  | 1273984  | 1274097  | 1408770  | 410778.1  | 594738.9 | 433389.6 | 869969.9 | 943261.6 | 2472724  | 239734   | 499712.6 | 278242.2 | 606414.6 |
| Q6IRE4 | 90585.42 | 5946.549 | 90797.03 | 5320.988 | 55669.28 | 19946.48 | 22604.05  | 13699.27 | 21463.6  | 12827.61 | 23765.14 | 14274.4  | 17513.86 | 18672.31 | 15912.97 | 25937.9  |
| Q6IRK9 | 4070901  | 6554484  | 5033862  | 5213763  | 4596302  | 4410719  | 6554710   | 3300706  | 4174010  | 3134621  | 3652252  | 3602425  | 3905955  | 6019744  | 3927917  | 6201286  |
| Q6IUU3 | 1248727  | 984702.3 | 998911.4 | 1102666  | 488247.9 | 1090360  | 974735.7  | 1003633  | 565474.1 | 723591   | 1072437  | 1416909  | 721008.3 | 581763.4 | 496568.8 | 464492.4 |
| Q6JE36 | 23819.24 | 14760.57 | 13222.77 | 5080.363 | 11503.94 | 7685.926 | 18157.21  | 6624.563 | 27146.04 | 20225.28 | 33327.24 | 19307.71 | 22254.43 | 16839.96 | 21058.23 | 15485.85 |
| Q6MG61 | 374585.2 | 474595.9 | 252494.4 | 343557   | 350316.6 | 290676.9 | 388701.3  | 267752.1 | 562503.9 | 502183.3 | 965274.5 | 555303.3 | 463737.9 | 281480.7 | 348514.1 | 611505.6 |
| Q6MG71 | 906656.1 | 733626.3 | 631908.4 | 820444.6 | 638781.7 | 714893.1 | 814140.8  | 753757.8 | 578776.6 | 925265.3 | 1693011  | 803711.8 | 519884.3 | 832206.1 | 599810.6 | 688956.5 |
| Q6NX65 | 1792.689 | 6620.682 | 5113.636 | 6857.267 | 4723.821 | 5869.083 | 3814.935  | 6269.04  | 4024.924 | 3655.406 | 3492.468 | 4475.469 | 3618.788 | 4111.157 | 3625.01  | 3894.464 |
| Q6NYB7 | 65535.27 | 54373.25 | 44081.55 | 69085.67 | 62495.22 | 61618.42 | 67424.58  | 53687.05 | 67088.51 | 100834.9 | 146836.6 | 71447.55 | 48794.98 | 40035.66 | 32064.11 | 68562.63 |
| Q6P6Q2 | 988781.9 | 261071   | 519389.7 | 582413.7 | 628882.1 | 580445.6 | 172370.2  | 409627.8 | 170103.3 | 435882.3 | 726703.5 | 914714.7 | 107476.8 | 193262.5 | 93752.45 | 310340.3 |
| Q6P6R2 | 7636.648 | 18017.19 | 7902.721 | 11525.07 | 4087.791 | 33088.21 | 10531.15  | 15476.19 | 11190.05 | 11911.97 | 5263.644 | 7419.292 | 2773.255 | 6192.718 | 3215.219 | 11190.3  |
| Q6P6S9 | 19428.81 | 22595.32 | 21493.91 | 25204.86 | 19112.33 | 22908.27 | 14300.76  | 21252.76 | 12663.39 | 12514.76 | 19701.75 | 23691.58 | 12273.01 | 19970.48 | 19804.54 | 14981.26 |
| Q6P6T1 | 33021.55 | 32229.03 | 30713.44 | 38546.66 | 22788.6  | 29957.21 | 33178.26  | 34023.13 | 14658.48 | 38292.82 | 17823.33 | 54717.79 | 34326.21 | 26909.04 | 25475.54 | 104637.2 |
| Q6P6V0 | 65911    | 35786.75 | 36507.23 | 30272.38 | 50498.39 | 37225.35 | 38746.75  | 60749.09 | 34642.32 | 72789.78 | 63529.7  | 30303.43 | 28435.25 | 28183.4  | 35456.08 | 33231.19 |
| Q6P734 | 247513.3 | 378422.4 | 209394.7 | 331753.2 | 210883.3 | 220246.2 | 195653.4  | 267644.6 | 159156.1 | 224714.6 | 246497.2 | 300609.9 | 157551.2 | 173720.8 | 210494.1 | 202375.8 |
| Q6P767 | 689514.8 | 721142.8 | 1004872  | 911441.9 | 1392109  | 905088.8 | 616582.4  | 590337.5 | 421390   | 398854.9 | 636706.3 | 354944.4 | 538962.1 | 1361578  | 522104   | 1000606  |
| Q6P777 | 35178.29 | 18532.87 | 63390.56 | 22880.53 | 28249.27 | 19012.92 | 10679.77  | 15246.86 | 17246.38 | 14586.84 | 22529.31 | 18036.17 | 16689.24 | 24831.11 | 10918.07 | 25153.84 |
| Q6P7A9 | 732236.6 | 716713.1 | 776064.6 | 747942.6 | 697093.4 | 633139.9 | 546139.2  | 730873.8 | 612313.9 | 658123.2 | 602491.8 | 728533.6 | 705022.9 | 1199763  | 741427.6 | 727613.4 |
| Q6P7Q4 | 36779.27 | 26512.72 | 26109.08 | 32592.14 | 24964.96 | 38980.66 | 26167.66  | 33231.35 | 37445.35 | 50139.38 | 44418.64 | 39170.77 | 35818.11 | 36919.17 | 36821.17 | 40717.44 |
| Q6P7S1 | 113610   | 143447.2 | 182313.9 | 115888   | 223908.9 | 106413.4 | 88037.05  | 87881.27 | 76485.74 | 101884.6 | 62652.9  | 74879.41 | 152239.6 | 187557.5 | 159494   | 174832.8 |
| Q6P9T8 | 128081   | 53169.37 | 40527.34 | 44832.24 | 40352.36 | 85420.09 | 114406.7  | 89052.79 | 41279.6  | 42217.41 | 52590.96 | 26348.75 | 42607.96 | 42611.7  | 43843.67 | 40028.02 |
| Q6PCU2 | 10747.81 | 10604.97 | 21843.7  | 21121.96 | 23245.42 | 27420.13 | 31153.08  | 16730.8  | 54293.01 | 66787.64 | 67403.2  | 37542.69 | 22463.04 | 24412.24 | 36162.15 | 20617.57 |
| Q6PEC4 | 28418.36 | 28694.32 | 36279.13 | 18619.76 | 49814.89 | 41430.22 | 22463.45  | 31095.75 | 24704.36 | 36406.84 | 56862.4  | 35271.4  | 26414.22 | 36124.7  | 37349.08 | 43512.79 |
| Q6Q0N1 | 88320.77 | 100321.8 | 81293.52 | 96888.02 | 253918.7 | 106905.8 | 180114.5  | 97713.46 | 219829.9 | 229164   | 326311.6 | 124871   | 167792.8 | 89600.41 | 162112.3 | 125843.1 |
| Q6Q7Y5 | 210552.3 | 189925.7 | 122167.5 | 273475.7 | 209173.9 | 268721.5 | 250327.2  | 232090.5 | 266928.3 | 244948.7 | 370684.4 | 289073.7 | 179602.3 | 201263.9 | 211110.4 | 226199.5 |
| Q6RUV5 | 83202.84 | 96810.51 | 88395.77 | 190501.3 | 88278.3  | 198277.7 | 142936.8  | 109334.1 | 113929.9 | 132359.6 | 128336.2 | 110311.5 | 57166.04 | 54535.73 | 53021.59 | 41575.11 |
| Q6RY07 | 27782.56 | 42411.74 | 22769.36 | 42090.68 | 35725.79 | 33722.8  | 31058.62  | 45894.42 | 29719.53 | 25452.92 | 26840.21 | 195802.5 | 15871.26 | 26179.52 | 25231.44 | 24508.55 |
| Q6TMA8 | 23468.63 | 112330.4 | 53906.6  | 161159.8 | 31155.35 | 48355.79 | 27393.87  | 71100.08 | 39396.8  | 22997.96 | 36814.79 | 34604.57 | 43567.94 | 32012.96 | 28798.44 | 19377.46 |
| Q6TUD4 | 17415772 | 29005524 | 19084712 | 15087184 | 5800728  | 20565688 | 325884628 | 22588664 | 21954510 | 22074204 | 25648110 | 24439138 | 35690456 | 54945772 | 36567412 | 45553556 |
| Q6VBQ5 | 40085.25 | 44014.93 | 24617.05 | 15130.97 | 51684.76 | 35400.92 | 31714.23  | 38034.14 | 25724.98 | 47271.2  | 40334.16 | 21338.55 | 28581.66 | 40808.16 | 59404.18 | 69885.49 |
| Q6X936 | 23022.01 | 48060.86 | 35639.6  | 39911.08 | 36139.43 | 36419.46 | 39828.65  | 29942.69 | 28711.19 | 29963.53 | 29215.01 | 25394.36 | 33468.55 | 35606.19 | 39395.04 | 38840.59 |
| Q711G3 | 86053.26 | 43982.41 | 95322.69 | 49960.22 | 122210.8 | 61468.98 | 45712.18  | 60196.03 | 137034.5 | 196855.9 | 114829.1 | 71628.88 | 96746.8  | 74277.52 | 101780.4 | 87177.59 |
| Q71MB6 | 29121.73 | 51151.74 | 32504.11 | 37060.59 | 68694.27 | 22232.48 | 42042.22  | 17678.7  | 30286.28 | 47921.2  | 43420.95 | 26372.44 | 20420.48 | 17227.59 | 39112.85 | 44832.39 |
| Q71UF4 | 5644.635 | 11239.91 | 9748.498 | 12144.94 | 13332.91 | 9465.727 | 13927.95  | 8239.7   | 6535.295 | 8172.271 | 10894.92 | 7826.267 | 6341.838 | 9949.59  | 6919.771 | 5081.154 |
| Q76HN1 | 64250.11 | 80162.24 | 91876.16 | 107084.1 | 78270.62 | 126341.1 | 59732.38  | 59050.86 | 79840.91 | 64565.29 | 76124.66 | 98476.92 | 92693.24 | 99043.72 | 113704.4 | 47600.85 |
| Q793F9 | 72040.23 | 82691.3  | 86894.4  | 98025.61 | 30670.22 | 40841.93 | 63333.55  | 76045.48 | 89468.94 | 117199.6 | 125241.2 | 66391.8  | 77421.75 | 128942.6 | 104729.9 | 128661.6 |
| Q794F9 | 16380.44 | 50998.45 | 23721.78 | 43567.13 | 17391.89 | 14931.6  | 23056.2   | 25297.55 | 13965.42 | 19799.61 | 26080.64 | 14006.32 | 19281.86 | 18343.94 | 11967.16 | 19825.2  |
| Q7M0E3 | 58335.46 | 82547.95 | 35296.19 | 89414.8  | 38031.4  | 65839.64 | 45058.79  | 75494.81 | 86882.78 | 67033.65 | 101016   | 65958.61 | 80802.09 | 40316.58 | 46878.18 | 62981.78 |
| Q7TP52 | 139312.1 | 147090.6 | 41908.69 | 117676.5 | 64540.14 | 82570.45 | 52598.12  | 37447.48 | 41500.32 | 95195.01 | 68084.66 | 35427.74 | 32653.93 | 34868.71 | 39473.54 | 48682.66 |
| Q7TPB1 | 3261.302 | 2499.387 | 1715.771 | 1508.061 | 1899.897 | 1788.451 | 2140.615  | 1977.084 | 2574.855 | 2885.549 | 21065.87 | 2015.348 | 9550.538 | 7046.074 | 1767.485 | 4732.747 |
| Q7TPB4 | 60699.99 | 112978.4 | 101192.4 | 66584.38 | 76076.36 | 69093.05 | 73546.45  | 86612.01 | 99791.2  | 65666.77 | 87115.25 | 76343.09 | 69689.85 | 105866.4 | 102874.2 | 106223.6 |
| Q7TQ94 | 33422.07 | 18989.44 | 27014.54 | 16224.48 | 68098.42 | 22717.24 | 27895.32  | 26354.63 | 41051.7  | 35980.05 | 56001.85 | 27767.92 | 35575.05 | 32456.75 | 40943.34 | 47553.2  |
| Q80W57 | 112611.5 | 130334.6 | 71414.18 | 124419.8 | 175418   | 92668.35 | 167980    | 73478.55 | 152969.9 | 252433.5 | 329310.2 | 83400.57 | 67287.23 | 84386.33 | 139601   | 173229.1 |
| Q80WD0 | 64854.36 | 101098.3 | 78549.2  | 104149.1 | 116213.7 | 119973   | 70503.03  | 76787    | 83429.34 | 87668.7  | 90447.63 | 81448.95 | 103233.1 | 131631.7 | 118157.6 | 124814.1 |
| Q80WD1 | 114140.2 | 191038.3 | 187113.9 | 140850   | 157383   | 175920.1 | 169667.7  | 123029.7 | 158650.5 | 132909   | 145637.5 | 130833.5 | 171147.1 | 222765.5 | 194985.5 | 208591.5 |
| Q80WF4 | 34787.34 | 48105.04 | 40707.57 | 35098.8  | 37978.64 | 34764.43 | 38566.91  | 42344.82 | 51466.86 | 43073.08 | 40480.68 | 41318.13 | 59095.69 | 69712.57 | 62378.91 | 70123.07 |
| Q80WL1 | 4905.131 | 26526.56 | 8495.394 | 28155.05 | 3673.604 | 3395.373 | 14531.08  | 24103.24 | 8267.707 | 9886.656 | 9231.116 | 20507.16 | 9477.109 | 6898.299 | 873.3964 | 6070.203 |



|        |          |          |          |          |          |          |          |          |          |          |          |          |          |          |          |          |
|--------|----------|----------|----------|----------|----------|----------|----------|----------|----------|----------|----------|----------|----------|----------|----------|----------|
| Q80WY6 | 55282.99 | 37380.89 | 48430.1  | 41484.65 | 44235.81 | 43996.61 | 55576.06 | 23897.96 | 13044.84 | 14553.06 | 17638.77 | 30298.09 | 26745.05 | 30236.01 | 26454.11 | 18528.18 |
| Q80YN4 | 22932.03 | 20537.2  | 17356.98 | 79199.61 | 27922.85 | 33713.75 | 26810.96 | 23317.26 | 16892.4  | 22000.29 | 28139.79 | 25130.67 | 16879.96 | 26195.7  | 18044.87 | 22381.38 |
| Q810F4 | 145189.5 | 177839.5 | 148724.6 | 156466.8 | 295312.1 | 213043.7 | 342603.4 | 156509.8 | 185046   | 155818.9 | 218288.8 | 159148.4 | 278464.9 | 188931.1 | 208441.8 | 192590.2 |
| Q811A3 | 39029.71 | 16945.5  | 23776.87 | 17252.77 | 20301.24 | 11755.85 | 14514.84 | 24394.04 | 11751.33 | 21572.9  | 26807.88 | 13374.77 | 10309.73 | 529917.8 | 23918.51 | 22345.07 |
| Q811M5 | 18878.2  | 28642.4  | 36049.07 | 44212.27 | 36949.69 | 19876.27 | 45122.64 | 17081.61 | 33386.26 | 36952.02 | 33178.96 | 29441.57 | 42329.47 | 50057.13 | 44375.29 | 41546.44 |
| Q811X6 | 49302.71 | 38391.23 | 44712.06 | 34019.29 | 86602.33 | 59629.61 | 34677.74 | 38628.5  | 81593.62 | 113259.5 | 78090.8  | 52760.91 | 72986.45 | 66619.18 | 58409.37 | 94771.86 |
| Q812E4 | 22524.71 | 6783.931 | 11702.85 | 12561.44 | 3608.655 | 12950.04 | 10733.46 | 11589.8  | 4843.884 | 10664.68 | 10860.29 | 16717.79 | 7744.121 | 5591.78  | 9767.519 | 9127.727 |
| Q812E9 | 282255   | 250612.2 | 173697.2 | 317240.8 | 344409   | 137782.7 | 347558.5 | 135207.6 | 200995.2 | 254578.9 | 235529.8 | 190250.8 | 133669.2 | 121121.9 | 245122.4 | 281054.4 |
| Q8CFN2 | 60753.47 | 66286.02 | 55224.96 | 84813.89 | 64220.76 | 108619.2 | 78303.78 | 78972.8  | 108826.8 | 120685.3 | 215943.1 | 114376   | 78862.73 | 56216.48 | 41527.11 | 21619.48 |
| Q8CG08 | 90150.91 | 107054.2 | 103725.5 | 115226.8 | 100214.3 | 104624   | 95322.94 | 72525.37 | 136248.8 | 106268.8 | 87060.35 | 87572.99 | 148163.8 | 102250.3 | 106405.4 | 110410.4 |
| Q8CG45 | 80165.63 | 54501.38 | 83368.78 | 52351.13 | 127706.8 | 62949.01 | 68020.07 | 87960.59 | 162808.5 | 140847   | 138410.5 | 89818.6  | 88067.1  | 82838.3  | 99406.91 | 105857.6 |
| Q8CGS4 | 31646    | 31902.14 | 25248.06 | 31166.71 | 1939.539 | 26665.04 | 28434.7  | 33556.24 | 20221.16 | 33072.9  | 134582.5 | 30864.63 | 24018.75 | 11255.24 | 35880.94 | 8600.729 |
| Q8CHN3 | 4544084  | 4733484  | 4009247  | 3210039  | 5008516  | 3902393  | 4456387  | 2520471  | 3658889  | 3270080  | 2739826  | 3132472  | 3396539  | 4569171  | 3775999  | 5501591  |
| Q8CHN8 | 52837.87 | 58128.89 | 28171.73 | 27626.11 | 49918.34 | 31580.7  | 60275.48 | 16406.33 | 41989.48 | 57745.57 | 28392.3  | 42238.03 | 37196.44 | 23990.39 | 29599.75 | 44766.34 |
| Q8CIZ5 | 26966.04 | 109113.5 | 49472    | 73023.05 | 33152.79 | 127236.2 | 63793.48 | 65303.65 | 26151.9  | 45705.64 | 39063.29 | 644842.4 | 30553.85 | 49144.89 | 36008.84 | 35847.79 |
| Q8CJ52 | 72386.32 | 23185.9  | 10910.58 | 51817.02 | 29056.62 | 46630.58 | 68947.16 | 83861.38 | 5976.621 | 16238.57 | 35221.48 | 59780    | 29114.88 | 18875.77 | 4032.483 | 21313.12 |
| Q8CJD3 | 11505.11 | 10127.59 | 32714.54 | 13642.98 | 64541.73 | 11338.68 | 20945.06 | 13838.67 | 12709.69 | 13233.87 | 13110.85 | 21657.59 | 5513.063 | 23234.7  | 20515.61 | 10894.1  |
| Q8JZQ0 | 121328.6 | 129559.6 | 140989.9 | 106563.9 | 111424.7 | 95185.66 | 160887.8 | 132254   | 133233.8 | 104658.6 | 112938.6 | 133996.5 | 126810.2 | 165365.2 | 130938.9 | 142258.9 |
| Q8K1G0 | 58224.41 | 57886.39 | 63073.69 | 85638.41 | 39288.34 | 45217.61 | 44701.73 | 59395.49 | 25488    | 35302.53 | 25253.73 | 48326.2  | 19064.38 | 20368.95 | 31252.37 | 11813.94 |
| Q8K3V3 | 26717.21 | 33385.65 | 33039.88 | 26357.85 | 24882.78 | 25481.41 | 26327.39 | 33410.37 | 29401.2  | 33999.57 | 53890.46 | 25708.86 | 27942.46 | 32807.31 | 31446.53 | 27596.35 |
| Q8K4G9 | 12894.83 | 8397.061 | 28020.03 | 44517.59 | 33157.57 | 17001.05 | 29324.7  | 4231.593 | 25257.76 | 11970.82 | 25389.02 | 11738.04 | 10751.65 | 14454.75 | 28298.32 | 20362.89 |
| Q8N7M5 | 24244.53 | 33650.89 | 31601.83 | 16047.12 | 37919.22 | 33266.3  | 39417.84 | 27559.38 | 22557.36 | 17805.81 | 20534.41 | 15335.65 | 24041.43 | 20271.9  | 26872.4  | 26891.82 |
| Q8R431 | 10586.55 | 14915.12 | 18659.05 | 10389.93 | 6399.599 | 9928.078 | 15335.9  | 7570.272 | 17726.09 | 21645.63 | 43864.62 | 12147.65 | 9788.896 | 110757   | 10574.9  | 13764.72 |
| Q8R491 | 74504.8  | 164308   | 102709.8 | 147120.8 | 82897.8  | 122227.4 | 185509.7 | 65190.79 | 111213   | 164330.7 | 331198.9 | 172336.1 | 100776.6 | 119114.5 | 120654.3 | 119114   |
| Q8R4E1 | 76057.34 | 80249.68 | 50611.1  | 55851.04 | 49499.54 | 60097.92 | 65939.86 | 62565.91 | 34377.51 | 62911.36 | 71107.36 | 57298.6  | 24834.14 | 33645.11 | 33378.26 | 49111.59 |
| Q8R5M3 | 83204.44 | 45347.89 | 59228.73 | 83220.52 | 72303.16 | 49001.08 | 69669.8  | 15914.6  | 111889.5 | 95954.07 | 116948.5 | 93215.81 | 144005   | 85088.9  | 89785.86 | 126828.6 |
| Q8R5M5 | 25093.44 | 26629.41 | 50576.43 | 30703.49 | 50874.66 | 33131.82 | 33376.84 | 26928.13 | 43620.58 | 37922.89 | 40552.95 | 36630.8  | 57932.24 | 29468.66 | 26721.92 | 27326.96 |
| Q8VD89 | 82701.55 | 232280.5 | 138198.2 | 86657.13 | 143987.7 | 141612.6 | 54444.1  | 157406.6 | 327032.4 | 186261.9 | 116699.4 | 409699.7 | 163805.4 | 337101.8 | 185100.9 | 139072.3 |
| Q8VIF7 | 151649   | 141789.8 | 149527.8 | 129272.2 | 209341   | 138871.4 | 153572.9 | 161265.6 | 212897.3 | 232720   | 214620.2 | 151843.3 | 177576   | 175653.8 | 238315.6 | 220697.9 |
| Q91XN4 | 67035.55 | 104989.8 | 84779    | 97496.39 | 62383.93 | 83132.94 | 99627.73 | 107436.8 | 71027.86 | 52048.52 | 75846.35 | 64501.79 | 57764.14 | 69094.56 | 92492.59 | 59883.38 |
| Q91XT9 | 27334.08 | 32415.23 | 31131.59 | 39987.76 | 30677.23 | 25085.24 | 26302.84 | 30306.4  | 20038.91 | 17994.95 | 22455    | 21591.36 | 25908.58 | 29987.71 | 24300.81 | 25319.21 |
| Q91ZS3 | 37109.64 | 56960.37 | 18584.02 | 10421.68 | 8593.856 | 31335.16 | 22743.46 | 15096.51 | 35461.21 | 27208.67 | 29538.25 | 18149.41 | 17754.27 | 12515.64 | 10173.04 | 12174.12 |
| Q920A6 | 1054537  | 1087771  | 1244364  | 943203.8 | 1608475  | 757899.1 | 1564954  | 1069132  | 766054.7 | 997434.9 | 1438039  | 1132022  | 845089.5 | 1642677  | 828965.3 | 1413849  |
| Q920G2 | 9570.896 | 6400.156 | 7141.996 | 11511.9  | 8828.225 | 6215.11  | 5871.546 | 6713.97  | 6133.827 | 10403.06 | 3526.12  | 2249.648 | 3620.515 | 3610.743 | 6805.969 | 5682.383 |
| Q920P0 | 32638.5  | 15707.7  | 28052.42 | 8821.334 | 55188.89 | 24309.75 | 12452.13 | 25747.96 | 56909.96 | 56949.66 | 41210.2  | 22601.94 | 33199.95 | 21292.11 | 28583.53 | 24655.51 |
| Q923M1 | 25217.84 | 22347.12 | 23675.37 | 13665.04 | 47787.25 | 25960.02 | 31709.57 | 18459.45 | 57970.38 | 63384.91 | 68365.23 | 24103.54 | 40207.61 | 14354.2  | 47244.62 | 51409.31 |
| Q923S2 | 122357.7 | 118024   | 98628.29 | 104836.4 | 139759.7 | 53342.9  | 119106.2 | 70055.02 | 232010.4 | 265139   | 277407.6 | 189508.5 | 163088.4 | 88171.26 | 146982.8 | 266881   |
| Q923V8 | 15354.82 | 21399.88 | 14062.94 | 16111.82 | 6303.387 | 19184.98 | 12200.71 | 12898.29 | 14239.07 | 14652.18 | 13942.28 | 19104.96 | 11482.09 | 11680.81 | 20325.62 | 9898.35  |
| Q924C3 | 6346.987 | 7035.571 | 3627.609 | 7828.662 | 5236.377 | 5738.951 | 5896.766 | 5904.755 | 6495.258 | 6161.411 | 7072.158 | 4446.002 | 7621.767 | 4856.642 | 3576.792 | 6971.49  |
| Q99041 | 1548798  | 342934.1 | 1103457  | 4958348  | 1982765  | 3482012  | 5651548  | 4703396  | 263834.9 | 388854.6 | 1336707  | 2983775  | 707063.4 | 84629.95 | 543978.8 | 628559.3 |
| Q99068 | 10508.19 | 16164.12 | 16601.46 | 47882.37 | 15233.42 | 9388.91  | 13543.25 | 4970.794 | 10433.85 | 12559.72 | 7600.396 | 8710.976 | 13800.25 | 14995.43 | 12241.26 | 11880.47 |
| Q99376 | 8563.738 | 15890.71 | 15770.09 | 11024.55 | 16473.03 | 14517.71 | 8228.319 | 7024.045 | 9467.946 | 9951.551 | 18994.25 | 10849.45 | 7842.965 | 7855.61  | 9653.737 | 9021.165 |
| Q99J86 | 199614.4 | 289001.3 | 267433.8 | 260634.9 | 256837.2 | 177539.8 | 193107.9 | 236489.6 | 223594.1 | 260790.1 | 242648.4 | 208813.9 | 270102   | 343261.2 | 242021.3 | 281876   |
| Q99M75 | 30761.45 | 37215.45 | 33842.07 | 30315.68 | 47385.61 | 18885.27 | 14893.99 | 36858.85 | 46010.01 | 41742.71 | 40809.22 | 34999.49 | 51011.01 | 52386.77 | 41228.66 | 46593.07 |
| Q99MA2 | 612211.4 | 603174.8 | 572315.6 | 600485.6 | 723299.6 | 451087.2 | 739342.3 | 430671.3 | 1056048  | 697508.6 | 917747.9 | 866133.7 | 625742.4 | 542830.1 | 742631.1 | 979528.6 |
| Q99MF4 | 77743.65 | 100836.3 | 105096.2 | 63106.91 | 82466.8  | 71609.5  | 76771.66 | 73036.45 | 71180.27 | 93535.76 | 47369.75 | 53181.1  | 68461.79 | 86985.58 | 40456.49 | 50574.77 |
| Q99MH3 | 421929.9 | 2641896  | 280959.5 | 1152422  | 724146.1 | 274043   | 980188   | 1081579  | 2196468  | 453452.3 | 2045464  | 491888.9 | 694481.5 | 2476645  | 1108774  | 2046014  |
| Q99PP0 | 12913.62 | 23483.64 | 14826.86 | 19708.35 | 9003.219 | 14923.73 | 49189.84 | 11590.09 | 13667.96 | 17039.26 | 16996.26 | 10197.42 | 20708.29 | 9113.011 | 25829.27 | 25581.26 |
| Q99PS8 | 408470.3 | 904266   | 1670476  | 508352.1 | 1517349  | 740554.5 | 889939   | 1042110  | 1231511  | 929565.2 | 698368.9 | 766002   | 1397559  | 1251792  | 1124332  | 1357414  |

|        |          |          |          |          |          |          |          |          |          |          |          |          |          |          |          |          |
|--------|----------|----------|----------|----------|----------|----------|----------|----------|----------|----------|----------|----------|----------|----------|----------|----------|
| Q99PW3 | 205596.2 | 234284.6 | 293102.3 | 196952.9 | 174811.2 | 306745.4 | 252537.7 | 191432   | 124876.5 | 110429.3 | 115903.2 | 128748.1 | 173519   | 223250.7 | 116204   | 166371   |
| Q99PW7 | 19308.5  | 24504.07 | 19743.82 | 25626.99 | 29696.67 | 25326.72 | 23102.26 | 17928.56 | 18141.07 | 14517.49 | 12833.53 | 13899.13 | 16077.78 | 20706.53 | 18419.05 | 15100.81 |
| Q9EPB1 | 5778425  | 6649823  | 6557358  | 6156832  | 7221372  | 4109293  | 4785156  | 5338772  | 9463602  | 9548730  | 42412584 | 8328545  | 9297145  | 17393608 | 12973765 | 11741971 |
| Q9EPF2 | 64179.55 | 91240.27 | 96545.11 | 53145.23 | 91068.38 | 68743.13 | 86644.52 | 80138.14 | 71794.04 | 92257.19 | 59497.8  | 64834.97 | 86855.65 | 76717.58 | 91694.11 | 128051.1 |
| Q9EQS0 | 6177.029 | 16910.87 | 7850.834 | 10446.64 | 3956.204 | 5964.171 | 8799.432 | 9375.658 | 3841.669 | 4031.316 | 4906.666 | 7229.695 | 1356.297 | 4814.211 | 1204.515 | 1689.803 |
| Q9EQV6 | 122954.4 | 95053.92 | 89333.74 | 147832.4 | 53553.9  | 79615.77 | 65283.73 | 87245.29 | 113675.4 | 96967.97 | 106330.1 | 121231.4 | 120816.6 | 145925.8 | 132199.7 | 86709.34 |
| Q9EQV9 | 123958.4 | 119811   | 72528.95 | 151853.6 | 50039.55 | 71180.45 | 73532.73 | 97662.61 | 50294.99 | 64023.17 | 50224.44 | 81829.52 | 22722.98 | 50438.4  | 77877.41 | 24658.8  |
| Q9EQX9 | 23254.26 | 18704.04 | 14061.39 | 19938.04 | 17801.73 | 15210.31 | 16984.64 | 23818.17 | 29898.32 | 20688.91 | 26068.96 | 17500.07 | 19176.88 | 17512.93 | 21952.44 | 20820.2  |
| Q9ERA7 | 11455.41 | 27756.18 | 15218.72 | 23808.92 | 15242.09 | 13112.2  | 20738.66 | 15552.91 | 16256.09 | 17620.8  | 23858.08 | 15873.14 | 15687.34 | 13885.42 | 18934.54 | 14953.57 |
| Q9ES87 | 730506.4 | 809257.1 | 848653.3 | 536844.1 | 585055.8 | 502921.6 | 786643.4 | 648512.9 | 686980.6 | 748937.3 | 751121.6 | 607697.9 | 527286.1 | 785486.3 | 874688   | 914130   |
| Q9ESG3 | 33153.26 | 44856.86 | 33476.29 | 49117.66 | 68369.05 | 42687.11 | 88894.59 | 35972.09 | 82266.89 | 127293.9 | 87417.02 | 70408.52 | 49770.19 | 37563.78 | 57492.79 | 88554.68 |
| Q9ESS6 | 164144.6 | 315038.1 | 218505.2 | 285419.4 | 316927.8 | 181783   | 276677.9 | 296756.5 | 211788   | 206818   | 177829.2 | 186704.2 | 188901   | 266249.4 | 241615.3 | 203927.6 |
| Q9ESW0 | 26692.29 | 12466.76 | 23453.54 | 37140.89 | 28649.3  | 7732.436 | 19683.88 | 15305.65 | 4160.204 | 7195.925 | 22210.48 | 21555.21 | 3201.085 | 9094.442 | 11209.73 | 5666.01  |
| Q9ET32 | 23095.21 | 8538.136 | 14788.4  | 3321.875 | 15891.72 | 14633.45 | 20529.93 | 15368.23 | 6835.203 | 11404.06 | 9313.787 | 20979.3  | 5541.04  | 14523.8  | 6209.125 | 11644.78 |
| Q9JHB9 | 907214.2 | 560832.7 | 118993.8 | 582127.6 | 359368.6 | 1285990  | 586771.9 | 717624.2 | 252415.6 | 263920.2 | 711025.8 | 1140118  | 678107.3 | 302113.8 | 46893.3  | 27393.99 |
| Q9JHW1 | 25297.79 | 29896.04 | 20246.96 | 31502.7  | 19433.74 | 27705.26 | 19803.54 | 23290.31 | 11030.23 | 16671.79 | 20343.24 | 21646.75 | 12796.36 | 16308.8  | 15909.12 | 14992.65 |
| Q9JHY1 | 1401662  | 1613736  | 1795628  | 1373013  | 1106246  | 1164398  | 1502732  | 1508253  | 1258699  | 1210930  | 1167264  | 1314217  | 1909662  | 1945444  | 1810615  | 2106636  |
| Q9JI85 | 680774.2 | 315362.8 | 118966.3 | 429297.1 | 118914.8 | 551063   | 576086.9 | 367507.2 | 140021.2 | 122335   | 333533.6 | 319640.3 | 209498   | 139278.6 | 78891.29 | 45276.66 |
| Q9JI92 | 236547.5 | 109661.8 | 169507.1 | 340454.3 | 190943.8 | 169600.6 | 131709.5 | 159282.3 | 110861.1 | 99143.71 | 213353.9 | 152286.2 | 146638.5 | 159015.2 | 101773.6 | 107501.6 |
| Q9JID2 | 24752.85 | 15475.99 | 17368.17 | 34809.84 | 17988.05 | 15261.85 | 21337.62 | 21492.85 | 28007.08 | 31665.62 | 59337.02 | 33805.98 | 15673.89 | 26886.49 | 26163.82 | 18781.74 |
| Q9JIK1 | 920038.9 | 700527.1 | 907508.6 | 672419   | 652738.1 | 741258.9 | 613597.9 | 955254.9 | 606864.3 | 371298.1 | 592779.6 | 653927.4 | 912860.6 | 763878   | 986960.1 | 1096237  |
| Q9JJ19 | 650098.6 | 638418.3 | 510961.1 | 644110.8 | 719133.1 | 541987   | 607225.3 | 358874.3 | 1162355  | 974076.2 | 1327592  | 1003325  | 890250.2 | 551620.4 | 789857.7 | 1107798  |
| Q9JJ22 | 17297.81 | 14945.16 | 8759.821 | 9051.805 | 7120.067 | 6814.846 | 6855.738 | 7107.286 | 8146.149 | 4967.46  | 4454.698 | 9630.275 | 5114.779 | 5665.382 | 7255.139 | 4441.063 |
| Q9JJ40 | 776118.1 | 774003.4 | 499262.3 | 781870.5 | 1033590  | 614714.8 | 864194.3 | 383050.1 | 869410.4 | 1142349  | 1292325  | 676447.2 | 444761.8 | 499054.3 | 713334.1 | 1164999  |
| Q9JJ50 | 17371.63 | 22696.79 | 16187.92 | 16846.5  | 21767.66 | 7261.214 | 11732.64 | 10833.03 | 25614.49 | 25037.03 | 29576.98 | 14788.81 | 9704.885 | 30434.38 | 19575.05 | 22726.37 |
| Q9JJ73 | 16645.06 | 36488.89 | 49760.63 | 26189.47 | 42777.39 | 24798.59 | 24902.51 | 24711.08 | 21429.12 | 19780.48 | 22908.59 | 26451.84 | 24639.45 | 40616.59 | 20727.91 | 33734.07 |
| Q9JJS8 | 10773.98 | 23432.31 | 31089.84 | 19945.16 | 10029.11 | 11553.84 | 4048.074 | 9917.663 | 8869.731 | 12103.82 | 5294.957 | 22342.13 | 6200.079 | 10165.1  | 5027.975 | 12129.87 |
| Q9JLJ3 | 60008.39 | 69586.07 | 60213.65 | 43106    | 85379.15 | 67903.53 | 73999.61 | 53240.24 | 108188.3 | 104870   | 132416.8 | 119031.2 | 76802.8  | 85197.85 | 70651.8  | 86475.95 |
| Q9JLS4 | 155176.8 | 268137.7 | 264717   | 178533.2 | 242415.6 | 199573.5 | 240938.5 | 206257   | 117533   | 193716.8 | 212845.2 | 126068.1 | 162137.7 | 154086.5 | 135457.8 | 277767.2 |
| Q9QUL6 | 1134226  | 671018.6 | 3388407  | 7300277  | 364767   | 835477.1 | 1533033  | 3355635  | 552861.2 | 1265761  | 445516.1 | 4588011  | 4654222  | 2695751  | 3504756  | 3537936  |
| Q9QW07 | 48432.42 | 6673.979 | 87218.77 | 12274.73 | 37098.77 | 9026.523 | 8233.941 | 10512.38 | 2083.393 | 3970.602 | 3868.812 | 8954.079 | 54723.55 | 65556.66 | 11972.99 | 15403.93 |
| Q9QW30 | 24232.47 | 31712.85 | 22657.94 | 23725.49 | 25245.39 | 25832.2  | 33677.02 | 39463.35 | 36200.73 | 18054.75 | 29520.92 | 33123.38 | 36383.19 | 34296.4  | 39005.46 | 20838.34 |
| Q9QWJ9 | 14363.2  | 30538.05 | 29508.94 | 19404.26 | 45471.55 | 11844.76 | 11392.68 | 32497.56 | 20497.25 | 26667.45 | 25720.73 | 30377.6  | 21297.16 | 168731.9 | 17620.01 | 34796.13 |
| Q9QX79 | 2785265  | 1499610  | 2847933  | 2001760  | 1781355  | 1103556  | 1970980  | 2986152  | 1146716  | 814780.2 | 859513.4 | 767905.9 | 746569.8 | 1021477  | 996452.3 | 695972.7 |
| Q9QXQ0 | 20497.1  | 35310.7  | 14214.8  | 38588.63 | 28513.01 | 21998.62 | 19571.59 | 41126.88 | 43821.5  | 51002.79 | 63347.62 | 35121.44 | 43257.69 | 38553.83 | 35964.32 | 56676.84 |
| Q9QY17 | 30146.6  | 14213.63 | 13600.11 | 19708.92 | 21426.81 | 17149.62 | 35225.13 | 20901    | 23464.66 | 20671.09 | 31892.59 | 40183.26 | 19812.19 | 19107.33 | 9341.297 | 16463.61 |
| Q9QYU4 | 36194.68 | 43010.24 | 21955.71 | 40860.95 | 49615.39 | 24005.31 | 32101.42 | 31935.49 | 61757.6  | 64955.52 | 129503.8 | 28829.76 | 45174.59 | 21967.59 | 45082.7  | 48016.84 |
| Q9QZ76 | 15526.77 | 10252.33 | 19984.29 | 10566.44 | 7905.052 | 21389.02 | 12393.33 | 10994.15 | 24080.17 | 12512.86 | 14783    | 16583.03 | 16888.12 | 13775.83 | 26072.04 | 14988.01 |
| Q9QZA2 | 302051.3 | 255468.9 | 248818.6 | 259675.7 | 295411.1 | 265049.8 | 267869.8 | 236516.8 | 224195.6 | 257714.8 | 295852.4 | 243771.8 | 216918.3 | 229095.4 | 218049.6 | 225927.3 |
| Q9QZA6 | 12855.8  | 10736.72 | 4549.373 | 11604.51 | 7478.867 | 5612.815 | 10854.58 | 21950.82 | 4312.993 | 4133.661 | 7047.771 | 10922.53 | 1835.211 | 5158.426 | 7986.906 | 3727.458 |
| Q9QZH0 | 179347.7 | 120670.8 | 183787.7 | 511333.2 | 139350.8 | 201954.7 | 223042.9 | 174473   | 144060.7 | 49917.46 | 61997.38 | 162433.9 | 223482.5 | 234167.6 | 227612.1 | 243171.3 |
| Q9QZK8 | 53027.9  | 36631.97 | 29401.02 | 62738.22 | 39621.09 | 56252.7  | 46211.06 | 53968.04 | 18128.38 | 21195.01 | 29062.75 | 41315.3  | 24904.83 | 26087.45 | 19834.47 | 19226.75 |
| Q9QZK9 | 29491.94 | 14766.81 | 32943.76 | 36547.27 | 27299.21 | 83825.09 | 58753.34 | 44311.87 | 4391.229 | 43016.6  | 40249.13 | 124001.3 | 53831.84 | 13893.54 | 12748.87 | 1442.526 |
| Q9QZQ5 | 46835.64 | 186161.9 | 92769.33 | 163683.3 | 100143.7 | 188314.8 | 296014.7 | 126888.6 | 106928.3 | 123436.3 | 133621.5 | 124861.8 | 86188.31 | 90819.43 | 135030   | 102471.2 |
| Q9R044 | 17596.32 | 22293.9  | 22587.88 | 38223.02 | 24512.22 | 22880.59 | 106092.1 | 33479.32 | 17340.51 | 18080.62 | 25278.23 | 19432.46 | 21060.91 | 27425.26 | 28816.88 | 26395.87 |
| Q9R063 | 139381.2 | 104944.9 | 93951.99 | 79628.7  | 88634.8  | 100264   | 123472.4 | 153999.7 | 117134.5 | 118300.3 | 191740.2 | 168594.8 | 91390.95 | 93507.65 | 76438.88 | 61272.68 |
| Q9R066 | 105684.2 | 135105.3 | 128105.2 | 81140.64 | 150329.9 | 87571.7  | 138196.8 | 131423.6 | 72123.31 | 102969   | 77175.27 | 66196.18 | 103284.7 | 84924.62 | 76748.83 | 103591.9 |
| Q9R0D6 | 169720.2 | 176484.2 | 135236.3 | 204373.8 | 182977.9 | 155620.4 | 179683.7 | 177481.2 | 133731.4 | 186792.8 | 132913.3 | 165787.7 | 148983.5 | 152542.3 | 137430   | 124502.6 |
| Q9R0J8 | 85581.37 | 141564.6 | 122054.6 | 115609.3 | 75084.75 | 58935.38 | 85033.23 | 61053.67 | 72639.8  | 94200.21 | 276237.7 | 106001.9 | 55973.66 | 115434.6 | 98633.2  | 95375.16 |

|        |          |          |          |          |          |          |          |          |          |          |          |          |          |          |          |          |
|--------|----------|----------|----------|----------|----------|----------|----------|----------|----------|----------|----------|----------|----------|----------|----------|----------|
| Q9R0T3 | 38278.03 | 37282.77 | 20431.59 | 68079.05 | 17032.23 | 42581.86 | 62974.02 | 61516.12 | 12786.24 | 19491.39 | 17908.47 | 25993.38 | 22901.99 | 8620.049 | 2335.08  | 21245.75 |
| Q9R0T4 | 8978921  | 20963068 | 11048058 | 12510219 | 11989258 | 3749927  | 10675380 | 12424805 | 5747888  | 4126560  | 8402504  | 8679344  | 9621849  | 13480900 | 8311478  | 10573261 |
| Q9R141 | 10619.26 | 13060.68 | 8455.326 | 11741.3  | 14910.78 | 8970.396 | 13979.63 | 6944.188 | 19027.73 | 24293.28 | 125192.2 | 15435.25 | 7597.284 | 11792.12 | 20508.6  | 17814.88 |
| Q9R1T1 | 30318.35 | 25449.74 | 34270.18 | 24585.8  | 22157.59 | 10545.52 | 28680.07 | 21031.58 | 12820.13 | 16245.01 | 31154.62 | 25018.56 | 10845.71 | 12705.84 | 12643.11 | 10540.28 |
| Q9R1T3 | 165029.2 | 173538.7 | 145109.8 | 170177.5 | 94108.67 | 187565.8 | 155888.8 | 118892.7 | 94345.38 | 91812.16 | 62357.6  | 113967   | 122674.8 | 85674.05 | 137025.2 | 65747.98 |
| Q9R1T5 | 13115.52 | 19607.2  | 12692.29 | 13729.18 | 16262.05 | 15946.31 | 23278.8  | 11213.4  | 27885.76 | 28309.63 | 26866.91 | 7221.2   | 22853.56 | 17780.72 | 18640.68 | 28342.36 |
| Q9WTQ2 | 349463.4 | 321450.8 | 378944.5 | 267097.8 | 466565.8 | 164159.3 | 244783.1 | 229077.1 | 123879.8 | 171736.6 | 204721.3 | 151167.7 | 148355.8 | 229727.6 | 232656.9 | 279415.8 |
| Q9WTT6 | 14719.3  | 19193.25 | 13545.8  | 21999.69 | 20608.32 | 51210.41 | 13951.54 | 58680.24 | 13410.48 | 13872.48 | 5021.948 | 13871.58 | 12370.79 | 14656.49 | 10285.62 | 10184.44 |
| Q9WTW7 | 139867.5 | 158407.4 | 94038.74 | 208269.4 | 300165.3 | 120961.9 | 177270.5 | 79460.15 | 212219.7 | 361889.7 | 314670.3 | 155691.9 | 165526.3 | 124381.9 | 247580.4 | 291677.5 |
| Q9WUC4 | 1022278  | 1060951  | 1002882  | 958786.1 | 668261.2 | 553156.1 | 1206152  | 416251.4 | 564304.3 | 810058.4 | 789571.6 | 742890.9 | 807259.9 | 1256688  | 977273.7 | 880167.1 |
| Q9WUD9 | 37664.82 | 22866.03 | 12412.31 | 25263.27 | 22104.75 | 37226.91 | 26988.82 | 34720.61 | 19143.37 | 18602.03 | 31477.04 | 26321.73 | 16538.22 | 23372.79 | 12165.41 | 10739.45 |
| Q9WUF4 | 21341.59 | 15921.02 | 10442.85 | 18630.2  | 8025.884 | 14608.71 | 21231.19 | 16875.93 | 15533.46 | 12898.68 | 10077.84 | 14473.31 | 12191.24 | 14445.72 | 9522.592 | 13793.01 |
| Q9WUK5 | 260928   | 273156.9 | 457963.4 | 232983.9 | 311474.2 | 133710.9 | 372098.4 | 396975.4 | 438868.4 | 266801.6 | 387058.5 | 451300   | 494455.3 | 486039.4 | 441501.6 | 633342.9 |
| Q9WUW3 | 151768.7 | 58219.48 | 131076.1 | 121689.6 | 65406.52 | 95945.51 | 104986.8 | 165591.8 | 74292.79 | 59859.86 | 79613.18 | 81503.99 | 88053.8  | 99832.88 | 97026.75 | 92902.25 |
| Q9WUW8 | 15768.87 | 14628.49 | 10502.04 | 13343.97 | 8860.885 | 9289.858 | 7843.891 | 12807.06 | 16817.74 | 31837.08 | 15402.48 | 17001.04 | 5939.339 | 10231.32 | 9088.273 | 41071.18 |
| Q9WUW9 | 58397.64 | 68813.47 | 35913.34 | 84583    | 72131.98 | 61044.79 | 64713.32 | 52057.06 | 92137.36 | 108510.4 | 134453.1 | 52274.8  | 40346.2  | 16872.72 | 51520.52 | 67495.01 |
| Q9WVH8 | 44512.98 | 60907.47 | 48354.84 | 51921.2  | 32689.92 | 50371.52 | 50869.41 | 46874.8  | 32212    | 38955.09 | 66560.96 | 38534.55 | 34753.96 | 32984.41 | 44967.18 | 42180.59 |
| Q9Z0J6 | 14423.28 | 12126.09 | 20910.51 | 14251.75 | 12473.52 | 7554.138 | 11410.53 | 16167.28 | 13167.46 | 9123.537 | 19615.77 | 15068.9  | 16740.92 | 22115.07 | 18838.72 | 18577.63 |
| Q9Z0T0 | 24631.88 | 27948.56 | 21347.62 | 20311.54 | 48677.16 | 20510.03 | 13224.63 | 18585.82 | 24081.87 | 18604.86 | 27771.04 | 21720.93 | 21831.9  | 19544.09 | 24800.93 | 22800.34 |
| Q9Z0V6 | 46923.27 | 109058.2 | 92840.55 | 217656.7 | 135199.7 | 303983.8 | 65774.34 | 150726.6 | 20250.84 | 32899.99 | 24043.48 | 42552.85 | 15103.04 | 40128.52 | 29295.3  | 21912.42 |
| Q9Z0W7 | 86850.46 | 121509.8 | 66916.91 | 100290   | 103311.3 | 65956.13 | 68267.21 | 79480.55 | 177749.2 | 231627.2 | 193705.3 | 113557.8 | 118840.2 | 62738.07 | 119886.7 | 153019.3 |
| Q9Z1F2 | 5416.464 | 6917.603 | 11221.48 | 51332.14 | 8890.597 | 4512.072 | 16374.21 | 6091.852 | 17627.72 | 26033.51 | 22504.46 | 10100.91 | 6681.101 | 12717.89 | 25306.42 | 24822.68 |
| Q9Z1Y3 | 764051.8 | 808271.1 | 720918.9 | 488922.3 | 1021748  | 380385   | 827598.9 | 789592.8 | 419620.5 | 295071.7 | 486714.2 | 368743   | 341783.1 | 688930.4 | 570879.6 | 484002.2 |
| Q9Z2Y9 | 72119.07 | 76805.27 | 77009.1  | 51414.07 | 59398.75 | 62936.57 | 62846.53 | 70776.8  | 90814.5  | 113173.3 | 95839.5  | 75315.72 | 61298.37 | 106962.4 | 84405.98 | 73777.23 |
| Q9Z339 | 185382.2 | 202707.3 | 209113   | 243577.9 | 71447.31 | 227073.8 | 145242.8 | 167338.2 | 178045.5 | 245469.5 | 245946.3 | 208628.4 | 151868.8 | 134369.9 | 194328.3 | 92039.33 |

| 17       | 18       | 19       | 20       | 21       | 22       | 23       | 24       | 25       | 26       | 27       | 28       | 29       | 30       | 31       | 32       | 33       |
|----------|----------|----------|----------|----------|----------|----------|----------|----------|----------|----------|----------|----------|----------|----------|----------|----------|
| D5-RAT9  | D7-RAT1  | D7-RAT2  | D7-RAT3  | D7-RAT4  | D7-RAT5  | D7-RAT6  | D7-RAT7  | D7-RAT8  | D7-RAT9  | D14-RAT1 | D14-RAT2 | D14-RAT3 | D14-RAT4 | D14-RAT5 | D14-RAT6 | D14-RAT7 |
| 16409.45 | 40589.12 | 2141.118 | 37576.02 | 13033.28 | 13716.8  | 58501.69 | 26713.88 | 24140.14 | 33812.65 | 64789.26 | 27535.17 | 18832.64 | 13814.6  | 59696.07 | 23590.44 | 13013.9  |
| 14286.39 | 7344.103 | 17865.4  | 18523.71 | 12305.39 | 17762.75 | 19601.82 | 13526.2  | 11451.17 | 9604.707 | 14297.91 | 17291.13 | 9033.076 | 9330.402 | 10136.51 | 14520.95 | 13315.13 |
| 113124.4 | 89433.42 | 92411.85 | 87298.63 | 67301.41 | 87418.37 | 73479.37 | 105684.8 | 89757.45 | 128014.8 | 92918.11 | 98061.97 | 78825.59 | 85872.91 | 114612.4 | 101006   | 123234.5 |
| 30708.06 | 34558.35 | 23731.73 | 29057.57 | 50572.02 | 29900.36 | 31497.6  | 24261.83 | 32927.95 | 41216.46 | 30318.05 | 26290.13 | 25593.36 | 75819.54 | 34790.47 | 34183.2  | 28082.34 |
| 61633.55 | 85519.85 | 67520.53 | 60941.14 | 48076.27 | 63983.53 | 58514.8  | 53533.32 | 65006.48 | 58975.52 | 78914.07 | 68590.84 | 37589.41 | 68242.02 | 75032.71 | 74378.56 | 57204.02 |
| 59581.73 | 31511.96 | 23703.23 | 89621.48 | 64417.37 | 29578.78 | 12468.06 | 85426.31 | 17968.29 | 506773.1 | 34008.63 | 29027.6  | 42224.63 | 53838.54 | 37504.82 | 6546.228 | 52620.46 |
| 5520.021 | 5405.481 | 5451.005 | 6895.621 | 9616.894 | 6408.81  | 8254.396 | 5886.378 | 8354.117 | 6811.54  | 9882.305 | 16425.59 | 17804.35 | 11182.35 | 9848.104 | 9754.882 | 8475.594 |
| 43216.66 | 43558.24 | 52089.6  | 61934.24 | 41482.23 | 54537.77 | 46729.7  | 51151.99 | 41025.54 | 37796.33 | 35870.59 | 35826.62 | 34956.41 | 35854.78 | 45817.39 | 43017.93 | 31018.4  |
| 10112.32 | 11457.15 | 13721.82 | 12815.75 | 6998.285 | 8029.446 | 7578.182 | 10391.31 | 5521.094 | 11583.02 | 12786.77 | 16481.96 | 8901.125 | 11386.72 | 10664.86 | 5777.747 | 10324.61 |
| 8030.705 | 17490.16 | 7864.747 | 6417.9   | 10698.86 | 9496.132 | 8500.532 | 14155.74 | 20262.97 | 24939.29 | 19669.79 | 29092.16 | 22351.91 | 12915.96 | 13919.75 | 13508.26 | 21772.37 |
| 8604.83  | 16593.3  | 13255.91 | 12502.14 | 10746.85 | 12579.38 | 14889.91 | 11322.64 | 11075.41 | 11893.75 | 19204.62 | 15887.34 | 15749.11 | 8235.604 | 11498.41 | 15223.53 | 13562.47 |
| 266954.1 | 523678.1 | 594696.5 | 570464.7 | 426001.2 | 478320.6 | 392730.3 | 377828.4 | 516228   | 209165.9 | 424897.8 | 165241.1 | 351557   | 358454.9 | 320086.5 | 397200.1 | 370448.9 |
| 12617.67 | 15497.32 | 10661.92 | 10635.38 | 13654.43 | 8722.39  | 14800.6  | 11773.47 | 19382    | 15082.27 | 14209.02 | 19047.66 | 15666.47 | 22521.96 | 18401.27 | 12172.34 | 19405.27 |
| 5942.279 | 22653.29 | 22217.79 | 22114.63 | 31095.99 | 16047.89 | 25229.53 | 48207.08 | 21940.86 | 35318.67 | 24397.9  | 42754.01 | 27174.98 | 42634.55 | 37342.16 | 15072.86 | 34293.61 |
| 15299.88 | 16616.25 | 15377.5  | 19169.6  | 16800.17 | 15990.21 | 25355.76 | 20161.68 | 16294.3  | 16980.08 | 18180.31 | 11982.91 | 15723.82 | 16895.5  | 16166.55 | 17765.73 | 16028.91 |
| 231454.1 | 264518.2 | 223655.9 | 264987   | 364408.3 | 221253.5 | 270751.9 | 205424.1 | 148020.2 | 289750.5 | 268132.8 | 218276   | 325454.1 | 356417.5 | 269616.9 | 294796.8 | 213358   |
| 18124.59 | 19126.01 | 24407.64 | 27724.87 | 17099.06 | 27305.02 | 25917.32 | 26923.24 | 26628.44 | 19165.02 | 14527.05 | 9964.531 | 19037.56 | 11801.84 | 21301.64 | 19502.62 | 25053.24 |
| 12739.06 | 22590.79 | 12735.7  | 12898.74 | 17876.03 | 16929.19 | 23757.84 | 10863.25 | 24411.86 | 99907.27 | 25401.48 | 13224.48 | 14792.03 | 7302.9   | 17243.78 | 18923.87 | 17389.46 |
| 352512.6 | 520288.7 | 420213.9 | 112973.1 | 806840   | 240163.4 | 413696.6 | 408960.9 | 117545.5 | 374193.5 | 753344   | 403539.9 | 298815.1 | 538055.6 | 321854.2 | 240973.3 | 203167.3 |
| 39272.26 | 40420.23 | 39380.13 | 53322.19 | 46012.56 | 68985.11 | 64961.41 | 34676.19 | 45372.27 | 48879.53 | 62617.02 | 25886.4  | 17021.13 | 40198.31 | 29720.12 | 34981.65 | 50339.7  |
| 28900.87 | 24915.89 | 24031.41 | 60105.71 | 21268.52 | 21183.79 | 80461.17 | 43957.04 | 26605.39 | 71027.56 | 31025.35 | 22513.13 | 17363.14 | 23860.91 | 28575.19 | 34328.66 | 50631.95 |
| 20300.61 | 24204.99 | 16607.3  | 18656.73 | 16195.32 | 18355.74 | 21453.29 | 18134.61 | 20233.57 | 20034.29 | 20806.8  | 26800.19 | 19579.1  | 25385.95 | 20240.78 | 20701.71 | 18029.15 |
| 27605.96 | 10130.93 | 15503.58 | 9163.746 | 18769.95 | 17835.47 | 35088.91 | 14664.36 | 17493.26 | 104570.8 | 16764.21 | 4524.325 | 20201.21 | 14368.51 | 16089.38 | 31002.43 | 18942.11 |
| 8031.242 | 7228.785 | 9705.91  | 9302.823 | 9158.746 | 7281.458 | 5914.833 | 4465.369 | 6246.215 | 8610.237 | 9129.702 | 13288.46 | 16936.93 | 8841.938 | 8617.375 | 10070.88 | 6503.398 |
| 26881.31 | 17671.05 | 17471.54 | 25658.22 | 65458.93 | 18231.71 | 31832.85 | 21900.45 | 23479.97 | 36998.94 | 45436.02 | 113698.6 | 90451.09 | 46035.39 | 17929.42 | 42634.2  | 37233.67 |
| 6165.384 | 19519.55 | 8422.743 | 10403.29 | 11193.7  | 10856.86 | 7761.612 | 6454.188 | 9924.569 | 6968.948 | 25915.65 | 13573.91 | 8487.023 | 10174.04 | 9164.275 | 15808.13 | 10109.7  |
| 102002.4 | 159046.3 | 114913.7 | 157142.2 | 127495.9 | 279446.6 | 275280.3 | 146444.7 | 204512   | 153441.2 | 249965   | 69840.99 | 109815.9 | 69984.05 | 114562.1 | 181582.6 | 122838.9 |
| 204769.3 | 268785.4 | 166229   | 188316.5 | 163315.8 | 211785.4 | 219088   | 182477.9 | 169233.3 | 186069.9 | 289091.6 | 220553.2 | 227645.7 | 208922.1 | 241977.2 | 300560.4 | 234855.4 |
| 87351.03 | 161865.7 | 54411.75 | 97554.02 | 83994.84 | 80515.82 | 102054.3 | 109964.1 | 95772.34 | 90118.44 | 135485.8 | 163795.1 | 85541.83 | 124056.9 | 136764.2 | 106084.9 | 161499.5 |
| 42844.1  | 26066.46 | 27645.89 | 35670.68 | 22316.92 | 17854.1  | 16620.48 | 32099.58 | 22064.25 | 30375.36 | 30143.5  | 31128.67 | 24339.2  | 21181.92 | 23040.9  | 22538.26 | 23123.73 |
| 71719.5  | 151368.1 | 138363.2 | 103007.6 | 91452.92 | 59415.2  | 242196.8 | 91958.42 | 140579.4 | 75596.25 | 128222.8 | 92598.64 | 56799.48 | 84364.73 | 50699.09 | 215503.9 | 120785.6 |
| 78593.96 | 17426.02 | 12041.01 | 12411.13 | 21983.13 | 7402.255 | 9924.226 | 6562.431 | 10479.42 | 10803.68 | 22490.92 | 39463.84 | 35698.39 | 17658.43 | 9943.374 | 16621.82 | 14065.2  |
| 13813.69 | 25209.09 | 20590.32 | 19385.92 | 24659.38 | 16869.6  | 18608.65 | 19878.62 | 18719.24 | 15350.71 | 18428.9  | 28342.91 | 19661.45 | 19748.58 | 31176.65 | 12836.86 | 15149.07 |
| 38573.54 | 28563.84 | 20931.05 | 22598.1  | 17859.88 | 24278.96 | 10269.39 | 15230.7  | 21181.97 | 26799.04 | 32899.61 | 26599.28 | 37959.88 | 19501.5  | 21504.67 | 17993.73 | 21301.05 |
| 110296.8 | 116227.2 | 111513.3 | 121823.1 | 83153.86 | 111906.4 | 128514.3 | 105373   | 130738.1 | 79638.08 | 134167.5 | 91838.3  | 128548   | 104512.5 | 103457.4 | 150907.3 | 136778.6 |
| 36017.06 | 78188.84 | 60860.38 | 72188.27 | 95122.2  | 67518.45 | 82433.92 | 65928.65 | 86558.27 | 58203.84 | 86051.27 | 58779.54 | 57349.2  | 78396.6  | 70661.71 | 60801.83 | 72003.73 |
| 480650.1 | 585811.3 | 664805.1 | 663743.4 | 502957.9 | 517562.5 | 809139.9 | 593337.6 | 515210   | 587775.9 | 540155.7 | 548755.6 | 634510.1 | 517471.3 | 497566.6 | 460554.7 | 512954.4 |
| 254137.9 | 276583.6 | 231701.7 | 191256.7 | 235513.3 | 178159   | 284972.9 | 198663.7 | 227611.6 | 245402.1 | 287023.1 | 264265.3 | 158711.3 | 226589.8 | 215310.6 | 292924.3 | 286194.9 |
| 39799.46 | 38121.86 | 48417.24 | 35543.01 | 21216.23 | 30008.41 | 30734.68 | 34316.1  | 45681.87 | 55335.28 | 32260.79 | 27977.82 | 33232.85 | 25921.48 | 30758.95 | 33732.78 | 39232.27 |
| 17654.02 | 30401.97 | 27279.09 | 62354.74 | 22955.29 | 20651.76 | 22946.01 | 20687.59 | 29580.75 | 20839.1  | 24406.43 | 13943.75 | 31609.73 | 22029.02 | 22758.29 | 20590.12 | 21079.96 |
| 56969.48 | 95021.52 | 61236.05 | 87802    | 116367.5 | 58321.16 | 62210.47 | 55075.19 | 91425.25 | 93430.94 | 79677.22 | 144955.4 | 97761.11 | 103766.1 | 94720.17 | 66282.84 | 63874.26 |
| 13953.26 | 28074.63 | 21173.29 | 15293.07 | 44667.39 | 19398.97 | 16718.54 | 7122.662 | 9926.847 | 5322.711 | 31067.46 | 108598.4 | 68356.63 | 17150.47 | 20767.51 | 16066.91 | 22837.65 |
| 427793.2 | 913598.8 | 628417.1 | 611836.9 | 695030.6 | 989977   | 664730.1 | 613560.1 | 1042073  | 580621.7 | 675966.4 | 357057.1 | 446313   | 590301.6 | 604404.6 | 622688.5 | 684724.4 |
| 28841.15 | 35475.07 | 30112.1  | 29631.66 | 40871.52 | 31759.25 | 22734.54 | 33963.11 | 62778.28 | 35704.21 | 24774.43 | 34401.38 | 18870.95 | 24635.44 | 23056.32 | 11718.43 | 17168.93 |
| 212428.3 | 320852.8 | 213630.9 | 210135.4 | 181609.8 | 204871.5 | 247856.8 | 207055.5 | 234845.1 | 351693.3 | 269632.2 | 212119.9 | 204811.8 | 249007.1 | 301880   | 323801.8 | 186451.4 |

|          |          |          |          |          |          |          |          |          |          |          |          |          |          |          |          |          |
|----------|----------|----------|----------|----------|----------|----------|----------|----------|----------|----------|----------|----------|----------|----------|----------|----------|
| 3454.755 | 5122.269 | 994.0897 | 4145.578 | 5721.109 | 1729.642 | 2897.516 | 2387.956 | 4461.434 | 5767.614 | 3297.199 | 2800.418 | 4648.53  | 4527.162 | 3287.482 | 8154.285 | 7558.656 |
| 54511.96 | 54384.79 | 45521.55 | 35661.2  | 31560.82 | 33207.73 | 33942.66 | 39826.92 | 38133.07 | 49515.63 | 40685.24 | 40640.27 | 29577.75 | 51215.72 | 39157.52 | 45315.1  | 43896.64 |
| 7461     | 16033.58 | 6056.116 | 2670.082 | 4604.742 | 8907.607 | 17831.32 | 7230.302 | 8495.391 | 15232.18 | 5552.188 | 9319.682 | 8662.006 | 4799.119 | 13235.45 | 8371.368 | 8605.067 |
| 58839.99 | 123586.8 | 103042.1 | 129797.6 | 111185.5 | 67517.75 | 65763.16 | 89863.3  | 59649.51 | 68974.44 | 173427.9 | 147334.3 | 112960.3 | 100266.8 | 75054.47 | 107463   | 107576.6 |
| 249277.4 | 90774.08 | 5972383  | 4328526  | 17336.01 | 8125751  | 5342056  | 1589192  | 82449.98 | 11488245 | 51420.66 | 4008110  | 22481.8  | 136222.9 | 2911048  | 25511.63 | 8259.557 |
| 214993.8 | 192960.9 | 72406.8  | 119883.7 | 288710.2 | 151917.6 | 64970.65 | 125672.6 | 179233.4 | 225383.2 | 168543.5 | 124389.2 | 165045.8 | 249421.5 | 155438.8 | 150065   | 271424.5 |
| 288134.8 | 357757.5 | 333520.4 | 146191.9 | 229824.2 | 231403.4 | 286819.3 | 227723.3 | 235021.8 | 172816.4 | 387493.4 | 79340.86 | 91339.33 | 243010.7 | 208120   | 173114.7 | 222323.4 |
| 75485.67 | 79180.66 | 86874.82 | 38461.25 | 57915.18 | 127926.1 | 135810.8 | 89478.87 | 107923.1 | 84373.9  | 71959.63 | 57129.08 | 27337.98 | 66164.19 | 119575.5 | 124162.3 | 85514.21 |
| 16629.28 | 12342.08 | 12991.12 | 10520.21 | 12399.06 | 9572.342 | 13213.09 | 13247.24 | 11721.32 | 9931.431 | 19568.19 | 14183.77 | 15430.38 | 15392.75 | 9665.49  | 12194.52 | 12418.06 |
| 346938.3 | 365529.6 | 347652.6 | 620129.6 | 618740.9 | 437681.3 | 157763.7 | 359449.5 | 141886   | 502891.6 | 307566.3 | 518487.6 | 423262.6 | 436747.3 | 445563.9 | 168460.9 | 280537   |
| 972951.4 | 709298.9 | 733712.6 | 838464.3 | 1093469  | 1118063  | 1317351  | 761310.9 | 1173249  | 1176385  | 765291.9 | 485501.9 | 799811.4 | 738809.8 | 498692.3 | 769404.8 | 754341.8 |
| 26760.83 | 21846.9  | 23462.09 | 16203.56 | 16766.11 | 21134.2  | 15338.69 | 17554.31 | 21108.55 | 18354.84 | 26861.77 | 28355.91 | 19816.77 | 21868.02 | 19042.74 | 18038.5  | 20916.45 |
| 66548.07 | 13296.38 | 19900.52 | 25218.25 | 17321.2  | 12998.28 | 23328.94 | 24517.79 | 12306.5  | 8434.337 | 23435.09 | 31523.5  | 29549.62 | 22646.74 | 20886.81 | 26425.52 | 139996   |
| 388103.2 | 314413.8 | 344249.2 | 367661   | 279837.1 | 294426.6 | 597888.2 | 374103.4 | 431049.2 | 487739.3 | 387444.5 | 295368.9 | 381775.6 | 360965.4 | 300195.6 | 619691.4 | 319517.2 |
| 30393.27 | 87538.5  | 45816.1  | 52191.25 | 61776.14 | 56918.56 | 52830    | 51454.01 | 42092.49 | 62736.59 | 89343.55 | 94421.63 | 102415.6 | 58072.46 | 73689.56 | 56641.64 | 53787.66 |
| 12874.72 | 12723.37 | 17029.46 | 18789.13 | 21955.06 | 46095.98 | 10936.14 | 20274.52 | 7525.877 | 22939.57 | 18479.87 | 29752.05 | 22921.93 | 15939.64 | 19210.39 | 12402.62 | 13100.56 |
| 2159402  | 1931012  | 1028835  | 1327633  | 1490578  | 1640900  | 1753028  | 1266886  | 1143494  | 1424964  | 3048161  | 1372770  | 1071375  | 1537889  | 2062092  | 1765237  | 1122659  |
| 311058.3 | 334076.3 | 280030.9 | 407555.9 | 290574.5 | 416307.9 | 453208.5 | 365814.7 | 415573.3 | 307303.4 | 431543.8 | 445443.1 | 396171.1 | 258957.9 | 359035.5 | 457847.8 | 425190.1 |
| 1968546  | 897260.9 | 761230.3 | 821655.4 | 786082.7 | 869182.9 | 1744751  | 1536333  | 1145939  | 1500191  | 1045457  | 879829.6 | 923797.3 | 1087935  | 855897.3 | 1277936  | 1928861  |
| 128369.3 | 216172.9 | 201858.8 | 231913.9 | 188054.8 | 197145.9 | 285429.5 | 226625.5 | 247840.7 | 153064.6 | 211242.3 | 173831.5 | 205459.2 | 172791.6 | 167078.2 | 223107.7 | 220742.5 |
| 2205.504 | 47392.66 | 33043.64 | 32216.97 | 9610.803 | 33106.6  | 30429.63 | 29032.92 | 39471.77 | 64710.06 | 39433.92 | 28912.04 | 22348.33 | 26829.44 | 26030.96 | 26153.13 | 27275.45 |
| 29224.84 | 44460.35 | 29924.24 | 52415.84 | 34408.98 | 55235.57 | 11449.03 | 54218.37 | 39035.55 | 95405.87 | 60903.84 | 46874.55 | 43002.3  | 47085    | 74012.69 | 22770.14 | 25979.5  |
| 37820.43 | 53133.98 | 46416.66 | 43120.5  | 30234.79 | 53110.08 | 53042.99 | 47934.96 | 43215.44 | 31214.68 | 52941.95 | 21757.56 | 31146.33 | 24715.45 | 41120.84 | 45376.26 | 31692.28 |
| 25909.75 | 26837.32 | 24020.63 | 28151.52 | 17723    | 13995    | 17435.64 | 16880.27 | 25339.63 | 21137.69 | 28299.43 | 32038.84 | 25783.17 | 18687.49 | 24264.23 | 19815.74 | 38964.88 |
| 7894.962 | 10943.65 | 9278.419 | 10195.94 | 18399.75 | 7051.344 | 7547.733 | 8162.724 | 8611.984 | 6353.865 | 14638.12 | 12538.63 | 10247.47 | 5730.228 | 10222.72 | 8600.902 | 9810.514 |
| 244711.3 | 185212.5 | 204848   | 292570.1 | 473196   | 257417.7 | 230236.9 | 194432.7 | 260686   | 402822.2 | 162065   | 190800.4 | 235479.7 | 259157   | 212633.5 | 154235.4 | 209853   |
| 97655.73 | 161467.1 | 129097.4 | 68587.9  | 100358.5 | 104324.5 | 112485.1 | 106931.8 | 160327.9 | 146846.9 | 184239.2 | 269294.1 | 119847.8 | 133240.6 | 178646   | 156395.2 | 183733.4 |
| 5539.836 | 10214.56 | 4071.702 | 2828.157 | 1523.435 | 5298.313 | 4121.46  | 3258.96  | 2142.793 | 7065.372 | 7657.307 | 6060.182 | 2825.824 | 4020.169 | 5001.757 | 19005.97 | 5438.631 |
| 59326.64 | 109985.1 | 94431.32 | 107820.4 | 82353.83 | 89442.16 | 90141.66 | 96327.99 | 129473.1 | 46342.73 | 75194.36 | 71840.95 | 76933.11 | 70127.5  | 63224.96 | 80604.19 | 87836.47 |
| 328902.3 | 377273.4 | 292018.2 | 310480.8 | 282093.9 | 189729.5 | 211547.5 | 253533.1 | 257201.4 | 421333.7 | 482729.4 | 496504.2 | 344249.1 | 322133.1 | 348979.8 | 434787.7 | 432305.2 |
| 17039.4  | 21123.05 | 18577.2  | 14455.67 | 14624.41 | 12474.06 | 21795.01 | 15483.14 | 18404.17 | 25140.52 | 24570.49 | 19589.08 | 13483.86 | 19358.5  | 19229.67 | 23507.15 | 17211.4  |
| 75263.95 | 139114.6 | 135398.7 | 49075.47 | 158414.3 | 75097    | 78465.05 | 110363   | 54491.42 | 85779.62 | 133626.4 | 82630.69 | 91452.41 | 118997.4 | 100740.1 | 87410.05 | 143689.9 |
| 485288.4 | 500517.4 | 375015.6 | 377387.3 | 346647.6 | 333743.7 | 352041.8 | 369645.3 | 463928.5 | 657287   | 528701.5 | 504816.7 | 352599.7 | 515224.3 | 504725.3 | 417990.5 | 437154.3 |
| 3754.587 | 6596.15  | 6498.385 | 9906.641 | 5307.82  | 8708.906 | 5508.131 | 3596.05  | 9277.288 | 30029.85 | 4946.664 | 21487.55 | 6868.787 | 5713.32  | 5561.101 | 5895.179 | 5338.163 |
| 24833176 | 22178334 | 21523186 | 22598218 | 25674460 | 23505452 | 21123780 | 23079798 | 24707346 | 20867062 | 24031712 | 25413634 | 27650286 | 24431700 | 20905432 | 28060262 | 28157964 |
| 53697.1  | 579089.8 | 183121.5 | 91761.64 | 39865.13 | 26346.88 | 627301.2 | 48845.1  | 832940.1 | 395266.1 | 472960.3 | 324497   | 140062.8 | 180070.9 | 69763.59 | 570526.3 | 110011.7 |
| 1498.709 | 7563.232 | 14987    | 37462.29 | 12857.15 | 109936.9 | 67403.21 | 92931.6  | 40457.01 | 102840.6 | 23509.85 | 9721.613 | 14871.73 | 6143.755 | 16543.72 | 14088.02 | 11433.35 |
| 18953730 | 14051439 | 13550457 | 17675060 | 10993960 | 13762350 | 19570556 | 18820050 | 18181886 | 16498043 | 13672925 | 12171926 | 16502042 | 12905515 | 13678156 | 17362916 | 17632002 |
| 9560049  | 6899943  | 8642256  | 6503365  | 13009048 | 5819692  | 13609300 | 6920969  | 6447363  | 8513606  | 7570485  | 13248232 | 10471589 | 14804671 | 9407778  | 10449226 | 11771222 |
| 262268.7 | 38548.75 | 1648.614 | 768.4922 | 19717.09 | 1355.971 | 15156.62 | 9855.689 | 24743.21 | 30785.41 | 20259.79 | 15839.17 | 18891.96 | 83597.95 | 20056.03 | 17454.13 | 26393.35 |
| 306632.4 | 369640.1 | 363771.2 | 567980.6 | 460584.6 | 434768.3 | 479903.4 | 479011.2 | 502945.3 | 423786.8 | 370481.3 | 367151.3 | 524762.7 | 393159.5 | 377596.4 | 396407.2 | 505194.2 |
| 2297640  | 2023410  | 1543629  | 2246528  | 3305984  | 1718206  | 2241599  | 2095560  | 1709689  | 3501487  | 2222514  | 2297183  | 2261748  | 2802920  | 2000884  | 2334733  | 2387455  |
| 507047   | 519682   | 505361.9 | 376046.2 | 275506.1 | 366470.8 | 317393.1 | 335849.6 | 383951.9 | 643628.7 | 490928.5 | 385459.7 | 350797.6 | 364707.4 | 501498.8 | 555854.8 | 563367.4 |
| 1327373  | 808930.6 | 1139984  | 2167539  | 1715236  | 946875.3 | 678417.9 | 1636026  | 408756.6 | 3104188  | 945789.1 | 2040872  | 1739312  | 1786580  | 1764218  | 721616.6 | 1495417  |
| 580405.4 | 419237.7 | 335433.9 | 372129.9 | 309093.6 | 235058.8 | 342540.1 | 409819.1 | 338173.6 | 2911686  | 315501.8 | 197196.1 | 233618.7 | 312085.8 | 187993.4 | 160215.8 | 277667   |
| 114959.3 | 127259.8 | 63285.93 | 152306   | 133664.8 | 80586.63 | 26809.38 | 75784.31 | 63099.13 | 217915.1 | 81244.98 | 65223.55 | 105404.2 | 107792.8 | 57875.4  | 137304.5 | 61014.32 |
| 9051840  | 2833832  | 2352370  | 1887555  | 4274717  | 2768800  | 3937472  | 1971432  | 3590995  | 31822900 | 2051206  | 1852033  | 1530979  | 2098744  | 1762781  | 1901068  | 1622116  |
| 1519802  | 578682   | 765983.3 | 1727449  | 1579239  | 544997.6 | 667228.3 | 207820   | 377696   | 1621497  | 1009302  | 2701755  | 1796828  | 1365085  | 335568.2 | 747356.4 | 216966.5 |
| 183640.8 | 220556.5 | 255436   | 329942.9 | 331018.7 | 350293.7 | 237182   | 322454.8 | 209586.3 | 203060.5 | 226662.5 | 179121.6 | 224347.8 | 333783.1 | 346150.9 | 223938.9 | 281517.5 |

|          |          |          |          |          |          |          |          |          |          |          |          |          |          |          |          |          |
|----------|----------|----------|----------|----------|----------|----------|----------|----------|----------|----------|----------|----------|----------|----------|----------|----------|
| 22605840 | 13112615 | 14023.26 | 21644372 | 32731486 | 55872.24 | 13326896 | 57721.17 | 4883546  | 10692512 | 18261274 | 20091388 | 19968662 | 34991300 | 52995.02 | 11810644 | 40715.49 |
| 606350.6 | 1554506  | 617914.9 | 5578249  | 6414119  | 3650419  | 1013924  | 4149593  | 1169588  | 6150326  | 1212845  | 5659525  | 5356775  | 6168946  | 4350635  | 7657749  | 754328.4 |
| 307656.6 | 29296.88 | 47485.69 | 29166.13 | 34410.21 | 23452.5  | 236345.2 | 110240.1 | 135455.3 | 556172.9 | 304510.8 | 29036.06 | 332075.9 | 19125.75 | 13649.79 | 10331.44 | 13403.66 |
| 620311.9 | 15227    | 63574.5  | 33639.91 | 9458.206 | 19830.09 | 378210.3 | 178989.7 | 176286.7 | 1261024  | 356320.6 | 35771.83 | 468667.7 | 11621.26 | 20888.76 | 1560.917 | 15521.4  |
| 38665.56 | 319021.1 | 134536   | 154960   | 96858.02 | 76047.92 | 55836.13 | 90281.09 | 190610.1 | 22312.24 | 106005.1 | 43927.43 | 64403.16 | 132005.1 | 96281.38 | 66692.06 | 88827.84 |
| 188240.4 | 439601.6 | 444725.1 | 156029.8 | 208014.5 | 421937.8 | 506914.8 | 240698.1 | 77118.02 | 217714.9 | 382000   | 128530.2 | 140825.5 | 304507.3 | 671548.8 | 133967.1 | 217477.5 |
| 23118.16 | 53168.48 | 63192.04 | 29367.97 | 27142.79 | 24016.4  | 53475.84 | 37258.05 | 25966.38 | 5600.811 | 78144.15 | 46561.11 | 56897.07 | 25054.25 | 11591.03 | 39331.08 | 34177.09 |
| 4937222  | 3570804  | 2670346  | 3631970  | 2480804  | 3750675  | 5454650  | 3854560  | 5939745  | 2252972  | 3451325  | 3036874  | 2790515  | 3079092  | 4019868  | 4665427  | 2433014  |
| 190130.7 | 455503.3 | 397229.2 | 413538.3 | 279487.3 | 353696.3 | 236049.7 | 360512.1 | 293544.1 | 268174.2 | 483100.4 | 261290.6 | 301425.4 | 294737   | 267792   | 269388.4 | 363772.8 |
| 38001.55 | 14789.52 | 19291.05 | 21122.02 | 21970.95 | 24342.37 | 14348.38 | 33096.39 | 25825.3  | 102314   | 14550    | 15851.08 | 22096.29 | 26926.17 | 15205.02 | 11240.24 | 9997.863 |
| 24671.84 | 17147.57 | 18316.18 | 20227.01 | 22434.52 | 23774.84 | 7677.204 | 13159.08 | 20180.95 | 19832.5  | 27596.56 | 17496.2  | 11612.94 | 43233.32 | 13982.83 | 17595.28 | 24916.57 |
| 8.08E+08 | 6.34E+08 | 6.02E+08 | 8.35E+08 | 1.39E+09 | 4.08E+08 | 4.05E+08 | 7.73E+08 | 2.29E+08 | 6.64E+08 | 7.93E+08 | 1.86E+09 | 8.06E+08 | 1.4E+09  | 1.09E+09 | 4.99E+08 | 9.07E+08 |
| 11842238 | 4546048  | 5563774  | 5264617  | 8285532  | 6039870  | 6484497  | 7908757  | 11778194 | 95184856 | 5766928  | 3410766  | 3910543  | 3563599  | 4258228  | 3691427  | 4829129  |
| 1562604  | 1892219  | 1153515  | 1347247  | 1414158  | 1195302  | 1291451  | 1301649  | 1421397  | 3806717  | 1390785  | 1419530  | 1303730  | 1757387  | 1455309  | 1134936  | 1395282  |
| 1.18E+08 | 54251328 | 43963780 | 39275136 | 45472444 | 40145384 | 37291740 | 48989740 | 27812412 | 2.72E+08 | 40373508 | 42149088 | 36229740 | 45094332 | 42401364 | 29189832 | 36435084 |
| 19955032 | 93376632 | 50343228 | 59921780 | 85872496 | 28701542 | 76483248 | 31170416 | 42107892 | 53644528 | 42947504 | 1.59E+08 | 1.67E+08 | 83010184 | 64936984 | 80598328 | 82491936 |
| 6090998  | 23006872 | 17257882 | 22669980 | 39281664 | 21565758 | 20237512 | 15793345 | 14980469 | 18269918 | 56158652 | 82536480 | 60457136 | 32370326 | 24266080 | 23962298 | 25937972 |
| 8948493  | 13259205 | 14382230 | 12356621 | 26064356 | 16427112 | 11636877 | 12632519 | 6029461  | 11290093 | 37631772 | 48514208 | 39586256 | 23817366 | 23832040 | 14484070 | 13893933 |
| 7637.26  | 8019.108 | 6775.165 | 5401.868 | 6346.777 | 7225.367 | 15164.89 | 7951.529 | 6308.379 | 21296.35 | 6370.268 | 7229.108 | 4849.594 | 20854.63 | 15278.35 | 2622.389 | 2709.852 |
| 20298.18 | 12214.16 | 15155.67 | 42543.11 | 24399.45 | 70587.41 | 24748.99 | 62679.12 | 23866.94 | 40130.32 | 33523.14 | 5061.341 | 13332.24 | 21583.47 | 4769.323 | 21915.17 | 7894.582 |
| 24205.65 | 16275.76 | 23537.28 | 24849.71 | 26477.13 | 24665.91 | 9863.101 | 11295.97 | 23784.41 | 19942.54 | 12673.37 | 15941.99 | 19406.22 | 10614    | 11751.55 | 11573.02 | 18111.78 |
| 23646.88 | 35270.34 | 20812.66 | 22133.97 | 17904.09 | 19340.24 | 18827.08 | 18682.91 | 19313.31 | 51520.95 | 27489.73 | 28692.74 | 14956.34 | 29911.89 | 25159.88 | 29920.82 | 25349.92 |
| 63325.64 | 107278   | 166811.1 | 77136.62 | 237828.5 | 111308.1 | 165008.5 | 107792.7 | 165307.8 | 40292.87 | 102042.6 | 101308.7 | 73240.56 | 168715.7 | 72092.8  | 143504.1 | 119864.1 |
| 8237.298 | 6669.188 | 4727.193 | 5559.108 | 2365.663 | 1622.322 | 6307.249 | 3727.002 | 9570.329 | 6179.067 | 5569.885 | 3998.107 | 2746.571 | 6689.723 | 5806.961 | 6509.688 | 4539.996 |
| 6576.282 | 10991.66 | 14393.02 | 11202.59 | 4549.495 | 6707.218 | 12209.92 | 11690.16 | 12630.04 | 11615.17 | 77056.38 | 57487.84 | 8175.226 | 11789.74 | 5662.111 | 7722.524 | 9145.394 |
| 38957.9  | 39406.79 | 55386.25 | 56296.9  | 51954.02 | 64547.35 | 50989.08 | 50818.45 | 50094.8  | 81579.75 | 120987.8 | 53988.43 | 99136.03 | 53430.64 | 63198.98 | 20161.13 | 68157.91 |
| 1531813  | 1666193  | 1476052  | 1699626  | 1276664  | 1232981  | 1083960  | 1614488  | 1261347  | 4185104  | 1130185  | 926881.3 | 1290949  | 1176611  | 1122191  | 783716.2 | 987961.3 |
| 45546.19 | 23277.82 | 30630.04 | 24692.46 | 32636.59 | 37095.82 | 35256.42 | 36179.65 | 9934.196 | 79681.17 | 35569.07 | 12487.48 | 32570.13 | 23531.92 | 47328.57 | 27847.34 | 20121.62 |
| 30820.81 | 59193.52 | 71206.42 | 68406.73 | 50579.83 | 34970.27 | 96484.73 | 60238.68 | 93871.03 | 19811.24 | 59165.88 | 25267.31 | 45517.09 | 54647.94 | 35144.41 | 46821.22 | 35883.28 |
| 332173.8 | 97225.49 | 56427.98 | 78758.38 | 67759.13 | 80816.16 | 90827.61 | 87849.38 | 96808.29 | 1267214  | 81395.67 | 55735.52 | 70438.77 | 98137.41 | 100302.3 | 68630.56 | 72651.65 |
| 137545.4 | 165767.8 | 244067.7 | 216455   | 149090.2 | 146001.1 | 137962.8 | 149677.3 | 201823.1 | 525522.8 | 177393.2 | 243605.9 | 168012.3 | 171604.8 | 186438.9 | 110342.5 | 149433.3 |
| 12325.56 | 13159.98 | 9657.21  | 6068.071 | 7027.464 | 7681.871 | 12328.02 | 12931.1  | 8286.594 | 12362.67 | 11382.66 | 13134.49 | 6275.31  | 11717.07 | 6570.491 | 8424.89  | 11952.27 |
| 579480.8 | 899038.4 | 819891.9 | 592173.7 | 525521.3 | 573707.3 | 593692.5 | 597985.5 | 736306.8 | 561322.9 | 690414.3 | 579990.4 | 498448.7 | 518946.8 | 753586   | 566442   | 747751.5 |
| 68259.03 | 109881.7 | 99154.98 | 110120.2 | 77076.45 | 98509.92 | 118001.1 | 87418.81 | 111176.7 | 73123.47 | 131816.1 | 126299.7 | 130397.6 | 84088.36 | 89591.11 | 106873.4 | 106146.8 |
| 628591   | 720426.6 | 666969.4 | 564096.4 | 775641.4 | 617328.9 | 427604.2 | 659634.4 | 474023.5 | 713751.8 | 698879.9 | 876718.6 | 515218.2 | 712913.1 | 744815.4 | 762021.1 | 713963.9 |
| 157349.7 | 274159.4 | 200597   | 215472.1 | 310007.2 | 163651.4 | 157064.6 | 173759.2 | 204422.1 | 176623.8 | 243976.5 | 548286.9 | 377177.2 | 292351.8 | 222539.7 | 201885.2 | 231379   |
| 12228.34 | 20620.84 | 20386.95 | 18836.87 | 17562.67 | 19441.44 | 14511.45 | 16555.17 | 13382.68 | 19846.03 | 20889.4  | 22170.5  | 15390.61 | 18745    | 18388.72 | 17920.31 | 13233.36 |
| 1235540  | 1078306  | 1142182  | 973811.6 | 782540.6 | 849513.4 | 765721.4 | 861111.6 | 903691.9 | 1223708  | 1154923  | 956321.4 | 774617.3 | 929216   | 1276376  | 879239.3 | 1058204  |
| 12940.54 | 32204.17 | 21597.25 | 27987.01 | 61775.22 | 19923.22 | 34409.45 | 14418.83 | 32955.99 | 31484.31 | 27695.23 | 90001.84 | 71930.63 | 27218.71 | 28366.31 | 44288.79 | 40247.98 |
| 48529.52 | 35995.33 | 26017.24 | 32625.39 | 51817.99 | 19736.65 | 68100.66 | 62375.9  | 27974.66 | 49050.89 | 32845.66 | 38832.14 | 21919.05 | 29375.97 | 25076.88 | 60773.35 | 44064.64 |
| 166515.5 | 189209.3 | 125554.9 | 194490.1 | 184220.3 | 115965   | 113165.3 | 183273.4 | 144394.2 | 150089   | 150889.9 | 191947.9 | 181667.6 | 260022.6 | 116701.3 | 126803.3 | 190212.3 |
| 11685376 | 13559358 | 13532746 | 12438762 | 9540416  | 12851670 | 12309059 | 9922544  | 9347394  | 10725840 | 12963153 | 7479205  | 9576603  | 11050859 | 9727049  | 11020158 | 11229860 |
| 90454.47 | 125900.3 | 104330.5 | 100729.2 | 93123.91 | 100436.5 | 95065.65 | 100895.6 | 102688   | 133964.5 | 118800.3 | 183769.6 | 131510.3 | 105969.2 | 175187.3 | 138171.7 | 109636.7 |
| 16419.64 | 48547.38 | 36429.46 | 28586.21 | 33681.16 | 20877.08 | 37099.03 | 20601.1  | 29108.84 | 25761.52 | 38921.21 | 52167.36 | 39734.32 | 27681.18 | 23034.19 | 29781.99 | 32426.8  |
| 23979.82 | 30926.11 | 14349.9  | 8165.486 | 14728.74 | 8631.935 | 38815.18 | 10182.37 | 9140.275 | 11044.52 | 51591.3  | 41855.29 | 31499.64 | 21969.47 | 13509.73 | 20951.74 | 16178    |
| 252554.5 | 383539.8 | 297005.3 | 301643.1 | 260414.6 | 324617.7 | 475637.1 | 345005.2 | 573697.9 | 313997.2 | 512637.3 | 425942.7 | 649220.5 | 329116.6 | 374224.6 | 548307.3 | 641783.3 |
| 16521.35 | 9398.499 | 22974.01 | 34021.21 | 12816.7  | 38058.19 | 27328.83 | 5398.363 | 27643.87 | 101049.1 | 29489.88 | 12612.76 | 15595.57 | 6652.757 | 21811.06 | 37401.75 | 15679.86 |
| 62437272 | 68482264 | 42481220 | 34037680 | 38700136 | 11135664 | 64183012 | 39647744 | 41929204 | 97023704 | 66634836 | 57480756 | 38536864 | 41520292 | 58418304 | 54232732 | 48053836 |
| 29717894 | 30698948 | 17432026 | 15904374 | 18613576 | 23549964 | 29529542 | 17216450 | 19396848 | 40715372 | 31244400 | 28550048 | 18348068 | 20230984 | 26257600 | 24267004 | 22402838 |

|          |          |          |          |          |          |          |          |          |          |          |          |          |          |          |          |          |
|----------|----------|----------|----------|----------|----------|----------|----------|----------|----------|----------|----------|----------|----------|----------|----------|----------|
| 5968.756 | 15935.2  | 8179.181 | 9855.604 | 13637.52 | 8253.899 | 11482.28 | 12183.61 | 11628.31 | 10086.77 | 18242.81 | 41249.13 | 28847.72 | 15836.33 | 14839.01 | 10281.13 | 11739.2  |
| 35777    | 24636.44 | 47273.9  | 20515.78 | 19823.39 | 23021.95 | 16927.39 | 20676.59 | 13060.74 | 39725.49 | 33135.18 | 6604.214 | 27012.78 | 40489.85 | 28307.81 | 18536.75 | 12752.8  |
| 290969.1 | 516389.5 | 392747.6 | 84611.38 | 352054.7 | 86346.26 | 334316.4 | 103034.7 | 171402.5 | 195292.8 | 374105.6 | 288361.2 | 371762.8 | 356622.1 | 216452.8 | 192711.1 | 200099.2 |
| 38417.98 | 32100.02 | 26661.83 | 29731.42 | 30356.76 | 30294.69 | 27051.46 | 35003.97 | 38097.09 | 112411.2 | 28756.08 | 27370.77 | 30318.08 | 29741.07 | 17688.08 | 18855.51 | 19047.41 |
| 32775.64 | 37630.79 | 35863.44 | 44969.82 | 29922.93 | 26225.3  | 23703.88 | 55406.98 | 37412.56 | 39061.02 | 40515    | 55836.69 | 56074.18 | 45376.29 | 48451    | 40008.21 | 61484.07 |
| 23860.64 | 37393.95 | 18643.59 | 14956.68 | 29653.92 | 8573.916 | 10016.4  | 11647.13 | 43496.81 | 13719.95 | 26571.46 | 33413.29 | 28009.23 | 25386.54 | 16191.54 | 24431.74 | 25387.49 |
| 4521216  | 602783.3 | 1210100  | 1559702  | 4631309  | 1640717  | 3977029  | 1848388  | 8897583  | 861526.1 | 6628974  | 349509.8 | 2144386  | 2171171  | 809840.6 | 6307388  | 1679670  |
| 49442.91 | 74705    | 78470.04 | 68977.99 | 97573.48 | 98793.83 | 80852.59 | 63642.16 | 81861.87 | 79122.92 | 133805.7 | 134240.1 | 152951.6 | 76433.47 | 68426.44 | 78372.41 | 93961.35 |
| 10838991 | 2363379  | 2982321  | 4277538  | 10853451 | 3194380  | 1294787  | 4241659  | 4310299  | 33865424 | 2463174  | 3445041  | 2335071  | 3823227  | 2190480  | 947159.7 | 2191006  |
| 11905.3  | 23714.96 | 196381.7 | 56757.99 | 64785    | 562601.3 | 414520.3 | 133210.3 | 1152104  | 30768.87 | 367727   | 1318308  | 742741.8 | 177238.9 | 985142.9 | 661910.9 | 378584.6 |
| 49240.07 | 67733.31 | 45255.07 | 35685.57 | 216498.4 | 38061.66 | 124731.7 | 61381.92 | 138044.7 | 92604.91 | 133642.5 | 47573.21 | 63763.46 | 70815.11 | 35524.09 | 77713.42 | 63468.73 |
| 17930908 | 6033079  | 8800958  | 5371405  | 13773583 | 9136158  | 6023252  | 10838323 | 5313530  | 16896690 | 9482472  | 12297484 | 6881744  | 10546833 | 11265272 | 5134966  | 11528044 |
| 133283.3 | 183454.6 | 161902.1 | 116258.6 | 155937.4 | 169670   | 174217.2 | 150951.8 | 192009.8 | 123279   | 171790.6 | 154009.2 | 161889.9 | 149297.1 | 126254.9 | 152871.5 | 159337   |
| 189772.2 | 1939065  | 924438.5 | 1367265  | 359634.7 | 609698.1 | 1664685  | 813320.5 | 1030142  | 535996.8 | 1088757  | 786497.6 | 623393.8 | 405325.7 | 588717.1 | 344972.3 | 352432.1 |
| 6525723  | 7078493  | 5169561  | 6546713  | 5327915  | 4747451  | 4625062  | 6043160  | 4721532  | 6927464  | 5662442  | 6435204  | 4796358  | 6929584  | 6192658  | 5051492  | 5046995  |
| 87621.76 | 109590   | 121675.8 | 138699.8 | 109866.5 | 114870.5 | 107143   | 123915.8 | 102817.7 | 65608.85 | 122026.6 | 110578.3 | 130188.7 | 113843.8 | 110527.5 | 114198.7 | 117936.1 |
| 18008.49 | 28434.54 | 43579.29 | 30441.24 | 18434.17 | 29562.61 | 7391.793 | 30603.71 | 19695.18 | 12949.25 | 44263.82 | 27863.97 | 26336.15 | 19751.62 | 30672.18 | 36680.89 | 41631.09 |
| 102110   | 266581.9 | 220065.8 | 206132.4 | 116604.1 | 228287.4 | 226299.8 | 178247.8 | 244665.2 | 166052.3 | 174418   | 137724.9 | 126489   | 119101.6 | 179270.4 | 130886.5 | 205898.7 |
| 34800640 | 55203960 | 48992892 | 43100196 | 41986608 | 45543568 | 66537944 | 37356672 | 52120464 | 42693164 | 50318240 | 42995664 | 40742764 | 45014784 | 46259348 | 61363384 | 42680864 |
| 7101234  | 6684872  | 6201288  | 4678415  | 6493638  | 11666079 | 8451946  | 9029183  | 6666933  | 12279389 | 7410488  | 4920705  | 4211002  | 7181730  | 7521837  | 6082056  | 7001494  |
| 4699543  | 12560958 | 11701440 | 10368777 | 18982310 | 14215154 | 7077323  | 6205147  | 4684306  | 5484585  | 21377522 | 26547136 | 24721620 | 11728107 | 11830152 | 7374452  | 17433576 |
| 1130986  | 1915514  | 1179124  | 1738822  | 2423597  | 1060933  | 1459984  | 1026538  | 955167.7 | 1394551  | 1949561  | 3971388  | 2960712  | 1814878  | 1179234  | 1701182  | 1366335  |
| 498375.5 | 544315.9 | 552325.6 | 565767.8 | 403502.3 | 710249.1 | 659182.9 | 535880.6 | 556408.9 | 405035.1 | 520852.1 | 246968.2 | 401482.8 | 415439.5 | 443121.5 | 492459.9 | 416065.9 |
| 30930.94 | 72954.91 | 62270.11 | 45443.66 | 40726    | 55397.93 | 45921.86 | 29365.08 | 69810.53 | 39871.23 | 50852    | 40207.09 | 34872.71 | 40040.69 | 41071.05 | 44854.36 | 32800.62 |
| 30070.43 | 76219.91 | 70476.27 | 53351.87 | 108700.2 | 38998.82 | 84657.48 | 28100.04 | 79790.76 | 49163.98 | 97702.34 | 94853.73 | 123791   | 70895.28 | 48296.92 | 74958.88 | 57805.66 |
| 47757.85 | 443160.5 | 147946   | 94497.34 | 107075.7 | 67535    | 232579.8 | 94873.87 | 165403.9 | 219788.1 | 236673.2 | 183302.6 | 108283.1 | 123637.1 | 107402   | 135321.4 | 123085.7 |
| 26024.05 | 35279.55 | 21902.37 | 25729.48 | 27133.7  | 23606.79 | 14678.23 | 15979.4  | 13400.3  | 17206.43 | 48422.36 | 11997.43 | 18481.56 | 28953.91 | 17713.56 | 23971.14 | 21017.07 |
| 462851.3 | 687604.2 | 902853.1 | 727967.7 | 510469.8 | 730695.8 | 537118.8 | 607726.1 | 722139.9 | 394597.8 | 647552.1 | 375696.2 | 565610.2 | 446976.5 | 550928.7 | 478024.5 | 541133   |
| 15941.26 | 28299.85 | 6156.635 | 16471.81 | 14494.54 | 17856.12 | 11862.25 | 26517.2  | 21139.93 | 60204.2  | 20082.06 | 24529.32 | 14647    | 16155.87 | 35795.91 | 5272.83  | 17086.94 |
| 277046.3 | 540337.8 | 487540.1 | 531998.8 | 418067   | 373108.8 | 580730.1 | 407321.6 | 379918.3 | 335776.7 | 478707.1 | 378462.5 | 438160.3 | 345319.1 | 368389.3 | 588163.3 | 408345   |
| 68286.67 | 110762.8 | 22991.15 | 43964.98 | 73489.04 | 37191.53 | 60436.92 | 46832.54 | 36438.86 | 40638.18 | 94298.1  | 123960.7 | 108258.9 | 60648.05 | 45174.79 | 51350.58 | 49592.29 |
| 2511399  | 1482231  | 2786377  | 1013313  | 2616728  | 2657152  | 1418109  | 1292178  | 1231014  | 2155188  | 2113841  | 516937.5 | 814952.8 | 800312.6 | 652674.9 | 1083083  | 1252755  |
| 91403.58 | 147364.8 | 154341.8 | 196229.6 | 133688   | 169099   | 185432   | 196832.6 | 172334.6 | 198030.7 | 159839.5 | 171475.1 | 156505.9 | 144928.8 | 150706.8 | 120582.1 | 170106   |
| 3315.523 | 9013.943 | 8056.02  | 12310.66 | 5930.043 | 8016.806 | 10669.11 | 9250.818 | 9649.122 | 6405.708 | 12775.49 | 9548.531 | 19087.62 | 6118.742 | 15553.9  | 9379.425 | 13567.12 |
| 1691591  | 4861240  | 742517.6 | 1100310  | 3920468  | 2071000  | 1438991  | 3203890  | 8038335  | 3475301  | 4463737  | 2369480  | 1177418  | 3275947  | 2999160  | 1979629  | 3013175  |
| 2488552  | 12130267 | 9473760  | 8179346  | 24889288 | 11959919 | 7767085  | 5108367  | 6429009  | 3353711  | 21726196 | 38596796 | 24642832 | 11375977 | 9370022  | 11804144 | 12715828 |
| 22347.36 | 60568.44 | 39240.38 | 41849.01 | 67863.08 | 30942.34 | 36546.2  | 39592.8  | 34400.11 | 39079.8  | 54293.13 | 117881.6 | 112287.8 | 62926.41 | 52986.45 | 27491.05 | 53648.52 |
| 15578525 | 3083740  | 3395758  | 2749515  | 4896047  | 3079115  | 3843754  | 2587673  | 4767344  | 35100000 | 2285830  | 2011644  | 1633738  | 1745472  | 2226764  | 2212980  | 1835768  |
| 21744.21 | 31170.22 | 27895.42 | 22193.08 | 24022.53 | 32284.43 | 30179.38 | 26889.77 | 23670.21 | 62252.61 | 27322.9  | 21415.63 | 17987.52 | 23574.58 | 19602.69 | 25132.14 | 19718.59 |
| 495810   | 587549.9 | 535091.6 | 524502.5 | 643248.6 | 549240.5 | 1465040  | 1138173  | 711871.6 | 262931.5 | 1236095  | 835866.4 | 1043992  | 599735.7 | 732589.4 | 1051636  | 1164860  |
| 1340166  | 463255.6 | 515980.8 | 597168.7 | 643432.4 | 616398.2 | 426588.5 | 770443.1 | 839089   | 10478106 | 404492.8 | 480136.5 | 436932.4 | 395609.6 | 414366.8 | 247980.1 | 406746.8 |
| 103826.2 | 166465.1 | 112639.5 | 110963   | 119720.9 | 111421.2 | 74526.9  | 97007.16 | 146805.6 | 140174.5 | 110531.5 | 169966.2 | 88602.16 | 109308.7 | 154240.1 | 157559.3 | 185172.1 |
| 4104.653 | 17556.4  | 11657.17 | 14843.99 | 22945.31 | 14286.01 | 12296    | 8062.406 | 10911.63 | 14590.61 | 18297.66 | 47772.1  | 45902.33 | 16054.75 | 12994.46 | 20096.26 | 18871.25 |
| 20795.54 | 23726.05 | 15216.64 | 30468.87 | 42682.38 | 10807.58 | 19522.24 | 17972.45 | 26736.36 | 32156.46 | 19921.43 | 85096.91 | 46916.54 | 53059.57 | 30854.73 | 38586.26 | 36395.64 |
| 27577.04 | 7342.002 | 7527.768 | 13775.82 | 41475.35 | 16161.41 | 7883.037 | 9360.873 | 26656.71 | 8520.644 | 5219.621 | 3260.006 | 12171.18 | 15729.86 | 11456.96 | 8535.902 | 5751.604 |
| 77482.83 | 74406.13 | 50263.27 | 69459.95 | 37191.46 | 59514.52 | 88046.21 | 70247.57 | 49929.73 | 89293.91 | 60311.88 | 61285.53 | 46803.23 | 63467.27 | 101499   | 119921.4 | 72630.31 |
| 20000.44 | 73074.41 | 65305.02 | 35946.98 | 103905.4 | 39022.02 | 45524.48 | 21375.44 | 20736.34 | 47257.77 | 155070.6 | 192321.5 | 177638.3 | 89733.3  | 50292.2  | 60904.56 | 62881.49 |
| 6372.185 | 12649.52 | 11949.51 | 12361.31 | 11417.91 | 12596.35 | 6672.089 | 10711.23 | 10589.73 | 9383.939 | 6153.979 | 9826.065 | 4940.984 | 8953.561 | 9586.209 | 7735.492 | 6029.942 |
| 761774.9 | 1211810  | 798519.5 | 927317.5 | 1327443  | 777820.4 | 1035503  | 980188.3 | 676747.8 | 1100963  | 1408429  | 1768299  | 1144888  | 1445981  | 1230919  | 1121189  | 1011010  |

|          |          |          |          |          |          |          |           |          |          |          |          |          |          |          |          |          |
|----------|----------|----------|----------|----------|----------|----------|-----------|----------|----------|----------|----------|----------|----------|----------|----------|----------|
| 11334.58 | 40328.18 | 23749.63 | 34381.93 | 49464.45 | 25998.5  | 32056.3  | 23562.42  | 24824.91 | 39741.51 | 35686.98 | 107360.1 | 69309.64 | 38964.81 | 34281.91 | 41177.39 | 33480.86 |
| 98133.88 | 180343.9 | 105317.7 | 123884   | 99958.29 | 89568.51 | 179155.8 | 95799.02  | 149628.1 | 118436.8 | 226228.6 | 232081.8 | 163183.4 | 162631.3 | 128851.1 | 289371.3 | 133704.5 |
| 67872.16 | 172093.6 | 108222.6 | 111489.1 | 111263.7 | 82873.82 | 125711.9 | 71151.55  | 107764.4 | 132242   | 142979.1 | 170439   | 111125.9 | 91846.45 | 97389.03 | 185774.6 | 123269.8 |
| 158247.2 | 189493.8 | 154662.8 | 157954.9 | 196505.5 | 212105   | 205558.6 | 215009.3  | 152677   | 118844.1 | 201814.8 | 119494.6 | 184519.5 | 163452.9 | 210301.2 | 268456.5 | 173529.4 |
| 1187358  | 1110951  | 1328131  | 1371779  | 1049623  | 1580366  | 1453357  | 1440372   | 1633022  | 909247.4 | 1231378  | 953672.2 | 1014170  | 1121188  | 1265306  | 1404867  | 1263278  |
| 7383.788 | 19321.24 | 10109.36 | 14145.49 | 16815.74 | 6600.608 | 14532.19 | 10513.47  | 16010.43 | 14492.7  | 13738.42 | 28873.1  | 14528.97 | 11380.4  | 12864.59 | 7852.212 | 7730.263 |
| 17964.18 | 24341.7  | 2436.102 | 25553.27 | 1647.466 | 6872.28  | 4353.837 | 18798.86  | 51324.78 | 11801.71 | 45159    | 169132.5 | 39601.74 | 30381.78 | 68215.14 | 44972.95 | 46618.79 |
| 39054.62 | 73721.75 | 62762.39 | 73981.8  | 29136.8  | 30740.17 | 62740.12 | 34554.29  | 47015.99 | 17299.19 | 63323.05 | 33332.77 | 55207.14 | 62901.37 | 39126.97 | 38769.23 | 25864.06 |
| 82686.67 | 922841.1 | 586823.4 | 452394.6 | 1324904  | 447159.6 | 442983.5 | 329389.6  | 130625.4 | 302602.5 | 648687.4 | 524283.4 | 520477.9 | 961523.1 | 1415694  | 861347.3 | 650299   |
| 49304.36 | 41122.75 | 39690.38 | 55213.37 | 38264.59 | 41386.02 | 40174.71 | 53229.82  | 42477.89 | 60379.34 | 52977.29 | 61200.99 | 43870.74 | 48122.11 | 51126.16 | 55486.68 | 54363.37 |
| 3060209  | 1952208  | 1631375  | 1425378  | 1140645  | 1396973  | 1727994  | 1809853   | 1068893  | 8124333  | 1747421  | 1767448  | 1462225  | 1601244  | 2351091  | 1311048  | 1781599  |
| 6146562  | 5813362  | 7369073  | 4587996  | 3020093  | 6159035  | 11246112 | 5237943   | 6239236  | 5279755  | 9314235  | 3814936  | 4426101  | 4963228  | 6065419  | 7769367  | 6284431  |
| 42731.25 | 100775.5 | 102611.3 | 21631.36 | 53380.47 | 54969.79 | 105201.4 | 62505.46  | 46982    | 56765.41 | 133512.8 | 32293.06 | 30751.08 | 54711.82 | 69810.48 | 47936.58 | 67760.5  |
| 369602.3 | 1572248  | 860638   | 666009.6 | 863510.4 | 658750.1 | 1183702  | 584286.7  | 880714.4 | 735904.1 | 1300713  | 906767.3 | 1209634  | 686738   | 737261.3 | 830922.3 | 825394.5 |
| 69350.92 | 110698.9 | 84382.2  | 73386.98 | 92509.27 | 63993.7  | 75608.65 | 67884.89  | 88511.47 | 127722.8 | 98958.38 | 79940.07 | 51793.02 | 72359.81 | 89056.09 | 82424.04 | 102596.7 |
| 6130.701 | 12052.98 | 8271.726 | 12537.28 | 3941.955 | 5693.195 | 10104.6  | 6990.843  | 13301.32 | 9872.801 | 6342.868 | 6768.963 | 10154.77 | 6410.04  | 7440.418 | 6150.458 | 6359.935 |
| 39114.92 | 62418.02 | 33678.76 | 34007.51 | 46278.94 | 35619.63 | 31247.84 | 22850.16  | 30630.48 | 38573.13 | 62971.8  | 29451.46 | 58314.22 | 35284.42 | 36604.46 | 28582.26 | 38969.95 |
| 9528.423 | 7184.004 | 17436.19 | 9471.096 | 10768.95 | 9732.044 | 13461.06 | 13358.01  | 10352.64 | 11534.98 | 14308.53 | 13140.19 | 6550.106 | 12897.28 | 9112.839 | 10484.23 | 17099.28 |
| 11405.34 | 6141.782 | 15875.81 | 15426.12 | 25316.19 | 16592.69 | 16823.37 | 17258.41  | 22697.64 | 112690.4 | 8972.392 | 17587.42 | 15818.86 | 3278.116 | 13531.55 | 23242.04 | 13931.53 |
| 45519.78 | 85036.44 | 68186.72 | 63645.7  | 69811.64 | 45466.4  | 52270.39 | 48136.5   | 50823.88 | 56672.37 | 78916.3  | 62942.07 | 67492.84 | 57859.97 | 58133.32 | 50345.2  | 43223.11 |
| 104046.5 | 66683.34 | 512898.3 | 256549.7 | 169277.2 | 652505.7 | 766976.2 | 240728.5  | 2138949  | 182295.2 | 672753.3 | 1172943  | 558779.2 | 376901.4 | 1195972  | 1098836  | 564734.4 |
| 44787212 | 12390833 | 9616179  | 10393860 | 11571314 | 8290366  | 8691070  | 10331784  | 7316032  | 85978320 | 10675349 | 9774102  | 10197818 | 9520210  | 7688862  | 6954001  | 10490321 |
| 14863.21 | 32567.39 | 13807.05 | 16274.39 | 23308.84 | 17273.71 | 14232.8  | 15048.47  | 19738.81 | 24466.31 | 21675.13 | 44616.26 | 30563.13 | 21816.41 | 26907.08 | 20497.6  | 9216.586 |
| 2512.483 | 5796.133 | 2066.551 | 1828.277 | 1862.378 | 1004.488 | 7523.483 | 1587.909  | 1840.525 | 2961.946 | 2624.771 | 3053.378 | 2036.281 | 1084.642 | 2083.433 | 1487.38  | 1687.126 |
| 59215.1  | 107312.2 | 112424.1 | 79688.55 | 52226.27 | 65989.2  | 89455.44 | 75562.21  | 103234.1 | 59583.27 | 93235.14 | 70862.6  | 59600.5  | 57026.37 | 75248.33 | 73374.86 | 90580.5  |
| 39130.53 | 42983.17 | 44260.45 | 46303.22 | 37335.06 | 74525.41 | 82734.14 | 64344.66  | 42551.52 | 27580.88 | 65796.26 | 33218.25 | 45776.69 | 48711.36 | 84967.36 | 44114.52 | 67796.59 |
| 565146.8 | 312726.2 | 64492.89 | 317038.6 | 1434891  | 505604.1 | 105301.8 | 647824.6  | 49932.68 | 119875.6 | 387525.7 | 516235.8 | 101009.1 | 430137.3 | 619287   | 510212.7 | 488509.8 |
| 23004.63 | 123341.3 | 132732.3 | 96478.61 | 93842.34 | 131821.1 | 135628.2 | 108451.8  | 161780   | 21166.46 | 154684   | 85060.95 | 118895.2 | 93134.25 | 66057.3  | 104602.8 | 86395.67 |
| 2766145  | 484004.8 | 618772.3 | 560258.9 | 696466.7 | 632831.9 | 725739.3 | 702193.3  | 717250.4 | 14532400 | 481069.4 | 518668.9 | 461865.1 | 514590.9 | 530396.5 | 401345   | 453639.3 |
| 96460.28 | 101576   | 122649.5 | 71457.17 | 54047.79 | 87100.46 | 79429.86 | 64954.71  | 56609.73 | 75348.38 | 115236.8 | 53292.3  | 83184.48 | 44926.27 | 44964.03 | 82452    | 105982.6 |
| 7719290  | 2064212  | 1470135  | 2696161  | 1187727  | 2413837  | 2383739  | 2137578   | 1501895  | 16053146 | 1273375  | 1582331  | 1701837  | 1971516  | 2698896  | 1281949  | 1981822  |
| 4284.325 | 7424.627 | 8289.061 | 2680.467 | 5189.887 | 3402.737 | 2442.533 | 4296.671  | 7408.355 | 3976.833 | 5975.657 | 4330.265 | 6289.862 | 5645.326 | 4815.99  | 4901.089 | 6125.331 |
| 13575.83 | 13628.27 | 15546.67 | 22141.04 | 8497.57  | 9005.454 | 18362.65 | 9277.023  | 15320.17 | 15865.16 | 16943.02 | 12768.56 | 12506.49 | 6670.021 | 13518.33 | 7983.663 | 10563.3  |
| 61796.26 | 15854.1  | 51397.65 | 9937.932 | 16539.37 | 17575.26 | 34161.08 | 60219.39  | 55898.87 | 196670.1 | 20291.54 | 12932.78 | 35906.95 | 37281.64 | 7625.911 | 8919.877 | 6393.747 |
| 153502.1 | 174450.1 | 95645    | 129915.4 | 94998.82 | 113288.5 | 287703.1 | 141819.6  | 176132.8 | 234576.3 | 169243.5 | 128579.4 | 61273.1  | 156433.7 | 161450.4 | 232718.2 | 156281.3 |
| 1158498  | 804125   | 880600.3 | 699229.4 | 950351.7 | 1368232  | 1304110  | 1274739   | 1292926  | 966673.5 | 953311.6 | 568869.2 | 712986.4 | 907666.1 | 1044643  | 1114078  | 1239907  |
| 4868.635 | 47024.02 | 67933.52 | 86785.71 | 15551.6  | 85711.31 | 26709.1  | 125872.9  | 92769.66 | 110428.5 | 86795.95 | 83291.33 | 63622.61 | 38205.04 | 98492.47 | 46165.26 | 49457.63 |
| 21816.88 | 56067.13 | 25962.46 | 15815.42 | 98230.8  | 14280.76 | 81628.12 | 25931.78  | 71597.48 | 64440.87 | 72958.5  | 17089.09 | 36310.11 | 29612.04 | 15661.45 | 35466.93 | 21170.22 |
| 3347207  | 2783649  | 1947115  | 2203987  | 2581106  | 2839781  | 2175996  | 3242883   | 2628819  | 3414779  | 2113027  | 2371961  | 1980518  | 3408177  | 3030170  | 2248833  | 2483467  |
| 8493442  | 7711174  | 7412697  | 9209367  | 9222394  | 10453949 | 7901047  | 6510257   | 6800542  | 9287225  | 8102116  | 7431319  | 8867728  | 7917490  | 8685120  | 6296488  | 6619304  |
| 119573.4 | 108523.2 | 119301.9 | 136742.6 | 127315.4 | 141816   | 142355.4 | 129464    | 157607.9 | 92779.06 | 126968.1 | 94040.39 | 132066.4 | 114717.8 | 111729.3 | 140159.3 | 127219.3 |
| 114182.2 | 92765.9  | 103417.4 | 87150.73 | 69826.26 | 62521.59 | 68664.73 | 76835.63  | 92549.38 | 94606.06 | 114438   | 78585.92 | 58324.21 | 83945.91 | 87004.55 | 69854.52 | 94482.94 |
| 4007582  | 4346930  | 4638334  | 3008684  | 4960898  | 3490620  | 4415920  | 3374702   | 2938928  | 4046913  | 6584990  | 6837971  | 5902024  | 3480792  | 2950724  | 5496375  | 4430577  |
| 6495.402 | 7344.225 | 8187.961 | 13552.25 | 7377.396 | 12366.93 | 15289.71 | 9230.638  | 18714.42 | 9520.147 | 12000.04 | 14162.9  | 9809.021 | 4937.142 | 9093.389 | 14635.88 | 10392.31 |
| 9948981  | 4516830  | 34449080 | 4790071  | 8501985  | 2164826  | 34305000 | 2835146   | 6111862  | 2112302  | 5682016  | 11249102 | 11835511 | 5621393  | 10081988 | 10648544 | 19119496 |
| 104790.1 | 152931.5 | 98848.77 | 78809.5  | 67686.73 | 110526.7 | 96471.7  | 61061.09  | 76571.14 | 60262.35 | 90534.55 | 46395.93 | 75285.1  | 53061.82 | 58841.73 | 73551.08 | 62760.96 |
| 2141051  | 5024822  | 2962588  | 2918682  | 3313243  | 2777251  | 4211190  | 3254386   | 3283894  | 3840802  | 4042194  | 3538701  | 2401426  | 5105565  | 3898853  | 2838764  | 3497723  |
| 2702.244 | 6540.531 | 5176.681 | 5662.398 | 6556.366 | 5837.581 | 6283.798 | 45457.952 | 7255.102 | 3175.2   | 8011.455 | 6144.447 | 7809.799 | 3578.045 | 3496.322 | 6038.597 | 4946.381 |
| 22513.46 | 32229.33 | 30468.85 | 30412.54 | 34854.44 | 34917.4  | 33003.02 | 29325.82  | 26140.59 | 16270.9  | 30778.17 | 32619.45 | 34933.61 | 22478.91 | 23595.06 | 34574.3  | 32226.71 |



|          |          |          |          |          |          |          |          |          |          |          |          |          |          |          |          |          |
|----------|----------|----------|----------|----------|----------|----------|----------|----------|----------|----------|----------|----------|----------|----------|----------|----------|
| 1086728  | 796097.5 | 1202288  | 905106.1 | 782122.1 | 312551.6 | 286298.5 | 288217.9 | 915420.3 | 1649548  | 776433.4 | 603491.2 | 679991.8 | 1140648  | 674495.8 | 261742.8 | 280135.6 |
| 26431.45 | 35111.45 | 37038.16 | 37171.55 | 33367.25 | 22515.44 | 43941.01 | 27814.44 | 260966.3 | 22770.25 | 43782.52 | 25813.24 | 43057.56 | 64644.51 | 35757.2  | 25829.9  | 366102.4 |
| 4221.188 | 10933.2  | 21499.13 | 9291.594 | 13669.99 | 10703.46 | 18042.79 | 4251.172 | 5264.777 | 2239     | 11332.57 | 2047.52  | 5104.802 | 15102.49 | 3250.439 | 12764.35 | 2601.615 |
| 61864.36 | 53367.27 | 62145.67 | 40557.28 | 68326.11 | 54240.65 | 45293.49 | 51324.96 | 38549.96 | 40664.86 | 55375.8  | 64100.94 | 41946.53 | 78553.64 | 64179.1  | 44646.73 | 52340.24 |
| 27046.47 | 21401.64 | 17453.4  | 16108.12 | 19092.71 | 16125.08 | 11532.6  | 25980.26 | 25310.1  | 94510.48 | 11704.03 | 13248.7  | 12220.32 | 6672.445 | 14636.14 | 9895.827 | 6747.386 |
| 35637.23 | 37982.7  | 33902.68 | 33068.19 | 52436.27 | 31041.69 | 52823.92 | 33628.77 | 43977.74 | 27193.08 | 40331.31 | 38258.5  | 37662.14 | 32263.74 | 35781.4  | 39559.77 | 39698.39 |
| 801322.4 | 722414.2 | 1129524  | 849295.9 | 902831.1 | 237224.3 | 152018.9 | 232629.7 | 835581.8 | 970456.9 | 727194.3 | 616042.9 | 828290.8 | 1029629  | 387139   | 228058.9 | 142984.5 |
| 3847970  | 11539439 | 5025861  | 7982297  | 9967507  | 7236297  | 14331637 | 9759648  | 13212709 | 9601861  | 10025288 | 5988832  | 8559529  | 8634257  | 7606798  | 10038763 | 10700290 |
| 38341.75 | 88115.04 | 68696.2  | 50187.99 | 40420.47 | 50800.45 | 33054.1  | 47580.19 | 40688.43 | 44401.64 | 61842.1  | 52564.01 | 42582.22 | 46169.48 | 55585.68 | 50251.43 | 51683.74 |
| 18093.96 | 51893.24 | 28781.3  | 13616.22 | 12116.1  | 19027.52 | 20310.51 | 27297.43 | 15027.73 | 41074.29 | 29590.12 | 14262.57 | 14654.74 | 10287.41 | 12926.03 | 13375.62 | 23740.5  |
| 131154.3 | 59732.56 | 203892.4 | 63491.73 | 108149.8 | 199486   | 135416.2 | 118419.3 | 263212   | 54509.57 | 135431.3 | 123843.3 | 103625.6 | 117093.7 | 64775.75 | 226153.3 | 106943.7 |
| 388090.4 | 241938.5 | 238907.2 | 229763   | 399943.5 | 330938   | 565678.8 | 247783.5 | 792957.3 | 390964.7 | 257746   | 289258.3 | 199603   | 256619.9 | 292293.3 | 397273.1 | 288477.1 |
| 24129842 | 6732318  | 6843787  | 5966170  | 6200220  | 6767628  | 5317197  | 6766818  | 5242906  | 74801984 | 6609344  | 6207856  | 5219905  | 6761464  | 6832438  | 3962931  | 6434721  |
| 55945.87 | 80782.16 | 98554.28 | 49692.24 | 73080.05 | 37684.14 | 4770.723 | 25389.86 | 59459.98 | 32452.11 | 29213.08 | 43665.97 | 23770.08 | 74473.97 | 52340.34 | 29387.31 | 45151.09 |
| 8273314  | 7791544  | 5498750  | 9272732  | 5585026  | 7718314  | 8881419  | 7725861  | 8256854  | 6514594  | 6124349  | 2684503  | 3970000  | 4716894  | 5604861  | 4820079  | 6105928  |
| 7567.112 | 10085.82 | 9168.101 | 9596.006 | 4059.67  | 8911.394 | 8906.331 | 7615.611 | 11362.64 | 14046.56 | 6248.596 | 7318.802 | 7756.577 | 6907.296 | 9160.519 | 7511.238 | 6544.88  |
| 24273.21 | 69584.57 | 51252.21 | 36450.95 | 42296.49 | 44876.41 | 31867.9  | 48851.17 | 42567.79 | 30219.11 | 107292.8 | 110863.3 | 61331.41 | 62232.98 | 42154.81 | 44463.18 | 90176.42 |
| 12909.62 | 19795.76 | 12740.94 | 21403.38 | 21264.85 | 33624.88 | 21836.61 | 14949.5  | 17671.63 | 20558.81 | 15323.28 | 12496.62 | 16238.14 | 16530.55 | 26255.58 | 16441.88 | 12296.46 |
| 31992.38 | 19958.27 | 15451.12 | 17766.76 | 20534.04 | 11777.26 | 11276.85 | 19809.3  | 18106.42 | 77282.45 | 14039.04 | 13710.32 | 15584.7  | 16879.59 | 13226.12 | 8046.819 | 19132.37 |
| 101026   | 87808.95 | 64433.81 | 86181.36 | 59585.79 | 57054.35 | 49708.76 | 67477.13 | 67850.88 | 87968.95 | 70906.41 | 80270.38 | 74201.8  | 99152.65 | 88163.63 | 74560.28 | 72800.16 |
| 80188.72 | 86321.77 | 71685.8  | 69181.52 | 44411.27 | 53577.56 | 56867.56 | 56809.91 | 80576.57 | 105845.4 | 77268.76 | 59504.05 | 51657.01 | 62054.27 | 68926.4  | 65011.89 | 56572.2  |
| 7309.236 | 5901.738 | 3790.226 | 6494.08  | 5716.966 | 5225.158 | 54841.46 | 9506.181 | 10595.67 | 8503.344 | 1830.457 | 7823.791 | 5318.877 | 32663.88 | 7652.759 | 1847.49  | 3296.17  |
| 91173.92 | 104036.9 | 90945.88 | 189482.1 | 34076.65 | 45898.1  | 480548.2 | 112436.9 | 107522.9 | 222851.9 | 120108.1 | 177710.5 | 251625.4 | 45915.19 | 57447.19 | 552835.3 | 127814.1 |
| 39359.85 | 18912.77 | 12542.04 | 18378.03 | 28333.63 | 11977.92 | 5296.531 | 8480.99  | 27559.08 | 103029.5 | 12606.19 | 33529.9  | 17250.97 | 51905.63 | 26371.11 | 5789.625 | 10755.86 |
| 626244.9 | 752970.3 | 432778.6 | 689815.2 | 441563.2 | 442190.2 | 441224   | 546385.2 | 492765.8 | 973893.8 | 681973.7 | 639508.1 | 551349.3 | 708745.3 | 709694.5 | 601378.1 | 537622.4 |
| 30411.03 | 20227.31 | 11633.68 | 10351.47 | 31903.05 | 34724.23 | 46498.5  | 44953.58 | 185386.2 | 25265.73 | 101392.9 | 619691.8 | 135686.8 | 133863.6 | 305713.4 | 65776.34 | 153496.9 |
| 141473.1 | 228159.1 | 224337.8 | 126503.5 | 153251.2 | 144346.3 | 140695.2 | 128789.6 | 164327.4 | 183673   | 182341   | 217303.3 | 148839.9 | 121692.3 | 154956.3 | 179384   | 228581.3 |
| 15459.89 | 31872.16 | 23085.21 | 24836.41 | 26553.63 | 30759.43 | 31598.29 | 47107.04 | 30375.24 | 12031.04 | 17843.42 | 19850.31 | 21536.65 | 21552.23 | 29231.7  | 29326.75 | 24288.55 |
| 303219.2 | 387225.5 | 159621.2 | 116690   | 182308.5 | 241172.1 | 350051   | 162984.4 | 177841   | 305558.5 | 619747.6 | 205156.8 | 263853.4 | 182720.3 | 290575.3 | 300493.6 | 195943.4 |
| 25113176 | 20890810 | 20718868 | 22280118 | 23179490 | 24271688 | 22261228 | 22567006 | 18707028 | 55769580 | 19641622 | 17087956 | 15155616 | 23059688 | 21611892 | 15429051 | 18256520 |
| 7473.593 | 10971.39 | 11767.88 | 9144.552 | 21178.75 | 8981.313 | 15157.44 | 10368.12 | 10546.09 | 12747.14 | 13637.68 | 25815.82 | 15805.78 | 15841.08 | 15401.85 | 16410.13 | 7922.413 |
| 2005338  | 1549430  | 1620111  | 1590539  | 1385130  | 1991929  | 3154649  | 1334966  | 2385196  | 1505759  | 1862972  | 1303083  | 1628458  | 1315464  | 1548037  | 3058498  | 1962570  |
| 13769.35 | 13654.37 | 3483.306 | 10958.92 | 33858.22 | 2708.813 | 9416.002 | 4907.073 | 24379.52 | 8276.698 | 18046.51 | 10307.06 | 8351.118 | 9553.744 | 9078.124 | 14136.11 | 6381.25  |
| 12314.12 | 19457.35 | 13284    | 10507.08 | 12941.97 | 9702.807 | 5463.365 | 11761.47 | 10001.59 | 99944.74 | 13952.91 | 19264.48 | 19655.07 | 10779.03 | 15439.13 | 15036.84 | 15024.44 |
| 653328.8 | 444171.6 | 577838.6 | 427002.1 | 435701.6 | 572980.3 | 680572.8 | 604527.8 | 336193.2 | 1413327  | 161808.4 | 543441.8 | 645423.9 | 728196.4 | 781640.3 | 743793.1 | 640824.4 |
| 911019.3 | 367013.4 | 453863.7 | 507022.3 | 437683.3 | 511764.9 | 752388.9 | 267823.9 | 2193914  | 524391.3 | 1380597  | 859288.7 | 779816.1 | 883785.9 | 690786.4 | 1204341  |          |
| 390564.2 | 71049.3  | 71045.81 | 97710.27 | 181980.5 | 128535.8 | 127433.1 | 171505.4 | 61938.33 | 1216378  | 86978.22 | 183341.5 | 148974   | 215522.8 | 185552.7 | 138661.8 | 225821.3 |
| 586501.3 | 705749.1 | 389558.7 | 1088409  | 867638.9 | 520527.6 | 1134240  | 398623.5 | 195738.5 | 1208562  | 753705.1 | 415510.7 | 1286654  | 1021528  | 790059.2 | 964046.9 | 774258.6 |
| 44516.73 | 21173.84 | 25032.54 | 9998.406 | 2857.665 | 67602.66 | 26021.85 | 9904.109 | 36022.06 | 38272.16 | 7079.621 | 24784.43 | 13163.99 | 11475.75 | 56408.72 | 40113.17 | 14477.11 |
| 27395096 | 17849102 | 25314518 | 26873948 | 30399254 | 17696020 | 28413594 | 10301376 | 26802288 | 20372544 | 22746232 | 17153902 | 28407064 | 29258356 | 13694896 | 29369066 | 12108223 |
| 232561   | 212250.7 | 221933.3 | 256819.4 | 185182.2 | 341513.1 | 212643.5 | 172694.7 | 379819.4 | 206530   | 217868.4 | 145089.8 | 229137.9 | 163962.5 | 219172.4 | 251371.3 | 226928.3 |
| 24870.81 | 29039.88 | 34657.45 | 26506.2  | 24026.26 | 23531.85 | 43975.13 | 26126.69 | 41186.2  | 37066.79 | 30351.38 | 23269.81 | 23220.83 | 22032.75 | 20173.53 | 30079.22 |          |
| 10069.41 | 5464.541 | 11437.02 | 11618.99 | 19318.2  | 14752.68 | 12231.48 | 7874.408 | 13387.21 | 7643.675 | 15476.15 | 5737.221 | 10022.22 | 9715.201 | 13994.61 | 13174.77 | 11632.57 |
| 5797.984 | 6493.6   | 6254.67  | 3929.805 | 7996.298 | 6037.139 | 5915.76  | 5877.812 | 9431.94  | 4527.233 | 3308.145 | 6272.339 | 7337.497 | 9771.064 | 7015.034 | 7156.162 | 5648.026 |
| 32917370 | 33414578 | 45963460 | 46301048 | 37001856 | 38805280 | 45042248 | 45448008 | 35443712 | 31235738 | 54852528 | 41491168 | 48009112 | 38633728 | 33491768 | 48055128 | 65624684 |
| 68639.85 | 10563.82 | 62697.44 | 86264.17 | 84003.38 | 73195.3  | 103657.1 | 67976.73 | 106536   | 95905.63 | 43615.07 | 5794.097 | 49558.71 | 49135.54 | 84440.66 | 61194.67 | 63603.85 |
| 99827.83 | 108236.8 | 154205.6 | 29488.68 | 764012.9 | 161979.9 | 225779.9 | 471042.9 | 594949.6 | 419776.6 | 225827.8 | 2047514  | 217706.2 | 110758   | 430356.8 | 106525.9 | 618215.6 |
| 2586222  | 6014092  | 3569691  | 4203240  | 5360843  | 3624241  | 6953627  | 3859845  | 3280725  | 3597689  | 5677677  | 5429135  | 7648929  | 6660877  | 5701218  | 3833798  | 4584951  |
| 18119.8  | 20365.03 | 13171.78 | 19462.77 | 14567.38 | 20759.86 | 17334.76 | 21134.94 | 17730.12 | 17334.44 | 16118.65 | 21368.08 | 20287.74 | 18847.68 | 16026.68 | 12250.01 | 18841.13 |

|          |          |          |          |          |          |          |          |          |          |          |          |          |          |          |          |          |
|----------|----------|----------|----------|----------|----------|----------|----------|----------|----------|----------|----------|----------|----------|----------|----------|----------|
| 33611844 | 32618522 | 36092124 | 24940516 | 54963588 | 50298160 | 44416840 | 20455968 | 17155086 | 42008384 | 63556704 | 78954704 | 75159120 | 37838264 | 43932848 | 44819416 | 36896216 |
| 25930116 | 61749300 | 35017008 | 31331050 | 54999288 | 44762308 | 42791432 | 19096926 | 16319268 | 39533652 | 73181880 | 90908368 | 72207320 | 39146528 | 38836536 | 36187184 | 43320452 |
| 85338.77 | 134379   | 175238.8 | 37630.01 | 102427.8 | 90948.34 | 100653.4 | 82967.44 | 89082.46 | 80692.39 | 124971.7 | 92355.59 | 36087.67 | 96542.62 | 131292   | 116160   | 139039   |
| 9037.3   | 7906.315 | 5968.131 | 5449.673 | 14536.86 | 4291.722 | 6785.034 | 6530.879 | 9662.779 | 10721.81 | 6877.103 | 5950.401 | 3199.164 | 10911.44 | 5026.708 | 5427.777 | 8191.927 |
| 137922.1 | 130685.8 | 132943.5 | 131233.2 | 189653   | 156655.6 | 114517.8 | 99705.65 | 107302.3 | 96732.95 | 181392.7 | 184274.8 | 184186.1 | 144076.7 | 121673.5 | 172158.1 | 142293.2 |
| 11344.16 | 122694.2 | 11274.01 | 20620.04 | 29392.64 | 9308.056 | 36960.83 | 12192.99 | 8221.443 | 9125.54  | 58820.88 | 200150.8 | 5811.48  | 13791.79 | 25748.7  | 14855.32 | 14364.05 |
| 3708714  | 2620017  | 2605035  | 2528218  | 2929279  | 1893886  | 3080213  | 2248361  | 3197027  | 4229728  | 2602770  | 1681435  | 1852653  | 3013400  | 2099317  | 2738527  | 2658680  |
| 26733.74 | 35302.22 | 13543.9  | 39067.2  | 24031.64 | 29408.47 | 22104.7  | 25651.33 | 24335.4  | 45001.8  | 25295.47 | 38162.5  | 17060.89 | 38204.83 | 39167.43 | 21099    | 17282.93 |
| 257076.1 | 326985.6 | 267388.4 | 314136.9 | 389443.6 | 272656.2 | 336713.5 | 312760.4 | 279913.6 | 399655.7 | 331189.8 | 379633.2 | 466647   | 323925.8 | 256788.3 | 299304.4 | 360103.5 |
| 891389.3 | 582401   | 693693.6 | 443856.7 | 524828.7 | 469422.7 | 703722.1 | 742044.8 | 665687.3 | 792510.6 | 370467.4 | 241876.9 | 422618.4 | 399562.3 | 492109.9 | 427001.1 | 545489   |
| 4882.762 | 6913.159 | 6057.266 | 9630.68  | 4729.95  | 8056.546 | 11067.29 | 12592.62 | 5836.511 | 9700.437 | 11104.63 | 9890.442 | 8805.271 | 11319.6  | 9988.992 | 22441.27 | 10942.87 |
| 32454504 | 62609048 | 50033408 | 58254584 | 25282302 | 42172748 | 33192702 | 25088052 | 21976124 | 35230328 | 41277884 | 18292000 | 26473034 | 31902334 | 34814708 | 24594718 | 33665160 |
| 1900786  | 1282685  | 1655830  | 1267742  | 1913101  | 1370461  | 3557035  | 2080139  | 3147803  | 2130922  | 2658066  | 1547932  | 1418004  | 1604864  | 1165954  | 2721024  | 1865158  |
| 51574.34 | 331679.4 | 192672.1 | 246995.3 | 336983.3 | 115289   | 267283.5 | 97841.27 | 165973.4 | 89549.95 | 401689.9 | 605141.7 | 531190.5 | 172236.5 | 127323.2 | 335433.5 | 210085.3 |
| 312441.6 | 177956.4 | 234305.6 | 304410   | 250537.7 | 231594.3 | 160263.9 | 311560.4 | 218590.4 | 181106.3 | 147425.3 | 179613.2 | 347695.1 | 317665.2 | 282073.5 | 173708.8 | 233795.7 |
| 171121.3 | 365842.4 | 108110.4 | 96067.7  | 186660.3 | 112040.3 | 214911.3 | 111933.5 | 263295.5 | 378577.4 | 243488.6 | 196141.2 | 92094.2  | 144274.7 | 156032.4 | 173555.3 | 220265.9 |
| 69098.34 | 389368.7 | 35324.61 | 51940.57 | 246532.8 | 30795.6  | 34638.05 | 13181.4  | 62060.33 | 81056.56 | 22093.72 | 227056.2 | 44803.31 | 191762.3 | 160412.9 | 79808.14 | 24954.35 |
| 148319.6 | 128069.3 | 113728.8 | 103563.5 | 80810.27 | 80205.97 | 107671.9 | 113675.9 | 131938.1 | 154787.8 | 121651.5 | 106608   | 85711.92 | 112974   | 111516.4 | 124396.3 | 123244.1 |
| 119152   | 131884   | 150784.3 | 109222.6 | 98638.72 | 87742.69 | 74451.88 | 107969.6 | 122967.1 | 113370.9 | 153685   | 182154.2 | 118276.3 | 109127.3 | 124267.3 | 117869.3 | 141309.3 |
| 2717.947 | 10854.29 | 11642.21 | 12437.89 | 27709.61 | 10293.85 | 15955.05 | 8820.332 | 12124.64 | 17890.57 | 10052.36 | 3467.294 | 30327.08 | 14548.11 | 32382.38 | 12833.04 | 3564.655 |
| 22090.95 | 18148.1  | 23210.92 | 13813.97 | 17739.56 | 35865.99 | 10498.55 | 15647.01 | 17835.9  | 8325.001 | 15068.67 | 19902.82 | 31520.51 | 19538    | 18338    | 7173.443 | 36055.74 |
| 3612186  | 2836035  | 2655476  | 2890274  | 2615580  | 3838125  | 3331539  | 3090399  | 3339565  | 1670980  | 2485821  | 2629904  | 2317227  | 2361469  | 2566801  | 3092397  | 2927008  |
| 8078.606 | 14961.27 | 9365.905 | 9671.017 | 12546.83 | 11584.56 | 16890.79 | 13681.73 | 13794.82 | 9664.133 | 18246.36 | 13892.39 | 17210.29 | 17563.81 | 12721.92 | 16567.68 | 14734.98 |
| 21703.63 | 56735.32 | 44244.38 | 32249.6  | 17496.72 | 30458.58 | 76806.97 | 36612.87 | 53722.53 | 35234.2  | 53350.61 | 33461.89 | 27273.87 | 25695.71 | 29600.41 | 39009.13 | 44129.5  |
| 870451.3 | 1790448  | 1471190  | 1491972  | 1102338  | 1612388  | 1508478  | 1301075  | 1152280  | 1309044  | 1487443  | 892718.8 | 1085209  | 1150652  | 1126588  | 1179328  | 1161491  |
| 17565.54 | 18639.85 | 20440.3  | 17192.02 | 23061.38 | 10889.19 | 35875.67 | 15073.61 | 25174.29 | 13003.82 | 29307.19 | 9561.35  | 15005.19 | 17420.21 | 10227.69 | 28379.41 | 16141.22 |
| 224689.3 | 273064.9 | 195033.5 | 204540.7 | 258782.8 | 182309.8 | 279103.3 | 255103.9 | 472529.1 | 233984   | 221027.4 | 232684.9 | 196604.3 | 223082.1 | 269895.9 | 253814.5 | 272898.6 |
| 26892.6  | 10095.31 | 12080.01 | 5739.99  | 15191.48 | 5866.487 | 15492.71 | 9776.735 | 27156.51 | 16374.58 | 10069.44 | 3230.008 | 6921.721 | 8811.279 | 15849.71 | 10992.59 | 16674.08 |
| 4727873  | 5167372  | 6079916  | 4948830  | 5728328  | 5646872  | 4835185  | 5274391  | 4200939  | 5466558  | 6143318  | 5601226  | 5892453  | 5473782  | 5318892  | 4622143  | 4997701  |
| 20584384 | 33456064 | 20436056 | 29990882 | 19395016 | 28318918 | 67036156 | 65157916 | 35425752 | 78411296 | 18234034 | 45734584 | 20687000 | 67410008 | 71130776 | 34030952 | 38429700 |
| 12008.91 | 13440.59 | 14959.54 | 8925.872 | 8620.217 | 9281.263 | 5601.902 | 10754.37 | 9592.791 | 12630.38 | 12043.16 | 11777.2  | 9812.383 | 14540.05 | 10227.19 | 9909.946 | 13717.42 |
| 4060.93  | 5715.18  | 2207.319 | 5508.774 | 4105.043 | 1912.964 | 7407.725 | 4099.91  | 2605.913 | 3233.488 | 3086.615 | 17017.45 | 6704.263 | 4208.079 | 5483.854 | 4007.264 | 5809.047 |
| 98225.14 | 73929    | 96330.49 | 70657.83 | 61457.14 | 64870.01 | 43923.39 | 63037.91 | 76052.61 | 100830.2 | 105535   | 157779.8 | 77932.93 | 89186.94 | 121794.6 | 98713.8  | 96269.08 |
| 23904.57 | 23251.47 | 15232.08 | 22529.2  | 15674.38 | 18719.93 | 14469.88 | 15144.21 | 19866.28 | 23204.87 | 24083.79 | 15098.2  | 11431.78 | 20903.59 | 22468.56 | 17440.86 | 10322.24 |
| 36333.39 | 45693.71 | 42550.46 | 48267.16 | 40796.21 | 47855.41 | 53626.44 | 47585.23 | 54230.06 | 41862.81 | 47077.62 | 44927.71 | 42545.3  | 40549.1  | 45103.38 | 38933.19 | 52141.01 |
| 57759.43 | 136700   | 77458.7  | 57860.9  | 41827.47 | 51466.23 | 249499.1 | 55699.88 | 61070.24 | 99715.14 | 237573.6 | 78040.37 | 79822.14 | 102166   | 58935.72 | 196564   | 86308.02 |
| 1815874  | 1868797  | 1304333  | 1721703  | 1958767  | 1313454  | 1633407  | 1702232  | 1763516  | 1662958  | 1472201  | 1618263  | 1413984  | 2370074  | 1484465  | 1458134  | 1328634  |
| 22138.48 | 54920.29 | 27663.22 | 21069.47 | 35094.81 | 20495.8  | 65245.63 | 23884.51 | 41494.98 | 39825.44 | 42815.13 | 19694.19 | 21291.87 | 13023.61 | 26285.16 | 48512.4  | 35609.32 |
| 114955.3 | 100373.8 | 112654.6 | 119786.2 | 126890.4 | 122544   | 91763.7  | 121441   | 119676.5 | 259901.6 | 115908   | 76685.89 | 93622.08 | 107548.7 | 116179.3 | 97623.97 | 108949.3 |
| 2068902  | 3027628  | 2533624  | 2088469  | 2622383  | 2479858  | 3795263  | 2923179  | 3164886  | 2825973  | 2816124  | 2460834  | 2016590  | 2377949  | 2225622  | 3109913  | 3016497  |
| 704168.6 | 742578.6 | 507401.9 | 650350   | 673087.6 | 503831.8 | 470620.7 | 719278.1 | 552394.4 | 624953.3 | 636962.3 | 545777.2 | 568797.1 | 860695.9 | 765160.9 | 544754.9 | 569385.8 |
| 34519.94 | 94463.53 | 125820.4 | 155581.8 | 340533.4 | 109295.4 | 99388.41 | 82091.9  | 135693.4 | 39444.18 | 193346.3 | 220303.8 | 424593.3 | 169729   | 92223.44 | 109159.4 | 99433.94 |
| 62545.66 | 73996.16 | 64636.52 | 56095.66 | 61744.93 | 76667.97 | 98403.83 | 55620.18 | 65764.29 | 73724.88 | 77000.15 | 76064.59 | 52548.59 | 65163.04 | 71771.65 | 87762.64 | 63666.51 |
| 1833721  | 991152.1 | 2757458  | 1445733  | 2527824  | 1716996  | 1620117  | 2482869  | 2895603  | 1.24E+08 | 1311383  | 1242683  | 1601911  | 1423510  | 1227731  | 1798850  | 1642370  |
| 74095.3  | 63250.17 | 46388.94 | 44213.02 | 53896.25 | 54255.76 | 54822.68 | 63347.74 | 48882.03 | 104566.8 | 68530.09 | 81729.68 | 55075.75 | 65575.44 | 75047.02 | 67578.4  | 66506.16 |
| 21296.85 | 15219.13 | 6898.783 | 28656    | 61347.82 | 35414.57 | 21533.42 | 12725.78 | 23383.92 | 41548.93 | 18605.7  | 19938.23 | 24089.07 | 32712.9  | 33019.39 | 23731.54 | 7848.445 |
| 296210.9 | 223510.1 | 263050.1 | 222620.4 | 205900.5 | 178596.2 | 143007.7 | 261832.1 | 217773   | 286023   | 320824.9 | 315769   | 177957.1 | 400422.9 | 348645.4 | 220946.8 | 355034.1 |
| 72370.15 | 15639.05 | 18762.3  | 88409.63 | 23930.41 | 88902.26 | 22275.96 | 21620.59 | 22636.32 | 4557.115 | 32140.47 | 37003.52 | 90882.91 | 18498.08 | 17049.05 | 21595.37 | 15845.17 |
| 422064.3 | 956998.7 | 938343.7 | 704782.8 | 594743.2 | 765094.1 | 879500.5 | 615405.3 | 1309688  | 635745.2 | 1687374  | 3979499  | 994353.9 | 1236690  | 2589459  | 1808572  | 1206706  |

|          |          |          |          |          |          |          |          |          |          |          |          |          |          |          |          |          |
|----------|----------|----------|----------|----------|----------|----------|----------|----------|----------|----------|----------|----------|----------|----------|----------|----------|
| 1536848  | 1987168  | 1397093  | 1174453  | 647035.9 | 1678832  | 2570203  | 1271357  | 2646792  | 3394650  | 1785587  | 1259253  | 1040686  | 984272.6 | 1445484  | 1781054  | 1481115  |
| 154014.7 | 101180.7 | 8293.345 | 14876.2  | 72146.57 | 12838.99 | 13108.72 | 15061.13 | 97820.59 | 26512.46 | 26914.45 | 33992.65 | 24621.31 | 133093.6 | 33564.71 | 22828.95 | 11084.74 |
| 1678954  | 1995238  | 1582111  | 1616626  | 2205074  | 1375725  | 1584763  | 1305831  | 1422722  | 1874182  | 2011241  | 3502330  | 2734707  | 2000458  | 1767526  | 2067853  | 1508470  |
| 1078909  | 1512861  | 1562483  | 1490745  | 1281166  | 1676204  | 1562639  | 1249538  | 1570812  | 1777621  | 1740049  | 1171449  | 1259331  | 1154663  | 925386   | 1699725  | 1388680  |
| 25715.64 | 39534.74 | 41916.8  | 22770.09 | 23518.63 | 21578.93 | 24164.81 | 28091.77 | 51714.54 | 44520.14 | 43933.77 | 39630.34 | 23048.26 | 31004    | 30596.37 | 37046.11 | 62114.62 |
| 10920.6  | 16632    | 9850.412 | 11558.48 | 15685.12 | 8726.854 | 8339.566 | 12955.7  | 13356.88 | 24775.38 | 16991.76 | 14308.75 | 13283.13 | 15052.57 | 15475.11 | 11514.05 | 10754.75 |
| 48042.39 | 43792.04 | 3334.235 | 38412.2  | 34045.98 | 30590.95 | 52664.63 | 56902.28 | 50488.3  | 54698.08 | 51052.66 | 47565.93 | 63970.29 | 49420.43 | 93060.7  | 57135.49 | 54898.27 |
| 48904.38 | 63105.3  | 29357.37 | 36086.22 | 91307.45 | 73502.65 | 223843.6 | 130377.2 | 39085.99 | 55322.78 | 132143.6 | 70255.26 | 59208.14 | 94573.85 | 83780.73 | 160081   | 145510.6 |
| 16574.88 | 18270.82 | 18485.24 | 24613.63 | 47691.54 | 32913.76 | 35018.24 | 26614.59 | 21982.08 | 10156.72 | 39311.43 | 21584.24 | 56367.38 | 32219.29 | 28009.65 | 32438.77 | 40240.62 |
| 14335.9  | 19012.64 | 14871.9  | 19099.44 | 19548.78 | 13327.14 | 9421.471 | 12931.58 | 14459.96 | 14396.05 | 19271.2  | 29954.89 | 26462.74 | 18548.8  | 18069.23 | 16941.67 | 17542.31 |
| 9612996  | 57732.56 | 14695.59 | 67433.08 | 5174879  | 5241068  | 6040214  | 5872631  | 1858323  | 102799.3 | 1104736  | 122136.8 | 93240.18 | 5413609  | 57843.28 | 66992.77 | 38544.75 |
| 9709.584 | 27718.13 | 124684.5 | 28216.19 | 49326.34 | 16592.59 | 22657.22 | 16011.47 | 15027.68 | 18247.24 | 31219.72 | 85291.51 | 61283.89 | 35525.51 | 24386.93 | 100702.6 | 52754.82 |
| 10118.64 | 14600.73 | 24090.8  | 18904.18 | 10563.66 | 18182.16 | 14169.23 | 13341.9  | 16564.53 | 15767.48 | 21728.52 | 15682.78 | 19498.38 | 25215.28 | 21982.79 | 20418.28 | 16489.38 |
| 44005.95 | 63221.63 | 45384.21 | 61177.41 | 68288.57 | 44913.44 | 37767.16 | 34484.68 | 29556.2  | 46428.05 | 34561.42 | 20614.5  | 40078.82 | 42753.3  | 36839.24 | 36858.64 | 34141.16 |
| 8320.371 | 8413.954 | 8012.42  | 8903.297 | 11168.83 | 7563.645 | 6583.944 | 11989.71 | 14676.59 | 5053.86  | 2956.771 | 2935.998 | 4988.425 | 13631.09 | 7403.379 | 6062.946 | 11907.23 |
| 2404.631 | 6216.027 | 2965.527 | 1536.235 | 652.1683 | 677.0096 | 7406.199 | 780.1038 | 956.1459 | 4995.871 | 3124.037 | 1172.048 | 1198.31  | 1406.779 | 1374.347 | 3532.982 | 1453.8   |
| 71820.3  | 99762.65 | 94767.45 | 72436.48 | 79646.04 | 54865.14 | 125592.8 | 80421.34 | 75575.74 | 78801.21 | 116494.1 | 112121.6 | 97775.19 | 79902.7  | 82776.65 | 83291.51 | 76792.72 |
| 27917.94 | 28331.55 | 15241.83 | 31691.66 | 11786.75 | 24116.73 | 19160.76 | 15184.88 | 15666.09 | 45414.75 | 20767.04 | 23738.62 | 25690.13 | 24929.31 | 16800.46 | 17007.08 | 27364.63 |
| 29729.1  | 70054.46 | 77286.98 | 79759.34 | 63381.42 | 55295.46 | 43671.24 | 45254.56 | 57278.96 | 12583.08 | 63015.38 | 43228.36 | 68759.39 | 84538.34 | 45908.97 | 44868.66 | 55200.83 |
| 61722580 | 60767368 | 60491824 | 74584136 | 88981232 | 61065528 | 69965824 | 59876072 | 59484756 | 59304380 | 1.07E+08 | 1.16E+08 | 1.22E+08 | 74730928 | 54117676 | 68552432 | 74970576 |
| 3161413  | 6383655  | 5304236  | 4684152  | 10244696 | 5620866  | 2096854  | 2717102  | 1763485  | 5971160  | 14887841 | 35505148 | 20488372 | 8323910  | 6673843  | 5004531  | 7829832  |
| 930757.3 | 666934.6 | 763079.2 | 910679.8 | 410661.8 | 1132745  | 1968263  | 828377.2 | 1118627  | 1867554  | 1517506  | 703161.3 | 1140416  | 487335.6 | 1330009  | 1622645  | 786482.2 |
| 2053064  | 557664.3 | 1114643  | 1284919  | 1060943  | 1724221  | 1444668  | 1975619  | 1326479  | 4890053  | 1200605  | 1045399  | 1124005  | 1626128  | 1834518  | 1238623  | 1725172  |
| 60624.31 | 48777.54 | 32773.72 | 37116.02 | 38975.63 | 34535.77 | 26939.56 | 33251.45 | 44370.44 | 48714.13 | 33428.65 | 54570.33 | 38452.14 | 41837.79 | 29347.55 | 70926.33 | 34351.27 |
| 183492   | 264983   | 269781.7 | 212143.9 | 230720.8 | 234446   | 264474.2 | 252877.5 | 200188.5 | 144999.8 | 232020.8 | 115308.9 | 171507.4 | 205819.5 | 167851.6 | 232678.8 | 217637   |
| 5686.796 | 9073.686 | 3935.962 | 3727.057 | 6255.975 | 6535.693 | 10346.1  | 5555.273 | 12554.34 | 7147.079 | 7041.512 | 2010.944 | 5422.711 | 5415.553 | 5962.963 | 9099.25  | 4269.611 |
| 12198.42 | 12760.3  | 8218.883 | 15505.45 | 17696.84 | 10785.18 | 6077.988 | 13489.65 | 17617.79 | 19996.82 | 16491.07 | 20066.9  | 17772.47 | 12935.39 | 10613.04 | 7607.805 | 16890.46 |
| 46603.14 | 59730.03 | 56286.38 | 52494.16 | 48538.51 | 69010.39 | 64032.27 | 40980.98 | 51056.24 | 46679.09 | 71027.09 | 42149.77 | 44663.82 | 43138.69 | 37822.2  | 62064.02 | 42945.38 |
| 346934.3 | 312487.4 | 278455.8 | 354781.5 | 211054.9 | 245609   | 316873   | 289931.1 | 242095.9 | 377824.9 | 262969.3 | 227453.3 | 259516.8 | 287656.3 | 288364.6 | 333198.8 | 306092.5 |
| 17596.35 | 36534.21 | 44132.59 | 24628.32 | 20768.9  | 28159.03 | 22444.95 | 20710.38 | 27210.36 | 25476.54 | 33270.12 | 24258.64 | 16825.17 | 17661.16 | 32446.08 | 29241.31 | 29946.87 |
| 30594.27 | 65418.98 | 80540.27 | 65535.4  | 131937.4 | 82119.92 | 71790.55 | 63638.07 | 55977.96 | 36199.66 | 96050.05 | 198454.3 | 202887.2 | 98566.91 | 73049.19 | 83002.25 | 89682.78 |
| 27536.16 | 47553.36 | 26835.88 | 35402.58 | 3648.214 | 30254.76 | 29362.76 | 31385.02 | 36296.11 | 45792.77 | 39974.61 | 47496.05 | 29604.97 | 41184.56 | 31122.07 | 31111.08 | 42422.43 |
| 132888.2 | 160936   | 145396.1 | 88916.22 | 95434.98 | 132729.3 | 100245.1 | 77944.02 | 183930.4 | 148593.1 | 170457.7 | 111602.4 | 94043.03 | 109942.7 | 152800.9 | 155253.1 | 165926.2 |
| 181769   | 366910.8 | 433897.8 | 327940.7 | 239085.3 | 230023.9 | 197091.6 | 246239.4 | 411284.9 | 240648.9 | 336546.2 | 264413.7 | 214712.1 | 229227   | 308911.4 | 189247   | 331915.5 |
| 6858230  | 12300580 | 8977248  | 15206516 | 24808712 | 6002002  | 4064029  | 1552140  | 4086412  | 4857277  | 3843434  | 8339093  | 3483077  | 16721070 | 18197856 | 9172110  | 6863314  |
| 279082.8 | 341011.1 | 361924.9 | 332256.2 | 273484.2 | 297022.7 | 508918.4 | 422787.7 | 330837.2 | 485197.9 | 406471.3 | 282244.1 | 411493.1 | 358645.6 | 377657.3 | 414448.7 | 436501.3 |
| 33981.49 | 44527.08 | 43541.37 | 49480.18 | 40048.07 | 36996.01 | 32089.51 | 39285.64 | 44150.69 | 66167.75 | 58110.09 | 45656.76 | 50295.49 | 78322.8  | 51838.33 | 41684.59 | 36727.46 |
| 51092.38 | 65956.03 | 43509.82 | 37708.97 | 41198.55 | 58927.33 | 108702.8 | 64826    | 53366.59 | 67904.42 | 90130.44 | 71665.06 | 49282.11 | 49291.22 | 71658.69 | 103963.6 | 65023.4  |
| 47010.91 | 38985.09 | 18814.48 | 20265.52 | 40947.64 | 23560.75 | 17650.35 | 24358.06 | 26608.83 | 42068.01 | 44910.65 | 45822.36 | 29292    | 46236.07 | 41803.53 | 34584.7  | 22314.42 |
| 263119.9 | 330200.1 | 247205.4 | 227285.2 | 120281.5 | 123050.6 | 245806.4 | 190898.8 | 150357.6 | 276365.2 | 256737.6 | 197679.1 | 189509.1 | 186872.4 | 156065.2 | 190459.5 | 168532.8 |
| 45384.67 | 107594.4 | 88447.08 | 99378.16 | 151619.6 | 66015.49 | 86646.75 | 48476.87 | 78231.6  | 70425.82 | 119501.8 | 252731.4 | 242277.1 | 93410.16 | 88594.69 | 112189.9 | 97012.74 |
| 157684.6 | 178138.2 | 136093   | 82206.05 | 90804.38 | 174094.8 | 46622.99 | 178126   | 100239.5 | 187475.4 | 115911.6 | 116765.6 | 89894.27 | 158314.8 | 166026   | 84942.64 | 113592.7 |
| 15676.7  | 9290.886 | 13654.72 | 29011.9  | 28628.69 | 23255.22 | 20946.65 | 22509.12 | 19733.84 | 19811.81 | 17952.63 | 5509.845 | 30060.5  | 30770.72 | 32634.83 | 29994.44 | 19276.91 |
| 164964.2 | 156329.5 | 120068.5 | 117828.8 | 93226.03 | 127403.4 | 116991.1 | 136974.9 | 109987.5 | 172356.8 | 137154.9 | 149202.9 | 125648.7 | 127894.8 | 131989.9 | 134482.5 | 97804.63 |
| 12644.07 | 28617.87 | 26566.58 | 46938.74 | 45919.44 | 32243.01 | 37073.71 | 15386.28 | 55811.38 | 15845.62 | 54939.6  | 126586.5 | 86538.88 | 35302.27 | 51421.38 | 98970.56 | 75028.44 |
| 110145.8 | 46441.68 | 146365.5 | 69830.03 | 77347.55 | 92584.24 | 130581.7 | 87377.51 | 103561.5 | 100992.3 | 53640.93 | 58848.08 | 87143.45 | 89600.13 | 89883.48 | 134006.3 | 100203.2 |
| 380526.7 | 310931.6 | 211411.8 | 461358.3 | 284684.1 | 412788.4 | 242559.8 | 271202.1 | 210539.8 | 186200.7 | 326574.2 | 215487.2 | 432507.7 | 299924.9 | 396327.7 | 362301.3 | 445173.3 |
| 8095.726 | 1842698  | 3486774  | 1421657  | 3207056  | 1479184  | 423979.2 | 393695.8 | 4186607  | 11763.1  | 1801802  | 1571658  | 7499.462 | 2930353  | 1261722  | 502620.2 | 392738.5 |
| 5178.345 | 14120.36 | 12132.68 | 14508.96 | 11419.69 | 6269.665 | 15449.83 | 14564.47 | 13723.2  | 10003.09 | 17253.73 | 24232.25 | 11508.41 | 11959.95 | 13321.73 | 11885.79 | 5832.549 |

|          |          |          |          |          |          |          |          |          |          |          |          |          |          |          |          |          |
|----------|----------|----------|----------|----------|----------|----------|----------|----------|----------|----------|----------|----------|----------|----------|----------|----------|
| 24561.39 | 44617.38 | 29209.6  | 26701.6  | 40910.91 | 35109.7  | 30670.69 | 25322.84 | 27695.4  | 23698.25 | 40451.51 | 60582.8  | 23502.04 | 39556.81 | 35747.38 | 46004.3  | 19195.56 |
| 5637270  | 1284527  | 1748802  | 1680285  | 1663267  | 2619775  | 1970789  | 2393171  | 2750946  | 10248411 | 1280652  | 1636546  | 2331745  | 1712904  | 2018553  | 1344977  | 1339100  |
| 25010.22 | 21846.43 | 20458.31 | 21966.46 | 22898.04 | 25888.34 | 19472.19 | 26628.68 | 39444.43 | 17925.9  | 22987.63 | 27284.84 | 21673.29 | 27495.59 | 29911.31 | 22742.1  | 31058.66 |
| 259669.3 | 334603.2 | 413354.2 | 267034.5 | 253861.2 | 210748.4 | 225284.1 | 259487.9 | 357563.9 | 252767.4 | 296209.2 | 220772.8 | 170220.1 | 199443   | 232688.3 | 257634.2 | 276467.7 |
| 301892   | 308435.5 | 212708.4 | 280615.3 | 175313.4 | 173717   | 227057.4 | 205445.3 | 179758.2 | 351728.1 | 250398.5 | 244633   | 218732.9 | 244661.7 | 282375.7 | 300704.5 | 206055   |
| 20208.29 | 47808.67 | 47505.9  | 46978.96 | 42010.69 | 34254.12 | 68303    | 30197.2  | 39239.22 | 27727.45 | 36692.18 | 32408.74 | 37719.74 | 39565.4  | 31774.74 | 36205.14 | 19463.59 |
| 31926.99 | 46579.44 | 27473.71 | 31937    | 21449.19 | 19372.62 | 37125.54 | 31920.65 | 39002.95 | 36551.76 | 51952.39 | 36054.02 | 32307.21 | 29692.35 | 26350.12 | 37122.39 | 43229.33 |
| 7444.417 | 11140.25 | 11502.35 | 11051.08 | 7545.122 | 5924.219 | 7785.664 | 6015.298 | 7758.372 | 8296.696 | 11488.93 | 4206.278 | 6351.164 | 9251.008 | 6805.955 | 8975.24  | 4203.758 |
| 109902.6 | 11991.61 | 46227.84 | 63326.41 | 1442330  | 7322.306 | 24696.09 | 98047.63 | 49767.43 | 61994.93 | 28037.24 | 12845.48 | 66454.27 | 253990   | 4384.857 | 15660.03 | 144897.3 |
| 166520.7 | 10692.67 | 72393.98 | 65322.16 | 1296137  | 12509.75 | 34504.76 | 92714.8  | 129964.4 | 116896.6 | 51393.14 | 36126.8  | 75395.09 | 313895.5 | 3183.624 | 17544.59 | 204620.4 |
| 1533594  | 1333991  | 876954.6 | 1456427  | 910734.8 | 1538440  | 2592028  | 1556059  | 1598470  | 2845332  | 1249837  | 1218276  | 1022334  | 1478723  | 1794204  | 1451774  | 1085760  |
| 12975.06 | 16765.54 | 9501.975 | 12838.04 | 11635.04 | 8679.907 | 36233.68 | 5998.487 | 9636.616 | 10330.58 | 11521.26 | 15206.44 | 13061.65 | 9958.981 | 13683.47 | 10362.34 | 13464.49 |
| 15378.62 | 13074.84 | 24116.17 | 9914.69  | 17337.27 | 21523.52 | 65041.2  | 16090.42 | 30698.15 | 11152.92 | 17146.67 | 22653.83 | 55535.25 | 17226.93 | 17402.74 | 24283.43 | 18527.31 |
| 17635.35 | 33966.91 | 32163.24 | 31702.03 | 5978.908 | 19554.3  | 26220.19 | 20330.61 | 29007.56 | 20403.73 | 18931.74 | 61750.25 | 37928.44 | 23131.63 | 26706.95 | 33004.73 | 33222.82 |
| 102321   | 103509.6 | 103588.5 | 96905.39 | 104618.6 | 79836.31 | 65143.89 | 91892.11 | 106861.9 | 97597.34 | 125187.6 | 214510.9 | 138587.2 | 120277.3 | 103127.2 | 92831.94 | 119127.7 |
| 580736.4 | 367033.2 | 359342.2 | 524249.6 | 507948.8 | 498870.1 | 391382.7 | 473735.4 | 418837.7 | 552382.4 | 410611.5 | 370502.6 | 474503.8 | 470975.7 | 497174.8 | 405468.7 | 550954.6 |
| 16634.57 | 16275.71 | 9725.796 | 11006.32 | 17209.18 | 11805.73 | 8947.501 | 11860.26 | 17127.03 | 11859.57 | 12011.71 | 23379.62 | 21794.79 | 17291.86 | 13676.04 | 12675.21 | 12766.67 |
| 37000.71 | 35553.28 | 44139.91 | 27023.2  | 32455.48 | 46554.07 | 23241.87 | 29117.45 | 19780.64 | 47024.41 | 42760.06 | 25517.55 | 38876.09 | 29326.86 | 32794.58 | 19787.92 | 24080.14 |
| 874384.3 | 780497.7 | 1044698  | 711294.3 | 603689.4 | 729287.8 | 310330.8 | 596590.8 | 664496.3 | 729971.5 | 842724.6 | 721507.5 | 646926.1 | 578816.5 | 903485.2 | 729500.4 | 948245.3 |
| 16355.18 | 33889.6  | 35805.06 | 47931.95 | 28850.24 | 29344.63 | 35158.61 | 34232.84 | 47516.83 | 13338.87 | 36064.4  | 33079.56 | 39178.89 | 24927.9  | 26177.26 | 25779.49 | 31209.34 |
| 28360.03 | 68615.02 | 39405.27 | 32854.87 | 24840.94 | 31616.18 | 20669.13 | 25660.48 | 25716.9  | 63595.68 | 62938.13 | 18780.05 | 30345.92 | 36863.14 | 46932.48 | 32127.44 | 29517.44 |
| 20365.34 | 139569.6 | 132206.6 | 268181   | 206171.3 | 168809.4 | 32693.63 | 164837.7 | 164173.3 | 176322.5 | 139731   | 142207.1 | 18294.76 | 170553.9 | 171720.9 | 15677.89 | 204997.8 |
| 358.1067 | 4309.732 | 2435.475 | 1461.186 | 3038.525 | 2395.483 | 8040.03  | 2633.016 | 2425.807 | 3223.24  | 1392.384 | 4405.676 | 2755.27  | 2871.958 | 1800.379 | 3696.287 | 1816.805 |
| 5188650  | 809797.4 | 208552.1 | 305721.9 | 1636829  | 306519.7 | 508842.5 | 437543   | 544053.9 | 170679.4 | 218798.3 | 817684.8 | 752354.7 | 1021521  | 3808414  | 603615.8 | 1349168  |
| 1512611  | 1252689  | 1416278  | 796898.8 | 797661.4 | 890599.2 | 1056661  | 1070352  | 932723.9 | 1452707  | 1329619  | 1139832  | 736340.7 | 975620.9 | 1299378  | 1153983  | 1349331  |
| 52854.83 | 43419.33 | 53711.42 | 47754.09 | 48691.96 | 51328.67 | 44401.98 | 58414.52 | 31915.14 | 48137.85 | 37976.42 | 30981.69 | 50016.64 | 58159.89 | 59171.9  | 51389.01 | 53560.16 |
| 17259.95 | 14916.17 | 9611.338 | 18352.44 | 11739.33 | 9174.281 | 13196.44 | 4143.527 | 10077.8  | 12427.4  | 14743.99 | 12371.91 | 12210.73 | 16630.31 | 20549.83 | 15785.12 | 10681.31 |
| 80957.77 | 107915.8 | 82311.88 | 99961.91 | 101068.3 | 88710.23 | 156165.6 | 123086.9 | 197165.3 | 120756.9 | 108694   | 77407.66 | 83780.9  | 87480.04 | 79771.61 | 108745.2 | 88367.78 |
| 46244.68 | 63924.21 | 37163.02 | 56361.18 | 61323.74 | 37500.77 | 23342.7  | 54208.8  | 60273.66 | 64736.52 | 49608.95 | 53834.87 | 51083.44 | 84181.05 | 54347.15 | 27073.92 | 40538.18 |
| 10292.46 | 22019.75 | 7769.391 | 22701.17 | 12200.98 | 38951.16 | 41266.07 | 24958.3  | 21237.72 | 23055.63 | 22446.47 | 42269.5  | 13044.52 | 17406.91 | 21789.13 | 15614.39 | 14559.19 |
| 90293.56 | 131142.8 | 127932.4 | 100396.1 | 132338.8 | 138566.2 | 146176.9 | 137275.5 | 149190.1 | 104161.7 | 168588.8 | 226374.4 | 193489.3 | 127925.9 | 112970.2 | 126814.3 | 163878.7 |
| 38362.76 | 66171.09 | 66959.52 | 61959.89 | 97081.59 | 52114.82 | 62090.76 | 41547.89 | 36339.63 | 47953.9  | 67730.84 | 150813.2 | 111916.2 | 68672.88 | 55499.05 | 65683.88 | 56409.66 |
| 98175.13 | 135540.2 | 115513.9 | 115330.6 | 153764.7 | 108198.7 | 85329.3  | 110002.9 | 106524.3 | 119808.1 | 124042.6 | 268664.1 | 178628.4 | 118448.6 | 118374.8 | 119124.4 | 132056.1 |
| 9948.421 | 10812.93 | 10589.78 | 9371.325 | 14824.41 | 6659.999 | 6313.094 | 6525.586 | 6285.308 | 9422.066 | 11443.67 | 19931.63 | 23114.95 | 13094.32 | 9185.444 | 9634.538 | 11710.01 |
| 17234.79 | 26176.23 | 28836.15 | 10475.74 | 9720.687 | 18655.93 | 25076.45 | 16908.55 | 22078.14 | 17525.51 | 34042.87 | 9660.859 | 27262.71 | 24356.3  | 9782.203 | 21454.17 | 24325.4  |
| 6791.926 | 17851.2  | 32355.6  | 12155.17 | 8781.307 | 17267.58 | 14487.06 | 12065.32 | 12344.12 | 16050.87 | 21196.96 | 20067.16 | 7135.285 | 18544.09 | 21245.84 | 10755.14 | 9508.706 |
| 10530.01 | 18500.05 | 9497.748 | 16584.23 | 13364.11 | 4586.536 | 23825.37 | 5923.024 | 12266    | 17836.7  | 17864.04 | 13855.75 | 25226.96 | 14955.92 | 20480.88 | 53201.66 | 8804.479 |
| 155242.4 | 116289.1 | 8174.892 | 6857.639 | 55375.7  | 13567    | 25816.14 | 54897.8  | 95420.72 | 112539.1 | 125936.7 | 314077.9 | 61561.76 | 350123.3 | 46681.64 | 42300.54 | 35961.57 |
| 63429.38 | 126760.1 | 88891.63 | 85404.37 | 105358.7 | 86363.57 | 101352.6 | 78685.09 | 87035.11 | 49085.76 | 106473.6 | 89806.09 | 102622.4 | 82433.06 | 86052.13 | 131945.6 | 72683.36 |
| 25609.01 | 14038.88 | 17057.4  | 15909.15 | 7699.828 | 26449    | 13425.05 | 8240.551 | 4400.806 | 34263.12 | 18759.05 | 11628.05 | 16555.31 | 9655.32  | 15000.82 | 9521.158 | 6535.919 |
| 32996.41 | 53679.8  | 33759.59 | 36748.76 | 37682.66 | 38297.06 | 47802.93 | 33391.21 | 40257.19 | 38905.87 | 42460.01 | 44273.8  | 39203.75 | 42574.63 | 41139.68 | 36003.15 | 27302.61 |
| 20513.36 | 7026.329 | 12279.04 | 10360.5  | 14021.69 | 9826.933 | 8997.323 | 6222.225 | 9460.466 | 13872.79 | 13258.35 | 13549.98 | 10741.22 | 23176.51 | 12012.89 | 9839.074 | 10843.36 |
| 10442.21 | 8982.868 | 4474.655 | 17473.78 | 7189.338 | 11226.71 | 269825.6 | 4316.765 | 397436.7 | 37615.4  | 180948.7 | 5706.771 | 4088.924 | 46349.49 | 8433.543 | 1550984  | 641415.4 |
| 61123.91 | 87484.63 | 94798.41 | 82993.73 | 75479.7  | 98476.02 | 118112.9 | 91770.51 | 131260.4 | 70723.88 | 78737.45 | 56377.54 | 55533.73 | 60879.52 | 65754.41 | 103575.4 | 79433.5  |
| 4260.005 | 6024.635 | 5886.434 | 6289.046 | 4469.158 | 2754.313 | 6685.268 | 4134.357 | 2881.795 | 7842.863 | 5723.238 | 5335.025 | 4728.191 | 8306.078 | 4028.446 | 8618.845 | 4961.074 |
| 5623.846 | 15559.83 | 15461.37 | 13157.21 | 9843.855 | 13119.62 | 11701.78 | 16382.63 | 18645.03 | 100712.4 | 13856.19 | 15642.52 | 12516.69 | 16445.51 | 12522.57 | 16479.09 | 12963.96 |
| 102681.6 | 474485   | 313137.1 | 170531.2 | 79664.36 | 186917.9 | 461708.5 | 201161.3 | 392119.1 | 342953.2 | 267758.3 | 133498.3 | 200429.5 | 135209.8 | 155184   | 409793.1 | 321128.4 |
| 2117874  | 1501817  | 1754392  | 1872606  | 1689799  | 1676646  | 1463866  | 1436901  | 1570070  | 2351979  | 1782451  | 1702678  | 1853704  | 2074908  | 1948476  | 1855548  | 1457915  |
| 13671.46 | 24106.16 | 21379.72 | 24196.67 | 43420.66 | 26636.38 | 19191.39 | 15692    | 12566.8  | 13853.44 | 34302.35 | 67895.71 | 83863.68 | 36448.47 | 27177.38 | 35550.28 | 25615.11 |

|          |          |          |          |          |          |          |          |          |          |          |          |          |          |          |          |          |
|----------|----------|----------|----------|----------|----------|----------|----------|----------|----------|----------|----------|----------|----------|----------|----------|----------|
| 16560.54 | 11937.33 | 13803.88 | 15659.16 | 19626.55 | 19442.27 | 11689.17 | 18952.01 | 15689.46 | 16465.15 | 14705.87 | 17813.68 | 13086.04 | 17098.53 | 17207.42 | 9817.307 | 54471.62 |
| 15211.97 | 73546.09 | 20786.66 | 39687.94 | 42519.25 | 17356.54 | 18180.55 | 20964.79 | 69610.55 | 54490.42 | 58875.4  | 103692.6 | 55776.74 | 62980.19 | 42367.81 | 31278.66 | 39774.72 |
| 99463.66 | 141066.5 | 113943.9 | 83039.07 | 76694.26 | 94580.11 | 98971.97 | 107178.4 | 123721.4 | 117694.8 | 120413.9 | 93331.63 | 59940.28 | 82646.08 | 111962.3 | 90831.68 | 131564.5 |
| 83685.14 | 141445.8 | 109508.9 | 78043.09 | 137633   | 83043.07 | 99174.72 | 90703.99 | 86342.62 | 150739.9 | 97858.99 | 254959.4 | 147839.6 | 87975.98 | 96989.26 | 116467.3 | 105693.7 |
| 24119.68 | 28282.75 | 41625.26 | 39921.84 | 37260    | 22182.69 | 18031.42 | 30372.46 | 29608.65 | 21270.68 | 33876.94 | 37084.48 | 31939.97 | 35261.18 | 27711.62 | 24037.63 | 36095.83 |
| 403627.2 | 529672.9 | 555612.1 | 292509.4 | 410315.2 | 344757.8 | 771573.4 | 602011.1 | 623658.2 | 630308.6 | 1286569  | 529421.6 | 291058.1 | 442063.4 | 309832.1 | 320040.2 | 380536   |
| 28648.29 | 54269.52 | 43099.06 | 42108.68 | 83932.79 | 30523.23 | 33213.87 | 32881.49 | 38551.38 | 23469.56 | 51885.9  | 109093.8 | 104535.4 | 42098.61 | 64584.74 | 39867.56 | 42189.64 |
| 55326.05 | 111413.9 | 91937.58 | 78299.33 | 83347.37 | 61504.52 | 89343.36 | 58081.64 | 86627.56 | 102374.3 | 103008.6 | 167297.1 | 128818   | 84643.59 | 82031.86 | 101121.4 | 76405.95 |
| 133640   | 246288.7 | 141689.6 | 163850.5 | 212112.8 | 146406.9 | 122013.7 | 130258.1 | 137295.6 | 176069.7 | 198278.4 | 285216.1 | 245695.4 | 233723.7 | 189972.8 | 197396   | 169009.9 |
| 61546.52 | 48204.24 | 48495.35 | 119734.3 | 84348.39 | 19032.15 | 24109.84 | 16651.69 | 20680.05 | 69061.46 | 82201.97 | 25982.02 | 115593.9 | 85384.78 | 56867.9  | 101420.4 | 59371.09 |
| 23275.27 | 39468.77 | 48096.11 | 26371.79 | 16737.5  | 16244.16 | 16607.63 | 15867.59 | 42154.08 | 17152.17 | 33101.87 | 32162.5  | 27772.88 | 30809.95 | 26068.26 | 30629.52 | 40717.65 |
| 69299.45 | 85972.04 | 74536.04 | 63293.48 | 81473.33 | 58403.92 | 70139.53 | 63954.09 | 52043.43 | 94547.63 | 75526.91 | 160823.4 | 116283   | 83342.68 | 86664.37 | 69830.84 | 76701.19 |
| 92384.59 | 84601.42 | 84824.44 | 74232.77 | 216235.5 | 62433.89 | 159842.5 | 79756.42 | 224918.7 | 101110.3 | 154322.9 | 134606   | 93585.89 | 109928.1 | 92852.3  | 144363.6 | 106637.5 |
| 44156.41 | 118795.1 | 63417.14 | 32186.88 | 61182.05 | 35753.39 | 39840.79 | 41824.82 | 38587.09 | 33420.84 | 73455.07 | 92892.16 | 42976.12 | 61329.42 | 58433.37 | 65751.46 | 37207.55 |
| 35241.71 | 93797.93 | 74513.87 | 45553.45 | 54762.96 | 41674.36 | 52939.08 | 36192.58 | 56522.35 | 43642.74 | 64479.09 | 69131.63 | 59081.46 | 50380.8  | 45899.55 | 65619.88 | 47833.22 |
| 343748.1 | 430169.2 | 400282.8 | 369914.5 | 385440.8 | 326217.5 | 331092.4 | 276892.4 | 316618.8 | 394971.8 | 525955.1 | 678711.1 | 614733.1 | 429131.3 | 363388.2 | 379097.1 | 420255.1 |
| 10224.72 | 20616.88 | 25415    | 16275.26 | 12233.11 | 13885.51 | 15789.03 | 16390.24 | 15300.92 | 14502.19 | 22128.51 | 20718.74 | 15565.58 | 12443.8  | 16409.64 | 13071.94 | 13331.58 |
| 4710.559 | 3337.127 | 3375.818 | 2389.23  | 4460.145 | 5383.567 | 1977.639 | 2663.038 | 1279.121 | 5180.047 | 1510.969 | 6699.697 | 4677.791 | 3036.987 | 3495.272 | 2723.267 | 2124.54  |
| 17554.07 | 52086.8  | 32250.28 | 35685.31 | 52677.18 | 31071.59 | 33402.29 | 40420.97 | 28150.3  | 27730.31 | 43644.5  | 93322.14 | 56888.7  | 56137.64 | 46219.54 | 42499.57 | 36309.7  |
| 104015.4 | 152393.2 | 156661.8 | 78390.1  | 183277.4 | 123625.5 | 113252.5 | 117069.9 | 168839.3 | 184187.5 | 224299.7 | 344750.8 | 247479.4 | 81050.38 | 88642.7  | 173686.4 | 136417.4 |
| 18241.94 | 63072.75 | 46886.62 | 37970.37 | 50375.98 | 42038.73 | 53245.81 | 36156.95 | 36242.59 | 59079.93 | 27767.88 | 147497.2 | 89402.63 | 55201.8  | 49671.47 | 65734.54 | 46026.1  |
| 23817.61 | 32627.59 | 19611    | 24353.79 | 18082.22 | 18914.34 | 24822.02 | 19822.39 | 20507.14 | 27820.9  | 31825.14 | 28063.25 | 34356.86 | 26346.56 | 29810.42 | 21552.35 | 22332.8  |
| 3897134  | 2867235  | 2722302  | 3314915  | 2497660  | 2673537  | 1986718  | 2304392  | 2691101  | 4114625  | 3094466  | 3270874  | 2854506  | 3264293  | 3690510  | 3443646  | 2206002  |
| 172325.6 | 358990.5 | 244856.1 | 230708.4 | 281987.2 | 182092.7 | 300472.7 | 162735.9 | 210047.5 | 255517.3 | 342666.2 | 460039.8 | 401523.2 | 231911.6 | 285106.8 | 265684.8 | 255121.8 |
| 34299.71 | 57102.04 | 61873.11 | 71102.55 | 73075.96 | 62506.7  | 59133.11 | 54036.67 | 141533.8 | 41108.92 | 81425.28 | 228678.7 | 119221.5 | 97224.64 | 141918.8 | 111511.1 | 115181.3 |
| 6440.003 | 12029.15 | 8033.75  | 11369.39 | 6183.813 | 7633.096 | 11887.91 | 14936.69 | 5720.194 | 9263.053 | 9119.699 | 5388.302 | 5651.81  | 6691.479 | 6818.745 | 4743.188 | 9138.624 |
| 37200.57 | 46491.86 | 49625.65 | 62219.7  | 53752.11 | 52050.67 | 40582.04 | 44013.52 | 100384.3 | 44109.34 | 70009.39 | 191557.3 | 91337.2  | 70181.62 | 107588.3 | 99180.98 | 92993.36 |
| 42556.23 | 47020.92 | 49112.3  | 26586.56 | 84831.48 | 41024.25 | 38302.14 | 40356.52 | 43656.08 | 67215.95 | 8242.469 | 79707.44 | 42039.25 | 78681.17 | 46901.31 | 40322.62 | 47550.01 |
| 67170.49 | 62508.27 | 108677.5 | 81328.9  | 70557.59 | 81481.59 | 83361.08 | 75815.19 | 127062.1 | 89344.95 | 81528.79 | 67994.22 | 83351.72 | 61831.19 | 78203.74 | 121093.1 | 113710.6 |
| 107337.1 | 183627.8 | 90833.3  | 107362   | 124480.3 | 143047   | 78090.16 | 110341.4 | 103015.6 | 203830.1 | 100545.4 | 123679.8 | 113810.8 | 124205.4 | 148551.2 | 95668.69 | 90331.59 |
| 42712.44 | 69514.78 | 32458.84 | 59448.02 | 49830    | 54364.22 | 34567.69 | 26641.31 | 55971.52 | 52640.85 | 71012.9  | 64139.44 | 57070.84 | 41144.78 | 53987.1  | 48801.49 | 50928.79 |
| 93315.93 | 90652.77 | 53895.01 | 76935.87 | 66092.58 | 66098.66 | 68584.2  | 75654.36 | 101103.3 | 91145.2  | 84026.17 | 71085.22 | 65585.02 | 73511.7  | 73966.77 | 62072.74 | 96949.26 |
| 67323.68 | 32169.86 | 54407.87 | 83811.48 | 113813.1 | 93426.63 | 152689.3 | 84724.8  | 187933.1 | 41301.48 | 97797.44 | 49408    | 74115.7  | 54818.68 | 83746.1  | 80251.72 | 57575.42 |
| 132785.6 | 35985.77 | 42633.41 | 69820.66 | 230214.5 | 49959.05 | 31803.85 | 90116.45 | 19152.41 | 231037   | 57408.5  | 107175.6 | 97182.3  | 168570.4 | 75675.09 | 20706.7  | 47367.55 |
| 215390.6 | 273042.6 | 356570.9 | 315834.9 | 205192.2 | 306539.7 | 334511.2 | 246345.5 | 485700.7 | 324560.8 | 266577.5 | 214143.3 | 298169.7 | 193527.4 | 290313.3 | 288041   | 279881.5 |
| 130694.8 | 141788.8 | 87979.51 | 60645.91 | 142566.3 | 196855.8 | 156155.2 | 180836.8 | 84276.77 | 95873.86 | 149577.3 | 66890.57 | 93003.09 | 100361.1 | 150557.6 | 156440   | 177055   |
| 267177.2 | 360956.6 | 373508.4 | 175716.3 | 211261.8 | 288874   | 455841.8 | 240776.8 | 300262.8 | 185660.3 | 654219.1 | 124682.2 | 168193.9 | 210249.9 | 311028.8 | 279996.6 | 260491.6 |
| 42572.77 | 39511.39 | 58850.2  | 35519.83 | 21218.33 | 44008.98 | 38521.03 | 32520.39 | 64305.13 | 37946.47 | 79283.74 | 31506.12 | 57266.69 | 23435.05 | 45919.72 | 44485.4  | 67648.19 |
| 96288.1  | 202804.4 | 189359.8 | 154041   | 189885.1 | 94657.36 | 82753    | 177591.8 | 144124.6 | 173391.8 | 169967   | 191322.5 | 111304.7 | 133587.7 | 180949.3 | 147844   | 177461.6 |
| 1.77E+08 | 1.54E+08 | 1.35E+08 | 1.64E+08 | 1.98E+08 | 1.61E+08 | 1.31E+08 | 1.86E+08 | 1.01E+08 | 1.2E+08  | 2.81E+08 | 1.15E+08 | 2.3E+08  | 2.07E+08 | 2.24E+08 | 1.62E+08 | 2.78E+08 |
| 1.38E+08 | 1.18E+08 | 1.26E+08 | 1.29E+08 | 2.16E+08 | 31930870 | 71183232 | 1.05E+08 | 63945760 | 89469912 | 1.49E+08 | 1.32E+08 | 1.32E+08 | 1.61E+08 | 1.29E+08 | 1.89E+08 | 1.31E+08 |
| 491551   | 495960.4 | 428776.1 | 289538   | 255051.2 | 483116.5 | 646046.9 | 351424   | 565916.6 | 535393.4 | 519869.9 | 363157.4 | 264666.6 | 309738   | 441704.8 | 538074.9 | 325983.1 |
| 6529.535 | 24995.18 | 14386    | 33958.08 | 25768.04 | 4860.804 | 2875.51  | 7666.254 | 13312.66 | 14851.63 | 31676.14 | 64029.81 | 52417.55 | 20275.22 | 18958.38 | 19657.93 | 18713.72 |
| 106544.5 | 107733.1 | 52050.21 | 25400.23 | 80342.55 | 36732.48 | 29377.52 | 31552.8  | 77147.12 | 175735.9 | 88069.33 | 77073    | 87957.41 | 60707.09 | 45762.6  | 47355.38 | 47852.71 |
| 75788768 | 62812828 | 62625804 | 56525708 | 17055418 | 66282752 | 7543777  | 72328768 | 4117089  | 3683899  | 92695160 | 54396256 | 12525200 | 68345240 | 5968503  | 78201704 | 8113124  |
| 13572.67 | 24523.04 | 13658.75 | 7537.246 | 38332.07 | 18350.72 | 2739.67  | 4415.745 | 8065.291 | 115034.3 | 15300.16 | 23040.2  | 27945.4  | 5618     | 32527.69 | 15935.5  | 18928.22 |
| 49452.14 | 48698.41 | 57076.05 | 68927.3  | 65485.55 | 92166.48 | 65245.31 | 58545.49 | 56020.89 | 43578.11 | 82558.74 | 80166.56 | 78193.64 | 64225.87 | 71285.34 | 58973.37 | 69269.92 |
| 34400.1  | 56277.79 | 47894.84 | 40238.21 | 34390.29 | 32071.62 | 40091.5  | 35805.45 | 42755.51 | 41927.85 | 43804.11 | 44346.97 | 40487.99 | 43884.41 | 43532.48 | 40874.07 | 45384.49 |
| 843528.2 | 1062634  | 682348.6 | 341503.2 | 901669.8 | 608761.3 | 1040858  | 1028478  | 1304741  | 938953.1 | 1458360  | 487320.8 | 266854.2 | 960986.5 | 515216.9 | 694434.3 | 823427.8 |

|          |          |          |          |          |          |          |          |          |          |          |          |          |          |          |          |          |
|----------|----------|----------|----------|----------|----------|----------|----------|----------|----------|----------|----------|----------|----------|----------|----------|----------|
| 59277.13 | 22724.46 | 51352.09 | 43053.41 | 42973.89 | 34827.14 | 54599.05 | 36642.43 | 48001.01 | 34982.9  | 49108.8  | 37480.73 | 34560.34 | 32786.69 | 33599.16 | 37823.89 | 38866.43 |
| 12427.14 | 20602.21 | 14546.07 | 17362    | 20795.49 | 24606.08 | 8679.661 | 15510.07 | 16471.22 | 22150.88 | 14600.43 | 16028.45 | 14011.79 | 20151.09 | 14040.98 | 10054.04 | 14509.7  |
| 783323.3 | 931995.3 | 938004.7 | 926296.7 | 721895.8 | 964571.1 | 925397.4 | 789342.4 | 1081188  | 745032.3 | 1015132  | 728653.4 | 720669.4 | 748099.1 | 909498.6 | 1032196  | 934046.2 |
| 117253.8 | 134515.1 | 120035.4 | 104974.2 | 95285.53 | 111589.8 | 94430.28 | 124475.4 | 90044.42 | 168370.2 | 80672.27 | 106194.3 | 89303.13 | 109581.9 | 89639.63 | 80874.3  | 79898.77 |
| 14709.27 | 23224.12 | 15560.28 | 15973.36 | 103628.7 | 22344.94 | 10733.43 | 15008.61 | 3790.28  | 18209.05 | 39124.17 | 65530.9  | 27435.55 | 23461.33 | 23004.38 | 11619.1  | 20383.49 |
| 7787.954 | 9594.548 | 13093.81 | 9684.919 | 17347.2  | 6441.722 | 18169.21 | 9410.176 | 12627.06 | 9215.357 | 12346.86 | 6765.98  | 9582.537 | 12071.27 | 9577.294 | 6486.552 | 11162.34 |
| 56398.15 | 204222.7 | 195456.8 | 150410.5 | 84941    | 95650.61 | 308191.3 | 187746.6 | 378009.4 | 148676.8 | 156856   | 150938.4 | 190625.4 | 88361.41 | 82747.26 | 197373.8 | 159011.6 |
| 1551762  | 7635.984 | 3344490  | 6782.261 | 47193.48 | 32166.02 | 3929346  | 96214.76 | 279736.3 | 1        | 286491.3 | 397583.8 | 10032.11 | 149618.8 | 866885.8 | 1942602  | 2526499  |
| 25122.96 | 9741.083 | 15789.49 | 7244.373 | 13196.1  | 12883.69 | 20105.31 | 10262.95 | 19197.47 | 8982.375 | 31543.59 | 20939.68 | 14572.6  | 9046.818 | 11424.19 | 18135.04 | 19883.46 |
| 93012.92 | 135446.9 | 127998.9 | 116232.3 | 91191.41 | 129188.1 | 189301.6 | 137402.4 | 210360.4 | 96144.26 | 152644.9 | 107772   | 114341.1 | 112281.1 | 110394.2 | 158196.7 | 147930.8 |
| 33088.74 | 52834.65 | 66414.86 | 60685.62 | 54223.1  | 76408.59 | 76383.69 | 79587.77 | 66772.16 | 40737    | 7901.646 | 25307.72 | 12114.62 | 34934.59 | 51686.81 | 89154.33 | 66743.1  |
| 13279.54 | 9318.582 | 7555.988 | 10599.2  | 4757.25  | 6740.705 | 3743.28  | 8813.834 | 4914.395 | 6196.583 | 11096.67 | 14638.06 | 7740.759 | 10973.13 | 10193.07 | 9641.556 | 9854.167 |
| 2655.057 | 5486.058 | 3613.598 | 2646.345 | 3873.316 | 6555.052 | 6397.142 | 3505.422 | 4309.231 | 4116.647 | 4841.875 | 9107.912 | 2427.519 | 4161.414 | 2077.54  | 4445.679 | 2488.326 |
| 273347.2 | 206705.4 | 98835.56 | 99312.49 | 137023.1 | 82693.63 | 96363.92 | 105314.2 | 163686.5 | 89088.93 | 127343.9 | 122767.8 | 139310.4 | 193854.3 | 131874.8 | 132356   | 129717.9 |
| 24421.34 | 42124.66 | 34375.31 | 22914.76 | 24915.96 | 14595.06 | 21529.32 | 14510.62 | 38284.46 | 18385.18 | 37617.04 | 36190.6  | 27436.46 | 25118.69 | 30152.09 | 32583.38 | 35382.83 |
| 96375.98 | 95239.52 | 100185.1 | 97320.18 | 97761.22 | 106813.4 | 110010.1 | 105777.5 | 107916.2 | 97683.74 | 107746.1 | 73458.91 | 109790.4 | 92714.46 | 98184.38 | 112744.5 | 121949.2 |
| 110070.3 | 147275.1 | 199028.2 | 102292.1 | 96020.32 | 107829.4 | 124870.4 | 96004.66 | 83468.66 | 95776.93 | 144451.4 | 83872.72 | 90477.75 | 112443.8 | 115856   | 88851.93 | 81404.65 |
| 17085.83 | 494096.7 | 1083551  | 26697.99 | 1012935  | 579470.8 | 123358.9 | 96008.09 | 1240549  | 21525.6  | 404868.9 | 475310.6 | 37589.02 | 876354.9 | 352515.4 | 149195.2 | 102115.9 |
| 484451.3 | 294723.9 | 11346.87 | 4418.79  | 135033.6 | 7682.856 | 13157.21 | 19836.64 | 193137.5 | 19391.27 | 68983.23 | 67912.94 | 40550.66 | 369821.9 | 108417.4 | 38583.02 | 31011.2  |
| 20502.92 | 24196.31 | 22850.09 | 16356.4  | 15294.71 | 19197.83 | 21480.9  | 16811.36 | 18819.59 | 37532.16 | 15387.72 | 24890.64 | 14255.47 | 12282.88 | 26738.77 | 18933.09 | 14941.24 |
| 1892743  | 2403069  | 2454549  | 2389196  | 1576640  | 2275390  | 3655489  | 2635003  | 2860971  | 1774459  | 2237825  | 1723920  | 1988495  | 1763889  | 2014035  | 2703807  | 2167038  |
| 211532.5 | 220805   | 270634.7 | 294876.3 | 183280.2 | 245295   | 328734.2 | 257305.3 | 302154.3 | 267848.2 | 229111.8 | 168243.2 | 203735.3 | 186196   | 162453.7 | 279046.5 | 229572.1 |
| 117234.5 | 195287.7 | 167954   | 147029.7 | 72540.21 | 130777.8 | 137671.3 | 105305.4 | 137652.2 | 193338.3 | 165034.8 | 75736.38 | 116762   | 76192.26 | 83325.6  | 102870   | 117278.8 |
| 156856.2 | 213995.5 | 187996.1 | 220328.4 | 158016   | 203635.3 | 199544.4 | 193636.1 | 275551.9 | 155473.6 | 212495.8 | 144625.4 | 150072   | 141218.3 | 159234.1 | 193039.1 | 183953.2 |
| 197540.3 | 120366.2 | 123900.3 | 176722.6 | 227719.5 | 94761.15 | 92077.4  | 47980.74 | 94566.33 | 218444.3 | 258641.6 | 83518.13 | 209592.3 | 190548.8 | 74521.28 | 217775   | 166489.9 |
| 7341258  | 8852226  | 5496963  | 5703614  | 4886607  | 4723700  | 5185923  | 4009635  | 3439510  | 11832403 | 7042020  | 3013630  | 4258405  | 4254199  | 5200613  | 3852441  | 4656554  |
| 597116.2 | 1383275  | 793556   | 334944.8 | 519449.3 | 415981.5 | 1299783  | 601305.4 | 1121253  | 808357.3 | 1580254  | 333391.3 | 377854.1 | 759480.8 | 663315.6 | 864686.8 | 742679.2 |
| 1468164  | 1015310  | 1267365  | 1098397  | 1246971  | 1496056  | 1410026  | 1439134  | 1346466  | 1530064  | 1362716  | 1115323  | 1205437  | 1181802  | 1266025  | 1329993  | 1500051  |
| 21143.48 | 28594.47 | 38910.71 | 33334.65 | 21316.09 | 18753.99 | 15340.69 | 10709.51 | 19512.84 | 10899.28 | 23065.63 | 14118.47 | 32207.91 | 26912.03 | 16277.02 | 32462.76 | 21070.31 |
| 107094.9 | 85790.75 | 109335.3 | 149026.5 | 166119   | 124643.8 | 126612   | 109629.7 | 117899.1 | 222394.3 | 123421.8 | 101195.8 | 157648   | 127451.1 | 129571.5 | 141556.1 | 111992.7 |
| 124101.5 | 137810.4 | 116020.2 | 114100.1 | 72033.77 | 104008.3 | 82375.45 | 115185.2 | 103204.2 | 106206.1 | 105371.8 | 104101.2 | 92292.08 | 100189.2 | 124749   | 101544.9 | 120350   |
| 752042.2 | 3090450  | 3020379  | 230768   | 876801.7 | 343174.8 | 2537598  | 956302.1 | 407476.7 | 1098084  | 6865983  | 415658.2 | 462076.7 | 183230.3 | 440225.3 | 668454.5 | 454302.7 |
| 409003.3 | 309050.7 | 209480.7 | 240817.6 | 157677.9 | 217434.9 | 262013.2 | 247419.5 | 134503.3 | 377785.7 | 251846.3 | 247046.1 | 222518.1 | 244120.9 | 260940.1 | 266482.5 | 236002   |
| 858308.6 | 346460.3 | 207075.7 | 301100.9 | 273546.2 | 433534.3 | 488824.4 | 328162   | 402501.2 | 1944121  | 308446.3 | 289109.3 | 331210.4 | 341110.1 | 424851.8 | 325979.8 | 343825.6 |
| 42870.36 | 42857.42 | 46859.43 | 50695.83 | 53381.33 | 50530.25 | 60006.75 | 43117.59 | 39838.61 | 35686.07 | 59739.83 | 46836.09 | 75364.8  | 54311.7  | 50280.29 | 77588.05 | 37840.98 |
| 1814617  | 3870368  | 2932188  | 3947034  | 6829719  | 6119644  | 4921432  | 4252603  | 3089596  | 1633692  | 5348491  | 2882134  | 3792200  | 6464664  | 4821402  | 6038466  | 782191   |
| 18051    | 37072.77 | 26778.93 | 30402.67 | 18754.21 | 23467.48 | 45243.8  | 20517.27 | 47073.46 | 42832.61 | 32505.33 | 18958.8  | 22926.31 | 17013.53 | 21052.85 | 34761.57 | 28360.57 |
| 83596.67 | 94469.8  | 65061.77 | 4626.258 | 40678.95 | 64387.29 | 104125.3 | 70634.98 | 61975.64 | 159975.3 | 19757.22 | 41183.3  | 63991.63 | 75785.45 | 115325.8 | 104705.5 | 54512.59 |
| 13107.61 | 17515.82 | 16131.7  | 10277.84 | 15116.91 | 13798.26 | 16027.77 | 14960.25 | 14432.43 | 16611.32 | 13987.16 | 15857.05 | 13288.09 | 14442.13 | 11854.95 | 15117.23 | 16102.23 |
| 206574.5 | 170764.1 | 111444.2 | 91043.98 | 117720.8 | 94695.34 | 173541.6 | 142827.9 | 278541.8 | 114884.7 | 154982.5 | 210910.7 | 122362.1 | 337704.4 | 143880.4 | 142997.7 | 195850.8 |
| 716116.1 | 727645.8 | 958115.3 | 872614.8 | 1273364  | 774711.3 | 600872.9 | 614247.5 | 684061.9 | 524384.3 | 880574.4 | 779770.5 | 1181354  | 798847.4 | 713756.1 | 578240.6 | 852487   |
| 5608.84  | 95028.39 | 84006.9  | 49928.44 | 76732.06 | 55169.71 | 82479.66 | 95911.16 | 87655.59 | 18117.61 | 120073.4 | 127783.4 | 60922.73 | 51926.46 | 59559.94 | 123289.8 | 120553.1 |
| 92920.93 | 81932.94 | 80850.84 | 91896.49 | 52504.21 | 110994.6 | 52590.26 | 104950   | 86266.13 | 91395.13 | 90551.11 | 61319.63 | 56906.18 | 89462.45 | 113820.5 | 46728.1  | 81126.4  |
| 207409.3 | 275532.1 | 261326.7 | 272583.8 | 252287   | 263459.4 | 387268.9 | 261848.9 | 348328.4 | 183321.8 | 331396.4 | 196392.2 | 284486.3 | 206309   | 314884.6 | 457848.7 | 366512.4 |
| 38091.42 | 34857.68 | 39056.38 | 8855.286 | 27595.75 | 30412.06 | 37238.24 | 33974.3  | 34149.91 | 33309.22 | 74776.96 | 26073.29 | 9142.575 | 25710.34 | 21680.77 | 36704.2  | 37856.29 |
| 18807.24 | 18455.98 | 16397.2  | 9751.71  | 12028.51 | 8953.066 | 31967.7  | 14067.99 | 10800.72 | 29188.59 | 12168.72 | 14333.8  | 6118.094 | 23162.56 | 16918.96 | 8802.634 | 14049.53 |
| 27171.81 | 29053.46 | 17397.36 | 30324.29 | 57201.06 | 28266.44 | 27089.17 | 30586.93 | 57054.04 | 37724.8  | 39735.67 | 22432.92 | 30197.99 | 34109.47 | 25390.49 | 37854.51 | 17589.73 |
| 28825.09 | 43295.02 | 49432.7  | 54514.8  | 51978.82 | 54960.12 | 43068.6  | 53242.01 | 59808.98 | 49485.33 | 57837.19 | 43763.88 | 39760.35 | 39489.11 | 42875.3  | 42997.01 | 51548.72 |
| 27968.91 | 30477.98 | 31630.77 | 23266.04 | 19634.48 | 20648.38 | 20556.62 | 26919.27 | 26561.32 | 28370.94 | 27189.64 | 25081.68 | 27147.35 | 15306.19 | 28153.71 | 21838.88 | 31759.72 |

|          |          |          |          |          |          |          |          |          |          |          |          |          |          |          |          |          |
|----------|----------|----------|----------|----------|----------|----------|----------|----------|----------|----------|----------|----------|----------|----------|----------|----------|
| 261337.9 | 217451   | 258901.3 | 223874.7 | 168237.9 | 193367.6 | 201064.9 | 192827.3 | 236298.8 | 197243.4 | 178456.1 | 188846.8 | 183245.6 | 177837.7 | 158840.9 | 230638.1 | 247439.8 |
| 272627.5 | 257968   | 283978   | 327971.5 | 147245.3 | 268081.2 | 408379.1 | 247336.5 | 445880.9 | 226891.4 | 188151.2 | 157512.4 | 238891.2 | 98575.03 | 194518.4 | 290529.4 | 224134.7 |
| 33420.55 | 24007.56 | 57476.23 | 56675.75 | 35599.46 | 38192.39 | 49978.81 | 59887.77 | 32164.89 | 42635.57 | 17187.67 | 29326.42 | 18174.11 | 31341.62 | 23778.94 | 34657.01 | 34705.28 |
| 26544.55 | 29607.47 | 22158.42 | 8791.347 | 51227.94 | 23444.72 | 16397.34 | 35054.24 | 23874.01 | 23156.85 | 10425.97 | 47668.75 | 52415.4  | 59360.59 | 28167.56 | 6963.158 | 23246.93 |
| 253456.5 | 438153.8 | 450951.3 | 144039.2 | 360787.6 | 187822.8 | 450060.2 | 346464.4 | 406448.6 | 334639.7 | 445452.7 | 208056.1 | 34429.77 | 340182.3 | 164849.5 | 369088.7 | 154525.5 |
| 17873.29 | 25210.72 | 29775.76 | 38528.44 | 18835.34 | 27936.47 | 17499.49 | 30795.64 | 20482.12 | 22765.21 | 28434.04 | 16570.84 | 18969.09 | 24643.93 | 20629.53 | 7352.449 | 24313.41 |
| 463248.6 | 927368.3 | 872713.2 | 941922.2 | 632908.3 | 800806.7 | 963293   | 890806.4 | 1389661  | 516726.3 | 694210.4 | 532709.6 | 601551.9 | 690883.1 | 762269.1 | 608271.6 | 760628.8 |
| 56733.6  | 92484.59 | 73574.43 | 50700.98 | 75000.66 | 22093.99 | 100490   | 33233.37 | 28668.3  | 62793.36 | 110021.3 | 77927.38 | 47882.07 | 49734.45 | 51307.61 | 98409.84 | 63195.43 |
| 95563.92 | 128060.4 | 123301.4 | 157728.4 | 126789.1 | 144229   | 168021.1 | 153860.2 | 166879.7 | 74789.2  | 120372.1 | 70457.38 | 115288.8 | 109160.1 | 125499.6 | 148718.9 | 131982.5 |
| 14535.26 | 14194.2  | 13726.55 | 12666.13 | 16156.79 | 15854.65 | 12212.95 | 11159.82 | 8381.392 | 26464.1  | 23655.02 | 15835.36 | 19446.15 | 17288.17 | 20204.17 | 11632.82 | 20806.89 |
| 255806.6 | 12637.42 | 835680.9 | 15808.11 | 23570.5  | 16121.96 | 660755.3 | 26463.8  | 40865.53 | 112173.6 | 84793.47 | 126936.3 | 14608.39 | 38056.16 | 234468.2 | 261152.9 | 495414.7 |
| 184459.9 | 88037    | 127629.6 | 107829.8 | 129468.5 | 129405.9 | 177976.2 | 110013.2 | 207387.6 | 153130.5 | 127001.1 | 71354.07 | 126879.1 | 112852.4 | 117119   | 147463.2 | 138528   |
| 38419.5  | 68772.19 | 50276.3  | 34491.01 | 47541.63 | 28674.02 | 45115.24 | 28451.48 | 32660.97 | 44294.47 | 79994.79 | 103744.6 | 74170.76 | 37486.16 | 38938.46 | 48790.07 | 56257.88 |
| 215810.4 | 398871.2 | 291746.8 | 293023.8 | 255631.2 | 302759.9 | 268816.5 | 319682.7 | 337591.4 | 281081.4 | 352373   | 365543.1 | 315499.7 | 326050.4 | 289413.9 | 262331.3 | 290308.6 |
| 124278   | 113360.6 | 82684.02 | 106930.2 | 146095.1 | 145235   | 72894.59 | 65119.42 | 61508.39 | 125393.2 | 133316.5 | 259141.9 | 192186.2 | 148488.6 | 126621.6 | 101890.1 | 80206.5  |
| 17249.25 | 22876.34 | 18455.46 | 18240.98 | 21088.69 | 29679.85 | 14959.77 | 19416.86 | 22359.33 | 18460.54 | 20885.89 | 43726.4  | 21916.74 | 21780.7  | 19082.5  | 27211.93 | 16401.63 |
| 11430.32 | 14742.73 | 12003.03 | 10947.36 | 12822.13 | 7813.63  | 8838.707 | 11845.08 | 13767.83 | 16097.82 | 18778.26 | 13530.49 | 16583.47 | 15516.95 | 15547.86 | 17931.27 | 11287.38 |
| 18015.69 | 24715.84 | 26700.04 | 22234.25 | 16844.72 | 23512.74 | 25201.18 | 17895.58 | 20194.34 | 16223.92 | 24676.05 | 14943.99 | 32887.21 | 11162.41 | 17162.13 | 18722.54 | 15730.85 |
| 40167.45 | 60481.32 | 33865.17 | 39477.73 | 29403.89 | 35696.88 | 16251.9  | 33094.23 | 34511.29 | 53325.93 | 40085.22 | 41428.7  | 30416.11 | 52501.87 | 59003.75 | 22499.87 | 22432.41 |
| 62463.81 | 62973.11 | 59027.09 | 44880.18 | 36077.78 | 39486.55 | 37952.34 | 26519.53 | 49652.29 | 54919.95 | 64720.19 | 64109.89 | 44628.56 | 45415.92 | 59281.71 | 52659.79 | 39096.61 |
| 9604.725 | 8849.237 | 6315.753 | 5409.962 | 2670.851 | 2941.197 | 8098.021 | 2133.182 | 2459.08  | 2597.428 | 6367.678 | 13004.02 | 7115.132 | 6008.583 | 3916.794 | 11928.79 | 8499.333 |
| 12890.3  | 26224.51 | 13211.96 | 19323.28 | 34729.46 | 23215.83 | 24686.45 | 23502.29 | 13532.55 | 18548.86 | 17327.07 | 25708.36 | 16373.28 | 25112.99 | 18544.44 | 11172.05 | 14877.22 |
| 83553.6  | 108385.4 | 133713.3 | 124077.7 | 97671.23 | 111920.3 | 101457.4 | 94308.09 | 101817.9 | 50515.98 | 93208.08 | 58904.98 | 93601.32 | 100904   | 74924.56 | 95569    | 81830.75 |
| 580628.4 | 477282.9 | 572741.6 | 569454   | 483181.8 | 700897   | 649847.3 | 773180.1 | 575418.6 | 549750.8 | 582451.4 | 460949.6 | 527294.5 | 528780.4 | 578311.4 | 581255.1 | 672714.6 |
| 21900.74 | 25895.08 | 26852.54 | 19817.01 | 25751.89 | 31590.37 | 27765.63 | 27647.93 | 42780.12 | 17255.21 | 26387.53 | 14645.04 | 29701.72 | 26765.43 | 21873.26 | 22336.37 | 27493.28 |
| 134473.9 | 553778.1 | 113189.4 | 396363.2 | 290265.3 | 101902.4 | 601598.1 | 114162.6 | 187410.9 | 766195   | 767278.3 | 348191.6 | 233576.8 | 130819.3 | 222994.8 | 465167.1 | 637394.6 |
| 3747.377 | 3785.884 | 5954.535 | 1100.13  | 3538.708 | 6175.534 | 4306.491 | 6244.43  | 12776.38 | 1983.576 | 5690.443 | 5274.754 | 3007.257 | 1284.649 | 1040.381 | 3416.23  | 3311.344 |
| 208162   | 150688   | 135988.7 | 177150   | 248978.6 | 160332   | 271343.2 | 163303.8 | 304770.7 | 265943.4 | 209925   | 201934.4 | 293038.3 | 226659.1 | 193102.3 | 217979.2 | 195552.2 |
| 256202.2 | 77541.34 | 119446.6 | 77192.62 | 185512.8 | 46141.97 | 51939.8  | 73162.41 | 162199.4 | 106175.3 | 103416   | 21015.08 | 75990.99 | 61797.37 | 47858.76 | 105979.9 | 79479.02 |
| 80235.17 | 84039.77 | 61326.04 | 93582.4  | 59375    | 54070.57 | 21394.28 | 62173.11 | 57595.02 | 80871.81 | 106338   | 120677.1 | 81857.59 | 91861.52 | 109444.3 | 73863.4  | 88074.99 |
| 70253.6  | 69796.14 | 67961.88 | 34332.8  | 54395.01 | 23707.76 | 56979.01 | 51510.81 | 63152.07 | 55060.64 | 37652.84 | 59569.76 | 35899.31 | 52334.48 | 33672.21 | 46545.36 | 58631.14 |
| 128620.4 | 75953.03 | 63382.86 | 71813.18 | 114868.1 | 74984.48 | 119155.3 | 94184.56 | 128934.3 | 79917.26 | 89704.84 | 74543.09 | 77126.55 | 70318.72 | 79844.19 | 136434.2 | 91763.11 |
| 645137.4 | 621325.8 | 489896.6 | 594898.6 | 495827.4 | 582815.9 | 692236.9 | 649816.1 | 504824.4 | 552207.3 | 600812.7 | 628360.3 | 581198.3 | 504439.2 | 554427.7 | 594811.4 | 650601   |
| 11618.63 | 5573.178 | 10053.89 | 11828.91 | 7223.226 | 9368.974 | 6372.768 | 13529.2  | 13527.92 | 8592.351 | 4055.101 | 4580.09  | 9553.042 | 9197.94  | 10233.09 | 8017     | 9429.463 |
| 273266   | 284532   | 295720.5 | 258620.9 | 384861.6 | 271488.9 | 224114.5 | 214750.6 | 232853.8 | 156349.5 | 277756.7 | 265280.5 | 226577.7 | 372135.1 | 264944.4 | 226691.5 | 222771.6 |
| 24423.28 | 15204.8  | 9686.485 | 42028.61 | 25702.94 | 33988.41 | 28564.32 | 30290.88 | 22922.16 | 18080.61 | 26413.09 | 40830.44 | 30283.65 | 29149.78 | 26456.45 | 56298.73 | 17566.22 |
| 15746.21 | 28496.44 | 17879.74 | 25027.99 | 20462.86 | 15109.7  | 23331.14 | 17471.2  | 22574.27 | 16688.68 | 23530.27 | 27312.06 | 24603.36 | 16757.21 | 15791.34 | 31103.01 | 19270.41 |
| 2811.715 | 23244.89 | 16267.74 | 9914.579 | 14175.97 | 12739.26 | 10501.08 | 10244.98 | 17245.65 | 104532.6 | 23385.44 | 12023.82 | 16221.52 | 13381.62 | 13517.51 | 2417.199 | 16668.9  |
| 113009.8 | 219425.4 | 183219.3 | 182315.4 | 214884.5 | 371299.2 | 249689   | 220143.9 | 267755   | 104252   | 229428.3 | 308313.8 | 269854.3 | 200212.3 | 173551.8 | 224594.4 | 221520.2 |
| 10871.15 | 11436.01 | 6663.705 | 14203.55 | 11940.77 | 13172.95 | 34245.11 | 10441.41 | 25257.38 | 9146.721 | 5207.143 | 11538.96 | 9547.542 | 11966.78 | 9182.151 | 21607.31 | 10075.27 |
| 162535.2 | 154821.2 | 144159.2 | 146371.2 | 158786.4 | 97455.68 | 244817.1 | 171619.6 | 197343   | 176137.2 | 155485.2 | 146715.3 | 187751.6 | 138636.5 | 173705.2 | 196225   | 177444.7 |
| 22393.69 | 46315.8  | 39593.4  | 21169.21 | 27160.91 | 22282.82 | 38518.15 | 15695.13 | 12314.46 | 42040.91 | 68428.02 | 50813.54 | 48050.93 | 23773.43 | 27279.7  | 19668.19 | 22354.66 |
| 2849.303 | 16810.02 | 32432.47 | 8350.922 | 6575.654 | 3683.325 | 23060.81 | 7776.244 | 9111.976 | 6263.405 | 11115.24 | 9048.761 | 7319.377 | 9726.534 | 4833.88  | 6423.254 | 1076.025 |
| 82880.42 | 45293.44 | 63160.71 | 43802.06 | 51040.48 | 44504.07 | 6761.322 | 34299.45 | 43484.86 | 26004.75 | 124408.1 | 51255.79 | 89894.48 | 89914.13 | 27689.62 | 54842.42 | 50258.34 |
| 56580.73 | 15439    | 15341.73 | 12515.06 | 9578.945 | 13941.3  | 26541.02 | 19422.2  | 14845.6  | 5329.56  | 11823.79 | 13873.95 | 11637.96 | 13310.07 | 13143.34 | 22215.41 | 12299.52 |
| 219212.4 | 328303.3 | 310223.7 | 272152.2 | 220981.8 | 300411.6 | 404325.3 | 324137.6 | 344485.8 | 336304.4 | 320504.1 | 265084   | 321367   | 282456.2 | 264810.7 | 357716.2 | 348783.6 |
| 200755.8 | 209250   | 177620.3 | 199344.3 | 193094.4 | 243120.4 | 377833.1 | 165814.6 | 250690.4 | 231102.5 | 223139.7 | 155198.7 | 193216.5 | 178423   | 237635.3 | 328008.1 | 200227.4 |
| 5516.706 | 11541.31 | 21635.54 | 12175.15 | 10112.98 | 5274.033 | 11348.05 | 6569.333 | 20646.54 | 13115.63 | 19347.57 | 13911.18 | 14599.17 | 14635.14 | 9028.185 | 3866258  | 15993.59 |
| 1635611  | 1710742  | 1371447  | 1314751  | 1539902  | 1718752  | 1978829  | 1532458  | 2142501  | 2382642  | 1322807  | 1238393  | 1057539  | 1418624  | 1389285  | 1731051  | 2121249  |

|          |          |          |          |          |          |          |          |          |          |          |          |          |          |          |          |          |
|----------|----------|----------|----------|----------|----------|----------|----------|----------|----------|----------|----------|----------|----------|----------|----------|----------|
| 31734.64 | 42935.41 | 49208.95 | 37610.87 | 34742.17 | 42905.66 | 47951.7  | 40344.24 | 42767.13 | 35722.65 | 58987.86 | 32476.56 | 34004.03 | 32938.6  | 42546.85 | 49095.6  | 33106.71 |
| 6844.163 | 11142.1  | 52183.33 | 38909.04 | 31373.89 | 147159.8 | 115015.9 | 37721.73 | 529947.2 | 22773.35 | 182663.9 | 495096.2 | 189302.4 | 108909.8 | 344563.3 | 168471.6 | 113917.3 |
| 130407.7 | 12427.02 | 273122.9 | 1788.178 | 18605.87 | 20197.16 | 15015.74 | 15206.81 | 4170.09  | 27632.58 | 10923.38 | 51122.98 | 2474.828 | 9546.399 | 10370.84 | 20608.57 | 6694.211 |
| 283857.2 | 301501.5 | 340653.7 | 340692.6 | 286177.6 | 345495.4 | 352533   | 335899.9 | 401412.8 | 254092.6 | 303874   | 206495.4 | 336310.6 | 281020.9 | 307218   | 370752.4 | 297869.6 |
| 8398.801 | 16819.37 | 4711.352 | 7305.258 | 10193.45 | 8915.946 | 29107.78 | 13700.3  | 19166.83 | 28082.02 | 14136.61 | 8434.143 | 8534.416 | 6702.299 | 11845.55 | 21341.33 | 12983.29 |
| 121024.3 | 135442.5 | 153326.9 | 168488.5 | 128162.8 | 483853.1 | 141656.7 | 150842.5 | 263594.7 | 108664.4 | 203372.1 | 81945.76 | 104738.3 | 111405.5 | 127799.6 | 141999.1 | 138090.4 |
| 106168.4 | 228618.6 | 103966.4 | 66468.42 | 76592.55 | 69518.27 | 84391.77 | 102131   | 272613.8 | 151079.4 | 146445.8 | 82609.83 | 83712.47 | 76793.68 | 92057.06 | 112960.1 | 113750.9 |
| 116060.9 | 192771.6 | 95676.2  | 131970.6 | 127554.2 | 99860.97 | 80681.48 | 131119.7 | 120726.6 | 155464.2 | 150206.4 | 155828   | 120542.1 | 173046.3 | 151131.4 | 71121.05 | 103386.4 |
| 40215.66 | 52663.3  | 42463.2  | 44798.75 | 37676.77 | 33027.23 | 24098.28 | 37458.47 | 40947.19 | 48929.57 | 43676.97 | 49339.66 | 33974.16 | 49203.7  | 56524.57 | 32711.25 | 45089.88 |
| 25165.94 | 31663.23 | 29216.23 | 9549.05  | 20701.28 | 29791.68 | 19118.49 | 27247.77 | 14047.4  | 38505.14 | 30723.71 | 30963.28 | 27051.67 | 2067.284 | 15075.22 | 19595.74 | 12865.63 |
| 75482.4  | 175255.5 | 120096.8 | 62921.1  | 126934.4 | 74278.94 | 188701.1 | 61208.39 | 159373.8 | 103766.4 | 147004.9 | 75952.38 | 130544.2 | 47805.93 | 126636.7 | 148480.6 | 127665.2 |
| 3196.877 | 13471.36 | 19881.45 | 21281.79 | 6753.437 | 13497.36 | 13590.93 | 27072.92 | 12716.75 | 6622.938 | 14602.35 | 15401.74 | 22564.08 | 9543.61  | 11031.98 | 5595.654 | 16292.3  |
| 359154   | 230876.4 | 199874.9 | 197803.9 | 182780.3 | 161979.8 | 211785.7 | 261982.4 | 178815   | 333449.7 | 203993.7 | 245171.5 | 176869.1 | 213224.5 | 192244   | 246331.8 | 287524.9 |
| 50868.35 | 111120   | 79636.94 | 70633.63 | 143511.6 | 64592.43 | 60922.8  | 80828.17 | 49285.92 | 68056.73 | 159986.1 | 172490.7 | 166209.7 | 73887.77 | 45192.32 | 54007.73 | 67868.86 |
| 17753.32 | 15968.32 | 1645.201 | 15141.62 | 26284.42 | 20323.67 | 21693.93 | 14294.57 | 17562.88 | 159572.8 | 22592.47 | 35312.97 | 30524.53 | 20124.65 | 7503.102 | 25438.21 | 20482.83 |
| 16713.69 | 18454.22 | 21776.81 | 24260.61 | 19487.63 | 26822.19 | 31618.64 | 18666.87 | 14523.75 | 11253.91 | 24383.07 | 14365.98 | 22257.51 | 10637.25 | 17407.87 | 27420.77 | 16487.43 |
| 161460   | 121685.2 | 98286.37 | 151540.8 | 86839.83 | 107982.1 | 42234.75 | 117511.8 | 102370.3 | 164675.8 | 101308.1 | 135460.7 | 98247.79 | 121020.6 | 138960.8 | 117401.9 | 103863.3 |
| 19290.26 | 15606.81 | 16914.03 | 21787.82 | 36384.96 | 38011.81 | 12569.57 | 18059.62 | 14937.83 | 17454.48 | 16962.54 | 35652.09 | 30668.33 | 18418.33 | 29385.01 | 15240.09 | 20830.38 |
| 37854.47 | 28920.3  | 34035.9  | 29492.64 | 27084.55 | 23946.2  | 18166.84 | 23062.5  | 22300.7  | 34446.71 | 25404.1  | 30903.67 | 26423.28 | 22867.12 | 32362.28 | 27209.41 | 31958.18 |
| 143974.6 | 262726.9 | 126104.4 | 231055.1 | 274932.1 | 112831.7 | 99585.13 | 256948.7 | 173376.1 | 195467.4 | 210891.3 | 266334.9 | 177392.4 | 463612.7 | 243100   | 99338.96 | 233647   |
| 70084.59 | 86426.27 | 40392.23 | 54760.75 | 115411.1 | 33988.47 | 51989.65 | 56071.76 | 68854.25 | 72120.67 | 75224.33 | 77118.64 | 31465.27 | 111946.1 | 25222.45 | 41314.82 | 59212.05 |
| 140285.8 | 141794.9 | 175093.8 | 138790.4 | 86682.75 | 117403.7 | 100919.1 | 137639.1 | 155999.3 | 155135.4 | 146182.4 | 148291.3 | 122684.5 | 153045.8 | 155192.8 | 141503   | 163313.4 |
| 38105.82 | 16445.82 | 13614.72 | 16183.47 | 59570.88 | 14008.65 | 30747.17 | 27886.58 | 33927.65 | 18312.01 | 6065.413 | 17482.58 | 21427.95 | 32889.51 | 17975.07 | 23326.29 | 22604.97 |
| 9646.622 | 20557.63 | 7754.538 | 10403.9  | 13371.72 | 8895.749 | 5757.787 | 7218.541 | 11838.2  | 10906.55 | 13837.85 | 19987.53 | 14217.36 | 14189.65 | 12640.86 | 17415.68 | 10641.21 |
| 31705.97 | 38297.8  | 31097.13 | 46179.68 | 51831.84 | 45060.04 | 34682.98 | 40990.29 | 45176.52 | 29634.21 | 31849.59 | 31649.52 | 42613.97 | 42381.56 | 47025.23 | 35733.84 | 43365.15 |
| 5108.81  | 29684.69 | 28157.79 | 7852.146 | 6311.769 | 8245.463 | 32159.44 | 4133.232 | 15177.2  | 26009.12 | 16798.59 | 20440.58 | 10922.21 | 18019.83 | 14808    | 17142.31 | 7055.26  |
| 2955.321 | 10230.07 | 4275.437 | 3188.931 | 2061.628 | 2051.107 | 4431.344 | 4261.896 | 5222.212 | 6932.782 | 5134.807 | 1994.805 | 3039.572 | 4663.939 | 3132.134 | 4612.602 | 5106.517 |
| 1146.596 | 5170.103 | 2297.41  | 2152.135 | 2175.648 | 1328.249 | 8923.931 | 1533.807 | 1180.316 | 881.7726 | 3494.705 | 6940.023 | 2128.219 | 2542.456 | 1933.394 | 1602.761 | 1950.049 |
| 7037.442 | 23931.57 | 18495.05 | 15687.61 | 15245.2  | 12152.98 | 8773.464 | 13252.57 | 16180.85 | 10651.93 | 12551.11 | 20485.37 | 16668.08 | 6379.371 | 19078.35 | 9890.254 | 18978.92 |
| 4805481  | 6477518  | 5735424  | 7317574  | 6009313  | 6968098  | 6590374  | 3635190  | 8777853  | 4308628  | 6325006  | 2819234  | 5756617  | 5969346  | 6557265  | 6155943  | 6078001  |
| 90974.82 | 96012.42 | 82228.49 | 75410.19 | 107809.9 | 62441.34 | 154239.1 | 85187.34 | 43766.8  | 143245.2 | 102633.7 | 165010.5 | 120525.9 | 121431.5 | 100494.1 | 101177.4 | 83285.3  |
| 8072.324 | 11998.12 | 16600.61 | 21372.41 | 13279.25 | 21546.33 | 11269.79 | 15137.99 | 11455.3  | 7854.388 | 7145.406 | 16001.33 | 17644.17 | 16869.14 | 18664.57 | 14319.02 | 14758.22 |
| 22919.99 | 49349.2  | 27090.36 | 22465.63 | 35854.01 | 28858.65 | 43390    | 35995.87 | 34222.41 | 31047.62 | 45700.98 | 59584.34 | 31532.23 | 28779.58 | 29261.49 | 53122.86 | 42722.02 |
| 19424.16 | 20128.3  | 24060.28 | 16279.2  | 15186.06 | 12518.96 | 19798.09 | 9389.956 | 13442.77 | 14146.68 | 10556.81 | 10830.04 | 11084.62 | 13547.96 | 12255.06 | 17654.91 | 11996.37 |
| 4093.353 | 10008.89 | 7607.195 | 7365.906 | 2631.101 | 5373.053 | 9974.552 | 4380.709 | 13060.53 | 11682.48 | 5711.171 | 5665.343 | 7050.039 | 5526.962 | 6881.124 | 7640.8   | 3990.328 |
| 199716.3 | 260353.8 | 282325.4 | 308610.5 | 203057.3 | 275454.7 | 374169.8 | 328390.9 | 408330.3 | 155569   | 261506.7 | 133669.1 | 266645.7 | 173204   | 197971.2 | 270758.9 | 275371.5 |
| 296747.4 | 201595.1 | 826732.3 | 12766.42 | 112007.9 | 1399.315 | 86144.55 | 19567.6  | 192628.5 | 54443.1  | 82555.71 | 101920.5 | 63975.23 | 286313.9 | 69467.16 | 82044.16 | 60278.89 |
| 17550.21 | 44218.27 | 10075.37 | 12604.64 | 29904.56 | 10381.85 | 35025.2  | 3207.559 | 17033.4  | 24403.13 | 29310.31 | 47664.16 | 18628.61 | 22847.79 | 20755.33 | 26630.93 | 16099.88 |
| 50150.72 | 98055.95 | 96065.72 | 98505.84 | 87324.66 | 77803.09 | 129710.8 | 89086.85 | 113861.1 | 59208.23 | 121753.6 | 105590.5 | 135279   | 85127.94 | 93819.23 | 108133.4 | 101925.4 |
| 60511.4  | 67057.66 | 37648.5  | 64143.65 | 54841.93 | 50994.52 | 18041.46 | 65869.69 | 62697.7  | 84475.05 | 60113.48 | 69409.67 | 46311.45 | 96049.45 | 78209.63 | 26435.09 | 44519.37 |
| 370166.6 | 492590.4 | 479832.1 | 710175.2 | 444949   | 567990.8 | 400648.8 | 504936.9 | 521732.9 | 234019.3 | 373820.2 | 148264.9 | 553758.2 | 281587.6 | 265152.7 | 357110   | 554534.3 |
| 53058.41 | 93063.91 | 79752.46 | 83523.47 | 88137.15 | 88870.42 | 101144.6 | 111417.2 | 105029.4 | 58872.65 | 111561.6 | 101880.3 | 101738.8 | 83534.28 | 73772.23 | 82701.97 | 105688.1 |
| 9003.771 | 29239.71 | 22452.85 | 23918.39 | 42287.43 | 21572.41 | 13947.91 | 23234.6  | 15436.17 | 29993.34 | 21954.88 | 64232.05 | 56007.23 | 36533.92 | 26886.26 | 18173.01 | 25810.79 |
| 95612.08 | 156484.7 | 170353   | 112877   | 113759.7 | 155688.3 | 173192.3 | 121333.5 | 146435.2 | 49398.52 | 137519.2 | 77944.96 | 102678.8 | 99647.55 | 103140.3 | 137876.8 | 103866   |
| 54934.15 | 72621.23 | 44247.85 | 55863.95 | 52473.73 | 42523.94 | 28740.65 | 50648.54 | 73027.52 | 75454.05 | 59373.55 | 50713.49 | 48718.53 | 65208.8  | 54827.32 | 30691.85 | 44519.9  |
| 6062.638 | 10548.14 | 7639.284 | 5440.852 | 7684.906 | 4359.646 | 12433.05 | 7522.518 | 9171.798 | 8701.019 | 4193.336 | 6602.748 | 5016.755 | 6286.204 | 6941.918 | 7035.219 | 6003.164 |
| 4519626  | 4945466  | 5613542  | 5261419  | 2624722  | 6012541  | 4576530  | 5688443  | 3784922  | 4408044  | 4248067  | 3505781  | 3595108  | 3357706  | 4432268  | 4642744  | 6206681  |
| 5456.152 | 5474.559 | 13871.28 | 8198.31  | 5838.596 | 6697.701 | 5270.013 | 5084.535 | 4116.444 | 6168.423 | 5086.182 | 7273.778 | 2121.362 | 6217.851 | 4153.219 | 5824.068 | 8223.005 |
| 20837.86 | 73276.64 | 81722.7  | 104752.1 | 111716.5 | 99671.09 | 75410.31 | 31301.84 | 34980.66 | 27714.1  | 95730.38 | 110923.2 | 315569.9 | 60591.97 | 84933.88 | 70720.55 | 65505.23 |



|          |          |          |          |          |          |          |          |          |          |           |          |          |          |          |          |          |
|----------|----------|----------|----------|----------|----------|----------|----------|----------|----------|-----------|----------|----------|----------|----------|----------|----------|
| 445626.1 | 223534.9 | 266774.2 | 284704.7 | 339839.8 | 238814.2 | 207267.6 | 279407.9 | 303291.6 | 2760429  | 208066.4  | 215876.4 | 181374.5 | 204309.1 | 178928.4 | 115145.1 | 200302.9 |
| 114279.4 | 91146.88 | 84939.1  | 158418   | 170777.5 | 140246.4 | 153571.6 | 123822.2 | 178005.5 | 95205.23 | 123234.4  | 75825.83 | 223837.7 | 121657.7 | 136010.1 | 197433.3 | 158807.5 |
| 25878.88 | 14518.19 | 13330.67 | 11911.74 | 16919.55 | 11048.81 | 14653.46 | 14269.35 | 14586.01 | 72984.91 | 21124.6   | 10360.92 | 2875.255 | 13473.11 | 13004.83 | 6387.134 | 19547.31 |
| 24404.44 | 15821.07 | 27950.52 | 48353.68 | 4428.555 | 85822.28 | 23605.35 | 11176.27 | 13744.73 | 22435.48 | 5542.864  | 7428.246 | 6571.508 | 11976.1  | 62289.95 | 13768.74 | 13874.77 |
| 10896538 | 13694721 | 13413209 | 13111808 | 7436227  | 12660321 | 14374901 | 12498447 | 13928497 | 13488685 | 14161606  | 10860960 | 9049786  | 10425517 | 11409345 | 12918230 | 15537210 |
| 61599.24 | 34810.56 | 21393.07 | 17220.65 | 17763.19 | 14331    | 19404.61 | 19479.39 | 42909.29 | 15833.73 | 22458.02  | 14758.89 | 18349.93 | 38771.88 | 19154.62 | 27258.21 | 18542.72 |
| 348869.1 | 911285.7 | 853342.7 | 1371889  | 783183   | 655058.6 | 898564.3 | 882320.8 | 1044889  | 315061.6 | 879487.3  | 772303   | 1459883  | 803170.9 | 581354.3 | 823125.8 | 972946.1 |
| 15749.2  | 23096.7  | 22536.07 | 17261.27 | 7688.511 | 7651.875 | 11578.59 | 9932.222 | 14930.33 | 13912.07 | 25118.24  | 16594.53 | 10892.08 | 8929.504 | 24648.95 | 16150.29 | 13792.76 |
| 22127.34 | 25632.66 | 22197.38 | 21281.47 | 8514.543 | 11721.39 | 27516.24 | 13801.56 | 8269.04  | 52768.18 | 32814.21  | 12560.29 | 11509.2  | 9599.759 | 12854.83 | 28321.22 | 20587.26 |
| 5858532  | 6931102  | 7324527  | 7554390  | 6218254  | 7530209  | 11694779 | 8247241  | 10970256 | 9713835  | 8074038   | 4642716  | 7284158  | 5728438  | 6010065  | 6983023  | 8755680  |
| 45341.5  | 70773.98 | 54373.84 | 55617.7  | 48586.36 | 43246.7  | 44982.39 | 50788.45 | 59638.96 | 59403.29 | 66159.45  | 48642.6  | 64338.81 | 56993.29 | 45791.01 | 64383.84 | 61721.72 |
| 403456.9 | 476457.1 | 560637.8 | 527203.1 | 511404.4 | 585151.4 | 613684.9 | 598977.1 | 349489.2 | 289127.7 | 504397.9  | 591950.8 | 420855.1 | 568855.1 | 642640.9 | 730131.8 | 635926.8 |
| 11847.74 | 20201.44 | 29469.83 | 24515.85 | 61425.63 | 63302.12 | 47972.49 | 58761.36 | 64551.92 | 20739.92 | 35262.82  | 73412.16 | 63687.23 | 68726.66 | 24293.46 | 71092.6  | 18589.77 |
| 8427.437 | 25913.15 | 14638.9  | 21353.66 | 48401.7  | 15583.53 | 11463.91 | 14199.14 | 13580.61 | 15742.68 | 22978.43  | 81703.69 | 56845.26 | 35287.31 | 23973.73 | 21438.08 | 23535.11 |
| 542426.9 | 254018.2 | 464351   | 216320.8 | 285912.5 | 397117.2 | 305354.3 | 258377.4 | 200770.7 | 613933.1 | 277969.8  | 160309.7 | 210376.4 | 284247.1 | 273986.3 | 245131.1 | 200720.9 |
| 145956.9 | 209769.5 | 105946.6 | 149731.8 | 180246   | 114294.8 | 61328.14 | 147767.7 | 147047.5 | 230307.8 | 143977.6  | 188120.4 | 123497.7 | 300265   | 188435.9 | 64563.83 | 114487.9 |
| 770468.4 | 1638229  | 1144970  | 1129343  | 1546350  | 944627.7 | 1374595  | 636895.4 | 694466   | 866997.8 | 1256881   | 317382.6 | 1760473  | 622832.3 | 1108067  | 1072628  | 751009.1 |
| 18865.6  | 24430.67 | 15473.86 | 17967.92 | 15842.55 | 12773.55 | 36284.22 | 14830.98 | 12934.9  | 9975.137 | 21832.68  | 12223.44 | 7630.214 | 30996.01 | 25834.51 | 16999.33 | 23437.97 |
| 12784.76 | 23998.49 | 18004.54 | 25040.42 | 26177.79 | 13315.7  | 25506.84 | 25921.04 | 19925.4  | 13739.32 | 34595.08  | 19786.15 | 24498.89 | 40720.36 | 34039    | 36918.36 | 31268.87 |
| 9445.766 | 15731.21 | 13399.06 | 9478.19  | 24142.38 | 8736.872 | 14049.76 | 9375.484 | 12814.37 | 15505.72 | 26856.68  | 27382.6  | 24629.71 | 11101.58 | 12850.01 | 18065.45 | 10904.09 |
| 66623.45 | 79134.71 | 33621.77 | 39878.55 | 45260.07 | 61509.29 | 61425.96 | 43477.36 | 62403.77 | 85282.33 | 23860.93  | 14790.91 | 28008.29 | 29465.55 | 18837.1  | 7407.075 | 23558.82 |
| 79953.02 | 101911.9 | 131011   | 140336.3 | 128262   | 157911.5 | 156972.6 | 116977.4 | 162619.5 | 141776.8 | 132434.6  | 58413.77 | 96571.93 | 74621.55 | 75590.59 | 108579.2 | 126239.1 |
| 220929.2 | 249351.8 | 200235.8 | 181818.5 | 173161   | 137479   | 181549.9 | 156492   | 206218   | 270910.3 | 230746.1  | 193353   | 138495.1 | 190862.4 | 225876.7 | 229033   | 274321.4 |
| 42659.36 | 89799.73 | 749918.7 | 28593.49 | 21973.98 | 64105.86 | 118919.5 | 131000.4 | 49979.37 | 52668.5  | 197572    | 15010.1  | 42321.09 | 74497.34 | 37858.78 | 247538   | 83349.27 |
| 705498.6 | 279464.7 | 368606.8 | 254278.5 | 286130.6 | 549165.8 | 378752.2 | 381597.6 | 251523   | 1442876  | 377767.1  | 176220   | 353051   | 210212.2 | 289025.2 | 317030.2 | 251737   |
| 3344.815 | 8781.475 | 4066.547 | 2174.695 | 4157.481 | 3544.513 | 9566.298 | 2980.016 | 6196.904 | 3545.044 | 3568.912  | 6227.465 | 4479.003 | 4619.433 | 2876.187 | 5156.754 | 4888.691 |
| 27516.38 | 23635.02 | 18210.36 | 12832.55 | 25513.75 | 26704.8  | 42034.36 | 19175.97 | 29850.37 | 21278.04 | 24261.7   | 24017.56 | 26470.2  | 26238.7  | 16751.78 | 40611.67 | 34668.89 |
| 12370.26 | 17298.48 | 15447.34 | 36472.05 | 11076.09 | 23755.33 | 29850.52 | 24525.54 | 18846.54 | 10454.87 | 30265.28  | 23818.45 | 69570.12 | 5853.269 | 14669.82 | 23022.1  | 46230.06 |
| 39898.8  | 21085.52 | 22126.92 | 22643.56 | 22122.18 | 19131.88 | 18430.49 | 15237.29 | 17385.48 | 48385.12 | 20258.58  | 17607.52 | 17024.47 | 30363.14 | 31803.88 | 19300.09 | 15769.06 |
| 456882.7 | 312409.1 | 328331.4 | 279517.3 | 357286.3 | 361293   | 365362.8 | 300664.1 | 309216.2 | 594842.1 | 353494.3  | 347433.9 | 311216   | 264360.2 | 329020.7 | 315061.2 | 328858.1 |
| 2087.15  | 4605.65  | 3525.885 | 1042.644 | 3904.026 | 1737     | 3515.911 | 1430.611 | 2088.923 | 5765.626 | 2988.535  | 1622.325 | 2921.265 | 2934.098 | 1028.14  | 5656.428 | 4232.334 |
| 139271.5 | 79895.18 | 88201.81 | 87318.8  | 108054.1 | 95605.78 | 80476.11 | 97570.67 | 78024.94 | 300550.1 | 78529.35  | 92057.33 | 77547.87 | 103627.5 | 84218.96 | 72995.54 | 100136.6 |
| 118441   | 225033.1 | 268547.1 | 180453.3 | 234838.2 | 211393.7 | 217196.1 | 149673.3 | 275060   | 261928.6 | 272341.7  | 339793.1 | 298505.8 | 158160.9 | 177280.8 | 237434.6 | 192346.4 |
| 207255.4 | 254207.2 | 207046.8 | 194207.5 | 209743   | 154702.6 | 262551.2 | 197962.5 | 232294.8 | 228511.8 | 269969.3  | 200721   | 178979.7 | 227613.2 | 205440.9 | 244203.1 | 214448.9 |
| 313829.9 | 202647.7 | 73320.49 | 154820.9 | 264368.9 | 224482.9 | 985342.7 | 448647.3 | 518546.9 | 154885.7 | 821257.3  | 388893.9 | 462940.7 | 166142.6 | 283737.3 | 633968.6 | 601588.3 |
| 65943.12 | 87634.86 | 84921.46 | 84346.98 | 66978.26 | 61806.04 | 122540   | 124580   | 156687.6 | 54965.4  | 81870.25  | 67795.7  | 65334.55 | 84646.05 | 86712.07 | 82197.14 | 96847.58 |
| 20343.47 | 20236.93 | 12615.93 | 19696.54 | 12160.96 | 8578.516 | 10518.92 | 21565.94 | 21075.61 | 21169.86 | 10834.88  | 10299.86 | 16095.79 | 14155.61 | 15931.07 | 11661.31 | 17108.19 |
| 24370.85 | 205847.4 | 39789.29 | 5831.271 | 7403.182 | 8940.537 | 44598.45 | 16567.73 | 4716.485 | 98165.51 | 30088.03  | 100507.1 | 46523.77 | 10249.26 | 10574.29 | 17322.36 | 10796.26 |
| 61598.05 | 70423.97 | 56828.71 | 44950.34 | 70155.91 | 36110.15 | 60903.67 | 8975.979 | 53508.69 | 46960.1  | 69654.2   | 54975.47 | 40261.79 | 92669.95 | 60493.45 | 45948.07 | 8780.651 |
| 33895    | 33864.12 | 18246.34 | 46004.7  | 41071.05 | 24587.93 | 211220.7 | 35174.98 | 36358.61 | 40840.3  | 27012.26  | 37479.13 | 23750.65 | 49648.65 | 36747.34 | 24283.45 | 23819.79 |
| 48795.34 | 46812.18 | 48404.78 | 48610.79 | 35333.91 | 35949.99 | 37085.63 | 33018.72 | 38093.91 | 42003.8  | 46310.4   | 40386.04 | 22721.32 | 47310.23 | 44276.93 | 54869.97 | 32409.21 |
| 7820.807 | 33658.85 | 17395.72 | 10383.76 | 9074.7   | 11865.53 | 46319.93 | 5778.56  | 6972.785 | 18717.23 | 10480.75  | 10410.48 | 12872.64 | 15532.81 | 3902.072 | 3190.187 | 13917.2  |
| 241336.2 | 271721.2 | 244203.7 | 292865.5 | 223766.9 | 291912.7 | 465506.9 | 232979.6 | 342756.5 | 271641.5 | 304450.9  | 244486.1 | 293052.6 | 221357.8 | 228350.1 | 383092.9 | 298028.5 |
| 66206.95 | 98265.81 | 53010.29 | 92261.23 | 85519.2  | 59625.41 | 62316.28 | 92040.98 | 46139.12 | 71625.09 | 30745.53  | 105019   | 92946.45 | 155639.9 | 84336.84 | 70497.41 | 66891.66 |
| 32077.83 | 50052.81 | 51488.98 | 46706.58 | 40738.96 | 46221.59 | 59856.49 | 81266.27 | 70808.13 | 57530.8  | 61415.59  | 46577.97 | 41577.24 | 55998.37 | 45946.9  | 63275.89 | 77312.72 |
| 36472.54 | 50133.31 | 41746.14 | 23514.13 | 28252.38 | 31655.44 | 39425.57 | 28113.46 | 23621.7  | 31311.94 | 55425.61  | 35411.25 | 37209.66 | 46085.78 | 46448.15 | 41449.09 | 35085.84 |
| 5073509  | 4468582  | 4274711  | 4034562  | 3886404  | 3823186  | 6923380  | 4374210  | 6740260  | 4767591  | 4483315   | 3876098  | 3629911  | 4543874  | 3767388  | 6032469  | 4311034  |
| 26285180 | 27628798 | 24797100 | 33936896 | 35750740 | 44056576 | 22550798 | 32631316 | 29188856 | 21389116 | 286664250 | 26941286 | 31383126 | 27713674 | 31067060 | 30748010 | 38176592 |
| 20641.5  | 23969.44 | 29380.28 | 18794.27 | 18602.99 | 16362.06 | 11417.83 | 13967.93 | 14350.24 | 30220.97 | 13258.8   | 14251.02 | 13217.38 | 20944.34 | 15656.77 | 10806.83 | 20691.05 |

|          |          |          |          |          |          |          |          |          |          |          |          |          |          |          |          |          |
|----------|----------|----------|----------|----------|----------|----------|----------|----------|----------|----------|----------|----------|----------|----------|----------|----------|
| 399217.7 | 904448.7 | 819481.8 | 651082.2 | 663400.5 | 846448.8 | 1145276  | 753257.5 | 1259692  | 358590.3 | 1143346  | 624396.6 | 581474.8 | 653942.7 | 792774.8 | 988951.3 | 883399.1 |
| 2299364  | 4053033  | 2011862  | 2616251  | 3000644  | 1742177  | 1524894  | 3288218  | 2634159  | 2941556  | 3288268  | 3331482  | 2425620  | 4900998  | 2346785  | 2022908  | 2488406  |
| 46737.18 | 46094.45 | 44226.28 | 45314.27 | 40370.47 | 57010.01 | 35050.79 | 36262.41 | 49012.02 | 25163.53 | 51768.32 | 17878.69 | 68162.69 | 24096.68 | 25000.56 | 48490.76 | 71740.88 |
| 87858.55 | 182469.9 | 64388.34 | 84888.98 | 114084.3 | 77481.77 | 145180.7 | 85038.3  | 160444.5 | 137009   | 173244.6 | 75414.13 | 71657.24 | 90863.87 | 74081.46 | 137400.6 | 124167.9 |
| 18914.93 | 20636.1  | 26329.69 | 17763.65 | 15843.44 | 14265.7  | 36190.7  | 14963.74 | 32753.14 | 21483.9  | 25601.44 | 29223.47 | 22422.6  | 19727.4  | 16838.43 | 19317.84 | 23574.19 |
| 367207.2 | 85994.74 | 138925.9 | 169685.3 | 119407.3 | 183024   | 94022.95 | 213051.7 | 101210.9 | 644963.8 | 80876.22 | 151466.6 | 140271.4 | 139786.1 | 256432   | 75850.29 | 132193.3 |
| 251328.8 | 206581   | 163530.7 | 221154.3 | 185460.1 | 172573.9 | 112720.6 | 191520.1 | 186510.7 | 336029.9 | 191013   | 208030   | 184077.4 | 241564.8 | 246383.6 | 136927.5 | 196002.3 |
| 156114.9 | 148724.9 | 96049.08 | 168929.9 | 131620.1 | 157746.9 | 150370.2 | 157558.7 | 159913.4 | 103903.5 | 170774.2 | 178706.2 | 166094.8 | 158886.1 | 119688.6 | 148606   | 177812.5 |
| 12656.52 | 14978.59 | 16949.39 | 11807.32 | 9401.858 | 10435.01 | 17276.94 | 11260.52 | 17901.96 | 13204.05 | 19926.82 | 9002.491 | 13904.39 | 13665.77 | 11543.86 | 19747.03 | 15958.08 |
| 28445.88 | 32102.88 | 11911.4  | 29307.32 | 17706.26 | 21254.03 | 20123.03 | 20026.4  | 13497.75 | 33732.5  | 20986.27 | 24864.81 | 28834.33 | 35590.35 | 35112.13 | 23034.64 | 19479.05 |
| 19687.05 | 22800.03 | 22039.81 | 20870.7  | 21660.1  | 23112.29 | 13743.89 | 12221.68 | 14913.88 | 16030.99 | 21367.93 | 26929.66 | 27623.84 | 29240.1  | 18464.74 | 18120.29 | 16914.76 |
| 252838.7 | 185864.7 | 197721.8 | 176544.3 | 219715.5 | 231975.7 | 320216.5 | 181808.2 | 257651.7 | 200738.6 | 179944.7 | 219247.2 | 179451.7 | 174830.1 | 178351.9 | 248818.4 | 185979.2 |
| 23690.18 | 23107.71 | 68081.29 | 42535.65 | 20026.21 | 19217.98 | 26837.48 | 23422    | 22301.54 | 28697.18 | 26460.28 | 18984.11 | 35671.64 | 16281.9  | 11157.63 | 40516.95 | 26317.25 |
| 10633.4  | 23093.02 | 26138.58 | 23453.06 | 18729.04 | 23554.49 | 15254.59 | 19241.99 | 15469.43 | 100282.4 | 18415.76 | 21583.42 | 12348.19 | 18746.84 | 17873.58 | 13833.82 | 20632.17 |
| 7971.503 | 17680.22 | 18434.32 | 15091.37 | 21068.35 | 15731.57 | 16834.03 | 16070.76 | 42433.73 | 103274.9 | 17735.35 | 15807.88 | 25632.74 | 11061.69 | 11528.12 | 11471.62 | 19557.32 |
| 49777.25 | 77752.25 | 69079.39 | 51992.51 | 37978.96 | 37856.65 | 38523.62 | 54435.8  | 49948.48 | 70466.13 | 63036.23 | 44798.54 | 61358.55 | 52490.2  | 51164.7  | 40159.23 | 71474.34 |
| 53275.23 | 94988.45 | 69399.43 | 81066.05 | 67439.76 | 90775.36 | 171356.1 | 91801.66 | 75778.76 | 110585   | 91706.45 | 70906.58 | 60141.8  | 95317.52 | 78182.46 | 138551.1 | 105213.1 |
| 10329625 | 8652034  | 9174702  | 10830838 | 9185695  | 10863155 | 6817039  | 9557445  | 5637331  | 8877192  | 9089995  | 10665924 | 11621992 | 9577718  | 12123828 | 8216101  | 9445912  |
| 101811.9 | 141294.4 | 305755.3 | 317626.6 | 283601.4 | 352925.5 | 416887.4 | 309892.7 | 402629.1 | 207683.5 | 320330.2 | 209976.4 | 304680.1 | 298087.9 | 340249   | 336462.5 | 294162.7 |
| 37440.05 | 26990.86 | 27013.01 | 25557.46 | 17080.66 | 22594.25 | 16808.49 | 27048.6  | 28892.14 | 32513.1  | 29731.98 | 23279.02 | 18066.54 | 18975.33 | 21462.05 | 25155.22 | 24082.47 |
| 33796.28 | 47307.46 | 20169.85 | 38167.59 | 28852.95 | 22262.56 | 39341.45 | 32745.5  | 24826.71 | 35291.53 | 39632.63 | 50278.89 | 43822.88 | 55611.54 | 28561.83 | 31089.17 | 35997.11 |
| 19503.1  | 6536.045 | 6327.45  | 4028.688 | 13275.39 | 6226.841 | 10844.89 | 97828.47 | 14821.11 | 29766.28 | 21119.84 | 16748.83 | 18907.66 | 155545.6 | 16179.11 | 10085.99 | 148330.8 |
| 188118.5 | 156775.1 | 171276   | 220678.7 | 145004.2 | 211732.2 | 269608.4 | 161498.4 | 209539.3 | 143372.8 | 161003   | 138523.4 | 187842.8 | 137962.8 | 153577.3 | 213614.3 | 177303.3 |
| 65393.93 | 132405   | 121893.4 | 143099.5 | 128884.1 | 97309.13 | 58239.82 | 131891.8 | 88354.32 | 102256.5 | 176050.6 | 167480.8 | 140280.7 | 111905.7 | 103373.4 | 120415   | 161404.7 |
| 9217.117 | 22603.87 | 7377.307 | 13496.09 | 13877.6  | 12367.26 | 10658.65 | 14672.91 | 20033.3  | 101820.6 | 42659.06 | 40148.12 | 12555.22 | 13095.48 | 21890.88 | 9771.178 | 18341.68 |
| 44625.89 | 45940.38 | 36831.9  | 45379.57 | 47886.96 | 39238.38 | 29182.73 | 55183.19 | 44430    | 48104.88 | 48158.06 | 59950.68 | 47361.01 | 69709.54 | 65337.95 | 29359.28 | 43437.21 |
| 2130.375 | 5170.103 | 2892.461 | 1924.836 | 2781.119 | 2214.575 | 16160.42 | 1469.761 | 1985.219 | 4995.871 | 2154.988 | 5209.567 | 2397.578 | 3124.661 | 2223.073 | 1731.544 | 1879.221 |
| 319089.7 | 477286.6 | 438505.6 | 415740   | 378311.3 | 535747.8 | 518431.8 | 389749.9 | 426489.8 | 294534.7 | 349538.1 | 238108.7 | 367553   | 344632.3 | 339130.1 | 449095.1 | 361596.4 |
| 45161.34 | 77096.18 | 88468.55 | 79720.24 | 58203.01 | 66356.47 | 135944.6 | 84975.28 | 100935   | 47665.41 | 88605.84 | 62193.66 | 78043.88 | 60646.28 | 65081.86 | 91192.64 | 83469.02 |
| 14953.71 | 36475.33 | 22932.73 | 28484.38 | 48079.53 | 4871.854 | 25562.24 | 22176.24 | 22485.59 | 6476.018 | 35905.24 | 70332.19 | 53805.1  | 17709.31 | 54340.55 | 43645.2  | 26593.89 |
| 92261.14 | 175256.7 | 147674.9 | 148301.3 | 115070.8 | 151716   | 199199.9 | 118524.2 | 191738.5 | 84139.88 | 148023.9 | 84322.17 | 129489.7 | 109659.1 | 121730.5 | 132218.7 | 153310.6 |
| 18301.08 | 4451.456 | 2228.736 | 3486.82  | 2136.247 | 2328.956 | 3561.231 | 3551.404 | 4244.534 | 7785.022 | 11407.64 | 11568.4  | 132.1305 | 17601.65 | 3565.459 | 5884.56  | 2235.85  |
| 12448.54 | 17385.63 | 19248.47 | 15616.7  | 13117.73 | 22944.06 | 23768.4  | 16139.19 | 21129.83 | 28587.4  | 18617.05 | 11526.15 | 17150.36 | 13669.85 | 25443.49 | 23790.71 | 16953.68 |
| 19052.88 | 20809.02 | 33954.45 | 19886.48 | 16398.68 | 51537.9  | 32967.02 | 29813.56 | 38018.39 | 26050.67 | 22888.34 | 23920.41 | 16606.44 | 22087.2  | 18165.02 | 22580.22 | 23984.13 |
| 58790.8  | 174315.9 | 110218.4 | 115400.3 | 204695.5 | 65162.99 | 74405.98 | 46305.15 | 70452.32 | 65698.07 | 207434.9 | 175664.1 | 505429.2 | 321094.8 | 152410.3 | 99141.63 | 75968.77 |
| 36165.34 | 42502.65 | 18630.46 | 19012.02 | 45840.02 | 32229.98 | 33719.49 | 16222.25 | 50100.25 | 29518.21 | 44454.38 | 37395.35 | 42463.98 | 32340.45 | 45260.96 | 55064.53 | 36292.4  |
| 444174.2 | 426806   | 361664.9 | 333863.7 | 196899.3 | 270218.5 | 367777.8 | 308855.3 | 256084.8 | 526738.1 | 376888.9 | 341845.1 | 248121.3 | 311990.4 | 375749.5 | 341909.3 | 341995.7 |
| 163516   | 195114.4 | 118077.4 | 132299.4 | 93986.69 | 147717.3 | 129946.6 | 164773.7 | 116811.5 | 157735.3 | 175618.4 | 162302.1 | 97743.45 | 131244.6 | 191449.2 | 124563.4 | 155408   |
| 87729.06 | 93189.56 | 66365.04 | 70497.37 | 68483.38 | 42010.51 | 153089.3 | 56218.5  | 91640.17 | 61499.39 | 84564.03 | 48456.3  | 44176.57 | 71815.44 | 87038.72 | 92736.08 | 52144.41 |
| 7024.821 | 13584.25 | 22898.95 | 10877.98 | 6570.768 | 10066.16 | 19953.61 | 12743.89 | 14897.04 | 2186.894 | 8667.759 | 10790.2  | 15712.02 | 10849.4  | 6571.175 | 9283.678 | 8845.973 |
| 752285   | 932217.1 | 769113.3 | 838066.1 | 749302.7 | 2393640  | 1004762  | 924721.6 | 903140.7 | 922629   | 1048306  | 891772.8 | 931836.4 | 792453.3 | 921291.1 | 703476.5 | 881417.6 |
| 13490.25 | 60505.05 | 39420.21 | 33810.54 | 52259.76 | 33975.87 | 54997.04 | 25312.36 | 28759.31 | 32486.62 | 69516.92 | 102971.2 | 97426.08 | 55836.51 | 40138.23 | 56829.22 | 46917.59 |
| 64054.65 | 61745.99 | 88616.67 | 38697.04 | 34004.78 | 24762.84 | 65420.92 | 55711.11 | 38733.74 | 39014.69 | 89752.55 | 32103.9  | 21616.18 | 16463.06 | 7688.9   | 24032.57 | 31845.69 |
| 431085.5 | 196282.3 | 151709.7 | 185415.8 | 147730.3 | 215172.2 | 274227.1 | 181827.9 | 176410.5 | 1021831  | 145414.5 | 159963.3 | 175311.9 | 133311.3 | 217037   | 172788   | 175281.3 |
| 4363.784 | 4976.903 | 7926.247 | 5053.716 | 5528.75  | 7406.072 | 7876.457 | 11197.7  | 8010.515 | 6063.343 | 8632.175 | 5896.906 | 7328.57  | 11028.91 | 5227.279 | 4422.8   | 7342.715 |
| 4765.529 | 43793.36 | 19020.36 | 22505.36 | 17031.7  | 28763.65 | 105159.9 | 36289.07 | 14626.53 | 40727.46 | 57735.09 | 53576.79 | 15508.07 | 27944.19 | 11277.87 | 63687.8  | 37076.95 |
| 359920.6 | 1093500  | 323906.8 | 565812.4 | 581280.2 | 248103.7 | 1878408  | 327217.4 | 457120.6 | 2040000  | 1441557  | 655464.1 | 458267.2 | 451964   | 410401   | 1326198  | 1144205  |
| 3720.745 | 4041.987 | 2031.383 | 2893.302 | 5123.542 | 2374.015 | 8979.879 | 3152.264 | 1528.075 | 7113.705 | 6459.508 | 3919.048 | 2581.405 | 4248.908 | 2185.736 | 7186.8   | 3812.205 |
| 13018.43 | 31349.37 | 139567.9 | 27228.87 | 11172.04 | 17154.75 | 63103.68 | 19398.67 | 11458.21 | 440536.8 | 76267.74 | 28084.05 | 27499.27 | 85768.45 | 21582.42 | 53097.41 | 14472.47 |

|          |          |          |          |          |          |          |          |          |          |          |          |          |          |          |          |          |
|----------|----------|----------|----------|----------|----------|----------|----------|----------|----------|----------|----------|----------|----------|----------|----------|----------|
| 169529.5 | 818131.9 | 167270.7 | 377263.4 | 212228.3 | 168723.4 | 985028.4 | 202007.3 | 237273.3 | 969871.4 | 972627.9 | 509104.2 | 241574.2 | 184195.9 | 281477.6 | 743327.5 | 755783.5 |
| 85998.8  | 335645.6 | 59843.97 | 229598.1 | 74508.07 | 47055.23 | 393671.3 | 61002.95 | 80572.84 | 365769.4 | 416814.7 | 195815.5 | 78061.23 | 60063.36 | 116337.5 | 285699.1 | 325841.5 |
| 381862.3 | 1494431  | 333920.8 | 830451   | 847456.9 | 428587.7 | 2767373  | 456998.2 | 572443.5 | 2273624  | 2013624  | 1044739  | 686790.6 | 399715.1 | 886763.5 | 1881535  | 1786153  |
| 9379.347 | 12085.3  | 8177.057 | 22538.86 | 17124.49 | 8059.895 | 12761.59 | 13681.83 | 12443.46 | 10790.44 | 5237.424 | 27414.45 | 19784.81 | 16951.8  | 15882.91 | 14346.2  | 14523.28 |
| 4141369  | 2299624  | 2204733  | 3522357  | 3116025  | 4586399  | 3758996  | 1961562  | 3904247  | 3154517  | 2807938  | 3570288  | 2820651  | 2042485  | 2748398  | 3778692  | 2194888  |
| 1497492  | 745994.1 | 707161.8 | 611377.4 | 658916   | 661817.1 | 877967.4 | 614419.9 | 1373857  | 528994.9 | 789583.4 | 781880.4 | 1229629  | 688199.4 | 676324.3 | 676976.1 | 699852.3 |
| 14849.34 | 12048.12 | 17156.69 | 16252.04 | 13221.79 | 18114.14 | 14074.48 | 15105.12 | 15087.66 | 10987.58 | 15773.45 | 28334.66 | 15338.7  | 8385.632 | 8590.143 | 14985.29 | 18043.91 |
| 449940   | 312294.3 | 371285.4 | 386834.7 | 487033.7 | 313511.3 | 234138.5 | 271301.3 | 343566.7 | 415968.5 | 307423.7 | 386482.9 | 372480.3 | 547115.6 | 407820.8 | 358486.4 | 188378.6 |
| 453372.6 | 1163952  | 831484.8 | 739864.8 | 1064215  | 640535.3 | 898421.3 | 630075.8 | 839594.1 | 604321.7 | 1203789  | 1478505  | 1837745  | 876333.1 | 575595   | 634507.9 | 761108.6 |
| 3339.276 | 5690.693 | 4465.006 | 4474.109 | 3502.198 | 3065.21  | 7346.952 | 4808.74  | 4426.604 | 3932.111 | 3965.486 | 10476.71 | 6519.8   | 6770.638 | 5833.019 | 1815.439 | 2894.314 |
| 35559.49 | 118310.6 | 48382.49 | 80392.45 | 81257.11 | 31592.91 | 66589.02 | 43839.34 | 59270.25 | 83381.64 | 80587.59 | 132598.9 | 89145.18 | 79663    | 64282.4  | 55965.14 | 43979.72 |
| 130222.1 | 1138177  | 161449.1 | 335256.9 | 376324.3 | 178927.9 | 1755455  | 215093.8 | 295034   | 1521794  | 1251196  | 467712.6 | 327013.5 | 161178.8 | 352489.8 | 989842.8 | 883063.9 |
| 15807.37 | 6945.835 | 5686.527 | 7947.694 | 21466.56 | 2583.37  | 21570.92 | 9483.072 | 46917.24 | 7191.769 | 10471.71 | 12481.32 | 5652.56  | 8774.621 | 5962.135 | 12387.86 | 5704.111 |
| 11197.14 | 27736.54 | 18653.85 | 21525.06 | 13706.28 | 17589.32 | 29981.68 | 12609.78 | 6290.558 | 16189.27 | 19747.68 | 22463.51 | 23730.62 | 16456.94 | 17940.52 | 24950.21 | 23417.66 |
| 61751.21 | 22145.24 | 45753.04 | 26494.45 | 27876.29 | 23138.24 | 19268.7  | 28904.51 | 33321.7  | 160887.6 | 33390.79 | 73430.65 | 27203.58 | 23512.17 | 23461.02 | 25770.33 | 14873.95 |
| 22275.01 | 46137.38 | 39034.77 | 39921.21 | 26700.97 | 23670.96 | 24558.65 | 28988.64 | 40515.58 | 30226.68 | 39616.2  | 61007.93 | 32607.32 | 35816.78 | 42215.34 | 32119.88 | 43248.7  |
| 274075.6 | 216380.1 | 237699.1 | 267342.4 | 316824.6 | 217936.9 | 211362.3 | 268851.3 | 249053.7 | 525078.6 | 201271.4 | 250329.7 | 247337.3 | 252305.8 | 171864.2 | 179711.6 | 237388.6 |
| 284019.7 | 483365.5 | 197447.5 | 546637.3 | 177132.7 | 874799.6 | 1203399  | 498341.1 | 751888.9 | 380164.7 | 453919.6 | 663546.8 | 390603.1 | 515050.4 | 883485.6 | 1420690  | 356556.7 |
| 16429.71 | 11673.12 | 13564.17 | 13546.9  | 19398.66 | 11668.91 | 19042    | 14297.69 | 18468.81 | 14735.89 | 14322.63 | 26505.96 | 16685.6  | 8354.552 | 9096.812 | 17654.91 | 14436.97 |
| 811681.8 | 612341.6 | 544937.8 | 705530.9 | 764705.4 | 605930.1 | 1250364  | 691238.5 | 675327.8 | 684694.5 | 614135   | 508059.2 | 760426.9 | 784352.3 | 544492.9 | 974609.6 | 816735.8 |
| 43412.59 | 44099.57 | 51867.66 | 35140.79 | 39751.77 | 32590.88 | 37704.36 | 35469.48 | 44006.13 | 39850.57 | 53052.15 | 59228.45 | 45618.43 | 40731.48 | 36980.3  | 46929.18 | 41635.59 |
| 68519.24 | 75285.8  | 90298.42 | 81937.08 | 89655.16 | 139162.3 | 197242.8 | 109278.1 | 189260.7 | 110598.7 | 78237.27 | 89003.86 | 60693.86 | 88294.08 | 145821.1 | 132601.6 | 113820.5 |
| 27854.04 | 44426.96 | 37950.16 | 35310.54 | 50710.29 | 33664.19 | 55538.25 | 19716.46 | 85641.88 | 55298.02 | 86651.31 | 179852.5 | 63598.77 | 63245    | 90393.35 | 89971.16 | 73930.58 |
| 9796.545 | 47234.39 | 33865.55 | 20765.11 | 24545.11 | 22566.98 | 9459.352 | 11552.48 | 16005.1  | 24933.15 | 40328.48 | 59944.84 | 29199.65 | 24031.59 | 38948.98 | 42945.21 | 35523.34 |
| 26002.02 | 21163.8  | 28271.93 | 27558.57 | 40897.1  | 30746.66 | 18483.71 | 30136.7  | 31603.03 | 27333.94 | 48703.99 | 58482.36 | 42333.7  | 41768.59 | 19478.74 | 25272.52 | 39131.16 |
| 160779.3 | 152837.5 | 120206.3 | 147851.2 | 100817.7 | 85638.48 | 86845.89 | 119461.8 | 72506.55 | 158159.1 | 131807   | 102600.4 | 108434.3 | 136874.3 | 152038.5 | 128674.5 | 137494.3 |
| 318043   | 267529   | 205214.8 | 225103.5 | 296813.7 | 186326.7 | 169696.8 | 203022.3 | 223719.9 | 190814.2 | 294560   | 592206.5 | 371931   | 295834.5 | 240031.8 | 222783.5 | 244010.8 |
| 65992.6  | 136312.3 | 89226.52 | 61890.95 | 133012.6 | 45580.89 | 116667.5 | 65723.05 | 61660.84 | 173169.8 | 81566.05 | 333566   | 181593.7 | 105693.5 | 111941.7 | 109935.8 | 88874.31 |
| 30971.53 | 19120.46 | 31761.87 | 33966.77 | 35996.36 | 19866.75 | 79882.13 | 26415.72 | 37761.29 | 34091.66 | 35056.32 | 22142.83 | 23295.32 | 28333.02 | 14836.25 | 44203.25 | 26372.97 |
| 11680.54 | 77047.1  | 39453.5  | 80020.44 | 58371.77 | 34225.42 | 91177.91 | 35187.82 | 47625.25 | 50909.34 | 22079.04 | 25064.8  | 125254.3 | 53935.54 | 37610.46 | 92911.7  | 59802.97 |
| 20287698 | 32381824 | 23305054 | 17135654 | 21579148 | 20837908 | 35611508 | 22953746 | 23738886 | 18483068 | 43584456 | 12106685 | 18861524 | 21071598 | 22954334 | 26458076 | 26029164 |
| 30944.77 | 38273.01 | 34538.18 | 50260.76 | 37259.52 | 34659.5  | 32645.55 | 52165.3  | 50823.1  | 38947.47 | 41407.75 | 41758.98 | 49180.23 | 30462.07 | 41062.73 | 50448.11 | 64458.93 |
| 21029.27 | 35502.29 | 27612.72 | 26720.38 | 26832.27 | 32039.08 | 33220.35 | 29679.52 | 37187.06 | 14962.98 | 36639.15 | 23949.81 | 24777.5  | 25713.99 | 29695.09 | 29147.23 | 31994.22 |
| 97412.55 | 113049.9 | 112295.3 | 70311.05 | 72111.95 | 68486.31 | 61258.19 | 74447.33 | 85507.63 | 85100.15 | 84424.77 | 80157.86 | 67271    | 76577.83 | 91853.17 | 81640.63 | 103373.8 |
| 39899.3  | 43980.96 | 17495.88 | 31781.67 | 42255.75 | 17784.01 | 11235.88 | 35774.03 | 21842.27 | 59817.7  | 33704.32 | 37856.06 | 29413.26 | 48854.17 | 42067.39 | 18360.66 | 31078.21 |
| 9688.752 | 10535.28 | 11247.22 | 13665.98 | 9017.09  | 8951.447 | 9079.191 | 8856.966 | 10463.22 | 5931.173 | 12172.64 | 9919.766 | 8643.663 | 4571.813 | 7108.387 | 6900.247 | 7271.504 |
| 52980.26 | 49553.77 | 86695.28 | 81765.84 | 62168.63 | 54756.16 | 56806.37 | 84241.48 | 52891.8  | 35880.73 | 60535.8  | 51766.6  | 83889.65 | 75780.53 | 64685.37 | 67094.65 | 102044.9 |
| 60745.15 | 75132.42 | 54755.66 | 67550.23 | 57829.93 | 53312.41 | 88158.23 | 70894.14 | 123420.2 | 66025.65 | 67861.2  | 61567.78 | 69737.27 | 51836.37 | 69703.52 | 115268.8 | 83781.44 |
| 22302.54 | 20646.56 | 17417.38 | 15839.88 | 14083.39 | 21353.29 | 30882.46 | 14187.07 | 21886.11 | 21016.18 | 39065.09 | 14544.09 | 20672.55 | 15829.78 | 14858.44 | 18057.09 | 16229.13 |
| 44235.07 | 95627.5  | 63061.93 | 34852.22 | 41161.14 | 50841.78 | 62430.22 | 48829.41 | 58518.55 | 68920.31 | 64255.63 | 97155.06 | 73985.59 | 62060.54 | 45698.8  | 62146.95 | 62854.81 |
| 54621.98 | 43362.65 | 41650.52 | 36702.04 | 19258.45 | 58982.66 | 25271.07 | 34274.25 | 36527.58 | 49337.26 | 46714.05 | 22936.46 | 20125.45 | 29930.73 | 42390.81 | 31781.65 | 28881.66 |
| 1144.456 | 2884.884 | 2346.497 | 1669.411 | 1355.702 | 1695.671 | 4241.451 | 9657.297 | 10769.74 | 5663.623 | 2449.417 | 19272.9  | 3352.774 | 2305.841 | 14213.7  | 2375.089 | 2854.21  |
| 57133.84 | 68328.52 | 49381.75 | 81514.77 | 62199.46 | 75771.2  | 68131.18 | 49916.13 | 82600.4  | 43250.09 | 56147.06 | 41370.44 | 45451.31 | 53963.71 | 50502.63 | 60346.07 | 51143.48 |
| 44688.1  | 35142.91 | 28303.86 | 28026.31 | 23366.18 | 25317.86 | 40558.5  | 35379.03 | 33204.85 | 50917.63 | 37086.39 | 38698.87 | 25756.37 | 36759.36 | 37560.3  | 40809.05 | 35590.38 |
| 82429.59 | 154874.4 | 70540.98 | 107537.2 | 73547.67 | 69655.82 | 57785.01 | 94627.05 | 115074   | 113836.1 | 94642.39 | 128014.7 | 83256.31 | 142696.5 | 116881.9 | 58093.84 | 84013.26 |
| 60527.05 | 77866.82 | 101548.1 | 95430.57 | 57674.82 | 81974.19 | 104955.5 | 94454.07 | 115998.2 | 48586.02 | 80581.65 | 61241.87 | 86361.46 | 67485.98 | 85767.35 | 76306.65 | 92034.6  |
| 123774.3 | 130837.2 | 135008.8 | 160296.7 | 116568.3 | 134197.5 | 122464   | 123246.1 | 159841.1 | 143313.1 | 104830.6 | 90296.72 | 103486.5 | 117831.5 | 111980.4 | 91648.52 | 121588   |
| 47055.18 | 38619.72 | 52125.1  | 54144.06 | 39613.27 | 45700.6  | 54411.4  | 54084.71 | 53441.3  | 36271.5  | 38323.97 | 37662.82 | 55835.25 | 44218.02 | 46772.69 | 43013.79 | 51622.2  |
| 9678.516 | 11257.01 | 7794.672 | 2223.076 | 21862.93 | 17501.14 | 7486.204 | 1703.31  | 7816.492 | 10816.48 | 7570.313 | 7172.28  | 6855.319 | 26282.93 | 22469.83 | 8106.028 | 1146.905 |

|          |          |          |          |          |          |          |          |          |          |          |          |          |          |          |          |          |
|----------|----------|----------|----------|----------|----------|----------|----------|----------|----------|----------|----------|----------|----------|----------|----------|----------|
| 45533.32 | 33267.83 | 40513.99 | 32628.3  | 35514.18 | 28236.16 | 30208.72 | 22826.75 | 13363.46 | 47792.59 | 21639.07 | 19848.96 | 18194.02 | 23692.61 | 24496    | 20003.55 | 23362.95 |
| 12766.25 | 21699.14 | 20146.28 | 13800.12 | 35320.22 | 9126.146 | 26870.45 | 20524.14 | 22240.3  | 14070.11 | 21210.3  | 19556.75 | 23000.84 | 17863.34 | 9564.768 | 22253.55 | 20253.21 |
| 138904.1 | 173440   | 232474.6 | 254947.6 | 173573.3 | 291208.6 | 222362.7 | 257262.4 | 176383.5 | 104380.8 | 231966.9 | 178828.7 | 222848.3 | 137169.9 | 252074.9 | 193367.6 | 260459.8 |
| 10430.29 | 24296.39 | 18158.36 | 32190.64 | 14129.98 | 13996.67 | 25817.53 | 30940.42 | 24471.63 | 16919.11 | 24463.07 | 15840.03 | 30236.32 | 19805.4  | 19759.35 | 21008.95 | 34815.12 |
| 34285.21 | 31875.71 | 27776.29 | 18632.66 | 20643.33 | 19878.61 | 23692.99 | 17803.83 | 11902.1  | 31321.21 | 40043.65 | 13944.93 | 17109.94 | 16249.4  | 21042.29 | 24528.02 | 18780.21 |
| 49082.94 | 80871.29 | 56576.46 | 43102.38 | 34294.01 | 48073.33 | 54642.55 | 47263.78 | 68251.96 | 64461.32 | 74361.99 | 45311.31 | 33956.92 | 45985.13 | 56185.81 | 65157.37 | 62259.71 |
| 1654.096 | 14644.39 | 10183.91 | 8354.261 | 14111.99 | 8751.078 | 6404.036 | 6397.82  | 6550.483 | 5373.123 | 18629.6  | 31598.81 | 24630.57 | 14612.77 | 10763.85 | 14488.98 | 14936.82 |
| 185827.4 | 271667.2 | 122942.9 | 185017.4 | 173901   | 183005.9 | 145718.6 | 214325.1 | 214894.4 | 303929.4 | 152186.6 | 190136.6 | 124306   | 231218   | 194176.1 | 93686.01 | 179019.6 |
| 57711.68 | 118560.1 | 90779.7  | 56678.18 | 70651.65 | 50066.87 | 106427.9 | 57539.77 | 55346.06 | 127501.5 | 95340.28 | 186846.1 | 162883   | 86655.6  | 92069.24 | 104158.1 | 71497.68 |
| 56888.21 | 99569.88 | 90147.12 | 98136.46 | 75085.38 | 90326.4  | 64994.85 | 50259.14 | 55939.89 | 66160.96 | 127346.4 | 39529.48 | 98414.17 | 54695.11 | 69724.07 | 53148.47 | 44454.37 |
| 95041.21 | 103512   | 89138.13 | 76152.55 | 67689.18 | 68683.47 | 67667.95 | 78049.49 | 78763.76 | 88934.94 | 99550.91 | 94861.88 | 70565.18 | 82186.41 | 81273.65 | 94006.8  | 89257.35 |
| 31866.19 | 38226.44 | 23417.66 | 19147.46 | 47114.69 | 24153.16 | 23324.51 | 24148.16 | 30296.05 | 23786    | 42459.78 | 52668.55 | 42746.07 | 35433.87 | 21204.28 | 23096.9  | 28386.78 |
| 3144311  | 2866629  | 3826700  | 2536971  | 2638654  | 2655395  | 4960078  | 3710348  | 3468733  | 2340095  | 3384035  | 1857861  | 3005627  | 2246233  | 1952779  | 5113937  | 3577769  |
| 35785.42 | 18451.73 | 35280.41 | 51028.6  | 31045.49 | 28447.73 | 5471.671 | 31184.99 | 31124.82 | 37152.36 | 62146.47 | 24341.65 | 21665.27 | 16848.04 | 11616.59 | 16079.13 | 21800.34 |
| 131389.9 | 71128.98 | 127817.8 | 41693.31 | 105401.8 | 41570.91 | 37252.44 | 46143.89 | 134346.9 | 37915.39 | 112411.4 | 129819.4 | 66071.91 | 297978.8 | 54667.56 | 104891   | 84878.94 |
| 10605.95 | 37207.42 | 25233.87 | 27003.81 | 69048.45 | 37860.23 | 27641.34 | 26893.14 | 17117.86 | 33669.71 | 61575.19 | 137574.5 | 105811.5 | 53735.94 | 42383    | 35710.27 | 50550.01 |
| 15839.1  | 11616.53 | 8798.371 | 17509.21 | 23132.17 | 13148.12 | 3340.273 | 62428.54 | 25877.42 | 109409.1 | 62934.73 | 220703.1 | 29005.09 | 217470.1 | 33881.72 | 9014.67  | 19986.85 |
| 74866.55 | 102442.8 | 109907.2 | 128285   | 127954.3 | 117755.2 | 109316.5 | 107166.1 | 153639.3 | 102657.8 | 98542.34 | 64018.15 | 82995.38 | 114920.5 | 88235.02 | 92638.53 | 95163.84 |
| 32368.55 | 32831.36 | 23600.39 | 51984    | 47514.85 | 34617.51 | 24688.94 | 33466.58 | 17887.3  | 5715.597 | 36218.34 | 50539.75 | 40650.56 | 41502.82 | 37037.36 | 21946.02 | 32073.57 |
| 20090.39 | 35342.53 | 27793.65 | 38712.93 | 24759.25 | 32654.1  | 51089.06 | 26605.94 | 40923.57 | 27763.2  | 34263.66 | 21494.03 | 43722.02 | 21541.73 | 21134.76 | 38229.04 | 25453.67 |
| 16153.77 | 15173.02 | 8776.332 | 6722.311 | 13577.1  | 16417.85 | 21484.2  | 21470.13 | 14303    | 10359.69 | 20722.66 | 16988.41 | 7564.244 | 20404.57 | 11170.9  | 22114.54 | 15986.04 |
| 21001.87 | 9982.123 | 21900.25 | 6954.264 | 15222.12 | 19342.49 | 10935.07 | 20326.63 | 17078.36 | 4467.405 | 9545.632 | 13210.26 | 6156.237 | 22237.88 | 9402.442 | 20514.92 | 19869.24 |
| 41109.78 | 15895.86 | 7053.026 | 10037.72 | 10196.33 | 6106.4   | 14439.6  | 9445.305 | 6089.044 | 12352.33 | 13514.63 | 11495.61 | 10303.39 | 13015.66 | 9667.894 | 7472.645 | 8245.396 |
| 64729.45 | 160569.2 | 117977.2 | 62422.51 | 135092.9 | 69511.66 | 124493.3 | 64570.35 | 71045.95 | 124584.9 | 130337.8 | 88061.95 | 97189    | 73937.68 | 59726.1  | 71741.96 | 61801.08 |
| 37984.03 | 67271.28 | 55970.47 | 53677.44 | 55707.96 | 55485.99 | 48976.29 | 43289.17 | 64529.5  | 50670.38 | 75022.62 | 79072.48 | 54326.23 | 54311.61 | 36120.09 | 54354.84 | 56856.25 |
| 76538.13 | 70238.89 | 87964.95 | 90190.6  | 72097.03 | 90593.07 | 50650.18 | 48616.93 | 101459.5 | 42175.78 | 69514.4  | 37355.1  | 63400.39 | 58475.53 | 61329.14 | 37211.48 | 48415.02 |
| 25011.19 | 23545.87 | 26563.48 | 14716.1  | 23334.61 | 35083.91 | 30217.46 | 23310.63 | 26684.32 | 24841.14 | 30405.92 | 37294.17 | 25727.96 | 23499.25 | 16937.03 | 16023.69 | 20087.8  |
| 512590.5 | 69226.14 | 301517.6 | 310331.1 | 431905.8 | 162147   | 160694.5 | 147978.5 | 311941.5 | 106745.1 | 241284   | 124900.5 | 316620.5 | 151691.9 | 56822.55 | 290806   | 51869.75 |
| 162103.7 | 340321.9 | 192377.5 | 108623.1 | 156387.2 | 130523.4 | 185647.8 | 170987.8 | 285822.7 | 191170.4 | 194927.5 | 120958.5 | 113382.1 | 129908.4 | 147803.3 | 184874.1 | 234363.9 |
| 53661.95 | 63658.26 | 37335.68 | 44707.71 | 58523.35 | 39346.85 | 115343.1 | 86401.97 | 90570.36 | 65404.86 | 134161.8 | 33663.47 | 44172.97 | 55237.57 | 51907.73 | 48499.03 | 87738.2  |
| 19240.86 | 25120.65 | 25392.11 | 25031.21 | 22741.08 | 24605.53 | 37183.27 | 32420.05 | 30269.96 | 20642.97 | 28082.37 | 34073.84 | 24548.63 | 46123.83 | 26461.54 | 28774.01 | 27436.75 |
| 9734.112 | 14834.25 | 6456.29  | 17445.13 | 17913.04 | 6469.446 | 8145.345 | 6771.848 | 21953.95 | 12393.82 | 27450.25 | 25709    | 31092.9  | 21903.26 | 7058.002 | 26711.91 | 16162.1  |
| 1297327  | 1171039  | 924502.9 | 1151653  | 1047178  | 1162283  | 2063655  | 838003.8 | 1300726  | 1310077  | 1327942  | 1133280  | 1333757  | 1107323  | 943971.4 | 1857085  | 1272433  |
| 5389.94  | 6641.931 | 5080.942 | 3279.728 | 4043.696 | 4868.198 | 15087.07 | 2260.753 | 4484.699 | 6215.422 | 3952.722 | 8488.163 | 5103.985 | 11940.42 | 1872.83  | 5237.064 | 4999.24  |
| 35027.68 | 41689.41 | 41203.84 | 20169.68 | 22002.88 | 21501.11 | 16725.89 | 25754.95 | 22218.1  | 14303.18 | 30876.01 | 28424.88 | 20836.09 | 7910.72  | 32380.96 | 23040.69 | 39590.52 |
| 39763.27 | 41969.86 | 30465.36 | 26526.66 | 21897.85 | 25261.07 | 17697.44 | 36812.07 | 28204.99 | 23710.1  | 41103.1  | 24317.36 | 27467.55 | 33939.91 | 39822.38 | 7953.953 | 28107.96 |
| 144613.9 | 148522.8 | 125758.6 | 82859.72 | 98907.99 | 90074.95 | 75682.86 | 112857.7 | 103094.5 | 197901   | 151886.1 | 142373.6 | 82841.84 | 138092.3 | 145019.1 | 104597.5 | 102450.1 |
| 12379.65 | 19772.41 | 16952.55 | 11119.06 | 36004.72 | 17170.87 | 18063.73 | 12467.56 | 12408.14 | 5284.041 | 27865.8  | 30596.63 | 25919.87 | 20486.75 | 11048.11 | 15066.7  | 21557.27 |
| 3910.853 | 4375.091 | 7077.566 | 8342.079 | 5349.685 | 4671.515 | 13589.41 | 4031.385 | 7311.779 | 5118.065 | 4685.33  | 5776.295 | 11162.31 | 3164.105 | 7218.502 | 8721.578 | 7485.155 |
| 2772298  | 478092.4 | 3778837  | 671515.8 | 2019566  | 673091.5 | 9044420  | 791303.8 | 3813753  | 171595.7 | 1819618  | 1414662  | 1100643  | 631075.4 | 1012671  | 1199233  | 3515683  |
| 5955.65  | 20591.31 | 11206.33 | 9839.771 | 7611.121 | 9720.759 | 18867.94 | 13172.03 | 12630.84 | 6501.832 | 18031.55 | 8834.029 | 10379.01 | 9384.151 | 11990.35 | 15405.64 | 10800.76 |
| 10524.75 | 15816.1  | 9867.305 | 20914.75 | 10184.69 | 9492.215 | 10996.07 | 9825.152 | 8677.456 | 11371.12 | 11129.39 | 13372.96 | 11565.56 | 6625.514 | 9380.972 | 6424.353 | 13839.11 |
| 211032.3 | 206094.1 | 218942.8 | 254878.1 | 178505.2 | 237830.6 | 228474.1 | 236557   | 352045.4 | 192942.1 | 200994.4 | 131357.1 | 205124.6 | 190203.5 | 174963.7 | 225670.5 | 242793.4 |
| 31550.01 | 27178.82 | 44692.62 | 45500.37 | 21329.02 | 42693.63 | 29504.24 | 36939.82 | 42342.41 | 21628.44 | 39935.54 | 31142.05 | 39965.08 | 27917.1  | 37067    | 39405.35 | 27222.44 |
| 675315.4 | 699739.4 | 500923.7 | 647630   | 735953   | 476661.6 | 455446.2 | 650207.7 | 692648.2 | 534649.3 | 645674.3 | 697401.8 | 517707.9 | 959097.6 | 627354.6 | 675407.6 | 607395.5 |
| 62381.87 | 80689.88 | 44681.03 | 70570.71 | 76963.55 | 48485.82 | 50943.34 | 32491.69 | 66416.46 | 36287.71 | 26071.06 | 35493.98 | 44888.51 | 68312.34 | 29035.95 | 64936.08 | 52061.5  |
| 140317.7 | 3045892  | 1417931  | 91732.49 | 969346.8 | 187043.8 | 2656139  | 325917.9 | 1734298  | 310903.5 | 3432669  | 908690.6 | 245972.4 | 590750.8 | 671476.9 | 442538   | 906160.6 |
| 7580.811 | 16108.76 | 19948.89 | 13772.47 | 8546.223 | 12669.08 | 11763.93 | 5145.005 | 8628.142 | 99762.57 | 11959.18 | 19509.72 | 4787.597 | 12274.46 | 12569.38 | 13145.94 | 10518.04 |
| 874101.4 | 1179545  | 1326272  | 833645.1 | 697329.8 | 965701.4 | 805121.8 | 693766.3 | 473554.5 | 659178.8 | 1081679  | 458759.7 | 656445.5 | 716541.2 | 675866.6 | 1049591  | 710429.2 |

|          |          |          |          |          |          |          |          |          |          |          |          |          |          |          |          |          |
|----------|----------|----------|----------|----------|----------|----------|----------|----------|----------|----------|----------|----------|----------|----------|----------|----------|
| 129168.7 | 160010.3 | 122582.7 | 100695.6 | 120013.2 | 185222.6 | 273468.8 | 159848.9 | 266109.4 | 168290.9 | 191155.6 | 137775.7 | 155527.1 | 164301.7 | 168715   | 241114.6 | 191612.9 |
| 10617.21 | 17006.98 | 21736.68 | 12019.41 | 10153.04 | 13428.27 | 23588.91 | 16259.04 | 15052.86 | 9397.634 | 13741.43 | 10278.62 | 9122.91  | 13357.39 | 12175.4  | 20740.32 | 19176.53 |
| 5567274  | 10815105 | 8893546  | 6151181  | 4416577  | 5638968  | 23627200 | 7136234  | 9396045  | 8505663  | 10801836 | 4415494  | 7497807  | 6083591  | 4902517  | 9475042  | 7817662  |
| 97375.73 | 115369.6 | 84273.15 | 83552.09 | 98209.87 | 86334.96 | 144669.5 | 115203   | 100490   | 86477.9  | 118526.2 | 83561.8  | 61128.25 | 68817.84 | 76586.81 | 90042.92 | 82134.7  |
| 1292.341 | 6167.378 | 4587.322 | 5147.244 | 6993.602 | 26836.02 | 7500.672 | 2155.666 | 7054.64  | 130532.2 | 6305.25  | 66902.26 | 2979.082 | 9413.354 | 2033.182 | 4493.175 | 5979.49  |
| 135994.9 | 127805.3 | 124294.5 | 172746.7 | 166048.8 | 175245.3 | 122290.5 | 199538.8 | 131861.7 | 145955.8 | 160782.5 | 200507.5 | 211561.1 | 147424.2 | 141271.1 | 139859.2 | 183326.7 |
| 141829.2 | 69721.48 | 60282.72 | 63080.49 | 137617.1 | 45498.31 | 54278.08 | 82079.27 | 44897.42 | 330590.9 | 68552.59 | 106771.2 | 69667.06 | 122354.6 | 89794.13 | 38389.12 | 85833.31 |
| 17635.72 | 22725.94 | 21591.57 | 12992.07 | 14770.5  | 14744    | 14344.35 | 17177    | 19324.62 | 23776.38 | 24031.07 | 22847.21 | 22565.74 | 17044.52 | 21264.45 | 21951.04 | 16538.11 |
| 11206.55 | 18573.72 | 15897.25 | 18264.92 | 9132.483 | 16845.22 | 15048.15 | 13293.92 | 13376.15 | 440492.8 | 10042.63 | 16920.58 | 19165.45 | 12531.69 | 15279.25 | 16588.18 | 15605.58 |
| 477418.3 | 950184.6 | 556937.5 | 600821.4 | 474255.9 | 644580.1 | 903960.9 | 615044.5 | 624337.1 | 741060.4 | 852627.6 | 426534.4 | 566700.4 | 609899.7 | 591042.2 | 706591.1 | 584034.4 |
| 55406.44 | 77305.78 | 50764.05 | 51942.78 | 65023.55 | 38465.22 | 36453.08 | 56008.08 | 51040.15 | 67307.17 | 59856.9  | 61837.33 | 47448.29 | 91185.9  | 69556.73 | 36957.09 | 40135.5  |
| 183032.2 | 207387.1 | 224284.7 | 197098.2 | 199263.7 | 243855.5 | 212777.8 | 240851.5 | 245874.4 | 241722.3 | 260250.8 | 191386.2 | 245441   | 215674.6 | 265876.8 | 222389   | 271039.6 |
| 12145.92 | 21083.12 | 5744.561 | 11644.8  | 15617.66 | 5140.123 | 9630.309 | 4784.86  | 5168.28  | 11763.33 | 8587.378 | 16970.86 | 6592.129 | 13634    | 8421.449 | 11928.36 | 12278.83 |
| 6701.574 | 10005.17 | 3774.954 | 10259.33 | 9119.777 | 5885.256 | 9332.71  | 6560.8   | 8531.987 | 5701.861 | 12878.94 | 20728.08 | 28062.46 | 8573.564 | 4966.123 | 16796.58 | 10923.92 |
| 183793.3 | 983286.2 | 582823.5 | 448141   | 917461.6 | 511801.4 | 697744.3 | 303441.6 | 424534.8 | 516392.8 | 2010469  | 1619214  | 1672331  | 712924   | 555956.6 | 929268.7 | 680732.1 |
| 13038.91 | 14676.02 | 21922.36 | 17551.24 | 16825.89 | 19309.28 | 28691.86 | 26161.31 | 13898.99 | 14077.34 | 20067.46 | 15098.27 | 23825.85 | 17058.69 | 19586.56 | 20104.65 | 23853.17 |
| 1372459  | 1217729  | 1549153  | 1879189  | 1269063  | 1796486  | 1612153  | 1602229  | 2409491  | 1256878  | 1716159  | 1286462  | 1904833  | 1472045  | 1672414  | 1638931  | 1420472  |
| 94335.78 | 354549.4 | 257489.4 | 295098.3 | 396814.8 | 266026.4 | 208982.1 | 176144.7 | 147357.6 | 54573.28 | 757971.4 | 790720.6 | 732346.5 | 255020.3 | 219264.8 | 247390.4 | 355528.6 |
| 119873.8 | 121020.4 | 137387.1 | 121560.6 | 156612.4 | 179944.9 | 173311.8 | 148053.9 | 115629.3 | 131540.7 | 146065.3 | 182743.4 | 154202.7 | 128299.2 | 122099.6 | 145272.3 | 144092   |
| 164977.4 | 33227.71 | 12082.3  | 11401.19 | 40500.02 | 21521.94 | 20672.95 | 23251.01 | 15801.36 | 102552.9 | 14842.5  | 51515.99 | 59392.6  | 37131.95 | 18996.1  | 15965.74 | 25062.13 |
| 909522.3 | 643670.4 | 563445.7 | 608442.9 | 506710.4 | 905713.8 | 812156.8 | 1094615  | 1128230  | 765184.8 | 618586.6 | 456649.1 | 632189.9 | 555508.3 | 740508.9 | 733797.9 | 1161323  |
| 881370.1 | 690526.5 | 592621.6 | 679644.5 | 862249   | 699638.5 | 494060.2 | 662413.1 | 568075.9 | 751322.8 | 695728.1 | 806276.6 | 724214.8 | 1064182  | 846146.3 | 724088.5 | 524257.3 |
| 9809.966 | 7557.77  | 3525.08  | 5173.682 | 6136.473 | 6229.587 | 2187.901 | 7835.69  | 7499.897 | 4575.004 | 4384.243 | 6076.576 | 8737.096 | 6397.078 | 4886.636 | 4165.869 | 7625.377 |
| 618177.1 | 709893.1 | 408657.6 | 651461.1 | 708973   | 668566.2 | 233518.3 | 690213.7 | 756976.6 | 734403.6 | 656959.4 | 641755   | 491233.9 | 905833.6 | 775417.9 | 454495.7 | 490554.2 |
| 46393.69 | 30318.6  | 15036.65 | 23104.01 | 14782.88 | 13371.56 | 22080.82 | 16022.14 | 11077.94 | 56036.27 | 23909.51 | 29662.36 | 19264.2  | 19799.85 | 25498.72 | 35764.8  | 16601.81 |
| 27338.83 | 21974.82 | 23580.32 | 26111.23 | 27650.49 | 28423.64 | 37219.43 | 28202.6  | 32757.18 | 20600.31 | 13578.13 | 21115.87 | 21207.75 | 23936.57 | 22619.23 | 34450.94 | 27072.6  |
| 7472.891 | 22020.37 | 5773.541 | 28643.72 | 20804.02 | 14810.68 | 25525.52 | 21440.19 | 15054.21 | 17687.43 | 224779.3 | 32755.22 | 15382.13 | 5208.827 | 26547.75 | 14161.99 | 22794.93 |
| 94361.69 | 87387.27 | 59870.77 | 60755.12 | 60062.05 | 49012.69 | 46774.3  | 62706.25 | 73069.52 | 77612.65 | 84156.65 | 65402.47 | 88413.09 | 72780.62 | 91547.4  | 87538.59 | 73506.28 |
| 117897.9 | 185736.8 | 170839.4 | 159174.7 | 81619.25 | 181475.4 | 146569.6 | 167014.2 | 293626.5 | 77539.17 | 108063.8 | 72782.46 | 59713.69 | 114436.9 | 77676.34 | 122006.4 | 176499.2 |
| 1510133  | 189001   | 2730990  | 1514660  | 1102714  | 1970774  | 1207511  | 1970869  | 2936722  | 624317.6 | 811064.1 | 754161.4 | 904558.8 | 1622246  | 1524576  | 1629720  | 4041973  |
| 182749.3 | 6669.974 | 3685.537 | 5308.035 | 11617.84 | 38857.81 | 4177.196 | 1367.453 | 3643.787 | 5092.503 | 10832.59 | 28124.21 | 29664.82 | 6361.753 | 16949.88 | 8279.234 | 3453.571 |
| 10185.52 | 32401.35 | 25583.4  | 30378.42 | 24195.98 | 38784.23 | 38484.02 | 27558.9  | 24495.45 | 25952.91 | 25546.93 | 7129.458 | 12774.64 | 21327.51 | 23246.45 | 35987.89 | 26060.98 |
| 22147.54 | 32552.89 | 23362.08 | 25805.24 | 20531.76 | 21496.18 | 42782.83 | 31606.96 | 28907.54 | 18692.22 | 37775.01 | 16958.78 | 27694.53 | 22745.38 | 31155.57 | 30682.87 | 29279.2  |
| 1034883  | 1559676  | 1060392  | 926581.8 | 857697.8 | 1020617  | 1361814  | 1252606  | 821506.9 | 2441467  | 1378584  | 1213625  | 1007976  | 943757.8 | 739851.4 | 1251196  | 1157418  |
| 35773.94 | 34046.19 | 41587.21 | 30273.78 | 26497.3  | 38973.8  | 46061.26 | 32785.98 | 37373.53 | 29791.39 | 34303.72 | 15918.18 | 33745.66 | 38948.71 | 28726.58 | 43715.7  | 21652.03 |
| 21222.67 | 19045.27 | 15327.88 | 26081.62 | 44014.68 | 18997.83 | 5947.619 | 14097.55 | 20496.7  | 22563.94 | 21129.46 | 34366.54 | 37160.84 | 34074.09 | 29928.03 | 22656.34 | 13250.83 |
| 24863.42 | 51992.06 | 33916.04 | 22684.49 | 31131.11 | 16374.81 | 24239.67 | 31812.29 | 30986.82 | 53649.53 | 44648.35 | 48468.55 | 26962.72 | 29877.66 | 36814.54 | 26446.63 | 29884.54 |
| 15261.46 | 15475.01 | 19226.6  | 14185.47 | 18392.8  | 24287.75 | 13283.77 | 49119.74 | 14209.42 | 20310.58 | 23033.47 | 15256.63 | 20233.01 | 25669.97 | 25684.58 | 17089.52 | 26539.94 |
| 216328.5 | 293837.6 | 229059.5 | 235230   | 275426.2 | 216031.5 | 262919.3 | 203210.6 | 242447.6 | 227274.3 | 309994.6 | 337727.4 | 306229.4 | 250052.4 | 264516.2 | 252260.8 | 269695.8 |
| 16708.34 | 11090.56 | 3689.91  | 7520.206 | 8268.234 | 2271.717 | 4994.917 | 4614.695 | 6067.526 | 5661.563 | 9195.462 | 19273.29 | 17248.15 | 11831.45 | 6683.432 | 7646.704 | 11097.54 |
| 196872.2 | 103668.8 | 140352.5 | 194244.5 | 96783.34 | 279255.4 | 112033.6 | 203380.2 | 222630.7 | 146638.3 | 164269.7 | 197424   | 125968.3 | 147935.3 | 151174.7 | 148820.3 | 179028.5 |
| 28359.12 | 33477.28 | 33333.61 | 32770.7  | 56361.8  | 34366.77 | 39386.37 | 32904.12 | 44810.29 | 38055.64 | 54729.8  | 61321.7  | 49307.59 | 34330.77 | 26503.4  | 39461.35 | 39203.13 |
| 114777   | 17476.07 | 43504.88 | 4560.7   | 53584.07 | 34100.47 | 27944.09 | 23292.07 | 140072.2 | 56523.8  | 25003.46 | 47877.01 | 78054.88 | 44080.84 | 50292.68 | 22946.08 | 58956.65 |
| 78919.1  | 104166.3 | 118052.5 | 100585.7 | 70300.81 | 88723.98 | 27780.4  | 71030.73 | 85859.89 | 36484.9  | 71689.09 | 34191.68 | 63236.13 | 51798.08 | 38497.29 | 45421.92 | 58061.83 |
| 16392.15 | 36020.46 | 19828.85 | 46855.22 | 41115.73 | 23122.54 | 28786.37 | 25903.78 | 28480.59 | 13523.02 | 20072.52 | 16519.5  | 26514.19 | 29502.41 | 14440.32 | 22365.48 | 24646.61 |
| 85864.49 | 129203.5 | 124753.3 | 76939.44 | 176242.6 | 107428.5 | 113657.2 | 93000.93 | 86322.09 | 117015.8 | 170134.7 | 237256   | 208551.5 | 128939.6 | 114328.2 | 169664.8 | 162510.8 |
| 56060.81 | 107461.1 | 77495.48 | 89133.07 | 81523.58 | 96491.32 | 125093.1 | 83034.66 | 112661.7 | 57855.41 | 107455.8 | 65646.01 | 77841.98 | 61667.29 | 93325.8  | 94480.83 | 72368.25 |
| 112991.8 | 131574   | 163276.3 | 167719.8 | 204524.9 | 133366.3 | 180533.5 | 143937.2 | 173156.1 | 114981.3 | 142746.1 | 166216   | 190564.7 | 173087.8 | 128301.2 | 141597.1 | 173506.5 |
| 80718.31 | 118079   | 68559.46 | 119534.8 | 96547.05 | 74750.48 | 118547   | 85329.98 | 78260.72 | 105938   | 105271.3 | 90866.69 | 133310.2 | 60251.05 | 64458.55 | 132696.8 | 96682.2  |

|          |          |          |          |          |          |          |          |          |          |          |          |          |          |          |          |          |
|----------|----------|----------|----------|----------|----------|----------|----------|----------|----------|----------|----------|----------|----------|----------|----------|----------|
| 17814.37 | 30723.27 | 22144.38 | 22069.24 | 30646.86 | 27418.51 | 20847.74 | 16184.91 | 12809.52 | 26594.37 | 47589.75 | 50316.14 | 41736.25 | 9496.36  | 20230.57 | 20039.65 | 32047.46 |
| 6927949  | 6223514  | 8463826  | 8141038  | 6620712  | 7696792  | 8724828  | 7449627  | 5894083  | 8401303  | 9177219  | 5741700  | 9404905  | 7339696  | 8249849  | 9346826  | 7123726  |
| 9425.876 | 21043.54 | 11740.22 | 10106.06 | 11289.57 | 12224.96 | 9977.839 | 12798.82 | 8947.41  | 29676.29 | 18048.95 | 11325.83 | 12747.85 | 19453.06 | 17183.79 | 5075.033 | 7715.44  |
| 13228.28 | 20783.21 | 6263.84  | 5160.603 | 14226.56 | 14816.84 | 16750.86 | 12868.32 | 15221.06 | 37274.99 | 19706.72 | 15004.79 | 7898.087 | 14514.72 | 16474.43 | 16513.57 | 19826.43 |
| 87700.38 | 90085.76 | 96181.67 | 91404.5  | 169228.4 | 131446.8 | 100739.7 | 135808.1 | 128529.4 | 194954.6 | 94106.17 | 62727.49 | 113475.4 | 108184   | 118962.4 | 128356.2 | 148310.7 |
| 24226.4  | 20502.61 | 17360.65 | 11504.2  | 8518.949 | 13689.22 | 7507.211 | 10270.57 | 14463.62 | 18280.21 | 7925.176 | 12239.18 | 10558.32 | 13028.77 | 16374.92 | 23380.8  | 10317.62 |
| 159300.8 | 216011.5 | 207655   | 237878.1 | 221121.6 | 221538.2 | 306830   | 368993.3 | 344384.3 | 299148.6 | 331677.1 | 298791.4 | 323026   | 287340.4 | 264701.3 | 441455.1 | 438049.1 |
| 13922.88 | 11003.23 | 3067.637 | 13472.66 | 41538.8  | 5808.667 | 24478.61 | 10331.73 | 51617.77 | 23610.08 | 28756.13 | 22236.08 | 15161.47 | 17702.75 | 12002.61 | 13448.77 | 7385.713 |
| 162421.6 | 152637.8 | 134177   | 196200.5 | 180883.7 | 257984.7 | 63876.16 | 207818.2 | 199068.4 | 185085   | 111722.8 | 144488.8 | 157346   | 268995   | 323986.2 | 74128.67 | 124211.9 |
| 531733.3 | 1100011  | 597162.2 | 411200.2 | 834831.5 | 480803.9 | 1197821  | 793317.3 | 630081.4 | 1022595  | 957509.1 | 466296.8 | 340497   | 502495.9 | 442526.3 | 735645.3 | 765045.9 |
| 11285.12 | 27555.14 | 16967.61 | 30694.34 | 36632.65 | 20163.56 | 17864.86 | 16519.42 | 22542.57 | 24053.56 | 31020.36 | 54181.41 | 58058.88 | 35738.68 | 33195.91 | 25764.44 | 24064.64 |
| 13604.14 | 14183.7  | 12564.81 | 7382.049 | 20064.84 | 9500.807 | 7080.939 | 4587.615 | 7861.518 | 22995.81 | 19236.63 | 41017.6  | 23874.66 | 19814.68 | 19204.27 | 13969.07 | 13782.4  |
| 305797.3 | 203208.8 | 296631.8 | 209963   | 238947.6 | 287626.8 | 337533.5 | 285993.6 | 389969.4 | 436571.2 | 255926.3 | 136710.5 | 181875.4 | 235235.7 | 228578.8 | 292493.8 | 193493.1 |
| 95324.71 | 112702.3 | 109467.5 | 102456   | 71214.39 | 99875.71 | 110424.2 | 123742.4 | 99331.51 | 174341.3 | 69742.28 | 50913.52 | 59402.05 | 60246.04 | 61333.19 | 67637.63 | 85383.72 |
| 3569.324 | 9419.096 | 9785.672 | 8302.189 | 5106.143 | 20881.47 | 8881.713 | 2468.67  | 15107.38 | 13927.28 | 15866.41 | 9058.198 | 12891.59 | 19674.54 | 21503.07 | 6277.843 | 13480.93 |
| 57125.08 | 83442.52 | 41289.82 | 51254.44 | 39460.88 | 29759.36 | 20883.61 | 30335.56 | 47517.5  | 95809.68 | 58732    | 36732.56 | 34410.65 | 53910.39 | 40027.31 | 32774.98 | 35684.71 |
| 27546.02 | 39663.36 | 39307.59 | 40598.46 | 29010.2  | 38897.27 | 46673.56 | 25728.12 | 33994.07 | 30937.05 | 38474.55 | 35886.51 | 40069.75 | 24367.66 | 23495.58 | 21359.6  | 42158.61 |
| 9500.954 | 21264.54 | 11387.34 | 14883.71 | 9438.347 | 27144.62 | 35122.94 | 22572.27 | 33510.57 | 12803.54 | 8540.184 | 16402.59 | 13071.03 | 9101.051 | 11269.08 | 8779.093 | 11427.65 |
| 37298.66 | 26745.84 | 20563.43 | 32461.89 | 14171.65 | 14936.57 | 17678.28 | 24959.86 | 10889.19 | 28670.06 | 25125.43 | 18358.58 | 28372.74 | 25308.11 | 39725.54 | 13654.39 | 28254.02 |
| 64387.98 | 41698.3  | 40647.68 | 40884.11 | 92599.7  | 54885.98 | 98495.4  | 65589.88 | 124758.6 | 87206.07 | 77601.13 | 42998.67 | 32986.96 | 87955.44 | 61485.78 | 80869.42 | 46428.19 |
| 158036.2 | 108347.3 | 90673.9  | 145022   | 114460.8 | 86007.63 | 86295.56 | 93399.63 | 86442.91 | 256625.5 | 106193.7 | 105639.7 | 109948.3 | 158923.3 | 175576.7 | 89957.39 | 94333.19 |
| 19488.31 | 9510.844 | 9860.66  | 14739.68 | 13502.44 | 13206.28 | 8424.219 | 17803.86 | 11715.24 | 20063.72 | 7037.271 | 12644.03 | 11231.48 | 23203.95 | 13978.74 | 6202.929 | 12583.14 |
| 520496.5 | 363692.8 | 454811.5 | 538392   | 440547.3 | 371293.2 | 498884.3 | 547828.3 | 315239   | 570356.4 | 590373.6 | 390953.2 | 409610.9 | 430829.8 | 339386.2 | 571500.6 | 472228.4 |
| 55423.35 | 89945.59 | 79935.66 | 70068.47 | 73086.16 | 52884.11 | 101154.8 | 51748.9  | 76193.08 | 56510.29 | 93404.09 | 75932.45 | 63231.96 | 71047.45 | 63887.17 | 75333.55 | 80745.53 |
| 204213.9 | 188008.2 | 201640.5 | 192455.5 | 214903.7 | 234368.2 | 120841.8 | 174369.1 | 95947.62 | 233327.2 | 178474.8 | 229714.5 | 194833.4 | 198639.1 | 210284   | 177120.6 | 192268.5 |

| 34       | 35       | 36       | 37       | 38       | 39       | 40       | 41       | 42       | 43       | 44       |
|----------|----------|----------|----------|----------|----------|----------|----------|----------|----------|----------|
| D14-RAT8 | D14-RAT9 | D28-RAT1 | D28-RAT2 | D28-RAT3 | D28-RAT4 | D28-RAT5 | D28-RAT6 | D28-RAT7 | D28-RAT8 | D28-RAT9 |
| 155788.1 | 20204.29 | 21336.48 | 30427.57 | 23676.25 | 40176.18 | 12990.77 | 15347.64 | 10537.96 | 24048.95 | 32673.98 |
| 14123.66 | 7989.45  | 13226.53 | 6200.314 | 9278.951 | 6754.75  | 8308.238 | 8363.703 | 10620.64 | 9046.325 | 8228.332 |
| 86253.53 | 136202.4 | 140598.8 | 104960   | 77887.41 | 97992.01 | 92607.1  | 88201.2  | 103857.5 | 70922.68 | 96176.72 |
| 19742.19 | 43904.27 | 20173.95 | 24722.84 | 67337.19 | 30377    | 30465.66 | 23884.95 | 25661.61 | 36155.29 | 28465.7  |
| 77344.48 | 58605.24 | 77373.64 | 57755.68 | 66175.89 | 57461.89 | 60878.83 | 51144.44 | 116432.7 | 49526.02 | 49638.64 |
| 49627.23 | 71784.88 | 20617.01 | 55655.93 | 229098   | 94788.01 | 60050.2  | 84497.25 | 106384.7 | 268933.3 | 57219.07 |
| 6809.479 | 7596.529 | 12667.86 | 12622.99 | 15891.76 | 13283.4  | 18732.56 | 5081.171 | 5697.1   | 6251.495 | 9770.96  |
| 43727.63 | 26800.33 | 52217.92 | 33233.14 | 42423.1  | 37521.04 | 34589.1  | 35258.89 | 41003.49 | 30877.75 | 23245.51 |
| 67791.44 | 11156.92 | 12616.66 | 13505.34 | 10050.33 | 11648.2  | 8957.851 | 8345.189 | 11221.57 | 6352.279 | 2119.855 |
| 19215.83 | 11185.4  | 16926.78 | 22349.06 | 12392.04 | 18084.36 | 16659.14 | 15963.26 | 15699.3  | 20378.71 | 14813.79 |
| 54153.37 | 5414.913 | 13673.45 | 16390.6  | 9101.563 | 10756.81 | 15124.03 | 12639.64 | 13499.2  | 7165.229 | 14780.59 |
| 410551   | 164979.8 | 417607.6 | 218544.5 | 257580.8 | 249482.8 | 260343.7 | 281452.7 | 368282.6 | 166615.1 | 320748.3 |
| 12174.99 | 13119.78 | 15884.58 | 15409.66 | 9676.676 | 10605.71 | 20276.13 | 12017.35 | 4522.757 | 14089.93 | 19503.14 |
| 20590.6  | 31487.26 | 25840.64 | 50674.42 | 35787.95 | 34302.2  | 38413.86 | 63085.39 | 30314.4  | 26327.92 | 26884.22 |
| 30847.39 | 12212.52 | 13188.2  | 9723.611 | 15278.48 | 15981.04 | 13013.39 | 15783.41 | 12929.09 | 27330.82 | 24602.79 |
| 281153.6 | 212288.7 | 266032.2 | 163214.2 | 264709.3 | 233251.9 | 121296.9 | 165165.6 | 203208.5 | 143114.3 | 230469.9 |
| 20153.23 | 20286.55 | 21954.71 | 13615.11 | 9011.063 | 14969.84 | 13254.67 | 16292.47 | 28527.43 | 17583.19 | 13702.91 |
| 24464.15 | 10578.26 | 16313.04 | 11355.53 | 13181.67 | 12076.86 | 11438.66 | 18827.77 | 16668.29 | 16094.71 | 20515.17 |
| 194908.9 | 412776.6 | 588292.2 | 318247.7 | 175788.8 | 382448.2 | 185787.7 | 439336   | 200947.1 | 767918.2 | 291168.2 |
| 64868.28 | 33167.56 | 51463.95 | 30401.65 | 31525.27 | 31028.43 | 28006.65 | 39632.06 | 17887.89 | 37380.1  | 41223.15 |
| 31103.6  | 25647.4  | 31301.54 | 23407.03 | 18566.6  | 23886.9  | 24106.56 | 15461.57 | 99546.41 | 21333.19 | 21372.26 |
| 62435.27 | 27922.42 | 18424.24 | 30214.38 | 29291.61 | 26477.63 | 24014.89 | 20630.03 | 28524.79 | 4575.064 | 27519.04 |
| 152332.4 | 15741.15 | 18466.34 | 10543.12 | 17658.85 | 10791.38 | 22999.01 | 25953.59 | 20960.25 | 78165.31 | 24862.89 |
| 27972.36 | 8417.016 | 12570.1  | 17047.5  | 11382.7  | 10619.1  | 15314.49 | 5459.387 | 7626.478 | 7356.269 | 9181.49  |
| 20424.56 | 18991.97 | 72405.45 | 115199.6 | 58686.47 | 76075.76 | 97207.2  | 46093.19 | 8086.643 | 64404.9  | 62293.33 |
| 22601.67 | 6341.124 | 12672.8  | 6864.183 | 11493.45 | 7182.016 | 12213.73 | 17421.31 | 12249.25 | 7075.405 | 6887.55  |
| 356593.3 | 40879.53 | 162186   | 65472.19 | 16781.39 | 49070.99 | 15198.48 | 126103.1 | 126690.6 | 73658.64 | 103305.7 |
| 282434.3 | 258301   | 231383.2 | 198116.6 | 175273.2 | 233417.3 | 124081.7 | 151468.3 | 123527.4 | 259333.7 | 194397.4 |
| 139389.5 | 84816.74 | 144962.7 | 136848.3 | 107462.1 | 142597.6 | 139833.1 | 96177.37 | 102848.5 | 60374    | 170235.2 |
| 13806.39 | 45751.17 | 21628.52 | 37384.91 | 19136.46 | 28725.6  | 31319.79 | 29250.71 | 56678.57 | 53218.23 | 23551.32 |
| 78893.13 | 51311.54 | 127862.4 | 76510.3  | 64035.09 | 43993.07 | 116595.2 | 83530.14 | 94772.84 | 49588.62 | 105345.4 |
| 9360.226 | 6417.771 | 25401.57 | 41840.5  | 23056.02 | 23747.79 | 31377.75 | 18237.99 | 4011.427 | 25728.79 | 26377.99 |
| 16406.16 | 15603.16 | 24001.7  | 22621.2  | 20027.39 | 21028.89 | 16709.19 | 18724.73 | 17819.1  | 19750.66 | 31570.15 |
| 10958.45 | 29341.58 | 27410.47 | 36619.96 | 25337.94 | 32999.52 | 42379.96 | 24541.58 | 31835.43 | 25977.02 | 21150.22 |
| 166700.8 | 103665.4 | 110752.5 | 79247.52 | 81852.91 | 92177.88 | 94452.61 | 129386.9 | 97125.02 | 100023   | 91248.53 |
| 55459.54 | 33671.12 | 46338.26 | 56588.31 | 44742.13 | 78522.56 | 79428.16 | 51866.52 | 80661.23 | 31868.79 | 62453.95 |
| 405103.1 | 499803.5 | 575158.9 | 509502.8 | 503618.8 | 541517.4 | 735489   | 456586.2 | 841791   | 529666.6 | 641951.3 |
| 253848.6 | 212836.4 | 275824   | 293573   | 234084.5 | 233562.1 | 209362.6 | 320612   | 344626.5 | 229111.7 | 260924.4 |
| 9698.107 | 37698.21 | 58014.87 | 40964.34 | 21047.12 | 28142.83 | 33209.32 | 25826.59 | 35188.18 | 23007.4  | 45660.63 |
| 22699.25 | 18420.7  | 25961.19 | 21464.33 | 9567.948 | 18338.96 | 21321.34 | 22302.62 | 30013.66 | 13461.31 | 23090.29 |
| 111607.3 | 100961   | 98854.56 | 135362   | 120572.5 | 123663.4 | 101488.2 | 81001.08 | 68945.77 | 91790.74 | 124936.9 |
| 12556.99 | 6961.425 | 60450    | 103305.2 | 22667.86 | 54957.25 | 76393.82 | 21959.32 | 8175.47  | 38030.01 | 56299.27 |
| 571253.3 | 211955.2 | 493562.3 | 348813.8 | 576745.3 | 608121.6 | 369034.5 | 480609   | 468565.6 | 391484.1 | 741423.5 |
| 53634.78 | 21691.39 | 24091.58 | 29076.09 | 23152.35 | 22781.36 | 17167.92 | 32035.57 | 32167.55 | 28913.17 | 20190.89 |
| 208390.6 | 208950   | 241452.7 | 261393.4 | 211094.5 | 213998.4 | 229647.8 | 199389.8 | 189695.6 | 177579.2 | 262634   |

|          |          |          |          |          |          |          |          |          |          |          |
|----------|----------|----------|----------|----------|----------|----------|----------|----------|----------|----------|
| 7126     | 3365.674 | 2582.307 | 3685.167 | 3081.103 | 1211.463 | 3528.473 | 3228.616 | 5977.339 | 7412.273 | 4940.635 |
| 133964   | 50417.61 | 41320.08 | 40495.55 | 54800.36 | 38442.05 | 36272.73 | 42796.76 | 91994.12 | 45795.34 | 41537.53 |
| 22226.37 | 9211.516 | 9384.242 | 9313.284 | 9222.809 | 12177.99 | 9026.525 | 5791.409 | 8204.051 | 13791.04 | 16432.73 |
| 52774.48 | 95153.79 | 131785.8 | 144947.3 | 89034.22 | 94355.05 | 55321.72 | 157564.2 | 48334.93 | 84113.15 | 102636.7 |
| 1842646  | 4134.286 | 8103607  | 2351323  | 2835127  | 9716421  | 2322021  | 44709.01 | 6058145  | 2931687  | 94849.95 |
| 226523.1 | 232702.5 | 265362.8 | 160516.7 | 218880.8 | 81937.11 | 75816.57 | 179546.4 | 122767.4 | 221360.3 | 114928.9 |
| 226455.5 | 150986   | 227703.5 | 93457.52 | 108014.1 | 82881.78 | 8972.438 | 124042.5 | 33430.5  | 162591.1 | 71904.83 |
| 105150   | 76163.73 | 74156.8  | 60585.88 | 62646.03 | 119085.8 | 105734.3 | 66966.07 | 62308.23 | 61804.31 | 119469.2 |
| 26103.8  | 11330.97 | 16102.79 | 12818.21 | 12679.17 | 10364.8  | 13797.91 | 4607.329 | 9611.772 | 10448.85 | 9372.041 |
| 136111.7 | 392998.5 | 363659   | 460869.9 | 625942.6 | 607688.3 | 289814.8 | 705538.8 | 462497.1 | 336175.4 | 259124.5 |
| 369898.1 | 604925.7 | 594341.3 | 414449.4 | 659502.4 | 620379.5 | 743106.3 | 727276.6 | 568106.6 | 651338.3 | 817668.3 |
| 23671.16 | 18998.95 | 24808.48 | 18513.16 | 21914.16 | 20477.14 | 23674.4  | 22058.59 | 21324.65 | 32313.18 | 19880.93 |
| 53493.78 | 138430.9 | 18814.34 | 28658.3  | 25331.26 | 24224    | 21933.09 | 33708.93 | 45075.02 | 6455.742 | 26833.05 |
| 523137.3 | 268555.9 | 301374.1 | 230349   | 277273.9 | 306512.6 | 441987.9 | 291867.3 | 303846.8 | 253807.9 | 398090.3 |
| 55159.9  | 33631.67 | 69524.86 | 69157.83 | 61167.29 | 83527.08 | 57468.57 | 53971.87 | 32121.09 | 50424.57 | 110803   |
| 7890.614 | 21836.9  | 13984.82 | 20763.89 | 28035.29 | 15570.07 | 17530.54 | 17039.58 | 35305.18 | 21952.84 | 16587.42 |
| 1636751  | 2322679  | 1008887  | 1221219  | 1498260  | 1750925  | 948007.5 | 1549978  | 1355419  | 2022982  | 1365114  |
| 339643.4 | 440497.7 | 389462   | 349231.1 | 283327.8 | 364611.9 | 333629.9 | 580523.3 | 405934.4 | 212437.7 | 282738.9 |
| 941622.8 | 1159907  | 646256.8 | 555344.8 | 988745.8 | 1068829  | 1353738  | 2057170  | 900539.7 | 1411552  | 1165682  |
| 190303.7 | 164904   | 211770.1 | 158225.5 | 150939.2 | 178736.4 | 212700.3 | 219313.1 | 184968.4 | 166605   | 205715.8 |
| 689413.1 | 49048.05 | 25280.3  | 29897.86 | 56239.56 | 33637.59 | 28659.1  | 26690.38 | 29013.44 | 43300.54 | 48259.13 |
| 29755.25 | 41638.71 | 44138.02 | 20847.15 | 48264.06 | 37322.52 | 41379.2  | 32040.41 | 23672.09 | 69644.91 | 26453.5  |
| 46751.61 | 23409.06 | 42236.61 | 19846.28 | 31174.32 | 34903.1  | 17773.87 | 49963.39 | 39801.29 | 38582.14 | 32541.09 |
| 23018.01 | 20155.82 | 31167.62 | 18755.59 | 18180.89 | 11216.38 | 23737.69 | 11619.8  | 51689.04 | 18305.42 | 15877.08 |
| 20520.12 | 11936.81 | 12016.19 | 7473.978 | 11419.58 | 23048.68 | 13770.92 | 6499.424 | 19492.23 | 4750.657 | 3518.26  |
| 243692.3 | 223346.6 | 179368.2 | 182588.5 | 222325   | 229498.5 | 194783.3 | 162477.1 | 321609.5 | 247578.3 | 187093.3 |
| 81501.37 | 116657.1 | 203671   | 167584.8 | 126135.4 | 167278.6 | 197641   | 276974.4 | 110453.6 | 84328.17 | 185686.3 |
| 4347.784 | 8038.721 | 5644.125 | 7537.392 | 4338.011 | 4857.809 | 7986.481 | 7828.12  | 2586.142 | 4345.121 | 5196.463 |
| 91916.84 | 41814.88 | 72126.81 | 68891.2  | 46466.28 | 60756.97 | 47787.68 | 71639.65 | 92816.41 | 48016.17 | 70930.43 |
| 353754.5 | 347296.4 | 523930.6 | 341214.3 | 350685   | 381326.4 | 241736.2 | 319218.3 | 384973.1 | 479518.5 | 374066.1 |
| 39359.96 | 18539.07 | 23059.26 | 14396.01 | 15217.66 | 14250.66 | 14482.35 | 24453    | 32090    | 23297.62 | 13529.22 |
| 151028.8 | 96370.2  | 128738.7 | 82008.63 | 87036.06 | 113373.5 | 65916.98 | 101074.6 | 54007.67 | 152543.3 | 114654   |
| 524005.1 | 531996.3 | 504797.9 | 415991.4 | 570226.4 | 411234.9 | 388500.3 | 382051.3 | 843365.6 | 429604.9 | 484287   |
| 16167.45 | 27901.7  | 5747.729 | 6082.584 | 6389.07  | 5983.264 | 5799.18  | 6642.211 | 22514.67 | 7903.963 | 4949.223 |
| 51929856 | 22715356 | 26611386 | 22274772 | 19863974 | 25867366 | 17072224 | 14073966 | 22851824 | 23424650 | 19664766 |
| 123094.1 | 104010.8 | 224639.4 | 230919   | 262190.2 | 75757.56 | 342301.6 | 122780.6 | 702018.9 | 176801.9 | 663047.3 |
| 6809.597 | 25523.71 | 1585.053 | 15965.81 | 23413.81 | 24459.52 | 8230.537 | 40886.26 | 25094.91 | 56249.99 | 20093.67 |
| 25039162 | 16017596 | 13476519 | 8861215  | 11429348 | 13491654 | 16240049 | 22197434 | 14966160 | 16237820 | 15919437 |
| 10842148 | 14351158 | 3218151  | 10140484 | 15799754 | 11871116 | 10847370 | 14424971 | 8052134  | 27937752 | 10130993 |
| 820833.4 | 35737.51 | 4574.729 | 10924.86 | 96790.97 | 10695.61 | 6879.222 | 70592.07 | 8940.557 | 31331.55 | 52982.99 |
| 328592.9 | 372680.2 | 383772.3 | 352842.6 | 456895.3 | 423791.9 | 418024.9 | 557319.7 | 481813.6 | 462430.3 | 402318.1 |
| 1858285  | 2254485  | 1827000  | 2094759  | 3816281  | 2745011  | 2546883  | 3695416  | 3137201  | 3230675  | 2536661  |
| 410860.9 | 521957.6 | 667744.5 | 396712.8 | 385074.1 | 418440.4 | 430996.6 | 339986.1 | 620794.7 | 485383.8 | 468370.1 |
| 580871.8 | 1685135  | 1401177  | 2734747  | 3190629  | 2865809  | 2071932  | 1780956  | 2280295  | 3675917  | 1586992  |
| 615861.9 | 903540.3 | 252603   | 351851.4 | 266631.7 | 221451.6 | 156206.5 | 245860.4 | 266060.1 | 4765737  | 241609   |
| 129589.5 | 69802    | 94597.56 | 112707.7 | 147519.2 | 139170.1 | 103606.6 | 98502.17 | 282588.3 | 191450.1 | 124234.8 |
| 4212360  | 6838807  | 1831256  | 2153439  | 2155067  | 1973460  | 2241082  | 1775708  | 4120311  | 13313571 | 2895202  |
| 417254.8 | 1936669  | 872803.1 | 741425.6 | 1626348  | 418444.8 | 1084322  | 305607.3 | 572142.4 | 6814228  | 1453849  |
| 179521.1 | 266252.2 | 250915.7 | 235409   | 331896.6 | 305854   | 227323.1 | 425402   | 295524.4 | 169438.3 | 223302.4 |



|          |          |          |          |          |          |          |          |          |          |          |
|----------|----------|----------|----------|----------|----------|----------|----------|----------|----------|----------|
| 61693.58 | 14924610 | 40220.88 | 24075.46 | 33750188 | 95723.01 | 13598511 | 86711.96 | 46133.23 | 24260244 | 16228211 |
| 5501080  | 490758.6 | 6436399  | 3731724  | 5293566  | 3589859  | 4492322  | 5910019  | 5099081  | 6128689  | 635797.5 |
| 26552.58 | 849418.6 | 37604.83 | 27945.62 | 50202.39 | 165847.2 | 11565.58 | 37991.71 | 14719.56 | 123690.7 | 57262.39 |
| 36230.56 | 2338687  | 23684.23 | 23499.94 | 25626.66 | 175956.6 | 7195.914 | 21820.66 | 19455.93 | 282364.6 | 79881.07 |
| 53188.5  | 27075.66 | 149661.4 | 96327.48 | 98872.48 | 70859.53 | 43413.49 | 117720   | 37184.34 | 96103.33 | 125243.5 |
| 238382.9 | 81003.23 | 213193.9 | 233970   | 259943.9 | 461944.3 | 25216.61 | 286934.4 | 83408.16 | 319936.1 | 209946.6 |
| 42873.13 | 21247.23 | 45631.35 | 70021.11 | 34222.71 | 22179.91 | 20688.45 | 44255.62 | 19642.03 | 84657.81 | 50320.87 |
| 4384613  | 4394768  | 3165177  | 2420993  | 2634222  | 3718181  | 4299694  | 3583340  | 3789835  | 4342804  | 4107497  |
| 321429.6 | 348756.4 | 349980.6 | 287784.7 | 200978.1 | 185499.4 | 76153.77 | 304237.4 | 104407.8 | 456722.8 | 191880.1 |
| 11378.88 | 46275.45 | 16618.22 | 26244.79 | 24944.53 | 20591.66 | 12197.15 | 11563.27 | 14695.42 | 84928.46 | 7902.526 |
| 40994.81 | 16835.43 | 39896.73 | 21909.58 | 37134.66 | 19790.19 | 8922.909 | 17959.69 | 28070.01 | 34971.5  | 17912.32 |
| 2.84E+08 | 1.19E+09 | 6.89E+08 | 1.43E+09 | 2.01E+09 | 2.22E+09 | 1.17E+09 | 1.35E+09 | 1.1E+09  | 2.05E+09 | 1.06E+09 |
| 6480135  | 6660577  | 4064406  | 3391653  | 5216951  | 3792579  | 3448882  | 5373736  | 7498884  | 5736216  | 4157671  |
| 1489983  | 5785315  | 1335218  | 2057717  | 2200582  | 1961122  | 1101263  | 2101227  | 1045678  | 7785329  | 1547545  |
| 38484760 | 2.35E+08 | 42069952 | 79231992 | 62100668 | 57343476 | 35782368 | 46852936 | 36062720 | 9.39E+08 | 38542480 |
| 35490092 | 30604730 | 1.36E+08 | 1.51E+08 | 1.03E+08 | 67710632 | 72885624 | 1.28E+08 | 15672292 | 95908208 | 1.25E+08 |
| 14849984 | 11674917 | 43580788 | 66599616 | 47245568 | 51228220 | 36724080 | 42299024 | 4987759  | 53597588 | 59860292 |
| 7754912  | 10644314 | 23032012 | 34953840 | 33221706 | 36400272 | 16723766 | 38278992 | 4898195  | 26382472 | 30017994 |
| 33131.82 | 43712.78 | 1117.708 | 7609.681 | 8082.69  | 6382.804 | 10032.99 | 12163.7  | 5557.59  | 27839.34 | 8857.296 |
| 18763.01 | 4755.913 | 30368.94 | 15255.89 | 16844.74 | 26127.77 | 4205.783 | 36468.84 | 27176.67 | 33436.49 | 35473.03 |
| 18405.26 | 8229.903 | 18706.72 | 9844.069 | 13106.94 | 8724.885 | 6085.601 | 14898.34 | 10281.81 | 19403.15 | 11687.16 |
| 26833.66 | 29303.22 | 27703.54 | 39507.65 | 41130.52 | 24372.57 | 29398.41 | 33966.95 | 22468.33 | 45762.03 | 28990.49 |
| 171729.6 | 61825.52 | 126063.3 | 123778.3 | 148250.8 | 100018.9 | 219243.1 | 78471.57 | 147960.1 | 116008.7 | 149775.5 |
| 7833.213 | 5860.69  | 7384.896 | 4223.748 | 4500.776 | 4838.555 | 2629.784 | 8178.216 | 4377.915 | 7152.915 | 5553.268 |
| 40821.09 | 5827.417 | 8909.846 | 110628.2 | 13872.69 | 15352.57 | 7411.49  | 9136.019 | 287917.4 | 26406.68 | 26559.43 |
| 84110.23 | 25292.31 | 66191.36 | 58132.61 | 63327.79 | 81183.81 | 33556.74 | 51700.22 | 55444.26 | 48676.64 | 90732.95 |
| 964044   | 2616002  | 936204.9 | 1455744  | 1071879  | 1051479  | 899787.8 | 1173929  | 1370752  | 8038020  | 1099251  |
| 16380.47 | 13910.14 | 39554.74 | 16872.37 | 15628.73 | 27463.28 | 3975.685 | 40789.45 | 21261.86 | 36088.12 | 48527.13 |
| 105260.6 | 22741.84 | 36920.96 | 21840.78 | 23645.8  | 18307.73 | 46295.25 | 34663.88 | 337642.5 | 26844.4  | 47716.39 |
| 91169.26 | 1052936  | 102069.2 | 180464.3 | 93723.44 | 76287.55 | 44445.69 | 90110.59 | 44768.38 | 2905679  | 61204.78 |
| 194146.7 | 123762.4 | 225537.9 | 167441.9 | 145787.2 | 152973.7 | 186875.6 | 143558.1 | 193760.7 | 115421.8 | 187649.8 |
| 24094.54 | 6932.366 | 11360.33 | 11727.3  | 21626.17 | 9622.503 | 23384.87 | 5505.156 | 256865.5 | 41645.66 | 28885.75 |
| 560809.5 | 509583.5 | 820576.9 | 494545.9 | 428155.8 | 552527   | 480741.8 | 631674.4 | 600335.6 | 423912.7 | 578207.3 |
| 143792.8 | 65230.84 | 144293.7 | 96214.87 | 90182.28 | 110673.3 | 96359.81 | 132501.7 | 102287.5 | 58987.37 | 117586.4 |
| 835013.8 | 727215.4 | 833234.7 | 660027.9 | 661302   | 711411.4 | 610435.7 | 784264.8 | 639284.3 | 661483.5 | 545247.2 |
| 186615.5 | 196333.5 | 368622.4 | 546365.5 | 350364.1 | 317489.6 | 499577.1 | 209792   | 94808.02 | 217060.3 | 309559.1 |
| 26708.11 | 25849.27 | 20432.28 | 19552.28 | 16263.05 | 28124.22 | 12638.46 | 15977.85 | 37017.17 | 32155.03 | 17269.65 |
| 706105.6 | 973888   | 1317051  | 1102599  | 936933.1 | 887389.1 | 873461.4 | 712597.4 | 1657249  | 957949.1 | 999153.3 |
| 10289.43 | 20719.35 | 47460.02 | 97796.94 | 59355.57 | 59525.45 | 118256.8 | 60701.46 | 10638.44 | 73364.51 | 73592.83 |
| 40134.72 | 66632.76 | 37899.48 | 76215.64 | 70183.52 | 57797.84 | 42103.55 | 46439.16 | 64107.96 | 71108.84 | 55146.79 |
| 126278.6 | 342124.3 | 155530.2 | 207824.4 | 379229.4 | 174966.3 | 176136.6 | 244043   | 474197.5 | 436054.7 | 186394.6 |
| 10329052 | 7253919  | 12832311 | 5974442  | 9120280  | 6758220  | 7406253  | 10439038 | 8413030  | 4353906  | 9143308  |
| 105872.8 | 118992.4 | 142746.9 | 132376.6 | 101508.9 | 139617.6 | 216913.2 | 149336.5 | 116838.4 | 121307.5 | 239130.3 |
| 41166.65 | 17281.14 | 53726.69 | 35832.14 | 25673.74 | 31150.26 | 42125.96 | 21356.21 | 28927.21 | 30252.8  | 42380.47 |
| 20481.87 | 9470.595 | 26295.24 | 42982.79 | 12362.29 | 18964.51 | 24900.29 | 25837.33 | 10463.76 | 34139.75 | 36811.14 |
| 352872.4 | 297016.8 | 365880.9 | 300407.1 | 250465   | 368867   | 449637.9 | 852591.2 | 306440.4 | 404497.1 | 534589.5 |
| 21269.63 | 2330.5   | 28716.42 | 1296.038 | 3189.525 | 12006    | 17339.33 | 19406.19 | 26533    | 14146.36 | 9294.668 |
| 49355232 | 1.02E+08 | 55482004 | 42922476 | 44427980 | 52659064 | 41480328 | 57145908 | 27425830 | 1.85E+08 | 54908840 |
| 22503164 | 51469992 | 22383564 | 20651656 | 21149482 | 28484942 | 23319698 | 29246462 | 16305853 | 93490248 | 24311898 |

|          |          |          |          |          |          |          |          |          |          |          |
|----------|----------|----------|----------|----------|----------|----------|----------|----------|----------|----------|
| 19410.38 | 12553.9  | 12886.64 | 19972.83 | 16197.11 | 16537.47 | 18318.91 | 17369.11 | 9402.826 | 19108.82 | 35730.16 |
| 11508.18 | 24950.63 | 28492.1  | 25827.21 | 16703.31 | 17541.78 | 6655.731 | 12257.32 | 12396.25 | 21535.49 | 25403.66 |
| 780711.3 | 115824.3 | 279450.3 | 795782   | 312939.4 | 199649.6 | 119201.6 | 270743.3 | 54828.98 | 270264.8 | 346925.4 |
| 50957.17 | 55360.31 | 25993.58 | 30744.81 | 27482.41 | 24365.39 | 22174.06 | 19296.05 | 26099.94 | 126205.6 | 16401.72 |
| 55156.25 | 48027.46 | 49888.44 | 53003.19 | 46058.35 | 26400.24 | 45529.52 | 39179.67 | 37688.47 | 42472.42 | 39384.04 |
| 131108.8 | 17854.97 | 35410.84 | 16844.08 | 21133.34 | 20380.63 | 8337.433 | 24795.75 | 12469.83 | 25787.3  | 24216.91 |
| 3251506  | 487013   | 369420.3 | 3090310  | 4693414  | 2358182  | 6842569  | 3392767  | 4680661  | 395287.7 | 5530990  |
| 66151.59 | 54127.61 | 92606.42 | 120866.3 | 74100.58 | 102959   | 117733.4 | 133104.5 | 72022.89 | 124492.8 | 112883.1 |
| 3094831  | 6899498  | 3230875  | 5997892  | 8685102  | 3977018  | 1507520  | 4910224  | 9262087  | 20921514 | 1259096  |
| 118571.3 | 69829.11 | 182998.4 | 309853   | 268643.5 | 518171.7 | 883644.2 | 859186   | 72579.77 | 50276.46 | 680063.4 |
| 48606.28 | 32024.29 | 55570.1  | 52983.62 | 75033.17 | 65211.71 | 100796.4 | 94538.5  | 64253.38 | 44215.03 | 117973.7 |
| 3563185  | 10162450 | 8843509  | 13043791 | 11389558 | 12294663 | 4345083  | 20276274 | 9177259  | 17896444 | 3931810  |
| 170616   | 142584.2 | 142226.4 | 139187   | 136129   | 145183   | 175613   | 169159.9 | 210019.6 | 185637.7 | 147389.3 |
| 393877.8 | 240911   | 1076592  | 406081.9 | 379553.6 | 397419.3 | 305810.5 | 547388.4 | 287689.8 | 278948.7 | 854278.4 |
| 5759688  | 7635266  | 5090430  | 5251022  | 7310121  | 5428128  | 5344945  | 6098793  | 4776538  | 5157206  | 5893027  |
| 168368.9 | 107001.9 | 111834.5 | 82603.56 | 90271.48 | 88166.84 | 108961.7 | 138626.9 | 122456.6 | 87046.55 | 83980.05 |
| 27993.13 | 23707.59 | 61949.22 | 35895.76 | 25763.55 | 32853.08 | 29141.52 | 21931.34 | 26979.86 | 23507.36 | 27078.37 |
| 115655.6 | 124425   | 221436.6 | 147693   | 113558.1 | 142006.2 | 136495.8 | 207097.6 | 137941.4 | 73302.05 | 131925.7 |
| 64191064 | 39493028 | 48225352 | 33811108 | 39626484 | 46854896 | 47387372 | 37983232 | 38404768 | 33003594 | 44361508 |
| 5729539  | 6527460  | 6187457  | 3396435  | 8641972  | 6642918  | 4313007  | 11987437 | 7180061  | 7110592  | 7843215  |
| 4578879  | 5666269  | 17292620 | 31823234 | 20268484 | 19442330 | 23327368 | 25539248 | 3408521  | 18981226 | 16406828 |
| 1110813  | 1217636  | 2027667  | 3061212  | 3052837  | 2652542  | 4358125  | 1562627  | 695614.3 | 2061123  | 3287027  |
| 557024.3 | 264589.1 | 500758.3 | 203786.9 | 267490.2 | 234967.2 | 215369.7 | 336478.3 | 341515.8 | 127591.3 | 377404.1 |
| 47864.74 | 26120.49 | 40085.88 | 21781.21 | 25698.84 | 46510.17 | 26450.23 | 31753.75 | 21371.63 | 33938.74 | 37788.82 |
| 36891.45 | 29372.71 | 84102.95 | 201138.5 | 103095.9 | 77381.81 | 182289.8 | 56721.33 | 36568.22 | 171521.4 | 133688.6 |
| 131058.5 | 122206.5 | 154993.5 | 114244.8 | 111628   | 110751.4 | 133056.8 | 177070.3 | 83187.45 | 346365.6 | 188883.1 |
| 25550.43 | 16075.52 | 20600.05 | 11399.23 | 20101.58 | 14873.02 | 8394.658 | 19551    | 85990.59 | 13010.34 | 15578.27 |
| 554845.5 | 404226.3 | 648323.3 | 384599.6 | 420480.9 | 480040.8 | 346602.5 | 433969.6 | 482972.9 | 301774.2 | 441331.6 |
| 24535.05 | 40106.5  | 19123.04 | 8125.473 | 12474.43 | 27232.76 | 3413.123 | 24636.7  | 15942.67 | 59314.03 | 18401.05 |
| 388583.8 | 302856.1 | 453079.1 | 288104.8 | 319135.7 | 317045.3 | 318078.1 | 479658.3 | 300005.5 | 225767.8 | 375926.4 |
| 40127.39 | 73633.06 | 51181.96 | 99545.24 | 141293.8 | 91733.12 | 106839.9 | 71133.63 | 25652.64 | 138388.6 | 73836.01 |
| 1130372  | 274980.3 | 2210000  | 515693.9 | 688695.8 | 686958.9 | 230273.8 | 1436071  | 1803277  | 467513.9 | 634523.1 |
| 133913.1 | 171011.1 | 174686.2 | 159344.4 | 153987.1 | 165389.1 | 149651.1 | 139286.9 | 199709.1 | 160797.1 | 136249.9 |
| 8841.756 | 10181.23 | 10589.88 | 7588.206 | 8301.83  | 8486.513 | 13850.53 | 7050.591 | 6154.047 | 4800.085 | 11243.13 |
| 557548.6 | 2910932  | 4535052  | 495070.2 | 2416980  | 1672456  | 1281220  | 2996944  | 3482831  | 1590745  | 3223050  |
| 2646474  | 23796520 | 33516248 | 19189012 | 28376938 | 31624490 | 27804504 | 3452334  | 11845307 | 20762276 |          |
| 17750.39 | 28919.31 | 70731.65 | 115455.3 | 68985.49 | 83575.89 | 117636   | 53098.08 | 6666.389 | 101243.2 | 93774.17 |
| 3175983  | 8281821  | 2505236  | 2645408  | 2301158  | 2198371  | 2163854  | 2150554  | 6403371  | 12527619 | 2632101  |
| 7690.153 | 35589.14 | 24900.19 | 24982.34 | 24773.59 | 21356.08 | 18440.95 | 23207.14 | 18652.25 | 83812.02 | 23049.37 |
| 1186613  | 685139.3 | 886265.5 | 1399281  | 820882.9 | 1026326  | 712476.9 | 1363392  | 723528.9 | 560302.2 | 758996.6 |
| 2468692  | 1651036  | 454196.3 | 883796.8 | 789064.3 | 590989.5 | 374949.7 | 556046.6 | 847839.3 | 4466312  | 410255.1 |
| 91795    | 128312.4 | 166172.8 | 98659.44 | 96105.13 | 158545.8 | 102009.4 | 91489.59 | 139080.9 | 103562.6 | 102202.3 |
| 13676.04 | 9049.874 | 26270.7  | 42093.38 | 26873.7  | 23935.73 | 37612.11 | 22270.66 | 6226.834 | 26572.49 | 27334.68 |
| 35330.5  | 24101.26 | 43444.42 | 48029.08 | 59082.99 | 44705.15 | 47788.68 | 46992.74 | 17296.99 | 30269.71 | 43023.42 |
| 27404.65 | 5851.997 | 4948.687 | 3107.147 | 17267.77 | 11327.59 | 11934.87 | 18340.07 | 14357.21 | 11270.04 | 11277.34 |
| 71595.13 | 97374.29 | 45008.99 | 63141.88 | 60786.39 | 72188.14 | 73217.98 | 60196.75 | 158578.6 | 63817.74 | 81752.42 |
| 21829.08 | 40884.74 | 118251.4 | 285017   | 121549.5 | 103868.6 | 152630   | 83698.38 | 8096.779 | 95342.24 | 96714.88 |
| 18926.84 | 7367.294 | 8644.892 | 9809.421 | 9578.337 | 8953.134 | 5204.568 | 9707.799 | 12943.65 | 5814.725 | 8797.592 |
| 1285717  | 1066947  | 1138872  | 1471811  | 1553305  | 1472674  | 1544791  | 1309669  | 1037611  | 1287520  | 1327364  |

|          |          |          |          |          |          |          |          |          |          |          |
|----------|----------|----------|----------|----------|----------|----------|----------|----------|----------|----------|
| 85021.63 | 25739.72 | 32819.28 | 104568.4 | 74724.58 | 48712.36 | 63326.58 | 47470.52 | 32606.49 | 64824.29 | 50757.58 |
| 359301.8 | 136121.1 | 166798.9 | 165224.6 | 139555.9 | 166119.9 | 151709.5 | 229446   | 62362.97 | 95564.18 | 236173.4 |
| 98158.76 | 65841.32 | 158459.6 | 160388.3 | 117276.4 | 125823   | 135119.8 | 144050.1 | 80968.27 | 90151.67 | 174757.4 |
| 267313.2 | 157130.4 | 170354.7 | 112239.6 | 167347.1 | 185867.3 | 121461.5 | 371808.1 | 151161.9 | 153837.7 | 167456.3 |
| 1194173  | 1147593  | 1347244  | 873000.5 | 1024132  | 1150682  | 1039146  | 1493353  | 1304247  | 534876.9 | 1057897  |
| 20530.49 | 8189.41  | 12134.82 | 15038.24 | 15306.66 | 20581.15 | 15096.44 | 14819.27 | 10485.18 | 19041.36 | 22801.31 |
| 23951.68 | 29455.48 | 16848.95 | 42584.8  | 32635.35 | 104802.2 | 163928.5 | 140709.4 | 8336.558 | 18104.16 | 105748.4 |
| 158834.9 | 15243.17 | 42723.88 | 18650.66 | 103661.3 | 19757.43 | 35031.91 | 26692.22 | 384323.3 | 31185.23 | 41372.09 |
| 346577.2 | 234064.4 | 1002931  | 509871.1 | 1220315  | 1290642  | 865614.3 | 734935.1 | 705259.5 | 157781   | 513185.5 |
| 40952.65 | 54954.69 | 45748.58 | 46720.02 | 51254.23 | 50112.12 | 59144.84 | 37825.59 | 185179.8 | 57166.65 | 56794.89 |
| 1565774  | 7927041  | 2092748  | 2718651  | 1953315  | 2536365  | 1632876  | 1482376  | 1335541  | 19583392 | 1943939  |
| 7210946  | 6028439  | 5711667  | 4502000  | 3770733  | 4501472  | 1790279  | 4390483  | 2429885  | 4411807  | 4400922  |
| 61408.45 | 38543.18 | 74545.05 | 57941.41 | 5345.694 | 30695.38 | 41153.94 | 50938.56 | 6682.243 | 17384.56 | 25939.72 |
| 881522   | 313312.1 | 1094479  | 887994.6 | 810791.9 | 604503.2 | 803265.1 | 1057360  | 592533.4 | 534035.3 | 1213314  |
| 111510.7 | 95933.13 | 109390.8 | 64540.85 | 66226.21 | 74811.43 | 81449.63 | 53323.63 | 147505.6 | 71209.53 | 98993.03 |
| 9472.295 | 7048.093 | 10038.5  | 3822.262 | 5395.148 | 7628.595 | 5916.854 | 5001.105 | 27472    | 5298.11  | 11421.55 |
| 39126.88 | 30199.15 | 36511.65 | 32333.9  | 30725.47 | 37070.25 | 22770.1  | 32085.17 | 7442.595 | 15213.5  | 41205.86 |
| 44461.62 | 8993.773 | 12887.02 | 18401.79 | 9699.97  | 3523.159 | 6704.767 | 10436.43 | 1131.249 | 7790.958 | 5776.245 |
| 31753.96 | 27398.11 | 4882.453 | 3354.066 | 11655.96 | 13302.38 | 13539.07 | 16285.73 | 16326.58 | 77959.82 | 13804.67 |
| 87122.88 | 8995.816 | 54471.56 | 51035.18 | 45110.7  | 62522    | 56875.09 | 48286.42 | 71481.1  | 77520.73 | 53235.54 |
| 173289.2 | 96711.72 | 362386.6 | 433150.9 | 397500.6 | 794021.4 | 1601147  | 1435088  | 141934.6 | 219771.1 | 1347002  |
| 8929592  | 89451992 | 10507518 | 23167476 | 16227557 | 11302608 | 6999139  | 11255448 | 10463510 | 2.83E+08 | 8243577  |
| 28119.97 | 19460.96 | 24852.37 | 34756.3  | 30767.47 | 30610.35 | 45336.8  | 31771.83 | 13358.95 | 30078.42 | 29290.2  |
| 14659.29 | 4384.658 | 1823.034 | 2313.197 | 5118.428 | 1147.109 | 1689.775 | 1065.089 | 2791.273 | 1339.353 | 2379.35  |
| 67611.95 | 74143.78 | 112208.3 | 61992.79 | 37027.04 | 57237.22 | 67932.09 | 42791.21 | 64593.73 | 36663.18 | 71198.23 |
| 31808.82 | 31757.38 | 39424.94 | 41032.9  | 73457.91 | 72319.21 | 104496.8 | 24933.43 | 66373.72 | 19607.98 | 70345.07 |
| 582792.6 | 172643.8 | 33587.32 | 676442   | 1223464  | 2130736  | 708130   | 2515943  | 962720.1 | 344579   | 110512.3 |
| 43848.91 | 29187.08 | 103796.5 | 24704.46 | 59486.39 | 37691.57 | 75395.06 | 86260.05 | 100847.1 | 9206.805 | 53596.9  |
| 589543.8 | 4106948  | 481217.2 | 1023026  | 734473.7 | 691417.7 | 483851.2 | 387704.6 | 609021.1 | 10476794 | 506997.8 |
| 46003.77 | 42892.17 | 85944.27 | 68466.16 | 69517.13 | 85655.55 | 54049.27 | 84517.45 | 101966.9 | 177779.5 | 87320.84 |
| 1816782  | 15964433 | 1272729  | 3079488  | 2915083  | 2352313  | 2662327  | 1533634  | 1815538  | 36785008 | 2301136  |
| 11652.24 | 4837.916 | 10519.26 | 4463.412 | 4794.234 | 5781.273 | 4545.865 | 5357.605 | 3535.426 | 4378.14  | 7232.601 |
| 27172.95 | 12596.34 | 19872.1  | 13361.95 | 14740.96 | 8552.719 | 16368.43 | 11175.95 | 31874.69 | 10289.81 | 15939.34 |
| 24287.15 | 69804.09 | 19638.1  | 43535.77 | 32088.39 | 33477.49 | 7015.958 | 11156.09 | 10787.64 | 153124.4 | 15330.18 |
| 133907.6 | 308413   | 144027.8 | 118865.6 | 214180.3 | 162856.7 | 258738.5 | 249626   | 160871   | 177297.2 | 270844.8 |
| 1292612  | 758874.6 | 1016284  | 630647.1 | 753638.6 | 989868   | 204834.1 | 1077957  | 946197.6 | 895097.3 | 694071.3 |
| 28261.02 | 45838.87 | 66846.62 | 32662.66 | 58480.09 | 92239.63 | 83544.44 | 102872.6 | 99772.46 | 48912.19 | 82405.75 |
| 10020.53 | 15449.91 | 24913.22 | 27523.25 | 23256.77 | 24450.09 | 47311.19 | 43963.49 | 31408.78 | 24042.99 | 62183.3  |
| 4540725  | 3979279  | 1766375  | 1806637  | 3441257  | 2837762  | 2843860  | 2257248  | 2910517  | 2738860  | 3074981  |
| 5319172  | 8633410  | 7919139  | 8430157  | 7840345  | 8008400  | 7162183  | 9903477  | 8377068  | 8969363  | 7634747  |
| 187844.9 | 101427.6 | 128905.8 | 86480.96 | 119389.8 | 125943.8 | 116322.1 | 147555.8 | 152602.4 | 89858.08 | 122404.9 |
| 68311.82 | 79523.47 | 100818.1 | 109418.4 | 75982.36 | 72519.34 | 70768.67 | 56752.41 | 127766.9 | 84847.05 | 70951.34 |
| 4444311  | 3231776  | 5108269  | 5367766  | 4407745  | 4611543  | 6209415  | 5591034  | 2821388  | 4559162  | 4898384  |
| 22460.41 | 6630.715 | 9845.598 | 8799.068 | 8728.369 | 10477.88 | 21852.96 | 10321.92 | 34242    | 12297.75 | 11946.68 |
| 4933438  | 20842756 | 6477532  | 17556256 | 23334120 | 7138770  | 12037763 | 6188452  | 1975732  | 7078930  | 8878839  |
| 38147.57 | 59470.74 | 89823.02 | 40303    | 65307.22 | 62049.07 | 32499.19 | 52789.75 | 55603.84 | 59877.67 | 66138.34 |
| 6860339  | 2693199  | 2779115  | 2456021  | 4019062  | 3411006  | 3589123  | 3158902  | 2770297  | 2630908  | 4068194  |
| 6605.405 | 2008.096 | 5299.182 | 4831.626 | 4033.195 | 6572.525 | 5911.896 | 4743.805 | 2382.271 | 3254.409 | 7035.448 |
| 58814.5  | 21383.81 | 27624.5  | 30975.45 | 25554.41 | 29365.32 | 33988.52 | 39983.18 | 28314.29 | 13579.72 | 26234.44 |

|          |          |          |          |          |          |          |          |          |          |          |
|----------|----------|----------|----------|----------|----------|----------|----------|----------|----------|----------|
| 617437.6 | 852113.9 | 1291200  | 921764.5 | 1127401  | 452030.6 | 346846.3 | 338873.7 | 1076277  | 439515.2 | 450409.6 |
| 106915.8 | 31647.87 | 261244.7 | 21033.9  | 118773   | 19229.25 | 35616.74 | 29130.95 | 91609.2  | 46750.19 | 50821.8  |
| 10229.45 | 1868.397 | 15255.92 | 2333.611 | 9270.668 | 14738.55 | 13924.69 | 22278.49 | 39604.09 | 14098.92 | 5932.967 |
| 53142.04 | 30801.33 | 53440.39 | 48184.51 | 79703.52 | 71007.48 | 49313.87 | 54309.79 | 61050.66 | 46955.66 | 43499.2  |
| 23276.81 | 77342.2  | 9500.393 | 24127.73 | 10824.28 | 18327.94 | 8849.152 | 13689.92 | 16734.98 | 305517.6 | 10329.41 |
| 52004.91 | 57084.02 | 29962.92 | 24308.59 | 57579.77 | 60896.8  | 40814.2  | 63636.95 | 50500.41 | 85211.22 | 48400.9  |
| 874976.9 | 664371.1 | 1014380  | 782826.6 | 905799.3 | 310420.3 | 234983.7 | 246236   | 801845.8 | 3616725  | 404658.7 |
| 8828620  | 5720413  | 8743797  | 4553273  | 7474928  | 6476597  | 6538837  | 10907026 | 9453132  | 3802064  | 9825654  |
| 31376.06 | 52106.32 | 68353.09 | 54084.13 | 37085.25 | 49856.75 | 40962.35 | 53679.61 | 52448.09 | 64055.95 | 54650.73 |
| 19782.6  | 33305.1  | 37542.77 | 6066.825 | 8682.173 | 17273.85 | 12106.93 | 20300.55 | 30972.81 | 75147.92 | 10432.74 |
| 259277.2 | 103159.7 | 66152.73 | 103454.4 | 109171.3 | 62645.43 | 110863.9 | 93895.23 | 211629.9 | 95025.84 | 125025.5 |
| 767725.9 | 237368.9 | 267360.1 | 206660.2 | 260191.3 | 253338.7 | 427524.4 | 207722.7 | 433595.3 | 310581.3 | 356068.7 |
| 18715132 | 43982840 | 7900021  | 14839755 | 10767596 | 9060354  | 4237436  | 5650322  | 6215767  | 1.2E+08  | 5915009  |
| 345364.6 | 10152.81 | 64479.44 | 52503.27 | 90606.1  | 28423.15 | 26112.51 | 22475.38 | 57211.23 | 87619    | 45037    |
| 7645334  | 5176946  | 5160622  | 3478891  | 5265774  | 2729094  | 5149599  | 5235497  | 5786298  | 4352978  | 4408529  |
| 55973.17 | 7898.701 | 10766.3  | 7816.012 | 6646.603 | 3467.707 | 4683.003 | 7190.604 | 6929.358 | 4244.639 | 5911.521 |
| 77816.13 | 56043.17 | 76070.46 | 118125.7 | 46346.3  | 73961.78 | 85102.45 | 148229.8 | 52597.18 | 29585.85 | 83790.96 |
| 19007.29 | 34315.55 | 32699.13 | 7630.01  | 12403.51 | 14643.25 | 15774.69 | 13344.59 | 11019.52 | 22745.08 | 12935.53 |
| 22206.15 | 23919.93 | 12587.77 | 20472.09 | 20138.37 | 18903.58 | 17771.29 | 14331.43 | 38555.3  | 38579.63 | 6546.96  |
| 197491.6 | 86133.61 | 57045.89 | 63922.37 | 87953.88 | 63399.36 | 68965.8  | 47670.24 | 243879.3 | 64735.89 | 95877.45 |
| 77471.84 | 75186.97 | 77952.96 | 44553.13 | 53361.5  | 58774.7  | 53562.16 | 33787.32 | 114734.5 | 62384.4  | 71031.23 |
| 68992.17 | 24147.22 | 6596.416 | 5790.692 | 18811.89 | 5370.105 | 7082.012 | 10949.19 | 7225.004 | 12302    | 4594.992 |
| 123233.9 | 232106.6 | 123194.3 | 148746.8 | 37185    | 75308.21 | 441969.8 | 196970.8 | 101757.7 | 210938.8 | 436549.3 |
| 266205.2 | 19775.24 | 23372.19 | 38861.87 | 48970.75 | 42419.25 | 20521.92 | 16501.55 | 24385.43 | 30287.87 | 47092.44 |
| 590933.6 | 692494.3 | 531929.3 | 464697.5 | 654861.5 | 580589.2 | 531333.3 | 392928.1 | 1304082  | 517478.4 | 702985.1 |
| 42965.36 | 54855.43 | 64009.99 | 90725.73 | 144125.6 | 342210.9 | 555823.6 | 393297.3 | 29709.85 | 58005.16 | 333895.1 |
| 142890.1 | 127466.3 | 268563.9 | 190551.6 | 126140.9 | 172503.8 | 207706.1 | 198472.5 | 186436.3 | 153203.4 | 174687.3 |
| 33862.21 | 30034.37 | 30183.28 | 20471.66 | 33624.95 | 65770.23 | 25478.02 | 35177.97 | 31471.73 | 29652.44 | 27631.47 |
| 311176.4 | 169549.6 | 262100.3 | 191575.8 | 146081.1 | 204059.3 | 69078.19 | 162090.9 | 117939.1 | 272189.4 | 185154.5 |
| 18460740 | 27119312 | 21820608 | 17094810 | 23191160 | 19189476 | 14241954 | 26309252 | 20639402 | 30676412 | 19555396 |
| 19257.28 | 7607.356 | 14604.53 | 23547.45 | 12127.02 | 17628.81 | 23802.62 | 14655.93 | 9317.789 | 11774.25 | 21517.98 |
| 3446873  | 1446496  | 2221578  | 1371629  | 1396084  | 1446657  | 1542023  | 1202530  | 1807896  | 1351091  | 1789465  |
| 21415.26 | 8237.518 | 10603.31 | 9734.452 | 5900.078 | 9590.883 | 13546.31 | 13498.57 | 11355.33 | 10675.14 | 16319.22 |
| 20451.27 | 13059.05 | 21975.17 | 8904.027 | 7192.146 | 22038.15 | 15384.78 | 12037.53 | 15007.93 | 9232.066 | 15406.42 |
| 447408.8 | 998163.9 | 863614.3 | 919666   | 981827.4 | 1001321  | 561329.6 | 841016.9 | 196541.2 | 2499292  | 630440.1 |
| 505447   | 2977078  | 1234233  | 1787655  | 1117405  | 1471206  | 1238772  | 2258824  | 580255.5 | 7832636  | 962340.6 |
| 84689.17 | 2052067  | 152479.9 | 417483.3 | 346301.8 | 348016.4 | 240578.4 | 351833.1 | 215451.5 | 6517378  | 215991.1 |
| 543628.9 | 1157524  | 748830.4 | 396324.9 | 686754.9 | 613433.3 | 629724.6 | 385096.7 | 853100.3 | 1856235  | 625381.8 |
| 52632.62 | 25753.68 | 31609.97 | 18916.92 | 14844.36 | 51701.1  | 41364.01 | 32236.02 | 36901.15 | 34648.3  | 42243.51 |
| 28887112 | 11404263 | 28871170 | 15109030 | 26551362 | 12080010 | 19965480 | 13505121 | 21791238 | 17871292 | 30343736 |
| 22351.63 | 219544.1 | 215556.5 | 163159.8 | 148796   | 194583   | 191406.3 | 213727.7 | 269782.1 | 171630.1 | 95726.17 |
| 38681.82 | 21824.87 | 30526.24 | 17468.36 | 15118.53 | 22998.59 | 16654.97 | 24798.23 | 21172.04 | 20743.53 | 23723.57 |
| 19985.29 | 9114.82  | 5730.993 | 6109.172 | 8632.497 | 12958.62 | 7450.046 | 10536.76 | 6331.257 | 4800.085 | 11950.28 |
| 6307.826 | 6707.259 | 5347.724 | 4372.59  | 6961.818 | 8591.97  | 4510.35  | 7570.888 | 11998.81 | 5361.115 | 6430.381 |
| 35998288 | 49969928 | 59231152 | 46075372 | 38687300 | 34146256 | 38229136 | 31368076 | 24355734 | 31476796 | 30646964 |
| 50174.65 | 72447.13 | 71548.59 | 46621.34 | 54950.84 | 46372.21 | 23981.04 | 46924.07 | 46056.56 | 47440.32 | 57661.54 |
| 25234.03 | 225392.7 | 345351.9 | 315986   | 233421.8 | 996786.3 | 147368.8 | 2026605  | 308247.9 | 1711572  | 139848.9 |
| 4114241  | 3017594  | 3462237  | 4027049  | 5881394  | 5752702  | 5100756  | 6822208  | 3870197  | 3919794  | 7146796  |
| 21081.8  | 12588.14 | 20997.63 | 20929.49 | 17764.89 | 20169.02 | 14250.8  | 16890.03 | 29571.74 | 19661.41 | 16807.05 |

|          |          |          |          |          |          |          |          |          |          |          |
|----------|----------|----------|----------|----------|----------|----------|----------|----------|----------|----------|
| 17636170 | 34416012 | 52502996 | 72579640 | 49380224 | 85636464 | 1.03E+08 | 61603200 | 10800365 | 1.3E+08  | 80665712 |
| 15825423 | 25839442 | 50708948 | 78015568 | 62946956 | 71691776 | 1.07E+08 | 67317352 | 9732446  | 1.57E+08 | 79609528 |
| 152469.5 | 89320.34 | 227769.6 | 112717.2 | 47689.48 | 111065.2 | 41592.61 | 38023    | 32924.34 | 111544.1 | 52144.8  |
| 32242.93 | 9477.207 | 6860.436 | 9172.298 | 7555.46  | 4708.515 | 3589.055 | 8084.623 | 7865.71  | 6495.642 | 5026.871 |
| 145115.2 | 129374.4 | 145104.4 | 146559   | 142756.1 | 172601.1 | 145736.4 | 167561.5 | 122559.3 | 144265.3 | 138179.3 |
| 18401.99 | 9262.908 | 6319.086 | 27186.46 | 170403   | 144806.3 | 2212.349 | 11656.17 | 6166.777 | 65988.09 | 34110.42 |
| 2713418  | 3897738  | 3362172  | 2052871  | 2287984  | 1370194  | 2010522  | 2609384  | 2072738  | 3965399  | 2327369  |
| 56953.16 | 21968    | 26878.88 | 30681.54 | 40758.85 | 22698.35 | 24675.27 | 40003.79 | 29010.37 | 42524.15 | 14026.59 |
| 251589.1 | 397128.8 | 335372.3 | 362942.8 | 435350.9 | 394529.4 | 375371.9 | 527934.4 | 669402.1 | 733076.1 | 359676.9 |
| 587262.3 | 565014.9 | 640561.6 | 245085.2 | 459856.8 | 416189.7 | 131631.7 | 717909.5 | 233243.5 | 210064.6 | 379480.6 |
| 15547.93 | 8354.994 | 6491.769 | 8348.637 | 8740.925 | 10526.46 | 2369.201 | 8162.879 | 5989.839 | 8096.181 | 7819.631 |
| 22681558 | 23082304 | 30930914 | 18282336 | 41585024 | 17062154 | 24430274 | 24595290 | 27435892 | 24707564 | 31850120 |
| 1907687  | 1359730  | 2005851  | 1742411  | 1710752  | 1559656  | 2372799  | 1372384  | 1704788  | 1518974  | 2464504  |
| 118238.8 | 19830.91 | 263928.9 | 359830   | 339762.6 | 294012.8 | 596767.5 | 289320.2 | 78229.01 | 174653   | 544127.3 |
| 464051.5 | 296018   | 240811.9 | 181662.7 | 256222.7 | 208682.7 | 183930.3 | 150237.8 | 191330.2 | 207810.1 | 187646.6 |
| 126595.9 | 132766.7 | 170886.8 | 86286.29 | 140964.8 | 157801.9 | 72310.94 | 228081.7 | 105944.1 | 139903.7 | 132193   |
| 1024309  | 78431.73 | 34364.58 | 40407.01 | 187141.4 | 59364.46 | 45205.35 | 79406.07 | 90060    | 132959.6 | 60282.62 |
| 134559.6 | 168652.1 | 125669.7 | 101572.8 | 84491.56 | 78388.73 | 110644.1 | 54484.14 | 316452.6 | 115526.8 | 111298.8 |
| 101651.8 | 91626.2  | 168589.1 | 117629.7 | 92398.21 | 121249   | 119096.3 | 139398.6 | 110279.8 | 86032.33 | 121025   |
| 11126.75 | 15088.55 | 8744.255 | 12556.24 | 10250.69 | 12436.53 | 14724.71 | 6387.842 | 14372.52 | 16820.55 | 14624.82 |
| 37321.34 | 14467.98 | 15386.81 | 25558.7  | 11370.05 | 25124.31 | 18491.73 | 26341.59 | 21700.37 | 19736.32 | 7586.788 |
| 2506452  | 2352523  | 3710740  | 2334989  | 2614861  | 3309076  | 1945014  | 4468065  | 2195346  | 1666023  | 2540091  |
| 27191.99 | 8599.422 | 11073.43 | 10703.67 | 11762.73 | 11991.88 | 14727.35 | 13724.3  | 16922.07 | 10521.82 | 10124.21 |
| 74829.95 | 29542.96 | 32359.2  | 14272.47 | 27008.45 | 22307.25 | 43454.88 | 24804.53 | 41732.43 | 49759.43 |          |
| 1105578  | 748236.2 | 1566546  | 850086.9 | 1051989  | 901593.3 | 822776.1 | 1410957  | 1107500  | 563830.8 | 1216754  |
| 38658.57 | 9511.834 | 15441.79 | 8141.399 | 11158.91 | 10676.77 | 14902.43 | 18746.67 | 166815.4 | 114224.9 | 23645.77 |
| 241400.4 | 193796.3 | 377701.8 | 186536.4 | 257490.9 | 233231.7 | 182496.2 | 255539.8 | 155627.4 | 141073.5 | 214154.7 |
| 125240.5 | 7195.343 | 11853.57 | 12413.45 | 18313.07 | 1471.816 | 10885.3  | 24258.31 | 17981.09 | 29511.67 | 15970.52 |
| 4047845  | 2562076  | 6621746  | 5693424  | 5635790  | 4704508  | 5147609  | 6791969  | 7552943  | 5098030  | 5584881  |
| 24789104 | 66869540 | 23544396 | 36501540 | 26325852 | 65725108 | 34341660 | 66789812 | 51217940 | 69996232 | 37796912 |
| 10285.13 | 11269.39 | 19344.33 | 13423.36 | 10863.18 | 11896.1  | 12200.44 | 8705.223 | 12192.59 | 13929.94 | 20306.58 |
| 17821.67 | 2498.03  | 5274.939 | 10888.69 | 6086.124 | 10079.14 | 13468.5  | 10711.43 | 6516.366 | 7412.273 | 9022.531 |
| 92492.96 | 85737.67 | 128597   | 88754.95 | 85237.84 | 119881.1 | 140557.7 | 85206.26 | 137505.6 | 46747.27 | 113166.2 |
| 36736.54 | 28746.56 | 13605.03 | 8194.231 | 13836.61 | 15587.51 | 15223.24 | 16579.28 | 26399.17 | 21248.59 | 10216.47 |
| 60170.73 | 37320.62 | 44204.6  | 33462.02 | 32304.3  | 42234.75 | 45254.83 | 35292.57 | 45961.22 | 42362.23 | 41007.15 |
| 188103.3 | 130181.8 | 99108.12 | 98332.29 | 106294.8 | 71306.94 | 115014.8 | 230291.1 | 76314.25 | 309609.7 | 280806.2 |
| 5123728  | 2208908  | 1138059  | 1313409  | 2398561  | 1432794  | 1647370  | 1681573  | 1834512  | 2122965  | 1735316  |
| 26946.41 | 32117.44 | 34401.06 | 27484.18 | 32990.49 | 51687.24 | 38374.59 | 36959.53 | 26800.63 | 20417.14 | 33913.86 |
| 85430.83 | 98313.66 | 110768   | 97236.41 | 94997.34 | 113899   | 78383.8  | 123323.7 | 134504.9 | 120238.3 | 87517.36 |
| 2841292  | 1997592  | 2357924  | 2024301  | 2632950  | 2554953  | 2660672  | 2964244  | 2533180  | 3194860  | 2907143  |
| 824672.4 | 681891.4 | 505038.6 | 415910.6 | 793868.1 | 583761.9 | 532651.2 | 489595.9 | 565501.8 | 720198.3 | 650563.1 |
| 86393.38 | 36079.2  | 190757.8 | 273260.4 | 210098.2 | 176171.7 | 205322.5 | 141543.1 | 31597.04 | 56677.41 | 156704.6 |
| 86335.83 | 63548.44 | 66026.11 | 53925.23 | 59933.38 | 77114.58 | 64932.77 | 72456.08 | 48716.47 | 57283.3  | 73951.23 |
| 2267844  | 1056116  | 1660290  | 1185932  | 942181.1 | 1239752  | 1095582  | 1542285  | 1961892  | 519838.1 | 1541611  |
| 35471.97 | 74398.47 | 68065.09 | 72633.38 | 52880.21 | 66373.58 | 84444.48 | 49325.75 | 70245.04 | 118489.7 | 63696.46 |
| 50519.34 | 36159.22 | 13209.39 | 26204.5  | 11135.8  | 9246.631 | 21505.07 | 32437.46 | 13133.9  | 34481.86 | 19967.62 |
| 336383.9 | 317241.1 | 349067   | 411931.6 | 451495.4 | 387130.9 | 271533.5 | 506588.5 | 718903.8 | 429898.2 | 261309.7 |
| 110219.3 | 20354.91 | 17137.2  | 103054.1 | 66485.04 | 24943.13 | 137975.5 | 29984.98 | 47593.86 | 75750.21 | 34925.07 |
| 514698   | 650633.1 | 1110373  | 1504568  | 1424374  | 2322700  | 3222377  | 4799898  | 683073.5 | 637326.2 | 2732032  |

|          |          |          |          |          |          |          |          |          |          |          |
|----------|----------|----------|----------|----------|----------|----------|----------|----------|----------|----------|
| 1692041  | 3680049  | 1737186  | 1293737  | 888232.1 | 1114029  | 1725597  | 1398323  | 1558034  | 5276399  | 2214934  |
| 709580.9 | 92315.73 | 7988.463 | 10646.42 | 283768.6 | 17414.75 | 18225.86 | 44274.49 | 22022.76 | 55127.38 | 112070.2 |
| 1462710  | 1898157  | 2545606  | 3784890  | 2291245  | 2489977  | 3005900  | 1906473  | 999443.9 | 2494145  | 2615860  |
| 1930747  | 1044890  | 1985667  | 1500675  | 1334160  | 1098507  | 1215563  | 1853604  | 1250498  | 1214961  | 1635245  |
| 42207.83 | 32277.96 | 74552.16 | 32883.32 | 30327.84 | 23253.1  | 29304.23 | 27973.96 | 44329.79 | 32892.74 | 38089.61 |
| 5665.175 | 19123.46 | 16753.17 | 13338.56 | 12529.27 | 12516.77 | 14742.66 | 13265.15 | 20864.17 | 11474.77 | 25196.41 |
| 47244.33 | 66980.61 | 47598.55 | 67506.85 | 45835.49 | 78738.77 | 26669.7  | 94016.15 | 35696.01 | 52364.58 | 73708.04 |
| 788563   | 35366.85 | 117826.3 | 30013.29 | 116652.4 | 66717.6  | 29719.02 | 10675.46 | 27968.57 | 114468.2 | 139866.1 |
| 35140.79 | 17905.75 | 34584.61 | 31220.81 | 28894.7  | 40881.8  | 41628.82 | 11942.75 | 19757.79 | 20621.95 | 28683.93 |
| 11799.95 | 14259.69 | 21672.31 | 36170.08 | 23090.77 | 21940.02 | 24867.91 | 17770.34 | 16896.08 | 20533.05 | 25467.16 |
| 3321175  | 92380.05 | 75208.75 | 70408.72 | 85452.16 | 8515408  | 79692.61 | 94769.09 | 25863.37 | 130082.1 | 99825.05 |
| 43800.66 | 24049.6  | 36650.1  | 102485.6 | 62821.65 | 58987.67 | 78135.03 | 29307.35 | 21695.42 | 32550.66 | 16153.58 |
| 31467.54 | 7603.16  | 19491.63 | 6754.681 | 11925.58 | 13680.27 | 4936.386 | 12968.55 | 105826.8 | 33177.79 | 14450.06 |
| 39873.54 | 20753.5  | 28877.37 | 14493.43 | 29199.32 | 22260.72 | 18550.44 | 29074.17 | 28431.12 | 25122.93 | 34060.86 |
| 4296.6   | 4103.752 | 9107.21  | 3710.821 | 4279.344 | 8830.339 | 2862.642 | 7357.129 | 9796.557 | 4568.737 | 5957.599 |
| 14659.29 | 5590.783 | 2388.973 | 2289.452 | 5270.635 | 1082.532 | 2792.868 | 1552.848 | 2692.838 | 6607.921 | 2901.325 |
| 78711.91 | 54057.49 | 99639    | 119235   | 64580.42 | 88253.81 | 68717.92 | 104956   | 73846.09 | 203032.1 | 56795.77 |
| 21551.58 | 50725.52 | 30118.33 | 13989.09 | 28959.26 | 15319.88 | 21262.77 | 25571.09 | 25908.11 | 112495.5 | 25428.03 |
| 62571.39 | 22332.71 | 61679.84 | 37714.49 | 68889.27 | 38555.05 | 42649.16 | 52065.78 | 53034.22 | 18156.43 | 48986.05 |
| 48372936 | 63606068 | 93590352 | 1.12E+08 | 82173144 | 86606504 | 93865776 | 1.18E+08 | 39908724 | 92417312 | 76656272 |
| 1307033  | 5006925  | 15752807 | 27387636 | 18293638 | 23618200 | 14166875 | 23238240 | 1406969  | 19194474 | 13646196 |
| 1210546  | 1092499  | 802272.3 | 686965.9 | 290117.8 | 1260611  | 2188600  | 937256.2 | 707479.6 | 962266.4 | 979612.1 |
| 1430304  | 5453275  | 1444288  | 1532678  | 1728820  | 1713704  | 1382648  | 1669605  | 1593255  | 13883026 | 1263376  |
| 46757.77 | 53913.92 | 39451.97 | 52306.61 | 64642.27 | 28959.91 | 42840.48 | 45527.57 | 38470.02 | 55436.53 | 52809.61 |
| 187186.3 | 253528.9 | 213499   | 234403.6 | 289682.9 | 150709.6 | 112954   | 245475.8 | 204344.5 | 140321.2 | 218812.3 |
| 14281.39 | 5398.219 | 3442.243 | 5954.799 | 3633.532 | 6040.894 | 2794.858 | 9061.57  | 4988.592 | 4378.14  | 6100.509 |
| 21337.13 | 14473.41 | 19934.06 | 15900.17 | 16594.86 | 17936.18 | 15890.75 | 7857.003 | 25780.14 | 17291.48 | 17955.21 |
| 68267.14 | 36841.52 | 50852.61 | 31584.39 | 29612.05 | 33585.43 | 30907.26 | 56817.18 | 30944.18 | 33279.11 | 45516.11 |
| 257926.4 | 293931.5 | 265940.8 | 233044.8 | 282288.9 | 275625.6 | 299674.8 | 177086.3 | 718513   | 155272.8 | 277096.4 |
| 46442.57 | 23692.56 | 52132.68 | 21291.39 | 16887.77 | 27729.74 | 26674.99 | 33780.15 | 23699.81 | 17545.85 | 14286.6  |
| 89195.06 | 36399.82 | 120774.9 | 188688.5 | 150503.7 | 148601.7 | 198654.1 | 95731.1  | 55059.89 | 85054.55 | 125309.2 |
| 16904.52 | 18226.26 | 44062.16 | 43387.57 | 44522.23 | 39510.51 | 25610.17 | 35567.15 | 41176.94 | 56793.91 | 61637.2  |
| 205365.1 | 109980.7 | 215507.6 | 104664   | 88258.52 | 128645.8 | 114105   | 96640.48 | 161659.8 | 80245.17 | 115785.3 |
| 244496.2 | 204723.5 | 479317.1 | 212449.1 | 164770.8 | 221599.2 | 206760   | 143135.5 | 197495.5 | 119157.6 | 218772.2 |
| 6998012  | 4633601  | 6762331  | 7642927  | 16650224 | 12263090 | 7374374  | 10985883 | 15571175 | 7296175  | 5576969  |
| 398459.7 | 315375.1 | 395855.7 | 305587.8 | 369787   | 386730.7 | 340256.7 | 392252.6 | 304001.2 | 239307.7 | 382527.2 |
| 51252.13 | 71187.62 | 57612.42 | 44904.72 | 64738.08 | 74227.42 | 36574.61 | 45118.68 | 36008.88 | 55166.47 | 51324.69 |
| 113404.3 | 64137.28 | 59639.99 | 62894.84 | 60059.25 | 73109.3  | 74272.16 | 71058.78 | 44875.6  | 81221.76 | 55417.7  |
| 23595.54 | 61772.91 | 22394.88 | 40174.83 | 25279.89 | 38570.06 | 27249.85 | 35726.23 | 21241.75 | 52583.8  | 37794.64 |
| 257170.5 | 309945.4 | 204039   | 207170.7 | 148986.1 | 116098.4 | 137180.4 | 152989.3 | 444681.9 | 183727   | 211515.5 |
| 54804.23 | 62235.32 | 144965.3 | 235229.6 | 112740.1 | 154060.5 | 233482   | 131609.4 | 104080.2 | 184044.4 | 183406   |
| 94642.4  | 170440   | 122984.8 | 94072.17 | 199378.2 | 126278   | 91317.43 | 72439.87 | 121880.5 | 124978.2 | 100544.8 |
| 23797.73 | 20392.58 | 12510.13 | 12429.35 | 32328.67 | 20459.44 | 30065.52 | 10908.53 | 36366.68 | 25821.2  | 25566.96 |
| 137139.8 | 175739.1 | 133418.6 | 103829   | 107934.1 | 114335.8 | 84923.59 | 121610.2 | 242218.7 | 92287.73 | 119871.1 |
| 19249.89 | 16970.86 | 64122.27 | 118081.5 | 43264.27 | 66852.81 | 130583.3 | 102790.9 | 10100.54 | 66083.96 | 94429.7  |
| 111374.2 | 93328.34 | 83213.79 | 64252.29 | 96733.69 | 110996.2 | 116502.6 | 87017.82 | 88649.98 | 69711.2  | 131292   |
| 296379.4 | 297292.8 | 315873.8 | 148664.3 | 378914.5 | 432599.9 | 309613.8 | 514695.6 | 452253.7 | 135395   | 267282.5 |
| 3786485  | 48068.44 | 3289183  | 2495735  | 2609464  | 1284150  | 340301.5 | 421316.8 | 2974842  | 1348107  | 1380543  |
| 23157.94 | 12674.79 | 8396.852 | 12473.34 | 17572.3  | 14588.01 | 19187.65 | 17565.91 | 11498.12 | 6357.567 | 10945.7  |

|          |          |          |          |          |          |          |          |          |          |          |
|----------|----------|----------|----------|----------|----------|----------|----------|----------|----------|----------|
| 22071.26 | 32951.16 | 34265.85 | 38834.1  | 45715.55 | 37862.38 | 63961.06 | 25841.4  | 24684.51 | 31202.14 | 51226.85 |
| 1685796  | 7001597  | 1711487  | 2260404  | 2418276  | 2152022  | 2008749  | 2214413  | 1840459  | 12531705 | 1800155  |
| 111503.9 | 23342.38 | 26131.8  | 26487.59 | 27285.04 | 26318.47 | 23909.77 | 41677.78 | 33166.57 | 11979    | 19371.11 |
| 166815.9 | 229423.6 | 279653.9 | 274863.1 | 183637.3 | 222491   | 263072.5 | 294849.9 | 359017.2 | 221621.3 | 283015.5 |
| 227476.1 | 259465.5 | 158514.6 | 182285.5 | 203607.7 | 216035.4 | 193236.6 | 203795.8 | 559856.1 | 203674.8 | 281872.3 |
| 28343.24 | 19496.34 | 26631.47 | 30056.26 | 38058.89 | 30673.64 | 28067.14 | 26582.1  | 14038.09 | 26973.81 | 33783.67 |
| 187700.8 | 18584.32 | 50936.69 | 31813.49 | 42167.39 | 12980.99 | 37457.08 | 43363.91 | 25846.13 | 21627.12 | 28199.29 |
| 28250.39 | 6353.78  | 7523.099 | 2219.088 | 8391.185 | 1848.827 | 2578.282 | 8723.991 | 4952.154 | 7094.025 | 6996.305 |
| 1168390  | 22854.57 | 5927.846 | 8931.558 | 190616.5 | 5404.759 | 17972.38 | 172685.6 | 15211.23 | 19474.98 | 24779.25 |
| 2537570  | 16757.55 | 26551.05 | 3808.034 | 212044.6 | 8567.636 | 7734.958 | 224096.3 | 32661.8  | 57317.55 | 25958.72 |
| 1933054  | 3234984  | 986169.1 | 832222.6 | 1398243  | 1388934  | 1938759  | 1157809  | 1682451  | 2646605  | 1849832  |
| 29720.67 | 8849.609 | 15082.92 | 12201.69 | 10207.19 | 11850.49 | 11697.56 | 7307.419 | 28313.92 | 14219.56 | 13997.62 |
| 18400.56 | 12303.84 | 23362.06 | 24083.57 | 61851.23 | 21901.68 | 21421.76 | 43012.6  | 9454.655 | 16014.54 | 21606.38 |
| 34389.47 | 55396.68 | 41066.51 | 57389.38 | 6561.24  | 41640.92 | 63346.37 | 20036    | 22449.25 | 57518.47 | 35463.21 |
| 106534.5 | 110924.4 | 168308.7 | 184842   | 140790.8 | 143582.7 | 192454.4 | 87585.13 | 96752.95 | 112757   | 135477.1 |
| 567957.4 | 637080.7 | 480626.3 | 364927.4 | 575822.3 | 508128.1 | 397124.6 | 547720.4 | 546723.9 | 562315.7 | 364485.4 |
| 10086.66 | 12576.81 | 16644.72 | 20579.86 | 18497.8  | 12154.81 | 18122.1  | 19941.11 | 9571.71  | 12795.39 | 13233.57 |
| 13500.09 | 24625.8  | 36523.21 | 18896.41 | 12752.05 | 23173.18 | 16907.36 | 40844.96 | 26437.12 | 19313    | 41322.8  |
| 498053.7 | 819139.6 | 1166990  | 851649.9 | 596240   | 758830.6 | 730985.2 | 476969.6 | 747187.1 | 618040.3 | 624757.8 |
| 23095.7  | 18973.46 | 35985.7  | 32429.39 | 22477.07 | 26194.34 | 35819.73 | 14559.16 | 20136.11 | 23414.18 | 31982.53 |
| 25299.36 | 33862.86 | 45700.93 | 17569.07 | 28049.89 | 26608.05 | 8357.123 | 35002.36 | 16420.74 | 45672.38 | 30747.37 |
| 134110   | 40420.28 | 154029.1 | 16488.36 | 176632.8 | 169972.2 | 17826.29 | 14595.59 | 168098.4 | 32301.29 | 166572.9 |
| 14659.29 | 2843.138 | 3826.205 | 4382.452 | 5118.428 | 2539.05  | 1952.762 | 5366.604 | 5138.432 | 7840.936 | 3776.741 |
| 575573.5 | 2526459  | 190356.2 | 743193   | 2058248  | 755556.1 | 259294.5 | 1437236  | 763501.2 | 2233126  | 882254.7 |
| 1048770  | 1462770  | 1216861  | 1103553  | 721397.8 | 815238.6 | 805845.2 | 1249944  | 1695501  | 1460782  | 920674.6 |
| 52723.06 | 37390.04 | 51181.38 | 50588.1  | 64650.13 | 61175.87 | 34287.64 | 64539.14 | 63441.04 | 46992.44 | 42390.97 |
| 22612.53 | 22293.45 | 8732.855 | 7481.927 | 14777.04 | 10622.5  | 6962.541 | 10121.46 | 18587.28 | 15883.56 | 14858.53 |
| 128543.3 | 54578.66 | 77069.92 | 55486.11 | 67526.59 | 72766.38 | 78521.63 | 79074.3  | 91026.95 | 74270.26 | 91974.45 |
| 67600.84 | 64067.6  | 37979.93 | 27976.66 | 82349.84 | 51151.86 | 59255.86 | 42290.79 | 53199.32 | 56194.27 | 73488.84 |
| 40010.39 | 36097.25 | 17902.13 | 30513.56 | 35615.46 | 62537.38 | 35190.07 | 122486.6 | 37843.19 | 55862.13 | 28867.93 |
| 106619.8 | 103186.1 | 164380.4 | 216699.7 | 174619.9 | 189159.5 | 217480.3 | 176701.1 | 111760.7 | 170692.5 | 164583.5 |
| 42294.66 | 46457.33 | 84516.45 | 143603.4 | 94905.94 | 96111.7  | 115974.9 | 63677.34 | 40030.23 | 73474.95 | 87136.2  |
| 95013.68 | 110625.7 | 172615.5 | 305682.6 | 170907.1 | 186326   | 205127.2 | 126841.5 | 78949.88 | 170541.3 | 182855.6 |
| 17290.01 | 8571.734 | 16317.85 | 23173.98 | 12287.71 | 16825.74 | 24340.1  | 4113.359 | 1896.568 | 8342.56  | 22028.41 |
| 24160.87 | 15370.66 | 25635.32 | 17065.81 | 6449.209 | 22536.14 | 14967.17 | 8259.758 | 30471.35 | 15046.26 | 32149.52 |
| 10931.94 | 9818.806 | 40003.87 | 29336.7  | 14779.04 | 24557.41 | 19741.37 | 16670.79 | 14045.96 | 22206.88 | 16671.98 |
| 20792.17 | 12261.7  | 6308.923 | 10394.2  | 15730.02 | 29405.98 | 21383.05 | 28930.36 | 30403.31 | 22814.28 | 27955.81 |
| 2671217  | 119147.8 | 13071.62 | 8220.121 | 350368.3 | 16891.5  | 16337.33 | 207610.2 | 51494.03 | 77221.47 | 111755.7 |
| 132643.3 | 64641.28 | 79279.44 | 59675.99 | 66752.25 | 97358.15 | 77539.97 | 100591.4 | 77658.48 | 87480.33 | 81849.35 |
| 19361.01 | 104488.5 | 19159.59 | 23085.14 | 11035.58 | 4750.449 | 10816.35 | 7273.684 | 9444.284 | 190705.8 | 11811.75 |
| 26395.69 | 39724.76 | 31707.78 | 40150.75 | 39455.75 | 41976.13 | 51641.88 | 45700    | 28382.22 | 42225.19 | 61780.09 |
| 146300   | 14015.25 | 18604.88 | 18833.71 | 14696.25 | 11913.18 | 8614.188 | 2015.555 | 10768.89 | 9522.469 | 5802.99  |
| 233725.7 | 13396.67 | 913724.4 | 8356.588 | 17211.69 | 129926.5 | 54172.25 | 9428.053 | 8934.26  | 89786.66 | 376104   |
| 133263   | 61290.78 | 84823.73 | 53517.74 | 55850.12 | 59260.45 | 68046.07 | 88043.03 | 99966.96 | 42895.18 | 90870.96 |
| 6207.196 | 7381.014 | 5762.208 | 6086.825 | 4293.193 | 6342.52  | 2637.574 | 7744.035 | 4747.53  | 7412.273 | 5913.928 |
| 38865.09 | 18156.5  | 17064.29 | 10753.61 | 6515.413 | 13420.68 | 12434.26 | 14245.66 | 13546.91 | 14862.77 | 13498.69 |
| 372386   | 120482.2 | 322183.5 | 138822.4 | 132168.2 | 127258.6 | 177837.6 | 123559.7 | 177969.5 | 222234.3 | 285214.3 |
| 1647963  | 1900688  | 1594382  | 1787118  | 1814879  | 1682146  | 2161518  | 937627.4 | 2047554  | 1993244  | 2022948  |
| 24838.46 | 20497.82 | 47279.26 | 114483.7 | 65092.52 | 93624.1  | 84199.74 | 41033.98 | 9078.629 | 55678.2  | 53356    |

|          |          |          |          |          |          |          |          |          |          |          |
|----------|----------|----------|----------|----------|----------|----------|----------|----------|----------|----------|
| 15385.27 | 14277.16 | 10408.99 | 12541.63 | 21213.89 | 14357.97 | 8978.951 | 12568.62 | 16555.45 | 13980.44 | 14203.36 |
| 58976.76 | 41890.58 | 65983.14 | 57688.52 | 70978.86 | 55373.64 | 51734.05 | 57825.66 | 33717.19 | 47048.66 | 121283.7 |
| 85838.53 | 118982.3 | 130856.4 | 91896.01 | 72360.1  | 87557.36 | 87909.73 | 95900.9  | 94117.48 | 72512.16 | 73434.15 |
| 105164.1 | 89350.46 | 167194.8 | 249979.6 | 92211.28 | 126749.1 | 188463.5 | 130931.9 | 47254.73 | 202987.7 | 140201.1 |
| 27372.19 | 25565.83 | 34259.84 | 31349.5  | 42302.96 | 28844.36 | 34341.69 | 31574.53 | 25305.32 | 22924.8  | 18495.03 |
| 738115.1 | 341490.3 | 276572.8 | 439647.3 | 223252.5 | 337433.6 | 230038.8 | 341324   | 188038   | 714728.8 | 336147.4 |
| 47737.95 | 54195.61 | 51601.55 | 57539.13 | 47376.3  | 82251.7  | 70062.91 | 46877.85 | 59242.18 | 27266.23 | 86264.64 |
| 72460.18 | 54938.86 | 127712.7 | 173840.2 | 98703.49 | 99902.65 | 156898.1 | 87614.74 | 99989.66 | 58559.39 | 155055.1 |
| 191738.5 | 161575.5 | 188466.7 | 299349.6 | 241531.3 | 225624.4 | 308846.1 | 137239.8 | 142864.6 | 287920.4 | 308000.6 |
| 66063.2  | 16332.81 | 87248.72 | 29487.71 | 56631.97 | 56995.27 | 87519.91 | 37510.68 | 176171.6 | 65274.71 | 72237.39 |
| 37193.66 | 17586.98 | 47908.03 | 30942.8  | 8815.147 | 24666.27 | 27654.56 | 21083.81 | 39071.3  | 23270.59 | 21904.52 |
| 88994.4  | 86985.77 | 75683.28 | 107997.9 | 99356.5  | 97536.6  | 104877.5 | 154874.2 | 39704.35 | 126272.8 | 88731.73 |
| 149361.3 | 45319.73 | 69743.29 | 108520.7 | 91577.09 | 115592.4 | 215224.3 | 225932.4 | 346821.3 | 109623.8 | 173907.6 |
| 52199.3  | 56230.53 | 67059.92 | 91263.68 | 74372.37 | 55988.3  | 46497.01 | 77865.8  | 40308.61 | 77927.31 | 66468.68 |
| 51529.24 | 42646.85 | 65200.14 | 77546.06 | 45399.79 | 53833.45 | 63378.35 | 44357.64 | 39868.12 | 50660.65 | 66755.48 |
| 348870.7 | 446340.1 | 498115   | 820626.8 | 551108.1 | 390993   | 604352.9 | 490076.1 | 454517.3 | 618165.4 | 511370   |
| 21320.83 | 11913.24 | 17819.09 | 14799.74 | 11514.3  | 15759.03 | 12285.86 | 20709.54 | 8705.799 | 8536.24  | 13507.25 |
| 53127.44 | 3575.945 | 4113.804 | 7951.901 | 5562.74  | 4203.058 | 6588.817 | 4362.189 | 2752.879 | 4300.76  | 4776.596 |
| 53762.84 | 31598.64 | 52545.25 | 50312.35 | 42211.68 | 38136.15 | 74739.01 | 27564.89 | 16649.77 | 57171.23 | 78121.46 |
| 137920.8 | 59643.7  | 225041.1 | 302012.9 | 114987.4 | 258347.6 | 194924.2 | 232791.4 | 183719   | 73027.61 | 129423.9 |
| 66892.1  | 43069.87 | 84296.12 | 112400.5 | 71351.8  | 84681.39 | 67049.95 | 70977    | 26791.67 | 109502.5 | 76886.38 |
| 26693.95 | 19824.6  | 28476.94 | 32093.34 | 22325.02 | 30264.48 | 32026.02 | 37914.58 | 18458.45 | 26423.97 | 12233.74 |
| 3168142  | 4239056  | 2692195  | 3717409  | 3107586  | 2920719  | 3193585  | 1600500  | 3074742  | 3686413  | 3412919  |
| 186629   | 205377.3 | 391392.5 | 439598.3 | 292163.3 | 357087.4 | 388940.4 | 257210   | 227093   | 266897.9 | 383294.4 |
| 56744.98 | 44321.84 | 69295.38 | 65149.73 | 89433.08 | 160922.4 | 203983.2 | 130780.8 | 108658.9 | 61706.45 | 151334.9 |
| 11787.45 | 9188.558 | 7438.908 | 4681.288 | 9697.474 | 6321.075 | 12609.53 | 11140.52 | 4181.967 | 6694.133 | 7542.159 |
| 35155.89 | 51263.18 | 59007.04 | 75581.27 | 74830.93 | 121981.7 | 153039.1 | 149367.8 | 96346.8  | 45271.66 | 126308.7 |
| 55749.39 | 29041.46 | 68499.31 | 49391.59 | 58873.59 | 48093.5  | 33538.18 | 46232.53 | 74548.45 | 39568.83 | 50554.27 |
| 66757.57 | 77609.16 | 95909.69 | 70570.34 | 75196.17 | 97279.04 | 74146.9  | 90274.52 | 78260.61 | 85163.16 | 90333.59 |
| 191391.5 | 192805.4 | 90124.55 | 174946.6 | 129817.9 | 196125.1 | 127602.7 | 82268.88 | 130564   | 152787.1 | 149489.4 |
| 60825.3  | 57390.96 | 42245.65 | 28913.4  | 43890.71 | 55474.84 | 31881.46 | 23560.23 | 97093.03 | 51744.01 | 66565.1  |
| 130059.2 | 80160.31 | 103894.1 | 68623.25 | 64215.66 | 74156.96 | 78298.35 | 56075.78 | 91629.03 | 38635.01 | 73760.49 |
| 184668.2 | 36654.97 | 31379.59 | 27912.73 | 82678.36 | 43095.84 | 117167.4 | 87989.93 | 76102.98 | 65900.16 | 61281.4  |
| 190908.8 | 151099.8 | 74249.96 | 284719.1 | 318248.2 | 117124.7 | 102284.6 | 148524.2 | 146654.2 | 242773   | 80583.55 |
| 403789.2 | 228884.6 | 419363.8 | 251082.8 | 206394.4 | 270011   | 259067.8 | 284364.4 | 325564   | 265302.2 | 265231.8 |
| 95416.97 | 100270.1 | 77819.34 | 83187.35 | 83725.04 | 101351.6 | 51653.29 | 162542.8 | 105238.6 | 67000.8  | 88965.26 |
| 270968.4 | 168423.5 | 316385.1 | 202224.8 | 108369.3 | 247344   | 105138.5 | 285683.8 | 44884.29 | 183148.6 | 110105.8 |
| 40566.77 | 28902.92 | 46124.36 | 47095.98 | 41804.36 | 38562.73 | 16773.71 | 59353.24 | 50924.45 | 34892.19 | 60215.62 |
| 65038.85 | 87937.69 | 182824.3 | 138446.9 | 159275.5 | 94411.36 | 114088.8 | 173583.9 | 112607.6 | 356887.4 | 85520.09 |
| 2.06E+08 | 1.73E+08 | 1.76E+08 | 1.25E+08 | 1.55E+08 | 2.14E+08 | 29179176 | 2.63E+08 | 47016528 | 1.64E+08 | 91053760 |
| 1.92E+08 | 1.51E+08 | 1.33E+08 | 70859904 | 1.9E+08  | 94525920 | 57609164 | 1.81E+08 | 62152008 | 1.21E+08 | 83294664 |
| 565391.1 | 482138.5 | 438171.8 | 378463.3 | 333599.2 | 362210.3 | 406098.2 | 352321   | 380595.2 | 515009.8 | 387817.6 |
| 6955.77  | 5815.799 | 35915.57 | 60136.29 | 34400.14 | 25620.13 | 54221.4  | 5995.195 | 10068.22 | 11767.59 | 30941.02 |
| 34923.32 | 26358.66 | 143482.9 | 29507.65 | 28123.45 | 52430.94 | 36871.59 | 69890.02 | 93673.98 | 47374.79 | 67896.38 |
| 1.09E+08 | 89382592 | 69406856 | 57192576 | 12074344 | 11942027 | 4086063  | 85193592 | 25065090 | 76801272 | 39807872 |
| 44025.08 | 24752.49 | 21528.87 | 18450.26 | 14251.91 | 27737.44 | 18862.51 | 23474.29 | 3923.78  | 75860.34 | 14339.05 |
| 45921.93 | 27575.67 | 73612.06 | 76001.75 | 63989.96 | 71954.73 | 84629.65 | 107401.6 | 110940.5 | 24178.3  | 84076.69 |
| 18515.42 | 31918.05 | 58551.93 | 43218.02 | 39936.98 | 36220.71 | 41178.79 | 39870.9  | 56776.68 | 24793.37 | 44692.46 |
| 1411651  | 733956.7 | 577462.4 | 334717.2 | 356982   | 337678   | 136291.5 | 386019.5 | 507082   | 637008.6 | 391661.5 |



|          |          |          |          |          |          |          |          |          |          |          |
|----------|----------|----------|----------|----------|----------|----------|----------|----------|----------|----------|
| 57633.5  | 27745.85 | 44225.2  | 35814.2  | 34931.14 | 29698.27 | 42920.05 | 42631.7  | 61911.54 | 35636.46 | 22005.53 |
| 15008.64 | 15209.65 | 18415.38 | 17165.13 | 18343.74 | 13562.75 | 7392.229 | 15855.18 | 19898.02 | 13621.8  | 10206.11 |
| 924468.9 | 786721   | 891122.9 | 635732.1 | 660167.9 | 745036.8 | 867913   | 1140079  | 848553.8 | 552987   | 777231.4 |
| 93483.73 | 78998.8  | 81765.38 | 130218.4 | 79545.97 | 100875.7 | 98607.89 | 108688.8 | 71739.85 | 64960.98 | 77260.47 |
| 24085.57 | 13922.92 | 14356.9  | 34611.34 | 18327.92 | 56186.18 | 39802.08 | 34665.11 | 3518.002 | 56300.83 | 26086.02 |
| 21927.3  | 7341.798 | 8808.033 | 12520.41 | 10951.2  | 9501.343 | 7723.068 | 10940.21 | 8081.276 | 4815.989 | 10902.91 |
| 138859.3 | 115899.7 | 200211   | 121524.1 | 71825.38 | 76848.08 | 184894.4 | 110936.4 | 109590   | 114496.4 | 193411.2 |
| 428292   | 2278621  | 115553.4 | 520047.2 | 3643256  | 318909.3 | 134502.9 | 252338.8 | 101275.9 | 360645.2 | 281988.7 |
| 62251.62 | 6868.055 | 14447.83 | 13789.05 | 15499.13 | 11224.54 | 15303.05 | 19079.32 | 4688.452 | 15662.43 | 18668.75 |
| 138134.1 | 82000.27 | 134711.4 | 93632.23 | 110770.1 | 107986.9 | 108043.8 | 123856.6 | 99631.28 | 75451.3  | 122779.1 |
| 46758.11 | 51412.03 | 24847.45 | 9072.215 | 16805.28 | 48664.83 | 16620.1  | 92605.52 | 57995.96 | 5478.951 | 39875.82 |
| 54510.72 | 9441.729 | 6417.317 | 10118.97 | 12842.22 | 19470.13 | 12173.25 | 12646.39 | 27066.91 | 7278.279 | 3404.667 |
| 14659.29 | 3408.061 | 3824.815 | 7572.08  | 5118.428 | 5021.75  | 5873.981 | 4720.589 | 987.9618 | 6811.12  | 5509.954 |
| 1250748  | 135000.4 | 99242.8  | 114697.5 | 285377.8 | 118597.2 | 93732.41 | 138870.3 | 118096.8 | 112192.2 | 203942.8 |
| 42505.74 | 15922.66 | 41672.92 | 30498.91 | 27851.95 | 19577.34 | 38804.57 | 34351.46 | 17311.22 | 23806.32 | 34033.91 |
| 96451.78 | 88903.7  | 106034.3 | 70314.76 | 84025.15 | 95953.36 | 87183.84 | 118421.5 | 83340.73 | 100939.5 | 109448.9 |
| 230655.4 | 104611.9 | 134047.6 | 177649.8 | 96847.28 | 119175.8 | 94700.48 | 139429   | 71602.4  | 106153.5 | 107904.6 |
| 1149168  | 11030.59 | 629345.6 | 664176.3 | 720238.8 | 334279.6 | 105791.8 | 155468.6 | 654685.6 | 23188.55 | 420108.8 |
| 4072115  | 102294.4 | 11190.66 | 11928.6  | 574077.2 | 12548.71 | 23941.86 | 207713.8 | 35201.38 | 95298.55 | 345820.8 |
| 25481.65 | 13437.47 | 23432.02 | 12610.65 | 18367.56 | 15912.91 | 18875.58 | 15937.13 | 12029.77 | 19978.82 | 19391.69 |
| 2285288  | 1721316  | 2044689  | 1296668  | 1582535  | 1769244  | 2051118  | 1674475  | 1778875  | 1427523  | 1999727  |
| 225819.1 | 123979   | 215698.1 | 174939   | 168850.2 | 184371.4 | 241439.3 | 251133.6 | 252885.3 | 66472.65 | 199822.3 |
| 76564.55 | 90253.78 | 177132.2 | 69991.63 | 69768.25 | 65450.92 | 64552.29 | 110081.3 | 52290.32 | 53796.53 | 116234.4 |
| 195635   | 154275.6 | 208969.8 | 106830.2 | 131051.1 | 123324.4 | 146245.3 | 150429.9 | 189990.6 | 87942.58 | 166951.6 |
| 320093.1 | 47993.65 | 200911.3 | 56351.66 | 122095.5 | 90105.5  | 132145.2 | 80963.66 | 101045.3 | 137260.3 | 109234.5 |
| 4705867  | 7625018  | 6899650  | 4571155  | 5149872  | 3235934  | 3128627  | 4814103  | 4145977  | 20693448 | 4309731  |
| 1210023  | 508463.5 | 908549   | 346543.5 | 385517.2 | 294631.9 | 78452.98 | 672064.4 | 184372.2 | 233655.8 | 433334.3 |
| 1693190  | 1231915  | 1164735  | 966329.8 | 1146578  | 1377917  | 1251791  | 1598538  | 1517211  | 1139905  | 927178.4 |
| 24506.75 | 7603.16  | 23905.56 | 15829.73 | 13799.85 | 12377.76 | 25889.82 | 5699.855 | 648256.1 | 25487.98 | 15596.95 |
| 302434.2 | 149754.2 | 130921.6 | 139167.5 | 180368.5 | 160318.1 | 141797.2 | 187780.8 | 190283.8 | 162639.5 | 130098.7 |
| 112828.6 | 138214.6 | 124535.7 | 122452.7 | 115749.3 | 100639.4 | 108900.9 | 89040.86 | 312379.3 | 85573.83 | 113319.5 |
| 1735794  | 536823.2 | 1066752  | 1116655  | 511664.2 | 595823.7 | 884035.2 | 947959.9 | 204143.3 | 1339417  | 1004736  |
| 245883.9 | 435310.6 | 170700.1 | 228148   | 262424.9 | 217066.9 | 219202.9 | 255560.2 | 650231.8 | 379630   | 181687.6 |
| 2323914  | 1683971  | 404284.8 | 360110.7 | 345368.1 | 439972.2 | 296562.6 | 331289.4 | 234139   | 3286504  | 438346.7 |
| 52355.86 | 29702.19 | 33349.15 | 37872.08 | 54959.22 | 52014.63 | 35545.96 | 80742.77 | 40164.84 | 52924.94 | 74305.58 |
| 1428416  | 5105708  | 3480728  | 2384442  | 5630357  | 5616475  | 4050587  | 7218935  | 3974292  | 1151057  | 6171916  |
| 34069.09 | 51525.78 | 27670.32 | 17904.57 | 15515.38 | 13298.4  | 27027.45 | 22444.47 | 19749.61 | 37585.68 | 31706.74 |
| 56982.23 | 158884.7 | 70787.73 | 72752.12 | 41048.18 | 50205.49 | 36506.57 | 75562.75 | 26464.61 | 96423.91 | 58907.2  |
| 7946.629 | 6496.207 | 15787.69 | 12988.5  | 8808.574 | 14307.17 | 9609.881 | 14431.45 | 15767.1  | 10340.75 | 10935.51 |
| 208862.4 | 184317.7 | 147254.4 | 108687   | 775712.7 | 127824.7 | 95948.92 | 936663.3 | 135970   | 118275.7 | 491344.6 |
| 526705.3 | 389611.7 | 724837.6 | 980830.4 | 804906.9 | 654583.4 | 509453.6 | 875868.6 | 409108.8 | 734961.8 | 772486.3 |
| 72608.48 | 10670.66 | 138112.9 | 90286.48 | 56423.47 | 107568.1 | 82544.82 | 132828.1 | 83784.14 | 36617.4  | 70183.87 |
| 101735.3 | 97943.5  | 93706.34 | 21362.6  | 80185.81 | 84857.41 | 62549.59 | 51795.8  | 73760.33 | 72603.15 | 78844.99 |
| 222986.3 | 290150.6 | 391848.3 | 226730.5 | 196235.5 | 281524.5 | 162989.4 | 390137   | 194021   | 91859.11 | 307577.6 |
| 105105.6 | 16489.8  | 44191.89 | 19294.64 | 9194.407 | 22605.47 | 3305.521 | 20123.95 | 21600.15 | 20299.62 | 17996.34 |
| 13231.94 | 12570.29 | 17398.17 | 7545.69  | 7616.095 | 11672.57 | 14707.85 | 12413.16 | 429470.9 | 23086.15 | 20949.88 |
| 49036.61 | 29971.66 | 17219.72 | 12778.3  | 25725.13 | 33786.88 | 41102.55 | 43550.35 | 34499.29 | 39437.02 | 55836.16 |
| 36829.86 | 34117.28 | 63255.81 | 50549.54 | 45219.62 | 70526.8  | 47677.67 | 52072.8  | 45361.3  | 40768.45 | 48672.51 |
| 36818.19 | 27550.22 | 33558.2  | 24417.68 | 22176.36 | 37574.29 | 22858.24 | 20213.54 | 40351.36 | 26166.77 | 21146.26 |

|          |          |          |          |          |          |          |          |          |          |          |
|----------|----------|----------|----------|----------|----------|----------|----------|----------|----------|----------|
| 130227.1 | 138923.8 | 235150.7 | 223373.3 | 249260.8 | 160310.1 | 180784.6 | 369111.6 | 346642.5 | 168561   | 218111   |
| 467917.2 | 158020.2 | 340709.6 | 145802.6 | 115789.1 | 168818   | 41009.89 | 247892.2 | 161059.4 | 142178.9 | 242311.5 |
| 59352.93 | 36852.67 | 33420.43 | 39636.74 | 31399.42 | 26457.43 | 34927.06 | 42910.48 | 45427.2  | 47513.13 | 37936.04 |
| 32969.43 | 31432.64 | 33820.72 | 42467.25 | 46531.05 | 38897.59 | 47617.66 | 53780.2  | 21141.74 | 46858.73 | 37114.92 |
| 372204.9 | 149680.8 | 367665.8 | 222530.9 | 80076.76 | 38360.54 | 230569.8 | 242665.2 | 283663.2 | 167848.5 | 90223.39 |
| 36329.93 | 24401.62 | 31668.92 | 16375.64 | 12904.21 | 19833.29 | 17186.12 | 21747.35 | 21111.6  | 25258.57 | 1599.627 |
| 776223   | 484844.3 | 727953.1 | 455226.1 | 643884.4 | 624556.3 | 629879   | 564907.8 | 197591.7 | 444097.1 | 826292.6 |
| 280278.6 | 49615.49 | 39788.34 | 85719.55 | 107478.1 | 82768.36 | 58504.42 | 33956.22 | 56849.29 | 650040.4 | 46647.96 |
| 132057.9 | 81291.84 | 112353.9 | 70093.88 | 90118.29 | 110411   | 99022.52 | 147446.1 | 100990.3 | 117688.9 | 104886.6 |
| 20618.61 | 13916.31 | 17458.01 | 22814.88 | 22677.01 | 23708.78 | 20401.83 | 21106.85 | 23488.64 | 31672    | 16854.64 |
| 34125.11 | 670666   | 20695.65 | 109092.3 | 317817.9 | 71071.88 | 49371.63 | 20167.69 | 8937.504 | 90651.21 | 65292.45 |
| 305354.6 | 109586.6 | 160760.8 | 100221.9 | 93952.25 | 81082.71 | 97494.55 | 62486.31 | 151213.2 | 77798.78 | 123267.6 |
| 48603.63 | 32818.3  | 39865.19 | 65272.79 | 60684.37 | 61109.52 | 69724.59 | 76911.64 | 50067.49 | 44229.5  | 73904.39 |
| 287405.8 | 337960   | 281366.3 | 268326.8 | 369766.3 | 319018.7 | 341440.9 | 237206.1 | 353316.6 | 304117.1 | 321503.5 |
| 84085.05 | 176123.3 | 152261.5 | 260316.9 | 183956.7 | 194958.9 | 216093.5 | 99370.89 | 51160.55 | 161376.5 | 158730.7 |
| 18074.97 | 27361.17 | 26489.4  | 48159.65 | 20889.07 | 30794.04 | 23954.98 | 28872.05 | 18620.57 | 33813.09 | 24087.44 |
| 9343.153 | 14960.3  | 17530.45 | 13767.57 | 11259.99 | 10024.23 | 9812.268 | 7617.251 | 5223.711 | 9181.36  | 13088.61 |
| 16976.82 | 17026.57 | 17242.11 | 16979.6  | 9370.116 | 13206.44 | 22263.18 | 15978.75 | 19083.79 | 16592.98 | 19369.96 |
| 61175.96 | 64129.09 | 37141.27 | 30989.67 | 69672.06 | 52551.88 | 28831.38 | 28038.02 | 46323.74 | 70435.67 | 40158.51 |
| 85811.75 | 60291.66 | 60059.77 | 52497.41 | 57027.05 | 44646.86 | 43850.63 | 33810.5  | 91405    | 57531.53 | 46528.98 |
| 12688.47 | 8721.643 | 7264.796 | 13539.2  | 8027.892 | 6722.396 | 8464.531 | 6601.873 | 5766.858 | 5313.682 | 6150.798 |
| 7947.056 | 16253.78 | 13278.47 | 21062.86 | 23007.63 | 24847.45 | 16122.2  | 25728.6  | 26846.73 | 35469.45 | 13350.23 |
| 111753.7 | 62399.27 | 84353.87 | 63343.29 | 63546.31 | 63860.94 | 46851.83 | 107549.3 | 73811.75 | 82792.23 | 68809.38 |
| 598949.8 | 593753.7 | 557769.7 | 428420.3 | 445632   | 544429.5 | 416786   | 787662.3 | 519993.1 | 458822   | 423485.4 |
| 34175.22 | 12724.65 | 29520.06 | 16662.49 | 15813.74 | 15006.79 | 14719.4  | 10773.08 | 37004.63 | 8803.082 | 22249.12 |
| 436075.8 | 319767.6 | 305821.3 | 686742.6 | 509286.8 | 353131.3 | 223233.7 | 140945.1 | 167727.6 | 4847373  | 116564.3 |
| 15207.59 | 2168.43  | 4192.742 | 6624.76  | 5690.44  | 4647.893 | 722.5555 | 938.4665 | 3495.678 | 6811.12  | 2589.506 |
| 257239.3 | 262272.9 | 215379.4 | 271878   | 287034.2 | 232118.4 | 293945.9 | 211010.3 | 293455   | 324554.5 | 284801.1 |
| 158124.7 | 67426.66 | 77231.21 | 96714.78 | 48158.84 | 38867.91 | 97524.7  | 21313.9  | 85850.25 | 81055.02 | 59879.38 |
| 68250.09 | 97336.53 | 81358.64 | 67166.16 | 98039.91 | 108720   | 81980.25 | 70307.42 | 117613   | 75687.52 | 104997   |
| 34278.43 | 79058.17 | 46418.92 | 37419.94 | 24670.46 | 41497.28 | 59371.76 | 32708.23 | 50154.12 | 23359.46 | 61695.61 |
| 163768.2 | 111837.2 | 93610.52 | 56871.7  | 82233.66 | 69116.1  | 91471.03 | 149456.6 | 85086.71 | 95184.92 | 81421.95 |
| 519799.8 | 613411.4 | 569990.1 | 435554.4 | 589304.8 | 636215.8 | 694502   | 647459.9 | 692514.1 | 597383.3 | 600182.7 |
| 7571.313 | 11832.24 | 9582.551 | 7547.051 | 7205.191 | 5473.983 | 1555.581 | 9499.677 | 5998.021 | 5389.109 | 15356.36 |
| 224215.5 | 177008.3 | 249036.5 | 254132.3 | 322353.2 | 249994.5 | 219727.9 | 335587.7 | 355706.5 | 97450.88 | 245014.6 |
| 55976.82 | 27765.01 | 32073.77 | 20449.11 | 31922.28 | 28213.07 | 46279    | 38100.96 | 32514.2  | 20448.55 | 28068.04 |
| 29036.54 | 21597.53 | 17150.1  | 19207.68 | 19852.45 | 21162.16 | 31736.12 | 6814.951 | 16786.88 | 39639.75 | 27224.58 |
| 23728.36 | 27512.15 | 11571.23 | 10554.52 | 1897.472 | 15292.58 | 17544.19 | 16988.79 | 35250.52 | 11855.82 | 17085.7  |
| 219503.4 | 102172.4 | 244807   | 282189.8 | 225944.7 | 243846.2 | 228589.5 | 241816.8 | 141807.1 | 120868.8 | 198725.3 |
| 19570.89 | 9146.581 | 5209.886 | 2915.548 | 10768.04 | 10687.83 | 19631.06 | 6713.105 | 4851.637 | 15749    | 12871.78 |
| 207025.5 | 138257.1 | 151469.7 | 140902.5 | 141424.3 | 158586.5 | 174228.4 | 107962.6 | 162282.3 | 148738.7 | 185498.8 |
| 30610.83 | 11245    | 40061.75 | 90083.77 | 27278.57 | 39966.18 | 23369.24 | 27783.81 | 12654.56 | 57288.96 | 32896.87 |
| 28054.46 | 14655.96 | 7143.679 | 8596.226 | 7123.607 | 5693.371 | 2141.385 | 2693.64  | 7300.26  | 9884.755 | 6580.528 |
| 61528.02 | 18813.7  | 49194.76 | 84916.7  | 62793.58 | 51085.21 | 114940.5 | 74674.57 | 44650.41 | 46191.63 | 60596.43 |
| 10185.95 | 16027.09 | 13882    | 11301.14 | 15218.95 | 7662.642 | 22830.61 | 22091.49 | 12108.57 | 19642.69 | 12662.15 |
| 307902.7 | 234697.5 | 266776.4 | 217853.2 | 235299.6 | 275618.7 | 289761.9 | 258494.8 | 322658.4 | 297521.7 | 281021.4 |
| 306713.6 | 232604.9 | 206025.7 | 185819.2 | 206142.3 | 211543.8 | 255364.6 | 135844.2 | 231705.3 | 220463.9 | 274273.2 |
| 23664    | 19800.05 | 16776.39 | 18043.48 | 14849.96 | 13380.98 | 15167.39 | 12699.97 | 17317.06 | 11953.64 | 15997.76 |
| 2011096  | 1377041  | 1158470  | 923640.1 | 1289700  | 1253393  | 1109613  | 2640725  | 1514515  | 1095615  | 1513706  |

|          |          |          |          |          |          |          |          |          |          |          |
|----------|----------|----------|----------|----------|----------|----------|----------|----------|----------|----------|
| 26659.55 | 38601.91 | 56368.83 | 32102.81 | 32242.48 | 37139.64 | 28990.28 | 40011.6  | 44871.43 | 25193.86 | 33866.45 |
| 28659.05 | 16879.52 | 91032.76 | 150363.2 | 112748   | 210344.5 | 470443.8 | 329223.9 | 20418.61 | 39117.49 | 367047   |
| 47589.64 | 27248.36 | 6903.859 | 7836.921 | 19826.6  | 8466.545 | 13366.51 | 20789.02 | 15458.78 | 56339.72 | 4524.17  |
| 220786.9 | 258004.8 | 326072.6 | 243075.6 | 217703.3 | 294133.1 | 238939.4 | 323123   | 250988.6 | 158260.2 | 310070.8 |
| 10364.24 | 10149.51 | 5193.047 | 2985.586 | 7873.2   | 16091.41 | 14238.81 | 16042.31 | 10423.51 | 13753.79 | 20012.46 |
| 146498.9 | 144299.4 | 128239   | 81133.16 | 101230.7 | 89458.24 | 66421.98 | 111445.3 | 95746.01 | 71896.51 | 132848.8 |
| 1643904  | 108325.2 | 131734   | 90484.63 | 61946.73 | 71192.02 | 81563.97 | 110571.2 | 110345.4 | 106183.5 | 82659.62 |
| 181347   | 126305.1 | 118296.7 | 94147.43 | 190380.4 | 151916.7 | 118346.4 | 105062.6 | 112169.3 | 105738   | 149237.1 |
| 39969.56 | 50782.25 | 45656.45 | 39751.7  | 40218.32 | 52445.43 | 42269.78 | 26142.69 | 89065.09 | 42635.11 | 50400.16 |
| 31448.62 | 51706.29 | 56777.4  | 40901.23 | 46139.98 | 33706.84 | 18091.53 | 66745.73 | 19603.36 | 23201.16 | 14441.69 |
| 82816.8  | 102235.2 | 65660.41 | 44475.36 | 117522.8 | 59427.24 | 50272.41 | 147931.9 | 42223.78 | 92917.03 | 100460.4 |
| 7400.913 | 7832.849 | 20772.49 | 18093.61 | 5155.09  | 12466.75 | 10894.96 | 18952.13 | 6071.304 | 9310.454 | 9933.783 |
| 276551   | 286958.2 | 192927.4 | 244774.8 | 248326.2 | 196238.7 | 205256.9 | 163309.4 | 576352.5 | 483237.2 | 275974.3 |
| 116541.9 | 32531.49 | 108027.5 | 151099.1 | 79012    | 107135.1 | 73779.23 | 77074.82 | 19122.98 | 87816.63 | 65914.8  |
| 38804.48 | 22238.72 | 27266.35 | 19135.56 | 19207.03 | 35396.74 | 42650.97 | 16537.72 | 24368.21 | 55107.71 | 25889.32 |
| 17950.3  | 12653.49 | 20878.75 | 14901.5  | 14891.59 | 20526.1  | 17473.15 | 11819.65 | 18170.82 | 22244.2  | 22132.66 |
| 99831.84 | 191644   | 81152.64 | 133528.6 | 124027.5 | 128431.8 | 37193.64 | 115852.8 | 189763.9 | 112670.2 | 97863.4  |
| 37163.12 | 19637.79 | 19690.84 | 28358.56 | 30606.09 | 35511.1  | 47711.96 | 60631.87 | 24642.11 | 22660.33 | 30681.98 |
| 31974.28 | 31218.87 | 34819.95 | 32789.16 | 21294.09 | 23877.23 | 31878.28 | 14406.76 | 23220.49 | 28159.13 | 32727.36 |
| 412400.3 | 169063.2 | 151991.4 | 117437.4 | 488055   | 237949.3 | 149738.9 | 219535.3 | 216044   | 217700.9 | 248969.3 |
| 37265.23 | 113229.4 | 90121.66 | 46939    | 100365.4 | 23185.1  | 52245.05 | 42644.22 | 40037.96 | 66275.05 | 52443.02 |
| 192370   | 199131.3 | 156030.9 | 149876   | 135973.8 | 122206.3 | 135275.9 | 147847.4 | 223184.5 | 131236.5 | 114298.2 |
| 162013.5 | 15758.38 | 7338.388 | 10115.52 | 38164.63 | 14824.01 | 11343.87 | 31501.05 | 16764.61 | 19488.37 | 21536    |
| 14717.82 | 11383.95 | 17257.65 | 26521    | 12141.55 | 20691.11 | 21162.1  | 9675.385 | 9842.486 | 7707.109 | 13318.81 |
| 47206.61 | 28533.39 | 29173.8  | 28587.81 | 40638.34 | 52461.69 | 36963.21 | 22405.25 | 42575.75 | 45694.21 | 27282.93 |
| 14469.46 | 3591.274 | 7890.681 | 11048.54 | 9614.8   | 6667.906 | 16237.72 | 13232.04 | 2772.027 | 9967.007 | 21405.74 |
| 17415.29 | 2770.466 | 3279.147 | 7577.416 | 3046.175 | 3587.529 | 3214.988 | 2528.388 | 1952.971 | 4378.14  | 4702.013 |
| 1566.764 | 3485.11  | 2869.872 | 5213.523 | 4615.114 | 4143.557 | 4173.243 | 2326.394 | 1673.741 | 6811.12  | 1288.833 |
| 16432.69 | 21209.7  | 15362.89 | 14621.34 | 17467.72 | 9558.702 | 12512.44 | 37474.48 | 15564.26 | 18651.04 | 19482.31 |
| 7272300  | 2869384  | 5115623  | 3552897  | 3184289  | 5840191  | 4657539  | 5579009  | 6322464  | 2379719  | 5400219  |
| 120644.1 | 163125.6 | 106096.2 | 141003.9 | 114995.4 | 112723   | 135148.3 | 135801.9 | 23183.54 | 385070.3 | 116588.4 |
| 19420.55 | 14665.74 | 13230.49 | 13546.06 | 14557.75 | 17948.68 | 14264.66 | 11738.94 | 16417.19 | 10827.03 | 11958.56 |
| 38262.38 | 19822.54 | 47669.37 | 42640.89 | 34104.78 | 35404.39 | 22073.29 | 55948.79 | 19343.49 | 23387.84 | 43653.8  |
| 11046.64 | 10027.18 | 21494.54 | 15589.15 | 9871.036 | 14669.2  | 9748.436 | 12380.01 | 22114.41 | 105115.7 | 13938.37 |
| 11598.62 | 4807.185 | 8282.063 | 3314.08  | 4767.728 | 6512.538 | 3356.76  | 7229.879 | 3790.006 | 1777.139 | 5057.552 |
| 211990.4 | 172047.2 | 257246.7 | 128938.1 | 151932.8 | 171793.7 | 175090.5 | 264227.6 | 178202   | 79604.9  | 233585.2 |
| 1508342  | 47988.8  | 24061.94 | 64060.05 | 336298.2 | 39751.13 | 105645.2 | 219566.8 | 32905.64 | 46411.76 | 272413.8 |
| 21853.63 | 22752.35 | 19616.87 | 42532.24 | 17963.16 | 24035.81 | 17421.82 | 24553.12 | 14239.74 | 47114.6  | 57930.23 |
| 116545.2 | 65786.5  | 107167.2 | 127672   | 92482.71 | 114421   | 127391.9 | 131289.8 | 79452.46 | 89459.11 | 117035.8 |
| 83422.99 | 103237.9 | 50389.96 | 47723.7  | 96740.02 | 81204.72 | 47183.96 | 42074.64 | 64237.42 | 61055.44 | 75354.28 |
| 373560.6 | 212633.2 | 404918.7 | 79252.3  | 252837   | 140161.3 | 197309.3 | 381860.3 | 407275.8 | 86795.71 | 323853.4 |
| 95598.77 | 54762.15 | 78967.2  | 57992.66 | 77709.68 | 93041.87 | 79383.39 | 61632.23 | 74661.3  | 71350.9  | 97088.66 |
| 18920.97 | 33281.24 | 40956.48 | 69428.68 | 45943.37 | 44840.99 | 52466    | 22280.11 | 12641.39 | 144891.6 | 41710.64 |
| 121714.2 | 36199.91 | 131032.2 | 68936.61 | 84862.85 | 81142.13 | 93725.68 | 91599.08 | 88159.78 | 21836.45 | 118516.5 |
| 70408.06 | 75657.31 | 44010.53 | 28649.93 | 56310.95 | 49048.7  | 44340.32 | 37299.47 | 65918.1  | 50106.04 | 70190.36 |
| 15301.86 | 6085.469 | 9068.406 | 4883.486 | 5978.97  | 4023.521 | 7174.676 | 3394.74  | 15001.43 | 4568.737 | 6614.502 |
| 3311521  | 5089641  | 5684742  | 5335244  | 4949832  | 5487343  | 4953978  | 8219228  | 3659002  | 3042092  | 4357266  |
| 25996.47 | 5335.801 | 4807.846 | 6452.969 | 6253.498 | 5334.046 | 1228.389 | 7298.354 | 7932.516 | 6898.677 | 2125.762 |
| 32547.26 | 14050.6  | 90100.55 | 152098.3 | 53922.56 | 165386.5 | 167188.4 | 74189.05 | 38381.96 | 105963.3 | 119470.9 |

|          |          |          |          |          |          |          |          |          |          |          |
|----------|----------|----------|----------|----------|----------|----------|----------|----------|----------|----------|
| 218575   | 438020.9 | 200655.5 | 295607.4 | 277324.8 | 212347.3 | 175699.5 | 268037.3 | 457966   | 1303014  | 154350.1 |
| 202216.7 | 99564.4  | 149818.1 | 114829.8 | 135700.3 | 188878.2 | 95303.02 | 247318.8 | 110144.4 | 107410.2 | 143105   |
| 21367.25 | 43117.96 | 10871.44 | 10886.08 | 10318.39 | 3273.129 | 3842.817 | 4604.393 | 24987.36 | 60453.36 | 10043    |
| 39301.39 | 11780.27 | 13543.32 | 30564.03 | 25254.17 | 22086.17 | 17617.6  | 8278.294 | 21867.48 | 33541.19 | 14589.66 |
| 13314429 | 14863973 | 13118237 | 9901422  | 10173353 | 10390059 | 11666159 | 12892558 | 10970102 | 11167961 | 11743430 |
| 234278.8 | 28030.78 | 18878.33 | 12991.08 | 47480.08 | 11797.74 | 15801.67 | 27806.07 | 17290.43 | 13596.15 | 39837.78 |
| 956203.6 | 493657.4 | 883829.3 | 647819.7 | 744421.5 | 627924.3 | 292208.5 | 1063243  | 739882.6 | 297626.7 | 611019.1 |
| 17156.33 | 14173.14 | 18471.5  | 21218.7  | 10206.82 | 15339.5  | 12267.9  | 5845.457 | 41402.09 | 14325.05 | 13085.18 |
| 23705.35 | 12448.95 | 26674.55 | 12256.31 | 16108.17 | 14401.24 | 10085.88 | 18078.74 | 36059.04 | 22008.62 | 16012.34 |
| 8570692  | 5178178  | 7437387  | 4531895  | 6045438  | 6716842  | 5355064  | 6861159  | 6239909  | 3795150  | 5719596  |
| 74852.08 | 68374.92 | 67803.67 | 46151.28 | 62052.53 | 48946.95 | 53059.82 | 44548.28 | 103012.8 | 30641.13 | 53826.07 |
| 313033.4 | 411482.6 | 526056.8 | 427332.1 | 639434.7 | 716553.3 | 458597.9 | 832492.8 | 372428   | 506548.5 | 543522.2 |
| 19818.13 | 19719.66 | 51696.51 | 44335.4  | 34744.88 | 65783.67 | 31975.85 | 47252.73 | 17209.87 | 33489.32 | 64269.26 |
| 19664.72 | 18970.52 | 37650.46 | 64142.36 | 49230.64 | 58894.13 | 69962.39 | 29305.44 | 11482.88 | 48336.96 | 66159.46 |
| 216118.8 | 347045.3 | 294617   | 294448.4 | 241341.2 | 234290.4 | 145680.5 | 43120.74 | 204329.1 | 1118864  | 215187.7 |
| 216043.7 | 228400.2 | 114891.5 | 97922.94 | 310090.6 | 194027.9 | 125042.1 | 109472.7 | 163262.6 | 181081.4 | 187954.7 |
| 1626762  | 558687.7 | 1716743  | 371510.5 | 616787.4 | 659909.1 | 103118   | 1129931  | 212960.8 | 532225   | 1153877  |
| 19905.49 | 24385.01 | 14201.83 | 5649.392 | 24851.89 | 9204.999 | 23178.31 | 18305.84 | 18441.13 | 26510.71 | 38411.52 |
| 58038.23 | 19590.87 | 41956.19 | 22988.03 | 23999.73 | 33704    | 3224.661 | 50977.28 | 5218.472 | 18454.25 | 35832.38 |
| 12609.24 | 10169.17 | 20804.15 | 25573.53 | 17669.68 | 23441.95 | 25989.8  | 21160.25 | 5475.782 | 21350.38 | 38259.2  |
| 34404.53 | 34303.46 | 34012.75 | 8071.934 | 38780.87 | 8983.522 | 21087.93 | 26575.32 | 54255.27 | 28999.18 | 46890.27 |
| 134083.3 | 44248.68 | 109024.4 | 62693.68 | 74961.08 | 64796.07 | 66060.84 | 98495.15 | 114814.5 | 39101.5  | 82217.83 |
| 270053.6 | 271609.3 | 245799.1 | 189266.3 | 186564.3 | 205628.7 | 214054.7 | 170681.7 | 396060.6 | 302063.2 | 230289.3 |
| 315553.9 | 61080.08 | 95504.01 | 39901.79 | 47947.81 | 46827.49 | 12057.63 | 76101.84 | 25142.2  | 89066.65 | 26257.19 |
| 603147.1 | 1186426  | 352651.3 | 438788.7 | 176740.4 | 224352.1 | 262171.6 | 137658.8 | 207078.2 | 2475726  | 141733.1 |
| 7474.599 | 4087.95  | 3038.732 | 4278.056 | 3811.293 | 2035.546 | 3307.819 | 5948.195 | 1396.001 | 6811.12  | 5175.5   |
| 50279.2  | 18299.15 | 25714.58 | 19945.15 | 31224.54 | 25588.21 | 25232.59 | 38564.46 | 19700.75 | 20633.98 | 33148.63 |
| 4505.07  | 18614.79 | 15172.71 | 24110.55 | 5637.263 | 13428.49 | 40483.33 | 49875.21 | 10386.16 | 14611.24 | 25947.32 |
| 15384.6  | 52666.53 | 17316.86 | 27961.25 | 18988.32 | 17259.33 | 30117.57 | 15385.33 | 18853.93 | 33105.59 | 33134.36 |
| 283190.3 | 473112.7 | 336044.5 | 383113.7 | 286913.2 | 384299.6 | 320235.7 | 354062.6 | 211797.5 | 733977.2 | 315350.3 |
| 8041.51  | 4290.523 | 4241.021 | 2142.531 | 2819.706 | 1270.706 | 2808.193 | 2291.163 | 1410.88  | 6607.921 | 4653.241 |
| 113457.9 | 240340.1 | 97801.09 | 159181.2 | 133092.2 | 116825.8 | 92455.16 | 108055   | 111152.3 | 819954.1 | 83339.67 |
| 204192   | 114465.6 | 323802.7 | 393337.8 | 227773.1 | 290837.7 | 382628.2 | 225457.2 | 136979.1 | 192822.9 | 329374.7 |
| 276870.4 | 185976.8 | 208796.1 | 199221.7 | 187037.5 | 181175.5 | 225631.1 | 202516.3 | 402868.7 | 188658.1 | 232281.5 |
| 853521.8 | 406640.8 | 475394.3 | 437772.7 | 283078.3 | 496973.4 | 299805.1 | 646101.9 | 253085.8 | 325935.8 | 359050.7 |
| 100930   | 80214.75 | 106996.4 | 47949.86 | 69402.31 | 80838.14 | 81896.51 | 98811.26 | 97345.24 | 66240.67 | 79766.19 |
| 8480.773 | 16376.71 | 12155.15 | 15151.91 | 10872.02 | 11055.07 | 16041.91 | 16529.28 | 17782.01 | 14123.22 | 7022.743 |
| 14003.51 | 7817.591 | 37049.55 | 23196.06 | 40535.9  | 38124.62 | 16498.22 | 13088.86 | 26082.49 | 74184.73 | 19489.65 |
| 50269.18 | 66909.04 | 43154.39 | 103347.5 | 77047.15 | 152811.3 | 16186.33 | 98090.79 | 67118.94 | 134714.5 | 191606.6 |
| 30494.08 | 49074.31 | 17398.6  | 20912.29 | 49615.46 | 30143.65 | 20449.93 | 44341.1  | 24022.6  | 30952.7  | 30365.76 |
| 33171.55 | 56093.35 | 45140.77 | 47490.17 | 44581.19 | 43426    | 37035.84 | 60389.95 | 48300.17 | 19776.07 | 46284.85 |
| 11298.34 | 17094.42 | 13478.59 | 9119.36  | 13355.95 | 16865.67 | 4875.083 | 16699.48 | 5208.725 | 17484.13 | 15425.72 |
| 352497.8 | 216637.4 | 294173.9 | 259123.5 | 262250.7 | 234629.5 | 332323.3 | 168754.7 | 319567.9 | 261410.8 | 342355.6 |
| 55636.36 | 72264.09 | 56530.52 | 81942.03 | 148459.8 | 95119.14 | 102467.5 | 66982.19 | 54208.3  | 56680.88 | 93214.09 |
| 41873.9  | 43653.41 | 60999.47 | 22579.14 | 37926.62 | 51129.06 | 38041.79 | 50241.34 | 44436.94 | 33684.31 | 53742.15 |
| 52687.2  | 40822.98 | 38062.78 | 40988.16 | 26835.7  | 31357.87 | 14057.43 | 15179.37 | 15352.36 | 49590.47 | 26673.13 |
| 9515740  | 4480609  | 3870728  | 3109937  | 4563030  | 3991751  | 4683374  | 4599808  | 5379027  | 4584651  | 5187770  |
| 34107920 | 20492448 | 30244590 | 29248978 | 32539316 | 30702400 | 22844052 | 47464308 | 37167776 | 23847130 | 33493776 |
| 8728.468 | 23573.04 | 15945.4  | 16125.45 | 25281.98 | 13255.96 | 8479.496 | 9704.065 | 12450.98 | 66193.45 | 10741.81 |

|          |          |          |          |          |          |          |          |          |          |          |
|----------|----------|----------|----------|----------|----------|----------|----------|----------|----------|----------|
| 1141028  | 379432.8 | 900351.3 | 540532.5 | 647016.9 | 844718.4 | 636243.6 | 720923.6 | 936788   | 323611.5 | 639057.6 |
| 4510697  | 3112021  | 2463971  | 1974763  | 4855695  | 2571670  | 2167398  | 1925658  | 2128989  | 1794857  | 2882472  |
| 58402.25 | 26391.48 | 36082.02 | 24875.83 | 38534.57 | 28654.3  | 16216.58 | 40391.04 | 60181.03 | 33642.22 | 27603.61 |
| 286500.4 | 125513.7 | 158781.9 | 73574.95 | 187757.9 | 130769.2 | 120440   | 77207.43 | 104079.8 | 138959   | 160430.9 |
| 44750.13 | 8903.665 | 25723.42 | 24316.91 | 22194.75 | 19116.04 | 20773.33 | 24808.28 | 13479.98 | 21482.09 | 20638.05 |
| 93274.46 | 765776   | 193739.4 | 308756.9 | 230855.3 | 223384.6 | 163792.5 | 177930.4 | 231870.8 | 1359754  | 135397.7 |
| 207663.5 | 242613.5 | 156399.5 | 149207.6 | 203464.4 | 195545.9 | 201769.8 | 132771.6 | 806813.9 | 241760.4 | 209286   |
| 137414.5 | 73519.91 | 156142.3 | 105545.5 | 123973.3 | 145038   | 173890.3 | 158829.1 | 152953.8 | 132203.7 | 132026.2 |
| 22100.94 | 7182.34  | 21027.33 | 5269.797 | 9695.147 | 7996.906 | 7795.039 | 13018.71 | 18370.56 | 5392.769 | 16236.54 |
| 22063.28 | 34072.5  | 12280.51 | 28887.05 | 33930.51 | 33748.88 | 31671.01 | 15144.86 | 124337.4 | 40405.35 | 19330.76 |
| 24431.19 | 18046.94 | 18046.75 | 23029.28 | 23049.14 | 35663.16 | 23146.75 | 17840.51 | 27978.32 | 29812.63 | 20060.93 |
| 246842.1 | 200904.3 | 211117.6 | 187469.8 | 189655.6 | 192865.4 | 277107.3 | 117272.1 | 287617.6 | 237736.7 | 236847.2 |
| 22067.13 | 27563.92 | 18897.75 | 10938.08 | 13431.93 | 12205.01 | 10989.27 | 17330.03 | 13960.38 | 51632.14 | 24702.39 |
| 19564.54 | 13167.08 | 19073.66 | 11111.35 | 17031.98 | 17649.02 | 10380.29 | 11908.49 | 18656.26 | 20859.13 | 20559.9  |
| 27376.43 | 14339.76 | 17572.61 | 8607.924 | 17115.11 | 16658.8  | 14175.05 | 17775.9  | 25261.54 | 16654.52 | 19851.2  |
| 86140.41 | 49738.6  | 58267.16 | 47329.08 | 52991.69 | 55942.35 | 50235.1  | 40773.59 | 83806.42 | 46220.3  | 60062.54 |
| 107189.2 | 76216.81 | 109822   | 69049.09 | 58156.31 | 70392.97 | 122796.2 | 92973.54 | 112504.5 | 39119.69 | 92716.64 |
| 6871733  | 9302745  | 9897002  | 10913310 | 13959971 | 13335151 | 10267418 | 14035189 | 11767288 | 6716505  | 9107521  |
| 523601.6 | 84561.36 | 256396   | 140155.4 | 193929.3 | 206847.1 | 222993.5 | 293252.5 | 235177.2 | 143070.3 | 287261.6 |
| 6519.116 | 25704.45 | 27071.46 | 17502.08 | 21693.44 | 19121.59 | 21293.74 | 6121.763 | 73367.7  | 25904.69 | 22639.82 |
| 31640.3  | 29581.01 | 16031.88 | 38329.23 | 36775.02 | 31259.32 | 42387.32 | 30967.97 | 64442.54 | 49574.54 | 48666.26 |
| 13906.3  | 27624.69 | 11192.21 | 19540.15 | 11341.61 | 12626.53 | 16013.31 | 20266.99 | 11219.61 | 32615.77 | 8790.412 |
| 256381.3 | 156718.6 | 168814.9 | 143065.8 | 166084.2 | 147552.3 | 207994   | 96125.63 | 202478.1 | 191048.3 | 180591.3 |
| 78668.1  | 109199   | 178821.6 | 162867.8 | 127149.3 | 141567.5 | 83500.95 | 120235.8 | 123026.8 | 168375.4 | 98774.45 |
| 27473.01 | 16503.38 | 3023.857 | 5049.754 | 15890.02 | 20847.51 | 18396.04 | 24972.91 | 17924.27 | 37357.82 | 17997.26 |
| 56094.28 | 71957.66 | 45581.21 | 56536.98 | 73750.07 | 56036.71 | 54763.19 | 43870.88 | 41304.63 | 42724.06 | 59588.21 |
| 14659.29 | 4384.658 | 2597.302 | 1691.028 | 2160.641 | 2953.623 | 2961.978 | 2037.554 | 2449.862 | 6811.12  | 3683.02  |
| 398265.6 | 236532.3 | 354541.4 | 233966   | 362489.1 | 363656.3 | 352269.1 | 408084.9 | 307926.8 | 264436.6 | 371863.2 |
| 67064.52 | 43640.69 | 81544.38 | 54161.44 | 58428.72 | 59926.13 | 71205.31 | 80036.56 | 67211.22 | 40276.29 | 69171.47 |
| 24832.49 | 23402.62 | 3565.561 | 35649.64 | 10347.59 | 76448.52 | 98026.33 | 49459.76 | 1801.146 | 53166.48 | 77971.54 |
| 124117   | 64771.45 | 121961.8 | 81515.3  | 91934.55 | 94220.73 | 98192.62 | 103888.4 | 106652.8 | 73114.13 | 146182   |
| 2904.331 | 6385.891 | 2640.559 | 11131.23 | 21007.05 | 9622.503 | 3749.496 | 6120.742 | 93965.8  | 6674.617 | 8113.964 |
| 29233.1  | 14378.82 | 20233.82 | 13540.15 | 13296.21 | 24180.62 | 17946.05 | 13349.48 | 12771.17 | 13504.43 | 22767.5  |
| 20713.17 | 21054.81 | 12317.89 | 11797.76 | 17158.13 | 12700.77 | 13428.6  | 14480.73 | 57590.11 | 23210.87 | 22390.24 |
| 151561.6 | 54919.13 | 113911.6 | 313232.7 | 312551.5 | 92992.43 | 158368.3 | 101005.8 | 18720.08 | 132602   | 191754.5 |
| 130143.1 | 15178.94 | 21534.02 | 33134.71 | 43673.91 | 38777.32 | 15390.45 | 15414.58 | 13519.66 | 13519.66 | 31474.32 |
| 178688.7 | 484762.2 | 377612.2 | 330511.8 | 283532   | 285508.9 | 278776.8 | 224402.6 | 834975.1 | 207809.5 | 331079.1 |
| 147806.1 | 130370.7 | 126733.9 | 110842.5 | 108306.5 | 168597.7 | 90394.78 | 133102   | 462848.6 | 100502.3 | 131153.2 |
| 72578.44 | 57960.14 | 60190.42 | 35069.47 | 33622.42 | 47940.21 | 45489.7  | 84458.74 | 38023.64 | 64851.58 | 86912.61 |
| 15769.71 | 6017.46  | 9840.26  | 7880.801 | 7455.044 | 9830.068 | 3190.55  | 11673.33 | 5231.99  | 7967.586 | 11764.7  |
| 943687.2 | 785318.9 | 891386.6 | 702399.6 | 919139.6 | 798041.6 | 723865   | 568374.4 | 972911.3 | 774434.1 | 811306   |
| 35898.02 | 26114.06 | 83409.83 | 115605   | 69444.41 | 78199.08 | 92169.27 | 51717.96 | 27270    | 50528.18 | 89762.52 |
| 9630.422 | 32307.68 | 23465.28 | 14269.91 | 30328.74 | 34820.43 | 20707.99 | 22794.45 | 9833.408 | 26917.15 | 17704.86 |
| 161205.1 | 947520   | 202331.3 | 283822.3 | 134718   | 238471.5 | 140568.1 | 238776.7 | 156450.5 | 2529462  | 180813.3 |
| 9307.772 | 6757.859 | 9923.149 | 6375.604 | 4172.489 | 7514.122 | 3450.515 | 7051.638 | 6327.523 | 4980.369 | 8721.554 |
| 37808.8  | 21037.9  | 22371.07 | 16465.06 | 54419.1  | 42973.46 | 24609.58 | 24287.86 | 56867.5  | 138875.5 | 20361.58 |
| 938634.4 | 473319.3 | 649895.4 | 548557.3 | 1174480  | 748676.5 | 493717.9 | 289322.5 | 449523.9 | 5658876  | 517099.1 |
| 3086.113 | 3097.544 | 2989.666 | 4766.357 | 11015.86 | 4143.941 | 3186.583 | 2594.23  | 1768.537 | 16947.81 | 2285.105 |
| 34624.98 | 17556.5  | 52709.27 | 27637.32 | 31653.57 | 38478.68 | 27747.63 | 21603.82 | 44457.7  | 48649.37 | 25984.47 |

|          |          |          |          |          |          |          |          |          |          |          |
|----------|----------|----------|----------|----------|----------|----------|----------|----------|----------|----------|
| 404370.6 | 391243.1 | 451564.7 | 565778.6 | 619639   | 623063.3 | 289712.3 | 168212.9 | 283685.8 | 3856408  | 175232.6 |
| 130929.2 | 196707.1 | 197142.7 | 220969.6 | 181694.7 | 280838.4 | 108591.6 | 37914.67 | 57831.89 | 3097458  | 99408.43 |
| 946484   | 910365.6 | 905930.7 | 1381125  | 1391462  | 1334968  | 554764.6 | 342489.8 | 590887.8 | 9444096  | 399435.1 |
| 65057.52 | 13695.73 | 18498.39 | 20479.81 | 19929.11 | 19728.8  | 30569.25 | 28624.1  | 21773.59 | 5626.38  | 16800.72 |
| 4183169  | 3443516  | 2986486  | 3648241  | 3309589  | 3281341  | 4449049  | 2320018  | 5938205  | 5215289  | 3894399  |
| 670269.5 | 356410   | 894537.1 | 711794.6 | 690820.1 | 846701.3 | 879943.3 | 746195.9 | 563915.1 | 575630.5 | 709684.4 |
| 18923.63 | 12778.11 | 20725.44 | 15046.94 | 16240.06 | 17181.89 | 12657.44 | 15034.71 | 11998.67 | 18439.61 | 14789.8  |
| 368051   | 457968.3 | 335296.3 | 382210.7 | 359816.6 | 388406.8 | 304731.1 | 209156.6 | 385052   | 297400.9 | 426014.9 |
| 1015235  | 491199.6 | 1281500  | 1279822  | 1068472  | 851991.1 | 1050501  | 638618.3 | 422267.3 | 636215.8 | 1207500  |
| 17936.54 | 4434.069 | 6136.125 | 9039.926 | 4315.081 | 4871.344 | 4385.16  | 4382.25  | 4114.357 | 6811.12  | 8685.069 |
| 73795.93 | 54383.55 | 93737.05 | 105402.1 | 113422.3 | 102508.9 | 96353.59 | 64822.59 | 47988.84 | 68736.92 | 122438   |
| 516795.8 | 346320.8 | 479025.7 | 605912.3 | 640589.8 | 533068.8 | 316015.3 | 149347.3 | 262168.5 | 4914604  | 233455.1 |
| 47626.5  | 5391.761 | 4430.277 | 9739.677 | 5902.99  | 4842.744 | 13823.37 | 20851.92 | 53999.93 | 8799.877 | 24603.61 |
| 19741.26 | 11434.16 | 19874.7  | 12536.28 | 20835.34 | 12164.53 | 16760.67 | 10315.84 | 23599.85 | 23189.64 | 16688.82 |
| 65094.95 | 29353.2  | 30823.95 | 58467.63 | 93694.55 | 29812.15 | 13914.28 | 37803.67 | 67876.41 | 78488.58 | 6885.443 |
| 29325.63 | 27714.83 | 56247.58 | 38204.11 | 36119.07 | 49422.79 | 61483.54 | 45851.12 | 53922.44 | 17240.39 | 54778.47 |
| 286205   | 223032.6 | 273154.3 | 353071.1 | 392244.6 | 285748.7 | 274933.2 | 300804.6 | 585325.8 | 408712.7 | 238757.5 |
| 685023.8 | 549573.9 | 701798.7 | 320116.1 | 464519.5 | 891237.9 | 1392442  | 400248.7 | 831280.8 | 608456.1 | 1104721  |
| 15515.32 | 7653.891 | 16484.93 | 23346.02 | 13647.53 | 17669.48 | 19349.36 | 12903.14 | 7801.027 | 15363.36 | 12316.41 |
| 977049.6 | 840246.7 | 499657.7 | 450383.1 | 732838.4 | 507001.1 | 593220.1 | 461812.5 | 607537.9 | 785682.8 | 802927.3 |
| 75800.55 | 46954.91 | 74440.98 | 71865.32 | 56112.55 | 44151.74 | 53637.16 | 53321.59 | 53304.28 | 50123.4  | 61333.84 |
| 169387.1 | 84572.2  | 98429.69 | 68253.95 | 79168.95 | 119199.1 | 87867.67 | 107567.2 | 100070.1 | 62416.45 | 135102.3 |
| 39925.19 | 62805.92 | 39615.85 | 45110.48 | 56198.53 | 112840.8 | 126452.6 | 123951.7 | 58779.82 | 63260.33 | 102898.1 |
| 14703.5  | 11618.63 | 49223.27 | 43121.08 | 31910.49 | 35654.93 | 12438.07 | 17107.41 | 11913.7  | 14223.39 | 12780.33 |
| 45911.57 | 17858    | 40829.48 | 47335.31 | 43104.13 | 39779.26 | 52835.79 | 56014.85 | 32033.41 | 26083.16 | 22801.84 |
| 100894.2 | 154757.1 | 103074.1 | 86316.73 | 115931.8 | 111984.9 | 79841.15 | 94388.5  | 152294.7 | 131687.5 | 107146.8 |
| 216621.1 | 432172.9 | 428922.8 | 571902   | 621385.1 | 323159.8 | 476105.8 | 449302.6 | 107930.4 | 198318.9 | 241045.9 |
| 77261.24 | 93471.95 | 196274.5 | 181176.5 | 183183.3 | 170633.6 | 149765.9 | 139581.5 | 35626.87 | 283313.8 | 228496.2 |
| 17169.48 | 19558.48 | 40923.3  | 31212.73 | 30573.02 | 12656.59 | 46173.16 | 16466.35 | 30431.81 | 30397.86 | 32269.4  |
| 74079.33 | 54955.04 | 38856.86 | 42768.31 | 94908.75 | 41115.93 | 105682.2 | 59295.68 | 95380.85 | 33300.78 | 82027.49 |
| 30185902 | 16360250 | 23619324 | 16224261 | 15328608 | 20728534 | 6771060  | 27193928 | 8614233  | 11007210 | 16732646 |
| 53326.66 | 33170.64 | 48939.36 | 33415.42 | 34117.4  | 27063.49 | 30408.81 | 38417.66 | 36149.88 | 23163.59 | 32981.56 |
| 36854.82 | 16984.23 | 29424.5  | 14716.35 | 19879.69 | 25005.66 | 22915.48 | 32908.69 | 26973.6  | 17951.21 | 29655.61 |
| 84672.7  | 78192.56 | 106691.7 | 81531.73 | 66777.77 | 72248.01 | 76944.16 | 44615.14 | 129431.7 | 76843.98 | 78204.63 |
| 34983.65 | 34828.71 | 25214.9  | 27567.99 | 30416.89 | 31257.52 | 26052.09 | 23745.99 | 41321.88 | 83331.27 | 30777.72 |
| 36826.39 | 5282.692 | 6788.864 | 8215.774 | 8243.883 | 6629.62  | 6800.382 | 9574.257 | 11451.44 | 4797.057 | 8583.554 |
| 51207.78 | 54102.04 | 91282.73 | 62952.52 | 66436.39 | 71120.76 | 50742.36 | 96287.5  | 48608.92 | 82129.45 | 50334.18 |
| 94125.98 | 43766.1  | 75487.51 | 55680.53 | 58054.92 | 64574.54 | 66554.38 | 56608.8  | 65894.92 | 67910.38 | 77404.73 |
| 27566.83 | 18361.25 | 17650.66 | 12407.89 | 15280.13 | 15949.75 | 19088.3  | 18460.58 | 16382.36 | 33645.79 | 15195.31 |
| 91128.31 | 33181.41 | 74939.99 | 91878.85 | 67260.7  | 19424.89 | 93552.84 | 79618.7  | 29869.31 | 43141.26 | 87838.01 |
| 38261.14 | 30953.05 | 59627.78 | 22283.38 | 29472.55 | 26176.2  | 19585.11 | 37525.72 | 40202.89 | 34871.14 | 32300.04 |
| 2118.758 | 1936.949 | 13736.22 | 2643.672 | 2696.255 | 4677.659 | 15854.84 | 2554.646 | 27418.49 | 1842.391 | 14194.88 |
| 52343.66 | 31284.13 | 46356.34 | 32341.94 | 36241.24 | 34885.26 | 37874.6  | 57786.45 | 49853.84 | 35833.62 | 53447.87 |
| 47673.69 | 44583.45 | 31063.84 | 36588.76 | 30221.68 | 27179.77 | 25219.9  | 21337.86 | 83191.42 | 37371.64 | 36134.38 |
| 103443.6 | 136458   | 94796.65 | 82257.11 | 113674   | 89432.32 | 101890.6 | 71636.11 | 88766.51 | 67194.55 | 68539.2  |
| 98332.7  | 64760.94 | 81307.19 | 37764.71 | 56196.92 | 64112.32 | 67713.22 | 64977.36 | 60184.17 | 49996.05 | 49310.68 |
| 122178.9 | 99928.7  | 95275.69 | 89333.02 | 112262.6 | 100581.4 | 113178.9 | 103918.3 | 105146.2 | 140658.4 | 114142.1 |
| 60050.74 | 46431.99 | 44882.66 | 35580.16 | 41476.3  | 46749.11 | 36406.88 | 36045.84 | 46004.45 | 49290.38 | 35573.55 |
| 12586.35 | 11507.16 | 6878.378 | 6664.061 | 23453.08 | 18938.12 | 1375.354 | 3015.165 | 16814.45 | 18249.91 | 5831.605 |

|          |          |          |          |          |          |          |          |          |          |          |
|----------|----------|----------|----------|----------|----------|----------|----------|----------|----------|----------|
| 11710.36 | 27461.29 | 26317.35 | 7337.092 | 19455.67 | 23944.38 | 13063.81 | 25928.97 | 33259.64 | 29598.24 | 17509.67 |
| 32943.9  | 12880.97 | 13930.09 | 18462.15 | 13806.75 | 18724.87 | 15965    | 23730.24 | 4507.979 | 17876.54 | 12360.83 |
| 140993.5 | 100171.6 | 226999.3 | 166069.7 | 153838.2 | 274300.2 | 174055.5 | 290330.4 | 176984.9 | 101512.5 | 159493.9 |
| 19661.91 | 19309.7  | 21816.92 | 12581.24 | 16864.01 | 14225.18 | 19379.75 | 24073    | 18674.42 | 30853.86 | 19378.47 |
| 23643.77 | 16273.7  | 23887.75 | 13938.75 | 16194.78 | 12453.31 | 22034    | 19361.09 | 13305.1  | 23583.31 | 22230.06 |
| 91130.64 | 46837.55 | 90135.45 | 41694.8  | 36264.14 | 41705.95 | 47271.24 | 22836.14 | 97558.71 | 27326.73 | 48225.3  |
| 3674.056 | 5438.134 | 13223.7  | 69050.09 | 24831.11 | 37584.7  | 27399.48 | 12039    | 1787.377 | 32248.9  | 24113.3  |
| 215529.2 | 330432.2 | 128758.1 | 124982.9 | 241087.5 | 158019.5 | 170440.9 | 156402   | 237779.7 | 268923.1 | 236406   |
| 41019.99 | 46515.9  | 128021.2 | 166998.9 | 150828.6 | 156689.5 | 127003.3 | 108111.8 | 21500.1  | 162598.6 | 160961.9 |
| 48912.31 | 31102.82 | 59968.6  | 17083.72 | 59629.77 | 38586.55 | 33567.19 | 36946.73 | 38113.46 | 45179.21 | 52144.83 |
| 99188.54 | 93481.6  | 107745.9 | 84305.05 | 79730.61 | 80548.02 | 68114.13 | 51940.7  | 149283.2 | 95467.53 | 79503.59 |
| 35532.5  | 17143.28 | 47675.64 | 60066.15 | 47407.62 | 44994.86 | 39011.95 | 39198.89 | 77137.52 | 30966.14 | 44663.11 |
| 4064353  | 1867566  | 2921567  | 1564915  | 2828579  | 2258916  | 1577781  | 4194383  | 2316740  | 1576993  | 2594544  |
| 22037.61 | 25119.43 | 37095.25 | 26412.85 | 28672.55 | 16697.4  | 20324.22 | 16418.17 | 30559.81 | 42029.51 | 9265.074 |
| 3306328  | 126118.6 | 49743.3  | 20208.24 | 278849.1 | 17942.14 | 29498.64 | 187588.3 | 99612.2  | 6247.539 | 101362.2 |
| 18539.9  | 20667.19 | 70273.36 | 116551.1 | 76871.97 | 105107   | 115490.5 | 55053.23 | 11923.99 | 104423.6 | 82968.8  |
| 216843.4 | 105843.8 | 9037.422 | 9118.698 | 207987.4 | 5495.972 | 9763.33  | 116335.9 | 44373.53 | 125308.5 | 10156.28 |
| 116835   | 62704.88 | 82007.11 | 52694.13 | 90166.16 | 71022.23 | 69191.96 | 85501.23 | 89163.48 | 60931.52 | 86727.34 |
| 102687.4 | 23078.06 | 35807.33 | 51781.82 | 48694.37 | 46883.38 | 46239.68 | 52859.46 | 58321.5  | 90600.54 | 110151.6 |
| 30307.92 | 21057.25 | 24675.71 | 21740.8  | 24527.68 | 28408.93 | 27640.02 | 28436.55 | 26431.78 | 12950.49 | 39505.65 |
| 16654.14 | 12452.54 | 8567.604 | 12881.97 | 10603.01 | 13392.9  | 11943.7  | 14845.44 | 16112.59 | 16615.9  | 17957.02 |
| 20791.81 | 11707.9  | 23304.15 | 12109.75 | 2832.559 | 18239.86 | 13783.19 | 21126.49 | 14948.87 | 19279.66 | 8120.729 |
| 9643.268 | 11675.17 | 10045.4  | 12064.55 | 19319.8  | 12251.89 | 8669.379 | 8309.637 | 10569.06 | 15320.14 | 15362.35 |
| 90473.72 | 22458.43 | 115062.3 | 85357.52 | 62454.29 | 75138.48 | 69348.94 | 54603.23 | 54867.45 | 72238.99 | 105290.7 |
| 33574.85 | 39832.41 | 70938.53 | 72904.57 | 52981.91 | 55000.46 | 61673.21 | 57813.16 | 50187.09 | 37627.89 | 73750.22 |
| 74648.48 | 48469.08 | 70879.95 | 33041.44 | 44645.3  | 44058.85 | 25761.79 | 24225    | 48449.39 | 37990.67 | 46322.09 |
| 44829.59 | 41069.86 | 33810.93 | 39900.94 | 22307.04 | 28068.97 | 26736.17 | 26074.63 | 29640.9  | 16891.94 | 27752.11 |
| 241125.5 | 141497.3 | 81561.86 | 262521   | 220432.3 | 93069.21 | 157492.2 | 67142.23 | 313913.1 | 327726.1 | 137840.8 |
| 2301160  | 154326.4 | 213753.3 | 121490.4 | 113765.1 | 126476.6 | 132299.8 | 139981   | 224134.8 | 123351.3 | 117158   |
| 104504.1 | 40106.01 | 73465.52 | 33951.77 | 46117.61 | 48196.89 | 57482.99 | 53369.98 | 11778.78 | 47897.32 | 35154.85 |
| 45659.96 | 28314.19 | 24607.14 | 21697.02 | 61084.44 | 26354.18 | 33983.32 | 36240.87 | 38169.05 | 19068.13 | 33277.08 |
| 23310.48 | 13071.02 | 16532.51 | 30719.61 | 16389.35 | 11909.8  | 6065.333 | 20113.58 | 13610.96 | 4755.832 | 7243.569 |
| 1433510  | 1238443  | 1117411  | 1102401  | 1207840  | 1055438  | 1356722  | 808649.3 | 1545178  | 1673173  | 1569877  |
| 25225.12 | 9846.707 | 6491.241 | 6152.3   | 8351.082 | 4955.369 | 3082.676 | 16286.2  | 5859.704 | 9003.648 | 2222.279 |
| 17390.39 | 19442.16 | 33682.52 | 27583.54 | 14366.45 | 11305.19 | 20309.01 | 14858.64 | 38921.89 | 22250.85 | 12381.64 |
| 31895.83 | 25212.72 | 20424.53 | 26869.08 | 42359.66 | 26844.68 | 24404.68 | 28355.12 | 34621.54 | 15840.65 | 25348.4  |
| 107444.8 | 182654.3 | 108157.2 | 170614.4 | 138766.5 | 114778.7 | 111922.9 | 85495.03 | 87168.63 | 120286.6 | 139094.7 |
| 7619.23  | 15721.74 | 20486.49 | 6024.521 | 14730.79 | 18375.7  | 19852.13 | 23055.78 | 14086.22 | 23801.94 | 20979.45 |
| 5733.455 | 4392.015 | 7944.53  | 9007.766 | 2857.012 | 10419.59 | 14893.18 | 6354.239 | 4930.32  | 5875.24  | 14711.17 |
| 2122048  | 170742.9 | 2421005  | 2699838  | 753880.1 | 2037757  | 1087478  | 4167675  | 510465.3 | 1129429  | 821807.5 |
| 4959.611 | 5396.844 | 10146.31 | 7832.47  | 4920.212 | 10980.33 | 11197.94 | 12061.21 | 15759.87 | 7589.961 | 13620.45 |
| 208567.7 | 11485.92 | 7382.875 | 9235.503 | 2579.525 | 5911.606 | 8619.599 | 6120.926 | 7548.832 | 2446.556 | 12604.53 |
| 273400.6 | 226879.2 | 195729.6 | 170663.7 | 203951   | 236310   | 176691.9 | 197524.3 | 176725.6 | 232920.4 | 214497.7 |
| 35889.45 | 26251.76 | 41770.94 | 31864.42 | 30567.36 | 32494.62 | 33145.34 | 40629.23 | 29251.72 | 29769.66 | 18867.14 |
| 1404804  | 761128.4 | 490229.2 | 562553.1 | 982631.7 | 549309.8 | 610260.9 | 766911.4 | 586298.3 | 425354.8 | 734220.8 |
| 48165.96 | 49181.86 | 45953.25 | 50156.19 | 74199.52 | 34902.12 | 75294.02 | 40538.83 | 36055.73 | 44809.82 | 69619.58 |
| 181231.5 | 851663.4 | 1323302  | 433669.8 | 420319.8 | 187958.1 | 20362.61 | 1018252  | 287906.1 | 162486.8 | 830089.1 |
| 17765.07 | 13963.43 | 10638.1  | 14253.47 | 9764.283 | 13148.33 | 11306.64 | 9202.671 | 13116.51 | 74735.12 | 5173.869 |
| 684937.8 | 612592.4 | 1177513  | 505363.6 | 590401.1 | 568701.9 | 455779.6 | 730052.4 | 646070.1 | 787439.5 | 797642.3 |

|          |          |          |          |          |          |          |          |          |          |          |
|----------|----------|----------|----------|----------|----------|----------|----------|----------|----------|----------|
| 338635.7 | 212051.4 | 211105.8 | 102464.9 | 93266.05 | 108716.8 | 140644.6 | 120477.6 | 216500.5 | 219746.6 | 183791.5 |
| 8803.929 | 9020.776 | 14404.96 | 11136.17 | 8379.303 | 15015.52 | 14097    | 13393.2  | 9882.335 | 18552.94 | 37099.87 |
| 8419250  | 5656445  | 9612660  | 3607122  | 4432478  | 3849758  | 5084868  | 3627225  | 5748898  | 5152870  | 6966084  |
| 95097.61 | 57886.61 | 78174.16 | 46450.56 | 66352.15 | 81439.11 | 61505.66 | 99517.69 | 77292.02 | 124104.4 | 78879.38 |
| 21589.46 | 121086.7 | 4301.48  | 7025.965 | 6643.481 | 2534.077 | 4377.638 | 5545.381 | 17423.32 | 128689.5 | 4086.77  |
| 86895.47 | 203391.4 | 172381.9 | 211236.5 | 191838.3 | 186528   | 185843.6 | 175489.8 | 206462.1 | 180226.3 | 170137   |
| 54918.83 | 250048.8 | 93356.41 | 158035.5 | 208696.3 | 142038.5 | 81311.15 | 100392.4 | 97965.9  | 635042.8 | 82471.91 |
| 13490.38 | 17315.6  | 33755.34 | 28101.78 | 16849.23 | 16790.31 | 23856.78 | 19619.33 | 14200.59 | 11667.67 | 25812.53 |
| 18302.09 | 15024.85 | 7424.147 | 10730.3  | 9175.35  | 13527.18 | 13049.26 | 18898.37 | 14591.36 | 17194.57 | 13132.32 |
| 771054.6 | 575327.3 | 733089.5 | 424059.1 | 737371.1 | 628433.8 | 542007.6 | 675049.6 | 471292.3 | 445461.3 | 561962   |
| 84017.55 | 70914.82 | 41521.59 | 44311.5  | 83943    | 64980.33 | 46875.55 | 44818.68 | 45678.75 | 71655.2  | 59722.64 |
| 209245.2 | 182267.2 | 266033.6 | 207845.3 | 179050   | 241788.3 | 207552.6 | 237516.8 | 231064.2 | 152459.6 | 249253.8 |
| 33068.16 | 16186.26 | 8079.594 | 13631.72 | 6981.801 | 23307.11 | 5393.147 | 16256.24 | 8301.827 | 6648.689 | 15269.23 |
| 19864.32 | 7672.535 | 6910.088 | 11262.22 | 8657.77  | 11459.2  | 36650.75 | 20946.5  | 8511.445 | 11383.78 | 26364.18 |
| 309263.8 | 227885.3 | 1609827  | 1721028  | 894625   | 1140966  | 666212.1 | 1466518  | 97047.84 | 483117.3 | 1432987  |
| 12568.03 | 15135    | 13705.58 | 21319.01 | 20199.31 | 19405.02 | 24577.43 | 27177.13 | 30296.76 | 13550.3  | 21425.55 |
| 1559291  | 1202518  | 2229632  | 1523638  | 1465674  | 1702001  | 1153217  | 2041413  | 1690777  | 874487   | 1464236  |
| 130772.6 | 118923.2 | 387222.8 | 562961.7 | 220863.4 | 398465.9 | 248971   | 531978.9 | 158756.3 | 153411.8 | 396475.1 |
| 162727.4 | 156182.2 | 149460.1 | 142376.6 | 136741.4 | 165822.8 | 211642   | 143013.5 | 131286.7 | 176763.9 | 179157.3 |
| 12369.12 | 20355.96 | 49976.01 | 64665.74 | 50984.9  | 56128.47 | 49749.99 | 25367.34 | 14899.1  | 41190.17 | 19267.78 |
| 2897705  | 856768.2 | 574228.9 | 387481.8 | 501842.1 | 689555.7 | 597402.8 | 1146679  | 795498.3 | 662760.3 | 858790.5 |
| 665242.4 | 1231776  | 571884   | 904872.4 | 921824.4 | 717805.6 | 744813.4 | 783499.5 | 491087.6 | 719306.2 | 730225.3 |
| 31698.75 | 7006.691 | 10917.1  | 8058.423 | 7154.276 | 9050.872 | 4803.856 | 9547.961 | 4782.922 | 4980.369 | 6102.25  |
| 517457.8 | 843169.1 | 600684.8 | 369721   | 753205.9 | 679552.1 | 482535.2 | 651174.1 | 555874.9 | 511267.1 | 649490.8 |
| 13201.79 | 36731.65 | 18974.3  | 22389.28 | 11061.23 | 17734.92 | 22151.6  | 22045.96 | 19774.31 | 25828.79 | 14123.26 |
| 27050.9  | 22575.92 | 17992.84 | 10853.15 | 25807.83 | 24786.38 | 29825.18 | 29333.4  | 24378.91 | 17936.15 | 31801.97 |
| 23173.12 | 34722.99 | 21162.93 | 36375.88 | 48659.74 | 109201.6 | 5325.178 | 11684.51 | 13525.43 | 29869.28 | 61504.22 |
| 159253.9 | 106382.7 | 92459.78 | 54310.08 | 59570.63 | 53248.58 | 44595.13 | 45456.46 | 123750.4 | 73335.45 | 74159.82 |
| 184875   | 102567   | 115226.5 | 107576.7 | 139291.3 | 103471   | 108395   | 181648.7 | 133398.8 | 60034.65 | 181308.8 |
| 747407.1 | 23284.37 | 3252012  | 2742859  | 1355118  | 1044108  | 622141.7 | 4133542  | 2840692  | 5236889  | 912864.9 |
| 28213.97 | 13408.08 | 18567.59 | 27969.63 | 18686.45 | 21309.62 | 23890.42 | 3939.154 | 1082.775 | 32645.24 | 26829.66 |
| 46408.35 | 7908.901 | 31009.14 | 8631.158 | 17323.07 | 14482.29 | 22155.71 | 26603.92 | 22810.33 | 15359.72 | 17710.21 |
| 68547.76 | 22511.5  | 26751.93 | 15237.47 | 24858.21 | 24290.07 | 30320.54 | 12941.64 | 24918.28 | 23981.02 | 33046.14 |
| 547656.5 | 2547998  | 1129818  | 1527474  | 1104056  | 813233.3 | 930540.6 | 1645874  | 848023.1 | 6602645  | 1121030  |
| 71567.65 | 18599.11 | 37342.21 | 22993.19 | 31714.82 | 19879.34 | 39661.14 | 9933.579 | 48109.54 | 20717.85 | 47654.91 |
| 21595.69 | 22119.17 | 23858.25 | 38217.84 | 32916.79 | 41199.95 | 43145.4  | 18937.58 | 8761.666 | 26413.74 | 22297.95 |
| 32400.7  | 34603.38 | 35921.9  | 31521.08 | 28959.42 | 38473.7  | 31303.75 | 14249.04 | 42304.4  | 31149.43 | 46880.89 |
| 14235    | 30451.15 | 29167.35 | 33695.59 | 27857.86 | 50450.67 | 7696.467 | 32127.66 | 9609.006 | 33264.4  | 22749.63 |
| 330828.1 | 272329.2 | 286951.7 | 292005.3 | 259208.9 | 319828.1 | 369828.1 | 194580.7 | 229730.1 | 335279   | 319949.4 |
| 27804.73 | 7719.243 | 10447.23 | 21114.54 | 15588.21 | 15863.13 | 15340.64 | 8438.015 | 5849.697 | 2400.854 | 11209.32 |
| 138096   | 184983.2 | 165983.9 | 250357   | 279635.3 | 121232.1 | 187596   | 353746.5 | 140260.2 | 104315.6 | 208689.6 |
| 23053.23 | 18420.84 | 40634.94 | 58405.59 | 46410.83 | 43454.49 | 58530.04 | 60243.24 | 39989.39 | 28071.98 | 44750.02 |
| 24960.55 | 13876.92 | 84132.27 | 114459.4 | 55454.67 | 100762.3 | 123143.3 | 70085.13 | 17393.93 | 110886.9 | 80561.18 |
| 63501.05 | 26175.48 | 93150.84 | 79748.69 | 42142.02 | 47635.97 | 37422.34 | 58637.73 | 100714.3 | 22059.63 | 54736.21 |
| 24710.51 | 23531.38 | 15321.86 | 24910.05 | 27487.86 | 16356.69 | 19727.74 | 18653.59 | 16733.11 | 14735.08 | 41054.29 |
| 113853   | 96043.02 | 198613.6 | 243791.9 | 168854.8 | 186733.3 | 188135.1 | 204952.8 | 78371.72 | 173453.9 | 193363.3 |
| 126607.6 | 56852.79 | 115383.3 | 74549.64 | 62001.2  | 106798.8 | 68550.91 | 102336.2 | 70021.72 | 78479.72 | 80019.55 |
| 164228.1 | 124411.2 | 151323.6 | 157316.8 | 171396.8 | 159073.2 | 201859.8 | 138539.7 | 139640.5 | 141778.7 | 191731.1 |
| 19481.41 | 100004.4 | 86972.06 | 84756.07 | 107674.6 | 96129.89 | 92027.2  | 95869.44 | 174581.1 | 162211.4 | 101985.2 |



|          |          |          |          |          |          |          |          |          |          |          |
|----------|----------|----------|----------|----------|----------|----------|----------|----------|----------|----------|
| 4690.854 | 13673.22 | 34709.88 | 38103.96 | 26017.4  | 40123.68 | 44116.64 | 46016.57 | 20426.58 | 10522.24 | 32186.73 |
| 8719680  | 5817402  | 9601989  | 6495109  | 6879085  | 6924819  | 7410366  | 7973227  | 7318923  | 3948695  | 11437204 |
| 13030.98 | 15819.92 | 13768.1  | 8979.183 | 19681.28 | 14526.33 | 7633.005 | 7474.977 | 7030.173 | 11590.74 | 28350.81 |
| 19142.79 | 4900.805 | 13687.72 | 15124.3  | 14890.74 | 11005.25 | 16203.06 | 10705.5  | 11491.59 | 15183.59 | 17161.61 |
| 117860.3 | 104985   | 128039   | 94693.59 | 105655.9 | 126763.7 | 129256.9 | 119712.3 | 102528.6 | 132694.7 | 119537.1 |
| 22204.94 | 18453.36 | 16221.11 | 8737.503 | 6025.144 | 9029.209 | 51041.98 | 14400.55 | 32874.98 | 14629.39 | 22002.5  |
| 420763.4 | 304167.6 | 317133.6 | 269884.3 | 298569.7 | 279030.9 | 381865.2 | 433552.9 | 307758.6 | 251389.7 | 341582   |
| 63029.64 | 7959.417 | 15026.4  | 12015.67 | 18792.98 | 13076.53 | 21838.32 | 19259.22 | 13873.47 | 24598.67 | 22392.55 |
| 222593.6 | 201917.7 | 127121.9 | 124233.1 | 237946.7 | 277986.9 | 140566.6 | 112484.9 | 180216   | 138313.2 | 237312.2 |
| 597536.5 | 452180.8 | 534232.6 | 344580.6 | 453528.5 | 538322.3 | 233346   | 630442.6 | 292019.6 | 811492.4 | 702173.9 |
| 18374.21 | 12773.44 | 33779.88 | 56264.67 | 40333.42 | 37277.05 | 53998.81 | 23356.1  | 8360.649 | 55757.54 | 59267.65 |
| 21431.9  | 19652.15 | 20130.84 | 39099.5  | 11484.55 | 19102.51 | 21968.34 | 9489.051 | 6228.472 | 36488.34 | 22865.98 |
| 329313   | 103722.1 | 279455.4 | 128505.1 | 169130.2 | 152123.5 | 168683.5 | 218139.8 | 350891.4 | 135833.8 | 195742.5 |
| 83461.78 | 93676.25 | 58042.89 | 58597.35 | 60122.52 | 43159.95 | 48802.78 | 80653.73 | 80205.97 | 251660.8 | 79470.59 |
| 11507.97 | 21954.69 | 13462.1  | 8509.378 | 8813.293 | 10007    | 14177.19 | 9691.097 | 27949.93 | 13361.57 | 11362.51 |
| 42146.82 | 71691.3  | 50114.53 | 27706.38 | 64094.66 | 36976.99 | 15326.41 | 12764.95 | 63462.25 | 30984.16 | 44032.08 |
| 39568.66 | 20019.73 | 50951.38 | 50483.58 | 31542.62 | 24111.46 | 18193.92 | 25221.49 | 30133.82 | 28682.04 | 50399.59 |
| 20482.52 | 9861.799 | 12438.06 | 7831.242 | 11581.09 | 12076.27 | 10387.65 | 15211.81 | 3868.548 | 14503.56 | 14374.64 |
| 22909.04 | 36245.27 | 18356.93 | 26220.62 | 41375.07 | 40722.35 | 26006.72 | 25235.23 | 39801.84 | 20568.44 | 29166.86 |
| 94763.52 | 85434.66 | 38532.53 | 29165.48 | 102243.9 | 61509.92 | 101026.6 | 62692.64 | 138994.4 | 66352.77 | 112974.4 |
| 125275.1 | 197634   | 95637.02 | 112064.2 | 164248.8 | 96192.55 | 167954.5 | 73228.58 | 131789.2 | 208251.3 | 129984.8 |
| 11024.96 | 21063.02 | 13168.35 | 12817.18 | 24102    | 16870.27 | 12189.95 | 10987.07 | 44867.62 | 13483.55 | 14923.79 |
| 576086.8 | 406406.8 | 672456.8 | 390340.2 | 409918   | 365217.5 | 372913   | 449390.4 | 463103.5 | 225745   | 423546   |
| 76651.21 | 57188.92 | 86433.67 | 68305.13 | 70350.52 | 73602.14 | 112763.1 | 64722.64 | 63390.48 | 54931.12 | 77651.29 |
| 82020.84 | 194417.9 | 253992.4 | 209803.2 | 223297.1 | 234203.3 | 179447.6 | 230225.8 | 240228.4 | 198437.7 | 171982.1 |
