# Supplementary figures and images for: Dynamic Changes of Urine Proteome in Rat Models Inoculated with Two Different Hepatoma Cell Lines
Source: Hindawi journal article supplement (doi:10.1155/2021/8895330), 2021-01-07

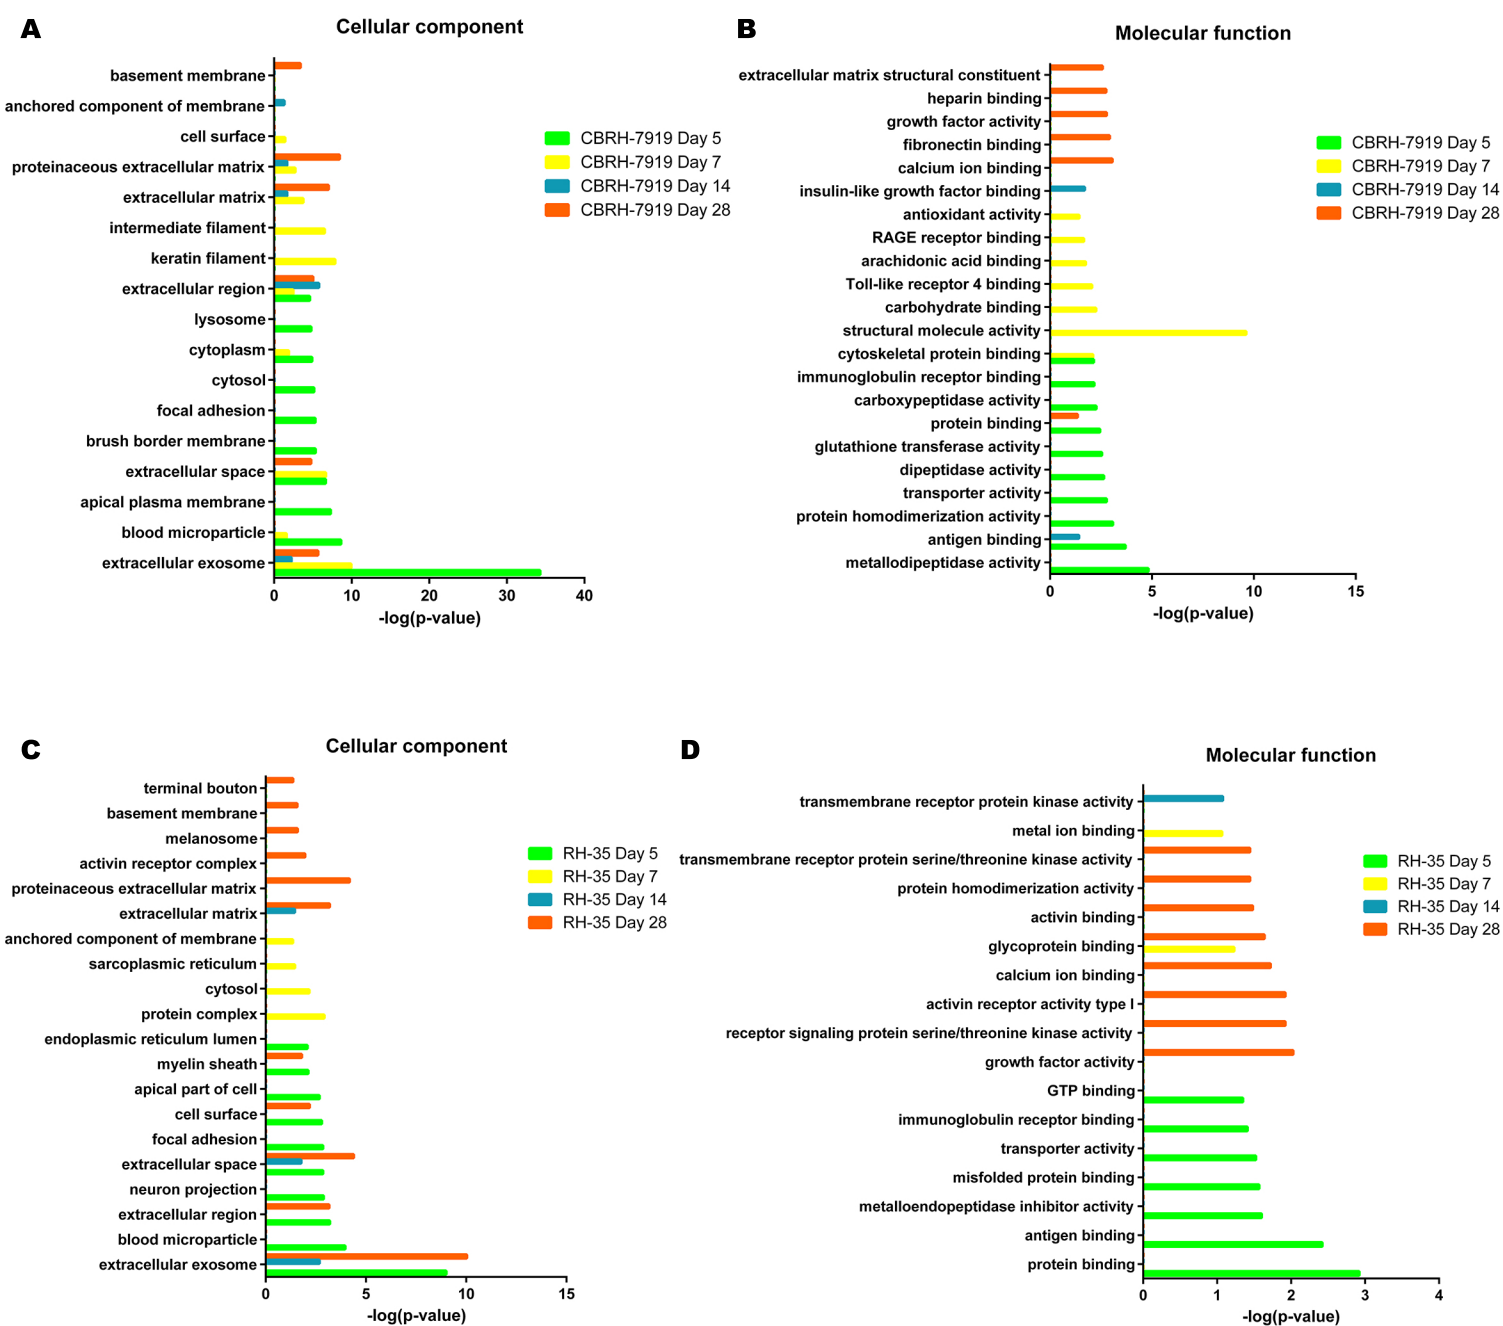

Supplement: f1 [file 8895330.f1.zip]
